# Supplementary material for: Epitope Classification and RBD Binding Properties of Neutralizing Antibodies Against SARS-CoV-2 Variants of Concern
Source: PubMed Central journal article supplement (PMC8212047; doi:10.3389/fimmu.2021.691715), 2021-06-04
Supplement: DataSheet_4.pdf [file DataSheet_4.pdf]

Supplementary Table 1. GISAID sequence headers (150,000-225,000) for each SARS-CoV-2 S amino acid sequence used in the frequency analysis.

>Spike|hCoV-19/Canada/ON-OICR-SLB2796/2020|2020-03-28|EPI\_ISL\_538328|Original|hCoV-19^^Ontario|Human|Kingston Health Sciences Centre / Queen's University|Ontario Institute for Cancer Research|de Borja|Canada

>Spike|hCoV-19/Germany/HH-hpi-p1336/2020|2020-03-24|EPI\_ISL\_775667|Original|hCoV-19^^Hamburg|Human|University Medical Center Hamburg Eppendorf|Heinrich Pette Institute|Robitaille|Germany

>Spike|hCoV-19/Scotland/CVR3092/2020|2020-04-24|EPI\_ISL\_461668|Original|hCoV-19^^Scotland|Human|West of Scotland Specialist Virology Centre|COVID-19 Genomics UK (COG-UK) Consortium|Robertson|United Kingdom

>Spike|hCoV-19/Australia/NSW2206/2020|2020-03-21|EPI\_ISL\_500664|Original|hCoV-19^^New South Wales|Human|Area of Virology|Area of Virology|Bull|Australia

>Spike|hCoV-19/Wales/PHWC-47FCAA/2020|2020-10-08|EPI\_ISL\_612796|Original|hCoV-19^^Wales|Human|Wales Specialist Virology Centre Sequencing lab|COVID-19 Genomics UK (COG-UK) Consortium|Moore|United Kingdom

>Spike|hCoV-19/Scotland/CVR1792/2020|2020-04-06|EPI\_ISL\_438848|Original|hCoV-19^^Scotland|Human|West of Scotland Specialist Virology Centre|COVID-19 Genomics UK (COG-UK) Consortium|Robertson|United Kingdom

>Spike|hCoV-19/USA/MI-MDHHS-SC20493/2020|2020-05-05|EPI\_ISL\_460031|Original|hCoV-19^^Michigan|Human|Michigan Department of Health and Human Services|Michigan Department of Health and Human Services|Blankenship|USA

>Spike|hCoV-19/England/ALDP-9BDC50/2020|2020-09-09|EPI\_ISL\_568179|Original|hCoV-19^^England|Human|Lighthouse Lab in Alderley Park|Wellcome Sanger Institute for the COVID-19 Genomics UK (COG-UK) consortium|Davies|United Kingdom

>Spike|hCoV-19/Belgium/ULG-10330/2020|2020-07-30|EPI\_ISL\_540497|Original|hCoV-19^^Li\u00e8ge|Human|Department of Clinical Microbiology|GIGA Medical Genomics|Durkin|Belgium

>Spike|hCoV-19/England/ALDP-5D210F/2020|2020-06-19|EPI\_ISL\_558544|Original|hCoV-19^^England|Human|Lighthouse Lab in Alderley Park|Wellcome Sanger Institute for the COVID-19 Genomics UK (COG-UK) consortium|Davies|United Kingdom

>Spike|hCoV-19/mink/Netherlands/NB-EMC-8-9/2020|2020-06-01|EPI\_ISL\_523118|Original|hCoV-19^^Limburg|Neovison vison|Dutch COVID-19 response team|Erasmus Medical Center|Oude Munnink|Netherlands

>Spike|hCoV-19/England/ALDP-A6FA16/2020|2020-10-14|EPI\_ISL\_607799|Original|hCoV-19^^England|Human|Lighthouse Lab in Alderley Park|Wellcome Sanger Institute for the COVID-19 Genomics UK (COG-UK) consortium|Davies|United Kingdom

>Spike|hCoV-19/England/QEUH-9C82F6/2020|2020-09-11|EPI\_ISL\_567149|Original|hCoV-19^^England|Human|Lighthouse Lab in Glasgow|Wellcome Sanger Institute for the COVID-19 Genomics UK (COG-UK) consortium|Davies|United Kingdom

>Spike|hCoV-19/USA/TX-HMH-3425/2020|2020-06-11|EPI\_ISL\_544183|Original|hCoV-19^^Texas|Human|Houston Methodist Hospital|Houston Methodist Hospital|Long|USA

>Spike|hCoV-19/Singapore/837/2020|2020-07-29|EPI\_ISL\_518001|Original|hCoV-19^^Singapore|Human|Singapore General Hospital|Department of Microbiology|Abdul Rahman|Singapore

>Spike|hCoV-19/England/MILK-9EF921/2020|2020-09-23|EPI\_ISL\_594958|Original|hCoV-19^^England|Human|Queens Medical Centre|COVID-19 Genomics UK (COG-UK) Consortium|Loose|United Kingdom

>Spike|hCoV-19/England/CAMB-1AF961/2020|2020-05-01|EPI\_ISL\_459277|Original|hCoV-19^^England|Human|Department of Pathology|Wellcome Sanger Institute for the COVID-19 Genomics UK (COG-UK) consortium|Davies|United Kingdom

>Spike|hCoV-19/England/ALDP-9554CB/2020|2020-06-12|EPI\_ISL\_553436|Original|hCoV-19^^England|Human|Lighthouse Lab in Alderley Park|Wellcome Sanger Institute for the COVID-19 Genomics UK (COG-UK) consortium|Davies|United Kingdom

>Spike|hCoV-19/England/QEUH-C93130/2020|2020-12-17|EPI\_ISL\_762161|Original|hCoV-19^^England|Human|Lighthouse Lab in Glasgow|Wellcome Sanger Institute for the COVID-19 Genomics UK (COG-UK) Consortium|Davies|United Kingdom

>Spike|hCoV-19/USA/MI-MDHHS-SC22050/2020|2020-09-21|EPI\_ISL\_583507|Original|hCoV-19^^Michigan|Human|Michigan Department of Health and Human Services|Michigan Department of Health and Human Services|Blankenship|USA

>Spike|hCoV-19/England/204742198/2020|2020-00-00|EPI\_ISL\_649909|Original|hCoV-19^^England|Human|Respiratory Virus Unit|COVID-19 Genomics UK (COG-UK) Consortium|Platt|United Kingdom

>Spike|hCoV-19/England/ALDP-8BA0A3/2020|2020-06-28|EPI\_ISL\_557122|Original|hCoV-19^^England|Human|Lighthouse Lab in Alderley Park|Wellcome Sanger Institute for the COVID-19 Genomics UK (COG-UK) consortium|Davies|United Kingdom

>Spike|hCoV-19/England/ALDP-A6E525/2020|2020-10-15|EPI\_ISL\_607896|Original|hCoV-19^^England|Human|Lighthouse Lab in Alderley Park|Wellcome Sanger Institute for the COVID-19 Genomics UK (COG-UK) consortium|Davies|United Kingdom

>Spike|hCoV-19/India/MH-GA14/2020|2020-06-17|EPI\_ISL\_508210|Original|hCoV-19^^Maharashtra|Human|Government Medical College|National Institute of Biomedical Genomics|Maitra|India

>Spike|hCoV-19/USA/MI-MDHHS-SC22525/2020|2020-11-17|EPI\_ISL\_708228|Original|hCoV-19^^Michigan|Human|Michigan Department of Health and Human Services|Michigan Department of Health and Human Services|Jacob|USA

>Spike|hCoV-19/Russia/StPetersburg-RII7501S/2020|2020-04-20|EPI\_ISL\_450254|Original|hCoV-19^^Saint Petersburg|Human|WHO National Influenza Centre Russian Federation|WHO National Influenza Centre Russian Federation|Komissarov|Russia

>Spike|hCoV-19/Ireland/G-NVRL-MPW79025/2020|2020-05-20|EPI\_ISL\_767794|Original|hCoV-19^^Galway|Human|National Virus Reference Laboratory|Irish Coronavirus Sequencing Consortium - Teagasc Moorepark|Walsh|Ireland

>Spike|hCoV-19/Wales/PHWC-2F4D2/2020|2020-04-17|EPI\_ISL\_446258|Original|hCoV-19^^Wales|Human|Wales Specialist Virology Centre|Public Health Wales Microbiology Cardiff|Moore|United Kingdom

>Spike|hCoV-19/Scotland/QEUH-95E459/2020|2020-08-10|EPI\_ISL\_534410|Original|hCoV-19^^Scotland|Human|NHSGGC West of Scotland Specialist Virology Centre / MRC-University of Glasgow Centre for Virus Research|Wellcome Sanger Institute for the COVID-19 Genomics UK (COG-UK) consortium|Davies|United Kingdom

>Spike|hCoV-19/Northern Ireland/NIRE-10541D/2020|2020-03-29|EPI\_ISL\_461786|Original|hCoV-19^^Northern Ireland|Human|Regional Virus Laboratory|COVID-19 Genomics UK (COG-UK) Consortium|Fairley|United Kingdom

>Spike|hCoV-19/England/SHEF-CA1F0/2020|2020-03-30|EPI\_ISL\_432487|Original|hCoV-19^^England|Human|Virology Department|COVID-19 Genomics UK (COG-UK) Consortium|de Silva|United Kingdom

>Spike|hCoV-19/England/NOTT-121952/2020|2020-12-23|EPI\_ISL\_764524|Original|hCoV-19^^England|Human|Queens Medical Centre|COVID-19 Genomics UK (COG-UK) Consortium|Loose|United Kingdom

>Spike|hCoV-19/Denmark/DCGC-19974/2020|2020-12-07|EPI\_ISL\_747901|Original|hCoV-19^^Sjaelland|Human|Department of Virus and Microbiological Special Diagnostics|Albertsen Lab|Michaelsen|Denmark

>Spike|hCoV-19/England/ALDP-AA4D1C/2020|2020-10-21|EPI\_ISL\_630901|Original|hCoV-19^^England|Human|Lighthouse Lab in Alderley Park|Wellcome Sanger Institute for the COVID-19 Genomics UK (COG-UK) consortium|Davies|United Kingdom

>Spike|hCoV-19/USA/WI-UW-1654/2020|2020-09-08|EPI\_ISL\_605528|Original|hCoV-19^^Wisconsin|Human|University of Wisconsin-Madison AIDS Vaccine Research Laboratories|University of Wisconsin-Madison AIDS Vaccine Research Laboratories|Baczenas|USA

>Spike|hCoV-19/England/ALDP-B1BB9D/2020|2020-11-01|EPI\_ISL\_645568|Original|hCoV-19^^England|Human|Lighthouse Lab in Alderley Park|Wellcome Sanger Institute for the COVID-19 Genomics UK (COG-UK) Consortium|Davies|United Kingdom

>Spike|hCoV-19/Scotland/EDB894/2020|2020-04-05|EPI\_ISL\_432868|Original|hCoV-19^^Scotland|Human|Virology Department|COVID-19 Genomics UK (COG-UK) Consortium|Williams|United Kingdom

>Spike|hCoV-19/England/MILK-B963A1/2020|2020-11-13|EPI\_ISL\_676156|Original|hCoV-19^^England|Human|Lighthouse Lab in Milton Keynes|Wellcome Sanger Institute for the COVID-19 Genomics UK (COG-UK) Consortium|Davies|United Kingdom

>Spike|hCoV-19/England/OXON-AE31A/2020|2020-00-00|EPI\_ISL\_448682|Original|hCoV-19^^England|Human|Oxford Viromics|COVID-19 Genomics UK (COG-UK) Consortium|Golubchik|United Kingdom

>Spike|hCoV-19/Australia/WA143/2020|2020-03-22|EPI\_ISL\_596706|Original|hCoV-19^^Western Australia|Human|PathWest Laboratory Medicine WA|PathWest Laboratory Medicine WA Microbial Surveillance Unit|Sikazwe|Australia

>Spike|hCoV-19/USA/WA-OHSU-1799/2020|2020-07-25|EPI\_ISL\_526108|Original|hCoV-19^^Washington|Human|OHSU Lab Services Molecular Microbiology Lab|Oregon SARS-CoV-2 Genome Sequencing Center|O'Roak|USA

>Spike|hCoV-19/Denmark/DCGC-852/2020|2020-05-11|EPI\_ISL\_614785|Original|hCoV-19^^Nordjylland|Human|Department of Virus and Microbiological Special Diagnostics|Albertsen lab|Michaelsen|Denmark

>Spike|hCoV-19/Australia/VIC2018/2020|2020-05-15|EPI\_ISL\_480660|Original|hCoV-19^^Victoria|Human|Victorian Infectious Diseases Reference Laboratory (VIDRL)|VIDRL and MDU-PHL|Schultz|Australia

>Spike|hCoV-19/Wales/PHWC-480B6D/2020|2020-10-11|EPI\_ISL\_612977|Original|hCoV-19^^Wales|Human|Wales Specialist Virology Centre Sequencing lab|COVID-19 Genomics UK (COG-UK) Consortium|Moore|United Kingdom

>Spike|hCoV-19/Iran/SA-Isf-11/2020|2020-05-10|EPI\_ISL\_582003|Original|hCoV-19^^Iran|Human|Infectious Diseases and Tropical Medicine Research Center|Infectious Diseases and Tropical Medicine Research Center|Haghjoo javanmard,S.|Iran

>Spike|hCoV-19/Canada/BC-BCCDC-6398/2020|2020-10-00|EPI\_ISL\_740554|Original|hCoV-19^^British Columbia|Human|BCCDC Public Health Laboratory|BCCDC Public Health Laboratory|Prystajecky|Canada

>Spike|hCoV-19/England/QEUEH-B7FDEC/2020|2020-11-14|EPI\_ISL\_668363|Original|hCoV-19^^England|Human|Lighthouse Lab in Glasgow|Wellcome Sanger Institute for the COVID-19 Genomics UK (COG-UK) Consortium|Davies|United Kingdom

>Spike|hCoV-19/USA/TX-HMH-MCoV-18237/2020|2020-09-08|EPI\_ISL\_784585|Original|hCoV-19^^Texas|Human|Houston Methodist Hospital|Houston Methodist Hospital|Long|USA

>Spike|hCoV-19/USA/MA-MGH-00741/2020|2020-04-09|EPI\_ISL\_791739|Original|hCoV-19^^Massachusetts|Human|Massachusetts General Hospital|Infectious Disease Program|Park|USA

>Spike|hCoV-19/Spain/RI-IBV-99010936/2020|2020-06-19|EPI\_ISL\_732773|Original|hCoV-19^^La Rioja|Human|Centro de Investigaci\u00f3n Biom\u00e9dica de La Rioja - Hospital San Pedro Logro\u00f1o|SeqCOVID-SPAIN consortium/IBV (CSIC)|Comas|Spain

>Spike|hCoV-19/England/ALDP-B46917/2020|2020-11-07|EPI\_ISL\_656137|Original|hCoV-19^^England|Human|Lighthouse Lab in Alderley Park|Wellcome Sanger Institute for the COVID-19 Genomics UK (COG-UK) Consortium|Davies|United Kingdom

>Spike|hCoV-19/England/CAMC-B08FC4/2020|2020-10-29|EPI\_ISL\_672956|Original|hCoV-19^^England|Human|Lighthouse Lab in Cambridge|Wellcome Sanger Institute for the COVID-19 Genomics UK (COG-UK) Consortium|Davies|United Kingdom

>Spike|hCoV-19/England/MILK-B8D2CE/2020|2020-11-13|EPI\_ISL\_674141|Original|hCoV-19^^England|Human|Lighthouse Lab in Milton Keynes|Wellcome Sanger Institute for the COVID-19 Genomics UK (COG-UK) Consortium|Davies|United Kingdom

>Spike|hCoV-19/USA/NY-SURV0472/2020|2020-03-09|EPI\_ISL\_436068|Original|hCoV-19^^New York|Human|NYC Department of Health and Mental Hygiene|Pathogen Discovery|Queen|USA

>Spike|hCoV-19/England/LIVE-DC389B/2020|2020-11-22|EPI\_ISL\_702718|Original|hCoV-19^^England|Human|Liverpool Clinical Laboratories|COVID-19 Genomics UK (COG-UK) Consortium|Haldenby|United Kingdom

>Spike|hCoV-19/USA/ME-HETL-J0260/2020|2020-09-29|EPI\_ISL\_755408|Original|hCoV-19^^Maine|Human|Maine Health and Environmental Testing Laboratory|Tewhey Lab|Tewhey|USA

>Spike|hCoV-19/England/CAMB-795F4/2020|2020-04-04|EPI\_ISL\_441102|Original|hCoV-19^^England|Human|Department of Pathology|Wellcome Sanger Institute for the COVID-19 Genomics UK (COG-UK) consortium|Amato|United Kingdom

>Spike|hCoV-19/England/ALDP-A92704/2020|2020-10-19|EPI\_ISL\_611036|Original|hCoV-19^^England|Human|Lighthouse Lab in Alderley Park|Wellcome Sanger Institute for the COVID-19 Genomics UK (COG-UK) consortium|Davies|United Kingdom

>Spike|hCoV-19/Australia/VIC18033/2020|2020-12-31|EPI\_ISL\_779641|Original|hCoV-19^^Victoria|Human|Microbiological Diagnostic Unit - Public Health Laboratory (MDU-PHL)|MDU-PHL|Beck|Australia

>Spike|hCoV-19/India/GJ-GBRC284b/2020|2020-06-30|EPI\_ISL\_495022|Original|hCoV-19^^Gujarat|Human|Government Medical College|Gujarat Biotechnology Research Centre|Joshi|India

>Spike|hCoV-19/Canada/ON-PHL-0654/2020|2020-03-00|EPI\_ISL\_418370|Original|hCoV-19^^Ontario|Human|Public Health Ontario Laboratories|Public Health Ontario Laboratories|Eshaghi|Canada

>Spike|hCoV-19/Bosnia and Herzegovina/ChVir7402/2020|2020-04-22|EPI\_ISL\_462470|Original|hCoV-19^^Sarajevo|Human|Clinical Center|Charite Universitatsmedizin Berlin|Muehlemann|Bosnia and Herzegovina

>Spike|hCoV-19/Singapore/37/2020|2020-03-13|EPI\_ISL\_422430|Original|hCoV-19^^Singapore|Human|National Public Health Laboratory|National Public Health Laboratory|Mak|Singapore

>Spike|hCoV-19/Russia/MOW-RII-MH2003S/2020|2020-06-19|EPI\_ISL\_596345|Original|hCoV-19^^Moscow|Human|Pathogenic Microorganisms Variability Laboratory|WHO National Influenza Centre Russian Federation|Komissarov|Russia

>Spike|hCoV-19/England/QEUIH-9FF751/2020|2020-10-02|EPI\_ISL\_600226|Original|hCoV-19^^England|Human|Lighthouse Lab in Glasgow|Wellcome Sanger Institute for the COVID-19 Genomics UK (COG-UK) consortium|Davies|United Kingdom

>Spike|hCoV-19/United Arab Emirates/0189/2020|2020-05-18|EPI\_ISL\_698375|Original|hCoV-19^^Abu Dhabi|Human|Group 42 (G42) Healthcare|G42 Healthcare|Ogrodzki|United Arab Emirates

>Spike|hCoV-19/USA/TX-HMH-488/2020|2020-04-05|EPI\_ISL\_544398|Original|hCoV-19^^Texas|Human|Houston Methodist Hospital|Houston Methodist Hospital|Long|USA

>Spike|hCoV-19/USA/HI-H200027/2020|2020-03-18|EPI\_ISL\_752614|Original|hCoV-19^^Hawaii|Human|State Laboratories Division|State Laboratories Division|Sultana|USA

>Spike|hCoV-19/Denmark/DCGC-20979/2020|2020-12-21|EPI\_ISL\_759486|Original|hCoV-19^^Nordjylland|Human|Department of Virus and Microbiological Special Diagnostics|Albertsen Lab|Michaelsen|Denmark

>Spike|hCoV-19/United Arab Emirates/0503/2020|2020-05-18|EPI\_ISL\_698670|Original|hCoV-19^^Abu Dhabi|Human|Group 42 (G42) Healthcare|G42 Healthcare|Ogrodzki|United Arab Emirates

>Spike|hCoV-19/Spain/MD-IBV-003716/2020|2020-04-03|EPI\_ISL\_467238|Original|hCoV-19^^Madrid|Human|Hospital General Universitario Gregorio Mara\u00f1a|SeqCOVID-SPAIN consortium|IBV (CSIC)|Comas|Spain

>Spike|hCoV-19/Ireland/D-SVUH-R9582/2020|2020-04-29|EPI\_ISL\_596640|Original|hCoV-19^^Dublin|Human|St.Vincent's University Hospital|St.Vincent's University Hospital|Gonzalez|Ireland

>Spike|hCoV-19/Belgium/AF-0327321/2020|2020-03-27|EPI\_ISL\_462175|Original|hCoV-19^^Marcinelle|Human|KU Leuven|KU Leuven|Maes|Belgium

>Spike|hCoV-19/England/ALDP-94D420/2020|2020-06-15|EPI\_ISL\_556065|Original|hCoV-19^^England|Human|Lighthouse Lab in Alderley Park|Wellcome Sanger Institute for the COVID-19 Genomics UK (COG-UK) consortium|Davies|United Kingdom

>Spike|hCoV-19/England/20119023104/2020|2020-03-13|EPI\_ISL\_465034|Original|hCoV-19^^England|Human|Respiratory Virus Unit|Respiratory Virus Unit|Platt|United Kingdom

>Spike|hCoV-19/Switzerland/ZH-ETHZ-240071/2020|2020-08-09|EPI\_ISL\_523909|Original|hCoV-19^^Zurich|Human|Viollier AG|Department of Biosystems Science and Engineering|Nadeau|Switzerland

>Spike|hCoV-19/England/ALDP-BBAAB1/2020|2020-11-20|EPI\_ISL\_702445|Original|hCoV-19^^England|Human|Lighthouse Lab in Alderley Park|Wellcome Sanger Institute for the COVID-19 Genomics UK (COG-UK) Consortium|Davies|United Kingdom

>Spike|hCoV-19/India/MH-ACTREC-615/2020|2020-09-09|EPI\_ISL\_723066|Original|hCoV-19^^Maharashtra|Human|Hematopathology Laboratory|Hematopathology Laboratory|Patkar|India

>Spike|hCoV-19/Wales/PHWC-486DBC/2020|2020-10-28|EPI\_ISL\_639133|Original|hCoV-19^^Wales|Human|Wales Specialist Virology Centre Sequencing lab|COVID-19 Genomics UK (COG-UK) Consortium|Moore|United Kingdom

>Spike|hCoV-19/USA/SC-CDC-2-3714370/2020|2020-12-01|EPI\_ISL\_751744|Original|hCoV-19^^South Carolina|Human|SC Dept of Health and Env. Control-Bureau of Laboratories|Genomics and Discovery|Queen|USA

>Spike|hCoV-19/USA/WA-UW-3871/2020|2020-03-26|EPI\_ISL\_427198|Original|hCoV-19^^Washington|Human|UW Virology Lab|UW Virology Lab|Roychoudhury|USA

>Spike|hCoV-19/Denmark/DCGC-764/2020|2020-03-09|EPI\_ISL\_614790|Original|hCoV-19^^Syddanmark|Human|Department of Virus and Microbiological Special Diagnostics|Albertsen lab|Michaelsen|Denmark

>Spike|hCoV-19/South Africa/R13300-20/2020|2020-06-30|EPI\_ISL\_622909|Original|hCoV-19^^KwaZulu-Natal|Human|National Institute for Communicable Diseases of the National Health Laboratory Service|National Institute for Communicable Diseases of the National Health Laboratory Service|Allam|South Africa

>Spike|hCoV-19/USA/LA-EVTL880/2020|2020-07-06|EPI\_ISL\_653571|Original|hCoV-19^^Louisiana|Human|LSUHS Emerging Viral Threat Laboratory|Microbial Genome Sequencing Center|Kamil|USA

>Spike|hCoV-19/Japan/PG-2347/2020|2020-05-00|EPI\_ISL\_685952|Original|hCoV-19^^Japan|Human|Pathogen Genomics Center|Pathogen Genomics Center|Sekizuka|Japan

>Spike|hCoV-19/USA/NY-QDX-2043/2020|2020-03-17|EPI\_ISL\_604364|Original|hCoV-19^^New York|Human|Quest Diagnostics|Quest Diagnostics|Kagan|USA

>Spike|hCoV-19/Australia/VIC12521/2020|2020-07-29|EPI\_ISL\_640335|Original|hCoV-19^^Victoria|Human|Microbiological Diagnostic Unit - Public Health Laboratory (MDU-PHL)|MDU-PHL|Schultz|Australia

>Spike|hCoV-19/Spain/MD-H12-63/2020|2020-04-12|EPI\_ISL\_529994|Original|hCoV-19^^Madrid|Human|Hospital Universitario 12 de Octubre|Hospital Universitario 12 de Octubre|Viedma|Spain

>Spike|hCoV-19/Japan/PG-6931/2020|2020-09-00|EPI\_ISL\_688037|Original|hCoV-19^^Japan|Human|Pathogen Genomics Center|Pathogen Genomics Center|Sekizuka|Japan

>Spike|hCoV-19/USA/TX-HMH-MCoV-18936/2020|2020-11-25|EPI\_ISL\_785232|Original|hCoV-19^^Texas|Human|Houston Methodist Hospital|Houston Methodist Hospital|Long|USA

>Spike|hCoV-19/South Korea/KCDC2567/2020|2020-06-25|EPI\_ISL\_514970|Original|hCoV-19^^South Korea|Human|Division of Viral Diseases|Division of Viral Diseases|Kim|South Korea

>Spike|hCoV-19/USA/TX-HMH-MCoV-16398/2020|2020-11-01|EPI\_ISL\_786082|Original|hCoV-19^^Texas|Human|Houston Methodist Hospital|Houston Methodist Hospital|Long|USA

>Spike|hCoV-19/Wales/PHWC-499C40/2020|2020-12-02|EPI\_ISL\_727421|Original|hCoV-19^^Wales|Human|Originating lab|COVID-19 Genomics UK (COG-UK) Consortium|Moore|United Kingdom

>Spike|hCoV-19/Luxembourg/LNS2346680/2020|2020-11-18|EPI\_ISL\_740102|Original|hCoV-19^^Luxembourg|Human|Laboratoire national de sant\u00e9|Laboratoire national de sant\u00e9|Wienecke-Baldacchino|Luxembourg

>Spike|hCoV-19/Australia/TAS83/2020|2020-03-27|EPI\_ISL\_522754|Original|hCoV-19^^Tasmania|Human|Royal Hobart Hospital Microbiology Department|MDU-PHL|Schultz|Australia

>Spike|hCoV-19/Japan/Donner89/2020|2020-08-16|EPI\_ISL\_644993|Original|hCoV-19^^Kanto|Human|Department of Infectious Diseases|Center for Medical Genetics|Kosaki|Japan

>Spike|hCoV-19/USA/LA-EVTL079/2020|2020-05-01|EPI\_ISL\_451240|Original|hCoV-19^^Louisiana|Human|LSUHS Emerging Viral Threat Laboratory|Microbial Genome Sequencing Center|Kamil|USA

>Spike|hCoV-19/England/QEUEH-B9F5EE/2020|2020-11-18|EPI\_ISL\_721064|Original|hCoV-19^^England|Human|Lighthouse Lab in Glasgow|Wellcome Sanger Institute for the COVID-19 Genomics UK (COG-UK) Consortium|Davies|United Kingdom

>Spike|hCoV-19/England/ALDP-950B07/2020|2020-06-14|EPI\_ISL\_554562|Original|hCoV-19^^England|Human|Lighthouse Lab in Alderley Park|Wellcome Sanger Institute for the COVID-19 Genomics UK (COG-UK) consortium|Davies|United Kingdom

>Spike|hCoV-19/Switzerland/VD-ETHZ-100795/2020|2020-03-25|EPI\_ISL\_451745|Original|hCoV-19^^Vaud|Human|Viollier AG|Department of Biosystems Science and Engineering|Nadeau|Switzerland

>Spike|hCoV-19/Wales/PHWC-329CE/2020|2020-04-14|EPI\_ISL\_474377|Original|hCoV-19^^Wales|Human|Originating lab|COVID-19 Genomics UK (COG-UK) Consortium|Moore|United Kingdom

>Spike|hCoV-19/England/QEUA-AAD37B/2020|2020-10-20|EPI\_ISL\_623908|Original|hCoV-19^^England|Human|Lighthouse Lab in Glasgow|Wellcome Sanger Institute for the COVID-19 Genomics UK (COG-UK) consortium|Davies|United Kingdom

>Spike|hCoV-19/England/ALDP-A505BD/2020|2020-10-07|EPI\_ISL\_597712|Original|hCoV-19^^England|Human|Lighthouse Lab in Alderley Park|Wellcome Sanger Institute for the COVID-19 Genomics UK (COG-UK) consortium|Davies|United Kingdom

>Spike|hCoV-19/England/ALDP-9E71D6/2020|2020-09-24|EPI\_ISL\_580442|Original|hCoV-19^^England|Human|Lighthouse Lab in Alderley Park|Wellcome Sanger Institute for the COVID-19 Genomics UK (COG-UK) consortium|Davies|United Kingdom

>Spike|hCoV-19/Russia/MOS-CRIE7160676/2020|2020-08-24|EPI\_ISL\_653923|Original|hCoV-19^^Moscow|Human|Molecular diagnostic laboratory of Federal Budget Institution of Science \Central Research Institute of Epidemiology\ of The Federal Service on Customers' Rights Protection and Human Well-being Surveillance|Group of Genomics and Postgenomic Technologies of Central Research Institute of Epidemiology|

>Samoilov|Russia

>Spike|hCoV-19/England/MILK-A8F069/2020|2020-10-16|EPI\_ISL\_650279|Original|hCoV-19^^England|Human|Northumbria University / South Tees Hospitals NHS Foundation Trust / North Cumbria Integrated Care NHS Foundation Trust / North Tees and Hartlepool NHS Foundation Trust / Newcastle Hospitals NHS Foundation Trust|COVID-19 Genomics UK (COG-UK) Consortium|Bashton|United Kingdom

>Spike|hCoV-19/Wales/PHWC-495989/2020|2020-11-24|EPI\_ISL\_726420|Original|hCoV-19^^Wales|Human|Originating lab|COVID-19 Genomics UK (COG-UK) Consortium|Moore|United Kingdom

>Spike|hCoV-19/England/SHEF-CE402/2020|2020-11-26|EPI\_ISL\_707003|Original|hCoV-19^^England|Human|Virology Department|COVID-19 Genomics UK (COG-UK) Consortium|de Silva|United Kingdom

>Spike|hCoV-19/England/ALDP-B62809/2020|2020-11-09|EPI\_ISL\_656384|Original|hCoV-19^^England|Human|Lighthouse Lab in Alderley Park|Wellcome Sanger Institute for the COVID-19 Genomics UK (COG-UK) Consortium|Davies|United Kingdom

>Spike|hCoV-19/USA/MA-MGH-00464/2020|2020-04-04|EPI\_ISL\_460177|Original|hCoV-19^^Massachusetts|Human|Massachusetts General Hospital|Infectious Disease Program|Lemieux|USA

>Spike|hCoV-19/USA/LA-EVTL418/2020|2020-07-28|EPI\_ISL\_578824|Original|hCoV-19^^Louisiana|Human|LSUHS Emerging Viral Threat Laboratory|Microbial Genome Sequencing Center|Kamil|USA

>Spike|hCoV-19/Denmark/DCGC-16221/2020|2020-11-16|EPI\_ISL\_714647|Original|hCoV-19^^Hovedstaden|Human|Department of Virus and Microbiological Special Diagnostics|Albertsen Lab|Michaelsen|Denmark

>Spike|hCoV-19/England/NORT-1B72C8F/2020|2020-12-08|EPI\_ISL\_724923|Original|hCoV-19^^England|Human|Northumbria University / South Tees Hospitals NHS Foundation Trust / North Cumbria Integrated Care NHS Foundation Trust / North Tees and Hartlepool NHS Foundation Trust / Newcastle Hospitals NHS Foundation Trust|COVID-19 Genomics UK (COG-UK) Consortium|Bashton|United Kingdom

>Spike|hCoV-19/USA/OR-OHSU-1233/2020|2020-07-13|EPI\_ISL\_509166|Original|hCoV-19^^Oregon|Human|OHSU Lab Services Molecular Microbiology Lab|Oregon SARS-CoV-2 Genome Sequencing Center|O'Roak|USA

>Spike|hCoV-19/England/ALDP-A69636/2020|2020-10-12|EPI\_ISL\_609089|Original|hCoV-19^^England|Human|Lighthouse Lab in Alderley Park|Wellcome Sanger Institute for the COVID-19 Genomics UK (COG-UK) consortium|Davies|United Kingdom

>Spike|hCoV-19/England/QEUA-A8CA13/2020|2020-10-16|EPI\_ISL\_643107|Original|hCoV-19^^England|Human|Lighthouse Lab in Glasgow|Wellcome Sanger Institute for the COVID-19 Genomics UK (COG-UK) Consortium|Davies|United Kingdom

>Spike|hCoV-19/Brazil/SP-L7-CD74/2020|2020-03-25|EPI\_ISL\_476441|Original|hCoV-19^^S\u00e3o Paulo|Human|Hospital da Cl\u00ednicas da Faculdade de Medicina da Universidade de S\u00e3o Paulo|Instituto de Medicina Tropical da Univesidade de S\u00e3o Paulo|Faria|Brazil

>Spike|hCoV-19/England/EXET-13546F/2020|2020-04-14|EPI\_ISL\_457062|Original|hCoV-19^^England|Human|University of Exeter|COVID-19 Genomics UK (COG-UK) Consortium|Temperton|United Kingdom

>Spike|hCoV-19/England/ALDP-A2ECFF/2020|2020-10-05|EPI\_ISL\_587039|Original|hCoV-19^^England|Human|Lighthouse Lab in Alderley Park|Wellcome Sanger Institute for the COVID-19 Genomics UK (COG-UK) consortium|Davies|United Kingdom

>Spike|hCoV-19/Scotland/CVR2734/2020|2020-04-16|EPI\_ISL\_453073|Original|hCoV-19^^Scotland|Human|West of Scotland Specialist Virology Centre|COVID-19 Genomics UK (COG-UK) Consortium|Robertson|United Kingdom

>Spike|hCoV-19/Switzerland/GL-ETHZ-110455/2020|2020-04-07|EPI\_ISL\_451875|Original|hCoV-19^^Glarus|Human|Viollier AG|Department of Biosystems Science and Engineering|Nadeau|Switzerland

>Spike|hCoV-19/England/EXET-13F1D7/2020|2020-12-15|EPI\_ISL\_763712|Original|hCoV-19^^England|Human|University of Exeter|COVID-19 Genomics UK (COG-UK) Consortium|Temperton|United Kingdom

>Spike|hCoV-19/England/ALDP-B762C8/2020|2020-11-12|EPI\_ISL\_723752|Original|hCoV-19^^England|Human|Oxford Viromics|COVID-19 Genomics UK (COG-UK) Consortium|Golubchik|United Kingdom

>Spike|hCoV-19/England/BIRM-67C21/2020|2020-11-06|EPI\_ISL\_650743|Original|hCoV-19^^England|Human|University of Birmingham|COVID-19 Genomics UK (COG-UK) Consortium|Loman|United Kingdom

>Spike|hCoV-19/England/20169019604/2020|2020-04-17|EPI\_ISL\_465205|Original|hCoV-19^^England|Human|Respiratory Virus Unit|Respiratory Virus Unit|Platt|United Kingdom

>Spike|hCoV-19/Denmark/DCGC-14046/2020|2020-11-30|EPI\_ISL\_711535|Original|hCoV-19^^Hovedstaden|Human|Department of Virus and Microbiological Special Diagnostics|Albertsen Lab|Michaelsen|Denmark

>Spike|hCoV-19/England/LIVE-DC297B/2020|2020-11-24|EPI\_ISL\_702674|Original|hCoV-19^^England|Human|Liverpool Clinical Laboratories|COVID-19 Genomics UK (COG-UK) Consortium|Haldenby|United Kingdom

>Spike|hCoV-19/Wales/PHWC-165E86/2020|2020-06-19|EPI\_ISL\_490809|Original|hCoV-19^^Wales|Human|Wales Specialist Virology Centre Sequencing lab|COVID-19 Genomics UK (COG-UK) Consortium|Moore|United Kingdom

>Spike|hCoV-19/England/NORW-EAE20/2020|2020-04-29|EPI\_ISL\_457382|Original|hCoV-19^^England|Human|Quadram Institute Bioscience|COVID-19 Genomics UK (COG-UK) Consortium|Alikhan|United Kingdom

>Spike|hCoV-19/Israel/990059233/2020|2020-03-25|EPI\_ISL\_447273|Original|hCoV-19^^South Coast District|Human|Microbiology laboratory|Stern Lab|Miller|Israel

>Spike|hCoV-19/Denmark/DCGC-20539/2020|2020-12-21|EPI\_ISL\_758904|Original|hCoV-19^^Hovedstaden|Human|Department of Virus and Microbiological Special Diagnostics|Albertsen Lab|Michaelsen|Denmark

>Spike|hCoV-19/United Arab Emirates/1070/2020|2020-06-11|EPI\_ISL\_698144|Original|hCoV-19^^Abu Dhabi|Human|Group 42 (G42) Healthcare|G42 Healthcare|Ogrodzki|United Arab Emirates

>Spike|hCoV-19/England/QEUI-B2DCC2/2020|2020-11-03|EPI\_ISL\_646840|Original|hCoV-19^^England|Human|Lighthouse Lab in Glasgow|Wellcome Sanger Institute for the COVID-19 Genomics UK (COG-UK) Consortium|Davies|United Kingdom

>Spike|hCoV-19/England/LOND-1261590/2020|2020-03-29|EPI\_ISL\_524696|Original|hCoV-19^^England|Human|North West London Pathology|Wellcome Sanger Institute for the COVID-19 Genomics UK (COG-UK) consortium|Davies|United Kingdom

>Spike|hCoV-19/England/ALDP-94DF7A/2020|2020-06-16|EPI\_ISL\_555601|Original|hCoV-19^^England|Human|Lighthouse Lab in Alderley Park|Wellcome Sanger Institute for the COVID-19 Genomics UK (COG-UK) consortium|Davies|United Kingdom

>Spike|hCoV-19/England/QEUI-BCD981/2020|2020-11-26|EPI\_ISL\_704469|Original|hCoV-19^^England|Human|Lighthouse Lab in Glasgow|Wellcome Sanger Institute for the COVID-19 Genomics UK (COG-UK) Consortium|Davies|United Kingdom

>Spike|hCoV-19/Portugal/PT1103/2020|2020-03-28|EPI\_ISL\_511650|Original|hCoV-19^^Portugal|Human|Instituto Nacional de Saude (INSA)|Instituto Nacional de Saude (INSA)|Borges|Portugal

>Spike|hCoV-19/USA/AZ-QDX-2310/2020|2020-03-15|EPI\_ISL\_604503|Original|hCoV-19^^Arizona|Human|Quest Diagnostics|Quest Diagnostics|Kagan|USA

>Spike|hCoV-19/USA/RI-CDC-2-3714565/2020|2020-12-03|EPI\_ISL\_751695|Original|hCoV-19^^Rhode Island|Human|RI State Health Laboratories|Genomics and Discovery|Queen|USA

>Spike|hCoV-19/Luxembourg/LNS0958161/2020|2020-10-19|EPI\_ISL\_739862|Original|hCoV-19^^Luxembourg|Human|Laboratoire national de sant\u00e9|Laboratoire national de sant\u00e9|Wienecke-Baldacchino|Luxembourg

>Spike|hCoV-19/Luxembourg/LNS4516866/2020|2020-10-23|EPI\_ISL\_740485|Original|hCoV-19^^Luxembourg|Human|Laboratoire national de sant\u00e9|Laboratoire national de sant\u00e9|Wienecke-Baldacchino|Luxembourg

>Spike|hCoV-19/Scotland/EDB10633/2020|2020-12-02|EPI\_ISL\_705788|Original|hCoV-19^^Scotland|Human|Virology Department|COVID-19 Genomics UK (COG-UK) Consortium|McHugh|United Kingdom

>Spike|hCoV-19/USA/MA-Yale-425/2020|2020-04-08|EPI\_ISL\_738269|Original|hCoV-19^^Massachusetts|Human|Connecticut Veterans' Affairs Hospital|Grubaugh Lab - Yale School of Public Health|Grubaugh|USA

>Spike|hCoV-19/USA/CA-ALSR-4599/2020|2020-07-10|EPI\_ISL\_667031|Original|hCoV-19^^California|Human|San Diego County Public Health Laboratory|Andersen lab at Scripps Research|Gangavarapu|USA

>Spike|hCoV-19/England/MILK-CA9D24/2020|2020-12-18|EPI\_ISL\_762216|Original|hCoV-19^^England|Human|Lighthouse Lab in Milton Keynes|Wellcome Sanger Institute for the COVID-19 Genomics UK (COG-UK) Consortium|Davies|United Kingdom

>Spike|hCoV-19/Wales/PHWC-490B1F/2020|2020-11-16|EPI\_ISL\_706538|Original|hCoV-19^^Wales|Human|Originating lab|COVID-19 Genomics UK (COG-UK) Consortium|Moore|United Kingdom

>Spike|hCoV-19/Belgium/UGent-278/2020|2020-11-23|EPI\_ISL\_718013|Original|hCoV-19^^Ghent|Human|Lab voor klinische biologie|Onderzoeksgroep Virologie|Lambrechts|Belgium

>Spike|hCoV-19/Chile/RM-ISPCH-43/2020|2020-03-16|EPI\_ISL\_445322|Original|hCoV-19^^Region Metropolitana de Santiago|Human|UNIV.DE CHILE HOSP.CLINICO|Instituto de Salud Publica de Chile|Fernandez|Chile

>Spike|hCoV-19/England/201140037/2020|2020-03-10|EPI\_ISL\_464701|Original|hCoV-19^^England|Human|Respiratory Virus Unit|Respiratory Virus Unit|Platt|United Kingdom

>Spike|hCoV-19/England/ALDP-B83213/2020|2020-11-14|EPI\_ISL\_675529|Original|hCoV-19^^England|Human|Lighthouse Lab in Alderley Park|Wellcome Sanger Institute for the COVID-19 Genomics UK (COG-UK) Consortium|Davies|United Kingdom

>Spike|hCoV-19/USA/NY-Wadsworth-10715-01/2020|2020-03-05|EPI\_ISL\_525577|Original|hCoV-19^^New York|Human|Wadsworth Center|Wadsworth Center|Plitnick|USA

>Spike|hCoV-19/USA/AZ-TG396363/2020|2020-06-11|EPI\_ISL\_694820|Original|hCoV-19^^Arizona|Human|AZ SPHL|TGen North|French|USA

>Spike|hCoV-19/England/MILK-9E3301/2020|2020-09-21|EPI\_ISL\_581299|Original|hCoV-19^^England|Human|Lighthouse Lab in Milton Keynes|Wellcome Sanger Institute for the COVID-19 Genomics UK (COG-UK) consortium|Davies|United Kingdom

>Spike|hCoV-19/USA/WI-UW-1263/2020|2020-08-23|EPI\_ISL\_536636|Original|hCoV-19^^Wisconsin|Human|University of Wisconsin-Madison AIDS Vaccine Research Laboratories|University of Wisconsin-Madison AIDS Vaccine Research Laboratories|Baczenas|USA

>Spike|hCoV-19/USA/MN-MDH-2227/2020|2020-12-05|EPI\_ISL\_770801|Original|hCoV-19^^Minnesota|Human|Vault Health|Minnesota Department of Health|Lorentz|USA

>Spike|hCoV-19/England/20144075304/2020|2020-04-01|EPI\_ISL\_466008|Original|hCoV-19^^England|Human|Respiratory Virus Unit|Respiratory Virus Unit|Platt|United Kingdom

>Spike|hCoV-19/England/ALDP-B638AE/2020|2020-11-09|EPI\_ISL\_656603|Original|hCoV-19^^England|Human|Lighthouse Lab in Alderley Park|Wellcome Sanger Institute for the COVID-19 Genomics UK (COG-UK) Consortium|Davies|United Kingdom

>Spike|hCoV-19/England/ALDP-9EDC57/2020|2020-05-08|EPI\_ISL\_580720|Original|hCoV-19^^England|Human|Lighthouse Lab in Alderley Park|Wellcome Sanger Institute for the COVID-19 Genomics UK (COG-UK) consortium|Davies|United Kingdom

>Spike|hCoV-19/Australia/VIC10397/2020|2020-08-25|EPI\_ISL\_562899|Original|hCoV-19^^Victoria|Human|Microbiological Diagnostic Unit - Public Health Laboratory (MDU-PHL)|MDU-PHL|Schultz|Australia

>Spike|hCoV-19/Wales/PHWC-1638F3/2020|2020-05-07|EPI\_ISL\_474015|Original|hCoV-19^^Wales|Human|Originating lab|COVID-19 Genomics UK (COG-UK) Consortium|Moore|United Kingdom



>Spike|hCoV-19/USA/HI-H200595/2020|2020-11-02|EPI\_ISL\_753121|Original|hCoV-19^^Hawaii|Human|State Laboratories Division|State Laboratories Division|Sultana|USA

>Spike|hCoV-19/USA/CA-SR0259/2020|2020-03-25|EPI\_ISL\_437553|Original|hCoV-19^^California|Human|Scripps Medical Laboratory|Andersen lab at Scripps Research|Gangavarapu|USA

>Spike|hCoV-19/Denmark/DCGC-21935/2020|2020-12-21|EPI\_ISL\_758100|Original|hCoV-19^^Syddanmark|Human|Department of Virus and Microbiological Special Diagnostics|Albertsen Lab|Michaelsen|Denmark

>Spike|hCoV-19/USA/TX-HMH-1802/2020|2020-05-16|EPI\_ISL\_542850|Original|hCoV-19^^Texas|Human|Houston Methodist Hospital|Houston Methodist Hospital|Long|USA

>Spike|hCoV-19/Scotland/EDB2359/2020|2020-04-22|EPI\_ISL\_439189|Original|hCoV-19^^Scotland|Human|Virology Department|COVID-19 Genomics UK (COG-UK) Consortium|Williams|United Kingdom

>Spike|hCoV-19/Japan/PG-4565/2020|2020-07-00|EPI\_ISL\_689702|Original|hCoV-19^^Japan|Human|Pathogen Genomics Center|Pathogen Genomics Center|Sekizuka|Japan

>Spike|hCoV-19/England/ALDP-AA2455/2020|2020-10-22|EPI\_ISL\_624392|Original|hCoV-19^^England|Human|Lighthouse Lab in Alderley Park|Wellcome Sanger Institute for the COVID-19 Genomics UK (COG-UK) consortium|Davies|United Kingdom

>Spike|hCoV-19/Luxembourg/LNS6619597/2020|2020-12-01|EPI\_ISL\_771004|Original|hCoV-19^^Luxembourg|Human|Laboratoire national de sant\u00e9|Laboratoire national de sant\u00e9|Wienecke-Baldacchino|Luxembourg

>Spike|hCoV-19/Belgium/ULG-10958/2020|2020-09-07|EPI\_ISL\_707737|Original|hCoV-19^^Li\u00e8ge|Human|Department of Clinical Microbiology|GIGA Medical Genomics|Durkin|Belgium

>Spike|hCoV-19/Switzerland/BE-ETHZ-350183/2020|2020-11-04|EPI\_ISL\_693832|Original|hCoV-19^^Bern|Human|Viollier AG|Department of Biosystems Science and Engineering|Nadeau|Switzerland

>Spike|hCoV-19/USA/FL-BPHL-1606/2020|2020-07-05|EPI\_ISL\_594296|Original|hCoV-19^^Florida|Human|Florida Bureau of Public Health Laboratories|Florida Bureau of Public Health Laboratories|Blanton|USA

>Spike|hCoV-19/Spain/MD-IBV-99007126/2020|2020-07-31|EPI\_ISL\_541900|Original|hCoV-19^^Madrid|Human|Hospital General Universitario Gregorio Mara\u00f1a|SeqCOVID-SPAIN consortium|IBV (CSIC)|Comas|Spain

>Spike|hCoV-19/USA/WA-S678/2020|2020-04-07|EPI\_ISL\_449848|Original|hCoV-19^^Washington|Human|Washington State Department of Health|Seattle Flu Study|Bedford|USA

>Spike|hCoV-19/England/BRIS-131339/2020|2020-05-21|EPI\_ISL\_467702|Original|hCoV-19^^England|Human|PHE South West Regional Laboratory|Wellcome Sanger Institute for the COVID-19 Genomics UK (COG-UK) consortium|Davies|United Kingdom

>Spike|hCoV-19/USA/TX-HMH-4139/2020|2020-06-18|EPI\_ISL\_543403|Original|hCoV-19^^Texas|Human|Houston Methodist Hospital|Houston Methodist Hospital|Long|USA

>Spike|hCoV-19/Australia/VIC2339/2020|2020-06-25|EPI\_ISL\_522060|Original|hCoV-19^^Victoria|Human|Victorian Infectious Diseases Reference Laboratory (VIDRL)|VIDRL and MDU-PHL|Schultz|Australia

>Spike|hCoV-19/USA/MI-MDHHS-SC21195/2020|2020-04-01|EPI\_ISL\_507452|Original|hCoV-19^^Michigan|Human|Michigan Department of Health and Human Services|Michigan Department of Health and Human Services|Blankenship|USA

>Spike|hCoV-19/Scotland/EDB3496/2020|2020-04-13|EPI\_ISL\_439269|Original|hCoV-19^^Scotland|Human|Virology Department|COVID-19 Genomics UK (COG-UK) Consortium|Williams|United Kingdom

>Spike|hCoV-19/England/QEUEH-B2F659/2020|2020-11-04|EPI\_ISL\_660023|Original|hCoV-19^^England|Human|Lighthouse Lab in Glasgow|Wellcome Sanger Institute for the COVID-19 Genomics UK (COG-UK) Consortium|Davies|United Kingdom

>Spike|hCoV-19/England/CAMB-1ACD4A/2020|2020-04-22|EPI\_ISL\_489467|Original|hCoV-19^^England|Human|Department of Pathology|Wellcome Sanger Institute for the COVID-19 Genomics UK (COG-UK) consortium|Davies|United Kingdom

>Spike|hCoV-19/USA/NY-Wadsworth-142785-01/2020|2020-04-18|EPI\_ISL\_676978|Original|hCoV-19^^New York|Human|Wadsworth Center|Wadsworth Center|Lasek-Nesselquist|USA

>Spike|hCoV-19/Netherlands/NB-EMC-258/2020|2020-07-08|EPI\_ISL\_523381|Original|hCoV-19^^Noord Brabant|Human|Dutch COVID-19 response team|Erasmus Medical Center|Oude Munnink|Netherlands

>Spike|hCoV-19/England/LEED-2AA358/2020|2020-04-08|EPI\_ISL\_538908|Original|hCoV-19^^England|Human|Leeds Teaching Hospitals NHS Trust and Public Health England|Wellcome Sanger Institute for the COVID-19 Genomics UK (COG-UK) consortium|Davies|United Kingdom

>Spike|hCoV-19/England/ALDP-AA49FA/2020|2020-10-21|EPI\_ISL\_624925|Original|hCoV-19^^England|Human|Lighthouse Lab in Alderley Park|Wellcome Sanger Institute for the COVID-19 Genomics UK (COG-UK) consortium|Davies|United Kingdom

>Spike|hCoV-19/England/BRIS-12C067/2020|2020-05-10|EPI\_ISL\_469365|Original|hCoV-19^^England|Human|PHE South West Regional Laboratory|Wellcome Sanger Institute for the COVID-19 Genomics UK (COG-UK) consortium|Davies|United Kingdom

>Spike|hCoV-19/Israel/CVL-280-ngs/2020|2020-12-27|EPI\_ISL\_776812|Original|hCoV-19^^Israel|Human|Israel Central Virology laboratory|Israel Central Virology laboratory|Zuckerman|Israel

>Spike|hCoV-19/USA/CA-CZB-10011/2020|2020-06-03|EPI\_ISL\_672083|Original|hCoV-19^^California|Human|The Ashley Laboratory|Chan-Zuckerberg Biohub|Bhatt|USA

>Spike|hCoV-19/USA/DE-DHSS-F918424/2020|2020-03-31|EPI\_ISL\_593960|Original|hCoV-19^^Delaware|Human|Delaware Public Health Lab|Delaware Public Health Lab|Bajwa|USA

>Spike|hCoV-19/England/ALDP-A859E0/2020|2020-10-17|EPI\_ISL\_610355|Original|hCoV-19^^England|Human|Lighthouse Lab in Alderley Park|Wellcome Sanger Institute for the COVID-19 Genomics UK (COG-UK) consortium|Davies|United Kingdom

>Spike|hCoV-19/USA/WA-S118/2020|2020-03-01|EPI\_ISL\_417171|Original|hCoV-19^^Washington|Human|Washington State Department of Health|Seattle Flu Study|Bedford|USA

>Spike|hCoV-19/England/QEUEH-B14208/2020|2020-11-02|EPI\_ISL\_641852|Original|hCoV-19^^England|Human|Lighthouse Lab in Glasgow|Wellcome Sanger Institute for the COVID-19 Genomics UK (COG-UK) Consortium|Davies|United Kingdom

>Spike|hCoV-19/England/20192017904/2020|2020-05-04|EPI\_ISL\_528416|Original|hCoV-19^^England|Human|Respiratory Virus Unit|Respiratory Virus Unit|Miah|United Kingdom

>Spike|hCoV-19/Denmark/DCGC-5149/2020|2020-09-21|EPI\_ISL\_621687|Original|hCoV-19^^Syddanmark|Human|Department of Virus and Microbiological Special Diagnostics|Albertsen lab|Michaelsen|Denmark

>Spike|hCoV-19/England/SHEF-10C5F16/2020|2020-12-21|EPI\_ISL\_741938|Original|hCoV-19^^England|Human|Virology Department|COVID-19 Genomics UK (COG-UK) Consortium|de Silva|United Kingdom

>Spike|hCoV-19/USA/MI-MDHHS-SC21620/2020|2020-03-29|EPI\_ISL\_516347|Original|hCoV-19^^Michigan|Human|Michigan Department of Health and Human Services|Michigan Department of Health and Human Services|Blankenship|USA

>Spike|hCoV-19/Scotland/EDB6111/2020|2020-05-12|EPI\_ISL\_478228|Original|hCoV-19^^Scotland|Human|Virology Department|COVID-19 Genomics UK (COG-UK) Consortium|Williams|United Kingdom

>Spike|hCoV-19/Canada/QC\_AA3/2020|2020-04-05|EPI\_ISL\_444495|Original|hCoV-19^^Quebec|Human|Laboratoire de microbiologie|Smith Laboratory|Smith|Canada

>Spike|hCoV-19/Denmark/DCGC-8617/2020|2020-10-26|EPI\_ISL\_625999|Original|hCoV-19^^Nordjylland|Human|Department of Virus and Microbiological Special Diagnostics|Albertsen lab|Michaelsen|Denmark

>Spike|hCoV-19/Gibraltar/204421241/2020|2020-10-27|EPI\_ISL\_613700|Original|hCoV-19^^Gibraltar|Human|Microbiology|Respiratory Virus Unit|Platt|Gibraltar

>Spike|hCoV-19/England/MILK-BDB4E9/2020|2020-11-26|EPI\_ISL\_709655|Original|hCoV-19^^England|Human|Lighthouse Lab in Milton Keynes|Wellcome Sanger Institute for the COVID-19 Genomics UK (COG-UK) Consortium|Davies|United Kingdom

>Spike|hCoV-19/Denmark/DCGC-16537/2020|2020-11-16|EPI\_ISL\_714824|Original|hCoV-19^^Hovedstaden|Human|Department of Virus and Microbiological Special Diagnostics|Albertsen Lab|Michaelsen|Denmark

>Spike|hCoV-19/South Africa/KRISP-0553/2020|2020-07-14|EPI\_ISL\_498092|Original|hCoV-19^^KwaZulu-Natal|Human|NHLIS-IALCH|KRISP|de Oliveira|South Africa

>Spike|hCoV-19/USA/UT-UPHL-2012729714/2020|2020-08-17|EPI\_ISL\_746193|Original|hCoV-19^^Utah|Human|Ginkgo Bioworks Clinical Laboratory|Utah Public Health Laboratory|Young|USA

>Spike|hCoV-19/USA/FL-BPHL-0299/2020|2020-05-14|EPI\_ISL\_480950|Original|hCoV-19^^Florida|Human|Florida Bureau of Public Health Laboratories|Florida Bureau of Public Health Laboratories|Blanton|USA

>Spike|hCoV-19/England/LIVE-A57AE/2020|2020-03-21|EPI\_ISL\_500150|Original|hCoV-19^^England|Human|Liverpool Clinical Laboratories|COVID-19 Genomics UK (COG-UK) Consortium|Haldenby|United Kingdom

>Spike|hCoV-19/England/LOND-D37F2/2020|2020-03-31|EPI\_ISL\_440990|Original|hCoV-19^^England|Human|University College London|COVID-19 Genomics UK (COG-UK) Consortium|Roy|United Kingdom

>Spike|hCoV-19/Australia/WA293/2020|2020-03-21|EPI\_ISL\_596836|Original|hCoV-19^^Western Australia|Human|PathWest Laboratory Medicine WA|PathWest Laboratory Medicine WA Microbial Surveillance Unit|Sikazwe|Australia

>Spike|hCoV-19/Scotland/QEUH-9E4CF6/2020|2020-09-23|EPI\_ISL\_600955|Original|hCoV-19^^Scotland|Human|Lighthouse Lab in Glasgow|Wellcome Sanger Institute for the COVID-19 Genomics UK (COG-UK) consortium|Davies|United Kingdom

>Spike|hCoV-19/England/CAMC-B5370E/2020|2020-11-08|EPI\_ISL\_656919|Original|hCoV-19^^England|Human|Lighthouse Lab in Cambridge|Wellcome Sanger Institute for the COVID-19 Genomics UK (COG-UK) Consortium|Davies|United Kingdom

>Spike|hCoV-19/England/201140079/2020|2020-03-09|EPI\_ISL\_464714|Original|hCoV-19^^England|Human|Respiratory Virus Unit|Respiratory Virus Unit|Platt|United Kingdom

>Spike|hCoV-19/USA/CA-CZB-2164/2020|2020-05-22|EPI\_ISL\_513714|Original|hCoV-19^^California|Human|Orange County Public Health Lab|Chan-Zuckerberg Biohub|Kamm|USA

>Spike|hCoV-19/England/QEUH-B3F638/2020|2020-11-08|EPI\_ISL\_658429|Original|hCoV-19^^England|Human|Lighthouse Lab in Glasgow|Wellcome Sanger Institute for the COVID-19 Genomics UK (COG-UK) Consortium|Davies|United Kingdom

>Spike|hCoV-19/Switzerland/BS-ETHZ-110000/2020|2020-04-01|EPI\_ISL\_486442|Original|hCoV-19^^Basel-Stadt|Human|Viollier AG|Department of Biosystems Science and Engineering|Nadeau|Switzerland

>Spike|hCoV-19/USA/OR-PROV-218/2020|2020-04-04|EPI\_ISL\_482453|Original|hCoV-19^^Oregon|Human|Providence St. Joseph Health Molecular Genomics Laboratory|Providence St. Joseph Health Molecular Genomics Laboratory|Dowdell|USA

>Spike|hCoV-19/Switzerland/BE-ETHZ-120030/2020|2020-04-18|EPI\_ISL\_468222|Original|hCoV-19^^Bern|Human|Viollier AG|Department of Biosystems Science and Engineering|Nadeau|Switzerland

>Spike|hCoV-19/England/LOND-124F361/2020|2020-04-24|EPI\_ISL\_664471|Original|hCoV-19^^England|Human|University College London Hospital|COVID-19 Genomics UK (COG-UK) Consortium|Byott|United Kingdom

>Spike|hCoV-19/USA/UT-UPHL-2012997217/2020|2020-06-17|EPI\_ISL\_746388|Original|hCoV-19^^Utah|Human|Utah Public Health Laboratory|Utah Public Health Laboratory|Gallagher|USA

>Spike|hCoV-19/Scotland/GCVR-173DE2/2020|2020-04-06|EPI\_ISL\_459115|Original|hCoV-19^^Scotland|Human|NHSGGC West of Scotland Specialist Virology Centre / MRC-University of Glasgow Centre for Virus Research|Wellcome Sanger Institute for the COVID-19 Genomics UK (COG-UK) consortium|Davies|United Kingdom

>Spike|hCoV-19/Wales/MILK-A05818/2020|2020-09-30|EPI\_ISL\_599955|Original|hCoV-19^^Wales|Human|Lighthouse Lab in Milton Keynes|Wellcome Sanger Institute for the COVID-19 Genomics UK (COG-UK) consortium|Davies|United Kingdom

>Spike|hCoV-19/England/C200047041/2020|2020-11-13|EPI\_ISL\_668442|Original|hCoV-19^^England|Human|Respiratory Virus Unit|COVID-19 Genomics UK (COG-UK) Consortium|Platt|United Kingdom

>Spike|hCoV-19/India/KA-IB14/2020|2020-06-18|EPI\_ISL\_508292|Original|hCoV-19^^Karnataka|Human|Indian Institute of Science|National Institute of Biomedical Genomics|Maitra|India

>Spike|hCoV-19/Netherlands/FR-RIVM-20554/2020|2020-12-15|EPI\_ISL\_790641|Original|hCoV-19^^Friesland|Human|Dutch COVID-19 response team|National Institute for Public Health and the Environment (RIVM)|Meijer|Netherlands

>Spike|hCoV-19/England/CAMC-B3476D/2020|2020-11-05|EPI\_ISL\_659495|Original|hCoV-19^^England|Human|Lighthouse Lab in Cambridge|Wellcome Sanger Institute for the COVID-19 Genomics UK (COG-UK) Consortium|Davies|United Kingdom

>Spike|hCoV-19/Wales/PHWC-15E4BB/2020|2020-05-15|EPI\_ISL\_472817|Original|hCoV-19^^Wales|Human|Wales Specialist Virology Centre Sequencing lab|COVID-19 Genomics UK (COG-UK) Consortium|Moore|United Kingdom

>Spike|hCoV-19/Denmark/DCGC-12555/2020|2020-11-16|EPI\_ISL\_682736|Original|hCoV-19^^Sjaelland|Human|Department of Virus and Microbiological Special Diagnostics|Albertsen Lab|Michaelsen|Denmark

>Spike|hCoV-19/England/MILK-9760B1/2020|2020-08-17|EPI\_ISL\_552755|Original|hCoV-19^^England|Human|Lighthouse Lab in Milton Keynes|Wellcome Sanger Institute for the COVID-19 Genomics UK (COG-UK) consortium|Davies|United Kingdom

>Spike|hCoV-19/USA/ME-HETL-J0037/2020|2020-03-16|EPI\_ISL\_513449|Original|hCoV-19^^Maine|Human|Maine HETL|Tewhey Lab|Tewhey|USA

>Spike|hCoV-19/Wales/CVR4749/2020|2020-09-20|EPI\_ISL\_627339|Original|hCoV-19^^Wales|Human|West of Scotland Specialist Virology Centre|COVID-19 Genomics UK (COG-UK) Consortium|Robertson|United Kingdom

>Spike|hCoV-19/Italy/CAM-IZSM-87503-NIKY/2020|2020-10-23|EPI\_ISL\_738121|Original|hCoV-19^^Campania|Human|IZSM-U.O.C. Virologia|Istituto Zooprofilattico Sperimentale del Mezzogiorno|Viscardi|Italy

>Spike|hCoV-19/England/QEUH-7532A7/2020|2020-07-19|EPI\_ISL\_532980|Original|hCoV-19^^England|Human|Lighthouse Lab in Glasgow|Wellcome Sanger Institute for the COVID-19 Genomics UK (COG-UK) consortium|Davies|United Kingdom

>Spike|hCoV-19/USA/NY-NYUMC516/2020|2020-03-30|EPI\_ISL\_444633|Original|hCoV-19^^New York|Human|NYU Langone Health|Departments of Pathology and Medicine|Maurano|USA

>Spike|hCoV-19/Denmark/DCGC-2021/2020|2020-07-27|EPI\_ISL\_618231|Original|hCoV-19^^Hovedstaden|Human|Department of Virus and Microbiological Special Diagnostics|Albertsen lab|Michaelsen|Denmark

>Spike|hCoV-19/England/MILK-B3999F/2020|2020-11-02|EPI\_ISL\_679652|Original|hCoV-19^^England|Human|Oxford Viromics|COVID-19 Genomics UK (COG-UK) Consortium|Golubchik|United Kingdom

>Spike|hCoV-19/Scotland/EDB9320/2020|2020-11-05|EPI\_ISL\_665790|Original|hCoV-19^^Scotland|Human|Virology Department|COVID-19 Genomics UK (COG-UK) Consortium|McHugh|United Kingdom

>Spike|hCoV-19/England/EXET-13EAFB/2020|2020-12-13|EPI\_ISL\_763707|Original|hCoV-19^^England|Human|University of Exeter|COVID-19 Genomics UK (COG-UK) Consortium|Temperton|United Kingdom

>Spike|hCoV-19/USA/AZ-TG305807/2020|2020-04-28|EPI\_ISL\_694282|Original|hCoV-19^^Arizona|Human|AZ SPHL|TGen North|French|USA

>Spike|hCoV-19/USA/LA-EVTL1100/2020|2020-12-02|EPI\_ISL\_768370|Original|hCoV-19^^Louisiana|Human|LSUHS Emerging Viral Threat Laboratory|Microbial Genome Sequencing Center|Kamil|USA

>Spike|hCoV-19/USA/AZ-TG408125/2020|2020-06-12|EPI\_ISL\_694888|Original|hCoV-19^^Arizona|Human|AZ SPHL|TGen North|French|USA

>Spike|hCoV-19/Denmark/DCGC-18693/2020|2020-12-07|EPI\_ISL\_749256|Original|hCoV-19^^Sjaelland|Human|Department of Virus and Microbiological Special Diagnostics|Albertsen Lab|Michaelsen|Denmark

>Spike|hCoV-19/England/ALDP-49BB50/2020|2020-06-11|EPI\_ISL\_559322|Original|hCoV-19^^England|Human|Lighthouse Lab in Alderley Park|Wellcome Sanger Institute for the COVID-19 Genomics UK (COG-UK) consortium|Davies|United Kingdom

>Spike|hCoV-19/Netherlands/OV-EMC-38/2020|2020-04-17|EPI\_ISL\_523422|Original|hCoV-19^^Overijssel|Human|Dutch COVID-19 response team|Erasmus Medical Center|Oude Munnink|Netherlands

>Spike|hCoV-19/USA/TX-DSHS-1835/2020|2020-06-23|EPI\_ISL\_745265|Original|hCoV-19^^Texas|Human|Texas Department of State Health Services|Texas Department of State Health Services|Rahman|USA

>Spike|hCoV-19/England/QEUH-9DCB9A/2020|2020-09-21|EPI\_ISL\_581082|Original|hCoV-19^^England|Human|Lighthouse Lab in Glasgow|Wellcome Sanger Institute for the COVID-19 Genomics UK (COG-UK) consortium|Davies|United Kingdom

>Spike|hCoV-19/South Africa/KRISP-K001323/2020|2020-07-18|EPI\_ISL\_515808|Original|hCoV-19^KwaZulu-Natal|Human|Medical Disagnostics Services (MDS)|KRISP|de Oliveira|South Africa

>Spike|hCoV-19/Sweden/20-13139/2020|2020-12-23|EPI\_ISL\_789025|Original|hCoV-19^Stockholm|Human|ABC|The Public Health Agency of Sweden|Svartstr\u00f6m|Sweden

>Spike|hCoV-19/England/ALDP-94C45E/2020|2020-06-15|EPI\_ISL\_555848|Original|hCoV-19^England|Human|Lighthouse Lab in Alderley Park|Wellcome Sanger Institute for the COVID-19 Genomics UK (COG-UK) consortium|Davies|United Kingdom

>Spike|hCoV-19/England/ALDP-4FF97E/2020|2020-06-23|EPI\_ISL\_559191|Original|hCoV-19^England|Human|Lighthouse Lab in Alderley Park|Wellcome Sanger Institute for the COVID-19 Genomics UK (COG-UK) consortium|Davies|United Kingdom

>Spike|hCoV-19/Wales/PHWC-30FCE/2020|2020-04-09|EPI\_ISL\_446389|Original|hCoV-19^Wales|Human|Wales Specialist Virology Centre|Public Health Wales Microbiology Cardiff|Moore|United Kingdom

>Spike|hCoV-19/England/EXET-1359F7/2020|2020-03-17|EPI\_ISL\_457124|Original|hCoV-19^England|Human|University of Exeter|COVID-19 Genomics UK (COG-UK) Consortium|Temperton|United Kingdom

>Spike|hCoV-19/USA/TX-HMH-MCoV-19372/2020|2020-11-27|EPI\_ISL\_783801|Original|hCoV-19^Texas|Human|Houston Methodist Hospital|Houston Methodist Hospital|Long|USA

>Spike|hCoV-19/England/ALDP-A6FFAE/2020|2020-10-15|EPI\_ISL\_608293|Original|hCoV-19^England|Human|Lighthouse Lab in Alderley Park|Wellcome Sanger Institute for the COVID-19 Genomics UK (COG-UK) consortium|Davies|United Kingdom

>Spike|hCoV-19/USA/CA-ALSR-2984/2020|2020-08-30|EPI\_ISL\_635772|Original|hCoV-19^California|Human|San Diego County Public Health Laboratory|Andersen lab at Scripps Research|Gangavarapu|USA

>Spike|hCoV-19/Wales/PHWC-48C81F/2020|2020-11-07|EPI\_ISL\_666473|Original|hCoV-19^Wales|Human|Wales Specialist Virology Centre Sequencing lab|COVID-19 Genomics UK (COG-UK) Consortium|Moore|United Kingdom

>Spike|hCoV-19/Wales/PHWC-4993E1/2020|2020-12-03|EPI\_ISL\_727300|Original|hCoV-19^Wales|Human|Originating lab|COVID-19 Genomics UK (COG-UK) Consortium|Moore|United Kingdom

>Spike|hCoV-19/Denmark/DCGC-13953/2020|2020-11-30|EPI\_ISL\_711473|Original|hCoV-19^Syddanmark|Human|Department of Virus and Microbiological Special Diagnostics|Albertsen Lab|Michaelsen|Denmark

>Spike|hCoV-19/Costa Rica/INC-0141/2020|2020-09-03|EPI\_ISL\_770010|Original|hCoV-19^San Jose|Human|Area De Salud Escazu (Coopesana)|Inciensa|Soto-Garita|Costa Rica

>Spike|hCoV-19/Singapore/1447/2020|2020-12-07|EPI\_ISL\_728183|Original|hCoV-19^Singapore|Human|National Public Health Laboratory|National Public Health Laboratory|Mak|Singapore

>Spike|hCoV-19/USA/IL-UW-1518/2020|2020-09-16|EPI\_ISL\_541547|Original|hCoV-19^Illinois|Human|University of Wisconsin-Madison AIDS Vaccine Research Laboratories|University of Wisconsin-Madison AIDS Vaccine Research Laboratories|Baczenas|USA

>Spike|hCoV-19/England/BRIS-1228F0/2020|2020-04-03|EPI\_ISL\_440771|Original|hCoV-19^England|Human|PHE South West Regional Laboratory|Wellcome Sanger Institute for the COVID-19 Genomics UK (COG-UK) consortium|Amato|United Kingdom

>Spike|hCoV-19/Denmark/DCGC-5596/2020|2020-09-21|EPI\_ISL\_620921|Original|hCoV-19^Sjaelland|Human|Department of Virus and Microbiological Special Diagnostics|Albertsen lab|Michaelsen|Denmark

>Spike|hCoV-19/England/ALDP-A6F2F0/2020|2020-10-15|EPI\_ISL\_606946|Original|hCoV-19^England|Human|Lighthouse Lab in Alderley Park|Wellcome Sanger Institute for the COVID-19 Genomics UK (COG-UK) consortium|Davies|United Kingdom

>Spike|hCoV-19/Wales/PHWC-2E1CD/2020|2020-04-07|EPI\_ISL\_446069|Original|hCoV-19^Wales|Human|Wales Specialist Virology Centre|Public Health Wales Microbiology Cardiff|Moore|United Kingdom

>Spike|hCoV-19/England/SHEF-CD588/2020|2020-05-26|EPI\_ISL\_475457|Original|hCoV-19^England|Human|Virology Department|COVID-19 Genomics UK (COG-UK) Consortium|de Silva|United Kingdom

>Spike|hCoV-19/England/NORT-29E9EC/2020|2020-05-11|EPI\_ISL\_488176|Original|hCoV-19^^England|Human|NU-OMICS DNA Sequencing research facility|Wellcome Sanger Institute for the COVID-19 Genomics UK (COG-UK) consortium|Davies|United Kingdom

>Spike|hCoV-19/USA/WA-S2572/2020|2020-06-17|EPI\_ISL\_497204|Original|hCoV-19^^Washington|Human|Washington State Department of Health|Seattle Flu Study|Lee|USA

>Spike|hCoV-19/Denmark/DCGC-17852/2020|2020-12-14|EPI\_ISL\_749600|Original|hCoV-19^^Hovedstaden|Human|Department of Virus and Microbiological Special Diagnostics|Albertsen Lab|Michaelsen|Denmark

>Spike|hCoV-19/England/QEUEH-9C844B/2020|2020-09-11|EPI\_ISL\_567025|Original|hCoV-19^^England|Human|Lighthouse Lab in Glasgow|Wellcome Sanger Institute for the COVID-19 Genomics UK (COG-UK) consortium|Davies|United Kingdom

>Spike|hCoV-19/England/NORW-F6243/2020|2020-11-26|EPI\_ISL\_703733|Original|hCoV-19^^England|Human|Quadram Institute Bioscience|COVID-19 Genomics UK (COG-UK) Consortium|Alikhan|United Kingdom

>Spike|hCoV-19/Australia/VIC8751/2020|2020-07-28|EPI\_ISL\_565174|Original|hCoV-19^^Victoria|Human|Victorian Infectious Diseases Reference Laboratory (VIDRL)|VIDRL and MDU-PHL|Schultz|Australia

>Spike|hCoV-19/England/ALDP-AA39EC/2020|2020-10-22|EPI\_ISL\_624387|Original|hCoV-19^^England|Human|Lighthouse Lab in Alderley Park|Wellcome Sanger Institute for the COVID-19 Genomics UK (COG-UK) consortium|Davies|United Kingdom

>Spike|hCoV-19/Japan/PG-0089/2020|2020-03-05|EPI\_ISL\_479836|Original|hCoV-19^^Hokkaido|Human|Sapporo City Institute of Public Health|Pathogen Genomics Center|Sekizuka|Japan

>Spike|hCoV-19/Australia/VIC10787/2020|2020-07-30|EPI\_ISL\_563089|Original|hCoV-19^^Victoria|Human|Microbiological Diagnostic Unit - Public Health Laboratory (MDU-PHL)|MDU-PHL|Schultz|Australia

>Spike|hCoV-19/England/QEUEH-AF4AE9/2020|2020-10-30|EPI\_ISL\_663166|Original|hCoV-19^^England|Human|Lighthouse Lab in Glasgow|Wellcome Sanger Institute for the COVID-19 Genomics UK (COG-UK) Consortium|Davies|United Kingdom

>Spike|hCoV-19/USA/CA-CZB-1043/2020|2020-04-01|EPI\_ISL\_437043|Original|hCoV-19^^California|Human|County of Santa Clara Public Health|Chan-Zuckerberg Biohub|Hao|USA

>Spike|hCoV-19/Denmark/DCGC-1084/2020|2020-05-11|EPI\_ISL\_614509|Original|hCoV-19^^Hovedstaden|Human|Department of Virus and Microbiological Special Diagnostics|Albertsen lab|Michaelsen|Denmark

>Spike|hCoV-19/England/QEUEH-9B7940/2020|2020-09-08|EPI\_ISL\_590477|Original|hCoV-19^^England|Human|Lighthouse Lab in Glasgow|Wellcome Sanger Institute for the COVID-19 Genomics UK (COG-UK) consortium|Davies|United Kingdom

>Spike|hCoV-19/England/ALDP-B1DF35/2020|2020-11-01|EPI\_ISL\_723549|Original|hCoV-19^^England|Human|Centre for Enzyme Innovation|COVID-19 Genomics UK (COG-UK) Consortium|Robson|United Kingdom

>Spike|hCoV-19/Belgium/reg-0417908/2020|2020-04-17|EPI\_ISL\_734619|Original|hCoV-19^^Mont-Saint-Guibert|Human|UZ Leuven|KU Leuven|Maes|Belgium

>Spike|hCoV-19/USA/CA-CZB-14130/2020|2020-05-23|EPI\_ISL\_739576|Original|hCoV-19^^California|Human|Alameda County Public Health Lab|Chan-Zuckerberg Biohub|Kamm|USA

>Spike|hCoV-19/USA/FL-BPHL-1195/2020|2020-08-21|EPI\_ISL\_526681|Original|hCoV-19^^Florida|Human|Florida Bureau of Public Health Laboratories|Florida Bureau of Public Health Laboratories|Blanton|USA

>Spike|hCoV-19/Denmark/DCGC-2160/2020|2020-08-10|EPI\_ISL\_617459|Original|hCoV-19^^Midtjylland|Human|Department of Virus and Microbiological Special Diagnostics|Albertsen lab|Michaelsen|Denmark

>Spike|hCoV-19/Wales/PHWC-290F2/2020|2020-04-02|EPI\_ISL\_445481|Original|hCoV-19^^Wales|Human|Wales Specialist Virology Centre|Public Health Wales Microbiology Cardiff|Moore|United Kingdom

>Spike|hCoV-19/England/MILK-99D6A3/2020|2020-08-31|EPI\_ISL\_549937|Original|hCoV-19^^England|Human|Lighthouse Lab in Milton Keynes|Wellcome Sanger Institute for the COVID-19 Genomics UK (COG-UK) consortium|Davies|United Kingdom

>Spike|hCoV-19/Wales/PHWC-3563D/2020|2020-04-24|EPI\_ISL\_474456|Original|hCoV-19^^Wales|Human|Originating lab|COVID-19 Genomics UK (COG-UK) Consortium|Moore|United Kingdom

>Spike|hCoV-19/Australia/VIC11796/2020|2020-08-01|EPI\_ISL\_591824|Original|hCoV-19^^Victoria|Human|Victorian Infectious Diseases Reference Laboratory (VIDRL)|VIDRL and MDU-PHL|Schultz|Australia

>Spike|hCoV-19/England/CAMB-7B62C/2020|2020-04-03|EPI\_ISL\_441195|Original|hCoV-19^^England|Human|Department of Pathology|Wellcome Sanger Institute for the COVID-19 Genomics UK (COG-UK) consortium|Amato|United Kingdom

>Spike|hCoV-19/England/LIVE-99989/2020|2020-04-09|EPI\_ISL\_439779|Original|hCoV-19^^England|Human|Liverpool Clinical Laboratories|COVID-19 Genomics UK (COG-UK) Consortium|Haldenby|United Kingdom

>Spike|hCoV-19/Scotland/EDB5108/2020|2020-03-31|EPI\_ISL\_453188|Original|hCoV-19^^Scotland|Human|Virology Department|COVID-19 Genomics UK (COG-UK) Consortium|Williams|United Kingdom

>Spike|hCoV-19/USA/CA-QDX-1598/2020|2020-03-18|EPI\_ISL\_603899|Original|hCoV-19^^California|Human|Quest Diagnostics|Quest Diagnostics|Kagan|USA

>Spike|hCoV-19/England/204742210/2020|2020-00-00|EPI\_ISL\_649917|Original|hCoV-19^^England|Human|Respiratory Virus Unit|COVID-19 Genomics UK (COG-UK) Consortium|Platt|United Kingdom

>Spike|hCoV-19/Denmark/DCGC-1771/2020|2020-07-13|EPI\_ISL\_618210|Original|hCoV-19^^Hovedstaden|Human|Department of Virus and Microbiological Special Diagnostics|Albertsen lab|Michaelsen|Denmark

>Spike|hCoV-19/USA/TX-HMH-2608/2020|2020-06-05|EPI\_ISL\_545424|Original|hCoV-19^^Texas|Human|Houston Methodist Hospital|Houston Methodist Hospital|Long|USA

>Spike|hCoV-19/England/NORW-EC6F9/2020|2020-05-11|EPI\_ISL\_457553|Original|hCoV-19^^England|Human|Quadram Institute Bioscience|COVID-19 Genomics UK (COG-UK) Consortium|Alikhan|United Kingdom

>Spike|hCoV-19/South Africa/NHLS-UCT-GS-0070/2020|2020-03-27|EPI\_ISL\_640063|Original|hCoV-19^^Western Cape|Human|CoVid WC Cape Town Metro|NHLS/UCT|Iranzadeh|South Africa

>Spike|hCoV-19/USA/DC-HP00043/2020|2020-03-22|EPI\_ISL\_434639|Original|hCoV-19^^District of Columbia|Human|Johns Hopkins Hospital Department of Pathology|Johns Hopkins Hospital Department of Pathology|Ramakrishnan|USA

>Spike|hCoV-19/England/MILK-9E2AFE/2020|2020-09-21|EPI\_ISL\_581210|Original|hCoV-19^^England|Human|Lighthouse Lab in Milton Keynes|Wellcome Sanger Institute for the COVID-19 Genomics UK (COG-UK) consortium|Davies|United Kingdom

>Spike|hCoV-19/Australia/VIC16653/2020|2020-08-08|EPI\_ISL\_640989|Original|hCoV-19^^Victoria|Human|Microbiological Diagnostic Unit - Public Health Laboratory (MDU-PHL)|MDU-PHL|Schultz|Australia

>Spike|hCoV-19/Denmark/DCGC-2338/2020|2020-08-10|EPI\_ISL\_617676|Original|hCoV-19^^Hovedstaden|Human|Department of Virus and Microbiological Special Diagnostics|Albertsen lab|Michaelsen|Denmark

>Spike|hCoV-19/England/QEUEH-C340F8/2020|2020-12-11|EPI\_ISL\_733998|Original|hCoV-19^^England|Human|Lighthouse Lab in Glasgow|Wellcome Sanger Institute for the COVID-19 Genomics UK (COG-UK) Consortium|Davies|United Kingdom

>Spike|hCoV-19/England/CAMC-A6560D/2020|2020-10-11|EPI\_ISL\_608504|Original|hCoV-19^^England|Human|Lighthouse Lab in Cambridge|Wellcome Sanger Institute for the COVID-19 Genomics UK (COG-UK) consortium|Davies|United Kingdom

>Spike|hCoV-19/Japan/PG-7482/2020|2020-08-00|EPI\_ISL\_688584|Original|hCoV-19^^Japan|Human|Tokyo Metropolitan Institute of Public Health|Pathogen Genomics Center|Sekizuka|Japan

>Spike|hCoV-19/USA/CA-QDX-1550/2020|2020-03-18|EPI\_ISL\_603796|Original|hCoV-19^^California|Human|Quest Diagnostics|Quest Diagnostics|Kagan|USA

>Spike|hCoV-19/Germany/HH-hpi-p2360/2020|2020-03-19|EPI\_ISL\_775825|Original|hCoV-19^^Hamburg|Human|University Medical Center Hamburg Eppendorf|Heinrich Pette Institute|Robitaille|Germany

>Spike|hCoV-19/England/EXET-13E439/2020|2020-12-06|EPI\_ISL\_724322|Original|hCoV-19^^England|Human|University of Exeter|COVID-19 Genomics UK (COG-UK) Consortium|Temperton|United Kingdom

>Spike|hCoV-19/USA/CA-ALSR-4557/2020|2020-07-08|EPI\_ISL\_667005|Original|hCoV-19^^California|Human|San Diego County Public Health Laboratory|Andersen lab at Scripps Research|Gangavarapu|USA

>Spike|hCoV-19/Wales/PHWC-48C994/2020|2020-11-04|EPI\_ISL\_665803|Original|hCoV-19^^Wales|Human|Wales Specialist Virology Centre Sequencing lab|COVID-19 Genomics UK (COG-UK) Consortium|Moore|United Kingdom

>Spike|hCoV-19/USA/UT-UPHL-2012859839/2020|2020-08-08|EPI\_ISL\_746049|Original|hCoV-19^^Utah|Human|Ginkgo Bioworks Clinical Laboratory|Utah Public Health Laboratory|Young|USA

>Spike|hCoV-19/USA/WI-UW-585/2020|2020-06-22|EPI\_ISL\_484960|Original|hCoV-19^^Wisconsin|Human|University of Wisconsin-Madison AIDS Vaccine Research Laboratories|University of Wisconsin-Madison AIDS Vaccine Research Laboratories|Baczenas|USA

>Spike|hCoV-19/Netherlands/NA\_153/2020|2020-03-20|EPI\_ISL\_422688|Original|hCoV-19^^Netherlands|Human|Dutch COVID-19 response team|Erasmus Medical Center|Oude Munnink|Netherlands

>Spike|hCoV-19/USA/CA-CSMC121/2020|2020-04-05|EPI\_ISL\_475598|Original|hCoV-19^^California|Human|Cedars-Sinai Medical Center|Cedars-Sinai Medical Center|Zhang|USA

>Spike|hCoV-19/USA/NM-UNM-00507/2020|2020-05-08|EPI\_ISL\_542937|Original|hCoV-19^^New Mexico|Human|TriCore Reference Laboratories|Center for Global Health|Domman|USA

>Spike|hCoV-19/USA/TX-HMH-MCoV-15479/2020|2020-10-23|EPI\_ISL\_786963|Original|hCoV-19^^Texas|Human|Houston Methodist Hospital|Houston Methodist Hospital|Long|USA

>Spike|hCoV-19/England/ALDP-51F5CE/2020|2020-06-02|EPI\_ISL\_558908|Original|hCoV-19^^England|Human|Lighthouse Lab in Alderley Park|Wellcome Sanger Institute for the COVID-19 Genomics UK (COG-UK) consortium|Davies|United Kingdom

>Spike|hCoV-19/England/QEUA-B6827E/2020|2020-11-11|EPI\_ISL\_655262|Original|hCoV-19^^England|Human|Lighthouse Lab in Glasgow|Wellcome Sanger Institute for the COVID-19 Genomics UK (COG-UK) Consortium|Davies|United Kingdom

>Spike|hCoV-19/England/QEUA-AD196D/2020|2020-10-26|EPI\_ISL\_634601|Original|hCoV-19^^England|Human|Lighthouse Lab in Glasgow|Wellcome Sanger Institute for the COVID-19 Genomics UK (COG-UK) consortium|Davies|United Kingdom

>Spike|hCoV-19/Scotland/QEUA-9E4652/2020|2020-09-23|EPI\_ISL\_600974|Original|hCoV-19^^Scotland|Human|Lighthouse Lab in Glasgow|Wellcome Sanger Institute for the COVID-19 Genomics UK (COG-UK) consortium|Davies|United Kingdom

>Spike|hCoV-19/United Arab Emirates/0569/2020|2020-05-15|EPI\_ISL\_698728|Original|hCoV-19^^Abu Dhabi|Human|Group 42 (G42) Healthcare|G42 Healthcare|Ogrodzki|United Arab Emirates

>Spike|hCoV-19/South Africa/Tygerberg\_337\_CC2/2020|2020-10-09|EPI\_ISL\_660144|Original|hCoV-19^^Western Cape|Human|PathCare|National Health Laboratory Service (NHLS)|de Oliveira|South Africa

>Spike|hCoV-19/England/CAMC-B77C50/2020|2020-11-12|EPI\_ISL\_783521|Original|hCoV-19^^England|Human|Lighthouse Lab in Cambridge|Wellcome Sanger Institute for the COVID-19 Genomics UK (COG-UK) Consortium|Davies|United Kingdom

>Spike|hCoV-19/USA/CA-CHLA-PLM57057181/2020|2020-11-22|EPI\_ISL\_753410|Original|hCoV-19^^California|Human|Clinical virology Laboratory|Center for Personalized Medicine|Dien Bard|USA

>Spike|hCoV-19/North Macedonia/5003/2020|2020-06-25|EPI\_ISL\_677711|Original|hCoV-19^^Ohrid|Human|General Hospital - Ohrid|Research Center for Genetic Engineering and Biotechnology \Georgi D. Efremov\u201d|Dimovski|North Macedonia

>Spike|hCoV-19/England/QEUA-9FA60E/2020|2020-09-26|EPI\_ISL\_588233|Original|hCoV-19^^England|Human|Lighthouse Lab in Glasgow|Wellcome Sanger Institute for the COVID-19 Genomics UK (COG-UK) consortium|Davies|United Kingdom

>Spike|hCoV-19/England/204481795/2020|2020-10-28|EPI\_ISL\_653995|Original|hCoV-19^^England|Human|Respiratory Virus Unit|COVID-19 Genomics UK (COG-UK) Consortium|Platt|United Kingdom

>Spike|hCoV-19/USA/LA-GBCL-26492458/2020|2020-04-28|EPI\_ISL\_485036|Original|hCoV-19^^Louisiana|Human|River Road Testing Lab|Ginkgo Bioworks Clinical Laboratory|Smith|USA

>Spike|hCoV-19/England/ALDP-A872F2/2020|2020-10-14|EPI\_ISL\_606283|Original|hCoV-19^^England|Human|Lighthouse Lab in Alderley Park|Wellcome Sanger Institute for the COVID-19 Genomics UK (COG-UK) consortium|Davies|United Kingdom



>Spike|hCoV-19/USA/AZ-TG664524/2020|2020-04-20|EPI\_ISL\_696141|Original|hCoV-19^^Arizona|Human|Sonora Quest Laboratories|TGen North|French|USA

>Spike|hCoV-19/USA/TX-HMH-1822/2020|2020-05-15|EPI\_ISL\_542864|Original|hCoV-19^^Texas|Human|Houston Methodist Hospital|Houston Methodist Hospital|Long|USA

>Spike|hCoV-19/England/MILK-B8FA5B/2020|2020-11-13|EPI\_ISL\_674712|Original|hCoV-19^^England|Human|Lighthouse Lab in Milton Keynes|Wellcome Sanger Institute for the COVID-19 Genomics UK (COG-UK) Consortium|Davies|United Kingdom

>Spike|hCoV-19/USA/VA-DCLS-1793/2020|2020-09-16|EPI\_ISL\_644876|Original|hCoV-19^^Virginia|Human|Virginia DCLS|Virginia DCLS|St. Jacques|USA

>Spike|hCoV-19/Canada/QC-LSPQ-L00239501/2020|2020-03-26|EPI\_ISL\_536254|Original|hCoV-19^^Quebec|Human|H\u00f4pital du Suro\u00eet|Laboratoire de sant\u00e9 publique du Qu\u00e9bec|Moreira|Canada

>Spike|hCoV-19/Denmark/DCGC-2528/2020|2020-08-10|EPI\_ISL\_617798|Original|hCoV-19^^Hovedstaden|Human|Department of Virus and Microbiological Special Diagnostics|Albertsen lab|Michaelsen|Denmark

>Spike|hCoV-19/USA/WA-CDC-8374/2020|2020-03-03|EPI\_ISL\_594447|original|hCoV-19^^Washington|Human|Washington State Public Health Laboratories|Pathogen Discovery|Queen|USA

>Spike|hCoV-19/England/CAMC-A57EE8/2020|2020-10-09|EPI\_ISL\_597012|Original|hCoV-19^^England|Human|Lighthouse Lab in Cambridge|Wellcome Sanger Institute for the COVID-19 Genomics UK (COG-UK) consortium|Davies|United Kingdom

>Spike|hCoV-19/England/LIVE-DCB7F0/2020|2020-11-24|EPI\_ISL\_724429|Original|hCoV-19^^England|Human|Liverpool Clinical Laboratories|COVID-19 Genomics UK (COG-UK) Consortium|Haldenby|United Kingdom

>Spike|hCoV-19/England/ALDP-943F74/2020|2020-06-07|EPI\_ISL\_554767|Original|hCoV-19^^England|Human|Lighthouse Lab in Alderley Park|Wellcome Sanger Institute for the COVID-19 Genomics UK (COG-UK) consortium|Davies|United Kingdom

>Spike|hCoV-19/England/MILK-ACC033/2020|2020-10-21|EPI\_ISL\_629329|Original|hCoV-19^^England|Human|Lighthouse Lab in Milton Keynes|Wellcome Sanger Institute for the COVID-19 Genomics UK (COG-UK) consortium|Davies|United Kingdom

>Spike|hCoV-19/Denmark/DCGC-22418/2020|2020-12-14|EPI\_ISL\_757552|Original|hCoV-19^^Midtjylland|Human|Department of Virus and Microbiological Special Diagnostics|Albertsen Lab|Michaelsen|Denmark

>Spike|hCoV-19/Netherlands/NB-EMC-185/2020|2020-05-07|EPI\_ISL\_523308|Original|hCoV-19^^Noord Brabant|Human|Dutch COVID-19 response team|Erasmus Medical Center|Oude Munnink|Netherlands

>Spike|hCoV-19/Austria/CeMM0274/2020|2020-03-24|EPI\_ISL\_438101|Original|hCoV-19^^Vienna|Human|Center for Virology|Bergthaler laboratory|Bergthaler|Austria

>Spike|hCoV-19/Wales/PHWC-16AA6F/2020|2020-09-13|EPI\_ISL\_560145|Original|hCoV-19^^Wales|Human|Wales Specialist Virology Centre Sequencing lab|COVID-19 Genomics UK (COG-UK) Consortium|Moore|United Kingdom

>Spike|hCoV-19/Scotland/QEUH-9611F2/2020|2020-08-04|EPI\_ISL\_532118|Original|hCoV-19^^Scotland|Human|NHSGGC West of Scotland Specialist Virology Centre / MRC-University of Glasgow Centre for Virus Research|Wellcome Sanger Institute for the COVID-19 Genomics UK (COG-UK) consortium|Davies|United Kingdom

>Spike|hCoV-19/England/MILK-A45F26/2020|2020-10-06|EPI\_ISL\_598729|Original|hCoV-19^^England|Human|Lighthouse Lab in Milton Keynes|Wellcome Sanger Institute for the COVID-19 Genomics UK (COG-UK) consortium|Davies|United Kingdom

>Spike|hCoV-19/India/MP-DRDE115/2020|2020-03-31|EPI\_ISL\_476023|Original|hCoV-19^^Madhya Pradesh|Human|Defence Research & Development Establishment (DRDE)|Defence Research & Development Establishment (DRDE)|Dash|India

>Spike|hCoV-19/Denmark/DCGC-2086/2020|2020-08-03|EPI\_ISL\_618343|Original|hCoV-19^^Syddanmark|Human|Department of Virus and Microbiological Special Diagnostics|Albertsen lab|Michaelsen|Denmark

>Spike|hCoV-19/USA/MI-MDHHS-SC21646/2020|2020-03-31|EPI\_ISL\_516373|Original|hCoV-19^^Michigan|Human|Michigan Department of Health and Human Services|Michigan Department of Health and Human Services|Blankenship|USA

>Spike|hCoV-19/Denmark/DCGC-21624/2020|2020-12-21|EPI\_ISL\_758269|Original|hCoV-19^^Denmark|Human|Department of Virus and Microbiological Special Diagnostics|Albertsen Lab|Michaelsen|Denmark

>Spike|hCoV-19/USA/TX-HMH-MCoV-14546/2020|2020-10-09|EPI\_ISL\_787831|Original|hCoV-19^^Texas|Human|Houston Methodist Hospital|Houston Methodist Hospital|Long|USA

>Spike|hCoV-19/England/ALDP-CB53F6/2020|2020-12-19|EPI\_ISL\_761799|Original|hCoV-19^^England|Human|Lighthouse Lab in Alderley Park|Wellcome Sanger Institute for the COVID-19 Genomics UK (COG-UK) Consortium|Davies|United Kingdom

>Spike|hCoV-19/Denmark/DCGC-1654/2020|2020-03-09|EPI\_ISL\_622403|Original|hCoV-19^^Hovedstaden|Human|Department of Virus and Microbiological Special Diagnostics|Albertsen lab|Michaelsen|Denmark

>Spike|hCoV-19/USA/MI-MDHHS-SC21753/2020|2020-07-22|EPI\_ISL\_529871|Original|hCoV-19^^Michigan|Human|Michigan Department of Health and Human Services|Michigan Department of Health and Human Services|Blankenship|USA

>Spike|hCoV-19/England/ALDP-97CF90/2020|2020-07-18|EPI\_ISL\_526318|Original|hCoV-19^^England|Human|University of Birmingham|COVID-19 Genomics UK (COG-UK) Consortium|Loman|United Kingdom

>Spike|hCoV-19/Canada/BC\_03385157/2020|2020-04-00|EPI\_ISL\_466737|Original|hCoV-19^^British Columbia|Human|BCCDC Public Health Laboratory|BCCDC Public Health Laboratory|Harrigan|Canada

>Spike|hCoV-19/USA/WI-WSLH-200536/2020|2020-05-29|EPI\_ISL\_578673|Original|hCoV-19^^Wisconsin|Human|Wisconsin State Laboratory of Hygiene Communicable Disease Division|Wisconsin State Laboratory of Hygiene Communicable Disease Division|Florek|USA

>Spike|hCoV-19/USA/WA-S2593/2020|2020-06-18|EPI\_ISL\_497225|Original|hCoV-19^^Washington|Human|Washington State Department of Health|Seattle Flu Study|Lee|USA

>Spike|hCoV-19/England/ALDP-9EE096/2020|2020-05-06|EPI\_ISL\_589361|Original|hCoV-19^^England|Human|Lighthouse Lab in Alderley Park|Wellcome Sanger Institute for the COVID-19 Genomics UK (COG-UK) consortium|Davies|United Kingdom

>Spike|hCoV-19/USA/LA-GBCL-26629255/2020|2020-04-21|EPI\_ISL\_485238|Original|hCoV-19^^Louisiana|Human|River Road Testing Lab|Ginkgo Bioworks Clinical Laboratory|Smith|USA

>Spike|hCoV-19/England/ALDP-92B112/2020|2020-06-22|EPI\_ISL\_551389|Original|hCoV-19^^England|Human|Lighthouse Lab in Alderley Park|Wellcome Sanger Institute for the COVID-19 Genomics UK (COG-UK) consortium|Davies|United Kingdom

>Spike|hCoV-19/England/201140293/2020|2020-03-08|EPI\_ISL\_464720|Original|hCoV-19^^England|Human|Respiratory Virus Unit|Respiratory Virus Unit|Platt|United Kingdom

>Spike|hCoV-19/England/QEUA-A223C9/2020|2020-10-01|EPI\_ISL\_587345|Original|hCoV-19^^England|Human|Lighthouse Lab in Glasgow|Wellcome Sanger Institute for the COVID-19 Genomics UK (COG-UK) consortium|Davies|United Kingdom

>Spike|hCoV-19/Wales/PHWC-2AE42/2020|2020-04-07|EPI\_ISL\_432269|Original|hCoV-19^^Wales|Human|Wales Specialist Virology Centre|Public Health Wales Microbiology Cardiff|Moore|United Kingdom

>Spike|hCoV-19/Denmark/DCGC-22136/2020|2020-12-14|EPI\_ISL\_758577|Original|hCoV-19^^Sjælland|Human|Department of Virus and Microbiological Special Diagnostics|Albertsen Lab|Michaelsen|Denmark

>Spike|hCoV-19/USA/NY-NYUMC358/2020|2020-04-08|EPI\_ISL\_430385|Original|hCoV-19^^New York|Human|NYU Langone Health|Departments of Pathology and Medicine|Maurano|USA

>Spike|hCoV-19/Northern Ireland/QEUA-95EA93/2020|2020-08-09|EPI\_ISL\_532303|Original|hCoV-19^^Northern Ireland|Human|Lighthouse Lab in Glasgow|Wellcome Sanger Institute for the COVID-19 Genomics UK (COG-UK) consortium|Davies|United Kingdom

>Spike|hCoV-19/Denmark/DCGC-10831/2020|2020-11-02|EPI\_ISL\_669825|Original|hCoV-19^^Midtjylland|Human|Department of Virus and Microbiological Special Diagnostics|Albertsen Lab|Michaelsen|Denmark

>Spike|hCoV-19/South Africa/LR00133/2020|2020-07-20|EPI\_ISL\_514364|Original|hCoV-19^^Gauteng|Human|National Institute for Communicable Diseases of the National Health Laboratory Service|National Institute for Communicable Diseases of the National Health Laboratory Service|Allam|South Africa

>Spike|hCoV-19/England/QEUA-B69BAF/2020|2020-11-11|EPI\_ISL\_655197|Original|hCoV-19^^England|Human|Lighthouse Lab in Glasgow|Wellcome Sanger Institute for the COVID-19 Genomics UK (COG-UK) Consortium|Davies|United Kingdom

>Spike|hCoV-19/Spain/PV-IBV-003262/2020|2020-03-17|EPI\_ISL\_481032|Original|hCoV-19^^Basque Country|Human|Servicio de Microbiolog\u00eda. Hospital Universitario Donostia. OSI Donostialdea. \u00clrea de Enfermedades Infecciosas|SeqCOVID-SPAIN consortium/IBV (CSIC) |Comas|Spain

>Spike|hCoV-19/Poland/1154942/2020|2020-06-07|EPI\_ISL\_512299|Original|hCoV-19^^Pomorskie|Human|Hematology Laboratory|Department of Virology|Smura|Poland

>Spike|hCoV-19/Wales/QEUA-A8B777/2020|2020-10-16|EPI\_ISL\_647860|Original|hCoV-19^^Wales|Human|Lighthouse Lab in Glasgow|Wellcome Sanger Institute for the COVID-19 Genomics UK (COG-UK) Consortium|Davies|United Kingdom

>Spike|hCoV-19/Germany/BE-ChVir8991/2020|2020-09-21|EPI\_ISL\_729600|Original|hCoV-19^^Berlin|Human|Charit\u00e9 Universit\u00e4tsmedizin Berlin|Charit\u00e9 Universit\u00e4tsmedizin Berlin|Muehlemann|Germany

>Spike|hCoV-19/USA/FL-BPHL-1225/2020|2020-07-28|EPI\_ISL\_541198|Original|hCoV-19^^Florida|Human|Florida Bureau of Public Health Laboratories|Florida Bureau of Public Health Laboratories|Blanton|USA

>Spike|hCoV-19/Netherlands/Flevoland\_3/2020|2020-03-31|EPI\_ISL\_455112|Original|hCoV-19^^Flevoland|Human|Dutch COVID-19 response team|Erasmus Medical Center|Oude Munnink|Netherlands

>Spike|hCoV-19/Australia/VIC2395/2020|2020-06-29|EPI\_ISL\_522112|Original|hCoV-19^^Victoria|Human|Microbiological Diagnostic Unit - Public Health Laboratory (MDU-PHL) |MDU-PHL|Schultz|Australia

>Spike|hCoV-19/England/CAMB-1ACCC5/2020|2020-04-23|EPI\_ISL\_489515|Original|hCoV-19^^England|Human|Department of Pathology|Wellcome Sanger Institute for the COVID-19 Genomics UK (COG-UK) consortium|Davies|United Kingdom

>Spike|hCoV-19/England/PRIN-254BB49/2020|2020-04-26|EPI\_ISL\_509442|Original|hCoV-19^^England|Human|The Princess Alexandra Hospital|Wellcome Sanger Institute for the COVID-19 Genomics UK (COG-UK) consortium|Davies|United Kingdom

>Spike|hCoV-19/Wales/PHWC-47E79B/2020|2020-09-26|EPI\_ISL\_595500|Original|hCoV-19^^Wales|Human|Originating lab|COVID-19 Genomics UK (COG-UK) Consortium|Moore|United Kingdom

>Spike|hCoV-19/USA/TX-HMH-MCoV-15790/2020|2020-07-10|EPI\_ISL\_785474|Original|hCoV-19^^Texas|Human|Houston Methodist Hospital|Houston Methodist Hospital|Long|USA

>Spike|hCoV-19/Netherlands/ZH-EMC-1161/2020|2020-11-23|EPI\_ISL\_763236|Original|hCoV-19^^Zuid Holland|Human|Dutch COVID-19 response team|Erasmus Medical Center|Oude Munnink|Netherlands

>Spike|hCoV-19/Netherlands/Gelderland\_122/2020|2020-05-22|EPI\_ISL\_460883|Original|hCoV-19^^Gelderland|Human|Dutch COVID-19 response team|Erasmus Medical Center|Oude Munnink|Netherlands

>Spike|hCoV-19/England/QEUA-9DDFAC/2020|2020-09-21|EPI\_ISL\_599533|Original|hCoV-19^^England|Human|Lighthouse Lab in Glasgow|Wellcome Sanger Institute for the COVID-19 Genomics UK (COG-UK) consortium|Davies|United Kingdom

>Spike|hCoV-19/Japan/PG-1032/2020|2020-04-00|EPI\_ISL\_684642|Original|hCoV-19^^Japan|Human|Fukuoka Institute of Health and Environmental Sciences|Pathogen Genomics Center|Sekizuka|Japan

>Spike|hCoV-19/England/ALDP-B1C042/2020|2020-11-01|EPI\_ISL\_645931|Original|hCoV-19^^England|Human|Lighthouse Lab in Alderley Park|Wellcome Sanger Institute for the COVID-19 Genomics UK (COG-UK) Consortium|Davies|United Kingdom

>Spike|hCoV-19/Scotland/CVR32/2020|2020-03-13|EPI\_ISL\_425761|Original|hCoV-19^^Scotland|Human|West of Scotland Specialist Virology Centre|COVID-19 Genomics UK (COG-UK) Consortium|Robertson|United Kingdom

>Spike|hCoV-19/India/TG-CDFD-C1486/2020|2020-06-10|EPI\_ISL\_528564|Original|hCoV-19^^Telangana|Human|National Genomics Core-Center for DNA Fingerprinting and Diagnostics|National Genomics Core-Center for DNA Fingerprinting and Diagnostics (NGC-CDFD)- DBT's PAN-INDIA-1000 Genome consortium|Vashisht|India

>Spike|hCoV-19/England/QEUA-9E52B7/2020|2020-09-23|EPI\_ISL\_579886|Original|hCoV-19^^England|Human|Lighthouse Lab in Glasgow|Wellcome Sanger Institute for the COVID-19 Genomics UK (COG-UK) consortium|Davies|United Kingdom

>Spike|hCoV-19/Finland/S20AE7/2020|2020-10-11|EPI\_ISL\_737076|Original|hCoV-19^^Uusimaa|Human|Department of Virology and Immunology|Department of Virology|Smura|Finland

>Spike|hCoV-19/Australia/VIC11678/2020|2020-07-22|EPI\_ISL\_563456|Original|hCoV-19^^Victoria|Human|Microbiological Diagnostic Unit - Public Health Laboratory (MDU-PHL)|MDU-PHL|Schultz|Australia

>Spike|hCoV-19/USA/TX-HMH-MCoV-13721/2020|2020-08-18|EPI\_ISL\_788814|Original|hCoV-19^^Texas|Human|Houston Methodist Hospital|Houston Methodist Hospital|Long|USA

>Spike|hCoV-19/Russia/MOS-CRIE-13679342/2020|2020-11-09|EPI\_ISL\_745251|Original|hCoV-19^^Moscow|Human|Molecular diagnostic laboratory of Federal Budget Institution of Science \Central Research Institute of Epidemiology\ of The Federal Service on Customers' Rights Protection and Human Well-being Surveillance|Group of Genomics and Postgenomic Technologies of Central Research Institute of Epidemiolog

>y|Korneenko|Russia

>Spike|hCoV-19/England/MILK-631F9A/2020|2020-07-05|EPI\_ISL\_556195|Original|hCoV-19^^England|Human|Lighthouse Lab in Milton Keynes|Wellcome Sanger Institute for the COVID-19 Genomics UK (COG-UK) consortium|Davies|United Kingdom

>Spike|hCoV-19/England/MILK-A79FFC/2020|2020-10-15|EPI\_ISL\_606821|Original|hCoV-19^^England|Human|Lighthouse Lab in Milton Keynes|Wellcome Sanger Institute for the COVID-19 Genomics UK (COG-UK) consortium|Davies|United Kingdom

>Spike|hCoV-19/England/CAMC-C44EFB/2020|2020-12-10|EPI\_ISL\_719160|Original|hCoV-19^^England|Human|Lighthouse Lab in Cambridge|Wellcome Sanger Institute for the COVID-19 Genomics UK (COG-UK) Consortium|Davies|United Kingdom

>Spike|hCoV-19/Spain/CT-IBV-98006563/2020|2020-06-30|EPI\_ISL\_541076|Original|hCoV-19^^Catalunya|Human|Hospital de la Santa Creu i Sant Pau. Servicio de Microbiolog\u00eda|SeqCOVID-SPAIN consortium/Institute of Biomedicine of Valencia|Comas|Spain

>Spike|hCoV-19/Denmark/DCGC-15658/2020|2020-11-23|EPI\_ISL\_713944|Original|hCoV-19^^Midtjylland|Human|Department of Virus and Microbiological Special Diagnostics|Albertsen Lab|Michaelsen|Denmark

>Spike|hCoV-19/England/MILK-B04EF8/2020|2020-10-24|EPI\_ISL\_650631|Original|hCoV-19^^England|Human|Department of Pathology|COVID-19 Genomics UK (COG-UK) Consortium|Goodfellow|United Kingdom

>Spike|hCoV-19/Pakistan/KP-RMI-01/2020|2020-04-01|EPI\_ISL\_632908|Original|hCoV-19^^Pakistan|Human|Genomic Sciences|Genomic Sciences|Haider|Pakistan

>Spike|hCoV-19/England/CAMB-1B3CE9/2020|2020-05-29|EPI\_ISL\_461583|Original|hCoV-19^^England|Human|Department of Pathology|COVID-19 Genomics UK (COG-UK) Consortium|Meredith|United Kingdom

>Spike|hCoV-19/Denmark/DCGC-3223/2020|2020-08-31|EPI\_ISL\_616883|Original|hCoV-19^^Syddanmark|Human|Department of Virus and Microbiological Special Diagnostics|Albertsen lab|Michaelsen|Denmark

>Spike|hCoV-19/England/CAMB-1AED57/2020|2020-05-07|EPI\_ISL\_452857|Original|hCoV-19^^England|Human|Department of Pathology|COVID-19 Genomics UK (COG-UK) Consortium|Meredith|United Kingdom

>Spike|hCoV-19/England/CAMC-B3666E/2020|2020-11-05|EPI\_ISL\_645268|Original|hCoV-19^^England|Human|Lighthouse Lab in Cambridge|Wellcome Sanger Institute for the COVID-19 Genomics UK (COG-UK) Consortium|Davies|United Kingdom

>Spike|hCoV-19/Hungary/MBL-465/2020|2020-03-27|EPI\_ISL\_435423|Original|hCoV-19^^Balassagyarmat|Human|Virological Research Group|Bioinformatics Research Group|Herczeg|Hungary

>Spike|hCoV-19/Denmark/DCGC-12997/2020|2020-12-07|EPI\_ISL\_712517|Original|hCoV-19^^Hovedstaden|Human|Department of Virus and Microbiological Special Diagnostics|Albertsen Lab|Michaelsen|Denmark

>Spike|hCoV-19/England/CAMC-B20B1D/2020|2020-11-02|EPI\_ISL\_647681|Original|hCoV-19^^England|Human|Lighthouse Lab in Cambridge|Wellcome Sanger Institute for the COVID-19 Genomics UK (COG-UK) Consortium|Davies|United Kingdom

>Spike|hCoV-19/Denmark/DCGC-2305/2020|2020-08-10|EPI\_ISL\_617730|Original|hCoV-19^^Hovedstaden|Human|Department of Virus and Microbiological Special Diagnostics|Albertsen lab|Michaelsen|Denmark

>Spike|hCoV-19/England/CAMB-74F0A/2020|2020-03-16|EPI\_ISL\_440418|Original|hCoV-19^^England|Human|Department of Pathology|Wellcome Sanger Institute for the COVID-19 Genomics UK (COG-UK) consortium|Amato|United Kingdom

>Spike|hCoV-19/Japan/PG-4586/2020|2020-08-00|EPI\_ISL\_689723|Original|hCoV-19^^Japan|Human|Pathogen Genomics Center|Pathogen Genomics Center|Sekizuka|Japan

>Spike|hCoV-19/Iceland/108/2020|2020-03-11|EPI\_ISL\_417708|Original|hCoV-19^^Reykjavik|Human|The National University Hospital of Iceland|deCODE genetics|J\u00f3nsson|Iceland

>Spike|hCoV-19/England/CAMB-7FD6F/2020|2020-00-00|EPI\_ISL\_444409|Original|hCoV-19^^England|Human|Department of Pathology|COVID-19 Genomics UK (COG-UK) Consortium|Meredith|United Kingdom

>Spike|hCoV-19/England/LIVE-A5C90/2020|2020-03-17|EPI\_ISL\_499657|Original|hCoV-19^^England|Human|Liverpool Clinical Laboratories|COVID-19 Genomics UK (COG-UK) Consortium|Haldenby|United Kingdom

>Spike|hCoV-19/Wales/PHWC-2C1B0/2020|2020-04-04|EPI\_ISL\_474287|Original|hCoV-19^^Wales|Human|Originating lab|COVID-19 Genomics UK (COG-UK) Consortium|Moore|United Kingdom

>Spike|hCoV-19/USA/TX-HMH-MCoV-15341/2020|2020-10-19|EPI\_ISL\_786825|Original|hCoV-19^^Texas|Human|Houston Methodist Hospital|Houston Methodist Hospital|Long|USA

>Spike|hCoV-19/Australia/VIC14661/2020|2020-08-06|EPI\_ISL\_592940|Original|hCoV-19^^Victoria|Human|Microbiological Diagnostic Unit - Public Health Laboratory (MDU-PHL)|MDU-PHL|Schultz|Australia

>Spike|hCoV-19/France/PAC-IHU-0369/2020|2020-03-25|EPI\_ISL\_569476|Original|hCoV-19^^Provence-Alpes-C\u00f4te-d\u0027Azur|Human|MEPHI|MEPHI|Levasseur|France

>Spike|hCoV-19/USA/TX-HMH-7569/2020|2020-06-25|EPI\_ISL\_546860|Original|hCoV-19^^Texas|Human|Houston Methodist Hospital|Houston Methodist Hospital|Long|USA

>Spike|hCoV-19/England/ALDP-C3A20B/2020|2020-12-09|EPI\_ISL\_731385|Original|hCoV-19^^England|Human|Lighthouse Lab in Alderley Park|Wellcome Sanger Institute for the COVID-19 Genomics UK (COG-UK) Consortium|Davies|United Kingdom

>Spike|hCoV-19/Wales/PHWC-4A2118/2020|2020-12-14|EPI\_ISL\_743848|Original|hCoV-19^^Wales|Human|Wales Specialist Virology Centre Sequencing lab|COVID-19 Genomics UK (COG-UK) Consortium|Moore|United Kingdom

>Spike|hCoV-19/Ireland/CE-NVRL-AIIDV1105v2/2020|2020-04-26|EPI\_ISL\_644269|Original|hCoV-19^^Clare|Human|CEPHR / Vincent's Hospital|Irish Coronavirus Sequencing Consortium - National Virus Reference Laboratory|Gonzalez|Ireland

>Spike|hCoV-19/Vietnam/40127/2020|2020-07-00|EPI\_ISL\_759877|Original|hCoV-19^^Vietnam|Human|National Influenza Center|National Influenza Center|Ung|Vietnam

>Spike|hCoV-19/England/SHEF-C9BA8/2020|2020-03-21|EPI\_ISL\_479237|Original|hCoV-19^^England|Human|Virology Department|COVID-19 Genomics UK (COG-UK) Consortium|de Silva|United Kingdom

>Spike|hCoV-19/Australia/VIC8067/2020|2020-08-18|EPI\_ISL\_564829|Original|hCoV-19^^Victoria|Human|Microbiological Diagnostic Unit - Public Health Laboratory (MDU-PHL)|MDU-PHL|Schultz|Australia

>Spike|hCoV-19/India/TG-CCMB-J131/2020|2020-04-01|EPI\_ISL\_447566|Original|hCoV-19^^Telangana|Human|CSIR-Centre for Cellular and Molecular Biology|CSIR-Centre for Cellular and Molecular Biology|Banu|India

>Spike|hCoV-19/England/QEUEH-B2CD1B/2020|2020-11-03|EPI\_ISL\_659922|Original|hCoV-19^^England|Human|Lighthouse Lab in Glasgow|Wellcome Sanger Institute for the COVID-19 Genomics UK (COG-UK) Consortium|Davies|United Kingdom

>Spike|hCoV-19/England/LIVE-DCB417/2020|2020-11-22|EPI\_ISL\_724403|Original|hCoV-19^^England|Human|Liverpool Clinical Laboratories|COVID-19 Genomics UK (COG-UK) Consortium|Haldenby|United Kingdom

>Spike|hCoV-19/Denmark/DCGC-7222/2020|2020-10-12|EPI\_ISL\_619088|Original|hCoV-19^^Midtjylland|Human|Department of Virus and Microbiological Special Diagnostics|Albertsen lab|Michaelsen|Denmark

>Spike|hCoV-19/England/LIVE-A56A1/2020|2020-03-19|EPI\_ISL\_499967|Original|hCoV-19^^England|Human|Liverpool Clinical Laboratories|COVID-19 Genomics UK (COG-UK) Consortium|Haldenby|United Kingdom

>Spike|hCoV-19/Japan/PG-0686/2020|2020-00-00|EPI\_ISL\_684296|Original|hCoV-19^^Japan|Human|Pathogen Genomics Center|Pathogen Genomics Center|Sekizuka|Japan

>Spike|hCoV-19/USA/CA-CZB-13479/2020|2020-10-21|EPI\_ISL\_672525|Original|hCoV-19^^California|Human|Madera County Department of Public Health|Chan-Zuckerberg Biohub|Bhatt|USA

>Spike|hCoV-19/USA/LA-EVTL1201/2020|2020-12-12|EPI\_ISL\_768470|Original|hCoV-19^^Louisiana|Human|LSUHS Emerging Viral Threat Laboratory|Microbial Genome Sequencing Center|Kamil|USA

>Spike|hCoV-19/Wales/PHWC-4931B0/2020|2020-11-28|EPI\_ISL\_725850|Original|hCoV-19^^Wales|Human|Originating lab|COVID-19 Genomics UK (COG-UK) Consortium|Moore|United Kingdom

>Spike|hCoV-19/mink/Netherlands/NB-EMC-55-20/2020|2020-09-23|EPI\_ISL\_632380|Original|hCoV-19^^Noord Brabant|Neovison vison|Dutch COVID-19 response team|Erasmus Medical Center|Oude Munnink|Netherlands

>Spike|hCoV-19/USA/NY-Wadsworth-236998-01/2020|2020-10-05|EPI\_ISL\_734317|Original|hCoV-19^^New York|Human|Wadsworth Center|Wadsworth Center|Lasek-Nesselquist|USA

>Spike|hCoV-19/Switzerland/ZG-ETHZ-150018plus/2020|2020-06-08|EPI\_ISL\_483657|Original|hCoV-19^^Zug|Human|Viollier AG|Department of Biosystems Science and Engineering|Nadeau|Switzerland

>Spike|hCoV-19/England/NOTT-114C04/2020|2020-10-10|EPI\_ISL\_595234|Original|hCoV-19^^England|Human|Queens Medical Centre|COVID-19 Genomics UK (COG-UK) Consortium|Loose|United Kingdom

>Spike|hCoV-19/Kenya/C3457/2020|2020-04-30|EPI\_ISL\_568715|Original|hCoV-19^^Mombasa|Human|KEMRI-Wellcome Trust Research Programme/KEMRI-CGMR-C Kilifi|KEMRI-Wellcome Trust Research Programme/KEMRI-CGMR-C Kilifi|Githinji|Kenya

>Spike|hCoV-19/USA/UT-UPHL-2012535481/2020|2020-08-15|EPI\_ISL\_746130|Original|hCoV-19^^Utah|Human|Ginkgo Bioworks Clinical Laboratory|Utah Public Health Laboratory|Young|USA

>Spike|hCoV-19/USA/NM-UNM-00317/2020|2020-05-13|EPI\_ISL\_508097|Original|hCoV-19^^New Mexico|Human|New Mexico Department of Health Scientific Laboratory Division|Center for Global Health|Domman|USA

>Spike|hCoV-19/USA/TX-HMH-MCoV-12940/2020|2020-08-18|EPI\_ISL\_788092|Original|hCoV-19^^Texas|Human|Houston Methodist Hospital|Houston Methodist Hospital|Long|USA

>Spike|hCoV-19/USA/MI-MDHHS-SC21457/2020|2020-04-08|EPI\_ISL\_507711|Original|hCoV-19^^Michigan|Human|Michigan Department of Health and Human Services|Michigan Department of Health and Human Services|Blankenship|USA

>Spike|hCoV-19/Denmark/DCGC-8639/2020|2020-10-26|EPI\_ISL\_625987|Original|hCoV-19^^Syddanmark|Human|Department of Virus and Microbiological Special Diagnostics|Albertsen lab|Michaelsen|Denmark

>Spike|hCoV-19/Australia/NSW1062/2020|2020-07-28|EPI\_ISL\_593671|Original|hCoV-19^^New South Wales|Human|Pathology West - NSW Health Pathology|NSW Health Pathology - Institute of Clinical Pathology and Medical Research; Westmead Hospital; University of Sydney|Gall|Australia

>Spike|hCoV-19/USA/UT-UPHL-2009200/2020|2020-05-27|EPI\_ISL\_525182|Original|hCoV-19^^Utah|Human|Utah Public Health Laboratory|Utah Public Health Laboratory|Young|USA

>Spike|hCoV-19/Japan/PG-7113/2020|2020-08-00|EPI\_ISL\_688218|Original|hCoV-19^^Japan|Human|Pathogen Genomics Center|Pathogen Genomics Center|Sekizuka|Japan

>Spike|hCoV-19/Belgium/ULG-10915/2020|2020-11-24|EPI\_ISL\_678456|Original|hCoV-19^^Li\u00e8ge|Human|Department of Clinical Microbiology|GIGA Medical Genomics|Durkin|Belgium

>Spike|hCoV-19/South Africa/KRISP-K002486/2020|2020-08-07|EPI\_ISL\_535393|Original|hCoV-19^^KwaZulu-Natal|Human|NHLS-IALCH|KRISP|de Oliveira|South Africa

>Spike|hCoV-19/Australia/VIC8196/2020|2020-08-13|EPI\_ISL\_564894|Original|hCoV-19^^Victoria|Human|Microbiological Diagnostic Unit - Public Health Laboratory (MDU-PHL)|MDU-PHL|Schultz|Australia

>Spike|hCoV-19/England/CAMC-BBC800/2020|2020-11-20|EPI\_ISL\_705598|Original|hCoV-19^^England|Human|Quadram Institute Bioscience|COVID-19 Genomics UK (COG-UK) Consortium|Alikhan|United Kingdom

>Spike|hCoV-19/USA/WI-UW-2534/2020|2020-12-29|EPI\_ISL\_779365|Original|hCoV-19^^Wisconsin|Human|University of Wisconsin-Madison AIDS Vaccine Research

Laboratories|University of Wisconsin-Madison AIDS Vaccine Research  
Laboratories|Moreno|USA  
>Spike|hCoV-19/Scotland/QEUH-96A95B/2020|2020-08-17|EPI\_ISL\_531382|Original|hCoV-19^^Scotland|Human|NHSGGC West of Scotland Specialist Virology Centre / MRC-University of Glasgow Centre for Virus Research|Wellcome Sanger Institute for the COVID-19 Genomics UK (COG-UK) consortium|Davies|United Kingdom  
>Spike|hCoV-19/England/LIVE-9B037/2020|2020-03-28|EPI\_ISL\_449404|Original|hCoV-19^^England|Human|Liverpool Clinical Laboratories|COVID-19 Genomics UK (COG-UK) Consortium|Haldenby|United Kingdom  
>Spike|hCoV-19/Australia/VIC8831/2020|2020-07-27|EPI\_ISL\_565222|Original|hCoV-19^^Victoria|Human|Victorian Infectious Diseases Reference Laboratory (VIDRL)|VIDRL and MDU-PHL|Schultz|Australia  
>Spike|hCoV-19/Wales/PHWC-485AE3/2020|2020-10-23|EPI\_ISL\_628251|Original|hCoV-19^^Wales|Human|Wales Specialist Virology Centre Sequencing lab|COVID-19 Genomics UK (COG-UK) Consortium|Moore|United Kingdom  
>Spike|hCoV-19/England/BRIS-12573C/2020|2020-03-28|EPI\_ISL\_443779|Original|hCoV-19^^England|Human|PHE South West Regional Laboratory|Wellcome Sanger Institute for the COVID-19 Genomics UK (COG-UK) consortium|Amato|United Kingdom  
>Spike|hCoV-19/USA/VA-DCLS-2144/2020|2020-10-28|EPI\_ISL\_677163|Original|hCoV-19^^Virginia|Human|Virginia Division of Consolidated Laboratory Services|Virginia Division of Consolidated Laboratory Services|St. Jacques|USA  
>Spike|hCoV-19/England/MILK-A194D1/2020|2020-10-03|EPI\_ISL\_612511|Original|hCoV-19^^England|Human|Wales Specialist Virology Centre Sequencing lab|COVID-19 Genomics UK (COG-UK) Consortium|Moore|United Kingdom  
>Spike|hCoV-19/India/MH-ACTREC-516/2020|2020-08-19|EPI\_ISL\_700163|Original|hCoV-19^^Maharashtra|Human|Hematopathology Laboratory|Hematopathology Laboratory|Patkar|India  
>Spike|hCoV-19/England/QEUH-9B7E50/2020|2020-09-07|EPI\_ISL\_590672|Original|hCoV-19^^England|Human|Lighthouse Lab in Glasgow|Wellcome Sanger Institute for the COVID-19 Genomics UK (COG-UK) consortium|Davies|United Kingdom  
>Spike|hCoV-19/England/MILK-A79D4D/2020|2020-10-15|EPI\_ISL\_606711|Original|hCoV-19^^England|Human|Lighthouse Lab in Milton Keynes|Wellcome Sanger Institute for the COVID-19 Genomics UK (COG-UK) consortium|Davies|United Kingdom  
>Spike|hCoV-19/Switzerland/FR-ETHZ-350302/2020|2020-10-30|EPI\_ISL\_728931|Original|hCoV-19^^Fribourg|Human|Viollier AG|Department of Biosystems Science and Engineering|Nadeau|Switzerland  
>Spike|hCoV-19/Costa Rica/INC-0032/2020|2020-03-15|EPI\_ISL\_491444|Original|hCoV-19^^San Jose|Human|Area de Salud Escazu (Coopesana)|Inciensa|Brenes Porras|Costa Rica  
>Spike|hCoV-19/USA/TX-HMH-MCoV-19588/2020|2020-11-21|EPI\_ISL\_783959|Original|hCoV-19^^Texas|Human|Houston Methodist Hospital|Houston Methodist Hospital|Long|USA  
>Spike|hCoV-19/USA/CA-CZB-10952/2020|2020-09-16|EPI\_ISL\_583036|Original|hCoV-19^^California|Human|Orange County Public Health Lab|Chan-Zuckerberg Biohub|Bhatt|USA  
>Spike|hCoV-19/USA/FL-BPHL-0911/2020|2020-06-30|EPI\_ISL\_517801|Original|hCoV-19^^Florida|Human|Florida Bureau of Public Health Laboratories|Florida Bureau of Public Health Laboratories|Blanton|USA  
>Spike|hCoV-19/Belgium/reg-10131440/2020|2020-10-13|EPI\_ISL\_738492|Original|hCoV-19^^Nossegem|Human|UZ Leuven|KU Leuven|Maes|Belgium  
>Spike|hCoV-19/England/CAMB-72467/2020|2020-03-24|EPI\_ISL\_439621|Original|hCoV-19^^England|Human|Department of Pathology|Wellcome Sanger Institute for the COVID-19 Genomics UK (COG-UK) consortium|Amato|United Kingdom  
>Spike|hCoV-19/Denmark/DCGC-6985/2020|2020-10-12|EPI\_ISL\_619831|Original|hCoV-19^^Hovedstaden|Human|Department of Virus and Microbiological Special Diagnostics|Albertsen lab|Michaelsen|Denmark  
>Spike|hCoV-19/Belgium/ULG-0190/2020|2020-03-23|EPI\_ISL\_447130|Original|hCoV-19^^Liege|Human|Department of Clinical Microbiology|GIGA Medical Genomics|Durkin|Belgium  
>Spike|hCoV-19/USA/MA-QDX-2015/2020|2020-03-17|EPI\_ISL\_604345|Original|hCoV-19^^Massachusetts|Human|Quest Diagnostics|Quest Diagnostics|Kagan|USA

>Spike|hCoV-19/Denmark/DCGC-15562/2020|2020-11-23|EPI\_ISL\_713895|Original|hCoV-19^^Hovedstaden|Human|Department of Virus and Microbiological Special Diagnostics|Albertsen Lab|Michaelsen|Denmark

>Spike|hCoV-19/England/20124030003/2020|2020-03-17|EPI\_ISL\_418707|Original|hCoV-19^^England|Human|Respiratory Virus Unit|Respiratory Virus Unit|Platt|United Kingdom

>Spike|hCoV-19/England/CAMC-B7BD68/2020|2020-11-12|EPI\_ISL\_724055|Original|hCoV-19^^England|Human|Oxford Viromics|COVID-19 Genomics UK (COG-UK) Consortium|Golubchik|United Kingdom

>Spike|hCoV-19/England/ALDP-94DBA3/2020|2020-06-17|EPI\_ISL\_555542|Original|hCoV-19^^England|Human|Lighthouse Lab in Alderley Park|Wellcome Sanger Institute for the COVID-19 Genomics UK (COG-UK) consortium|Davies|United Kingdom

>Spike|hCoV-19/South Africa/R13287-20/2020|2020-07-02|EPI\_ISL\_622928|Original|hCoV-19^^KwaZulu-Natal|Human|National Institute for Communicable Diseases of the National Health Laboratory Service|National Institute for Communicable Diseases of the National Health Laboratory Service|Allam|South Africa

>Spike|hCoV-19/DRC/300/2020|2020-03-22|EPI\_ISL\_420841|Original|hCoV-19^^Sud Kivu|Human|Viral Respiratory Lab|Pathogen Sequencing Lab|Pratt|Democratic Republic of the Congo

>Spike|hCoV-19/Scotland/QEUH-AACBB0/2020|2020-10-21|EPI\_ISL\_652903|Original|hCoV-19^^Scotland|Human|Oxford Viromics|COVID-19 Genomics UK (COG-UK) Consortium|Golubchik|United Kingdom

>Spike|hCoV-19/Scotland/EDB3025/2020|2020-04-03|EPI\_ISL\_488979|Original|hCoV-19^^Scotland|Human|Virology Department|Wellcome Sanger Institute for the COVID-19 Genomics UK (COG-UK) consortium|Davies|United Kingdom

>Spike|hCoV-19/Denmark/DCGC-3753/2020|2020-04-20|EPI\_ISL\_622627|Original|hCoV-19^^Hovedstaden|Human|Department of Virus and Microbiological Special Diagnostics|Albertsen lab|Michaelsen|Denmark

>Spike|hCoV-19/England/QEUH-9AEFFF/2020|2020-09-03|EPI\_ISL\_573525|Original|hCoV-19^^England|Human|University College London|COVID-19 Genomics UK (COG-UK) Consortium|Roy|United Kingdom

>Spike|hCoV-19/England/ALDP-49A30E/2020|2020-06-08|EPI\_ISL\_559394|Original|hCoV-19^^England|Human|Lighthouse Lab in Alderley Park|Wellcome Sanger Institute for the COVID-19 Genomics UK (COG-UK) consortium|Davies|United Kingdom

>Spike|hCoV-19/Denmark/DCGC-6385/2020|2020-09-28|EPI\_ISL\_622322|Original|hCoV-19^^Sjaelland|Human|Department of Virus and Microbiological Special Diagnostics|Albertsen lab|Michaelsen|Denmark

>Spike|hCoV-19/Denmark/DCGC-8963/2020|2020-10-26|EPI\_ISL\_625869|Original|hCoV-19^^Nordjylland|Human|Department of Virus and Microbiological Special Diagnostics|Albertsen lab|Michaelsen|Denmark

>Spike|hCoV-19/England/ALDP-A6DF64/2020|2020-10-14|EPI\_ISL\_607710|Original|hCoV-19^^England|Human|Lighthouse Lab in Alderley Park|Wellcome Sanger Institute for the COVID-19 Genomics UK (COG-UK) consortium|Davies|United Kingdom

>Spike|hCoV-19/England/ALDP-A84A2A/2020|2020-10-18|EPI\_ISL\_610440|Original|hCoV-19^^England|Human|Lighthouse Lab in Alderley Park|Wellcome Sanger Institute for the COVID-19 Genomics UK (COG-UK) consortium|Davies|United Kingdom

>Spike|hCoV-19/Scotland/EDB740/2020|2020-04-02|EPI\_ISL\_705796|Original|hCoV-19^^Scotland|Human|Virology Department|COVID-19 Genomics UK (COG-UK) Consortium|McHugh|United Kingdom

>Spike|hCoV-19/Palestine/46/2020|2020-08-17|EPI\_ISL\_596529|Original|hCoV-19^^Jerusalem|Human|Palestinian Ministry of Health|Molecular Genetics Lab|van Dorp|Palestine

>Spike|hCoV-19/USA/VA-DCLS-1170/2020|2020-07-18|EPI\_ISL\_525197|Original|hCoV-19^^Virginia|Human|Virginia DCLS|Virginia DCLS|St. Jacques|USA

>Spike|hCoV-19/Scotland/GCVR-1724C0/2020|2020-03-30|EPI\_ISL\_469964|Original|hCoV-19^^Scotland|Human|NHSGGC West of Scotland Specialist Virology Centre / MRC - University of Glasgow Centre for Virus Research|Wellcome Sanger Institute for the COVID-19 Genomics UK (COG-UK) consortium|Davies|United Kingdom

>Spike|hCoV-19/England/MILK-ABBD8B/2020|2020-10-21|EPI\_ISL\_631198|Original|hCoV-19^^England|Human|Lighthouse Lab in Milton Keynes|Wellcome Sanger Institute for the COVID-19 Genomics UK (COG-UK) consortium|Davies|United Kingdom



>Spike|hCoV-19/South Africa/KRISP-0080/2020|2020-04-01|EPI\_ISL\_467454|Original|hCoV-19^^KwaZulu-Natal|Human|AMPATH-DBN|KRISP|de Oliveira|South Africa

>Spike|hCoV-19/Wales/PHWC-48A213/2020|2020-10-27|EPI\_ISL\_650914|Original|hCoV-19^^Wales|Human|Wales Specialist Virology Centre Sequencing lab|COVID-19 Genomics UK (COG-UK) Consortium|Moore|United Kingdom

>Spike|hCoV-19/Denmark/DCGC-14145/2020|2020-11-30|EPI\_ISL\_711288|Original|hCoV-19^^Syddanmark|Human|Department of Virus and Microbiological Special Diagnostics|Albertsen Lab|Michaelsen|Denmark

>Spike|hCoV-19/Switzerland/SG-ETHZ-331457/2020|2020-10-21|EPI\_ISL\_614945|Original|hCoV-19^^St Gallen|Human|Viollier AG|Department of Biosystems Science and Engineering|Nadeau|Switzerland

>Spike|hCoV-19/England/QEUH-A4D823/2020|2020-10-07|EPI\_ISL\_628612|Original|hCoV-19^^England|Human|Oxford Viromics|COVID-19 Genomics UK (COG-UK) Consortium|Golubchik|United Kingdom

>Spike|hCoV-19/USA/TX-HMH-5236/2020|2020-06-26|EPI\_ISL\_544614|Original|hCoV-19^^Texas|Human|Houston Methodist Hospital|Houston Methodist Hospital|Long|USA

>Spike|hCoV-19/USA/WA-UW65/2020|2020-03-10|EPI\_ISL\_415593|Original|hCoV-19^^Washington|Human|UW Virology Lab|UW Virology Lab|Roychoudhury|USA

>Spike|hCoV-19/India/DL-NCDC7557-CSIR-IGIB/2020|2020-05-27|EPI\_ISL\_482643|Original|hCoV-19^^Delhi|Human|National Centre for Disease control (NCDC)|NCDC/CSIR-IGIB|Singh|India

>Spike|hCoV-19/Japan/IC-0127/2020|2020-08-00|EPI\_ISL\_591468|Original|hCoV-19^^Japan|Human|Pathogen Genomics Center|Pathogen Genomics Center|Sekizuka|Japan

>Spike|hCoV-19/South Africa/KRISP-K002826/2020|2020-09-01|EPI\_ISL\_602646|Original|hCoV-19^^KwaZulu-Natal|Human|NHLs-IALCH|KRISP|de Oliveira|South Africa

>Spike|hCoV-19/England/NORW-E88E8/2020|2020-04-11|EPI\_ISL\_448248|Original|hCoV-19^^England|Human|Quadram Institute Bioscience|COVID-19 Genomics UK (COG-UK) Consortium|Alikhan|United Kingdom

>Spike|hCoV-19/Germany/HH-hpi-pl664/2020|2020-03-18|EPI\_ISL\_775646|Original|hCoV-19^^Hamburg|Human|University Medical Center Hamburg Eppendorf|Heinrich Pette Institute|Robitaille|Germany

>Spike|hCoV-19/Spain/AR-IBV-005036/2020|2020-04-20|EPI\_ISL\_500340|Original|hCoV-19^^Aragon|Human|Servicio de Microbiolog\u00eda|SeqCOVID-SPAIN consortium|IBV (CSIC)|Comas|Spain

>Spike|hCoV-19/Australia/VIC11899/2020|2020-08-03|EPI\_ISL\_591887|Original|hCoV-19^^Victoria|Human|Victorian Infectious Diseases Reference Laboratory (VIDRL)|VIDRL and MDU-PHL|Schultz|Australia

>Spike|hCoV-19/Italy/APU-IZSPB-172APT/2020|2020-08-20|EPI\_ISL\_649191|Vero|hCoV-19^^Apulia|Human|Istituto Zooprofilattico Sperimentale della Puglia e della Basilicata|Istituto Zooprofilattico Sperimentale della Puglia e della Basilicata|Parisi|Italy

>Spike|hCoV-19/England/20109002404/2020|2020-03-03|EPI\_ISL\_464504|Original|hCoV-19^^England|Human|Respiratory Virus Unit|Respiratory Virus Unit|Platt|United Kingdom

>Spike|hCoV-19/England/SHEF-CD737/2020|2020-03-29|EPI\_ISL\_432548|Original|hCoV-19^^England|Human|Virology Department|COVID-19 Genomics UK (COG-UK) Consortium|de Silva|United Kingdom

>Spike|hCoV-19/USA/WI-UW-971/2020|2020-07-03|EPI\_ISL\_509969|Original|hCoV-19^^Wisconsin|Human|University of Wisconsin-Madison AIDS Vaccine Research Laboratories|University of Wisconsin-Madison AIDS Vaccine Research Laboratories|Baczenas|USA

>Spike|hCoV-19/Japan/PG-0673/2020|2020-04-00|EPI\_ISL\_684283|Original|hCoV-19^^Japan|Human|Gunma Prefectural Institute of Public Health and Environmental Sciences|Pathogen Genomics Center|Sekizuka|Japan

>Spike|hCoV-19/USA/FL-BPHL-1057/2020|2020-06-04|EPI\_ISL\_517947|Original|hCoV-19^^Florida|Human|Florida Bureau of Public Health Laboratories|Florida Bureau of Public Health Laboratories|Blanton|USA

>Spike|hCoV-19/Denmark/DCGC-8950/2020|2020-10-26|EPI\_ISL\_626195|Original|hCoV-19^^Midtjylland|Human|Department of Virus and Microbiological Special Diagnostics|Albertsen lab|Michaelsen|Denmark

>Spike|hCoV-19/USA/UT-08716/2020|2020-05-19|EPI\_ISL\_524773|Original|hCoV-19^^Utah|Human|Utah Public Health Laboratory|Utah Public Health Laboratory|Young|USA

>Spike|hCoV-19/Brazil/SP-678/2020|2020-06-12|EPI\_ISL\_693233|Original|hCoV-19^^S\u00e3o Paulo|Human|Hospital Santa Cruz|Instituto Adolfo Lutz|Sacchi|Brazil

>Spike|hCoV-19/Hong Kong/VM20135296/2020|2020-10-20|EPI\_ISL\_730616|Original|hCoV-19^^Hong Kong|Human|United Christian Hospital|Hong Kong Department of Health|Mak|China

>Spike|hCoV-19/Japan/PG-0856/2020|2020-04-00|EPI\_ISL\_684466|Original|hCoV-19^^Japan|Human|Fukuoka Institute of Health and Environmental Sciences|Pathogen Genomics Center|Sekizuka|Japan

>Spike|hCoV-19/USA/TX-HMH-7751/2020|2020-06-26|EPI\_ISL\_545615|Original|hCoV-19^^Texas|Human|Houston Methodist Hospital|Houston Methodist Hospital|Long|USA

>Spike|hCoV-19/England/ALDP-A8525E/2020|2020-10-16|EPI\_ISL\_610506|Original|hCoV-19^^England|Human|Lighthouse Lab in Alderley Park|Wellcome Sanger Institute for the COVID-19 Genomics UK (COG-UK) consortium|Davies|United Kingdom

>Spike|hCoV-19/England/ALDP-9EA355/2020|2020-09-24|EPI\_ISL\_579942|Original|hCoV-19^^England|Human|Lighthouse Lab in Alderley Park|Wellcome Sanger Institute for the COVID-19 Genomics UK (COG-UK) consortium|Davies|United Kingdom

>Spike|hCoV-19/USA/CA-QDX-2361/2020|2020-03-17|EPI\_ISL\_604655|Original|hCoV-19^^California|Human|Quest Diagnostics|Quest Diagnostics|Kagan|USA

>Spike|hCoV-19/Australia/VIC4196/2020|2020-07-15|EPI\_ISL\_519524|Original|hCoV-19^^Victoria|Human|Microbiological Diagnostic Unit - Public Health Laboratory (MDU-PHL)|MDU-PHL|Schultz|Australia

>Spike|hCoV-19/England/20144057404/2020|2020-03-31|EPI\_ISL\_466003|Original|hCoV-19^^England|Human|Respiratory Virus Unit|Respiratory Virus Unit|Platt|United Kingdom

>Spike|hCoV-19/England/MILK-C7B5D8/2020|2020-12-15|EPI\_ISL\_756762|Original|hCoV-19^^England|Human|Lighthouse Lab in Milton Keynes|Wellcome Sanger Institute for the COVID-19 Genomics UK (COG-UK) Consortium|Davies|United Kingdom

>Spike|hCoV-19/Netherlands/NA\_333/2020|2020-04-03|EPI\_ISL\_455138|Original|hCoV-19^^Netherlands|Human|Dutch COVID-19 response team|Erasmus Medical Center|Oude Munnink|Netherlands

>Spike|hCoV-19/Belgium/regal-12111435/2020|2020-12-11|EPI\_ISL\_738487|Original|hCoV-19^^Mol|Human|UZ Leuven|KU Leuven|Maes|Belgium

>Spike|hCoV-19/USA/WA-S740/2020|2020-04-13|EPI\_ISL\_449910|Original|hCoV-19^^Washington|Human|Washington State Department of Health|Seattle Flu Study|Bedford|USA

>Spike|hCoV-19/England/ALDP-AA0A91/2020|2020-10-22|EPI\_ISL\_625196|Original|hCoV-19^^England|Human|Lighthouse Lab in Alderley Park|Wellcome Sanger Institute for the COVID-19 Genomics UK (COG-UK) consortium|Davies|United Kingdom

>Spike|hCoV-19/Australia/NSW2796/2020|2020-09-20|EPI\_ISL\_678348|Original|hCoV-19^^New South Wales|Human|Area of Virology|Virology Research Laboratory; Area of Virology|Foster|Australia

>Spike|hCoV-19/England/QEUA-9E426D/2020|2020-09-22|EPI\_ISL\_579811|Original|hCoV-19^^England|Human|Lighthouse Lab in Glasgow|Wellcome Sanger Institute for the COVID-19 Genomics UK (COG-UK) consortium|Davies|United Kingdom

>Spike|hCoV-19/England/QEUA-B6ADD5/2020|2020-11-11|EPI\_ISL\_662377|Original|hCoV-19^^England|Human|Lighthouse Lab in Glasgow|Wellcome Sanger Institute for the COVID-19 Genomics UK (COG-UK) Consortium|Davies|United Kingdom

>Spike|hCoV-19/USA/NY-NYCPHL-001424/2020|2020-11-20|EPI\_ISL\_683794|Original|hCoV-19^^New York|Human|DOHMH Corona|New York City Public Health Laboratory|Wang|USA

>Spike|hCoV-19/England/20126095704/2020|2020-03-18|EPI\_ISL\_423904|Original|hCoV-19^^England|Human|Respiratory Virus Unit|Respiratory Virus Unit|Platt|United Kingdom

>Spike|hCoV-19/Canada/QC\_AT9/2020|2020-04-05|EPI\_ISL\_463944|Original|hCoV-19^^Quebec|Human|Laboratoire de microbiologie|Smith Laboratory|Smith|Canada

>Spike|hCoV-19/England/CAMC-BBFF17/2020|2020-11-21|EPI\_ISL\_704830|Original|hCoV-19^^England|Human|Lighthouse Lab in Cambridge|Wellcome Sanger Institute for the COVID-19 Genomics UK (COG-UK) Consortium|Davies|United Kingdom

>Spike|hCoV-19/France/ARA-SC043/2020|2020-03-31|EPI\_ISL\_666663|Original|hCoV-19^^Auvergne-Rh\u00f4ne-Alpes|Human|Laboratoire du Centre Hospitalier Annecy Genevois|CNR Virus des Infections Respiratoires - France SUD|Bal|France

>Spike|hCoV-19/Australia/VIC4571/2020|2020-07-13|EPI\_ISL\_518977|Original|hCoV-19^^Victoria|Human|Microbiological Diagnostic Unit - Public Health Laboratory (MDU-PHL) |MDU-PHL|Schultz|Australia

>Spike|hCoV-19/Denmark/DCGC-17447/2020|2020-12-14|EPI\_ISL\_750990|Original|hCoV-19^^Nordjylland|Human|Department of Virus and Microbiological Special Diagnostics|Albertsen Lab|Michaelsen|Denmark

>Spike|hCoV-19/Portugal/PT0415/2020|2020-03-23|EPI\_ISL\_454139|Original|hCoV-19^^Portugal|Human|unknown|Instituto Nacional de Saude (INSA)|Borges|Portugal

>Spike|hCoV-19/Mexico/AGS-INDRE-79/2020|2020-11-02|EPI\_ISL\_658865|Original|hCoV-19^^Aguascalientes|Human|Instituto de Diagnostico y Referencia Epidemiologicos (INDRE)|Instituto de Diagnostico y Referencia Epidemiologicos (INDRE)|Rodriguez|Mexico

>Spike|hCoV-19/England/ALDP-9CC16E/2020|2020-09-16|EPI\_ISL\_573088|Original|hCoV-19^^England|Human|Quadram Institute Bioscience|COVID-19 Genomics UK (COG-UK) Consortium|Alikhan|United Kingdom

>Spike|hCoV-19/USA/TX-HMH-MCoV-12745/2020|2020-08-29|EPI\_ISL\_790502|Original|hCoV-19^^Texas|Human|Houston Methodist Hospital|Houston Methodist Hospital|Long|USA

>Spike|hCoV-19/England/QEUH-9B7E32/2020|2020-09-07|EPI\_ISL\_590587|Original|hCoV-19^^England|Human|Lighthouse Lab in Glasgow|Wellcome Sanger Institute for the COVID-19 Genomics UK (COG-UK) consortium|Davies|United Kingdom

>Spike|hCoV-19/Denmark/DCGC-15267/2020|2020-11-23|EPI\_ISL\_713732|Original|hCoV-19^^Syddanmark|Human|Department of Virus and Microbiological Special Diagnostics|Albertsen Lab|Michaelsen|Denmark

>Spike|hCoV-19/USA/FL-BPHL-0730/2020|2020-07-14|EPI\_ISL\_509788|Original|hCoV-19^^Florida|Human|Florida Bureau of Public Health Laboratories|Florida Bureau of Public Health Laboratories|Blanton|USA

>Spike|hCoV-19/USA/CA-CZB-1911/2020|2020-04-22|EPI\_ISL\_486204|Original|hCoV-19^^California|Human|Orange County Public Health Laboratory|Chan-Zuckerberg Biohub|McGeever|USA

>Spike|hCoV-19/England/NORT-284DCF/2020|2020-03-27|EPI\_ISL\_478595|Original|hCoV-19^^England|Human|Northumbria University / South Tees Hospitals NHS Foundation Trust / North Cumbria Integrated Care NHS Foundation Trust / North Tees and Hartlepool NHS Foundation Trust / Newcastle Hospitals NHS Foundation Trust|COVID-19 Genomics UK (COG-UK) Consortium|Bashton|United Kingdom

>Spike|hCoV-19/India/HR-NIBG-TF77/2020|2020-05-25|EPI\_ISL\_653917|Original|hCoV-19^^Haryana|Human|Translational Health Science and Technology Institute|National Institute of Biomedical Genomics|Maitra|India

>Spike|hCoV-19/USA/FL-BPHL-1684/2020|2020-08-12|EPI\_ISL\_594373|Original|hCoV-19^^Florida|Human|Florida Bureau of Public Health Laboratories|Florida Bureau of Public Health Laboratories|Blanton|USA

>Spike|hCoV-19/Canada/QC-LSPQ-L00234639/2020|2020-03-23|EPI\_ISL\_536065|Original|hCoV-19^^Quebec|Human|H\u00f4pital Pierre-Le Gardeur|Laboratoire de sant\u00e9 publique du Qu\u00e9bec|Moreira|Canada

>Spike|hCoV-19/Japan/PG-4441/2020|2020-07-00|EPI\_ISL\_692664|Original|hCoV-19^^Japan|Human|Sakai City Institute of Public Health|Pathogen Genomics Center|Sekizuka|Japan

>Spike|hCoV-19/Denmark/DCGC-12614/2020|2020-11-16|EPI\_ISL\_682795|Original|hCoV-19^^Syddanmark|Human|Department of Virus and Microbiological Special Diagnostics|Albertsen Lab|Michaelsen|Denmark

>Spike|hCoV-19/Australia/VIC3304/2020|2020-07-11|EPI\_ISL\_520983|Original|hCoV-19^^Victoria|Human|Microbiological Diagnostic Unit - Public Health Laboratory (MDU-PHL) |MDU-PHL|Schultz|Australia

>Spike|hCoV-19/England/QEUH-AA03F0/2020|2020-10-19|EPI\_ISL\_611454|Original|hCoV-19^^England|Human|Lighthouse Lab in Glasgow|Wellcome Sanger Institute for the COVID-19 Genomics UK (COG-UK) consortium|Davies|United Kingdom

>Spike|hCoV-19/Australia/NSW852/2020|2020-08-12|EPI\_ISL\_526194|Original|hCoV-19^^New South Wales|Human|St Vincent's Pathology (SydPath)|NSW Health Pathology - Institute of Clinical Pathology and Medical Research; Westmead Hospital; University of Sydney|Gall|Australia

>Spike|hCoV-19/USA/WA-UW-5750/2020|2020-04-06|EPI\_ISL\_430918|Original|hCoV-19^^Washington|Human|UW Virology Lab|UW Virology Lab|Roychoudhury|USA

>Spike|hCoV-19/USA/TX-HMH-MCoV-12587/2020|2020-08-31|EPI\_ISL\_790408|Original|hCoV-19^^Texas|Human|Houston Methodist Hospital|Houston Methodist Hospital|Long|USA

>Spike|hCoV-19/Australia/VIC6697/2020|2020-07-20|EPI\_ISL\_563999|Original|hCoV-19^^Victoria|Human|Victorian Infectious Diseases Reference Laboratory (VIDRL)|VIDRL and MDU-PHL|Schultz|Australia

>Spike|hCoV-19/England/QEUA-9C8241/2020|2020-09-11|EPI\_ISL\_567062|Original|hCoV-19^^England|Human|Lighthouse Lab in Glasgow|Wellcome Sanger Institute for the COVID-19 Genomics UK (COG-UK) consortium|Davies|United Kingdom

>Spike|hCoV-19/Denmark/DCGC-15113/2020|2020-11-23|EPI\_ISL\_713638|Original|hCoV-19^^Hovedstaden|Human|Department of Virus and Microbiological Special Diagnostics|Albertsen Lab|Michaelsen|Denmark

>Spike|hCoV-19/England/CAMC-BC1EBB/2020|2020-11-22|EPI\_ISL\_705634|Original|hCoV-19^^England|Human|Department of Pathology|COVID-19 Genomics UK (COG-UK) Consortium|Goodfellow|United Kingdom

>Spike|hCoV-19/Australia/VIC10756/2020|2020-00-00|EPI\_ISL\_563073|Original|hCoV-19^^Victoria|Human|Microbiological Diagnostic Unit - Public Health Laboratory (MDU-PHL)|MDU-PHL|Schultz|Australia

>Spike|hCoV-19/Wales/PHWC-16DB5A/2020|2020-09-22|EPI\_ISL\_577496|Original|hCoV-19^^Wales|Human|Wales Specialist Virology Centre Sequencing lab|COVID-19 Genomics UK (COG-UK) Consortium|Moore|United Kingdom

>Spike|hCoV-19/England/CAMC-BD1B57/2020|2020-11-27|EPI\_ISL\_702190|Original|hCoV-19^^England|Human|Lighthouse Lab in Cambridge|Wellcome Sanger Institute for the COVID-19 Genomics UK (COG-UK) Consortium|Davies|United Kingdom

>Spike|hCoV-19/England/MILK-A0613A/2020|2020-10-01|EPI\_ISL\_600116|Original|hCoV-19^^England|Human|Lighthouse Lab in Milton Keynes|Wellcome Sanger Institute for the COVID-19 Genomics UK (COG-UK) consortium|Davies|United Kingdom

>Spike|hCoV-19/England/ALDP-B235FE/2020|2020-11-04|EPI\_ISL\_646941|Original|hCoV-19^^England|Human|Lighthouse Lab in Alderley Park|Wellcome Sanger Institute for the COVID-19 Genomics UK (COG-UK) Consortium|Davies|United Kingdom

>Spike|hCoV-19/England/ALDP-B73F5B/2020|2020-11-12|EPI\_ISL\_664638|Original|hCoV-19^^England|Human|Quadram Institute Bioscience|COVID-19 Genomics UK (COG-UK) Consortium|Alikhan|United Kingdom

>Spike|hCoV-19/Canada/QC\_BC6/2020|2020-04-11|EPI\_ISL\_515245|Original|hCoV-19^^Quebec|Human|Laboratoire de microbiologie|Smith Laboratory|Smith|Canada

>Spike|hCoV-19/England/MILK-B39908/2020|2020-11-01|EPI\_ISL\_741360|Original|hCoV-19^^England|Human|University of Exeter|COVID-19 Genomics UK (COG-UK) Consortium|Temperton|United Kingdom

>Spike|hCoV-19/England/LOND-12F0E31/2020|2020-12-03|EPI\_ISL\_705331|Original|hCoV-19^^England|Human|University College London|COVID-19 Genomics UK (COG-UK) Consortium|Roy|United Kingdom

>Spike|hCoV-19/England/GSTT-265DD89/2020|2020-03-28|EPI\_ISL\_484102|Original|hCoV-19^^England|Human|Centre for Clinical Infection and Diagnostics Research and Genomics Innovation Unit|COVID-19 Genomics UK (COG-UK) Consortium|Awan|United Kingdom

>Spike|hCoV-19/USA/ME-HETL-J0337/2020|2020-11-24|EPI\_ISL\_755465|Original|hCoV-19^^Maine|Human|Maine Health and Environmental Testing Laboratory|Tewhey Lab|Tewhey|USA

>Spike|hCoV-19/England/CAMB-1AD383/2020|2020-04-25|EPI\_ISL\_489488|Original|hCoV-19^^England|Human|Department of Pathology|Wellcome Sanger Institute for the COVID-19 Genomics UK (COG-UK) consortium|Davies|United Kingdom

>Spike|hCoV-19/France/OCC-154/2020|2020-11-18|EPI\_ISL\_751474|Original|hCoV-19^^Occitanie|Human|CHU Purpan - Laboratoire de Virologie - Institut F\u00e9d\u00e9ratif de Biologie|CHU Purpan - Laboratoire de Virologie - Institut F\u00e9d\u00e9ratif de Biologie|Latour|France

>Spike|hCoV-19/DRC/3440/2020|2020-04-22|EPI\_ISL\_447597|Original|hCoV-19^^Kinshasa|Human|Viral Respiratory Lab|Pathogen Sequencing Lab|Lusamaki|Democratic Republic of the Congo

>Spike|hCoV-19/England/OXON-B0281/2020|2020-04-10|EPI\_ISL\_478870|Original|hCoV-19^^England|Human|Oxford Viromics|COVID-19 Genomics UK (COG-UK) Consortium|Golubchik|United Kingdom

>Spike|hCoV-19/England/BIRM-5F0A8/2020|2020-05-05|EPI\_ISL\_473308|Original|hCoV-19^^England|Human|University of Birmingham|COVID-19 Genomics UK (COG-UK) Consortium|Loman|United Kingdom

>Spike|hCoV-19/USA/TX-HMH-MCoV-18260/2020|2020-11-17|EPI\_ISL\_784608|Original|hCoV-19^^Texas|Human|Houston Methodist Hospital|Houston Methodist Hospital|Long|USA

>Spike|hCoV-19/England/ALDP-A67A4B/2020|2020-10-12|EPI\_ISL\_630478|Original|hCoV-19^^England|Human|Lighthouse Lab in Alderley Park|Wellcome Sanger Institute for the COVID-19 Genomics UK (COG-UK) consortium|Davies|United Kingdom

>Spike|hCoV-19/Norway/2952/2020|2020-07-31|EPI\_ISL\_549027|Original|hCoV-19^^Oslo|Human|Furst Medical Laboratory|Norwegian Institute of Public Health|Kopperud Riis|Norway

>Spike|hCoV-19/USA/AZ-TG347264/2020|2020-06-02|EPI\_ISL\_694396|Original|hCoV-19^^Arizona|Human|TGen North|TGen North|French|USA

>Spike|hCoV-19/England/CAMC-B37FAE/2020|2020-11-05|EPI\_ISL\_659084|Original|hCoV-19^^England|Human|Lighthouse Lab in Cambridge|Wellcome Sanger Institute for the COVID-19 Genomics UK (COG-UK) Consortium|Davies|United Kingdom

>Spike|hCoV-19/England/ALDP-AA19FD/2020|2020-10-22|EPI\_ISL\_624525|Original|hCoV-19^^England|Human|Lighthouse Lab in Alderley Park|Wellcome Sanger Institute for the COVID-19 Genomics UK (COG-UK) consortium|Davies|United Kingdom

>Spike|hCoV-19/England/QEUEH-9B41E1/2020|2020-09-03|EPI\_ISL\_559881|Original|hCoV-19^^England|Human|Oxford Viromics|COVID-19 Genomics UK (COG-UK) Consortium|Golubchik|United Kingdom

>Spike|hCoV-19/Wales/PHWC-48C985/2020|2020-11-08|EPI\_ISL\_666489|Original|hCoV-19^^Wales|Human|Wales Specialist Virology Centre Sequencing lab|COVID-19 Genomics UK (COG-UK) Consortium|Moore|United Kingdom

>Spike|hCoV-19/England/CAMB-768FE/2020|2020-03-29|EPI\_ISL\_438462|Original|hCoV-19^^England|Human|Department of Pathology|Wellcome Sanger Institute for the COVID-19 Genomics UK (COG-UK) consortium|Amato|United Kingdom

>Spike|hCoV-19/South Korea/KCDC2758/2020|2020-07-20|EPI\_ISL\_522537|Original|hCoV-19^^South Korea|Human|Division of Viral Diseases|Division of Viral Diseases|Kim|South Korea

>Spike|hCoV-19/Singapore/1443/2020|2020-12-05|EPI\_ISL\_728179|Original|hCoV-19^^Singapore|Human|National Public Health Laboratory|National Public Health Laboratory|Mak|Singapore

>Spike|hCoV-19/USA/MD-HP12084/2020|2020-11-18|EPI\_ISL\_791409|Original|hCoV-19^^Maryland|Human|Johns Hopkins Hospital Department of Pathology|Johns Hopkins Hospital Department of Pathology|Morris|USA

>Spike|hCoV-19/Australia/NSW261/2020|2020-03-27|EPI\_ISL\_451526|Original|hCoV-19^^New South Wales|Human|Pathology West - NSW Health Pathology|NSW Health Pathology - Institute of Clinical Pathology and Medical Research; Westmead Hospital; University of Sydney|Gall|Australia

>Spike|hCoV-19/England/204961138/2020|2020-12-03|EPI\_ISL\_700624|Original|hCoV-19^^England|Human|Respiratory Virus Unit|COVID-19 Genomics UK (COG-UK) Consortium|Platt|United Kingdom

>Spike|hCoV-19/England/QEUEH-B7E503/2020|2020-11-14|EPI\_ISL\_668053|Original|hCoV-19^^England|Human|Lighthouse Lab in Glasgow|Wellcome Sanger Institute for the COVID-19 Genomics UK (COG-UK) Consortium|Davies|United Kingdom

>Spike|hCoV-19/England/QEUEH-A79509/2020|2020-10-12|EPI\_ISL\_638808|Original|hCoV-19^^England|Human|Oxford Viromics|COVID-19 Genomics UK (COG-UK) Consortium|Golubchik|United Kingdom

>Spike|hCoV-19/Australia/VIC8127/2020|2020-08-06|EPI\_ISL\_564865|Original|hCoV-19^^Victoria|Human|Microbiological Diagnostic Unit - Public Health Laboratory (MDU-PHL) |MDU-PHL|Schultz|Australia

>Spike|hCoV-19/Denmark/DCGC-15999/2020|2020-11-23|EPI\_ISL\_714121|Original|hCoV-19^^Syddanmark|Human|Department of Virus and Microbiological Special Diagnostics|Albertsen Lab|Michaelsen|Denmark

>Spike|hCoV-19/England/QEUIH-9984CC/2020|2020-08-24|EPI\_ISL\_540004|Original|hCoV-19^^England|Human|Lighthouse Lab in Glasgow|Wellcome Sanger Institute for the COVID-19 Genomics UK (COG-UK) consortium|Davies|United Kingdom

>Spike|hCoV-19/Scotland/CVR2730/2020|2020-04-18|EPI\_ISL\_473550|Original|hCoV-19^^Scotland|Human|West of Scotland Specialist Virology Centre|COVID-19 Genomics UK (COG-UK) Consortium|Robertson|United Kingdom

>Spike|hCoV-19/USA/UT-QDX-2480/2020|2020-03-13|EPI\_ISL\_604850|Original|hCoV-19^^Utah|Human|Quest Diagnostics|Quest Diagnostics|Kagan|USA

>Spike|hCoV-19/England/NORT-295B94/2020|2020-04-03|EPI\_ISL\_488489|Original|hCoV-19^^England|Human|NU-OMICS DNA Sequencing research facility|Wellcome Sanger Institute for the COVID-19 Genomics UK (COG-UK) consortium|Davies|United Kingdom

>Spike|hCoV-19/England/OXON-AC428/2020|2020-04-07|EPI\_ISL\_448449|Original|hCoV-19^^England|Human|Oxford Viromics|COVID-19 Genomics UK (COG-UK) Consortium|Golubchik|United Kingdom

>Spike|hCoV-19/England/SHEF-CDE14/2020|2020-05-27|EPI\_ISL\_535082|Original|hCoV-19^^England|Human|Virology Department|COVID-19 Genomics UK (COG-UK) Consortium|de Silva|United Kingdom

>Spike|hCoV-19/Denmark/DCGC-11474/2020|2020-11-02|EPI\_ISL\_670939|Original|hCoV-19^^Hovedstaden|Human|Department of Virus and Microbiological Special Diagnostics|Albertsen Lab|Michaelsen|Denmark

>Spike|hCoV-19/Denmark/DCGC-5897/2020|2020-10-05|EPI\_ISL\_620162|Original|hCoV-19^^Midtjylland|Human|Department of Virus and Microbiological Special Diagnostics|Albertsen lab|Michaelsen|Denmark

>Spike|hCoV-19/England/CAMB-82CE4/2020|2020-04-13|EPI\_ISL\_443468|Original|hCoV-19^^England|Human|Department of Pathology|Wellcome Sanger Institute for the COVID-19 Genomics UK (COG-UK) consortium|Amato|United Kingdom

>Spike|hCoV-19/England/ALDP-9CD358/2020|2020-09-15|EPI\_ISL\_566130|Original|hCoV-19^^England|Human|Lighthouse Lab in Alderley Park|Wellcome Sanger Institute for the COVID-19 Genomics UK (COG-UK) consortium|Davies|United Kingdom

>Spike|hCoV-19/Japan/PG-7658/2020|2020-08-00|EPI\_ISL\_686760|Original|hCoV-19^^Japan|Human|Chiba Prefectural Institute of Public Health|Pathogen Genomics Center|Sekizuka|Japan

>Spike|hCoV-19/Scotland/CVR4926/2020|2020-10-01|EPI\_ISL\_594692|Original|hCoV-19^^Scotland|Human|West of Scotland Specialist Virology Centre|COVID-19 Genomics UK (COG-UK) Consortium|Robertson|United Kingdom

>Spike|hCoV-19/Northern Ireland/NIRE-2344E7/2020|2020-10-19|EPI\_ISL\_680398|Original|hCoV-19^^Northern Ireland|Human|Regional Virus Laboratory|COVID-19 Genomics UK (COG-UK) Consortium|Fairley|United Kingdom

>Spike|hCoV-19/Scotland/EDB3157/2020|2020-04-06|EPI\_ISL\_489063|Original|hCoV-19^^Scotland|Human|Virology Department|Wellcome Sanger Institute for the COVID-19 Genomics UK (COG-UK) consortium|Davies|United Kingdom

>Spike|hCoV-19/Germany/BY-ChVir20731/2020|2020-11-18|EPI\_ISL\_729673|Original|hCoV-19^^Bavaria|Human|A. Krumbholz|Charit\u00e9 Universit\u00e4tsmedizin Berlin|Muehlemann|Germany

>Spike|hCoV-19/Canada/NS-NML-1371/2020|2020-04-15|EPI\_ISL\_579747|Original|hCoV-19^^Nova Scotia|Human|QEII Health Sciences Centre|National Microbiology Laboratory (NML)|Majer|Canada

>Spike|hCoV-19/England/QEUIH-A49A12/2020|2020-10-08|EPI\_ISL\_628445|Original|hCoV-19^^England|Human|Oxford Viromics|COVID-19 Genomics UK (COG-UK) Consortium|Golubchik|United Kingdom

>Spike|hCoV-19/Scotland/QEUIH-96E8B4/2020|2020-08-17|EPI\_ISL\_534468|Original|hCoV-19^^Scotland|Human|NHSGGC West of Scotland Specialist Virology Centre / MRC-University of Glasgow Centre for Virus Research|Wellcome Sanger Institute for the COVID-19 Genomics UK (COG-UK) consortium|Davies|United Kingdom

>Spike|hCoV-19/Spain/MD-IBV-004968/2020|2020-05-07|EPI\_ISL\_481041|Original|hCoV-19^^Madrid|Human|Hospital General Universitario Gregorio Mara\u00f1a|SeqCOVID-SPAIN consortium|IBV (CSIC)|Comas|Spain

>Spike|hCoV-19/Japan/PG-8669/2020|2020-09-00|EPI\_ISL\_686265|Original|hCoV-19^^Japan|Human|Pathogen Genomics Center|Pathogen Genomics Center|Sekizuka|Japan

>Spike|hCoV-19/Denmark/DCGC-16852/2020|2020-12-14|EPI\_ISL\_750526|Original|hCoV-19^^Nordjylland|Human|Department of Virus and Microbiological Special Diagnostics|Albertsen Lab|Michaelsen|Denmark

>Spike|hCoV-19/South Africa/NHLS-UCT-GS-1026/2020|2020-10-27|EPI\_ISL\_700497|Original|hCoV-19^^Western Cape|Human|George Hospital wc GRH|NHLS/UCT|Iranzadeh|South Africa

>Spike|hCoV-19/England/QEUA-B9EC08/2020|2020-11-18|EPI\_ISL\_719618|Original|hCoV-19^^England|Human|Lighthouse Lab in Glasgow|Wellcome Sanger Institute for the COVID-19 Genomics UK (COG-UK) Consortium|Davies|United Kingdom

>Spike|hCoV-19/England/CAMC-BBB79B/2020|2020-11-21|EPI\_ISL\_704486|Original|hCoV-19^^England|Human|Department of Pathology|COVID-19 Genomics UK (COG-UK) Consortium|Goodfellow|United Kingdom

>Spike|hCoV-19/England/LOND-1261554/2020|2020-03-28|EPI\_ISL\_524679|Original|hCoV-19^^England|Human|North West London Pathology|Wellcome Sanger Institute for the COVID-19 Genomics UK (COG-UK) consortium|Davies|United Kingdom

>Spike|hCoV-19/England/MILK-802B23/2020|2020-07-16|EPI\_ISL\_557207|Original|hCoV-19^^England|Human|Lighthouse Lab in Milton Keynes|Wellcome Sanger Institute for the COVID-19 Genomics UK (COG-UK) consortium|Davies|United Kingdom

>Spike|hCoV-19/England/ALDP-A6EC20/2020|2020-10-15|EPI\_ISL\_607259|Original|hCoV-19^^England|Human|Lighthouse Lab in Alderley Park|Wellcome Sanger Institute for the COVID-19 Genomics UK (COG-UK) consortium|Davies|United Kingdom

>Spike|hCoV-19/USA/HI-H200342/2020|2020-08-27|EPI\_ISL\_752898|Original|hCoV-19^^Hawaii|Human|State Laboratories Division|State Laboratories Division|Sultana|USA

>Spike|hCoV-19/England/ALDP-B23910/2020|2020-11-04|EPI\_ISL\_646812|Original|hCoV-19^^England|Human|Lighthouse Lab in Alderley Park|Wellcome Sanger Institute for the COVID-19 Genomics UK (COG-UK) Consortium|Davies|United Kingdom

>Spike|hCoV-19/England/SHEF-10D5FF5/2020|2020-12-19|EPI\_ISL\_742083|Original|hCoV-19^^England|Human|Virology Department|COVID-19 Genomics UK (COG-UK) Consortium|de Silva|United Kingdom

>Spike|hCoV-19/England/QEUA-A61E18/2020|2020-10-12|EPI\_ISL\_706938|Original|hCoV-19^^England|Human|Oxford Viromics|COVID-19 Genomics UK (COG-UK) Consortium|Golubchik|United Kingdom

>Spike|hCoV-19/Australia/VIC17566/2020|2020-08-21|EPI\_ISL\_663925|Original|hCoV-19^^Victoria|Human|Microbiological Diagnostic Unit - Public Health Laboratory (MDU-PHL)|MDU-PHL|Schultz|Australia

>Spike|hCoV-19/Spain/VC-FISABIO-627/2020|2020-03-31|EPI\_ISL\_455739|Original|hCoV-19^^Comunitat Valenciana|Human|Servicio de Microbiología. Hospital Clínico Universitario de Valencia|Sequencing and Bioinformatics Service and Molecular Epidemiology Research Group. FISABIO-Public Health|Gonzalez-Candelas|Spain

>Spike|hCoV-19/Australia/VIC12250/2020|2020-07-26|EPI\_ISL\_640500|Original|hCoV-19^^Victoria|Human|Microbiological Diagnostic Unit - Public Health Laboratory (MDU-PHL)|MDU-PHL|Schultz|Australia

>Spike|hCoV-19/USA/WA-S2187/2020|2020-06-08|EPI\_ISL\_497615|Original|hCoV-19^^Washington|Human|Washington State Department of Health|Seattle Flu Study|Lee|USA

>Spike|hCoV-19/Denmark/DCGC-8503/2020|2020-10-26|EPI\_ISL\_625898|Original|hCoV-19^^Syddanmark|Human|Department of Virus and Microbiological Special Diagnostics|Albertsen lab|Michaelsen|Denmark

>Spike|hCoV-19/Sweden/20-53236/2020|2020-10-26|EPI\_ISL\_676496|Original|hCoV-19^^Orebro|Human|Klinisk mikrobiologi|The Public Health Agency of Sweden|Svartstr\u00f6m|Sweden

>Spike|hCoV-19/Denmark/DCGC-15517/2020|2020-11-23|EPI\_ISL\_713864|Original|hCoV-19^^Hovedstaden|Human|Department of Virus and Microbiological Special Diagnostics|Albertsen Lab|Michaelsen|Denmark

>Spike|hCoV-19/England/QEUA-B11C1C/2020|2020-11-02|EPI\_ISL\_642209|Original|hCoV-19^^England|Human|Lighthouse Lab in Glasgow|Wellcome Sanger Institute for the COVID-19 Genomics UK (COG-UK) Consortium|Davies|United Kingdom

>Spike|hCoV-19/Finland/18ES5AH5/2020|2020-08-18|EPI\_ISL\_756283|Original|hCoV-19^^Uusimaa|Human|Department of Virology and Immunology|Department of Virology|Smura|Finland

>Spike|hCoV-19/England/ALDP-A8630F/2020|2020-10-17|EPI\_ISL\_606258|Original|hCoV-19^^England|Human|Lighthouse Lab in Alderley Park|Wellcome Sanger Institute for the COVID-19 Genomics UK (COG-UK) consortium|Davies|United Kingdom

>Spike|hCoV-19/Japan/PG-8083/2020|2020-08-00|EPI\_ISL\_687184|Original|hCoV-19^^Japan|Human|Pathogen Genomics Center|Pathogen Genomics Center|Sekizuka|Japan

>Spike|hCoV-19/England/NORT-293E60/2020|2020-07-20|EPI\_ISL\_573331|Original|hCoV-19^^England|Human|Northumbria University / South Tees Hospitals NHS Foundation Trust / North Cumbria Integrated Care NHS Foundation Trust / North Tees and Hartlepool NHS Foundation Trust / Newcastle Hospitals NHS Foundation Trust|COVID-19 Genomics UK (COG-UK) Consortium|Bashton|United Kingdom

>Spike|hCoV-19/England/MILK-9C3941/2020|2020-09-10|EPI\_ISL\_566867|Original|hCoV-19^^England|Human|Lighthouse Lab in Milton Keynes|Wellcome Sanger Institute for the COVID-19 Genomics UK (COG-UK) consortium|Davies|United Kingdom

>Spike|hCoV-19/England/CAMC-C458A1/2020|2020-12-10|EPI\_ISL\_719545|Original|hCoV-19^^England|Human|Lighthouse Lab in Cambridge|Wellcome Sanger Institute for the COVID-19 Genomics UK (COG-UK) Consortium|Davies|United Kingdom

>Spike|hCoV-19/England/MILK-C7B59C/2020|2020-12-15|EPI\_ISL\_756786|Original|hCoV-19^^England|Human|Lighthouse Lab in Milton Keynes|Wellcome Sanger Institute for the COVID-19 Genomics UK (COG-UK) Consortium|Davies|United Kingdom

>Spike|hCoV-19/England/NORW-EC5A1/2020|2020-05-10|EPI\_ISL\_457535|Original|hCoV-19^^England|Human|Quadram Institute Bioscience|COVID-19 Genomics UK (COG-UK) Consortium|Alikhan|United Kingdom

>Spike|hCoV-19/England/MILK-A6B25E/2020|2020-10-09|EPI\_ISL\_608779|Original|hCoV-19^^England|Human|Lighthouse Lab in Milton Keynes|Wellcome Sanger Institute for the COVID-19 Genomics UK (COG-UK) consortium|Davies|United Kingdom

>Spike|hCoV-19/England/MILK-9F03F2/2020|2020-09-24|EPI\_ISL\_580634|Original|hCoV-19^^England|Human|Lighthouse Lab in Milton Keynes|Wellcome Sanger Institute for the COVID-19 Genomics UK (COG-UK) consortium|Davies|United Kingdom

>Spike|hCoV-19/England/BHRT-24B37EF/2020|2020-05-16|EPI\_ISL\_528803|Original|hCoV-19^^England|Human|Microbiology Department|Wellcome Sanger Institute for the COVID-19 Genomics UK (COG-UK) consortium|Davies|United Kingdom

>Spike|hCoV-19/England/CAMC-B78220/2020|2020-11-12|EPI\_ISL\_783401|Original|hCoV-19^^England|Human|Lighthouse Lab in Cambridge|Wellcome Sanger Institute for the COVID-19 Genomics UK (COG-UK) Consortium|Davies|United Kingdom

>Spike|hCoV-19/Bangladesh/BCSIR-NILMRC-383/2020|2020-07-21|EPI\_ISL\_514251|Original|hCoV-19^^Chittagong|Human|National Institute of Laboratory Medicine and Referral Center|Genomic Research Lab|Khan|Bangladesh

>Spike|hCoV-19/Denmark/DCGC-13874/2020|2020-11-30|EPI\_ISL\_713075|Original|hCoV-19^^Midtjylland|Human|Department of Virus and Microbiological Special Diagnostics|Albertsen Lab|Michaelsen|Denmark

>Spike|hCoV-19/USA/MA-MGH-03205/2020|2020-10-01|EPI\_ISL\_765746|Original|hCoV-19^^Massachusetts|Human|Massachusetts General Hospital|Infectious Disease Program|Park|USA

>Spike|hCoV-19/USA/MI-QDX-902/2020|2020-03-19|EPI\_ISL\_571623|Original|hCoV-19^^Michigan|Human|Quest Diagnostics|Quest Diagnostics|Kagan|USA

>Spike|hCoV-19/USA/WI-UW-2602/2021|2021-01-03|EPI\_ISL\_791119|Original|hCoV-19^^Wisconsin|Human|University of Wisconsin-Madison AIDS Vaccine Research Laboratories|University of Wisconsin-Madison AIDS Vaccine Research Laboratories|Moreno|USA

>Spike|hCoV-19/USA/AZ-TG618045/2020|2020-07-20|EPI\_ISL\_695687|Original|hCoV-19^^Arizona|Human|AZ SPHL|TGen North|French|USA

>Spike|hCoV-19/Switzerland/GR-ETHZ-390381/2020|2020-12-01|EPI\_ISL\_721818|Original|hCoV-19^^Graub\u00f6cnden|Human|Viollier AG|Department of Biosystems Science and Engineering|Nadeau|Switzerland

>Spike|hCoV-19/Wales/PHWC-4800B9/2020|2020-10-21|EPI\_ISL\_612849|Original|hCoV-19^^Wales|Human|Wales Specialist Virology Centre Sequencing lab|COVID-19 Genomics UK (COG-UK) Consortium|Moore|United Kingdom

>Spike|hCoV-19/England/CAMC-A5801E/2020|2020-10-09|EPI\_ISL\_596937|Original|hCoV-19^^England|Human|Lighthouse Lab in Cambridge|Wellcome Sanger Institute for the COVID-19 Genomics UK (COG-UK) consortium|Davies|United Kingdom



>Spike|hCoV-19/England/MILK-ABB608/2020|2020-10-21|EPI\_ISL\_623471|Original|hCoV-19^^England|Human|Lighthouse Lab in Milton Keynes|Wellcome Sanger Institute for the COVID-19 Genomics UK (COG-UK) consortium|Davies|United Kingdom

>Spike|hCoV-19/United Kingdom/USAFSAM-S026/2020|2020-03-18|EPI\_ISL\_513310|Original|hCoV-19^^United Kingdom|Human|Public Health|Public Health|Friès|United Kingdom

>Spike|hCoV-19/Indonesia/JB-WJHL-ITB-A02050/2020|2020-10-21|EPI\_ISL\_747235|Original|hCoV-19^^West Java|Human|Sukabumi Health Laboratory|West Java Health Laboratory; School of Life Sciences and Technology|Fibriani|Indonesia

>Spike|hCoV-19/France/ARA-10580/2020|2020-03-18|EPI\_ISL\_508999|Original|hCoV-19^^Auvergne-Rhône-Alpes|Human|CNR Virus des Infections Respiratoires - France SUD|CNR Virus des Infections Respiratoires - France SUD|Josset|France

>Spike|hCoV-19/Northern Ireland/NIRE-FC74E/2020|2020-04-21|EPI\_ISL\_459349|Original|hCoV-19^^Northern Ireland|Human|Regional Virus Laboratory|Wellcome Sanger Institute for the COVID-19 Genomics UK (COG-UK) consortium|Davies|United Kingdom

>Spike|hCoV-19/Scotland/QEUIH-96BF49/2020|2020-08-17|EPI\_ISL\_534673|Original|hCoV-19^^Scotland|Human|NHSGGC West of Scotland Specialist Virology Centre / MRC-University of Glasgow Centre for Virus Research|Wellcome Sanger Institute for the COVID-19 Genomics UK (COG-UK) consortium|Davies|United Kingdom

>Spike|hCoV-19/USA/TX-HMH-MCoV-11831/2020|2020-09-17|EPI\_ISL\_790118|Original|hCoV-19^^Texas|Human|Houston Methodist Hospital|Houston Methodist Hospital|Long|USA

>Spike|hCoV-19/England/CAMB-83C3E/2020|2020-04-16|EPI\_ISL\_443376|Original|hCoV-19^^England|Human|Department of Pathology|Wellcome Sanger Institute for the COVID-19 Genomics UK (COG-UK) consortium|Amato|United Kingdom

>Spike|hCoV-19/England/QEUIH-AF61D3/2020|2020-10-30|EPI\_ISL\_663189|Original|hCoV-19^^England|Human|Lighthouse Lab in Glasgow|Wellcome Sanger Institute for the COVID-19 Genomics UK (COG-UK) Consortium|Davies|United Kingdom

>Spike|hCoV-19/Germany/HH-hpi-p1528/2020|2020-03-15|EPI\_ISL\_775905|Original|hCoV-19^^Hamburg|Human|University Medical Center Hamburg Eppendorf|Heinrich Pette Institute|Robitaille|Germany

>Spike|hCoV-19/Peru/LIM-UPCH-0191/2020|2020-10-15|EPI\_ISL\_729887|Original|hCoV-19^^Lima|Human|Laboratorio de Referencia Nacional de Virus Respiratorios|Laboratorio de Genética Microbiana|Tsukayama|Peru

>Spike|hCoV-19/England/MILK-B8F1DE/2020|2020-11-13|EPI\_ISL\_675185|Original|hCoV-19^^England|Human|Lighthouse Lab in Milton Keynes|Wellcome Sanger Institute for the COVID-19 Genomics UK (COG-UK) Consortium|Davies|United Kingdom

>Spike|hCoV-19/Scotland/QEUIH-96A27E/2020|2020-08-15|EPI\_ISL\_534376|Original|hCoV-19^^Scotland|Human|NHSGGC West of Scotland Specialist Virology Centre / MRC-University of Glasgow Centre for Virus Research|Wellcome Sanger Institute for the COVID-19 Genomics UK (COG-UK) consortium|Davies|United Kingdom

>Spike|hCoV-19/South Africa/KRISP-K002390/2020|2020-07-25|EPI\_ISL\_515755|Original|hCoV-19^^KwaZulu-Natal|Human|NHLs-IALCH|KRISP|de Oliveira|South Africa

>Spike|hCoV-19/England/QEUIH-A004EC/2020|2020-09-30|EPI\_ISL\_600406|Original|hCoV-19^^England|Human|Lighthouse Lab in Glasgow|Wellcome Sanger Institute for the COVID-19 Genomics UK (COG-UK) consortium|Davies|United Kingdom

>Spike|hCoV-19/Palestine/95/2020|2020-07-11|EPI\_ISL\_596565|Original|hCoV-19^^Nablus|Human|Palestinian Ministry of Health|Molecular Genetics Lab|van Dorp|Palestine

>Spike|hCoV-19/Wales/PHWC-26110/2020|2020-03-24|EPI\_ISL\_422210|Original|hCoV-19^^Wales|Human|Wales Specialist Virology Centre|Public Health Wales Microbiology Cardiff|Moore|United Kingdom

>Spike|hCoV-19/USA/CA-QDX-2116/2020|2020-03-13|EPI\_ISL\_604417|Original|hCoV-19^^California|Human|Quest Diagnostics|Quest Diagnostics|Kagan|USA

>Spike|hCoV-19/Australia/VIC4470/2020|2020-07-16|EPI\_ISL\_519766|Original|hCoV-19^^Victoria|Human|Microbiological Diagnostic Unit - Public Health Laboratory (MDU-PHL)|MDU-PHL|Schultz|Australia

>Spike|hCoV-19/England/20136006402/2020|2020-03-25|EPI\_ISL\_420519|Original|hCoV-19^^England|Human|Respiratory Virus Unit|Respiratory Virus Unit|Platt|United Kingdom

>Spike|hCoV-19/Colombia/CAQ-INS-007007/2020|2020-10-17|EPI\_ISL\_739679|Original|hCoV-19^^Caqueta|Human|Instituto Nacional de Salud|Instituto Nacional de Salud|Franco-Mu\u00f1oz|Colombia

>Spike|hCoV-19/Australia/WA367/2020|2020-10-23|EPI\_ISL\_605844|Original|hCoV-19^^Western Australia|Human|PathWest Laboratory Medicine WA|PathWest Laboratory Medicine WA Microbial Surveillance Unit|Sikazwe|Australia

>Spike|hCoV-19/USA/MN-MDH-1775/2020|2020-04-13|EPI\_ISL\_590778|Original|hCoV-19^^Minnesota|Human|Minnesota Department of Health|Minnesota Department of Health|Lorentz|USA

>Spike|hCoV-19/Japan/PG-5619/2020|2020-08-00|EPI\_ISL\_688744|Original|hCoV-19^^Japan|Human|Pathogen Genomics Center|Pathogen Genomics Center|Sekizuka|Japan

>Spike|hCoV-19/Latvia/206/2020|2020-09-16|EPI\_ISL\_770042|Original|hCoV-19^^Latvia|Human|Centr\u00f1a Laboratorija|Latvian Biomedical Research and Study Centre|Zrelavs|Latvia

>Spike|hCoV-19/England/ALDP-AA2B50/2020|2020-10-22|EPI\_ISL\_624088|Original|hCoV-19^^England|Human|Lighthouse Lab in Alderley Park|Wellcome Sanger Institute for the COVID-19 Genomics UK (COG-UK) consortium|Davies|United Kingdom

>Spike|hCoV-19/USA/IL-NM091/2020|2020-03-19|EPI\_ISL\_444581|Original|hCoV-19^^Illinois|Human|Northwestern Memorial Hospital|Ozer Lab|Ozer|USA

>Spike|hCoV-19/Australia/VIC2236/2020|2020-06-22|EPI\_ISL\_521973|Original|hCoV-19^^Victoria|Human|Microbiological Diagnostic Unit - Public Health Laboratory (MDU-PHL)|MDU-PHL|Schultz|Australia

>Spike|hCoV-19/England/20156041804/2020|2020-04-08|EPI\_ISL\_466312|Original|hCoV-19^^England|Human|Respiratory Virus Unit|Respiratory Virus Unit|Platt|United Kingdom

>Spike|hCoV-19/USA/VA-DCLS-0694/2020|2020-04-17|EPI\_ISL\_500855|Original|hCoV-19^^Virginia|Human|Virginia DCLS|Virginia DCLS|St. Jacques|USA

>Spike|hCoV-19/Russia/MOS-CRIE-13373431/2020|2020-11-07|EPI\_ISL\_745237|Original|hCoV-19^^Moscow|Human|Molecular diagnostic laboratory of Federal Budget Institution of Science \Central Research Institute of Epidemiology\ of The Federal Service on Customers' Rights Protection and Human Well-being Surveillance|Group of Genomics and Postgenomic Technologies of Central Research Institute of Epidemiology|y|Korneenko|Russia

>Spike|hCoV-19/Denmark/DCGC-1780/2020|2020-07-13|EPI\_ISL\_618183|Original|hCoV-19^^Nordjylland|Human|Department of Virus and Microbiological Special Diagnostics|Albertsen lab|Michaelsen|Denmark

>Spike|hCoV-19/England/QEUH-B418D3/2020|2020-11-08|EPI\_ISL\_658726|Original|hCoV-19^^England|Human|Lighthouse Lab in Glasgow|Wellcome Sanger Institute for the COVID-19 Genomics UK (COG-UK) Consortium|Davies|United Kingdom

>Spike|hCoV-19/USA/WI-GMF-07491/2020|2020-06-23|EPI\_ISL\_489921|Original|hCoV-19^^Wisconsin|Human|Gundersen Molecular Diagnostics Laboratory|Kabara Cancer Research Institute|Kenny|USA

>Spike|hCoV-19/England/202822188/2020|2020-06-14|EPI\_ISL\_490244|Original|hCoV-19^^England|Human|Respiratory Virus Unit|Respiratory Virus Unit|Platt|United Kingdom

>Spike|hCoV-19/Denmark/DCGC-22156/2020|2020-12-14|EPI\_ISL\_757820|Original|hCoV-19^^Hovedstaden|Human|Department of Virus and Microbiological Special Diagnostics|Albertsen Lab|Michaelsen|Denmark

>Spike|hCoV-19/England/CAMC-BD147A/2020|2020-11-29|EPI\_ISL\_702336|Original|hCoV-19^^England|Human|Lighthouse Lab in Cambridge|Wellcome Sanger Institute for the COVID-19 Genomics UK (COG-UK) Consortium|Davies|United Kingdom

>Spike|hCoV-19/England/CAMB-7A748/2020|2020-04-02|EPI\_ISL\_441094|Original|hCoV-19^^England|Human|Department of Pathology|Wellcome Sanger Institute for the COVID-19 Genomics UK (COG-UK) consortium|Amato|United Kingdom

>Spike|hCoV-19/USA/AZ-TG491507/2020|2020-06-18|EPI\_ISL\_695131|Original|hCoV-19^^Arizona|Human|AZ SPHL|TGen North|French|USA

>Spike|hCoV-19/Finland/8LS12D10/2020|2020-10-08|EPI\_ISL\_755971|Original|hCoV-19^^Uusimaa|Human|Department of Virology and Immunology|Department of Virology|Smura|Finland

>Spike|hCoV-19/Australia/NSW102/2020|2020-03-11|EPI\_ISL\_427656|Original|hCoV-19^^New South Wales|Human|Centre for Infectious Diseases and Microbiology Public Health|NSW

Health Pathology - Institute of Clinical Pathology and Medical Research; Westmead Hospital; University of Sydney|Gall|Australia  
>Spike|hCoV-19/Portugal/PT0249/2020|2020-04-02|EPI\_ISL\_453963|Original|hCoV-19^^Portugal|Human|unknown|Instituto Nacional de Saude (INSA)|Borges|Portugal  
>Spike|hCoV-19/Belgium/UGent-52/2020|2020-03-31|EPI\_ISL\_451165|Original|hCoV-19^^Ghent|Human|Lab voor klinische biologie|Onderzoeksgroep Virologie|Lambrechts|Belgium  
>Spike|hCoV-19/Canada/NS-NML-1377/2020|2020-04-15|EPI\_ISL\_579752|Original|hCoV-19^^Nova Scotia|Human|QEII Health Sciences Centre|National Microbiology Laboratory (NML)|Majer|Canada  
>Spike|hCoV-19/Australia/VIC11143/2020|2020-07-25|EPI\_ISL\_563268|Original|hCoV-19^^Victoria|Human|Microbiological Diagnostic Unit - Public Health Laboratory (MDU-PHL)|MDU-PHL|Schultz|Australia  
>Spike|hCoV-19/USA/AZ-TG395932/2020|2020-06-08|EPI\_ISL\_694768|Original|hCoV-19^^Arizona|Human|AZ SPHL|TGen North|French|USA  
>Spike|hCoV-19/Wales/PHWC-4851A2/2020|2020-10-25|EPI\_ISL\_628155|Original|hCoV-19^^Wales|Human|Wales Specialist Virology Centre Sequencing lab|COVID-19 Genomics UK (COG-UK) Consortium|Moore|United Kingdom  
>Spike|hCoV-19/USA/CA-CZB-14762/2020|2020-11-05|EPI\_ISL\_739292|Original|hCoV-19^^California|Human|Humboldt County Public Health Laboratory|Chan-Zuckerberg Biohub|Kamm|USA  
>Spike|hCoV-19/Japan/PG-7673/2020|2020-08-00|EPI\_ISL\_686775|Original|hCoV-19^^Japan|Human|Chiba Prefectural Institute of Public Health|Pathogen Genomics Center|Sekizuka|Japan  
>Spike|hCoV-19/Denmark/DCGC-19017/2020|2020-12-07|EPI\_ISL\_748700|Original|hCoV-19^^Hovedstaden|Human|Department of Virus and Microbiological Special Diagnostics|Albertsen Lab|Michaelsen|Denmark  
>Spike|hCoV-19/England/BRIS-1233FE/2020|2020-04-05|EPI\_ISL\_442721|Original|hCoV-19^^England|Human|PHE South West Regional Laboratory|Wellcome Sanger Institute for the COVID-19 Genomics UK (COG-UK) consortium|Amato|United Kingdom  
>Spike|hCoV-19/England/OXON-B389B/2020|2020-04-07|EPI\_ISL\_534892|Original|hCoV-19^^England|Human|Oxford Viromics|COVID-19 Genomics UK (COG-UK) Consortium|Golubchik|United Kingdom  
>Spike|hCoV-19/Australia/VIC15727/2020|2020-00-00|EPI\_ISL\_593426|Original|hCoV-19^^Victoria|Human|Microbiological Diagnostic Unit - Public Health Laboratory (MDU-PHL)|MDU-PHL|Schultz|Australia  
>Spike|hCoV-19/USA/CA-CZB-13728/2020|2020-11-09|EPI\_ISL\_739477|Original|hCoV-19^^California|Human|County of San Luis Obispo Public Health Laboratory|Chan-Zuckerberg Biohub|Kamm|USA  
>Spike|hCoV-19/Germany/SH-ChVir8333/2020|2020-08-05|EPI\_ISL\_729586|Original|hCoV-19^^Schleswig-Holstein|Human|A. Krumbholz|Charit\u00e9 Universit\u00e4tsmedizin Berlin|Muehlemann|Germany  
>Spike|hCoV-19/England/ALDP-A95A35/2020|2020-10-19|EPI\_ISL\_624783|Original|hCoV-19^^England|Human|Lighthouse Lab in Alderley Park|Wellcome Sanger Institute for the COVID-19 Genomics UK (COG-UK) consortium|Davies|United Kingdom  
>Spike|hCoV-19/Canada/BC\_07924910/2020|2020-04-00|EPI\_ISL\_477102|Original|hCoV-19^^British Columbia|Human|BCCDC Public Health Laboratory|BCCDC Public Health Laboratory|Harrigan|Canada  
>Spike|hCoV-19/England/QEUEH-B822AB/2020|2020-11-14|EPI\_ISL\_661861|Original|hCoV-19^^England|Human|Lighthouse Lab in Glasgow|Wellcome Sanger Institute for the COVID-19 Genomics UK (COG-UK) Consortium|Davies|United Kingdom  
>Spike|hCoV-19/England/ALDP-9BCE4C/2020|2020-09-09|EPI\_ISL\_573079|Original|hCoV-19^^England|Human|Oxford Viromics|COVID-19 Genomics UK (COG-UK) Consortium|Golubchik|United Kingdom  
>Spike|hCoV-19/England/C200028755/2020|2020-10-09|EPI\_ISL\_733586|Original|hCoV-19^^England|Human|Respiratory Virus Unit|COVID-19 Genomics UK (COG-UK) Consortium|Lackenby|United Kingdom  
>Spike|hCoV-19/USA/WA-S1959/2020|2020-06-04|EPI\_ISL\_497387|Original|hCoV-19^^Washington|Human|Washington State Department of Health|Seattle Flu Study|Lee|USA

>Spike|hCoV-19/USA/NV-NSPHL-A0108/2020|2020-04-17|EPI\_ISL\_515381|Original|hCoV-19^^Nevada|Human|Nevada State Public Health Laboratory|Nevada State Public Health Laboratory|Sevinsky|USA

>Spike|hCoV-19/England/CAMB-7D04A/2020|2020-04-03|EPI\_ISL\_442811|Original|hCoV-19^^England|Human|Department of Pathology|Wellcome Sanger Institute for the COVID-19 Genomics UK (COG-UK) consortium|Amato|United Kingdom

>Spike|hCoV-19/England/LOND-126041C/2020|2020-03-16|EPI\_ISL\_524653|Original|hCoV-19^^England|Human|North West London Pathology|Wellcome Sanger Institute for the COVID-19 Genomics UK (COG-UK) consortium|Davies|United Kingdom

>Spike|hCoV-19/England/CAMB-848B1/2020|2020-03-04|EPI\_ISL\_440512|Original|hCoV-19^^England|Human|Department of Pathology|Wellcome Sanger Institute for the COVID-19 Genomics UK (COG-UK) consortium|Amato|United Kingdom

>Spike|hCoV-19/USA/DE-DHSS-F917709/2020|2020-03-23|EPI\_ISL\_560307|Original|hCoV-19^^Delaware|Human|Delaware Public Health Lab|Delaware Public Health Lab|Bajwa|USA

>Spike|hCoV-19/USA/TX-DSHS-0357/2020|2020-06-13|EPI\_ISL\_538294|Original|hCoV-19^^Texas|Human|Texas Department of State Health Services|Texas Department of State Health Services|Rahman|USA

>Spike|hCoV-19/Wales/PHWC-498A56/2020|2020-12-05|EPI\_ISL\_727163|Original|hCoV-19^^Wales|Human|Originating lab|COVID-19 Genomics UK (COG-UK) Consortium|Moore|United Kingdom

>Spike|hCoV-19/USA/LA-EVTL268/2020|2020-08-22|EPI\_ISL\_574402|Original|hCoV-19^^Louisiana|Human|LSUHS Emerging Viral Threat Laboratory|Microbial Genome Sequencing Center|Kamil|USA

>Spike|hCoV-19/England/ALDP-A6E543/2020|2020-10-15|EPI\_ISL\_607193|Original|hCoV-19^^England|Human|Lighthouse Lab in Alderley Park|Wellcome Sanger Institute for the COVID-19 Genomics UK (COG-UK) consortium|Davies|United Kingdom

>Spike|hCoV-19/USA/TX-HMH-6930/2020|2020-06-27|EPI\_ISL\_546360|Original|hCoV-19^^Texas|Human|Houston Methodist Hospital|Houston Methodist Hospital|Long|USA

>Spike|hCoV-19/England/NORW-E7D62/2020|2020-05-06|EPI\_ISL\_449089|Original|hCoV-19^^England|Human|Quadram Institute Bioscience|COVID-19 Genomics UK (COG-UK) Consortium|Alikhan|United Kingdom

>Spike|hCoV-19/Wales/PHWC-2CB1C/2020|2020-04-01|EPI\_ISL\_445950|Original|hCoV-19^^Wales|Human|Wales Specialist Virology Centre|Public Health Wales Microbiology Cardiff|Moore|United Kingdom

>Spike|hCoV-19/Singapore/564nan/2020|2020-04-02|EPI\_ISL\_538471|Original|hCoV-19^^Singapore|Human|Department of Laboratory Medicine|Department of Laboratory Medicine|Chen|Singapore

>Spike|hCoV-19/USA/TX-HMH-MCoV-14841/2020|2020-10-13|EPI\_ISL\_786325|Original|hCoV-19^^Texas|Human|Houston Methodist Hospital|Houston Methodist Hospital|Long|USA

>Spike|hCoV-19/England/NOTT-11CC1B/2020|2020-11-19|EPI\_ISL\_665740|Original|hCoV-19^^England|Human|Queens Medical Centre|COVID-19 Genomics UK (COG-UK) Consortium|Loose|United Kingdom

>Spike|hCoV-19/England/CAMC-C98D28/2020|2020-12-18|EPI\_ISL\_777332|Original|hCoV-19^^England|Human|Lighthouse Lab in Cambridge|Wellcome Sanger Institute for the COVID-19 Genomics UK (COG-UK) Consortium|Davies|United Kingdom

>Spike|hCoV-19/Australia/VIC4229/2020|2020-07-14|EPI\_ISL\_519557|Original|hCoV-19^^Victoria|Human|Microbiological Diagnostic Unit - Public Health Laboratory (MDU-PHL)|MDU-PHL|Schultz|Australia

>Spike|hCoV-19/Wales/PHWC-29292/2020|2020-04-03|EPI\_ISL\_445502|Original|hCoV-19^^Wales|Human|Wales Specialist Virology Centre|Public Health Wales Microbiology Cardiff|Moore|United Kingdom

>Spike|hCoV-19/England/QEUH-AD2FD3/2020|2020-10-26|EPI\_ISL\_630004|Original|hCoV-19^^England|Human|Lighthouse Lab in Glasgow|Wellcome Sanger Institute for the COVID-19 Genomics UK (COG-UK) consortium|Davies|United Kingdom

>Spike|hCoV-19/England/20129177404/2020|2020-03-22|EPI\_ISL\_424161|Original|hCoV-19^^England|Human|Respiratory Virus Unit|Respiratory Virus Unit|Platt|United Kingdom

>Spike|hCoV-19/England/ALDP-94482D/2020|2020-06-07|EPI\_ISL\_555599|Original|hCoV-19^^England|Human|Lighthouse Lab in Alderley Park|Wellcome Sanger Institute for the COVID-19 Genomics UK (COG-UK) consortium|Davies|United Kingdom

>Spike|hCoV-19/England/BIRM-65A56/2020|2020-10-01|EPI\_ISL\_594605|Original|hCoV-19^^England|Human|University of Birmingham|COVID-19 Genomics UK (COG-UK) Consortium|Loman|United Kingdom

>Spike|hCoV-19/England/MILK-ACD4AF/2020|2020-10-22|EPI\_ISL\_634510|Original|hCoV-19^^England|Human|Lighthouse Lab in Milton Keynes|Wellcome Sanger Institute for the COVID-19 Genomics UK (COG-UK) consortium|Davies|United Kingdom

>Spike|hCoV-19/USA/TX-DSHS-1094/2020|2020-05-22|EPI\_ISL\_615133|Original|hCoV-19^^Texas|Human|Texas Department of State Health Services|Texas Department of State Health Services|Rahman|USA

>Spike|hCoV-19/Australia/NSW1308/2020|2020-12-18|EPI\_ISL\_767874|Original|hCoV-19^^New South Wales|Human|Histopath|NSW Health Pathology - Institute of Clinical Pathology and Medical Research; Westmead Hospital; University of Sydney|Gall|Australia

>Spike|hCoV-19/England/MILK-A7D71E/2020|2020-10-13|EPI\_ISL\_606497|Original|hCoV-19^^England|Human|Lighthouse Lab in Milton Keynes|Wellcome Sanger Institute for the COVID-19 Genomics UK (COG-UK) consortium|Davies|United Kingdom

>Spike|hCoV-19/USA/WI-GMF-13999/2020|2020-08-05|EPI\_ISL\_547664|Original|hCoV-19^^Wisconsin|Human|Gundersen Molecular Diagnostics Laboratory|Kabara Cancer Research Institute|Kenny|USA

>Spike|hCoV-19/Scotland/EDB031/2020|2020-03-13|EPI\_ISL\_425837|Original|hCoV-19^^Scotland|Human|Virology Department|COVID-19 Genomics UK (COG-UK) Consortium|Williams|United Kingdom

>Spike|hCoV-19/England/QEUEH-BC4BC0/2020|2020-11-25|EPI\_ISL\_704114|Original|hCoV-19^^England|Human|Lighthouse Lab in Glasgow|Wellcome Sanger Institute for the COVID-19 Genomics UK (COG-UK) Consortium|Davies|United Kingdom

>Spike|hCoV-19/USA/TX-HMH-4100/2020|2020-06-18|EPI\_ISL\_543370|Original|hCoV-19^^Texas|Human|Houston Methodist Hospital|Houston Methodist Hospital|Long|USA

>Spike|hCoV-19/England/MILK-BEE39B/2020|2020-11-30|EPI\_ISL\_721526|Original|hCoV-19^^England|Human|Lighthouse Lab in Milton Keynes|Wellcome Sanger Institute for the COVID-19 Genomics UK (COG-UK) Consortium|Davies|United Kingdom

>Spike|hCoV-19/England/ALDP-A2E15A/2020|2020-10-06|EPI\_ISL\_586917|Original|hCoV-19^^England|Human|Lighthouse Lab in Alderley Park|Wellcome Sanger Institute for the COVID-19 Genomics UK (COG-UK) consortium|Davies|United Kingdom

>Spike|hCoV-19/England/CAMC-A57B87/2020|2020-10-10|EPI\_ISL\_597250|Original|hCoV-19^^England|Human|Lighthouse Lab in Cambridge|Wellcome Sanger Institute for the COVID-19 Genomics UK (COG-UK) consortium|Davies|United Kingdom

>Spike|hCoV-19/England/ALDP-B45AE8/2020|2020-11-07|EPI\_ISL\_656023|Original|hCoV-19^^England|Human|Lighthouse Lab in Alderley Park|Wellcome Sanger Institute for the COVID-19 Genomics UK (COG-UK) Consortium|Davies|United Kingdom

>Spike|hCoV-19/Wales/MILK-B048DC/2020|2020-10-24|EPI\_ISL\_651031|Original|hCoV-19^^Wales|Human|Department of Pathology|COVID-19 Genomics UK (COG-UK) Consortium|Goodfellow|United Kingdom

>Spike|hCoV-19/England/201090513/2020|2020-03-07|EPI\_ISL\_464577|Original|hCoV-19^^England|Human|Respiratory Virus Unit|Respiratory Virus Unit|Platt|United Kingdom

>Spike|hCoV-19/England/QEUEH-9B4952/2020|2020-09-03|EPI\_ISL\_590242|Original|hCoV-19^^England|Human|Lighthouse Lab in Glasgow|Wellcome Sanger Institute for the COVID-19 Genomics UK (COG-UK) consortium|Davies|United Kingdom

>Spike|hCoV-19/Denmark/DCGC-2647/2020|2020-08-17|EPI\_ISL\_617866|Original|hCoV-19^^Syddanmark|Human|Department of Virus and Microbiological Special Diagnostics|Albertsen lab|Michaelsen|Denmark

>Spike|hCoV-19/USA/CA-CZB-3629/2020|2020-07-23|EPI\_ISL\_548351|Original|hCoV-19^^California|Human|County of San Luis Obispo Public Health Laboratory|Chan-Zuckerberg Biohub|Bhatt|USA

>Spike|hCoV-19/England/CAMB-7BE60/2020|2020-04-05|EPI\_ISL\_470497|Original|hCoV-19^^England|Human|Department of Pathology|Wellcome Sanger Institute for the COVID-19 Genomics UK (COG-UK) consortium|Davies|United Kingdom

>Spike|hCoV-19/Japan/PG-6316/2020|2020-08-00|EPI\_ISL\_689427|Original|hCoV-19^^Japan|Human|Pathogen Genomics Center|Pathogen Genomics Center|Sekizuka|Japan

>Spike|hCoV-19/Denmark/DCGC-10108/2020|2020-11-09|EPI\_ISL\_669398|Original|hCoV-19^^Hovedstaden|Human|Department of Virus and Microbiological Special Diagnostics|Albertsen Lab|Michaelsen|Denmark

>Spike|hCoV-19/USA/CA-CZB-4067/2020|2020-08-05|EPI\_ISL\_548654|Original|hCoV-19^^California|Human|Orange County Public Health Laboratory|Chan-Zuckerberg Biohub|Bhatt|USA

>Spike|hCoV-19/Denmark/DCGC-20391/2020|2020-12-21|EPI\_ISL\_758720|Original|hCoV-19^^Hovedstaden|Human|Department of Virus and Microbiological Special Diagnostics|Albertsen Lab|Michaelsen|Denmark

>Spike|hCoV-19/England/MILK-BFF485/2020|2020-12-02|EPI\_ISL\_720826|Original|hCoV-19^^England|Human|Lighthouse Lab in Milton Keynes|Wellcome Sanger Institute for the COVID-19 Genomics UK (COG-UK) Consortium|Davies|United Kingdom

>Spike|hCoV-19/Denmark/DCGC-9634/2020|2020-11-09|EPI\_ISL\_669078|Original|hCoV-19^^Sjaelland|Human|Department of Virus and Microbiological Special Diagnostics|Albertsen Lab|Michaelsen|Denmark

>Spike|hCoV-19/England/MILK-4674DA/2020|2020-05-21|EPI\_ISL\_559719|Original|hCoV-19^^England|Human|Lighthouse Lab in Milton Keynes|Wellcome Sanger Institute for the COVID-19 Genomics UK (COG-UK) consortium|Davies|United Kingdom

>Spike|hCoV-19/USA/CT-UW-4238/2020|2020-03-30|EPI\_ISL\_427162|Original|hCoV-19^^Connecticut|Human|UW Virology Lab|UW Virology Lab|Roychoudhury|USA

>Spike|hCoV-19/England/QEUEH-B2BA06/2020|2020-11-02|EPI\_ISL\_646539|Original|hCoV-19^^England|Human|Lighthouse Lab in Glasgow|Wellcome Sanger Institute for the COVID-19 Genomics UK (COG-UK) Consortium|Davies|United Kingdom

>Spike|hCoV-19/England/QEUEH-B68618/2020|2020-11-11|EPI\_ISL\_662257|Original|hCoV-19^^England|Human|Lighthouse Lab in Glasgow|Wellcome Sanger Institute for the COVID-19 Genomics UK (COG-UK) Consortium|Davies|United Kingdom

>Spike|hCoV-19/England/CAMC-B08CCD/2020|2020-10-30|EPI\_ISL\_643674|Original|hCoV-19^^England|Human|Lighthouse Lab in Cambridge|Wellcome Sanger Institute for the COVID-19 Genomics UK (COG-UK) Consortium|Davies|United Kingdom

>Spike|hCoV-19/England/QEUEH-9DE284/2020|2020-09-21|EPI\_ISL\_599764|Original|hCoV-19^^England|Human|Lighthouse Lab in Glasgow|Wellcome Sanger Institute for the COVID-19 Genomics UK (COG-UK) consortium|Davies|United Kingdom

>Spike|hCoV-19/Denmark/DCGC-2743/2020|2020-08-17|EPI\_ISL\_616488|Original|hCoV-19^^Midtjylland|Human|Department of Virus and Microbiological Special Diagnostics|Albertsen lab|Michaelsen|Denmark

>Spike|hCoV-19/USA/AZ-TG670225/2020|2020-04-30|EPI\_ISL\_696408|Original|hCoV-19^^Arizona|Human|Sonora Quest Laboratories|TGen North|French|USA

>Spike|hCoV-19/USA/CA-CZB-1036/2020|2020-04-02|EPI\_ISL\_436677|Original|hCoV-19^^California|Human|County of Santa Clara Public Health Department|Chan-Zuckerberg Biohub|Hao|USA

>Spike|hCoV-19/Switzerland/ZH-ETHZ-300299/2020|2020-09-25|EPI\_ISL\_603331|Original|hCoV-19^^Zurich|Human|Viollier AG|Department of Biosystems Science and Engineering|Nadeau|Switzerland

>Spike|hCoV-19/Wales/PHWC-3465C/2020|2020-04-20|EPI\_ISL\_446953|Original|hCoV-19^^Wales|Human|Wales Specialist Virology Centre|Public Health Wales Microbiology Cardiff|Moore|United Kingdom

>Spike|hCoV-19/USA/FL-BPHL-0432/2020|2020-03-22|EPI\_ISL\_495338|Original|hCoV-19^^Florida|Human|Florida Bureau of Public Health Laboratories|Florida Bureau of Public Health Laboratories|Blanton|USA

>Spike|hCoV-19/USA/CA-CZB-1283/2020|2020-04-02|EPI\_ISL\_454641|Original|hCoV-19^^California|Human|Humboldt County Public Health Laboratory|Chan-Zuckerberg Biohub|Hao|USA

>Spike|hCoV-19/England/MILK-BDB72C/2020|2020-11-26|EPI\_ISL\_709570|Original|hCoV-19^^England|Human|Lighthouse Lab in Milton Keynes|Wellcome Sanger Institute for the COVID-19 Genomics UK (COG-UK) Consortium|Davies|United Kingdom

>Spike|hCoV-19/United Arab Emirates/0467/2020|2020-05-18|EPI\_ISL\_698637|Original|hCoV-19^^Abu Dhabi|Human|Group 42 (G42) Healthcare|G42 Healthcare|Ogrodzki|United Arab Emirates

>Spike|hCoV-19/Denmark/DCGC-11324/2020|2020-11-02|EPI\_ISL\_670840|Original|hCoV-19^^Syddanmark|Human|Department of Virus and Microbiological Special Diagnostics|Albertsen Lab|Michaelsen|Denmark

>Spike|hCoV-19/England/ALDP-5B4938/2020|2020-06-18|EPI\_ISL\_558718|Original|hCoV-19^^England|Human|Lighthouse Lab in Alderley Park|Wellcome Sanger Institute for the COVID-19 Genomics UK (COG-UK) consortium|Davies|United Kingdom

>Spike|hCoV-19/England/QEUEH-9DC6F3/2020|2020-09-21|EPI\_ISL\_581052|Original|hCoV-19^^England|Human|Lighthouse Lab in Glasgow|Wellcome Sanger Institute for the COVID-19 Genomics UK (COG-UK) consortium|Davies|United Kingdom

>Spike|hCoV-19/England/MILK-BB1258/2020|2020-11-17|EPI\_ISL\_719995|Original|hCoV-19^^England|Human|Lighthouse Lab in Milton Keynes|Wellcome Sanger Institute for the COVID-19 Genomics UK (COG-UK) Consortium|Davies|United Kingdom

>Spike|hCoV-19/England/CAMC-B083AA/2020|2020-10-30|EPI\_ISL\_643880|Original|hCoV-19^^England|Human|Lighthouse Lab in Cambridge|Wellcome Sanger Institute for the COVID-19 Genomics UK (COG-UK) Consortium|Davies|United Kingdom

>Spike|hCoV-19/USA/CA-IGI-0101/2020|2020-06-03|EPI\_ISL\_495123|Original|hCoV-19^^California|Human|Innovative Genomics Institute|Innovative Genomics Institute|Shivram|USA

>Spike|hCoV-19/Wales/PHWC-49E407/2020|2020-12-07|EPI\_ISL\_743000|Original|hCoV-19^^Wales|Human|Wales Specialist Virology Centre Sequencing lab|COVID-19 Genomics UK (COG-UK) Consortium|Moore|United Kingdom

>Spike|hCoV-19/Australia/VIC5107/2020|2020-07-19|EPI\_ISL\_519910|Original|hCoV-19^^Victoria|Human|Microbiological Diagnostic Unit - Public Health Laboratory (MDU-PHL)|MDU-PHL|Schultz|Australia

>Spike|hCoV-19/Spain/AR-IBV-97010749/2020|2020-10-02|EPI\_ISL\_779740|Original|hCoV-19^^Aragon|Human|Servicio de Microbiolog\u00eda|SeqCOVID-SPAIN consortium/IBV (CSIC)|Comas|Spain

>Spike|hCoV-19/England/QEUEH-B6ACAB/2020|2020-11-11|EPI\_ISL\_655166|Original|hCoV-19^^England|Human|Lighthouse Lab in Glasgow|Wellcome Sanger Institute for the COVID-19 Genomics UK (COG-UK) Consortium|Davies|United Kingdom

>Spike|hCoV-19/USA/TX-HMH-MCoV-13655/2020|2020-08-20|EPI\_ISL\_788757|Original|hCoV-19^^Texas|Human|Houston Methodist Hospital|Houston Methodist Hospital|Long|USA

>Spike|hCoV-19/England/ALDP-95CB74/2020|2020-06-19|EPI\_ISL\_553471|Original|hCoV-19^^England|Human|Lighthouse Lab in Alderley Park|Wellcome Sanger Institute for the COVID-19 Genomics UK (COG-UK) consortium|Davies|United Kingdom

>Spike|hCoV-19/France/PAC-IHU-0136/2020|2020-03-15|EPI\_ISL\_569331|Original|hCoV-19^^Provence-Alpes-C\u00f4te-d\u2019Azur|Human|MEPHI|MEPHI|Levasseur|France

>Spike|hCoV-19/USA/NY-Wadsworth-46358-01/2020|2020-04-14|EPI\_ISL\_676846|Original|hCoV-19^^New York|Human|Wadsworth Center|Wadsworth Center|Lasek-Nesselquist|USA

>Spike|hCoV-19/USA/CA-ALSR-1793/2020|2020-05-18|EPI\_ISL\_512188|Original|hCoV-19^^California|Human|San Diego County Public Health Laboratory|Andersen lab at Scripps Research|Gangavarapu|USA

>Spike|hCoV-19/Australia/VIC9635/2020|2020-08-21|EPI\_ISL\_562746|Original|hCoV-19^^Victoria|Human|Microbiological Diagnostic Unit - Public Health Laboratory (MDU-PHL)|MDU-PHL|Schultz|Australia

>Spike|hCoV-19/Russia/MOS-CRIE-13385721/2020|2020-11-06|EPI\_ISL\_732672|Original|hCoV-19^^Moscow|Human|Molecular diagnostic laboratory of Federal Budget Institution of Science \Central Research Institute of Epidemiology\ of The Federal Service on Customers' Rights Protection and Human Well-being Surveillance|Group of Genomics and Postgenomic Technologies of Central Research Institute of Epidemiolog

>y|Korneenko|Russia

>Spike|hCoV-19/England/QEUEH-AD2F5B/2020|2020-10-26|EPI\_ISL\_629894|Original|hCoV-19^^England|Human|Lighthouse Lab in Glasgow|Wellcome Sanger Institute for the COVID-19 Genomics UK (COG-UK) consortium|Davies|United Kingdom

>Spike|hCoV-19/England/BRIS-12A685/2020|2020-04-30|EPI\_ISL\_458469|Original|hCoV-19^^England|Human|PHE South West Regional Laboratory|Wellcome Sanger Institute for the COVID-19 Genomics UK (COG-UK) consortium|Davies|United Kingdom

>Spike|hCoV-19/Russia/ROS-RII-MH2820S/2020|2020-09-24|EPI\_ISL\_639965|Original|hCoV-19^^Rostov|Human|HELIX LLC|WHO National Influenza Centre Russian Federation|Komissarov|Russia

>Spike|hCoV-19/England/QEUA-B9F548/2020|2020-11-18|EPI\_ISL\_721036|Original|hCoV-19^^England|Human|Lighthouse Lab in Glasgow|Wellcome Sanger Institute for the COVID-19 Genomics UK (COG-UK) Consortium|Davies|United Kingdom

>Spike|hCoV-19/USA/TX-HMH-4487/2020|2020-06-19|EPI\_ISL\_543660|Original|hCoV-19^^Texas|Human|Houston Methodist Hospital|Houston Methodist Hospital|Long|USA

>Spike|hCoV-19/England/QEUA-B3FC09/2020|2020-11-08|EPI\_ISL\_658451|Original|hCoV-19^^England|Human|Lighthouse Lab in Glasgow|Wellcome Sanger Institute for the COVID-19 Genomics UK (COG-UK) Consortium|Davies|United Kingdom

>Spike|hCoV-19/USA/UT-08596/2020|2020-05-26|EPI\_ISL\_524343|Original|hCoV-19^^Utah|Human|Utah Public Health Laboratory|Utah Public Health Laboratory|Young|USA

>Spike|hCoV-19/England/NOTT-1112F6/2020|2020-05-11|EPI\_ISL\_453646|Original|hCoV-19^^England|Human|Queens Medical Centre|COVID-19 Genomics UK (COG-UK) Consortium|Loose|United Kingdom

>Spike|hCoV-19/India/GJ-GBRC-419b/2020|2020-07-14|EPI\_ISL\_586550|Original|hCoV-19^^Gujarat|Human|CCC,Veraval|Gujarat Biotechnology Research Centre|Joshi|India

>Spike|hCoV-19/USA/MN-MDH-1338/2020|2020-03-25|EPI\_ISL\_496924|Original|hCoV-19^^Minnesota|Human|Minnesota Department of Health|Minnesota Department of Health|Garfin|USA

>Spike|hCoV-19/Denmark/DCGC-7279/2020|2020-10-12|EPI\_ISL\_619248|Original|hCoV-19^^NA|Human|Department of Virus and Microbiological Special Diagnostics|Albertsen lab|Michaelsen|Denmark

>Spike|hCoV-19/Spain/PV-IBV-98007653/2020|2020-09-10|EPI\_ISL\_582044|Original|hCoV-19^^Basque Country|Human|Servicio de Microbiolog\u00eda. Hospital Universitario Donostia. OSI Donostialdea. \u00c1rea de Enfermedades Infecciosas|SeqCOVID-SPAIN consortium/IBV (CSIC) |Comas|Spain

>Spike|hCoV-19/England/BRIS-12332B/2020|2020-04-05|EPI\_ISL\_442804|Original|hCoV-19^^England|Human|PHE South West Regional Laboratory|Wellcome Sanger Institute for the COVID-19 Genomics UK (COG-UK) consortium|Amato|United Kingdom

>Spike|hCoV-19/England/QEUA-A1DBE7/2020|2020-09-29|EPI\_ISL\_587309|Original|hCoV-19^^England|Human|Lighthouse Lab in Glasgow|Wellcome Sanger Institute for the COVID-19 Genomics UK (COG-UK) consortium|Davies|United Kingdom

>Spike|hCoV-19/Australia/VIC4500/2020|2020-07-14|EPI\_ISL\_518911|Original|hCoV-19^^Victoria|Human|Microbiological Diagnostic Unit - Public Health Laboratory (MDU-PHL) |MDU-PHL|Schultz|Australia

>Spike|hCoV-19/England/ALDP-95B094/2020|2020-06-15|EPI\_ISL\_555531|Original|hCoV-19^^England|Human|Lighthouse Lab in Alderley Park|Wellcome Sanger Institute for the COVID-19 Genomics UK (COG-UK) consortium|Davies|United Kingdom

>Spike|hCoV-19/England/QEUA-9C88C7/2020|2020-09-10|EPI\_ISL\_567253|Original|hCoV-19^^England|Human|Lighthouse Lab in Glasgow|Wellcome Sanger Institute for the COVID-19 Genomics UK (COG-UK) consortium|Davies|United Kingdom

>Spike|hCoV-19/England/QEUA-AAF4B2/2020|2020-10-17|EPI\_ISL\_653026|Original|hCoV-19^^England|Human|Oxford Viromics|COVID-19 Genomics UK (COG-UK) Consortium|Golubchik|United Kingdom

>Spike|hCoV-19/Wales/PHWC-4813FB/2020|2020-10-19|EPI\_ISL\_613066|Original|hCoV-19^^Wales|Human|Wales Specialist Virology Centre Sequencing lab|COVID-19 Genomics UK (COG-UK) Consortium|Moore|United Kingdom

>Spike|hCoV-19/England/MILK-9E21F9/2020|2020-09-20|EPI\_ISL\_581114|Original|hCoV-19^^England|Human|Lighthouse Lab in Milton Keynes|Wellcome Sanger Institute for the COVID-19 Genomics UK (COG-UK) consortium|Davies|United Kingdom

>Spike|hCoV-19/USA/TX-HMH-5807/2020|2020-06-28|EPI\_ISL\_547029|Original|hCoV-19^^Texas|Human|Houston Methodist Hospital|Houston Methodist Hospital|Long|USA

>Spike|hCoV-19/England/ALDP-A86E59/2020|2020-10-16|EPI\_ISL\_605980|Original|hCoV-19^^England|Human|Lighthouse Lab in Alderley Park|Wellcome Sanger Institute for the COVID-19 Genomics UK (COG-UK) consortium|Davies|United Kingdom

>Spike|hCoV-19/Scotland/QEUA-96E33B/2020|2020-08-20|EPI\_ISL\_534457|Original|hCoV-19^^Scotland|Human|NHSGGC West of Scotland Specialist Virology Centre / MRC - University of Glasgow Centre for Virus Research|Wellcome Sanger Institute for the COVID-19 Genomics UK (COG-UK) consortium|Davies|United Kingdom



>Spike|hCoV-19/Netherlands/ZH-EMC-367/2020|2020-08-02|EPI\_ISL\_523707|Original|hCoV-19^^Zuid Holland|Human|Dutch COVID-19 response team|Erasmus Medical Center|Oude Munnink|Netherlands

>Spike|hCoV-19/England/QEUEH-C15F96/2020|2020-12-06|EPI\_ISL\_709380|Original|hCoV-19^^England|Human|Lighthouse Lab in Glasgow|Wellcome Sanger Institute for the COVID-19 Genomics UK (COG-UK) Consortium|Davies|United Kingdom

>Spike|hCoV-19/USA/TX-HMH-MCoV-10040/2020|2020-07-06|EPI\_ISL\_789300|Original|hCoV-19^^Texas|Human|Houston Methodist Hospital|Houston Methodist Hospital|Long|USA

>Spike|hCoV-19/England/QEUEH-A00D0F/2020|2020-10-02|EPI\_ISL\_584900|Original|hCoV-19^^England|Human|University of Exeter|COVID-19 Genomics UK (COG-UK) Consortium|Temperton|United Kingdom

>Spike|hCoV-19/England/CAMC-B08058/2020|2020-10-29|EPI\_ISL\_643364|Original|hCoV-19^^England|Human|Lighthouse Lab in Cambridge|Wellcome Sanger Institute for the COVID-19 Genomics UK (COG-UK) Consortium|Davies|United Kingdom

>Spike|hCoV-19/England/LIVE-DB106B/2020|2020-10-23|EPI\_ISL\_637954|Original|hCoV-19^^England|Human|Liverpool Clinical Laboratories|COVID-19 Genomics UK (COG-UK) Consortium|Haldenby|United Kingdom

>Spike|hCoV-19/England/QEUEH-B66322/2020|2020-11-10|EPI\_ISL\_661617|Original|hCoV-19^^England|Human|Lighthouse Lab in Glasgow|Wellcome Sanger Institute for the COVID-19 Genomics UK (COG-UK) Consortium|Davies|United Kingdom

>Spike|hCoV-19/USA/WI-GMF-00744/2020|2020-04-03|EPI\_ISL\_422462|Original|hCoV-19^^Iowa|Human|Gundersen Molecular Diagnostics Laboratory|Kabara Cancer Research Institute|Kenny|USA

>Spike|hCoV-19/Australia/VIC12975/2020|2020-07-28|EPI\_ISL\_563614|Original|hCoV-19^^Victoria|Human|Microbiological Diagnostic Unit - Public Health Laboratory (MDU-PHL)|MDU-PHL|Schultz|Australia

>Spike|hCoV-19/USA/TX-HMH-6763/2020|2020-06-25|EPI\_ISL\_546226|Original|hCoV-19^^Texas|Human|Houston Methodist Hospital|Houston Methodist Hospital|Long|USA

>Spike|hCoV-19/Scotland/QEUEH-A00B7E/2020|2020-10-02|EPI\_ISL\_585553|Original|hCoV-19^^Scotland|Human|University of Exeter|COVID-19 Genomics UK (COG-UK) Consortium|Temperton|United Kingdom

>Spike|hCoV-19/India/TG-CCMB-W866/2020|2020-07-14|EPI\_ISL\_528829|Original|hCoV-19^^Telangana|Human|CSIR-Centre for Cellular and Molecular Biology|CSIR-Centre for Cellular and Molecular Biology|Banu|India

>Spike|hCoV-19/England/QEUEH-C149C6/2020|2020-12-06|EPI\_ISL\_709565|Original|hCoV-19^^England|Human|Lighthouse Lab in Glasgow|Wellcome Sanger Institute for the COVID-19 Genomics UK (COG-UK) Consortium|Davies|United Kingdom

>Spike|hCoV-19/England/SHEF-CAF41/2020|2020-05-12|EPI\_ISL\_479244|Original|hCoV-19^^England|Human|Virology Department|COVID-19 Genomics UK (COG-UK) Consortium|de Silva|United Kingdom

>Spike|hCoV-19/England/NORT-28945C/2020|2020-03-29|EPI\_ISL\_458667|Original|hCoV-19^^England|Human|NU-OMICS DNA Sequencing research facility|Wellcome Sanger Institute for the COVID-19 Genomics UK (COG-UK) consortium|Davies|United Kingdom

>Spike|hCoV-19/Denmark/ALAB-SSI119/2020|2020-03-08|EPI\_ISL\_429348|Original|hCoV-19^^Denmark|Human|Department of Virus and Microbiological Special Diagnostics|Albertsen lab|Kirkegaard|Denmark

>Spike|hCoV-19/England/ALDP-AA383A/2020|2020-10-22|EPI\_ISL\_624948|Original|hCoV-19^^England|Human|Lighthouse Lab in Alderley Park|Wellcome Sanger Institute for the COVID-19 Genomics UK (COG-UK) consortium|Davies|United Kingdom

>Spike|hCoV-19/France/OCC-SC566/2020|2020-05-20|EPI\_ISL\_663243|Original|hCoV-19^^Occitanie|Human|CHU N\u00eemes|CNR Virus des Infections Respiratoires - France SUD|Bal|France

>Spike|hCoV-19/USA/AZ-TG666165/2020|2020-05-01|EPI\_ISL\_696245|Original|hCoV-19^^Arizona|Human|Sonora Quest Laboratories|TGen North|French|USA

>Spike|hCoV-19/Wales/PHWC-481F51/2020|2020-10-16|EPI\_ISL\_613188|Original|hCoV-19^^Wales|Human|Wales Specialist Virology Centre Sequencing lab|COVID-19 Genomics UK (COG-UK) Consortium|Moore|United Kingdom

>Spike|hCoV-19/England/CAMC-AB215B/2020|2020-10-23|EPI\_ISL\_623809|Original|hCoV-19^^England|Human|Lighthouse Lab in Cambridge|Wellcome Sanger Institute for the COVID-19 Genomics UK (COG-UK) consortium|Davies|United Kingdom

>Spike|hCoV-19/USA/WA-UW50/2020|2020-03-08|EPI\_ISL\_415615|Original|hCoV-19^^Washington|Human|UW Virology Lab|UW Virology Lab|Roychoudhury|USA

>Spike|hCoV-19/Australia/QLD1083/2020|2020-03-26|EPI\_ISL\_593602|Original|hCoV-19^^Australia|Human|unknown|Public Health Virology Laboratory|Nguyen|Australia

>Spike|hCoV-19/England/LIVE-1D2E93/2020|2020-04-01|EPI\_ISL\_612431|Original|hCoV-19^^England|Human|Liverpool Clinical Laboratories|COVID-19 Genomics UK (COG-UK) Consortium|Haldenby|United Kingdom

>Spike|hCoV-19/USA/MI-MDHHS-SC22596/2020|2020-11-18|EPI\_ISL\_737169|Original|hCoV-19^^Michigan|Human|Michigan Department of Health and Human Services|Michigan Department of Health and Human Services|Blankenship|USA

>Spike|hCoV-19/Australia/NSW1366/2020|2020-12-24|EPI\_ISL\_767932|Original|hCoV-19^^New South Wales|Human|Southern. IML Pathology|NSW Health Pathology - Institute of Clinical Pathology and Medical Research; Westmead Hospital; University of Sydney|Gall|Australia

>Spike|hCoV-19/USA/TX-DSHS-2032/2020|2020-07-30|EPI\_ISL\_766681|Original|hCoV-19^^Texas|Human|Texas Department of State Health Services|Texas Department of State Health Services|Rahman|USA

>Spike|hCoV-19/England/MILK-B3B62D/2020|2020-11-01|EPI\_ISL\_706071|Original|hCoV-19^^England|Human|Oxford Viromics|COVID-19 Genomics UK (COG-UK) Consortium|Golubchik|United Kingdom

>Spike|hCoV-19/England/MILK-992CBB/2020|2020-08-26|EPI\_ISL\_552154|Original|hCoV-19^^England|Human|Lighthouse Lab in Milton Keynes|Wellcome Sanger Institute for the COVID-19 Genomics UK (COG-UK) consortium|Davies|United Kingdom

>Spike|hCoV-19/England/ALDP-9BCD30/2020|2020-09-09|EPI\_ISL\_573072|Original|hCoV-19^^England|Human|Oxford Viromics|COVID-19 Genomics UK (COG-UK) Consortium|Golubchik|United Kingdom

>Spike|hCoV-19/Wales/PHWC-486183/2020|2020-10-15|EPI\_ISL\_639013|Original|hCoV-19^^Wales|Human|Wales Specialist Virology Centre Sequencing lab|COVID-19 Genomics UK (COG-UK) Consortium|Moore|United Kingdom

>Spike|hCoV-19/USA/TX-HMH-7912/2020|2020-06-30|EPI\_ISL\_545701|Original|hCoV-19^^Texas|Human|Houston Methodist Hospital|Houston Methodist Hospital|Long|USA

>Spike|hCoV-19/England/QEUEH-B7C884/2020|2020-11-14|EPI\_ISL\_741795|Original|hCoV-19^^England|Human|Oxford Viromics|COVID-19 Genomics UK (COG-UK) Consortium|Golubchik|United Kingdom

>Spike|hCoV-19/Scotland/QEUEH-A4B2CD/2020|2020-10-08|EPI\_ISL\_637826|Original|hCoV-19^^Scotland|Human|Department of Pathology|COVID-19 Genomics UK (COG-UK) Consortium|Goodfellow|United Kingdom

>Spike|hCoV-19/USA/CA-CZB-14306/2020|2020-08-24|EPI\_ISL\_739179|Original|hCoV-19^^California|Human|Alameda County Public Health Lab|Chan-Zuckerberg Biohub|Kamm|USA

>Spike|hCoV-19/USA/UT-UPHL-2012118130/2020|2020-08-08|EPI\_ISL\_745784|Original|hCoV-19^^Utah|Human|Ginkgo Bioworks Clinical Laboratory|Utah Public Health Laboratory|Young|USA

>Spike|hCoV-19/Japan/PG-5389/2020|2020-08-00|EPI\_ISL\_690492|Original|hCoV-19^^Japan|Human|Fukuoka Institute of Health and Environmental Sciences|Pathogen Genomics Center|Sekizuka|Japan

>Spike|hCoV-19/USA/WI-WSLH-200180/2020|2020-04-06|EPI\_ISL\_578405|Original|hCoV-19^^Wisconsin|Human|Wisconsin State Laboratory of Hygiene Communicable Disease Division|Wisconsin State Laboratory of Hygiene Communicable Disease Division|Florek|USA

>Spike|hCoV-19/England/CAMB-1AE908/2020|2020-04-29|EPI\_ISL\_524587|Original|hCoV-19^^England|Human|Department of Pathology|Wellcome Sanger Institute for the COVID-19 Genomics UK (COG-UK) consortium|Davies|United Kingdom

>Spike|hCoV-19/Sweden/20-50257/2020|2020-03-08|EPI\_ISL\_455895|Original|hCoV-19^^Stockholm|Human|Karolinska Universitetslaboratoriet|The Public Health Agency of Sweden|Svartstr\u00f6m|Sweden

>Spike|hCoV-19/England/ALDP-A680EE/2020|2020-10-10|EPI\_ISL\_609078|Original|hCoV-19^^England|Human|Lighthouse Lab in Alderley Park|Wellcome Sanger Institute for the COVID-19 Genomics UK (COG-UK) consortium|Davies|United Kingdom

>Spike|hCoV-19/England/ALDP-A6D034/2020|2020-10-14|EPI\_ISL\_608324|Original|hCoV-19^^England|Human|Lighthouse Lab in Alderley Park|Wellcome Sanger Institute for the COVID-19 Genomics UK (COG-UK) consortium|Davies|United Kingdom

>Spike|hCoV-19/USA/OR-OHSU-1425/2020|2020-07-16|EPI\_ISL\_509197|Original|hCoV-19^^Oregon|Human|OHSU Lab Services Molecular Microbiology Lab|Oregon SARS-CoV-2 Genome Sequencing Center|O'Roak|USA

>Spike|hCoV-19/Scotland/EDB413/2020|2020-03-29|EPI\_ISL\_426004|Original|hCoV-19^^Scotland|Human|Virology Department|COVID-19 Genomics UK (COG-UK) Consortium|Williams|United Kingdom

>Spike|hCoV-19/England/CAMC-CB736D/2020|2020-12-18|EPI\_ISL\_778185|Original|hCoV-19^^England|Human|Lighthouse Lab in Cambridge|Wellcome Sanger Institute for the COVID-19 Genomics UK (COG-UK) Consortium|Davies|United Kingdom

>Spike|hCoV-19/Wales/PHWC-24419/2020|2020-03-17|EPI\_ISL\_419409|Original|hCoV-19^^Wales|Human|Wales Specialist Virology Centre|Public Health Wales Microbiology Cardiff|Moore|United Kingdom

>Spike|hCoV-19/England/MILK-ACE981/2020|2020-10-21|EPI\_ISL\_629202|Original|hCoV-19^^England|Human|Lighthouse Lab in Milton Keynes|Wellcome Sanger Institute for the COVID-19 Genomics UK (COG-UK) consortium|Davies|United Kingdom

>Spike|hCoV-19/England/NORT-1B7A021/2020|2020-11-23|EPI\_ISL\_724950|Original|hCoV-19^^England|Human|Northumbria University / South Tees Hospitals NHS Foundation Trust / North Cumbria Integrated Care NHS Foundation Trust / North Tees and Hartlepool NHS Foundation Trust / Newcastle Hospitals NHS Foundation Trust|COVID-19 Genomics UK (COG-UK) Consortium|Bashton|United Kingdom

>Spike|hCoV-19/Denmark/DCGC-19909/2020|2020-12-07|EPI\_ISL\_747535|Original|hCoV-19^^Hovedstaden|Human|Department of Virus and Microbiological Special Diagnostics|Albertsen Lab|Michaelsen|Denmark

>Spike|hCoV-19/England/NOTT-113212/2020|2020-09-13|EPI\_ISL\_540711|Original|hCoV-19^^England|Human|Queens Medical Centre|COVID-19 Genomics UK (COG-UK) Consortium|Loose|United Kingdom

>Spike|hCoV-19/USA/OR-OHSU-0184/2020|2020-05-09|EPI\_ISL\_468126|Original|hCoV-19^^Oregon|Human|OHSU Lab Services Molecular Microbiology Lab|Oregon SARS-CoV-2 Genome Sequencing Center|O'Roak|USA

>Spike|hCoV-19/England/ALDP-BB3669/2020|2020-11-19|EPI\_ISL\_702638|Original|hCoV-19^^England|Human|Lighthouse Lab in Alderley Park|Wellcome Sanger Institute for the COVID-19 Genomics UK (COG-UK) Consortium|Davies|United Kingdom

>Spike|hCoV-19/Scotland/QEUEH-9C92C8/2020|2020-09-14|EPI\_ISL\_576062|Original|hCoV-19^^Scotland|Human|Lighthouse Lab in Glasgow|Wellcome Sanger Institute for the COVID-19 Genomics UK (COG-UK) consortium|Davies|United Kingdom

>Spike|hCoV-19/USA/WA-UW99/2020|2020-03-12|EPI\_ISL\_416637|Original|hCoV-19^^Washington|Human|UW Virology Lab|UW Virology Lab|Roychoudhury|USA

>Spike|hCoV-19/England/PORT-2D3A06/2020|2020-04-17|EPI\_ISL\_529350|Original|hCoV-19^^England|Human|Centre for Enzyme Innovation|COVID-19 Genomics UK (COG-UK) Consortium|Robson|United Kingdom

>Spike|hCoV-19/Guangdong/20SF4051/2020|2020-02-17|EPI\_ISL\_428463|Original|hCoV-19^^Guangdong|Human|Guangdong Provincial Center for Diseases Control and Prevention;Guangdong Provincial Institute of Public Health|School of Public Health|Gu|China

>Spike|hCoV-19/England/205260868/2020|2020-12-20|EPI\_ISL\_754371|Original|hCoV-19^^England|Human|Respiratory Virus Unit|COVID-19 Genomics UK (COG-UK) Consortium|Platt|United Kingdom

>Spike|hCoV-19/USA/UT-UPHL-2012527816/2020|2020-12-03|EPI\_ISL\_747030|Original|hCoV-19^^Utah|Human|Utah Public Health Laboratory|Utah Public Health Laboratory|Gallagher|USA

>Spike|hCoV-19/Australia/VIC9614/2020|2020-07-29|EPI\_ISL\_565626|Original|hCoV-19^^Victoria|Human|Microbiological Diagnostic Unit - Public Health Laboratory (MDU-PHL) |MDU-PHL|Schultz|Australia

>Spike|hCoV-19/England/BRIS-133C5A/2020|2020-08-20|EPI\_ISL\_529655|Original|hCoV-19^^England|Human|University of Birmingham|COVID-19 Genomics UK (COG-UK) Consortium|Loman|United Kingdom

>Spike|hCoV-19/England/QEUA-963372/2020|2020-08-10|EPI\_ISL\_531786|Original|hCoV-19^England|Human|Lighthouse Lab in Glasgow|Wellcome Sanger Institute for the COVID-19 Genomics UK (COG-UK) consortium|Davies|United Kingdom

>Spike|hCoV-19/Greece/54\_37163/2020|2020-03-31|EPI\_ISL\_447835|unknown|hCoV-19^Athens|Human|unknown|Department of Medicine|Submitter|Greece

>Spike|hCoV-19/England/QEUA-C321BB/2020|2020-12-11|EPI\_ISL\_782558|Original|hCoV-19^England|Human|Lighthouse Lab in Glasgow|Wellcome Sanger Institute for the COVID-19 Genomics UK (COG-UK) Consortium|Davies|United Kingdom

>Spike|hCoV-19/South Africa/NHLS-UCT-GS-1374/2020|2020-11-13|EPI\_ISL\_700434|Original|hCoV-19^Western Cape|Human|Plettenberg Bay Clinic w PLC|NHLS/UCT|Iranzadeh|South Africa

>Spike|hCoV-19/England/ALDP-B76DA9/2020|2020-11-12|EPI\_ISL\_723811|Original|hCoV-19^England|Human|Oxford Viromics|COVID-19 Genomics UK (COG-UK) Consortium|Golubchik|United Kingdom

>Spike|hCoV-19/Denmark/DCGC-8903/2020|2020-10-26|EPI\_ISL\_625886|Original|hCoV-19^Hovedstaden|Human|Department of Virus and Microbiological Special Diagnostics|Albertsen lab|Michaelsen|Denmark

>Spike|hCoV-19/England/ALDP-C48307/2020|2020-12-11|EPI\_ISL\_736642|Original|hCoV-19^England|Human|Lighthouse Lab in Alderley Park|Wellcome Sanger Institute for the COVID-19 Genomics UK (COG-UK) Consortium|Davies|United Kingdom

>Spike|hCoV-19/Switzerland/BE-ETHZ-280140/2020|2020-09-08|EPI\_ISL\_560438|Original|hCoV-19^Bern|Human|Viollier AG|Department of Biosystems Science and Engineering|Nadeau|Switzerland

>Spike|hCoV-19/Northern Ireland/NIRE-23322A/2020|2020-09-24|EPI\_ISL\_680268|Original|hCoV-19^Northern Ireland|Human|Regional Virus Laboratory|COVID-19 Genomics UK (COG-UK) Consortium|Fairley|United Kingdom

>Spike|hCoV-19/Sweden/20-06165/2020|2020-03-23|EPI\_ISL\_452230|Original|hCoV-19^Vastra Gotaland|Human|Narhalsan Backa vardcentral|The Public Health Agency of Sweden|Svartstr\u00f6m|Sweden

>Spike|hCoV-19/USA/MA-MGH-01018/2020|2020-04-30|EPI\_ISL\_791845|Original|hCoV-19^Massachusetts|Human|Massachusetts General Hospital|Infectious Disease Program|Park|USA

>Spike|hCoV-19/England/ALDP-A9384C/2020|2020-10-20|EPI\_ISL\_611045|Original|hCoV-19^England|Human|Lighthouse Lab in Alderley Park|Wellcome Sanger Institute for the COVID-19 Genomics UK (COG-UK) consortium|Davies|United Kingdom

>Spike|hCoV-19/Denmark/DCGC-11158/2020|2020-11-02|EPI\_ISL\_670426|Original|hCoV-19^Syddanmark|Human|Department of Virus and Microbiological Special Diagnostics|Albertsen Lab|Michaelsen|Denmark

>Spike|hCoV-19/Denmark/DCGC-2615/2020|2020-08-17|EPI\_ISL\_617852|Original|hCoV-19^Midtjylland|Human|Department of Virus and Microbiological Special Diagnostics|Albertsen lab|Michaelsen|Denmark

>Spike|hCoV-19/USA/UT-UPHL-201121906/2020|2020-04-23|EPI\_ISL\_634898|Original|hCoV-19^Utah|Human|Utah Public Health Laboratory|Utah Public Health Laboratory|Young|USA

>Spike|hCoV-19/England/MILK-B8780E/2020|2020-11-13|EPI\_ISL\_724803|Original|hCoV-19^England|Human|Oxford Viromics|COVID-19 Genomics UK (COG-UK) Consortium|Golubchik|United Kingdom

>Spike|hCoV-19/England/ALDP-B62C49/2020|2020-11-08|EPI\_ISL\_655511|Original|hCoV-19^England|Human|Lighthouse Lab in Alderley Park|Wellcome Sanger Institute for the COVID-19 Genomics UK (COG-UK) Consortium|Davies|United Kingdom

>Spike|hCoV-19/USA/MN-MDH-162/2020|2020-03-23|EPI\_ISL\_460057|Original|hCoV-19^Minnesota|Human|Minnesota Department of Health|Minnesota Department of Health|Garfin|USA

>Spike|hCoV-19/Hong Kong/VM20072469/2020|2020-07-23|EPI\_ISL\_602601|Original|hCoV-19^Hong Kong|Human|Tseung Kwan O Hospital|Hong Kong Department of Health|Mak|China

>Spike|hCoV-19/Spain/PV-IBV-000754/2020|2020-03-10|EPI\_ISL\_452735|Original|hCoV-19^Basque Country|Human|Hospital Universitario Araba. Vitoria-Gasteiz,|SeqCOVID-SPAIN consortium|IBV (CSIC)|Comas|Spain

>Spike|hCoV-19/USA/MI-UM-10036535365/2020|2020-10-20|EPI\_ISL\_640148|Original|hCoV-19^Michigan|Human|University of Michigan Clinical Microbiology Laboratory|Lauring Lab|Valesano|USA

>Spike|hCoV-19/USA/UT-01888/2020|2020-04-13|EPI\_ISL\_470743|Original|hCoV-19^^Utah|Human|Utah Public Health Laboratory|Utah Public Health Laboratory|Butz|USA

>Spike|hCoV-19/USA/AZ-TG274748/2020|2020-04-07|EPI\_ISL\_694068|Original|hCoV-19^^Arizona|Human|AZ SPHL|TGen North|French|USA

>Spike|hCoV-19/England/CAMB-83FEA/2020|2020-04-27|EPI\_ISL\_438721|Original|hCoV-19^^England|Human|Department of Pathology|COVID-19 Genomics UK (COG-UK) Consortium|Meredith|United Kingdom

>Spike|hCoV-19/England/PORT-2E9C43/2020|2020-00-00|EPI\_ISL\_706875|Original|hCoV-19^^England|Human|Centre for Enzyme Innovation|COVID-19 Genomics UK (COG-UK) Consortium|Robson|United Kingdom

>Spike|hCoV-19/Italy/LAZ-INMI-128/2020|2020-12-22|EPI\_ISL\_746835|Original|hCoV-19^^Lazio|Human|National Institute for Infectious Diseases|National Institute for Infectious Diseases|Gruber|Italy

>Spike|hCoV-19/USA/LA-EVTL648/2020|2020-08-06|EPI\_ISL\_579052|Original|hCoV-19^^Louisiana|Human|LSUHS Emerging Viral Threat Laboratory|Microbial Genome Sequencing Center|Kamil|USA

>Spike|hCoV-19/South Africa/LR00105/2020|2020-07-15|EPI\_ISL\_514402|Original|hCoV-19^^Gauteng|Human|National Institute for Communicable Diseases of the National Health Laboratory Service|National Institute for Communicable Diseases of the National Health Laboratory Service|Allam|South Africa

>Spike|hCoV-19/England/MILK-C52F42/2020|2020-12-12|EPI\_ISL\_736214|Original|hCoV-19^^England|Human|Lighthouse Lab in Milton Keynes|Wellcome Sanger Institute for the COVID-19 Genomics UK (COG-UK) Consortium|Davies|United Kingdom

>Spike|hCoV-19/Wales/PHWC-483A12/2020|2020-10-20|EPI\_ISL\_627884|Original|hCoV-19^^Wales|Human|Wales Specialist Virology Centre Sequencing lab|COVID-19 Genomics UK (COG-UK) Consortium|Moore|United Kingdom

>Spike|hCoV-19/USA/HI-QDX-1288/2020|2020-03-16|EPI\_ISL\_571927|Original|hCoV-19^^Hawaii|Human|Quest Diagnostics|Quest Diagnostics|Kagan|USA

>Spike|hCoV-19/Scotland/EDB6740/2020|2020-04-13|EPI\_ISL\_491618|Original|hCoV-19^^Scotland|Human|Virology Department|Wellcome Sanger Institute for the COVID-19 Genomics UK (COG-UK) consortium|Davies|United Kingdom

>Spike|hCoV-19/Switzerland/BS-4222420/2020|2020-04-06|EPI\_ISL\_581683|Original|hCoV-19^^Basel-Stadt|Human|University Hospital Basel|University Hospital Basel|Roloff Handschin|Switzerland

>Spike|hCoV-19/Switzerland/BS-UHB-42197025/2020|2020-03-18|EPI\_ISL\_528202|Original|hCoV-19^^Basel-Stadt|Human|University Hospital Basel|University Hospital Basel|Roloff Handschin|Switzerland

>Spike|hCoV-19/USA/WI-UW-1358/2020|2020-09-08|EPI\_ISL\_536729|Original|hCoV-19^^Wisconsin|Human|University of Wisconsin-Madison AIDS Vaccine Research Laboratories|University of Wisconsin-Madison AIDS Vaccine Research Laboratories|Baczenas|USA

>Spike|hCoV-19/USA/MD-MDH-0407/2020|2020-11-05|EPI\_ISL\_666777|Original|hCoV-19^^Maryland|Human|Maryland Public Health Laboratory|Maryland Public Health Laboratory|Keller|USA

>Spike|hCoV-19/Northern Ireland/QEUI-5E535E/2020|2020-06-17|EPI\_ISL\_533281|Original|hCoV-19^^Northern Ireland|Human|Lighthouse Lab in Glasgow|Wellcome Sanger Institute for the COVID-19 Genomics UK (COG-UK) consortium|Davies|United Kingdom

>Spike|hCoV-19/USA/WA-S626/2020|2020-04-18|EPI\_ISL\_438179|Original|hCoV-19^^Washington|Human|Washington State Department of Health|Seattle Flu Study|Bedford|USA

>Spike|hCoV-19/USA/WI-UW-2595/2021|2021-01-01|EPI\_ISL\_791112|Original|hCoV-19^^Wisconsin|Human|University of Wisconsin-Madison AIDS Vaccine Research Laboratories|University of Wisconsin-Madison AIDS Vaccine Research Laboratories|Moreno|USA

>Spike|hCoV-19/Ireland/D-NVRL-20G35482/2020|2020-03-20|EPI\_ISL\_605118|Original|hCoV-19^^Dublin|Human|National Virus Reference Laboratory|Irish Coronavirus Sequencing Consortium - Helixworks|Chalapati|Ireland

>Spike|hCoV-19/USA/TX-DSHS-0237/2020|2020-04-25|EPI\_ISL\_525788|Original|hCoV-19^^Texas|Human|Texas Department of State Health Services|Texas Department of State Health Services|Rahman|USA

>Spike|hCoV-19/England/LIVE-99400/2020|2020-04-08|EPI\_ISL\_439720|Original|hCoV-19^^England|Human|Liverpool Clinical Laboratories|COVID-19 Genomics UK (COG-UK) Consortium|Haldenby|United Kingdom

>Spike|hCoV-19/Portugal/PT0858/2020|2020-03-27|EPI\_ISL\_511117|Original|hCoV-19^^Portugal|Human|Instituto Nacional de Saude (INSA)|Instituto Nacional de Saude (INSA)|Borges|Portugal

>Spike|hCoV-19/England/ALDP-A6D377/2020|2020-10-15|EPI\_ISL\_608277|Original|hCoV-19^^England|Human|Lighthouse Lab in Alderley Park|Wellcome Sanger Institute for the COVID-19 Genomics UK (COG-UK) consortium|Davies|United Kingdom

>Spike|hCoV-19/USA/AZ-TG480916/2020|2020-07-08|EPI\_ISL\_695069|Original|hCoV-19^^Arizona|Human|TGen North|TGen North|French|USA

>Spike|hCoV-19/England/QEUEH-A9F9C5/2020|2020-10-20|EPI\_ISL\_651143|Original|hCoV-19^^England|Human|University of Exeter|COVID-19 Genomics UK (COG-UK) Consortium|Temperton|United Kingdom

>Spike|hCoV-19/New Zealand/20VR2081/2020|2020-04-11|EPI\_ISL\_456367|Original|hCoV-19^^Canterbury|Human|Canterbury Health Laboratories|Institute of Environmental Science and Research (ESR)|de Ligt|New Zealand

>Spike|hCoV-19/Scotland/EDB4438/2020|2020-05-04|EPI\_ISL\_493900|Original|hCoV-19^^Scotland|Human|Virology Department|COVID-19 Genomics UK (COG-UK) Consortium|Williams|United Kingdom

>Spike|hCoV-19/England/MILK-9D52D8/2020|2020-09-18|EPI\_ISL\_637781|Original|hCoV-19^^England|Human|Centre for Enzyme Innovation|COVID-19 Genomics UK (COG-UK) Consortium|Robson|United Kingdom

>Spike|hCoV-19/Wales/PHWC-49B6AA/2020|2020-12-03|EPI\_ISL\_742368|Original|hCoV-19^^Wales|Human|Wales Specialist Virology Centre Sequencing lab|COVID-19 Genomics UK (COG-UK) Consortium|Moore|United Kingdom

>Spike|hCoV-19/England/NORW-E7272/2020|2020-04-19|EPI\_ISL\_449015|Original|hCoV-19^^England|Human|Quadram Institute Bioscience|COVID-19 Genomics UK (COG-UK) Consortium|Alikhan|United Kingdom

>Spike|hCoV-19/Australia/VIC2831/2020|2020-07-01|EPI\_ISL\_521662|Original|hCoV-19^^Victoria|Human|Microbiological Diagnostic Unit - Public Health Laboratory (MDU-PHL)|MDU-PHL|Schultz|Australia

>Spike|hCoV-19/USA/CA-CZB-1485/2020|2020-05-06|EPI\_ISL\_468436|Original|hCoV-19^^California|Human|County of San Luis Obispo Public Health Laboratory|Chan-Zuckerberg Biohub|Hao|USA

>Spike|hCoV-19/USA/NM-NMDOH-2020135000/2020|2020-06-18|EPI\_ISL\_535287|Original|hCoV-19^^New Mexico|Human|New Mexico Department of Health Scientific Laboratory|New Mexico Department of Health Scientific Laboratory|Johnson|USA

>Spike|hCoV-19/India/DL-SK-IGIB-CSIR-IGIB/2020|2020-08-10|EPI\_ISL\_636832|Original|hCoV-19^^Delhi|Human|National Centre for Disease control (NCDC)|NCDC/CSIR-IGIB|Faruq|India

>Spike|hCoV-19/USA/NM-NMDOH-2020320996/2020|2020-09-01|EPI\_ISL\_632823|Original|hCoV-19^^New Mexico|Human|New Mexico Department of Health Scientific Laboratory|New Mexico Department of Health Scientific Laboratory|Johnson|USA

>Spike|hCoV-19/England/QEUEH-969F69/2020|2020-08-12|EPI\_ISL\_530820|Original|hCoV-19^^England|Human|Lighthouse Lab in Glasgow|Wellcome Sanger Institute for the COVID-19 Genomics UK (COG-UK) consortium|Davies|United Kingdom

>Spike|hCoV-19/England/CAMC-946CC5/2020|2020-07-14|EPI\_ISL\_556807|Original|hCoV-19^^England|Human|Lighthouse Lab in Cambridge|Wellcome Sanger Institute for the COVID-19 Genomics UK (COG-UK) consortium|Davies|United Kingdom

>Spike|hCoV-19/England/CAMB-1B1155/2020|2020-05-07|EPI\_ISL\_459204|Original|hCoV-19^^England|Human|Department of Pathology|Wellcome Sanger Institute for the COVID-19 Genomics UK (COG-UK) consortium|Davies|United Kingdom

>Spike|hCoV-19/Spain/AN-IBV-004091/2020|2020-04-17|EPI\_ISL\_510050|Original|hCoV-19^^Andalucia|Human|Servicio de Microbiolog\u00eda. HRU de M\u00e9llaga. Servicio Andaluz de Salud|SeqCOVID-SPAIN consortium/IBV(CSIC)|Comas|Spain

>Spike|hCoV-19/Russia/MOS-CRIE-13677408/2020|2020-11-09|EPI\_ISL\_745229|Original|hCoV-19^^Moscow|Human|Molecular diagnostic laboratory of Federal Budget Institution of Science \Central Research Institute of Epidemiology\ of The Federal Service on Customers' Rights Protection and Human Well-being Surveillance|Group of Genomics and Postgenomic Technologies of Central Research Institute of Epidemiolog  
>y|Korneenko|Russia  
>Spike|hCoV-19/England/ALDP-9315C2/2020|2020-06-21|EPI\_ISL\_552816|Original|hCoV-19^^England|Human|Lighthouse Lab in Alderley Park|Wellcome Sanger Institute for the COVID-19 Genomics UK (COG-UK) consortium|Davies|United Kingdom  
>Spike|hCoV-19/Netherlands/OV-RIVM-20464/2020|2020-11-17|EPI\_ISL\_728679|Original|hCoV-19^^Overijssel|Human|Dutch COVID-19 response team|National Institute for Public Health and the Environment (RIVM)|Meijer|Netherlands  
>Spike|hCoV-19/Scotland/EDB9503/2020|2020-10-25|EPI\_ISL\_650815|Original|hCoV-19^^Scotland|Human|Virology Department|COVID-19 Genomics UK (COG-UK) Consortium|McHugh|United Kingdom  
>Spike|hCoV-19/Scotland/GCVR-171036/2020|2020-03-27|EPI\_ISL\_459701|Original|hCoV-19^^Scotland|Human|NHSGGC West of Scotland Specialist Virology Centre / MRC-University of Glasgow Centre for Virus Research|Wellcome Sanger Institute for the COVID-19 Genomics UK (COG-UK) consortium|Davies|United Kingdom  
>Spike|hCoV-19/England/20119073604/2020|2020-03-13|EPI\_ISL\_465101|Original|hCoV-19^^England|Human|Respiratory Virus Unit|Respiratory Virus Unit|Platt|United Kingdom  
>Spike|hCoV-19/South Africa/N00089/2020|2020-08-06|EPI\_ISL\_623039|Original|hCoV-19^^Eastern Cape|Human|National Health Laboratory Service|National Institute for Communicable Diseases of the National Health Laboratory Service|Allam|South Africa  
>Spike|hCoV-19/Spain/VC-FISABIO-105/2020|2020-03-18|EPI\_ISL\_436200|Original|hCoV-19^^Comunitat Valenciana|Human|Servicio de Microbiolog\u00eda. Consorcio Hospital General Universitario de Valencia|Sequencing and Bioinformatics Service and Molecular Epidemiology Research Group. FISABIO-Public Health|Gonzalez-Candelas|Spain  
>Spike|hCoV-19/Scotland/QEUEH-9F6CE2/2020|2020-09-27|EPI\_ISL\_595625|Original|hCoV-19^^Scotland|Human|Oxford Viromics|COVID-19 Genomics UK (COG-UK) Consortium|Golubchik|United Kingdom  
>Spike|hCoV-19/Denmark/DCGC-14217/2020|2020-11-30|EPI\_ISL\_711631|Original|hCoV-19^^Nordjylland|Human|Department of Virus and Microbiological Special Diagnostics|Albertsen Lab|Michaelsen|Denmark  
>Spike|hCoV-19/England/BRIS-1256E4/2020|2020-03-28|EPI\_ISL\_443783|Original|hCoV-19^^England|Human|PHE South West Regional Laboratory|Wellcome Sanger Institute for the COVID-19 Genomics UK (COG-UK) consortium|Amato|United Kingdom  
>Spike|hCoV-19/England/QEUEH-95DE6B/2020|2020-08-07|EPI\_ISL\_537036|Original|hCoV-19^^England|Human|Lighthouse Lab in Glasgow|Wellcome Sanger Institute for the COVID-19 Genomics UK (COG-UK) consortium|Davies|United Kingdom  
>Spike|hCoV-19/England/CAMC-9EC58A/2020|2020-09-24|EPI\_ISL\_580499|Original|hCoV-19^^England|Human|Lighthouse Lab in Cambridge|Wellcome Sanger Institute for the COVID-19 Genomics UK (COG-UK) consortium|Davies|United Kingdom  
>Spike|hCoV-19/India/MH-NIV-155669/2020|2020-08-08|EPI\_ISL\_541705|Original|hCoV-19^^Maharashtra|Human|National Institute of Virology|National Institute of Virology|Potdar|India  
>Spike|hCoV-19/USA/FL-BPHL-1503/2020|2020-07-23|EPI\_ISL\_568601|Original|hCoV-19^^Florida|Human|Florida Bureau of Public Health Laboratories|Florida Bureau of Public Health Laboratories|Blanton|USA  
>Spike|hCoV-19/England/MILK-B56AF3/2020|2020-11-05|EPI\_ISL\_656955|Original|hCoV-19^^England|Human|Lighthouse Lab in Milton Keynes|Wellcome Sanger Institute for the COVID-19 Genomics UK (COG-UK) Consortium|Davies|United Kingdom  
>Spike|hCoV-19/Scotland/EDB1437/2020|2020-04-12|EPI\_ISL\_433448|Original|hCoV-19^^Scotland|Human|Virology Department|COVID-19 Genomics UK (COG-UK) Consortium|Williams|United Kingdom  
>Spike|hCoV-19/USA/TX-DSHS-1858/2020|2020-06-24|EPI\_ISL\_745294|Original|hCoV-19^^Texas|Human|Texas Department of State Health Services|Texas Department of State Health Services|Rahman|USA

>Spike|hCoV-19/Northern Ireland/QEUI-96D5AF/2020|2020-08-20|EPI\_ISL\_530792|Original|hCoV-19^^Northern Ireland|Human|Lighthouse Lab in Glasgow|Wellcome Sanger Institute for the COVID-19 Genomics UK (COG-UK) consortium|Davies|United Kingdom

>Spike|hCoV-19/England/ALDP-BB36B4/2020|2020-11-19|EPI\_ISL\_693332|Original|hCoV-19^^England|Human|Lighthouse Lab in Alderley Park|Wellcome Sanger Institute for the COVID-19 Genomics UK (COG-UK) Consortium|Davies|United Kingdom

>Spike|hCoV-19/Norway/3715/2020|2020-09-03|EPI\_ISL\_590987|Original|hCoV-19^^Viken|Human|Ostfold Hospital Trust - Kalnes|Norwegian Institute of Public Health|Vollan|Norway

>Spike|hCoV-19/Denmark/DCGC-18538/2020|2020-12-07|EPI\_ISL\_750028|Original|hCoV-19^^Midtjylland|Human|Department of Virus and Microbiological Special Diagnostics|Albertsen Lab|Michaelsen|Denmark

>Spike|hCoV-19/England/NOTT-11284E/2020|2020-04-14|EPI\_ISL\_493552|Original|hCoV-19^^England|Human|Lincolnshire Hospitals and DeepSeq Nottingham|COVID-19 Genomics UK (COG-UK) Consortium|Loose|United Kingdom

>Spike|hCoV-19/Wales/PHWC-16491D/2020|2020-06-09|EPI\_ISL\_479323|Original|hCoV-19^^Wales|Human|Wales Specialist Virology Centre Sequencing lab|COVID-19 Genomics UK (COG-UK) Consortium|Moore|United Kingdom

>Spike|hCoV-19/South Korea/KCDC2270/2020|2020-05-14|EPI\_ISL\_510608|Original|hCoV-19^^South Korea|Human|Division of Viral Diseases|Division of Viral Diseases|Kim|South Korea

>Spike|hCoV-19/USA/MI-MDHHS-SC21303/2020|2020-04-07|EPI\_ISL\_507558|Original|hCoV-19^^Michigan|Human|Michigan Department of Health and Human Services|Michigan Department of Health and Human Services|Blankenship|USA

>Spike|hCoV-19/England/SHEF-C965C/2020|2020-04-18|EPI\_ISL\_462040|Original|hCoV-19^^England|Human|Virology Department|COVID-19 Genomics UK (COG-UK) Consortium|de Silva|United Kingdom

>Spike|hCoV-19/England/ALDP-AA5179/2020|2020-10-22|EPI\_ISL\_624178|Original|hCoV-19^^England|Human|Lighthouse Lab in Alderley Park|Wellcome Sanger Institute for the COVID-19 Genomics UK (COG-UK) consortium|Davies|United Kingdom

>Spike|hCoV-19/USA/VA-DCLS-0777/2020|2020-06-11|EPI\_ISL\_526891|Original|hCoV-19^^Virginia|Human|Virginia DCLS|Virginia DCLS|St. Jacques|USA

>Spike|hCoV-19/Denmark/DCGC-13322/2020|2020-11-30|EPI\_ISL\_712264|Original|hCoV-19^^Sjaelland|Human|Department of Virus and Microbiological Special Diagnostics|Albertsen Lab|Michaelsen|Denmark

>Spike|hCoV-19/England/MILK-A068DB/2020|2020-10-01|EPI\_ISL\_599919|Original|hCoV-19^^England|Human|Lighthouse Lab in Milton Keynes|Wellcome Sanger Institute for the COVID-19 Genomics UK (COG-UK) consortium|Davies|United Kingdom

>Spike|hCoV-19/England/LIVE-DCC5AA/2020|2020-11-28|EPI\_ISL\_724517|Original|hCoV-19^^England|Human|Liverpool Clinical Laboratories|COVID-19 Genomics UK (COG-UK) Consortium|Haldenby|United Kingdom

>Spike|hCoV-19/Northern Ireland/QEUI-9F9915/2020|2020-09-25|EPI\_ISL\_589102|Original|hCoV-19^^Northern Ireland|Human|Lighthouse Lab in Glasgow|Wellcome Sanger Institute for the COVID-19 Genomics UK (COG-UK) consortium|Davies|United Kingdom

>Spike|hCoV-19/India/MH-ACTREC-649/2020|2020-09-14|EPI\_ISL\_700279|Original|hCoV-19^^Maharashtra|Human|Hematopathology Laboratory|Hematopathology Laboratory|Patkar|India

>Spike|hCoV-19/USA/TX-HMH-MCoV-15574/2020|2020-10-26|EPI\_ISL\_787058|Original|hCoV-19^^Texas|Human|Houston Methodist Hospital|Houston Methodist Hospital|Long|USA

>Spike|hCoV-19/USA/CA-QDX-2005/2020|2020-03-17|EPI\_ISL\_604302|Original|hCoV-19^^California|Human|Quest Diagnostics|Quest Diagnostics|Kagan|USA

>Spike|hCoV-19/England/LIVE-DC6D3F/2020|2020-11-27|EPI\_ISL\_705387|Original|hCoV-19^^England|Human|Liverpool Clinical Laboratories|COVID-19 Genomics UK (COG-UK) Consortium|Haldenby|United Kingdom

>Spike|hCoV-19/England/NOTT-11368F/2020|2020-09-13|EPI\_ISL\_549371|Original|hCoV-19^^England|Human|Lincolnshire Hospitals and DeepSeq Nottingham|COVID-19 Genomics UK (COG-UK) Consortium|Loose|United Kingdom



>Spike|hCoV-19/USA/IL-UW-627/2020|2020-06-26|EPI\_ISL\_491308|Original|hCoV-19^^Iowa|Human|University of Wisconsin-Madison AIDS Vaccine Research Laboratories|University of Wisconsin-Madison AIDS Vaccine Research Laboratories|Baczenas|USA

>Spike|hCoV-19/Brazil/RS-00661/2020|2020-11-26|EPI\_ISL\_770604|Original|hCoV-19^^Rio Grande do Sul|Human|Laborat\u00f3rio de Microbiologia Molecular - Universidade FEEVALE|Bioinformatics Laboratory / LNCC|Almeida|Brazil

>Spike|hCoV-19/England/CAMC-A647CF/2020|2020-10-10|EPI\_ISL\_608868|Original|hCoV-19^^England|Human|Lighthouse Lab in Cambridge|Wellcome Sanger Institute for the COVID-19 Genomics UK (COG-UK) consortium|Davies|United Kingdom

>Spike|hCoV-19/USA/VA-DCLS-2258/2020|2020-11-07|EPI\_ISL\_723505|Original|hCoV-19^^Virginia|Human|Virginia Division of Consolidated Laboratory Services (DCLS)|Virginia Division of Consolidated Laboratory Services (DCLS)|St. Jacques|USA

>Spike|hCoV-19/England/BRIS-1283EA/2020|2020-04-16|EPI\_ISL\_469564|Original|hCoV-19^^England|Human|PHE South West Regional Laboratory|Wellcome Sanger Institute for the COVID-19 Genomics UK (COG-UK) consortium|Davies|United Kingdom

>Spike|hCoV-19/Brazil/RJ-2100/2020|2020-04-16|EPI\_ISL\_541353|Original|hCoV-19^^Rio de Janeiro|Human|Laboratory of Respiratory Viruses and Measles|Laboratory of Respiratory Viruses and Measles|Silva|Brazil

>Spike|hCoV-19/USA/MN-MDH-1683/2020|2020-04-08|EPI\_ISL\_560770|Original|hCoV-19^^Minnesota|Human|Minnesota Department of Health|Minnesota Department of Health|Garfin|USA

>Spike|hCoV-19/England/MILK-A7D286/2020|2020-10-13|EPI\_ISL\_606558|Original|hCoV-19^^England|Human|Lighthouse Lab in Milton Keynes|Wellcome Sanger Institute for the COVID-19 Genomics UK (COG-UK) consortium|Davies|United Kingdom

>Spike|hCoV-19/Singapore/587/2020|2020-03-27|EPI\_ISL\_483610|Original|hCoV-19^^Singapore|Human|National Public Health Laboratory|National Public Health Laboratory|Mak|Singapore

>Spike|hCoV-19/England/NORT-282787/2020|2020-03-27|EPI\_ISL\_488482|Original|hCoV-19^^England|Human|NU-OMICS DNA Sequencing research facility|Wellcome Sanger Institute for the COVID-19 Genomics UK (COG-UK) consortium|Davies|United Kingdom

>Spike|hCoV-19/England/ALDP-A70827/2020|2020-10-15|EPI\_ISL\_608262|Original|hCoV-19^^England|Human|Lighthouse Lab in Alderley Park|Wellcome Sanger Institute for the COVID-19 Genomics UK (COG-UK) consortium|Davies|United Kingdom

>Spike|hCoV-19/USA/SC-DHEC-1116/2020|2020-07-09|EPI\_ISL\_574570|Original|hCoV-19^^South Carolina|Human|Microbiology Division|Microbiology Division|Flores|USA

>Spike|hCoV-19/England/ALDP-4FBAAC/2020|2020-06-23|EPI\_ISL\_559160|Original|hCoV-19^^England|Human|Lighthouse Lab in Alderley Park|Wellcome Sanger Institute for the COVID-19 Genomics UK (COG-UK) consortium|Davies|United Kingdom

>Spike|hCoV-19/Australia/VIC11312/2020|2020-08-14|EPI\_ISL\_563325|Original|hCoV-19^^Victoria|Human|Microbiological Diagnostic Unit - Public Health Laboratory (MDU-PHL)|MDU-PHL|Schultz|Australia

>Spike|hCoV-19/Spain/PV-IBV-2157/2020|2020-04-12|EPI\_ISL\_468937|Original|hCoV-19^^Basque Country|Human|Servicio de Microbiolog\u00eda. Hospital Universitario Donostia. OSI Donostialdea. \u00clrea de Enfermedades Infecciosas|SeqCOVID-SPAIN consortium/IBV (CSIC)|Comas|Spain

>Spike|hCoV-19/USA/LA-BIE-092/2020|2020-04-05|EPI\_ISL\_436959|Original|hCoV-19^^Louisiana|Human|Ochsner Health|Bioinfoexperts|Cross|USA

>Spike|hCoV-19/England/ALDP-5B4859/2020|2020-06-18|EPI\_ISL\_558784|Original|hCoV-19^^England|Human|Lighthouse Lab in Alderley Park|Wellcome Sanger Institute for the COVID-19 Genomics UK (COG-UK) consortium|Davies|United Kingdom

>Spike|hCoV-19/USA/WI-UW-1989/2020|2020-09-26|EPI\_ISL\_677397|Original|hCoV-19^^Wisconsin|Human|University of Wisconsin-Madison AIDS Vaccine Research Laboratories|University of Wisconsin-Madison AIDS Vaccine Research Laboratories|Baczenas|USA

>Spike|hCoV-19/Canada/QC-LSPQ-L00237113/2020|2020-03-25|EPI\_ISL\_536164|Original|hCoV-19^^Quebec|Human|CSSS Haut-Richelieu/Rouville (H\u00f4pital)|Laboratoire de sant\u00e9 publique du Qu\u00e9bec|Moreira|Canada

>Spike|hCoV-19/India/DL-NCDC5723-CSIR-IGIB/2020|2020-05-23|EPI\_ISL\_482611|Original|hCoV-19^^Delhi|Human|National Centre for Disease control (NCDC)|NCDC/CSIR-IGIB|Singh|India

>Spike|hCoV-19/England/ALDP-BB562B/2020|2020-11-20|EPI\_ISL\_701921|Original|hCoV-19^^England|Human|Lighthouse Lab in Alderley Park|Wellcome Sanger Institute for the COVID-19 Genomics UK (COG-UK) Consortium|Davies|United Kingdom

>Spike|hCoV-19/USA/WI-UW-04/2020|2020-03-15|EPI\_ISL\_416491|Original|hCoV-19^^Wisconsin|Human|University of Wisconsin-Madison AIDS Vaccine Research Laboratories|University of Wisconsin-Madison AIDS Vaccine Research Laboratories|Braun|USA

>Spike|hCoV-19/England/LIVE-A61DC/2020|2020-03-21|EPI\_ISL\_499692|Original|hCoV-19^^England|Human|Liverpool Clinical Laboratories|COVID-19 Genomics UK (COG-UK) Consortium|Haldenby|United Kingdom

>Spike|hCoV-19/Denmark/DCGC-15106/2020|2020-11-23|EPI\_ISL\_713633|Original|hCoV-19^^Sjaelland|Human|Department of Virus and Microbiological Special Diagnostics|Albertsen Lab|Michaelsen|Denmark

>Spike|hCoV-19/Australia/NSW2508/2020|2020-07-04|EPI\_ISL\_527029|Original|hCoV-19^^New South Wales|Human|Area of Virology|Area of Virology|Yeang|Australia

>Spike|hCoV-19/England/MILK-4691FF/2020|2020-05-22|EPI\_ISL\_559738|Original|hCoV-19^^England|Human|Lighthouse Lab in Milton Keynes|Wellcome Sanger Institute for the COVID-19 Genomics UK (COG-UK) consortium|Davies|United Kingdom

>Spike|hCoV-19/England/MILK-957AD6/2020|2020-06-11|EPI\_ISL\_554152|Original|hCoV-19^^England|Human|Lighthouse Lab in Milton Keynes|Wellcome Sanger Institute for the COVID-19 Genomics UK (COG-UK) consortium|Davies|United Kingdom

>Spike|hCoV-19/Japan/PG-3929/2020|2020-07-00|EPI\_ISL\_692180|Original|hCoV-19^^Japan|Human|Pathogen Genomics Center|Pathogen Genomics Center|Sekizuka|Japan

>Spike|hCoV-19/England/QEUH-A5E3E2/2020|2020-10-12|EPI\_ISL\_597322|Original|hCoV-19^^England|Human|Lighthouse Lab in Glasgow|Wellcome Sanger Institute for the COVID-19 Genomics UK (COG-UK) consortium|Davies|United Kingdom

>Spike|hCoV-19/Japan/PG-5735/2020|2020-08-00|EPI\_ISL\_688855|Original|hCoV-19^^Japan|Human|Pathogen Genomics Center|Pathogen Genomics Center|Sekizuka|Japan

>Spike|hCoV-19/USA/TX-HMH-MCoV-15996/2020|2020-07-10|EPI\_ISL\_785680|Original|hCoV-19^^Texas|Human|Houston Methodist Hospital|Houston Methodist Hospital|Long|USA

>Spike|hCoV-19/USA/TX-HMH-7065/2020|2020-06-28|EPI\_ISL\_546475|Original|hCoV-19^^Texas|Human|Houston Methodist Hospital|Houston Methodist Hospital|Long|USA

>Spike|hCoV-19/mink/Netherlands/NB-EMC-12-23/2020|2020-06-07|EPI\_ISL\_523007|Original|hCoV-19^^Limburg|Neovison vison|Dutch COVID-19 response team|Erasmus Medical Center|Oude Munnink|Netherlands

>Spike|hCoV-19/United Arab Emirates/0399/2020|2020-05-19|EPI\_ISL\_698574|Original|hCoV-19^^Abu Dhabi|Human|Group 42 (G42) Healthcare|G42 Healthcare|Ogrodzki|United Arab Emirates

>Spike|hCoV-19/Wales/PHWC-4833DB/2020|2020-10-23|EPI\_ISL\_627813|Original|hCoV-19^^Wales|Human|Wales Specialist Virology Centre Sequencing lab|COVID-19 Genomics UK (COG-UK) Consortium|Moore|United Kingdom

>Spike|hCoV-19/England/ALDP-AA5319/2020|2020-10-21|EPI\_ISL\_625015|Original|hCoV-19^^England|Human|Lighthouse Lab in Alderley Park|Wellcome Sanger Institute for the COVID-19 Genomics UK (COG-UK) consortium|Davies|United Kingdom

>Spike|hCoV-19/Scotland/QEUH-96B3A7/2020|2020-08-17|EPI\_ISL\_534652|Original|hCoV-19^^Scotland|Human|NHSGGC West of Scotland Specialist Virology Centre / MRC-University of Glasgow Centre for Virus Research|Wellcome Sanger Institute for the COVID-19 Genomics UK (COG-UK) consortium|Davies|United Kingdom

>Spike|hCoV-19/USA/MA-MASPHL-00877/2020|2020-10-13|EPI\_ISL\_692855|Original|hCoV-19^^Massachusetts|Human|Massachusetts State Public Health Laboratory|Massachusetts State Public Health Laboratory|Lang|USA

>Spike|hCoV-19/England/CAMB-77778/2020|2020-03-30|EPI\_ISL\_439457|Original|hCoV-19^^England|Human|Department of Pathology|Wellcome Sanger Institute for the COVID-19 Genomics UK (COG-UK) consortium|Amato|United Kingdom

>Spike|hCoV-19/England/QEUH-C14EE5/2020|2020-12-06|EPI\_ISL\_709336|Original|hCoV-19^^England|Human|Lighthouse Lab in Glasgow|Wellcome Sanger Institute for the COVID-19 Genomics UK (COG-UK) Consortium|Davies|United Kingdom

>Spike|hCoV-19/USA/LA-SR0161/2020|2020-03-28|EPI\_ISL\_435464|Original|hCoV-19^^Louisiana|Human|Robert Garry lab|Andersen lab at Scripps Research|Gangavarapu|USA

>Spike|hCoV-19/England/QEUA-A1DACC/2020|2020-09-29|EPI\_ISL\_587409|Original|hCoV-19^^England|Human|Lighthouse Lab in Glasgow|Wellcome Sanger Institute for the COVID-19 Genomics UK (COG-UK) consortium|Davies|United Kingdom

>Spike|hCoV-19/Chile/RM-170122/2020|2020-09-04|EPI\_ISL\_746710|Original|hCoV-19^^Region Metropolitana de Santiago|Human|Genetica Molecular and Subdepartamento de Virologia ISP Chile|Instituto de Salud Publica de Chile|Tognarelli|Chile

>Spike|hCoV-19/USA/TX-HMH-MCoV-9353/2020|2020-07-03|EPI\_ISL\_781074|Original|hCoV-19^^Texas|Human|Houston Methodist Hospital|Houston Methodist Hospital|Long|USA

>Spike|hCoV-19/England/MILK-BA9DDA/2020|2020-11-17|EPI\_ISL\_783198|Original|hCoV-19^^England|Human|Lighthouse Lab in Milton Keynes|Wellcome Sanger Institute for the COVID-19 Genomics UK (COG-UK) Consortium|Davies|United Kingdom

>Spike|hCoV-19/Sweden/20-53904/2020|2020-12-16|EPI\_ISL\_789056|Original|hCoV-19^^Stockholm|Human|Klinisk mikrobiologi|The Public Health Agency of Sweden|Svartstr\u00f6m|Sweden

>Spike|hCoV-19/England/BRIS-185373B/2020|2020-04-13|EPI\_ISL\_492267|Original|hCoV-19^^England|Human|PHE South West Regional Laboratory|Wellcome Sanger Institute for the COVID-19 Genomics UK (COG-UK) consortium|Davies|United Kingdom

>Spike|hCoV-19/USA/LA-GBCL-26544563/2020|2020-04-18|EPI\_ISL\_485137|Original|hCoV-19^^Louisiana|Human|River Road Testing Lab|Ginkgo Bioworks Clinical Laboratory|Smith|USA

>Spike|hCoV-19/England/QEUA-A4BCCF/2020|2020-10-05|EPI\_ISL\_628522|Original|hCoV-19^^England|Human|Oxford Viromics|COVID-19 Genomics UK (COG-UK) Consortium|Golubchik|United Kingdom

>Spike|hCoV-19/England/QEUA-9F5ABC/2020|2020-09-27|EPI\_ISL\_588332|Original|hCoV-19^^England|Human|Lighthouse Lab in Glasgow|Wellcome Sanger Institute for the COVID-19 Genomics UK (COG-UK) consortium|Davies|United Kingdom

>Spike|hCoV-19/Scotland/EDB8603/2020|2020-10-22|EPI\_ISL\_651978|Original|hCoV-19^^Scotland|Human|Virology Department|COVID-19 Genomics UK (COG-UK) Consortium|McHugh|United Kingdom

>Spike|hCoV-19/USA/TX-HMH-4253/2020|2020-06-18|EPI\_ISL\_543465|Original|hCoV-19^^Texas|Human|Houston Methodist Hospital|Houston Methodist Hospital|Long|USA

>Spike|hCoV-19/Luxembourg/LNS5453199/2020|2020-12-01|EPI\_ISL\_770934|Original|hCoV-19^^Luxembourg|Human|Laboratoire national de sant\u00e9|Laboratoire national de sant\u00e9|Wienecke-Baldacchino|Luxembourg

>Spike|hCoV-19/Wales/PHWC-160489/2020|2020-05-24|EPI\_ISL\_472937|Original|hCoV-19^^Wales|Human|Wales Specialist Virology Centre Sequencing lab|COVID-19 Genomics UK (COG-UK) Consortium|Moore|United Kingdom

>Spike|hCoV-19/USA/UT-UPHL-201021581/2020|2020-04-18|EPI\_ISL\_594110|Original|hCoV-19^^Utah|Human|Utah Public Health Laboratory|Utah Public Health Laboratory|Young|USA

>Spike|hCoV-19/England/20189164301/2020|2020-05-01|EPI\_ISL\_465568|Original|hCoV-19^^England|Human|Respiratory Virus Unit|Respiratory Virus Unit|Platt|United Kingdom

>Spike|hCoV-19/USA/UT-QDX-2549/2020|2020-03-12|EPI\_ISL\_604864|Original|hCoV-19^^Utah|Human|Quest Diagnostics|Quest Diagnostics|Kagan|USA

>Spike|hCoV-19/Scotland/CVR2784/2020|2020-04-20|EPI\_ISL\_473564|Original|hCoV-19^^Scotland|Human|West of Scotland Specialist Virology Centre|COVID-19 Genomics UK (COG-UK) Consortium|Robertson|United Kingdom

>Spike|hCoV-19/England/ALDP-9D95BD/2020|2020-09-18|EPI\_ISL\_576743|Original|hCoV-19^^England|Human|Oxford Viromics|COVID-19 Genomics UK (COG-UK) Consortium|Golubchik|United Kingdom

>Spike|hCoV-19/England/CAMC-AAF616/2020|2020-10-23|EPI\_ISL\_631148|Original|hCoV-19^^England|Human|Lighthouse Lab in Cambridge|Wellcome Sanger Institute for the COVID-19 Genomics UK (COG-UK) consortium|Davies|United Kingdom

>Spike|hCoV-19/Luxembourg/LNS8287433/2020|2020-11-02|EPI\_ISL\_744712|Original|hCoV-19^^Luxembourg|Human|Laboratoire national de sant\u00e9|Laboratoire national de sant\u00e9|Wienecke-Baldacchino|Luxembourg

>Spike|hCoV-19/England/QEUA-AA01BA/2020|2020-10-19|EPI\_ISL\_611484|Original|hCoV-19^^England|Human|Lighthouse Lab in Glasgow|Wellcome Sanger Institute for the COVID-19 Genomics UK (COG-UK) consortium|Davies|United Kingdom

>Spike|hCoV-19/Australia/VIC3274/2020|2020-07-07|EPI\_ISL\_520953|Original|hCoV-19^^Victoria|Human|Microbiological Diagnostic Unit - Public Health Laboratory (MDU-PHL)|MDU-PHL|Schultz|Australia

>Spike|hCoV-19/England/CAMC-B36947/2020|2020-11-05|EPI\_ISL\_645524|Original|hCoV-19^^England|Human|Lighthouse Lab in Cambridge|Wellcome Sanger Institute for the COVID-19 Genomics UK (COG-UK) Consortium|Davies|United Kingdom

>Spike|hCoV-19/India/GJ-GBRC233b/2020|2020-06-12|EPI\_ISL\_476875|Original|hCoV-19^^Gujarat|Human|Department of MicroBiology|Gujarat Biotechnology Research Centre|Joshi|India

>Spike|hCoV-19/England/CAMB-7C37F/2020|2020-04-14|EPI\_ISL\_434033|Original|hCoV-19^^England|Human|Department of Pathology|COVID-19 Genomics UK (COG-UK) Consortium|Meredith|United Kingdom

>Spike|hCoV-19/England/ALDP-59A974/2020|2020-06-15|EPI\_ISL\_558350|Original|hCoV-19^^England|Human|Lighthouse Lab in Alderley Park|Wellcome Sanger Institute for the COVID-19 Genomics UK (COG-UK) consortium|Davies|United Kingdom

>Spike|hCoV-19/USA/TX-HMH-MCoV-15583/2020|2020-10-25|EPI\_ISL\_787067|Original|hCoV-19^^Texas|Human|Houston Methodist Hospital|Houston Methodist Hospital|Long|USA

>Spike|hCoV-19/USA/MA-MGH-00580/2020|2020-03-28|EPI\_ISL\_460273|Original|hCoV-19^^Massachusetts|Human|Massachusetts General Hospital|Infectious Disease Program|Lemieux|USA

>Spike|hCoV-19/England/MILK-ACD463/2020|2020-10-22|EPI\_ISL\_634356|Original|hCoV-19^^England|Human|Lighthouse Lab in Milton Keynes|Wellcome Sanger Institute for the COVID-19 Genomics UK (COG-UK) consortium|Davies|United Kingdom

>Spike|hCoV-19/England/QEUA-B6C7D5/2020|2020-11-10|EPI\_ISL\_655735|Original|hCoV-19^^England|Human|Lighthouse Lab in Glasgow|Wellcome Sanger Institute for the COVID-19 Genomics UK (COG-UK) Consortium|Davies|United Kingdom

>Spike|hCoV-19/England/MILK-9D5144/2020|2020-09-15|EPI\_ISL\_577049|Original|hCoV-19^^England|Human|Centre for Enzyme Innovation|COVID-19 Genomics UK (COG-UK) Consortium|Robson|United Kingdom

>Spike|hCoV-19/England/MILK-A6A5A1/2020|2020-10-09|EPI\_ISL\_627512|Original|hCoV-19^^England|Human|Virology Department|COVID-19 Genomics UK (COG-UK) Consortium|de Silva|United Kingdom

>Spike|hCoV-19/Denmark/DCGC-18518/2020|2020-12-07|EPI\_ISL\_750017|Original|hCoV-19^^Nordjylland|Human|Department of Virus and Microbiological Special Diagnostics|Albertsen Lab|Michaelsen|Denmark

>Spike|hCoV-19/Mexico/GUA-INDRE-20/2020|2020-04-02|EPI\_ISL\_493335|Original|hCoV-19^^Guanajuato|Human|Instituto de Diagnostico y Referencia Epidemiologicos (INDRE)|Instituto de Diagnostico y Referencia Epidemiologicos (INDRE)|Rodriguez|Mexico

>Spike|hCoV-19/Italy/LAZ-INMI-131/2020|2020-12-21|EPI\_ISL\_765569|Original|hCoV-19^^Lazio|Human|National Institute for Infectious Diseases|National Institute for Infectious Diseases|Gruber|Italy

>Spike|hCoV-19/USA/CA-CDPH124/2020|2020-09-21|EPI\_ISL\_754951|Original|hCoV-19^^California|Human|California Department of Public Health|California Department of Public Health|Bell|USA

>Spike|hCoV-19/South Africa/NHLS-UCT-GS-0030/2020|2020-08-19|EPI\_ISL\_640031|Original|hCoV-19^^Western Cape|Human|Beaufort West Hospital w/BWH|NHLS/UCT|Iranzadeh|South Africa

>Spike|hCoV-19/Denmark/DCGC-9734/2020|2020-11-09|EPI\_ISL\_669135|Original|hCoV-19^^Sjaelland|Human|Department of Virus and Microbiological Special Diagnostics|Albertsen Lab|Michaelsen|Denmark

>Spike|hCoV-19/Scotland/CVR4067/2020|2020-08-31|EPI\_ISL\_535158|Original|hCoV-19^^Scotland|Human|West of Scotland Specialist Virology Centre|COVID-19 Genomics UK (COG-UK) Consortium|Robertson|United Kingdom

>Spike|hCoV-19/Hungary/MH-6074/2020|2020-04-30|EPI\_ISL\_526219|Original|hCoV-19^^Pest county|Human|Hungarian Defence Forces Military Medical Centre|National Laboratory of Virology|Kemenesi|Hungary

>Spike|hCoV-19/USA/MI-MDHHS-SC21860/2020|2020-05-10|EPI\_ISL\_565903|Original|hCoV-19^^Michigan|Human|Michigan Department of Health and Human Services|Michigan Department of Health and Human Services|Blankenship|USA

>Spike|hCoV-19/Australia/SAP170/2020|2020-03-13|EPI\_ISL\_467985|Original|hCoV-19^^South Australia|Human|SA Pathology|SA Pathology|Leong|Australia

>Spike|hCoV-19/Australia/VIC17532/2020|2020-08-19|EPI\_ISL\_663911|Original|hCoV-19^^Victoria|Human|Microbiological Diagnostic Unit - Public Health Laboratory (MDU-PHL)|MDU-PHL|Schultz|Australia

>Spike|hCoV-19/USA/NY-NYCPHL-000839/2020|2020-03-29|EPI\_ISL\_632216|Original|hCoV-19^^New York|Human|Richmond University Medical Center|New York City Public Health Laboratory|Wang|USA

>Spike|hCoV-19/England/MILK-BAFEC2/2020|2020-11-17|EPI\_ISL\_720584|Original|hCoV-19^^England|Human|Lighthouse Lab in Milton Keynes|Wellcome Sanger Institute for the COVID-19 Genomics UK (COG-UK) Consortium|Davies|United Kingdom

>Spike|hCoV-19/Denmark/DCGC-21797/2020|2020-12-21|EPI\_ISL\_758368|Original|hCoV-19^^Midtjylland|Human|Department of Virus and Microbiological Special Diagnostics|Albertsen Lab|Michaelsen|Denmark

>Spike|hCoV-19/Canada/ON-PHL-20-02482/2020|2020-09-00|EPI\_ISL\_671603|Original|hCoV-19^^Ontario|Human|Public Health Ontario Laboratory|Public Health Ontario Laboratory|Guthrie|Canada

>Spike|hCoV-19/England/CAMC-B211B0/2020|2020-11-03|EPI\_ISL\_647475|Original|hCoV-19^^England|Human|Lighthouse Lab in Cambridge|Wellcome Sanger Institute for the COVID-19 Genomics UK (COG-UK) Consortium|Davies|United Kingdom

>Spike|hCoV-19/England/BRIS-129167/2020|2020-04-19|EPI\_ISL\_458782|Original|hCoV-19^^England|Human|PHE South West Regional Laboratory|Wellcome Sanger Institute for the COVID-19 Genomics UK (COG-UK) consortium|Davies|United Kingdom

>Spike|hCoV-19/USA/TX-HMH0375/2020|2020-03-31|EPI\_ISL\_434964|Original|hCoV-19^^Texas|Human|Houston Methodist Hospital|Houston Methodist Hospital|Long|USA

>Spike|hCoV-19/Spain/CL-IBV-97006208/2020|2020-04-13|EPI\_ISL\_537354|Original|hCoV-19^^Castilla y Leon|Human|Universidad de Le\u00f3n|SeqCOVID-SPAIN consortium/IBV (CSIC)|Comas|Spain

>Spike|hCoV-19/Australia/NSW241/2020|2020-03-25|EPI\_ISL\_451507|Original|hCoV-19^^New South Wales|Human|Pathology West - NSW Health Pathology|NSW Health Pathology - Institute of Clinical Pathology and Medical Research; Westmead Hospital; University of Sydney|Gall|Australia

>Spike|hCoV-19/England/MILK-BFF4B2/2020|2020-12-02|EPI\_ISL\_720890|Original|hCoV-19^^England|Human|Lighthouse Lab in Milton Keynes|Wellcome Sanger Institute for the COVID-19 Genomics UK (COG-UK) Consortium|Davies|United Kingdom

>Spike|hCoV-19/England/ALDP-C3D068/2020|2020-12-10|EPI\_ISL\_730961|Original|hCoV-19^^England|Human|Lighthouse Lab in Alderley Park|Wellcome Sanger Institute for the COVID-19 Genomics UK (COG-UK) Consortium|Davies|United Kingdom

>Spike|hCoV-19/USA/HI-H200091/2020|2020-06-21|EPI\_ISL\_752658|Original|hCoV-19^^Hawaii|Human|State Laboratories Division|State Laboratories Division|Sultana|USA

>Spike|hCoV-19/Japan/PG-6381/2020|2020-08-00|EPI\_ISL\_689491|Original|hCoV-19^^Japan|Human|Fukuoka Institute of Health and Environmental Sciences|Pathogen Genomics Center|Sekizuka|Japan

>Spike|hCoV-19/England/ALDP-BC7565/2020|2020-11-22|EPI\_ISL\_721226|Original|hCoV-19^^England|Human|Lighthouse Lab in Alderley Park|Wellcome Sanger Institute for the COVID-19 Genomics UK (COG-UK) Consortium|Davies|United Kingdom

>Spike|hCoV-19/England/QEUA-9644F6/2020|2020-08-11|EPI\_ISL\_536819|Original|hCoV-19^^England|Human|Lighthouse Lab in Glasgow|Wellcome Sanger Institute for the COVID-19 Genomics UK (COG-UK) consortium|Davies|United Kingdom

>Spike|hCoV-19/Scotland/QEUA-A60F9E/2020|2020-10-13|EPI\_ISL\_665618|Original|hCoV-19^^Scotland|Human|Northumbria University / South Tees Hospitals NHS Foundation Trust / North Cumbria Integrated Care NHS Foundation Trust / North Tees and Hartlepool NHS Foundation Trust / Newcastle Hospitals NHS Foundation Trust|COVID-19 Genomics UK (COG-UK) Consortium|Bashton|United Kingdom

>Spike|hCoV-19/Iran/K1r-64/2020|2020-03-25|EPI\_ISL\_568498|Original|hCoV-19^^Iran|Human|Virology|Virology|Ranjbar|Iran

>Spike|hCoV-19/England/QEUA-AD1DCB/2020|2020-10-24|EPI\_ISL\_629964|Original|hCoV-19^^England|Human|Lighthouse Lab in Glasgow|Wellcome Sanger Institute for the COVID-19 Genomics UK (COG-UK) consortium|Davies|United Kingdom

>Spike|hCoV-19/England/LEED-2A8C5F/2020|2020-04-01|EPI\_ISL\_539090|Original|hCoV-19^^England|Human|Leeds Teaching Hospitals NHS Trust and Public Health England|Wellcome Sanger Institute for the COVID-19 Genomics UK (COG-UK) consortium|Davies|United Kingdom

>Spike|hCoV-19/USA/UT-UPHL-2012683062/2020|2020-06-19|EPI\_ISL\_746458|Original|hCoV-19^^Utah|Human|Utah Public Health Laboratory|Utah Public Health Laboratory|Gallagher|USA

>Spike|hCoV-19/USA/NY-SBU-A58597/2020|2020-04-25|EPI\_ISL\_602563|Original|hCoV-19^^New York|Human|Department of Microbiology and Immunology|Department of Microbiology and Immunology|Nascimento Conde|USA

>Spike|hCoV-19/Denmark/DCGC-4126/2020|2020-09-21|EPI\_ISL\_621946|Original|hCoV-19^^Hovedstaden|Human|Department of Virus and Microbiological Special Diagnostics|Albertsen lab|Michaelsen|Denmark

>Spike|hCoV-19/England/MILK-A7C436/2020|2020-10-15|EPI\_ISL\_606572|Original|hCoV-19^^England|Human|Lighthouse Lab in Milton Keynes|Wellcome Sanger Institute for the COVID-19 Genomics UK (COG-UK) consortium|Davies|United Kingdom

>Spike|hCoV-19/Spain/RI-IBV-99010951/2020|2020-08-25|EPI\_ISL\_732782|Original|hCoV-19^^La\_Rioja|Human|Centro de Investigaci\u00f3n Biom\u00e9dica de La Rioja - Hospital San Pedro Logro\u00f1o|SeqCOVID-SPAIN consortium/IBV (CSIC)|Comas|Spain

>Spike|hCoV-19/Malaysia/MGI-G873/2020|2020-04-07|EPI\_ISL\_528738|Original|hCoV-19^^Selangor|Human|Malaysia Genome Institute|Malaysia Genome Institute|Mat Isa|Malaysia

>Spike|hCoV-19/Wuhan/HB-WH3-185/2020|2020-03-15|EPI\_ISL\_454945|Original|hCoV-19^^Hubei|Human|Wuhan Chain Medical Labs (CMLabs)|State Key Laboratory of Biotherapy of Sichuan University|Tang|China

>Spike|hCoV-19/USA/TX-HMH-4013/2020|2020-06-16|EPI\_ISL\_543295|Original|hCoV-19^^Texas|Human|Houston Methodist Hospital|Houston Methodist Hospital|Long|USA

>Spike|hCoV-19/USA/MN-MDH-1268/2020|2020-03-10|EPI\_ISL\_482989|Original|hCoV-19^^Minnesota|Human|Minnesota Department of Health|Minnesota Department of Health|Garfin|USA

>Spike|hCoV-19/England/MILK-991ED4/2020|2020-08-27|EPI\_ISL\_552085|Original|hCoV-19^^England|Human|Lighthouse Lab in Milton Keynes|Wellcome Sanger Institute for the COVID-19 Genomics UK (COG-UK) consortium|Davies|United Kingdom

>Spike|hCoV-19/Netherlands/GE-EMC-323/2020|2020-10-07|EPI\_ISL\_632655|Original|hCoV-19^^Gelderland|Human|Dutch COVID-19 response team|Erasmus Medical Center|Oude Munnink|Netherlands

>Spike|hCoV-19/Scotland/QEUH-A1EDD1/2020|2020-10-01|EPI\_ISL\_598861|Original|hCoV-19^^Scotland|Human|Lighthouse Lab in Glasgow|Wellcome Sanger Institute for the COVID-19 Genomics UK (COG-UK) consortium|Davies|United Kingdom

>Spike|hCoV-19/Jordan/AM-ALSR-3978/2020|2020-10-02|EPI\_ISL\_636341|Original|hCoV-19^^Amman|Human|Biolab Diagnostic Laboratories|Andersen lab at Scripps Research|Gangavarapu|Jordan

>Spike|hCoV-19/Switzerland/BS-UHB-42200965/2020|2020-03-20|EPI\_ISL\_528280|Original|hCoV-19^^Basel-Stadt|Human|University Hospital Basel|University Hospital Basel|Roloff Handschin|Switzerland

>Spike|hCoV-19/USA/CA-CZB-12795/2020|2020-10-14|EPI\_ISL\_648450|Original|hCoV-19^^California|Human|Santa Clara County Public Health Laboratory|Chan-Zuckerberg Biohub|Bhatt|USA

>Spike|hCoV-19/Switzerland/BS-ETHZ-321468/2020|2020-10-14|EPI\_ISL\_603682|Original|hCoV-19^^Basel-Stadt|Human|Viollier AG|Department of Biosystems Science and Engineering|Nadeau|Switzerland

>Spike|hCoV-19/Denmark/DCGC-15073/2020|2020-11-23|EPI\_ISL\_713619|Original|hCoV-19^^Midtjylland|Human|Department of Virus and Microbiological Special Diagnostics|Albertsen Lab|Michaelsen|Denmark

>Spike|hCoV-19/Morocco/6899/2020|2020-04-21|EPI\_ISL\_459977|Original|hCoV-19^^Morocco|Human|Institut Pasteur du Maroc|Institut Pasteur du Maroc|Enouf|Morocco

>Spike|hCoV-19/USA/FL-BPHL-017/2020|2020-04-08|EPI\_ISL\_436521|Original|hCoV-19^^Florida|Human|Florida Bureau of Public Health Laboratories|Florida Bureau of Public Health Laboratories|Blanton|USA

>Spike|hCoV-19/USA/MN-MDH-1933/2020|2020-10-06|EPI\_ISL\_613493|Original|hCoV-19^^Minnesota|Human|Public Health Laboratory - Infectious Disease Lab|Minnesota Department of Health|Lorentz|USA

>Spike|hCoV-19/United Arab Emirates/0518/2020|2020-05-18|EPI\_ISL\_698681|Original|hCoV-19^^Abu Dhabi|Human|Group 42 (G42) Healthcare|G42 Healthcare|Ogrodzki|United Arab Emirates

>Spike|hCoV-19/Denmark/DCGC-17822/2020|2020-12-14|EPI\_ISL\_749586|Original|hCoV-19^^Hovedstaden|Human|Department of Virus and Microbiological Special Diagnostics|Albertsen Lab|Michaelsen|Denmark

>Spike|hCoV-19/USA/CA-CZB-16177/2020|2020-11-30|EPI\_ISL\_739348|Original|hCoV-19^^California|Human|Renegade|Chan-Zuckerberg Biohub|Kamm|USA

>Spike|hCoV-19/England/EXET-13F386/2020|2020-12-16|EPI\_ISL\_764196|Original|hCoV-19^^England|Human|University of Exeter|COVID-19 Genomics UK (COG-UK) Consortium|Temperton|United Kingdom

>Spike|hCoV-19/England/ALDP-B74F3C/2020|2020-11-12|EPI\_ISL\_664916|Original|hCoV-19^^England|Human|Quadram Institute Bioscience|COVID-19 Genomics UK (COG-UK) Consortium|Alikhan|United Kingdom

>Spike|hCoV-19/England/BIRM-5F794/2020|2020-05-11|EPI\_ISL\_473329|Original|hCoV-19^^England|Human|University of Birmingham|COVID-19 Genomics UK (COG-UK) Consortium|Loman|United Kingdom

>Spike|hCoV-19/USA/WA-S2871/2020|2020-09-22|EPI\_ISL\_596402|Original|hCoV-19^^Washington|Human|Seattle Flu Study|Seattle Flu Study|Lee|USA

>Spike|hCoV-19/USA/WI-GMF-31613/2020|2020-11-05|EPI\_ISL\_661102|Original|hCoV-19^^Wisconsin|Human|Gundersen Molecular Diagnostics Laboratory|Kabara Cancer Research Institute|Kenny|USA

>Spike|hCoV-19/USA/WA-UW-4210/2020|2020-03-31|EPI\_ISL\_437821|Original|hCoV-19^^Washington|Human|UW Virology Lab|UW Virology Lab|Roychoudhury|USA

>Spike|hCoV-19/England/CAMB-1BD64B/2020|2020-11-30|EPI\_ISL\_764325|Original|hCoV-19^^England|Human|Department of Pathology|COVID-19 Genomics UK (COG-UK) Consortium|Goodfellow|United Kingdom

>Spike|hCoV-19/Australia/VIC2205/2020|2020-06-25|EPI\_ISL\_521947|Original|hCoV-19^^Victoria|Human|Victorian Infectious Diseases Reference Laboratory (VIDRL)|VIDRL and MDU-PHL|Schultz|Australia

>Spike|hCoV-19/USA/MI-MDHHS-SC20230/2020|2020-03-18|EPI\_ISL\_447200|Original|hCoV-19^^Michigan|Human|Michigan Department of Health and Human Services|Michigan Department of Health and Human Services|Blankenship|USA

>Spike|hCoV-19/Latvia/061/2020|2020-07-07|EPI\_ISL\_492996|Original|hCoV-19^^Latvia|Human|E. Gulbja Laboratorija|Latvian Biomedical Research and Study Centre|Zrelavs|Latvia

>Spike|hCoV-19/Australia/VIC355/2020|2020-03-21|EPI\_ISL\_426663|Original|hCoV-19^^Victoria|Human|Victorian Infectious Diseases Reference Laboratory (VIDRL)|Microbiological Diagnostic Unit Public Health Laboratory and Victorian Infectious Diseases Reference Laboratory|Schultz|Australia

>Spike|hCoV-19/Australia/VIC4930/2020|2020-07-14|EPI\_ISL\_519304|Original|hCoV-19^^Victoria|Human|Victorian Infectious Diseases Reference Laboratory (VIDRL)|VIDRL and MDU-PHL|Schultz|Australia

>Spike|hCoV-19/Wales/PHWC-4895FD/2020|2020-10-28|EPI\_ISL\_639594|Original|hCoV-19^^Wales|Human|Wales Specialist Virology Centre Sequencing lab|COVID-19 Genomics UK (COG-UK) Consortium|Moore|United Kingdom

>Spike|hCoV-19/Saudi Arabia/85790/2020|2020-03-15|EPI\_ISL\_469245|Original|hCoV-19^^Jeddah|Human|Special Infectious Agents Unit|Special Infectious Agents Unit|Submitter|Saudi Arabia

>Spike|hCoV-19/Wales/PHWC-491149/2020|2020-11-10|EPI\_ISL\_706616|Original|hCoV-19^^Wales|Human|Originating lab|COVID-19 Genomics UK (COG-UK) Consortium|Moore|United Kingdom

>Spike|hCoV-19/Iceland/225/2020|2020-03-16|EPI\_ISL\_417554|Original|hCoV-19^^Reykjavik|Human|The National University Hospital of Iceland|deCODE genetics|J\u00f3nsson|Iceland

>Spike|hCoV-19/England/ALDP-9ED282/2020|2020-05-05|EPI\_ISL\_589490|Original|hCoV-19^^England|Human|Lighthouse Lab in Alderley Park|Wellcome Sanger Institute for the COVID-19 Genomics UK (COG-UK) consortium|Davies|United Kingdom

>Spike|hCoV-19/Switzerland/BS-UHB-42188149/2020|2020-03-12|EPI\_ISL\_528033|Original|hCoV-19^^Basel-Stadt|Human|University Hospital Basel|University Hospital Basel|Roloff Handschin|Switzerland

>Spike|hCoV-19/England/ALDP-9BEDB6/2020|2020-09-10|EPI\_ISL\_568073|Original|hCoV-19^^England|Human|Lighthouse Lab in Alderley Park|Wellcome Sanger Institute for the COVID-19 Genomics UK (COG-UK) consortium|Davies|United Kingdom

>Spike|hCoV-19/England/ALDP-B75FD1/2020|2020-11-12|EPI\_ISL\_723721|Original|hCoV-19^^England|Human|Oxford Viromics|COVID-19 Genomics UK (COG-UK) Consortium|Golubchik|United Kingdom

>Spike|hCoV-19/England/QEUA-BF0B8F/2020|2020-12-05|EPI\_ISL\_709190|Original|hCoV-19^^England|Human|Lighthouse Lab in Glasgow|Wellcome Sanger Institute for the COVID-19 Genomics UK (COG-UK) Consortium|Davies|United Kingdom

>Spike|hCoV-19/England/QEUA-AD2771/2020|2020-10-24|EPI\_ISL\_629785|Original|hCoV-19^^England|Human|Lighthouse Lab in Glasgow|Wellcome Sanger Institute for the COVID-19 Genomics UK (COG-UK) consortium|Davies|United Kingdom

>Spike|hCoV-19/England/20130087004/2020|2020-03-20|EPI\_ISL\_423673|Original|hCoV-19^^England|Human|Respiratory Virus Unit|Respiratory Virus Unit|Platt|United Kingdom

>Spike|hCoV-19/USA/TX-HMH-MCoV-12845/2020|2020-08-19|EPI\_ISL\_787998|Original|hCoV-19^^Texas|Human|Houston Methodist Hospital|Houston Methodist Hospital|Long|USA

>Spike|hCoV-19/England/QEUA-96E052/2020|2020-08-18|EPI\_ISL\_530458|Original|hCoV-19^^England|Human|Lighthouse Lab in Glasgow|Wellcome Sanger Institute for the COVID-19 Genomics UK (COG-UK) consortium|Davies|United Kingdom

>Spike|hCoV-19/USA/AZ-TG305735/2020|2020-04-27|EPI\_ISL\_694259|Original|hCoV-19^^Arizona|Human|AZ SPHL|TGen North|French|USA

>Spike|hCoV-19/USA/AZ-TG491470/2020|2020-06-17|EPI\_ISL\_695105|Original|hCoV-19^^Arizona|Human|AZ SPHL|TGen North|French|USA

>Spike|hCoV-19/USA/FL-BPHL-0285/2020|2020-05-13|EPI\_ISL\_480936|Original|hCoV-19^^Florida|Human|Florida Bureau of Public Health Laboratories|Florida Bureau of Public Health Laboratories|Blanton|USA

>Spike|hCoV-19/USA/TX-HMH-5711/2020|2020-06-29|EPI\_ISL\_546961|Original|hCoV-19^^Texas|Human|Houston Methodist Hospital|Houston Methodist Hospital|Long|USA

>Spike|hCoV-19/England/MILK-9705B8/2020|2020-08-18|EPI\_ISL\_553237|Original|hCoV-19^^England|Human|Lighthouse Lab in Milton Keynes|Wellcome Sanger Institute for the COVID-19 Genomics UK (COG-UK) consortium|Davies|United Kingdom

>Spike|hCoV-19/England/MILK-C307D9/2020|2020-12-07|EPI\_ISL\_782935|Original|hCoV-19^^England|Human|Lighthouse Lab in Milton Keynes|Wellcome Sanger Institute for the COVID-19 Genomics UK (COG-UK) Consortium|Davies|United Kingdom

>Spike|hCoV-19/England/ALDP-937C7C/2020|2020-06-21|EPI\_ISL\_552881|Original|hCoV-19^^England|Human|Lighthouse Lab in Alderley Park|Wellcome Sanger Institute for the COVID-19 Genomics UK (COG-UK) consortium|Davies|United Kingdom

>Spike|hCoV-19/USA/TX-HMH-MCoV-14412/2020|2020-10-07|EPI\_ISL\_787697|Original|hCoV-19^^Texas|Human|Houston Methodist Hospital|Houston Methodist Hospital|Long|USA

>Spike|hCoV-19/England/CAMC-B32C9D/2020|2020-11-05|EPI\_ISL\_659713|Original|hCoV-19^^England|Human|Lighthouse Lab in Cambridge|Wellcome Sanger Institute for the COVID-19 Genomics UK (COG-UK) Consortium|Davies|United Kingdom

>Spike|hCoV-19/USA/TX-HMH-MCoV-18079/2020|2020-11-15|EPI\_ISL\_784427|Original|hCoV-19^^Texas|Human|Houston Methodist Hospital|Houston Methodist Hospital|Long|USA

>Spike|hCoV-19/England/NOTT-1113D5/2020|2020-05-15|EPI\_ISL\_453658|Original|hCoV-19^^England|Human|Queens Medical Centre|COVID-19 Genomics UK (COG-UK) Consortium|Loose|United Kingdom

>Spike|hCoV-19/USA/CA-CZB-3830/2020|2020-07-21|EPI\_ISL\_548451|Original|hCoV-19^^California|Human|County of Santa Clara Public Health Department|Chan-Zuckerberg Biohub|Bhatt|USA

>Spike|hCoV-19/France/PAC-IHU-1169/2020|2020-08-14|EPI\_ISL\_569072|Original|hCoV-19^^Provence-Alpes-C\00f4te-d\02019Azur|Human|MEPHI|MEPHI|Levasseur|France

>Spike|hCoV-19/Australia/VIC1603/2020|2020-05-11|EPI\_ISL\_456515|Original|hCoV-19^^Victoria|Human|Victorian Infectious Diseases Reference Laboratory



(VIDRL)|Microbiological Diagnostic Unit Public Health Laboratory and Victorian Infectious Diseases Reference Laboratory|Schultz|Australia  
>Spike|hCoV-19/Ireland/KE-NVRL-73IRL13514/2020|2020-09-16|EPI\_ISL\_578288|Original|hCoV-19^^Kildare|Human|National Virus Reference Laboratory|National Virus Reference Laboratory|Gonzalez|Ireland  
>Spike|hCoV-19/Wales/PHWC-493790/2020|2020-11-29|EPI\_ISL\_725939|Original|hCoV-19^^Wales|Human|Originating lab|COVID-19 Genomics UK (COG-UK) Consortium|Moore|United Kingdom  
>Spike|hCoV-19/England/205141686/2020|2020-12-15|EPI\_ISL\_766223|Original|hCoV-19^^England|Human|Respiratory Virus Unit|COVID-19 Genomics UK (COG-UK) Consortium|Platt|United Kingdom  
>Spike|hCoV-19/Wales/PHWC-48BD20/2020|2020-11-03|EPI\_ISL\_666349|Original|hCoV-19^^Wales|Human|Wales Specialist Virology Centre Sequencing lab|COVID-19 Genomics UK (COG-UK) Consortium|Moore|United Kingdom  
>Spike|hCoV-19/Scotland/EDB1730/2020|2020-04-15|EPI\_ISL\_433130|Original|hCoV-19^^Scotland|Human|Virology Department|COVID-19 Genomics UK (COG-UK) Consortium|Williams|United Kingdom  
>Spike|hCoV-19/England/CAMC-C45F06/2020|2020-12-10|EPI\_ISL\_718532|Original|hCoV-19^^England|Human|Lighthouse Lab in Cambridge|Wellcome Sanger Institute for the COVID-19 Genomics UK (COG-UK) Consortium|Davies|United Kingdom  
>Spike|hCoV-19/South Korea/KCDC2257/2020|2020-05-12|EPI\_ISL\_510595|Original|hCoV-19^^South Korea|Human|Division of Viral Diseases|Division of Viral Diseases|Kim|South Korea  
>Spike|hCoV-19/England/SHEF-10D2C97/2020|2020-12-18|EPI\_ISL\_742048|Original|hCoV-19^^England|Human|Virology Department|COVID-19 Genomics UK (COG-UK) Consortium|de Silva|United Kingdom  
>Spike|hCoV-19/England/LOND-D622B/2020|2020-04-20|EPI\_ISL\_482167|Original|hCoV-19^^England|Human|University College London|Wellcome Sanger Institute for the COVID-19 Genomics UK (COG-UK) consortium|Davies|United Kingdom  
>Spike|hCoV-19/Denmark/DCGC-18995/2020|2020-12-07|EPI\_ISL\_748186|Original|hCoV-19^^Hovedstaden|Human|Department of Virus and Microbiological Special Diagnostics|Albertsen Lab|Michaelsen|Denmark  
>Spike|hCoV-19/USA/HI-H200294/2020|2020-08-11|EPI\_ISL\_752853|Original|hCoV-19^^Hawaii|Human|State Laboratories Division|State Laboratories Division|Sultana|USA  
>Spike|hCoV-19/England/MILK-CA9FD3/2020|2020-12-17|EPI\_ISL\_761587|Original|hCoV-19^^England|Human|Lighthouse Lab in Milton Keynes|Wellcome Sanger Institute for the COVID-19 Genomics UK (COG-UK) Consortium|Davies|United Kingdom  
>Spike|hCoV-19/Australia/VIC11975/2020|2020-08-11|EPI\_ISL\_640924|Original|hCoV-19^^Victoria|Human|Microbiological Diagnostic Unit - Public Health Laboratory (MDU-PHL)|MDU-PHL|Schultz|Australia  
>Spike|hCoV-19/England/ALDP-A93A0A/2020|2020-10-19|EPI\_ISL\_611223|Original|hCoV-19^^England|Human|Lighthouse Lab in Alderley Park|Wellcome Sanger Institute for the COVID-19 Genomics UK (COG-UK) consortium|Davies|United Kingdom  
>Spike|hCoV-19/Northern Ireland/NIRE-108CB8/2020|2020-10-05|EPI\_ISL\_627550|Original|hCoV-19^^Northern Ireland|Human|Regional Virus Laboratory|COVID-19 Genomics UK (COG-UK) Consortium|Fairley|United Kingdom  
>Spike|hCoV-19/England/ALDP-9CCD97/2020|2020-09-16|EPI\_ISL\_566146|Original|hCoV-19^^England|Human|Lighthouse Lab in Alderley Park|Wellcome Sanger Institute for the COVID-19 Genomics UK (COG-UK) consortium|Davies|United Kingdom  
>Spike|hCoV-19/USA/TX-HMH-7270/2020|2020-06-29|EPI\_ISL\_546639|Original|hCoV-19^^Texas|Human|Houston Methodist Hospital|Houston Methodist Hospital|Long|USA  
>Spike|hCoV-19/Australia/VIC12277/2020|2020-08-08|EPI\_ISL\_591946|Original|hCoV-19^^Victoria|Human|Victorian Infectious Diseases Reference Laboratory (VIDRL)|VIDRL and MDU-PHL|Schultz|Australia  
>Spike|hCoV-19/USA/CT-QDX-2695/2020|2020-03-16|EPI\_ISL\_605023|Original|hCoV-19^^Connecticut|Human|Quest Diagnostics|Quest Diagnostics|Kagan|USA  
>Spike|hCoV-19/England/ALDP-B45B21/2020|2020-11-07|EPI\_ISL\_656322|Original|hCoV-19^^England|Human|Lighthouse Lab in Alderley Park|Wellcome Sanger Institute for the COVID-19 Genomics UK (COG-UK) Consortium|Davies|United Kingdom

>Spike|hCoV-19/USA/LA-GBCL-26492443/2020|2020-04-28|EPI\_ISL\_485026|Original|hCoV-19^^Louisiana|Human|River Road Testing Lab|Ginkgo Bioworks Clinical Laboratory|Smith|USA

>Spike|hCoV-19/Scotland/EDB5077/2020|2020-04-23|EPI\_ISL\_487820|Original|hCoV-19^^Scotland|Human|Virology Department|Wellcome Sanger Institute for the COVID-19 Genomics UK (COG-UK) consortium|Davies|United Kingdom

>Spike|hCoV-19/England/CAMC-B51C01/2020|2020-11-09|EPI\_ISL\_657994|Original|hCoV-19^^England|Human|Lighthouse Lab in Cambridge|Wellcome Sanger Institute for the COVID-19 Genomics UK (COG-UK) Consortium|Davies|United Kingdom

>Spike|hCoV-19/Denmark/DCGC-15413/2020|2020-11-23|EPI\_ISL\_713812|Original|hCoV-19^^Nordjylland|Human|Department of Virus and Microbiological Special Diagnostics|Albertsen Lab|Michaelsen|Denmark

>Spike|hCoV-19/England/ALDP-B83B45/2020|2020-11-14|EPI\_ISL\_675650|Original|hCoV-19^^England|Human|Lighthouse Lab in Alderley Park|Wellcome Sanger Institute for the COVID-19 Genomics UK (COG-UK) Consortium|Davies|United Kingdom

>Spike|hCoV-19/USA/MA-MGH-00028/2020|2020-03-25|EPI\_ISL\_460469|Original|hCoV-19^^Massachusetts|Human|Massachusetts General Hospital|Infectious Disease Program|Lemieux|USA

>Spike|hCoV-19/Australia/VIC5281/2020|2020-07-17|EPI\_ISL\_520046|Original|hCoV-19^^Victoria|Human|Microbiological Diagnostic Unit - Public Health Laboratory (MDU-PHL) |MDU-PHL|Schultz|Australia

>Spike|hCoV-19/Denmark/DCGC-5518/2020|2020-09-21|EPI\_ISL\_620843|Original|hCoV-19^^Hovedstaden|Human|Department of Virus and Microbiological Special Diagnostics|Albertsen lab|Michaelsen|Denmark

>Spike|hCoV-19/Denmark/DCGC-10499/2020|2020-11-02|EPI\_ISL\_670018|Original|hCoV-19^^Hovedstaden|Human|Department of Virus and Microbiological Special Diagnostics|Albertsen Lab|Michaelsen|Denmark

>Spike|hCoV-19/England/CAMC-A81D60/2020|2020-10-13|EPI\_ISL\_610727|Original|hCoV-19^^England|Human|Lighthouse Lab in Cambridge|Wellcome Sanger Institute for the COVID-19 Genomics UK (COG-UK) consortium|Davies|United Kingdom

>Spike|hCoV-19/USA/TX-HMH-MCoV-14092/2020|2020-08-14|EPI\_ISL\_787378|Original|hCoV-19^^Texas|Human|Houston Methodist Hospital|Houston Methodist Hospital|Long|USA

>Spike|hCoV-19/USA/FL-BPHL-2179/2020|2020-08-19|EPI\_ISL\_653332|Original|hCoV-19^^Florida|Human|Florida Bureau of Public Health Laboratories|Florida Bureau of Public Health Laboratories|Blanton|USA

>Spike|hCoV-19/USA/TX-HMH-MCoV-11476/2020|2020-09-03|EPI\_ISL\_790028|Original|hCoV-19^^Texas|Human|Houston Methodist Hospital|Houston Methodist Hospital|Long|USA

>Spike|hCoV-19/USA/NV-NSPHL-A0083/2020|2020-04-13|EPI\_ISL\_515360|Original|hCoV-19^^Nevada|Human|Nevada State Public Health Laboratory|Nevada State Public Health Laboratory|Sevinsky|USA

>Spike|hCoV-19/USA/WA-UW-22757/2020|2020-08-06|EPI\_ISL\_570712|Original|hCoV-19^^Washington|Human|UW Virology Lab|UW Virology Lab|Roychoudhury|USA

>Spike|hCoV-19/Gibraltar/204421216/2020|2020-10-27|EPI\_ISL\_613677|Original|hCoV-19^^Gibraltar|Human|Microbiology|Respiratory Virus Unit|Platt|Gibraltar

>Spike|hCoV-19/England/QEUEH-C31BCD/2020|2020-12-11|EPI\_ISL\_782530|Original|hCoV-19^^England|Human|Lighthouse Lab in Glasgow|Wellcome Sanger Institute for the COVID-19 Genomics UK (COG-UK) Consortium|Davies|United Kingdom

>Spike|hCoV-19/USA/UT-UPHL-2012523098/2020|2020-08-03|EPI\_ISL\_745751|Original|hCoV-19^^Utah|Human|Ginkgo Bioworks Clinical Laboratory|Utah Public Health Laboratory|Young|USA

>Spike|hCoV-19/Scotland/QEUEH-B135A6/2020|2020-11-03|EPI\_ISL\_649608|Original|hCoV-19^^Scotland|Human|Lighthouse Lab in Glasgow|Wellcome Sanger Institute for the COVID-19 Genomics UK (COG-UK) Consortium|Davies|United Kingdom

>Spike|hCoV-19/Wales/PHWC-499606/2020|2020-12-04|EPI\_ISL\_727331|Original|hCoV-19^^Wales|Human|Originating lab|COVID-19 Genomics UK (COG-UK) Consortium|Moore|United Kingdom

>Spike|hCoV-19/England/NORT-28937D/2020|2020-03-29|EPI\_ISL\_458693|Original|hCoV-19^^England|Human|NU-OMICS DNA Sequencing research facility|Wellcome Sanger Institute for the COVID-19 Genomics UK (COG-UK) consortium|Davies|United Kingdom

>Spike|hCoV-19/Denmark/DCGC-20870/2020|2020-12-21|EPI\_ISL\_759420|Original|hCoV-19^^Nordjylland|Human|Department of Virus and Microbiological Special Diagnostics|Albertsen Lab|Michaelsen|Denmark

>Spike|hCoV-19/Japan/PG-5602/2020|2020-08-00|EPI\_ISL\_688727|Original|hCoV-19^^Japan|Human|Pathogen Genomics Center|Pathogen Genomics Center|Sekizuka|Japan

>Spike|hCoV-19/England/ALDP-B8493B/2020|2020-11-14|EPI\_ISL\_675206|Original|hCoV-19^^England|Human|Lighthouse Lab in Alderley Park|Wellcome Sanger Institute for the COVID-19 Genomics UK (COG-UK) Consortium|Davies|United Kingdom

>Spike|hCoV-19/England/NORW-E8A4C/2020|2020-04-11|EPI\_ISL\_448267|Original|hCoV-19^^England|Human|Quadram Institute Bioscience|COVID-19 Genomics UK (COG-UK) Consortium|Alikhan|United Kingdom

>Spike|hCoV-19/Germany/BE-ChVir-D2016-5933/2020|2020-10-18|EPI\_ISL\_753901|Original|hCoV-19^^Berlin|Human|Charit\u00e9 Universit\u00e4tsmedizin Berlin|Charit\u00e9 Universit\u00e4tsmedizin Berlin|Muehlemann|Germany

>Spike|hCoV-19/Wales/PHWC-16F323/2020|2020-10-05|EPI\_ISL\_585948|Original|hCoV-19^^Wales|Human|Wales Specialist Virology Centre Sequencing lab|COVID-19 Genomics UK (COG-UK) Consortium|Moore|United Kingdom

>Spike|hCoV-19/England/BRIS-12A2DC/2020|2020-04-16|EPI\_ISL\_458396|Original|hCoV-19^^England|Human|PHE South West Regional Laboratory|Wellcome Sanger Institute for the COVID-19 Genomics UK (COG-UK) consortium|Davies|United Kingdom

>Spike|hCoV-19/England/LIVE-DB40A4/2020|2020-10-19|EPI\_ISL\_650331|Original|hCoV-19^^England|Human|Liverpool Clinical Laboratories|COVID-19 Genomics UK (COG-UK) Consortium|Haldenby|United Kingdom

>Spike|hCoV-19/USA/NY-Wadsworth-251944-01/2020|2020-10-22|EPI\_ISL\_734390|Original|hCoV-19^^New York|Human|Wadsworth Center|Wadsworth Center|Lasek-Nesselquist|USA

>Spike|hCoV-19/England/OXON-AC789/2020|2020-04-07|EPI\_ISL\_448482|Original|hCoV-19^^England|Human|Oxford Viromics|COVID-19 Genomics UK (COG-UK) Consortium|Golubchik|United Kingdom

>Spike|hCoV-19/England/CAMC-A64FE5/2020|2020-10-11|EPI\_ISL\_608447|Original|hCoV-19^^England|Human|Lighthouse Lab in Cambridge|Wellcome Sanger Institute for the COVID-19 Genomics UK (COG-UK) consortium|Davies|United Kingdom

>Spike|hCoV-19/Scotland/CVR5072/2020|2020-10-11|EPI\_ISL\_594805|Original|hCoV-19^^Scotland|Human|West of Scotland Specialist Virology Centre|COVID-19 Genomics UK (COG-UK) Consortium|Robertson|United Kingdom

>Spike|hCoV-19/Spain/AN-ISCI-201616/2020|2020-03-05|EPI\_ISL\_455319|Original|hCoV-19^^Andalucia|Human|Hospital Virgen de las Nieves|Instituto de Salud Carlos III|Caballero|Spain

>Spike|hCoV-19/England/LIVE-DC9CB7/2020|2020-12-03|EPI\_ISL\_705347|Original|hCoV-19^^England|Human|Liverpool Clinical Laboratories|COVID-19 Genomics UK (COG-UK) Consortium|Haldenby|United Kingdom

>Spike|hCoV-19/Greece/9057\_HPI/2020|2020-04-04|EPI\_ISL\_487379|Original|hCoV-19^^Athens|Human|Hellenic Pasteur Institute|Hellenic Pasteur Institute|Kosyvakis|Greece

>Spike|hCoV-19/Wales/PHWC-49A5CC/2020|2020-12-02|EPI\_ISL\_727569|Original|hCoV-19^^Wales|Human|Originating lab|COVID-19 Genomics UK (COG-UK) Consortium|Moore|United Kingdom

>Spike|hCoV-19/USA/NY-NYUMC191/2020|2020-04-01|EPI\_ISL\_427486|Original|hCoV-19^^New York|Human|NYU Langone Health|Departments of Pathology and Medicine|Maurano|USA

>Spike|hCoV-19/Russia/OMS-ORINFI-MH10285M/2020|2020-11-12|EPI\_ISL\_733489|Original|hCoV-19^^Omsk|Human|Omsk Research Institute of Natural Focal Infections|WHO National Influenza Centre Russian Federation|Komissarov|Russia

>Spike|hCoV-19/England/CAMC-A5948A/2020|2020-10-08|EPI\_ISL\_596954|Original|hCoV-19^^England|Human|Lighthouse Lab in Cambridge|Wellcome Sanger Institute for the COVID-19 Genomics UK (COG-UK) consortium|Davies|United Kingdom

>Spike|hCoV-19/Scotland/CVR6021/2020|2020-11-29|EPI\_ISL\_680458|Original|hCoV-19^^Scotland|Human|West of Scotland Specialist Virology Centre|COVID-19 Genomics UK (COG-UK) Consortium|Robertson|United Kingdom

>Spike|hCoV-19/England/CAMB-1B616F/2020|2020-09-17|EPI\_ISL\_573149|Original|hCoV-19^^England|Human|Department of Pathology|COVID-19 Genomics UK (COG-UK) Consortium|Goodfellow|United Kingdom

>Spike|hCoV-19/England/LIVE-1DDFD1/2020|2020-10-09|EPI\_ISL\_611675|Original|hCoV-19^^England|Human|Liverpool Clinical Laboratories|COVID-19 Genomics UK (COG-UK) Consortium|Haldenby|United Kingdom

>Spike|hCoV-19/England/MILK-597072/2020|2020-06-13|EPI\_ISL\_558241|Original|hCoV-19^^England|Human|Lighthouse Lab in Milton Keynes|Wellcome Sanger Institute for the COVID-19 Genomics UK (COG-UK) consortium|Davies|United Kingdom

>Spike|hCoV-19/Australia/VIC14141/2020|2020-09-20|EPI\_ISL\_591815|Original|hCoV-19^^Victoria|Human|Microbiological Diagnostic Unit - Public Health Laboratory (MDU-PHL)|MDU-PHL|Schultz|Australia

>Spike|hCoV-19/England/QEUH-B9E8B9/2020|2020-11-18|EPI\_ISL\_719832|Original|hCoV-19^^England|Human|Lighthouse Lab in Glasgow|Wellcome Sanger Institute for the COVID-19 Genomics UK (COG-UK) Consortium|Davies|United Kingdom

>Spike|hCoV-19/USA/WA-UW-4326/2020|2020-03-31|EPI\_ISL\_427263|Original|hCoV-19^^Washington|Human|UW Virology Lab|UW Virology Lab|Roychoudhury|USA

>Spike|hCoV-19/Wales/PHWC-47F7C7/2020|2020-10-09|EPI\_ISL\_612725|Original|hCoV-19^^Wales|Human|Wales Specialist Virology Centre Sequencing lab|COVID-19 Genomics UK (COG-UK) Consortium|Moore|United Kingdom

>Spike|hCoV-19/Denmark/DCGC-2972/2020|2020-08-24|EPI\_ISL\_616734|Original|hCoV-19^^Midtjylland|Human|Department of Virus and Microbiological Special Diagnostics|Albertsen lab|Michaelsen|Denmark

>Spike|hCoV-19/Austria/CeMM0285/2020|2020-03-26|EPI\_ISL\_438111|Original|hCoV-19^^Burgenland|Human|Center for Virology|Bergthaler laboratory|Bergthaler|Austria

>Spike|hCoV-19/Spain/MD-HLP-56/2020|2020-04-20|EPI\_ISL\_530059|Original|hCoV-19^^Madrid|Human|Hospital Universitario La Paz|Hospital Universitario La Paz|Viedma|Spain

>Spike|hCoV-19/Taiwan/CGMH-CGU-29/2020|2020-04-02|EPI\_ISL\_464093|Vero E6|hCoV-19^^Taoyuan|Human|Laboratory Medicine|Department of Laboratory Medicine|Yi Chun|Taiwan

>Spike|hCoV-19/Japan/PG-1042/2020|2020-04-00|EPI\_ISL\_684652|Original|hCoV-19^^Japan|Human|Fukuoka Institute of Health and Environmental Sciences|Pathogen Genomics Center|Sekizuka|Japan

>Spike|hCoV-19/England/204261293/2020|2020-10-15|EPI\_ISL\_613582|Original|hCoV-19^^England|Human|Respiratory Virus Unit|Respiratory Virus Unit|Platt|United Kingdom

>Spike|hCoV-19/USA/CA-ALSR-1036-SAN/2020|2020-06-21|EPI\_ISL\_483476|Original|hCoV-19^^California|Human|UC San Diego Center for Advanced Laboratory Medicine|Andersen lab at Scripps Research|Gangavarapu|USA

>Spike|hCoV-19/Scotland/EDB4546/2020|2020-05-05|EPI\_ISL\_461720|Original|hCoV-19^^Scotland|Human|Virology Department|COVID-19 Genomics UK (COG-UK) Consortium|Williams|United Kingdom

>Spike|hCoV-19/England/CAMB-74016/2020|2020-03-18|EPI\_ISL\_440303|Original|hCoV-19^^England|Human|Department of Pathology|Wellcome Sanger Institute for the COVID-19 Genomics UK (COG-UK) consortium|Amato|United Kingdom

>Spike|hCoV-19/Canada/MB-NML-864/2020|2020-03-30|EPI\_ISL\_582345|Original|hCoV-19^^Manitoba|Human|Cadham Provincial Laboratory|National Microbiology Laboratory (NML)|Majer|Canada

>Spike|hCoV-19/England/BIRM-62901/2020|2020-08-21|EPI\_ISL\_529628|Original|hCoV-19^^England|Human|University of Birmingham|COVID-19 Genomics UK (COG-UK) Consortium|Loman|United Kingdom

>Spike|hCoV-19/USA/TX-HMH-MCoV-18842/2020|2020-11-25|EPI\_ISL\_785161|Original|hCoV-19^^Texas|Human|Houston Methodist Hospital|Houston Methodist Hospital|Long|USA

>Spike|hCoV-19/United Arab Emirates/0105/2020|2020-05-15|EPI\_ISL\_698295|Original|hCoV-19^^Abu Dhabi|Human|Group 42 (G42) Healthcare|G42 Healthcare|Ogrodzki|United Arab Emirates

>Spike|hCoV-19/Denmark/DCGC-21334/2020|2020-12-21|EPI\_ISL\_759686|Original|hCoV-19^^Nordjylland|Human|Department of Virus and Microbiological Special Diagnostics|Albertsen Lab|Michaelsen|Denmark

>Spike|hCoV-19/England/EXET-13E536/2020|2020-00-00|EPI\_ISL\_724327|Original|hCoV-19^^England|Human|University of Exeter|COVID-19 Genomics UK (COG-UK) Consortium|Temperton|United Kingdom

>Spike|hCoV-19/Denmark/DCGC-2335/2020|2020-08-10|EPI\_ISL\_617673|Original|hCoV-19^^Nordjylland|Human|Department of Virus and Microbiological Special Diagnostics|Albertsen lab|Michaelsen|Denmark

>Spike|hCoV-19/Scotland/ALDP-9FDD42/2020|2020-10-01|EPI\_ISL\_600523|Original|hCoV-19^^Scotland|Human|Lighthouse Lab in Alderley Park|Wellcome Sanger Institute for the COVID-19 Genomics UK (COG-UK) consortium|Davies|United Kingdom

>Spike|hCoV-19/Australia/VIC4347/2020|2020-07-13|EPI\_ISL\_519643|Original|hCoV-19^^Victoria|Human|Microbiological Diagnostic Unit - Public Health Laboratory (MDU-PHL)|MDU-PHL|Schultz|Australia

>Spike|hCoV-19/USA/WA-S1945/2020|2020-06-02|EPI\_ISL\_497373|Original|hCoV-19^^Washington|Human|Washington State Department of Health|Seattle Flu Study|Lee|USA

>Spike|hCoV-19/USA/LA-EVTL318/2020|2020-05-15|EPI\_ISL\_578725|Original|hCoV-19^^Louisiana|Human|LSUHS Emerging Viral Threat Laboratory|Microbial Genome Sequencing Center|Kamil|USA

>Spike|hCoV-19/Australia/VIC15232/2020|2020-08-04|EPI\_ISL\_593208|Original|hCoV-19^^Victoria|Human|Microbiological Diagnostic Unit - Public Health Laboratory (MDU-PHL)|MDU-PHL|Schultz|Australia

>Spike|hCoV-19/United Arab Emirates/0225/2020|2020-05-17|EPI\_ISL\_698175|Original|hCoV-19^^Abu Dhabi|Human|Group 42 (G42) Healthcare|G42 Healthcare|Ogrodzki|United Arab Emirates

>Spike|hCoV-19/USA/LA-EVTL022/2020|2020-04-24|EPI\_ISL\_435560|Original|hCoV-19^^Louisiana|Human|LSUHS Emerging Viral Threat Laboratory|Microbial Genome Sequencing Center|Kamil|USA

>Spike|hCoV-19/England/QEUH-B4230E/2020|2020-11-08|EPI\_ISL\_657336|Original|hCoV-19^^England|Human|Lighthouse Lab in Glasgow|Wellcome Sanger Institute for the COVID-19 Genomics UK (COG-UK) Consortium|Davies|United Kingdom

>Spike|hCoV-19/USA/TX-HMH-6331/2020|2020-06-29|EPI\_ISL\_547395|Original|hCoV-19^^Texas|Human|Houston Methodist Hospital|Houston Methodist Hospital|Long|USA

>Spike|hCoV-19/Netherlands/NA\_553/2020|2020-03-19|EPI\_ISL\_460721|Original|hCoV-19^^Netherlands|Human|Dutch COVID-19 response team|Erasmus Medical Center|Oude Munnink|Netherlands

>Spike|hCoV-19/USA/MA-MGH-00521/2020|2020-03-16|EPI\_ISL\_460224|Original|hCoV-19^^Massachusetts|Human|Massachusetts General Hospital|Infectious Disease Program|Lemieux|USA

>Spike|hCoV-19/India/GJ-GBRC348a/2020|2020-06-18|EPI\_ISL\_514591|Original|hCoV-19^^Gujarat|Human|B.J. Medical College and Civil hospital|Gujarat Biotechnology Research Centre|Joshi|India

>Spike|hCoV-19/Australia/NSW1314/2020|2020-12-21|EPI\_ISL\_767880|Original|hCoV-19^^New South Wales|Human|Laverty Pathology|NSW Health Pathology - Institute of Clinical Pathology and Medical Research; Westmead Hospital; University of Sydney|Gall|Australia

>Spike|hCoV-19/Denmark/DCGC-2758/2020|2020-08-24|EPI\_ISL\_616592|Original|hCoV-19^^Hovedstaden|Human|Department of Virus and Microbiological Special Diagnostics|Albertsen lab|Michaelsen|Denmark

>Spike|hCoV-19/Switzerland/LU-ETHZ-110029/2020|2020-04-01|EPI\_ISL\_486466|Original|hCoV-19^^Luzern|Human|Viollier AG|Department of Biosystems Science and Engineering|Nadeau|Switzerland

>Spike|hCoV-19/India/MH-AFCO-15275/2020|2020-07-25|EPI\_ISL\_721632|Original|hCoV-19^^Maharashtra|Human|Armed Forces Medical College|National Centre For Cell Science|Paul|India

>Spike|hCoV-19/England/MILK-B54B5C/2020|2020-11-05|EPI\_ISL\_657981|Original|hCoV-19^^England|Human|Lighthouse Lab in Milton Keynes|Wellcome Sanger Institute for the COVID-19 Genomics UK (COG-UK) Consortium|Davies|United Kingdom

>Spike|hCoV-19/England/CAMC-A65403/2020|2020-10-11|EPI\_ISL\_608359|Original|hCoV-19^^England|Human|Lighthouse Lab in Cambridge|Wellcome Sanger Institute for the COVID-19 Genomics UK (COG-UK) consortium|Davies|United Kingdom

>Spike|hCoV-19/England/ALDP-C48440/2020|2020-12-12|EPI\_ISL\_736562|Original|hCoV-19^^England|Human|Lighthouse Lab in Alderley Park|Wellcome Sanger Institute for the COVID-19 Genomics UK (COG-UK) Consortium|Davies|United Kingdom

>Spike|hCoV-19/USA/HI-H200584/2020|2020-11-04|EPI\_ISL\_753110|Original|hCoV-19^^Hawaii|Human|State Laboratories Division|State Laboratories Division|Sultana|USA

>Spike|hCoV-19/DRC/81/2020|2020-03-18|EPI\_ISL\_417944|Original|hCoV-19^^Kinshasa|Human|Viral Respiratory Lab|Pathogen Sequencing Lab|Pratt|Democratic Republic of the Congo

>Spike|hCoV-19/England/CAMC-B9971B/2020|2020-11-16|EPI\_ISL\_673705|Original|hCoV-19^^England|Human|Lighthouse Lab in Cambridge|Wellcome Sanger Institute for the COVID-19 Genomics UK (COG-UK) Consortium|Davies|United Kingdom

>Spike|hCoV-19/Wales/PHWC-163389/2020|2020-04-24|EPI\_ISL\_473285|Original|hCoV-19^^Wales|Human|Wales Specialist Virology Centre Sequencing lab|COVID-19 Genomics UK (COG-UK) Consortium|Moore|United Kingdom

>Spike|hCoV-19/England/QEUA-9F88EC/2020|2020-09-27|EPI\_ISL\_588733|Original|hCoV-19^^England|Human|Lighthouse Lab in Glasgow|Wellcome Sanger Institute for the COVID-19 Genomics UK (COG-UK) consortium|Davies|United Kingdom

>Spike|hCoV-19/Scotland/EDB901/2020|2020-04-05|EPI\_ISL\_432873|Original|hCoV-19^^Scotland|Human|Virology Department|COVID-19 Genomics UK (COG-UK) Consortium|Williams|United Kingdom

>Spike|hCoV-19/Denmark/DCGC-9291/2020|2020-11-16|EPI\_ISL\_668889|Original|hCoV-19^^Nordjylland|Human|Department of Virus and Microbiological Special Diagnostics|Albertsen Lab|Michaelsen|Denmark

>Spike|hCoV-19/England/SHEF-CD1DF/2020|2020-04-23|EPI\_ISL\_453749|Original|hCoV-19^^England|Human|Virology Department|COVID-19 Genomics UK (COG-UK) Consortium|de Silva|United Kingdom

>Spike|hCoV-19/England/MILK-A47425/2020|2020-10-06|EPI\_ISL\_598471|Original|hCoV-19^^England|Human|Lighthouse Lab in Milton Keynes|Wellcome Sanger Institute for the COVID-19 Genomics UK (COG-UK) consortium|Davies|United Kingdom

>Spike|hCoV-19/USA/CA-IGI-0205/2020|2020-07-09|EPI\_ISL\_569889|Original|hCoV-19^^California|Human|Innovative Genomics Institute|Innovative Genomics Institute|Wyman|USA

>Spike|hCoV-19/India/DL-NCDC2004-CSIR-IGIB/2020|2020-05-18|EPI\_ISL\_482524|Original|hCoV-19^^Delhi|Human|National Centre for Disease control (NCDC)|NCDC/CSIR-IGIB|Pandey|India

>Spike|hCoV-19/USA/VA-DCLS-1621/2020|2020-08-19|EPI\_ISL\_614028|Original|hCoV-19^^Virginia|Human|Virginia DCLS|Virginia DCLS|St. Jacques|USA

>Spike|hCoV-19/Luxembourg/LNS9459476/2020|2020-10-27|EPI\_ISL\_744919|Original|hCoV-19^^Luxembourg|Human|Laboratoire national de sant\u00e9|Laboratoire national de sant\u00e9|Wienecke-Baldacchino|Luxembourg

>Spike|hCoV-19/Denmark/DCGC-20982/2020|2020-12-21|EPI\_ISL\_759488|Original|hCoV-19^^Midtjylland|Human|Department of Virus and Microbiological Special Diagnostics|Albertsen Lab|Michaelsen|Denmark

>Spike|hCoV-19/USA/OR-OHSU-1827/2020|2020-07-27|EPI\_ISL\_526040|Original|hCoV-19^^Oregon|Human|OHSU Lab Services Molecular Microbiology Lab|Oregon SARS-CoV-2 Genome Sequencing Center|O'Roak|USA

>Spike|hCoV-19/USA/UT-02234/2020|2020-04-14|EPI\_ISL\_436931|Original|hCoV-19^^Utah|Human|Utah Public Health Laboratory|Utah Public Health Laboratory|Young|USA

>Spike|hCoV-19/England/204241459/2020|2020-10-14|EPI\_ISL\_622854|Original|hCoV-19^^England|Human|Respiratory Virus Unit|Respiratory Virus Unit|Platt|United Kingdom

>Spike|hCoV-19/Denmark/DCGC-11278/2020|2020-11-02|EPI\_ISL\_670809|Original|hCoV-19^^Midtjylland|Human|Department of Virus and Microbiological Special Diagnostics|Albertsen Lab|Michaelsen|Denmark

>Spike|hCoV-19/USA/TX-HMH-921/2020|2020-04-17|EPI\_ISL\_545920|Original|hCoV-19^^Texas|Human|Houston Methodist Hospital|Houston Methodist Hospital|Long|USA

>Spike|hCoV-19/England/QEUA-9F480E/2020|2020-09-27|EPI\_ISL\_588365|Original|hCoV-19^^England|Human|Lighthouse Lab in Glasgow|Wellcome Sanger Institute for the COVID-19 Genomics UK (COG-UK) consortium|Davies|United Kingdom

>Spike|hCoV-19/USA/NY-NYUMC396/2020|2020-04-11|EPI\_ISL\_430423|Original|hCoV-19^^New York|Human|NYU Langone Health|Departments of Pathology and Medicine|Maurano|USA

>Spike|hCoV-19/Romania/ROSV\_4995/2020|2020-04-27|EPI\_ISL\_491080|Original|hCoV-19^^Suceava|Human|Suceava County Emergency Hospital|\Stefan cel Mare\ University Metagenomics Lab|Lobiuc|Romania

>Spike|hCoV-19/England/MILK-C62D18/2020|2020-12-13|EPI\_ISL\_735681|Original|hCoV-19^^England|Human|Lighthouse Lab in Milton Keynes|Wellcome Sanger Institute for the COVID-19 Genomics UK (COG-UK) Consortium|Davies|United Kingdom

>Spike|hCoV-19/Denmark/DCGC-3460/2020|2020-08-31|EPI\_ISL\_616224|Original|hCoV-19^^Hovedstaden|Human|Department of Virus and Microbiological Special Diagnostics|Albertsen lab|Michaelsen|Denmark

>Spike|hCoV-19/England/MILK-99D755/2020|2020-08-31|EPI\_ISL\_549913|Original|hCoV-19^^England|Human|Lighthouse Lab in Milton Keynes|Wellcome Sanger Institute for the COVID-19 Genomics UK (COG-UK) consortium|Davies|United Kingdom

>Spike|hCoV-19/USA/DE-DHSS-F918378/2020|2020-03-30|EPI\_ISL\_593951|Original|hCoV-19^^Delaware|Human|Delaware Public Health Lab|Delaware Public Health Lab|Bajwa|USA

>Spike|hCoV-19/Norway/3143/2020|2020-08-09|EPI\_ISL\_549044|Original|hCoV-19^^Viken|Human|Ostfold Hospital Trust - Kalnes|Norwegian Institute of Public Health|Kopperud Riis|Norway

>Spike|hCoV-19/Turkey/Ankara\_GUMV\_22790/2020|2020-08-26|EPI\_ISL\_730571|Original|hCoV-19^^Ankara|Human|Gazi University Faculty of Medicine|Gazi University Faculty of Medicine|Sahin|Turkey

>Spike|hCoV-19/England/ALDP-C57F4D/2020|2020-12-14|EPI\_ISL\_736189|Original|hCoV-19^^England|Human|Lighthouse Lab in Alderley Park|Wellcome Sanger Institute for the COVID-19 Genomics UK (COG-UK) Consortium|Davies|United Kingdom

>Spike|hCoV-19/England/NORW-EB00B/2020|2020-04-30|EPI\_ISL\_457405|Original|hCoV-19^^England|Human|Quadram Institute Bioscience|COVID-19 Genomics UK (COG-UK) Consortium|Alikhan|United Kingdom

>Spike|hCoV-19/England/ALDP-B83671/2020|2020-11-15|EPI\_ISL\_675213|Original|hCoV-19^^England|Human|Lighthouse Lab in Alderley Park|Wellcome Sanger Institute for the COVID-19 Genomics UK (COG-UK) Consortium|Davies|United Kingdom

>Spike|hCoV-19/USA/TX-HMH-MCoV-10504/2020|2020-07-08|EPI\_ISL\_789504|Original|hCoV-19^^Texas|Human|Houston Methodist Hospital|Houston Methodist Hospital|Long|USA

>Spike|hCoV-19/England/ALDP-9ED158/2020|2020-05-05|EPI\_ISL\_589364|Original|hCoV-19^^England|Human|Lighthouse Lab in Alderley Park|Wellcome Sanger Institute for the COVID-19 Genomics UK (COG-UK) consortium|Davies|United Kingdom

>Spike|hCoV-19/USA/MN-MDH-1255/2020|2020-06-09|EPI\_ISL\_482976|Original|hCoV-19^^Minnesota|Human|Mayo Clinic & Mayo Clinic Laboratories|Minnesota Department of Health|Garfin|USA

>Spike|hCoV-19/England/MILK-9A9237/2020|2020-08-31|EPI\_ISL\_551277|Original|hCoV-19^^England|Human|Lighthouse Lab in Milton Keynes|Wellcome Sanger Institute for the COVID-19 Genomics UK (COG-UK) consortium|Davies|United Kingdom

>Spike|hCoV-19/Japan/PG-3242/2020|2020-04-00|EPI\_ISL\_691358|Original|hCoV-19^^Japan|Human|Pathogen Genomics Center|Pathogen Genomics Center|Sekizuka|Japan

>Spike|hCoV-19/England/MILK-ACFC3C/2020|2020-10-22|EPI\_ISL\_652128|Original|hCoV-19^^England|Human|Oxford Viromics|COVID-19 Genomics UK (COG-UK) Consortium|Golubchik|United Kingdom

>Spike|hCoV-19/England/NORW-F9FC1/2020|2020-12-14|EPI\_ISL\_741606|Original|hCoV-19^^England|Human|Quadram Institute Bioscience|COVID-19 Genomics UK (COG-UK) Consortium|Alikhan|United Kingdom

>Spike|hCoV-19/South Africa/KRISP-K002351/2020|2020-07-21|EPI\_ISL\_515723|Original|hCoV-19^^KwaZulu-Natal|Human|NHLS-IALCH|KRISP|de Oliveira|South Africa

>Spike|hCoV-19/India/MH-NIV-10435/2020|2020-04-16|EPI\_ISL\_541683|Original|hCoV-19^^Maharashtra|Human|National Institute of Virology|National Institute of Virology|Potdar|India

>Spike|hCoV-19/Malaysia/IMR-WC272624/2020|2020-11-12|EPI\_ISL\_728247|Original|hCoV-19^^Malaysia|Human|Institute for Medical Research|Institute for Medical Research|Suppiah|Malaysia

>Spike|hCoV-19/USA/MN-GMF-28226/2020|2020-10-27|EPI\_ISL\_661013|Original|hCoV-19^^Minnesota|Human|Gundersen Molecular Diagnostics Laboratory|Kabara Cancer Research Institute|Kenny|USA

>Spike|hCoV-19/United Arab Emirates/L5621/2020|2020-03-11|EPI\_ISL\_435136|Original|hCoV-19^^United Arab Emirates|Human|Mohammed Bin Rashid University of Medicine and Health Sciences|Al Jalila Genomics Center|Ramaswamy|United Arab Emirates

>Spike|hCoV-19/India/UP-NBRI-N14-TCR324/2020|2020-04-02|EPI\_ISL\_516943|Original|hCoV-19^^Uttar Pradesh|Human|King Georges Medical University|CSIR-National Botanical Research Institute|Bag|India

>Spike|hCoV-19/England/QEUEH-9F322F/2020|2020-09-23|EPI\_ISL\_588502|Original|hCoV-19^^England|Human|Lighthouse Lab in Glasgow|Wellcome Sanger Institute for the COVID-19 Genomics UK (COG-UK) consortium|Davies|United Kingdom

>Spike|hCoV-19/USA/IL-NM-0488/2020|2020-04-23|EPI\_ISL\_626428|Original|hCoV-19^^Illinois|Human|Northwestern Memorial Hospital|Ozer Lab|Ozer|USA

>Spike|hCoV-19/USA/TX-HMH-MCoV-8360/2020|2020-07-07|EPI\_ISL\_784351|Original|hCoV-19^^Texas|Human|Houston Methodist Hospital|Houston Methodist Hospital|Long|USA

>Spike|hCoV-19/Wales/QEUEH-95E978/2020|2020-08-06|EPI\_ISL\_532427|Original|hCoV-19^^Wales|Human|Lighthouse Lab in Glasgow|Wellcome Sanger Institute for the COVID-19 Genomics UK (COG-UK) consortium|Davies|United Kingdom

>Spike|hCoV-19/England/CAMB-74641/2020|2020-03-20|EPI\_ISL\_425318|Original|hCoV-19^^England|Human|Department of Pathology|COVID-19 Genomics UK (COG-UK) Consortium|Meredith|United Kingdom

>Spike|hCoV-19/Japan/PG-6340/2020|2020-08-00|EPI\_ISL\_689451|Original|hCoV-19^^Japan|Human|Pathogen Genomics Center|Pathogen Genomics Center|Sekizuka|Japan

>Spike|hCoV-19/Scotland/EDB2278/2020|2020-04-21|EPI\_ISL\_491507|Original|hCoV-19^^Scotland|Human|Virology Department|Wellcome Sanger Institute for the COVID-19 Genomics UK (COG-UK) consortium|Davies|United Kingdom

>Spike|hCoV-19/Wales/PHWC-491AC6/2020|2020-11-10|EPI\_ISL\_706738|Original|hCoV-19^^Wales|Human|Originating lab|COVID-19 Genomics UK (COG-UK) Consortium|Moore|United Kingdom

>Spike|hCoV-19/Norway/5885/2020|2020-11-13|EPI\_ISL\_775346|Original|hCoV-19^^Vestland|Human|Department of medical microbiology|Norwegian Institute of Public Health|Vollan|Norway

>Spike|hCoV-19/Denmark/DCGC-8973/2020|2020-10-26|EPI\_ISL\_626190|Original|hCoV-19^^Syddanmark|Human|Department of Virus and Microbiological Special Diagnostics|Albertsen lab|Michaelsen|Denmark

>Spike|hCoV-19/Wales/PHWC-491E33/2020|2020-11-16|EPI\_ISL\_706785|Original|hCoV-19^^Wales|Human|Originating lab|COVID-19 Genomics UK (COG-UK) Consortium|Moore|United Kingdom

>Spike|hCoV-19/England/ALDP-4996AC/2020|2020-05-27|EPI\_ISL\_559432|Original|hCoV-19^^England|Human|Lighthouse Lab in Alderley Park|Wellcome Sanger Institute for the COVID-19 Genomics UK (COG-UK) consortium|Davies|United Kingdom

>Spike|hCoV-19/England/MILK-AC8A1B/2020|2020-10-22|EPI\_ISL\_629616|Original|hCoV-19^^England|Human|Lighthouse Lab in Milton Keynes|Wellcome Sanger Institute for the COVID-19 Genomics UK (COG-UK) consortium|Davies|United Kingdom

>Spike|hCoV-19/Spain/MD-IBV-005331/2020|2020-03-17|EPI\_ISL\_510209|Original|hCoV-19^^Madrid|Human|Hospital General Universitario Gregorio Mara\u00f1a|SeqCOVID-SPAIN consortium|IBV (CSIC)|Comas|Spain

>Spike|hCoV-19/Israel/CVL-46381/2020|2020-12-15|EPI\_ISL\_745070|Original|hCoV-19^^Tel Aviv|Human|Israel Central Virology laboratory|Israel Central Virology laboratory|Zuckerman|Israel

>Spike|hCoV-19/England/QEUEH-9DC769/2020|2020-09-19|EPI\_ISL\_581024|Original|hCoV-19^^England|Human|Lighthouse Lab in Glasgow|Wellcome Sanger Institute for the COVID-19 Genomics UK (COG-UK) consortium|Davies|United Kingdom

>Spike|hCoV-19/England/ALDP-4FC786/2020|2020-06-23|EPI\_ISL\_559137|Original|hCoV-19^^England|Human|Lighthouse Lab in Alderley Park|Wellcome Sanger Institute for the COVID-19 Genomics UK (COG-UK) consortium|Davies|United Kingdom

>Spike|hCoV-19/Denmark/DCGC-7248/2020|2020-10-12|EPI\_ISL\_619098|Original|hCoV-19^^Sjaelland|Human|Department of Virus and Microbiological Special Diagnostics|Albertsen lab|Michaelsen|Denmark



>Spike|hCoV-19/Canada/MB-NML-1141/2020|2020-08-03|EPI\_ISL\_582471|Original|hCoV-19^^Manitoba|Human|Cadham Provincial Laboratory|National Microbiology Laboratory (NML)|Majer|Canada

>Spike|hCoV-19/Denmark/DCGC-4592/2020|2020-09-21|EPI\_ISL\_622261|Original|hCoV-19^^Sjaelland|Human|Department of Virus and Microbiological Special Diagnostics|Albertsen lab|Michaelsen|Denmark

>Spike|hCoV-19/Wales/PHWC-16B6D3/2020|2020-09-17|EPI\_ISL\_573889|Original|hCoV-19^^Wales|Human|Wales Specialist Virology Centre Sequencing lab|COVID-19 Genomics UK (COG-UK) Consortium|Moore|United Kingdom

>Spike|hCoV-19/England/ALDP-9EA522/2020|2020-09-24|EPI\_ISL\_579947|Original|hCoV-19^^England|Human|Lighthouse Lab in Alderley Park|Wellcome Sanger Institute for the COVID-19 Genomics UK (COG-UK) consortium|Davies|United Kingdom

>Spike|hCoV-19/Wales/PHWC-47FD01/2020|2020-10-13|EPI\_ISL\_612800|Original|hCoV-19^^Wales|Human|Wales Specialist Virology Centre Sequencing lab|COVID-19 Genomics UK (COG-UK) Consortium|Moore|United Kingdom

>Spike|hCoV-19/USA/UT-08719/2020|2020-05-21|EPI\_ISL\_524776|Original|hCoV-19^^Utah|Human|Utah Public Health Laboratory|Utah Public Health Laboratory|Young|USA

>Spike|hCoV-19/Saudi Arabia/562/2020|2020-02-16|EPI\_ISL\_490003|Original|hCoV-19^^Saudi Arabia|Human|King Fahad Medical City|King Fahad Medical City|Naeem|Saudi Arabia

>Spike|hCoV-19/USA/NY-Wadsworth-289756-01/2020|2020-12-21|EPI\_ISL\_767503|Original|hCoV-19^^New York|Human|Wadsworth Center|Wadsworth Center|Lasek-Nesselquist|USA

>Spike|hCoV-19/England/NOTT-113BCC/2020|2020-09-28|EPI\_ISL\_573466|Original|hCoV-19^^England|Human|Queens Medical Centre|COVID-19 Genomics UK (COG-UK) Consortium|Loose|United Kingdom

>Spike|hCoV-19/Belgium/reg-0417510/2020|2020-04-17|EPI\_ISL\_734602|Original|hCoV-19^^Gent|Human|UZ Leuven|KU Leuven|Maes|Belgium

>Spike|hCoV-19/USA/CA-CZB-2353/2020|2020-05-13|EPI\_ISL\_513800|Original|hCoV-19^^California|Human|Orange County Public Health Laboratory|Chan-Zuckerberg Biohub|Kamm|USA

>Spike|hCoV-19/Latvia/065/2020|2020-07-09|EPI\_ISL\_493000|Original|hCoV-19^^Latvia|Human|E. Gulbja Laboratorija|Latvian Biomedical Research and Study Centre|Zrelavs|Latvia

>Spike|hCoV-19/USA/TX-HMH-6881/2020|2020-06-25|EPI\_ISL\_546316|Original|hCoV-19^^Texas|Human|Houston Methodist Hospital|Houston Methodist Hospital|Long|USA

>Spike|hCoV-19/USA/WA-S745/2020|2020-04-13|EPI\_ISL\_449915|Original|hCoV-19^^Washington|Human|Washington State Department of Health|Seattle Flu Study|Bedford|USA

>Spike|hCoV-19/England/ALDP-520032/2020|2020-06-02|EPI\_ISL\_559064|Original|hCoV-19^^England|Human|Lighthouse Lab in Alderley Park|Wellcome Sanger Institute for the COVID-19 Genomics UK (COG-UK) consortium|Davies|United Kingdom

>Spike|hCoV-19/USA/TX-HMH-MCoV-14869/2020|2020-10-13|EPI\_ISL\_786353|Original|hCoV-19^^Texas|Human|Houston Methodist Hospital|Houston Methodist Hospital|Long|USA

>Spike|hCoV-19/Denmark/DCGC-1996/2020|2020-07-20|EPI\_ISL\_618297|Original|hCoV-19^^Nordjylland|Human|Department of Virus and Microbiological Special Diagnostics|Albertsen lab|Michaelsen|Denmark

>Spike|hCoV-19/Poland/PL\_MCB\_50/2020|2020-05-10|EPI\_ISL\_645049|Original|hCoV-19^^Poland|Human|Human Genome Variation Research Group|Human Genome Variation Research Group|Poland

>Spike|hCoV-19/USA/MN-QDX-2054/2020|2020-03-15|EPI\_ISL\_604355|Original|hCoV-19^^Minnesota|Human|Quest Diagnostics|Quest Diagnostics|Kagan|USA

>Spike|hCoV-19/Denmark/DCGC-3555/2020|2020-08-31|EPI\_ISL\_616348|Original|hCoV-19^^Sjaelland|Human|Department of Virus and Microbiological Special Diagnostics|Albertsen lab|Michaelsen|Denmark

>Spike|hCoV-19/USA/HI-H200217/2020|2020-08-10|EPI\_ISL\_752776|Original|hCoV-19^^Hawaii|Human|State Laboratories Division|State Laboratories Division|Sultana|USA

>Spike|hCoV-19/Scotland/QEUH-9AE43C/2020|2020-09-05|EPI\_ISL\_638907|Original|hCoV-19^^Scotland|Human|Department of Pathology|COVID-19 Genomics UK (COG-UK) Consortium|Goodfellow|United Kingdom

>Spike|hCoV-19/Japan/PG-8361/2020|2020-07-00|EPI\_ISL\_687460|Original|hCoV-19^^Japan|Human|Pathogen Genomics Center|Pathogen Genomics Center|Sekizuka|Japan

>Spike|hCoV-19/England/SHEF-C50BC/2020|2020-04-18|EPI\_ISL\_462017|Original|hCoV-19^^England|Human|Virology Department|COVID-19 Genomics UK (COG-UK) Consortium|de Silva|United Kingdom

>Spike|hCoV-19/England/QEUEH-AF27B7/2020|2020-10-30|EPI\_ISL\_662677|Original|hCoV-19^^England|Human|Lighthouse Lab in Glasgow|Wellcome Sanger Institute for the COVID-19 Genomics UK (COG-UK) Consortium|Davies|United Kingdom

>Spike|hCoV-19/England/ALDP-9D8E77/2020|2020-09-18|EPI\_ISL\_576678|Original|hCoV-19^^England|Human|Oxford Viromics|COVID-19 Genomics UK (COG-UK) Consortium|Golubchik|United Kingdom

>Spike|hCoV-19/England/QEUEH-BA316B/2020|2020-11-18|EPI\_ISL\_672786|Original|hCoV-19^^England|Human|Lighthouse Lab in Glasgow|Wellcome Sanger Institute for the COVID-19 Genomics UK (COG-UK) Consortium|Davies|United Kingdom

>Spike|hCoV-19/England/ALDP-A52560/2020|2020-10-07|EPI\_ISL\_598018|Original|hCoV-19^^England|Human|Lighthouse Lab in Alderley Park|Wellcome Sanger Institute for the COVID-19 Genomics UK (COG-UK) consortium|Davies|United Kingdom

>Spike|hCoV-19/Australia/VIC7363/2020|2020-07-21|EPI\_ISL\_564360|Original|hCoV-19^^Victoria|Human|Victorian Infectious Diseases Reference Laboratory (VIDRL)|VIDRL and MDU-PHL|Schultz|Australia

>Spike|hCoV-19/England/QEUEH-B41123/2020|2020-11-08|EPI\_ISL\_658432|Original|hCoV-19^^England|Human|Lighthouse Lab in Glasgow|Wellcome Sanger Institute for the COVID-19 Genomics UK (COG-UK) Consortium|Davies|United Kingdom

>Spike|hCoV-19/USA/MI-UM-10036819118/2020|2020-11-06|EPI\_ISL\_728396|Original|hCoV-19^^Michigan|Human|University of Michigan Clinical Microbiology Laboratory|Lauring Lab|Valesano|USA

>Spike|hCoV-19/Belgium/reg-10181068/2020|2020-10-18|EPI\_ISL\_735108|Original|hCoV-19^^Sint-Stevens-Woluwe|Human|UZ Leuven|KU Leuven|Maes|Belgium

>Spike|hCoV-19/USA/CA-ALSR-3259/2020|2020-09-05|EPI\_ISL\_635935|Original|hCoV-19^^California|Human|San Diego County Public Health Laboratory|Andersen lab at Scripps Research|Gangavarapu|USA

>Spike|hCoV-19/Switzerland/BE-ETHZ-120221/2020|2020-04-30|EPI\_ISL\_468284|Original|hCoV-19^^Bern|Human|Viollier AG|Department of Biosystems Science and Engineering|Nadeau|Switzerland

>Spike|hCoV-19/Sweden/20-08044/2020|2020-03-09|EPI\_ISL\_454439|Original|hCoV-19^^Halland|Human|Halmstad klinisk mikrobiologi|The Public Health Agency of Sweden|Svartstr\u00f6m|Sweden

>Spike|hCoV-19/England/QEUEH-9C98E4/2020|2020-09-10|EPI\_ISL\_567468|Original|hCoV-19^^England|Human|Lighthouse Lab in Glasgow|Wellcome Sanger Institute for the COVID-19 Genomics UK (COG-UK) consortium|Davies|United Kingdom

>Spike|hCoV-19/England/CAMB-1B0350/2020|2020-05-01|EPI\_ISL\_459253|Original|hCoV-19^^England|Human|Department of Pathology|Wellcome Sanger Institute for the COVID-19 Genomics UK (COG-UK) consortium|Davies|United Kingdom

>Spike|hCoV-19/Wales/PHWC-28A5F/2020|2020-04-02|EPI\_ISL\_445391|Original|hCoV-19^^Wales|Human|Wales Specialist Virology Centre|Public Health Wales Microbiology Cardiff|Moore|United Kingdom

>Spike|hCoV-19/USA/NY-Wadsworth-213738-01/2020|2020-09-09|EPI\_ISL\_765501|Original|hCoV-19^^New York|Human|Wadsworth Center|Wadsworth Center|Lasek-Nesselquist|USA

>Spike|hCoV-19/England/CAMC-A592CC/2020|2020-10-07|EPI\_ISL\_597226|Original|hCoV-19^^England|Human|Lighthouse Lab in Cambridge|Wellcome Sanger Institute for the COVID-19 Genomics UK (COG-UK) consortium|Davies|United Kingdom

>Spike|hCoV-19/Australia/VIC9520/2020|2020-08-19|EPI\_ISL\_565584|Original|hCoV-19^^Victoria|Human|Microbiological Diagnostic Unit - Public Health Laboratory (MDU-PHL)|MDU-PHL|Schultz|Australia

>Spike|hCoV-19/USA/NY-WCMP5H02P/2020|2020-03-13|EPI\_ISL\_427542|Original|hCoV-19^^New York|Human|NewYork-Presbyterian & Mason Lab|Mason Lab|Mason|USA

>Spike|hCoV-19/USA/IA-GMF-21220/2020|2020-09-19|EPI\_ISL\_660829|Original|hCoV-19^^Iowa|Human|Gundersen Molecular Diagnostics Laboratory|Kabara Cancer Research Institute|Kenny|USA

>Spike|hCoV-19/England/QEUA-A9B668/2020|2020-10-20|EPI\_ISL\_611451|Original|hCoV-19^^England|Human|Lighthouse Lab in Glasgow|Wellcome Sanger Institute for the COVID-19 Genomics UK (COG-UK) consortium|Davies|United Kingdom

>Spike|hCoV-19/England/MILK-ACDB9B/2020|2020-10-21|EPI\_ISL\_630072|Original|hCoV-19^^England|Human|Lighthouse Lab in Milton Keynes|Wellcome Sanger Institute for the COVID-19 Genomics UK (COG-UK) consortium|Davies|United Kingdom

>Spike|hCoV-19/England/CAMB-784DA/2020|2020-04-06|EPI\_ISL\_433742|Original|hCoV-19^^England|Human|Department of Pathology|COVID-19 Genomics UK (COG-UK) Consortium|Meredith|United Kingdom

>Spike|hCoV-19/England/MILK-A47BD5/2020|2020-10-05|EPI\_ISL\_598345|Original|hCoV-19^^England|Human|Lighthouse Lab in Milton Keynes|Wellcome Sanger Institute for the COVID-19 Genomics UK (COG-UK) consortium|Davies|United Kingdom

>Spike|hCoV-19/Oman/24774/2020|2020-04-17|EPI\_ISL\_491151|Original|hCoV-19^^South Batinah|Human|Oman-National Influenza Center|Biotechnology & OMICs Laboratory|Al Mahruqi|Oman

>Spike|hCoV-19/Hong Kong/VM20001776/2020|2020-01-29|EPI\_ISL\_409002|Original|hCoV-19^^Hong Kong|Human|Queen Mary Hospital|Hong Kong Department of Health|Mak|China

>Spike|hCoV-19/USA/AZ-TG670178/2020|2020-04-29|EPI\_ISL\_696375|Original|hCoV-19^^Arizona|Human|Sonora Quest Laboratories|TGen North|French|USA

>Spike|hCoV-19/Uruguay/BUN-M151/2020|2020-07-20|EPI\_ISL\_751185|Original|hCoV-19^^Bella Union|Human|CENUR Litoral Norte \u2013 UdelaR|Institut Pasteur de Montevideo|Spangenberg|Uruguay

>Spike|hCoV-19/USA/MI-MDHHS-SC20268/2020|2020-03-27|EPI\_ISL\_447066|Original|hCoV-19^^Michigan|Human|Michigan Department of Health and Human Services|Michigan Department of Health and Human Services|Blankenship|USA

>Spike|hCoV-19/USA/MI-UM-10036818548/2020|2020-11-06|EPI\_ISL\_728435|Original|hCoV-19^^Michigan|Human|University of Michigan Clinical Microbiology Laboratory|Lauring Lab|Valesano|USA

>Spike|hCoV-19/Austria/CeMM0993/2020|2020-04-11|EPI\_ISL\_583837|Original|hCoV-19^^Austria|Human|Dr. Gernot Walder GmbH|Bergthaler laboratory|Bergthaler|Austria

>Spike|hCoV-19/South Africa/LR00022/2020|2020-07-02|EPI\_ISL\_515151|Original|hCoV-19^^Gauteng|Human|National Institute for Communicable Diseases of the National Health Laboratory Service|National Institute for Communicable Diseases of the National Health Laboratory Service|Allam|South Africa

>Spike|hCoV-19/Singapore/1047/2020|2020-03-22|EPI\_ISL\_574532|Original|hCoV-19^^Singapore|Human|National Public Health Laboratory|National Public Health Laboratory|Mak|Singapore

>Spike|hCoV-19/England/20118087504/2020|2020-03-12|EPI\_ISL\_464946|Original|hCoV-19^^England|Human|Respiratory Virus Unit|Respiratory Virus Unit|Platt|United Kingdom

>Spike|hCoV-19/USA/MI-MDHHS-SC21192/2020|2020-03-30|EPI\_ISL\_507449|Original|hCoV-19^^Michigan|Human|Michigan Department of Health and Human Services|Michigan Department of Health and Human Services|Blankenship|USA

>Spike|hCoV-19/England/CAMB-1B0086/2020|2020-00-00|EPI\_ISL\_448105|Original|hCoV-19^^England|Human|Department of Pathology|COVID-19 Genomics UK (COG-UK) Consortium|Meredith|United Kingdom

>Spike|hCoV-19/USA/WY-WYPHL007/2020|2020-03-15|EPI\_ISL\_421544|Original|hCoV-19^^Wyoming|Human|Wyoming Public Health Laboratory|Center for Global Health|Domman|USA

>Spike|hCoV-19/USA/CA-ALSR-5032/2020|2020-12-02|EPI\_ISL\_730303|Original|hCoV-19^^California|Human|San Diego County Public Health Laboratory|Andersen lab at Scripps Research|Gangavarapu|USA

>Spike|hCoV-19/USA/TX-HMH-MCoV-10892/2020|2020-07-09|EPI\_ISL\_789673|Original|hCoV-19^^Texas|Human|Houston Methodist Hospital|Houston Methodist Hospital|Long|USA

>Spike|hCoV-19/Austria/CeMM0875/2020|2020-04-30|EPI\_ISL\_583738|Original|hCoV-19^^Austria|Human|Dr. Gernot Walder GmbH|Bergthaler laboratory|Bergthaler|Austria

>Spike|hCoV-19/USA/VA-DCLS-0092/2020|2020-04-01|EPI\_ISL\_429989|Original|hCoV-19^^Virginia|Human|Virginia DCLS|Virginia DCLS|St. Jacques|USA

>Spike|hCoV-19/Switzerland/BS-42216240/2020|2020-04-01|EPI\_ISL\_581669|Original|hCoV-19^^Basel-Stadt|Human|University Hospital Basel|University Hospital Basel|Roloff Handschin|Switzerland

>Spike|hCoV-19/England/ALDP-B859EF/2020|2020-11-14|EPI\_ISL\_675833|Original|hCoV-19^^England|Human|Lighthouse Lab in Alderley Park|Wellcome Sanger Institute for the COVID-19 Genomics UK (COG-UK) Consortium|Davies|United Kingdom

>Spike|hCoV-19/England/CAMB-76445/2020|2020-03-30|EPI\_ISL\_438273|Original|hCoV-19^^England|Human|Department of Pathology|Wellcome Sanger Institute for the COVID-19 Genomics UK (COG-UK) consortium|Amato|United Kingdom

>Spike|hCoV-19/Denmark/DCGC-22532/2020|2020-12-14|EPI\_ISL\_757620|Original|hCoV-19^^Nordjylland|Human|Department of Virus and Microbiological Special Diagnostics|Albertsen Lab|Michaelsen|Denmark

>Spike|hCoV-19/USA/UT-UPHL-201117690/2020|2020-04-09|EPI\_ISL\_623195|Original|hCoV-19^^Utah|Human|Utah Public Health Laboratory|Utah Public Health Laboratory|Young|USA

>Spike|hCoV-19/Denmark/DCGC-3394/2020|2020-08-31|EPI\_ISL\_616153|Original|hCoV-19^^Hovedstaden|Human|Department of Virus and Microbiological Special Diagnostics|Albertsen lab|Michaelsen|Denmark

>Spike|hCoV-19/England/205190041/2020|2020-12-18|EPI\_ISL\_791218|Original|hCoV-19^^England|Human|Respiratory Virus Unit|COVID-19 Genomics UK (COG-UK) Consortium|Platt|United Kingdom

>Spike|hCoV-19/England/CAMC-B9A2A0/2020|2020-11-15|EPI\_ISL\_673521|Original|hCoV-19^^England|Human|Lighthouse Lab in Cambridge|Wellcome Sanger Institute for the COVID-19 Genomics UK (COG-UK) Consortium|Davies|United Kingdom

>Spike|hCoV-19/Australia/VIC6154/2020|2020-07-22|EPI\_ISL\_518163|Original|hCoV-19^^Victoria|Human|Victorian Infectious Diseases Reference Laboratory (VIDRL)|VIDRL and MDU-PHL|Schultz|Australia

>Spike|hCoV-19/England/QEUA-A4D4E3/2020|2020-10-05|EPI\_ISL\_628602|Original|hCoV-19^^England|Human|Oxford Viromics|COVID-19 Genomics UK (COG-UK) Consortium|Golubchik|United Kingdom

>Spike|hCoV-19/England/OXON-AF416/2020|2020-04-13|EPI\_ISL\_478736|Original|hCoV-19^^England|Human|Oxford Viromics|COVID-19 Genomics UK (COG-UK) Consortium|Golubchik|United Kingdom

>Spike|hCoV-19/Spain/MD-IBV-006427/2020|2020-04-01|EPI\_ISL\_510141|Original|hCoV-19^^Madrid|Human|Hospital General Universitario Gregorio Mara\u00f1a|SeqCOVID-SPAIN consortium|IBV (CSIC)|Comas|Spain

>Spike|hCoV-19/England/ALDP-8C95B1/2020|2020-06-27|EPI\_ISL\_556619|Original|hCoV-19^^England|Human|Lighthouse Lab in Alderley Park|Wellcome Sanger Institute for the COVID-19 Genomics UK (COG-UK) consortium|Davies|United Kingdom

>Spike|hCoV-19/Australia/VIC6011/2020|2020-07-23|EPI\_ISL\_518786|Original|hCoV-19^^Victoria|Human|Microbiological Diagnostic Unit - Public Health Laboratory (MDU-PHL)|MDU-PHL|Schultz|Australia

>Spike|hCoV-19/USA/AZ-TG569502/2020|2020-07-10|EPI\_ISL\_695586|Original|hCoV-19^^Arizona|Human|AZ SPHL|TGen North|French|USA

>Spike|hCoV-19/USA/TX-HMH-MCoV-18293/2020|2020-11-17|EPI\_ISL\_784641|Original|hCoV-19^^Texas|Human|Houston Methodist Hospital|Houston Methodist Hospital|Long|USA

>Spike|hCoV-19/England/CAMB-1B9DB3/2020|2020-10-31|EPI\_ISL\_651557|Original|hCoV-19^^England|Human|Department of Pathology|COVID-19 Genomics UK (COG-UK) Consortium|Goodfellow|United Kingdom

>Spike|hCoV-19/USA/UT-UPHL-2012405767/2020|2020-08-11|EPI\_ISL\_745932|Original|hCoV-19^^Utah|Human|Ginkgo Bioworks Clinical Laboratory|Utah Public Health Laboratory|Young|USA

>Spike|hCoV-19/USA/AZ-TG654314/2020|2020-04-12|EPI\_ISL\_695969|Original|hCoV-19^^Arizona|Human|Sonora Quest Laboratories|TGen North|French|USA

>Spike|hCoV-19/England/QEUA-A3141F/2020|2020-10-05|EPI\_ISL\_595886|Original|hCoV-19^^England|Human|Quadram Institute Bioscience|COVID-19 Genomics UK (COG-UK) Consortium|Alikhan|United Kingdom

>Spike|hCoV-19/Denmark/DCGC-14652/2020|2020-11-23|EPI\_ISL\_711892|Original|hCoV-19^^Nordjylland|Human|Department of Virus and Microbiological Special Diagnostics|Albertsen Lab|Michaelsen|Denmark

>Spike|hCoV-19/Australia/VIC5031/2020|2020-07-17|EPI\_ISL\_519835|Original|hCoV-19^^Victoria|Human|Microbiological Diagnostic Unit - Public Health Laboratory (MDU-PHL)|MDU-PHL|Schultz|Australia

>Spike|hCoV-19/England/ALDP-B1D542/2020|2020-11-01|EPI\_ISL\_645858|Original|hCoV-19^^England|Human|Lighthouse Lab in Alderley Park|Wellcome Sanger Institute for the COVID-19 Genomics UK (COG-UK) Consortium|Davies|United Kingdom

>Spike|hCoV-19/New Zealand/20VR1833/2020|2020-03-30|EPI\_ISL\_456276|Original|hCoV-19^^Southern|Human|Southern Community Labs Dunedin|Institute of Environmental Science and Research (ESR)|de Ligt|New Zealand

>Spike|hCoV-19/England/CAMC-A57176/2020|2020-10-08|EPI\_ISL\_597233|Original|hCoV-19^^England|Human|Lighthouse Lab in Cambridge|Wellcome Sanger Institute for the COVID-19 Genomics UK (COG-UK) consortium|Davies|United Kingdom

>Spike|hCoV-19/USA/TX-HMH-MCoV-10036/2020|2020-07-08|EPI\_ISL\_789298|Original|hCoV-19^^Texas|Human|Houston Methodist Hospital|Houston Methodist Hospital|Long|USA

>Spike|hCoV-19/Northern Ireland/NIRE-10338B/2020|2020-04-17|EPI\_ISL\_489377|Original|hCoV-19^^Northern Ireland|Human|Regional Virus Laboratory|Wellcome Sanger Institute for the COVID-19 Genomics UK (COG-UK) consortium|Davies|United Kingdom

>Spike|hCoV-19/England/CAMB-72BEA/2020|2020-03-22|EPI\_ISL\_439996|Original|hCoV-19^^England|Human|Department of Pathology|Wellcome Sanger Institute for the COVID-19 Genomics UK (COG-UK) consortium|Amato|United Kingdom

>Spike|hCoV-19/Denmark/DCGC-6940/2020|2020-10-12|EPI\_ISL\_619786|Original|hCoV-19^^Sjaelland|Human|Department of Virus and Microbiological Special Diagnostics|Albertsen lab|Michaelsen|Denmark

>Spike|hCoV-19/Wales/PHWC-16BDA1/2020|2020-09-17|EPI\_ISL\_573972|Original|hCoV-19^^Wales|Human|Wales Specialist Virology Centre Sequencing lab|COVID-19 Genomics UK (COG-UK) Consortium|Moore|United Kingdom

>Spike|hCoV-19/Denmark/DCGC-15254/2020|2020-11-23|EPI\_ISL\_713722|Original|hCoV-19^^Sjaelland|Human|Department of Virus and Microbiological Special Diagnostics|Albertsen Lab|Michaelsen|Denmark

>Spike|hCoV-19/Luxembourg/LNS1055944/2020|2020-03-23|EPI\_ISL\_429768|Original|hCoV-19^^Luxembourg|Human|Laboratoire National de Sante|Laboratoire National de Sante|Wienecke-Baldacchino|Luxembourg

>Spike|hCoV-19/USA/CA-QRTP-Donor14/2020|2020-04-01|EPI\_ISL\_490218|Original|hCoV-19^^California|Human|Quest Diagnostics|Q Squared Solutions - QRTP facility|Weigman|USA

>Spike|hCoV-19/Northern Ireland/QEUA-943493/2020|2020-08-01|EPI\_ISL\_532561|Original|hCoV-19^^Northern Ireland|Human|Lighthouse Lab in Glasgow|Wellcome Sanger Institute for the COVID-19 Genomics UK (COG-UK) consortium|Davies|United Kingdom

>Spike|hCoV-19/Beijing/DT-travelIT05/2020|2020-03-19|EPI\_ISL\_452334|Original|hCoV-19^^Beijing|Human|Laboratory of Infectious Diseases Center of Beijing Ditan Hospital|Laboratory of Infectious Diseases Center of Beijing Ditan Hospital|Yang|China

>Spike|hCoV-19/England/QEUA-B9E1EB/2020|2020-11-17|EPI\_ISL\_720916|Original|hCoV-19^^England|Human|Lighthouse Lab in Glasgow|Wellcome Sanger Institute for the COVID-19 Genomics UK (COG-UK) Consortium|Davies|United Kingdom

>Spike|hCoV-19/Switzerland/BS-ETHZ-100020/2020|2020-03-09|EPI\_ISL\_466944|Original|hCoV-19^^Basel-Stadt|Human|Viollier AG|Department of Biosystems Science and Engineering|Nadeau|Switzerland

>Spike|hCoV-19/USA/CA-ALSR-3650/2020|2020-09-28|EPI\_ISL\_636127|Original|hCoV-19^^California|Human|San Diego County Public Health Laboratory|Andersen lab at Scripps Research|Gangavarapu|USA

>Spike|hCoV-19/Netherlands/Overijssel\_15/2020|2020-04-13|EPI\_ISL\_460804|Original|hCoV-19^^Overijssel|Human|Dutch COVID-19 response team|Erasmus Medical Center|Oude Munnink|Netherlands

>Spike|hCoV-19/Scotland/QEUA-AA0660/2020|2020-10-21|EPI\_ISL\_666096|Original|hCoV-19^^Scotland|Human|Northumbria University / South Tees Hospitals NHS Foundation Trust / North Cumbria Integrated Care NHS Foundation Trust / North Tees and Hartlepool NHS Foundation Trust / Newcastle Hospitals NHS Foundation Trust|COVID-19 Genomics UK (COG-UK) Consortium|Bashton|United Kingdom

>Spike|hCoV-19/USA/NY-NYCPHL-001516/2020|2020-11-30|EPI\_ISL\_745433|Original|hCoV-19^^New York|Human|DOHMH Morrisania|New York City Public Health Laboratory|Wang|USA

>Spike|hCoV-19/England/20124020802/2020|2020-03-16|EPI\_ISL\_418702|Original|hCoV-19^^England|Human|Respiratory Virus Unit|Respiratory Virus Unit|Platt|United Kingdom

>Spike|hCoV-19/Singapore/1220/2020|2020-04-23|EPI\_ISL\_648636|Original|hCoV-19^^Singapore|Human|Department of Laboratory Medicine|Department of Laboratory Medicine|Chen|Singapore

>Spike|hCoV-19/England/ALDP-A68B65/2020|2020-10-12|EPI\_ISL\_608676|Original|hCoV-19^^England|Human|Lighthouse Lab in Alderley Park|Wellcome Sanger Institute for the COVID-19 Genomics UK (COG-UK) consortium|Davies|United Kingdom

>Spike|hCoV-19/England/MILK-BABFC3/2020|2020-11-18|EPI\_ISL\_720544|Original|hCoV-19^^England|Human|Lighthouse Lab in Milton Keynes|Wellcome Sanger Institute for the COVID-19 Genomics UK (COG-UK) Consortium|Davies|United Kingdom

>Spike|hCoV-19/USA/WA-S730/2020|2020-04-11|EPI\_ISL\_449900|Original|hCoV-19^^Washington|Human|Washington State Department of Health|Seattle Flu Study|Bedford|USA

>Spike|hCoV-19/England/CAMB-1AC25A/2020|2020-04-27|EPI\_ISL\_444385|Original|hCoV-19^^England|Human|Department of Pathology|COVID-19 Genomics UK (COG-UK) Consortium|Meredith|United Kingdom

>Spike|hCoV-19/England/ALDP-9C596D/2020|2020-09-10|EPI\_ISL\_567720|Original|hCoV-19^^England|Human|Lighthouse Lab in Alderley Park|Wellcome Sanger Institute for the COVID-19 Genomics UK (COG-UK) consortium|Davies|United Kingdom

>Spike|hCoV-19/Germany/BW-UKT-a020/2020|2020-04-04|EPI\_ISL\_723111|Original|hCoV-19^^Baden-Wuerttemberg|Human|Institute of Medical Genetics and Applied Genomics|Institute of Medical Genetics and Applied Genomics|Gross|Germany

>Spike|hCoV-19/Czech Republic/NRL-10733/2020|2020-11-03|EPI\_ISL\_693675|Original|hCoV-19^^Czech Republic|Human|The National Institute of Public Health|State Veterinary Institute Prague|Nagy|Czech Republic

>Spike|hCoV-19/England/EXET-1370F0/2020|2020-04-21|EPI\_ISL\_471949|Original|hCoV-19^^England|Human|University of Exeter|COVID-19 Genomics UK (COG-UK) Consortium|Temperton|United Kingdom

>Spike|hCoV-19/Scotland/EDB10674/2020|2020-12-03|EPI\_ISL\_705793|Original|hCoV-19^^Scotland|Human|Virology Department|COVID-19 Genomics UK (COG-UK) Consortium|McHugh|United Kingdom

>Spike|hCoV-19/Wales/PHWC-167D87/2020|2020-04-17|EPI\_ISL\_494154|Original|hCoV-19^^Wales|Human|Originating lab|COVID-19 Genomics UK (COG-UK) Consortium|Moore|United Kingdom

>Spike|hCoV-19/USA/NY-Wadsworth-32317-01/2020|2020-03-29|EPI\_ISL\_676782|Original|hCoV-19^^New York|Human|Wadsworth Center|Wadsworth Center|Lasek-Nesselquist|USA

>Spike|hCoV-19/Australia/VIC3909/2020|2020-07-11|EPI\_ISL\_520621|Original|hCoV-19^^Victoria|Human|Microbiological Diagnostic Unit - Public Health Laboratory (MDU-PHL)|MDU-PHL|Schultz|Australia

>Spike|hCoV-19/Mexico/BCN-ALSR-2571/2020|2020-07-08|EPI\_ISL\_635572|Original|hCoV-19^^Baja California|Human|Centro de Diagn\u00f3stico COVID-19 UABC Tijuana|Andersen lab at Scripps Research|Gangavarapu|Mexico

>Spike|hCoV-19/England/CAMC-B372A5/2020|2020-11-05|EPI\_ISL\_645273|Original|hCoV-19^^England|Human|Lighthouse Lab in Cambridge|Wellcome Sanger Institute for the COVID-19 Genomics UK (COG-UK) Consortium|Davies|United Kingdom

>Spike|hCoV-19/Japan/PG-3237/2020|2020-04-00|EPI\_ISL\_691353|Original|hCoV-19^^Japan|Human|Pathogen Genomics Center|Pathogen Genomics Center|Sekizuka|Japan

>Spike|hCoV-19/Denmark/DCGC-14821/2020|2020-11-23|EPI\_ISL\_712009|Original|hCoV-19^^Sjaelland|Human|Department of Virus and Microbiological Special Diagnostics|Albertsen Lab|Michaelsen|Denmark

>Spike|hCoV-19/Belgium/ULG-10483/2020|2020-09-23|EPI\_ISL\_581648|Original|hCoV-19^^Li\u00e8ge|Human|Department of Clinical Microbiology|GIGA Medical Genomics|Durkin|Belgium

>Spike|hCoV-19/USA/IA-GMF-28410/2020|2020-10-28|EPI\_ISL\_661018|Original|hCoV-19^^Iowa|Human|Gundersen Molecular Diagnostics Laboratory|Kabara Cancer Research Institute|Kenny|USA

>Spike|hCoV-19/USA/WA-UW-21786/2020|2020-08-05|EPI\_ISL\_571006|Original|hCoV-19^^Washington|Human|UW Virology Lab|UW Virology Lab|Roychoudhury|USA

>Spike|hCoV-19/Denmark/DCGC-3503/2020|2020-08-31|EPI\_ISL\_616292|Original|hCoV-19^^Syddanmark|Human|Department of Virus and Microbiological Special Diagnostics|Albertsen lab|Michaelsen|Denmark

>Spike|hCoV-19/Australia/VIC9767/2020|2020-07-17|EPI\_ISL\_565703|Original|hCoV-19^^Victoria|Human|Microbiological Diagnostic Unit - Public Health Laboratory (MDU-PHL)|MDU-PHL|Schultz|Australia

>Spike|hCoV-19/England/MILK-B3CF6D/2020|2020-11-02|EPI\_ISL\_706209|Original|hCoV-19^^England|Human|Oxford Viromics|COVID-19 Genomics UK (COG-UK) Consortium|Golubchik|United Kingdom

>Spike|hCoV-19/England/ALDP-B240B0/2020|2020-11-04|EPI\_ISL\_646323|Original|hCoV-19^^England|Human|Lighthouse Lab in Alderley Park|Wellcome Sanger Institute for the COVID-19 Genomics UK (COG-UK) Consortium|Davies|United Kingdom

>Spike|hCoV-19/Wales/PHWC-4A0147/2020|2020-12-02|EPI\_ISL\_743401|Original|hCoV-19^^Wales|Human|Wales Specialist Virology Centre Sequencing lab|COVID-19 Genomics UK (COG-UK) Consortium|Moore|United Kingdom

>Spike|hCoV-19/Israel/CVL-265-ngs/2020|2020-12-27|EPI\_ISL\_776828|Original|hCoV-19^^Israel|Human|Israel Central Virology laboratory|Israel Central Virology laboratory|Zuckerman|Israel

>Spike|hCoV-19/England/LEED-2AA1F4/2020|2020-03-30|EPI\_ISL\_538932|Original|hCoV-19^^England|Human|Leeds Teaching Hospitals NHS Trust and Public Health England|Wellcome Sanger Institute for the COVID-19 Genomics UK (COG-UK) consortium|Davies|United Kingdom

>Spike|hCoV-19/USA/CA-CZB-4050/2020|2020-08-03|EPI\_ISL\_548616|Original|hCoV-19^^California|Human|County of Santa Clara Public Health Department|Chan-Zuckerberg Biohub|Bhatt|USA

>Spike|hCoV-19/Netherlands/NoordBrabant\_71/2020|2020-03-11|EPI\_ISL\_422867|Original|hCoV-19^^Noord Brabant|Human|Dutch COVID-19 response team|Erasmus Medical Center|Oude Munnink|Netherlands

>Spike|hCoV-19/Denmark/DCGC-11265/2020|2020-11-02|EPI\_ISL\_670802|Original|hCoV-19^^Syddanmark|Human|Department of Virus and Microbiological Special Diagnostics|Albertsen Lab|Michaelsen|Denmark

>Spike|hCoV-19/USA/UT-UPHL-2012566391/2020|2020-08-11|EPI\_ISL\_745541|Original|hCoV-19^^Utah|Human|Ginkgo Bioworks Clinical Laboratory|Utah Public Health Laboratory|Young|USA

>Spike|hCoV-19/Thailand/Bangkok\_2864/2020|2020-03-00|EPI\_ISL\_515475|Vero P2|hCoV-19^^Bangkok|Human|National Institute of Health|National Institute of Health|Phuygun|Thailand

>Spike|hCoV-19/England/20132031404/2020|2020-03-22|EPI\_ISL\_423769|Original|hCoV-19^^England|Human|Respiratory Virus Unit|Respiratory Virus Unit|Platt|United Kingdom

>Spike|hCoV-19/USA/FL-BPHL-1969/2020|2020-04-15|EPI\_ISL\_653122|Original|hCoV-19^^Florida|Human|Florida Bureau of Public Health Laboratories|Florida Bureau of Public Health Laboratories|Blanton|USA

>Spike|hCoV-19/USA/WI-WSLH-200346/2020|2020-04-20|EPI\_ISL\_578520|Original|hCoV-19^^Wisconsin|Human|Wisconsin State Laboratory of Hygiene Communicable Disease Division|Wisconsin State Laboratory of Hygiene Communicable Disease Division|Florek|USA

>Spike|hCoV-19/USA/TX-HMH-MCoV-14749/2020|2020-10-12|EPI\_ISL\_786234|Original|hCoV-19^^Texas|Human|Houston Methodist Hospital|Houston Methodist Hospital|Long|USA

>Spike|hCoV-19/Lithuania/MR-LUHS-Eilnr39/2020|2020-04-06|EPI\_ISL\_603093|Original|hCoV-19^^Marijampoles apskritis|Human|Lithuanian University of Health Sciences Hospital|Lithuanian University of Health Sciences|Zemaitis|Lithuania

>Spike|hCoV-19/USA/AZ-TG325106/2020|2020-05-22|EPI\_ISL\_694343|Original|hCoV-19^^Arizona|Human|TGen North|TGen North|French|USA

>Spike|hCoV-19/Scotland/CVR151/2020|2020-03-17|EPI\_ISL\_425694|Original|hCoV-19^^Scotland|Human|West of Scotland Specialist Virology Centre|COVID-19 Genomics UK (COG-UK) Consortium|Robertson|United Kingdom

>Spike|hCoV-19/England/CAMB-73DC5/2020|2020-04-01|EPI\_ISL\_433698|Original|hCoV-19^^England|Human|Department of Pathology|COVID-19 Genomics UK (COG-UK) Consortium|Meredith|United Kingdom

>Spike|hCoV-19/USA/TX-HMH-MCoV-10837/2020|2020-07-05|EPI\_ISL\_789652|Original|hCoV-19^^Texas|Human|Houston Methodist Hospital|Houston Methodist Hospital|Long|USA

>Spike|hCoV-19/Australia/VIC7046/2020|2020-07-19|EPI\_ISL\_564207|Original|hCoV-19^^Victoria|Human|Victorian Infectious Diseases Reference Laboratory (VIDRL)|VIDRL and MDU-PHL|Schultz|Australia

>Spike|hCoV-19/Japan/PG-0847/2020|2020-04-00|EPI\_ISL\_684457|Original|hCoV-19^^Japan|Human|Fukuoka Institute of Health and Environmental Sciences|Pathogen Genomics Center|Sekizuka|Japan

>Spike|hCoV-19/Wales/PHWC-27B02/2020|2020-03-30|EPI\_ISL\_432321|Original|hCoV-19^^Wales|Human|Wales Specialist Virology Centre|Public Health Wales Microbiology Cardiff|Moore|United Kingdom

>Spike|hCoV-19/Denmark/DCGC-11821/2020|2020-10-26|EPI\_ISL\_671154|Original|hCoV-19^^Syddanmark|Human|Department of Virus and Microbiological Special Diagnostics|Albertsen Lab|Michaelsen|Denmark

>Spike|hCoV-19/Denmark/DCGC-1336/2020|2020-06-01|EPI\_ISL\_618010|Original|hCoV-19^^Hovedstaden|Human|Department of Virus and Microbiological Special Diagnostics|Albertsen lab|Michaelsen|Denmark

>Spike|hCoV-19/Switzerland/ZH-UZH-IMV110/2020|2020-12-20|EPI\_ISL\_730627|Original|hCoV-19^^Zurich|Human|M\u00e4nnedorf Hospital|Institute of Medical Virology|Schmutz|Switzerland

>Spike|hCoV-19/England/QEUEH-9F7C78/2020|2020-09-27|EPI\_ISL\_588964|Original|hCoV-19^^England|Human|Lighthouse Lab in Glasgow|Wellcome Sanger Institute for the COVID-19 Genomics UK (COG-UK) consortium|Davies|United Kingdom

>Spike|hCoV-19/England/GSTT-5781/2020|2020-03-23|EPI\_ISL\_560713|Original|hCoV-19^^England|Human|Centre for Clinical Infection and Diagnostics Research and Genomics Innovation Unit|Centre for Clinical Infection and Diagnostics Research and Genomics Innovation Unit|Awan|United Kingdom

>Spike|hCoV-19/USA/CA-ALSR-2266/2020|2020-06-29|EPI\_ISL\_635400|Original|hCoV-19^^California|Human|San Diego County Public Health Laboratory|Andersen lab at Scripps Research|Gangavarapu|USA

>Spike|hCoV-19/England/BIRM-5F6A6/2020|2020-00-00|EPI\_ISL\_461525|Original|hCoV-19^^England|Human|University of Birmingham|COVID-19 Genomics UK (COG-UK) Consortium|Loman|United Kingdom

>Spike|hCoV-19/Kenya/C4616/2020|2020-05-08|EPI\_ISL\_568731|Original|hCoV-19^^Mombasa|Human|KEMRI-Wellcome Trust Research Programme/KEMRI-CGMR-C Kilifi|KEMRI-Wellcome Trust Research Programme/KEMRI-CGMR-C Kilifi|Githinji|Kenya

>Spike|hCoV-19/Northern Ireland/NIRE-107466/2020|2020-03-31|EPI\_ISL\_585152|Original|hCoV-19^^Northern Ireland|Human|Regional Virus Laboratory|COVID-19 Genomics UK (COG-UK) Consortium|Fairley|United Kingdom

>Spike|hCoV-19/England/MILK-99376E/2020|2020-08-26|EPI\_ISL\_551998|Original|hCoV-19^^England|Human|Lighthouse Lab in Milton Keynes|Wellcome Sanger Institute for the COVID-19 Genomics UK (COG-UK) consortium|Davies|United Kingdom

>Spike|hCoV-19/England/CAMB-7B6FF/2020|2020-04-03|EPI\_ISL\_442259|Original|hCoV-19^^England|Human|Department of Pathology|Wellcome Sanger Institute for the COVID-19 Genomics UK (COG-UK) consortium|Amato|United Kingdom

>Spike|hCoV-19/Denmark/DCGC-5751/2020|2020-09-28|EPI\_ISL\_621256|Original|hCoV-19^^Hovedstaden|Human|Department of Virus and Microbiological Special Diagnostics|Albertsen lab|Michaelsen|Denmark

>Spike|hCoV-19/England/SHEF-C3B80/2020|2020-05-04|EPI\_ISL\_475373|Original|hCoV-19^^England|Human|Virology Department|COVID-19 Genomics UK (COG-UK) Consortium|de Silva|United Kingdom

>Spike|hCoV-19/USA/NY-NYCPHL-000735/2020|2020-03-22|EPI\_ISL\_632117|Original|hCoV-19^^New York|Human|Richmond University Medical Center|New York City Public Health Laboratory|Wang|USA

>Spike|hCoV-19/England/ALDP-94DF98/2020|2020-06-16|EPI\_ISL\_555566|Original|hCoV-19^^England|Human|Lighthouse Lab in Alderley Park|Wellcome Sanger Institute for the COVID-19 Genomics UK (COG-UK) consortium|Davies|United Kingdom

>Spike|hCoV-19/Wales/PHWC-16CBD3/2020|2020-09-24|EPI\_ISL\_574145|Original|hCoV-19^^Wales|Human|Wales Specialist Virology Centre Sequencing lab|COVID-19 Genomics UK (COG-UK) Consortium|Moore|United Kingdom



>Spike|hCoV-19/Spain/MD-HLP-R81/2020|2020-05-07|EPI\_ISL\_530114|Original|hCoV-19^^Madrid|Human|Hospital Universitario Ram\u00f3n y Cajal|Hospital Universitario La Paz|Viedma|Spain

>Spike|hCoV-19/Australia/NSW776/2020|2020-07-29|EPI\_ISL\_526118|Original|hCoV-19^^New South Wales|Human|Pathology West - NSW Health Pathology|NSW Health Pathology - Institute of Clinical Pathology and Medical Research; Westmead Hospital; University of Sydney|Gall|Australia

>Spike|hCoV-19/Netherlands/ZH-EMC-1088/2020|2020-12-13|EPI\_ISL\_722769|Original|hCoV-19^^Zuid Holland|Human|Dutch COVID-19 response team|Erasmus Medical Center|Oude Munnink|Netherlands

>Spike|hCoV-19/England/CAMB-72EE1/2020|2020-03-23|EPI\_ISL\_440055|Original|hCoV-19^^England|Human|Department of Pathology|Wellcome Sanger Institute for the COVID-19 Genomics UK (COG-UK) consortium|Amato|United Kingdom

>Spike|hCoV-19/England/GSTT-265DC40/2020|2020-03-21|EPI\_ISL\_484084|Original|hCoV-19^^England|Human|Centre for Clinical Infection and Diagnostics Research and Genomics Innovation Unit|COVID-19 Genomics UK (COG-UK) Consortium|Awan|United Kingdom

>Spike|hCoV-19/England/NOTT-117C4D/2020|2020-10-25|EPI\_ISL\_612588|Original|hCoV-19^^England|Human|Queens Medical Centre|COVID-19 Genomics UK (COG-UK) Consortium|Loose|United Kingdom

>Spike|hCoV-19/USA/WA-QDX-1060/2020|2020-03-17|EPI\_ISL\_571802|Original|hCoV-19^^Washington|Human|Quest Diagnostics|Quest Diagnostics|Kagan|USA

>Spike|hCoV-19/England/MILK-B95278/2020|2020-11-13|EPI\_ISL\_673801|Original|hCoV-19^^England|Human|Lighthouse Lab in Milton Keynes|Wellcome Sanger Institute for the COVID-19 Genomics UK (COG-UK) Consortium|Davies|United Kingdom

>Spike|hCoV-19/Wales/PHWC-2B1EE/2020|2020-04-07|EPI\_ISL\_432272|Original|hCoV-19^^Wales|Human|Wales Specialist Virology Centre|Public Health Wales Microbiology Cardiff|Moore|United Kingdom

>Spike|hCoV-19/England/ALDP-4A78C3/2020|2020-06-08|EPI\_ISL\_559608|Original|hCoV-19^^England|Human|Lighthouse Lab in Alderley Park|Wellcome Sanger Institute for the COVID-19 Genomics UK (COG-UK) consortium|Davies|United Kingdom

>Spike|hCoV-19/Luxembourg/LNS0927824/2020|2020-11-22|EPI\_ISL\_739858|Original|hCoV-19^^Luxembourg|Human|Laboratoire national de sant\u00e9|Laboratoire national de sant\u00e9|Wienecke-Baldacchino|Luxembourg

>Spike|hCoV-19/USA/CA-ALSR-3175/2020|2020-06-03|EPI\_ISL\_635901|Original|hCoV-19^^California|Human|San Diego County Public Health Laboratory|Andersen lab at Scripps Research|Gangavarapu|USA

>Spike|hCoV-19/England/20134004304/2020|2020-03-23|EPI\_ISL\_423062|Original|hCoV-19^^England|Human|Respiratory Virus Unit|Respiratory Virus Unit|Platt|United Kingdom

>Spike|hCoV-19/England/LCST-24D6D8A/2020|2020-06-10|EPI\_ISL\_478341|Original|hCoV-19^^England|Human|University Hospitals Of Leicester NHS Trust and DeepSeq Nottingham|COVID-19 Genomics UK (COG-UK) Consortium|Loose|United Kingdom

>Spike|hCoV-19/England/BRIS-1305F8/2020|2020-04-12|EPI\_ISL\_492530|Original|hCoV-19^^England|Human|PHE South West Regional Laboratory|Wellcome Sanger Institute for the COVID-19 Genomics UK (COG-UK) consortium|Davies|United Kingdom

>Spike|hCoV-19/Luxembourg/LNS6434733/2020|2020-10-26|EPI\_ISL\_744413|Original|hCoV-19^^Luxembourg|Human|Laboratoire national de sant\u00e9|Laboratoire national de sant\u00e9|Wienecke-Baldacchino|Luxembourg

>Spike|hCoV-19/Wales/PHWC-485D35/2020|2020-10-21|EPI\_ISL\_628275|Original|hCoV-19^^Wales|Human|Wales Specialist Virology Centre Sequencing lab|COVID-19 Genomics UK (COG-UK) Consortium|Moore|United Kingdom

>Spike|hCoV-19/USA/WA-S1037/2020|2020-05-03|EPI\_ISL\_463527|Original|hCoV-19^^Washington|Human|Washington State Department of Health|Seattle Flu Study|Bedford|USA

>Spike|hCoV-19/USA/NM-UNM-00570/2020|2020-08-08|EPI\_ISL\_542984|Original|hCoV-19^^New Mexico|Human|TriCore Reference Laboratories|Center for Global Health|Domman|USA

>Spike|hCoV-19/DRC/3841/2020|2020-04-25|EPI\_ISL\_447249|Original|hCoV-19^^Kinshasa|Human|Viral Respiratory Lab|Pathogen Sequencing Lab|Amuri|Democratic Republic of the Congo

>Spike|hCoV-19/USA/WA-UW324/2020|2020-03-24|EPI\_ISL\_418891|Original|hCoV-19^^Washington|Human|UW Virology Lab|UW Virology Lab|Roychoudhury|USA

>Spike|hCoV-19/England/ALDP-A2FB1F/2020|2020-10-05|EPI\_ISL\_586955|Original|hCoV-19^^England|Human|Lighthouse Lab in Alderley Park|Wellcome Sanger Institute for the COVID-19 Genomics UK (COG-UK) consortium|Davies|United Kingdom

>Spike|hCoV-19/Japan/PG-1348/2020|2020-04-00|EPI\_ISL\_684956|Original|hCoV-19^^Japan|Human|Saitama Prefectural Institute of Public Health|Pathogen Genomics Center|Sekizuka|Japan

>Spike|hCoV-19/Russia/SPE-RII-7388V/2020|2020-04-20|EPI\_ISL\_524049|Vero P1|hCoV-19^^Saint Petersburg|Human|WHO National Influenza Centre Russian Federation|WHO National Influenza Centre Russian Federation|Komissarov|Russia

>Spike|hCoV-19/Australia/VIC9018/2020|2020-07-24|EPI\_ISL\_565355|Original|hCoV-19^^Victoria|Human|Microbiological Diagnostic Unit - Public Health Laboratory (MDU-PHL)|MDU-PHL|Schultz|Australia

>Spike|hCoV-19/France/PAC-IHU-0199/2020|2020-03-27|EPI\_ISL\_569366|Original|hCoV-19^^Provence-Alpes-C\u00f4te-d\u2019Azur|Human|MEPHI|MEPHI|Levasseur|France

>Spike|hCoV-19/England/205320747/2020|2020-12-28|EPI\_ISL\_770469|Original|hCoV-19^^England|Human|Respiratory Virus Unit|COVID-19 Genomics UK (COG-UK) Consortium|Platt|United Kingdom

>Spike|hCoV-19/England/QEUH-9B553F/2020|2020-09-03|EPI\_ISL\_590353|Original|hCoV-19^^England|Human|Lighthouse Lab in Glasgow|Wellcome Sanger Institute for the COVID-19 Genomics UK (COG-UK) consortium|Davies|United Kingdom

>Spike|hCoV-19/England/204221433/2020|2020-00-00|EPI\_ISL\_593809|Original|hCoV-19^^England|Human|Respiratory Virus Unit|Respiratory Virus Unit|Platt|United Kingdom

>Spike|hCoV-19/USA/TX-HMH-MCoV-8155/2020|2020-06-30|EPI\_ISL\_784236|Original|hCoV-19^^Texas|Human|Houston Methodist Hospital|Houston Methodist Hospital|Long|USA

>Spike|hCoV-19/England/NORW-F8092/2020|2020-11-13|EPI\_ISL\_650387|Original|hCoV-19^^England|Human|Quadram Institute Bioscience|COVID-19 Genomics UK (COG-UK) Consortium|Alikhan|United Kingdom

>Spike|hCoV-19/Wales/PHWC-15CBB8/2020|2020-03-31|EPI\_ISL\_472591|Original|hCoV-19^^Wales|Human|Wales Specialist Virology Centre Sequencing lab|COVID-19 Genomics UK (COG-UK) Consortium|Moore|United Kingdom

>Spike|hCoV-19/USA/TX-DSHS-0030/2020|2020-05-07|EPI\_ISL\_517963|Original|hCoV-19^^Texas|Human|Texas Department of State Health Services|Texas Department of State Health Services|Rahman|USA

>Spike|hCoV-19/Denmark/DCGC-18475/2020|2020-12-07|EPI\_ISL\_749988|Original|hCoV-19^^Syddanmark|Human|Department of Virus and Microbiological Special Diagnostics|Albertsen Lab|Michaelsen|Denmark

>Spike|hCoV-19/USA/LA-GBCL-26629248/2020|2020-04-21|EPI\_ISL\_485894|Original|hCoV-19^^Louisiana|Human|River Road Testing Lab|Ginkgo Bioworks Clinical Laboratory|Smith|USA

>Spike|hCoV-19/Wales/PHWC-4862BD/2020|2020-10-16|EPI\_ISL\_637619|Original|hCoV-19^^Wales|Human|Wales Specialist Virology Centre Sequencing lab|COVID-19 Genomics UK (COG-UK) Consortium|Moore|United Kingdom

>Spike|hCoV-19/Denmark/DCGC-3141/2020|2020-08-31|EPI\_ISL\_615960|Original|hCoV-19^^NA|Human|Department of Virus and Microbiological Special Diagnostics|Albertsen lab|Michaelsen|Denmark

>Spike|hCoV-19/England/ALDP-B84537/2020|2020-11-14|EPI\_ISL\_675455|Original|hCoV-19^^England|Human|Lighthouse Lab in Alderley Park|Wellcome Sanger Institute for the COVID-19 Genomics UK (COG-UK) Consortium|Davies|United Kingdom

>Spike|hCoV-19/USA/CA-CZB-15278/2020|2020-11-28|EPI\_ISL\_738610|Original|hCoV-19^^California|Human|Santa Clara County Public Health Laboratory|Chan-Zuckerberg Biohub|Kamm|USA

>Spike|hCoV-19/England/ALDP-AA28E0/2020|2020-10-21|EPI\_ISL\_630758|Original|hCoV-19^^England|Human|Lighthouse Lab in Alderley Park|Wellcome Sanger Institute for the COVID-19 Genomics UK (COG-UK) consortium|Davies|United Kingdom

>Spike|hCoV-19/Denmark/DCGC-20645/2020|2020-12-21|EPI\_ISL\_759273|Original|hCoV-19^^Hovedstaden|Human|Department of Virus and Microbiological Special Diagnostics|Albertsen Lab|Michaelsen|Denmark

>Spike|hCoV-19/England/SHEF-10D7E05/2020|2020-12-09|EPI\_ISL\_742110|Original|hCoV-19^^England|Human|Virology Department|COVID-19 Genomics UK (COG-UK) Consortium|de Silva|United Kingdom

>Spike|hCoV-19/England/SHEF-C8ACA/2020|2020-11-05|EPI\_ISL\_680156|Original|hCoV-19^^England|Human|Virology Department|COVID-19 Genomics UK (COG-UK) Consortium|de Silva|United Kingdom

>Spike|hCoV-19/Canada/BC\_05845391/2020|2020-04-00|EPI\_ISL\_466791|Original|hCoV-19^^British Columbia|Human|BCCDC Public Health Laboratory|BCCDC Public Health Laboratory|Harrigan|Canada

>Spike|hCoV-19/Denmark/DCGC-7409/2020|2020-10-12|EPI\_ISL\_619359|Original|hCoV-19^^Midtjylland|Human|Department of Virus and Microbiological Special Diagnostics|Albertsen lab|Michaelsen|Denmark

>Spike|hCoV-19/England/NORW-ED564/2020|2020-00-00|EPI\_ISL\_472374|Original|hCoV-19^^England|Human|Quadram Institute Bioscience|COVID-19 Genomics UK (COG-UK) Consortium|Alikhan|United Kingdom

>Spike|hCoV-19/Finland/23LS5C4/2020|2020-10-23|EPI\_ISL\_759776|Original|hCoV-19^^Uusimaa|Human|Department of Virology and Immunology|Department of Virology|Smura|Finland

>Spike|hCoV-19/Spain/PV-IBV-005154/2020|2020-06-22|EPI\_ISL\_509642|Original|hCoV-19^^Basque Country|Human|Servicio de Microbiolog\u00eda. Hospital Universitario Donostia. OSI Donostialdea. \u00c1rea de Enfermedades Infecciosas|SeqCOVID-SPAIN consortium/IBV (CSIC) |Comas|Spain

>Spike|hCoV-19/Switzerland/ZH-ETHZ-150041plus/2020|2020-06-02|EPI\_ISL\_483666|Original|hCoV-19^^Zurich|Human|Viollier AG|Department of Biosystems Science and Engineering|Nadeau|Switzerland

>Spike|hCoV-19/England/QEUA-AD2243/2020|2020-10-26|EPI\_ISL\_629938|Original|hCoV-19^^England|Human|Lighthouse Lab in Glasgow|Wellcome Sanger Institute for the COVID-19 Genomics UK (COG-UK) consortium|Davies|United Kingdom

>Spike|hCoV-19/England/QEUA-BA331A/2020|2020-11-18|EPI\_ISL\_721127|Original|hCoV-19^^England|Human|Lighthouse Lab in Glasgow|Wellcome Sanger Institute for the COVID-19 Genomics UK (COG-UK) Consortium|Davies|United Kingdom

>Spike|hCoV-19/England/ALDP-AA2060/2020|2020-10-22|EPI\_ISL\_624300|Original|hCoV-19^^England|Human|Lighthouse Lab in Alderley Park|Wellcome Sanger Institute for the COVID-19 Genomics UK (COG-UK) consortium|Davies|United Kingdom

>Spike|hCoV-19/USA/TX-HMH-MCoV-19275/2020|2020-11-23|EPI\_ISL\_783734|Original|hCoV-19^^Texas|Human|Houston Methodist Hospital|Houston Methodist Hospital|Long|USA

>Spike|hCoV-19/USA/AZ-TG519153/2020|2020-06-30|EPI\_ISL\_695357|Original|hCoV-19^^Arizona|Human|AZ SPHL|TGen North|French|USA

>Spike|hCoV-19/Belgium/reg-09181047/2020|2020-09-18|EPI\_ISL\_734991|Original|hCoV-19^^Wijgmaal|Human|UZ Leuven|KU Leuven|Maes|Belgium

>Spike|hCoV-19/USA/NY-SURV0983/2020|2020-03-19|EPI\_ISL\_436078|Original|hCoV-19^^New York|Human|NYC Department of Health and Mental Hygiene|Pathogen Discovery|Queen|USA

>Spike|hCoV-19/USA/TX-HMH-MCoV-8634/2020|2020-07-01|EPI\_ISL\_780664|Original|hCoV-19^^Texas|Human|Houston Methodist Hospital|Houston Methodist Hospital|Long|USA

>Spike|hCoV-19/Spain/GA-IBV-002723/2020|2020-04-07|EPI\_ISL\_467295|Original|hCoV-19^^Galicia|Human|Hospital Cl\u00e9nico Universitario de Santiago de Compostela|SeqCOVID-SPAIN consortium/IBV (CSIC) |Comas|Spain

>Spike|hCoV-19/England/MILK-A7AE76/2020|2020-10-15|EPI\_ISL\_606376|Original|hCoV-19^^England|Human|Lighthouse Lab in Milton Keynes|Wellcome Sanger Institute for the COVID-19 Genomics UK (COG-UK) consortium|Davies|United Kingdom

>Spike|hCoV-19/England/20108165204/2020|2020-03-05|EPI\_ISL\_452253|Original|hCoV-19^^England|Human|Respiratory Virus Unit|Respiratory Virus Unit|Platt|United Kingdom

>Spike|hCoV-19/Wales/PHWC-47D9B4/2020|2020-10-08|EPI\_ISL\_586219|Original|hCoV-19^^Wales|Human|Wales Specialist Virology Centre Sequencing lab|COVID-19 Genomics UK (COG-UK) Consortium|Moore|United Kingdom

>Spike|hCoV-19/Russia/SVE-RII-MH1924S/2020|2020-09-16|EPI\_ISL\_602367|Original|hCoV-19^^Sverdlovsk|Human|HELIX LLC|WHO National Influenza Centre Russian Federation|Komissarov|Russia

>Spike|hCoV-19/England/CAMC-9DF845/2020|2020-09-21|EPI\_ISL\_638427|Original|hCoV-19^^England|Human|Department of Pathology|COVID-19 Genomics UK (COG-UK) Consortium|Goodfellow|United Kingdom

>Spike|hCoV-19/USA/TX-HMH-4792/2020|2020-06-22|EPI\_ISL\_544335|Original|hCoV-19^^Texas|Human|Houston Methodist Hospital|Houston Methodist Hospital|Long|USA

>Spike|hCoV-19/USA/TX-HMH-MCoV-12302/2020|2020-09-25|EPI\_ISL\_790290|Original|hCoV-19^^Texas|Human|Houston Methodist Hospital|Houston Methodist Hospital|Long|USA

>Spike|hCoV-19/Wales/PHWC-48F8FE/2020|2020-11-10|EPI\_ISL\_681157|Original|hCoV-19^^Wales|Human|Wales Specialist Virology Centre Sequencing lab|COVID-19 Genomics UK (COG-UK) Consortium|Moore|United Kingdom

>Spike|hCoV-19/England/CAMB-7FB74/2020|2020-04-17|EPI\_ISL\_433483|Original|hCoV-19^^England|Human|Department of Pathology|COVID-19 Genomics UK (COG-UK) Consortium|Meredith|United Kingdom

>Spike|hCoV-19/Vietnam/PIHCM-372/2020|2020-03-20|EPI\_ISL\_654872|Vero E6|hCoV-19^^Ho Chi Minh city|Human|Pasteur Institute in Ho Chi Minh city|Department of Microbiology and Immunology - Pasteur Institute in Ho Chi Minh city|Vu|Viet Nam

>Spike|hCoV-19/England/MILK-BAB743/2020|2020-11-18|EPI\_ISL\_783362|Original|hCoV-19^^England|Human|Lighthouse Lab in Milton Keynes|Wellcome Sanger Institute for the COVID-19 Genomics UK (COG-UK) Consortium|Davies|United Kingdom

>Spike|hCoV-19/Russia/MOW-RII-MH2917S/2020|2020-09-23|EPI\_ISL\_733069|Original|hCoV-19^^Moscow|Human|HELIX LLC|WHO National Influenza Centre Russian Federation|Komissarov|Russia

>Spike|hCoV-19/England/ALDP-B5D93B/2020|2020-11-10|EPI\_ISL\_704446|Original|hCoV-19^^England|Human|Department of Pathology|COVID-19 Genomics UK (COG-UK) Consortium|Goodfellow|United Kingdom

>Spike|hCoV-19/Wales/PHWC-4A630F/2020|2020-12-16|EPI\_ISL\_765025|Original|hCoV-19^^Wales|Human|Wales Specialist Virology Centre Sequencing lab|COVID-19 Genomics UK (COG-UK) Consortium|Moore|United Kingdom

>Spike|hCoV-19/Israel/CVL-11-ngs/2020|2020-12-24|EPI\_ISL\_776581|Original|hCoV-19^^Israel|Human|Israel Central Virology laboratory|Israel Central Virology laboratory|Zuckerman|Israel

>Spike|hCoV-19/Wales/PHWC-49E759/2020|2020-12-08|EPI\_ISL\_743042|Original|hCoV-19^^Wales|Human|Wales Specialist Virology Centre Sequencing lab|COVID-19 Genomics UK (COG-UK) Consortium|Moore|United Kingdom

>Spike|hCoV-19/South Korea/KCDC2066/2020|2020-02-20|EPI\_ISL\_497967|Vero E6 P1|hCoV-19^^South Korea|Human|Division of Viral Diseases|Division of Viral Diseases|Kim|South Korea

>Spike|hCoV-19/Denmark/DCGC-22339/2020|2020-12-14|EPI\_ISL\_757848|Original|hCoV-19^^Sjaelland|Human|Department of Virus and Microbiological Special Diagnostics|Albertsen Lab|Michaelsen|Denmark

>Spike|hCoV-19/USA/TX-HMH-MCoV-8758/2020|2020-07-01|EPI\_ISL\_780737|Original|hCoV-19^^Texas|Human|Houston Methodist Hospital|Houston Methodist Hospital|Long|USA

>Spike|hCoV-19/South Korea/KDCA0294/2020|2020-10-26|EPI\_ISL\_760088|Original|hCoV-19^^South Korea|Human|Division of Emerging Infectious Diseases|Division of Emerging Infectious Diseases|Park|South Korea

>Spike|hCoV-19/England/ALDP-C3AD91/2020|2020-12-09|EPI\_ISL\_731265|Original|hCoV-19^^England|Human|Lighthouse Lab in Alderley Park|Wellcome Sanger Institute for the COVID-19 Genomics UK (COG-UK) Consortium|Davies|United Kingdom

>Spike|hCoV-19/Scotland/QEUIH-BEB04C/2020|2020-12-03|EPI\_ISL\_710646|Original|hCoV-19^^Scotland|Human|Lighthouse Lab in Glasgow|Wellcome Sanger Institute for the COVID-19 Genomics UK (COG-UK) Consortium|Davies|United Kingdom

>Spike|hCoV-19/Netherlands/FR-RIVM-20101/2020|2020-12-02|EPI\_ISL\_723278|Original|hCoV-19^^Friesland|Human|Dutch COVID-19 response team|National Institute for Public Health and the Environment (RIVM)|Meijer|Netherlands

>Spike|hCoV-19/Wales/PHWC-164BAE/2020|2020-06-01|EPI\_ISL\_479355|Original|hCoV-19^^Wales|Human|Wales Specialist Virology Centre Sequencing lab|COVID-19 Genomics UK (COG-UK) Consortium|Moore|United Kingdom

>Spike|hCoV-19/Austria/CeMM0213/2020|2020-03-16|EPI\_ISL\_438049|Original|hCoV-19^^Vienna|Human|Center for Virology|Bergthaler laboratory|Bergthaler|Austria

>Spike|hCoV-19/Hong Kong/VM20123559/2020|2020-09-18|EPI\_ISL\_760035|Original|hCoV-19^^Hong Kong|Human|Hong Kong Department of Health|School of Public Health|Chu|China

>Spike|hCoV-19/USA/CA-QDX-2397/2020|2020-03-17|EPI\_ISL\_604671|Original|hCoV-19^^California|Human|Quest Diagnostics|Quest Diagnostics|Kagan|USA

>Spike|hCoV-19/Netherlands/ZH-EMC-405/2020|2020-07-23|EPI\_ISL\_523745|Original|hCoV-19^^Zuid Holland|Human|Dutch COVID-19 response team|Erasmus Medical Center|Oude Munnink|Netherlands

>Spike|hCoV-19/Wales/PHWC-16874C/2020|2020-04-19|EPI\_ISL\_494280|Original|hCoV-19^^Wales|Human|Originating lab|COVID-19 Genomics UK (COG-UK) Consortium|Moore|United Kingdom

>Spike|hCoV-19/Netherlands/Friesland\_9/2020|2020-03-30|EPI\_ISL\_422573|Original|hCoV-19^^Friesland|Human|Dutch COVID-19 response team|Erasmus Medical Center|Oude Munnink|Netherlands

>Spike|hCoV-19/South Africa/R10639/2020|2020-06-11|EPI\_ISL\_490291|Original|hCoV-19^^Free State|Human|National Institute for Communicable Diseases of the National Health Laboratory Service|National Institute for Communicable Diseases of the National Health Laboratory Service|Allam|South Africa

>Spike|hCoV-19/England/SHEF-C6D4B/2020|2020-04-23|EPI\_ISL\_457615|Original|hCoV-19^^England|Human|Virology Department|COVID-19 Genomics UK (COG-UK) Consortium|de Silva|United Kingdom

>Spike|hCoV-19/USA/IL-NM058/2020|2020-03-18|EPI\_ISL\_444554|Original|hCoV-19^^Illinois|Human|Northwestern Memorial Hospital|Ozer Lab|Ozer|USA

>Spike|hCoV-19/England/QEUEH-AD4FFF/2020|2020-10-26|EPI\_ISL\_633854|Original|hCoV-19^^England|Human|Lighthouse Lab in Glasgow|Wellcome Sanger Institute for the COVID-19 Genomics UK (COG-UK) consortium|Davies|United Kingdom

>Spike|hCoV-19/England/MILK-9943D2/2020|2020-08-26|EPI\_ISL\_551682|Original|hCoV-19^^England|Human|Lighthouse Lab in Milton Keynes|Wellcome Sanger Institute for the COVID-19 Genomics UK (COG-UK) consortium|Davies|United Kingdom

>Spike|hCoV-19/Canada/NS\_40/2020|2020-03-05|EPI\_ISL\_482469|Original|hCoV-19^^Nova Scotia|Human|Queen Elizabeth II Health Science Centre|National Microbiology Laboratory|Majer|Canada

>Spike|hCoV-19/Wales/PHWC-498889/2020|2020-11-27|EPI\_ISL\_727134|Original|hCoV-19^^Wales|Human|Originating lab|COVID-19 Genomics UK (COG-UK) Consortium|Moore|United Kingdom

>Spike|hCoV-19/USA/LA-EVTL380/2020|2020-06-03|EPI\_ISL\_578786|Original|hCoV-19^^Louisiana|Human|LSUHS Emerging Viral Threat Laboratory|Microbial Genome Sequencing Center|Kamil|USA

>Spike|hCoV-19/USA/TX-HMH-MCoV-18096/2020|2020-11-13|EPI\_ISL\_784444|Original|hCoV-19^^Texas|Human|Houston Methodist Hospital|Houston Methodist Hospital|Long|USA

>Spike|hCoV-19/USA/AZ-TG640829/2020|2020-04-27|EPI\_ISL\_695783|Original|hCoV-19^^Arizona|Human|Sonora Quest Laboratories|TGen North|French|USA

>Spike|hCoV-19/England/QEUEH-9601C6/2020|2020-08-06|EPI\_ISL\_531868|Original|hCoV-19^^England|Human|Lighthouse Lab in Glasgow|Wellcome Sanger Institute for the COVID-19 Genomics UK (COG-UK) consortium|Davies|United Kingdom

>Spike|hCoV-19/England/MILK-6395CD/2020|2020-07-04|EPI\_ISL\_557740|Original|hCoV-19^^England|Human|Lighthouse Lab in Milton Keynes|Wellcome Sanger Institute for the COVID-19 Genomics UK (COG-UK) consortium|Davies|United Kingdom

>Spike|hCoV-19/Australia/VIC13784/2020|2020-09-16|EPI\_ISL\_563835|Original|hCoV-19^^Victoria|Human|Microbiological Diagnostic Unit - Public Health Laboratory (MDU-PHL)|MDU-PHL|Schultz|Australia

>Spike|hCoV-19/Scotland/QEUEH-9E4898/2020|2020-09-23|EPI\_ISL\_600950|Original|hCoV-19^^Scotland|Human|Lighthouse Lab in Glasgow|Wellcome Sanger Institute for the COVID-19 Genomics UK (COG-UK) consortium|Davies|United Kingdom

>Spike|hCoV-19/Japan/PG-3177/2020|2020-03-00|EPI\_ISL\_691297|Original|hCoV-19^^Japan|Human|Pathogen Genomics Center|Pathogen Genomics Center|Sekizuka|Japan

>Spike|hCoV-19/England/ALDP-A68A2C/2020|2020-10-12|EPI\_ISL\_608972|Original|hCoV-19^^England|Human|Lighthouse Lab in Alderley Park|Wellcome Sanger Institute for the COVID-19 Genomics UK (COG-UK) consortium|Davies|United Kingdom

>Spike|hCoV-19/Denmark/DCGC-1702/2020|2020-06-29|EPI\_ISL\_618169|Original|hCoV-19^^Nordjylland|Human|Department of Virus and Microbiological Special Diagnostics|Albertsen lab|Michaelsen|Denmark

>Spike|hCoV-19/England/MILK-99DBC2/2020|2020-08-31|EPI\_ISL\_550601|Original|hCoV-19^^England|Human|Lighthouse Lab in Milton Keynes|Wellcome Sanger Institute for the COVID-19 Genomics UK (COG-UK) consortium|Davies|United Kingdom

>Spike|hCoV-19/England/QEUA-B31C5/2020|2020-11-18|EPI\_ISL\_672897|Original|hCoV-19^^England|Human|Lighthouse Lab in Glasgow|Wellcome Sanger Institute for the COVID-19 Genomics UK (COG-UK) Consortium|Davies|United Kingdom

>Spike|hCoV-19/Scotland/CVR2777/2020|2020-04-20|EPI\_ISL\_478036|Original|hCoV-19^^Scotland|Human|West of Scotland Specialist Virology Centre|COVID-19 Genomics UK (COG-UK) Consortium|Robertson|United Kingdom

>Spike|hCoV-19/Bangladesh/BCSIR-NILMRC-318/2020|2020-05-31|EPI\_ISL\_498789|Original|hCoV-19^^Mymensingh|Human|National Institute of Laboratory Medicine and Referral Center|Genomic Research Lab|Khan|Bangladesh

>Spike|hCoV-19/France/ARA-SC346/2020|2020-03-17|EPI\_ISL\_641543|Original|hCoV-19^^Auvergne-Rhone-Alpes|Human|CHU de Saint-\u00c9tienne H\u00f4pital Nord|CNR Virus des Infections Respiratoires - France SUD|Bal|France

>Spike|hCoV-19/England/20146006804/2020|2020-04-01|EPI\_ISL\_466018|Original|hCoV-19^^England|Human|Respiratory Virus Unit|Respiratory Virus Unit|Platt|United Kingdom

>Spike|hCoV-19/Wales/PHWC-47F1C9/2020|2020-10-08|EPI\_ISL\_612642|Original|hCoV-19^^Wales|Human|Wales Specialist Virology Centre Sequencing lab|COVID-19 Genomics UK (COG-UK) Consortium|Moore|United Kingdom

>Spike|hCoV-19/USA/HI-H200605/2020|2020-11-23|EPI\_ISL\_753131|Original|hCoV-19^^Hawaii|Human|State Laboratories Division|State Laboratories Division|Sultana|USA

>Spike|hCoV-19/Scotland/QEUA-996929/2020|2020-08-29|EPI\_ISL\_559990|Original|hCoV-19^^Scotland|Human|Oxford Viromics|COVID-19 Genomics UK (COG-UK) Consortium|Golubchik|United Kingdom

>Spike|hCoV-19/Wales/MILK-B02470/2020|2020-10-24|EPI\_ISL\_647851|Original|hCoV-19^^Wales|Human|Lighthouse Lab in Milton Keynes|Wellcome Sanger Institute for the COVID-19 Genomics UK (COG-UK) Consortium|Davies|United Kingdom

>Spike|hCoV-19/Denmark/DCGC-20107/2020|2020-12-07|EPI\_ISL\_747986|Original|hCoV-19^^Nordjylland|Human|Department of Virus and Microbiological Special Diagnostics|Albertsen Lab|Michaelsen|Denmark

>Spike|hCoV-19/Denmark/DCGC-11526/2020|2020-11-02|EPI\_ISL\_670529|Original|hCoV-19^^Hovedstaden|Human|Department of Virus and Microbiological Special Diagnostics|Albertsen Lab|Michaelsen|Denmark

>Spike|hCoV-19/India/MH-ACTREC-146/2020|2020-05-29|EPI\_ISL\_699802|Original|hCoV-19^^Maharashtra|Human|Hematopathology Laboratory|Hematopathology Laboratory|Patkar|India

>Spike|hCoV-19/Japan/PG-5193/2020|2020-08-00|EPI\_ISL\_690296|Original|hCoV-19^^Japan|Human|Pathogen Genomics Center|Pathogen Genomics Center|Sekizuka|Japan

>Spike|hCoV-19/Wales/PHWC-48CC8C/2020|2020-10-31|EPI\_ISL\_666525|Original|hCoV-19^^Wales|Human|Wales Specialist Virology Centre Sequencing lab|COVID-19 Genomics UK (COG-UK) Consortium|Moore|United Kingdom

>Spike|hCoV-19/Italy/LAZ-INMI-50/2020|2020-06-02|EPI\_ISL\_603157|Original|hCoV-19^^Lazio|Human|INMI Lazzaro Spallanzani IRCCS|INMI Lazzaro Spallanzani IRCCS|Gruber|Italy

>Spike|hCoV-19/Spain/PV-IBV-2103/2020|2020-04-11|EPI\_ISL\_468890|Original|hCoV-19^^Basque Country|Human|Servicio de Microbiolog\u00eda. Hospital Universitario Donostia. OSI Donostialdea. \u00c1rea de Enfermedades Infecciosas|SeqCOVID-SPAIN consortium/IBV (CSIC) |Comas|Spain

>Spike|hCoV-19/USA/CA-ALSR-2055/2020|2020-05-07|EPI\_ISL\_635321|Original|hCoV-19^^California|Human|San Diego County Public Health Laboratory|Andersen lab at Scripps Research|Gangavarapu|USA

>Spike|hCoV-19/USA/TX-HMH-MCoV-18371/2020|2020-11-18|EPI\_ISL\_784719|Original|hCoV-19^^Texas|Human|Houston Methodist Hospital|Houston Methodist Hospital|Long|USA

>Spike|hCoV-19/USA/WI-UW-2389/2020|2020-10-04|EPI\_ISL\_754628|Original|hCoV-19^^Wisconsin|Human|University of Wisconsin-Madison AIDS Vaccine Research Laboratories|University of Wisconsin-Madison AIDS Vaccine Research Laboratories|Moreno|USA

>Spike|hCoV-19/Switzerland/BE-UNIBE-200-5795/2020|2020-03-26|EPI\_ISL\_574838|Original|hCoV-19^^Bern|Human|Institute for Infectious Diseases|Institute for Infectious Diseases|Koch|Switzerland

>Spike|hCoV-19/Scotland/QEUH-96C6BC/2020|2020-08-07|EPI\_ISL\_530869|Original|hCoV-19^^Scotland|Human|Lighthouse Lab in Glasgow|Wellcome Sanger Institute for the COVID-19 Genomics UK (COG-UK) consortium|Davies|United Kingdom

>Spike|hCoV-19/India/GJ-GBRC149/2020|2020-05-17|EPI\_ISL\_458111|Original|hCoV-19^^Gujarat|Human|Gujarat Biotechnology Research Centre|Gujarat Biotechnology Research Centre|Joshi|India

>Spike|hCoV-19/Japan/PG-5370/2020|2020-08-00|EPI\_ISL\_690473|Original|hCoV-19^^Japan|Human|Fukuoka Institute of Health and Environmental Sciences|Pathogen Genomics Center|Sekizuka|Japan

>Spike|hCoV-19/England/LOND-124F765/2020|2020-03-25|EPI\_ISL\_665170|Original|hCoV-19^^England|Human|University College London Hospital|COVID-19 Genomics UK (COG-UK) Consortium|Byott|United Kingdom

>Spike|hCoV-19/USA/MA-MASPHL-00186/2020|2020-04-06|EPI\_ISL\_791645|Original|hCoV-19^^Massachusetts|Human|Massachusetts State Public Health Laboratory|Infectious Disease Program|Park|USA

>Spike|hCoV-19/England/LIVE-9F1c7/2020|2020-05-02|EPI\_ISL\_453435|Original|hCoV-19^^England|Human|Liverpool Clinical Laboratories|COVID-19 Genomics UK (COG-UK) Consortium|Haldenby|United Kingdom

>Spike|hCoV-19/England/204841912/2020|2020-11-25|EPI\_ISL\_683581|Original|hCoV-19^^England|Human|Respiratory Virus Unit|COVID-19 Genomics UK (COG-UK) Consortium|Platt|United Kingdom

>Spike|hCoV-19/Ecuador/USFQ-171/2020|2020-07-29|EPI\_ISL\_516652|Original|hCoV-19^^Orellana|Human|Institute of Microbiology|Institute of Microbiology|Cardenas|Ecuador

>Spike|hCoV-19/Wales/PHWC-48DB51/2020|2020-11-01|EPI\_ISL\_680731|Original|hCoV-19^^Wales|Human|Wales Specialist Virology Centre Sequencing lab|COVID-19 Genomics UK (COG-UK) Consortium|Moore|United Kingdom

>Spike|hCoV-19/USA/CA-CZB-3616/2020|2020-07-28|EPI\_ISL\_548339|Original|hCoV-19^^California|Human|County of Santa Clara Public Health Department|Chan-Zuckerberg Biohub|Bhatt|USA

>Spike|hCoV-19/England/ALDP-B23F2D/2020|2020-11-04|EPI\_ISL\_646309|Original|hCoV-19^^England|Human|Lighthouse Lab in Alderley Park|Wellcome Sanger Institute for the COVID-19 Genomics UK (COG-UK) Consortium|Davies|United Kingdom

>Spike|hCoV-19/England/ALDP-B1AEE0/2020|2020-11-01|EPI\_ISL\_645853|Original|hCoV-19^^England|Human|Lighthouse Lab in Alderley Park|Wellcome Sanger Institute for the COVID-19 Genomics UK (COG-UK) Consortium|Davies|United Kingdom

>Spike|hCoV-19/England/BRIS-12FA0C/2020|2020-04-03|EPI\_ISL\_488293|Original|hCoV-19^^England|Human|PHE South West Regional Laboratory|Wellcome Sanger Institute for the COVID-19 Genomics UK (COG-UK) consortium|Davies|United Kingdom

>Spike|hCoV-19/Denmark/DCGC-2105/2020|2020-07-27|EPI\_ISL\_618367|Original|hCoV-19^^Midtjylland|Human|Department of Virus and Microbiological Special Diagnostics|Albertsen lab|Michaelsen|Denmark

>Spike|hCoV-19/England/LIVE-1D5012/2020|2020-09-17|EPI\_ISL\_572479|Original|hCoV-19^^England|Human|Liverpool Clinical Laboratories|COVID-19 Genomics UK (COG-UK) Consortium|Haldenby|United Kingdom

>Spike|hCoV-19/England/MILK-A91723/2020|2020-10-19|EPI\_ISL\_705979|Original|hCoV-19^^England|Human|Oxford Viromics|COVID-19 Genomics UK (COG-UK) Consortium|Golubchik|United Kingdom

>Spike|hCoV-19/Denmark/DCGC-4178/2020|2020-09-14|EPI\_ISL\_621998|Original|hCoV-19^^Hovedstaden|Human|Department of Virus and Microbiological Special Diagnostics|Albertsen lab|Michaelsen|Denmark

>Spike|hCoV-19/Scotland/EDB6256/2020|2020-06-02|EPI\_ISL\_478238|Original|hCoV-19^^Scotland|Human|Virology Department|COVID-19 Genomics UK (COG-UK) Consortium|Williams|United Kingdom

>Spike|hCoV-19/England/SHEF-10C5963/2020|2020-12-14|EPI\_ISL\_765149|Original|hCoV-19^^England|Human|Virology Department|COVID-19 Genomics UK (COG-UK) Consortium|de Silva|United Kingdom

>Spike|hCoV-19/England/EXET-13998A/2020|2020-00-00|EPI\_ISL\_724255|Original|hCoV-19^^England|Human|University of Exeter|COVID-19 Genomics UK (COG-UK) Consortium|Temperton|United Kingdom

>Spike|hCoV-19/Spain/MD-IBV-99012386/2020|2020-10-29|EPI\_ISL\_779961|Original|hCoV-19^^Madrid|Human|Hospital General Universitario Gregorio Mara\u00f1a\u00f3n|SeqCOVID-SPAIN consortium/IBV (CSIC)|Comas|Spain

>Spike|hCoV-19/Japan/PG-4904/2020|2020-08-00|EPI\_ISL\_690025|Original|hCoV-19^^Japan|Human|Sakai City Institute of Public Health|Pathogen Genomics Center|Sekizuka|Japan

>Spike|hCoV-19/England/QEUA-A4D726/2020|2020-10-05|EPI\_ISL\_628609|Original|hCoV-19^^England|Human|Oxford Viromics|COVID-19 Genomics UK (COG-UK) Consortium|Golubchik|United Kingdom

>Spike|hCoV-19/USA/TX-HMH-MCoV-17995/2020|2020-11-16|EPI\_ISL\_786143|Original|hCoV-19^^Texas|Human|Houston Methodist Hospital|Houston Methodist Hospital|Long|USA

>Spike|hCoV-19/England/QEUA-B6C5AE/2020|2020-11-10|EPI\_ISL\_661537|Original|hCoV-19^^England|Human|Lighthouse Lab in Glasgow|Wellcome Sanger Institute for the COVID-19 Genomics UK (COG-UK) Consortium|Davies|United Kingdom

>Spike|hCoV-19/England/NORT-29DB23/2020|2020-05-07|EPI\_ISL\_488173|Original|hCoV-19^^England|Human|NU-OMICS DNA Sequencing research facility|Wellcome Sanger Institute for the COVID-19 Genomics UK (COG-UK) consortium|Davies|United Kingdom

>Spike|hCoV-19/England/ALDP-A2FA30/2020|2020-10-05|EPI\_ISL\_587227|Original|hCoV-19^^England|Human|Lighthouse Lab in Alderley Park|Wellcome Sanger Institute for the COVID-19 Genomics UK (COG-UK) consortium|Davies|United Kingdom

>Spike|hCoV-19/England/MILK-B38550/2020|2020-11-01|EPI\_ISL\_658990|Original|hCoV-19^^England|Human|Lighthouse Lab in Milton Keynes|Wellcome Sanger Institute for the COVID-19 Genomics UK (COG-UK) Consortium|Davies|United Kingdom

>Spike|hCoV-19/Wales/PHWC-48E5E9/2020|2020-11-12|EPI\_ISL\_680883|Original|hCoV-19^^Wales|Human|Wales Specialist Virology Centre Sequencing lab|COVID-19 Genomics UK (COG-UK) Consortium|Moore|United Kingdom

>Spike|hCoV-19/Wales/PHWC-49F80A/2020|2020-12-08|EPI\_ISL\_743273|Original|hCoV-19^^Wales|Human|Wales Specialist Virology Centre Sequencing lab|COVID-19 Genomics UK (COG-UK) Consortium|Moore|United Kingdom

>Spike|hCoV-19/Scotland/CVR6106/2020|2020-12-03|EPI\_ISL\_703233|Original|hCoV-19^^Scotland|Human|West of Scotland Specialist Virology Centre|COVID-19 Genomics UK (COG-UK) Consortium|Robertson|United Kingdom

>Spike|hCoV-19/USA/FL-BPHL-0155/2020|2020-03-31|EPI\_ISL\_480806|Original|hCoV-19^^Florida|Human|Florida Bureau of Public Health Laboratories|Florida Bureau of Public Health Laboratories|Blanton|USA

>Spike|hCoV-19/Japan/PG-4575/2020|2020-07-00|EPI\_ISL\_689712|Original|hCoV-19^^Japan|Human|Pathogen Genomics Center|Pathogen Genomics Center|Sekizuka|Japan

>Spike|hCoV-19/USA/NY-Wadsworth-281872-01/2020|2020-12-01|EPI\_ISL\_754426|Original|hCoV-19^^New York|Human|Wadsworth Center|Wadsworth Center|Lasek-Nesselquist|USA

>Spike|hCoV-19/Switzerland/ZH-ETHZ-240091/2020|2020-08-13|EPI\_ISL\_523926|Original|hCoV-19^^Zurich|Human|Viollier AG|Department of Biosystems Science and Engineering|Nadeau|Switzerland

>Spike|hCoV-19/Japan/PG-0082/2020|2020-03-02|EPI\_ISL\_479833|Original|hCoV-19^^Hokkaido|Human|Sapporo City Institute of Public Health|Pathogen Genomics Center|Sekizuka|Japan

>Spike|hCoV-19/Canada/NS-NML-1268/2020|2020-04-16|EPI\_ISL\_579656|Original|hCoV-19^^Nova Scotia|Human|QEII Health Sciences Centre|National Microbiology Laboratory (NML)|Majer|Canada

>Spike|hCoV-19/Germany/BE-ChVir-W1693-4382/2020|2020-08-04|EPI\_ISL\_753988|Original|hCoV-19^^Berlin|Human|Charit\u00e9 Universit\u00e4tsmedizin Berlin|Charit\u00e9 Universit\u00e4tsmedizin Berlin|Muehlemann|Germany

>Spike|hCoV-19/England/CAMB-8067F/2020|2020-04-10|EPI\_ISL\_470442|Original|hCoV-19^^England|Human|Department of Pathology|Wellcome Sanger Institute for the COVID-19 Genomics UK (COG-UK) consortium|Davies|United Kingdom

>Spike|hCoV-19/France/PDL-SC646/2020|2020-04-12|EPI\_ISL\_663283|Original|hCoV-19^^Pays-de-la-Loire|Human|CHU Nantes|CNR Virus des Infections Respiratoires - France SUD|Bal|France



>Spike|hCoV-19/England/QEUH-964C67/2020|2020-08-13|EPI\_ISL\_530987|Original|hCoV-19^^England|Human|Lighthouse Lab in Glasgow|Wellcome Sanger Institute for the COVID-19 Genomics UK (COG-UK) consortium|Davies|United Kingdom

>Spike|hCoV-19/England/204291438/2020|2020-10-16|EPI\_ISL\_622875|Original|hCoV-19^^England|Human|Respiratory Virus Unit|Respiratory Virus Unit|Platt|United Kingdom

>Spike|hCoV-19/USA/TX-HMH-MCoV-10712/2020|2020-07-09|EPI\_ISL\_789598|Original|hCoV-19^^Texas|Human|Houston Methodist Hospital|Houston Methodist Hospital|Long|USA

>Spike|hCoV-19/USA/NY-NYCPHL-000818/2020|2020-04-02|EPI\_ISL\_632195|Original|hCoV-19^^New York|Human|Jamaica Hospital Medical Center|New York City Public Health Laboratory|Wang|USA

>Spike|hCoV-19/France/ARA-34744/2020|2020-05-06|EPI\_ISL\_636481|Original|hCoV-19^^Auvergne-Rhone-Alpes|Human|Centre Hospitalier de Bourg en Bresse|CNR Virus des Infections Respiratoires - France SUD|Josset|France

>Spike|hCoV-19/Germany/BY-MGZ-02/2020|2020-04-21|EPI\_ISL\_490206|Original|hCoV-19^^Bavaria|Human|M\u00f6nchen Klinik Schwabing|MGZ Medical Genetics Center|Wolf|Germany

>Spike|hCoV-19/Australia/VIC13639/2020|2020-09-13|EPI\_ISL\_563792|Original|hCoV-19^^Victoria|Human|Victorian Infectious Diseases Reference Laboratory (VIDRL)|VIDRL and MDU-PHL|Schultz|Australia

>Spike|hCoV-19/Denmark/DCGC-6025/2020|2020-09-21|EPI\_ISL\_621134|Original|hCoV-19^^Midtjylland|Human|Department of Virus and Microbiological Special Diagnostics|Albertsen lab|Michaelsen|Denmark

>Spike|hCoV-19/USA/VA-DCLS-2036/2020|2020-10-13|EPI\_ISL\_677178|Original|hCoV-19^^Virginia|Human|Virginia Division of Consolidated Laboratory Services|Virginia Division of Consolidated Laboratory Services|St. Jacques|USA

>Spike|hCoV-19/Wales/PHWC-25A34/2020|2020-03-22|EPI\_ISL\_422301|Original|hCoV-19^^Wales|Human|Wales Specialist Virology Centre|Public Health Wales Microbiology Cardiff|Moore|United Kingdom

>Spike|hCoV-19/England/CAMC-AEB0C5/2020|2020-10-25|EPI\_ISL\_633129|Original|hCoV-19^^England|Human|Lighthouse Lab in Cambridge|Wellcome Sanger Institute for the COVID-19 Genomics UK (COG-UK) consortium|Davies|United Kingdom

>Spike|hCoV-19/Scotland/EDB7079/2020|2020-08-02|EPI\_ISL\_514518|Original|hCoV-19^^Scotland|Human|Virology Department|COVID-19 Genomics UK (COG-UK) Consortium|Williams|United Kingdom

>Spike|hCoV-19/USA/FL-BPHL-2160/2020|2020-05-21|EPI\_ISL\_653313|Original|hCoV-19^^Florida|Human|Florida Bureau of Public Health Laboratories|Florida Bureau of Public Health Laboratories|Blanton|USA

>Spike|hCoV-19/Canada/ON-PHL-20-01260/2020|2020-06-00|EPI\_ISL\_548875|Original|hCoV-19^^Ontario|Human|Public Health Ontario Laboratory|Public Health Ontario Laboratory|Guthrie|Canada

>Spike|hCoV-19/Japan/PG-8134/2020|2020-08-00|EPI\_ISL\_687233|Original|hCoV-19^^Japan|Human|Pathogen Genomics Center|Pathogen Genomics Center|Sekizuka|Japan

>Spike|hCoV-19/Japan/PG-1361/2020|2020-04-00|EPI\_ISL\_684969|Original|hCoV-19^^Japan|Human|Saitama Prefectural Institute of Public Health|Pathogen Genomics Center|Sekizuka|Japan

>Spike|hCoV-19/Northern Ireland/NIRE-100DAE/2020|2020-05-02|EPI\_ISL\_482146|Original|hCoV-19^^Northern Ireland|Human|Regional Virus Laboratory|Wellcome Sanger Institute for the COVID-19 Genomics UK (COG-UK) consortium|Davies|United Kingdom

>Spike|hCoV-19/England/MILK-C7B3CF/2020|2020-12-15|EPI\_ISL\_756863|Original|hCoV-19^^England|Human|Lighthouse Lab in Milton Keynes|Wellcome Sanger Institute for the COVID-19 Genomics UK (COG-UK) Consortium|Davies|United Kingdom

>Spike|hCoV-19/England/204591848/2020|2020-00-00|EPI\_ISL\_637185|Original|hCoV-19^^England|Human|Respiratory Virus Unit|COVID-19 Genomics UK (COG-UK) Consortium|Platt|United Kingdom

>Spike|hCoV-19/Wales/PHWC-2A808/2020|2020-04-07|EPI\_ISL\_445622|Original|hCoV-19^^Wales|Human|Wales Specialist Virology Centre|Public Health Wales Microbiology Cardiff|Moore|United Kingdom

>Spike|hCoV-19/Belgium/ULG-10560/2020|2020-10-23|EPI\_ISL\_626328|Original|hCoV-19^^Li\u00e8ge|Human|Department of Clinical Microbiology|GIGA Medical Genomics|Durkin|Belgium

>Spike|hCoV-19/USA/CA-SCCPHD-UC130/2020|2020-03-06|EPI\_ISL\_435609|Original|hCoV-19^^California|Human|Santa Clara County Public Health Department|Chiu Laboratory|Chiu|USA

>Spike|hCoV-19/USA/NY-NYCPHL-001256/2020|2020-11-06|EPI\_ISL\_683895|Original|hCoV-19^^New York|Human|DOHMH Riverside|New York City Public Health Laboratory|Wang|USA

>Spike|hCoV-19/England/ALDP-B472DF/2020|2020-11-07|EPI\_ISL\_656303|Original|hCoV-19^^England|Human|Lighthouse Lab in Alderley Park|Wellcome Sanger Institute for the COVID-19 Genomics UK (COG-UK) Consortium|Davies|United Kingdom

>Spike|hCoV-19/England/BRIS-18535AA/2020|2020-04-08|EPI\_ISL\_492357|Original|hCoV-19^^England|Human|PHE South West Regional Laboratory|Wellcome Sanger Institute for the COVID-19 Genomics UK (COG-UK) consortium|Davies|United Kingdom

>Spike|hCoV-19/England/BRIS-12358F/2020|2020-04-06|EPI\_ISL\_442763|Original|hCoV-19^^England|Human|PHE South West Regional Laboratory|Wellcome Sanger Institute for the COVID-19 Genomics UK (COG-UK) consortium|Amato|United Kingdom

>Spike|hCoV-19/England/CAMB-7E1EC/2020|2020-04-15|EPI\_ISL\_434050|Original|hCoV-19^^England|Human|Department of Pathology|COVID-19 Genomics UK (COG-UK) Consortium|Meredith|United Kingdom

>Spike|hCoV-19/Belgium/ULG-10953/2020|2020-09-06|EPI\_ISL\_707732|Original|hCoV-19^^Li\u00e8ge|Human|Department of Clinical Microbiology|GIGA Medical Genomics|Durkin|Belgium

>Spike|hCoV-19/USA/FL-BPHL-0373/2020|2020-04-21|EPI\_ISL\_489782|Original|hCoV-19^^Florida|Human|Florida Bureau of Public Health Laboratories|Florida Bureau of Public Health Laboratories|Blanton|USA

>Spike|hCoV-19/England/ALDP-B1A572/2020|2020-11-01|EPI\_ISL\_647618|Original|hCoV-19^^England|Human|Lighthouse Lab in Alderley Park|Wellcome Sanger Institute for the COVID-19 Genomics UK (COG-UK) Consortium|Davies|United Kingdom

>Spike|hCoV-19/USA/VA-DCLS-0414/2020|2020-04-26|EPI\_ISL\_467808|Original|hCoV-19^^Virginia|Human|Virginia DCLS|Virginia DCLS|St. Jacques|USA

>Spike|hCoV-19/Netherlands/UT-EMC-77/2020|2020-08-27|EPI\_ISL\_577893|Original|hCoV-19^^Utrecht|Human|Dutch COVID-19 response team|Erasmus Medical Center|Oude Munnink|Netherlands

>Spike|hCoV-19/England/CAMC-B98D1A/2020|2020-11-15|EPI\_ISL\_673582|Original|hCoV-19^^England|Human|Lighthouse Lab in Cambridge|Wellcome Sanger Institute for the COVID-19 Genomics UK (COG-UK) Consortium|Davies|United Kingdom

>Spike|hCoV-19/England/QEUEH-B0F947/2020|2020-11-02|EPI\_ISL\_642050|Original|hCoV-19^^England|Human|Lighthouse Lab in Glasgow|Wellcome Sanger Institute for the COVID-19 Genomics UK (COG-UK) Consortium|Davies|United Kingdom

>Spike|hCoV-19/USA/WI-UW-1577/2020|2020-09-17|EPI\_ISL\_605454|Original|hCoV-19^^Wisconsin|Human|University of Wisconsin-Madison AIDS Vaccine Research Laboratories|University of Wisconsin-Madison AIDS Vaccine Research Laboratories|Baczenas|USA

>Spike|hCoV-19/Denmark/DCGC-22439/2020|2020-12-14|EPI\_ISL\_757563|Original|hCoV-19^^Hovedstaden|Human|Department of Virus and Microbiological Special Diagnostics|Albertsen Lab|Michaelsen|Denmark

>Spike|hCoV-19/England/CAMC-9D731F/2020|2020-09-18|EPI\_ISL\_584362|Original|hCoV-19^^England|Human|Virology Department|COVID-19 Genomics UK (COG-UK) Consortium|de Silva|United Kingdom

>Spike|hCoV-19/Spain/MD-IBV-005323/2020|2020-03-17|EPI\_ISL\_510202|Original|hCoV-19^^Madrid|Human|Hospital General Universitario Gregorio Mara\u00f1a|SeqCOVID-SPAIN consortium|IBV (CSIC)|Comas|Spain

>Spike|hCoV-19/England/CAMB-71E2E/2020|2020-03-29|EPI\_ISL\_438435|Original|hCoV-19^^England|Human|Department of Pathology|Wellcome Sanger Institute for the COVID-19 Genomics UK (COG-UK) consortium|Amato|United Kingdom

>Spike|hCoV-19/England/PORT-2D2506/2020|2020-03-26|EPI\_ISL\_507152|Original|hCoV-19^^England|Human|Centre for Enzyme Innovation|COVID-19 Genomics UK (COG-UK) Consortium|Robson|United Kingdom

>Spike|hCoV-19/England/CAMB-77EA0/2020|2020-04-01|EPI\_ISL\_441185|Original|hCoV-19^^England|Human|Department of Pathology|Wellcome Sanger Institute for the COVID-19 Genomics UK (COG-UK) consortium|Amato|United Kingdom

>Spike|hCoV-19/Wales/CAMC-A58AF2/2020|2020-10-09|EPI\_ISL\_609162|Original|hCoV-19^^Wales|Human|Lighthouse Lab in Cambridge|Wellcome Sanger Institute for the COVID-19 Genomics UK (COG-UK) consortium|Davies|United Kingdom

>Spike|hCoV-19/Australia/QLD1148/2020|2020-03-29|EPI\_ISL\_639751|Original|hCoV-19^^Australia|Human|unknown|Public Health Virology Laboratory|Nguyen|Australia

>Spike|hCoV-19/USA/WI-GMF-19746/2020|2020-09-11|EPI\_ISL\_547845|Original|hCoV-19^^Wisconsin|Human|Gundersen Molecular Diagnostics Laboratory|Kabara Cancer Research Institute|Kenny|USA

>Spike|hCoV-19/USA/WA-UW-3186/2020|2020-03-28|EPI\_ISL\_491009|Original|hCoV-19^^Washington|Human|UW Virology Lab|UW Virology Lab|Roychoudhury|USA

>Spike|hCoV-19/England/QEUA-A8BE45/2020|2020-10-16|EPI\_ISL\_643051|Original|hCoV-19^^England|Human|Lighthouse Lab in Glasgow|Wellcome Sanger Institute for the COVID-19 Genomics UK (COG-UK) Consortium|Davies|United Kingdom

>Spike|hCoV-19/England/CAMB-78C5A/2020|2020-04-03|EPI\_ISL\_441138|Original|hCoV-19^^England|Human|Department of Pathology|Wellcome Sanger Institute for the COVID-19 Genomics UK (COG-UK) consortium|Amato|United Kingdom

>Spike|hCoV-19/USA/TX-HMH-MCoV-10549/2020|2020-07-09|EPI\_ISL\_789530|Original|hCoV-19^^Texas|Human|Houston Methodist Hospital|Houston Methodist Hospital|Long|USA

>Spike|hCoV-19/England/QEUA-5DB986/2020|2020-06-17|EPI\_ISL\_533275|Original|hCoV-19^^England|Human|Lighthouse Lab in Glasgow|Wellcome Sanger Institute for the COVID-19 Genomics UK (COG-UK) consortium|Davies|United Kingdom

>Spike|hCoV-19/Denmark/DCGC-7742/2020|2020-10-19|EPI\_ISL\_618677|Original|hCoV-19^^Syddanmark|Human|Department of Virus and Microbiological Special Diagnostics|Albertsen lab|Michaelsen|Denmark

>Spike|hCoV-19/Wales/PHWC-487920/2020|2020-10-30|EPI\_ISL\_639254|Original|hCoV-19^^Wales|Human|Wales Specialist Virology Centre Sequencing lab|COVID-19 Genomics UK (COG-UK) Consortium|Moore|United Kingdom

>Spike|hCoV-19/USA/VA-DCLS-1039/2020|2020-06-03|EPI\_ISL\_526923|Original|hCoV-19^^Virginia|Human|Virginia DCLS|Virginia DCLS|St. Jacques|USA

>Spike|hCoV-19/England/204740425/2020|2020-11-17|EPI\_ISL\_693465|Original|hCoV-19^^England|Human|Respiratory Virus Unit|COVID-19 Genomics UK (COG-UK) Consortium|Platt|United Kingdom

>Spike|hCoV-19/England/QEUA-B12088/2020|2020-11-02|EPI\_ISL\_642608|Original|hCoV-19^^England|Human|Lighthouse Lab in Glasgow|Wellcome Sanger Institute for the COVID-19 Genomics UK (COG-UK) Consortium|Davies|United Kingdom

>Spike|hCoV-19/USA/NY-NYUMC653/2020|2020-04-10|EPI\_ISL\_444770|Original|hCoV-19^^New York|Human|NYU Langone Health|Departments of Pathology and Medicine|Maurano|USA

>Spike|hCoV-19/USA/MN-MDH-1704/2020|2020-04-10|EPI\_ISL\_560791|Original|hCoV-19^^Minnesota|Human|Minnesota Department of Health|Minnesota Department of Health|Garfin|USA

>Spike|hCoV-19/Canada/ON-PHL-20-01323/2020|2020-06-00|EPI\_ISL\_548926|Original|hCoV-19^^Ontario|Human|Public Health Ontario Laboratory|Public Health Ontario Laboratory|Guthrie|Canada

>Spike|hCoV-19/USA/WA-S2582/2020|2020-06-18|EPI\_ISL\_497214|Original|hCoV-19^^Washington|Human|Washington State Department of Health|Seattle Flu Study|Lee|USA

>Spike|hCoV-19/Colombia/DC-INS-2553/2020|2020-08-06|EPI\_ISL\_653745|Original|hCoV-19^^Bogota|Human|Instituto Nacional de Salud|Instituto Nacional de Salud|Franco-Mu\u00f1oz|Colombia

>Spike|hCoV-19/Russia/OMS-ORINFI-4822S/2020|2020-07-10|EPI\_ISL\_569800|Original|hCoV-19^^Omsk|Human|Omsk Research Institute of Natural Focal Infections|WHO National Influenza Centre Russian Federation|Komissarov|Russia

>Spike|hCoV-19/Switzerland/SZ-ETHZ-420546/2020|2020-12-22|EPI\_ISL\_768233|Original|hCoV-19^^Schwyz|Human|Viollier AG|Department of Biosystems Science and Engineering|Nadeau|Switzerland

>Spike|hCoV-19/Wales/PHWC-16B4BB/2020|2020-09-14|EPI\_ISL\_560294|Original|hCoV-19^^Wales|Human|Wales Specialist Virology Centre Sequencing lab|COVID-19 Genomics UK (COG-UK) Consortium|Moore|United Kingdom

>Spike|hCoV-19/England/CAMB-1B1DCA/2020|2020-05-09|EPI\_ISL\_458552|Original|hCoV-19^^England|Human|Department of Pathology|Wellcome Sanger Institute for the COVID-19 Genomics UK (COG-UK) consortium|Davies|United Kingdom

>Spike|hCoV-19/Scotland/CVR896/2020|2020-03-27|EPI\_ISL\_439131|Original|hCoV-19^^Scotland|Human|West of Scotland Specialist Virology Centre|COVID-19 Genomics UK (COG-UK) Consortium|Robertson|United Kingdom

>Spike|hCoV-19/England/CAMB-84927/2020|2020-03-06|EPI\_ISL\_440481|Original|hCoV-19^^England|Human|Department of Pathology|Wellcome Sanger Institute for the COVID-19 Genomics UK (COG-UK) consortium|Amato|United Kingdom

>Spike|hCoV-19/Australia/NT53/2020|2020-06-30|EPI\_ISL\_521862|Original|hCoV-19^^Northern Territory|Human|Royal Darwin Hospital Pathology|MDU-PHL|Schultz|Australia

>Spike|hCoV-19/USA/WI-UW-660/2020|2020-06-26|EPI\_ISL\_491347|Original|hCoV-19^^Wisconsin|Human|University of Wisconsin-Madison AIDS Vaccine Research Laboratories|University of Wisconsin-Madison AIDS Vaccine Research Laboratories|Baczenas|USA

>Spike|hCoV-19/England/LIVE-A263B/2020|2020-05-20|EPI\_ISL\_500000|Original|hCoV-19^^England|Human|Liverpool Clinical Laboratories|COVID-19 Genomics UK (COG-UK) Consortium|Haldenby|United Kingdom

>Spike|hCoV-19/England/MILK-843D20/2020|2020-07-15|EPI\_ISL\_557310|Original|hCoV-19^^England|Human|Lighthouse Lab in Milton Keynes|Wellcome Sanger Institute for the COVID-19 Genomics UK (COG-UK) consortium|Davies|United Kingdom

>Spike|hCoV-19/USA/WI-UW-236/2020|2020-03-27|EPI\_ISL\_428332|Original|hCoV-19^^Wisconsin|Human|University of Wisconsin-Madison AIDS Vaccine Research Laboratories|University of Wisconsin-Madison AIDS Vaccine Research Laboratories|Moreno|USA

>Spike|hCoV-19/Denmark/DCGC-7647/2020|2020-10-19|EPI\_ISL\_618539|Original|hCoV-19^^Nordjylland|Human|Department of Virus and Microbiological Special Diagnostics|Albertsen lab|Michaelsen|Denmark

>Spike|hCoV-19/England/ALDP-9BE3B4/2020|2020-09-10|EPI\_ISL\_567971|Original|hCoV-19^^England|Human|Lighthouse Lab in Alderley Park|Wellcome Sanger Institute for the COVID-19 Genomics UK (COG-UK) consortium|Davies|United Kingdom

>Spike|hCoV-19/England/ALDP-B73FC4/2020|2020-11-12|EPI\_ISL\_662239|Original|hCoV-19^^England|Human|Lighthouse Lab in Alderley Park|Wellcome Sanger Institute for the COVID-19 Genomics UK (COG-UK) Consortium|Davies|United Kingdom

>Spike|hCoV-19/England/MILK-A7D13E/2020|2020-10-13|EPI\_ISL\_606517|Original|hCoV-19^^England|Human|Lighthouse Lab in Milton Keynes|Wellcome Sanger Institute for the COVID-19 Genomics UK (COG-UK) consortium|Davies|United Kingdom

>Spike|hCoV-19/England/QEUH-C4B577/2020|2020-12-13|EPI\_ISL\_769724|Original|hCoV-19^^England|Human|Lighthouse Lab in Glasgow|Wellcome Sanger Institute for the COVID-19 Genomics UK (COG-UK) Consortium|Davies|United Kingdom

>Spike|hCoV-19/England/QEUH-A01CB6/2020|2020-10-02|EPI\_ISL\_595836|Original|hCoV-19^^England|Human|Virology Department|COVID-19 Genomics UK (COG-UK) Consortium|de Silva|United Kingdom

>Spike|hCoV-19/Denmark/DCGC-16294/2020|2020-11-16|EPI\_ISL\_714285|Original|hCoV-19^^Midtjylland|Human|Department of Virus and Microbiological Special Diagnostics|Albertsen Lab|Michaelsen|Denmark

>Spike|hCoV-19/England/20132022304/2020|2020-03-23|EPI\_ISL\_423745|Original|hCoV-19^^England|Human|Respiratory Virus Unit|Respiratory Virus Unit|Platt|United Kingdom

>Spike|hCoV-19/USA/NY-QDX-865/2020|2020-03-17|EPI\_ISL\_571672|Original|hCoV-19^^New York|Human|Quest Diagnostics|Quest Diagnostics|Kagan|USA

>Spike|hCoV-19/USA/CA-CZB-5154/2020|2020-08-22|EPI\_ISL\_672028|Original|hCoV-19^^California|Human|County of San Luis Obispo Public Health Laboratory|Chan-Zuckerberg Biohub|Bhatt|USA

>Spike|hCoV-19/England/LOND-D9A6C/2020|2020-09-09|EPI\_ISL\_584674|Original|hCoV-19^^England|Human|University College London|COVID-19 Genomics UK (COG-UK) Consortium|Roy|United Kingdom

>Spike|hCoV-19/Kenya/C6876/2020|2020-05-15|EPI\_ISL\_568812|Original|hCoV-19^^Taita Taveta|Human|KEMRI-Wellcome Trust Research Programme/KEMRI-CGMR-C Kilifi|KEMRI-Wellcome Trust Research Programme/KEMRI-CGMR-C Kilifi|Githinji|Kenya

>Spike|hCoV-19/England/ALDP-CB4D9F/2020|2020-12-17|EPI\_ISL\_761203|Original|hCoV-19^^England|Human|Lighthouse Lab in Alderley Park|Wellcome Sanger Institute for the COVID-19 Genomics UK (COG-UK) Consortium|Davies|United Kingdom

>Spike|hCoV-19/USA/HI-H200117/2020|2020-06-10|EPI\_ISL\_752680|Original|hCoV-19^^Hawaii|Human|State Laboratories Division|State Laboratories Division|Sultana|USA

>Spike|hCoV-19/Wales/PHWC-48AF3A/2020|2020-11-04|EPI\_ISL\_666175|Original|hCoV-19^^Wales|Human|Wales Specialist Virology Centre Sequencing lab|COVID-19 Genomics UK (COG-UK) Consortium|Moore|United Kingdom

>Spike|hCoV-19/Japan/PG-8497/2020|2020-06-00|EPI\_ISL\_687596|Original|hCoV-19^^Japan|Human|Pathogen Genomics Center|Pathogen Genomics Center|Sekizuka|Japan

>Spike|hCoV-19/Australia/VIC259/2020|2020-03-21|EPI\_ISL\_419952|Original|hCoV-19^^Victoria|Human|Victorian Infectious Diseases Reference Laboratory (VIDRL)|Victorian Infectious Diseases Reference Laboratory and Microbiological Diagnostic Unit Public Health Laboratory|Schultz|Australia

>Spike|hCoV-19/Iran/SA-Isf-38/2020|2020-06-10|EPI\_ISL\_672590|Original|hCoV-19^^Iran|Human|Infectious Diseases and Tropical Medicine Research Center|Infectious Diseases and Tropical Medicine Research Center|Ahangarzadeh, S.|Iran

>Spike|hCoV-19/Denmark/DCGC-2102/2020|2020-07-20|EPI\_ISL\_618361|Original|hCoV-19^^Hovedstaden|Human|Department of Virus and Microbiological Special Diagnostics|Albertsen lab|Michaelsen|Denmark

>Spike|hCoV-19/England/MILK-B3AA13/2020|2020-11-02|EPI\_ISL\_679702|Original|hCoV-19^^England|Human|Oxford Viromics|COVID-19 Genomics UK (COG-UK) Consortium|Golubchik|United Kingdom

>Spike|hCoV-19/England/20166019504/2020|2020-04-16|EPI\_ISL\_528400|Original|hCoV-19^^England|Human|Respiratory Virus Unit|Respiratory Virus Unit|Miah|United Kingdom

>Spike|hCoV-19/USA/FL-BPHL-040/2020|2020-04-16|EPI\_ISL\_436544|Original|hCoV-19^^Florida|Human|Florida Bureau of Public Health Laboratories|Florida Bureau of Public Health Laboratories|Blanton|USA

>Spike|hCoV-19/USA/TX-HMH-MCoV-14528/2020|2020-10-08|EPI\_ISL\_787813|Original|hCoV-19^^Texas|Human|Houston Methodist Hospital|Houston Methodist Hospital|Long|USA

>Spike|hCoV-19/mink/Netherlands/NB03\_index/2020|2020-05-06|EPI\_ISL\_447633|Original|hCoV-19^^Netherlands|Mustela lutreola|Virology|Virology|Oreshkova|Netherlands

>Spike|hCoV-19/England/QEUH-B68E7A/2020|2020-11-11|EPI\_ISL\_662284|Original|hCoV-19^^England|Human|Lighthouse Lab in Glasgow|Wellcome Sanger Institute for the COVID-19 Genomics UK (COG-UK) Consortium|Davies|United Kingdom

>Spike|hCoV-19/Australia/NSW2738/2020|2020-09-02|EPI\_ISL\_530336|Original|hCoV-19^^New South Wales|Human|Area of Virology|Area of Virology|Yeang|Australia

>Spike|hCoV-19/England/SHEF-10CCEE5/2020|2020-12-23|EPI\_ISL\_764213|Original|hCoV-19^^England|Human|Virology Department|COVID-19 Genomics UK (COG-UK) Consortium|de Silva|United Kingdom

>Spike|hCoV-19/Belgium/regal-12111338/2020|2020-12-11|EPI\_ISL\_738391|Original|hCoV-19^^Mol|Human|UZ Leuven|KU Leuven|Maes|Belgium

>Spike|hCoV-19/USA/WA-UW-11115/2020|2020-06-18|EPI\_ISL\_570376|Original|hCoV-19^^Washington|Human|UW Virology Lab|UW Virology Lab|Roychoudhury|USA

>Spike|hCoV-19/England/ALDP-68397D/2020|2020-07-02|EPI\_ISL\_551755|Original|hCoV-19^^England|Human|Lighthouse Lab in Alderley Park|Wellcome Sanger Institute for the COVID-19 Genomics UK (COG-UK) consortium|Davies|United Kingdom

>Spike|hCoV-19/England/ALDP-A9268F/2020|2020-10-19|EPI\_ISL\_610949|Original|hCoV-19^^England|Human|Lighthouse Lab in Alderley Park|Wellcome Sanger Institute for the COVID-19 Genomics UK (COG-UK) consortium|Davies|United Kingdom

>Spike|hCoV-19/England/ALDP-50631B/2020|2020-06-25|EPI\_ISL\_559272|Original|hCoV-19^^England|Human|Lighthouse Lab in Alderley Park|Wellcome Sanger Institute for the COVID-19 Genomics UK (COG-UK) consortium|Davies|United Kingdom

>Spike|hCoV-19/Switzerland/ZH-UZH-IMV4/2020|2020-03-11|EPI\_ISL\_590826|Vero P2|hCoV-19^^Zurich|Human|Institute of Medical Virology|Institute of Medical Virology|Kufner|Switzerland

>Spike|hCoV-19/Portugal/PT0361/2020|2020-03-19|EPI\_ISL\_454077|Original|hCoV-19^^Portugal|Human|unknown|Instituto Nacional de Saude (INSA)|Borges|Portugal

>Spike|hCoV-19/USA/MA-MASPHL-00928/2020|2020-05-28|EPI\_ISL\_692825|Original|hCoV-19^^Massachusetts|Human|Massachusetts State Public Health Laboratory|Massachusetts State Public Health Laboratory|Lang|USA

>Spike|hCoV-19/Russia/SPE-RII-MH1500S/2020|2020-09-11|EPI\_ISL\_596282|Original|hCoV-19^^Saint Petersburg|Human|HELIX LCC|WHO National Influenza Centre Russian Federation|Komissarov|Russia

>Spike|hCoV-19/Japan/PG-5187/2020|2020-08-00|EPI\_ISL\_690290|Original|hCoV-19^^Japan|Human|Pathogen Genomics Center|Pathogen Genomics Center|Sekizuka|Japan

>Spike|hCoV-19/Beijing/DT-travelUSA04/2020|2020-03-22|EPI\_ISL\_452339|Original|hCoV-19^^Beijing|Human|Laboratory of Infectious Diseases Center of Beijing Ditan Hospital|Laboratory of Infectious Diseases Center of Beijing Ditan Hospital|Yang|China

>Spike|hCoV-19/England/EXET-139F5B/2020|2020-00-00|EPI\_ISL\_679354|Original|hCoV-19^^England|Human|University of Exeter|COVID-19 Genomics UK (COG-UK) Consortium|Temperton|United Kingdom

>Spike|hCoV-19/USA/VA-DCLS-0743/2020|2020-06-12|EPI\_ISL\_526863|Original|hCoV-19^^Virginia|Human|Virginia DCLS|Virginia DCLS|St. Jacques|USA

>Spike|hCoV-19/England/QEUH-B68EB6/2020|2020-11-11|EPI\_ISL\_662037|Original|hCoV-19^^England|Human|Lighthouse Lab in Glasgow|Wellcome Sanger Institute for the COVID-19 Genomics UK (COG-UK) Consortium|Davies|United Kingdom

>Spike|hCoV-19/USA/NC-QDX-253/2020|2020-04-30|EPI\_ISL\_498732|Original|hCoV-19^^North Carolina|Human|Quest Diagnostics|Quest Diagnostics|Kagan|USA

>Spike|hCoV-19/Netherlands/NA\_308/2020|2020-04-02|EPI\_ISL\_422617|Original|hCoV-19^^Netherlands|Human|Dutch COVID-19 response team|Erasmus Medical Center|Oude Munnink|Netherlands

>Spike|hCoV-19/Denmark/DCGC-12706/2020|2020-11-16|EPI\_ISL\_682887|Original|hCoV-19^^Sjaelland|Human|Department of Virus and Microbiological Special Diagnostics|Albertsen Lab|Michaelsen|Denmark

>Spike|hCoV-19/England/CAMC-BD2172/2020|2020-11-28|EPI\_ISL\_702087|Original|hCoV-19^^England|Human|Lighthouse Lab in Cambridge|Wellcome Sanger Institute for the COVID-19 Genomics UK (COG-UK) Consortium|Davies|United Kingdom

>Spike|hCoV-19/Wales/PHWC-2ECDB/2020|2020-04-06|EPI\_ISL\_446139|Original|hCoV-19^^Wales|Human|Wales Specialist Virology Centre|Public Health Wales Microbiology Cardiff|Moore|United Kingdom

>Spike|hCoV-19/Scotland/QEUH-A769A6/2020|2020-10-15|EPI\_ISL\_613340|Original|hCoV-19^^Scotland|Human|Queens Medical Centre|COVID-19 Genomics UK (COG-UK) Consortium|Loose|United Kingdom

>Spike|hCoV-19/England/EXET-13DF0C/2020|2020-12-03|EPI\_ISL\_724300|Original|hCoV-19^^England|Human|University of Exeter|COVID-19 Genomics UK (COG-UK) Consortium|Temperton|United Kingdom

>Spike|hCoV-19/Switzerland/BL-ETHZ-240022/2020|2020-08-10|EPI\_ISL\_523873|Original|hCoV-19^^Basel-Landschaft|Human|Viollier AG|Department of Biosystems Science and Engineering|Nadeau|Switzerland

>Spike|hCoV-19/England/MILK-ACCFDC/2020|2020-10-20|EPI\_ISL\_630337|Original|hCoV-19^^England|Human|Lighthouse Lab in Milton Keynes|Wellcome Sanger Institute for the COVID-19 Genomics UK (COG-UK) consortium|Davies|United Kingdom

>Spike|hCoV-19/Denmark/DCGC-22078/2020|2020-12-14|EPI\_ISL\_758540|Original|hCoV-19^^Hovedstaden|Human|Department of Virus and Microbiological Special Diagnostics|Albertsen Lab|Michaelsen|Denmark

>Spike|hCoV-19/Russia/VOR-RII-MH2793S/2020|2020-09-28|EPI\_ISL\_602455|Original|hCoV-19^^Voronezh|Human|HELIX LLC|WHO National Influenza Centre Russian Federation|Komissarov|Russia

>Spike|hCoV-19/USA/FL-BPHL-0670/2020|2020-03-13|EPI\_ISL\_509728|Original|hCoV-19^^Florida|Human|Florida Bureau of Public Health Laboratories|Florida Bureau of Public Health Laboratories|Blanton|USA

>Spike|hCoV-19/England/MILK-9AAA6B/2020|2020-08-31|EPI\_ISL\_550908|Original|hCoV-19^^England|Human|Lighthouse Lab in Milton Keynes|Wellcome Sanger Institute for the COVID-19 Genomics UK (COG-UK) consortium|Davies|United Kingdom

>Spike|hCoV-19/England/MILK-B8EA5C/2020|2020-11-13|EPI\_ISL\_674663|Original|hCoV-19^^England|Human|Lighthouse Lab in Milton Keynes|Wellcome Sanger Institute for the COVID-19 Genomics UK (COG-UK) Consortium|Davies|United Kingdom

>Spike|hCoV-19/Luxembourg/LNS5121437/2020|2020-08-31|EPI\_ISL\_744187|Original|hCoV-19^^Luxembourg|Human|Laboratoire national de sant\u00e9|Laboratoire national de sant\u00e9|Wienecke-Baldacchino|Luxembourg

>Spike|hCoV-19/USA/CA-CZB-14279/2020|2020-08-27|EPI\_ISL\_739426|Original|hCoV-19^^California|Human|Alameda County Public Health Lab|Chan-Zuckerberg Biohub|Kamm|USA

>Spike|hCoV-19/Scotland/EDB112/2020|2020-03-22|EPI\_ISL\_433407|Original|hCoV-19^^Scotland|Human|Virology Department|COVID-19 Genomics UK (COG-UK) Consortium|Williams|United Kingdom

>Spike|hCoV-19/England/CAMC-B77F1B/2020|2020-11-12|EPI\_ISL\_783503|Original|hCoV-19^^England|Human|Lighthouse Lab in Cambridge|Wellcome Sanger Institute for the COVID-19 Genomics UK (COG-UK) Consortium|Davies|United Kingdom

>Spike|hCoV-19/USA/NY-Wadsworth-251061-01/2020|2020-10-21|EPI\_ISL\_754693|Original|hCoV-19^^New York|Human|Wadsworth Center|Wadsworth Center|Lasek-Nesselquist|USA

>Spike|hCoV-19/England/CAMB-1ACF9F/2020|2020-04-23|EPI\_ISL\_489522|Original|hCoV-19^^England|Human|Department of Pathology|Wellcome Sanger Institute for the COVID-19 Genomics UK (COG-UK) consortium|Davies|United Kingdom

>Spike|hCoV-19/England/CAMC-AEACE0/2020|2020-10-25|EPI\_ISL\_633267|Original|hCoV-19^^England|Human|Lighthouse Lab in Cambridge|Wellcome Sanger Institute for the COVID-19 Genomics UK (COG-UK) consortium|Davies|United Kingdom

>Spike|hCoV-19/USA/MN-MDH-1437/2020|2020-03-31|EPI\_ISL\_514656|Original|hCoV-19^^Minnesota|Human|Mayo Clinic & Mayo Clinic Laboratories|Minnesota Department of Health|Garfin|USA

>Spike|hCoV-19/USA/UT-UPHL-2009331/2020|2020-05-16|EPI\_ISL\_524932|Original|hCoV-19^^Utah|Human|Utah Public Health Laboratory|Utah Public Health Laboratory|Young|USA

>Spike|hCoV-19/Belgium/ULG-10146/2020|2020-04-17|EPI\_ISL\_447138|Original|hCoV-19^^Liege|Human|Department of Clinical Microbiology|GIGA Medical Genomics|Durkin|Belgium

>Spike|hCoV-19/USA/NY-WCMP12E06P/2020|2020-03-16|EPI\_ISL\_427607|Original|hCoV-19^^New York|Human|NewYork-Presbyterian & Mason Lab|Mason Lab|Mason|USA

>Spike|hCoV-19/Australia/VIC15176/2020|2020-08-11|EPI\_ISL\_593172|Original|hCoV-19^^Victoria|Human|Microbiological Diagnostic Unit - Public Health Laboratory (MDU-PHL)|MDU-PHL|Schultz|Australia

>Spike|hCoV-19/Denmark/DCGC-19682/2020|2020-12-07|EPI\_ISL\_749108|Original|hCoV-19^^Sjaelland|Human|Department of Virus and Microbiological Special Diagnostics|Albertsen Lab|Michaelsen|Denmark

>Spike|hCoV-19/Luxembourg/LNS5638426/2020|2020-11-24|EPI\_ISL\_744267|Original|hCoV-19^^Luxembourg|Human|Laboratoire national de sant\u00e9|Laboratoire national de sant\u00e9|Wienecke-Baldacchino|Luxembourg

>Spike|hCoV-19/England/NOTT-112161/2020|2020-06-20|EPI\_ISL\_484348|Original|hCoV-19^^England|Human|Queens Medical Centre|COVID-19 Genomics UK (COG-UK) Consortium|Loose|United Kingdom

>Spike|hCoV-19/Wales/MILK-9C1E53/2020|2020-09-10|EPI\_ISL\_566471|Original|hCoV-19^^Wales|Human|Lighthouse Lab in Milton Keynes|Wellcome Sanger Institute for the COVID-19 Genomics UK (COG-UK) consortium|Davies|United Kingdom

>Spike|hCoV-19/Scotland/QEUEH-99B4D8/2020|2020-08-30|EPI\_ISL\_559996|Original|hCoV-19^^Scotland|Human|Oxford Viromics|COVID-19 Genomics UK (COG-UK) Consortium|Golubchik|United Kingdom

>Spike|hCoV-19/Scotland/QEUEH-9D0431/2020|2020-09-16|EPI\_ISL\_601811|Original|hCoV-19^^Scotland|Human|Lighthouse Lab in Glasgow|Wellcome Sanger Institute for the COVID-19 Genomics UK (COG-UK) consortium|Davies|United Kingdom

>Spike|hCoV-19/Iran/SA-Isf-33/2020|2020-04-12|EPI\_ISL\_672585|Original|hCoV-19^^Iran|Human|Infectious Diseases and Tropical Medicine Research Center|Infectious Diseases and Tropical Medicine Research Center|Haghjooy Javanmard,S.|Iran

>Spike|hCoV-19/England/LIVE-A1AF4/2020|2020-06-15|EPI\_ISL\_490353|Original|hCoV-19^^England|Human|Liverpool Clinical Laboratories|COVID-19 Genomics UK (COG-UK) Consortium|Haldenby|United Kingdom

>Spike|hCoV-19/Germany/BE-ChVir-W1048-4346/2020|2020-03-27|EPI\_ISL\_753926|Original|hCoV-19^^Berlin|Human|Charit\u00e9 Universit\u00e4tsmedizin Berlin|Charit\u00e9 Universit\u00e4tsmedizin Berlin|Muehlemann|Germany

>Spike|hCoV-19/Jordan/AM-ALSR-5307/2020|2020-11-02|EPI\_ISL\_730543|Original|hCoV-19^^Amman|Human|Biolab Diagnostic Laboratories|Andersen lab at Scripps Research|Gangavarapu|Jordan

>Spike|hCoV-19/England/204390706/2020|2020-10-22|EPI\_ISL\_649873|Original|hCoV-19^^England|Human|Respiratory Virus Unit|COVID-19 Genomics UK (COG-UK) Consortium|Platt|United Kingdom

>Spike|hCoV-19/Spain/PV-IBV-98008428/2020|2020-10-21|EPI\_ISL\_654602|Original|hCoV-19^^Basque Country|Human|Servicio de Microbiolog\u00eda. Hospital Universitario Donostia. OSI Donostialdea. \u00c1rea de Enfermedades Infecciosas|SeqCOVID-SPAIN consortium/IBV (CSIC) |Comas|Spain

>Spike|hCoV-19/Luxembourg/LNS8187762/2020|2020-10-22|EPI\_ISL\_744699|Original|hCoV-19^^Luxembourg|Human|Laboratoire national de sant\u00e9|Laboratoire national de sant\u00e9|Wienecke-Baldacchino|Luxembourg

>Spike|hCoV-19/Japan/PG-8484/2020|2020-08-00|EPI\_ISL\_687583|Original|hCoV-19^^Japan|Human|Pathogen Genomics Center|Pathogen Genomics Center|Sekizuka|Japan

>Spike|hCoV-19/Wales/PHWC-48DABE/2020|2020-11-01|EPI\_ISL\_680722|Original|hCoV-19^^Wales|Human|Wales Specialist Virology Centre Sequencing lab|COVID-19 Genomics UK (COG-UK) Consortium|Moore|United Kingdom

>Spike|hCoV-19/Wales/ALDP-BB9D22/2020|2020-11-20|EPI\_ISL\_710739|Original|hCoV-19^^Wales|Human|Lighthouse Lab in Alderley Park|Wellcome Sanger Institute for the COVID-19 Genomics UK (COG-UK) Consortium|Davies|United Kingdom

>Spike|hCoV-19/Scotland/CVR1952/2020|2020-04-08|EPI\_ISL\_438861|Original|hCoV-19^^Scotland|Human|West of Scotland Specialist Virology Centre|COVID-19 Genomics UK (COG-UK) Consortium|Robertson|United Kingdom

>Spike|hCoV-19/England/OXON-AFCE1/2020|2020-00-00|EPI\_ISL\_478821|Original|hCoV-19^^England|Human|Oxford Viromics|COVID-19 Genomics UK (COG-UK) Consortium|Golubchik|United Kingdom

>Spike|hCoV-19/Latvia/095/2020|2020-07-21|EPI\_ISL\_512650|Original|hCoV-19^^Latvia|Human|Latvijas Infektolo\u0123ijas centrs|Latvian Biomedical Research and Study Centre|Zrelavs|Latvia

>Spike|hCoV-19/England/LOND-12E85CE/2020|2020-12-15|EPI\_ISL\_741331|Original|hCoV-19^^England|Human|University College London|COVID-19 Genomics UK (COG-UK) Consortium|Roy|United Kingdom

>Spike|hCoV-19/Denmark/DCGC-14855/2020|2020-11-23|EPI\_ISL\_712030|Original|hCoV-19^^Hovedstaden|Human|Department of Virus and Microbiological Special Diagnostics|Albertsen Lab|Michaelsen|Denmark

>Spike|hCoV-19/France/ARA-17747/2020|2020-03-31|EPI\_ISL\_508960|Original|hCoV-19^^Auvergne-Rh\u00f4ne-Alpes|Human|Centre Hospitalier Saint Joseph Saint Luc|CNR Virus des Infections Respiratoires - France SUD|Josset|France

>Spike|hCoV-19/England/ALDP-9EA9EA/2020|2020-09-24|EPI\_ISL\_580028|Original|hCoV-19^^England|Human|Lighthouse Lab in Alderley Park|Wellcome Sanger Institute for the COVID-19 Genomics UK (COG-UK) consortium|Davies|United Kingdom

>Spike|hCoV-19/England/20149051704/2020|2020-04-02|EPI\_ISL\_466205|Original|hCoV-19^^England|Human|Respiratory Virus Unit|Respiratory Virus Unit|Platt|United Kingdom

>Spike|hCoV-19/USA/MA-MGH-00231/2020|2020-04-06|EPI\_ISL\_460345|Original|hCoV-19^^Massachusetts|Human|Massachusetts General Hospital|Infectious Disease Program|Lemieux|USA

>Spike|hCoV-19/South Africa/NHLS-UCT-GP-5597/2020|2020-05-12|EPI\_ISL\_700595|Original|hCoV-19^^Western Cape|Human|Heideveld Emergency Centre|NHLS/UCT|Iranzadeh|South Africa

>Spike|hCoV-19/England/QEUH-B68F86/2020|2020-11-11|EPI\_ISL\_661976|Original|hCoV-19^^England|Human|Lighthouse Lab in Glasgow|Wellcome Sanger Institute for the COVID-19 Genomics UK (COG-UK) Consortium|Davies|United Kingdom

>Spike|hCoV-19/England/MILK-B8C757/2020|2020-11-13|EPI\_ISL\_675896|Original|hCoV-19^^England|Human|Lighthouse Lab in Milton Keynes|Wellcome Sanger Institute for the COVID-19 Genomics UK (COG-UK) Consortium|Davies|United Kingdom



>Spike|hCoV-19/Switzerland/NE-ETHZ-350329/2020|2020-11-03|EPI\_ISL\_729194|Original|hCoV-19^^Neuch\u00e2tel|Human|Viollier AG|Department of Biosystems Science and Engineering|Nadeau|Switzerland

>Spike|hCoV-19/England/MILK-AB84A7/2020|2020-10-21|EPI\_ISL\_623435|Original|hCoV-19^^England|Human|Lighthouse Lab in Milton Keynes|Wellcome Sanger Institute for the COVID-19 Genomics UK (COG-UK) consortium|Davies|United Kingdom

>Spike|hCoV-19/Finland/21SS13C8/2020|2020-09-21|EPI\_ISL\_757380|Original|hCoV-19^^Uusimaa|Human|Department of Virology and Immunology|Department of Virology|Smura|Finland

>Spike|hCoV-19/Australia/VIC14708/2020|2020-08-06|EPI\_ISL\_592962|Original|hCoV-19^^Victoria|Human|Microbiological Diagnostic Unit - Public Health Laboratory (MDU-PHL)|MDU-PHL|Schultz|Australia

>Spike|hCoV-19/USA/AZ-TG410819/2020|2020-06-24|EPI\_ISL\_694970|Original|hCoV-19^^Arizona|Human|TGen North|TGen North|French|USA

>Spike|hCoV-19/USA/AZ-TG547955/2020|2020-07-27|EPI\_ISL\_695523|Original|hCoV-19^^Arizona|Human|TGen North|TGen North|French|USA

>Spike|hCoV-19/USA/TX-HMH-4136/2020|2020-06-18|EPI\_ISL\_543400|Original|hCoV-19^^Texas|Human|Houston Methodist Hospital|Houston Methodist Hospital|Long|USA

>Spike|hCoV-19/USA/MN-MDH-1779/2020|2020-04-13|EPI\_ISL\_590781|Original|hCoV-19^^Minnesota|Human|Minnesota Department of Health|Minnesota Department of Health|Lorentz|USA

>Spike|hCoV-19/USA/CA-CHLA-PLM14086335/2020|2020-12-01|EPI\_ISL\_753574|Original|hCoV-19^^California|Human|Clinical virology Laboratory|Center for Personalized Medicine|Dien Bard|USA

>Spike|hCoV-19/Japan/PG-2911/2020|2020-04-00|EPI\_ISL\_691037|Original|hCoV-19^^Japan|Human|Pathogen Genomics Center|Pathogen Genomics Center|Sekizuka|Japan

>Spike|hCoV-19/England/ALDP-9B5915/2020|2020-08-28|EPI\_ISL\_590284|Original|hCoV-19^^England|Human|Lighthouse Lab in Alderley Park|Wellcome Sanger Institute for the COVID-19 Genomics UK (COG-UK) consortium|Davies|United Kingdom

>Spike|hCoV-19/Northern Ireland/QEUIH-96220D/2020|2020-08-10|EPI\_ISL\_531627|Original|hCoV-19^^Northern Ireland|Human|Lighthouse Lab in Glasgow|Wellcome Sanger Institute for the COVID-19 Genomics UK (COG-UK) consortium|Davies|United Kingdom

>Spike|hCoV-19/India/OR-ILSCV30220/2020|2020-05-23|EPI\_ISL\_481143|Original|hCoV-19^^Odisha|Human|Immunogenomics lab|Immunogenomics lab|Raghav|India

>Spike|hCoV-19/Switzerland/BS-ETHZ-250129/2020|2020-08-15|EPI\_ISL\_535636|Original|hCoV-19^^Basel-Stadt|Human|Viollier AG|Department of Biosystems Science and Engineering|Nadeau|Switzerland

>Spike|hCoV-19/USA/TX-HMH-MCoV-16273/2020|2020-10-27|EPI\_ISL\_785957|Original|hCoV-19^^Texas|Human|Houston Methodist Hospital|Houston Methodist Hospital|Long|USA

>Spike|hCoV-19/USA/AZ-TG668390/2020|2020-04-20|EPI\_ISL\_696296|Original|hCoV-19^^Arizona|Human|Sonora Quest Laboratories|TGen North|French|USA

>Spike|hCoV-19/England/SHEF-10CBFD4/2020|2020-12-20|EPI\_ISL\_741986|Original|hCoV-19^^England|Human|Virology Department|COVID-19 Genomics UK (COG-UK) Consortium|de Silva|United Kingdom

>Spike|hCoV-19/USA/TX-HMH-MCoV-15470/2020|2020-10-23|EPI\_ISL\_786954|Original|hCoV-19^^Texas|Human|Houston Methodist Hospital|Houston Methodist Hospital|Long|USA

>Spike|hCoV-19/England/ALDP-B485B7/2020|2020-11-07|EPI\_ISL\_649397|Original|hCoV-19^^England|Human|Lighthouse Lab in Alderley Park|Wellcome Sanger Institute for the COVID-19 Genomics UK (COG-UK) Consortium|Davies|United Kingdom

>Spike|hCoV-19/India/UT-AR17/2020|2020-05-27|EPI\_ISL\_508164|Original|hCoV-19^^Uttarakhand|Human|All india institute of Medical Sciences Rishikesh|National Institute of Biomedical Genomics|Maitra|India

>Spike|hCoV-19/Australia/VIC10118/2020|2020-08-11|EPI\_ISL\_562795|Original|hCoV-19^^Victoria|Human|Microbiological Diagnostic Unit - Public Health Laboratory (MDU-PHL)|MDU-PHL|Schultz|Australia

>Spike|hCoV-19/USA/CA-ALSR-4261/2020|2020-08-21|EPI\_ISL\_648921|Original|hCoV-19^^California|Human|San Diego County Public Health Laboratory|Andersen lab at Scripps Research|Gangavarapu|USA

>Spike|hCoV-19/Singapore/409/2020|2020-04-22|EPI\_ISL\_475940|Original|hCoV-19^^Singapore|Human|National Public Health Laboratory|National Public Health Laboratory|Mak|Singapore

>Spike|hCoV-19/Iceland/79/2020|2020-03-09|EPI\_ISL\_417679|Original|hCoV-19^^Reykjavik|Human|The National University Hospital of Iceland|deCODE genetics|J\u00f3nsson|Iceland

>Spike|hCoV-19/Spain/CT-IBV-99009896/2020|2020-08-07|EPI\_ISL\_660293|Original|hCoV-19^^Catalunya|Human|Servicio de Microbiolog\u00eda|SeqCOVID-SPAIN consortium/IBV (CSIC) |Comas|Spain

>Spike|hCoV-19/Australia/VIC13755/2020|2020-08-30|EPI\_ISL\_563826|Original|hCoV-19^^Victoria|Human|Microbiological Diagnostic Unit - Public Health Laboratory (MDU-PHL) |MDU-PHL|Schultz|Australia

>Spike|hCoV-19/USA/WA-S1265/2020|2020-05-13|EPI\_ISL\_495715|Original|hCoV-19^^Washington|Human|Washington State Department of Health|Seattle Flu Study|Lee|USA

>Spike|hCoV-19/England/204521588/2020|2020-11-02|EPI\_ISL\_637183|Original|hCoV-19^^England|Human|Respiratory Virus Unit|COVID-19 Genomics UK (COG-UK) Consortium|Platt|United Kingdom

>Spike|hCoV-19/Australia/VIC8461/2020|2020-07-27|EPI\_ISL\_565031|Original|hCoV-19^^Victoria|Human|Microbiological Diagnostic Unit - Public Health Laboratory (MDU-PHL) |MDU-PHL|Schultz|Australia

>Spike|hCoV-19/Wales/PHWC-3182C/2020|2020-04-10|EPI\_ISL\_446494|Original|hCoV-19^^Wales|Human|Wales Specialist Virology Centre|Public Health Wales Microbiology Cardiff|Moore|United Kingdom

>Spike|hCoV-19/Wales/PHWC-494D15/2020|2020-11-22|EPI\_ISL\_726244|Original|hCoV-19^^Wales|Human|Originating lab|COVID-19 Genomics UK (COG-UK) Consortium|Moore|United Kingdom

>Spike|hCoV-19/Germany/HH-hpi-p2447/2020|2020-04-21|EPI\_ISL\_776510|Original|hCoV-19^^Hamburg|Human|University Medical Center Hamburg Eppendorf|Heinrich Pette Institute|Robitaille|Germany

>Spike|hCoV-19/Spain/CL-IBV-97006342/2020|2020-05-26|EPI\_ISL\_537689|Original|hCoV-19^^Castilla y Leon|Human|Universidad de Le\u00f3n|SeqCOVID-SPAIN consortium/IBV (CSIC) |Comas|Spain

>Spike|hCoV-19/Puerto Rico/CDC-S19/2020|2020-04-01|EPI\_ISL\_434553|Original|hCoV-19^^Puerto Rico|Human|Puerto Rico Department of Health|Centers for Disease Control and Prevention|Santiago|USA

>Spike|hCoV-19/USA/NY-WCMP12F07P/2020|2020-03-16|EPI\_ISL\_427612|Original|hCoV-19^^New York|Human|NewYork-Presbyterian & Mason Lab|Mason Lab|Mason|USA

>Spike|hCoV-19/Scotland/EDB8405/2020|2020-10-15|EPI\_ISL\_612354|Original|hCoV-19^^Scotland|Human|Virology Department|COVID-19 Genomics UK (COG-UK) Consortium|McHugh|United Kingdom

>Spike|hCoV-19/England/ALDP-5B30AD/2020|2020-06-18|EPI\_ISL\_558630|Original|hCoV-19^^England|Human|Lighthouse Lab in Alderley Park|Wellcome Sanger Institute for the COVID-19 Genomics UK (COG-UK) consortium|Davies|United Kingdom

>Spike|hCoV-19/USA/TX-DSHS-1135/2020|2020-06-17|EPI\_ISL\_634939|Original|hCoV-19^^Texas|Human|Texas Department of State Health Services|Texas Department of State Health Services|Rahman|USA

>Spike|hCoV-19/England/QEUEH-9C9D6D/2020|2020-09-10|EPI\_ISL\_567280|Original|hCoV-19^^England|Human|Lighthouse Lab in Glasgow|Wellcome Sanger Institute for the COVID-19 Genomics UK (COG-UK) consortium|Davies|United Kingdom

>Spike|hCoV-19/Denmark/DCGC-8787/2020|2020-10-26|EPI\_ISL\_626073|Original|hCoV-19^^Hovedstaden|Human|Department of Virus and Microbiological Special Diagnostics|Albertsen lab|Michaelsen|Denmark

>Spike|hCoV-19/Denmark/DCGC-795/2020|2020-04-13|EPI\_ISL\_614711|Original|hCoV-19^^Hovedstaden|Human|Department of Virus and Microbiological Special Diagnostics|Albertsen lab|Michaelsen|Denmark

>Spike|hCoV-19/England/NORW-EC7F6/2020|2020-05-13|EPI\_ISL\_457564|Original|hCoV-19^^England|Human|Quadram Institute Bioscience|COVID-19 Genomics UK (COG-UK) Consortium|Alikhan|United Kingdom

>Spike|hCoV-19/Scotland/CVR3941/2020|2020-07-03|EPI\_ISL\_490705|Original|hCoV-19^^Scotland|Human|West of Scotland Specialist Virology Centre|COVID-19 Genomics UK (COG-UK) Consortium|Robertson|United Kingdom

>Spike|hCoV-19/Japan/PG-1050/2020|2020-04-00|EPI\_ISL\_684660|Original|hCoV-19^^Japan|Human|Fukuoka Institute of Health and Environmental Sciences|Pathogen Genomics Center|Sekizuka|Japan

>Spike|hCoV-19/Mali/M002673/2020|2020-04-10|EPI\_ISL\_487455|Original|hCoV-19^^Bamako|Human|CICM-Mali|Bundeswehr Institut of Microbiology|Antwerpen|Mali

>Spike|hCoV-19/Italy/LAZ-INMI-37/2020|2020-06-12|EPI\_ISL\_603144|Original|hCoV-19^^Lazio|Human|INMI Lazzaro Spallanzani IRCCS|INMI Lazzaro Spallanzani IRCCS|Gruber|Italy

>Spike|hCoV-19/Japan/PG-7253/2020|2020-08-00|EPI\_ISL\_688356|Original|hCoV-19^^Japan|Human|Saitama Prefectural Institute of Public Health|Pathogen Genomics Center|Sekizuka|Japan

>Spike|hCoV-19/South Korea/KCDC2709/2020|2020-07-08|EPI\_ISL\_522488|Original|hCoV-19^^South Korea|Human|Division of Viral Diseases|Division of Viral Diseases|Kim|South Korea

>Spike|hCoV-19/England/204742214/2020|2020-00-00|EPI\_ISL\_649920|Original|hCoV-19^^England|Human|Respiratory Virus Unit|COVID-19 Genomics UK (COG-UK) Consortium|Platt|United Kingdom

>Spike|hCoV-19/England/ALDP-BB3C58/2020|2020-11-20|EPI\_ISL\_701828|Original|hCoV-19^^England|Human|Lighthouse Lab in Alderley Park|Wellcome Sanger Institute for the COVID-19 Genomics UK (COG-UK) Consortium|Davies|United Kingdom

>Spike|hCoV-19/Nigeria/AK-CV319/2020|2020-07-17|EPI\_ISL\_729990|Original|hCoV-19^^Akwa-Ibom State|Human|Nigeria Centre for Disease Control (NCDC)|African Centre of Excellence for Genomics of Infectious Diseases (ACEGID)|Oluniyi|Nigeria

>Spike|hCoV-19/England/MILK-C5263E/2020|2020-12-11|EPI\_ISL\_736308|Original|hCoV-19^^England|Human|Lighthouse Lab in Milton Keynes|Wellcome Sanger Institute for the COVID-19 Genomics UK (COG-UK) Consortium|Davies|United Kingdom

>Spike|hCoV-19/England/CAMB-75BBA/2020|2020-03-29|EPI\_ISL\_438338|Original|hCoV-19^^England|Human|Department of Pathology|Wellcome Sanger Institute for the COVID-19 Genomics UK (COG-UK) consortium|Amato|United Kingdom

>Spike|hCoV-19/England/QEUH-9C7AFF/2020|2020-09-11|EPI\_ISL\_567160|Original|hCoV-19^^England|Human|Lighthouse Lab in Glasgow|Wellcome Sanger Institute for the COVID-19 Genomics UK (COG-UK) consortium|Davies|United Kingdom

>Spike|hCoV-19/England/MILK-9E18E6/2020|2020-09-19|EPI\_ISL\_577091|Original|hCoV-19^^England|Human|Oxford Viromics|COVID-19 Genomics UK (COG-UK) Consortium|Golubchik|United Kingdom

>Spike|hCoV-19/Australia/VIC3641/2020|2020-07-08|EPI\_ISL\_520381|Original|hCoV-19^^Victoria|Human|Victorian Infectious Diseases Reference Laboratory (VIDRL)|VIDRL and MDU-PHL|Schultz|Australia

>Spike|hCoV-19/Japan/PG-0970/2020|2020-04-00|EPI\_ISL\_684580|Original|hCoV-19^^Japan|Human|Pathogen Genomics Center|Pathogen Genomics Center|Sekizuka|Japan

>Spike|hCoV-19/USA/NY-Wadsworth-16833-01/2020|2020-03-15|EPI\_ISL\_426316|Original|hCoV-19^^New York|Human|Wadsworth Center|Wadsworth Center|Lasek-Nesselquist|USA

>Spike|hCoV-19/England/SHEF-CFB39/2020|2020-10-15|EPI\_ISL\_611783|Original|hCoV-19^^England|Human|Virology Department|COVID-19 Genomics UK (COG-UK) Consortium|de Silva|United Kingdom

>Spike|hCoV-19/Wales/PHWC-4A642A/2020|2020-12-16|EPI\_ISL\_765036|Original|hCoV-19^^Wales|Human|Wales Specialist Virology Centre Sequencing lab|COVID-19 Genomics UK (COG-UK) Consortium|Moore|United Kingdom

>Spike|hCoV-19/USA/WI-GMF-10913/2020|2020-07-15|EPI\_ISL\_547620|Original|hCoV-19^^Wisconsin|Human|Gundersen Molecular Diagnostics Laboratory|Kabara Cancer Research Institute|Kenny|USA

>Spike|hCoV-19/England/ALDP-B25204/2020|2020-11-04|EPI\_ISL\_646493|Original|hCoV-19^^England|Human|Lighthouse Lab in Alderley Park|Wellcome Sanger Institute for the COVID-19 Genomics UK (COG-UK) Consortium|Davies|United Kingdom

>Spike|hCoV-19/France/OCC-110/2020|2020-10-23|EPI\_ISL\_671956|Original|hCoV-19^^Occitanie|Human|CHU Purpan - Laboratoire de Virologie - Institut

F\u00e9ratif de Biologie|CHU Purpan - Laboratoire de Virologie - Institut  
F\u00e9ratif de Biologie|Latour|France  
>Spike|hCoV-19/England/LEED-2A8633/2020|2020-03-20|EPI\_ISL\_539131|Original|hCoV-  
19^^England|Human|Leeds Teaching Hospitals NHS Trust and Public Health  
England|Wellcome Sanger Institute for the COVID-19 Genomics UK (COG-UK)  
consortium|Davies|United Kingdom  
>Spike|hCoV-19/Denmark/DCGC-10300/2020|2020-11-02|EPI\_ISL\_669885|Original|hCoV-  
19^^Syddanmark|Human|Department of Virus and Microbiological Special  
Diagnostics|Albertsen Lab|Michaelsen|Denmark  
>Spike|hCoV-19/Uganda/UG065/2020|2020-08-26|EPI\_ISL\_737981|Original|hCoV-  
19^^Uganda|Human|Uganda Central Public Health Lab and Uganda Virus Research  
Institute|MRC/UVRI & LSHTM Uganda Research Unit|Cotten|Uganda  
>Spike|hCoV-19/England/ALDP-94E0FE/2020|2020-06-16|EPI\_ISL\_555338|Original|hCoV-  
19^^England|Human|Lighthouse Lab in Alderley Park|Wellcome Sanger Institute for the  
COVID-19 Genomics UK (COG-UK) consortium|Davies|United Kingdom  
>Spike|hCoV-19/Germany/SH-ChVir3196/2020|2020-03-22|EPI\_ISL\_729540|Original|hCoV-  
19^^Schleswig-Holstein|Human|A. Krumbholz|Charit\u00e9 Universit\u00e4tsmedizin  
Berlin|Muehlemann|Germany  
>Spike|hCoV-19/India/TG-CCMB-OM5/2020|2020-05-14|EPI\_ISL\_495292|Original|hCoV-  
19^^Telangana|Human|Osmania Medical College|CSIR-Centre for Cellular and Molecular  
Biology|Banu|India  
>Spike|hCoV-19/England/CAMC-A82224/2020|2020-10-12|EPI\_ISL\_610830|Original|hCoV-  
19^^England|Human|Lighthouse Lab in Cambridge|Wellcome Sanger Institute for the  
COVID-19 Genomics UK (COG-UK) consortium|Davies|United Kingdom  
>Spike|hCoV-19/Netherlands/Utrecht\_30/2020|2020-04-20|EPI\_ISL\_461228|Original|hCoV-  
19^^Utrecht|Human|Dutch COVID-19 response team|Erasmus Medical Center|Oude  
Munnink|Netherlands  
>Spike|hCoV-19/USA/NY-Wadsworth-41097-01/2020|2020-04-  
08|EPI\_ISL\_676817|Original|hCoV-19^^New York|Human|Wadsworth Center|Wadsworth  
Center|Lasek-Nesselquist|USA  
>Spike|hCoV-19/England/ALDP-BBA116/2020|2020-11-20|EPI\_ISL\_701817|Original|hCoV-  
19^^England|Human|Lighthouse Lab in Alderley Park|Wellcome Sanger Institute for the  
COVID-19 Genomics UK (COG-UK) Consortium|Davies|United Kingdom  
>Spike|hCoV-19/USA/TX-HMH-MCoV-13052/2020|2020-08-27|EPI\_ISL\_788203|Original|hCoV-  
19^^Texas|Human|Houston Methodist Hospital|Houston Methodist Hospital|Long|USA  
>Spike|hCoV-19/Japan/PG-2346/2020|2020-05-00|EPI\_ISL\_685951|Original|hCoV-  
19^^Japan|Human|Pathogen Genomics Center|Pathogen Genomics Center|Sekizuka|Japan  
>Spike|hCoV-19/Northern Ireland/OXON-F40533/2020|2020-12-  
08|EPI\_ISL\_764532|Original|hCoV-19^^Northern Ireland|Human|Oxford Viromics|COVID-19  
Genomics UK (COG-UK) Consortium|Golubchik|United Kingdom  
>Spike|hCoV-19/Singapore/36nan/2020|2020-02-16|EPI\_ISL\_538435|Original|hCoV-  
19^^Singapore|Human|Department of Laboratory Medicine|Department of Laboratory  
Medicine|Chen|Singapore  
>Spike|hCoV-19/USA/FL-BPHL-1212/2020|2020-07-25|EPI\_ISL\_541185|Original|hCoV-  
19^^Florida|Human|Florida Bureau of Public Health Laboratories|Florida Bureau of  
Public Health Laboratories|Blanton|USA  
>Spike|hCoV-19/England/20170036004/2020|2020-04-14|EPI\_ISL\_465284|Original|hCoV-  
19^^England|Human|Respiratory Virus Unit|Respiratory Virus Unit|Platt|United Kingdom  
>Spike|hCoV-19/England/QEUEH-C31B45/2020|2020-12-11|EPI\_ISL\_782675|Original|hCoV-  
19^^England|Human|Lighthouse Lab in Glasgow|Wellcome Sanger Institute for the COVID-  
19 Genomics UK (COG-UK) Consortium|Davies|United Kingdom  
>Spike|hCoV-19/USA/TX-HMH-MCoV-15180/2020|2020-10-19|EPI\_ISL\_786664|Original|hCoV-  
19^^Texas|Human|Houston Methodist Hospital|Houston Methodist Hospital|Long|USA  
>Spike|hCoV-19/USA/MI-MDHHS-SC22125/2020|2020-10-06|EPI\_ISL\_614176|Original|hCoV-  
19^^Michigan|Human|Michigan Department of Health and Human Services|Michigan  
Department of Health and Human Services|Jacob|USA  
>Spike|hCoV-19/Denmark/DCGC-1840/2020|2020-07-13|EPI\_ISL\_622605|Original|hCoV-  
19^^Hovedstaden|Human|Department of Virus and Microbiological Special  
Diagnostics|Albertsen lab|Michaelsen|Denmark

>Spike|hCoV-19/Wales/PHWC-33F43/2020|2020-04-17|EPI\_ISL\_446844|Original|hCoV-19^^Wales|Human|Wales Specialist Virology Centre|Public Health Wales Microbiology Cardiff|Moore|United Kingdom

>Spike|hCoV-19/England/LIVE-A88E4/2020|2020-03-26|EPI\_ISL\_517229|Original|hCoV-19^^England|Human|Liverpool Clinical Laboratories|COVID-19 Genomics UK (COG-UK) Consortium|Haldenby|United Kingdom

>Spike|hCoV-19/England/ALDP-95CAB3/2020|2020-06-21|EPI\_ISL\_554933|Original|hCoV-19^^England|Human|Lighthouse Lab in Alderley Park|Wellcome Sanger Institute for the COVID-19 Genomics UK (COG-UK) consortium|Davies|United Kingdom

>Spike|hCoV-19/England/SHEF-10D2D1C/2020|2020-12-14|EPI\_ISL\_742050|Original|hCoV-19^^England|Human|Virology Department|COVID-19 Genomics UK (COG-UK) Consortium|de Silva|United Kingdom

>Spike|hCoV-19/Canada/BC-BCCDC-8621/2020|2020-11-00|EPI\_ISL\_740856|Original|hCoV-19^^British Columbia|Human|BCCDC Public Health Laboratory|BCCDC Public Health Laboratory|Prystajeky|Canada

>Spike|hCoV-19/USA/CA-SEARCH-5573/2020|2020-11-25|EPI\_ISL\_755300|Original|hCoV-19^^California|Human|San Diego County Public Health Laboratory|Andersen lab at Scripps Research|Gangavarapu|USA

>Spike|hCoV-19/USA/NY-Wadsworth-287495-01/2020|2020-12-15|EPI\_ISL\_767462|Original|hCoV-19^^New York|Human|Wadsworth Center|Wadsworth Center|Lasek-Nesselquist|USA

>Spike|hCoV-19/USA/UT-UPHL-201225377/2020|2020-12-01|EPI\_ISL\_684007|Original|hCoV-19^^Utah|Human|Utah Public Health Laboratory|Utah Public Health Laboratory|Young|USA

>Spike|hCoV-19/England/LIVE-DCB30B/2020|2020-11-23|EPI\_ISL\_724397|Original|hCoV-19^^England|Human|Liverpool Clinical Laboratories|COVID-19 Genomics UK (COG-UK) Consortium|Haldenby|United Kingdom

>Spike|hCoV-19/England/QEUEH-9F6E91/2020|2020-09-27|EPI\_ISL\_595640|Original|hCoV-19^^England|Human|Oxford Viromics|COVID-19 Genomics UK (COG-UK) Consortium|Golubchik|United Kingdom

>Spike|hCoV-19/England/ALDP-95AD43/2020|2020-06-16|EPI\_ISL\_555680|Original|hCoV-19^^England|Human|Lighthouse Lab in Alderley Park|Wellcome Sanger Institute for the COVID-19 Genomics UK (COG-UK) consortium|Davies|United Kingdom

>Spike|hCoV-19/England/QEUEH-9F51B7/2020|2020-09-25|EPI\_ISL\_637856|Original|hCoV-19^^England|Human|Department of Pathology|COVID-19 Genomics UK (COG-UK) Consortium|Goodfellow|United Kingdom

>Spike|hCoV-19/England/NORT-294B86/2020|2020-03-28|EPI\_ISL\_490467|Original|hCoV-19^^England|Human|Northumbria University / South Tees Hospitals NHS Foundation Trust / North Cumbria Integrated Care NHS Foundation Trust / North Tees and Hartlepool NHS Foundation Trust / Newcastle Hospitals NHS Foundation Trust|COVID-19 Genomics UK (COG-UK) Consortium|Bashton|United Kingdom

>Spike|hCoV-19/Scotland/CVR3911/2020|2020-06-15|EPI\_ISL\_512461|Original|hCoV-19^^Scotland|Human|West of Scotland Specialist Virology Centre|COVID-19 Genomics UK (COG-UK) Consortium|Robertson|United Kingdom

>Spike|hCoV-19/England/QEUEH-A8A9AF/2020|2020-10-16|EPI\_ISL\_638866|Original|hCoV-19^^England|Human|Oxford Viromics|COVID-19 Genomics UK (COG-UK) Consortium|Golubchik|United Kingdom

>Spike|hCoV-19/England/QEUEH-C30FFF/2020|2020-12-08|EPI\_ISL\_731398|Original|hCoV-19^^England|Human|Lighthouse Lab in Glasgow|Wellcome Sanger Institute for the COVID-19 Genomics UK (COG-UK) Consortium|Davies|United Kingdom

>Spike|hCoV-19/England/CAMB-7EA0F/2020|2020-04-08|EPI\_ISL\_442609|Original|hCoV-19^^England|Human|Department of Pathology|Wellcome Sanger Institute for the COVID-19 Genomics UK (COG-UK) consortium|Amato|United Kingdom

>Spike|hCoV-19/Lithuania/KL-LUHS-Eilnr59/2020|2020-04-10|EPI\_ISL\_603095|Original|hCoV-19^^Klaipėdos apskritis|Human|Lithuanian University of Health Sciences Hospital|Lithuanian University of Health Sciences|Zemaitis|Lithuania

>Spike|hCoV-19/England/ALDP-A6C4A2/2020|2020-10-14|EPI\_ISL\_608207|Original|hCoV-19^^England|Human|Lighthouse Lab in Alderley Park|Wellcome Sanger Institute for the COVID-19 Genomics UK (COG-UK) consortium|Davies|United Kingdom

>Spike|hCoV-19/Sweden/20-53305/2020|2020-10-27|EPI\_ISL\_676516|Original|hCoV-19^^Gavleborg|Human|Laboratoriemedicin|The Public Health Agency of Sweden|Svartstr\u00f6m|Sweden

>Spike|hCoV-19/England/BRIS-12F5ED/2020|2020-03-03|EPI\_ISL\_488202|Original|hCoV-19^^England|Human|PHE South West Regional Laboratory|Wellcome Sanger Institute for the COVID-19 Genomics UK (COG-UK) consortium|Davies|United Kingdom

>Spike|hCoV-19/India/GJ-GBRC65b/2020|2020-05-03|EPI\_ISL\_447041|Original|hCoV-19^^Gujarat|Human|B.J. Medical College and Civil hospital|Gujarat Biotechnology Research Centre|Joshi|India

>Spike|hCoV-19/Scotland/CVR5704/2020|2020-11-06|EPI\_ISL\_651922|Original|hCoV-19^^Scotland|Human|West of Scotland Specialist Virology Centre|COVID-19 Genomics UK (COG-UK) Consortium|Robertson|United Kingdom

>Spike|hCoV-19/Spain/PV-IBV-005172/2020|2020-06-26|EPI\_ISL\_509651|Original|hCoV-19^^Basque Country|Human|Servicio de Microbiolog\u00eda. Hospital Universitario Donostia. OSI Donostialdea. \u00c1rea de Enfermedades Infecciosas|SeqCOVID-SPAIN consortium|IBV (CSIC)|Comas|Spain

>Spike|hCoV-19/Australia/VIC3494/2020|2020-07-04|EPI\_ISL\_520250|Original|hCoV-19^^Victoria|Human|Victorian Infectious Diseases Reference Laboratory (VIDRL)|VIDRL and MDU-PHL|Schultz|Australia

>Spike|hCoV-19/USA/CA-CZB-14690/2020|2020-11-17|EPI\_ISL\_738603|Original|hCoV-19^^California|Human|Orange County Public Health Lab|Chan-Zuckerberg Biohub|Kamm|USA

>Spike|hCoV-19/England/EXET-136B69/2020|2020-04-24|EPI\_ISL\_457250|Original|hCoV-19^^England|Human|University of Exeter|COVID-19 Genomics UK (COG-UK) Consortium|Temperton|United Kingdom

>Spike|hCoV-19/Kenya/C4717/2020|2020-05-08|EPI\_ISL\_568737|Original|hCoV-19^^Mombasa|Human|KEMRI-Wellcome Trust Research Programme/KEMRI-CGMR-C Kilifi|KEMRI-Wellcome Trust Research Programme/KEMRI-CGMR-C Kilifi|Githinji|Kenya

>Spike|hCoV-19/England/LOND-126377A/2020|2020-11-01|EPI\_ISL\_679475|Original|hCoV-19^^England|Human|University College London|COVID-19 Genomics UK (COG-UK) Consortium|Roy|United Kingdom

>Spike|hCoV-19/Wales/PHWC-4A3038/2020|2020-12-14|EPI\_ISL\_744043|Original|hCoV-19^^Wales|Human|Wales Specialist Virology Centre Sequencing lab|COVID-19 Genomics UK (COG-UK) Consortium|Moore|United Kingdom

>Spike|hCoV-19/Wales/QEUEH-A5DE6A/2020|2020-10-12|EPI\_ISL\_609206|Original|hCoV-19^^Wales|Human|Lighthouse Lab in Glasgow|Wellcome Sanger Institute for the COVID-19 Genomics UK (COG-UK) consortium|Davies|United Kingdom

>Spike|hCoV-19/England/CAMB-7D1DE/2020|2020-04-06|EPI\_ISL\_442051|Original|hCoV-19^^England|Human|Department of Pathology|Wellcome Sanger Institute for the COVID-19 Genomics UK (COG-UK) consortium|Amato|United Kingdom

>Spike|hCoV-19/USA/MI-MDHHS-SC22566/2020|2020-11-10|EPI\_ISL\_737138|Original|hCoV-19^^Michigan|Human|Michigan Department of Health and Human Services|Michigan Department of Health and Human Services|Blankenship|USA

>Spike|hCoV-19/England/QEUEH-B806ED/2020|2020-11-14|EPI\_ISL\_668360|Original|hCoV-19^^England|Human|Lighthouse Lab in Glasgow|Wellcome Sanger Institute for the COVID-19 Genomics UK (COG-UK) Consortium|Davies|United Kingdom

>Spike|hCoV-19/England/ALDP-B5C2D7/2020|2020-11-10|EPI\_ISL\_655681|Original|hCoV-19^^England|Human|Lighthouse Lab in Alderley Park|Wellcome Sanger Institute for the COVID-19 Genomics UK (COG-UK) Consortium|Davies|United Kingdom

>Spike|hCoV-19/England/QEUEH-98F677/2020|2020-08-27|EPI\_ISL\_539988|Original|hCoV-19^^England|Human|Lighthouse Lab in Glasgow|Wellcome Sanger Institute for the COVID-19 Genomics UK (COG-UK) consortium|Davies|United Kingdom

>Spike|hCoV-19/Portugal/PT2061/2020|2020-11-10|EPI\_ISL\_732275|Original|hCoV-19^^Portugal|Human|Instituto Nacional de Saude (INSA) and Instituto Gulbenkian de Ciencia (IGC)|Instituto Nacional de Saude (INSA) and Instituto Gulbenkian de Ciencia (IGC)|Borges|Portugal

>Spike|hCoV-19/England/NORW-F1961/2020|2020-11-15|EPI\_ISL\_725125|Original|hCoV-19^^England|Human|Quadram Institute Bioscience|COVID-19 Genomics UK (COG-UK) Consortium|Alikhan|United Kingdom

>Spike|hCoV-19/England/20144012904/2020|2020-03-31|EPI\_ISL\_421931|Original|hCoV-19^^England|Human|Respiratory Virus Unit|Respiratory Virus Unit|Platt|United Kingdom

>Spike|hCoV-19/England/QEUA-AD1D34/2020|2020-10-26|EPI\_ISL\_629996|Original|hCoV-19^^England|Human|Lighthouse Lab in Glasgow|Wellcome Sanger Institute for the COVID-19 Genomics UK (COG-UK) consortium|Davies|United Kingdom

>Spike|hCoV-19/Wales/PHWC-4898B8/2020|2020-10-27|EPI\_ISL\_652420|Original|hCoV-19^^Wales|Human|Wales Specialist Virology Centre Sequencing lab|COVID-19 Genomics UK (COG-UK) Consortium|Moore|United Kingdom

>Spike|hCoV-19/England/BRIS-125383/2020|2020-03-26|EPI\_ISL\_443907|Original|hCoV-19^^England|Human|PHE South West Regional Laboratory|Wellcome Sanger Institute for the COVID-19 Genomics UK (COG-UK) consortium|Amato|United Kingdom

>Spike|hCoV-19/England/MILK-B54F7E/2020|2020-11-06|EPI\_ISL\_657862|Original|hCoV-19^^England|Human|Lighthouse Lab in Milton Keynes|Wellcome Sanger Institute for the COVID-19 Genomics UK (COG-UK) Consortium|Davies|United Kingdom

>Spike|hCoV-19/USA/TX-HMH-MCoV-9992/2020|2020-07-06|EPI\_ISL\_780372|Original|hCoV-19^^Texas|Human|Houston Methodist Hospital|Houston Methodist Hospital|Long|USA

>Spike|hCoV-19/USA/UT-UPHL-2012889221/2020|2020-08-13|EPI\_ISL\_745915|Original|hCoV-19^^Utah|Human|Ginkgo Bioworks Clinical Laboratory|Utah Public Health Laboratory|Young|USA

>Spike|hCoV-19/England/QEUA-A1DBF6/2020|2020-09-29|EPI\_ISL\_587453|Original|hCoV-19^^England|Human|Lighthouse Lab in Glasgow|Wellcome Sanger Institute for the COVID-19 Genomics UK (COG-UK) consortium|Davies|United Kingdom

>Spike|hCoV-19/USA/TX-HMH-MCoV-8650/2020|2020-07-01|EPI\_ISL\_780677|Original|hCoV-19^^Texas|Human|Houston Methodist Hospital|Houston Methodist Hospital|Long|USA

>Spike|hCoV-19/England/CAMB-1B3232/2020|2020-05-21|EPI\_ISL\_456754|Original|hCoV-19^^England|Human|Department of Pathology|COVID-19 Genomics UK (COG-UK) Consortium|Meredith|United Kingdom

>Spike|hCoV-19/Spain/CT-IBV-005604/2020|2020-03-26|EPI\_ISL\_508650|Original|hCoV-19^^Catalunya|Human|Departamento de Microbiolog\u00eda|SeqCOVID-SPAIN consortium/IBV (CSIC) |Comas|Spain

>Spike|hCoV-19/Switzerland/ZH-ETHZ-260055/2020|2020-08-24|EPI\_ISL\_539382|Original|hCoV-19^^Zurich|Human|Viollier AG|Department of Biosystems Science and Engineering|Nadeau|Switzerland

>Spike|hCoV-19/Denmark/DCGC-17080/2020|2020-12-14|EPI\_ISL\_750746|Original|hCoV-19^^Midtjylland|Human|Department of Virus and Microbiological Special Diagnostics|Albertsen Lab|Michaelsen|Denmark

>Spike|hCoV-19/England/QEUA-969F4B/2020|2020-08-13|EPI\_ISL\_530916|Original|hCoV-19^^England|Human|Lighthouse Lab in Glasgow|Wellcome Sanger Institute for the COVID-19 Genomics UK (COG-UK) consortium|Davies|United Kingdom

>Spike|hCoV-19/USA/WA-S427/2020|2020-03-28|EPI\_ISL\_434187|Original|hCoV-19^^Washington|Human|Washington State Department of Health|Seattle Flu Study|Bedford|USA

>Spike|hCoV-19/Denmark/DCGC-5740/2020|2020-09-28|EPI\_ISL\_621245|Original|hCoV-19^^Sjælland|Human|Department of Virus and Microbiological Special Diagnostics|Albertsen lab|Michaelsen|Denmark

>Spike|hCoV-19/Netherlands/ZH-RIVM-10133/2020|2020-00-00|EPI\_ISL\_547568|Original|hCoV-19^^Zuid Holland|Human|Dutch COVID-19 response team|National Institute for Public Health and the Environment (RIVM)|Meijer|Netherlands

>Spike|hCoV-19/England/QEUA-9C900A/2020|2020-09-11|EPI\_ISL\_567217|Original|hCoV-19^^England|Human|Lighthouse Lab in Glasgow|Wellcome Sanger Institute for the COVID-19 Genomics UK (COG-UK) consortium|Davies|United Kingdom

>Spike|hCoV-19/Portugal/PT0975/2020|2020-03-27|EPI\_ISL\_511524|Original|hCoV-19^^Portugal|Human|Instituto Nacional de Saude (INSA)|Instituto Nacional de Saude (INSA)|Borges|Portugal

>Spike|hCoV-19/USA/TX-HMH-1278/2020|2020-04-15|EPI\_ISL\_542625|Original|hCoV-19^^Texas|Human|Houston Methodist Hospital|Houston Methodist Hospital|Long|USA

>Spike|hCoV-19/England/MILK-ACBF82/2020|2020-10-20|EPI\_ISL\_629267|Original|hCoV-19^^England|Human|Lighthouse Lab in Milton Keynes|Wellcome Sanger Institute for the COVID-19 Genomics UK (COG-UK) consortium|Davies|United Kingdom

>Spike|hCoV-19/England/C200049042/2020|2020-00-00|EPI\_ISL\_683456|Original|hCoV-19^^England|Human|Respiratory Virus Unit|COVID-19 Genomics UK (COG-UK) Consortium|Platt|United Kingdom

>Spike|hCoV-19/England/MILK-512376/2020|2020-06-10|EPI\_ISL\_559043|Original|hCoV-19^^England|Human|Lighthouse Lab in Milton Keynes|Wellcome Sanger Institute for the COVID-19 Genomics UK (COG-UK) consortium|Davies|United Kingdom

>Spike|hCoV-19/England/ALDP-9535F7/2020|2020-06-08|EPI\_ISL\_553867|Original|hCoV-19^^England|Human|Lighthouse Lab in Alderley Park|Wellcome Sanger Institute for the COVID-19 Genomics UK (COG-UK) consortium|Davies|United Kingdom

>Spike|hCoV-19/England/20124097004/2020|2020-03-13|EPI\_ISL\_465794|Original|hCoV-19^^England|Human|Respiratory Virus Unit|Respiratory Virus Unit|Platt|United Kingdom

>Spike|hCoV-19/England/QEUEH-B302BB/2020|2020-11-04|EPI\_ISL\_659846|Original|hCoV-19^^England|Human|Lighthouse Lab in Glasgow|Wellcome Sanger Institute for the COVID-19 Genomics UK (COG-UK) Consortium|Davies|United Kingdom

>Spike|hCoV-19/England/MILK-B88700/2020|2020-11-14|EPI\_ISL\_674359|Original|hCoV-19^^England|Human|Lighthouse Lab in Milton Keynes|Wellcome Sanger Institute for the COVID-19 Genomics UK (COG-UK) Consortium|Davies|United Kingdom

>Spike|hCoV-19/Belgium/ULG-10552/2020|2020-10-23|EPI\_ISL\_626304|Original|hCoV-19^^Li\u00e8ge|Human|Department of Clinical Microbiology|GIGA Medical Genomics|Durkin|Belgium

>Spike|hCoV-19/England/QEUEH-9F57A6/2020|2020-09-25|EPI\_ISL\_588824|Original|hCoV-19^^England|Human|Lighthouse Lab in Glasgow|Wellcome Sanger Institute for the COVID-19 Genomics UK (COG-UK) consortium|Davies|United Kingdom

>Spike|hCoV-19/Denmark/ALAB-SSI215/2020|2020-03-11|EPI\_ISL\_429407|Original|hCoV-19^^Denmark|Human|Department of Virus and Microbiological Special Diagnostics|Albertsen lab|Kirkegaard|Denmark

>Spike|hCoV-19/England/201140359/2020|2020-03-11|EPI\_ISL\_464728|Original|hCoV-19^^England|Human|Respiratory Virus Unit|Respiratory Virus Unit|Platt|United Kingdom

>Spike|hCoV-19/Japan/TK-YE611821/2020|2020-04-00|EPI\_ISL\_486891|Original|hCoV-19^^Tokyo|Human|Tokyo Metropolitan Institute of Public Health|Tokyo Metropolitan Institute of Public Health|Nagashima|Japan

>Spike|hCoV-19/USA/FL-BPHL-1573/2020|2020-09-15|EPI\_ISL\_568671|Original|hCoV-19^^Florida|Human|Florida Bureau of Public Health Laboratories|Florida Bureau of Public Health Laboratories|Blanton|USA

>Spike|hCoV-19/Canada/ON-PHL-20-01237/2020|2020-06-00|EPI\_ISL\_548859|Original|hCoV-19^^Ontario|Human|Public Health Ontario Laboratory|Public Health Ontario Laboratory|Guthrie|Canada

>Spike|hCoV-19/Scotland/CVR4018/2020|2020-08-29|EPI\_ISL\_535117|Original|hCoV-19^^Scotland|Human|West of Scotland Specialist Virology Centre|COVID-19 Genomics UK (COG-UK) Consortium|Robertson|United Kingdom

>Spike|hCoV-19/USA/MI-MDHHS-SC21421/2020|2020-03-25|EPI\_ISL\_507675|Original|hCoV-19^^Michigan|Human|Michigan Department of Health and Human Services|Michigan Department of Health and Human Services|Blankenship|USA

>Spike|hCoV-19/Denmark/DCGC-15230/2020|2020-11-23|EPI\_ISL\_713710|Original|hCoV-19^^Hovedstaden|Human|Department of Virus and Microbiological Special Diagnostics|Albertsen Lab|Michaelsen|Denmark

>Spike|hCoV-19/USA/AZ-TG670148/2020|2020-04-29|EPI\_ISL\_696352|Original|hCoV-19^^Arizona|Human|Sonora Quest Laboratories|TGen North|French|USA

>Spike|hCoV-19/England/QEUEH-B136A3/2020|2020-11-02|EPI\_ISL\_642272|Original|hCoV-19^^England|Human|Lighthouse Lab in Glasgow|Wellcome Sanger Institute for the COVID-19 Genomics UK (COG-UK) Consortium|Davies|United Kingdom

>Spike|hCoV-19/Switzerland/BS-42210896/2020|2020-03-28|EPI\_ISL\_581807|Original|hCoV-19^^Basel-Stadt|Human|University Hospital Basel|University Hospital Basel|Roloff Handschin|Switzerland

>Spike|hCoV-19/Scotland/EDB5781/2020|2020-04-27|EPI\_ISL\_487890|Original|hCoV-19^^Scotland|Human|Virology Department|Wellcome Sanger Institute for the COVID-19 Genomics UK (COG-UK) consortium|Davies|United Kingdom

>Spike|hCoV-19/England/CAMB-1AFB7A/2020|2020-05-02|EPI\_ISL\_459194|Original|hCoV-19^^England|Human|Department of Pathology|Wellcome Sanger Institute for the COVID-19 Genomics UK (COG-UK) consortium|Davies|United Kingdom



>Spike|hCoV-19/Switzerland/BE-ETHZ-100054/2020|2020-03-12|EPI\_ISL\_466976|Original|hCoV-19^^Bern|Human|Viollier AG|Department of Biosystems Science and Engineering|Nadeau|Switzerland

>Spike|hCoV-19/USA/NM-DOH-2020631397/2020|2020-12-19|EPI\_ISL\_766899|Original|hCoV-19^^New Mexico|Human|New Mexico Department of Health Scientific Laboratory|New Mexico Department of Health Scientific Laboratory|Malone|USA

>Spike|hCoV-19/England/QEUA-B2B3A1/2020|2020-11-03|EPI\_ISL\_646766|Original|hCoV-19^^England|Human|Lighthouse Lab in Glasgow|Wellcome Sanger Institute for the COVID-19 Genomics UK (COG-UK) Consortium|Davies|United Kingdom

>Spike|hCoV-19/USA/FL-BPHL-0513/2020|2020-06-12|EPI\_ISL\_508716|Original|hCoV-19^^Florida|Human|Florida Bureau of Public Health Laboratories|Florida Bureau of Public Health Laboratories|Blanton|USA

>Spike|hCoV-19/Germany/BY-MVP-0076/2020|2020-03-30|EPI\_ISL\_437271|Original|hCoV-19^^Bavaria|Human|Max von Pettenkofer Institute|Laboratory for Functional Genome Analysis|Graf|Germany

>Spike|hCoV-19/England/CAMB-81BF7/2020|2020-04-11|EPI\_ISL\_442541|Original|hCoV-19^^England|Human|Department of Pathology|Wellcome Sanger Institute for the COVID-19 Genomics UK (COG-UK) consortium|Amato|United Kingdom

>Spike|hCoV-19/Spain/IB-IBV-99010835/2020|2020-08-24|EPI\_ISL\_691645|Original|hCoV-19^^Balear Islands|Human|Servicio de Microbiolog\u00eda|SeqCOVID-SPAIN consortium|IBV (CSIC) |Comas|Spain

>Spike|hCoV-19/USA/MI-MDHHS-SC20874/2020|2020-05-15|EPI\_ISL\_471895|Original|hCoV-19^^Michigan|Human|Michigan Department of Health and Human Services|Michigan Department of Health and Human Services|Blankenship|USA

>Spike|hCoV-19/South Africa/KRISP-K004636/2020|2020-11-01|EPI\_ISL\_660652|Original|hCoV-19^^KwaZulu-Natal|Human|NHLS-IALCH|KRISP|de Oliveira|South Africa

>Spike|hCoV-19/USA/TX-HMH-MCoV-12033/2020|2020-09-19|EPI\_ISL\_790176|Original|hCoV-19^^Texas|Human|Houston Methodist Hospital|Houston Methodist Hospital|Long|USA

>Spike|hCoV-19/USA/DE-DHSS-F917887/2020|2020-03-25|EPI\_ISL\_584013|Original|hCoV-19^^Delaware|Human|Delaware Public Health Lab|Delaware Public Health Lab|Bajwa|USA

>Spike|hCoV-19/Denmark/DCGC-16321/2020|2020-11-16|EPI\_ISL\_714702|Original|hCoV-19^^Hovedstaden|Human|Department of Virus and Microbiological Special Diagnostics|Albertsen Lab|Michaelsen|Denmark

>Spike|hCoV-19/France/PAC-IHU-0617/2020|2020-04-12|EPI\_ISL\_568890|Original|hCoV-19^^Provence-Alpes-C\u00f4te-d\u2019Azur|Human|MEPHI|MEPHI|Levasseur|France

>Spike|hCoV-19/Denmark/DCGC-17094/2020|2020-12-14|EPI\_ISL\_750753|Original|hCoV-19^^Midtjylland|Human|Department of Virus and Microbiological Special Diagnostics|Albertsen Lab|Michaelsen|Denmark

>Spike|hCoV-19/South Africa/KRISP-K002848/2020|2020-09-01|EPI\_ISL\_602664|Original|hCoV-19^^KwaZulu-Natal|Human|NHLS-IALCH|KRISP|de Oliveira|South Africa

>Spike|hCoV-19/England/NORT-29349B/2020|2020-06-22|EPI\_ISL\_499502|Original|hCoV-19^^England|Human|Northumbria University / South Tees Hospitals NHS Foundation Trust / North Cumbria Integrated Care NHS Foundation Trust / North Tees and Hartlepool NHS Foundation Trust / Newcastle Hospitals NHS Foundation Trust|COVID-19 Genomics UK (COG-UK) Consortium|Bashton|United Kingdom

>Spike|hCoV-19/England/LEED-2AA07F/2020|2020-04-08|EPI\_ISL\_538921|Original|hCoV-19^^England|Human|Leeds Teaching Hospitals NHS Trust and Public Health England|Wellcome Sanger Institute for the COVID-19 Genomics UK (COG-UK) consortium|Davies|United Kingdom

>Spike|hCoV-19/England/ALDP-94C5C4/2020|2020-06-15|EPI\_ISL\_555874|Original|hCoV-19^^England|Human|Lighthouse Lab in Alderley Park|Wellcome Sanger Institute for the COVID-19 Genomics UK (COG-UK) consortium|Davies|United Kingdom

>Spike|hCoV-19/England/CAMB-79460/2020|2020-04-03|EPI\_ISL\_441114|Original|hCoV-19^^England|Human|Department of Pathology|Wellcome Sanger Institute for the COVID-19 Genomics UK (COG-UK) consortium|Amato|United Kingdom

>Spike|hCoV-19/Portugal/PT0915/2020|2020-03-28|EPI\_ISL\_511172|Original|hCoV-19^^Portugal|Human|Instituto Nacional de Saude (INSA)|Instituto Nacional de Saude (INSA)|Borges|Portugal

>Spike|hCoV-19/Scotland/CVR143/2020|2020-03-17|EPI\_ISL\_425687|Original|hCoV-19^^Scotland|Human|West of Scotland Specialist Virology Centre|COVID-19 Genomics UK (COG-UK) Consortium|Robertson|United Kingdom

>Spike|hCoV-19/England/MILK-B3D676/2020|2020-11-02|EPI\_ISL\_645438|Original|hCoV-19^^England|Human|Lighthouse Lab in Milton Keynes|Wellcome Sanger Institute for the COVID-19 Genomics UK (COG-UK) Consortium|Davies|United Kingdom

>Spike|hCoV-19/England/204590464/2020|2020-11-06|EPI\_ISL\_683505|Original|hCoV-19^^England|Human|Respiratory Virus Unit|COVID-19 Genomics UK (COG-UK) Consortium|Platt|United Kingdom

>Spike|hCoV-19/Northern Ireland/QEUI-963EF9/2020|2020-08-12|EPI\_ISL\_536843|Original|hCoV-19^^Northern Ireland|Human|Lighthouse Lab in Glasgow|Wellcome Sanger Institute for the COVID-19 Genomics UK (COG-UK) consortium|Davies|United Kingdom

>Spike|hCoV-19/Japan/PG-7846/2020|2020-08-00|EPI\_ISL\_686947|Original|hCoV-19^^Japan|Human|Pathogen Genomics Center|Pathogen Genomics Center|Sekizuka|Japan

>Spike|hCoV-19/Luxembourg/LNS9388829/2020|2020-10-26|EPI\_ISL\_744901|Original|hCoV-19^^Luxembourg|Human|Laboratoire national de sant\u00e9|Laboratoire national de sant\u00e9|Wienecke-Baldacchino|Luxembourg

>Spike|hCoV-19/England/PORT-2D46D4/2020|2020-10-08|EPI\_ISL\_613291|Original|hCoV-19^^England|Human|Centre for Enzyme Innovation|COVID-19 Genomics UK (COG-UK) Consortium|Robson|United Kingdom

>Spike|hCoV-19/England/EXET-136A7B/2020|2020-04-27|EPI\_ISL\_457245|Original|hCoV-19^^England|Human|University of Exeter|COVID-19 Genomics UK (COG-UK) Consortium|Temperton|United Kingdom

>Spike|hCoV-19/Wales/PHWC-15D197/2020|2020-03-30|EPI\_ISL\_472677|Original|hCoV-19^^Wales|Human|Wales Specialist Virology Centre Sequencing lab|COVID-19 Genomics UK (COG-UK) Consortium|Moore|United Kingdom

>Spike|hCoV-19/USA/MA-MGH-03417/2020|2020-11-11|EPI\_ISL\_765827|Original|hCoV-19^^Massachusetts|Human|Massachusetts General Hospital|Infectious Disease Program|Park|USA

>Spike|hCoV-19/USA/WI-UW-1499/2020|2020-09-11|EPI\_ISL\_541626|Original|hCoV-19^^Wisconsin|Human|University of Wisconsin-Madison AIDS Vaccine Research Laboratories|University of Wisconsin-Madison AIDS Vaccine Research Laboratories|Baczenas|USA

>Spike|hCoV-19/England/QEUI-BA0429/2020|2020-11-18|EPI\_ISL\_719730|Original|hCoV-19^^England|Human|Lighthouse Lab in Glasgow|Wellcome Sanger Institute for the COVID-19 Genomics UK (COG-UK) Consortium|Davies|United Kingdom

>Spike|hCoV-19/England/QEUI-B3FBC0/2020|2020-11-08|EPI\_ISL\_658489|Original|hCoV-19^^England|Human|Lighthouse Lab in Glasgow|Wellcome Sanger Institute for the COVID-19 Genomics UK (COG-UK) Consortium|Davies|United Kingdom

>Spike|hCoV-19/France/OCC-117/2020|2020-10-22|EPI\_ISL\_671962|Original|hCoV-19^^Occitanie|Human|CHU Purpan - Laboratoire de Virologie - Institut F\u00e9d\u00e9ratif de Biologie|CHU Purpan - Laboratoire de Virologie - Institut F\u00e9d\u00e9ratif de Biologie|Latour|France

>Spike|hCoV-19/Wales/QEUI-9648DC/2020|2020-08-11|EPI\_ISL\_531127|Original|hCoV-19^^Wales|Human|Lighthouse Lab in Glasgow|Wellcome Sanger Institute for the COVID-19 Genomics UK (COG-UK) consortium|Davies|United Kingdom

>Spike|hCoV-19/England/MILK-99DFB7/2020|2020-08-31|EPI\_ISL\_550544|Original|hCoV-19^^England|Human|Lighthouse Lab in Milton Keynes|Wellcome Sanger Institute for the COVID-19 Genomics UK (COG-UK) consortium|Davies|United Kingdom

>Spike|hCoV-19/England/CAMB-1BC1C3/2020|2020-11-21|EPI\_ISL\_723855|Original|hCoV-19^^England|Human|Department of Pathology|COVID-19 Genomics UK (COG-UK) Consortium|Goodfellow|United Kingdom

>Spike|hCoV-19/USA/WA-S1025/2020|2020-05-01|EPI\_ISL\_463515|Original|hCoV-19^^Washington|Human|Washington State Department of Health|Seattle Flu Study|Bedford|USA

>Spike|hCoV-19/Germany/SH-ChVir8315/2020|2020-07-26|EPI\_ISL\_729574|Original|hCoV-19^^Schleswig-Holstein|Human|A. Krumbholz|Charit\u00e9 Universit\u00e4tsmedizin Berlin|Muehlemann|Germany

>Spike|hCoV-19/England/CAMC-941899/2020|2020-07-23|EPI\_ISL\_556856|Original|hCoV-19^^England|Human|Lighthouse Lab in Cambridge|Wellcome Sanger Institute for the COVID-19 Genomics UK (COG-UK) consortium|Davies|United Kingdom

>Spike|hCoV-19/England/NOTT-11F60B/2020|2020-11-25|EPI\_ISL\_725547|Original|hCoV-19^^England|Human|Lincolnshire Hospitals and DeepSeq Nottingham|COVID-19 Genomics UK (COG-UK) Consortium|Loose|United Kingdom

>Spike|hCoV-19/USA/CA-ALSR-3764/2020|2020-05-27|EPI\_ISL\_636189|Original|hCoV-19^^California|Human|San Diego County Public Health Laboratory|Andersen lab at Scripps Research|Gangavarapu|USA

>Spike|hCoV-19/Japan/PG-4444/2020|2020-07-00|EPI\_ISL\_692667|Original|hCoV-19^^Japan|Human|Sakai City Institute of Public Health|Pathogen Genomics Center|Sekizuka|Japan

>Spike|hCoV-19/England/OXON-B0F3F/2020|2020-04-09|EPI\_ISL\_478979|Original|hCoV-19^^England|Human|Oxford Viromics|COVID-19 Genomics UK (COG-UK) Consortium|Golubchik|United Kingdom

>Spike|hCoV-19/Scotland/CVR4909/2020|2020-10-05|EPI\_ISL\_594675|Original|hCoV-19^^Scotland|Human|West of Scotland Specialist Virology Centre|COVID-19 Genomics UK (COG-UK) Consortium|Robertson|United Kingdom

>Spike|hCoV-19/Netherlands/ZuidHolland\_34/2020|2020-03-16|EPI\_ISL\_422906|Original|hCoV-19^^Zuid Holland|Human|Dutch COVID-19 response team|Erasmus Medical Center|Oude Munnink|Netherlands

>Spike|hCoV-19/England/ALDP-A2DBB7/2020|2020-10-05|EPI\_ISL\_586668|Original|hCoV-19^^England|Human|Lighthouse Lab in Alderley Park|Wellcome Sanger Institute for the COVID-19 Genomics UK (COG-UK) consortium|Davies|United Kingdom

>Spike|hCoV-19/Japan/IC-0537/2020|2020-09-00|EPI\_ISL\_779220|Original|hCoV-19^^Japan|Human|Pathogen Genomics Center|Pathogen Genomics Center|Sekizuka|Japan

>Spike|hCoV-19/India/MH-GA38/2020|2020-06-20|EPI\_ISL\_508232|Original|hCoV-19^^Maharashtra|Human|Government Medical College|National Institute of Biomedical Genomics|Maitra|India

>Spike|hCoV-19/Scotland/EDB4536/2020|2020-05-06|EPI\_ISL\_461719|Original|hCoV-19^^Scotland|Human|Virology Department|COVID-19 Genomics UK (COG-UK) Consortium|Williams|United Kingdom

>Spike|hCoV-19/USA/CA-CZB-10293/2020|2020-09-08|EPI\_ISL\_583020|Original|hCoV-19^^California|Human|Orange County Public Health Lab|Chan-Zuckerberg Biohub|Bhatt|USA

>Spike|hCoV-19/mink/Netherlands/NB-EMC-55-17/2020|2020-09-23|EPI\_ISL\_632420|Original|hCoV-19^^Noord Brabant|Neovison vison|Dutch COVID-19 response team|Erasmus Medical Center|Oude Munnink|Netherlands

>Spike|hCoV-19/England/QEUEH-9FF618/2020|2020-09-30|EPI\_ISL\_600342|Original|hCoV-19^^England|Human|Lighthouse Lab in Glasgow|Wellcome Sanger Institute for the COVID-19 Genomics UK (COG-UK) consortium|Davies|United Kingdom

>Spike|hCoV-19/Jordan/AM-ALSR-4071/2020|2020-10-03|EPI\_ISL\_636431|Original|hCoV-19^^Amman|Human|Biolab Diagnostic Laboratories|Andersen lab at Scripps Research|Gangavarapu|Jordan

>Spike|hCoV-19/Uruguay/UY-AT/2020|2020-05-20|EPI\_ISL\_480347|Original|hCoV-19^^Montevideo|Human|Microbial Genomics Laboratory|Microbial Genomics Laboratory|Iraola|Uruguay

>Spike|hCoV-19/Spain/VC-IBV-98003451/2020|2020-04-03|EPI\_ISL\_539258|Original|hCoV-19^^Comunitat Valenciana|Human|Hospital Universitario de La Ribera (Alzira|SeqCOVID-SPAIN consortium|IBV (CSIC)|Comas|Spain

>Spike|hCoV-19/Wales/ALDP-A851F7/2020|2020-10-16|EPI\_ISL\_625275|Original|hCoV-19^^Wales|Human|Lighthouse Lab in Alderley Park|Wellcome Sanger Institute for the COVID-19 Genomics UK (COG-UK) consortium|Davies|United Kingdom

>Spike|hCoV-19/England/MILK-BB1E72/2020|2020-11-18|EPI\_ISL\_720052|Original|hCoV-19^^England|Human|Lighthouse Lab in Milton Keynes|Wellcome Sanger Institute for the COVID-19 Genomics UK (COG-UK) Consortium|Davies|United Kingdom

>Spike|hCoV-19/England/NORT-29DF81/2020|2020-05-06|EPI\_ISL\_493503|Original|hCoV-19^^England|Human|Northumbria University / South Tees Hospitals NHS Foundation Trust / North Cumbria Integrated Care NHS Foundation Trust / North Tees and Hartlepool NHS Foundation Trust / Newcastle Hospitals NHS Foundation Trust|COVID-19 Genomics UK (COG-UK) Consortium|Bashton|United Kingdom

>Spike|hCoV-19/USA/TX-HMH-MCoV-18897/2020|2020-11-25|EPI\_ISL\_785205|Original|hCoV-19^^Texas|Human|Houston Methodist Hospital|Houston Methodist Hospital|Long|USA

>Spike|hCoV-19/DRC/11632/2020|2020-05-25|EPI\_ISL\_527493|Original|hCoV-19^^Kinshasa|Human|Viral Respiratory Lab|Pathogen Sequencing Lab|Lokilo|Democratic Republic of the Congo

>Spike|hCoV-19/England/ALDP-A85FC0/2020|2020-10-17|EPI\_ISL\_610456|Original|hCoV-19^^England|Human|Lighthouse Lab in Alderley Park|Wellcome Sanger Institute for the COVID-19 Genomics UK (COG-UK) consortium|Davies|United Kingdom

>Spike|hCoV-19/Japan/PG-4520/2020|2020-07-00|EPI\_ISL\_689659|Original|hCoV-19^^Japan|Human|Pathogen Genomics Center|Pathogen Genomics Center|Sekizuka|Japan

>Spike|hCoV-19/Singapore/1291/2020|2020-05-11|EPI\_ISL\_648776|Original|hCoV-19^^Singapore|Human|Department of Laboratory Medicine|Department of Laboratory Medicine|Chen|Singapore

>Spike|hCoV-19/England/MILK-B8C8BE/2020|2020-11-12|EPI\_ISL\_675792|Original|hCoV-19^^England|Human|Lighthouse Lab in Milton Keynes|Wellcome Sanger Institute for the COVID-19 Genomics UK (COG-UK) Consortium|Davies|United Kingdom

>Spike|hCoV-19/Wales/PHWC-492B0E/2020|2020-11-26|EPI\_ISL\_725749|Original|hCoV-19^^Wales|Human|Originating lab|COVID-19 Genomics UK (COG-UK) Consortium|Moore|United Kingdom

>Spike|hCoV-19/USA/NY-Wadsworth-251095-01/2020|2020-10-21|EPI\_ISL\_734301|Original|hCoV-19^^New York|Human|Wadsworth Center|Wadsworth Center|Lasek-Nesselquist|USA

>Spike|hCoV-19/USA/MI-QDX-1308/2020|2020-03-17|EPI\_ISL\_571963|Original|hCoV-19^^Michigan|Human|Quest Diagnostics|Quest Diagnostics|Kagan|USA

>Spike|hCoV-19/England/ALDP-B8418E/2020|2020-11-14|EPI\_ISL\_675177|Original|hCoV-19^^England|Human|Lighthouse Lab in Alderley Park|Wellcome Sanger Institute for the COVID-19 Genomics UK (COG-UK) Consortium|Davies|United Kingdom

>Spike|hCoV-19/Wales/PHWC-29FC8/2020|2020-04-03|EPI\_ISL\_432313|Original|hCoV-19^^Wales|Human|Wales Specialist Virology Centre|Public Health Wales Microbiology Cardiff|Moore|United Kingdom

>Spike|hCoV-19/USA/MI-QDX-345/2020|2020-03-23|EPI\_ISL\_571089|Original|hCoV-19^^Michigan|Human|Quest Diagnostics|Quest Diagnostics|Kagan|USA

>Spike|hCoV-19/Wales/PHWC-36809/2020|2020-04-29|EPI\_ISL\_474716|Original|hCoV-19^^Wales|Human|Originating lab|COVID-19 Genomics UK (COG-UK) Consortium|Moore|United Kingdom

>Spike|hCoV-19/India/UP-NBRI-N16-TCR338/2020|2020-04-01|EPI\_ISL\_516945|Original|hCoV-19^^Uttar Pradesh|Human|King Georges Medical University|CSIR-National Botanical Research Institute|Bag|India

>Spike|hCoV-19/USA/CT-Yale-205/2020|2020-03-30|EPI\_ISL\_463143|Original|hCoV-19^^Connecticut|Human|Yale Clinical Virology Laboratory|Grubaugh Lab - Yale School of Public Health|Grubaugh|USA

>Spike|hCoV-19/USA/GA-CDC-7556/2020|2020-10-23|EPI\_ISL\_681795|Original|hCoV-19^^Georgia|Human|GA Department of Public Health Laboratory|Pathogen Discovery|Queen|USA

>Spike|hCoV-19/France/OCC-SC423/2020|2020-04-12|EPI\_ISL\_660376|Original|hCoV-19^^Occitanie|Human|CHU Toulouse|CNR Virus des Infections Respiratoires - France SUD|Bal|France

>Spike|hCoV-19/South Africa/KRISP-005/2020|2020-04-29|EPI\_ISL\_455630|Original|hCoV-19^^KwaZulu-Natal|Human|KRISP|KRISP|de Oliveira|South Africa

>Spike|hCoV-19/Wales/PHWC-31E0C/2020|2020-04-11|EPI\_ISL\_446571|Original|hCoV-19^^Wales|Human|Wales Specialist Virology Centre|Public Health Wales Microbiology Cardiff|Moore|United Kingdom

>Spike|hCoV-19/England/20142115101/2020|2020-03-30|EPI\_ISL\_465954|Original|hCoV-19^^England|Human|Respiratory Virus Unit|Respiratory Virus Unit|Platt|United Kingdom

>Spike|hCoV-19/Australia/VIC5668/2020|2020-07-19|EPI\_ISL\_518475|Original|hCoV-19^^Victoria|Human|Microbiological Diagnostic Unit - Public Health Laboratory (MDU-PHL)|MDU-PHL|Schultz|Australia

>Spike|hCoV-19/Scotland/CVR3517/2020|2020-05-12|EPI\_ISL\_473657|Original|hCoV-19^^Scotland|Human|West of Scotland Specialist Virology Centre|COVID-19 Genomics UK (COG-UK) Consortium|Robertson|United Kingdom

>Spike|hCoV-19/England/MILK-A7C2E1/2020|2020-10-15|EPI\_ISL\_606351|Original|hCoV-19^^England|Human|Lighthouse Lab in Milton Keynes|Wellcome Sanger Institute for the COVID-19 Genomics UK (COG-UK) consortium|Davies|United Kingdom

>Spike|hCoV-19/England/SHEF-10B2D30/2020|2020-05-15|EPI\_ISL\_537269|Original|hCoV-19^^England|Human|Virology Department|Wellcome Sanger Institute for the COVID-19 Genomics UK (COG-UK) consortium|Davies|United Kingdom

>Spike|hCoV-19/Australia/VIC6487/2020|2020-00-00|EPI\_ISL\_521265|Original|hCoV-19^^Victoria|Human|Microbiological Diagnostic Unit - Public Health Laboratory (MDU-PHL)|MDU-PHL|Schultz|Australia

>Spike|hCoV-19/England/CAMC-B09E6C/2020|2020-10-29|EPI\_ISL\_672961|Original|hCoV-19^^England|Human|Lighthouse Lab in Cambridge|Wellcome Sanger Institute for the COVID-19 Genomics UK (COG-UK) Consortium|Davies|United Kingdom

>Spike|hCoV-19/Canada/BC\_21462515/2020|2020-03-00|EPI\_ISL\_462815|Original|hCoV-19^^British Columbia|Human|BCCDC Public Health Laboratory|BCCDC Public Health Laboratory|Harrigan|Canada

>Spike|hCoV-19/Denmark/DCGC-4602/2020|2020-09-21|EPI\_ISL\_621271|Original|hCoV-19^^Nordjylland|Human|Department of Virus and Microbiological Special Diagnostics|Albertsen lab|Michaelsen|Denmark

>Spike|hCoV-19/Australia/VIC7711/2020|2020-08-04|EPI\_ISL\_564596|Original|hCoV-19^^Victoria|Human|Microbiological Diagnostic Unit - Public Health Laboratory (MDU-PHL)|MDU-PHL|Schultz|Australia

>Spike|hCoV-19/United Arab Emirates/1026/2020|2020-06-11|EPI\_ISL\_699158|Original|hCoV-19^^Abu Dhabi|Human|Group 42 (G42) Healthcare|G42 Healthcare|Ogrodzki|United Arab Emirates

>Spike|hCoV-19/England/SHEF-C06BF/2020|2020-03-25|EPI\_ISL\_420248|Original|hCoV-19^^England|Human|Virology Department|Department of Infection|de Silva|United Kingdom

>Spike|hCoV-19/England/QEUH-9F70F4/2020|2020-09-27|EPI\_ISL\_595661|Original|hCoV-19^^England|Human|Oxford Viromics|COVID-19 Genomics UK (COG-UK) Consortium|Golubchik|United Kingdom

>Spike|hCoV-19/Netherlands/ZH-EMC-475/2020|2020-08-25|EPI\_ISL\_574787|Original|hCoV-19^^Zuid Holland|Human|Dutch COVID-19 response team|Erasmus Medical Center|Oude Munnink|Netherlands

>Spike|hCoV-19/England/ALDP-95CCEA/2020|2020-06-17|EPI\_ISL\_554912|Original|hCoV-19^^England|Human|Lighthouse Lab in Alderley Park|Wellcome Sanger Institute for the COVID-19 Genomics UK (COG-UK) consortium|Davies|United Kingdom

>Spike|hCoV-19/Netherlands/NB-RIVM-20269/2020|2020-11-20|EPI\_ISL\_723412|Original|hCoV-19^^Noord-Brabant|Human|Dutch COVID-19 response team|National Institute for Public Health and the Environment (RIVM)|Meijer|Netherlands

>Spike|hCoV-19/England/CAMB-8214F/2020|2020-04-21|EPI\_ISL\_438623|Original|hCoV-19^^England|Human|Department of Pathology|COVID-19 Genomics UK (COG-UK) Consortium|Meredith|United Kingdom

>Spike|hCoV-19/Israel/CVL-85-ngs/2020|2020-12-27|EPI\_ISL\_776653|Original|hCoV-19^^Israel|Human|Israel Central Virology laboratory|Israel Central Virology laboratory|Zuckerman|Israel

>Spike|hCoV-19/England/ALDP-649463/2020|2020-06-18|EPI\_ISL\_558076|Original|hCoV-19^^England|Human|Lighthouse Lab in Alderley Park|Wellcome Sanger Institute for the COVID-19 Genomics UK (COG-UK) consortium|Davies|United Kingdom

>Spike|hCoV-19/England/ALDP-9EAA32/2020|2020-09-24|EPI\_ISL\_580165|Original|hCoV-19^^England|Human|Lighthouse Lab in Alderley Park|Wellcome Sanger Institute for the COVID-19 Genomics UK (COG-UK) consortium|Davies|United Kingdom

>Spike|hCoV-19/England/CAMB-7D262/2020|2020-04-06|EPI\_ISL\_442123|Original|hCoV-19^^England|Human|Department of Pathology|Wellcome Sanger Institute for the COVID-19 Genomics UK (COG-UK) consortium|Amato|United Kingdom

>Spike|hCoV-19/Denmark/DCGC-884/2020|2020-05-11|EPI\_ISL\_614800|Original|hCoV-19^^Hovedstaden|Human|Department of Virus and Microbiological Special Diagnostics|Albertsen lab|Michaelsen|Denmark

>Spike|hCoV-19/France/PAC-SC444/2020|2020-04-22|EPI\_ISL\_660735|Original|hCoV-19^^Provence-Alpes-C\u00f4te-d\u00e0z|Human|Unit\u00e9 des Virus \u00c9mergents|CNR Virus des Infections Respiratoires - France SUD|Bal|France

>Spike|hCoV-19/England/MILK-9D4B1A/2020|2020-09-19|EPI\_ISL\_601653|Original|hCoV-19^^England|Human|Lighthouse Lab in Milton Keynes|Wellcome Sanger Institute for the COVID-19 Genomics UK (COG-UK) consortium|Davies|United Kingdom

>Spike|hCoV-19/Denmark/DCGC-1731/2020|2020-05-11|EPI\_ISL\_617950|Original|hCoV-19^^Hovedstaden|Human|Department of Virus and Microbiological Special Diagnostics|Albertsen lab|Michaelsen|Denmark

>Spike|hCoV-19/USA/CA-CZB-3269/2020|2020-07-15|EPI\_ISL\_548267|Original|hCoV-19^^California|Human|County of Santa Clara Public Health Department|Chan-Zuckerberg Biohub|Bhatt|USA

>Spike|hCoV-19/Japan/PG-5899/2020|2020-08-00|EPI\_ISL\_689014|Original|hCoV-19^^Japan|Human|Pathogen Genomics Center|Pathogen Genomics Center|Sekizuka|Japan

>Spike|hCoV-19/USA/TX-HMH-MCoV-8120/2020|2020-06-30|EPI\_ISL\_784211|Original|hCoV-19^^Texas|Human|Houston Methodist Hospital|Houston Methodist Hospital|Long|USA

>Spike|hCoV-19/India/KA-nimh-12171/2020|2020-05-06|EPI\_ISL\_515953|Original|hCoV-19^^Karnataka|Human|VICTORIA HOSPITAL|Department of Neurovirology|Pattabiraman|India

>Spike|hCoV-19/Denmark/DCGC-17131/2020|2020-12-14|EPI\_ISL\_750331|Original|hCoV-19^^Midtjylland|Human|Department of Virus and Microbiological Special Diagnostics|Albertsen Lab|Michaelsen|Denmark

>Spike|hCoV-19/USA/CA-CHLA-PLM03763789/2020|2020-11-30|EPI\_ISL\_753484|Original|hCoV-19^^California|Human|Clinical virology Laboratory|Center for Personalized Medicine|Dien Bard|USA

>Spike|hCoV-19/Scotland/EDB842/2020|2020-04-04|EPI\_ISL\_433254|Original|hCoV-19^^Scotland|Human|Virology Department|COVID-19 Genomics UK (COG-UK) Consortium|Williams|United Kingdom

>Spike|hCoV-19/Wales/PHWC-49C9EC/2020|2020-11-19|EPI\_ISL\_742629|Original|hCoV-19^^Wales|Human|Wales Specialist Virology Centre Sequencing lab|COVID-19 Genomics UK (COG-UK) Consortium|Moore|United Kingdom

>Spike|hCoV-19/Switzerland/BE-UNIBE-197-5085/2020|2020-03-24|EPI\_ISL\_574835|Original|hCoV-19^^Bern|Human|Institute for Infectious Diseases|Institute for Infectious Diseases|Koch|Switzerland

>Spike|hCoV-19/England/MILK-99B4F6/2020|2020-08-30|EPI\_ISL\_550402|Original|hCoV-19^^England|Human|Lighthouse Lab in Milton Keynes|Wellcome Sanger Institute for the COVID-19 Genomics UK (COG-UK) consortium|Davies|United Kingdom

>Spike|hCoV-19/Ireland/SO-NVRL-73IRL69650/2020|2020-09-13|EPI\_ISL\_639846|Original|hCoV-19^^Sligo|Human|National Virus Reference Laboratory|National Virus Reference Laboratory|Gonzalez|Ireland

>Spike|hCoV-19/England/QEUI-9F37E4/2020|2020-09-24|EPI\_ISL\_588511|Original|hCoV-19^^England|Human|Lighthouse Lab in Glasgow|Wellcome Sanger Institute for the COVID-19 Genomics UK (COG-UK) consortium|Davies|United Kingdom

>Spike|hCoV-19/USA/MI-MDHHS-SC21739/2020|2020-03-25|EPI\_ISL\_529858|Original|hCoV-19^^Michigan|Human|Michigan Department of Health and Human Services|Michigan Department of Health and Human Services|Blankenship|USA

>Spike|hCoV-19/England/CAMC-9D1EE7/2020|2020-09-18|EPI\_ISL\_601700|Original|hCoV-19^^England|Human|Lighthouse Lab in Cambridge|Wellcome Sanger Institute for the COVID-19 Genomics UK (COG-UK) consortium|Davies|United Kingdom

>Spike|hCoV-19/Netherlands/NoordBrabant\_30/2020|2020-03-08|EPI\_ISL\_414539|Original|hCoV-19^^Noord Brabant|Human|Dutch COVID-19 response team|Erasmus Medical Center|Oude Munnink|Netherlands

>Spike|hCoV-19/Russia/SPE-RII-10167V/2020|2020-04-25|EPI\_ISL\_523996|Vero P1|hCoV-19^^Saint Petersburg|Human|WHO National Influenza Centre Russian Federation|WHO National Influenza Centre Russian Federation|Komissarov|Russia

>Spike|hCoV-19/England/OXON-AF364/2020|2020-00-00|EPI\_ISL\_478730|Original|hCoV-19^^England|Human|Oxford Viromics|COVID-19 Genomics UK (COG-UK) Consortium|Golubchik|United Kingdom

>Spike|hCoV-19/USA/TX-HMH-MCoV-9133/2020|2020-07-02|EPI\_ISL\_780959|Original|hCoV-19^^Texas|Human|Houston Methodist Hospital|Houston Methodist Hospital|Long|USA

>Spike|hCoV-19/Australia/VIC2649/2020|2020-07-01|EPI\_ISL\_521495|Original|hCoV-19^^Victoria|Human|Victorian Infectious Diseases Reference Laboratory (VIDRL)|VIDRL and MDU-PHL|Schultz|Australia

>Spike|hCoV-19/England/ALDP-4F7D89/2020|2020-06-24|EPI\_ISL\_559279|Original|hCoV-19^^England|Human|Lighthouse Lab in Alderley Park|Wellcome Sanger Institute for the COVID-19 Genomics UK (COG-UK) consortium|Davies|United Kingdom

>Spike|hCoV-19/England/CAMC-AAF959/2020|2020-10-23|EPI\_ISL\_623273|Original|hCoV-19^^England|Human|Lighthouse Lab in Cambridge|Wellcome Sanger Institute for the COVID-19 Genomics UK (COG-UK) consortium|Davies|United Kingdom

>Spike|hCoV-19/England/NORW-EB40F/2020|2020-05-01|EPI\_ISL\_457429|Original|hCoV-19^^England|Human|Quadram Institute Bioscience|COVID-19 Genomics UK (COG-UK) Consortium|Alikhan|United Kingdom

>Spike|hCoV-19/Luxembourg/LNS6212793/2020|2020-10-22|EPI\_ISL\_744382|Original|hCoV-19^^Luxembourg|Human|Laboratoire national de sant\u00e9|Laboratoire national de sant\u00e9|Wienecke-Baldacchino|Luxembourg

>Spike|hCoV-19/Wales/PHWC-30F37/2020|2020-04-09|EPI\_ISL\_446381|Original|hCoV-19^^Wales|Human|Wales Specialist Virology Centre|Public Health Wales Microbiology Cardiff|Moore|United Kingdom

>Spike|hCoV-19/USA/WA-S1531/2020|2020-05-25|EPI\_ISL\_495957|Original|hCoV-19^^Washington|Human|Washington State Department of Health|Seattle Flu Study|Lee|USA

>Spike|hCoV-19/Cote d'Ivoire/BKE0349/2020|2020-06-29|EPI\_ISL\_681832|Original|hCoV-19^^Boauk\u00e9|Human|Molecular diagnostic unit for viral haemorrhagic fevers and emerging viruses|Project group Epidemiology of Highly Pathogenic Microorganisms|Schubert|C\u00f4te d'Ivoire

>Spike|hCoV-19/USA/AZ-TG334281/2020|2020-05-26|EPI\_ISL\_694364|Original|hCoV-19^^Arizona|Human|TGen North|TGen North|French|USA

>Spike|hCoV-19/Netherlands/ZH-EMC-282/2020|2020-06-19|EPI\_ISL\_523624|Original|hCoV-19^^Zuid Holland|Human|Dutch COVID-19 response team|Erasmus Medical Center|Oude Munnink|Netherlands

>Spike|hCoV-19/Scotland/EDB7819/2020|2020-09-21|EPI\_ISL\_573795|Original|hCoV-19^^Scotland|Human|Virology Department|COVID-19 Genomics UK (COG-UK) Consortium|Williams|United Kingdom

>Spike|hCoV-19/England/BIRM-65CC9/2020|2020-10-09|EPI\_ISL\_612219|Original|hCoV-19^^England|Human|University of Birmingham|COVID-19 Genomics UK (COG-UK) Consortium|Loman|United Kingdom

>Spike|hCoV-19/Denmark/DCGC-5089/2020|2020-09-21|EPI\_ISL\_621627|Original|hCoV-19^^Sjaelland|Human|Department of Virus and Microbiological Special Diagnostics|Albertsen lab|Michaelsen|Denmark

>Spike|hCoV-19/USA/AZ-TG381372/2020|2020-06-15|EPI\_ISL\_694661|Original|hCoV-19^^Arizona|Human|TGen North|TGen North|French|USA

>Spike|hCoV-19/USA/CA-LACPHL-AF00009/2020|2020-12-01|EPI\_ISL\_737244|Original|hCoV-19^^California|Human|Los Angeles County PHL|Los Angeles County PHL|Hemarajata|USA

>Spike|hCoV-19/Wales/PHWC-16C283/2020|2020-09-17|EPI\_ISL\_574031|Original|hCoV-19^^Wales|Human|Wales Specialist Virology Centre Sequencing lab|COVID-19 Genomics UK (COG-UK) Consortium|Moore|United Kingdom

>Spike|hCoV-19/Japan/PG-2535/2020|2020-05-00|EPI\_ISL\_690670|Original|hCoV-19^^Japan|Human|Saitama Prefectural Institute of Public Health|Pathogen Genomics Center|Sekizuka|Japan

>Spike|hCoV-19/Japan/PG-1180/2020|2020-04-00|EPI\_ISL\_684790|Original|hCoV-19^^Japan|Human|Pathogen Genomics Center|Pathogen Genomics Center|Sekizuka|Japan

>Spike|hCoV-19/England/ALDP-AA0976/2020|2020-10-22|EPI\_ISL\_630865|Original|hCoV-19^^England|Human|Lighthouse Lab in Alderley Park|Wellcome Sanger Institute for the COVID-19 Genomics UK (COG-UK) consortium|Davies|United Kingdom

>Spike|hCoV-19/USA/PR-B3SB/2020|2020-08-06|EPI\_ISL\_534694|Original|hCoV-19^^Puerto Rico|Human|University of Miami Immunology and Histocompatibility Laboratory|University of Miami Immunology and Histocompatibility Laboratory|Margolles-Clark|USA

>Spike|hCoV-19/Singapore/765/2020|2020-06-11|EPI\_ISL\_509375|Original|hCoV-19^^Singapore|Human|Singapore General Hospital|Department of Microbiology|Abdul Rahman|Singapore

>Spike|hCoV-19/New Zealand/20CV0435/2020|2020-10-16|EPI\_ISL\_622777|Original|hCoV-19^^Auckland|Human|LabPLUS|Institute of Environmental Science and Research (ESR)|Wang|New Zealand

>Spike|hCoV-19/England/NOTT-115043/2020|2020-10-13|EPI\_ISL\_595237|Original|hCoV-19^^England|Human|Queens Medical Centre|COVID-19 Genomics UK (COG-UK) Consortium|Loose|United Kingdom

>Spike|hCoV-19/USA/MI-UM-10036629769/2020|2020-10-26|EPI\_ISL\_650055|Original|hCoV-19^^Michigan|Human|University of Michigan Clinical Microbiology Laboratory|Lauring Lab|Valesano|USA

>Spike|hCoV-19/Wales/PHWC-49A483/2020|2020-12-02|EPI\_ISL\_727550|Original|hCoV-19^^Wales|Human|Originating lab|COVID-19 Genomics UK (COG-UK) Consortium|Moore|United Kingdom

>Spike|hCoV-19/Belgium/regal-10031031/2020|2020-10-03|EPI\_ISL\_735048|Original|hCoV-19^^Rotselaar|Human|UZ Leuven|KU Leuven|Maes|Belgium

>Spike|hCoV-19/Bangladesh/DNAS\_DRICM\_isl\_MH-25/2020|2020-06-28|EPI\_ISL\_775008|Original|hCoV-19^^Dhaka|Human|Designated Reference Institute for Chemical Measurements (DRICM)|DNA SOLUTION LTD.|Rabbi|Bangladesh

>Spike|hCoV-19/Brazil/RJ-00308/2020|2020-05-21|EPI\_ISL\_623111|Original|hCoV-19^^Rio de Janeiro|Human|Laboratorio de Virologia Molecular / UFRJ|Bioinformatics Laboratory / LNCC|Almeida|Brazil

>Spike|hCoV-19/USA/TX-HMH-MCoV-8862/2020|2020-07-02|EPI\_ISL\_780534|Original|hCoV-19^^Texas|Human|Houston Methodist Hospital|Houston Methodist Hospital|Long|USA

>Spike|hCoV-19/New Zealand/20CV0291/2020|2020-03-27|EPI\_ISL\_579081|Original|hCoV-19^^Canterbury|Human|Canterbury Health Laboratories|Institute of Environmental Science and Research (ESR)|Wang|New Zealand

>Spike|hCoV-19/Saudi Arabia/KAUST-Makkah124/2020|2020-03-24|EPI\_ISL\_437691|Original|hCoV-19^^Makkah|Human|Pathogen Genomics Lab King Abdullah University of Science and Technology(KAUST)|Pathogen Genomics Lab King Abdullah University of Science and Technology(KAUST)|Mohamed Ghazzali|Saudi Arabia

>Spike|hCoV-19/USA/HI-H200514/2020|2020-08-16|EPI\_ISL\_753050|Original|hCoV-19^^Hawaii|Human|State Laboratories Division|State Laboratories Division|Sultana|USA

>Spike|hCoV-19/England/CAMB-73C5F/2020|2020-04-02|EPI\_ISL\_433680|Original|hCoV-19^^England|Human|Department of Pathology|COVID-19 Genomics UK (COG-UK) Consortium|Meredith|United Kingdom

>Spike|hCoV-19/England/NORT-292E16/2020|2020-05-20|EPI\_ISL\_489140|Original|hCoV-19^^England|Human|NU-OMICS DNA Sequencing research facility|Wellcome Sanger Institute for the COVID-19 Genomics UK (COG-UK) consortium|Davies|United Kingdom

>Spike|hCoV-19/Scotland/EDB1077/2020|2020-04-07|EPI\_ISL\_433385|Original|hCoV-19^^Scotland|Human|Virology Department|COVID-19 Genomics UK (COG-UK) Consortium|Williams|United Kingdom

>Spike|hCoV-19/USA/LA-CDC-1271/2020|2020-06-10|EPI\_ISL\_535312|Vero P1|hCoV-19^^Louisiana|Human|LA Office of Public Health Laboratories|Pathogen Discovery|Queen|USA

>Spike|hCoV-19/Denmark/DCGC-18912/2020|2020-12-07|EPI\_ISL\_748636|Original|hCoV-19^^Hovedstaden|Human|Department of Virus and Microbiological Special Diagnostics|Albertsen Lab|Michaelsen|Denmark

>Spike|hCoV-19/Luxembourg/LNS4845603/2020|2020-03-15|EPI\_ISL\_419589|Original|hCoV-19^^Luxembourg|Human|Laboratoire National de Sant\u00e9|Laboratoire National de Sant\u00e9|Wienecke-Baldacchino|Luxembourg

>Spike|hCoV-19/USA/MI-MDHHS-SC20004/2020|2020-03-10|EPI\_ISL\_424982|unknown|hCoV-19^^Michigan|Human|Bureau of Laboratories|Michigan Department of Health and Human Services|Blankenship|USA

>Spike|hCoV-19/Italy/VEN-UniVR-98/2020|2020-03-25|EPI\_ISL\_751404|Original|hCoV-19^^Veneto|Human|IRCCS Sacro Cuore Don Calabria Hospital|University of Verona|Mori|Italy

>Spike|hCoV-19/USA/TX-HMH-3795/2020|2020-06-11|EPI\_ISL\_543199|Original|hCoV-19^^Texas|Human|Houston Methodist Hospital|Houston Methodist Hospital|Long|USA

>Spike|hCoV-19/USA/TX-DSHS-0618/2020|2020-06-06|EPI\_ISL\_569728|Original|hCoV-19^^Texas|Human|Texas Department of State Health Services|Texas Department of State Health Services|Rahman|USA

>Spike|hCoV-19/Japan/PG-4756/2020|2020-08-00|EPI\_ISL\_689892|Original|hCoV-19^^Japan|Human|Pathogen Genomics Center|Pathogen Genomics Center|Sekizuka|Japan



>Spike|hCoV-19/Wales/PHWC-168D86/2020|2020-04-20|EPI\_ISL\_494363|Original|hCoV-19^^Wales|Human|Originating lab|COVID-19 Genomics UK (COG-UK) Consortium|Moore|United Kingdom

>Spike|hCoV-19/Jordan/AM-ALSR-5326/2020|2020-11-03|EPI\_ISL\_730562|Original|hCoV-19^^Amman|Human|Biolab Diagnostic Laboratories|Andersen lab at Scripps Research|Gangavarapu|Jordan

>Spike|hCoV-19/USA/WI-GMF-20295/2020|2020-09-15|EPI\_ISL\_547862|Original|hCoV-19^^Wisconsin|Human|Gundersen Molecular Diagnostics Laboratory|Kabara Cancer Research Institute|Kenny|USA

>Spike|hCoV-19/Denmark/DCGC-15662/2020|2020-11-23|EPI\_ISL\_713947|Original|hCoV-19^^Sjaelland|Human|Department of Virus and Microbiological Special Diagnostics|Albertsen Lab|Michaelsen|Denmark

>Spike|hCoV-19/Luxembourg/LNS7385509/2020|2020-11-20|EPI\_ISL\_744558|Original|hCoV-19^^Luxembourg|Human|Laboratoire national de sant\u00e9|Laboratoire national de sant\u00e9|Wienecke-Baldacchino|Luxembourg

>Spike|hCoV-19/England/20134025204/2020|2020-03-23|EPI\_ISL\_423129|Original|hCoV-19^^England|Human|Respiratory Virus Unit|Respiratory Virus Unit|Platt|United Kingdom

>Spike|hCoV-19/India/MH-NIV-122530/2020|2020-07-18|EPI\_ISL\_541690|Original|hCoV-19^^Maharashtra|Human|National Institute of Virology|National Institute of Virology|Potdar|India

>Spike|hCoV-19/England/ALDP-A708EB/2020|2020-10-14|EPI\_ISL\_608144|Original|hCoV-19^^England|Human|Lighthouse Lab in Alderley Park|Wellcome Sanger Institute for the COVID-19 Genomics UK (COG-UK) consortium|Davies|United Kingdom

>Spike|hCoV-19/Denmark/ALAB-SSI-1398/2020|2020-04-03|EPI\_ISL\_444858|Original|hCoV-19^^Denmark|Human|Department of Virus and Microbiological Special Diagnostics|Albertsen lab|Kirkegaard|Denmark

>Spike|hCoV-19/England/ALDP-6FCA6D/2020|2020-06-29|EPI\_ISL\_557399|Original|hCoV-19^^England|Human|Lighthouse Lab in Alderley Park|Wellcome Sanger Institute for the COVID-19 Genomics UK (COG-UK) consortium|Davies|United Kingdom

>Spike|hCoV-19/Switzerland/BL-ETHZ-110427/2020|2020-04-07|EPI\_ISL\_451857|Original|hCoV-19^^Basel-Landschaft|Human|Viollier AG|Department of Biosystems Science and Engineering|Nadeau|Switzerland

>Spike|hCoV-19/USA/CA-Q RTP-Donor18/2020|2020-04-01|EPI\_ISL\_490221|Original|hCoV-19^^California|Human|Quest Diagnostics|Q Squared Solutions - Q RTP facility|Weigman|USA

>Spike|hCoV-19/France/ARA-32195/2020|2020-04-29|EPI\_ISL\_678539|Original|hCoV-19^^Auvergne-Rh\u00f4ne-Alpes|Human|CNR Virus des Infections Respiratoires - France SUD|CNR Virus des Infections Respiratoires - France SUD|Bal|France

>Spike|hCoV-19/England/ALDP-BB3DBF/2020|2020-11-20|EPI\_ISL\_701809|Original|hCoV-19^^England|Human|Lighthouse Lab in Alderley Park|Wellcome Sanger Institute for the COVID-19 Genomics UK (COG-UK) Consortium|Davies|United Kingdom

>Spike|hCoV-19/England/ALDP-9BC723/2020|2020-09-08|EPI\_ISL\_568022|Original|hCoV-19^^England|Human|Lighthouse Lab in Alderley Park|Wellcome Sanger Institute for the COVID-19 Genomics UK (COG-UK) consortium|Davies|United Kingdom

>Spike|hCoV-19/England/QEUH-CC2DBC/2020|2020-12-21|EPI\_ISL\_778156|Original|hCoV-19^^England|Human|Lighthouse Lab in Glasgow|Wellcome Sanger Institute for the COVID-19 Genomics UK (COG-UK) Consortium|Davies|United Kingdom

>Spike|hCoV-19/Australia/VIC10142/2020|2020-08-14|EPI\_ISL\_562806|Original|hCoV-19^^Victoria|Human|Victorian Infectious Diseases Reference Laboratory (VIDRL)|VIDRL and MDU-PHL|Schultz|Australia

>Spike|hCoV-19/Portugal/PT0391a/2020|2020-04-14|EPI\_ISL\_454110|Original|hCoV-19^^Portugal|Human|unknown|Instituto Nacional de Saude (INSA)|Borges|Portugal

>Spike|hCoV-19/South Africa/KRISP-K003511/2020|2020-09-26|EPI\_ISL\_602833|Original|hCoV-19^^KwaZulu-Natal|Human|NHLS-IALCH|KRISP|de Oliveira|South Africa

>Spike|hCoV-19/Netherlands/UT-RIVM-20382/2020|2020-12-07|EPI\_ISL\_728602|Original|hCoV-19^^Utrecht|Human|Dutch COVID-19 response team|National Institute for Public Health and the Environment (RIVM)|Meijer|Netherlands

>Spike|hCoV-19/Brazil/SP-L25-CD665/2020|2020-04-14|EPI\_ISL\_672717|Original|hCoV-19^^S\u00e3o Paulo|Human|Institute of Tropical Medicine at the University of S\u00e3o Paulo (IMT-USP)|Laborat\u00f3rio de Parasitologia M\u00e9dica - Instituto de Medicina Tropical - Universidade de S\u00e3o Paulo|de Jesus|Brazil

>Spike|hCoV-19/Australia/VIC3962/2020|2020-07-15|EPI\_ISL\_519355|Original|hCoV-19^^Victoria|Human|Microbiological Diagnostic Unit - Public Health Laboratory (MDU-PHL)|MDU-PHL|Schultz|Australia

>Spike|hCoV-19/Scotland/CVR1928/2020|2020-04-08|EPI\_ISL\_484524|Original|hCoV-19^^Scotland|Human|West of Scotland Specialist Virology Centre|COVID-19 Genomics UK (COG-UK) Consortium|Robertson|United Kingdom

>Spike|hCoV-19/England/MILK-B96101/2020|2020-11-14|EPI\_ISL\_676203|Original|hCoV-19^^England|Human|Lighthouse Lab in Milton Keynes|Wellcome Sanger Institute for the COVID-19 Genomics UK (COG-UK) Consortium|Davies|United Kingdom

>Spike|hCoV-19/Scotland/EDB1812/2020|2020-04-16|EPI\_ISL\_433136|Original|hCoV-19^^Scotland|Human|Virology Department|COVID-19 Genomics UK (COG-UK) Consortium|Williams|United Kingdom

>Spike|hCoV-19/India/MH-NCCS-NR2523/2020|2020-05-24|EPI\_ISL\_496584|Original|hCoV-19^^Maharashtra|Human|National Centre For Cell Science|National Centre For Cell Science|Paul|India

>Spike|hCoV-19/Iceland/329/2020|2020-03-14|EPI\_ISL\_417658|Original|hCoV-19^^Reykjavik|Human|deCODE genetics|deCODE genetics|J\u00f3nsson|Iceland

>Spike|hCoV-19/England/MILK-BA9B49/2020|2020-11-17|EPI\_ISL\_681651|Original|hCoV-19^^England|Human|Lighthouse Lab in Milton Keynes|Wellcome Sanger Institute for the COVID-19 Genomics UK (COG-UK) Consortium|Davies|United Kingdom

>Spike|hCoV-19/USA/CA-ALSR-1268/2020|2020-05-04|EPI\_ISL\_494468|Original|hCoV-19^^California|Human|San Diego County Public Health Laboratory|Andersen lab at Scripps Research|Gangavarapu|USA

>Spike|hCoV-19/Hong Kong/VM20040263/2020|2020-07-14|EPI\_ISL\_523847|Original|hCoV-19^^Hong Kong|Human|Queen Elizabeth Hospital|Hong Kong Department of Health|Mak|China

>Spike|hCoV-19/Hong Kong/HKPU-1362/2020|2020-07-09|EPI\_ISL\_610179|Original|hCoV-19^^Hong Kong|Human|Department of Health Technology and Informatics|Department of Health Technology and Informatics|Leung|China

>Spike|hCoV-19/Australia/VIC17787/2020|2020-07-28|EPI\_ISL\_779452|Original|hCoV-19^^Victoria|Human|Microbiological Diagnostic Unit - Public Health Laboratory (MDU-PHL)|MDU-PHL|Beck|Australia

>Spike|hCoV-19/Denmark/DCGC-15755/2020|2020-11-23|EPI\_ISL\_714002|Original|hCoV-19^^Hovedstaden|Human|Department of Virus and Microbiological Special Diagnostics|Albertsen Lab|Michaelsen|Denmark

>Spike|hCoV-19/England/LOND-D61F1/2020|2020-04-20|EPI\_ISL\_482161|Original|hCoV-19^^England|Human|University College London|Wellcome Sanger Institute for the COVID-19 Genomics UK (COG-UK) consortium|Davies|United Kingdom

>Spike|hCoV-19/England/QEUH-A01B5F/2020|2020-10-01|EPI\_ISL\_680008|Original|hCoV-19^^England|Human|Virology Department|COVID-19 Genomics UK (COG-UK) Consortium|de Silva|United Kingdom

>Spike|hCoV-19/Australia/VIC1342/2020|2020-04-14|EPI\_ISL\_430683|Original|hCoV-19^^Victoria|Human|Microbiological Diagnostic Unit Public Health Laboratory|Microbiological Diagnostic Unit Public Health Laboratory|Schultz|Australia

>Spike|hCoV-19/Wales/PHWC-33839/2020|2020-04-18|EPI\_ISL\_446755|Original|hCoV-19^^Wales|Human|Wales Specialist Virology Centre|Public Health Wales Microbiology Cardiff|Moore|United Kingdom

>Spike|hCoV-19/Singapore/11/2020|2020-02-02|EPI\_ISL\_410719|Original|hCoV-19^^Singapore|Human|National Public Health Laboratory|National Public Health Laboratory|Mak|Singapore

>Spike|hCoV-19/England/CAMC-9B1BD7/2020|2020-09-03|EPI\_ISL\_566445|Original|hCoV-19^^England|Human|Lighthouse Lab in Cambridge|Wellcome Sanger Institute for the COVID-19 Genomics UK (COG-UK) consortium|Davies|United Kingdom

>Spike|hCoV-19/Scotland/EDB4043/2020|2020-04-15|EPI\_ISL\_473793|Original|hCoV-19^^Scotland|Human|Virology Department|COVID-19 Genomics UK (COG-UK) Consortium|Williams|United Kingdom

>Spike|hCoV-19/England/MILK-A05BE2/2020|2020-09-30|EPI\_ISL\_599962|Original|hCoV-19^^England|Human|Lighthouse Lab in Milton Keynes|Wellcome Sanger Institute for the COVID-19 Genomics UK (COG-UK) consortium|Davies|United Kingdom

>Spike|hCoV-19/Canada/NS-NML-1361/2020|2020-04-14|EPI\_ISL\_579737|Original|hCoV-19^^Nova Scotia|Human|QEII Health Sciences Centre|National Microbiology Laboratory (NML)|Majer|Canada

>Spike|hCoV-19/Portugal/PT0190/2020|2020-03-29|EPI\_ISL\_453906|Original|hCoV-19^^Portugal|Human|unknown|Instituto Nacional de Saude (INSA)|Borges|Portugal

>Spike|hCoV-19/England/ALDP-A6F6E5/2020|2020-10-15|EPI\_ISL\_607823|Original|hCoV-19^^England|Human|Lighthouse Lab in Alderley Park|Wellcome Sanger Institute for the COVID-19 Genomics UK (COG-UK) consortium|Davies|United Kingdom

>Spike|hCoV-19/Burkina Faso/2-068-2228/2020|2020-09-06|EPI\_ISL\_660457|Original|hCoV-19^^Bobo Dioulasso|Human|Laboratoire de Microbiologie CHU Sourou Sanou|Centre Muraz|Ouedraogo|Burkina Faso

>Spike|hCoV-19/USA/IA-CDC-4052/2020|2020-03-09|EPI\_ISL\_647998|Original|hCoV-19^^Iowa|Human|IA State Hygienic Laboratory|Pathogen Discovery|Queen|USA

>Spike|hCoV-19/England/NORW-E8AB5/2020|2020-04-13|EPI\_ISL\_448274|Original|hCoV-19^^England|Human|Quadram Institute Bioscience|COVID-19 Genomics UK (COG-UK) Consortium|Alikhan|United Kingdom

>Spike|hCoV-19/Scotland/QEUIH-B7DEDC/2020|2020-11-13|EPI\_ISL\_742255|Original|hCoV-19^^Scotland|Human|Oxford Viromics|COVID-19 Genomics UK (COG-UK) Consortium|Golubchik|United Kingdom

>Spike|hCoV-19/England/ALDP-B2741B/2020|2020-11-04|EPI\_ISL\_647072|Original|hCoV-19^^England|Human|Lighthouse Lab in Alderley Park|Wellcome Sanger Institute for the COVID-19 Genomics UK (COG-UK) Consortium|Davies|United Kingdom

>Spike|hCoV-19/Brazil/SP-376/2020|2020-06-07|EPI\_ISL\_603023|Original|hCoV-19^^S\u00e3o Paulo|Human|Vigil\u00eancia em Sa\u00fade Visa Sul|Instituto Adolfo Lutz|Sacchi|Brazil

>Spike|hCoV-19/Scotland/CVR2096/2020|2020-04-10|EPI\_ISL\_490662|Original|hCoV-19^^Scotland|Human|West of Scotland Specialist Virology Centre|COVID-19 Genomics UK (COG-UK) Consortium|Robertson|United Kingdom

>Spike|hCoV-19/USA/TX-HMH-2812/2020|2020-06-08|EPI\_ISL\_545574|Original|hCoV-19^^Texas|Human|Houston Methodist Hospital|Houston Methodist Hospital|Long|USA

>Spike|hCoV-19/Denmark/DCGC-8844/2020|2020-10-26|EPI\_ISL\_626114|Original|hCoV-19^^Sjælland|Human|Department of Virus and Microbiological Special Diagnostics|Albertsen lab|Michaelsen|Denmark

>Spike|hCoV-19/USA/OR-OHSU-2441/2020|2020-08-14|EPI\_ISL\_667208|Original|hCoV-19^^Oregon|Human|OHSU Lab Services Molecular Microbiology Lab|Oregon SARS-CoV-2 Genome Sequencing Center|O'Roak|USA

>Spike|hCoV-19/England/ALDP-A6E30D/2020|2020-10-15|EPI\_ISL\_606964|Original|hCoV-19^^England|Human|Lighthouse Lab in Alderley Park|Wellcome Sanger Institute for the COVID-19 Genomics UK (COG-UK) consortium|Davies|United Kingdom

>Spike|hCoV-19/USA/TX-HMH-MCoV-13946/2020|2020-08-15|EPI\_ISL\_787238|Original|hCoV-19^^Texas|Human|Houston Methodist Hospital|Houston Methodist Hospital|Long|USA

>Spike|hCoV-19/England/WSFT-25C0F9B/2020|2020-05-02|EPI\_ISL\_492881|Original|hCoV-19^^England|Human|Department of Medical Microbiology|Wellcome Sanger Institute for the COVID-19 Genomics UK (COG-UK) consortium|Davies|United Kingdom

>Spike|hCoV-19/Wales/PHWC-4A483F/2020|2020-12-17|EPI\_ISL\_764737|Original|hCoV-19^^Wales|Human|Wales Specialist Virology Centre Sequencing lab|COVID-19 Genomics UK (COG-UK) Consortium|Moore|United Kingdom

>Spike|hCoV-19/England/QEUIH-BC4AE1/2020|2020-11-25|EPI\_ISL\_704008|Original|hCoV-19^^England|Human|Lighthouse Lab in Glasgow|Wellcome Sanger Institute for the COVID-19 Genomics UK (COG-UK) Consortium|Davies|United Kingdom

>Spike|hCoV-19/England/20150041004/2020|2020-04-06|EPI\_ISL\_466231|Original|hCoV-19^^England|Human|Respiratory Virus Unit|Respiratory Virus Unit|Platt|United Kingdom

>Spike|hCoV-19/England/CAMB-1B1568/2020|2020-05-08|EPI\_ISL\_458560|Original|hCoV-19^^England|Human|Department of Pathology|Wellcome Sanger Institute for the COVID-19 Genomics UK (COG-UK) consortium|Davies|United Kingdom

>Spike|hCoV-19/Wales/PHWC-2A0D3/2020|2020-04-04|EPI\_ISL\_432391|Original|hCoV-19^^Wales|Human|Wales Specialist Virology Centre|Public Health Wales Microbiology Cardiff|Moore|United Kingdom

>Spike|hCoV-19/England/ALDP-9509A3/2020|2020-06-14|EPI\_ISL\_554439|Original|hCoV-19^^England|Human|Lighthouse Lab in Alderley Park|Wellcome Sanger Institute for the COVID-19 Genomics UK (COG-UK) consortium|Davies|United Kingdom

>Spike|hCoV-19/Australia/VIC10651/2020|2020-07-31|EPI\_ISL\_563016|Original|hCoV-19^^Victoria|Human|Microbiological Diagnostic Unit - Public Health Laboratory (MDU-PHL)|MDU-PHL|Schultz|Australia

>Spike|hCoV-19/Germany/HH-hpi-p1462/2020|2020-03-12|EPI\_ISL\_775975|Original|hCoV-19^^Hamburg|Human|University Medical Center Hamburg Eppendorf|Heinrich Pette Institute|Robitaille|Germany

>Spike|hCoV-19/England/ALDP-982B75/2020|2020-08-10|EPI\_ISL\_552579|Original|hCoV-19^^England|Human|Lighthouse Lab in Alderley Park|Wellcome Sanger Institute for the COVID-19 Genomics UK (COG-UK) consortium|Davies|United Kingdom

>Spike|hCoV-19/England/ALDP-B634C8/2020|2020-11-09|EPI\_ISL\_656487|Original|hCoV-19^^England|Human|Lighthouse Lab in Alderley Park|Wellcome Sanger Institute for the COVID-19 Genomics UK (COG-UK) Consortium|Davies|United Kingdom

>Spike|hCoV-19/Switzerland/SO-ETHZ-340102/2020|2020-10-26|EPI\_ISL\_721868|Original|hCoV-19^^Solothurn|Human|Viollier AG|Department of Biosystems Science and Engineering|Nadeau|Switzerland

>Spike|hCoV-19/Scotland/QEUA-9B9D8E/2020|2020-09-07|EPI\_ISL\_568239|Original|hCoV-19^^Scotland|Human|Lighthouse Lab in Glasgow|Wellcome Sanger Institute for the COVID-19 Genomics UK (COG-UK) consortium|Davies|United Kingdom

>Spike|hCoV-19/England/MILK-A6B3F1/2020|2020-10-08|EPI\_ISL\_608806|Original|hCoV-19^^England|Human|Lighthouse Lab in Milton Keynes|Wellcome Sanger Institute for the COVID-19 Genomics UK (COG-UK) consortium|Davies|United Kingdom

>Spike|hCoV-19/USA/TX-HMH-1826/2020|2020-05-16|EPI\_ISL\_542867|Original|hCoV-19^^Texas|Human|Houston Methodist Hospital|Houston Methodist Hospital|Long|USA

>Spike|hCoV-19/South Korea/KDCA0004/2020|2020-09-08|EPI\_ISL\_747245|Original|hCoV-19^^South Korea|Human|Division of Emerging Infectious Diseases|Division of Emerging Infectious Diseases|Park|South Korea

>Spike|hCoV-19/Australia/VIC9225/2020|2020-08-20|EPI\_ISL\_565453|Original|hCoV-19^^Victoria|Human|Microbiological Diagnostic Unit - Public Health Laboratory (MDU-PHL)|MDU-PHL|Schultz|Australia

>Spike|hCoV-19/England/ALDP-CEC0C2/2020|2020-12-21|EPI\_ISL\_781378|Original|hCoV-19^^England|Human|Lighthouse Lab in Alderley Park|Wellcome Sanger Institute for the COVID-19 Genomics UK (COG-UK) Consortium|Davies|United Kingdom

>Spike|hCoV-19/England/QEUA-B662CB/2020|2020-11-09|EPI\_ISL\_661348|Original|hCoV-19^^England|Human|Lighthouse Lab in Glasgow|Wellcome Sanger Institute for the COVID-19 Genomics UK (COG-UK) Consortium|Davies|United Kingdom

>Spike|hCoV-19/Scotland/QEUA-9E35DE/2020|2020-09-24|EPI\_ISL\_585509|Original|hCoV-19^^Scotland|Human|Northumbria University / South Tees Hospitals NHS Foundation Trust / North Cumbria Integrated Care NHS Foundation Trust / North Tees and Hartlepool NHS Foundation Trust / Newcastle Hospitals NHS Foundation Trust|COVID-19 Genomics UK (COG-UK) Consortium|Bashton|United Kingdom

>Spike|hCoV-19/USA/LA-CDC-1266/2020|2020-06-10|EPI\_ISL\_535307|Vero P1|hCoV-19^^Louisiana|Human|LA Office of Public Health Laboratories|Pathogen Discovery|Queen|USA

>Spike|hCoV-19/England/ALDP-B4856C/2020|2020-11-07|EPI\_ISL\_649415|Original|hCoV-19^^England|Human|Lighthouse Lab in Alderley Park|Wellcome Sanger Institute for the COVID-19 Genomics UK (COG-UK) Consortium|Davies|United Kingdom

>Spike|hCoV-19/Japan/PG-3392/2020|2020-05-00|EPI\_ISL\_691506|Original|hCoV-19^^Japan|Human|Pathogen Genomics Center|Pathogen Genomics Center|Sekizuka|Japan

>Spike|hCoV-19/USA/TX-HMH-MCoV-16279/2020|2020-10-30|EPI\_ISL\_785963|Original|hCoV-19^^Texas|Human|Houston Methodist Hospital|Houston Methodist Hospital|Long|USA

>Spike|hCoV-19/England/MILK-A7E012/2020|2020-10-12|EPI\_ISL\_638482|Original|hCoV-19^^England|Human|Oxford Viromics|COVID-19 Genomics UK (COG-UK) Consortium|Golubchik|United Kingdom

>Spike|hCoV-19/England/CAMC-9EC5C6/2020|2020-09-24|EPI\_ISL\_580341|Original|hCoV-19^^England|Human|Lighthouse Lab in Cambridge|Wellcome Sanger Institute for the COVID-19 Genomics UK (COG-UK) consortium|Davies|United Kingdom

>Spike|hCoV-19/England/GSTT-265D509/2020|2020-03-23|EPI\_ISL\_483971|Original|hCoV-19^^England|Human|Centre for Clinical Infection and Diagnostics Research and Genomics Innovation Unit|COVID-19 Genomics UK (COG-UK) Consortium|Awan|United Kingdom

>Spike|hCoV-19/South Korea/KCDC2171/2020|2020-03-23|EPI\_ISL\_506965|Original|hCoV-19^^South Korea|Human|Division of Viral Diseases|Division of Viral Diseases|Kim|South Korea

>Spike|hCoV-19/USA/TX-HMH-1981/2020|2020-05-18|EPI\_ISL\_542934|Original|hCoV-19^^Texas|Human|Houston Methodist Hospital|Houston Methodist Hospital|Long|USA

>Spike|hCoV-19/USA/CA-CZB-14334/2020|2020-07-23|EPI\_ISL\_739407|Original|hCoV-19^^California|Human|Alameda County Public Health Lab|Chan-Zuckerberg Biohub|Kamm|USA

>Spike|hCoV-19/USA/TX-HMH-4115/2020|2020-06-18|EPI\_ISL\_543382|Original|hCoV-19^^Texas|Human|Houston Methodist Hospital|Houston Methodist Hospital|Long|USA

>Spike|hCoV-19/USA/TX-HMH-MCoV-13302/2020|2020-08-25|EPI\_ISL\_788450|Original|hCoV-19^^Texas|Human|Houston Methodist Hospital|Houston Methodist Hospital|Long|USA

>Spike|hCoV-19/USA/TX-HMH-4952/2020|2020-06-20|EPI\_ISL\_544426|Original|hCoV-19^^Texas|Human|Houston Methodist Hospital|Houston Methodist Hospital|Long|USA

>Spike|hCoV-19/England/QEUEH-C342F2/2020|2020-12-11|EPI\_ISL\_733926|Original|hCoV-19^^England|Human|Lighthouse Lab in Glasgow|Wellcome Sanger Institute for the COVID-19 Genomics UK (COG-UK) Consortium|Davies|United Kingdom

>Spike|hCoV-19/England/QEUEH-B3219E/2020|2020-11-04|EPI\_ISL\_646425|Original|hCoV-19^^England|Human|Lighthouse Lab in Glasgow|Wellcome Sanger Institute for the COVID-19 Genomics UK (COG-UK) Consortium|Davies|United Kingdom

>Spike|hCoV-19/Germany/SH-ChVir9275/2020|2020-09-28|EPI\_ISL\_729616|Original|hCoV-19^^Schleswig-Holstein|Human|A. Krumbholz|Charit\u00e9 Universit\u00e4tsmedizin Berlin|Muehlemann|Germany

>Spike|hCoV-19/Netherlands/NB-EMC-410/2020|2020-00-00|EPI\_ISL\_722484|Original|hCoV-19^^Noord Brabant|Human|Dutch COVID-19 response team|Erasmus Medical Center|Oude Munnink|Netherlands

>Spike|hCoV-19/England/ALDP-9E9F16/2020|2020-09-24|EPI\_ISL\_580212|Original|hCoV-19^^England|Human|Lighthouse Lab in Alderley Park|Wellcome Sanger Institute for the COVID-19 Genomics UK (COG-UK) consortium|Davies|United Kingdom

>Spike|hCoV-19/Jordan/AQ-ALSR-5261/2020|2020-10-06|EPI\_ISL\_730499|Original|hCoV-19^^Aqaba|Human|Biolab Diagnostic Laboratories|Andersen lab at Scripps Research|Gangavarapu|Jordan

>Spike|hCoV-19/Germany/NW-UBI-10/2020|2020-04-03|EPI\_ISL\_602291|original|hCoV-19^^North Rhine-Westphalia|Human|Evangelisches Klinikum Bethel|Bielefeld University|Brandt|Germany

>Spike|hCoV-19/Northern Ireland/OXON-F40885/2020|2020-12-09|EPI\_ISL\_764539|Original|hCoV-19^^Northern Ireland|Human|Oxford Viromics|COVID-19 Genomics UK (COG-UK) Consortium|Golubchik|United Kingdom

>Spike|hCoV-19/Panama/330754/2020|2020-03-12|EPI\_ISL\_496671|Original|hCoV-19^^Panama West|Human|Gorgas Memorial Laboratory of Health Studies|Gorgas Memorial Laboratory of Health Studies|Martinez|Panama

>Spike|hCoV-19/England/ALDP-C57E5F/2020|2020-12-13|EPI\_ISL\_736061|Original|hCoV-19^^England|Human|Lighthouse Lab in Alderley Park|Wellcome Sanger Institute for the COVID-19 Genomics UK (COG-UK) Consortium|Davies|United Kingdom

>Spike|hCoV-19/Wales/PHWC-49C7C4/2020|2020-11-19|EPI\_ISL\_742603|Original|hCoV-19^^Wales|Human|Wales Specialist Virology Centre Sequencing lab|COVID-19 Genomics UK (COG-UK) Consortium|Moore|United Kingdom

>Spike|hCoV-19/England/ALDP-A2DEDC/2020|2020-10-06|EPI\_ISL\_586657|Original|hCoV-19^^England|Human|Lighthouse Lab in Alderley Park|Wellcome Sanger Institute for the COVID-19 Genomics UK (COG-UK) consortium|Davies|United Kingdom

>Spike|hCoV-19/England/QEUEH-9F898F/2020|2020-09-27|EPI\_ISL\_588788|Original|hCoV-19^^England|Human|Lighthouse Lab in Glasgow|Wellcome Sanger Institute for the COVID-19 Genomics UK (COG-UK) consortium|Davies|United Kingdom

>Spike|hCoV-19/Brazil/SP-L10-CD143/2020|2020-03-13|EPI\_ISL\_476173|Original|hCoV-19^^S\u00e3o Paulo|Human|DB Diagn\u00f3sticos do Brasil|Instituto de Medicina Tropical da Universidade de S\u00e3o Paulo|Sabino|Brazil

>Spike|hCoV-19/Wales/PHWC-4855F1/2020|2020-10-26|EPI\_ISL\_628198|Original|hCoV-19^^Wales|Human|Wales Specialist Virology Centre Sequencing lab|COVID-19 Genomics UK (COG-UK) Consortium|Moore|United Kingdom

>Spike|hCoV-19/USA/AZ-TG640919/2020|2020-04-27|EPI\_ISL\_695816|Original|hCoV-19^^Arizona|Human|Sonora Quest Laboratories|TGen North|French|USA

>Spike|hCoV-19/Wales/PHWC-4805AB/2020|2020-10-18|EPI\_ISL\_611887|Original|hCoV-19^^Wales|Human|Wales Specialist Virology Centre Sequencing lab|COVID-19 Genomics UK (COG-UK) Consortium|Moore|United Kingdom

>Spike|hCoV-19/England/MILK-993661/2020|2020-08-26|EPI\_ISL\_551928|Original|hCoV-19^^England|Human|Lighthouse Lab in Milton Keynes|Wellcome Sanger Institute for the COVID-19 Genomics UK (COG-UK) consortium|Davies|United Kingdom

>Spike|hCoV-19/England/EXET-1353EA/2020|2020-04-13|EPI\_ISL\_457055|Original|hCoV-19^^England|Human|University of Exeter|COVID-19 Genomics UK (COG-UK) Consortium|Temperton|United Kingdom

>Spike|hCoV-19/USA/TX-HMH-MCoV-19600/2020|2020-11-24|EPI\_ISL\_783970|Original|hCoV-19^^Texas|Human|Houston Methodist Hospital|Houston Methodist Hospital|Long|USA

>Spike|hCoV-19/Israel/CVL-n-7422/2020|2020-04-11|EPI\_ISL\_475023|Original|hCoV-19^^Israel|Human|Israel Central Virology laboratory|Israel Central Virology laboratory|Zuckerman|Israel

>Spike|hCoV-19/England/ALDP-5C78EA/2020|2020-06-19|EPI\_ISL\_558559|Original|hCoV-19^^England|Human|Lighthouse Lab in Alderley Park|Wellcome Sanger Institute for the COVID-19 Genomics UK (COG-UK) consortium|Davies|United Kingdom

>Spike|hCoV-19/USA/UT-02593/2020|2020-04-26|EPI\_ISL\_522259|Original|hCoV-19^^Utah|Human|Utah Public Health Laboratory|Utah Public Health Laboratory|Young|USA

>Spike|hCoV-19/England/20164010104/2020|2020-04-14|EPI\_ISL\_528397|Original|hCoV-19^^England|Human|Respiratory Virus Unit|Respiratory Virus Unit|Miah|United Kingdom

>Spike|hCoV-19/USA/NM-UNM-00575/2020|2020-08-07|EPI\_ISL\_542989|Original|hCoV-19^^New Mexico|Human|TriCore Reference Laboratories|Center for Global Health|Domman|USA

>Spike|hCoV-19/England/NOTT-10E0E3/2020|2020-03-19|EPI\_ISL\_425497|Original|hCoV-19^^England|Human|Queens Medical Centre|COVID-19 Genomics UK (COG-UK) Consortium|Loose|United Kingdom

>Spike|hCoV-19/England/ALDP-951F28/2020|2020-06-09|EPI\_ISL\_551322|Original|hCoV-19^^England|Human|Lighthouse Lab in Alderley Park|Wellcome Sanger Institute for the COVID-19 Genomics UK (COG-UK) consortium|Davies|United Kingdom

>Spike|hCoV-19/England/ALDP-BE963D/2020|2020-12-03|EPI\_ISL\_708882|Original|hCoV-19^^England|Human|Lighthouse Lab in Alderley Park|Wellcome Sanger Institute for the COVID-19 Genomics UK (COG-UK) Consortium|Davies|United Kingdom

>Spike|hCoV-19/USA/WI-UW-614/2020|2020-06-23|EPI\_ISL\_484989|Original|hCoV-19^^Wisconsin|Human|University of Wisconsin-Madison AIDS Vaccine Research Laboratories|University of Wisconsin-Madison AIDS Vaccine Research Laboratories|Baczenas|USA

>Spike|hCoV-19/USA/NY-Wadsworth-288623-01/2020|2020-12-16|EPI\_ISL\_767483|Original|hCoV-19^^New York|Human|Wadsworth Center|Wadsworth Center|Lasek-Nesselquist|USA

>Spike|hCoV-19/England/MILK-B55A9A/2020|2020-11-05|EPI\_ISL\_657367|Original|hCoV-19^^England|Human|Lighthouse Lab in Milton Keynes|Wellcome Sanger Institute for the COVID-19 Genomics UK (COG-UK) Consortium|Davies|United Kingdom

>Spike|hCoV-19/USA/WA-S2690/2020|2020-06-22|EPI\_ISL\_497322|Original|hCoV-19^^Washington|Human|Washington State Department of Health|Seattle Flu Study|Lee|USA

>Spike|hCoV-19/USA/TX-HMH-MCoV-14354/2020|2020-10-06|EPI\_ISL\_787639|Original|hCoV-19^^Texas|Human|Houston Methodist Hospital|Houston Methodist Hospital|Long|USA

>Spike|hCoV-19/England/CAMB-79AF5/2020|2020-03-27|EPI\_ISL\_433823|Original|hCoV-19^^England|Human|Department of Pathology|COVID-19 Genomics UK (COG-UK) Consortium|Meredith|United Kingdom

>Spike|hCoV-19/Scotland/QEUH-9A3FCD/2020|2020-09-01|EPI\_ISL\_568380|Original|hCoV-19^^Scotland|Human|Lighthouse Lab in Glasgow|Wellcome Sanger Institute for the COVID-19 Genomics UK (COG-UK) consortium|Davies|United Kingdom

>Spike|hCoV-19/Canada/ON\_MU-S679/2020|2020-04-09|EPI\_ISL\_463992|Original|hCoV-19^^Ontario|Human|Toronto Invasive Bacterial Diseases Network|McMaster University|McArthur|Canada

>Spike|hCoV-19/England/ALDP-C3C6A3/2020|2020-12-10|EPI\_ISL\_731820|Original|hCoV-19^^England|Human|Lighthouse Lab in Alderley Park|Wellcome Sanger Institute for the COVID-19 Genomics UK (COG-UK) Consortium|Davies|United Kingdom

>Spike|hCoV-19/USA/TX-HMH-2197/2020|2020-05-21|EPI\_ISL\_545175|Original|hCoV-19^^Texas|Human|Houston Methodist Hospital|Houston Methodist Hospital|Long|USA

>Spike|hCoV-19/England/MILK-A1927D/2020|2020-09-30|EPI\_ISL\_679627|Original|hCoV-19^^England|Human|University College London|COVID-19 Genomics UK (COG-UK) Consortium|Roy|United Kingdom

>Spike|hCoV-19/Denmark/DCGC-18231/2020|2020-12-14|EPI\_ISL\_749829|Original|hCoV-19^^Hovedstaden|Human|Department of Virus and Microbiological Special Diagnostics|Albertsen Lab|Michaelsen|Denmark

>Spike|hCoV-19/Spain/MD-IBV-99008682/2020|2020-10-06|EPI\_ISL\_654237|Original|hCoV-19^^Madrid|Human|Hospital General Universitario Gregorio Mara\u00f1\u00f3n|SeqCOVID-SPAIN consortium/IBV (CSIC)|Comas|Spain

>Spike|hCoV-19/Japan/IC-0180/2020|2020-09-00|EPI\_ISL\_667609|Original|hCoV-19^^Japan|Human|Pathogen Genomics Center|Pathogen Genomics Center|Sekizuka|Japan

>Spike|hCoV-19/Wales/PHWC-498ED2/2020|2020-11-30|EPI\_ISL\_727226|Original|hCoV-19^^Wales|Human|Originating lab|COVID-19 Genomics UK (COG-UK) Consortium|Moore|United Kingdom

>Spike|hCoV-19/Japan/PG-0993/2020|2020-04-00|EPI\_ISL\_684603|Original|hCoV-19^^Japan|Human|Pathogen Genomics Center|Pathogen Genomics Center|Sekizuka|Japan

>Spike|hCoV-19/USA/CA-ALSR-4848/2020|2020-11-04|EPI\_ISL\_730176|Original|hCoV-19^^California|Human|San Diego County Public Health Laboratory|Andersen lab at Scripps Research|Gangavarapu|USA

>Spike|hCoV-19/England/OXON-B2D06/2020|2020-04-14|EPI\_ISL\_534808|Original|hCoV-19^^England|Human|Oxford Viromics|COVID-19 Genomics UK (COG-UK) Consortium|Golubchik|United Kingdom

>Spike|hCoV-19/England/LIVE-9C300/2020|2020-03-30|EPI\_ISL\_449529|Original|hCoV-19^^England|Human|Liverpool Clinical Laboratories|COVID-19 Genomics UK (COG-UK) Consortium|Haldenby|United Kingdom

>Spike|hCoV-19/Netherlands/Zeeland\_35/2020|2020-04-27|EPI\_ISL\_461274|Original|hCoV-19^^Zeeland|Human|Dutch COVID-19 response team|Erasmus Medical Center|Oude Munnink|Netherlands

>Spike|hCoV-19/USA/WI-UW-792/2020|2020-07-05|EPI\_ISL\_495496|Original|hCoV-19^^Wisconsin|Human|University of Wisconsin-Madison AIDS Vaccine Research Laboratories|University of Wisconsin-Madison AIDS Vaccine Research Laboratories|Baczenas|USA

>Spike|hCoV-19/Japan/PG-7650/2020|2020-08-00|EPI\_ISL\_686752|Original|hCoV-19^^Japan|Human|Chiba Prefectural Institute of Public Health|Pathogen Genomics Center|Sekizuka|Japan

>Spike|hCoV-19/England/CAMB-1B6518/2020|2020-09-22|EPI\_ISL\_576919|Original|hCoV-19^^England|Human|Department of Pathology|COVID-19 Genomics UK (COG-UK) Consortium|Goodfellow|United Kingdom

>Spike|hCoV-19/Scotland/EDB8349/2020|2020-10-05|EPI\_ISL\_612337|Original|hCoV-19^^Scotland|Human|Virology Department|COVID-19 Genomics UK (COG-UK) Consortium|McHugh|United Kingdom

>Spike|hCoV-19/Indonesia/JT-NIHRD-PME3225/2020|2020-07-17|EPI\_ISL\_791987|Original|hCoV-19^^Center Java|Human|RSUD dr. Loekmono Hadi Kudus|National Institute of Health Research and Development|Setiawati|Indonesia

>Spike|hCoV-19/England/ALDP-9CD112/2020|2020-09-16|EPI\_ISL\_566407|Original|hCoV-19^^England|Human|Lighthouse Lab in Alderley Park|Wellcome Sanger Institute for the COVID-19 Genomics UK (COG-UK) consortium|Davies|United Kingdom

>Spike|hCoV-19/USA/TX-HMH-MCoV-19215/2020|2020-11-24|EPI\_ISL\_783695|Original|hCoV-19^^Texas|Human|Houston Methodist Hospital|Houston Methodist Hospital|Long|USA

>Spike|hCoV-19/England/QEUH-AF48A3/2020|2020-10-30|EPI\_ISL\_663040|Original|hCoV-19^^England|Human|Lighthouse Lab in Glasgow|Wellcome Sanger Institute for the COVID-19 Genomics UK (COG-UK) Consortium|Davies|United Kingdom

>Spike|hCoV-19/England/PORT-2F5707/2020|2020-00-00|EPI\_ISL\_611762|Original|hCoV-19^^England|Human|Centre for Enzyme Innovation|COVID-19 Genomics UK (COG-UK) Consortium|Robson|United Kingdom

>Spike|hCoV-19/USA/AZ-TG664242/2020|2020-04-28|EPI\_ISL\_696046|Original|hCoV-19^^Arizona|Human|Sonora Quest Laboratories|TGen North|French|USA

>Spike|hCoV-19/Wales/PHWC-3660F/2020|2020-05-01|EPI\_ISL\_474690|Original|hCoV-19^^Wales|Human|Originating lab|COVID-19 Genomics UK (COG-UK) Consortium|Moore|United Kingdom

>Spike|hCoV-19/Portugal/PT1429/2020|2020-03-28|EPI\_ISL\_511388|Original|hCoV-19^^Portugal|Human|Instituto Nacional de Saude (INSA)|Instituto Nacional de Saude (INSA)|Borges|Portugal

>Spike|hCoV-19/England/ALDP-A67841/2020|2020-10-09|EPI\_ISL\_630644|Original|hCoV-19^^England|Human|Lighthouse Lab in Alderley Park|Wellcome Sanger Institute for the COVID-19 Genomics UK (COG-UK) consortium|Davies|United Kingdom

>Spike|hCoV-19/Norway/CS-28/2020|2020-04-21|EPI\_ISL\_666608|Original|hCoV-19^^Viken|Human|Dept. of Microbiology and Infection Control|Dept. of Microbiology and Infection Control|Hesselberg L\u00f8vestad|Norway

>Spike|hCoV-19/England/MILK-A6A6BD/2020|2020-10-09|EPI\_ISL\_627514|Original|hCoV-19^^England|Human|Virology Department|COVID-19 Genomics UK (COG-UK) Consortium|de Silva|United Kingdom

>Spike|hCoV-19/England/CAMB-7E322/2020|2020-04-17|EPI\_ISL\_433471|Original|hCoV-19^^England|Human|Department of Pathology|COVID-19 Genomics UK (COG-UK) Consortium|Meredith|United Kingdom

>Spike|hCoV-19/England/CAMB-1B5CE7/2020|2020-08-20|EPI\_ISL\_529524|Original|hCoV-19^^England|Human|Department of Pathology|COVID-19 Genomics UK (COG-UK) Consortium|Meredith|United Kingdom

>Spike|hCoV-19/Australia/VIC4731/2020|2020-07-14|EPI\_ISL\_519119|Original|hCoV-19^^Victoria|Human|Microbiological Diagnostic Unit - Public Health Laboratory (MDU-PHL)|MDU-PHL|Schultz|Australia

>Spike|hCoV-19/England/ALDP-66A9D6/2020|2020-07-02|EPI\_ISL\_558205|Original|hCoV-19^^England|Human|Lighthouse Lab in Alderley Park|Wellcome Sanger Institute for the COVID-19 Genomics UK (COG-UK) consortium|Davies|United Kingdom

>Spike|hCoV-19/France/NAQ-SC251/2020|2020-03-16|EPI\_ISL\_645174|Original|hCoV-19^^Nouvelle-Aquitaine|Human|CHU de Limoges|CNR Virus des Infections Respiratoires - France SUD|Bal|France

>Spike|hCoV-19/USA/FL-BPHL-2025/2020|2020-03-13|EPI\_ISL\_653178|Original|hCoV-19^^Florida|Human|Florida Bureau of Public Health Laboratories|Florida Bureau of Public Health Laboratories|Blanton|USA

>Spike|hCoV-19/England/CAMC-A58667/2020|2020-10-09|EPI\_ISL\_597046|Original|hCoV-19^^England|Human|Lighthouse Lab in Cambridge|Wellcome Sanger Institute for the COVID-19 Genomics UK (COG-UK) consortium|Davies|United Kingdom

>Spike|hCoV-19/England/CAMC-B079D6/2020|2020-10-30|EPI\_ISL\_643963|Original|hCoV-19^^England|Human|Lighthouse Lab in Cambridge|Wellcome Sanger Institute for the COVID-19 Genomics UK (COG-UK) Consortium|Davies|United Kingdom

>Spike|hCoV-19/England/ALDP-B24AB2/2020|2020-11-04|EPI\_ISL\_647098|Original|hCoV-19^^England|Human|Lighthouse Lab in Alderley Park|Wellcome Sanger Institute for the COVID-19 Genomics UK (COG-UK) Consortium|Davies|United Kingdom

>Spike|hCoV-19/USA/AR-CDC-4299/2020|2020-07-17|EPI\_ISL\_527648|Original|hCoV-19^^Arkansas|Human|AR Dept. of Health-Public Health Lab|Pathogen Discovery|Queen|USA

>Spike|hCoV-19/England/CAMC-BC197E/2020|2020-11-22|EPI\_ISL\_704302|Original|hCoV-19^^England|Human|Department of Pathology|COVID-19 Genomics UK (COG-UK) Consortium|Goodfellow|United Kingdom

>Spike|hCoV-19/Japan/PG-7957/2020|2020-05-00|EPI\_ISL\_687058|Original|hCoV-19^^Japan|Human|Kanagawa Prefectural Institute of Public Health|Pathogen Genomics Center|Sekizuka|Japan

>Spike|hCoV-19/England/QEUA-C32F75/2020|2020-12-11|EPI\_ISL\_734089|Original|hCoV-19^^England|Human|Lighthouse Lab in Glasgow|Wellcome Sanger Institute for the COVID-19 Genomics UK (COG-UK) Consortium|Davies|United Kingdom

>Spike|hCoV-19/Netherlands/NH-RIVM-20700/2020|2020-12-19|EPI\_ISL\_790767|Original|hCoV-19^^Noord-Holland|Human|Dutch COVID-19 response



team|National Institute for Public Health and the Environment  
(RIVM)|Meijer|Netherlands  
>Spike|hCoV-19/England/QEUEH-9F3535/2020|2020-09-24|EPI\_ISL\_588631|Original|hCoV-19^^England|Human|Lighthouse Lab in Glasgow|Wellcome Sanger Institute for the COVID-19 Genomics UK (COG-UK) consortium|Davies|United Kingdom  
>Spike|hCoV-19/Australia/VIC2278/2020|2020-06-27|EPI\_ISL\_522000|Original|hCoV-19^^Victoria|Human|Microbiological Diagnostic Unit - Public Health Laboratory (MDU-PHL)|MDU-PHL|Schultz|Australia  
>Spike|hCoV-19/Australia/VIC3099/2020|2020-07-04|EPI\_ISL\_520806|Original|hCoV-19^^Victoria|Human|Victorian Infectious Diseases Reference Laboratory (VIDRL)|VIDRL and MDU-PHL|Schultz|Australia  
>Spike|hCoV-19/England/SHEF-CB9AC/2020|2020-04-24|EPI\_ISL\_479249|Original|hCoV-19^^England|Human|Virology Department|COVID-19 Genomics UK (COG-UK) Consortium|de Silva|United Kingdom  
>Spike|hCoV-19/Portugal/PT1947/2020|2020-11-11|EPI\_ISL\_732174|Original|hCoV-19^^Portugal|Human|Instituto Nacional de Saude (INSA) and Instituto Gulbenkian de Ciencia (IGC)|Instituto Nacional de Saude (INSA) and Instituto Gulbenkian de Ciencia (IGC)|Borges|Portugal  
>Spike|hCoV-19/England/NORW-EED89/2020|2020-11-29|EPI\_ISL\_704908|Original|hCoV-19^^England|Human|Quadram Institute Bioscience|COVID-19 Genomics UK (COG-UK) Consortium|Alikhan|United Kingdom  
>Spike|hCoV-19/USA/TX-HMH-6185/2020|2020-07-04|EPI\_ISL\_547297|Original|hCoV-19^^Texas|Human|Houston Methodist Hospital|Houston Methodist Hospital|Long|USA  
>Spike|hCoV-19/Australia/VIC8586/2020|2020-08-15|EPI\_ISL\_565101|Original|hCoV-19^^Victoria|Human|Microbiological Diagnostic Unit - Public Health Laboratory (MDU-PHL)|MDU-PHL|Schultz|Australia  
>Spike|hCoV-19/Wales/PHWC-4A1665/2020|2020-12-10|EPI\_ISL\_743706|Original|hCoV-19^^Wales|Human|Wales Specialist Virology Centre Sequencing lab|COVID-19 Genomics UK (COG-UK) Consortium|Moore|United Kingdom  
>Spike|hCoV-19/Switzerland/Vs-ETHZ-320408/2020|2020-10-12|EPI\_ISL\_737833|Original|hCoV-19^^Valais|Human|Viollier AG|Department of Biosystems Science and Engineering|Nadeau|Switzerland  
>Spike|hCoV-19/USA/MA-MGH-00097/2020|2020-03-24|EPI\_ISL\_460326|Original|hCoV-19^^Massachusetts|Human|Massachusetts General Hospital|Infectious Disease Program|Lemieux|USA  
>Spike|hCoV-19/England/CAMB-7B510/2020|2020-04-13|EPI\_ISL\_433970|Original|hCoV-19^^England|Human|Department of Pathology|COVID-19 Genomics UK (COG-UK) Consortium|Meredith|United Kingdom  
>Spike|hCoV-19/USA/MI-MDHHS-SC21813/2020|2020-06-29|EPI\_ISL\_565856|Original|hCoV-19^^Michigan|Human|Michigan Department of Health and Human Services|Michigan Department of Health and Human Services|Blankenship|USA  
>Spike|hCoV-19/Chile/RM-CMM-0007M/2020|2020-05-01|EPI\_ISL\_629020|Original|hCoV-19^^Region Metropolitana de Santiago|Human|Centro de Biotecnolog\u00eda Vegetal|Center for Mathematical Modeling and Center for Genome Regulation. Santiago|Palma V\u00e9jares|Chile  
>Spike|hCoV-19/Denmark/DCGC-3371/2020|2020-08-31|EPI\_ISL\_616128|Original|hCoV-19^^Midtjylland|Human|Department of Virus and Microbiological Special Diagnostics|Albertsen lab|Michaelsen|Denmark  
>Spike|hCoV-19/England/QEUEH-B69B36/2020|2020-11-11|EPI\_ISL\_661547|Original|hCoV-19^^England|Human|Lighthouse Lab in Glasgow|Wellcome Sanger Institute for the COVID-19 Genomics UK (COG-UK) Consortium|Davies|United Kingdom  
>Spike|hCoV-19/Denmark/DCGC-4969/2020|2020-09-21|EPI\_ISL\_621507|Original|hCoV-19^^Hovedstaden|Human|Department of Virus and Microbiological Special Diagnostics|Albertsen lab|Michaelsen|Denmark  
>Spike|hCoV-19/England/NORT-28B205/2020|2020-04-18|EPI\_ISL\_469305|Original|hCoV-19^^England|Human|NU-OMICS DNA Sequencing research facility|Wellcome Sanger Institute for the COVID-19 Genomics UK (COG-UK) consortium|Davies|United Kingdom  
>Spike|hCoV-19/USA/MI-UM-2006S001095/2020|2020-04-18|EPI\_ISL\_495578|Original|hCoV-19^^Michigan|Human|University of Michigan Clinical Microbiology Laboratory|Lauring Lab|Valesano|USA

>Spike|hCoV-19/Italy/UMB-IZSUM-48682-6/2020|2020-10-29|EPI\_ISL\_763324|Original|hCoV-19^^Umbria|Human|Istituto Zooprofilattico Sperimentale dell' Umbria e delle Marche - Togo Rosati|Istituto Superiore di Sanit\u00e0|De Sabato|Italy

>Spike|hCoV-19/England/LEED-2A9D1F/2020|2020-03-29|EPI\_ISL\_538968|Original|hCoV-19^^England|Human|Leeds Teaching Hospitals NHS Trust and Public Health England|Wellcome Sanger Institute for the COVID-19 Genomics UK (COG-UK) consortium|Davies|United Kingdom

>Spike|hCoV-19/England/PORT-2D4B20/2020|2020-10-15|EPI\_ISL\_611983|Original|hCoV-19^^England|Human|Centre for Enzyme Innovation|COVID-19 Genomics UK (COG-UK) Consortium|Robson|United Kingdom

>Spike|hCoV-19/Japan/PG-1502/2020|2020-04-00|EPI\_ISL\_685109|Original|hCoV-19^^Japan|Human|Saitama Prefectural Institute of Public Health|Pathogen Genomics Center|Sekizuka|Japan

>Spike|hCoV-19/England/204291476/2020|2020-10-16|EPI\_ISL\_649810|Original|hCoV-19^^England|Human|Respiratory Virus Unit|COVID-19 Genomics UK (COG-UK) Consortium|Platt|United Kingdom

>Spike|hCoV-19/England/ALDP-A6E419/2020|2020-10-15|EPI\_ISL\_607874|Original|hCoV-19^^England|Human|Lighthouse Lab in Alderley Park|Wellcome Sanger Institute for the COVID-19 Genomics UK (COG-UK) consortium|Davies|United Kingdom

>Spike|hCoV-19/USA/WI-UW-837/2020|2020-05-03|EPI\_ISL\_509844|Original|hCoV-19^^Wisconsin|Human|University of Wisconsin-Madison AIDS Vaccine Research Laboratories|University of Wisconsin-Madison AIDS Vaccine Research Laboratories|Baczenas|USA

>Spike|hCoV-19/Japan/PG-5573/2020|2020-08-00|EPI\_ISL\_688698|Original|hCoV-19^^Japan|Human|Pathogen Genomics Center|Pathogen Genomics Center|Sekizuka|Japan

>Spike|hCoV-19/England/ALDP-B251BC/2020|2020-11-04|EPI\_ISL\_646787|Original|hCoV-19^^England|Human|Lighthouse Lab in Alderley Park|Wellcome Sanger Institute for the COVID-19 Genomics UK (COG-UK) Consortium|Davies|United Kingdom

>Spike|hCoV-19/India/GJ-GBRC228b/2020|2020-06-11|EPI\_ISL\_476866|Original|hCoV-19^^Gujarat|Human|GMERS Medical College and Hospital|Gujarat Biotechnology Research Centre|Joshi|India

>Spike|hCoV-19/England/CAMC-C994B9/2020|2020-12-17|EPI\_ISL\_762183|Original|hCoV-19^^England|Human|Lighthouse Lab in Cambridge|Wellcome Sanger Institute for the COVID-19 Genomics UK (COG-UK) Consortium|Davies|United Kingdom

>Spike|hCoV-19/England/QEUEH-CAD8E3/2020|2020-12-20|EPI\_ISL\_760985|Original|hCoV-19^^England|Human|Lighthouse Lab in Glasgow|Wellcome Sanger Institute for the COVID-19 Genomics UK (COG-UK) Consortium|Davies|United Kingdom

>Spike|hCoV-19/France/PAC-IHU-0525/2020|2020-04-07|EPI\_ISL\_569571|Original|hCoV-19^^Provence-Alpes-C\u00f4te-d\u0201Azur|Human|MEPHI|MEPHI|Levasseur|France

>Spike|hCoV-19/India/TG-CCMB-M950/2020|2020-06-13|EPI\_ISL\_495266|Original|hCoV-19^^Telangana|Human|CSIR-Centre for Cellular and Molecular Biology|CSIR-Centre for Cellular and Molecular Biology|Banu|India

>Spike|hCoV-19/Wales/PHWC-16C98E/2020|2020-06-01|EPI\_ISL\_572612|Original|hCoV-19^^Wales|Human|Wales Specialist Virology Centre Sequencing lab|COVID-19 Genomics UK (COG-UK) Consortium|Moore|United Kingdom

>Spike|hCoV-19/England/CAMC-B322E6/2020|2020-11-05|EPI\_ISL\_659210|Original|hCoV-19^^England|Human|Lighthouse Lab in Cambridge|Wellcome Sanger Institute for the COVID-19 Genomics UK (COG-UK) Consortium|Davies|United Kingdom

>Spike|hCoV-19/USA/UT-UPHL-2008893/2020|2020-05-26|EPI\_ISL\_525007|Original|hCoV-19^^Utah|Human|Utah Public Health Laboratory|Utah Public Health Laboratory|Young|USA

>Spike|hCoV-19/USA/SC-DHEC-0550/2020|2020-06-19|EPI\_ISL\_529089|Original|hCoV-19^^South Carolina|Human|Microbiology Division|Microbiology Division|Flores,H.|USA

>Spike|hCoV-19/England/CAMC-9EBD83/2020|2020-09-24|EPI\_ISL\_584419|Original|hCoV-19^^England|Human|Queens Medical Centre|COVID-19 Genomics UK (COG-UK) Consortium|Loose|United Kingdom

>Spike|hCoV-19/USA/CA-CZB-10176/2020|2020-05-12|EPI\_ISL\_672245|Original|hCoV-19^^California|Human|The Ashley Laboratory|Chan-Zuckerberg Biohub|Bhatt|USA

>Spike|hCoV-19/England/205141190/2020|2020-12-16|EPI\_ISL\_756144|Original|hCoV-19^^England|Human|Respiratory Virus Unit|COVID-19 Genomics UK (COG-UK) Consortium|Miah|United Kingdom

>Spike|hCoV-19/England/SHEF-C3F84/2020|2020-04-03|EPI\_ISL\_432785|Original|hCoV-19^^England|Human|Virology Department|COVID-19 Genomics UK (COG-UK) Consortium|de Silva|United Kingdom

>Spike|hCoV-19/Wales/PHWC-4A3D6E/2020|2020-12-12|EPI\_ISL\_764626|Original|hCoV-19^^Wales|Human|Wales Specialist Virology Centre Sequencing lab|COVID-19 Genomics UK (COG-UK) Consortium|Moore|United Kingdom

>Spike|hCoV-19/Scotland/QEUEH-AD2B0C/2020|2020-10-27|EPI\_ISL\_644033|Original|hCoV-19^^Scotland|Human|Lighthouse Lab in Glasgow|Wellcome Sanger Institute for the COVID-19 Genomics UK (COG-UK) Consortium|Davies|United Kingdom

>Spike|hCoV-19/England/ALDP-B1CA71/2020|2020-11-02|EPI\_ISL\_664843|Original|hCoV-19^^England|Human|Centre for Enzyme Innovation|COVID-19 Genomics UK (COG-UK) Consortium|Robson|United Kingdom

>Spike|hCoV-19/France/OCC-37/2020|2020-06-23|EPI\_ISL\_591545|Original|hCoV-19^^Occitanie|Human|CHU Purpan - Laboratoire de Virologie - Institut F\u00e9deratif de Biologie|CHU Purpan - Laboratoire de Virologie - Institut F\u00e9deratif de Biologie|Latour|France

>Spike|hCoV-19/England/SHEF-C517D/2020|2020-04-27|EPI\_ISL\_475381|Original|hCoV-19^^England|Human|Virology Department|COVID-19 Genomics UK (COG-UK) Consortium|de Silva|United Kingdom

>Spike|hCoV-19/England/OXON-B070A/2020|2020-04-10|EPI\_ISL\_478904|Original|hCoV-19^^England|Human|Oxford Viromics|COVID-19 Genomics UK (COG-UK) Consortium|Golubchik|United Kingdom

>Spike|hCoV-19/England/CAMC-B21332/2020|2020-11-03|EPI\_ISL\_647163|Original|hCoV-19^^England|Human|Lighthouse Lab in Cambridge|Wellcome Sanger Institute for the COVID-19 Genomics UK (COG-UK) Consortium|Davies|United Kingdom

>Spike|hCoV-19/England/ALDP-A4F988/2020|2020-10-07|EPI\_ISL\_597857|Original|hCoV-19^^England|Human|Lighthouse Lab in Alderley Park|Wellcome Sanger Institute for the COVID-19 Genomics UK (COG-UK) consortium|Davies|United Kingdom

>Spike|hCoV-19/England/QEUEH-B0F8E0/2020|2020-11-02|EPI\_ISL\_641974|Original|hCoV-19^^England|Human|Lighthouse Lab in Glasgow|Wellcome Sanger Institute for the COVID-19 Genomics UK (COG-UK) Consortium|Davies|United Kingdom

>Spike|hCoV-19/Japan/PG-0703/2020|2020-04-00|EPI\_ISL\_684313|Original|hCoV-19^^Japan|Human|Pathogen Genomics Center|Pathogen Genomics Center|Sekizuka|Japan

>Spike|hCoV-19/Northern Ireland/QEUEH-96DCAA/2020|2020-08-20|EPI\_ISL\_530650|Original|hCoV-19^^Northern Ireland|Human|Lighthouse Lab in Glasgow|Wellcome Sanger Institute for the COVID-19 Genomics UK (COG-UK) consortium|Davies|United Kingdom

>Spike|hCoV-19/England/ALDP-94F910/2020|2020-06-16|EPI\_ISL\_555222|Original|hCoV-19^^England|Human|Lighthouse Lab in Alderley Park|Wellcome Sanger Institute for the COVID-19 Genomics UK (COG-UK) consortium|Davies|United Kingdom

>Spike|hCoV-19/England/NOTT-11C914/2020|2020-11-17|EPI\_ISL\_665543|Original|hCoV-19^^England|Human|Queens Medical Centre|COVID-19 Genomics UK (COG-UK) Consortium|Loose|United Kingdom

>Spike|hCoV-19/Australia/VIC12647/2020|2020-07-25|EPI\_ISL\_592043|Original|hCoV-19^^Victoria|Human|Microbiological Diagnostic Unit - Public Health Laboratory (MDU-PHL)|MDU-PHL|Schultz|Australia

>Spike|hCoV-19/England/QEUEH-A4CD70/2020|2020-10-05|EPI\_ISL\_596052|Original|hCoV-19^^England|Human|Quadram Institute Bioscience|COVID-19 Genomics UK (COG-UK) Consortium|Alikhan|United Kingdom

>Spike|hCoV-19/Netherlands/ZH-RIVM-20491/2020|2020-10-26|EPI\_ISL\_728706|Original|hCoV-19^^Zuid-holland|Human|Dutch COVID-19 response team|National Institute for Public Health and the Environment (RIVM)|Meijer|Netherlands

>Spike|hCoV-19/England/CAMC-BBCE59/2020|2020-11-21|EPI\_ISL\_705613|Original|hCoV-19^^England|Human|Queens Medical Centre|COVID-19 Genomics UK (COG-UK) Consortium|Loose|United Kingdom

>Spike|hCoV-19/England/ALDP-8E5397/2020|2020-06-25|EPI\_ISL\_556597|Original|hCoV-19^^England|Human|Lighthouse Lab in Alderley Park|Wellcome Sanger Institute for the COVID-19 Genomics UK (COG-UK) consortium|Davies|United Kingdom

>Spike|hCoV-19/England/20154083704/2020|2020-04-07|EPI\_ISL\_466273|Original|hCoV-19^^England|Human|Respiratory Virus Unit|Respiratory Virus Unit|Platt|United Kingdom

>Spike|hCoV-19/Romania/ROSV\_4730/2020|2020-04-26|EPI\_ISL\_491079|Original|hCoV-19^^Suceava|Human|Suceava County Emergency Hospital|\Stefan cel Mare\ University Metagenomics Lab|Lobiuc|Romania

>Spike|hCoV-19/Denmark/DCGC-10104/2020|2020-11-09|EPI\_ISL\_669395|Original|hCoV-19^^Hovedstaden|Human|Department of Virus and Microbiological Special Diagnostics|Albertsen Lab|Michaelsen|Denmark

>Spike|hCoV-19/England/20118172104/2020|2020-03-13|EPI\_ISL\_464995|Original|hCoV-19^^England|Human|Respiratory Virus Unit|Respiratory Virus Unit|Platt|United Kingdom

>Spike|hCoV-19/USA/NY-Yale-025/2020|2020-03-19|EPI\_ISL\_420093|Original|hCoV-19^^New York|Human|Yale Clinical Virology Laboratory|Grubaugh Lab - Yale School of Public Health|Grubaugh|USA

>Spike|hCoV-19/USA/WA-S413/2020|2020-03-26|EPI\_ISL\_434173|Original|hCoV-19^^Washington|Human|Washington State Department of Health|Seattle Flu Study|Bedford|USA

>Spike|hCoV-19/England/ALDP-CB52DB/2020|2020-12-18|EPI\_ISL\_761765|Original|hCoV-19^^England|Human|Lighthouse Lab in Alderley Park|Wellcome Sanger Institute for the COVID-19 Genomics UK (COG-UK) Consortium|Davies|United Kingdom

>Spike|hCoV-19/England/MILK-957AC7/2020|2020-06-09|EPI\_ISL\_554223|Original|hCoV-19^^England|Human|Lighthouse Lab in Milton Keynes|Wellcome Sanger Institute for the COVID-19 Genomics UK (COG-UK) consortium|Davies|United Kingdom

>Spike|hCoV-19/USA/FL-04-UMTL-95QV/2020|2020-04-03|EPI\_ISL\_479759|Original|hCoV-19^^Florida|Human|University of Miami Immunology and Histocompatibility Laboratory|University of Miami Immunology and Histocompatibility Laboratory|Margolles-Clark|USA

>Spike|hCoV-19/England/BRIS-18542EE/2020|2020-04-28|EPI\_ISL\_492274|Original|hCoV-19^^England|Human|PHE South West Regional Laboratory|Wellcome Sanger Institute for the COVID-19 Genomics UK (COG-UK) consortium|Davies|United Kingdom

>Spike|hCoV-19/Greece/135/2020|2020-03-10|EPI\_ISL\_434476|Original|hCoV-19^^Athens|Human|Laboratory of Microbiology|Laboratory of Biology|Karakasiliotis|Greece

>Spike|hCoV-19/Wales/PHWC-351A5/2020|2020-04-25|EPI\_ISL\_474436|Original|hCoV-19^^Wales|Human|Originating lab|COVID-19 Genomics UK (COG-UK) Consortium|Moore|United Kingdom

>Spike|hCoV-19/USA/WI-UW-916/2020|2020-07-12|EPI\_ISL\_509917|Original|hCoV-19^^Wisconsin|Human|University of Wisconsin-Madison AIDS Vaccine Research Laboratories|University of Wisconsin-Madison AIDS Vaccine Research Laboratories|Baczenas|USA

>Spike|hCoV-19/Netherlands/ZH-EMC-972/2020|2020-10-05|EPI\_ISL\_722595|Original|hCoV-19^^Zuid Holland|Human|Dutch COVID-19 response team|Erasmus Medical Center|Oude Munnink|Netherlands

>Spike|hCoV-19/Spain/PV-IBV-001542/2020|2020-03-15|EPI\_ISL\_509618|Original|hCoV-19^^Basque Country|Human|Hospital Universitario Araba. Vitoria-Gasteiz|SeqCOVID-SPAIN consortium|IBV (CSIC) |Comas|Spain

>Spike|hCoV-19/England/20132096004/2020|2020-03-23|EPI\_ISL\_423829|Original|hCoV-19^^England|Human|Respiratory Virus Unit|Respiratory Virus Unit|Platt|United Kingdom

>Spike|hCoV-19/Ireland/LH-NVRL-20IRL51314/2020|2020-09-30|EPI\_ISL\_639893|Original|hCoV-19^^Louth|Human|National Virus Reference Laboratory|National Virus Reference Laboratory|Gonzalez|Ireland

>Spike|hCoV-19/England/ALDP-A2ED1A/2020|2020-10-05|EPI\_ISL\_587242|Original|hCoV-19^^England|Human|Lighthouse Lab in Alderley Park|Wellcome Sanger Institute for the COVID-19 Genomics UK (COG-UK) consortium|Davies|United Kingdom

>Spike|hCoV-19/England/MILK-B8F7EB/2020|2020-11-13|EPI\_ISL\_674753|Original|hCoV-19^^England|Human|Lighthouse Lab in Milton Keynes|Wellcome Sanger Institute for the COVID-19 Genomics UK (COG-UK) Consortium|Davies|United Kingdom

>Spike|hCoV-19/USA/NM-NMDOH-2020214860/2020|2020-07-16|EPI\_ISL\_510878|Original|hCoV-19^^New Mexico|Human|New Mexico Department of Health Scientific Laboratory|New Mexico Department of Health Scientific Laboratory|Johnson|USA

>Spike|hCoV-19/USA/OR-OHSU-2151/2020|2020-08-05|EPI\_ISL\_667128|Original|hCoV-19^^Oregon|Human|OHSU Lab Services Molecular Microbiology Lab|Oregon SARS-CoV-2 Genome Sequencing Center|O'Roak|USA

>Spike|hCoV-19/Brazil/SP-L17-CD328/2020|2020-03-27|EPI\_ISL\_476300|Original|hCoV-19^^S\u00e3o Paulo|Human|DB Diagn\u00f3sticos do Brasil|Instituto de Medicina Tropical da Universidade de S\u00e3o Paulo|Sabino|Brazil

>Spike|hCoV-19/England/QEUA-9F9DA0/2020|2020-09-26|EPI\_ISL\_595765|Original|hCoV-19^^England|Human|Oxford Viromics|COVID-19 Genomics UK (COG-UK) Consortium|Golubchik|United Kingdom

>Spike|hCoV-19/USA/MA-MGH-03452/2020|2020-11-16|EPI\_ISL\_765844|Original|hCoV-19^^Massachusetts|Human|Massachusetts General Hospital|Infectious Disease Program|Park|USA

>Spike|hCoV-19/England/QEUA-9605CA/2020|2020-08-03|EPI\_ISL\_531961|Original|hCoV-19^^England|Human|Lighthouse Lab in Glasgow|Wellcome Sanger Institute for the COVID-19 Genomics UK (COG-UK) consortium|Davies|United Kingdom

>Spike|hCoV-19/England/ALDP-C240BF/2020|2020-12-06|EPI\_ISL\_733808|Original|hCoV-19^^England|Human|Lighthouse Lab in Alderley Park|Wellcome Sanger Institute for the COVID-19 Genomics UK (COG-UK) Consortium|Davies|United Kingdom

>Spike|hCoV-19/England/EXET-13A242/2020|2020-11-03|EPI\_ISL\_664398|Original|hCoV-19^^England|Human|University of Exeter|COVID-19 Genomics UK (COG-UK) Consortium|Temperton|United Kingdom

>Spike|hCoV-19/USA/AR-CDC-2-3714076/2020|2020-09-02|EPI\_ISL\_751731|Original|hCoV-19^^Arkansas|Human|AR Dept. of Health-Public Health Lab|Genomics and Discovery|Queen|USA

>Spike|hCoV-19/Switzerland/GR-ETHZ-340106/2020|2020-10-26|EPI\_ISL\_721815|Original|hCoV-19^^Graub\u00fcnden|Human|Viollier AG|Department of Biosystems Science and Engineering|Nadeau|Switzerland

>Spike|hCoV-19/Belgium/ITM-C5185/2020|2020-09-16|EPI\_ISL\_582130|Original|hCoV-19^^Edegem|Human|Antwerp University Hospital|Institute of Tropical Medicine|Selhorst|Belgium

>Spike|hCoV-19/England/CAMB-7325d/2020|2020-03-22|EPI\_ISL\_440176|Original|hCoV-19^^England|Human|Department of Pathology|Wellcome Sanger Institute for the COVID-19 Genomics UK (COG-UK) consortium|Amato|United Kingdom

>Spike|hCoV-19/Scotland/CVR1085/2020|2020-03-29|EPI\_ISL\_433508|Original|hCoV-19^^Scotland|Human|West of Scotland Specialist Virology Centre|COVID-19 Genomics UK (COG-UK) Consortium|Robertson|United Kingdom

>Spike|hCoV-19/USA/VA-DCLS-2277/2020|2020-10-24|EPI\_ISL\_723516|Original|hCoV-19^^Virginia|Human|Virginia Division of Consolidated Laboratory Services (DCLS)|Virginia Division of Consolidated Laboratory Services (DCLS)|St. Jacques|USA

>Spike|hCoV-19/England/NORT-28928F/2020|2020-03-28|EPI\_ISL\_458640|Original|hCoV-19^^England|Human|NU-OMICS DNA Sequencing research facility|Wellcome Sanger Institute for the COVID-19 Genomics UK (COG-UK) consortium|Davies|United Kingdom

>Spike|hCoV-19/Spain/MD-HLP-108/2020|2020-04-22|EPI\_ISL\_530037|Original|hCoV-19^^Madrid|Human|Hospital Universitario La Paz|Hospital Universitario La Paz|Viedma|Spain

>Spike|hCoV-19/USA/WI-UW-1930/2020|2020-09-24|EPI\_ISL\_677339|Original|hCoV-19^^Wisconsin|Human|University of Wisconsin-Madison AIDS Vaccine Research Laboratories|University of Wisconsin-Madison AIDS Vaccine Research Laboratories|Baczenas|USA

>Spike|hCoV-19/Japan/IC-0603/2021|2021-01-00|EPI\_ISL\_779689|Original|hCoV-19^^Japan|Human|Pathogen Genomics Center|Pathogen Genomics Center|Sekizuka|Japan

>Spike|hCoV-19/England/BRIS-12A61C/2020|2020-04-29|EPI\_ISL\_458345|Original|hCoV-19^^England|Human|PHE South West Regional Laboratory|Wellcome Sanger Institute for the COVID-19 Genomics UK (COG-UK) consortium|Davies|United Kingdom

>Spike|hCoV-19/Denmark/DCGC-19857/2020|2020-12-07|EPI\_ISL\_747832|Original|hCoV-19^^Sjælland|Human|Department of Virus and Microbiological Special Diagnostics|Albertsen Lab|Michaelsen|Denmark

>Spike|hCoV-19/England/MILK-AC89D2/2020|2020-10-22|EPI\_ISL\_629652|Original|hCoV-19^^England|Human|Lighthouse Lab in Milton Keynes|Wellcome Sanger Institute for the COVID-19 Genomics UK (COG-UK) consortium|Davies|United Kingdom

>Spike|hCoV-19/Norway/3053/2020|2020-08-07|EPI\_ISL\_549082|Original|hCoV-19^^Oslo|Human|Furst Medical Laboratory|Norwegian Institute of Public Health|Kopperud Riis|Norway

>Spike|hCoV-19/USA/MI-MDHHS-SC20720/2020|2020-04-20|EPI\_ISL\_471744|Original|hCoV-19^^Michigan|Human|Michigan Department of Health and Human Services|Michigan Department of Health and Human Services|Blankenship|USA

>Spike|hCoV-19/Denmark/DCGC-5132/2020|2020-09-21|EPI\_ISL\_621670|Original|hCoV-19^^Syddanmark|Human|Department of Virus and Microbiological Special Diagnostics|Albertsen lab|Michaelsen|Denmark

>Spike|hCoV-19/England/ALDP-B5DAFC/2020|2020-11-10|EPI\_ISL\_704395|Original|hCoV-19^^England|Human|Department of Pathology|COVID-19 Genomics UK (COG-UK) Consortium|Goodfellow|United Kingdom

>Spike|hCoV-19/Scotland/CVR1695/2020|2020-04-05|EPI\_ISL\_433655|Original|hCoV-19^^Scotland|Human|West of Scotland Specialist Virology Centre|COVID-19 Genomics UK (COG-UK) Consortium|Robertson|United Kingdom

>Spike|hCoV-19/England/QEUEH-B69C33/2020|2020-11-11|EPI\_ISL\_655012|Original|hCoV-19^^England|Human|Lighthouse Lab in Glasgow|Wellcome Sanger Institute for the COVID-19 Genomics UK (COG-UK) Consortium|Davies|United Kingdom

>Spike|hCoV-19/USA/CT-Yale-508/2020|2020-11-05|EPI\_ISL\_729785|Original|hCoV-19^^Connecticut|Human|Grubaugh Lab - Yale School of Public Health|Grubaugh Lab - Yale School of Public Health|Grubaugh|USA

>Spike|hCoV-19/Wales/PHWC-47E31F/2020|2020-10-11|EPI\_ISL\_595438|Original|hCoV-19^^Wales|Human|Originating lab|COVID-19 Genomics UK (COG-UK) Consortium|Moore|United Kingdom

>Spike|hCoV-19/Switzerland/ZH-ETHZ-350473/2020|2020-11-03|EPI\_ISL\_728836|Original|hCoV-19^^Zurich|Human|Viollier AG|Department of Biosystems Science and Engineering|Nadeau|Switzerland

>Spike|hCoV-19/Saudi Arabia/KAUST-jeddah839/2020|2020-05-24|EPI\_ISL\_636972|Original|hCoV-19^^Jeddah|Human|Pathogen Genomics Lab King Abdullah University of Science and Technology (KAUST)|Pathogen Genomics Lab King Abdullah University of Science and Technology (KAUST)|Mohamed Ghazzali|Saudi Arabia

>Spike|hCoV-19/Wales/PHWC-48ABAF/2020|2020-11-05|EPI\_ISL\_666129|Original|hCoV-19^^Wales|Human|Wales Specialist Virology Centre Sequencing lab|COVID-19 Genomics UK (COG-UK) Consortium|Moore|United Kingdom

>Spike|hCoV-19/Japan/PG-7594/2020|2020-07-00|EPI\_ISL\_686696|Original|hCoV-19^^Japan|Human|Chiba Prefectural Institute of Public Health|Pathogen Genomics Center|Sekizuka|Japan

>Spike|hCoV-19/Japan/PG-1820/2020|2020-04-00|EPI\_ISL\_685426|Original|hCoV-19^^Japan|Human|Tokyo Metropolitan Institute of Public Health|Pathogen Genomics Center|Sekizuka|Japan

>Spike|hCoV-19/USA/AZ-TG412678/2020|2020-06-25|EPI\_ISL\_694984|Original|hCoV-19^^Arizona|Human|TGen North|TGen North|French|USA

>Spike|hCoV-19/England/LIVE-A6093/2020|2020-03-21|EPI\_ISL\_499681|Original|hCoV-19^^England|Human|Liverpool Clinical Laboratories|COVID-19 Genomics UK (COG-UK) Consortium|Haldenby|United Kingdom

>Spike|hCoV-19/England/QEUEH-AF5B7C/2020|2020-10-30|EPI\_ISL\_663184|Original|hCoV-19^^England|Human|Lighthouse Lab in Glasgow|Wellcome Sanger Institute for the COVID-19 Genomics UK (COG-UK) Consortium|Davies|United Kingdom

>Spike|hCoV-19/Denmark/DCGC-2576/2020|2020-08-17|EPI\_ISL\_616407|Original|hCoV-19^^Syddanmark|Human|Department of Virus and Microbiological Special Diagnostics|Albertsen lab|Michaelsen|Denmark

>Spike|hCoV-19/Luxembourg/LNS8672733/2020|2020-11-01|EPI\_ISL\_744783|Original|hCoV-19^^Luxembourg|Human|Laboratoire national de sant\u00e9|Laboratoire national de sant\u00e9|Wienecke-Baldacchino|Luxembourg

>Spike|hCoV-19/England/NOTT-1104B5/2020|2020-04-19|EPI\_ISL\_441521|Original|hCoV-19^^England|Human|Queens Medical Centre|COVID-19 Genomics UK (COG-UK) Consortium|Loose|United Kingdom

>Spike|hCoV-19/Sweden/20-52279/2020|2020-07-05|EPI\_ISL\_560982|Original|hCoV-19^^Stockholm|Human|Karolinska universitetslaboratoriet SOLNA|The Public Health Agency of Sweden|Svartstr\u00f6m|Sweden

>Spike|hCoV-19/Spain/AN-IBV-002983/2020|2020-03-31|EPI\_ISL\_474908|Original|hCoV-19^^Andalucia|Human|Hospital Universitario Virgen de las Nieves de Granada-SAS|SeqCOVID-SPAIN consortium/IBV(CSIC)|Comas|Spain

>Spike|hCoV-19/Australia/VIC8974/2020|2020-07-28|EPI\_ISL\_565325|Original|hCoV-19^^Victoria|Human|Microbiological Diagnostic Unit - Public Health Laboratory (MDU-PHL)|MDU-PHL|Schultz|Australia

>Spike|hCoV-19/Spain/CL-IBV-97006232/2020|2020-04-14|EPI\_ISL\_537378|Original|hCoV-19^^Castilla y Leon|Human|Universidad de Le\u00f3n|SeqCOVID-SPAIN consortium/IBV(CSIC)|Comas|Spain

>Spike|hCoV-19/Guangdong/20SF616/2020|2020-01-24|EPI\_ISL\_428465|Original|hCoV-19^^Guangdong|Human|Guangdong Provincial Center for Diseases Control and Prevention;Guangdong Provincial Institute of Public Health|School of Public Health|Gu|China

>Spike|hCoV-19/England/BRIS-127381/2020|2020-04-22|EPI\_ISL\_469779|Original|hCoV-19^^England|Human|PHE South West Regional Laboratory|Wellcome Sanger Institute for the COVID-19 Genomics UK (COG-UK) consortium|Davies|United Kingdom

>Spike|hCoV-19/South Africa/R12723-20/2020|2020-06-16|EPI\_ISL\_504243|Original|hCoV-19^^North West|Human|National Institute for Communicable Diseases of the National Health Laboratory Service|National Institute for Communicable Diseases of the National Health Laboratory Service|Allam|South Africa

>Spike|hCoV-19/Australia/VIC15214/2020|2020-08-03|EPI\_ISL\_593193|Original|hCoV-19^^Victoria|Human|Microbiological Diagnostic Unit - Public Health Laboratory (MDU-PHL)|MDU-PHL|Schultz|Australia

>Spike|hCoV-19/England/202822193/2020|2020-05-28|EPI\_ISL\_490249|Original|hCoV-19^^England|Human|Respiratory Virus Unit|Respiratory Virus Unit|Platt|United Kingdom

>Spike|hCoV-19/Wales/PHWC-4A6484/2020|2020-12-16|EPI\_ISL\_765040|Original|hCoV-19^^Wales|Human|Wales Specialist Virology Centre Sequencing lab|COVID-19 Genomics UK (COG-UK) Consortium|Moore|United Kingdom

>Spike|hCoV-19/England/MILK-97788B/2020|2020-07-25|EPI\_ISL\_550506|Original|hCoV-19^^England|Human|Lighthouse Lab in Milton Keynes|Wellcome Sanger Institute for the COVID-19 Genomics UK (COG-UK) consortium|Davies|United Kingdom

>Spike|hCoV-19/India/OR-ILSCV16514/2020|2020-05-12|EPI\_ISL\_463052|Original|hCoV-19^^Odisha|Human|Institute of Life Sciences|Immunogenomics lab|Raghav|India

>Spike|hCoV-19/England/CAMC-9D23C9/2020|2020-09-18|EPI\_ISL\_601604|Original|hCoV-19^^England|Human|Lighthouse Lab in Cambridge|Wellcome Sanger Institute for the COVID-19 Genomics UK (COG-UK) consortium|Davies|United Kingdom

>Spike|hCoV-19/Northern Ireland/NIRE-FCD4C/2020|2020-04-27|EPI\_ISL\_489326|Original|hCoV-19^^Northern Ireland|Human|Regional Virus Laboratory|Wellcome Sanger Institute for the COVID-19 Genomics UK (COG-UK) consortium|Davies|United Kingdom

>Spike|hCoV-19/USA/MI-UM-10036438245/2020|2020-10-14|EPI\_ISL\_610111|Original|hCoV-19^^Michigan|Human|University of Michigan Clinical Microbiology Laboratory|Lauring Lab|Valesano|USA

>Spike|hCoV-19/USA/CA-CZB-1785/2020|2020-06-05|EPI\_ISL\_486118|Original|hCoV-19^^California|Human|County of Santa Clara Public Health Department|Chan-Zuckerberg Biohub|McGeever|USA

>Spike|hCoV-19/England/ALDP-6D1A04/2020|2020-07-02|EPI\_ISL\_556143|Original|hCoV-19^^England|Human|Lighthouse Lab in Alderley Park|Wellcome Sanger Institute for the COVID-19 Genomics UK (COG-UK) consortium|Davies|United Kingdom

>Spike|hCoV-19/Netherlands/FR-RIVM-20306/2020|2020-11-21|EPI\_ISL\_723445|Original|hCoV-19^^Friesland|Human|Dutch COVID-19 response team|National Institute for Public Health and the Environment (RIVM)|Meijer|Netherlands

>Spike|hCoV-19/Spain/VC-FISABIO-118/2020|2020-03-13|EPI\_ISL\_436213|Original|hCoV-19^^Comunitat Valenciana|Human|Servicio de Microbiolog\u00eda. Consorcio Hospital General Universitario de Valencia|Sequencing and Bioinformatics Service and Molecular Epidemiology Research Group. FISABIO-Public Health|Gonzalez-Candelas|Spain

>Spike|hCoV-19/England/QEUH-B7C839/2020|2020-11-14|EPI\_ISL\_741793|Original|hCoV-19^^England|Human|Oxford Viromics|COVID-19 Genomics UK (COG-UK) Consortium|Golubchik|United Kingdom

>Spike|hCoV-19/England/QEUEH-CDE306/2020|2020-12-26|EPI\_ISL\_782306|Original|hCoV-19^^England|Human|Lighthouse Lab in Glasgow|Wellcome Sanger Institute for the COVID-19 Genomics UK (COG-UK) Consortium|Davies|United Kingdom

>Spike|hCoV-19/England/ALDP-AA317B/2020|2020-10-22|EPI\_ISL\_630961|Original|hCoV-19^^England|Human|Lighthouse Lab in Alderley Park|Wellcome Sanger Institute for the COVID-19 Genomics UK (COG-UK) consortium|Davies|United Kingdom

>Spike|hCoV-19/England/NORT-28406C/2020|2020-05-04|EPI\_ISL\_488622|Original|hCoV-19^^England|Human|NU-OMICS DNA Sequencing research facility|Wellcome Sanger Institute for the COVID-19 Genomics UK (COG-UK) consortium|Davies|United Kingdom

>Spike|hCoV-19/Denmark/DCGC-16450/2020|2020-11-16|EPI\_ISL\_714774|Original|hCoV-19^^Sjaelland|Human|Department of Virus and Microbiological Special Diagnostics|Albertsen Lab|Michaelsen|Denmark

>Spike|hCoV-19/Canada/ON-UHTC\_0022/2020|2020-03-31|EPI\_ISL\_464055|unknown|hCoV-19^^Ontario|Human|Unity Health Toronto|Ontario Institute for Cancer Research|de Borja|Canada

>Spike|hCoV-19/USA/MI-MDHHS-SC20912/2020|2020-04-29|EPI\_ISL\_476048|Original|hCoV-19^^Michigan|Human|Michigan Department of Health and Human Services|Michigan Department of Health and Human Services|Blankenship|USA

>Spike|hCoV-19/England/SHEF-10C9F12/2020|2020-12-19|EPI\_ISL\_741967|Original|hCoV-19^^England|Human|Virology Department|COVID-19 Genomics UK (COG-UK) Consortium|de Silva|United Kingdom

>Spike|hCoV-19/Northern Ireland/NIRE-106AA1/2020|2020-05-20|EPI\_ISL\_501048|Original|hCoV-19^^Northern Ireland|Human|Regional Virus Laboratory|Wellcome Sanger Institute for the COVID-19 Genomics UK (COG-UK) consortium|Davies|United Kingdom

>Spike|hCoV-19/England/ALDP-A935FA/2020|2020-10-20|EPI\_ISL\_611056|Original|hCoV-19^^England|Human|Lighthouse Lab in Alderley Park|Wellcome Sanger Institute for the COVID-19 Genomics UK (COG-UK) consortium|Davies|United Kingdom

>Spike|hCoV-19/USA/TX-HMH-MCoV-8269/2020|2020-07-07|EPI\_ISL\_784300|Original|hCoV-19^^Texas|Human|Houston Methodist Hospital|Houston Methodist Hospital|Long|USA

>Spike|hCoV-19/Denmark/DCGC-6461/2020|2020-10-12|EPI\_ISL\_620361|Original|hCoV-19^^Hovedstaden|Human|Department of Virus and Microbiological Special Diagnostics|Albertsen lab|Michaelsen|Denmark

>Spike|hCoV-19/DRC/1779/2020|2020-04-10|EPI\_ISL\_435158|Original|hCoV-19^^Kinshasa|Human|Viral Respiratory Lab|Pathogen Sequencing Lab|Pratt|Democratic Republic of the Congo

>Spike|hCoV-19/USA/FL-BPHL-0356/2020|2020-04-13|EPI\_ISL\_489765|Original|hCoV-19^^Florida|Human|Florida Bureau of Public Health Laboratories|Florida Bureau of Public Health Laboratories|Blanton|USA

>Spike|hCoV-19/England/ALDP-A9477B/2020|2020-10-19|EPI\_ISL\_624675|Original|hCoV-19^^England|Human|Lighthouse Lab in Alderley Park|Wellcome Sanger Institute for the COVID-19 Genomics UK (COG-UK) consortium|Davies|United Kingdom

>Spike|hCoV-19/USA/FL-BPHL-1190/2020|2020-08-20|EPI\_ISL\_526676|Original|hCoV-19^^Florida|Human|Florida Bureau of Public Health Laboratories|Florida Bureau of Public Health Laboratories|Blanton|USA

>Spike|hCoV-19/England/QEUEH-9B4A8C/2020|2020-09-03|EPI\_ISL\_590185|Original|hCoV-19^^England|Human|Lighthouse Lab in Glasgow|Wellcome Sanger Institute for the COVID-19 Genomics UK (COG-UK) consortium|Davies|United Kingdom

>Spike|hCoV-19/USA/WA-UW-47430/2020|2020-12-11|EPI\_ISL\_776742|Original|hCoV-19^^Washington|Human|UW Virology Lab|UW Virology Lab|Roychoudhury|USA

>Spike|hCoV-19/Australia/VIC15633/2020|2020-07-30|EPI\_ISL\_593388|Original|hCoV-19^^Victoria|Human|Microbiological Diagnostic Unit - Public Health Laboratory (MDU-PHL)|MDU-PHL|Schultz|Australia

>Spike|hCoV-19/USA/OR-OHSU-2971/2020|2020-09-07|EPI\_ISL\_667438|Original|hCoV-19^^Oregon|Human|OHSU Lab Services Molecular Microbiology Lab|Oregon SARS-CoV-2 Genome Sequencing Center|O'Roak|USA

>Spike|hCoV-19/Denmark/DCGC-3060/2020|2020-08-24|EPI\_ISL\_616840|Original|hCoV-19^^Hovedstaden|Human|Department of Virus and Microbiological Special Diagnostics|Albertsen lab|Michaelsen|Denmark



>Spike|hCoV-19/Canada/QC-LSPQ-L00231860/2020|2020-03-20|EPI\_ISL\_535965|Original|hCoV-19^^Quebec|Human|H\u00f4pital de Chicoutimi|Laboratoire de sant\u00e9 publique du Qu\u00e9bec|Moreira|Canada

>Spike|hCoV-19/Australia/VIC14014/2020|2020-09-16|EPI\_ISL\_563929|Original|hCoV-19^^Victoria|Human|Microbiological Diagnostic Unit - Public Health Laboratory (MDU-PHL)|MDU-PHL|Schultz|Australia

>Spike|hCoV-19/USA/UT-UPHL-2012922250/2020|2020-06-18|EPI\_ISL\_746474|Original|hCoV-19^^Utah|Human|Utah Public Health Laboratory|Utah Public Health Laboratory|Gallagher|USA

>Spike|hCoV-19/England/QEUEH-77ADF4/2020|2020-07-15|EPI\_ISL\_533172|Original|hCoV-19^^England|Human|Lighthouse Lab in Glasgow|Wellcome Sanger Institute for the COVID-19 Genomics UK (COG-UK) consortium|Davies|United Kingdom

>Spike|hCoV-19/England/QEUEH-B41AA0/2020|2020-11-08|EPI\_ISL\_658530|Original|hCoV-19^^England|Human|Lighthouse Lab in Glasgow|Wellcome Sanger Institute for the COVID-19 Genomics UK (COG-UK) Consortium|Davies|United Kingdom

>Spike|hCoV-19/England/CAMC-AAF91D/2020|2020-10-23|EPI\_ISL\_631171|Original|hCoV-19^^England|Human|Lighthouse Lab in Cambridge|Wellcome Sanger Institute for the COVID-19 Genomics UK (COG-UK) consortium|Davies|United Kingdom

>Spike|hCoV-19/Belgium/regal-12141311/2020|2020-12-14|EPI\_ISL\_738365|Original|hCoV-19^^Mol|Human|UZ Leuven|KU Leuven|Maes|Belgium

>Spike|hCoV-19/Singapore/95/2020|2020-03-18|EPI\_ISL\_435700|Original|hCoV-19^^Singapore|Human|National Public Health Laboratory|National Public Health Laboratory|Mak|Singapore

>Spike|hCoV-19/Serbia/Sremska Mitrovica-011821207/2020|2020-07-11|EPI\_ISL\_676575|Original|hCoV-19^^Sremska Mitrovica|Human|Scientific Veterinary Institute Novi Sad|Veterinary Specialized Institute \Kraljevo\|Vidanovic|Serbia

>Spike|hCoV-19/Finland/24ES15B12/2020|2020-08-24|EPI\_ISL\_759809|Original|hCoV-19^^Uusimaa|Human|Department of Virology and Immunology|Department of Virology|Smura|Finland

>Spike|hCoV-19/France/PDL-SC627/2020|2020-04-01|EPI\_ISL\_649178|Original|hCoV-19^^Pays-de-la-Loire|Human|CHU Nantes|CNR Virus des Infections Respiratoires - France SUD|Bal|France

>Spike|hCoV-19/England/MILK-62D81E/2020|2020-07-05|EPI\_ISL\_557953|Original|hCoV-19^^England|Human|Lighthouse Lab in Milton Keynes|Wellcome Sanger Institute for the COVID-19 Genomics UK (COG-UK) consortium|Davies|United Kingdom

>Spike|hCoV-19/USA/TX-HMH-MCoV-15270/2020|2020-10-19|EPI\_ISL\_786754|Original|hCoV-19^^Texas|Human|Houston Methodist Hospital|Houston Methodist Hospital|Long|USA

>Spike|hCoV-19/England/ALDP-4A723E/2020|2020-06-13|EPI\_ISL\_559463|Original|hCoV-19^^England|Human|Lighthouse Lab in Alderley Park|Wellcome Sanger Institute for the COVID-19 Genomics UK (COG-UK) consortium|Davies|United Kingdom

>Spike|hCoV-19/Singapore/647/2020|2020-05-06|EPI\_ISL\_493407|Original|hCoV-19^^Singapore|Human|National Public Health Laboratory|National Public Health Laboratory|Mak|Singapore

>Spike|hCoV-19/Portugal/PT1442/2020|2020-03-25|EPI\_ISL\_511401|Original|hCoV-19^^Portugal|Human|Instituto Nacional de Saude (INSA)|Instituto Nacional de Saude (INSA)|Borges|Portugal

>Spike|hCoV-19/England/BRIS-122F46/2020|2020-04-01|EPI\_ISL\_440786|Original|hCoV-19^^England|Human|PHE South West Regional Laboratory|Wellcome Sanger Institute for the COVID-19 Genomics UK (COG-UK) consortium|Amato|United Kingdom

>Spike|hCoV-19/Australia/VIC4394/2020|2020-07-13|EPI\_ISL\_519690|Original|hCoV-19^^Victoria|Human|Microbiological Diagnostic Unit - Public Health Laboratory (MDU-PHL)|MDU-PHL|Schultz|Australia

>Spike|hCoV-19/USA/WA-S1299/2020|2020-05-14|EPI\_ISL\_495749|Original|hCoV-19^^Washington|Human|Washington State Department of Health|Seattle Flu Study|Lee|USA

>Spike|hCoV-19/Spain/NC-IBV-001373/2020|2020-03-13|EPI\_ISL\_452528|Original|hCoV-19^^Navarra|Human|Cl\u00e9nica Universidad de Navarra. Servicio de Enfermedades Infecciosas y Microbiolog\u00eda cl\u00e9nica|SeqCOVID-SPAIN consortium|IBV (CSIC)|Comas|Spain

>Spike|hCoV-19/Belgium/regal-09221148/2020|2020-09-22|EPI\_ISL\_738236|Original|hCoV-19^^Tervuren|Human|UZ Leuven|KU Leuven|Maes|Belgium

>Spike|hCoV-19/USA/IL-NM012/2020|2020-03-17|EPI\_ISL\_444524|Original|hCoV-19^^Illinois|Human|Northwestern Memorial Hospital|Ozer Lab|Ozer|USA

>Spike|hCoV-19/USA/UT-UPHL-2012105352/2020|2020-07-27|EPI\_ISL\_745797|Original|hCoV-19^^Utah|Human|Ginkgo Bioworks Clinical Laboratory|Utah Public Health Laboratory|Young|USA

>Spike|hCoV-19/Japan/PG-7450/2020|2020-07-00|EPI\_ISL\_688552|Original|hCoV-19^^Japan|Human|Pathogen Genomics Center|Pathogen Genomics Center|Sekizuka|Japan

>Spike|hCoV-19/USA/NY-Wadsworth-292753-01/2020|2020-12-19|EPI\_ISL\_769931|Original|hCoV-19^^New York|Human|Albany Medical Center Hospital Clinical Laboratories|Wadsworth Center|Lasek-Nesselquist|USA

>Spike|hCoV-19/Portugal/PT0640/2020|2020-03-29|EPI\_ISL\_510901|Original|hCoV-19^^Portugal|Human|Instituto Nacional de Saude (INSA)|Instituto Nacional de Saude (INSA)|Borges|Portugal

>Spike|hCoV-19/Switzerland/GE-SNRCI-6699/2020|2020-03-00|EPI\_ISL\_548178|Original|hCoV-19^^Geneve|Human|Laboratoire de Virologie|Swiss National Reference Centre for Influenza|Gon\u00e7alves Cabecinhas|Switzerland

>Spike|hCoV-19/Australia/VIC4512/2020|2020-07-19|EPI\_ISL\_518923|Original|hCoV-19^^Victoria|Human|Microbiological Diagnostic Unit - Public Health Laboratory (MDU-PHL)|MDU-PHL|Schultz|Australia

>Spike|hCoV-19/England/QEUA-C14665/2020|2020-12-06|EPI\_ISL\_709404|Original|hCoV-19^^England|Human|Lighthouse Lab in Glasgow|Wellcome Sanger Institute for the COVID-19 Genomics UK (COG-UK) Consortium|Davies|United Kingdom

>Spike|hCoV-19/Netherlands/Flevoland\_17/2020|2020-05-22|EPI\_ISL\_460840|Original|hCoV-19^^Flevoland|Human|Dutch COVID-19 response team|Erasmus Medical Center|Oude Munnink|Netherlands

>Spike|hCoV-19/Australia/VIC4242/2020|2020-00-00|EPI\_ISL\_519570|Original|hCoV-19^^Victoria|Human|Microbiological Diagnostic Unit - Public Health Laboratory (MDU-PHL)|MDU-PHL|Schultz|Australia

>Spike|hCoV-19/Austria/CeMM0198/2020|2020-03-14|EPI\_ISL\_438039|Original|hCoV-19^^Vienna|Human|Center for Virology|Bergthaler laboratory|Bergthaler|Austria

>Spike|hCoV-19/USA/CA-CZB-13331/2020|2020-11-02|EPI\_ISL\_672437|Original|hCoV-19^^California|Human|Santa Clara County Public Health Laboratory|Chan-Zuckerberg Biohub|Bhatt|USA

>Spike|hCoV-19/Denmark/DCGC-17593/2020|2020-12-14|EPI\_ISL\_751092|Original|hCoV-19^^Sjaelland|Human|Department of Virus and Microbiological Special Diagnostics|Albertsen Lab|Michaelsen|Denmark

>Spike|hCoV-19/England/MILK-9C212C/2020|2020-09-11|EPI\_ISL\_566438|Original|hCoV-19^^England|Human|Lighthouse Lab in Milton Keynes|Wellcome Sanger Institute for the COVID-19 Genomics UK (COG-UK) consortium|Davies|United Kingdom

>Spike|hCoV-19/England/CAMC-B3235C/2020|2020-11-03|EPI\_ISL\_659167|Original|hCoV-19^^England|Human|Lighthouse Lab in Cambridge|Wellcome Sanger Institute for the COVID-19 Genomics UK (COG-UK) Consortium|Davies|United Kingdom

>Spike|hCoV-19/Denmark/DCGC-22267/2020|2020-12-14|EPI\_ISL\_757838|Original|hCoV-19^^Hovedstaden|Human|Department of Virus and Microbiological Special Diagnostics|Albertsen Lab|Michaelsen|Denmark

>Spike|hCoV-19/Wales/PHWC-49E698/2020|2020-12-07|EPI\_ISL\_743032|Original|hCoV-19^^Wales|Human|Wales Specialist Virology Centre Sequencing lab|COVID-19 Genomics UK (COG-UK) Consortium|Moore|United Kingdom

>Spike|hCoV-19/England/QEUA-B0F349/2020|2020-11-02|EPI\_ISL\_642204|Original|hCoV-19^^England|Human|Lighthouse Lab in Glasgow|Wellcome Sanger Institute for the COVID-19 Genomics UK (COG-UK) Consortium|Davies|United Kingdom

>Spike|hCoV-19/USA/AZ-TG491612/2020|2020-06-24|EPI\_ISL\_695194|Original|hCoV-19^^Arizona|Human|AZ SPHL|TGen North|French|USA

>Spike|hCoV-19/USA/FL-BPHL-1397/2020|2020-04-13|EPI\_ISL\_549179|Original|hCoV-19^^Florida|Human|Florida Bureau of Public Health Laboratories|Florida Bureau of Public Health Laboratories|Blanton|USA

>Spike|hCoV-19/England/BRIS-12377A/2020|2020-04-02|EPI\_ISL\_442784|Original|hCoV-19^^England|Human|PHE South West Regional Laboratory|Wellcome Sanger Institute for the COVID-19 Genomics UK (COG-UK) consortium|Amato|United Kingdom

>Spike|hCoV-19/Netherlands/ZH-EMC-1173/2020|2020-12-20|EPI\_ISL\_763248|Original|hCoV-19^^Zuid Holland|Human|Dutch COVID-19 response team|Erasmus Medical Center|Oude Munnink|Netherlands

>Spike|hCoV-19/USA/OH-UW-2397/2020|2020-12-05|EPI\_ISL\_754667|Original|hCoV-19^^Ohio|Human|University of Wisconsin-Madison AIDS Vaccine Research Laboratories|University of Wisconsin-Madison AIDS Vaccine Research Laboratories|Moreno|USA

>Spike|hCoV-19/Denmark/DCGC-6522/2020|2020-10-05|EPI\_ISL\_619422|Original|hCoV-19^^Midtjylland|Human|Department of Virus and Microbiological Special Diagnostics|Albertsen lab|Michaelsen|Denmark

>Spike|hCoV-19/England/MILK-B8682D/2020|2020-11-13|EPI\_ISL\_674072|Original|hCoV-19^^England|Human|Lighthouse Lab in Milton Keynes|Wellcome Sanger Institute for the COVID-19 Genomics UK (COG-UK) Consortium|Davies|United Kingdom

>Spike|hCoV-19/USA/TX-HMH-MCoV-8942/2020|2020-07-02|EPI\_ISL\_780848|Original|hCoV-19^^Texas|Human|Houston Methodist Hospital|Houston Methodist Hospital|Long|USA

>Spike|hCoV-19/India/DL-IGIB-1130078/2020|2020-06-00|EPI\_ISL\_641354|Original|hCoV-19^^Delhi|Human|Devki Devi Foundation|CSIR Institute of Genomics and Integrative Biology (CSIR-IGIB) / Max|Pandey|India

>Spike|hCoV-19/Australia/SAP559/2020|2020-11-16|EPI\_ISL\_654802|Original|hCoV-19^^South Australia|Human|SA Pathology|SA Pathology|Leong|Australia

>Spike|hCoV-19/USA/TX-HMH-MCoV-13029/2020|2020-08-28|EPI\_ISL\_788180|Original|hCoV-19^^Texas|Human|Houston Methodist Hospital|Houston Methodist Hospital|Long|USA

>Spike|hCoV-19/USA/HI-H200337/2020|2020-08-16|EPI\_ISL\_752895|Original|hCoV-19^^Hawaii|Human|State Laboratories Division|State Laboratories Division|Sultana|USA

>Spike|hCoV-19/Japan/PG-1779/2020|2020-04-00|EPI\_ISL\_685385|Original|hCoV-19^^Japan|Human|Pathogen Genomics Center|Pathogen Genomics Center|Sekizuka|Japan

>Spike|hCoV-19/Wales/PHWC-16625C/2020|2020-06-22|EPI\_ISL\_490856|Original|hCoV-19^^Wales|Human|Wales Specialist Virology Centre Sequencing lab|COVID-19 Genomics UK (COG-UK) Consortium|Moore|United Kingdom

>Spike|hCoV-19/Australia/VIC5773/2020|2020-07-21|EPI\_ISL\_518571|Original|hCoV-19^^Victoria|Human|Microbiological Diagnostic Unit - Public Health Laboratory (MDU-PHL) |MDU-PHL|Schultz|Australia

>Spike|hCoV-19/Denmark/DCGC-2907/2020|2020-08-17|EPI\_ISL\_616541|Original|hCoV-19^^Syddanmark|Human|Department of Virus and Microbiological Special Diagnostics|Albertsen lab|Michaelsen|Denmark

>Spike|hCoV-19/USA/IL-NM0116/2020|2020-03-19|EPI\_ISL\_444599|Original|hCoV-19^^Illinois|Human|Northwestern Memorial Hospital|Ozer Lab|Ozer|USA

>Spike|hCoV-19/Hungary/MH-6633/2020|2020-05-11|EPI\_ISL\_526220|Original|hCoV-19^^Pest county|Human|Hungarian Defence Forces Military Medical Centre|National Laboratory of Virology|Kemenesi|Hungary

>Spike|hCoV-19/England/QEUH-9F5FEA/2020|2020-09-25|EPI\_ISL\_588400|Original|hCoV-19^^England|Human|Lighthouse Lab in Glasgow|Wellcome Sanger Institute for the COVID-19 Genomics UK (COG-UK) consortium|Davies|United Kingdom

>Spike|hCoV-19/USA/TX-HMH-MCoV-15011/2020|2020-10-16|EPI\_ISL\_786495|Original|hCoV-19^^Texas|Human|Houston Methodist Hospital|Houston Methodist Hospital|Long|USA

>Spike|hCoV-19/Denmark/DCGC-14401/2020|2020-11-30|EPI\_ISL\_711745|Original|hCoV-19^^Syddanmark|Human|Department of Virus and Microbiological Special Diagnostics|Albertsen Lab|Michaelsen|Denmark

>Spike|hCoV-19/England/MILK-BDC4AC/2020|2020-11-26|EPI\_ISL\_709696|Original|hCoV-19^^England|Human|Lighthouse Lab in Milton Keynes|Wellcome Sanger Institute for the COVID-19 Genomics UK (COG-UK) Consortium|Davies|United Kingdom

>Spike|hCoV-19/Wales/PHWC-48B494/2020|2020-11-04|EPI\_ISL\_666240|Original|hCoV-19^^Wales|Human|Wales Specialist Virology Centre Sequencing lab|COVID-19 Genomics UK (COG-UK) Consortium|Moore|United Kingdom

>Spike|hCoV-19/England/SHEF-CF96C/2020|2020-05-23|EPI\_ISL\_475481|Original|hCoV-19^^England|Human|Virology Department|COVID-19 Genomics UK (COG-UK) Consortium|de Silva|United Kingdom

>Spike|hCoV-19/England/LOND-126169D/2020|2020-03-29|EPI\_ISL\_524706|Original|hCoV-19^^England|Human|North West London Pathology|Wellcome Sanger Institute for the COVID-19 Genomics UK (COG-UK) consortium|Davies|United Kingdom

>Spike|hCoV-19/England/ALDP-951BBB/2020|2020-06-10|EPI\_ISL\_551285|Original|hCoV-19^^England|Human|Lighthouse Lab in Alderley Park|Wellcome Sanger Institute for the COVID-19 Genomics UK (COG-UK) consortium|Davies|United Kingdom

>Spike|hCoV-19/England/MILK-9F0CE8/2020|2020-09-24|EPI\_ISL\_589573|Original|hCoV-19^^England|Human|Lighthouse Lab in Milton Keynes|Wellcome Sanger Institute for the COVID-19 Genomics UK (COG-UK) consortium|Davies|United Kingdom

>Spike|hCoV-19/Australia/VIC4719/2020|2020-07-13|EPI\_ISL\_519107|Original|hCoV-19^^Victoria|Human|Microbiological Diagnostic Unit - Public Health Laboratory (MDU-PHL)|MDU-PHL|Schultz|Australia

>Spike|hCoV-19/USA/MD-HP00129/2020|2020-03-30|EPI\_ISL\_457818|Original|hCoV-19^^Maryland|Human|Johns Hopkins Hospital Department of Pathology|Johns Hopkins Hospital Department of Pathology|Ramakrishnan|USA

>Spike|hCoV-19/Cote d'Ivoire/BKE0880/2020|2020-08-17|EPI\_ISL\_614387|Original|hCoV-19^^Boauk\u00e9|Human|Molecular diagnostic unit for viral haemorrhagic fevers and emerging viruses|Project group Epidemiology of Highly Pathogenic Microorganisms|Calvignac-Spencer|C\u00f4te d'Ivoire

>Spike|hCoV-19/SaudiArabia/KAUST-MADINAH1038/2020|2020-06-13|EPI\_ISL\_513074|Original|hCoV-19^^Madinah|Human|Pathogen Genomics Lab King Abdullah University of Science and Technology(KAUST)|Pathogen Genomics Lab King Abdullah University of Science and Technology(KAUST)|Mohamed Ghazzali|Saudi Arabia

>Spike|hCoV-19/USA/AK-PHL640/2020|2020-06-26|EPI\_ISL\_586248|Original|hCoV-19^^Alaska|Human|Alaska State Virology Laboratory|Alaska State Virology Laboratory|Chen|USA

>Spike|hCoV-19/England/MILK-ACD032/2020|2020-10-21|EPI\_ISL\_634445|Original|hCoV-19^^England|Human|Lighthouse Lab in Milton Keynes|Wellcome Sanger Institute for the COVID-19 Genomics UK (COG-UK) consortium|Davies|United Kingdom

>Spike|hCoV-19/England/LIVE-9B592/2020|2020-04-02|EPI\_ISL\_449464|Original|hCoV-19^^England|Human|Liverpool Clinical Laboratories|COVID-19 Genomics UK (COG-UK) Consortium|Haldenby|United Kingdom

>Spike|hCoV-19/England/CAMB-1AB992/2020|2020-04-20|EPI\_ISL\_470194|Original|hCoV-19^^England|Human|Department of Pathology|Wellcome Sanger Institute for the COVID-19 Genomics UK (COG-UK) consortium|Davies|United Kingdom

>Spike|hCoV-19/USA/MN-MDH-78/2020|2020-03-17|EPI\_ISL\_460065|Original|hCoV-19^^Minnesota|Human|Minnesota Department of Health|Minnesota Department of Health|Garfin|USA

>Spike|hCoV-19/England/CAMB-77C79/2020|2020-04-01|EPI\_ISL\_440815|Original|hCoV-19^^England|Human|Department of Pathology|Wellcome Sanger Institute for the COVID-19 Genomics UK (COG-UK) consortium|Amato|United Kingdom

>Spike|hCoV-19/Japan/NGS-CD-365/2020|2020-04-24|EPI\_ISL\_481263|Vero|hCoV-19^^Nagasaki|Human|Department of Emerging Infectious Diseases|Department of Emerging Infectious Diseases|Abe|Japan

>Spike|hCoV-19/England/QEUIH-9FB649/2020|2020-09-29|EPI\_ISL\_588077|Original|hCoV-19^^England|Human|Lighthouse Lab in Glasgow|Wellcome Sanger Institute for the COVID-19 Genomics UK (COG-UK) consortium|Davies|United Kingdom

>Spike|hCoV-19/England/CAMC-9EC371/2020|2020-09-21|EPI\_ISL\_580550|Original|hCoV-19^^England|Human|Lighthouse Lab in Cambridge|Wellcome Sanger Institute for the COVID-19 Genomics UK (COG-UK) consortium|Davies|United Kingdom

>Spike|hCoV-19/England/QEUIH-BCCADA/2020|2020-11-25|EPI\_ISL\_704544|Original|hCoV-19^^England|Human|Lighthouse Lab in Glasgow|Wellcome Sanger Institute for the COVID-19 Genomics UK (COG-UK) Consortium|Davies|United Kingdom

>Spike|hCoV-19/Luxembourg/LNS4648424/2020|2020-11-09|EPI\_ISL\_740515|Original|hCoV-19^^Luxembourg|Human|Laboratoire national de sant\u00e9|Laboratoire national de sant\u00e9|Wienecke-Baldacchino|Luxembourg

>Spike|hCoV-19/England/QEUIH-96A8B8/2020|2020-08-12|EPI\_ISL\_530807|Original|hCoV-19^^England|Human|Lighthouse Lab in Glasgow|Wellcome Sanger Institute for the COVID-19 Genomics UK (COG-UK) consortium|Davies|United Kingdom

>Spike|hCoV-19/Switzerland/GE-HUG-2164/2020|2020-03-17|EPI\_ISL\_429208|Original|hCoV-19^^Geneve|Human|University Hospitals of Geneva Laboratory of Virology|University Hospitals of Geneva Laboratory of Virology|Cordey|Switzerland

>Spike|hCoV-19/England/NORW-EBEC5/2020|2020-05-07|EPI\_ISL\_457519|Original|hCoV-19^^England|Human|Quadram Institute Bioscience|COVID-19 Genomics UK (COG-UK) Consortium|Alikhan|United Kingdom

>Spike|hCoV-19/Japan/PG-0708/2020|2020-04-00|EPI\_ISL\_684318|Original|hCoV-19^^Japan|Human|Pathogen Genomics Center|Pathogen Genomics Center|Sekizuka|Japan

>Spike|hCoV-19/Switzerland/GE-SNRCI-7836/2020|2020-03-00|EPI\_ISL\_548204|Original|hCoV-19^^Geneve|Human|Laboratoire de Virologie|Swiss National Reference Centre for Influenza|Gon\|u00e7alves Cabecinhas|Switzerland

>Spike|hCoV-19/USA/CA-CZB-10796/2020|2020-06-25|EPI\_ISL\_583056|Original|hCoV-19^^California|Human|Humboldt County Public Health Laboratory|Chan-Zuckerberg Biohub|Bhatt|USA

>Spike|hCoV-19/USA/MD-MDH-0242/2020|2020-10-02|EPI\_ISL\_602265|Original|hCoV-19^^Maryland|Human|MD PHL|MD PHL|Keller|USA

>Spike|hCoV-19/England/BIRM-61340/2020|2020-04-28|EPI\_ISL\_477763|Original|hCoV-19^^England|Human|University of Birmingham|COVID-19 Genomics UK (COG-UK) Consortium|Loman|United Kingdom

>Spike|hCoV-19/Australia/VIC5752/2020|2020-07-21|EPI\_ISL\_518550|Original|hCoV-19^^Victoria|Human|Microbiological Diagnostic Unit - Public Health Laboratory (MDU-PHL)|MDU-PHL|Schultz|Australia

>Spike|hCoV-19/USA/NY-NYUMC340/2020|2020-04-07|EPI\_ISL\_430367|Original|hCoV-19^^New York|Human|NYU Langone Health|Departments of Pathology and Medicine|Maurano|USA

>Spike|hCoV-19/Scotland/EDB025/2020|2020-03-15|EPI\_ISL\_425831|Original|hCoV-19^^Scotland|Human|Virology Department|COVID-19 Genomics UK (COG-UK) Consortium|Williams|United Kingdom

>Spike|hCoV-19/England/ALDP-95581A/2020|2020-06-12|EPI\_ISL\_554523|Original|hCoV-19^^England|Human|Lighthouse Lab in Alderley Park|Wellcome Sanger Institute for the COVID-19 Genomics UK (COG-UK) consortium|Davies|United Kingdom

>Spike|hCoV-19/England/ALDP-B76EB5/2020|2020-11-12|EPI\_ISL\_723823|Original|hCoV-19^^England|Human|Oxford Viromics|COVID-19 Genomics UK (COG-UK) Consortium|Golubchik|United Kingdom

>Spike|hCoV-19/USA/WA-S1634/2020|2020-05-27|EPI\_ISL\_496060|Original|hCoV-19^^Washington|Human|Washington State Department of Health|Seattle Flu Study|Lee|USA

>Spike|hCoV-19/Scotland/QEUEH-BA14DD/2020|2020-11-18|EPI\_ISL\_757213|Original|hCoV-19^^Scotland|Human|Lighthouse Lab in Glasgow|Wellcome Sanger Institute for the COVID-19 Genomics UK (COG-UK) Consortium|Davies|United Kingdom

>Spike|hCoV-19/England/ALDP-A52797/2020|2020-10-07|EPI\_ISL\_598068|Original|hCoV-19^^England|Human|Lighthouse Lab in Alderley Park|Wellcome Sanger Institute for the COVID-19 Genomics UK (COG-UK) consortium|Davies|United Kingdom

>Spike|hCoV-19/England/CAMC-991584/2020|2020-08-28|EPI\_ISL\_552166|Original|hCoV-19^^England|Human|Lighthouse Lab in Cambridge|Wellcome Sanger Institute for the COVID-19 Genomics UK (COG-UK) consortium|Davies|United Kingdom

>Spike|hCoV-19/USA/CA-SCCPHD-UC113/2020|2020-03-03|EPI\_ISL\_435592|Original|hCoV-19^^California|Human|Santa Clara County Public Health Department|Chiu Laboratory|Chiu|USA

>Spike|hCoV-19/England/MILK-C78A18/2020|2020-12-15|EPI\_ISL\_756818|Original|hCoV-19^^England|Human|Lighthouse Lab in Milton Keynes|Wellcome Sanger Institute for the COVID-19 Genomics UK (COG-UK) Consortium|Davies|United Kingdom

>Spike|hCoV-19/Singapore/630/2020|2020-02-06|EPI\_ISL\_493390|Original|hCoV-19^^Singapore|Human|National Public Health Laboratory|National Public Health Laboratory|Mak|Singapore

>Spike|hCoV-19/Italy/ABR-IZSGC-TE5547/2020|2020-03-20|EPI\_ISL\_436722|Original|hCoV-19^^Abruzzo|Human|Ospedale Civile S. Liberatore di Atri|Istituto Zooprofilattico Sperimentale dell'Abruzzo e Molise \G.Caporale\|Lorusso|Italy

>Spike|hCoV-19/USA/WA-UW-4779/2020|2020-03-29|EPI\_ISL\_461432|Original|hCoV-19^^Washington|Human|UW Virology Lab|UW Virology Lab|Roychoudhury|USA

>Spike|hCoV-19/Wales/PHWC-16B54F/2020|2020-09-15|EPI\_ISL\_560301|Original|hCoV-19^^Wales|Human|Wales Specialist Virology Centre Sequencing lab|COVID-19 Genomics UK (COG-UK) Consortium|Moore|United Kingdom

>Spike|hCoV-19/USA/TX-HMH-7950/2020|2020-06-26|EPI\_ISL\_545733|Original|hCoV-19^^Texas|Human|Houston Methodist Hospital|Houston Methodist Hospital|Long|USA

>Spike|hCoV-19/England/SHEF-CA55E/2020|2020-05-05|EPI\_ISL\_493695|Original|hCoV-19^^England|Human|Virology Department|COVID-19 Genomics UK (COG-UK) Consortium|de Silva|United Kingdom

>Spike|hCoV-19/Northern Ireland/NIRE-234D91/2020|2020-10-19|EPI\_ISL\_764395|Original|hCoV-19^^Northern Ireland|Human|Regional Virus Laboratory|COVID-19 Genomics UK (COG-UK) Consortium|Fairley|United Kingdom

>Spike|hCoV-19/Portugal/PT1146/2020|2020-04-08|EPI\_ISL\_511693|Original|hCoV-19^^Portugal|Human|Instituto Nacional de Saude (INSA)|Instituto Nacional de Saude (INSA)|Borges|Portugal

>Spike|hCoV-19/England/BRIS-12ECCB/2020|2020-04-21|EPI\_ISL\_488313|Original|hCoV-19^^England|Human|PHE South West Regional Laboratory|Wellcome Sanger Institute for the COVID-19 Genomics UK (COG-UK) consortium|Davies|United Kingdom

>Spike|hCoV-19/Ireland/OY-NVRL-20G31858/2020|2020-03-17|EPI\_ISL\_605079|Original|hCoV-19^^Offaly|Human|National Virus Reference Laboratory|Irish Coronavirus Sequencing Consortium - Helixworks|Chalapati|Ireland

>Spike|hCoV-19/USA/WA-S1417/2020|2020-05-19|EPI\_ISL\_495867|Original|hCoV-19^^Washington|Human|Washington State Department of Health|Seattle Flu Study|Lee|USA

>Spike|hCoV-19/Denmark/DCGC-14705/2020|2020-11-23|EPI\_ISL\_711919|Original|hCoV-19^^Hovedstaden|Human|Department of Virus and Microbiological Special Diagnostics|Albertsen Lab|Michaelsen|Denmark

>Spike|hCoV-19/USA/UT-QDX-2313/2020|2020-03-13|EPI\_ISL\_604620|Original|hCoV-19^^Utah|Human|Quest Diagnostics|Quest Diagnostics|Kagan|USA

>Spike|hCoV-19/England/20126045602/2020|2020-03-18|EPI\_ISL\_418767|Original|hCoV-19^^England|Human|Respiratory Virus Unit|Respiratory Virus Unit|Platt|United Kingdom

>Spike|hCoV-19/Brazil/SP-619/2020|2020-04-13|EPI\_ISL\_515562|Original|hCoV-19^^S\u00e3o Paulo|Human|Hospital Municipal Doutor Alexandre Zaio|Instituto Adolfo Lutz|Sacchi|Brazil

>Spike|hCoV-19/Denmark/DCGC-9916/2020|2020-11-09|EPI\_ISL\_669270|Original|hCoV-19^^Hovedstaden|Human|Department of Virus and Microbiological Special Diagnostics|Albertsen Lab|Michaelsen|Denmark

>Spike|hCoV-19/England/ALDP-C58902/2020|2020-12-14|EPI\_ISL\_736028|Original|hCoV-19^^England|Human|Lighthouse Lab in Alderley Park|Wellcome Sanger Institute for the COVID-19 Genomics UK (COG-UK) Consortium|Davies|United Kingdom

>Spike|hCoV-19/USA/LA-EVTL519/2020|2020-08-03|EPI\_ISL\_578923|Original|hCoV-19^^Louisiana|Human|LSUHS Emerging Viral Threat Laboratory|Microbial Genome Sequencing Center|Kamil|USA

>Spike|hCoV-19/England/NOTT-10FEAC/2020|2020-04-09|EPI\_ISL\_441453|Original|hCoV-19^^England|Human|Queens Medical Centre|COVID-19 Genomics UK (COG-UK) Consortium|Loose|United Kingdom

>Spike|hCoV-19/Switzerland/BS-UHB-42195540/2020|2020-03-17|EPI\_ISL\_528178|Original|hCoV-19^^Basel-Stadt|Human|University Hospital Basel|University Hospital Basel|Roloff Handschin|Switzerland

>Spike|hCoV-19/England/QEUH-B68D7D/2020|2020-11-11|EPI\_ISL\_662119|Original|hCoV-19^^England|Human|Lighthouse Lab in Glasgow|Wellcome Sanger Institute for the COVID-19 Genomics UK (COG-UK) Consortium|Davies|United Kingdom

>Spike|hCoV-19/USA/UT-UPHL-2009217/2020|2020-05-15|EPI\_ISL\_525217|Original|hCoV-19^^Utah|Human|Utah Public Health Laboratory|Utah Public Health Laboratory|Young|USA

>Spike|hCoV-19/USA/CO-CDPHE-2100023473/2020|2020-11-19|EPI\_ISL\_771332|Original|hCoV-19^^Colorado|Human|Colorado Department of Public Health and Environment|Colorado Department of Public Health and Environment|Bankers|USA

>Spike|hCoV-19/Brazil/SP-L32-CD839/2020|2020-04-16|EPI\_ISL\_722033|Original|hCoV-19^^S\u00e3o Paulo|Human|Hospital das Cl\u00ednicas Universidade de S\u00e3o Paulo Medical School|Laborat\u00f3rio de Parasitologia M\u00e9dica - Instituto de Medicina Tropical - Universidade de S\u00e3o Paulo|de Jesus|Brazil

>Spike|hCoV-19/England/ALDP-951007/2020|2020-06-13|EPI\_ISL\_554280|Original|hCoV-19^^England|Human|Lighthouse Lab in Alderley Park|Wellcome Sanger Institute for the COVID-19 Genomics UK (COG-UK) consortium|Davies|United Kingdom

>Spike|hCoV-19/India/MH-NIV-QC-800/2020|2020-04-26|EPI\_ISL\_452217|Original|hCoV-19^^Maharashtra|Human|NIV Influenza|NIV Influenza|Potdar|India

>Spike|hCoV-19/England/NORW-E8727/2020|2020-00-00|EPI\_ISL\_448228|Original|hCoV-19^^England|Human|Quadram Institute Bioscience|COVID-19 Genomics UK (COG-UK) Consortium|Alikhan|United Kingdom

>Spike|hCoV-19/USA/DE-DHSS-F1013965/2020|2020-10-12|EPI\_ISL\_708387|Original|hCoV-19^^Delaware|Human|Delaware Public Health Lab|Delaware Public Health Lab|Bajwa|USA

>Spike|hCoV-19/England/20134068904/2020|2020-03-24|EPI\_ISL\_423160|Original|hCoV-19^^England|Human|Respiratory Virus Unit|Respiratory Virus Unit|Platt|United Kingdom

>Spike|hCoV-19/England/MILK-9A8AC7/2020|2020-08-31|EPI\_ISL\_550171|Original|hCoV-19^^England|Human|Lighthouse Lab in Milton Keynes|Wellcome Sanger Institute for the COVID-19 Genomics UK (COG-UK) consortium|Davies|United Kingdom

>Spike|hCoV-19/England/ALDP-A2D0A9/2020|2020-10-06|EPI\_ISL\_586857|Original|hCoV-19^^England|Human|Lighthouse Lab in Alderley Park|Wellcome Sanger Institute for the COVID-19 Genomics UK (COG-UK) consortium|Davies|United Kingdom

>Spike|hCoV-19/USA/GA-EHC-086H/2020|2020-03-10|EPI\_ISL\_455356|Original|hCoV-19^^Georgia|Human|Emory Molecular Diagnostics Laboratory|Piantadosi Lab|Piantadosi|USA

>Spike|hCoV-19/South Africa/KRISP-K003758/2020|2020-09-28|EPI\_ISL\_602929|Original|hCoV-19^^KwaZulu-Natal|Human|NHLs-IALCH|KRISP|de Oliveira|South Africa

>Spike|hCoV-19/Italy/SIC-IZSBM193-67/2020|2020-06-00|EPI\_ISL\_582846|Original|hCoV-19^^Sicily|Human|Laboratorio di Riferimento Regionale della Sicilia Occidentale per l'Emergenza COVID-19|Istituto Zooprofilattico Sperimentale della Sicilia|Reale|Italy

>Spike|hCoV-19/USA/CA-ALSR-2382/2020|2020-07-06|EPI\_ISL\_635451|Original|hCoV-19^^California|Human|San Diego County Public Health Laboratory|Andersen lab at Scripps Research|Gangavarapu|USA

>Spike|hCoV-19/Scotland/QEUH-9F856D/2020|2020-09-27|EPI\_ISL\_600878|Original|hCoV-19^^Scotland|Human|Lighthouse Lab in Glasgow|Wellcome Sanger Institute for the COVID-19 Genomics UK (COG-UK) consortium|Davies|United Kingdom

>Spike|hCoV-19/Japan/PG-0541/2020|2020-04-03|EPI\_ISL\_480197|Original|hCoV-19^^HokurikuShinsyu|Human|Toyama Institute of Health|Pathogen Genomics Center|Sekizuka|Japan

>Spike|hCoV-19/Luxembourg/LNS9580764/2020|2020-11-09|EPI\_ISL\_744943|Original|hCoV-19^^Luxembourg|Human|Laboratoire national de sant\u00e9|Laboratoire national de sant\u00e9|Wienecke-Baldacchino|Luxembourg

>Spike|hCoV-19/Scotland/CVR2284/2020|2020-04-13|EPI\_ISL\_448175|Original|hCoV-19^^Scotland|Human|West of Scotland Specialist Virology Centre|COVID-19 Genomics UK (COG-UK) Consortium|Robertson|United Kingdom

>Spike|hCoV-19/England/QEUH-9DDBC6/2020|2020-09-21|EPI\_ISL\_599777|Original|hCoV-19^^England|Human|Lighthouse Lab in Glasgow|Wellcome Sanger Institute for the COVID-19 Genomics UK (COG-UK) consortium|Davies|United Kingdom

>Spike|hCoV-19/Netherlands/GE-RIVM-10385/2020|2020-03-23|EPI\_ISL\_636501|Original|hCoV-19^^Gelderland|Human|Dutch COVID-19 response team|National Institute for Public Health and the Environment (RIVM)|Meijer|Netherlands

>Spike|hCoV-19/Australia/VIC4724/2020|2020-07-14|EPI\_ISL\_519112|Original|hCoV-19^^Victoria|Human|Microbiological Diagnostic Unit - Public Health Laboratory (MDU-PHL)|MDU-PHL|Schultz|Australia

>Spike|hCoV-19/Singapore/1364/2020|2020-06-25|EPI\_ISL\_648715|Original|hCoV-19^^Singapore|Human|Department of Laboratory Medicine|Department of Laboratory Medicine|Chen|Singapore

>Spike|hCoV-19/England/MILK-A6BA74/2020|2020-10-09|EPI\_ISL\_608755|Original|hCoV-19^^England|Human|Lighthouse Lab in Milton Keynes|Wellcome Sanger Institute for the COVID-19 Genomics UK (COG-UK) consortium|Davies|United Kingdom

>Spike|hCoV-19/Denmark/DCGC-9455/2020|2020-11-09|EPI\_ISL\_668980|Original|hCoV-19^^Hovedstaden|Human|Department of Virus and Microbiological Special Diagnostics|Albertsen Lab|Michaelsen|Denmark

>Spike|hCoV-19/Portugal/PT1602/2020|2020-07-05|EPI\_ISL\_693605|Original|hCoV-19^^Portugal|Human|Instituto Nacional de Saude (INSA)|Instituto Nacional de Saude (INSA)|Borges|Portugal

>Spike|hCoV-19/Wales/MILK-973175/2020|2020-08-20|EPI\_ISL\_575842|Original|hCoV-19^^Wales|Human|Lighthouse Lab in Milton Keynes|Wellcome Sanger Institute for the COVID-19 Genomics UK (COG-UK) consortium|Davies|United Kingdom

>Spike|hCoV-19/England/LIVE-9E948/2020|2020-04-11|EPI\_ISL\_453345|Original|hCoV-19^^England|Human|Liverpool Clinical Laboratories|COVID-19 Genomics UK (COG-UK) Consortium|Haldenby|United Kingdom

>Spike|hCoV-19/South Africa/KRISP-0579/2020|2020-07-08|EPI\_ISL\_498117|Original|hCoV-19^^KwaZulu-Natal|Human|NHLS-IALCH|KRISP|de Oliveira|South Africa

>Spike|hCoV-19/England/20180032304/2020|2020-04-24|EPI\_ISL\_465436|Original|hCoV-19^^England|Human|Respiratory Virus Unit|Respiratory Virus Unit|Platt|United Kingdom

>Spike|hCoV-19/Japan/PG-5874/2020|2020-08-00|EPI\_ISL\_688989|Original|hCoV-19^^Japan|Human|Pathogen Genomics Center|Pathogen Genomics Center|Sekizuka|Japan

>Spike|hCoV-19/Wales/PHWC-166E94/2020|2020-06-11|EPI\_ISL\_494124|Original|hCoV-19^^Wales|Human|Originating lab|COVID-19 Genomics UK (COG-UK) Consortium|Moore|United Kingdom

>Spike|hCoV-19/Wales/PHWC-499FA1/2020|2020-11-25|EPI\_ISL\_727475|Original|hCoV-19^^Wales|Human|Originating lab|COVID-19 Genomics UK (COG-UK) Consortium|Moore|United Kingdom

>Spike|hCoV-19/South Africa/KRISP-K002175/2020|2020-07-09|EPI\_ISL\_515577|Original|hCoV-19^^KwaZulu-Natal|Human|NHLS-IALCH|KRISP|de Oliveira|South Africa

>Spike|hCoV-19/USA/AZ-TG395900/2020|2020-06-05|EPI\_ISL\_694744|Original|hCoV-19^^Arizona|Human|AZ SPHL|TGen North|French|USA

>Spike|hCoV-19/USA/CA-CZB-2459/2020|2020-05-21|EPI\_ISL\_513865|Original|hCoV-19^^California|Human|San Francisco Public Health Laboratory|Chan-Zuckerberg Biohub|Kamm|USA

>Spike|hCoV-19/USA/WA-S2442/2020|2020-06-16|EPI\_ISL\_497074|Original|hCoV-19^^Washington|Human|Washington State Department of Health|Seattle Flu Study|Lee|USA

>Spike|hCoV-19/Netherlands/NA\_354/2020|2020-04-07|EPI\_ISL\_455158|Original|hCoV-19^^Netherlands|Human|Dutch COVID-19 response team|Erasmus Medical Center|Oude Munnink|Netherlands

>Spike|hCoV-19/Denmark/DCGC-8020/2020|2020-10-26|EPI\_ISL\_617071|Original|hCoV-19^^Nordjylland|Human|Department of Virus and Microbiological Special Diagnostics|Albertsen lab|Michaelsen|Denmark

>Spike|hCoV-19/India/MH-ACTREC-225/2020|2020-07-01|EPI\_ISL\_699879|Original|hCoV-19^^Maharashtra|Human|Hematopathology Laboratory|Hematopathology Laboratory|Patkar|India

>Spike|hCoV-19/USA/TX-HMH-MCoV-12554/2020|2020-09-30|EPI\_ISL\_790387|Original|hCoV-19^^Texas|Human|Houston Methodist Hospital|Houston Methodist Hospital|Long|USA

>Spike|hCoV-19/Denmark/DCGC-19095/2020|2020-12-07|EPI\_ISL\_748294|Original|hCoV-19^^Midtjylland|Human|Department of Virus and Microbiological Special Diagnostics|Albertsen Lab|Michaelsen|Denmark

>Spike|hCoV-19/Canada/ON-PHL-20-00033/2020|2020-00-00|EPI\_ISL\_548714|Original|hCoV-19^^Ontario|Human|Public Health Ontario Laboratory|Public Health Ontario Laboratory|Guthrie|Canada

>Spike|hCoV-19/South Africa/Tygerberg\_21/2020|2020-04-09|EPI\_ISL\_464132|Original|hCoV-19^^Western Cape|Human|National Health Laboratory Service (NHLS)|Division of Medical Virology|Engelbrecht|South Africa

>Spike|hCoV-19/Portugal/PT1544/2020|2020-06-21|EPI\_ISL\_693558|Original|hCoV-19^^Portugal|Human|Instituto Nacional de Saude (INSA)|Instituto Nacional de Saude (INSA)|Borges|Portugal

>Spike|hCoV-19/England/MILK-C30654/2020|2020-12-07|EPI\_ISL\_782990|Original|hCoV-19^^England|Human|Lighthouse Lab in Milton Keynes|Wellcome Sanger Institute for the COVID-19 Genomics UK (COG-UK) Consortium|Davies|United Kingdom

>Spike|hCoV-19/England/CAMB-1B493C/2020|2020-06-04|EPI\_ISL\_473487|Original|hCoV-19^^England|Human|Department of Pathology|COVID-19 Genomics UK (COG-UK) Consortium|Meredith|United Kingdom

>Spike|hCoV-19/England/204291949/2020|2020-10-18|EPI\_ISL\_660743|Original|hCoV-19^^England|Human|Respiratory Virus Unit|COVID-19 Genomics UK (COG-UK) Consortium|Platt|United Kingdom



>Spike|hCoV-19/Japan/PG-8822/2020|2020-08-00|EPI\_ISL\_686404|Original|hCoV-19^^Japan|Human|Pathogen Genomics Center|Pathogen Genomics Center|Sekizuka|Japan

>Spike|hCoV-19/Northern Ireland/NIRE-102708/2020|2020-04-18|EPI\_ISL\_469857|Original|hCoV-19^^Northern Ireland|Human|Regional Virus Laboratory|Wellcome Sanger Institute for the COVID-19 Genomics UK (COG-UK) consortium|Davies|United Kingdom

>Spike|hCoV-19/Netherlands/ZH-EMC-483/2020|2020-08-09|EPI\_ISL\_577913|Original|hCoV-19^^Zuid Holland|Human|Dutch COVID-19 response team|Erasmus Medical Center|Oude Munnink|Netherlands

>Spike|hCoV-19/Latvia/120/2020|2020-07-31|EPI\_ISL\_534209|Original|hCoV-19^^Latvia|Human|Latvijas Infektolo\u0123ijas centrs|Latvian Biomedical Research and Study Centre|Zrelavs|Latvia

>Spike|hCoV-19/France/PAC-MEPHI-2221/2020|2020-10-02|EPI\_ISL\_644528|Original|hCoV-19^^Provence-Alpes-Cote-d\u2019Azur|Human|MEPHI|MEPHI|Levasseur|France

>Spike|hCoV-19/USA/TX-HMH-MCoV-18504/2020|2020-11-20|EPI\_ISL\_784852|Original|hCoV-19^^Texas|Human|Houston Methodist Hospital|Houston Methodist Hospital|Long|USA

>Spike|hCoV-19/England/20144014504/2020|2020-03-31|EPI\_ISL\_423509|Original|hCoV-19^^England|Human|Respiratory Virus Unit|Respiratory Virus Unit|Platt|United Kingdom

>Spike|hCoV-19/England/QEUA-A6357B/2020|2020-10-12|EPI\_ISL\_596120|Original|hCoV-19^^England|Human|Quadram Institute Bioscience|COVID-19 Genomics UK (COG-UK) Consortium|Alikhan|United Kingdom

>Spike|hCoV-19/USA/WA-UW-9600/2020|2020-05-22|EPI\_ISL\_570267|Original|hCoV-19^^Washington|Human|UW Virology Lab|UW Virology Lab|Roychoudhury|USA

>Spike|hCoV-19/USA/LA-EVTL1061/2020|2020-11-27|EPI\_ISL\_768331|Original|hCoV-19^^Louisiana|Human|LSUHS Emerging Viral Threat Laboratory|Microbial Genome Sequencing Center|Kamil|USA

>Spike|hCoV-19/Luxembourg/LNS0829711/2020|2020-11-05|EPI\_ISL\_739836|Original|hCoV-19^^Luxembourg|Human|Laboratoire national de sant\u00e9|Laboratoire national de sant\u00e9|Wienecke-Baldacchino|Luxembourg

>Spike|hCoV-19/India/MH-ACTREC-093/2020|2020-05-22|EPI\_ISL\_699749|Original|hCoV-19^^Maharashtra|Human|Hematopathology Laboratory|Hematopathology Laboratory|Patkar|India

>Spike|hCoV-19/USA/TX-HMH-MCoV-19537/2020|2020-11-17|EPI\_ISL\_783913|Original|hCoV-19^^Texas|Human|Houston Methodist Hospital|Houston Methodist Hospital|Long|USA

>Spike|hCoV-19/England/CAMB-1AC15D/2020|2020-04-28|EPI\_ISL\_444377|Original|hCoV-19^^England|Human|Department of Pathology|COVID-19 Genomics UK (COG-UK) Consortium|Meredith|United Kingdom

>Spike|hCoV-19/USA/TX-DSHS-1210/2020|2020-03-18|EPI\_ISL\_631671|Original|hCoV-19^^Texas|Human|Texas Department of State Health Services|Texas Department of State Health Services|Rahman|USA

>Spike|hCoV-19/USA/TX-HMH-MCoV-15717/2020|2020-07-09|EPI\_ISL\_785401|Original|hCoV-19^^Texas|Human|Houston Methodist Hospital|Houston Methodist Hospital|Long|USA

>Spike|hCoV-19/England/ALDP-9B5FE6/2020|2020-08-28|EPI\_ISL\_572981|Original|hCoV-19^^England|Human|Oxford Viromics|COVID-19 Genomics UK (COG-UK) Consortium|Golubchik|United Kingdom

>Spike|hCoV-19/Gibraltar/204841769/2020|2020-00-00|EPI\_ISL\_671334|Original|hCoV-19^^Gibraltar|Human|Microbiology|Respiratory Virus Unit|Platt|Gibraltar

>Spike|hCoV-19/Denmark/DCGC-4079/2020|2020-09-14|EPI\_ISL\_622035|Original|hCoV-19^^Hovedstaden|Human|Department of Virus and Microbiological Special Diagnostics|Albertsen lab|Michaelsen|Denmark

>Spike|hCoV-19/Denmark/DCGC-14091/2020|2020-11-30|EPI\_ISL\_711561|Original|hCoV-19^^Nordjylland|Human|Department of Virus and Microbiological Special Diagnostics|Albertsen Lab|Michaelsen|Denmark

>Spike|hCoV-19/Scotland/CAMC-A82ED5/2020|2020-10-13|EPI\_ISL\_625294|Original|hCoV-19^^Scotland|Human|Lighthouse Lab in Cambridge|Wellcome Sanger Institute for the COVID-19 Genomics UK (COG-UK) consortium|Davies|United Kingdom

>Spike|hCoV-19/USA/OR-OHSU-2884/2020|2020-09-04|EPI\_ISL\_667385|Original|hCoV-19^^Oregon|Human|OHSU Lab Services Molecular Microbiology Lab|Oregon SARS-CoV-2 Genome Sequencing Center|O'Roak|USA

>Spike|hCoV-19/England/NOTT-114C22/2020|2020-10-10|EPI\_ISL\_584765|Original|hCoV-19^^England|Human|Queens Medical Centre|COVID-19 Genomics UK (COG-UK) Consortium|Loose|United Kingdom

>Spike|hCoV-19/USA/MI-MDHHS-SC22267/2020|2020-11-02|EPI\_ISL\_666933|Original|hCoV-19^^Michigan|Human|Michigan Department of Health and Human Services|Michigan Department of Health and Human Services|Jacob|USA

>Spike|hCoV-19/Beijing/ICDC-DT005/2020|2020-02-05|EPI\_ISL\_412386|Original|hCoV-19^^Beijing|Human|Beijing Ditan Hospital|National Institute for Communicable Disease Control and Prevention|Lu|China

>Spike|hCoV-19/Australia/VIC6340/2020|2020-07-20|EPI\_ISL\_518322|Original|hCoV-19^^Victoria|Human|Microbiological Diagnostic Unit - Public Health Laboratory (MDU-PHL)|MDU-PHL|Schultz|Australia

>Spike|hCoV-19/Australia/VIC15084/2020|2020-08-11|EPI\_ISL\_593130|Original|hCoV-19^^Victoria|Human|Microbiological Diagnostic Unit - Public Health Laboratory (MDU-PHL)|MDU-PHL|Schultz|Australia

>Spike|hCoV-19/USA/WA-UW-1718/2020|2020-03-20|EPI\_ISL\_424210|Original|hCoV-19^^Washington|Human|UW Virology Lab|UW Virology Lab|Roychoudhury|USA

>Spike|hCoV-19/USA/VA-DCLS-2165/2020|2020-11-06|EPI\_ISL\_677194|Original|hCoV-19^^Virginia|Human|Virginia Division of Consolidated Laboratory Services|Virginia Division of Consolidated Laboratory Services|St. Jacques|USA

>Spike|hCoV-19/India/GJ-GBRC24b/2020|2020-04-26|EPI\_ISL\_437454|Original|hCoV-19^^Gujarat|Human|B.J. Medical College and Civil hospital|Gujarat Biotechnology Research Centre|Joshi|India

>Spike|hCoV-19/USA/TX-HMH-5689/2020|2020-06-26|EPI\_ISL\_546946|Original|hCoV-19^^Texas|Human|Houston Methodist Hospital|Houston Methodist Hospital|Long|USA

>Spike|hCoV-19/England/CAMC-B33A47/2020|2020-11-05|EPI\_ISL\_659231|Original|hCoV-19^^England|Human|Lighthouse Lab in Cambridge|Wellcome Sanger Institute for the COVID-19 Genomics UK (COG-UK) Consortium|Davies|United Kingdom

>Spike|hCoV-19/USA/FL-BPHL-0260/2020|2020-05-04|EPI\_ISL\_480911|Original|hCoV-19^^Florida|Human|Florida Bureau of Public Health Laboratories|Florida Bureau of Public Health Laboratories|Blanton|USA

>Spike|hCoV-19/USA/CA-ALSR-4331/2020|2020-10-06|EPI\_ISL\_648976|Original|hCoV-19^^California|Human|San Diego County Public Health Laboratory|Andersen lab at Scripps Research|Gangavarapu|USA

>Spike|hCoV-19/Japan/IC-0611/2020|2020-12-00|EPI\_ISL\_779697|Original|hCoV-19^^Japan|Human|Pathogen Genomics Center|Pathogen Genomics Center|Sekizuka|Japan

>Spike|hCoV-19/England/QEUEH-B2D406/2020|2020-11-04|EPI\_ISL\_659968|Original|hCoV-19^^England|Human|Lighthouse Lab in Glasgow|Wellcome Sanger Institute for the COVID-19 Genomics UK (COG-UK) Consortium|Davies|United Kingdom

>Spike|hCoV-19/USA/MI-MDHHS-SC20421/2020|2020-03-17|EPI\_ISL\_452295|Original|hCoV-19^^Michigan|Human|Michigan Department of Health and Human Services|Michigan Department of Health and Human Services|Blankenship|USA

>Spike|hCoV-19/England/ALDP-9CB85B/2020|2020-09-16|EPI\_ISL\_575621|Original|hCoV-19^^England|Human|Lighthouse Lab in Alderley Park|Wellcome Sanger Institute for the COVID-19 Genomics UK (COG-UK) consortium|Davies|United Kingdom

>Spike|hCoV-19/England/QEUEH-A4BB2C/2020|2020-10-05|EPI\_ISL\_628510|Original|hCoV-19^^England|Human|Oxford Viromics|COVID-19 Genomics UK (COG-UK) Consortium|Golubchik|United Kingdom

>Spike|hCoV-19/Canada/ON-S246/2020|2020-03-27|EPI\_ISL\_755831|Original|hCoV-19^^Ontario|Human|Toronto Invasive Bacterial Diseases Network|McMaster University|McArthur|Canada

>Spike|hCoV-19/England/MILK-B952B4/2020|2020-11-13|EPI\_ISL\_673633|Original|hCoV-19^^England|Human|Lighthouse Lab in Milton Keynes|Wellcome Sanger Institute for the COVID-19 Genomics UK (COG-UK) Consortium|Davies|United Kingdom

>Spike|hCoV-19/England/ALDP-AA4839/2020|2020-10-21|EPI\_ISL\_624523|Original|hCoV-19^^England|Human|Lighthouse Lab in Alderley Park|Wellcome Sanger Institute for the COVID-19 Genomics UK (COG-UK) consortium|Davies|United Kingdom

>Spike|hCoV-19/USA/WI-UW-1527/2020|2020-09-03|EPI\_ISL\_605405|Original|hCoV-19^^Wisconsin|Human|University of Wisconsin-Madison AIDS Vaccine Research

Laboratories|University of Wisconsin-Madison AIDS Vaccine Research  
Laboratories|Baczenas|USA  
>Spike|hCoV-19/England/LOND-124DA7D/2020|2020-00-00|EPI\_ISL\_584636|Original|hCoV-19^^England|Human|University College London Hospital|COVID-19 Genomics UK (COG-UK) Consortium|Byott|United Kingdom  
>Spike|hCoV-19/England/QEUA-A029AF/2020|2020-09-29|EPI\_ISL\_584939|Original|hCoV-19^^England|Human|Quadram Institute Bioscience|COVID-19 Genomics UK (COG-UK) Consortium|Alikhan|United Kingdom  
>Spike|hCoV-19/Brazil/RS-00667/2020|2020-11-26|EPI\_ISL\_770609|Original|hCoV-19^^Rio Grande do Sul|Human|Laborat\u00f3rio de Microbiologia Molecular - Universidade FEEVALE|Bioinformatics Laboratory / LNCC|Almeida|Brazil  
>Spike|hCoV-19/England/CAMC-B325ED/2020|2020-11-05|EPI\_ISL\_659362|Original|hCoV-19^^England|Human|Lighthouse Lab in Cambridge|Wellcome Sanger Institute for the COVID-19 Genomics UK (COG-UK) Consortium|Davies|United Kingdom  
>Spike|hCoV-19/England/ALDP-B270CC/2020|2020-11-04|EPI\_ISL\_664386|Original|hCoV-19^^England|Human|Northumbria University / South Tees Hospitals NHS Foundation Trust / North Cumbria Integrated Care NHS Foundation Trust / North Tees and Hartlepool NHS Foundation Trust / Newcastle Hospitals NHS Foundation Trust|COVID-19 Genomics UK (COG-UK) Consortium|Bashton|United Kingdom  
>Spike|hCoV-19/USA/CT-Yale-032/2020|2020-03-18|EPI\_ISL\_428370|Original|hCoV-19^^Connecticut|Human|Yale Clinical Virology Laboratory|Grubaugh Lab - Yale School of Public Health|Grubaugh|USA  
>Spike|hCoV-19/USA/LA-EVTL1023/2020|2020-08-25|EPI\_ISL\_653714|Original|hCoV-19^^Louisiana|Human|LSUHS Emerging Viral Threat Laboratory|Microbial Genome Sequencing Center|Kamil|USA  
>Spike|hCoV-19/Canada/ON-OICR-SLB2830/2020|2020-04-03|EPI\_ISL\_538356|Original|hCoV-19^^Ontario|Human|Kingston Health Sciences Centre / Queen's University|Ontario Institute for Cancer Research|de Borja|Canada  
>Spike|hCoV-19/Netherlands/UT-EMC-53/2020|2020-05-22|EPI\_ISL\_523530|Original|hCoV-19^^Utrecht|Human|Dutch COVID-19 response team|Erasmus Medical Center|Oude Munnink|Netherlands  
>Spike|hCoV-19/USA/CA-SEARCH-5545/2020|2020-12-01|EPI\_ISL\_755286|Original|hCoV-19^^California|Human|San Diego County Public Health Laboratory|Andersen lab at Scripps Research|Gangavarapu|USA  
>Spike|hCoV-19/DRC/4084/2020|2020-04-27|EPI\_ISL\_471407|Original|hCoV-19^^Kinshasa|Human|Viral Respiratory Lab|Pathogen Sequencing Lab|Lusamaki|Democratic Republic of the Congo  
>Spike|hCoV-19/Denmark/DCGC-4727/2020|2020-09-14|EPI\_ISL\_622166|Original|hCoV-19^^Syddanmark|Human|Department of Virus and Microbiological Special Diagnostics|Albertsen lab|Michaelsen|Denmark  
>Spike|hCoV-19/England/ALDP-A84C06/2020|2020-10-16|EPI\_ISL\_610604|Original|hCoV-19^^England|Human|Lighthouse Lab in Alderley Park|Wellcome Sanger Institute for the COVID-19 Genomics UK (COG-UK) consortium|Davies|United Kingdom  
>Spike|hCoV-19/England/ALDP-B75A85/2020|2020-11-12|EPI\_ISL\_664931|Original|hCoV-19^^England|Human|Quadram Institute Bioscience|COVID-19 Genomics UK (COG-UK) Consortium|Alikhan|United Kingdom  
>Spike|hCoV-19/Australia/VIC6461/2020|2020-07-22|EPI\_ISL\_521239|Original|hCoV-19^^Victoria|Human|Microbiological Diagnostic Unit - Public Health Laboratory (MDU-PHL) |MDU-PHL|Schultz|Australia  
>Spike|hCoV-19/England/QEUA-A60BF4/2020|2020-10-13|EPI\_ISL\_665387|Original|hCoV-19^^England|Human|Northumbria University / South Tees Hospitals NHS Foundation Trust / North Cumbria Integrated Care NHS Foundation Trust / North Tees and Hartlepool NHS Foundation Trust / Newcastle Hospitals NHS Foundation Trust|COVID-19 Genomics UK (COG-UK) Consortium|Bashton|United Kingdom  
>Spike|hCoV-19/England/20194008304/2020|2020-05-04|EPI\_ISL\_465607|Original|hCoV-19^^England|Human|Respiratory Virus Unit|Respiratory Virus Unit|Platt|United Kingdom  
>Spike|hCoV-19/Canada/MB-NML-583/2020|2020-03-31|EPI\_ISL\_582273|Original|hCoV-19^^Manitoba|Human|Cadham Provincial Laboratory|National Microbiology Laboratory (NML) |Majer|Canada

>Spike|hCoV-19/USA/MI-MDHHS-SC21078/2020|2020-03-29|EPI\_ISL\_507854|Original|hCoV-19^^Michigan|Human|Michigan Department of Health and Human Services|Michigan Department of Health and Human Services|Blankenship|USA

>Spike|hCoV-19/England/CAMC-C8391D/2020|2020-12-17|EPI\_ISL\_762549|Original|hCoV-19^^England|Human|Lighthouse Lab in Cambridge|Wellcome Sanger Institute for the COVID-19 Genomics UK (COG-UK) Consortium|Davies|United Kingdom

>Spike|hCoV-19/Singapore/113nan/2020|2020-03-17|EPI\_ISL\_538448|Original|hCoV-19^^Singapore|Human|Department of Laboratory Medicine|Department of Laboratory Medicine|Chen|Singapore

>Spike|hCoV-19/Japan/PG-4157/2020|2020-07-00|EPI\_ISL\_692396|Original|hCoV-19^^Japan|Human|Pathogen Genomics Center|Pathogen Genomics Center|Sekizuka|Japan

>Spike|hCoV-19/England/ALDP-B61FD8/2020|2020-11-08|EPI\_ISL\_656347|Original|hCoV-19^^England|Human|Lighthouse Lab in Alderley Park|Wellcome Sanger Institute for the COVID-19 Genomics UK (COG-UK) Consortium|Davies|United Kingdom

>Spike|hCoV-19/Spain/EX-IBV-005006/2020|2020-03-13|EPI\_ISL\_510315|Original|hCoV-19^^Extremadura|Human|Hospital San Pedro de Alc\u00e9ntara (C\u00e9rcer)|SeqCOVID-SPAIN consortium/IBV (CSIC)|Comas|Spain

>Spike|hCoV-19/Wales/PHWC-16A267/2020|2020-09-06|EPI\_ISL\_535222|Original|hCoV-19^^Wales|Human|Wales Specialist Virology Centre Sequencing lab|COVID-19 Genomics UK (COG-UK) Consortium|Moore|United Kingdom

>Spike|hCoV-19/England/QEUEH-768A5C/2020|2020-07-15|EPI\_ISL\_532969|Original|hCoV-19^^England|Human|Lighthouse Lab in Glasgow|Wellcome Sanger Institute for the COVID-19 Genomics UK (COG-UK) consortium|Davies|United Kingdom

>Spike|hCoV-19/Australia/VIC2686/2020|2020-07-01|EPI\_ISL\_521527|Original|hCoV-19^^Victoria|Human|Victorian Infectious Diseases Reference Laboratory (VIDRL)|VIDRL and MDU-PHL|Schultz|Australia

>Spike|hCoV-19/USA/IL-UW-2079/2020|2020-10-19|EPI\_ISL\_677484|Original|hCoV-19^^Illinois|Human|University of Wisconsin-Madison AIDS Vaccine Research Laboratories|University of Wisconsin-Madison AIDS Vaccine Research Laboratories|Baczenas|USA

>Spike|hCoV-19/USA/TX-HMH-3371/2020|2020-06-12|EPI\_ISL\_544155|Original|hCoV-19^^Texas|Human|Houston Methodist Hospital|Houston Methodist Hospital|Long|USA

>Spike|hCoV-19/Denmark/DCGC-18540/2020|2020-12-07|EPI\_ISL\_750030|Original|hCoV-19^^Hovedstaden|Human|Department of Virus and Microbiological Special Diagnostics|Albertsen Lab|Michaelsen|Denmark

>Spike|hCoV-19/Netherlands/NA\_587/2020|2020-00-00|EPI\_ISL\_460751|Original|hCoV-19^^Netherlands|Human|Dutch COVID-19 response team|Erasmus Medical Center|Oude Munnink|Netherlands

>Spike|hCoV-19/Wales/PHWC-33EEC/2020|2020-04-16|EPI\_ISL\_446839|Original|hCoV-19^^Wales|Human|Wales Specialist Virology Centre|Public Health Wales Microbiology Cardiff|Moore|United Kingdom

>Spike|hCoV-19/England/ALDP-9C539C/2020|2020-09-10|EPI\_ISL\_567875|Original|hCoV-19^^England|Human|Lighthouse Lab in Alderley Park|Wellcome Sanger Institute for the COVID-19 Genomics UK (COG-UK) consortium|Davies|United Kingdom

>Spike|hCoV-19/England/ALDP-AA48FD/2020|2020-10-21|EPI\_ISL\_624280|Original|hCoV-19^^England|Human|Lighthouse Lab in Alderley Park|Wellcome Sanger Institute for the COVID-19 Genomics UK (COG-UK) consortium|Davies|United Kingdom

>Spike|hCoV-19/Wales/PHWC-49C23C/2020|2020-12-07|EPI\_ISL\_742528|Original|hCoV-19^^Wales|Human|Wales Specialist Virology Centre Sequencing lab|COVID-19 Genomics UK (COG-UK) Consortium|Moore|United Kingdom

>Spike|hCoV-19/USA/LA-EVTL1130/2020|2020-12-07|EPI\_ISL\_768399|Original|hCoV-19^^Louisiana|Human|LSUHS Emerging Viral Threat Laboratory|Microbial Genome Sequencing Center|Kamil|USA

>Spike|hCoV-19/England/OXON-ACB05/2020|2020-04-06|EPI\_ISL\_448509|Original|hCoV-19^^England|Human|Oxford Viromics|COVID-19 Genomics UK (COG-UK) Consortium|Golubchik|United Kingdom

>Spike|hCoV-19/England/LIVE-1DDAC1/2020|2020-09-27|EPI\_ISL\_611743|Original|hCoV-19^^England|Human|Liverpool Clinical Laboratories|COVID-19 Genomics UK (COG-UK) Consortium|Haldenby|United Kingdom

>Spike|hCoV-19/USA/TX-HMH-MCoV-18067/2020|2020-11-16|EPI\_ISL\_784415|Original|hCoV-19^^Texas|Human|Houston Methodist Hospital|Houston Methodist Hospital|Long|USA

>Spike|hCoV-19/England/QEUH-B7C8C0/2020|2020-11-14|EPI\_ISL\_741798|Original|hCoV-19^^England|Human|Oxford Viromics|COVID-19 Genomics UK (COG-UK) Consortium|Golubchik|United Kingdom

>Spike|hCoV-19/Denmark/DCGC-4315/2020|2020-09-07|EPI\_ISL\_615752|Original|hCoV-19^^Nordjylland|Human|Department of Virus and Microbiological Special Diagnostics|Albertsen lab|Michaelsen|Denmark

>Spike|hCoV-19/USA/WA-UW-1574/2020|2020-03-19|EPI\_ISL\_423019|Original|hCoV-19^^Washington|Human|UW Virology Lab|UW Virology Lab|Roychoudhury|USA

>Spike|hCoV-19/Weifang/WF0012/2020|2020-02-00|EPI\_ISL\_413697|Original|hCoV-19^^Weifang|Human|Weifang Center for Disease Control and Prevention|Weifang Center for Disease Control and Prevention & BGI-Shenzhen|Li|China

>Spike|hCoV-19/England/QEUH-A76320/2020|2020-10-13|EPI\_ISL\_613317|Original|hCoV-19^^England|Human|Queens Medical Centre|COVID-19 Genomics UK (COG-UK) Consortium|Loose|United Kingdom

>Spike|hCoV-19/USA/TX-HMH-4078/2020|2020-06-18|EPI\_ISL\_543349|Original|hCoV-19^^Texas|Human|Houston Methodist Hospital|Houston Methodist Hospital|Long|USA

>Spike|hCoV-19/England/LIVE-9C0DC/2020|2020-04-01|EPI\_ISL\_449508|Original|hCoV-19^^England|Human|Liverpool Clinical Laboratories|COVID-19 Genomics UK (COG-UK) Consortium|Haldenby|United Kingdom

>Spike|hCoV-19/Denmark/DCGC-4064/2020|2020-09-14|EPI\_ISL\_622020|Original|hCoV-19^^Hovedstaden|Human|Department of Virus and Microbiological Special Diagnostics|Albertsen lab|Michaelsen|Denmark

>Spike|hCoV-19/England/ALDP-A68770/2020|2020-10-12|EPI\_ISL\_608691|Original|hCoV-19^^England|Human|Lighthouse Lab in Alderley Park|Wellcome Sanger Institute for the COVID-19 Genomics UK (COG-UK) consortium|Davies|United Kingdom

>Spike|hCoV-19/England/CAMC-B22911/2020|2020-11-01|EPI\_ISL\_647452|Original|hCoV-19^^England|Human|Lighthouse Lab in Cambridge|Wellcome Sanger Institute for the COVID-19 Genomics UK (COG-UK) Consortium|Davies|United Kingdom

>Spike|hCoV-19/Australia/VIC8417/2020|2020-07-24|EPI\_ISL\_564998|Original|hCoV-19^^Victoria|Human|Microbiological Diagnostic Unit - Public Health Laboratory (MDU-PHL) |MDU-PHL|Schultz|Australia

>Spike|hCoV-19/England/MILK-A7C9A0/2020|2020-10-16|EPI\_ISL\_607412|Original|hCoV-19^^England|Human|Lighthouse Lab in Milton Keynes|Wellcome Sanger Institute for the COVID-19 Genomics UK (COG-UK) consortium|Davies|United Kingdom

>Spike|hCoV-19/Australia/VIC15219/2020|2020-08-03|EPI\_ISL\_593198|Original|hCoV-19^^Victoria|Human|Microbiological Diagnostic Unit - Public Health Laboratory (MDU-PHL) |MDU-PHL|Schultz|Australia

>Spike|hCoV-19/England/ALDP-6CE92B/2020|2020-07-02|EPI\_ISL\_556215|Original|hCoV-19^^England|Human|Lighthouse Lab in Alderley Park|Wellcome Sanger Institute for the COVID-19 Genomics UK (COG-UK) consortium|Davies|United Kingdom

>Spike|hCoV-19/USA/FL-BPHL-1650/2020|2020-07-03|EPI\_ISL\_594339|Original|hCoV-19^^Florida|Human|Florida Bureau of Public Health Laboratories|Florida Bureau of Public Health Laboratories|Blanton|USA

>Spike|hCoV-19/Japan/PG-5933/2020|2020-00-00|EPI\_ISL\_689048|Original|hCoV-19^^Japan|Human|Gunma Prefectural Institute of Public Health and Environmental Sciences|Pathogen Genomics Center|Sekizuka|Japan

>Spike|hCoV-19/USA/TX-HMH-MCoV-19530/2020|2020-11-30|EPI\_ISL\_783906|Original|hCoV-19^^Texas|Human|Houston Methodist Hospital|Houston Methodist Hospital|Long|USA

>Spike|hCoV-19/England/ALDP-4F43A8/2020|2020-06-24|EPI\_ISL\_559225|Original|hCoV-19^^England|Human|Lighthouse Lab in Alderley Park|Wellcome Sanger Institute for the COVID-19 Genomics UK (COG-UK) consortium|Davies|United Kingdom

>Spike|hCoV-19/USA/TX-HMH-MCoV-18566/2020|2020-11-20|EPI\_ISL\_784914|Original|hCoV-19^^Texas|Human|Houston Methodist Hospital|Houston Methodist Hospital|Long|USA

>Spike|hCoV-19/USA/MD-MDH-0038/2020|2020-04-09|EPI\_ISL\_486917|Original|hCoV-19^^Maryland|Human|Maryland Department of Health|Maryland Department of Health|Keller|USA

>Spike|hCoV-19/Wales/PHWC-4A488A/2020|2020-12-14|EPI\_ISL\_764741|Original|hCoV-19^^Wales|Human|Wales Specialist Virology Centre Sequencing lab|COVID-19 Genomics UK (COG-UK) Consortium|Moore|United Kingdom

>Spike|hCoV-19/USA/WA-UW-22094/2020|2020-08-03|EPI\_ISL\_570624|Original|hCoV-19^^Washington|Human|UW Virology Lab|UW Virology Lab|Roychoudhury|USA

>Spike|hCoV-19/South Africa/KRISP-K002661/2020|2020-08-03|EPI\_ISL\_535529|Original|hCoV-19^^KwaZulu-Natal|Human|NHLS-IALCH|KRISP|de Oliveira|South Africa

>Spike|hCoV-19/USA/CA-CZB-1427/2020|2020-03-21|EPI\_ISL\_468398|Original|hCoV-19^^California|Human|County of San Luis Obispo Public Health Laboratory|Chan-Zuckerberg Biohub|Hao|USA

>Spike|hCoV-19/England/CAMC-9C05AA/2020|2020-09-08|EPI\_ISL\_573191|Original|hCoV-19^^England|Human|Oxford Viromics|COVID-19 Genomics UK (COG-UK) Consortium|Golubchik|United Kingdom

>Spike|hCoV-19/England/MILK-BB0189/2020|2020-11-18|EPI\_ISL\_720215|Original|hCoV-19^^England|Human|Lighthouse Lab in Milton Keynes|Wellcome Sanger Institute for the COVID-19 Genomics UK (COG-UK) Consortium|Davies|United Kingdom

>Spike|hCoV-19/England/ALDP-C57FB6/2020|2020-12-14|EPI\_ISL\_735943|Original|hCoV-19^^England|Human|Lighthouse Lab in Alderley Park|Wellcome Sanger Institute for the COVID-19 Genomics UK (COG-UK) Consortium|Davies|United Kingdom

>Spike|hCoV-19/England/PORT-2D54E8/2020|2020-00-00|EPI\_ISL\_765118|Original|hCoV-19^^England|Human|Centre for Enzyme Innovation|COVID-19 Genomics UK (COG-UK) Consortium|Robson|United Kingdom

>Spike|hCoV-19/USA/OR-OHSU-0540/2020|2020-06-15|EPI\_ISL\_525837|Original|hCoV-19^^Oregon|Human|OHSU Lab Services Molecular Microbiology Lab|Ginkgo Bioworks Clinical Laboratory|O'Roak|USA

>Spike|hCoV-19/England/QEUEH-B82557/2020|2020-11-14|EPI\_ISL\_661686|Original|hCoV-19^^England|Human|Lighthouse Lab in Glasgow|Wellcome Sanger Institute for the COVID-19 Genomics UK (COG-UK) Consortium|Davies|United Kingdom

>Spike|hCoV-19/Spain/CN-IBV-97006520/2020|2020-04-05|EPI\_ISL\_537725|Original|hCoV-19^^Canary Islands|Human|Hospital Universitario de Gran Canaria Dr. Negr\u00ededn|SeqCOVID-SPAIN consortium|IBV(CSIC)|Comas|Spain

>Spike|hCoV-19/Lithuania/MR-LUHS-Eilnrj22/2020|2020-11-00|EPI\_ISL\_770541|Original|hCoV-19^^Jonavos apskritis|Human|Private lab|Lithuanian University of Health Sciences|Zemaitis|Lithuania

>Spike|hCoV-19/Scotland/QEUEH-A1FBF4/2020|2020-10-01|EPI\_ISL\_599105|Original|hCoV-19^^Scotland|Human|Lighthouse Lab in Glasgow|Wellcome Sanger Institute for the COVID-19 Genomics UK (COG-UK) consortium|Davies|United Kingdom

>Spike|hCoV-19/USA/FL-BPHL-1102/2020|2020-08-04|EPI\_ISL\_526588|Original|hCoV-19^^Florida|Human|Florida Bureau of Public Health Laboratories|Florida Bureau of Public Health Laboratories|Blanton|USA

>Spike|hCoV-19/Bangladesh/CHRF-0010/2020|2020-05-03|EPI\_ISL\_468078|Original|hCoV-19^^Dhaka|Human|Child Health Research Foundation|Child Health Research Foundation|Saha|Bangladesh

>Spike|hCoV-19/England/ALDP-5ADA02/2020|2020-06-16|EPI\_ISL\_558721|Original|hCoV-19^^England|Human|Lighthouse Lab in Alderley Park|Wellcome Sanger Institute for the COVID-19 Genomics UK (COG-UK) consortium|Davies|United Kingdom

>Spike|hCoV-19/England/QEUEH-AA0017/2020|2020-10-20|EPI\_ISL\_652700|Original|hCoV-19^^England|Human|University of Exeter|COVID-19 Genomics UK (COG-UK) Consortium|Temperton|United Kingdom

>Spike|hCoV-19/England/ALDP-AA4F25/2020|2020-10-21|EPI\_ISL\_630839|Original|hCoV-19^^England|Human|Lighthouse Lab in Alderley Park|Wellcome Sanger Institute for the COVID-19 Genomics UK (COG-UK) consortium|Davies|United Kingdom

>Spike|hCoV-19/England/CAMC-B9A914/2020|2020-11-15|EPI\_ISL\_673323|Original|hCoV-19^^England|Human|Lighthouse Lab in Cambridge|Wellcome Sanger Institute for the COVID-19 Genomics UK (COG-UK) Consortium|Davies|United Kingdom

>Spike|hCoV-19/Kenya/C7603/2020|2020-05-16|EPI\_ISL\_568845|Original|hCoV-19^^Kwale|Human|KEMRI-Wellcome Trust Research Programme|KEMRI-CGMR-C Kilifi|KEMRI-Wellcome Trust Research Programme|KEMRI-CGMR-C Kilifi|Githinji|Kenya

>Spike|hCoV-19/England/MILK-99D807/2020|2020-08-30|EPI\_ISL\_550703|Original|hCoV-19^^England|Human|Lighthouse Lab in Milton Keynes|Wellcome Sanger Institute for the COVID-19 Genomics UK (COG-UK) consortium|Davies|United Kingdom

>Spike|hCoV-19/Australia/VIC2300/2020|2020-06-24|EPI\_ISL\_522021|Original|hCoV-19^^Victoria|Human|Microbiological Diagnostic Unit - Public Health Laboratory (MDU-PHL)|MDU-PHL|Schultz|Australia

>Spike|hCoV-19/Australia/VIC2069/2020|2020-06-14|EPI\_ISL\_480758|Original|hCoV-19^^Victoria|Human|Microbiological Diagnostic Unit - Public Health Laboratory (MDU-PHL)|MDU-PHL|Schultz|Australia

>Spike|hCoV-19/England/QEUEH-C4B771/2020|2020-12-13|EPI\_ISL\_769773|Original|hCoV-19^^England|Human|Lighthouse Lab in Glasgow|Wellcome Sanger Institute for the COVID-19 Genomics UK (COG-UK) Consortium|Davies|United Kingdom

>Spike|hCoV-19/Finland/24MS5H7/2020|2020-03-24|EPI\_ISL\_759817|Original|hCoV-19^^Uusimaa|Human|Department of Virology and Immunology|Department of Virology|Smura|Finland

>Spike|hCoV-19/England/CAMC-B98CE0/2020|2020-11-15|EPI\_ISL\_673626|Original|hCoV-19^^England|Human|Lighthouse Lab in Cambridge|Wellcome Sanger Institute for the COVID-19 Genomics UK (COG-UK) Consortium|Davies|United Kingdom

>Spike|hCoV-19/England/ALDP-501ED3/2020|2020-06-25|EPI\_ISL\_559178|Original|hCoV-19^^England|Human|Lighthouse Lab in Alderley Park|Wellcome Sanger Institute for the COVID-19 Genomics UK (COG-UK) consortium|Davies|United Kingdom

>Spike|hCoV-19/England/ALDP-A6EA53/2020|2020-10-15|EPI\_ISL\_607913|Original|hCoV-19^^England|Human|Lighthouse Lab in Alderley Park|Wellcome Sanger Institute for the COVID-19 Genomics UK (COG-UK) consortium|Davies|United Kingdom

>Spike|hCoV-19/Wales/PHWC-31F18/2020|2020-04-07|EPI\_ISL\_446585|Original|hCoV-19^^Wales|Human|Wales Specialist Virology Centre|Public Health Wales Microbiology Cardiff|Moore|United Kingdom

>Spike|hCoV-19/USA/MI-MDHHS-SC20819/2020|2020-05-13|EPI\_ISL\_471840|Original|hCoV-19^^Michigan|Human|Michigan Department of Health and Human Services|Michigan Department of Health and Human Services|Blankenship|USA

>Spike|hCoV-19/Beijing/Wuhan\_IME-BJ02/2020|2020-01-25|EPI\_ISL\_424356|unknown|hCoV-19^^Beijing|Human|Beijing Institute of Microbiology and Epidemiology|Beijing Institute of Microbiology and Epidemiology|Submitter|China

>Spike|hCoV-19/Denmark/DCGC-2046/2020|2020-04-13|EPI\_ISL\_619337|Original|hCoV-19^^Midtjylland|Human|Department of Virus and Microbiological Special Diagnostics|Albertsen lab|Michaelsen|Denmark

>Spike|hCoV-19/USA/AZ-TG664512/2020|2020-04-20|EPI\_ISL\_696134|Original|hCoV-19^^Arizona|Human|Sonora Quest Laboratories|TGen North|French|USA

>Spike|hCoV-19/Sweden/20-07044/2020|2020-04-05|EPI\_ISL\_445230|Original|hCoV-19^^Uppsala|Human|Uppsala Narakut Aleris|The Public Health Agency of Sweden|Svartstr\u00f6m|Sweden

>Spike|hCoV-19/Spain/MD-IBV-99012439/2020|2020-11-27|EPI\_ISL\_780052|Original|hCoV-19^^Madrid|Human|Hospital General Universitario Gregorio Mara\u00f1\u00f3n|SeqCOVID-SPAIN consortium|IBV (CSIC)|Comas|Spain

>Spike|hCoV-19/England/QEUEH-AD4C8F/2020|2020-10-26|EPI\_ISL\_634652|Original|hCoV-19^^England|Human|Lighthouse Lab in Glasgow|Wellcome Sanger Institute for the COVID-19 Genomics UK (COG-UK) consortium|Davies|United Kingdom

>Spike|hCoV-19/Portugal/PT0680/2020|2020-03-25|EPI\_ISL\_510939|Original|hCoV-19^^Portugal|Human|Instituto Nacional de Saude (INSA)|Instituto Nacional de Saude (INSA)|Borges|Portugal

>Spike|hCoV-19/USA/CA-ALSR-4649/2020|2020-09-04|EPI\_ISL\_667056|Original|hCoV-19^^California|Human|San Diego County Public Health Laboratory|Andersen lab at Scripps Research|Gangavarapu|USA

>Spike|hCoV-19/England/CAMC-B20C0B/2020|2020-11-02|EPI\_ISL\_647729|Original|hCoV-19^^England|Human|Lighthouse Lab in Cambridge|Wellcome Sanger Institute for the COVID-19 Genomics UK (COG-UK) Consortium|Davies|United Kingdom

>Spike|hCoV-19/England/MILK-BAAFA6/2020|2020-11-17|EPI\_ISL\_681614|Original|hCoV-19^^England|Human|Lighthouse Lab in Milton Keynes|Wellcome Sanger Institute for the COVID-19 Genomics UK (COG-UK) Consortium|Davies|United Kingdom

>Spike|hCoV-19/Australia/VIC16199/2020|2020-10-03|EPI\_ISL\_640588|Original|hCoV-19^^Victoria|Human|Victorian Infectious Diseases Reference Laboratory (VIDRL)|VIDRL and MDU-PHL|Schultz|Australia

>Spike|hCoV-19/England/QEUEH-795FB1/2020|2020-07-15|EPI\_ISL\_533019|Original|hCoV-19^^England|Human|Lighthouse Lab in Glasgow|Wellcome Sanger Institute for the COVID-19 Genomics UK (COG-UK) consortium|Davies|United Kingdom

>Spike|hCoV-19/England/CAMB-7AF6E/2020|2020-04-10|EPI\_ISL\_433899|Original|hCoV-19^^England|Human|Department of Pathology|COVID-19 Genomics UK (COG-UK) Consortium|Meredith|United Kingdom

>Spike|hCoV-19/USA/CA-CDC-4730/2020|2020-06-16|EPI\_ISL\_535701|Original|hCoV-19^^California|Human|CDPH|Pathogen Discovery|Queen|USA

>Spike|hCoV-19/England/LOND-124D1B4/2020|2020-03-23|EPI\_ISL\_507063|Original|hCoV-19^^England|Human|University College London Hospital|COVID-19 Genomics UK (COG-UK) Consortium|Byott|United Kingdom

>Spike|hCoV-19/Germany/ChVir20311/2020|2020-11-16|EPI\_ISL\_729646|Original|hCoV-19^^Germany|Human|A. Krumbholz|Charit\u00e9 Universit\u00e4tsmedizin Berlin|Muehlemann|Germany

>Spike|hCoV-19/Switzerland/TG-ETHZ-210010/2020|2020-07-20|EPI\_ISL\_511985|Original|hCoV-19^^Thurgau|Human|Viollier AG|Department of Biosystems Science and Engineering|Nadeau|Switzerland

>Spike|hCoV-19/Canada/BC\_12246693/2020|2020-04-00|EPI\_ISL\_467333|Original|hCoV-19^^British Columbia|Human|BCCDC Public Health Laboratory|BCCDC Public Health Laboratory|Harrigan|Canada

>Spike|hCoV-19/Hong Kong/VM20010467/2020|2020-04-08|EPI\_ISL\_463322|Original|hCoV-19^^Hong Kong|Human|North Lantau Hospital|Hong Kong Department of Health|Mak|China

>Spike|hCoV-19/Denmark/DCGC-19048/2020|2020-12-07|EPI\_ISL\_748720|Original|hCoV-19^^Hovedstaden|Human|Department of Virus and Microbiological Special Diagnostics|Albertsen Lab|Michaelsen|Denmark

>Spike|hCoV-19/England/LIVE-A0758/2020|2020-06-03|EPI\_ISL\_472132|Original|hCoV-19^^England|Human|Liverpool Clinical Laboratories|COVID-19 Genomics UK (COG-UK) Consortium|Haldenby|United Kingdom

>Spike|hCoV-19/England/20170000704/2020|2020-04-20|EPI\_ISL\_465262|Original|hCoV-19^^England|Human|Respiratory Virus Unit|Respiratory Virus Unit|Platt|United Kingdom

>Spike|hCoV-19/Canada/ON-S1227/2020|2020-04-02|EPI\_ISL\_586302|Original|hCoV-19^^Ontario|Human|Toronto Invasive Bacterial Diseases Network|McMaster University|McArthur|Canada

>Spike|hCoV-19/USA/MA-MASPHL-00527/2020|2020-05-05|EPI\_ISL\_693051|Original|hCoV-19^^Massachusetts|Human|Massachusetts State Public Health Laboratory|Massachusetts State Public Health Laboratory|Lang|USA

>Spike|hCoV-19/USA/MI-MDHHS-SC20663/2020|2020-04-29|EPI\_ISL\_471687|Original|hCoV-19^^Michigan|Human|Michigan Department of Health and Human Services|Michigan Department of Health and Human Services|Blankenship|USA

>Spike|hCoV-19/England/ALDP-C3BD36/2020|2020-12-11|EPI\_ISL\_731728|Original|hCoV-19^^England|Human|Lighthouse Lab in Alderley Park|Wellcome Sanger Institute for the COVID-19 Genomics UK (COG-UK) Consortium|Davies|United Kingdom

>Spike|hCoV-19/England/EXET-137843/2020|2020-05-03|EPI\_ISL\_471988|Original|hCoV-19^^England|Human|University of Exeter|COVID-19 Genomics UK (COG-UK) Consortium|Temperton|United Kingdom

>Spike|hCoV-19/USA/WI-UW-1070/2020|2020-08-05|EPI\_ISL\_516496|Original|hCoV-19^^Wisconsin|Human|University of Wisconsin-Madison AIDS Vaccine Research Laboratories|University of Wisconsin-Madison AIDS Vaccine Research Laboratories|Baczenas|USA

>Spike|hCoV-19/Australia/VIC4287/2020|2020-07-14|EPI\_ISL\_519615|Original|hCoV-19^^Victoria|Human|Microbiological Diagnostic Unit - Public Health Laboratory (MDU-PHL)|MDU-PHL|Schultz|Australia

>Spike|hCoV-19/England/EXET-13B038/2020|2020-11-10|EPI\_ISL\_665107|Original|hCoV-19^^England|Human|University of Exeter|COVID-19 Genomics UK (COG-UK) Consortium|Temperton|United Kingdom



>Spike|hCoV-19/United Arab Emirates/0244/2020|2020-05-17|EPI\_ISL\_698426|Original|hCoV-19^^Abu Dhabi|Human|Group 42 (G42) Healthcare|G42 Healthcare|Ogrodzki|United Arab Emirates

>Spike|hCoV-19/Luxembourg/LNS0613111/2020|2020-11-17|EPI\_ISL\_739805|Original|hCoV-19^^Luxembourg|Human|Laboratoire national de sant\u00e9|Laboratoire national de sant\u00e9|Wienecke-Baldacchino|Luxembourg

>Spike|hCoV-19/England/ALDP-A2E05D/2020|2020-10-06|EPI\_ISL\_586908|Original|hCoV-19^^England|Human|Lighthouse Lab in Alderley Park|Wellcome Sanger Institute for the COVID-19 Genomics UK (COG-UK) consortium|Davies|United Kingdom

>Spike|hCoV-19/England/C200029520/2020|2020-10-09|EPI\_ISL\_636703|Original|hCoV-19^^England|Human|Respiratory Virus Unit|Respiratory Virus Unit|Platt|United Kingdom

>Spike|hCoV-19/Denmark/DCGC-18902/2020|2020-12-07|EPI\_ISL\_748178|Original|hCoV-19^^Hovedstaden|Human|Department of Virus and Microbiological Special Diagnostics|Albertsen Lab|Michaelsen|Denmark

>Spike|hCoV-19/USA/AK-PHL648/2020|2020-06-26|EPI\_ISL\_586251|Original|hCoV-19^^Alaska|Human|Alaska State Virology Laboratory|Alaska State Virology Laboratory|Chen|USA

>Spike|hCoV-19/England/NORW-22233A/2020|2020-12-21|EPI\_ISL\_764487|Original|hCoV-19^^England|Human|Quadram Institute Bioscience|COVID-19 Genomics UK (COG-UK) Consortium|Alikhan|United Kingdom

>Spike|hCoV-19/Oman/205036690/2020|2020-05-17|EPI\_ISL\_491981|Original|hCoV-19^^Muscat|Human|Oman-NIC|Department of\u00a0Microbiology\u00a0and Immunology-SQUH|AL Zadjali|Oman

>Spike|hCoV-19/Latvia/103/2020|2020-08-05|EPI\_ISL\_515190|Original|hCoV-19^^Latvia|Human|E. Gulbja Laboratorija|Latvian Biomedical Research and Study Centre|Zrelavs|Latvia

>Spike|hCoV-19/Denmark/DCGC-14185/2020|2020-11-30|EPI\_ISL\_711104|Original|hCoV-19^^Sjaelland|Human|Department of Virus and Microbiological Special Diagnostics|Albertsen Lab|Michaelsen|Denmark

>Spike|hCoV-19/Denmark/DCGC-17062/2020|2020-12-14|EPI\_ISL\_750218|Original|hCoV-19^^Sjaelland|Human|Department of Virus and Microbiological Special Diagnostics|Albertsen Lab|Michaelsen|Denmark

>Spike|hCoV-19/England/QEUEH-AD49C4/2020|2020-10-26|EPI\_ISL\_634159|Original|hCoV-19^^England|Human|Lighthouse Lab in Glasgow|Wellcome Sanger Institute for the COVID-19 Genomics UK (COG-UK) consortium|Davies|United Kingdom

>Spike|hCoV-19/Turkey/6224-Ankara1034/2020|2020-03-17|EPI\_ISL\_417413|Original|hCoV-19^^Turkey|Human|Ministry of Health Turkey|Ministry of Health Turkey|Bayrakdar|Turkey

>Spike|hCoV-19/Denmark/DCGC-2195/2020|2020-08-10|EPI\_ISL\_617496|Original|hCoV-19^^Nordjylland|Human|Department of Virus and Microbiological Special Diagnostics|Albertsen lab|Michaelsen|Denmark

>Spike|hCoV-19/USA/CA-ALSR-1498/2020|2020-04-01|EPI\_ISL\_494623|Original|hCoV-19^^California|Human|San Diego County Public Health Laboratory|Andersen lab at Scripps Research|Gangavarapu|USA

>Spike|hCoV-19/England/MILK-975920/2020|2020-08-20|EPI\_ISL\_552674|Original|hCoV-19^^England|Human|Lighthouse Lab in Milton Keynes|Wellcome Sanger Institute for the COVID-19 Genomics UK (COG-UK) consortium|Davies|United Kingdom

>Spike|hCoV-19/England/CAMC-BBCD10/2020|2020-11-21|EPI\_ISL\_679276|Original|hCoV-19^^England|Human|Queens Medical Centre|COVID-19 Genomics UK (COG-UK) Consortium|Loose|United Kingdom

>Spike|hCoV-19/Denmark/DCGC-16570/2020|2020-11-16|EPI\_ISL\_714843|Original|hCoV-19^^Sjaelland|Human|Department of Virus and Microbiological Special Diagnostics|Albertsen Lab|Michaelsen|Denmark

>Spike|hCoV-19/Indonesia/JK-EIJK42/2020|2020-06-03|EPI\_ISL\_574613|Original|hCoV-19^^Jakarta|Human|RS Harapan Bunda|Eijkman Institute for Molecular Biology|Soebandrio|Indonesia

>Spike|hCoV-19/Wales/PHWC-48E394/2020|2020-11-12|EPI\_ISL\_680849|Original|hCoV-19^^Wales|Human|Wales Specialist Virology Centre Sequencing lab|COVID-19 Genomics UK (COG-UK) Consortium|Moore|United Kingdom

>Spike|hCoV-19/England/LIVE-DC982C/2020|2020-12-04|EPI\_ISL\_705304|Original|hCoV-19^^England|Human|Liverpool Clinical Laboratories|COVID-19 Genomics UK (COG-UK) Consortium|Haldenby|United Kingdom

>Spike|hCoV-19/USA/NY-NYUMC182/2020|2020-04-01|EPI\_ISL\_427478|Original|hCoV-19^^New York|Human|NYU Langone Health|Departments of Pathology and Medicine|Maurano|USA

>Spike|hCoV-19/USA/LA-EVTL181/2020|2020-05-15|EPI\_ISL\_574316|Original|hCoV-19^^Louisiana|Human|LSUHS Emerging Viral Threat Laboratory|Microbial Genome Sequencing Center|Kamil|USA

>Spike|hCoV-19/France/PAC-IHU-1524/2020|2020-08-12|EPI\_ISL\_569188|Original|hCoV-19^^Provence-Alpes-C\u00f4te-d\u2019Azur|Human|MEPHI|MEPHI|Levasseur|France

>Spike|hCoV-19/England/CAMC-B7AF18/2020|2020-11-12|EPI\_ISL\_723969|Original|hCoV-19^^England|Human|Oxford Viromics|COVID-19 Genomics UK (COG-UK) Consortium|Golubchik|United Kingdom

>Spike|hCoV-19/Netherlands/ZH-EMC-838/2020|2020-10-05|EPI\_ISL\_632344|Original|hCoV-19^^Zuid Holland|Human|Dutch COVID-19 response team|Erasmus Medical Center|Oude Munnink|Netherlands

>Spike|hCoV-19/England/CAMB-1BBB3F/2020|2020-11-17|EPI\_ISL\_679196|Original|hCoV-19^^England|Human|Department of Pathology|COVID-19 Genomics UK (COG-UK) Consortium|Goodfellow|United Kingdom

>Spike|hCoV-19/Wales/PHWC-4833BD/2020|2020-10-21|EPI\_ISL\_627812|Original|hCoV-19^^Wales|Human|Wales Specialist Virology Centre Sequencing lab|COVID-19 Genomics UK (COG-UK) Consortium|Moore|United Kingdom

>Spike|hCoV-19/Kazakhstan/21927/2020|2020-04-22|EPI\_ISL\_454503|Original|hCoV-19^^Nur-Sultan|Human|RSE \National Center for Biotechnology\|RSE \National Center for Biotechnology\|Kalendar|Kazakhstan

>Spike|hCoV-19/Denmark/DCGC-11745/2020|2020-10-26|EPI\_ISL\_671109|Original|hCoV-19^^Syddanmark|Human|Department of Virus and Microbiological Special Diagnostics|Albertsen Lab|Michaelsen|Denmark

>Spike|hCoV-19/England/20104014004/2020|2020-03-02|EPI\_ISL\_464330|Original|hCoV-19^^England|Human|Respiratory Virus Unit|Respiratory Virus Unit|Platt|United Kingdom

>Spike|hCoV-19/England/CAMC-B34A55/2020|2020-11-05|EPI\_ISL\_659654|Original|hCoV-19^^England|Human|Lighthouse Lab in Cambridge|Wellcome Sanger Institute for the COVID-19 Genomics UK (COG-UK) Consortium|Davies|United Kingdom

>Spike|hCoV-19/Spain/PV-IBV-001574/2020|2020-03-14|EPI\_ISL\_467180|Original|hCoV-19^^Basque Country|Human|Hospital Universitario Araba. Vitoria-Gasteiz|SeqCOVID-SPAIN consortium|IBV (CSIC)|Comas|Spain

>Spike|hCoV-19/USA/WA-UW-4664/2020|2020-04-06|EPI\_ISL\_513635|Original|hCoV-19^^Washington|Human|University of Washington Virology Lab|University of Washington Virology Lab|Roychoudhury|USA

>Spike|hCoV-19/Belgium/ULG-10367/2020|2020-08-07|EPI\_ISL\_540534|Original|hCoV-19^^Li\u00e8ge|Human|Department of Clinical Microbiology|GIGA Medical Genomics|Durkin|Belgium

>Spike|hCoV-19/Denmark/DCGC-21441/2020|2020-12-21|EPI\_ISL\_758167|Original|hCoV-19^^Hovedstaden|Human|Department of Virus and Microbiological Special Diagnostics|Albertsen Lab|Michaelsen|Denmark

>Spike|hCoV-19/Japan/PG-1647/2020|2020-04-00|EPI\_ISL\_685253|Original|hCoV-19^^Japan|Human|Pathogen Genomics Center|Pathogen Genomics Center|Sekizuka|Japan

>Spike|hCoV-19/USA/WI-UW-645/2020|2020-06-26|EPI\_ISL\_491336|Original|hCoV-19^^Wisconsin|Human|University of Wisconsin-Madison AIDS Vaccine Research Laboratories|University of Wisconsin-Madison AIDS Vaccine Research Laboratories|Baczenas|USA

>Spike|hCoV-19/Japan/PG-2778/2020|2020-06-00|EPI\_ISL\_690905|Original|hCoV-19^^Japan|Human|Tokyo Metropolitan Institute of Public Health|Pathogen Genomics Center|Sekizuka|Japan

>Spike|hCoV-19/Australia/VIC9133/2020|2020-08-09|EPI\_ISL\_565403|Original|hCoV-19^^Victoria|Human|Victorian Infectious Diseases Reference Laboratory (VIDRL)|VIDRL and MDU-PHL|Schultz|Australia

>Spike|hCoV-19/USA/TX-HMH-3138/2020|2020-06-11|EPI\_ISL\_544020|Original|hCoV-19^^Texas|Human|Houston Methodist Hospital|Houston Methodist Hospital|Long|USA

>Spike|hCoV-19/USA/MI-MDHHS-SC21178/2020|2020-07-06|EPI\_ISL\_507435|Original|hCoV-19^^Michigan|Human|Michigan Department of Health and Human Services|Michigan Department of Health and Human Services|Blankenship|USA

>Spike|hCoV-19/USA/WI-UW-1558/2020|2020-09-15|EPI\_ISL\_605436|Original|hCoV-19^^Wisconsin|Human|University of Wisconsin-Madison AIDS Vaccine Research Laboratories|University of Wisconsin-Madison AIDS Vaccine Research Laboratories|Baczenas|USA

>Spike|hCoV-19/England/MILK-957A7C/2020|2020-06-11|EPI\_ISL\_554231|Original|hCoV-19^^England|Human|Lighthouse Lab in Milton Keynes|Wellcome Sanger Institute for the COVID-19 Genomics UK (COG-UK) consortium|Davies|United Kingdom

>Spike|hCoV-19/England/ALDP-B5C43B/2020|2020-11-10|EPI\_ISL\_655968|Original|hCoV-19^^England|Human|Lighthouse Lab in Alderley Park|Wellcome Sanger Institute for the COVID-19 Genomics UK (COG-UK) Consortium|Davies|United Kingdom

>Spike|hCoV-19/Wales/PHWC-48F1F3/2020|2020-11-07|EPI\_ISL\_681059|Original|hCoV-19^^Wales|Human|Wales Specialist Virology Centre Sequencing lab|COVID-19 Genomics UK (COG-UK) Consortium|Moore|United Kingdom

>Spike|hCoV-19/England/NOTT-111EE3/2020|2020-05-02|EPI\_ISL\_472422|Original|hCoV-19^^England|Human|Queens Medical Centre|COVID-19 Genomics UK (COG-UK) Consortium|Loose|United Kingdom

>Spike|hCoV-19/USA/TX-HMH-MCoV-19563/2020|2020-11-30|EPI\_ISL\_783935|Original|hCoV-19^^Texas|Human|Houston Methodist Hospital|Houston Methodist Hospital|Long|USA

>Spike|hCoV-19/England/MILK-9AB657/2020|2020-08-31|EPI\_ISL\_549451|Original|hCoV-19^^England|Human|Oxford Viromics|COVID-19 Genomics UK (COG-UK) Consortium|Golubchik|United Kingdom

>Spike|hCoV-19/Scotland/EDB4507/2020|2020-05-05|EPI\_ISL\_456946|Original|hCoV-19^^Scotland|Human|Virology Department|COVID-19 Genomics UK (COG-UK) Consortium|Williams|United Kingdom

>Spike|hCoV-19/Scotland/QEUH-A0BD9B/2020|2020-10-03|EPI\_ISL\_599385|Original|hCoV-19^^Scotland|Human|Lighthouse Lab in Glasgow|Wellcome Sanger Institute for the COVID-19 Genomics UK (COG-UK) consortium|Davies|United Kingdom

>Spike|hCoV-19/Scotland/EDB9048/2020|2020-10-31|EPI\_ISL\_652038|Original|hCoV-19^^Scotland|Human|Virology Department|COVID-19 Genomics UK (COG-UK) Consortium|McHugh|United Kingdom

>Spike|hCoV-19/USA/MI-MDHHS-SC22134/2020|2020-10-19|EPI\_ISL\_614185|Original|hCoV-19^^Michigan|Human|Michigan Department of Health and Human Services|Michigan Department of Health and Human Services|Jacob|USA

>Spike|hCoV-19/USA/AZ-TG276476/2020|2020-04-13|EPI\_ISL\_694105|Original|hCoV-19^^Arizona|Human|AZ SPHL|TGen North|French|USA

>Spike|hCoV-19/England/LIVE-DB7D9B/2020|2020-10-26|EPI\_ISL\_651288|Original|hCoV-19^^England|Human|Liverpool Clinical Laboratories|COVID-19 Genomics UK (COG-UK) Consortium|Haldenby|United Kingdom

>Spike|hCoV-19/Scotland/CVR2298/2020|2020-04-12|EPI\_ISL\_484574|Original|hCoV-19^^Scotland|Human|West of Scotland Specialist Virology Centre|COVID-19 Genomics UK (COG-UK) Consortium|Robertson|United Kingdom

>Spike|hCoV-19/Japan/PG-5308/2020|2020-08-00|EPI\_ISL\_690411|Original|hCoV-19^^Japan|Human|Pathogen Genomics Center|Pathogen Genomics Center|Sekizuka|Japan

>Spike|hCoV-19/England/LIVE-DCA472/2020|2020-12-06|EPI\_ISL\_724364|Original|hCoV-19^^England|Human|Liverpool Clinical Laboratories|COVID-19 Genomics UK (COG-UK) Consortium|Haldenby|United Kingdom

>Spike|hCoV-19/Belgium/ULG-10305/2020|2020-07-23|EPI\_ISL\_540472|Original|hCoV-19^^Li\u00e8ge|Human|Department of Clinical Microbiology|GIGA Medical Genomics|Durkin|Belgium

>Spike|hCoV-19/England/CAMC-B234E2/2020|2020-11-02|EPI\_ISL\_651730|Original|hCoV-19^^England|Human|Virology Department|COVID-19 Genomics UK (COG-UK) Consortium|de Silva|United Kingdom

>Spike|hCoV-19/England/LIVE-A695C/2020|2020-03-16|EPI\_ISL\_499757|Original|hCoV-19^^England|Human|Liverpool Clinical Laboratories|COVID-19 Genomics UK (COG-UK) Consortium|Haldenby|United Kingdom

>Spike|hCoV-19/England/MILK-A7D374/2020|2020-10-13|EPI\_ISL\_606420|Original|hCoV-19^^England|Human|Lighthouse Lab in Milton Keynes|Wellcome Sanger Institute for the COVID-19 Genomics UK (COG-UK) consortium|Davies|United Kingdom

>Spike|hCoV-19/England/CAMB-84848/2020|2020-03-04|EPI\_ISL\_440518|Original|hCoV-19^^England|Human|Department of Pathology|Wellcome Sanger Institute for the COVID-19 Genomics UK (COG-UK) consortium|Amato|United Kingdom

>Spike|hCoV-19/England/20148044604/2020|2020-04-02|EPI\_ISL\_423592|Original|hCoV-19^^England|Human|Respiratory Virus Unit|Respiratory Virus Unit|Platt|United Kingdom

>Spike|hCoV-19/New Zealand/20VR3202/2020|2020-03-31|EPI\_ISL\_579487|Original|hCoV-19^^Canterbury|Human|Canterbury Health Laboratories|Institute of Environmental Science and Research (ESR)|Wang|New Zealand

>Spike|hCoV-19/Switzerland/ZH-ETHZ-300235/2020|2020-09-30|EPI\_ISL\_603268|Original|hCoV-19^^Zurich|Human|Viollier AG|Department of Biosystems Science and Engineering|Nadeau|Switzerland

>Spike|hCoV-19/Australia/VIC16732/2020|2020-08-08|EPI\_ISL\_663557|Original|hCoV-19^^Victoria|Human|Microbiological Diagnostic Unit - Public Health Laboratory (MDU-PHL)|MDU-PHL|Schultz|Australia

>Spike|hCoV-19/England/QEUA-B68B46/2020|2020-11-11|EPI\_ISL\_655224|Original|hCoV-19^^England|Human|Lighthouse Lab in Glasgow|Wellcome Sanger Institute for the COVID-19 Genomics UK (COG-UK) Consortium|Davies|United Kingdom

>Spike|hCoV-19/England/20139057704/2020|2020-03-28|EPI\_ISL\_420722|Original|hCoV-19^^England|Human|Respiratory Virus Unit|Respiratory Virus Unit|Platt|United Kingdom

>Spike|hCoV-19/Scotland/QEUA-A9D174/2020|2020-10-20|EPI\_ISL\_652660|Original|hCoV-19^^Scotland|Human|Queens Medical Centre|COVID-19 Genomics UK (COG-UK) Consortium|Loose|United Kingdom

>Spike|hCoV-19/USA/UT-098/2020|2020-03-14|EPI\_ISL\_430036|Original|hCoV-19^^Utah|Human|Utah Public Health Laboratory|Utah Public Health Laboratory|Young|USA

>Spike|hCoV-19/England/NOTT-112A84/2020|2020-04-23|EPI\_ISL\_493579|Original|hCoV-19^^England|Human|Lincolnshire Hospitals and DeepSeq Nottingham|COVID-19 Genomics UK (COG-UK) Consortium|Loose|United Kingdom

>Spike|hCoV-19/England/BRIS-13009D/2020|2020-04-11|EPI\_ISL\_492625|Original|hCoV-19^^England|Human|PHE South West Regional Laboratory|Wellcome Sanger Institute for the COVID-19 Genomics UK (COG-UK) consortium|Davies|United Kingdom

>Spike|hCoV-19/Australia/VIC12056/2020|2020-07-23|EPI\_ISL\_591910|Original|hCoV-19^^Victoria|Human|Microbiological Diagnostic Unit - Public Health Laboratory (MDU-PHL)|MDU-PHL|Schultz|Australia

>Spike|hCoV-19/England/QEUA-AD0861/2020|2020-10-24|EPI\_ISL\_633706|Original|hCoV-19^^England|Human|Lighthouse Lab in Glasgow|Wellcome Sanger Institute for the COVID-19 Genomics UK (COG-UK) consortium|Davies|United Kingdom

>Spike|hCoV-19/England/CAMB-7C755/2020|2020-04-05|EPI\_ISL\_442211|Original|hCoV-19^^England|Human|Department of Pathology|Wellcome Sanger Institute for the COVID-19 Genomics UK (COG-UK) consortium|Amato|United Kingdom

>Spike|hCoV-19/Scotland/CVR1397/2020|2020-04-01|EPI\_ISL\_526455|Original|hCoV-19^^Scotland|Human|West of Scotland Specialist Virology Centre|COVID-19 Genomics UK (COG-UK) Consortium|Robertson|United Kingdom

>Spike|hCoV-19/Denmark/DCGC-15714/2020|2020-11-23|EPI\_ISL\_713113|Original|hCoV-19^^Hovedstaden|Human|Department of Virus and Microbiological Special Diagnostics|Albertsen Lab|Michaelsen|Denmark

>Spike|hCoV-19/Scotland/QEUA-A4B315/2020|2020-10-08|EPI\_ISL\_628465|Original|hCoV-19^^Scotland|Human|Oxford Viromics|COVID-19 Genomics UK (COG-UK) Consortium|Golubchik|United Kingdom

>Spike|hCoV-19/USA/HI-H200412/2020|2020-08-06|EPI\_ISL\_752956|Original|hCoV-19^^Hawaii|Human|State Laboratories Division|State Laboratories Division|Sultana|USA

>Spike|hCoV-19/Denmark/DCGC-1269/2020|2020-06-08|EPI\_ISL\_618058|Original|hCoV-19^^Nordjylland|Human|Department of Virus and Microbiological Special Diagnostics|Albertsen lab|Michaelsen|Denmark

>Spike|hCoV-19/Scotland/EDB8759/2020|2020-10-25|EPI\_ISL\_651366|Original|hCoV-19^^Scotland|Human|Virology Department|COVID-19 Genomics UK (COG-UK) Consortium|McHugh|United Kingdom

>Spike|hCoV-19/England/ALDP-94FC62/2020|2020-06-15|EPI\_ISL\_555298|Original|hCoV-19^^England|Human|Lighthouse Lab in Alderley Park|Wellcome Sanger Institute for the COVID-19 Genomics UK (COG-UK) consortium|Davies|United Kingdom

>Spike|hCoV-19/England/CAMC-AAFB62/2020|2020-10-23|EPI\_ISL\_623444|Original|hCoV-19^^England|Human|Lighthouse Lab in Cambridge|Wellcome Sanger Institute for the COVID-19 Genomics UK (COG-UK) consortium|Davies|United Kingdom

>Spike|hCoV-19/USA/ID-UW-2173/2020|2020-03-23|EPI\_ISL\_529160|Original|hCoV-19^^Idaho|Human|University of Washington|University of Washington|Roychoudhury|USA

>Spike|hCoV-19/England/QEUA-AD669E/2020|2020-10-26|EPI\_ISL\_634211|Original|hCoV-19^^England|Human|Lighthouse Lab in Glasgow|Wellcome Sanger Institute for the COVID-19 Genomics UK (COG-UK) consortium|Davies|United Kingdom

>Spike|hCoV-19/Spain/AN-IBV-001892/2020|2020-03-12|EPI\_ISL\_452456|Original|hCoV-19^^Andalucia|Human|Hospital Universitario Puerta del Mar de C\u00e0ldiz - INIBICA|SeqCOVID-SPAIN consortium/IBV (CSIC)|Comas|Spain

>Spike|hCoV-19/United Arab Emirates/0151/2020|2020-05-18|EPI\_ISL\_698338|Original|hCoV-19^^Abu Dhabi|Human|Group 42 (G42) Healthcare|G42 Healthcare|Ogrodzki|United Arab Emirates

>Spike|hCoV-19/USA/CA-CZB-11821/2020|2020-10-02|EPI\_ISL\_625659|Original|hCoV-19^^California|Human|Orange County Public Health Lab|Chan-Zuckerberg Biohub|Bhatt|USA

>Spike|hCoV-19/England/GSTT-265D28A/2020|2020-03-16|EPI\_ISL\_483934|Original|hCoV-19^^England|Human|Centre for Clinical Infection and Diagnostics Research and Genomics Innovation Unit|COVID-19 Genomics UK (COG-UK) Consortium|Awan|United Kingdom

>Spike|hCoV-19/Gibraltar/205000669/2020|2020-12-00|EPI\_ISL\_709995|Original|hCoV-19^^Gibraltar|Human|Microbiology|Respiratory Virus Unit|Platt|Gibraltar

>Spike|hCoV-19/Japan/PG-8720/2020|2020-08-00|EPI\_ISL\_686316|Original|hCoV-19^^Japan|Human|Pathogen Genomics Center|Pathogen Genomics Center|Sekizuka|Japan

>Spike|hCoV-19/USA/TX-HMH-MCoV-8425/2020|2020-07-01|EPI\_ISL\_784390|Original|hCoV-19^^Texas|Human|Houston Methodist Hospital|Houston Methodist Hospital|Long|USA

>Spike|hCoV-19/USA/TX-HMH-MCoV-15295/2020|2020-10-19|EPI\_ISL\_786779|Original|hCoV-19^^Texas|Human|Houston Methodist Hospital|Houston Methodist Hospital|Long|USA

>Spike|hCoV-19/England/CAMC-B52286/2020|2020-11-08|EPI\_ISL\_656722|Original|hCoV-19^^England|Human|Lighthouse Lab in Cambridge|Wellcome Sanger Institute for the COVID-19 Genomics UK (COG-UK) Consortium|Davies|United Kingdom

>Spike|hCoV-19/Japan/PG-1132/2020|2020-04-00|EPI\_ISL\_684742|Original|hCoV-19^^Japan|Human|Pathogen Genomics Center|Pathogen Genomics Center|Sekizuka|Japan

>Spike|hCoV-19/Denmark/DCGC-17012/2020|2020-12-14|EPI\_ISL\_750708|Original|hCoV-19^^Midtjylland|Human|Department of Virus and Microbiological Special Diagnostics|Albertsen Lab|Michaelsen|Denmark

>Spike|hCoV-19/Scotland/QEUA-A1FE19/2020|2020-10-01|EPI\_ISL\_599136|Original|hCoV-19^^Scotland|Human|Lighthouse Lab in Glasgow|Wellcome Sanger Institute for the COVID-19 Genomics UK (COG-UK) consortium|Davies|United Kingdom

>Spike|hCoV-19/Denmark/DCGC-1437/2020|2020-03-23|EPI\_ISL\_622445|Original|hCoV-19^^Hovedstaden|Human|Department of Virus and Microbiological Special Diagnostics|Albertsen lab|Michaelsen|Denmark

>Spike|hCoV-19/Canada/MB-NML-421/2020|2020-03-29|EPI\_ISL\_582255|Original|hCoV-19^^Manitoba|Human|Cadham Provincial Laboratory|National Microbiology Laboratory (NML)|Majer|Canada

>Spike|hCoV-19/Scotland/CVR2416/2020|2020-04-14|EPI\_ISL\_477933|Original|hCoV-19^^Scotland|Human|West of Scotland Specialist Virology Centre|COVID-19 Genomics UK (COG-UK) Consortium|Robertson|United Kingdom

>Spike|hCoV-19/Netherlands/NH-EMC-63/2020|2020-08-18|EPI\_ISL\_577859|Original|hCoV-19^^Noord Holland|Human|Dutch COVID-19 response team|Erasmus Medical Center|Oude Munnink|Netherlands

>Spike|hCoV-19/USA/UT-UPHL-2012089916/2020|2020-10-27|EPI\_ISL\_745654|Original|hCoV-19^^Utah|Human|Ginkgo Bioworks Clinical Laboratory|Utah Public Health Laboratory|Young|USA

>Spike|hCoV-19/Scotland/EDB1080/2020|2020-04-07|EPI\_ISL\_439146|Original|hCoV-19^^Scotland|Human|Virology Department|COVID-19 Genomics UK (COG-UK) Consortium|Williams|United Kingdom

>Spike|hCoV-19/Scotland/GCVR-17040E/2020|2020-03-24|EPI\_ISL\_459679|Original|hCoV-19^^Scotland|Human|NHSGGC West of Scotland Specialist Virology Centre / MRC-University of Glasgow Centre for Virus Research|Wellcome Sanger Institute for the COVID-19 Genomics UK (COG-UK) consortium|Davies|United Kingdom

>Spike|hCoV-19/Denmark/DCGC-18062/2020|2020-12-14|EPI\_ISL\_749362|Original|hCoV-19^^Hovedstaden|Human|Department of Virus and Microbiological Special Diagnostics|Albertsen Lab|Michaelsen|Denmark

>Spike|hCoV-19/Netherlands/NA\_185/2020|2020-03-23|EPI\_ISL\_422720|Original|hCoV-19^^Netherlands|Human|Dutch COVID-19 response team|Erasmus Medical Center|Oude Munnink|Netherlands

>Spike|hCoV-19/Japan/PG-4927/2020|2020-07-00|EPI\_ISL\_690047|Original|hCoV-19^^Japan|Human|Pathogen Genomics Center|Pathogen Genomics Center|Sekizuka|Japan

>Spike|hCoV-19/England/LOND-12E8670/2020|2020-12-15|EPI\_ISL\_741340|Original|hCoV-19^^England|Human|University College London|COVID-19 Genomics UK (COG-UK) Consortium|Roy|United Kingdom

>Spike|hCoV-19/USA/WA-S169/2020|2020-03-18|EPI\_ISL\_430207|Original|hCoV-19^^Washington|Human|Washington State Department of Health|Seattle Flu Study|Bedford|USA

>Spike|hCoV-19/Wales/PHWC-48361E/2020|2020-10-23|EPI\_ISL\_627838|Original|hCoV-19^^Wales|Human|Wales Specialist Virology Centre Sequencing lab|COVID-19 Genomics UK (COG-UK) Consortium|Moore|United Kingdom

>Spike|hCoV-19/England/ALDP-B62818/2020|2020-11-09|EPI\_ISL\_656440|Original|hCoV-19^^England|Human|Lighthouse Lab in Alderley Park|Wellcome Sanger Institute for the COVID-19 Genomics UK (COG-UK) Consortium|Davies|United Kingdom

>Spike|hCoV-19/Denmark/DCGC-17942/2020|2020-12-14|EPI\_ISL\_749658|Original|hCoV-19^^Sjaelland|Human|Department of Virus and Microbiological Special Diagnostics|Albertsen Lab|Michaelsen|Denmark

>Spike|hCoV-19/Scotland/EDB2287/2020|2020-04-21|EPI\_ISL\_439179|Original|hCoV-19^^Scotland|Human|Virology Department|COVID-19 Genomics UK (COG-UK) Consortium|Williams|United Kingdom

>Spike|hCoV-19/USA/AZ-TG666095/2020|2020-05-02|EPI\_ISL\_696185|Original|hCoV-19^^Arizona|Human|Sonora Quest Laboratories|TGen North|French|USA

>Spike|hCoV-19/USA/UT-QDX-1786/2020|2020-03-16|EPI\_ISL\_604118|Original|hCoV-19^^Utah|Human|Quest Diagnostics|Quest Diagnostics|Kagan|USA

>Spike|hCoV-19/Australia/VIC6117/2020|2020-07-22|EPI\_ISL\_518135|Original|hCoV-19^^Victoria|Human|Victorian Infectious Diseases Reference Laboratory (VIDRL)|VIDRL and MDU-PHL|Schultz|Australia

>Spike|hCoV-19/England/MILK-99200A/2020|2020-08-27|EPI\_ISL\_540643|Original|hCoV-19^^England|Human|Queens Medical Centre|COVID-19 Genomics UK (COG-UK) Consortium|Loose|United Kingdom

>Spike|hCoV-19/England/ALDP-AA1298/2020|2020-10-22|EPI\_ISL\_624082|Original|hCoV-19^^England|Human|Lighthouse Lab in Alderley Park|Wellcome Sanger Institute for the COVID-19 Genomics UK (COG-UK) consortium|Davies|United Kingdom

>Spike|hCoV-19/Australia/VIC8899/2020|2020-07-23|EPI\_ISL\_565271|Original|hCoV-19^^Victoria|Human|Microbiological Diagnostic Unit - Public Health Laboratory (MDU-PHL)|MDU-PHL|Schultz|Australia

>Spike|hCoV-19/Scotland/CVR5029/2020|2020-10-08|EPI\_ISL\_594763|Original|hCoV-19^^Scotland|Human|West of Scotland Specialist Virology Centre|COVID-19 Genomics UK (COG-UK) Consortium|Robertson|United Kingdom

>Spike|hCoV-19/England/MILK-AB7402/2020|2020-10-20|EPI\_ISL\_623223|Original|hCoV-19^^England|Human|Lighthouse Lab in Milton Keynes|Wellcome Sanger Institute for the COVID-19 Genomics UK (COG-UK) consortium|Davies|United Kingdom

>Spike|hCoV-19/England/MILK-9718CD/2020|2020-08-18|EPI\_ISL\_553007|Original|hCoV-19^^England|Human|Lighthouse Lab in Milton Keynes|Wellcome Sanger Institute for the COVID-19 Genomics UK (COG-UK) consortium|Davies|United Kingdom

>Spike|hCoV-19/USA/UT-UPHL-2012105116/2020|2020-08-14|EPI\_ISL\_745964|Original|hCoV-19^^Utah|Human|Ginkgo Bioworks Clinical Laboratory|Utah Public Health Laboratory|Young|USA

>Spike|hCoV-19/USA/TX-HMH-MCoV-8289/2020|2020-07-07|EPI\_ISL\_784312|Original|hCoV-19^^Texas|Human|Houston Methodist Hospital|Houston Methodist Hospital|Long|USA

>Spike|hCoV-19/England/QEUA-9AD27F/2020|2020-09-05|EPI\_ISL\_559823|Original|hCoV-19^^England|Human|Oxford Viromics|COVID-19 Genomics UK (COG-UK) Consortium|Golubchik|United Kingdom

>Spike|hCoV-19/Italy/APU-IZSPB\_308PT/2020|2020-10-24|EPI\_ISL\_653802|Original|hCoV-19^^Apulia|Human|I.R.C.C.S. \S. De Bellis\ - Ente Ospedaliero|Istituto Zooprofilattico Sperimentale della Puglia e della Basilicata|Parisi|Italy

>Spike|hCoV-19/USA/VA\_NIDDL\_2768/2020|2020-03-29|EPI\_ISL\_491916|Original|hCoV-19^^Virginia|Human|Naval Infectious Diseases Diagnostic Laboratory|Naval Medical Research Center Biological Defense Research Directorate|Voegtly|USA

>Spike|hCoV-19/USA/CA-CZB-14299/2020|2020-08-24|EPI\_ISL\_738592|Original|hCoV-19^^California|Human|Alameda County Public Health Lab|Chan-Zuckerberg Biohub|Kamm|USA

>Spike|hCoV-19/USA/TX-HMH-6739/2020|2020-06-25|EPI\_ISL\_546206|Original|hCoV-19^^Texas|Human|Houston Methodist Hospital|Houston Methodist Hospital|Long|USA

>Spike|hCoV-19/USA/SC-DHEC-1143/2020|2020-07-10|EPI\_ISL\_574564|Original|hCoV-19^^South Carolina|Human|Microbiology Division|Microbiology Division|Flores|USA

>Spike|hCoV-19/Ghana/84260\_S28/2020|2020-05-25|EPI\_ISL\_515107|Original|hCoV-19^^Ghana|Human|Department of Biochemistry|WACCBIP|Amuzu|Ghana

>Spike|hCoV-19/South Africa/UFS-VIRO-NGS-31/2020|2020-09-23|EPI\_ISL\_682338|Original|hCoV-19^^Free State|Human|NHLS Universitas Academic|UFS Virology|Bester|South Africa

>Spike|hCoV-19/England/QEUA-9F6AAC/2020|2020-09-27|EPI\_ISL\_588319|Original|hCoV-19^^England|Human|Lighthouse Lab in Glasgow|Wellcome Sanger Institute for the COVID-19 Genomics UK (COG-UK) consortium|Davies|United Kingdom

>Spike|hCoV-19/Australia/VIC13186/2020|2020-08-14|EPI\_ISL\_563634|Original|hCoV-19^^Victoria|Human|Microbiological Diagnostic Unit - Public Health Laboratory (MDU-PHL)|MDU-PHL|Schultz|Australia

>Spike|hCoV-19/England/ALDP-49CD86/2020|2020-06-14|EPI\_ISL\_559471|Original|hCoV-19^^England|Human|Lighthouse Lab in Alderley Park|Wellcome Sanger Institute for the COVID-19 Genomics UK (COG-UK) consortium|Davies|United Kingdom

>Spike|hCoV-19/France/ARA-70122/2020|2020-09-09|EPI\_ISL\_693490|Original|hCoV-19^^Auvergne-Rh\u00f4ne-Alpes|Human|CNR Virus des Infections Respiratoires - France SUD|CNR Virus des Infections Respiratoires - France SUD|Bal|France

>Spike|hCoV-19/South Korea/KDCA0318/2020|2020-10-16|EPI\_ISL\_760104|Original|hCoV-19^^South Korea|Human|Division of Emerging Infectious Diseases|Division of Emerging Infectious Diseases|Park|South Korea

>Spike|hCoV-19/USA/WA-S625/2020|2020-04-19|EPI\_ISL\_438178|Original|hCoV-19^^Washington|Human|Washington State Department of Health|Seattle Flu Study|Bedford|USA

>Spike|hCoV-19/Denmark/DCGC-3072/2020|2020-08-24|EPI\_ISL\_616852|Original|hCoV-19^^Hovedstaden|Human|Department of Virus and Microbiological Special Diagnostics|Albertsen lab|Michaelsen|Denmark

>Spike|hCoV-19/Switzerland/ZH-ETHZ-300272/2020|2020-10-01|EPI\_ISL\_603304|Original|hCoV-19^^Zurich|Human|Viollier AG|Department of Biosystems Science and Engineering|Nadeau|Switzerland

>Spike|hCoV-19/Hungary/UD-56307/2020|2020-08-31|EPI\_ISL\_671426|Original|hCoV-19^^Hajd\u00fa-Bihar county|Human|University of Debrecen|National Laboratory of Virology|Kemenesi|Hungary

>Spike|hCoV-19/England/LOND-D64BC/2020|2020-04-22|EPI\_ISL\_487615|Original|hCoV-19^^England|Human|University College London|Wellcome Sanger Institute for the COVID-19 Genomics UK (COG-UK) consortium|Davies|United Kingdom

>Spike|hCoV-19/USA/CA-CZB042/2020|2020-03-25|EPI\_ISL\_429035|Original|hCoV-19^^California|Human|UCSF Clinical Microbiology Laboratory|Chan-Zuckerberg Biohub|Kamm|USA

>Spike|hCoV-19/England/ALDP-AA2DA5/2020|2020-10-22|EPI\_ISL\_623894|Original|hCoV-19^^England|Human|Lighthouse Lab in Alderley Park|Wellcome Sanger Institute for the COVID-19 Genomics UK (COG-UK) consortium|Davies|United Kingdom

>Spike|hCoV-19/Japan/PG-7310/2020|2020-08-00|EPI\_ISL\_688413|Original|hCoV-19^^Japan|Human|Pathogen Genomics Center|Pathogen Genomics Center|Sekizuka|Japan

>Spike|hCoV-19/Canada/MB-NML-1080/2020|2020-08-04|EPI\_ISL\_582432|Original|hCoV-19^^Manitoba|Human|Cadham Provincial Laboratory|National Microbiology Laboratory (NML)|Majer|Canada

>Spike|hCoV-19/USA/UT-02009/2020|2020-04-16|EPI\_ISL\_454727|Original|hCoV-19^^Utah|Human|Utah Public Health Laboratory|Utah Public Health Laboratory|Young|USA

>Spike|hCoV-19/USA/CA-UCSF-UC41/2020|2020-03-14|EPI\_ISL\_450233|Original|hCoV-19^^California|Human|UCSF Clinical Microbiology Laboratory|Chiu Laboratory|Chiu|USA

>Spike|hCoV-19/Israel/CVL-n14268/2020|2020-03-17|EPI\_ISL\_514308|Original|hCoV-19^^Central District|Human|Israel Central Virology laboratory|Israel Central Virology laboratory|Zuckerman|Israel

>Spike|hCoV-19/England/ALDP-9C603A/2020|2020-09-10|EPI\_ISL\_567776|Original|hCoV-19^^England|Human|Lighthouse Lab in Alderley Park|Wellcome Sanger Institute for the COVID-19 Genomics UK (COG-UK) consortium|Davies|United Kingdom

>Spike|hCoV-19/USA/CA-ALSR-1165/2020|2020-04-05|EPI\_ISL\_494407|Original|hCoV-19^^California|Human|San Diego County Public Health Laboratory|Andersen lab at Scripps Research|Gangavarapu|USA

>Spike|hCoV-19/USA/IL-NM026/2020|2020-03-16|EPI\_ISL\_444536|Original|hCoV-19^^Illinois|Human|Northwestern Memorial Hospital|Ozer Lab|Ozer|USA

>Spike|hCoV-19/India/GJ-GBRC-433/2020|2020-09-01|EPI\_ISL\_586570|Original|hCoV-19^^Gujarat|Human|GCRI,Ahmedabad|Gujarat Biotechnology Research Centre|Joshi|India

>Spike|hCoV-19/Singapore/1438/2020|2020-11-23|EPI\_ISL\_693326|Original|hCoV-19^^Singapore|Human|National Public Health Laboratory|National Public Health Laboratory|Mak|Singapore

>Spike|hCoV-19/USA/MA-MASPHL-00639/2020|2020-05-13|EPI\_ISL\_692990|Original|hCoV-19^^Massachusetts|Human|Massachusetts State Public Health Laboratory|Massachusetts State Public Health Laboratory|Lang|USA

>Spike|hCoV-19/England/ALDP-BE9011/2020|2020-12-03|EPI\_ISL\_708845|Original|hCoV-19^^England|Human|Lighthouse Lab in Alderley Park|Wellcome Sanger Institute for the COVID-19 Genomics UK (COG-UK) Consortium|Davies|United Kingdom

>Spike|hCoV-19/England/QEUA-A8B786/2020|2020-10-16|EPI\_ISL\_643217|Original|hCoV-19^^England|Human|Lighthouse Lab in Glasgow|Wellcome Sanger Institute for the COVID-19 Genomics UK (COG-UK) Consortium|Davies|United Kingdom

>Spike|hCoV-19/USA/FL-BPHL-1517/2020|2020-07-27|EPI\_ISL\_568615|Original|hCoV-19^^Florida|Human|Florida Bureau of Public Health Laboratories|Florida Bureau of Public Health Laboratories|Blanton|USA

>Spike|hCoV-19/Mexico/BCN-ALSR-2520/2020|2020-06-16|EPI\_ISL\_635524|Original|hCoV-19^^Baja California|Human|Centro de Diagn\u00e9stico COVID-19 UABC Tijuana|Andersen lab at Scripps Research|Gangavarapu|Mexico

>Spike|hCoV-19/Switzerland/AG-ETHZ-260149/2020|2020-08-26|EPI\_ISL\_539445|Original|hCoV-19^^Aargau|Human|Viollier AG|Department of Biosystems Science and Engineering|Nadeau|Switzerland

>Spike|hCoV-19/England/LOND-D36D7/2020|2020-03-31|EPI\_ISL\_440975|Original|hCoV-19^^England|Human|University College London|COVID-19 Genomics UK (COG-UK) Consortium|Roy|United Kingdom

>Spike|hCoV-19/USA/CA-CZB-7149/2020|2020-09-09|EPI\_ISL\_582933|Original|hCoV-19^^California|Human|County of Santa Clara Public Health Department|Chan-Zuckerberg Biohub|Bhatt|USA

>Spike|hCoV-19/Brazil/RJ-UFRJ-54093/2020|2020-04-16|EPI\_ISL\_492042|Original|hCoV-19^^Rio de Janeiro|Human|Instituto de Biologia do Ex\u00e9rcito|Laborat\u00f3rio Metabolismo Macromolecular FirminoTorres de Castro|Moura-Neto|Brazil

>Spike|hCoV-19/England/MILK-9C43D9/2020|2020-09-09|EPI\_ISL\_566777|Original|hCoV-19^^England|Human|Lighthouse Lab in Milton Keynes|Wellcome Sanger Institute for the COVID-19 Genomics UK (COG-UK) consortium|Davies|United Kingdom

>Spike|hCoV-19/USA/MI-UM-10036721426/2020|2020-10-31|EPI\_ISL\_682136|Original|hCoV-19^^Michigan|Human|University of Michigan Clinical Microbiology Laboratory|Lauring Lab|Valesano|USA

>Spike|hCoV-19/England/ALDP-BBAC7F/2020|2020-11-21|EPI\_ISL\_701769|Original|hCoV-19^^England|Human|Lighthouse Lab in Alderley Park|Wellcome Sanger Institute for the COVID-19 Genomics UK (COG-UK) Consortium|Davies|United Kingdom



>Spike|hCoV-19/Russia/OMS-ORINFI-916S/2020|2020-06-26|EPI\_ISL\_639945|Original|hCoV-19^^Omsk|Human|Omsk Research Institute of Natural Focal Infections|WHO National Influenza Centre Russian Federation|Komissarov|Russia

>Spike|hCoV-19/USA/CO-CDPHE-2008063525/2020|2020-08-05|EPI\_ISL\_710321|Original|hCoV-19^^Colorado|Human|Colorado Department of Public Health and Environment|Colorado Department of Public Health and Environment|Bankers|USA

>Spike|hCoV-19/England/ALDP-C3CB0E/2020|2020-12-10|EPI\_ISL\_731702|Original|hCoV-19^^England|Human|Lighthouse Lab in Alderley Park|Wellcome Sanger Institute for the COVID-19 Genomics UK (COG-UK) Consortium|Davies|United Kingdom

>Spike|hCoV-19/USA/CA-ALSR-2787/2020|2020-07-22|EPI\_ISL\_635679|Original|hCoV-19^^California|Human|San Diego County Public Health Laboratory|Andersen lab at Scripps Research|Gangavarapu|USA

>Spike|hCoV-19/Peru/LIM-UPCH-0155/2020|2020-08-27|EPI\_ISL\_568548|Original|hCoV-19^^Lima|Human|Laboratorio de Referencia Nacional de Virus Respiratorios|Laboratorio de Gen\u00f3mica Microbiana|Tsukayama|Peru

>Spike|hCoV-19/USA/CA-ALSR-4539/2020|2020-09-16|EPI\_ISL\_666997|Original|hCoV-19^^California|Human|San Diego County Public Health Laboratory|Andersen lab at Scripps Research|Gangavarapu|USA

>Spike|hCoV-19/USA/CA-CZB-14886/2020|2020-11-24|EPI\_ISL\_738893|Original|hCoV-19^^California|Human|Orange County Public Health Lab|Chan-Zuckerberg Biohub|Kamm|USA

>Spike|hCoV-19/USA/TX-HMH-MCoV-15734/2020|2020-07-09|EPI\_ISL\_785418|Original|hCoV-19^^Texas|Human|Houston Methodist Hospital|Houston Methodist Hospital|Long|USA

>Spike|hCoV-19/Japan/PG-3377/2020|2020-04-00|EPI\_ISL\_691492|Original|hCoV-19^^Japan|Human|Pathogen Genomics Center|Pathogen Genomics Center|Sekizuka|Japan

>Spike|hCoV-19/England/ALDP-9CE050/2020|2020-09-16|EPI\_ISL\_566192|Original|hCoV-19^^England|Human|Lighthouse Lab in Alderley Park|Wellcome Sanger Institute for the COVID-19 Genomics UK (COG-UK) consortium|Davies|United Kingdom

>Spike|hCoV-19/USA/AZ-TG377726/2020|2020-06-13|EPI\_ISL\_694624|Original|hCoV-19^^Arizona|Human|TGen North|TGen North|French|USA

>Spike|hCoV-19/Scotland/QEUH-A00C8A/2020|2020-10-02|EPI\_ISL\_585566|Original|hCoV-19^^Scotland|Human|University of Exeter|COVID-19 Genomics UK (COG-UK) Consortium|Temperton|United Kingdom

>Spike|hCoV-19/Switzerland/AG-ETHZ-340139/2020|2020-10-27|EPI\_ISL\_721708|Original|hCoV-19^^Aargau|Human|Viollier AG|Department of Biosystems Science and Engineering|Nadeau|Switzerland

>Spike|hCoV-19/USA/MI-UM-10036787921/2020|2020-11-04|EPI\_ISL\_707860|Original|hCoV-19^^Michigan|Human|University of Michigan Clinical Microbiology Laboratory|Lauring Lab|Valesano|USA

>Spike|hCoV-19/England/CAMB-79390/2020|2020-04-03|EPI\_ISL\_441832|Original|hCoV-19^^England|Human|Department of Pathology|Wellcome Sanger Institute for the COVID-19 Genomics UK (COG-UK) consortium|Amato|United Kingdom

>Spike|hCoV-19/Denmark/DCGC-19538/2020|2020-12-07|EPI\_ISL\_749015|Original|hCoV-19^^Hovedstaden|Human|Department of Virus and Microbiological Special Diagnostics|Albertsen Lab|Michaelsen|Denmark

>Spike|hCoV-19/England/ALDP-508F33/2020|2020-06-25|EPI\_ISL\_559161|Original|hCoV-19^^England|Human|Lighthouse Lab in Alderley Park|Wellcome Sanger Institute for the COVID-19 Genomics UK (COG-UK) consortium|Davies|United Kingdom

>Spike|hCoV-19/England/MILK-A7C849/2020|2020-10-15|EPI\_ISL\_607605|Original|hCoV-19^^England|Human|Lighthouse Lab in Milton Keynes|Wellcome Sanger Institute for the COVID-19 Genomics UK (COG-UK) consortium|Davies|United Kingdom

>Spike|hCoV-19/Japan/PG-6573/2020|2020-09-00|EPI\_ISL\_687685|Original|hCoV-19^^Japan|Human|Pathogen Genomics Center|Pathogen Genomics Center|Sekizuka|Japan

>Spike|hCoV-19/Croatia/1146\_Split/2020|2020-03-18|EPI\_ISL\_454581|Original|hCoV-19^^Split|Human|University Hospital for Infectious Diseases \Dr. Fran Mihaljevi\u0107\|University of Zagreb|Ivancic Jelecki|Croatia

>Spike|hCoV-19/USA/ID-QDX-1294/2020|2020-03-16|EPI\_ISL\_571933|Original|hCoV-19^^Idaho|Human|Quest Diagnostics|Quest Diagnostics|Kagan|USA

>Spike|hCoV-19/Sweden/20-06817/2020|2020-04-01|EPI\_ISL\_445229|Original|hCoV-19^^Vastra Gotaland|Human|Narhalsan Backa vardcentral|The Public Health Agency of Sweden|Svartstr\u00f6m|Sweden

>Spike|hCoV-19/England/CAMB-1B3074/2020|2020-05-25|EPI\_ISL\_461547|Original|hCoV-19^^England|Human|Department of Pathology|COVID-19 Genomics UK (COG-UK) Consortium|Meredith|United Kingdom

>Spike|hCoV-19/Japan/PG-6998/2020|2020-09-00|EPI\_ISL\_688103|Original|hCoV-19^^Japan|Human|Pathogen Genomics Center|Pathogen Genomics Center|Sekizuka|Japan

>Spike|hCoV-19/England/CAMC-A5802D/2020|2020-10-08|EPI\_ISL\_596928|Original|hCoV-19^^England|Human|Lighthouse Lab in Cambridge|Wellcome Sanger Institute for the COVID-19 Genomics UK (COG-UK) consortium|Davies|United Kingdom

>Spike|hCoV-19/England/LOND-12F1717/2020|2020-12-15|EPI\_ISL\_763544|Original|hCoV-19^^England|Human|University College London|COVID-19 Genomics UK (COG-UK) Consortium|Roy|United Kingdom

>Spike|hCoV-19/USA/NM-DOH-2020315751/2020|2020-08-27|EPI\_ISL\_732714|Original|hCoV-19^^New Mexico|Human|New Mexico Department of Health Scientific Laboratory|New Mexico Department of Health Scientific Laboratory|Johnson|USA

>Spike|hCoV-19/Chile/MA-ISPCH-13/2020|2020-03-21|EPI\_ISL\_445294|Original|hCoV-19^^Magallanes|Human|HOSPITAL REG.LAUTARO NAVARRO AVARIA|Instituto de Salud Publica de Chile|Fernandez|Chile

>Spike|hCoV-19/England/LIVE-DBEA15/2020|2020-10-29|EPI\_ISL\_664632|Original|hCoV-19^^England|Human|Liverpool Clinical Laboratories|COVID-19 Genomics UK (COG-UK) Consortium|Haldenby|United Kingdom

>Spike|hCoV-19/USA/CA-ALSR-4220/2020|2020-10-02|EPI\_ISL\_648894|Original|hCoV-19^^California|Human|San Diego County Public Health Laboratory|Andersen lab at Scripps Research|Gangavarapu|USA

>Spike|hCoV-19/Wales/QEUEH-9B7D17/2020|2020-09-04|EPI\_ISL\_590487|Original|hCoV-19^^Wales|Human|Lighthouse Lab in Glasgow|Wellcome Sanger Institute for the COVID-19 Genomics UK (COG-UK) consortium|Davies|United Kingdom

>Spike|hCoV-19/England/20144064402/2020|2020-03-30|EPI\_ISL\_421955|Original|hCoV-19^^England|Human|Respiratory Virus Unit|Respiratory Virus Unit|Platt|United Kingdom

>Spike|hCoV-19/Denmark/DCGC-2579/2020|2020-08-17|EPI\_ISL\_616415|Original|hCoV-19^^Hovedstaden|Human|Department of Virus and Microbiological Special Diagnostics|Albertsen lab|Michaelsen|Denmark

>Spike|hCoV-19/England/LIVE-1D2A80/2020|2020-03-29|EPI\_ISL\_612404|Original|hCoV-19^^England|Human|Liverpool Clinical Laboratories|COVID-19 Genomics UK (COG-UK) Consortium|Haldenby|United Kingdom

>Spike|hCoV-19/England/CAMB-79372/2020|2020-04-03|EPI\_ISL\_441165|Original|hCoV-19^^England|Human|Department of Pathology|Wellcome Sanger Institute for the COVID-19 Genomics UK (COG-UK) consortium|Amato|United Kingdom

>Spike|hCoV-19/Scotland/CVR5675/2020|2020-11-09|EPI\_ISL\_651011|Original|hCoV-19^^Scotland|Human|West of Scotland Specialist Virology Centre|COVID-19 Genomics UK (COG-UK) Consortium|Robertson|United Kingdom

>Spike|hCoV-19/Belgium/reg-0319860/2020|2020-03-19|EPI\_ISL\_734509|Original|hCoV-19^^Auderghem|Human|UZ Leuven|KU Leuven|Maes|Belgium

>Spike|hCoV-19/South Africa/KRISP-K001360/2020|2020-07-16|EPI\_ISL\_515845|Original|hCoV-19^^KwaZulu-Natal|Human|Medical Disagnostics Services (MDS)|KRISP|de Oliveira|South Africa

>Spike|hCoV-19/England/ALDP-B5E484/2020|2020-11-09|EPI\_ISL\_723659|Original|hCoV-19^^England|Human|Oxford Viromics|COVID-19 Genomics UK (COG-UK) Consortium|Golubchik|United Kingdom

>Spike|hCoV-19/Belgium/ULG-10866/2020|2020-11-13|EPI\_ISL\_678410|Original|hCoV-19^^Li\u00e8ge|Human|Department of Clinical Microbiology|GIGA Medical Genomics|Durkin|Belgium

>Spike|hCoV-19/England/MILK-559F06/2020|2020-06-10|EPI\_ISL\_558280|Original|hCoV-19^^England|Human|Lighthouse Lab in Milton Keynes|Wellcome Sanger Institute for the COVID-19 Genomics UK (COG-UK) consortium|Davies|United Kingdom

>Spike|hCoV-19/Wuhan/IME-WH05/2020|2019-12-30|EPI\_ISL\_529217|Original|hCoV-19^^Hubei|Human|Beijing Institute of Microbiology and Epidemiology|Beijing Institute of Microbiology and Epidemiology|Fan|China

>Spike|hCoV-19/Denmark/DCGC-1135/2020|2020-03-16|EPI\_ISL\_614619|Original|hCoV-19^^Syddanmark|Human|Department of Virus and Microbiological Special Diagnostics|Albertsen lab|Michaelsen|Denmark

>Spike|hCoV-19/England/QEUA-B12A02/2020|2020-10-31|EPI\_ISL\_642655|Original|hCoV-19^^England|Human|Lighthouse Lab in Glasgow|Wellcome Sanger Institute for the COVID-19 Genomics UK (COG-UK) Consortium|Davies|United Kingdom

>Spike|hCoV-19/Scotland/EDB6737/2020|2020-04-13|EPI\_ISL\_491551|Original|hCoV-19^^Scotland|Human|Virology Department|Wellcome Sanger Institute for the COVID-19 Genomics UK (COG-UK) consortium|Davies|United Kingdom

>Spike|hCoV-19/Luxembourg/LNS4377160/2020|2020-10-24|EPI\_ISL\_740460|Original|hCoV-19^^Luxembourg|Human|Laboratoire national de sant\u00e9|Laboratoire national de sant\u00e9|Wienecke-Baldacchino|Luxembourg

>Spike|hCoV-19/England/ALDP-B6354D/2020|2020-11-09|EPI\_ISL\_656506|Original|hCoV-19^^England|Human|Lighthouse Lab in Alderley Park|Wellcome Sanger Institute for the COVID-19 Genomics UK (COG-UK) Consortium|Davies|United Kingdom

>Spike|hCoV-19/England/CAMB-82BAB/2020|2020-04-25|EPI\_ISL\_438666|Original|hCoV-19^^England|Human|Department of Pathology|COVID-19 Genomics UK (COG-UK) Consortium|Meredith|United Kingdom

>Spike|hCoV-19/Northern Ireland/NIRE-FCEFE/2020|2020-04-24|EPI\_ISL\_489334|Original|hCoV-19^^Northern Ireland|Human|Regional Virus Laboratory|Wellcome Sanger Institute for the COVID-19 Genomics UK (COG-UK) consortium|Davies|United Kingdom

>Spike|hCoV-19/Australia/SAP562/2020|2020-11-16|EPI\_ISL\_654805|Original|hCoV-19^^South Australia|Human|SA Pathology|SA Pathology|Leong|Australia

>Spike|hCoV-19/England/ALDP-9D9034/2020|2020-09-18|EPI\_ISL\_576693|Original|hCoV-19^^England|Human|Oxford Viromics|COVID-19 Genomics UK (COG-UK) Consortium|Golubchik|United Kingdom

>Spike|hCoV-19/England/BIRM-62AC2/2020|2020-09-02|EPI\_ISL\_529641|Original|hCoV-19^^England|Human|University of Birmingham|COVID-19 Genomics UK (COG-UK) Consortium|Loman|United Kingdom

>Spike|hCoV-19/USA/FL-BPHL-1630/2020|2020-06-29|EPI\_ISL\_594320|Original|hCoV-19^^Florida|Human|Florida Bureau of Public Health Laboratories|Florida Bureau of Public Health Laboratories|Blanton|USA

>Spike|hCoV-19/Finland/18SS12E4/2020|2020-09-18|EPI\_ISL\_756289|Original|hCoV-19^^Uusimaa|Human|Department of Virology and Immunology|Department of Virology|Smura|Finland

>Spike|hCoV-19/Denmark/DCGC-7030/2020|2020-10-12|EPI\_ISL\_619877|Original|hCoV-19^^Hovedstaden|Human|Department of Virus and Microbiological Special Diagnostics|Albertsen lab|Michaelsen|Denmark

>Spike|hCoV-19/Spain/AN-ISCI-201373/2020|2020-03-02|EPI\_ISL\_418244|Original|hCoV-19^^Andalucia|Human|HOSPITAL UNIVERSITARIO VIRGEN DE LAS NIEVES|Instituto de Salud Carlos III|Caballero|Spain

>Spike|hCoV-19/Canada/ON-S215/2020|2020-03-26|EPI\_ISL\_586380|Original|hCoV-19^^Ontario|Human|Toronto Invasive Bacterial Diseases Network|McMaster University|McArthur|Canada

>Spike|hCoV-19/England/MILK-BB0DD0/2020|2020-11-18|EPI\_ISL\_720507|Original|hCoV-19^^England|Human|Lighthouse Lab in Milton Keynes|Wellcome Sanger Institute for the COVID-19 Genomics UK (COG-UK) Consortium|Davies|United Kingdom

>Spike|hCoV-19/Australia/VIC13485/2020|2020-08-03|EPI\_ISL\_592260|Original|hCoV-19^^Victoria|Human|Microbiological Diagnostic Unit - Public Health Laboratory (MDU-PHL)|MDU-PHL|Schultz|Australia

>Spike|hCoV-19/USA/WA-S2114/2020|2020-06-08|EPI\_ISL\_497542|Original|hCoV-19^^Washington|Human|Washington State Department of Health|Seattle Flu Study|Lee|USA

>Spike|hCoV-19/England/SHEF-C98DE/2020|2020-04-17|EPI\_ISL\_462041|Original|hCoV-19^^England|Human|Virology Department|COVID-19 Genomics UK (COG-UK) Consortium|de Silva|United Kingdom

>Spike|hCoV-19/Wales/MILK-9D55C0/2020|2020-09-19|EPI\_ISL\_577397|Original|hCoV-19^^Wales|Human|Centre for Enzyme Innovation|COVID-19 Genomics UK (COG-UK) Consortium|Robson|United Kingdom

>Spike|hCoV-19/Denmark/DCGC-6801/2020|2020-10-12|EPI\_ISL\_619498|Original|hCoV-19^^Hovedstaden|Human|Department of Virus and Microbiological Special Diagnostics|Albertsen lab|Michaelsen|Denmark

>Spike|hCoV-19/England/LOND-12673FA/2020|2020-12-08|EPI\_ISL\_741284|Original|hCoV-19^^England|Human|University College London|COVID-19 Genomics UK (COG-UK) Consortium|Roy|United Kingdom

>Spike|hCoV-19/Canada/ON-PHL-20-01291/2020|2020-06-00|EPI\_ISL\_548895|Original|hCoV-19^^Ontario|Human|Public Health Ontario Laboratory|Public Health Ontario Laboratory|Guthrie|Canada

>Spike|hCoV-19/Denmark/DCGC-21282/2020|2020-12-21|EPI\_ISL\_759652|Original|hCoV-19^^Nordjylland|Human|Department of Virus and Microbiological Special Diagnostics|Albertsen Lab|Michaelsen|Denmark

>Spike|hCoV-19/England/QEUEH-9C8C8F/2020|2020-09-10|EPI\_ISL\_567186|Original|hCoV-19^^England|Human|Lighthouse Lab in Glasgow|Wellcome Sanger Institute for the COVID-19 Genomics UK (COG-UK) consortium|Davies|United Kingdom

>Spike|hCoV-19/England/NORT-283C0F/2020|2020-04-03|EPI\_ISL\_472250|Original|hCoV-19^^England|Human|Northumbria University / South Tees Hospitals NHS Foundation Trust / North Cumbria Integrated Care NHS Foundation Trust / North Tees and Hartlepool NHS Foundation Trust / Newcastle Hospitals NHS Foundation Trust|COVID-19 Genomics UK (COG-UK) Consortium|Bashton|United Kingdom

>Spike|hCoV-19/Netherlands/LI-EMC-144/2020|2020-11-20|EPI\_ISL\_763112|Original|hCoV-19^^Limburg|Human|Dutch COVID-19 response team|Erasmus Medical Center|Oude Munnink|Netherlands

>Spike|hCoV-19/Spain/AN-IBV-006086/2020|2020-04-27|EPI\_ISL\_510426|Original|hCoV-19^^Andalucia|Human|Hospital Universitario Virgen de las Nieves de Granada-SAS|SeqCOVID-SPAIN consortium/IBV(CSIC)|Comas|Spain

>Spike|hCoV-19/England/LIVE-1D2DF0/2020|2020-03-31|EPI\_ISL\_612425|Original|hCoV-19^^England|Human|Liverpool Clinical Laboratories|COVID-19 Genomics UK (COG-UK) Consortium|Haldenby|United Kingdom

>Spike|hCoV-19/England/20134078004/2020|2020-03-24|EPI\_ISL\_423172|Original|hCoV-19^^England|Human|Respiratory Virus Unit|Respiratory Virus Unit|Platt|United Kingdom

>Spike|hCoV-19/England/QEUEH-A9F38B/2020|2020-10-20|EPI\_ISL\_611390|Original|hCoV-19^^England|Human|Lighthouse Lab in Glasgow|Wellcome Sanger Institute for the COVID-19 Genomics UK (COG-UK) consortium|Davies|United Kingdom

>Spike|hCoV-19/Chile/RM-83613/2020|2020-05-30|EPI\_ISL\_746800|Original|hCoV-19^^Region Metropolitana de Santiago|Human|Genetica Molecular and Subdepartamento de Virologia ISP Chile|Instituto de Salud Publica de Chile|Tognarelli|Chile

>Spike|hCoV-19/England/ALDP-A9287A/2020|2020-10-20|EPI\_ISL\_610926|Original|hCoV-19^^England|Human|Lighthouse Lab in Alderley Park|Wellcome Sanger Institute for the COVID-19 Genomics UK (COG-UK) consortium|Davies|United Kingdom

>Spike|hCoV-19/England/CAMC-B36455/2020|2020-11-05|EPI\_ISL\_645230|Original|hCoV-19^^England|Human|Lighthouse Lab in Cambridge|Wellcome Sanger Institute for the COVID-19 Genomics UK (COG-UK) Consortium|Davies|United Kingdom

>Spike|hCoV-19/England/QEUEH-9F33B3/2020|2020-09-24|EPI\_ISL\_588695|Original|hCoV-19^^England|Human|Lighthouse Lab in Glasgow|Wellcome Sanger Institute for the COVID-19 Genomics UK (COG-UK) consortium|Davies|United Kingdom

>Spike|hCoV-19/Canada/ON-PHL-20-01791/2020|2020-07-00|EPI\_ISL\_636941|Original|hCoV-19^^Ontario|Human|Public Health Ontario Laboratory|Public Health Ontario Laboratory|Guthrie|Canada

>Spike|hCoV-19/South Africa/R09103/2020|2020-04-28|EPI\_ISL\_470879|Original|hCoV-19^^Eastern Cape|Human|National Institute for Communicable Diseases of the National Health Laboratory Service|National Institute for Communicable Diseases of the National Health Laboratory Service|Allam|South Africa

>Spike|hCoV-19/Denmark/DCGC-2187/2020|2020-08-10|EPI\_ISL\_617488|Original|hCoV-19^^Hovedstaden|Human|Department of Virus and Microbiological Special Diagnostics|Albertsen lab|Michaelsen|Denmark

>Spike|hCoV-19/England/QEUEH-9F4C7B/2020|2020-09-25|EPI\_ISL\_638174|Original|hCoV-19^^England|Human|Department of Pathology|COVID-19 Genomics UK (COG-UK) Consortium|Goodfellow|United Kingdom

>Spike|hCoV-19/Japan/PG-1809/2020|2020-04-00|EPI\_ISL\_685415|Original|hCoV-19^^Japan|Human|Tokyo Metropolitan Institute of Public Health|Pathogen Genomics Center|Sekizuka|Japan

>Spike|hCoV-19/Scotland/EDB4832/2020|2020-04-03|EPI\_ISL\_453159|Original|hCoV-19^^Scotland|Human|Virology Department|COVID-19 Genomics UK (COG-UK) Consortium|Williams|United Kingdom

>Spike|hCoV-19/HongKong/CM20000489/2020|2020-12-20|EPI\_ISL\_759892|Original|hCoV-19^^Hong Kong|Human|Temporary Specimen Collection Centre|Hong Kong Department of Health|Tsang|China

>Spike|hCoV-19/USA/TX-HMH-6395/2020|2020-07-05|EPI\_ISL\_545968|Original|hCoV-19^^Texas|Human|Houston Methodist Hospital|Houston Methodist Hospital|Long|USA

>Spike|hCoV-19/England/201620591/2020|2020-04-14|EPI\_ISL\_466427|Original|hCoV-19^^England|Human|Respiratory Virus Unit|Respiratory Virus Unit|Platt|United Kingdom

>Spike|hCoV-19/Japan/PG-8445/2020|2020-09-00|EPI\_ISL\_687544|Original|hCoV-19^^Japan|Human|Fukuoka Institute of Health and Environmental Sciences|Pathogen Genomics Center|Sekizuka|Japan

>Spike|hCoV-19/Netherlands/Gelderland\_35/2020|2020-04-29|EPI\_ISL\_460935|Original|hCoV-19^^Gelderland|Human|Dutch COVID-19 response team|Erasmus Medical Center|Oude Munnink|Netherlands

>Spike|hCoV-19/Wales/PHWC-2517B/2020|2020-03-22|EPI\_ISL\_420975|Original|hCoV-19^^Wales|Human|Wales Specialist Virology Centre|Public Health Wales Microbiology Cardiff|Moore|United Kingdom

>Spike|hCoV-19/USA/TX-HMH-MCoV-15288/2020|2020-10-21|EPI\_ISL\_786772|Original|hCoV-19^^Texas|Human|Houston Methodist Hospital|Houston Methodist Hospital|Long|USA

>Spike|hCoV-19/Denmark/DCGC-19462/2020|2020-12-07|EPI\_ISL\_748962|Original|hCoV-19^^Syddanmark|Human|Department of Virus and Microbiological Special Diagnostics|Albertsen Lab|Michaelsen|Denmark

>Spike|hCoV-19/Colombia/SAN-INS-80123/2020|2020-03-15|EPI\_ISL\_456149|Original|hCoV-19^^Santander|Human|Instituto Nacional de Salud - Unidad de Secuenciación y Análisis Genómico|Instituto Nacional de Salud|Díaz|Colombia

>Spike|hCoV-19/Denmark/DCGC-3086/2020|2020-08-31|EPI\_ISL\_616866|Original|hCoV-19^^Hovedstaden|Human|Department of Virus and Microbiological Special Diagnostics|Albertsen lab|Michaelsen|Denmark

>Spike|hCoV-19/England/ALDP-5A219F/2020|2020-06-12|EPI\_ISL\_558816|Original|hCoV-19^^England|Human|Lighthouse Lab in Alderley Park|Wellcome Sanger Institute for the COVID-19 Genomics UK (COG-UK) consortium|Davies|United Kingdom

>Spike|hCoV-19/USA/TX-HMH-MCoV-12896/2020|2020-08-18|EPI\_ISL\_788048|Original|hCoV-19^^Texas|Human|Houston Methodist Hospital|Houston Methodist Hospital|Long|USA

>Spike|hCoV-19/South Korea/KCDC2462/2020|2020-06-08|EPI\_ISL\_514865|Original|hCoV-19^^South Korea|Human|Division of Viral Diseases|Division of Viral Diseases|Kim|South Korea

>Spike|hCoV-19/USA/MI-MDHHS-SC20857/2020|2020-04-29|EPI\_ISL\_471878|Original|hCoV-19^^Michigan|Human|Michigan Department of Health and Human Services|Michigan Department of Health and Human Services|Blankenship|USA

>Spike|hCoV-19/Iceland/202/2020|2020-03-16|EPI\_ISL\_417750|Original|hCoV-19^^Reykjavik|Human|The National University Hospital of Iceland|deCODE genetics|Jónsson|Iceland

>Spike|hCoV-19/USA/MA-MGH-03537/2020|2020-11-27|EPI\_ISL\_765877|Original|hCoV-19^^Massachusetts|Human|Massachusetts General Hospital|Infectious Disease Program|Park|USA

>Spike|hCoV-19/Wales/PHWC-4930E0/2020|2020-11-28|EPI\_ISL\_725837|Original|hCoV-19^^Wales|Human|Originating lab|COVID-19 Genomics UK (COG-UK) Consortium|Moore|United Kingdom

>Spike|hCoV-19/Japan/PG-0804/2020|2020-04-00|EPI\_ISL\_684414|Original|hCoV-19^^Japan|Human|Fukuoka Institute of Health and Environmental Sciences|Pathogen Genomics Center|Sekizuka|Japan

>Spike|hCoV-19/USA/WI-WSLH-200159/2020|2020-03-31|EPI\_ISL\_578386|Original|hCoV-19^^Wisconsin|Human|Wisconsin State Laboratory of Hygiene Communicable Disease Division|Wisconsin State Laboratory of Hygiene Communicable Disease Division|Florek|USA

>Spike|hCoV-19/USA/WI-WSLH-200027/2020|2020-04-17|EPI\_ISL\_471192|Original|hCoV-19^^Wisconsin|Human|Wisconsin State Laboratory of Hygiene Communicable Disease

Division|Wisconsin State Laboratory of Hygiene Communicable Disease  
Division|Florek|USA  
>Spike|hCoV-19/England/204891537/2020|2020-11-27|EPI\_ISL\_723020|Original|hCoV-19^^England|Human|Respiratory Virus Unit|COVID-19 Genomics UK (COG-UK) Consortium|Platt|United Kingdom  
>Spike|hCoV-19/Netherlands/UT-RIVM-10138/2020|2020-04-22|EPI\_ISL\_547538|Original|hCoV-19^^Utrecht|Human|Dutch COVID-19 response team|National Institute for Public Health and the Environment (RIVM)|Meijer|Netherlands  
>Spike|hCoV-19/England/NOTT-1129E1/2020|2020-04-22|EPI\_ISL\_493572|Original|hCoV-19^^England|Human|Lincolnshire Hospitals and DeepSeq Nottingham|COVID-19 Genomics UK (COG-UK) Consortium|Loose|United Kingdom  
>Spike|hCoV-19/England/LIVE-DCOEB/2020|2020-11-03|EPI\_ISL\_705411|Original|hCoV-19^^England|Human|Liverpool Clinical Laboratories|COVID-19 Genomics UK (COG-UK) Consortium|Haldenby|United Kingdom  
>Spike|hCoV-19/England/20148049704/2020|2020-04-02|EPI\_ISL\_466071|Original|hCoV-19^^England|Human|Respiratory Virus Unit|Respiratory Virus Unit|Platt|United Kingdom  
>Spike|hCoV-19/USA/NY-NYCPHL-000774/2020|2020-03-16|EPI\_ISL\_632154|Original|hCoV-19^^New York|Human|Richmond University Medical Center|New York City Public Health Laboratory|Wang|USA  
>Spike|hCoV-19/England/MILK-AC8064/2020|2020-10-22|EPI\_ISL\_629732|Original|hCoV-19^^England|Human|Lighthouse Lab in Milton Keynes|Wellcome Sanger Institute for the COVID-19 Genomics UK (COG-UK) consortium|Davies|United Kingdom  
>Spike|hCoV-19/Singapore/937/2020|2020-04-02|EPI\_ISL\_538470|Original|hCoV-19^^Singapore|Human|Department of Laboratory Medicine|Department of Laboratory Medicine|Chen|Singapore  
>Spike|hCoV-19/New Zealand/20CV0516/2020|2020-10-30|EPI\_ISL\_626354|Original|hCoV-19^^Auckland|Human|LabPLUS|Institute of Environmental Science and Research (ESR)|Wang|New Zealand  
>Spike|hCoV-19/Australia/VIC3601/2020|2020-07-08|EPI\_ISL\_520346|Original|hCoV-19^^Victoria|Human|Victorian Infectious Diseases Reference Laboratory (VIDRL)|VIDRL and MDU-PHL|Schultz|Australia  
>Spike|hCoV-19/England/QEUH-9DE3DC/2020|2020-09-21|EPI\_ISL\_599636|Original|hCoV-19^^England|Human|Lighthouse Lab in Glasgow|Wellcome Sanger Institute for the COVID-19 Genomics UK (COG-UK) consortium|Davies|United Kingdom  
>Spike|hCoV-19/England/20110015106/2020|2020-03-08|EPI\_ISL\_417306|Original|hCoV-19^^England|Human|Respiratory Virus Unit|Respiratory Virus Unit|Platt|United Kingdom  
>Spike|hCoV-19/Japan/PG-7742/2020|2020-09-00|EPI\_ISL\_686844|Original|hCoV-19^^Japan|Human|Chiba Prefectural Institute of Public Health|Pathogen Genomics Center|Sekizuka|Japan  
>Spike|hCoV-19/England/ALDP-B24AEF/2020|2020-11-04|EPI\_ISL\_646884|Original|hCoV-19^^England|Human|Lighthouse Lab in Alderley Park|Wellcome Sanger Institute for the COVID-19 Genomics UK (COG-UK) Consortium|Davies|United Kingdom  
>Spike|hCoV-19/England/MILK-B5A3C7/2020|2020-11-06|EPI\_ISL\_658140|Original|hCoV-19^^England|Human|Lighthouse Lab in Milton Keynes|Wellcome Sanger Institute for the COVID-19 Genomics UK (COG-UK) Consortium|Davies|United Kingdom  
>Spike|hCoV-19/England/MILK-95D7D9/2020|2020-06-21|EPI\_ISL\_556170|Original|hCoV-19^^England|Human|Lighthouse Lab in Milton Keynes|Wellcome Sanger Institute for the COVID-19 Genomics UK (COG-UK) consortium|Davies|United Kingdom  
>Spike|hCoV-19/England/CAMB-1B08D9/2020|2020-05-04|EPI\_ISL\_459224|Original|hCoV-19^^England|Human|Department of Pathology|Wellcome Sanger Institute for the COVID-19 Genomics UK (COG-UK) consortium|Davies|United Kingdom  
>Spike|hCoV-19/Wales/PHWC-24015/2020|2020-03-15|EPI\_ISL\_418138|Original|hCoV-19^^Wales|Human|Wales Specialist Virology Centre|Public Health Wales Microbiology Cardiff|Moore|United Kingdom  
>Spike|hCoV-19/England/QEUH-A366BA/2020|2020-10-05|EPI\_ISL\_706913|Original|hCoV-19^^England|Human|Oxford Viromics|COVID-19 Genomics UK (COG-UK) Consortium|Golubchik|United Kingdom  
>Spike|hCoV-19/England/20188020404/2020|2020-04-03|EPI\_ISL\_465499|Original|hCoV-19^^England|Human|Respiratory Virus Unit|Respiratory Virus Unit|Platt|United Kingdom

>Spike|hCoV-19/England/ALDP-9CB080/2020|2020-09-16|EPI\_ISL\_575402|Original|hCoV-19^^England|Human|Lighthouse Lab in Alderley Park|Wellcome Sanger Institute for the COVID-19 Genomics UK (COG-UK) consortium|Davies|United Kingdom

>Spike|hCoV-19/USA/WA-S1641/2020|2020-05-26|EPI\_ISL\_496067|Original|hCoV-19^^Washington|Human|Washington State Department of Health|Seattle Flu Study|Lee|USA

>Spike|hCoV-19/England/BRIS-128E34/2020|2020-04-18|EPI\_ISL\_458892|Original|hCoV-19^^England|Human|PHE South West Regional Laboratory|Wellcome Sanger Institute for the COVID-19 Genomics UK (COG-UK) consortium|Davies|United Kingdom

>Spike|hCoV-19/Norway/5840/2020|2020-11-05|EPI\_ISL\_775487|Original|hCoV-19^^Nordland|Human|Nordland Hospital - Bodo|Norwegian Institute of Public Health|Vollan|Norway

>Spike|hCoV-19/England/ALDP-9EA1E2/2020|2020-09-24|EPI\_ISL\_580101|Original|hCoV-19^^England|Human|Lighthouse Lab in Alderley Park|Wellcome Sanger Institute for the COVID-19 Genomics UK (COG-UK) consortium|Davies|United Kingdom

>Spike|hCoV-19/Denmark/DCGC-1221/2020|2020-05-18|EPI\_ISL\_614864|Original|hCoV-19^^Hovedstaden|Human|Department of Virus and Microbiological Special Diagnostics|Albertsen lab|Michaelsen|Denmark

>Spike|hCoV-19/Singapore/456/2020|2020-03-19|EPI\_ISL\_475987|Original|hCoV-19^^Singapore|Human|National Public Health Laboratory|National Public Health Laboratory|Mak|Singapore

>Spike|hCoV-19/USA/TX-HMH-MCoV-8671/2020|2020-07-01|EPI\_ISL\_780481|Original|hCoV-19^^Texas|Human|Houston Methodist Hospital|Houston Methodist Hospital|Long|USA

>Spike|hCoV-19/USA/MI-QDX-373/2020|2020-03-23|EPI\_ISL\_571116|Original|hCoV-19^^Michigan|Human|Quest Diagnostics|Quest Diagnostics|Kagan|USA

>Spike|hCoV-19/USA/NY-NYCPHL-000490/2020|2020-04-01|EPI\_ISL\_631953|Original|hCoV-19^^New York|Human|NYC HH Lincoln Medical And Mental Health Center|New York City Public Health Laboratory|Wang|USA

>Spike|hCoV-19/England/SHEF-D2007/2020|2020-09-14|EPI\_ISL\_559944|Original|hCoV-19^^England|Human|Virology Department|COVID-19 Genomics UK (COG-UK) Consortium|de Silva|United Kingdom

>Spike|hCoV-19/USA/VA-DCLS-0100/2020|2020-04-10|EPI\_ISL\_434594|Original|hCoV-19^^Virginia|Human|Virginia DCLS|Virginia DCLS|St. Jacques|USA

>Spike|hCoV-19/USA/CA-CZB-1455/2020|2020-04-10|EPI\_ISL\_468416|Original|hCoV-19^^California|Human|County of San Luis Obispo Public Health Laboratory|Chan-Zuckerberg Biohub|Hao|USA

>Spike|hCoV-19/Denmark/DCGC-17466/2020|2020-12-14|EPI\_ISL\_750355|Original|hCoV-19^^Nordjylland|Human|Department of Virus and Microbiological Special Diagnostics|Albertsen Lab|Michaelsen|Denmark

>Spike|hCoV-19/Australia/VIC9584/2020|2020-08-21|EPI\_ISL\_565613|Original|hCoV-19^^Victoria|Human|Microbiological Diagnostic Unit - Public Health Laboratory (MDU-PHL)|MDU-PHL|Schultz|Australia

>Spike|hCoV-19/Scotland/EDB7860/2020|2020-09-22|EPI\_ISL\_572543|Original|hCoV-19^^Scotland|Human|Virology Department|COVID-19 Genomics UK (COG-UK) Consortium|Williams|United Kingdom

>Spike|hCoV-19/Oman/C-6324/2020|2020-04-25|EPI\_ISL\_491126|Original|hCoV-19^^Muscat|Human|Oman-National Influenza Center|Biotechnology & OMICs Laboratory|Al Mahruqi|Oman

>Spike|hCoV-19/Japan/PG-6470/2020|2020-08-00|EPI\_ISL\_689575|Original|hCoV-19^^Japan|Human|Pathogen Genomics Center|Pathogen Genomics Center|Sekizuka|Japan

>Spike|hCoV-19/Netherlands/NB-RIVM-20607/2020|2020-12-10|EPI\_ISL\_790690|Original|hCoV-19^^Noord-Brabant|Human|Dutch COVID-19 response team|National Institute for Public Health and the Environment (RIVM)|Meijer|Netherlands

>Spike|hCoV-19/USA/CO-CDPHE-2011210342/2020|2020-11-19|EPI\_ISL\_771273|Original|hCoV-19^^Colorado|Human|Colorado Department of Public Health and Environment|Colorado Department of Public Health and Environment|Bankers|USA

>Spike|hCoV-19/England/QEUH-CAD1E8/2020|2020-12-20|EPI\_ISL\_760934|Original|hCoV-19^^England|Human|Lighthouse Lab in Glasgow|Wellcome Sanger Institute for the COVID-19 Genomics UK (COG-UK) Consortium|Davies|United Kingdom

>Spike|hCoV-19/USA/NY-NYCPHL-000552/2020|2020-03-24|EPI\_ISL\_632012|Original|hCoV-19^^New York|Human|Jamaica Hospital Medical Center|New York City Public Health Laboratory|Wang|USA

>Spike|hCoV-19/USA/CA-CZB-1235/2020|2020-04-11|EPI\_ISL\_454655|Original|hCoV-19^^California|Human|County of Santa Clara Public Health Department|Chan-Zuckerberg Biohub|Hao|USA

>Spike|hCoV-19/England/ALDP-9DA0F7/2020|2020-09-18|EPI\_ISL\_576846|Original|hCoV-19^^England|Human|Oxford Viromics|COVID-19 Genomics UK (COG-UK) Consortium|Golubchik|United Kingdom

>Spike|hCoV-19/England/BRIS-12ED13/2020|2020-04-22|EPI\_ISL\_488252|Original|hCoV-19^^England|Human|PHE South West Regional Laboratory|Wellcome Sanger Institute for the COVID-19 Genomics UK (COG-UK) consortium|Davies|United Kingdom

>Spike|hCoV-19/England/ALDP-691C19/2020|2020-07-02|EPI\_ISL\_558209|Original|hCoV-19^^England|Human|Lighthouse Lab in Alderley Park|Wellcome Sanger Institute for the COVID-19 Genomics UK (COG-UK) consortium|Davies|United Kingdom

>Spike|hCoV-19/USA/TX-HMH-2063/2020|2020-05-11|EPI\_ISL\_545097|Original|hCoV-19^^Texas|Human|Houston Methodist Hospital|Houston Methodist Hospital|Long|USA

>Spike|hCoV-19/United Arab Emirates/0139/2020|2020-05-18|EPI\_ISL\_698326|Original|hCoV-19^^Abu Dhabi|Human|Group 42 (G42) Healthcare|G42 Healthcare|Ogrodzki|United Arab Emirates

>Spike|hCoV-19/Canada/ON-PHL-20-03770/2020|2020-11-00|EPI\_ISL\_775079|Original|hCoV-19^^Ontario|Human|Public Health Ontario Laboratory|Public Health Ontario Laboratory|Guthrie|Canada

>Spike|hCoV-19/England/QEUEH-B417B8/2020|2020-11-08|EPI\_ISL\_658503|Original|hCoV-19^^England|Human|Lighthouse Lab in Glasgow|Wellcome Sanger Institute for the COVID-19 Genomics UK (COG-UK) Consortium|Davies|United Kingdom

>Spike|hCoV-19/USA/UT-08435/2020|2020-05-15|EPI\_ISL\_524211|Original|hCoV-19^^Utah|Human|Utah Public Health Laboratory|Utah Public Health Laboratory|Young|USA

>Spike|hCoV-19/DRC/5957/2020|2020-05-07|EPI\_ISL\_496499|Original|hCoV-19^^Kinshasa|Human|Viral Respiratory Lab|Pathogen Sequencing Lab|Lokilo|Democratic Republic of the Congo

>Spike|hCoV-19/Scotland/QEUEH-9ADF69/2020|2020-09-05|EPI\_ISL\_637955|Original|hCoV-19^^Scotland|Human|Department of Pathology|COVID-19 Genomics UK (COG-UK) Consortium|Goodfellow|United Kingdom

>Spike|hCoV-19/Wales/PHWC-2B4C7/2020|2020-04-11|EPI\_ISL\_445718|Original|hCoV-19^^Wales|Human|Wales Specialist Virology Centre|Public Health Wales Microbiology Cardiff|Moore|United Kingdom

>Spike|hCoV-19/Japan/PG-1652/2020|2020-04-00|EPI\_ISL\_685258|Original|hCoV-19^^Japan|Human|Pathogen Genomics Center|Pathogen Genomics Center|Sekizuka|Japan

>Spike|hCoV-19/USA/AZ-TG664493/2020|2020-04-20|EPI\_ISL\_696119|Original|hCoV-19^^Arizona|Human|Sonora Quest Laboratories|TGen North|French|USA

>Spike|hCoV-19/Australia/VIC12154/2020|2020-08-09|EPI\_ISL\_641289|Original|hCoV-19^^Victoria|Human|Microbiological Diagnostic Unit - Public Health Laboratory (MDU-PHL)|MDU-PHL|Schultz|Australia

>Spike|hCoV-19/USA/CA-SEARCH-5392/2020|2020-12-01|EPI\_ISL\_755203|Original|hCoV-19^^California|Human|UCSD EXCITE lab|Andersen lab at Scripps Research|Gangavarapu|USA

>Spike|hCoV-19/USA/MI-UM-10036626781/2020|2020-10-26|EPI\_ISL\_650024|Original|hCoV-19^^Michigan|Human|University of Michigan Clinical Microbiology Laboratory|Lauring Lab|Valesano|USA

>Spike|hCoV-19/England/SHEF-CF93F/2020|2020-04-13|EPI\_ISL\_448898|Original|hCoV-19^^England|Human|Virology Department|COVID-19 Genomics UK (COG-UK) Consortium|de Silva|United Kingdom

>Spike|hCoV-19/Spain/MD-IBV-99008482/2020|2020-08-11|EPI\_ISL\_654035|Original|hCoV-19^^Madrid|Human|Hospital General Universitario Gregorio Mara\u00f1a|SeqCOVID-SPAIN consortium|IBV (CSIC)|Comas|Spain

>Spike|hCoV-19/France/ARA-CDP81800/2020|2020-09-16|EPI\_ISL\_582116|Original|hCoV-19^^Auvergne-Rh\u00f4ne-Alpes|Human|CNR Virus des Infections Respiratoires - France SUD|CNR Virus des Infections Respiratoires - France SUD|Josset|France



>Spike|hCoV-19/South Africa/KRISP-K001041/2020|2020-07-16|EPI\_ISL\_509304|Original|hCoV-19^^KwaZulu-Natal|Human|NHLS-IALCH|KRISP|de Oliveira|South Africa

>Spike|hCoV-19/England/QEUA-B685B1/2020|2020-11-11|EPI\_ISL\_654962|Original|hCoV-19^^England|Human|Lighthouse Lab in Glasgow|Wellcome Sanger Institute for the COVID-19 Genomics UK (COG-UK) Consortium|Davies|United Kingdom

>Spike|hCoV-19/England/CAMC-9488ED/2020|2020-07-21|EPI\_ISL\_556961|Original|hCoV-19^^England|Human|Lighthouse Lab in Cambridge|Wellcome Sanger Institute for the COVID-19 Genomics UK (COG-UK) consortium|Davies|United Kingdom

>Spike|hCoV-19/England/CAMC-9D1DAE/2020|2020-09-18|EPI\_ISL\_601771|Original|hCoV-19^^England|Human|Lighthouse Lab in Cambridge|Wellcome Sanger Institute for the COVID-19 Genomics UK (COG-UK) consortium|Davies|United Kingdom

>Spike|hCoV-19/England/205261879/2020|2020-12-18|EPI\_ISL\_766560|Original|hCoV-19^^England|Human|Respiratory Virus Unit|COVID-19 Genomics UK (COG-UK) Consortium|Platt|United Kingdom

>Spike|hCoV-19/Romania/ROSV\_2794/2020|2020-04-16|EPI\_ISL\_491060|Original|hCoV-19^^Suceava|Human|Suceava County Emergency Hospital|\Stefan cel Mare\ University Metagenomics Lab|Lobiuc|Romania

>Spike|hCoV-19/England/MILK-B391D3/2020|2020-11-01|EPI\_ISL\_652295|Original|hCoV-19^^England|Human|University of Exeter|COVID-19 Genomics UK (COG-UK) Consortium|Temperton|United Kingdom

>Spike|hCoV-19/England/ALDP-A6C32D/2020|2020-10-15|EPI\_ISL\_607983|Original|hCoV-19^^England|Human|Lighthouse Lab in Alderley Park|Wellcome Sanger Institute for the COVID-19 Genomics UK (COG-UK) consortium|Davies|United Kingdom

>Spike|hCoV-19/England/QEUA-9F4D5A/2020|2020-09-25|EPI\_ISL\_588385|Original|hCoV-19^^England|Human|Lighthouse Lab in Glasgow|Wellcome Sanger Institute for the COVID-19 Genomics UK (COG-UK) consortium|Davies|United Kingdom

>Spike|hCoV-19/Egypt/CUNCI-HGC010/2020|2020-05-02|EPI\_ISL\_468055|Original|hCoV-19^^Egypt|Human|Egyptian National Cancer Institute (ENCI)|Egyptian National Cancer Institute (ENCI)|Zekri|Egypt

>Spike|hCoV-19/Canada/QC-LSPQ-L00236905/2020|2020-03-25|EPI\_ISL\_536151|Original|hCoV-19^^Quebec|Human|Centre Hospitalier R\u00e9gional de Lanaudi\u00e8re|Laboratoire de sant\u00e9 publique du Qu\u00e9bec|Moreira|Canada

>Spike|hCoV-19/USA/TX-HMH-MCoV-13475/2020|2020-08-21|EPI\_ISL\_788605|Original|hCoV-19^^Texas|Human|Houston Methodist Hospital|Houston Methodist Hospital|Long|USA

>Spike|hCoV-19/Hong Kong/VM20097391/2020|2020-08-03|EPI\_ISL\_602621|Original|hCoV-19^^Hong Kong|Human|GLENEAGLES HONG KONG (CLINICAL LAB)|Hong Kong Department of Health|Mak|China

>Spike|hCoV-19/England/201390708/2020|2020-03-29|EPI\_ISL\_465863|Original|hCoV-19^^England|Human|Respiratory Virus Unit|Respiratory Virus Unit|Platt|United Kingdom

>Spike|hCoV-19/Netherlands/NB-EMC-347/2020|2020-10-25|EPI\_ISL\_722287|Original|hCoV-19^^Noord Brabant|Human|Dutch COVID-19 response team|Erasmus Medical Center|Oude Munnink|Netherlands

>Spike|hCoV-19/Scotland/QEUA-AE1D7D/2020|2020-10-24|EPI\_ISL\_649640|Original|hCoV-19^^Scotland|Human|Lighthouse Lab in Glasgow|Wellcome Sanger Institute for the COVID-19 Genomics UK (COG-UK) Consortium|Davies|United Kingdom

>Spike|hCoV-19/England/QEUA-BA357E/2020|2020-11-18|EPI\_ISL\_721037|Original|hCoV-19^^England|Human|Lighthouse Lab in Glasgow|Wellcome Sanger Institute for the COVID-19 Genomics UK (COG-UK) Consortium|Davies|United Kingdom

>Spike|hCoV-19/England/ALDP-B47EBD/2020|2020-11-07|EPI\_ISL\_649345|Original|hCoV-19^^England|Human|Lighthouse Lab in Alderley Park|Wellcome Sanger Institute for the COVID-19 Genomics UK (COG-UK) Consortium|Davies|United Kingdom

>Spike|hCoV-19/England/NOTT-11E2EA/2020|2020-11-27|EPI\_ISL\_725523|Original|hCoV-19^^England|Human|Queens Medical Centre|COVID-19 Genomics UK (COG-UK) Consortium|Loose|United Kingdom

>Spike|hCoV-19/Australia/VIC10279/2020|2020-07-28|EPI\_ISL\_562848|Original|hCoV-19^^Victoria|Human|Microbiological Diagnostic Unit - Public Health Laboratory (MDU-PHL)|MDU-PHL|Schultz|Australia

>Spike|hCoV-19/England/ALDP-C3BC57/2020|2020-12-11|EPI\_ISL\_731723|Original|hCoV-19^^England|Human|Lighthouse Lab in Alderley Park|Wellcome Sanger Institute for the COVID-19 Genomics UK (COG-UK) Consortium|Davies|United Kingdom

>Spike|hCoV-19/USA/CA-IGI-0363/2020|2020-06-29|EPI\_ISL\_576547|Original|hCoV-19^^California|Human|Innovative Genomics Institute|Innovative Genomics Institute|Wyman|USA

>Spike|hCoV-19/Japan/PG-7235/2020|2020-08-00|EPI\_ISL\_688339|Original|hCoV-19^^Japan|Human|Saitama Prefectural Institute of Public Health|Pathogen Genomics Center|Sekizuka|Japan

>Spike|hCoV-19/USA/NM-NMDOH-2020322589/2020|2020-09-03|EPI\_ISL\_569635|Original|hCoV-19^^New Mexico|Human|New Mexico Department of Health Scientific Laboratory|New Mexico Department of Health Scientific Laboratory|Johnson|USA

>Spike|hCoV-19/Denmark/DCGC-9817/2020|2020-11-09|EPI\_ISL\_668486|Original|hCoV-19^^Hovedstaden|Human|Department of Virus and Microbiological Special Diagnostics|Albertsen Lab|Michaelsen|Denmark

>Spike|hCoV-19/England/MILK-B3A9AD/2020|2020-11-02|EPI\_ISL\_679696|Original|hCoV-19^^England|Human|Oxford Viromics|COVID-19 Genomics UK (COG-UK) Consortium|Golubchik|United Kingdom

>Spike|hCoV-19/USA/WI-WSLH-200202/2020|2020-03-18|EPI\_ISL\_578425|Original|hCoV-19^^Wisconsin|Human|Wisconsin State Laboratory of Hygiene Communicable Disease Division|Wisconsin State Laboratory of Hygiene Communicable Disease Division|Florek|USA

>Spike|hCoV-19/England/MILK-95DAEF/2020|2020-06-19|EPI\_ISL\_556285|Original|hCoV-19^^England|Human|Lighthouse Lab in Milton Keynes|Wellcome Sanger Institute for the COVID-19 Genomics UK (COG-UK) consortium|Davies|United Kingdom

>Spike|hCoV-19/England/QEUEH-B7FE43/2020|2020-11-14|EPI\_ISL\_661745|Original|hCoV-19^^England|Human|Lighthouse Lab in Glasgow|Wellcome Sanger Institute for the COVID-19 Genomics UK (COG-UK) Consortium|Davies|United Kingdom

>Spike|hCoV-19/England/ALDP-C06086/2020|2020-12-04|EPI\_ISL\_709437|Original|hCoV-19^^England|Human|Lighthouse Lab in Alderley Park|Wellcome Sanger Institute for the COVID-19 Genomics UK (COG-UK) Consortium|Davies|United Kingdom

>Spike|hCoV-19/Netherlands/GE-EMC-221/2020|2020-05-12|EPI\_ISL\_523203|Original|hCoV-19^^Gelderland|Human|Dutch COVID-19 response team|Erasmus Medical Center|Oude Munnink|Netherlands

>Spike|hCoV-19/USA/CA-CHLA-PLM02905782/2020|2020-11-30|EPI\_ISL\_753448|Original|hCoV-19^^California|Human|Clinical virology Laboratory|Center for Personalized Medicine|Dien Bard|USA

>Spike|hCoV-19/USA/CA-UCLA-18/2020|2020-05-01|EPI\_ISL\_537506|Original|hCoV-19^^California|Human|UCLA Pathology Clinical Microbiology Lab|Kruglyak Lab|Boocock|USA

>Spike|hCoV-19/USA/FL-BPHL-1303/2020|2020-08-31|EPI\_ISL\_541235|Original|hCoV-19^^Florida|Human|Florida Bureau of Public Health Laboratories|Florida Bureau of Public Health Laboratories|Blanton|USA

>Spike|hCoV-19/Australia/VIC3945/2020|2020-07-14|EPI\_ISL\_520656|Original|hCoV-19^^Victoria|Human|Microbiological Diagnostic Unit - Public Health Laboratory (MDU-PHL)|MDU-PHL|Schultz|Australia

>Spike|hCoV-19/New Zealand/20VR3481/2020|2020-04-03|EPI\_ISL\_579499|Original|hCoV-19^^Canterbury|Human|Canterbury Health Laboratories|Institute of Environmental Science and Research (ESR)|Wang|New Zealand

>Spike|hCoV-19/Australia/VIC7724/2020|2020-08-04|EPI\_ISL\_564607|Original|hCoV-19^^Victoria|Human|Microbiological Diagnostic Unit - Public Health Laboratory (MDU-PHL)|MDU-PHL|Schultz|Australia

>Spike|hCoV-19/England/QEUEH-B66C18/2020|2020-11-11|EPI\_ISL\_662615|Original|hCoV-19^^England|Human|Lighthouse Lab in Glasgow|Wellcome Sanger Institute for the COVID-19 Genomics UK (COG-UK) Consortium|Davies|United Kingdom

>Spike|hCoV-19/USA/TX-DSHS-1962/2020|2020-06-23|EPI\_ISL\_765931|Original|hCoV-19^^Texas|Human|TXDSHS|TXDSHS|Rahman|USA

>Spike|hCoV-19/England/20134016504/2020|2020-03-23|EPI\_ISL\_423089|Original|hCoV-19^^England|Human|Respiratory Virus Unit|Respiratory Virus Unit|Platt|United Kingdom

>Spike|hCoV-19/Canada/QC\_A09/2020|2020-04-09|EPI\_ISL\_463923|Original|hCoV-19^^Quebec|Human|Laboratoire de microbiologie|Smith Laboratory|Smith|Canada

>Spike|hCoV-19/Australia/VIC2695/2020|2020-07-02|EPI\_ISL\_521535|Original|hCoV-19^^Victoria|Human|Victorian Infectious Diseases Reference Laboratory (VIDRL)|VIDRL and MDU-PHL|Schultz|Australia

>Spike|hCoV-19/Northern Ireland/NIRE-101F7A/2020|2020-03-23|EPI\_ISL\_441360|Original|hCoV-19^^Northern Ireland|Human|Regional Virus Laboratory|COVID-19 Genomics UK (COG-UK) Consortium|Fairley|United Kingdom

>Spike|hCoV-19/England/QEUEH-AD1736/2020|2020-10-26|EPI\_ISL\_634666|Original|hCoV-19^^England|Human|Lighthouse Lab in Glasgow|Wellcome Sanger Institute for the COVID-19 Genomics UK (COG-UK) consortium|Davies|United Kingdom

>Spike|hCoV-19/Thailand/Bangkok-0042/2020|2020-03-28|EPI\_ISL\_429178|Original|hCoV-19^^Bangkok|Human|Ramathibodi Hospital|COVID-19 Network Investigations (CONI) Alliance|Batty|Thailand

>Spike|hCoV-19/USA/UT-UPHL-2008915/2020|2020-05-18|EPI\_ISL\_525021|Original|hCoV-19^^Utah|Human|Utah Public Health Laboratory|Utah Public Health Laboratory|Young|USA

>Spike|hCoV-19/England/CAMB-72C23/2020|2020-03-22|EPI\_ISL\_439963|Original|hCoV-19^^England|Human|Department of Pathology|Wellcome Sanger Institute for the COVID-19 Genomics UK (COG-UK) consortium|Amato|United Kingdom

>Spike|hCoV-19/England/MILK-B95A61/2020|2020-11-13|EPI\_ISL\_673767|Original|hCoV-19^^England|Human|Lighthouse Lab in Milton Keynes|Wellcome Sanger Institute for the COVID-19 Genomics UK (COG-UK) Consortium|Davies|United Kingdom

>Spike|hCoV-19/England/MILK-56DF0F/2020|2020-06-11|EPI\_ISL\_558365|Original|hCoV-19^^England|Human|Lighthouse Lab in Milton Keynes|Wellcome Sanger Institute for the COVID-19 Genomics UK (COG-UK) consortium|Davies|United Kingdom

>Spike|hCoV-19/Australia/VIC4691/2020|2020-07-17|EPI\_ISL\_519079|Original|hCoV-19^^Victoria|Human|Microbiological Diagnostic Unit - Public Health Laboratory (MDU-PHL)|MDU-PHL|Schultz|Australia

>Spike|hCoV-19/Japan/PG-4145/2020|2020-07-00|EPI\_ISL\_692384|Original|hCoV-19^^Japan|Human|Pathogen Genomics Center|Pathogen Genomics Center|Sekizuka|Japan

>Spike|hCoV-19/Japan/PG-5162/2020|2020-08-00|EPI\_ISL\_690268|Original|hCoV-19^^Japan|Human|Pathogen Genomics Center|Pathogen Genomics Center|Sekizuka|Japan

>Spike|hCoV-19/Wales/PHWC-163B54/2020|2020-04-29|EPI\_ISL\_474046|Original|hCoV-19^^Wales|Human|Originating lab|COVID-19 Genomics UK (COG-UK) Consortium|Moore|United Kingdom

>Spike|hCoV-19/Denmark/DCGC-16310/2020|2020-11-16|EPI\_ISL\_714696|Original|hCoV-19^^Hovedstaden|Human|Department of Virus and Microbiological Special Diagnostics|Albertsen Lab|Michaelsen|Denmark

>Spike|hCoV-19/Denmark/DCGC-2775/2020|2020-08-24|EPI\_ISL\_616610|Original|hCoV-19^^Midtjylland|Human|Department of Virus and Microbiological Special Diagnostics|Albertsen lab|Michaelsen|Denmark

>Spike|hCoV-19/England/CAMC-BC1BB4/2020|2020-11-22|EPI\_ISL\_704767|Original|hCoV-19^^England|Human|Lighthouse Lab in Cambridge|Wellcome Sanger Institute for the COVID-19 Genomics UK (COG-UK) Consortium|Davies|United Kingdom

>Spike|hCoV-19/England/SHEF-C1F86/2020|2020-04-26|EPI\_ISL\_457589|Original|hCoV-19^^England|Human|Virology Department|COVID-19 Genomics UK (COG-UK) Consortium|de Silva|United Kingdom

>Spike|hCoV-19/Denmark/DCGC-12589/2020|2020-11-16|EPI\_ISL\_682770|Original|hCoV-19^^Midtjylland|Human|Department of Virus and Microbiological Special Diagnostics|Albertsen Lab|Michaelsen|Denmark

>Spike|hCoV-19/England/NORT-293E24/2020|2020-07-20|EPI\_ISL\_573330|Original|hCoV-19^^England|Human|Northumbria University / South Tees Hospitals NHS Foundation Trust / North Cumbria Integrated Care NHS Foundation Trust / North Tees and Hartlepool NHS Foundation Trust / Newcastle Hospitals NHS Foundation Trust|COVID-19 Genomics UK (COG-UK) Consortium|Bashton|United Kingdom

>Spike|hCoV-19/England/205120838/2020|2020-12-12|EPI\_ISL\_766109|Original|hCoV-19^^England|Human|Respiratory Virus Unit|COVID-19 Genomics UK (COG-UK) Consortium|Platt|United Kingdom

>Spike|hCoV-19/USA/CA-ALSR-1687/2020|2020-03-25|EPI\_ISL\_494744|Original|hCoV-19^^California|Human|San Diego County Public Health Laboratory|Andersen lab at Scripps Research|Gangavarapu|USA

>Spike|hCoV-19/Netherlands/NH-RIVM-20005/2020|2020-11-20|EPI\_ISL\_723204|Original|hCoV-19^^Noord-Holland|Human|Dutch COVID-19 response team|National Institute for Public Health and the Environment (RIVM)|Meijer|Netherlands

>Spike|hCoV-19/Belgium/reg-10191305/2020|2020-10-19|EPI\_ISL\_735208|Original|hCoV-19^^Heverlee|Human|UZ Leuven|KU Leuven|Maes|Belgium

>Spike|hCoV-19/USA/ID-UW-4255/2020|2020-03-30|EPI\_ISL\_430940|Original|hCoV-19^^Idaho|Human|UW Virology Lab|UW Virology Lab|Roychoudhury|USA

>Spike|hCoV-19/Japan/PG-7202/2020|2020-07-00|EPI\_ISL\_688306|Original|hCoV-19^^Japan|Human|Saitama Prefectural Institute of Public Health|Pathogen Genomics Center|Sekizuka|Japan

>Spike|hCoV-19/Scotland/CVR3094/2020|2020-04-25|EPI\_ISL\_439034|Original|hCoV-19^^Scotland|Human|West of Scotland Specialist Virology Centre|COVID-19 Genomics UK (COG-UK) Consortium|Robertson|United Kingdom

>Spike|hCoV-19/Scotland/EDB10459/2020|2020-11-09|EPI\_ISL\_705766|Original|hCoV-19^^Scotland|Human|Virology Department|COVID-19 Genomics UK (COG-UK) Consortium|McHugh|United Kingdom

>Spike|hCoV-19/Luxembourg/LNS9375963/2020|2020-10-31|EPI\_ISL\_744895|Original|hCoV-19^^Luxembourg|Human|Laboratoire national de sant\u00e9|Laboratoire national de sant\u00e9|Wienecke-Baldacchino|Luxembourg

>Spike|hCoV-19/England/QEUA-9DA73E/2020|2020-09-22|EPI\_ISL\_601318|Original|hCoV-19^^England|Human|Lighthouse Lab in Glasgow|Wellcome Sanger Institute for the COVID-19 Genomics UK (COG-UK) consortium|Davies|United Kingdom

>Spike|hCoV-19/Wales/PHWC-23D88/2020|2020-03-13|EPI\_ISL\_418112|Original|hCoV-19^^Wales|Human|Wales Specialist Virology Centre|Public Health Wales Microbiology Cardiff|Moore|United Kingdom

>Spike|hCoV-19/Australia/NSW943/2020|2020-04-15|EPI\_ISL\_545015|Original|hCoV-19^^New South Wales|Human|South Eastern Area Laboratory Services (SEALS)|NSW Health Pathology - Institute of Clinical Pathology and Medical Research; Westmead Hospital; University of Sydney|Gall|Australia

>Spike|hCoV-19/USA/MA-MASPHL-00414/2020|2020-04-26|EPI\_ISL\_693136|Original|hCoV-19^^Massachusetts|Human|Massachusetts State Public Health Laboratory|Massachusetts State Public Health Laboratory|Lang|USA

>Spike|hCoV-19/England/ALDP-A855BF/2020|2020-10-17|EPI\_ISL\_610306|Original|hCoV-19^^England|Human|Lighthouse Lab in Alderley Park|Wellcome Sanger Institute for the COVID-19 Genomics UK (COG-UK) consortium|Davies|United Kingdom

>Spike|hCoV-19/USA/TX-HMH-MCoV-14571/2020|2020-10-08|EPI\_ISL\_787856|Original|hCoV-19^^Texas|Human|Houston Methodist Hospital|Houston Methodist Hospital|Long|USA

>Spike|hCoV-19/England/ALDP-A6FA8F/2020|2020-10-15|EPI\_ISL\_607056|Original|hCoV-19^^England|Human|Lighthouse Lab in Alderley Park|Wellcome Sanger Institute for the COVID-19 Genomics UK (COG-UK) consortium|Davies|United Kingdom

>Spike|hCoV-19/Denmark/DCGC-18409/2020|2020-12-07|EPI\_ISL\_749949|Original|hCoV-19^^Hovedstaden|Human|Department of Virus and Microbiological Special Diagnostics|Albertsen Lab|Michaelsen|Denmark

>Spike|hCoV-19/Canada/ON-S1835/2020|2020-11-24|EPI\_ISL\_729299|Original|hCoV-19^^Ontario|Human|Toronto Invasive Bacterial Diseases Network|McMaster University|McArthur|Canada

>Spike|hCoV-19/USA/CA-ALSR-1461/2020|2020-03-23|EPI\_ISL\_494617|Original|hCoV-19^^California|Human|Scripps Medical Laboratory|Andersen lab at Scripps Research|Gangavarapu|USA

>Spike|hCoV-19/Spain/RI-IBV-99010987/2020|2020-08-28|EPI\_ISL\_732810|Original|hCoV-19^^La Rioja|Human|Centro de Investigaci\u00f3n Biom\u00e9dica de La Rioja - Hospital San Pedro Logro\u00f1o|SeqCOVID-SPAIN consortium|IBV (CSIC)|Comas|Spain

>Spike|hCoV-19/Wales/PHWC-491CA2/2020|2020-11-12|EPI\_ISL\_706765|Original|hCoV-19^^Wales|Human|Originating lab|COVID-19 Genomics UK (COG-UK) Consortium|Moore|United Kingdom

>Spike|hCoV-19/England/MILK-9C4A3E/2020|2020-09-10|EPI\_ISL\_573263|Original|hCoV-19^^England|Human|Centre for Enzyme Innovation|COVID-19 Genomics UK (COG-UK) Consortium|Robson|United Kingdom

>Spike|hCoV-19/Japan/PG-5625/2020|2020-08-00|EPI\_ISL\_688750|Original|hCoV-19^^Japan|Human|Pathogen Genomics Center|Pathogen Genomics Center|Sekizuka|Japan

>Spike|hCoV-19/England/ALDP-9BE8A6/2020|2020-09-09|EPI\_ISL\_568100|Original|hCoV-19^^England|Human|Lighthouse Lab in Alderley Park|Wellcome Sanger Institute for the COVID-19 Genomics UK (COG-UK) consortium|Davies|United Kingdom

>Spike|hCoV-19/Denmark/DCGC-1103/2020|2020-03-16|EPI\_ISL\_614612|Original|hCoV-19^^Hovedstaden|Human|Department of Virus and Microbiological Special Diagnostics|Albertsen lab|Michaelsen|Denmark

>Spike|hCoV-19/Denmark/DCGC-16623/2020|2020-11-16|EPI\_ISL\_714877|Original|hCoV-19^^Hovedstaden|Human|Department of Virus and Microbiological Special Diagnostics|Albertsen Lab|Michaelsen|Denmark

>Spike|hCoV-19/Japan/PG-0449/2020|2020-03-21|EPI\_ISL\_480112|Original|hCoV-19^^Kyusyu|Human|Oita Prefectural Institute of Public Health and Environmental Science|Pathogen Genomics Center|Sekizuka|Japan

>Spike|hCoV-19/Canada/ON-S907/2020|2020-04-13|EPI\_ISL\_586480|Original|hCoV-19^^Ontario|Human|Toronto Invasive Bacterial Diseases Network|McMaster University|McArthur|Canada

>Spike|hCoV-19/Denmark/DCGC-11856/2020|2020-10-26|EPI\_ISL\_671180|Original|hCoV-19^^Hovedstaden|Human|Department of Virus and Microbiological Special Diagnostics|Albertsen Lab|Michaelsen|Denmark

>Spike|hCoV-19/Scotland/EDB2137/2020|2020-04-20|EPI\_ISL\_439167|Original|hCoV-19^^Scotland|Human|Virology Department|COVID-19 Genomics UK (COG-UK) Consortium|Williams|United Kingdom

>Spike|hCoV-19/Belgium/UGent-243/2020|2020-11-13|EPI\_ISL\_717628|Original|hCoV-19^^Ghent|Human|Lab voor klinische biologie|Onderzoeksgroep Virologie|Lambrechts|Belgium

>Spike|hCoV-19/Bangladesh/BCSIR-NILMRC-141/2020|2020-06-18|EPI\_ISL\_480417|Original|hCoV-19^^Dhaka|Human|National Institute of Laboratory Medicine and Referral Center|Bangladesh Council of Scientific and Industrial Research|Khan|Bangladesh

>Spike|hCoV-19/Wales/PHWC-2B579/2020|2020-04-10|EPI\_ISL\_445727|Original|hCoV-19^^Wales|Human|Wales Specialist Virology Centre|Public Health Wales Microbiology Cardiff|Moore|United Kingdom

>Spike|hCoV-19/England/ALDP-9FDA78/2020|2020-10-01|EPI\_ISL\_587761|Original|hCoV-19^^England|Human|Lighthouse Lab in Alderley Park|Wellcome Sanger Institute for the COVID-19 Genomics UK (COG-UK) consortium|Davies|United Kingdom

>Spike|hCoV-19/England/ALDP-B2642B/2020|2020-11-04|EPI\_ISL\_646512|Original|hCoV-19^^England|Human|Lighthouse Lab in Alderley Park|Wellcome Sanger Institute for the COVID-19 Genomics UK (COG-UK) Consortium|Davies|United Kingdom

>Spike|hCoV-19/England/QEUAH-AD3B83/2020|2020-10-26|EPI\_ISL\_634230|Original|hCoV-19^^England|Human|Lighthouse Lab in Glasgow|Wellcome Sanger Institute for the COVID-19 Genomics UK (COG-UK) consortium|Davies|United Kingdom

>Spike|hCoV-19/Denmark/DCGC-4146/2020|2020-09-21|EPI\_ISL\_621966|Original|hCoV-19^^Hovedstaden|Human|Department of Virus and Microbiological Special Diagnostics|Albertsen lab|Michaelsen|Denmark

>Spike|hCoV-19/Germany/BY-UHR-7ZK/2020|2020-03-22|EPI\_ISL\_513304|Viral culture|hCoV-19^^Bavaria|Human|Department of Infection Prevention and Infectious Diseases|University Hospital Regensburg|Fritsch|Germany

>Spike|hCoV-19/England/QEUAH-AF0537/2020|2020-10-29|EPI\_ISL\_662779|Original|hCoV-19^^England|Human|Lighthouse Lab in Glasgow|Wellcome Sanger Institute for the COVID-19 Genomics UK (COG-UK) Consortium|Davies|United Kingdom

>Spike|hCoV-19/England/ALDP-B48362/2020|2020-11-07|EPI\_ISL\_649294|Original|hCoV-19^^England|Human|Lighthouse Lab in Alderley Park|Wellcome Sanger Institute for the COVID-19 Genomics UK (COG-UK) Consortium|Davies|United Kingdom

>Spike|hCoV-19/USA/CA-ALSR-2417/2020|2020-05-27|EPI\_ISL\_635469|Original|hCoV-19^^California|Human|San Diego County Public Health Laboratory|Andersen lab at Scripps Research|Gangavarapu|USA

>Spike|hCoV-19/Denmark/DCGC-2981/2020|2020-08-24|EPI\_ISL\_616743|Original|hCoV-19^^Hovedstaden|Human|Department of Virus and Microbiological Special Diagnostics|Albertsen lab|Michaelsen|Denmark

>Spike|hCoV-19/England/CAMC-B32CBB/2020|2020-11-06|EPI\_ISL\_659580|Original|hCoV-19^^England|Human|Lighthouse Lab in Cambridge|Wellcome Sanger Institute for the COVID-19 Genomics UK (COG-UK) Consortium|Davies|United Kingdom

>Spike|hCoV-19/USA/TX-HMH-MCoV-15274/2020|2020-10-21|EPI\_ISL\_786758|Original|hCoV-19^^Texas|Human|Houston Methodist Hospital|Houston Methodist Hospital|Long|USA

>Spike|hCoV-19/Indonesia/BT-MRINUPH-200624-349/2020|2020-06-22|EPI\_ISL\_779395|Original|hCoV-19^^Banten|Human|Siloam Hospital Lippo Village|Mochtar Riady Institute for Nanotechnology-Universitas Pelita Harapan|Suriapranata|Indonesia

>Spike|hCoV-19/USA/CA-QDX-223/2020|2020-04-11|EPI\_ISL\_498699|Original|hCoV-19^^California|Human|Quest Diagnostics|Quest Diagnostics|Kagan|USA

>Spike|hCoV-19/Denmark/DCGC-14987/2020|2020-11-23|EPI\_ISL\_713564|Original|hCoV-19^^Midtjylland|Human|Department of Virus and Microbiological Special Diagnostics|Albertsen Lab|Michaelsen|Denmark

>Spike|hCoV-19/England/SHEF-CA7B2/2020|2020-03-31|EPI\_ISL\_442363|Original|hCoV-19^^England|Human|Virology Department|COVID-19 Genomics UK (COG-UK) Consortium|de Silva|United Kingdom

>Spike|hCoV-19/Wales/PHWC-48FB9B/2020|2020-11-11|EPI\_ISL\_681196|Original|hCoV-19^^Wales|Human|Wales Specialist Virology Centre Sequencing lab|COVID-19 Genomics UK (COG-UK) Consortium|Moore|United Kingdom

>Spike|hCoV-19/USA/MI-QDX-933/2020|2020-03-20|EPI\_ISL\_571637|Original|hCoV-19^^Michigan|Human|Quest Diagnostics|Quest Diagnostics|Kagan|USA

>Spike|hCoV-19/England/ALDP-A693D5/2020|2020-10-12|EPI\_ISL\_609134|Original|hCoV-19^^England|Human|Lighthouse Lab in Alderley Park|Wellcome Sanger Institute for the COVID-19 Genomics UK (COG-UK) consortium|Davies|United Kingdom

>Spike|hCoV-19/Portugal/PT0571/2020|2020-03-26|EPI\_ISL\_454294|Original|hCoV-19^^Portugal|Human|unknown|Instituto Nacional de Saude (INSA)|Borges|Portugal

>Spike|hCoV-19/Denmark/DCGC-783/2020|2020-04-27|EPI\_ISL\_614754|Original|hCoV-19^^Syddanmark|Human|Department of Virus and Microbiological Special Diagnostics|Albertsen lab|Michaelsen|Denmark

>Spike|hCoV-19/England/LIVE-1D8C0C/2020|2020-09-25|EPI\_ISL\_576982|Original|hCoV-19^^England|Human|Liverpool Clinical Laboratories|COVID-19 Genomics UK (COG-UK) Consortium|Haldenby|United Kingdom

>Spike|hCoV-19/USA/TX-DSHS-1799/2020|2020-06-13|EPI\_ISL\_738172|Original|hCoV-19^^Texas|Human|Texas Department of State Health Services|Texas Department of State Health Services|Rahman|USA

>Spike|hCoV-19/USA/HI-H200224/2020|2020-08-11|EPI\_ISL\_752783|Original|hCoV-19^^Hawaii|Human|State Laboratories Division|State Laboratories Division|Sultana|USA

>Spike|hCoV-19/England/MILK-A45DD1/2020|2020-10-06|EPI\_ISL\_598608|Original|hCoV-19^^England|Human|Lighthouse Lab in Milton Keynes|Wellcome Sanger Institute for the COVID-19 Genomics UK (COG-UK) consortium|Davies|United Kingdom

>Spike|hCoV-19/England/203290153/2020|2020-08-06|EPI\_ISL\_534721|Original|hCoV-19^^England|Human|Respiratory Virus Unit|Respiratory Virus Unit|Platt|United Kingdom

>Spike|hCoV-19/USA/LA-GBCL-26684517/2020|2020-04-10|EPI\_ISL\_485319|Original|hCoV-19^^Louisiana|Human|River Road Testing Lab|Ginkgo Bioworks Clinical Laboratory|Smith|USA

>Spike|hCoV-19/England/SHEF-CBF04/2020|2020-11-14|EPI\_ISL\_705276|Original|hCoV-19^^England|Human|Virology Department|COVID-19 Genomics UK (COG-UK) Consortium|de Silva|United Kingdom

>Spike|hCoV-19/Japan/PG-5800/2020|2020-08-00|EPI\_ISL\_688919|Original|hCoV-19^^Japan|Human|Fukuoka Institute of Health and Environmental Sciences|Pathogen Genomics Center|Sekizuka|Japan

>Spike|hCoV-19/Netherlands/LI-RIVM-20447/2020|2020-12-09|EPI\_ISL\_728666|Original|hCoV-19^^Limburg|Human|Dutch COVID-19 response team|National Institute for Public Health and the Environment (RIVM)|Meijer|Netherlands

>Spike|hCoV-19/England/QEUA-A636A5/2020|2020-10-12|EPI\_ISL\_596132|Original|hCoV-19^^England|Human|Quadram Institute Bioscience|COVID-19 Genomics UK (COG-UK) Consortium|Alikhan|United Kingdom

>Spike|hCoV-19/Denmark/DCGC-9696/2020|2020-11-09|EPI\_ISL\_669115|Original|hCoV-19^^Syddanmark|Human|Department of Virus and Microbiological Special Diagnostics|Albertsen Lab|Michaelsen|Denmark

>Spike|hCoV-19/Australia/VIC14265/2020|2020-07-29|EPI\_ISL\_592426|Original|hCoV-19^^Victoria|Human|Microbiological Diagnostic Unit - Public Health Laboratory (MDU-PHL)|MDU-PHL|Schultz|Australia

>Spike|hCoV-19/France/PAC-MEPHI-2132/2020|2020-09-25|EPI\_ISL\_644505|Original|hCoV-19^^Provence-Alpes-Cote-d\u2019Azur|Human|MEPHI|MEPHI|Levasseur|France

>Spike|hCoV-19/England/ALDP-AA1975/2020|2020-10-21|EPI\_ISL\_623971|Original|hCoV-19^^England|Human|Lighthouse Lab in Alderley Park|Wellcome Sanger Institute for the COVID-19 Genomics UK (COG-UK) consortium|Davies|United Kingdom

>Spike|hCoV-19/Netherlands/NoordBrabant\_10/2020|2020-03-02|EPI\_ISL\_414431|Original|hCoV-19^^Noord Brabant|Human|Dutch COVID-19 response team|Erasmus Medical Center|Oude Munnink|Netherlands

>Spike|hCoV-19/England/MILK-A7AA90/2020|2020-10-15|EPI\_ISL\_606414|Original|hCoV-19^^England|Human|Lighthouse Lab in Milton Keynes|Wellcome Sanger Institute for the COVID-19 Genomics UK (COG-UK) consortium|Davies|United Kingdom

>Spike|hCoV-19/England/QEUA-AF505F/2020|2020-10-30|EPI\_ISL\_663066|Original|hCoV-19^^England|Human|Lighthouse Lab in Glasgow|Wellcome Sanger Institute for the COVID-19 Genomics UK (COG-UK) Consortium|Davies|United Kingdom

>Spike|hCoV-19/Japan/PG-5123/2020|2020-08-00|EPI\_ISL\_689617|Original|hCoV-19^^Japan|Human|Gunma Prefectural Institute of Public Health and Environmental Sciences|Pathogen Genomics Center|Sekizuka|Japan

>Spike|hCoV-19/England/ALDP-AA4259/2020|2020-10-22|EPI\_ISL\_624287|Original|hCoV-19^^England|Human|Lighthouse Lab in Alderley Park|Wellcome Sanger Institute for the COVID-19 Genomics UK (COG-UK) consortium|Davies|United Kingdom

>Spike|hCoV-19/England/CAMC-B34202/2020|2020-11-05|EPI\_ISL\_659726|Original|hCoV-19^^England|Human|Lighthouse Lab in Cambridge|Wellcome Sanger Institute for the COVID-19 Genomics UK (COG-UK) Consortium|Davies|United Kingdom

>Spike|hCoV-19/England/QEUA-9DE3FA/2020|2020-09-21|EPI\_ISL\_599609|Original|hCoV-19^^England|Human|Lighthouse Lab in Glasgow|Wellcome Sanger Institute for the COVID-19 Genomics UK (COG-UK) consortium|Davies|United Kingdom

>Spike|hCoV-19/Denmark/DCGC-6101/2020|2020-10-05|EPI\_ISL\_620296|Original|hCoV-19^^Hovedstaden|Human|Department of Virus and Microbiological Special Diagnostics|Albertsen lab|Michaelsen|Denmark

>Spike|hCoV-19/England/MILK-BACD9B/2020|2020-11-17|EPI\_ISL\_681635|Original|hCoV-19^^England|Human|Lighthouse Lab in Milton Keynes|Wellcome Sanger Institute for the COVID-19 Genomics UK (COG-UK) Consortium|Davies|United Kingdom

>Spike|hCoV-19/England/QEUA-AD43B7/2020|2020-10-26|EPI\_ISL\_634673|Original|hCoV-19^^England|Human|Lighthouse Lab in Glasgow|Wellcome Sanger Institute for the COVID-19 Genomics UK (COG-UK) consortium|Davies|United Kingdom

>Spike|hCoV-19/England/CAMC-A41959/2020|2020-10-07|EPI\_ISL\_609392|Original|hCoV-19^^England|Human|Lighthouse Lab in Cambridge|Wellcome Sanger Institute for the COVID-19 Genomics UK (COG-UK) consortium|Davies|United Kingdom

>Spike|hCoV-19/England/SHEF-C1083/2020|2020-11-15|EPI\_ISL\_706991|Original|hCoV-19^^England|Human|Virology Department|COVID-19 Genomics UK (COG-UK) Consortium|de Silva|United Kingdom

>Spike|hCoV-19/England/ALDP-A52700/2020|2020-10-07|EPI\_ISL\_598050|Original|hCoV-19^^England|Human|Lighthouse Lab in Alderley Park|Wellcome Sanger Institute for the COVID-19 Genomics UK (COG-UK) consortium|Davies|United Kingdom

>Spike|hCoV-19/Norway/3743/2020|2020-09-01|EPI\_ISL\_590998|Original|hCoV-19^^Viken|Human|Ostfold Hospital Trust - Kalnes|Norwegian Institute of Public Health|Vollan|Norway

>Spike|hCoV-19/Luxembourg/LNS8387253/2020|2020-11-02|EPI\_ISL\_744732|Original|hCoV-19^^Luxembourg|Human|Laboratoire national de sant\u00e9|Laboratoire national de sant\u00e9|Wienecke-Baldacchino|Luxembourg

>Spike|hCoV-19/England/CAMC-9D2235/2020|2020-09-19|EPI\_ISL\_601555|Original|hCoV-19^^England|Human|Lighthouse Lab in Cambridge|Wellcome Sanger Institute for the COVID-19 Genomics UK (COG-UK) consortium|Davies|United Kingdom

>Spike|hCoV-19/Australia/VIC15729/2020|2020-10-04|EPI\_ISL\_593427|Original|hCoV-19^^Victoria|Human|Microbiological Diagnostic Unit - Public Health Laboratory (MDU-PHL)|MDU-PHL|Schultz|Australia

>Spike|hCoV-19/England/NORT-29DE0C/2020|2020-05-06|EPI\_ISL\_484318|Original|hCoV-19^^England|Human|Northumbria University / South Tees Hospitals NHS Foundation Trust / North Cumbria Integrated Care NHS Foundation Trust / North Tees and Hartlepool NHS Foundation Trust / Newcastle Hospitals NHS Foundation Trust|COVID-19 Genomics UK (COG-UK) Consortium|Bashton|United Kingdom

>Spike|hCoV-19/England/ALDP-9E99AF/2020|2020-09-24|EPI\_ISL\_584272|Original|hCoV-19^^England|Human|Virology Department|COVID-19 Genomics UK (COG-UK) Consortium|de Silva|United Kingdom

>Spike|hCoV-19/Australia/VIC15047/2020|2020-07-29|EPI\_ISL\_593122|Original|hCoV-19^^Victoria|Human|Microbiological Diagnostic Unit - Public Health Laboratory (MDU-PHL)|MDU-PHL|Schultz|Australia

>Spike|hCoV-19/Portugal/PT0505/2020|2020-03-18|EPI\_ISL\_454229|Original|hCoV-19^^Portugal|Human|unknown|Instituto Nacional de Saude (INSA)|Borges|Portugal

>Spike|hCoV-19/Japan/PG-6129/2020|2020-08-00|EPI\_ISL\_689241|Original|hCoV-19^^Japan|Human|Pathogen Genomics Center|Pathogen Genomics Center|Sekizuka|Japan

>Spike|hCoV-19/USA/FL-BPHL-0199/2020|2020-04-07|EPI\_ISL\_480850|Original|hCoV-19^^Florida|Human|Florida Bureau of Public Health Laboratories|Florida Bureau of Public Health Laboratories|Blanton|USA

>Spike|hCoV-19/England/QEUA-B2B65D/2020|2020-11-01|EPI\_ISL\_646507|Original|hCoV-19^^England|Human|Lighthouse Lab in Glasgow|Wellcome Sanger Institute for the COVID-19 Genomics UK (COG-UK) Consortium|Davies|United Kingdom

>Spike|hCoV-19/Canada/QC-LSPQ-L00238906/2020|2020-03-26|EPI\_ISL\_536226|Original|hCoV-19^^Quebec|Human|H\u00f4pital du Suro\u00eet|Laboratoire de sant\u00e9 publique du Qu\u00e9bec|Moreira|Canada

>Spike|hCoV-19/Denmark/DCGC-16718/2020|2020-10-19|EPI\_ISL\_714430|Original|hCoV-19^^Hovedstaden|Human|Department of Virus and Microbiological Special Diagnostics|Albertsen Lab|Michaelsen|Denmark

>Spike|hCoV-19/England/BRIS-126795/2020|2020-04-08|EPI\_ISL\_459015|Original|hCoV-19^^England|Human|PHE South West Regional Laboratory|Wellcome Sanger Institute for the COVID-19 Genomics UK (COG-UK) consortium|Davies|United Kingdom

>Spike|hCoV-19/England/SHEF-BFF21/2020|2020-03-25|EPI\_ISL\_418309|Original|hCoV-19^^England|Human|Virology Department|Department of Infection|de Silva|United Kingdom

>Spike|hCoV-19/India/TG-CCMB-AB223/2020|2020-08-14|EPI\_ISL\_539640|Original|hCoV-19^^Telangana|Human|CSIR-Centre for Cellular and Molecular Biology|CSIR-Centre for Cellular and Molecular Biology|Mukherjee|India

>Spike|hCoV-19/Japan/PG-1586/2020|2020-04-00|EPI\_ISL\_685192|Original|hCoV-19^^Japan|Human|Pathogen Genomics Center|Pathogen Genomics Center|Sekizuka|Japan

>Spike|hCoV-19/USA/CA-CHLA-PLM07768214/2020|2020-11-28|EPI\_ISL\_753531|Original|hCoV-19^^California|Human|Clinical virology Laboratory|Center for Personalized Medicine|Dien Bard|USA

>Spike|hCoV-19/England/CAMB-1AB24C/2020|2020-04-19|EPI\_ISL\_470111|Original|hCoV-19^^England|Human|Department of Pathology|Wellcome Sanger Institute for the COVID-19 Genomics UK (COG-UK) consortium|Davies|United Kingdom

>Spike|hCoV-19/Canada/BC\_26650347/2020|2020-03-00|EPI\_ISL\_463250|Original|hCoV-19^^British Columbia|Human|BCCDC Public Health Laboratory|BCCDC Public Health Laboratory|Harrigan|Canada

>Spike|hCoV-19/USA/UT-01857/2020|2020-04-13|EPI\_ISL\_498631|Original|hCoV-19^^Utah|Human|Utah Public Health Laboratory|Utah Public Health Laboratory|Butz|USA

>Spike|hCoV-19/England/LIVE-DB3D62/2020|2020-10-20|EPI\_ISL\_650656|Original|hCoV-19^^England|Human|Liverpool Clinical Laboratories|COVID-19 Genomics UK (COG-UK) Consortium|Haldenby|United Kingdom

>Spike|hCoV-19/England/204682412/2020|2020-11-13|EPI\_ISL\_693426|Original|hCoV-19^^England|Human|Respiratory Virus Unit|COVID-19 Genomics UK (COG-UK) Consortium|Platt|United Kingdom



>Spike|hCoV-19/Denmark/DCGC-14287/2020|2020-11-30|EPI\_ISL\_711420|Original|hCoV-19^^Hovedstaden|Human|Department of Virus and Microbiological Special Diagnostics|Albertsen Lab|Michaelsen|Denmark

>Spike|hCoV-19/England/EXET-135EBC/2020|2020-03-22|EPI\_ISL\_457177|Original|hCoV-19^^England|Human|University of Exeter|COVID-19 Genomics UK (COG-UK) Consortium|Temperton|United Kingdom

>Spike|hCoV-19/Japan/PG-7135/2020|2020-08-00|EPI\_ISL\_688240|Original|hCoV-19^^Japan|Human|Pathogen Genomics Center|Pathogen Genomics Center|Sekizuka|Japan

>Spike|hCoV-19/Australia/WA368/2020|2020-10-18|EPI\_ISL\_605845|Original|hCoV-19^^Western Australia|Human|PathWest Laboratory Medicine WA|PathWest Laboratory Medicine WA Microbial Surveillance Unit|Sikazwe|Australia

>Spike|hCoV-19/Switzerland/BE-ETHZ-280109/2020|2020-09-07|EPI\_ISL\_560432|Original|hCoV-19^^Bern|Human|Viollier AG|Department of Biosystems Science and Engineering|Nadeau|Switzerland

>Spike|hCoV-19/Australia/NSW919/2020|2020-09-02|EPI\_ISL\_545000|Original|hCoV-19^^New South Wales|Human|St Vincent's Pathology (SydPath)|NSW Health Pathology - Institute of Clinical Pathology and Medical Research; Westmead Hospital; University of Sydney|Gall|Australia

>Spike|hCoV-19/Guatemala/CDC-1228/2020|2020-03-15|EPI\_ISL\_509696|Original|hCoV-19^^Guatemala|Human|Guatemala Ministry of Public Health|Pathogen Discovery|Queen|Guatemala

>Spike|hCoV-19/Japan/PG-5473/2020|2020-08-00|EPI\_ISL\_690576|Original|hCoV-19^^Japan|Human|Pathogen Genomics Center|Pathogen Genomics Center|Sekizuka|Japan

>Spike|hCoV-19/Spain/PV-IBV-004304/2020|2020-04-09|EPI\_ISL\_510419|Original|hCoV-19^^Basque Country|Human|Servicio de Microbiolog\u00eda. Hospital Universitario Donostia. OSI Donostialdea. \u00c1rea de Enfermedades Infecciosas|SeqCOVID-SPAIN consortium|IBV (CSIC)|Comas|Spain

>Spike|hCoV-19/Wales/PHWC-48E4EC/2020|2020-11-12|EPI\_ISL\_680868|Original|hCoV-19^^Wales|Human|Wales Specialist Virology Centre Sequencing lab|COVID-19 Genomics UK (COG-UK) Consortium|Moore|United Kingdom

>Spike|hCoV-19/USA/AZ-TG274711/2020|2020-04-05|EPI\_ISL\_694062|Original|hCoV-19^^Arizona|Human|AZ SPHL|TGen North|French|USA

>Spike|hCoV-19/Denmark/DCGC-16600/2020|2020-11-16|EPI\_ISL\_714862|Original|hCoV-19^^Midtjylland|Human|Department of Virus and Microbiological Special Diagnostics|Albertsen Lab|Michaelsen|Denmark

>Spike|hCoV-19/USA/NY-Wadsworth-251067-01/2020|2020-10-21|EPI\_ISL\_754822|Original|hCoV-19^^New York|Human|Wadsworth Center|Wadsworth Center|Lasek-Nesselquist|USA

>Spike|hCoV-19/France/ARA-23092/2020|2020-04-10|EPI\_ISL\_508925|Original|hCoV-19^^Auvergne-Rh\u00f4ne-Alpes|Human|CNR Virus des Infections Respiratoires - France SUD|CNR Virus des Infections Respiratoires - France SUD|Josset|France

>Spike|hCoV-19/USA/WA-S918/2020|2020-04-24|EPI\_ISL\_463408|Original|hCoV-19^^Washington|Human|Washington State Department of Health|Seattle Flu Study|Bedford|USA

>Spike|hCoV-19/England/LOND-D4B5F/2020|2020-04-11|EPI\_ISL\_444181|Original|hCoV-19^^England|Human|University College London|COVID-19 Genomics UK (COG-UK) Consortium|Roy|United Kingdom

>Spike|hCoV-19/USA/CA-IGI-0355/2020|2020-07-20|EPI\_ISL\_754875|Original|hCoV-19^^California|Human|Innovative Genomics Institute|Innovative Genomics Institute|Wyman|USA

>Spike|hCoV-19/England/MILK-A240EE/2020|2020-10-04|EPI\_ISL\_652108|Original|hCoV-19^^England|Human|Centre for Enzyme Innovation|COVID-19 Genomics UK (COG-UK) Consortium|Robson|United Kingdom

>Spike|hCoV-19/Scotland/QEUA-A4CC46/2020|2020-10-08|EPI\_ISL\_596036|Original|hCoV-19^^Scotland|Human|Quadram Institute Bioscience|COVID-19 Genomics UK (COG-UK) Consortium|Alikhan|United Kingdom

>Spike|hCoV-19/South Korea/KDCA0421/2020|2020-10-04|EPI\_ISL\_760205|Original|hCoV-19^^South Korea|Human|Division of Emerging Infectious Diseases|Division of Emerging Infectious Diseases|Park|South Korea

>Spike|hCoV-19/England/MILK-B39AF6/2020|2020-11-02|EPI\_ISL\_651058|Original|hCoV-19^^England|Human|University of Exeter|COVID-19 Genomics UK (COG-UK) Consortium|Temperton|United Kingdom

>Spike|hCoV-19/Jordan/SEARCH-5485/2020|2020-09-13|EPI\_ISL\_755123|Original|hCoV-19^^Amman|Human|Biolab Diagnostic Laboratories|Andersen lab at Scripps Research|Gangavarapu|Jordan

>Spike|hCoV-19/Wales/PHWC-49AF28/2020|2020-12-05|EPI\_ISL\_742273|Original|hCoV-19^^Wales|Human|Wales Specialist Virology Centre Sequencing lab|COVID-19 Genomics UK (COG-UK) Consortium|Moore|United Kingdom

>Spike|hCoV-19/England/CAMC-B0A5A2/2020|2020-10-29|EPI\_ISL\_672978|Original|hCoV-19^^England|Human|Lighthouse Lab in Cambridge|Wellcome Sanger Institute for the COVID-19 Genomics UK (COG-UK) Consortium|Davies|United Kingdom

>Spike|hCoV-19/England/LEED-2A99FD/2020|2020-04-10|EPI\_ISL\_538919|Original|hCoV-19^^England|Human|Leeds Teaching Hospitals NHS Trust and Public Health England|Wellcome Sanger Institute for the COVID-19 Genomics UK (COG-UK) consortium|Davies|United Kingdom

>Spike|hCoV-19/England/MILK-A7BE66/2020|2020-10-15|EPI\_ISL\_607511|Original|hCoV-19^^England|Human|Lighthouse Lab in Milton Keynes|Wellcome Sanger Institute for the COVID-19 Genomics UK (COG-UK) consortium|Davies|United Kingdom

>Spike|hCoV-19/USA/TX-HMH-MCoV-15833/2020|2020-07-10|EPI\_ISL\_785517|Original|hCoV-19^^Texas|Human|Houston Methodist Hospital|Houston Methodist Hospital|Long|USA

>Spike|hCoV-19/England/BRIS-122CC7/2020|2020-04-03|EPI\_ISL\_440775|Original|hCoV-19^^England|Human|PHE South West Regional Laboratory|Wellcome Sanger Institute for the COVID-19 Genomics UK (COG-UK) consortium|Amato|United Kingdom

>Spike|hCoV-19/USA/VI-CDC-1993/2020|2020-04-01|EPI\_ISL\_436046|Original|hCoV-19^^Virgin Islands|Human|US VI Department of Health|Pathogen Discovery|Queen|USA

>Spike|hCoV-19/Denmark/DCGC-7721/2020|2020-10-19|EPI\_ISL\_618663|Original|hCoV-19^^Sjaelland|Human|Department of Virus and Microbiological Special Diagnostics|Albertsen lab|Michaelsen|Denmark

>Spike|hCoV-19/England/NORW-EBCAD/2020|2020-05-06|EPI\_ISL\_457498|Original|hCoV-19^^England|Human|Quadram Institute Bioscience|COVID-19 Genomics UK (COG-UK) Consortium|Alikhan|United Kingdom

>Spike|hCoV-19/Denmark/DCGC-18864/2020|2020-12-07|EPI\_ISL\_748605|Original|hCoV-19^^Hovedstaden|Human|Department of Virus and Microbiological Special Diagnostics|Albertsen Lab|Michaelsen|Denmark

>Spike|hCoV-19/Australia/VIC13317/2020|2020-07-28|EPI\_ISL\_563668|Original|hCoV-19^^Victoria|Human|Microbiological Diagnostic Unit - Public Health Laboratory (MDU-PHL) |MDU-PHL|Schultz|Australia

>Spike|hCoV-19/England/ALDP-CF159E/2020|2020-12-18|EPI\_ISL\_781954|Original|hCoV-19^^England|Human|Lighthouse Lab in Alderley Park|Wellcome Sanger Institute for the COVID-19 Genomics UK (COG-UK) Consortium|Davies|United Kingdom

>Spike|hCoV-19/England/CAMC-9D74C1/2020|2020-09-18|EPI\_ISL\_584376|Original|hCoV-19^^England|Human|Virology Department|COVID-19 Genomics UK (COG-UK) Consortium|de Silva|United Kingdom

>Spike|hCoV-19/United Arab Emirates/0868/2020|2020-05-19|EPI\_ISL\_699007|Original|hCoV-19^^Abu Dhabi|Human|Group 42 (G42) Healthcare|G42 Healthcare|Ogrodzki|United Arab Emirates

>Spike|hCoV-19/England/ALDP-A6F3FD/2020|2020-10-15|EPI\_ISL\_607943|Original|hCoV-19^^England|Human|Lighthouse Lab in Alderley Park|Wellcome Sanger Institute for the COVID-19 Genomics UK (COG-UK) consortium|Davies|United Kingdom

>Spike|hCoV-19/Iceland/89/2020|2020-03-10|EPI\_ISL\_417738|Original|hCoV-19^^Reykjavik|Human|The National University Hospital of Iceland|deCODE genetics|J\u00f3nsson|Iceland

>Spike|hCoV-19/Wales/PHWC-2B807/2020|2020-04-09|EPI\_ISL\_445765|Original|hCoV-19^^Wales|Human|Wales Specialist Virology Centre|Public Health Wales Microbiology Cardiff|Moore|United Kingdom

>Spike|hCoV-19/Germany/TH-RKI-NP-0012/2020|2020-12-03|EPI\_ISL\_763008|Original|hCoV-19^^Thuringia|Human|Unit 17|Project group Epidemiology of Highly Pathogenic Microorganisms|Schubert|Germany

>Spike|hCoV-19/USA/CA-CZB-13922/2020|2020-08-06|EPI\_ISL\_739572|Original|hCoV-19^^California|Human|Alameda County Public Health Lab|Chan-Zuckerberg Biohub|Kamm|USA

>Spike|hCoV-19/USA/VA-DCLS-1753/2020|2020-09-10|EPI\_ISL\_644853|Original|hCoV-19^^Virginia|Human|Virginia DCLS|Virginia DCLS|St. Jacques|USA

>Spike|hCoV-19/Japan/PG-0549/2020|2020-04-00|EPI\_ISL\_684179|Original|hCoV-19^^Japan|Human|Pathogen Genomics Center|Pathogen Genomics Center|Sekizuka|Japan

>Spike|hCoV-19/USA/WI-UW-2183/2020|2020-10-21|EPI\_ISL\_677587|Original|hCoV-19^^Wisconsin|Human|University of Wisconsin-Madison AIDS Vaccine Research Laboratories|University of Wisconsin-Madison AIDS Vaccine Research Laboratories|Baczenas|USA

>Spike|hCoV-19/England/MILK-A6B203/2020|2020-10-08|EPI\_ISL\_608820|Original|hCoV-19^^England|Human|Lighthouse Lab in Milton Keynes|Wellcome Sanger Institute for the COVID-19 Genomics UK (COG-UK) consortium|Davies|United Kingdom

>Spike|hCoV-19/England/ALDP-94E841/2020|2020-06-16|EPI\_ISL\_555048|Original|hCoV-19^^England|Human|Lighthouse Lab in Alderley Park|Wellcome Sanger Institute for the COVID-19 Genomics UK (COG-UK) consortium|Davies|United Kingdom

>Spike|hCoV-19/mink/Netherlands/NB-EMC-64-5/2020|2020-10-14|EPI\_ISL\_632439|Original|hCoV-19^^Noord Brabant|Neovison vison|Dutch COVID-19 response team|Erasmus Medical Center|Oude Munnink|Netherlands

>Spike|hCoV-19/England/CAMC-A5936F/2020|2020-10-09|EPI\_ISL\_597164|Original|hCoV-19^^England|Human|Lighthouse Lab in Cambridge|Wellcome Sanger Institute for the COVID-19 Genomics UK (COG-UK) consortium|Davies|United Kingdom

>Spike|hCoV-19/England/ALDP-BB9F68/2020|2020-11-20|EPI\_ISL\_701887|Original|hCoV-19^^England|Human|Lighthouse Lab in Alderley Park|Wellcome Sanger Institute for the COVID-19 Genomics UK (COG-UK) Consortium|Davies|United Kingdom

>Spike|hCoV-19/USA/TX-DSHS-1608/2020|2020-09-14|EPI\_ISL\_700734|Original|hCoV-19^^Texas|Human|Texas Department of State Health Services|Texas Department of State Health Services|Rahman|USA

>Spike|hCoV-19/USA/AZ-TG547283/2020|2020-07-02|EPI\_ISL\_695462|Original|hCoV-19^^Arizona|Human|AZ SPHL|TGen North|French|USA

>Spike|hCoV-19/Wales/PHWC-248C2/2020|2020-03-19|EPI\_ISL\_419454|Original|hCoV-19^^Wales|Human|Wales Specialist Virology Centre|Public Health Wales Microbiology Cardiff|Moore|United Kingdom

>Spike|hCoV-19/Australia/VIC8385/2020|2020-08-12|EPI\_ISL\_564975|Original|hCoV-19^^Victoria|Human|Microbiological Diagnostic Unit - Public Health Laboratory (MDU-PHL)|MDU-PHL|Schultz|Australia

>Spike|hCoV-19/USA/WA-S864/2020|2020-04-23|EPI\_ISL\_463354|Original|hCoV-19^^Washington|Human|Washington State Department of Health|Seattle Flu Study|Bedford|USA

>Spike|hCoV-19/USA/CA-QDX-1442/2020|2020-03-18|EPI\_ISL\_572093|Original|hCoV-19^^California|Human|Quest Diagnostics|Quest Diagnostics|Kagan|USA

>Spike|hCoV-19/Scotland/QEUH-9E5572/2020|2020-09-24|EPI\_ISL\_600951|Original|hCoV-19^^Scotland|Human|Lighthouse Lab in Glasgow|Wellcome Sanger Institute for the COVID-19 Genomics UK (COG-UK) consortium|Davies|United Kingdom

>Spike|hCoV-19/England/QEUH-9986D5/2020|2020-08-24|EPI\_ISL\_540114|Original|hCoV-19^^England|Human|Lighthouse Lab in Glasgow|Wellcome Sanger Institute for the COVID-19 Genomics UK (COG-UK) consortium|Davies|United Kingdom

>Spike|hCoV-19/USA/FL-BPHL-1310/2020|2020-07-06|EPI\_ISL\_541248|Original|hCoV-19^^Florida|Human|Florida Bureau of Public Health Laboratories|Florida Bureau of Public Health Laboratories|Blanton|USA

>Spike|hCoV-19/England/MILK-9D52E7/2020|2020-09-18|EPI\_ISL\_637494|Original|hCoV-19^^England|Human|Centre for Enzyme Innovation|COVID-19 Genomics UK (COG-UK) Consortium|Robson|United Kingdom

>Spike|hCoV-19/England/BRIS-128EBC/2020|2020-04-19|EPI\_ISL\_458847|Original|hCoV-19^^England|Human|PHE South West Regional Laboratory|Wellcome Sanger Institute for the COVID-19 Genomics UK (COG-UK) consortium|Davies|United Kingdom

>Spike|hCoV-19/Wales/PHWC-162979/2020|2020-05-13|EPI\_ISL\_473145|Original|hCoV-19^^Wales|Human|Wales Specialist Virology Centre Sequencing lab|COVID-19 Genomics UK (COG-UK) Consortium|Moore|United Kingdom

>Spike|hCoV-19/Spain/VC-IBV-98003581/2020|2020-03-31|EPI\_ISL\_537994|Original|hCoV-19^^Comunitat Valenciana|Human|Servicio de Microbiolog\u00eda. Hospital General Universitario de Castell\u00f3n|SeqCOVID-SPAIN consortium/IBV(CSIC)|Comas|Spain

>Spike|hCoV-19/Russia/STA-RII-MH2787S/2020|2020-09-19|EPI\_ISL\_602452|Original|hCoV-19^^Stavropol|Human|HELIX LLC|WHO National Influenza Centre Russian Federation|Komissarov|Russia

>Spike|hCoV-19/Brazil/SP-218/2020|2020-04-22|EPI\_ISL\_527865|Original|hCoV-19^^S\u00e3o Paulo|Human|Hospital e Maternidade S\u00e3o Crist\u00f3v\u00e1o|Instituto Adolfo Lutz|Sacchi|Brazil

>Spike|hCoV-19/Russia/MOW-RII-MH2890S/2020|2020-09-22|EPI\_ISL\_733057|Original|hCoV-19^^Moscow|Human|HELIX LLC|WHO National Influenza Centre Russian Federation|Komissarov|Russia

>Spike|hCoV-19/USA/CA-IGI-0765/2020|2020-07-31|EPI\_ISL\_677886|Original|hCoV-19^^California|Human|Innovative Genomics Institute|Innovative Genomics Institute|Wyman|USA

>Spike|hCoV-19/Sweden/20-53340/2020|2020-11-01|EPI\_ISL\_710598|Original|hCoV-19^^Halland|Human|Klinisk mikrobiologi|The Public Health Agency of Sweden|Svartstr\u00f6m|Sweden

>Spike|hCoV-19/Colombia/ANT-GUV-92252/2020|2020-04-01|EPI\_ISL\_447767|Original|hCoV-19^^Antioquia|Human|Instituto Nacional de Salud|Grupo de Investigaciones Microbiol\u00f3gicas-UR (GIMUR)|Ram\u00e9rez|Colombia

>Spike|hCoV-19/South Africa/Tygerberg\_37/2020|2020-04-08|EPI\_ISL\_464148|Original|hCoV-19^^Western Cape|Human|National Health Laboratory Service (NHLS)|Division of Medical Virology|Engelbrecht|South Africa

>Spike|hCoV-19/England/CAMC-A80D52/2020|2020-10-13|EPI\_ISL\_610712|Original|hCoV-19^^England|Human|Lighthouse Lab in Cambridge|Wellcome Sanger Institute for the COVID-19 Genomics UK (COG-UK) consortium|Davies|United Kingdom

>Spike|hCoV-19/Japan/IC-0249/2020|2020-10-00|EPI\_ISL\_667678|Original|hCoV-19^^Japan|Human|Pathogen Genomics Center|Pathogen Genomics Center|Sekizuka|Japan

>Spike|hCoV-19/USA/OR-OHSU-1277/2020|2020-07-14|EPI\_ISL\_509177|Original|hCoV-19^^Oregon|Human|OHSU Lab Services Molecular Microbiology Lab|Oregon SARS-CoV-2 Genome Sequencing Center|O'Roak|USA

>Spike|hCoV-19/Peru/LIM-UPCH-0117/2020|2020-06-09|EPI\_ISL\_568514|Original|hCoV-19^^Lima|Human|Laboratorio de Referencia Nacional de Virus Respiratorios|Laboratorio de Gen\u00e9tica Microbiana|Tsukayama|Peru

>Spike|hCoV-19/Jordan/AM-ALSR-5163/2020|2020-10-16|EPI\_ISL\_730402|Original|hCoV-19^^Amman|Human|Biolab Diagnostic Laboratories|Andersen lab at Scripps Research|Gangavarapu|Jordan

>Spike|hCoV-19/Portugal/PT0274/2020|2020-04-05|EPI\_ISL\_453988|Original|hCoV-19^^Portugal|Human|unknown|Instituto Nacional de Saude (INSA)|Borges|Portugal

>Spike|hCoV-19/England/ALDP-9E6D88/2020|2020-09-24|EPI\_ISL\_580289|Original|hCoV-19^^England|Human|Lighthouse Lab in Alderley Park|Wellcome Sanger Institute for the COVID-19 Genomics UK (COG-UK) consortium|Davies|United Kingdom

>Spike|hCoV-19/Northern Ireland/NIRE-FD024/2020|2020-04-24|EPI\_ISL\_489166|Original|hCoV-19^^Northern Ireland|Human|Regional Virus Laboratory|Wellcome Sanger Institute for the COVID-19 Genomics UK (COG-UK) consortium|Davies|United Kingdom

>Spike|hCoV-19/England/ALDP-9E7112/2020|2020-09-24|EPI\_ISL\_580372|Original|hCoV-19^^England|Human|Lighthouse Lab in Alderley Park|Wellcome Sanger Institute for the COVID-19 Genomics UK (COG-UK) consortium|Davies|United Kingdom

>Spike|hCoV-19/Luxembourg/LNS5936010/2020|2020-11-14|EPI\_ISL\_744326|Original|hCoV-19^^Luxembourg|Human|Laboratoire national de sant\u00e9|Laboratoire national de sant\u00e9|Wienecke-Baldacchino|Luxembourg

>Spike|hCoV-19/England/BRIS-1264AD/2020|2020-04-10|EPI\_ISL\_459057|Original|hCoV-19^^England|Human|PHE South West Regional Laboratory|Wellcome Sanger Institute for the COVID-19 Genomics UK (COG-UK) consortium|Davies|United Kingdom

>Spike|hCoV-19/Germany/BY-MVP-V2012612/2020|2020-03-19|EPI\_ISL\_420908|Original|hCoV-19^^Bavaria|Human|Max von Pettenkofer Institute|Laboratory for Functional Genome Analysis|Graf|Germany

>Spike|hCoV-19/Belgium/reg-0804726/2020|2020-08-04|EPI\_ISL\_734907|Original|hCoV-19^^Deurne|Human|UZ Leuven|KU Leuven|Maes|Belgium

>Spike|hCoV-19/England/204590738/2020|2020-11-06|EPI\_ISL\_700672|Original|hCoV-19^^England|Human|Respiratory Virus Unit|COVID-19 Genomics UK (COG-UK) Consortium|Platt|United Kingdom

>Spike|hCoV-19/Japan/PG-3423/2020|2020-04-00|EPI\_ISL\_691535|Original|hCoV-19^^Japan|Human|Sakai City Institute of Public Health|Pathogen Genomics Center|Sekizuka|Japan

>Spike|hCoV-19/Northern Ireland/NIRE-1017EB/2020|2020-05-09|EPI\_ISL\_489286|Original|hCoV-19^^Northern Ireland|Human|Regional Virus Laboratory|Wellcome Sanger Institute for the COVID-19 Genomics UK (COG-UK) consortium|Davies|United Kingdom

>Spike|hCoV-19/England/MILK-9584E6/2020|2020-06-11|EPI\_ISL\_554858|Original|hCoV-19^^England|Human|Lighthouse Lab in Milton Keynes|Wellcome Sanger Institute for the COVID-19 Genomics UK (COG-UK) consortium|Davies|United Kingdom

>Spike|hCoV-19/Denmark/DCGC-16390/2020|2020-11-16|EPI\_ISL\_714177|Original|hCoV-19^^Syddanmark|Human|Department of Virus and Microbiological Special Diagnostics|Albertsen Lab|Michaelsen|Denmark

>Spike|hCoV-19/England/QEUEH-AA0545/2020|2020-10-19|EPI\_ISL\_611350|Original|hCoV-19^^England|Human|Lighthouse Lab in Glasgow|Wellcome Sanger Institute for the COVID-19 Genomics UK (COG-UK) consortium|Davies|United Kingdom

>Spike|hCoV-19/England/LOND-D44CD/2020|2020-04-08|EPI\_ISL\_444129|Original|hCoV-19^^England|Human|University College London|COVID-19 Genomics UK (COG-UK) Consortium|Roy|United Kingdom

>Spike|hCoV-19/England/ALDP-9BE6D9/2020|2020-09-09|EPI\_ISL\_567963|Original|hCoV-19^^England|Human|Lighthouse Lab in Alderley Park|Wellcome Sanger Institute for the COVID-19 Genomics UK (COG-UK) consortium|Davies|United Kingdom

>Spike|hCoV-19/Switzerland/TI-ETHZ-100098/2020|2020-03-13|EPI\_ISL\_451690|Original|hCoV-19^^Ticino|Human|Viollier AG|Department of Biosystems Science and Engineering|Nadeau|Switzerland

>Spike|hCoV-19/Spain/MD-IBV-99012315/2020|2020-11-17|EPI\_ISL\_779975|Original|hCoV-19^^Madrid|Human|Hospital General Universitario Gregorio Mara\u00f1a|SeqCOVID-SPAIN consortium|IBV (CSIC)|Comas|Spain

>Spike|hCoV-19/Sweden/20-50486/2020|2020-03-26|EPI\_ISL\_475143|Original|hCoV-19^^Vasterbotten|Human|Umea klinisk mikrobiologi|The Public Health Agency of Sweden|Svartstr\u00f6m|Sweden

>Spike|hCoV-19/USA/LA-EVTL241/2020|2020-08-22|EPI\_ISL\_574375|Original|hCoV-19^^Louisiana|Human|LSUHS Emerging Viral Threat Laboratory|Microbial Genome Sequencing Center|Kamil|USA

>Spike|hCoV-19/Hungary/SRC-00175/2020|2020-03-22|EPI\_ISL\_435406|Original|hCoV-19^^Baranya|Human|Virological Research Group|Bioinformatics Research Group|Herczeg|Hungary

>Spike|hCoV-19/England/CAMB-1AFC95/2020|2020-05-13|EPI\_ISL\_452872|Original|hCoV-19^^England|Human|Department of Pathology|COVID-19 Genomics UK (COG-UK) Consortium|Meredith|United Kingdom

>Spike|hCoV-19/England/MILK-9C3A8A/2020|2020-09-09|EPI\_ISL\_566962|Original|hCoV-19^^England|Human|Lighthouse Lab in Milton Keynes|Wellcome Sanger Institute for the COVID-19 Genomics UK (COG-UK) consortium|Davies|United Kingdom

>Spike|hCoV-19/England/MILK-A6AD5E/2020|2020-10-08|EPI\_ISL\_608787|Original|hCoV-19^^England|Human|Lighthouse Lab in Milton Keynes|Wellcome Sanger Institute for the COVID-19 Genomics UK (COG-UK) consortium|Davies|United Kingdom

>Spike|hCoV-19/Netherlands/NB-EMC-262/2020|2020-06-15|EPI\_ISL\_523385|Original|hCoV-19^^Noord Brabant|Human|Dutch COVID-19 response team|Erasmus Medical Center|Oude Munnink|Netherlands

>Spike|hCoV-19/USA/PR-B6BV/2020|2020-08-11|EPI\_ISL\_527394|Original|hCoV-19^^Puerto Rico|Human|University of Miami Immunology and Histocompatibility Laboratory|University of Miami Immunology and Histocompatibility Laboratory|Margolles-Clark|USA

>Spike|hCoV-19/Lithuania/MR-LUHS-Eilnr235905/2020|2020-12-18|EPI\_ISL\_770504|Original|hCoV-19^^Kauno apskritis|Human|Lithuanian University of Health Sciences Hospital|Lithuanian University of Health Sciences|Zemaitis|Lithuania

>Spike|hCoV-19/Wales/PHWC-49AEA3/2020|2020-12-07|EPI\_ISL\_742266|Original|hCoV-19^^Wales|Human|Wales Specialist Virology Centre Sequencing lab|COVID-19 Genomics UK (COG-UK) Consortium|Moore|United Kingdom

>Spike|hCoV-19/USA/TX-HMH-MCoV-18659/2020|2020-11-17|EPI\_ISL\_785007|Original|hCoV-19^^Texas|Human|Houston Methodist Hospital|Houston Methodist Hospital|Long|USA

>Spike|hCoV-19/England/ALDP-B24690/2020|2020-11-04|EPI\_ISL\_646844|Original|hCoV-19^^England|Human|Lighthouse Lab in Alderley Park|Wellcome Sanger Institute for the COVID-19 Genomics UK (COG-UK) Consortium|Davies|United Kingdom

>Spike|hCoV-19/USA/TX-HMH-MCoV-16320/2020|2020-11-02|EPI\_ISL\_786004|Original|hCoV-19^^Texas|Human|Houston Methodist Hospital|Houston Methodist Hospital|Long|USA

>Spike|hCoV-19/USA/MI-MDHHS-SC22043/2020|2020-09-16|EPI\_ISL\_577593|Original|hCoV-19^^Michigan|Human|Michigan Department of Health and Human Services|Michigan Department of Health and Human Services|Jacob|USA

>Spike|hCoV-19/Scotland/EDB4168/2020|2020-04-20|EPI\_ISL\_456930|Original|hCoV-19^^Scotland|Human|Virology Department|COVID-19 Genomics UK (COG-UK) Consortium|Williams|United Kingdom

>Spike|hCoV-19/USA/WA-UW-22900/2020|2020-08-06|EPI\_ISL\_570732|Original|hCoV-19^^Washington|Human|UW Virology Lab|UW Virology Lab|Roychoudhury|USA

>Spike|hCoV-19/England/CAMB-1B0244/2020|2020-04-30|EPI\_ISL\_459259|Original|hCoV-19^^England|Human|Department of Pathology|Wellcome Sanger Institute for the COVID-19 Genomics UK (COG-UK) consortium|Davies|United Kingdom

>Spike|hCoV-19/England/205141159/2020|2020-12-16|EPI\_ISL\_756135|Original|hCoV-19^^England|Human|Respiratory Virus Unit|COVID-19 Genomics UK (COG-UK) Consortium|Miah|United Kingdom

>Spike|hCoV-19/Australia/VIC4380/2020|2020-07-14|EPI\_ISL\_519676|Original|hCoV-19^^Victoria|Human|Microbiological Diagnostic Unit - Public Health Laboratory (MDU-PHL)|MDU-PHL|Schultz|Australia

>Spike|hCoV-19/Luxembourg/LNS0972408/2020|2020-10-28|EPI\_ISL\_739866|Original|hCoV-19^^Luxembourg|Human|Laboratoire national de sant\u00e9|Laboratoire national de sant\u00e9|Wienecke-Baldacchino|Luxembourg

>Spike|hCoV-19/England/NOTT-121804/2020|2020-12-21|EPI\_ISL\_763819|Original|hCoV-19^^England|Human|Queens Medical Centre|COVID-19 Genomics UK (COG-UK) Consortium|Loose|United Kingdom

>Spike|hCoV-19/Denmark/DCGC-9764/2020|2020-11-09|EPI\_ISL\_669157|Original|hCoV-19^^Sjaelland|Human|Department of Virus and Microbiological Special Diagnostics|Albertsen Lab|Michaelsen|Denmark

>Spike|hCoV-19/England/MILK-ACBD00/2020|2020-10-20|EPI\_ISL\_629117|Original|hCoV-19^^England|Human|Lighthouse Lab in Milton Keynes|Wellcome Sanger Institute for the COVID-19 Genomics UK (COG-UK) consortium|Davies|United Kingdom

>Spike|hCoV-19/Japan/PG-6727/2020|2020-08-00|EPI\_ISL\_687838|Original|hCoV-19^^Japan|Human|Pathogen Genomics Center|Pathogen Genomics Center|Sekizuka|Japan

>Spike|hCoV-19/Denmark/DCGC-7047/2020|2020-10-12|EPI\_ISL\_619896|Original|hCoV-19^^Syddanmark|Human|Department of Virus and Microbiological Special Diagnostics|Albertsen lab|Michaelsen|Denmark

>Spike|hCoV-19/Wales/ALDP-9C5772/2020|2020-09-10|EPI\_ISL\_567782|Original|hCoV-19^^Wales|Human|Lighthouse Lab in Alderley Park|Wellcome Sanger Institute for the COVID-19 Genomics UK (COG-UK) consortium|Davies|United Kingdom

>Spike|hCoV-19/USA/TX-HMH-2591/2020|2020-06-02|EPI\_ISL\_545414|Original|hCoV-19^^Texas|Human|Houston Methodist Hospital|Houston Methodist Hospital|Long|USA

>Spike|hCoV-19/Wales/ALDP-C3AEB3/2020|2020-12-08|EPI\_ISL\_767202|Original|hCoV-19^^Wales|Human|Lighthouse Lab in Alderley Park|Wellcome Sanger Institute for the COVID-19 Genomics UK (COG-UK) Consortium|Davies|United Kingdom

>Spike|hCoV-19/Japan/PG-2655/2020|2020-04-00|EPI\_ISL\_690787|Original|hCoV-19^^Japan|Human|Pathogen Genomics Center|Pathogen Genomics Center|Sekizuka|Japan

>Spike|hCoV-19/England/QEUH-C5D8F1/2020|2020-12-14|EPI\_ISL\_769360|Original|hCoV-19^^England|Human|Lighthouse Lab in Glasgow|Wellcome Sanger Institute for the COVID-19 Genomics UK (COG-UK) Consortium|Davies|United Kingdom

>Spike|hCoV-19/USA/MN-MDH-2231/2020|2020-12-02|EPI\_ISL\_770805|Original|hCoV-19^^Minnesota|Human|Vault Health|Minnesota Department of Health|Lorentz|USA

>Spike|hCoV-19/England/CAMB-1B2488/2020|2020-05-15|EPI\_ISL\_456682|Original|hCoV-19^^England|Human|Department of Pathology|COVID-19 Genomics UK (COG-UK) Consortium|Meredith|United Kingdom

>Spike|hCoV-19/Russia/Sverdlovsk-71905/2020|2020-03-19|EPI\_ISL\_428879|Vero|hCoV-19^^Sverdlovsk|Human|State Research Center of Virology and Biotechnology VECTOR|State Research Center of Virology and Biotechnology VECTOR|Shvalov|Russia

>Spike|hCoV-19/USA/TX-HMH-4353/2020|2020-06-17|EPI\_ISL\_543554|Original|hCoV-19^^Texas|Human|Houston Methodist Hospital|Houston Methodist Hospital|Long|USA

>Spike|hCoV-19/Scotland/QEUH-A4C569/2020|2020-10-07|EPI\_ISL\_595977|Original|hCoV-19^^Scotland|Human|Quadram Institute Bioscience|COVID-19 Genomics UK (COG-UK) Consortium|Alikhan|United Kingdom

>Spike|hCoV-19/Australia/VIC15150/2020|2020-08-27|EPI\_ISL\_593160|Original|hCoV-19^^Victoria|Human|Microbiological Diagnostic Unit - Public Health Laboratory (MDU-PHL)|MDU-PHL|Schultz|Australia

>Spike|hCoV-19/Canada/ON-S1591/2020|2020-09-04|EPI\_ISL\_755932|Original|hCoV-19^^Ontario|Human|Toronto Invasive Bacterial Diseases Network|McMaster University|McArthur|Canada

>Spike|hCoV-19/Switzerland/BS-42341001/2020|2020-07-06|EPI\_ISL\_581897|Original|hCoV-19^^Basel-Stadt|Human|University Hospital Basel|University Hospital Basel|Roloff Handschin|Switzerland

>Spike|hCoV-19/Denmark/DCGC-13546/2020|2020-11-30|EPI\_ISL\_712239|Original|hCoV-19^^Midtjylland|Human|Department of Virus and Microbiological Special Diagnostics|Albertsen Lab|Michaelsen|Denmark

>Spike|hCoV-19/Switzerland/BL-42209561/2020|2020-03-27|EPI\_ISL\_581798|Original|hCoV-19^^Basel-Land|Human|University Hospital Basel|University Hospital Basel|Roloff Handschin|Switzerland

>Spike|hCoV-19/USA/CA-CZB-11914/2020|2020-10-04|EPI\_ISL\_672289|Original|hCoV-19^^California|Human|Santa Clara County Public Health Laboratory|Chan-Zuckerberg Biohub|Bhatt|USA

>Spike|hCoV-19/USA/TX-HMH-7967/2020|2020-06-29|EPI\_ISL\_545749|Original|hCoV-19^^Texas|Human|Houston Methodist Hospital|Houston Methodist Hospital|Long|USA

>Spike|hCoV-19/England/ALDP-9CE032/2020|2020-09-16|EPI\_ISL\_566286|Original|hCoV-19^^England|Human|Lighthouse Lab in Alderley Park|Wellcome Sanger Institute for the COVID-19 Genomics UK (COG-UK) consortium|Davies|United Kingdom

>Spike|hCoV-19/Australia/VIC9382/2020|2020-08-17|EPI\_ISL\_565533|Original|hCoV-19^^Victoria|Human|Microbiological Diagnostic Unit - Public Health Laboratory (MDU-PHL)|MDU-PHL|Schultz|Australia

>Spike|hCoV-19/Canada/MB\_8/2020|2020-03-12|EPI\_ISL\_418812|Original|hCoV-19^^Manitoba|Human|Cadham Provincial Laboratory|National Microbiology Laboratory|Majer|Canada

>Spike|hCoV-19/England/CAMC-C80AA4/2020|2020-12-17|EPI\_ISL\_762717|Original|hCoV-19^^England|Human|Lighthouse Lab in Cambridge|Wellcome Sanger Institute for the COVID-19 Genomics UK (COG-UK) Consortium|Davies|United Kingdom

>Spike|hCoV-19/England/ALDP-A667CD/2020|2020-10-12|EPI\_ISL\_630620|Original|hCoV-19^^England|Human|Lighthouse Lab in Alderley Park|Wellcome Sanger Institute for the COVID-19 Genomics UK (COG-UK) consortium|Davies|United Kingdom

>Spike|hCoV-19/England/QEUH-9B8EC8/2020|2020-09-06|EPI\_ISL\_602142|Original|hCoV-19^^England|Human|Lighthouse Lab in Glasgow|Wellcome Sanger Institute for the COVID-19 Genomics UK (COG-UK) consortium|Davies|United Kingdom

>Spike|hCoV-19/Belgium/ULG-10570/2020|2020-10-23|EPI\_ISL\_626316|Original|hCoV-19^^Li\u00e8ge|Human|Department of Clinical Microbiology|GIGA Medical Genomics|Durkin|Belgium

>Spike|hCoV-19/England/ALDP-B23C35/2020|2020-11-04|EPI\_ISL\_646429|Original|hCoV-19^^England|Human|Lighthouse Lab in Alderley Park|Wellcome Sanger Institute for the COVID-19 Genomics UK (COG-UK) Consortium|Davies|United Kingdom

>Spike|hCoV-19/Iceland/312/2020|2020-03-18|EPI\_ISL\_417641|Original|hCoV-19^^Reykjavik|Human|The National University Hospital of Iceland|deCODE genetics|J\u00f3nsson|Iceland

>Spike|hCoV-19/Singapore/447/2020|2020-04-15|EPI\_ISL\_475978|Original|hCoV-19^^Singapore|Human|National Public Health Laboratory|National Public Health Laboratory|Mak|Singapore

>Spike|hCoV-19/Norway/4601/2020|2020-10-14|EPI\_ISL\_775478|Original|hCoV-19^^Vestfold og Telemark|Human|Unilabs Laboratory Medicine|Norwegian Institute of Public Health|Vollan|Norway

>Spike|hCoV-19/USA/CT-Yale-098/2020|2020-04-02|EPI\_ISL\_428749|Original|hCoV-19^^Connecticut|Human|Yale COVID-19 Biorepository|Grubaugh Lab - Yale School of Public Health|Grubaugh|USA

>Spike|hCoV-19/England/QEUEH-C31204/2020|2020-12-10|EPI\_ISL\_731429|Original|hCoV-19^^England|Human|Lighthouse Lab in Glasgow|Wellcome Sanger Institute for the COVID-19 Genomics UK (COG-UK) Consortium|Davies|United Kingdom

>Spike|hCoV-19/Japan/IC-0007/2020|2020-06-00|EPI\_ISL\_591353|Original|hCoV-19^^Japan|Human|Pathogen Genomics Center|Pathogen Genomics Center|Sekizuka|Japan

>Spike|hCoV-19/SaudiArabia/KAUST-JEDDAH1018/2020|2020-06-17|EPI\_ISL\_512889|Original|hCoV-19^^Jeddah|Human|Pathogen Genomics Lab King Abdullah University of Science and Technology(KAUST)|Pathogen Genomics Lab King Abdullah University of Science and Technology(KAUST)|Mohamed Ghazzali|Saudi Arabia

>Spike|hCoV-19/England/20186006704/2020|2020-04-29|EPI\_ISL\_465466|Original|hCoV-19^^England|Human|Respiratory Virus Unit|Respiratory Virus Unit|Platt|United Kingdom

>Spike|hCoV-19/USA/UT-UPHL-201113557/2020|2020-04-23|EPI\_ISL\_634901|Original|hCoV-19^^Utah|Human|Utah Public Health Laboratory|Utah Public Health Laboratory|Young|USA

>Spike|hCoV-19/England/ALDP-B5B42D/2020|2020-11-08|EPI\_ISL\_655488|Original|hCoV-19^^England|Human|Lighthouse Lab in Alderley Park|Wellcome Sanger Institute for the COVID-19 Genomics UK (COG-UK) Consortium|Davies|United Kingdom

>Spike|hCoV-19/Scotland/EDB3631/2020|2020-04-27|EPI\_ISL\_439301|Original|hCoV-19^^Scotland|Human|Virology Department|COVID-19 Genomics UK (COG-UK) Consortium|Williams|United Kingdom

>Spike|hCoV-19/USA/TX-HMH-7250/2020|2020-06-29|EPI\_ISL\_546626|Original|hCoV-19^^Texas|Human|Houston Methodist Hospital|Houston Methodist Hospital|Long|USA

>Spike|hCoV-19/Scotland/QEUEH-A369DF/2020|2020-10-04|EPI\_ISL\_638932|Original|hCoV-19^^Scotland|Human|Wales Specialist Virology Centre Sequencing lab|COVID-19 Genomics UK (COG-UK) Consortium|Moore|United Kingdom

>Spike|hCoV-19/England/NOTT-110C35/2020|2020-05-01|EPI\_ISL\_448396|Original|hCoV-19^^England|Human|Queens Medical Centre|COVID-19 Genomics UK (COG-UK) Consortium|Loose|United Kingdom

>Spike|hCoV-19/USA/CA-CZB-2413/2020|2020-05-22|EPI\_ISL\_513835|Original|hCoV-19^^California|Human|Orange County Public Health Laboratory|Chan-Zuckerberg Biohub|Kamm|USA

>Spike|hCoV-19/USA/AZ-TG280882/2020|2020-04-23|EPI\_ISL\_694211|Original|hCoV-19^^Arizona|Human|AZ SPHL|TGen North|French|USA

>Spike|hCoV-19/Japan/PG-6696/2020|2020-07-00|EPI\_ISL\_687807|Original|hCoV-19^^Japan|Human|Pathogen Genomics Center|Pathogen Genomics Center|Sekizuka|Japan

>Spike|hCoV-19/India/MH-ACTREC-174/2020|2020-06-13|EPI\_ISL\_699829|Original|hCoV-19^^Maharashtra|Human|Hematopathology Laboratory|Hematopathology Laboratory|Patkar|India

>Spike|hCoV-19/USA/MA-MGH-01504/2020|2020-05-07|EPI\_ISL\_791961|Original|hCoV-19^^Massachusetts|Human|Massachusetts General Hospital|Infectious Disease Program|Park|USA

>Spike|hCoV-19/Spain/CL-IBV-97006162/2020|2020-04-05|EPI\_ISL\_537309|Original|hCoV-19^^Castilla y Leon|Human|Universidad de Le\u00f3n|SeqCOVID-SPAIN consortium/IBV (CSIC) |Comas|Spain

>Spike|hCoV-19/England/ALDP-955373/2020|2020-06-12|EPI\_ISL\_553427|Original|hCoV-19^^England|Human|Lighthouse Lab in Alderley Park|Wellcome Sanger Institute for the COVID-19 Genomics UK (COG-UK) consortium|Davies|United Kingdom

>Spike|hCoV-19/USA/CA-ALSR-0682-SAN/2020|2020-03-28|EPI\_ISL\_483299|Original|hCoV-19^^California|Human|UC San Diego Center for Advanced Laboratory Medicine|Andersen lab at Scripps Research|Gangavarapu|USA



>Spike|hCoV-19/England/ALDP-66DEF2/2020|2020-07-02|EPI\_ISL\_558050|Original|hCoV-19^^England|Human|Lighthouse Lab in Alderley Park|Wellcome Sanger Institute for the COVID-19 Genomics UK (COG-UK) consortium|Davies|United Kingdom

>Spike|hCoV-19/Australia/VIC15225/2020|2020-08-03|EPI\_ISL\_593202|Original|hCoV-19^^Victoria|Human|Microbiological Diagnostic Unit - Public Health Laboratory (MDU-PHL)|MDU-PHL|Schultz|Australia

>Spike|hCoV-19/Singapore/846/2020|2020-07-12|EPI\_ISL\_518010|Original|hCoV-19^^Singapore|Human|Singapore General Hospital|Department of Microbiology|Abdul Rahman|Singapore

>Spike|hCoV-19/England/ALDP-AC0F8D/2020|2020-10-08|EPI\_ISL\_649312|Original|hCoV-19^^England|Human|Lighthouse Lab in Alderley Park|Wellcome Sanger Institute for the COVID-19 Genomics UK (COG-UK) Consortium|Davies|United Kingdom

>Spike|hCoV-19/Netherlands/NoordHolland\_7/2020|2020-04-01|EPI\_ISL\_460796|Original|hCoV-19^^Noord Holland|Human|Dutch COVID-19 response team|Erasmus Medical Center|Oude Munnink|Netherlands

>Spike|hCoV-19/Japan/Donner93/2020|2020-08-20|EPI\_ISL\_644997|Original|hCoV-19^^Kanto|Human|Department of Infectious Diseases|Center for Medical Genetics|Kosaki|Japan

>Spike|hCoV-19/England/MILK-B88A9E/2020|2020-11-14|EPI\_ISL\_675940|Original|hCoV-19^^England|Human|Lighthouse Lab in Milton Keynes|Wellcome Sanger Institute for the COVID-19 Genomics UK (COG-UK) Consortium|Davies|United Kingdom

>Spike|hCoV-19/England/CAMB-71D9A/2020|2020-03-30|EPI\_ISL\_438300|Original|hCoV-19^^England|Human|Department of Pathology|Wellcome Sanger Institute for the COVID-19 Genomics UK (COG-UK) consortium|Amato|United Kingdom

>Spike|hCoV-19/England/ALDP-B5D986/2020|2020-11-09|EPI\_ISL\_704452|Original|hCoV-19^^England|Human|Department of Pathology|COVID-19 Genomics UK (COG-UK) Consortium|Goodfellow|United Kingdom

>Spike|hCoV-19/England/ALDP-950D2F/2020|2020-06-14|EPI\_ISL\_554566|Original|hCoV-19^^England|Human|Lighthouse Lab in Alderley Park|Wellcome Sanger Institute for the COVID-19 Genomics UK (COG-UK) consortium|Davies|United Kingdom

>Spike|hCoV-19/USA/MA-MGH-00705/2020|2020-04-06|EPI\_ISL\_460293|Original|hCoV-19^^Massachusetts|Human|Massachusetts General Hospital|Infectious Disease Program|Lemieux|USA

>Spike|hCoV-19/England/ALDP-955BB7/2020|2020-06-12|EPI\_ISL\_555489|Original|hCoV-19^^England|Human|Lighthouse Lab in Alderley Park|Wellcome Sanger Institute for the COVID-19 Genomics UK (COG-UK) consortium|Davies|United Kingdom

>Spike|hCoV-19/Spain/RI-IBV-005934/2020|2020-03-20|EPI\_ISL\_500370|Original|hCoV-19^^La Rioja|Human|Centro de Investigaci\u00f3n Biom\u00e9dica de La Rioja - Hospital San Pedro Logro\u00f1o|SeqCOVID-SPAIN consortium|IBV (CSIC)|Comas|Spain

>Spike|hCoV-19/Australia/VIC17056/2020|2020-08-04|EPI\_ISL\_663710|Original|hCoV-19^^Victoria|Human|Microbiological Diagnostic Unit - Public Health Laboratory (MDU-PHL)|MDU-PHL|Schultz|Australia

>Spike|hCoV-19/England/ALDP-B626E1/2020|2020-11-08|EPI\_ISL\_656436|Original|hCoV-19^^England|Human|Lighthouse Lab in Alderley Park|Wellcome Sanger Institute for the COVID-19 Genomics UK (COG-UK) Consortium|Davies|United Kingdom

>Spike|hCoV-19/England/LIVE-DC11FC/2020|2020-11-01|EPI\_ISL\_664354|Original|hCoV-19^^England|Human|Liverpool Clinical Laboratories|COVID-19 Genomics UK (COG-UK) Consortium|Haldenby|United Kingdom

>Spike|hCoV-19/USA/TX-HMH-4628/2020|2020-06-22|EPI\_ISL\_543765|Original|hCoV-19^^Texas|Human|Houston Methodist Hospital|Houston Methodist Hospital|Long|USA

>Spike|hCoV-19/Finland/8May30S7/2020|2020-05-08|EPI\_ISL\_481723|Original|hCoV-19^^Uusimaa|Human|Department of Virology and Immunology|Department of Virology|Smura|Finland

>Spike|hCoV-19/Wales/PHWC-368BE/2020|2020-04-28|EPI\_ISL\_474725|Original|hCoV-19^^Wales|Human|Originating lab|COVID-19 Genomics UK (COG-UK) Consortium|Moore|United Kingdom

>Spike|hCoV-19/Denmark/DCGC-20254/2020|2020-11-30|EPI\_ISL\_748077|Original|hCoV-19^^Sjaelland|Human|Department of Virus and Microbiological Special Diagnostics|Albertsen Lab|Michaelsen|Denmark

>Spike|hCoV-19/Australia/VIC11436/2020|2020-08-22|EPI\_ISL\_562643|Original|hCoV-19^^Victoria|Human|Microbiological Diagnostic Unit - Public Health Laboratory (MDU-PHL)|MDU-PHL|Schultz|Australia

>Spike|hCoV-19/USA/NY-Wadsworth-290635-01/2020|2020-12-24|EPI\_ISL\_767536|Original|hCoV-19^^New York|Human|Wadsworth Center|Wadsworth Center|Lasek-Nesselquist|USA

>Spike|hCoV-19/England/SHEF-C5B8E/2020|2020-11-24|EPI\_ISL\_680142|Original|hCoV-19^^England|Human|Virology Department|COVID-19 Genomics UK (COG-UK) Consortium|de Silva|United Kingdom

>Spike|hCoV-19/England/ALDP-94C755/2020|2020-06-15|EPI\_ISL\_556061|Original|hCoV-19^^England|Human|Lighthouse Lab in Alderley Park|Wellcome Sanger Institute for the COVID-19 Genomics UK (COG-UK) consortium|Davies|United Kingdom

>Spike|hCoV-19/Wales/PHWC-16667E/2020|2020-06-23|EPI\_ISL\_494027|Original|hCoV-19^^Wales|Human|Originating lab|COVID-19 Genomics UK (COG-UK) Consortium|Moore|United Kingdom

>Spike|hCoV-19/England/20189054101/2020|2020-04-30|EPI\_ISL\_465535|Original|hCoV-19^^England|Human|Respiratory Virus Unit|Respiratory Virus Unit|Platt|United Kingdom

>Spike|hCoV-19/England/QEUEH-9DCA7F/2020|2020-09-21|EPI\_ISL\_580947|Original|hCoV-19^^England|Human|Lighthouse Lab in Glasgow|Wellcome Sanger Institute for the COVID-19 Genomics UK (COG-UK) consortium|Davies|United Kingdom

>Spike|hCoV-19/Wales/PHWC-490168/2020|2020-11-05|EPI\_ISL\_706450|Original|hCoV-19^^Wales|Human|Originating lab|COVID-19 Genomics UK (COG-UK) Consortium|Moore|United Kingdom

>Spike|hCoV-19/United Arab Emirates/0419/2020|2020-05-15|EPI\_ISL\_698594|Original|hCoV-19^^Abu Dhabi|Human|Group 42 (G42) Healthcare|G42 Healthcare|Ogrodzki|United Arab Emirates

>Spike|hCoV-19/England/QEUEH-9DE4BB/2020|2020-09-21|EPI\_ISL\_599727|Original|hCoV-19^^England|Human|Lighthouse Lab in Glasgow|Wellcome Sanger Institute for the COVID-19 Genomics UK (COG-UK) consortium|Davies|United Kingdom

>Spike|hCoV-19/Japan/PG-0055/2020|2020-03-07|EPI\_ISL\_479818|Original|hCoV-19^^Hokkaido|Human|Hokkaido Institute of Public Health|Pathogen Genomics Center|Sekizuka|Japan

>Spike|hCoV-19/Spain/VC-FISABIO-236/2020|2020-03-25|EPI\_ISL\_436331|Original|hCoV-19^^Comunitat Valenciana|Human|Servicio de Microbiologia. Hospital Clinico Universitario de Valencia|Sequencing and Bioinformatics Service and Molecular Epidemiology Research Group. FISABIO-Public Health|Gonzalez-Candelas|Spain

>Spike|hCoV-19/Denmark/DCGC-9647/2020|2020-11-09|EPI\_ISL\_669086|Original|hCoV-19^^Sjaelland|Human|Department of Virus and Microbiological Special Diagnostics|Albertsen Lab|Michaelsen|Denmark

>Spike|hCoV-19/Hong Kong/HKU-200723-025/2020|2020-02-25|EPI\_ISL\_497792|Original|hCoV-19^^Hong Kong|Human|Department of Microbiology|Department of Microbiology|Chan|China

>Spike|hCoV-19/Australia/SAP317/2020|2020-03-26|EPI\_ISL\_483097|Original|hCoV-19^^South Australia|Human|SA Pathology|SA Pathology|Leong|Australia

>Spike|hCoV-19/USA/MI-MDHHS-SC20550/2020|2020-03-24|EPI\_ISL\_460598|Original|hCoV-19^^Michigan|Human|Michigan Department of Health and Human Services|Michigan Department of Health and Human Services|Blankenship|USA

>Spike|hCoV-19/England/QEUEH-B2EEF8/2020|2020-11-03|EPI\_ISL\_660018|Original|hCoV-19^^England|Human|Lighthouse Lab in Glasgow|Wellcome Sanger Institute for the COVID-19 Genomics UK (COG-UK) Consortium|Davies|United Kingdom

>Spike|hCoV-19/Netherlands/Gelderland\_78/2020|2020-05-19|EPI\_ISL\_460977|Original|hCoV-19^^Gelderland|Human|Dutch COVID-19 response team|Erasmus Medical Center|Oude Munnink|Netherlands

>Spike|hCoV-19/England/QEUEH-9647B1/2020|2020-08-11|EPI\_ISL\_536851|Original|hCoV-19^^England|Human|Lighthouse Lab in Glasgow|Wellcome Sanger Institute for the COVID-19 Genomics UK (COG-UK) consortium|Davies|United Kingdom

>Spike|hCoV-19/England/MILK-B02DB1/2020|2020-10-24|EPI\_ISL\_642770|Original|hCoV-19^^England|Human|Lighthouse Lab in Milton Keynes|Wellcome Sanger Institute for the COVID-19 Genomics UK (COG-UK) Consortium|Davies|United Kingdom

>Spike|hCoV-19/Wales/PHWC-165800/2020|2020-06-13|EPI\_ISL\_490728|Original|hCoV-19^^Wales|Human|Wales Specialist Virology Centre Sequencing lab|COVID-19 Genomics UK (COG-UK) Consortium|Moore|United Kingdom

>Spike|hCoV-19/England/CAMC-9D20E0/2020|2020-09-18|EPI\_ISL\_601580|Original|hCoV-19^^England|Human|Lighthouse Lab in Cambridge|Wellcome Sanger Institute for the COVID-19 Genomics UK (COG-UK) consortium|Davies|United Kingdom

>Spike|hCoV-19/England/OXON-B328E/2020|2020-03-27|EPI\_ISL\_534846|Original|hCoV-19^^England|Human|Oxford Viromics|COVID-19 Genomics UK (COG-UK) Consortium|Golubchik|United Kingdom

>Spike|hCoV-19/Israel/CVL-76-ngs/2020|2020-12-24|EPI\_ISL\_776580|Original|hCoV-19^^Israel|Human|Israel Central Virology laboratory|Israel Central Virology laboratory|Zuckerman|Israel

>Spike|hCoV-19/England/MILK-99A460/2020|2020-08-29|EPI\_ISL\_550387|Original|hCoV-19^^England|Human|Lighthouse Lab in Milton Keynes|Wellcome Sanger Institute for the COVID-19 Genomics UK (COG-UK) consortium|Davies|United Kingdom

>Spike|hCoV-19/England/LOND-124D424/2020|2020-04-27|EPI\_ISL\_507097|Original|hCoV-19^^England|Human|University College London Hospital|COVID-19 Genomics UK (COG-UK) Consortium|Byott|United Kingdom

>Spike|hCoV-19/England/MILK-9A802F/2020|2020-09-02|EPI\_ISL\_572514|Original|hCoV-19^^England|Human|Virology Department|COVID-19 Genomics UK (COG-UK) Consortium|Williams|United Kingdom

>Spike|hCoV-19/USA/UT-UPHL-2012584910/2020|2020-08-10|EPI\_ISL\_745854|Original|hCoV-19^^Utah|Human|Ginkgo Bioworks Clinical Laboratory|Utah Public Health Laboratory|Young|USA

>Spike|hCoV-19/USA/WI-GMF-11750/2020|2020-07-21|EPI\_ISL\_547632|Original|hCoV-19^^Wisconsin|Human|Gundersen Molecular Diagnostics Laboratory|Kabara Cancer Research Institute|Kenny|USA

>Spike|hCoV-19/Ireland/MN-NVRL-MPL10032/2020|2020-04-17|EPI\_ISL\_767822|Original|hCoV-19^^Monaghan|Human|National Virus Reference Laboratory|Irish Coronavirus Sequencing Consortium - Teagasc Moorepark|Walsh|Ireland

>Spike|hCoV-19/Belgium/regA-10191289/2020|2020-10-19|EPI\_ISL\_735195|Original|hCoV-19^^Nossegem|Human|UZ Leuven|KU Leuven|Maes|Belgium

>Spike|hCoV-19/USA/TX-HMH-MCoV-12794/2020|2020-08-19|EPI\_ISL\_790527|Original|hCoV-19^^Texas|Human|Houston Methodist Hospital|Houston Methodist Hospital|Long|USA

>Spike|hCoV-19/USA/CA-CZB-2342/2020|2020-05-12|EPI\_ISL\_513792|Original|hCoV-19^^California|Human|Orange County Public Health Laboratory|Chan-Zuckerberg Biohub|Kamm|USA

>Spike|hCoV-19/England/CAMC-B09F2D/2020|2020-10-30|EPI\_ISL\_673142|Original|hCoV-19^^England|Human|Lighthouse Lab in Cambridge|Wellcome Sanger Institute for the COVID-19 Genomics UK (COG-UK) Consortium|Davies|United Kingdom

>Spike|hCoV-19/USA/NY-Wadsworth-290320-01/2020|2020-00-00|EPI\_ISL\_765521|Original|hCoV-19^^New York|Human|SARATOGA HOSPITAL LABORATORY|Wadsworth Center|Lasek-Nesselquist|USA

>Spike|hCoV-19/Japan/Donner78/2020|2020-08-01|EPI\_ISL\_644982|Original|hCoV-19^^Kanto|Human|Department of Infectious Diseases|Center for Medical Genetics|Kosaki|Japan

>Spike|hCoV-19/Iran/SA-Isf-55/2020|2020-08-06|EPI\_ISL\_591346|Original|hCoV-19^^Iran|Human|Infectious Diseases and Tropical Medicine Research Center|Infectious Diseases and Tropical Medicine Research Center|Haghjooy Javanmard, S.|Iran

>Spike|hCoV-19/Wales/PHWC-16F772/2020|2020-10-04|EPI\_ISL\_586016|Original|hCoV-19^^Wales|Human|Wales Specialist Virology Centre Sequencing lab|COVID-19 Genomics UK (COG-UK) Consortium|Moore|United Kingdom

>Spike|hCoV-19/Iran/SA-Isf-61/2020|2020-05-13|EPI\_ISL\_582007|Original|hCoV-19^^Iran|Human|Infectious Diseases and Tropical Medicine Research Center|Infectious Diseases and Tropical Medicine Research Center|Ahangarzadeh, S.|Iran

>Spike|hCoV-19/USA/UT-02574/2020|2020-04-25|EPI\_ISL\_487220|Original|hCoV-19^^Utah|Human|Utah Public Health Laboratory|Utah Public Health Laboratory|Butz|USA

>Spike|hCoV-19/England/MILK-B39FAC/2020|2020-10-31|EPI\_ISL\_706013|Original|hCoV-19^^England|Human|Oxford Viromics|COVID-19 Genomics UK (COG-UK) Consortium|Golubchik|United Kingdom

>Spike|hCoV-19/Luxembourg/LNS9117076/2020|2020-10-26|EPI\_ISL\_744855|Original|hCoV-19^^Luxembourg|Human|Laboratoire national de sant\u00e9|Laboratoire national de sant\u00e9|Wienecke-Baldacchino|Luxembourg

>Spike|hCoV-19/England/CAMC-CFC28D/2020|2020-12-21|EPI\_ISL\_781737|Original|hCoV-19^^England|Human|Lighthouse Lab in Cambridge|Wellcome Sanger Institute for the COVID-19 Genomics UK (COG-UK) Consortium|Davies|United Kingdom

>Spike|hCoV-19/Spain/MD-H12-53/2020|2020-04-12|EPI\_ISL\_529985|Vero|hCoV-19^^Madrid|Human|Hospital Universitario 12 de Octubre|Hospital Universitario 12 de Octubre|Viedma|Spain

>Spike|hCoV-19/USA/MA-CDC-STM-P056/2020|2020-12-19|EPI\_ISL\_755617|Original|hCoV-19^^Massachusetts|Human|Helix/Illumina|Genomics and Discovery|Cook|USA

>Spike|hCoV-19/USA/AZ-TG491542/2020|2020-06-21|EPI\_ISL\_695158|Original|hCoV-19^^Arizona|Human|AZ SPHL|TGen North|French|USA

>Spike|hCoV-19/Canada/ON-S1561/2020|2020-09-02|EPI\_ISL\_755918|Original|hCoV-19^^Ontario|Human|Toronto Invasive Bacterial Diseases Network|McMaster University|McArthur|Canada

>Spike|hCoV-19/USA/WA-UW-11602/2020|2020-06-17|EPI\_ISL\_570445|Original|hCoV-19^^Washington|Human|UW Virology Lab|UW Virology Lab|Roychoudhury|USA

>Spike|hCoV-19/USA/LA-EVTL1244/2020|2020-12-18|EPI\_ISL\_768513|Original|hCoV-19^^Louisiana|Human|LSUHS Emerging Viral Threat Laboratory|Microbial Genome Sequencing Center|Kamil|USA

>Spike|hCoV-19/Ireland/D-NVRL-AIIDV0053v2/2020|2020-04-09|EPI\_ISL\_644335|Original|hCoV-19^^Dublin|Human|CEPHR / Vincent's Hospital|Irish Coronavirus Sequencing Consortium - National Virus Reference Laboratory|Gonzalez|Ireland

>Spike|hCoV-19/Wales/PHWC-480FE9/2020|2020-10-20|EPI\_ISL\_613025|Original|hCoV-19^^Wales|Human|Wales Specialist Virology Centre Sequencing lab|COVID-19 Genomics UK (COG-UK) Consortium|Moore|United Kingdom

>Spike|hCoV-19/England/ALDP-BC7B72/2020|2020-11-23|EPI\_ISL\_721328|Original|hCoV-19^^England|Human|Lighthouse Lab in Alderley Park|Wellcome Sanger Institute for the COVID-19 Genomics UK (COG-UK) Consortium|Davies|United Kingdom

>Spike|hCoV-19/USA/NY-NYUMC694/2020|2020-03-26|EPI\_ISL\_451409|Original|hCoV-19^^New York|Human|NYU Langone Health|Departments of Pathology and Medicine|Maurano|USA

>Spike|hCoV-19/England/ALDP-A849F0/2020|2020-10-18|EPI\_ISL\_610523|Original|hCoV-19^^England|Human|Lighthouse Lab in Alderley Park|Wellcome Sanger Institute for the COVID-19 Genomics UK (COG-UK) consortium|Davies|United Kingdom

>Spike|hCoV-19/Spain/RI-IBV-99005875/2020|2020-03-07|EPI\_ISL\_537417|Original|hCoV-19^^La Rioja|Human|Centro de Investigaci\u00f3n Biom\u00e9dica de La Rioja - Hospital San Pedro Logro\u00f1o|SeqCOVID-SPAIN consortium|IBV (CSIC)|Comas|Spain

>Spike|hCoV-19/Australia/VIC2136/2020|2020-06-20|EPI\_ISL\_480737|Original|hCoV-19^^Victoria|Human|Victorian Infectious Diseases Reference Laboratory (VIDRL)|VIDRL and MDU-PHL|Schultz|Australia

>Spike|hCoV-19/England/LIVE-1D16AB/2020|2020-05-14|EPI\_ISL\_572815|Original|hCoV-19^^England|Human|Liverpool Clinical Laboratories|COVID-19 Genomics UK (COG-UK) Consortium|Haldenby|United Kingdom

>Spike|hCoV-19/India/TG-CCMB-J021/2020|2020-03-30|EPI\_ISL\_447556|Original|hCoV-19^^Telangana|Human|CSIR-Centre for Cellular and Molecular Biology|CSIR-Centre for Cellular and Molecular Biology|Banu|India

>Spike|hCoV-19/England/MILK-9A9C0C/2020|2020-09-01|EPI\_ISL\_551135|Original|hCoV-19^^England|Human|Lighthouse Lab in Milton Keynes|Wellcome Sanger Institute for the COVID-19 Genomics UK (COG-UK) consortium|Davies|United Kingdom

>Spike|hCoV-19/Bangladesh/DNAS-CPH-isl-479/2020|2020-04-29|EPI\_ISL\_605890|Original|hCoV-19^^Bangladesh|Human|NGS Lab|NGS Lab|Rabbi|Bangladesh

>Spike|hCoV-19/England/ALDP-95CD32/2020|2020-06-16|EPI\_ISL\_555124|Original|hCoV-19^^England|Human|Lighthouse Lab in Alderley Park|Wellcome Sanger Institute for the COVID-19 Genomics UK (COG-UK) consortium|Davies|United Kingdom

>Spike|hCoV-19/USA/TX-DSHS-1307/2020|2020-03-31|EPI\_ISL\_648255|Original|hCoV-19^^Texas|Human|Texas Department of State Health Services|Texas Department of State Health Services|Rahman|USA

>Spike|hCoV-19/England/LIVE-DC302A/2020|2020-11-25|EPI\_ISL\_703807|Original|hCoV-19^^England|Human|Liverpool Clinical Laboratories|COVID-19 Genomics UK (COG-UK) Consortium|Haldenby|United Kingdom

>Spike|hCoV-19/USA/TX-HMH-MCoV-9368/2020|2020-07-03|EPI\_ISL\_781081|Original|hCoV-19^^Texas|Human|Houston Methodist Hospital|Houston Methodist Hospital|Long|USA

>Spike|hCoV-19/Wales/PHWC-49AD88/2020|2020-12-03|EPI\_ISL\_727683|Original|hCoV-19^^Wales|Human|Originating lab|COVID-19 Genomics UK (COG-UK) Consortium|Moore|United Kingdom

>Spike|hCoV-19/Australia/SAP254/2020|2020-03-26|EPI\_ISL\_483082|Original|hCoV-19^^South Australia|Human|SA Pathology|SA Pathology|Leong|Australia

>Spike|hCoV-19/USA/IL-NM-0437/2020|2020-04-10|EPI\_ISL\_626408|Original|hCoV-19^^Illinois|Human|Northwestern Memorial Hospital|Ozer Lab|Ozer|USA

>Spike|hCoV-19/USA/CO-CDPHE-2005110165/2020|2020-05-11|EPI\_ISL\_710211|Original|hCoV-19^^Colorado|Human|Colorado Department of Public Health and Environment|Colorado Department of Public Health and Environment|Bankers|USA

>Spike|hCoV-19/England/BRIS-12CFB5/2020|2020-04-25|EPI\_ISL\_481839|Original|hCoV-19^^England|Human|PHE South West Regional Laboratory|Wellcome Sanger Institute for the COVID-19 Genomics UK (COG-UK) consortium|Davies|United Kingdom

>Spike|hCoV-19/South Korea/KCDC2377/2020|2020-05-31|EPI\_ISL\_514780|Original|hCoV-19^^South Korea|Human|Division of Viral Diseases|Division of Viral Diseases|Kim|South Korea

>Spike|hCoV-19/Turkey/HSGM-1495/2020|2020-03-19|EPI\_ISL\_437325|Vero Pl|hCoV-19^^Istanbul|Human|Ministry of Health Turkey|Ministry of Health Turkey|Bayrakdar|Turkey

>Spike|hCoV-19/Canada/BC\_07833956/2020|2020-04-00|EPI\_ISL\_466822|Original|hCoV-19^^British Columbia|Human|BCCDC Public Health Laboratory|BCCDC Public Health Laboratory|Harrigan|Canada

>Spike|hCoV-19/Denmark/DCGC-3007/2020|2020-08-24|EPI\_ISL\_616783|Original|hCoV-19^^Syddanmark|Human|Department of Virus and Microbiological Special Diagnostics|Albertsen lab|Michaelsen|Denmark

>Spike|hCoV-19/South Africa/KRISP-0411/2020|2020-07-02|EPI\_ISL\_495536|Original|hCoV-19^^KwaZulu-Natal|Human|Medical Disagnostics Services (MDS)|KRISP|de Oliveira|South Africa

>Spike|hCoV-19/England/ALDP-936ED1/2020|2020-06-21|EPI\_ISL\_552932|Original|hCoV-19^^England|Human|Lighthouse Lab in Alderley Park|Wellcome Sanger Institute for the COVID-19 Genomics UK (COG-UK) consortium|Davies|United Kingdom

>Spike|hCoV-19/Wales/PHWC-36906/2020|2020-04-28|EPI\_ISL\_474730|Original|hCoV-19^^Wales|Human|Originating lab|COVID-19 Genomics UK (COG-UK) Consortium|Moore|United Kingdom

>Spike|hCoV-19/Netherlands/GE-EMC-421/2020|2020-11-27|EPI\_ISL\_722693|Original|hCoV-19^^Gelderland|Human|Dutch COVID-19 response team|Erasmus Medical Center|Oude Munnink|Netherlands

>Spike|hCoV-19/England/20140074104/2020|2020-03-29|EPI\_ISL\_423420|Original|hCoV-19^^England|Human|Respiratory Virus Unit|Respiratory Virus Unit|Platt|United Kingdom

>Spike|hCoV-19/Portugal/PT2053/2020|2020-11-09|EPI\_ISL\_732267|Original|hCoV-19^^Portugal|Human|Instituto Nacional de Saude (INSA) and Instituto Gulbenkian de Ciencia (IGC)|Instituto Nacional de Saude (INSA) and Instituto Gulbenkian de Ciencia (IGC)|Borges|Portugal

>Spike|hCoV-19/England/MILK-B3D306/2020|2020-11-01|EPI\_ISL\_679835|Original|hCoV-19^^England|Human|Oxford Viromics|COVID-19 Genomics UK (COG-UK) Consortium|Golubchik|United Kingdom

>Spike|hCoV-19/England/ALDP-950A28/2020|2020-06-14|EPI\_ISL\_554420|Original|hCoV-19^^England|Human|Lighthouse Lab in Alderley Park|Wellcome Sanger Institute for the COVID-19 Genomics UK (COG-UK) consortium|Davies|United Kingdom

>Spike|hCoV-19/India/MH-ACTREC-003/2020|2020-05-01|EPI\_ISL\_699660|Original|hCoV-19^^Maharashtra|Human|Hematopathology Laboratory|Hematopathology Laboratory|Patkar|India

>Spike|hCoV-19/Denmark/DCGC-6410/2020|2020-10-12|EPI\_ISL\_620310|Original|hCoV-19^^Sjaelland|Human|Department of Virus and Microbiological Special Diagnostics|Albertsen lab|Michaelsen|Denmark

>Spike|hCoV-19/Netherlands/GE-EMC-198/2020|2020-05-04|EPI\_ISL\_523180|Original|hCoV-19^^Gelderland|Human|Dutch COVID-19 response team|Erasmus Medical Center|Oude Munnink|Netherlands

>Spike|hCoV-19/Australia/VIC7364/2020|2020-07-21|EPI\_ISL\_564361|Original|hCoV-19^^Victoria|Human|Victorian Infectious Diseases Reference Laboratory (VIDRL)|VIDRL and MDU-PHL|Schultz|Australia

>Spike|hCoV-19/Belgium/rega-10181069/2020|2020-10-18|EPI\_ISL\_735109|Original|hCoV-19^^Bierbeek|Human|UZ Leuven|KU Leuven|Maes|Belgium

>Spike|hCoV-19/England/MILK-976637/2020|2020-08-20|EPI\_ISL\_575826|Original|hCoV-19^^England|Human|Lighthouse Lab in Milton Keynes|Wellcome Sanger Institute for the COVID-19 Genomics UK (COG-UK) consortium|Davies|United Kingdom

>Spike|hCoV-19/USA/CA-CZB-15145/2020|2020-11-23|EPI\_ISL\_738763|Original|hCoV-19^^California|Human|Santa Clara County Public Health Laboratory|Chan-Zuckerberg Biohub|Kamm|USA

>Spike|hCoV-19/England/ALDP-9D8E86/2020|2020-09-18|EPI\_ISL\_576679|Original|hCoV-19^^England|Human|Oxford Viromics|COVID-19 Genomics UK (COG-UK) Consortium|Golubchik|United Kingdom

>Spike|hCoV-19/Portugal/PT0456/2020|2020-04-18|EPI\_ISL\_454180|Original|hCoV-19^^Portugal|Human|unknown|Instituto Nacional de Saude (INSA)|Borges|Portugal

>Spike|hCoV-19/USA/NY-Wadsworth-286666-01/2020|2020-12-14|EPI\_ISL\_767451|Original|hCoV-19^^New York|Human|Wadsworth Center|Wadsworth Center|Lasek-Nesselquist|USA

>Spike|hCoV-19/England/ALDP-C3B1A3/2020|2020-12-09|EPI\_ISL\_730741|Original|hCoV-19^^England|Human|Lighthouse Lab in Alderley Park|Wellcome Sanger Institute for the COVID-19 Genomics UK (COG-UK) Consortium|Davies|United Kingdom

>Spike|hCoV-19/Australia/VIC9408/2020|2020-08-19|EPI\_ISL\_565538|Original|hCoV-19^^Victoria|Human|Microbiological Diagnostic Unit - Public Health Laboratory (MDU-PHL)|MDU-PHL|Schultz|Australia

>Spike|hCoV-19/England/SHEF-C4F56/2020|2020-04-19|EPI\_ISL\_462016|Original|hCoV-19^^England|Human|Virology Department|COVID-19 Genomics UK (COG-UK) Consortium|de Silva|United Kingdom

>Spike|hCoV-19/England/MILK-B95928/2020|2020-11-13|EPI\_ISL\_674975|Original|hCoV-19^^England|Human|Lighthouse Lab in Milton Keynes|Wellcome Sanger Institute for the COVID-19 Genomics UK (COG-UK) Consortium|Davies|United Kingdom

>Spike|hCoV-19/USA/CA-SR0370/2020|2020-04-29|EPI\_ISL\_458253|Original|hCoV-19^^California|Human|Scripps Medical Laboratory|Andersen lab at Scripps Research|Gangavarapu|USA

>Spike|hCoV-19/Japan/PG-8642/2020|2020-09-00|EPI\_ISL\_686238|Original|hCoV-19^^Japan|Human|Pathogen Genomics Center|Pathogen Genomics Center|Sekizuka|Japan

>Spike|hCoV-19/Australia/VIC4634/2020|2020-07-10|EPI\_ISL\_519025|Original|hCoV-19^^Victoria|Human|Victorian Infectious Diseases Reference Laboratory (VIDRL)|VIDRL and MDU-PHL|Schultz|Australia

>Spike|hCoV-19/Iceland/389/2020|2020-03-19|EPI\_ISL\_424413|Original|hCoV-19^^Reykjavik|Human|The National University Hospital of Iceland|deCODE genetics|J\u00f3nsson|Iceland

>Spike|hCoV-19/Italy/LAZ-INMI-41/2020|2020-06-12|EPI\_ISL\_603148|Original|hCoV-19^^Lazio|Human|INMI Lazzaro Spallanzani IRCCS|INMI Lazzaro Spallanzani IRCCS|Gruber|Italy

>Spike|hCoV-19/USA/NY-NYCPHL-001461/2020|2020-11-25|EPI\_ISL\_683822|Original|hCoV-19^^New York|Human|DOHMH Jamaica|New York City Public Health Laboratory|Wang|USA

>Spike|hCoV-19/Spain/CL-IBV-97006266/2020|2020-04-21|EPI\_ISL\_537638|Original|hCoV-19^^Castilla y Leon|Human|Universidad de Le\u00f3n|SeqCOVID-SPAIN consortium|IBV (CSIC)|Comas|Spain

>Spike|hCoV-19/USA/FL-BPHL-0527/2020|2020-06-19|EPI\_ISL\_508730|Original|hCoV-19^^Florida|Human|Florida Bureau of Public Health Laboratories|Florida Bureau of Public Health Laboratories|Blanton|USA

>Spike|hCoV-19/Luxembourg/LNS3694003/2020|2020-03-18|EPI\_ISL\_417528|Original|hCoV-19^^Luxembourg|Human|Laboratoire Nationale de Sant\u00e9|Laboratoire Nationale de Sant\u00e9|Wienecke-Baldacchino|Luxembourg

>Spike|hCoV-19/England/CAMB-77611/2020|2020-03-31|EPI\_ISL\_439388|Original|hCoV-19^^England|Human|Department of Pathology|Wellcome Sanger Institute for the COVID-19 Genomics UK (COG-UK) consortium|Amato|United Kingdom

>Spike|hCoV-19/Wales/PHWC-4A5AFC/2020|2020-12-11|EPI\_ISL\_764953|Original|hCoV-19^^Wales|Human|Wales Specialist Virology Centre Sequencing lab|COVID-19 Genomics UK (COG-UK) Consortium|Moore|United Kingdom

>Spike|hCoV-19/England/NORT-1B72B19/2020|2020-12-06|EPI\_ISL\_724913|Original|hCoV-19^^England|Human|Northumbria University / South Tees Hospitals NHS Foundation Trust / North Cumbria Integrated Care NHS Foundation Trust / North Tees and Hartlepool NHS Foundation Trust / Newcastle Hospitals NHS Foundation Trust|COVID-19 Genomics UK (COG-UK) Consortium|Bashton|United Kingdom

>Spike|hCoV-19/Australia/VIC11740/2020|2020-07-22|EPI\_ISL\_563478|Original|hCoV-19^^Victoria|Human|Microbiological Diagnostic Unit - Public Health Laboratory (MDU-PHL) |MDU-PHL|Schultz|Australia

>Spike|hCoV-19/England/LIVE-DC6BEA/2020|2020-11-29|EPI\_ISL\_702974|Original|hCoV-19^^England|Human|Liverpool Clinical Laboratories|COVID-19 Genomics UK (COG-UK) Consortium|Haldenby|United Kingdom

>Spike|hCoV-19/Japan/PG-5058/2020|2020-08-00|EPI\_ISL\_690169|Original|hCoV-19^^Japan|Human|Pathogen Genomics Center|Pathogen Genomics Center|Sekizuka|Japan

>Spike|hCoV-19/USA/MI-QDX-732/2020|2020-03-21|EPI\_ISL\_571465|Original|hCoV-19^^Michigan|Human|Quest Diagnostics|Quest Diagnostics|Kagan|USA

>Spike|hCoV-19/USA/MN-QDX-1695/2020|2020-03-16|EPI\_ISL\_604009|Original|hCoV-19^^Minnesota|Human|Quest Diagnostics|Quest Diagnostics|Kagan|USA

>Spike|hCoV-19/England/QEUEH-BA3550/2020|2020-11-18|EPI\_ISL\_721054|Original|hCoV-19^^England|Human|Lighthouse Lab in Glasgow|Wellcome Sanger Institute for the COVID-19 Genomics UK (COG-UK) Consortium|Davies|United Kingdom

>Spike|hCoV-19/USA/AZ-TG637292/2020|2020-07-27|EPI\_ISL\_695721|Original|hCoV-19^^Arizona|Human|AZ SPHL|TGen North|French|USA

>Spike|hCoV-19/USA/TX-HMH-4415/2020|2020-06-17|EPI\_ISL\_543602|Original|hCoV-19^^Texas|Human|Houston Methodist Hospital|Houston Methodist Hospital|Long|USA

>Spike|hCoV-19/USA/UT-02595/2020|2020-04-26|EPI\_ISL\_522261|Original|hCoV-19^^Utah|Human|Utah Public Health Laboratory|Utah Public Health Laboratory|Young|USA

>Spike|hCoV-19/Wales/PHWC-48A231/2020|2020-11-04|EPI\_ISL\_651543|Original|hCoV-19^^Wales|Human|Wales Specialist Virology Centre Sequencing lab|COVID-19 Genomics UK (COG-UK) Consortium|Moore|United Kingdom

>Spike|hCoV-19/South Korea/KDCA0189/2020|2020-11-22|EPI\_ISL\_747425|Original|hCoV-19^^South Korea|Human|Division of Emerging Infectious Diseases|Division of Emerging Infectious Diseases|Park|South Korea

>Spike|hCoV-19/Canada/QC-LSPQ-L00236526/2020|2020-03-24|EPI\_ISL\_536132|Original|hCoV-19^^Quebec|Human|H\u00f4pital de Hull|Laboratoire de sant\u00e9 publique du Qu\u00e9bec|Moreira|Canada

>Spike|hCoV-19/England/NORT-28171F/2020|2020-03-19|EPI\_ISL\_488789|Original|hCoV-19^^England|Human|NU-OMICS DNA Sequencing research facility|Wellcome Sanger Institute for the COVID-19 Genomics UK (COG-UK) consortium|Davies|United Kingdom

>Spike|hCoV-19/India/UN-777/2020|2020-03-03|EPI\_ISL\_420551|Original|hCoV-19^^India|Human|National Influenza Center|Indian Council of Medical Research-National Institute of Virology|Yadav|India

>Spike|hCoV-19/England/BIRM-5E971/2020|2020-04-26|EPI\_ISL\_447925|Original|hCoV-19^^England|Human|University of Birmingham|COVID-19 Genomics UK (COG-UK) Consortium|Loman|United Kingdom

>Spike|hCoV-19/Canada/ON-S846/2020|2020-04-11|EPI\_ISL\_591169|Original|hCoV-19^^Ontario|Human|Toronto Invasive Bacterial Diseases Network|McMaster University|McArthur|Canada

>Spike|hCoV-19/England/QEUEH-9B0D0F/2020|2020-09-03|EPI\_ISL\_559861|Original|hCoV-19^^England|Human|Oxford Viromics|COVID-19 Genomics UK (COG-UK) Consortium|Golubchik|United Kingdom

>Spike|hCoV-19/Denmark/DCGC-8708/2020|2020-10-26|EPI\_ISL\_625699|Original|hCoV-19^^Hovedstaden|Human|Department of Virus and Microbiological Special Diagnostics|Albertsen lab|Michaelsen|Denmark

>Spike|hCoV-19/USA/UT-UPHL-201117349/2020|2020-04-01|EPI\_ISL\_623181|Original|hCoV-19^^Utah|Human|Utah Public Health Laboratory|Utah Public Health Laboratory|Young|USA

>Spike|hCoV-19/Denmark/DCGC-8634/2020|2020-10-26|EPI\_ISL\_625996|Original|hCoV-19^^Sjaelland|Human|Department of Virus and Microbiological Special Diagnostics|Albertsen lab|Michaelsen|Denmark

>Spike|hCoV-19/USA/WA-S494/2020|2020-04-01|EPI\_ISL\_434254|Original|hCoV-19^^Washington|Human|Washington State Department of Health|Seattle Flu Study|Bedford|USA

>Spike|hCoV-19/Denmark/DCGC-2709/2020|2020-08-17|EPI\_ISL\_616442|Original|hCoV-19^^Midtjylland|Human|Department of Virus and Microbiological Special Diagnostics|Albertsen lab|Michaelsen|Denmark

>Spike|hCoV-19/USA/FL-BPHL-0326/2020|2020-04-13|EPI\_ISL\_489735|Original|hCoV-19^^Florida|Human|Florida Bureau of Public Health Laboratories|Florida Bureau of Public Health Laboratories|Blanton|USA

>Spike|hCoV-19/Australia/NSW1015/2020|2020-03-22|EPI\_ISL\_593660|Original|hCoV-19^^New South Wales|Human|Pathology West - NSW Health Pathology|NSW Health Pathology - Institute of Clinical Pathology and Medical Research; Westmead Hospital; University of Sydney|Gall|Australia

>Spike|hCoV-19/England/MILK-9A95A7/2020|2020-08-31|EPI\_ISL\_551249|Original|hCoV-19^^England|Human|Lighthouse Lab in Milton Keynes|Wellcome Sanger Institute for the COVID-19 Genomics UK (COG-UK) consortium|Davies|United Kingdom

>Spike|hCoV-19/England/ALDP-A6D016/2020|2020-10-14|EPI\_ISL\_608169|Original|hCoV-19^^England|Human|Lighthouse Lab in Alderley Park|Wellcome Sanger Institute for the COVID-19 Genomics UK (COG-UK) consortium|Davies|United Kingdom

>Spike|hCoV-19/USA/MN-MDH-1227/2020|2020-05-18|EPI\_ISL\_482948|Original|hCoV-19^^Minnesota|Human|Minnesota Department of Health|Minnesota Department of Health|Garfin|USA

>Spike|hCoV-19/USA/IL-UW-2119/2020|2020-10-02|EPI\_ISL\_677524|Original|hCoV-19^^Illinois|Human|University of Wisconsin-Madison AIDS Vaccine Research Laboratories|University of Wisconsin-Madison AIDS Vaccine Research Laboratories|Baczenas|USA

>Spike|hCoV-19/USA/WA-S951/2020|2020-04-27|EPI\_ISL\_463441|Original|hCoV-19^^Washington|Human|Washington State Department of Health|Seattle Flu Study|Bedford|USA

>Spike|hCoV-19/England/QEUEH-C5BEC4/2020|2020-12-14|EPI\_ISL\_769460|Original|hCoV-19^^England|Human|Lighthouse Lab in Glasgow|Wellcome Sanger Institute for the COVID-19 Genomics UK (COG-UK) Consortium|Davies|United Kingdom

>Spike|hCoV-19/USA/MA-MASPHL-00820/2020|2020-05-27|EPI\_ISL\_692881|Original|hCoV-19^^Massachusetts|Human|Massachusetts State Public Health Laboratory|Massachusetts State Public Health Laboratory|Lang|USA

>Spike|hCoV-19/England/QEUEH-96D26C/2020|2020-08-18|EPI\_ISL\_530697|Original|hCoV-19^^England|Human|Lighthouse Lab in Glasgow|Wellcome Sanger Institute for the COVID-19 Genomics UK (COG-UK) consortium|Davies|United Kingdom

>Spike|hCoV-19/USA/VA-DCLS-1606/2020|2020-08-20|EPI\_ISL\_614016|Original|hCoV-19^^Virginia|Human|Virginia DCLS|Virginia DCLS|St. Jacques|USA

>Spike|hCoV-19/Wales/PHWC-48C93A/2020|2020-11-02|EPI\_ISL\_665584|Original|hCoV-19^^Wales|Human|Wales Specialist Virology Centre Sequencing lab|COVID-19 Genomics UK (COG-UK) Consortium|Moore|United Kingdom

>Spike|hCoV-19/Spain/PV-IBV-98008265/2020|2020-10-01|EPI\_ISL\_654553|Original|hCoV-19^^Basque Country|Human|Servicio de Microbiolog\u00eda. Hospital Universitario Donostia. OSI Donostialdea. \u00clrea de Enfermedades Infecciosas|SeqCOVID-SPAIN consortium|IBV (CSIC) |Comas|Spain

>Spike|hCoV-19/Switzerland/Vs-ETHZ-321402/2020|2020-10-14|EPI\_ISL\_603643|Original|hCoV-19^^Valais|Human|Viollier AG|Department of Biosystems Science and Engineering|Nadeau|Switzerland

>Spike|hCoV-19/England/LIVE-DB61AF/2020|2020-11-06|EPI\_ISL\_650542|Original|hCoV-19^^England|Human|Liverpool Clinical Laboratories|COVID-19 Genomics UK (COG-UK) Consortium|Haldenby|United Kingdom



>Spike|hCoV-19/England/ALDP-A85A29/2020|2020-10-17|EPI\_ISL\_610502|Original|hCoV-19^^England|Human|Lighthouse Lab in Alderley Park|Wellcome Sanger Institute for the COVID-19 Genomics UK (COG-UK) Consortium|Davies|United Kingdom

>Spike|hCoV-19/England/PORT-2EA95A/2020|2020-00-00|EPI\_ISL\_704588|Original|hCoV-19^^England|Human|Centre for Enzyme Innovation|COVID-19 Genomics UK (COG-UK) Consortium|Robson|United Kingdom

>Spike|hCoV-19/USA/TX-HMH-MCoV-10869/2020|2020-07-09|EPI\_ISL\_789667|Original|hCoV-19^^Texas|Human|Houston Methodist Hospital|Houston Methodist Hospital|Long|USA

>Spike|hCoV-19/USA/GA-CDC-7407/2020|2020-10-22|EPI\_ISL\_681820|Original|hCoV-19^^Georgia|Human|GA Department of Public Health Laboratory|Pathogen Discovery|Queen|USA

>Spike|hCoV-19/Japan/TKYE622387/2020|2020-07-00|EPI\_ISL\_649128|Original|hCoV-19^^Japan|Human|Tokyo Metropolitan Institute of Public Health|Tokyo Metropolitan Institute of Public Health|Ryota|Japan

>Spike|hCoV-19/England/PORT-2D3F9E/2020|2020-00-00|EPI\_ISL\_507158|Original|hCoV-19^^England|Human|Centre for Enzyme Innovation|COVID-19 Genomics UK (COG-UK) Consortium|Robson|United Kingdom

>Spike|hCoV-19/USA/IL-NM-1071/2020|2020-06-06|EPI\_ISL\_626494|Original|hCoV-19^^Illinois|Human|Northwestern Memorial Hospital|Ozer Lab|Ozer|USA

>Spike|hCoV-19/Israel/CVL-46394/2020|2020-12-15|EPI\_ISL\_745071|Original|hCoV-19^^Tel Aviv|Human|Israel Central Virology laboratory|Israel Central Virology laboratory|Zuckerman|Israel

>Spike|hCoV-19/Iceland/210/2020|2020-03-16|EPI\_ISL\_417829|Original|hCoV-19^^Reykjavik|Human|The National University Hospital of Iceland|deCODE genetics|J\u00f3nsson|Iceland

>Spike|hCoV-19/Canada/NS-NML-1261/2020|2020-04-06|EPI\_ISL\_579649|Original|hCoV-19^^Nova Scotia|Human|QEII Health Sciences Centre|National Microbiology Laboratory (NML)|Majer|Canada

>Spike|hCoV-19/England/MILK-A22DE9/2020|2020-10-03|EPI\_ISL\_611951|Original|hCoV-19^^England|Human|Northumbria University / South Tees Hospitals NHS Foundation Trust / North Cumbria Integrated Care NHS Foundation Trust / North Tees and Hartlepool NHS Foundation Trust / Newcastle Hospitals NHS Foundation Trust|COVID-19 Genomics UK (COG-UK) Consortium|Bashton|United Kingdom

>Spike|hCoV-19/USA/TX-HMH-7402/2020|2020-06-29|EPI\_ISL\_546741|Original|hCoV-19^^Texas|Human|Houston Methodist Hospital|Houston Methodist Hospital|Long|USA

>Spike|hCoV-19/Japan/PG-2527/2020|2020-05-00|EPI\_ISL\_690662|Original|hCoV-19^^Japan|Human|Saitama Prefectural Institute of Public Health|Pathogen Genomics Center|Sekizuka|Japan

>Spike|hCoV-19/England/20118109104/2020|2020-03-12|EPI\_ISL\_464952|Original|hCoV-19^^England|Human|Respiratory Virus Unit|Respiratory Virus Unit|Platt|United Kingdom

>Spike|hCoV-19/Wales/PHWC-48AE5B/2020|2020-11-06|EPI\_ISL\_665361|Original|hCoV-19^^Wales|Human|Wales Specialist Virology Centre Sequencing lab|COVID-19 Genomics UK (COG-UK) Consortium|Moore|United Kingdom

>Spike|hCoV-19/Denmark/DCGC-16490/2020|2020-11-16|EPI\_ISL\_714799|Original|hCoV-19^^Midtjylland|Human|Department of Virus and Microbiological Special Diagnostics|Albertsen Lab|Michaelsen|Denmark

>Spike|hCoV-19/Canada/ON-S1806/2020|2020-11-24|EPI\_ISL\_729278|Original|hCoV-19^^Ontario|Human|Toronto Invasive Bacterial Diseases Network|McMaster University|McArthur|Canada

>Spike|hCoV-19/Wales/PHWC-487EA9/2020|2020-10-29|EPI\_ISL\_639318|Original|hCoV-19^^Wales|Human|Wales Specialist Virology Centre Sequencing lab|COVID-19 Genomics UK (COG-UK) Consortium|Moore|United Kingdom

>Spike|hCoV-19/England/CAMC-BC0F22/2020|2020-11-22|EPI\_ISL\_704793|Original|hCoV-19^^England|Human|Lighthouse Lab in Cambridge|Wellcome Sanger Institute for the COVID-19 Genomics UK (COG-UK) Consortium|Davies|United Kingdom

>Spike|hCoV-19/USA/TX-HMH-MCoV-18365/2020|2020-11-18|EPI\_ISL\_784713|Original|hCoV-19^^Texas|Human|Houston Methodist Hospital|Houston Methodist Hospital|Long|USA

>Spike|hCoV-19/France/PAC-IHU-0170/2020|2020-03-25|EPI\_ISL\_569346|Original|hCoV-19^^Provence-Alpes-C\u00f4te-d\u0027Azur|Human|MEPHI|MEPHI|Levasseur|France

>Spike|hCoV-19/England/MILK-AB7E6E/2020|2020-10-21|EPI\_ISL\_623327|Original|hCoV-19^^England|Human|Lighthouse Lab in Milton Keynes|Wellcome Sanger Institute for the COVID-19 Genomics UK (COG-UK) consortium|Davies|United Kingdom

>Spike|hCoV-19/England/LOND-D62C1/2020|2020-04-21|EPI\_ISL\_482204|Original|hCoV-19^^England|Human|University College London|Wellcome Sanger Institute for the COVID-19 Genomics UK (COG-UK) consortium|Davies|United Kingdom

>Spike|hCoV-19/Denmark/DCGC-16204/2020|2020-11-16|EPI\_ISL\_714367|Original|hCoV-19^^Midtjylland|Human|Department of Virus and Microbiological Special Diagnostics|Albertsen Lab|Michaelsen|Denmark

>Spike|hCoV-19/USA/CA-IGI-0133/2020|2020-06-10|EPI\_ISL\_495154|Original|hCoV-19^^California|Human|Innovative Genomics Institute|Innovative Genomics Institute|Shivram|USA

>Spike|hCoV-19/USA/AR-CDC-2-3693681/2020|2020-10-29|EPI\_ISL\_747066|Original|hCoV-19^^Arkansas|Human|Respiratory Viruses Branch|Respiratory Viruses Branch|Queen|USA

>Spike|hCoV-19/England/ALDP-A506BA/2020|2020-10-07|EPI\_ISL\_597838|Original|hCoV-19^^England|Human|Lighthouse Lab in Alderley Park|Wellcome Sanger Institute for the COVID-19 Genomics UK (COG-UK) consortium|Davies|United Kingdom

>Spike|hCoV-19/Luxembourg/LNS1667297/2020|2020-04-17|EPI\_ISL\_445065|Original|hCoV-19^^Luxembourg|Human|Laboratoire National de Sante|Laboratoire National de Sante|Wienecke-Baldacchino|Luxembourg

>Spike|hCoV-19/Wales/PHWC-48D1D7/2020|2020-11-07|EPI\_ISL\_680588|Original|hCoV-19^^Wales|Human|Wales Specialist Virology Centre Sequencing lab|COVID-19 Genomics UK (COG-UK) Consortium|Moore|United Kingdom

>Spike|hCoV-19/Ireland/MH-NVRL-MPK48258/2020|2020-05-20|EPI\_ISL\_767816|Original|hCoV-19^^Meath|Human|National Virus Reference Laboratory|Irish Coronavirus Sequencing Consortium - Teagasc Moorepark|Walsh|Ireland

>Spike|hCoV-19/USA/UT-UPHL-2009665/2020|2020-07-27|EPI\_ISL\_605340|Original|hCoV-19^^Utah|Human|Utah Public Health Laboratory|Utah Public Health Laboratory|Young|USA

>Spike|hCoV-19/Denmark/ALAB-SSI-840/2020|2020-03-29|EPI\_ISL\_444933|Original|hCoV-19^^Denmark|Human|Department of Virus and Microbiological Special Diagnostics|Albertsen lab|Kirkegaard|Denmark

>Spike|hCoV-19/Wales/PHWC-36371/2020|2020-04-29|EPI\_ISL\_474657|Original|hCoV-19^^Wales|Human|Originating lab|COVID-19 Genomics UK (COG-UK) Consortium|Moore|United Kingdom

>Spike|hCoV-19/England/ALDP-B46856/2020|2020-11-06|EPI\_ISL\_656041|Original|hCoV-19^^England|Human|Lighthouse Lab in Alderley Park|Wellcome Sanger Institute for the COVID-19 Genomics UK (COG-UK) Consortium|Davies|United Kingdom

>Spike|hCoV-19/England/PORT-2D1E66/2020|2020-04-05|EPI\_ISL\_499287|Original|hCoV-19^^England|Human|Centre for Enzyme Innovation|COVID-19 Genomics UK (COG-UK) Consortium|Robson|United Kingdom

>Spike|hCoV-19/England/ALDP-A66AF1/2020|2020-10-12|EPI\_ISL\_630683|Original|hCoV-19^^England|Human|Lighthouse Lab in Alderley Park|Wellcome Sanger Institute for the COVID-19 Genomics UK (COG-UK) consortium|Davies|United Kingdom

>Spike|hCoV-19/USA/WA-S1578/2020|2020-05-26|EPI\_ISL\_496004|Original|hCoV-19^^Washington|Human|Washington State Department of Health|Seattle Flu Study|Lee|USA

>Spike|hCoV-19/England/MILK-BB1B20/2020|2020-11-18|EPI\_ISL\_720618|Original|hCoV-19^^England|Human|Lighthouse Lab in Milton Keynes|Wellcome Sanger Institute for the COVID-19 Genomics UK (COG-UK) Consortium|Davies|United Kingdom

>Spike|hCoV-19/England/NORT-28AD8D/2020|2020-04-15|EPI\_ISL\_492942|Original|hCoV-19^^England|Human|NU-OMICS DNA Sequencing research facility|Wellcome Sanger Institute for the COVID-19 Genomics UK (COG-UK) consortium|Davies|United Kingdom

>Spike|hCoV-19/Wales/PHWC-499B25/2020|2020-12-05|EPI\_ISL\_727404|Original|hCoV-19^^Wales|Human|Originating lab|COVID-19 Genomics UK (COG-UK) Consortium|Moore|United Kingdom

>Spike|hCoV-19/England/NORT-29E71F/2020|2020-04-30|EPI\_ISL\_488097|Original|hCoV-19^^England|Human|NU-OMICS DNA Sequencing research facility|Wellcome Sanger Institute for the COVID-19 Genomics UK (COG-UK) consortium|Davies|United Kingdom

>Spike|hCoV-19/Canada/ON-PHL-20-02292/2020|2020-09-00|EPI\_ISL\_671522|Original|hCoV-19^^Ontario|Human|Public Health Ontario Laboratory|Public Health Ontario Laboratory|Guthrie|Canada

>Spike|hCoV-19/India/TG-CDFD-C673/2020|2020-05-12|EPI\_ISL\_528602|Original|hCoV-19^^Telangana|Human|National Genomics Core-Center for DNA Fingerprinting and Diagnostics|National Genomics Core- Center for DNA Fingerprinting and Diagnostics (NGC-CDFD) - DBT's PAN-INDIA-1000 Genome consortium|Vashisht|India

>Spike|hCoV-19/USA/WA-UW216/2020|2020-03-14|EPI\_ISL\_417365|Original|hCoV-19^^Washington|Human|UW Virology Lab|UW Virology Lab|Roychoudhury|USA

>Spike|hCoV-19/Denmark/DCGC-5691/2020|2020-09-21|EPI\_ISL\_621196|Original|hCoV-19^^Hovedstaden|Human|Department of Virus and Microbiological Special Diagnostics|Albertsen lab|Michaelsen|Denmark

>Spike|hCoV-19/USA/CA-CZB-3735/2020|2020-07-22|EPI\_ISL\_548438|Original|hCoV-19^^California|Human|Orange County Public Health Laboratory|Chan-Zuckerberg Biohub|Bhatt|USA

>Spike|hCoV-19/Australia/VIC6847/2020|2020-07-25|EPI\_ISL\_564094|Original|hCoV-19^^Victoria|Human|Victorian Infectious Diseases Reference Laboratory (VIDRL)|VIDRL and MDU-PHL|Schultz|Australia

>Spike|hCoV-19/USA/CA-CZB-9789/2020|2020-05-17|EPI\_ISL\_672177|Original|hCoV-19^^California|Human|The Ashley Laboratory|Chan-Zuckerberg Biohub|Bhatt|USA

>Spike|hCoV-19/USA/FL\_9655/2020|2020-03-05|EPI\_ISL\_424854|Original|hCoV-19^^Florida|Human|FL Bureau of Public Health Laboratories-Miami|Pathogen Discovery|Queen|USA

>Spike|hCoV-19/England/QEUEH-C32FEE/2020|2020-12-11|EPI\_ISL\_782653|Original|hCoV-19^^England|Human|Lighthouse Lab in Glasgow|Wellcome Sanger Institute for the COVID-19 Genomics UK (COG-UK) Consortium|Davies|United Kingdom

>Spike|hCoV-19/Australia/NSW796/2020|2020-08-04|EPI\_ISL\_526138|Original|hCoV-19^^New South Wales|Human|Pathology West - NSW Health Pathology|NSW Health Pathology - Institute of Clinical Pathology and Medical Research; Westmead Hospital; University of Sydney|Gall|Australia

>Spike|hCoV-19/Iceland/252/2020|2020-03-17|EPI\_ISL\_417580|Original|hCoV-19^^Reykjavik|Human|The National University Hospital of Iceland|deCODE genetics|J\u00f3nsson|Iceland

>Spike|hCoV-19/England/BRIS-1250F5/2020|2020-03-23|EPI\_ISL\_443693|Original|hCoV-19^^England|Human|PHE South West Regional Laboratory|Wellcome Sanger Institute for the COVID-19 Genomics UK (COG-UK) consortium|Amato|United Kingdom

>Spike|hCoV-19/Scotland/EDB10083/2020|2020-11-20|EPI\_ISL\_680466|Original|hCoV-19^^Scotland|Human|Virology Department|COVID-19 Genomics UK (COG-UK) Consortium|McHugh|United Kingdom

>Spike|hCoV-19/Canada/ON-S901/2020|2020-04-12|EPI\_ISL\_586474|Original|hCoV-19^^Ontario|Human|Toronto Invasive Bacterial Diseases Network|McMaster University|McArthur|Canada

>Spike|hCoV-19/Denmark/ALAB-SSI490/2020|2020-03-21|EPI\_ISL\_429567|Original|hCoV-19^^Denmark|Human|Department of Virus and Microbiological Special Diagnostics|Albertsen lab|Kirkegaard|Denmark

>Spike|hCoV-19/USA/TX-HMH-MCoV-10224/2020|2020-07-07|EPI\_ISL\_789377|Original|hCoV-19^^Texas|Human|Houston Methodist Hospital|Houston Methodist Hospital|Long|USA

>Spike|hCoV-19/Scotland/CVR2580/2020|2020-04-16|EPI\_ISL\_473518|Original|hCoV-19^^Scotland|Human|West of Scotland Specialist Virology Centre|COVID-19 Genomics UK (COG-UK) Consortium|Robertson|United Kingdom

>Spike|hCoV-19/Netherlands/ZH-EMC-577/2020|2020-09-19|EPI\_ISL\_578005|Original|hCoV-19^^Zuid Holland|Human|Dutch COVID-19 response team|Erasmus Medical Center|Oude Munnink|Netherlands

>Spike|hCoV-19/England/CAMC-A42035/2020|2020-10-05|EPI\_ISL\_609478|Original|hCoV-19^^England|Human|Lighthouse Lab in Cambridge|Wellcome Sanger Institute for the COVID-19 Genomics UK (COG-UK) consortium|Davies|United Kingdom

>Spike|hCoV-19/Scotland/EDB3500/2020|2020-04-13|EPI\_ISL\_439273|Original|hCoV-19^^Scotland|Human|Virology Department|COVID-19 Genomics UK (COG-UK) Consortium|Williams|United Kingdom

>Spike|hCoV-19/England/QEUEH-A8A277/2020|2020-10-16|EPI\_ISL\_638840|Original|hCoV-19^^England|Human|Oxford Viromics|COVID-19 Genomics UK (COG-UK) Consortium|Golubchik|United Kingdom

>Spike|hCoV-19/Japan/PG-1567/2020|2020-04-00|EPI\_ISL\_685173|Original|hCoV-19^^Japan|Human|Pathogen Genomics Center|Pathogen Genomics Center|Sekizuka|Japan

>Spike|hCoV-19/USA/CT-CDC-2-3693464/2020|2020-11-05|EPI\_ISL\_747135|Original|hCoV-19^^Connecticut|Human|Respiratory Viruses Branch|Respiratory Viruses Branch|Queen|USA

>Spike|hCoV-19/Japan/PG-2294/2020|2020-04-00|EPI\_ISL\_685899|Original|hCoV-19^^Japan|Human|Pathogen Genomics Center|Pathogen Genomics Center|Sekizuka|Japan

>Spike|hCoV-19/England/MILK-A7AA36/2020|2020-10-15|EPI\_ISL\_606343|Original|hCoV-19^^England|Human|Lighthouse Lab in Milton Keynes|Wellcome Sanger Institute for the COVID-19 Genomics UK (COG-UK) consortium|Davies|United Kingdom

>Spike|hCoV-19/USA/NY-PV09071/2020|2020-03-20|EPI\_ISL\_421618|Original|hCoV-19^^New York|Human|MSHS Clinical Microbiology Laboratories|MSHS Pathogen Surveillance Program|van Bakel|USA

>Spike|hCoV-19/Denmark/DCGC-4788/2020|2020-09-21|EPI\_ISL\_621398|Original|hCoV-19^^Sjaelland|Human|Department of Virus and Microbiological Special Diagnostics|Albertsen lab|Michaelsen|Denmark

>Spike|hCoV-19/England/QEUA-C93CA8/2020|2020-12-17|EPI\_ISL\_762002|Original|hCoV-19^^England|Human|Lighthouse Lab in Glasgow|Wellcome Sanger Institute for the COVID-19 Genomics UK (COG-UK) Consortium|Davies|United Kingdom

>Spike|hCoV-19/Latvia/094/2020|2020-07-21|EPI\_ISL\_512649|Original|hCoV-19^^Latvia|Human|Latvijas Infektolo\u0123ijas centrs|Latvian Biomedical Research and Study Centre|Zrelavs|Latvia

>Spike|hCoV-19/Switzerland/BE-ETHZ-360193/2020|2020-11-10|EPI\_ISL\_728866|Original|hCoV-19^^Bern|Human|Viollier AG|Department of Biosystems Science and Engineering|Nadeau|Switzerland

>Spike|hCoV-19/USA/WA-S639/2020|2020-04-16|EPI\_ISL\_438192|Original|hCoV-19^^Washington|Human|Washington State Department of Health|Seattle Flu Study|Bedford|USA

>Spike|hCoV-19/England/LEED-2A8ADD/2020|2020-04-04|EPI\_ISL\_539044|Original|hCoV-19^^England|Human|Leeds Teaching Hospitals NHS Trust and Public Health England|Wellcome Sanger Institute for the COVID-19 Genomics UK (COG-UK) consortium|Davies|United Kingdom

>Spike|hCoV-19/England/LIVE-AB9C0/2020|2020-05-31|EPI\_ISL\_612446|Original|hCoV-19^^England|Human|Liverpool Clinical Laboratories|COVID-19 Genomics UK (COG-UK) Consortium|Haldenby|United Kingdom

>Spike|hCoV-19/France/ARA-SC402/2020|2020-04-15|EPI\_ISL\_660364|Original|hCoV-19^^Auvergne-Rh\u00f4ne-Alpes|Human|CHU Clermont-Ferrand|CNR Virus des Infections Respiratoires - France SUD|Bal|France

>Spike|hCoV-19/USA/NY-Wadsworth-194570-01/2020|2020-08-07|EPI\_ISL\_677034|Original|hCoV-19^^New York|Human|Wadsworth Center|Wadsworth Center|Lasek-Nesselquist|USA

>Spike|hCoV-19/England/ALDP-B63C75/2020|2020-11-08|EPI\_ISL\_656417|Original|hCoV-19^^England|Human|Lighthouse Lab in Alderley Park|Wellcome Sanger Institute for the COVID-19 Genomics UK (COG-UK) Consortium|Davies|United Kingdom

>Spike|hCoV-19/Denmark/DCGC-8675/2020|2020-10-26|EPI\_ISL\_625983|Original|hCoV-19^^Hovedstaden|Human|Department of Virus and Microbiological Special Diagnostics|Albertsen lab|Michaelsen|Denmark

>Spike|hCoV-19/South Korea/KCDC2481/2020|2020-06-11|EPI\_ISL\_514884|Original|hCoV-19^^South Korea|Human|Division of Viral Diseases|Division of Viral Diseases|Kim|South Korea

>Spike|hCoV-19/Australia/NSW596/2020|2020-03-27|EPI\_ISL\_478708|Original|hCoV-19^^New South Wales|Human|South Eastern Area Laboratory Services (SEALS)|NSW Health Pathology - Institute of Clinical Pathology and Medical Research; Westmead Hospital; University of Sydney|Gall|Australia

>Spike|hCoV-19/USA/WA-S2602/2020|2020-06-18|EPI\_ISL\_497234|Original|hCoV-19^^Washington|Human|Washington State Department of Health|Seattle Flu Study|Lee|USA

>Spike|hCoV-19/Denmark/DCGC-5860/2020|2020-09-28|EPI\_ISL\_621047|Original|hCoV-19^^Midtjylland|Human|Department of Virus and Microbiological Special Diagnostics|Albertsen lab|Michaelsen|Denmark

>Spike|hCoV-19/USA/MA-MASPHL-00317/2020|2020-04-18|EPI\_ISL\_791723|Original|hCoV-19^^Massachusetts|Human|Massachusetts State Public Health Laboratory|Infectious Disease Program|Park|USA

>Spike|hCoV-19/England/QEUEH-9F380F/2020|2020-09-24|EPI\_ISL\_588529|Original|hCoV-19^^England|Human|Lighthouse Lab in Glasgow|Wellcome Sanger Institute for the COVID-19 Genomics UK (COG-UK) consortium|Davies|United Kingdom

>Spike|hCoV-19/England/ALDP-94FAC2/2020|2020-06-16|EPI\_ISL\_555777|Original|hCoV-19^^England|Human|Lighthouse Lab in Alderley Park|Wellcome Sanger Institute for the COVID-19 Genomics UK (COG-UK) consortium|Davies|United Kingdom

>Spike|hCoV-19/Brazil/SP-317/2020|2020-05-04|EPI\_ISL\_534314|Original|hCoV-19^^S\u00e3o Paulo|Human|Hospital Universitario da USP de SP|Instituto Adolfo Lutz|Sacchi|Brazil

>Spike|hCoV-19/England/QEUEH-BA0D00/2020|2020-11-18|EPI\_ISL\_719781|Original|hCoV-19^^England|Human|Lighthouse Lab in Glasgow|Wellcome Sanger Institute for the COVID-19 Genomics UK (COG-UK) Consortium|Davies|United Kingdom

>Spike|hCoV-19/USA/NY-PV09122/2020|2020-03-19|EPI\_ISL\_422497|Original|hCoV-19^^New York|Human|MSHS Clinical Microbiology Laboratories|MSHS Pathogen Surveillance Program|van Bakel|USA

>Spike|hCoV-19/England/ALDP-94F5C1/2020|2020-06-18|EPI\_ISL\_556322|Original|hCoV-19^^England|Human|Lighthouse Lab in Alderley Park|Wellcome Sanger Institute for the COVID-19 Genomics UK (COG-UK) consortium|Davies|United Kingdom

>Spike|hCoV-19/England/ALDP-B45EDD/2020|2020-11-07|EPI\_ISL\_655997|Original|hCoV-19^^England|Human|Lighthouse Lab in Alderley Park|Wellcome Sanger Institute for the COVID-19 Genomics UK (COG-UK) Consortium|Davies|United Kingdom

>Spike|hCoV-19/USA/MI-MDHHS-SC21049/2020|2020-03-25|EPI\_ISL\_507825|Original|hCoV-19^^Michigan|Human|Michigan Department of Health and Human Services|Michigan Department of Health and Human Services|Blankenship|USA

>Spike|hCoV-19/USA/WA-S101/2020|2020-02-28|EPI\_ISL\_417154|Original|hCoV-19^^Washington|Human|Washington State Department of Health|Seattle Flu Study|Bedford|USA

>Spike|hCoV-19/USA/CT-Yale-309/2020|2020-03-30|EPI\_ISL\_476537|Original|hCoV-19^^Connecticut|Human|Yale Clinical Virology Laboratory|Grubaugh Lab - Yale School of Public Health|Grubaugh|USA

>Spike|hCoV-19/England/CAMC-B2228F/2020|2020-11-02|EPI\_ISL\_645866|Original|hCoV-19^^England|Human|Lighthouse Lab in Cambridge|Wellcome Sanger Institute for the COVID-19 Genomics UK (COG-UK) Consortium|Davies|United Kingdom

>Spike|hCoV-19/Denmark/DCGC-3011/2020|2020-08-24|EPI\_ISL\_616788|Original|hCoV-19^^Hovedstaden|Human|Department of Virus and Microbiological Special Diagnostics|Albertsen lab|Michaelsen|Denmark

>Spike|hCoV-19/England/QEUEH-B68724/2020|2020-11-11|EPI\_ISL\_662157|Original|hCoV-19^^England|Human|Lighthouse Lab in Glasgow|Wellcome Sanger Institute for the COVID-19 Genomics UK (COG-UK) Consortium|Davies|United Kingdom

>Spike|hCoV-19/Belgium/reg-0411455/2020|2020-04-11|EPI\_ISL\_476965|Original|hCoV-19^^Mouscron|Human|KU Leuven|KU Leuven|Maes|Belgium

>Spike|hCoV-19/Germany/BY-MVP-0221/2020|2020-04-22|EPI\_ISL\_466894|Original|hCoV-19^^Bavaria|Human|Max von Pettenkofer Institute|Laboratory for Functional Genome Analysis|Graf|Germany

>Spike|hCoV-19/Luxembourg/LNS7630398/2020|2020-10-24|EPI\_ISL\_744602|Original|hCoV-19^^Luxembourg|Human|Laboratoire national de sant\u00e9|Laboratoire national de sant\u00e9|Wienecke-Baldacchino|Luxembourg

>Spike|hCoV-19/Japan/PG-7542/2020|2020-08-00|EPI\_ISL\_686644|Original|hCoV-19^^Japan|Human|Pathogen Genomics Center|Pathogen Genomics Center|Sekizuka|Japan

>Spike|hCoV-19/Italy/LOM-INMI-BG-9225/2020|2020-02-26|EPI\_ISL\_460083|Original|hCoV-19^^Lombardy|Human|Molecular Virology Unit|Laboratory of Virology|Gruber|Italy

>Spike|hCoV-19/USA/VA-DCLS-0177/2020|2020-04-06|EPI\_ISL\_437393|Original|hCoV-19^^Virginia|Human|Virginia DCLS|Virginia DCLS|St. Jacques|USA

>Spike|hCoV-19/Scotland/QEUEH-A4C305/2020|2020-10-05|EPI\_ISL\_628561|Original|hCoV-19^^Scotland|Human|Oxford Viromics|COVID-19 Genomics UK (COG-UK) Consortium|Golubchik|United Kingdom

>Spike|hCoV-19/Scotland/CVR6022/2020|2020-11-30|EPI\_ISL\_680459|Original|hCoV-19^^Scotland|Human|West of Scotland Specialist Virology Centre|COVID-19 Genomics UK (COG-UK) Consortium|Robertson|United Kingdom

>Spike|hCoV-19/England/QEUEH-7A0C25/2020|2020-07-12|EPI\_ISL\_533108|Original|hCoV-19^^England|Human|Lighthouse Lab in Glasgow|Wellcome Sanger Institute for the COVID-19 Genomics UK (COG-UK) consortium|Davies|United Kingdom

>Spike|hCoV-19/Austria/CeMM0796/2020|2020-05-08|EPI\_ISL\_583706|Original|hCoV-19^^Austria|Human|Center for Virology|Bergthaler laboratory|Bergthaler|Austria

>Spike|hCoV-19/Denmark/DCGC-7431/2020|2020-10-12|EPI\_ISL\_619353|Original|hCoV-19^^Syddanmark|Human|Department of Virus and Microbiological Special Diagnostics|Albertsen lab|Michaelsen|Denmark

>Spike|hCoV-19/USA/TX-HMH-MCoV-14006/2020|2020-08-15|EPI\_ISL\_787297|Original|hCoV-19^^Texas|Human|Houston Methodist Hospital|Houston Methodist Hospital|Long|USA

>Spike|hCoV-19/England/CAMC-B32E88/2020|2020-11-05|EPI\_ISL\_659313|Original|hCoV-19^^England|Human|Lighthouse Lab in Cambridge|Wellcome Sanger Institute for the COVID-19 Genomics UK (COG-UK) Consortium|Davies|United Kingdom

>Spike|hCoV-19/Denmark/DCGC-13655/2020|2020-11-30|EPI\_ISL\_712941|Original|hCoV-19^^Hovedstaden|Human|Department of Virus and Microbiological Special Diagnostics|Albertsen Lab|Michaelsen|Denmark

>Spike|hCoV-19/England/BRIS-12C7CC/2020|2020-05-13|EPI\_ISL\_469518|Original|hCoV-19^^England|Human|PHE South West Regional Laboratory|Wellcome Sanger Institute for the COVID-19 Genomics UK (COG-UK) consortium|Davies|United Kingdom

>Spike|hCoV-19/USA/FL-BPHL-0459/2020|2020-03-24|EPI\_ISL\_495365|Original|hCoV-19^^Florida|Human|Florida Bureau of Public Health Laboratories|Florida Bureau of Public Health Laboratories|Blanton|USA

>Spike|hCoV-19/South Korea/KCDC2436/2020|2020-06-04|EPI\_ISL\_514839|Original|hCoV-19^^South Korea|Human|Division of Viral Diseases|Division of Viral Diseases|Kim|South Korea

>Spike|hCoV-19/England/QEUEH-9CE8B2/2020|2020-09-17|EPI\_ISL\_590142|Original|hCoV-19^^England|Human|Lighthouse Lab in Glasgow|Wellcome Sanger Institute for the COVID-19 Genomics UK (COG-UK) consortium|Davies|United Kingdom

>Spike|hCoV-19/England/LIVE-9DFDE/2020|2020-04-09|EPI\_ISL\_453258|Original|hCoV-19^^England|Human|Liverpool Clinical Laboratories|COVID-19 Genomics UK (COG-UK) Consortium|Haldenby|United Kingdom

>Spike|hCoV-19/England/QEUEH-B0DE2C/2020|2020-11-02|EPI\_ISL\_642070|Original|hCoV-19^^England|Human|Lighthouse Lab in Glasgow|Wellcome Sanger Institute for the COVID-19 Genomics UK (COG-UK) Consortium|Davies|United Kingdom

>Spike|hCoV-19/Scotland/QEUEH-9F6875/2020|2020-09-27|EPI\_ISL\_600836|Original|hCoV-19^^Scotland|Human|Lighthouse Lab in Glasgow|Wellcome Sanger Institute for the COVID-19 Genomics UK (COG-UK) consortium|Davies|United Kingdom

>Spike|hCoV-19/England/QEUEH-A63FC8/2020|2020-10-12|EPI\_ISL\_628681|Original|hCoV-19^^England|Human|Oxford Viromics|COVID-19 Genomics UK (COG-UK) Consortium|Golubchik|United Kingdom

>Spike|hCoV-19/England/ALDP-8D8379/2020|2020-06-24|EPI\_ISL\_556995|Original|hCoV-19^^England|Human|Lighthouse Lab in Alderley Park|Wellcome Sanger Institute for the COVID-19 Genomics UK (COG-UK) consortium|Davies|United Kingdom

>Spike|hCoV-19/Scotland/EDB8490/2020|2020-10-18|EPI\_ISL\_612372|Original|hCoV-19^^Scotland|Human|Virology Department|COVID-19 Genomics UK (COG-UK) Consortium|McHugh|United Kingdom

>Spike|hCoV-19/USA/LA-EVTL1249/2020|2020-12-18|EPI\_ISL\_768518|Original|hCoV-19^^Louisiana|Human|LSUHS Emerging Viral Threat Laboratory|Microbial Genome Sequencing Center|Kamil|USA

>Spike|hCoV-19/England/ALDP-A87AAF/2020|2020-10-17|EPI\_ISL\_606292|Original|hCoV-19^^England|Human|Lighthouse Lab in Alderley Park|Wellcome Sanger Institute for the COVID-19 Genomics UK (COG-UK) consortium|Davies|United Kingdom

>Spike|hCoV-19/Canada/QC-LSPQ-L00215981/2020|2020-03-12|EPI\_ISL\_535743|Original|hCoV-19^^Quebec|Human|Centre de SSS La Pommerai e|Laboratoire de sant e publique du Qu bec|Moreira|Canada

>Spike|hCoV-19/Denmark/DCGC-5744/2020|2020-09-28|EPI\_ISL\_621249|Original|hCoV-19^^Hovedstaden|Human|Department of Virus and Microbiological Special Diagnostics|Albertsen lab|Michaelsen|Denmark

>Spike|hCoV-19/Wales/PHWC-163A39/2020|2020-05-10|EPI\_ISL\_474030|Original|hCoV-19^^Wales|Human|Originating lab|COVID-19 Genomics UK (COG-UK) Consortium|Moore|United Kingdom

>Spike|hCoV-19/Spain/VC-IBV-98003477/2020|2020-04-07|EPI\_ISL\_539275|Original|hCoV-19^^Comunitat Valenciana|Human|Hospital Universitario de La Ribera (Alzira|SeqCOVID-SPAIN consortium|IBV (CSIC)|Comas|Spain

>Spike|hCoV-19/Netherlands/LI-RIVM-20588/2020|2020-12-13|EPI\_ISL\_790671|Original|hCoV-19^^Limburg|Human|Dutch COVID-19 response team|National Institute for Public Health and the Environment (RIVM)|Meijer|Netherlands

>Spike|hCoV-19/England/ALDP-C586DE/2020|2020-12-13|EPI\_ISL\_736073|Original|hCoV-19^^England|Human|Lighthouse Lab in Alderley Park|Wellcome Sanger Institute for the COVID-19 Genomics UK (COG-UK) Consortium|Davies|United Kingdom

>Spike|hCoV-19/USA/MN-MDH-1190/2020|2020-05-05|EPI\_ISL\_477280|Original|hCoV-19^^Minnesota|Human|M Health Fairview|Minnesota Department of Health|Garfin|USA

>Spike|hCoV-19/Germany/HH-hpi-p1541/2020|2020-03-15|EPI\_ISL\_776033|Original|hCoV-19^^Hamburg|Human|University Medical Center Hamburg Eppendorf|Heinrich Pette Institute|Robitaille|Germany

>Spike|hCoV-19/Canada/ON-E71b/2020|2020-04-03|EPI\_ISL\_770824|Original|hCoV-19^^Ontario|Human|Eastern Ontario Regional Laboratory Association|McMaster University|McArthur|Canada

>Spike|hCoV-19/USA/LA-EVTL479/2020|2020-06-23|EPI\_ISL\_578883|Original|hCoV-19^^Louisiana|Human|LSUHS Emerging Viral Threat Laboratory|Microbial Genome Sequencing Center|Kamil|USA

>Spike|hCoV-19/USA/AZ-TG396346/2020|2020-06-09|EPI\_ISL\_694805|Original|hCoV-19^^Arizona|Human|AZ SPHL|TGen North|French|USA

>Spike|hCoV-19/USA/WA-S1660/2020|2020-05-29|EPI\_ISL\_496086|Original|hCoV-19^^Washington|Human|Washington State Department of Health|Seattle Flu Study|Lee|USA

>Spike|hCoV-19/Colombia/CAU-INS-89002/2020|2020-03-31|EPI\_ISL\_498159|Original|hCoV-19^^Cauca|Human|Instituto Nacional de Salud|Instituto Nacional de Salud|Franco-Mu\u00f1oz|Colombia

>Spike|hCoV-19/Switzerland/BL-ETHZ-110036/2020|2020-04-01|EPI\_ISL\_486472|Original|hCoV-19^^Basel-Landschaft|Human|Viollier AG|Department of Biosystems Science and Engineering|Nadeau|Switzerland

>Spike|hCoV-19/USA/CO-CDPHE-2100038277/2020|2020-11-17|EPI\_ISL\_771172|Original|hCoV-19^^Colorado|Human|Colorado Department of Public Health and Environment|Colorado Department of Public Health and Environment|Bankers|USA

>Spike|hCoV-19/Switzerland/ZH-ETHZ-120013/2020|2020-04-17|EPI\_ISL\_468212|Original|hCoV-19^^Zurich|Human|Viollier AG|Department of Biosystems Science and Engineering|Nadeau|Switzerland

>Spike|hCoV-19/England/CAMC-B08FF1/2020|2020-10-29|EPI\_ISL\_681656|Original|hCoV-19^^England|Human|Lighthouse Lab in Cambridge|Wellcome Sanger Institute for the COVID-19 Genomics UK (COG-UK) Consortium|Davies|United Kingdom

>Spike|hCoV-19/England/BRIS-130BAB/2020|2020-03-14|EPI\_ISL\_492592|Original|hCoV-19^^England|Human|PHE South West Regional Laboratory|Wellcome Sanger Institute for the COVID-19 Genomics UK (COG-UK) consortium|Davies|United Kingdom

>Spike|hCoV-19/France/PAC-IHU-0977/2020|2020-07-24|EPI\_ISL\_569024|Original|hCoV-19^^Provence-Alpes-C\u00f4te-d\u00e0z|Human|MEPHI|MEPHI|Levasseur|France

>Spike|hCoV-19/England/CAMB-7C852/2020|2020-04-05|EPI\_ISL\_441613|Original|hCoV-19^^England|Human|Department of Pathology|Wellcome Sanger Institute for the COVID-19 Genomics UK (COG-UK) consortium|Amato|United Kingdom

>Spike|hCoV-19/Bahrain/340861247\_S22/2020|2020-10-14|EPI\_ISL\_632255|Original|hCoV-19^^Bahrain|Human|Communicable Disease Laboratory|Communicable Disease Laboratory|Altaif|Bahrain

>Spike|hCoV-19/USA/CA-ALSR-3851/2020|2020-06-29|EPI\_ISL\_636244|Original|hCoV-19^^California|Human|San Diego County Public Health Laboratory|Andersen lab at Scripps Research|Gangavarapu|USA

>Spike|hCoV-19/England/ALDP-AA3542/2020|2020-10-22|EPI\_ISL\_623912|Original|hCoV-19^^England|Human|Lighthouse Lab in Alderley Park|Wellcome Sanger Institute for the COVID-19 Genomics UK (COG-UK) consortium|Davies|United Kingdom

>Spike|hCoV-19/USA/LA-EVTL036/2020|2020-04-24|EPI\_ISL\_435574|Original|hCoV-19^^Louisiana|Human|LSUHS Emerging Viral Threat Laboratory|Microbial Genome Sequencing Center|Kamil|USA

>Spike|hCoV-19/England/MILK-A05784/2020|2020-09-30|EPI\_ISL\_600032|Original|hCoV-19^^England|Human|Lighthouse Lab in Milton Keynes|Wellcome Sanger Institute for the COVID-19 Genomics UK (COG-UK) consortium|Davies|United Kingdom

>Spike|hCoV-19/USA/AZ-TG280795/2020|2020-04-18|EPI\_ISL\_694152|Original|hCoV-19^^Arizona|Human|AZ SPHL|TGen North|French|USA

>Spike|hCoV-19/Denmark/DCGC-13174/2020|2020-11-30|EPI\_ISL\_712145|Original|hCoV-19^^Hovedstaden|Human|Department of Virus and Microbiological Special Diagnostics|Albertsen Lab|Michaelsen|Denmark

>Spike|hCoV-19/Portugal/PT1411/2020|2020-03-28|EPI\_ISL\_511370|Original|hCoV-19^^Portugal|Human|Instituto Nacional de Saude (INSA)|Instituto Nacional de Saude (INSA)|Borges|Portugal

>Spike|hCoV-19/USA/CA-CZB-3659/2020|2020-07-18|EPI\_ISL\_516734|Original|hCoV-19^^California|Human|UCSF Clinical Microbiology Laboratory|Chan-Zuckerberg Biohub|Kamm|USA

>Spike|hCoV-19/USA/UT-UPHL-2012135808/2020|2020-08-15|EPI\_ISL\_746305|Original|hCoV-19^^Utah|Human|Ginkgo Bioworks Clinical Laboratory|Utah Public Health Laboratory|Young|USA

>Spike|hCoV-19/England/ALDP-A6E33A/2020|2020-10-15|EPI\_ISL\_607173|Original|hCoV-19^^England|Human|Lighthouse Lab in Alderley Park|Wellcome Sanger Institute for the COVID-19 Genomics UK (COG-UK) consortium|Davies|United Kingdom

>Spike|hCoV-19/India/MH-CMP-34/2020|2020-09-09|EPI\_ISL\_779708|Original|hCoV-19^^Maharashtra|Human|The Foundation for Medical Research|The Foundation for Medical Research|Mandal|India

>Spike|hCoV-19/England/ALDP-CC061D/2020|2020-12-18|EPI\_ISL\_760587|Original|hCoV-19^^England|Human|Lighthouse Lab in Alderley Park|Wellcome Sanger Institute for the COVID-19 Genomics UK (COG-UK) Consortium|Davies|United Kingdom

>Spike|hCoV-19/England/ALDP-A6CC40/2020|2020-10-14|EPI\_ISL\_607088|Original|hCoV-19^^England|Human|Lighthouse Lab in Alderley Park|Wellcome Sanger Institute for the COVID-19 Genomics UK (COG-UK) consortium|Davies|United Kingdom

>Spike|hCoV-19/Japan/PG-8758/2020|2020-09-00|EPI\_ISL\_686354|Original|hCoV-19^^Japan|Human|Pathogen Genomics Center|Pathogen Genomics Center|Sekizuka|Japan

>Spike|hCoV-19/USA/TX-HMH-3720/2020|2020-06-16|EPI\_ISL\_543136|Original|hCoV-19^^Texas|Human|Houston Methodist Hospital|Houston Methodist Hospital|Long|USA

>Spike|hCoV-19/England/MILK-59460A/2020|2020-06-11|EPI\_ISL\_558255|Original|hCoV-19^^England|Human|Lighthouse Lab in Milton Keynes|Wellcome Sanger Institute for the COVID-19 Genomics UK (COG-UK) consortium|Davies|United Kingdom

>Spike|hCoV-19/Australia/VIC6217/2020|2020-07-23|EPI\_ISL\_518215|Original|hCoV-19^^Victoria|Human|Victorian Infectious Diseases Reference Laboratory (VIDRL)|VIDRL and MDU-PHL|Schultz|Australia

>Spike|hCoV-19/SaudiArabia/KAUST-MADINAH1066/2020|2020-06-13|EPI\_ISL\_513087|Original|hCoV-19^^Madinah|Human|Pathogen Genomics Lab King Abdullah University of Science and Technology(KAUST)|Pathogen Genomics Lab King Abdullah University of Science and Technology(KAUST)|Mohamed Ghazzali|Saudi Arabia

>Spike|hCoV-19/England/MILK-BAA0A3/2020|2020-11-18|EPI\_ISL\_783173|Original|hCoV-19^^England|Human|Lighthouse Lab in Milton Keynes|Wellcome Sanger Institute for the COVID-19 Genomics UK (COG-UK) Consortium|Davies|United Kingdom

>Spike|hCoV-19/England/SHEF-C658F/2020|2020-04-25|EPI\_ISL\_479219|Original|hCoV-19^^England|Human|Virology Department|COVID-19 Genomics UK (COG-UK) Consortium|de Silva|United Kingdom

>Spike|hCoV-19/England/ALDP-B26160/2020|2020-11-04|EPI\_ISL\_646691|Original|hCoV-19^^England|Human|Lighthouse Lab in Alderley Park|Wellcome Sanger Institute for the COVID-19 Genomics UK (COG-UK) Consortium|Davies|United Kingdom



>Spike|hCoV-19/USA/MI-MDHHS-SC21205/2020|2020-04-01|EPI\_ISL\_507462|Original|hCoV-19^^Michigan|Human|Michigan Department of Health and Human Services|Michigan Department of Health and Human Services|Blankenship|USA

>Spike|hCoV-19/England/CAMC-B52338/2020|2020-11-08|EPI\_ISL\_656760|Original|hCoV-19^^England|Human|Lighthouse Lab in Cambridge|Wellcome Sanger Institute for the COVID-19 Genomics UK (COG-UK) Consortium|Davies|United Kingdom

>Spike|hCoV-19/England/204241470/2020|2020-10-13|EPI\_ISL\_622855|Original|hCoV-19^^England|Human|Respiratory Virus Unit|Respiratory Virus Unit|Platt|United Kingdom

>Spike|hCoV-19/England/CAMC-C70B68/2020|2020-12-16|EPI\_ISL\_769207|Original|hCoV-19^^England|Human|Lighthouse Lab in Cambridge|Wellcome Sanger Institute for the COVID-19 Genomics UK (COG-UK) Consortium|Davies|United Kingdom

>Spike|hCoV-19/England/MILK-C61362/2020|2020-12-13|EPI\_ISL\_735560|Original|hCoV-19^^England|Human|Lighthouse Lab in Milton Keynes|Wellcome Sanger Institute for the COVID-19 Genomics UK (COG-UK) Consortium|Davies|United Kingdom

>Spike|hCoV-19/England/NOTT-113B08/2020|2020-09-26|EPI\_ISL\_573458|Original|hCoV-19^^England|Human|Queens Medical Centre|COVID-19 Genomics UK (COG-UK) Consortium|Loose|United Kingdom

>Spike|hCoV-19/USA/CA-CZB-13943/2020|2020-06-23|EPI\_ISL\_739056|Original|hCoV-19^^California|Human|Alameda County Public Health Lab|Chan-Zuckerberg Biohub|Kamm|USA

>Spike|hCoV-19/Scotland/EDB1541/2020|2020-04-12|EPI\_ISL\_433077|Original|hCoV-19^^Scotland|Human|Virology Department|COVID-19 Genomics UK (COG-UK) Consortium|Williams|United Kingdom

>Spike|hCoV-19/England/ALDP-BC76BD/2020|2020-11-22|EPI\_ISL\_721185|Original|hCoV-19^^England|Human|Lighthouse Lab in Alderley Park|Wellcome Sanger Institute for the COVID-19 Genomics UK (COG-UK) Consortium|Davies|United Kingdom

>Spike|hCoV-19/England/MILK-B8C07A/2020|2020-11-13|EPI\_ISL\_674213|Original|hCoV-19^^England|Human|Lighthouse Lab in Milton Keynes|Wellcome Sanger Institute for the COVID-19 Genomics UK (COG-UK) Consortium|Davies|United Kingdom

>Spike|hCoV-19/USA/WA-UW89/2020|2020-03-10|EPI\_ISL\_416445|Original|hCoV-19^^Washington|Human|UW Virology Lab|UW Virology Lab|Roychoudhury|USA

>Spike|hCoV-19/Austria/CeMM0376/2020|2020-03-28|EPI\_ISL\_475820|Original|hCoV-19^^Mayrhofen|Human|Institut f\u00fcr Virologie am Department f\u00fcr Hygiene|Bergthaler laboratory|Bergthaler|Austria

>Spike|hCoV-19/England/MILK-C2FB2C/2020|2020-12-07|EPI\_ISL\_733872|Original|hCoV-19^^England|Human|Lighthouse Lab in Milton Keynes|Wellcome Sanger Institute for the COVID-19 Genomics UK (COG-UK) Consortium|Davies|United Kingdom

>Spike|hCoV-19/Canada/ON-PHL-20-03814/2020|2020-11-00|EPI\_ISL\_775025|Original|hCoV-19^^Ontario|Human|Public Health Ontario Laboratory|Public Health Ontario Laboratory|Guthrie|Canada

>Spike|hCoV-19/Portugal/PT2065/2020|2020-11-11|EPI\_ISL\_732279|Original|hCoV-19^^Portugal|Human|Instituto Nacional de Saude (INSA) and Instituto Gulbenkian de Ciencia (IGC)|Instituto Nacional de Saude (INSA) and Instituto Gulbenkian de Ciencia (IGC)|Borges|Portugal

>Spike|hCoV-19/Australia/NSW2538/2020|2020-04-04|EPI\_ISL\_527040|Original|hCoV-19^^New South Wales|Human|Area of Virology|Area of Virology|Yeang|Australia

>Spike|hCoV-19/England/EXET-13DA92/2020|2020-00-00|EPI\_ISL\_724275|Original|hCoV-19^^England|Human|University of Exeter|COVID-19 Genomics UK (COG-UK) Consortium|Temperton|United Kingdom

>Spike|hCoV-19/Spain/CT-IBV-97010114/2020|2020-11-14|EPI\_ISL\_683641|Original|hCoV-19^^Catalunya|Human|Servicio de Microbiolog\u00eda|SeqCOVID-SPAIN consortium|IBV (CSIC) |Comas|Spain

>Spike|hCoV-19/Australia/VIC17272/2020|2020-07-31|EPI\_ISL\_663814|Original|hCoV-19^^Victoria|Human|Microbiological Diagnostic Unit - Public Health Laboratory (MDU-PHL) |MDU-PHL|Schultz|Australia

>Spike|hCoV-19/Denmark/DCGC-2297/2020|2020-08-10|EPI\_ISL\_617721|Original|hCoV-19^^Midtjylland|Human|Department of Virus and Microbiological Special Diagnostics|Albertsen lab|Michaelsen|Denmark

>Spike|hCoV-19/England/CAMB-1AA553/2020|2020-04-17|EPI\_ISL\_443604|Original|hCoV-19^^England|Human|Department of Pathology|Wellcome Sanger Institute for the COVID-19 Genomics UK (COG-UK) consortium|Amato|United Kingdom

>Spike|hCoV-19/Belgium/IMJ-0401373/2020|2020-04-01|EPI\_ISL\_462227|Original|hCoV-19^^Bornem|Human|KU Leuven|KU Leuven|Maes|Belgium

>Spike|hCoV-19/Portugal/PT0037/2020|2020-03-15|EPI\_ISL\_418022|Original|hCoV-19^^Portugal|Human|H Braga|Instituto Nacional de Saude (INSA)|Borges|Portugal

>Spike|hCoV-19/Netherlands/NA\_227/2020|2020-03-27|EPI\_ISL\_422762|Original|hCoV-19^^Netherlands|Human|Dutch COVID-19 response team|Erasmus Medical Center|Oude Munnink|Netherlands

>Spike|hCoV-19/Denmark/DCGC-8169/2020|2020-10-26|EPI\_ISL\_617224|Original|hCoV-19^^Hovedstaden|Human|Department of Virus and Microbiological Special Diagnostics|Albertsen lab|Michaelsen|Denmark

>Spike|hCoV-19/Belgium/ULG-10628/2020|2020-10-25|EPI\_ISL\_636607|Original|hCoV-19^^Li\u00e8ge|Human|Department of Clinical Microbiology|GIGA Medical Genomics|Durkin|Belgium

>Spike|hCoV-19/England/QEUA-B6895B/2020|2020-11-11|EPI\_ISL\_661517|Original|hCoV-19^^England|Human|Lighthouse Lab in Glasgow|Wellcome Sanger Institute for the COVID-19 Genomics UK (COG-UK) Consortium|Davies|United Kingdom

>Spike|hCoV-19/Scotland/QEUA-A0B2D8/2020|2020-10-03|EPI\_ISL\_599294|Original|hCoV-19^^Scotland|Human|Lighthouse Lab in Glasgow|Wellcome Sanger Institute for the COVID-19 Genomics UK (COG-UK) consortium|Davies|United Kingdom

>Spike|hCoV-19/Australia/VIC4830/2020|2020-07-18|EPI\_ISL\_519214|Original|hCoV-19^^Victoria|Human|Microbiological Diagnostic Unit - Public Health Laboratory (MDU-PHL)|MDU-PHL|Schultz|Australia

>Spike|hCoV-19/USA/FL-BPHL-0143/2020|2020-03-06|EPI\_ISL\_480794|Original|hCoV-19^^Florida|Human|Florida Bureau of Public Health Laboratories|Florida Bureau of Public Health Laboratories|Blanton|USA

>Spike|hCoV-19/England/PORT-2D0E85/2020|2020-03-31|EPI\_ISL\_475297|Original|hCoV-19^^England|Human|Centre for Enzyme Innovation|COVID-19 Genomics UK (COG-UK) Consortium|Robson|United Kingdom

>Spike|hCoV-19/England/MILK-9C463A/2020|2020-09-09|EPI\_ISL\_566956|Original|hCoV-19^^England|Human|Lighthouse Lab in Milton Keynes|Wellcome Sanger Institute for the COVID-19 Genomics UK (COG-UK) consortium|Davies|United Kingdom

>Spike|hCoV-19/Wales/PHWC-47D8D5/2020|2020-10-09|EPI\_ISL\_586206|Original|hCoV-19^^Wales|Human|Wales Specialist Virology Centre Sequencing lab|COVID-19 Genomics UK (COG-UK) Consortium|Moore|United Kingdom

>Spike|hCoV-19/Japan/PG-1553/2020|2020-04-00|EPI\_ISL\_685159|Original|hCoV-19^^Japan|Human|Pathogen Genomics Center|Pathogen Genomics Center|Sekizuka|Japan

>Spike|hCoV-19/England/GSTT-265D8F1/2020|2020-03-25|EPI\_ISL\_484033|Original|hCoV-19^^England|Human|Centre for Clinical Infection and Diagnostics Research and Genomics Innovation Unit|COVID-19 Genomics UK (COG-UK) Consortium|Awan|United Kingdom

>Spike|hCoV-19/Denmark/DCGC-13205/2020|2020-11-30|EPI\_ISL\_712150|Original|hCoV-19^^Hovedstaden|Human|Department of Virus and Microbiological Special Diagnostics|Albertsen Lab|Michaelsen|Denmark

>Spike|hCoV-19/Japan/PG-5045/2020|2020-07-00|EPI\_ISL\_690156|Original|hCoV-19^^Japan|Human|Pathogen Genomics Center|Pathogen Genomics Center|Sekizuka|Japan

>Spike|hCoV-19/Scotland/QEUA-A1FE64/2020|2020-10-01|EPI\_ISL\_598971|Original|hCoV-19^^Scotland|Human|Lighthouse Lab in Glasgow|Wellcome Sanger Institute for the COVID-19 Genomics UK (COG-UK) consortium|Davies|United Kingdom

>Spike|hCoV-19/England/NOTT-113027/2020|2020-09-07|EPI\_ISL\_534757|Original|hCoV-19^^England|Human|Queens Medical Centre|COVID-19 Genomics UK (COG-UK) Consortium|Loose|United Kingdom

>Spike|hCoV-19/England/MILK-AC8617/2020|2020-10-21|EPI\_ISL\_629426|Original|hCoV-19^^England|Human|Lighthouse Lab in Milton Keynes|Wellcome Sanger Institute for the COVID-19 Genomics UK (COG-UK) consortium|Davies|United Kingdom

>Spike|hCoV-19/England/MILK-A0639E/2020|2020-10-01|EPI\_ISL\_600027|Original|hCoV-19^^England|Human|Lighthouse Lab in Milton Keynes|Wellcome Sanger Institute for the COVID-19 Genomics UK (COG-UK) consortium|Davies|United Kingdom

>Spike|hCoV-19/Netherlands/ZuidHolland\_95/2020|2020-03-31|EPI\_ISL\_422631|Original|hCoV-19^^Zuid Holland|Human|Dutch COVID-19 response team|Erasmus Medical Center|Oude Munnink|Netherlands

>Spike|hCoV-19/England/QEUEH-CC77D7/2020|2020-12-20|EPI\_ISL\_760377|Original|hCoV-19^^England|Human|Lighthouse Lab in Glasgow|Wellcome Sanger Institute for the COVID-19 Genomics UK (COG-UK) Consortium|Davies|United Kingdom

>Spike|hCoV-19/Australia/VIC126/2020|2020-03-20|EPI\_ISL\_419728|Original|hCoV-19^^Victoria|Human|Microbiological Diagnostic Unit Public Health Laboratory|Microbiological Diagnostic Unit Public Health Laboratory|Schultz|Australia

>Spike|hCoV-19/Australia/VIC16938/2020|2020-08-05|EPI\_ISL\_663648|Original|hCoV-19^^Victoria|Human|Microbiological Diagnostic Unit - Public Health Laboratory (MDU-PHL)|MDU-PHL|Schultz|Australia

>Spike|hCoV-19/Japan/IC-0535/2021|2021-01-00|EPI\_ISL\_779218|Original|hCoV-19^^Japan|Human|Pathogen Genomics Center|Pathogen Genomics Center|Sekizuka|Japan

>Spike|hCoV-19/England/ALDP-A958B3/2020|2020-10-19|EPI\_ISL\_624846|Original|hCoV-19^^England|Human|Lighthouse Lab in Alderley Park|Wellcome Sanger Institute for the COVID-19 Genomics UK (COG-UK) consortium|Davies|United Kingdom

>Spike|hCoV-19/USA/TX-HMH-MCoV-15781/2020|2020-07-10|EPI\_ISL\_785465|Original|hCoV-19^^Texas|Human|Houston Methodist Hospital|Houston Methodist Hospital|Long|USA

>Spike|hCoV-19/USA/WA-UW-12903/2020|2020-06-29|EPI\_ISL\_570809|Original|hCoV-19^^Washington|Human|UW Virology Lab|UW Virology Lab|Roychoudhury|USA

>Spike|hCoV-19/England/MILK-B384BD/2020|2020-11-01|EPI\_ISL\_658751|Original|hCoV-19^^England|Human|Lighthouse Lab in Milton Keynes|Wellcome Sanger Institute for the COVID-19 Genomics UK (COG-UK) Consortium|Davies|United Kingdom

>Spike|hCoV-19/USA/UT-UPHL-2009308/2020|2020-05-14|EPI\_ISL\_524914|Original|hCoV-19^^Utah|Human|Utah Public Health Laboratory|Utah Public Health Laboratory|Young|USA

>Spike|hCoV-19/USA/MI-QDX-467/2020|2020-03-23|EPI\_ISL\_571202|Original|hCoV-19^^Michigan|Human|Quest Diagnostics|Quest Diagnostics|Kagan|USA

>Spike|hCoV-19/Australia/VIC705/2020|2020-03-30|EPI\_ISL\_426992|Original|hCoV-19^^Victoria|Human|Victorian Infectious Diseases Reference Laboratory (VIDRL)|Microbiological Diagnostic Unit Public Health Laboratory and Victorian Infectious Diseases Reference Laboratory|Schultz|Australia

>Spike|hCoV-19/USA/UN-UW-1407/2020|2020-03-17|EPI\_ISL\_422983|Original|hCoV-19^^USA|Human|UW Virology Lab|UW Virology Lab|Roychoudhury|USA

>Spike|hCoV-19/Denmark/DCGC-2846/2020|2020-08-24|EPI\_ISL\_616673|Original|hCoV-19^^Hovedstaden|Human|Department of Virus and Microbiological Special Diagnostics|Albertsen lab|Michaelsen|Denmark

>Spike|hCoV-19/USA/FL-BPHL-1490/2020|2020-08-10|EPI\_ISL\_568588|Original|hCoV-19^^Florida|Human|Florida Bureau of Public Health Laboratories|Florida Bureau of Public Health Laboratories|Blanton|USA

>Spike|hCoV-19/England/QEUEH-96216A/2020|2020-08-10|EPI\_ISL\_531747|Original|hCoV-19^^England|Human|Lighthouse Lab in Glasgow|Wellcome Sanger Institute for the COVID-19 Genomics UK (COG-UK) consortium|Davies|United Kingdom

>Spike|hCoV-19/England/20100122107/2020|2020-03-02|EPI\_ISL\_415143|Original|hCoV-19^^England|Human|Respiratory Virus Unit|Respiratory Virus Unit|Platt|United Kingdom

>Spike|hCoV-19/USA/CA-CZB-2036/2020|2020-05-13|EPI\_ISL\_486282|Original|hCoV-19^^California|Human|Humboldt County Public Health Laboratory|Chan-Zuckerberg Biohub|McGeever|USA

>Spike|hCoV-19/England/QEUEH-B10D56/2020|2020-11-02|EPI\_ISL\_642433|Original|hCoV-19^^England|Human|Lighthouse Lab in Glasgow|Wellcome Sanger Institute for the COVID-19 Genomics UK (COG-UK) Consortium|Davies|United Kingdom

>Spike|hCoV-19/France/ARA75981/2020|2020-09-21|EPI\_ISL\_639985|Original|hCoV-19^^Auvergne-Rhone-Alpes|Human|CNR Virus des Infections Respiratoires - France SUD|CNR Virus des Infections Respiratoires - France SUD|Josset|France

>Spike|hCoV-19/Denmark/DCGC-15975/2020|2020-11-23|EPI\_ISL\_714515|Original|hCoV-19^^Syddanmark|Human|Department of Virus and Microbiological Special Diagnostics|Albertsen Lab|Michaelsen|Denmark

>Spike|hCoV-19/England/QEUEH-95F537/2020|2020-08-06|EPI\_ISL\_532312|Original|hCoV-19^^England|Human|Lighthouse Lab in Glasgow|Wellcome Sanger Institute for the COVID-19 Genomics UK (COG-UK) consortium|Davies|United Kingdom

>Spike|hCoV-19/England/ALDP-953612/2020|2020-06-08|EPI\_ISL\_553771|Original|hCoV-19^^England|Human|Lighthouse Lab in Alderley Park|Wellcome Sanger Institute for the COVID-19 Genomics UK (COG-UK) consortium|Davies|United Kingdom

>Spike|hCoV-19/England/PORT-2D7510/2020|2020-10-27|EPI\_ISL\_651277|Original|hCoV-19^^England|Human|Centre for Enzyme Innovation|COVID-19 Genomics UK (COG-UK) Consortium|Robson|United Kingdom

>Spike|hCoV-19/England/QEUA-B66A1E/2020|2020-11-11|EPI\_ISL\_655266|Original|hCoV-19^^England|Human|Lighthouse Lab in Glasgow|Wellcome Sanger Institute for the COVID-19 Genomics UK (COG-UK) Consortium|Davies|United Kingdom

>Spike|hCoV-19/England/QEUA-9C80FC/2020|2020-09-11|EPI\_ISL\_567140|Original|hCoV-19^^England|Human|Lighthouse Lab in Glasgow|Wellcome Sanger Institute for the COVID-19 Genomics UK (COG-UK) consortium|Davies|United Kingdom

>Spike|hCoV-19/England/LCST-24D7071/2020|2020-06-06|EPI\_ISL\_478358|Original|hCoV-19^^England|Human|University Hospitals Of Leicester NHS Trust and DeepSeq Nottingham|COVID-19 Genomics UK (COG-UK) Consortium|Loose|United Kingdom

>Spike|hCoV-19/England/BRIS-12ABD/2020|2020-05-02|EPI\_ISL\_458427|Original|hCoV-19^^England|Human|PHE South West Regional Laboratory|Wellcome Sanger Institute for the COVID-19 Genomics UK (COG-UK) consortium|Davies|United Kingdom

>Spike|hCoV-19/Australia/VIC2148/2020|2020-06-20|EPI\_ISL\_521917|Original|hCoV-19^^Victoria|Human|Victorian Infectious Diseases Reference Laboratory (VIDRL)|VIDRL and MDU-PHL|Schultz|Australia

>Spike|hCoV-19/India/MH-AFMC-5309/2020|2020-05-21|EPI\_ISL\_496538|Original|hCoV-19^^Maharashtra|Human|Armed Forces Medical College|National Centre For Cell Science|Paul|India

>Spike|hCoV-19/England/205091067/2020|2020-12-11|EPI\_ISL\_766299|Original|hCoV-19^^England|Human|Respiratory Virus Unit|COVID-19 Genomics UK (COG-UK) Consortium|Platt|United Kingdom

>Spike|hCoV-19/USA/MN-MDH-2141/2020|2020-11-09|EPI\_ISL\_708479|Original|hCoV-19^^Minnesota|Human|Minnesota Department of Health|Minnesota Department of Health|Lorentz|USA

>Spike|hCoV-19/Belgium/regal-10191293/2020|2020-10-19|EPI\_ISL\_735198|Original|hCoV-19^^Nossegem|Human|UZ Leuven|KU Leuven|Maes|Belgium

>Spike|hCoV-19/Denmark/DCGC-6003/2020|2020-09-28|EPI\_ISL\_621112|Original|hCoV-19^^Midtjylland|Human|Department of Virus and Microbiological Special Diagnostics|Albertsen lab|Michaelsen|Denmark

>Spike|hCoV-19/England/MILK-B894CC/2020|2020-11-13|EPI\_ISL\_675958|Original|hCoV-19^^England|Human|Lighthouse Lab in Milton Keynes|Wellcome Sanger Institute for the COVID-19 Genomics UK (COG-UK) Consortium|Davies|United Kingdom

>Spike|hCoV-19/Spain/MD-IBV-99008615/2020|2020-09-28|EPI\_ISL\_654194|Original|hCoV-19^^Madrid|Human|Hospital General Universitario Gregorio Mara\u00f1a|SeqCOVID-SPAIN consortium/IBV (CSIC)|Comas|Spain

>Spike|hCoV-19/Netherlands/NA\_313/2020|2020-04-02|EPI\_ISL\_422622|Original|hCoV-19^^Netherlands|Human|Dutch COVID-19 response team|Erasmus Medical Center|Oude Munnink|Netherlands

>Spike|hCoV-19/England/SHEF-C8990/2020|2020-10-12|EPI\_ISL\_613375|Original|hCoV-19^^England|Human|Virology Department|COVID-19 Genomics UK (COG-UK) Consortium|de Silva|United Kingdom

>Spike|hCoV-19/England/CAMC-B366B9/2020|2020-11-05|EPI\_ISL\_645339|Original|hCoV-19^^England|Human|Lighthouse Lab in Cambridge|Wellcome Sanger Institute for the COVID-19 Genomics UK (COG-UK) Consortium|Davies|United Kingdom

>Spike|hCoV-19/England/LEED-2A992A/2020|2020-04-12|EPI\_ISL\_538878|Original|hCoV-19^^England|Human|Leeds Teaching Hospitals NHS Trust and Public Health England|Wellcome Sanger Institute for the COVID-19 Genomics UK (COG-UK) consortium|Davies|United Kingdom

>Spike|hCoV-19/England/EXET-13BC25/2020|2020-00-00|EPI\_ISL\_679361|Original|hCoV-19^^England|Human|University of Exeter|COVID-19 Genomics UK (COG-UK) Consortium|Temperton|United Kingdom

>Spike|hCoV-19/India/UN-15348/2020|2020-00-00|EPI\_ISL\_491479|Original|hCoV-19^^India|Human|CSIR-CDRI/SGPGI|CSIR-CDRI/SGPGI|Singh|India

>Spike|hCoV-19/USA/TX-HMH-MCoV-18857/2020|2020-11-24|EPI\_ISL\_785173|Original|hCoV-19^^Texas|Human|Houston Methodist Hospital|Houston Methodist Hospital|Long|USA

>Spike|hCoV-19/USA/CA-ALSR-2666/2020|2020-07-09|EPI\_ISL\_635617|Original|hCoV-19^^California|Human|San Diego County Public Health Laboratory|Andersen lab at Scripps Research|Gangavarapu|USA

>Spike|hCoV-19/England/QEUEH-B68C70/2020|2020-11-11|EPI\_ISL\_655128|Original|hCoV-19^^England|Human|Lighthouse Lab in Glasgow|Wellcome Sanger Institute for the COVID-19 Genomics UK (COG-UK) Consortium|Davies|United Kingdom

>Spike|hCoV-19/Australia/VIC138/2020|2020-03-23|EPI\_ISL\_419834|Original|hCoV-19^^Victoria|Human|Victorian Infectious Diseases Reference Laboratory (VIDRL)|Victorian Infectious Diseases Reference Laboratory and Microbiological Diagnostic Unit Public Health Laboratory|Schultz|Australia

>Spike|hCoV-19/Australia/VIC3831/2020|2020-07-13|EPI\_ISL\_520544|Original|hCoV-19^^Victoria|Human|Microbiological Diagnostic Unit - Public Health Laboratory (MDU-PHL)|MDU-PHL|Schultz|Australia

>Spike|hCoV-19/England/ALDP-9C4B4A/2020|2020-09-11|EPI\_ISL\_567718|Original|hCoV-19^^England|Human|Lighthouse Lab in Alderley Park|Wellcome Sanger Institute for the COVID-19 Genomics UK (COG-UK) consortium|Davies|United Kingdom

>Spike|hCoV-19/England/MILK-B95DC2/2020|2020-11-14|EPI\_ISL\_709897|Original|hCoV-19^^England|Human|Lighthouse Lab in Milton Keynes|Wellcome Sanger Institute for the COVID-19 Genomics UK (COG-UK) Consortium|Davies|United Kingdom

>Spike|hCoV-19/USA/TX-DSHS-0556/2020|2020-05-14|EPI\_ISL\_574459|Original|hCoV-19^^Texas|Human|Texas Department of State Health Services|Texas Department of State Health Services|Rahman|USA

>Spike|hCoV-19/England/ALDP-9CAC05/2020|2020-09-16|EPI\_ISL\_575705|Original|hCoV-19^^England|Human|Lighthouse Lab in Alderley Park|Wellcome Sanger Institute for the COVID-19 Genomics UK (COG-UK) consortium|Davies|United Kingdom

>Spike|hCoV-19/Poland/PL\_MCB\_65/2020|2020-06-06|EPI\_ISL\_645064|Original|hCoV-19^^Poland|Human|Human Genome Variation Research Group|Human Genome Variation Research Group||Poland

>Spike|hCoV-19/England/QEUEH-9CFBB8/2020|2020-09-16|EPI\_ISL\_589892|Original|hCoV-19^^England|Human|Lighthouse Lab in Glasgow|Wellcome Sanger Institute for the COVID-19 Genomics UK (COG-UK) consortium|Davies|United Kingdom

>Spike|hCoV-19/Scotland/QEUEH-9E5396/2020|2020-09-24|EPI\_ISL\_601035|Original|hCoV-19^^Scotland|Human|Lighthouse Lab in Glasgow|Wellcome Sanger Institute for the COVID-19 Genomics UK (COG-UK) consortium|Davies|United Kingdom

>Spike|hCoV-19/Wales/PHWC-35B6B/2020|2020-04-27|EPI\_ISL\_474533|Original|hCoV-19^^Wales|Human|Originating lab|COVID-19 Genomics UK (COG-UK) Consortium|Moore|United Kingdom

>Spike|hCoV-19/Denmark/DCGC-22447/2020|2020-12-14|EPI\_ISL\_757416|Original|hCoV-19^^Hovedstaden|Human|Department of Virus and Microbiological Special Diagnostics|Albertsen Lab|Michaelsen|Denmark

>Spike|hCoV-19/Wales/PHWC-249DE/2020|2020-03-19|EPI\_ISL\_419466|Original|hCoV-19^^Wales|Human|Wales Specialist Virology Centre|Public Health Wales Microbiology Cardiff|Moore|United Kingdom

>Spike|hCoV-19/England/ALDP-B62906/2020|2020-11-09|EPI\_ISL\_656620|Original|hCoV-19^^England|Human|Lighthouse Lab in Alderley Park|Wellcome Sanger Institute for the COVID-19 Genomics UK (COG-UK) Consortium|Davies|United Kingdom

>Spike|hCoV-19/USA/MI-UM-10035977253/2020|2020-09-16|EPI\_ISL\_583356|Original|hCoV-19^^Michigan|Human|University of Michigan Clinical Microbiology Laboratory|Lauring Lab|Valesano|USA

>Spike|hCoV-19/Netherlands/ZH-EMC-1089/2020|2020-12-13|EPI\_ISL\_722770|Original|hCoV-19^^Zuid Holland|Human|Dutch COVID-19 response team|Erasmus Medical Center|Oude Munnink|Netherlands

>Spike|hCoV-19/Australia/VIC9349/2020|2020-07-30|EPI\_ISL\_565514|Original|hCoV-19^^Victoria|Human|Microbiological Diagnostic Unit - Public Health Laboratory (MDU-PHL)|MDU-PHL|Schultz|Australia

>Spike|hCoV-19/USA/CA-QDX-1784/2020|2020-03-17|EPI\_ISL\_604098|Original|hCoV-19^^California|Human|Quest Diagnostics|Quest Diagnostics|Kagan|USA

>Spike|hCoV-19/England/MILK-A7AA09/2020|2020-10-15|EPI\_ISL\_606471|Original|hCoV-19^^England|Human|Lighthouse Lab in Milton Keynes|Wellcome Sanger Institute for the COVID-19 Genomics UK (COG-UK) consortium|Davies|United Kingdom

>Spike|hCoV-19/Denmark/DCGC-2885/2020|2020-08-24|EPI\_ISL\_616580|Original|hCoV-19^^Hovedstaden|Human|Department of Virus and Microbiological Special Diagnostics|Albertsen lab|Michaelsen|Denmark

>Spike|hCoV-19/England/LOND-D3BC9/2020|2020-04-04|EPI\_ISL\_449637|Original|hCoV-19^^England|Human|University College London|COVID-19 Genomics UK (COG-UK) Consortium|Roy|United Kingdom

>Spike|hCoV-19/USA/TX-HMH-4185/2020|2020-06-18|EPI\_ISL\_543420|Original|hCoV-19^^Texas|Human|Houston Methodist Hospital|Houston Methodist Hospital|Long|USA

>Spike|hCoV-19/England/ALDP-C8B47E/2020|2020-12-16|EPI\_ISL\_756619|Original|hCoV-19^^England|Human|Lighthouse Lab in Alderley Park|Wellcome Sanger Institute for the COVID-19 Genomics UK (COG-UK) Consortium|Davies|United Kingdom

>Spike|hCoV-19/England/MILK-9581B2/2020|2020-06-09|EPI\_ISL\_554770|Original|hCoV-19^^England|Human|Lighthouse Lab in Milton Keynes|Wellcome Sanger Institute for the COVID-19 Genomics UK (COG-UK) consortium|Davies|United Kingdom

>Spike|hCoV-19/Panama/333271/2020|2020-02-23|EPI\_ISL\_496736|Original|hCoV-19^^Panama Center|Human|Gorgas Memorial Laboratory of Health Studies|Gorgas Memorial Laboratory of Health Studies|Martinez|Panama

>Spike|hCoV-19/England/ALDP-9EDBD2/2020|2020-05-09|EPI\_ISL\_580650|Original|hCoV-19^^England|Human|Lighthouse Lab in Alderley Park|Wellcome Sanger Institute for the COVID-19 Genomics UK (COG-UK) consortium|Davies|United Kingdom

>Spike|hCoV-19/USA/UT-UPHL-201108499/2020|2020-05-12|EPI\_ISL\_628988|Original|hCoV-19^^Utah|Human|Utah Public Health Laboratory|Utah Public Health Laboratory|Young|USA

>Spike|hCoV-19/India/MH-CSIR-IGIB-patE-F/2020|2020-09-04|EPI\_ISL\_676509|Original|hCoV-19^^Maharashtra|Human|TNMC & Nair ch. Hospital|CSIR-Institute of Genomics and Integrative Biology|Pandey|India

>Spike|hCoV-19/USA/WA-UW-10420/2020|2020-06-05|EPI\_ISL\_501089|Original|hCoV-19^^Washington|Human|University of Washington Virology Lab|University of Washington Virology Lab|Roychoudhury|USA

>Spike|hCoV-19/England/QEUEH-98EF6E/2020|2020-08-28|EPI\_ISL\_540395|Original|hCoV-19^^England|Human|Lighthouse Lab in Glasgow|Wellcome Sanger Institute for the COVID-19 Genomics UK (COG-UK) consortium|Davies|United Kingdom

>Spike|hCoV-19/USA/WA-UW39/2020|2020-03-06|EPI\_ISL\_416456|Original|hCoV-19^^Washington|Human|UW Virology Lab|UW Virology Lab|Roychoudhury|USA

>Spike|hCoV-19/England/NOTT-110F3C/2020|2020-04-20|EPI\_ISL\_448438|Original|hCoV-19^^England|Human|Queens Medical Centre|COVID-19 Genomics UK (COG-UK) Consortium|Loose|United Kingdom

>Spike|hCoV-19/Switzerland/UR-ETHZ-240077/2020|2020-08-10|EPI\_ISL\_523915|Original|hCoV-19^^Uri|Human|Viollier AG|Department of Biosystems Science and Engineering|Nadeau|Switzerland

>Spike|hCoV-19/Singapore/171/2020|2020-04-15|EPI\_ISL\_462289|Original|hCoV-19^^Singapore|Human|National Public Health Laboratory|National Public Health Laboratory|Mak|Singapore

>Spike|hCoV-19/England/ALDP-9E8A34/2020|2020-09-24|EPI\_ISL\_638273|Original|hCoV-19^^England|Human|Centre for Enzyme Innovation|COVID-19 Genomics UK (COG-UK) Consortium|Robson|United Kingdom

>Spike|hCoV-19/Russia/NVS-RII-34320S/2020|2020-00-00|EPI\_ISL\_605792|Original|hCoV-19^^Novosibirsk|Human|Department of Experimental Modeling and Pathogenesis of Infectious Diseases|WHO National Influenza Centre Russian Federation|Komissarov|Russia

>Spike|hCoV-19/Belgium/ULG-10072/2020|2020-04-03|EPI\_ISL\_424631|Original|hCoV-19^^Li\u00e8ge|Human|Department of Clinical Microbiology|GIGA Medical Genomics|Durkin|Belgium

>Spike|hCoV-19/England/CAMC-B21E7D/2020|2020-11-02|EPI\_ISL\_646067|Original|hCoV-19^^England|Human|Lighthouse Lab in Cambridge|Wellcome Sanger Institute for the COVID-19 Genomics UK (COG-UK) Consortium|Davies|United Kingdom

>Spike|hCoV-19/Australia/VIC9216/2020|2020-08-21|EPI\_ISL\_565447|Original|hCoV-19^^Victoria|Human|Microbiological Diagnostic Unit - Public Health Laboratory (MDU-PHL)|MDU-PHL|Schultz|Australia

>Spike|hCoV-19/England/20144005404/2020|2020-03-31|EPI\_ISL\_423490|Original|hCoV-19^^England|Human|Respiratory Virus Unit|Respiratory Virus Unit|Platt|United Kingdom

>Spike|hCoV-19/England/QEUEH-9C9DE5/2020|2020-09-10|EPI\_ISL\_567516|Original|hCoV-19^^England|Human|Lighthouse Lab in Glasgow|Wellcome Sanger Institute for the COVID-19 Genomics UK (COG-UK) consortium|Davies|United Kingdom

>Spike|hCoV-19/England/LIVE-DC0C65/2020|2020-11-03|EPI\_ISL\_705340|Original|hCoV-19^^England|Human|Liverpool Clinical Laboratories|COVID-19 Genomics UK (COG-UK) Consortium|Haldenby|United Kingdom

>Spike|hCoV-19/Netherlands/ZH-EMC-769/2020|2020-10-10|EPI\_ISL\_632605|Original|hCoV-19^^Zuid Holland|Human|Dutch COVID-19 response team|Erasmus Medical Center|Oude Munnink|Netherlands

>Spike|hCoV-19/Belgium/SC-0325380/2020|2020-03-25|EPI\_ISL\_462234|Original|hCoV-19^^Aisemont|Human|KU Leuven|KU Leuven|Maes|Belgium

>Spike|hCoV-19/Switzerland/ZH-ETHZ-400052/2020|2020-12-05|EPI\_ISL\_729109|Original|hCoV-19^^Zurich|Human|Viollier AG|Department of Biosystems Science and Engineering|Nadeau|Switzerland

>Spike|hCoV-19/England/CAMB-7B237/2020|2020-04-11|EPI\_ISL\_433933|Original|hCoV-19^^England|Human|Department of Pathology|COVID-19 Genomics UK (COG-UK) Consortium|Meredith|United Kingdom

>Spike|hCoV-19/Jordan/AM-ALSR-5147/2020|2020-10-16|EPI\_ISL\_730386|Original|hCoV-19^^Amman|Human|Biolab Diagnostic Laboratories|Andersen lab at Scripps Research|Gangavarapu|Jordan

>Spike|hCoV-19/England/QEUEH-9F7BD5/2020|2020-09-27|EPI\_ISL\_589096|Original|hCoV-19^^England|Human|Lighthouse Lab in Glasgow|Wellcome Sanger Institute for the COVID-19 Genomics UK (COG-UK) consortium|Davies|United Kingdom

>Spike|hCoV-19/USA/NY-PV09075/2020|2020-03-20|EPI\_ISL\_421621|Original|hCoV-19^^New York|Human|MSHS Clinical Microbiology Laboratories|MSHS Pathogen Surveillance Program|van Bakel|USA

>Spike|hCoV-19/England/LIVE-9F929/2020|2020-06-07|EPI\_ISL\_472025|Original|hCoV-19^^England|Human|Liverpool Clinical Laboratories|COVID-19 Genomics UK (COG-UK) Consortium|Haldenby|United Kingdom

>Spike|hCoV-19/USA/TX-HMH-MCoV-8639/2020|2020-07-01|EPI\_ISL\_780668|Original|hCoV-19^^Texas|Human|Houston Methodist Hospital|Houston Methodist Hospital|Long|USA

>Spike|hCoV-19/Senegal/1749/2020|2020-03-31|EPI\_ISL\_480787|Original|hCoV-19^^Dakar|Human|Institut Pasteur Dakar|Institut Pasteur de Dakar|Dia|Senegal

>Spike|hCoV-19/USA/MI-MDHHS-SC20897/2020|2020-04-24|EPI\_ISL\_476034|Original|hCoV-19^^Michigan|Human|Michigan Department of Health and Human Services|Michigan Department of Health and Human Services|Blankenship|USA

>Spike|hCoV-19/USA/CT-Yale-604/2020|2020-05-05|EPI\_ISL\_730066|Original|hCoV-19^^Connecticut|Human|Yale Clinical Virology Laboratory|Grubaugh Lab - Yale School of Public Health|Grubaugh|USA

>Spike|hCoV-19/Poland/76089/2020|2020-11-00|EPI\_ISL\_732860|Original|hCoV-19^^Poland|Human|genXone SA|genXone SA|Kaszuba|Poland

>Spike|hCoV-19/USA/WI-UW-1438/2020|2020-09-11|EPI\_ISL\_541571|Original|hCoV-19^^Wisconsin|Human|University of Wisconsin-Madison AIDS Vaccine Research Laboratories|University of Wisconsin-Madison AIDS Vaccine Research Laboratories|Baczenas|USA

>Spike|hCoV-19/Denmark/DCGC-9865/2020|2020-11-09|EPI\_ISL\_669238|Original|hCoV-19^^Midtjylland|Human|Department of Virus and Microbiological Special Diagnostics|Albertsen Lab|Michaelsen|Denmark

>Spike|hCoV-19/USA/AZ-TG547246/2020|2020-07-03|EPI\_ISL\_695445|Original|hCoV-19^^Arizona|Human|AZ SPHL|TGen North|French|USA

>Spike|hCoV-19/England/MILK-56133C/2020|2020-06-10|EPI\_ISL\_558300|Original|hCoV-19^^England|Human|Lighthouse Lab in Milton Keynes|Wellcome Sanger Institute for the COVID-19 Genomics UK (COG-UK) consortium|Davies|United Kingdom

>Spike|hCoV-19/England/MILK-99A66A/2020|2020-08-29|EPI\_ISL\_550322|Original|hCoV-19^^England|Human|Lighthouse Lab in Milton Keynes|Wellcome Sanger Institute for the COVID-19 Genomics UK (COG-UK) consortium|Davies|United Kingdom

>Spike|hCoV-19/England/QEUEH-AD39F2/2020|2020-10-26|EPI\_ISL\_629872|Original|hCoV-19^^England|Human|Lighthouse Lab in Glasgow|Wellcome Sanger Institute for the COVID-19 Genomics UK (COG-UK) consortium|Davies|United Kingdom

>Spike|hCoV-19/England/202881397/2020|2020-07-03|EPI\_ISL\_491731|Original|hCoV-19^^England|Human|Respiratory Virus Unit|Respiratory Virus Unit|Platt|United Kingdom

>Spike|hCoV-19/USA/NY-NYUMC365/2020|2020-04-08|EPI\_ISL\_430392|Original|hCoV-19^^New York|Human|NYU Langone Health|Departments of Pathology and Medicine|Maurano|USA

>Spike|hCoV-19/England/MILK-ACE040/2020|2020-10-21|EPI\_ISL\_630317|Original|hCoV-19^^England|Human|Lighthouse Lab in Milton Keynes|Wellcome Sanger Institute for the COVID-19 Genomics UK (COG-UK) consortium|Davies|United Kingdom

>Spike|hCoV-19/Australia/NSW1321/2020|2020-12-16|EPI\_ISL\_767887|Original|hCoV-19^^New South Wales|Human|South Eastern Area Laboratory Services (SEALS)|NSW Health Pathology - Institute of Clinical Pathology and Medical Research; Westmead Hospital; University of Sydney|Gall|Australia

>Spike|hCoV-19/USA/WI-UW-587/2020|2020-06-24|EPI\_ISL\_484962|Original|hCoV-19^^Wisconsin|Human|University of Wisconsin-Madison AIDS Vaccine Research Laboratories|University of Wisconsin-Madison AIDS Vaccine Research Laboratories|Baczenas|USA

>Spike|hCoV-19/England/NORW-EF966/2020|2020-09-26|EPI\_ISL\_572651|Original|hCoV-19^^England|Human|Quadram Institute Bioscience|COVID-19 Genomics UK (COG-UK) Consortium|Alikhan|United Kingdom

>Spike|hCoV-19/England/QEUEH-BF1975/2020|2020-12-05|EPI\_ISL\_709288|Original|hCoV-19^^England|Human|Lighthouse Lab in Glasgow|Wellcome Sanger Institute for the COVID-19 Genomics UK (COG-UK) Consortium|Davies|United Kingdom

>Spike|hCoV-19/England/QEUEH-B6885E/2020|2020-11-11|EPI\_ISL\_655260|Original|hCoV-19^^England|Human|Lighthouse Lab in Glasgow|Wellcome Sanger Institute for the COVID-19 Genomics UK (COG-UK) Consortium|Davies|United Kingdom

>Spike|hCoV-19/England/CAMB-79B6B/2020|2020-04-02|EPI\_ISL\_441305|Original|hCoV-19^^England|Human|Department of Pathology|Wellcome Sanger Institute for the COVID-19 Genomics UK (COG-UK) consortium|Amato|United Kingdom

>Spike|hCoV-19/Finland/S11F9/2020|2020-09-20|EPI\_ISL\_732629|Original|hCoV-19^^Uusimaa|Human|Department of Virology and Immunology|Department of Virology|Smura|Finland

>Spike|hCoV-19/England/MILK-B391B5/2020|2020-11-01|EPI\_ISL\_658858|Original|hCoV-19^^England|Human|Lighthouse Lab in Milton Keynes|Wellcome Sanger Institute for the COVID-19 Genomics UK (COG-UK) Consortium|Davies|United Kingdom

>Spike|hCoV-19/USA/TX-HMH-6547/2020|2020-06-23|EPI\_ISL\_546073|Original|hCoV-19^^Texas|Human|Houston Methodist Hospital|Houston Methodist Hospital|Long|USA

>Spike|hCoV-19/England/20139009504/2020|2020-03-27|EPI\_ISL\_421868|Original|hCoV-19^^England|Human|Respiratory Virus Unit|Respiratory Virus Unit|Platt|United Kingdom

>Spike|hCoV-19/England/CAMC-B5315B/2020|2020-11-09|EPI\_ISL\_657634|Original|hCoV-19^^England|Human|Lighthouse Lab in Cambridge|Wellcome Sanger Institute for the COVID-19 Genomics UK (COG-UK) Consortium|Davies|United Kingdom

>Spike|hCoV-19/USA/OR-OHSU-0859/2020|2020-06-28|EPI\_ISL\_525913|Original|hCoV-19^^Oregon|Human|OHSU Lab Services Molecular Microbiology Lab|Oregon SARS-CoV-2 Genome Sequencing Center|O'Roak|USA

>Spike|hCoV-19/Japan/PG-6593/2020|2020-08-00|EPI\_ISL\_687705|Original|hCoV-19^^Japan|Human|Niigata Prefectural Institute of Public Health and Environmental Sciences|Pathogen Genomics Center|Sekizuka|Japan

>Spike|hCoV-19/Denmark/DCGC-21328/2020|2020-12-21|EPI\_ISL\_759681|Original|hCoV-19^^Sjaelland|Human|Department of Virus and Microbiological Special Diagnostics|Albertsen Lab|Michaelsen|Denmark

>Spike|hCoV-19/USA/MI-MDHHS-SC21495/2020|2020-07-30|EPI\_ISL\_516222|Original|hCoV-19^^Michigan|Human|Michigan Department of Health and Human Services|Michigan Department of Health and Human Services|Blankenship|USA

>Spike|hCoV-19/Wales/QEUEH-B2CA05/2020|2020-11-02|EPI\_ISL\_711006|Original|hCoV-19^^Wales|Human|Lighthouse Lab in Glasgow|Wellcome Sanger Institute for the COVID-19 Genomics UK (COG-UK) Consortium|Davies|United Kingdom

>Spike|hCoV-19/Canada/MB-NML-859/2020|2020-03-30|EPI\_ISL\_582342|Original|hCoV-19^^Manitoba|Human|Cadham Provincial Laboratory|National Microbiology Laboratory (NML)|Majer|Canada



>Spike|hCoV-19/USA/OR-OHSU-1153/2020|2020-07-10|EPI\_ISL\_509150|Original|hCoV-19^^Oregon|Human|OHSU Lab Services Molecular Microbiology Lab|Oregon SARS-CoV-2 Genome Sequencing Center|O'Roak|USA

>Spike|hCoV-19/Japan/PG-1045/2020|2020-04-00|EPI\_ISL\_684655|Original|hCoV-19^^Japan|Human|Fukuoka Institute of Health and Environmental Sciences|Pathogen Genomics Center|Sekizuka|Japan

>Spike|hCoV-19/Germany/NW-HHU-313/2020|2020-10-06|EPI\_ISL\_631316|Orginal|hCoV-19^^North Rhine-Westphalia|Human|ZOTZ KLIMAS MVZ D\u00f0fcsseldorf-Centrum GbR \u00dcBAG f\u00fcr Labormedizin|Center of Medical Microbiology|Wienemann|Germany

>Spike|hCoV-19/Denmark/DCGC-5526/2020|2020-09-28|EPI\_ISL\_620851|Original|hCoV-19^^Hovedstaden|Human|Department of Virus and Microbiological Special Diagnostics|Albertsen lab|Michaelsen|Denmark

>Spike|hCoV-19/USA/NY-NYCPHL-001036/2020|2020-09-29|EPI\_ISL\_633049|Original|hCoV-19^^New York|Human|DOHMH Morrisania|New York City Public Health Laboratory|Wang|USA

>Spike|hCoV-19/Wales/PHWC-4873AA/2020|2020-10-14|EPI\_ISL\_639187|Original|hCoV-19^^Wales|Human|Wales Specialist Virology Centre Sequencing lab|COVID-19 Genomics UK (COG-UK) Consortium|Moore|United Kingdom

>Spike|hCoV-19/USA/SC-DHEC-0238/2020|2020-06-03|EPI\_ISL\_529199|Original|hCoV-19^^South Carolina|Human|South Carolina Department of Health and Environmental Control|South Carolina Department of Health and Environmental Control|Flores|USA

>Spike|hCoV-19/USA/TX-HMH-MCoV-9153/2020|2020-07-02|EPI\_ISL\_780972|Original|hCoV-19^^Texas|Human|Houston Methodist Hospital|Houston Methodist Hospital|Long|USA

>Spike|hCoV-19/USA/MN-MDH-1839/2020|2020-09-21|EPI\_ISL\_602974|Original|hCoV-19^^Minnesota|Human|Minnesota Department of Health|Minnesota Department of Health|Garfin|USA

>Spike|hCoV-19/Australia/VIC12037/2020|2020-07-13|EPI\_ISL\_563512|Original|hCoV-19^^Victoria|Human|Microbiological Diagnostic Unit - Public Health Laboratory (MDU-PHL) |MDU-PHL|Schultz|Australia

>Spike|hCoV-19/England/MILK-C006E4/2020|2020-12-02|EPI\_ISL\_720868|Original|hCoV-19^^England|Human|Lighthouse Lab in Milton Keynes|Wellcome Sanger Institute for the COVID-19 Genomics UK (COG-UK) Consortium|Davies|United Kingdom

>Spike|hCoV-19/England/ALDP-6EA6C8/2020|2020-06-30|EPI\_ISL\_557568|Original|hCoV-19^^England|Human|Lighthouse Lab in Alderley Park|Wellcome Sanger Institute for the COVID-19 Genomics UK (COG-UK) consortium|Davies|United Kingdom

>Spike|hCoV-19/England/ALDP-C25FC0/2020|2020-12-06|EPI\_ISL\_782791|Original|hCoV-19^^England|Human|Lighthouse Lab in Alderley Park|Wellcome Sanger Institute for the COVID-19 Genomics UK (COG-UK) Consortium|Davies|United Kingdom

>Spike|hCoV-19/Wales/PHWC-4A5212/2020|2020-12-15|EPI\_ISL\_764839|Original|hCoV-19^^Wales|Human|Wales Specialist Virology Centre Sequencing lab|COVID-19 Genomics UK (COG-UK) Consortium|Moore|United Kingdom

>Spike|hCoV-19/Costa Rica/INC-0059/2020|2020-06-18|EPI\_ISL\_512665|Original|hCoV-19^^San Jose|Human|Hospital De Las Mujeres Dr. Adolfo Carit|Inciensa|Brenes Porras|Costa Rica

>Spike|hCoV-19/England/QEUA-A2236F/2020|2020-10-01|EPI\_ISL\_587459|Original|hCoV-19^^England|Human|Lighthouse Lab in Glasgow|Wellcome Sanger Institute for the COVID-19 Genomics UK (COG-UK) consortium|Davies|United Kingdom

>Spike|hCoV-19/England/QEUA-9B0C7B/2020|2020-09-03|EPI\_ISL\_559858|Original|hCoV-19^^England|Human|Oxford Viromics|COVID-19 Genomics UK (COG-UK) Consortium|Golubchik|United Kingdom

>Spike|hCoV-19/Norway/3142/2020|2020-08-09|EPI\_ISL\_549043|Original|hCoV-19^^Viken|Human|Ostfold Hospital Trust - Kalnes|Norwegian Institute of Public Health|Kopperud Riis|Norway

>Spike|hCoV-19/England/MILK-BABF87/2020|2020-11-18|EPI\_ISL\_720487|Original|hCoV-19^^England|Human|Lighthouse Lab in Milton Keynes|Wellcome Sanger Institute for the COVID-19 Genomics UK (COG-UK) Consortium|Davies|United Kingdom

>Spike|hCoV-19/Kenya/C1162/2020|2020-04-19|EPI\_ISL\_457850|Original|hCoV-19^^Kenya|Human|KEMRI-CGMR-C|KEMRI-Wellcome Trust Research Programme|KEMRI-CGMR-C Kilifi|Githinji|Kenya

>Spike|hCoV-19/Russia/OMS-ORINFI-3868S/2020|2020-07-08|EPI\_ISL\_569781|Original|hCoV-19^^Omsk|Human|Omsk Research Institute of Natural Focal Infections|WHO National Influenza Centre Russian Federation|Komissarov|Russia

>Spike|hCoV-19/USA/UT-02245/2020|2020-04-15|EPI\_ISL\_436936|Original|hCoV-19^^Utah|Human|Utah Public Health Laboratory|Utah Public Health Laboratory|Young|USA

>Spike|hCoV-19/England/CAMC-946560/2020|2020-07-14|EPI\_ISL\_556689|Original|hCoV-19^^England|Human|Lighthouse Lab in Cambridge|Wellcome Sanger Institute for the COVID-19 Genomics UK (COG-UK) consortium|Davies|United Kingdom

>Spike|hCoV-19/England/ALDP-5BB61C/2020|2020-06-15|EPI\_ISL\_558756|Original|hCoV-19^^England|Human|Lighthouse Lab in Alderley Park|Wellcome Sanger Institute for the COVID-19 Genomics UK (COG-UK) consortium|Davies|United Kingdom

>Spike|hCoV-19/USA/MN-MDH-564/2020|2020-04-14|EPI\_ISL\_437380|Original|hCoV-19^^Minnesota|Human|Minnesota Department of Health|Minnesota Department of Health|Garfin|USA

>Spike|hCoV-19/USA/WI-UW-456/2020|2020-06-16|EPI\_ISL\_484831|Original|hCoV-19^^Wisconsin|Human|University of Wisconsin-Madison AIDS Vaccine Research Laboratories|University of Wisconsin-Madison AIDS Vaccine Research Laboratories|Baczenas|USA

>Spike|hCoV-19/England/CAMB-7A678/2020|2020-04-01|EPI\_ISL\_441256|Original|hCoV-19^^England|Human|Department of Pathology|Wellcome Sanger Institute for the COVID-19 Genomics UK (COG-UK) consortium|Amato|United Kingdom

>Spike|hCoV-19/England/MILK-ABB592/2020|2020-10-22|EPI\_ISL\_623400|Original|hCoV-19^^England|Human|Lighthouse Lab in Milton Keynes|Wellcome Sanger Institute for the COVID-19 Genomics UK (COG-UK) consortium|Davies|United Kingdom

>Spike|hCoV-19/Northern Ireland/NIRE-FC4DE/2020|2020-04-12|EPI\_ISL\_459385|Original|hCoV-19^^Northern Ireland|Human|Regional Virus Laboratory|Wellcome Sanger Institute for the COVID-19 Genomics UK (COG-UK) consortium|Davies|United Kingdom

>Spike|hCoV-19/USA/NJ-CDC-7300/2020|2020-03-10|EPI\_ISL\_452117|Original|hCoV-19^^New Jersey|Human|NJ Public Health and Environmental Laboratories|Pathogen Discovery|Queen|USA

>Spike|hCoV-19/England/ALDP-C3CA3E/2020|2020-12-10|EPI\_ISL\_731072|Original|hCoV-19^^England|Human|Lighthouse Lab in Alderley Park|Wellcome Sanger Institute for the COVID-19 Genomics UK (COG-UK) Consortium|Davies|United Kingdom

>Spike|hCoV-19/USA/WA-UW-3843/2020|2020-03-27|EPI\_ISL\_427191|Original|hCoV-19^^Washington|Human|UW Virology Lab|UW Virology Lab|Roychoudhury|USA

>Spike|hCoV-19/Denmark/DCGC-16728/2020|2020-10-19|EPI\_ISL\_714440|Original|hCoV-19^^Hovedstaden|Human|Department of Virus and Microbiological Special Diagnostics|Albertsen Lab|Michaelsen|Denmark

>Spike|hCoV-19/England/QEUEH-AD1CCE/2020|2020-10-26|EPI\_ISL\_629921|Original|hCoV-19^^England|Human|Lighthouse Lab in Glasgow|Wellcome Sanger Institute for the COVID-19 Genomics UK (COG-UK) consortium|Davies|United Kingdom

>Spike|hCoV-19/USA/TX-HMH-MCoV-13355/2020|2020-08-24|EPI\_ISL\_788502|Original|hCoV-19^^Texas|Human|Houston Methodist Hospital|Houston Methodist Hospital|Long|USA

>Spike|hCoV-19/England/MILK-A69C9E/2020|2020-10-09|EPI\_ISL\_608838|Original|hCoV-19^^England|Human|Lighthouse Lab in Milton Keynes|Wellcome Sanger Institute for the COVID-19 Genomics UK (COG-UK) consortium|Davies|United Kingdom

>Spike|hCoV-19/England/QEUEH-9F8D47/2020|2020-09-27|EPI\_ISL\_588957|Original|hCoV-19^^England|Human|Lighthouse Lab in Glasgow|Wellcome Sanger Institute for the COVID-19 Genomics UK (COG-UK) consortium|Davies|United Kingdom

>Spike|hCoV-19/Denmark/DCGC-19373/2020|2020-12-07|EPI\_ISL\_748912|Original|hCoV-19^^Syddanmark|Human|Department of Virus and Microbiological Special Diagnostics|Albertsen Lab|Michaelsen|Denmark

>Spike|hCoV-19/Wales/PHWC-486AA6/2020|2020-10-30|EPI\_ISL\_639105|Original|hCoV-19^^Wales|Human|Wales Specialist Virology Centre Sequencing lab|COVID-19 Genomics UK (COG-UK) Consortium|Moore|United Kingdom

>Spike|hCoV-19/Denmark/DCGC-14381/2020|2020-11-30|EPI\_ISL\_711732|Original|hCoV-19^^Hovedstaden|Human|Department of Virus and Microbiological Special Diagnostics|Albertsen Lab|Michaelsen|Denmark

>Spike|hCoV-19/USA/DE-DHSS-F986750/2020|2020-11-17|EPI\_ISL\_767001|Original|hCoV-19^^Delaware|Human|Delaware Public Health Laboratory|Delaware Public Health Laboratory|Bajwa|USA

>Spike|hCoV-19/Japan/PG-7355/2020|2020-08-00|EPI\_ISL\_688457|Original|hCoV-19^^Japan|Human|Pathogen Genomics Center|Pathogen Genomics Center|Sekizuka|Japan

>Spike|hCoV-19/England/ALDP-B62EDA/2020|2020-11-08|EPI\_ISL\_655609|Original|hCoV-19^^England|Human|Lighthouse Lab in Alderley Park|Wellcome Sanger Institute for the COVID-19 Genomics UK (COG-UK) Consortium|Davies|United Kingdom

>Spike|hCoV-19/USA/VA-DCLS-0410/2020|2020-04-24|EPI\_ISL\_467804|Original|hCoV-19^^Virginia|Human|Virginia DCLS|Virginia DCLS|St. Jacques|USA

>Spike|hCoV-19/Netherlands/NH-RIVM-10315/2020|2020-00-00|EPI\_ISL\_636563|Original|hCoV-19^^NoordHolland|Human|Dutch COVID-19 response team|National Institute for Public Health and the Environment (RIVM)|Meijer|Netherlands

>Spike|hCoV-19/USA/GA\_2070/2020|2020-03-07|EPI\_ISL\_426417|Original|hCoV-19^^Georgia|Human|GA Department of Public Health Laboratory|Pathogen Discovery|Queen|USA

>Spike|hCoV-19/Australia/SAP033/2020|2020-03-19|EPI\_ISL\_451078|Original|hCoV-19^^South Australia|Human|SA Pathology|SA Pathology|Leong|Australia

>Spike|hCoV-19/India/MH-CCMB-NIV4/2020|2020-03-26|EPI\_ISL\_450324|Original|hCoV-19^^Maharashtra|Human|NIV Pune|CSIR-Centre for Cellular and Molecular Biology|Banu|India

>Spike|hCoV-19/Wales/ALDP-94D7AF/2020|2020-06-16|EPI\_ISL\_555103|Original|hCoV-19^^Wales|Human|Lighthouse Lab in Alderley Park|Wellcome Sanger Institute for the COVID-19 Genomics UK (COG-UK) consortium|Davies|United Kingdom

>Spike|hCoV-19/England/LIVE-99840/2020|2020-04-09|EPI\_ISL\_439765|Original|hCoV-19^^England|Human|Liverpool Clinical Laboratories|COVID-19 Genomics UK (COG-UK) Consortium|Haldenby|United Kingdom

>Spike|hCoV-19/England/ALDP-B3EC91/2020|2020-10-21|EPI\_ISL\_645418|Original|hCoV-19^^England|Human|Lighthouse Lab in Alderley Park|Wellcome Sanger Institute for the COVID-19 Genomics UK (COG-UK) Consortium|Davies|United Kingdom

>Spike|hCoV-19/USA/WI-WSLH-200037/2020|2020-03-25|EPI\_ISL\_471202|Original|hCoV-19^^Wisconsin|Human|Wisconsin State Laboratory of Hygiene Communicable Disease Division|Wisconsin State Laboratory of Hygiene Communicable Disease Division|Florek|USA

>Spike|hCoV-19/England/20149012004/2020|2020-04-03|EPI\_ISL\_466152|Original|hCoV-19^^England|Human|Respiratory Virus Unit|Respiratory Virus Unit|Platt|United Kingdom

>Spike|hCoV-19/Wales/PHWC-47F67F/2020|2020-10-06|EPI\_ISL\_612708|Original|hCoV-19^^Wales|Human|Wales Specialist Virology Centre Sequencing lab|COVID-19 Genomics UK (COG-UK) Consortium|Moore|United Kingdom

>Spike|hCoV-19/Wales/PHWC-48E024/2020|2020-11-09|EPI\_ISL\_680795|Original|hCoV-19^^Wales|Human|Wales Specialist Virology Centre Sequencing lab|COVID-19 Genomics UK (COG-UK) Consortium|Moore|United Kingdom

>Spike|hCoV-19/England/20129042204/2020|2020-03-12|EPI\_ISL\_424043|Original|hCoV-19^^England|Human|Respiratory Virus Unit|Respiratory Virus Unit|Platt|United Kingdom

>Spike|hCoV-19/USA/AZ-TG666138/2020|2020-03-25|EPI\_ISL\_696221|Original|hCoV-19^^Arizona|Human|Sonora Quest Laboratories|TGen North|French|USA

>Spike|hCoV-19/England/QEUA-A314A6/2020|2020-10-05|EPI\_ISL\_595894|Original|hCoV-19^^England|Human|Quadram Institute Bioscience|COVID-19 Genomics UK (COG-UK) Consortium|Alikhan|United Kingdom

>Spike|hCoV-19/England/ALDP-8E1762/2020|2020-06-25|EPI\_ISL\_557052|Original|hCoV-19^^England|Human|Lighthouse Lab in Alderley Park|Wellcome Sanger Institute for the COVID-19 Genomics UK (COG-UK) consortium|Davies|United Kingdom

>Spike|hCoV-19/England/CAMC-990A95/2020|2020-08-26|EPI\_ISL\_551845|Original|hCoV-19^^England|Human|Lighthouse Lab in Cambridge|Wellcome Sanger Institute for the COVID-19 Genomics UK (COG-UK) consortium|Davies|United Kingdom

>Spike|hCoV-19/Russia/SPE-RII-MH1624S/2020|2020-09-09|EPI\_ISL\_602341|Original|hCoV-19^^Saint Petersburg|Human|HELIX LLC|WHO National Influenza Centre Russian Federation|Komissarov|Russia

>Spike|hCoV-19/New Zealand/20VR1817/2020|2020-03-27|EPI\_ISL\_456264|Original|hCoV-19^^Southern|Human|Southern Community Labs Dunedin|Institute of Environmental Science and Research (ESR)|de Ligt|New Zealand

>Spike|hCoV-19/Australia/VIC5023/2020|2020-07-15|EPI\_ISL\_519827|Original|hCoV-19^^Victoria|Human|Microbiological Diagnostic Unit - Public Health Laboratory (MDU-PHL)|MDU-PHL|Schultz|Australia

>Spike|hCoV-19/USA/CA-ALSR-3128/2020|2020-08-26|EPI\_ISL\_635861|Original|hCoV-19^^California|Human|San Diego County Public Health Laboratory|Andersen lab at Scripps Research|Gangavarapu|USA

>Spike|hCoV-19/USA/MN-MDH-2162/2020|2020-12-03|EPI\_ISL\_708500|Original|hCoV-19^^Minnesota|Human|Minnesota Department of Health|Minnesota Department of Health|Lorentz|USA

>Spike|hCoV-19/England/QEUEH-78EC5A/2020|2020-07-15|EPI\_ISL\_533199|Original|hCoV-19^^England|Human|Lighthouse Lab in Glasgow|Wellcome Sanger Institute for the COVID-19 Genomics UK (COG-UK) consortium|Davies|United Kingdom

>Spike|hCoV-19/Switzerland/AG-ETHZ-420517/2020|2020-12-22|EPI\_ISL\_767956|Original|hCoV-19^^Aargau|Human|Viollier AG|Department of Biosystems Science and Engineering|Nadeau|Switzerland

>Spike|hCoV-19/England/ALDP-9FCE7D/2020|2020-10-01|EPI\_ISL\_587786|Original|hCoV-19^^England|Human|Lighthouse Lab in Alderley Park|Wellcome Sanger Institute for the COVID-19 Genomics UK (COG-UK) consortium|Davies|United Kingdom

>Spike|hCoV-19/Spain/GA-ISCI-202282/2020|2020-03-11|EPI\_ISL\_455334|Original|hCoV-19^^Galicia|Human|Complejo Hospitalario de Orense|Instituto de Salud Carlos III|Caballero|Spain

>Spike|hCoV-19/Germany/SH-ChVir9939/2020|2020-10-30|EPI\_ISL\_729426|Original|hCoV-19^^Schleswig-Holstein|Human|A. Krumbholz|Charit\u00e9 Universit\u00e4tsmedizin Berlin|Muehlemann|Germany

>Spike|hCoV-19/England/CAMB-1AF891/2020|2020-05-01|EPI\_ISL\_459307|Original|hCoV-19^^England|Human|Department of Pathology|Wellcome Sanger Institute for the COVID-19 Genomics UK (COG-UK) consortium|Davies|United Kingdom

>Spike|hCoV-19/USA/UT-UPHL-201211368/2020|2020-04-07|EPI\_ISL\_678512|Original|hCoV-19^^Utah|Human|Utah Public Health Laboratory|Utah Public Health Laboratory|Young|USA

>Spike|hCoV-19/USA/CA-IGI-0125/2020|2020-06-08|EPI\_ISL\_495147|Original|hCoV-19^^California|Human|Innovative Genomics Institute|Innovative Genomics Institute|Shivram|USA

>Spike|hCoV-19/England/QEUEH-B7D452/2020|2020-11-14|EPI\_ISL\_741862|Original|hCoV-19^^England|Human|Oxford Viromics|COVID-19 Genomics UK (COG-UK) Consortium|Golubchik|United Kingdom

>Spike|hCoV-19/England/QEUEH-9CFABB/2020|2020-09-16|EPI\_ISL\_589805|Original|hCoV-19^^England|Human|Lighthouse Lab in Glasgow|Wellcome Sanger Institute for the COVID-19 Genomics UK (COG-UK) consortium|Davies|United Kingdom

>Spike|hCoV-19/USA/AZ-TG670174/2020|2020-04-29|EPI\_ISL\_696372|Original|hCoV-19^^Arizona|Human|Sonora Quest Laboratories|TGen North|French|USA

>Spike|hCoV-19/Scotland/CVR23/2020|2020-03-12|EPI\_ISL\_425749|Original|hCoV-19^^Scotland|Human|West of Scotland Specialist Virology Centre|COVID-19 Genomics UK (COG-UK) Consortium|Robertson|United Kingdom

>Spike|hCoV-19/England/QEUEH-B2E186/2020|2020-11-03|EPI\_ISL\_646243|Original|hCoV-19^^England|Human|Lighthouse Lab in Glasgow|Wellcome Sanger Institute for the COVID-19 Genomics UK (COG-UK) Consortium|Davies|United Kingdom

>Spike|hCoV-19/India/MH-ACTREC-668/2020|2020-09-16|EPI\_ISL\_700294|Original|hCoV-19^^Maharashtra|Human|Hematopathology Laboratory|Hematopathology Laboratory|Patkar|India

>Spike|hCoV-19/Scotland/QEUEH-C33958/2020|2020-12-11|EPI\_ISL\_757184|Original|hCoV-19^^Scotland|Human|Lighthouse Lab in Glasgow|Wellcome Sanger Institute for the COVID-19 Genomics UK (COG-UK) Consortium|Davies|United Kingdom

>Spike|hCoV-19/Japan/IC-0398/2020|2020-12-00|EPI\_ISL\_736908|Original|hCoV-19^^Japan|Human|Pathogen Genomics Center|Pathogen Genomics Center|Sekizuka|Japan

>Spike|hCoV-19/France/PAC-IHU-0187/2020|2020-03-27|EPI\_ISL\_569355|Original|hCoV-19^^Provence-Alpes-C\u00f4te-d\u00e0z|Human|MEPHI|MEPHI|Levasseur|France

>Spike|hCoV-19/South Africa/Tygerberg\_41/2020|2020-04-08|EPI\_ISL\_464150|Original|hCoV-19^Western Cape|Human|National Health Laboratory Service (NHLS)|Division of Medical Virology|Engelbrecht|South Africa

>Spike|hCoV-19/England/MILK-AC73D5/2020|2020-10-22|EPI\_ISL\_630075|Original|hCoV-19^England|Human|Lighthouse Lab in Milton Keynes|Wellcome Sanger Institute for the COVID-19 Genomics UK (COG-UK) consortium|Davies|United Kingdom

>Spike|hCoV-19/Denmark/DCGC-10528/2020|2020-11-02|EPI\_ISL\_670035|Original|hCoV-19^Hovedstaden|Human|Department of Virus and Microbiological Special Diagnostics|Albertsen Lab|Michaelsen|Denmark

>Spike|hCoV-19/USA/UT-UPHL-201015242/2020|2020-04-08|EPI\_ISL\_594091|Original|hCoV-19^Utah|Human|Utah Public Health Laboratory|Utah Public Health Laboratory|Young|USA

>Spike|hCoV-19/Jordan/IR-ALSR-3902/2020|2020-09-30|EPI\_ISL\_636268|Original|hCoV-19^Irbid|Human|Biolab Diagnostic Laboratories|Andersen lab at Scripps Research|Gangavarapu|Jordan

>Spike|hCoV-19/Spain/IB-IBV-99011559/2020|2020-12-14|EPI\_ISL\_779896|Original|hCoV-19^Balear Islands|Human|Servicio de Microbiolog\u00eda|SeqCOVID-SPAIN consortium/IBV (CSIC) |Comas|Spain

>Spike|hCoV-19/USA/CA-CZB-2158/2020|2020-05-22|EPI\_ISL\_513708|Original|hCoV-19^California|Human|Orange County Public Health Lab|Chan-Zuckerberg Biohub|Kamm|USA

>Spike|hCoV-19/England/MILK-9730C3/2020|2020-08-20|EPI\_ISL\_575820|Original|hCoV-19^England|Human|Lighthouse Lab in Milton Keynes|Wellcome Sanger Institute for the COVID-19 Genomics UK (COG-UK) consortium|Davies|United Kingdom

>Spike|hCoV-19/England/MILK-991B64/2020|2020-08-27|EPI\_ISL\_577026|Original|hCoV-19^England|Human|Northumbria University / South Tees Hospitals NHS Foundation Trust / North Cumbria Integrated Care NHS Foundation Trust / North Tees and Hartlepool NHS Foundation Trust / Newcastle Hospitals NHS Foundation Trust|COVID-19 Genomics UK (COG-UK) Consortium|Bashton|United Kingdom

>Spike|hCoV-19/USA/VA-DCLS-2537/2020|2020-11-14|EPI\_ISL\_734253|Original|hCoV-19^Virginia|Human|Virginia Division of Consolidated Laboratory Services (DCLS)|Virginia Division of Consolidated Laboratory Services (DCLS)|St. Jacques|USA

>Spike|hCoV-19/USA/WA-UW-10272/2020|2020-06-03|EPI\_ISL\_570287|Original|hCoV-19^Washington|Human|UW Virology Lab|UW Virology Lab|Roychoudhury|USA

>Spike|hCoV-19/England/ALDP-A681FA/2020|2020-10-12|EPI\_ISL\_608584|Original|hCoV-19^England|Human|Lighthouse Lab in Alderley Park|Wellcome Sanger Institute for the COVID-19 Genomics UK (COG-UK) consortium|Davies|United Kingdom

>Spike|hCoV-19/England/ALDP-52C0FA/2020|2020-06-01|EPI\_ISL\_558935|Original|hCoV-19^England|Human|Lighthouse Lab in Alderley Park|Wellcome Sanger Institute for the COVID-19 Genomics UK (COG-UK) consortium|Davies|United Kingdom

>Spike|hCoV-19/USA/WI-WSLH-200220/2020|2020-04-10|EPI\_ISL\_578440|Original|hCoV-19^Wisconsin|Human|Wisconsin State Laboratory of Hygiene Communicable Disease Division|Wisconsin State Laboratory of Hygiene Communicable Disease Division|Florek|USA

>Spike|hCoV-19/Scotland/CVR5569/2020|2020-10-28|EPI\_ISL\_651844|Original|hCoV-19^Scotland|Human|West of Scotland Specialist Virology Centre|COVID-19 Genomics UK (COG-UK) Consortium|Robertson|United Kingdom

>Spike|hCoV-19/USA/AZ-TG271882/2020|2020-03-20|EPI\_ISL\_426544|Original|hCoV-19^Arizona|Human|AZ SPHL|TGen North|Lemmer|USA

>Spike|hCoV-19/Scotland/EDB3032/2020|2020-04-03|EPI\_ISL\_489038|Original|hCoV-19^Scotland|Human|Virology Department|Wellcome Sanger Institute for the COVID-19 Genomics UK (COG-UK) consortium|Davies|United Kingdom

>Spike|hCoV-19/USA/CA-CZB-2366/2020|2020-05-15|EPI\_ISL\_513807|Original|hCoV-19^California|Human|Orange County Public Health Laboratory|Chan-Zuckerberg Biohub|Kamm|USA

>Spike|hCoV-19/Japan/PG-0619/2020|2020-04-00|EPI\_ISL\_684229|Original|hCoV-19^Japan|Human|Gunma Prefectural Institute of Public Health and Environmental Sciences|Pathogen Genomics Center|Sekizuka|Japan

>Spike|hCoV-19/Australia/VIC2944/2020|2020-07-11|EPI\_ISL\_521774|Original|hCoV-19^Victoria|Human|Microbiological Diagnostic Unit - Public Health Laboratory (MDU-PHL) |MDU-PHL|Schultz|Australia

>Spike|hCoV-19/Slovakia/UKBA-207/2020|2020-04-29|EPI\_ISL\_577738|Original|hCoV-19^^Pezinok|Human|Institute of Virology|Faculty of Natural Sciences|Vinar|Slovakia

>Spike|hCoV-19/USA/CA-CZB-4005/2020|2020-08-01|EPI\_ISL\_548630|Original|hCoV-19^^California|Human|County of Santa Clara Public Health Department|Chan-Zuckerberg Biohub|Bhatt|USA

>Spike|hCoV-19/Japan/PG-6332/2020|2020-07-00|EPI\_ISL\_689443|Original|hCoV-19^^Japan|Human|Pathogen Genomics Center|Pathogen Genomics Center|Sekizuka|Japan

>Spike|hCoV-19/USA/WI-UW-800/2020|2020-07-05|EPI\_ISL\_495504|Original|hCoV-19^^Wisconsin|Human|University of Wisconsin-Madison AIDS Vaccine Research Laboratories|University of Wisconsin-Madison AIDS Vaccine Research Laboratories|Baczenas|USA

>Spike|hCoV-19/England/OXON-B4083/2020|2020-04-21|EPI\_ISL\_534927|Original|hCoV-19^^England|Human|Oxford Viromics|COVID-19 Genomics UK (COG-UK) Consortium|Golubchik|United Kingdom

>Spike|hCoV-19/Canada/BC\_41851/2020|2020-03-02|EPI\_ISL\_415584|Original|hCoV-19^^British Columbia|Human|BCCDC Public Health Laboratory|BCCDC Public Health Laboratory|Harrigan|Canada

>Spike|hCoV-19/Turkey/IST-GLAB-248/2020|2020-05-18|EPI\_ISL\_735314|Original|hCoV-19^^Istanbul|Human|Genomic Laboratory (GLAB) (Conjoint lab of Health Directorate of Istanbul and Istanbul Technical University)|Genomic Laboratory (GLAB)|Karacan|Turkey

>Spike|hCoV-19/Australia/VIC6006/2020|2020-07-25|EPI\_ISL\_518781|Original|hCoV-19^^Victoria|Human|Microbiological Diagnostic Unit - Public Health Laboratory (MDU-PHL)|MDU-PHL|Schultz|Australia

>Spike|hCoV-19/USA/MI-MDHHS-SC22229/2020|2020-10-25|EPI\_ISL\_666895|Original|hCoV-19^^Michigan|Human|Michigan Department of Health and Human Services|Michigan Department of Health and Human Services|Jacob|USA

>Spike|hCoV-19/USA/TX-HMH-5219/2020|2020-06-24|EPI\_ISL\_544603|Original|hCoV-19^^Texas|Human|Houston Methodist Hospital|Houston Methodist Hospital|Long|USA

>Spike|hCoV-19/Wuhan/HB-WHCM-117/2020|2020-03-02|EPI\_ISL\_454997|Original|hCoV-19^^Hubei|Human|Wuhan Chain Medical Labs (CMLabs)|State Key Laboratory of Biotherapy of Sichuan University|Tang|China

>Spike|hCoV-19/Scotland/QEUA-96D67F/2020|2020-08-20|EPI\_ISL\_534628|Original|hCoV-19^^Scotland|Human|NHSGGC West of Scotland Specialist Virology Centre / MRC-University of Glasgow Centre for Virus Research|Wellcome Sanger Institute for the COVID-19 Genomics UK (COG-UK) consortium|Davies|United Kingdom

>Spike|hCoV-19/England/QEUA-9FF94C/2020|2020-09-30|EPI\_ISL\_600158|Original|hCoV-19^^England|Human|Lighthouse Lab in Glasgow|Wellcome Sanger Institute for the COVID-19 Genomics UK (COG-UK) consortium|Davies|United Kingdom

>Spike|hCoV-19/USA/HI-H200442/2020|2020-10-07|EPI\_ISL\_752985|Original|hCoV-19^^Hawaii|Human|State Laboratories Division|State Laboratories Division|Sultana|USA

>Spike|hCoV-19/Luxembourg/LNS9804369/2020|2020-11-14|EPI\_ISL\_744989|Original|hCoV-19^^Luxembourg|Human|Laboratoire national de sant\u00e9|Laboratoire national de sant\u00e9|Wienecke-Baldacchino|Luxembourg

>Spike|hCoV-19/England/QEUA-9C8539/2020|2020-09-11|EPI\_ISL\_567091|Original|hCoV-19^^England|Human|Lighthouse Lab in Glasgow|Wellcome Sanger Institute for the COVID-19 Genomics UK (COG-UK) consortium|Davies|United Kingdom

>Spike|hCoV-19/England/CAMB-1B9ADA/2020|2020-11-08|EPI\_ISL\_679150|Original|hCoV-19^^England|Human|Department of Pathology|COVID-19 Genomics UK (COG-UK) Consortium|Goodfellow|United Kingdom

>Spike|hCoV-19/USA/NJ-QDX-1221/2020|2020-03-16|EPI\_ISL\_571977|Original|hCoV-19^^New Jersey|Human|Quest Diagnostics|Quest Diagnostics|Kagan|USA

>Spike|hCoV-19/England/QEUA-795F48/2020|2020-07-15|EPI\_ISL\_533131|Original|hCoV-19^^England|Human|Lighthouse Lab in Glasgow|Wellcome Sanger Institute for the COVID-19 Genomics UK (COG-UK) consortium|Davies|United Kingdom

>Spike|hCoV-19/Australia/VIC17433/2020|2020-08-17|EPI\_ISL\_663885|Original|hCoV-19^^Victoria|Human|Microbiological Diagnostic Unit - Public Health Laboratory (MDU-PHL)|MDU-PHL|Schultz|Australia

>Spike|hCoV-19/England/ALDP-9CB3C3/2020|2020-09-17|EPI\_ISL\_575589|Original|hCoV-19^^England|Human|Lighthouse Lab in Alderley Park|Wellcome Sanger Institute for the COVID-19 Genomics UK (COG-UK) consortium|Davies|United Kingdom

>Spike|hCoV-19/Scotland/QEUA-A35EB3/2020|2020-10-05|EPI\_ISL\_706898|Original|hCoV-19^^Scotland|Human|Oxford Viromics|COVID-19 Genomics UK (COG-UK) Consortium|Golubchik|United Kingdom

>Spike|hCoV-19/France/ARA-118811/2020|2020-12-11|EPI\_ISL\_745382|Original|hCoV-19^^Auvergne-Rhône-Alpes|Human|CNR Virus des Infections Respiratoires - France SUD|CNR Virus des Infections Respiratoires - France SUD|Bal|France

>Spike|hCoV-19/England/20188069004/2020|2020-04-30|EPI\_ISL\_465512|Original|hCoV-19^^England|Human|Respiratory Virus Unit|Respiratory Virus Unit|Platt|United Kingdom

>Spike|hCoV-19/South Africa/N00358/2020|2020-09-28|EPI\_ISL\_712092|Original|hCoV-19^^Eastern Cape|Human|East London NHLS Laboratory|National Institute for Communicable Diseases of the National Health Laboratory Service|Bhiman|South Africa

>Spike|hCoV-19/USA/NY-MH001832/2020|2020-05-06|EPI\_ISL\_526688|Original|hCoV-19^^New York|Human|Faith Laboratory|van Bakel Laboratory|van Bakel|USA

>Spike|hCoV-19/England/QEUA-5480AD/2020|2020-05-14|EPI\_ISL\_533434|Original|hCoV-19^^England|Human|Lighthouse Lab in Glasgow|Wellcome Sanger Institute for the COVID-19 Genomics UK (COG-UK) consortium|Davies|United Kingdom

>Spike|hCoV-19/USA/NY-QDX-2370/2020|2020-03-17|EPI\_ISL\_604711|Original|hCoV-19^^New York|Human|Quest Diagnostics|Quest Diagnostics|Kagan|USA

>Spike|hCoV-19/USA/WA-S684/2020|2020-04-11|EPI\_ISL\_449854|Original|hCoV-19^^Washington|Human|Washington State Department of Health|Seattle Flu Study|Bedford|USA

>Spike|hCoV-19/England/BIRM-65CBA/2020|2020-10-10|EPI\_ISL\_612218|Original|hCoV-19^^England|Human|University of Birmingham|COVID-19 Genomics UK (COG-UK) Consortium|Loman|United Kingdom

>Spike|hCoV-19/Wales/PHWC-16F806/2020|2020-10-01|EPI\_ISL\_586024|Original|hCoV-19^^Wales|Human|Wales Specialist Virology Centre Sequencing lab|COVID-19 Genomics UK (COG-UK) Consortium|Moore|United Kingdom

>Spike|hCoV-19/Japan/PG-8198/2020|2020-08-00|EPI\_ISL\_687297|Original|hCoV-19^^Japan|Human|Pathogen Genomics Center|Pathogen Genomics Center|Sekizuka|Japan

>Spike|hCoV-19/Japan/PG-6906/2020|2020-09-00|EPI\_ISL\_688014|Original|hCoV-19^^Japan|Human|Pathogen Genomics Center|Pathogen Genomics Center|Sekizuka|Japan

>Spike|hCoV-19/USA/NY-PV08464/2020|2020-03-18|EPI\_ISL\_421410|Original|hCoV-19^^New York|Human|MSHS Clinical Microbiology Laboratories|MSHS Pathogen Surveillance Program|van Bakel|USA

>Spike|hCoV-19/USA/FL-BPHL-1546/2020|2020-09-03|EPI\_ISL\_568644|Original|hCoV-19^^Florida|Human|Florida Bureau of Public Health Laboratories|Florida Bureau of Public Health Laboratories|Blanton|USA

>Spike|hCoV-19/USA/WA-UW-10027/2020|2020-05-29|EPI\_ISL\_461450|Original|hCoV-19^^Washington|Human|UW Virology Lab|UW Virology Lab|Roychoudhury|USA

>Spike|hCoV-19/England/CAMB-735CD/2020|2020-03-20|EPI\_ISL\_440073|Original|hCoV-19^^England|Human|Department of Pathology|Wellcome Sanger Institute for the COVID-19 Genomics UK (COG-UK) consortium|Amato|United Kingdom

>Spike|hCoV-19/Denmark/DCGC-7266/2020|2020-10-12|EPI\_ISL\_619239|Original|hCoV-19^^Midtjylland|Human|Department of Virus and Microbiological Special Diagnostics|Albertsen lab|Michaelsen|Denmark

>Spike|hCoV-19/England/MILK-97061F/2020|2020-08-18|EPI\_ISL\_553258|Original|hCoV-19^^England|Human|Lighthouse Lab in Milton Keynes|Wellcome Sanger Institute for the COVID-19 Genomics UK (COG-UK) consortium|Davies|United Kingdom

>Spike|hCoV-19/USA/NY-Wadsworth-32670-01/2020|2020-03-30|EPI\_ISL\_676785|Original|hCoV-19^^New York|Human|Wadsworth Center|Wadsworth Center|Lasek-Nesselquist|USA

>Spike|hCoV-19/Norway/4698/2020|2020-10-15|EPI\_ISL\_635070|Original|hCoV-19^^Troms og Finnmark|Human|University Hospital of Northern Norway|Norwegian Institute of Public Health|Vollan|Norway

>Spike|hCoV-19/USA/FL-BPHL-0664/2020|2020-03-14|EPI\_ISL\_509722|Original|hCoV-19^^Florida|Human|Florida Bureau of Public Health Laboratories|Florida Bureau of Public Health Laboratories|Blanton|USA

>Spike|hCoV-19/Nigeria/FC-CV247/2020|2020-07-08|EPI\_ISL\_729932|Original|hCoV-19^^Abuja|Human|Nigeria Centre for Disease Control (NCDC)|African Centre of Excellence for Genomics of Infectious Diseases (ACEGID)|Oluniyi|Nigeria

>Spike|hCoV-19/India/GJ-GBRC-402b/2020|2020-06-25|EPI\_ISL\_586521|Original|hCoV-19^^Gujarat|Human|B.J. Medical College and Civil hospital|Gujarat Biotechnology Research Centre|Joshi|India

>Spike|hCoV-19/USA/TX-HMH-MCoV-16030/2020|2020-10-27|EPI\_ISL\_785714|Original|hCoV-19^^Texas|Human|Houston Methodist Hospital|Houston Methodist Hospital|Long|USA

>Spike|hCoV-19/Denmark/DCGC-14290/2020|2020-11-30|EPI\_ISL\_711674|Original|hCoV-19^^Sjaelland|Human|Department of Virus and Microbiological Special Diagnostics|Albertsen Lab|Michaelsen|Denmark

>Spike|hCoV-19/USA/UT-08578/2020|2020-05-20|EPI\_ISL\_524332|Original|hCoV-19^^Utah|Human|Utah Public Health Laboratory|Utah Public Health Laboratory|Young|USA

>Spike|hCoV-19/England/QEUH-CC5B64/2020|2020-12-22|EPI\_ISL\_760503|Original|hCoV-19^^England|Human|Lighthouse Lab in Glasgow|Wellcome Sanger Institute for the COVID-19 Genomics UK (COG-UK) Consortium|Davies|United Kingdom

>Spike|hCoV-19/England/QEUH-B7D6D4/2020|2020-11-14|EPI\_ISL\_674589|Original|hCoV-19^^England|Human|Lighthouse Lab in Glasgow|Wellcome Sanger Institute for the COVID-19 Genomics UK (COG-UK) Consortium|Davies|United Kingdom

>Spike|hCoV-19/South Africa/LR00127/2020|2020-07-20|EPI\_ISL\_514359|Original|hCoV-19^^Gauteng|Human|National Institute for Communicable Diseases of the National Health Laboratory Service|National Institute for Communicable Diseases of the National Health Laboratory Service|Allam|South Africa

>Spike|hCoV-19/Japan/PG-5118/2020|2020-08-00|EPI\_ISL\_690227|Original|hCoV-19^^Japan|Human|Gunma Prefectural Institute of Public Health and Environmental Sciences|Pathogen Genomics Center|Sekizuka|Japan

>Spike|hCoV-19/Jordan/AM-ALSR-4065/2020|2020-10-03|EPI\_ISL\_636425|Original|hCoV-19^^Amman|Human|Biolab Diagnostic Laboratories|Andersen lab at Scripps Research|Gangavarapu|Jordan

>Spike|hCoV-19/USA/CA-CZB-13454/2020|2020-09-09|EPI\_ISL\_672474|Original|hCoV-19^^California|Human|Alameda County Public Health Lab|Chan-Zuckerberg Biohub|Bhatt|USA

>Spike|hCoV-19/Australia/VIC8389/2020|2020-08-10|EPI\_ISL\_564978|Original|hCoV-19^^Victoria|Human|Microbiological Diagnostic Unit - Public Health Laboratory (MDU-PHL)|MDU-PHL|Schultz|Australia

>Spike|hCoV-19/England/NORT-1B63225/2020|2020-12-01|EPI\_ISL\_741425|Original|hCoV-19^^England|Human|Northumbria University / South Tees Hospitals NHS Foundation Trust / North Cumbria Integrated Care NHS Foundation Trust / North Tees and Hartlepool NHS Foundation Trust / Newcastle Hospitals NHS Foundation Trust|COVID-19 Genomics UK (COG-UK) Consortium|Bashton|United Kingdom

>Spike|hCoV-19/USA/CT-UW-4347/2020|2020-03-30|EPI\_ISL\_426054|Original|hCoV-19^^Connecticut|Human|UW Virology Lab|UW Virology Lab|Roychoudhury|USA

>Spike|hCoV-19/Italy/CAM-IZSM-119235/2020|2020-08-26|EPI\_ISL\_738128|Original|hCoV-19^^Campania|Human|IZSM-U.O.C. Virologia|Istituto Zooprofilattico Sperimentale del Mezzogiorno|Viscardi|Italy

>Spike|hCoV-19/India/TG-CCMB-K499/2020|2020-04-14|EPI\_ISL\_447865|Original|hCoV-19^^Telangana|Human|CSIR-Centre for Cellular and Molecular Biology|CSIR-Centre for Cellular and Molecular Biology|Banu|India

>Spike|hCoV-19/Wales/PHWC-48CCF5/2020|2020-11-07|EPI\_ISL\_666529|Original|hCoV-19^^Wales|Human|Wales Specialist Virology Centre Sequencing lab|COVID-19 Genomics UK (COG-UK) Consortium|Moore|United Kingdom

>Spike|hCoV-19/England/MILK-CA3E72/2020|2020-12-16|EPI\_ISL\_762452|Original|hCoV-19^^England|Human|Lighthouse Lab in Milton Keynes|Wellcome Sanger Institute for the COVID-19 Genomics UK (COG-UK) Consortium|Davies|United Kingdom

>Spike|hCoV-19/USA/UN-UW-2-2069/2020|2020-04-16|EPI\_ISL\_485949|Original|hCoV-19^^USA|Human|UW Virology Lab|UW Virology Lab|Roychoudhury|USA

>Spike|hCoV-19/USA/UT-02713/2020|2020-04-26|EPI\_ISL\_522272|Original|hCoV-19^^Utah|Human|Utah Public Health Laboratory|Utah Public Health Laboratory|Young|USA

>Spike|hCoV-19/Russia/OMS-ORINFI-1612S/2020|2020-07-06|EPI\_ISL\_639914|Original|hCoV-19^^Omsk|Human|Omsk Research Institute of Natural Focal Infections|WHO National Influenza Centre Russian Federation|Komissarov|Russia



>Spike|hCoV-19/USA/OR-OHSU-0969/2020|2020-06-30|EPI\_ISL\_525939|Original|hCoV-19^^Oregon|Human|OHSU Lab Services Molecular Microbiology Lab|Oregon SARS-CoV-2 Genome Sequencing Center|O'Roak|USA

>Spike|hCoV-19/Ireland/LK-NVRL-MPT39150/2020|2020-05-20|EPI\_ISL\_767810|Original|hCoV-19^^Limerick|Human|National Virus Reference Laboratory|Irish Coronavirus Sequencing Consortium - Teagasc Moorepark|Walsh|Ireland

>Spike|hCoV-19/England/NORT-2837FF/2020|2020-03-31|EPI\_ISL\_488529|Original|hCoV-19^^England|Human|NU-OMICS DNA Sequencing research facility|Wellcome Sanger Institute for the COVID-19 Genomics UK (COG-UK) consortium|Davies|United Kingdom

>Spike|hCoV-19/Switzerland/BL-ETHZ-100816/2020|2020-03-26|EPI\_ISL\_451766|Original|hCoV-19^^Basel-Landschaft|Human|Viollier AG|Department of Biosystems Science and Engineering|Nadeau|Switzerland

>Spike|hCoV-19/England/QEUEH-95F467/2020|2020-08-06|EPI\_ISL\_532383|Original|hCoV-19^^England|Human|Lighthouse Lab in Glasgow|Wellcome Sanger Institute for the COVID-19 Genomics UK (COG-UK) consortium|Davies|United Kingdom

>Spike|hCoV-19/England/ALDP-920B1F/2020|2020-06-23|EPI\_ISL\_552853|Original|hCoV-19^^England|Human|Lighthouse Lab in Alderley Park|Wellcome Sanger Institute for the COVID-19 Genomics UK (COG-UK) consortium|Davies|United Kingdom

>Spike|hCoV-19/England/QEUEH-96AD31/2020|2020-08-14|EPI\_ISL\_531436|Original|hCoV-19^^England|Human|Lighthouse Lab in Glasgow|Wellcome Sanger Institute for the COVID-19 Genomics UK (COG-UK) consortium|Davies|United Kingdom

>Spike|hCoV-19/England/ALDP-A6D2D4/2020|2020-10-14|EPI\_ISL\_608029|Original|hCoV-19^^England|Human|Lighthouse Lab in Alderley Park|Wellcome Sanger Institute for the COVID-19 Genomics UK (COG-UK) consortium|Davies|United Kingdom

>Spike|hCoV-19/Australia/VIC15268/2020|2020-08-04|EPI\_ISL\_593225|Original|hCoV-19^^Victoria|Human|Microbiological Diagnostic Unit - Public Health Laboratory (MDU-PHL)|MDU-PHL|Schultz|Australia

>Spike|hCoV-19/England/CAMC-A660A4/2020|2020-10-10|EPI\_ISL\_637424|Original|hCoV-19^^England|Human|Department of Pathology|COVID-19 Genomics UK (COG-UK) Consortium|Goodfellow|United Kingdom

>Spike|hCoV-19/Peru/LIM-UPCH-0103/2020|2020-06-17|EPI\_ISL\_540981|Original|hCoV-19^^Lima|Human|Laboratorio de Referencia Nacional de Virus Respiratorios|Laboratorio de Gen\u00f3mica Microbiana|Tsukayama|Peru

>Spike|hCoV-19/USA/FL-UW-1387/2020|2020-09-05|EPI\_ISL\_536758|Original|hCoV-19^^Florida|Human|University of Wisconsin-Madison AIDS Vaccine Research Laboratories|University of Wisconsin-Madison AIDS Vaccine Research Laboratories|Baczenas|USA

>Spike|hCoV-19/England/ALDP-B462D0/2020|2020-11-07|EPI\_ISL\_656188|Original|hCoV-19^^England|Human|Lighthouse Lab in Alderley Park|Wellcome Sanger Institute for the COVID-19 Genomics UK (COG-UK) Consortium|Davies|United Kingdom

>Spike|hCoV-19/USA/AZ-TG448671/2020|2020-06-26|EPI\_ISL\_695018|Original|hCoV-19^^Arizona|Human|TGen North|TGen North|French|USA

>Spike|hCoV-19/Japan/PG-2198/2020|2020-04-00|EPI\_ISL\_685803|Original|hCoV-19^^Japan|Human|Pathogen Genomics Center|Pathogen Genomics Center|Sekizuka|Japan

>Spike|hCoV-19/England/BRIS-12D1AF/2020|2020-05-04|EPI\_ISL\_481897|Original|hCoV-19^^England|Human|PHE South West Regional Laboratory|Wellcome Sanger Institute for the COVID-19 Genomics UK (COG-UK) consortium|Davies|United Kingdom

>Spike|hCoV-19/England/BRIS-1303FE/2020|2020-04-11|EPI\_ISL\_492739|Original|hCoV-19^^England|Human|PHE South West Regional Laboratory|Wellcome Sanger Institute for the COVID-19 Genomics UK (COG-UK) consortium|Davies|United Kingdom

>Spike|hCoV-19/Wales/PHWC-497A57/2020|2020-11-23|EPI\_ISL\_726923|Original|hCoV-19^^Wales|Human|Originating lab|COVID-19 Genomics UK (COG-UK) Consortium|Moore|United Kingdom

>Spike|hCoV-19/USA/TX-HMH-MCoV-15902/2020|2020-07-10|EPI\_ISL\_785586|Original|hCoV-19^^Texas|Human|Houston Methodist Hospital|Houston Methodist Hospital|Long|USA

>Spike|hCoV-19/USA/AZ-TG379993/2020|2020-06-16|EPI\_ISL\_694641|Original|hCoV-19^^Arizona|Human|TGen North|TGen North|French|USA

>Spike|hCoV-19/Switzerland/BE-ETHZ-310523/2020|2020-10-08|EPI\_ISL\_603591|Original|hCoV-19^^Bern|Human|Viollier AG|Department of Biosystems Science and Engineering|Nadeau|Switzerland

>Spike|hCoV-19/Scotland/CVR5237/2020|2020-10-20|EPI\_ISL\_626849|Original|hCoV-19^^Scotland|Human|West of Scotland Specialist Virology Centre|COVID-19 Genomics UK (COG-UK) Consortium|Robertson|United Kingdom

>Spike|hCoV-19/Canada/ON-UHTC\_0041/2020|2020-04-03|EPI\_ISL\_464037|unknown|hCoV-19^^Ontario|Human|Unity Health Toronto|Ontario Institute for Cancer Research|de Borja|Canada

>Spike|hCoV-19/England/CAMB-1B9FAE/2020|2020-11-04|EPI\_ISL\_651571|Original|hCoV-19^^England|Human|Department of Pathology|COVID-19 Genomics UK (COG-UK) Consortium|Goodfellow|United Kingdom

>Spike|hCoV-19/USA/MN-QDX-1362/2020|2020-03-15|EPI\_ISL\_572151|Original|hCoV-19^^Minnesota|Human|Quest Diagnostics|Quest Diagnostics|Kagan|USA

>Spike|hCoV-19/France/PAC-IHU-0604/2020|2020-04-10|EPI\_ISL\_568884|Original|hCoV-19^^Provence-Alpes-C\u00f4te-d\u2019Azur|Human|MEPHI|MEPHI|Levasseur|France

>Spike|hCoV-19/Italy/ABR-IZSGC-TE5166/2020|2020-03-18|EPI\_ISL\_420563|Original|hCoV-19^^Abruzzo|Human|Ospedale Civile Giuseppe Mazzini|Istituto Zooprofilattico Sperimentale dell' Abruzzo e Molise \G. Caporale\|Lorusso|Italy

>Spike|hCoV-19/USA/WA-S1864/2020|2020-05-27|EPI\_ISL\_496290|Original|hCoV-19^^Washington|Human|Washington State Department of Health|Seattle Flu Study|Lee|USA

>Spike|hCoV-19/Russia/PER-RII-MH1950S/2020|2020-09-16|EPI\_ISL\_602375|Original|hCoV-19^^Perm|Human|HELIX LLC|WHO National Influenza Centre Russian Federation|Komissarov|Russia

>Spike|hCoV-19/England/20109008404/2020|2020-03-05|EPI\_ISL\_464532|Original|hCoV-19^^England|Human|Respiratory Virus Unit|Respiratory Virus Unit|Platt|United Kingdom

>Spike|hCoV-19/England/ALDP-8DE30A/2020|2020-06-25|EPI\_ISL\_557066|Original|hCoV-19^^England|Human|Lighthouse Lab in Alderley Park|Wellcome Sanger Institute for the COVID-19 Genomics UK (COG-UK) consortium|Davies|United Kingdom

>Spike|hCoV-19/Scotland/CVR4630/2020|2020-09-07|EPI\_ISL\_612284|Original|hCoV-19^^Scotland|Human|West of Scotland Specialist Virology Centre|COVID-19 Genomics UK (COG-UK) Consortium|Robertson|United Kingdom

>Spike|hCoV-19/USA/UT-QDX-1954/2020|2020-03-12|EPI\_ISL\_604288|Original|hCoV-19^^Utah|Human|Quest Diagnostics|Quest Diagnostics|Kagan|USA

>Spike|hCoV-19/England/CAMC-9DF8FA/2020|2020-09-20|EPI\_ISL\_638435|Original|hCoV-19^^England|Human|Department of Pathology|COVID-19 Genomics UK (COG-UK) Consortium|Goodfellow|United Kingdom

>Spike|hCoV-19/Canada/ON-PHL-20-03656/2020|2020-11-00|EPI\_ISL\_775095|Original|hCoV-19^^Ontario|Human|Public Health Ontario Laboratory|Public Health Ontario Laboratory|Guthrie|Canada

>Spike|hCoV-19/Australia/VIC17283/2020|2020-08-16|EPI\_ISL\_663819|Original|hCoV-19^^Victoria|Human|Microbiological Diagnostic Unit - Public Health Laboratory (MDU-PHL) |MDU-PHL|Schultz|Australia

>Spike|hCoV-19/Netherlands/UT-EMC-220/2020|2020-12-04|EPI\_ISL\_722385|Original|hCoV-19^^Utrecht|Human|Dutch COVID-19 response team|Erasmus Medical Center|Oude Munnink|Netherlands

>Spike|hCoV-19/England/QEUA-96E09E/2020|2020-08-18|EPI\_ISL\_530618|Original|hCoV-19^^England|Human|Lighthouse Lab in Glasgow|Wellcome Sanger Institute for the COVID-19 Genomics UK (COG-UK) consortium|Davies|United Kingdom

>Spike|hCoV-19/USA/CA-QDX-811/2020|2020-03-23|EPI\_ISL\_571504|Original|hCoV-19^^California|Human|Quest Diagnostics|Quest Diagnostics|Kagan|USA

>Spike|hCoV-19/USA/TX-HMH-6156/2020|2020-07-04|EPI\_ISL\_547277|Original|hCoV-19^^Texas|Human|Houston Methodist Hospital|Houston Methodist Hospital|Long|USA

>Spike|hCoV-19/Luxembourg/LNS2068754/2020|2020-10-31|EPI\_ISL\_740053|Original|hCoV-19^^Luxembourg|Human|Laboratoire national de sant\u00e9|Laboratoire national de sant\u00e9|Wienecke-Baldacchino|Luxembourg

>Spike|hCoV-19/England/20139044504/2020|2020-03-28|EPI\_ISL\_420683|Original|hCoV-19^^England|Human|Respiratory Virus Unit|Respiratory Virus Unit|Platt|United Kingdom

>Spike|hCoV-19/England/NORT-28D6DA/2020|2020-11-18|EPI\_ISL\_702815|Original|hCoV-19^^England|Human|Northumbria University / South Tees Hospitals NHS Foundation Trust / North Cumbria Integrated Care NHS Foundation Trust / North Tees and Hartlepool NHS Foundation Trust / Newcastle Hospitals NHS Foundation Trust|COVID-19 Genomics UK (COG-UK) Consortium|Bashton|United Kingdom

>Spike|hCoV-19/Wales/PHWC-48031A/2020|2020-10-11|EPI\_ISL\_612164|Original|hCoV-19^^Wales|Human|Wales Specialist Virology Centre Sequencing lab|COVID-19 Genomics UK (COG-UK) Consortium|Moore|United Kingdom

>Spike|hCoV-19/USA/TX-HMH-MCoV-13940/2020|2020-08-15|EPI\_ISL\_787232|Original|hCoV-19^^Texas|Human|Houston Methodist Hospital|Houston Methodist Hospital|Long|USA

>Spike|hCoV-19/USA/NY-NYCPHL-000127/2020|2020-04-02|EPI\_ISL\_631618|Original|hCoV-19^^New York|Human|OCME Office Of Chief Medical Examiner|New York City Public Health Laboratory|Wang|USA

>Spike|hCoV-19/Australia/VIC16932/2020|2020-08-06|EPI\_ISL\_663645|Original|hCoV-19^^Victoria|Human|Microbiological Diagnostic Unit - Public Health Laboratory (MDU-PHL) |MDU-PHL|Schultz|Australia

>Spike|hCoV-19/USA/CA-CZB-7140/2020|2020-09-02|EPI\_ISL\_583015|Original|hCoV-19^^California|Human|Orange County Public Health Lab|Chan-Zuckerberg Biohub|Bhatt|USA

>Spike|hCoV-19/England/CAMC-B32BFA/2020|2020-11-05|EPI\_ISL\_659105|Original|hCoV-19^^England|Human|Lighthouse Lab in Cambridge|Wellcome Sanger Institute for the COVID-19 Genomics UK (COG-UK) Consortium|Davies|United Kingdom

>Spike|hCoV-19/USA/MA-MGH-00055/2020|2020-03-25|EPI\_ISL\_460175|Original|hCoV-19^^Massachusetts|Human|Massachusetts General Hospital|Infectious Disease Program|Lemieux|USA

>Spike|hCoV-19/USA/WA-UW108/2020|2020-03-11|EPI\_ISL\_416646|Original|hCoV-19^^Washington|Human|UW Virology Lab|UW Virology Lab|Roychoudhury|USA

>Spike|hCoV-19/USA/TX-HMH-MCoV-13597/2020|2020-08-20|EPI\_ISL\_788707|Original|hCoV-19^^Texas|Human|Houston Methodist Hospital|Houston Methodist Hospital|Long|USA

>Spike|hCoV-19/Northern Ireland/NIRE-FBCB9/2020|2020-04-10|EPI\_ISL\_470084|Original|hCoV-19^^Northern Ireland|Human|Regional Virus Laboratory|Wellcome Sanger Institute for the COVID-19 Genomics UK (COG-UK) consortium|Davies|United Kingdom

>Spike|hCoV-19/USA/TX-HMH-MCoV-14299/2020|2020-10-05|EPI\_ISL\_787584|Original|hCoV-19^^Texas|Human|Houston Methodist Hospital|Houston Methodist Hospital|Long|USA

>Spike|hCoV-19/USA/VA-DCLS-0725/2020|2020-07-09|EPI\_ISL\_526848|Original|hCoV-19^^Virginia|Human|Virginia DCLS|Virginia DCLS|St. Jacques|USA

>Spike|hCoV-19/France/PAC-IHU-0545/2020|2020-04-06|EPI\_ISL\_569584|Original|hCoV-19^^Provence-Alpes-C\u00f4te-d\u2019Azur|Human|MEPHI|MEPHI|Levasseur|France

>Spike|hCoV-19/England/ALDP-B49185/2020|2020-11-07|EPI\_ISL\_649314|Original|hCoV-19^^England|Human|Lighthouse Lab in Alderley Park|Wellcome Sanger Institute for the COVID-19 Genomics UK (COG-UK) Consortium|Davies|United Kingdom

>Spike|hCoV-19/England/QEUH-B31DB9/2020|2020-11-04|EPI\_ISL\_646197|Original|hCoV-19^^England|Human|Lighthouse Lab in Glasgow|Wellcome Sanger Institute for the COVID-19 Genomics UK (COG-UK) Consortium|Davies|United Kingdom

>Spike|hCoV-19/England/CAMB-1AF336/2020|2020-04-30|EPI\_ISL\_459260|Original|hCoV-19^^England|Human|Department of Pathology|Wellcome Sanger Institute for the COVID-19 Genomics UK (COG-UK) consortium|Davies|United Kingdom

>Spike|hCoV-19/England/201160049/2020|2020-03-11|EPI\_ISL\_464781|Original|hCoV-19^^England|Human|Respiratory Virus Unit|Respiratory Virus Unit|Platt|United Kingdom

>Spike|hCoV-19/England/NORW-F57EB/2020|2020-10-31|EPI\_ISL\_665458|Original|hCoV-19^^England|Human|Quadram Institute Bioscience|COVID-19 Genomics UK (COG-UK) Consortium|Alikhan|United Kingdom

>Spike|hCoV-19/England/MILK-99C6B3/2020|2020-08-30|EPI\_ISL\_550571|Original|hCoV-19^^England|Human|Lighthouse Lab in Milton Keynes|Wellcome Sanger Institute for the COVID-19 Genomics UK (COG-UK) consortium|Davies|United Kingdom

>Spike|hCoV-19/Spain/MD-ISCI-2014599/2020|2020-08-19|EPI\_ISL\_691702|Original|hCoV-19^^Madrid|Human|Hospital Cl\u00e9nico San Carlos|Instituto de Salud Carlos III|Caballero|Spain

>Spike|hCoV-19/England/PORT-2E9F1D/2020|2020-00-00|EPI\_ISL\_679975|Original|hCoV-19^^England|Human|Centre for Enzyme Innovation|COVID-19 Genomics UK (COG-UK) Consortium|Robson|United Kingdom

>Spike|hCoV-19/Scotland/EDB2096/2020|2020-04-19|EPI\_ISL\_433194|Original|hCoV-19^^Scotland|Human|Virology Department|COVID-19 Genomics UK (COG-UK) Consortium|Williams|United Kingdom

>Spike|hCoV-19/Russia/OMS-ORINFI-6680S/2020|2020-05-12|EPI\_ISL\_639935|Original|hCoV-19^^Omsk|Human|Omsk Research Institute of Natural Focal Infections|WHO National Influenza Centre Russian Federation|Komissarov|Russia

>Spike|hCoV-19/England/QEUI-9F5867/2020|2020-09-25|EPI\_ISL\_588462|Original|hCoV-19^^England|Human|Lighthouse Lab in Glasgow|Wellcome Sanger Institute for the COVID-19 Genomics UK (COG-UK) consortium|Davies|United Kingdom

>Spike|hCoV-19/USA/NY-Wadsworth-11330-01/2020|2020-03-07|EPI\_ISL\_426328|Original|hCoV-19^^New York|Human|Wadsworth Center|Wadsworth Center|Lasek-Nesselquist|USA

>Spike|hCoV-19/England/ALDP-B1C9CF/2020|2020-11-01|EPI\_ISL\_645622|Original|hCoV-19^^England|Human|Lighthouse Lab in Alderley Park|Wellcome Sanger Institute for the COVID-19 Genomics UK (COG-UK) Consortium|Davies|United Kingdom

>Spike|hCoV-19/England/QEUI-B1370A/2020|2020-11-02|EPI\_ISL\_641633|Original|hCoV-19^^England|Human|Lighthouse Lab in Glasgow|Wellcome Sanger Institute for the COVID-19 Genomics UK (COG-UK) Consortium|Davies|United Kingdom

>Spike|hCoV-19/Japan/PG-7428/2020|2020-07-00|EPI\_ISL\_688530|Original|hCoV-19^^Japan|Human|Pathogen Genomics Center|Pathogen Genomics Center|Sekizuka|Japan

>Spike|hCoV-19/USA/TX-HMH-MCoV-8988/2020|2020-07-02|EPI\_ISL\_780478|Original|hCoV-19^^Texas|Human|Houston Methodist Hospital|Houston Methodist Hospital|Long|USA

>Spike|hCoV-19/Denmark/DCGC-909/2020|2020-05-18|EPI\_ISL\_614472|Original|hCoV-19^^Hovedstaden|Human|Department of Virus and Microbiological Special Diagnostics|Albertsen lab|Michaelsen|Denmark

>Spike|hCoV-19/Ukraine/Kharkiv-879/2020|2020-08-07|EPI\_ISL\_582511|Original|hCoV-19^^Kharkiv|Human|Department of Respiratory and other Viral Infections of L.V.Gromashevsky Institute of Epidemiology & Infectious Diseases NAMS of Ukrain\u0435|Department of Respiratory and other Viral Infections of L.V.Gromashevsky Institute of Epidemiology & Infectious Diseases NAMS of Ukrain\u0435|Mironenko|Ukraine

>Spike|hCoV-19/England/ALDP-9C5323/2020|2020-09-10|EPI\_ISL\_567809|Original|hCoV-19^^England|Human|Lighthouse Lab in Alderley Park|Wellcome Sanger Institute for the COVID-19 Genomics UK (COG-UK) consortium|Davies|United Kingdom

>Spike|hCoV-19/Wales/PHWC-4987F5/2020|2020-11-26|EPI\_ISL\_727126|Original|hCoV-19^^Wales|Human|Originating lab|COVID-19 Genomics UK (COG-UK) Consortium|Moore|United Kingdom

>Spike|hCoV-19/England/ALDP-BB4D54/2020|2020-11-20|EPI\_ISL\_702514|Original|hCoV-19^^England|Human|Lighthouse Lab in Alderley Park|Wellcome Sanger Institute for the COVID-19 Genomics UK (COG-UK) Consortium|Davies|United Kingdom

>Spike|hCoV-19/England/MILK-B55933/2020|2020-11-05|EPI\_ISL\_657682|Original|hCoV-19^^England|Human|Lighthouse Lab in Milton Keynes|Wellcome Sanger Institute for the COVID-19 Genomics UK (COG-UK) Consortium|Davies|United Kingdom

>Spike|hCoV-19/Wales/PHWC-47DC51/2020|2020-10-13|EPI\_ISL\_595344|Original|hCoV-19^^Wales|Human|Originating lab|COVID-19 Genomics UK (COG-UK) Consortium|Moore|United Kingdom

>Spike|hCoV-19/Denmark/DCGC-19310/2020|2020-12-07|EPI\_ISL\_748875|Original|hCoV-19^^Hovedstaden|Human|Department of Virus and Microbiological Special Diagnostics|Albertsen Lab|Michaelsen|Denmark

>Spike|hCoV-19/England/QEUI-BF0B25/2020|2020-12-05|EPI\_ISL\_709283|Original|hCoV-19^^England|Human|Lighthouse Lab in Glasgow|Wellcome Sanger Institute for the COVID-19 Genomics UK (COG-UK) Consortium|Davies|United Kingdom

>Spike|hCoV-19/Netherlands/GE-EMC-273/2020|2020-06-06|EPI\_ISL\_523252|Original|hCoV-19^^Gelderland|Human|Dutch COVID-19 response team|Erasmus Medical Center|Oude Munnink|Netherlands

>Spike|hCoV-19/USA/TX-DSHS-1527/2020|2020-06-23|EPI\_ISL\_683442|Original|hCoV-19^^Texas|Human|Texas Department of State Health Services|Texas Department of State Health Services|Rahman|USA

>Spike|hCoV-19/England/MILK-B964BD/2020|2020-11-14|EPI\_ISL\_674947|Original|hCoV-19^^England|Human|Lighthouse Lab in Milton Keynes|Wellcome Sanger Institute for the COVID-19 Genomics UK (COG-UK) Consortium|Davies|United Kingdom

>Spike|hCoV-19/England/CAMB-8283B/2020|2020-04-13|EPI\_ISL\_443407|Original|hCoV-19^^England|Human|Department of Pathology|Wellcome Sanger Institute for the COVID-19 Genomics UK (COG-UK) consortium|Amato|United Kingdom

>Spike|hCoV-19/Northern Ireland/NIRE-FBB9E/2020|2020-04-13|EPI\_ISL\_470039|Original|hCoV-19^^Northern Ireland|Human|Regional Virus Laboratory|Wellcome Sanger Institute for the COVID-19 Genomics UK (COG-UK) consortium|Davies|United Kingdom

>Spike|hCoV-19/Canada/NB-226/2020|2020-03-23|EPI\_ISL\_479642|Original|hCoV-19^^New Brunswick|Human|Dr. Georges-L.-Dumont University Hospital Centre|National Microbiology Laboratory|Majer|Canada

>Spike|hCoV-19/South Africa/LR00066/2020|2020-07-13|EPI\_ISL\_514378|Original|hCoV-19^^Gauteng|Human|National Institute for Communicable Diseases of the National Health Laboratory Service|National Institute for Communicable Diseases of the National Health Laboratory Service|Allam|South Africa

>Spike|hCoV-19/USA/CA-ALSR-4472/2020|2020-10-20|EPI\_ISL\_649049|Original|hCoV-19^^California|Human|San Diego County Public Health Laboratory|Andersen lab at Scripps Research|Gangavarapu|USA

>Spike|hCoV-19/Netherlands/ZH-EMC-417/2020|2020-08-10|EPI\_ISL\_523757|Original|hCoV-19^^Zuid Holland|Human|Dutch COVID-19 response team|Erasmus Medical Center|Oude Munnink|Netherlands

>Spike|hCoV-19/Ireland/D-NVRL-AIIDV0030v1/2020|2020-04-03|EPI\_ISL\_644326|Original|hCoV-19^^Dublin|Human|CEPHR / Vincent's Hospital|Irish Coronavirus Sequencing Consortium - National Virus Reference Laboratory|Gonzalez|Ireland

>Spike|hCoV-19/Wales/PHWC-16881C/2020|2020-04-21|EPI\_ISL\_494292|Original|hCoV-19^^Wales|Human|Originating lab|COVID-19 Genomics UK (COG-UK) Consortium|Moore|United Kingdom

>Spike|hCoV-19/Wales/PHWC-49AA72/2020|2020-12-03|EPI\_ISL\_727638|Original|hCoV-19^^Wales|Human|Originating lab|COVID-19 Genomics UK (COG-UK) Consortium|Moore|United Kingdom

>Spike|hCoV-19/England/CAMC-9DF748/2020|2020-09-21|EPI\_ISL\_638420|Original|hCoV-19^^England|Human|Department of Pathology|COVID-19 Genomics UK (COG-UK) Consortium|Goodfellow|United Kingdom

>Spike|hCoV-19/England/20109007304/2020|2020-03-07|EPI\_ISL\_464527|Original|hCoV-19^^England|Human|Respiratory Virus Unit|Respiratory Virus Unit|Platt|United Kingdom

>Spike|hCoV-19/England/BRIS-1854002/2020|2020-04-27|EPI\_ISL\_492294|Original|hCoV-19^^England|Human|PHE South West Regional Laboratory|Wellcome Sanger Institute for the COVID-19 Genomics UK (COG-UK) consortium|Davies|United Kingdom

>Spike|hCoV-19/England/QEUEH-B68557/2020|2020-11-11|EPI\_ISL\_655070|Original|hCoV-19^^England|Human|Lighthouse Lab in Glasgow|Wellcome Sanger Institute for the COVID-19 Genomics UK (COG-UK) Consortium|Davies|United Kingdom

>Spike|hCoV-19/USA/TX-HMH-3788/2020|2020-06-12|EPI\_ISL\_543193|Original|hCoV-19^^Texas|Human|Houston Methodist Hospital|Houston Methodist Hospital|Long|USA

>Spike|hCoV-19/USA/TX-HMH-4285/2020|2020-06-18|EPI\_ISL\_543496|Original|hCoV-19^^Texas|Human|Houston Methodist Hospital|Houston Methodist Hospital|Long|USA

>Spike|hCoV-19/USA/MI-UM-10036117605/2020|2020-09-24|EPI\_ISL\_590717|Original|hCoV-19^^Michigan|Human|University of Michigan Clinical Microbiology Laboratory|Lauring Lab|Valesano|USA

>Spike|hCoV-19/Northern Ireland/NIRE-103B47/2020|2020-04-16|EPI\_ISL\_489217|Original|hCoV-19^^Northern Ireland|Human|Regional Virus Laboratory|Wellcome Sanger Institute for the COVID-19 Genomics UK (COG-UK) consortium|Davies|United Kingdom

>Spike|hCoV-19/USA/TX-DSHS-1345/2020|2020-04-07|EPI\_ISL\_654926|Original|hCoV-19^^Texas|Human|Texas Department of State Health Services|Texas Department of State Health Services|Rahman|USA

>Spike|hCoV-19/England/CAMC-B3632B/2020|2020-11-05|EPI\_ISL\_645261|Original|hCoV-19^^England|Human|Lighthouse Lab in Cambridge|Wellcome Sanger Institute for the COVID-19 Genomics UK (COG-UK) Consortium|Davies|United Kingdom

>Spike|hCoV-19/England/ALDP-AA1526/2020|2020-10-22|EPI\_ISL\_624307|Original|hCoV-19^^England|Human|Lighthouse Lab in Alderley Park|Wellcome Sanger Institute for the COVID-19 Genomics UK (COG-UK) consortium|Davies|United Kingdom

>Spike|hCoV-19/Switzerland/SO-ETHZ-380286/2020|2020-11-25|EPI\_ISL\_721877|Original|hCoV-19^^Solothurn|Human|Viollier AG|Department of Biosystems Science and Engineering|Nadeau|Switzerland

>Spike|hCoV-19/USA/CT-Yale-395/2020|2020-05-05|EPI\_ISL\_738312|Original|hCoV-19^^Connecticut|Human|Connecticut Veterans' Affairs Hospital|Grubaugh Lab - Yale School of Public Health|Grubaugh|USA

>Spike|hCoV-19/USA/TX-HMH-7078/2020|2020-06-28|EPI\_ISL\_546486|Original|hCoV-19^^Texas|Human|Houston Methodist Hospital|Houston Methodist Hospital|Long|USA

>Spike|hCoV-19/England/SHEF-C82B3/2020|2020-11-12|EPI\_ISL\_680151|Original|hCoV-19^^England|Human|Virology Department|COVID-19 Genomics UK (COG-UK) Consortium|de Silva|United Kingdom

>Spike|hCoV-19/Wales/ALDP-94CA10/2020|2020-06-15|EPI\_ISL\_556072|Original|hCoV-19^^Wales|Human|Lighthouse Lab in Alderley Park|Wellcome Sanger Institute for the COVID-19 Genomics UK (COG-UK) consortium|Davies|United Kingdom

>Spike|hCoV-19/England/ALDP-5A30DD/2020|2020-06-14|EPI\_ISL\_558748|Original|hCoV-19^^England|Human|Lighthouse Lab in Alderley Park|Wellcome Sanger Institute for the COVID-19 Genomics UK (COG-UK) consortium|Davies|United Kingdom

>Spike|hCoV-19/England/CAMB-1B823D/2020|2020-10-19|EPI\_ISL\_638198|Original|hCoV-19^^England|Human|Department of Pathology|COVID-19 Genomics UK (COG-UK) Consortium|Goodfellow|United Kingdom

>Spike|hCoV-19/England/EXET-13E985/2020|2020-12-12|EPI\_ISL\_764170|Original|hCoV-19^^England|Human|University of Exeter|COVID-19 Genomics UK (COG-UK) Consortium|Temperton|United Kingdom

>Spike|hCoV-19/England/ALDP-A6FC89/2020|2020-10-15|EPI\_ISL\_607090|Original|hCoV-19^^England|Human|Lighthouse Lab in Alderley Park|Wellcome Sanger Institute for the COVID-19 Genomics UK (COG-UK) consortium|Davies|United Kingdom

>Spike|hCoV-19/Japan/PG-7189/2020|2020-07-00|EPI\_ISL\_688293|Original|hCoV-19^^Japan|Human|Saitama Prefectural Institute of Public Health|Pathogen Genomics Center|Sekizuka|Japan

>Spike|hCoV-19/Ireland/KK-NVRL-72IRL21404/2020|2020-08-13|EPI\_ISL\_528483|Original|hCoV-19^^Kilkenny|Human|National Virus Reference Laboratory|National Virus Reference Laboratory|Gonzalez|Ireland

>Spike|hCoV-19/England/ALDP-94E902/2020|2020-06-20|EPI\_ISL\_555122|Original|hCoV-19^^England|Human|Lighthouse Lab in Alderley Park|Wellcome Sanger Institute for the COVID-19 Genomics UK (COG-UK) consortium|Davies|United Kingdom

>Spike|hCoV-19/England/QEUEH-BC3F98/2020|2020-11-24|EPI\_ISL\_703801|Original|hCoV-19^^England|Human|Lighthouse Lab in Glasgow|Wellcome Sanger Institute for the COVID-19 Genomics UK (COG-UK) Consortium|Davies|United Kingdom

>Spike|hCoV-19/Denmark/DCGC-15766/2020|2020-11-23|EPI\_ISL\_714008|Original|hCoV-19^^Hovedstaden|Human|Department of Virus and Microbiological Special Diagnostics|Albertsen Lab|Michaelsen|Denmark

>Spike|hCoV-19/England/QEUEH-9DE99E/2020|2020-09-21|EPI\_ISL\_584816|Original|hCoV-19^^England|Human|University College London|COVID-19 Genomics UK (COG-UK) Consortium|Roy|United Kingdom

>Spike|hCoV-19/England/CAMB-1B4671/2020|2020-05-27|EPI\_ISL\_473479|Original|hCoV-19^^England|Human|Department of Pathology|COVID-19 Genomics UK (COG-UK) Consortium|Meredith|United Kingdom

>Spike|hCoV-19/England/OXON-AD0BA/2020|2020-00-00|EPI\_ISL\_448560|Original|hCoV-19^^England|Human|Oxford Viromics|COVID-19 Genomics UK (COG-UK) Consortium|Golubchik|United Kingdom

>Spike|hCoV-19/USA/TX-HMH-4988/2020|2020-06-22|EPI\_ISL\_544439|Original|hCoV-19^^Texas|Human|Houston Methodist Hospital|Houston Methodist Hospital|Long|USA

>Spike|hCoV-19/USA/IN-CDC-2-3713960/2020|2020-12-04|EPI\_ISL\_751600|Original|hCoV-19^^Indiana|Human|IN State Department of Health Laboratory Services|Genomics and Discovery|Queen|USA

>Spike|hCoV-19/Wales/PHWC-49887A/2020|2020-11-27|EPI\_ISL\_727133|Original|hCoV-19^^Wales|Human|Originating lab|COVID-19 Genomics UK (COG-UK) Consortium|Moore|United Kingdom

>Spike|hCoV-19/England/BRIS-12A9B9/2020|2020-04-30|EPI\_ISL\_458491|Original|hCoV-19^^England|Human|PHE South West Regional Laboratory|Wellcome Sanger Institute for the COVID-19 Genomics UK (COG-UK) Consortium|Davies|United Kingdom

>Spike|hCoV-19/Scotland/QEUH-A1FE73/2020|2020-10-01|EPI\_ISL\_599082|Original|hCoV-19^^Scotland|Human|Lighthouse Lab in Glasgow|Wellcome Sanger Institute for the COVID-19 Genomics UK (COG-UK) consortium|Davies|United Kingdom

>Spike|hCoV-19/USA/CA-CZB-13342/2020|2020-05-02|EPI\_ISL\_672440|Original|hCoV-19^^California|Human|Alameda County Public Health Lab|Chan-Zuckerberg Biohub|Bhatt|USA

>Spike|hCoV-19/Ireland/D-NVRL-AIIDV0091v1/2020|2020-04-14|EPI\_ISL\_644333|Original|hCoV-19^^Dublin|Human|CEPHR / Vincent's Hospital|Irish Coronavirus Sequencing Consortium - National Virus Reference Laboratory|Gonzalez|Ireland

>Spike|hCoV-19/England/CAMC-B226B0/2020|2020-11-02|EPI\_ISL\_647183|Original|hCoV-19^^England|Human|Lighthouse Lab in Cambridge|Wellcome Sanger Institute for the COVID-19 Genomics UK (COG-UK) Consortium|Davies|United Kingdom

>Spike|hCoV-19/Singapore/7/2020|2020-01-27|EPI\_ISL\_410713|Original|hCoV-19^^Singapore|Human|National Public Health Laboratory|National Public Health Laboratory|Mak|Singapore

>Spike|hCoV-19/England/QEUH-AE5016/2020|2020-10-27|EPI\_ISL\_633259|Original|hCoV-19^^England|Human|Lighthouse Lab in Glasgow|Wellcome Sanger Institute for the COVID-19 Genomics UK (COG-UK) consortium|Davies|United Kingdom

>Spike|hCoV-19/England/20170037804/2020|2020-04-09|EPI\_ISL\_465290|Original|hCoV-19^^England|Human|Respiratory Virus Unit|Respiratory Virus Unit|Platt|United Kingdom

>Spike|hCoV-19/England/ALDP-A2D8A1/2020|2020-10-06|EPI\_ISL\_586648|Original|hCoV-19^^England|Human|Lighthouse Lab in Alderley Park|Wellcome Sanger Institute for the COVID-19 Genomics UK (COG-UK) consortium|Davies|United Kingdom

>Spike|hCoV-19/England/NOTT-11974A/2020|2020-11-02|EPI\_ISL\_627304|Original|hCoV-19^^England|Human|Queens Medical Centre|COVID-19 Genomics UK (COG-UK) Consortium|Loose|United Kingdom

>Spike|hCoV-19/England/LIVE-DC199A/2020|2020-11-19|EPI\_ISL\_705812|Original|hCoV-19^^England|Human|Liverpool Clinical Laboratories|COVID-19 Genomics UK (COG-UK) Consortium|Haldenby|United Kingdom

>Spike|hCoV-19/Japan/PG-6703/2020|2020-07-00|EPI\_ISL\_687814|Original|hCoV-19^^Japan|Human|Pathogen Genomics Center|Pathogen Genomics Center|Sekizuka|Japan

>Spike|hCoV-19/England/QEUH-B6AC7E/2020|2020-11-11|EPI\_ISL\_655123|Original|hCoV-19^^England|Human|Lighthouse Lab in Glasgow|Wellcome Sanger Institute for the COVID-19 Genomics UK (COG-UK) Consortium|Davies|United Kingdom

>Spike|hCoV-19/India/MH-CMP-30/2020|2020-09-09|EPI\_ISL\_779705|Original|hCoV-19^^Maharashtra|Human|The Foundation for Medical Research|The Foundation for Medical Research|Mandal|India

>Spike|hCoV-19/Singapore/1069/2020|2020-10-05|EPI\_ISL\_596459|Original|hCoV-19^^Singapore|Human|National Public Health Laboratory|National Public Health Laboratory|Mak|Singapore

>Spike|hCoV-19/England/205081168/2020|2020-12-09|EPI\_ISL\_766292|Original|hCoV-19^^England|Human|Respiratory Virus Unit|COVID-19 Genomics UK (COG-UK) Consortium|Platt|United Kingdom

>Spike|hCoV-19/Netherlands/ZH-EMC-522/2020|2020-09-01|EPI\_ISL\_577950|Original|hCoV-19^^Zuid Holland|Human|Dutch COVID-19 response team|Erasmus Medical Center|Oude Munnink|Netherlands

>Spike|hCoV-19/Canada/ON-UHTC\_0101/2020|2020-05-10|EPI\_ISL\_526257|Original|hCoV-19^^Ontario|Human|Unity Health Toronto|Ontario Institute for Cancer Research|de Borja|Canada

>Spike|hCoV-19/England/QEUH-9F8D38/2020|2020-09-27|EPI\_ISL\_588898|Original|hCoV-19^^England|Human|Lighthouse Lab in Glasgow|Wellcome Sanger Institute for the COVID-19 Genomics UK (COG-UK) consortium|Davies|United Kingdom

>Spike|hCoV-19/England/CAMC-942EB4/2020|2020-07-22|EPI\_ISL\_556876|Original|hCoV-19^^England|Human|Lighthouse Lab in Cambridge|Wellcome Sanger Institute for the COVID-19 Genomics UK (COG-UK) consortium|Davies|United Kingdom

>Spike|hCoV-19/Denmark/DCGC-2318/2020|2020-08-10|EPI\_ISL\_617655|Original|hCoV-19^^Midtjylland|Human|Department of Virus and Microbiological Special Diagnostics|Albertsen lab|Michaelsen|Denmark

>Spike|hCoV-19/England/ALDP-AA0ED1/2020|2020-10-22|EPI\_ISL\_623920|Original|hCoV-19^^England|Human|Lighthouse Lab in Alderley Park|Wellcome Sanger Institute for the COVID-19 Genomics UK (COG-UK) consortium|Davies|United Kingdom

>Spike|hCoV-19/South Africa/KRISP-K002276/2020|2020-07-19|EPI\_ISL\_515656|Original|hCoV-19^^KwaZulu-Natal|Human|NHLs-IALCH|KRISP|de Oliveira|South Africa

>Spike|hCoV-19/USA/CA-ALSR-4358/2020|2020-08-04|EPI\_ISL\_648988|Original|hCoV-19^^California|Human|San Diego County Public Health Laboratory|Andersen lab at Scripps Research|Gangavarapu|USA

>Spike|hCoV-19/Japan/PG-7795/2020|2020-07-00|EPI\_ISL\_686897|Original|hCoV-19^^Japan|Human|Pathogen Genomics Center|Pathogen Genomics Center|Sekizuka|Japan

>Spike|hCoV-19/United Arab Emirates/1079/2020|2020-06-12|EPI\_ISL\_698153|Original|hCoV-19^^Abu Dhabi|Human|Group 42 (G42) Healthcare|G42 Healthcare|Ogrodzki|United Arab Emirates

>Spike|hCoV-19/USA/WA-UW-8601/2020|2020-05-06|EPI\_ISL\_776659|Original|hCoV-19^^Washington|Human|UW Virology Lab|UW Virology Lab|Roychoudhury|USA

>Spike|hCoV-19/England/QEUEH-9CA731/2020|2020-09-10|EPI\_ISL\_567471|Original|hCoV-19^^England|Human|Lighthouse Lab in Glasgow|Wellcome Sanger Institute for the COVID-19 Genomics UK (COG-UK) consortium|Davies|United Kingdom

>Spike|hCoV-19/Switzerland/BE-ETHZ-270038/2020|2020-09-02|EPI\_ISL\_541416|Original|hCoV-19^^Bern|Human|Viollier AG|Department of Biosystems Science and Engineering|Nadeau|Switzerland

>Spike|hCoV-19/USA/MD-MDH-0508/2020|2020-11-13|EPI\_ISL\_778889|Original|hCoV-19^^Maryland|Human|Maryland Public Health Laboratory|Maryland Public Health Laboratory|Keller|USA

>Spike|hCoV-19/USA/WI-GMF-21221/2020|2020-09-19|EPI\_ISL\_660830|Original|hCoV-19^^Wisconsin|Human|Gundersen Molecular Diagnostics Laboratory|Kabara Cancer Research Institute|Kenny|USA

>Spike|hCoV-19/England/MILK-A79C13/2020|2020-10-15|EPI\_ISL\_606718|Original|hCoV-19^^England|Human|Lighthouse Lab in Milton Keynes|Wellcome Sanger Institute for the COVID-19 Genomics UK (COG-UK) consortium|Davies|United Kingdom

>Spike|hCoV-19/India/KA-IB57/2020|2020-05-13|EPI\_ISL\_511948|Original|hCoV-19^^Karnataka|Human|Indian Institute of Science|National Institute of Biomedical Genomics -\u00a0DBT's PAN-INDIA 1000 SARS--CoV-2 RNA Genome Sequencing Consortium|Maitra|India

>Spike|hCoV-19/Wales/PHWC-2D3D7/2020|2020-04-03|EPI\_ISL\_445982|Original|hCoV-19^^Wales|Human|Wales Specialist Virology Centre|Public Health Wales Microbiology Cardiff|Moore|United Kingdom

>Spike|hCoV-19/England/EXET-13E9D0/2020|2020-12-12|EPI\_ISL\_763705|Original|hCoV-19^^England|Human|University of Exeter|COVID-19 Genomics UK (COG-UK) Consortium|Temperton|United Kingdom

>Spike|hCoV-19/England/204221459/2020|2020-09-19|EPI\_ISL\_593824|Original|hCoV-19^^England|Human|Respiratory Virus Unit|Respiratory Virus Unit|Platt|United Kingdom

>Spike|hCoV-19/England/CAMB-1AB80E/2020|2020-04-26|EPI\_ISL\_444334|Original|hCoV-19^^England|Human|Department of Pathology|COVID-19 Genomics UK (COG-UK) Consortium|Meredith|United Kingdom

>Spike|hCoV-19/Scotland/QEUEH-96EDE2/2020|2020-08-19|EPI\_ISL\_534490|Original|hCoV-19^^Scotland|Human|NHSGGC West of Scotland Specialist Virology Centre / MRC-University of Glasgow Centre for Virus Research|Wellcome Sanger Institute for the COVID-19 Genomics UK (COG-UK) consortium|Davies|United Kingdom

>Spike|hCoV-19/England/ALDP-9FD95D/2020|2020-10-02|EPI\_ISL\_587979|Original|hCoV-19^^England|Human|Lighthouse Lab in Alderley Park|Wellcome Sanger Institute for the COVID-19 Genomics UK (COG-UK) consortium|Davies|United Kingdom



>Spike|hCoV-19/USA/MI-MDHHS-SC22512/2020|2020-11-17|EPI\_ISL\_708215|Original|hCoV-19^^Michigan|Human|Michigan Department of Health and Human Services|Michigan Department of Health and Human Services|Jacob|USA

>Spike|hCoV-19/France/ARA-120740/2020|2020-12-16|EPI\_ISL\_779787|Original|hCoV-19^^Auvergne-Rh\u00f4ne-Alpes|Human|CNR Virus des Infections Respiratoires - France SUD|CNR Virus des Infections Respiratoires - France SUD|Bal|France

>Spike|hCoV-19/USA/IN-QDX-964/2020|2020-03-16|EPI\_ISL\_571720|Original|hCoV-19^^Indiana|Human|Quest Diagnostics|Quest Diagnostics|Kagan|USA

>Spike|hCoV-19/England/ALDP-A5172F/2020|2020-10-07|EPI\_ISL\_597888|Original|hCoV-19^^England|Human|Lighthouse Lab in Alderley Park|Wellcome Sanger Institute for the COVID-19 Genomics UK (COG-UK) consortium|Davies|United Kingdom

>Spike|hCoV-19/Wales/PHWC-163820/2020|2020-04-29|EPI\_ISL\_474002|Original|hCoV-19^^Wales|Human|Originating lab|COVID-19 Genomics UK (COG-UK) Consortium|Moore|United Kingdom

>Spike|hCoV-19/Spain/RI-IBV-99005855/2020|2020-03-24|EPI\_ISL\_537398|Original|hCoV-19^^La Rioja|Human|Centro de Investigaci\u00f3n Biom\u00e9dica de La Rioja - Hospital San Pedro Logro\u00f1o|SeqCOVID-SPAIN consortium|IBV (CSIC)|Comas|Spain

>Spike|hCoV-19/Denmark/DCGC-2828/2020|2020-08-24|EPI\_ISL\_616654|Original|hCoV-19^^Hovedstaden|Human|Department of Virus and Microbiological Special Diagnostics|Albertsen lab|Michaelsen|Denmark

>Spike|hCoV-19/USA/MN-MDH-1907/2020|2020-10-18|EPI\_ISL\_613519|Original|hCoV-19^^Minnesota|Human|Public Health Laboratory - Infectious Disease Lab|Minnesota Department of Health|Lorentz|USA

>Spike|hCoV-19/Panama/329862/2020|2020-03-14|EPI\_ISL\_496651|Original|hCoV-19^^Panama Center|Human|Gorgas Memorial Laboratory of Health Studies|Gorgas Memorial Laboratory of Health Studies|Martinez|Panama

>Spike|hCoV-19/England/ALDP-95A61B/2020|2020-06-10|EPI\_ISL\_554918|Original|hCoV-19^^England|Human|Lighthouse Lab in Alderley Park|Wellcome Sanger Institute for the COVID-19 Genomics UK (COG-UK) consortium|Davies|United Kingdom

>Spike|hCoV-19/Wales/PHWC-2EFE1/2020|2020-04-04|EPI\_ISL\_446185|Original|hCoV-19^^Wales|Human|Wales Specialist Virology Centre|Public Health Wales Microbiology Cardiff|Moore|United Kingdom

>Spike|hCoV-19/Denmark/DCGC-7256/2020|2020-10-12|EPI\_ISL\_619232|Original|hCoV-19^^Midtjylland|Human|Department of Virus and Microbiological Special Diagnostics|Albertsen lab|Michaelsen|Denmark

>Spike|hCoV-19/England/CAMC-B32FD0/2020|2020-11-05|EPI\_ISL\_659272|Original|hCoV-19^^England|Human|Lighthouse Lab in Cambridge|Wellcome Sanger Institute for the COVID-19 Genomics UK (COG-UK) Consortium|Davies|United Kingdom

>Spike|hCoV-19/England/204540536/2020|2020-11-03|EPI\_ISL\_678651|Original|hCoV-19^^England|Human|Respiratory Virus Unit|COVID-19 Genomics UK (COG-UK) Consortium|Platt|United Kingdom

>Spike|hCoV-19/England/ALDP-983215/2020|2020-07-21|EPI\_ISL\_529553|Original|hCoV-19^^England|Human|Queens Medical Centre|COVID-19 Genomics UK (COG-UK) Consortium|Loose|United Kingdom

>Spike|hCoV-19/England/QEUEH-B0FC11/2020|2020-11-02|EPI\_ISL\_642111|Original|hCoV-19^^England|Human|Lighthouse Lab in Glasgow|Wellcome Sanger Institute for the COVID-19 Genomics UK (COG-UK) Consortium|Davies|United Kingdom

>Spike|hCoV-19/Northern Ireland/NIRE-108DE2/2020|2020-10-12|EPI\_ISL\_627563|Original|hCoV-19^^Northern Ireland|Human|Regional Virus Laboratory|COVID-19 Genomics UK (COG-UK) Consortium|Fairley|United Kingdom

>Spike|hCoV-19/England/QEUEH-9CF5AB/2020|2020-09-15|EPI\_ISL\_590023|Original|hCoV-19^^England|Human|Lighthouse Lab in Glasgow|Wellcome Sanger Institute for the COVID-19 Genomics UK (COG-UK) consortium|Davies|United Kingdom

>Spike|hCoV-19/England/CAMB-71C15/2020|2020-03-31|EPI\_ISL\_439927|Original|hCoV-19^^England|Human|Department of Pathology|Wellcome Sanger Institute for the COVID-19 Genomics UK (COG-UK) consortium|Amato|United Kingdom

>Spike|hCoV-19/USA/WI-UW-164/2020|2020-03-16|EPI\_ISL\_428260|Original|hCoV-19^^Wisconsin|Human|University of Wisconsin-Madison AIDS Vaccine Research Laboratories|University of Wisconsin-Madison AIDS Vaccine Research Laboratories|Moreno|USA

>Spike|hCoV-19/USA/NY-Wadsworth-292840-01/2020|2020-12-28|EPI\_ISL\_769979|Original|hCoV-19^^New York|Human|Albany Medical Center Hospital Clinical Laboratories|Wadsworth Center|Lasek-Nesselquist|USA

>Spike|hCoV-19/USA/NM-DOH-2020315317/2020|2020-08-27|EPI\_ISL\_574288|Original|hCoV-19^^New Mexico|Human|New Mexico Department of Health Scientific Laboratory|New Mexico Department of Health Scientific Laboratory|Johnson|USA

>Spike|hCoV-19/Scotland/QEUIH-AD14A8/2020|2020-10-27|EPI\_ISL\_649686|Original|hCoV-19^^Scotland|Human|Lighthouse Lab in Glasgow|Wellcome Sanger Institute for the COVID-19 Genomics UK (COG-UK) Consortium|Davies|United Kingdom

>Spike|hCoV-19/Wales/PHWC-47F712/2020|2020-10-06|EPI\_ISL\_612716|Original|hCoV-19^^Wales|Human|Wales Specialist Virology Centre Sequencing lab|COVID-19 Genomics UK (COG-UK) Consortium|Moore|United Kingdom

>Spike|hCoV-19/Canada/QC-LSPQ-L00237883/2020|2020-03-25|EPI\_ISL\_536197|Original|hCoV-19^^Quebec|Human|CSSS Haut-Richelieu/Rouville (H\u00f4pital)|Laboratoire de sant\u00e9 publique du Qu\u00e9bec|Moreira|Canada

>Spike|hCoV-19/Denmark/DCGC-8960/2020|2020-10-26|EPI\_ISL\_626189|Original|hCoV-19^^Hovedstaden|Human|Department of Virus and Microbiological Special Diagnostics|Albertsen lab|Michaelsen|Denmark

>Spike|hCoV-19/USA/TX-HMH-6346/2020|2020-06-28|EPI\_ISL\_547405|Original|hCoV-19^^Texas|Human|Houston Methodist Hospital|Houston Methodist Hospital|Long|USA

>Spike|hCoV-19/Canada/BC-BCCDC-6481/2020|2020-10-00|EPI\_ISL\_740621|Original|hCoV-19^^British Columbia|Human|BCCDC Public Health Laboratory|BCCDC Public Health Laboratory|Prystajacky|Canada

>Spike|hCoV-19/USA/CT-Yale-480/2020|2020-09-18|EPI\_ISL\_729765|Original|hCoV-19^^Connecticut|Human|Connecticut Department of Health|Grubaugh Lab - Yale School of Public Health|Grubaugh|USA

>Spike|hCoV-19/England/QEUIH-BCD24A/2020|2020-11-25|EPI\_ISL\_704375|Original|hCoV-19^^England|Human|Lighthouse Lab in Glasgow|Wellcome Sanger Institute for the COVID-19 Genomics UK (COG-UK) Consortium|Davies|United Kingdom

>Spike|hCoV-19/Netherlands/NB-EMC-417/2020|2020-11-09|EPI\_ISL\_722312|Original|hCoV-19^^Noord Brabant|Human|Dutch COVID-19 response team|Erasmus Medical Center|Oude Munnink|Netherlands

>Spike|hCoV-19/USA/WA-S1477/2020|2020-05-11|EPI\_ISL\_495652|Original|hCoV-19^^Washington|Human|Washington State Department of Health|Seattle Flu Study|Lee|USA

>Spike|hCoV-19/Denmark/DCGC-6494/2020|2020-10-05|EPI\_ISL\_620394|Original|hCoV-19^^Hovedstaden|Human|Department of Virus and Microbiological Special Diagnostics|Albertsen lab|Michaelsen|Denmark

>Spike|hCoV-19/Belgium/ULG-11006/2020|2020-11-14|EPI\_ISL\_707720|Original|hCoV-19^^Li\u00e8ge|Human|Department of Clinical Microbiology|GIGA Medical Genomics|Durkin|Belgium

>Spike|hCoV-19/England/ALDP-9E83FD/2020|2020-09-24|EPI\_ISL\_638247|Original|hCoV-19^^England|Human|Department of Pathology|COVID-19 Genomics UK (COG-UK) Consortium|Goodfellow|United Kingdom

>Spike|hCoV-19/USA/WA-S7/2020|2020-02-24|EPI\_ISL\_416462|Original|hCoV-19^^Washington|Human|Seattle Flu Study|Seattle Flu Study|Bedford|USA

>Spike|hCoV-19/England/BIRM-67043/2020|2020-10-28|EPI\_ISL\_651606|Original|hCoV-19^^England|Human|University of Birmingham|COVID-19 Genomics UK (COG-UK) Consortium|Loman|United Kingdom

>Spike|hCoV-19/USA/OR-OHSU-2301/2020|2020-08-10|EPI\_ISL\_667175|Original|hCoV-19^^Oregon|Human|OHSU Lab Services Molecular Microbiology Lab|Oregon SARS-CoV-2 Genome Sequencing Center|O'Roak|USA

>Spike|hCoV-19/England/MILK-A6A9E1/2020|2020-10-08|EPI\_ISL\_627135|Original|hCoV-19^^England|Human|Liverpool Clinical Laboratories|COVID-19 Genomics UK (COG-UK) Consortium|Haldenby|United Kingdom

>Spike|hCoV-19/Scotland/CVR3248/2020|2020-04-27|EPI\_ISL\_449255|Original|hCoV-19^^Scotland|Human|West of Scotland Specialist Virology Centre|COVID-19 Genomics UK (COG-UK) Consortium|Robertson|United Kingdom

>Spike|hCoV-19/USA/WI-UW-2177/2020|2020-10-28|EPI\_ISL\_677581|Original|hCoV-19^^Wisconsin|Human|University of Wisconsin-Madison AIDS Vaccine Research

Laboratories|University of Wisconsin-Madison AIDS Vaccine Research  
Laboratories|Baczenas|USA  
>Spike|hCoV-19/Australia/VIC14735/2020|2020-08-22|EPI\_ISL\_592976|Original|hCoV-19^^Victoria|Human|Victorian Infectious Diseases Reference Laboratory (VIDRL)|VIDRL and MDU-PHL|Schultz|Australia  
>Spike|hCoV-19/USA/OR-OHSU-3071/2020|2020-09-30|EPI\_ISL\_667470|Original|hCoV-19^^Oregon|Human|OHSU Lab Services Molecular Microbiology Lab|Oregon SARS-CoV-2 Genome Sequencing Center|O'Roak|USA  
>Spike|hCoV-19/England/ALDP-5BA01F/2020|2020-06-15|EPI\_ISL\_558878|Original|hCoV-19^^England|Human|Lighthouse Lab in Alderley Park|Wellcome Sanger Institute for the COVID-19 Genomics UK (COG-UK) consortium|Davies|United Kingdom  
>Spike|hCoV-19/England/MILK-B8DE7F/2020|2020-11-13|EPI\_ISL\_674731|Original|hCoV-19^^England|Human|Lighthouse Lab in Milton Keynes|Wellcome Sanger Institute for the COVID-19 Genomics UK (COG-UK) Consortium|Davies|United Kingdom  
>Spike|hCoV-19/Denmark/DCGC-5420/2020|2020-09-14|EPI\_ISL\_615352|Original|hCoV-19^^Syddanmark|Human|Department of Virus and Microbiological Special Diagnostics|Albertsen lab|Michaelsen|Denmark  
>Spike|hCoV-19/Australia/VIC461/2020|2020-03-27|EPI\_ISL\_426754|Original|hCoV-19^^Victoria|Human|Victorian Infectious Diseases Reference Laboratory (VIDRL)|Microbiological Diagnostic Unit Public Health Laboratory and Victorian Infectious Diseases Reference Laboratory|Schultz|Australia  
>Spike|hCoV-19/France/ARA-18783/2020|2020-04-03|EPI\_ISL\_508974|Original|hCoV-19^^Auvergne-Rh\u00f4ne-Alpes|Human|CNR Virus des Infections Respiratoires - France SUD|CNR Virus des Infections Respiratoires - France SUD|Josset|France  
>Spike|hCoV-19/USA/NY-NYUMC2/2020|2020-03-16|EPI\_ISL\_416830|Original|hCoV-19^^New York|Human|NYU Langone Health|Department of Pathology and Medicine|Maurano|USA  
>Spike|hCoV-19/USA/CA-CHLA-PLM28814725/2020|2020-11-15|EPI\_ISL\_753338|Original|hCoV-19^^California|Human|Clinical virology Laboratory|Center for Personalized Medicine|Dien Bard|USA  
>Spike|hCoV-19/England/BRIS-121994/2020|2020-03-15|EPI\_ISL\_440196|Original|hCoV-19^^England|Human|PHE South West Regional Laboratory|Wellcome Sanger Institute for the COVID-19 Genomics UK (COG-UK) consortium|Amato|United Kingdom  
>Spike|hCoV-19/Wales/PHWC-48E2F1/2020|2020-11-12|EPI\_ISL\_680839|Original|hCoV-19^^Wales|Human|Wales Specialist Virology Centre Sequencing lab|COVID-19 Genomics UK (COG-UK) Consortium|Moore|United Kingdom  
>Spike|hCoV-19/England/MILK-AC9203/2020|2020-10-22|EPI\_ISL\_629552|Original|hCoV-19^^England|Human|Lighthouse Lab in Milton Keynes|Wellcome Sanger Institute for the COVID-19 Genomics UK (COG-UK) consortium|Davies|United Kingdom  
>Spike|hCoV-19/England/ALDP-95069D/2020|2020-06-18|EPI\_ISL\_555240|Original|hCoV-19^^England|Human|Lighthouse Lab in Alderley Park|Wellcome Sanger Institute for the COVID-19 Genomics UK (COG-UK) consortium|Davies|United Kingdom  
>Spike|hCoV-19/India/TG-GMC-RK100/2020|2020-03-01|EPI\_ISL\_431101|Original|hCoV-19^^Telangana|Human|Department of Microbiology, Gandhi Medical College and Hospital|Virus Research Laboratory|Muttineni|India  
>Spike|hCoV-19/mink/Netherlands/NB-EMC-63-2/2020|2020-10-06|EPI\_ISL\_632334|Original|hCoV-19^^Noord Brabant|Neovison vison|Dutch COVID-19 response team|Erasmus Medical Center|Oude Munnink|Netherlands  
>Spike|hCoV-19/USA/MA-MASPHL-00299/2020|2020-04-17|EPI\_ISL\_791711|Original|hCoV-19^^Massachusetts|Human|Massachusetts State Public Health Laboratory|Infectious Disease Program|Park|USA  
>Spike|hCoV-19/USA/TX-HMH-4603/2020|2020-06-21|EPI\_ISL\_543749|Original|hCoV-19^^Texas|Human|Houston Methodist Hospital|Houston Methodist Hospital|Long|USA  
>Spike|hCoV-19/England/SHEF-C3081/2020|2020-06-04|EPI\_ISL\_484442|Original|hCoV-19^^England|Human|Virology Department|COVID-19 Genomics UK (COG-UK) Consortium|de Silva|United Kingdom  
>Spike|hCoV-19/USA/IA-GMF-20217/2020|2020-09-14|EPI\_ISL\_547857|Original|hCoV-19^^Iowa|Human|Gundersen Molecular Diagnostics Laboratory|Kabara Cancer Research Institute|Kenny|USA  
>Spike|hCoV-19/Cote d'Ivoire/BKE0104/2020|2020-06-08|EPI\_ISL\_614353|Original|hCoV-19^^Boauk\u00e9|Human|Molecular diagnostic unit for viral haemorrhagic fevers and

emerging viruses|Project group Epidemiology of Highly Pathogenic  
Microorganisms|Calvignac-Spencer|C\u00f4te d'Ivoire  
>Spike|hCoV-19/Denmark/DCGC-1389/2020|2020-05-11|EPI\_ISL\_622420|Original|hCoV-  
19^^Hovedstaden|Human|Department of Virus and Microbiological Special  
Diagnostics|Albertsen lab|Michaelsen|Denmark  
>Spike|hCoV-19/England/NOTT-10E881/2020|2020-03-25|EPI\_ISL\_425604|Original|hCoV-  
19^^England|Human|Queens Medical Centre|COVID-19 Genomics UK (COG-UK)  
Consortium|Loose|United Kingdom  
>Spike|hCoV-19/England/20109005704/2020|2020-03-06|EPI\_ISL\_464518|Original|hCoV-  
19^^England|Human|Respiratory Virus Unit|Respiratory Virus Unit|Platt|United Kingdom  
>Spike|hCoV-19/USA/UT-08352/2020|2020-05-15|EPI\_ISL\_524137|Original|hCoV-  
19^^Utah|Human|Utah Public Health Laboratory|Utah Public Health Laboratory|Young|USA  
>Spike|hCoV-19/Wales/PHWC-49940C/2020|2020-12-03|EPI\_ISL\_727302|Original|hCoV-  
19^^Wales|Human|Originating lab|COVID-19 Genomics UK (COG-UK) Consortium|Moore|United  
Kingdom  
>Spike|hCoV-19/USA/TX-HMH-MCoV-10531/2020|2020-07-08|EPI\_ISL\_789522|Original|hCoV-  
19^^Texas|Human|Houston Methodist Hospital|Houston Methodist Hospital|Long|USA  
>Spike|hCoV-19/Wales/PHWC-49D374/2020|2020-12-10|EPI\_ISL\_742770|Original|hCoV-  
19^^Wales|Human|Wales Specialist Virology Centre Sequencing lab|COVID-19 Genomics UK  
(COG-UK) Consortium|Moore|United Kingdom  
>Spike|hCoV-19/Netherlands/ZuidHolland\_178/2020|2020-04-  
20|EPI\_ISL\_461350|Original|hCoV-19^^Zuid Holland|Human|Dutch COVID-19 response  
team|Erasmus Medical Center|Oude Munnink|Netherlands  
>Spike|hCoV-19/USA/MI-QDX-496/2020|2020-03-23|EPI\_ISL\_571230|Original|hCoV-  
19^^Michigan|Human|Quest Diagnostics|Quest Diagnostics|Kagan|USA  
>Spike|hCoV-19/Denmark/DCGC-16992/2020|2020-12-14|EPI\_ISL\_750696|Original|hCoV-  
19^^Midtjylland|Human|Department of Virus and Microbiological Special  
Diagnostics|Albertsen Lab|Michaelsen|Denmark  
>Spike|hCoV-19/Wales/PHWC-47F25D/2020|2020-10-05|EPI\_ISL\_612650|Original|hCoV-  
19^^Wales|Human|Wales Specialist Virology Centre Sequencing lab|COVID-19 Genomics UK  
(COG-UK) Consortium|Moore|United Kingdom  
>Spike|hCoV-19/USA/MI-MDHHS-SC20133/2020|2020-03-24|EPI\_ISL\_436851|Original|hCoV-  
19^^Michigan|Human|Michigan Department of Health and Human Services|Michigan  
Department of Health and Human Services|Blankenship|USA  
>Spike|hCoV-19/England/MILK-ACEA42/2020|2020-10-22|EPI\_ISL\_629749|Original|hCoV-  
19^^England|Human|Lighthouse Lab in Milton Keynes|Wellcome Sanger Institute for the  
COVID-19 Genomics UK (COG-UK) consortium|Davies|United Kingdom  
>Spike|hCoV-19/England/MILK-B8DF9A/2020|2020-11-13|EPI\_ISL\_674597|Original|hCoV-  
19^^England|Human|Lighthouse Lab in Milton Keynes|Wellcome Sanger Institute for the  
COVID-19 Genomics UK (COG-UK) Consortium|Davies|United Kingdom  
>Spike|hCoV-19/England/ALDP-A2F5C6/2020|2020-10-05|EPI\_ISL\_587086|Original|hCoV-  
19^^England|Human|Lighthouse Lab in Alderley Park|Wellcome Sanger Institute for the  
COVID-19 Genomics UK (COG-UK) consortium|Davies|United Kingdom  
>Spike|hCoV-19/Denmark/DCGC-14768/2020|2020-11-23|EPI\_ISL\_711965|Original|hCoV-  
19^^Hovedstaden|Human|Department of Virus and Microbiological Special  
Diagnostics|Albertsen Lab|Michaelsen|Denmark  
>Spike|hCoV-19/England/205260459/2020|2020-12-20|EPI\_ISL\_754382|Original|hCoV-  
19^^England|Human|Respiratory Virus Unit|COVID-19 Genomics UK (COG-UK)  
Consortium|Platt|United Kingdom  
>Spike|hCoV-19/Australia/VIC5545/2020|2020-07-20|EPI\_ISL\_518374|Original|hCoV-  
19^^Victoria|Human|Microbiological Diagnostic Unit - Public Health Laboratory (MDU-  
PHL)|MDU-PHL|Schultz|Australia  
>Spike|hCoV-19/Spain/AN-IBV-001161/2020|2020-03-25|EPI\_ISL\_452575|Original|hCoV-  
19^^Andalucia|Human|Servicio de Microbiolog\u00eda y Parasitolog\u00eda cl\u00ednica.  
UCEIMP. Hospital Universitario Virgen del Roc\u00edo/IBIS/CSIC/US.|SeqCOVID-SPAIN  
consortium/IBV (CSIC) |Comas|Spain  
>Spike|hCoV-19/England/ALDP-9CD75C/2020|2020-09-15|EPI\_ISL\_566280|Original|hCoV-  
19^^England|Human|Lighthouse Lab in Alderley Park|Wellcome Sanger Institute for the  
COVID-19 Genomics UK (COG-UK) consortium|Davies|United Kingdom

>Spike|hCoV-19/Canada/QC-LSPQ-L00242662/2020|2020-03-29|EPI\_ISL\_536331|Original|hCoV-19^^Quebec|Human|H\u00f4pital Charles-LeMoine|Laboratoire de sant\u00e9 publique du Qu\u00e9bec|Moreira|Canada

>Spike|hCoV-19/England/NORT-29498C/2020|2020-03-27|EPI\_ISL\_490459|Original|hCoV-19^^England|Human|Northumbria University / South Tees Hospitals NHS Foundation Trust / North Cumbria Integrated Care NHS Foundation Trust / North Tees and Hartlepool NHS Foundation Trust / Newcastle Hospitals NHS Foundation Trust|COVID-19 Genomics UK (COG-UK) Consortium|Bashton|United Kingdom

>Spike|hCoV-19/England/QEUA-A223D8/2020|2020-10-01|EPI\_ISL\_587366|Original|hCoV-19^^England|Human|Lighthouse Lab in Glasgow|Wellcome Sanger Institute for the COVID-19 Genomics UK (COG-UK) consortium|Davies|United Kingdom

>Spike|hCoV-19/DRC/10375/2020|2020-05-22|EPI\_ISL\_527499|Original|hCoV-19^^Kinshasa|Human|Viral Respiratory Lab|Pathogen Sequencing Lab|Lokilo|Democratic Republic of the Congo

>Spike|hCoV-19/Netherlands/NA\_539/2020|2020-00-00|EPI\_ISL\_460712|Original|hCoV-19^^Netherlands|Human|Dutch COVID-19 response team|Erasmus Medical Center|Oude Munnink|Netherlands

>Spike|hCoV-19/USA/NY-Wadsworth-10131-01/2020|2020-02-29|EPI\_ISL\_525575|Original|hCoV-19^^New York|Human|Wadsworth Center|Wadsworth Center|Plitnick|USA

>Spike|hCoV-19/England/CAMB-1BAC00/2020|2020-11-12|EPI\_ISL\_664786|Original|hCoV-19^^England|Human|Department of Pathology|COVID-19 Genomics UK (COG-UK) Consortium|Goodfellow|United Kingdom

>Spike|hCoV-19/USA/MA-MASPHL-00684/2020|2020-04-15|EPI\_ISL\_692962|Original|hCoV-19^^Massachusetts|Human|Massachusetts State Public Health Laboratory|Massachusetts State Public Health Laboratory|Lang|USA

>Spike|hCoV-19/England/GSTT-265D6F7/2020|2020-03-24|EPI\_ISL\_484001|Original|hCoV-19^^England|Human|Centre for Clinical Infection and Diagnostics Research and Genomics Innovation Unit|COVID-19 Genomics UK (COG-UK) Consortium|Awan|United Kingdom

>Spike|hCoV-19/Wales/PHWC-47D028/2020|2020-10-09|EPI\_ISL\_586087|Original|hCoV-19^^Wales|Human|Wales Specialist Virology Centre Sequencing lab|COVID-19 Genomics UK (COG-UK) Consortium|Moore|United Kingdom

>Spike|hCoV-19/South Africa/KRISP-K002573/2020|2020-07-29|EPI\_ISL\_535439|Original|hCoV-19^^KwaZulu-Natal|Human|NHLS-IALCH|KRISP|de Oliveira|South Africa

>Spike|hCoV-19/England/CAMC-B5182B/2020|2020-11-08|EPI\_ISL\_658186|Original|hCoV-19^^England|Human|Lighthouse Lab in Cambridge|Wellcome Sanger Institute for the COVID-19 Genomics UK (COG-UK) Consortium|Davies|United Kingdom

>Spike|hCoV-19/Italy/VEN-UniVR-83/2020|2020-03-23|EPI\_ISL\_751392|Original|hCoV-19^^Veneto|Human|IRCCS Sacro Cuore Don Calabria Hospital|University of Verona|Mori|Italy

>Spike|hCoV-19/USA/AZ-TG366706/2020|2020-06-01|EPI\_ISL\_694470|Original|hCoV-19^^Arizona|Human|AZ SPHL|TGen North|French|USA

>Spike|hCoV-19/Wales/PHWC-483D37/2020|2020-10-21|EPI\_ISL\_627924|Original|hCoV-19^^Wales|Human|Wales Specialist Virology Centre Sequencing lab|COVID-19 Genomics UK (COG-UK) Consortium|Moore|United Kingdom

>Spike|hCoV-19/Scotland/EDB4457/2020|2020-05-05|EPI\_ISL\_461713|Original|hCoV-19^^Scotland|Human|Virology Department|COVID-19 Genomics UK (COG-UK) Consortium|Williams|United Kingdom

>Spike|hCoV-19/Iran/K1r-135/2020|2020-05-27|EPI\_ISL\_568507|Original|hCoV-19^^Iran|Human|Virology|Virology|Ranjbar|Iran

>Spike|hCoV-19/Scotland/CVR213/2020|2020-03-19|EPI\_ISL\_425742|Original|hCoV-19^^Scotland|Human|West of Scotland Specialist Virology Centre|COVID-19 Genomics UK (COG-UK) Consortium|Robertson|United Kingdom

>Spike|hCoV-19/Spain/CL-IBV-97006263/2020|2020-04-20|EPI\_ISL\_537635|Original|hCoV-19^^Castilla y Leon|Human|Universidad de Le\u00f3n|SeqCOVID-SPAIN consortium|IBV (CSIC) |Comas|Spain

>Spike|hCoV-19/England/CAMB-1AE8A1/2020|2020-04-30|EPI\_ISL\_524574|Original|hCoV-19^^England|Human|Department of Pathology|Wellcome Sanger Institute for the COVID-19 Genomics UK (COG-UK) consortium|Davies|United Kingdom

>Spike|hCoV-19/USA/MN-MDH-1595/2020|2020-05-13|EPI\_ISL\_530191|Original|hCoV-19^^Minnesota|Human|Minnesota Department of Health|Minnesota Department of Health|Garfin|USA

>Spike|hCoV-19/Denmark/DCGC-5540/2020|2020-09-28|EPI\_ISL\_620865|Original|hCoV-19^^Midtjylland|Human|Department of Virus and Microbiological Special Diagnostics|Albertsen lab|Michaelsen|Denmark

>Spike|hCoV-19/USA/WA-UW141/2020|2020-03-11|EPI\_ISL\_416679|Original|hCoV-19^^Washington|Human|UW Virology Lab|UW Virology Lab|Roychoudhury|USA

>Spike|hCoV-19/Scotland/CVR3940/2020|2020-07-03|EPI\_ISL\_490704|Original|hCoV-19^^Scotland|Human|West of Scotland Specialist Virology Centre|COVID-19 Genomics UK (COG-UK) Consortium|Robertson|United Kingdom

>Spike|hCoV-19/England/QEUH-9B9E12/2020|2020-09-07|EPI\_ISL\_549692|Original|hCoV-19^^England|Human|Lighthouse Lab in Glasgow|Wellcome Sanger Institute for the COVID-19 Genomics UK (COG-UK) consortium|Davies|United Kingdom

>Spike|hCoV-19/England/ALDP-AA0B52/2020|2020-10-22|EPI\_ISL\_625071|Original|hCoV-19^^England|Human|Lighthouse Lab in Alderley Park|Wellcome Sanger Institute for the COVID-19 Genomics UK (COG-UK) consortium|Davies|United Kingdom

>Spike|hCoV-19/Luxembourg/LNS1419064/2020|2020-11-03|EPI\_ISL\_739933|Original|hCoV-19^^Luxembourg|Human|Laboratoire national de sant\u00e9|Laboratoire national de sant\u00e9|Wienecke-Baldacchino|Luxembourg

>Spike|hCoV-19/Wales/PHWC-16E078/2020|2020-09-30|EPI\_ISL\_585661|Original|hCoV-19^^Wales|Human|Wales Specialist Virology Centre Sequencing lab|COVID-19 Genomics UK (COG-UK) Consortium|Moore|United Kingdom

>Spike|hCoV-19/Chile/RM-157312/2020|2020-08-21|EPI\_ISL\_746494|Original|hCoV-19^^Region Metropolitana de Santiago|Human|Genetica Molecular and Subdepartamento de Virologia ISP Chile|Instituto de Salud Publica de Chile|Tognarelli|Chile

>Spike|hCoV-19/Italy/APU-PODV-15711018/2020|2020-04-19|EPI\_ISL\_788964|Original|hCoV-19^^Apulia|Human|Ospedale \Di Venere\|Beaconlab (Bioinformatics|Chiara|Italy

>Spike|hCoV-19/England/ALDP-94DF10/2020|2020-06-17|EPI\_ISL\_555255|Original|hCoV-19^^England|Human|Lighthouse Lab in Alderley Park|Wellcome Sanger Institute for the COVID-19 Genomics UK (COG-UK) consortium|Davies|United Kingdom

>Spike|hCoV-19/Wales/PHWC-16A540/2020|2020-09-06|EPI\_ISL\_540903|Original|hCoV-19^^Wales|Human|Wales Specialist Virology Centre Sequencing lab|COVID-19 Genomics UK (COG-UK) Consortium|Moore|United Kingdom

>Spike|hCoV-19/USA/TX-HMH-6596/2020|2020-06-24|EPI\_ISL\_546114|Original|hCoV-19^^Texas|Human|Houston Methodist Hospital|Houston Methodist Hospital|Long|USA

>Spike|hCoV-19/Japan/PG-4917/2020|2020-08-00|EPI\_ISL\_690037|Original|hCoV-19^^Japan|Human|Pathogen Genomics Center|Pathogen Genomics Center|Sekizuka|Japan

>Spike|hCoV-19/Luxembourg/LNS9838378/2020|2020-11-04|EPI\_ISL\_744997|Original|hCoV-19^^Luxembourg|Human|Laboratoire national de sant\u00e9|Laboratoire national de sant\u00e9|Wienecke-Baldacchino|Luxembourg

>Spike|hCoV-19/USA/HI-H200131/2020|2020-07-06|EPI\_ISL\_752694|Original|hCoV-19^^Hawaii|Human|State Laboratories Division|State Laboratories Division|Sultana|USA

>Spike|hCoV-19/England/20172048804/2020|2020-04-17|EPI\_ISL\_465354|Original|hCoV-19^^England|Human|Respiratory Virus Unit|Respiratory Virus Unit|Platt|United Kingdom

>Spike|hCoV-19/Denmark/DCGC-11958/2020|2020-09-21|EPI\_ISL\_671231|Original|hCoV-19^^Midtjylland|Human|Department of Virus and Microbiological Special Diagnostics|Albertsen Lab|Michaelsen|Denmark

>Spike|hCoV-19/Switzerland/VD-ETHZ-100168/2020|2020-03-16|EPI\_ISL\_574979|Original|hCoV-19^^Vaud|Human|Viollier AG|Department of Biosystems Science and Engineering|Nadeau|Switzerland

>Spike|hCoV-19/USA/MN-CDC-6302/2020|2020-05-08|EPI\_ISL\_527697|Original|hCoV-19^^Minnesota|Human|MN PHL Division|Pathogen Discovery|Queen|USA

>Spike|hCoV-19/England/MILK-AC787C/2020|2020-10-21|EPI\_ISL\_634439|Original|hCoV-19^^England|Human|Lighthouse Lab in Milton Keynes|Wellcome Sanger Institute for the COVID-19 Genomics UK (COG-UK) consortium|Davies|United Kingdom

>Spike|hCoV-19/England/BRIS-124CF2/2020|2020-03-26|EPI\_ISL\_443939|Original|hCoV-19^^England|Human|PHE South West Regional Laboratory|Wellcome Sanger Institute for the COVID-19 Genomics UK (COG-UK) consortium|Amato|United Kingdom

>Spike|hCoV-19/USA/CA-ALSR-2975/2020|2020-09-02|EPI\_ISL\_635765|Original|hCoV-19^^California|Human|San Diego County Public Health Laboratory|Andersen lab at Scripps Research|Gangavarapu|USA

>Spike|hCoV-19/USA/HI-H200539/2020|2020-11-05|EPI\_ISL\_753070|Original|hCoV-19^^Hawaii|Human|State Laboratories Division|State Laboratories Division|Sultana|USA

>Spike|hCoV-19/USA/TX-HMH-3660/2020|2020-06-15|EPI\_ISL\_543104|Original|hCoV-19^^Texas|Human|Houston Methodist Hospital|Houston Methodist Hospital|Long|USA

>Spike|hCoV-19/England/LOND-DA069/2020|2020-11-07|EPI\_ISL\_665669|Original|hCoV-19^^England|Human|University College London|COVID-19 Genomics UK (COG-UK) Consortium|Roy|United Kingdom

>Spike|hCoV-19/Wales/PHWC-30B24/2020|2020-04-10|EPI\_ISL\_446323|Original|hCoV-19^^Wales|Human|Wales Specialist Virology Centre|Public Health Wales Microbiology Cardiff|Moore|United Kingdom

>Spike|hCoV-19/England/ALDP-9E6F73/2020|2020-09-24|EPI\_ISL\_580374|Original|hCoV-19^^England|Human|Lighthouse Lab in Alderley Park|Wellcome Sanger Institute for the COVID-19 Genomics UK (COG-UK) consortium|Davies|United Kingdom

>Spike|hCoV-19/England/QEUH-BCB75C/2020|2020-11-27|EPI\_ISL\_704665|Original|hCoV-19^^England|Human|Lighthouse Lab in Glasgow|Wellcome Sanger Institute for the COVID-19 Genomics UK (COG-UK) Consortium|Davies|United Kingdom

>Spike|hCoV-19/England/CAMC-BBE21F/2020|2020-11-22|EPI\_ISL\_702798|Original|hCoV-19^^England|Human|Virology Department|COVID-19 Genomics UK (COG-UK) Consortium|de Silva|United Kingdom

>Spike|hCoV-19/Wales/PHWC-4A06FD/2020|2020-12-08|EPI\_ISL\_743484|Original|hCoV-19^^Wales|Human|Wales Specialist Virology Centre Sequencing lab|COVID-19 Genomics UK (COG-UK) Consortium|Moore|United Kingdom

>Spike|hCoV-19/USA/MA-MASPHL-01028/2020|2020-11-15|EPI\_ISL\_692783|Original|hCoV-19^^Massachusetts|Human|Massachusetts State Public Health Laboratory|Massachusetts State Public Health Laboratory|Lang|USA

>Spike|hCoV-19/England/EXET-1386EE/2020|2020-10-15|EPI\_ISL\_627425|Original|hCoV-19^^England|Human|University of Exeter|COVID-19 Genomics UK (COG-UK) Consortium|Temperton|United Kingdom

>Spike|hCoV-19/USA/CA-ALSR-4187/2020|2020-08-21|EPI\_ISL\_648873|Original|hCoV-19^^California|Human|San Diego County Public Health Laboratory|Andersen lab at Scripps Research|Gangavarapu|USA

>Spike|hCoV-19/England/ALDP-A9559E/2020|2020-10-20|EPI\_ISL\_624695|Original|hCoV-19^^England|Human|Lighthouse Lab in Alderley Park|Wellcome Sanger Institute for the COVID-19 Genomics UK (COG-UK) consortium|Davies|United Kingdom

>Spike|hCoV-19/Australia/NSW712/2020|2020-07-26|EPI\_ISL\_513355|Original|hCoV-19^^New South Wales|Human|St Vincent's Pathology (SydPath)|NSW Health Pathology - Institute of Clinical Pathology and Medical Research; Westmead Hospital; University of Sydney|Gall|Australia

>Spike|hCoV-19/Wales/PHWC-496645/2020|2020-11-19|EPI\_ISL\_726613|Original|hCoV-19^^Wales|Human|Originating lab|COVID-19 Genomics UK (COG-UK) Consortium|Moore|United Kingdom

>Spike|hCoV-19/England/CAMB-7DB1C/2020|2020-04-07|EPI\_ISL\_441767|Original|hCoV-19^^England|Human|Department of Pathology|Wellcome Sanger Institute for the COVID-19 Genomics UK (COG-UK) consortium|Amato|United Kingdom

>Spike|hCoV-19/England/CAMC-A3EFD5/2020|2020-10-06|EPI\_ISL\_609780|Original|hCoV-19^^England|Human|Lighthouse Lab in Cambridge|Wellcome Sanger Institute for the COVID-19 Genomics UK (COG-UK) consortium|Davies|United Kingdom

>Spike|hCoV-19/Gibraltar/205121231/2020|2020-00-00|EPI\_ISL\_766356|Original|hCoV-19^^Gibraltar|Human|Microbiology|Respiratory Virus Unit|Platt|Gibraltar

>Spike|hCoV-19/USA/MA-MGH-00425/2020|2020-03-07|EPI\_ISL\_460313|Original|hCoV-19^^Massachusetts|Human|Massachusetts General Hospital|Infectious Disease Program|Lemieux|USA

>Spike|hCoV-19/England/QEUH-54C6C5/2020|2020-05-12|EPI\_ISL\_532224|Original|hCoV-19^^England|Human|Lighthouse Lab in Glasgow|Wellcome Sanger Institute for the COVID-19 Genomics UK (COG-UK) consortium|Davies|United Kingdom

>Spike|hCoV-19/Wales/PHWC-31F72/2020|2020-04-14|EPI\_ISL\_446591|Original|hCoV-19^^Wales|Human|Wales Specialist Virology Centre|Public Health Wales Microbiology Cardiff|Moore|United Kingdom

>Spike|hCoV-19/England/ALDP-952358/2020|2020-06-09|EPI\_ISL\_553647|Original|hCoV-19^^England|Human|Lighthouse Lab in Alderley Park|Wellcome Sanger Institute for the COVID-19 Genomics UK (COG-UK) consortium|Davies|United Kingdom

>Spike|hCoV-19/Denmark/DCGC-16711/2020|2020-10-19|EPI\_ISL\_714423|Original|hCoV-19^^Hovedstaden|Human|Department of Virus and Microbiological Special Diagnostics|Albertsen Lab|Michaelsen|Denmark

>Spike|hCoV-19/Northern Ireland/NIRE-23472A/2020|2020-10-14|EPI\_ISL\_680429|Original|hCoV-19^^Northern Ireland|Human|Regional Virus Laboratory|COVID-19 Genomics UK (COG-UK) Consortium|Fairley|United Kingdom

>Spike|hCoV-19/Australia/VIC9188/2020|2020-08-18|EPI\_ISL\_565431|Original|hCoV-19^^Victoria|Human|Microbiological Diagnostic Unit - Public Health Laboratory (MDU-PHL)|MDU-PHL|Schultz|Australia

>Spike|hCoV-19/USA/UT-UPHL-05395/2020|2020-07-10|EPI\_ISL\_560873|Original|hCoV-19^^Utah|Human|Utah Public Health Laboratory|Utah Public Health Laboratory|Young|USA

>Spike|hCoV-19/England/ALDP-CB3589/2020|2020-12-20|EPI\_ISL\_761240|Original|hCoV-19^^England|Human|Lighthouse Lab in Alderley Park|Wellcome Sanger Institute for the COVID-19 Genomics UK (COG-UK) Consortium|Davies|United Kingdom

>Spike|hCoV-19/England/MILK-B8C4D8/2020|2020-11-13|EPI\_ISL\_674196|Original|hCoV-19^^England|Human|Lighthouse Lab in Milton Keynes|Wellcome Sanger Institute for the COVID-19 Genomics UK (COG-UK) Consortium|Davies|United Kingdom

>Spike|hCoV-19/Indonesia/BT-MRINUPH-200620-312/2020|2020-06-17|EPI\_ISL\_779393|Original|hCoV-19^^Banten|Human|Siloam Hospital Lippo Village|Mochtar Riady Institute for Nanotechnology-Universitas Pelita Harapan|Suriapranata|Indonesia

>Spike|hCoV-19/England/CAMB-1AC5E8/2020|2020-04-23|EPI\_ISL\_489432|Original|hCoV-19^^England|Human|Department of Pathology|Wellcome Sanger Institute for the COVID-19 Genomics UK (COG-UK) consortium|Davies|United Kingdom

>Spike|hCoV-19/England/LIVE-995D0/2020|2020-04-08|EPI\_ISL\_439739|Original|hCoV-19^^England|Human|Liverpool Clinical Laboratories|COVID-19 Genomics UK (COG-UK) Consortium|Haldenby|United Kingdom

>Spike|hCoV-19/England/LIVE-DCBA51/2020|2020-11-25|EPI\_ISL\_724448|Original|hCoV-19^^England|Human|Liverpool Clinical Laboratories|COVID-19 Genomics UK (COG-UK) Consortium|Haldenby|United Kingdom

>Spike|hCoV-19/England/ALDP-95134A/2020|2020-06-13|EPI\_ISL\_554203|Original|hCoV-19^^England|Human|Lighthouse Lab in Alderley Park|Wellcome Sanger Institute for the COVID-19 Genomics UK (COG-UK) consortium|Davies|United Kingdom

>Spike|hCoV-19/New Zealand/20VR1857/2020|2020-03-30|EPI\_ISL\_456285|Original|hCoV-19^^Southern|Human|Southern Community Labs Dunedin|Institute of Environmental Science and Research (ESR)|de Ligt|New Zealand

>Spike|hCoV-19/Japan/PG-5277/2020|2020-08-00|EPI\_ISL\_690380|Original|hCoV-19^^Japan|Human|Pathogen Genomics Center|Pathogen Genomics Center|Sekizuka|Japan

>Spike|hCoV-19/Australia/NSW1281/2020|2020-12-17|EPI\_ISL\_745096|Original|hCoV-19^^New South Wales|Human|Pathology North - Hunter - NSW Health Pathology|CIDM-PH|Gall|Australia

>Spike|hCoV-19/USA/TX-HMH-MCoV-19441/2020|2020-11-30|EPI\_ISL\_783841|Original|hCoV-19^^Texas|Human|Houston Methodist Hospital|Houston Methodist Hospital|Long|USA

>Spike|hCoV-19/Jordan/AQ-ALSR-5277/2020|2020-10-05|EPI\_ISL\_730515|Original|hCoV-19^^Aqaba|Human|Biolab Diagnostic Laboratories|Andersen lab at Scripps Research|Gangavarapu|Jordan

>Spike|hCoV-19/England/BRIS-12CB1B/2020|2020-04-18|EPI\_ISL\_481842|Original|hCoV-19^^England|Human|PHE South West Regional Laboratory|Wellcome Sanger Institute for the COVID-19 Genomics UK (COG-UK) consortium|Davies|United Kingdom

>Spike|hCoV-19/India/GJ-GBRC302a/2020|2020-06-15|EPI\_ISL\_495048|Original|hCoV-19^^Gujarat|Human|GMERS Medical College & Hospital|Gujarat Biotechnology Research Centre|Joshi|India



>Spike|hCoV-19/England/NOTT-1109C5/2020|2020-04-30|EPI\_ISL\_441882|Original|hCoV-19^^England|Human|Queens Medical Centre|COVID-19 Genomics UK (COG-UK) Consortium|Loose|United Kingdom

>Spike|hCoV-19/Netherlands/FR-RIVM-20197/2020|2020-11-29|EPI\_ISL\_723351|Original|hCoV-19^^Friesland|Human|Dutch COVID-19 response team|National Institute for Public Health and the Environment (RIVM)|Meijer|Netherlands

>Spike|hCoV-19/Spain/RI-IBV-99010993/2020|2020-11-06|EPI\_ISL\_732816|Original|hCoV-19^^La Rioja|Human|Centro de Investigaci\u00f3n Biom\u00e9dica de La Rioja - Hospital San Pedro Logro\u00f1o|SeqCOVID-SPAIN consortium/IBV (CSIC)|Comas|Spain

>Spike|hCoV-19/England/CAMB-1BBE63/2020|2020-11-14|EPI\_ISL\_679244|Original|hCoV-19^^England|Human|Department of Pathology|COVID-19 Genomics UK (COG-UK) Consortium|Goodfellow|United Kingdom

>Spike|hCoV-19/England/QEUEH-C013EC/2020|2020-12-04|EPI\_ISL\_720704|Original|hCoV-19^^England|Human|Lighthouse Lab in Glasgow|Wellcome Sanger Institute for the COVID-19 Genomics UK (COG-UK) Consortium|Davies|United Kingdom

>Spike|hCoV-19/USA/WA-UW262/2020|2020-03-16|EPI\_ISL\_418047|Original|hCoV-19^^Washington|Human|UW Virology Lab|UW Virology Lab|Roychoudhury|USA

>Spike|hCoV-19/England/ALDP-C06DE9/2020|2020-12-06|EPI\_ISL\_709305|Original|hCoV-19^^England|Human|Lighthouse Lab in Alderley Park|Wellcome Sanger Institute for the COVID-19 Genomics UK (COG-UK) Consortium|Davies|United Kingdom

>Spike|hCoV-19/Australia/WA421/2020|2020-03-20|EPI\_ISL\_672633|Original|hCoV-19^^Western Australia|Human|PathWest Laboratory Medicine WA|PathWest Laboratory Medicine WA Microbial Surveillance Unit|Sikazwe|Australia

>Spike|hCoV-19/USA/FL-BPHL-1777/2020|2020-07-29|EPI\_ISL\_613755|Original|hCoV-19^^Florida|Human|Florida Bureau of Public Health Laboratories|Florida Bureau of Public Health Laboratories|Blanton|USA

>Spike|hCoV-19/USA/AK-CDC-2-3714567/2020|2020-11-16|EPI\_ISL\_751793|Original|hCoV-19^^Alaska|Human|AK State Public Health Lab|Genomics and Discovery|Queen|USA

>Spike|hCoV-19/Switzerland/BL-ETHZ-140063/2020|2020-04-30|EPI\_ISL\_476111|Original|hCoV-19^^Basel-Landschaft|Human|Viollier AG|Department of Biosystems Science and Engineering|Nadeau|Switzerland

>Spike|hCoV-19/Switzerland/BL-UHB-42186686/2020|2020-03-11|EPI\_ISL\_528015|Original|hCoV-19^^Basel-Land|Human|University Hospital Basel|University Hospital Basel|Roloff Handschin|Switzerland

>Spike|hCoV-19/England/PRIN-254BC91/2020|2020-04-29|EPI\_ISL\_509436|Original|hCoV-19^^England|Human|The Princess Alexandra Hospital|Wellcome Sanger Institute for the COVID-19 Genomics UK (COG-UK) consortium|Davies|United Kingdom

>Spike|hCoV-19/England/20114052703/2020|2020-03-11|EPI\_ISL\_420458|Original|hCoV-19^^England|Human|Respiratory Virus Unit|Respiratory Virus Unit|Platt|United Kingdom

>Spike|hCoV-19/Singapore/472cul/2020|2020-06-03|EPI\_ISL\_574492|VeroE6 P1|hCoV-19^^Singapore|Human|Programme in Emerging Infectious Diseases|National Public Health Laboratory|Mak|Singapore

>Spike|hCoV-19/England/LIVE-DC4D40/2020|2020-11-12|EPI\_ISL\_703992|Original|hCoV-19^^England|Human|Liverpool Clinical Laboratories|COVID-19 Genomics UK (COG-UK) Consortium|Haldenby|United Kingdom

>Spike|hCoV-19/USA/TX-HMH-MCoV-8200/2020|2020-07-07|EPI\_ISL\_784259|Original|hCoV-19^^Texas|Human|Houston Methodist Hospital|Houston Methodist Hospital|Long|USA

>Spike|hCoV-19/England/MILK-99CEAC/2020|2020-08-31|EPI\_ISL\_549899|Original|hCoV-19^^England|Human|Lighthouse Lab in Milton Keynes|Wellcome Sanger Institute for the COVID-19 Genomics UK (COG-UK) consortium|Davies|United Kingdom

>Spike|hCoV-19/England/BRIS-12F134/2020|2020-04-13|EPI\_ISL\_488385|Original|hCoV-19^^England|Human|PHE South West Regional Laboratory|Wellcome Sanger Institute for the COVID-19 Genomics UK (COG-UK) consortium|Davies|United Kingdom

>Spike|hCoV-19/Norway/4968/2020|2020-10-26|EPI\_ISL\_635084|Original|hCoV-19^^Vestlandet|Human|Haukeland University Hospital|Norwegian Institute of Public Health|Vollan|Norway

>Spike|hCoV-19/United Arab Emirates/0695/2020|2020-05-15|EPI\_ISL\_698846|Original|hCoV-19^^Abu Dhabi|Human|Group 42 (G42) Healthcare|G42 Healthcare|Ogrodzki|United Arab Emirates

>Spike|hCoV-19/Germany/SH-ChVir8607/2020|2020-08-24|EPI\_ISL\_729594|Original|hCoV-19^^Schleswig-Holstein|Human|A. Krumbholz|Charit\u00e9 Universit\u00e4tsmedizin Berlin|Muehlemann|Germany

>Spike|hCoV-19/England/NORW-F205C/2020|2020-10-19|EPI\_ISL\_627024|Original|hCoV-19^^England|Human|Quadram Institute Bioscience|COVID-19 Genomics UK (COG-UK) Consortium|Alikhan|United Kingdom

>Spike|hCoV-19/USA/MI-MDHHS-SC20886/2020|2020-05-18|EPI\_ISL\_471907|Original|hCoV-19^^Michigan|Human|Michigan Department of Health and Human Services|Michigan Department of Health and Human Services|Blankenship|USA

>Spike|hCoV-19/Uganda/UG035/2020|2020-03-27|EPI\_ISL\_737955|Original|hCoV-19^^Uganda|Human|Uganda Central Public Health Lab and Uganda Virus Research Institute|MRC/UVRI & LSHTM Uganda\u00a0Research Unit|Cotten|Uganda

>Spike|hCoV-19/Switzerland/VD-ETHZ-100845/2020|2020-03-25|EPI\_ISL\_451792|Original|hCoV-19^^Vaud|Human|Viollier AG|Department of Biosystems Science and Engineering|Nadeau|Switzerland

>Spike|hCoV-19/Germany/HH-hpi-p2496/2020|2020-06-26|EPI\_ISL\_776546|Original|hCoV-19^^Hamburg|Human|University Medical Center Hamburg Eppendorf|Heinrich Pette Institute|Robitaille|Germany

>Spike|hCoV-19/Scotland/QEUH-AD53B6/2020|2020-10-26|EPI\_ISL\_634580|Original|hCoV-19^^Scotland|Human|Lighthouse Lab in Glasgow|Wellcome Sanger Institute for the COVID-19 Genomics UK (COG-UK) consortium|Davies|United Kingdom

>Spike|hCoV-19/England/20130065604/2020|2020-03-21|EPI\_ISL\_423655|Original|hCoV-19^^England|Human|Respiratory Virus Unit|Respiratory Virus Unit|Platt|United Kingdom

>Spike|hCoV-19/Denmark/DCGC-3522/2020|2020-08-31|EPI\_ISL\_616313|Original|hCoV-19^^Midtjylland|Human|Department of Virus and Microbiological Special Diagnostics|Albertsen lab|Michaelsen|Denmark

>Spike|hCoV-19/USA/UT-UPHL-2012337841/2020|2020-08-10|EPI\_ISL\_745892|Original|hCoV-19^^Utah|Human|Ginkgo Bioworks Clinical Laboratory|Utah Public Health Laboratory|Young|USA

>Spike|hCoV-19/Australia/NSW217/2020|2020-03-02|EPI\_ISL\_427644|Original|hCoV-19^^New South Wales|Human|Centre for Infectious Diseases and Microbiology Public Health|NSW Health Pathology - Institute of Clinical Pathology and Medical Research; Westmead Hospital; University of Sydney|Gall|Australia

>Spike|hCoV-19/Singapore/49/2020|2020-03-08|EPI\_ISL\_428828|Original|hCoV-19^^Singapore|Human|National Public Health Laboratory|National Public Health Laboratory|Mak|Singapore

>Spike|hCoV-19/USA/TX-HMH-1341/2020|2020-04-14|EPI\_ISL\_542659|Original|hCoV-19^^Texas|Human|Houston Methodist Hospital|Houston Methodist Hospital|Long|USA

>Spike|hCoV-19/England/OXON-B01A2/2020|2020-00-00|EPI\_ISL\_478862|Original|hCoV-19^^England|Human|Oxford Viromics|COVID-19 Genomics UK (COG-UK) Consortium|Golubchik|United Kingdom

>Spike|hCoV-19/USA/TX-HMH-2720/2020|2020-06-06|EPI\_ISL\_545503|Original|hCoV-19^^Texas|Human|Houston Methodist Hospital|Houston Methodist Hospital|Long|USA

>Spike|hCoV-19/Denmark/DCGC-1588/2020|2020-04-13|EPI\_ISL\_618632|Original|hCoV-19^^Hovedstaden|Human|Department of Virus and Microbiological Special Diagnostics|Albertsen lab|Michaelsen|Denmark

>Spike|hCoV-19/South Africa/KRISP-0475/2020|2020-07-06|EPI\_ISL\_495558|Original|hCoV-19^^KwaZulu-Natal|Human|NHLS-IALCH|KRISP|de Oliveira|South Africa

>Spike|hCoV-19/USA/TX-HMH-MCoV-10649/2020|2020-07-08|EPI\_ISL\_789575|Original|hCoV-19^^Texas|Human|Houston Methodist Hospital|Houston Methodist Hospital|Long|USA

>Spike|hCoV-19/Wales/PHWC-16A971/2020|2020-09-09|EPI\_ISL\_560131|Original|hCoV-19^^Wales|Human|Wales Specialist Virology Centre Sequencing lab|COVID-19 Genomics UK (COG-UK) Consortium|Moore|United Kingdom

>Spike|hCoV-19/Scotland/EDB3588/2020|2020-04-27|EPI\_ISL\_439294|Original|hCoV-19^^Scotland|Human|Virology Department|COVID-19 Genomics UK (COG-UK) Consortium|Williams|United Kingdom

>Spike|hCoV-19/Japan/IC-0081/2020|2020-07-00|EPI\_ISL\_591423|Original|hCoV-19^^Japan|Human|Pathogen Genomics Center|Pathogen Genomics Center|Sekizuka|Japan

>Spike|hCoV-19/Spain/AS-IBV-98006597/2020|2020-03-12|EPI\_ISL\_654641|Original|hCoV-19^^Asturias|Human|Servicio de Microbiolog\u00eda|SeqCOVID-SPAIN consortium/IBV (CSIC) |Comas|Spain

>Spike|hCoV-19/England/CAMC-B0CC50/2020|2020-10-30|EPI\_ISL\_643511|Original|hCoV-19^^England|Human|Lighthouse Lab in Cambridge|Wellcome Sanger Institute for the COVID-19 Genomics UK (COG-UK) Consortium|Davies|United Kingdom

>Spike|hCoV-19/Belgium/reg-0320861/2020|2020-03-20|EPI\_ISL\_734511|Original|hCoV-19^^Genval|Human|UZ Leuven|KU Leuven|Maes|Belgium

>Spike|hCoV-19/South Africa/R10852/2020|2020-06-17|EPI\_ISL\_490310|Original|hCoV-19^^Free State|Human|National Institute for Communicable Diseases of the National Health Laboratory Service|National Institute for Communicable Diseases of the National Health Laboratory Service|Allam|South Africa

>Spike|hCoV-19/India/KA-IB51/2020|2020-06-19|EPI\_ISL\_508329|Original|hCoV-19^^Karnataka|Human|Indian Institute of Science|National Institute of Biomedical Genomics|Maitra|India

>Spike|hCoV-19/England/20194103201/2020|2020-05-05|EPI\_ISL\_465613|Original|hCoV-19^^England|Human|Respiratory Virus Unit|Respiratory Virus Unit|Platt|United Kingdom

>Spike|hCoV-19/England/SHEF-10C6610/2020|2020-12-06|EPI\_ISL\_702487|Original|hCoV-19^^England|Human|Virology Department|COVID-19 Genomics UK (COG-UK) Consortium|de Silva|United Kingdom

>Spike|hCoV-19/South Africa/KRISP-K002386/2020|2020-07-21|EPI\_ISL\_515752|Original|hCoV-19^^KwaZulu-Natal|Human|NHL-S-IALCH|KRISP|de Oliveira|South Africa

>Spike|hCoV-19/Poland/PL\_P1/2020|2020-03-03|EPI\_ISL\_416488|Vero E6|hCoV-19^^Zielonogorskie|Human|ViroGenetics - BSL3 Laboratory of Virology; Human Genome Variation Research Group & Genomics Centre MCB; Bioinformatics Research Group Department of Virology|ViroGenetics - BSL3 Laboratory of Virology; Human Genome Variation Research Group & Genomics Centre MCB; Bioinformatics Research Group Department of Virology||Poland

>Spike|hCoV-19/England/QEUA-9C8584/2020|2020-09-11|EPI\_ISL\_567070|Original|hCoV-19^^England|Human|Lighthouse Lab in Glasgow|Wellcome Sanger Institute for the COVID-19 Genomics UK (COG-UK) consortium|Davies|United Kingdom

>Spike|hCoV-19/Wales/PHWC-48B670/2020|2020-10-31|EPI\_ISL\_665576|Original|hCoV-19^^Wales|Human|Wales Specialist Virology Centre Sequencing lab|COVID-19 Genomics UK (COG-UK) Consortium|Moore|United Kingdom

>Spike|hCoV-19/England/LOND-12624ED/2020|2020-09-27|EPI\_ISL\_594861|Original|hCoV-19^^England|Human|University College London|COVID-19 Genomics UK (COG-UK) Consortium|Roy|United Kingdom

>Spike|hCoV-19/Scotland/QEUA-A219AA/2020|2020-10-01|EPI\_ISL\_598852|Original|hCoV-19^^Scotland|Human|Lighthouse Lab in Glasgow|Wellcome Sanger Institute for the COVID-19 Genomics UK (COG-UK) consortium|Davies|United Kingdom

>Spike|hCoV-19/England/ALDP-9FD683/2020|2020-10-01|EPI\_ISL\_588049|Original|hCoV-19^^England|Human|Lighthouse Lab in Alderley Park|Wellcome Sanger Institute for the COVID-19 Genomics UK (COG-UK) consortium|Davies|United Kingdom

>Spike|hCoV-19/Sweden/20-53293/2020|2020-10-27|EPI\_ISL\_648166|Original|hCoV-19^^Sweden|Human|Eskilstuna|The Public Health Agency of Sweden|Svartstr\u00f6m|Sweden

>Spike|hCoV-19/France/ARA-100617/2020|2020-11-03|EPI\_ISL\_683334|Original|hCoV-19^^Auvergne-Rh\u00f4ne-Alpes|Human|CNR Virus des Infections Respiratoires - France SUD|CNR Virus des Infections Respiratoires - France SUD|Bal|France

>Spike|hCoV-19/Scotland/CVR3174/2020|2020-04-26|EPI\_ISL\_449202|Original|hCoV-19^^Scotland|Human|West of Scotland Specialist Virology Centre|COVID-19 Genomics UK (COG-UK) Consortium|Robertson|United Kingdom

>Spike|hCoV-19/England/QEUA-AA02D5/2020|2020-10-20|EPI\_ISL\_611314|Original|hCoV-19^^England|Human|Lighthouse Lab in Glasgow|Wellcome Sanger Institute for the COVID-19 Genomics UK (COG-UK) consortium|Davies|United Kingdom

>Spike|hCoV-19/England/MILK-B8EA2F/2020|2020-11-13|EPI\_ISL\_674766|Original|hCoV-19^^England|Human|Lighthouse Lab in Milton Keynes|Wellcome Sanger Institute for the COVID-19 Genomics UK (COG-UK) Consortium|Davies|United Kingdom

>Spike|hCoV-19/Switzerland/ZH-ETHZ-250070/2020|2020-08-18|EPI\_ISL\_535595|Original|hCoV-19^^Zurich|Human|Viollier AG|Department of Biosystems Science and Engineering|Nadeau|Switzerland

>Spike|hCoV-19/England/ALDP-AA1447/2020|2020-10-22|EPI\_ISL\_623899|Original|hCoV-19^^England|Human|Lighthouse Lab in Alderley Park|Wellcome Sanger Institute for the COVID-19 Genomics UK (COG-UK) consortium|Davies|United Kingdom

>Spike|hCoV-19/USA/NY-NYCPHL-001081/2020|2020-10-18|EPI\_ISL\_633082|Original|hCoV-19^^New York|Human|DOHMH Morrisania|New York City Public Health Laboratory|Wang|USA

>Spike|hCoV-19/Canada/BC\_04806819/2020|2020-05-00|EPI\_ISL\_477056|Original|hCoV-19^^British Columbia|Human|BCCDC Public Health Laboratory|BCCDC Public Health Laboratory|Harrigan|Canada

>Spike|hCoV-19/England/ALDP-B5C705/2020|2020-11-09|EPI\_ISL\_655640|Original|hCoV-19^^England|Human|Lighthouse Lab in Alderley Park|Wellcome Sanger Institute for the COVID-19 Genomics UK (COG-UK) Consortium|Davies|United Kingdom

>Spike|hCoV-19/USA/WA-UW-24556/2020|2020-08-17|EPI\_ISL\_576485|Original|hCoV-19^^Washington|Human|UW Virology Lab|UW Virology Lab|Roychoudhury|USA

>Spike|hCoV-19/USA/TX-HMH-MCoV-16230/2020|2020-10-30|EPI\_ISL\_785914|Original|hCoV-19^^Texas|Human|Houston Methodist Hospital|Houston Methodist Hospital|Long|USA

>Spike|hCoV-19/England/CAMB-1B97A6/2020|2020-11-04|EPI\_ISL\_664577|Original|hCoV-19^^England|Human|Department of Pathology|COVID-19 Genomics UK (COG-UK) Consortium|Goodfellow|United Kingdom

>Spike|hCoV-19/India/WB-IK7/2020|2020-04-03|EPI\_ISL\_508394|Original|hCoV-19^^West Bengal|Human|Institute of Post Graduate Medical Education & Research|National Institute of Biomedical Genomics|Maitra|India

>Spike|hCoV-19/England/MILK-ACFA32/2020|2020-10-22|EPI\_ISL\_629658|Original|hCoV-19^^England|Human|Lighthouse Lab in Milton Keynes|Wellcome Sanger Institute for the COVID-19 Genomics UK (COG-UK) consortium|Davies|United Kingdom

>Spike|hCoV-19/USA/AZ-TG323186/2020|2020-05-21|EPI\_ISL\_694339|Original|hCoV-19^^Arizona|Human|TGen North|TGen North|French|USA

>Spike|hCoV-19/USA/TX-HMH-994/2020|2020-04-07|EPI\_ISL\_545951|Original|hCoV-19^^Texas|Human|Houston Methodist Hospital|Houston Methodist Hospital|Long|USA

>Spike|hCoV-19/Netherlands/OV-RIVM-20678/2020|2020-12-07|EPI\_ISL\_790747|Original|hCoV-19^^Overijssel|Human|Dutch COVID-19 response team|National Institute for Public Health and the Environment (RIVM)|Meijer|Netherlands

>Spike|hCoV-19/Denmark/DCGC-18645/2020|2020-12-07|EPI\_ISL\_749508|Original|hCoV-19^^Hovedstaden|Human|Department of Virus and Microbiological Special Diagnostics|Albertsen Lab|Michaelsen|Denmark

>Spike|hCoV-19/England/QEUEH-A1ED95/2020|2020-09-29|EPI\_ISL\_587492|Original|hCoV-19^^England|Human|Lighthouse Lab in Glasgow|Wellcome Sanger Institute for the COVID-19 Genomics UK (COG-UK) consortium|Davies|United Kingdom

>Spike|hCoV-19/Canada/BC-BCCDC-7309/2020|2020-00-00|EPI\_ISL\_740676|Original|hCoV-19^^British Columbia|Human|BCCDC Public Health Laboratory|BCCDC Public Health Laboratory|Prystajecky|Canada

>Spike|hCoV-19/England/CAMC-B789FE/2020|2020-11-12|EPI\_ISL\_668041|Original|hCoV-19^^England|Human|Lighthouse Lab in Cambridge|Wellcome Sanger Institute for the COVID-19 Genomics UK (COG-UK) Consortium|Davies|United Kingdom

>Spike|hCoV-19/England/QEUEH-C3317E/2020|2020-12-11|EPI\_ISL\_733951|Original|hCoV-19^^England|Human|Lighthouse Lab in Glasgow|Wellcome Sanger Institute for the COVID-19 Genomics UK (COG-UK) Consortium|Davies|United Kingdom

>Spike|hCoV-19/England/ALDP-A69223/2020|2020-10-10|EPI\_ISL\_608922|Original|hCoV-19^^England|Human|Lighthouse Lab in Alderley Park|Wellcome Sanger Institute for the COVID-19 Genomics UK (COG-UK) consortium|Davies|United Kingdom

>Spike|hCoV-19/South Africa/KRISP-K005313/2020|2020-10-29|EPI\_ISL\_678606|Original|hCoV-19^^KwaZulu-Natal|Human|NHLS-IALCH|KRISP|de Oliveira|South Africa

>Spike|hCoV-19/Singapore/1161/2020|2020-04-03|EPI\_ISL\_648088|Original|hCoV-19^^Singapore|Human|Department of Laboratory Medicine|Department of Laboratory Medicine|Chen|Singapore

>Spike|hCoV-19/USA/MI-MDHHS-SC20150/2020|2020-03-13|EPI\_ISL\_436813|Original|hCoV-19^^Michigan|Human|Michigan Department of Health and Human Services|Michigan Department of Health and Human Services|Blankenship|USA

>Spike|hCoV-19/Australia/VIC5839/2020|2020-07-21|EPI\_ISL\_518633|Original|hCoV-19^^Victoria|Human|Microbiological Diagnostic Unit - Public Health Laboratory (MDU-PHL)|MDU-PHL|Schultz|Australia

>Spike|hCoV-19/Japan/PG-7670/2020|2020-08-00|EPI\_ISL\_686772|Original|hCoV-19^^Japan|Human|Chiba Prefectural Institute of Public Health|Pathogen Genomics Center|Sekizuka|Japan

>Spike|hCoV-19/USA/OR-OHSU-2890/2020|2020-09-04|EPI\_ISL\_667391|Original|hCoV-19^^Oregon|Human|OHSU Lab Services Molecular Microbiology Lab|Oregon SARS-CoV-2 Genome Sequencing Center|O'Roak|USA

>Spike|hCoV-19/Denmark/DCGC-1633/2020|2020-04-06|EPI\_ISL\_619185|Original|hCoV-19^^Hovedstaden|Human|Department of Virus and Microbiological Special Diagnostics|Albertsen lab|Michaelsen|Denmark

>Spike|hCoV-19/USA/WI-WSLH-200184/2020|2020-04-06|EPI\_ISL\_578409|Original|hCoV-19^^Wisconsin|Human|Wisconsin State Laboratory of Hygiene Communicable Disease Division|Wisconsin State Laboratory of Hygiene Communicable Disease Division|Florek|USA

>Spike|hCoV-19/England/CAMC-A584F4/2020|2020-10-06|EPI\_ISL\_597135|Original|hCoV-19^^England|Human|Lighthouse Lab in Cambridge|Wellcome Sanger Institute for the COVID-19 Genomics UK (COG-UK) consortium|Davies|United Kingdom

>Spike|hCoV-19/Japan/PG-3003/2020|2020-04-00|EPI\_ISL\_691127|Original|hCoV-19^^Japan|Human|Pathogen Genomics Center|Pathogen Genomics Center|Sekizuka|Japan

>Spike|hCoV-19/Denmark/DCGC-1873/2020|2020-07-13|EPI\_ISL\_622599|Original|hCoV-19^^Hovedstaden|Human|Department of Virus and Microbiological Special Diagnostics|Albertsen lab|Michaelsen|Denmark

>Spike|hCoV-19/Australia/VIC160/2020|2020-03-18|EPI\_ISL\_419857|Original|hCoV-19^^Victoria|Human|Victorian Infectious Diseases Reference Laboratory (VIDRL)|Victorian Infectious Diseases Reference Laboratory and Microbiological Diagnostic Unit Public Health Laboratory|Schultz|Australia

>Spike|hCoV-19/Russia/StPetersburg-RII8417S/2020|2020-04-22|EPI\_ISL\_450283|Original|hCoV-19^^Saint Petersburg|Human|WHO National Influenza Centre Russian Federation|WHO National Influenza Centre Russian Federation|Komissarov|Russia

>Spike|hCoV-19/England/ALDP-A501F5/2020|2020-10-07|EPI\_ISL\_597862|Original|hCoV-19^^England|Human|Lighthouse Lab in Alderley Park|Wellcome Sanger Institute for the COVID-19 Genomics UK (COG-UK) consortium|Davies|United Kingdom

>Spike|hCoV-19/Finland/18SS6E7/2020|2020-09-18|EPI\_ISL\_756291|Original|hCoV-19^^Uusimaa|Human|Department of Virology and Immunology|Department of Virology|Smura|Finland

>Spike|hCoV-19/USA/SC-20-0946-T14/2020|2020-06-24|EPI\_ISL\_516751|Original|hCoV-19^^South Carolina|Human|van Bakel Laboratory|van Bakel Laboratory|van Bakel|USA

>Spike|hCoV-19/Netherlands/NH-RIVM-20018/2020|2020-11-21|EPI\_ISL\_723217|Original|hCoV-19^^Noord-Holland|Human|Dutch COVID-19 response team|National Institute for Public Health and the Environment (RIVM)|Meijer|Netherlands

>Spike|hCoV-19/Denmark/DCGC-20244/2020|2020-11-30|EPI\_ISL\_747539|Original|hCoV-19^^Hovedstaden|Human|Department of Virus and Microbiological Special Diagnostics|Albertsen Lab|Michaelsen|Denmark

>Spike|hCoV-19/Russia/Khabarovsk-71403/2020|2020-03-19|EPI\_ISL\_428880|Vero|hCoV-19^^Khabarovsk|Human|State Research Center of Virology and Biotechnology VECTOR|State Research Center of Virology and Biotechnology VECTOR|Shvalov|Russia

>Spike|hCoV-19/Denmark/DCGC-761/2020|2020-03-09|EPI\_ISL\_614752|Original|hCoV-19^^Syddanmark|Human|Department of Virus and Microbiological Special Diagnostics|Albertsen lab|Michaelsen|Denmark

>Spike|hCoV-19/England/MILK-B8F262/2020|2020-11-13|EPI\_ISL\_675331|Original|hCoV-19^^England|Human|Lighthouse Lab in Milton Keynes|Wellcome Sanger Institute for the COVID-19 Genomics UK (COG-UK) Consortium|Davies|United Kingdom

>Spike|hCoV-19/Australia/NSW645/2020|2020-07-12|EPI\_ISL\_498764|Original|hCoV-19^^New South Wales|Human|Sydney South West Pathology Service (SSWPS) - Liverpool Hospital -

NSW Health Pathology|NSW Health Pathology - Institute of Clinical Pathology and Medical Research; Westmead Hospital; University of Sydney|Gall|Australia  
>Spike|hCoV-19/USA/WA-UW-7776/2020|2020-04-19|EPI\_ISL\_570193|Original|hCoV-19^^Washington|Human|UW Virology Lab|UW Virology Lab|Roychoudhury|USA  
>Spike|hCoV-19/England/CAMC-CB8B82/2020|2020-12-19|EPI\_ISL\_778134|Original|hCoV-19^^England|Human|Lighthouse Lab in Cambridge|Wellcome Sanger Institute for the COVID-19 Genomics UK (COG-UK) Consortium|Davies|United Kingdom  
>Spike|hCoV-19/England/BRIS-12C498/2020|2020-05-12|EPI\_ISL\_469493|Original|hCoV-19^^England|Human|PHE South West Regional Laboratory|Wellcome Sanger Institute for the COVID-19 Genomics UK (COG-UK) consortium|Davies|United Kingdom  
>Spike|hCoV-19/Wales/PHWC-1661E6/2020|2020-06-13|EPI\_ISL\_490849|Original|hCoV-19^^Wales|Human|Wales Specialist Virology Centre Sequencing lab|COVID-19 Genomics UK (COG-UK) Consortium|Moore|United Kingdom  
>Spike|hCoV-19/Chile/RM-112467/2020|2020-06-28|EPI\_ISL\_746585|Original|hCoV-19^^Region Metropolitana de Santiago|Human|Genetica Molecular and Subdepartamento de Virologia ISP Chile|Instituto de Salud Publica de Chile|Tognarelli|Chile  
>Spike|hCoV-19/Spain/IB-IBV-99011588/2020|2020-12-08|EPI\_ISL\_779862|Original|hCoV-19^^Balear Islands|Human|Servicio de Microbiolog\u00eda|SeqCOVID-SPAIN consortium/IBV (CSIC) |Comas|Spain  
>Spike|hCoV-19/Sweden/20-08106/2020|2020-03-10|EPI\_ISL\_454477|Original|hCoV-19^^Stockholm|Human|Karolinska Universitetslaboratoriet|The Public Health Agency of Sweden|Svartstr\u00f6m|Sweden  
>Spike|hCoV-19/Wales/PHWC-16BA04/2020|2020-09-14|EPI\_ISL\_573929|Original|hCoV-19^^Wales|Human|Wales Specialist Virology Centre Sequencing lab|COVID-19 Genomics UK (COG-UK) Consortium|Moore|United Kingdom  
>Spike|hCoV-19/Scotland/EDB10517/2020|2020-11-29|EPI\_ISL\_705775|Original|hCoV-19^^Scotland|Human|Virology Department|COVID-19 Genomics UK (COG-UK) Consortium|McHugh|United Kingdom  
>Spike|hCoV-19/England/MILK-BB0365/2020|2020-11-17|EPI\_ISL\_720347|Original|hCoV-19^^England|Human|Lighthouse Lab in Milton Keynes|Wellcome Sanger Institute for the COVID-19 Genomics UK (COG-UK) Consortium|Davies|United Kingdom  
>Spike|hCoV-19/USA/NM-DOH-2020313085/2020|2020-08-26|EPI\_ISL\_574262|Original|hCoV-19^^New Mexico|Human|New Mexico Department of Health Scientific Laboratory|New Mexico Department of Health Scientific Laboratory|Johnson|USA  
>Spike|hCoV-19/England/204561386/2020|2020-11-04|EPI\_ISL\_678684|Original|hCoV-19^^England|Human|Respiratory Virus Unit|COVID-19 Genomics UK (COG-UK) Consortium|Platt|United Kingdom  
>Spike|hCoV-19/Poland/PL\_P45/2020|2020-04-13|EPI\_ISL\_492070|Original|hCoV-19^^Mazowieckie|Human|1. ViroGenetics - BSL3 Laboratory of Virology|1. ViroGenetics - BSL3 Laboratory of Virology|Pyrz|Poland  
>Spike|hCoV-19/USA/HI-H200680/2020|2020-12-01|EPI\_ISL\_753203|Original|hCoV-19^^Hawaii|Human|State Laboratories Division|State Laboratories Division|Sultana|USA  
>Spike|hCoV-19/South Africa/KRISP-K002579/2020|2020-07-29|EPI\_ISL\_535444|Original|hCoV-19^^KwaZulu-Natal|Human|NHLS-IALCH|KRISP|de Oliveira|South Africa  
>Spike|hCoV-19/South Africa/KRISP-K004555/2020|2020-10-19|EPI\_ISL\_660252|Original|hCoV-19^^KwaZulu-Natal|Human|NHLS-IALCH|KRISP|de Oliveira|South Africa  
>Spike|hCoV-19/USA/CA-ALSR-1309/2020|2020-05-11|EPI\_ISL\_494488|Original|hCoV-19^^California|Human|San Diego County Public Health Laboratory|Andersen lab at Scripps Research|Gangavarapu|USA  
>Spike|hCoV-19/England/ALDP-B63AD5/2020|2020-11-09|EPI\_ISL\_656521|Original|hCoV-19^^England|Human|Lighthouse Lab in Alderley Park|Wellcome Sanger Institute for the COVID-19 Genomics UK (COG-UK) Consortium|Davies|United Kingdom  
>Spike|hCoV-19/Australia/NSW1130/2020|2020-09-05|EPI\_ISL\_593743|Original|hCoV-19^^New South Wales|Human|South Eastern Area Laboratory Services (SEALS)|NSW Health Pathology - Institute of Clinical Pathology and Medical Research; Westmead Hospital; University of Sydney|Gall|Australia  
>Spike|hCoV-19/England/20140003204/2020|2020-03-28|EPI\_ISL\_465870|Original|hCoV-19^^England|Human|Respiratory Virus Unit|Respiratory Virus Unit|Platt|United Kingdom

>Spike|hCoV-19/Australia/VIC760/2020|2020-03-29|EPI\_ISL\_427036|Original|hCoV-19^^Victoria|Human|Victorian Infectious Diseases Reference Laboratory (VIDRL)|Microbiological Diagnostic Unit Public Health Laboratory and Victorian Infectious Diseases Reference Laboratory|Schultz|Australia

>Spike|hCoV-19/England/CAMB-75E2A/2020|2020-03-29|EPI\_ISL\_438344|Original|hCoV-19^^England|Human|Department of Pathology|Wellcome Sanger Institute for the COVID-19 Genomics UK (COG-UK) consortium|Amato|United Kingdom

>Spike|hCoV-19/Wales/PHWC-48F1A8/2020|2020-11-09|EPI\_ISL\_681054|Original|hCoV-19^^Wales|Human|Wales Specialist Virology Centre Sequencing lab|COVID-19 Genomics UK (COG-UK) Consortium|Moore|United Kingdom

>Spike|hCoV-19/England/QEUH-9D089F/2020|2020-09-16|EPI\_ISL\_589873|Original|hCoV-19^^England|Human|Lighthouse Lab in Glasgow|Wellcome Sanger Institute for the COVID-19 Genomics UK (COG-UK) consortium|Davies|United Kingdom

>Spike|hCoV-19/Denmark/DCGC-22100/2020|2020-12-14|EPI\_ISL\_757818|Original|hCoV-19^^Hovedstaden|Human|Department of Virus and Microbiological Special Diagnostics|Albertsen Lab|Michaelsen|Denmark

>Spike|hCoV-19/England/LIVE-DC2CFA/2020|2020-11-25|EPI\_ISL\_705845|Original|hCoV-19^^England|Human|Liverpool Clinical Laboratories|COVID-19 Genomics UK (COG-UK) Consortium|Haldenby|United Kingdom

>Spike|hCoV-19/England/LOND-D3947/2020|2020-04-03|EPI\_ISL\_441011|Original|hCoV-19^^England|Human|University College London|COVID-19 Genomics UK (COG-UK) Consortium|Roy|United Kingdom

>Spike|hCoV-19/USA/UT-UPHL-08764/2020|2020-08-13|EPI\_ISL\_525350|Original|hCoV-19^^Utah|Human|Utah Public Health Laboratory|Utah Public Health Laboratory|Young|USA

>Spike|hCoV-19/England/ALDP-C063D8/2020|2020-12-06|EPI\_ISL\_709499|Original|hCoV-19^^England|Human|Lighthouse Lab in Alderley Park|Wellcome Sanger Institute for the COVID-19 Genomics UK (COG-UK) Consortium|Davies|United Kingdom

>Spike|hCoV-19/England/OXON-B2E12/2020|2020-03-31|EPI\_ISL\_534817|Original|hCoV-19^^England|Human|Oxford Viromics|COVID-19 Genomics UK (COG-UK) Consortium|Golubchik|United Kingdom

>Spike|hCoV-19/Wales/PHWC-24B32/2020|2020-03-20|EPI\_ISL\_419487|Original|hCoV-19^^Wales|Human|Wales Specialist Virology Centre|Public Health Wales Microbiology Cardiff|Moore|United Kingdom

>Spike|hCoV-19/USA/UT-01694/2020|2020-04-13|EPI\_ISL\_454715|Original|hCoV-19^^Utah|Human|Utah Public Health Laboratory|Utah Public Health Laboratory|Young|USA

>Spike|hCoV-19/Australia/VIC11645/2020|2020-08-14|EPI\_ISL\_641029|Original|hCoV-19^^Victoria|Human|Microbiological Diagnostic Unit - Public Health Laboratory (MDU-PHL)|MDU-PHL|Schultz|Australia

>Spike|hCoV-19/USA/TX-HMH-MCoV-18879/2020|2020-11-23|EPI\_ISL\_785192|Original|hCoV-19^^Texas|Human|Houston Methodist Hospital|Houston Methodist Hospital|Long|USA

>Spike|hCoV-19/England/QEUH-961A15/2020|2020-08-03|EPI\_ISL\_537010|Original|hCoV-19^^England|Human|Lighthouse Lab in Glasgow|Wellcome Sanger Institute for the COVID-19 Genomics UK (COG-UK) consortium|Davies|United Kingdom

>Spike|hCoV-19/India/TN-NCDC-02332/2020|2020-03-29|EPI\_ISL\_435096|Original|hCoV-19^^Tamil Nadu|Human|National Centre for Disease control (NCDC)|NCDC/CSIR-IGIB|Faruq|India

>Spike|hCoV-19/Sweden/20-50181/2020|2020-03-08|EPI\_ISL\_429154|Original|hCoV-19^^Varmland|Human|Klinisk mikrobiologi Orebro|The Public Health Agency of Sweden|Svartstr\u00f6m|Sweden

>Spike|hCoV-19/USA/CA-IGI-0639/2020|2020-08-03|EPI\_ISL\_677855|Original|hCoV-19^^California|Human|Innovative Genomics Institute|Innovative Genomics Institute|Wyman|USA

>Spike|hCoV-19/Hong Kong/VM20118387/2020|2020-09-05|EPI\_ISL\_730582|Original|hCoV-19^^Hong Kong|Human|Hong Kong Adventist Hospital \u2013 Tsuen Wan|Hong Kong Department of Health|Mak|China

>Spike|hCoV-19/England/CAMB-79679/2020|2020-04-03|EPI\_ISL\_441815|Original|hCoV-19^^England|Human|Department of Pathology|Wellcome Sanger Institute for the COVID-19 Genomics UK (COG-UK) consortium|Amato|United Kingdom

>Spike|hCoV-19/USA/MI-UM-10036847408/2020|2020-11-09|EPI\_ISL\_728451|Original|hCoV-19^^Michigan|Human|University of Michigan Clinical Microbiology Laboratory|Lauring Lab|Valesano|USA

>Spike|hCoV-19/Denmark/DCGC-12719/2020|2020-11-16|EPI\_ISL\_682900|Original|hCoV-19^^Hovedstaden|Human|Department of Virus and Microbiological Special Diagnostics|Albertsen Lab|Michaelsen|Denmark

>Spike|hCoV-19/England/QEUA-98F9F6/2020|2020-08-26|EPI\_ISL\_540029|Original|hCoV-19^^England|Human|Lighthouse Lab in Glasgow|Wellcome Sanger Institute for the COVID-19 Genomics UK (COG-UK) consortium|Davies|United Kingdom

>Spike|hCoV-19/USA/MN-MDH-1845/2020|2020-09-29|EPI\_ISL\_602980|Original|hCoV-19^^Minnesota|Human|Minnesota Department of Health|Minnesota Department of Health|Garfin|USA

>Spike|hCoV-19/Australia/VIC511/2020|2020-03-23|EPI\_ISL\_426781|Original|hCoV-19^^Victoria|Human|Victorian Infectious Diseases Reference Laboratory (VIDRL)|Microbiological Diagnostic Unit Public Health Laboratory and Victorian Infectious Diseases Reference Laboratory|Schultz|Australia

>Spike|hCoV-19/England/ALDP-BE8F42/2020|2020-12-03|EPI\_ISL\_708924|Original|hCoV-19^^England|Human|Lighthouse Lab in Alderley Park|Wellcome Sanger Institute for the COVID-19 Genomics UK (COG-UK) Consortium|Davies|United Kingdom

>Spike|hCoV-19/Northern Ireland/QEUA-961BF4/2020|2020-08-02|EPI\_ISL\_537143|Original|hCoV-19^^Northern Ireland|Human|Lighthouse Lab in Glasgow|Wellcome Sanger Institute for the COVID-19 Genomics UK (COG-UK) consortium|Davies|United Kingdom

>Spike|hCoV-19/England/NORT-28943E/2020|2020-03-29|EPI\_ISL\_458595|Original|hCoV-19^^England|Human|NU-OMICS DNA Sequencing research facility|Wellcome Sanger Institute for the COVID-19 Genomics UK (COG-UK) consortium|Davies|United Kingdom

>Spike|hCoV-19/USA/NY-NYCPHL-000969/2020|2020-08-25|EPI\_ISL\_633000|Original|hCoV-19^^New York|Human|DOHMH Jamaica|New York City Public Health Laboratory|Wang|USA

>Spike|hCoV-19/Poland/Slas2/2020|2020-05-05|EPI\_ISL\_451656|Original|hCoV-19^^Slask|Human|State Sanitary Inspectorate|Laboratory of Recombinant Vaccines|Rabalski|Poland

>Spike|hCoV-19/England/LEED-2A8AA0/2020|2020-04-02|EPI\_ISL\_539021|Original|hCoV-19^^England|Human|Leeds Teaching Hospitals NHS Trust and Public Health England|Wellcome Sanger Institute for the COVID-19 Genomics UK (COG-UK) consortium|Davies|United Kingdom

>Spike|hCoV-19/Sweden/20-50371/2020|2020-03-16|EPI\_ISL\_475138|Original|hCoV-19^^Kalmar|Human|Kalmar klinisk mikrobiologi|The Public Health Agency of Sweden|Svartstr\u00f6m|Sweden

>Spike|hCoV-19/USA/MI-MDHHS-SC20983/2020|2020-05-27|EPI\_ISL\_507770|Original|hCoV-19^^Michigan|Human|Michigan Department of Health and Human Services|Michigan Department of Health and Human Services|Blankenship|USA

>Spike|hCoV-19/Scotland/EDB1580/2020|2020-04-13|EPI\_ISL\_433085|Original|hCoV-19^^Scotland|Human|Virology Department|COVID-19 Genomics UK (COG-UK) Consortium|Williams|United Kingdom

>Spike|hCoV-19/Latvia/015/2020|2020-03-23|EPI\_ISL\_437094|Original|hCoV-19^^Latvia|Human|Latvijas Infektolo\u0123ijas centrs|Latvian Biomedical Research and Study Centre|Zrel\u0113vs|Latvia

>Spike|hCoV-19/England/CAMC-CFC33F/2020|2020-12-21|EPI\_ISL\_781688|Original|hCoV-19^^England|Human|Lighthouse Lab in Cambridge|Wellcome Sanger Institute for the COVID-19 Genomics UK (COG-UK) Consortium|Davies|United Kingdom

>Spike|hCoV-19/England/MILK-B046E1/2020|2020-10-24|EPI\_ISL\_652166|Original|hCoV-19^^England|Human|Department of Pathology|COVID-19 Genomics UK (COG-UK) Consortium|Goodfellow|United Kingdom

>Spike|hCoV-19/Belgium/CGP-0325334/2020|2020-03-25|EPI\_ISL\_462188|Original|hCoV-19^^Bottelare|Human|KU Leuven|KU Leuven|Maes|Belgium

>Spike|hCoV-19/USA/TX-HMH-MCoV-13487/2020|2020-08-21|EPI\_ISL\_788616|Original|hCoV-19^^Texas|Human|Houston Methodist Hospital|Houston Methodist Hospital|Long|USA

>Spike|hCoV-19/England/LIVE-9B5A1/2020|2020-04-02|EPI\_ISL\_449465|Original|hCoV-19^^England|Human|Liverpool Clinical Laboratories|COVID-19 Genomics UK (COG-UK) Consortium|Haldenby|United Kingdom



>Spike|hCoV-19/Germany/HH-hpi-p1834/2020|2020-03-22|EPI\_ISL\_776187|Original|hCoV-19^^Hamburg|Human|University Medical Center Hamburg Eppendorf|Heinrich Pette Institute|Robitaille|Germany

>Spike|hCoV-19/England/QEUA-CC301C/2020|2020-12-21|EPI\_ISL\_778058|Original|hCoV-19^^England|Human|Lighthouse Lab in Glasgow|Wellcome Sanger Institute for the COVID-19 Genomics UK (COG-UK) Consortium|Davies|United Kingdom

>Spike|hCoV-19/Scotland/CVR5544/2020|2020-10-26|EPI\_ISL\_651533|Original|hCoV-19^^Scotland|Human|West of Scotland Specialist Virology Centre|COVID-19 Genomics UK (COG-UK) Consortium|Robertson|United Kingdom

>Spike|hCoV-19/Denmark/DCGC-2064/2020|2020-07-13|EPI\_ISL\_618308|Original|hCoV-19^^Hovedstaden|Human|Department of Virus and Microbiological Special Diagnostics|Albertsen lab|Michaelsen|Denmark

>Spike|hCoV-19/Netherlands/GE-EMC-356/2020|2020-10-21|EPI\_ISL\_722522|Original|hCoV-19^^Gelderland|Human|Dutch COVID-19 response team|Erasmus Medical Center|Oude Munnink|Netherlands

>Spike|hCoV-19/England/ALDP-C88426/2020|2020-12-17|EPI\_ISL\_762562|Original|hCoV-19^^England|Human|Lighthouse Lab in Alderley Park|Wellcome Sanger Institute for the COVID-19 Genomics UK (COG-UK) Consortium|Davies|United Kingdom

>Spike|hCoV-19/England/ALDP-A2EE53/2020|2020-10-05|EPI\_ISL\_587115|Original|hCoV-19^^England|Human|Lighthouse Lab in Alderley Park|Wellcome Sanger Institute for the COVID-19 Genomics UK (COG-UK) consortium|Davies|United Kingdom

>Spike|hCoV-19/England/MILK-B04C85/2020|2020-10-23|EPI\_ISL\_651036|Original|hCoV-19^^England|Human|Department of Pathology|COVID-19 Genomics UK (COG-UK) Consortium|Goodfellow|United Kingdom

>Spike|hCoV-19/New Zealand/20VR1290/2020|2020-03-21|EPI\_ISL\_456212|Original|hCoV-19^^Auckland|Human|LabPLUS|Institute of Environmental Science and Research (ESR)|de Ligt|New Zealand

>Spike|hCoV-19/Japan/PG-6012/2020|2020-07-00|EPI\_ISL\_689125|Original|hCoV-19^^Japan|Human|Pathogen Genomics Center|Pathogen Genomics Center|Sekizuka|Japan

>Spike|hCoV-19/England/MILK-9570B6/2020|2020-06-12|EPI\_ISL\_554294|Original|hCoV-19^^England|Human|Lighthouse Lab in Milton Keynes|Wellcome Sanger Institute for the COVID-19 Genomics UK (COG-UK) consortium|Davies|United Kingdom

>Spike|hCoV-19/England/QEUA-A4C9F4/2020|2020-10-05|EPI\_ISL\_628586|Original|hCoV-19^^England|Human|Oxford Viromics|COVID-19 Genomics UK (COG-UK) Consortium|Golubchik|United Kingdom

>Spike|hCoV-19/England/CAMC-BC0BB5/2020|2020-11-22|EPI\_ISL\_705107|Original|hCoV-19^^England|Human|Lighthouse Lab in Cambridge|Wellcome Sanger Institute for the COVID-19 Genomics UK (COG-UK) Consortium|Davies|United Kingdom

>Spike|hCoV-19/USA/WA-UW-2305/2020|2020-03-30|EPI\_ISL\_485982|Original|hCoV-19^^Washington|Human|UW Virology Lab|UW Virology Lab|Roychoudhury|USA

>Spike|hCoV-19/Wales/PHWC-2CA88/2020|2020-04-01|EPI\_ISL\_445942|Original|hCoV-19^^Wales|Human|Wales Specialist Virology Centre|Public Health Wales Microbiology Cardiff|Moore|United Kingdom

>Spike|hCoV-19/Scotland/EDB7746/2020|2020-09-09|EPI\_ISL\_540885|Original|hCoV-19^^Scotland|Human|Virology Department|COVID-19 Genomics UK (COG-UK) Consortium|Williams|United Kingdom

>Spike|hCoV-19/USA/UT-UPHL-04311\_2/2020|2020-05-15|EPI\_ISL\_591302|Original|hCoV-19^^Utah|Human|Utah Public Health Laboratory|Utah Public Health Laboratory|Young|USA

>Spike|hCoV-19/England/CAMC-A64853/2020|2020-10-10|EPI\_ISL\_608908|Original|hCoV-19^^England|Human|Lighthouse Lab in Cambridge|Wellcome Sanger Institute for the COVID-19 Genomics UK (COG-UK) consortium|Davies|United Kingdom

>Spike|hCoV-19/England/QEUA-B2BF52/2020|2020-11-04|EPI\_ISL\_680040|Original|hCoV-19^^England|Human|Department of Pathology|COVID-19 Genomics UK (COG-UK) Consortium|Goodfellow|United Kingdom

>Spike|hCoV-19/Wales/PHWC-489065/2020|2020-11-02|EPI\_ISL\_639530|Original|hCoV-19^^Wales|Human|Wales Specialist Virology Centre Sequencing lab|COVID-19 Genomics UK (COG-UK) Consortium|Moore|United Kingdom

>Spike|hCoV-19/England/LOND-12D4CFD/2020|2020-10-09|EPI\_ISL\_679570|Original|hCoV-19^^England|Human|University College London|COVID-19 Genomics UK (COG-UK) Consortium|Roy|United Kingdom

>Spike|hCoV-19/mink/Denmark/AL25-Farm1/2020|2020-06-14|EPI\_ISL\_626347|Original|hCoV-19^^Denmark|Neovison vison|Statens Serum Institute|Statens Serum Institute|Rasmussen|Denmark

>Spike|hCoV-19/USA/WA-S2262/2020|2020-06-10|EPI\_ISL\_497690|Original|hCoV-19^^Washington|Human|Washington State Department of Health|Seattle Flu Study|Lee|USA

>Spike|hCoV-19/England/MILK-9D4E5D/2020|2020-09-19|EPI\_ISL\_601699|Original|hCoV-19^^England|Human|Lighthouse Lab in Milton Keynes|Wellcome Sanger Institute for the COVID-19 Genomics UK (COG-UK) consortium|Davies|United Kingdom

>Spike|hCoV-19/USA/WI-GMF-M00026/2020|2020-08-02|EPI\_ISL\_547676|Original|hCoV-19^^Wisconsin|Human|Gundersen Clinical Microbiology Laboratory|Kabara Cancer Research Institute|Kenny|USA

>Spike|hCoV-19/England/MILK-A7D013/2020|2020-10-13|EPI\_ISL\_606485|Original|hCoV-19^^England|Human|Lighthouse Lab in Milton Keynes|Wellcome Sanger Institute for the COVID-19 Genomics UK (COG-UK) consortium|Davies|United Kingdom

>Spike|hCoV-19/Wales/PHWC-16B7C1/2020|2020-09-14|EPI\_ISL\_573903|Original|hCoV-19^^Wales|Human|Wales Specialist Virology Centre Sequencing lab|COVID-19 Genomics UK (COG-UK) Consortium|Moore|United Kingdom

>Spike|hCoV-19/Australia/NSW1027/2020|2020-03-15|EPI\_ISL\_593756|Original|hCoV-19^^New South Wales|Human|Sydney South West Pathology Service (SSWPS) - Liverpool Hospital - NSW Health Pathology|NSW Health Pathology - Institute of Clinical Pathology and Medical Research; Westmead Hospital; University of Sydney|Gall|Australia

>Spike|hCoV-19/Scotland/GCVR-16FBF/2020|2020-03-21|EPI\_ISL\_489603|Original|hCoV-19^^Scotland|Human|NHSGGC West of Scotland Specialist Virology Centre / MRC-University of Glasgow Centre for Virus Research|Wellcome Sanger Institute for the COVID-19 Genomics UK (COG-UK) consortium|Davies|United Kingdom

>Spike|hCoV-19/USA/UT-UPHL-201229777/2020|2020-11-27|EPI\_ISL\_746940|Original|hCoV-19^^Utah|Human|Utah Public Health Laboratory|Utah Public Health Laboratory|Gallagher|USA

>Spike|hCoV-19/England/204561543/2020|2020-11-05|EPI\_ISL\_678691|Original|hCoV-19^^England|Human|Respiratory Virus Unit|COVID-19 Genomics UK (COG-UK) Consortium|Platt|United Kingdom

>Spike|hCoV-19/England/MILK-B8D158/2020|2020-11-13|EPI\_ISL\_674047|Original|hCoV-19^^England|Human|Lighthouse Lab in Milton Keynes|Wellcome Sanger Institute for the COVID-19 Genomics UK (COG-UK) Consortium|Davies|United Kingdom

>Spike|hCoV-19/England/BRIS-1854239/2020|2020-04-28|EPI\_ISL\_492385|Original|hCoV-19^^England|Human|PHE South West Regional Laboratory|Wellcome Sanger Institute for the COVID-19 Genomics UK (COG-UK) consortium|Davies|United Kingdom

>Spike|hCoV-19/England/QEUA-B31AA3/2020|2020-11-04|EPI\_ISL\_646220|Original|hCoV-19^^England|Human|Lighthouse Lab in Glasgow|Wellcome Sanger Institute for the COVID-19 Genomics UK (COG-UK) Consortium|Davies|United Kingdom

>Spike|hCoV-19/Argentina/Heritas-HG023/2020|2020-05-26|EPI\_ISL\_615121|Original|hCoV-19^^Ciudad Autonoma de Buenos Aires|Human|Hospital de Pediatr\u00eda \Prof. Dr. Juan P Garrahan|Heritas|Pereyra|Argentina

>Spike|hCoV-19/Japan/PG-4059/2020|2020-07-00|EPI\_ISL\_692300|Original|hCoV-19^^Japan|Human|Sakai City Institute of Public Health|Pathogen Genomics Center|Sekizuka|Japan

>Spike|hCoV-19/USA/MA-MASPHL-00866/2020|2020-05-18|EPI\_ISL\_692859|Original|hCoV-19^^Massachusetts|Human|Massachusetts State Public Health Laboratory|Massachusetts State Public Health Laboratory|Lang|USA

>Spike|hCoV-19/USA/NM-DOH-2020317191/2020|2020-08-26|EPI\_ISL\_732726|Original|hCoV-19^^New Mexico|Human|New Mexico Department of Health Scientific Laboratory|New Mexico Department of Health Scientific Laboratory|Johnson|USA

>Spike|hCoV-19/England/OXON-AF513/2020|2020-04-13|EPI\_ISL\_478747|Original|hCoV-19^^England|Human|Oxford Viromics|COVID-19 Genomics UK (COG-UK) Consortium|Golubchik|United Kingdom

>Spike|hCoV-19/England/QEUA-98F7B0/2020|2020-08-27|EPI\_ISL\_540081|Original|hCoV-19^^England|Human|Lighthouse Lab in Glasgow|Wellcome Sanger Institute for the COVID-19 Genomics UK (COG-UK) consortium|Davies|United Kingdom

>Spike|hCoV-19/England/QEUA-B68A76/2020|2020-11-11|EPI\_ISL\_654964|Original|hCoV-19^^England|Human|Lighthouse Lab in Glasgow|Wellcome Sanger Institute for the COVID-19 Genomics UK (COG-UK) Consortium|Davies|United Kingdom

>Spike|hCoV-19/England/ALDP-CB68C9/2020|2020-12-17|EPI\_ISL\_761122|Original|hCoV-19^^England|Human|Lighthouse Lab in Alderley Park|Wellcome Sanger Institute for the COVID-19 Genomics UK (COG-UK) Consortium|Davies|United Kingdom

>Spike|hCoV-19/Netherlands/NB-EMC-292/2020|2020-08-24|EPI\_ISL\_577841|Original|hCoV-19^^Noord Brabant|Human|Dutch COVID-19 response team|Erasmus Medical Center|Oude Munnink|Netherlands

>Spike|hCoV-19/France/PAC-IHU-1519/2020|2020-08-12|EPI\_ISL\_569185|Original|hCoV-19^^Provence-Alpes-C\u00f4te-d\u00a9Azur|Human|MEPHI|MEPHI|Levasseur|France

>Spike|hCoV-19/England/204590468/2020|2020-11-06|EPI\_ISL\_686556|Original|hCoV-19^^England|Human|Respiratory Virus Unit|COVID-19 Genomics UK (COG-UK) Consortium|Platt|United Kingdom

>Spike|hCoV-19/Scotland/EDB6261/2020|2020-06-02|EPI\_ISL\_478242|Original|hCoV-19^^Scotland|Human|Virology Department|COVID-19 Genomics UK (COG-UK) Consortium|Williams|United Kingdom

>Spike|hCoV-19/Ireland/MN-NVRL-73IRL72912/2020|2020-09-14|EPI\_ISL\_639831|Original|hCoV-19^^Monaghan|Human|National Virus Reference Laboratory|National Virus Reference Laboratory|Gonzalez|Ireland

>Spike|hCoV-19/Scotland/EDB1610/2020|2020-04-14|EPI\_ISL\_433090|Original|hCoV-19^^Scotland|Human|Virology Department|COVID-19 Genomics UK (COG-UK) Consortium|Williams|United Kingdom

>Spike|hCoV-19/USA/CA-ALSR-3033/2020|2020-08-28|EPI\_ISL\_635802|Original|hCoV-19^^California|Human|San Diego County Public Health Laboratory|Andersen lab at Scripps Research|Gangavarapu|USA

>Spike|hCoV-19/Switzerland/BL-ETHZ-400095/2020|2020-12-07|EPI\_ISL\_729140|Original|hCoV-19^^Basel-Landschaft|Human|Viollier AG|Department of Biosystems Science and Engineering|Nadeau|Switzerland

>Spike|hCoV-19/England/ALDP-B1BC12/2020|2020-11-01|EPI\_ISL\_645726|Original|hCoV-19^^England|Human|Lighthouse Lab in Alderley Park|Wellcome Sanger Institute for the COVID-19 Genomics UK (COG-UK) Consortium|Davies|United Kingdom

>Spike|hCoV-19/USA/MI-MDHHS-SC20526/2020|2020-05-15|EPI\_ISL\_460574|Original|hCoV-19^^Michigan|Human|Michigan Department of Health and Human Services|Michigan Department of Health and Human Services|Blankenship|USA

>Spike|hCoV-19/Denmark/DCGC-21562/2020|2020-12-21|EPI\_ISL\_758237|Original|hCoV-19^^Hovedstaden|Human|Department of Virus and Microbiological Special Diagnostics|Albertsen Lab|Michaelsen|Denmark

>Spike|hCoV-19/USA/CA-CZB-4095/2020|2020-08-14|EPI\_ISL\_548646|Original|hCoV-19^^California|Human|Orange County Public Health Laboratory|Chan-Zuckerberg Biohub|Bhatt|USA

>Spike|hCoV-19/Denmark/DCGC-1718/2020|2020-03-30|EPI\_ISL\_615577|Original|hCoV-19^^Sjælland|Human|Department of Virus and Microbiological Special Diagnostics|Albertsen lab|Michaelsen|Denmark

>Spike|hCoV-19/England/NOTT-10FE8E/2020|2020-04-09|EPI\_ISL\_441452|Original|hCoV-19^^England|Human|Queens Medical Centre|COVID-19 Genomics UK (COG-UK) Consortium|Loose|United Kingdom

>Spike|hCoV-19/Germany/HH-hpi-p1839/2020|2020-03-22|EPI\_ISL\_776192|Original|hCoV-19^^Hamburg|Human|University Medical Center Hamburg Eppendorf|Heinrich Pette Institute|Robitaille|Germany

>Spike|hCoV-19/Wales/ALDP-BCA7C6/2020|2020-11-23|EPI\_ISL\_710750|Original|hCoV-19^^Wales|Human|Lighthouse Lab in Alderley Park|Wellcome Sanger Institute for the COVID-19 Genomics UK (COG-UK) Consortium|Davies|United Kingdom

>Spike|hCoV-19/Scotland/QEUA-89C0D4/2020|2020-07-28|EPI\_ISL\_532811|Original|hCoV-19^^Scotland|Human|NHSGGC West of Scotland Specialist Virology Centre / MRC-University of Glasgow Centre for Virus Research|Wellcome Sanger Institute for the COVID-19 Genomics UK (COG-UK) consortium|Davies|United Kingdom

>Spike|hCoV-19/Australia/VIC4031/2020|2020-07-11|EPI\_ISL\_519416|Original|hCoV-19^^Victoria|Human|Microbiological Diagnostic Unit - Public Health Laboratory (MDU-PHL)|MDU-PHL|Schultz|Australia

>Spike|hCoV-19/Scotland/QEUH-A00B8D/2020|2020-10-02|EPI\_ISL\_585554|Original|hCoV-19^^Scotland|Human|University of Exeter|COVID-19 Genomics UK (COG-UK) Consortium|Temperton|United Kingdom

>Spike|hCoV-19/England/QEUH-B2D66A/2020|2020-11-04|EPI\_ISL\_660049|Original|hCoV-19^^England|Human|Lighthouse Lab in Glasgow|Wellcome Sanger Institute for the COVID-19 Genomics UK (COG-UK) Consortium|Davies|United Kingdom

>Spike|hCoV-19/Netherlands/Gelderland\_26/2020|2020-04-26|EPI\_ISL\_460926|Original|hCoV-19^^Gelderland|Human|Dutch COVID-19 response team|Erasmus Medical Center|Oude Munnink|Netherlands

>Spike|hCoV-19/Australia/VIC12966/2020|2020-07-29|EPI\_ISL\_563613|Original|hCoV-19^^Victoria|Human|Microbiological Diagnostic Unit - Public Health Laboratory (MDU-PHL)|MDU-PHL|Schultz|Australia

>Spike|hCoV-19/England/QEUH-B2DFAB/2020|2020-11-04|EPI\_ISL\_659956|Original|hCoV-19^^England|Human|Lighthouse Lab in Glasgow|Wellcome Sanger Institute for the COVID-19 Genomics UK (COG-UK) Consortium|Davies|United Kingdom

>Spike|hCoV-19/Japan/PG-4631/2020|2020-07-00|EPI\_ISL\_689768|Original|hCoV-19^^Japan|Human|Fukuoka Institute of Health and Environmental Sciences|Pathogen Genomics Center|Sekizuka|Japan

>Spike|hCoV-19/Scotland/QEUH-9B9DCA/2020|2020-09-07|EPI\_ISL\_568264|Original|hCoV-19^^Scotland|Human|Lighthouse Lab in Glasgow|Wellcome Sanger Institute for the COVID-19 Genomics UK (COG-UK) consortium|Davies|United Kingdom

>Spike|hCoV-19/USA/SC-DHEC-1081/2020|2020-07-06|EPI\_ISL\_541665|Original|hCoV-19^^South Carolina|Human|Microbiology Division|Microbiology Division|Flores|USA

>Spike|hCoV-19/England/LEED-2A8642/2020|2020-03-26|EPI\_ISL\_539089|Original|hCoV-19^^England|Human|Leeds Teaching Hospitals NHS Trust and Public Health England|Wellcome Sanger Institute for the COVID-19 Genomics UK (COG-UK) consortium|Davies|United Kingdom

>Spike|hCoV-19/England/ALDP-951DE2/2020|2020-06-10|EPI\_ISL\_551291|Original|hCoV-19^^England|Human|Lighthouse Lab in Alderley Park|Wellcome Sanger Institute for the COVID-19 Genomics UK (COG-UK) consortium|Davies|United Kingdom

>Spike|hCoV-19/England/QEUH-AABCFA/2020|2020-10-21|EPI\_ISL\_652824|Original|hCoV-19^^England|Human|Oxford Viromics|COVID-19 Genomics UK (COG-UK) Consortium|Golubchik|United Kingdom

>Spike|hCoV-19/USA/VA-DCLS-1655/2020|2020-08-29|EPI\_ISL\_644828|Original|hCoV-19^^Virginia|Human|Virginia DCLS|Virginia DCLS|St. Jacques|USA

>Spike|hCoV-19/England/20106145903/2020|2020-03-03|EPI\_ISL\_417246|Original|hCoV-19^^England|Human|Respiratory Virus Unit|Respiratory Virus Unit|Platt|United Kingdom

>Spike|hCoV-19/Australia/QLD1248/2020|2020-03-22|EPI\_ISL\_693252|Original|hCoV-19^^Australia|Human|unknown|Public Health Virology Laboratory|Nguyen|Australia

>Spike|hCoV-19/USA/AZ-TG408168/2020|2020-06-16|EPI\_ISL\_694919|Original|hCoV-19^^Arizona|Human|AZ SPHL|TGen North|French|USA

>Spike|hCoV-19/Denmark/DCGC-11586/2020|2020-11-02|EPI\_ISL\_670692|Original|hCoV-19^^Midtjylland|Human|Department of Virus and Microbiological Special Diagnostics|Albertsen Lab|Michaelsen|Denmark

>Spike|hCoV-19/USA/MI-UM-10036690355/2020|2020-10-29|EPI\_ISL\_682130|Original|hCoV-19^^Michigan|Human|University of Michigan Clinical Microbiology Laboratory|Lauring Lab|Valesano|USA

>Spike|hCoV-19/England/ALDP-A68075/2020|2020-10-10|EPI\_ISL\_608994|Original|hCoV-19^^England|Human|Lighthouse Lab in Alderley Park|Wellcome Sanger Institute for the COVID-19 Genomics UK (COG-UK) consortium|Davies|United Kingdom

>Spike|hCoV-19/England/ALDP-BCA104/2020|2020-11-23|EPI\_ISL\_703386|Original|hCoV-19^^England|Human|Lighthouse Lab in Alderley Park|Wellcome Sanger Institute for the COVID-19 Genomics UK (COG-UK) Consortium|Davies|United Kingdom

>Spike|hCoV-19/Finland/20A49S7/2020|2020-04-20|EPI\_ISL\_481600|Original|hCoV-19^^Uusimaa|Human|Department of Virology and Immunology|Department of Virology|Smura|Finland

>Spike|hCoV-19/England/201380063/2020|2020-03-25|EPI\_ISL\_421815|Original|hCoV-19^^England|Human|Respiratory Virus Unit|Respiratory Virus Unit|Platt|United Kingdom

>Spike|hCoV-19/Brazil/PE-IAM1447/2020|2020-05-13|EPI\_ISL\_572394|Original|hCoV-19^^Pernambuco|Human|LACEN/PE|WallauLab|Wallau|Brazil

>Spike|hCoV-19/Scotland/EDB5731/2020|2020-04-09|EPI\_ISL\_473848|Original|hCoV-19^^Scotland|Human|Virology Department|COVID-19 Genomics UK (COG-UK) Consortium|Williams|United Kingdom

>Spike|hCoV-19/USA/CA-CZB-10810/2020|2020-07-06|EPI\_ISL\_583063|Original|hCoV-19^^California|Human|Humboldt County Public Health Laboratory|Chan-Zuckerberg Biohub|Bhatt|USA

>Spike|hCoV-19/Scotland/EDB6890/2020|2020-04-30|EPI\_ISL\_559976|Original|hCoV-19^^Scotland|Human|Virology Department|COVID-19 Genomics UK (COG-UK) Consortium|Williams|United Kingdom

>Spike|hCoV-19/Japan/PG-3068/2020|2020-04-00|EPI\_ISL\_691191|Original|hCoV-19^^Japan|Human|Pathogen Genomics Center|Pathogen Genomics Center|Sekizuka|Japan

>Spike|hCoV-19/England/CAMB-1AC0AB/2020|2020-04-28|EPI\_ISL\_444368|Original|hCoV-19^^England|Human|Department of Pathology|COVID-19 Genomics UK (COG-UK) Consortium|Meredith|United Kingdom

>Spike|hCoV-19/Malaysia/IMR-CV140338/2020|2020-09-01|EPI\_ISL\_718305|Original|hCoV-19^^Malaysia|Human|Institute for Medical Research|Institute for Medical Research|Suppiah|Malaysia

>Spike|hCoV-19/Netherlands/NA\_23/2020|2020-03-09|EPI\_ISL\_415480|Original|hCoV-19^^Netherlands|Human|Dutch COVID-19 response team|Erasmus Medical Center|Oude Munnink|Netherlands

>Spike|hCoV-19/England/QEUA-A5E17F/2020|2020-10-12|EPI\_ISL\_597486|Original|hCoV-19^^England|Human|Lighthouse Lab in Glasgow|Wellcome Sanger Institute for the COVID-19 Genomics UK (COG-UK) consortium|Davies|United Kingdom

>Spike|hCoV-19/England/NORW-E9085/2020|2020-04-25|EPI\_ISL\_453580|Original|hCoV-19^^England|Human|Quadram Institute Bioscience|COVID-19 Genomics UK (COG-UK) Consortium|Alikhan|United Kingdom

>Spike|hCoV-19/Northern Ireland/QEUA-96AAFE/2020|2020-08-17|EPI\_ISL\_531239|Original|hCoV-19^^Northern Ireland|Human|Lighthouse Lab in Glasgow|Wellcome Sanger Institute for the COVID-19 Genomics UK (COG-UK) consortium|Davies|United Kingdom

>Spike|hCoV-19/USA/NY-NYCPHL-001548/2020|2020-12-02|EPI\_ISL\_745463|Original|hCoV-19^^New York|Human|DOHMH Fort Greene|New York City Public Health Laboratory|Wang|USA

>Spike|hCoV-19/Denmark/DCGC-5566/2020|2020-09-28|EPI\_ISL\_620891|Original|hCoV-19^^Hovedstaden|Human|Department of Virus and Microbiological Special Diagnostics|Albertsen lab|Michaelsen|Denmark

>Spike|hCoV-19/Spain/PV-IBV-2085/2020|2020-04-10|EPI\_ISL\_468876|Original|hCoV-19^^Basque Country|Human|Servicio de Microbiolog\u00eda. Hospital Universitario Donostia. OSI Donostialdea. \u00c1rea de Enfermedades Infecciosas|SeqCOVID-SPAIN consortium|IBV (CSIC)|Comas|Spain

>Spike|hCoV-19/England/QEUA-9612D1/2020|2020-08-03|EPI\_ISL\_532089|Original|hCoV-19^^England|Human|Lighthouse Lab in Glasgow|Wellcome Sanger Institute for the COVID-19 Genomics UK (COG-UK) consortium|Davies|United Kingdom

>Spike|hCoV-19/Wales/PHWC-47F035/2020|2020-10-14|EPI\_ISL\_612619|Original|hCoV-19^^Wales|Human|Wales Specialist Virology Centre Sequencing lab|COVID-19 Genomics UK (COG-UK) Consortium|Moore|United Kingdom

>Spike|hCoV-19/Australia/WA204/2020|2020-03-25|EPI\_ISL\_596767|Original|hCoV-19^^Western Australia|Human|PathWest Laboratory Medicine WA|PathWest Laboratory Medicine WA Microbial Surveillance Unit|Sikazwe|Australia

>Spike|hCoV-19/USA/MA-MGH-02757/2020|2020-09-23|EPI\_ISL\_765619|Original|hCoV-19^^Massachusetts|Human|Massachusetts General Hospital|Infectious Disease Program|Park|USA

>Spike|hCoV-19/England/ALDP-9C5F6B/2020|2020-09-10|EPI\_ISL\_567770|Original|hCoV-19^^England|Human|Lighthouse Lab in Alderley Park|Wellcome Sanger Institute for the COVID-19 Genomics UK (COG-UK) consortium|Davies|United Kingdom

>Spike|hCoV-19/Uruguay/TYT-M64/2020|2020-06-21|EPI\_ISL\_749155|Original|hCoV-19^^Treinta y Tres|Human|Sanatorio Americano|Institut Pasteur de Montevideo|Spangenberg|Uruguay

>Spike|hCoV-19/Hong Kong/VM20060398/2020|2020-07-19|EPI\_ISL\_539811|Original|hCoV-19^^Hong Kong|Human|Asiaworld Expo Command Post|Hong Kong Department of Health|Tsang|China

>Spike|hCoV-19/USA/MI-QDX-1143/2020|2020-03-23|EPI\_ISL\_571873|Original|hCoV-19^^Michigan|Human|Quest Diagnostics|Quest Diagnostics|Kagan|USA

>Spike|hCoV-19/England/CAMB-7706E/2020|2020-03-31|EPI\_ISL\_425456|Original|hCoV-19^^England|Human|Department of Pathology|COVID-19 Genomics UK (COG-UK) Consortium|Meredith|United Kingdom

>Spike|hCoV-19/Belgium/ULG-10231/2020|2020-05-16|EPI\_ISL\_498137|Original|hCoV-19^^Li\u00e8ge|Human|Department of Clinical Microbiology|GIGA Medical Genomics|Durkin|Belgium

>Spike|hCoV-19/Japan/PG-6937/2020|2020-09-00|EPI\_ISL\_688043|Original|hCoV-19^^Japan|Human|Pathogen Genomics Center|Pathogen Genomics Center|Sekizuka|Japan

>Spike|hCoV-19/USA/CA-ALSR-4320/2020|2020-10-02|EPI\_ISL\_648969|Original|hCoV-19^^California|Human|San Diego County Public Health Laboratory|Andersen lab at Scripps Research|Gangavarapu|USA

>Spike|hCoV-19/Scotland/QEUEH-96E580/2020|2020-08-19|EPI\_ISL\_530533|Original|hCoV-19^^Scotland|Human|NHSGGC West of Scotland Specialist Virology Centre / MRC-University of Glasgow Centre for Virus Research|Wellcome Sanger Institute for the COVID-19 Genomics UK (COG-UK) consortium|Davies|United Kingdom

>Spike|hCoV-19/England/ALDP-A6CFA1/2020|2020-10-14|EPI\_ISL\_608270|Original|hCoV-19^^England|Human|Lighthouse Lab in Alderley Park|Wellcome Sanger Institute for the COVID-19 Genomics UK (COG-UK) consortium|Davies|United Kingdom

>Spike|hCoV-19/England/SHEF-CEE40/2020|2020-09-28|EPI\_ISL\_585070|Original|hCoV-19^^England|Human|Virology Department|COVID-19 Genomics UK (COG-UK) Consortium|de Silva|United Kingdom

>Spike|hCoV-19/USA/FL-BPHL-2000/2020|2020-03-21|EPI\_ISL\_653153|Original|hCoV-19^^Florida|Human|Florida Bureau of Public Health Laboratories|Florida Bureau of Public Health Laboratories|Blanton|USA

>Spike|hCoV-19/Denmark/DCGC-5133/2020|2020-09-21|EPI\_ISL\_621671|Original|hCoV-19^^Syddanmark|Human|Department of Virus and Microbiological Special Diagnostics|Albertsen lab|Michaelsen|Denmark

>Spike|hCoV-19/Switzerland/SZ-ETHZ-280242/2020|2020-09-10|EPI\_ISL\_560482|Original|hCoV-19^^Schwyz|Human|Viollier AG|Department of Biosystems Science and Engineering|Nadeau|Switzerland

>Spike|hCoV-19/USA/VA-DCLS-1490/2020|2020-07-28|EPI\_ISL\_581564|Original|hCoV-19^^Virginia|Human|Virginia DCLS|Virginia DCLS|St. Jacques|USA

>Spike|hCoV-19/England/CAMB-8307E/2020|2020-04-14|EPI\_ISL\_443522|Original|hCoV-19^^England|Human|Department of Pathology|Wellcome Sanger Institute for the COVID-19 Genomics UK (COG-UK) consortium|Amato|United Kingdom

>Spike|hCoV-19/Spain/CL-IBV-97006150/2020|2020-04-05|EPI\_ISL\_537297|Original|hCoV-19^^Castilla y Leon|Human|Universidad de Le\u00f3n|SeqCOVID-SPAIN consortium|IBV (CSIC) |Comas|Spain

>Spike|hCoV-19/Canada/BC\_13871523/2020|2020-03-00|EPI\_ISL\_460608|Original|hCoV-19^^British Columbia|Human|BCCDC Public Health Laboratory|BCCDC Public Health Laboratory|Harrigan|Canada

>Spike|hCoV-19/Scotland/EDB1156/2020|2020-04-07|EPI\_ISL\_456891|Original|hCoV-19^^Scotland|Human|Virology Department|COVID-19 Genomics UK (COG-UK) Consortium|Williams|United Kingdom

>Spike|hCoV-19/USA/AZ-TG408200/2020|2020-06-17|EPI\_ISL\_694938|Original|hCoV-19^^Arizona|Human|AZ SPHL|TGen North|French|USA

>Spike|hCoV-19/Austria/CeMM0916/2020|2020-03-16|EPI\_ISL\_583768|Original|hCoV-19^^Austria|Human|Dr. Gernot Walder GmbH|Bergthaler laboratory|Bergthaler|Austria

>Spike|hCoV-19/Spain/CT-IBV-97007954/2020|2020-10-07|EPI\_ISL\_654517|Original|hCoV-19^^Catalunya|Human|Servicio de Microbiolog\u00eda|SeqCOVID-SPAIN consortium|IBV (CSIC) |Comas|Spain

>Spike|hCoV-19/Estonia/ChVir4266/2020|2020-03-00|EPI\_ISL\_457722|Original|hCoV-19^^Estonia|Human|SYNLAB Eesti OU\u0038|Charite Universit\u00e4tsmedizin Berlin|Muehlemann|Estonia

>Spike|hCoV-19/USA/CA-QDX-1247/2020|2020-03-16|EPI\_ISL\_571920|Original|hCoV-19^^California|Human|Quest Diagnostics|Quest Diagnostics|Kagan|USA

>Spike|hCoV-19/Switzerland/BL-ETHZ-350001/2020|2020-11-03|EPI\_ISL\_693776|Original|hCoV-19^^Basel-Landschaft|Human|Viollier AG|Department of Biosystems Science and Engineering|Nadeau|Switzerland

>Spike|hCoV-19/Singapore/738/2020|2020-07-06|EPI\_ISL\_500558|Original|hCoV-19^^Singapore|Human|Singapore General Hospital|Department of Microbiology|Abdul Rahman|Singapore

>Spike|hCoV-19/England/ALDP-B743A9/2020|2020-11-12|EPI\_ISL\_661983|Original|hCoV-19^^England|Human|Lighthouse Lab in Alderley Park|Wellcome Sanger Institute for the COVID-19 Genomics UK (COG-UK) Consortium|Davies|United Kingdom

>Spike|hCoV-19/USA/LA-EVTL651/2020|2020-08-06|EPI\_ISL\_579055|Original|hCoV-19^^Louisiana|Human|LSUHS Emerging Viral Threat Laboratory|Microbial Genome Sequencing Center|Kamil|USA

>Spike|hCoV-19/USA/WI-UW-1875/2020|2020-09-11|EPI\_ISL\_605747|Original|hCoV-19^^Wisconsin|Human|University of Wisconsin-Madison AIDS Vaccine Research Laboratories|University of Wisconsin-Madison AIDS Vaccine Research Laboratories|Baczenas|USA

>Spike|hCoV-19/England/ALDP-BC7C24/2020|2020-11-23|EPI\_ISL\_721446|Original|hCoV-19^^England|Human|Lighthouse Lab in Alderley Park|Wellcome Sanger Institute for the COVID-19 Genomics UK (COG-UK) Consortium|Davies|United Kingdom

>Spike|hCoV-19/Spain/MD-IBV-006380/2020|2020-04-02|EPI\_ISL\_510111|Original|hCoV-19^^Madrid|Human|Hospital General Universitario Gregorio Mara\u00f1\u00f3n|SeqCOVID-SPAIN consortium/IBV (CSIC)|Comas|Spain

>Spike|hCoV-19/Scotland/QEUA-A2199B/2020|2020-10-01|EPI\_ISL\_598859|Original|hCoV-19^^Scotland|Human|Lighthouse Lab in Glasgow|Wellcome Sanger Institute for the COVID-19 Genomics UK (COG-UK) consortium|Davies|United Kingdom

>Spike|hCoV-19/England/QEUA-BC3AA6/2020|2020-11-25|EPI\_ISL\_704074|Original|hCoV-19^^England|Human|Lighthouse Lab in Glasgow|Wellcome Sanger Institute for the COVID-19 Genomics UK (COG-UK) Consortium|Davies|United Kingdom

>Spike|hCoV-19/USA/CA-ALSR-4208/2020|2020-08-11|EPI\_ISL\_648887|Original|hCoV-19^^California|Human|San Diego County Public Health Laboratory|Andersen lab at Scripps Research|Gangavarapu|USA

>Spike|hCoV-19/England/ALDP-9E9C1F/2020|2020-09-23|EPI\_ISL\_580060|Original|hCoV-19^^England|Human|Lighthouse Lab in Alderley Park|Wellcome Sanger Institute for the COVID-19 Genomics UK (COG-UK) consortium|Davies|United Kingdom

>Spike|hCoV-19/England/QEUA-9DA69B/2020|2020-09-21|EPI\_ISL\_601253|Original|hCoV-19^^England|Human|Lighthouse Lab in Glasgow|Wellcome Sanger Institute for the COVID-19 Genomics UK (COG-UK) consortium|Davies|United Kingdom

>Spike|hCoV-19/Netherlands/GE-RIVM-20523/2020|2020-12-03|EPI\_ISL\_728738|Original|hCoV-19^^Gelderland|Human|Dutch COVID-19 response team|National Institute for Public Health and the Environment (RIVM)|Meijer|Netherlands

>Spike|hCoV-19/England/MILK-B3CD90/2020|2020-11-01|EPI\_ISL\_706198|Original|hCoV-19^^England|Human|Oxford Viromics|COVID-19 Genomics UK (COG-UK) Consortium|Golubchik|United Kingdom

>Spike|hCoV-19/Japan/PG-2868/2020|2020-04-00|EPI\_ISL\_690994|Original|hCoV-19^^Japan|Human|Pathogen Genomics Center|Pathogen Genomics Center|Sekizuka|Japan

>Spike|hCoV-19/England/ALDP-644F1C/2020|2020-07-04|EPI\_ISL\_558173|Original|hCoV-19^^England|Human|Lighthouse Lab in Alderley Park|Wellcome Sanger Institute for the COVID-19 Genomics UK (COG-UK) consortium|Davies|United Kingdom

>Spike|hCoV-19/England/QEUA-B143AB/2020|2020-11-03|EPI\_ISL\_642646|Original|hCoV-19^^England|Human|Lighthouse Lab in Glasgow|Wellcome Sanger Institute for the COVID-19 Genomics UK (COG-UK) Consortium|Davies|United Kingdom

>Spike|hCoV-19/England/QEUA-B2C908/2020|2020-11-03|EPI\_ISL\_646657|Original|hCoV-19^^England|Human|Lighthouse Lab in Glasgow|Wellcome Sanger Institute for the COVID-19 Genomics UK (COG-UK) Consortium|Davies|United Kingdom

>Spike|hCoV-19/England/204441570/2020|2020-10-00|EPI\_ISL\_622893|Original|hCoV-19^^England|Human|Respiratory Virus Unit|Respiratory Virus Unit|Platt|United Kingdom

>Spike|hCoV-19/USA/TX-HMH-2725/2020|2020-06-05|EPI\_ISL\_545508|Original|hCoV-19^^Texas|Human|Houston Methodist Hospital|Houston Methodist Hospital|Long|USA

>Spike|hCoV-19/USA/NY-NYCPHL-000670/2020|2020-03-18|EPI\_ISL\_632088|Original|hCoV-19^^New York|Human|Jamaica Hospital Medical Center|New York City Public Health Laboratory|Wang|USA

>Spike|hCoV-19/Sweden/20-07856/2020|2020-04-23|EPI\_ISL\_452237|Original|hCoV-19^^Stockholm|Human|Huddinge VC|The Public Health Agency of Sweden|Svartstr\u00f6m|Sweden

>Spike|hCoV-19/Wales/PHWC-16D185/2020|2020-09-26|EPI\_ISL\_627731|Original|hCoV-19^^Wales|Human|Wales Specialist Virology Centre Sequencing lab|COVID-19 Genomics UK (COG-UK) Consortium|Moore|United Kingdom

>Spike|hCoV-19/Japan/PG-3675/2020|2020-04-00|EPI\_ISL\_691928|Original|hCoV-19^^Japan|Human|Pathogen Genomics Center|Pathogen Genomics Center|Sekizuka|Japan

>Spike|hCoV-19/USA/OR-PROV-020/2020|2020-03-26|EPI\_ISL\_482306|Original|hCoV-19^^Oregon|Human|Providence St. Joseph Health Molecular Genomics Laboratory|Providence St. Joseph Health Molecular Genomics Laboratory|Dowdell|USA

>Spike|hCoV-19/Denmark/DCGC-3931/2020|2020-09-14|EPI\_ISL\_615842|Original|hCoV-19^^Hovedstaden|Human|Department of Virus and Microbiological Special Diagnostics|Albertsen lab|Michaelsen|Denmark

>Spike|hCoV-19/Scotland/QEUA-B3185E/2020|2020-11-04|EPI\_ISL\_676427|Original|hCoV-19^^Scotland|Human|Lighthouse Lab in Glasgow|Wellcome Sanger Institute for the COVID-19 Genomics UK (COG-UK) Consortium|Davies|United Kingdom

>Spike|hCoV-19/England/ALDP-BB4E60/2020|2020-11-20|EPI\_ISL\_702392|Original|hCoV-19^^England|Human|Lighthouse Lab in Alderley Park|Wellcome Sanger Institute for the COVID-19 Genomics UK (COG-UK) Consortium|Davies|United Kingdom

>Spike|hCoV-19/England/MILK-9C26D2/2020|2020-09-10|EPI\_ISL\_566439|Original|hCoV-19^^England|Human|Lighthouse Lab in Milton Keynes|Wellcome Sanger Institute for the COVID-19 Genomics UK (COG-UK) consortium|Davies|United Kingdom

>Spike|hCoV-19/Scotland/CVR6097/2020|2020-11-26|EPI\_ISL\_703924|Original|hCoV-19^^Scotland|Human|West of Scotland Specialist Virology Centre|COVID-19 Genomics UK (COG-UK) Consortium|Robertson|United Kingdom

>Spike|hCoV-19/Canada/MB-NML-1035/2020|2020-07-17|EPI\_ISL\_582397|Original|hCoV-19^^Manitoba|Human|Cadham Provincial Laboratory|National Microbiology Laboratory (NML)|Majer|Canada

>Spike|hCoV-19/USA/WA-S775/2020|2020-04-14|EPI\_ISL\_449945|Original|hCoV-19^^Washington|Human|Washington State Department of Health|Seattle Flu Study|Bedford|USA

>Spike|hCoV-19/England/QEUA-9FAD36/2020|2020-09-28|EPI\_ISL\_588259|Original|hCoV-19^^England|Human|Lighthouse Lab in Glasgow|Wellcome Sanger Institute for the COVID-19 Genomics UK (COG-UK) consortium|Davies|United Kingdom

>Spike|hCoV-19/England/ALDP-C5860B/2020|2020-12-14|EPI\_ISL\_736008|Original|hCoV-19^^England|Human|Lighthouse Lab in Alderley Park|Wellcome Sanger Institute for the COVID-19 Genomics UK (COG-UK) Consortium|Davies|United Kingdom

>Spike|hCoV-19/England/ALDP-9D7D7B/2020|2020-09-18|EPI\_ISL\_576628|Original|hCoV-19^^England|Human|Oxford Viromics|COVID-19 Genomics UK (COG-UK) Consortium|Golubchik|United Kingdom

>Spike|hCoV-19/Netherlands/NH-RIVM-20850/2020|2020-12-21|EPI\_ISL\_790905|Original|hCoV-19^^Noord-Holland|Human|Dutch COVID-19 response team|National Institute for Public Health and the Environment (RIVM)|Meijer|Netherlands

>Spike|hCoV-19/USA/CA-QDX-795/2020|2020-03-21|EPI\_ISL\_571489|Original|hCoV-19^^California|Human|Quest Diagnostics|Quest Diagnostics|Kagan|USA

>Spike|hCoV-19/USA/MA-MASPHL-00649/2020|2020-05-14|EPI\_ISL\_692983|Original|hCoV-19^^Massachusetts|Human|Massachusetts State Public Health Laboratory|Massachusetts State Public Health Laboratory|Lang|USA

>Spike|hCoV-19/South Africa/KRISP-0584/2020|2020-07-07|EPI\_ISL\_498122|Original|hCoV-19^^KwaZulu-Natal|Human|NHLS-IALCH|KRISP|de Oliveira|South Africa

>Spike|hCoV-19/Colombia/VAC-GVI-97212/2020|2020-04-04|EPI\_ISL\_447795|Original|hCoV-19^^Valle del Cauca|Human|Instituto Nacional de Salud|Grupo de Investigaciones Microbiol\u00f3gicas-UR (GIMUR)|Ram\u00e9rez|Colombia



>Spike|hCoV-19/England/QEUA-961C5B/2020|2020-08-01|EPI\_ISL\_537031|Original|hCoV-19^^England|Human|Lighthouse Lab in Glasgow|Wellcome Sanger Institute for the COVID-19 Genomics UK (COG-UK) consortium|Davies|United Kingdom

>Spike|hCoV-19/USA/MI-MDHHS-SC21685/2020|2020-07-08|EPI\_ISL\_516412|Original|hCoV-19^^Michigan|Human|Michigan Department of Health and Human Services|Michigan Department of Health and Human Services|Blankenship|USA

>Spike|hCoV-19/Switzerland/BS-UHB-42203098/2020|2020-03-23|EPI\_ISL\_528343|Original|hCoV-19^^Basel-Stadt|Human|University Hospital Basel|University Hospital Basel|Roloff Handschin|Switzerland

>Spike|hCoV-19/England/QEUA-AD3910/2020|2020-10-25|EPI\_ISL\_633898|Original|hCoV-19^^England|Human|Lighthouse Lab in Glasgow|Wellcome Sanger Institute for the COVID-19 Genomics UK (COG-UK) consortium|Davies|United Kingdom

>Spike|hCoV-19/Mexico/NLE-UANL-035/2020|2020-11-16|EPI\_ISL\_779196|Original|hCoV-19^^Nuevo Leon|Human|Laboratorio Estatal de Salud P\u00fablica de Nuevo Le\u00f3n|Laboratorio de Infectolog\u00eda Molecular|Gal\u00e9n|Mexico

>Spike|hCoV-19/South Korea/KCDC2214/2020|2020-05-08|EPI\_ISL\_510552|Original|hCoV-19^^South Korea|Human|Division of Viral Diseases|Division of Viral Diseases|Kim|South Korea

>Spike|hCoV-19/England/QEUA-A5DFD0/2020|2020-10-12|EPI\_ISL\_597276|Original|hCoV-19^^England|Human|Lighthouse Lab in Glasgow|Wellcome Sanger Institute for the COVID-19 Genomics UK (COG-UK) consortium|Davies|United Kingdom

>Spike|hCoV-19/Australia/VIC7835/2020|2020-07-28|EPI\_ISL\_564688|Original|hCoV-19^^Victoria|Human|Microbiological Diagnostic Unit - Public Health Laboratory (MDU-PHL)|MDU-PHL|Schultz|Australia

>Spike|hCoV-19/England/CAMC-B32592/2020|2020-11-05|EPI\_ISL\_659286|Original|hCoV-19^^England|Human|Lighthouse Lab in Cambridge|Wellcome Sanger Institute for the COVID-19 Genomics UK (COG-UK) Consortium|Davies|United Kingdom

>Spike|hCoV-19/USA/NY-NYUMC217/2020|2020-04-03|EPI\_ISL\_427512|Original|hCoV-19^^New York|Human|NYU Langone Health|Departments of Pathology and Medicine|Maurano|USA

>Spike|hCoV-19/Scotland/QEUA-9D1C47/2020|2020-09-16|EPI\_ISL\_572684|Original|hCoV-19^^Scotland|Human|University College London|COVID-19 Genomics UK (COG-UK) Consortium|Roy|United Kingdom

>Spike|hCoV-19/USA/CA-CDPH071/2020|2020-07-01|EPI\_ISL\_754969|Original|hCoV-19^^California|Human|California Department of Public Health|California Department of Public Health|Bell|USA

>Spike|hCoV-19/Denmark/DCGC-10575/2020|2020-11-02|EPI\_ISL\_670062|Original|hCoV-19^^Hovedstaden|Human|Department of Virus and Microbiological Special Diagnostics|Albertsen Lab|Michaelsen|Denmark

>Spike|hCoV-19/Germany/BE-ChVir-W2202-4448/2020|2020-11-21|EPI\_ISL\_753828|Original|hCoV-19^^Berlin|Human|Charit\u00e9 Universit\u00e4tsmedizin Berlin|Charit\u00e9 Universit\u00e4tsmedizin Berlin|Muehlemann|Germany

>Spike|hCoV-19/USA/CA-CZB-1984/2020|2020-05-07|EPI\_ISL\_486251|Original|hCoV-19^^California|Human|Orange County Public Health Laboratory|Chan-Zuckerberg Biohub|McGeever|USA

>Spike|hCoV-19/Brazil/RJ-00485/2020|2020-10-26|EPI\_ISL\_717879|Original|hCoV-19^^Rio de Janeiro|Human|Laboratorio de Virologia Molecular / UFRJ|Bioinformatics Laboratory / LNCC|Almeida|Brazil

>Spike|hCoV-19/England/ALDP-8E1DCA/2020|2020-06-25|EPI\_ISL\_557156|Original|hCoV-19^^England|Human|Lighthouse Lab in Alderley Park|Wellcome Sanger Institute for the COVID-19 Genomics UK (COG-UK) consortium|Davies|United Kingdom

>Spike|hCoV-19/USA/CA-CDPH017/2020|2020-02-27|EPI\_ISL\_515910|Original|hCoV-19^^California|Human|California Department of Public Health|California Department of Public Health|Bell|USA

>Spike|hCoV-19/USA/NM-UNM-00792/2020|2020-05-05|EPI\_ISL\_610258|Original|hCoV-19^^New Mexico|Human|TriCore Reference Laboratories|Center for Global Health|Domman|USA

>Spike|hCoV-19/England/CAMC-B51FDB/2020|2020-11-08|EPI\_ISL\_657953|Original|hCoV-19^^England|Human|Lighthouse Lab in Cambridge|Wellcome Sanger Institute for the COVID-19 Genomics UK (COG-UK) Consortium|Davies|United Kingdom

>Spike|hCoV-19/England/QEUA-B69BDC/2020|2020-11-11|EPI\_ISL\_655155|Original|hCoV-19^^England|Human|Lighthouse Lab in Glasgow|Wellcome Sanger Institute for the COVID-19 Genomics UK (COG-UK) Consortium|Davies|United Kingdom

>Spike|hCoV-19/Canada/QC-LSPQ-L00218559/2020|2020-03-14|EPI\_ISL\_535785|Original|hCoV-19^^Quebec|Human|CHUL-LABO MULTI / MICRO|Laboratoire de sant e publique du Qu bec|Moreira|Canada

>Spike|hCoV-19/South Korea/KDCA0050/2020|2020-09-15|EPI\_ISL\_747291|Original|hCoV-19^^South Korea|Human|Division of Emerging Infectious Diseases|Division of Emerging Infectious Diseases|Park|South Korea

>Spike|hCoV-19/Australia/VIC14746/2020|2020-08-19|EPI\_ISL\_592982|Original|hCoV-19^^Victoria|Human|Victorian Infectious Diseases Reference Laboratory (VIDRL)|VIDRL and MDU-PHL|Schultz|Australia

>Spike|hCoV-19/Denmark/DCGC-6460/2020|2020-10-12|EPI\_ISL\_620360|Original|hCoV-19^^Hovedstaden|Human|Department of Virus and Microbiological Special Diagnostics|Albertsen lab|Michaelsen|Denmark

>Spike|hCoV-19/England/CAMC-A3F3E7/2020|2020-10-06|EPI\_ISL\_609761|Original|hCoV-19^^England|Human|Lighthouse Lab in Cambridge|Wellcome Sanger Institute for the COVID-19 Genomics UK (COG-UK) consortium|Davies|United Kingdom

>Spike|hCoV-19/USA/MD-HP00079/2020|2020-03-17|EPI\_ISL\_438236|Original|hCoV-19^^Maryland|Human|Johns Hopkins Hospital Department of Pathology|Johns Hopkins Hospital Department of Pathology|Mehoke|USA

>Spike|hCoV-19/Netherlands/ZH-EMC-761/2020|2020-10-01|EPI\_ISL\_632598|Original|hCoV-19^^Zuid Holland|Human|Dutch COVID-19 response team|Erasmus Medical Center|Oude Munnink|Netherlands

>Spike|hCoV-19/USA/CA-SCCPHD-UC200/2020|2020-03-10|EPI\_ISL\_671768|Original|hCoV-19^^California|Human|Santa Clara County Public Health Department|Chiu Laboratory|Chiu|USA

>Spike|hCoV-19/Canada/ON-S38/2020|2020-03-17|EPI\_ISL\_591138|Original|hCoV-19^^Ontario|Human|Toronto Invasive Bacterial Diseases Network|McMaster University|McArthur|Canada

>Spike|hCoV-19/Scotland/CVR1644/2020|2020-04-06|EPI\_ISL\_433641|Original|hCoV-19^^Scotland|Human|West of Scotland Specialist Virology Centre|COVID-19 Genomics UK (COG-UK) Consortium|Robertson|United Kingdom

>Spike|hCoV-19/England/CAMC-B35492/2020|2020-11-05|EPI\_ISL\_659530|Original|hCoV-19^^England|Human|Lighthouse Lab in Cambridge|Wellcome Sanger Institute for the COVID-19 Genomics UK (COG-UK) Consortium|Davies|United Kingdom

>Spike|hCoV-19/England/MILK-B878C2/2020|2020-11-13|EPI\_ISL\_724811|Original|hCoV-19^^England|Human|Oxford Viromics|COVID-19 Genomics UK (COG-UK) Consortium|Golubchik|United Kingdom

>Spike|hCoV-19/India/DL-NCDC6082-CSIR-IGIB/2020|2020-05-25|EPI\_ISL\_482616|Original|hCoV-19^^Delhi|Human|National Centre for Disease control (NCDC)|NCDC/CSIR-IGIB|Singh|India

>Spike|hCoV-19/Spain/PV-IBV-000778/2020|2020-03-09|EPI\_ISL\_452727|Original|hCoV-19^^Basque Country|Human|Hospital Universitario Araba. Vitoria-Gasteiz,|SeqCOVID-SPAIN consortium|IBV (CSIC)|Comas|Spain

>Spike|hCoV-19/DRC/2942/2020|2020-04-17|EPI\_ISL\_437355|Original|hCoV-19^^Kinshasa|Human|Viral Respiratory Lab|Pathogen Sequencing Lab|Amuri|Democratic Republic of the Congo

>Spike|hCoV-19/Japan/PG-6290/2020|2020-07-00|EPI\_ISL\_689401|Original|hCoV-19^^Japan|Human|Pathogen Genomics Center|Pathogen Genomics Center|Sekizuka|Japan

>Spike|hCoV-19/England/QEUA-AD1FD4/2020|2020-10-26|EPI\_ISL\_634160|Original|hCoV-19^^England|Human|Lighthouse Lab in Glasgow|Wellcome Sanger Institute for the COVID-19 Genomics UK (COG-UK) consortium|Davies|United Kingdom

>Spike|hCoV-19/Australia/VIC4039/2020|2020-07-11|EPI\_ISL\_519422|Original|hCoV-19^^Victoria|Human|Microbiological Diagnostic Unit - Public Health Laboratory (MDU-PHL)|MDU-PHL|Schultz|Australia

>Spike|hCoV-19/England/CAMC-B7750A/2020|2020-11-12|EPI\_ISL\_783418|Original|hCoV-19^^England|Human|Lighthouse Lab in Cambridge|Wellcome Sanger Institute for the COVID-19 Genomics UK (COG-UK) Consortium|Davies|United Kingdom

>Spike|hCoV-19/Japan/NF-10/2020|2020-04-00|EPI\_ISL\_591480|Original|hCoV-19^^Japan|Human|Pathogen Genomics Center|Pathogen Genomics Center|Sekizuka|Japan

>Spike|hCoV-19/USA/CA-CHLA-PLM50317441/2020|2020-11-28|EPI\_ISL\_753529|Original|hCoV-19^^California|Human|Clinical virology Laboratory|Center for Personalized Medicine|Dien Bard|USA

>Spike|hCoV-19/England/ALDP-9DA455/2020|2020-09-18|EPI\_ISL\_576874|Original|hCoV-19^^England|Human|Oxford Viromics|COVID-19 Genomics UK (COG-UK) Consortium|Golubchik|United Kingdom

>Spike|hCoV-19/USA/WA-S1989/2020|2020-06-04|EPI\_ISL\_497417|Original|hCoV-19^^Washington|Human|Washington State Department of Health|Seattle Flu Study|Lee|USA

>Spike|hCoV-19/England/NORW-F0883/2020|2020-10-17|EPI\_ISL\_595194|Original|hCoV-19^^England|Human|Quadram Institute Bioscience|COVID-19 Genomics UK (COG-UK) Consortium|Alikhan|United Kingdom

>Spike|hCoV-19/Denmark/DCGC-5635/2020|2020-09-28|EPI\_ISL\_619922|Original|hCoV-19^^Hovedstaden|Human|Department of Virus and Microbiological Special Diagnostics|Albertsen lab|Michaelsen|Denmark

>Spike|hCoV-19/USA/NY-NYCPHL-000269/2020|2020-03-17|EPI\_ISL\_631795|Original|hCoV-19^^New York|Human|Jamaica Hospital Medical Center|New York City Public Health Laboratory|Wang|USA

>Spike|hCoV-19/England/QEUEH-AD1D70/2020|2020-10-26|EPI\_ISL\_629949|Original|hCoV-19^^England|Human|Lighthouse Lab in Glasgow|Wellcome Sanger Institute for the COVID-19 Genomics UK (COG-UK) consortium|Davies|United Kingdom

>Spike|hCoV-19/Denmark/DCGC-14435/2020|2020-11-30|EPI\_ISL\_711765|Original|hCoV-19^^Hovedstaden|Human|Department of Virus and Microbiological Special Diagnostics|Albertsen Lab|Michaelsen|Denmark

>Spike|hCoV-19/USA/CA-CZB-15493/2020|2020-09-18|EPI\_ISL\_739038|Original|hCoV-19^^California|Human|County of San Luis Obispo Public Health Laboratory|Chan-Zuckerberg Biohub|Kamm|USA

>Spike|hCoV-19/England/MILK-A7C506/2020|2020-10-15|EPI\_ISL\_607603|Original|hCoV-19^^England|Human|Lighthouse Lab in Milton Keynes|Wellcome Sanger Institute for the COVID-19 Genomics UK (COG-UK) consortium|Davies|United Kingdom

>Spike|hCoV-19/England/WSFT-25C0D73/2020|2020-05-01|EPI\_ISL\_492855|Original|hCoV-19^^England|Human|Department of Medical Microbiology|Wellcome Sanger Institute for the COVID-19 Genomics UK (COG-UK) consortium|Davies|United Kingdom

>Spike|hCoV-19/Northern Ireland/NIRE-2358EA/2020|2020-11-10|EPI\_ISL\_742161|Original|hCoV-19^^Northern Ireland|Human|Regional Virus Laboratory|COVID-19 Genomics UK (COG-UK) Consortium|Fairley|United Kingdom

>Spike|hCoV-19/England/CAMC-BD1F79/2020|2020-11-28|EPI\_ISL\_702121|Original|hCoV-19^^England|Human|Lighthouse Lab in Cambridge|Wellcome Sanger Institute for the COVID-19 Genomics UK (COG-UK) Consortium|Davies|United Kingdom

>Spike|hCoV-19/England/MILK-A47EAF/2020|2020-10-06|EPI\_ISL\_598421|Original|hCoV-19^^England|Human|Lighthouse Lab in Milton Keynes|Wellcome Sanger Institute for the COVID-19 Genomics UK (COG-UK) consortium|Davies|United Kingdom

>Spike|hCoV-19/Switzerland/BL-UHB-42179323/2020|2020-03-06|EPI\_ISL\_527946|Original|hCoV-19^^Basel-Land|Human|University Hospital Basel|University Hospital Basel|Roloff Handschin|Switzerland

>Spike|hCoV-19/Netherlands/ZH-EMC-974/2020|2020-11-17|EPI\_ISL\_722364|Original|hCoV-19^^Zuid Holland|Human|Dutch COVID-19 response team|Erasmus Medical Center|Oude Munnink|Netherlands

>Spike|hCoV-19/USA/AZ-TG670229/2020|2020-05-01|EPI\_ISL\_696411|Original|hCoV-19^^Arizona|Human|Sonora Quest Laboratories|TGen North|French|USA

>Spike|hCoV-19/Brazil/SP-138/2020|2020-04-08|EPI\_ISL\_468305|Original|hCoV-19^^S\u00e3o Paulo|Human|Centro de Vigilancia a Saude de Diadema|Instituto Adolfo Lutz|Sacchi|Brazil

>Spike|hCoV-19/India/DL-NCDC3820-CSIR-IGIB/2020|2020-05-20|EPI\_ISL\_482574|Original|hCoV-19^^Delhi|Human|National Centre for Disease control (NCDC)|NCDC/CSIR-IGIB|Pandey|India

>Spike|hCoV-19/Iceland/109/2020|2020-03-11|EPI\_ISL\_417748|Original|hCoV-19^^Reykjavik|Human|The National University Hospital of Iceland|deCODE genetics|J\u00f3nsson|Iceland

>Spike|hCoV-19/Australia/VIC1458/2020|2020-04-20|EPI\_ISL\_456454|Original|hCoV-19^^Victoria|Human|Victorian Infectious Diseases Reference Laboratory (VIDRL)|Microbiological Diagnostic Unit Public Health Laboratory and Victorian Infectious Diseases Reference Laboratory|Schultz|Australia

>Spike|hCoV-19/Gibraltar/204462817/2020|2020-10-29|EPI\_ISL\_614992|Original|hCoV-19^^Gibraltar|Human|Microbiology|Respiratory Virus Unit|Platt|Gibraltar

>Spike|hCoV-19/France/PAC-IHU-0291/2020|2020-03-31|EPI\_ISL\_569436|Original|hCoV-19^^Provence-Alpes-C\u00f4te-d\u2019Azur|Human|MEPHI|MEPHI|Levasseur|France

>Spike|hCoV-19/Wales/PHWC-32409/2020|2020-04-10|EPI\_ISL\_446645|Original|hCoV-19^^Wales|Human|Wales Specialist Virology Centre|Public Health Wales Microbiology Cardiff|Moore|United Kingdom

>Spike|hCoV-19/England/QEUH-AE523E/2020|2020-10-27|EPI\_ISL\_633343|Original|hCoV-19^^England|Human|Lighthouse Lab in Glasgow|Wellcome Sanger Institute for the COVID-19 Genomics UK (COG-UK) consortium|Davies|United Kingdom

>Spike|hCoV-19/England/LIVE-1D7511/2020|2020-09-26|EPI\_ISL\_584603|Original|hCoV-19^^England|Human|Liverpool Clinical Laboratories|COVID-19 Genomics UK (COG-UK) Consortium|Haldenby|United Kingdom

>Spike|hCoV-19/Belgium/reg-a-0916972/2020|2020-09-16|EPI\_ISL\_734962|Original|hCoV-19^^Wezembeek-Oppem|Human|UZ Leuven|KU Leuven|Maes|Belgium

>Spike|hCoV-19/Japan/PG-3440/2020|2020-07-00|EPI\_ISL\_691550|Original|hCoV-19^^Japan|Human|Fukuoka Institute of Health and Environmental Sciences|Pathogen Genomics Center|Sekizuka|Japan

>Spike|hCoV-19/Denmark/DCGC-14971/2020|2020-11-23|EPI\_ISL\_713556|Original|hCoV-19^^Hovedstaden|Human|Department of Virus and Microbiological Special Diagnostics|Albertsen Lab|Michaelsen|Denmark

>Spike|hCoV-19/France/ARA-9315/2020|2020-03-15|EPI\_ISL\_678494|Original|hCoV-19^^Auvergne-Rh\u00f4ne-Alpes|Human|CNR Virus des Infections Respiratoires - France SUD|CNR Virus des Infections Respiratoires - France SUD|Bal|France

>Spike|hCoV-19/England/QEUH-9D0D36/2020|2020-09-13|EPI\_ISL\_589983|Original|hCoV-19^^England|Human|Lighthouse Lab in Glasgow|Wellcome Sanger Institute for the COVID-19 Genomics UK (COG-UK) consortium|Davies|United Kingdom

>Spike|hCoV-19/Bahrain/340846472/2020|2020-10-11|EPI\_ISL\_682314|Original|hCoV-19^^Bahrain|Human|Communicable Disease Laboratory|Communicable Disease Laboratory|Altaif|Bahrain

>Spike|hCoV-19/Denmark/DCGC-17683/2020|2020-12-14|EPI\_ISL\_751142|Original|hCoV-19^^Sjælland|Human|Department of Virus and Microbiological Special Diagnostics|Albertsen Lab|Michaelsen|Denmark

>Spike|hCoV-19/Wales/PHWC-168A52/2020|2020-04-20|EPI\_ISL\_494320|Original|hCoV-19^^Wales|Human|Originating lab|COVID-19 Genomics UK (COG-UK) Consortium|Moore|United Kingdom

>Spike|hCoV-19/Wales/PHWC-48C211/2020|2020-11-03|EPI\_ISL\_666407|Original|hCoV-19^^Wales|Human|Wales Specialist Virology Centre Sequencing lab|COVID-19 Genomics UK (COG-UK) Consortium|Moore|United Kingdom

>Spike|hCoV-19/Denmark/ALAB-SSI113/2020|2020-03-08|EPI\_ISL\_429344|Original|hCoV-19^^Denmark|Human|Department of Virus and Microbiological Special Diagnostics|Albertsen lab|Kirkegaard|Denmark

>Spike|hCoV-19/USA/ME-HETL-J0328/2020|2020-11-24|EPI\_ISL\_755456|Original|hCoV-19^^Maine|Human|Maine Health and Environmental Testing Laboratory|Tewhey Lab|Tewhey|USA

>Spike|hCoV-19/Belgium/AM-0328342/2020|2020-03-28|EPI\_ISL\_462196|Original|hCoV-19^^Genk|Human|KU Leuven|KU Leuven|Maes|Belgium

>Spike|hCoV-19/Italy/VEN-UniVR-153/2020|2020-04-16|EPI\_ISL\_751447|Original|hCoV-19^^Veneto|Human|IRCCS Sacro Cuore Don Calabria Hospital|University of Verona|Mori|Italy

>Spike|hCoV-19/England/CAMC-BBCC40/2020|2020-11-22|EPI\_ISL\_679270|Original|hCoV-19^^England|Human|Queens Medical Centre|COVID-19 Genomics UK (COG-UK) Consortium|Loose|United Kingdom

>Spike|hCoV-19/Chile/RM-170370/2020|2020-09-05|EPI\_ISL\_746717|Original|hCoV-19^^Region Metropolitana de Santiago|Human|Genética Molecular and Subdepartamento de Virología ISP Chile|Instituto de Salud Pública de Chile|Tognarelli|Chile

>Spike|hCoV-19/England/20149035404/2020|2020-04-03|EPI\_ISL\_466187|Original|hCoV-19^^England|Human|Respiratory Virus Unit|Respiratory Virus Unit|Platt|United Kingdom

>Spike|hCoV-19/France/ARA-532/2020|2020-03-04|EPI\_ISL\_416749|Original|hCoV-19^^Auvergne-Rh\u00f4ne-Alpes|Human|Centre Hospitalier de Valence|CNR Virus des Infections Respiratoires - France SUD|Josset|France

>Spike|hCoV-19/England/MILK-B8EE32/2020|2020-11-13|EPI\_ISL\_675243|Original|hCoV-19^^England|Human|Lighthouse Lab in Milton Keynes|Wellcome Sanger Institute for the COVID-19 Genomics UK (COG-UK) Consortium|Davies|United Kingdom

>Spike|hCoV-19/England/MILK-A7BB8D/2020|2020-10-15|EPI\_ISL\_607561|Original|hCoV-19^^England|Human|Lighthouse Lab in Milton Keynes|Wellcome Sanger Institute for the COVID-19 Genomics UK (COG-UK) consortium|Davies|United Kingdom

>Spike|hCoV-19/Scotland/CVR3377/2020|2020-05-07|EPI\_ISL\_456806|Original|hCoV-19^^Scotland|Human|West of Scotland Specialist Virology Centre|COVID-19 Genomics UK (COG-UK) Consortium|Robertson|United Kingdom

>Spike|hCoV-19/Canada/BC\_04033837/2020|2020-04-00|EPI\_ISL\_466762|Original|hCoV-19^^British Columbia|Human|BCCDC Public Health Laboratory|BCCDC Public Health Laboratory|Harrigan|Canada

>Spike|hCoV-19/England/EXET-1390A3/2020|2020-10-28|EPI\_ISL\_665052|Original|hCoV-19^^England|Human|University of Exeter|COVID-19 Genomics UK (COG-UK) Consortium|Temperton|United Kingdom

>Spike|hCoV-19/Scotland/EDB6251/2020|2020-05-22|EPI\_ISL\_473931|Original|hCoV-19^^Scotland|Human|Virology Department|COVID-19 Genomics UK (COG-UK) Consortium|Williams|United Kingdom

>Spike|hCoV-19/Netherlands/GE-EMC-343/2020|2020-10-20|EPI\_ISL\_632342|Original|hCoV-19^^Gelderland|Human|Dutch COVID-19 response team|Erasmus Medical Center|Oude Munnink|Netherlands

>Spike|hCoV-19/USA/MI-MDHHS-SC22466/2020|2020-11-03|EPI\_ISL\_708568|Original|hCoV-19^^Michigan|Human|Michigan Department of Health and Human Services|Michigan Department of Health and Human Services|Jacob|USA

>Spike|hCoV-19/USA/TX-DSHS-0403/2020|2020-06-01|EPI\_ISL\_542463|Original|hCoV-19^^Texas|Human|Texas Department of State Health Services|Texas Department of State Health Services|Rahman|USA

>Spike|hCoV-19/England/ALDP-C57CDD/2020|2020-12-14|EPI\_ISL\_735963|Original|hCoV-19^^England|Human|Lighthouse Lab in Alderley Park|Wellcome Sanger Institute for the COVID-19 Genomics UK (COG-UK) Consortium|Davies|United Kingdom

>Spike|hCoV-19/USA/AZ-TG371281/2020|2020-05-16|EPI\_ISL\_694540|Original|hCoV-19^^Arizona|Human|AZ SPHL|TGen North|French|USA

>Spike|hCoV-19/Wales/PHWC-49106A/2020|2020-11-10|EPI\_ISL\_706604|Original|hCoV-19^^Wales|Human|Originating lab|COVID-19 Genomics UK (COG-UK) Consortium|Moore|United Kingdom

>Spike|hCoV-19/USA/CA-QDX-2419/2020|2020-03-17|EPI\_ISL\_604682|Original|hCoV-19^^California|Human|Quest Diagnostics|Quest Diagnostics|Kagan|USA

>Spike|hCoV-19/USA/CA-ALSR-0941-SAN/2020|2020-03-29|EPI\_ISL\_483426|Original|hCoV-19^^California|Human|UC San Diego Center for Advanced Laboratory Medicine|Andersen lab at Scripps Research|Gangavarapu|USA

>Spike|hCoV-19/Denmark/DCGC-21071/2020|2020-12-21|EPI\_ISL\_759536|Original|hCoV-19^^Nordjylland|Human|Department of Virus and Microbiological Special Diagnostics|Albertsen Lab|Michaelsen|Denmark

>Spike|hCoV-19/England/BRIS-1227D5/2020|2020-04-05|EPI\_ISL\_440656|Original|hCoV-19^^England|Human|PHE South West Regional Laboratory|Wellcome Sanger Institute for the COVID-19 Genomics UK (COG-UK) consortium|Amato|United Kingdom

>Spike|hCoV-19/Brazil/RJ-00451/2020|2020-06-01|EPI\_ISL\_717846|Original|hCoV-19^^Rio de Janeiro|Human|Laboratorio de Virologia Molecular / UFRJ|Bioinformatics Laboratory / LNCC|Almeida|Brazil

>Spike|hCoV-19/Japan/PG-5953/2020|2020-00-00|EPI\_ISL\_689068|Original|hCoV-19^^Japan|Human|Gunma Prefectural Institute of Public Health and Environmental Sciences|Pathogen Genomics Center|Sekizuka|Japan

>Spike|hCoV-19/USA/TX-HMH-MCoV-9432/2020|2020-07-03|EPI\_ISL\_781120|Original|hCoV-19^^Texas|Human|Houston Methodist Hospital|Houston Methodist Hospital|Long|USA

>Spike|hCoV-19/USA/CA-SR0410/2020|2020-04-21|EPI\_ISL\_458280|Original|hCoV-19^^California|Human|Scripps Medical Laboratory|Andersen lab at Scripps Research|Gangavarapu|USA

>Spike|hCoV-19/India/MH-ACTREC-219/2020|2020-06-29|EPI\_ISL\_699873|Original|hCoV-19^^Maharashtra|Human|Hematopathology Laboratory|Hematopathology Laboratory|Patkar|India

>Spike|hCoV-19/USA/CA-ALSR-1332/2020|2020-04-29|EPI\_ISL\_494496|Original|hCoV-19^^California|Human|San Diego County Public Health Laboratory|Andersen lab at Scripps Research|Gangavarapu|USA

>Spike|hCoV-19/India/OR-ILSCV20596/2020|2020-05-15|EPI\_ISL\_463079|Original|hCoV-19^^Odisha|Human|Institute of Life Sciences|Immunogenomics lab|Raghav|India

>Spike|hCoV-19/USA/OR-OHSU-0993/2020|2020-07-07|EPI\_ISL\_525944|Original|hCoV-19^^Oregon|Human|OHSU Lab Services Molecular Microbiology Lab|Oregon SARS-CoV-2 Genome Sequencing Center|O'Roak|USA

>Spike|hCoV-19/USA/TX-HMH-MCoV-18519/2020|2020-11-19|EPI\_ISL\_784867|Original|hCoV-19^^Texas|Human|Houston Methodist Hospital|Houston Methodist Hospital|Long|USA

>Spike|hCoV-19/Scotland/QEUA-AD1E40/2020|2020-10-27|EPI\_ISL\_644027|Original|hCoV-19^^Scotland|Human|Lighthouse Lab in Glasgow|Wellcome Sanger Institute for the COVID-19 Genomics UK (COG-UK) Consortium|Davies|United Kingdom

>Spike|hCoV-19/England/ALDP-A94FBF/2020|2020-10-19|EPI\_ISL\_624718|Original|hCoV-19^^England|Human|Lighthouse Lab in Alderley Park|Wellcome Sanger Institute for the COVID-19 Genomics UK (COG-UK) consortium|Davies|United Kingdom

>Spike|hCoV-19/England/ALDP-921E33/2020|2020-06-23|EPI\_ISL\_553298|Original|hCoV-19^^England|Human|Lighthouse Lab in Alderley Park|Wellcome Sanger Institute for the COVID-19 Genomics UK (COG-UK) consortium|Davies|United Kingdom

>Spike|hCoV-19/Netherlands/GR-RIVM-20421/2020|2020-11-30|EPI\_ISL\_728641|Original|hCoV-19^^Groningen|Human|Dutch COVID-19 response team|National Institute for Public Health and the Environment (RIVM)|Meijer|Netherlands

>Spike|hCoV-19/England/ALDP-9EA67A/2020|2020-09-24|EPI\_ISL\_580119|Original|hCoV-19^^England|Human|Lighthouse Lab in Alderley Park|Wellcome Sanger Institute for the COVID-19 Genomics UK (COG-UK) consortium|Davies|United Kingdom

>Spike|hCoV-19/Wales/PHWC-168050/2020|2020-04-19|EPI\_ISL\_494193|Original|hCoV-19^^Wales|Human|Originating lab|COVID-19 Genomics UK (COG-UK) Consortium|Moore|United Kingdom

>Spike|hCoV-19/England/ALDP-A6D08F/2020|2020-10-14|EPI\_ISL\_608054|Original|hCoV-19^^England|Human|Lighthouse Lab in Alderley Park|Wellcome Sanger Institute for the COVID-19 Genomics UK (COG-UK) consortium|Davies|United Kingdom

>Spike|hCoV-19/USA/WA-S2691/2020|2020-06-22|EPI\_ISL\_497323|Original|hCoV-19^^Washington|Human|Washington State Department of Health|Seattle Flu Study|Lee|USA

>Spike|hCoV-19/England/QEUA-9F5375/2020|2020-09-25|EPI\_ISL\_638667|Original|hCoV-19^^England|Human|Department of Pathology|COVID-19 Genomics UK (COG-UK) Consortium|Goodfellow|United Kingdom

>Spike|hCoV-19/USA/WA-UW-31218/2020|2020-10-13|EPI\_ISL\_735462|Original|hCoV-19^^Washington|Human|UW Virology Lab|UW Virology Lab|Roychoudhury|USA

>Spike|hCoV-19/USA/CA-CZB-14512/2020|2020-11-11|EPI\_ISL\_739451|Original|hCoV-19^^California|Human|Santa Clara County Public Health Laboratory|Chan-Zuckerberg Biohub|Kamm|USA

>Spike|hCoV-19/USA/NY-NYCPHL-000023/2020|2020-03-10|EPI\_ISL\_631519|Original|hCoV-19^^New York|Human|New York Presbyterian-Brooklyn Methodist Hospital|New York City Public Health Laboratory|Wang|USA

>Spike|hCoV-19/England/MILK-9A5602/2020|2020-09-03|EPI\_ISL\_550095|Original|hCoV-19^^England|Human|Lighthouse Lab in Milton Keynes|Wellcome Sanger Institute for the COVID-19 Genomics UK (COG-UK) consortium|Davies|United Kingdom

>Spike|hCoV-19/USA/VA-DCLS-1087/2020|2020-06-18|EPI\_ISL\_528679|Original|hCoV-19^^Virginia|Human|Virginia Division of Consolidated Laboratory Services (DCLS)|Virginia Division of Consolidated Laboratory Services (DCLS)|St. Jacques|USA

>Spike|hCoV-19/USA/UT-UPHL-201026758/2020|2020-07-06|EPI\_ISL\_594044|Original|hCoV-19^^Utah|Human|Utah Public Health Laboratory|Utah Public Health Laboratory|Young|USA

>Spike|hCoV-19/Wales/PHWC-4A1304/2020|2020-12-09|EPI\_ISL\_743654|Original|hCoV-19^^Wales|Human|Wales Specialist Virology Centre Sequencing lab|COVID-19 Genomics UK (COG-UK) Consortium|Moore|United Kingdom

>Spike|hCoV-19/England/ALDP-9C5068/2020|2020-09-10|EPI\_ISL\_567855|Original|hCoV-19^^England|Human|Lighthouse Lab in Alderley Park|Wellcome Sanger Institute for the COVID-19 Genomics UK (COG-UK) consortium|Davies|United Kingdom

>Spike|hCoV-19/England/QEUA-B80A78/2020|2020-11-14|EPI\_ISL\_661847|Original|hCoV-19^^England|Human|Lighthouse Lab in Glasgow|Wellcome Sanger Institute for the COVID-19 Genomics UK (COG-UK) Consortium|Davies|United Kingdom

>Spike|hCoV-19/Belgium/reg-0409682/2020|2020-04-09|EPI\_ISL\_738208|Original|hCoV-19^^Sint-Niklaas|Human|UZ Leuven|KU Leuven|Maes|Belgium

>Spike|hCoV-19/USA/TX-HMH-MCoV-15576/2020|2020-10-26|EPI\_ISL\_787060|Original|hCoV-19^^Texas|Human|Houston Methodist Hospital|Houston Methodist Hospital|Long|USA

>Spike|hCoV-19/Japan/PG-7286/2020|2020-08-00|EPI\_ISL\_688389|Original|hCoV-19^^Japan|Human|Saitama Prefectural Institute of Public Health|Pathogen Genomics Center|Sekizuka|Japan

>Spike|hCoV-19/Ireland/OY-NVRL-76IRL27010/2020|2020-10-18|EPI\_ISL\_732523|Original|hCoV-19^^Offaly|Human|National Virus Reference Laboratory|National Virus Reference Laboratory|Gonzalez|Ireland

>Spike|hCoV-19/USA/CA-CZB-14430/2020|2020-11-04|EPI\_ISL\_738802|Original|hCoV-19^^California|Human|Alameda County Public Health Lab|Chan-Zuckerberg Biohub|Kamm|USA

>Spike|hCoV-19/Iran/SA-Isf-2/2020|2020-04-18|EPI\_ISL\_660111|Original|hCoV-19^^Iran|Human|Infectious Diseases and Tropical Medicine Research Center|Infectious Diseases and Tropical Medicine Research Center|Haghjooy Javanmard,S.|Iran

>Spike|hCoV-19/England/QEUA-96A205/2020|2020-08-15|EPI\_ISL\_536958|Original|hCoV-19^^England|Human|Lighthouse Lab in Glasgow|Wellcome Sanger Institute for the COVID-19 Genomics UK (COG-UK) consortium|Davies|United Kingdom

>Spike|hCoV-19/England/20172002704/2020|2020-04-18|EPI\_ISL\_465322|Original|hCoV-19^^England|Human|Respiratory Virus Unit|Respiratory Virus Unit|Platt|United Kingdom

>Spike|hCoV-19/Netherlands/NA\_69/2020|2020-03-09|EPI\_ISL\_422829|Original|hCoV-19^^Netherlands|Human|Dutch COVID-19 response team|Erasmus Medical Center|Oude Munnink|Netherlands

>Spike|hCoV-19/USA/TX-HMH-2763/2020|2020-06-03|EPI\_ISL\_545537|Original|hCoV-19^^Texas|Human|Houston Methodist Hospital|Houston Methodist Hospital|Long|USA

>Spike|hCoV-19/England/QEUA-76CAB2/2020|2020-07-14|EPI\_ISL\_533204|Original|hCoV-19^^England|Human|Lighthouse Lab in Glasgow|Wellcome Sanger Institute for the COVID-19 Genomics UK (COG-UK) consortium|Davies|United Kingdom

>Spike|hCoV-19/England/QEUA-B139F5/2020|2020-11-02|EPI\_ISL\_641826|Original|hCoV-19^^England|Human|Lighthouse Lab in Glasgow|Wellcome Sanger Institute for the COVID-19 Genomics UK (COG-UK) Consortium|Davies|United Kingdom

>Spike|hCoV-19/England/ALDP-981A1F/2020|2020-08-09|EPI\_ISL\_526358|Original|hCoV-19^^England|Human|Queens Medical Centre|COVID-19 Genomics UK (COG-UK) Consortium|Loose|United Kingdom

>Spike|hCoV-19/USA/UT-UPHL-2012193060/2020|2020-08-13|EPI\_ISL\_745652|Original|hCoV-19^^Utah|Human|Ginkgo Bioworks Clinical Laboratory|Utah Public Health Laboratory|Young|USA

>Spike|hCoV-19/England/QEUA-99078F/2020|2020-08-24|EPI\_ISL\_530354|Original|hCoV-19^^England|Human|Lighthouse Lab in Glasgow|Wellcome Sanger Institute for the COVID-19 Genomics UK (COG-UK) consortium|Davies|United Kingdom

>Spike|hCoV-19/Australia/VIC17340/2020|2020-00-00|EPI\_ISL\_663850|Original|hCoV-19^^Victoria|Human|Microbiological Diagnostic Unit - Public Health Laboratory (MDU-PHL)|MDU-PHL|Schultz|Australia

>Spike|hCoV-19/England/CAMC-B78CAA/2020|2020-11-12|EPI\_ISL\_667841|Original|hCoV-19^^England|Human|Lighthouse Lab in Cambridge|Wellcome Sanger Institute for the COVID-19 Genomics UK (COG-UK) Consortium|Davies|United Kingdom

>Spike|hCoV-19/Scotland/QEUA-A0CAC0/2020|2020-10-03|EPI\_ISL\_585617|Original|hCoV-19^^Scotland|Human|Quadram Institute Bioscience|COVID-19 Genomics UK (COG-UK) Consortium|Alikhan|United Kingdom

>Spike|hCoV-19/Australia/SAP191/2020|2020-03-21|EPI\_ISL\_492128|Original|hCoV-19^^South Australia|Human|SA Pathology|SA Pathology|Leong|Australia

>Spike|hCoV-19/USA/WI-UW-723/2020|2020-06-30|EPI\_ISL\_491398|Original|hCoV-19^^Wisconsin|Human|University of Wisconsin-Madison AIDS Vaccine Research Laboratories|University of Wisconsin-Madison AIDS Vaccine Research Laboratories|Baczenas|USA

>Spike|hCoV-19/England/QEUH-A0266C/2020|2020-09-28|EPI\_ISL\_584919|Original|hCoV-19^^England|Human|Quadram Institute Bioscience|COVID-19 Genomics UK (COG-UK) Consortium|Alikhan|United Kingdom

>Spike|hCoV-19/Wuhan/HB-WH3-181/2020|2020-03-02|EPI\_ISL\_454942|Original|hCoV-19^^Hubei|Human|Wuhan Chain Medical Labs (CMLabs)|State Key Laboratory of Biotherapy of Sichuan University|Tang|China

>Spike|hCoV-19/Colombia/AMA-INS-103039/2020|2020-04-23|EPI\_ISL\_456144|Original|hCoV-19^^Amazonas|Human|Instituto Nacional de Salud - Unidad de Secuenciación y Análisis Genómico|Instituto Nacional de Salud|Díaz|Colombia

>Spike|hCoV-19/Japan/PG-0809/2020|2020-04-00|EPI\_ISL\_684419|Original|hCoV-19^^Japan|Human|Fukuoka Institute of Health and Environmental Sciences|Pathogen Genomics Center|Sekizuka|Japan

>Spike|hCoV-19/USA/WA-QDX-2176/2020|2020-03-21|EPI\_ISL\_604499|Original|hCoV-19^^Washington|Human|Quest Diagnostics|Quest Diagnostics|Kagan|USA

>Spike|hCoV-19/Spain/GA-IBV-004032/2020|2020-03-14|EPI\_ISL\_510273|Original|hCoV-19^^Galicia|Human|Hospital Clínico Universitario de Santiago de Compostela|SeqCOVID-SPAIN consortium/IBV (CSIC)|Comas|Spain

>Spike|hCoV-19/Wales/PHWC-492A2F/2020|2020-11-23|EPI\_ISL\_725735|Original|hCoV-19^^Wales|Human|Originating lab|COVID-19 Genomics UK (COG-UK) Consortium|Moore|United Kingdom

>Spike|hCoV-19/England/MILK-BAAE9A/2020|2020-11-18|EPI\_ISL\_783137|Original|hCoV-19^^England|Human|Lighthouse Lab in Milton Keynes|Wellcome Sanger Institute for the COVID-19 Genomics UK (COG-UK) Consortium|Davies|United Kingdom

>Spike|hCoV-19/Germany/SH-ChVir20798/2020|2020-12-02|EPI\_ISL\_729706|Original|hCoV-19^^Schleswig-Holstein|Human|A. Krumbholz|Charité Universitätsmedizin Berlin|Muehlemann|Germany

>Spike|hCoV-19/Ireland/D-NVRL-20G35042/2020|2020-03-19|EPI\_ISL\_605120|Original|hCoV-19^^Dublin|Human|National Virus Reference Laboratory|Irish Coronavirus Sequencing Consortium - Helixworks|Chalapathi|Ireland

>Spike|hCoV-19/England/MILK-97098F/2020|2020-08-18|EPI\_ISL\_553083|Original|hCoV-19^^England|Human|Lighthouse Lab in Milton Keynes|Wellcome Sanger Institute for the COVID-19 Genomics UK (COG-UK) consortium|Davies|United Kingdom

>Spike|hCoV-19/England/MILK-A79B8F/2020|2020-10-15|EPI\_ISL\_606695|Original|hCoV-19^^England|Human|Lighthouse Lab in Milton Keynes|Wellcome Sanger Institute for the COVID-19 Genomics UK (COG-UK) consortium|Davies|United Kingdom

>Spike|hCoV-19/England/BIRM-5FC68/2020|2020-05-21|EPI\_ISL\_473393|Original|hCoV-19^^England|Human|University of Birmingham|COVID-19 Genomics UK (COG-UK) Consortium|Loman|United Kingdom

>Spike|hCoV-19/England/MILK-9F0D4F/2020|2020-09-24|EPI\_ISL\_589579|Original|hCoV-19^^England|Human|Lighthouse Lab in Milton Keynes|Wellcome Sanger Institute for the COVID-19 Genomics UK (COG-UK) consortium|Davies|United Kingdom

>Spike|hCoV-19/USA/TX-HMH-MCoV-8657/2020|2020-07-01|EPI\_ISL\_780682|Original|hCoV-19^^Texas|Human|Houston Methodist Hospital|Houston Methodist Hospital|Long|USA

>Spike|hCoV-19/USA/TX-HMH-MCoV-18072/2020|2020-11-13|EPI\_ISL\_784420|Original|hCoV-19^^Texas|Human|Houston Methodist Hospital|Houston Methodist Hospital|Long|USA

>Spike|hCoV-19/USA/WA-UW-1709/2020|2020-03-21|EPI\_ISL\_424230|Original|hCoV-19^^Washington|Human|UW Virology Lab|UW Virology Lab|Roychoudhury|USA

>Spike|hCoV-19/Denmark/DCGC-6757/2020|2020-04-20|EPI\_ISL\_622348|Original|hCoV-19^^Hovedstaden|Human|Department of Virus and Microbiological Special Diagnostics|Albertsen lab|Michaelsen|Denmark

>Spike|hCoV-19/Wales/PHWC-4939E5/2020|2020-11-30|EPI\_ISL\_725969|Original|hCoV-19^^Wales|Human|Originating lab|COVID-19 Genomics UK (COG-UK) Consortium|Moore|United Kingdom

>Spike|hCoV-19/England/20139058304/2020|2020-03-27|EPI\_ISL\_420724|Original|hCoV-19^^England|Human|Respiratory Virus Unit|Respiratory Virus Unit|Platt|United Kingdom



>Spike|hCoV-19/Switzerland/GE-SNRCI-2480/2020|2020-03-00|EPI\_ISL\_548153|Original|hCoV-19^^Geneve|Human|Laboratoire de Virologie|Swiss National Reference Centre for Influenza|Gon\u00e7alves Cabecinhas|Switzerland

>Spike|hCoV-19/USA/NC\_200272/2020|2020-04-00|EPI\_ISL\_454811|Original|hCoV-19^^North Carolina|Human|Dirk Dittmer|Dirk Dittmer|Moorad|USA

>Spike|hCoV-19/Chile/RM-ISPCH-60/2020|2020-03-21|EPI\_ISL\_445356|Original|hCoV-19^^Region Metropolitana de Santiago|Human|PONTIFICIA U. CATOLICA SERV. LABORATORIO|Instituto de Salud Publica de Chile|Fernandez|Chile

>Spike|hCoV-19/Northern Ireland/NIRE-104083/2020|2020-04-08|EPI\_ISL\_482137|Original|hCoV-19^^Northern Ireland|Human|Regional Virus Laboratory|Wellcome Sanger Institute for the COVID-19 Genomics UK (COG-UK) consortium|Davies|United Kingdom

>Spike|hCoV-19/USA/MD-HP12067/2020|2020-11-25|EPI\_ISL\_791399|Original|hCoV-19^^Maryland|Human|Johns Hopkins Hospital Department of Pathology|Johns Hopkins Hospital Department of Pathology|Morris|USA

>Spike|hCoV-19/Japan/PG-1707/2020|2020-04-00|EPI\_ISL\_685313|Original|hCoV-19^^Japan|Human|Pathogen Genomics Center|Pathogen Genomics Center|Sekizuka|Japan

>Spike|hCoV-19/USA/UT-UPHL-2012543435/2020|2020-08-13|EPI\_ISL\_746009|Original|hCoV-19^^Utah|Human|Ginkgo Bioworks Clinical Laboratory|Utah Public Health Laboratory|Young|USA

>Spike|hCoV-19/Australia/VIC2441/2020|2020-06-26|EPI\_ISL\_522147|Original|hCoV-19^^Victoria|Human|Victorian Infectious Diseases Reference Laboratory (VIDRL)|VIDRL and MDU-PHL|Schultz|Australia

>Spike|hCoV-19/England/CAMC-A3E861/2020|2020-10-04|EPI\_ISL\_609545|Original|hCoV-19^^England|Human|Lighthouse Lab in Cambridge|Wellcome Sanger Institute for the COVID-19 Genomics UK (COG-UK) consortium|Davies|United Kingdom

>Spike|hCoV-19/South Africa/KRISP-K002162/2020|2020-07-08|EPI\_ISL\_515568|Original|hCoV-19^^KwaZulu-Natal|Human|NHLs-IALCH|KRISP|de Oliveira|South Africa

>Spike|hCoV-19/USA/MI-MDHHS-SC21320/2020|2020-04-01|EPI\_ISL\_507575|Original|hCoV-19^^Michigan|Human|Michigan Department of Health and Human Services|Michigan Department of Health and Human Services|Blankenship|USA

>Spike|hCoV-19/USA/CA-CHLA-PLM61959420/2020|2020-11-30|EPI\_ISL\_753450|Original|hCoV-19^^California|Human|Clinical virology Laboratory|Center for Personalized Medicine|Dien Bard|USA

>Spike|hCoV-19/England/CAMC-B9C5E1/2020|2020-11-15|EPI\_ISL\_673245|Original|hCoV-19^^England|Human|Lighthouse Lab in Cambridge|Wellcome Sanger Institute for the COVID-19 Genomics UK (COG-UK) Consortium|Davies|United Kingdom

>Spike|hCoV-19/USA/ME-HETL-J0085/2020|2020-03-21|EPI\_ISL\_513495|Original|hCoV-19^^Maine|Human|Maine HETL|Tewhey Lab|Tewhey|USA

>Spike|hCoV-19/USA/LA-GBCL-26513022/2020|2020-04-23|EPI\_ISL\_485076|Original|hCoV-19^^Louisiana|Human|River Road Testing Lab|Ginkgo Bioworks Clinical Laboratory|Smith|USA

>Spike|hCoV-19/England/ALDP-B24074/2020|2020-11-04|EPI\_ISL\_646283|Original|hCoV-19^^England|Human|Lighthouse Lab in Alderley Park|Wellcome Sanger Institute for the COVID-19 Genomics UK (COG-UK) Consortium|Davies|United Kingdom

>Spike|hCoV-19/Wales/PHWC-15C505/2020|2020-03-31|EPI\_ISL\_472499|Original|hCoV-19^^Wales|Human|Wales Specialist Virology Centre Sequencing lab|COVID-19 Genomics UK (COG-UK) Consortium|Moore|United Kingdom

>Spike|hCoV-19/England/QEUA-B11D64/2020|2020-11-02|EPI\_ISL\_642292|Original|hCoV-19^^England|Human|Lighthouse Lab in Glasgow|Wellcome Sanger Institute for the COVID-19 Genomics UK (COG-UK) Consortium|Davies|United Kingdom

>Spike|hCoV-19/Wales/MILK-B02CF0/2020|2020-10-24|EPI\_ISL\_647835|Original|hCoV-19^^Wales|Human|Lighthouse Lab in Milton Keynes|Wellcome Sanger Institute for the COVID-19 Genomics UK (COG-UK) Consortium|Davies|United Kingdom

>Spike|hCoV-19/South Korea/KCDC2080/2020|2020-02-21|EPI\_ISL\_497981|Original|hCoV-19^^South Korea|Human|Division of Viral Diseases|Division of Viral Diseases|Kim|South Korea

>Spike|hCoV-19/England/CAMC-A59280/2020|2020-10-08|EPI\_ISL\_597101|Original|hCoV-19^^England|Human|Lighthouse Lab in Cambridge|Wellcome Sanger Institute for the COVID-19 Genomics UK (COG-UK) consortium|Davies|United Kingdom

>Spike|hCoV-19/USA/OR-OHSU-0347/2020|2020-05-17|EPI\_ISL\_509112|Original|hCoV-19^^Oregon|Human|OHSU Lab Services Molecular Microbiology Lab|Oregon SARS-CoV-2 Genome Sequencing Center|O'Roak|USA

>Spike|hCoV-19/England/CAMB-73F74/2020|2020-03-20|EPI\_ISL\_440346|Original|hCoV-19^^England|Human|Department of Pathology|Wellcome Sanger Institute for the COVID-19 Genomics UK (COG-UK) consortium|Amato|United Kingdom

>Spike|hCoV-19/USA/CT-UW-2465/2020|2020-03-29|EPI\_ISL\_485921|Original|hCoV-19^^Connecticut|Human|UW Virology Lab|UW Virology Lab|Roychoudhury|USA

>Spike|hCoV-19/Scotland/CVR5641/2020|2020-10-20|EPI\_ISL\_651884|Original|hCoV-19^^Scotland|Human|West of Scotland Specialist Virology Centre|COVID-19 Genomics UK (COG-UK) Consortium|Robertson|United Kingdom

>Spike|hCoV-19/England/BRIS-12D682/2020|2020-05-08|EPI\_ISL\_481930|Original|hCoV-19^^England|Human|PHE South West Regional Laboratory|Wellcome Sanger Institute for the COVID-19 Genomics UK (COG-UK) consortium|Davies|United Kingdom

>Spike|hCoV-19/USA/AZ-TG648608/2020|2020-04-27|EPI\_ISL\_695855|Original|hCoV-19^^Arizona|Human|Sonora Quest Laboratories|TGen North|French|USA

>Spike|hCoV-19/England/BIRM-63821/2020|2020-08-19|EPI\_ISL\_529368|Original|hCoV-19^^England|Human|University of Birmingham|COVID-19 Genomics UK (COG-UK) Consortium|Loman|United Kingdom

>Spike|hCoV-19/England/MILK-B8F2F9/2020|2020-11-13|EPI\_ISL\_675305|Original|hCoV-19^^England|Human|Lighthouse Lab in Milton Keynes|Wellcome Sanger Institute for the COVID-19 Genomics UK (COG-UK) Consortium|Davies|United Kingdom

>Spike|hCoV-19/England/ALDP-A95859/2020|2020-10-20|EPI\_ISL\_624802|Original|hCoV-19^^England|Human|Lighthouse Lab in Alderley Park|Wellcome Sanger Institute for the COVID-19 Genomics UK (COG-UK) consortium|Davies|United Kingdom

>Spike|hCoV-19/Italy/CAM-INTPas-9/2020|2020-00-00|EPI\_ISL\_494763|Original|hCoV-19^^Campania|Human|INT Fondazione Pascale|INT Fondazione Pascale|Rachiglio|Italy

>Spike|hCoV-19/USA/LA-EVTL896/2020|2020-07-08|EPI\_ISL\_653587|Original|hCoV-19^^Louisiana|Human|LSUHS Emerging Viral Threat Laboratory|Microbial Genome Sequencing Center|Kamil|USA

>Spike|hCoV-19/USA/WA-S2704/2020|2020-06-22|EPI\_ISL\_497336|Original|hCoV-19^^Washington|Human|Washington State Department of Health|Seattle Flu Study|Lee|USA

>Spike|hCoV-19/India/MH-ACTREC-461/2020|2020-08-10|EPI\_ISL\_700109|Original|hCoV-19^^Maharashtra|Human|Hematopathology Laboratory|Hematopathology Laboratory|Patkar|India

>Spike|hCoV-19/USA/TX-HMH-6487/2020|2020-06-27|EPI\_ISL\_546031|Original|hCoV-19^^Texas|Human|Houston Methodist Hospital|Houston Methodist Hospital|Long|USA

>Spike|hCoV-19/England/CAMB-1BD60F/2020|2020-12-02|EPI\_ISL\_764322|Original|hCoV-19^^England|Human|Department of Pathology|COVID-19 Genomics UK (COG-UK) Consortium|Goodfellow|United Kingdom

>Spike|hCoV-19/England/NORT-29F5F6/2020|2020-04-30|EPI\_ISL\_490492|Original|hCoV-19^^England|Human|Northumbria University / South Tees Hospitals NHS Foundation Trust / North Cumbria Integrated Care NHS Foundation Trust / North Tees and Hartlepool NHS Foundation Trust / Newcastle Hospitals NHS Foundation Trust|COVID-19 Genomics UK (COG-UK) Consortium|Bashton|United Kingdom

>Spike|hCoV-19/England/ALDP-954462/2020|2020-06-13|EPI\_ISL\_553788|Original|hCoV-19^^England|Human|Lighthouse Lab in Alderley Park|Wellcome Sanger Institute for the COVID-19 Genomics UK (COG-UK) consortium|Davies|United Kingdom

>Spike|hCoV-19/USA/CA-CZB-1203/2020|2020-03-25|EPI\_ISL\_450452|Original|hCoV-19^^California|Human|Stanford clinical virology lab|Chan-Zuckerberg Biohub|Hao|USA

>Spike|hCoV-19/England/ALDP-AA3560/2020|2020-10-22|EPI\_ISL\_623943|Original|hCoV-19^^England|Human|Lighthouse Lab in Alderley Park|Wellcome Sanger Institute for the COVID-19 Genomics UK (COG-UK) consortium|Davies|United Kingdom

>Spike|hCoV-19/Switzerland/ZH-ETHZ-420606/2020|2020-12-22|EPI\_ISL\_768311|Original|hCoV-19^^Zurich|Human|Viollier AG|Department of Biosystems Science and Engineering|Nadeau|Switzerland

>Spike|hCoV-19/Spain/PV-IBV-000714/2020|2020-03-05|EPI\_ISL\_452754|Original|hCoV-19^^Basque Country|Human|Hospital Universitario Araba. Vitoria-Gasteiz,|SeqCOVID-SPAIN consortium/IBV (CSIC)|Comas|Spain

>Spike|hCoV-19/England/LIVE-AAEA4/2020|2020-07-28|EPI\_ISL\_540623|Original|hCoV-19^^England|Human|Liverpool Clinical Laboratories|COVID-19 Genomics UK (COG-UK) Consortium|Haldenby|United Kingdom

>Spike|hCoV-19/USA/NY-NYUMC58/2020|2020-03-18|EPI\_ISL\_420573|Original|hCoV-19^^New York|Human|NYU Langone Health|Departments of Pathology and Medicine|Maurano|USA

>Spike|hCoV-19/USA/TX-HMH-MCoV-19437/2020|2020-11-30|EPI\_ISL\_783839|Original|hCoV-19^^Texas|Human|Houston Methodist Hospital|Houston Methodist Hospital|Long|USA

>Spike|hCoV-19/Gibraltar/205000642/2020|2020-12-00|EPI\_ISL\_709977|Original|hCoV-19^^Gibraltar|Human|Microbiology|Respiratory Virus Unit|Platt|Gibraltar

>Spike|hCoV-19/USA/TX-DSHS-0457/2020|2020-06-18|EPI\_ISL\_541990|Original|hCoV-19^^Texas|Human|Texas Department of State Health Services|Texas Department of State Health Services|Rahman|USA

>Spike|hCoV-19/USA/TX-HMH-MCoV-12307/2020|2020-09-25|EPI\_ISL\_790292|Original|hCoV-19^^Texas|Human|Houston Methodist Hospital|Houston Methodist Hospital|Long|USA

>Spike|hCoV-19/USA/TX-HMH-4798/2020|2020-06-22|EPI\_ISL\_544337|Original|hCoV-19^^Texas|Human|Houston Methodist Hospital|Houston Methodist Hospital|Long|USA

>Spike|hCoV-19/USA/MI-MDHHS-SC20932/2020|2020-03-23|EPI\_ISL\_507722|Original|hCoV-19^^Michigan|Human|Michigan Department of Health and Human Services|Michigan Department of Health and Human Services|Blankenship|USA

>Spike|hCoV-19/Iceland/363/2020|2020-03-19|EPI\_ISL\_424387|Original|hCoV-19^^Reykjavik|Human|The National University Hospital of Iceland|deCODE genetics|J\u00f3nsson|Iceland

>Spike|hCoV-19/Austria/CeMM0475/2020|2020-03-16|EPI\_ISL\_475880|Original|hCoV-19^^Austria|Human|Austrian Agency for Health and Food Safety (AGES)|Bergthaler laboratory|Bergthaler|Austria

>Spike|hCoV-19/England/ALDP-C8EEC8/2020|2020-12-09|EPI\_ISL\_777169|Original|hCoV-19^^England|Human|Lighthouse Lab in Alderley Park|Wellcome Sanger Institute for the COVID-19 Genomics UK (COG-UK) Consortium|Davies|United Kingdom

>Spike|hCoV-19/Belgium/UGent-138/2020|2020-04-27|EPI\_ISL\_481230|Original|hCoV-19^^Ghent|Human|Lab voor klinische biologie|Onderzoeksgroep Virologie|Lambrechts|Belgium

>Spike|hCoV-19/Denmark/DCGC-16515/2020|2020-11-16|EPI\_ISL\_714809|Original|hCoV-19^^Hovedstaden|Human|Department of Virus and Microbiological Special Diagnostics|Albertsen Lab|Michaelsen|Denmark

>Spike|hCoV-19/USA/WA-S973/2020|2020-05-01|EPI\_ISL\_463463|Original|hCoV-19^^Washington|Human|Washington State Department of Health|Seattle Flu Study|Bedford|USA

>Spike|hCoV-19/Denmark/DCGC-19424/2020|2020-12-07|EPI\_ISL\_748936|Original|hCoV-19^^Sjælland|Human|Department of Virus and Microbiological Special Diagnostics|Albertsen Lab|Michaelsen|Denmark

>Spike|hCoV-19/England/CAMC-B22C90/2020|2020-11-02|EPI\_ISL\_647335|Original|hCoV-19^^England|Human|Lighthouse Lab in Cambridge|Wellcome Sanger Institute for the COVID-19 Genomics UK (COG-UK) Consortium|Davies|United Kingdom

>Spike|hCoV-19/Canada/BC\_20847524/2020|2020-03-00|EPI\_ISL\_462782|Original|hCoV-19^^British Columbia|Human|BCCDC Public Health Laboratory|BCCDC Public Health Laboratory|Harrigan|Canada

>Spike|hCoV-19/Wales/PHWC-166702/2020|2020-06-13|EPI\_ISL\_494031|Original|hCoV-19^^Wales|Human|Originating lab|COVID-19 Genomics UK (COG-UK) Consortium|Moore|United Kingdom

>Spike|hCoV-19/Japan/PG-1613/2020|2020-04-00|EPI\_ISL\_685219|Original|hCoV-19^^Japan|Human|Pathogen Genomics Center|Pathogen Genomics Center|Sekizuka|Japan

>Spike|hCoV-19/England/LIVE-DB6251/2020|2020-11-06|EPI\_ISL\_650560|Original|hCoV-19^^England|Human|Liverpool Clinical Laboratories|COVID-19 Genomics UK (COG-UK) Consortium|Haldenby|United Kingdom

>Spike|hCoV-19/USA/MI-MDHHS-SC22621/2020|2020-11-23|EPI\_ISL\_737194|Original|hCoV-19^^Michigan|Human|Michigan Department of Health and Human Services|Michigan Department of Health and Human Services|Blankenship|USA

>Spike|hCoV-19/Denmark/DCGC-2566/2020|2020-08-10|EPI\_ISL\_617781|Original|hCoV-19^^Midtjylland|Human|Department of Virus and Microbiological Special Diagnostics|Albertsen lab|Michaelsen|Denmark

>Spike|hCoV-19/USA/WI-UW-213/2020|2020-03-25|EPI\_ISL\_428309|Original|hCoV-19^^Wisconsin|Human|University of Wisconsin-Madison AIDS Vaccine Research Laboratories|University of Wisconsin-Madison AIDS Vaccine Research Laboratories|Moreno|USA

>Spike|hCoV-19/England/CAMC-9B1D1D/2020|2020-09-04|EPI\_ISL\_566519|Original|hCoV-19^^England|Human|Lighthouse Lab in Cambridge|Wellcome Sanger Institute for the COVID-19 Genomics UK (COG-UK) consortium|Davies|United Kingdom

>Spike|hCoV-19/Egypt/CUNCI-HGC4I029/2020|2020-06-02|EPI\_ISL\_479701|Original|hCoV-19^^Egypt|Human|Egyptian National Cancer Institute (ENCI)|Egyptian National Cancer Institute (ENCI)|Zekri|Egypt

>Spike|hCoV-19/Japan/PG-2208/2020|2020-04-00|EPI\_ISL\_685813|Original|hCoV-19^^Japan|Human|Pathogen Genomics Center|Pathogen Genomics Center|Sekizuka|Japan

>Spike|hCoV-19/Singapore/1019/2020|2020-03-23|EPI\_ISL\_574504|Original|hCoV-19^^Singapore|Human|National Public Health Laboratory|National Public Health Laboratory|Mak|Singapore

>Spike|hCoV-19/England/ALDP-9FD850/2020|2020-10-02|EPI\_ISL\_587810|Original|hCoV-19^^England|Human|Lighthouse Lab in Alderley Park|Wellcome Sanger Institute for the COVID-19 Genomics UK (COG-UK) consortium|Davies|United Kingdom

>Spike|hCoV-19/Netherlands/NB-EMC-188/2020|2020-00-00|EPI\_ISL\_523311|Original|hCoV-19^^Noord Brabant|Human|Dutch COVID-19 response team|Erasmus Medical Center|Oude Munnink|Netherlands

>Spike|hCoV-19/India/TG-CCMB-X94/2020|2020-07-14|EPI\_ISL\_528869|Original|hCoV-19^^Telangana|Human|CSIR-Centre for Cellular and Molecular Biology|CSIR-Centre for Cellular and Molecular Biology|Banu|India

>Spike|hCoV-19/Belgium/GC-0328313/2020|2020-03-28|EPI\_ISL\_462167|Original|hCoV-19^^Binche|Human|KU Leuven|KU Leuven|Maes|Belgium

>Spike|hCoV-19/USA/NY-NYCPHL-000595/2020|2020-03-10|EPI\_ISL\_632053|Original|hCoV-19^^New York|Human|New York Presbyterian Queens|New York City Public Health Laboratory|Wang|USA

>Spike|hCoV-19/Peru/AMZ-UPCH-0257/2020|2020-09-28|EPI\_ISL\_729903|Original|hCoV-19^^Amazonas|Human|Instituto de Medicina Tropical|Laboratorio de Gen\u00f3mica Microbiana|Tsukayama|Peru

>Spike|hCoV-19/Hungary/US-60432w/2020|2020-10-02|EPI\_ISL\_677807|Original|hCoV-19^^B\u00e9k\u00e9s county|Human|University of Szeged|National Laboratory of Virology|Kemenesi|Hungary

>Spike|hCoV-19/USA/WA-UW-1828/2020|2020-03-22|EPI\_ISL\_424269|Original|hCoV-19^^Washington|Human|UW Virology Lab|UW Virology Lab|Roychoudhury|USA

>Spike|hCoV-19/England/MILK-995993/2020|2020-08-23|EPI\_ISL\_551680|Original|hCoV-19^^England|Human|Lighthouse Lab in Milton Keynes|Wellcome Sanger Institute for the COVID-19 Genomics UK (COG-UK) consortium|Davies|United Kingdom

>Spike|hCoV-19/Scotland/EDB6157/2020|2020-05-14|EPI\_ISL\_473893|Original|hCoV-19^^Scotland|Human|Virology Department|COVID-19 Genomics UK (COG-UK) Consortium|Williams|United Kingdom

>Spike|hCoV-19/England/MILK-AC81E9/2020|2020-10-21|EPI\_ISL\_629486|Original|hCoV-19^^England|Human|Lighthouse Lab in Milton Keynes|Wellcome Sanger Institute for the COVID-19 Genomics UK (COG-UK) consortium|Davies|United Kingdom

>Spike|hCoV-19/England/ALDP-BB35C6/2020|2020-11-19|EPI\_ISL\_702001|Original|hCoV-19^^England|Human|Lighthouse Lab in Alderley Park|Wellcome Sanger Institute for the COVID-19 Genomics UK (COG-UK) Consortium|Davies|United Kingdom

>Spike|hCoV-19/Netherlands/NB-RIVM-20282/2020|2020-11-28|EPI\_ISL\_723422|Original|hCoV-19^^Noord-Brabant|Human|Dutch COVID-19 response team|National Institute for Public Health and the Environment (RIVM)|Meijer|Netherlands

>Spike|hCoV-19/England/20124097102/2020|2020-03-13|EPI\_ISL\_418734|Original|hCoV-19^^England|Human|Respiratory Virus Unit|Respiratory Virus Unit|Platt|United Kingdom

>Spike|hCoV-19/England/ALDP-9E5A19/2020|2020-09-24|EPI\_ISL\_589473|Original|hCoV-19^^England|Human|Lighthouse Lab in Alderley Park|Wellcome Sanger Institute for the COVID-19 Genomics UK (COG-UK) consortium|Davies|United Kingdom

>Spike|hCoV-19/Denmark/DCGC-22455/2020|2020-12-14|EPI\_ISL\_757418|Original|hCoV-19^^Hovedstaden|Human|Department of Virus and Microbiological Special Diagnostics|Albertsen Lab|Michaelsen|Denmark

>Spike|hCoV-19/England/ALDP-4A8570/2020|2020-06-11|EPI\_ISL\_559542|Original|hCoV-19^^England|Human|Lighthouse Lab in Alderley Park|Wellcome Sanger Institute for the COVID-19 Genomics UK (COG-UK) consortium|Davies|United Kingdom

>Spike|hCoV-19/USA/FL-BPHL-0942/2020|2020-07-17|EPI\_ISL\_517832|Original|hCoV-19^^Florida|Human|Florida Bureau of Public Health Laboratories|Florida Bureau of Public Health Laboratories|Blanton|USA

>Spike|hCoV-19/England/LOND-1264D59/2020|2020-11-23|EPI\_ISL\_724563|Original|hCoV-19^^England|Human|University College London|COVID-19 Genomics UK (COG-UK) Consortium|Roy|United Kingdom

>Spike|hCoV-19/Denmark/DCGC-6956/2020|2020-10-12|EPI\_ISL\_619802|Original|hCoV-19^^Syddanmark|Human|Department of Virus and Microbiological Special Diagnostics|Albertsen lab|Michaelsen|Denmark

>Spike|hCoV-19/Scotland/QEUEH-AEFEF4/2020|2020-10-30|EPI\_ISL\_676454|Original|hCoV-19^^Scotland|Human|Lighthouse Lab in Glasgow|Wellcome Sanger Institute for the COVID-19 Genomics UK (COG-UK) Consortium|Davies|United Kingdom

>Spike|hCoV-19/England/QEUEH-B6A4D0/2020|2020-11-11|EPI\_ISL\_662509|Original|hCoV-19^^England|Human|Lighthouse Lab in Glasgow|Wellcome Sanger Institute for the COVID-19 Genomics UK (COG-UK) Consortium|Davies|United Kingdom

>Spike|hCoV-19/India/KA-nimh-17585/2020|2020-05-12|EPI\_ISL\_515963|Original|hCoV-19^^Karnataka|Human|VICTORIA HOSPITAL|Department of Neurovirology|Pattabiraman|India

>Spike|hCoV-19/England/CAMC-B33476/2020|2020-11-05|EPI\_ISL\_659115|Original|hCoV-19^^England|Human|Lighthouse Lab in Cambridge|Wellcome Sanger Institute for the COVID-19 Genomics UK (COG-UK) Consortium|Davies|United Kingdom

>Spike|hCoV-19/England/MILK-9589BA/2020|2020-06-15|EPI\_ISL\_554690|Original|hCoV-19^^England|Human|Lighthouse Lab in Milton Keynes|Wellcome Sanger Institute for the COVID-19 Genomics UK (COG-UK) consortium|Davies|United Kingdom

>Spike|hCoV-19/Wales/PHWC-485412/2020|2020-10-25|EPI\_ISL\_628182|Original|hCoV-19^^Wales|Human|Wales Specialist Virology Centre Sequencing lab|COVID-19 Genomics UK (COG-UK) Consortium|Moore|United Kingdom

>Spike|hCoV-19/Australia/VIC1711/2020|2020-05-19|EPI\_ISL\_456616|Original|hCoV-19^^Victoria|Human|Victorian Infectious Diseases Reference Laboratory (VIDRL)|Microbiological Diagnostic Unit Public Health Laboratory and Victorian Infectious Diseases Reference Laboratory|Schultz|Australia

>Spike|hCoV-19/Japan/PG-6415/2020|2020-07-00|EPI\_ISL\_689521|Original|hCoV-19^^Japan|Human|Pathogen Genomics Center|Pathogen Genomics Center|Sekizuka|Japan

>Spike|hCoV-19/Australia/TAS75/2020|2020-03-20|EPI\_ISL\_522746|Original|hCoV-19^^Tasmania|Human|Royal Hobart Hospital Microbiology Department|MDU-PHL|Schultz|Australia

>Spike|hCoV-19/England/ALDP-955BE4/2020|2020-06-12|EPI\_ISL\_555329|Original|hCoV-19^^England|Human|Lighthouse Lab in Alderley Park|Wellcome Sanger Institute for the COVID-19 Genomics UK (COG-UK) consortium|Davies|United Kingdom

>Spike|hCoV-19/England/LOND-1260713/2020|2020-03-17|EPI\_ISL\_516833|Original|hCoV-19^^England|Human|North West London Pathology|Wellcome Sanger Institute for the COVID-19 Genomics UK (COG-UK) consortium|Davies|United Kingdom

>Spike|hCoV-19/Australia/VIC15241/2020|2020-08-02|EPI\_ISL\_593214|Original|hCoV-19^^Victoria|Human|Microbiological Diagnostic Unit - Public Health Laboratory (MDU-PHL)|MDU-PHL|Schultz|Australia

>Spike|hCoV-19/Northern Ireland/NIRE-10892A/2020|2020-09-10|EPI\_ISL\_585218|Original|hCoV-19^^Northern Ireland|Human|Regional Virus Laboratory|COVID-19 Genomics UK (COG-UK) Consortium|Fairley|United Kingdom

>Spike|hCoV-19/England/CAMC-A80D25/2020|2020-10-13|EPI\_ISL\_610821|Original|hCoV-19^^England|Human|Lighthouse Lab in Cambridge|Wellcome Sanger Institute for the COVID-19 Genomics UK (COG-UK) consortium|Davies|United Kingdom

>Spike|hCoV-19/Latvia/073/2020|2020-07-10|EPI\_ISL\_501289|Original|hCoV-19^^Latvia|Human|Centr\u0101l\u0101 laboratorija|Latvian Biomedical Research and Study Centre|Zrelavs|Latvia

>Spike|hCoV-19/England/QEUH-9DC06E/2020|2020-09-21|EPI\_ISL\_601366|Original|hCoV-19^^England|Human|Lighthouse Lab in Glasgow|Wellcome Sanger Institute for the COVID-19 Genomics UK (COG-UK) Consortium|Davies|United Kingdom

>Spike|hCoV-19/Scotland/EDB7104/2020|2020-08-03|EPI\_ISL\_514530|Original|hCoV-19^^Scotland|Human|Virology Department|COVID-19 Genomics UK (COG-UK) Consortium|Williams|United Kingdom

>Spike|hCoV-19/Scotland/CVR6052/2020|2020-11-26|EPI\_ISL\_705718|Original|hCoV-19^^Scotland|Human|West of Scotland Specialist Virology Centre|COVID-19 Genomics UK (COG-UK) Consortium|Robertson|United Kingdom

>Spike|hCoV-19/USA/MI-MDHHS-SC21995/2020|2020-09-26|EPI\_ISL\_576218|Original|hCoV-19^^Michigan|Human|Michigan Department of Health and Human Services|Michigan Department of Health and Human Services|Blankenship|USA

>Spike|hCoV-19/England/NORW-EE34B/2020|2020-00-00|EPI\_ISL\_490530|Original|hCoV-19^^England|Human|Quadram Institute Bioscience|COVID-19 Genomics UK (COG-UK) Consortium|Alikhan|United Kingdom

>Spike|hCoV-19/USA/UT-08475/2020|2020-05-20|EPI\_ISL\_524245|Original|hCoV-19^^Utah|Human|Utah Public Health Laboratory|Utah Public Health Laboratory|Young|USA

>Spike|hCoV-19/Panama/335862/2020|2020-04-03|EPI\_ISL\_496822|Original|hCoV-19^^Panama West|Human|Gorgas Memorial Laboratory of Health Studies|Gorgas Memorial Laboratory of Health Studies|Martinez|Panama

>Spike|hCoV-19/Scotland/QEUH-A1EA70/2020|2020-10-01|EPI\_ISL\_598897|Original|hCoV-19^^Scotland|Human|Lighthouse Lab in Glasgow|Wellcome Sanger Institute for the COVID-19 Genomics UK (COG-UK) consortium|Davies|United Kingdom

>Spike|hCoV-19/England/ALDP-931735/2020|2020-06-21|EPI\_ISL\_552999|Original|hCoV-19^^England|Human|Lighthouse Lab in Alderley Park|Wellcome Sanger Institute for the COVID-19 Genomics UK (COG-UK) consortium|Davies|United Kingdom

>Spike|hCoV-19/Thailand/NIH-3083/2020|2020-03-00|EPI\_ISL\_515292|Vero P2|hCoV-19^^Bangkok|Human|Ramkhamhaeng Hospital|National Institute of Health. Department of medical Sciences|Phuygun|Thailand

>Spike|hCoV-19/USA/CA-ALSR-3505/2020|2020-09-17|EPI\_ISL\_636057|Original|hCoV-19^^California|Human|San Diego County Public Health Laboratory|Andersen lab at Scripps Research|Gangavarapu|USA

>Spike|hCoV-19/Netherlands/Gelderland\_75/2020|2020-05-18|EPI\_ISL\_460974|Original|hCoV-19^^Gelderland|Human|Dutch COVID-19 response team|Erasmus Medical Center|Oude Munnink|Netherlands

>Spike|hCoV-19/England/MILK-ACED0D/2020|2020-10-21|EPI\_ISL\_629325|Original|hCoV-19^^England|Human|Lighthouse Lab in Milton Keynes|Wellcome Sanger Institute for the COVID-19 Genomics UK (COG-UK) consortium|Davies|United Kingdom

>Spike|hCoV-19/USA/TX-HMH-1517/2020|2020-05-01|EPI\_ISL\_542767|Original|hCoV-19^^Texas|Human|Houston Methodist Hospital|Houston Methodist Hospital|Long|USA

>Spike|hCoV-19/England/ALDP-502652/2020|2020-06-25|EPI\_ISL\_559101|Original|hCoV-19^^England|Human|Lighthouse Lab in Alderley Park|Wellcome Sanger Institute for the COVID-19 Genomics UK (COG-UK) consortium|Davies|United Kingdom

>Spike|hCoV-19/Morocco/6903/2020|2020-04-19|EPI\_ISL\_459981|Original|hCoV-19^^Morocco|Human|Institut Pasteur du Maroc|Institut Pasteur du Maroc|Enouf|Morocco

>Spike|hCoV-19/USA/TX-HMH-MCoV-13203/2020|2020-08-26|EPI\_ISL\_788354|Original|hCoV-19^^Texas|Human|Houston Methodist Hospital|Houston Methodist Hospital|Long|USA

>Spike|hCoV-19/USA/CA-CZB-1572/2020|2020-04-12|EPI\_ISL\_468504|Original|hCoV-19^^California|Human|Ventura County Public Health Lab|Chan-Zuckerberg Biohub|Hao|USA

>Spike|hCoV-19/Germany/HH-hpi-p1870/2020|2020-03-23|EPI\_ISL\_775675|Original|hCoV-19^^Hamburg|Human|University Medical Center Hamburg Eppendorf|Heinrich Pette Institute|Robitaille|Germany

>Spike|hCoV-19/England/CAMC-991171/2020|2020-08-27|EPI\_ISL\_551874|Original|hCoV-19^^England|Human|Lighthouse Lab in Cambridge|Wellcome Sanger Institute for the COVID-19 Genomics UK (COG-UK) consortium|Davies|United Kingdom

>Spike|hCoV-19/USA/CA-CZB-14424/2020|2020-11-05|EPI\_ISL\_739606|Original|hCoV-19^^California|Human|Alameda County Public Health Lab|Chan-Zuckerberg Biohub|Kamm|USA

>Spike|hCoV-19/Spain/GA-IBV-002750/2020|2020-04-13|EPI\_ISL\_467282|Original|hCoV-19^^Galicia|Human|Hospital Cl\u00e9nico Universitario de Santiago de Compostela|SeqCOVID-SPAIN consortium/IBV (CSIC)|Comas|Spain

>Spike|hCoV-19/England/OXON-B3B47/2020|2020-03-23|EPI\_ISL\_534903|Original|hCoV-19^^England|Human|Oxford Viromics|COVID-19 Genomics UK (COG-UK) Consortium|Golubchik|United Kingdom

>Spike|hCoV-19/USA/CA-CZB-13814/2020|2020-08-17|EPI\_ISL\_739303|Original|hCoV-19^^California|Human|Alameda County Public Health Lab|Chan-Zuckerberg Biohub|Kamm|USA

>Spike|hCoV-19/England/LIVE-DBEAD9/2020|2020-10-29|EPI\_ISL\_664652|Original|hCoV-19^^England|Human|Liverpool Clinical Laboratories|COVID-19 Genomics UK (COG-UK) Consortium|Haldenby|United Kingdom

>Spike|hCoV-19/England/LIVE-DB4A5B/2020|2020-10-24|EPI\_ISL\_651391|Original|hCoV-19^^England|Human|Liverpool Clinical Laboratories|COVID-19 Genomics UK (COG-UK) Consortium|Haldenby|United Kingdom

>Spike|hCoV-19/England/MILK-BFD5EE/2020|2020-12-03|EPI\_ISL\_720769|Original|hCoV-19^^England|Human|Lighthouse Lab in Milton Keynes|Wellcome Sanger Institute for the COVID-19 Genomics UK (COG-UK) Consortium|Davies|United Kingdom

>Spike|hCoV-19/Wales/PHWC-31BD8/2020|2020-04-12|EPI\_ISL\_446541|Original|hCoV-19^^Wales|Human|Wales Specialist Virology Centre|Public Health Wales Microbiology Cardiff|Moore|United Kingdom

>Spike|hCoV-19/England/QEUEH-9C8399/2020|2020-09-11|EPI\_ISL\_567008|Original|hCoV-19^^England|Human|Lighthouse Lab in Glasgow|Wellcome Sanger Institute for the COVID-19 Genomics UK (COG-UK) consortium|Davies|United Kingdom

>Spike|hCoV-19/England/CAMC-BBCF47/2020|2020-11-18|EPI\_ISL\_704502|Original|hCoV-19^^England|Human|Department of Pathology|COVID-19 Genomics UK (COG-UK) Consortium|Goodfellow|United Kingdom

>Spike|hCoV-19/England/CAMB-1B8F72/2020|2020-11-02|EPI\_ISL\_651694|Original|hCoV-19^^England|Human|Department of Pathology|COVID-19 Genomics UK (COG-UK) Consortium|Goodfellow|United Kingdom

>Spike|hCoV-19/England/MILK-74A838/2020|2020-06-30|EPI\_ISL\_557435|Original|hCoV-19^^England|Human|Lighthouse Lab in Milton Keynes|Wellcome Sanger Institute for the COVID-19 Genomics UK (COG-UK) consortium|Davies|United Kingdom

>Spike|hCoV-19/USA/DE-DHSS-F917736/2020|2020-03-24|EPI\_ISL\_561346|Original|hCoV-19^^Delaware|Human|Delaware Public Health Lab|Delaware Public Health Lab|Bajwa|USA

>Spike|hCoV-19/England/QEUEH-A9EDBB/2020|2020-10-20|EPI\_ISL\_611467|Original|hCoV-19^^England|Human|Lighthouse Lab in Glasgow|Wellcome Sanger Institute for the COVID-19 Genomics UK (COG-UK) consortium|Davies|United Kingdom

>Spike|hCoV-19/England/QEUEH-BA2CA7/2020|2020-11-18|EPI\_ISL\_672802|Original|hCoV-19^^England|Human|Lighthouse Lab in Glasgow|Wellcome Sanger Institute for the COVID-19 Genomics UK (COG-UK) Consortium|Davies|United Kingdom

>Spike|hCoV-19/USA/TX-HMH-7353/2020|2020-06-29|EPI\_ISL\_546698|Original|hCoV-19^^Texas|Human|Houston Methodist Hospital|Houston Methodist Hospital|Long|USA

>Spike|hCoV-19/Spain/AN-IBV-001064/2020|2020-04-01|EPI\_ISL\_452612|Original|hCoV-19^^Andalucia|Human|Servicio de Microbiolog\u00eda y Parasitolog\u00eda cl\u00ednica. UCEIMP. Hospital Universitario Virgen del Roc\u00edo/IBIS/CSIC/US.|SeqCOVID-SPAIN consortium/IBV (CSIC) |Comas|Spain

>Spike|hCoV-19/Colombia/SAP-INS-SPSAN02/2020|2020-12-28|EPI\_ISL\_791088|Original|hCoV-19^^San Andres|Human|Instituto Nacional de Salud - Unidad de Secuenciaci\u00f3n y An\u00e9lisis Gen\u00f3mico|Instituto Nacional de Salud - Direcci\u00f3n de Investigaci\u00f3n en Salud P\u00fablica|D\u00edaz|Colombia

>Spike|hCoV-19/Netherlands/OV-EMC-97/2020|2020-09-09|EPI\_ISL\_722436|Original|hCoV-19^^Overijssel|Human|Dutch COVID-19 response team|Erasmus Medical Center|Oude Munnink|Netherlands

>Spike|hCoV-19/USA/TX-HMH-MCoV-9686/2020|2020-07-06|EPI\_ISL\_780225|Original|hCoV-19^^Texas|Human|Houston Methodist Hospital|Houston Methodist Hospital|Long|USA

>Spike|hCoV-19/England/QEUEH-B67DAB/2020|2020-11-11|EPI\_ISL\_655133|Original|hCoV-19^^England|Human|Lighthouse Lab in Glasgow|Wellcome Sanger Institute for the COVID-19 Genomics UK (COG-UK) Consortium|Davies|United Kingdom

>Spike|hCoV-19/Belgium/CJE-0325178/2020|2020-03-25|EPI\_ISL\_420435|Original|hCoV-19^^Colfontaine|Human|KU Leuven|KU Leuven|Maes|Belgium

>Spike|hCoV-19/Wales/PHWC-493C0A/2020|2020-11-17|EPI\_ISL\_725998|Original|hCoV-19^^Wales|Human|Originating lab|COVID-19 Genomics UK (COG-UK) Consortium|Moore|United Kingdom

>Spike|hCoV-19/England/ALDP-94F330/2020|2020-06-22|EPI\_ISL\_556489|Original|hCoV-19^^England|Human|Lighthouse Lab in Alderley Park|Wellcome Sanger Institute for the COVID-19 Genomics UK (COG-UK) consortium|Davies|United Kingdom

>Spike|hCoV-19/Portugal/PT1121/2020|2020-03-31|EPI\_ISL\_511668|Original|hCoV-19^^Portugal|Human|Instituto Nacional de Saude (INSA)|Instituto Nacional de Saude (INSA)|Borges|Portugal

>Spike|hCoV-19/England/QEUA-BA2D59/2020|2020-11-18|EPI\_ISL\_721063|Original|hCoV-19^^England|Human|Lighthouse Lab in Glasgow|Wellcome Sanger Institute for the COVID-19 Genomics UK (COG-UK) Consortium|Davies|United Kingdom

>Spike|hCoV-19/England/CAMC-A8234F/2020|2020-10-12|EPI\_ISL\_610834|Original|hCoV-19^^England|Human|Lighthouse Lab in Cambridge|Wellcome Sanger Institute for the COVID-19 Genomics UK (COG-UK) consortium|Davies|United Kingdom

>Spike|hCoV-19/Denmark/DCGC-13269/2020|2020-11-30|EPI\_ISL\_712158|Original|hCoV-19^^Hovedstaden|Human|Department of Virus and Microbiological Special Diagnostics|Albertsen Lab|Michaelsen|Denmark

>Spike|hCoV-19/Finland/S11BD1/2020|2020-09-22|EPI\_ISL\_732627|Original|hCoV-19^^Uusimaa|Human|Department of Virology and Immunology|Department of Virology|Smura|Finland

>Spike|hCoV-19/England/CAMB-7FC35/2020|2020-04-16|EPI\_ISL\_433494|Original|hCoV-19^^England|Human|Department of Pathology|COVID-19 Genomics UK (COG-UK) Consortium|Meredith|United Kingdom

>Spike|hCoV-19/France/IDF-8707/2020|2020-06-29|EPI\_ISL\_560642|Original|hCoV-19^^\u00cele-de-France|Human|Labo Analyses Med|National Reference Center for Viruses of Respiratory Infections|Enouf|France

>Spike|hCoV-19/Canada/ON-PHL-20-02222/2020|2020-09-00|EPI\_ISL\_671500|Original|hCoV-19^^Ontario|Human|Public Health Ontario Laboratory|Public Health Ontario Laboratory|Guthrie|Canada

>Spike|hCoV-19/England/CAMC-B21912/2020|2020-11-01|EPI\_ISL\_647273|Original|hCoV-19^^England|Human|Lighthouse Lab in Cambridge|Wellcome Sanger Institute for the COVID-19 Genomics UK (COG-UK) Consortium|Davies|United Kingdom

>Spike|hCoV-19/Scotland/EDB2983/2020|2020-04-02|EPI\_ISL\_487733|Original|hCoV-19^^Scotland|Human|Virology Department|Wellcome Sanger Institute for the COVID-19 Genomics UK (COG-UK) consortium|Davies|United Kingdom

>Spike|hCoV-19/Wales/MILK-973148/2020|2020-08-20|EPI\_ISL\_575811|Original|hCoV-19^^Wales|Human|Lighthouse Lab in Milton Keynes|Wellcome Sanger Institute for the COVID-19 Genomics UK (COG-UK) consortium|Davies|United Kingdom

>Spike|hCoV-19/Spain/MD-H12-62/2020|2020-04-12|EPI\_ISL\_529993|Original|hCoV-19^^Madrid|Human|Hospital Universitario 12 de Octubre|Hospital Universitario 12 de Octubre|Viedma|Spain

>Spike|hCoV-19/Denmark/DCGC-5749/2020|2020-09-28|EPI\_ISL\_621254|Original|hCoV-19^^Nordjylland|Human|Department of Virus and Microbiological Special Diagnostics|Albertsen lab|Michaelsen|Denmark

>Spike|hCoV-19/Netherlands/ZH-EMC-1223/2020|2020-12-17|EPI\_ISL\_763292|Original|hCoV-19^^Zuid Holland|Human|Dutch COVID-19 response team|Erasmus Medical Center|Oude Munnink|Netherlands

>Spike|hCoV-19/Denmark/DCGC-9270/2020|2020-11-16|EPI\_ISL\_668880|Original|hCoV-19^^Nordjylland|Human|Department of Virus and Microbiological Special Diagnostics|Albertsen Lab|Michaelsen|Denmark

>Spike|hCoV-19/Australia/VIC1948/2020|2020-06-09|EPI\_ISL\_480672|Original|hCoV-19^^Victoria|Human|Victorian Infectious Diseases Reference Laboratory (VIDRL)|VIDRL and MDU-PHL|Schultz|Australia

>Spike|hCoV-19/Wales/PHWC-25393/2020|2020-03-23|EPI\_ISL\_432190|Original|hCoV-19^^Wales|Human|Wales Specialist Virology Centre|Public Health Wales Microbiology Cardiff|Moore|United Kingdom

>Spike|hCoV-19/Scotland/QEUA-9E4EB4/2020|2020-09-24|EPI\_ISL\_601011|Original|hCoV-19^^Scotland|Human|Lighthouse Lab in Glasgow|Wellcome Sanger Institute for the COVID-19 Genomics UK (COG-UK) consortium|Davies|United Kingdom

>Spike|hCoV-19/Northern Ireland/NIRE-109051/2020|2020-10-13|EPI\_ISL\_652310|Original|hCoV-19^^Northern Ireland|Human|Regional Virus Laboratory|COVID-19 Genomics UK (COG-UK) Consortium|Fairley|United Kingdom



>Spike|hCoV-19/USA/MI-UM-10036762197/2020|2020-11-03|EPI\_ISL\_682221|Original|hCoV-19^^Michigan|Human|University of Michigan Clinical Microbiology Laboratory|Lauring Lab|Valesano|USA

>Spike|hCoV-19/England/CAMB-7277D/2020|2020-03-24|EPI\_ISL\_439638|Original|hCoV-19^^England|Human|Department of Pathology|Wellcome Sanger Institute for the COVID-19 Genomics UK (COG-UK) consortium|Amato|United Kingdom

>Spike|hCoV-19/Wales/PHWC-1638C6/2020|2020-05-02|EPI\_ISL\_474012|Original|hCoV-19^^Wales|Human|Originating lab|COVID-19 Genomics UK (COG-UK) Consortium|Moore|United Kingdom

>Spike|hCoV-19/England/MILK-9A67FF/2020|2020-08-30|EPI\_ISL\_576094|Original|hCoV-19^^England|Human|Lighthouse Lab in Milton Keynes|Wellcome Sanger Institute for the COVID-19 Genomics UK (COG-UK) consortium|Davies|United Kingdom

>Spike|hCoV-19/USA/MI-QDX-501/2020|2020-03-24|EPI\_ISL\_571235|Original|hCoV-19^^Michigan|Human|Quest Diagnostics|Quest Diagnostics|Kagan|USA

>Spike|hCoV-19/Denmark/DCGC-22547/2020|2020-12-14|EPI\_ISL\_757432|Original|hCoV-19^^Syddanmark|Human|Department of Virus and Microbiological Special Diagnostics|Albertsen Lab|Michaelsen|Denmark

>Spike|hCoV-19/Scotland/QEUAH-943703/2020|2020-08-02|EPI\_ISL\_532620|Original|hCoV-19^^Scotland|Human|NHSGGC West of Scotland Specialist Virology Centre / MRC-University of Glasgow Centre for Virus Research|Wellcome Sanger Institute for the COVID-19 Genomics UK (COG-UK) consortium|Davies|United Kingdom

>Spike|hCoV-19/Portugal/PT0700/2020|2020-03-17|EPI\_ISL\_510959|Original|hCoV-19^^Portugal|Human|Instituto Nacional de Saude (INSA)|Instituto Nacional de Saude (INSA)|Borges|Portugal

>Spike|hCoV-19/Denmark/DCGC-18608/2020|2020-12-07|EPI\_ISL\_750076|Original|hCoV-19^^Midtjylland|Human|Department of Virus and Microbiological Special Diagnostics|Albertsen Lab|Michaelsen|Denmark

>Spike|hCoV-19/Chile/RM-ISPCH-46/2020|2020-03-21|EPI\_ISL\_445325|Original|hCoV-19^^Region Metropolitana de Santiago|Human|HOSPITAL DR.SOTERO DEL RIO|Instituto de Salud Publica de Chile|Fernandez|Chile

>Spike|hCoV-19/England/MILK-4882BB/2020|2020-05-07|EPI\_ISL\_559688|Original|hCoV-19^^England|Human|Lighthouse Lab in Milton Keynes|Wellcome Sanger Institute for the COVID-19 Genomics UK (COG-UK) consortium|Davies|United Kingdom

>Spike|hCoV-19/Switzerland/Vs-ETHZ-110010/2020|2020-04-01|EPI\_ISL\_486450|Original|hCoV-19^^Valais|Human|Viollier AG|Department of Biosystems Science and Engineering|Nadeau|Switzerland

>Spike|hCoV-19/Luxembourg/LNS9562893/2020|2020-12-29|EPI\_ISL\_771150|Original|hCoV-19^^Luxembourg|Human|Laboratoire national de sant\u00e9|Laboratoire national de sant\u00e9|Wienecke-Baldacchino|Luxembourg

>Spike|hCoV-19/England/BIRM-6A08C/2020|2020-11-09|EPI\_ISL\_679018|Original|hCoV-19^^England|Human|University of Birmingham|COVID-19 Genomics UK (COG-UK) Consortium|Loman|United Kingdom

>Spike|hCoV-19/England/BIRM-64EB5/2020|2020-09-24|EPI\_ISL\_594527|Original|hCoV-19^^England|Human|University of Birmingham|COVID-19 Genomics UK (COG-UK) Consortium|Loman|United Kingdom

>Spike|hCoV-19/Denmark/DCGC-8964/2020|2020-10-26|EPI\_ISL\_625870|Original|hCoV-19^^Nordjylland|Human|Department of Virus and Microbiological Special Diagnostics|Albertsen lab|Michaelsen|Denmark

>Spike|hCoV-19/USA/UT-UPHL-04858/2020|2020-05-23|EPI\_ISL\_575179|Original|hCoV-19^^Utah|Human|Utah Public Health Laboratory|Utah Public Health Laboratory|Young|USA

>Spike|hCoV-19/Denmark/DCGC-9761/2020|2020-11-09|EPI\_ISL\_669154|Original|hCoV-19^^Midtjylland|Human|Department of Virus and Microbiological Special Diagnostics|Albertsen Lab|Michaelsen|Denmark

>Spike|hCoV-19/USA/TX-HMH-1155/2020|2020-04-27|EPI\_ISL\_542556|Original|hCoV-19^^Texas|Human|Houston Methodist Hospital|Houston Methodist Hospital|Long|USA

>Spike|hCoV-19/Australia/VIC2187/2020|2020-06-23|EPI\_ISL\_521933|Original|hCoV-19^^Victoria|Human|Microbiological Diagnostic Unit - Public Health Laboratory (MDU-PHL)|MDU-PHL|Schultz|Australia

>Spike|hCoV-19/Denmark/DCGC-6704/2020|2020-04-20|EPI\_ISL\_622386|Original|hCoV-19^^Hovedstaden|Human|Department of Virus and Microbiological Special Diagnostics|Albertsen lab|Michaelsen|Denmark

>Spike|hCoV-19/Spain/AR-IBV-2432/2020|2020-03-24|EPI\_ISL\_468788|Original|hCoV-19^^Aragon|Human|Servicio de Microbiolog\u00eda|SeqCOVID-SPAIN consortium/IBV (CSIC) |Comas|Spain

>Spike|hCoV-19/Denmark/DCGC-20333/2020|2020-11-16|EPI\_ISL\_748118|Original|hCoV-19^^Sjaelland|Human|Department of Virus and Microbiological Special Diagnostics|Albertsen Lab|Michaelsen|Denmark

>Spike|hCoV-19/England/MILK-ACCA80/2020|2020-10-21|EPI\_ISL\_629411|Original|hCoV-19^^England|Human|Lighthouse Lab in Milton Keynes|Wellcome Sanger Institute for the COVID-19 Genomics UK (COG-UK) consortium|Davies|United Kingdom

>Spike|hCoV-19/England/MILK-A79BE9/2020|2020-10-15|EPI\_ISL\_606708|Original|hCoV-19^^England|Human|Lighthouse Lab in Milton Keynes|Wellcome Sanger Institute for the COVID-19 Genomics UK (COG-UK) consortium|Davies|United Kingdom

>Spike|hCoV-19/England/NORW-E8FB6/2020|2020-04-24|EPI\_ISL\_453571|Original|hCoV-19^^England|Human|Quadram Institute Bioscience|COVID-19 Genomics UK (COG-UK) Consortium|Alikhan|United Kingdom

>Spike|hCoV-19/Sweden/20-08533/2020|2020-03-27|EPI\_ISL\_476143|Original|hCoV-19^^Vastra Gotaland|Human|Skovde/Unilabs|The Public Health Agency of Sweden|Svartstr\u00f6m|Sweden

>Spike|hCoV-19/Switzerland/VD-ETHZ-280181/2020|2020-09-09|EPI\_ISL\_560520|Original|hCoV-19^^Vaud|Human|Viollier AG|Department of Biosystems Science and Engineering|Nadeau|Switzerland

>Spike|hCoV-19/Sweden/20-50194/2020|2020-03-05|EPI\_ISL\_455863|Original|hCoV-19^^Stockholm|Human|Karolinska Universitetslaboratoriet|The Public Health Agency of Sweden|Svartstr\u00f6m|Sweden

>Spike|hCoV-19/Japan/PG-7249/2020|2020-08-00|EPI\_ISL\_688352|Original|hCoV-19^^Japan|Human|Saitama Prefectural Institute of Public Health|Pathogen Genomics Center|Sekizuka|Japan

>Spike|hCoV-19/USA/MI-MDHHS-SC22159/2020|2020-10-12|EPI\_ISL\_614210|Original|hCoV-19^^Michigan|Human|Michigan Department of Health and Human Services|Michigan Department of Health and Human Services|Jacob|USA

>Spike|hCoV-19/England/ALDP-B23673/2020|2020-11-04|EPI\_ISL\_647111|Original|hCoV-19^^England|Human|Lighthouse Lab in Alderley Park|Wellcome Sanger Institute for the COVID-19 Genomics UK (COG-UK) Consortium|Davies|United Kingdom

>Spike|hCoV-19/Denmark/DCGC-20113/2020|2020-12-07|EPI\_ISL\_747991|Original|hCoV-19^^Syddanmark|Human|Department of Virus and Microbiological Special Diagnostics|Albertsen Lab|Michaelsen|Denmark

>Spike|hCoV-19/England/ALDP-B2397A/2020|2020-11-04|EPI\_ISL\_646914|Original|hCoV-19^^England|Human|Lighthouse Lab in Alderley Park|Wellcome Sanger Institute for the COVID-19 Genomics UK (COG-UK) Consortium|Davies|United Kingdom

>Spike|hCoV-19/Denmark/DCGC-1307/2020|2020-06-08|EPI\_ISL\_618090|Original|hCoV-19^^Nordjylland|Human|Department of Virus and Microbiological Special Diagnostics|Albertsen lab|Michaelsen|Denmark

>Spike|hCoV-19/Wales/PHWC-492245/2020|2020-11-17|EPI\_ISL\_704038|Original|hCoV-19^^Wales|Human|Originating lab|COVID-19 Genomics UK (COG-UK) Consortium|Moore|United Kingdom

>Spike|hCoV-19/USA/MA-MASPHL-00914/2020|2020-10-22|EPI\_ISL\_692834|Original|hCoV-19^^Massachusetts|Human|Massachusetts State Public Health Laboratory|Massachusetts State Public Health Laboratory|Lang|USA

>Spike|hCoV-19/Australia/VIC7214/2020|2020-07-11|EPI\_ISL\_564287|Original|hCoV-19^^Victoria|Human|Microbiological Diagnostic Unit - Public Health Laboratory (MDU-PHL) |MDU-PHL|Schultz|Australia

>Spike|hCoV-19/Denmark/DCGC-13016/2020|2020-11-30|EPI\_ISL\_712531|Original|hCoV-19^^Sjaelland|Human|Department of Virus and Microbiological Special Diagnostics|Albertsen Lab|Michaelsen|Denmark

>Spike|hCoV-19/England/MILK-699FBE/2020|2020-07-01|EPI\_ISL\_551744|Original|hCoV-19^^England|Human|Lighthouse Lab in Milton Keynes|Wellcome Sanger Institute for the COVID-19 Genomics UK (COG-UK) consortium|Davies|United Kingdom

>Spike|hCoV-19/USA/MI-UM-10036853496/2020|2020-11-09|EPI\_ISL\_728494|Original|hCoV-19^^Michigan|Human|University of Michigan Clinical Microbiology Laboratory|Lauring Lab|Valesano|USA

>Spike|hCoV-19/USA/FL-BPHL-051/2020|2020-04-17|EPI\_ISL\_436555|Original|hCoV-19^^Florida|Human|Florida Bureau of Public Health Laboratories|Florida Bureau of Public Health Laboratories|Blanton|USA

>Spike|hCoV-19/USA/NY-SURV0144/2020|2020-03-02|EPI\_ISL\_436050|Original|hCoV-19^^New York|Human|NYC Department of Health and Mental Hygiene|Pathogen Discovery|Queen|USA

>Spike|hCoV-19/Wales/PHWC-48AE4C/2020|2020-11-03|EPI\_ISL\_666164|Original|hCoV-19^^Wales|Human|Wales Specialist Virology Centre Sequencing lab|COVID-19 Genomics UK (COG-UK) Consortium|Moore|United Kingdom

>Spike|hCoV-19/England/CAMC-B20A7A/2020|2020-11-01|EPI\_ISL\_647547|Original|hCoV-19^^England|Human|Lighthouse Lab in Cambridge|Wellcome Sanger Institute for the COVID-19 Genomics UK (COG-UK) Consortium|Davies|United Kingdom

>Spike|hCoV-19/England/204290933/2020|2020-10-17|EPI\_ISL\_622862|Original|hCoV-19^^England|Human|Respiratory Virus Unit|Respiratory Virus Unit|Platt|United Kingdom

>Spike|hCoV-19/Scotland/EDB4636/2020|2020-05-08|EPI\_ISL\_478172|Original|hCoV-19^^Scotland|Human|Virology Department|COVID-19 Genomics UK (COG-UK) Consortium|Williams|United Kingdom

>Spike|hCoV-19/USA/MI-QDX-641/2020|2020-03-17|EPI\_ISL\_571366|Original|hCoV-19^^Michigan|Human|Quest Diagnostics|Quest Diagnostics|Kagan|USA

>Spike|hCoV-19/Wales/PHWC-24DB4/2020|2020-03-20|EPI\_ISL\_419511|Original|hCoV-19^^Wales|Human|Wales Specialist Virology Centre|Public Health Wales Microbiology Cardiff|Moore|United Kingdom

>Spike|hCoV-19/Sichuan/SC-WCH2-006/2020|2020-02-08|EPI\_ISL\_451076|Original|hCoV-19^^Sichuan|Human|West China Hospital of Sichuan University|State Key Laboratory of Biotherapy of Sichuan University|Tang|China

>Spike|hCoV-19/Germany/NW-HHU-85/2020|2020-08-17|EPI\_ISL\_539601|Original|hCoV-19^^North Rhine-Westphalia|Human|ZOTZ KLIMAS MVZ D\u00fcsseldorf-Centrum GbR \u00dcBAG f\u00fcr Labormedizin|Center of Medical Microbiology|Wienemann|Germany

>Spike|hCoV-19/England/MILK-BAC171/2020|2020-11-18|EPI\_ISL\_783144|Original|hCoV-19^^England|Human|Lighthouse Lab in Milton Keynes|Wellcome Sanger Institute for the COVID-19 Genomics UK (COG-UK) Consortium|Davies|United Kingdom

>Spike|hCoV-19/England/CAMC-A5951E/2020|2020-10-09|EPI\_ISL\_597021|Original|hCoV-19^^England|Human|Lighthouse Lab in Cambridge|Wellcome Sanger Institute for the COVID-19 Genomics UK (COG-UK) consortium|Davies|United Kingdom

>Spike|hCoV-19/USA/TX-HMH-5943/2020|2020-06-25|EPI\_ISL\_547110|Original|hCoV-19^^Texas|Human|Houston Methodist Hospital|Houston Methodist Hospital|Long|USA

>Spike|hCoV-19/Canada/ON-PHL-3680/2020|2020-03-00|EPI\_ISL\_418348|Original|hCoV-19^^Ontario|Human|Public Health Ontario Laboratories|Public Health Ontario Laboratories|Eshaghi|Canada

>Spike|hCoV-19/USA/FL-BPHL-0865/2020|2020-07-02|EPI\_ISL\_514211|Original|hCoV-19^^Florida|Human|Florida Bureau of Public Health Laboratories|Florida Bureau of Public Health Laboratories|Blanton|USA

>Spike|hCoV-19/England/ALDP-955258/2020|2020-06-12|EPI\_ISL\_553615|Original|hCoV-19^^England|Human|Lighthouse Lab in Alderley Park|Wellcome Sanger Institute for the COVID-19 Genomics UK (COG-UK) consortium|Davies|United Kingdom

>Spike|hCoV-19/Switzerland/BS-UHB-42173111/2020|2020-03-02|EPI\_ISL\_527920|Original|hCoV-19^^Basel-Stadt|Human|University Hospital Basel|University Hospital Basel|Roloff Handschin|Switzerland

>Spike|hCoV-19/England/ALDP-C3B774/2020|2020-12-11|EPI\_ISL\_731043|Original|hCoV-19^^England|Human|Lighthouse Lab in Alderley Park|Wellcome Sanger Institute for the COVID-19 Genomics UK (COG-UK) Consortium|Davies|United Kingdom

>Spike|hCoV-19/Suriname/SR-33/2020|2020-06-25|EPI\_ISL\_517644|Original|hCoV-19^^Suriname|Human|Academic Hospital Paramaribo|Erasmus Medical Center|M\u00f6nster|Suriname

>Spike|hCoV-19/India/DL-NCDC1895-CSIR-IGIB/2020|2020-05-18|EPI\_ISL\_482512|Original|hCoV-19^^Delhi|Human|National Centre for Disease control (NCDC)|NCDC/CSIR-IGIB|Pandey|India

>Spike|hCoV-19/USA/CA-CZB-3870/2020|2020-07-17|EPI\_ISL\_548576|Original|hCoV-19^^California|Human|County of Santa Clara Public Health Department|Chan-Zuckerberg Biohub|Bhatt|USA

>Spike|hCoV-19/Austria/CeMM0829/2020|2020-04-15|EPI\_ISL\_583724|Original|hCoV-19^^Austria|Human|Center for Virology|Bergthaler laboratory|Bergthaler|Austria

>Spike|hCoV-19/Denmark/DCGC-12416/2020|2020-11-16|EPI\_ISL\_682597|Original|hCoV-19^^Hovedstaden|Human|Department of Virus and Microbiological Special Diagnostics|Albertsen Lab|Michaelsen|Denmark

>Spike|hCoV-19/England/MILK-A6B731/2020|2020-10-09|EPI\_ISL\_608836|Original|hCoV-19^^England|Human|Lighthouse Lab in Milton Keynes|Wellcome Sanger Institute for the COVID-19 Genomics UK (COG-UK) consortium|Davies|United Kingdom

>Spike|hCoV-19/Japan/PG-3912/2020|2020-06-00|EPI\_ISL\_692163|Original|hCoV-19^^Japan|Human|Tokyo Metropolitan Institute of Public Health|Pathogen Genomics Center|Sekizuka|Japan

>Spike|hCoV-19/England/ALDP-CECD43/2020|2020-12-21|EPI\_ISL\_781348|Original|hCoV-19^^England|Human|Lighthouse Lab in Alderley Park|Wellcome Sanger Institute for the COVID-19 Genomics UK (COG-UK) Consortium|Davies|United Kingdom

>Spike|hCoV-19/Colombia/VAC-INS-79930/2020|2020-03-14|EPI\_ISL\_456137|Original|hCoV-19^^Valle del Cauca|Human|Instituto Nacional de Salud - Unidad de Secuenciación y Análisis Genómico|Instituto Nacional de Salud|Díaz|Colombia

>Spike|hCoV-19/England/QEUEH-BC3718/2020|2020-11-25|EPI\_ISL\_704085|Original|hCoV-19^^England|Human|Lighthouse Lab in Glasgow|Wellcome Sanger Institute for the COVID-19 Genomics UK (COG-UK) Consortium|Davies|United Kingdom

>Spike|hCoV-19/Australia/VIC17876/2020|2020-08-21|EPI\_ISL\_779524|Original|hCoV-19^^Victoria|Human|Microbiological Diagnostic Unit - Public Health Laboratory (MDU-PHL)|MDU-PHL|Beck|Australia

>Spike|hCoV-19/Denmark/DCGC-22138/2020|2020-12-14|EPI\_ISL\_758107|Original|hCoV-19^^Hovedstaden|Human|Department of Virus and Microbiological Special Diagnostics|Albertsen Lab|Michaelsen|Denmark

>Spike|hCoV-19/Singapore/1153/2020|2020-03-19|EPI\_ISL\_648067|Original|hCoV-19^^Singapore|Human|Department of Laboratory Medicine|Department of Laboratory Medicine|Chen|Singapore

>Spike|hCoV-19/Scotland/CVR5216/2020|2020-10-15|EPI\_ISL\_626687|Original|hCoV-19^^Scotland|Human|West of Scotland Specialist Virology Centre|COVID-19 Genomics UK (COG-UK) Consortium|Robertson|United Kingdom

>Spike|hCoV-19/England/QEUEH-A005DA/2020|2020-10-02|EPI\_ISL\_584891|Original|hCoV-19^^England|Human|University of Exeter|COVID-19 Genomics UK (COG-UK) Consortium|Temperton|United Kingdom

>Spike|hCoV-19/USA/MI-MDHHS-SC22029/2020|2020-09-14|EPI\_ISL\_577585|Original|hCoV-19^^Michigan|Human|Michigan Department of Health and Human Services|Michigan Department of Health and Human Services|Jacob|USA

>Spike|hCoV-19/England/QEUEH-89C2DE/2020|2020-07-27|EPI\_ISL\_532688|Original|hCoV-19^^England|Human|Lighthouse Lab in Glasgow|Wellcome Sanger Institute for the COVID-19 Genomics UK (COG-UK) consortium|Davies|United Kingdom

>Spike|hCoV-19/USA/UT-UPHL-2012575394/2020|2020-08-03|EPI\_ISL\_745767|Original|hCoV-19^^Utah|Human|Ginkgo Bioworks Clinical Laboratory|Utah Public Health Laboratory|Young|USA

>Spike|hCoV-19/England/CAMB-A98434/2020|2020-12-26|EPI\_ISL\_764344|Original|hCoV-19^^England|Human|Department of Pathology|COVID-19 Genomics UK (COG-UK) Consortium|Goodfellow|United Kingdom

>Spike|hCoV-19/England/SHEF-D125D/2020|2020-04-23|EPI\_ISL\_484514|Original|hCoV-19^^England|Human|Virology Department|COVID-19 Genomics UK (COG-UK) Consortium|de Silva|United Kingdom

>Spike|hCoV-19/Wales/PHWC-261D4/2020|2020-03-26|EPI\_ISL\_422316|Original|hCoV-19^^Wales|Human|Wales Specialist Virology Centre|Public Health Wales Microbiology Cardiff|Moore|United Kingdom

>Spike|hCoV-19/England/ALDP-9C5736/2020|2020-09-10|EPI\_ISL\_567794|Original|hCoV-19^^England|Human|Lighthouse Lab in Alderley Park|Wellcome Sanger Institute for the COVID-19 Genomics UK (COG-UK) consortium|Davies|United Kingdom

>Spike|hCoV-19/New Zealand/20CV0611/2020|2020-11-28|EPI\_ISL\_682289|Original|hCoV-19^^Counties Manukau|Human|Middlemore Hospital|Institute of Environmental Science and Research (ESR)|Wang|New Zealand

>Spike|hCoV-19/Wales/PHWC-48978E/2020|2020-11-03|EPI\_ISL\_639615|Original|hCoV-19^^Wales|Human|Wales Specialist Virology Centre Sequencing lab|COVID-19 Genomics UK (COG-UK) Consortium|Moore|United Kingdom

>Spike|hCoV-19/USA/UT-UPHL-201211132/2020|2020-04-06|EPI\_ISL\_678509|Original|hCoV-19^^Utah|Human|Utah Public Health Laboratory|Utah Public Health Laboratory|Young|USA

>Spike|hCoV-19/England/QEUH-9D19E6/2020|2020-09-14|EPI\_ISL\_573674|Original|hCoV-19^^England|Human|University College London|COVID-19 Genomics UK (COG-UK) Consortium|Roy|United Kingdom

>Spike|hCoV-19/Brazil/RJ-00440/2020|2020-06-03|EPI\_ISL\_717835|Original|hCoV-19^^Rio de Janeiro|Human|LACEN Dr. Francisco Rimolo Neto|Bioinformatics Laboratory / LNCC|Almeida|Brazil

>Spike|hCoV-19/USA/TX-DSHS-1376/2020|2020-05-11|EPI\_ISL\_654740|Original|hCoV-19^^Texas|Human|Texas Department of State Health Services|Texas Department of State Health Services|Rahman|USA

>Spike|hCoV-19/Wales/PHWC-2A440/2020|2020-04-01|EPI\_ISL\_445568|Original|hCoV-19^^Wales|Human|Wales Specialist Virology Centre|Public Health Wales Microbiology Cardiff|Moore|United Kingdom

>Spike|hCoV-19/Scotland/CVR5596/2020|2020-10-31|EPI\_ISL\_650751|Original|hCoV-19^^Scotland|Human|West of Scotland Specialist Virology Centre|COVID-19 Genomics UK (COG-UK) Consortium|Robertson|United Kingdom

>Spike|hCoV-19/USA/LA-EVTL403/2020|2020-06-01|EPI\_ISL\_578809|Original|hCoV-19^^Louisiana|Human|LSUHS Emerging Viral Threat Laboratory|Microbial Genome Sequencing Center|Kamil|USA

>Spike|hCoV-19/USA/TX-DSHS-0180/2020|2020-03-16|EPI\_ISL\_524061|Original|hCoV-19^^Texas|Human|Texas Department of State Health Services|Texas Department of State Health Services|Rahman|USA

>Spike|hCoV-19/USA/VA-DCLS-0750/2020|2020-06-15|EPI\_ISL\_526867|Original|hCoV-19^^Virginia|Human|Virginia DCLS|Virginia DCLS|St. Jacques|USA

>Spike|hCoV-19/Denmark/DCGC-15728/2020|2020-11-23|EPI\_ISL\_713476|Original|hCoV-19^^Nordjylland|Human|Department of Virus and Microbiological Special Diagnostics|Albertsen Lab|Michaelsen|Denmark

>Spike|hCoV-19/England/NORW-F6E4F/2020|2020-12-05|EPI\_ISL\_725305|Original|hCoV-19^^England|Human|Quadram Institute Bioscience|COVID-19 Genomics UK (COG-UK) Consortium|Alikhan|United Kingdom

>Spike|hCoV-19/England/CAMB-7E1BF/2020|2020-04-16|EPI\_ISL\_434047|Original|hCoV-19^^England|Human|Department of Pathology|COVID-19 Genomics UK (COG-UK) Consortium|Meredith|United Kingdom

>Spike|hCoV-19/England/20138027404/2020|2020-03-26|EPI\_ISL\_423317|Original|hCoV-19^^England|Human|Respiratory Virus Unit|Respiratory Virus Unit|Platt|United Kingdom

>Spike|hCoV-19/USA/CA-QDX-1438/2020|2020-03-18|EPI\_ISL\_572090|Original|hCoV-19^^California|Human|Quest Diagnostics|Quest Diagnostics|Kagan|USA

>Spike|hCoV-19/Ireland/un-NVRL-AIIDB0134v1/2020|2020-12-11|EPI\_ISL\_778831|Original|hCoV-19^^Ireland|Human|AIID|Irish Coronavirus Sequencing Consortium-Teagasc Grange|McCabe|Ireland

>Spike|hCoV-19/England/204360017/2020|2020-10-21|EPI\_ISL\_668445|Original|hCoV-19^^England|Human|Respiratory Virus Unit|COVID-19 Genomics UK (COG-UK) Consortium|Platt|United Kingdom

>Spike|hCoV-19/Scotland/QEUH-C30FD1/2020|2020-12-11|EPI\_ISL\_757122|Original|hCoV-19^^Scotland|Human|Lighthouse Lab in Glasgow|Wellcome Sanger Institute for the COVID-19 Genomics UK (COG-UK) Consortium|Davies|United Kingdom

>Spike|hCoV-19/New Zealand/20VR2922/2020|2020-04-25|EPI\_ISL\_456391|Original|hCoV-19^^Auckland|Human|LabPLUS|Institute of Environmental Science and Research (ESR)|de Ligt|New Zealand

>Spike|hCoV-19/Japan/PG-1488/2020|2020-04-00|EPI\_ISL\_685095|Original|hCoV-19^^Japan|Human|Saitama Prefectural Institute of Public Health|Pathogen Genomics Center|Sekizuka|Japan

>Spike|hCoV-19/Wales/MILK-B025AA/2020|2020-10-24|EPI\_ISL\_647853|Original|hCoV-19^^Wales|Human|Lighthouse Lab in Milton Keynes|Wellcome Sanger Institute for the COVID-19 Genomics UK (COG-UK) Consortium|Davies|United Kingdom

>Spike|hCoV-19/Spain/CN-IBV-97006483/2020|2020-03-25|EPI\_ISL\_537698|Original|hCoV-19^^Canary Islands|Human|Hospital Universitario de Gran Canaria Dr. Negr\u00ededn|SeqCOVID-SPAIN consortium|IBV(CSIC)|Comas|Spain

>Spike|hCoV-19/Spain/MD-HLP-H11-40/2020|2020-03-12|EPI\_ISL\_417967|Original|hCoV-19^^Madrid|Human|Hospital Universitario 12 de Octubre|Hospital Universitario La Paz|Viedma|Spain

>Spike|hCoV-19/Burkina Faso/3103/2020|2020-09-28|EPI\_ISL\_660467|Original|hCoV-19^^Bobo Dioulasso|Human|Laboratoire de Microbiologie CHU Sourou Sanou|Centre Muraz|Ouedraogo|Burkina Faso

>Spike|hCoV-19/Denmark/DCGC-21221/2020|2020-12-21|EPI\_ISL\_759618|Original|hCoV-19^^Sjaelland|Human|Department of Virus and Microbiological Special Diagnostics|Albertsen Lab|Michaelsen|Denmark

>Spike|hCoV-19/England/204221398/2020|2020-00-00|EPI\_ISL\_593793|Original|hCoV-19^^England|Human|Respiratory Virus Unit|Respiratory Virus Unit|Platt|United Kingdom

>Spike|hCoV-19/USA/TX-HMH-MCoV-13327/2020|2020-08-25|EPI\_ISL\_788475|Original|hCoV-19^^Texas|Human|Houston Methodist Hospital|Houston Methodist Hospital|Long|USA

>Spike|hCoV-19/England/MILK-B50534/2020|2020-10-19|EPI\_ISL\_649386|Original|hCoV-19^^England|Human|Lighthouse Lab in Milton Keynes|Wellcome Sanger Institute for the COVID-19 Genomics UK (COG-UK) Consortium|Davies|United Kingdom

>Spike|hCoV-19/Norway/4548/2020|2020-10-16|EPI\_ISL\_775451|Original|hCoV-19^^Vestfold og Telemark|Human|Vestfold Hospital|Norwegian Institute of Public Health|Vollan|Norway

>Spike|hCoV-19/Canada/ON-S1222/2020|2020-03-18|EPI\_ISL\_586299|Original|hCoV-19^^Ontario|Human|Toronto Invasive Bacterial Diseases Network|McMaster University|McArthur|Canada

>Spike|hCoV-19/Scotland/QEUA-9DC471/2020|2020-09-22|EPI\_ISL\_601157|Original|hCoV-19^^Scotland|Human|Lighthouse Lab in Glasgow|Wellcome Sanger Institute for the COVID-19 Genomics UK (COG-UK) consortium|Davies|United Kingdom

>Spike|hCoV-19/Denmark/DCGC-5090/2020|2020-09-21|EPI\_ISL\_621628|Original|hCoV-19^^Sjaelland|Human|Department of Virus and Microbiological Special Diagnostics|Albertsen lab|Michaelsen|Denmark

>Spike|hCoV-19/England/MILK-99D5C4/2020|2020-08-31|EPI\_ISL\_549930|Original|hCoV-19^^England|Human|Lighthouse Lab in Milton Keynes|Wellcome Sanger Institute for the COVID-19 Genomics UK (COG-UK) consortium|Davies|United Kingdom

>Spike|hCoV-19/Wales/PHWC-49F2B1/2020|2020-12-06|EPI\_ISL\_743191|Original|hCoV-19^^Wales|Human|Wales Specialist Virology Centre Sequencing lab|COVID-19 Genomics UK (COG-UK) Consortium|Moore|United Kingdom

>Spike|hCoV-19/Wales/MILK-9E11FA/2020|2020-09-20|EPI\_ISL\_581038|Original|hCoV-19^^Wales|Human|Lighthouse Lab in Milton Keynes|Wellcome Sanger Institute for the COVID-19 Genomics UK (COG-UK) consortium|Davies|United Kingdom

>Spike|hCoV-19/United Arab Emirates/0171/2020|2020-05-18|EPI\_ISL\_698358|Original|hCoV-19^^Abu Dhabi|Human|Group 42 (G42) Healthcare|G42 Healthcare|Ogrodzki|United Arab Emirates

>Spike|hCoV-19/England/QEUA-95E969/2020|2020-08-07|EPI\_ISL\_532486|Original|hCoV-19^^England|Human|Lighthouse Lab in Glasgow|Wellcome Sanger Institute for the COVID-19 Genomics UK (COG-UK) consortium|Davies|United Kingdom

>Spike|hCoV-19/England/CAMC-9D74B2/2020|2020-09-20|EPI\_ISL\_584375|Original|hCoV-19^^England|Human|Virology Department|COVID-19 Genomics UK (COG-UK) Consortium|de Silva|United Kingdom

>Spike|hCoV-19/England/QEUA-9644AB/2020|2020-08-12|EPI\_ISL\_536878|Original|hCoV-19^^England|Human|Lighthouse Lab in Glasgow|Wellcome Sanger Institute for the COVID-19 Genomics UK (COG-UK) consortium|Davies|United Kingdom

>Spike|hCoV-19/USA/NE-11331/2020|2020-05-04|EPI\_ISL\_475208|Original|hCoV-19^^Nebraska|Human|Nebraska Public Health Laboratory|UNMC COVID-19 Response Team|Pratt|USA

>Spike|hCoV-19/USA/TX-HMH-MCoV-15332/2020|2020-10-19|EPI\_ISL\_786816|Original|hCoV-19^^Texas|Human|Houston Methodist Hospital|Houston Methodist Hospital|Long|USA

>Spike|hCoV-19/USA/WA-UW-2670/2020|2020-03-30|EPI\_ISL\_486013|Original|hCoV-19^^Washington|Human|UW Virology Lab|UW Virology Lab|Roychoudhury|USA

>Spike|hCoV-19/Netherlands/un-EMC-788/2020|2020-00-00|EPI\_ISL\_577884|Original|hCoV-19^^Netherlands|Human|Dutch COVID-19 response team|Erasmus Medical Center|Oude Munnink|Netherlands

>Spike|hCoV-19/England/QEUA-AF6944/2020|2020-10-30|EPI\_ISL\_663161|Original|hCoV-19^^England|Human|Lighthouse Lab in Glasgow|Wellcome Sanger Institute for the COVID-19 Genomics UK (COG-UK) Consortium|Davies|United Kingdom

>Spike|hCoV-19/USA/FL-CDC-3582/2020|2020-04-07|EPI\_ISL\_594461|original|hCoV-19^^Florida|Human|FL Bureau of Public Health Laboratories|Pathogen Discovery|Queen|USA

>Spike|hCoV-19/USA/OR-OHSU-2289/2020|2020-08-10|EPI\_ISL\_667170|Original|hCoV-19^^Oregon|Human|OHSU Lab Services Molecular Microbiology Lab|Oregon SARS-CoV-2 Genome Sequencing Center|O'Roak|USA

>Spike|hCoV-19/Gibraltar/205121220/2020|2020-00-00|EPI\_ISL\_766346|Original|hCoV-19^^Gibraltar|Human|Microbiology|Respiratory Virus Unit|Platt|Gibraltar

>Spike|hCoV-19/Wales/PHWC-490432/2020|2020-10-30|EPI\_ISL\_706479|Original|hCoV-19^^Wales|Human|Originating lab|COVID-19 Genomics UK (COG-UK) Consortium|Moore|United Kingdom

>Spike|hCoV-19/Australia/VIC10690/2020|2020-09-03|EPI\_ISL\_563033|Original|hCoV-19^^Victoria|Human|Microbiological Diagnostic Unit - Public Health Laboratory (MDU-PHL)|MDU-PHL|Schultz|Australia

>Spike|hCoV-19/France/PAC-MEPHI-1208/2020|2020-08-17|EPI\_ISL\_644402|Original|hCoV-19^^Provence-Alpes-Cote-d\u2019Azur|Human|MEPHI|MEPHI|Levasseur|France

>Spike|hCoV-19/England/QEUA-787301/2020|2020-07-15|EPI\_ISL\_533182|Original|hCoV-19^^England|Human|Lighthouse Lab in Glasgow|Wellcome Sanger Institute for the COVID-19 Genomics UK (COG-UK) consortium|Davies|United Kingdom

>Spike|hCoV-19/Wales/PHWC-4A45DE/2020|2020-12-16|EPI\_ISL\_764712|Original|hCoV-19^^Wales|Human|Wales Specialist Virology Centre Sequencing lab|COVID-19 Genomics UK (COG-UK) Consortium|Moore|United Kingdom

>Spike|hCoV-19/Italy/APU-PODV-15934631/2020|2020-08-23|EPI\_ISL\_788974|Original|hCoV-19^^Apulia|Human|Ospedale \Di Venere\|Beaconlab (Bioinformatics|Chiara|Italy

>Spike|hCoV-19/USA/AZ-TG340910/2020|2020-06-01|EPI\_ISL\_694036|Original|hCoV-19^^Arizona|Human|TGen North|TGen North|French|USA

>Spike|hCoV-19/USA/NY-PV09379/2020|2020-03-19|EPI\_ISL\_450062|Original|hCoV-19^^New York|Human|MSSS Clinical Microbiology Laboratories|MSSS Pathogen Surveillance Program|van Bakel|USA

>Spike|hCoV-19/Scotland/EDB8205/2020|2020-10-08|EPI\_ISL\_594833|Original|hCoV-19^^Scotland|Human|Virology Department|COVID-19 Genomics UK (COG-UK) Consortium|McHugh|United Kingdom

>Spike|hCoV-19/Denmark/DCGC-11929/2020|2020-10-19|EPI\_ISL\_671221|Original|hCoV-19^^Midtjylland|Human|Department of Virus and Microbiological Special Diagnostics|Albertsen Lab|Michaelsen|Denmark

>Spike|hCoV-19/Chile/RM-204591/2020|2020-10-12|EPI\_ISL\_746764|Original|hCoV-19^^Region Metropolitana de Santiago|Human|Genetica Molecular and Subdepartamento de Virologia ISP Chile|Instituto de Salud Publica de Chile|Tognarelli|Chile

>Spike|hCoV-19/Switzerland/Vs-ETHZ-100173/2020|2020-03-16|EPI\_ISL\_574969|Original|hCoV-19^^Valais|Human|Viollier AG|Department of Biosystems Science and Engineering|Nadeau|Switzerland

>Spike|hCoV-19/USA/MN-MDH-1871/2020|2020-10-13|EPI\_ISL\_603006|Original|hCoV-19^^Minnesota|Human|Minnesota Department of Health|Minnesota Department of Health|Garfin|USA

>Spike|hCoV-19/USA/NY-NYCPHL-000235/2020|2020-03-15|EPI\_ISL\_631764|Original|hCoV-19^^New York|Human|Mount Sinai Hospital|New York City Public Health Laboratory|Wang|USA

>Spike|hCoV-19/Canada/ON-UHTC\_0355/2020|2020-10-03|EPI\_ISL\_609822|Original|hCoV-19^^Ontario|Human|Unity Health Toronto|Ontario Institute for Cancer Research|de Borja|Canada

>Spike|hCoV-19/USA/AZ-TG280923/2020|2020-04-27|EPI\_ISL\_694219|Original|hCoV-19^^Arizona|Human|TGen North|TGen North|French|USA

>Spike|hCoV-19/USA/AK-PHL550/2020|2020-06-20|EPI\_ISL\_522405|Original|hCoV-19^^Alaska|Human|Alaska State Virology Laboratory|Alaska State Virology Laboratory|Chen|USA

>Spike|hCoV-19/England/CAMC-B22AC3/2020|2020-11-02|EPI\_ISL\_647198|Original|hCoV-19^^England|Human|Lighthouse Lab in Cambridge|Wellcome Sanger Institute for the COVID-19 Genomics UK (COG-UK) Consortium|Davies|United Kingdom

>Spike|hCoV-19/England/QEUH-9D07ED/2020|2020-09-16|EPI\_ISL\_589882|Original|hCoV-19^^England|Human|Lighthouse Lab in Glasgow|Wellcome Sanger Institute for the COVID-19 Genomics UK (COG-UK) consortium|Davies|United Kingdom

>Spike|hCoV-19/England/ALDP-A6FA34/2020|2020-10-14|EPI\_ISL\_607832|Original|hCoV-19^^England|Human|Lighthouse Lab in Alderley Park|Wellcome Sanger Institute for the COVID-19 Genomics UK (COG-UK) consortium|Davies|United Kingdom

>Spike|hCoV-19/England/CAMB-1AE294/2020|2020-04-27|EPI\_ISL\_459436|Original|hCoV-19^^England|Human|Department of Pathology|Wellcome Sanger Institute for the COVID-19 Genomics UK (COG-UK) consortium|Davies|United Kingdom

>Spike|hCoV-19/Japan/PG-3336/2020|2020-04-00|EPI\_ISL\_691451|Original|hCoV-19^^Japan|Human|Pathogen Genomics Center|Pathogen Genomics Center|Sekizuka|Japan

>Spike|hCoV-19/South Korea/KDCA0264/2020|2020-08-14|EPI\_ISL\_760029|Original|hCoV-19^^South Korea|Human|Division of Emerging Infectious Diseases|Division of Emerging Infectious Diseases|Park|South Korea

>Spike|hCoV-19/Wales/PHWC-33769/2020|2020-04-17|EPI\_ISL\_446744|Original|hCoV-19^^Wales|Human|Wales Specialist Virology Centre|Public Health Wales Microbiology Cardiff|Moore|United Kingdom

>Spike|hCoV-19/Italy/ABR-IZSGC-TE5173/2020|2020-03-18|EPI\_ISL\_528924|Original|hCoV-19^^Abruzzo|Human|Ospedale \Giuseppe Mazzini\ -Teramo|Istituto Zooprofilattico Sperimentale dell'Abruzzo e Molise \G.Caporale\|Lorusso|Italy

>Spike|hCoV-19/England/MILK-9D47DA/2020|2020-09-17|EPI\_ISL\_601520|Original|hCoV-19^^England|Human|Lighthouse Lab in Milton Keynes|Wellcome Sanger Institute for the COVID-19 Genomics UK (COG-UK) consortium|Davies|United Kingdom

>Spike|hCoV-19/India/PB-IMT-L176/2020|2020-04-30|EPI\_ISL\_539486|Original|hCoV-19^^Punjab|Human|Civil Hospital|CSIR-Institute of Microbial Technology|Patil|India

>Spike|hCoV-19/USA/HI-H200285/2020|2020-07-07|EPI\_ISL\_752844|Original|hCoV-19^^Hawaii|Human|State Laboratories Division|State Laboratories Division|Sultana|USA

>Spike|hCoV-19/England/QEUH-C30A85/2020|2020-12-09|EPI\_ISL\_731421|Original|hCoV-19^^England|Human|Lighthouse Lab in Glasgow|Wellcome Sanger Institute for the COVID-19 Genomics UK (COG-UK) Consortium|Davies|United Kingdom

>Spike|hCoV-19/Luxembourg/LNS9095238/2020|2020-10-31|EPI\_ISL\_744848|Original|hCoV-19^^Luxembourg|Human|Laboratoire national de sant\u00e9|Laboratoire national de sant\u00e9|Wienecke-Baldacchino|Luxembourg

>Spike|hCoV-19/Switzerland/AG-ETHZ-331066/2020|2020-10-20|EPI\_ISL\_614893|Original|hCoV-19^^Aargau|Human|Viollier AG|Department of Biosystems Science and Engineering|Nadeau|Switzerland

>Spike|hCoV-19/England/ALDP-9D8A37/2020|2020-09-18|EPI\_ISL\_576645|Original|hCoV-19^^England|Human|Oxford Viromics|COVID-19 Genomics UK (COG-UK) Consortium|Golubchik|United Kingdom

>Spike|hCoV-19/France/PAC-IHU-0986/2020|2020-08-09|EPI\_ISL\_569032|Original|hCoV-19^^Provence-Alpes-C\u00f4te-d\u2019Azur|Human|MEPHI|MEPHI|Levasseur|France

>Spike|hCoV-19/Japan/PG-4523/2020|2020-08-00|EPI\_ISL\_689662|Original|hCoV-19^^Japan|Human|Pathogen Genomics Center|Pathogen Genomics Center|Sekizuka|Japan

>Spike|hCoV-19/USA/CA-CZB-14846/2020|2020-11-20|EPI\_ISL\_739106|Original|hCoV-19^^California|Human|Humboldt County Public Health Laboratory|Chan-Zuckerberg Biohub|Kamm|USA

>Spike|hCoV-19/Wales/PHWC-4A691C/2020|2020-12-17|EPI\_ISL\_765084|Original|hCoV-19^^Wales|Human|Wales Specialist Virology Centre Sequencing lab|COVID-19 Genomics UK (COG-UK) Consortium|Moore|United Kingdom

>Spike|hCoV-19/USA/CA-ALSR-4549/2020|2020-07-09|EPI\_ISL\_667002|Original|hCoV-19^^California|Human|San Diego County Public Health Laboratory|Andersen lab at Scripps Research|Gangavarapu|USA



>Spike|hCoV-19/England/QEUH-AD2D7F/2020|2020-10-26|EPI\_ISL\_629877|Original|hCoV-19^^England|Human|Lighthouse Lab in Glasgow|Wellcome Sanger Institute for the COVID-19 Genomics UK (COG-UK) consortium|Davies|United Kingdom

>Spike|hCoV-19/Australia/VIC10890/2020|2020-08-17|EPI\_ISL\_563141|Original|hCoV-19^^Victoria|Human|Victorian Infectious Diseases Reference Laboratory (VIDRL)|VIDRL and MDU-PHL|Schultz|Australia

>Spike|hCoV-19/USA/TX-HMH-1164/2020|2020-04-26|EPI\_ISL\_542562|Original|hCoV-19^^Texas|Human|Houston Methodist Hospital|Houston Methodist Hospital|Long|USA

>Spike|hCoV-19/Scotland/CVR4871/2020|2020-10-03|EPI\_ISL\_650490|Original|hCoV-19^^Scotland|Human|West of Scotland Specialist Virology Centre|COVID-19 Genomics UK (COG-UK) Consortium|Robertson|United Kingdom

>Spike|hCoV-19/England/BRIS-13090B/2020|2020-04-13|EPI\_ISL\_492539|Original|hCoV-19^^England|Human|PHE South West Regional Laboratory|Wellcome Sanger Institute for the COVID-19 Genomics UK (COG-UK) consortium|Davies|United Kingdom

>Spike|hCoV-19/Denmark/DCGC-20814/2020|2020-12-21|EPI\_ISL\_759381|Original|hCoV-19^^Syddanmark|Human|Department of Virus and Microbiological Special Diagnostics|Albertsen Lab|Michaelsen|Denmark

>Spike|hCoV-19/Denmark/DCGC-17333/2020|2020-12-14|EPI\_ISL\_750915|Original|hCoV-19^^Syddanmark|Human|Department of Virus and Microbiological Special Diagnostics|Albertsen Lab|Michaelsen|Denmark

>Spike|hCoV-19/Scotland/MILK-A6B063/2020|2020-10-08|EPI\_ISL\_625416|Original|hCoV-19^^Scotland|Human|Lighthouse Lab in Milton Keynes|Wellcome Sanger Institute for the COVID-19 Genomics UK (COG-UK) consortium|Davies|United Kingdom

>Spike|hCoV-19/England/MILK-95DBFB/2020|2020-06-18|EPI\_ISL\_556187|Original|hCoV-19^^England|Human|Lighthouse Lab in Milton Keynes|Wellcome Sanger Institute for the COVID-19 Genomics UK (COG-UK) consortium|Davies|United Kingdom

>Spike|hCoV-19/USA/WA-UW-5756/2020|2020-04-07|EPI\_ISL\_430920|Original|hCoV-19^^Washington|Human|UW Virology Lab|UW Virology Lab|Roychoudhury|USA

>Spike|hCoV-19/Mali/M002826/2020|2020-04-14|EPI\_ISL\_487465|Original|hCoV-19^^Bamako|Human|CICM-Mali|Bundeswehr Institut of Microbiology|Antwerpen|Mali

>Spike|hCoV-19/Pakistan/NIH-44905/2020|2020-06-02|EPI\_ISL\_468159|unknown|hCoV-19^^Islamabad|Human|unknown|Department of Virology|Umair|Pakistan

>Spike|hCoV-19/Luxembourg/LNS9510711/2020|2020-03-17|EPI\_ISL\_421762|Original|hCoV-19^^Luxembourg|Human|Laboratoire National de Sante|Laboratoire National de Sante|Wienecke-Baldacchino|Luxembourg

>Spike|hCoV-19/England/ALDP-A92731/2020|2020-10-19|EPI\_ISL\_611169|Original|hCoV-19^^England|Human|Lighthouse Lab in Alderley Park|Wellcome Sanger Institute for the COVID-19 Genomics UK (COG-UK) consortium|Davies|United Kingdom

>Spike|hCoV-19/Wales/PHWC-15C2A4/2020|2020-04-20|EPI\_ISL\_472463|Original|hCoV-19^^Wales|Human|Wales Specialist Virology Centre Sequencing lab|COVID-19 Genomics UK (COG-UK) Consortium|Moore|United Kingdom

>Spike|hCoV-19/Brazil/RJ-00412/2020|2020-09-03|EPI\_ISL\_717814|Original|hCoV-19^^Rio de Janeiro|Human|Laboratorio de Virologia Molecular / UFRJ|Bioinformatics Laboratory / LNCC|Almeida|Brazil

>Spike|hCoV-19/England/NORT-2867CF/2020|2020-10-08|EPI\_ISL\_638568|Original|hCoV-19^^England|Human|Northumbria University / South Tees Hospitals NHS Foundation Trust / North Cumbria Integrated Care NHS Foundation Trust / North Tees and Hartlepool NHS Foundation Trust / Newcastle Hospitals NHS Foundation Trust|COVID-19 Genomics UK (COG-UK) Consortium|Bashton|United Kingdom

>Spike|hCoV-19/England/ALDP-C0643F/2020|2020-12-06|EPI\_ISL\_709363|Original|hCoV-19^^England|Human|Lighthouse Lab in Alderley Park|Wellcome Sanger Institute for the COVID-19 Genomics UK (COG-UK) Consortium|Davies|United Kingdom

>Spike|hCoV-19/England/QEUH-A5E704/2020|2020-10-12|EPI\_ISL\_597348|Original|hCoV-19^^England|Human|Lighthouse Lab in Glasgow|Wellcome Sanger Institute for the COVID-19 Genomics UK (COG-UK) consortium|Davies|United Kingdom

>Spike|hCoV-19/England/QEUH-AE294B/2020|2020-10-27|EPI\_ISL\_633549|Original|hCoV-19^^England|Human|Lighthouse Lab in Glasgow|Wellcome Sanger Institute for the COVID-19 Genomics UK (COG-UK) consortium|Davies|United Kingdom

>Spike|hCoV-19/Australia/NSW2542/2020|2020-04-04|EPI\_ISL\_527043|Original|hCoV-19^^New South Wales|Human|Area of Virology|Area of Virology|Yeang|Australia

>Spike|hCoV-19/England/MILK-9F0EB5/2020|2020-09-23|EPI\_ISL\_589663|Original|hCoV-19^^England|Human|Lighthouse Lab in Milton Keynes|Wellcome Sanger Institute for the COVID-19 Genomics UK (COG-UK) consortium|Davies|United Kingdom

>Spike|hCoV-19/USA/MA-MGH-03544/2020|2020-11-28|EPI\_ISL\_765880|Original|hCoV-19^^Massachusetts|Human|Massachusetts General Hospital|Infectious Disease Program|Park|USA

>Spike|hCoV-19/England/MILK-BDB9DB/2020|2020-11-27|EPI\_ISL\_709666|Original|hCoV-19^^England|Human|Lighthouse Lab in Milton Keynes|Wellcome Sanger Institute for the COVID-19 Genomics UK (COG-UK) Consortium|Davies|United Kingdom

>Spike|hCoV-19/Wales/PHWC-15C72D/2020|2020-03-31|EPI\_ISL\_472530|Original|hCoV-19^^Wales|Human|Wales Specialist Virology Centre Sequencing lab|COVID-19 Genomics UK (COG-UK) Consortium|Moore|United Kingdom

>Spike|hCoV-19/India/MH-ACTREC-323/2020|2020-07-17|EPI\_ISL\_699972|Original|hCoV-19^^Maharashtra|Human|Hematopathology Laboratory|Hematopathology Laboratory|Patkar|India

>Spike|hCoV-19/USA/TX-HMH-3783/2020|2020-06-12|EPI\_ISL\_543188|Original|hCoV-19^^Texas|Human|Houston Methodist Hospital|Houston Methodist Hospital|Long|USA

>Spike|hCoV-19/Brazil/SP-387/2020|2020-06-20|EPI\_ISL\_603027|Original|hCoV-19^^S\u00e3o Paulo|Human|Santa Casa de Misericordia de Ara\u00e7atuba|Instituto Adolfo Lutz|Sacchi|Brazil

>Spike|hCoV-19/Australia/VIC7508/2020|2020-00-00|EPI\_ISL\_564456|Original|hCoV-19^^Victoria|Human|Microbiological Diagnostic Unit - Public Health Laboratory (MDU-PHL)|MDU-PHL|Schultz|Australia

>Spike|hCoV-19/USA/UT-08698/2020|2020-05-08|EPI\_ISL\_524416|Original|hCoV-19^^Utah|Human|Utah Public Health Laboratory|Utah Public Health Laboratory|Young|USA

>Spike|hCoV-19/Japan/PG-0596/2020|2020-04-00|EPI\_ISL\_684206|Original|hCoV-19^^Japan|Human|Pathogen Genomics Center|Pathogen Genomics Center|Sekizuka|Japan

>Spike|hCoV-19/USA/TX-HMH-2894/2020|2020-06-08|EPI\_ISL\_543862|Original|hCoV-19^^Texas|Human|Houston Methodist Hospital|Houston Methodist Hospital|Long|USA

>Spike|hCoV-19/Canada/ON-UHTC\_0344/2020|2020-09-11|EPI\_ISL\_609803|Original|hCoV-19^^Ontario|Human|Unity Health Toronto|Ontario Institute for Cancer Research|de Borja|Canada

>Spike|hCoV-19/England/MILK-AC83C5/2020|2020-10-21|EPI\_ISL\_629393|Original|hCoV-19^^England|Human|Lighthouse Lab in Milton Keynes|Wellcome Sanger Institute for the COVID-19 Genomics UK (COG-UK) consortium|Davies|United Kingdom

>Spike|hCoV-19/Denmark/ALAB-HH75/2020|2020-03-18|EPI\_ISL\_429316|Original|hCoV-19^^Denmark|Human|Department of Clinical Microbiology|Albertsen lab|Kirkegaard|Denmark

>Spike|hCoV-19/Belgium/reg-0912943/2020|2020-09-12|EPI\_ISL\_734930|Original|hCoV-19^^Maasmechelen|Human|UZ Leuven|KU Leuven|Maes|Belgium

>Spike|hCoV-19/USA/WA-S375/2020|2020-03-26|EPI\_ISL\_434135|Original|hCoV-19^^Washington|Human|Washington State Department of Health|Seattle Flu Study|Bedford|USA

>Spike|hCoV-19/USA/LA-EVTL1277/2020|2020-12-04|EPI\_ISL\_778943|Original|hCoV-19^^Louisiana|Human|LSUHS Emerging Viral Threat Laboratory|Microbial Genome Sequencing Center|Kamil|USA

>Spike|hCoV-19/Wales/PHWC-492C92/2020|2020-11-27|EPI\_ISL\_725772|Original|hCoV-19^^Wales|Human|Originating lab|COVID-19 Genomics UK (COG-UK) Consortium|Moore|United Kingdom

>Spike|hCoV-19/Luxembourg/LNS5868219/2020|2020-08-10|EPI\_ISL\_744311|Original|hCoV-19^^Luxembourg|Human|Laboratoire national de sant\u00e9|Laboratoire national de sant\u00e9|Wienecke-Baldacchino|Luxembourg

>Spike|hCoV-19/Sweden/20-52118/2020|2020-05-07|EPI\_ISL\_615096|Original|hCoV-19^^Vasterbotten|Human|Umea klinisk mikrobiologi|The Public Health Agency of Sweden|Svartstr\u00f6m|Sweden

>Spike|hCoV-19/Denmark/DCGC-18483/2020|2020-12-07|EPI\_ISL\_749994|Original|hCoV-19^^Midtjylland|Human|Department of Virus and Microbiological Special Diagnostics|Albertsen Lab|Michaelsen|Denmark

>Spike|hCoV-19/USA/TX-HMH-MCoV-13868/2020|2020-08-17|EPI\_ISL\_787161|Original|hCoV-19^^Texas|Human|Houston Methodist Hospital|Houston Methodist Hospital|Long|USA

>Spike|hCoV-19/England/ALDP-C3ADDD/2020|2020-12-09|EPI\_ISL\_731692|Original|hCoV-19^^England|Human|Lighthouse Lab in Alderley Park|Wellcome Sanger Institute for the COVID-19 Genomics UK (COG-UK) Consortium|Davies|United Kingdom

>Spike|hCoV-19/Wales/QEUEH-AD58E4/2020|2020-10-25|EPI\_ISL\_647921|Original|hCoV-19^^Wales|Human|Lighthouse Lab in Glasgow|Wellcome Sanger Institute for the COVID-19 Genomics UK (COG-UK) Consortium|Davies|United Kingdom

>Spike|hCoV-19/England/NOTT-1107CB/2020|2020-04-20|EPI\_ISL\_441859|Original|hCoV-19^^England|Human|Queens Medical Centre|COVID-19 Genomics UK (COG-UK) Consortium|Loose|United Kingdom

>Spike|hCoV-19/Denmark/DCGC-19509/2020|2020-12-07|EPI\_ISL\_748322|Original|hCoV-19^^Syddanmark|Human|Department of Virus and Microbiological Special Diagnostics|Albertsen Lab|Michaelsen|Denmark

>Spike|hCoV-19/England/QEUEH-9B5511/2020|2020-09-03|EPI\_ISL\_590451|Original|hCoV-19^^England|Human|Lighthouse Lab in Glasgow|Wellcome Sanger Institute for the COVID-19 Genomics UK (COG-UK) consortium|Davies|United Kingdom

>Spike|hCoV-19/USA/NY-Wadsworth-278519-01/2020|2020-11-23|EPI\_ISL\_754405|Original|hCoV-19^^New York|Human|Wadsworth Center|Wadsworth Center|Lasek-Nesselquist|USA

>Spike|hCoV-19/USA/NV-NSPHL-A0010/2020|2020-03-14|EPI\_ISL\_515299|Original|hCoV-19^^Nevada|Human|Nevada State Public Health Laboratory|Nevada State Public Health Laboratory|Sevinsky|USA

>Spike|hCoV-19/Netherlands/NA\_497/2020|2020-04-06|EPI\_ISL\_460670|Original|hCoV-19^^Netherlands|Human|Dutch COVID-19 response team|Erasmus Medical Center|Oude Munnink|Netherlands

>Spike|hCoV-19/England/CAMB-7A48D/2020|2020-04-02|EPI\_ISL\_441253|Original|hCoV-19^^England|Human|Department of Pathology|Wellcome Sanger Institute for the COVID-19 Genomics UK (COG-UK) consortium|Amato|United Kingdom

>Spike|hCoV-19/England/MILK-AB7E31/2020|2020-10-21|EPI\_ISL\_623405|Original|hCoV-19^^England|Human|Lighthouse Lab in Milton Keynes|Wellcome Sanger Institute for the COVID-19 Genomics UK (COG-UK) consortium|Davies|United Kingdom

>Spike|hCoV-19/United Arab Emirates/0834/2020|2020-05-19|EPI\_ISL\_698973|Original|hCoV-19^^Abu Dhabi|Human|Group 42 (G42) Healthcare|G42 Healthcare|Ogrodzki|United Arab Emirates

>Spike|hCoV-19/Ireland/DL-NVRL-20G45123/2020|2020-04-02|EPI\_ISL\_666708|Original|hCoV-19^^Donegal|Human|National Virus Reference Lab (NVRL)|Irish Coronavirus Sequencing Consortium-Teagasc Grange|McCabe|Ireland

>Spike|hCoV-19/USA/TX-HMH-MCoV-15353/2020|2020-10-22|EPI\_ISL\_786837|Original|hCoV-19^^Texas|Human|Houston Methodist Hospital|Houston Methodist Hospital|Long|USA

>Spike|hCoV-19/England/ALDP-BB8F69/2020|2020-11-20|EPI\_ISL\_703210|Original|hCoV-19^^England|Human|Lighthouse Lab in Alderley Park|Wellcome Sanger Institute for the COVID-19 Genomics UK (COG-UK) Consortium|Davies|United Kingdom

>Spike|hCoV-19/England/LIVE-A9F39/2020|2020-03-23|EPI\_ISL\_517375|Original|hCoV-19^^England|Human|Liverpool Clinical Laboratories|COVID-19 Genomics UK (COG-UK) Consortium|Haldenby|United Kingdom

>Spike|hCoV-19/Norway/5415/2020|2020-10-28|EPI\_ISL\_708082|Original|hCoV-19^^Troms og Finnmark|Human|University Hospital of Northern Norway|Norwegian Institute of Public Health|Kopperud Riis|Norway

>Spike|hCoV-19/England/QEUEH-99870F/2020|2020-08-24|EPI\_ISL\_540065|Original|hCoV-19^^England|Human|Lighthouse Lab in Glasgow|Wellcome Sanger Institute for the COVID-19 Genomics UK (COG-UK) consortium|Davies|United Kingdom

>Spike|hCoV-19/USA/TX-HMH-2471/2020|2020-05-29|EPI\_ISL\_545328|Original|hCoV-19^^Texas|Human|Houston Methodist Hospital|Houston Methodist Hospital|Long|USA

>Spike|hCoV-19/Denmark/DCGC-18264/2020|2020-12-14|EPI\_ISL\_749265|Original|hCoV-19^^Sjaelland|Human|Department of Virus and Microbiological Special Diagnostics|Albertsen Lab|Michaelsen|Denmark

>Spike|hCoV-19/USA/LA-GBCL-26791769/2020|2020-04-04|EPI\_ISL\_485379|Original|hCoV-19^^Louisiana|Human|River Road Testing Lab|Ginkgo Bioworks Clinical Laboratory|Smith|USA

>Spike|hCoV-19/India/DL-NCDC-02155/2020|2020-03-26|EPI\_ISL\_435072|Original|hCoV-19^^Delhi|Human|National Centre for Disease control (NCDC)|NCDC/CSIR-IGIB|Faruq|India

>Spike|hCoV-19/Germany/TH-IIMK-CaSe-9/2020|2020-05-24|EPI\_ISL\_728303|Original|hCoV-19^^Thuringia|Human|Jena University Hospital|Institute of infectious medicine & hospital hygiene|Brandt|Germany

>Spike|hCoV-19/Canada/ON-UHTC-0176/2020|2020-05-23|EPI\_ISL\_569970|Original|hCoV-19^^Ontario|Human|Unity Health Toronto|Ontario Institute for Cancer Research|de Borja|Canada

>Spike|hCoV-19/England/MILK-9F09E1/2020|2020-09-24|EPI\_ISL\_589725|Original|hCoV-19^^England|Human|Lighthouse Lab in Milton Keynes|Wellcome Sanger Institute for the COVID-19 Genomics UK (COG-UK) consortium|Davies|United Kingdom

>Spike|hCoV-19/Belgium/ULG-3000/2020|2020-03-05|EPI\_ISL\_417004|Original|hCoV-19^^Li\u00e8ge|Human|Department of Clinical Microbiology|GIGA Medical Genomics|Durkin|Belgium

>Spike|hCoV-19/Scotland/QEUI-9C8469/2020|2020-09-15|EPI\_ISL\_576008|Original|hCoV-19^^Scotland|Human|Lighthouse Lab in Glasgow|Wellcome Sanger Institute for the COVID-19 Genomics UK (COG-UK) consortium|Davies|United Kingdom

>Spike|hCoV-19/USA/UT-UPHL-2008998/2020|2020-05-11|EPI\_ISL\_525309|Original|hCoV-19^^Utah|Human|Utah Public Health Laboratory|Utah Public Health Laboratory|Young|USA

>Spike|hCoV-19/England/204280144/2020|2020-10-15|EPI\_ISL\_613595|Original|hCoV-19^^England|Human|Respiratory Virus Unit|Respiratory Virus Unit|Platt|United Kingdom

>Spike|hCoV-19/Northern Ireland/QEUI-5E542E/2020|2020-06-17|EPI\_ISL\_533305|Original|hCoV-19^^Northern Ireland|Human|Lighthouse Lab in Glasgow|Wellcome Sanger Institute for the COVID-19 Genomics UK (COG-UK) consortium|Davies|United Kingdom

>Spike|hCoV-19/England/NORT-281A52/2020|2020-03-22|EPI\_ISL\_472173|Original|hCoV-19^^England|Human|Northumbria University / South Tees Hospitals NHS Foundation Trust / North Cumbria Integrated Care NHS Foundation Trust / North Tees and Hartlepool NHS Foundation Trust / Newcastle Hospitals NHS Foundation Trust|COVID-19 Genomics UK (COG-UK) Consortium|Bashton|United Kingdom

>Spike|hCoV-19/USA/MI-MDHHS-SC20146/2020|2020-03-27|EPI\_ISL\_436875|Original|hCoV-19^^Michigan|Human|Michigan Department of Health and Human Services|Michigan Department of Health and Human Services|Blankenship|USA

>Spike|hCoV-19/Australia/VIC15763/2020|2020-08-01|EPI\_ISL\_593447|Original|hCoV-19^^Victoria|Human|Microbiological Diagnostic Unit - Public Health Laboratory (MDU-PHL) |MDU-PHL|Schultz|Australia

>Spike|hCoV-19/USA/TX-DSHS-1624/2020|2020-10-20|EPI\_ISL\_700703|Original|hCoV-19^^Texas|Human|Texas Department of State Health Services|Texas Department of State Health Services|Rahman|USA

>Spike|hCoV-19/USA/WA-UW-1334/2020|2020-03-17|EPI\_ISL\_422995|Original|hCoV-19^^Washington|Human|UW Virology Lab|UW Virology Lab|Roychoudhury|USA

>Spike|hCoV-19/Wales/PHWC-16A3EC/2020|2020-09-06|EPI\_ISL\_535245|Original|hCoV-19^^Wales|Human|Wales Specialist Virology Centre Sequencing lab|COVID-19 Genomics UK (COG-UK) Consortium|Moore|United Kingdom

>Spike|hCoV-19/USA/TX-HMH-4379/2020|2020-06-17|EPI\_ISL\_543576|Original|hCoV-19^^Texas|Human|Houston Methodist Hospital|Houston Methodist Hospital|Long|USA

>Spike|hCoV-19/England/QEUI-9F38E1/2020|2020-09-24|EPI\_ISL\_588724|Original|hCoV-19^^England|Human|Lighthouse Lab in Glasgow|Wellcome Sanger Institute for the COVID-19 Genomics UK (COG-UK) consortium|Davies|United Kingdom

>Spike|hCoV-19/Wales/PHWC-1633F2/2020|2020-05-10|EPI\_ISL\_473292|Original|hCoV-19^^Wales|Human|Wales Specialist Virology Centre Sequencing lab|COVID-19 Genomics UK (COG-UK) Consortium|Moore|United Kingdom

>Spike|hCoV-19/Canada/NS-NML-1356/2020|2020-04-14|EPI\_ISL\_579733|Original|hCoV-19^^Nova Scotia|Human|QEII Health Sciences Centre|National Microbiology Laboratory (NML) |Majer|Canada

>Spike|hCoV-19/USA/NY-NYUMC238/2020|2020-04-06|EPI\_ISL\_427637|Original|hCoV-19^^New York|Human|NYU Langone Health|Departments of Pathology and Medicine|Maurano|USA

>Spike|hCoV-19/Belgium/VAG-03013/2020|2020-03-01|EPI\_ISL\_415155|Original|hCoV-19^^Huldenberg|Human|KU Leuven|KU Leuven|Maes|Belgium

>Spike|hCoV-19/England/ALDP-9EA21C/2020|2020-09-24|EPI\_ISL\_580203|Original|hCoV-19^^England|Human|Lighthouse Lab in Alderley Park|Wellcome Sanger Institute for the COVID-19 Genomics UK (COG-UK) consortium|Davies|United Kingdom

>Spike|hCoV-19/USA/TX-HMH-842/2020|2020-04-09|EPI\_ISL\_545864|Original|hCoV-19^^Texas|Human|Houston Methodist Hospital|Houston Methodist Hospital|Long|USA

>Spike|hCoV-19/England/QEUEH-B2EECB/2020|2020-11-03|EPI\_ISL\_659849|Original|hCoV-19^^England|Human|Lighthouse Lab in Glasgow|Wellcome Sanger Institute for the COVID-19 Genomics UK (COG-UK) Consortium|Davies|United Kingdom

>Spike|hCoV-19/Wales/PHWC-494E4F/2020|2020-11-21|EPI\_ISL\_726261|Original|hCoV-19^^Wales|Human|Originating lab|COVID-19 Genomics UK (COG-UK) Consortium|Moore|United Kingdom

>Spike|hCoV-19/England/NOTT-117FAE/2020|2020-10-26|EPI\_ISL\_612594|Original|hCoV-19^^England|Human|Queens Medical Centre|COVID-19 Genomics UK (COG-UK) Consortium|Loose|United Kingdom

>Spike|hCoV-19/England/QEUEH-961514/2020|2020-08-03|EPI\_ISL\_537049|Original|hCoV-19^^England|Human|Lighthouse Lab in Glasgow|Wellcome Sanger Institute for the COVID-19 Genomics UK (COG-UK) consortium|Davies|United Kingdom

>Spike|hCoV-19/England/LOND-1250D32/2020|2020-11-08|EPI\_ISL\_665811|Original|hCoV-19^^England|Human|University College London Hospital|COVID-19 Genomics UK (COG-UK) Consortium|Byott|United Kingdom

>Spike|hCoV-19/Denmark/DCGC-4298/2020|2020-09-07|EPI\_ISL\_615735|Original|hCoV-19^^Hovedstaden|Human|Department of Virus and Microbiological Special Diagnostics|Albertsen lab|Michaelsen|Denmark

>Spike|hCoV-19/India/MH-NCCS-NR2347/2020|2020-05-22|EPI\_ISL\_496580|Original|hCoV-19^^Maharashtra|Human|National Centre For Cell Science|National Centre For Cell Science|Paul|India

>Spike|hCoV-19/England/MILK-B8C335/2020|2020-11-13|EPI\_ISL\_674356|Original|hCoV-19^^England|Human|Lighthouse Lab in Milton Keynes|Wellcome Sanger Institute for the COVID-19 Genomics UK (COG-UK) Consortium|Davies|United Kingdom

>Spike|hCoV-19/England/CAMC-B77D6C/2020|2020-11-12|EPI\_ISL\_668294|Original|hCoV-19^^England|Human|Lighthouse Lab in Cambridge|Wellcome Sanger Institute for the COVID-19 Genomics UK (COG-UK) Consortium|Davies|United Kingdom

>Spike|hCoV-19/England/CAMC-B0761B/2020|2020-10-30|EPI\_ISL\_643779|Original|hCoV-19^^England|Human|Lighthouse Lab in Cambridge|Wellcome Sanger Institute for the COVID-19 Genomics UK (COG-UK) Consortium|Davies|United Kingdom

>Spike|hCoV-19/Belgium/reg-0623853/2020|2020-06-23|EPI\_ISL\_734779|Original|hCoV-19^^Brugge|Human|UZ Leuven|KU Leuven|Maes|Belgium

>Spike|hCoV-19/Japan/PG-1735/2020|2020-04-00|EPI\_ISL\_685341|Original|hCoV-19^^Japan|Human|Pathogen Genomics Center|Pathogen Genomics Center|Sekizuka|Japan

>Spike|hCoV-19/Wales/ALDP-95AAF1/2020|2020-06-11|EPI\_ISL\_602160|Original|hCoV-19^^Wales|Human|Lighthouse Lab in Alderley Park|Wellcome Sanger Institute for the COVID-19 Genomics UK (COG-UK) consortium|Davies|United Kingdom

>Spike|hCoV-19/England/CAMB-7A335/2020|2020-04-02|EPI\_ISL\_441315|Original|hCoV-19^^England|Human|Department of Pathology|Wellcome Sanger Institute for the COVID-19 Genomics UK (COG-UK) consortium|Amato|United Kingdom

>Spike|hCoV-19/USA/UT-QDX-2643/2020|2020-03-12|EPI\_ISL\_604977|Original|hCoV-19^^Utah|Human|Quest Diagnostics|Quest Diagnostics|Kagan|USA

>Spike|hCoV-19/England/CAMC-A583AC/2020|2020-10-08|EPI\_ISL\_597000|Original|hCoV-19^^England|Human|Lighthouse Lab in Cambridge|Wellcome Sanger Institute for the COVID-19 Genomics UK (COG-UK) consortium|Davies|United Kingdom

>Spike|hCoV-19/England/CAMC-B07147/2020|2020-10-29|EPI\_ISL\_643925|Original|hCoV-19^^England|Human|Lighthouse Lab in Cambridge|Wellcome Sanger Institute for the COVID-19 Genomics UK (COG-UK) Consortium|Davies|United Kingdom

>Spike|hCoV-19/India/TG-CCMB-R249/2020|2020-08-09|EPI\_ISL\_539620|Original|hCoV-19^^Telangana|Human|CSIR-Centre for Cellular and Molecular Biology|CSIR-Centre for Cellular and Molecular Biology|Mukherjee|India

>Spike|hCoV-19/South Korea/KCDC2764/2020|2020-07-21|EPI\_ISL\_522543|Original|hCoV-19^^South Korea|Human|Division of Viral Diseases|Division of Viral Diseases|Kim|South Korea

>Spike|hCoV-19/England/CAMB-75D0F/2020|2020-03-29|EPI\_ISL\_438416|Original|hCoV-19^^England|Human|Department of Pathology|Wellcome Sanger Institute for the COVID-19 Genomics UK (COG-UK) consortium|Amato|United Kingdom

>Spike|hCoV-19/Israel/CVL-45936/2020|2020-12-10|EPI\_ISL\_745058|Original|hCoV-19^^Jerusalem|Human|Israel Central Virology laboratory|Israel Central Virology laboratory|Zuckerman|Israel

>Spike|hCoV-19/Luxembourg/LNS5800178/2020|2020-11-04|EPI\_ISL\_744304|Original|hCoV-19^^Luxembourg|Human|Laboratoire national de sant\u00e9|Laboratoire national de sant\u00e9|Wienecke-Baldacchino|Luxembourg

>Spike|hCoV-19/Canada/ON-E36/2020|2020-05-26|EPI\_ISL\_593514|Original|hCoV-19^^Ontario|Human|Eastern Ontario Regional Laboratory Association|McMaster University|McArthur|Canada

>Spike|hCoV-19/Ireland/D-SVUH-R6565/2020|2020-04-05|EPI\_ISL\_596659|Original|hCoV-19^^Dublin|Human|St.Vincent's University Hospital|St.Vincent's University Hospital|Gonzalez|Ireland

>Spike|hCoV-19/England/MILK-95839E/2020|2020-06-11|EPI\_ISL\_554775|Original|hCoV-19^^England|Human|Lighthouse Lab in Milton Keynes|Wellcome Sanger Institute for the COVID-19 Genomics UK (COG-UK) consortium|Davies|United Kingdom

>Spike|hCoV-19/England/204581874/2020|2020-11-05|EPI\_ISL\_700650|Original|hCoV-19^^England|Human|Respiratory Virus Unit|COVID-19 Genomics UK (COG-UK) Consortium|Platt|United Kingdom

>Spike|hCoV-19/USA/TX-HMH-MCoV-14003/2020|2020-08-15|EPI\_ISL\_787294|Original|hCoV-19^^Texas|Human|Houston Methodist Hospital|Houston Methodist Hospital|Long|USA

>Spike|hCoV-19/England/CAMB-79EAE/2020|2020-04-01|EPI\_ISL\_441246|Original|hCoV-19^^England|Human|Department of Pathology|Wellcome Sanger Institute for the COVID-19 Genomics UK (COG-UK) consortium|Amato|United Kingdom

>Spike|hCoV-19/Wales/PHWC-489D5F/2020|2020-10-28|EPI\_ISL\_652487|Original|hCoV-19^^Wales|Human|Wales Specialist Virology Centre Sequencing lab|COVID-19 Genomics UK (COG-UK) Consortium|Moore|United Kingdom

>Spike|hCoV-19/England/ALDP-952DD2/2020|2020-06-11|EPI\_ISL\_553634|Original|hCoV-19^^England|Human|Lighthouse Lab in Alderley Park|Wellcome Sanger Institute for the COVID-19 Genomics UK (COG-UK) consortium|Davies|United Kingdom

>Spike|hCoV-19/USA/TX-HMH-1025/2020|2020-04-08|EPI\_ISL\_542499|Original|hCoV-19^^Texas|Human|Houston Methodist Hospital|Houston Methodist Hospital|Long|USA

>Spike|hCoV-19/Scotland/CVR2554/2020|2020-04-16|EPI\_ISL\_477967|Original|hCoV-19^^Scotland|Human|West of Scotland Specialist Virology Centre|COVID-19 Genomics UK (COG-UK) Consortium|Robertson|United Kingdom

>Spike|hCoV-19/England/ALDP-A6D562/2020|2020-10-14|EPI\_ISL\_606975|Original|hCoV-19^^England|Human|Lighthouse Lab in Alderley Park|Wellcome Sanger Institute for the COVID-19 Genomics UK (COG-UK) consortium|Davies|United Kingdom

>Spike|hCoV-19/Spain/VC-IBV-98003604/2020|2020-03-14|EPI\_ISL\_538621|Original|hCoV-19^^Comunitat Valenciana|Human|Servicio de Microbiolog\u00eda. Hospital General Universitario de Castell\u00f3n|SeqCOVID-SPAIN consortium|IBV(CSIC)|Comas|Spain

>Spike|hCoV-19/USA/WI-WSLH-200521/2020|2020-05-27|EPI\_ISL\_578661|Original|hCoV-19^^Wisconsin|Human|Wisconsin State Laboratory of Hygiene Communicable Disease Division|Wisconsin State Laboratory of Hygiene Communicable Disease Division|Florek|USA

>Spike|hCoV-19/Canada/BC\_02585169/2020|2020-04-00|EPI\_ISL\_466725|Original|hCoV-19^^British Columbia|Human|BCCDC Public Health Laboratory|BCCDC Public Health Laboratory|Harrigan|Canada

>Spike|hCoV-19/Belgium/regA-0502639/2020|2020-05-02|EPI\_ISL\_734697|Original|hCoV-19^^Kessel-Lo|Human|UZ Leuven|KU Leuven|Maes|Belgium

>Spike|hCoV-19/Scotland/QEUH-A21F6C/2020|2020-10-01|EPI\_ISL\_598834|Original|hCoV-19^^Scotland|Human|Lighthouse Lab in Glasgow|Wellcome Sanger Institute for the COVID-19 Genomics UK (COG-UK) consortium|Davies|United Kingdom

>Spike|hCoV-19/Switzerland/BE-ETHZ-370520/2020|2020-11-19|EPI\_ISL\_694002|Original|hCoV-19^^Bern|Human|Viollier AG|Department of Biosystems Science and Engineering|Nadeau|Switzerland

>Spike|hCoV-19/Wales/ALDP-9503D2/2020|2020-06-16|EPI\_ISL\_555191|Original|hCoV-19^^Wales|Human|Lighthouse Lab in Alderley Park|Wellcome Sanger Institute for the COVID-19 Genomics UK (COG-UK) consortium|Davies|United Kingdom

>Spike|hCoV-19/Australia/VIC8835/2020|2020-07-23|EPI\_ISL\_565225|Original|hCoV-19^^Victoria|Human|Microbiological Diagnostic Unit - Public Health Laboratory (MDU-PHL)|MDU-PHL|Schultz|Australia

>Spike|hCoV-19/England/LEED-2A98A5/2020|2020-04-10|EPI\_ISL\_538911|Original|hCoV-19^^England|Human|Leeds Teaching Hospitals NHS Trust and Public Health England|Wellcome Sanger Institute for the COVID-19 Genomics UK (COG-UK) consortium|Davies|United Kingdom

>Spike|hCoV-19/England/CAMC-B20CB0/2020|2020-11-02|EPI\_ISL\_647559|Original|hCoV-19^^England|Human|Lighthouse Lab in Cambridge|Wellcome Sanger Institute for the COVID-19 Genomics UK (COG-UK) Consortium|Davies|United Kingdom

>Spike|hCoV-19/Wales/PHWC-168D3B/2020|2020-04-01|EPI\_ISL\_494358|Original|hCoV-19^^Wales|Human|Originating lab|COVID-19 Genomics UK (COG-UK) Consortium|Moore|United Kingdom

>Spike|hCoV-19/Scotland/CVR3258/2020|2020-04-28|EPI\_ISL\_473646|Original|hCoV-19^^Scotland|Human|West of Scotland Specialist Virology Centre|COVID-19 Genomics UK (COG-UK) Consortium|Robertson|United Kingdom

>Spike|hCoV-19/Luxembourg/LNS6230945/2020|2020-11-08|EPI\_ISL\_744386|Original|hCoV-19^^Luxembourg|Human|Laboratoire national de sant\u00e9|Laboratoire national de sant\u00e9|Wienecke-Baldacchino|Luxembourg

>Spike|hCoV-19/England/CWAR-24FDDE7/2020|2020-06-07|EPI\_ISL\_584526|Original|hCoV-19^^England|Human|UHCW / University of Warwick|COVID-19 Genomics UK (COG-UK) Consortium|Stark|United Kingdom

>Spike|hCoV-19/USA/WA-S482/2020|2020-04-06|EPI\_ISL\_434242|Original|hCoV-19^^Washington|Human|Washington State Department of Health|Seattle Flu Study|Bedford|USA

>Spike|hCoV-19/Switzerland/AG-ETHZ-420598/2020|2020-12-22|EPI\_ISL\_767946|Original|hCoV-19^^Aargau|Human|Viollier AG|Department of Biosystems Science and Engineering|Nadeau|Switzerland

>Spike|hCoV-19/Portugal/PT2034/2020|2020-11-09|EPI\_ISL\_732250|Original|hCoV-19^^Portugal|Human|Instituto Nacional de Saude (INSA) and Instituto Gulbenkian de Ciencia (IGC)|Instituto Nacional de Saude (INSA) and Instituto Gulbenkian de Ciencia (IGC)|Borges|Portugal

>Spike|hCoV-19/England/QEUA-9B87EB/2020|2020-09-05|EPI\_ISL\_549689|Original|hCoV-19^^England|Human|Lighthouse Lab in Glasgow|Wellcome Sanger Institute for the COVID-19 Genomics UK (COG-UK) consortium|Davies|United Kingdom

>Spike|hCoV-19/Scotland/QEUA-AD0C56/2020|2020-10-26|EPI\_ISL\_649766|Original|hCoV-19^^Scotland|Human|Lighthouse Lab in Glasgow|Wellcome Sanger Institute for the COVID-19 Genomics UK (COG-UK) Consortium|Davies|United Kingdom

>Spike|hCoV-19/Germany/HH-hpi-pl851/2020|2020-03-23|EPI\_ISL\_776201|Original|hCoV-19^^Hamburg|Human|University Medical Center Hamburg Eppendorf|Heinrich Pette Institute|Robitaille|Germany

>Spike|hCoV-19/Denmark/DCGC-3392/2020|2020-08-31|EPI\_ISL\_616151|Original|hCoV-19^^Hovedstaden|Human|Department of Virus and Microbiological Special Diagnostics|Albertsen lab|Michaelsen|Denmark

>Spike|hCoV-19/England/ALDP-B46838/2020|2020-11-06|EPI\_ISL\_656111|Original|hCoV-19^^England|Human|Lighthouse Lab in Alderley Park|Wellcome Sanger Institute for the COVID-19 Genomics UK (COG-UK) Consortium|Davies|United Kingdom

>Spike|hCoV-19/England/MILK-C508D0/2020|2020-12-11|EPI\_ISL\_736744|Original|hCoV-19^^England|Human|Lighthouse Lab in Milton Keynes|Wellcome Sanger Institute for the COVID-19 Genomics UK (COG-UK) Consortium|Davies|United Kingdom

>Spike|hCoV-19/England/GSTT-265E0BC/2020|2020-03-30|EPI\_ISL\_484149|Original|hCoV-19^^England|Human|Centre for Clinical Infection and Diagnostics Research and Genomics Innovation Unit|COVID-19 Genomics UK (COG-UK) Consortium|Awan|United Kingdom

>Spike|hCoV-19/USA/TX-HMH-MCoV-12876/2020|2020-08-18|EPI\_ISL\_788028|Original|hCoV-19^^Texas|Human|Houston Methodist Hospital|Houston Methodist Hospital|Long|USA

>Spike|hCoV-19/England/BRIS-12E250/2020|2020-04-13|EPI\_ISL\_482009|Original|hCoV-19^^England|Human|PHE South West Regional Laboratory|Wellcome Sanger Institute for the COVID-19 Genomics UK (COG-UK) consortium|Davies|United Kingdom

>Spike|hCoV-19/England/QEUEH-9F5991/2020|2020-09-25|EPI\_ISL\_588947|Original|hCoV-19^^England|Human|Lighthouse Lab in Glasgow|Wellcome Sanger Institute for the COVID-19 Genomics UK (COG-UK) consortium|Davies|United Kingdom

>Spike|hCoV-19/Denmark/DCGC-21598/2020|2020-12-21|EPI\_ISL\_758119|Original|hCoV-19^^Hovedstaden|Human|Department of Virus and Microbiological Special Diagnostics|Albertsen Lab|Michaelsen|Denmark

>Spike|hCoV-19/Wales/PHWC-48545E/2020|2020-10-25|EPI\_ISL\_626762|Original|hCoV-19^^Wales|Human|Wales Specialist Virology Centre Sequencing lab|COVID-19 Genomics UK (COG-UK) Consortium|Moore|United Kingdom

>Spike|hCoV-19/Chile/RM-ISPCH-2/2020|2020-03-05|EPI\_ISL\_414580|Original|hCoV-19^^Region Metropolitana de Santiago|Human|Clinica Santa Maria|Instituto de Salud Publica de Chile|Fernandez|Chile

>Spike|hCoV-19/England/NOTT-114475/2020|2020-10-08|EPI\_ISL\_577165|Original|hCoV-19^^England|Human|Queens Medical Centre|COVID-19 Genomics UK (COG-UK) Consortium|Loose|United Kingdom

>Spike|hCoV-19/USA/WI-UW-2465/2020|2020-12-18|EPI\_ISL\_759740|Original|hCoV-19^^Wisconsin|Human|University of Wisconsin-Madison AIDS Vaccine Research Laboratories|University of Wisconsin-Madison AIDS Vaccine Research Laboratories|Moreno|USA

>Spike|hCoV-19/Hong Kong/HKU-IHCE0511-004b/2020|2020-02-05|EPI\_ISL\_538543|Original|hCoV-19^^Hong Kong|Human|Department of Microbiology|Department of Microbiology|Chan|China

>Spike|hCoV-19/USA/CA-CZB-1654/2020|2020-04-18|EPI\_ISL\_468598|Original|hCoV-19^^California|Human|Orange County Public Health Lab|Chan-Zuckerberg Biohub|McGeever|USA

>Spike|hCoV-19/USA/CA-CSMC9/2020|2020-03-27|EPI\_ISL\_475706|Original|hCoV-19^^California|Human|Cedars-Sinai Medical Center|Cedars-Sinai Medical Center|Zhang|USA

>Spike|hCoV-19/Japan/PG-7920/2020|2020-07-00|EPI\_ISL\_687021|Original|hCoV-19^^Japan|Human|Pathogen Genomics Center|Pathogen Genomics Center|Sekizuka|Japan

>Spike|hCoV-19/England/ALDP-9C5C82/2020|2020-09-10|EPI\_ISL\_567671|Original|hCoV-19^^England|Human|Lighthouse Lab in Alderley Park|Wellcome Sanger Institute for the COVID-19 Genomics UK (COG-UK) consortium|Davies|United Kingdom

>Spike|hCoV-19/England/EXET-1360B5/2020|2020-04-17|EPI\_ISL\_457195|Original|hCoV-19^^England|Human|University of Exeter|COVID-19 Genomics UK (COG-UK) Consortium|Temperton|United Kingdom

>Spike|hCoV-19/Switzerland/SO-ETHZ-420716/2020|2020-12-24|EPI\_ISL\_768172|Original|hCoV-19^^Solothurn|Human|Viollier AG|Department of Biosystems Science and Engineering|Nadeau|Switzerland

>Spike|hCoV-19/USA/UT-02219/2020|2020-04-15|EPI\_ISL\_436919|Original|hCoV-19^^Utah|Human|Utah Public Health Laboratory|Utah Public Health Laboratory|Young|USA

>Spike|hCoV-19/Wales/PHWC-484914/2020|2020-10-23|EPI\_ISL\_628058|Original|hCoV-19^^Wales|Human|Wales Specialist Virology Centre Sequencing lab|COVID-19 Genomics UK (COG-UK) Consortium|Moore|United Kingdom

>Spike|hCoV-19/England/CAMB-A985AA/2020|2020-12-27|EPI\_ISL\_764141|Original|hCoV-19^^England|Human|Department of Pathology|COVID-19 Genomics UK (COG-UK) Consortium|Goodfellow|United Kingdom

>Spike|hCoV-19/Gibraltar/204641721/2020|2020-00-00|EPI\_ISL\_637199|Original|hCoV-19^^Gibraltar|Human|Microbiology|Respiratory Virus Unit|Platt|Gibraltar

>Spike|hCoV-19/England/MILK-994493/2020|2020-08-25|EPI\_ISL\_552404|Original|hCoV-19^^England|Human|Lighthouse Lab in Milton Keynes|Wellcome Sanger Institute for the COVID-19 Genomics UK (COG-UK) consortium|Davies|United Kingdom

>Spike|hCoV-19/England/204221405/2020|2020-00-00|EPI\_ISL\_593798|Original|hCoV-19^^England|Human|Respiratory Virus Unit|Respiratory Virus Unit|Platt|United Kingdom

>Spike|hCoV-19/England/MILK-ACC507/2020|2020-10-21|EPI\_ISL\_634329|Original|hCoV-19^^England|Human|Lighthouse Lab in Milton Keynes|Wellcome Sanger Institute for the COVID-19 Genomics UK (COG-UK) consortium|Davies|United Kingdom

>Spike|hCoV-19/Denmark/DCGC-6343/2020|2020-09-28|EPI\_ISL\_622325|Original|hCoV-19^^Hovedstaden|Human|Department of Virus and Microbiological Special Diagnostics|Albertsen lab|Michaelsen|Denmark



>Spike|hCoV-19/England/QEUA-AD54D1/2020|2020-10-26|EPI\_ISL\_633862|Original|hCoV-19^England|Human|Lighthouse Lab in Glasgow|Wellcome Sanger Institute for the COVID-19 Genomics UK (COG-UK) consortium|Davies|United Kingdom

>Spike|hCoV-19/England/CAMB-1B1911/2020|2020-05-13|EPI\_ISL\_452981|Original|hCoV-19^England|Human|Department of Pathology|COVID-19 Genomics UK (COG-UK) Consortium|Meredith|United Kingdom

>Spike|hCoV-19/USA/FL-BPHL-1230/2020|2020-04-10|EPI\_ISL\_541240|Original|hCoV-19^Florida|Human|Florida Bureau of Public Health Laboratories|Florida Bureau of Public Health Laboratories|Blanton|USA

>Spike|hCoV-19/England/ALDP-95C066/2020|2020-06-14|EPI\_ISL\_556110|Original|hCoV-19^England|Human|Lighthouse Lab in Alderley Park|Wellcome Sanger Institute for the COVID-19 Genomics UK (COG-UK) consortium|Davies|United Kingdom

>Spike|hCoV-19/England/BIRM-6128F/2020|2020-06-08|EPI\_ISL\_473448|Original|hCoV-19^England|Human|University of Birmingham|COVID-19 Genomics UK (COG-UK) Consortium|Loman|United Kingdom

>Spike|hCoV-19/Wales/PHWC-47DD7C/2020|2020-10-10|EPI\_ISL\_595360|Original|hCoV-19^Wales|Human|Originating lab|COVID-19 Genomics UK (COG-UK) Consortium|Moore|United Kingdom

>Spike|hCoV-19/USA/FL-BPHL-1543/2020|2020-08-27|EPI\_ISL\_568641|Original|hCoV-19^Florida|Human|Florida Bureau of Public Health Laboratories|Florida Bureau of Public Health Laboratories|Blanton|USA

>Spike|hCoV-19/Scotland/EDB3783/2020|2020-04-29|EPI\_ISL\_439323|Original|hCoV-19^Scotland|Human|Virology Department|COVID-19 Genomics UK (COG-UK) Consortium|Williams|United Kingdom

>Spike|hCoV-19/Denmark/DCGC-14045/2020|2020-11-30|EPI\_ISL\_711094|Original|hCoV-19^Hovedstaden|Human|Department of Virus and Microbiological Special Diagnostics|Albertsen Lab|Michaelsen|Denmark

>Spike|hCoV-19/England/MILK-A69A49/2020|2020-10-09|EPI\_ISL\_665721|Original|hCoV-19^England|Human|University of Exeter|COVID-19 Genomics UK (COG-UK) Consortium|Temperton|United Kingdom

>Spike|hCoV-19/USA/SC-DHEC-0886/2020|2020-06-26|EPI\_ISL\_538410|Original|hCoV-19^South Carolina|Human|Microbiology Division|Microbiology Division|Flores|USA

>Spike|hCoV-19/Scotland/CVR5589/2020|2020-10-30|EPI\_ISL\_651854|Original|hCoV-19^Scotland|Human|West of Scotland Specialist Virology Centre|COVID-19 Genomics UK (COG-UK) Consortium|Robertson|United Kingdom

>Spike|hCoV-19/Wales/QEUA-A60C88/2020|2020-10-12|EPI\_ISL\_666591|Original|hCoV-19^Wales|Human|Northumbria University / South Tees Hospitals NHS Foundation Trust / North Cumbria Integrated Care NHS Foundation Trust / North Tees and Hartlepool NHS Foundation Trust / Newcastle Hospitals NHS Foundation Trust|COVID-19 Genomics UK (COG-UK) Consortium|Bashton|United Kingdom

>Spike|hCoV-19/Denmark/DCGC-13832/2020|2020-11-30|EPI\_ISL\_712224|Original|hCoV-19^Syddanmark|Human|Department of Virus and Microbiological Special Diagnostics|Albertsen Lab|Michaelsen|Denmark

>Spike|hCoV-19/Japan/PG-2369/2020|2020-05-00|EPI\_ISL\_685974|Original|hCoV-19^Japan|Human|Tokyo Metropolitan Institute of Public Health|Pathogen Genomics Center|Sekizuka|Japan

>Spike|hCoV-19/Netherlands/NA\_395/2020|2020-04-05|EPI\_ISL\_455197|Original|hCoV-19^Netherlands|Human|Dutch COVID-19 response team|Erasmus Medical Center|Oude Munnink|Netherlands

>Spike|hCoV-19/Oman/C-6069/2020|2020-04-26|EPI\_ISL\_491146|Original|hCoV-19^Muscat|Human|Oman-National Influenza Center|Biotechnology & OMICs Laboratory|Al Mahruqi|Oman

>Spike|hCoV-19/USA/TX-DSHS-1115/2020|2020-06-21|EPI\_ISL\_615152|Original|hCoV-19^Texas|Human|Texas Department of State Health Services|Texas Department of State Health Services|Rahman|USA

>Spike|hCoV-19/England/QEUA-B6C0CB/2020|2020-11-11|EPI\_ISL\_655112|Original|hCoV-19^England|Human|Lighthouse Lab in Glasgow|Wellcome Sanger Institute for the COVID-19 Genomics UK (COG-UK) Consortium|Davies|United Kingdom

>Spike|hCoV-19/USA/TX-HMH-MCoV-9651/2020|2020-07-06|EPI\_ISL\_780204|Original|hCoV-19^Texas|Human|Houston Methodist Hospital|Houston Methodist Hospital|Long|USA

>Spike|hCoV-19/Iceland/381/2020|2020-03-19|EPI\_ISL\_424405|Original|hCoV-19^^Reykjavik|Human|The National University Hospital of Iceland|deCODE genetics|J\u00f3nsson|Iceland

>Spike|hCoV-19/England/ALDP-A8733B/2020|2020-10-17|EPI\_ISL\_606213|Original|hCoV-19^^England|Human|Lighthouse Lab in Alderley Park|Wellcome Sanger Institute for the COVID-19 Genomics UK (COG-UK) consortium|Davies|United Kingdom

>Spike|hCoV-19/Scotland/QEUEH-9C7CBD/2020|2020-09-15|EPI\_ISL\_576037|Original|hCoV-19^^Scotland|Human|Lighthouse Lab in Glasgow|Wellcome Sanger Institute for the COVID-19 Genomics UK (COG-UK) consortium|Davies|United Kingdom

>Spike|hCoV-19/USA/UT-UPHL-04008/2020|2020-05-07|EPI\_ISL\_575287|Original|hCoV-19^^Utah|Human|Utah Public Health Laboratory|Utah Public Health Laboratory|Young|USA

>Spike|hCoV-19/England/SHEF-D3297/2020|2020-04-29|EPI\_ISL\_475508|Original|hCoV-19^^England|Human|Virology Department|COVID-19 Genomics UK (COG-UK) Consortium|de Silva|United Kingdom

>Spike|hCoV-19/USA/AZ-TG664281/2020|2020-04-29|EPI\_ISL\_696082|Original|hCoV-19^^Arizona|Human|Sonora Quest Laboratories|TGen North|French|USA

>Spike|hCoV-19/Japan/PG-8577/2020|2020-08-00|EPI\_ISL\_686173|Original|hCoV-19^^Japan|Human|Pathogen Genomics Center|Pathogen Genomics Center|Sekizuka|Japan

>Spike|hCoV-19/England/SHEF-D04D0/2020|2020-04-17|EPI\_ISL\_448903|Original|hCoV-19^^England|Human|Virology Department|COVID-19 Genomics UK (COG-UK) Consortium|de Silva|United Kingdom

>Spike|hCoV-19/England/QEUEH-9FA7FC/2020|2020-09-28|EPI\_ISL\_588143|Original|hCoV-19^^England|Human|Lighthouse Lab in Glasgow|Wellcome Sanger Institute for the COVID-19 Genomics UK (COG-UK) consortium|Davies|United Kingdom

>Spike|hCoV-19/Switzerland/BS-42205161/2020|2020-03-24|EPI\_ISL\_581738|Original|hCoV-19^^Basel-Stadt|Human|University Hospital Basel|University Hospital Basel|Roloff Handschin|Switzerland

>Spike|hCoV-19/England/PORT-2D3D85/2020|2020-04-22|EPI\_ISL\_514504|Original|hCoV-19^^England|Human|Centre for Enzyme Innovation|COVID-19 Genomics UK (COG-UK) Consortium|Robson|United Kingdom

>Spike|hCoV-19/Scotland/CVR4028/2020|2020-08-29|EPI\_ISL\_535127|Original|hCoV-19^^Scotland|Human|West of Scotland Specialist Virology Centre|COVID-19 Genomics UK (COG-UK) Consortium|Robertson|United Kingdom

>Spike|hCoV-19/Wales/PHWC-16BD74/2020|2020-09-15|EPI\_ISL\_573970|Original|hCoV-19^^Wales|Human|Wales Specialist Virology Centre Sequencing lab|COVID-19 Genomics UK (COG-UK) Consortium|Moore|United Kingdom

>Spike|hCoV-19/England/QEUEH-9B8CDD/2020|2020-09-08|EPI\_ISL\_549621|Original|hCoV-19^^England|Human|Lighthouse Lab in Glasgow|Wellcome Sanger Institute for the COVID-19 Genomics UK (COG-UK) consortium|Davies|United Kingdom

>Spike|hCoV-19/USA/WI-UW-2481/2020|2020-12-25|EPI\_ISL\_759755|Original|hCoV-19^^Wisconsin|Human|University of Wisconsin-Madison AIDS Vaccine Research Laboratories|University of Wisconsin-Madison AIDS Vaccine Research Laboratories|Moreno|USA

>Spike|hCoV-19/England/NOTT-110DBA/2020|2020-05-05|EPI\_ISL\_448417|Original|hCoV-19^^England|Human|Queens Medical Centre|COVID-19 Genomics UK (COG-UK) Consortium|Loose|United Kingdom

>Spike|hCoV-19/USA/CA-CZB-1354/2020|2020-04-12|EPI\_ISL\_468368|Original|hCoV-19^^California|Human|Alameda County Public Health Lab|Chan-Zuckerberg Biohub|Hao|USA

>Spike|hCoV-19/India/MH-ACTREC-517/2020|2020-08-20|EPI\_ISL\_723055|Original|hCoV-19^^Maharashtra|Human|Hematopathology Laboratory|Hematopathology Laboratory|Patkar|India

>Spike|hCoV-19/Luxembourg/LNS1695013/2020|2020-10-23|EPI\_ISL\_739980|Original|hCoV-19^^Luxembourg|Human|Laboratoire national de sant\u00e9|Laboratoire national de sant\u00e9|Wienecke-Baldacchino|Luxembourg

>Spike|hCoV-19/England/PORT-2F534F/2020|2020-00-00|EPI\_ISL\_706888|Original|hCoV-19^^England|Human|Centre for Enzyme Innovation|COVID-19 Genomics UK (COG-UK) Consortium|Robson|United Kingdom

>Spike|hCoV-19/Japan/PG-2483/2020|2020-04-00|EPI\_ISL\_686088|Original|hCoV-19^^Japan|Human|Saitama Prefectural Institute of Public Health|Pathogen Genomics Center|Sekizuka|Japan

>Spike|hCoV-19/Norway/3361/2020|2020-09-08|EPI\_ISL\_590881|Original|hCoV-19^^Oslo|Human|Furst Medical Laboratory|Norwegian Institute of Public Health|Vollan|Norway

>Spike|hCoV-19/Australia/VIC9253/2020|2020-08-23|EPI\_ISL\_565468|Original|hCoV-19^^Victoria|Human|Microbiological Diagnostic Unit - Public Health Laboratory (MDU-PHL)|MDU-PHL|Schultz|Australia

>Spike|hCoV-19/England/ALDP-9444B0/2020|2020-06-07|EPI\_ISL\_554850|Original|hCoV-19^^England|Human|Lighthouse Lab in Alderley Park|Wellcome Sanger Institute for the COVID-19 Genomics UK (COG-UK) consortium|Davies|United Kingdom

>Spike|hCoV-19/Ireland/WW-NVRL-AIIDV1257v1/2020|2020-10-21|EPI\_ISL\_768782|Original|hCoV-19^^Wicklow|Human|AIID|Irish Coronavirus Sequencing Consortium - National Virus Reference Laboratory|Gonzalez|Ireland

>Spike|hCoV-19/England/QEUH-9CA081/2020|2020-09-10|EPI\_ISL\_567361|Original|hCoV-19^^England|Human|Lighthouse Lab in Glasgow|Wellcome Sanger Institute for the COVID-19 Genomics UK (COG-UK) consortium|Davies|United Kingdom

>Spike|hCoV-19/Australia/VIC11434/2020|2020-08-30|EPI\_ISL\_563370|Original|hCoV-19^^Victoria|Human|Microbiological Diagnostic Unit - Public Health Laboratory (MDU-PHL)|MDU-PHL|Schultz|Australia

>Spike|hCoV-19/Netherlands/ZH-EMC-585/2020|2020-09-18|EPI\_ISL\_578013|Original|hCoV-19^^Zuid Holland|Human|Dutch COVID-19 response team|Erasmus Medical Center|Oude Munnink|Netherlands

>Spike|hCoV-19/Australia/NSW315/2020|2020-03-27|EPI\_ISL\_451578|Original|hCoV-19^^New South Wales|Human|Pathology Sydney South West - NSW Health Pathology|NSW Health Pathology - Institute of Clinical Pathology and Medical Research; Westmead Hospital; University of Sydney|Gall|Australia

>Spike|hCoV-19/England/20149013604/2020|2020-04-03|EPI\_ISL\_466157|Original|hCoV-19^^England|Human|Respiratory Virus Unit|Respiratory Virus Unit|Platt|United Kingdom

>Spike|hCoV-19/Wuhan/0125-A145/2020|2020-01-25|EPI\_ISL\_493151|Original|hCoV-19^^Hubei|Human|National Virus Resource Center|Computational Virology Group|Liu|China

>Spike|hCoV-19/Scotland/EDB5112/2020|2020-04-21|EPI\_ISL\_453191|Original|hCoV-19^^Scotland|Human|Virology Department|COVID-19 Genomics UK (COG-UK) Consortium|Williams|United Kingdom

>Spike|hCoV-19/England/ALDP-9C4B2C/2020|2020-09-10|EPI\_ISL\_567664|Original|hCoV-19^^England|Human|Lighthouse Lab in Alderley Park|Wellcome Sanger Institute for the COVID-19 Genomics UK (COG-UK) consortium|Davies|United Kingdom

>Spike|hCoV-19/England/BIRM-65B53/2020|2020-10-11|EPI\_ISL\_612208|Original|hCoV-19^^England|Human|University of Birmingham|COVID-19 Genomics UK (COG-UK) Consortium|Loman|United Kingdom

>Spike|hCoV-19/England/QEUH-B10CB3/2020|2020-11-02|EPI\_ISL\_642304|Original|hCoV-19^^England|Human|Lighthouse Lab in Glasgow|Wellcome Sanger Institute for the COVID-19 Genomics UK (COG-UK) Consortium|Davies|United Kingdom

>Spike|hCoV-19/Cote d'Ivoire/BKE0011/2020|2020-05-30|EPI\_ISL\_614348|Original|hCoV-19^^Boauk|Human|Molecular diagnostic unit for viral haemorrhagic fevers and emerging viruses|Project group Epidemiology of Highly Pathogenic Microorganisms|Calvignac-Spencer|Cote d'Ivoire

>Spike|hCoV-19/Luxembourg/LNS3841557/2020|2020-11-01|EPI\_ISL\_740382|Original|hCoV-19^^Luxembourg|Human|Laboratoire national de santé|Laboratoire national de santé|Wienecke-Baldacchino|Luxembourg

>Spike|hCoV-19/Spain/MD-IBV-99008744/2020|2020-10-16|EPI\_ISL\_654308|Original|hCoV-19^^Madrid|Human|Hospital General Universitario Gregorio Marañón|SeqCOVID-SPAIN consortium|IBV (CSIC)|Comas|Spain

>Spike|hCoV-19/Australia/VIC7523/2020|2020-00-00|EPI\_ISL\_564469|Original|hCoV-19^^Victoria|Human|Microbiological Diagnostic Unit - Public Health Laboratory (MDU-PHL)|MDU-PHL|Schultz|Australia

>Spike|hCoV-19/USA/AZ-CDC-2-3693477/2020|2020-11-02|EPI\_ISL\_747123|Original|hCoV-19^^Arizona|Human|Respiratory Viruses Branch|Respiratory Viruses Branch|Queen|USA

>Spike|hCoV-19/USA/CA-CZB-4089/2020|2020-08-12|EPI\_ISL\_548620|Original|hCoV-19^^California|Human|Orange County Public Health Laboratory|Chan-Zuckerberg Biohub|Bhatt|USA

>Spike|hCoV-19/England/NORW-EE730/2020|2020-00-00|EPI\_ISL\_529243|Original|hCoV-19^^England|Human|Quadram Institute Bioscience|COVID-19 Genomics UK (COG-UK) Consortium|Alikhan|United Kingdom

>Spike|hCoV-19/Saudi Arabia/KAUST-MAKKAH26/2020|2020-03-26|EPI\_ISL\_678141|Original|hCoV-19^^Makkah|Human|Pathogen Genomics Lab King Abdullah University of Science and Technology(KAUST)|Pathogen Genomics Lab King Abdullah University of Science and Technology(KAUST)|Mohamed Ghazzali|Saudi Arabia

>Spike|hCoV-19/Australia/NSW2171/2020|2020-03-20|EPI\_ISL\_500642|Original|hCoV-19^^New South Wales|Human|Area of Virology|Area of Virology|Bull|Australia

>Spike|hCoV-19/Australia/VIC4844/2020|2020-07-15|EPI\_ISL\_519228|Original|hCoV-19^^Victoria|Human|Microbiological Diagnostic Unit - Public Health Laboratory (MDU-PHL)|MDU-PHL|Schultz|Australia

>Spike|hCoV-19/USA/WY-WYPHL-20092968/2020|2020-09-30|EPI\_ISL\_754182|Original|hCoV-19^^Wyoming|Human|Wyoming Public Health Laboratory|Wyoming Public Health Laboratory|Hull|USA

>Spike|hCoV-19/England/SHEF-CD069/2020|2020-06-21|EPI\_ISL\_493709|Original|hCoV-19^^England|Human|Virology Department|COVID-19 Genomics UK (COG-UK) Consortium|de Silva|United Kingdom

>Spike|hCoV-19/England/SHEF-10C762E/2020|2020-12-21|EPI\_ISL\_765155|Original|hCoV-19^^England|Human|Virology Department|COVID-19 Genomics UK (COG-UK) Consortium|de Silva|United Kingdom

>Spike|hCoV-19/Denmark/DCGC-22195/2020|2020-12-14|EPI\_ISL\_758607|Original|hCoV-19^^Midtjylland|Human|Department of Virus and Microbiological Special Diagnostics|Albertsen Lab|Michaelsen|Denmark

>Spike|hCoV-19/Spain/CN-IBV-97006526/2020|2020-06-18|EPI\_ISL\_561372|Original|hCoV-19^^Canary Islands|Human|Hospital Universitario de Gran Canaria Dr. Negr\u00ededn|SeqCOVID-SPAIN consortium|IBV(CSIC)|Comas|Spain

>Spike|hCoV-19/USA/WI-UW-2415/2020|2020-12-12|EPI\_ISL\_754634|Original|hCoV-19^^Wisconsin|Human|University of Wisconsin-Madison AIDS Vaccine Research Laboratories|University of Wisconsin-Madison AIDS Vaccine Research Laboratories|Moreno|USA

>Spike|hCoV-19/USA/OR-QDX-1274/2020|2020-03-16|EPI\_ISL\_572033|Original|hCoV-19^^Oregon|Human|Quest Diagnostics|Quest Diagnostics|Kagan|USA

>Spike|hCoV-19/Costa Rica/INC-0045/2020|2020-03-23|EPI\_ISL\_491456|Original|hCoV-19^^San Jose|Human|Hospital San Juan de Dios|Inciensa|Brenes Porras|Costa Rica

>Spike|hCoV-19/Denmark/DCGC-11739/2020|2020-10-26|EPI\_ISL\_670535|Original|hCoV-19^^Midtjylland|Human|Department of Virus and Microbiological Special Diagnostics|Albertsen Lab|Michaelsen|Denmark

>Spike|hCoV-19/USA/MI-MDHHS-SC20449/2020|2020-03-16|EPI\_ISL\_452323|Original|hCoV-19^^Michigan|Human|Michigan Department of Health and Human Services|Michigan Department of Health and Human Services|Blankenship|USA

>Spike|hCoV-19/USA/LA-CDC-2-3693763/2020|2020-11-04|EPI\_ISL\_747070|Original|hCoV-19^^Louisiana|Human|Respiratory Viruses Branch|Respiratory Viruses Branch|Queen|USA

>Spike|hCoV-19/England/QEUEH-B7D9EA/2020|2020-11-14|EPI\_ISL\_727840|Original|hCoV-19^^England|Human|Oxford Viromics|COVID-19 Genomics UK (COG-UK) Consortium|Golubchik|United Kingdom

>Spike|hCoV-19/USA/TX-HMH-4413/2020|2020-06-19|EPI\_ISL\_543601|Original|hCoV-19^^Texas|Human|Houston Methodist Hospital|Houston Methodist Hospital|Long|USA

>Spike|hCoV-19/England/QEUEH-B7C07D/2020|2020-11-14|EPI\_ISL\_668203|Original|hCoV-19^^England|Human|Lighthouse Lab in Glasgow|Wellcome Sanger Institute for the COVID-19 Genomics UK (COG-UK) Consortium|Davies|United Kingdom

>Spike|hCoV-19/England/CAMC-A3E500/2020|2020-10-05|EPI\_ISL\_609660|Original|hCoV-19^^England|Human|Lighthouse Lab in Cambridge|Wellcome Sanger Institute for the COVID-19 Genomics UK (COG-UK) consortium|Davies|United Kingdom

>Spike|hCoV-19/USA/UT-UPHL-2012433715/2020|2020-11-30|EPI\_ISL\_746926|Original|hCoV-19^^Utah|Human|Utah Public Health Laboratory|Utah Public Health Laboratory|Gallagher|USA

>Spike|hCoV-19/England/PORT-2D1EB1/2020|2020-04-06|EPI\_ISL\_499291|Original|hCoV-19^^England|Human|Centre for Enzyme Innovation|COVID-19 Genomics UK (COG-UK) Consortium|Robson|United Kingdom

>Spike|hCoV-19/England/MILK-9E1DAB/2020|2020-09-20|EPI\_ISL\_581228|Original|hCoV-19^^England|Human|Lighthouse Lab in Milton Keynes|Wellcome Sanger Institute for the COVID-19 Genomics UK (COG-UK) consortium|Davies|United Kingdom

>Spike|hCoV-19/England/QEUA-9DA6AA/2020|2020-09-21|EPI\_ISL\_601347|Original|hCoV-19^^England|Human|Lighthouse Lab in Glasgow|Wellcome Sanger Institute for the COVID-19 Genomics UK (COG-UK) consortium|Davies|United Kingdom

>Spike|hCoV-19/England/CAMC-B9A12B/2020|2020-11-15|EPI\_ISL\_673465|Original|hCoV-19^^England|Human|Lighthouse Lab in Cambridge|Wellcome Sanger Institute for the COVID-19 Genomics UK (COG-UK) Consortium|Davies|United Kingdom

>Spike|hCoV-19/England/ALDP-9CC18C/2020|2020-09-16|EPI\_ISL\_584165|Original|hCoV-19^^England|Human|Quadram Institute Bioscience|COVID-19 Genomics UK (COG-UK) Consortium|Alikhan|United Kingdom

>Spike|hCoV-19/South Africa/KRISP-K000581/2020|2020-07-13|EPI\_ISL\_509237|Original|hCoV-19^^KwaZulu-Natal|Human|NHLS-IALCH|KRISP|de Oliveira|South Africa

>Spike|hCoV-19/England/QEUA-AD5B54/2020|2020-10-26|EPI\_ISL\_634639|Original|hCoV-19^^England|Human|Lighthouse Lab in Glasgow|Wellcome Sanger Institute for the COVID-19 Genomics UK (COG-UK) consortium|Davies|United Kingdom

>Spike|hCoV-19/England/ALDP-A6EC8A/2020|2020-10-15|EPI\_ISL\_607207|Original|hCoV-19^^England|Human|Lighthouse Lab in Alderley Park|Wellcome Sanger Institute for the COVID-19 Genomics UK (COG-UK) consortium|Davies|United Kingdom

>Spike|hCoV-19/USA/CA-ALSR-0543-SAN/2020|2020-05-04|EPI\_ISL\_483213|Original|hCoV-19^^California|Human|UC San Diego Center for Advanced Laboratory Medicine|Andersen lab at Scripps Research|Gangavarapu|USA

>Spike|hCoV-19/England/NORT-29DC20/2020|2020-05-07|EPI\_ISL\_488081|Original|hCoV-19^^England|Human|NU-OMICS DNA Sequencing research facility|Wellcome Sanger Institute for the COVID-19 Genomics UK (COG-UK) consortium|Davies|United Kingdom

>Spike|hCoV-19/England/LIVE-A883F/2020|2020-03-26|EPI\_ISL\_517219|Original|hCoV-19^^England|Human|Liverpool Clinical Laboratories|COVID-19 Genomics UK (COG-UK) Consortium|Haldenby|United Kingdom

>Spike|hCoV-19/England/CAMB-71E79/2020|2020-03-29|EPI\_ISL\_439633|Original|hCoV-19^^England|Human|Department of Pathology|Wellcome Sanger Institute for the COVID-19 Genomics UK (COG-UK) consortium|Amato|United Kingdom

>Spike|hCoV-19/USA/WA-S2381/2020|2020-06-12|EPI\_ISL\_497013|Original|hCoV-19^^Washington|Human|Washington State Department of Health|Seattle Flu Study|Lee|USA

>Spike|hCoV-19/USA/CA-CSMC3/2020|2020-03-27|EPI\_ISL\_475640|Original|hCoV-19^^California|Human|Cedars-Sinai Medical Center|Cedars-Sinai Medical Center|Zhang|USA

>Spike|hCoV-19/England/QEUA-B6793E/2020|2020-11-10|EPI\_ISL\_655850|Original|hCoV-19^^England|Human|Lighthouse Lab in Glasgow|Wellcome Sanger Institute for the COVID-19 Genomics UK (COG-UK) Consortium|Davies|United Kingdom

>Spike|hCoV-19/Canada/BC-BCCDC-8392/2020|2020-11-00|EPI\_ISL\_740769|Original|hCoV-19^^British Columbia|Human|BCCDC Public Health Laboratory|BCCDC Public Health Laboratory|Prystajek|Canada

>Spike|hCoV-19/England/BRIS-1287FD/2020|2020-04-15|EPI\_ISL\_458755|Original|hCoV-19^^England|Human|PHE South West Regional Laboratory|Wellcome Sanger Institute for the COVID-19 Genomics UK (COG-UK) consortium|Davies|United Kingdom

>Spike|hCoV-19/USA/CA-ALSR-3655/2020|2020-09-25|EPI\_ISL\_636130|Original|hCoV-19^^California|Human|San Diego County Public Health Laboratory|Andersen lab at Scripps Research|Gangavarapu|USA

>Spike|hCoV-19/England/20144063304/2020|2020-03-31|EPI\_ISL\_466004|Original|hCoV-19^^England|Human|Respiratory Virus Unit|Respiratory Virus Unit|Platt|United Kingdom

>Spike|hCoV-19/USA/TX-HMH-1337/2020|2020-04-22|EPI\_ISL\_542657|Original|hCoV-19^^Texas|Human|Houston Methodist Hospital|Houston Methodist Hospital|Long|USA

>Spike|hCoV-19/England/ALDP-C8A10F/2020|2020-12-16|EPI\_ISL\_762847|Original|hCoV-19^^England|Human|Lighthouse Lab in Alderley Park|Wellcome Sanger Institute for the COVID-19 Genomics UK (COG-UK) Consortium|Davies|United Kingdom

>Spike|hCoV-19/England/QEUA-9C7BED/2020|2020-09-12|EPI\_ISL\_567265|Original|hCoV-19^^England|Human|Lighthouse Lab in Glasgow|Wellcome Sanger Institute for the COVID-19 Genomics UK (COG-UK) consortium|Davies|United Kingdom

>Spike|hCoV-19/England/PORT-2D0F82/2020|2020-04-23|EPI\_ISL\_475312|Original|hCoV-19^^England|Human|Centre for Enzyme Innovation|COVID-19 Genomics UK (COG-UK) Consortium|Robson|United Kingdom

>Spike|hCoV-19/USA/MI-MDHHS-SC20179/2020|2020-03-12|EPI\_ISL\_436808|Original|hCoV-19^^Michigan|Human|Michigan Department of Health and Human Services|Michigan Department of Health and Human Services|Blankenship|USA

>Spike|hCoV-19/England/NORT-2834DA/2020|2020-03-29|EPI\_ISL\_488633|Original|hCoV-19^^England|Human|NU-OMICS DNA Sequencing research facility|Wellcome Sanger Institute for the COVID-19 Genomics UK (COG-UK) consortium|Davies|United Kingdom

>Spike|hCoV-19/Wales/PHWC-49170B/2020|2020-11-05|EPI\_ISL\_706683|Original|hCoV-19^^Wales|Human|Originating lab|COVID-19 Genomics UK (COG-UK) Consortium|Moore|United Kingdom

>Spike|hCoV-19/England/NOTT-1207F5/2020|2020-12-10|EPI\_ISL\_725649|Original|hCoV-19^^England|Human|Queens Medical Centre|COVID-19 Genomics UK (COG-UK) Consortium|Loose|United Kingdom

>Spike|hCoV-19/USA/FL-BPHL-0954/2020|2020-07-07|EPI\_ISL\_517844|Original|hCoV-19^^Florida|Human|Florida Bureau of Public Health Laboratories|Florida Bureau of Public Health Laboratories|Blanton|USA

>Spike|hCoV-19/England/20166058904/2020|2020-04-15|EPI\_ISL\_466556|Original|hCoV-19^^England|Human|Respiratory Virus Unit|Respiratory Virus Unit|Platt|United Kingdom

>Spike|hCoV-19/England/BRIS-12EDD7/2020|2020-04-21|EPI\_ISL\_488336|Original|hCoV-19^^England|Human|PHE South West Regional Laboratory|Wellcome Sanger Institute for the COVID-19 Genomics UK (COG-UK) consortium|Davies|United Kingdom

>Spike|hCoV-19/USA/CA-CZB-3677/2020|2020-07-13|EPI\_ISL\_548479|Original|hCoV-19^^California|Human|University of California|Chan-Zuckerberg Biohub|Bhatt|USA

>Spike|hCoV-19/Wales/CAMC-9DF72A/2020|2020-09-20|EPI\_ISL\_639004|Original|hCoV-19^^Wales|Human|Department of Pathology|COVID-19 Genomics UK (COG-UK) Consortium|Goodfellow|United Kingdom

>Spike|hCoV-19/England/LIVE-A3FC6/2020|2020-06-25|EPI\_ISL\_490400|Original|hCoV-19^^England|Human|Liverpool Clinical Laboratories|COVID-19 Genomics UK (COG-UK) Consortium|Haldenby|United Kingdom

>Spike|hCoV-19/India/MH-NIV-157478/2020|2020-08-10|EPI\_ISL\_541707|Original|hCoV-19^^Maharashtra|Human|National Institute of Virology|National Institute of Virology|Potdar|India

>Spike|hCoV-19/England/MILK-BAA191/2020|2020-11-18|EPI\_ISL\_681628|Original|hCoV-19^^England|Human|Lighthouse Lab in Milton Keynes|Wellcome Sanger Institute for the COVID-19 Genomics UK (COG-UK) Consortium|Davies|United Kingdom

>Spike|hCoV-19/Wales/PHWC-33DD0/2020|2020-04-16|EPI\_ISL\_446823|Original|hCoV-19^^Wales|Human|Wales Specialist Virology Centre|Public Health Wales Microbiology Cardiff|Moore|United Kingdom

>Spike|hCoV-19/Wales/PHWC-4805C9/2020|2020-10-18|EPI\_ISL\_612906|Original|hCoV-19^^Wales|Human|Wales Specialist Virology Centre Sequencing lab|COVID-19 Genomics UK (COG-UK) Consortium|Moore|United Kingdom

>Spike|hCoV-19/Germany/NW-HHU-380/2020|2020-11-26|EPI\_ISL\_718048|Original|hCoV-19^^North Rhine-Westphalia|Human|ZOTZ KLIMAS MVZ D\u00fcsseldorf-Centrum GbR \u00dcBAG f\u00fcr Labormedizin|Center of Medical Microbiology|Wienemann|Germany

>Spike|hCoV-19/Italy/VEN-UniVR-67/2020|2020-03-14|EPI\_ISL\_751376|Original|hCoV-19^^Veneto|Human|IRCCS Sacro Cuore Don Calabria Hospital|University of Verona|Mori|Italy

>Spike|hCoV-19/England/PORT-2EA1CB/2020|2020-00-00|EPI\_ISL\_665483|Original|hCoV-19^^England|Human|Centre for Enzyme Innovation|COVID-19 Genomics UK (COG-UK) Consortium|Robson|United Kingdom

>Spike|hCoV-19/Norway/3708/2020|2020-09-21|EPI\_ISL\_590985|original|hCoV-19^^Vestland|Human|Foerde Hospital|Norwegian Institute of Public Health|Vollan|Norway

>Spike|hCoV-19/USA/VA-DCLS-0687/2020|2020-04-18|EPI\_ISL\_500849|Original|hCoV-19^^Virginia|Human|Virginia DCLS|Virginia DCLS|St. Jacques|USA

>Spike|hCoV-19/Spain/AN-IBV-004097/2020|2020-04-17|EPI\_ISL\_510052|Original|hCoV-19^^Andalucia|Human|Servicio de Microbiolog\u00eda. HRU de M\u00e9llaga. Servicio Andaluz de Salud|SeqCOVID-SPAIN consortium/IBV(CSIC)|Comas|Spain

>Spike|hCoV-19/England/LOND-DA63A/2020|2020-11-11|EPI\_ISL\_724648|Original|hCoV-19^^England|Human|University College London|COVID-19 Genomics UK (COG-UK) Consortium|Roy|United Kingdom

>Spike|hCoV-19/England/LIVE-DC3163/2020|2020-11-20|EPI\_ISL\_704137|Original|hCoV-19^^England|Human|Liverpool Clinical Laboratories|COVID-19 Genomics UK (COG-UK) Consortium|Haldenby|United Kingdom

>Spike|hCoV-19/Japan/PG-1775/2020|2020-04-00|EPI\_ISL\_685381|Original|hCoV-19^^Japan|Human|Pathogen Genomics Center|Pathogen Genomics Center|Sekizuka|Japan

>Spike|hCoV-19/Austria/CeMM0779/2020|2020-04-24|EPI\_ISL\_583696|Original|hCoV-19^^Austria|Human|Center for Virology|Bergthaler laboratory|Bergthaler|Austria

>Spike|hCoV-19/England/ALDP-B84F2A/2020|2020-11-15|EPI\_ISL\_674396|Original|hCoV-19^^England|Human|Lighthouse Lab in Alderley Park|Wellcome Sanger Institute for the COVID-19 Genomics UK (COG-UK) Consortium|Davies|United Kingdom

>Spike|hCoV-19/India/MH-AFMC-5670/2020|2020-05-25|EPI\_ISL\_496540|Original|hCoV-19^^Maharashtra|Human|Armed Forces Medical College|National Centre For Cell Science|Paul|India

>Spike|hCoV-19/India/GJ-GBRC182b/2020|2020-06-03|EPI\_ISL\_467052|Original|hCoV-19^^Gujarat|Human|B.J. Medical College and Civil hospital|Gujarat Biotechnology Research Centre|Joshi|India

>Spike|hCoV-19/England/MILK-48213C/2020|2020-04-29|EPI\_ISL\_559669|Original|hCoV-19^^England|Human|Lighthouse Lab in Milton Keynes|Wellcome Sanger Institute for the COVID-19 Genomics UK (COG-UK) consortium|Davies|United Kingdom

>Spike|hCoV-19/England/MILK-9932E5/2020|2020-08-27|EPI\_ISL\_551944|Original|hCoV-19^^England|Human|Lighthouse Lab in Milton Keynes|Wellcome Sanger Institute for the COVID-19 Genomics UK (COG-UK) consortium|Davies|United Kingdom

>Spike|hCoV-19/Burkina Faso/2-042-1650/2020|2020-08-13|EPI\_ISL\_660493|Original|hCoV-19^^Hound\u00e9|Human|Laboratoire de Microbiologie CHU Sourou Sanou|Centre Muraz|Ouedraogo|Burkina Faso

>Spike|hCoV-19/Norway/2090/2020|2020-03-16|EPI\_ISL\_420153|Original|hCoV-19^^Norway|Human|University Hospital of Northern Norway|Norwegian Institute of Public Health|Hungnes|Norway

>Spike|hCoV-19/England/OXON-B2FE2/2020|2020-05-24|EPI\_ISL\_534833|Original|hCoV-19^^England|Human|Oxford Viromics|COVID-19 Genomics UK (COG-UK) Consortium|Golubchik|United Kingdom

>Spike|hCoV-19/England/QEUEH-9DDA14/2020|2020-09-21|EPI\_ISL\_599549|Original|hCoV-19^^England|Human|Lighthouse Lab in Glasgow|Wellcome Sanger Institute for the COVID-19 Genomics UK (COG-UK) consortium|Davies|United Kingdom

>Spike|hCoV-19/Japan/PG-4408/2020|2020-07-00|EPI\_ISL\_692634|Original|hCoV-19^^Japan|Human|Pathogen Genomics Center|Pathogen Genomics Center|Sekizuka|Japan

>Spike|hCoV-19/Germany/HH-hpi-pl862/2020|2020-03-23|EPI\_ISL\_775919|Original|hCoV-19^^Hamburg|Human|University Medical Center Hamburg Eppendorf|Heinrich Pette Institute|Robitaille|Germany

>Spike|hCoV-19/Denmark/DCGC-22595/2020|2020-12-14|EPI\_ISL\_757660|Original|hCoV-19^^Midtjylland|Human|Department of Virus and Microbiological Special Diagnostics|Albertsen Lab|Michaelsen|Denmark

>Spike|hCoV-19/USA/FL-BPHL-0352/2020|2020-04-13|EPI\_ISL\_489761|Original|hCoV-19^^Florida|Human|Florida Bureau of Public Health Laboratories|Florida Bureau of Public Health Laboratories|Blanton|USA

>Spike|hCoV-19/Ireland/RN-NVRL-73IRL30636/2020|2020-09-16|EPI\_ISL\_578319|Original|hCoV-19^^Roscommon|Human|National Virus Reference Laboratory|National Virus Reference Laboratory|Gonzalez|Ireland

>Spike|hCoV-19/USA/MD-MDH-0462/2020|2020-11-11|EPI\_ISL\_682073|Original|hCoV-19^^Maryland|Human|Maryland Public Health Laboratory|Maryland Public Health Laboratory|Keller|USA

>Spike|hCoV-19/India/MH-ACTREC-426/2020|2020-07-31|EPI\_ISL\_700075|Original|hCoV-19^^Maharashtra|Human|Hematopathology Laboratory|Hematopathology Laboratory|Patkar|India

>Spike|hCoV-19/France/PAC-SC456/2020|2020-05-08|EPI\_ISL\_645212|Original|hCoV-19^^Provence-Alpes-Cote-d\u2019Azur|Human|Unit\u00e9 des Virus \u00c9mergents|CNR Virus des Infections Respiratoires - France SUD|Bal|France

>Spike|hCoV-19/England/CAMB-77B9A/2020|2020-04-03|EPI\_ISL\_440830|Original|hCoV-19^^England|Human|Department of Pathology|Wellcome Sanger Institute for the COVID-19 Genomics UK (COG-UK) consortium|Amato|United Kingdom

>Spike|hCoV-19/England/QEUEH-BCD7F0/2020|2020-11-26|EPI\_ISL\_704681|Original|hCoV-19^^England|Human|Lighthouse Lab in Glasgow|Wellcome Sanger Institute for the COVID-19 Genomics UK (COG-UK) Consortium|Davies|United Kingdom

>Spike|hCoV-19/England/ALDP-954CE2/2020|2020-06-12|EPI\_ISL\_553514|Original|hCoV-19^^England|Human|Lighthouse Lab in Alderley Park|Wellcome Sanger Institute for the COVID-19 Genomics UK (COG-UK) consortium|Davies|United Kingdom

>Spike|hCoV-19/England/20132053902/2020|2020-03-22|EPI\_ISL\_420505|Original|hCoV-19^^England|Human|Respiratory Virus Unit|Respiratory Virus Unit|Platt|United Kingdom

>Spike|hCoV-19/Russia/OMS-ORINFI-543S/2020|2020-05-23|EPI\_ISL\_569751|Original|hCoV-19^^Omsk|Human|Omsk Research Institute of Natural Focal Infections|WHO National Influenza Centre Russian Federation|Komissarov|Russia

>Spike|hCoV-19/Scotland/QEUEH-9D09AB/2020|2020-09-16|EPI\_ISL\_601849|Original|hCoV-19^^Scotland|Human|Lighthouse Lab in Glasgow|Wellcome Sanger Institute for the COVID-19 Genomics UK (COG-UK) consortium|Davies|United Kingdom

>Spike|hCoV-19/USA/CA-CZB-1129/2020|2020-03-31|EPI\_ISL\_445177|Original|hCoV-19^^California|Human|UCSF Clinical Microbiology Laboratory|Chan-Zuckerberg Biohub|Kamm|USA

>Spike|hCoV-19/Denmark/DCGC-21515/2020|2020-12-21|EPI\_ISL\_758206|Original|hCoV-19^^Hovedstaden|Human|Department of Virus and Microbiological Special Diagnostics|Albertsen Lab|Michaelsen|Denmark

>Spike|hCoV-19/England/20194020701/2020|2020-05-05|EPI\_ISL\_465608|Original|hCoV-19^^England|Human|Respiratory Virus Unit|Respiratory Virus Unit|Platt|United Kingdom

>Spike|hCoV-19/England/ALDP-B23BED/2020|2020-11-04|EPI\_ISL\_646342|Original|hCoV-19^^England|Human|Lighthouse Lab in Alderley Park|Wellcome Sanger Institute for the COVID-19 Genomics UK (COG-UK) Consortium|Davies|United Kingdom

>Spike|hCoV-19/England/NOTT-119A8D/2020|2020-11-03|EPI\_ISL\_627721|Original|hCoV-19^^England|Human|Queens Medical Centre|COVID-19 Genomics UK (COG-UK) Consortium|Loose|United Kingdom

>Spike|hCoV-19/Norway/2966/2020|2020-07-22|EPI\_ISL\_549093|Original|hCoV-19^^Oslo|Human|Ostfold Hospital Trust - Kalnes|Norwegian Institute of Public Health|Kopperud Riis|Norway

>Spike|hCoV-19/Cyprus/008/2020|2020-04-27|EPI\_ISL\_463748|Original|hCoV-19^^Cyprus|Human|Department of Molecular Virology|Department of Molecular Virology|Richter|Cyprus

>Spike|hCoV-19/USA/WI-GMF-27798/2020|2020-10-26|EPI\_ISL\_660992|Original|hCoV-19^^Wisconsin|Human|Gundersen Molecular Diagnostics Laboratory|Kabara Cancer Research Institute|Kenny|USA

>Spike|hCoV-19/USA/CA-CZB-13012/2020|2020-10-26|EPI\_ISL\_672065|Original|hCoV-19^^California|Human|Santa Clara County Public Health Laboratory|Chan-Zuckerberg Biohub|Bhatt|USA

>Spike|hCoV-19/USA/UT-QDX-2523/2020|2020-03-13|EPI\_ISL\_604859|Original|hCoV-19^^Utah|Human|Quest Diagnostics|Quest Diagnostics|Kagan|USA

>Spike|hCoV-19/Australia/VIC17944/2020|2020-08-16|EPI\_ISL\_779578|Original|hCoV-19^^Victoria|Human|Microbiological Diagnostic Unit - Public Health Laboratory (MDU-PHL)|MDU-PHL|Beck|Australia

>Spike|hCoV-19/Portugal/PT0371/2020|2020-03-19|EPI\_ISL\_454087|Original|hCoV-19^^Portugal|Human|unknown|Instituto Nacional de Saude (INSA)|Borges|Portugal

>Spike|hCoV-19/Scotland/QEUEH-9B8253/2020|2020-09-10|EPI\_ISL\_568255|Original|hCoV-19^^Scotland|Human|Lighthouse Lab in Glasgow|Wellcome Sanger Institute for the COVID-19 Genomics UK (COG-UK) consortium|Davies|United Kingdom

>Spike|hCoV-19/England/ALDP-BBB151/2020|2020-11-20|EPI\_ISL\_701691|Original|hCoV-19^^England|Human|Lighthouse Lab in Alderley Park|Wellcome Sanger Institute for the COVID-19 Genomics UK (COG-UK) Consortium|Davies|United Kingdom

>Spike|hCoV-19/France/PAC-IHU-1292/2020|2020-08-18|EPI\_ISL\_569109|Original|hCoV-19^^Provence-Alpes-C\u00f4te-d\u0027Azur|Human|MEPHI|MEPHI|Levasseur|France



>Spike|hCoV-19/England/CAMC-A64E60/2020|2020-10-11|EPI\_ISL\_608485|Original|hCoV-19^^England|Human|Lighthouse Lab in Cambridge|Wellcome Sanger Institute for the COVID-19 Genomics UK (COG-UK) consortium|Davies|United Kingdom

>Spike|hCoV-19/USA/UT-UPHL-201002768/2020|2020-04-24|EPI\_ISL\_594428|Original|hCoV-19^^Utah|Human|Utah Public Health Laboratory|Utah Public Health Laboratory|Young|USA

>Spike|hCoV-19/USA/OR-OHSU-0698/2020|2020-06-18|EPI\_ISL\_525890|Original|hCoV-19^^Oregon|Human|OHSU Lab Services Molecular Microbiology Lab|Ginkgo Bioworks Clinical Laboratory|O'Roak|USA

>Spike|hCoV-19/DRC/4647/2020|2020-04-30|EPI\_ISL\_513609|Original|hCoV-19^^Kinshasa|Human|Viral Respiratory Lab|Pathogen Sequencing Lab|Lokilo|Democratic Republic of the Congo

>Spike|hCoV-19/USA/TX-HMH-781/2020|2020-04-09|EPI\_ISL\_545645|Original|hCoV-19^^Texas|Human|Houston Methodist Hospital|Houston Methodist Hospital|Long|USA

>Spike|hCoV-19/USA/WA-UW-1578/2020|2020-03-19|EPI\_ISL\_423016|Original|hCoV-19^^Washington|Human|UW Virology Lab|UW Virology Lab|Roychoudhury|USA

>Spike|hCoV-19/Luxembourg/LNS4470088/2020|2020-11-19|EPI\_ISL\_740476|Original|hCoV-19^^Luxembourg|Human|Laboratoire national de sant\u00e9|Laboratoire national de sant\u00e9|Wienecke-Baldacchino|Luxembourg

>Spike|hCoV-19/England/QEUEH-C938E0/2020|2020-12-17|EPI\_ISL\_777059|Original|hCoV-19^^England|Human|Lighthouse Lab in Glasgow|Wellcome Sanger Institute for the COVID-19 Genomics UK (COG-UK) Consortium|Davies|United Kingdom

>Spike|hCoV-19/Wales/PHWC-2EE3F/2020|2020-04-06|EPI\_ISL\_446161|Original|hCoV-19^^Wales|Human|Wales Specialist Virology Centre|Public Health Wales Microbiology Cardiff|Moore|United Kingdom

>Spike|hCoV-19/England/QEUEH-AE26EA/2020|2020-10-26|EPI\_ISL\_633467|Original|hCoV-19^^England|Human|Lighthouse Lab in Glasgow|Wellcome Sanger Institute for the COVID-19 Genomics UK (COG-UK) consortium|Davies|United Kingdom

>Spike|hCoV-19/USA/TX-HMH-MCoV-8959/2020|2020-07-02|EPI\_ISL\_780859|Original|hCoV-19^^Texas|Human|Houston Methodist Hospital|Houston Methodist Hospital|Long|USA

>Spike|hCoV-19/England/ALDP-B751EA/2020|2020-11-12|EPI\_ISL\_740899|Original|hCoV-19^^England|Human|Oxford Viromics|COVID-19 Genomics UK (COG-UK) Consortium|Golubchik|United Kingdom

>Spike|hCoV-19/Finland/S5CD7/2020|2020-10-30|EPI\_ISL\_732651|Original|hCoV-19^^Uusimaa|Human|Department of Virology and Immunology|Department of Virology|Smura|Finland

>Spike|hCoV-19/USA/LA-GBCL-26684506/2020|2020-04-10|EPI\_ISL\_485311|Original|hCoV-19^^Louisiana|Human|River Road Testing Lab|Ginkgo Bioworks Clinical Laboratory|Smith|USA

>Spike|hCoV-19/USA/TX-HMH-MCoV-10339/2020|2020-07-08|EPI\_ISL\_789428|Original|hCoV-19^^Texas|Human|Houston Methodist Hospital|Houston Methodist Hospital|Long|USA

>Spike|hCoV-19/USA/CA-ALSR-0907-IPL/2020|2020-04-27|EPI\_ISL\_483409|Original|hCoV-19^^California|Human|UC San Diego Center for Advanced Laboratory Medicine|Andersen lab at Scripps Research|Gangavarapu|USA

>Spike|hCoV-19/Denmark/DCGC-10589/2020|2020-11-02|EPI\_ISL\_670072|Original|hCoV-19^^Hovedstaden|Human|Department of Virus and Microbiological Special Diagnostics|Albertsen Lab|Michaelsen|Denmark

>Spike|hCoV-19/Iceland/241/2020|2020-03-17|EPI\_ISL\_417569|Original|hCoV-19^^Reykjavik|Human|The National University Hospital of Iceland|deCODE genetics|J\u00f3nsson|Iceland

>Spike|hCoV-19/England/ALDP-500469/2020|2020-06-25|EPI\_ISL\_559099|Original|hCoV-19^^England|Human|Lighthouse Lab in Alderley Park|Wellcome Sanger Institute for the COVID-19 Genomics UK (COG-UK) consortium|Davies|United Kingdom

>Spike|hCoV-19/Netherlands/ZH-EMC-462/2020|2020-08-12|EPI\_ISL\_523799|Original|hCoV-19^^Zuid Holland|Human|Dutch COVID-19 response team|Erasmus Medical Center|Oude Munnink|Netherlands

>Spike|hCoV-19/England/QEUEH-AAED9A/2020|2020-10-22|EPI\_ISL\_653005|Original|hCoV-19^^England|Human|Oxford Viromics|COVID-19 Genomics UK (COG-UK) Consortium|Golubchik|United Kingdom

>Spike|hCoV-19/England/CAMC-BC2096/2020|2020-11-22|EPI\_ISL\_705123|Original|hCoV-19^^England|Human|Lighthouse Lab in Cambridge|Wellcome Sanger Institute for the COVID-19 Genomics UK (COG-UK) Consortium|Davies|United Kingdom

>Spike|hCoV-19/England/ALDP-9C5D25/2020|2020-09-10|EPI\_ISL\_567775|Original|hCoV-19^^England|Human|Lighthouse Lab in Alderley Park|Wellcome Sanger Institute for the COVID-19 Genomics UK (COG-UK) consortium|Davies|United Kingdom

>Spike|hCoV-19/England/MILK-A69803/2020|2020-10-08|EPI\_ISL\_665273|Original|hCoV-19^^England|Human|University of Exeter|COVID-19 Genomics UK (COG-UK) Consortium|Temperton|United Kingdom

>Spike|hCoV-19/USA/UT-0291/2020|2020-03-27|EPI\_ISL\_420811|Original|hCoV-19^^Utah|Human|Utah Public Health Laboratory|Utah Public Health Laboratory|Young|USA

>Spike|hCoV-19/Scotland/QEUEH-9D31EC/2020|2020-09-20|EPI\_ISL\_577381|Original|hCoV-19^^Scotland|Human|Centre for Enzyme Innovation|COVID-19 Genomics UK (COG-UK) Consortium|Robson|United Kingdom

>Spike|hCoV-19/USA/ID-UW-6468/2020|2020-04-02|EPI\_ISL\_570120|Original|hCoV-19^^Idaho|Human|UW Virology Lab|UW Virology Lab|Roychoudhury|USA

>Spike|hCoV-19/England/SHEF-C27F6/2020|2020-05-01|EPI\_ISL\_457594|Original|hCoV-19^^England|Human|Virology Department|COVID-19 Genomics UK (COG-UK) Consortium|de Silva|United Kingdom

>Spike|hCoV-19/Belgium/ULG-11095/2020|2020-12-15|EPI\_ISL\_737344|Original|hCoV-19^^Li\u00e8ge|Human|Department of Clinical Microbiology|GIGA Medical Genomics|Durkin|Belgium

>Spike|hCoV-19/England/CAMC-B2187F/2020|2020-11-01|EPI\_ISL\_647205|Original|hCoV-19^^England|Human|Lighthouse Lab in Cambridge|Wellcome Sanger Institute for the COVID-19 Genomics UK (COG-UK) Consortium|Davies|United Kingdom

>Spike|hCoV-19/England/LIVE-A4332/2020|2020-06-16|EPI\_ISL\_490415|Original|hCoV-19^^England|Human|Liverpool Clinical Laboratories|COVID-19 Genomics UK (COG-UK) Consortium|Haldenby|United Kingdom

>Spike|hCoV-19/England/CAMC-D025B7/2020|2020-12-21|EPI\_ISL\_781757|Original|hCoV-19^^England|Human|Lighthouse Lab in Cambridge|Wellcome Sanger Institute for the COVID-19 Genomics UK (COG-UK) Consortium|Davies|United Kingdom

>Spike|hCoV-19/Wales/PHWC-497C24/2020|2020-11-25|EPI\_ISL\_726950|Original|hCoV-19^^Wales|Human|Originating lab|COVID-19 Genomics UK (COG-UK) Consortium|Moore|United Kingdom

>Spike|hCoV-19/Denmark/DCGC-19517/2020|2020-12-07|EPI\_ISL\_749003|Original|hCoV-19^^Sjælland|Human|Department of Virus and Microbiological Special Diagnostics|Albertsen Lab|Michaelsen|Denmark

>Spike|hCoV-19/England/QEUEH-9DE187/2020|2020-09-21|EPI\_ISL\_599752|Original|hCoV-19^^England|Human|Lighthouse Lab in Glasgow|Wellcome Sanger Institute for the COVID-19 Genomics UK (COG-UK) consortium|Davies|United Kingdom

>Spike|hCoV-19/Scotland/QEUEH-B68BA0/2020|2020-11-11|EPI\_ISL\_676381|Original|hCoV-19^^Scotland|Human|Lighthouse Lab in Glasgow|Wellcome Sanger Institute for the COVID-19 Genomics UK (COG-UK) Consortium|Davies|United Kingdom

>Spike|hCoV-19/Switzerland/BS-42222049/2020|2020-04-06|EPI\_ISL\_581681|Original|hCoV-19^^Basel-Stadt|Human|University Hospital Basel|University Hospital Basel|Roloff Handschin|Switzerland

>Spike|hCoV-19/Denmark/DCGC-16726/2020|2020-10-19|EPI\_ISL\_714438|Original|hCoV-19^^Hovedstaden|Human|Department of Virus and Microbiological Special Diagnostics|Albertsen Lab|Michaelsen|Denmark

>Spike|hCoV-19/USA/CA-QDX-79/2020|2020-03-15|EPI\_ISL\_467843|Original|hCoV-19^^California|Human|Quest Diagnostics|Quest Diagnostics|Kagan|USA

>Spike|hCoV-19/England/QEUEH-9E45EC/2020|2020-09-22|EPI\_ISL\_579907|Original|hCoV-19^^England|Human|Lighthouse Lab in Glasgow|Wellcome Sanger Institute for the COVID-19 Genomics UK (COG-UK) consortium|Davies|United Kingdom

>Spike|hCoV-19/United Arab Emirates/L920634181/2020|2020-03-31|EPI\_ISL\_520727|Original|hCoV-19^^United Arab Emirates|Human|Mohammed Bin Rashid University of Medicine and Health Sciences|Al Jalila Genomics Center|Ramaswamy|United Arab Emirates

>Spike|hCoV-19/England/QEUEH-9F57D3/2020|2020-09-25|EPI\_ISL\_588910|Original|hCoV-19^^England|Human|Lighthouse Lab in Glasgow|Wellcome Sanger Institute for the COVID-19 Genomics UK (COG-UK) consortium|Davies|United Kingdom

>Spike|hCoV-19/Wales/PHWC-48895C/2020|2020-11-01|EPI\_ISL\_639447|Original|hCoV-19^^Wales|Human|Wales Specialist Virology Centre Sequencing lab|COVID-19 Genomics UK (COG-UK) Consortium|Moore|United Kingdom

>Spike|hCoV-19/England/CAMC-B0C86B/2020|2020-10-31|EPI\_ISL\_643347|Original|hCoV-19^^England|Human|Lighthouse Lab in Cambridge|Wellcome Sanger Institute for the COVID-19 Genomics UK (COG-UK) Consortium|Davies|United Kingdom

>Spike|hCoV-19/England/MILK-B04B5B/2020|2020-10-24|EPI\_ISL\_650951|Original|hCoV-19^^England|Human|Department of Pathology|COVID-19 Genomics UK (COG-UK) Consortium|Goodfellow|United Kingdom

>Spike|hCoV-19/Luxembourg/LNS1908786/2020|2020-10-26|EPI\_ISL\_740020|Original|hCoV-19^^Luxembourg|Human|Laboratoire national de sant\u00e9|Laboratoire national de sant\u00e9|Wienecke-Baldacchino|Luxembourg

>Spike|hCoV-19/England/ALDP-B854B1/2020|2020-11-12|EPI\_ISL\_675489|Original|hCoV-19^^England|Human|Lighthouse Lab in Alderley Park|Wellcome Sanger Institute for the COVID-19 Genomics UK (COG-UK) Consortium|Davies|United Kingdom

>Spike|hCoV-19/Wales/CAMC-AAF6DA/2020|2020-10-21|EPI\_ISL\_634795|Original|hCoV-19^^Wales|Human|Lighthouse Lab in Cambridge|Wellcome Sanger Institute for the COVID-19 Genomics UK (COG-UK) consortium|Davies|United Kingdom

>Spike|hCoV-19/England/MILK-9AAE23/2020|2020-08-26|EPI\_ISL\_551208|Original|hCoV-19^^England|Human|Lighthouse Lab in Milton Keynes|Wellcome Sanger Institute for the COVID-19 Genomics UK (COG-UK) consortium|Davies|United Kingdom

>Spike|hCoV-19/USA/TX-HMH-MCoV-12605/2020|2020-08-31|EPI\_ISL\_790414|Original|hCoV-19^^Texas|Human|Houston Methodist Hospital|Houston Methodist Hospital|Long|USA

>Spike|hCoV-19/Sweden/20-08561/2020|2020-03-29|EPI\_ISL\_475109|Original|hCoV-19^^Sormland|Human|Skovde/Unilabs|The Public Health Agency of Sweden|Svartstr\u00f6m|Sweden

>Spike|hCoV-19/France/ARA-SC326/2020|2020-03-24|EPI\_ISL\_660330|Original|hCoV-19^^Auvergne-Rh\u00f4ne-Alpes|Human|CHU de Saint-\u00c9tienne H\u00f4pital Nord|CNR Virus des Infections Respiratoires - France SUD|Bal|France

>Spike|hCoV-19/USA/MI-MDHHS-SC22535/2020|2020-11-02|EPI\_ISL\_708547|Original|hCoV-19^^Michigan|Human|Michigan Department of Health and Human Services|Michigan Department of Health and Human Services|Jacob|USA

>Spike|hCoV-19/England/ALDP-98243E/2020|2020-08-09|EPI\_ISL\_526362|Original|hCoV-19^^England|Human|Queens Medical Centre|COVID-19 Genomics UK (COG-UK) Consortium|Loose|United Kingdom

>Spike|hCoV-19/England/NORT-1B71BCF/2020|2020-11-19|EPI\_ISL\_704574|Original|hCoV-19^^England|Human|Northumbria University / South Tees Hospitals NHS Foundation Trust / North Cumbria Integrated Care NHS Foundation Trust / North Tees and Hartlepool NHS Foundation Trust / Newcastle Hospitals NHS Foundation Trust|COVID-19 Genomics UK (COG-UK) Consortium|Bashton|United Kingdom

>Spike|hCoV-19/USA/UT-UPHL-2012864126/2020|2020-08-11|EPI\_ISL\_745967|Original|hCoV-19^^Utah|Human|Ginkgo Bioworks Clinical Laboratory|Utah Public Health Laboratory|Young|USA

>Spike|hCoV-19/USA/TX-HMH-MCoV-13171/2020|2020-08-26|EPI\_ISL\_788322|Original|hCoV-19^^Texas|Human|Houston Methodist Hospital|Houston Methodist Hospital|Long|USA

>Spike|hCoV-19/England/ALDP-B8436A/2020|2020-11-14|EPI\_ISL\_674435|Original|hCoV-19^^England|Human|Lighthouse Lab in Alderley Park|Wellcome Sanger Institute for the COVID-19 Genomics UK (COG-UK) Consortium|Davies|United Kingdom

>Spike|hCoV-19/Canada/MB-NML-574/2020|2020-03-28|EPI\_ISL\_582269|Original|hCoV-19^^Manitoba|Human|Cadham Provincial Laboratory|National Microbiology Laboratory (NML)|Majer|Canada

>Spike|hCoV-19/Denmark/DCGC-1400/2020|2020-03-30|EPI\_ISL\_622479|Original|hCoV-19^^Hovedstaden|Human|Department of Virus and Microbiological Special Diagnostics|Albertsen lab|Michaelsen|Denmark

>Spike|hCoV-19/Canada/ON-S1820/2020|2020-11-24|EPI\_ISL\_729284|Original|hCoV-19^^Ontario|Human|Toronto Invasive Bacterial Diseases Network|McMaster University|McArthur|Canada

>Spike|hCoV-19/Switzerland/SO-ETHZ-420485/2020|2020-12-21|EPI\_ISL\_768198|Original|hCoV-19^^Solothurn|Human|Viollier AG|Department of Biosystems Science and Engineering|Nadeau|Switzerland

>Spike|hCoV-19/Wales/PHWC-27777/2020|2020-03-31|EPI\_ISL\_432008|Original|hCoV-19^^Wales|Human|Wales Specialist Virology Centre|Public Health Wales Microbiology Cardiff|Moore|United Kingdom

>Spike|hCoV-19/England/20172002104/2020|2020-04-20|EPI\_ISL\_465318|Original|hCoV-19^^England|Human|Respiratory Virus Unit|Respiratory Virus Unit|Platt|United Kingdom

>Spike|hCoV-19/England/C200042043/2020|2020-11-02|EPI\_ISL\_649801|Original|hCoV-19^^England|Human|Respiratory Virus Unit|COVID-19 Genomics UK (COG-UK) Consortium|Platt|United Kingdom

>Spike|hCoV-19/Japan/PG-1511/2020|2020-04-00|EPI\_ISL\_685118|Original|hCoV-19^^Japan|Human|Saitama Prefectural Institute of Public Health|Pathogen Genomics Center|Sekizuka|Japan

>Spike|hCoV-19/England/MILK-A7DE46/2020|2020-10-15|EPI\_ISL\_638479|Original|hCoV-19^^England|Human|Oxford Viromics|COVID-19 Genomics UK (COG-UK) Consortium|Golubchik|United Kingdom

>Spike|hCoV-19/England/SHEF-CCC75/2020|2020-04-02|EPI\_ISL\_432532|Original|hCoV-19^^England|Human|Virology Department|COVID-19 Genomics UK (COG-UK) Consortium|de Silva|United Kingdom

>Spike|hCoV-19/USA/NY-NYCPHL-000886/2020|2020-03-27|EPI\_ISL\_632958|Original|hCoV-19^^New York|Human|Jamaica Hospital Medical Center|New York City Public Health Laboratory|Wang|USA

>Spike|hCoV-19/England/ALDP-9BC680/2020|2020-09-09|EPI\_ISL\_568122|Original|hCoV-19^^England|Human|Lighthouse Lab in Alderley Park|Wellcome Sanger Institute for the COVID-19 Genomics UK (COG-UK) consortium|Davies|United Kingdom

>Spike|hCoV-19/USA/CA-CZB-11114/2020|2020-05-28|EPI\_ISL\_625507|Original|hCoV-19^^California|Human|Alameda County Public Health Lab|Chan-Zuckerberg Biohub|Bhatt|USA

>Spike|hCoV-19/England/LIVE-DC38D7/2020|2020-11-11|EPI\_ISL\_705312|Original|hCoV-19^^England|Human|Liverpool Clinical Laboratories|COVID-19 Genomics UK (COG-UK) Consortium|Haldenby|United Kingdom

>Spike|hCoV-19/Denmark/DCGC-20673/2020|2020-12-21|EPI\_ISL\_759290|Original|hCoV-19^^Nordjylland|Human|Department of Virus and Microbiological Special Diagnostics|Albertsen Lab|Michaelsen|Denmark

>Spike|hCoV-19/England/ALDP-B1A378/2020|2020-11-01|EPI\_ISL\_646088|Original|hCoV-19^^England|Human|Lighthouse Lab in Alderley Park|Wellcome Sanger Institute for the COVID-19 Genomics UK (COG-UK) Consortium|Davies|United Kingdom

>Spike|hCoV-19/England/CAMC-A65315/2020|2020-10-11|EPI\_ISL\_608412|Original|hCoV-19^^England|Human|Lighthouse Lab in Cambridge|Wellcome Sanger Institute for the COVID-19 Genomics UK (COG-UK) consortium|Davies|United Kingdom

>Spike|hCoV-19/Spain/CT-IBV-97009570/2020|2020-07-29|EPI\_ISL\_683600|Original|hCoV-19^^Catalunya|Human|Servicio de Microbiolog\u00eda|SeqCOVID-SPAIN consortium|IBV (CSIC) |Comas|Spain

>Spike|hCoV-19/DRC/6163/2020|2020-05-08|EPI\_ISL\_513623|Original|hCoV-19^^Kinshasa|Human|Viral Respiratory Lab|Pathogen Sequencing Lab|Lokilo|Democratic Republic of the Congo

>Spike|hCoV-19/England/MILK-BB259A/2020|2020-11-18|EPI\_ISL\_720298|Original|hCoV-19^^England|Human|Lighthouse Lab in Milton Keynes|Wellcome Sanger Institute for the COVID-19 Genomics UK (COG-UK) Consortium|Davies|United Kingdom

>Spike|hCoV-19/USA/TX-HMH-MCoV-18228/2020|2020-11-12|EPI\_ISL\_784576|Original|hCoV-19^^Texas|Human|Houston Methodist Hospital|Houston Methodist Hospital|Long|USA

>Spike|hCoV-19/USA/WI-UW-501/2020|2020-06-01|EPI\_ISL\_484876|Original|hCoV-19^^Wisconsin|Human|University of Wisconsin-Madison AIDS Vaccine Research Laboratories|University of Wisconsin-Madison AIDS Vaccine Research Laboratories|Baczenas|USA

>Spike|hCoV-19/England/MILK-A6B494/2020|2020-10-09|EPI\_ISL\_608840|Original|hCoV-19^^England|Human|Lighthouse Lab in Milton Keynes|Wellcome Sanger Institute for the COVID-19 Genomics UK (COG-UK) consortium|Davies|United Kingdom

>Spike|hCoV-19/Wales/PHWC-49F406/2020|2020-12-07|EPI\_ISL\_743212|Original|hCoV-19^^Wales|Human|Wales Specialist Virology Centre Sequencing lab|COVID-19 Genomics UK (COG-UK) Consortium|Moore|United Kingdom

>Spike|hCoV-19/Colombia/VAC-INS-81271/2020|2020-03-18|EPI\_ISL\_456141|Original|hCoV-19^^Valle del Cauca|Human|Instituto Nacional de Salud - Unidad de Secuenciación y Análisis Genómico|Instituto Nacional de Salud|Diedaz|Colombia

>Spike|hCoV-19/Netherlands/ZH-RIVM-20710/2020|2020-12-22|EPI\_ISL\_790776|Original|hCoV-19^^Zuid-holland|Human|Dutch COVID-19 response team|National Institute for Public Health and the Environment (RIVM)|Meijer|Netherlands

>Spike|hCoV-19/England/CAMB-1AA887/2020|2020-04-17|EPI\_ISL\_470126|Original|hCoV-19^^England|Human|Department of Pathology|Wellcome Sanger Institute for the COVID-19 Genomics UK (COG-UK) consortium|Davies|United Kingdom

>Spike|hCoV-19/England/EXET-138AA6/2020|2020-10-18|EPI\_ISL\_626805|Original|hCoV-19^^England|Human|University of Exeter|COVID-19 Genomics UK (COG-UK) Consortium|Temperton|United Kingdom

>Spike|hCoV-19/England/ALDP-B5B6FA/2020|2020-11-09|EPI\_ISL\_655591|Original|hCoV-19^^England|Human|Lighthouse Lab in Alderley Park|Wellcome Sanger Institute for the COVID-19 Genomics UK (COG-UK) Consortium|Davies|United Kingdom

>Spike|hCoV-19/USA/WA-S2010/2020|2020-06-04|EPI\_ISL\_497438|Original|hCoV-19^^Washington|Human|Washington State Department of Health|Seattle Flu Study|Lee|USA

>Spike|hCoV-19/Australia/VIC2157/2020|2020-06-15|EPI\_ISL\_480768|Original|hCoV-19^^Victoria|Human|Microbiological Diagnostic Unit - Public Health Laboratory (MDU-PHL)|MDU-PHL|Schultz|Australia

>Spike|hCoV-19/USA/MD-HP00128/2020|2020-03-24|EPI\_ISL\_457817|Original|hCoV-19^^Maryland|Human|Johns Hopkins Hospital Department of Pathology|Johns Hopkins Hospital Department of Pathology|Ramakrishnan|USA

>Spike|hCoV-19/Spain/RI-IBV-005953/2020|2020-03-10|EPI\_ISL\_500387|Original|hCoV-19^^La Rioja|Human|Centro de Investigación Biomédica de La Rioja - Hospital San Pedro Logroño|SeqCOVID-SPAIN consortium/IBV (CSIC)|Comas|Spain

>Spike|hCoV-19/England/ALDP-4F8061/2020|2020-06-24|EPI\_ISL\_559148|Original|hCoV-19^^England|Human|Lighthouse Lab in Alderley Park|Wellcome Sanger Institute for the COVID-19 Genomics UK (COG-UK) consortium|Davies|United Kingdom

>Spike|hCoV-19/England/MILK-B9507E/2020|2020-11-13|EPI\_ISL\_673616|Original|hCoV-19^^England|Human|Lighthouse Lab in Milton Keynes|Wellcome Sanger Institute for the COVID-19 Genomics UK (COG-UK) Consortium|Davies|United Kingdom

>Spike|hCoV-19/Japan/PG-6084/2020|2020-07-00|EPI\_ISL\_689196|Original|hCoV-19^^Japan|Human|Pathogen Genomics Center|Pathogen Genomics Center|Sekizuka|Japan

>Spike|hCoV-19/England/MILK-8009A3/2020|2020-07-16|EPI\_ISL\_557224|Original|hCoV-19^^England|Human|Lighthouse Lab in Milton Keynes|Wellcome Sanger Institute for the COVID-19 Genomics UK (COG-UK) consortium|Davies|United Kingdom

>Spike|hCoV-19/USA/AZ-TG398891/2020|2020-06-22|EPI\_ISL\_694851|Original|hCoV-19^^Arizona|Human|TGen North|TGen North|French|USA

>Spike|hCoV-19/Wales/PHWC-494C54/2020|2020-11-24|EPI\_ISL\_726236|Original|hCoV-19^^Wales|Human|Originating lab|COVID-19 Genomics UK (COG-UK) Consortium|Moore|United Kingdom

>Spike|hCoV-19/USA/TX-HMH-MCoV-8484/2020|2020-07-01|EPI\_ISL\_780434|Original|hCoV-19^^Texas|Human|Houston Methodist Hospital|Houston Methodist Hospital|Long|USA

>Spike|hCoV-19/England/QEUEH-9B8499/2020|2020-09-07|EPI\_ISL\_549800|Original|hCoV-19^^England|Human|Lighthouse Lab in Glasgow|Wellcome Sanger Institute for the COVID-19 Genomics UK (COG-UK) consortium|Davies|United Kingdom

>Spike|hCoV-19/England/ALDP-B6249C/2020|2020-11-08|EPI\_ISL\_656377|Original|hCoV-19^^England|Human|Lighthouse Lab in Alderley Park|Wellcome Sanger Institute for the COVID-19 Genomics UK (COG-UK) Consortium|Davies|United Kingdom

>Spike|hCoV-19/Denmark/DCGC-19545/2020|2020-12-07|EPI\_ISL\_748233|Original|hCoV-19^^Hovedstaden|Human|Department of Virus and Microbiological Special Diagnostics|Albertsen Lab|Michaelsen|Denmark

>Spike|hCoV-19/England/ALDP-AA3393/2020|2020-10-22|EPI\_ISL\_624150|Original|hCoV-19^^England|Human|Lighthouse Lab in Alderley Park|Wellcome Sanger Institute for the COVID-19 Genomics UK (COG-UK) consortium|Davies|United Kingdom

>Spike|hCoV-19/England/MILK-A45AF8/2020|2020-10-06|EPI\_ISL\_598682|Original|hCoV-19^^England|Human|Lighthouse Lab in Milton Keynes|Wellcome Sanger Institute for the COVID-19 Genomics UK (COG-UK) consortium|Davies|United Kingdom

>Spike|hCoV-19/Germany/HH-hpi-p1611/2020|2020-03-16|EPI\_ISL\_776067|Original|hCoV-19^^Hamburg|Human|University Medical Center Hamburg Eppendorf|Heinrich Pette Institute|Robitaille|Germany

>Spike|hCoV-19/USA/AZ-TG532062/2020|2020-07-01|EPI\_ISL\_695402|Original|hCoV-19^^Arizona|Human|AZ SPHL|TGen North|French|USA

>Spike|hCoV-19/England/ALDP-B74628/2020|2020-11-12|EPI\_ISL\_678938|Original|hCoV-19^^England|Human|Queens Medical Centre|COVID-19 Genomics UK (COG-UK) Consortium|Loose|United Kingdom

>Spike|hCoV-19/Wales/PHWC-2465F/2020|2020-03-17|EPI\_ISL\_419434|Original|hCoV-19^^Wales|Human|Wales Specialist Virology Centre|Public Health Wales Microbiology Cardiff|Moore|United Kingdom

>Spike|hCoV-19/England/LIVE-9C458/2020|2020-03-30|EPI\_ISL\_449538|Original|hCoV-19^^England|Human|Liverpool Clinical Laboratories|COVID-19 Genomics UK (COG-UK) Consortium|Haldenby|United Kingdom

>Spike|hCoV-19/England/SHEF-C58E1/2020|2020-04-27|EPI\_ISL\_475385|Original|hCoV-19^^England|Human|Virology Department|COVID-19 Genomics UK (COG-UK) Consortium|de Silva|United Kingdom

>Spike|hCoV-19/England/ALDP-B838A8/2020|2020-11-14|EPI\_ISL\_675300|Original|hCoV-19^^England|Human|Lighthouse Lab in Alderley Park|Wellcome Sanger Institute for the COVID-19 Genomics UK (COG-UK) Consortium|Davies|United Kingdom

>Spike|hCoV-19/Switzerland/SG-ETHZ-101137/2020|2020-03-30|EPI\_ISL\_451804|Original|hCoV-19^^Sankt Gallen|Human|Viollier AG|Department of Biosystems Science and Engineering|Nadeau|Switzerland

>Spike|hCoV-19/England/QEUEH-B6AE4B/2020|2020-11-11|EPI\_ISL\_662555|Original|hCoV-19^^England|Human|Lighthouse Lab in Glasgow|Wellcome Sanger Institute for the COVID-19 Genomics UK (COG-UK) Consortium|Davies|United Kingdom

>Spike|hCoV-19/England/CAMB-73F0B/2020|2020-03-19|EPI\_ISL\_440343|Original|hCoV-19^^England|Human|Department of Pathology|Wellcome Sanger Institute for the COVID-19 Genomics UK (COG-UK) consortium|Amato|United Kingdom

>Spike|hCoV-19/England/QEUEH-AD1D43/2020|2020-10-26|EPI\_ISL\_629787|Original|hCoV-19^^England|Human|Lighthouse Lab in Glasgow|Wellcome Sanger Institute for the COVID-19 Genomics UK (COG-UK) consortium|Davies|United Kingdom

>Spike|hCoV-19/Spain/MD-IBV-99008665/2020|2020-09-30|EPI\_ISL\_654226|Original|hCoV-19^^Madrid|Human|Hospital General Universitario Gregorio Mara\u00f1a|SeqCOVID-SPAIN consortium|IBV (CSIC)|Comas|Spain

>Spike|hCoV-19/USA/WI-UW-1054/2020|2020-07-30|EPI\_ISL\_516480|Original|hCoV-19^^Wisconsin|Human|University of Wisconsin-Madison AIDS Vaccine Research Laboratories|University of Wisconsin-Madison AIDS Vaccine Research Laboratories|Baczenas|USA

>Spike|hCoV-19/USA/WA-S2869/2020|2020-09-21|EPI\_ISL\_596400|Original|hCoV-19^^Washington|Human|Seattle Flu Study|Seattle Flu Study|Lee|USA

>Spike|hCoV-19/England/CAMC-B211DE/2020|2020-11-03|EPI\_ISL\_647782|Original|hCoV-19^^England|Human|Lighthouse Lab in Cambridge|Wellcome Sanger Institute for the COVID-19 Genomics UK (COG-UK) Consortium|Davies|United Kingdom

>Spike|hCoV-19/England/QEUEH-CC5D8C/2020|2020-12-22|EPI\_ISL\_760336|Original|hCoV-19^^England|Human|Lighthouse Lab in Glasgow|Wellcome Sanger Institute for the COVID-19 Genomics UK (COG-UK) Consortium|Davies|United Kingdom

>Spike|hCoV-19/Singapore/492/2020|2020-04-26|EPI\_ISL\_477189|Original|hCoV-19^^Singapore|Human|Department of Laboratory Medicine Tan Tock Seng Hospital|Department of Laboratory Medicine Tan Tock Seng Hospital|Chen|Singapore

>Spike|hCoV-19/Wales/PHWC-486B85/2020|2020-10-16|EPI\_ISL\_637449|Original|hCoV-19^^Wales|Human|Wales Specialist Virology Centre Sequencing lab|COVID-19 Genomics UK (COG-UK) Consortium|Moore|United Kingdom

>Spike|hCoV-19/Scotland/QEUEH-A0BBFB/2020|2020-10-01|EPI\_ISL\_599386|Original|hCoV-19^^Scotland|Human|Lighthouse Lab in Glasgow|Wellcome Sanger Institute for the COVID-19 Genomics UK (COG-UK) consortium|Davies|United Kingdom

>Spike|hCoV-19/USA/MS-CDC-6516/2020|2020-08-22|EPI\_ISL\_648004|Original|hCoV-19^^Mississippi|Human|MS Public Health Laboratory|Pathogen Discovery|Queen|USA

>Spike|hCoV-19/Denmark/DCGC-10160/2020|2020-11-09|EPI\_ISL\_669427|Original|hCoV-19^^Sjaelland|Human|Department of Virus and Microbiological Special Diagnostics|Albertsen Lab|Michaelsen|Denmark

>Spike|hCoV-19/USA/TX-HMH-5509/2020|2020-06-26|EPI\_ISL\_544832|Original|hCoV-19^^Texas|Human|Houston Methodist Hospital|Houston Methodist Hospital|Long|USA

>Spike|hCoV-19/USA/UT-QDX-2556/2020|2020-03-14|EPI\_ISL\_604866|Original|hCoV-19^^Utah|Human|Quest Diagnostics|Quest Diagnostics|Kagan|USA

>Spike|hCoV-19/USA/OR-OHSU-2067/2020|2020-08-03|EPI\_ISL\_667106|Original|hCoV-19^^Oregon|Human|OHSU Lab Services Molecular Microbiology Lab|Oregon SARS-CoV-2 Genome Sequencing Center|O'Roak|USA

>Spike|hCoV-19/England/MILK-B8C3BD/2020|2020-11-13|EPI\_ISL\_674247|Original|hCoV-19^^England|Human|Lighthouse Lab in Milton Keynes|Wellcome Sanger Institute for the COVID-19 Genomics UK (COG-UK) Consortium|Davies|United Kingdom

>Spike|hCoV-19/Belgium/ULG-10979/2020|2020-09-08|EPI\_ISL\_707753|Original|hCoV-19^^Li\u00e8ge|Human|Department of Clinical Microbiology|GIGA Medical Genomics|Durkin|Belgium

>Spike|hCoV-19/USA/WA-S255/2020|2020-03-08|EPI\_ISL\_430293|Original|hCoV-19^^Washington|Human|Washington State Department of Health|Seattle Flu Study|Bedford|USA

>Spike|hCoV-19/France/BRE-IPP9945/2020|2020-09-09|EPI\_ISL\_693759|Original|hCoV-19^^Bretagne|Human|Hospital|National Reference Center for Viruses of Respiratory Infections|Enouf|France

>Spike|hCoV-19/England/NORT-2963F5/2020|2020-05-13|EPI\_ISL\_484269|Original|hCoV-19^^England|Human|Northumbria University / South Tees Hospitals NHS Foundation Trust / North Cumbria Integrated Care NHS Foundation Trust / North Tees and Hartlepool NHS Foundation Trust / Newcastle Hospitals NHS Foundation Trust|COVID-19 Genomics UK (COG-UK) Consortium|Bashton|United Kingdom

>Spike|hCoV-19/England/QEUH-9F5CE3/2020|2020-09-24|EPI\_ISL\_588330|Original|hCoV-19^^England|Human|Lighthouse Lab in Glasgow|Wellcome Sanger Institute for the COVID-19 Genomics UK (COG-UK) consortium|Davies|United Kingdom

>Spike|hCoV-19/England/CAMC-A58F20/2020|2020-10-08|EPI\_ISL\_597042|Original|hCoV-19^^England|Human|Lighthouse Lab in Cambridge|Wellcome Sanger Institute for the COVID-19 Genomics UK (COG-UK) consortium|Davies|United Kingdom

>Spike|hCoV-19/Wales/ALDP-94F585/2020|2020-06-18|EPI\_ISL\_555884|Original|hCoV-19^^Wales|Human|Lighthouse Lab in Alderley Park|Wellcome Sanger Institute for the COVID-19 Genomics UK (COG-UK) consortium|Davies|United Kingdom

>Spike|hCoV-19/England/ALDP-CB3E51/2020|2020-12-19|EPI\_ISL\_761271|Original|hCoV-19^^England|Human|Lighthouse Lab in Alderley Park|Wellcome Sanger Institute for the COVID-19 Genomics UK (COG-UK) Consortium|Davies|United Kingdom

>Spike|hCoV-19/England/ALDP-B5B9B5/2020|2020-11-08|EPI\_ISL\_655584|Original|hCoV-19^^England|Human|Lighthouse Lab in Alderley Park|Wellcome Sanger Institute for the COVID-19 Genomics UK (COG-UK) Consortium|Davies|United Kingdom

>Spike|hCoV-19/Luxembourg/LNS7851926/2020|2020-11-08|EPI\_ISL\_744643|Original|hCoV-19^^Luxembourg|Human|Laboratoire national de sant\u00e9|Laboratoire national de sant\u00e9|Wienecke-Baldacchino|Luxembourg

>Spike|hCoV-19/Switzerland/ZH-ETHZ-210021/2020|2020-07-21|EPI\_ISL\_510766|Original|hCoV-19^^Zurich|Human|Viollier AG|Department of Biosystems Science and Engineering|Nadeau|Switzerland

>Spike|hCoV-19/England/CAMB-1AC9A0/2020|2020-04-23|EPI\_ISL\_489403|Original|hCoV-19^^England|Human|Department of Pathology|Wellcome Sanger Institute for the COVID-19 Genomics UK (COG-UK) consortium|Davies|United Kingdom

>Spike|hCoV-19/England/ALDP-9E6CC7/2020|2020-09-24|EPI\_ISL\_580617|Original|hCoV-19^^England|Human|Lighthouse Lab in Alderley Park|Wellcome Sanger Institute for the COVID-19 Genomics UK (COG-UK) consortium|Davies|United Kingdom

>Spike|hCoV-19/USA/TX-HMH-1546/2020|2020-04-13|EPI\_ISL\_542786|Original|hCoV-19^^Texas|Human|Houston Methodist Hospital|Houston Methodist Hospital|Long|USA

>Spike|hCoV-19/England/SHEF-C4E3B/2020|2020-10-28|EPI\_ISL\_638883|Original|hCoV-19^^England|Human|Virology Department|COVID-19 Genomics UK (COG-UK) Consortium|de Silva|United Kingdom

>Spike|hCoV-19/England/CAMC-BBCCF5/2020|2020-11-21|EPI\_ISL\_679275|Original|hCoV-19^^England|Human|Queens Medical Centre|COVID-19 Genomics UK (COG-UK) Consortium|Loose|United Kingdom

>Spike|hCoV-19/United Arab Emirates/0534/2020|2020-05-17|EPI\_ISL\_698696|Original|hCoV-19^^Abu Dhabi|Human|Group 42 (G42) Healthcare|G42 Healthcare|Ogrodzki|United Arab Emirates

>Spike|hCoV-19/Finland/13M69/2020|2020-03-13|EPI\_ISL\_418396|Original|hCoV-19^^Finland|Human|Department of Virology and Immunology|Department of Virology|Smura|Finland

>Spike|hCoV-19/Germany/BY-MVP-0149/2020|2020-03-30|EPI\_ISL\_451942|Original|hCoV-19^^Bavaria|Human|Max von Pettenkofer Institute|Laboratory for Functional Genome Analysis|Graf|Germany

>Spike|hCoV-19/Spain/MD-IBV-99009611/2020|2020-10-22|EPI\_ISL\_654360|Original|hCoV-19^^Madrid|Human|Hospital General Universitario Gregorio Mara\u00f1\u00f3n|SeqCOVID-SPAIN consortium/IBV (CSIC) |Comas|Spain

>Spike|hCoV-19/Switzerland/BS-42243953/2020|2020-04-24|EPI\_ISL\_581919|Original|hCoV-19^^Basel-Stadt|Human|University Hospital Basel|University Hospital Basel|Roloff Handschin|Switzerland

>Spike|hCoV-19/England/MILK-C61DA0/2020|2020-12-13|EPI\_ISL\_735669|Original|hCoV-19^^England|Human|Lighthouse Lab in Milton Keynes|Wellcome Sanger Institute for the COVID-19 Genomics UK (COG-UK) Consortium|Davies|United Kingdom

>Spike|hCoV-19/Belgium/reg-0404885/2020|2020-04-04|EPI\_ISL\_734535|Original|hCoV-19^^Moriensart|Human|UZ Leuven|KU Leuven|Maes|Belgium

>Spike|hCoV-19/England/MILK-BDB6C5/2020|2020-11-26|EPI\_ISL\_709631|Original|hCoV-19^^England|Human|Lighthouse Lab in Milton Keynes|Wellcome Sanger Institute for the COVID-19 Genomics UK (COG-UK) Consortium|Davies|United Kingdom

>Spike|hCoV-19/Denmark/DCGC-2697/2020|2020-08-17|EPI\_ISL\_616429|Original|hCoV-19^^Sjaelland|Human|Department of Virus and Microbiological Special Diagnostics|Albertsen lab|Michaelsen|Denmark

>Spike|hCoV-19/Australia/SAP373/2020|2020-03-20|EPI\_ISL\_492138|Original|hCoV-19^^South Australia|Human|SA Pathology|SA Pathology|Leong|Australia

>Spike|hCoV-19/Belgium/ULG-10681/2020|2020-10-26|EPI\_ISL\_636653|Original|hCoV-19^^Li\u00e8ge|Human|Department of Clinical Microbiology|GIGA Medical Genomics|Durkin|Belgium

>Spike|hCoV-19/Spain/VC-IBV-98006459/2020|2020-06-25|EPI\_ISL\_538663|Original|hCoV-19^^Comunitat Valenciana|Human|Servicio de Microbiolog\u00eda. Hospital General Universitario de Castell\u00f3n|SeqCOVID-SPAIN consortium/IBV (CSIC) |Comas|Spain

>Spike|hCoV-19/England/ALDP-A6D605/2020|2020-10-14|EPI\_ISL\_607132|Original|hCoV-19^^England|Human|Lighthouse Lab in Alderley Park|Wellcome Sanger Institute for the COVID-19 Genomics UK (COG-UK) consortium|Davies|United Kingdom

>Spike|hCoV-19/England/CAMB-783DD/2020|2020-04-05|EPI\_ISL\_433728|Original|hCoV-19^^England|Human|Department of Pathology|COVID-19 Genomics UK (COG-UK) Consortium|Meredith|United Kingdom

>Spike|hCoV-19/Spain/CL-IBV-97006283/2020|2020-04-21|EPI\_ISL\_537653|Original|hCoV-19^^Castilla y Leon|Human|Universidad de Le\u00f3n|SeqCOVID-SPAIN consortium/IBV (CSIC) |Comas|Spain

>Spike|hCoV-19/USA/ME-HETL-J0385/2020|2020-12-15|EPI\_ISL\_755500|Original|hCoV-19^^Maine|Human|Maine Health and Environmental Testing Laboratory|Tewhey Lab|Tewhey|USA

>Spike|hCoV-19/Wales/ALDP-B49237/2020|2020-11-07|EPI\_ISL\_710902|Original|hCoV-19^^Wales|Human|Lighthouse Lab in Alderley Park|Wellcome Sanger Institute for the COVID-19 Genomics UK (COG-UK) Consortium|Davies|United Kingdom

>Spike|hCoV-19/Japan/PG-8153/2020|2020-09-00|EPI\_ISL\_687252|Original|hCoV-19^^Japan|Human|Pathogen Genomics Center|Pathogen Genomics Center|Sekizuka|Japan

>Spike|hCoV-19/England/ALDP-C8E55A/2020|2020-12-15|EPI\_ISL\_777576|Original|hCoV-19^^England|Human|Lighthouse Lab in Alderley Park|Wellcome Sanger Institute for the COVID-19 Genomics UK (COG-UK) Consortium|Davies|United Kingdom



>Spike|hCoV-19/USA/MS-CDC-6558/2020|2020-09-03|EPI\_ISL\_648011|Original|hCoV-19^^Mississippi|Human|MS Public Health Laboratory|Pathogen Discovery|Queen|USA

>Spike|hCoV-19/USA/TX-HMH-MCoV-13758/2020|2020-08-18|EPI\_ISL\_788851|Original|hCoV-19^^Texas|Human|Houston Methodist Hospital|Houston Methodist Hospital|Long|USA

>Spike|hCoV-19/England/MILK-99E2BD/2020|2020-08-31|EPI\_ISL\_550528|Original|hCoV-19^^England|Human|Lighthouse Lab in Milton Keynes|Wellcome Sanger Institute for the COVID-19 Genomics UK (COG-UK) consortium|Davies|United Kingdom

>Spike|hCoV-19/England/ALDP-A85BAE/2020|2020-10-17|EPI\_ISL\_610487|Original|hCoV-19^^England|Human|Lighthouse Lab in Alderley Park|Wellcome Sanger Institute for the COVID-19 Genomics UK (COG-UK) consortium|Davies|United Kingdom

>Spike|hCoV-19/USA/WI-GMF-31832/2020|2020-11-06|EPI\_ISL\_661115|Original|hCoV-19^^Wisconsin|Human|Gundersen Molecular Diagnostics Laboratory|Kabara Cancer Research Institute|Kenny|USA

>Spike|hCoV-19/England/QEUEH-9DDD75/2020|2020-09-21|EPI\_ISL\_599696|Original|hCoV-19^^England|Human|Lighthouse Lab in Glasgow|Wellcome Sanger Institute for the COVID-19 Genomics UK (COG-UK) consortium|Davies|United Kingdom

>Spike|hCoV-19/USA/CA-ALSR-5020/2020|2020-11-12|EPI\_ISL\_730292|Original|hCoV-19^^California|Human|San Diego County Public Health Laboratory|Andersen lab at Scripps Research|Gangavarapu|USA

>Spike|hCoV-19/Wales/PHWC-485F7B/2020|2020-10-25|EPI\_ISL\_628296|Original|hCoV-19^^Wales|Human|Wales Specialist Virology Centre Sequencing lab|COVID-19 Genomics UK (COG-UK) Consortium|Moore|United Kingdom

>Spike|hCoV-19/England/QEUEH-A224B7/2020|2020-10-01|EPI\_ISL\_587605|Original|hCoV-19^^England|Human|Lighthouse Lab in Glasgow|Wellcome Sanger Institute for the COVID-19 Genomics UK (COG-UK) consortium|Davies|United Kingdom

>Spike|hCoV-19/USA/CA-CZB-14200/2020|2020-11-09|EPI\_ISL\_739151|Original|hCoV-19^^California|Human|Orange County Public Health Lab|Chan-Zuckerberg Biohub|Kamm|USA

>Spike|hCoV-19/England/SHEF-10CA46D/2020|2020-11-29|EPI\_ISL\_727895|Original|hCoV-19^^England|Human|Virology Department|COVID-19 Genomics UK (COG-UK) Consortium|de Silva|United Kingdom

>Spike|hCoV-19/Wales/PHWC-32AAD/2020|2020-04-15|EPI\_ISL\_474391|Original|hCoV-19^^Wales|Human|Originating lab|COVID-19 Genomics UK (COG-UK) Consortium|Moore|United Kingdom

>Spike|hCoV-19/Japan/PG-4328/2020|2020-07-00|EPI\_ISL\_692556|Original|hCoV-19^^Japan|Human|Pathogen Genomics Center|Pathogen Genomics Center|Sekizuka|Japan

>Spike|hCoV-19/England/CAMC-B348D3/2020|2020-11-05|EPI\_ISL\_659704|Original|hCoV-19^^England|Human|Lighthouse Lab in Cambridge|Wellcome Sanger Institute for the COVID-19 Genomics UK (COG-UK) Consortium|Davies|United Kingdom

>Spike|hCoV-19/England/MILK-9A670E/2020|2020-09-01|EPI\_ISL\_550090|Original|hCoV-19^^England|Human|Lighthouse Lab in Milton Keynes|Wellcome Sanger Institute for the COVID-19 Genomics UK (COG-UK) consortium|Davies|United Kingdom

>Spike|hCoV-19/England/201141550/2020|2020-03-09|EPI\_ISL\_464765|Original|hCoV-19^^England|Human|Respiratory Virus Unit|Respiratory Virus Unit|Platt|United Kingdom

>Spike|hCoV-19/USA/TX-HMH-MCoV-18990/2020|2020-11-25|EPI\_ISL\_785269|Original|hCoV-19^^Texas|Human|Houston Methodist Hospital|Houston Methodist Hospital|Long|USA

>Spike|hCoV-19/England/MILK-B8F8D9/2020|2020-11-13|EPI\_ISL\_674611|Original|hCoV-19^^England|Human|Lighthouse Lab in Milton Keynes|Wellcome Sanger Institute for the COVID-19 Genomics UK (COG-UK) Consortium|Davies|United Kingdom

>Spike|hCoV-19/SaudiArabia/KAUST-MAKKAH810/2020|2020-04-24|EPI\_ISL\_513260|Original|hCoV-19^^Makkah|Human|Pathogen Genomics Lab King Abdullah University of Science and Technology(KAUST)|Pathogen Genomics Lab King Abdullah University of Science and Technology(KAUST)|Mohamed Ghazzali|Saudi Arabia

>Spike|hCoV-19/USA/UT-01843/2020|2020-04-13|EPI\_ISL\_470685|Original|hCoV-19^^Utah|Human|Utah Public Health Laboratory|Utah Public Health Laboratory|Young|USA

>Spike|hCoV-19/England/CAMB-1AD972/2020|2020-05-02|EPI\_ISL\_448029|Original|hCoV-19^^England|Human|Department of Pathology|COVID-19 Genomics UK (COG-UK) Consortium|Meredith|United Kingdom

>Spike|hCoV-19/England/BRIS-12FBDC/2020|2020-04-04|EPI\_ISL\_492633|Original|hCoV-19^^England|Human|PHE South West Regional Laboratory|Wellcome Sanger Institute for the COVID-19 Genomics UK (COG-UK) consortium|Davies|United Kingdom

>Spike|hCoV-19/USA/TX-QDX-414/2020|2020-03-18|EPI\_ISL\_571256|Original|hCoV-19^^Texas|Human|Quest Diagnostics|Quest Diagnostics|Kagan|USA

>Spike|hCoV-19/India/GJ-GBRC235b/2020|2020-06-12|EPI\_ISL\_476877|Original|hCoV-19^^Gujarat|Human|Department of MicroBiology|Gujarat Biotechnology Research Centre|Joshi|India

>Spike|hCoV-19/England/QEUA-AF6926/2020|2020-10-30|EPI\_ISL\_662912|Original|hCoV-19^^England|Human|Lighthouse Lab in Glasgow|Wellcome Sanger Institute for the COVID-19 Genomics UK (COG-UK) Consortium|Davies|United Kingdom

>Spike|hCoV-19/USA/CO-CDPHE-2009051670/2020|2020-09-03|EPI\_ISL\_677244|Original|hCoV-19^^Colorado|Human|Colorado Department of Public Health and Environment|Colorado Department of Public Health and Environment|Bankers|USA

>Spike|hCoV-19/England/CAMB-1AC90A/2020|2020-04-24|EPI\_ISL\_489550|Original|hCoV-19^^England|Human|Department of Pathology|Wellcome Sanger Institute for the COVID-19 Genomics UK (COG-UK) consortium|Davies|United Kingdom

>Spike|hCoV-19/Gibraltar/204641730/2020|2020-00-00|EPI\_ISL\_637204|Original|hCoV-19^^Gibraltar|Human|Microbiology|Respiratory Virus Unit|Platt|Gibraltar

>Spike|hCoV-19/USA/HI-H200619/2020|2020-11-23|EPI\_ISL\_753145|Original|hCoV-19^^Hawaii|Human|State Laboratories Division|State Laboratories Division|Sultana|USA

>Spike|hCoV-19/England/ALDP-9E97D2/2020|2020-09-24|EPI\_ISL\_584250|Original|hCoV-19^^England|Human|Virology Department|COVID-19 Genomics UK (COG-UK) Consortium|de Silva|United Kingdom

>Spike|hCoV-19/Australia/VIC6325/2020|2020-07-23|EPI\_ISL\_518312|Original|hCoV-19^^Victoria|Human|Microbiological Diagnostic Unit - Public Health Laboratory (MDU-PHL)|MDU-PHL|Schultz|Australia

>Spike|hCoV-19/Wales/PHWC-15C839/2020|2020-04-09|EPI\_ISL\_472546|Original|hCoV-19^^Wales|Human|Wales Specialist Virology Centre Sequencing lab|COVID-19 Genomics UK (COG-UK) Consortium|Moore|United Kingdom

>Spike|hCoV-19/Wales/PHWC-48C3B4/2020|2020-11-05|EPI\_ISL\_666423|Original|hCoV-19^^Wales|Human|Wales Specialist Virology Centre Sequencing lab|COVID-19 Genomics UK (COG-UK) Consortium|Moore|United Kingdom

>Spike|hCoV-19/USA/OR-PROV-024/2020|2020-03-28|EPI\_ISL\_482308|Original|hCoV-19^^Oregon|Human|Providence St. Joseph Health Molecular Genomics Laboratory|Providence St. Joseph Health Molecular Genomics Laboratory|Dowdell|USA

>Spike|hCoV-19/Belgium/reg-0322864/2020|2020-03-22|EPI\_ISL\_734514|Original|hCoV-19^^Chaumont-gistoux|Human|UZ Leuven|KU Leuven|Maes|Belgium

>Spike|hCoV-19/England/205260437/2020|2020-00-00|EPI\_ISL\_766549|Original|hCoV-19^^England|Human|Respiratory Virus Unit|COVID-19 Genomics UK (COG-UK) Consortium|Platt|United Kingdom

>Spike|hCoV-19/England/ALDP-A84A93/2020|2020-10-18|EPI\_ISL\_610615|Original|hCoV-19^^England|Human|Lighthouse Lab in Alderley Park|Wellcome Sanger Institute for the COVID-19 Genomics UK (COG-UK) consortium|Davies|United Kingdom

>Spike|hCoV-19/USA/TX-HMH-MCoV-15859/2020|2020-07-10|EPI\_ISL\_785543|Original|hCoV-19^^Texas|Human|Houston Methodist Hospital|Houston Methodist Hospital|Long|USA

>Spike|hCoV-19/Italy/SIC-IZSBM169-66/2020|2020-06-00|EPI\_ISL\_582767|Original|hCoV-19^^Sicily|Human|Laboratorio di Riferimento Regionale della Sicilia Occidentale per l'Emergenza COVID-19|Istituto Zooprofilattico Sperimentale della Sicilia|Reale|Italy

>Spike|hCoV-19/USA/MN-MDH-1013/2020|2020-04-30|EPI\_ISL\_462858|Original|hCoV-19^^Minnesota|Human|Minnesota Department of Health|Minnesota Department of Health|Garfin|USA

>Spike|hCoV-19/Spain/AS-IBV-98006600/2020|2020-03-13|EPI\_ISL\_654644|Original|hCoV-19^^Asturias|Human|Servicio de Microbiolog\u00eda|SeqCOVID-SPAIN consortium|IBV (CSIC)|Comas|Spain

>Spike|hCoV-19/Scotland/QEUA-A0BC34/2020|2020-10-03|EPI\_ISL\_599404|Original|hCoV-19^^Scotland|Human|Lighthouse Lab in Glasgow|Wellcome Sanger Institute for the COVID-19 Genomics UK (COG-UK) consortium|Davies|United Kingdom

>Spike|hCoV-19/USA/NY-NYUMC878/2020|2020-03-18|EPI\_ISL\_458017|Original|hCoV-19^^New York|Human|NYU Langone Health|Departments of Pathology and Medicine|Maurano|USA

>Spike|hCoV-19/Denmark/DCGC-16599/2020|2020-11-16|EPI\_ISL\_714861|Original|hCoV-19^^Hovedstaden|Human|Department of Virus and Microbiological Special Diagnostics|Albertsen Lab|Michaelsen|Denmark

>Spike|hCoV-19/England/MILK-B3D9E6/2020|2020-11-01|EPI\_ISL\_741377|Original|hCoV-19^^England|Human|Oxford Viromics|COVID-19 Genomics UK (COG-UK) Consortium|Golubchik|United Kingdom

>Spike|hCoV-19/Netherlands/GE-RIVM-20521/2020|2020-11-24|EPI\_ISL\_728736|Original|hCoV-19^^Gelderland|Human|Dutch COVID-19 response team|National Institute for Public Health and the Environment (RIVM)|Meijer|Netherlands

>Spike|hCoV-19/Denmark/DCGC-17930/2020|2020-12-14|EPI\_ISL\_749650|Original|hCoV-19^^Midtjylland|Human|Department of Virus and Microbiological Special Diagnostics|Albertsen Lab|Michaelsen|Denmark

>Spike|hCoV-19/England/MILK-46DEF4/2020|2020-06-04|EPI\_ISL\_559724|Original|hCoV-19^^England|Human|Lighthouse Lab in Milton Keynes|Wellcome Sanger Institute for the COVID-19 Genomics UK (COG-UK) Consortium|Davies|United Kingdom

>Spike|hCoV-19/Scotland/GCVR-172105/2020|2020-03-31|EPI\_ISL\_469997|Original|hCoV-19^^Scotland|Human|NHSGGC West of Scotland Specialist Virology Centre / MRC-University of Glasgow Centre for Virus Research|Wellcome Sanger Institute for the COVID-19 Genomics UK (COG-UK) consortium|Davies|United Kingdom

>Spike|hCoV-19/Wales/PHWC-16296A/2020|2020-05-20|EPI\_ISL\_473042|Original|hCoV-19^^Wales|Human|Wales Specialist Virology Centre Sequencing lab|COVID-19 Genomics UK (COG-UK) Consortium|Moore|United Kingdom

>Spike|hCoV-19/USA/TX-HMH-MCoV-18194/2020|2020-11-15|EPI\_ISL\_784542|Original|hCoV-19^^Texas|Human|Houston Methodist Hospital|Houston Methodist Hospital|Long|USA

>Spike|hCoV-19/USA/AZ-TG670259/2020|2020-03-25|EPI\_ISL\_696435|Original|hCoV-19^^Arizona|Human|Sonora Quest Laboratories|TGen North|French|USA

>Spike|hCoV-19/Canada/ON-SLB2861/2020|2020-04-07|EPI\_ISL\_718105|Original|hCoV-19^^Ontario|Human|Kingston Health Sciences Centre and Queen's University|Ontario Institute for Cancer Research|de Borja|Canada

>Spike|hCoV-19/USA/UT-01967/2020|2020-04-15|EPI\_ISL\_452164|Original|hCoV-19^^Utah|Human|Utah Public Health Laboratory|Utah Public Health Laboratory|Young|USA

>Spike|hCoV-19/Luxembourg/LNS2321488/2020|2020-11-24|EPI\_ISL\_740096|Original|hCoV-19^^Luxembourg|Human|Laboratoire national de sant\u00e9|Laboratoire national de sant\u00e9|Wienecke-Baldacchino|Luxembourg

>Spike|hCoV-19/USA/MI-UM-10035702532/2020|2020-08-28|EPI\_ISL\_583263|Original|hCoV-19^^Michigan|Human|University of Michigan Clinical Microbiology Laboratory|Lauring Lab|Valesano|USA

>Spike|hCoV-19/USA/CT-Yale-393/2020|2020-06-13|EPI\_ISL\_594133|Original|hCoV-19^^Connecticut|Human|Yale COVID-19 Biorepository|Grubaugh Lab - Yale School of Public Health|Grubaugh|USA

>Spike|hCoV-19/Scotland/QEUH-9B4925/2020|2020-09-03|EPI\_ISL\_602050|Original|hCoV-19^^Scotland|Human|Lighthouse Lab in Glasgow|Wellcome Sanger Institute for the COVID-19 Genomics UK (COG-UK) consortium|Davies|United Kingdom

>Spike|hCoV-19/Wales/PHWC-4968E5/2020|2020-11-21|EPI\_ISL\_726654|Original|hCoV-19^^Wales|Human|Originating lab|COVID-19 Genomics UK (COG-UK) Consortium|Moore|United Kingdom

>Spike|hCoV-19/England/QEUH-98F668/2020|2020-08-27|EPI\_ISL\_540013|Original|hCoV-19^^England|Human|Lighthouse Lab in Glasgow|Wellcome Sanger Institute for the COVID-19 Genomics UK (COG-UK) consortium|Davies|United Kingdom

>Spike|hCoV-19/England/MILK-C610C5/2020|2020-12-12|EPI\_ISL\_735515|Original|hCoV-19^^England|Human|Lighthouse Lab in Milton Keynes|Wellcome Sanger Institute for the COVID-19 Genomics UK (COG-UK) Consortium|Davies|United Kingdom

>Spike|hCoV-19/Australia/VIC8145/2020|2020-08-05|EPI\_ISL\_564872|Original|hCoV-19^^Victoria|Human|Microbiological Diagnostic Unit - Public Health Laboratory (MDU-PHL)|MDU-PHL|Schultz|Australia

>Spike|hCoV-19/England/NOTT-10EFF5/2020|2020-03-30|EPI\_ISL\_432954|Original|hCoV-19^^England|Human|Queens Medical Centre|COVID-19 Genomics UK (COG-UK) Consortium|Loose|United Kingdom

>Spike|hCoV-19/Australia/VIC4057/2020|2020-07-10|EPI\_ISL\_519439|Original|hCoV-19^^Victoria|Human|Microbiological Diagnostic Unit - Public Health Laboratory (MDU-PHL)|MDU-PHL|Schultz|Australia

>Spike|hCoV-19/USA/TX-DSHS-1721/2020|2020-06-19|EPI\_ISL\_708611|Original|hCoV-19^^Texas|Human|Texas Department of State Health Services|Texas Department of State Health Services|Rahman|USA

>Spike|hCoV-19/England/ALDP-A50A72/2020|2020-10-07|EPI\_ISL\_597566|Original|hCoV-19^^England|Human|Lighthouse Lab in Alderley Park|Wellcome Sanger Institute for the COVID-19 Genomics UK (COG-UK) consortium|Davies|United Kingdom

>Spike|hCoV-19/Denmark/DCGC-9693/2020|2020-11-09|EPI\_ISL\_668541|Original|hCoV-19^^Syddanmark|Human|Department of Virus and Microbiological Special Diagnostics|Albertsen Lab|Michaelsen|Denmark

>Spike|hCoV-19/England/MILK-BAC5EE/2020|2020-11-18|EPI\_ISL\_720449|Original|hCoV-19^^England|Human|Lighthouse Lab in Milton Keynes|Wellcome Sanger Institute for the COVID-19 Genomics UK (COG-UK) Consortium|Davies|United Kingdom

>Spike|hCoV-19/England/204393980/2020|2020-10-25|EPI\_ISL\_649888|Original|hCoV-19^^England|Human|Respiratory Virus Unit|COVID-19 Genomics UK (COG-UK) Consortium|Platt|United Kingdom

>Spike|hCoV-19/USA/TX-HMH-MCoV-9799/2020|2020-07-04|EPI\_ISL\_780105|Original|hCoV-19^^Texas|Human|Houston Methodist Hospital|Houston Methodist Hospital|Long|USA

>Spike|hCoV-19/USA/MI-UM-10035862473/2020|2020-09-09|EPI\_ISL\_583330|Original|hCoV-19^^Michigan|Human|University of Michigan Clinical Microbiology Laboratory|Lauring Lab|Valesano|USA

>Spike|hCoV-19/England/QEUEH-BC3E8C/2020|2020-11-25|EPI\_ISL\_704194|Original|hCoV-19^^England|Human|Lighthouse Lab in Glasgow|Wellcome Sanger Institute for the COVID-19 Genomics UK (COG-UK) Consortium|Davies|United Kingdom

>Spike|hCoV-19/England/20178032304/2020|2020-04-23|EPI\_ISL\_465418|Original|hCoV-19^^England|Human|Respiratory Virus Unit|Respiratory Virus Unit|Platt|United Kingdom

>Spike|hCoV-19/England/MILK-BAC43C/2020|2020-11-17|EPI\_ISL\_681333|Original|hCoV-19^^England|Human|Lighthouse Lab in Milton Keynes|Wellcome Sanger Institute for the COVID-19 Genomics UK (COG-UK) Consortium|Davies|United Kingdom

>Spike|hCoV-19/Canada/ON-PHL-20-01283/2020|2020-06-00|EPI\_ISL\_548888|Original|hCoV-19^^Ontario|Human|Public Health Ontario Laboratory|Public Health Ontario Laboratory|Guthrie|Canada

>Spike|hCoV-19/India/TG-CCMB-M844/2020|2020-06-12|EPI\_ISL\_495256|Original|hCoV-19^^Telangana|Human|CSIR-Centre for Cellular and Molecular Biology|CSIR-Centre for Cellular and Molecular Biology|Banu|India

>Spike|hCoV-19/USA/CA-CZB-1783/2020|2020-06-03|EPI\_ISL\_486117|Original|hCoV-19^^California|Human|County of Santa Clara Public Health Department|Chan-Zuckerberg Biohub|McGeever|USA

>Spike|hCoV-19/Wales/PHWC-48BB44/2020|2020-11-03|EPI\_ISL\_666328|Original|hCoV-19^^Wales|Human|Wales Specialist Virology Centre Sequencing lab|COVID-19 Genomics UK (COG-UK) Consortium|Moore|United Kingdom

>Spike|hCoV-19/Japan/PG-5165/2020|2020-08-00|EPI\_ISL\_689614|Original|hCoV-19^^Japan|Human|Pathogen Genomics Center|Pathogen Genomics Center|Sekizuka|Japan

>Spike|hCoV-19/USA/MI-MDHHS-SC20053/2020|2020-03-20|EPI\_ISL\_437140|Original|hCoV-19^^Michigan|Human|Michigan Department of Health and Human Services|Michigan Department of Health and Human Services|Blankenship|USA

>Spike|hCoV-19/England/MILK-A45B7D/2020|2020-10-06|EPI\_ISL\_598556|Original|hCoV-19^^England|Human|Lighthouse Lab in Milton Keynes|Wellcome Sanger Institute for the COVID-19 Genomics UK (COG-UK) consortium|Davies|United Kingdom

>Spike|hCoV-19/USA/TX-DSHS-1944/2020|2020-06-21|EPI\_ISL\_765918|Original|hCoV-19^^Texas|Human|TXDSHS|TXDSHS|Rahman|USA

>Spike|hCoV-19/USA/MA-JLL-17S/2020|2020-00-00|EPI\_ISL\_632288|Original|hCoV-19^^Massachusetts|Human|Brigham and Women's Hospital|Jonathan Li laboratory|Choudhary|USA

>Spike|hCoV-19/Denmark/DCGC-6100/2020|2020-10-05|EPI\_ISL\_620295|Original|hCoV-19^^Hovedstaden|Human|Department of Virus and Microbiological Special Diagnostics|Albertsen lab|Michaelsen|Denmark

>Spike|hCoV-19/England/QEUEH-998E91/2020|2020-08-24|EPI\_ISL\_541816|Original|hCoV-19^^England|Human|Lighthouse Lab in Glasgow|Wellcome Sanger Institute for the COVID-19 Genomics UK (COG-UK) consortium|Davies|United Kingdom

>Spike|hCoV-19/England/ALDP-AA1A36/2020|2020-10-22|EPI\_ISL\_624461|Original|hCoV-19^^England|Human|Lighthouse Lab in Alderley Park|Wellcome Sanger Institute for the COVID-19 Genomics UK (COG-UK) consortium|Davies|United Kingdom

>Spike|hCoV-19/Australia/VIC15046/2020|2020-07-29|EPI\_ISL\_593121|Original|hCoV-19^^Victoria|Human|Microbiological Diagnostic Unit - Public Health Laboratory (MDU-PHL)|MDU-PHL|Schultz|Australia

>Spike|hCoV-19/England/NORW-F693F/2020|2020-11-06|EPI\_ISL\_652352|Original|hCoV-19^^England|Human|Quadram Institute Bioscience|COVID-19 Genomics UK (COG-UK) Consortium|Alikhan|United Kingdom

>Spike|hCoV-19/USA/WI-UW-1220/2020|2020-08-17|EPI\_ISL\_536593|Original|hCoV-19^^Wisconsin|Human|University of Wisconsin-Madison AIDS Vaccine Research Laboratories|University of Wisconsin-Madison AIDS Vaccine Research Laboratories|Baczenas|USA

>Spike|hCoV-19/Wales/PHWC-4851FD/2020|2020-10-25|EPI\_ISL\_628157|Original|hCoV-19^^Wales|Human|Wales Specialist Virology Centre Sequencing lab|COVID-19 Genomics UK (COG-UK) Consortium|Moore|United Kingdom

>Spike|hCoV-19/England/CAMC-A3E8BC/2020|2020-10-05|EPI\_ISL\_609574|Original|hCoV-19^^England|Human|Lighthouse Lab in Cambridge|Wellcome Sanger Institute for the COVID-19 Genomics UK (COG-UK) consortium|Davies|United Kingdom

>Spike|hCoV-19/USA/TX-HMH-MCoV-19192/2020|2020-11-23|EPI\_ISL\_783550|Original|hCoV-19^^Texas|Human|Houston Methodist Hospital|Houston Methodist Hospital|Long|USA

>Spike|hCoV-19/Scotland/QEUA-C14C63/2020|2020-12-06|EPI\_ISL\_710691|Original|hCoV-19^^Scotland|Human|Lighthouse Lab in Glasgow|Wellcome Sanger Institute for the COVID-19 Genomics UK (COG-UK) Consortium|Davies|United Kingdom

>Spike|hCoV-19/Wales/PHWC-16CF31/2020|2020-09-25|EPI\_ISL\_574187|Original|hCoV-19^^Wales|Human|Wales Specialist Virology Centre Sequencing lab|COVID-19 Genomics UK (COG-UK) Consortium|Moore|United Kingdom

>Spike|hCoV-19/Netherlands/ZE-RIVM-20013/2020|2020-10-10|EPI\_ISL\_723212|Original|hCoV-19^^Zeeland|Human|Dutch COVID-19 response team|National Institute for Public Health and the Environment (RIVM)|Meijer|Netherlands

>Spike|hCoV-19/USA/UT-UPHL-2012191595/2020|2020-06-17|EPI\_ISL\_746365|Original|hCoV-19^^Utah|Human|Utah Public Health Laboratory|Utah Public Health Laboratory|Gallagher|USA

>Spike|hCoV-19/USA/WA-UW-11538/2020|2020-06-21|EPI\_ISL\_501101|Original|hCoV-19^^Washington|Human|University of Washington Virology Lab|University of Washington Virology Lab|Roychoudhury|USA

>Spike|hCoV-19/Denmark/DCGC-5011/2020|2020-09-14|EPI\_ISL\_621791|Original|hCoV-19^^Hovedstaden|Human|Department of Virus and Microbiological Special Diagnostics|Albertsen lab|Michaelsen|Denmark

>Spike|hCoV-19/England/MILK-994448/2020|2020-08-26|EPI\_ISL\_551655|Original|hCoV-19^^England|Human|Lighthouse Lab in Milton Keynes|Wellcome Sanger Institute for the COVID-19 Genomics UK (COG-UK) consortium|Davies|United Kingdom

>Spike|hCoV-19/USA/UT-UPHL-2012645552/2020|2020-07-31|EPI\_ISL\_745730|Original|hCoV-19^^Utah|Human|Ginkgo Bioworks Clinical Laboratory|Utah Public Health Laboratory|Young|USA

>Spike|hCoV-19/Wales/PHWC-4840B5/2020|2020-10-25|EPI\_ISL\_627963|Original|hCoV-19^^Wales|Human|Wales Specialist Virology Centre Sequencing lab|COVID-19 Genomics UK (COG-UK) Consortium|Moore|United Kingdom

>Spike|hCoV-19/England/CAMC-B0A593/2020|2020-10-31|EPI\_ISL\_673129|Original|hCoV-19^^England|Human|Lighthouse Lab in Cambridge|Wellcome Sanger Institute for the COVID-19 Genomics UK (COG-UK) Consortium|Davies|United Kingdom

>Spike|hCoV-19/England/BRIS-12566C/2020|2020-03-28|EPI\_ISL\_443722|Original|hCoV-19^^England|Human|PHE South West Regional Laboratory|Wellcome Sanger Institute for the COVID-19 Genomics UK (COG-UK) consortium|Amato|United Kingdom

>Spike|hCoV-19/England/LIVE-DCOCCF/2020|2020-11-03|EPI\_ISL\_704129|Original|hCoV-19^^England|Human|Liverpool Clinical Laboratories|COVID-19 Genomics UK (COG-UK) Consortium|Haldenby|United Kingdom

>Spike|hCoV-19/Wales/ALDP-B1B6C9/2020|2020-11-01|EPI\_ISL\_710923|Original|hCoV-19^^Wales|Human|Lighthouse Lab in Alderley Park|Wellcome Sanger Institute for the COVID-19 Genomics UK (COG-UK) Consortium|Davies|United Kingdom

>Spike|hCoV-19/Ukraine/Chernivtsi\_860/2020|2020-08-06|EPI\_ISL\_654818|Original|hCoV-19^^Chernivtsi|Human|Department of Respiratory and other Viral Infections of L.V.Gromashevsky Institute of Epidemiology & Infectious Diseases NAMS of Ukrain\u0435|Department of Respiratory and other Viral Infections of L.V.Gromashevsky Institute of Epidemiology & Infectious Diseases NAMS of Ukrain\u0435|Mironenko|Ukraine

>Spike|hCoV-19/France/ARA-0873/2020|2020-03-14|EPI\_ISL\_508875|Original|hCoV-19^^Auvergne-Rh\u00f4ne-Alpes|Human|Centre Hospitalier de Macon|CNR Virus des Infections Respiratoires - France SUD|Josset|France

>Spike|hCoV-19/USA/WA-S1068/2020|2020-04-29|EPI\_ISL\_463558|Original|hCoV-19^^Washington|Human|Washington State Department of Health|Seattle Flu Study|Bedford|USA

>Spike|hCoV-19/Portugal/PT0453/2020|2020-04-04|EPI\_ISL\_454177|Original|hCoV-19^^Portugal|Human|unknown|Instituto Nacional de Saude (INSA)|Borges|Portugal

>Spike|hCoV-19/USA/TX-HMH-MCoV-16361/2020|2020-11-01|EPI\_ISL\_786045|Original|hCoV-19^^Texas|Human|Houston Methodist Hospital|Houston Methodist Hospital|Long|USA

>Spike|hCoV-19/USA/AZ-TG408181/2020|2020-06-16|EPI\_ISL\_694923|Original|hCoV-19^^Arizona|Human|AZ SPHL|TGen North|French|USA

>Spike|hCoV-19/Australia/QLD1266/2020|2020-03-25|EPI\_ISL\_693268|Original|hCoV-19^^Australia|Human|unknown|Public Health Virology Laboratory|Nguyen|Australia

>Spike|hCoV-19/England/QEUA-A36CB8/2020|2020-10-05|EPI\_ISL\_638705|Original|hCoV-19^^England|Human|Wales Specialist Virology Centre Sequencing lab|COVID-19 Genomics UK (COG-UK) Consortium|Moore|United Kingdom

>Spike|hCoV-19/Japan/PG-3883/2020|2020-07-00|EPI\_ISL\_692134|Original|hCoV-19^^Japan|Human|Pathogen Genomics Center|Pathogen Genomics Center|Sekizuka|Japan

>Spike|hCoV-19/England/ALDP-B62AD6/2020|2020-11-08|EPI\_ISL\_655355|Original|hCoV-19^^England|Human|Lighthouse Lab in Alderley Park|Wellcome Sanger Institute for the COVID-19 Genomics UK (COG-UK) Consortium|Davies|United Kingdom

>Spike|hCoV-19/USA/TX-HMH-MCoV-15370/2020|2020-10-21|EPI\_ISL\_786854|Original|hCoV-19^^Texas|Human|Houston Methodist Hospital|Houston Methodist Hospital|Long|USA

>Spike|hCoV-19/England/CAMC-C2C8EC/2020|2020-12-08|EPI\_ISL\_733812|Original|hCoV-19^^England|Human|Lighthouse Lab in Cambridge|Wellcome Sanger Institute for the COVID-19 Genomics UK (COG-UK) Consortium|Davies|United Kingdom

>Spike|hCoV-19/Wales/PHWC-49541F/2020|2020-11-21|EPI\_ISL\_726344|Original|hCoV-19^^Wales|Human|Originating lab|COVID-19 Genomics UK (COG-UK) Consortium|Moore|United Kingdom

>Spike|hCoV-19/Ireland/TA-UHL288/2020|2020-04-26|EPI\_ISL\_681770|Original|hCoV-19^^Tipperary|Human|University Hospital Limerick|Irish Coronavirus Sequencing Consortium - Teagasc Moorepark|Walsh|Ireland

>Spike|hCoV-19/England/MILK-A7D268/2020|2020-10-13|EPI\_ISL\_606551|Original|hCoV-19^^England|Human|Lighthouse Lab in Milton Keynes|Wellcome Sanger Institute for the COVID-19 Genomics UK (COG-UK) consortium|Davies|United Kingdom

>Spike|hCoV-19/Denmark/DCGC-4145/2020|2020-09-21|EPI\_ISL\_621965|Original|hCoV-19^^Midtjylland|Human|Department of Virus and Microbiological Special Diagnostics|Albertsen lab|Michaelsen|Denmark

>Spike|hCoV-19/Malaysia/IMR\_WC1098/2020|2020-02-29|EPI\_ISL\_430442|Vero E6|hCoV-19^^Malaysia|Human|Institute for Medical Research|Institute for Medical Research|Suppiah|Malaysia

>Spike|hCoV-19/Wales/PHWC-48FB8C/2020|2020-11-11|EPI\_ISL\_681195|Original|hCoV-19^^Wales|Human|Wales Specialist Virology Centre Sequencing lab|COVID-19 Genomics UK (COG-UK) Consortium|Moore|United Kingdom

>Spike|hCoV-19/Scotland/QEUA-9DC356/2020|2020-09-22|EPI\_ISL\_601115|Original|hCoV-19^^Scotland|Human|Lighthouse Lab in Glasgow|Wellcome Sanger Institute for the COVID-19 Genomics UK (COG-UK) consortium|Davies|United Kingdom

>Spike|hCoV-19/Denmark/DCGC-19591/2020|2020-12-07|EPI\_ISL\_748341|Original|hCoV-19^^Hovedstaden|Human|Department of Virus and Microbiological Special Diagnostics|Albertsen Lab|Michaelsen|Denmark

>Spike|hCoV-19/England/CAMC-B072F9/2020|2020-10-30|EPI\_ISL\_643953|Original|hCoV-19^^England|Human|Lighthouse Lab in Cambridge|Wellcome Sanger Institute for the COVID-19 Genomics UK (COG-UK) Consortium|Davies|United Kingdom

>Spike|hCoV-19/England/MILK-AB90B1/2020|2020-10-21|EPI\_ISL\_623786|Original|hCoV-19^^England|Human|Lighthouse Lab in Milton Keynes|Wellcome Sanger Institute for the COVID-19 Genomics UK (COG-UK) consortium|Davies|United Kingdom

>Spike|hCoV-19/England/CAMC-B346CA/2020|2020-11-05|EPI\_ISL\_659583|Original|hCoV-19^^England|Human|Lighthouse Lab in Cambridge|Wellcome Sanger Institute for the COVID-19 Genomics UK (COG-UK) Consortium|Davies|United Kingdom

>Spike|hCoV-19/England/CAMC-AEAC1D/2020|2020-10-26|EPI\_ISL\_633372|Original|hCoV-19^^England|Human|Lighthouse Lab in Cambridge|Wellcome Sanger Institute for the COVID-19 Genomics UK (COG-UK) consortium|Davies|United Kingdom

>Spike|hCoV-19/Scotland/CVR3353/2020|2020-05-01|EPI\_ISL\_456785|Original|hCoV-19^^Scotland|Human|West of Scotland Specialist Virology Centre|COVID-19 Genomics UK (COG-UK) Consortium|Robertson|United Kingdom

>Spike|hCoV-19/Australia/VIC2309/2020|2020-06-26|EPI\_ISL\_522030|Original|hCoV-19^^Victoria|Human|Microbiological Diagnostic Unit - Public Health Laboratory (MDU-PHL)|MDU-PHL|Schultz|Australia

>Spike|hCoV-19/England/QEUH-9AEA85/2020|2020-09-05|EPI\_ISL\_577271|Original|hCoV-19^^England|Human|University of Exeter|COVID-19 Genomics UK (COG-UK) Consortium|Temperton|United Kingdom

>Spike|hCoV-19/England/NOTT-11369E/2020|2020-09-11|EPI\_ISL\_549520|Original|hCoV-19^^England|Human|Lincolnshire Hospitals and DeepSeq Nottingham|COVID-19 Genomics UK (COG-UK) Consortium|Loose|United Kingdom

>Spike|hCoV-19/Denmark/DCGC-4723/2020|2020-09-21|EPI\_ISL\_622162|Original|hCoV-19^^Syddanmark|Human|Department of Virus and Microbiological Special Diagnostics|Albertsen lab|Michaelsen|Denmark

>Spike|hCoV-19/USA/LA-EVTL514/2020|2020-06-25|EPI\_ISL\_578918|Original|hCoV-19^^Louisiana|Human|LSUHS Emerging Viral Threat Laboratory|Microbial Genome Sequencing Center|Kamil|USA

>Spike|hCoV-19/Switzerland/BE-ETHZ-190010/2020|2020-07-03|EPI\_ISL\_498627|Original|hCoV-19^^Bern|Human|Viollier AG|Department of Biosystems Science and Engineering|Nadeau|Switzerland

>Spike|hCoV-19/Japan/PG-2545/2020|2020-05-00|EPI\_ISL\_690680|Original|hCoV-19^^Japan|Human|Saitama Prefectural Institute of Public Health|Pathogen Genomics Center|Sekizuka|Japan

>Spike|hCoV-19/Argentina/PAIS-A0019/2020|2020-04-07|EPI\_ISL\_430810|Original|hCoV-19^^Ciudad Autonoma de Buenos Aires|Human|Laboratorio de Virolog\u00eda del Hospital de Ni\u00f1os Dr. Ricardo Gutierrez|\u00c1rea de Secuenciaci\u00f3n del Laboratorio de Virolog\u00eda del Hospital de Ni\u00f1os Dr. Ricardo Gutierrez|Viegas|Argentina

>Spike|hCoV-19/England/CAMC-B78387/2020|2020-11-12|EPI\_ISL\_661697|Original|hCoV-19^^England|Human|Lighthouse Lab in Cambridge|Wellcome Sanger Institute for the COVID-19 Genomics UK (COG-UK) Consortium|Davies|United Kingdom

>Spike|hCoV-19/England/CAMC-BD2AA4/2020|2020-11-28|EPI\_ISL\_702272|Original|hCoV-19^^England|Human|Lighthouse Lab in Cambridge|Wellcome Sanger Institute for the COVID-19 Genomics UK (COG-UK) Consortium|Davies|United Kingdom

>Spike|hCoV-19/France/IDF-9150/2020|2020-09-01|EPI\_ISL\_593930|Original|hCoV-19^^\u00e9tats-Unis|Human|Labo Analyses Med|National Reference Center for Viruses of Respiratory Infections|Enouf|France

>Spike|hCoV-19/England/ALDP-A92E2D/2020|2020-10-20|EPI\_ISL\_611059|Original|hCoV-19^^England|Human|Lighthouse Lab in Alderley Park|Wellcome Sanger Institute for the COVID-19 Genomics UK (COG-UK) consortium|Davies|United Kingdom

>Spike|hCoV-19/Japan/PG-8802/2020|2020-08-00|EPI\_ISL\_686389|Original|hCoV-19^^Japan|Human|Pathogen Genomics Center|Pathogen Genomics Center|Sekizuka|Japan

>Spike|hCoV-19/USA/PA-MGSC55-05/2020|2020-03-23|EPI\_ISL\_436502|Original|hCoV-19^^Pennsylvania|Human|UPMC Clinical Laboratory|Microbial Genome Sequencing Center|Cooper|USA

>Spike|hCoV-19/Wales/PHWC-4A23E5/2020|2020-12-13|EPI\_ISL\_743884|Original|hCoV-19^^Wales|Human|Wales Specialist Virology Centre Sequencing lab|COVID-19 Genomics UK (COG-UK) Consortium|Moore|United Kingdom

>Spike|hCoV-19/Scotland/QEUH-96FB7E/2020|2020-08-18|EPI\_ISL\_568406|Original|hCoV-19^^Scotland|Human|Lighthouse Lab in Glasgow|Wellcome Sanger Institute for the COVID-19 Genomics UK (COG-UK) consortium|Davies|United Kingdom

>Spike|hCoV-19/Russia/OMS-ORINFI-60S/2020|2020-05-13|EPI\_ISL\_569855|Original|hCoV-19^^Omsk|Human|Omsk Research Institute of Natural Focal Infections|WHO National Influenza Centre Russian Federation|Komissarov|Russia

>Spike|hCoV-19/DRC/1767/2020|2020-04-10|EPI\_ISL\_435157|Original|hCoV-19^^Kinshasa|Human|Viral Respiratory Lab|Pathogen Sequencing Lab|Pratt|Democratic Republic of the Congo

>Spike|hCoV-19/Portugal/PT1210/2020|2020-03-26|EPI\_ISL\_511753|Original|hCoV-19^^Portugal|Human|Instituto Nacional de Saude (INSA)|Instituto Nacional de Saude (INSA) and Instituto Gulbenkian de Ciencia (IGC)|Borges|Portugal

>Spike|hCoV-19/USA/LA-EVTL187/2020|2020-05-21|EPI\_ISL\_574321|Original|hCoV-19^^Louisiana|Human|LSUHS Emerging Viral Threat Laboratory|Microbial Genome Sequencing Center|Kamil|USA

>Spike|hCoV-19/England/ALDP-B74DC9/2020|2020-11-12|EPI\_ISL\_661998|Original|hCoV-19^^England|Human|Lighthouse Lab in Alderley Park|Wellcome Sanger Institute for the COVID-19 Genomics UK (COG-UK) Consortium|Davies|United Kingdom

>Spike|hCoV-19/England/ALDP-658829/2020|2020-07-03|EPI\_ISL\_558168|Original|hCoV-19^^England|Human|Lighthouse Lab in Alderley Park|Wellcome Sanger Institute for the COVID-19 Genomics UK (COG-UK) consortium|Davies|United Kingdom

>Spike|hCoV-19/France/ARA-117399/2020|2020-12-08|EPI\_ISL\_745373|Original|hCoV-19^^Auvergne-Rh\u00f4ne-Alpes|Human|CNR Virus des Infections Respiratoires - France SUD|CNR Virus des Infections Respiratoires - France SUD|Bal|France

>Spike|hCoV-19/Northern Ireland/NIRE-233952/2020|2020-10-04|EPI\_ISL\_680327|Original|hCoV-19^^Northern Ireland|Human|Regional Virus Laboratory|COVID-19 Genomics UK (COG-UK) Consortium|Fairley|United Kingdom

>Spike|hCoV-19/England/CAMC-B51AAD/2020|2020-11-08|EPI\_ISL\_658234|Original|hCoV-19^^England|Human|Lighthouse Lab in Cambridge|Wellcome Sanger Institute for the COVID-19 Genomics UK (COG-UK) Consortium|Davies|United Kingdom

>Spike|hCoV-19/USA/SD-SDPHL-0001/2020|2020-04-03|EPI\_ISL\_569609|Original|hCoV-19^^South Dakota|Human|Bennet County Hospital|South Dakota Public Health Laboratory|Carlson|USA

>Spike|hCoV-19/England/EXET-1350F2/2020|2020-04-04|EPI\_ISL\_457032|Original|hCoV-19^^England|Human|University of Exeter|COVID-19 Genomics UK (COG-UK) Consortium|Temperton|United Kingdom

>Spike|hCoV-19/England/CAMB-1AC102/2020|2020-04-29|EPI\_ISL\_444373|Original|hCoV-19^^England|Human|Department of Pathology|COVID-19 Genomics UK (COG-UK) Consortium|Meredith|United Kingdom

>Spike|hCoV-19/USA/WA-UW-12085/2020|2020-06-22|EPI\_ISL\_570486|Original|hCoV-19^^Washington|Human|UW Virology Lab|UW Virology Lab|Roychoudhury|USA

>Spike|hCoV-19/USA/CA-CZB-3666/2020|2020-07-08|EPI\_ISL\_516741|Original|hCoV-19^^California|Human|UCSF Clinical Microbiology Laboratory|Chan-Zuckerberg Biohub|Kamm|USA

>Spike|hCoV-19/England/LIVE-A0372/2020|2020-05-25|EPI\_ISL\_472105|Original|hCoV-19^^England|Human|Liverpool Clinical Laboratories|COVID-19 Genomics UK (COG-UK) Consortium|Haldenby|United Kingdom

>Spike|hCoV-19/England/CAMC-B9907A/2020|2020-11-15|EPI\_ISL\_673439|Original|hCoV-19^^England|Human|Lighthouse Lab in Cambridge|Wellcome Sanger Institute for the COVID-19 Genomics UK (COG-UK) Consortium|Davies|United Kingdom

>Spike|hCoV-19/South Africa/KRISP-K003522/2020|2020-09-26|EPI\_ISL\_602841|Original|hCoV-19^^KwaZulu-Natal|Human|NHLS-IALCH|KRISP|de Oliveira|South Africa

>Spike|hCoV-19/England/MILK-BAFC22/2020|2020-11-17|EPI\_ISL\_720652|Original|hCoV-19^^England|Human|Lighthouse Lab in Milton Keynes|Wellcome Sanger Institute for the COVID-19 Genomics UK (COG-UK) Consortium|Davies|United Kingdom

>Spike|hCoV-19/USA/TX-HMH-4088/2020|2020-06-17|EPI\_ISL\_543358|Original|hCoV-19^^Texas|Human|Houston Methodist Hospital|Houston Methodist Hospital|Long|USA

>Spike|hCoV-19/England/NORT-282B4F/2020|2020-03-28|EPI\_ISL\_488565|Original|hCoV-19^^England|Human|NU-OMICS DNA Sequencing research facility|Wellcome Sanger Institute for the COVID-19 Genomics UK (COG-UK) consortium|Davies|United Kingdom



>Spike|hCoV-19/Luxembourg/LNS0795813/2020|2020-10-28|EPI\_ISL\_739832|Original|hCoV-19^^Luxembourg|Human|Laboratoire national de sant\u00e9|Laboratoire national de sant\u00e9|Wienecke-Baldacchino|Luxembourg

>Spike|hCoV-19/Chile/RM-126534/2020|2020-07-16|EPI\_ISL\_746595|Original|hCoV-19^^Region Metropolitana de Santiago|Human|Genetica Molecular and Subdepartamento de Virologia ISP Chile|Instituto de Salud Publica de Chile|Tognarelli|Chile

>Spike|hCoV-19/France/ARA-09434/2020|2020-03-15|EPI\_ISL\_418414|Original|hCoV-19^^Auvergne-Rh\u00f4ne-Alpes|Human|Centre Hospitalier de Valence|CNR Virus des Infections Respiratoires - France SUD|Josset|France

>Spike|hCoV-19/England/MILK-ABBF67/2020|2020-10-22|EPI\_ISL\_631090|Original|hCoV-19^^England|Human|Lighthouse Lab in Milton Keynes|Wellcome Sanger Institute for the COVID-19 Genomics UK (COG-UK) Consortium|Davies|United Kingdom

>Spike|hCoV-19/USA/MN-MDH-1627/2020|2020-03-31|EPI\_ISL\_530223|Original|hCoV-19^^Minnesota|Human|Minnesota Department of Health|Minnesota Department of Health|Garfin|USA

>Spike|hCoV-19/USA/WI-UW-91/2020|2020-04-01|EPI\_ISL\_425148|Original|hCoV-19^^Wisconsin|Human|University of Wisconsin-Madison AIDS Vaccine Research Laboratories|University of Wisconsin-Madison AIDS Vaccine Research Laboratories|Baczenas|USA

>Spike|hCoV-19/England/ALDP-671A24/2020|2020-07-03|EPI\_ISL\_558086|Original|hCoV-19^^England|Human|Lighthouse Lab in Alderley Park|Wellcome Sanger Institute for the COVID-19 Genomics UK (COG-UK) consortium|Davies|United Kingdom

>Spike|hCoV-19/England/ALDP-9E9040/2020|2020-09-24|EPI\_ISL\_584184|Original|hCoV-19^^England|Human|Centre for Enzyme Innovation|COVID-19 Genomics UK (COG-UK) Consortium|Robson|United Kingdom

>Spike|hCoV-19/Japan/PG-1731/2020|2020-04-00|EPI\_ISL\_685337|Original|hCoV-19^^Japan|Human|Pathogen Genomics Center|Pathogen Genomics Center|Sekizuka|Japan

>Spike|hCoV-19/USA/FL-BPHL-1277/2020|2020-08-07|EPI\_ISL\_541209|Original|hCoV-19^^Florida|Human|Florida Bureau of Public Health Laboratories|Florida Bureau of Public Health Laboratories|Blanton|USA

>Spike|hCoV-19/Germany/NW-HHU-351/2020|2020-09-10|EPI\_ISL\_666638|Original|hCoV-19^^North Rhine-Westphalia|Human|ZOTZ KLIMAS MVZ D\u00fcsseldorf-Centrum GbR \u00dcBAG f\u00fcr Labormedizin|Center of Medical Microbiology|Wienemann|Germany

>Spike|hCoV-19/Japan/PG-6953/2020|2020-07-00|EPI\_ISL\_688058|Original|hCoV-19^^Japan|Human|Pathogen Genomics Center|Pathogen Genomics Center|Sekizuka|Japan

>Spike|hCoV-19/Australia/SAP446/2020|2020-03-20|EPI\_ISL\_508137|Original|hCoV-19^^South Australia|Human|SA Pathology|SA Pathology|Leong|Australia

>Spike|hCoV-19/Spain/PV-IBV-98007684/2020|2020-09-14|EPI\_ISL\_582079|Original|hCoV-19^^Basque Country|Human|Servicio de Microbiolog\u00eda. Hospital Universitario Donostia. OSI Donostialdea. \u00c1rea de Enfermedades Infecciosas|SeqCOVID-SPAIN consortium/IBV (CSIC) |Comas|Spain

>Spike|hCoV-19/USA/WI-UW-1132/2020|2020-08-13|EPI\_ISL\_522889|Original|hCoV-19^^Wisconsin|Human|University of Wisconsin-Madison AIDS Vaccine Research Laboratories|University of Wisconsin-Madison AIDS Vaccine Research Laboratories|Baczenas|USA

>Spike|hCoV-19/USA/WI-UW-1882/2020|2020-09-14|EPI\_ISL\_632897|Original|hCoV-19^^Wisconsin|Human|University of Wisconsin-Madison AIDS Vaccine Research Laboratories|University of Wisconsin-Madison AIDS Vaccine Research Laboratories|Baczenas|USA

>Spike|hCoV-19/Luxembourg/LNS2818424/2020|2020-04-15|EPI\_ISL\_434500|Original|hCoV-19^^Luxembourg|Human|Laboratoire National de Sante|Laboratoire National de Sante|Wienecke-Baldacchino|Luxembourg

>Spike|hCoV-19/Norway/4793/2020|2020-10-22|EPI\_ISL\_668407|Original|hCoV-19^^Rogaland|Human|Dept. of Medical Microbiology|Norwegian Institute of Public Health|Kopperud Riis|Norway

>Spike|hCoV-19/Switzerland/BE-ETHZ-110486/2020|2020-04-07|EPI\_ISL\_451898|Original|hCoV-19^^Bern|Human|Viollier AG|Department of Biosystems Science and Engineering|Nadeau|Switzerland

>Spike|hCoV-19/England/CAMC-A64BC3/2020|2020-10-11|EPI\_ISL\_608602|Original|hCoV-19^^England|Human|Lighthouse Lab in Cambridge|Wellcome Sanger Institute for the COVID-19 Genomics UK (COG-UK) consortium|Davies|United Kingdom

>Spike|hCoV-19/USA/NY-NYCPHL-001528/2020|2020-12-01|EPI\_ISL\_745447|Original|hCoV-19^^New York|Human|DOHMH Corona|New York City Public Health Laboratory|Wang|USA

>Spike|hCoV-19/Australia/VIC4656/2020|2020-07-13|EPI\_ISL\_519045|Original|hCoV-19^^Victoria|Human|Victorian Infectious Diseases Reference Laboratory (VIDRL)|VIDRL and MDU-PHL|Schultz|Australia

>Spike|hCoV-19/Denmark/DCGC-5168/2020|2020-09-21|EPI\_ISL\_621706|Original|hCoV-19^^Syddanmark|Human|Department of Virus and Microbiological Special Diagnostics|Albertsen lab|Michaelsen|Denmark

>Spike|hCoV-19/England/SHEF-D069E/2020|2020-07-03|EPI\_ISL\_526448|Original|hCoV-19^^England|Human|Virology Department|COVID-19 Genomics UK (COG-UK) Consortium|de Silva|United Kingdom

>Spike|hCoV-19/England/QEUA-9FAE60/2020|2020-09-27|EPI\_ISL\_588268|Original|hCoV-19^^England|Human|Lighthouse Lab in Glasgow|Wellcome Sanger Institute for the COVID-19 Genomics UK (COG-UK) consortium|Davies|United Kingdom

>Spike|hCoV-19/North Macedonia/3310/2020|2020-06-13|EPI\_ISL\_516423|Original|hCoV-19^^Skopje|Human|Center for public health - Skopje|Research Center for Genetic Engineering and Biotechnology \Georgi D. Efremov\u201d|Dimovski|North Macedonia

>Spike|hCoV-19/Greece/210\_33942/2020|2020-03-14|EPI\_ISL\_437880|Original|hCoV-19^^Athens|Human|Laboratory of Microbiology|Laboratory of Biology|Karakasiliotis|Greece

>Spike|hCoV-19/India/MH-NIV-69925/2020|2020-06-19|EPI\_ISL\_541733|Original|hCoV-19^^Maharashtra|Human|National Institute of Virology|National Institute of Virology|Potdar|India

>Spike|hCoV-19/Wales/PHWC-27AAB/2020|2020-03-30|EPI\_ISL\_432227|Original|hCoV-19^^Wales|Human|Wales Specialist Virology Centre|Public Health Wales Microbiology Cardiff|Moore|United Kingdom

>Spike|hCoV-19/Russia/LEN-RII-MH3119S/2020|2020-10-01|EPI\_ISL\_733094|Original|hCoV-19^^Leningrad|Human|HELIX LLC|WHO National Influenza Centre Russian Federation|Komissarov|Russia

>Spike|hCoV-19/England/QEUA-9F4FDC/2020|2020-09-25|EPI\_ISL\_637805|Original|hCoV-19^^England|Human|Department of Pathology|COVID-19 Genomics UK (COG-UK) Consortium|Goodfellow|United Kingdom

>Spike|hCoV-19/Australia/VIC3944/2020|2020-07-14|EPI\_ISL\_520655|Original|hCoV-19^^Victoria|Human|Microbiological Diagnostic Unit - Public Health Laboratory (MDU-PHL)|MDU-PHL|Schultz|Australia

>Spike|hCoV-19/England/CAMB-1AD8EE/2020|2020-05-02|EPI\_ISL\_448022|Original|hCoV-19^^England|Human|Department of Pathology|COVID-19 Genomics UK (COG-UK) Consortium|Meredith|United Kingdom

>Spike|hCoV-19/Australia/VIC2667/2020|2020-07-02|EPI\_ISL\_521509|Original|hCoV-19^^Victoria|Human|Victorian Infectious Diseases Reference Laboratory (VIDRL)|VIDRL and MDU-PHL|Schultz|Australia

>Spike|hCoV-19/Wales/MILK-9EEB2C/2020|2020-09-23|EPI\_ISL\_580840|Original|hCoV-19^^Wales|Human|Lighthouse Lab in Milton Keynes|Wellcome Sanger Institute for the COVID-19 Genomics UK (COG-UK) Consortium|Davies|United Kingdom

>Spike|hCoV-19/England/LIVE-9E8D2/2020|2020-04-11|EPI\_ISL\_453341|Original|hCoV-19^^England|Human|Liverpool Clinical Laboratories|COVID-19 Genomics UK (COG-UK) Consortium|Haldenby|United Kingdom

>Spike|hCoV-19/England/CAMB-7CE05/2020|2020-04-05|EPI\_ISL\_442151|Original|hCoV-19^^England|Human|Department of Pathology|Wellcome Sanger Institute for the COVID-19 Genomics UK (COG-UK) consortium|Amato|United Kingdom

>Spike|hCoV-19/Ireland/G-NVRL-76IRL13817/2020|2020-10-16|EPI\_ISL\_671905|Original|hCoV-19^^Galway|Human|National Virus Reference Laboratory|National Virus Reference Laboratory|Gonzalez|Ireland

>Spike|hCoV-19/Belgium/ITM\_C340/2020|2020-04-06|EPI\_ISL\_434367|Original|hCoV-19^^Antwerp|Human|Hospital AZ Rivierenland|Institute of Tropical Medicine|Selhorst|Belgium

>Spike|hCoV-19/Scotland/GCVR-171467/2020|2020-03-28|EPI\_ISL\_489606|Original|hCoV-19^^Scotland|Human|NHSGGC West of Scotland Specialist Virology Centre / MRC-University of Glasgow Centre for Virus Research|Wellcome Sanger Institute for the COVID-19 Genomics UK (COG-UK) consortium|Davies|United Kingdom

>Spike|hCoV-19/England/BRIS-1255D8/2020|2020-03-28|EPI\_ISL\_443708|Original|hCoV-19^^England|Human|PHE South West Regional Laboratory|Wellcome Sanger Institute for the COVID-19 Genomics UK (COG-UK) consortium|Amato|United Kingdom

>Spike|hCoV-19/Japan/PG-4409/2020|2020-07-00|EPI\_ISL\_691750|Original|hCoV-19^^Japan|Human|Pathogen Genomics Center|Pathogen Genomics Center|Sekizuka|Japan

>Spike|hCoV-19/England/LCST-24D69A4/2020|2020-06-02|EPI\_ISL\_478314|Original|hCoV-19^^England|Human|University Hospitals Of Leicester NHS Trust and DeepSeq Nottingham|COVID-19 Genomics UK (COG-UK) Consortium|Loose|United Kingdom

>Spike|hCoV-19/Denmark/DCGC-7063/2020|2020-10-12|EPI\_ISL\_619117|Original|hCoV-19^^Midtjylland|Human|Department of Virus and Microbiological Special Diagnostics|Albertsen lab|Michaelsen|Denmark

>Spike|hCoV-19/USA/TX-HMH-MCoV-8204/2020|2020-07-07|EPI\_ISL\_784263|Original|hCoV-19^^Texas|Human|Houston Methodist Hospital|Houston Methodist Hospital|Long|USA

>Spike|hCoV-19/England/CAMC-B32B81/2020|2020-11-05|EPI\_ISL\_659452|Original|hCoV-19^^England|Human|Lighthouse Lab in Cambridge|Wellcome Sanger Institute for the COVID-19 Genomics UK (COG-UK) Consortium|Davies|United Kingdom

>Spike|hCoV-19/Wales/PHWC-494841/2020|2020-11-20|EPI\_ISL\_726175|Original|hCoV-19^^Wales|Human|Originating lab|COVID-19 Genomics UK (COG-UK) Consortium|Moore|United Kingdom

>Spike|hCoV-19/England/MILK-A45DC2/2020|2020-10-06|EPI\_ISL\_598621|Original|hCoV-19^^England|Human|Lighthouse Lab in Milton Keynes|Wellcome Sanger Institute for the COVID-19 Genomics UK (COG-UK) consortium|Davies|United Kingdom

>Spike|hCoV-19/England/QEUEH-B10BF2/2020|2020-11-02|EPI\_ISL\_642731|Original|hCoV-19^^England|Human|Lighthouse Lab in Glasgow|Wellcome Sanger Institute for the COVID-19 Genomics UK (COG-UK) Consortium|Davies|United Kingdom

>Spike|hCoV-19/USA/NY-Wadsworth-46242-01/2020|2020-04-12|EPI\_ISL\_676844|Original|hCoV-19^^New York|Human|Wadsworth Center|Wadsworth Center|Lasek-Nesselquist|USA

>Spike|hCoV-19/England/QEUEH-9B70B4/2020|2020-09-04|EPI\_ISL\_590603|Original|hCoV-19^^England|Human|Lighthouse Lab in Glasgow|Wellcome Sanger Institute for the COVID-19 Genomics UK (COG-UK) consortium|Davies|United Kingdom

>Spike|hCoV-19/Gibraltar/204462917/2020|2020-10-29|EPI\_ISL\_632815|Original|hCoV-19^^Gibraltar|Human|Microbiology|Respiratory Virus Unit|Platt|Gibraltar

>Spike|hCoV-19/Japan/NGY-NNH-035/2020|2020-07-28|EPI\_ISL\_637001|Original|hCoV-19^^Aichi|Human|Department of Infectious Diseases and Immunology|Clinical Research Center|Iwatani|Japan

>Spike|hCoV-19/Denmark/DCGC-19306/2020|2020-12-07|EPI\_ISL\_748526|Original|hCoV-19^^Hovedstaden|Human|Department of Virus and Microbiological Special Diagnostics|Albertsen Lab|Michaelsen|Denmark

>Spike|hCoV-19/England/CAMC-BBCB07/2020|2020-11-21|EPI\_ISL\_705609|Original|hCoV-19^^England|Human|Quadram Institute Bioscience|COVID-19 Genomics UK (COG-UK) Consortium|Alikhan|United Kingdom

>Spike|hCoV-19/Wales/ALDP-6CE967/2020|2020-07-02|EPI\_ISL\_556088|Original|hCoV-19^^Wales|Human|Lighthouse Lab in Alderley Park|Wellcome Sanger Institute for the COVID-19 Genomics UK (COG-UK) consortium|Davies|United Kingdom

>Spike|hCoV-19/Japan/PG-1240/2020|2020-04-00|EPI\_ISL\_684850|Original|hCoV-19^^Japan|Human|Yamagata Prefectural Institute of Public Health|Pathogen Genomics Center|Sekizuka|Japan

>Spike|hCoV-19/England/CAMC-BFBA87/2020|2020-12-04|EPI\_ISL\_708989|Original|hCoV-19^^England|Human|Lighthouse Lab in Cambridge|Wellcome Sanger Institute for the COVID-19 Genomics UK (COG-UK) Consortium|Davies|United Kingdom

>Spike|hCoV-19/New Zealand/20VR3025/2020|2020-00-00|EPI\_ISL\_579391|Original|hCoV-19^^Combined Wellington|Human|Wellington SCL (WN)|Institute of Environmental Science and Research (ESR)|Wang|New Zealand

>Spike|hCoV-19/England/MILK-992231/2020|2020-08-26|EPI\_ISL\_540661|Original|hCoV-19^England|Human|Queens Medical Centre|COVID-19 Genomics UK (COG-UK) Consortium|Loose|United Kingdom

>Spike|hCoV-19/Wales/PHWC-164564/2020|2020-05-09|EPI\_ISL\_474194|Original|hCoV-19^Wales|Human|Originating lab|COVID-19 Genomics UK (COG-UK) Consortium|Moore|United Kingdom

>Spike|hCoV-19/USA/UT-UPHL-2012849927/2020|2020-12-01|EPI\_ISL\_779314|Original|hCoV-19^Utah|Human|Utah Public Health Laboratory|Utah Public Health Laboratory|Gallagher|USA

>Spike|hCoV-19/USA/MI-MDHHS-SC21224/2020|2020-04-07|EPI\_ISL\_507480|Original|hCoV-19^Michigan|Human|Michigan Department of Health and Human Services|Michigan Department of Health and Human Services|Blankenship|USA

>Spike|hCoV-19/England/ALDP-B260FA/2020|2020-11-04|EPI\_ISL\_646673|Original|hCoV-19^England|Human|Lighthouse Lab in Alderley Park|Wellcome Sanger Institute for the COVID-19 Genomics UK (COG-UK) Consortium|Davies|United Kingdom

>Spike|hCoV-19/Hungary/US-636w/2020|2020-03-30|EPI\_ISL\_476078|Original|hCoV-19^Csongr\u00e9ld County|Human|University of Szeged|National Laboratory of Virology|Kemenesi|Hungary

>Spike|hCoV-19/England/ALDP-8D7592/2020|2020-06-24|EPI\_ISL\_557034|Original|hCoV-19^England|Human|Lighthouse Lab in Alderley Park|Wellcome Sanger Institute for the COVID-19 Genomics UK (COG-UK) consortium|Davies|United Kingdom

>Spike|hCoV-19/England/ALDP-BB28FB/2020|2020-11-19|EPI\_ISL\_703111|Original|hCoV-19^England|Human|Lighthouse Lab in Alderley Park|Wellcome Sanger Institute for the COVID-19 Genomics UK (COG-UK) Consortium|Davies|United Kingdom

>Spike|hCoV-19/England/MILK-956A13/2020|2020-06-05|EPI\_ISL\_554284|Original|hCoV-19^England|Human|Lighthouse Lab in Milton Keynes|Wellcome Sanger Institute for the COVID-19 Genomics UK (COG-UK) consortium|Davies|United Kingdom

>Spike|hCoV-19/England/QEUH-9FF37B/2020|2020-10-02|EPI\_ISL\_600276|Original|hCoV-19^England|Human|Lighthouse Lab in Glasgow|Wellcome Sanger Institute for the COVID-19 Genomics UK (COG-UK) consortium|Davies|United Kingdom

>Spike|hCoV-19/USA/MI-MDHHS-SC20740/2020|2020-04-29|EPI\_ISL\_471761|Original|hCoV-19^Michigan|Human|Michigan Department of Health and Human Services|Michigan Department of Health and Human Services|Blankenship|USA

>Spike|hCoV-19/England/PORT-2D2269/2020|2020-03-23|EPI\_ISL\_507138|Original|hCoV-19^England|Human|Centre for Enzyme Innovation|COVID-19 Genomics UK (COG-UK) Consortium|Robson|United Kingdom

>Spike|hCoV-19/England/PORT-2D74B9/2020|2020-00-00|EPI\_ISL\_665301|Original|hCoV-19^England|Human|Centre for Enzyme Innovation|COVID-19 Genomics UK (COG-UK) Consortium|Robson|United Kingdom

>Spike|hCoV-19/Wales/QEUH-A9FB92/2020|2020-10-20|EPI\_ISL\_625341|Original|hCoV-19^Wales|Human|Lighthouse Lab in Glasgow|Wellcome Sanger Institute for the COVID-19 Genomics UK (COG-UK) consortium|Davies|United Kingdom

>Spike|hCoV-19/USA/LA-BIE-031/2020|2020-04-04|EPI\_ISL\_463279|Original|hCoV-19^Louisiana|Human|Ochsner Health|Bioinfoexperts|Cross|USA

>Spike|hCoV-19/Japan/PG-5500/2020|2020-08-00|EPI\_ISL\_690602|Original|hCoV-19^Japan|Human|Pathogen Genomics Center|Pathogen Genomics Center|Sekizuka|Japan

>Spike|hCoV-19/USA/WA-UW-4630/2020|2020-03-28|EPI\_ISL\_570052|Original|hCoV-19^Washington|Human|UW Virology Lab|UW Virology Lab|Roychoudhury|USA

>Spike|hCoV-19/Australia/QLD1254/2020|2020-03-23|EPI\_ISL\_693257|Original|hCoV-19^Australia|Human|unknown|Public Health Virology Laboratory|Nguyen|Australia

>Spike|hCoV-19/England/LOND-12516EB/2020|2020-11-21|EPI\_ISL\_679426|Original|hCoV-19^England|Human|University College London Hospital|COVID-19 Genomics UK (COG-UK) Consortium|Byott|United Kingdom

>Spike|hCoV-19/USA/FL-UW-MAYO68/2020|2020-03-18|EPI\_ISL\_490988|Original|hCoV-19^Florida|Human|Mayo Clinic Laboratories|UW Virology Lab|Roychoudhury|USA

>Spike|hCoV-19/Netherlands/FR-RIVM-20810/2020|2020-12-13|EPI\_ISL\_790867|Original|hCoV-19^Friesland|Human|Dutch COVID-19 response team|National Institute for Public Health and the Environment (RIVM)|Meijer|Netherlands

>Spike|hCoV-19/England/20189159304/2020|2020-05-02|EPI\_ISL\_465561|Original|hCoV-19^^England|Human|Respiratory Virus Unit|Respiratory Virus Unit|Platt|United Kingdom

>Spike|hCoV-19/England/LOND-D4612/2020|2020-04-08|EPI\_ISL\_444142|Original|hCoV-19^^England|Human|University College London|COVID-19 Genomics UK (COG-UK) Consortium|Roy|United Kingdom

>Spike|hCoV-19/Wales/PHWC-4801D4/2020|2020-10-21|EPI\_ISL\_612861|Original|hCoV-19^^Wales|Human|Wales Specialist Virology Centre Sequencing lab|COVID-19 Genomics UK (COG-UK) Consortium|Moore|United Kingdom

>Spike|hCoV-19/England/NOTT-115508/2020|2020-10-14|EPI\_ISL\_595245|Original|hCoV-19^^England|Human|Queens Medical Centre|COVID-19 Genomics UK (COG-UK) Consortium|Loose|United Kingdom

>Spike|hCoV-19/Northern Ireland/NIRE-1064FE/2020|2020-05-04|EPI\_ISL\_500993|Original|hCoV-19^^Northern Ireland|Human|Regional Virus Laboratory|Wellcome Sanger Institute for the COVID-19 Genomics UK (COG-UK) consortium|Davies|United Kingdom

>Spike|hCoV-19/USA/NY-Wadsworth-284794-01/2020|2020-12-08|EPI\_ISL\_754459|Original|hCoV-19^^New York|Human|Wadsworth Center|Wadsworth Center|Lasek-Nesselquist|USA

>Spike|hCoV-19/England/MILK-974DE9/2020|2020-08-18|EPI\_ISL\_552521|Original|hCoV-19^^England|Human|Lighthouse Lab in Milton Keynes|Wellcome Sanger Institute for the COVID-19 Genomics UK (COG-UK) consortium|Davies|United Kingdom

>Spike|hCoV-19/Japan/PG-7328/2020|2020-08-00|EPI\_ISL\_688431|Original|hCoV-19^^Japan|Human|Pathogen Genomics Center|Pathogen Genomics Center|Sekizuka|Japan

>Spike|hCoV-19/Wales/PHWC-485922/2020|2020-10-21|EPI\_ISL\_628235|Original|hCoV-19^^Wales|Human|Wales Specialist Virology Centre Sequencing lab|COVID-19 Genomics UK (COG-UK) Consortium|Moore|United Kingdom

>Spike|hCoV-19/Denmark/DCGC-15285/2020|2020-11-23|EPI\_ISL\_713743|Original|hCoV-19^^Hovedstaden|Human|Department of Virus and Microbiological Special Diagnostics|Albertsen Lab|Michaelsen|Denmark

>Spike|hCoV-19/England/QEUEH-B0F798/2020|2020-11-02|EPI\_ISL\_641674|Original|hCoV-19^^England|Human|Lighthouse Lab in Glasgow|Wellcome Sanger Institute for the COVID-19 Genomics UK (COG-UK) Consortium|Davies|United Kingdom

>Spike|hCoV-19/USA/TX-HMH-MCoV-19112/2020|2020-11-23|EPI\_ISL\_783632|Original|hCoV-19^^Texas|Human|Houston Methodist Hospital|Houston Methodist Hospital|Long|USA

>Spike|hCoV-19/England/ALDP-B63413/2020|2020-11-09|EPI\_ISL\_656524|Original|hCoV-19^^England|Human|Lighthouse Lab in Alderley Park|Wellcome Sanger Institute for the COVID-19 Genomics UK (COG-UK) Consortium|Davies|United Kingdom

>Spike|hCoV-19/Netherlands/NB-EMC-416/2020|2020-11-09|EPI\_ISL\_722291|Original|hCoV-19^^Noord Brabant|Human|Dutch COVID-19 response team|Erasmus Medical Center|Oude Munnink|Netherlands

>Spike|hCoV-19/England/LEED-2A91B9/2020|2020-04-07|EPI\_ISL\_539177|Original|hCoV-19^^England|Human|Leeds Teaching Hospitals NHS Trust and Public Health England|Wellcome Sanger Institute for the COVID-19 Genomics UK (COG-UK) consortium|Davies|United Kingdom

>Spike|hCoV-19/Wales/PHWC-497152/2020|2020-11-26|EPI\_ISL\_726785|Original|hCoV-19^^Wales|Human|Originating lab|COVID-19 Genomics UK (COG-UK) Consortium|Moore|United Kingdom

>Spike|hCoV-19/England/LIVE-9CCE7/2020|2020-04-23|EPI\_ISL\_440942|Original|hCoV-19^^England|Human|Liverpool Clinical Laboratories|COVID-19 Genomics UK (COG-UK) Consortium|Haldenby|United Kingdom

>Spike|hCoV-19/Northern Ireland/NIRE-103118/2020|2020-04-20|EPI\_ISL\_489316|Original|hCoV-19^^Northern Ireland|Human|Regional Virus Laboratory|Wellcome Sanger Institute for the COVID-19 Genomics UK (COG-UK) consortium|Davies|United Kingdom

>Spike|hCoV-19/South Korea/KCDC2585/2020|2020-06-27|EPI\_ISL\_514988|Original|hCoV-19^^South Korea|Human|Division of Viral Diseases|Division of Viral Diseases|Kim|South Korea

>Spike|hCoV-19/Denmark/DCGC-19117/2020|2020-12-07|EPI\_ISL\_748165|Original|hCoV-19^^Sjaelland|Human|Department of Virus and Microbiological Special Diagnostics|Albertsen Lab|Michaelsen|Denmark

>Spike|hCoV-19/Japan/PG-6471/2020|2020-08-00|EPI\_ISL\_689576|Original|hCoV-19^^Japan|Human|Pathogen Genomics Center|Pathogen Genomics Center|Sekizuka|Japan

>Spike|hCoV-19/Denmark/DCGC-19147/2020|2020-12-07|EPI\_ISL\_748780|Original|hCoV-19^^Hovedstaden|Human|Department of Virus and Microbiological Special Diagnostics|Albertsen Lab|Michaelsen|Denmark

>Spike|hCoV-19/England/ALDP-BCA2F2/2020|2020-11-23|EPI\_ISL\_703552|Original|hCoV-19^^England|Human|Lighthouse Lab in Alderley Park|Wellcome Sanger Institute for the COVID-19 Genomics UK (COG-UK) Consortium|Davies|United Kingdom

>Spike|hCoV-19/England/ALDP-A5019B/2020|2020-10-07|EPI\_ISL\_597858|Original|hCoV-19^^England|Human|Lighthouse Lab in Alderley Park|Wellcome Sanger Institute for the COVID-19 Genomics UK (COG-UK) consortium|Davies|United Kingdom

>Spike|hCoV-19/England/MILK-AB9075/2020|2020-10-21|EPI\_ISL\_623642|Original|hCoV-19^^England|Human|Lighthouse Lab in Milton Keynes|Wellcome Sanger Institute for the COVID-19 Genomics UK (COG-UK) consortium|Davies|United Kingdom

>Spike|hCoV-19/England/QEUEH-95F0BE/2020|2020-08-07|EPI\_ISL\_532500|Original|hCoV-19^^England|Human|Lighthouse Lab in Glasgow|Wellcome Sanger Institute for the COVID-19 Genomics UK (COG-UK) consortium|Davies|United Kingdom

>Spike|hCoV-19/India/MH-MW23/2020|2020-05-16|EPI\_ISL\_511925|Original|hCoV-19^^Maharashtra|Human|Mahatma Gandhi Institute of Medical Sciences|National Institute of Biomedical Genomics - \u00a0DBT's PAN-INDIA 1000 SARS--CoV-2 RNA Genome Sequencing Consortium|Maitra|India

>Spike|hCoV-19/England/MILK-9F28D3/2020|2020-09-23|EPI\_ISL\_589121|Original|hCoV-19^^England|Human|Lighthouse Lab in Milton Keynes|Wellcome Sanger Institute for the COVID-19 Genomics UK (COG-UK) consortium|Davies|United Kingdom

>Spike|hCoV-19/Denmark/DCGC-18175/2020|2020-12-14|EPI\_ISL\_749164|Original|hCoV-19^^Sjaelland|Human|Department of Virus and Microbiological Special Diagnostics|Albertsen Lab|Michaelsen|Denmark

>Spike|hCoV-19/Portugal/PT0491/2020|2020-04-29|EPI\_ISL\_454215|Original|hCoV-19^^Portugal|Human|unknown|Instituto Nacional de Saude (INSA)|Borges|Portugal

>Spike|hCoV-19/England/CAMC-B537A4/2020|2020-11-08|EPI\_ISL\_657020|Original|hCoV-19^^England|Human|Lighthouse Lab in Cambridge|Wellcome Sanger Institute for the COVID-19 Genomics UK (COG-UK) Consortium|Davies|United Kingdom

>Spike|hCoV-19/USA/WI-WSLH-200212/2020|2020-03-28|EPI\_ISL\_578433|Original|hCoV-19^^Wisconsin|Human|Wisconsin State Laboratory of Hygiene Communicable Disease Division|Wisconsin State Laboratory of Hygiene Communicable Disease Division|Florek|USA

>Spike|hCoV-19/USA/MI-MDHHS-SC22209/2020|2020-10-26|EPI\_ISL\_644361|Original|hCoV-19^^Michigan|Human|Michigan Department of Health and Human Services|Michigan Department of Health and Human Services|Jacob|USA

>Spike|hCoV-19/England/ALDP-9FD823/2020|2020-10-02|EPI\_ISL\_587914|Original|hCoV-19^^England|Human|Lighthouse Lab in Alderley Park|Wellcome Sanger Institute for the COVID-19 Genomics UK (COG-UK) consortium|Davies|United Kingdom

>Spike|hCoV-19/England/MILK-99486A/2020|2020-08-25|EPI\_ISL\_552282|Original|hCoV-19^^England|Human|Lighthouse Lab in Milton Keynes|Wellcome Sanger Institute for the COVID-19 Genomics UK (COG-UK) consortium|Davies|United Kingdom

>Spike|hCoV-19/England/ALDP-9060F2/2020|2020-06-24|EPI\_ISL\_551537|Original|hCoV-19^^England|Human|Lighthouse Lab in Alderley Park|Wellcome Sanger Institute for the COVID-19 Genomics UK (COG-UK) consortium|Davies|United Kingdom

>Spike|hCoV-19/USA/NY-NYCPHL-001534/2020|2020-12-01|EPI\_ISL\_745452|Original|hCoV-19^^New York|Human|DOHMH Crown Heights|New York City Public Health Laboratory|Wang|USA

>Spike|hCoV-19/Scotland/CVR2625/2020|2020-04-17|EPI\_ISL\_484621|Original|hCoV-19^^Scotland|Human|West of Scotland Specialist Virology Centre|COVID-19 Genomics UK (COG-UK) Consortium|Robertson|United Kingdom

>Spike|hCoV-19/England/NORT-2820B9/2020|2020-03-25|EPI\_ISL\_472192|Original|hCoV-19^^England|Human|Northumbria University / South Tees Hospitals NHS Foundation Trust / North Cumbria Integrated Care NHS Foundation Trust / North Tees and Hartlepool NHS Foundation Trust / Newcastle Hospitals NHS Foundation Trust|COVID-19 Genomics UK (COG-UK) Consortium|Bashton|United Kingdom

>Spike|hCoV-19/USA/CA-CZB-9522/2020|2020-04-07|EPI\_ISL\_672117|Original|hCoV-19^^California|Human|The Ashley Laboratory|Chan-Zuckerberg Biohub|Bhatt|USA

>Spike|hCoV-19/England/NOTT-116112/2020|2020-10-18|EPI\_ISL\_595303|Original|hCoV-19^^England|Human|Queens Medical Centre|COVID-19 Genomics UK (COG-UK) Consortium|Loose|United Kingdom

>Spike|hCoV-19/USA/ME-HETL-J0163/2020|2020-09-14|EPI\_ISL\_755346|Original|hCoV-19^^Maine|Human|Maine Health and Environmental Testing Laboratory|Tewhey Lab|Tewhey|USA

>Spike|hCoV-19/USA/NM-UNM-00563/2020|2020-04-10|EPI\_ISL\_542979|Original|hCoV-19^^New Mexico|Human|TriCore Reference Laboratories|Center for Global Health|Domman|USA

>Spike|hCoV-19/Scotland/CVR4887/2020|2020-10-06|EPI\_ISL\_651738|Original|hCoV-19^^Scotland|Human|West of Scotland Specialist Virology Centre|COVID-19 Genomics UK (COG-UK) Consortium|Robertson|United Kingdom

>Spike|hCoV-19/Wales/PHWC-48BA74/2020|2020-11-05|EPI\_ISL\_666317|Original|hCoV-19^^Wales|Human|Wales Specialist Virology Centre Sequencing lab|COVID-19 Genomics UK (COG-UK) Consortium|Moore|United Kingdom

>Spike|hCoV-19/USA/NM-NMDOH-2020330308/2020|2020-09-03|EPI\_ISL\_644584|Original|hCoV-19^^New Mexico|Human|New Mexico Department of Health Scientific Laboratory|New Mexico Department of Health Scientific Laboratory|Johnson|USA

>Spike|hCoV-19/USA/AR-CDC-2-3713986/2020|2020-09-02|EPI\_ISL\_751652|Original|hCoV-19^^Arkansas|Human|AR Dept. of Health-Public Health Lab|Genomics and Discovery|Queen|USA

>Spike|hCoV-19/England/ALDP-94E46B/2020|2020-06-17|EPI\_ISL\_555475|Original|hCoV-19^^England|Human|Lighthouse Lab in Alderley Park|Wellcome Sanger Institute for the COVID-19 Genomics UK (COG-UK) consortium|Davies|United Kingdom

>Spike|hCoV-19/England/ALDP-AAODE3/2020|2020-10-22|EPI\_ISL\_624008|Original|hCoV-19^^England|Human|Lighthouse Lab in Alderley Park|Wellcome Sanger Institute for the COVID-19 Genomics UK (COG-UK) consortium|Davies|United Kingdom

>Spike|hCoV-19/Scotland/QEUEH-A61355/2020|2020-10-13|EPI\_ISL\_665314|Original|hCoV-19^^Scotland|Human|Northumbria University / South Tees Hospitals NHS Foundation Trust / North Cumbria Integrated Care NHS Foundation Trust / North Tees and Hartlepool NHS Foundation Trust / Newcastle Hospitals NHS Foundation Trust|COVID-19 Genomics UK (COG-UK) Consortium|Bashton|United Kingdom

>Spike|hCoV-19/Japan/PG-2239/2020|2020-04-00|EPI\_ISL\_685844|Original|hCoV-19^^Japan|Human|Pathogen Genomics Center|Pathogen Genomics Center|Sekizuka|Japan

>Spike|hCoV-19/Scotland/QEUEH-96D4A2/2020|2020-08-20|EPI\_ISL\_534513|Original|hCoV-19^^Scotland|Human|NHSGGC West of Scotland Specialist Virology Centre / MRC-University of Glasgow Centre for Virus Research|Wellcome Sanger Institute for the COVID-19 Genomics UK (COG-UK) consortium|Davies|United Kingdom

>Spike|hCoV-19/Australia/VIC13735/2020|2020-09-01|EPI\_ISL\_592311|Original|hCoV-19^^Victoria|Human|Microbiological Diagnostic Unit - Public Health Laboratory (MDU-PHL) |MDU-PHL|Schultz|Australia

>Spike|hCoV-19/India/WB-S2/2020|2020-03-21|EPI\_ISL\_430468|Original|hCoV-19^^West Bengal|Human|ICMR-National Institute of Cholera and Enteric Diseases|National Institute of Biomedical Genomics|Maitra|India

>Spike|hCoV-19/England/SHEF-C2AFD/2020|2020-04-22|EPI\_ISL\_453702|Original|hCoV-19^^England|Human|Virology Department|COVID-19 Genomics UK (COG-UK) Consortium|de Silva|United Kingdom

>Spike|hCoV-19/Brazil/MA-L19-CD407/2020|2020-04-02|EPI\_ISL\_476330|Original|hCoV-19^^Maranh\u00e3o|Human|DB Diagn\u00f3sticos do Brasil|Instituto de Medicina Tropical da Universidade de S\u00e3o Paulo|Faria|Brazil

>Spike|hCoV-19/Switzerland/TI-ETHZ-321395/2020|2020-10-13|EPI\_ISL\_603636|Original|hCoV-19^^Ticino|Human|Viollier AG|Department of Biosystems Science and Engineering|Nadeau|Switzerland

>Spike|hCoV-19/USA/CO-CDC-2-3713995/2020|2020-12-03|EPI\_ISL\_751701|Original|hCoV-19^^Colorado|Human|CO Dept. of Public Health and Environment|Genomics and Discovery|Queen|USA

>Spike|hCoV-19/Scotland/GCVR-1707E7/2020|2020-03-26|EPI\_ISL\_501635|Original|hCoV-19^^Scotland|Human|NHSGGC West of Scotland Specialist Virology Centre / MRC-

University of Glasgow Centre for Virus Research|Wellcome Sanger Institute for the COVID-19 Genomics UK (COG-UK) consortium|Davies|United Kingdom  
>Spike|hCoV-19/Bangladesh/BCSIR-NILMRC-188/2020|2020-06-16|EPI\_ISL\_483633|Original|hCoV-19^^Chittagong|Human|National Institute of Laboratory Medicine and Referral Center|Genomic Research Lab|Khan|Bangladesh  
>Spike|hCoV-19/India/GJ-GBRC137b/2020|2020-05-24|EPI\_ISL\_458095|Original|hCoV-19^^Gujarat|Human|B.J. Medical College and Civil hospital|Gujarat Biotechnology Research Centre|Joshi|India  
>Spike|hCoV-19/South Africa/KRISP-0436/2020|2020-07-01|EPI\_ISL\_498055|Original|hCoV-19^^KwaZulu-Natal|Human|NHLs-IALCH|KRISP|de Oliveira|South Africa  
>Spike|hCoV-19/Gibraltar/204462814/2020|2020-10-29|EPI\_ISL\_614989|Original|hCoV-19^^Gibraltar|Human|Microbiology|Respiratory Virus Unit|Platt|Gibraltar  
>Spike|hCoV-19/USA/MN-MDH-1666/2020|2020-04-04|EPI\_ISL\_560753|Original|hCoV-19^^Minnesota|Human|Minnesota Department of Health|Minnesota Department of Health|Garfin|USA  
>Spike|hCoV-19/Belgium/regA-0429623/2020|2020-04-29|EPI\_ISL\_734676|Original|hCoV-19^^Couvin|Human|UZ Leuven|KU Leuven|Maes|Belgium  
>Spike|hCoV-19/USA/UT-UPHL-2012787431/2020|2020-08-15|EPI\_ISL\_746154|Original|hCoV-19^^Utah|Human|Ginkgo Bioworks Clinical Laboratory|Utah Public Health Laboratory|Young|USA  
>Spike|hCoV-19/India/MH-ACTREC-405/2020|2020-07-29|EPI\_ISL\_700054|Original|hCoV-19^^Maharashtra|Human|Hematopathology Laboratory|Hematopathology Laboratory|Patkar|India  
>Spike|hCoV-19/England/ALDP-950EFF/2020|2020-06-13|EPI\_ISL\_554171|Original|hCoV-19^^England|Human|Lighthouse Lab in Alderley Park|Wellcome Sanger Institute for the COVID-19 Genomics UK (COG-UK) consortium|Davies|United Kingdom  
>Spike|hCoV-19/Russia/StPetersburg-RII15673S/2020|2020-05-15|EPI\_ISL\_507270|Original|hCoV-19^^Saint Petersburg|Human|WHO National Influenza Centre Russian Federation|WHO National Influenza Centre Russian Federation|Komissarov|Russia  
>Spike|hCoV-19/Spain/ML-ISCIII-202449/2020|2020-03-14|EPI\_ISL\_455347|Original|hCoV-19^^Melilla|Human|Hospital Comarcal de Melilla|Instituto de Salud Carlos III|Caballero|Spain  
>Spike|hCoV-19/England/ALDP-A93A55/2020|2020-10-19|EPI\_ISL\_610925|Original|hCoV-19^^England|Human|Lighthouse Lab in Alderley Park|Wellcome Sanger Institute for the COVID-19 Genomics UK (COG-UK) consortium|Davies|United Kingdom  
>Spike|hCoV-19/Scotland/EDB6535/2020|2020-06-17|EPI\_ISL\_478252|Original|hCoV-19^^Scotland|Human|Virology Department|COVID-19 Genomics UK (COG-UK) Consortium|Williams|United Kingdom  
>Spike|hCoV-19/Japan/PG-7397/2020|2020-07-00|EPI\_ISL\_688499|Original|hCoV-19^^Japan|Human|Pathogen Genomics Center|Pathogen Genomics Center|Sekizuka|Japan  
>Spike|hCoV-19/England/QEUA-B12431/2020|2020-11-02|EPI\_ISL\_642597|Original|hCoV-19^^England|Human|Lighthouse Lab in Glasgow|Wellcome Sanger Institute for the COVID-19 Genomics UK (COG-UK) Consortium|Davies|United Kingdom  
>Spike|hCoV-19/Canada/ON-OICR-SLB2859/2020|2020-04-07|EPI\_ISL\_538378|Original|hCoV-19^^Ontario|Human|Kingston Health Sciences Centre / Queen's University|Ontario Institute for Cancer Research|de Borja|Canada  
>Spike|hCoV-19/Wales/MILK-B04960/2020|2020-10-24|EPI\_ISL\_651033|Original|hCoV-19^^Wales|Human|Department of Pathology|COVID-19 Genomics UK (COG-UK) Consortium|Goodfellow|United Kingdom  
>Spike|hCoV-19/England/QEUA-B14059/2020|2020-11-03|EPI\_ISL\_641828|Original|hCoV-19^^England|Human|Lighthouse Lab in Glasgow|Wellcome Sanger Institute for the COVID-19 Genomics UK (COG-UK) Consortium|Davies|United Kingdom  
>Spike|hCoV-19/New Zealand/20VR1450/2020|2020-03-24|EPI\_ISL\_456217|Original|hCoV-19^^Southern|Human|Southern Community Labs Dunedin|Institute of Environmental Science and Research (ESR)|de Ligt|New Zealand  
>Spike|hCoV-19/England/ALDP-A6C581/2020|2020-10-15|EPI\_ISL\_607995|Original|hCoV-19^^England|Human|Lighthouse Lab in Alderley Park|Wellcome Sanger Institute for the COVID-19 Genomics UK (COG-UK) consortium|Davies|United Kingdom



>Spike|hCoV-19/England/MILK-B3DC1A/2020|2020-11-01|EPI\_ISL\_706249|Original|hCoV-19^^England|Human|Oxford Viromics|COVID-19 Genomics UK (COG-UK) Consortium|Golubchik|United Kingdom

>Spike|hCoV-19/Australia/VIC578/2020|2020-03-26|EPI\_ISL\_426836|Original|hCoV-19^^Victoria|Human|Victorian Infectious Diseases Reference Laboratory (VIDRL)|Microbiological Diagnostic Unit Public Health Laboratory and Victorian Infectious Diseases Reference Laboratory|Schultz|Australia

>Spike|hCoV-19/England/QEUA-B41105/2020|2020-11-08|EPI\_ISL\_658648|Original|hCoV-19^^England|Human|Lighthouse Lab in Glasgow|Wellcome Sanger Institute for the COVID-19 Genomics UK (COG-UK) Consortium|Davies|United Kingdom

>Spike|hCoV-19/Australia/VIC12949/2020|2020-07-28|EPI\_ISL\_563610|Original|hCoV-19^^Victoria|Human|Microbiological Diagnostic Unit - Public Health Laboratory (MDU-PHL)|MDU-PHL|Schultz|Australia

>Spike|hCoV-19/Hong Kong/HKU-IHCE0511-007b/2020|2020-02-15|EPI\_ISL\_538533|Original|hCoV-19^^Hong Kong|Human|Department of Microbiology|Department of Microbiology|Chan|China

>Spike|hCoV-19/England/NORT-289322/2020|2020-03-29|EPI\_ISL\_458663|Original|hCoV-19^^England|Human|NU-OMICS DNA Sequencing research facility|Wellcome Sanger Institute for the COVID-19 Genomics UK (COG-UK) consortium|Davies|United Kingdom

>Spike|hCoV-19/Denmark/DCGC-935/2020|2020-03-09|EPI\_ISL\_614695|Original|hCoV-19^^Sjaelland|Human|Department of Virus and Microbiological Special Diagnostics|Albertsen lab|Michaelsen|Denmark

>Spike|hCoV-19/United Arab Emirates/0456/2020|2020-05-18|EPI\_ISL\_698626|Original|hCoV-19^^Abu Dhabi|Human|Group 42 (G42) Healthcare|G42 Healthcare|Ogrodzki|United Arab Emirates

>Spike|hCoV-19/USA/CA-ALSR-4703/2020|2020-09-09|EPI\_ISL\_730091|Original|hCoV-19^^California|Human|San Diego County Public Health Laboratory|Andersen lab at Scripps Research|Gangavarapu|USA

>Spike|hCoV-19/England/NORT-2818EF/2020|2020-03-20|EPI\_ISL\_488752|Original|hCoV-19^^England|Human|NU-OMICS DNA Sequencing research facility|Wellcome Sanger Institute for the COVID-19 Genomics UK (COG-UK) consortium|Davies|United Kingdom

>Spike|hCoV-19/England/QEUA-9DBE0B/2020|2020-09-21|EPI\_ISL\_601429|Original|hCoV-19^^England|Human|Lighthouse Lab in Glasgow|Wellcome Sanger Institute for the COVID-19 Genomics UK (COG-UK) consortium|Davies|United Kingdom

>Spike|hCoV-19/Wales/PHWC-480268/2020|2020-10-05|EPI\_ISL\_612867|Original|hCoV-19^^Wales|Human|Wales Specialist Virology Centre Sequencing lab|COVID-19 Genomics UK (COG-UK) Consortium|Moore|United Kingdom

>Spike|hCoV-19/Denmark/DCGC-3244/2020|2020-08-24|EPI\_ISL\_616876|Original|hCoV-19^^Nordjylland|Human|Department of Virus and Microbiological Special Diagnostics|Albertsen lab|Michaelsen|Denmark

>Spike|hCoV-19/England/GSTT-6885/2020|2020-03-30|EPI\_ISL\_560740|Original|hCoV-19^^England|Human|Centre for Clinical Infection and Diagnostics Research and Genomics Innovation Unit|Centre for Clinical Infection and Diagnostics Research and Genomics Innovation Unit|Awan|United Kingdom

>Spike|hCoV-19/France/ARA-SC036/2020|2020-03-28|EPI\_ISL\_629094|Original|hCoV-19^^Auvergne-Rhône-Alpes|Human|Laboratoire du Centre Hospitalier Annecy Genevois|CNR Virus des Infections Respiratoires - France SUD|Bal|France

>Spike|hCoV-19/Austria/CeMM0474/2020|2020-03-10|EPI\_ISL\_475879|Original|hCoV-19^^Austria|Human|Austrian Agency for Health and Food Safety (AGES)|Bergthaler laboratory|Bergthaler|Austria

>Spike|hCoV-19/Denmark/DCGC-11741/2020|2020-10-26|EPI\_ISL\_671107|Original|hCoV-19^^Syddanmark|Human|Department of Virus and Microbiological Special Diagnostics|Albertsen Lab|Michaelsen|Denmark

>Spike|hCoV-19/England/MILK-A7C71F/2020|2020-10-15|EPI\_ISL\_606568|Original|hCoV-19^^England|Human|Lighthouse Lab in Milton Keynes|Wellcome Sanger Institute for the COVID-19 Genomics UK (COG-UK) consortium|Davies|United Kingdom

>Spike|hCoV-19/Australia/VIC10711/2020|2020-09-06|EPI\_ISL\_563048|Original|hCoV-19^^Victoria|Human|Microbiological Diagnostic Unit - Public Health Laboratory (MDU-PHL)|MDU-PHL|Schultz|Australia

>Spike|hCoV-19/USA/CA-CZB-1082/2020|2020-04-23|EPI\_ISL\_437082|Original|hCoV-19^^California|Human|County of Santa Clara Public Health|Chan-Zuckerberg Biohub|Hao|USA

>Spike|hCoV-19/South Africa/NHLS-UCT-GS-1378/2020|2020-11-13|EPI\_ISL\_700542|Original|hCoV-19^^Western Cape|Human|Knysna CDC wc WLC|NHLS/UCT|Iranzadeh|South Africa

>Spike|hCoV-19/England/MILK-9D45EF/2020|2020-09-17|EPI\_ISL\_601774|Original|hCoV-19^^England|Human|Lighthouse Lab in Milton Keynes|Wellcome Sanger Institute for the COVID-19 Genomics UK (COG-UK) consortium|Davies|United Kingdom

>Spike|hCoV-19/Bangladesh/109879/2020|2020-04-09|EPI\_ISL\_600428|Original|hCoV-19^^Barishal|Human|Institute of Epidemiology Disease Control And Research|Institute for Developing Science and Health Initiatives|Cowley|Bangladesh

>Spike|hCoV-19/USA/WA-S472/2020|2020-04-05|EPI\_ISL\_434232|Original|hCoV-19^^Washington|Human|Washington State Department of Health|Seattle Flu Study|Bedford|USA

>Spike|hCoV-19/England/ALDP-B620B6/2020|2020-11-08|EPI\_ISL\_656464|Original|hCoV-19^^England|Human|Lighthouse Lab in Alderley Park|Wellcome Sanger Institute for the COVID-19 Genomics UK (COG-UK) Consortium|Davies|United Kingdom

>Spike|hCoV-19/Scotland/EDB6329/2020|2020-06-04|EPI\_ISL\_473939|Original|hCoV-19^^Scotland|Human|Virology Department|COVID-19 Genomics UK (COG-UK) Consortium|Williams|United Kingdom

>Spike|hCoV-19/England/MILK-93CCA4/2020|2020-06-21|EPI\_ISL\_552975|Original|hCoV-19^^England|Human|Lighthouse Lab in Milton Keynes|Wellcome Sanger Institute for the COVID-19 Genomics UK (COG-UK) consortium|Davies|United Kingdom

>Spike|hCoV-19/Japan/PG-3180/2020|2020-04-00|EPI\_ISL\_691300|Original|hCoV-19^^Japan|Human|Pathogen Genomics Center|Pathogen Genomics Center|Sekizuka|Japan

>Spike|hCoV-19/India/MH-ACTREC-398/2020|2020-07-29|EPI\_ISL\_700047|Original|hCoV-19^^Maharashtra|Human|Hematopathology Laboratory|Hematopathology Laboratory|Patkar|India

>Spike|hCoV-19/England/CAMC-9466B8/2020|2020-07-16|EPI\_ISL\_556964|Original|hCoV-19^^England|Human|Lighthouse Lab in Cambridge|Wellcome Sanger Institute for the COVID-19 Genomics UK (COG-UK) consortium|Davies|United Kingdom

>Spike|hCoV-19/USA/CA-ALSR-0850-NBG/2020|2020-05-14|EPI\_ISL\_483398|Original|hCoV-19^^Louisiana|Human|UC San Diego Center for Advanced Laboratory Medicine|Andersen lab at Scripps Research|Gangavarapu|USA

>Spike|hCoV-19/USA/LA-EVTL517/2020|2020-06-25|EPI\_ISL\_578921|Original|hCoV-19^^Louisiana|Human|LSUHS Emerging Viral Threat Laboratory|Microbial Genome Sequencing Center|Kamil|USA

>Spike|hCoV-19/England/MILK-A45E74/2020|2020-10-06|EPI\_ISL\_598774|Original|hCoV-19^^England|Human|Lighthouse Lab in Milton Keynes|Wellcome Sanger Institute for the COVID-19 Genomics UK (COG-UK) consortium|Davies|United Kingdom

>Spike|hCoV-19/England/MILK-9922B9/2020|2020-08-27|EPI\_ISL\_540667|Original|hCoV-19^^England|Human|Queens Medical Centre|COVID-19 Genomics UK (COG-UK) Consortium|Loose|United Kingdom

>Spike|hCoV-19/England/QEUH-A4D1EC/2020|2020-10-07|EPI\_ISL\_628590|Original|hCoV-19^^England|Human|Oxford Viromics|COVID-19 Genomics UK (COG-UK) Consortium|Golubchik|United Kingdom

>Spike|hCoV-19/England/ALDP-CBDEDF/2020|2020-12-18|EPI\_ISL\_760498|Original|hCoV-19^^England|Human|Lighthouse Lab in Alderley Park|Wellcome Sanger Institute for the COVID-19 Genomics UK (COG-UK) Consortium|Davies|United Kingdom

>Spike|hCoV-19/USA/LA-SR0290/2020|2020-04-01|EPI\_ISL\_445145|Original|hCoV-19^^Louisiana|Human|Robert Garry lab|Andersen lab at Scripps Research|Gangavarapu|USA

>Spike|hCoV-19/Wales/MILK-970A5F/2020|2020-08-18|EPI\_ISL\_553023|Original|hCoV-19^^Wales|Human|Lighthouse Lab in Milton Keynes|Wellcome Sanger Institute for the COVID-19 Genomics UK (COG-UK) consortium|Davies|United Kingdom

>Spike|hCoV-19/USA/TX-DSHS-1041/2020|2020-06-15|EPI\_ISL\_628723|Original|hCoV-19^^Texas|Human|Texas Department of State Health Services|Texas Department of State Health Services|Rahman|USA

>Spike|hCoV-19/England/MILK-C5023C/2020|2020-12-11|EPI\_ISL\_769555|Original|hCoV-19^^England|Human|Lighthouse Lab in Milton Keynes|Wellcome Sanger Institute for the COVID-19 Genomics UK (COG-UK) Consortium|Davies|United Kingdom

>Spike|hCoV-19/England/EXET-137825/2020|2020-05-01|EPI\_ISL\_471986|Original|hCoV-19^^England|Human|University of Exeter|COVID-19 Genomics UK (COG-UK) Consortium|Temperton|United Kingdom

>Spike|hCoV-19/Australia/VIC14239/2020|2020-08-03|EPI\_ISL\_592409|Original|hCoV-19^^Victoria|Human|Microbiological Diagnostic Unit - Public Health Laboratory (MDU-PHL)|MDU-PHL|Schultz|Australia

>Spike|hCoV-19/USA/WI-UW-1763/2020|2020-09-14|EPI\_ISL\_605636|Original|hCoV-19^^Wisconsin|Human|University of Wisconsin-Madison AIDS Vaccine Research Laboratories|University of Wisconsin-Madison AIDS Vaccine Research Laboratories|Baczenas|USA

>Spike|hCoV-19/England/ALDP-AA557D/2020|2020-10-21|EPI\_ISL\_625149|Original|hCoV-19^^England|Human|Lighthouse Lab in Alderley Park|Wellcome Sanger Institute for the COVID-19 Genomics UK (COG-UK) consortium|Davies|United Kingdom

>Spike|hCoV-19/USA/CA-ALSR-3290/2020|2020-09-16|EPI\_ISL\_635952|Original|hCoV-19^^California|Human|San Diego County Public Health Laboratory|Andersen lab at Scripps Research|Gangavarapu|USA

>Spike|hCoV-19/England/QEUEH-99930A/2020|2020-08-23|EPI\_ISL\_541788|Original|hCoV-19^^England|Human|Lighthouse Lab in Glasgow|Wellcome Sanger Institute for the COVID-19 Genomics UK (COG-UK) consortium|Davies|United Kingdom

>Spike|hCoV-19/Iceland/451/2020|2020-03-20|EPI\_ISL\_424475|Original|hCoV-19^^Reykjavik|Human|The National University Hospital of Iceland|deCODE genetics|J\u00f3nsson|Iceland

>Spike|hCoV-19/Luxembourg/LNS0061167/2020|2020-10-26|EPI\_ISL\_739704|Original|hCoV-19^^Luxembourg|Human|Laboratoire national de sant\u00e9|Laboratoire national de sant\u00e9|Wienecke-Baldacchino|Luxembourg

>Spike|hCoV-19/England/ALDP-C489E7/2020|2020-12-12|EPI\_ISL\_736587|Original|hCoV-19^^England|Human|Lighthouse Lab in Alderley Park|Wellcome Sanger Institute for the COVID-19 Genomics UK (COG-UK) Consortium|Davies|United Kingdom

>Spike|hCoV-19/Guangdong/20SF1159/2020|2020-01-31|EPI\_ISL\_428446|Original|hCoV-19^^Guangdong|Human|Guangdong Provincial Center for Diseases Control and Prevention;Guangdong Provincial Institute of Public Health|School of Public Health|Gu|China

>Spike|hCoV-19/Wales/PHWC-49E461/2020|2020-12-08|EPI\_ISL\_743004|Original|hCoV-19^^Wales|Human|Wales Specialist Virology Centre Sequencing lab|COVID-19 Genomics UK (COG-UK) Consortium|Moore|United Kingdom

>Spike|hCoV-19/USA/WA-S1204/2020|2020-05-06|EPI\_ISL\_463694|Original|hCoV-19^^Washington|Human|Washington State Department of Health|Seattle Flu Study|Bedford|USA

>Spike|hCoV-19/England/ALDP-94E35F/2020|2020-06-17|EPI\_ISL\_555588|Original|hCoV-19^^England|Human|Lighthouse Lab in Alderley Park|Wellcome Sanger Institute for the COVID-19 Genomics UK (COG-UK) consortium|Davies|United Kingdom

>Spike|hCoV-19/Japan/PG-5514/2020|2020-08-00|EPI\_ISL\_688639|Original|hCoV-19^^Japan|Human|Pathogen Genomics Center|Pathogen Genomics Center|Sekizuka|Japan

>Spike|hCoV-19/Wales/PHWC-4A58C5/2020|2020-12-16|EPI\_ISL\_764935|Original|hCoV-19^^Wales|Human|Wales Specialist Virology Centre Sequencing lab|COVID-19 Genomics UK (COG-UK) Consortium|Moore|United Kingdom

>Spike|hCoV-19/USA/NY-NYUMC887/2020|2020-04-30|EPI\_ISL\_467380|Original|hCoV-19^^New York|Human|NYU Langone Health|Departments of Pathology and Medicine|Maurano|USA

>Spike|hCoV-19/Scotland/CVR3992/2020|2020-09-02|EPI\_ISL\_540789|Original|hCoV-19^^Scotland|Human|West of Scotland Specialist Virology Centre|COVID-19 Genomics UK (COG-UK) Consortium|Robertson|United Kingdom

>Spike|hCoV-19/Denmark/DCGC-2394/2020|2020-08-10|EPI\_ISL\_617576|Original|hCoV-19^^Midtjylland|Human|Department of Virus and Microbiological Special Diagnostics|Albertsen lab|Michaelsen|Denmark

>Spike|hCoV-19/USA/TX-HMH-MCoV-15147/2020|2020-10-18|EPI\_ISL\_786631|Original|hCoV-19^^Texas|Human|Houston Methodist Hospital|Houston Methodist Hospital|Long|USA

>Spike|hCoV-19/England/LIVE-DC1ED7/2020|2020-11-22|EPI\_ISL\_679396|Original|hCoV-19^^England|Human|Liverpool Clinical Laboratories|COVID-19 Genomics UK (COG-UK) Consortium|Haldenby|United Kingdom

>Spike|hCoV-19/England/CAMC-AEAD1A/2020|2020-10-26|EPI\_ISL\_633218|Original|hCoV-19^^England|Human|Lighthouse Lab in Cambridge|Wellcome Sanger Institute for the COVID-19 Genomics UK (COG-UK) consortium|Davies|United Kingdom

>Spike|hCoV-19/England/QEUA-96F103/2020|2020-08-17|EPI\_ISL\_530442|Original|hCoV-19^^England|Human|Lighthouse Lab in Glasgow|Wellcome Sanger Institute for the COVID-19 Genomics UK (COG-UK) consortium|Davies|United Kingdom

>Spike|hCoV-19/Australia/NSW96/2020|2020-03-23|EPI\_ISL\_427678|Original|hCoV-19^^New South Wales|Human|Centre for Infectious Diseases and Microbiology Public Health|NSW Health Pathology - Institute of Clinical Pathology and Medical Research; Westmead Hospital; University of Sydney|Gall|Australia

>Spike|hCoV-19/Wales/MILK-A22824/2020|2020-10-02|EPI\_ISL\_611864|Original|hCoV-19^^Wales|Human|Northumbria University / South Tees Hospitals NHS Foundation Trust / North Cumbria Integrated Care NHS Foundation Trust / North Tees and Hartlepool NHS Foundation Trust / Newcastle Hospitals NHS Foundation Trust|COVID-19 Genomics UK (COG-UK) Consortium|Bashton|United Kingdom

>Spike|hCoV-19/England/ALDP-B5C3A7/2020|2020-11-10|EPI\_ISL\_655835|Original|hCoV-19^^England|Human|Lighthouse Lab in Alderley Park|Wellcome Sanger Institute for the COVID-19 Genomics UK (COG-UK) Consortium|Davies|United Kingdom

>Spike|hCoV-19/USA/WA-S1139/2020|2020-05-04|EPI\_ISL\_463629|Original|hCoV-19^^Washington|Human|Washington State Department of Health|Seattle Flu Study|Bedford|USA

>Spike|hCoV-19/USA/CA-CSMC16/2020|2020-04-13|EPI\_ISL\_475625|Original|hCoV-19^^California|Human|Cedars-Sinai Medical Center|Cedars-Sinai Medical Center|Zhang|USA

>Spike|hCoV-19/England/ALDP-954286/2020|2020-06-12|EPI\_ISL\_554589|Original|hCoV-19^^England|Human|Lighthouse Lab in Alderley Park|Wellcome Sanger Institute for the COVID-19 Genomics UK (COG-UK) consortium|Davies|United Kingdom

>Spike|hCoV-19/USA/TX-DSHS-0347/2020|2020-06-13|EPI\_ISL\_538285|Original|hCoV-19^^Texas|Human|Texas Department of State Health Services|Texas Department of State Health Services|Rahman|USA

>Spike|hCoV-19/Scotland/EDB5405/2020|2020-04-05|EPI\_ISL\_487762|Original|hCoV-19^^Scotland|Human|Virology Department|Wellcome Sanger Institute for the COVID-19 Genomics UK (COG-UK) consortium|Davies|United Kingdom

>Spike|hCoV-19/USA/NY-NYUMC487/2020|2020-03-18|EPI\_ISL\_436735|Original|hCoV-19^^New York|Human|NYU Langone Health|Departments of Pathology and Medicine|Maurano|USA

>Spike|hCoV-19/Japan/PG-6956/2020|2020-07-00|EPI\_ISL\_688061|Original|hCoV-19^^Japan|Human|Pathogen Genomics Center|Pathogen Genomics Center|Sekizuka|Japan

>Spike|hCoV-19/England/QEUA-A8BCF0/2020|2020-10-17|EPI\_ISL\_643233|Original|hCoV-19^^England|Human|Lighthouse Lab in Glasgow|Wellcome Sanger Institute for the COVID-19 Genomics UK (COG-UK) Consortium|Davies|United Kingdom

>Spike|hCoV-19/England/BRIS-1254DB/2020|2020-03-27|EPI\_ISL\_444017|Original|hCoV-19^^England|Human|PHE South West Regional Laboratory|Wellcome Sanger Institute for the COVID-19 Genomics UK (COG-UK) consortium|Amato|United Kingdom

>Spike|hCoV-19/Denmark/DCGC-17764/2020|2020-12-14|EPI\_ISL\_749297|Original|hCoV-19^^Syddanmark|Human|Department of Virus and Microbiological Special Diagnostics|Albertsen Lab|Michaelsen|Denmark

>Spike|hCoV-19/England/LEED-2A9EFE/2020|2020-04-10|EPI\_ISL\_538780|Original|hCoV-19^^England|Human|Leeds Teaching Hospitals NHS Trust and Public Health England|Wellcome Sanger Institute for the COVID-19 Genomics UK (COG-UK) consortium|Davies|United Kingdom

>Spike|hCoV-19/England/MILK-B04687/2020|2020-10-24|EPI\_ISL\_652165|Original|hCoV-19^^England|Human|Department of Pathology|COVID-19 Genomics UK (COG-UK) Consortium|Goodfellow|United Kingdom

>Spike|hCoV-19/USA/TX-DSHS-1015/2020|2020-04-09|EPI\_ISL\_644169|Original|hCoV-19^^Texas|Human|Texas Department of State Health Services|Texas Department of State Health Services|Rahman|USA

>Spike|hCoV-19/USA/TX-HMH-5186/2020|2020-06-23|EPI\_ISL\_544583|Original|hCoV-19^^Texas|Human|Houston Methodist Hospital|Houston Methodist Hospital|Long|USA

>Spike|hCoV-19/Kazakhstan/26829/2020|2020-04-26|EPI\_ISL\_454518|Original|hCoV-19^^Nur-Sultan|Human|RSE \National Center for Biotechnology\|RSE \National Center for Biotechnology\|Kalendar|Kazakhstan

>Spike|hCoV-19/USA/WA-UW76/2020|2020-03-10|EPI\_ISL\_415604|Original|hCoV-19^^Washington|Human|UW Virology Lab|UW Virology Lab|Roychoudhury|USA

>Spike|hCoV-19/Finland/23SS12G8/2020|2020-09-23|EPI\_ISL\_759798|Original|hCoV-19^^Uusimaa|Human|Department of Virology and Immunology|Department of Virology|Smura|Finland

>Spike|hCoV-19/USA/UT-04480/2020|2020-05-21|EPI\_ISL\_522341|Original|hCoV-19^^Utah|Human|Utah Public Health Laboratory|Utah Public Health Laboratory|Young|USA

>Spike|hCoV-19/England/CAMB-1B2A4A/2020|2020-05-15|EPI\_ISL\_469913|Original|hCoV-19^^England|Human|Department of Pathology|Wellcome Sanger Institute for the COVID-19 Genomics UK (COG-UK) consortium|Davies|United Kingdom

>Spike|hCoV-19/England/OXON-B4D5F/2020|2020-05-02|EPI\_ISL\_535011|Original|hCoV-19^^England|Human|Oxford Viromics|COVID-19 Genomics UK (COG-UK) Consortium|Golubchik|United Kingdom

>Spike|hCoV-19/Singapore/903/2020|2020-09-03|EPI\_ISL\_536444|Original|hCoV-19^^Singapore|Human|National Public Health Laboratory|National Public Health Laboratory|Mak|Singapore

>Spike|hCoV-19/Wales/PHWC-48F506/2020|2020-11-10|EPI\_ISL\_681104|Original|hCoV-19^^Wales|Human|Wales Specialist Virology Centre Sequencing lab|COVID-19 Genomics UK (COG-UK) Consortium|Moore|United Kingdom

>Spike|hCoV-19/Australia/VIC17984/2020|2020-08-21|EPI\_ISL\_779602|Original|hCoV-19^^Victoria|Human|Microbiological Diagnostic Unit - Public Health Laboratory (MDU-PHL)|MDU-PHL|Beck|Australia

>Spike|hCoV-19/Netherlands/NH-RIVM-20226/2020|2020-12-05|EPI\_ISL\_723378|Original|hCoV-19^^Noord-Holland|Human|Dutch COVID-19 response team|National Institute for Public Health and the Environment (RIVM)|Meijer|Netherlands

>Spike|hCoV-19/Wales/PHWC-1608C9/2020|2020-04-29|EPI\_ISL\_472990|Original|hCoV-19^^Wales|Human|Wales Specialist Virology Centre Sequencing lab|COVID-19 Genomics UK (COG-UK) Consortium|Moore|United Kingdom

>Spike|hCoV-19/USA/WI-GMF-24736/2020|2020-10-08|EPI\_ISL\_660908|Original|hCoV-19^^Wisconsin|Human|Gundersen Molecular Diagnostics Laboratory|Kabara Cancer Research Institute|Kenny|USA

>Spike|hCoV-19/England/ALDP-B5AF4B/2020|2020-11-09|EPI\_ISL\_655521|Original|hCoV-19^^England|Human|Lighthouse Lab in Alderley Park|Wellcome Sanger Institute for the COVID-19 Genomics UK (COG-UK) Consortium|Davies|United Kingdom

>Spike|hCoV-19/Portugal/PT1463/2020|2020-03-30|EPI\_ISL\_511422|Original|hCoV-19^^Portugal|Human|Instituto Nacional de Saude (INSA)|Instituto Nacional de Saude (INSA)|Borges|Portugal

>Spike|hCoV-19/Scotland/CVR3776/2020|2020-05-31|EPI\_ISL\_478109|Original|hCoV-19^^Scotland|Human|West of Scotland Specialist Virology Centre|COVID-19 Genomics UK (COG-UK) Consortium|Robertson|United Kingdom

>Spike|hCoV-19/Aruba/AW-RIVM-10390/2020|2020-08-06|EPI\_ISL\_636516|Original|hCoV-19^^Aruba|Human|Dutch COVID-19 response team|National Institute for Public Health and the Environment (RIVM)|Meijer|Aruba

>Spike|hCoV-19/Russia/LEN-RII-MH2050S/2020|2020-09-18|EPI\_ISL\_602389|Original|hCoV-19^^Leningrad|Human|HELIX LLC|WHO National Influenza Centre Russian Federation|Komissarov|Russia

>Spike|hCoV-19/USA/TX-HMH-MCoV-15013/2020|2020-10-17|EPI\_ISL\_786497|Original|hCoV-19^^Texas|Human|Houston Methodist Hospital|Houston Methodist Hospital|Long|USA

>Spike|hCoV-19/USA/WI-UW-1348/2020|2020-09-08|EPI\_ISL\_536719|Original|hCoV-19^^Wisconsin|Human|University of Wisconsin-Madison AIDS Vaccine Research Laboratories|University of Wisconsin-Madison AIDS Vaccine Research Laboratories|Baczenas|USA

>Spike|hCoV-19/USA/TX-HMH-MCoV-18646/2020|2020-11-21|EPI\_ISL\_784994|Original|hCoV-19^^Texas|Human|Houston Methodist Hospital|Houston Methodist Hospital|Long|USA

>Spike|hCoV-19/Spain/CB-IBV-98007076/2020|2020-09-03|EPI\_ISL\_582106|Original|hCoV-19^^Cantabria|Human|Hospital Universitario Marqu\u00e9s de Valdecilla - IDIVAL (Santander|SeqCOVID-SPAIN consortium/IBV (CSIC)|Comas|Spain

>Spike|hCoV-19/England/CAMC-B22A3C/2020|2020-11-02|EPI\_ISL\_647364|Original|hCoV-19^^England|Human|Lighthouse Lab in Cambridge|Wellcome Sanger Institute for the COVID-19 Genomics UK (COG-UK) Consortium|Davies|United Kingdom

>Spike|hCoV-19/USA/MI-MDHHS-SC22199/2020|2020-10-26|EPI\_ISL\_644367|Original|hCoV-19^^Michigan|Human|Michigan Department of Health and Human Services|Michigan Department of Health and Human Services|Jacob|USA

>Spike|hCoV-19/Wales/PHWC-4A2822/2020|2020-12-08|EPI\_ISL\_743946|Original|hCoV-19^^Wales|Human|Wales Specialist Virology Centre Sequencing lab|COVID-19 Genomics UK (COG-UK) Consortium|Moore|United Kingdom

>Spike|hCoV-19/USA/TX-DSHS-0587/2020|2020-06-03|EPI\_ISL\_569698|Original|hCoV-19^^Texas|Human|Texas Department of State Health Services|Texas Department of State Health Services|Rahman|USA

>Spike|hCoV-19/Japan/PG-5140/2020|2020-08-00|EPI\_ISL\_690247|Original|hCoV-19^^Japan|Human|Gunma Prefectural Institute of Public Health and Environmental Sciences|Pathogen Genomics Center|Sekizuka|Japan

>Spike|hCoV-19/Northern Ireland/NIRE-FCBE8/2020|2020-04-22|EPI\_ISL\_470078|Original|hCoV-19^^Northern Ireland|Human|Regional Virus Laboratory|Wellcome Sanger Institute for the COVID-19 Genomics UK (COG-UK) consortium|Davies|United Kingdom

>Spike|hCoV-19/USA/UT-01696/2020|2020-04-13|EPI\_ISL\_454716|Original|hCoV-19^^Utah|Human|Utah Public Health Laboratory|Utah Public Health Laboratory|Young|USA

>Spike|hCoV-19/USA/CA-CHLA-PLM58846794/2020|2020-11-30|EPI\_ISL\_753458|Original|hCoV-19^^California|Human|Clinical virology Laboratory|Center for Personalized Medicine|Dien Bard|USA

>Spike|hCoV-19/Japan/PG-8313/2020|2020-08-00|EPI\_ISL\_687412|Original|hCoV-19^^Japan|Human|Pathogen Genomics Center|Pathogen Genomics Center|Sekizuka|Japan

>Spike|hCoV-19/Wales/PHWC-246AA/2020|2020-03-17|EPI\_ISL\_419439|Original|hCoV-19^^Wales|Human|Wales Specialist Virology Centre|Public Health Wales Microbiology Cardiff|Moore|United Kingdom

>Spike|hCoV-19/England/MILK-B5A628/2020|2020-11-06|EPI\_ISL\_658145|Original|hCoV-19^^England|Human|Lighthouse Lab in Milton Keynes|Wellcome Sanger Institute for the COVID-19 Genomics UK (COG-UK) Consortium|Davies|United Kingdom

>Spike|hCoV-19/England/BRIS-125013/2020|2020-03-26|EPI\_ISL\_444002|Original|hCoV-19^^England|Human|PHE South West Regional Laboratory|Wellcome Sanger Institute for the COVID-19 Genomics UK (COG-UK) consortium|Amato|United Kingdom

>Spike|hCoV-19/England/QEUEH-9CF3ED/2020|2020-09-17|EPI\_ISL\_590048|Original|hCoV-19^^England|Human|Lighthouse Lab in Glasgow|Wellcome Sanger Institute for the COVID-19 Genomics UK (COG-UK) consortium|Davies|United Kingdom

>Spike|hCoV-19/England/CAMC-B52329/2020|2020-11-08|EPI\_ISL\_656970|Original|hCoV-19^^England|Human|Lighthouse Lab in Cambridge|Wellcome Sanger Institute for the COVID-19 Genomics UK (COG-UK) Consortium|Davies|United Kingdom

>Spike|hCoV-19/Australia/VIC7249/2020|2020-07-27|EPI\_ISL\_564312|Original|hCoV-19^^Victoria|Human|Microbiological Diagnostic Unit - Public Health Laboratory (MDU-PHL)|MDU-PHL|Schultz|Australia

>Spike|hCoV-19/England/MILK-974AB5/2020|2020-08-21|EPI\_ISL\_552461|Original|hCoV-19^^England|Human|Lighthouse Lab in Milton Keynes|Wellcome Sanger Institute for the COVID-19 Genomics UK (COG-UK) consortium|Davies|United Kingdom

>Spike|hCoV-19/USA/WA-UW-32904/2020|2020-10-17|EPI\_ISL\_737096|Original|hCoV-19^^Washington|Human|UW Virology Lab|UW Virology Lab|Roychoudhury|USA

>Spike|hCoV-19/USA/MN-MDH-1632/2020|2020-04-28|EPI\_ISL\_539826|Original|hCoV-19^^Minnesota|Human|Minnesota Department of Health|Minnesota Department of Health|Garfin|USA

>Spike|hCoV-19/England/QEUEH-AD3224/2020|2020-10-25|EPI\_ISL\_633807|Original|hCoV-19^^England|Human|Lighthouse Lab in Glasgow|Wellcome Sanger Institute for the COVID-19 Genomics UK (COG-UK) consortium|Davies|United Kingdom

>Spike|hCoV-19/England/QEUI-B0535/2020|2020-11-18|EPI\_ISL\_719636|Original|hCoV-19^^England|Human|Lighthouse Lab in Glasgow|Wellcome Sanger Institute for the COVID-19 Genomics UK (COG-UK) Consortium|Davies|United Kingdom

>Spike|hCoV-19/England/201380217/2020|2020-03-25|EPI\_ISL\_421822|Original|hCoV-19^^England|Human|Respiratory Virus Unit|Respiratory Virus Unit|Platt|United Kingdom

>Spike|hCoV-19/Vietnam/VNHN\_1072/2020|2020-03-17|EPI\_ISL\_455717|Original|hCoV-19^^Hanoi|Human|National Hospital of Tropical Diseases|Oxford University Clinical Research Unit|Nguyen|Vietnam

>Spike|hCoV-19/England/QEUI-9F58D0/2020|2020-09-25|EPI\_ISL\_588423|Original|hCoV-19^^England|Human|Lighthouse Lab in Glasgow|Wellcome Sanger Institute for the COVID-19 Genomics UK (COG-UK) consortium|Davies|United Kingdom

>Spike|hCoV-19/USA/CA-ALSR-1829/2020|2020-05-19|EPI\_ISL\_512199|Original|hCoV-19^^California|Human|San Diego County Public Health Laboratory|Andersen lab at Scripps Research|Gangavarapu|USA

>Spike|hCoV-19/England/CAMC-B99265/2020|2020-11-15|EPI\_ISL\_673415|Original|hCoV-19^^England|Human|Lighthouse Lab in Cambridge|Wellcome Sanger Institute for the COVID-19 Genomics UK (COG-UK) Consortium|Davies|United Kingdom

>Spike|hCoV-19/Denmark/ALAB-SSI-885/2020|2020-03-30|EPI\_ISL\_444955|Original|hCoV-19^^Denmark|Human|Department of Virus and Microbiological Special Diagnostics|Albertsen lab|Kirkegaard|Denmark

>Spike|hCoV-19/England/MILK-BAB752/2020|2020-11-18|EPI\_ISL\_783331|Original|hCoV-19^^England|Human|Lighthouse Lab in Milton Keynes|Wellcome Sanger Institute for the COVID-19 Genomics UK (COG-UK) Consortium|Davies|United Kingdom

>Spike|hCoV-19/England/MILK-B39522/2020|2020-11-02|EPI\_ISL\_658812|Original|hCoV-19^^England|Human|Lighthouse Lab in Milton Keynes|Wellcome Sanger Institute for the COVID-19 Genomics UK (COG-UK) Consortium|Davies|United Kingdom

>Spike|hCoV-19/England/MILK-A7A429/2020|2020-10-15|EPI\_ISL\_606773|Original|hCoV-19^^England|Human|Lighthouse Lab in Milton Keynes|Wellcome Sanger Institute for the COVID-19 Genomics UK (COG-UK) consortium|Davies|United Kingdom

>Spike|hCoV-19/England/205160492/2020|2020-12-16|EPI\_ISL\_766423|Original|hCoV-19^^England|Human|Respiratory Virus Unit|COVID-19 Genomics UK (COG-UK) Consortium|Platt|United Kingdom

>Spike|hCoV-19/England/SHEF-D1A64/2020|2020-09-13|EPI\_ISL\_559941|Original|hCoV-19^^England|Human|Virology Department|COVID-19 Genomics UK (COG-UK) Consortium|de Silva|United Kingdom

>Spike|hCoV-19/England/ALDP-A670C1/2020|2020-10-12|EPI\_ISL\_630505|Original|hCoV-19^^England|Human|Lighthouse Lab in Alderley Park|Wellcome Sanger Institute for the COVID-19 Genomics UK (COG-UK) consortium|Davies|United Kingdom

>Spike|hCoV-19/USA/FL-BPHL-1840/2020|2020-04-09|EPI\_ISL\_613920|Original|hCoV-19^^Florida|Human|Florida Bureau of Public Health Laboratories|Florida Bureau of Public Health Laboratories|Blanton|USA

>Spike|hCoV-19/Wales/PHWC-165967/2020|2020-05-15|EPI\_ISL\_490745|Original|hCoV-19^^Wales|Human|Wales Specialist Virology Centre Sequencing lab|COVID-19 Genomics UK (COG-UK) Consortium|Moore|United Kingdom

>Spike|hCoV-19/Denmark/DCGC-11560/2020|2020-11-02|EPI\_ISL\_670995|Original|hCoV-19^^Nordjylland|Human|Department of Virus and Microbiological Special Diagnostics|Albertsen Lab|Michaelsen|Denmark

>Spike|hCoV-19/USA/CA-ALSR-4811/2020|2020-05-01|EPI\_ISL\_730155|Original|hCoV-19^^California|Human|Scripps Medical Laboratory|Andersen lab at Scripps Research|Gangavarapu|USA

>Spike|hCoV-19/Scotland/GCVR-1725BE/2020|2020-04-04|EPI\_ISL\_524535|Original|hCoV-19^^Scotland|Human|NHSGGC West of Scotland Specialist Virology Centre / MRC - University of Glasgow Centre for Virus Research|Wellcome Sanger Institute for the COVID-19 Genomics UK (COG-UK) consortium|Davies|United Kingdom

>Spike|hCoV-19/England/MILK-9944EE/2020|2020-08-25|EPI\_ISL\_552206|Original|hCoV-19^^England|Human|Lighthouse Lab in Milton Keynes|Wellcome Sanger Institute for the COVID-19 Genomics UK (COG-UK) consortium|Davies|United Kingdom

>Spike|hCoV-19/USA/CT-Yale-371/2020|2020-08-17|EPI\_ISL\_527785|Original|hCoV-19^^Connecticut|Human|Connecticut State Department of Public Health|Grubaugh Lab - Yale School of Public Health|Fauver|USA

>Spike|hCoV-19/England/QEUA-BCC06F/2020|2020-11-27|EPI\_ISL\_703984|Original|hCoV-19^^England|Human|Lighthouse Lab in Glasgow|Wellcome Sanger Institute for the COVID-19 Genomics UK (COG-UK) Consortium|Davies|United Kingdom

>Spike|hCoV-19/Singapore/141cul/2020|2020-03-23|EPI\_ISL\_574484|VeroE6 P1|hCoV-19^^Singapore|Human|Programme in Emerging Infectious Diseases|National Public Health Laboratory|Mak|Singapore

>Spike|hCoV-19/Australia/VIC4335/2020|2020-07-13|EPI\_ISL\_519631|Original|hCoV-19^^Victoria|Human|Microbiological Diagnostic Unit - Public Health Laboratory (MDU-PHL)|MDU-PHL|Schultz|Australia

>Spike|hCoV-19/Denmark/DCGC-2419/2020|2020-08-10|EPI\_ISL\_617601|Original|hCoV-19^^Midtjylland|Human|Department of Virus and Microbiological Special Diagnostics|Albertsen lab|Michaelsen|Denmark

>Spike|hCoV-19/England/ALDP-AA11C8/2020|2020-10-22|EPI\_ISL\_623974|Original|hCoV-19^^England|Human|Lighthouse Lab in Alderley Park|Wellcome Sanger Institute for the COVID-19 Genomics UK (COG-UK) Consortium|Davies|United Kingdom

>Spike|hCoV-19/USA/WA-UW-10159/2020|2020-06-02|EPI\_ISL\_570270|Original|hCoV-19^^Washington|Human|UW Virology Lab|UW Virology Lab|Roychoudhury|USA

>Spike|hCoV-19/England/LIVE-DCA393/2020|2020-12-06|EPI\_ISL\_724355|Original|hCoV-19^^England|Human|Liverpool Clinical Laboratories|COVID-19 Genomics UK (COG-UK) Consortium|Haldenby|United Kingdom

>Spike|hCoV-19/India/MH-NCCS-NR1290/2020|2020-05-15|EPI\_ISL\_496558|Original|hCoV-19^^Maharashtra|Human|National Centre For Cell Science|National Centre For Cell Science|Paul|India

>Spike|hCoV-19/England/QEUA-CABDE6/2020|2020-12-20|EPI\_ISL\_761058|Original|hCoV-19^^England|Human|Lighthouse Lab in Glasgow|Wellcome Sanger Institute for the COVID-19 Genomics UK (COG-UK) Consortium|Davies|United Kingdom

>Spike|hCoV-19/Timor-Leste/TL06/2020|2020-04-11|EPI\_ISL\_456598|Original|hCoV-19^^Timor-Leste|Human|National Health Laboratory|Microbiological Diagnostic Unit Public Health Laboratory|Schultz|Timor-Leste

>Spike|hCoV-19/Australia/VIC2763/2020|2020-07-07|EPI\_ISL\_521598|Original|hCoV-19^^Victoria|Human|Microbiological Diagnostic Unit - Public Health Laboratory (MDU-PHL)|MDU-PHL|Schultz|Australia

>Spike|hCoV-19/USA/HI-H200331/2020|2020-08-24|EPI\_ISL\_752889|Original|hCoV-19^^Hawaii|Human|State Laboratories Division|State Laboratories Division|Sultana|USA

>Spike|hCoV-19/Australia/VIC7844/2020|2020-07-29|EPI\_ISL\_564695|Original|hCoV-19^^Victoria|Human|Microbiological Diagnostic Unit - Public Health Laboratory (MDU-PHL)|MDU-PHL|Schultz|Australia

>Spike|hCoV-19/England/QEUA-9C9C60/2020|2020-09-10|EPI\_ISL\_567425|Original|hCoV-19^^England|Human|Lighthouse Lab in Glasgow|Wellcome Sanger Institute for the COVID-19 Genomics UK (COG-UK) consortium|Davies|United Kingdom

>Spike|hCoV-19/England/QEUA-A37103/2020|2020-10-04|EPI\_ISL\_706929|Original|hCoV-19^^England|Human|Oxford Viromics|COVID-19 Genomics UK (COG-UK) Consortium|Golubchik|United Kingdom

>Spike|hCoV-19/England/QEUA-9A40E7/2020|2020-09-01|EPI\_ISL\_540146|Original|hCoV-19^^England|Human|Lighthouse Lab in Glasgow|Wellcome Sanger Institute for the COVID-19 Genomics UK (COG-UK) consortium|Davies|United Kingdom

>Spike|hCoV-19/England/QEUA-A0B733/2020|2020-10-01|EPI\_ISL\_599309|Original|hCoV-19^^England|Human|Lighthouse Lab in Glasgow|Wellcome Sanger Institute for the COVID-19 Genomics UK (COG-UK) consortium|Davies|United Kingdom

>Spike|hCoV-19/England/ALDP-5D2390/2020|2020-06-19|EPI\_ISL\_558590|Original|hCoV-19^^England|Human|Lighthouse Lab in Alderley Park|Wellcome Sanger Institute for the COVID-19 Genomics UK (COG-UK) consortium|Davies|United Kingdom

>Spike|hCoV-19/England/CAMC-B32E00/2020|2020-11-05|EPI\_ISL\_659723|Original|hCoV-19^^England|Human|Lighthouse Lab in Cambridge|Wellcome Sanger Institute for the COVID-19 Genomics UK (COG-UK) Consortium|Davies|United Kingdom

>Spike|hCoV-19/England/LOND-D4BAA/2020|2020-04-11|EPI\_ISL\_449657|Original|hCoV-19^^England|Human|University College London|COVID-19 Genomics UK (COG-UK) Consortium|Roy|United Kingdom



>Spike|hCoV-19/Denmark/DCGC-10979/2020|2020-11-02|EPI\_ISL\_670322|Original|hCoV-19^^Sjaelland|Human|Department of Virus and Microbiological Special Diagnostics|Albertsen Lab|Michaelsen|Denmark

>Spike|hCoV-19/Japan/PG-8945/2020|2020-08-00|EPI\_ISL\_686491|Original|hCoV-19^^Japan|Human|Pathogen Genomics Center|Pathogen Genomics Center|Sekizuka|Japan

>Spike|hCoV-19/England/CAMC-A3F596/2020|2020-10-06|EPI\_ISL\_609692|Original|hCoV-19^^England|Human|Lighthouse Lab in Cambridge|Wellcome Sanger Institute for the COVID-19 Genomics UK (COG-UK) consortium|Davies|United Kingdom

>Spike|hCoV-19/Wales/PHWC-481267/2020|2020-10-19|EPI\_ISL\_613048|Original|hCoV-19^^Wales|Human|Wales Specialist Virology Centre Sequencing lab|COVID-19 Genomics UK (COG-UK) Consortium|Moore|United Kingdom

>Spike|hCoV-19/England/QEUEH-AAEDE5/2020|2020-10-22|EPI\_ISL\_653008|Original|hCoV-19^^England|Human|Oxford Viromics|COVID-19 Genomics UK (COG-UK) Consortium|Golubchik|United Kingdom

>Spike|hCoV-19/Japan/PG-0788/2020|2020-04-00|EPI\_ISL\_684398|Original|hCoV-19^^Japan|Human|Pathogen Genomics Center|Pathogen Genomics Center|Sekizuka|Japan

>Spike|hCoV-19/Wales/PHWC-49EAD8/2020|2020-12-08|EPI\_ISL\_743093|Original|hCoV-19^^Wales|Human|Wales Specialist Virology Centre Sequencing lab|COVID-19 Genomics UK (COG-UK) Consortium|Moore|United Kingdom

>Spike|hCoV-19/England/ALDP-950958/2020|2020-06-14|EPI\_ISL\_554346|Original|hCoV-19^^England|Human|Lighthouse Lab in Alderley Park|Wellcome Sanger Institute for the COVID-19 Genomics UK (COG-UK) consortium|Davies|United Kingdom

>Spike|hCoV-19/Finland/15A32S5/2020|2020-04-15|EPI\_ISL\_481555|Original|hCoV-19^^Uusimaa|Human|Department of Virology and Immunology|Department of Virology|Smura|Finland

>Spike|hCoV-19/Canada/ON-PHL-20-01158/2020|2020-04-00|EPI\_ISL\_548781|Original|hCoV-19^^Ontario|Human|Public Health Ontario Laboratory|Public Health Ontario Laboratory|Guthrie|Canada

>Spike|hCoV-19/Scotland/CVR2621/2020|2020-04-17|EPI\_ISL\_484618|Original|hCoV-19^^Scotland|Human|West of Scotland Specialist Virology Centre|COVID-19 Genomics UK (COG-UK) Consortium|Robertson|United Kingdom

>Spike|hCoV-19/USA/NY-Wadsworth-285291-01/2020|2020-12-08|EPI\_ISL\_754475|Original|hCoV-19^^New York|Human|Wadsworth Center|Wadsworth Center|Lasek-Nesselquist|USA

>Spike|hCoV-19/Denmark/DCGC-1276/2020|2020-06-08|EPI\_ISL\_618069|Original|hCoV-19^^Nordjylland|Human|Department of Virus and Microbiological Special Diagnostics|Albertsen lab|Michaelsen|Denmark

>Spike|hCoV-19/England/LIVE-9BA39/2020|2020-04-19|EPI\_ISL\_440895|Original|hCoV-19^^England|Human|Liverpool Clinical Laboratories|COVID-19 Genomics UK (COG-UK) Consortium|Haldenby|United Kingdom

>Spike|hCoV-19/England/ALDP-BCA77B/2020|2020-11-23|EPI\_ISL\_703260|Original|hCoV-19^^England|Human|Lighthouse Lab in Alderley Park|Wellcome Sanger Institute for the COVID-19 Genomics UK (COG-UK) Consortium|Davies|United Kingdom

>Spike|hCoV-19/USA/MI-MDHHS-SC20552/2020|2020-04-29|EPI\_ISL\_460600|Original|hCoV-19^^Michigan|Human|Michigan Department of Health and Human Services|Michigan Department of Health and Human Services|Blankenship|USA

>Spike|hCoV-19/Japan/PG-1886/2020|2020-05-00|EPI\_ISL\_685492|Original|hCoV-19^^Japan|Human|Tokyo Metropolitan Institute of Public Health|Pathogen Genomics Center|Sekizuka|Japan

>Spike|hCoV-19/Denmark/DCGC-13987/2020|2020-11-30|EPI\_ISL\_711498|Original|hCoV-19^^Nordjylland|Human|Department of Virus and Microbiological Special Diagnostics|Albertsen Lab|Michaelsen|Denmark

>Spike|hCoV-19/England/CAMB-1AA6AB/2020|2020-04-17|EPI\_ISL\_470114|Original|hCoV-19^^England|Human|Department of Pathology|Wellcome Sanger Institute for the COVID-19 Genomics UK (COG-UK) consortium|Davies|United Kingdom

>Spike|hCoV-19/Switzerland/VD-ETHZ-100177/2020|2020-03-17|EPI\_ISL\_574985|Original|hCoV-19^^Vaud|Human|Viollier AG|Department of Biosystems Science and Engineering|Nadeau|Switzerland

>Spike|hCoV-19/Denmark/DCGC-6260/2020|2020-10-05|EPI\_ISL\_620020|Original|hCoV-19^^Syddanmark|Human|Department of Virus and Microbiological Special Diagnostics|Albertsen lab|Michaelsen|Denmark

>Spike|hCoV-19/England/QEUA-96BF76/2020|2020-08-14|EPI\_ISL\_531362|Original|hCoV-19^^England|Human|Lighthouse Lab in Glasgow|Wellcome Sanger Institute for the COVID-19 Genomics UK (COG-UK) consortium|Davies|United Kingdom

>Spike|hCoV-19/Switzerland/BL-ETHZ-200059/2020|2020-07-14|EPI\_ISL\_510741|Original|hCoV-19^^Basel-Landschaft|Human|Viollier AG|Department of Biosystems Science and Engineering|Nadeau|Switzerland

>Spike|hCoV-19/England/QEUA-A1DC11/2020|2020-09-29|EPI\_ISL\_587491|Original|hCoV-19^^England|Human|Lighthouse Lab in Glasgow|Wellcome Sanger Institute for the COVID-19 Genomics UK (COG-UK) consortium|Davies|United Kingdom

>Spike|hCoV-19/USA/UT-UPHL-2008808/2020|2020-05-23|EPI\_ISL\_524834|Original|hCoV-19^^Utah|Human|Utah Public Health Laboratory|Utah Public Health Laboratory|Young|USA

>Spike|hCoV-19/England/QEUA-A49B00/2020|2020-10-05|EPI\_ISL\_627281|Original|hCoV-19^^England|Human|Oxford Viromics|COVID-19 Genomics UK (COG-UK) Consortium|Golubchik|United Kingdom

>Spike|hCoV-19/Wales/PHWC-484404/2020|2020-10-23|EPI\_ISL\_628002|Original|hCoV-19^^Wales|Human|Wales Specialist Virology Centre Sequencing lab|COVID-19 Genomics UK (COG-UK) Consortium|Moore|United Kingdom

>Spike|hCoV-19/Denmark/DCGC-22377/2020|2020-12-14|EPI\_ISL\_757525|Original|hCoV-19^^Syddanmark|Human|Department of Virus and Microbiological Special Diagnostics|Albertsen Lab|Michaelsen|Denmark

>Spike|hCoV-19/USA/WA-UW-24557/2020|2020-08-17|EPI\_ISL\_576486|Original|hCoV-19^^Washington|Human|UW Virology Lab|UW Virology Lab|Roychoudhury|USA

>Spike|hCoV-19/USA/TX-DSHS-0235/2020|2020-04-25|EPI\_ISL\_525787|Original|hCoV-19^^Texas|Human|Texas Department of State Health Services|Texas Department of State Health Services|Rahman|USA

>Spike|hCoV-19/England/BIRM-66202/2020|2020-10-07|EPI\_ISL\_612247|Original|hCoV-19^^England|Human|University of Birmingham|COVID-19 Genomics UK (COG-UK) Consortium|Loman|United Kingdom

>Spike|hCoV-19/South Korea/KCDC2747/2020|2020-07-19|EPI\_ISL\_522526|Original|hCoV-19^^South Korea|Human|Division of Viral Diseases|Division of Viral Diseases|Kim|South Korea

>Spike|hCoV-19/England/BRIS-126DDF/2020|2020-04-09|EPI\_ISL\_459010|Original|hCoV-19^^England|Human|PHE South West Regional Laboratory|Wellcome Sanger Institute for the COVID-19 Genomics UK (COG-UK) consortium|Davies|United Kingdom

>Spike|hCoV-19/USA/VAN4606/2020|2020-05-11|EPI\_ISL\_677688|Original|hCoV-19^^New York|Human|Vanda Pharmaceuticals Clinical Site|Vanda Pharmaceuticals|Przychodzen|USA

>Spike|hCoV-19/Northern Ireland/NIRE-10675F/2020|2020-05-14|EPI\_ISL\_501054|Original|hCoV-19^^Northern Ireland|Human|Regional Virus Laboratory|Wellcome Sanger Institute for the COVID-19 Genomics UK (COG-UK) consortium|Davies|United Kingdom

>Spike|hCoV-19/England/MILK-AB902A/2020|2020-10-21|EPI\_ISL\_623728|Original|hCoV-19^^England|Human|Lighthouse Lab in Milton Keynes|Wellcome Sanger Institute for the COVID-19 Genomics UK (COG-UK) consortium|Davies|United Kingdom

>Spike|hCoV-19/USA/TX-HMH-MCoV-14561/2020|2020-10-08|EPI\_ISL\_787846|Original|hCoV-19^^Texas|Human|Houston Methodist Hospital|Houston Methodist Hospital|Long|USA

>Spike|hCoV-19/England/MILK-9C7039/2020|2020-09-08|EPI\_ISL\_573273|Original|hCoV-19^^England|Human|Northumbria University / South Tees Hospitals NHS Foundation Trust / North Cumbria Integrated Care NHS Foundation Trust / North Tees and Hartlepool NHS Foundation Trust / Newcastle Hospitals NHS Foundation Trust|COVID-19 Genomics UK (COG-UK) Consortium|Bashton|United Kingdom

>Spike|hCoV-19/Denmark/DCGC-16439/2020|2020-11-16|EPI\_ISL\_714768|Original|hCoV-19^^Sjaelland|Human|Department of Virus and Microbiological Special Diagnostics|Albertsen Lab|Michaelsen|Denmark

>Spike|hCoV-19/USA/MD-MDH-0162/2020|2020-07-14|EPI\_ISL\_524889|Original|hCoV-19^^Maryland|Human|MD PHL|MD PHL|Keller|USA

>Spike|hCoV-19/England/MILK-A79633/2020|2020-10-13|EPI\_ISL\_606910|Original|hCoV-19^^England|Human|Lighthouse Lab in Milton Keynes|Wellcome Sanger Institute for the COVID-19 Genomics UK (COG-UK) consortium|Davies|United Kingdom

>Spike|hCoV-19/England/SHEF-C7ADA/2020|2020-05-26|EPI\_ISL\_475401|Original|hCoV-19^^England|Human|Virology Department|COVID-19 Genomics UK (COG-UK) Consortium|de Silva|United Kingdom

>Spike|hCoV-19/Denmark/ALAB-SSI515/2020|2020-03-23|EPI\_ISL\_429583|Original|hCoV-19^^Denmark|Human|Department of Virus and Microbiological Special Diagnostics|Albertsen lab|Kirkegaard|Denmark

>Spike|hCoV-19/Japan/PG-4957/2020|2020-08-00|EPI\_ISL\_690076|Original|hCoV-19^^Japan|Human|Pathogen Genomics Center|Pathogen Genomics Center|Sekizuka|Japan

>Spike|hCoV-19/Morocco/RMPS-21/2020|2020-04-01|EPI\_ISL\_728235|Original|hCoV-19^^Morocco|Human|LNR National Reference Laboratory|Medical Biotechnology Laboratory|Kartti|Morocco

>Spike|hCoV-19/Wales/PHWC-4A1C81/2020|2020-12-11|EPI\_ISL\_743798|Original|hCoV-19^^Wales|Human|Wales Specialist Virology Centre Sequencing lab|COVID-19 Genomics UK (COG-UK) Consortium|Moore|United Kingdom

>Spike|hCoV-19/Denmark/DCGC-2484/2020|2020-08-10|EPI\_ISL\_617752|Original|hCoV-19^^Midtjylland|Human|Department of Virus and Microbiological Special Diagnostics|Albertsen lab|Michaelsen|Denmark

>Spike|hCoV-19/Denmark/DCGC-19789/2020|2020-12-07|EPI\_ISL\_747789|Original|hCoV-19^^Midtjylland|Human|Department of Virus and Microbiological Special Diagnostics|Albertsen Lab|Michaelsen|Denmark

>Spike|hCoV-19/England/ALDP-C588AB/2020|2020-12-14|EPI\_ISL\_735941|Original|hCoV-19^^England|Human|Lighthouse Lab in Alderley Park|Wellcome Sanger Institute for the COVID-19 Genomics UK (COG-UK) Consortium|Davies|United Kingdom

>Spike|hCoV-19/USA/UT-UPHL-2012159735/2020|2020-07-27|EPI\_ISL\_745665|Original|hCoV-19^^Utah|Human|Ginkgo Bioworks Clinical Laboratory|Utah Public Health Laboratory|Young|USA

>Spike|hCoV-19/Japan/PG-6505/2020|2020-07-00|EPI\_ISL\_689607|Original|hCoV-19^^Japan|Human|Pathogen Genomics Center|Pathogen Genomics Center|Sekizuka|Japan

>Spike|hCoV-19/Australia/VIC13901/2020|2020-09-14|EPI\_ISL\_563873|Original|hCoV-19^^Victoria|Human|Microbiological Diagnostic Unit - Public Health Laboratory (MDU-PHL) |MDU-PHL|Schultz|Australia

>Spike|hCoV-19/USA/VA-DCLS-2167/2020|2020-11-06|EPI\_ISL\_677196|Original|hCoV-19^^Virginia|Human|Virginia Division of Consolidated Laboratory Services|Virginia Division of Consolidated Laboratory Services|St. Jacques|USA

>Spike|hCoV-19/USA/UT-08643/2020|2020-05-26|EPI\_ISL\_524378|Original|hCoV-19^^Utah|Human|Utah Public Health Laboratory|Utah Public Health Laboratory|Young|USA

>Spike|hCoV-19/Denmark/DCGC-20118/2020|2020-12-07|EPI\_ISL\_747672|Original|hCoV-19^^Syddanmark|Human|Department of Virus and Microbiological Special Diagnostics|Albertsen Lab|Michaelsen|Denmark

>Spike|hCoV-19/Chile/RM-ISPCH-77/2020|2020-04-04|EPI\_ISL\_445374|Original|hCoV-19^^Region Metropolitana de Santiago|Human|HOSPITAL SAN JUAN DE DIOS|Instituto de Salud Publica de Chile|Fernandez|Chile

>Spike|hCoV-19/Australia/NSW583/2020|2020-03-14|EPI\_ISL\_478695|Original|hCoV-19^^New South Wales|Human|South Eastern Area Laboratory Services (SEALS)|NSW Health Pathology - Institute of Clinical Pathology and Medical Research; Westmead Hospital; University of Sydney|Gall|Australia

>Spike|hCoV-19/Denmark/DCGC-20782/2020|2020-12-21|EPI\_ISL\_759359|Original|hCoV-19^^Nordjylland|Human|Department of Virus and Microbiological Special Diagnostics|Albertsen Lab|Michaelsen|Denmark

>Spike|hCoV-19/Scotland/EDB10461/2020|2020-11-09|EPI\_ISL\_704187|Original|hCoV-19^^Scotland|Human|Virology Department|COVID-19 Genomics UK (COG-UK) Consortium|McHugh|United Kingdom

>Spike|hCoV-19/England/QEUH-AD3F1E/2020|2020-10-26|EPI\_ISL\_634663|Original|hCoV-19^^England|Human|Lighthouse Lab in Glasgow|Wellcome Sanger Institute for the COVID-19 Genomics UK (COG-UK) consortium|Davies|United Kingdom

>Spike|hCoV-19/Wales/PHWC-2A5D4/2020|2020-04-06|EPI\_ISL\_445591|Original|hCoV-19^^Wales|Human|Wales Specialist Virology Centre|Public Health Wales Microbiology Cardiff|Moore|United Kingdom

>Spike|hCoV-19/Jordan/SR-054/2020|2020-03-30|EPI\_ISL\_430012|Original|hCoV-19^^Irbid|Human|Biolab Diagnostic Laboratories|Andersen lab at Scripps Research|Gangavarapu|Jordan

>Spike|hCoV-19/England/QEUH-99922B/2020|2020-08-24|EPI\_ISL\_541805|Original|hCoV-19^^England|Human|Lighthouse Lab in Glasgow|Wellcome Sanger Institute for the COVID-19 Genomics UK (COG-UK) consortium|Davies|United Kingdom

>Spike|hCoV-19/South Korea/KCDC2678/2020|2020-06-22|EPI\_ISL\_522460|Original|hCoV-19^^South Korea|Human|Center for Laboratory Control of Infectious Diseases|Center for Laboratory Control of Infectious Diseases|Kim|South Korea

>Spike|hCoV-19/England/ALDP-953E29/2020|2020-06-13|EPI\_ISL\_553818|Original|hCoV-19^^England|Human|Lighthouse Lab in Alderley Park|Wellcome Sanger Institute for the COVID-19 Genomics UK (COG-UK) consortium|Davies|United Kingdom

>Spike|hCoV-19/England/QEUH-B2EA12/2020|2020-11-03|EPI\_ISL\_659839|Original|hCoV-19^^England|Human|Lighthouse Lab in Glasgow|Wellcome Sanger Institute for the COVID-19 Genomics UK (COG-UK) Consortium|Davies|United Kingdom

>Spike|hCoV-19/Scotland/EDB3426/2020|2020-04-10|EPI\_ISL\_487852|Original|hCoV-19^^Scotland|Human|Virology Department|Wellcome Sanger Institute for the COVID-19 Genomics UK (COG-UK) consortium|Davies|United Kingdom

>Spike|hCoV-19/Luxembourg/LNS6690193/2020|2020-04-15|EPI\_ISL\_434506|Original|hCoV-19^^Luxembourg|Human|Laboratoire National de Sante|Laboratoire National de Sante|Wienecke-Baldacchino|Luxembourg

>Spike|hCoV-19/Switzerland/AG-ETHZ-101157/2020|2020-03-31|EPI\_ISL\_451823|Original|hCoV-19^^Aargau|Human|Viollier AG|Department of Biosystems Science and Engineering|Nadeau|Switzerland

>Spike|hCoV-19/England/ALDP-A6FBE6/2020|2020-10-15|EPI\_ISL\_607100|Original|hCoV-19^^England|Human|Lighthouse Lab in Alderley Park|Wellcome Sanger Institute for the COVID-19 Genomics UK (COG-UK) consortium|Davies|United Kingdom

>Spike|hCoV-19/Egypt/CUNCI-HGC3I013/2020|2020-06-02|EPI\_ISL\_479694|Original|hCoV-19^^Egypt|Human|Egyptian National Cancer Institute (ENCI)|Egyptian National Cancer Institute (ENCI)|Zekri|Egypt

>Spike|hCoV-19/England/CAMB-81E94/2020|2020-04-22|EPI\_ISL\_438588|Original|hCoV-19^^England|Human|Department of Pathology|COVID-19 Genomics UK (COG-UK) Consortium|Meredith|United Kingdom

>Spike|hCoV-19/USA/MI-MDHHS-SC21515/2020|2020-04-02|EPI\_ISL\_516242|Original|hCoV-19^^Michigan|Human|Michigan Department of Health and Human Services|Michigan Department of Health and Human Services|Blankenship|USA

>Spike|hCoV-19/USA/LA-GBCL-26684476/2020|2020-04-10|EPI\_ISL\_485903|Original|hCoV-19^^Louisiana|Human|River Road Testing Lab|Ginkgo Bioworks Clinical Laboratory|Smith|USA

>Spike|hCoV-19/England/ALDP-C3B4B9/2020|2020-12-09|EPI\_ISL\_731719|Original|hCoV-19^^England|Human|Lighthouse Lab in Alderley Park|Wellcome Sanger Institute for the COVID-19 Genomics UK (COG-UK) Consortium|Davies|United Kingdom

>Spike|hCoV-19/Wales/PHWC-495B92/2020|2020-11-26|EPI\_ISL\_726449|Original|hCoV-19^^Wales|Human|Originating lab|COVID-19 Genomics UK (COG-UK) Consortium|Moore|United Kingdom

>Spike|hCoV-19/England/ALDP-CEB4D6/2020|2020-12-21|EPI\_ISL\_781412|Original|hCoV-19^^England|Human|Lighthouse Lab in Alderley Park|Wellcome Sanger Institute for the COVID-19 Genomics UK (COG-UK) Consortium|Davies|United Kingdom

>Spike|hCoV-19/Japan/PG-1963/2020|2020-04-00|EPI\_ISL\_685569|Original|hCoV-19^^Japan|Human|Pathogen Genomics Center|Pathogen Genomics Center|Sekizuka|Japan

>Spike|hCoV-19/England/QEUH-960955/2020|2020-08-07|EPI\_ISL\_532029|Original|hCoV-19^^England|Human|Lighthouse Lab in Glasgow|Wellcome Sanger Institute for the COVID-19 Genomics UK (COG-UK) consortium|Davies|United Kingdom

>Spike|hCoV-19/Scotland/QEUH-A1F59C/2020|2020-10-01|EPI\_ISL\_598917|Original|hCoV-19^^Scotland|Human|Lighthouse Lab in Glasgow|Wellcome Sanger Institute for the COVID-19 Genomics UK (COG-UK) consortium|Davies|United Kingdom

>Spike|hCoV-19/Japan/PG-0374/2020|2020-02-22|EPI\_ISL\_480044|Original|hCoV-19^^Chubu|Human|Nagoya City Public Health Research Institute|Pathogen Genomics Center|Sekizuka|Japan

>Spike|hCoV-19/USA/CA-ALSR-2603/2020|2020-07-11|EPI\_ISL\_635582|Original|hCoV-19^^California|Human|San Diego County Public Health Laboratory|Andersen lab at Scripps Research|Gangavarapu|USA

>Spike|hCoV-19/USA/NY-WC-13741-01/2020|2020-03-12|EPI\_ISL\_534731|Original|hCoV-19^^New York|Human|Wadsworth Center|Wadsworth Center|Plitnick|USA

>Spike|hCoV-19/Netherlands/UT-EMC-129/2020|2020-10-22|EPI\_ISL\_632723|Original|hCoV-19^^Utrecht|Human|Dutch COVID-19 response team|Erasmus Medical Center|Oude Munnink|Netherlands

>Spike|hCoV-19/Ireland/D-NVRL-AIIDV1472/2020|2020-12-14|EPI\_ISL\_791306|Original|hCoV-19^^Dublin|Human|National Virus Reference Laboratory|Irish Coronavirus Sequencing Consortium - Teagasc Moorepark|Walsh|Ireland

>Spike|hCoV-19/USA/NY-NYUMC440/2020|2020-04-15|EPI\_ISL\_435507|Original|hCoV-19^^New York|Human|NYU Langone Health|Departments of Pathology and Medicine|Maurano|USA

>Spike|hCoV-19/England/ALDP-A67D8E/2020|2020-10-10|EPI\_ISL\_608989|Original|hCoV-19^^England|Human|Lighthouse Lab in Alderley Park|Wellcome Sanger Institute for the COVID-19 Genomics UK (COG-UK) consortium|Davies|United Kingdom

>Spike|hCoV-19/USA/TX-HMH-1046/2020|2020-04-05|EPI\_ISL\_542507|Original|hCoV-19^^Texas|Human|Houston Methodist Hospital|Houston Methodist Hospital|Long|USA

>Spike|hCoV-19/Russia/PRI-RII-MH762S/2020|2020-08-11|EPI\_ISL\_733010|Original|hCoV-19^^Primorsky|Human|WHO National Influenza Centre Russian Federation|WHO National Influenza Centre Russian Federation|Komissarov|Russia

>Spike|hCoV-19/England/MILK-B94E39/2020|2020-11-14|EPI\_ISL\_676277|Original|hCoV-19^^England|Human|Lighthouse Lab in Milton Keynes|Wellcome Sanger Institute for the COVID-19 Genomics UK (COG-UK) Consortium|Davies|United Kingdom

>Spike|hCoV-19/Scotland/CVR2026/2020|2020-04-10|EPI\_ISL\_477844|Original|hCoV-19^^Scotland|Human|West of Scotland Specialist Virology Centre|COVID-19 Genomics UK (COG-UK) Consortium|Robertson|United Kingdom

>Spike|hCoV-19/USA/LA-EVTL1063/2020|2020-11-27|EPI\_ISL\_768333|Original|hCoV-19^^Louisiana|Human|LSUHS Emerging Viral Threat Laboratory|Microbial Genome Sequencing Center|Kamil|USA

>Spike|hCoV-19/Ireland/CE-NVRL-73IRL22902/2020|2020-09-16|EPI\_ISL\_578247|Original|hCoV-19^^Clare|Human|National Virus Reference Laboratory|National Virus Reference Laboratory|Gonzalez|Ireland

>Spike|hCoV-19/USA/AZ-TG388028/2020|2020-06-18|EPI\_ISL\_694697|Original|hCoV-19^^Arizona|Human|TGen North|TGen North|French|USA

>Spike|hCoV-19/Wales/PHWC-47E212/2020|2020-09-27|EPI\_ISL\_595424|Original|hCoV-19^^Wales|Human|Originating lab|COVID-19 Genomics UK (COG-UK) Consortium|Moore|United Kingdom

>Spike|hCoV-19/USA/UT-UPHL-2012698275/2020|2020-10-19|EPI\_ISL\_745590|Original|hCoV-19^^Utah|Human|Ginkgo Bioworks Clinical Laboratory|Utah Public Health Laboratory|Young|USA

>Spike|hCoV-19/Australia/VIC6915/2020|2020-07-24|EPI\_ISL\_564136|Original|hCoV-19^^Victoria|Human|Microbiological Diagnostic Unit - Public Health Laboratory (MDU-PHL)|MDU-PHL|Schultz|Australia

>Spike|hCoV-19/Italy/APU-IZSPB\_326PT/2020|2020-11-04|EPI\_ISL\_653819|Original|hCoV-19^^Apulia|Human|I.R.C.C.S. \S. De Bellis\ - Ente Ospedaliero|Istituto Zooprofilattico Sperimentale della Puglia e della Basilicata|Parisi|Italy

>Spike|hCoV-19/USA/IL-NM-0693/2020|2020-05-10|EPI\_ISL\_626470|Original|hCoV-19^^Illinois|Human|Northwestern Memorial Hospital|Ozer Lab|Ozer|USA

>Spike|hCoV-19/USA/HI-H200572/2020|2020-10-24|EPI\_ISL\_753099|Original|hCoV-19^^Hawaii|Human|State Laboratories Division|State Laboratories Division|Sultana|USA

>Spike|hCoV-19/Scotland/QEUH-96CDF3/2020|2020-08-21|EPI\_ISL\_534582|Original|hCoV-19^^Scotland|Human|NHSGGC West of Scotland Specialist Virology Centre / MRC - University of Glasgow Centre for Virus Research|Wellcome Sanger Institute for the COVID-19 Genomics UK (COG-UK) consortium|Davies|United Kingdom

>Spike|hCoV-19/England/BRIS-1276B5/2020|2020-04-02|EPI\_ISL\_469636|Original|hCoV-19^^England|Human|PHE South West Regional Laboratory|Wellcome Sanger Institute for the COVID-19 Genomics UK (COG-UK) consortium|Davies|United Kingdom

>Spike|hCoV-19/Portugal/PT1635/2020|2020-05-28|EPI\_ISL\_731945|Original|hCoV-19^^Portugal|Human|Instituto Nacional de Saude (INSA)|Instituto Nacional de Saude (INSA)|Borges|Portugal

>Spike|hCoV-19/Denmark/DCGC-2479/2020|2020-08-10|EPI\_ISL\_617747|Original|hCoV-19^^Midtjylland|Human|Department of Virus and Microbiological Special Diagnostics|Albertsen lab|Michaelsen|Denmark

>Spike|hCoV-19/England/ALDP-95031E/2020|2020-06-18|EPI\_ISL\_555201|Original|hCoV-19^^England|Human|Lighthouse Lab in Alderley Park|Wellcome Sanger Institute for the COVID-19 Genomics UK (COG-UK) consortium|Davies|United Kingdom

>Spike|hCoV-19/Portugal/PT1289/2020|2020-03-24|EPI\_ISL\_511250|Original|hCoV-19^^Portugal|Human|Instituto Nacional de Saude (INSA) and Instituto Gulbenkian de Ciencia (IGC)|Instituto Nacional de Saude (INSA) and Instituto Gulbenkian de Ciencia (IGC)|Borges|Portugal

>Spike|hCoV-19/USA/CA-CZB-15488/2020|2020-09-15|EPI\_ISL\_739588|Original|hCoV-19^^California|Human|County of San Luis Obispo Public Health Laboratory|Chan-Zuckerberg Biohub|Kamm|USA

>Spike|hCoV-19/England/MILK-9E201A/2020|2020-09-20|EPI\_ISL\_581321|Original|hCoV-19^^England|Human|Lighthouse Lab in Milton Keynes|Wellcome Sanger Institute for the COVID-19 Genomics UK (COG-UK) consortium|Davies|United Kingdom

>Spike|hCoV-19/England/MILK-A24084/2020|2020-10-04|EPI\_ISL\_650949|Original|hCoV-19^^England|Human|Centre for Enzyme Innovation|COVID-19 Genomics UK (COG-UK) Consortium|Robson|United Kingdom

>Spike|hCoV-19/Australia/WA418/2020|2020-07-11|EPI\_ISL\_672630|Original|hCoV-19^^Western Australia|Human|PathWest Laboratory Medicine WA|PathWest Laboratory Medicine WA Microbial Surveillance Unit|Sikazwe|Australia

>Spike|hCoV-19/Japan/PG-7884/2020|2020-07-00|EPI\_ISL\_686985|Original|hCoV-19^^Japan|Human|Pathogen Genomics Center|Pathogen Genomics Center|Sekizuka|Japan

>Spike|hCoV-19/England/CAMB-7A168/2020|2020-04-03|EPI\_ISL\_441236|Original|hCoV-19^^England|Human|Department of Pathology|Wellcome Sanger Institute for the COVID-19 Genomics UK (COG-UK) consortium|Amato|United Kingdom

>Spike|hCoV-19/USA/TX-HMH-MCoV-15624/2020|2020-10-26|EPI\_ISL\_785308|Original|hCoV-19^^Texas|Human|Houston Methodist Hospital|Houston Methodist Hospital|Long|USA

>Spike|hCoV-19/Jordan/SEARCH-5432/2020|2020-09-07|EPI\_ISL\_755239|Original|hCoV-19^^Amman|Human|Biolab Diagnostic Laboratories|Andersen lab at Scripps Research|Gangavarapu|Jordan

>Spike|hCoV-19/USA/WA-UW-2940/2020|2020-03-28|EPI\_ISL\_486057|Original|hCoV-19^^Washington|Human|UW Virology Lab|UW Virology Lab|Roychoudhury|USA

>Spike|hCoV-19/Denmark/DCGC-13645/2020|2020-11-30|EPI\_ISL\_712932|Original|hCoV-19^^Hovedstaden|Human|Department of Virus and Microbiological Special Diagnostics|Albertsen Lab|Michaelsen|Denmark

>Spike|hCoV-19/England/QEUA-AE2F76/2020|2020-10-28|EPI\_ISL\_633591|Original|hCoV-19^^England|Human|Lighthouse Lab in Glasgow|Wellcome Sanger Institute for the COVID-19 Genomics UK (COG-UK) consortium|Davies|United Kingdom

>Spike|hCoV-19/England/ALDP-B5CF85/2020|2020-11-09|EPI\_ISL\_655656|Original|hCoV-19^^England|Human|Lighthouse Lab in Alderley Park|Wellcome Sanger Institute for the COVID-19 Genomics UK (COG-UK) Consortium|Davies|United Kingdom

>Spike|hCoV-19/Wales/PHWC-4953F4/2020|2020-11-21|EPI\_ISL\_726342|Original|hCoV-19^^Wales|Human|Originating lab|COVID-19 Genomics UK (COG-UK) Consortium|Moore|United Kingdom

>Spike|hCoV-19/Mexico/MIC-INDRE-73/2020|2020-08-20|EPI\_ISL\_576276|Original|hCoV-19^^Michoacan|Human|Instituto de Diagnostico y Referencia Epidemiologicos (INDRE)|Instituto de Diagnostico y Referencia Epidemiologicos (INDRE)|Rodriguez|Mexico

>Spike|hCoV-19/USA/GA-CDC-7327/2020|2020-10-22|EPI\_ISL\_681776|Original|hCoV-19^^Georgia|Human|GA Department of Public Health Laboratory|Pathogen Discovery|Queen|USA

>Spike|hCoV-19/USA/TX-HMH-3738/2020|2020-06-16|EPI\_ISL\_543150|Original|hCoV-19^^Texas|Human|Houston Methodist Hospital|Houston Methodist Hospital|Long|USA

>Spike|hCoV-19/Switzerland/BS-42418442/2020|2020-08-31|EPI\_ISL\_581996|Original|hCoV-19^^Basel-Stadt|Human|University Hospital Basel|University Hospital Basel|Roloff Handschin|Switzerland

>Spike|hCoV-19/England/ALDP-B271F6/2020|2020-11-04|EPI\_ISL\_664561|Original|hCoV-19^^England|Human|Northumbria University / South Tees Hospitals NHS Foundation Trust / North Cumbria Integrated Care NHS Foundation Trust / North Tees and Hartlepool NHS Foundation Trust / Newcastle Hospitals NHS Foundation Trust|COVID-19 Genomics UK (COG-UK) Consortium|Bashton|United Kingdom

>Spike|hCoV-19/United Arab Emirates/0902/2020|2020-06-25|EPI\_ISL\_699040|Original|hCoV-19^^Abu Dhabi|Human|Group 42 (G42) Healthcare|G42 Healthcare|Ogrodzki|United Arab Emirates

>Spike|hCoV-19/Australia/VIC2953/2020|2020-07-07|EPI\_ISL\_521783|Original|hCoV-19^^Victoria|Human|Microbiological Diagnostic Unit - Public Health Laboratory (MDU-PHL) |MDU-PHL|Schultz|Australia

>Spike|hCoV-19/Switzerland/SO-ETHZ-360303/2020|2020-11-06|EPI\_ISL\_729221|Original|hCoV-19^^Solothurn|Human|Viollier AG|Department of Biosystems Science and Engineering|Nadeau|Switzerland

>Spike|hCoV-19/Netherlands/ZH-RIVM-20683/2020|2020-12-23|EPI\_ISL\_790751|Original|hCoV-19^^Zuid-holland|Human|Dutch COVID-19 response team|National Institute for Public Health and the Environment (RIVM) |Meijer|Netherlands

>Spike|hCoV-19/New Zealand/20VR2647/2020|2020-00-00|EPI\_ISL\_579315|Original|hCoV-19^^Auckland|Human|LabPLUS|Institute of Environmental Science and Research (ESR) |Wang|New Zealand

>Spike|hCoV-19/Scotland/CVR2748/2020|2020-04-18|EPI\_ISL\_438946|Original|hCoV-19^^Scotland|Human|West of Scotland Specialist Virology Centre|COVID-19 Genomics UK (COG-UK) Consortium|Robertson|United Kingdom

>Spike|hCoV-19/Japan/PG-1004/2020|2020-04-00|EPI\_ISL\_684614|Original|hCoV-19^^Japan|Human|Pathogen Genomics Center|Pathogen Genomics Center|Sekizuka|Japan

>Spike|hCoV-19/England/LOND-12650C8/2020|2020-11-26|EPI\_ISL\_724584|Original|hCoV-19^^England|Human|University College London|COVID-19 Genomics UK (COG-UK) Consortium|Roy|United Kingdom

>Spike|hCoV-19/England/BRIS-1853847/2020|2020-04-14|EPI\_ISL\_492398|Original|hCoV-19^^England|Human|PHE South West Regional Laboratory|Wellcome Sanger Institute for the COVID-19 Genomics UK (COG-UK) consortium|Davies|United Kingdom

>Spike|hCoV-19/England/ALDP-B1A2B7/2020|2020-11-01|EPI\_ISL\_645967|Original|hCoV-19^^England|Human|Lighthouse Lab in Alderley Park|Wellcome Sanger Institute for the COVID-19 Genomics UK (COG-UK) Consortium|Davies|United Kingdom

>Spike|hCoV-19/Denmark/DCGC-2032/2020|2020-07-27|EPI\_ISL\_618253|Original|hCoV-19^^Midtjylland|Human|Department of Virus and Microbiological Special Diagnostics|Albertsen lab|Michaelsen|Denmark

>Spike|hCoV-19/USA/MI-MDHHS-SC21148/2020|2020-03-26|EPI\_ISL\_507924|Original|hCoV-19^^Michigan|Human|Michigan Department of Health and Human Services|Michigan Department of Health and Human Services|Blankenship|USA

>Spike|hCoV-19/Northern Ireland/NIRE-23358B/2020|2020-09-09|EPI\_ISL\_680300|Original|hCoV-19^^Northern Ireland|Human|Regional Virus Laboratory|COVID-19 Genomics UK (COG-UK) Consortium|Fairley|United Kingdom

>Spike|hCoV-19/Australia/VIC1849/2020|2020-03-24|EPI\_ISL\_480560|Original|hCoV-19^^Victoria|Human|Microbiological Diagnostic Unit - Public Health Laboratory (MDU-PHL) |MDU-PHL|Schultz|Australia

>Spike|hCoV-19/USA/AZ-TG351918/2020|2020-05-24|EPI\_ISL\_694405|Original|hCoV-19^^Arizona|Human|AZ SPHL|TGen North|French|USA

>Spike|hCoV-19/Canada/ON\_MU-S401/2020|2020-03-30|EPI\_ISL\_463985|Original|hCoV-19^^Ontario|Human|Toronto Invasive Bacterial Diseases Network|McMaster University|McArthur|Canada

>Spike|hCoV-19/England/ALDP-4A7D88/2020|2020-06-11|EPI\_ISL\_559645|Original|hCoV-19^^England|Human|Lighthouse Lab in Alderley Park|Wellcome Sanger Institute for the COVID-19 Genomics UK (COG-UK) consortium|Davies|United Kingdom

>Spike|hCoV-19/England/MILK-ACF7C2/2020|2020-10-22|EPI\_ISL\_629461|Original|hCoV-19^^England|Human|Lighthouse Lab in Milton Keynes|Wellcome Sanger Institute for the COVID-19 Genomics UK (COG-UK) consortium|Davies|United Kingdom

>Spike|hCoV-19/England/ALDP-932734/2020|2020-06-20|EPI\_ISL\_551362|Original|hCoV-19^^England|Human|Lighthouse Lab in Alderley Park|Wellcome Sanger Institute for the COVID-19 Genomics UK (COG-UK) consortium|Davies|United Kingdom

>Spike|hCoV-19/SaudiArabia/KAUST-JEDDAH1007/2020|2020-06-17|EPI\_ISL\_512878|Original|hCoV-19^^Jeddah|Human|Pathogen Genomics Lab King Abdullah University of Science and Technology(KAUST)|Pathogen Genomics Lab King Abdullah University of Science and Technology(KAUST)|Mohamed Ghazzali|Saudi Arabia

>Spike|hCoV-19/Senegal/6430/2020|2020-04-11|EPI\_ISL\_486872|Original|hCoV-19^^Dakar|Human|Institut Pasteur Dakar|Institut Pasteur de Dakar|Dia|Senegal

>Spike|hCoV-19/USA/FL-BPHL-1356/2020|2020-07-17|EPI\_ISL\_541293|Original|hCoV-19^^Florida|Human|Florida Bureau of Public Health Laboratories|Florida Bureau of Public Health Laboratories|Blanton|USA

>Spike|hCoV-19/England/201160010/2020|2020-03-11|EPI\_ISL\_464776|Original|hCoV-19^^England|Human|Respiratory Virus Unit|Respiratory Virus Unit|Platt|United Kingdom

>Spike|hCoV-19/USA/AZ-TG664248/2020|2020-04-28|EPI\_ISL\_696051|Original|hCoV-19^^Arizona|Human|Sonora Quest Laboratories|TGen North|French|USA

>Spike|hCoV-19/USA/WI-UW-1269/2020|2020-08-25|EPI\_ISL\_536641|Original|hCoV-19^^Wisconsin|Human|University of Wisconsin-Madison AIDS Vaccine Research Laboratories|University of Wisconsin-Madison AIDS Vaccine Research Laboratories|Baczenas|USA

>Spike|hCoV-19/USA/WI-UW-548/2020|2020-06-22|EPI\_ISL\_484923|Original|hCoV-19^^Wisconsin|Human|University of Wisconsin-Madison AIDS Vaccine Research Laboratories|University of Wisconsin-Madison AIDS Vaccine Research Laboratories|Baczenas|USA

>Spike|hCoV-19/USA/TX-DSHS-1677/2020|2020-06-24|EPI\_ISL\_710046|Original|hCoV-19^^Texas|Human|Texas Department of State Health Services|Texas Department of State Health Services|Rahman|USA

>Spike|hCoV-19/Denmark/DCGC-10970/2020|2020-11-02|EPI\_ISL\_670316|Original|hCoV-19^^Syddanmark|Human|Department of Virus and Microbiological Special Diagnostics|Albertsen Lab|Michaelsen|Denmark

>Spike|hCoV-19/USA/LA-EVTL1436/2020|2020-12-15|EPI\_ISL\_779102|Original|hCoV-19^^Louisiana|Human|LSUHS Emerging Viral Threat Laboratory|Microbial Genome Sequencing Center|Kamil|USA

>Spike|hCoV-19/USA/CA-CZB-3766/2020|2020-06-28|EPI\_ISL\_548455|Original|hCoV-19^^California|Human|Ventura County Public Health Lab|Chan-Zuckerberg Biohub|Bhatt|USA

>Spike|hCoV-19/Australia/VIC7260/2020|2020-07-23|EPI\_ISL\_564319|Original|hCoV-19^^Victoria|Human|Victorian Infectious Diseases Reference Laboratory (VIDRL)|VIDRL and MDU-PHL|Schultz|Australia

>Spike|hCoV-19/England/QEUA-9614EA/2020|2020-08-03|EPI\_ISL\_537018|Original|hCoV-19^^England|Human|Lighthouse Lab in Glasgow|Wellcome Sanger Institute for the COVID-19 Genomics UK (COG-UK) consortium|Davies|United Kingdom

>Spike|hCoV-19/England/MILK-629C52/2020|2020-07-05|EPI\_ISL\_557828|Original|hCoV-19^^England|Human|Lighthouse Lab in Milton Keynes|Wellcome Sanger Institute for the COVID-19 Genomics UK (COG-UK) consortium|Davies|United Kingdom

>Spike|hCoV-19/SaudiArabia/KAUST-MADINAH857/2020|2020-05-26|EPI\_ISL\_513193|Original|hCoV-19^^Madinah|Human|Pathogen Genomics Lab King Abdullah University of Science and Technology(KAUST)|Pathogen Genomics Lab King Abdullah University of Science and Technology(KAUST)|Mohamed Ghazzali|Saudi Arabia

>Spike|hCoV-19/England/ALDP-9E974B/2020|2020-09-24|EPI\_ISL\_584243|Original|hCoV-19^^England|Human|Virology Department|COVID-19 Genomics UK (COG-UK) Consortium|de Silva|United Kingdom

>Spike|hCoV-19/England/QEUA-9B929E/2020|2020-09-05|EPI\_ISL\_549806|Original|hCoV-19^^England|Human|Lighthouse Lab in Glasgow|Wellcome Sanger Institute for the COVID-19 Genomics UK (COG-UK) consortium|Davies|United Kingdom



>Spike|hCoV-19/England/ALDP-9E57D6/2020|2020-09-24|EPI\_ISL\_589429|Original|hCoV-19^^England|Human|Lighthouse Lab in Alderley Park|Wellcome Sanger Institute for the COVID-19 Genomics UK (COG-UK) consortium|Davies|United Kingdom

>Spike|hCoV-19/USA/TX-HMH-4318/2020|2020-06-18|EPI\_ISL\_543527|Original|hCoV-19^^Texas|Human|Houston Methodist Hospital|Houston Methodist Hospital|Long|USA

>Spike|hCoV-19/Scotland/CVR2964/2020|2020-04-22|EPI\_ISL\_478051|Original|hCoV-19^^Scotland|Human|West of Scotland Specialist Virology Centre|COVID-19 Genomics UK (COG-UK) Consortium|Robertson|United Kingdom

>Spike|hCoV-19/Japan/PG-3300/2020|2020-04-00|EPI\_ISL\_691415|Original|hCoV-19^^Japan|Human|Pathogen Genomics Center|Pathogen Genomics Center|Sekizuka|Japan

>Spike|hCoV-19/USA/TX-HMH-MCoV-19800/2020|2020-11-26|EPI\_ISL\_783562|Original|hCoV-19^^Texas|Human|Houston Methodist Hospital|Houston Methodist Hospital|Long|USA

>Spike|hCoV-19/Wales/PHWC-4A60AE/2020|2020-12-16|EPI\_ISL\_764996|Original|hCoV-19^^Wales|Human|Wales Specialist Virology Centre Sequencing lab|COVID-19 Genomics UK (COG-UK) Consortium|Moore|United Kingdom

>Spike|hCoV-19/USA/TX-HMH-MCoV-9454/2020|2020-07-03|EPI\_ISL\_780561|Original|hCoV-19^^Texas|Human|Houston Methodist Hospital|Houston Methodist Hospital|Long|USA

>Spike|hCoV-19/England/QEUEH-AD2902/2020|2020-10-25|EPI\_ISL\_634214|Original|hCoV-19^^England|Human|Lighthouse Lab in Glasgow|Wellcome Sanger Institute for the COVID-19 Genomics UK (COG-UK) consortium|Davies|United Kingdom

>Spike|hCoV-19/England/NOTT-11CFF4/2020|2020-11-20|EPI\_ISL\_665913|Original|hCoV-19^^England|Human|Queens Medical Centre|COVID-19 Genomics UK (COG-UK) Consortium|Loose|United Kingdom

>Spike|hCoV-19/England/NORT-29ADC6/2020|2020-05-25|EPI\_ISL\_492493|Original|hCoV-19^^England|Human|NU-OMICS DNA Sequencing research facility|Wellcome Sanger Institute for the COVID-19 Genomics UK (COG-UK) consortium|Davies|United Kingdom

>Spike|hCoV-19/USA/TX-HMH-7860/2020|2020-06-30|EPI\_ISL\_545669|Original|hCoV-19^^Texas|Human|Houston Methodist Hospital|Houston Methodist Hospital|Long|USA

>Spike|hCoV-19/USA/FL-BPHL-0775/2020|2020-06-29|EPI\_ISL\_512579|Original|hCoV-19^^Florida|Human|Florida Bureau of Public Health Laboratories|Florida Bureau of Public Health Laboratories|Blanton|USA

>Spike|hCoV-19/Scotland/QEUEH-9F6471/2020|2020-09-25|EPI\_ISL\_600864|Original|hCoV-19^^Scotland|Human|Lighthouse Lab in Glasgow|Wellcome Sanger Institute for the COVID-19 Genomics UK (COG-UK) consortium|Davies|United Kingdom

>Spike|hCoV-19/England/202521344/2020|2020-06-13|EPI\_ISL\_566046|Original|hCoV-19^^England|Human|Respiratory Virus Unit|Respiratory Virus Unit|Platt|United Kingdom

>Spike|hCoV-19/USA/MI-QDX-560/2020|2020-03-17|EPI\_ISL\_571316|Original|hCoV-19^^Michigan|Human|Quest Diagnostics|Quest Diagnostics|Kagan|USA

>Spike|hCoV-19/USA/WA-UW-862/2020|2020-03-14|EPI\_ISL\_476937|Original|hCoV-19^^Washington|Human|UW Virology Lab|UW Virology Lab|Roychoudhury|USA

>Spike|hCoV-19/England/ALDP-9CB105/2020|2020-09-16|EPI\_ISL\_575602|Original|hCoV-19^^England|Human|Lighthouse Lab in Alderley Park|Wellcome Sanger Institute for the COVID-19 Genomics UK (COG-UK) consortium|Davies|United Kingdom

>Spike|hCoV-19/Denmark/DCGC-21667/2020|2020-12-21|EPI\_ISL\_758297|Original|hCoV-19^^Hovedstaden|Human|Department of Virus and Microbiological Special Diagnostics|Albertsen Lab|Michaelsen|Denmark

>Spike|hCoV-19/England/CAMC-B07280/2020|2020-10-29|EPI\_ISL\_643974|Original|hCoV-19^^England|Human|Lighthouse Lab in Cambridge|Wellcome Sanger Institute for the COVID-19 Genomics UK (COG-UK) Consortium|Davies|United Kingdom

>Spike|hCoV-19/England/CAMC-990F78/2020|2020-08-28|EPI\_ISL\_551886|Original|hCoV-19^^England|Human|Lighthouse Lab in Cambridge|Wellcome Sanger Institute for the COVID-19 Genomics UK (COG-UK) consortium|Davies|United Kingdom

>Spike|hCoV-19/USA/WA-S1554/2020|2020-05-26|EPI\_ISL\_495980|Original|hCoV-19^^Washington|Human|Washington State Department of Health|Seattle Flu Study|Lee|USA

>Spike|hCoV-19/Iceland/516/2020|2020-03-24|EPI\_ISL\_424538|Original|hCoV-19^^Reykjavik|Human|deCODE genetics|deCODE genetics|J\u00f3nsson|Iceland

>Spike|hCoV-19/Morocco/6895/2020|2020-03-20|EPI\_ISL\_459973|Original|hCoV-19^^Morocco|Human|Institut Pasteur du Maroc|Institut Pasteur du Maroc|Enouf|Morocco

>Spike|hCoV-19/USA/MI-MDHHS-SC22679/2020|2020-11-26|EPI\_ISL\_737293|Original|hCoV-19^^Michigan|Human|Michigan Department of Health and Human Services|Michigan Department of Health and Human Services|Blankenship|USA

>Spike|hCoV-19/Australia/VIC6890/2020|2020-07-11|EPI\_ISL\_564117|Original|hCoV-19^^Victoria|Human|Microbiological Diagnostic Unit - Public Health Laboratory (MDU-PHL)|MDU-PHL|Schultz|Australia

>Spike|hCoV-19/USA/TX-HMH-2760/2020|2020-06-04|EPI\_ISL\_545534|Original|hCoV-19^^Texas|Human|Houston Methodist Hospital|Houston Methodist Hospital|Long|USA

>Spike|hCoV-19/England/QEUEH-C940E7/2020|2020-12-18|EPI\_ISL\_777436|Original|hCoV-19^^England|Human|Lighthouse Lab in Glasgow|Wellcome Sanger Institute for the COVID-19 Genomics UK (COG-UK) Consortium|Davies|United Kingdom

>Spike|hCoV-19/England/MILK-A8EEF7/2020|2020-10-16|EPI\_ISL\_650968|Original|hCoV-19^^England|Human|Northumbria University / South Tees Hospitals NHS Foundation Trust / North Cumbria Integrated Care NHS Foundation Trust / North Tees and Hartlepool NHS Foundation Trust / Newcastle Hospitals NHS Foundation Trust|COVID-19 Genomics UK (COG-UK) Consortium|Bashton|United Kingdom

>Spike|hCoV-19/USA/TX-HMH019/2020|2020-03-17|EPI\_ISL\_434729|Original|hCoV-19^^Texas|Human|Houston Methodist Hospital|Houston Methodist Hospital|Long|USA

>Spike|hCoV-19/England/SHEF-10B234D/2020|2020-04-13|EPI\_ISL\_469918|Original|hCoV-19^^England|Human|Virology Department|Wellcome Sanger Institute for the COVID-19 Genomics UK (COG-UK) consortium|Davies|United Kingdom

>Spike|hCoV-19/England/CAMB-1BBA9C/2020|2020-11-13|EPI\_ISL\_679186|Original|hCoV-19^^England|Human|Department of Pathology|COVID-19 Genomics UK (COG-UK) Consortium|Goodfellow|United Kingdom

>Spike|hCoV-19/England/20139021304/2020|2020-03-26|EPI\_ISL\_421881|Original|hCoV-19^^England|Human|Respiratory Virus Unit|Respiratory Virus Unit|Platt|United Kingdom

>Spike|hCoV-19/England/MILK-A44F90/2020|2020-10-06|EPI\_ISL\_598571|Original|hCoV-19^^England|Human|Lighthouse Lab in Milton Keynes|Wellcome Sanger Institute for the COVID-19 Genomics UK (COG-UK) consortium|Davies|United Kingdom

>Spike|hCoV-19/Scotland/EDB2767/2020|2020-03-29|EPI\_ISL\_488905|Original|hCoV-19^^Scotland|Human|Virology Department|Wellcome Sanger Institute for the COVID-19 Genomics UK (COG-UK) consortium|Davies|United Kingdom

>Spike|hCoV-19/Australia/VIC5817/2020|2020-07-20|EPI\_ISL\_518611|Original|hCoV-19^^Victoria|Human|Microbiological Diagnostic Unit - Public Health Laboratory (MDU-PHL)|MDU-PHL|Schultz|Australia

>Spike|hCoV-19/England/QEUEH-C14A0F/2020|2020-12-06|EPI\_ISL\_709439|Original|hCoV-19^^England|Human|Lighthouse Lab in Glasgow|Wellcome Sanger Institute for the COVID-19 Genomics UK (COG-UK) Consortium|Davies|United Kingdom

>Spike|hCoV-19/England/LIVE-A8680/2020|2020-03-26|EPI\_ISL\_517197|Original|hCoV-19^^England|Human|Liverpool Clinical Laboratories|COVID-19 Genomics UK (COG-UK) Consortium|Haldenby|United Kingdom

>Spike|hCoV-19/England/BRIS-132F61/2020|2020-06-20|EPI\_ISL\_511980|Original|hCoV-19^^England|Human|PHE South West Regional Laboratory|Wellcome Sanger Institute for the COVID-19 Genomics UK (COG-UK) consortium|Davies|United Kingdom

>Spike|hCoV-19/Israel/CVL-57-ngs/2020|2020-12-24|EPI\_ISL\_776571|Original|hCoV-19^^Israel|Human|Israel Central Virology laboratory|Israel Central Virology laboratory|Zuckerman|Israel

>Spike|hCoV-19/India/MH-NCCS-NR-7614/2020|2020-06-26|EPI\_ISL\_721661|Original|hCoV-19^^Maharashtra|Human|National Centre For Cell Science|National Centre For Cell Science|Paul|India

>Spike|hCoV-19/England/ALDP-9CABF9/2020|2020-09-16|EPI\_ISL\_575744|Original|hCoV-19^^England|Human|Lighthouse Lab in Alderley Park|Wellcome Sanger Institute for the COVID-19 Genomics UK (COG-UK) consortium|Davies|United Kingdom

>Spike|hCoV-19/USA/TX-HMH-5804/2020|2020-06-27|EPI\_ISL\_547026|Original|hCoV-19^^Texas|Human|Houston Methodist Hospital|Houston Methodist Hospital|Long|USA

>Spike|hCoV-19/USA/WI-WSLH-200315/2020|2020-04-20|EPI\_ISL\_578496|Original|hCoV-19^^Wisconsin|Human|Wisconsin State Laboratory of Hygiene Communicable Disease Division|Wisconsin State Laboratory of Hygiene Communicable Disease Division|Florek|USA

>Spike|hCoV-19/Denmark/DCGC-1941/2020|2020-03-30|EPI\_ISL\_622506|Original|hCoV-19^^Hovedstaden|Human|Department of Virus and Microbiological Special Diagnostics|Albertsen lab|Michaelsen|Denmark

>Spike|hCoV-19/Russia/SPE-RII-16011V/2020|2020-05-19|EPI\_ISL\_524011|Vero P1|hCoV-19^^Saint Petersburg|Human|WHO National Influenza Centre Russian Federation|WHO National Influenza Centre Russian Federation|Komissarov|Russia

>Spike|hCoV-19/USA/TX-HMH-2682/2020|2020-06-05|EPI\_ISL\_545472|Original|hCoV-19^^Texas|Human|Houston Methodist Hospital|Houston Methodist Hospital|Long|USA

>Spike|hCoV-19/Australia/VIC5235/2020|2020-07-17|EPI\_ISL\_520000|Original|hCoV-19^^Victoria|Human|Microbiological Diagnostic Unit - Public Health Laboratory (MDU-PHL)|MDU-PHL|Schultz|Australia

>Spike|hCoV-19/England/SHEF-C6F27/2020|2020-04-29|EPI\_ISL\_475396|Original|hCoV-19^^England|Human|Virology Department|COVID-19 Genomics UK (COG-UK) Consortium|de Silva|United Kingdom

>Spike|hCoV-19/United Arab Emirates/skmc-004/2020|2020-02-21|EPI\_ISL\_582613|Original|hCoV-19^^United Arab Emirates|Human|Sheikh Khalifa Medical City|Molecular/Surveillance lab\nSheikh Khalifa Medical City|Amirtharaj|United Arab Emirates

>Spike|hCoV-19/USA/AR-QDX-679/2020|2020-03-18|EPI\_ISL\_571408|Original|hCoV-19^^Arkansas|Human|Quest Diagnostics|Quest Diagnostics|Kagan|USA

>Spike|hCoV-19/USA/CO-CSU-D1657-3/2020|2020-04-15|EPI\_ISL\_527444|Original|hCoV-19^^Colorado|Human|Colorado State University - Ebel Lab|Colorado State University - Ebel Lab|Cline|USA

>Spike|hCoV-19/Denmark/DCGC-18049/2020|2020-12-14|EPI\_ISL\_749724|Original|hCoV-19^^Midtjylland|Human|Department of Virus and Microbiological Special Diagnostics|Albertsen Lab|Michaelsen|Denmark

>Spike|hCoV-19/Sweden/20-08081/2020|2020-03-05|EPI\_ISL\_454455|Original|hCoV-19^^Stockholm|Human|Karolinska Universitetslaboratoriet|The Public Health Agency of Sweden|Svartstr\u00f6m|Sweden

>Spike|hCoV-19/England/QEUEH-B7E4F7/2020|2020-11-14|EPI\_ISL\_667904|Original|hCoV-19^^England|Human|Lighthouse Lab in Glasgow|Wellcome Sanger Institute for the COVID-19 Genomics UK (COG-UK) Consortium|Davies|United Kingdom

>Spike|hCoV-19/USA/MA-MASPHL-00176/2020|2020-04-03|EPI\_ISL\_791637|Original|hCoV-19^^Massachusetts|Human|Massachusetts State Public Health Laboratory|Infectious Disease Program|Park|USA

>Spike|hCoV-19/Switzerland/VD-ETHZ-310505/2020|2020-10-08|EPI\_ISL\_603573|Original|hCoV-19^^Vaud|Human|Viollier AG|Department of Biosystems Science and Engineering|Nadeau|Switzerland

>Spike|hCoV-19/England/CAMC-C448C0/2020|2020-12-10|EPI\_ISL\_719426|Original|hCoV-19^^England|Human|Lighthouse Lab in Cambridge|Wellcome Sanger Institute for the COVID-19 Genomics UK (COG-UK) Consortium|Davies|United Kingdom

>Spike|hCoV-19/England/BIRM-5F837/2020|2020-05-13|EPI\_ISL\_473338|Original|hCoV-19^^England|Human|University of Birmingham|COVID-19 Genomics UK (COG-UK) Consortium|Loman|United Kingdom

>Spike|hCoV-19/Wales/PHWC-481F33/2020|2020-10-16|EPI\_ISL\_613187|Original|hCoV-19^^Wales|Human|Wales Specialist Virology Centre Sequencing lab|COVID-19 Genomics UK (COG-UK) Consortium|Moore|United Kingdom

>Spike|hCoV-19/USA/WI-UW-2668/2020|2020-12-31|EPI\_ISL\_791181|Original|hCoV-19^^Wisconsin|Human|University of Wisconsin-Madison AIDS Vaccine Research Laboratories|University of Wisconsin-Madison AIDS Vaccine Research Laboratories|Moreno|USA

>Spike|hCoV-19/Scotland/CVR3315/2020|2020-05-05|EPI\_ISL\_493868|Original|hCoV-19^^Scotland|Human|West of Scotland Specialist Virology Centre|COVID-19 Genomics UK (COG-UK) Consortium|Robertson|United Kingdom

>Spike|hCoV-19/Australia/SAP217/2020|2020-03-03|EPI\_ISL\_483073|Original|hCoV-19^^South Australia|Human|SA Pathology|SA Pathology|Leong|Australia

>Spike|hCoV-19/England/ALDP-B242F6/2020|2020-11-04|EPI\_ISL\_647027|Original|hCoV-19^^England|Human|Lighthouse Lab in Alderley Park|Wellcome Sanger Institute for the COVID-19 Genomics UK (COG-UK) Consortium|Davies|United Kingdom

>Spike|hCoV-19/Japan/PG-7159/2020|2020-09-00|EPI\_ISL\_688264|Original|hCoV-19^^Japan|Human|Pathogen Genomics Center|Pathogen Genomics Center|Sekizuka|Japan

>Spike|hCoV-19/USA/WA-S190/2020|2020-03-23|EPI\_ISL\_430228|Original|hCoV-19^^Washington|Human|Washington State Department of Health|Seattle Flu Study|Bedford|USA

>Spike|hCoV-19/England/MILK-B969AF/2020|2020-11-13|EPI\_ISL\_676310|Original|hCoV-19^^England|Human|Lighthouse Lab in Milton Keynes|Wellcome Sanger Institute for the COVID-19 Genomics UK (COG-UK) Consortium|Davies|United Kingdom

>Spike|hCoV-19/Japan/PG-7379/2020|2020-07-00|EPI\_ISL\_688481|Original|hCoV-19^^Japan|Human|Pathogen Genomics Center|Pathogen Genomics Center|Sekizuka|Japan

>Spike|hCoV-19/Belgium/UGent-220/2020|2020-10-19|EPI\_ISL\_717619|Original|hCoV-19^^Ghent|Human|Lab voor klinische biologie|Onderzoeksgroep Virologie|Lambrechts|Belgium

>Spike|hCoV-19/England/SHEF-C9470/2020|2020-05-27|EPI\_ISL\_475420|Original|hCoV-19^^England|Human|Virology Department|COVID-19 Genomics UK (COG-UK) Consortium|de Silva|United Kingdom

>Spike|hCoV-19/USA/CA-ALSR-0839-IPL/2020|2020-04-21|EPI\_ISL\_483393|Original|hCoV-19^^California|Human|UC San Diego Center for Advanced Laboratory Medicine|Andersen lab at Scripps Research|Gangavarapu|USA

>Spike|hCoV-19/England/210100383/2021|2021-01-04|EPI\_ISL\_791261|Original|hCoV-19^^England|Human|Respiratory Virus Unit|COVID-19 Genomics UK (COG-UK) Consortium|Platt|United Kingdom

>Spike|hCoV-19/England/MILK-BEE36E/2020|2020-11-30|EPI\_ISL\_708984|Original|hCoV-19^^England|Human|Lighthouse Lab in Milton Keynes|Wellcome Sanger Institute for the COVID-19 Genomics UK (COG-UK) Consortium|Davies|United Kingdom

>Spike|hCoV-19/Japan/PG-7079/2020|2020-08-00|EPI\_ISL\_688184|Original|hCoV-19^^Japan|Human|Pathogen Genomics Center|Pathogen Genomics Center|Sekizuka|Japan

>Spike|hCoV-19/USA/CA-LACPHL-AB00001/2020|2020-09-29|EPI\_ISL\_694046|Original|hCoV-19^^California|Human|Los Angeles County Public Health Laboratory|Los Angeles County Public Health Laboratory|Hemarajata|USA

>Spike|hCoV-19/England/ALDP-A6D41A/2020|2020-10-15|EPI\_ISL\_608104|Original|hCoV-19^^England|Human|Lighthouse Lab in Alderley Park|Wellcome Sanger Institute for the COVID-19 Genomics UK (COG-UK) consortium|Davies|United Kingdom

>Spike|hCoV-19/France/PAC-IHU-0397/2020|2020-03-29|EPI\_ISL\_569488|Original|hCoV-19^^Provence-Alpes-C\u00f4te-d\u2019Azur|Human|MEPHI|MEPHI|Levasseur|France

>Spike|hCoV-19/USA/TX-HMH-6687/2020|2020-06-24|EPI\_ISL\_546174|Original|hCoV-19^^Texas|Human|Houston Methodist Hospital|Houston Methodist Hospital|Long|USA

>Spike|hCoV-19/Spain/MD-IBV-006423/2020|2020-04-11|EPI\_ISL\_510138|Original|hCoV-19^^Madrid|Human|Hospital General Universitario Gregorio Mara\u00f1a|SeqCOVID-SPAIN consortium|IBV (CSIC)|Comas|Spain

>Spike|hCoV-19/Denmark/DCGC-1314/2020|2020-06-08|EPI\_ISL\_618048|Original|hCoV-19^^Syddanmark|Human|Department of Virus and Microbiological Special Diagnostics|Albertsen lab|Michaelsen|Denmark

>Spike|hCoV-19/USA/LA-EVTL321/2020|2020-05-18|EPI\_ISL\_578698|Original|hCoV-19^^Louisiana|Human|LSUHS Emerging Viral Threat Laboratory|Microbial Genome Sequencing Center|Kamil|USA

>Spike|hCoV-19/USA/TX-HMH-MCoV-19708/2020|2020-11-18|EPI\_ISL\_784060|Original|hCoV-19^^Texas|Human|Houston Methodist Hospital|Houston Methodist Hospital|Long|USA

>Spike|hCoV-19/England/NORW-ECBEB/2020|2020-06-03|EPI\_ISL\_472339|Original|hCoV-19^^England|Human|Quadram Institute Bioscience|COVID-19 Genomics UK (COG-UK) Consortium|Alikhan|United Kingdom

>Spike|hCoV-19/Spain/PV-IBV-004194/2020|2020-04-02|EPI\_ISL\_510480|Original|hCoV-19^^Basque Country|Human|Servicio de Microbiolog\u00eda. Hospital Universitario Donostia. OSI Donostialdea. \u00c1rea de Enfermedades Infecciosas|SeqCOVID-SPAIN consortium|IBV (CSIC)|Comas|Spain

>Spike|hCoV-19/Denmark/DCGC-3489/2020|2020-08-31|EPI\_ISL\_616277|Original|hCoV-19^^Hovedstaden|Human|Department of Virus and Microbiological Special Diagnostics|Albertsen lab|Michaelsen|Denmark

>Spike|hCoV-19/Iceland/36/2020|2020-03-04|EPI\_ISL\_417844|Original|hCoV-19^^Reykjavik|Human|The National University Hospital of Iceland|deCODE genetics|J\u00f3nsson|Iceland

>Spike|hCoV-19/England/QEUH-B66638/2020|2020-11-11|EPI\_ISL\_661618|Original|hCoV-19^^England|Human|Lighthouse Lab in Glasgow|Wellcome Sanger Institute for the COVID-19 Genomics UK (COG-UK) Consortium|Davies|United Kingdom

>Spike|hCoV-19/England/CAMB-761D5/2020|2020-03-30|EPI\_ISL\_438452|Original|hCoV-19^^England|Human|Department of Pathology|Wellcome Sanger Institute for the COVID-19 Genomics UK (COG-UK) consortium|Amato|United Kingdom

>Spike|hCoV-19/Portugal/PT0880/2020|2020-04-24|EPI\_ISL\_511139|Original|hCoV-19^^Portugal|Human|Instituto Nacional de Saude (INSA)|Instituto Nacional de Saude (INSA)|Borges|Portugal

>Spike|hCoV-19/USA/HI-H200467/2020|2020-10-09|EPI\_ISL\_753010|Original|hCoV-19^^Hawaii|Human|State Laboratories Division|State Laboratories Division|Sultana|USA

>Spike|hCoV-19/Switzerland/AG-ETHZ-380337/2020|2020-11-26|EPI\_ISL\_721732|Original|hCoV-19^^Aargau|Human|Viollier AG|Department of Biosystems Science and Engineering|Nadeau|Switzerland

>Spike|hCoV-19/England/OXON-AEF8F/2020|2020-04-08|EPI\_ISL\_448799|Original|hCoV-19^^England|Human|Oxford Viromics|COVID-19 Genomics UK (COG-UK) Consortium|Golubchik|United Kingdom

>Spike|hCoV-19/Australia/VIC5967/2020|2020-00-00|EPI\_ISL\_518742|Original|hCoV-19^^Victoria|Human|Microbiological Diagnostic Unit - Public Health Laboratory (MDU-PHL)|MDU-PHL|Schultz|Australia

>Spike|hCoV-19/Taiwan/170/2020|2020-03-21|EPI\_ISL\_420084|Original|hCoV-19^^Taiwan|Human|Centers for Disease Control|Centers for Disease Control|Yang|Taiwan

>Spike|hCoV-19/USA/NM-DOH-2020327831/2020|2020-09-03|EPI\_ISL\_575312|Original|hCoV-19^^New Mexico|Human|Molecular Biology|Molecular Biology|Johnson|USA

>Spike|hCoV-19/Luxembourg/LNS3537918/2020|2020-11-30|EPI\_ISL\_770930|Original|hCoV-19^^Luxembourg|Human|Laboratoire national de sant\u00e9|Laboratoire national de sant\u00e9|Wienecke-Baldacchino|Luxembourg

>Spike|hCoV-19/Thailand/Bangkok-0079/2020|2020-04-01|EPI\_ISL\_447020|Original|hCoV-19^^Bangkok|Human|Ramathibodi Hospital|COVID-19 Network Investigations (CONI) Alliance|Batty|Thailand

>Spike|hCoV-19/USA/UT-01560/2020|2020-04-07|EPI\_ISL\_449815|Original|hCoV-19^^Utah|Human|Utah Public Health Laboratory|Utah Public Health Laboratory|Young|USA

>Spike|hCoV-19/USA/UT-02512/2020|2020-04-23|EPI\_ISL\_493100|Original|hCoV-19^^Utah|Human|Utah Public Health Laboratory|Utah Public Health Laboratory|Butz|USA

>Spike|hCoV-19/USA/HI-H200113/2020|2020-06-24|EPI\_ISL\_752676|Original|hCoV-19^^Hawaii|Human|State Laboratories Division|State Laboratories Division|Sultana|USA

>Spike|hCoV-19/Japan/PG-7001/2020|2020-09-00|EPI\_ISL\_688106|Original|hCoV-19^^Japan|Human|Pathogen Genomics Center|Pathogen Genomics Center|Sekizuka|Japan

>Spike|hCoV-19/England/QEUH-AAE565/2020|2020-10-22|EPI\_ISL\_623884|Original|hCoV-19^^England|Human|Lighthouse Lab in Glasgow|Wellcome Sanger Institute for the COVID-19 Genomics UK (COG-UK) consortium|Davies|United Kingdom

>Spike|hCoV-19/England/NORT-282B21/2020|2020-03-28|EPI\_ISL\_488486|Original|hCoV-19^^England|Human|NU-OMICS DNA Sequencing research facility|Wellcome Sanger Institute for the COVID-19 Genomics UK (COG-UK) consortium|Davies|United Kingdom

>Spike|hCoV-19/Estonia/ChVir4298/2020|2020-03-00|EPI\_ISL\_457734|Original|hCoV-19^^Estonia|Human|SYNLAB Eesti OU\u00308|Charite Universit\u00e4tsmedizin Berlin|Muehlemann|Estonia

>Spike|hCoV-19/England/CAMC-B782C6/2020|2020-11-12|EPI\_ISL\_661928|Original|hCoV-19^^England|Human|Lighthouse Lab in Cambridge|Wellcome Sanger Institute for the COVID-19 Genomics UK (COG-UK) Consortium|Davies|United Kingdom

>Spike|hCoV-19/Brazil/RS-6177/2020|2020-05-06|EPI\_ISL\_729820|Original|hCoV-19^^Rio Grande do Sul|Human|Laboratorio Central de Saude P\u00fablica do Estado do Rio Grande do Sul (LACEN-RS)|Laboratory of Respiratory Viruses and Measles|Silva|Brazil

>Spike|hCoV-19/England/CAMB-84F9E/2020|2020-03-13|EPI\_ISL\_440464|Original|hCoV-19^^England|Human|Department of Pathology|Wellcome Sanger Institute for the COVID-19 Genomics UK (COG-UK) consortium|Amato|United Kingdom

>Spike|hCoV-19/Wales/PHWC-48B634/2020|2020-11-04|EPI\_ISL\_666263|Original|hCoV-19^^Wales|Human|Wales Specialist Virology Centre Sequencing lab|COVID-19 Genomics UK (COG-UK) Consortium|Moore|United Kingdom

>Spike|hCoV-19/England/CAMC-C45373/2020|2020-12-10|EPI\_ISL\_718418|Original|hCoV-19^^England|Human|Lighthouse Lab in Cambridge|Wellcome Sanger Institute for the COVID-19 Genomics UK (COG-UK) Consortium|Davies|United Kingdom

>Spike|hCoV-19/USA/WA-UW-11193/2020|2020-06-17|EPI\_ISL\_570380|Original|hCoV-19^^Washington|Human|UW Virology Lab|UW Virology Lab|Roychoudhury|USA

>Spike|hCoV-19/Denmark/DCGC-2894/2020|2020-08-17|EPI\_ISL\_616410|Original|hCoV-19^^Syddanmark|Human|Department of Virus and Microbiological Special Diagnostics|Albertsen lab|Michaelsen|Denmark

>Spike|hCoV-19/Wales/PHWC-29CFE/2020|2020-04-02|EPI\_ISL\_474246|Original|hCoV-19^^Wales|Human|Originating lab|COVID-19 Genomics UK (COG-UK) Consortium|Moore|United Kingdom

>Spike|hCoV-19/India/WB-S44/2020|2020-05-01|EPI\_ISL\_455665|Original|hCoV-19^^West Bengal|Human|ICMR-National Institute of Cholera and Enteric Diseases|National Institute of Biomedical Genomics|Maitra|India

>Spike|hCoV-19/Denmark/DCGC-19801/2020|2020-12-07|EPI\_ISL\_747797|Original|hCoV-19^^Hovedstaden|Human|Department of Virus and Microbiological Special Diagnostics|Albertsen Lab|Michaelsen|Denmark

>Spike|hCoV-19/England/ALDP-5CCD22/2020|2020-06-19|EPI\_ISL\_558460|Original|hCoV-19^^England|Human|Lighthouse Lab in Alderley Park|Wellcome Sanger Institute for the COVID-19 Genomics UK (COG-UK) consortium|Davies|United Kingdom

>Spike|hCoV-19/USA/LA-EVTL639/2020|2020-08-06|EPI\_ISL\_579043|Original|hCoV-19^^Louisiana|Human|LSUHS Emerging Viral Threat Laboratory|Microbial Genome Sequencing Center|Kamil|USA

>Spike|hCoV-19/Australia/NSW332/2020|2020-04-11|EPI\_ISL\_451594|Original|hCoV-19^^New South Wales|Human|Childrens Hospital Westmead|NSW Health Pathology - Institute of Clinical Pathology and Medical Research; Westmead Hospital; University of Sydney|Gall|Australia

>Spike|hCoV-19/USA/CO-CDPHE-2100014440/2020|2020-11-20|EPI\_ISL\_771304|Original|hCoV-19^^Colorado|Human|Colorado Department of Public Health and Environment|Colorado Department of Public Health and Environment|Bankers|USA

>Spike|hCoV-19/USA/NY-Wadsworth-249773-01/2020|2020-10-20|EPI\_ISL\_754736|Original|hCoV-19^^New York|Human|Wadsworth Center|Wadsworth Center|Lasek-Nesselquist|USA

>Spike|hCoV-19/USA/NY-NYUMC611/2020|2020-04-01|EPI\_ISL\_444728|Original|hCoV-19^^New York|Human|NYU Langone Health|Departments of Pathology and Medicine|Maurano|USA

>Spike|hCoV-19/USA/LA-EVTL511/2020|2020-06-25|EPI\_ISL\_578915|Original|hCoV-19^^Louisiana|Human|LSUHS Emerging Viral Threat Laboratory|Microbial Genome Sequencing Center|Kamil|USA

>Spike|hCoV-19/Denmark/DCGC-17077/2020|2020-12-14|EPI\_ISL\_750222|Original|hCoV-19^^Hovedstaden|Human|Department of Virus and Microbiological Special Diagnostics|Albertsen Lab|Michaelsen|Denmark

>Spike|hCoV-19/Denmark/DCGC-18407/2020|2020-12-07|EPI\_ISL\_749947|Original|hCoV-19^^Hovedstaden|Human|Department of Virus and Microbiological Special Diagnostics|Albertsen Lab|Michaelsen|Denmark

>Spike|hCoV-19/Australia/VIC13374/2020|2020-08-11|EPI\_ISL\_563699|Original|hCoV-19^^Victoria|Human|Microbiological Diagnostic Unit - Public Health Laboratory (MDU-PHL)|MDU-PHL|Schultz|Australia

>Spike|hCoV-19/Denmark/ALAB-SSI-1421/2020|2020-03-26|EPI\_ISL\_437653|Original|hCoV-19^^Denmark|Human|Department of Virus and Microbiological Special Diagnostics|Albertsen lab|Kirkegaard|Denmark

>Spike|hCoV-19/USA/HI-H200564/2020|2020-10-24|EPI\_ISL\_753092|Original|hCoV-19^^Hawaii|Human|State Laboratories Division|State Laboratories Division|Sultana|USA

>Spike|hCoV-19/Japan/PG-8796/2020|2020-08-00|EPI\_ISL\_686384|Original|hCoV-19^^Japan|Human|Pathogen Genomics Center|Pathogen Genomics Center|Sekizuka|Japan

>Spike|hCoV-19/Spain/CT-HUVH-VH7458/2020|2020-04-06|EPI\_ISL\_444974|Original|hCoV-19^^Catalunya|Human|Hospital Universitari Vall d'Hebron - Vall d'Hebron Institut de Recerca|Hospital Universitari Vall d'Hebron|Anton|Spain

>Spike|hCoV-19/Australia/VIC6035/2020|2020-07-24|EPI\_ISL\_518076|Original|hCoV-19^^Victoria|Human|Microbiological Diagnostic Unit - Public Health Laboratory (MDU-PHL)|MDU-PHL|Schultz|Australia

>Spike|hCoV-19/England/ALDP-A96427/2020|2020-10-20|EPI\_ISL\_624724|Original|hCoV-19^^England|Human|Lighthouse Lab in Alderley Park|Wellcome Sanger Institute for the COVID-19 Genomics UK (COG-UK) consortium|Davies|United Kingdom

>Spike|hCoV-19/USA/NV-NSPHL-A0033/2020|2020-03-21|EPI\_ISL\_515319|Original|hCoV-19^^Nevada|Human|Nevada State Public Health Laboratory|Nevada State Public Health Laboratory|Sevinsky|USA

>Spike|hCoV-19/England/QEUA-AEFAF0/2020|2020-10-29|EPI\_ISL\_662699|Original|hCoV-19^^England|Human|Lighthouse Lab in Glasgow|Wellcome Sanger Institute for the COVID-19 Genomics UK (COG-UK) Consortium|Davies|United Kingdom

>Spike|hCoV-19/Scotland/QEUA-96310F/2020|2020-08-11|EPI\_ISL\_531477|Original|hCoV-19^^Scotland|Human|NHSGGC West of Scotland Specialist Virology Centre / MRC-University of Glasgow Centre for Virus Research|Wellcome Sanger Institute for the COVID-19 Genomics UK (COG-UK) consortium|Davies|United Kingdom

>Spike|hCoV-19/England/CAMB-82B50/2020|2020-04-22|EPI\_ISL\_438663|Original|hCoV-19^^England|Human|Department of Pathology|COVID-19 Genomics UK (COG-UK) Consortium|Meredith|United Kingdom

>Spike|hCoV-19/England/QEUA-AE4B61/2020|2020-10-26|EPI\_ISL\_633171|Original|hCoV-19^^England|Human|Lighthouse Lab in Glasgow|Wellcome Sanger Institute for the COVID-19 Genomics UK (COG-UK) consortium|Davies|United Kingdom

>Spike|hCoV-19/USA/TX-HMH-MCoV-12830/2020|2020-08-19|EPI\_ISL\_790554|Original|hCoV-19^^Texas|Human|Houston Methodist Hospital|Houston Methodist Hospital|Long|USA

>Spike|hCoV-19/England/CAMC-B0A5DF/2020|2020-10-29|EPI\_ISL\_673131|Original|hCoV-19^^England|Human|Lighthouse Lab in Cambridge|Wellcome Sanger Institute for the COVID-19 Genomics UK (COG-UK) Consortium|Davies|United Kingdom

>Spike|hCoV-19/USA/WA-UW-1603/2020|2020-03-19|EPI\_ISL\_423005|Original|hCoV-19^^Washington|Human|UW Virology Lab|UW Virology Lab|Roychoudhury|USA

>Spike|hCoV-19/USA/MI-MDHHS-SC21877/2020|2020-08-21|EPI\_ISL\_565938|Original|hCoV-19^^Michigan|Human|Michigan Department of Health and Human Services|Michigan Department of Health and Human Services|Blankenship|USA

>Spike|hCoV-19/Northern Ireland/NIRE-1083D1/2020|2020-09-09|EPI\_ISL\_585188|Original|hCoV-19^^Northern Ireland|Human|Regional Virus Laboratory|COVID-19 Genomics UK (COG-UK) Consortium|Fairley|United Kingdom

>Spike|hCoV-19/England/ALDP-C3CBD1/2020|2020-12-10|EPI\_ISL\_731712|Original|hCoV-19^^England|Human|Lighthouse Lab in Alderley Park|Wellcome Sanger Institute for the COVID-19 Genomics UK (COG-UK) Consortium|Davies|United Kingdom

>Spike|hCoV-19/USA/NY-NYCPHL-001271/2020|2020-11-09|EPI\_ISL\_683870|Original|hCoV-19^^New York|Human|DOHMH Corona|New York City Public Health Laboratory|Wang|USA

>Spike|hCoV-19/England/NOTT-11831A/2020|2020-10-26|EPI\_ISL\_627674|Original|hCoV-19^^England|Human|Queens Medical Centre|COVID-19 Genomics UK (COG-UK) Consortium|Loose|United Kingdom

>Spike|hCoV-19/England/ALDP-B85A55/2020|2020-11-14|EPI\_ISL\_675629|Original|hCoV-19^^England|Human|Lighthouse Lab in Alderley Park|Wellcome Sanger Institute for the COVID-19 Genomics UK (COG-UK) Consortium|Davies|United Kingdom

>Spike|hCoV-19/Switzerland/BL-65240238/2020|2020-04-06|EPI\_ISL\_581873|Original|hCoV-19^^Basel-Land|Human|University Hospital Basel|University Hospital Basel|Roloff Handschin|Switzerland

>Spike|hCoV-19/USA/CA-CZB-10825/2020|2020-07-13|EPI\_ISL\_583075|Original|hCoV-19^^California|Human|Humboldt County Public Health Laboratory|Chan-Zuckerberg Biohub|Bhatt|USA

>Spike|hCoV-19/USA/FL-BPHL-1636/2020|2020-09-11|EPI\_ISL\_594325|Original|hCoV-19^^Florida|Human|Florida Bureau of Public Health Laboratories|Florida Bureau of Public Health Laboratories|Blanton|USA

>Spike|hCoV-19/England/LIVE-9C133/2020|2020-03-31|EPI\_ISL\_449514|Original|hCoV-19^^England|Human|Liverpool Clinical Laboratories|COVID-19 Genomics UK (COG-UK) Consortium|Haldenby|United Kingdom

>Spike|hCoV-19/England/CAMC-BBE4CE/2020|2020-11-21|EPI\_ISL\_703575|Original|hCoV-19^^England|Human|Virology Department|COVID-19 Genomics UK (COG-UK) Consortium|de Silva|United Kingdom

>Spike|hCoV-19/England/CAMC-B32B45/2020|2020-11-05|EPI\_ISL\_659460|Original|hCoV-19^^England|Human|Lighthouse Lab in Cambridge|Wellcome Sanger Institute for the COVID-19 Genomics UK (COG-UK) Consortium|Davies|United Kingdom

>Spike|hCoV-19/Gambia/3673/2020|2020-07-30|EPI\_ISL\_560995|Original|hCoV-19^^Kombo|Human|MRCG at LSHTM Genomics lab|MRCG at LSHTM Genomics lab|Sesay|Gambia

>Spike|hCoV-19/Netherlands/ZuidHolland\_85/2020|2020-03-27|EPI\_ISL\_422953|Original|hCoV-19^^Zuid Holland|Human|Dutch COVID-19 response team|Erasmus Medical Center|Oude Munnink|Netherlands

>Spike|hCoV-19/Wales/PHWC-163161/2020|2020-05-27|EPI\_ISL\_473254|Original|hCoV-19^^Wales|Human|Wales Specialist Virology Centre Sequencing lab|COVID-19 Genomics UK (COG-UK) Consortium|Moore|United Kingdom

>Spike|hCoV-19/Japan/PG-3367/2020|2020-04-00|EPI\_ISL\_691482|Original|hCoV-19^^Japan|Human|Pathogen Genomics Center|Pathogen Genomics Center|Sekizuka|Japan

>Spike|hCoV-19/England/QEUEH-BA2FAE/2020|2020-11-18|EPI\_ISL\_672867|Original|hCoV-19^^England|Human|Lighthouse Lab in Glasgow|Wellcome Sanger Institute for the COVID-19 Genomics UK (COG-UK) Consortium|Davies|United Kingdom

>Spike|hCoV-19/Pakistan/JRCGR-KHI15/2020|2020-08-10|EPI\_ISL\_779275|Original|hCoV-19^^Karachi|Human|Jamil-ur-Rahman Center for Genome Research|Jamil-ur-Rahman Center for Genome Research|Shakeel|Pakistan

>Spike|hCoV-19/England/QEUEH-C32704/2020|2020-12-11|EPI\_ISL\_782614|Original|hCoV-19^^England|Human|Lighthouse Lab in Glasgow|Wellcome Sanger Institute for the COVID-19 Genomics UK (COG-UK) Consortium|Davies|United Kingdom

>Spike|hCoV-19/USA/UT-0366/2020|2020-03-28|EPI\_ISL\_435354|Original|hCoV-19^^Utah|Human|Utah Public Health Laboratory|Utah Public Health Laboratory|Young|USA

>Spike|hCoV-19/USA/CA-CZB-13735/2020|2020-09-09|EPI\_ISL\_739288|Original|hCoV-19^^California|Human|Alameda County Public Health Lab|Chan-Zuckerberg Biohub|Kamm|USA

>Spike|hCoV-19/Brazil/SP-0104/2020|2020-03-13|EPI\_ISL\_417928|Original|hCoV-19^^S\u00e3o Paulo|Human|Laborat\u00f3rio Hermes Pardini|Bioinformatics Laboratory - LNCC|Almeida|Brazil

>Spike|hCoV-19/Japan/PG-2325/2020|2020-03-00|EPI\_ISL\_685930|Original|hCoV-19^^Japan|Human|Pathogen Genomics Center|Pathogen Genomics Center|Sekizuka|Japan

>Spike|hCoV-19/England/PORT-2D1534/2020|2020-04-01|EPI\_ISL\_512400|Original|hCoV-19^^England|Human|Centre for Enzyme Innovation|COVID-19 Genomics UK (COG-UK) Consortium|Robson|United Kingdom

>Spike|hCoV-19/England/QEUEH-78634E/2020|2020-07-15|EPI\_ISL\_533023|Original|hCoV-19^^England|Human|Lighthouse Lab in Glasgow|Wellcome Sanger Institute for the COVID-19 Genomics UK (COG-UK) consortium|Davies|United Kingdom

>Spike|hCoV-19/USA/TX-DSHS-0256/2020|2020-04-25|EPI\_ISL\_527829|Original|hCoV-19^^Texas|Human|Texas Department of State Health Services|Texas Department of State Health Services|Rahman|USA

>Spike|hCoV-19/Netherlands/ZH-EMC-570/2020|2020-09-20|EPI\_ISL\_577998|Original|hCoV-19^^Zuid Holland|Human|Dutch COVID-19 response team|Erasmus Medical Center|Oude Munnink|Netherlands

>Spike|hCoV-19/England/20128036004/2020|2020-03-19|EPI\_ISL\_423952|Original|hCoV-19^^England|Human|Respiratory Virus Unit|Respiratory Virus Unit|Platt|United Kingdom

>Spike|hCoV-19/England/MILK-A916DB/2020|2020-10-19|EPI\_ISL\_704866|Original|hCoV-19^^England|Human|Oxford Viromics|COVID-19 Genomics UK (COG-UK) Consortium|Golubchik|United Kingdom

>Spike|hCoV-19/England/LOND-124C3A0/2020|2020-04-16|EPI\_ISL\_492905|Original|hCoV-19^^England|Human|Royal Free Hospital / Health Services Laboratories|Wellcome Sanger Institute for the COVID-19 Genomics UK (COG-UK) consortium|Davies|United Kingdom

>Spike|hCoV-19/England/CAMC-B99669/2020|2020-11-15|EPI\_ISL\_673489|Original|hCoV-19^^England|Human|Lighthouse Lab in Cambridge|Wellcome Sanger Institute for the COVID-19 Genomics UK (COG-UK) Consortium|Davies|United Kingdom

>Spike|hCoV-19/Scotland/CVR5670/2020|2020-11-02|EPI\_ISL\_650146|Original|hCoV-19^^Scotland|Human|West of Scotland Specialist Virology Centre|COVID-19 Genomics UK (COG-UK) Consortium|Robertson|United Kingdom



>Spike|hCoV-19/Luxembourg/LNS1932776/2020|2020-10-31|EPI\_ISL\_740026|Original|hCoV-19^^Luxembourg|Human|Laboratoire national de sant\u00e9|Laboratoire national de sant\u00e9|Wienecke-Baldacchino|Luxembourg

>Spike|hCoV-19/Wales/PHWC-36AB8/2020|2020-05-01|EPI\_ISL\_474756|Original|hCoV-19^^Wales|Human|Originating lab|COVID-19 Genomics UK (COG-UK) Consortium|Moore|United Kingdom

>Spike|hCoV-19/Denmark/DCGC-3346/2020|2020-08-31|EPI\_ISL\_616100|Original|hCoV-19^^Hovedstaden|Human|Department of Virus and Microbiological Special Diagnostics|Albertsen lab|Michaelsen|Denmark

>Spike|hCoV-19/USA/NY-NYCPHL-001019/2020|2020-09-16|EPI\_ISL\_633037|Original|hCoV-19^^New York|Human|DOHMH Central Harlem|New York City Public Health Laboratory|Wang|USA

>Spike|hCoV-19/USA/VA-DCLS-0300/2020|2020-05-18|EPI\_ISL\_463103|Original|hCoV-19^^Virginia|Human|Virginia DCLS|Virginia DCLS|St. Jacques|USA

>Spike|hCoV-19/Denmark/DCGC-20440/2020|2020-12-21|EPI\_ISL\_759149|Original|hCoV-19^^Syddanmark|Human|Department of Virus and Microbiological Special Diagnostics|Albertsen Lab|Michaelsen|Denmark

>Spike|hCoV-19/USA/UT-UPHL-201025399/2020|2020-06-22|EPI\_ISL\_594263|Original|hCoV-19^^Utah|Human|Utah Public Health Laboratory|Utah Public Health Laboratory|Young|USA

>Spike|hCoV-19/Australia/VIC17147/2020|2020-08-15|EPI\_ISL\_663763|Original|hCoV-19^^Victoria|Human|Microbiological Diagnostic Unit - Public Health Laboratory (MDU-PHL) |MDU-PHL|Schultz|Australia

>Spike|hCoV-19/Guangdong/20SF013/2020|2020-01-15|EPI\_ISL\_403933|Original|hCoV-19^^Guangdong|Human|Guangdong Provincial Center for Diseases Control and Prevention; Guangdong Provincial Public Health|Department of Microbiology|Lu|China

>Spike|hCoV-19/England/CAMB-78F9D/2020|2020-04-03|EPI\_ISL\_441175|Original|hCoV-19^^England|Human|Department of Pathology|Wellcome Sanger Institute for the COVID-19 Genomics UK (COG-UK) consortium|Amato|United Kingdom

>Spike|hCoV-19/Australia/NSW556/2020|2020-04-14|EPI\_ISL\_455095|Original|hCoV-19^^New South Wales|Human|Pathology West - NSW Health Pathology|NSW Health Pathology - Institute of Clinical Pathology and Medical Research; Westmead Hospital; University of Sydney|Gall|Australia

>Spike|hCoV-19/Hong Kong/HKU-200723-086/2020|2020-07-12|EPI\_ISL\_497853|Original|hCoV-19^^Hong Kong|Human|Department of Microbiology|Department of Microbiology|Chan|China

>Spike|hCoV-19/USA/MN-MDH-148/2020|2020-03-21|EPI\_ISL\_460053|Original|hCoV-19^^Minnesota|Human|Minnesota Department of Health|Minnesota Department of Health|Garfin|USA

>Spike|hCoV-19/England/QEUA-9968A4/2020|2020-08-29|EPI\_ISL\_549538|Original|hCoV-19^^England|Human|Oxford Viromics|COVID-19 Genomics UK (COG-UK) Consortium|Golubchik|United Kingdom

>Spike|hCoV-19/England/CAMB-1B2CF9/2020|2020-05-20|EPI\_ISL\_456720|Original|hCoV-19^^England|Human|Department of Pathology|COVID-19 Genomics UK (COG-UK) Consortium|Meredith|United Kingdom

>Spike|hCoV-19/England/ALDP-C049E7/2020|2020-12-04|EPI\_ISL\_720816|Original|hCoV-19^^England|Human|Lighthouse Lab in Alderley Park|Wellcome Sanger Institute for the COVID-19 Genomics UK (COG-UK) Consortium|Davies|United Kingdom

>Spike|hCoV-19/England/QEUA-A78151/2020|2020-10-12|EPI\_ISL\_638145|Original|hCoV-19^^England|Human|Oxford Viromics|COVID-19 Genomics UK (COG-UK) Consortium|Golubchik|United Kingdom

>Spike|hCoV-19/Singapore/1382/2020|2020-07-18|EPI\_ISL\_648736|Original|hCoV-19^^Singapore|Human|Department of Laboratory Medicine|Department of Laboratory Medicine|Chen|Singapore

>Spike|hCoV-19/Canada/ON-S1427/2020|2020-08-24|EPI\_ISL\_591193|Original|hCoV-19^^Ontario|Human|Toronto Invasive Bacterial Diseases Network|McMaster University|McArthur|Canada

>Spike|hCoV-19/Scotland/QEUA-96D949/2020|2020-08-20|EPI\_ISL\_534521|Original|hCoV-19^^Scotland|Human|NHSGGC West of Scotland Specialist Virology Centre / MRC-University of Glasgow Centre for Virus Research|Wellcome Sanger Institute for the COVID-19 Genomics UK (COG-UK) consortium|Davies|United Kingdom

>Spike|hCoV-19/Australia/VIC11872/2020|2020-08-04|EPI\_ISL\_591879|Original|hCoV-19^^Victoria|Human|Victorian Infectious Diseases Reference Laboratory (VIDRL)|VIDRL and MDU-PHL|Schultz|Australia

>Spike|hCoV-19/Russia/MOW-RII-MH1988S/2020|2020-05-25|EPI\_ISL\_596332|Original|hCoV-19^^Moscow|Human|Pathogenic Microorganisms Variability Laboratory|WHO National Influenza Centre Russian Federation|Komissarov|Russia

>Spike|hCoV-19/USA/PA-MGEL92/2020|2020-04-01|EPI\_ISL\_454374|Original|hCoV-19^^Pennsylvania|Human|UPMC Clinical Microbiology Laboratory|Microbial Genome Sequencing Center|Mustapha|USA

>Spike|hCoV-19/Wales/PHWC-48B740/2020|2020-10-29|EPI\_ISL\_666276|Original|hCoV-19^^Wales|Human|Wales Specialist Virology Centre Sequencing lab|COVID-19 Genomics UK (COG-UK) Consortium|Moore|United Kingdom

>Spike|hCoV-19/England/QEUEH-98FD90/2020|2020-08-25|EPI\_ISL\_539941|Original|hCoV-19^^England|Human|Lighthouse Lab in Glasgow|Wellcome Sanger Institute for the COVID-19 Genomics UK (COG-UK) consortium|Davies|United Kingdom

>Spike|hCoV-19/Australia/VIC7195/2020|2020-07-11|EPI\_ISL\_564275|Original|hCoV-19^^Victoria|Human|Microbiological Diagnostic Unit - Public Health Laboratory (MDU-PHL)|MDU-PHL|Schultz|Australia

>Spike|hCoV-19/USA/MI-MDHHS-SC20369/2020|2020-03-15|EPI\_ISL\_450580|Original|hCoV-19^^Michigan|Human|Michigan Department of Health and Human Services|Michigan Department of Health and Human Services|Blankenship|USA

>Spike|hCoV-19/England/MILK-9C4AD4/2020|2020-09-10|EPI\_ISL\_549360|Original|hCoV-19^^England|Human|Centre for Enzyme Innovation|COVID-19 Genomics UK (COG-UK) Consortium|Robson|United Kingdom

>Spike|hCoV-19/USA/WI-WSLH-200706/2020|2020-06-26|EPI\_ISL\_631463|Original|hCoV-19^^Wisconsin|Human|Wisconsin State Laboratory of Hygiene Communicable Disease Division|Wisconsin State Laboratory of Hygiene Communicable Disease Division|Florek|USA

>Spike|hCoV-19/England/CAMC-C3FAC2/2020|2020-12-10|EPI\_ISL\_719254|Original|hCoV-19^^England|Human|Lighthouse Lab in Cambridge|Wellcome Sanger Institute for the COVID-19 Genomics UK (COG-UK) Consortium|Davies|United Kingdom

>Spike|hCoV-19/USA/VA-DCLS-0636/2020|2020-04-11|EPI\_ISL\_495308|Original|hCoV-19^^Virginia|Human|Virginia DCLS|Virginia DCLS|St. Jacques|USA

>Spike|hCoV-19/Scotland/EDB10890/2020|2020-12-10|EPI\_ISL\_742177|Original|hCoV-19^^Scotland|Human|Virology Department|COVID-19 Genomics UK (COG-UK) Consortium|McHugh|United Kingdom

>Spike|hCoV-19/Portugal/PT0378/2020|2020-03-20|EPI\_ISL\_454094|Original|hCoV-19^^Portugal|Human|unknown|Instituto Nacional de Saude (INSA)|Borges|Portugal

>Spike|hCoV-19/Denmark/DCGC-20068/2020|2020-12-07|EPI\_ISL\_747963|Original|hCoV-19^^Midtjylland|Human|Department of Virus and Microbiological Special Diagnostics|Albertsen Lab|Michaelsen|Denmark

>Spike|hCoV-19/Canada/ON-S3/2020|2020-03-13|EPI\_ISL\_586390|Original|hCoV-19^^Ontario|Human|Toronto Invasive Bacterial Diseases Network|McMaster University|McArthur|Canada

>Spike|hCoV-19/USA/LA-ALSR-0059-NBG/2020|2020-03-23|EPI\_ISL\_434518|Original|hCoV-19^^Louisiana|Human|Robert Garry lab|Andersen lab at Scripps Research|Gangavarapu|USA

>Spike|hCoV-19/Wales/PHWC-49EB4E/2020|2020-12-08|EPI\_ISL\_743098|Original|hCoV-19^^Wales|Human|Wales Specialist Virology Centre Sequencing lab|COVID-19 Genomics UK (COG-UK) Consortium|Moore|United Kingdom

>Spike|hCoV-19/USA/WA-S1118/2020|2020-05-04|EPI\_ISL\_463608|Original|hCoV-19^^Washington|Human|Washington State Department of Health|Seattle Flu Study|Bedford|USA

>Spike|hCoV-19/Denmark/DCGC-3943/2020|2020-09-14|EPI\_ISL\_615854|Original|hCoV-19^^Hovedstaden|Human|Department of Virus and Microbiological Special Diagnostics|Albertsen lab|Michaelsen|Denmark

>Spike|hCoV-19/England/NORW-E9216/2020|2020-04-26|EPI\_ISL\_453583|Original|hCoV-19^^England|Human|Quadram Institute Bioscience|COVID-19 Genomics UK (COG-UK) Consortium|Alikhan|United Kingdom

>Spike|hCoV-19/USA/HI-H200169/2020|2020-07-11|EPI\_ISL\_752730|Original|hCoV-19^^Hawaii|Human|State Laboratories Division|State Laboratories Division|Sultana|USA

>Spike|hCoV-19/England/NORT-2A4B1A/2020|2020-09-16|EPI\_ISL\_573396|Original|hCoV-19^^England|Human|Northumbria University / South Tees Hospitals NHS Foundation Trust / North Cumbria Integrated Care NHS Foundation Trust / North Tees and Hartlepool NHS Foundation Trust / Newcastle Hospitals NHS Foundation Trust|COVID-19 Genomics UK (COG-UK) Consortium|Bashton|United Kingdom

>Spike|hCoV-19/USA/TX-HMH-MCoV-15126/2020|2020-10-16|EPI\_ISL\_786610|Original|hCoV-19^^Texas|Human|Houston Methodist Hospital|Houston Methodist Hospital|Long|USA

>Spike|hCoV-19/USA/TX-HMH-MCoV-10479/2020|2020-07-08|EPI\_ISL\_789493|Original|hCoV-19^^Texas|Human|Houston Methodist Hospital|Houston Methodist Hospital|Long|USA

>Spike|hCoV-19/Netherlands/Friesland\_42/2020|2020-04-29|EPI\_ISL\_460857|Original|hCoV-19^^Friesland|Human|Dutch COVID-19 response team|Erasmus Medical Center|Oude Munnink|Netherlands

>Spike|hCoV-19/New Zealand/20CV0594/2020|2020-11-20|EPI\_ISL\_661264|Original|hCoV-19^^Auckland|Human|LabPLUS|Institute of Environmental Science and Research (ESR)|Wang|New Zealand

>Spike|hCoV-19/Wales/PHWC-49FFAB/2020|2020-12-12|EPI\_ISL\_743378|Original|hCoV-19^^Wales|Human|Wales Specialist Virology Centre Sequencing lab|COVID-19 Genomics UK (COG-UK) Consortium|Moore|United Kingdom

>Spike|hCoV-19/England/SHEF-D0388/2020|2020-05-02|EPI\_ISL\_457672|Original|hCoV-19^^England|Human|Virology Department|COVID-19 Genomics UK (COG-UK) Consortium|de Silva|United Kingdom

>Spike|hCoV-19/USA/UT-QDX-18/2020|2020-03-13|EPI\_ISL\_467916|Original|hCoV-19^^Utah|Human|Quest Diagnostics|Quest Diagnostics|Kagan|USA

>Spike|hCoV-19/Wales/PHWC-276C5/2020|2020-03-31|EPI\_ISL\_432200|Original|hCoV-19^^Wales|Human|Wales Specialist Virology Centre|Public Health Wales Microbiology Cardiff|Moore|United Kingdom

>Spike|hCoV-19/England/ALDP-CB4F8A/2020|2020-12-17|EPI\_ISL\_761904|Original|hCoV-19^^England|Human|Lighthouse Lab in Alderley Park|Wellcome Sanger Institute for the COVID-19 Genomics UK (COG-UK) Consortium|Davies|United Kingdom

>Spike|hCoV-19/Jordan/AM-ALSR-3929/2020|2020-09-30|EPI\_ISL\_636294|Original|hCoV-19^^Amman|Human|Biolab Diagnostic Laboratories|Andersen lab at Scripps Research|Gangavarapu|Jordan

>Spike|hCoV-19/England/CAMC-BBB898/2020|2020-11-21|EPI\_ISL\_702561|Original|hCoV-19^^England|Human|Department of Pathology|COVID-19 Genomics UK (COG-UK) Consortium|Goodfellow|United Kingdom

>Spike|hCoV-19/England/BRIS-12218C/2020|2020-03-23|EPI\_ISL\_439978|Original|hCoV-19^^England|Human|PHE South West Regional Laboratory|Wellcome Sanger Institute for the COVID-19 Genomics UK (COG-UK) consortium|Amato|United Kingdom

>Spike|hCoV-19/England/QEUEH-C579F4/2020|2020-12-12|EPI\_ISL\_736343|Original|hCoV-19^^England|Human|Lighthouse Lab in Glasgow|Wellcome Sanger Institute for the COVID-19 Genomics UK (COG-UK) Consortium|Davies|United Kingdom

>Spike|hCoV-19/England/QEUEH-B302D9/2020|2020-11-04|EPI\_ISL\_659795|Original|hCoV-19^^England|Human|Lighthouse Lab in Glasgow|Wellcome Sanger Institute for the COVID-19 Genomics UK (COG-UK) Consortium|Davies|United Kingdom

>Spike|hCoV-19/Ireland/D-NVRL-73IRL14028/2020|2020-09-16|EPI\_ISL\_578259|Original|hCoV-19^^Dublin|Human|National Virus Reference Laboratory|National Virus Reference Laboratory|Gonzalez|Ireland

>Spike|hCoV-19/Scotland/QEUEH-A21861/2020|2020-10-01|EPI\_ISL\_598909|Original|hCoV-19^^Scotland|Human|Lighthouse Lab in Glasgow|Wellcome Sanger Institute for the COVID-19 Genomics UK (COG-UK) consortium|Davies|United Kingdom

>Spike|hCoV-19/Northern Ireland/NIRE-FB23F/2020|2020-03-24|EPI\_ISL\_448952|Original|hCoV-19^^Northern Ireland|Human|Regional Virus Laboratory|COVID-19 Genomics UK (COG-UK) Consortium|Fairley|United Kingdom

>Spike|hCoV-19/England/QEUEH-A5E69E/2020|2020-10-12|EPI\_ISL\_597260|Original|hCoV-19^^England|Human|Lighthouse Lab in Glasgow|Wellcome Sanger Institute for the COVID-19 Genomics UK (COG-UK) consortium|Davies|United Kingdom

>Spike|hCoV-19/USA/TX-HMH-MCoV-18393/2020|2020-11-18|EPI\_ISL\_784741|Original|hCoV-19^^Texas|Human|Houston Methodist Hospital|Houston Methodist Hospital|Long|USA

>Spike|hCoV-19/England/ALDP-9CD437/2020|2020-09-16|EPI\_ISL\_566197|Original|hCoV-19^^England|Human|Lighthouse Lab in Alderley Park|Wellcome Sanger Institute for the COVID-19 Genomics UK (COG-UK) consortium|Davies|United Kingdom

>Spike|hCoV-19/Austria/CeMM0264/2020|2020-03-23|EPI\_ISL\_438093|Original|hCoV-19^^Vienna|Human|Center for Virology|Bergthaler laboratory|Bergthaler|Austria

>Spike|hCoV-19/Australia/VIC8977/2020|2020-07-28|EPI\_ISL\_565327|Original|hCoV-19^^Victoria|Human|Microbiological Diagnostic Unit - Public Health Laboratory (MDU-PHL)|MDU-PHL|Schultz|Australia

>Spike|hCoV-19/England/ALDP-954AAC/2020|2020-06-11|EPI\_ISL\_553454|Original|hCoV-19^^England|Human|Lighthouse Lab in Alderley Park|Wellcome Sanger Institute for the COVID-19 Genomics UK (COG-UK) consortium|Davies|United Kingdom

>Spike|hCoV-19/USA/TX-HMH-MCoV-13675/2020|2020-08-20|EPI\_ISL\_788772|Original|hCoV-19^^Texas|Human|Houston Methodist Hospital|Houston Methodist Hospital|Long|USA

>Spike|hCoV-19/USA/MA-MGH-00240/2020|2020-04-04|EPI\_ISL\_460405|Original|hCoV-19^^Massachusetts|Human|Massachusetts General Hospital|Infectious Disease Program|Lemieux|USA

>Spike|hCoV-19/Luxembourg/LNS3352091/2020|2020-11-02|EPI\_ISL\_740295|Original|hCoV-19^^Luxembourg|Human|Laboratoire national de sant\u00e9|Laboratoire national de sant\u00e9|Wienecke-Baldacchino|Luxembourg

>Spike|hCoV-19/Switzerland/GE-SNRCI-8820/2020|2020-03-00|EPI\_ISL\_548232|Original|hCoV-19^^Geneve|Human|Laboratoire de Virologie|Swiss National Reference Centre for Influenza|Gon\u00e7alves Cabecinhas|Switzerland

>Spike|hCoV-19/England/LIVE-DCOB2C/2020|2020-11-04|EPI\_ISL\_705198|Original|hCoV-19^^England|Human|Liverpool Clinical Laboratories|COVID-19 Genomics UK (COG-UK) Consortium|Haldenby|United Kingdom

>Spike|hCoV-19/Scotland/EDB4432/2020|2020-05-04|EPI\_ISL\_559975|Original|hCoV-19^^Scotland|Human|Virology Department|COVID-19 Genomics UK (COG-UK) Consortium|Williams|United Kingdom

>Spike|hCoV-19/USA/CA-CDPH117/2020|2020-09-20|EPI\_ISL\_755029|Original|hCoV-19^^California|Human|California Department of Public Health|California Department of Public Health|Bell|USA

>Spike|hCoV-19/USA/TX-DSHS-1117/2020|2020-06-21|EPI\_ISL\_615154|Original|hCoV-19^^Texas|Human|Texas Department of State Health Services|Texas Department of State Health Services|Rahman|USA

>Spike|hCoV-19/Beijing/DT-travelFR01/2020|2020-03-21|EPI\_ISL\_452330|Original|hCoV-19^^Beijing|Human|Laboratory of Infectious Diseases Center of Beijing Ditan Hospital|Laboratory of Infectious Diseases Center of Beijing Ditan Hospital|Yang|China

>Spike|hCoV-19/England/ALDP-AA215E/2020|2020-10-22|EPI\_ISL\_624486|Original|hCoV-19^^England|Human|Lighthouse Lab in Alderley Park|Wellcome Sanger Institute for the COVID-19 Genomics UK (COG-UK) consortium|Davies|United Kingdom

>Spike|hCoV-19/USA/CO-CDPHE-2011020331/2020|2020-11-01|EPI\_ISL\_710373|Original|hCoV-19^^Colorado|Human|Colorado Department of Public Health and Environment|Colorado Department of Public Health and Environment|Bankers|USA

>Spike|hCoV-19/Turkey/KU-044/2020|2020-05-17|EPI\_ISL\_495454|Original|hCoV-19^^Kars Province|Human|Kafkas University|Kafkas University|Karamese|Turkey

>Spike|hCoV-19/USA/CO-CSU-D1490-1/2020|2020-04-08|EPI\_ISL\_527439|Original|hCoV-19^^Colorado|Human|Colorado State University - Ebel Lab|Colorado State University - Ebel Lab|Cline|USA

>Spike|hCoV-19/USA/WA-UW-22885/2020|2020-08-06|EPI\_ISL\_570729|Original|hCoV-19^^Washington|Human|UW Virology Lab|UW Virology Lab|Roychoudhury|USA

>Spike|hCoV-19/USA/MI-MDHHS-SC22036/2020|2020-09-01|EPI\_ISL\_577588|Original|hCoV-19^^Michigan|Human|Michigan Department of Health and Human Services|Michigan Department of Health and Human Services|Jacob|USA

>Spike|hCoV-19/England/MILK-B85EB3/2020|2020-11-13|EPI\_ISL\_673899|Original|hCoV-19^^England|Human|Lighthouse Lab in Milton Keynes|Wellcome Sanger Institute for the COVID-19 Genomics UK (COG-UK) Consortium|Davies|United Kingdom

>Spike|hCoV-19/England/QEUH-B13B2C/2020|2020-11-02|EPI\_ISL\_641611|Original|hCoV-19^^England|Human|Lighthouse Lab in Glasgow|Wellcome Sanger Institute for the COVID-19 Genomics UK (COG-UK) Consortium|Davies|United Kingdom

>Spike|hCoV-19/Iceland/336/2020|2020-03-14|EPI\_ISL\_417665|Original|hCoV-19^^Reykjavik|Human|deCODE genetics|deCODE genetics|J\u00f3nsson|Iceland

>Spike|hCoV-19/Denmark/DCGC-6336/2020|2020-08-17|EPI\_ISL\_621193|Original|hCoV-19^^Midtjylland|Human|Department of Virus and Microbiological Special Diagnostics|Albertsen lab|Michaelsen|Denmark

>Spike|hCoV-19/USA/TX-HMH-MCoV-13330/2020|2020-08-24|EPI\_ISL\_788478|Original|hCoV-19^^Texas|Human|Houston Methodist Hospital|Houston Methodist Hospital|Long|USA

>Spike|hCoV-19/England/MILK-B95FCC/2020|2020-11-13|EPI\_ISL\_676283|Original|hCoV-19^^England|Human|Lighthouse Lab in Milton Keynes|Wellcome Sanger Institute for the COVID-19 Genomics UK (COG-UK) Consortium|Davies|United Kingdom

>Spike|hCoV-19/England/MILK-51856B/2020|2020-06-10|EPI\_ISL\_558923|Original|hCoV-19^^England|Human|Lighthouse Lab in Milton Keynes|Wellcome Sanger Institute for the COVID-19 Genomics UK (COG-UK) consortium|Davies|United Kingdom

>Spike|hCoV-19/England/ALDP-A707DF/2020|2020-10-15|EPI\_ISL\_608097|Original|hCoV-19^^England|Human|Lighthouse Lab in Alderley Park|Wellcome Sanger Institute for the COVID-19 Genomics UK (COG-UK) consortium|Davies|United Kingdom

>Spike|hCoV-19/South Africa/KRISP-K000567/2020|2020-07-13|EPI\_ISL\_509224|Original|hCoV-19^^KwaZulu-Natal|Human|NHLS-IALCH|KRISP|de Oliveira|South Africa

>Spike|hCoV-19/Japan/PG-1772/2020|2020-04-00|EPI\_ISL\_685378|Original|hCoV-19^^Japan|Human|Pathogen Genomics Center|Pathogen Genomics Center|Sekizuka|Japan

>Spike|hCoV-19/Italy/APU-UniMI-5436/2020|2020-04-11|EPI\_ISL\_525568|Original|hCoV-19^^Apulia|Human|Istituto Zooprofilattico Sperimentale Puglia e Basilicata; Dipartimento di Bioscienze|Beaconlab (Bioinformatics)|Chiara|Italy

>Spike|hCoV-19/USA/HI-H200309/2020|2020-08-12|EPI\_ISL\_752868|Original|hCoV-19^^Hawaii|Human|State Laboratories Division|State Laboratories Division|Sultana|USA

>Spike|hCoV-19/England/MILK-BAB28E/2020|2020-11-18|EPI\_ISL\_681369|Original|hCoV-19^^England|Human|Lighthouse Lab in Milton Keynes|Wellcome Sanger Institute for the COVID-19 Genomics UK (COG-UK) Consortium|Davies|United Kingdom

>Spike|hCoV-19/England/ALDP-95A7AF/2020|2020-06-13|EPI\_ISL\_554910|Original|hCoV-19^^England|Human|Lighthouse Lab in Alderley Park|Wellcome Sanger Institute for the COVID-19 Genomics UK (COG-UK) consortium|Davies|United Kingdom

>Spike|hCoV-19/England/QEUH-C801BE/2020|2020-12-16|EPI\_ISL\_756879|Original|hCoV-19^^England|Human|Lighthouse Lab in Glasgow|Wellcome Sanger Institute for the COVID-19 Genomics UK (COG-UK) Consortium|Davies|United Kingdom

>Spike|hCoV-19/USA/MI-UM-10033903914/2020|2020-04-10|EPI\_ISL\_578153|Original|hCoV-19^^Michigan|Human|University of Michigan Clinical Microbiology Laboratory|Lauring Lab|Valesano|USA

>Spike|hCoV-19/Australia/WA170/2020|2020-04-07|EPI\_ISL\_596733|Original|hCoV-19^^Western Australia|Human|PathWest Laboratory Medicine WA|PathWest Laboratory Medicine WA Microbial Surveillance Unit|Sikazwe|Australia

>Spike|hCoV-19/England/BRIS-123C3F/2020|2020-04-07|EPI\_ISL\_442779|Original|hCoV-19^^England|Human|PHE South West Regional Laboratory|Wellcome Sanger Institute for the COVID-19 Genomics UK (COG-UK) consortium|Amato|United Kingdom

>Spike|hCoV-19/Germany/BW-UKT-046/2020|2020-03-30|EPI\_ISL\_581463|Original|hCoV-19^^Baden-W\u00fcrtemberg|Human|Medizinische Klinik Innere Medizin I|NGS Competence Center T\u00fcbingen|Angelov|Germany

>Spike|hCoV-19/England/CAMB-1AC1C6/2020|2020-04-28|EPI\_ISL\_444381|Original|hCoV-19^^England|Human|Department of Pathology|COVID-19 Genomics UK (COG-UK) Consortium|Meredith|United Kingdom

>Spike|hCoV-19/England/CAMB-71B27/2020|2020-04-01|EPI\_ISL\_439620|Original|hCoV-19^^England|Human|Department of Pathology|Wellcome Sanger Institute for the COVID-19 Genomics UK (COG-UK) consortium|Amato|United Kingdom

>Spike|hCoV-19/Denmark/DCGC-3564/2020|2020-08-31|EPI\_ISL\_616359|Original|hCoV-19^^Sjaelland|Human|Department of Virus and Microbiological Special Diagnostics|Albertsen lab|Michaelsen|Denmark

>Spike|hCoV-19/USA/NY-PV09186/2020|2020-03-20|EPI\_ISL\_422543|Original|hCoV-19^^New York|Human|MSHS Clinical Microbiology Laboratories|MSHS Pathogen Surveillance Program|van Bakel|USA

>Spike|hCoV-19/USA/UT-UPHL-2012790266/2020|2020-06-18|EPI\_ISL\_746382|Original|hCoV-19^^Utah|Human|Utah Public Health Laboratory|Utah Public Health Laboratory|Gallagher|USA

>Spike|hCoV-19/Denmark/DCGC-19360/2020|2020-12-07|EPI\_ISL\_748904|Original|hCoV-19^^Syddanmark|Human|Department of Virus and Microbiological Special Diagnostics|Albertsen Lab|Michaelsen|Denmark

>Spike|hCoV-19/India/GJ-GBRC165/2020|2020-05-27|EPI\_ISL\_461500|Original|hCoV-19^^Gujarat|Human|B.J. Medical College and Civil hospital|Gujarat Biotechnology Research Centre|Joshi|India

>Spike|hCoV-19/England/QEUEH-9B4E26/2020|2020-09-04|EPI\_ISL\_590178|Original|hCoV-19^^England|Human|Lighthouse Lab in Glasgow|Wellcome Sanger Institute for the COVID-19 Genomics UK (COG-UK) consortium|Davies|United Kingdom

>Spike|hCoV-19/USA/TX-HMH-MCoV-10213/2020|2020-07-07|EPI\_ISL\_789372|Original|hCoV-19^^Texas|Human|Houston Methodist Hospital|Houston Methodist Hospital|Long|USA

>Spike|hCoV-19/England/QEUEH-9C7C17/2020|2020-09-12|EPI\_ISL\_567092|Original|hCoV-19^^England|Human|Lighthouse Lab in Glasgow|Wellcome Sanger Institute for the COVID-19 Genomics UK (COG-UK) consortium|Davies|United Kingdom

>Spike|hCoV-19/England/NOTT-10F8F9/2020|2020-04-04|EPI\_ISL\_433058|Original|hCoV-19^^England|Human|Queens Medical Centre|COVID-19 Genomics UK (COG-UK) Consortium|Loose|United Kingdom

>Spike|hCoV-19/Switzerland/BS-UHB-42199797/2020|2020-03-20|EPI\_ISL\_528251|Original|hCoV-19^^Basel-Stadt|Human|University Hospital Basel|University Hospital Basel|Roloff Handschin|Switzerland

>Spike|hCoV-19/USA/MA-MGH-03384/2020|2020-11-10|EPI\_ISL\_765811|Original|hCoV-19^^Massachusetts|Human|Massachusetts General Hospital|Infectious Disease Program|Park|USA

>Spike|hCoV-19/Germany/NW-HHU-58/2020|2020-03-27|EPI\_ISL\_523929|Original|hCoV-19^^North Rhine-Westphalia|Human|Center of Medical Microbiology|Center of Medical Microbiology|Wienemann|Germany

>Spike|hCoV-19/Poland/PL\_P23/2020|2020-03-29|EPI\_ISL\_451984|Original|hCoV-19^^Malopolska|Human|1. ViroGenetics - BSL3 Laboratory of Virology|1. ViroGenetics - BSL3 Laboratory of Virology|Pyrz|Poland

>Spike|hCoV-19/England/ALDP-9C58F7/2020|2020-09-11|EPI\_ISL\_567677|Original|hCoV-19^^England|Human|Lighthouse Lab in Alderley Park|Wellcome Sanger Institute for the COVID-19 Genomics UK (COG-UK) consortium|Davies|United Kingdom

>Spike|hCoV-19/Japan/PG-5274/2020|2020-08-00|EPI\_ISL\_690377|Original|hCoV-19^^Japan|Human|Pathogen Genomics Center|Pathogen Genomics Center|Sekizuka|Japan

>Spike|hCoV-19/Denmark/DCGC-1905/2020|2020-05-25|EPI\_ISL\_622495|Original|hCoV-19^^Hovedstaden|Human|Department of Virus and Microbiological Special Diagnostics|Albertsen lab|Michaelsen|Denmark

>Spike|hCoV-19/Scotland/QEUEH-A5E643/2020|2020-10-11|EPI\_ISL\_609178|Original|hCoV-19^^Scotland|Human|Lighthouse Lab in Glasgow|Wellcome Sanger Institute for the COVID-19 Genomics UK (COG-UK) consortium|Davies|United Kingdom

>Spike|hCoV-19/USA/WI-UW-2624/2021|2021-01-02|EPI\_ISL\_791141|Original|hCoV-19^^Wisconsin|Human|University of Wisconsin-Madison AIDS Vaccine Research Laboratories|University of Wisconsin-Madison AIDS Vaccine Research Laboratories|Moreno|USA

>Spike|hCoV-19/Wales/PHWC-2BEC9/2020|2020-04-10|EPI\_ISL\_445864|Original|hCoV-19^^Wales|Human|Wales Specialist Virology Centre|Public Health Wales Microbiology Cardiff|Moore|United Kingdom

>Spike|hCoV-19/USA/NY-Wadsworth-192895-01/2020|2020-07-06|EPI\_ISL\_677669|Original|hCoV-19^^New York|Human|Masonic Medical Research Institute|Wadsworth Center|Lasek-Nesselquist|USA

>Spike|hCoV-19/England/ALDP-A2E59A/2020|2020-10-05|EPI\_ISL\_586791|Original|hCoV-19^^England|Human|Lighthouse Lab in Alderley Park|Wellcome Sanger Institute for the COVID-19 Genomics UK (COG-UK) consortium|Davies|United Kingdom

>Spike|hCoV-19/Spain/MD-HLP-59/2020|2020-04-20|EPI\_ISL\_530062|Original|hCoV-19^^Madrid|Human|Hospital Universitario La Paz|Hospital Universitario La Paz|Viedma|Spain

>Spike|hCoV-19/Denmark/DCGC-17769/2020|2020-12-14|EPI\_ISL\_749557|Original|hCoV-19^^Midtjylland|Human|Department of Virus and Microbiological Special Diagnostics|Albertsen Lab|Michaelsen|Denmark

>Spike|hCoV-19/USA/LA-EVTL710/2020|2020-07-15|EPI\_ISL\_653402|Original|hCoV-19^^Louisiana|Human|LSUHS Emerging Viral Threat Laboratory|Microbial Genome Sequencing Center|Kamil|USA

>Spike|hCoV-19/Guadeloupe/IPG-7344/2020|2020-03-26|EPI\_ISL\_613442|Original|hCoV-19^^Saint-Fran\u00e7ois|Human|Institut Pasteur de la Guadeloupe|Institut Pasteur de la Guadeloupe|Enouf|Guadeloupe

>Spike|hCoV-19/Spain/PV-IBV-000698/2020|2020-03-05|EPI\_ISL\_452766|Original|hCoV-19^^Basque Country|Human|Hospital Universitario Araba. Vitoria-Gasteiz,|SeqCOVID-SPAIN consortium/IBV (CSIC)|Comas|Spain

>Spike|hCoV-19/England/ALDP-C49852/2020|2020-12-12|EPI\_ISL\_718707|Original|hCoV-19^^England|Human|Lighthouse Lab in Alderley Park|Wellcome Sanger Institute for the COVID-19 Genomics UK (COG-UK) Consortium|Davies|United Kingdom

>Spike|hCoV-19/England/CAMB-1B9D1D/2020|2020-11-06|EPI\_ISL\_651553|Original|hCoV-19^^England|Human|Department of Pathology|COVID-19 Genomics UK (COG-UK) Consortium|Goodfellow|United Kingdom

>Spike|hCoV-19/USA/UT-UPHL-2009282/2020|2020-05-14|EPI\_ISL\_525263|Original|hCoV-19^^Utah|Human|Utah Public Health Laboratory|Utah Public Health Laboratory|Young|USA

>Spike|hCoV-19/Wales/PHWC-4A5009/2020|2020-12-13|EPI\_ISL\_764810|Original|hCoV-19^^Wales|Human|Wales Specialist Virology Centre Sequencing lab|COVID-19 Genomics UK (COG-UK) Consortium|Moore|United Kingdom

>Spike|hCoV-19/England/BIRM-5EC3C/2020|2020-04-28|EPI\_ISL\_447935|Original|hCoV-19^^England|Human|University of Birmingham|COVID-19 Genomics UK (COG-UK) Consortium|Loman|United Kingdom

>Spike|hCoV-19/England/MILK-B398ED/2020|2020-11-02|EPI\_ISL\_651056|Original|hCoV-19^^England|Human|University of Exeter|COVID-19 Genomics UK (COG-UK) Consortium|Temperton|United Kingdom

>Spike|hCoV-19/Switzerland/GE-ETHZ-360077/2020|2020-11-09|EPI\_ISL\_693890|Original|hCoV-19^^Geneva|Human|Viollier AG|Department of Biosystems Science and Engineering|Nadeau|Switzerland

>Spike|hCoV-19/South Africa/KRISP-K002759/2020|2020-08-15|EPI\_ISL\_529755|Original|hCoV-19^^KwaZulu-Natal|Human|NHLs-IALCH|KRISP|de Oliveira|South Africa

>Spike|hCoV-19/England/MILK-A6B86B/2020|2020-10-10|EPI\_ISL\_709945|Original|hCoV-19^^England|Human|Lighthouse Lab in Milton Keynes|Wellcome Sanger Institute for the COVID-19 Genomics UK (COG-UK) Consortium|Davies|United Kingdom

>Spike|hCoV-19/USA/CA-IGI-0058/2020|2020-05-20|EPI\_ISL\_511813|Original|hCoV-19^^California|Human|Innovative Genomics Institute|Innovative Genomics Institute|Wyman|USA

>Spike|hCoV-19/Hong Kong/HKU-200723-037/2020|2020-03-25|EPI\_ISL\_497804|Original|hCoV-19^^Hong Kong|Human|Department of Microbiology|Department of Microbiology|Chan|China

>Spike|hCoV-19/USA/LA-EVTL1418/2020|2020-12-14|EPI\_ISL\_779084|Original|hCoV-19^^Louisiana|Human|LSUHS Emerging Viral Threat Laboratory|Microbial Genome Sequencing Center|Kamil|USA

>Spike|hCoV-19/Canada/BC-BCCDC-6420/2020|2020-10-00|EPI\_ISL\_740574|Original|hCoV-19^^British Columbia|Human|BCCDC Public Health Laboratory|BCCDC Public Health Laboratory|Prystajek|Canada

>Spike|hCoV-19/South Africa/NHLs-UCT-GS-2215/2020|2020-08-05|EPI\_ISL\_700534|Original|hCoV-19^^Western Cape|Human|Groote Schuur Hospital w GSH|NHLs/UCT|Iranzadeh|South Africa

>Spike|hCoV-19/USA/AZ-TG519187/2020|2020-07-01|EPI\_ISL\_695367|Original|hCoV-19^^Arizona|Human|AZ SPHL|TGen North|French|USA

>Spike|hCoV-19/Japan/PG-5689/2020|2020-05-00|EPI\_ISL\_688813|Original|hCoV-19^^Japan|Human|Pathogen Genomics Center|Pathogen Genomics Center|Sekizuka|Japan

>Spike|hCoV-19/Spain/AN-ISCI-201623/2020|2020-03-05|EPI\_ISL\_455322|Original|hCoV-19^^Andalucia|Human|Hospital Virgen de las Nieves|Instituto de Salud Carlos III|Caballero|Spain

>Spike|hCoV-19/Spain/CT-ISCI-2013592/2020|2020-06-11|EPI\_ISL\_539544|Original|hCoV-19^^Catalunya|Human|Hospital Cl\u00e9nico|Instituto de Salud Carlos III|Caballero|Spain

>Spike|hCoV-19/England/QEUH-BA2A61/2020|2020-11-18|EPI\_ISL\_672782|Original|hCoV-19^^England|Human|Lighthouse Lab in Glasgow|Wellcome Sanger Institute for the COVID-19 Genomics UK (COG-UK) Consortium|Davies|United Kingdom

>Spike|hCoV-19/USA/AK-PHL587/2020|2020-06-22|EPI\_ISL\_512152|Original|hCoV-19^^Alaska|Human|Alaska State Virology Laboratory|Alaska State Virology Laboratory|Drown|USA

>Spike|hCoV-19/USA/UT-UPHL-2012988511/2020|2020-08-04|EPI\_ISL\_746077|Original|hCoV-19^^Utah|Human|Ginkgo Bioworks Clinical Laboratory|Utah Public Health Laboratory|Young|USA

>Spike|hCoV-19/USA/VA-DCLS-1821/2020|2020-09-22|EPI\_ISL\_614140|Original|hCoV-19^^Virginia|Human|Virginia DCLS|Virginia DCLS|St. Jacques|USA

>Spike|hCoV-19/England/ALDP-9ED71A/2020|2020-05-09|EPI\_ISL\_580825|Original|hCoV-19^^England|Human|Lighthouse Lab in Alderley Park|Wellcome Sanger Institute for the COVID-19 Genomics UK (COG-UK) consortium|Davies|United Kingdom

>Spike|hCoV-19/United Arab Emirates/0665/2020|2020-05-15|EPI\_ISL\_698819|Original|hCoV-19^^Abu Dhabi|Human|Group 42 (G42) Healthcare|G42 Healthcare|Ogrodzki|United Arab Emirates

>Spike|hCoV-19/England/CAMB-1B71B9/2020|2020-10-13|EPI\_ISL\_638309|Original|hCoV-19^^England|Human|Department of Pathology|COVID-19 Genomics UK (COG-UK) Consortium|Goodfellow|United Kingdom

>Spike|hCoV-19/Singapore/418/2020|2020-03-18|EPI\_ISL\_475949|Original|hCoV-19^^Singapore|Human|National Public Health Laboratory|National Public Health Laboratory|Mak|Singapore

>Spike|hCoV-19/England/ALDP-A68BFC/2020|2020-10-12|EPI\_ISL\_608587|Original|hCoV-19^^England|Human|Lighthouse Lab in Alderley Park|Wellcome Sanger Institute for the COVID-19 Genomics UK (COG-UK) consortium|Davies|United Kingdom

>Spike|hCoV-19/England/ALDP-52165D/2020|2020-06-02|EPI\_ISL\_559060|Original|hCoV-19^^England|Human|Lighthouse Lab in Alderley Park|Wellcome Sanger Institute for the COVID-19 Genomics UK (COG-UK) consortium|Davies|United Kingdom

>Spike|hCoV-19/Australia/VIC4627/2020|2020-07-12|EPI\_ISL\_519020|Original|hCoV-19^^Victoria|Human|Victorian Infectious Diseases Reference Laboratory (VIDRL)|VIDRL and MDU-PHL|Schultz|Australia

>Spike|hCoV-19/USA/UT-UPHL-201118084/2020|2020-06-21|EPI\_ISL\_640300|Original|hCoV-19^^Utah|Human|Utah Public Health Laboratory|Utah Public Health Laboratory|Young|USA

>Spike|hCoV-19/England/CAMB-81113/2020|2020-04-19|EPI\_ISL\_438569|Original|hCoV-19^^England|Human|Department of Pathology|COVID-19 Genomics UK (COG-UK) Consortium|Meredith|United Kingdom

>Spike|hCoV-19/Wales/PHWC-25ABC/2020|2020-03-24|EPI\_ISL\_422053|Original|hCoV-19^^Wales|Human|Wales Specialist Virology Centre|Public Health Wales Microbiology Cardiff|Moore|United Kingdom

>Spike|hCoV-19/Belgium/ULG-10768/2020|2020-11-02|EPI\_ISL\_644614|Original|hCoV-19^^Li\u00e8ge|Human|Department of Clinical Microbiology|GIGA Medical Genomics|Durkin|Belgium

>Spike|hCoV-19/USA/WI-UW-1634/2020|2020-09-09|EPI\_ISL\_605508|Original|hCoV-19^^Wisconsin|Human|University of Wisconsin-Madison AIDS Vaccine Research Laboratories|University of Wisconsin-Madison AIDS Vaccine Research Laboratories|Baczenas|USA

>Spike|hCoV-19/Portugal/PT1576/2020|2020-06-29|EPI\_ISL\_693584|Original|hCoV-19^^Portugal|Human|Instituto Nacional de Saude (INSA)|Instituto Nacional de Saude (INSA)|Borges|Portugal

>Spike|hCoV-19/USA/NM-NMDOH-2020126501/2020|2020-06-15|EPI\_ISL\_535269|Original|hCoV-19^^New Mexico|Human|New Mexico Department of Health Scientific Laboratory|New Mexico Department of Health Scientific Laboratory|Johnson|USA

>Spike|hCoV-19/USA/WA-S2082/2020|2020-06-06|EPI\_ISL\_497510|Original|hCoV-19^^Washington|Human|Washington State Department of Health|Seattle Flu Study|Lee|USA



>Spike|hCoV-19/Wales/PHWC-48D7B7/2020|2020-11-07|EPI\_ISL\_680678|Original|hCoV-19^^Wales|Human|Wales Specialist Virology Centre Sequencing lab|COVID-19 Genomics UK (COG-UK) Consortium|Moore|United Kingdom

>Spike|hCoV-19/Denmark/DCGC-5922/2020|2020-10-05|EPI\_ISL\_620187|Original|hCoV-19^^Hovedstaden|Human|Department of Virus and Microbiological Special Diagnostics|Albertsen lab|Michaelsen|Denmark

>Spike|hCoV-19/England/QEUH-9DCE64/2020|2020-09-21|EPI\_ISL\_599518|Original|hCoV-19^^England|Human|Lighthouse Lab in Glasgow|Wellcome Sanger Institute for the COVID-19 Genomics UK (COG-UK) consortium|Davies|United Kingdom

>Spike|hCoV-19/Australia/VIC3303/2020|2020-07-07|EPI\_ISL\_520982|Original|hCoV-19^^Victoria|Human|Microbiological Diagnostic Unit - Public Health Laboratory (MDU-PHL)|MDU-PHL|Schultz|Australia

>Spike|hCoV-19/Japan/PG-7683/2020|2020-08-00|EPI\_ISL\_686785|Original|hCoV-19^^Japan|Human|Chiba Prefectural Institute of Public Health|Pathogen Genomics Center|Sekizuka|Japan

>Spike|hCoV-19/England/CAMC-990EE4/2020|2020-08-27|EPI\_ISL\_551915|Original|hCoV-19^^England|Human|Lighthouse Lab in Cambridge|Wellcome Sanger Institute for the COVID-19 Genomics UK (COG-UK) consortium|Davies|United Kingdom

>Spike|hCoV-19/Oman/11374/2020|2020-04-07|EPI\_ISL\_491155|Original|hCoV-19^^South Batinah|Human|Oman-National Influenza Center|Biotechnology & OMICs Laboratory|Al Mahruqi|Oman

>Spike|hCoV-19/USA/HI-H200673/2020|2020-11-25|EPI\_ISL\_753196|Original|hCoV-19^^Hawaii|Human|State Laboratories Division|State Laboratories Division|Sultana|USA

>Spike|hCoV-19/Australia/VIC16986/2020|2020-08-17|EPI\_ISL\_663672|Original|hCoV-19^^Victoria|Human|Microbiological Diagnostic Unit - Public Health Laboratory (MDU-PHL)|MDU-PHL|Schultz|Australia

>Spike|hCoV-19/India/MH-GA36/2020|2020-06-20|EPI\_ISL\_508230|Original|hCoV-19^^Maharashtra|Human|Government Medical College|National Institute of Biomedical Genomics|Maitra|India

>Spike|hCoV-19/Luxembourg/LNS0988203/2020|2020-10-20|EPI\_ISL\_739868|Original|hCoV-19^^Luxembourg|Human|Laboratoire national de sant\u00e9|Laboratoire national de sant\u00e9|Wienecke-Baldacchino|Luxembourg

>Spike|hCoV-19/England/MILK-9D4901/2020|2020-09-19|EPI\_ISL\_601644|Original|hCoV-19^^England|Human|Lighthouse Lab in Milton Keynes|Wellcome Sanger Institute for the COVID-19 Genomics UK (COG-UK) consortium|Davies|United Kingdom

>Spike|hCoV-19/USA/TX-HMH-MCoV-10022/2020|2020-07-06|EPI\_ISL\_789289|Original|hCoV-19^^Texas|Human|Houston Methodist Hospital|Houston Methodist Hospital|Long|USA

>Spike|hCoV-19/Wales/PHWC-4A004A/2020|2020-11-30|EPI\_ISL\_743387|Original|hCoV-19^^Wales|Human|Wales Specialist Virology Centre Sequencing lab|COVID-19 Genomics UK (COG-UK) Consortium|Moore|United Kingdom

>Spike|hCoV-19/Norway/4018/2020|2020-09-21|EPI\_ISL\_590969|original|hCoV-19^^Rogaland|Human|Dept. of Medical Microbiology|Norwegian Institute of Public Health|Vollan|Norway

>Spike|hCoV-19/Israel/CVL-70-ngs/2020|2020-12-24|EPI\_ISL\_776644|Original|hCoV-19^^Israel|Human|Israel Central Virology laboratory|Israel Central Virology laboratory|Zuckerman|Israel

>Spike|hCoV-19/England/ALDP-B5D5BF/2020|2020-11-10|EPI\_ISL\_702971|Original|hCoV-19^^England|Human|Department of Pathology|COVID-19 Genomics UK (COG-UK) Consortium|Goodfellow|United Kingdom

>Spike|hCoV-19/India/MH-ACTREC-531/2020|2020-08-25|EPI\_ISL\_700177|Original|hCoV-19^^Maharashtra|Human|Hematopathology Laboratory|Hematopathology Laboratory|Patkar|India

>Spike|hCoV-19/USA/CA-CHLA-PLM87208720/2020|2020-11-03|EPI\_ISL\_753276|Original|hCoV-19^^California|Human|Clinical virology Laboratory|Center for Personalized Medicine|Dien Bard|USA

>Spike|hCoV-19/England/LOND-DA324/2020|2020-11-16|EPI\_ISL\_724619|Original|hCoV-19^^England|Human|University College London|COVID-19 Genomics UK (COG-UK) Consortium|Roy|United Kingdom

>Spike|hCoV-19/Spain/AR-IBV-005046/2020|2020-04-21|EPI\_ISL\_500341|Original|hCoV-19^^Aragon|Human|Servicio de Microbiolog\u00eda|SeqCOVID-SPAIN consortium/IBV (CSIC) |Comas|Spain

>Spike|hCoV-19/Belgium/ULG-10416/2020|2020-08-14|EPI\_ISL\_581598|Original|hCoV-19^^Li\u00e8ge|Human|Department of Clinical Microbiology|GIGA Medical Genomics|Durkin|Belgium

>Spike|hCoV-19/USA/MI-UM-10036188357/2020|2020-09-29|EPI\_ISL\_590735|Original|hCoV-19^^Michigan|Human|University of Michigan Clinical Microbiology Laboratory|Lauring Lab|Valesano|USA

>Spike|hCoV-19/England/BIRM-5F916/2020|2020-05-22|EPI\_ISL\_473350|Original|hCoV-19^^England|Human|University of Birmingham|COVID-19 Genomics UK (COG-UK) Consortium|Loman|United Kingdom

>Spike|hCoV-19/Canada/BC-BCCDC-7318/2020|2020-10-00|EPI\_ISL\_740681|Original|hCoV-19^^British Columbia|Human|BCCDC Public Health Laboratory|BCCDC Public Health Laboratory|Prystajacky|Canada

>Spike|hCoV-19/Australia/VIC2636/2020|2020-06-28|EPI\_ISL\_521482|Original|hCoV-19^^Victoria|Human|Victorian Infectious Diseases Reference Laboratory (VIDRL)|VIDRL and MDU-PHL|Schultz|Australia

>Spike|hCoV-19/Wales/PHWC-492272/2020|2020-11-17|EPI\_ISL\_706833|Original|hCoV-19^^Wales|Human|Originating lab|COVID-19 Genomics UK (COG-UK) Consortium|Moore|United Kingdom

>Spike|hCoV-19/England/ALDP-AA2DB4/2020|2020-10-22|EPI\_ISL\_624325|Original|hCoV-19^^England|Human|Lighthouse Lab in Alderley Park|Wellcome Sanger Institute for the COVID-19 Genomics UK (COG-UK) consortium|Davies|United Kingdom

>Spike|hCoV-19/Finland/6A962SIIC/2020|2020-04-06|EPI\_ISL\_481712|Original|hCoV-19^^Uusimaa|Human|Department of Virology and Immunology|Department of Virology|Smura|Finland

>Spike|hCoV-19/England/PORT-2D320E/2020|2020-04-09|EPI\_ISL\_628316|Original|hCoV-19^^England|Human|Centre for Enzyme Innovation|COVID-19 Genomics UK (COG-UK) Consortium|Robson|United Kingdom

>Spike|hCoV-19/India/GJ-GBRC189/2020|2020-06-02|EPI\_ISL\_469032|Original|hCoV-19^^Gujarat|Human|Government Medical College|Gujarat Biotechnology Research Centre|Joshi|India

>Spike|hCoV-19/USA/CA-CZB0719/2020|2020-03-31|EPI\_ISL\_429072|Original|hCoV-19^^California|Human|UCSF Clinical Microbiology Laboratory|Chan-Zuckerberg Biohub|Kamm|USA

>Spike|hCoV-19/Peru/LIM-UPCH-0170/2020|2020-10-14|EPI\_ISL\_729877|Original|hCoV-19^^Lima|Human|Laboratorio de Referencia Nacional de Virus Respiratorios|Laboratorio de Gen\u00f3mica Microbiana|Tsukayama|Peru

>Spike|hCoV-19/Belgium/ULG-10573/2020|2020-10-23|EPI\_ISL\_626274|Original|hCoV-19^^Li\u00e8ge|Human|Department of Clinical Microbiology|GIGA Medical Genomics|Durkin|Belgium

>Spike|hCoV-19/USA/CA-ALSR-0767-IPL/2020|2020-04-12|EPI\_ISL\_483346|Original|hCoV-19^^California|Human|UC San Diego Center for Advanced Laboratory Medicine|Andersen lab at Scripps Research|Gangavarapu|USA

>Spike|hCoV-19/England/BRIS-128441/2020|2020-04-16|EPI\_ISL\_469537|Original|hCoV-19^^England|Human|PHE South West Regional Laboratory|Wellcome Sanger Institute for the COVID-19 Genomics UK (COG-UK) consortium|Davies|United Kingdom

>Spike|hCoV-19/England/LOND-D44AF/2020|2020-04-08|EPI\_ISL\_444127|Original|hCoV-19^^England|Human|University College London|COVID-19 Genomics UK (COG-UK) Consortium|Roy|United Kingdom

>Spike|hCoV-19/England/CAMB-7EFB5/2020|2020-04-08|EPI\_ISL\_442930|Original|hCoV-19^^England|Human|Department of Pathology|Wellcome Sanger Institute for the COVID-19 Genomics UK (COG-UK) consortium|Amato|United Kingdom

>Spike|hCoV-19/USA/WA-UW-2203/2020|2020-03-25|EPI\_ISL\_426111|Original|hCoV-19^^Washington|Human|UW Virology Lab|UW Virology Lab|Roychoudhury|USA

>Spike|hCoV-19/USA/WI-WSLH-200036/2020|2020-03-27|EPI\_ISL\_471201|Original|hCoV-19^^Wisconsin|Human|Wisconsin State Laboratory of Hygiene Communicable Disease Division|Wisconsin State Laboratory of Hygiene Communicable Disease Division|Florek|USA

>Spike|hCoV-19/England/C200044569/2020|2020-11-06|EPI\_ISL\_664038|Original|hCoV-19^^England|Human|Respiratory Virus Unit|COVID-19 Genomics UK (COG-UK) Consortium|Platt|United Kingdom

>Spike|hCoV-19/Canada/ON-E65/2020|2020-06-07|EPI\_ISL\_593538|Original|hCoV-19^^Ontario|Human|Eastern Ontario Regional Laboratory Association|McMaster University|McArthur|Canada

>Spike|hCoV-19/Mexico/CMX-INMEGEN-15/2020|2020-08-06|EPI\_ISL\_522980|Original|hCoV-19^^Mexico City|Human|Instituto Nacional de Medicina Gen\u00f3mica|Instituto Nacional de Medicina Gen\u00f3mica|Hidalgo|Mexico

>Spike|hCoV-19/USA/ME-HETL-J0357/2020|2020-11-24|EPI\_ISL\_755480|Original|hCoV-19^^Maine|Human|Maine Health and Environmental Testing Laboratory|Tewhey Lab|Tewhey|USA

>Spike|hCoV-19/Italy/BAS-IZSPB-372PT/2020|2020-10-28|EPI\_ISL\_722905|Original|hCoV-19^^Basilicata|Human|Istituto Zooprofilattico Sperimentale della Puglia e della Basilicata|Istituto Zooprofilattico Sperimentale della Puglia e della Basilicata|Parisi|Italy

>Spike|hCoV-19/Denmark/DCGC-16629/2020|2020-11-16|EPI\_ISL\_714299|Original|hCoV-19^^Midtjylland|Human|Department of Virus and Microbiological Special Diagnostics|Albertsen Lab|Michaelsen|Denmark

>Spike|hCoV-19/USA/FL-BPHL-1959/2020|2020-04-13|EPI\_ISL\_653112|Original|hCoV-19^^Florida|Human|Florida Bureau of Public Health Laboratories|Florida Bureau of Public Health Laboratories|Blanton|USA

>Spike|hCoV-19/USA/LA-EVTL137/2020|2020-03-28|EPI\_ISL\_455980|Original|hCoV-19^^Louisiana|Human|LSUHS Emerging Viral Threat Laboratory|Microbial Genome Sequencing Center|Kamil|USA

>Spike|hCoV-19/Singapore/1038/2020|2020-03-22|EPI\_ISL\_574523|Original|hCoV-19^^Singapore|Human|National Public Health Laboratory|National Public Health Laboratory|Mak|Singapore

>Spike|hCoV-19/England/QEUH-BCE4F8/2020|2020-11-26|EPI\_ISL\_704368|Original|hCoV-19^^England|Human|Lighthouse Lab in Glasgow|Wellcome Sanger Institute for the COVID-19 Genomics UK (COG-UK) Consortium|Davies|United Kingdom

>Spike|hCoV-19/Wales/PHWC-169B6D/2020|2020-08-03|EPI\_ISL\_517596|Original|hCoV-19^^Wales|Human|Wales Specialist Virology Centre Sequencing lab|COVID-19 Genomics UK (COG-UK) Consortium|Moore|United Kingdom

>Spike|hCoV-19/England/ALDP-AA1993/2020|2020-10-21|EPI\_ISL\_624047|Original|hCoV-19^^England|Human|Lighthouse Lab in Alderley Park|Wellcome Sanger Institute for the COVID-19 Genomics UK (COG-UK) consortium|Davies|United Kingdom

>Spike|hCoV-19/New Zealand/20VR2957/2020|2020-00-00|EPI\_ISL\_579376|Original|hCoV-19^^Auckland|Human|LabPLUS|Institute of Environmental Science and Research (ESR)|Wang|New Zealand

>Spike|hCoV-19/England/QEUH-B14587/2020|2020-11-03|EPI\_ISL\_642685|Original|hCoV-19^^England|Human|Lighthouse Lab in Glasgow|Wellcome Sanger Institute for the COVID-19 Genomics UK (COG-UK) Consortium|Davies|United Kingdom

>Spike|hCoV-19/England/MILK-56A4E5/2020|2020-06-10|EPI\_ISL\_558250|Original|hCoV-19^^England|Human|Lighthouse Lab in Milton Keynes|Wellcome Sanger Institute for the COVID-19 Genomics UK (COG-UK) consortium|Davies|United Kingdom

>Spike|hCoV-19/Australia/NSW99/2020|2020-03-25|EPI\_ISL\_427777|Original|hCoV-19^^New South Wales|Human|Centre for Infectious Diseases and Microbiology Public Health|NSW Health Pathology - Institute of Clinical Pathology and Medical Research; Westmead Hospital; University of Sydney|Gall|Australia

>Spike|hCoV-19/USA/LA-GBCL-26556517/2020|2020-04-16|EPI\_ISL\_485164|Original|hCoV-19^^Louisiana|Human|River Road Testing Lab|Ginkgo Bioworks Clinical Laboratory|Smith|USA

>Spike|hCoV-19/England/LIVE-DCB7D2/2020|2020-11-24|EPI\_ISL\_724428|Original|hCoV-19^^England|Human|Liverpool Clinical Laboratories|COVID-19 Genomics UK (COG-UK) Consortium|Haldenby|United Kingdom

>Spike|hCoV-19/Wales/PHWC-486E6E/2020|2020-10-28|EPI\_ISL\_639139|Original|hCoV-19^^Wales|Human|Wales Specialist Virology Centre Sequencing lab|COVID-19 Genomics UK (COG-UK) Consortium|Moore|United Kingdom

>Spike|hCoV-19/Denmark/DCGC-16731/2020|2020-10-19|EPI\_ISL\_714443|Original|hCoV-19^^Hovedstaden|Human|Department of Virus and Microbiological Special Diagnostics|Albertsen Lab|Michaelsen|Denmark

>Spike|hCoV-19/England/MILK-AC7690/2020|2020-10-21|EPI\_ISL\_630247|Original|hCoV-19^^England|Human|Lighthouse Lab in Milton Keynes|Wellcome Sanger Institute for the COVID-19 Genomics UK (COG-UK) consortium|Davies|United Kingdom

>Spike|hCoV-19/USA/MI-MDHHS-SC21001/2020|2020-06-11|EPI\_ISL\_507787|Original|hCoV-19^^Michigan|Human|Michigan Department of Health and Human Services|Michigan Department of Health and Human Services|Blankenship|USA

>Spike|hCoV-19/Brazil/RJ-00303/2020|2020-04-24|EPI\_ISL\_623106|Original|hCoV-19^^Rio de Janeiro|Human|Laboratorio de Virologia Molecular / UFRJ|Bioinformatics Laboratory / LNCC|Almeida|Brazil

>Spike|hCoV-19/Wales/PHWC-36D37/2020|2020-05-03|EPI\_ISL\_474796|Original|hCoV-19^^Wales|Human|Originating lab|COVID-19 Genomics UK (COG-UK) Consortium|Moore|United Kingdom

>Spike|hCoV-19/England/MILK-808AF3/2020|2020-07-16|EPI\_ISL\_557333|Original|hCoV-19^^England|Human|Lighthouse Lab in Milton Keynes|Wellcome Sanger Institute for the COVID-19 Genomics UK (COG-UK) consortium|Davies|United Kingdom

>Spike|hCoV-19/USA/WI-UW-683/2020|2020-06-26|EPI\_ISL\_491364|Original|hCoV-19^^Wisconsin|Human|University of Wisconsin-Madison AIDS Vaccine Research Laboratories|University of Wisconsin-Madison AIDS Vaccine Research Laboratories|Baczenas|USA

>Spike|hCoV-19/USA/NM-NMDOH-2020242037/2020|2020-07-22|EPI\_ISL\_510885|Original|hCoV-19^^New Mexico|Human|New Mexico Department of Health Scientific Laboratory|New Mexico Department of Health Scientific Laboratory|Johnson|USA

>Spike|hCoV-19/Israel/51146355/2020|2020-04-04|EPI\_ISL\_447315|Original|hCoV-19^^South District|Human|Clinical Virology Laboratory|Stern Lab|Miller|Israel

>Spike|hCoV-19/England/ALDP-505DF0/2020|2020-06-25|EPI\_ISL\_559251|Original|hCoV-19^^England|Human|Lighthouse Lab in Alderley Park|Wellcome Sanger Institute for the COVID-19 Genomics UK (COG-UK) consortium|Davies|United Kingdom

>Spike|hCoV-19/Denmark/DCGC-3237/2020|2020-08-31|EPI\_ISL\_616897|Original|hCoV-19^^Hovedstaden|Human|Department of Virus and Microbiological Special Diagnostics|Albertsen lab|Michaelsen|Denmark

>Spike|hCoV-19/England/ALDP-94F94D/2020|2020-06-15|EPI\_ISL\_555262|Original|hCoV-19^^England|Human|Lighthouse Lab in Alderley Park|Wellcome Sanger Institute for the COVID-19 Genomics UK (COG-UK) consortium|Davies|United Kingdom

>Spike|hCoV-19/Peru/LIM-UPCH-0034/2020|2020-06-17|EPI\_ISL\_540934|Original|hCoV-19^^Lima|Human|Laboratorio de Referencia Nacional de Virus Respiratorios|Laboratorio de Gen\u00f3mica Microbiana|Tsukayama|Peru

>Spike|hCoV-19/England/ALDP-9ECF6E/2020|2020-05-05|EPI\_ISL\_589360|Original|hCoV-19^^England|Human|Lighthouse Lab in Alderley Park|Wellcome Sanger Institute for the COVID-19 Genomics UK (COG-UK) consortium|Davies|United Kingdom

>Spike|hCoV-19/United Arab Emirates/0352/2020|2020-05-15|EPI\_ISL\_698527|Original|hCoV-19^^Abu Dhabi|Human|Group 42 (G42) Healthcare|G42 Healthcare|Ogrodzki|United Arab Emirates

>Spike|hCoV-19/England/ALDP-A85EA5/2020|2020-10-17|EPI\_ISL\_610585|Original|hCoV-19^^England|Human|Lighthouse Lab in Alderley Park|Wellcome Sanger Institute for the COVID-19 Genomics UK (COG-UK) consortium|Davies|United Kingdom

>Spike|hCoV-19/mink/Netherlands/NB-EMC-20-21/2020|2020-07-09|EPI\_ISL\_523054|Original|hCoV-19^^Limburg|Neovison vison|Dutch COVID-19 response team|Erasmus Medical Center|Oude Munnink|Netherlands

>Spike|hCoV-19/England/CAMC-A6598C/2020|2020-10-11|EPI\_ISL\_608456|Original|hCoV-19^^England|Human|Lighthouse Lab in Cambridge|Wellcome Sanger Institute for the COVID-19 Genomics UK (COG-UK) consortium|Davies|United Kingdom

>Spike|hCoV-19/England/MILK-99386B/2020|2020-08-26|EPI\_ISL\_552323|Original|hCoV-19^^England|Human|Lighthouse Lab in Milton Keynes|Wellcome Sanger Institute for the COVID-19 Genomics UK (COG-UK) consortium|Davies|United Kingdom

>Spike|hCoV-19/Australia/VIC7497/2020|2020-07-23|EPI\_ISL\_564450|Original|hCoV-19^^Victoria|Human|Microbiological Diagnostic Unit - Public Health Laboratory (MDU-PHL)|MDU-PHL|Schultz|Australia

>Spike|hCoV-19/Northern Ireland/NIRE-10966E/2020|2020-10-22|EPI\_ISL\_680211|Original|hCoV-19^^Northern Ireland|Human|Regional Virus Laboratory|COVID-19 Genomics UK (COG-UK) Consortium|Fairley|United Kingdom

>Spike|hCoV-19/England/ALDP-94EFD3/2020|2020-06-19|EPI\_ISL\_556332|Original|hCoV-19^^England|Human|Lighthouse Lab in Alderley Park|Wellcome Sanger Institute for the COVID-19 Genomics UK (COG-UK) consortium|Davies|United Kingdom

>Spike|hCoV-19/Wales/PHWC-16F3D8/2020|2020-10-05|EPI\_ISL\_585959|Original|hCoV-19^^Wales|Human|Wales Specialist Virology Centre Sequencing lab|COVID-19 Genomics UK (COG-UK) Consortium|Moore|United Kingdom

>Spike|hCoV-19/England/ALDP-A6E5DA/2020|2020-10-15|EPI\_ISL\_607030|Original|hCoV-19^^England|Human|Lighthouse Lab in Alderley Park|Wellcome Sanger Institute for the COVID-19 Genomics UK (COG-UK) consortium|Davies|United Kingdom

>Spike|hCoV-19/Ukraine/Kyiv-785/2020|2020-08-03|EPI\_ISL\_576148|Original|hCoV-19^^Kyiv|Human|Department of Respiratory & Other Viral Infections of L.V. Gromashevsky Institute of Epidemiology & Infectious Diseases NAMS of Ukraine|Department of Respiratory & Other Viral Infections of L.V. Gromashevsky Institute of Epidemiology & Infectious Diseases NAMS of Ukraine|Mironenko|Ukraine

>Spike|hCoV-19/USA/VA-DCLS-1023/2020|2020-06-03|EPI\_ISL\_526913|Original|hCoV-19^^Virginia|Human|Virginia DCLS|Virginia DCLS|St. Jacques|USA

>Spike|hCoV-19/USA/NY-SURV0331/2020|2020-03-09|EPI\_ISL\_436062|Original|hCoV-19^^New York|Human|NYC Department of Health and Mental Hygiene|Pathogen Discovery|Queen|USA

>Spike|hCoV-19/England/ALDP-94E6A1/2020|2020-06-22|EPI\_ISL\_555487|Original|hCoV-19^^England|Human|Lighthouse Lab in Alderley Park|Wellcome Sanger Institute for the COVID-19 Genomics UK (COG-UK) consortium|Davies|United Kingdom

>Spike|hCoV-19/USA/TX-HMH-MCoV-15849/2020|2020-07-10|EPI\_ISL\_785533|Original|hCoV-19^^Texas|Human|Houston Methodist Hospital|Houston Methodist Hospital|Long|USA

>Spike|hCoV-19/England/MILK-A7AF82/2020|2020-10-14|EPI\_ISL\_607535|Original|hCoV-19^^England|Human|Lighthouse Lab in Milton Keynes|Wellcome Sanger Institute for the COVID-19 Genomics UK (COG-UK) consortium|Davies|United Kingdom

>Spike|hCoV-19/Switzerland/BL-42237708/2020|2020-04-19|EPI\_ISL\_581714|Original|hCoV-19^^Basel-Land|Human|University Hospital Basel|University Hospital Basel|Roloff Handschin|Switzerland

>Spike|hCoV-19/England/CAMC-B5281B/2020|2020-11-08|EPI\_ISL\_657637|Original|hCoV-19^^England|Human|Lighthouse Lab in Cambridge|Wellcome Sanger Institute for the COVID-19 Genomics UK (COG-UK) Consortium|Davies|United Kingdom

>Spike|hCoV-19/Wales/PHWC-493BD0/2020|2020-11-16|EPI\_ISL\_725995|Original|hCoV-19^^Wales|Human|Originating lab|COVID-19 Genomics UK (COG-UK) Consortium|Moore|United Kingdom

>Spike|hCoV-19/England/ALDP-65DB2B/2020|2020-07-03|EPI\_ISL\_555634|Original|hCoV-19^^England|Human|Lighthouse Lab in Alderley Park|Wellcome Sanger Institute for the COVID-19 Genomics UK (COG-UK) consortium|Davies|United Kingdom

>Spike|hCoV-19/USA/MI-MDHHS-SC21415/2020|2020-03-21|EPI\_ISL\_507669|Original|hCoV-19^^Michigan|Human|Michigan Department of Health and Human Services|Michigan Department of Health and Human Services|Blankenship|USA

>Spike|hCoV-19/England/NORT-292BD3/2020|2020-05-27|EPI\_ISL\_472280|Original|hCoV-19^^England|Human|Northumbria University / South Tees Hospitals NHS Foundation Trust / North Cumbria Integrated Care NHS Foundation Trust / North Tees and Hartlepool NHS Foundation Trust / Newcastle Hospitals NHS Foundation Trust|COVID-19 Genomics UK (COG-UK) Consortium|Bashton|United Kingdom

>Spike|hCoV-19/USA/NY-Wadsworth-38057-01/2020|2020-04-07|EPI\_ISL\_676711|Original|hCoV-19^^New York|Human|Wadsworth Center|Wadsworth Center|Lasek-Nesselquist|USA

>Spike|hCoV-19/Portugal/PT1401/2020|2020-03-29|EPI\_ISL\_511360|Original|hCoV-19^^Portugal|Human|Instituto Nacional de Saude (INSA)|Instituto Nacional de Saude (INSA)|Borges|Portugal

>Spike|hCoV-19/Portugal/PT0081/2020|2020-03-19|EPI\_ISL\_421484|Original|hCoV-19^^Portugal|Human|CH VN Gaia - Espinho|Instituto Nacional de Saude (INSA)|Borges|Portugal

>Spike|hCoV-19/USA/TX-DSHS-1889/2020|2020-07-08|EPI\_ISL\_751540|Original|hCoV-19^^Texas|Human|Texas Department of State Health Services|Texas Department of State Health Services|Rahman|USA

>Spike|hCoV-19/Denmark/DCGC-6548/2020|2020-10-05|EPI\_ISL\_619448|Original|hCoV-19^^Hovedstaden|Human|Department of Virus and Microbiological Special Diagnostics|Albertsen lab|Michaelsen|Denmark

>Spike|hCoV-19/France/OCC-SC516/2020|2020-04-29|EPI\_ISL\_644696|Original|hCoV-19^^Occitanie|Human|CHU Montpellier|CNR Virus des Infections Respiratoires - France SUD|Bal|France

>Spike|hCoV-19/Wales/MILK-9C44E5/2020|2020-09-09|EPI\_ISL\_566800|Original|hCoV-19^^Wales|Human|Lighthouse Lab in Milton Keynes|Wellcome Sanger Institute for the COVID-19 Genomics UK (COG-UK) consortium|Davies|United Kingdom

>Spike|hCoV-19/Denmark/DCGC-8781/2020|2020-10-26|EPI\_ISL\_626045|Original|hCoV-19^^Hovedstaden|Human|Department of Virus and Microbiological Special Diagnostics|Albertsen lab|Michaelsen|Denmark

>Spike|hCoV-19/Russia/MOW-RII-MH1679V/2020|2020-09-06|EPI\_ISL\_733393|Vero|hCoV-19^^Moscow|Human|HELIX LLC|WHO National Influenza Centre Russian Federation|Komissarov|Russia

>Spike|hCoV-19/England/QEUH-AF0DA8/2020|2020-10-29|EPI\_ISL\_666005|Original|hCoV-19^^England|Human|Northumbria University / South Tees Hospitals NHS Foundation Trust / North Cumbria Integrated Care NHS Foundation Trust / North Tees and Hartlepool NHS Foundation Trust / Newcastle Hospitals NHS Foundation Trust|COVID-19 Genomics UK (COG-UK) Consortium|Bashton|United Kingdom

>Spike|hCoV-19/Japan/PG-5540/2020|2020-08-00|EPI\_ISL\_688665|Original|hCoV-19^^Japan|Human|Pathogen Genomics Center|Pathogen Genomics Center|Sekizuka|Japan

>Spike|hCoV-19/England/CAMC-CF987F/2020|2020-12-18|EPI\_ISL\_781471|Original|hCoV-19^^England|Human|Lighthouse Lab in Cambridge|Wellcome Sanger Institute for the COVID-19 Genomics UK (COG-UK) Consortium|Davies|United Kingdom

>Spike|hCoV-19/USA/TX-GCID-192000254/2020|2020-04-07|EPI\_ISL\_501171|Original|hCoV-19^^Texas|Human|Baylor College of Medicine|Baylor College of Medicine|Skinner|USA

>Spike|hCoV-19/United Arab Emirates/0101/2020|2020-05-19|EPI\_ISL\_698291|Original|hCoV-19^^Abu Dhabi|Human|Group 42 (G42) Healthcare|G42 Healthcare|Ogrodzki|United Arab Emirates

>Spike|hCoV-19/Scotland/QEUH-A20E60/2020|2020-10-01|EPI\_ISL\_599022|Original|hCoV-19^^Scotland|Human|Lighthouse Lab in Glasgow|Wellcome Sanger Institute for the COVID-19 Genomics UK (COG-UK) consortium|Davies|United Kingdom

>Spike|hCoV-19/Italy/LAZ-INMI-65/2020|2020-06-19|EPI\_ISL\_603172|Original|hCoV-19^^Lazio|Human|INMI Lazzaro Spallanzani IRCCS|INMI Lazzaro Spallanzani IRCCS|Gruber|Italy

>Spike|hCoV-19/England/ALDP-A864A2/2020|2020-10-17|EPI\_ISL\_605965|Original|hCoV-19^^England|Human|Lighthouse Lab in Alderley Park|Wellcome Sanger Institute for the COVID-19 Genomics UK (COG-UK) consortium|Davies|United Kingdom

>Spike|hCoV-19/England/CAMB-7CF4E/2020|2020-04-05|EPI\_ISL\_442256|Original|hCoV-19^^England|Human|Department of Pathology|Wellcome Sanger Institute for the COVID-19 Genomics UK (COG-UK) consortium|Amato|United Kingdom

>Spike|hCoV-19/Australia/VIC12152/2020|2020-07-25|EPI\_ISL\_641063|Original|hCoV-19^^Victoria|Human|Microbiological Diagnostic Unit - Public Health Laboratory (MDU-PHL)|MDU-PHL|Schultz|Australia

>Spike|hCoV-19/Portugal/PT0195/2020|2020-03-29|EPI\_ISL\_453911|Original|hCoV-19^^Portugal|Human|unknown|Instituto Nacional de Saude (INSA)|Borges|Portugal

>Spike|hCoV-19/Mexico/BCN-ALSR-1715/2020|2020-04-29|EPI\_ISL\_496376|Original|hCoV-19^^Baja California|Human|Infectolab|Andersen lab at Scripps Research|Gangavarapu|Mexico

>Spike|hCoV-19/Lithuania/MR-LUHS-Eilnr55/2020|2020-04-09|EPI\_ISL\_541866|Original|hCoV-19^^Marijampoles apskritis|Human|Lithuanian University of Health Sciences Hospital|Lithuanian University of Health Sciences|Zemaitis|Lithuania

>Spike|hCoV-19/South Africa/R13561-20/2020|2020-07-13|EPI\_ISL\_622903|Original|hCoV-19^^North West|Human|National Institute for Communicable Diseases of the National

Health Laboratory Service|National Institute for Communicable Diseases of the National Health Laboratory Service|Allam|South Africa  
>Spike|hCoV-19/Belgium/ULG-10724/2020|2020-09-15|EPI\_ISL\_641566|Original|hCoV-19^^Li\u00e8ge|Human|Department of Clinical Microbiology|GIGA Medical Genomics|Durkin|Belgium  
>Spike|hCoV-19/England/ALDP-744449/2020|2020-06-29|EPI\_ISL\_557485|Original|hCoV-19^^England|Human|Lighthouse Lab in Alderley Park|Wellcome Sanger Institute for the COVID-19 Genomics UK (COG-UK) consortium|Davies|United Kingdom  
>Spike|hCoV-19/Singapore/69/2020|2020-04-15|EPI\_ISL\_428848|Original|hCoV-19^^Singapore|Human|National Public Health Laboratory|National Public Health Laboratory|Mak|Singapore  
>Spike|hCoV-19/USA/TX-DSHS-1619/2020|2020-10-14|EPI\_ISL\_700710|Original|hCoV-19^^Texas|Human|Texas Department of State Health Services|Texas Department of State Health Services|Rahman|USA  
>Spike|hCoV-19/Brazil/SP-626/2020|2020-03-24|EPI\_ISL\_515529|Original|hCoV-19^^S\u00e3o Paulo|Human|Pronto Socorro Municipal Julio Tupy|Instituto Adolfo Lutz|Sacchi|Brazil  
>Spike|hCoV-19/England/SHEF-C02CA/2020|2020-03-27|EPI\_ISL\_420180|Original|hCoV-19^^England|Human|Virology Department|Department of Infection|de Silva|United Kingdom  
>Spike|hCoV-19/Japan/PG-1746/2020|2020-05-00|EPI\_ISL\_685352|Original|hCoV-19^^Japan|Human|Pathogen Genomics Center|Pathogen Genomics Center|Sekizuka|Japan  
>Spike|hCoV-19/France/ARA-11228/2020|2020-03-18|EPI\_ISL\_525542|Original|hCoV-19^^Auvergne-Rh\u00f4ne-Alpes|Human|CNR Virus des Infections Respiratoires - France SUD|CNR Virus des Infections Respiratoires - France SUD|Josset|France  
>Spike|hCoV-19/USA/CA-CZB-1861/2020|2020-04-28|EPI\_ISL\_486167|Original|hCoV-19^^California|Human|Orange County Public Health Laboratory|Chan-Zuckerberg Biohub|McGeever|USA  
>Spike|hCoV-19/USA/WI-UW-586/2020|2020-06-19|EPI\_ISL\_484961|Original|hCoV-19^^Wisconsin|Human|University of Wisconsin-Madison AIDS Vaccine Research Laboratories|University of Wisconsin-Madison AIDS Vaccine Research Laboratories|Baczenas|USA  
>Spike|hCoV-19/Scotland/EDB4708/2020|2020-04-27|EPI\_ISL\_449324|Original|hCoV-19^^Scotland|Human|Virology Department|COVID-19 Genomics UK (COG-UK) Consortium|Williams|United Kingdom  
>Spike|hCoV-19/USA/CA-CZB-14826/2020|2020-11-19|EPI\_ISL\_739405|Original|hCoV-19^^California|Human|Humboldt County Public Health Laboratory|Chan-Zuckerberg Biohub|Kamm|USA  
>Spike|hCoV-19/England/CAMB-76DB3/2020|2020-03-31|EPI\_ISL\_425428|Original|hCoV-19^^England|Human|Department of Pathology|COVID-19 Genomics UK (COG-UK) Consortium|Meredith|United Kingdom  
>Spike|hCoV-19/England/SHEF-C3959/2020|2020-04-02|EPI\_ISL\_432778|Original|hCoV-19^^England|Human|Virology Department|COVID-19 Genomics UK (COG-UK) Consortium|de Silva|United Kingdom  
>Spike|hCoV-19/USA/VA-DCLS-1933/2020|2020-09-28|EPI\_ISL\_644924|Original|hCoV-19^^Virginia|Human|Virginia DCLS|Virginia DCLS|St. Jacques|USA  
>Spike|hCoV-19/USA/MI-UM-10035869177/2020|2020-09-09|EPI\_ISL\_583340|Original|hCoV-19^^Michigan|Human|University of Michigan Clinical Microbiology Laboratory|Lauring Lab|Valesano|USA  
>Spike|hCoV-19/England/CAMC-B513DF/2020|2020-11-08|EPI\_ISL\_657771|Original|hCoV-19^^England|Human|Lighthouse Lab in Cambridge|Wellcome Sanger Institute for the COVID-19 Genomics UK (COG-UK) Consortium|Davies|United Kingdom  
>Spike|hCoV-19/Luxembourg/LNS5351629/2020|2020-12-29|EPI\_ISL\_771099|Original|hCoV-19^^Luxembourg|Human|Laboratoire national de sant\u00e9|Laboratoire national de sant\u00e9|Wienecke-Baldacchino|Luxembourg  
>Spike|hCoV-19/USA/TX-HMH-MCoV-18627/2020|2020-11-19|EPI\_ISL\_784975|Original|hCoV-19^^Texas|Human|Houston Methodist Hospital|Houston Methodist Hospital|Long|USA  
>Spike|hCoV-19/Scotland/CVR3426/2020|2020-05-07|EPI\_ISL\_456847|Original|hCoV-19^^Scotland|Human|West of Scotland Specialist Virology Centre|COVID-19 Genomics UK (COG-UK) Consortium|Robertson|United Kingdom

>Spike|hCoV-19/England/CAMB-1B97E2/2020|2020-11-04|EPI\_ISL\_664945|Original|hCoV-19^^England|Human|Department of Pathology|COVID-19 Genomics UK (COG-UK) Consortium|Goodfellow|United Kingdom

>Spike|hCoV-19/England/MILK-B04EE9/2020|2020-10-24|EPI\_ISL\_650630|Original|hCoV-19^^England|Human|Department of Pathology|COVID-19 Genomics UK (COG-UK) Consortium|Goodfellow|United Kingdom

>Spike|hCoV-19/Switzerland/BL-UHB-42192884/2020|2020-03-16|EPI\_ISL\_528133|Original|hCoV-19^^Basel-Land|Human|University Hospital Basel|University Hospital Basel|Roloff Handschin|Switzerland

>Spike|hCoV-19/Australia/VIC6920/2020|2020-07-21|EPI\_ISL\_564140|Original|hCoV-19^^Victoria|Human|Microbiological Diagnostic Unit - Public Health Laboratory (MDU-PHL)|MDU-PHL|Schultz|Australia

>Spike|hCoV-19/England/NOTT-10EA8B/2020|2020-03-29|EPI\_ISL\_425633|Original|hCoV-19^^England|Human|Queens Medical Centre|COVID-19 Genomics UK (COG-UK) Consortium|Loose|United Kingdom

>Spike|hCoV-19/USA/AK-PHL549/2020|2020-06-20|EPI\_ISL\_525759|Original|hCoV-19^^Alaska|Human|Alaska State Virology Laboratory|Alaska State Virology Laboratory|Chen|USA

>Spike|hCoV-19/Japan/PG-3690/2020|2020-04-00|EPI\_ISL\_691943|Original|hCoV-19^^Japan|Human|Pathogen Genomics Center|Pathogen Genomics Center|Sekizuka|Japan

>Spike|hCoV-19/India/OR-ILSCV32652/2020|2020-06-03|EPI\_ISL\_481160|Original|hCoV-19^^Odisha|Human|Immunogenomics lab|Immunogenomics lab|Raghav|India

>Spike|hCoV-19/USA/WA-S1804/2020|2020-06-02|EPI\_ISL\_496230|Original|hCoV-19^^Washington|Human|Washington State Department of Health|Seattle Flu Study|Lee|USA

>Spike|hCoV-19/USA/MN-MDH-1543/2020|2020-08-03|EPI\_ISL\_527608|Original|hCoV-19^^Minnesota|Human|Minnesota Department of Health|Minnesota Department of Health|Garfin|USA

>Spike|hCoV-19/England/CAMC-C836DA/2020|2020-12-17|EPI\_ISL\_762580|Original|hCoV-19^^England|Human|Lighthouse Lab in Cambridge|Wellcome Sanger Institute for the COVID-19 Genomics UK (COG-UK) Consortium|Davies|United Kingdom

>Spike|hCoV-19/USA/UT-UPHL-2009490/2020|2020-07-19|EPI\_ISL\_605174|Original|hCoV-19^^Utah|Human|Utah Public Health Laboratory|Utah Public Health Laboratory|Young|USA

>Spike|hCoV-19/USA/MI-QDX-612/2020|2020-03-18|EPI\_ISL\_571341|Original|hCoV-19^^Michigan|Human|Quest Diagnostics|Quest Diagnostics|Kagan|USA

>Spike|hCoV-19/England/EXET-13E90D/2020|2020-12-13|EPI\_ISL\_764178|Original|hCoV-19^^England|Human|University of Exeter|COVID-19 Genomics UK (COG-UK) Consortium|Temperton|United Kingdom

>Spike|hCoV-19/Switzerland/ZH-ETHZ-200033/2020|2020-07-15|EPI\_ISL\_510722|Original|hCoV-19^^Zurich|Human|Viollier AG|Department of Biosystems Science and Engineering|Nadeau|Switzerland

>Spike|hCoV-19/Luxembourg/LNS7643605/2020|2020-10-26|EPI\_ISL\_744607|Original|hCoV-19^^Luxembourg|Human|Laboratoire national de sant\u00e9|Laboratoire national de sant\u00e9|Wienecke-Baldacchino|Luxembourg

>Spike|hCoV-19/England/LEED-2A83E1/2020|2020-03-30|EPI\_ISL\_538995|Original|hCoV-19^^England|Human|Leeds Teaching Hospitals NHS Trust and Public Health England|Wellcome Sanger Institute for the COVID-19 Genomics UK (COG-UK) consortium|Davies|United Kingdom

>Spike|hCoV-19/England/ALDP-CB3835/2020|2020-12-20|EPI\_ISL\_761235|Original|hCoV-19^^England|Human|Lighthouse Lab in Alderley Park|Wellcome Sanger Institute for the COVID-19 Genomics UK (COG-UK) Consortium|Davies|United Kingdom

>Spike|hCoV-19/Switzerland/LU-ETHZ-350450/2020|2020-11-04|EPI\_ISL\_729257|Original|hCoV-19^^Lucerne|Human|Viollier AG|Department of Biosystems Science and Engineering|Nadeau|Switzerland

>Spike|hCoV-19/Denmark/DCGC-18649/2020|2020-12-07|EPI\_ISL\_750102|Original|hCoV-19^^Midtjylland|Human|Department of Virus and Microbiological Special Diagnostics|Albertsen Lab|Michaelsen|Denmark

>Spike|hCoV-19/Wales/PHWC-496760/2020|2020-11-20|EPI\_ISL\_726631|Original|hCoV-19^^Wales|Human|Originating lab|COVID-19 Genomics UK (COG-UK) Consortium|Moore|United Kingdom



>Spike|hCoV-19/Italy/ABR-IZSGC-484/2020|2020-02-27|EPI\_ISL\_457749|Vero E6|hCoV-19^^Abruzzo|Human|Department of Infectious Diseases|Army Medical and Veterinary Research Center|Lista|Italy

>Spike|hCoV-19/Wales/PHWC-2B737/2020|2020-04-13|EPI\_ISL\_445754|Original|hCoV-19^^Wales|Human|Wales Specialist Virology Centre|Public Health Wales Microbiology Cardiff|Moore|United Kingdom

>Spike|hCoV-19/USA/WA-UW-1977/2020|2020-03-24|EPI\_ISL\_424337|Original|hCoV-19^^Washington|Human|UW Virology Lab|UW Virology Lab|Roychoudhury|USA

>Spike|hCoV-19/England/ALDP-9E8991/2020|2020-09-24|EPI\_ISL\_638270|Original|hCoV-19^^England|Human|Centre for Enzyme Innovation|COVID-19 Genomics UK (COG-UK) Consortium|Robson|United Kingdom

>Spike|hCoV-19/USA/DC-BBI2/2020|2020-10-14|EPI\_ISL\_605791|Original|hCoV-19^^District of Columbia|Human|Brotman Baty Institute for Precision Medicine|Brotman Baty Institute for Precision Medicine|Bedford|USA

>Spike|hCoV-19/England/SHEF-C039A/2020|2020-03-28|EPI\_ISL\_420195|Original|hCoV-19^^England|Human|Virology Department|Department of Infection|de Silva|United Kingdom

>Spike|hCoV-19/Denmark/DCGC-13299/2020|2020-11-30|EPI\_ISL\_712718|Original|hCoV-19^^Hovedstaden|Human|Department of Virus and Microbiological Special Diagnostics|Albertsen Lab|Michaelsen|Denmark

>Spike|hCoV-19/Denmark/DCGC-6207/2020|2020-10-05|EPI\_ISL\_620110|Original|hCoV-19^^Midtjylland|Human|Department of Virus and Microbiological Special Diagnostics|Albertsen lab|Michaelsen|Denmark

>Spike|hCoV-19/England/20138080104/2020|2020-03-26|EPI\_ISL\_423325|Original|hCoV-19^^England|Human|Respiratory Virus Unit|Respiratory Virus Unit|Platt|United Kingdom

>Spike|hCoV-19/USA/VA-DCLS-2171/2020|2020-11-06|EPI\_ISL\_677200|Original|hCoV-19^^Virginia|Human|Virginia Division of Consolidated Laboratory Services|Virginia Division of Consolidated Laboratory Services|St. Jacques|USA

>Spike|hCoV-19/England/BRIS-123394/2020|2020-04-06|EPI\_ISL\_442746|Original|hCoV-19^^England|Human|PHE South West Regional Laboratory|Wellcome Sanger Institute for the COVID-19 Genomics UK (COG-UK) consortium|Amato|United Kingdom

>Spike|hCoV-19/Northern Ireland/NIRE-FAF2A/2020|2020-04-14|EPI\_ISL\_470024|Original|hCoV-19^^Northern Ireland|Human|Regional Virus Laboratory|Wellcome Sanger Institute for the COVID-19 Genomics UK (COG-UK) consortium|Davies|United Kingdom

>Spike|hCoV-19/Australia/VIC5860/2020|2020-07-18|EPI\_ISL\_518653|Original|hCoV-19^^Victoria|Human|Microbiological Diagnostic Unit - Public Health Laboratory (MDU-PHL) |MDU-PHL|Schultz|Australia

>Spike|hCoV-19/Australia/SAP063/2020|2020-03-28|EPI\_ISL\_451102|Original|hCoV-19^^South Australia|Human|SA Pathology|SA Pathology|Leong|Australia

>Spike|hCoV-19/DRC/191/2020|2020-03-21|EPI\_ISL\_417955|Original|hCoV-19^^Kinshasa|Human|Viral Respiratory Lab|Pathogen Sequencing Lab|Pratt|Democratic Republic of the Congo

>Spike|hCoV-19/France/ARA78036/2020|2020-09-25|EPI\_ISL\_639995|Original|hCoV-19^^Auvergne-Rhone-Alpes|Human|CNR Virus des Infections Respiratoires - France SUD|CNR Virus des Infections Respiratoires - France SUD|Josset|France

>Spike|hCoV-19/USA/WA-UW-1805/2020|2020-03-22|EPI\_ISL\_424264|Original|hCoV-19^^Washington|Human|UW Virology Lab|UW Virology Lab|Roychoudhury|USA

>Spike|hCoV-19/England/201140309/2020|2020-03-11|EPI\_ISL\_464721|Original|hCoV-19^^England|Human|Respiratory Virus Unit|Respiratory Virus Unit|Platt|United Kingdom

>Spike|hCoV-19/Northern Ireland/NIRE-108D00/2020|2020-10-09|EPI\_ISL\_627554|Original|hCoV-19^^Northern Ireland|Human|Regional Virus Laboratory|COVID-19 Genomics UK (COG-UK) Consortium|Fairley|United Kingdom

>Spike|hCoV-19/Wales/PHWC-49FA5F/2020|2020-12-09|EPI\_ISL\_743310|Original|hCoV-19^^Wales|Human|Wales Specialist Virology Centre Sequencing lab|COVID-19 Genomics UK (COG-UK) Consortium|Moore|United Kingdom

>Spike|hCoV-19/England/LIVE-1D28FF/2020|2020-08-28|EPI\_ISL\_534747|Original|hCoV-19^^England|Human|Liverpool Clinical Laboratories|COVID-19 Genomics UK (COG-UK) Consortium|Haldenby|United Kingdom

>Spike|hCoV-19/England/QEUA-9CA564/2020|2020-09-09|EPI\_ISL\_567446|Original|hCoV-19^^England|Human|Lighthouse Lab in Glasgow|Wellcome Sanger Institute for the COVID-19 Genomics UK (COG-UK) consortium|Davies|United Kingdom

>Spike|hCoV-19/Denmark/DCGC-21354/2020|2020-12-21|EPI\_ISL\_759697|Original|hCoV-19^^Hovedstaden|Human|Department of Virus and Microbiological Special Diagnostics|Albertsen Lab|Michaelsen|Denmark

>Spike|hCoV-19/USA/TX-HMH-1183/2020|2020-04-01|EPI\_ISL\_542571|Original|hCoV-19^^Texas|Human|Houston Methodist Hospital|Houston Methodist Hospital|Long|USA

>Spike|hCoV-19/USA/TX-HMH-MCoV-15041/2020|2020-10-15|EPI\_ISL\_786525|Original|hCoV-19^^Texas|Human|Houston Methodist Hospital|Houston Methodist Hospital|Long|USA

>Spike|hCoV-19/Denmark/DCGC-11541/2020|2020-11-02|EPI\_ISL\_670519|Original|hCoV-19^^Hovedstaden|Human|Department of Virus and Microbiological Special Diagnostics|Albertsen Lab|Michaelsen|Denmark

>Spike|hCoV-19/USA/MI-MDHHS-SC22186/2020|2020-10-20|EPI\_ISL\_614237|Original|hCoV-19^^Michigan|Human|Michigan Department of Health and Human Services|Michigan Department of Health and Human Services|Jacob|USA

>Spike|hCoV-19/USA/WA-S2159/2020|2020-06-08|EPI\_ISL\_497587|Original|hCoV-19^^Washington|Human|Washington State Department of Health|Seattle Flu Study|Lee|USA

>Spike|hCoV-19/South Korea/KDCA0293/2020|2020-10-26|EPI\_ISL\_760087|Original|hCoV-19^^South Korea|Human|Division of Emerging Infectious Diseases|Division of Emerging Infectious Diseases|Park|South Korea

>Spike|hCoV-19/England/ALDP-9BEDD4/2020|2020-09-10|EPI\_ISL\_568020|Original|hCoV-19^^England|Human|Lighthouse Lab in Alderley Park|Wellcome Sanger Institute for the COVID-19 Genomics UK (COG-UK) consortium|Davies|United Kingdom

>Spike|hCoV-19/Japan/PG-5545/2020|2020-08-00|EPI\_ISL\_688670|Original|hCoV-19^^Japan|Human|Pathogen Genomics Center|Pathogen Genomics Center|Sekizuka|Japan

>Spike|hCoV-19/England/OXON-ADD95/2020|2020-00-00|EPI\_ISL\_448635|Original|hCoV-19^^England|Human|Oxford Viromics|COVID-19 Genomics UK (COG-UK) Consortium|Golubchik|United Kingdom

>Spike|hCoV-19/USA/CA-ALSR-1021-IPL/2020|2020-04-23|EPI\_ISL\_483467|Original|hCoV-19^^California|Human|UC San Diego Center for Advanced Laboratory Medicine|Andersen lab at Scripps Research|Gangavarapu|USA

>Spike|hCoV-19/Wales/PHWC-49919C/2020|2020-12-02|EPI\_ISL\_727266|Original|hCoV-19^^Wales|Human|Originating lab|COVID-19 Genomics UK (COG-UK) Consortium|Moore|United Kingdom

>Spike|hCoV-19/Wales/PHWC-487EE5/2020|2020-10-31|EPI\_ISL\_639322|Original|hCoV-19^^Wales|Human|Wales Specialist Virology Centre Sequencing lab|COVID-19 Genomics UK (COG-UK) Consortium|Moore|United Kingdom

>Spike|hCoV-19/Germany/HH-hpi-p1770/2020|2020-03-19|EPI\_ISL\_776144|Original|hCoV-19^^Hamburg|Human|University Medical Center Hamburg Eppendorf|Heinrich Pette Institute|Robitaille|Germany

>Spike|hCoV-19/USA/WA-S2020/2020|2020-06-05|EPI\_ISL\_497448|Original|hCoV-19^^Washington|Human|Washington State Department of Health|Seattle Flu Study|Lee|USA

>Spike|hCoV-19/USA/WA-S347/2020|2020-04-01|EPI\_ISL\_434107|Original|hCoV-19^^Washington|Human|Washington State Department of Health|Seattle Flu Study|Bedford|USA

>Spike|hCoV-19/England/C200044549/2020|2020-11-06|EPI\_ISL\_664033|Original|hCoV-19^^England|Human|Respiratory Virus Unit|COVID-19 Genomics UK (COG-UK) Consortium|Platt|United Kingdom

>Spike|hCoV-19/Wales/PHWC-483A30/2020|2020-10-06|EPI\_ISL\_626875|Original|hCoV-19^^Wales|Human|Wales Specialist Virology Centre Sequencing lab|COVID-19 Genomics UK (COG-UK) Consortium|Moore|United Kingdom

>Spike|hCoV-19/Japan/TKYT22342/2020|2020-07-00|EPI\_ISL\_649126|Original|hCoV-19^^Japan|Human|Tokyo Metropolitan Institute of Public Health|Tokyo Metropolitan Institute of Public Health|Ryota|Japan

>Spike|hCoV-19/Netherlands/ZH-EMC-296/2020|2020-07-03|EPI\_ISL\_523638|Original|hCoV-19^^Zuid Holland|Human|Dutch COVID-19 response team|Erasmus Medical Center|Oude Munnink|Netherlands

>Spike|hCoV-19/USA/WA-S679/2020|2020-04-07|EPI\_ISL\_449849|Original|hCoV-19^^Washington|Human|Washington State Department of Health|Seattle Flu Study|Bedford|USA

>Spike|hCoV-19/England/ALDP-A6E73E/2020|2020-10-15|EPI\_ISL\_607953|Original|hCoV-19^^England|Human|Lighthouse Lab in Alderley Park|Wellcome Sanger Institute for the COVID-19 Genomics UK (COG-UK) consortium|Davies|United Kingdom

>Spike|hCoV-19/England/ALDP-4FF659/2020|2020-06-23|EPI\_ISL\_559138|Original|hCoV-19^^England|Human|Lighthouse Lab in Alderley Park|Wellcome Sanger Institute for the COVID-19 Genomics UK (COG-UK) consortium|Davies|United Kingdom

>Spike|hCoV-19/Denmark/DCGC-3450/2020|2020-08-31|EPI\_ISL\_616214|Original|hCoV-19^^Syddanmark|Human|Department of Virus and Microbiological Special Diagnostics|Albertsen lab|Michaelsen|Denmark

>Spike|hCoV-19/Scotland/QEUH-9DAB41/2020|2020-09-22|EPI\_ISL\_601144|Original|hCoV-19^^Scotland|Human|Lighthouse Lab in Glasgow|Wellcome Sanger Institute for the COVID-19 Genomics UK (COG-UK) consortium|Davies|United Kingdom

>Spike|hCoV-19/Australia/VIC15984/2020|2020-10-09|EPI\_ISL\_641104|Original|hCoV-19^^Victoria|Human|Microbiological Diagnostic Unit - Public Health Laboratory (MDU-PHL)|MDU-PHL|Schultz|Australia

>Spike|hCoV-19/England/CAMC-B08A87/2020|2020-10-29|EPI\_ISL\_643902|Original|hCoV-19^^England|Human|Lighthouse Lab in Cambridge|Wellcome Sanger Institute for the COVID-19 Genomics UK (COG-UK) Consortium|Davies|United Kingdom

>Spike|hCoV-19/Switzerland/ZH-ETHZ-160008/2020|2020-06-19|EPI\_ISL\_486505|Original|hCoV-19^^Zurich|Human|Viollier AG|Department of Biosystems Science and Engineering|Nadeau|Switzerland

>Spike|hCoV-19/Scotland/EDB4727/2020|2020-04-28|EPI\_ISL\_487659|Original|hCoV-19^^Scotland|Human|Virology Department|Wellcome Sanger Institute for the COVID-19 Genomics UK (COG-UK) consortium|Davies|United Kingdom

>Spike|hCoV-19/Japan/PG-2125/2020|2020-05-00|EPI\_ISL\_685730|Original|hCoV-19^^Japan|Human|Pathogen Genomics Center|Pathogen Genomics Center|Sekizuka|Japan

>Spike|hCoV-19/Spain/VC-FISABIO-3/2020|2020-03-05|EPI\_ISL\_414598|Original|hCoV-19^^Comunitat Valenciana|Human|Servicio Microbiologia|Sequencing and Bioinformatics Service and Molecular Epidemiology Research Group. FISABIO-Public Health.|Gonzalez-Candelas|Spain

>Spike|hCoV-19/Germany/SN-RKI-NP-0028/2020|2020-12-08|EPI\_ISL\_763018|Original|hCoV-19^^Saxony|Human|Unit 17|Project group Epidemiology of Highly Pathogenic Microorganisms|Schubert|Germany

>Spike|hCoV-19/England/LIVE-DC2D06/2020|2020-11-24|EPI\_ISL\_702894|Original|hCoV-19^^England|Human|Liverpool Clinical Laboratories|COVID-19 Genomics UK (COG-UK) Consortium|Haldenby|United Kingdom

>Spike|hCoV-19/Scotland/CVR3233/2020|2020-04-26|EPI\_ISL\_449243|Original|hCoV-19^^Scotland|Human|West of Scotland Specialist Virology Centre|COVID-19 Genomics UK (COG-UK) Consortium|Robertson|United Kingdom

>Spike|hCoV-19/Denmark/DCGC-18685/2020|2020-12-07|EPI\_ISL\_750123|Original|hCoV-19^^Hovedstaden|Human|Department of Virus and Microbiological Special Diagnostics|Albertsen Lab|Michaelsen|Denmark

>Spike|hCoV-19/Denmark/DCGC-16540/2020|2020-11-16|EPI\_ISL\_714825|Original|hCoV-19^^Sjaelland|Human|Department of Virus and Microbiological Special Diagnostics|Albertsen Lab|Michaelsen|Denmark

>Spike|hCoV-19/Scotland/QEUH-96D79A/2020|2020-08-20|EPI\_ISL\_534635|Original|hCoV-19^^Scotland|Human|NHSGGC West of Scotland Specialist Virology Centre / MRC-University of Glasgow Centre for Virus Research|Wellcome Sanger Institute for the COVID-19 Genomics UK (COG-UK) consortium|Davies|United Kingdom

>Spike|hCoV-19/England/CAMB-812D4/2020|2020-04-11|EPI\_ISL\_442986|Original|hCoV-19^^England|Human|Department of Pathology|Wellcome Sanger Institute for the COVID-19 Genomics UK (COG-UK) consortium|Amato|United Kingdom

>Spike|hCoV-19/Denmark/DCGC-14858/2020|2020-11-23|EPI\_ISL\_712032|Original|hCoV-19^^Hovedstaden|Human|Department of Virus and Microbiological Special Diagnostics|Albertsen Lab|Michaelsen|Denmark

>Spike|hCoV-19/France/ARA-1811/2020|2020-04-01|EPI\_ISL\_508962|Original|hCoV-19^^Auvergne-Rh\u00f4ne-Alpes|Human|CNR Virus des Infections Respiratoires - France SUD|CNR Virus des Infections Respiratoires - France SUD|Josset|France

>Spike|hCoV-19/Denmark/DCGC-8147/2020|2020-10-26|EPI\_ISL\_617215|Original|hCoV-19^^Hovedstaden|Human|Department of Virus and Microbiological Special Diagnostics|Albertsen lab|Michaelsen|Denmark

>Spike|hCoV-19/England/ALDP-A6EADB/2020|2020-10-15|EPI\_ISL\_606952|Original|hCoV-19^^England|Human|Lighthouse Lab in Alderley Park|Wellcome Sanger Institute for the COVID-19 Genomics UK (COG-UK) consortium|Davies|United Kingdom

>Spike|hCoV-19/England/CAMB-1B1498/2020|2020-05-08|EPI\_ISL\_458556|Original|hCoV-19^^England|Human|Department of Pathology|Wellcome Sanger Institute for the COVID-19 Genomics UK (COG-UK) consortium|Davies|United Kingdom

>Spike|hCoV-19/Spain/NC-IBV-001403/2020|2020-03-19|EPI\_ISL\_452498|Original|hCoV-19^^Navarra|Human|Cl\u00e9nica Universidad de Navarra. Servicio de Enfermedades Infecciosas y Microbiolog\u00eda cl\u00e9nica|SeqCOVID-SPAIN consortium/IBV (CSIC) |Comas|Spain

>Spike|hCoV-19/England/CAMB-84BB8/2020|2020-03-11|EPI\_ISL\_440485|Original|hCoV-19^^England|Human|Department of Pathology|Wellcome Sanger Institute for the COVID-19 Genomics UK (COG-UK) consortium|Amato|United Kingdom

>Spike|hCoV-19/Spain/MD-IBV-99012307/2020|2020-11-14|EPI\_ISL\_779970|Original|hCoV-19^^Madrid|Human|Hospital General Universitario Gregorio Mara\u00f1a|SeqCOVID-SPAIN consortium/IBV (CSIC) |Comas|Spain

>Spike|hCoV-19/England/QEUIH-997CC5/2020|2020-08-25|EPI\_ISL\_559760|Original|hCoV-19^^England|Human|Oxford Viromics|COVID-19 Genomics UK (COG-UK) Consortium|Golubchik|United Kingdom

>Spike|hCoV-19/England/QEUIH-CDF7FA/2020|2020-12-26|EPI\_ISL\_782446|Original|hCoV-19^^England|Human|Lighthouse Lab in Glasgow|Wellcome Sanger Institute for the COVID-19 Genomics UK (COG-UK) Consortium|Davies|United Kingdom

>Spike|hCoV-19/USA/CT-Yale-095/2020|2020-04-08|EPI\_ISL\_428398|Original|hCoV-19^^Connecticut|Human|Yale COVID-19 Biorepository|Grubaugh Lab - Yale School of Public Health|Grubaugh|USA

>Spike|hCoV-19/USA/IL-NM-0487/2020|2020-04-23|EPI\_ISL\_626427|Original|hCoV-19^^Illinois|Human|Northwestern Memorial Hospital|Ozer Lab|Ozer|USA

>Spike|hCoV-19/Australia/VIC7518/2020|2020-00-00|EPI\_ISL\_564464|Original|hCoV-19^^Victoria|Human|Microbiological Diagnostic Unit - Public Health Laboratory (MDU-PHL) |MDU-PHL|Schultz|Australia

>Spike|hCoV-19/Luxembourg/LNS7342327/2020|2020-05-12|EPI\_ISL\_459905|Original|hCoV-19^^Luxembourg|Human|Laboratoire National de Sante|Laboratoire National de Sante|Wienecke-Baldacchino|Luxembourg

>Spike|hCoV-19/England/MILK-A6B573/2020|2020-10-09|EPI\_ISL\_608782|Original|hCoV-19^^England|Human|Lighthouse Lab in Milton Keynes|Wellcome Sanger Institute for the COVID-19 Genomics UK (COG-UK) consortium|Davies|United Kingdom

>Spike|hCoV-19/USA/WI-UW-48/2020|2020-03-25|EPI\_ISL\_421306|Original|hCoV-19^^Wisconsin|Human|University of Wisconsin-Madison AIDS Vaccine Research Laboratories|University of Wisconsin-Madison AIDS Vaccine Research Laboratories|Baczenas|USA

>Spike|hCoV-19/Scotland/QEUIH-5F6624/2020|2020-06-25|EPI\_ISL\_533271|Original|hCoV-19^^Scotland|Human|NHSGGC West of Scotland Specialist Virology Centre / MRC-University of Glasgow Centre for Virus Research|Wellcome Sanger Institute for the COVID-19 Genomics UK (COG-UK) consortium|Davies|United Kingdom

>Spike|hCoV-19/Wales/PHWC-4878D8/2020|2020-10-28|EPI\_ISL\_639250|Original|hCoV-19^^Wales|Human|Wales Specialist Virology Centre Sequencing lab|COVID-19 Genomics UK (COG-UK) Consortium|Moore|United Kingdom

>Spike|hCoV-19/Finland/S8AC11/2020|2020-10-10|EPI\_ISL\_737056|Original|hCoV-19^^Uusimaa|Human|Department of Virology and Immunology|Department of Virology|Smura|Finland

>Spike|hCoV-19/Luxembourg/LNS4260242/2020|2020-11-21|EPI\_ISL\_740439|Original|hCoV-19^^Luxembourg|Human|Laboratoire national de sant\u00e9|Laboratoire national de sant\u00e9|Wienecke-Baldacchino|Luxembourg

>Spike|hCoV-19/Denmark/DCGC-12921/2020|2020-12-07|EPI\_ISL\_712464|Original|hCoV-19^^Midtjylland|Human|Department of Virus and Microbiological Special Diagnostics|Albertsen Lab|Michaelsen|Denmark

>Spike|hCoV-19/Australia/QLD1012/2020|2020-03-26|EPI\_ISL\_530272|Original|hCoV-19^^Queensland|Human|Queensland Health Forensic and Scientific Services|Public Health Virology Laboratory|Nguyen|Australia

>Spike|hCoV-19/Denmark/DCGC-16128/2020|2020-11-16|EPI\_ISL\_714599|Original|hCoV-19^^Midtjylland|Human|Department of Virus and Microbiological Special Diagnostics|Albertsen Lab|Michaelsen|Denmark

>Spike|hCoV-19/Wales/PHWC-483D73/2020|2020-10-21|EPI\_ISL\_627927|Original|hCoV-19^^Wales|Human|Wales Specialist Virology Centre Sequencing lab|COVID-19 Genomics UK (COG-UK) Consortium|Moore|United Kingdom

>Spike|hCoV-19/Denmark/DCGC-10210/2020|2020-11-09|EPI\_ISL\_669457|Original|hCoV-19^^Hovedstaden|Human|Department of Virus and Microbiological Special Diagnostics|Albertsen Lab|Michaelsen|Denmark

>Spike|hCoV-19/England/ALDP-94DF01/2020|2020-06-17|EPI\_ISL\_555305|Original|hCoV-19^^England|Human|Lighthouse Lab in Alderley Park|Wellcome Sanger Institute for the COVID-19 Genomics UK (COG-UK) consortium|Davies|United Kingdom

>Spike|hCoV-19/Australia/VIC11735/2020|2020-07-23|EPI\_ISL\_563476|Original|hCoV-19^^Victoria|Human|Microbiological Diagnostic Unit - Public Health Laboratory (MDU-PHL) |MDU-PHL|Schultz|Australia

>Spike|hCoV-19/Australia/VIC16840/2020|2020-08-06|EPI\_ISL\_663599|Original|hCoV-19^^Victoria|Human|Microbiological Diagnostic Unit - Public Health Laboratory (MDU-PHL) |MDU-PHL|Schultz|Australia

>Spike|hCoV-19/England/QEUA-9BA2F7/2020|2020-09-07|EPI\_ISL\_573587|Original|hCoV-19^^England|Human|Oxford Viromics|COVID-19 Genomics UK (COG-UK) Consortium|Golubchik|United Kingdom

>Spike|hCoV-19/Denmark/ALAB-SSI-832/2020|2020-03-30|EPI\_ISL\_444928|Original|hCoV-19^^Denmark|Human|Department of Virus and Microbiological Special Diagnostics|Albertsen lab|Kirkegaard|Denmark

>Spike|hCoV-19/England/MILK-A7CE0B/2020|2020-10-13|EPI\_ISL\_606801|Original|hCoV-19^^England|Human|Lighthouse Lab in Milton Keynes|Wellcome Sanger Institute for the COVID-19 Genomics UK (COG-UK) consortium|Davies|United Kingdom

>Spike|hCoV-19/Wales/PHWC-48C897/2020|2020-11-06|EPI\_ISL\_665464|Original|hCoV-19^^Wales|Human|Wales Specialist Virology Centre Sequencing lab|COVID-19 Genomics UK (COG-UK) Consortium|Moore|United Kingdom

>Spike|hCoV-19/Wales/MILK-9E227E/2020|2020-09-20|EPI\_ISL\_581225|Original|hCoV-19^^Wales|Human|Lighthouse Lab in Milton Keynes|Wellcome Sanger Institute for the COVID-19 Genomics UK (COG-UK) consortium|Davies|United Kingdom

>Spike|hCoV-19/South Africa/KRISP-K003478/2020|2020-09-12|EPI\_ISL\_602810|Original|hCoV-19^^KwaZulu-Natal|Human|NHLS-IALCH|KRISP|de Oliveira|South Africa

>Spike|hCoV-19/USA/WA-UW-5629/2020|2020-04-08|EPI\_ISL\_430912|Original|hCoV-19^^Washington|Human|UW Virology Lab|UW Virology Lab|Roychoudhury|USA

>Spike|hCoV-19/Chile/RM-CMM-IN233883987/2020|2020-08-24|EPI\_ISL\_591531|Original|hCoV-19^^Region Metropolitana de Santiago|Human|Laboratorio de Infectologia y virologia molecular|Center for Mathematical Modeling and Center for Genome Regulation. Santiago|Palma V\|Chile

>Spike|hCoV-19/Wales/ALDP-C39D56/2020|2020-12-09|EPI\_ISL\_767207|Original|hCoV-19^^Wales|Human|Lighthouse Lab in Alderley Park|Wellcome Sanger Institute for the COVID-19 Genomics UK (COG-UK) Consortium|Davies|United Kingdom

>Spike|hCoV-19/England/CAMC-949C68/2020|2020-07-19|EPI\_ISL\_556750|Original|hCoV-19^^England|Human|Lighthouse Lab in Cambridge|Wellcome Sanger Institute for the COVID-19 Genomics UK (COG-UK) consortium|Davies|United Kingdom

>Spike|hCoV-19/Spain/CL-IBV-97006187/2020|2020-04-13|EPI\_ISL\_537333|Original|hCoV-19^^Castilla y Leon|Human|Universidad de Le\|SeqCOVID-SPAIN consortium|IBV (CSIC) |Comas|Spain

>Spike|hCoV-19/USA/AZ-TG305912/2020|2020-04-29|EPI\_ISL\_694296|Original|hCoV-19^^Arizona|Human|AZ SPHL|TGen North|French|USA

>Spike|hCoV-19/England/MILK-A8EF9A/2020|2020-10-16|EPI\_ISL\_650247|Original|hCoV-19^^England|Human|Northumbria University / South Tees Hospitals NHS Foundation Trust / North Cumbria Integrated Care NHS Foundation Trust / North Tees and Hartlepool NHS Foundation Trust / Newcastle Hospitals NHS Foundation Trust|COVID-19 Genomics UK (COG-UK) Consortium|Bashton|United Kingdom

>Spike|hCoV-19/India/MH-ACTREC-157/2020|2020-06-04|EPI\_ISL\_699813|Original|hCoV-19^^Maharashtra|Human|Hematopathology Laboratory|Hematopathology Laboratory|Patkar|India

>Spike|hCoV-19/Netherlands/ZH-EMC-652/2020|2020-09-28|EPI\_ISL\_632494|Original|hCoV-19^^Zuid Holland|Human|Dutch COVID-19 response team|Erasmus Medical Center|Oude Munnink|Netherlands

>Spike|hCoV-19/England/CAMC-B98794/2020|2020-11-15|EPI\_ISL\_673788|Original|hCoV-19^^England|Human|Lighthouse Lab in Cambridge|Wellcome Sanger Institute for the COVID-19 Genomics UK (COG-UK) Consortium|Davies|United Kingdom

>Spike|hCoV-19/USA/CA-ALSR-1841/2020|2020-05-18|EPI\_ISL\_512204|Original|hCoV-19^^California|Human|San Diego County Public Health Laboratory|Andersen lab at Scripps Research|Gangavarapu|USA

>Spike|hCoV-19/Wales/PHWC-4896DC/2020|2020-11-02|EPI\_ISL\_639606|Original|hCoV-19^^Wales|Human|Wales Specialist Virology Centre Sequencing lab|COVID-19 Genomics UK (COG-UK) Consortium|Moore|United Kingdom

>Spike|hCoV-19/Lithuania/MR-LUHS-Eilnr25/2020|2020-04-06|EPI\_ISL\_541852|Original|hCoV-19^^Alytaus apskritis|Human|Lithuanian University of Health Sciences Hospital|Lithuanian University of Health Sciences|Zemaitis|Lithuania

>Spike|hCoV-19/Denmark/DCGC-14769/2020|2020-11-23|EPI\_ISL\_711966|Original|hCoV-19^^Hovedstaden|Human|Department of Virus and Microbiological Special Diagnostics|Albertsen Lab|Michaelsen|Denmark

>Spike|hCoV-19/England/205260457/2020|2020-12-18|EPI\_ISL\_754381|Original|hCoV-19^^England|Human|Respiratory Virus Unit|COVID-19 Genomics UK (COG-UK) Consortium|Platt|United Kingdom

>Spike|hCoV-19/USA/NY-NYCPHL-001228/2020|2020-11-05|EPI\_ISL\_683891|Original|hCoV-19^^New York|Human|DOHMH Crown Heights|New York City Public Health Laboratory|Wang|USA

>Spike|hCoV-19/USA/CA-CZB-13425/2020|2020-09-03|EPI\_ISL\_672469|Original|hCoV-19^^California|Human|Alameda County Public Health Lab|Chan-Zuckerberg Biohub|Bhatt|USA

>Spike|hCoV-19/USA/MI-MDHHS-SC21245/2020|2020-04-04|EPI\_ISL\_507500|Original|hCoV-19^^Michigan|Human|Michigan Department of Health and Human Services|Michigan Department of Health and Human Services|Blankenship|USA

>Spike|hCoV-19/England/CAMC-A40E4C/2020|2020-10-06|EPI\_ISL\_609530|Original|hCoV-19^^England|Human|Lighthouse Lab in Cambridge|Wellcome Sanger Institute for the COVID-19 Genomics UK (COG-UK) consortium|Davies|United Kingdom

>Spike|hCoV-19/England/QEUH-9648BE/2020|2020-08-11|EPI\_ISL\_536938|Original|hCoV-19^^England|Human|Lighthouse Lab in Glasgow|Wellcome Sanger Institute for the COVID-19 Genomics UK (COG-UK) consortium|Davies|United Kingdom

>Spike|hCoV-19/Sweden/20-51952/2020|2020-06-05|EPI\_ISL\_560974|Original|hCoV-19^^Stockholm|Human|Karolinska Universitetslaboratoriet|The Public Health Agency of Sweden|Svartstr\u00f6m|Sweden

>Spike|hCoV-19/England/QEUH-C5B750/2020|2020-12-14|EPI\_ISL\_736057|Original|hCoV-19^^England|Human|Lighthouse Lab in Glasgow|Wellcome Sanger Institute for the COVID-19 Genomics UK (COG-UK) Consortium|Davies|United Kingdom

>Spike|hCoV-19/England/ALDP-B62942/2020|2020-11-09|EPI\_ISL\_656602|Original|hCoV-19^^England|Human|Lighthouse Lab in Alderley Park|Wellcome Sanger Institute for the COVID-19 Genomics UK (COG-UK) Consortium|Davies|United Kingdom

>Spike|hCoV-19/Australia/VIC6059/2020|2020-07-26|EPI\_ISL\_518097|Original|hCoV-19^^Victoria|Human|Microbiological Diagnostic Unit - Public Health Laboratory (MDU-PHL)|MDU-PHL|Schultz|Australia

>Spike|hCoV-19/Denmark/DCGC-7245/2020|2020-10-12|EPI\_ISL\_619224|Original|hCoV-19^^Hovedstaden|Human|Department of Virus and Microbiological Special Diagnostics|Albertsen lab|Michaelsen|Denmark

>Spike|hCoV-19/SaudiArabia/KAUST-MADINAH955/2020|2020-05-12|EPI\_ISL\_513205|Original|hCoV-19^^Madinah|Human|Pathogen Genomics Lab King Abdullah University of Science and Technology(KAUST)|Pathogen Genomics Lab King Abdullah University of Science and Technology(KAUST)|Mohamed Ghazzali|Saudi Arabia

>Spike|hCoV-19/Canada/BC\_0554880/2020|2020-03-13|EPI\_ISL\_418817|Original|hCoV-19^^British Columbia|Human|BCCDC Public Health Laboratory|BCCDC Public Health Laboratory|Harrigan|Canada

>Spike|hCoV-19/England/ALDP-BB3D64/2020|2020-11-20|EPI\_ISL\_701798|Original|hCoV-19^^England|Human|Lighthouse Lab in Alderley Park|Wellcome Sanger Institute for the COVID-19 Genomics UK (COG-UK) Consortium|Davies|United Kingdom

>Spike|hCoV-19/Luxembourg/LNS7025344/2020|2020-10-15|EPI\_ISL\_744495|Original|hCoV-19^^Luxembourg|Human|Laboratoire national de sant\u00e9|Laboratoire national de sant\u00e9|Wienecke-Baldacchino|Luxembourg

>Spike|hCoV-19/Wales/PHWC-162A67/2020|2020-05-13|EPI\_ISL\_473155|Original|hCoV-19^^Wales|Human|Wales Specialist Virology Centre Sequencing lab|COVID-19 Genomics UK (COG-UK) Consortium|Moore|United Kingdom

>Spike|hCoV-19/USA/UT-03002/2020|2020-05-01|EPI\_ISL\_513700|Original|hCoV-19^^Utah|Human|Utah Public Health Laboratory|Utah Public Health Laboratory|Butz|USA

>Spike|hCoV-19/USA/TX-HMH-493/2020|2020-04-07|EPI\_ISL\_544410|Original|hCoV-19^^Texas|Human|Houston Methodist Hospital|Houston Methodist Hospital|Long|USA

>Spike|hCoV-19/Denmark/DCGC-16807/2020|2020-12-14|EPI\_ISL\_750575|Original|hCoV-19^^Hovedstaden|Human|Department of Virus and Microbiological Special Diagnostics|Albertsen Lab|Michaelsen|Denmark

>Spike|hCoV-19/Palestine/52/2020|2020-08-19|EPI\_ISL\_596536|Original|hCoV-19^^Ramallah|Human|Palestinian Ministry of Health|Molecular Genetics Lab|van Dorp|Palestine

>Spike|hCoV-19/USA/TX-DSHS-0380/2020|2020-06-14|EPI\_ISL\_538316|Original|hCoV-19^^Texas|Human|Texas Department of State Health Services|Texas Department of State Health Services|Rahman|USA

>Spike|hCoV-19/England/ALDP-94E2E9/2020|2020-06-19|EPI\_ISL\_555746|Original|hCoV-19^^England|Human|Lighthouse Lab in Alderley Park|Wellcome Sanger Institute for the COVID-19 Genomics UK (COG-UK) consortium|Davies|United Kingdom

>Spike|hCoV-19/USA/AZ-TG371276/2020|2020-05-15|EPI\_ISL\_694535|Original|hCoV-19^^Arizona|Human|AZ SPHL|TGen North|French|USA

>Spike|hCoV-19/Scotland/EDB11046/2020|2020-12-14|EPI\_ISL\_742196|Original|hCoV-19^^Scotland|Human|Virology Department|COVID-19 Genomics UK (COG-UK) Consortium|McHugh|United Kingdom

>Spike|hCoV-19/USA/MD-MDH-0424/2020|2020-11-03|EPI\_ISL\_666792|Original|hCoV-19^^Maryland|Human|Maryland Public Health Laboratory|Maryland Public Health Laboratory|Keller|USA

>Spike|hCoV-19/England/CAMB-77B21/2020|2020-04-01|EPI\_ISL\_439425|Original|hCoV-19^^England|Human|Department of Pathology|Wellcome Sanger Institute for the COVID-19 Genomics UK (COG-UK) consortium|Amato|United Kingdom

>Spike|hCoV-19/Netherlands/ZH-EMC-228/2020|2020-05-17|EPI\_ISL\_523570|Original|hCoV-19^^Zuid Holland|Human|Dutch COVID-19 response team|Erasmus Medical Center|Oude Munnink|Netherlands

>Spike|hCoV-19/USA/MN-MDH-1232/2020|2020-05-18|EPI\_ISL\_482953|Original|hCoV-19^^Minnesota|Human|Minnesota Department of Health|Minnesota Department of Health|Garfin|USA

>Spike|hCoV-19/Wales/PHWC-16A601/2020|2020-09-08|EPI\_ISL\_540915|Original|hCoV-19^^Wales|Human|Wales Specialist Virology Centre Sequencing lab|COVID-19 Genomics UK (COG-UK) Consortium|Moore|United Kingdom

>Spike|hCoV-19/Italy/VEN-UniVR-135/2020|2020-04-02|EPI\_ISL\_751432|Original|hCoV-19^^Veneto|Human|IRCCS Sacro Cuore Don Calabria Hospital|University of Verona|Mori|Italy

>Spike|hCoV-19/England/BRIS-12BBFE/2020|2020-05-16|EPI\_ISL\_469371|Original|hCoV-19^^England|Human|PHE South West Regional Laboratory|Wellcome Sanger Institute for the COVID-19 Genomics UK (COG-UK) consortium|Davies|United Kingdom

>Spike|hCoV-19/USA/UT-03434/2020|2020-04-20|EPI\_ISL\_498663|Original|hCoV-19^^Utah|Human|Utah Public Health Laboratory|Utah Public Health Laboratory|Butz|USA

>Spike|hCoV-19/England/LIVE-9F77A/2020|2020-04-21|EPI\_ISL\_472012|Original|hCoV-19^^England|Human|Liverpool Clinical Laboratories|COVID-19 Genomics UK (COG-UK) Consortium|Haldenby|United Kingdom

>Spike|hCoV-19/England/ALDP-4F5BAF/2020|2020-06-24|EPI\_ISL\_559190|Original|hCoV-19^^England|Human|Lighthouse Lab in Alderley Park|Wellcome Sanger Institute for the COVID-19 Genomics UK (COG-UK) consortium|Davies|United Kingdom

>Spike|hCoV-19/England/ALDP-9FD304/2020|2020-10-02|EPI\_ISL\_587894|Original|hCoV-19^^England|Human|Lighthouse Lab in Alderley Park|Wellcome Sanger Institute for the COVID-19 Genomics UK (COG-UK) consortium|Davies|United Kingdom

>Spike|hCoV-19/USA/TX-HMH-MCoV-14526/2020|2020-10-08|EPI\_ISL\_787811|Original|hCoV-19^^Texas|Human|Houston Methodist Hospital|Houston Methodist Hospital|Long|USA

>Spike|hCoV-19/USA/WA-UW-22415/2020|2020-08-07|EPI\_ISL\_570591|Original|hCoV-19^^Washington|Human|UW Virology Lab|UW Virology Lab|Roychoudhury|USA

>Spike|hCoV-19/Denmark/DCGC-21584/2020|2020-12-21|EPI\_ISL\_758249|Original|hCoV-19^^Hovedstaden|Human|Department of Virus and Microbiological Special Diagnostics|Albertsen Lab|Michaelsen|Denmark

>Spike|hCoV-19/Denmark/DCGC-19611/2020|2020-12-07|EPI\_ISL\_749059|Original|hCoV-19^^Hovedstaden|Human|Department of Virus and Microbiological Special Diagnostics|Albertsen Lab|Michaelsen|Denmark

>Spike|hCoV-19/Bangladesh/BARJ-CVASU-CTG-501/2020|2020-05-10|EPI\_ISL\_450339|Original|hCoV-19^^Chittagong|Human|Bangladesh Institute of Tropical & Infectious Diseases|Basic and Applied Research on Jute Project|Ahmed|Bangladesh

>Spike|hCoV-19/Japan/PG-4049/2020|2020-07-00|EPI\_ISL\_692290|Original|hCoV-19^^Japan|Human|Sakai City Institute of Public Health|Pathogen Genomics Center|Sekizuka|Japan

>Spike|hCoV-19/England/ALDP-A95A08/2020|2020-10-19|EPI\_ISL\_624563|Original|hCoV-19^^England|Human|Lighthouse Lab in Alderley Park|Wellcome Sanger Institute for the COVID-19 Genomics UK (COG-UK) consortium|Davies|United Kingdom

>Spike|hCoV-19/England/GSTT-265D3C3/2020|2020-03-18|EPI\_ISL\_483952|Original|hCoV-19^^England|Human|Centre for Clinical Infection and Diagnostics Research and Genomics Innovation Unit|COVID-19 Genomics UK (COG-UK) Consortium|Awan|United Kingdom

>Spike|hCoV-19/England/LIVE-9996B/2020|2020-04-09|EPI\_ISL\_439778|Original|hCoV-19^^England|Human|Liverpool Clinical Laboratories|COVID-19 Genomics UK (COG-UK) Consortium|Haldenby|United Kingdom

>Spike|hCoV-19/England/CAMB-76991/2020|2020-03-30|EPI\_ISL\_438424|Original|hCoV-19^^England|Human|Department of Pathology|Wellcome Sanger Institute for the COVID-19 Genomics UK (COG-UK) consortium|Amato|United Kingdom

>Spike|hCoV-19/USA/FL-BPHL-1074/2020|2020-04-24|EPI\_ISL\_526560|Original|hCoV-19^^Florida|Human|Florida Bureau of Public Health Laboratories|Florida Bureau of Public Health Laboratories|Blanton|USA

>Spike|hCoV-19/USA/TX-HMH-MCoV-14158/2020|2020-10-02|EPI\_ISL\_787443|Original|hCoV-19^^Texas|Human|Houston Methodist Hospital|Houston Methodist Hospital|Long|USA

>Spike|hCoV-19/USA/LA-EVTL717/2020|2020-07-14|EPI\_ISL\_653409|Original|hCoV-19^^Louisiana|Human|LSUHS Emerging Viral Threat Laboratory|Microbial Genome Sequencing Center|Kamil|USA

>Spike|hCoV-19/Japan/PG-2544/2020|2020-05-00|EPI\_ISL\_690679|Original|hCoV-19^^Japan|Human|Saitama Prefectural Institute of Public Health|Pathogen Genomics Center|Sekizuka|Japan

>Spike|hCoV-19/England/CAMC-A4191D/2020|2020-10-04|EPI\_ISL\_609476|Original|hCoV-19^^England|Human|Lighthouse Lab in Cambridge|Wellcome Sanger Institute for the COVID-19 Genomics UK (COG-UK) consortium|Davies|United Kingdom

>Spike|hCoV-19/Denmark/DCGC-18710/2020|2020-12-07|EPI\_ISL\_750136|Original|hCoV-19^^Midtjylland|Human|Department of Virus and Microbiological Special Diagnostics|Albertsen Lab|Michaelsen|Denmark

>Spike|hCoV-19/Scotland/CVR2572/2020|2020-04-16|EPI\_ISL\_473516|Original|hCoV-19^^Scotland|Human|West of Scotland Specialist Virology Centre|COVID-19 Genomics UK (COG-UK) Consortium|Robertson|United Kingdom

>Spike|hCoV-19/Wales/CAMC-9B1AAD/2020|2020-09-04|EPI\_ISL\_590173|Original|hCoV-19^^Wales|Human|Lighthouse Lab in Cambridge|Wellcome Sanger Institute for the COVID-19 Genomics UK (COG-UK) consortium|Davies|United Kingdom



>Spike|hCoV-19/Israel/ISR\_NH\_GD3\_0726/2020|2020-07-26|EPI\_ISL\_594162|Original|hCoV-19^^Israel|Human|Israel Institute for Biological Research|Israel Institute for Biological Research|Zaide|Israel

>Spike|hCoV-19/Scotland/QEUIH-964308/2020|2020-08-12|EPI\_ISL\_534398|Original|hCoV-19^^Scotland|Human|NHSGGG West of Scotland Specialist Virology Centre / MRC-University of Glasgow Centre for Virus Research|Wellcome Sanger Institute for the COVID-19 Genomics UK (COG-UK) consortium|Davies|United Kingdom

>Spike|hCoV-19/England/204691279/2020|2020-11-13|EPI\_ISL\_686595|Original|hCoV-19^^England|Human|Respiratory Virus Unit|COVID-19 Genomics UK (COG-UK) Consortium|Platt|United Kingdom

>Spike|hCoV-19/England/BIRM-67034/2020|2020-10-28|EPI\_ISL\_651605|Original|hCoV-19^^England|Human|University of Birmingham|COVID-19 Genomics UK (COG-UK) Consortium|Loman|United Kingdom

>Spike|hCoV-19/Denmark/DCGC-16975/2020|2020-12-14|EPI\_ISL\_750680|Original|hCoV-19^^Nordjylland|Human|Department of Virus and Microbiological Special Diagnostics|Albertsen Lab|Michaelsen|Denmark

>Spike|hCoV-19/Spain/VC-IBV-98000396/2020|2020-03-23|EPI\_ISL\_539244|Original|hCoV-19^^Comunitat Valenciana|Human|Servicio de Microbiologia. Hospital Clinico Universitario de Valencia|SeqCOVID-SPAIN consortium/IBV(CSIC)|Comas|Spain

>Spike|hCoV-19/USA/CA-ALSR-4505/2020|2020-11-02|EPI\_ISL\_666973|Original|hCoV-19^^California|Human|San Diego County Public Health Laboratory|Andersen lab at Scripps Research|Gangavarapu|USA

>Spike|hCoV-19/England/CAMC-A40F3A/2020|2020-10-06|EPI\_ISL\_609525|Original|hCoV-19^^England|Human|Lighthouse Lab in Cambridge|Wellcome Sanger Institute for the COVID-19 Genomics UK (COG-UK) consortium|Davies|United Kingdom

>Spike|hCoV-19/England/CAMC-A658DA/2020|2020-10-11|EPI\_ISL\_608679|Original|hCoV-19^^England|Human|Lighthouse Lab in Cambridge|Wellcome Sanger Institute for the COVID-19 Genomics UK (COG-UK) consortium|Davies|United Kingdom

>Spike|hCoV-19/Australia/VIC12435/2020|2020-08-01|EPI\_ISL\_641042|Original|hCoV-19^^Victoria|Human|Microbiological Diagnostic Unit - Public Health Laboratory (MDU-PHL)|MDU-PHL|Schultz|Australia

>Spike|hCoV-19/Denmark/DCGC-19143/2020|2020-12-07|EPI\_ISL\_748256|Original|hCoV-19^^Hovedstaden|Human|Department of Virus and Microbiological Special Diagnostics|Albertsen Lab|Michaelsen|Denmark

>Spike|hCoV-19/England/ALDP-B5BD7D/2020|2020-11-09|EPI\_ISL\_655848|Original|hCoV-19^^England|Human|Lighthouse Lab in Alderley Park|Wellcome Sanger Institute for the COVID-19 Genomics UK (COG-UK) Consortium|Davies|United Kingdom

>Spike|hCoV-19/Northern Ireland/QEUIH-9634CA/2020|2020-08-11|EPI\_ISL\_531763|Original|hCoV-19^^Northern Ireland|Human|Lighthouse Lab in Glasgow|Wellcome Sanger Institute for the COVID-19 Genomics UK (COG-UK) consortium|Davies|United Kingdom

>Spike|hCoV-19/USA/TX-HMH-3584/2020|2020-06-15|EPI\_ISL\_543041|Original|hCoV-19^^Texas|Human|Houston Methodist Hospital|Houston Methodist Hospital|Long|USA

>Spike|hCoV-19/Mexico/BCN-ALSR-1696/2020|2020-04-24|EPI\_ISL\_496357|Original|hCoV-19^^Baja California|Human|Infectolab|Andersen lab at Scripps Research|Gangavarapu|Mexico

>Spike|hCoV-19/Wales/PHWC-3177A/2020|2020-04-13|EPI\_ISL\_446483|Original|hCoV-19^^Wales|Human|Wales Specialist Virology Centre|Public Health Wales Microbiology Cardiff|Moore|United Kingdom

>Spike|hCoV-19/England/QEUIH-AE49FE/2020|2020-10-27|EPI\_ISL\_633185|Original|hCoV-19^^England|Human|Lighthouse Lab in Glasgow|Wellcome Sanger Institute for the COVID-19 Genomics UK (COG-UK) consortium|Davies|United Kingdom

>Spike|hCoV-19/USA/UT-UPHL-03104/2020|2020-05-05|EPI\_ISL\_576367|Original|hCoV-19^^Utah|Human|Utah Public Health Laboratory|Utah Public Health Laboratory|Young|USA

>Spike|hCoV-19/Canada/QC-LSPQ-L00242573/2020|2020-03-29|EPI\_ISL\_536327|Original|hCoV-19^^Quebec|Human|H\u00f4pital Charles-LeMoine|Laboratoire de sant\u00e9 publique du Qu\u00e9bec|Moreira|Canada

>Spike|hCoV-19/USA/WI-UW-167/2020|2020-03-18|EPI\_ISL\_428263|Original|hCoV-19^^Wisconsin|Human|University of Wisconsin-Madison AIDS Vaccine Research

Laboratories|University of Wisconsin-Madison AIDS Vaccine Research  
Laboratories|Moreno|USA  
>Spike|hCoV-19/Brazil/RS-00644/2020|2020-11-25|EPI\_ISL\_779161|Original|hCoV-19^^Rio Grande do Sul|Human|Laborat\u00f3rio de Microbiologia Molecular - Universidade FEEVALE|Bioinformatics Laboratory / LNCC|Almeida|Brazil  
>Spike|hCoV-19/Luxembourg/LNS6889202/2020|2020-06-26|EPI\_ISL\_744480|Original|hCoV-19^^Luxembourg|Human|Laboratoire national de sant\u00e9|Laboratoire national de sant\u00e9|Wienecke-Baldacchino|Luxembourg  
>Spike|hCoV-19/Scotland/QEUIH-AD1499/2020|2020-10-27|EPI\_ISL\_649685|Original|hCoV-19^^Scotland|Human|Lighthouse Lab in Glasgow|Wellcome Sanger Institute for the COVID-19 Genomics UK (COG-UK) Consortium|Davies|United Kingdom  
>Spike|hCoV-19/Denmark/DCGC-13480/2020|2020-11-30|EPI\_ISL\_712823|Original|hCoV-19^^Midtjylland|Human|Department of Virus and Microbiological Special Diagnostics|Albertsen Lab|Michaelsen|Denmark  
>Spike|hCoV-19/Australia/VIC9366/2020|2020-08-17|EPI\_ISL\_565523|Original|hCoV-19^^Victoria|Human|Microbiological Diagnostic Unit - Public Health Laboratory (MDU-PHL) |MDU-PHL|Schultz|Australia  
>Spike|hCoV-19/Denmark/DCGC-18590/2020|2020-12-07|EPI\_ISL\_750065|Original|hCoV-19^^Hovedstaden|Human|Department of Virus and Microbiological Special Diagnostics|Albertsen Lab|Michaelsen|Denmark  
>Spike|hCoV-19/Brazil/RJ-1119/2020|2020-03-25|EPI\_ISL\_456077|Original|hCoV-19^^Rio de Janeiro|Human|LACEN RJ - Laborat\u00f3rio Central de Sa\u00fade P\u00fablica Noel Nutels|Laboratory of Respiratory Viruses and Measles|Silva|Brazil  
>Spike|hCoV-19/England/201140250/2020|2020-03-09|EPI\_ISL\_464715|Original|hCoV-19^^England|Human|Respiratory Virus Unit|Respiratory Virus Unit|Platt|United Kingdom  
>Spike|hCoV-19/England/LOND-DC3B9/2020|2020-10-26|EPI\_ISL\_651253|Original|hCoV-19^^England|Human|University College London|COVID-19 Genomics UK (COG-UK) Consortium|Roy|United Kingdom  
>Spike|hCoV-19/South Africa/KRISP-K000643/2020|2020-07-10|EPI\_ISL\_509292|Original|hCoV-19^^KwaZulu-Natal|Human|NHLS-IALCH|KRISP|de Oliveira|South Africa  
>Spike|hCoV-19/Denmark/DCGC-10184/2020|2020-11-09|EPI\_ISL\_669442|Original|hCoV-19^^Hovedstaden|Human|Department of Virus and Microbiological Special Diagnostics|Albertsen Lab|Michaelsen|Denmark  
>Spike|hCoV-19/Switzerland/AG-ETHZ-410275/2020|2020-12-15|EPI\_ISL\_737546|Original|hCoV-19^^Aargau|Human|Viollier AG|Department of Biosystems Science and Engineering|Nadeau|Switzerland  
>Spike|hCoV-19/Northern Ireland/QEUIH-96DD5C/2020|2020-08-20|EPI\_ISL\_530762|Original|hCoV-19^^Northern Ireland|Human|Lighthouse Lab in Glasgow|Wellcome Sanger Institute for the COVID-19 Genomics UK (COG-UK) consortium|Davies|United Kingdom  
>Spike|hCoV-19/Jordan/AM-ALSR-3909/2020|2020-09-30|EPI\_ISL\_636275|Original|hCoV-19^^Amman|Human|Biolab Diagnostic Laboratories|Andersen lab at Scripps Research|Gangavarapu|Jordan  
>Spike|hCoV-19/Denmark/DCGC-2018/2020|2020-07-06|EPI\_ISL\_618230|Original|hCoV-19^^Syddanmark|Human|Department of Virus and Microbiological Special Diagnostics|Albertsen lab|Michaelsen|Denmark  
>Spike|hCoV-19/Germany/BE-ChVir-D1914-8251/2020|2020-10-05|EPI\_ISL\_753862|Original|hCoV-19^^Berlin|Human|Charit\u00e9 Universit\u00e4tsmedizin Berlin|Charit\u00e9 Universit\u00e4tsmedizin Berlin|Muehlemann|Germany  
>Spike|hCoV-19/France/ARA33273/2020|2020-05-02|EPI\_ISL\_636490|Original|hCoV-19^^Auvergne-Rhone-Alpes|Human|CNR Virus des Infections Respiratoires - France SUD|CNR Virus des Infections Respiratoires - France SUD|Josset|France  
>Spike|hCoV-19/Spain/MD-IBV-97010077/2020|2020-03-17|EPI\_ISL\_779739|Original|hCoV-19^^Madrid|Human|IdISSC/Hospital Cl\u00e9nico San Carlos de Madrid\u200b|SeqCOVID-SPAIN consortium|IBV (CSIC) |Comas|Spain  
>Spike|hCoV-19/England/203020503/2020|2020-07-10|EPI\_ISL\_500709|Original|hCoV-19^^England|Human|Respiratory Virus Unit|Respiratory Virus Unit|Platt|United Kingdom

>Spike|hCoV-19/Spain/CL-IBV-97006179/2020|2020-04-10|EPI\_ISL\_537326|Original|hCoV-19^^Castilla y Leon|Human|Universidad de Le\u00f3n|SeqCOVID-SPAIN consortium/IBV (CSIC) |Comas|Spain

>Spike|hCoV-19/Chile/RM-133147/2020|2020-07-25|EPI\_ISL\_746631|Original|hCoV-19^^Region Metropolitana de Santiago|Human|Genetica Molecular and Subdepartamento de Virologia ISP Chile|Instituto de Salud Publica de Chile|Tognarelli|Chile

>Spike|hCoV-19/England/MILK-976910/2020|2020-08-18|EPI\_ISL\_552754|Original|hCoV-19^^England|Human|Lighthouse Lab in Milton Keynes|Wellcome Sanger Institute for the COVID-19 Genomics UK (COG-UK) consortium|Davies|United Kingdom

>Spike|hCoV-19/England/QEUEH-9DE11E/2020|2020-09-21|EPI\_ISL\_599506|Original|hCoV-19^^England|Human|Lighthouse Lab in Glasgow|Wellcome Sanger Institute for the COVID-19 Genomics UK (COG-UK) consortium|Davies|United Kingdom

>Spike|hCoV-19/USA/TX-DSHS-1381/2020|2020-05-13|EPI\_ISL\_654746|Original|hCoV-19^^Texas|Human|Texas Department of State Health Services|Texas Department of State Health Services|Rahman|USA

>Spike|hCoV-19/Denmark/DCGC-798/2020|2020-04-20|EPI\_ISL\_614706|Original|hCoV-19^^Hovedstaden|Human|Department of Virus and Microbiological Special Diagnostics|Albertsen lab|Michaelsen|Denmark

>Spike|hCoV-19/Scotland/CVR5784/2020|2020-11-10|EPI\_ISL\_666024|Original|hCoV-19^^Scotland|Human|West of Scotland Specialist Virology Centre|COVID-19 Genomics UK (COG-UK) Consortium|Robertson|United Kingdom

>Spike|hCoV-19/England/QEUEH-75E998/2020|2020-07-16|EPI\_ISL\_532981|Original|hCoV-19^^England|Human|Lighthouse Lab in Glasgow|Wellcome Sanger Institute for the COVID-19 Genomics UK (COG-UK) consortium|Davies|United Kingdom

>Spike|hCoV-19/Denmark/DCGC-10514/2020|2020-11-02|EPI\_ISL\_670028|Original|hCoV-19^^Sjaelland|Human|Department of Virus and Microbiological Special Diagnostics|Albertsen Lab|Michaelsen|Denmark

>Spike|hCoV-19/Wales/PHWC-168409/2020|2020-04-01|EPI\_ISL\_494239|Original|hCoV-19^^Wales|Human|Originating lab|COVID-19 Genomics UK (COG-UK) Consortium|Moore|United Kingdom

>Spike|hCoV-19/England/ALDP-94C8BC/2020|2020-06-16|EPI\_ISL\_555925|Original|hCoV-19^^England|Human|Lighthouse Lab in Alderley Park|Wellcome Sanger Institute for the COVID-19 Genomics UK (COG-UK) consortium|Davies|United Kingdom

>Spike|hCoV-19/England/BRIS-132CA6/2020|2020-06-15|EPI\_ISL\_511974|Original|hCoV-19^^England|Human|PHE South West Regional Laboratory|Wellcome Sanger Institute for the COVID-19 Genomics UK (COG-UK) consortium|Davies|United Kingdom

>Spike|hCoV-19/England/202822171/2020|2020-05-30|EPI\_ISL\_490228|Original|hCoV-19^^England|Human|Respiratory Virus Unit|Respiratory Virus Unit|Platt|United Kingdom

>Spike|hCoV-19/South Africa/R12681-20/2020|2020-06-16|EPI\_ISL\_504222|Original|hCoV-19^^North West|Human|National Institute for Communicable Diseases of the National Health Laboratory Service|National Institute for Communicable Diseases of the National Health Laboratory Service|Allam|South Africa

>Spike|hCoV-19/Denmark/DCGC-1545/2020|2020-06-01|EPI\_ISL\_617966|Original|hCoV-19^^Hovedstaden|Human|Department of Virus and Microbiological Special Diagnostics|Albertsen lab|Michaelsen|Denmark

>Spike|hCoV-19/Japan/PG-4419/2020|2020-08-00|EPI\_ISL\_692644|Original|hCoV-19^^Japan|Human|Pathogen Genomics Center|Pathogen Genomics Center|Sekizuka|Japan

>Spike|hCoV-19/USA/TX-DSHS-0177/2020|2020-03-13|EPI\_ISL\_524058|Original|hCoV-19^^Texas|Human|Texas Department of State Health Services|Texas Department of State Health Services|Rahman|USA

>Spike|hCoV-19/Australia/VIC8994/2020|2020-07-27|EPI\_ISL\_565344|Original|hCoV-19^^Victoria|Human|Microbiological Diagnostic Unit - Public Health Laboratory (MDU-PHL) |MDU-PHL|Schultz|Australia

>Spike|hCoV-19/Japan/PG-1038/2020|2020-04-00|EPI\_ISL\_684648|Original|hCoV-19^^Japan|Human|Fukuoka Institute of Health and Environmental Sciences|Pathogen Genomics Center|Sekizuka|Japan

>Spike|hCoV-19/England/MILK-99E235/2020|2020-08-31|EPI\_ISL\_550687|Original|hCoV-19^^England|Human|Lighthouse Lab in Milton Keynes|Wellcome Sanger Institute for the COVID-19 Genomics UK (COG-UK) consortium|Davies|United Kingdom

>Spike|hCoV-19/England/MILK-B01EEC/2020|2020-10-24|EPI\_ISL\_642775|Original|hCoV-19^^England|Human|Lighthouse Lab in Milton Keynes|Wellcome Sanger Institute for the COVID-19 Genomics UK (COG-UK) Consortium|Davies|United Kingdom

>Spike|hCoV-19/USA/WA-UW313/2020|2020-03-14|EPI\_ISL\_418880|Original|hCoV-19^^Washington|Human|UW Virology Lab|UW Virology Lab|Roychoudhury|USA

>Spike|hCoV-19/England/QEUH-A36A63/2020|2020-10-05|EPI\_ISL\_638690|Original|hCoV-19^^England|Human|Wales Specialist Virology Centre Sequencing lab|COVID-19 Genomics UK (COG-UK) Consortium|Moore|United Kingdom

>Spike|hCoV-19/Switzerland/BL-ETHZ-260114/2020|2020-08-26|EPI\_ISL\_539423|Original|hCoV-19^^Basel-Landschaft|Human|Viollier AG|Department of Biosystems Science and Engineering|Nadeau|Switzerland

>Spike|hCoV-19/Australia/VIC787/2020|2020-03-30|EPI\_ISL\_427062|Original|hCoV-19^^Victoria|Human|Microbiological Diagnostic Unit Public Health Laboratory|Microbiological Diagnostic Unit Public Health Laboratory|Schultz|Australia

>Spike|hCoV-19/USA/MA-MGH-00170/2020|2020-03-27|EPI\_ISL\_460283|Original|hCoV-19^^Massachusetts|Human|Massachusetts General Hospital|Infectious Disease Program|Lemieux|USA

>Spike|hCoV-19/England/NOTT-11F331/2020|2020-11-24|EPI\_ISL\_679963|Original|hCoV-19^^England|Human|Lincolnshire Hospitals and DeepSeq Nottingham|COVID-19 Genomics UK (COG-UK) Consortium|Loose|United Kingdom

>Spike|hCoV-19/Luxembourg/LNS6358751/2020|2020-10-30|EPI\_ISL\_744402|Original|hCoV-19^^Luxembourg|Human|Laboratoire national de sant\u00e9|Laboratoire national de sant\u00e9|Wienecke-Baldacchino|Luxembourg

>Spike|hCoV-19/Wales/PHWC-4907EE/2020|2020-11-13|EPI\_ISL\_706513|Original|hCoV-19^^Wales|Human|Originating lab|COVID-19 Genomics UK (COG-UK) Consortium|Moore|United Kingdom

>Spike|hCoV-19/USA/CA-QDX-1117/2020|2020-03-20|EPI\_ISL\_571813|Original|hCoV-19^^California|Human|Quest Diagnostics|Quest Diagnostics|Kagan|USA

>Spike|hCoV-19/USA/TX-HMH-MCoV-15109/2020|2020-10-21|EPI\_ISL\_786593|Original|hCoV-19^^Texas|Human|Houston Methodist Hospital|Houston Methodist Hospital|Long|USA

>Spike|hCoV-19/Scotland/QEUH-A4B588/2020|2020-10-08|EPI\_ISL\_637841|Original|hCoV-19^^Scotland|Human|Department of Pathology|COVID-19 Genomics UK (COG-UK) Consortium|Goodfellow|United Kingdom

>Spike|hCoV-19/Germany/HH-hpi-pl299/2020|2020-03-19|EPI\_ISL\_775887|Original|hCoV-19^^Hamburg|Human|University Medical Center Hamburg Eppendorf|Heinrich Pette Institute|Robitaille|Germany

>Spike|hCoV-19/USA/MN-QDX-1778/2020|2020-03-13|EPI\_ISL\_604090|Original|hCoV-19^^Minnesota|Human|Quest Diagnostics|Quest Diagnostics|Kagan|USA

>Spike|hCoV-19/USA/NY-Wadsworth-288188-01/2020|2020-12-15|EPI\_ISL\_767475|Original|hCoV-19^^New York|Human|Wadsworth Center|Wadsworth Center|Lasek-Nesselquist|USA

>Spike|hCoV-19/USA/CA-ALSR-0578-SAN/2020|2020-05-13|EPI\_ISL\_483234|Original|hCoV-19^^California|Human|UC San Diego Center for Advanced Laboratory Medicine|Andersen lab at Scripps Research|Gangavarapu|USA

>Spike|hCoV-19/England/MILK-B55AB8/2020|2020-11-05|EPI\_ISL\_657391|Original|hCoV-19^^England|Human|Lighthouse Lab in Milton Keynes|Wellcome Sanger Institute for the COVID-19 Genomics UK (COG-UK) Consortium|Davies|United Kingdom

>Spike|hCoV-19/England/ALDP-A6EEB1/2020|2020-10-15|EPI\_ISL\_607220|Original|hCoV-19^^England|Human|Lighthouse Lab in Alderley Park|Wellcome Sanger Institute for the COVID-19 Genomics UK (COG-UK) consortium|Davies|United Kingdom

>Spike|hCoV-19/USA/MN-MDH-1152/2020|2020-05-01|EPI\_ISL\_476737|Original|hCoV-19^^Minnesota|Human|Minnesota Department of Health|Minnesota Department of Health|Garfin|USA

>Spike|hCoV-19/Wales/ALDP-94E568/2020|2020-06-16|EPI\_ISL\_555392|Original|hCoV-19^^Wales|Human|Lighthouse Lab in Alderley Park|Wellcome Sanger Institute for the COVID-19 Genomics UK (COG-UK) consortium|Davies|United Kingdom

>Spike|hCoV-19/England/MILK-B939EE/2020|2020-11-13|EPI\_ISL\_676157|Original|hCoV-19^^England|Human|Lighthouse Lab in Milton Keynes|Wellcome Sanger Institute for the COVID-19 Genomics UK (COG-UK) Consortium|Davies|United Kingdom

>Spike|hCoV-19/England/20170041504/2020|2020-04-17|EPI\_ISL\_465293|Original|hCoV-19^^England|Human|Respiratory Virus Unit|Respiratory Virus Unit|Platt|United Kingdom

>Spike|hCoV-19/Australia/VIC697/2020|2020-03-28|EPI\_ISL\_426989|Original|hCoV-19^^Victoria|Human|Victorian Infectious Diseases Reference Laboratory (VIDRL)|Microbiological Diagnostic Unit Public Health Laboratory and Victorian Infectious Diseases Reference Laboratory|Schultz|Australia

>Spike|hCoV-19/Japan/PG-3334/2020|2020-04-00|EPI\_ISL\_691449|Original|hCoV-19^^Japan|Human|Pathogen Genomics Center|Pathogen Genomics Center|Sekizuka|Japan

>Spike|hCoV-19/Denmark/DCGC-13293/2020|2020-11-30|EPI\_ISL\_712713|Original|hCoV-19^^Sjaelland|Human|Department of Virus and Microbiological Special Diagnostics|Albertsen Lab|Michaelsen|Denmark

>Spike|hCoV-19/England/CAMC-9E001C/2020|2020-09-21|EPI\_ISL\_576952|Original|hCoV-19^^England|Human|Oxford Viromics|COVID-19 Genomics UK (COG-UK) Consortium|Golubchik|United Kingdom

>Spike|hCoV-19/England/QEUEH-AD6379/2020|2020-10-24|EPI\_ISL\_629760|Original|hCoV-19^^England|Human|Lighthouse Lab in Glasgow|Wellcome Sanger Institute for the COVID-19 Genomics UK (COG-UK) consortium|Davies|United Kingdom

>Spike|hCoV-19/Australia/NSW1282/2020|2020-12-17|EPI\_ISL\_745106|Original|hCoV-19^^New South Wales|Human|Pathology North - Royal North Shore Hospital - NSW Health Pathology|CIDM-PH|Gall|Australia

>Spike|hCoV-19/Denmark/DCGC-3864/2020|2020-09-07|EPI\_ISL\_622741|Original|hCoV-19^^Hovedstaden|Human|Department of Virus and Microbiological Special Diagnostics|Albertsen lab|Michaelsen|Denmark

>Spike|hCoV-19/USA/WI-WSLH-200607/2020|2020-08-18|EPI\_ISL\_631400|Original|hCoV-19^^Wisconsin|Human|Wisconsin State Laboratory of Hygiene Communicable Disease Division|Wisconsin State Laboratory of Hygiene Communicable Disease Division|Florek|USA

>Spike|hCoV-19/USA/LA-QDX-1194/2020|2020-03-16|EPI\_ISL\_571940|Original|hCoV-19^^Louisiana|Human|Quest Diagnostics|Quest Diagnostics|Kagan|USA

>Spike|hCoV-19/Switzerland/SO-ETHZ-380245/2020|2020-11-21|EPI\_ISL\_721874|Original|hCoV-19^^Solothurn|Human|Viollier AG|Department of Biosystems Science and Engineering|Nadeau|Switzerland

>Spike|hCoV-19/England/CAMC-947259/2020|2020-07-21|EPI\_ISL\_556574|Original|hCoV-19^^England|Human|Lighthouse Lab in Cambridge|Wellcome Sanger Institute for the COVID-19 Genomics UK (COG-UK) consortium|Davies|United Kingdom

>Spike|hCoV-19/USA/TX-HMH-MCoV-13887/2020|2020-08-17|EPI\_ISL\_787179|Original|hCoV-19^^Texas|Human|Houston Methodist Hospital|Houston Methodist Hospital|Long|USA

>Spike|hCoV-19/England/ALDP-94B8EA/2020|2020-06-11|EPI\_ISL\_556391|Original|hCoV-19^^England|Human|Lighthouse Lab in Alderley Park|Wellcome Sanger Institute for the COVID-19 Genomics UK (COG-UK) consortium|Davies|United Kingdom

>Spike|hCoV-19/Portugal/PT0594/2020|2020-04-03|EPI\_ISL\_454317|Original|hCoV-19^^Portugal|Human|unknown|Instituto Nacional de Saude (INSA)|Borges|Portugal

>Spike|hCoV-19/England/CAMC-B783B4/2020|2020-11-11|EPI\_ISL\_661651|Original|hCoV-19^^England|Human|Lighthouse Lab in Cambridge|Wellcome Sanger Institute for the COVID-19 Genomics UK (COG-UK) Consortium|Davies|United Kingdom

>Spike|hCoV-19/Russia/MOW-RII-MH2010S/2020|2020-06-05|EPI\_ISL\_596351|Original|hCoV-19^^Moscow|Human|Pathogenic Microorganisms Variability Laboratory|WHO National Influenza Centre Russian Federation|Komissarov|Russia

>Spike|hCoV-19/Japan/PG-5240/2020|2020-08-00|EPI\_ISL\_690343|Original|hCoV-19^^Japan|Human|Pathogen Genomics Center|Pathogen Genomics Center|Sekizuka|Japan

>Spike|hCoV-19/England/MILK-BB1FF7/2020|2020-11-18|EPI\_ISL\_720427|Original|hCoV-19^^England|Human|Lighthouse Lab in Milton Keynes|Wellcome Sanger Institute for the COVID-19 Genomics UK (COG-UK) Consortium|Davies|United Kingdom

>Spike|hCoV-19/Wales/PHWC-24F18/2020|2020-03-20|EPI\_ISL\_420927|Original|hCoV-19^^Wales|Human|Wales Specialist Virology Centre|Public Health Wales Microbiology Cardiff|Moore|United Kingdom

>Spike|hCoV-19/USA/MN-MDH-2016/2020|2020-09-28|EPI\_ISL\_654697|Original|hCoV-19^^Minnesota|Human|Essentia Health-St. Mary's Medical Center|Minnesota Department of Health|Lorentz|USA

>Spike|hCoV-19/South Korea/KDCA0378/2020|2020-11-04|EPI\_ISL\_760162|Original|hCoV-19^^South Korea|Human|Division of Emerging Infectious Diseases|Division of Emerging Infectious Diseases|Park|South Korea

>Spike|hCoV-19/England/ALDP-B1CB7E/2020|2020-11-02|EPI\_ISL\_678831|Original|hCoV-19^^England|Human|Centre for Enzyme Innovation|COVID-19 Genomics UK (COG-UK) Consortium|Robson|United Kingdom

>Spike|hCoV-19/South Korea/KCDC2382/2020|2020-05-31|EPI\_ISL\_514785|Original|hCoV-19^^South Korea|Human|Division of Viral Diseases|Division of Viral Diseases|Kim|South Korea

>Spike|hCoV-19/England/QEUEH-96F90B/2020|2020-08-17|EPI\_ISL\_540320|Original|hCoV-19^^England|Human|Lighthouse Lab in Glasgow|Wellcome Sanger Institute for the COVID-19 Genomics UK (COG-UK) consortium|Davies|United Kingdom

>Spike|hCoV-19/Scotland/CVR3537/2020|2020-05-14|EPI\_ISL\_473674|Original|hCoV-19^^Scotland|Human|West of Scotland Specialist Virology Centre|COVID-19 Genomics UK (COG-UK) Consortium|Robertson|United Kingdom

>Spike|hCoV-19/England/NOTT-10EAD6/2020|2020-03-30|EPI\_ISL\_425638|Original|hCoV-19^^England|Human|Queens Medical Centre|COVID-19 Genomics UK (COG-UK) Consortium|Loose|United Kingdom

>Spike|hCoV-19/Poland/Wro-02/2020|2020-03-18|EPI\_ISL\_437625|Original|hCoV-19^^Dolnoslaskie|Human|Laboratory of Genomics & Bioinformatics|Laboratory of Genomics & Bioinformatics|Laczanski|Poland

>Spike|hCoV-19/USA/TX-HMH-MCoV-9982/2020|2020-07-06|EPI\_ISL\_780365|Original|hCoV-19^^Texas|Human|Houston Methodist Hospital|Houston Methodist Hospital|Long|USA

>Spike|hCoV-19/England/ALDP-B638CC/2020|2020-11-09|EPI\_ISL\_656426|Original|hCoV-19^^England|Human|Lighthouse Lab in Alderley Park|Wellcome Sanger Institute for the COVID-19 Genomics UK (COG-UK) Consortium|Davies|United Kingdom

>Spike|hCoV-19/Denmark/DCGC-5862/2020|2020-09-28|EPI\_ISL\_621049|Original|hCoV-19^^Midtjylland|Human|Department of Virus and Microbiological Special Diagnostics|Albertsen lab|Michaelsen|Denmark

>Spike|hCoV-19/Denmark/DCGC-21985/2020|2020-12-14|EPI\_ISL\_758493|Original|hCoV-19^^Sjaelland|Human|Department of Virus and Microbiological Special Diagnostics|Albertsen Lab|Michaelsen|Denmark

>Spike|hCoV-19/England/CAMB-7BC66/2020|2020-04-04|EPI\_ISL\_442046|Original|hCoV-19^^England|Human|Department of Pathology|Wellcome Sanger Institute for the COVID-19 Genomics UK (COG-UK) consortium|Amato|United Kingdom

>Spike|hCoV-19/Canada/NS-NML-160/2020|2020-04-18|EPI\_ISL\_579530|Original|hCoV-19^^Nova Scotia|Human|QEII Health Sciences Centre|National Microbiology Laboratory (NML)|Majer|Canada

>Spike|hCoV-19/England/210100343/2021|2021-01-04|EPI\_ISL\_791228|Original|hCoV-19^^England|Human|Respiratory Virus Unit|COVID-19 Genomics UK (COG-UK) Consortium|Platt|United Kingdom

>Spike|hCoV-19/Japan/PG-0423/2020|2020-04-02|EPI\_ISL\_480091|Original|hCoV-19^^Kansai|Human|Department of Infectious Diseases|Pathogen Genomics Center|Sekizuka|Japan

>Spike|hCoV-19/England/ALDP-9ED817/2020|2020-05-05|EPI\_ISL\_589285|Original|hCoV-19^^England|Human|Lighthouse Lab in Alderley Park|Wellcome Sanger Institute for the COVID-19 Genomics UK (COG-UK) consortium|Davies|United Kingdom

>Spike|hCoV-19/Scotland/EDB3181/2020|2020-04-06|EPI\_ISL\_488959|Original|hCoV-19^^Scotland|Human|Virology Department|Wellcome Sanger Institute for the COVID-19 Genomics UK (COG-UK) consortium|Davies|United Kingdom

>Spike|hCoV-19/USA/OR-OHSU-1453/2020|2020-07-17|EPI\_ISL\_509205|Original|hCoV-19^^Oregon|Human|OHSU Lab Services Molecular Microbiology Lab|Oregon SARS-CoV-2 Genome Sequencing Center|O'Roak|USA

>Spike|hCoV-19/Hong Kong/VM20010007/2020|2020-04-07|EPI\_ISL\_444040|Original|hCoV-19^^Hong Kong|Human|Queen Elizabeth Hospital|Hong Kong Department of Health|Mak|China

>Spike|hCoV-19/Wales/PHWC-16F6C0/2020|2020-10-05|EPI\_ISL\_586006|Original|hCoV-19^^Wales|Human|Wales Specialist Virology Centre Sequencing lab|COVID-19 Genomics UK (COG-UK) Consortium|Moore|United Kingdom

>Spike|hCoV-19/Belgium/reg-0616834/2020|2020-06-16|EPI\_ISL\_734761|Original|hCoV-19^^Hulste|Human|UZ Leuven|KU Leuven|Maes|Belgium

>Spike|hCoV-19/USA/TX-HMH-2383/2020|2020-05-25|EPI\_ISL\_545276|Original|hCoV-19^^Texas|Human|Houston Methodist Hospital|Houston Methodist Hospital|Long|USA

>Spike|hCoV-19/England/NORT-28AD50/2020|2020-04-15|EPI\_ISL\_492966|Original|hCoV-19^^England|Human|NU-OMICS DNA Sequencing research facility|Wellcome Sanger Institute for the COVID-19 Genomics UK (COG-UK) consortium|Davies|United Kingdom

>Spike|hCoV-19/USA/MA-Yale-439/2020|2020-04-10|EPI\_ISL\_738257|Original|hCoV-19^^Massachusetts|Human|Connecticut Veterans' Affairs Hospital|Grubaugh Lab - Yale School of Public Health|Grubaugh|USA

>Spike|hCoV-19/Brazil/CE-L13-CD207/2020|2020-03-16|EPI\_ISL\_476227|Original|hCoV-19^^Cear\u00e1|Human|DB Diagn\u00f3sticos do Brasil|Instituto de Medicina Tropical da Universidade de S\u00e3o Paulo|Sabino|Brazil

>Spike|hCoV-19/Australia/VIC3552/2020|2020-07-08|EPI\_ISL\_520301|Original|hCoV-19^^Victoria|Human|Victorian Infectious Diseases Reference Laboratory (VIDRL)|VIDRL and MDU-PHL|Schultz|Australia

>Spike|hCoV-19/England/MILK-9AB156/2020|2020-08-31|EPI\_ISL\_551076|Original|hCoV-19^^England|Human|Lighthouse Lab in Milton Keynes|Wellcome Sanger Institute for the COVID-19 Genomics UK (COG-UK) consortium|Davies|United Kingdom

>Spike|hCoV-19/England/QEUH-9F7953/2020|2020-09-27|EPI\_ISL\_589165|Original|hCoV-19^^England|Human|Lighthouse Lab in Glasgow|Wellcome Sanger Institute for the COVID-19 Genomics UK (COG-UK) consortium|Davies|United Kingdom

>Spike|hCoV-19/England/MILK-BB0EEC/2020|2020-11-17|EPI\_ISL\_720561|Original|hCoV-19^^England|Human|Lighthouse Lab in Milton Keynes|Wellcome Sanger Institute for the COVID-19 Genomics UK (COG-UK) Consortium|Davies|United Kingdom

>Spike|hCoV-19/France/ARA-111014/2020|2020-11-23|EPI\_ISL\_728543|Original|hCoV-19^^Auvergne-Rh\u00f4ne-Alpes|Human|CNR Virus des Infections Respiratoires - France SUD|CNR Virus des Infections Respiratoires - France SUD|Bal|France

>Spike|hCoV-19/Denmark/DCGC-3611/2020|2020-09-07|EPI\_ISL\_616378|Original|hCoV-19^^Hovedstaden|Human|Department of Virus and Microbiological Special Diagnostics|Albertsen lab|Michaelsen|Denmark

>Spike|hCoV-19/England/20124095002/2020|2020-03-13|EPI\_ISL\_418727|Original|hCoV-19^^England|Human|Respiratory Virus Unit|Respiratory Virus Unit|Platt|United Kingdom

>Spike|hCoV-19/Wales/PHWC-497732/2020|2020-11-21|EPI\_ISL\_726873|Original|hCoV-19^^Wales|Human|Originating lab|COVID-19 Genomics UK (COG-UK) Consortium|Moore|United Kingdom

>Spike|hCoV-19/Scotland/QEUH-A4B263/2020|2020-10-08|EPI\_ISL\_638937|Original|hCoV-19^^Scotland|Human|Department of Pathology|COVID-19 Genomics UK (COG-UK) Consortium|Goodfellow|United Kingdom

>Spike|hCoV-19/Denmark/DCGC-9282/2020|2020-11-16|EPI\_ISL\_668886|Original|hCoV-19^^Nordjylland|Human|Department of Virus and Microbiological Special Diagnostics|Albertsen Lab|Michaelsen|Denmark

>Spike|hCoV-19/England/ALDP-4AC1E1/2020|2020-06-14|EPI\_ISL\_559551|Original|hCoV-19^^England|Human|Lighthouse Lab in Alderley Park|Wellcome Sanger Institute for the COVID-19 Genomics UK (COG-UK) consortium|Davies|United Kingdom

>Spike|hCoV-19/England/MILK-AB83F5/2020|2020-10-21|EPI\_ISL\_623303|Original|hCoV-19^^England|Human|Lighthouse Lab in Milton Keynes|Wellcome Sanger Institute for the COVID-19 Genomics UK (COG-UK) consortium|Davies|United Kingdom

>Spike|hCoV-19/South Africa/KRISP-K003327/2020|2020-09-07|EPI\_ISL\_602720|Original|hCoV-19^^KwaZulu-Natal|Human|NHLs-IALCH|KRISP|de Oliveira|South Africa

>Spike|hCoV-19/France/PAC-IHU-0195/2020|2020-03-27|EPI\_ISL\_569362|Original|hCoV-19^^Provence-Alpes-C\u00f4te-d\u00e0z|Human|MEPHI|MEPHI|Levasseur|France

>Spike|hCoV-19/South Korea/KDCA0313/2020|2020-10-29|EPI\_ISL\_760099|Original|hCoV-19^^South Korea|Human|Division of Emerging Infectious Diseases|Division of Emerging Infectious Diseases|Park|South Korea

>Spike|hCoV-19/USA/MA-MGH-00466/2020|2020-04-04|EPI\_ISL\_460176|Original|hCoV-19^^Massachusetts|Human|Massachusetts General Hospital|Infectious Disease Program|Lemieux|USA

>Spike|hCoV-19/Denmark/DCGC-22247/2020|2020-12-14|EPI\_ISL\_758635|Original|hCoV-19^^Sjælland|Human|Department of Virus and Microbiological Special Diagnostics|Albertsen Lab|Michaelsen|Denmark

>Spike|hCoV-19/Romania/Bucuresti-14658/2020|2020-04-17|EPI\_ISL\_468154|Original|hCoV-19^^Bucuresti|Human|[Romania|[Romania|Paraschiv|Romania

>Spike|hCoV-19/USA/NY-QDX-1225/2020|2020-03-17|EPI\_ISL\_572001|Original|hCoV-19^^New York|Human|Quest Diagnostics|Quest Diagnostics|Kagan|USA

>Spike|hCoV-19/New Zealand/20VR1899/2020|2020-03-31|EPI\_ISL\_456300|Original|hCoV-19^^Waikato|Human|LabPLUS|Institute of Environmental Science and Research (ESR)|de Ligt|New Zealand

>Spike|hCoV-19/SaudiArabia/KAUST-MADINAH521/2020|2020-04-06|EPI\_ISL\_513167|Original|hCoV-19^^Madinah|Human|Pathogen Genomics Lab King Abdullah University of Science and Technology(KAUST)|Pathogen Genomics Lab King Abdullah University of Science and Technology(KAUST)|Mohamed Ghazzali|Saudi Arabia

>Spike|hCoV-19/Ireland/D-NVRL-20G44542/2020|2020-03-31|EPI\_ISL\_605084|Original|hCoV-19^^Dublin|Human|National Virus Reference Laboratory|Irish Coronavirus Sequencing Consortium - Helixworks|Chalapati|Ireland

>Spike|hCoV-19/Crimea/RII-MH2937S/2020|2020-09-21|EPI\_ISL\_733078|Original|hCoV-19^^Alushta|Human|HELIX LLC|WHO National Influenza Centre Russian Federation|Komissarov|Crimea

>Spike|hCoV-19/England/BRIS-127B2F/2020|2020-04-17|EPI\_ISL\_469802|Original|hCoV-19^^England|Human|PHE South West Regional Laboratory|Wellcome Sanger Institute for the COVID-19 Genomics UK (COG-UK) consortium|Davies|United Kingdom

>Spike|hCoV-19/France/PAC-IHU-1195/2020|2020-08-17|EPI\_ISL\_569082|Original|hCoV-19^^Provence-Alpes-C\u00f4te-d\u00a9Azur|Human|MEPHI|MEPHI|Levasseur|France

>Spike|hCoV-19/England/QEUH-B814C4/2020|2020-11-14|EPI\_ISL\_668231|Original|hCoV-19^^England|Human|Lighthouse Lab in Glasgow|Wellcome Sanger Institute for the COVID-19 Genomics UK (COG-UK) Consortium|Davies|United Kingdom

>Spike|hCoV-19/India/MH-ACTREC-067/2020|2020-05-06|EPI\_ISL\_699723|Original|hCoV-19^^Maharashtra|Human|Hematopathology Laboratory|Hematopathology Laboratory|Patkar|India

>Spike|hCoV-19/Japan/PG-8558/2020|2020-08-00|EPI\_ISL\_686154|Original|hCoV-19^^Japan|Human|Pathogen Genomics Center|Pathogen Genomics Center|Sekizuka|Japan

>Spike|hCoV-19/England/MILK-9C3835/2020|2020-09-10|EPI\_ISL\_566704|Original|hCoV-19^^England|Human|Lighthouse Lab in Milton Keynes|Wellcome Sanger Institute for the COVID-19 Genomics UK (COG-UK) consortium|Davies|United Kingdom

>Spike|hCoV-19/France/OCC-SC539/2020|2020-03-28|EPI\_ISL\_660716|Original|hCoV-19^^Occitanie|Human|CHU N\u00eames|CNR Virus des Infections Respiratoires - France SUD|Bal|France

>Spike|hCoV-19/England/MILK-9E088D/2020|2020-09-20|EPI\_ISL\_601375|Original|hCoV-19^^England|Human|Lighthouse Lab in Milton Keynes|Wellcome Sanger Institute for the COVID-19 Genomics UK (COG-UK) consortium|Davies|United Kingdom

>Spike|hCoV-19/Switzerland/AG-ETHZ-260131/2020|2020-08-25|EPI\_ISL\_539436|Original|hCoV-19^^Aargau|Human|Viollier AG|Department of Biosystems Science and Engineering|Nadeau|Switzerland

>Spike|hCoV-19/USA/CA-CZB-1566/2020|2020-04-05|EPI\_ISL\_468502|Original|hCoV-19^^California|Human|Ventura County Public Health Lab|Chan-Zuckerberg Biohub|Hao|USA

>Spike|hCoV-19/Luxembourg/LNS7753431/2020|2020-03-12|EPI\_ISL\_419595|Original|hCoV-19^^Luxembourg|Human|Laboratoire National de Sant\u00e9|Laboratoire National de Sant\u00e9|Wienecke-Baldacchino|Luxembourg

>Spike|hCoV-19/Canada/MB-NML-620/2020|2020-04-03|EPI\_ISL\_632917|Original|hCoV-19^^Manitoba|Human|Cadham Provincial laboratory|Cadham Provincial laboratory|Majer|Canada

>Spike|hCoV-19/Lithuania/MR-LUHS-Eilnr479/2020|2020-09-12|EPI\_ISL\_636906|Original|hCoV-19^^Kauno apskritis|Human|Lithuanian University of Health Sciences Hospital|Lithuanian University of Health Sciences|Zemaitis|Lithuania

>Spike|hCoV-19/England/ALDP-989D69/2020|2020-08-01|EPI\_ISL\_529271|Original|hCoV-19^^England|Human|Liverpool Clinical Laboratories|COVID-19 Genomics UK (COG-UK) Consortium|Haldenby|United Kingdom

>Spike|hCoV-19/England/ALDP-B5B8D6/2020|2020-11-08|EPI\_ISL\_655563|Original|hCoV-19^^England|Human|Lighthouse Lab in Alderley Park|Wellcome Sanger Institute for the COVID-19 Genomics UK (COG-UK) Consortium|Davies|United Kingdom



>Spike|hCoV-19/England/QEUA-B145C3/2020|2020-11-03|EPI\_ISL\_642633|Original|hCoV-19^^England|Human|Lighthouse Lab in Glasgow|Wellcome Sanger Institute for the COVID-19 Genomics UK (COG-UK) Consortium|Davies|United Kingdom

>Spike|hCoV-19/Wales/PHWC-494182/2020|2020-11-16|EPI\_ISL\_726077|Original|hCoV-19^^Wales|Human|Originating lab|COVID-19 Genomics UK (COG-UK) Consortium|Moore|United Kingdom

>Spike|hCoV-19/South Korea/KDCA0181/2020|2020-07-03|EPI\_ISL\_747414|Original|hCoV-19^^South Korea|Human|Division of Emerging Infectious Diseases|Division of Emerging Infectious Diseases|Park|South Korea

>Spike|hCoV-19/Canada/QC-LSPQ-L00235638/2020|2020-03-24|EPI\_ISL\_536103|Original|hCoV-19^^Quebec|Human|H\u00f4pital Pierre-Boucher|Laboratoire de sant\u00e9 publique du Qu\u00e9bec|Moreira|Canada

>Spike|hCoV-19/Gambia/NPHL-1208/2020|2020-06-30|EPI\_ISL\_561213|Original|hCoV-19^^Kombo|Human|MRCG at LSHTM Genomics lab|MRCG at LSHTM Genomics lab|Sesay|Gambia

>Spike|hCoV-19/England/MILK-B39337/2020|2020-11-01|EPI\_ISL\_658903|Original|hCoV-19^^England|Human|Lighthouse Lab in Milton Keynes|Wellcome Sanger Institute for the COVID-19 Genomics UK (COG-UK) Consortium|Davies|United Kingdom

>Spike|hCoV-19/England/ALDP-94E717/2020|2020-06-18|EPI\_ISL\_555269|Original|hCoV-19^^England|Human|Lighthouse Lab in Alderley Park|Wellcome Sanger Institute for the COVID-19 Genomics UK (COG-UK) consortium|Davies|United Kingdom

>Spike|hCoV-19/England/BRIS-12607C/2020|2020-04-09|EPI\_ISL\_458986|Original|hCoV-19^^England|Human|PHE South West Regional Laboratory|Wellcome Sanger Institute for the COVID-19 Genomics UK (COG-UK) consortium|Davies|United Kingdom

>Spike|hCoV-19/India/DL-NCDC4592-CSIR-IGIB/2020|2020-05-23|EPI\_ISL\_482596|Original|hCoV-19^^Delhi|Human|National Centre for Disease control (NCDC)|NCDC/CSIR-IGIB|Singh|India

>Spike|hCoV-19/USA/WI-UW-1860/2020|2020-09-14|EPI\_ISL\_605732|Original|hCoV-19^^Wisconsin|Human|University of Wisconsin-Madison AIDS Vaccine Research Laboratories|University of Wisconsin-Madison AIDS Vaccine Research Laboratories|Baczenas|USA

>Spike|hCoV-19/Brazil/RS-6242/2020|2020-05-31|EPI\_ISL\_729843|Original|hCoV-19^^Rio Grande do Sul|Human|Laboratorio Central de Saude Publica do Estado do Rio Grande do Sul (LACEN-RS)|Laboratory of Respiratory Viruses and Measles|Silva|Brazil

>Spike|hCoV-19/USA/WI-UW-1505/2020|2020-09-14|EPI\_ISL\_541631|Original|hCoV-19^^Wisconsin|Human|University of Wisconsin-Madison AIDS Vaccine Research Laboratories|University of Wisconsin-Madison AIDS Vaccine Research Laboratories|Baczenas|USA

>Spike|hCoV-19/Australia/VIC7036/2020|2020-07-14|EPI\_ISL\_564203|Original|hCoV-19^^Victoria|Human|Victorian Infectious Diseases Reference Laboratory (VIDRL)|VIDRL and MDU-PHL|Schultz|Australia

>Spike|hCoV-19/USA/MA-MGH-00829/2020|2020-04-13|EPI\_ISL\_791785|Original|hCoV-19^^Massachusetts|Human|Massachusetts General Hospital|Infectious Disease Program|Park|USA

>Spike|hCoV-19/Wales/ALDP-5C23DF/2020|2020-06-15|EPI\_ISL\_558851|Original|hCoV-19^^Wales|Human|Lighthouse Lab in Alderley Park|Wellcome Sanger Institute for the COVID-19 Genomics UK (COG-UK) consortium|Davies|United Kingdom

>Spike|hCoV-19/USA/TX-HMH-2465/2020|2020-05-29|EPI\_ISL\_545325|Original|hCoV-19^^Texas|Human|Houston Methodist Hospital|Houston Methodist Hospital|Long|USA

>Spike|hCoV-19/England/QEUA-9647DF/2020|2020-08-11|EPI\_ISL\_536854|Original|hCoV-19^^England|Human|Lighthouse Lab in Glasgow|Wellcome Sanger Institute for the COVID-19 Genomics UK (COG-UK) consortium|Davies|United Kingdom

>Spike|hCoV-19/USA/LA-EVTL732/2020|2020-07-16|EPI\_ISL\_653423|Original|hCoV-19^^Louisiana|Human|LSUHS Emerging Viral Threat Laboratory|Microbial Genome Sequencing Center|Kamil|USA

>Spike|hCoV-19/USA/WA-S706/2020|2020-04-08|EPI\_ISL\_449876|Original|hCoV-19^^Washington|Human|Washington State Department of Health|Seattle Flu Study|Bedford|USA

>Spike|hCoV-19/Israel/CVL-45201/2020|2020-12-03|EPI\_ISL\_745040|Original|hCoV-19^^Haifa|Human|Israel Central Virology laboratory|Israel Central Virology laboratory|Zuckerman|Israel

>Spike|hCoV-19/England/BRIS-12ABE0/2020|2020-05-01|EPI\_ISL\_458331|Original|hCoV-19^^England|Human|PHE South West Regional Laboratory|Wellcome Sanger Institute for the COVID-19 Genomics UK (COG-UK) consortium|Davies|United Kingdom

>Spike|hCoV-19/Australia/SAP309/2020|2020-03-27|EPI\_ISL\_483092|Original|hCoV-19^^South Australia|Human|SA Pathology|SA Pathology|Leong|Australia

>Spike|hCoV-19/Kenya/C1357/2020|2020-04-20|EPI\_ISL\_457858|Original|hCoV-19^^Kenya|Human|KEMRI-CGMR-C|KEMRI-Wellcome Trust Research Programme/KEMRI-CGMR-C Kilifi|Githinji|Kenya

>Spike|hCoV-19/Japan/PG-4696/2020|2020-08-00|EPI\_ISL\_689833|Original|hCoV-19^^Japan|Human|Pathogen Genomics Center|Pathogen Genomics Center|Sekizuka|Japan

>Spike|hCoV-19/England/PORT-2D4917/2020|2020-10-13|EPI\_ISL\_611960|Original|hCoV-19^^England|Human|Centre for Enzyme Innovation|COVID-19 Genomics UK (COG-UK) Consortium|Robson|United Kingdom

>Spike|hCoV-19/SaudiArabia/KAUST-MADINAH1072/2020|2020-06-11|EPI\_ISL\_513089|Original|hCoV-19^^Madinah|Human|Pathogen Genomics Lab King Abdullah University of Science and Technology(KAUST)|Pathogen Genomics Lab King Abdullah University of Science and Technology(KAUST)|Mohamed Ghazzali|Saudi Arabia

>Spike|hCoV-19/England/MILK-B3BC3A/2020|2020-10-31|EPI\_ISL\_679797|Original|hCoV-19^^England|Human|Oxford Viromics|COVID-19 Genomics UK (COG-UK) Consortium|Golubchik|United Kingdom

>Spike|hCoV-19/Ireland/WW-NVRL-AIIDV0063v1/2020|2020-04-08|EPI\_ISL\_644303|Original|hCoV-19^^Wicklow|Human|CEPHR / Vincent's Hospital|Irish Coronavirus Sequencing Consortium - National Virus Reference Laboratory|Gonzalez|Ireland

>Spike|hCoV-19/USA/AZ-TG271922/2020|2020-03-26|EPI\_ISL\_426555|Original|hCoV-19^^Arizona|Human|AZ SPHL|TGen North|Lemmer|USA

>Spike|hCoV-19/USA/WA-S2375/2020|2020-06-11|EPI\_ISL\_497007|Original|hCoV-19^^Washington|Human|Washington State Department of Health|Seattle Flu Study|Lee|USA

>Spike|hCoV-19/England/NOTT-112143/2020|2020-06-18|EPI\_ISL\_484346|Original|hCoV-19^^England|Human|Queens Medical Centre|COVID-19 Genomics UK (COG-UK) Consortium|Loose|United Kingdom

>Spike|hCoV-19/Denmark/DCGC-15600/2020|2020-11-23|EPI\_ISL\_713179|Original|hCoV-19^^Hovedstaden|Human|Department of Virus and Microbiological Special Diagnostics|Albertsen Lab|Michaelsen|Denmark

>Spike|hCoV-19/England/QEUEH-C149E4/2020|2020-12-06|EPI\_ISL\_709443|Original|hCoV-19^^England|Human|Lighthouse Lab in Glasgow|Wellcome Sanger Institute for the COVID-19 Genomics UK (COG-UK) Consortium|Davies|United Kingdom

>Spike|hCoV-19/USA/AK-PHL462/2020|2020-06-10|EPI\_ISL\_512140|Original|hCoV-19^^Alaska|Human|Alaska State Virology Laboratory|Alaska State Virology Laboratory|Drown|USA

>Spike|hCoV-19/Denmark/DCGC-17439/2020|2020-12-14|EPI\_ISL\_750983|Original|hCoV-19^^Midtjylland|Human|Department of Virus and Microbiological Special Diagnostics|Albertsen Lab|Michaelsen|Denmark

>Spike|hCoV-19/Wales/PHWC-4842A0/2020|2020-10-18|EPI\_ISL\_627983|Original|hCoV-19^^Wales|Human|Wales Specialist Virology Centre Sequencing lab|COVID-19 Genomics UK (COG-UK) Consortium|Moore|United Kingdom

>Spike|hCoV-19/England/QEUEH-9B9304/2020|2020-09-07|EPI\_ISL\_549766|Original|hCoV-19^^England|Human|Lighthouse Lab in Glasgow|Wellcome Sanger Institute for the COVID-19 Genomics UK (COG-UK) consortium|Davies|United Kingdom

>Spike|hCoV-19/Bahrain/340864151\_S32/2020|2020-10-14|EPI\_ISL\_632268|Original|hCoV-19^^Bahrain|Human|Communicable Disease Laboratory|Communicable Disease Laboratory|Altaif|Bahrain

>Spike|hCoV-19/Australia/VIC776/2020|2020-03-30|EPI\_ISL\_427051|Original|hCoV-19^^Victoria|Human|Victorian Infectious Diseases Reference Laboratory (VIDRL)|Microbiological Diagnostic Unit Public Health Laboratory and Victorian Infectious Diseases Reference Laboratory|Schultz|Australia

>Spike|hCoV-19/Wales/PHWC-3131C/2020|2020-04-10|EPI\_ISL\_446432|Original|hCoV-19^^Wales|Human|Wales Specialist Virology Centre|Public Health Wales Microbiology Cardiff|Moore|United Kingdom

>Spike|hCoV-19/USA/NY-NYCPHL-000461/2020|2020-05-05|EPI\_ISL\_631932|Original|hCoV-19^^New York|Human|OCME Office Of Chief Medical Examiner|New York City Public Health Laboratory|Wang|USA

>Spike|hCoV-19/Finland/2A72SVIIIA/2020|2020-04-02|EPI\_ISL\_481653|Original|hCoV-19^^Uusimaa|Human|Department of Virology and Immunology|Department of Virology|Smura|Finland

>Spike|hCoV-19/Scotland/CVR5292/2020|2020-10-21|EPI\_ISL\_650854|Original|hCoV-19^^Scotland|Human|West of Scotland Specialist Virology Centre|COVID-19 Genomics UK (COG-UK) Consortium|Robertson|United Kingdom

>Spike|hCoV-19/England/PORT-2D1E48/2020|2020-04-02|EPI\_ISL\_499285|Original|hCoV-19^^England|Human|Centre for Enzyme Innovation|COVID-19 Genomics UK (COG-UK) Consortium|Robson|United Kingdom

>Spike|hCoV-19/Australia/VIC14566/2020|2020-08-27|EPI\_ISL\_592897|Original|hCoV-19^^Victoria|Human|Microbiological Diagnostic Unit - Public Health Laboratory (MDU-PHL)|MDU-PHL|Schultz|Australia

>Spike|hCoV-19/England/MILK-BB1CF0/2020|2020-11-17|EPI\_ISL\_731252|Original|hCoV-19^^England|Human|Lighthouse Lab in Milton Keynes|Wellcome Sanger Institute for the COVID-19 Genomics UK (COG-UK) Consortium|Davies|United Kingdom

>Spike|hCoV-19/England/QEUIH-960BB9/2020|2020-08-04|EPI\_ISL\_532067|Original|hCoV-19^^England|Human|Lighthouse Lab in Glasgow|Wellcome Sanger Institute for the COVID-19 Genomics UK (COG-UK) consortium|Davies|United Kingdom

>Spike|hCoV-19/England/LIVE-DC4117/2020|2020-11-08|EPI\_ISL\_703530|Original|hCoV-19^^England|Human|Liverpool Clinical Laboratories|COVID-19 Genomics UK (COG-UK) Consortium|Haldenby|United Kingdom

>Spike|hCoV-19/England/QEUIH-B69152/2020|2020-11-11|EPI\_ISL\_662039|Original|hCoV-19^^England|Human|Lighthouse Lab in Glasgow|Wellcome Sanger Institute for the COVID-19 Genomics UK (COG-UK) Consortium|Davies|United Kingdom

>Spike|hCoV-19/Spain/PV-IBV-2132/2020|2020-04-12|EPI\_ISL\_468898|Original|hCoV-19^^Basque Country|Human|Servicio de Microbiolog\u00eda. Hospital Universitario Donostia. OSI Donostialdea. \u00c1rea de Enfermedades Infecciosas|SeqCOVID-SPAIN consortium/IBV (CSIC)|Comas|Spain

>Spike|hCoV-19/South Korea/KCDC2714/2020|2020-07-12|EPI\_ISL\_522493|Original|hCoV-19^^South Korea|Human|Center for Laboratory Control of Infectious Diseases|Center for Laboratory Control of Infectious Diseases|Kim|South Korea

>Spike|hCoV-19/England/ALDP-A668AC/2020|2020-10-12|EPI\_ISL\_630561|Original|hCoV-19^^England|Human|Lighthouse Lab in Alderley Park|Wellcome Sanger Institute for the COVID-19 Genomics UK (COG-UK) consortium|Davies|United Kingdom

>Spike|hCoV-19/England/ALDP-B23E7B/2020|2020-11-04|EPI\_ISL\_646252|Original|hCoV-19^^England|Human|Lighthouse Lab in Alderley Park|Wellcome Sanger Institute for the COVID-19 Genomics UK (COG-UK) Consortium|Davies|United Kingdom

>Spike|hCoV-19/Israel/2115964/2020|2020-04-16|EPI\_ISL\_447338|Original|hCoV-19^^Tel Aviv District|Human|Clinical Virology Unit|Stern Lab|Miller|Israel

>Spike|hCoV-19/England/CAMC-947F16/2020|2020-07-22|EPI\_ISL\_556915|Original|hCoV-19^^England|Human|Lighthouse Lab in Cambridge|Wellcome Sanger Institute for the COVID-19 Genomics UK (COG-UK) consortium|Davies|United Kingdom

>Spike|hCoV-19/Wales/PHWC-49DAAC/2020|2020-12-08|EPI\_ISL\_742870|Original|hCoV-19^^Wales|Human|Wales Specialist Virology Centre Sequencing lab|COVID-19 Genomics UK (COG-UK) Consortium|Moore|United Kingdom

>Spike|hCoV-19/Denmark/DCGC-11247/2020|2020-11-02|EPI\_ISL\_670792|Original|hCoV-19^^Denmark|Human|Department of Virus and Microbiological Special Diagnostics|Albertsen Lab|Michaelsen|Denmark

>Spike|hCoV-19/USA/TX-HMH-MCoV-12649/2020|2020-08-31|EPI\_ISL\_790442|Original|hCoV-19^^Texas|Human|Houston Methodist Hospital|Houston Methodist Hospital|Long|USA

>Spike|hCoV-19/Australia/NSW370/2020|2020-03-26|EPI\_ISL\_451631|Original|hCoV-19^^New South Wales|Human|Laverty Pathology|NSW Health Pathology - Institute of Clinical Pathology and Medical Research; Westmead Hospital; University of Sydney|Gall|Australia

>Spike|hCoV-19/Wales/PHWC-486059/2020|2020-10-26|EPI\_ISL\_628304|Original|hCoV-19^^Wales|Human|Wales Specialist Virology Centre Sequencing lab|COVID-19 Genomics UK (COG-UK) Consortium|Moore|United Kingdom

>Spike|hCoV-19/Spain/RI-IBV-98002384/2020|2020-03-11|EPI\_ISL\_537873|Original|hCoV-19^^La Rioja|Human|Centro de Investigaci\u00f3n Biom\u00e9dica de La Rioja - Hospital San Pedro Logro\u00f1o|SeqCOVID-SPAIN consortium/IBV (CSIC)|Comas|Spain

>Spike|hCoV-19/England/CAMC-B382E0/2020|2020-11-05|EPI\_ISL\_659073|Original|hCoV-19^^England|Human|Lighthouse Lab in Cambridge|Wellcome Sanger Institute for the COVID-19 Genomics UK (COG-UK) Consortium|Davies|United Kingdom

>Spike|hCoV-19/Australia/VIC11914/2020|2020-08-02|EPI\_ISL\_591894|Original|hCoV-19^^Victoria|Human|Victorian Infectious Diseases Reference Laboratory (VIDRL)|VIDRL and MDU-PHL|Schultz|Australia

>Spike|hCoV-19/England/CAMB-1B625D/2020|2020-09-16|EPI\_ISL\_572471|Original|hCoV-19^^England|Human|Department of Pathology|COVID-19 Genomics UK (COG-UK) Consortium|Goodfellow|United Kingdom

>Spike|hCoV-19/England/NORW-E80E0/2020|2020-04-08|EPI\_ISL\_449107|Original|hCoV-19^^England|Human|Quadram Institute Bioscience|COVID-19 Genomics UK (COG-UK) Consortium|Alikhan|United Kingdom

>Spike|hCoV-19/England/ALDP-BB2907/2020|2020-11-19|EPI\_ISL\_703166|Original|hCoV-19^^England|Human|Lighthouse Lab in Alderley Park|Wellcome Sanger Institute for the COVID-19 Genomics UK (COG-UK) Consortium|Davies|United Kingdom

>Spike|hCoV-19/England/LIVE-AAD3E/2020|2020-07-29|EPI\_ISL\_540616|Original|hCoV-19^^England|Human|Liverpool Clinical Laboratories|COVID-19 Genomics UK (COG-UK) Consortium|Haldenby|United Kingdom

>Spike|hCoV-19/Australia/VIC6766/2020|2020-07-26|EPI\_ISL\_562085|Original|hCoV-19^^Victoria|Human|Victorian Infectious Diseases Reference Laboratory (VIDRL)|VIDRL and MDU-PHL|Schultz|Australia

>Spike|hCoV-19/South Africa/KRISP-K002839/2020|2020-09-01|EPI\_ISL\_602655|Original|hCoV-19^^KwaZulu-Natal|Human|NHLs-IALCH|KRISP|de Oliveira|South Africa

>Spike|hCoV-19/England/CAMC-B089B7/2020|2020-10-30|EPI\_ISL\_643549|Original|hCoV-19^^England|Human|Lighthouse Lab in Cambridge|Wellcome Sanger Institute for the COVID-19 Genomics UK (COG-UK) Consortium|Davies|United Kingdom

>Spike|hCoV-19/England/QEUH-B2B453/2020|2020-11-03|EPI\_ISL\_646604|Original|hCoV-19^^England|Human|Lighthouse Lab in Glasgow|Wellcome Sanger Institute for the COVID-19 Genomics UK (COG-UK) Consortium|Davies|United Kingdom

>Spike|hCoV-19/England/NORT-295DCB/2020|2020-05-17|EPI\_ISL\_488723|Original|hCoV-19^^England|Human|NU-OMICS DNA Sequencing research facility|Wellcome Sanger Institute for the COVID-19 Genomics UK (COG-UK) consortium|Davies|United Kingdom

>Spike|hCoV-19/USA/UT-08407/2020|2020-05-20|EPI\_ISL\_524185|Original|hCoV-19^^Utah|Human|Utah Public Health Laboratory|Utah Public Health Laboratory|Young|USA

>Spike|hCoV-19/Guadeloupe/IPG-7353/2020|2020-03-31|EPI\_ISL\_613445|Original|hCoV-19^^M\u00e9tropole|Human|Institut Pasteur de la Guadeloupe|Institut Pasteur de la Guadeloupe|Enouf|Guadeloupe

>Spike|hCoV-19/USA/NY-NYCPHL-000609/2020|2020-03-11|EPI\_ISL\_632066|Original|hCoV-19^^New York|Human|Jamaica Hospital Medical Center|New York City Public Health Laboratory|Wang|USA

>Spike|hCoV-19/USA/MI-QDX-656/2020|2020-03-19|EPI\_ISL\_571379|Original|hCoV-19^^Michigan|Human|Quest Diagnostics|Quest Diagnostics|Kagan|USA

>Spike|hCoV-19/Hong Kong/HKU-IHCE0511-003a/2020|2020-01-27|EPI\_ISL\_538542|Original|hCoV-19^^Hong Kong|Human|Department of Microbiology|Department of Microbiology|Chan|China

>Spike|hCoV-19/Northern Ireland/NIRE-233336/2020|2020-09-24|EPI\_ISL\_680281|Original|hCoV-19^^Northern Ireland|Human|Regional Virus Laboratory|COVID-19 Genomics UK (COG-UK) Consortium|Fairley|United Kingdom

>Spike|hCoV-19/Japan/PG-2221/2020|2020-04-00|EPI\_ISL\_685826|Original|hCoV-19^^Japan|Human|Pathogen Genomics Center|Pathogen Genomics Center|Sekizuka|Japan

>Spike|hCoV-19/England/MILK-AC7EF2/2020|2020-10-22|EPI\_ISL\_629600|Original|hCoV-19^^England|Human|Lighthouse Lab in Milton Keynes|Wellcome Sanger Institute for the COVID-19 Genomics UK (COG-UK) consortium|Davies|United Kingdom

>Spike|hCoV-19/USA/MI-UM-10036310581/2020|2020-10-06|EPI\_ISL\_596587|Original|hCoV-19^^Michigan|Human|University of Michigan Clinical Microbiology Laboratory|Lauring Lab|Valesano|USA

>Spike|hCoV-19/Denmark/ALAB-SSI488/2020|2020-03-24|EPI\_ISL\_429565|Original|hCoV-19^^Denmark|Human|Department of Virus and Microbiological Special Diagnostics|Albertsen lab|Kirkegaard|Denmark

>Spike|hCoV-19/Sichuan/SC-WCH4-287/2020|2020-01-30|EPI\_ISL\_451389|Original|hCoV-19^^Sichuan|Human|West China Hospital of Sichuan University|State Key Laboratory of Biotherapy of Sichuan University|Tang|China

>Spike|hCoV-19/Denmark/DCGC-3029/2020|2020-08-24|EPI\_ISL\_616807|Original|hCoV-19^^NA|Human|Department of Virus and Microbiological Special Diagnostics|Albertsen lab|Michaelsen|Denmark

>Spike|hCoV-19/Japan/PG-7038/2020|2020-08-00|EPI\_ISL\_688143|Original|hCoV-19^^Japan|Human|Pathogen Genomics Center|Pathogen Genomics Center|Sekizuka|Japan

>Spike|hCoV-19/Hungary/UD-90512/2020|2020-10-04|EPI\_ISL\_671473|Original|hCoV-19^^Pest county|Human|University of Debrecen|National Laboratory of Virology|Kemenesi|Hungary

>Spike|hCoV-19/USA/WI-WSLH-200675/2020|2020-06-23|EPI\_ISL\_631433|Original|hCoV-19^^Wisconsin|Human|Wisconsin State Laboratory of Hygiene Communicable Disease Division|Wisconsin State Laboratory of Hygiene Communicable Disease Division|Florek|USA

>Spike|hCoV-19/Wales/PHWC-47FE2C/2020|2020-10-04|EPI\_ISL\_612816|Original|hCoV-19^^Wales|Human|Wales Specialist Virology Centre Sequencing lab|COVID-19 Genomics UK (COG-UK) Consortium|Moore|United Kingdom

>Spike|hCoV-19/England/ALDP-94DA00/2020|2020-06-17|EPI\_ISL\_555309|Original|hCoV-19^^England|Human|Lighthouse Lab in Alderley Park|Wellcome Sanger Institute for the COVID-19 Genomics UK (COG-UK) consortium|Davies|United Kingdom

>Spike|hCoV-19/Ireland/D-NVRL-73IRL62905/2020|2020-09-12|EPI\_ISL\_596893|Original|hCoV-19^^Dublin|Human|National Virus Reference Laboratory|National Virus Reference Laboratory|Gonzalez|Ireland

>Spike|hCoV-19/USA/CA-CZB-5681/2020|2020-07-23|EPI\_ISL\_582973|Original|hCoV-19^^California|Human|San Luis Obispo Public Health Department|Chan-Zuckerberg Biohub|Bhatt|USA

>Spike|hCoV-19/Norway/5733/2020|2020-11-12|EPI\_ISL\_708152|Original|hCoV-19^^Innlandet|Human|Innlandet Hospital Trust|Norwegian Institute of Public Health|Kopperud Riis|Norway

>Spike|hCoV-19/England/MILK-C5FFCD/2020|2020-12-13|EPI\_ISL\_769531|Original|hCoV-19^^England|Human|Lighthouse Lab in Milton Keynes|Wellcome Sanger Institute for the COVID-19 Genomics UK (COG-UK) Consortium|Davies|United Kingdom

>Spike|hCoV-19/Switzerland/BE-ETHZ-260084/2020|2020-08-25|EPI\_ISL\_539405|Original|hCoV-19^^Bern|Human|Viollier AG|Department of Biosystems Science and Engineering|Nadeau|Switzerland

>Spike|hCoV-19/England/NORW-F562A/2020|2020-10-30|EPI\_ISL\_665887|Original|hCoV-19^^England|Human|Quadram Institute Bioscience|COVID-19 Genomics UK (COG-UK) Consortium|Alikhan|United Kingdom

>Spike|hCoV-19/England/NOTT-11EC64/2020|2020-11-30|EPI\_ISL\_679945|Original|hCoV-19^^England|Human|Queens Medical Centre|COVID-19 Genomics UK (COG-UK) Consortium|Loose|United Kingdom

>Spike|hCoV-19/England/NORW-21F761/2020|2020-12-08|EPI\_ISL\_725047|Original|hCoV-19^^England|Human|Quadram Institute Bioscience|COVID-19 Genomics UK (COG-UK) Consortium|Alikhan|United Kingdom

>Spike|hCoV-19/Canada/QC-LSPQ-L00243875/2020|2020-03-31|EPI\_ISL\_536383|Original|hCoV-19^^Quebec|Human|CSSS Haut-Richelieu/Rouville (H\u00f4pital)|Laboratoire de sant\u00e9 publique du Qu\u00e9bec|Moreira|Canada

>Spike|hCoV-19/England/ALDP-A2F951/2020|2020-10-05|EPI\_ISL\_587034|Original|hCoV-19^^England|Human|Lighthouse Lab in Alderley Park|Wellcome Sanger Institute for the COVID-19 Genomics UK (COG-UK) consortium|Davies|United Kingdom

>Spike|hCoV-19/USA/MI-MDHHS-SC20448/2020|2020-03-16|EPI\_ISL\_452322|Original|hCoV-19^^Michigan|Human|Michigan Department of Health and Human Services|Michigan Department of Health and Human Services|Blankenship|USA

>Spike|hCoV-19/Denmark/DCGC-1856/2020|2020-07-06|EPI\_ISL\_622569|Original|hCoV-19^^Hovedstaden|Human|Department of Virus and Microbiological Special Diagnostics|Albertsen lab|Michaelsen|Denmark

>Spike|hCoV-19/England/ALDP-9E6614/2020|2020-09-24|EPI\_ISL\_580295|Original|hCoV-19^^England|Human|Lighthouse Lab in Alderley Park|Wellcome Sanger Institute for the COVID-19 Genomics UK (COG-UK) consortium|Davies|United Kingdom

>Spike|hCoV-19/England/QEUEH-B7D4AD/2020|2020-11-14|EPI\_ISL\_741866|Original|hCoV-19^^England|Human|Oxford Viromics|COVID-19 Genomics UK (COG-UK) Consortium|Golubchik|United Kingdom

>Spike|hCoV-19/Hong Kong/VM20001794/2020|2020-01-29|EPI\_ISL\_409001|Original|hCoV-19^^Hong Kong|Human|Queen Mary Hospital|Hong Kong Department of Health|Mak|China

>Spike|hCoV-19/Australia/VIC3306/2020|2020-07-07|EPI\_ISL\_520985|Original|hCoV-19^^Victoria|Human|Microbiological Diagnostic Unit - Public Health Laboratory (MDU-PHL)|MDU-PHL|Schultz|Australia

>Spike|hCoV-19/USA/WA-UW138/2020|2020-03-11|EPI\_ISL\_416676|Original|hCoV-19^^Washington|Human|UW Virology Lab|UW Virology Lab|Roychoudhury|USA

>Spike|hCoV-19/USA/NM-DOH-2020321223/2020|2020-09-03|EPI\_ISL\_575293|Original|hCoV-19^^New Mexico|Human|Molecular Biology|Molecular Biology|Johnson|USA

>Spike|hCoV-19/Wales/PHWC-4915A7/2020|2020-10-28|EPI\_ISL\_706668|Original|hCoV-19^^Wales|Human|Originating lab|COVID-19 Genomics UK (COG-UK) Consortium|Moore|United Kingdom

>Spike|hCoV-19/USA/NY-Wadsworth-11344-01/2020|2020-03-06|EPI\_ISL\_426045|Original|hCoV-19^^New York|Human|Wadsworth Center|Wadsworth Center|Lasek-Nesselquist|USA

>Spike|hCoV-19/USA/WA-UW-11761/2020|2020-06-24|EPI\_ISL\_570466|Original|hCoV-19^^Washington|Human|UW Virology Lab|UW Virology Lab|Roychoudhury|USA

>Spike|hCoV-19/England/NOTT-121830/2020|2020-12-21|EPI\_ISL\_764503|Original|hCoV-19^^England|Human|Queens Medical Centre|COVID-19 Genomics UK (COG-UK) Consortium|Loose|United Kingdom

>Spike|hCoV-19/England/MILK-9569F8/2020|2020-06-07|EPI\_ISL\_554308|Original|hCoV-19^^England|Human|Lighthouse Lab in Milton Keynes|Wellcome Sanger Institute for the COVID-19 Genomics UK (COG-UK) consortium|Davies|United Kingdom

>Spike|hCoV-19/England/MILK-BB1B5D/2020|2020-11-18|EPI\_ISL\_720552|Original|hCoV-19^^England|Human|Lighthouse Lab in Milton Keynes|Wellcome Sanger Institute for the COVID-19 Genomics UK (COG-UK) Consortium|Davies|United Kingdom

>Spike|hCoV-19/Japan/PG-3627/2020|2020-04-00|EPI\_ISL\_691880|Original|hCoV-19^^Japan|Human|Pathogen Genomics Center|Pathogen Genomics Center|Sekizuka|Japan

>Spike|hCoV-19/USA/WI-UW-1015/2020|2020-07-22|EPI\_ISL\_516441|Original|hCoV-19^^Wisconsin|Human|University of Wisconsin-Madison AIDS Vaccine Research Laboratories|University of Wisconsin-Madison AIDS Vaccine Research Laboratories|Baczenas|USA

>Spike|hCoV-19/USA/CA-CDPH155/2020|2020-09-15|EPI\_ISL\_754987|Original|hCoV-19^^California|Human|California Department of Public Health|California Department of Public Health|Bell|USA

>Spike|hCoV-19/USA/NY-PV08450/2020|2020-03-17|EPI\_ISL\_421401|Original|hCoV-19^^New York|Human|MSHS Clinical Microbiology Laboratories|MSHS Pathogen Surveillance Program|van Bakel|USA

>Spike|hCoV-19/Iran/K1r-13/2020|2020-03-00|EPI\_ISL\_582024|Original|hCoV-19^^Iran|Human|Virology|Virology|Ranjbar|Iran

>Spike|hCoV-19/Singapore/514/2020|2020-05-24|EPI\_ISL\_479592|Original|hCoV-19^^Singapore|Human|National Public Health Laboratory|National Public Health Laboratory|Mak|Singapore

>Spike|hCoV-19/USA/TX-HMH-3307/2020|2020-06-11|EPI\_ISL\_544119|Original|hCoV-19^^Texas|Human|Houston Methodist Hospital|Houston Methodist Hospital|Long|USA

>Spike|hCoV-19/England/MILK-B3A72B/2020|2020-11-01|EPI\_ISL\_706030|Original|hCoV-19^^England|Human|Oxford Viromics|COVID-19 Genomics UK (COG-UK) Consortium|Golubchik|United Kingdom

>Spike|hCoV-19/USA/CA-IGI-0509/2020|2020-07-27|EPI\_ISL\_756332|Original|hCoV-19^^California|Human|Innovative Genomics Institute|Innovative Genomics Institute|Wyman|USA

>Spike|hCoV-19/Canada/ON-S341/2020|2020-03-29|EPI\_ISL\_755868|Original|hCoV-19^^Ontario|Human|Toronto Invasive Bacterial Diseases Network|McMaster University|McArthur|Canada

>Spike|hCoV-19/Japan/PG-2228/2020|2020-04-00|EPI\_ISL\_685833|Original|hCoV-19^^Japan|Human|Pathogen Genomics Center|Pathogen Genomics Center|Sekizuka|Japan

>Spike|hCoV-19/England/MILK-9C70DF/2020|2020-09-08|EPI\_ISL\_573280|Original|hCoV-19^^England|Human|Northumbria University / South Tees Hospitals NHS Foundation Trust / North Cumbria Integrated Care NHS Foundation Trust / North Tees and Hartlepool NHS Foundation Trust / Newcastle Hospitals NHS Foundation Trust|COVID-19 Genomics UK (COG-UK) Consortium|Bashton|United Kingdom

>Spike|hCoV-19/England/CAMB-80D98/2020|2020-04-10|EPI\_ISL\_442937|Original|hCoV-19^^England|Human|Department of Pathology|Wellcome Sanger Institute for the COVID-19 Genomics UK (COG-UK) consortium|Amato|United Kingdom

>Spike|hCoV-19/England/HECH-259A158/2020|2020-05-18|EPI\_ISL\_488839|Original|hCoV-19^^England|Human|Microbiology Department|Wellcome Sanger Institute for the COVID-19 Genomics UK (COG-UK) consortium|Davies|United Kingdom

>Spike|hCoV-19/England/QEUEH-B6636E/2020|2020-11-10|EPI\_ISL\_661597|Original|hCoV-19^^England|Human|Lighthouse Lab in Glasgow|Wellcome Sanger Institute for the COVID-19 Genomics UK (COG-UK) Consortium|Davies|United Kingdom

>Spike|hCoV-19/Peru/AMZ-UPCH-0269/2020|2020-10-01|EPI\_ISL\_729870|Original|hCoV-19^^Amazonas|Human|Instituto de Medicina Tropical|Laboratorio de Gen\u00f3mica Microbiana|Tsukayama|Peru

>Spike|hCoV-19/England/PORT-2D522A/2020|2020-00-00|EPI\_ISL\_741687|Original|hCoV-19^^England|Human|Centre for Enzyme Innovation|COVID-19 Genomics UK (COG-UK) Consortium|Robson|United Kingdom

>Spike|hCoV-19/England/CAMC-AAF670/2020|2020-10-23|EPI\_ISL\_631123|Original|hCoV-19^^England|Human|Lighthouse Lab in Cambridge|Wellcome Sanger Institute for the COVID-19 Genomics UK (COG-UK) consortium|Davies|United Kingdom

>Spike|hCoV-19/USA/WI-UW-1086/2020|2020-07-25|EPI\_ISL\_516512|Original|hCoV-19^^Wisconsin|Human|University of Wisconsin-Madison AIDS Vaccine Research Laboratories|University of Wisconsin-Madison AIDS Vaccine Research Laboratories|Baczenas|USA

>Spike|hCoV-19/USA/CT-Yale-208/2020|2020-03-30|EPI\_ISL\_463146|Original|hCoV-19^^Connecticut|Human|Yale Clinical Virology Laboratory|Grubaugh Lab - Yale School of Public Health|Grubaugh|USA

>Spike|hCoV-19/England/201421117/2020|2020-03-30|EPI\_ISL\_465951|Original|hCoV-19^^England|Human|Respiratory Virus Unit|Respiratory Virus Unit|Platt|United Kingdom

>Spike|hCoV-19/England/CAMC-B0A40F/2020|2020-10-29|EPI\_ISL\_673032|Original|hCoV-19^^England|Human|Lighthouse Lab in Cambridge|Wellcome Sanger Institute for the COVID-19 Genomics UK (COG-UK) Consortium|Davies|United Kingdom

>Spike|hCoV-19/Australia/NSW363/2020|2020-04-19|EPI\_ISL\_451624|Original|hCoV-19^^New South Wales|Human|Pathology West - NSW Health Pathology|NSW Health Pathology - Institute of Clinical Pathology and Medical Research; Westmead Hospital; University of Sydney|Gall|Australia

>Spike|hCoV-19/USA/FL-BPHL-1138/2020|2020-08-17|EPI\_ISL\_526624|Original|hCoV-19^^Florida|Human|Florida Bureau of Public Health Laboratories|Florida Bureau of Public Health Laboratories|Blanton|USA

>Spike|hCoV-19/USA/WA-S1714/2020|2020-06-01|EPI\_ISL\_496140|Original|hCoV-19^^Washington|Human|Washington State Department of Health|Seattle Flu Study|Lee|USA

>Spike|hCoV-19/Australia/VIC7982/2020|2020-08-13|EPI\_ISL\_564788|Original|hCoV-19^^Victoria|Human|Microbiological Diagnostic Unit - Public Health Laboratory (MDU-PHL)|MDU-PHL|Schultz|Australia

>Spike|hCoV-19/Belgium/ULG-10849/2020|2020-10-29|EPI\_ISL\_666884|Original|hCoV-19^^Li\u00e8ge|Human|Department of Clinical Microbiology|GIGA Medical Genomics|Durkin|Belgium

>Spike|hCoV-19/England/CAMC-BBB6F8/2020|2020-11-22|EPI\_ISL\_703476|Original|hCoV-19^^England|Human|Department of Pathology|COVID-19 Genomics UK (COG-UK) Consortium|Goodfellow|United Kingdom

>Spike|hCoV-19/Japan/PG-6045/2020|2020-07-00|EPI\_ISL\_689157|Original|hCoV-19^^Japan|Human|Pathogen Genomics Center|Pathogen Genomics Center|Sekizuka|Japan

>Spike|hCoV-19/England/BRIS-12549F/2020|2020-03-26|EPI\_ISL\_443936|Original|hCoV-19^^England|Human|PHE South West Regional Laboratory|Wellcome Sanger Institute for the COVID-19 Genomics UK (COG-UK) consortium|Amato|United Kingdom

>Spike|hCoV-19/Denmark/DCGC-14636/2020|2020-11-23|EPI\_ISL\_711884|Original|hCoV-19^^Sjaelland|Human|Department of Virus and Microbiological Special Diagnostics|Albertsen Lab|Michaelsen|Denmark

>Spike|hCoV-19/England/ALDP-A66C19/2020|2020-10-12|EPI\_ISL\_630427|Original|hCoV-19^^England|Human|Lighthouse Lab in Alderley Park|Wellcome Sanger Institute for the COVID-19 Genomics UK (COG-UK) consortium|Davies|United Kingdom

>Spike|hCoV-19/USA/CA-CZB-1602/2020|2020-04-01|EPI\_ISL\_468531|Original|hCoV-19^^California|Human|San Joaquin County Public Health Lab|Chan-Zuckerberg Biohub|Hao|USA

>Spike|hCoV-19/England/QEUEH-B7E07B/2020|2020-11-13|EPI\_ISL\_741935|Original|hCoV-19^^England|Human|Oxford Viromics|COVID-19 Genomics UK (COG-UK) Consortium|Golubchik|United Kingdom

>Spike|hCoV-19/England/SHEF-CB1E0/2020|2020-04-08|EPI\_ISL\_442380|Original|hCoV-19^^England|Human|Virology Department|COVID-19 Genomics UK (COG-UK) Consortium|de Silva|United Kingdom

>Spike|hCoV-19/Japan/PG-0628/2020|2020-04-00|EPI\_ISL\_684238|Original|hCoV-19^^Japan|Human|Gunma Prefectural Institute of Public Health and Environmental Sciences|Pathogen Genomics Center|Sekizuka|Japan

>Spike|hCoV-19/England/NORW-EB01A/2020|2020-04-30|EPI\_ISL\_457406|Original|hCoV-19^^England|Human|Quadram Institute Bioscience|COVID-19 Genomics UK (COG-UK) Consortium|Alikhan|United Kingdom

>Spike|hCoV-19/England/OXON-AEC79/2020|2020-04-08|EPI\_ISL\_448774|Original|hCoV-19^^England|Human|Oxford Viromics|COVID-19 Genomics UK (COG-UK) Consortium|Golubchik|United Kingdom

>Spike|hCoV-19/England/204691946/2020|2020-11-15|EPI\_ISL\_693452|Original|hCoV-19^^England|Human|Respiratory Virus Unit|COVID-19 Genomics UK (COG-UK) Consortium|Platt|United Kingdom

>Spike|hCoV-19/England/NORT-296FA6/2020|2020-04-27|EPI\_ISL\_484282|Original|hCoV-19^^England|Human|Northumbria University / South Tees Hospitals NHS Foundation Trust / North Cumbria Integrated Care NHS Foundation Trust / North Tees and Hartlepool NHS Foundation Trust / Newcastle Hospitals NHS Foundation Trust|COVID-19 Genomics UK (COG-UK) Consortium|Bashton|United Kingdom

>Spike|hCoV-19/England/LIVE-DCC1B5/2020|2020-11-23|EPI\_ISL\_724492|Original|hCoV-19^^England|Human|Liverpool Clinical Laboratories|COVID-19 Genomics UK (COG-UK) Consortium|Haldenby|United Kingdom

>Spike|hCoV-19/USA/MI-MDHHS-SC20760/2020|2020-04-20|EPI\_ISL\_471781|Original|hCoV-19^^Michigan|Human|Michigan Department of Health and Human Services|Michigan Department of Health and Human Services|Blankenship|USA

>Spike|hCoV-19/USA/TX-HMH-MCoV-14796/2020|2020-10-13|EPI\_ISL\_786281|Original|hCoV-19^^Texas|Human|Houston Methodist Hospital|Houston Methodist Hospital|Long|USA

>Spike|hCoV-19/South Africa/NHLS-UCT-GS-0958/2020|2020-10-15|EPI\_ISL\_700519|Original|hCoV-19^^Western Cape|Human|Clinic-in-Asla|NHLS/UCT|Iranzadeh|South Africa

>Spike|hCoV-19/USA/NM-DOH-2020643097/2020|2020-12-28|EPI\_ISL\_767087|Original|hCoV-19^^New Mexico|Human|New Mexico Department of Health Scientific Laboratory|New Mexico Department of Health Scientific Laboratory|Malone|USA

>Spike|hCoV-19/England/CAMC-B513FD/2020|2020-11-08|EPI\_ISL\_657763|Original|hCoV-19^^England|Human|Lighthouse Lab in Cambridge|Wellcome Sanger Institute for the COVID-19 Genomics UK (COG-UK) Consortium|Davies|United Kingdom

>Spike|hCoV-19/USA/CA-ALSR-1428/2020|2020-03-28|EPI\_ISL\_494596|Original|hCoV-19^^California|Human|Scripps Medical Laboratory|Andersen lab at Scripps Research|Gangavarapu|USA

>Spike|hCoV-19/Japan/PG-0515/2020|2020-04-03|EPI\_ISL\_480173|Original|hCoV-19^^Kanto|Human|Gunma Prefectural Institute of Public Health and Environmental Sciences|Pathogen Genomics Center|Sekizuka|Japan

>Spike|hCoV-19/England/MILK-956D38/2020|2020-06-10|EPI\_ISL\_554184|Original|hCoV-19^^England|Human|Lighthouse Lab in Milton Keynes|Wellcome Sanger Institute for the COVID-19 Genomics UK (COG-UK) consortium|Davies|United Kingdom



>Spike|hCoV-19/USA/OR-OHSU-3045/2020|2020-09-30|EPI\_ISL\_667455|Original|hCoV-19^^Oregon|Human|OHSU Lab Services Molecular Microbiology Lab|Oregon SARS-CoV-2 Genome Sequencing Center|O'Roak|USA

>Spike|hCoV-19/England/ALDP-A5117C/2020|2020-10-07|EPI\_ISL\_598177|Original|hCoV-19^^England|Human|Lighthouse Lab in Alderley Park|Wellcome Sanger Institute for the COVID-19 Genomics UK (COG-UK) consortium|Davies|United Kingdom

>Spike|hCoV-19/Denmark/DCGC-1255/2020|2020-06-01|EPI\_ISL\_618018|Original|hCoV-19^^Hovedstaden|Human|Department of Virus and Microbiological Special Diagnostics|Albertsen lab|Michaelsen|Denmark

>Spike|hCoV-19/Spain/AN-IBV-001965/2020|2020-03-13|EPI\_ISL\_452416|Original|hCoV-19^^Andalucia|Human|Servicio de Microbiolog\u00eda. HRU de M\u00ellaga. Servicio Andaluz de Salud|SeqCOVID-SPAIN consortium|IBV(CSIC)|Comas|Spain

>Spike|hCoV-19/England/MILK-B599C6/2020|2020-11-06|EPI\_ISL\_679894|Original|hCoV-19^^England|Human|Virology Department|COVID-19 Genomics UK (COG-UK) Consortium|de Silva|United Kingdom

>Spike|hCoV-19/England/QEUEH-9B4A40/2020|2020-09-03|EPI\_ISL\_590450|Original|hCoV-19^^England|Human|Lighthouse Lab in Glasgow|Wellcome Sanger Institute for the COVID-19 Genomics UK (COG-UK) consortium|Davies|United Kingdom

>Spike|hCoV-19/England/QEUEH-B2DE08/2020|2020-11-03|EPI\_ISL\_646396|Original|hCoV-19^^England|Human|Lighthouse Lab in Glasgow|Wellcome Sanger Institute for the COVID-19 Genomics UK (COG-UK) Consortium|Davies|United Kingdom

>Spike|hCoV-19/Spain/MD-IBV-99007162/2020|2020-08-19|EPI\_ISL\_541932|Original|hCoV-19^^Madrid|Human|Hospital General Universitario Gregorio Mara\u00f1a|SeqCOVID-SPAIN consortium|IBV(CSIC)|Comas|Spain

>Spike|hCoV-19/USA/TX-HMH-3717/2020|2020-06-16|EPI\_ISL\_543134|Original|hCoV-19^^Texas|Human|Houston Methodist Hospital|Houston Methodist Hospital|Long|USA

>Spike|hCoV-19/USA/UN-PB-Wuhan-Hu-1-5/2020|2020-04-05|EPI\_ISL\_759864|Original|hCoV-19^^USA|Human|Molecular|Molecular|Papoutsis, A.J.|USA

>Spike|hCoV-19/England/MILK-B06D9F/2020|2020-10-29|EPI\_ISL\_652276|Original|hCoV-19^^England|Human|Quadram Institute Bioscience|COVID-19 Genomics UK (COG-UK) Consortium|Alikhan|United Kingdom

>Spike|hCoV-19/Bangladesh/DNAS\_DRICM\_isl\_MH-32/2020|2020-07-11|EPI\_ISL\_774971|Original|hCoV-19^^Dhaka|Human|Designated Reference Institute for Chemical Measurements (DRICM)|DNA SOLUTION LTD.|Rabbi|Bangladesh

>Spike|hCoV-19/New Zealand/20VR2951/2020|2020-00-00|EPI\_ISL\_579371|Original|hCoV-19^^Auckland|Human|LabPLUS|Institute of Environmental Science and Research (ESR)|Wang|New Zealand

>Spike|hCoV-19/England/ALDP-AA125C/2020|2020-10-22|EPI\_ISL\_624040|Original|hCoV-19^^England|Human|Lighthouse Lab in Alderley Park|Wellcome Sanger Institute for the COVID-19 Genomics UK (COG-UK) consortium|Davies|United Kingdom

>Spike|hCoV-19/Scotland/EDB3607/2020|2020-04-27|EPI\_ISL\_491586|Original|hCoV-19^^Scotland|Human|Virology Department|Wellcome Sanger Institute for the COVID-19 Genomics UK (COG-UK) consortium|Davies|United Kingdom

>Spike|hCoV-19/England/205160993/2020|2020-12-17|EPI\_ISL\_766086|Original|hCoV-19^^England|Human|Respiratory Virus Unit|COVID-19 Genomics UK (COG-UK) Consortium|Platt|United Kingdom

>Spike|hCoV-19/England/MILK-ACD73D/2020|2020-10-21|EPI\_ISL\_634302|Original|hCoV-19^^England|Human|Lighthouse Lab in Milton Keynes|Wellcome Sanger Institute for the COVID-19 Genomics UK (COG-UK) consortium|Davies|United Kingdom

>Spike|hCoV-19/Denmark/DCGC-11029/2020|2020-11-02|EPI\_ISL\_670353|Original|hCoV-19^^Sjaelland|Human|Department of Virus and Microbiological Special Diagnostics|Albertsen Lab|Michaelsen|Denmark

>Spike|hCoV-19/Switzerland/ZH-ETHZ-120004/2020|2020-04-17|EPI\_ISL\_468205|Original|hCoV-19^^Zurich|Human|Viollier AG|Department of Biosystems Science and Engineering|Nadeau|Switzerland

>Spike|hCoV-19/Japan/PG-0258/2020|2020-03-24|EPI\_ISL\_479942|Original|hCoV-19^^Kanto|Human|Ibaraki Prefectural Institute of Public Health|Pathogen Genomics Center|Sekizuka|Japan

>Spike|hCoV-19/SaudiArabia/KAUST-JEDDAH1009/2020|2020-06-17|EPI\_ISL\_512880|Original|hCoV-19^^Jeddah|Human|Pathogen Genomics Lab King Abdullah

University of Science and Technology(KAUST)|Pathogen Genomics Lab King Abdullah  
University of Science and Technology(KAUST)|Mohamed Ghazzali|Saudi Arabia  
>Spike|hCoV-19/Netherlands/NA\_556/2020|2020-00-00|EPI\_ISL\_460722|Original|hCoV-  
19^^Netherlands|Human|Dutch COVID-19 response team|Erasmus Medical Center|Oude  
Munnink|Netherlands  
>Spike|hCoV-19/England/CAMC-B33E96/2020|2020-11-05|EPI\_ISL\_659257|Original|hCoV-  
19^^England|Human|Lighthouse Lab in Cambridge|Wellcome Sanger Institute for the  
COVID-19 Genomics UK (COG-UK) Consortium|Davies|United Kingdom  
>Spike|hCoV-19/Scotland/EDB3657/2020|2020-04-28|EPI\_ISL\_439308|Original|hCoV-  
19^^Scotland|Human|Virology Department|COVID-19 Genomics UK (COG-UK)  
Consortium|Williams|United Kingdom  
>Spike|hCoV-19/USA/UT-UPHL-2009310/2020|2020-05-14|EPI\_ISL\_524916|Original|hCoV-  
19^^Utah|Human|Utah Public Health Laboratory|Utah Public Health Laboratory|Young|USA  
>Spike|hCoV-19/USA/TX-DSHS-1596/2020|2020-06-22|EPI\_ISL\_700717|Original|hCoV-  
19^^Texas|Human|Texas Department of State Health Services|Texas Department of State  
Health Services|Rahman|USA  
>Spike|hCoV-19/Russia/StPetersburg-RII4694S/2020|2020-04-  
07|EPI\_ISL\_427326|Original|hCoV-19^^Saint Petersburg|Human|WHO National Influenza  
Centre Russian Federation|WHO National Influenza Centre Russian  
Federation|Komissarov|Russia  
>Spike|hCoV-19/England/EXET-13A7E9/2020|2020-11-09|EPI\_ISL\_664153|Original|hCoV-  
19^^England|Human|University of Exeter|COVID-19 Genomics UK (COG-UK)  
Consortium|Temperton|United Kingdom  
>Spike|hCoV-19/Wales/MILK-9F0635/2020|2020-09-24|EPI\_ISL\_580712|Original|hCoV-  
19^^Wales|Human|Lighthouse Lab in Milton Keynes|Wellcome Sanger Institute for the  
COVID-19 Genomics UK (COG-UK) consortium|Davies|United Kingdom  
>Spike|hCoV-19/England/QEUH-BCBCB7/2020|2020-11-26|EPI\_ISL\_703948|Original|hCoV-  
19^^England|Human|Lighthouse Lab in Glasgow|Wellcome Sanger Institute for the COVID-  
19 Genomics UK (COG-UK) Consortium|Davies|United Kingdom  
>Spike|hCoV-19/Netherlands/NB-EMC-404/2020|2020-00-00|EPI\_ISL\_722481|Original|hCoV-  
19^^Noord Brabant|Human|Dutch COVID-19 response team|Erasmus Medical Center|Oude  
Munnink|Netherlands  
>Spike|hCoV-19/England/QEUH-9F6AE8/2020|2020-09-26|EPI\_ISL\_588288|Original|hCoV-  
19^^England|Human|Lighthouse Lab in Glasgow|Wellcome Sanger Institute for the COVID-  
19 Genomics UK (COG-UK) consortium|Davies|United Kingdom  
>Spike|hCoV-19/USA/CA-CZB-2487/2020|2020-04-15|EPI\_ISL\_513881|Original|hCoV-  
19^^California|Human|San Francisco Public Health Laboratory|Chan-Zuckerberg  
Biohub|Kamm|USA  
>Spike|hCoV-19/USA/CA-ALSR-0482-SAN/2020|2020-04-01|EPI\_ISL\_483170|Original|hCoV-  
19^^California|Human|UC San Diego Center for Advanced Laboratory Medicine|Andersen  
lab at Scripps Research|Gangavarapu|USA  
>Spike|hCoV-19/England/CAMC-B22B75/2020|2020-11-02|EPI\_ISL\_647421|Original|hCoV-  
19^^England|Human|Lighthouse Lab in Cambridge|Wellcome Sanger Institute for the  
COVID-19 Genomics UK (COG-UK) Consortium|Davies|United Kingdom  
>Spike|hCoV-19/Denmark/DCGC-22256/2020|2020-12-14|EPI\_ISL\_758639|Original|hCoV-  
19^^Syddanmark|Human|Department of Virus and Microbiological Special  
Diagnostics|Albertsen Lab|Michaelsen|Denmark  
>Spike|hCoV-19/England/ALDP-B8427C/2020|2020-11-14|EPI\_ISL\_675343|Original|hCoV-  
19^^England|Human|Lighthouse Lab in Alderley Park|Wellcome Sanger Institute for the  
COVID-19 Genomics UK (COG-UK) Consortium|Davies|United Kingdom  
>Spike|hCoV-19/Australia/WA79/2020|2020-07-13|EPI\_ISL\_512732|Original|hCoV-  
19^^Western Australia|Human|PathWest Laboratory Medicine WA|PathWest Laboratory  
Medicine WA Microbial Surveillance Unit|Sikazwe|Australia  
>Spike|hCoV-19/England/MILK-975D33/2020|2020-08-20|EPI\_ISL\_552772|Original|hCoV-  
19^^England|Human|Lighthouse Lab in Milton Keynes|Wellcome Sanger Institute for the  
COVID-19 Genomics UK (COG-UK) consortium|Davies|United Kingdom  
>Spike|hCoV-19/Switzerland/BE-ETHZ-270126/2020|2020-09-  
03|EPI\_ISL\_541433|Original|hCoV-19^^Bern|Human|Viollier AG|Department of Biosystems  
Science and Engineering|Nadeau|Switzerland

>Spike|hCoV-19/South Africa/KRISP-0259/2020|2020-06-15|EPI\_ISL\_482729|Original|hCoV-19^^KwaZulu-Natal|Human|NHLs-IALCH|KRISP|de Oliveira|South Africa

>Spike|hCoV-19/England/QEUH-9D35A4/2020|2020-09-18|EPI\_ISL\_577340|Original|hCoV-19^^England|Human|Centre for Enzyme Innovation|COVID-19 Genomics UK (COG-UK) Consortium|Robson|United Kingdom

>Spike|hCoV-19/Wales/PHWC-49C7F1/2020|2020-11-18|EPI\_ISL\_742606|Original|hCoV-19^^Wales|Human|Wales Specialist Virology Centre Sequencing lab|COVID-19 Genomics UK (COG-UK) Consortium|Moore|United Kingdom

>Spike|hCoV-19/Japan/PG-8105/2020|2020-08-00|EPI\_ISL\_687204|Original|hCoV-19^^Japan|Human|Pathogen Genomics Center|Pathogen Genomics Center|Sekizuka|Japan

>Spike|hCoV-19/England/QEUH-9CA160/2020|2020-09-10|EPI\_ISL\_567454|Original|hCoV-19^^England|Human|Lighthouse Lab in Glasgow|Wellcome Sanger Institute for the COVID-19 Genomics UK (COG-UK) consortium|Davies|United Kingdom

>Spike|hCoV-19/USA/NY-NYUMC167/2020|2020-04-01|EPI\_ISL\_426622|Original|hCoV-19^^New York|Human|NYU Langone Health|Departments of Pathology and Medicine|Maurano|USA

>Spike|hCoV-19/Wales/MILK-A6AC60/2020|2020-10-09|EPI\_ISL\_625417|Original|hCoV-19^^Wales|Human|Lighthouse Lab in Milton Keynes|Wellcome Sanger Institute for the COVID-19 Genomics UK (COG-UK) consortium|Davies|United Kingdom

>Spike|hCoV-19/England/QEUH-BF0D3E/2020|2020-12-04|EPI\_ISL\_709231|Original|hCoV-19^^England|Human|Lighthouse Lab in Glasgow|Wellcome Sanger Institute for the COVID-19 Genomics UK (COG-UK) Consortium|Davies|United Kingdom

>Spike|hCoV-19/USA/CA-QDX-1542/2020|2020-03-18|EPI\_ISL\_603790|Original|hCoV-19^^California|Human|Quest Diagnostics|Quest Diagnostics|Kagan|USA

>Spike|hCoV-19/England/QEUH-CC5F86/2020|2020-12-21|EPI\_ISL\_760375|Original|hCoV-19^^England|Human|Lighthouse Lab in Glasgow|Wellcome Sanger Institute for the COVID-19 Genomics UK (COG-UK) Consortium|Davies|United Kingdom

>Spike|hCoV-19/England/20129010104/2020|2020-03-20|EPI\_ISL\_423980|Original|hCoV-19^^England|Human|Respiratory Virus Unit|Respiratory Virus Unit|Platt|United Kingdom

>Spike|hCoV-19/USA/OR-OHSU-0871/2020|2020-06-29|EPI\_ISL\_525917|Original|hCoV-19^^Oregon|Human|OHSU Lab Services Molecular Microbiology Lab|Oregon SARS-CoV-2 Genome Sequencing Center|O'Roak|USA

>Spike|hCoV-19/Scotland/CVR336/2020|2020-03-21|EPI\_ISL\_439055|Original|hCoV-19^^Scotland|Human|West of Scotland Specialist Virology Centre|COVID-19 Genomics UK (COG-UK) Consortium|Robertson|United Kingdom

>Spike|hCoV-19/USA/GA-QDX-2259/2020|2020-03-13|EPI\_ISL\_604531|Original|hCoV-19^^Georgia|Human|Quest Diagnostics|Quest Diagnostics|Kagan|USA

>Spike|hCoV-19/USA/CA-UW-MAYO55/2020|2020-03-27|EPI\_ISL\_500534|Original|hCoV-19^^California|Human|Mayo Clinic Laboratories|University of Washington Virology Lab|Roychoudhury|USA

>Spike|hCoV-19/Thailand/Bangkok-CONI-0323/2020|2020-12-05|EPI\_ISL\_707710|Original|hCoV-19^^Bangkok|Human|Hospital for Tropical Diseases|COVID-19 Network Investigations (CONI) Alliance|Batty|Thailand

>Spike|hCoV-19/France/PAC-IHU-1475/2020|2020-08-11|EPI\_ISL\_569175|Original|hCoV-19^^Provence-Alpes-C\u00f4te-d\u2019Azur|Human|MEPHI|MEPHI|Levasseur|France

>Spike|hCoV-19/England/MILK-B3C4B9/2020|2020-11-02|EPI\_ISL\_706149|Original|hCoV-19^^England|Human|Oxford Viromics|COVID-19 Genomics UK (COG-UK) Consortium|Golubchik|United Kingdom

>Spike|hCoV-19/Canada/NS-NML-951/2020|2020-03-26|EPI\_ISL\_579581|Original|hCoV-19^^Nova Scotia|Human|QEII Health Sciences Centre|National Microbiology Laboratory (NML)|Majer|Canada

>Spike|hCoV-19/USA/AZ-TG664535/2020|2020-04-20|EPI\_ISL\_696152|Original|hCoV-19^^Arizona|Human|Sonora Quest Laboratories|TGen North|French|USA

>Spike|hCoV-19/Norway/5452/2020|2020-11-03|EPI\_ISL\_708096|Original|hCoV-19^^Norway|Human|Oslo University Hospital|Norwegian Institute of Public Health|Kopperud Riis|Norway

>Spike|hCoV-19/England/201120454/2020|2020-03-09|EPI\_ISL\_464675|Original|hCoV-19^^England|Human|Respiratory Virus Unit|Respiratory Virus Unit|Platt|United Kingdom

>Spike|hCoV-19/England/QEUH-AAC707/2020|2020-10-21|EPI\_ISL\_652869|Original|hCoV-19^^England|Human|Oxford Viromics|COVID-19 Genomics UK (COG-UK) Consortium|Golubchik|United Kingdom

>Spike|hCoV-19/USA/LA-CDC-0499/2020|2020-03-10|EPI\_ISL\_452106|Original|hCoV-19^^Louisiana|Human|LA Office of Public Health Laboratories|Pathogen Discovery|Queen|USA

>Spike|hCoV-19/England/ALDP-B1C473/2020|2020-11-01|EPI\_ISL\_646063|Original|hCoV-19^^England|Human|Lighthouse Lab in Alderley Park|Wellcome Sanger Institute for the COVID-19 Genomics UK (COG-UK) Consortium|Davies|United Kingdom

>Spike|hCoV-19/England/MILK-956A31/2020|2020-06-05|EPI\_ISL\_554191|Original|hCoV-19^^England|Human|Lighthouse Lab in Milton Keynes|Wellcome Sanger Institute for the COVID-19 Genomics UK (COG-UK) consortium|Davies|United Kingdom

>Spike|hCoV-19/Scotland/QEUEH-9E386C/2020|2020-09-23|EPI\_ISL\_585519|Original|hCoV-19^^Scotland|Human|Northumbria University / South Tees Hospitals NHS Foundation Trust / North Cumbria Integrated Care NHS Foundation Trust / North Tees and Hartlepool NHS Foundation Trust / Newcastle Hospitals NHS Foundation Trust|COVID-19 Genomics UK (COG-UK) Consortium|Bashton|United Kingdom

>Spike|hCoV-19/Scotland/CVR3826/2020|2020-05-28|EPI\_ISL\_478152|Original|hCoV-19^^Scotland|Human|West of Scotland Specialist Virology Centre|COVID-19 Genomics UK (COG-UK) Consortium|Robertson|United Kingdom

>Spike|hCoV-19/Australia/VIC2326/2020|2020-06-25|EPI\_ISL\_522047|Original|hCoV-19^^Victoria|Human|Microbiological Diagnostic Unit - Public Health Laboratory (MDU-PHL) |MDU-PHL|Schultz|Australia

>Spike|hCoV-19/Australia/VIC3134/2020|2020-07-04|EPI\_ISL\_520841|Original|hCoV-19^^Victoria|Human|Victorian Infectious Diseases Reference Laboratory (VIDRL) |VIDRL and MDU-PHL|Schultz|Australia

>Spike|hCoV-19/USA/MN-MDH-1714/2020|2020-08-25|EPI\_ISL\_560801|Original|hCoV-19^^Minnesota|Human|M Health Fairview|Minnesota Department of Health|Garfin|USA

>Spike|hCoV-19/Scotland/QEUEH-9DAA44/2020|2020-09-22|EPI\_ISL\_575357|Original|hCoV-19^^Scotland|Human|Lighthouse Lab in Glasgow|Wellcome Sanger Institute for the COVID-19 Genomics UK (COG-UK) consortium|Davies|United Kingdom

>Spike|hCoV-19/England/CAMC-B08A69/2020|2020-10-30|EPI\_ISL\_643924|Original|hCoV-19^^England|Human|Lighthouse Lab in Cambridge|Wellcome Sanger Institute for the COVID-19 Genomics UK (COG-UK) Consortium|Davies|United Kingdom

>Spike|hCoV-19/Vietnam/40227/2020|2020-08-00|EPI\_ISL\_759871|Original|hCoV-19^^Vietnam|Human|National Influenza Center|National Influenza Center|Ung|Vietnam

>Spike|hCoV-19/USA/TX-HMH-MCoV-16289/2020|2020-10-30|EPI\_ISL\_785973|Original|hCoV-19^^Texas|Human|Houston Methodist Hospital|Houston Methodist Hospital|Long|USA

>Spike|hCoV-19/Denmark/DCGC-2664/2020|2020-08-17|EPI\_ISL\_617884|Original|hCoV-19^^Hovedstaden|Human|Department of Virus and Microbiological Special Diagnostics|Albertsen lab|Michaelsen|Denmark

>Spike|hCoV-19/USA/GA-CDC-7731/2020|2020-10-27|EPI\_ISL\_681808|Original|hCoV-19^^Georgia|Human|GA Department of Public Health Laboratory|Pathogen Discovery|Queen|USA

>Spike|hCoV-19/Canada/ON-S267/2020|2020-03-27|EPI\_ISL\_755842|Original|hCoV-19^^Ontario|Human|Toronto Invasive Bacterial Diseases Network|McMaster University|McArthur|Canada

>Spike|hCoV-19/England/QEUEH-BCE2D0/2020|2020-11-26|EPI\_ISL\_704345|Original|hCoV-19^^England|Human|Lighthouse Lab in Glasgow|Wellcome Sanger Institute for the COVID-19 Genomics UK (COG-UK) Consortium|Davies|United Kingdom

>Spike|hCoV-19/England/MILK-9C2E16/2020|2020-09-10|EPI\_ISL\_566513|Original|hCoV-19^^England|Human|Lighthouse Lab in Milton Keynes|Wellcome Sanger Institute for the COVID-19 Genomics UK (COG-UK) consortium|Davies|United Kingdom

>Spike|hCoV-19/Egypt/MASRI-018/2020|2020-05-10|EPI\_ISL\_483036|Original|hCoV-19^^Cairo|Human|Medical Ain Shams Research Institute (MASRI) |Medical Ain Shams Research Institute (MASRI) |Moustafa|Egypt

>Spike|hCoV-19/England/QEUEH-A00631/2020|2020-10-01|EPI\_ISL\_600283|Original|hCoV-19^^England|Human|Lighthouse Lab in Glasgow|Wellcome Sanger Institute for the COVID-19 Genomics UK (COG-UK) consortium|Davies|United Kingdom

>Spike|hCoV-19/USA/TX-HMH-MCoV-12318/2020|2020-09-25|EPI\_ISL\_790298|Original|hCoV-19^^Texas|Human|Houston Methodist Hospital|Houston Methodist Hospital|Long|USA

>Spike|hCoV-19/Denmark/ALAB-SSI-1033/2020|2020-03-31|EPI\_ISL\_437629|Original|hCoV-19^^Denmark|Human|Department of Virus and Microbiological Special Diagnostics|Albertsen lab|Kirkegaard|Denmark

>Spike|hCoV-19/England/NORT-29D516/2020|2020-05-08|EPI\_ISL\_484297|Original|hCoV-19^^England|Human|Northumbria University / South Tees Hospitals NHS Foundation Trust / North Cumbria Integrated Care NHS Foundation Trust / North Tees and Hartlepool NHS Foundation Trust / Newcastle Hospitals NHS Foundation Trust|COVID-19 Genomics UK (COG-UK) Consortium|Bashton|United Kingdom

>Spike|hCoV-19/England/BRIS-12A236/2020|2020-04-16|EPI\_ISL\_458395|Original|hCoV-19^^England|Human|PHE South West Regional Laboratory|Wellcome Sanger Institute for the COVID-19 Genomics UK (COG-UK) consortium|Davies|United Kingdom

>Spike|hCoV-19/Denmark/DCGC-1550/2020|2020-04-13|EPI\_ISL\_618655|Original|hCoV-19^^Syddanmark|Human|Department of Virus and Microbiological Special Diagnostics|Albertsen lab|Michaelsen|Denmark

>Spike|hCoV-19/England/CAMC-A82CBD/2020|2020-10-13|EPI\_ISL\_610677|Original|hCoV-19^^England|Human|Lighthouse Lab in Cambridge|Wellcome Sanger Institute for the COVID-19 Genomics UK (COG-UK) consortium|Davies|United Kingdom

>Spike|hCoV-19/France/PAC-IHU-1615/2020|2020-09-04|EPI\_ISL\_569228|Original|hCoV-19^^Provence-Alpes-C\u00f4te-d\u00a0Azur|Human|MEPHI|MEPHI|Levasseur|France

>Spike|hCoV-19/USA/TX-HMH-4289/2020|2020-06-18|EPI\_ISL\_543499|Original|hCoV-19^^Texas|Human|Houston Methodist Hospital|Houston Methodist Hospital|Long|USA

>Spike|hCoV-19/Denmark/DCGC-5588/2020|2020-09-28|EPI\_ISL\_620913|Original|hCoV-19^^Sjaelland|Human|Department of Virus and Microbiological Special Diagnostics|Albertsen lab|Michaelsen|Denmark

>Spike|hCoV-19/England/ALDP-506041/2020|2020-06-25|EPI\_ISL\_559243|Original|hCoV-19^^England|Human|Lighthouse Lab in Alderley Park|Wellcome Sanger Institute for the COVID-19 Genomics UK (COG-UK) consortium|Davies|United Kingdom

>Spike|hCoV-19/USA/TX-HMH-MCoV-18624/2020|2020-11-21|EPI\_ISL\_784972|Original|hCoV-19^^Texas|Human|Houston Methodist Hospital|Houston Methodist Hospital|Long|USA

>Spike|hCoV-19/Northern Ireland/NIRE-102DAC/2020|2020-04-20|EPI\_ISL\_489218|Original|hCoV-19^^Northern Ireland|Human|Regional Virus Laboratory|Wellcome Sanger Institute for the COVID-19 Genomics UK (COG-UK) consortium|Davies|United Kingdom

>Spike|hCoV-19/Switzerland/ZH-ETHZ-331074/2020|2020-10-20|EPI\_ISL\_614969|Original|hCoV-19^^Zurich|Human|Viollier AG|Department of Biosystems Science and Engineering|Nadeau|Switzerland

>Spike|hCoV-19/USA/WA-UW-22228/2020|2020-08-02|EPI\_ISL\_570642|Original|hCoV-19^^Washington|Human|UW Virology Lab|UW Virology Lab|Roychoudhury|USA

>Spike|hCoV-19/Peru/LIM-UPCH-0025/2020|2020-06-17|EPI\_ISL\_540926|Original|hCoV-19^^Lima|Human|Laboratorio de Referencia Nacional de Virus Respiratorios|Laboratorio de Gen\u00f3mica Microbiana|Tsukayama|Peru

>Spike|hCoV-19/Palestine/16/2020|2020-03-16|EPI\_ISL\_596505|Original|hCoV-19^^Bethlehem|Human|Palestinian Ministry of Health|Molecular Genetics Lab|van Dorp|Palestine

>Spike|hCoV-19/USA/WI-GMF-28108/2020|2020-10-27|EPI\_ISL\_661005|Original|hCoV-19^^Wisconsin|Human|Gundersen Molecular Diagnostics Laboratory|Kabara Cancer Research Institute|Kenny|USA

>Spike|hCoV-19/Austria/CeMM0037/2020|2020-03-09|EPI\_ISL\_437926|Original|hCoV-19^^Ischgl|Human|Institut f\u00fcr Virologie am Department f\u00fcr Hygiene|Bergthaler laboratory|Bergthaler|Austria

>Spike|hCoV-19/DRC/3483/2020|2020-04-22|EPI\_ISL\_447602|Original|hCoV-19^^Kinshasa|Human|Viral Respiratory Lab|Pathogen Sequencing Lab|Lusamaki|Democratic Republic of the Congo

>Spike|hCoV-19/Gambia/1277/2020|2020-05-07|EPI\_ISL\_471171|Original|hCoV-19^^Kombo|Human|MRCG at LSHTM Genomics lab|MRCG at LSHTM Genomics lab|Sesay|Gambia

>Spike|hCoV-19/Australia/VIC3011/2020|2020-07-05|EPI\_ISL\_521840|Original|hCoV-19^^Victoria|Human|Victorian Infectious Diseases Reference Laboratory (VIDRL)|VIDRL and MDU-PHL|Schultz|Australia

>Spike|hCoV-19/USA/MI-MDHHS-SC22641/2020|2020-12-01|EPI\_ISL\_737123|Original|hCoV-19^^Michigan|Human|Michigan Department of Health and Human Services|Michigan Department of Health and Human Services|Blankenship|USA

>Spike|hCoV-19/USA/NY-QDX-19/2020|2020-03-16|EPI\_ISL\_467897|Original|hCoV-19^^New York|Human|Quest Diagnostics|Quest Diagnostics|Kagan|USA

>Spike|hCoV-19/Scotland/CVR5879/2020|2020-11-16|EPI\_ISL\_705641|Original|hCoV-19^^Scotland|Human|West of Scotland Specialist Virology Centre|COVID-19 Genomics UK (COG-UK) Consortium|Robertson|United Kingdom

>Spike|hCoV-19/USA/TX-HMH-MCoV-10373/2020|2020-07-08|EPI\_ISL\_789441|Original|hCoV-19^^Texas|Human|Houston Methodist Hospital|Houston Methodist Hospital|Long|USA

>Spike|hCoV-19/Switzerland/SZ-ETHZ-310391/2020|2020-10-08|EPI\_ISL\_603465|Original|hCoV-19^^Schwyz|Human|Viollier AG|Department of Biosystems Science and Engineering|Nadeau|Switzerland

>Spike|hCoV-19/USA/WA-S2152/2020|2020-06-08|EPI\_ISL\_497580|Original|hCoV-19^^Washington|Human|Washington State Department of Health|Seattle Flu Study|Lee|USA

>Spike|hCoV-19/England/LOND-D3F90/2020|2020-04-04|EPI\_ISL\_441049|Original|hCoV-19^^England|Human|University College London|COVID-19 Genomics UK (COG-UK) Consortium|Roy|United Kingdom

>Spike|hCoV-19/Scotland/EDB5444/2020|2020-04-13|EPI\_ISL\_473824|Original|hCoV-19^^Scotland|Human|Virology Department|COVID-19 Genomics UK (COG-UK) Consortium|Williams|United Kingdom

>Spike|hCoV-19/United Arab Emirates/0286/2020|2020-05-17|EPI\_ISL\_698466|Original|hCoV-19^^Abu Dhabi|Human|Group 42 (G42) Healthcare|G42 Healthcare|Ogrodzki|United Arab Emirates

>Spike|hCoV-19/England/201380026/2020|2020-03-26|EPI\_ISL\_465828|Original|hCoV-19^^England|Human|Respiratory Virus Unit|Respiratory Virus Unit|Platt|United Kingdom

>Spike|hCoV-19/India/GJ-GBRC207a/2020|2020-06-11|EPI\_ISL\_475033|Original|hCoV-19^^Gujarat|Human|Department of MicroBiology|Gujarat Biotechnology Research Centre|Joshi|India

>Spike|hCoV-19/Netherlands/NA\_447/2020|2020-04-01|EPI\_ISL\_455249|Original|hCoV-19^^Netherlands|Human|Dutch COVID-19 response team|Erasmus Medical Center|Oude Munnink|Netherlands

>Spike|hCoV-19/South Africa/NHLS-UCT-GS-0784/2020|2020-07-23|EPI\_ISL\_640070|Original|hCoV-19^^Western Cape|Human|Guguletu CHC wc GDH|NHLS/UCT|Iranzadeh|South Africa

>Spike|hCoV-19/England/MILK-A7CF44/2020|2020-10-12|EPI\_ISL\_606827|Original|hCoV-19^^England|Human|Lighthouse Lab in Milton Keynes|Wellcome Sanger Institute for the COVID-19 Genomics UK (COG-UK) consortium|Davies|United Kingdom

>Spike|hCoV-19/Norway/3598/2020|2020-09-23|EPI\_ISL\_590944|Original|hCoV-19^^Norway|Human|University Hospital of Northern Norway|Norwegian Institute of Public Health|Vollan|Norway

>Spike|hCoV-19/England/LOND-125FF1F/2020|2020-03-08|EPI\_ISL\_516839|Original|hCoV-19^^England|Human|North West London Pathology|Wellcome Sanger Institute for the COVID-19 Genomics UK (COG-UK) consortium|Davies|United Kingdom

>Spike|hCoV-19/England/ALDP-BE8F51/2020|2020-12-03|EPI\_ISL\_708892|Original|hCoV-19^^England|Human|Lighthouse Lab in Alderley Park|Wellcome Sanger Institute for the COVID-19 Genomics UK (COG-UK) Consortium|Davies|United Kingdom

>Spike|hCoV-19/Russia/MOS-CRIE-13644986/2020|2020-11-09|EPI\_ISL\_745257|Original|hCoV-19^^Moscow|Human|Molecular diagnostic laboratory of Federal Budget Institution of Science \Central Research Institute of Epidemiology\ of The Federal Service on Customers' Rights Protection and Human Well-being Surveillance|Group of Genomics and Postgenomic Technologies of Central Research Institute of Epidemiology

>y|Korneenko|Russia

>Spike|hCoV-19/Japan/PG-2684/2020|2020-06-00|EPI\_ISL\_690816|Original|hCoV-19^^Japan|Human|Tokyo Metropolitan Institute of Public Health|Pathogen Genomics Center|Sekizuka|Japan

>Spike|hCoV-19/Sweden/20-53909/2020|2020-12-14|EPI\_ISL\_766725|Original|hCoV-19^^Uppsala|Human|Klinisk mikrobiologi|The Public Health Agency of Sweden|Svartstr\u00f6m|Sweden

>Spike|hCoV-19/England/MILK-ABBA84/2020|2020-10-22|EPI\_ISL\_623542|Original|hCoV-19^^England|Human|Lighthouse Lab in Milton Keynes|Wellcome Sanger Institute for the COVID-19 Genomics UK (COG-UK) consortium|Davies|United Kingdom

>Spike|hCoV-19/USA/TX-HMH-6312/2020|2020-06-30|EPI\_ISL\_547383|Original|hCoV-19^^Texas|Human|Houston Methodist Hospital|Houston Methodist Hospital|Long|USA

>Spike|hCoV-19/USA/CA-CZB-14831/2020|2020-11-18|EPI\_ISL\_739417|Original|hCoV-19^^California|Human|Humboldt County Public Health Laboratory|Chan-Zuckerberg Biohub|Kamm|USA

>Spike|hCoV-19/Spain/PV-IBV-001514/2020|2020-03-19|EPI\_ISL\_467093|Original|hCoV-19^^Basque Country|Human|Hospital Universitario Araba. Vitoria-Gasteiz|SeqCOVID-SPAIN consortium/IBV (CSIC) |Comas|Spain

>Spike|hCoV-19/Scotland/CVR2267/2020|2020-04-10|EPI\_ISL\_477888|Original|hCoV-19^^Scotland|Human|West of Scotland Specialist Virology Centre|COVID-19 Genomics UK (COG-UK) Consortium|Robertson|United Kingdom

>Spike|hCoV-19/Australia/NSW1330/2020|2020-12-24|EPI\_ISL\_767896|Original|hCoV-19^^New South Wales|Human|Australian Clinical Labs|NSW Health Pathology - Institute of Clinical Pathology and Medical Research; Westmead Hospital; University of Sydney|Gall|Australia

>Spike|hCoV-19/England/QEUA-B319D3/2020|2020-11-04|EPI\_ISL\_646435|Original|hCoV-19^^England|Human|Lighthouse Lab in Glasgow|Wellcome Sanger Institute for the COVID-19 Genomics UK (COG-UK) Consortium|Davies|United Kingdom

>Spike|hCoV-19/Spain/AR-IBV-98008124/2020|2020-10-13|EPI\_ISL\_654428|Original|hCoV-19^^Aragon|Human|Servicio de Microbiolog\u00eda|SeqCOVID-SPAIN consortium/IBV (CSIC) |Comas|Spain

>Spike|hCoV-19/England/CAMC-B98C59/2020|2020-11-15|EPI\_ISL\_673713|Original|hCoV-19^^England|Human|Lighthouse Lab in Cambridge|Wellcome Sanger Institute for the COVID-19 Genomics UK (COG-UK) Consortium|Davies|United Kingdom

>Spike|hCoV-19/Italy/TUS-DBM-21/2020|2020-04-27|EPI\_ISL\_583958|Original|hCoV-19^^Tuscany|Human|UOC Microbiologia e Virologia|Dipartimento di Biotechnologie Mediche|Pinzauti|Italy

>Spike|hCoV-19/Scotland/EDB2834/2020|2020-03-31|EPI\_ISL\_489016|Original|hCoV-19^^Scotland|Human|Virology Department|Wellcome Sanger Institute for the COVID-19 Genomics UK (COG-UK) consortium|Davies|United Kingdom

>Spike|hCoV-19/USA/CA-QDX-1045/2020|2020-03-17|EPI\_ISL\_571710|Original|hCoV-19^^California|Human|Quest Diagnostics|Quest Diagnostics|Kagan|USA

>Spike|hCoV-19/Japan/PG-8614/2020|2020-08-00|EPI\_ISL\_686210|Original|hCoV-19^^Japan|Human|Pathogen Genomics Center|Pathogen Genomics Center|Sekizuka|Japan

>Spike|hCoV-19/Scotland/GCVR-173C4F/2020|2020-04-07|EPI\_ISL\_459127|Original|hCoV-19^^Scotland|Human|NHSGGC West of Scotland Specialist Virology Centre / MRC-University of Glasgow Centre for Virus Research|Wellcome Sanger Institute for the COVID-19 Genomics UK (COG-UK) consortium|Davies|United Kingdom

>Spike|hCoV-19/Scotland/QEUA-C4BF2E/2020|2020-12-14|EPI\_ISL\_757117|Original|hCoV-19^^Scotland|Human|Lighthouse Lab in Glasgow|Wellcome Sanger Institute for the COVID-19 Genomics UK (COG-UK) Consortium|Davies|United Kingdom

>Spike|hCoV-19/India/GJ-GBRC249b/2020|2020-06-12|EPI\_ISL\_483832|Original|hCoV-19^^Gujarat|Human|Pandit Deendayal Upadhyay Government Medical College|Gujarat Biotechnology Research Centre|Joshi|India

>Spike|hCoV-19/USA/MN-MDH-1897/2020|2020-10-23|EPI\_ISL\_613529|Original|hCoV-19^^Minnesota|Human|Public Health Laboratory - Infectious Disease Lab|Minnesota Department of Health|Lorentz|USA

>Spike|hCoV-19/England/NORW-EEEFF/2020|2020-09-29|EPI\_ISL\_584716|Original|hCoV-19^^England|Human|Quadram Institute Bioscience|COVID-19 Genomics UK (COG-UK) Consortium|Alikhan|United Kingdom

>Spike|hCoV-19/Scotland/QEUA-9DD531/2020|2020-09-21|EPI\_ISL\_599588|Original|hCoV-19^^Scotland|Human|Lighthouse Lab in Glasgow|Wellcome Sanger Institute for the COVID-19 Genomics UK (COG-UK) consortium|Davies|United Kingdom

>Spike|hCoV-19/Morocco/OUA677-19/2020|2020-04-23|EPI\_ISL\_451400|Original|hCoV-19^^Ouarzazate|Human|Laboratoire de Recherche et d'Analyse M\u00e9dicale de la Gendarmerie Royale|Laboratoire de Recherche et d'Analyse M\u00e9dicale de la Gendarmerie Royale|Lemriss|Morocco

>Spike|hCoV-19/Wales/PHWC-4884B5/2020|2020-10-30|EPI\_ISL\_639398|Original|hCoV-19^^Wales|Human|Wales Specialist Virology Centre Sequencing lab|COVID-19 Genomics UK (COG-UK) Consortium|Moore|United Kingdom

>Spike|hCoV-19/Netherlands/ZH-RIVM-10126/2020|2020-00-00|EPI\_ISL\_547566|Original|hCoV-19^^Zuid Holland|Human|Dutch COVID-19 response team|National Institute for Public Health and the Environment (RIVM)|Meijer|Netherlands

>Spike|hCoV-19/England/ALDP-95A4B7/2020|2020-06-12|EPI\_ISL\_553549|Original|hCoV-19^^England|Human|Lighthouse Lab in Alderley Park|Wellcome Sanger Institute for the COVID-19 Genomics UK (COG-UK) consortium|Davies|United Kingdom

>Spike|hCoV-19/England/QEUH-5DE288/2020|2020-06-17|EPI\_ISL\_533276|Original|hCoV-19^^England|Human|Lighthouse Lab in Glasgow|Wellcome Sanger Institute for the COVID-19 Genomics UK (COG-UK) consortium|Davies|United Kingdom

>Spike|hCoV-19/England/CAMC-B0B301/2020|2020-10-29|EPI\_ISL\_643557|Original|hCoV-19^^England|Human|Lighthouse Lab in Cambridge|Wellcome Sanger Institute for the COVID-19 Genomics UK (COG-UK) Consortium|Davies|United Kingdom

>Spike|hCoV-19/England/LIVE-9F060/2020|2020-04-15|EPI\_ISL\_453423|Original|hCoV-19^^England|Human|Liverpool Clinical Laboratories|COVID-19 Genomics UK (COG-UK) Consortium|Haldenby|United Kingdom

>Spike|hCoV-19/USA/NY-NYCPHL-000243/2020|2020-04-12|EPI\_ISL\_631770|Original|hCoV-19^^New York|Human|Flushing Hospital Medical Center|New York City Public Health Laboratory|Wang|USA

>Spike|hCoV-19/Wales/PHWC-15C56F/2020|2020-05-04|EPI\_ISL\_472505|Original|hCoV-19^^Wales|Human|Wales Specialist Virology Centre Sequencing lab|COVID-19 Genomics UK (COG-UK) Consortium|Moore|United Kingdom

>Spike|hCoV-19/Thailand/Bangkok-CONI-0137/2020|2020-03-13|EPI\_ISL\_455931|Original|hCoV-19^^Bangkok|Human|Ramathibodi Hospital|COVID-19 Network Investigations (CONI) Alliance|Batty|Thailand

>Spike|hCoV-19/Scotland/QEUH-960560/2020|2020-08-05|EPI\_ISL\_531990|Original|hCoV-19^^Scotland|Human|NHSGGC West of Scotland Specialist Virology Centre / MRC-University of Glasgow Centre for Virus Research|Wellcome Sanger Institute for the COVID-19 Genomics UK (COG-UK) consortium|Davies|United Kingdom

>Spike|hCoV-19/Australia/VIC17292/2020|2020-07-29|EPI\_ISL\_663822|Original|hCoV-19^^Victoria|Human|Microbiological Diagnostic Unit - Public Health Laboratory (MDU-PHL)|MDU-PHL|Schultz|Australia

>Spike|hCoV-19/USA/TX-HMH-6992/2020|2020-06-28|EPI\_ISL\_546415|Original|hCoV-19^^Texas|Human|Houston Methodist Hospital|Houston Methodist Hospital|Long|USA

>Spike|hCoV-19/Belgium/regal-12141328/2020|2020-12-14|EPI\_ISL\_738381|Original|hCoV-19^^Mol|Human|UZ Leuven|KU Leuven|Maes|Belgium

>Spike|hCoV-19/USA/CA-CZB-12353/2020|2020-10-12|EPI\_ISL\_648425|Original|hCoV-19^^California|Human|Santa Clara County Public Health Laboratory|Chan-Zuckerberg Biohub|Bhatt|USA

>Spike|hCoV-19/Canada/BC\_15448387/2020|2020-04-00|EPI\_ISL\_468667|Original|hCoV-19^^British Columbia|Human|BCCDC Public Health Laboratory|BCCDC Public Health Laboratory|Harrigan|Canada

>Spike|hCoV-19/Germany/BY-ChVir1980/2020|2020-03-06|EPI\_ISL\_729494|Original|hCoV-19^^Bavaria|Human|Charit\u00e9 Universit\u00e4tsmedizin Berlin|Charit\u00e9 Universit\u00e4tsmedizin Berlin|Muehlemann|Germany

>Spike|hCoV-19/Gambia/GC19-3418/2020|2020-07-27|EPI\_ISL\_561176|Original|hCoV-19^^Kombo|Human|MRCG at LSHTM Genomics lab|MRCG at LSHTM Genomics lab|Sesay|Gambia

>Spike|hCoV-19/England/QEUH-9F80E4/2020|2020-09-27|EPI\_ISL\_595729|Original|hCoV-19^^England|Human|Oxford Viromics|COVID-19 Genomics UK (COG-UK) Consortium|Golubchik|United Kingdom

>Spike|hCoV-19/Scotland/CVR5698/2020|2020-11-07|EPI\_ISL\_651918|Original|hCoV-19^^Scotland|Human|West of Scotland Specialist Virology Centre|COVID-19 Genomics UK (COG-UK) Consortium|Robertson|United Kingdom

>Spike|hCoV-19/England/CAMC-B081BF/2020|2020-10-29|EPI\_ISL\_643905|Original|hCoV-19^^England|Human|Lighthouse Lab in Cambridge|Wellcome Sanger Institute for the COVID-19 Genomics UK (COG-UK) Consortium|Davies|United Kingdom



>Spike|hCoV-19/England/ALDP-CF1552/2020|2020-12-18|EPI\_ISL\_781943|Original|hCoV-19^^England|Human|Lighthouse Lab in Alderley Park|Wellcome Sanger Institute for the COVID-19 Genomics UK (COG-UK) Consortium|Davies|United Kingdom

>Spike|hCoV-19/Australia/VIC5092/2020|2020-07-19|EPI\_ISL\_519895|Original|hCoV-19^^Victoria|Human|Microbiological Diagnostic Unit - Public Health Laboratory (MDU-PHL)|Microbiological Diagnostic Unit - Public Health Laboratory (MDU-PHL)|Schultz|Australia

>Spike|hCoV-19/England/QEUEH-9F47B6/2020|2020-09-24|EPI\_ISL\_588352|Original|hCoV-19^^England|Human|Lighthouse Lab in Glasgow|Wellcome Sanger Institute for the COVID-19 Genomics UK (COG-UK) consortium|Davies|United Kingdom

>Spike|hCoV-19/England/ALDP-A509FD/2020|2020-10-07|EPI\_ISL\_597525|Original|hCoV-19^^England|Human|Lighthouse Lab in Alderley Park|Wellcome Sanger Institute for the COVID-19 Genomics UK (COG-UK) consortium|Davies|United Kingdom

>Spike|hCoV-19/Denmark/DCGC-18877/2020|2020-12-07|EPI\_ISL\_748612|Original|hCoV-19^^Midtjylland|Human|Department of Virus and Microbiological Special Diagnostics|Albertsen Lab|Michaelsen|Denmark

>Spike|hCoV-19/Wales/PHWC-3225A/2020|2020-04-09|EPI\_ISL\_446622|Original|hCoV-19^^Wales|Human|Wales Specialist Virology Centre|Public Health Wales Microbiology Cardiff|Moore|United Kingdom

>Spike|hCoV-19/New Zealand/20VR2730/2020|2020-00-00|EPI\_ISL\_579345|Original|hCoV-19^^Auckland|Human|LabPLUS|Institute of Environmental Science and Research (ESR)|Wang|New Zealand

>Spike|hCoV-19/Germany/HH-hpi-p1769/2020|2020-03-19|EPI\_ISL\_776143|Original|hCoV-19^^Hamburg|Human|University Medical Center Hamburg Eppendorf|Heinrich Pette Institute|Robitaille|Germany

>Spike|hCoV-19/Spain/AR-IBV-98010596/2020|2020-10-03|EPI\_ISL\_722250|Original|hCoV-19^^Aragon|Human|Servicio de Microbiolog\u00eda|SeqCOVID-SPAIN consortium/IBV (CSIC)|Comas|Spain

>Spike|hCoV-19/Wales/PHWC-48661B/2020|2020-10-21|EPI\_ISL\_639059|Original|hCoV-19^^Wales|Human|Wales Specialist Virology Centre Sequencing lab|COVID-19 Genomics UK (COG-UK) Consortium|Moore|United Kingdom

>Spike|hCoV-19/England/BIRM-64E97/2020|2020-09-24|EPI\_ISL\_594526|Original|hCoV-19^^England|Human|University of Birmingham|COVID-19 Genomics UK (COG-UK) Consortium|Loman|United Kingdom

>Spike|hCoV-19/Denmark/DCGC-4439/2020|2020-09-21|EPI\_ISL\_621860|Original|hCoV-19^^Nordjylland|Human|Department of Virus and Microbiological Special Diagnostics|Albertsen lab|Michaelsen|Denmark

>Spike|hCoV-19/Spain/VC-IBV-98003567/2020|2020-03-14|EPI\_ISL\_537983|Original|hCoV-19^^Comunitat Valenciana|Human|Servicio de Microbiolog\u00eda. Hospital General Universitario de Castell\u00f3n|SeqCOVID-SPAIN consortium/IBV (CSIC)|Comas|Spain

>Spike|hCoV-19/France/PAC-IHU-0955/2020|2020-07-13|EPI\_ISL\_569007|Original|hCoV-19^^Provence-Alpes-C\u00f4te-d\u0192Azur|Human|MEPHI|MEPHI|Levasseur|France

>Spike|hCoV-19/Scotland/CVR5300/2020|2020-10-22|EPI\_ISL\_651744|Original|hCoV-19^^Scotland|Human|West of Scotland Specialist Virology Centre|COVID-19 Genomics UK (COG-UK) Consortium|Robertson|United Kingdom

>Spike|hCoV-19/Germany/BY-ChVir-929-2/2020|2020-01-28|EPI\_ISL\_450198|Original|hCoV-19^^Bavaria|Human|Department of Virology|Department of Virology|B\u00f6hmer|Germany

>Spike|hCoV-19/Netherlands/NB-RIVM-20263/2020|2020-11-17|EPI\_ISL\_723409|Original|hCoV-19^^Noord-Brabant|Human|Dutch COVID-19 response team|National Institute for Public Health and the Environment (RIVM)|Meijer|Netherlands

>Spike|hCoV-19/USA/TX-HMH-MCoV-15467/2020|2020-10-23|EPI\_ISL\_786951|Original|hCoV-19^^Texas|Human|Houston Methodist Hospital|Houston Methodist Hospital|Long|USA

>Spike|hCoV-19/Luxembourg/LNS2761686/2020|2020-07-16|EPI\_ISL\_740186|Original|hCoV-19^^Luxembourg|Human|Laboratoire national de sant\u00e9|Laboratoire national de sant\u00e9|Wienecke-Baldacchino|Luxembourg

>Spike|hCoV-19/Spain/VC-IBV-98003447/2020|2020-04-03|EPI\_ISL\_539256|Original|hCoV-19^^Comunitat Valenciana|Human|Hospital Universitario de La Ribera (Alzira|SeqCOVID-SPAIN consortium/IBV (CSIC)|Comas|Spain

>Spike|hCoV-19/USA/MI-MDHHS-SC20142/2020|2020-03-24|EPI\_ISL\_436855|Original|hCoV-19^^Michigan|Human|Michigan Department of Health and Human Services|Michigan Department of Health and Human Services|Blankenship|USA

>Spike|hCoV-19/England/20138024004/2020|2020-03-25|EPI\_ISL\_423303|Original|hCoV-19^^England|Human|Respiratory Virus Unit|Respiratory Virus Unit|Platt|United Kingdom

>Spike|hCoV-19/USA/WA-S2771/2020|2020-08-01|EPI\_ISL\_530128|Original|hCoV-19^^Washington|Human|Seattle Flu Study|Seattle Flu Study|Lee|USA

>Spike|hCoV-19/USA/NY-NYCPHL-001265/2020|2020-11-09|EPI\_ISL\_683896|Original|hCoV-19^^New York|Human|DOHMH Corona|New York City Public Health Laboratory|Wang|USA

>Spike|hCoV-19/England/CAMB-7FC71/2020|2020-04-19|EPI\_ISL\_444398|Original|hCoV-19^^England|Human|Department of Pathology|COVID-19 Genomics UK (COG-UK) Consortium|Meredith|United Kingdom

>Spike|hCoV-19/France/ARA-36389/2020|2020-05-11|EPI\_ISL\_636482|Original|hCoV-19^^Auvergne-Rhone-Alpes|Human|Centre Hospitalier Pierre Oudot|CNR Virus des Infections Respiratoires - France SUD|Josset|France

>Spike|hCoV-19/England/ALDP-6C43DC/2020|2020-07-01|EPI\_ISL\_556252|Original|hCoV-19^^England|Human|Lighthouse Lab in Alderley Park|Wellcome Sanger Institute for the COVID-19 Genomics UK (COG-UK) consortium|Davies|United Kingdom

>Spike|hCoV-19/Australia/VIC7614/2020|2020-07-21|EPI\_ISL\_564530|Original|hCoV-19^^Victoria|Human|Microbiological Diagnostic Unit - Public Health Laboratory (MDU-PHL)|MDU-PHL|Schultz|Australia

>Spike|hCoV-19/Brazil/SP-L7-CD82/2020|2020-03-24|EPI\_ISL\_476447|Original|hCoV-19^^S\u00e3o Paulo|Human|Hospital da Cl\u00ednicas da Faculdade de Medicina da Universidade de S\u00e3o Paulo|Instituto de Medicina Tropical da Univesidade de S\u00e3o Paulo|Faria|Brazil

>Spike|hCoV-19/England/ALDP-A6E6B9/2020|2020-10-15|EPI\_ISL\_607150|Original|hCoV-19^^England|Human|Lighthouse Lab in Alderley Park|Wellcome Sanger Institute for the COVID-19 Genomics UK (COG-UK) consortium|Davies|United Kingdom

>Spike|hCoV-19/USA/TX\_GCID\_192000052/2020|2020-03-23|EPI\_ISL\_445079|Original|hCoV-19^^Texas|Human|Baylor College of Medicine|Baylor College of Medicine|Skinner|USA

>Spike|hCoV-19/England/QEUH-5DF339/2020|2020-06-17|EPI\_ISL\_533325|Original|hCoV-19^^England|Human|Lighthouse Lab in Glasgow|Wellcome Sanger Institute for the COVID-19 Genomics UK (COG-UK) consortium|Davies|United Kingdom

>Spike|hCoV-19/USA/CA-ALSR-4727/2020|2020-09-21|EPI\_ISL\_730110|Original|hCoV-19^^California|Human|San Diego County Public Health Laboratory|Andersen lab at Scripps Research|Gangavarapu|USA

>Spike|hCoV-19/England/EXET-139DE8/2020|2020-00-00|EPI\_ISL\_679344|Original|hCoV-19^^England|Human|University of Exeter|COVID-19 Genomics UK (COG-UK) Consortium|Temperton|United Kingdom

>Spike|hCoV-19/Poland/19876/2020|2020-11-00|EPI\_ISL\_732916|Original|hCoV-19^^Poland|Human|genXone SA|genXone SA|Kaszuba|Poland

>Spike|hCoV-19/USA/MI-UM-10036455460/2020|2020-10-15|EPI\_ISL\_628843|Original|hCoV-19^^Michigan|Human|University of Michigan Clinical Microbiology Laboratory|Lauring Lab|Valesano|USA

>Spike|hCoV-19/Germany/NW-HHU-282/2020|2020-09-29|EPI\_ISL\_631326|Original|hCoV-19^^North Rhine-Westphalia|Human|ZOTZ KLIMAS MVZ D\u00fcsseldorf-Centrum GbR \u00dcBAG f\u00fcr Labormedizin|Center of Medical Microbiology|Wienemann|Germany

>Spike|hCoV-19/Denmark/DCGC-8812/2020|2020-10-26|EPI\_ISL\_626076|Original|hCoV-19^^Hovedstaden|Human|Department of Virus and Microbiological Special Diagnostics|Albertsen lab|Michaelsen|Denmark

>Spike|hCoV-19/England/MILK-A7AE3A/2020|2020-10-16|EPI\_ISL\_606806|Original|hCoV-19^^England|Human|Lighthouse Lab in Milton Keynes|Wellcome Sanger Institute for the COVID-19 Genomics UK (COG-UK) consortium|Davies|United Kingdom

>Spike|hCoV-19/Denmark/DCGC-20524/2020|2020-12-21|EPI\_ISL\_758902|Original|hCoV-19^^Syddanmark|Human|Department of Virus and Microbiological Special Diagnostics|Albertsen Lab|Michaelsen|Denmark

>Spike|hCoV-19/United Arab Emirates/L3290161092/2020|2020-05-13|EPI\_ISL\_520681|Original|hCoV-19^^United Arab Emirates|Human|Mohammed Bin Rashid University of Medicine and Health Sciences|Al Jalila Genomics Center|Ramaswamy|United Arab Emirates

>Spike|hCoV-19/South Africa/NHLS-UCT-GS-0045/2020|2020-03-22|EPI\_ISL\_640051|Original|hCoV-19^Western Cape|Human|Groote Schuur Hospital wc GSH|NHLS/UCT|Iranzadeh|South Africa

>Spike|hCoV-19/Netherlands/NA\_466/2020|2020-04-10|EPI\_ISL\_455268|Original|hCoV-19^Netherlands|Human|Dutch COVID-19 response team|Erasmus Medical Center|Oude Munnink|Netherlands

>Spike|hCoV-19/Denmark/DCGC-13378/2020|2020-11-30|EPI\_ISL\_712166|Original|hCoV-19^Syddanmark|Human|Department of Virus and Microbiological Special Diagnostics|Albertsen Lab|Michaelsen|Denmark

>Spike|hCoV-19/Canada/QC-LSPQ-L00244068/2020|2020-03-31|EPI\_ISL\_536388|Original|hCoV-19^Quebec|Human|H\u00f4pital Pierre-Boucher|Laboratoire de sant\u00e9 publique du Qu\u00e9bec|Moreira|Canada

>Spike|hCoV-19/Australia/VIC3644/2020|2020-07-08|EPI\_ISL\_520384|Original|hCoV-19^Victoria|Human|Victorian Infectious Diseases Reference Laboratory (VIDRL)|VIDRL and MDU-PHL|Schultz|Australia

>Spike|hCoV-19/USA/OR-CDC-2-3714482/2020|2020-11-30|EPI\_ISL\_751693|Original|hCoV-19^Oregon|Human|OR State PHL-Virology/Immunology Section|Genomics and Discovery|Queen|USA

>Spike|hCoV-19/England/PORT-2D1B14/2020|2020-04-02|EPI\_ISL\_493650|Original|hCoV-19^England|Human|Centre for Enzyme Innovation|COVID-19 Genomics UK (COG-UK) Consortium|Robson|United Kingdom

>Spike|hCoV-19/England/CAMC-A3F8F7/2020|2020-10-07|EPI\_ISL\_609791|Original|hCoV-19^England|Human|Lighthouse Lab in Cambridge|Wellcome Sanger Institute for the COVID-19 Genomics UK (COG-UK) consortium|Davies|United Kingdom

>Spike|hCoV-19/England/ALDP-9FCFA7/2020|2020-10-01|EPI\_ISL\_587721|Original|hCoV-19^England|Human|Lighthouse Lab in Alderley Park|Wellcome Sanger Institute for the COVID-19 Genomics UK (COG-UK) consortium|Davies|United Kingdom

>Spike|hCoV-19/England/MILK-9767BC/2020|2020-08-17|EPI\_ISL\_575969|Original|hCoV-19^England|Human|Lighthouse Lab in Milton Keynes|Wellcome Sanger Institute for the COVID-19 Genomics UK (COG-UK) consortium|Davies|United Kingdom

>Spike|hCoV-19/Australia/VIC8749/2020|2020-07-28|EPI\_ISL\_565172|Original|hCoV-19^Victoria|Human|Victorian Infectious Diseases Reference Laboratory (VIDRL)|VIDRL and MDU-PHL|Schultz|Australia

>Spike|hCoV-19/Wuhan/HB-WH2-157/2020|2020-02-28|EPI\_ISL\_454925|Original|hCoV-19^Hubei|Human|Wuhan Chain Medical Labs (CMLabs)|State Key Laboratory of Biotherapy of Sichuan University|Tang|China

>Spike|hCoV-19/USA/MI-UM-10036684811/2020|2020-10-29|EPI\_ISL\_682086|Original|hCoV-19^Michigan|Human|University of Michigan Clinical Microbiology Laboratory|Lauring Lab|Valesano|USA

>Spike|hCoV-19/India/MH-ACTREC-431/2020|2020-08-04|EPI\_ISL\_700080|Original|hCoV-19^Maharashtra|Human|Hematopathology Laboratory|Hematopathology Laboratory|Patkar|India

>Spike|hCoV-19/Denmark/DCGC-1262/2020|2020-06-08|EPI\_ISL\_618039|Original|hCoV-19^Nordjylland|Human|Department of Virus and Microbiological Special Diagnostics|Albertsen lab|Michaelsen|Denmark

>Spike|hCoV-19/Wales/PHWC-24D5A/2020|2020-03-20|EPI\_ISL\_419505|Original|hCoV-19^Wales|Human|Wales Specialist Virology Centre|Public Health Wales Microbiology Cardiff|Moore|United Kingdom

>Spike|hCoV-19/England/QEUH-9F3B15/2020|2020-09-23|EPI\_ISL\_588642|Original|hCoV-19^England|Human|Lighthouse Lab in Glasgow|Wellcome Sanger Institute for the COVID-19 Genomics UK (COG-UK) consortium|Davies|United Kingdom

>Spike|hCoV-19/Luxembourg/LNS3497064/2020|2020-11-13|EPI\_ISL\_740320|Original|hCoV-19^Luxembourg|Human|Laboratoire national de sant\u00e9|Laboratoire national de sant\u00e9|Wienecke-Baldacchino|Luxembourg

>Spike|hCoV-19/Canada/NS-NML-1267/2020|2020-04-16|EPI\_ISL\_579655|Original|hCoV-19^Nova Scotia|Human|QEII Health Sciences Centre|National Microbiology Laboratory (NML)|Majer|Canada

>Spike|hCoV-19/USA/CA-ALSR-2987/2020|2020-08-30|EPI\_ISL\_635774|Original|hCoV-19^California|Human|San Diego County Public Health Laboratory|Andersen lab at Scripps Research|Gangavarapu|USA

>Spike|hCoV-19/India/MH-ACTREC-301/2020|2020-07-14|EPI\_ISL\_699952|Original|hCoV-19^^Maharashtra|Human|Hematopathology Laboratory|Hematopathology Laboratory|Patkar|India

>Spike|hCoV-19/Northern Ireland/NIRE-232F24/2020|2020-09-25|EPI\_ISL\_680237|Original|hCoV-19^^Northern Ireland|Human|Regional Virus Laboratory|COVID-19 Genomics UK (COG-UK) Consortium|Fairley|United Kingdom

>Spike|hCoV-19/England/CAMC-A57D45/2020|2020-10-09|EPI\_ISL\_597088|Original|hCoV-19^^England|Human|Lighthouse Lab in Cambridge|Wellcome Sanger Institute for the COVID-19 Genomics UK (COG-UK) consortium|Davies|United Kingdom

>Spike|hCoV-19/USA/UT-UPHL-2012280511/2020|2020-10-20|EPI\_ISL\_746260|Original|hCoV-19^^Utah|Human|Ginkgo Bioworks Clinical Laboratory|Utah Public Health Laboratory|Young|USA

>Spike|hCoV-19/Australia/VIC7532/2020|2020-07-23|EPI\_ISL\_564476|Original|hCoV-19^^Victoria|Human|Microbiological Diagnostic Unit - Public Health Laboratory (MDU-PHL)|MDU-PHL|Schultz|Australia

>Spike|hCoV-19/USA/TX-HMH-4758/2020|2020-06-21|EPI\_ISL\_544309|Original|hCoV-19^^Texas|Human|Houston Methodist Hospital|Houston Methodist Hospital|Long|USA

>Spike|hCoV-19/Wales/PHWC-2B0F0/2020|2020-04-07|EPI\_ISL\_432055|Original|hCoV-19^^Wales|Human|Wales Specialist Virology Centre|Public Health Wales Microbiology Cardiff|Moore|United Kingdom

>Spike|hCoV-19/England/CAMB-74553/2020|2020-03-28|EPI\_ISL\_425305|Original|hCoV-19^^England|Human|Department of Pathology|COVID-19 Genomics UK (COG-UK) Consortium|Meredith|United Kingdom

>Spike|hCoV-19/England/BIRM-63DAA/2020|2020-09-04|EPI\_ISL\_576884|Original|hCoV-19^^England|Human|University of Birmingham|COVID-19 Genomics UK (COG-UK) Consortium|Loman|United Kingdom

>Spike|hCoV-19/USA/CA-ALSR-1080-SAN/2020|2020-06-23|EPI\_ISL\_483507|Original|hCoV-19^^California|Human|UC San Diego Center for Advanced Laboratory Medicine|Andersen lab at Scripps Research|Gangavarapu|USA

>Spike|hCoV-19/USA/WI-UW-1168/2020|2020-08-08|EPI\_ISL\_522924|Original|hCoV-19^^Wisconsin|Human|University of Wisconsin-Madison AIDS Vaccine Research Laboratories|University of Wisconsin-Madison AIDS Vaccine Research Laboratories|Baczenas|USA

>Spike|hCoV-19/Denmark/DCGC-4781/2020|2020-09-21|EPI\_ISL\_621391|Original|hCoV-19^^Hovedstaden|Human|Department of Virus and Microbiological Special Diagnostics|Albertsen lab|Michaelsen|Denmark

>Spike|hCoV-19/Netherlands/FR-RIVM-20147/2020|2020-11-23|EPI\_ISL\_723317|Original|hCoV-19^^Friesland|Human|Dutch COVID-19 response team|National Institute for Public Health and the Environment (RIVM)|Meijer|Netherlands

>Spike|hCoV-19/Spain/MD-IBV-006439/2020|2020-03-17|EPI\_ISL\_510149|Original|hCoV-19^^Madrid|Human|Hospital General Universitario Gregorio Mara\u00f1a|SeqCOVID-SPAIN consortium|IBV (CSIC)|Comas|Spain

>Spike|hCoV-19/England/GSTT-265E052/2020|2020-03-30|EPI\_ISL\_484143|Original|hCoV-19^^England|Human|Centre for Clinical Infection and Diagnostics Research and Genomics Innovation Unit|COVID-19 Genomics UK (COG-UK) Consortium|Awan|United Kingdom

>Spike|hCoV-19/Denmark/DCGC-14841/2020|2020-11-23|EPI\_ISL\_712020|Original|hCoV-19^^Midtjylland|Human|Department of Virus and Microbiological Special Diagnostics|Albertsen Lab|Michaelsen|Denmark

>Spike|hCoV-19/England/CAMB-7EBA2/2020|2020-04-06|EPI\_ISL\_442994|Original|hCoV-19^^England|Human|Department of Pathology|Wellcome Sanger Institute for the COVID-19 Genomics UK (COG-UK) consortium|Amato|United Kingdom

>Spike|hCoV-19/USA/CA-IGI-0371/2020|2020-07-22|EPI\_ISL\_754877|Original|hCoV-19^^California|Human|Innovative Genomics Institute|Innovative Genomics Institute|Wyman|USA

>Spike|hCoV-19/Wales/PHWC-4823AF/2020|2020-10-15|EPI\_ISL\_613216|Original|hCoV-19^^Wales|Human|Wales Specialist Virology Centre Sequencing lab|COVID-19 Genomics UK (COG-UK) Consortium|Moore|United Kingdom

>Spike|hCoV-19/South Korea/KCDC2024/2020|2020-02-19|EPI\_ISL\_471440|Original|hCoV-19^^South Korea|Human|Division of Viral Diseases|Division of Viral Diseases|Kim|South Korea

>Spike|hCoV-19/Denmark/DCGC-17820/2020|2020-12-14|EPI\_ISL\_749303|Original|hCoV-19^^Sjaelland|Human|Department of Virus and Microbiological Special Diagnostics|Albertsen Lab|Michaelsen|Denmark

>Spike|hCoV-19/Ireland/G-NVRL-78IRL74215/2020|2020-11-23|EPI\_ISL\_752565|Original|hCoV-19^^Galway|Human|National Virus Reference Laboratory|National Virus Reference Laboratory|Gonzalez|Ireland

>Spike|hCoV-19/USA/CA-CHLA-PLM71317172/2020|2020-12-04|EPI\_ISL\_753639|Original|hCoV-19^^California|Human|Clinical virology Laboratory|Center for Personalized Medicine|Dien Bard|USA

>Spike|hCoV-19/Scotland/CVR878/2020|2020-03-27|EPI\_ISL\_439127|Original|hCoV-19^^Scotland|Human|West of Scotland Specialist Virology Centre|COVID-19 Genomics UK (COG-UK) Consortium|Robertson|United Kingdom

>Spike|hCoV-19/Scotland/QEUH-9BA8E6/2020|2020-09-09|EPI\_ISL\_573829|Original|hCoV-19^^Scotland|Human|Oxford Viromics|COVID-19 Genomics UK (COG-UK) Consortium|Golubchik|United Kingdom

>Spike|hCoV-19/USA/UT-03889/2020|2020-04-13|EPI\_ISL\_450566|Original|hCoV-19^^Utah|Human|Utah Public Health Laboratory|Utah Public Health Laboratory|Young|USA

>Spike|hCoV-19/Denmark/DCGC-7711/2020|2020-10-19|EPI\_ISL\_618581|Original|hCoV-19^^Midtjylland|Human|Department of Virus and Microbiological Special Diagnostics|Albertsen lab|Michaelsen|Denmark

>Spike|hCoV-19/USA/WA-UW-5205/2020|2020-04-02|EPI\_ISL\_430900|Original|hCoV-19^^Washington|Human|UW Virology Lab|UW Virology Lab|Roychoudhury|USA

>Spike|hCoV-19/Spain/CL-IBV-97006174/2020|2020-04-06|EPI\_ISL\_537321|Original|hCoV-19^^Castilla y Leon|Human|Universidad de Le\u00f3n|SeqCOVID-SPAIN consortium|IBV (CSIC) |Comas|Spain

>Spike|hCoV-19/England/QEUH-9DDB20/2020|2020-09-21|EPI\_ISL\_599501|Original|hCoV-19^^England|Human|Lighthouse Lab in Glasgow|Wellcome Sanger Institute for the COVID-19 Genomics UK (COG-UK) consortium|Davies|United Kingdom

>Spike|hCoV-19/Denmark/DCGC-14028/2020|2020-11-30|EPI\_ISL\_711526|Original|hCoV-19^^Hovedstaden|Human|Department of Virus and Microbiological Special Diagnostics|Albertsen Lab|Michaelsen|Denmark

>Spike|hCoV-19/Australia/NSW223/2020|2020-03-26|EPI\_ISL\_451489|Original|hCoV-19^^New South Wales|Human|Laverty Pathology|NSW Health Pathology - Institute of Clinical Pathology and Medical Research; Westmead Hospital; University of Sydney|Gall|Australia

>Spike|hCoV-19/Switzerland/ZH-ETHZ-110442/2020|2020-04-07|EPI\_ISL\_451866|Original|hCoV-19^^Zurich|Human|Viollier AG|Department of Biosystems Science and Engineering|Nadeau|Switzerland

>Spike|hCoV-19/India/MH-ACTREC-145/2020|2020-05-29|EPI\_ISL\_699801|Original|hCoV-19^^Maharashtra|Human|Hematopathology Laboratory|Hematopathology Laboratory|Patkar|India

>Spike|hCoV-19/England/MILK-974790/2020|2020-08-21|EPI\_ISL\_575788|Original|hCoV-19^^England|Human|Lighthouse Lab in Milton Keynes|Wellcome Sanger Institute for the COVID-19 Genomics UK (COG-UK) consortium|Davies|United Kingdom

>Spike|hCoV-19/New Zealand/20CV0610/2020|2020-11-27|EPI\_ISL\_682288|Original|hCoV-19^^Counties Manukau|Human|Middlemore Hospital|Institute of Environmental Science and Research (ESR)|Wang|New Zealand

>Spike|hCoV-19/Denmark/DCGC-17552/2020|2020-12-14|EPI\_ISL\_751063|Original|hCoV-19^^Midtjylland|Human|Department of Virus and Microbiological Special Diagnostics|Albertsen Lab|Michaelsen|Denmark

>Spike|hCoV-19/USA/NY-Wadsworth-33281-01/2020|2020-03-30|EPI\_ISL\_525639|Original|hCoV-19^^New York|Human|Wadsworth Center|Wadsworth Center|Plitnick|USA

>Spike|hCoV-19/England/MILK-99485B/2020|2020-08-25|EPI\_ISL\_552256|Original|hCoV-19^^England|Human|Lighthouse Lab in Milton Keynes|Wellcome Sanger Institute for the COVID-19 Genomics UK (COG-UK) consortium|Davies|United Kingdom

>Spike|hCoV-19/Switzerland/VB-ETHZ-280128/2020|2020-09-07|EPI\_ISL\_560534|Original|hCoV-19^^Valais|Human|Viollier AG|Department of Biosystems Science and Engineering|Nadeau|Switzerland

>Spike|hCoV-19/England/QEUA-B7C462/2020|2020-11-14|EPI\_ISL\_741777|Original|hCoV-19^^England|Human|Oxford Viromics|COVID-19 Genomics UK (COG-UK) Consortium|Golubchik|United Kingdom

>Spike|hCoV-19/England/ALDP-4A5889/2020|2020-06-09|EPI\_ISL\_559621|Original|hCoV-19^^England|Human|Lighthouse Lab in Alderley Park|Wellcome Sanger Institute for the COVID-19 Genomics UK (COG-UK) consortium|Davies|United Kingdom

>Spike|hCoV-19/USA/MI-MDHHS-SC21787/2020|2020-08-14|EPI\_ISL\_529905|Original|hCoV-19^^Michigan|Human|Michigan Department of Health and Human Services|Michigan Department of Health and Human Services|Blankenship|USA

>Spike|hCoV-19/Japan/PG-0326/2020|2020-03-26|EPI\_ISL\_480001|Original|hCoV-19^^HokurikuShinsyu|Human|Nagano Environmental Conservation Research Institute|Pathogen Genomics Center|Sekizuka|Japan

>Spike|hCoV-19/USA/NMDOH-2020305747/2020|2020-08-21|EPI\_ISL\_542047|Original|hCoV-19^^New Mexico|Human|New Mexico Department of Health Scientific Laboratory|New Mexico Department of Health Scientific Laboratory|Johnson|USA

>Spike|hCoV-19/England/ALDP-9CABEA/2020|2020-09-16|EPI\_ISL\_575468|Original|hCoV-19^^England|Human|Lighthouse Lab in Alderley Park|Wellcome Sanger Institute for the COVID-19 Genomics UK (COG-UK) consortium|Davies|United Kingdom

>Spike|hCoV-19/Netherlands/ZH-RIVM-20413/2020|2020-12-11|EPI\_ISL\_728633|Original|hCoV-19^^Zuid-holland|Human|Dutch COVID-19 response team|National Institute for Public Health and the Environment (RIVM)|Meijer|Netherlands

>Spike|hCoV-19/USA/MI-MDHHS-SC20570/2020|2020-04-30|EPI\_ISL\_462652|Original|hCoV-19^^Michigan|Human|Michigan Department of Health and Human Services|Michigan Department of Health and Human Services|Blankenship|USA

>Spike|hCoV-19/England/LIVE-1DDCCB/2020|2020-10-10|EPI\_ISL\_612019|Original|hCoV-19^^England|Human|Liverpool Clinical Laboratories|COVID-19 Genomics UK (COG-UK) Consortium|Haldenby|United Kingdom

>Spike|hCoV-19/Luxembourg/LNS2783388/2020|2020-10-22|EPI\_ISL\_740193|Original|hCoV-19^^Luxembourg|Human|Laboratoire national de sant\u00e9|Laboratoire national de sant\u00e9|Wienecke-Baldacchino|Luxembourg

>Spike|hCoV-19/England/QEUA-9CE75B/2020|2020-09-17|EPI\_ISL\_590027|Original|hCoV-19^^England|Human|Lighthouse Lab in Glasgow|Wellcome Sanger Institute for the COVID-19 Genomics UK (COG-UK) consortium|Davies|United Kingdom

>Spike|hCoV-19/England/LIVE-A8750/2020|2020-03-27|EPI\_ISL\_517206|Original|hCoV-19^^England|Human|Liverpool Clinical Laboratories|COVID-19 Genomics UK (COG-UK) Consortium|Haldenby|United Kingdom

>Spike|hCoV-19/India/TG-CCMB-M359/2020|2020-06-09|EPI\_ISL\_495200|Original|hCoV-19^^Telangana|Human|CSIR-Centre for Cellular and Molecular Biology|CSIR-Centre for Cellular and Molecular Biology|Banu|India

>Spike|hCoV-19/USA/FL-UF-15/2020|2020-04-17|EPI\_ISL\_468721|Original|hCoV-19^^Florida|Human|University of Florida|University of Florida|Lednicky|USA

>Spike|hCoV-19/Wales/PHWC-16C247/2020|2020-09-22|EPI\_ISL\_572674|Original|hCoV-19^^Wales|Human|Wales Specialist Virology Centre Sequencing lab|COVID-19 Genomics UK (COG-UK) Consortium|Moore|United Kingdom

>Spike|hCoV-19/England/QEUA-9B3AD8/2020|2020-09-04|EPI\_ISL\_573528|Original|hCoV-19^^England|Human|Virology Department|COVID-19 Genomics UK (COG-UK) Consortium|de Silva|United Kingdom

>Spike|hCoV-19/England/204540597/2020|2020-11-03|EPI\_ISL\_678655|Original|hCoV-19^^England|Human|Respiratory Virus Unit|COVID-19 Genomics UK (COG-UK) Consortium|Platt|United Kingdom

>Spike|hCoV-19/USA/MI-MDHHS-SC20029/2020|2020-03-15|EPI\_ISL\_437116|Original|hCoV-19^^Michigan|Human|Michigan Department of Health and Human Services|Michigan Department of Health and Human Services|Blankenship|USA

>Spike|hCoV-19/England/QEUA-AF69DB/2020|2020-10-30|EPI\_ISL\_663033|Original|hCoV-19^^England|Human|Lighthouse Lab in Glasgow|Wellcome Sanger Institute for the COVID-19 Genomics UK (COG-UK) Consortium|Davies|United Kingdom

>Spike|hCoV-19/Japan/PG-4292/2020|2020-07-00|EPI\_ISL\_692521|Original|hCoV-19^^Japan|Human|Pathogen Genomics Center|Pathogen Genomics Center|Sekizuka|Japan

>Spike|hCoV-19/England/QEUEH-95EE6A/2020|2020-08-06|EPI\_ISL\_532331|Original|hCoV-19^^England|Human|Lighthouse Lab in Glasgow|Wellcome Sanger Institute for the COVID-19 Genomics UK (COG-UK) consortium|Davies|United Kingdom

>Spike|hCoV-19/USA/TX-HMH-MCoV-11188/2020|2020-09-02|EPI\_ISL\_789728|Original|hCoV-19^^Texas|Human|Houston Methodist Hospital|Houston Methodist Hospital|Long|USA

>Spike|hCoV-19/Australia/VIC13535/2020|2020-08-04|EPI\_ISL\_563739|Original|hCoV-19^^Victoria|Human|Microbiological Diagnostic Unit - Public Health Laboratory (MDU-PHL)|MDU-PHL|Schultz|Australia

>Spike|hCoV-19/England/CAMC-AAFD8A/2020|2020-10-21|EPI\_ISL\_623393|Original|hCoV-19^^England|Human|Lighthouse Lab in Cambridge|Wellcome Sanger Institute for the COVID-19 Genomics UK (COG-UK) consortium|Davies|United Kingdom

>Spike|hCoV-19/Germany/HH-hpi-pl499/2020|2020-03-14|EPI\_ISL\_776005|Original|hCoV-19^^Hamburg|Human|University Medical Center Hamburg Eppendorf|Heinrich Pette Institute|Robitaille|Germany

>Spike|hCoV-19/England/CAMB-1B2594/2020|2020-05-15|EPI\_ISL\_456695|Original|hCoV-19^^England|Human|Department of Pathology|COVID-19 Genomics UK (COG-UK) Consortium|Meredith|United Kingdom

>Spike|hCoV-19/USA/UT-UPHL-05584/2020|2020-06-01|EPI\_ISL\_575230|Original|hCoV-19^^Utah|Human|Utah Public Health Laboratory|Utah Public Health Laboratory|Young|USA

>Spike|hCoV-19/Luxembourg/LNS8585990/2020|2020-11-10|EPI\_ISL\_744767|Original|hCoV-19^^Luxembourg|Human|Laboratoire national de sant\u00e9|Laboratoire national de sant\u00e9|Wienecke-Baldacchino|Luxembourg

>Spike|hCoV-19/Switzerland/BL-ETHZ-100236/2020|2020-03-18|EPI\_ISL\_574886|Original|hCoV-19^^Basel-Landschaft|Human|Viollier AG|Department of Biosystems Science and Engineering|Nadeau|Switzerland

>Spike|hCoV-19/USA/MN-MDH-301/2020|2020-03-30|EPI\_ISL\_450768|Original|hCoV-19^^Minnesota|Human|Minnesota Department of Health|Minnesota Department of Health|Garfin|USA

>Spike|hCoV-19/England/ALDP-95C628/2020|2020-06-20|EPI\_ISL\_555075|Original|hCoV-19^^England|Human|Lighthouse Lab in Alderley Park|Wellcome Sanger Institute for the COVID-19 Genomics UK (COG-UK) consortium|Davies|United Kingdom

>Spike|hCoV-19/England/CAMC-B9A219/2020|2020-11-15|EPI\_ISL\_673718|Original|hCoV-19^^England|Human|Lighthouse Lab in Cambridge|Wellcome Sanger Institute for the COVID-19 Genomics UK (COG-UK) Consortium|Davies|United Kingdom

>Spike|hCoV-19/England/ALDP-9FD39B/2020|2020-10-02|EPI\_ISL\_587942|Original|hCoV-19^^England|Human|Lighthouse Lab in Alderley Park|Wellcome Sanger Institute for the COVID-19 Genomics UK (COG-UK) consortium|Davies|United Kingdom

>Spike|hCoV-19/England/CAMC-BBB7B9/2020|2020-11-21|EPI\_ISL\_724067|Original|hCoV-19^^England|Human|Northumbria University / South Tees Hospitals NHS Foundation Trust / North Cumbria Integrated Care NHS Foundation Trust / North Tees and Hartlepool NHS Foundation Trust / Newcastle Hospitals NHS Foundation Trust|COVID-19 Genomics UK (COG-UK) Consortium|Bashton|United Kingdom

>Spike|hCoV-19/Wales/PHWC-16CC76/2020|2020-09-23|EPI\_ISL\_574153|Original|hCoV-19^^Wales|Human|Wales Specialist Virology Centre Sequencing lab|COVID-19 Genomics UK (COG-UK) Consortium|Moore|United Kingdom

>Spike|hCoV-19/USA/MN-MDH-288/2020|2020-03-31|EPI\_ISL\_450757|Original|hCoV-19^^Minnesota|Human|Minnesota Department of Health|Minnesota Department of Health|Garfin|USA

>Spike|hCoV-19/USA/MN-MDH-1904/2020|2020-10-18|EPI\_ISL\_613522|Original|hCoV-19^^Minnesota|Human|Public Health Laboratory - Infectious Disease Lab|Minnesota Department of Health|Lorentz|USA

>Spike|hCoV-19/England/MILK-B95BE6/2020|2020-11-14|EPI\_ISL\_676150|Original|hCoV-19^^England|Human|Lighthouse Lab in Milton Keynes|Wellcome Sanger Institute for the COVID-19 Genomics UK (COG-UK) Consortium|Davies|United Kingdom

>Spike|hCoV-19/Japan/TK-YV12689/2020|2020-04-00|EPI\_ISL\_486894|Original|hCoV-19^^Tokyo|Human|Tokyo Metropolitan Institute of Public Health|Tokyo Metropolitan Institute of Public Health|Nagashima|Japan

>Spike|hCoV-19/USA/CA-CSMC105/2020|2020-04-02|EPI\_ISL\_475580|Original|hCoV-19^^California|Human|Cedars-Sinai Medical Center|Cedars-Sinai Medical Center|Zhang|USA

>Spike|hCoV-19/Belgium/ULG-10526/2020|2020-10-23|EPI\_ISL\_626301|Original|hCoV-19^^Li\u00e8ge|Human|Department of Clinical Microbiology|GIGA Medical Genomics|Durkin|Belgium

>Spike|hCoV-19/England/205090680/2020|2020-12-10|EPI\_ISL\_766296|Original|hCoV-19^^England|Human|Respiratory Virus Unit|COVID-19 Genomics UK (COG-UK) Consortium|Platt|United Kingdom

>Spike|hCoV-19/India/MH-ACTREC-075/2020|2020-05-18|EPI\_ISL\_699731|Original|hCoV-19^^Maharashtra|Human|Hematopathology Laboratory|Hematopathology Laboratory|Patkar|India

>Spike|hCoV-19/USA/TX-HMH-6543/2020|2020-06-22|EPI\_ISL\_546069|Original|hCoV-19^^Texas|Human|Houston Methodist Hospital|Houston Methodist Hospital|Long|USA

>Spike|hCoV-19/South Africa/KRISP-0170/2020|2020-05-31|EPI\_ISL\_467520|Original|hCoV-19^^KwaZulu-Natal|Human|NHLs-IALCH|KRISP|de Oliveira|South Africa

>Spike|hCoV-19/Denmark/DCGC-3285/2020|2020-08-31|EPI\_ISL\_616037|Original|hCoV-19^^Hovedstaden|Human|Department of Virus and Microbiological Special Diagnostics|Albertsen lab|Michaelsen|Denmark

>Spike|hCoV-19/USA/NY-Wadsworth-119711-01/2020|2020-05-26|EPI\_ISL\_676708|Original|hCoV-19^^New York|Human|Wadsworth Center|Wadsworth Center|Lasek-Nesselquist|USA

>Spike|hCoV-19/England/CAMB-73A37/2020|2020-03-31|EPI\_ISL\_425269|Original|hCoV-19^^England|Human|Department of Pathology|COVID-19 Genomics UK (COG-UK) Consortium|Meredith|United Kingdom

>Spike|hCoV-19/Spain/AN-IBV-001078/2020|2020-03-26|EPI\_ISL\_452606|Original|hCoV-19^^Andalucia|Human|Servicio de Microbiolog\u00eda y Parasitolog\u00eda cl\u00ednica. UCEIMP. Hospital Universitario Virgen del Roc\u00edo/IBIS/CSIC/US.|SeqCOVID-SPAIN consortium/IBV (CSIC) |Comas|Spain

>Spike|hCoV-19/France/PAC-IHU-0204/2020|2020-03-27|EPI\_ISL\_569370|Original|hCoV-19^^Provence-Alpes-C\u00f4te-d\u2019Azur|Human|MEPHI|MEPHI|Levasseur|France

>Spike|hCoV-19/England/QEUIH-AD58C6/2020|2020-10-26|EPI\_ISL\_634544|Original|hCoV-19^^England|Human|Lighthouse Lab in Glasgow|Wellcome Sanger Institute for the COVID-19 Genomics UK (COG-UK) consortium|Davies|United Kingdom

>Spike|hCoV-19/England/QEUIH-B2DE62/2020|2020-11-03|EPI\_ISL\_646266|Original|hCoV-19^^England|Human|Lighthouse Lab in Glasgow|Wellcome Sanger Institute for the COVID-19 Genomics UK (COG-UK) Consortium|Davies|United Kingdom

>Spike|hCoV-19/Scotland/QEUIH-9E527B/2020|2020-09-23|EPI\_ISL\_601087|Original|hCoV-19^^Scotland|Human|Lighthouse Lab in Glasgow|Wellcome Sanger Institute for the COVID-19 Genomics UK (COG-UK) consortium|Davies|United Kingdom

>Spike|hCoV-19/England/20131103104/2020|2020-03-23|EPI\_ISL\_423691|Original|hCoV-19^^England|Human|Respiratory Virus Unit|Respiratory Virus Unit|Platt|United Kingdom

>Spike|hCoV-19/Indonesia/JI-NIHRD-PME0999/2020|2020-00-00|EPI\_ISL\_538498|Original|hCoV-19^^East Java|Human|RSUD Soediono Madiun East Java|National Institute of Health Research and Development|Setiawati|Indonesia

>Spike|hCoV-19/Australia/NSW90/2020|2020-03-22|EPI\_ISL\_427680|Original|hCoV-19^^New South Wales|Human|Centre for Infectious Diseases and Microbiology Public Health|NSW Health Pathology - Institute of Clinical Pathology and Medical Research; Westmead Hospital; University of Sydney|Gall|Australia

>Spike|hCoV-19/England/QEUIH-A61838/2020|2020-10-10|EPI\_ISL\_628635|Original|hCoV-19^^England|Human|Oxford Viromics|COVID-19 Genomics UK (COG-UK) Consortium|Golubchik|United Kingdom

>Spike|hCoV-19/South Africa/KRISP-K002680/2020|2020-08-03|EPI\_ISL\_535544|Original|hCoV-19^^KwaZulu-Natal|Human|NHLs-IALCH|KRISP|de Oliveira|South Africa

>Spike|hCoV-19/Netherlands/ZH-RIVM-20844/2020|2020-12-17|EPI\_ISL\_790899|Original|hCoV-19^^Zuid-holland|Human|Dutch COVID-19 response team|National Institute for Public Health and the Environment (RIVM)|Meijer|Netherlands

>Spike|hCoV-19/Japan/PG-4898/2020|2020-08-00|EPI\_ISL\_690019|Original|hCoV-19^^Japan|Human|Sakai City Institute of Public Health|Pathogen Genomics Center|Sekizuka|Japan



>Spike|hCoV-19/England/QEUA-9AE4A5/2020|2020-09-02|EPI\_ISL\_637547|Original|hCoV-19^^England|Human|Department of Pathology|COVID-19 Genomics UK (COG-UK) Consortium|Goodfellow|United Kingdom

>Spike|hCoV-19/USA/UT-UPHL-2009545/2020|2020-07-18|EPI\_ISL\_605225|Original|hCoV-19^^Utah|Human|Utah Public Health Laboratory|Utah Public Health Laboratory|Young|USA

>Spike|hCoV-19/Wales/PHWC-488D6F/2020|2020-11-01|EPI\_ISL\_639498|Original|hCoV-19^^Wales|Human|Wales Specialist Virology Centre Sequencing lab|COVID-19 Genomics UK (COG-UK) Consortium|Moore|United Kingdom

>Spike|hCoV-19/Portugal/PT2051/2020|2020-11-13|EPI\_ISL\_732265|Original|hCoV-19^^Portugal|Human|Instituto Nacional de Saude (INSA) and Instituto Gulbenkian de Ciencia (IGC)|Instituto Nacional de Saude (INSA) and Instituto Gulbenkian de Ciencia (IGC)|Borges|Portugal

>Spike|hCoV-19/England/ALDP-9CDF81/2020|2020-09-16|EPI\_ISL\_566340|Original|hCoV-19^^England|Human|Lighthouse Lab in Alderley Park|Wellcome Sanger Institute for the COVID-19 Genomics UK (COG-UK) consortium|Davies|United Kingdom

>Spike|hCoV-19/Spain/IB-IBV-99010756/2020|2020-05-11|EPI\_ISL\_691640|Original|hCoV-19^^Balear Islands|Human|Servicio de Microbiolog\u00eda|SeqCOVID-SPAIN consortium/IBV (CSIC)|Comas|Spain

>Spike|hCoV-19/England/CAMC-BC1668/2020|2020-11-20|EPI\_ISL\_704516|Original|hCoV-19^^England|Human|Department of Pathology|COVID-19 Genomics UK (COG-UK) Consortium|Goodfellow|United Kingdom

>Spike|hCoV-19/USA/TX-HMH-4635/2020|2020-06-23|EPI\_ISL\_543772|Original|hCoV-19^^Texas|Human|Houston Methodist Hospital|Houston Methodist Hospital|Long|USA

>Spike|hCoV-19/Switzerland/VD-ETHZ-100302/2020|2020-03-19|EPI\_ISL\_575001|Original|hCoV-19^^Vaud|Human|Viollier AG|Department of Biosystems Science and Engineering|Nadeau|Switzerland

>Spike|hCoV-19/Australia/QLD1142/2020|2020-08-29|EPI\_ISL\_593643|Original|hCoV-19^^Australia|Human|unknown|Public Health Virology Laboratory|Nguyen|Australia

>Spike|hCoV-19/England/MILK-B8C1A4/2020|2020-11-13|EPI\_ISL\_674457|Original|hCoV-19^^England|Human|Lighthouse Lab in Milton Keynes|Wellcome Sanger Institute for the COVID-19 Genomics UK (COG-UK) Consortium|Davies|United Kingdom

>Spike|hCoV-19/England/BRIS-1257F0/2020|2020-03-29|EPI\_ISL\_443917|Original|hCoV-19^^England|Human|PHE South West Regional Laboratory|Wellcome Sanger Institute for the COVID-19 Genomics UK (COG-UK) consortium|Amato|United Kingdom

>Spike|hCoV-19/Turkey/HSGM-1458/2020|2020-03-19|EPI\_ISL\_437327|Vero P1|hCoV-19^^Agri|Human|Ministry of Health Turkey|Ministry of Health Turkey|Bayrakdar|Turkey

>Spike|hCoV-19/Switzerland/VV-ETHZ-350360/2020|2020-10-31|EPI\_ISL\_728850|Original|hCoV-19^^Valais|Human|Viollier AG|Department of Biosystems Science and Engineering|Nadeau|Switzerland

>Spike|hCoV-19/Canada/ON-UHTC\_0039/2020|2020-04-10|EPI\_ISL\_464026|unknown|hCoV-19^^Ontario|Human|Unity Health Toronto|Ontario Institute for Cancer Research|de Borja|Canada

>Spike|hCoV-19/Norway/6246/2020|2020-11-16|EPI\_ISL\_775364|Original|hCoV-19^^Vestland|Human|Foerde Hospital|Norwegian Institute of Public Health|Vollan|Norway

>Spike|hCoV-19/England/ALDP-720B8A/2020|2020-07-01|EPI\_ISL\_557572|Original|hCoV-19^^England|Human|Lighthouse Lab in Alderley Park|Wellcome Sanger Institute for the COVID-19 Genomics UK (COG-UK) consortium|Davies|United Kingdom

>Spike|hCoV-19/England/ALDP-CB3D81/2020|2020-12-19|EPI\_ISL\_760832|Original|hCoV-19^^England|Human|Lighthouse Lab in Alderley Park|Wellcome Sanger Institute for the COVID-19 Genomics UK (COG-UK) Consortium|Davies|United Kingdom

>Spike|hCoV-19/USA/TX-HMH-5260/2020|2020-06-26|EPI\_ISL\_544633|Original|hCoV-19^^Texas|Human|Houston Methodist Hospital|Houston Methodist Hospital|Long|USA

>Spike|hCoV-19/Spain/PV-IBV-2154/2020|2020-04-12|EPI\_ISL\_468942|Original|hCoV-19^^Basque Country|Human|Servicio de Microbiolog\u00eda. Hospital Universitario Donostia. OSI Donostialdea. \u00c1rea de Enfermedades Infecciosas|SeqCOVID-SPAIN consortium/IBV (CSIC)|Comas|Spain

>Spike|hCoV-19/Portugal/PT1927/2020|2020-11-15|EPI\_ISL\_732138|Original|hCoV-19^^Portugal|Human|Instituto Nacional de Saude (INSA) and Instituto Gulbenkian de Ciencia (IGC)|Instituto Nacional de Saude (INSA) and Instituto Gulbenkian de Ciencia (IGC)|Borges|Portugal

>Spike|hCoV-19/Denmark/DCGC-17781/2020|2020-12-14|EPI\_ISL\_749564|Original|hCoV-19^^Sjaelland|Human|Department of Virus and Microbiological Special Diagnostics|Albertsen Lab|Michaelsen|Denmark

>Spike|hCoV-19/Wales/PHWC-4999B2/2020|2020-12-04|EPI\_ISL\_727384|Original|hCoV-19^^Wales|Human|Originating lab|COVID-19 Genomics UK (COG-UK) Consortium|Moore|United Kingdom

>Spike|hCoV-19/England/ALDP-AA266E/2020|2020-10-22|EPI\_ISL\_630854|Original|hCoV-19^^England|Human|Lighthouse Lab in Alderley Park|Wellcome Sanger Institute for the COVID-19 Genomics UK (COG-UK) consortium|Davies|United Kingdom

>Spike|hCoV-19/England/ALDP-9C5AE2/2020|2020-09-10|EPI\_ISL\_567644|Original|hCoV-19^^England|Human|Lighthouse Lab in Alderley Park|Wellcome Sanger Institute for the COVID-19 Genomics UK (COG-UK) consortium|Davies|United Kingdom

>Spike|hCoV-19/USA/CA-IGI-0390/2020|2020-07-17|EPI\_ISL\_756313|Original|hCoV-19^^California|Human|Innovative Genomics Institute|Innovative Genomics Institute|Wyman|USA

>Spike|hCoV-19/England/MILK-ACEEEC/2020|2020-10-22|EPI\_ISL\_629634|Original|hCoV-19^^England|Human|Lighthouse Lab in Milton Keynes|Wellcome Sanger Institute for the COVID-19 Genomics UK (COG-UK) consortium|Davies|United Kingdom

>Spike|hCoV-19/USA/MA-MGH-00855/2020|2020-04-13|EPI\_ISL\_791797|Original|hCoV-19^^Massachusetts|Human|Massachusetts General Hospital|Infectious Disease Program|Park|USA

>Spike|hCoV-19/USA/CA-ALSR-5073/2020|2020-06-25|EPI\_ISL\_730334|Original|hCoV-19^^California|Human|San Diego County Public Health Laboratory|Andersen lab at Scripps Research|Gangavarapu|USA

>Spike|hCoV-19/USA/WI-UW-1496/2020|2020-09-14|EPI\_ISL\_541623|Original|hCoV-19^^Wisconsin|Human|University of Wisconsin-Madison AIDS Vaccine Research Laboratories|University of Wisconsin-Madison AIDS Vaccine Research Laboratories|Baczenas|USA

>Spike|hCoV-19/USA/CA-CZB0141/2020|2020-04-08|EPI\_ISL\_429054|Original|hCoV-19^^California|Human|UCSF Clinical Microbiology Laboratory|Chan-Zuckerberg Biohub|Kamm|USA

>Spike|hCoV-19/England/EXET-1368F9/2020|2020-04-29|EPI\_ISL\_457240|Original|hCoV-19^^England|Human|University of Exeter|COVID-19 Genomics UK (COG-UK) Consortium|Temperton|United Kingdom

>Spike|hCoV-19/England/SHEF-D15DC/2020|2020-03-30|EPI\_ISL\_432632|Original|hCoV-19^^England|Human|Virology Department|COVID-19 Genomics UK (COG-UK) Consortium|de Silva|United Kingdom

>Spike|hCoV-19/Scotland/CVR1825/2020|2020-04-07|EPI\_ISL\_448132|Original|hCoV-19^^Scotland|Human|West of Scotland Specialist Virology Centre|COVID-19 Genomics UK (COG-UK) Consortium|Robertson|United Kingdom

>Spike|hCoV-19/England/BRIS-12C902/2020|2020-05-13|EPI\_ISL\_469511|Original|hCoV-19^^England|Human|PHE South West Regional Laboratory|Wellcome Sanger Institute for the COVID-19 Genomics UK (COG-UK) consortium|Davies|United Kingdom

>Spike|hCoV-19/Australia/VIC3031/2020|2020-07-01|EPI\_ISL\_520745|Original|hCoV-19^^Victoria|Human|Victorian Infectious Diseases Reference Laboratory (VIDRL)|VIDRL and MDU-PHL|Schultz|Australia

>Spike|hCoV-19/England/PORT-2D47C2/2020|2020-10-11|EPI\_ISL\_613294|Original|hCoV-19^^England|Human|Centre for Enzyme Innovation|COVID-19 Genomics UK (COG-UK) Consortium|Robson|United Kingdom

>Spike|hCoV-19/Canada/ON-UHTC\_0393/2020|2020-11-24|EPI\_ISL\_698086|Original|hCoV-19^^Ontario|Human|Unity Health Toronto|Ontario Institute for Cancer Research|de Borja|Canada

>Spike|hCoV-19/Portugal/PT0085/2020|2020-03-22|EPI\_ISL\_421488|Original|hCoV-19^^Portugal|Human|H Santarem|Instituto Nacional de Saude (INSA)|Borges|Portugal

>Spike|hCoV-19/USA/TX-HMH-MCoV-19023/2020|2020-11-25|EPI\_ISL\_785289|Original|hCoV-19^^Texas|Human|Houston Methodist Hospital|Houston Methodist Hospital|Long|USA

>Spike|hCoV-19/Wales/PHWC-4A35C0/2020|2020-12-15|EPI\_ISL\_744115|Original|hCoV-19^^Wales|Human|Wales Specialist Virology Centre Sequencing lab|COVID-19 Genomics UK (COG-UK) Consortium|Moore|United Kingdom

>Spike|hCoV-19/England/MILK-9A6B7B/2020|2020-09-02|EPI\_ISL\_550070|Original|hCoV-19^^England|Human|Lighthouse Lab in Milton Keynes|Wellcome Sanger Institute for the COVID-19 Genomics UK (COG-UK) consortium|Davies|United Kingdom

>Spike|hCoV-19/Wales/PHWC-3118B/2020|2020-04-10|EPI\_ISL\_446413|Original|hCoV-19^^Wales|Human|Wales Specialist Virology Centre|Public Health Wales Microbiology Cardiff|Moore|United Kingdom

>Spike|hCoV-19/Scotland/EDB084/2020|2020-03-21|EPI\_ISL\_425876|Original|hCoV-19^^Scotland|Human|Virology Department|COVID-19 Genomics UK (COG-UK) Consortium|Williams|United Kingdom

>Spike|hCoV-19/Wales/MILK-99C9C9/2020|2020-08-31|EPI\_ISL\_550575|Original|hCoV-19^^Wales|Human|Lighthouse Lab in Milton Keynes|Wellcome Sanger Institute for the COVID-19 Genomics UK (COG-UK) consortium|Davies|United Kingdom

>Spike|hCoV-19/India/TG-CCMB-L1967/2020|2020-06-04|EPI\_ISL\_495177|Original|hCoV-19^^Telangana|Human|CSIR-Centre for Cellular and Molecular Biology|CSIR-Centre for Cellular and Molecular Biology|Banu|India

>Spike|hCoV-19/Scotland/EDB3546/2020|2020-04-13|EPI\_ISL\_487880|Original|hCoV-19^^Scotland|Human|Virology Department|Wellcome Sanger Institute for the COVID-19 Genomics UK (COG-UK) consortium|Davies|United Kingdom

>Spike|hCoV-19/USA/LA-GBCL-26513042/2020|2020-04-21|EPI\_ISL\_485086|Original|hCoV-19^^Louisiana|Human|River Road Testing Lab|Ginkgo Bioworks Clinical Laboratory|Smith|USA

>Spike|hCoV-19/Scotland/CVR51/2020|2020-03-13|EPI\_ISL\_425779|Original|hCoV-19^^Scotland|Human|West of Scotland Specialist Virology Centre|COVID-19 Genomics UK (COG-UK) Consortium|Robertson|United Kingdom

>Spike|hCoV-19/Canada/QC-LSPQ-L00234537/2020|2020-03-23|EPI\_ISL\_536057|Original|hCoV-19^^Quebec|Human|H\u00f4pital Sainte-Croix|Laboratoire de sant\u00e9 publique du Qu\u00e9bec|Moreira|Canada

>Spike|hCoV-19/England/LIVE-AA5FA/2020|2020-03-24|EPI\_ISL\_517474|Original|hCoV-19^^England|Human|Liverpool Clinical Laboratories|COVID-19 Genomics UK (COG-UK) Consortium|Haldenby|United Kingdom

>Spike|hCoV-19/Japan/PG-1900/2020|2020-04-00|EPI\_ISL\_685506|Original|hCoV-19^^Japan|Human|Pathogen Genomics Center|Pathogen Genomics Center|Sekizuka|Japan

>Spike|hCoV-19/USA/WA-UW104/2020|2020-03-11|EPI\_ISL\_416642|Original|hCoV-19^^Washington|Human|UW Virology Lab|UW Virology Lab|Roychoudhury|USA

>Spike|hCoV-19/England/MILK-A79CD7/2020|2020-10-15|EPI\_ISL\_606736|Original|hCoV-19^^England|Human|Lighthouse Lab in Milton Keynes|Wellcome Sanger Institute for the COVID-19 Genomics UK (COG-UK) consortium|Davies|United Kingdom

>Spike|hCoV-19/Belgium/ULG-10826/2020|2020-11-13|EPI\_ISL\_661215|Original|hCoV-19^^Li\u00e8ge|Human|Department of Clinical Microbiology|GIGA Medical Genomics|Durkin|Belgium

>Spike|hCoV-19/USA/VA-DCLS-2048/2020|2020-10-26|EPI\_ISL\_677219|Original|hCoV-19^^Virginia|Human|Virginia Division of Consolidated Laboratory Services|Virginia Division of Consolidated Laboratory Services|St. Jacques|USA

>Spike|hCoV-19/USA/MA-MASPHL-00025/2020|2020-04-02|EPI\_ISL\_791531|Original|hCoV-19^^Massachusetts|Human|Massachusetts State Public Health Laboratory|Infectious Disease Program|Park|USA

>Spike|hCoV-19/England/NORT-2A5C8F/2020|2020-10-04|EPI\_ISL\_584708|Original|hCoV-19^^England|Human|Northumbria University / South Tees Hospitals NHS Foundation Trust / North Cumbria Integrated Care NHS Foundation Trust / North Tees and Hartlepool NHS Foundation Trust / Newcastle Hospitals NHS Foundation Trust|COVID-19 Genomics UK (COG-UK) Consortium|Bashton|United Kingdom

>Spike|hCoV-19/England/NORT-287D71/2020|2020-11-11|EPI\_ISL\_724998|Original|hCoV-19^^England|Human|Northumbria University / South Tees Hospitals NHS Foundation Trust / North Cumbria Integrated Care NHS Foundation Trust / North Tees and Hartlepool NHS Foundation Trust / Newcastle Hospitals NHS Foundation Trust|COVID-19 Genomics UK (COG-UK) Consortium|Bashton|United Kingdom

>Spike|hCoV-19/England/CAMC-B0CB44/2020|2020-10-30|EPI\_ISL\_643486|Original|hCoV-19^^England|Human|Lighthouse Lab in Cambridge|Wellcome Sanger Institute for the COVID-19 Genomics UK (COG-UK) Consortium|Davies|United Kingdom

>Spike|hCoV-19/United Arab Emirates/0010/2020|2020-05-07|EPI\_ISL\_698220|Original|hCoV-19^^Abu Dhabi|Human|Group 42 (G42) Healthcare|G42 Healthcare|Ogrodzki|United Arab Emirates

>Spike|hCoV-19/USA/CA-CSMC61/2020|2020-04-01|EPI\_ISL\_475675|Original|hCoV-19^^California|Human|Cedars-Sinai Medical Center|Cedars-Sinai Medical Center|Zhang|USA

>Spike|hCoV-19/Switzerland/SH-ETHZ-370458/2020|2020-11-16|EPI\_ISL\_693958|Original|hCoV-19^^Schaffhausen|Human|Viollier AG|Department of Biosystems Science and Engineering|Nadeau|Switzerland

>Spike|hCoV-19/Equatorial Guinea/12462/2020|2020-05-29|EPI\_ISL\_648311|Original|hCoV-19^^Bioko Norte|Human|Laboratorio de Investigaciones de Baney|University Hospital Basel|Hosch|Equatorial Guinea

>Spike|hCoV-19/England/NORT-28ADBA/2020|2020-04-16|EPI\_ISL\_461795|Original|hCoV-19^^England|Human|Northumbria University / South Tees Hospitals NHS Foundation Trust / North Cumbria Integrated Care NHS Foundation Trust / North Tees and Hartlepool NHS Foundation Trust / Newcastle Hospitals NHS Foundation Trust|COVID-19 Genomics UK (COG-UK) Consortium|Bashton|United Kingdom

>Spike|hCoV-19/USA/TX-HMH-4954/2020|2020-06-20|EPI\_ISL\_544428|Original|hCoV-19^^Texas|Human|Houston Methodist Hospital|Houston Methodist Hospital|Long|USA

>Spike|hCoV-19/England/OXON-AD23C/2020|2020-00-00|EPI\_ISL\_448571|Original|hCoV-19^^England|Human|Oxford Viromics|COVID-19 Genomics UK (COG-UK) Consortium|Golubchik|United Kingdom

>Spike|hCoV-19/England/QEUH-9F6F07/2020|2020-09-27|EPI\_ISL\_595645|Original|hCoV-19^^England|Human|Oxford Viromics|COVID-19 Genomics UK (COG-UK) Consortium|Golubchik|United Kingdom

>Spike|hCoV-19/England/SHEF-10D32EF/2020|2020-12-10|EPI\_ISL\_742055|Original|hCoV-19^^England|Human|Virology Department|COVID-19 Genomics UK (COG-UK) Consortium|de Silva|United Kingdom

>Spike|hCoV-19/USA/LA-EVTL700/2020|2020-07-14|EPI\_ISL\_653392|Original|hCoV-19^^Louisiana|Human|LSUHS Emerging Viral Threat Laboratory|Microbial Genome Sequencing Center|Kamil|USA

>Spike|hCoV-19/Thailand/Bangkok-CONI-0274/2020|2020-03-14|EPI\_ISL\_693352|Original|hCoV-19^^Bangkok|Human|Ramathibodi Hospital|COVID-19 Network Investigations (CONI) Alliance|Batty|Thailand

>Spike|hCoV-19/Japan/PG-6924/2020|2020-09-00|EPI\_ISL\_688031|Original|hCoV-19^^Japan|Human|Pathogen Genomics Center|Pathogen Genomics Center|Sekizuka|Japan

>Spike|hCoV-19/Belgium/ULG-10239/2020|2020-06-26|EPI\_ISL\_498145|Original|hCoV-19^^Li\u00e8ge|Human|Department of Clinical Microbiology|GIGA Medical Genomics|Durkin|Belgium

>Spike|hCoV-19/Brazil/RS-00636/2020|2020-11-24|EPI\_ISL\_770584|Original|hCoV-19^^Rio Grande do Sul|Human|Laborat\u00f3rio de Microbiologia Molecular - Universidade FEEVALE|Bioinformatics Laboratory / LNCC|Almeida|Brazil

>Spike|hCoV-19/England/QEUH-9F965A/2020|2020-09-25|EPI\_ISL\_589031|Original|hCoV-19^^England|Human|Lighthouse Lab in Glasgow|Wellcome Sanger Institute for the COVID-19 Genomics UK (COG-UK) consortium|Davies|United Kingdom

>Spike|hCoV-19/USA/MN-MDH-1546/2020|2020-08-03|EPI\_ISL\_527611|Original|hCoV-19^^Minnesota|Human|Minnesota Department of Health|Minnesota Department of Health|Garfin|USA

>Spike|hCoV-19/England/MILK-9756B0/2020|2020-08-20|EPI\_ISL\_552697|Original|hCoV-19^^England|Human|Lighthouse Lab in Milton Keynes|Wellcome Sanger Institute for the COVID-19 Genomics UK (COG-UK) consortium|Davies|United Kingdom

>Spike|hCoV-19/England/BRIS-130E48/2020|2020-03-23|EPI\_ISL\_501596|Original|hCoV-19^^England|Human|PHE South West Regional Laboratory|Wellcome Sanger Institute for the COVID-19 Genomics UK (COG-UK) consortium|Davies|United Kingdom

>Spike|hCoV-19/England/LIVE-DB3E23/2020|2020-10-21|EPI\_ISL\_650694|Original|hCoV-19^^England|Human|Liverpool Clinical Laboratories|COVID-19 Genomics UK (COG-UK) Consortium|Haldenby|United Kingdom

>Spike|hCoV-19/England/QEUH-9C9D9A/2020|2020-09-10|EPI\_ISL\_567354|Original|hCoV-19^^England|Human|Lighthouse Lab in Glasgow|Wellcome Sanger Institute for the COVID-19 Genomics UK (COG-UK) consortium|Davies|United Kingdom

>Spike|hCoV-19/USA/WA-S2042/2020|2020-06-05|EPI\_ISL\_497470|Original|hCoV-19^^Washington|Human|Washington State Department of Health|Seattle Flu Study|Lee|USA

>Spike|hCoV-19/Luxembourg/LNS9425421/2020|2020-10-29|EPI\_ISL\_744911|Original|hCoV-19^^Luxembourg|Human|Laboratoire national de sant\u00e9|Laboratoire national de sant\u00e9|Wienecke-Baldacchino|Luxembourg

>Spike|hCoV-19/England/QEUH-9F81A5/2020|2020-09-27|EPI\_ISL\_588967|Original|hCoV-19^^England|Human|Lighthouse Lab in Glasgow|Wellcome Sanger Institute for the COVID-19 Genomics UK (COG-UK) consortium|Davies|United Kingdom

>Spike|hCoV-19/England/20189054401/2020|2020-04-30|EPI\_ISL\_465537|Original|hCoV-19^^England|Human|Respiratory Virus Unit|Respiratory Virus Unit|Platt|United Kingdom

>Spike|hCoV-19/Canada/QC-LSPQ-L00229794/2020|2020-03-20|EPI\_ISL\_535903|Original|hCoV-19^^Quebec|Human|H\u00f4tel-Dieu de Sorel|Laboratoire de sant\u00e9 publique du Qu\u00e9bec|Moreira|Canada

>Spike|hCoV-19/USA/WI-UW-2486/2020|2020-12-03|EPI\_ISL\_759760|Original|hCoV-19^^Wisconsin|Human|University of Wisconsin-Madison AIDS Vaccine Research Laboratories|University of Wisconsin-Madison AIDS Vaccine Research Laboratories|Moreno|USA

>Spike|hCoV-19/Canada/ON-S842/2020|2020-04-00|EPI\_ISL\_586457|Original|hCoV-19^^Ontario|Human|Toronto Invasive Bacterial Diseases Network|McMaster University|McArthur|Canada

>Spike|hCoV-19/England/QEUH-AD3A2C/2020|2020-10-26|EPI\_ISL\_629993|Original|hCoV-19^^England|Human|Lighthouse Lab in Glasgow|Wellcome Sanger Institute for the COVID-19 Genomics UK (COG-UK) consortium|Davies|United Kingdom

>Spike|hCoV-19/England/ALDP-B1B5DB/2020|2020-11-01|EPI\_ISL\_645775|Original|hCoV-19^^England|Human|Lighthouse Lab in Alderley Park|Wellcome Sanger Institute for the COVID-19 Genomics UK (COG-UK) Consortium|Davies|United Kingdom

>Spike|hCoV-19/England/ALDP-97CCD5/2020|2020-07-17|EPI\_ISL\_526315|Original|hCoV-19^^England|Human|University of Birmingham|COVID-19 Genomics UK (COG-UK) Consortium|Loman|United Kingdom

>Spike|hCoV-19/Spain/IB-IBV-99010845/2020|2020-09-05|EPI\_ISL\_691655|Original|hCoV-19^^Balear Islands|Human|Servicio de Microbiolog\u00eda|SeqCOVID-SPAIN consortium|IBV (CSIC)|Comas|Spain

>Spike|hCoV-19/England/MILK-B87525/2020|2020-11-13|EPI\_ISL\_724779|Original|hCoV-19^^England|Human|Oxford Viromics|COVID-19 Genomics UK (COG-UK) Consortium|Golubchik|United Kingdom

>Spike|hCoV-19/Wales/ALDP-BB4F30/2020|2020-11-20|EPI\_ISL\_710703|Original|hCoV-19^^Wales|Human|Lighthouse Lab in Alderley Park|Wellcome Sanger Institute for the COVID-19 Genomics UK (COG-UK) Consortium|Davies|United Kingdom

>Spike|hCoV-19/USA/NY-NYCPHL-001251/2020|2020-11-06|EPI\_ISL\_683947|Original|hCoV-19^^New York|Human|DOHMH Morrisania|New York City Public Health Laboratory|Wang|USA

>Spike|hCoV-19/India/GJ-GBRC286/2020|2020-07-03|EPI\_ISL\_495024|Original|hCoV-19^^Gujarat|Human|Government Medical College|Gujarat Biotechnology Research Centre|Joshi|India

>Spike|hCoV-19/South Africa/KRISP-K001339/2020|2020-07-10|EPI\_ISL\_515824|Original|hCoV-19^^KwaZulu-Natal|Human|Medical Disagnostics Services (MDS)|KRISP|de Oliveira|South Africa

>Spike|hCoV-19/Denmark/DCGC-18369/2020|2020-12-07|EPI\_ISL\_749923|Original|hCoV-19^^Hovedstaden|Human|Department of Virus and Microbiological Special Diagnostics|Albertsen Lab|Michaelsen|Denmark

>Spike|hCoV-19/England/LOND-D5E19/2020|2020-04-19|EPI\_ISL\_444249|Original|hCoV-19^^England|Human|University College London|COVID-19 Genomics UK (COG-UK) Consortium|Roy|United Kingdom

>Spike|hCoV-19/England/CAMB-7DED7/2020|2020-04-06|EPI\_ISL\_470481|Original|hCoV-19^^England|Human|Department of Pathology|Wellcome Sanger Institute for the COVID-19 Genomics UK (COG-UK) consortium|Davies|United Kingdom

>Spike|hCoV-19/USA/WA-S2727/2020|2020-07-08|EPI\_ISL\_525717|Original|hCoV-19^^Washington|Human|Seattle Flu Study|Seattle Flu Study|Lee|USA

>Spike|hCoV-19/Wales/PHWC-496056/2020|2020-11-19|EPI\_ISL\_726522|Original|hCoV-19^^Wales|Human|Originating lab|COVID-19 Genomics UK (COG-UK) Consortium|Moore|United Kingdom

>Spike|hCoV-19/USA/CA-ALSR-2843/2020|2020-08-06|EPI\_ISL\_635709|Original|hCoV-19^^California|Human|San Diego County Public Health Laboratory|Andersen lab at Scripps Research|Gangavarapu|USA

>Spike|hCoV-19/Belarus/ChVir2070/2020|2020-03-00|EPI\_ISL\_451948|Original|hCoV-19^^Belarus|Human|The Republican Research and Practical Center for Epidemiology and Microbiology|Charite Universitatsmedizin Berlin|Muehlemann|Belarus

>Spike|hCoV-19/England/20109041904/2020|2020-03-04|EPI\_ISL\_464561|Original|hCoV-19^^England|Human|Respiratory Virus Unit|Respiratory Virus Unit|Platt|United Kingdom

>Spike|hCoV-19/Belgium/reg-0428425/2020|2020-04-28|EPI\_ISL\_476993|Original|hCoV-19^^Leuven|Human|KU Leuven|KU Leuven|Maes|Belgium

>Spike|hCoV-19/USA/CA-CZB-16178/2020|2020-12-01|EPI\_ISL\_739355|Original|hCoV-19^^California|Human|Renegade|Chan-Zuckerberg Biohub|Kamm|USA

>Spike|hCoV-19/Scotland/CVR3380/2020|2020-05-08|EPI\_ISL\_456809|Original|hCoV-19^^Scotland|Human|West of Scotland Specialist Virology Centre|COVID-19 Genomics UK (COG-UK) Consortium|Robertson|United Kingdom

>Spike|hCoV-19/USA/TX-QDX-745/2020|2020-03-19|EPI\_ISL\_571557|Original|hCoV-19^^Texas|Human|Quest Diagnostics|Quest Diagnostics|Kagan|USA

>Spike|hCoV-19/Sweden/20-52881/2020|2020-09-09|EPI\_ISL\_648148|Original|hCoV-19^^Halland|Human|Halmstad klinisk mikrobiologi|The Public Health Agency of Sweden|Svartstr\u00f6m|Sweden

>Spike|hCoV-19/England/NOTT-11F4B6/2020|2020-11-25|EPI\_ISL\_702846|Original|hCoV-19^^England|Human|Queens Medical Centre|COVID-19 Genomics UK (COG-UK) Consortium|Loose|United Kingdom

>Spike|hCoV-19/USA/WA-S1246/2020|2020-05-11|EPI\_ISL\_495696|Original|hCoV-19^^Washington|Human|Washington State Department of Health|Seattle Flu Study|Lee|USA

>Spike|hCoV-19/USA/WI-UW-1893/2020|2020-09-23|EPI\_ISL\_605762|Original|hCoV-19^^Wisconsin|Human|University of Wisconsin-Madison AIDS Vaccine Research Laboratories|University of Wisconsin-Madison AIDS Vaccine Research Laboratories|Baczenas|USA

>Spike|hCoV-19/England/OXON-B4C8F/2020|2020-04-30|EPI\_ISL\_535003|Original|hCoV-19^^England|Human|Oxford Viromics|COVID-19 Genomics UK (COG-UK) Consortium|Golubchik|United Kingdom

>Spike|hCoV-19/Denmark/DCGC-12362/2020|2020-11-16|EPI\_ISL\_682543|Original|hCoV-19^^Hovedstaden|Human|Department of Virus and Microbiological Special Diagnostics|Albertsen Lab|Michaelsen|Denmark

>Spike|hCoV-19/USA/UT-UPHL-2012365234/2020|2020-10-21|EPI\_ISL\_745648|Original|hCoV-19^^Utah|Human|Ginkgo Bioworks Clinical Laboratory|Utah Public Health Laboratory|Young|USA

>Spike|hCoV-19/Australia/NSW1365/2020|2020-12-25|EPI\_ISL\_767931|Original|hCoV-19^^New South Wales|Human|4Cyte Pathology|NSW Health Pathology - Institute of Clinical Pathology and Medical Research; Westmead Hospital; University of Sydney|Gall|Australia

>Spike|hCoV-19/England/201060055/2020|2020-03-04|EPI\_ISL\_464384|Original|hCoV-19^^England|Human|Respiratory Virus Unit|Respiratory Virus Unit|Platt|United Kingdom

>Spike|hCoV-19/Portugal/PT2006/2020|2020-11-13|EPI\_ISL\_732227|Original|hCoV-19^^Portugal|Human|Instituto Nacional de Saude (INSA) and Instituto Gulbenkian de Ciencia (IGC)|Instituto Nacional de Saude (INSA) and Instituto Gulbenkian de Ciencia (IGC)|Borges|Portugal

>Spike|hCoV-19/Brazil/SP-162/2020|2020-04-15|EPI\_ISL\_523958|Original|hCoV-19^^S\u00e3o Paulo|Human|Pronto Socorro Municipal de Perus|Instituto Adolfo Lutz|Sacchi|Brazil

>Spike|hCoV-19/USA/FL-BPHL-0754/2020|2020-06-23|EPI\_ISL\_512560|Original|hCoV-19^^Florida|Human|Florida Bureau of Public Health Laboratories|Florida Bureau of Public Health Laboratories|Blanton|USA

>Spike|hCoV-19/USA/WA-QDX-1080/2020|2020-03-19|EPI\_ISL\_571905|Original|hCoV-19^^Washington|Human|Quest Diagnostics|Quest Diagnostics|Kagan|USA

>Spike|hCoV-19/England/QEUH-B68DC8/2020|2020-11-11|EPI\_ISL\_662241|Original|hCoV-19^^England|Human|Lighthouse Lab in Glasgow|Wellcome Sanger Institute for the COVID-19 Genomics UK (COG-UK) Consortium|Davies|United Kingdom

>Spike|hCoV-19/England/MILK-9937B9/2020|2020-08-27|EPI\_ISL\_552025|Original|hCoV-19^^England|Human|Lighthouse Lab in Milton Keynes|Wellcome Sanger Institute for the COVID-19 Genomics UK (COG-UK) consortium|Davies|United Kingdom

>Spike|hCoV-19/England/MILK-6EF195/2020|2020-06-30|EPI\_ISL\_557368|Original|hCoV-19^^England|Human|Lighthouse Lab in Milton Keynes|Wellcome Sanger Institute for the COVID-19 Genomics UK (COG-UK) consortium|Davies|United Kingdom

>Spike|hCoV-19/USA/TX-HMH-MCoV-9201/2020|2020-07-02|EPI\_ISL\_780997|Original|hCoV-19^^Texas|Human|Houston Methodist Hospital|Houston Methodist Hospital|Long|USA

>Spike|hCoV-19/United Arab Emirates/L3290324509/2020|2020-05-27|EPI\_ISL\_520707|Original|hCoV-19^^United Arab Emirates|Human|Mohammed Bin Rashid University of Medicine and Health Sciences|Al Jalila Genomics Center|Ramaswamy|United Arab Emirates

>Spike|hCoV-19/USA/MN-MDH-1856/2020|2020-10-06|EPI\_ISL\_602991|Original|hCoV-19^^Minnesota|Human|Minnesota Department of Health|Minnesota Department of Health|Garfin|USA

>Spike|hCoV-19/England/QEUA-A0114E/2020|2020-10-02|EPI\_ISL\_584903|Original|hCoV-19^^England|Human|University of Exeter|COVID-19 Genomics UK (COG-UK) Consortium|Temperton|United Kingdom

>Spike|hCoV-19/England/NOTT-10F9C9/2020|2020-04-05|EPI\_ISL\_432670|Original|hCoV-19^^England|Human|Queens Medical Centre|COVID-19 Genomics UK (COG-UK) Consortium|Loose|United Kingdom

>Spike|hCoV-19/USA/TX-HMH-6188/2020|2020-07-04|EPI\_ISL\_547299|Original|hCoV-19^^Texas|Human|Houston Methodist Hospital|Houston Methodist Hospital|Long|USA

>Spike|hCoV-19/Wales/PHWC-1640EB/2020|2020-05-11|EPI\_ISL\_474128|Original|hCoV-19^^Wales|Human|Originating lab|COVID-19 Genomics UK (COG-UK) Consortium|Moore|United Kingdom

>Spike|hCoV-19/USA/WA-UW30/2020|2020-03-08|EPI\_ISL\_414617|Original|hCoV-19^^Washington|Human|UW Virology Lab|UW Virology Lab|Roychoudhury|USA

>Spike|hCoV-19/Denmark/DCGC-14980/2020|2020-11-23|EPI\_ISL\_713559|Original|hCoV-19^^Hovedstaden|Human|Department of Virus and Microbiological Special Diagnostics|Albertsen Lab|Michaelsen|Denmark

>Spike|hCoV-19/England/BIRM-60086/2020|2020-00-00|EPI\_ISL\_493436|Original|hCoV-19^^England|Human|University of Birmingham|COVID-19 Genomics UK (COG-UK) Consortium|Loman|United Kingdom

>Spike|hCoV-19/USA/CA-LACPHL-AF00002/2020|2020-12-18|EPI\_ISL\_737237|Original|hCoV-19^^California|Human|Los Angeles County PHL|Los Angeles County PHL|Hemarajata|USA

>Spike|hCoV-19/England/CAMB-7EE5E/2020|2020-04-08|EPI\_ISL\_443002|Original|hCoV-19^^England|Human|Department of Pathology|Wellcome Sanger Institute for the COVID-19 Genomics UK (COG-UK) consortium|Amato|United Kingdom

>Spike|hCoV-19/USA/WI-GMF-00707/2020|2020-04-06|EPI\_ISL\_422461|Original|hCoV-19^^Iowa|Human|Gundersen Molecular Diagnostics Laboratory|Kabara Cancer Research Institute|Kenny|USA

>Spike|hCoV-19/England/LIVE-A34A9/2020|2020-05-20|EPI\_ISL\_490383|Original|hCoV-19^^England|Human|Liverpool Clinical Laboratories|COVID-19 Genomics UK (COG-UK) Consortium|Haldenby|United Kingdom

>Spike|hCoV-19/USA/NY-QDX-1946/2020|2020-03-15|EPI\_ISL\_604266|Original|hCoV-19^^New York|Human|Quest Diagnostics|Quest Diagnostics|Kagan|USA

>Spike|hCoV-19/England/LIVE-A2C93/2020|2020-05-19|EPI\_ISL\_499917|Original|hCoV-19^^England|Human|Liverpool Clinical Laboratories|COVID-19 Genomics UK (COG-UK) Consortium|Haldenby|United Kingdom

>Spike|hCoV-19/Italy/SAR-ASSL-06/2020|2020-04-28|EPI\_ISL\_614397|Original|hCoV-19^^Sardinia|Human|Laboratorio Biologia Molecolare Sars Cov2 - UOC Laboratorio Analisi - Servizio Medicina di Laboratorio|Laboratorio specialistico UOC Ematologia - Ospedale \San Francesco\ - ATS-ASSL Nuoro|Piras|Italy

>Spike|hCoV-19/USA/WI-UW-287/2020|2020-04-06|EPI\_ISL\_436581|Original|hCoV-19^^Wisconsin|Human|University of Wisconsin-Madison AIDS Vaccine Research Laboratories|University of Wisconsin-Madison AIDS Vaccine Research Laboratories|Baczenas|USA

>Spike|hCoV-19/USA/TX-HMH-3757/2020|2020-06-16|EPI\_ISL\_543168|Original|hCoV-19^^Texas|Human|Houston Methodist Hospital|Houston Methodist Hospital|Long|USA

>Spike|hCoV-19/Mexico/BCN-ALSR-2499/2020|2020-06-01|EPI\_ISL\_635507|Original|hCoV-19^^Baja California|Human|Centro de Diagn\u221a\u2265tico COVID-19 UABC Tijuana|Andersen lab at Scripps Research|Gangavarapu|Mexico

>Spike|hCoV-19/Scotland/EDB8971/2020|2020-10-30|EPI\_ISL\_651229|Original|hCoV-19^^Scotland|Human|Virology Department|COVID-19 Genomics UK (COG-UK) Consortium|McHugh|United Kingdom

>Spike|hCoV-19/England/204690983/2020|2020-11-13|EPI\_ISL\_766269|Original|hCoV-19^^England|Human|Respiratory Virus Unit|COVID-19 Genomics UK (COG-UK) Consortium|Platt|United Kingdom

>Spike|hCoV-19/England/ALDP-94B8DB/2020|2020-06-11|EPI\_ISL\_556462|Original|hCoV-19^^England|Human|Lighthouse Lab in Alderley Park|Wellcome Sanger Institute for the COVID-19 Genomics UK (COG-UK) consortium|Davies|United Kingdom

>Spike|hCoV-19/Wales/PHWC-48B959/2020|2020-11-05|EPI\_ISL\_666303|Original|hCoV-19^^Wales|Human|Wales Specialist Virology Centre Sequencing lab|COVID-19 Genomics UK (COG-UK) Consortium|Moore|United Kingdom

>Spike|hCoV-19/India/TG-CCMB-L1781/2020|2020-06-02|EPI\_ISL\_471633|Original|hCoV-19^^Telangana|Human|CSIR-Centre for Cellular and Molecular Biology|CSIR-Centre for Cellular and Molecular Biology|Banu|India

>Spike|hCoV-19/Scotland/QEUEH-B317E8/2020|2020-11-04|EPI\_ISL\_676417|Original|hCoV-19^^Scotland|Human|Lighthouse Lab in Glasgow|Wellcome Sanger Institute for the COVID-19 Genomics UK (COG-UK) Consortium|Davies|United Kingdom

>Spike|hCoV-19/England/ALDP-9C5AB5/2020|2020-09-11|EPI\_ISL\_567755|Original|hCoV-19^^England|Human|Lighthouse Lab in Alderley Park|Wellcome Sanger Institute for the COVID-19 Genomics UK (COG-UK) consortium|Davies|United Kingdom

>Spike|hCoV-19/England/QEUEH-9FA3E9/2020|2020-09-28|EPI\_ISL\_588269|Original|hCoV-19^^England|Human|Lighthouse Lab in Glasgow|Wellcome Sanger Institute for the COVID-19 Genomics UK (COG-UK) consortium|Davies|United Kingdom

>Spike|hCoV-19/USA/WA-S1427/2020|2020-05-20|EPI\_ISL\_495877|Original|hCoV-19^^Washington|Human|Washington State Department of Health|Seattle Flu Study|Lee|USA

>Spike|hCoV-19/England/CAMB-8422C/2020|2020-04-15|EPI\_ISL\_443454|Original|hCoV-19^^England|Human|Department of Pathology|Wellcome Sanger Institute for the COVID-19 Genomics UK (COG-UK) consortium|Amato|United Kingdom

>Spike|hCoV-19/Italy/SAR-ASSL-01/2020|2020-04-04|EPI\_ISL\_613560|Original|hCoV-19^^Sardinia|Human|Laboratorio Biologia Molecolare Sars Cov2 - UOC Laboratorio Analisi - Servizio Medicina di Laboratorio|Laboratorio specialistico UOC Ematologia - Ospedale \San Francesco\ - ATS-ASSL Nuoro Nuoro|Piras|Italy

>Spike|hCoV-19/Wales/PHWC-499387/2020|2020-12-03|EPI\_ISL\_727295|Original|hCoV-19^^Wales|Human|Originating lab|COVID-19 Genomics UK (COG-UK) Consortium|Moore|United Kingdom

>Spike|hCoV-19/USA/WI-UW-29/2020|2020-03-24|EPI\_ISL\_421287|Original|hCoV-19^^Wisconsin|Human|University of Wisconsin-Madison AIDS Vaccine Research Laboratories|University of Wisconsin-Madison AIDS Vaccine Research Laboratories|Baczenas|USA

>Spike|hCoV-19/USA/TX-DSHS-1496/2020|2020-06-22|EPI\_ISL\_683411|Original|hCoV-19^^Texas|Human|Texas Department of State Health Services|Texas Department of State Health Services|Rahman|USA

>Spike|hCoV-19/Netherlands/GE-EMC-219/2020|2020-05-27|EPI\_ISL\_523201|Original|hCoV-19^^Gelderland|Human|Dutch COVID-19 response team|Erasmus Medical Center|Oude Munnink|Netherlands

>Spike|hCoV-19/England/MILK-863DFD/2020|2020-07-17|EPI\_ISL\_557463|Original|hCoV-19^^England|Human|Lighthouse Lab in Milton Keynes|Wellcome Sanger Institute for the COVID-19 Genomics UK (COG-UK) consortium|Davies|United Kingdom

>Spike|hCoV-19/USA/LA-EVTL471/2020|2020-06-23|EPI\_ISL\_578875|Original|hCoV-19^^Louisiana|Human|LSUHS Emerging Viral Threat Laboratory|Microbial Genome Sequencing Center|Kamil|USA

>Spike|hCoV-19/England/MILK-9715A8/2020|2020-08-18|EPI\_ISL\_553177|Original|hCoV-19^^England|Human|Lighthouse Lab in Milton Keynes|Wellcome Sanger Institute for the COVID-19 Genomics UK (COG-UK) consortium|Davies|United Kingdom

>Spike|hCoV-19/Germany/BE-ChVir-D1979-4481/2020|2020-10-09|EPI\_ISL\_753818|Original|hCoV-19^^Berlin|Human|Charit\u00e9



Universit\u00e4tsmedizin Berlin|Charit\u00e9 Universit\u00e4tsmedizin  
Berlin|Muehleemann|Germany  
>Spike|hCoV-19/England/LIVE-A81BC/2020|2020-03-26|EPI\_ISL\_517126|Original|hCoV-  
19^^England|Human|Liverpool Clinical Laboratories|COVID-19 Genomics UK (COG-UK)  
Consortium|Haldenby|United Kingdom  
>Spike|hCoV-19/Denmark/DCGC-18956/2020|2020-12-07|EPI\_ISL\_748291|Original|hCoV-  
19^^Syddanmark|Human|Department of Virus and Microbiological Special  
Diagnostics|Albertsen Lab|Michaelsen|Denmark  
>Spike|hCoV-19/England/204441477/2020|2020-10-28|EPI\_ISL\_653972|Original|hCoV-  
19^^England|Human|Respiratory Virus Unit|COVID-19 Genomics UK (COG-UK)  
Consortium|Platt|United Kingdom  
>Spike|hCoV-19/Denmark/DCGC-21784/2020|2020-12-21|EPI\_ISL\_758360|Original|hCoV-  
19^^Hovedstaden|Human|Department of Virus and Microbiological Special  
Diagnostics|Albertsen Lab|Michaelsen|Denmark  
>Spike|hCoV-19/Japan/IC-0178/2020|2020-09-00|EPI\_ISL\_667607|Original|hCoV-  
19^^Japan|Human|Pathogen Genomics Center|Pathogen Genomics Center|Sekizuka|Japan  
>Spike|hCoV-19/England/SHEF-C1609/2020|2020-05-19|EPI\_ISL\_529677|Original|hCoV-  
19^^England|Human|Virology Department|COVID-19 Genomics UK (COG-UK) Consortium|de  
Silva|United Kingdom  
>Spike|hCoV-19/Spain/MD-IBV-99007095/2020|2020-04-14|EPI\_ISL\_541880|Original|hCoV-  
19^^Madrid|Human|Hospital General Universitario Gregorio Mara\u00f1a|SeqCOVID-  
SPAIN consortium/IBV (CSIC)|Comas|Spain  
>Spike|hCoV-19/England/QEUA-C4BDAC/2020|2020-12-14|EPI\_ISL\_736580|Original|hCoV-  
19^^England|Human|Lighthouse Lab in Glasgow|Wellcome Sanger Institute for the COVID-  
19 Genomics UK (COG-UK) Consortium|Davies|United Kingdom  
>Spike|hCoV-19/USA/NY-NYCPHL-000477/2020|2020-05-05|EPI\_ISL\_631944|Original|hCoV-  
19^^New York|Human|St Barnabas Hospital|New York City Public Health  
Laboratory|Wang|USA  
>Spike|hCoV-19/Denmark/DCGC-5938/2020|2020-10-05|EPI\_ISL\_620203|Original|hCoV-  
19^^Midtjylland|Human|Department of Virus and Microbiological Special  
Diagnostics|Albertsen lab|Michaelsen|Denmark  
>Spike|hCoV-19/Russia/SVE-RII-MH2841S/2020|2020-09-26|EPI\_ISL\_733028|Original|hCoV-  
19^^Sverdlovsk|Human|HELIX LLC|WHO National Influenza Centre Russian  
Federation|Komissarov|Russia  
>Spike|hCoV-19/England/CAMB-75D1E/2020|2020-03-29|EPI\_ISL\_438355|Original|hCoV-  
19^^England|Human|Department of Pathology|Wellcome Sanger Institute for the COVID-19  
Genomics UK (COG-UK) consortium|Amato|United Kingdom  
>Spike|hCoV-19/Luxembourg/LNS4369621/2020|2020-06-24|EPI\_ISL\_740456|Original|hCoV-  
19^^Luxembourg|Human|Laboratoire national de sant\u00e9|Laboratoire national de  
sant\u00e9|Wienecke-Baldacchino|Luxembourg  
>Spike|hCoV-19/Denmark/DCGC-3321/2020|2020-08-31|EPI\_ISL\_616075|Original|hCoV-  
19^^Hovedstaden|Human|Department of Virus and Microbiological Special  
Diagnostics|Albertsen lab|Michaelsen|Denmark  
>Spike|hCoV-19/Denmark/DCGC-18806/2020|2020-12-07|EPI\_ISL\_748171|Original|hCoV-  
19^^Syddanmark|Human|Department of Virus and Microbiological Special  
Diagnostics|Albertsen Lab|Michaelsen|Denmark  
>Spike|hCoV-19/England/ALDP-9CADA8/2020|2020-09-16|EPI\_ISL\_575415|Original|hCoV-  
19^^England|Human|Lighthouse Lab in Alderley Park|Wellcome Sanger Institute for the  
COVID-19 Genomics UK (COG-UK) consortium|Davies|United Kingdom  
>Spike|hCoV-19/USA/TX-HMH-4096/2020|2020-06-18|EPI\_ISL\_543366|Original|hCoV-  
19^^Texas|Human|Houston Methodist Hospital|Houston Methodist Hospital|Long|USA  
>Spike|hCoV-19/England/QEUA-9FA8CC/2020|2020-09-28|EPI\_ISL\_588134|Original|hCoV-  
19^^England|Human|Lighthouse Lab in Glasgow|Wellcome Sanger Institute for the COVID-  
19 Genomics UK (COG-UK) consortium|Davies|United Kingdom  
>Spike|hCoV-19/England/CAMB-1B477E/2020|2020-06-03|EPI\_ISL\_473482|Original|hCoV-  
19^^England|Human|Department of Pathology|COVID-19 Genomics UK (COG-UK)  
Consortium|Meredith|United Kingdom  
>Spike|hCoV-19/England/NOTT-10E39F/2020|2020-03-21|EPI\_ISL\_425535|Original|hCoV-  
19^^England|Human|Queens Medical Centre|COVID-19 Genomics UK (COG-UK)  
Consortium|Loose|United Kingdom

>Spike|hCoV-19/England/PORT-2D22D2/2020|2020-03-23|EPI\_ISL\_499308|Original|hCoV-19^^England|Human|Centre for Enzyme Innovation|COVID-19 Genomics UK (COG-UK) Consortium|Robson|United Kingdom

>Spike|hCoV-19/USA/TX-HMH-MCoV-12097/2020|2020-09-22|EPI\_ISL\_790199|Original|hCoV-19^^Texas|Human|Houston Methodist Hospital|Houston Methodist Hospital|Long|USA

>Spike|hCoV-19/USA/FL-BPHL-2130/2020|2020-04-09|EPI\_ISL\_653283|Original|hCoV-19^^Florida|Human|Florida Bureau of Public Health Laboratories|Florida Bureau of Public Health Laboratories|Blanton|USA

>Spike|hCoV-19/England/NORT-288DBC/2020|2020-03-22|EPI\_ISL\_458591|Original|hCoV-19^^England|Human|NU-OMICS DNA Sequencing research facility|Wellcome Sanger Institute for the COVID-19 Genomics UK (COG-UK) consortium|Davies|United Kingdom

>Spike|hCoV-19/Denmark/DCGC-14394/2020|2020-11-30|EPI\_ISL\_711740|Original|hCoV-19^^Sjaelland|Human|Department of Virus and Microbiological Special Diagnostics|Albertsen Lab|Michaelsen|Denmark

>Spike|hCoV-19/England/MILK-B54C95/2020|2020-11-05|EPI\_ISL\_657797|Original|hCoV-19^^England|Human|Lighthouse Lab in Milton Keynes|Wellcome Sanger Institute for the COVID-19 Genomics UK (COG-UK) Consortium|Davies|United Kingdom

>Spike|hCoV-19/Wales/PHWC-25BF5/2020|2020-03-24|EPI\_ISL\_422291|Original|hCoV-19^^Wales|Human|Wales Specialist Virology Centre|Public Health Wales Microbiology Cardiff|Moore|United Kingdom

>Spike|hCoV-19/Denmark/DCGC-13258/2020|2020-11-30|EPI\_ISL\_712315|Original|hCoV-19^^Hovedstaden|Human|Department of Virus and Microbiological Special Diagnostics|Albertsen Lab|Michaelsen|Denmark

>Spike|hCoV-19/USA/CA-IGI-0809/2020|2020-06-30|EPI\_ISL\_756344|Original|hCoV-19^^California|Human|Innovative Genomics Institute|Innovative Genomics Institute|Wyman|USA

>Spike|hCoV-19/England/201620535/2020|2020-03-26|EPI\_ISL\_466425|Original|hCoV-19^^England|Human|Respiratory Virus Unit|Respiratory Virus Unit|Platt|United Kingdom

>Spike|hCoV-19/England/MILK-9A557E/2020|2020-09-03|EPI\_ISL\_549959|Original|hCoV-19^^England|Human|Lighthouse Lab in Milton Keynes|Wellcome Sanger Institute for the COVID-19 Genomics UK (COG-UK) consortium|Davies|United Kingdom

>Spike|hCoV-19/USA/WI-UW-918/2020|2020-07-10|EPI\_ISL\_509919|Original|hCoV-19^^Wisconsin|Human|University of Wisconsin-Madison AIDS Vaccine Research Laboratories|University of Wisconsin-Madison AIDS Vaccine Research Laboratories|Baczenas|USA

>Spike|hCoV-19/England/NORT-291C95/2020|2020-05-11|EPI\_ISL\_489119|Original|hCoV-19^^England|Human|NU-OMICS DNA Sequencing research facility|Wellcome Sanger Institute for the COVID-19 Genomics UK (COG-UK) consortium|Davies|United Kingdom

>Spike|hCoV-19/Germany/BW-MVZ-LS-04/2020|2020-04-14|EPI\_ISL\_640222|Original|hCoV-19^^Baden-W\u00fcrtemberg|Human|MVZ Labor\u00e4rzte Singen|MVZ Labor\u00e4rzte Singen|Schmidt|Germany

>Spike|hCoV-19/Japan/PG-6393/2020|2020-08-00|EPI\_ISL\_689499|Original|hCoV-19^^Japan|Human|Pathogen Genomics Center|Pathogen Genomics Center|Sekizuka|Japan

>Spike|hCoV-19/Luxembourg/LNS4090457/2020|2020-11-29|EPI\_ISL\_770929|Original|hCoV-19^^Luxembourg|Human|Laboratoire national de sant\u00e9|Laboratoire national de sant\u00e9|Wienecke-Baldacchino|Luxembourg

>Spike|hCoV-19/England/ALDP-9081DF/2020|2020-06-22|EPI\_ISL\_551465|Original|hCoV-19^^England|Human|Lighthouse Lab in Alderley Park|Wellcome Sanger Institute for the COVID-19 Genomics UK (COG-UK) consortium|Davies|United Kingdom

>Spike|hCoV-19/Australia/NSW2249/2020|2020-03-23|EPI\_ISL\_500688|Original|hCoV-19^^New South Wales|Human|Area of Virology|Area of Virology|Bull|Australia

>Spike|hCoV-19/USA/CA-CZB-13422/2020|2020-09-03|EPI\_ISL\_672045|Original|hCoV-19^^California|Human|Alameda County Public Health Lab|Chan-Zuckerberg Biohub|Bhatt|USA

>Spike|hCoV-19/England/MILK-A7A623/2020|2020-10-15|EPI\_ISL\_606627|Original|hCoV-19^^England|Human|Lighthouse Lab in Milton Keynes|Wellcome Sanger Institute for the COVID-19 Genomics UK (COG-UK) consortium|Davies|United Kingdom

>Spike|hCoV-19/England/BRIS-131023/2020|2020-03-21|EPI\_ISL\_501569|Original|hCoV-19^^England|Human|PHE South West Regional Laboratory|Wellcome Sanger Institute for the COVID-19 Genomics UK (COG-UK) consortium|Davies|United Kingdom

>Spike|hCoV-19/USA/UT-UPHL-2009207/2020|2020-05-11|EPI\_ISL\_525207|Original|hCoV-19^^Utah|Human|Utah Public Health Laboratory|Utah Public Health Laboratory|Young|USA

>Spike|hCoV-19/Denmark/ALAB-SSI-824/2020|2020-03-28|EPI\_ISL\_437675|Original|hCoV-19^^Denmark|Human|Department of Virus and Microbiological Special Diagnostics|Albertsen lab|Kirkegaard|Denmark

>Spike|hCoV-19/Rwanda/U66912-RD/2020|2020-07-00|EPI\_ISL\_615063|Original|hCoV-19^^Rwanda|Human|Rwanda National Reference Laboratory|Rwanda National Reference Laboratory|Mukantwari|Rwanda

>Spike|hCoV-19/England/NORW-E85C3/2020|2020-04-18|EPI\_ISL\_449164|Original|hCoV-19^^England|Human|Quadram Institute Bioscience|COVID-19 Genomics UK (COG-UK) Consortium|Alikhan|United Kingdom

>Spike|hCoV-19/USA/UN-UW-12776/2020|2020-06-29|EPI\_ISL\_576403|Original|hCoV-19^^USA|Human|UW Virology Lab|UW Virology Lab|Roychoudhury|USA

>Spike|hCoV-19/India/GJ-GBRC311b/2020|2020-06-20|EPI\_ISL\_495066|Original|hCoV-19^^Gujarat|Human|GAIMS & G K General Hospital|Gujarat Biotechnology Research Centre|Joshi|India

>Spike|hCoV-19/England/204580253/2020|2020-11-05|EPI\_ISL\_686547|Original|hCoV-19^^England|Human|Respiratory Virus Unit|COVID-19 Genomics UK (COG-UK) Consortium|Platt|United Kingdom

>Spike|hCoV-19/England/QEUEH-9F334A/2020|2020-09-24|EPI\_ISL\_588577|Original|hCoV-19^^England|Human|Lighthouse Lab in Glasgow|Wellcome Sanger Institute for the COVID-19 Genomics UK (COG-UK) consortium|Davies|United Kingdom

>Spike|hCoV-19/England/ALDP-C57DDA/2020|2020-12-13|EPI\_ISL\_735979|Original|hCoV-19^^England|Human|Lighthouse Lab in Alderley Park|Wellcome Sanger Institute for the COVID-19 Genomics UK (COG-UK) Consortium|Davies|United Kingdom

>Spike|hCoV-19/Scotland/EDB300/2020|2020-03-29|EPI\_ISL\_425967|Original|hCoV-19^^Scotland|Human|Virology Department|COVID-19 Genomics UK (COG-UK) Consortium|Williams|United Kingdom

>Spike|hCoV-19/Wales/PHWC-489BEC/2020|2020-10-24|EPI\_ISL\_652467|Original|hCoV-19^^Wales|Human|Wales Specialist Virology Centre Sequencing lab|COVID-19 Genomics UK (COG-UK) Consortium|Moore|United Kingdom

>Spike|hCoV-19/Canada/ON-OICR-SLB2860/2020|2020-04-07|EPI\_ISL\_538379|Original|hCoV-19^^Ontario|Human|Kingston Health Sciences Centre / Queen's University|Ontario Institute for Cancer Research|de Borja|Canada

>Spike|hCoV-19/USA/CA-ALSR-3048/2020|2020-07-31|EPI\_ISL\_635813|Original|hCoV-19^^California|Human|San Diego County Public Health Laboratory|Andersen lab at Scripps Research|Gangavarapu|USA

>Spike|hCoV-19/England/QEUEH-9F87EF/2020|2020-09-27|EPI\_ISL\_588998|Original|hCoV-19^^England|Human|Lighthouse Lab in Glasgow|Wellcome Sanger Institute for the COVID-19 Genomics UK (COG-UK) consortium|Davies|United Kingdom

>Spike|hCoV-19/USA/FL-BPHL-1847/2020|2020-04-09|EPI\_ISL\_613927|Original|hCoV-19^^Florida|Human|Florida Bureau of Public Health Laboratories|Florida Bureau of Public Health Laboratories|Blanton|USA

>Spike|hCoV-19/England/SHEF-D2B33/2020|2020-09-11|EPI\_ISL\_559946|Original|hCoV-19^^England|Human|Virology Department|COVID-19 Genomics UK (COG-UK) Consortium|de Silva|United Kingdom

>Spike|hCoV-19/Scotland/EDB733/2020|2020-04-02|EPI\_ISL\_433232|Original|hCoV-19^^Scotland|Human|Virology Department|COVID-19 Genomics UK (COG-UK) Consortium|Williams|United Kingdom

>Spike|hCoV-19/USA/LA-EVTL456/2020|2020-06-22|EPI\_ISL\_578860|Original|hCoV-19^^Louisiana|Human|LSUHS Emerging Viral Threat Laboratory|Microbial Genome Sequencing Center|Kamil|USA

>Spike|hCoV-19/Portugal/PT1862/2020|2020-11-09|EPI\_ISL\_732081|Original|hCoV-19^^Portugal|Human|Instituto Nacional de Saude (INSA)|Instituto Nacional de Saude (INSA)|Borges|Portugal

>Spike|hCoV-19/Scotland/QEUEH-960F44/2020|2020-08-05|EPI\_ISL\_532004|Original|hCoV-19^^Scotland|Human|NHSGGC West of Scotland Specialist Virology Centre / MRC-University of Glasgow Centre for Virus Research|Wellcome Sanger Institute for the COVID-19 Genomics UK (COG-UK) consortium|Davies|United Kingdom

>Spike|hCoV-19/Russia/MOS-CRIE-13378928/2020|2020-11-06|EPI\_ISL\_732664|Original|hCoV-19^^Moscow|Human|Molecular diagnostic laboratory of Federal Budget Institution of Science \Central Research Institute of Epidemiology\ of The Federal Service on Customers' Rights Protection and Human Well-being Surveillance|Group of Genomics and Postgenomic Technologies of Central Research Institute of Epidemiolog  
>y|Korneenko|Russia  
>Spike|hCoV-19/England/CAMC-B37384/2020|2020-11-05|EPI\_ISL\_645361|Original|hCoV-19^^England|Human|Lighthouse Lab in Cambridge|Wellcome Sanger Institute for the COVID-19 Genomics UK (COG-UK) Consortium|Davies|United Kingdom  
>Spike|hCoV-19/England/20144023404/2020|2020-03-27|EPI\_ISL\_423526|Original|hCoV-19^^England|Human|Respiratory Virus Unit|Respiratory Virus Unit|Platt|United Kingdom  
>Spike|hCoV-19/Sweden/20-07616/2020|2020-04-20|EPI\_ISL\_434676|Original|hCoV-19^^Stockholm|Human|Surbrunns VC|The Public Health Agency of Sweden|Svartstr\u00f6m|Sweden  
>Spike|hCoV-19/Netherlands/GE-EMC-166/2020|2020-05-22|EPI\_ISL\_523149|Original|hCoV-19^^Gelderland|Human|Dutch COVID-19 response team|Erasmus Medical Center|Oude Munnink|Netherlands  
>Spike|hCoV-19/France/ARA-SC139/2020|2020-04-27|EPI\_ISL\_700403|Original|hCoV-19^^Auvergne-Rh\u00f4ne-Alpes|Human|Centre hospitalier M\u00e9tropole Savoie|CNR Virus des Infections Respiratoires - France SUD|Bal|France  
>Spike|hCoV-19/Luxembourg/LNS4281216/2020|2020-10-26|EPI\_ISL\_740443|Original|hCoV-19^^Luxembourg|Human|Laboratoire national de sant\u00e9|Laboratoire national de sant\u00e9|Wienecke-Baldacchino|Luxembourg  
>Spike|hCoV-19/Denmark/DCGC-2281/2020|2020-08-10|EPI\_ISL\_617639|Original|hCoV-19^^NA|Human|Department of Virus and Microbiological Special Diagnostics|Albertsen lab|Michaelsen|Denmark  
>Spike|hCoV-19/England/ALDP-9E72E2/2020|2020-09-24|EPI\_ISL\_580406|Original|hCoV-19^^England|Human|Lighthouse Lab in Alderley Park|Wellcome Sanger Institute for the COVID-19 Genomics UK (COG-UK) consortium|Davies|United Kingdom  
>Spike|hCoV-19/England/NORT-292924/2020|2020-05-31|EPI\_ISL\_472273|Original|hCoV-19^^England|Human|Northumbria University / South Tees Hospitals NHS Foundation Trust / North Cumbria Integrated Care NHS Foundation Trust / North Tees and Hartlepool NHS Foundation Trust / Newcastle Hospitals NHS Foundation Trust|COVID-19 Genomics UK (COG-UK) Consortium|Bashton|United Kingdom  
>Spike|hCoV-19/Canada/ON-UHTC-0289/2020|2020-07-28|EPI\_ISL\_569990|Original|hCoV-19^^Ontario|Human|Unity Health Toronto|Ontario Institute for Cancer Research|de Borja|Canada  
>Spike|hCoV-19/Greece/234\_31670/2020|2020-03-05|EPI\_ISL\_437894|Original|hCoV-19^^Athens|Human|Laboratory of Microbiology|Laboratory of Biology|Karakasiliotis|Greece  
>Spike|hCoV-19/Denmark/DCGC-18147/2020|2020-12-14|EPI\_ISL\_749780|Original|hCoV-19^^Sjælland|Human|Department of Virus and Microbiological Special Diagnostics|Albertsen Lab|Michaelsen|Denmark  
>Spike|hCoV-19/England/LIVE-A43AB/2020|2020-06-17|EPI\_ISL\_490420|Original|hCoV-19^^England|Human|Liverpool Clinical Laboratories|COVID-19 Genomics UK (COG-UK) Consortium|Haldenby|United Kingdom  
>Spike|hCoV-19/USA/TX-DSHS-0360/2020|2020-06-13|EPI\_ISL\_538297|Original|hCoV-19^^Texas|Human|Texas Department of State Health Services|Texas Department of State Health Services|Rahman|USA  
>Spike|hCoV-19/USA/VA-DCLS-1556/2020|2020-08-08|EPI\_ISL\_610120|Original|hCoV-19^^Virginia|Human|Virginia DCLS|Virginia DCLS|St. Jacques|USA  
>Spike|hCoV-19/USA/WA-UW-24459/2020|2020-08-14|EPI\_ISL\_776688|Original|hCoV-19^^Washington|Human|UW Virology Lab|UW Virology Lab|Roychoudhury|USA  
>Spike|hCoV-19/USA/FL-BPHL-1418/2020|2020-08-13|EPI\_ISL\_549200|Original|hCoV-19^^Florida|Human|Florida Bureau of Public Health Laboratories|Florida Bureau of Public Health Laboratories|Blanton|USA  
>Spike|hCoV-19/Wales/PHWC-499F0B/2020|2020-11-24|EPI\_ISL\_727465|Original|hCoV-19^^Wales|Human|Originating lab|COVID-19 Genomics UK (COG-UK) Consortium|Moore|United Kingdom

>Spike|hCoV-19/USA/WA-S2300/2020|2020-06-12|EPI\_ISL\_496932|Original|hCoV-19^^Washington|Human|Washington State Department of Health|Seattle Flu Study|Lee|USA

>Spike|hCoV-19/England/ALDP-A68FF0/2020|2020-10-12|EPI\_ISL\_608919|Original|hCoV-19^^England|Human|Lighthouse Lab in Alderley Park|Wellcome Sanger Institute for the COVID-19 Genomics UK (COG-UK) consortium|Davies|United Kingdom

>Spike|hCoV-19/England/QEUA-B2C08B/2020|2020-11-04|EPI\_ISL\_680051|Original|hCoV-19^^England|Human|Department of Pathology|COVID-19 Genomics UK (COG-UK) Consortium|Goodfellow|United Kingdom

>Spike|hCoV-19/USA/UT-UPHL-03109/2020|2020-05-04|EPI\_ISL\_575258|Original|hCoV-19^^Utah|Human|Utah Public Health Laboratory|Utah Public Health Laboratory|Young|USA

>Spike|hCoV-19/England/ALDP-AA22A6/2020|2020-10-22|EPI\_ISL\_625206|Original|hCoV-19^^England|Human|Lighthouse Lab in Alderley Park|Wellcome Sanger Institute for the COVID-19 Genomics UK (COG-UK) consortium|Davies|United Kingdom

>Spike|hCoV-19/Japan/PG-5133/2020|2020-08-00|EPI\_ISL\_690240|Original|hCoV-19^^Japan|Human|Gunma Prefectural Institute of Public Health and Environmental Sciences|Pathogen Genomics Center|Sekizuka|Japan

>Spike|hCoV-19/Scotland/EDB8778/2020|2020-10-26|EPI\_ISL\_650280|Original|hCoV-19^^Scotland|Human|Virology Department|COVID-19 Genomics UK (COG-UK) Consortium|McHugh|United Kingdom

>Spike|hCoV-19/USA/MI-UM-10036861068/2020|2020-11-09|EPI\_ISL\_728506|Original|hCoV-19^^Michigan|Human|University of Michigan Clinical Microbiology Laboratory|Lauring Lab|Valesano|USA

>Spike|hCoV-19/England/ALDP-6CE985/2020|2020-07-02|EPI\_ISL\_556292|Original|hCoV-19^^England|Human|Lighthouse Lab in Alderley Park|Wellcome Sanger Institute for the COVID-19 Genomics UK (COG-UK) consortium|Davies|United Kingdom

>Spike|hCoV-19/Denmark/DCGC-8603/2020|2020-10-26|EPI\_ISL\_625703|Original|hCoV-19^^Syddanmark|Human|Department of Virus and Microbiological Special Diagnostics|Albertsen lab|Michaelsen|Denmark

>Spike|hCoV-19/England/ALDP-B84133/2020|2020-11-14|EPI\_ISL\_675388|Original|hCoV-19^^England|Human|Lighthouse Lab in Alderley Park|Wellcome Sanger Institute for the COVID-19 Genomics UK (COG-UK) Consortium|Davies|United Kingdom

>Spike|hCoV-19/Canada/BC-BCCDC-7559/2020|2020-11-00|EPI\_ISL\_740721|Original|hCoV-19^^British Columbia|Human|BCCDC Public Health Laboratory|BCCDC Public Health Laboratory|Prystajecky|Canada

>Spike|hCoV-19/Australia/VIC2474/2020|2020-06-27|EPI\_ISL\_522177|Original|hCoV-19^^Victoria|Human|Victorian Infectious Diseases Reference Laboratory (VIDRL)|VIDRL and MDU-PHL|Schultz|Australia

>Spike|hCoV-19/USA/OR-OHSU-2895/2020|2020-09-04|EPI\_ISL\_667395|Original|hCoV-19^^Oregon|Human|OHSU Lab Services Molecular Microbiology Lab|Oregon SARS-CoV-2 Genome Sequencing Center|O'Roak|USA

>Spike|hCoV-19/Italy/ABR-IZSGC-TE4953/2020|2020-03-14|EPI\_ISL\_418258|Original|hCoV-19^^Abruzzo|Human|Presidio ospedaliero \Santo Spirito\|Istituto Zooprofilattico Sperimentale dell'Abruzzo e Molise \G. Caporale\|Lorusso|Italy

>Spike|hCoV-19/Belgium/Rega-0330248/2020|2020-03-30|EPI\_ISL\_458218|Original|hCoV-19^^Bury|Human|KU Leuven|KU Leuven|Maes|Belgium

>Spike|hCoV-19/Luxembourg/LNS0511956/2020|2020-10-30|EPI\_ISL\_739794|Original|hCoV-19^^Luxembourg|Human|Laboratoire national de sant\u00e9|Laboratoire national de sant\u00e9|Wienecke-Baldacchino|Luxembourg

>Spike|hCoV-19/England/ALDP-C48686/2020|2020-12-13|EPI\_ISL\_736517|Original|hCoV-19^^England|Human|Lighthouse Lab in Alderley Park|Wellcome Sanger Institute for the COVID-19 Genomics UK (COG-UK) Consortium|Davies|United Kingdom

>Spike|hCoV-19/Shanghai/SH0088/2020|2020-02-01|EPI\_ISL\_416387|Original|hCoV-19^^Shanghai|Human|Shanghai Public Health Clinical Center|National Research Center for Translational Medicine (Shanghai)|Zhang|China

>Spike|hCoV-19/USA/NY-QDX-2701/2020|2020-03-15|EPI\_ISL\_605043|Original|hCoV-19^^New York|Human|Quest Diagnostics|Quest Diagnostics|Kagan|USA

>Spike|hCoV-19/Germany/SH-ChVir9991/2020|2020-11-04|EPI\_ISL\_729665|Original|hCoV-19^^Schleswig-Holstein|Human|A. Krumbholz|Charit\u00e9 Universit\u00e4tsmedizin Berlin|Muehlemann|Germany

>Spike|hCoV-19/England/ALDP-BB4F21/2020|2020-11-20|EPI\_ISL\_702388|Original|hCoV-19^^England|Human|Lighthouse Lab in Alderley Park|Wellcome Sanger Institute for the COVID-19 Genomics UK (COG-UK) Consortium|Davies|United Kingdom

>Spike|hCoV-19/USA/CA-CZB-14110/2020|2020-05-27|EPI\_ISL\_739171|Original|hCoV-19^^California|Human|Alameda County Public Health Lab|Chan-Zuckerberg Biohub|Kamm|USA

>Spike|hCoV-19/England/NORT-1B6C013/2020|2020-09-30|EPI\_ISL\_611746|Original|hCoV-19^^England|Human|Northumbria University / South Tees Hospitals NHS Foundation Trust / North Cumbria Integrated Care NHS Foundation Trust / North Tees and Hartlepool NHS Foundation Trust / Newcastle Hospitals NHS Foundation Trust|COVID-19 Genomics UK (COG-UK) Consortium|Bashton|United Kingdom

>Spike|hCoV-19/USA/TX-HMH-MCoV-18062/2020|2020-11-17|EPI\_ISL\_784410|Original|hCoV-19^^Texas|Human|Houston Methodist Hospital|Houston Methodist Hospital|Long|USA

>Spike|hCoV-19/India/MH-MW18/2020|2020-05-08|EPI\_ISL\_508426|Original|hCoV-19^^Maharashtra|Human|Mahatma Gandhi Institute of Medical Sciences|National Institute of Biomedical Genomics|Maitra|India

>Spike|hCoV-19/Wales/PHWC-494A0F/2020|2020-11-22|EPI\_ISL\_726203|Original|hCoV-19^^Wales|Human|Originating lab|COVID-19 Genomics UK (COG-UK) Consortium|Moore|United Kingdom

>Spike|hCoV-19/Switzerland/VD-ETHZ-100835/2020|2020-03-25|EPI\_ISL\_451783|Original|hCoV-19^^Vaud|Human|Viollier AG|Department of Biosystems Science and Engineering|Nadeau|Switzerland

>Spike|hCoV-19/USA/MI-MDHHS-SC21681/2020|2020-06-29|EPI\_ISL\_516408|Original|hCoV-19^^Michigan|Human|Michigan Department of Health and Human Services|Michigan Department of Health and Human Services|Blankenship|USA

>Spike|hCoV-19/England/LOND-D3D87/2020|2020-04-04|EPI\_ISL\_449650|Original|hCoV-19^^England|Human|University College London|COVID-19 Genomics UK (COG-UK) Consortium|Roy|United Kingdom

>Spike|hCoV-19/Australia/VIC3348/2020|2020-07-08|EPI\_ISL\_521027|Original|hCoV-19^^Victoria|Human|Microbiological Diagnostic Unit - Public Health Laboratory (MDU-PHL)|MDU-PHL|Schultz|Australia

>Spike|hCoV-19/USA/MA-MASPHL-00626/2020|2020-05-12|EPI\_ISL\_692999|Original|hCoV-19^^Massachusetts|Human|Massachusetts State Public Health Laboratory|Massachusetts State Public Health Laboratory|Lang|USA

>Spike|hCoV-19/England/ALDP-A2EE26/2020|2020-10-05|EPI\_ISL\_586996|Original|hCoV-19^^England|Human|Lighthouse Lab in Alderley Park|Wellcome Sanger Institute for the COVID-19 Genomics UK (COG-UK) consortium|Davies|United Kingdom

>Spike|hCoV-19/Japan/PG-1320/2020|2020-04-00|EPI\_ISL\_684928|Original|hCoV-19^^Japan|Human|Saitama Prefectural Institute of Public Health|Pathogen Genomics Center|Sekizuka|Japan

>Spike|hCoV-19/Wales/PHWC-3603E/2020|2020-04-28|EPI\_ISL\_474609|Original|hCoV-19^^Wales|Human|Originating lab|COVID-19 Genomics UK (COG-UK) Consortium|Moore|United Kingdom

>Spike|hCoV-19/England/CAMB-1BD511/2020|2020-12-01|EPI\_ISL\_764312|Original|hCoV-19^^England|Human|Department of Pathology|COVID-19 Genomics UK (COG-UK) Consortium|Goodfellow|United Kingdom

>Spike|hCoV-19/England/CAMB-78A14/2020|2020-00-00|EPI\_ISL\_433807|Original|hCoV-19^^England|Human|Department of Pathology|COVID-19 Genomics UK (COG-UK) Consortium|Meredith|United Kingdom

>Spike|hCoV-19/USA/CA-CZB-1213/2020|2020-03-23|EPI\_ISL\_450462|Original|hCoV-19^^California|Human|Stanford clinical virology lab|Chan-Zuckerberg Biohub|Hao|USA

>Spike|hCoV-19/Spain/CT-IBV-99009872/2020|2020-07-31|EPI\_ISL\_660269|Original|hCoV-19^^Catalunya|Human|Servicio de Microbiolog\u00eda|SeqCOVID-SPAIN consortium|IBV (CSIC)|Comas|Spain

>Spike|hCoV-19/India/GJ-GBRC216a/2020|2020-06-08|EPI\_ISL\_475050|Original|hCoV-19^^Gujarat|Human|GMERS Medical College & Hospital|Gujarat Biotechnology Research Centre|Joshi|India

>Spike|hCoV-19/England/20122018304/2020|2020-03-16|EPI\_ISL\_465744|Original|hCoV-19^^England|Human|Respiratory Virus Unit|Respiratory Virus Unit|Platt|United Kingdom

>Spike|hCoV-19/USA/TX-HMH-MCoV-8179/2020|2020-06-30|EPI\_ISL\_784248|Original|hCoV-19^^Texas|Human|Houston Methodist Hospital|Houston Methodist Hospital|Long|USA

>Spike|hCoV-19/Denmark/DCGC-8437/2020|2020-10-26|EPI\_ISL\_617909|Original|hCoV-19^^Syddanmark|Human|Department of Virus and Microbiological Special Diagnostics|Albertsen lab|Michaelsen|Denmark

>Spike|hCoV-19/USA/NY-NYUMC545/2020|2020-03-31|EPI\_ISL\_444662|Original|hCoV-19^^New York|Human|NYU Langone Health|Departments of Pathology and Medicine|Maurano|USA

>Spike|hCoV-19/Wales/PHWC-164DE4/2020|2020-05-22|EPI\_ISL\_479383|Original|hCoV-19^^Wales|Human|Wales Specialist Virology Centre Sequencing lab|COVID-19 Genomics UK (COG-UK) Consortium|Moore|United Kingdom

>Spike|hCoV-19/England/CAMC-A57158/2020|2020-10-09|EPI\_ISL\_597489|Original|hCoV-19^^England|Human|Lighthouse Lab in Cambridge|Wellcome Sanger Institute for the COVID-19 Genomics UK (COG-UK) consortium|Davies|United Kingdom

>Spike|hCoV-19/England/NORT-293D54/2020|2020-07-18|EPI\_ISL\_573327|Original|hCoV-19^^England|Human|Northumbria University / South Tees Hospitals NHS Foundation Trust / North Cumbria Integrated Care NHS Foundation Trust / North Tees and Hartlepool NHS Foundation Trust / Newcastle Hospitals NHS Foundation Trust|COVID-19 Genomics UK (COG-UK) Consortium|Bashton|United Kingdom

>Spike|hCoV-19/Ireland/TA-NVRL-78IRL62510/2020|2020-11-22|EPI\_ISL\_752532|Original|hCoV-19^^Tipperary|Human|National Virus Reference Laboratory|National Virus Reference Laboratory|Gonzalez|Ireland

>Spike|hCoV-19/England/ALDP-9CD65F/2020|2020-09-15|EPI\_ISL\_566328|Original|hCoV-19^^England|Human|Lighthouse Lab in Alderley Park|Wellcome Sanger Institute for the COVID-19 Genomics UK (COG-UK) consortium|Davies|United Kingdom

>Spike|hCoV-19/South Africa/KRISP-K002807/2020|2020-08-25|EPI\_ISL\_529801|Original|hCoV-19^^KwaZulu-Natal|Human|NHLs-IALCH|KRISP|de Oliveira|South Africa

>Spike|hCoV-19/England/NOTT-1116DC/2020|2020-05-22|EPI\_ISL\_461909|Original|hCoV-19^^England|Human|Queens Medical Centre|COVID-19 Genomics UK (COG-UK) Consortium|Loose|United Kingdom

>Spike|hCoV-19/USA/UT-08521/2020|2020-05-17|EPI\_ISL\_524284|Original|hCoV-19^^Utah|Human|Utah Public Health Laboratory|Utah Public Health Laboratory|Young|USA

>Spike|hCoV-19/DRC/11676/2020|2020-05-26|EPI\_ISL\_527531|Original|hCoV-19^^Kinshasa|Human|Viral Respiratory Lab|Pathogen Sequencing Lab|Lokilo|Democratic Republic of the Congo

>Spike|hCoV-19/USA/TX-DSHS-0813/2020|2020-06-03|EPI\_ISL\_590874|Original|hCoV-19^^Texas|Human|Texas Department of State Health Services|Texas Department of State Health Services|Rahman|USA

>Spike|hCoV-19/Scotland/QEUA-A4CEC8/2020|2020-10-05|EPI\_ISL\_596063|Original|hCoV-19^^Scotland|Human|Quadram Institute Bioscience|COVID-19 Genomics UK (COG-UK) Consortium|Alikhan|United Kingdom

>Spike|hCoV-19/Denmark/DCGC-18747/2020|2020-12-07|EPI\_ISL\_749354|Original|hCoV-19^^Midtjylland|Human|Department of Virus and Microbiological Special Diagnostics|Albertsen Lab|Michaelsen|Denmark

>Spike|hCoV-19/Netherlands/NA\_181/2020|2020-03-22|EPI\_ISL\_422716|Original|hCoV-19^^Netherlands|Human|Dutch COVID-19 response team|Erasmus Medical Center|Oude Munnink|Netherlands

>Spike|hCoV-19/USA/CA-CZB-4068/2020|2020-08-05|EPI\_ISL\_548668|Original|hCoV-19^^California|Human|Orange County Public Health Laboratory|Chan-Zuckerberg Biohub|Bhatt|USA

>Spike|hCoV-19/Ukraine/203100338/2020|2020-07-10|EPI\_ISL\_512617|Original|hCoV-19^^Ukraine|Human|National Laboratory for Influenza/Virology reference laboratory|Respiratory Virus Unit|Platt|Ukraine

>Spike|hCoV-19/England/QEUA-A9FEA8/2020|2020-10-20|EPI\_ISL\_665397|Original|hCoV-19^^England|Human|Northumbria University / South Tees Hospitals NHS Foundation Trust / North Cumbria Integrated Care NHS Foundation Trust / North Tees and Hartlepool NHS Foundation Trust / Newcastle Hospitals NHS Foundation Trust|COVID-19 Genomics UK (COG-UK) Consortium|Bashton|United Kingdom

>Spike|hCoV-19/USA/MA-MASPHL-01035/2020|2020-11-17|EPI\_ISL\_692778|Original|hCoV-19^^Massachusetts|Human|Massachusetts State Public Health Laboratory|Massachusetts State Public Health Laboratory|Lang|USA

>Spike|hCoV-19/England/ALDP-5AF9B8/2020|2020-06-19|EPI\_ISL\_558799|Original|hCoV-19^^England|Human|Lighthouse Lab in Alderley Park|Wellcome Sanger Institute for the COVID-19 Genomics UK (COG-UK) consortium|Davies|United Kingdom

>Spike|hCoV-19/Gambia/NPHL-2529/2020|2020-07-21|EPI\_ISL\_561269|Original|hCoV-19^^Kombo|Human|MRCG at LSHTM Genomics lab|MRCG at LSHTM Genomics lab|Sesay|Gambia

>Spike|hCoV-19/England/BRIS-12175E/2020|2020-03-02|EPI\_ISL\_440225|Original|hCoV-19^^England|Human|PHE South West Regional Laboratory|Wellcome Sanger Institute for the COVID-19 Genomics UK (COG-UK) consortium|Amato|United Kingdom

>Spike|hCoV-19/Wales/PHWC-48C378/2020|2020-11-07|EPI\_ISL\_666422|Original|hCoV-19^^Wales|Human|Wales Specialist Virology Centre Sequencing lab|COVID-19 Genomics UK (COG-UK) Consortium|Moore|United Kingdom

>Spike|hCoV-19/England/QEUEH-B822D8/2020|2020-11-14|EPI\_ISL\_661683|Original|hCoV-19^^England|Human|Lighthouse Lab in Glasgow|Wellcome Sanger Institute for the COVID-19 Genomics UK (COG-UK) Consortium|Davies|United Kingdom

>Spike|hCoV-19/mink/Netherlands/NB-EMC-31-6/2020|2020-08-15|EPI\_ISL\_577760|Original|hCoV-19^^Noord Brabant|Neovison vison|Dutch COVID-19 response team|Erasmus Medical Center|Oude Munnink|Netherlands

>Spike|hCoV-19/England/205260436/2020|2020-00-00|EPI\_ISL\_766548|Original|hCoV-19^^England|Human|Respiratory Virus Unit|COVID-19 Genomics UK (COG-UK) Consortium|Platt|United Kingdom

>Spike|hCoV-19/Australia/VIC205/2020|2020-03-19|EPI\_ISL\_419900|Original|hCoV-19^^Victoria|Human|Victorian Infectious Diseases Reference Laboratory (VIDRL)|Victorian Infectious Diseases Reference Laboratory and Microbiological Diagnostic Unit Public Health Laboratory|Schultz|Australia

>Spike|hCoV-19/England/MILK-9A862D/2020|2020-09-02|EPI\_ISL\_550203|Original|hCoV-19^^England|Human|Lighthouse Lab in Milton Keynes|Wellcome Sanger Institute for the COVID-19 Genomics UK (COG-UK) consortium|Davies|United Kingdom

>Spike|hCoV-19/USA/UT-02548/2020|2020-04-23|EPI\_ISL\_493119|Original|hCoV-19^^Utah|Human|Utah Public Health Laboratory|Utah Public Health Laboratory|Butz|USA

>Spike|hCoV-19/USA/TX-HMH-5996/2020|2020-06-27|EPI\_ISL\_547153|Original|hCoV-19^^Texas|Human|Houston Methodist Hospital|Houston Methodist Hospital|Long|USA

>Spike|hCoV-19/England/MILK-9C22DE/2020|2020-09-11|EPI\_ISL\_566570|Original|hCoV-19^^England|Human|Lighthouse Lab in Milton Keynes|Wellcome Sanger Institute for the COVID-19 Genomics UK (COG-UK) consortium|Davies|United Kingdom

>Spike|hCoV-19/Denmark/DCGC-19528/2020|2020-12-07|EPI\_ISL\_749009|Original|hCoV-19^^Midtjylland|Human|Department of Virus and Microbiological Special Diagnostics|Albertsen Lab|Michaelsen|Denmark

>Spike|hCoV-19/USA/CT-Yale-465/2020|2020-09-12|EPI\_ISL\_729736|Original|hCoV-19^^Connecticut|Human|Connecticut Department of Health|Grubaugh Lab - Yale School of Public Health|Grubaugh|USA

>Spike|hCoV-19/Portugal/PT0117/2020|2020-03-25|EPI\_ISL\_453833|Original|hCoV-19^^Portugal|Human|unknown|Instituto Nacional de Saude (INSA)|Borges|Portugal

>Spike|hCoV-19/Denmark/DCGC-9995/2020|2020-11-09|EPI\_ISL\_669319|Original|hCoV-19^^Midtjylland|Human|Department of Virus and Microbiological Special Diagnostics|Albertsen Lab|Michaelsen|Denmark

>Spike|hCoV-19/South Korea/KCDC2354/2020|2020-05-28|EPI\_ISL\_514757|Original|hCoV-19^^South Korea|Human|Division of Viral Diseases|Division of Viral Diseases|Kim|South Korea

>Spike|hCoV-19/Australia/NSW265/2020|2020-03-28|EPI\_ISL\_451530|Original|hCoV-19^^New South Wales|Human|Pathology Sydney South West - NSW Health Pathology|NSW Health Pathology - Institute of Clinical Pathology and Medical Research; Westmead Hospital; University of Sydney|Gall|Australia

>Spike|hCoV-19/England/QEUEH-963521/2020|2020-08-10|EPI\_ISL\_531580|Original|hCoV-19^^England|Human|Lighthouse Lab in Glasgow|Wellcome Sanger Institute for the COVID-19 Genomics UK (COG-UK) consortium|Davies|United Kingdom

>Spike|hCoV-19/England/ALDP-B1B8C3/2020|2020-11-01|EPI\_ISL\_646000|Original|hCoV-19^^England|Human|Lighthouse Lab in Alderley Park|Wellcome Sanger Institute for the COVID-19 Genomics UK (COG-UK) Consortium|Davies|United Kingdom



>Spike|hCoV-19/England/QEUA-AE2A93/2020|2020-10-27|EPI\_ISL\_633583|Original|hCoV-19^^England|Human|Lighthouse Lab in Glasgow|Wellcome Sanger Institute for the COVID-19 Genomics UK (COG-UK) consortium|Davies|United Kingdom

>Spike|hCoV-19/USA/CA-ALSR-4126/2020|2020-07-06|EPI\_ISL\_648835|Original|hCoV-19^^California|Human|San Diego County Public Health Laboratory|Andersen lab at Scripps Research|Gangavarapu|USA

>Spike|hCoV-19/USA/VA-DCLS-0631/2020|2020-04-09|EPI\_ISL\_495304|Original|hCoV-19^^Virginia|Human|Virginia DCLS|Virginia DCLS|St. Jacques|USA

>Spike|hCoV-19/USA/VA-DCLS-2285/2020|2020-10-30|EPI\_ISL\_723518|Original|hCoV-19^^Virginia|Human|Virginia Division of Consolidated Laboratory Services (DCLS)|Virginia Division of Consolidated Laboratory Services (DCLS)|St. Jacques|USA

>Spike|hCoV-19/England/SHEF-D186A/2020|2020-05-27|EPI\_ISL\_535094|Original|hCoV-19^^England|Human|Virology Department|COVID-19 Genomics UK (COG-UK) Consortium|de Silva|United Kingdom

>Spike|hCoV-19/Ireland/TA-UHL11/2020|2020-03-31|EPI\_ISL\_681764|Original|hCoV-19^^Tipperary|Human|University Hospital Limerick|Irish Coronavirus Sequencing Consortium - Teagasc Moorepark|Walsh|Ireland

>Spike|hCoV-19/England/205120686/2020|2020-12-15|EPI\_ISL\_766310|Original|hCoV-19^^England|Human|Respiratory Virus Unit|COVID-19 Genomics UK (COG-UK) Consortium|Platt|United Kingdom

>Spike|hCoV-19/Ireland/WD-NVRL-20IRL03398/2020|2020-08-17|EPI\_ISL\_578240|Original|hCoV-19^^Waterford|Human|National Virus Reference Laboratory|National Virus Reference Laboratory|Gonzalez|Ireland

>Spike|hCoV-19/Spain/IB-IBV-002495/2020|2020-03-19|EPI\_ISL\_467058|Original|hCoV-19^^Illes Balears|Human|Servicio de Microbiolog\u00eda|SeqCOVID-SPAIN consortium|IBV (CSIC)|Comas|Spain

>Spike|hCoV-19/England/ALDP-B73498/2020|2020-11-12|EPI\_ISL\_662390|Original|hCoV-19^^England|Human|Lighthouse Lab in Alderley Park|Wellcome Sanger Institute for the COVID-19 Genomics UK (COG-UK) Consortium|Davies|United Kingdom

>Spike|hCoV-19/England/ALDP-9447A8/2020|2020-06-07|EPI\_ISL\_555650|Original|hCoV-19^^England|Human|Lighthouse Lab in Alderley Park|Wellcome Sanger Institute for the COVID-19 Genomics UK (COG-UK) Consortium|Davies|United Kingdom

>Spike|hCoV-19/Russia/NVS-RII-MH2810S/2020|2020-09-25|EPI\_ISL\_639959|Original|hCoV-19^^Novosibirsk|Human|HELIX LLC|WHO National Influenza Centre Russian Federation|Komissarov|Russia

>Spike|hCoV-19/USA/CA-CZB-15001/2020|2020-11-18|EPI\_ISL\_738780|Original|hCoV-19^^California|Human|Santa Clara County Public Health Laboratory|Chan-Zuckerberg Biohub|Kamm|USA

>Spike|hCoV-19/USA/TX-HMH-549/2020|2020-04-06|EPI\_ISL\_544812|Original|hCoV-19^^Texas|Human|Houston Methodist Hospital|Houston Methodist Hospital|Long|USA

>Spike|hCoV-19/England/ALDP-94E5E0/2020|2020-06-17|EPI\_ISL\_555355|Original|hCoV-19^^England|Human|Lighthouse Lab in Alderley Park|Wellcome Sanger Institute for the COVID-19 Genomics UK (COG-UK) consortium|Davies|United Kingdom

>Spike|hCoV-19/England/205141230/2020|2020-12-16|EPI\_ISL\_756160|Original|hCoV-19^^England|Human|Respiratory Virus Unit|COVID-19 Genomics UK (COG-UK) Consortium|Miah|United Kingdom

>Spike|hCoV-19/England/CAMC-94BD45/2020|2020-07-17|EPI\_ISL\_556700|Original|hCoV-19^^England|Human|Lighthouse Lab in Cambridge|Wellcome Sanger Institute for the COVID-19 Genomics UK (COG-UK) consortium|Davies|United Kingdom

>Spike|hCoV-19/USA/ID-UW-4307/2020|2020-03-31|EPI\_ISL\_430942|Original|hCoV-19^^Idaho|Human|UW Virology Lab|UW Virology Lab|Roychoudhury|USA

>Spike|hCoV-19/USA/TX-HMH-2148/2020|2020-05-20|EPI\_ISL\_545144|Original|hCoV-19^^Texas|Human|Houston Methodist Hospital|Houston Methodist Hospital|Long|USA

>Spike|hCoV-19/England/ALDP-A50B9D/2020|2020-10-07|EPI\_ISL\_597873|Original|hCoV-19^^England|Human|Lighthouse Lab in Alderley Park|Wellcome Sanger Institute for the COVID-19 Genomics UK (COG-UK) consortium|Davies|United Kingdom

>Spike|hCoV-19/Scotland/QEUA-9CF30B/2020|2020-09-17|EPI\_ISL\_601910|Original|hCoV-19^^Scotland|Human|Lighthouse Lab in Glasgow|Wellcome Sanger Institute for the COVID-19 Genomics UK (COG-UK) consortium|Davies|United Kingdom

>Spike|hCoV-19/England/EXET-13511D/2020|2020-04-06|EPI\_ISL\_457033|Original|hCoV-19^^England|Human|University of Exeter|COVID-19 Genomics UK (COG-UK) Consortium|Temperton|United Kingdom

>Spike|hCoV-19/Netherlands/ZH-EMC-448/2020|2020-08-12|EPI\_ISL\_523786|Original|hCoV-19^^Zuid Holland|Human|Dutch COVID-19 response team|Erasmus Medical Center|Oude Munnink|Netherlands

>Spike|hCoV-19/USA/NM-UNM-00814/2020|2020-05-13|EPI\_ISL\_610257|Original|hCoV-19^^New Mexico|Human|TriCore Reference Laboratories|Center for Global Health|Domman|USA

>Spike|hCoV-19/Scotland/CVR2134/2020|2020-04-10|EPI\_ISL\_453022|Original|hCoV-19^^Scotland|Human|West of Scotland Specialist Virology Centre|COVID-19 Genomics UK (COG-UK) Consortium|Robertson|United Kingdom

>Spike|hCoV-19/Australia/VIC5828/2020|2020-07-22|EPI\_ISL\_518622|Original|hCoV-19^^Victoria|Human|Microbiological Diagnostic Unit - Public Health Laboratory (MDU-PHL)|MDU-PHL|Schultz|Australia

>Spike|hCoV-19/England/SHEF-CB0E3/2020|2020-04-19|EPI\_ISL\_462048|Original|hCoV-19^^England|Human|Virology Department|COVID-19 Genomics UK (COG-UK) Consortium|de Silva|United Kingdom

>Spike|hCoV-19/Hong Kong/VM20003891/2020|2020-03-19|EPI\_ISL\_463314|Original|hCoV-19^^Hong Kong|Human|Queen Elizabeth Hospital|Hong Kong Department of Health|Mak|China

>Spike|hCoV-19/Denmark/DCGC-2777/2020|2020-08-24|EPI\_ISL\_616612|Original|hCoV-19^^Midtjylland|Human|Department of Virus and Microbiological Special Diagnostics|Albertsen lab|Michaelsen|Denmark

>Spike|hCoV-19/Wales/PHWC-4A0E5F/2020|2020-12-10|EPI\_ISL\_743584|Original|hCoV-19^^Wales|Human|Wales Specialist Virology Centre Sequencing lab|COVID-19 Genomics UK (COG-UK) Consortium|Moore|United Kingdom

>Spike|hCoV-19/England/CAMB-7C193/2020|2020-04-14|EPI\_ISL\_434004|Original|hCoV-19^^England|Human|Department of Pathology|COVID-19 Genomics UK (COG-UK) Consortium|Meredith|United Kingdom

>Spike|hCoV-19/USA/MI-MDHHS-SC20129/2020|2020-03-10|EPI\_ISL\_436802|Original|hCoV-19^^Michigan|Human|Michigan Department of Health and Human Services|Michigan Department of Health and Human Services|Blankenship|USA

>Spike|hCoV-19/USA/UT-UPHL-2012203505/2020|2020-08-11|EPI\_ISL\_745479|Original|hCoV-19^^Utah|Human|Ginkgo Bioworks Clinical Laboratory|Utah Public Health Laboratory|Young|USA

>Spike|hCoV-19/USA/TX-HMH-4291/2020|2020-06-19|EPI\_ISL\_543501|Original|hCoV-19^^Texas|Human|Houston Methodist Hospital|Houston Methodist Hospital|Long|USA

>Spike|hCoV-19/England/QEUEH-9F513F/2020|2020-09-27|EPI\_ISL\_638657|Original|hCoV-19^^England|Human|Department of Pathology|COVID-19 Genomics UK (COG-UK) Consortium|Goodfellow|United Kingdom

>Spike|hCoV-19/Denmark/ALAB-HH-144/2020|2020-03-11|EPI\_ISL\_452023|Original|hCoV-19^^Denmark|Human|Department of Clinical Microbiology|Albertsen lab|Kirkegaard|Denmark

>Spike|hCoV-19/Canada/QC-LSPQ-L00243460/2020|2020-03-30|EPI\_ISL\_536362|Original|hCoV-19^^Quebec|Human|H\u00f4pital du Suro\u00eet|Laboratoire de sant\u00e9 publique du Qu\u00e9bec|Moreira|Canada

>Spike|hCoV-19/England/QEUEH-B82681/2020|2020-11-14|EPI\_ISL\_661877|Original|hCoV-19^^England|Human|Lighthouse Lab in Glasgow|Wellcome Sanger Institute for the COVID-19 Genomics UK (COG-UK) Consortium|Davies|United Kingdom

>Spike|hCoV-19/Austria/CeMM0562/2020|2020-03-12|EPI\_ISL\_475912|Original|hCoV-19^^Ischgl|Human|Klinikum Wels-Grieskirchen|Bergthaler laboratory|Bergthaler|Austria

>Spike|hCoV-19/USA/CA-CZB-14088/2020|2020-06-22|EPI\_ISL\_739164|Original|hCoV-19^^California|Human|Alameda County Public Health Lab|Chan-Zuckerberg Biohub|Kamm|USA

>Spike|hCoV-19/USA/MI-MDHHS-SC20882/2020|2020-05-16|EPI\_ISL\_471903|Original|hCoV-19^^Michigan|Human|Michigan Department of Health and Human Services|Michigan Department of Health and Human Services|Blankenship|USA

>Spike|hCoV-19/England/MILK-A7D3ED/2020|2020-10-13|EPI\_ISL\_606403|Original|hCoV-19^^England|Human|Lighthouse Lab in Milton Keynes|Wellcome Sanger Institute for the COVID-19 Genomics UK (COG-UK) consortium|Davies|United Kingdom

>Spike|hCoV-19/England/CAMB-1AA3A4/2020|2020-04-16|EPI\_ISL\_443538|Original|hCoV-19^^England|Human|Department of Pathology|Wellcome Sanger Institute for the COVID-19 Genomics UK (COG-UK) consortium|Amato|United Kingdom

>Spike|hCoV-19/England/CAMC-B3618B/2020|2020-11-05|EPI\_ISL\_645440|Original|hCoV-19^^England|Human|Lighthouse Lab in Cambridge|Wellcome Sanger Institute for the COVID-19 Genomics UK (COG-UK) Consortium|Davies|United Kingdom

>Spike|hCoV-19/England/MILK-B05A3F/2020|2020-10-25|EPI\_ISL\_652215|Original|hCoV-19^^England|Human|Queens Medical Centre|COVID-19 Genomics UK (COG-UK) Consortium|Loose|United Kingdom

>Spike|hCoV-19/England/20132000804/2020|2020-03-23|EPI\_ISL\_423702|Original|hCoV-19^^England|Human|Respiratory Virus Unit|Respiratory Virus Unit|Platt|United Kingdom

>Spike|hCoV-19/Japan/PG-8739/2020|2020-08-00|EPI\_ISL\_686335|Original|hCoV-19^^Japan|Human|Pathogen Genomics Center|Pathogen Genomics Center|Sekizuka|Japan

>Spike|hCoV-19/USA/MI-MDHHS-SC20416/2020|2020-03-16|EPI\_ISL\_452290|Original|hCoV-19^^Michigan|Human|Michigan Department of Health and Human Services|Michigan Department of Health and Human Services|Blankenship|USA

>Spike|hCoV-19/Switzerland/BS-42414282/2020|2020-08-27|EPI\_ISL\_581991|Original|hCoV-19^^Basel-Stadt|Human|University Hospital Basel|University Hospital Basel|Roloff Handschin|Switzerland

>Spike|hCoV-19/Scotland/QEUH-96D91C/2020|2020-08-20|EPI\_ISL\_534538|Original|hCoV-19^^Scotland|Human|NHSGGC West of Scotland Specialist Virology Centre / MRC-University of Glasgow Centre for Virus Research|Wellcome Sanger Institute for the COVID-19 Genomics UK (COG-UK) consortium|Davies|United Kingdom

>Spike|hCoV-19/Spain/IB-IBV-99007192/2020|2020-03-08|EPI\_ISL\_541951|Original|hCoV-19^^Balear Islands|Human|Servicio de Microbiolog\u00eda|SeqCOVID-SPAIN consortium|IBV (CSIC) |Comas|Spain

>Spike|hCoV-19/Japan/PG-4191/2020|2020-07-00|EPI\_ISL\_692430|Original|hCoV-19^^Japan|Human|Pathogen Genomics Center|Pathogen Genomics Center|Sekizuka|Japan

>Spike|hCoV-19/Denmark/DCGC-10334/2020|2020-11-02|EPI\_ISL\_669906|Original|hCoV-19^^Nordjylland|Human|Department of Virus and Microbiological Special Diagnostics|Albertsen Lab|Michaelsen|Denmark

>Spike|hCoV-19/USA/MN-MDH-1315/2020|2020-03-24|EPI\_ISL\_495614|Original|hCoV-19^^Minnesota|Human|Minnesota Department of Health|Minnesota Department of Health|Garfin|USA

>Spike|hCoV-19/England/LIVE-1DD7D9/2020|2020-10-02|EPI\_ISL\_611600|Original|hCoV-19^^England|Human|Liverpool Clinical Laboratories|COVID-19 Genomics UK (COG-UK) Consortium|Haldenby|United Kingdom

>Spike|hCoV-19/Scotland/GCVR-1722F3/2020|2020-03-30|EPI\_ISL\_469983|Original|hCoV-19^^Scotland|Human|NHSGGC West of Scotland Specialist Virology Centre / MRC-University of Glasgow Centre for Virus Research|Wellcome Sanger Institute for the COVID-19 Genomics UK (COG-UK) consortium|Davies|United Kingdom

>Spike|hCoV-19/England/EXET-139252/2020|2020-10-26|EPI\_ISL\_664686|Original|hCoV-19^^England|Human|University of Exeter|COVID-19 Genomics UK (COG-UK) Consortium|Temperton|United Kingdom

>Spike|hCoV-19/Australia/VIC6192/2020|2020-07-22|EPI\_ISL\_518194|Original|hCoV-19^^Victoria|Human|Victorian Infectious Diseases Reference Laboratory (VIDRL)|VIDRL and MDU-PHL|Schultz|Australia

>Spike|hCoV-19/England/NORW-EFCC7/2020|2020-00-00|EPI\_ISL\_549379|Original|hCoV-19^^England|Human|Quadram Institute Bioscience|COVID-19 Genomics UK (COG-UK) Consortium|Alikhan|United Kingdom

>Spike|hCoV-19/USA/OR-OHSU-2969/2020|2020-09-07|EPI\_ISL\_667436|Original|hCoV-19^^Oregon|Human|OHSU Lab Services Molecular Microbiology Lab|Oregon SARS-CoV-2 Genome Sequencing Center|O'Roak|USA

>Spike|hCoV-19/USA/UT-QDX-2491/2020|2020-03-12|EPI\_ISL\_604853|Original|hCoV-19^^Utah|Human|Quest Diagnostics|Quest Diagnostics|Kagan|USA

>Spike|hCoV-19/England/SHEF-D2C5E/2020|2020-11-10|EPI\_ISL\_680195|Original|hCoV-19^^England|Human|Virology Department|COVID-19 Genomics UK (COG-UK) Consortium|de Silva|United Kingdom

>Spike|hCoV-19/USA/CA-QDX-1855/2020|2020-03-17|EPI\_ISL\_604104|Original|hCoV-19^^California|Human|Quest Diagnostics|Quest Diagnostics|Kagan|USA

>Spike|hCoV-19/England/OXON-AF197/2020|2020-03-17|EPI\_ISL\_448818|Original|hCoV-19^^England|Human|Oxford Viromics|COVID-19 Genomics UK (COG-UK) Consortium|Golubchik|United Kingdom

>Spike|hCoV-19/England/NORW-F9073/2020|2020-11-24|EPI\_ISL\_705332|Original|hCoV-19^^England|Human|Quadram Institute Bioscience|COVID-19 Genomics UK (COG-UK) Consortium|Alikhan|United Kingdom

>Spike|hCoV-19/USA/CA-ALSR-3087/2020|2020-09-06|EPI\_ISL\_635839|Original|hCoV-19^^California|Human|San Diego County Public Health Laboratory|Andersen lab at Scripps Research|Gangavarapu|USA

>Spike|hCoV-19/USA/MI-MDHHS-SC22460/2020|2020-11-04|EPI\_ISL\_708558|Original|hCoV-19^^Michigan|Human|Michigan Department of Health and Human Services|Michigan Department of Health and Human Services|Jacob|USA

>Spike|hCoV-19/Russia/KLU-RII-MH3423S/2020|2020-10-06|EPI\_ISL\_733144|Original|hCoV-19^^Kaluga|Human|HELIX LLC|WHO National Influenza Centre Russian Federation|Komissarov|Russia

>Spike|hCoV-19/England/CAMC-A6545E/2020|2020-10-11|EPI\_ISL\_608432|Original|hCoV-19^^England|Human|Lighthouse Lab in Cambridge|Wellcome Sanger Institute for the COVID-19 Genomics UK (COG-UK) consortium|Davies|United Kingdom

>Spike|hCoV-19/Germany/HH-hpi-p1918/2020|2020-03-25|EPI\_ISL\_776249|Original|hCoV-19^^Hamburg|Human|University Medical Center Hamburg Eppendorf|Heinrich Pette Institute|Robitaille|Germany

>Spike|hCoV-19/England/ALDP-B7529C/2020|2020-11-12|EPI\_ISL\_661999|Original|hCoV-19^^England|Human|Lighthouse Lab in Alderley Park|Wellcome Sanger Institute for the COVID-19 Genomics UK (COG-UK) Consortium|Davies|United Kingdom

>Spike|hCoV-19/England/MILK-9954FC/2020|2020-08-25|EPI\_ISL\_552347|Original|hCoV-19^^England|Human|Lighthouse Lab in Milton Keynes|Wellcome Sanger Institute for the COVID-19 Genomics UK (COG-UK) consortium|Davies|United Kingdom

>Spike|hCoV-19/England/MILK-B3E147/2020|2020-11-01|EPI\_ISL\_706262|Original|hCoV-19^^England|Human|Oxford Viromics|COVID-19 Genomics UK (COG-UK) Consortium|Golubchik|United Kingdom

>Spike|hCoV-19/USA/MI-MDHHS-SC21589/2020|2020-03-26|EPI\_ISL\_516316|Original|hCoV-19^^Michigan|Human|Michigan Department of Health and Human Services|Michigan Department of Health and Human Services|Blankenship|USA

>Spike|hCoV-19/Wales/PHWC-15C8C0/2020|2020-03-31|EPI\_ISL\_472552|Original|hCoV-19^^Wales|Human|Wales Specialist Virology Centre Sequencing lab|COVID-19 Genomics UK (COG-UK) Consortium|Moore|United Kingdom

>Spike|hCoV-19/USA/MD-MDH-0361/2020|2020-10-22|EPI\_ISL\_648297|Original|hCoV-19^^Maryland|Human|MD PHL|MD PHL|Keller|USA

>Spike|hCoV-19/Sweden/RV-FOI-5/2020|2020-03-19|EPI\_ISL\_549024|Original|hCoV-19^^Vasterbotten|Human|Klinisk mikrobiologi|Unit for Biological Agents|Sjodin|Sweden

>Spike|hCoV-19/USA/CA-ALSR-2929/2020|2020-07-17|EPI\_ISL\_635736|Original|hCoV-19^^California|Human|San Diego County Public Health Laboratory|Andersen lab at Scripps Research|Gangavarapu|USA

>Spike|hCoV-19/Netherlands/ZH-EMC-1246/2020|2020-00-00|EPI\_ISL\_763315|Original|hCoV-19^^Zuid Holland|Human|Dutch COVID-19 response team|Erasmus Medical Center|Oude Munnink|Netherlands

>Spike|hCoV-19/USA/NY-Wadsworth-97873-01/2020|2020-05-13|EPI\_ISL\_676929|Original|hCoV-19^^New York|Human|Wadsworth Center|Wadsworth Center|Lasek-Nesselquist|USA

>Spike|hCoV-19/Northern Ireland/QEUI-963FE7/2020|2020-08-12|EPI\_ISL\_536886|Original|hCoV-19^^Northern Ireland|Human|Lighthouse Lab in Glasgow|Wellcome Sanger Institute for the COVID-19 Genomics UK (COG-UK) consortium|Davies|United Kingdom

>Spike|hCoV-19/Switzerland/UR-ETHZ-310469/2020|2020-10-07|EPI\_ISL\_603540|Original|hCoV-19^^Uri|Human|Viollier AG|Department of Biosystems Science and Engineering|Nadeau|Switzerland

>Spike|hCoV-19/Denmark/DCGC-20934/2020|2020-12-21|EPI\_ISL\_759455|Original|hCoV-19^^Syddanmark|Human|Department of Virus and Microbiological Special Diagnostics|Albertsen Lab|Michaelsen|Denmark

>Spike|hCoV-19/England/NORT-1B79B03/2020|2020-11-25|EPI\_ISL\_741449|Original|hCoV-19^^England|Human|Northumbria University / South Tees Hospitals NHS Foundation Trust / North Cumbria Integrated Care NHS Foundation Trust / North Tees and Hartlepool NHS Foundation Trust / Newcastle Hospitals NHS Foundation Trust|COVID-19 Genomics UK (COG-UK) Consortium|Bashton|United Kingdom

>Spike|hCoV-19/Japan/PG-3297/2020|2020-04-00|EPI\_ISL\_691412|Original|hCoV-19^^Japan|Human|Pathogen Genomics Center|Pathogen Genomics Center|Sekizuka|Japan

>Spike|hCoV-19/England/QEUA-C321F7/2020|2020-12-11|EPI\_ISL\_730831|Original|hCoV-19^^England|Human|Lighthouse Lab in Glasgow|Wellcome Sanger Institute for the COVID-19 Genomics UK (COG-UK) Consortium|Davies|United Kingdom

>Spike|hCoV-19/England/CAMC-B0752D/2020|2020-10-31|EPI\_ISL\_643820|Original|hCoV-19^^England|Human|Lighthouse Lab in Cambridge|Wellcome Sanger Institute for the COVID-19 Genomics UK (COG-UK) Consortium|Davies|United Kingdom

>Spike|hCoV-19/Denmark/DCGC-15834/2020|2020-11-23|EPI\_ISL\_714050|Original|hCoV-19^^Hovedstaden|Human|Department of Virus and Microbiological Special Diagnostics|Albertsen Lab|Michaelsen|Denmark

>Spike|hCoV-19/USA/FL-ADNH/2020|2020-06-25|EPI\_ISL\_513274|Original|hCoV-19^^Florida|Human|University of Miami Immunology and Histocompatibility Laboratory|University of Miami Immunology and Histocompatibility Laboratory|Margolles-Clark|USA

>Spike|hCoV-19/USA/TX-HMH-5712/2020|2020-06-20|EPI\_ISL\_546962|Original|hCoV-19^^Texas|Human|Houston Methodist Hospital|Houston Methodist Hospital|Long|USA

>Spike|hCoV-19/England/CAMB-7C940/2020|2020-04-05|EPI\_ISL\_442819|Original|hCoV-19^^England|Human|Department of Pathology|Wellcome Sanger Institute for the COVID-19 Genomics UK (COG-UK) consortium|Amato|United Kingdom

>Spike|hCoV-19/USA/NY-NYUMC455/2020|2020-04-20|EPI\_ISL\_435521|Original|hCoV-19^^New York|Human|NYU Langone Health|Departments of Pathology and Medicine|Maurano|USA

>Spike|hCoV-19/England/CAMB-1AF55E/2020|2020-05-08|EPI\_ISL\_448080|Original|hCoV-19^^England|Human|Department of Pathology|COVID-19 Genomics UK (COG-UK) Consortium|Meredith|United Kingdom

>Spike|hCoV-19/Canada/ON-PHL-20-01178/2020|2020-06-00|EPI\_ISL\_548800|Original|hCoV-19^^Ontario|Human|Public Health Ontario Laboratory|Public Health Ontario Laboratory|Guthrie|Canada

>Spike|hCoV-19/England/CAMC-B22683/2020|2020-11-02|EPI\_ISL\_647286|Original|hCoV-19^^England|Human|Lighthouse Lab in Cambridge|Wellcome Sanger Institute for the COVID-19 Genomics UK (COG-UK) Consortium|Davies|United Kingdom

>Spike|hCoV-19/France/PAC-MEPHI-2288/2020|2020-10-06|EPI\_ISL\_644533|Original|hCoV-19^^Provence-Alpes-Cote-d\u2019Azur|Human|MEPHI|MEPHI|Levasseur|France

>Spike|hCoV-19/Australia/VIC14241/2020|2020-08-04|EPI\_ISL\_592410|Original|hCoV-19^^Victoria|Human|Microbiological Diagnostic Unit - Public Health Laboratory (MDU-PHL)|MDU-PHL|Schultz|Australia

>Spike|hCoV-19/England/NORT-2952AE/2020|2020-03-31|EPI\_ISL\_488545|Original|hCoV-19^^England|Human|NU-OMICS DNA Sequencing research facility|Wellcome Sanger Institute for the COVID-19 Genomics UK (COG-UK) consortium|Davies|United Kingdom

>Spike|hCoV-19/USA/WA-UW-1860/2020|2020-03-23|EPI\_ISL\_424289|Original|hCoV-19^^Washington|Human|UW Virology Lab|UW Virology Lab|Roychoudhury|USA

>Spike|hCoV-19/USA/UT-UPHL-2012038111/2020|2020-07-27|EPI\_ISL\_745705|Original|hCoV-19^^Utah|Human|Ginkgo Bioworks Clinical Laboratory|Utah Public Health Laboratory|Young|USA

>Spike|hCoV-19/France/ARA74567/2020|2020-09-17|EPI\_ISL\_639978|Original|hCoV-19^^Auvergne-Rhone-Alpes|Human|Centre Hospitalier Saint Joseph Saint Luc|CNR Virus des Infections Respiratoires - France SUD|Josset|France

>Spike|hCoV-19/USA/WI-WSLH-200300/2020|2020-04-17|EPI\_ISL\_578484|Original|hCoV-19^^Wisconsin|Human|Wisconsin State Laboratory of Hygiene Communicable Disease Division|Wisconsin State Laboratory of Hygiene Communicable Disease Division|Florek|USA

>Spike|hCoV-19/England/QEUA-9A4551/2020|2020-09-01|EPI\_ISL\_540228|Original|hCoV-19^^England|Human|Lighthouse Lab in Glasgow|Wellcome Sanger Institute for the COVID-19 Genomics UK (COG-UK) consortium|Davies|United Kingdom

>Spike|hCoV-19/Brazil/RJ-00462/2020|2020-07-02|EPI\_ISL\_717857|Original|hCoV-19^^Rio de Janeiro|Human|Laboratorio de Virologia Molecular / UFRJ|Bioinformatics Laboratory / LNCC|Almeida|Brazil

>Spike|hCoV-19/Scotland/CVR20/2020|2020-03-13|EPI\_ISL\_425730|Original|hCoV-19^^Scotland|Human|West of Scotland Specialist Virology Centre|COVID-19 Genomics UK (COG-UK) Consortium|Robertson|United Kingdom

>Spike|hCoV-19/Scotland/EDB5376/2020|2020-03-31|EPI\_ISL\_457012|Original|hCoV-19^^Scotland|Human|Virology Department|COVID-19 Genomics UK (COG-UK) Consortium|Williams|United Kingdom

>Spike|hCoV-19/USA/TX-HMH-MCoV-19565/2020|2020-11-30|EPI\_ISL\_783937|Original|hCoV-19^^Texas|Human|Houston Methodist Hospital|Houston Methodist Hospital|Long|USA

>Spike|hCoV-19/South Africa/LR00077/2020|2020-07-13|EPI\_ISL\_514388|Original|hCoV-19^^Gauteng|Human|National Institute for Communicable Diseases of the National Health Laboratory Service|National Institute for Communicable Diseases of the National Health Laboratory Service|Allam|South Africa

>Spike|hCoV-19/England/QEUA-AD2F88/2020|2020-10-26|EPI\_ISL\_629786|Original|hCoV-19^^England|Human|Lighthouse Lab in Glasgow|Wellcome Sanger Institute for the COVID-19 Genomics UK (COG-UK) consortium|Davies|United Kingdom

>Spike|hCoV-19/Northern Ireland/QEUA-969DBA/2020|2020-08-14|EPI\_ISL\_530809|Original|hCoV-19^^Northern Ireland|Human|Lighthouse Lab in Glasgow|Wellcome Sanger Institute for the COVID-19 Genomics UK (COG-UK) consortium|Davies|United Kingdom

>Spike|hCoV-19/USA/TX-HMH0384/2020|2020-03-31|EPI\_ISL\_434972|Original|hCoV-19^^Texas|Human|Houston Methodist Hospital|Houston Methodist Hospital|Long|USA

>Spike|hCoV-19/USA/NY-NYUMC539/2020|2020-03-30|EPI\_ISL\_444656|Original|hCoV-19^^New York|Human|NYU Langone Health|Departments of Pathology and Medicine|Maurano|USA

>Spike|hCoV-19/England/20154089204/2020|2020-04-05|EPI\_ISL\_466276|Original|hCoV-19^^England|Human|Respiratory Virus Unit|Respiratory Virus Unit|Platt|United Kingdom

>Spike|hCoV-19/Czech Republic/NRL\_5553/2020|2020-03-18|EPI\_ISL\_530350|Original|hCoV-19^^Brno|Human|The National Institute of Public Health|State Veterinary Institute Prague|Nagy|Czech Republic

>Spike|hCoV-19/England/ALDP-9E5D01/2020|2020-09-24|EPI\_ISL\_589325|Original|hCoV-19^^England|Human|Lighthouse Lab in Alderley Park|Wellcome Sanger Institute for the COVID-19 Genomics UK (COG-UK) consortium|Davies|United Kingdom

>Spike|hCoV-19/England/QEUA-B41378/2020|2020-11-08|EPI\_ISL\_658642|Original|hCoV-19^^England|Human|Lighthouse Lab in Glasgow|Wellcome Sanger Institute for the COVID-19 Genomics UK (COG-UK) Consortium|Davies|United Kingdom

>Spike|hCoV-19/England/QEUA-C347E4/2020|2020-12-11|EPI\_ISL\_734024|Original|hCoV-19^^England|Human|Lighthouse Lab in Glasgow|Wellcome Sanger Institute for the COVID-19 Genomics UK (COG-UK) Consortium|Davies|United Kingdom

>Spike|hCoV-19/England/SHEF-10B30DC/2020|2020-06-04|EPI\_ISL\_537211|Original|hCoV-19^^England|Human|Virology Department|Wellcome Sanger Institute for the COVID-19 Genomics UK (COG-UK) consortium|Davies|United Kingdom

>Spike|hCoV-19/England/20124002002/2020|2020-03-17|EPI\_ISL\_418687|Original|hCoV-19^^England|Human|Respiratory Virus Unit|Respiratory Virus Unit|Platt|United Kingdom

>Spike|hCoV-19/USA/CA-CZB-3633/2020|2020-07-23|EPI\_ISL\_548359|Original|hCoV-19^^California|Human|County of San Luis Obispo Public Health Laboratory|Chan-Zuckerberg Biohub|Bhatt|USA

>Spike|hCoV-19/USA/WA-S1561/2020|2020-05-26|EPI\_ISL\_495987|Original|hCoV-19^^Washington|Human|Washington State Department of Health|Seattle Flu Study|Lee|USA

>Spike|hCoV-19/England/LOND-D50B9/2020|2020-04-15|EPI\_ISL\_444200|Original|hCoV-19^^England|Human|University College London|COVID-19 Genomics UK (COG-UK) Consortium|Roy|United Kingdom

>Spike|hCoV-19/England/ALDP-8DAA09/2020|2020-06-25|EPI\_ISL\_557096|Original|hCoV-19^^England|Human|Lighthouse Lab in Alderley Park|Wellcome Sanger Institute for the COVID-19 Genomics UK (COG-UK) consortium|Davies|United Kingdom

>Spike|hCoV-19/Denmark/DCGC-3269/2020|2020-08-31|EPI\_ISL\_616265|Original|hCoV-19^^Hovedstaden|Human|Department of Virus and Microbiological Special Diagnostics|Albertsen lab|Michaelsen|Denmark

>Spike|hCoV-19/India/OR-ILSCV29666/2020|2020-05-23|EPI\_ISL\_481130|Original|hCoV-19^^Odisha|Human|Immunogenomics lab|Immunogenomics lab|Raghav|India

>Spike|hCoV-19/Netherlands/ZH-EMC-307/2020|2020-07-04|EPI\_ISL\_523649|Original|hCoV-19^^Zuid Holland|Human|Dutch COVID-19 response team|Erasmus Medical Center|Oude Munnink|Netherlands

>Spike|hCoV-19/Denmark/DCGC-21656/2020|2020-12-21|EPI\_ISL\_758290|Original|hCoV-19^^Syddanmark|Human|Department of Virus and Microbiological Special Diagnostics|Albertsen Lab|Michaelsen|Denmark

>Spike|hCoV-19/England/MILK-9A6B8A/2020|2020-09-02|EPI\_ISL\_550237|Original|hCoV-19^^England|Human|Lighthouse Lab in Milton Keynes|Wellcome Sanger Institute for the COVID-19 Genomics UK (COG-UK) consortium|Davies|United Kingdom

>Spike|hCoV-19/USA/WA-S130/2020|2020-03-13|EPI\_ISL\_430167|Original|hCoV-19^^Washington|Human|Washington State Department of Health|Seattle Flu Study|Bedford|USA

>Spike|hCoV-19/England/MILK-BDC7A3/2020|2020-11-27|EPI\_ISL\_709578|Original|hCoV-19^^England|Human|Lighthouse Lab in Milton Keynes|Wellcome Sanger Institute for the COVID-19 Genomics UK (COG-UK) Consortium|Davies|United Kingdom

>Spike|hCoV-19/England/BRIS-124463/2020|2020-04-08|EPI\_ISL\_492774|Original|hCoV-19^^England|Human|PHE South West Regional Laboratory|Wellcome Sanger Institute for the COVID-19 Genomics UK (COG-UK) consortium|Davies|United Kingdom

>Spike|hCoV-19/Germany/NW-HHU-80/2020|2020-08-16|EPI\_ISL\_539596|Original|hCoV-19^^North Rhine-Westphalia|Human|ZOTZ KLIMAS MVZ D\u00f0fcsseldorf-Centrum GbR \u00dcBAG f\u00fcr Labormedizin|Center of Medical Microbiology|Wienemann|Germany

>Spike|hCoV-19/Japan/PG-1638/2020|2020-04-00|EPI\_ISL\_685244|Original|hCoV-19^^Japan|Human|Pathogen Genomics Center|Pathogen Genomics Center|Sekizuka|Japan

>Spike|hCoV-19/USA/WA-QDX-2548/2020|2020-03-16|EPI\_ISL\_604872|Original|hCoV-19^^Washington|Human|Quest Diagnostics|Quest Diagnostics|Kagan|USA

>Spike|hCoV-19/England/PORT-2CF751/2020|2020-05-19|EPI\_ISL\_461980|Original|hCoV-19^^England|Human|Centre for Enzyme Innovation|COVID-19 Genomics UK (COG-UK) Consortium|Robson|United Kingdom

>Spike|hCoV-19/Denmark/DCGC-6555/2020|2020-10-12|EPI\_ISL\_619603|Original|hCoV-19^^Syddanmark|Human|Department of Virus and Microbiological Special Diagnostics|Albertsen lab|Michaelsen|Denmark

>Spike|hCoV-19/England/ALDP-B1BC4F/2020|2020-11-01|EPI\_ISL\_645781|Original|hCoV-19^^England|Human|Lighthouse Lab in Alderley Park|Wellcome Sanger Institute for the COVID-19 Genomics UK (COG-UK) Consortium|Davies|United Kingdom

>Spike|hCoV-19/Denmark/DCGC-8573/2020|2020-10-26|EPI\_ISL\_625954|Original|hCoV-19^^Hovedstaden|Human|Department of Virus and Microbiological Special Diagnostics|Albertsen lab|Michaelsen|Denmark

>Spike|hCoV-19/Scotland/CVR2982/2020|2020-04-23|EPI\_ISL\_439002|Original|hCoV-19^^Scotland|Human|West of Scotland Specialist Virology Centre|COVID-19 Genomics UK (COG-UK) Consortium|Robertson|United Kingdom

>Spike|hCoV-19/England/CAMC-B1FDC0/2020|2020-11-01|EPI\_ISL\_647796|Original|hCoV-19^^England|Human|Lighthouse Lab in Cambridge|Wellcome Sanger Institute for the COVID-19 Genomics UK (COG-UK) Consortium|Davies|United Kingdom

>Spike|hCoV-19/USA/NY-QDX-2198/2020|2020-03-15|EPI\_ISL\_604566|Original|hCoV-19^^New York|Human|Quest Diagnostics|Quest Diagnostics|Kagan|USA

>Spike|hCoV-19/Netherlands/OV-EMC-68/2020|2020-06-13|EPI\_ISL\_523452|Original|hCoV-19^^Overijssel|Human|Dutch COVID-19 response team|Erasmus Medical Center|Oude Munnink|Netherlands

>Spike|hCoV-19/Singapore/115/2020|2020-03-18|EPI\_ISL\_443207|Original|hCoV-19^^Singapore|Human|National Public Health Laboratory|National Public Health Laboratory|Mak|Singapore

>Spike|hCoV-19/Canada/ON-PHL-20-01193/2020|2020-06-00|EPI\_ISL\_548815|Original|hCoV-19^^Ontario|Human|Public Health Ontario Laboratory|Public Health Ontario Laboratory|Guthrie|Canada

>Spike|hCoV-19/USA/WA-S1088/2020|2020-04-29|EPI\_ISL\_463578|Original|hCoV-19^^Washington|Human|Washington State Department of Health|Seattle Flu Study|Bedford|USA

>Spike|hCoV-19/Wales/PHWC-2815A/2020|2020-03-25|EPI\_ISL\_432170|Original|hCoV-19^^Wales|Human|Wales Specialist Virology Centre|Public Health Wales Microbiology Cardiff|Moore|United Kingdom

>Spike|hCoV-19/Scotland/EDB6608/2020|2020-06-22|EPI\_ISL\_484683|Original|hCoV-19^^Scotland|Human|Virology Department|COVID-19 Genomics UK (COG-UK) Consortium|Williams|United Kingdom

>Spike|hCoV-19/England/ALDP-94DC19/2020|2020-06-18|EPI\_ISL\_555584|Original|hCoV-19^^England|Human|Lighthouse Lab in Alderley Park|Wellcome Sanger Institute for the COVID-19 Genomics UK (COG-UK) consortium|Davies|United Kingdom

>Spike|hCoV-19/Japan/Donner9/2020|2020-04-06|EPI\_ISL\_438954|Original|hCoV-19^^Kanto|Human|Keio University School of Medicine|Keio University School of Medicine|Kosaki|Japan

>Spike|hCoV-19/Russia/SPE-RII-17942V/2020|2020-05-27|EPI\_ISL\_524016|Vero P1|hCoV-19^^Saint Petersburg|Human|WHO National Influenza Centre Russian Federation|WHO National Influenza Centre Russian Federation|Komissarov|Russia

>Spike|hCoV-19/USA/ME-HETL-J0387/2020|2020-12-15|EPI\_ISL\_755501|Original|hCoV-19^^Maine|Human|Maine Health and Environmental Testing Laboratory|Tewhey Lab|Tewhey|USA

>Spike|hCoV-19/Japan/NGY-NNH-005/2020|2020-04-07|EPI\_ISL\_568560|Original|hCoV-19^^Aichi|Human|Department of Infectious Diseases and Immunology|Clinical Research Center|Iwatani|Japan

>Spike|hCoV-19/Luxembourg/LNS0084824/2020|2020-11-16|EPI\_ISL\_739708|Original|hCoV-19^^Luxembourg|Human|Laboratoire national de sant\u00e9|Laboratoire national de sant\u00e9|Wienecke-Baldacchino|Luxembourg

>Spike|hCoV-19/England/ALDP-B5C9B4/2020|2020-11-08|EPI\_ISL\_655884|Original|hCoV-19^^England|Human|Lighthouse Lab in Alderley Park|Wellcome Sanger Institute for the COVID-19 Genomics UK (COG-UK) Consortium|Davies|United Kingdom

>Spike|hCoV-19/Netherlands/NA\_273/2020|2020-03-30|EPI\_ISL\_422584|Original|hCoV-19^^Netherlands|Human|Dutch COVID-19 response team|Erasmus Medical Center|Oude Munnink|Netherlands

>Spike|hCoV-19/England/EXET-13A770/2020|2020-11-09|EPI\_ISL\_664401|Original|hCoV-19^^England|Human|University of Exeter|COVID-19 Genomics UK (COG-UK) Consortium|Temperton|United Kingdom

>Spike|hCoV-19/England/ALDP-AA2C6C/2020|2020-10-22|EPI\_ISL\_625218|Original|hCoV-19^^England|Human|Lighthouse Lab in Alderley Park|Wellcome Sanger Institute for the COVID-19 Genomics UK (COG-UK) consortium|Davies|United Kingdom

>Spike|hCoV-19/Wales/PHWC-32F44/2020|2020-04-14|EPI\_ISL\_446712|Original|hCoV-19^^Wales|Human|Wales Specialist Virology Centre|Public Health Wales Microbiology Cardiff|Moore|United Kingdom

>Spike|hCoV-19/England/20139069404/2020|2020-03-29|EPI\_ISL\_423360|Original|hCoV-19^^England|Human|Respiratory Virus Unit|Respiratory Virus Unit|Platt|United Kingdom

>Spike|hCoV-19/Wales/MILK-9F0617/2020|2020-09-24|EPI\_ISL\_580745|Original|hCoV-19^^Wales|Human|Lighthouse Lab in Milton Keynes|Wellcome Sanger Institute for the COVID-19 Genomics UK (COG-UK) consortium|Davies|United Kingdom

>Spike|hCoV-19/USA/MI-UM-10035812504/2020|2020-09-04|EPI\_ISL\_583310|Original|hCoV-19^^Michigan|Human|University of Michigan Clinical Microbiology Laboratory|Lauring Lab|Valesano|USA

>Spike|hCoV-19/USA/UT-UPHL-201005514/2020|2020-06-22|EPI\_ISL\_594040|Original|hCoV-19^^Utah|Human|Utah Public Health Laboratory|Utah Public Health Laboratory|Young|USA

>Spike|hCoV-19/Saudi Arabia/KAUST-Makkah12/2020|2020-03-23|EPI\_ISL\_437465|Original|hCoV-19^^Makkah|Human|Pathogen Genomics Lab King Abdullah University of Science and Technology(KAUST)|Pathogen Genomics Lab King Abdullah University of Science and Technology(KAUST)|Mohamed Ghazzali|Saudi Arabia

>Spike|hCoV-19/Japan/PG-0215/2020|2020-03-01|EPI\_ISL\_479915|Original|hCoV-19^^Kanto|Human|Niigata City Public Health Research Institute|Pathogen Genomics Center|Sekizuka|Japan

>Spike|hCoV-19/Wales/PHWC-16C3BD/2020|2020-09-23|EPI\_ISL\_574049|Original|hCoV-19^^Wales|Human|Wales Specialist Virology Centre Sequencing lab|COVID-19 Genomics UK (COG-UK) Consortium|Moore|United Kingdom



>Spike|hCoV-19/England/ALDP-9EDEAC/2020|2020-05-03|EPI\_ISL\_589568|Original|hCoV-19^^England|Human|Lighthouse Lab in Alderley Park|Wellcome Sanger Institute for the COVID-19 Genomics UK (COG-UK) consortium|Davies|United Kingdom

>Spike|hCoV-19/Australia/VIC11291/2020|2020-07-18|EPI\_ISL\_563319|Original|hCoV-19^^Victoria|Human|Microbiological Diagnostic Unit - Public Health Laboratory (MDU-PHL)|MDU-PHL|Schultz|Australia

>Spike|hCoV-19/Denmark/DCGC-14965/2020|2020-11-23|EPI\_ISL\_713552|Original|hCoV-19^^Hovedstaden|Human|Department of Virus and Microbiological Special Diagnostics|Albertsen Lab|Michaelsen|Denmark

>Spike|hCoV-19/England/202600045/2020|2020-06-05|EPI\_ISL\_566054|Original|hCoV-19^^England|Human|Respiratory Virus Unit|Respiratory Virus Unit|Platt|United Kingdom

>Spike|hCoV-19/England/BRIS-123710/2020|2020-04-06|EPI\_ISL\_442650|Original|hCoV-19^^England|Human|PHE South West Regional Laboratory|Wellcome Sanger Institute for the COVID-19 Genomics UK (COG-UK) consortium|Amato|United Kingdom

>Spike|hCoV-19/Australia/VIC4034/2020|2020-07-08|EPI\_ISL\_519419|Original|hCoV-19^^Victoria|Human|Microbiological Diagnostic Unit - Public Health Laboratory (MDU-PHL)|MDU-PHL|Schultz|Australia

>Spike|hCoV-19/USA/TX-HMH-602/2020|2020-04-09|EPI\_ISL\_547172|Original|hCoV-19^^Texas|Human|Houston Methodist Hospital|Houston Methodist Hospital|Long|USA

>Spike|hCoV-19/Scotland/EDB5519/2020|2020-04-22|EPI\_ISL\_487932|Original|hCoV-19^^Scotland|Human|Virology Department|Wellcome Sanger Institute for the COVID-19 Genomics UK (COG-UK) consortium|Davies|United Kingdom

>Spike|hCoV-19/England/LOND-D6C3C/2020|2020-03-30|EPI\_ISL\_478415|Original|hCoV-19^^England|Human|University College London|COVID-19 Genomics UK (COG-UK) Consortium|Roy|United Kingdom

>Spike|hCoV-19/England/MILK-A0689F/2020|2020-10-01|EPI\_ISL\_599876|Original|hCoV-19^^England|Human|Lighthouse Lab in Milton Keynes|Wellcome Sanger Institute for the COVID-19 Genomics UK (COG-UK) consortium|Davies|United Kingdom

>Spike|hCoV-19/England/ALDP-CB55A5/2020|2020-12-20|EPI\_ISL\_761775|Original|hCoV-19^^England|Human|Lighthouse Lab in Alderley Park|Wellcome Sanger Institute for the COVID-19 Genomics UK (COG-UK) Consortium|Davies|United Kingdom

>Spike|hCoV-19/USA/AR-CDC-0837/2020|2020-07-07|EPI\_ISL\_535650|Original|hCoV-19^^Arkansas|Human|AR Dept. of Health-Public Health Lab|Pathogen Discovery|Queen|USA

>Spike|hCoV-19/Zimbabwe/ZW-25/2020|2020-03-01|EPI\_ISL\_647977|Original|hCoV-19^^Zimbabwe|Human|National Microbiology Reference Laboratory|Quadram Institute Bioscience|Alikhan|Zimbabwe

>Spike|hCoV-19/England/MILK-BAC1EA/2020|2020-11-18|EPI\_ISL\_783126|Original|hCoV-19^^England|Human|Lighthouse Lab in Milton Keynes|Wellcome Sanger Institute for the COVID-19 Genomics UK (COG-UK) Consortium|Davies|United Kingdom

>Spike|hCoV-19/England/NORT-291DFC/2020|2020-05-05|EPI\_ISL\_489107|Original|hCoV-19^^England|Human|NU-OMICS DNA Sequencing research facility|Wellcome Sanger Institute for the COVID-19 Genomics UK (COG-UK) consortium|Davies|United Kingdom

>Spike|hCoV-19/England/CAMB-1B8A08/2020|2020-10-29|EPI\_ISL\_651674|Original|hCoV-19^^England|Human|Department of Pathology|COVID-19 Genomics UK (COG-UK) Consortium|Goodfellow|United Kingdom

>Spike|hCoV-19/Sweden/20-52048/2020|2020-06-09|EPI\_ISL\_510868|Original|hCoV-19^^Vastra Gotaland|Human|Klinisk mikrobiologi NAL Trollhattan|The Public Health Agency of Sweden|Svartstr\u00f6m|Sweden

>Spike|hCoV-19/Wales/PHWC-49A31D/2020|2020-12-01|EPI\_ISL\_727528|Original|hCoV-19^^Wales|Human|Originating lab|COVID-19 Genomics UK (COG-UK) Consortium|Moore|United Kingdom

>Spike|hCoV-19/Australia/SAP374/2020|2020-03-20|EPI\_ISL\_492139|Original|hCoV-19^^South Australia|Human|SA Pathology|SA Pathology|Leong|Australia

>Spike|hCoV-19/England/CAMB-77550/2020|2020-04-01|EPI\_ISL\_439454|Original|hCoV-19^^England|Human|Department of Pathology|Wellcome Sanger Institute for the COVID-19 Genomics UK (COG-UK) consortium|Amato|United Kingdom

>Spike|hCoV-19/Canada/BC\_04346268/2020|2020-04-00|EPI\_ISL\_466766|Original|hCoV-19^^British Columbia|Human|BCCDC Public Health Laboratory|BCCDC Public Health Laboratory|Harrigan|Canada

>Spike|hCoV-19/Wales/PHWC-498546/2020|2020-12-01|EPI\_ISL\_727090|Original|hCoV-19^^Wales|Human|Originating lab|COVID-19 Genomics UK (COG-UK) Consortium|Moore|United Kingdom

>Spike|hCoV-19/USA/LA-EVTL1035/2020|2020-08-25|EPI\_ISL\_653725|Original|hCoV-19^^Louisiana|Human|LSUHS Emerging Viral Threat Laboratory|Microbial Genome Sequencing Center|Kamil|USA

>Spike|hCoV-19/USA/MI-MDHHS-SC21701/2020|2020-03-25|EPI\_ISL\_529820|Original|hCoV-19^^Michigan|Human|Michigan Department of Health and Human Services|Michigan Department of Health and Human Services|Blankenship|USA

>Spike|hCoV-19/Germany/HH-hpi-p2429/2020|2020-04-20|EPI\_ISL\_776498|Original|hCoV-19^^Hamburg|Human|University Medical Center Hamburg Eppendorf|Heinrich Pette Institute|Robitaille|Germany

>Spike|hCoV-19/Wales/PHWC-4960CF/2020|2020-11-25|EPI\_ISL\_726529|Original|hCoV-19^^Wales|Human|Originating lab|COVID-19 Genomics UK (COG-UK) Consortium|Moore|United Kingdom

>Spike|hCoV-19/Germany/BE-ChVir-W1139-8123/2020|2020-04-06|EPI\_ISL\_753940|Original|hCoV-19^^Berlin|Human|Charit\u00e9 Universit\u00e4tsmedizin Berlin|Charit\u00e9 Universit\u00e4tsmedizin Berlin|Muehlemann|Germany

>Spike|hCoV-19/England/PORT-2E9180/2020|2020-12-18|EPI\_ISL\_763624|Original|hCoV-19^^England|Human|Centre for Enzyme Innovation|COVID-19 Genomics UK (COG-UK) Consortium|Robson|United Kingdom

>Spike|hCoV-19/Slovenia/4499/2020|2020-03-05|EPI\_ISL\_635207|Original|hCoV-19^^Slovenia|Human|Institute of Microbiology and Immunology|Institute of Microbiology and Immunology|Zakotnik|Slovenia

>Spike|hCoV-19/England/QEUH-C33B16/2020|2020-12-11|EPI\_ISL\_734031|Original|hCoV-19^^England|Human|Lighthouse Lab in Glasgow|Wellcome Sanger Institute for the COVID-19 Genomics UK (COG-UK) Consortium|Davies|United Kingdom

>Spike|hCoV-19/USA/TX-DSHS-0125/2020|2020-06-11|EPI\_ISL\_522952|Original|hCoV-19^^Texas|Human|Texas Department of State Health Services|Texas Department of State Health Services|Rahman|USA

>Spike|hCoV-19/USA/HI-H200567/2020|2020-10-24|EPI\_ISL\_753095|Original|hCoV-19^^Hawaii|Human|State Laboratories Division|State Laboratories Division|Sultana|USA

>Spike|hCoV-19/England/ALDP-B23E20/2020|2020-11-04|EPI\_ISL\_646343|Original|hCoV-19^^England|Human|Lighthouse Lab in Alderley Park|Wellcome Sanger Institute for the COVID-19 Genomics UK (COG-UK) Consortium|Davies|United Kingdom

>Spike|hCoV-19/Netherlands/ZH-EMC-931/2020|2020-10-15|EPI\_ISL\_722507|Original|hCoV-19^^Zuid Holland|Human|Dutch COVID-19 response team|Erasmus Medical Center|Oude Munnink|Netherlands

>Spike|hCoV-19/USA/OR-PROV-035/2020|2020-03-26|EPI\_ISL\_482317|Original|hCoV-19^^Oregon|Human|Providence St. Joseph Health Molecular Genomics Laboratory|Providence St. Joseph Health Molecular Genomics Laboratory|Dowdell|USA

>Spike|hCoV-19/USA/NC-CDC-2-4693552/2020|2020-11-09|EPI\_ISL\_747175|Original|hCoV-19^^North Carolina|Human|Respiratory Viruses Branch|Respiratory Viruses Branch|Queen|USA

>Spike|hCoV-19/Australia/SAP057/2020|2020-03-27|EPI\_ISL\_451096|Original|hCoV-19^^South Australia|Human|SA Pathology|SA Pathology|Leong|Australia

>Spike|hCoV-19/Switzerland/LU-ETHZ-350472/2020|2020-11-03|EPI\_ISL\_728826|Original|hCoV-19^^Lucerne|Human|Viollier AG|Department of Biosystems Science and Engineering|Nadeau|Switzerland

>Spike|hCoV-19/England/204961136/2020|2020-12-03|EPI\_ISL\_700691|Original|hCoV-19^^England|Human|Respiratory Virus Unit|COVID-19 Genomics UK (COG-UK) Consortium|Platt|United Kingdom

>Spike|hCoV-19/USA/TX-HMH-3797/2020|2020-06-13|EPI\_ISL\_543201|Original|hCoV-19^^Texas|Human|Houston Methodist Hospital|Houston Methodist Hospital|Long|USA

>Spike|hCoV-19/England/SHEF-C9267/2020|2020-05-23|EPI\_ISL\_475418|Original|hCoV-19^^England|Human|Virology Department|COVID-19 Genomics UK (COG-UK) Consortium|de Silva|United Kingdom

>Spike|hCoV-19/South Africa/KRISP-K004591/2020|2020-11-07|EPI\_ISL\_660621|Original|hCoV-19^^KwaZulu-Natal|Human|NHLS-IALCH|KRISP|de Oliveira|South Africa

>Spike|hCoV-19/USA/AZ-TG666102/2020|2020-03-27|EPI\_ISL\_696192|Original|hCoV-19^^Arizona|Human|Sonora Quest Laboratories|TGen North|French|USA

>Spike|hCoV-19/Denmark/DCGC-15933/2020|2020-11-23|EPI\_ISL\_714491|Original|hCoV-19^^Hovedstaden|Human|Department of Virus and Microbiological Special Diagnostics|Albertsen Lab|Michaelsen|Denmark

>Spike|hCoV-19/England/ALDP-AA08F1/2020|2020-10-21|EPI\_ISL\_625029|Original|hCoV-19^^England|Human|Lighthouse Lab in Alderley Park|Wellcome Sanger Institute for the COVID-19 Genomics UK (COG-UK) consortium|Davies|United Kingdom

>Spike|hCoV-19/Wales/PHWC-16DEF7/2020|2020-09-28|EPI\_ISL\_585639|Original|hCoV-19^^Wales|Human|Wales Specialist Virology Centre Sequencing lab|COVID-19 Genomics UK (COG-UK) Consortium|Moore|United Kingdom

>Spike|hCoV-19/Northern Ireland/QEUIH-7A4D4C/2020|2020-07-14|EPI\_ISL\_533177|Original|hCoV-19^^Northern Ireland|Human|Lighthouse Lab in Glasgow|Wellcome Sanger Institute for the COVID-19 Genomics UK (COG-UK) consortium|Davies|United Kingdom

>Spike|hCoV-19/England/C200044478/2020|2020-11-06|EPI\_ISL\_666761|Original|hCoV-19^^England|Human|Respiratory Virus Unit|COVID-19 Genomics UK (COG-UK) Consortium|Platt|United Kingdom

>Spike|hCoV-19/England/201090820/2020|2020-03-04|EPI\_ISL\_464608|Original|hCoV-19^^England|Human|Respiratory Virus Unit|Respiratory Virus Unit|Platt|United Kingdom

>Spike|hCoV-19/Singapore/607/2020|2020-07-01|EPI\_ISL\_490057|Original|hCoV-19^^Singapore|Human|National Public Health Laboratory|National Public Health Laboratory|Mak|Singapore

>Spike|hCoV-19/Luxembourg/LNS9726231/2020|2020-11-24|EPI\_ISL\_744972|Original|hCoV-19^^Luxembourg|Human|Laboratoire national de sant\u00e9|Laboratoire national de sant\u00e9|Wienecke-Baldacchino|Luxembourg

>Spike|hCoV-19/England/CAMC-BBB75F/2020|2020-11-21|EPI\_ISL\_705561|Original|hCoV-19^^England|Human|Department of Pathology|COVID-19 Genomics UK (COG-UK) Consortium|Goodfellow|United Kingdom

>Spike|hCoV-19/England/ALDP-9EE0D2/2020|2020-05-06|EPI\_ISL\_589557|Original|hCoV-19^^England|Human|Lighthouse Lab in Alderley Park|Wellcome Sanger Institute for the COVID-19 Genomics UK (COG-UK) consortium|Davies|United Kingdom

>Spike|hCoV-19/Bangladesh/DNAS\_DRCIM\_isl\_SM-01/2020|2020-07-04|EPI\_ISL\_774919|Original|hCoV-19^^Dhaka|Human|Designated Reference Institute for Chemical Measurements (DRICM)|DNA SOLUTION LTD.|Rabbi|Bangladesh

>Spike|hCoV-19/Denmark/DCGC-13965/2020|2020-11-30|EPI\_ISL\_711481|Original|hCoV-19^^Midtjylland|Human|Department of Virus and Microbiological Special Diagnostics|Albertsen Lab|Michaelsen|Denmark

>Spike|hCoV-19/Wales/PHWC-24F27/2020|2020-03-22|EPI\_ISL\_420956|Original|hCoV-19^^Wales|Human|Wales Specialist Virology Centre|Public Health Wales Microbiology Cardiff|Moore|United Kingdom

>Spike|hCoV-19/USA/AZ-TG312514/2020|2020-05-16|EPI\_ISL\_694323|Original|hCoV-19^^Arizona|Human|TGen North|TGen North|French|USA

>Spike|hCoV-19/England/ALDP-94FF96/2020|2020-06-15|EPI\_ISL\_555150|Original|hCoV-19^^England|Human|Lighthouse Lab in Alderley Park|Wellcome Sanger Institute for the COVID-19 Genomics UK (COG-UK) consortium|Davies|United Kingdom

>Spike|hCoV-19/USA/CA-QDX-1668/2020|2020-03-18|EPI\_ISL\_603919|Original|hCoV-19^^California|Human|Quest Diagnostics|Quest Diagnostics|Kagan|USA

>Spike|hCoV-19/France/ARA-27286/2020|2020-04-19|EPI\_ISL\_676570|Original|hCoV-19^^Auvergne-Rh\u00f4ne-Alpes|Human|CNR Virus des Infections Respiratoires - France SUD|CNR Virus des Infections Respiratoires - France SUD|Bal|France

>Spike|hCoV-19/England/CAMB-80967/2020|2020-04-10|EPI\_ISL\_443036|Original|hCoV-19^^England|Human|Department of Pathology|Wellcome Sanger Institute for the COVID-19 Genomics UK (COG-UK) consortium|Amato|United Kingdom

>Spike|hCoV-19/England/OXON-B28E7/2020|2020-04-10|EPI\_ISL\_534780|Original|hCoV-19^^England|Human|Oxford Viromics|COVID-19 Genomics UK (COG-UK) Consortium|Golubchik|United Kingdom

>Spike|hCoV-19/Germany/NW-HHU-368/2020|2020-11-26|EPI\_ISL\_718049|Original|hCoV-19^^North Rhine-Westphalia|Human|ZOTZ KLIMAS MVZ D\u00f0fcsseldorf-Centrum GbR \u00dcBAG f\u00f0fcr Labormedizin|Center of Medical Microbiology|Wienemann|Germany

>Spike|hCoV-19/England/QEUEH-9E36AE/2020|2020-09-24|EPI\_ISL\_584864|Original|hCoV-19^^England|Human|Northumbria University / South Tees Hospitals NHS Foundation Trust / North Cumbria Integrated Care NHS Foundation Trust / North Tees and Hartlepool NHS Foundation Trust / Newcastle Hospitals NHS Foundation Trust|COVID-19 Genomics UK (COG-UK) Consortium|Bashton|United Kingdom

>Spike|hCoV-19/USA/CA-CZB-14939/2020|2020-11-29|EPI\_ISL\_738736|Original|hCoV-19^^California|Human|Orange County Public Health Lab|Chan-Zuckerberg Biohub|Kamm|USA

>Spike|hCoV-19/Wales/PHWC-15DA9C/2020|2020-05-14|EPI\_ISL\_472757|Original|hCoV-19^^Wales|Human|Wales Specialist Virology Centre Sequencing lab|COVID-19 Genomics UK (COG-UK) Consortium|Moore|United Kingdom

>Spike|hCoV-19/South Korea/KCDC2512/2020|2020-06-17|EPI\_ISL\_514915|Original|hCoV-19^^South Korea|Human|Division of Viral Diseases|Division of Viral Diseases|Kim|South Korea

>Spike|hCoV-19/England/QEUEH-B67B83/2020|2020-11-11|EPI\_ISL\_661493|Original|hCoV-19^^England|Human|Lighthouse Lab in Glasgow|Wellcome Sanger Institute for the COVID-19 Genomics UK (COG-UK) Consortium|Davies|United Kingdom

>Spike|hCoV-19/USA/PA-QDX-30/2020|2020-03-13|EPI\_ISL\_467904|Original|hCoV-19^^Pennsylvania|Human|Quest Diagnostics|Quest Diagnostics|Kagan|USA

>Spike|hCoV-19/Belgium/reg-09221140/2020|2020-09-22|EPI\_ISL\_738233|Original|hCoV-19^^Kumtich|Human|UZ Leuven|KU Leuven|Maes|Belgium

>Spike|hCoV-19/Scotland/CVR453/2020|2020-03-23|EPI\_ISL\_439080|Original|hCoV-19^^Scotland|Human|West of Scotland Specialist Virology Centre|COVID-19 Genomics UK (COG-UK) Consortium|Robertson|United Kingdom

>Spike|hCoV-19/England/CAMB-1B7B06/2020|2020-10-20|EPI\_ISL\_638359|Original|hCoV-19^^England|Human|Department of Pathology|COVID-19 Genomics UK (COG-UK) Consortium|Goodfellow|United Kingdom

>Spike|hCoV-19/USA/NM-UNM-00610/2020|2020-05-11|EPI\_ISL\_560325|Original|hCoV-19^^New Mexico|Human|TriCore Reference Laboratories|Center for Global Health|Domman|USA

>Spike|hCoV-19/South Korea/KCDC2641/2020|2020-07-09|EPI\_ISL\_515043|Original|hCoV-19^^South Korea|Human|Division of Viral Diseases|Division of Viral Diseases|Kim|South Korea

>Spike|hCoV-19/USA/WA-S771/2020|2020-04-13|EPI\_ISL\_449941|Original|hCoV-19^^Washington|Human|Washington State Department of Health|Seattle Flu Study|Bedford|USA

>Spike|hCoV-19/Northern Ireland/NIRE-107299/2020|2020-03-31|EPI\_ISL\_585132|Original|hCoV-19^^Northern Ireland|Human|Regional Virus Laboratory|COVID-19 Genomics UK (COG-UK) Consortium|Fairley|United Kingdom

>Spike|hCoV-19/Australia/VIC12258/2020|2020-07-23|EPI\_ISL\_591938|Original|hCoV-19^^Victoria|Human|Microbiological Diagnostic Unit - Public Health Laboratory (MDU-PHL)|MDU-PHL|Schultz|Australia

>Spike|hCoV-19/Denmark/DCGC-17600/2020|2020-12-14|EPI\_ISL\_751097|Original|hCoV-19^^Hovedstaden|Human|Department of Virus and Microbiological Special Diagnostics|Albertsen Lab|Michaelsen|Denmark

>Spike|hCoV-19/USA/MI-MDHHS-SC22425/2020|2020-11-09|EPI\_ISL\_708258|Original|hCoV-19^^Michigan|Human|Michigan Department of Health and Human Services|Michigan Department of Health and Human Services|Jacob|USA

>Spike|hCoV-19/England/CAMC-B7B0C9/2020|2020-11-12|EPI\_ISL\_668108|Original|hCoV-19^^England|Human|Lighthouse Lab in Cambridge|Wellcome Sanger Institute for the COVID-19 Genomics UK (COG-UK) Consortium|Davies|United Kingdom

>Spike|hCoV-19/Denmark/DCGC-13379/2020|2020-11-30|EPI\_ISL\_712762|Original|hCoV-19^^Sjaelland|Human|Department of Virus and Microbiological Special Diagnostics|Albertsen Lab|Michaelsen|Denmark

>Spike|hCoV-19/Wales/PHWC-16D149/2020|2020-09-24|EPI\_ISL\_572932|Original|hCoV-19^^Wales|Human|Wales Specialist Virology Centre Sequencing lab|COVID-19 Genomics UK (COG-UK) Consortium|Moore|United Kingdom

>Spike|hCoV-19/Netherlands/Friesland\_30/2020|2020-04-18|EPI\_ISL\_460845|Original|hCoV-19^^Friesland|Human|Dutch COVID-19 response team|Erasmus Medical Center|Oude Munnink|Netherlands

>Spike|hCoV-19/England/MILK-B967A5/2020|2020-11-14|EPI\_ISL\_676126|Original|hCoV-19^^England|Human|Lighthouse Lab in Milton Keynes|Wellcome Sanger Institute for the COVID-19 Genomics UK (COG-UK) Consortium|Davies|United Kingdom

>Spike|hCoV-19/England/ALDP-4A8376/2020|2020-06-11|EPI\_ISL\_559535|Original|hCoV-19^^England|Human|Lighthouse Lab in Alderley Park|Wellcome Sanger Institute for the COVID-19 Genomics UK (COG-UK) consortium|Davies|United Kingdom

>Spike|hCoV-19/Wales/PHWC-47EF75/2020|2020-10-06|EPI\_ISL\_612608|Original|hCoV-19^^Wales|Human|Wales Specialist Virology Centre Sequencing lab|COVID-19 Genomics UK (COG-UK) Consortium|Moore|United Kingdom

>Spike|hCoV-19/USA/WA-UW-7670/2020|2020-04-17|EPI\_ISL\_570189|Original|hCoV-19^^Washington|Human|UW Virology Lab|UW Virology Lab|Roychoudhury|USA

>Spike|hCoV-19/England/QEUEH-96BED3/2020|2020-08-13|EPI\_ISL\_531295|Original|hCoV-19^^England|Human|Lighthouse Lab in Glasgow|Wellcome Sanger Institute for the COVID-19 Genomics UK (COG-UK) consortium|Davies|United Kingdom

>Spike|hCoV-19/England/ALDP-B26027/2020|2020-11-04|EPI\_ISL\_646715|Original|hCoV-19^^England|Human|Lighthouse Lab in Alderley Park|Wellcome Sanger Institute for the COVID-19 Genomics UK (COG-UK) Consortium|Davies|United Kingdom

>Spike|hCoV-19/Spain/AN-IBV-002054/2020|2020-03-15|EPI\_ISL\_452375|Original|hCoV-19^^Andalucia|Human|Servicio de Microbiolog\u00eda. HRU de M\u00ella. Servicio Andaluz de Salud|SeqCOVID-SPAIN consortium|IBV(CSIC)|Comas|Spain

>Spike|hCoV-19/USA/TX-HMH-MCoV-8191/2020|2020-07-07|EPI\_ISL\_784256|Original|hCoV-19^^Texas|Human|Houston Methodist Hospital|Houston Methodist Hospital|Long|USA

>Spike|hCoV-19/England/CAMC-B51E56/2020|2020-11-06|EPI\_ISL\_657957|Original|hCoV-19^^England|Human|Lighthouse Lab in Cambridge|Wellcome Sanger Institute for the COVID-19 Genomics UK (COG-UK) Consortium|Davies|United Kingdom

>Spike|hCoV-19/England/BRIS-124F44/2020|2020-03-26|EPI\_ISL\_443832|Original|hCoV-19^^England|Human|PHE South West Regional Laboratory|Wellcome Sanger Institute for the COVID-19 Genomics UK (COG-UK) consortium|Amato|United Kingdom

>Spike|hCoV-19/USA/AZ-TG670099/2020|2020-05-02|EPI\_ISL\_696321|Original|hCoV-19^^Arizona|Human|Sonora Quest Laboratories|TGen North|French|USA

>Spike|hCoV-19/USA/WA-S1618/2020|2020-05-26|EPI\_ISL\_496044|Original|hCoV-19^^Washington|Human|Washington State Department of Health|Seattle Flu Study|Lee|USA

>Spike|hCoV-19/England/CAMB-82B6F/2020|2020-04-22|EPI\_ISL\_438664|Original|hCoV-19^^England|Human|Department of Pathology|COVID-19 Genomics UK (COG-UK) Consortium|Meredith|United Kingdom

>Spike|hCoV-19/Australia/VIC17846/2020|2020-07-27|EPI\_ISL\_779497|Original|hCoV-19^^Victoria|Human|Microbiological Diagnostic Unit - Public Health Laboratory (MDU-PHL)|MDU-PHL|Beck|Australia

>Spike|hCoV-19/USA/WA-S1057/2020|2020-04-30|EPI\_ISL\_463547|Original|hCoV-19^^Washington|Human|Washington State Department of Health|Seattle Flu Study|Bedford|USA

>Spike|hCoV-19/Switzerland/AG-ETHZ-260158/2020|2020-08-26|EPI\_ISL\_539452|Original|hCoV-19^^Aargau|Human|Viollier AG|Department of Biosystems Science and Engineering|Nadeau|Switzerland

>Spike|hCoV-19/England/QEUEH-A5DDF4/2020|2020-10-12|EPI\_ISL\_597389|Original|hCoV-19^^England|Human|Lighthouse Lab in Glasgow|Wellcome Sanger Institute for the COVID-19 Genomics UK (COG-UK) consortium|Davies|United Kingdom

>Spike|hCoV-19/France/ARA-21154/2020|2020-04-07|EPI\_ISL\_508991|Original|hCoV-19^^Auvergne-Rh\u00f4ne-Alpes|Human|CNR Virus des Infections Respiratoires - France SUD|CNR Virus des Infections Respiratoires - France SUD|Josset|France

>Spike|hCoV-19/env/Qingdao/IVDC-05-10/2020|2020-09-24|EPI\_ISL\_591274|Original|hCoV-19^^Shandong|Environment|National Institute for Viral Disease Control and Prevention|National Institute for Viral Disease Control and Prevention|Chen|China

>Spike|hCoV-19/England/ALDP-9BE484/2020|2020-09-09|EPI\_ISL\_567928|Original|hCoV-19^^England|Human|Lighthouse Lab in Alderley Park|Wellcome Sanger Institute for the COVID-19 Genomics UK (COG-UK) consortium|Davies|United Kingdom

>Spike|hCoV-19/USA/NY-Wadsworth-243231-01/2020|2020-10-11|EPI\_ISL\_734346|Original|hCoV-19^^New York|Human|Wadsworth Center|Wadsworth Center|Lasek-Nesselquist|USA

>Spike|hCoV-19/Australia/VIC5474/2020|2020-07-20|EPI\_ISL\_520223|Original|hCoV-19^^Victoria|Human|Microbiological Diagnostic Unit - Public Health Laboratory (MDU-PHL)|MDU-PHL|Schultz|Australia

>Spike|hCoV-19/Canada/ON-A27/2020|2020-11-24|EPI\_ISL\_755725|Original|hCoV-19^^Ontario|Human|Toronto Invasive Bacterial Diseases Network|McMaster University|McArthur|Canada

>Spike|hCoV-19/England/QEUEH-B9EC35/2020|2020-11-18|EPI\_ISL\_719756|Original|hCoV-19^^England|Human|Lighthouse Lab in Glasgow|Wellcome Sanger Institute for the COVID-19 Genomics UK (COG-UK) Consortium|Davies|United Kingdom

>Spike|hCoV-19/England/NORW-F7E02/2020|2020-11-13|EPI\_ISL\_650502|Original|hCoV-19^^England|Human|Quadram Institute Bioscience|COVID-19 Genomics UK (COG-UK) Consortium|Alikhan|United Kingdom

>Spike|hCoV-19/England/LIVE-DB2CDF/2020|2020-11-01|EPI\_ISL\_637976|Original|hCoV-19^^England|Human|Liverpool Clinical Laboratories|COVID-19 Genomics UK (COG-UK) Consortium|Haldenby|United Kingdom

>Spike|hCoV-19/India/TG-CCMB-AA586/2020|2020-08-12|EPI\_ISL\_539649|Original|hCoV-19^^Telangana|Human|CSIR-Centre for Cellular and Molecular Biology|CSIR-Centre for Cellular and Molecular Biology|Mukherjee|India

>Spike|hCoV-19/England/BRIS-12EF68/2020|2020-04-25|EPI\_ISL\_488271|Original|hCoV-19^^England|Human|PHE South West Regional Laboratory|Wellcome Sanger Institute for the COVID-19 Genomics UK (COG-UK) consortium|Davies|United Kingdom

>Spike|hCoV-19/Switzerland/BE-ETHZ-360261/2020|2020-11-09|EPI\_ISL\_729238|Original|hCoV-19^^Bern|Human|Viollier AG|Department of Biosystems Science and Engineering|Nadeau|Switzerland

>Spike|hCoV-19/England/QEUEH-9B89E5/2020|2020-09-07|EPI\_ISL\_549582|Original|hCoV-19^^England|Human|Lighthouse Lab in Glasgow|Wellcome Sanger Institute for the COVID-19 Genomics UK (COG-UK) consortium|Davies|United Kingdom

>Spike|hCoV-19/USA/NY-NYUMC670/2020|2020-04-14|EPI\_ISL\_444787|Original|hCoV-19^^New York|Human|NYU Langone Health|Departments of Pathology and Medicine|Maurano|USA

>Spike|hCoV-19/Hong Kong/VM20002588/2020|2020-02-13|EPI\_ISL\_413497|Original|hCoV-19^^Hong Kong|Human|Ruttonjee Hospital|Hong Kong Department of Health|Mak|China

>Spike|hCoV-19/India/DL-NCDC5643-CSIR-IGIB/2020|2020-05-25|EPI\_ISL\_482607|Original|hCoV-19^^Delhi|Human|National Centre for Disease control (NCDC)|NCDC/CSIR-IGIB|Singh|India

>Spike|hCoV-19/USA/UT-UPHL-2009244/2020|2020-05-12|EPI\_ISL\_525233|Original|hCoV-19^^Utah|Human|Utah Public Health Laboratory|Utah Public Health Laboratory|Young|USA

>Spike|hCoV-19/USA/LA-EVTL1316/2020|2020-12-11|EPI\_ISL\_778982|Original|hCoV-19^^Louisiana|Human|LSUHS Emerging Viral Threat Laboratory|Microbial Genome Sequencing Center|Kamil|USA

>Spike|hCoV-19/USA/WA-UW398/2020|2020-03-29|EPI\_ISL\_529200|Original|hCoV-19^^Washington|Human|University of Washington|University of Washington|Roychoudhury|USA

>Spike|hCoV-19/Denmark/DCGC-13276/2020|2020-11-30|EPI\_ISL\_712699|Original|hCoV-19^^Sjaelland|Human|Department of Virus and Microbiological Special Diagnostics|Albertsen Lab|Michaelsen|Denmark

>Spike|hCoV-19/England/LIVE-DC6E3C/2020|2020-11-24|EPI\_ISL\_705926|Original|hCoV-19^^England|Human|Liverpool Clinical Laboratories|COVID-19 Genomics UK (COG-UK) Consortium|Haldenby|United Kingdom

>Spike|hCoV-19/Portugal/PT0169/2020|2020-03-28|EPI\_ISL\_453885|Original|hCoV-19^^Portugal|Human|unknown|Instituto Nacional de Saude (INSA)|Borges|Portugal

>Spike|hCoV-19/England/QEUEH-BCC1B7/2020|2020-11-27|EPI\_ISL\_704390|Original|hCoV-19^^England|Human|Lighthouse Lab in Glasgow|Wellcome Sanger Institute for the COVID-19 Genomics UK (COG-UK) Consortium|Davies|United Kingdom

>Spike|hCoV-19/USA/MD-MDH-0350/2020|2020-10-20|EPI\_ISL\_648289|Original|hCoV-19^^Maryland|Human|MD PHL|MD PHL|Keller|USA

>Spike|hCoV-19/England/MILK-ACBEB2/2020|2020-10-20|EPI\_ISL\_709915|Original|hCoV-19^^England|Human|Lighthouse Lab in Milton Keynes|Wellcome Sanger Institute for the COVID-19 Genomics UK (COG-UK) Consortium|Davies|United Kingdom

>Spike|hCoV-19/USA/WA-S167/2020|2020-03-18|EPI\_ISL\_430205|Original|hCoV-19^^Washington|Human|Washington State Department of Health|Seattle Flu Study|Bedford|USA

>Spike|hCoV-19/England/BRIS-1853B20/2020|2020-04-25|EPI\_ISL\_492416|Original|hCoV-19^^England|Human|PHE South West Regional Laboratory|Wellcome Sanger Institute for the COVID-19 Genomics UK (COG-UK) consortium|Davies|United Kingdom

>Spike|hCoV-19/DRC/1486/2020|2020-04-08|EPI\_ISL\_434711|Original|hCoV-19^^Kinshasa|Human|Viral Respiratory Lab|Pathogen Sequencing Lab|Amuri|Democratic Republic of the Congo

>Spike|hCoV-19/England/PORT-2E9CBC/2020|2020-00-00|EPI\_ISL\_706876|Original|hCoV-19^^England|Human|Centre for Enzyme Innovation|COVID-19 Genomics UK (COG-UK) Consortium|Robson|United Kingdom

>Spike|hCoV-19/England/NORW-F77BC/2020|2020-12-02|EPI\_ISL\_704070|Original|hCoV-19^^England|Human|Quadram Institute Bioscience|COVID-19 Genomics UK (COG-UK) Consortium|Alikhan|United Kingdom

>Spike|hCoV-19/Japan/P4-1/2020|2020-03-11|EPI\_ISL\_419301|Original|hCoV-19^^Saitama|Human|Saitama Prefectural Institute of Public Health|Pathogen Genomics Center|Sekizuka|Japan

>Spike|hCoV-19/England/MILK-9A564E/2020|2020-09-03|EPI\_ISL\_550155|Original|hCoV-19^^England|Human|Lighthouse Lab in Milton Keynes|Wellcome Sanger Institute for the COVID-19 Genomics UK (COG-UK) consortium|Davies|United Kingdom

>Spike|hCoV-19/England/QEUH-9B51E0/2020|2020-09-03|EPI\_ISL\_590195|Original|hCoV-19^^England|Human|Lighthouse Lab in Glasgow|Wellcome Sanger Institute for the COVID-19 Genomics UK (COG-UK) consortium|Davies|United Kingdom

>Spike|hCoV-19/USA/MA-MASPHL-00488/2020|2020-05-02|EPI\_ISL\_693079|Original|hCoV-19^^Massachusetts|Human|Massachusetts State Public Health Laboratory|Massachusetts State Public Health Laboratory|Lang|USA

>Spike|hCoV-19/England/MILK-A47461/2020|2020-10-05|EPI\_ISL\_598304|Original|hCoV-19^^England|Human|Lighthouse Lab in Milton Keynes|Wellcome Sanger Institute for the COVID-19 Genomics UK (COG-UK) consortium|Davies|United Kingdom

>Spike|hCoV-19/USA/CA-CZB-10815/2020|2020-07-06|EPI\_ISL\_583067|Original|hCoV-19^^California|Human|Humboldt County Public Health Laboratory|Chan-Zuckerberg Biohub|Bhatt|USA

>Spike|hCoV-19/Luxembourg/LNS3343013/2020|2020-10-26|EPI\_ISL\_740292|Original|hCoV-19^^Luxembourg|Human|Laboratoire national de sant\u00e9|Laboratoire national de sant\u00e9|Wienecke-Baldacchino|Luxembourg

>Spike|hCoV-19/United Arab Emirates/L5857/2020|2020-03-31|EPI\_ISL\_469279|Original|hCoV-19^^United Arab Emirates|Human|Mohammed Bin Rashid University of Medicine and Health Sciences|Al Jalila Genomics Center|Ramaswamy|United Arab Emirates

>Spike|hCoV-19/Netherlands/NA\_27/2020|2020-03-13|EPI\_ISL\_415484|Original|hCoV-19^^Netherlands|Human|Dutch COVID-19 response team|Erasmus Medical Center|Oude Munnink|Netherlands

>Spike|hCoV-19/Wales/PHWC-164E4B/2020|2020-05-23|EPI\_ISL\_479388|Original|hCoV-19^^Wales|Human|Wales Specialist Virology Centre Sequencing lab|COVID-19 Genomics UK (COG-UK) Consortium|Moore|United Kingdom

>Spike|hCoV-19/Denmark/DCGC-21036/2020|2020-12-21|EPI\_ISL\_759518|Original|hCoV-19^^Sjaelland|Human|Department of Virus and Microbiological Special Diagnostics|Albertsen Lab|Michaelsen|Denmark

>Spike|hCoV-19/Australia/VIC966/2020|2020-03-27|EPI\_ISL\_430653|Original|hCoV-19^^Victoria|Human|Microbiological Diagnostic Unit Public Health Laboratory|Microbiological Diagnostic Unit Public Health Laboratory|Schultz|Australia

>Spike|hCoV-19/Japan/PG-1789/2020|2020-05-00|EPI\_ISL\_685395|Original|hCoV-19^^Japan|Human|Pathogen Genomics Center|Pathogen Genomics Center|Sekizuka|Japan

>Spike|hCoV-19/USA/AZ-TG496036/2020|2020-07-10|EPI\_ISL\_695264|Original|hCoV-19^^Arizona|Human|TGen North|TGen North|French|USA

>Spike|hCoV-19/India/MH-ACTREC-484/2020|2020-08-13|EPI\_ISL\_700132|Original|hCoV-19^^Maharashtra|Human|Hematopathology Laboratory|Hematopathology Laboratory|Patkar|India

>Spike|hCoV-19/USA/NY-Wadsworth-278038-01/2020|2020-11-22|EPI\_ISL\_754597|Original|hCoV-19^^New York|Human|Wadsworth Center|Wadsworth Center|Lasek-Nesselquist|USA

>Spike|hCoV-19/England/ALDP-5D1F15/2020|2020-06-19|EPI\_ISL\_558521|Original|hCoV-19^^England|Human|Lighthouse Lab in Alderley Park|Wellcome Sanger Institute for the COVID-19 Genomics UK (COG-UK) consortium|Davies|United Kingdom

>Spike|hCoV-19/Denmark/DCGC-15348/2020|2020-11-23|EPI\_ISL\_713776|Original|hCoV-19^^Hovedstaden|Human|Department of Virus and Microbiological Special Diagnostics|Albertsen Lab|Michaelsen|Denmark

>Spike|hCoV-19/USA/VA-DCLS-2235/2020|2020-11-03|EPI\_ISL\_734215|Original|hCoV-19^^Virginia|Human|Virginia Division of Consolidated Laboratory Services (DCLS)|Virginia Division of Consolidated Laboratory Services (DCLS)|St. Jacques|USA

>Spike|hCoV-19/USA/WA-S1309/2020|2020-05-14|EPI\_ISL\_495759|Original|hCoV-19^^Washington|Human|Washington State Department of Health|Seattle Flu Study|Lee|USA

>Spike|hCoV-19/England/CAMB-7DC55/2020|2020-04-05|EPI\_ISL\_441679|Original|hCoV-19^^England|Human|Department of Pathology|Wellcome Sanger Institute for the COVID-19 Genomics UK (COG-UK) consortium|Amato|United Kingdom

>Spike|hCoV-19/Scotland/QEUH-A4B2AF/2020|2020-10-08|EPI\_ISL\_637825|Original|hCoV-19^^Scotland|Human|Department of Pathology|COVID-19 Genomics UK (COG-UK) Consortium|Goodfellow|United Kingdom

>Spike|hCoV-19/England/MILK-ABC009/2020|2020-10-22|EPI\_ISL\_631032|Original|hCoV-19^^England|Human|Lighthouse Lab in Milton Keynes|Wellcome Sanger Institute for the COVID-19 Genomics UK (COG-UK) consortium|Davies|United Kingdom

>Spike|hCoV-19/England/MILK-B3B64B/2020|2020-11-02|EPI\_ISL\_706072|Original|hCoV-19^^England|Human|Oxford Viromics|COVID-19 Genomics UK (COG-UK) Consortium|Golubchik|United Kingdom

>Spike|hCoV-19/Japan/PG-3827/2020|2020-07-00|EPI\_ISL\_692078|Original|hCoV-19^^Japan|Human|Pathogen Genomics Center|Pathogen Genomics Center|Sekizuka|Japan

>Spike|hCoV-19/Denmark/DCGC-12682/2020|2020-11-16|EPI\_ISL\_682863|Original|hCoV-19^^Syddanmark|Human|Department of Virus and Microbiological Special Diagnostics|Albertsen Lab|Michaelsen|Denmark

>Spike|hCoV-19/Canada/ON-PHL-20-01274/2020|2020-06-00|EPI\_ISL\_548882|Original|hCoV-19^^Ontario|Human|Public Health Ontario Laboratory|Public Health Ontario Laboratory|Guthrie|Canada

>Spike|hCoV-19/South Korea/KCDC2497/2020|2020-06-15|EPI\_ISL\_514900|Original|hCoV-19^^South Korea|Human|Division of Viral Diseases|Division of Viral Diseases|Kim|South Korea

>Spike|hCoV-19/England/20176041404/2020|2020-04-21|EPI\_ISL\_465412|Original|hCoV-19^^England|Human|Respiratory Virus Unit|Respiratory Virus Unit|Platt|United Kingdom

>Spike|hCoV-19/USA/CA-CZB-15987/2020|2020-11-23|EPI\_ISL\_738723|Original|hCoV-19^^California|Human|Renegade|Chan-Zuckerberg Biohub|Kamm|USA

>Spike|hCoV-19/USA/TX-HMH-MCoV-18948/2020|2020-11-25|EPI\_ISL\_785242|Original|hCoV-19^^Texas|Human|Houston Methodist Hospital|Houston Methodist Hospital|Long|USA

>Spike|hCoV-19/United Arab Emirates/skmc-3891274/2020|2020-09-23|EPI\_ISL\_582683|Original|hCoV-19^^United Arab Emirates|Human|Sheikh Khalifa Medical City|Molecular/Surveillance lab\nSheikh Khalifa Medical City|Amirtharaj|United Arab Emirates

>Spike|hCoV-19/USA/TX-DSHS-1515/2020|2020-06-22|EPI\_ISL\_683430|Original|hCoV-19^^Texas|Human|Texas Department of State Health Services|Texas Department of State Health Services|Rahman|USA

>Spike|hCoV-19/USA/NY-PV09142/2020|2020-03-20|EPI\_ISL\_422513|Original|hCoV-19^^New York|Human|MSHS Clinical Microbiology Laboratories|MSHS Pathogen Surveillance Program|van Bakel|USA

>Spike|hCoV-19/USA/CA-SCCPHD-UC164/2020|2020-03-12|EPI\_ISL\_435643|Original|hCoV-19^^California|Human|Santa Clara County Public Health Department|Chiu Laboratory|Chiu|USA



>Spike|hCoV-19/England/ALDP-59977B/2020|2020-06-08|EPI\_ISL\_558379|Original|hCoV-19^^England|Human|Lighthouse Lab in Alderley Park|Wellcome Sanger Institute for the COVID-19 Genomics UK (COG-UK) consortium|Davies|United Kingdom

>Spike|hCoV-19/England/MILK-974596/2020|2020-08-17|EPI\_ISL\_575769|Original|hCoV-19^^England|Human|Lighthouse Lab in Milton Keynes|Wellcome Sanger Institute for the COVID-19 Genomics UK (COG-UK) consortium|Davies|United Kingdom

>Spike|hCoV-19/Scotland/QEUIH-96F3D0/2020|2020-08-17|EPI\_ISL\_534475|Original|hCoV-19^^Scotland|Human|NHSGGC West of Scotland Specialist Virology Centre / MRC-University of Glasgow Centre for Virus Research|Wellcome Sanger Institute for the COVID-19 Genomics UK (COG-UK) consortium|Davies|United Kingdom

>Spike|hCoV-19/Wales/PHWC-4A0A6A/2020|2020-12-10|EPI\_ISL\_743534|Original|hCoV-19^^Wales|Human|Wales Specialist Virology Centre Sequencing lab|COVID-19 Genomics UK (COG-UK) Consortium|Moore|United Kingdom

>Spike|hCoV-19/Australia/VIC5913/2020|2020-07-21|EPI\_ISL\_518692|Original|hCoV-19^^Victoria|Human|Microbiological Diagnostic Unit - Public Health Laboratory (MDU-PHL)|MDU-PHL|Schultz|Australia

>Spike|hCoV-19/England/MILK-A44F81/2020|2020-10-06|EPI\_ISL\_598612|Original|hCoV-19^^England|Human|Lighthouse Lab in Milton Keynes|Wellcome Sanger Institute for the COVID-19 Genomics UK (COG-UK) consortium|Davies|United Kingdom

>Spike|hCoV-19/USA/AZ-TG547344/2020|2020-07-06|EPI\_ISL\_695492|Original|hCoV-19^^Arizona|Human|AZ SPHL|TGen North|French|USA

>Spike|hCoV-19/USA/FL-BPHL-1234/2020|2020-05-28|EPI\_ISL\_541158|Original|hCoV-19^^Florida|Human|Florida Bureau of Public Health Laboratories|Florida Bureau of Public Health Laboratories|Blanton|USA

>Spike|hCoV-19/Portugal/PT0009/2020|2020-03-08|EPI\_ISL\_417994|Original|hCoV-19^^Portugal|Human|CHULC - H Curry Cabral|Instituto Nacional de Saude (INSA)|Borges|Portugal

>Spike|hCoV-19/USA/TX-DSHS-1427/2020|2020-06-23|EPI\_ISL\_671639|Original|hCoV-19^^Texas|Human|Texas Department of State Health Services|Texas Department of State Health Services|Rahman|USA

>Spike|hCoV-19/USA/WI-UW-1730/2020|2020-09-09|EPI\_ISL\_605603|Original|hCoV-19^^Wisconsin|Human|University of Wisconsin-Madison AIDS Vaccine Research Laboratories|University of Wisconsin-Madison AIDS Vaccine Research Laboratories|Baczenas|USA

>Spike|hCoV-19/New Zealand/20CV0369/2020|2020-09-24|EPI\_ISL\_579111|Original|hCoV-19^^Auckland|Human|LabPLUS|Institute of Environmental Science and Research (ESR)|Wang|New Zealand

>Spike|hCoV-19/USA/TX-HMH-MCoV-19080/2020|2020-11-24|EPI\_ISL\_783614|Original|hCoV-19^^Texas|Human|Houston Methodist Hospital|Houston Methodist Hospital|Long|USA

>Spike|hCoV-19/Denmark/DCGC-8536/2020|2020-10-26|EPI\_ISL\_625896|Original|hCoV-19^^Midtjylland|Human|Department of Virus and Microbiological Special Diagnostics|Albertsen lab|Michaelsen|Denmark

>Spike|hCoV-19/England/MILK-978662/2020|2020-07-31|EPI\_ISL\_550510|Original|hCoV-19^^England|Human|Lighthouse Lab in Milton Keynes|Wellcome Sanger Institute for the COVID-19 Genomics UK (COG-UK) consortium|Davies|United Kingdom

>Spike|hCoV-19/USA/AZ-TG640815/2020|2020-04-27|EPI\_ISL\_695772|Original|hCoV-19^^Arizona|Human|Sonora Quest Laboratories|TGen North|French|USA

>Spike|hCoV-19/England/ALDP-BBAFD0/2020|2020-11-20|EPI\_ISL\_701778|Original|hCoV-19^^England|Human|Lighthouse Lab in Alderley Park|Wellcome Sanger Institute for the COVID-19 Genomics UK (COG-UK) Consortium|Davies|United Kingdom

>Spike|hCoV-19/England/ALDP-9EA980/2020|2020-09-24|EPI\_ISL\_580124|Original|hCoV-19^^England|Human|Lighthouse Lab in Alderley Park|Wellcome Sanger Institute for the COVID-19 Genomics UK (COG-UK) consortium|Davies|United Kingdom

>Spike|hCoV-19/USA/TX-HMH-MCoV-11543/2020|2020-09-11|EPI\_ISL\_790050|Original|hCoV-19^^Texas|Human|Houston Methodist Hospital|Houston Methodist Hospital|Long|USA

>Spike|hCoV-19/United Arab Emirates/1043/2020|2020-06-11|EPI\_ISL\_698118|Original|hCoV-19^^Abu Dhabi|Human|Group 42 (G42) Healthcare|G42 Healthcare|Ogrodzki|United Arab Emirates

>Spike|hCoV-19/Scotland/CVR5827/2020|2020-11-14|EPI\_ISL\_665439|Original|hCoV-19^^Scotland|Human|West of Scotland Specialist Virology Centre|COVID-19 Genomics UK (COG-UK) Consortium|Robertson|United Kingdom

>Spike|hCoV-19/New Zealand/20VR3084/2020|2020-00-00|EPI\_ISL\_579414|Original|hCoV-19^^Canterbury|Human|Canterbury Health Laboratories|Institute of Environmental Science and Research (ESR)|Wang|New Zealand

>Spike|hCoV-19/England/CAMC-A41F0C/2020|2020-10-06|EPI\_ISL\_609335|Original|hCoV-19^^England|Human|Lighthouse Lab in Cambridge|Wellcome Sanger Institute for the COVID-19 Genomics UK (COG-UK) consortium|Davies|United Kingdom

>Spike|hCoV-19/Canada/ON-PHL-20-01286/2020|2020-06-00|EPI\_ISL\_548891|Original|hCoV-19^^Ontario|Human|Public Health Ontario Laboratory|Public Health Ontario Laboratory|Guthrie|Canada

>Spike|hCoV-19/Wales/PHWC-4A4978/2020|2020-12-14|EPI\_ISL\_763413|Original|hCoV-19^^Wales|Human|Wales Specialist Virology Centre Sequencing lab|COVID-19 Genomics UK (COG-UK) Consortium|Moore|United Kingdom

>Spike|hCoV-19/England/SHEF-10D0FEB/2020|2020-12-18|EPI\_ISL\_742030|Original|hCoV-19^^England|Human|Virology Department|COVID-19 Genomics UK (COG-UK) Consortium|de Silva|United Kingdom

>Spike|hCoV-19/Japan/IC-0139/2020|2020-09-00|EPI\_ISL\_667568|Original|hCoV-19^^Japan|Human|Pathogen Genomics Center|Pathogen Genomics Center|Sekizuka|Japan

>Spike|hCoV-19/Australia/VIC4509/2020|2020-07-17|EPI\_ISL\_518920|Original|hCoV-19^^Victoria|Human|Microbiological Diagnostic Unit - Public Health Laboratory (MDU-PHL)|MDU-PHL|Schultz|Australia

>Spike|hCoV-19/England/QEUA-AAD117/2020|2020-10-21|EPI\_ISL\_652941|Original|hCoV-19^^England|Human|Oxford Viromics|COVID-19 Genomics UK (COG-UK) Consortium|Golubchik|United Kingdom

>Spike|hCoV-19/Croatia/Zagreb-10/2020|2020-09-30|EPI\_ISL\_710568|Original|hCoV-19^^Zagreb|Human|University Hospital Dubrava|Ru\u0111er Bo\u0161kovic Institute; Forensic Science Centre Ivan Vu\u010deti\u0107; University of Zagreb Faculty of Science|Karlic|Croatia

>Spike|hCoV-19/USA/CA-IGI-0703/2020|2020-07-28|EPI\_ISL\_677876|Original|hCoV-19^^California|Human|Innovative Genomics Institute|Innovative Genomics Institute|Wyman|USA

>Spike|hCoV-19/USA/AZ-TG268770/2020|2020-03-19|EPI\_ISL\_426511|Original|hCoV-19^^Arizona|Human|TGen North|TGen North|Lemmer|USA

>Spike|hCoV-19/England/SHEF-C0AFF/2020|2020-09-27|EPI\_ISL\_573687|Original|hCoV-19^^England|Human|Virology Department|COVID-19 Genomics UK (COG-UK) Consortium|de Silva|United Kingdom

>Spike|hCoV-19/England/CAMC-A59754/2020|2020-10-08|EPI\_ISL\_597129|Original|hCoV-19^^England|Human|Lighthouse Lab in Cambridge|Wellcome Sanger Institute for the COVID-19 Genomics UK (COG-UK) consortium|Davies|United Kingdom

>Spike|hCoV-19/USA/CA-CDPH230/2020|2020-11-15|EPI\_ISL\_755080|Original|hCoV-19^^California|Human|California Department of Public Health|California Department of Public Health|Bell|USA

>Spike|hCoV-19/Peru/LIM-INS-009/2020|2020-03-08|EPI\_ISL\_489987|Original|hCoV-19^^Lima|Human|Laboratorio de Referencia Nacional de Virus Respiratorio. Instituto Nacional de Salud Per\u00fa|Laboratorio de Referencia Nacional de Biotecnolog\u00eda y Biolog\u00eda Molecular. Instituto Nacional de Salud Per\u00fa|Padilla Rojas|Peru

>Spike|hCoV-19/Japan/PG-1072/2020|2020-04-00|EPI\_ISL\_684682|Original|hCoV-19^^Japan|Human|Fukuoka Institute of Health and Environmental Sciences|Pathogen Genomics Center|Sekizuka|Japan

>Spike|hCoV-19/Belgium/ULG-10097/2020|2020-04-06|EPI\_ISL\_427348|Original|hCoV-19^^Liege|Human|Department of Clinical Microbiology|GIGA Medical Genomics|Durkin|Belgium

>Spike|hCoV-19/USA/MD-MDH-0078/2020|2020-05-25|EPI\_ISL\_509482|Original|hCoV-19^^Maryland|Human|Maryland Department of Health|Maryland Department of Health|Keller|USA

>Spike|hCoV-19/Japan/PG-2630/2020|2020-04-00|EPI\_ISL\_690762|Original|hCoV-19^^Japan|Human|Pathogen Genomics Center|Pathogen Genomics Center|Sekizuka|Japan

>Spike|hCoV-19/Morocco/FMP-13/2020|2020-11-00|EPI\_ISL\_728297|Original|hCoV-19^^Rabat|Human|Laboratoire Biolife|Laboratoire de Biotechnologie|Oudghiri|Morocco

>Spike|hCoV-19/Iceland/163/2020|2020-03-14|EPI\_ISL\_417775|Original|hCoV-19^^Reykjavik|Human|The National University Hospital of Iceland|deCODE genetics|J\u00f3nsson|Iceland

>Spike|hCoV-19/Wales/PHWC-2B588/2020|2020-04-10|EPI\_ISL\_445728|Original|hCoV-19^^Wales|Human|Wales Specialist Virology Centre|Public Health Wales Microbiology Cardiff|Moore|United Kingdom

>Spike|hCoV-19/USA/NY-Wadsworth-290723-01/2020|2020-12-20|EPI\_ISL\_767551|Original|hCoV-19^^New York|Human|URMC LABS|Wadsworth Center|Lasek-Nesselquist|USA

>Spike|hCoV-19/England/BIRM-5FF9C/2020|2020-00-00|EPI\_ISL\_461543|Original|hCoV-19^^England|Human|University of Birmingham|COVID-19 Genomics UK (COG-UK) Consortium|Loman|United Kingdom

>Spike|hCoV-19/England/BRIS-123938/2020|2020-04-07|EPI\_ISL\_442669|Original|hCoV-19^^England|Human|PHE South West Regional Laboratory|Wellcome Sanger Institute for the COVID-19 Genomics UK (COG-UK) consortium|Amato|United Kingdom

>Spike|hCoV-19/Portugal/PT1443/2020|2020-03-24|EPI\_ISL\_511402|Original|hCoV-19^^Portugal|Human|Instituto Nacional de Saude (INSA)|Instituto Nacional de Saude (INSA)|Borges|Portugal

>Spike|hCoV-19/Netherlands/GE-RIVM-10382/2020|2020-10-09|EPI\_ISL\_636536|Original|hCoV-19^^Gelderland|Human|Dutch COVID-19 response team|National Institute for Public Health and the Environment (RIVM)|Meijer|Netherlands

>Spike|hCoV-19/England/LIVE-A2B69/2020|2020-05-19|EPI\_ISL\_499925|Original|hCoV-19^^England|Human|Liverpool Clinical Laboratories|COVID-19 Genomics UK (COG-UK) Consortium|Haldenby|United Kingdom

>Spike|hCoV-19/USA/CA-ALSR-3012/2020|2020-07-12|EPI\_ISL\_635786|Original|hCoV-19^^California|Human|San Diego County Public Health Laboratory|Andersen lab at Scripps Research|Gangavarapu|USA

>Spike|hCoV-19/Japan/PG-2257/2020|2020-04-00|EPI\_ISL\_685862|Original|hCoV-19^^Japan|Human|Pathogen Genomics Center|Pathogen Genomics Center|Sekizuka|Japan

>Spike|hCoV-19/England/ALDP-9C4EE7/2020|2020-09-10|EPI\_ISL\_567634|Original|hCoV-19^^England|Human|Lighthouse Lab in Alderley Park|Wellcome Sanger Institute for the COVID-19 Genomics UK (COG-UK) consortium|Davies|United Kingdom

>Spike|hCoV-19/Denmark/DCGC-15935/2020|2020-11-23|EPI\_ISL\_714272|Original|hCoV-19^^Hovedstaden|Human|Department of Virus and Microbiological Special Diagnostics|Albertsen Lab|Michaelsen|Denmark

>Spike|hCoV-19/Japan/PG-1529/2020|2020-03-00|EPI\_ISL\_685135|Original|hCoV-19^^Japan|Human|Pathogen Genomics Center|Pathogen Genomics Center|Sekizuka|Japan

>Spike|hCoV-19/England/MILK-B02337/2020|2020-10-23|EPI\_ISL\_643008|Original|hCoV-19^^England|Human|Lighthouse Lab in Milton Keynes|Wellcome Sanger Institute for the COVID-19 Genomics UK (COG-UK) Consortium|Davies|United Kingdom

>Spike|hCoV-19/England/MILK-ACC7C5/2020|2020-10-21|EPI\_ISL\_634467|Original|hCoV-19^^England|Human|Lighthouse Lab in Milton Keynes|Wellcome Sanger Institute for the COVID-19 Genomics UK (COG-UK) consortium|Davies|United Kingdom

>Spike|hCoV-19/Scotland/CVR2862/2020|2020-04-21|EPI\_ISL\_473603|Original|hCoV-19^^Scotland|Human|West of Scotland Specialist Virology Centre|COVID-19 Genomics UK (COG-UK) Consortium|Robertson|United Kingdom

>Spike|hCoV-19/DRC/3453/2020|2020-04-22|EPI\_ISL\_447599|Original|hCoV-19^^Kinshasa|Human|Viral Respiratory Lab|Pathogen Sequencing Lab|Lusamaki|Democratic Republic of the Congo

>Spike|hCoV-19/USA/TX-HMH-MCoV-10635/2020|2020-07-08|EPI\_ISL\_789569|Original|hCoV-19^^Texas|Human|Houston Methodist Hospital|Houston Methodist Hospital|Long|USA

>Spike|hCoV-19/England/MILK-992170/2020|2020-08-27|EPI\_ISL\_540652|Original|hCoV-19^^England|Human|Queens Medical Centre|COVID-19 Genomics UK (COG-UK) Consortium|Loose|United Kingdom

>Spike|hCoV-19/USA/WA-OHSU-0504/2020|2020-06-05|EPI\_ISL\_526090|Original|hCoV-19^^Washington|Human|OHSU Lab Services Molecular Microbiology Lab|Ginkgo Bioworks Clinical Laboratory|O'Roak|USA

>Spike|hCoV-19/England/CAMC-A81B93/2020|2020-10-14|EPI\_ISL\_610903|Original|hCoV-19^^England|Human|Lighthouse Lab in Cambridge|Wellcome Sanger Institute for the COVID-19 Genomics UK (COG-UK) consortium|Davies|United Kingdom

>Spike|hCoV-19/Wales/ALDP-950F56/2020|2020-06-14|EPI\_ISL\_554157|Original|hCoV-19^^Wales|Human|Lighthouse Lab in Alderley Park|Wellcome Sanger Institute for the COVID-19 Genomics UK (COG-UK) consortium|Davies|United Kingdom

>Spike|hCoV-19/Wales/PHWC-48E525/2020|2020-11-12|EPI\_ISL\_680872|Original|hCoV-19^^Wales|Human|Wales Specialist Virology Centre Sequencing lab|COVID-19 Genomics UK (COG-UK) Consortium|Moore|United Kingdom

>Spike|hCoV-19/England/ALDP-9CB615/2020|2020-09-16|EPI\_ISL\_575574|Original|hCoV-19^^England|Human|Lighthouse Lab in Alderley Park|Wellcome Sanger Institute for the COVID-19 Genomics UK (COG-UK) consortium|Davies|United Kingdom

>Spike|hCoV-19/England/MILK-ACE5D8/2020|2020-10-21|EPI\_ISL\_629519|Original|hCoV-19^^England|Human|Lighthouse Lab in Milton Keynes|Wellcome Sanger Institute for the COVID-19 Genomics UK (COG-UK) consortium|Davies|United Kingdom

>Spike|hCoV-19/Switzerland/ZH-ETHZ-400346/2020|2020-12-08|EPI\_ISL\_729176|Original|hCoV-19^^Zurich|Human|Viollier AG|Department of Biosystems Science and Engineering|Nadeau|Switzerland

>Spike|hCoV-19/England/EXET-138569/2020|2020-10-18|EPI\_ISL\_612400|Original|hCoV-19^^England|Human|University of Exeter|COVID-19 Genomics UK (COG-UK) Consortium|Temperton|United Kingdom

>Spike|hCoV-19/England/QEUH-95F1BB/2020|2020-08-07|EPI\_ISL\_532290|Original|hCoV-19^^England|Human|Lighthouse Lab in Glasgow|Wellcome Sanger Institute for the COVID-19 Genomics UK (COG-UK) consortium|Davies|United Kingdom

>Spike|hCoV-19/Japan/PG-4250/2020|2020-07-00|EPI\_ISL\_692480|Original|hCoV-19^^Japan|Human|Fukuoka Institute of Health and Environmental Sciences|Pathogen Genomics Center|Sekizuka|Japan

>Spike|hCoV-19/Canada/QC\_AE6/2020|2020-04-06|EPI\_ISL\_463906|Original|hCoV-19^^Quebec|Human|Laboratoire de microbiologie|Smith Laboratory|Smith|Canada

>Spike|hCoV-19/Brazil/SP-L14-CD250/2020|2020-03-27|EPI\_ISL\_476250|Original|hCoV-19^^S\u00e3o Paulo|Human|Hospital da Cl\u00ednicas da Faculdade de Medicina da Universidade de S\u00e3o Paulo|Instituto de Medicina Tropical da Univesidade de S\u00e3o Paulo|Sabino|Brazil

>Spike|hCoV-19/South Africa/N00017/2020|2020-08-06|EPI\_ISL\_623029|Original|hCoV-19^^Eastern Cape|Human|National Health Laboratory Service|National Institute for Communicable Diseases of the National Health Laboratory Service|Allam|South Africa

>Spike|hCoV-19/USA/IL-NM022/2020|2020-03-15|EPI\_ISL\_444532|Original|hCoV-19^^Illinois|Human|Northwestern Memorial Hospital|Ozer Lab|Ozer|USA

>Spike|hCoV-19/Japan/PG-5394/2020|2020-08-00|EPI\_ISL\_690497|Original|hCoV-19^^Japan|Human|Fukuoka Institute of Health and Environmental Sciences|Pathogen Genomics Center|Sekizuka|Japan

>Spike|hCoV-19/Wales/PHWC-48BB08/2020|2020-11-06|EPI\_ISL\_666324|Original|hCoV-19^^Wales|Human|Wales Specialist Virology Centre Sequencing lab|COVID-19 Genomics UK (COG-UK) Consortium|Moore|United Kingdom

>Spike|hCoV-19/Luxembourg/LNS1146047/2020|2020-10-26|EPI\_ISL\_739896|Original|hCoV-19^^Luxembourg|Human|Laboratoire national de sant\u00e9|Laboratoire national de sant\u00e9|Wienecke-Baldacchino|Luxembourg

>Spike|hCoV-19/Denmark/DCGC-13688/2020|2020-11-30|EPI\_ISL\_712194|Original|hCoV-19^^Midtjylland|Human|Department of Virus and Microbiological Special Diagnostics|Albertsen Lab|Michaelsen|Denmark

>Spike|hCoV-19/Japan/PG-5082/2020|2020-08-00|EPI\_ISL\_690192|Original|hCoV-19^^Japan|Human|Pathogen Genomics Center|Pathogen Genomics Center|Sekizuka|Japan

>Spike|hCoV-19/England/NOTT-112DA9/2020|2020-07-17|EPI\_ISL\_499269|Original|hCoV-19^^England|Human|Queens Medical Centre|COVID-19 Genomics UK (COG-UK) Consortium|Loose|United Kingdom

>Spike|hCoV-19/USA/FL-BPHL-1450/2020|2020-04-07|EPI\_ISL\_549232|Original|hCoV-19^^Florida|Human|Florida Bureau of Public Health Laboratories|Florida Bureau of Public Health Laboratories|Blanton|USA

>Spike|hCoV-19/Italy/VEN-UniVR-54/2020|2020-03-12|EPI\_ISL\_751364|Original|hCoV-19^^Veneto|Human|IRCCS Sacro Cuore Don Calabria Hospital|University of Verona|Mori|Italy

>Spike|hCoV-19/England/QEUA-B69AA2/2020|2020-11-11|EPI\_ISL\_661480|Original|hCoV-19^^England|Human|Lighthouse Lab in Glasgow|Wellcome Sanger Institute for the COVID-19 Genomics UK (COG-UK) Consortium|Davies|United Kingdom

>Spike|hCoV-19/England/ALDP-6CBA2B/2020|2020-07-02|EPI\_ISL\_556140|Original|hCoV-19^^England|Human|Lighthouse Lab in Alderley Park|Wellcome Sanger Institute for the COVID-19 Genomics UK (COG-UK) consortium|Davies|United Kingdom

>Spike|hCoV-19/England/ALDP-BCA91B/2020|2020-11-23|EPI\_ISL\_703339|Original|hCoV-19^^England|Human|Lighthouse Lab in Alderley Park|Wellcome Sanger Institute for the COVID-19 Genomics UK (COG-UK) Consortium|Davies|United Kingdom

>Spike|hCoV-19/England/MILK-AC82D7/2020|2020-10-21|EPI\_ISL\_629207|Original|hCoV-19^^England|Human|Lighthouse Lab in Milton Keynes|Wellcome Sanger Institute for the COVID-19 Genomics UK (COG-UK) consortium|Davies|United Kingdom

>Spike|hCoV-19/England/CAMC-A64BB4/2020|2020-10-11|EPI\_ISL\_608624|Original|hCoV-19^^England|Human|Lighthouse Lab in Cambridge|Wellcome Sanger Institute for the COVID-19 Genomics UK (COG-UK) consortium|Davies|United Kingdom

>Spike|hCoV-19/USA/CO-CDPHE-2003120922/2020|2020-03-11|EPI\_ISL\_677269|Original|hCoV-19^^Colorado|Human|Colorado Department of Public Health and Environment|Colorado Department of Public Health and Environment|Bankers|USA

>Spike|hCoV-19/USA/WA-UW-47087/2020|2020-12-15|EPI\_ISL\_756225|Original|hCoV-19^^Washington|Human|UW Virology Lab|UW Virology Lab|Roychoudhury|USA

>Spike|hCoV-19/Equatorial Guinea/16819/2020|2020-06-10|EPI\_ISL\_648361|Original|hCoV-19^^Bioko Norte|Human|Laboratorio de Investigaciones de Baney|University Hospital Basel|Hosch|Equatorial Guinea

>Spike|hCoV-19/USA/MN-CDC-6568/2020|2020-04-19|EPI\_ISL\_527732|Original|hCoV-19^^Minnesota|Human|MN PHL Division|Pathogen Discovery|Queen|USA

>Spike|hCoV-19/Switzerland/BLETHZ-360156/2020|2020-11-06|EPI\_ISL\_693928|Original|hCoV-19^^Basel-Landschaft|Human|Viollier AG|Department of Biosystems Science and Engineering|Nadeau|Switzerland

>Spike|hCoV-19/Japan/PG-5169/2020|2020-08-00|EPI\_ISL\_690272|Original|hCoV-19^^Japan|Human|Pathogen Genomics Center|Pathogen Genomics Center|Sekizuka|Japan

>Spike|hCoV-19/Japan/PG-8021/2020|2020-08-00|EPI\_ISL\_687122|Original|hCoV-19^^Japan|Human|Pathogen Genomics Center|Pathogen Genomics Center|Sekizuka|Japan

>Spike|hCoV-19/USA/CA-CSMC128/2020|2020-04-09|EPI\_ISL\_475605|Original|hCoV-19^^California|Human|Cedars-Sinai Medical Center|Cedars-Sinai Medical Center|Zhang|USA

>Spike|hCoV-19/Germany/BE-ChVir-D1952-5748/2020|2020-10-09|EPI\_ISL\_753882|Original|hCoV-19^^Berlin|Human|Charit\u00e99 Universit\u00e4tsmedizin Berlin|Charit\u00e99 Universit\u00e4tsmedizin Berlin|Muehlemann|Germany

>Spike|hCoV-19/Netherlands/UT-EMC-105/2020|2020-09-28|EPI\_ISL\_632461|Original|hCoV-19^^Utrecht|Human|Dutch COVID-19 response team|Erasmus Medical Center|Oude Munnink|Netherlands

>Spike|hCoV-19/Switzerland/BS-42221749/2020|2020-04-06|EPI\_ISL\_581867|Original|hCoV-19^^Basel-Stadt|Human|University Hospital Basel|University Hospital Basel|Roloff Handschin|Switzerland

>Spike|hCoV-19/USA/TX-DSHS-0955/2020|2020-07-16|EPI\_ISL\_602252|Original|hCoV-19^^Texas|Human|Texas Department of State Health Services|Texas Department of State Health Services|Rahman|USA

>Spike|hCoV-19/New Zealand/20VR2108/2020|2020-04-15|EPI\_ISL\_456377|Original|hCoV-19^^MidCentral|Human|MedLab Central Ltd|Institute of Environmental Science and Research (ESR)|de Ligt|New Zealand

>Spike|hCoV-19/Wales/PHWC-49B74D/2020|2020-12-04|EPI\_ISL\_742378|Original|hCoV-19^^Wales|Human|Wales Specialist Virology Centre Sequencing lab|COVID-19 Genomics UK (COG-UK) Consortium|Moore|United Kingdom

>Spike|hCoV-19/England/MILK-CA5159/2020|2020-12-17|EPI\_ISL\_762407|Original|hCoV-19^^England|Human|Lighthouse Lab in Milton Keynes|Wellcome Sanger Institute for the COVID-19 Genomics UK (COG-UK) Consortium|Davies|United Kingdom

>Spike|hCoV-19/Scotland/EDB4655/2020|2020-05-08|EPI\_ISL\_493910|Original|hCoV-19^^Scotland|Human|Virology Department|COVID-19 Genomics UK (COG-UK) Consortium|Williams|United Kingdom

>Spike|hCoV-19/England/QEUH-AD3637/2020|2020-10-26|EPI\_ISL\_633780|Original|hCoV-19^^England|Human|Lighthouse Lab in Glasgow|Wellcome Sanger Institute for the COVID-19 Genomics UK (COG-UK) consortium|Davies|United Kingdom

>Spike|hCoV-19/England/NORT-1B71FA5/2020|2020-11-22|EPI\_ISL\_706329|Original|hCoV-19^^England|Human|Northumbria University / South Tees Hospitals NHS Foundation Trust / North Cumbria Integrated Care NHS Foundation Trust / North Tees and Hartlepool NHS Foundation Trust / Newcastle Hospitals NHS Foundation Trust|COVID-19 Genomics UK (COG-UK) Consortium|Bashton|United Kingdom

>Spike|hCoV-19/USA/CO-CDPHE-2008210131/2020|2020-08-20|EPI\_ISL\_710325|Original|hCoV-19^^Colorado|Human|Colorado Department of Public Health and Environment|Colorado Department of Public Health and Environment|Bankers|USA

>Spike|hCoV-19/Netherlands/ZuidHolland\_79/2020|2020-03-26|EPI\_ISL\_422947|Original|hCoV-19^^Zuid Holland|Human|Dutch COVID-19 response team|Erasmus Medical Center|Oude Munnink|Netherlands

>Spike|hCoV-19/Scotland/QEUH-B127CF/2020|2020-11-02|EPI\_ISL\_649585|Original|hCoV-19^^Scotland|Human|Lighthouse Lab in Glasgow|Wellcome Sanger Institute for the COVID-19 Genomics UK (COG-UK) Consortium|Davies|United Kingdom

>Spike|hCoV-19/USA/NM-NMDOH-2020229805/2020|2020-07-20|EPI\_ISL\_535297|Original|hCoV-19^^New Mexico|Human|New Mexico Department of Health Scientific Laboratory|New Mexico Department of Health Scientific Laboratory|Johnson|USA

>Spike|hCoV-19/Scotland/CVR2770/2020|2020-04-20|EPI\_ISL\_438978|Original|hCoV-19^^Scotland|Human|West of Scotland Specialist Virology Centre|COVID-19 Genomics UK (COG-UK) Consortium|Robertson|United Kingdom

>Spike|hCoV-19/England/MILK-74AF7F/2020|2020-06-30|EPI\_ISL\_557444|Original|hCoV-19^^England|Human|Lighthouse Lab in Milton Keynes|Wellcome Sanger Institute for the COVID-19 Genomics UK (COG-UK) consortium|Davies|United Kingdom

>Spike|hCoV-19/Canada/ON-PHL-20-01217/2020|2020-06-00|EPI\_ISL\_548839|Original|hCoV-19^^Ontario|Human|Public Health Ontario Laboratory|Public Health Ontario Laboratory|Guthrie|Canada

>Spike|hCoV-19/England/CAMC-A64A5D/2020|2020-10-10|EPI\_ISL\_608996|Original|hCoV-19^^England|Human|Lighthouse Lab in Cambridge|Wellcome Sanger Institute for the COVID-19 Genomics UK (COG-UK) consortium|Davies|United Kingdom

>Spike|hCoV-19/Sweden/20-05469/2020|2020-03-10|EPI\_ISL\_434644|Original|hCoV-19^^Stockholm|Human|Kungsholmsdoktorn|The Public Health Agency of Sweden|Svartstr\u00f6m|Sweden

>Spike|hCoV-19/England/MILK-9E046B/2020|2020-09-20|EPI\_ISL\_601302|Original|hCoV-19^^England|Human|Lighthouse Lab in Milton Keynes|Wellcome Sanger Institute for the COVID-19 Genomics UK (COG-UK) consortium|Davies|United Kingdom

>Spike|hCoV-19/Norway/4613/2020|2020-09-30|EPI\_ISL\_635098|Original|hCoV-19^^Vestland|Human|Foerde Hospital|Norwegian Institute of Public Health|Vollan|Norway

>Spike|hCoV-19/Wales/PHWC-48C150/2020|2020-11-03|EPI\_ISL\_666399|Original|hCoV-19^^Wales|Human|Wales Specialist Virology Centre Sequencing lab|COVID-19 Genomics UK (COG-UK) Consortium|Moore|United Kingdom

>Spike|hCoV-19/England/ALDP-9CE041/2020|2020-09-16|EPI\_ISL\_566276|Original|hCoV-19^^England|Human|Lighthouse Lab in Alderley Park|Wellcome Sanger Institute for the COVID-19 Genomics UK (COG-UK) consortium|Davies|United Kingdom

>Spike|hCoV-19/USA/WA-S581/2020|2020-03-30|EPI\_ISL\_434341|Original|hCoV-19^^Washington|Human|Washington State Department of Health|Seattle Flu Study|Bedford|USA

>Spike|hCoV-19/Australia/VIC14276/2020|2020-08-04|EPI\_ISL\_592429|Original|hCoV-19^^Victoria|Human|Microbiological Diagnostic Unit - Public Health Laboratory (MDU-PHL)|MDU-PHL|Schultz|Australia

>Spike|hCoV-19/USA/NY-NYUMC323/2020|2020-04-02|EPI\_ISL\_430350|Original|hCoV-19^^New York|Human|NYU Langone Health|Departments of Pathology and Medicine|Maurano|USA

>Spike|hCoV-19/Scotland/EDB4674/2020|2020-05-09|EPI\_ISL\_478181|Original|hCoV-19^^Scotland|Human|Virology Department|COVID-19 Genomics UK (COG-UK) Consortium|Williams|United Kingdom

>Spike|hCoV-19/USA/WA-UW-12886/2020|2020-06-29|EPI\_ISL\_570923|Original|hCoV-19^^Washington|Human|UW Virology Lab|UW Virology Lab|Roychoudhury|USA

>Spike|hCoV-19/Australia/NSW317/2020|2020-03-31|EPI\_ISL\_451580|Original|hCoV-19^^New South Wales|Human|Pathology West - NSW Health Pathology|NSW Health Pathology - Institute of Clinical Pathology and Medical Research; Westmead Hospital; University of Sydney|Gall|Australia

>Spike|hCoV-19/Scotland/EDB4881/2020|2020-05-13|EPI\_ISL\_453169|Original|hCoV-19^^Scotland|Human|Virology Department|COVID-19 Genomics UK (COG-UK) Consortium|Williams|United Kingdom

>Spike|hCoV-19/England/MILK-AC7BDD/2020|2020-10-22|EPI\_ISL\_634472|Original|hCoV-19^^England|Human|Lighthouse Lab in Milton Keynes|Wellcome Sanger Institute for the COVID-19 Genomics UK (COG-UK) consortium|Davies|United Kingdom

>Spike|hCoV-19/USA/MI-MDHHS-SC20509/2020|2020-05-08|EPI\_ISL\_460557|Original|hCoV-19^^Michigan|Human|Michigan Department of Health and Human Services|Michigan Department of Health and Human Services|Blankenship|USA

>Spike|hCoV-19/Switzerland/BS-42378086/2020|2020-08-03|EPI\_ISL\_581934|Original|hCoV-19^^Basel-Stadt|Human|University Hospital Basel|University Hospital Basel|Roloff Handschin|Switzerland

>Spike|hCoV-19/USA/WA-S2740/2020|2020-07-16|EPI\_ISL\_525730|Original|hCoV-19^^Washington|Human|Seattle Flu Study|Seattle Flu Study|Lee|USA

>Spike|hCoV-19/Australia/VIC9899/2020|2020-08-25|EPI\_ISL\_565770|Original|hCoV-19^^Victoria|Human|Microbiological Diagnostic Unit - Public Health Laboratory (MDU-PHL)|MDU-PHL|Schultz|Australia

>Spike|hCoV-19/USA/WI-UW-811/2020|2020-06-22|EPI\_ISL\_509996|Original|hCoV-19^^Wisconsin|Human|University of Wisconsin-Madison AIDS Vaccine Research Laboratories|University of Wisconsin-Madison AIDS Vaccine Research Laboratories|Baczenas|USA

>Spike|hCoV-19/England/MILK-ACDF26/2020|2020-10-20|EPI\_ISL\_630286|Original|hCoV-19^^England|Human|Lighthouse Lab in Milton Keynes|Wellcome Sanger Institute for the COVID-19 Genomics UK (COG-UK) consortium|Davies|United Kingdom

>Spike|hCoV-19/Scotland/EDB6579/2020|2020-05-10|EPI\_ISL\_478261|Original|hCoV-19^^Scotland|Human|Virology Department|COVID-19 Genomics UK (COG-UK) Consortium|Williams|United Kingdom

>Spike|hCoV-19/England/204661388/2020|2020-11-11|EPI\_ISL\_686575|Original|hCoV-19^^England|Human|Respiratory Virus Unit|COVID-19 Genomics UK (COG-UK) Consortium|Platt|United Kingdom

>Spike|hCoV-19/England/CAMC-A3FB0D/2020|2020-10-05|EPI\_ISL\_609776|Original|hCoV-19^^England|Human|Lighthouse Lab in Cambridge|Wellcome Sanger Institute for the COVID-19 Genomics UK (COG-UK) consortium|Davies|United Kingdom

>Spike|hCoV-19/England/CAMB-1AA948/2020|2020-04-18|EPI\_ISL\_470243|Original|hCoV-19^^England|Human|Department of Pathology|Wellcome Sanger Institute for the COVID-19 Genomics UK (COG-UK) consortium|Davies|United Kingdom

>Spike|hCoV-19/England/CAMC-A598D9/2020|2020-10-09|EPI\_ISL\_596984|Original|hCoV-19^^England|Human|Lighthouse Lab in Cambridge|Wellcome Sanger Institute for the COVID-19 Genomics UK (COG-UK) consortium|Davies|United Kingdom

>Spike|hCoV-19/USA/TX-HMH-3808/2020|2020-06-12|EPI\_ISL\_543212|Original|hCoV-19^^Texas|Human|Houston Methodist Hospital|Houston Methodist Hospital|Long|USA

>Spike|hCoV-19/England/CAMB-77CA6/2020|2020-04-01|EPI\_ISL\_440822|Original|hCoV-19^^England|Human|Department of Pathology|Wellcome Sanger Institute for the COVID-19 Genomics UK (COG-UK) consortium|Amato|United Kingdom

>Spike|hCoV-19/Australia/VIC15476/2020|2020-08-02|EPI\_ISL\_593323|Original|hCoV-19^^Victoria|Human|Microbiological Diagnostic Unit - Public Health Laboratory (MDU-PHL)|MDU-PHL|Schultz|Australia

>Spike|hCoV-19/Kenya/C4895/2020|2020-05-08|EPI\_ISL\_568742|Original|hCoV-19^^Mombasa|Human|KEMRI-Wellcome Trust Research Programme|KEMRI-CGMR-C Kilifi|KEMRI-Wellcome Trust Research Programme|KEMRI-CGMR-C Kilifi|Githinji|Kenya

>Spike|hCoV-19/France/ARA-64293/2020|2020-08-26|EPI\_ISL\_683380|Original|hCoV-19^^Auvergne-Rh\u00f4ne-Alpes|Human|CNR Virus des Infections Respiratoires - France SUD|CNR Virus des Infections Respiratoires - France SUD|Bal|France

>Spike|hCoV-19/England/MILK-BEE42F/2020|2020-11-30|EPI\_ISL\_708912|Original|hCoV-19^^England|Human|Lighthouse Lab in Milton Keynes|Wellcome Sanger Institute for the COVID-19 Genomics UK (COG-UK) Consortium|Davies|United Kingdom

>Spike|hCoV-19/USA/MN-MDH-1472/2020|2020-03-27|EPI\_ISL\_518866|Original|hCoV-19^^Minnesota|Human|Mayo Clinic & Mayo Clinic Laboratories|Minnesota Department of Health|Garfin|USA

>Spike|hCoV-19/Australia/VIC14638/2020|2020-08-02|EPI\_ISL\_592928|Original|hCoV-19^^Victoria|Human|Microbiological Diagnostic Unit - Public Health Laboratory (MDU-PHL)|MDU-PHL|Schultz|Australia

>Spike|hCoV-19/USA/CA-UCLA-11/2020|2020-04-17|EPI\_ISL\_537470|Original|hCoV-19^^California|Human|UCLA Pathology Clinical Microbiology Lab|Kruglyak Lab|Boocock|USA

>Spike|hCoV-19/England/LIVE-DC2119/2020|2020-11-21|EPI\_ISL\_679400|Original|hCoV-19^^England|Human|Liverpool Clinical Laboratories|COVID-19 Genomics UK (COG-UK) Consortium|Haldenby|United Kingdom

>Spike|hCoV-19/USA/TX-HMH-MCoV-15928/2020|2020-07-10|EPI\_ISL\_785612|Original|hCoV-19^^Texas|Human|Houston Methodist Hospital|Houston Methodist Hospital|Long|USA

>Spike|hCoV-19/USA/OR-OHSU-0674/2020|2020-06-17|EPI\_ISL\_525882|Original|hCoV-19^^Oregon|Human|OHSU Lab Services Molecular Microbiology Lab|Ginkgo Bioworks Clinical Laboratory|O'Roak|USA

>Spike|hCoV-19/England/ALDP-9CCA09/2020|2020-09-16|EPI\_ISL\_573124|Original|hCoV-19^^England|Human|Quadram Institute Bioscience|COVID-19 Genomics UK (COG-UK) Consortium|Alikhan|United Kingdom

>Spike|hCoV-19/England/ALDP-9829F3/2020|2020-08-10|EPI\_ISL\_552507|Original|hCoV-19^^England|Human|Lighthouse Lab in Alderley Park|Wellcome Sanger Institute for the COVID-19 Genomics UK (COG-UK) consortium|Davies|United Kingdom

>Spike|hCoV-19/Canada/QC-LSPQ-L00232073/2020|2020-03-22|EPI\_ISL\_535973|Original|hCoV-19^^Quebec|Human|H\u00f4pital Charles-LeMoine|Laboratoire de sant\u00e9 publique du Qu\u00e9bec|Moreira|Canada

>Spike|hCoV-19/England/MILK-C2FEC9/2020|2020-12-07|EPI\_ISL\_782753|Original|hCoV-19^^England|Human|Lighthouse Lab in Milton Keynes|Wellcome Sanger Institute for the COVID-19 Genomics UK (COG-UK) Consortium|Davies|United Kingdom

>Spike|hCoV-19/USA/VA-DCLS-1455/2020|2020-08-19|EPI\_ISL\_572198|Original|hCoV-19^^Virginia|Human|Virginia DCLS|Virginia DCLS|St. Jacques|USA

>Spike|hCoV-19/England/ALDP-9CBCC8/2020|2020-09-16|EPI\_ISL\_575603|Original|hCoV-19^^England|Human|Lighthouse Lab in Alderley Park|Wellcome Sanger Institute for the COVID-19 Genomics UK (COG-UK) consortium|Davies|United Kingdom

>Spike|hCoV-19/USA/TX-HMH-3759/2020|2020-06-16|EPI\_ISL\_543170|Original|hCoV-19^^Texas|Human|Houston Methodist Hospital|Houston Methodist Hospital|Long|USA

>Spike|hCoV-19/Northern Ireland/QEUH-96209A/2020|2020-08-10|EPI\_ISL\_531652|Original|hCoV-19^^Northern Ireland|Human|Lighthouse Lab in Glasgow|Wellcome Sanger Institute for the COVID-19 Genomics UK (COG-UK) consortium|Davies|United Kingdom

>Spike|hCoV-19/England/QEUH-9D1184/2020|2020-09-16|EPI\_ISL\_589994|Original|hCoV-19^^England|Human|Lighthouse Lab in Glasgow|Wellcome Sanger Institute for the COVID-19 Genomics UK (COG-UK) consortium|Davies|United Kingdom

>Spike|hCoV-19/England/MILK-99E5C3/2020|2020-08-31|EPI\_ISL\_550734|Original|hCoV-19^^England|Human|Lighthouse Lab in Milton Keynes|Wellcome Sanger Institute for the COVID-19 Genomics UK (COG-UK) consortium|Davies|United Kingdom

>Spike|hCoV-19/England/ALDP-C5A047/2020|2020-12-13|EPI\_ISL\_736173|Original|hCoV-19^^England|Human|Lighthouse Lab in Alderley Park|Wellcome Sanger Institute for the COVID-19 Genomics UK (COG-UK) Consortium|Davies|United Kingdom

>Spike|hCoV-19/New Zealand/20VR2716/2020|2020-00-00|EPI\_ISL\_579335|Original|hCoV-19^^Auckland|Human|LabPLUS|Institute of Environmental Science and Research (ESR)|Wang|New Zealand

>Spike|hCoV-19/England/ALDP-AA2DE1/2020|2020-10-22|EPI\_ISL\_624004|Original|hCoV-19^^England|Human|Lighthouse Lab in Alderley Park|Wellcome Sanger Institute for the COVID-19 Genomics UK (COG-UK) consortium|Davies|United Kingdom



>Spike|hCoV-19/England/QEUA-B2EF8C/2020|2020-11-03|EPI\_ISL\_660055|Original|hCoV-19^^England|Human|Lighthouse Lab in Glasgow|Wellcome Sanger Institute for the COVID-19 Genomics UK (COG-UK) Consortium|Davies|United Kingdom

>Spike|hCoV-19/England/QEUA-9AE487/2020|2020-09-02|EPI\_ISL\_637345|Original|hCoV-19^^England|Human|Department of Pathology|COVID-19 Genomics UK (COG-UK) Consortium|Goodfellow|United Kingdom

>Spike|hCoV-19/Denmark/DCGC-7302/2020|2020-10-12|EPI\_ISL\_619300|Original|hCoV-19^^Hovedstaden|Human|Department of Virus and Microbiological Special Diagnostics|Albertsen lab|Michaelsen|Denmark

>Spike|hCoV-19/USA/OR-OHSU-2093/2020|2020-08-04|EPI\_ISL\_667114|Original|hCoV-19^^Oregon|Human|OHSU Lab Services Molecular Microbiology Lab|Oregon SARS-CoV-2 Genome Sequencing Center|O'Roak|USA

>Spike|hCoV-19/England/MILK-AC9A47/2020|2020-10-21|EPI\_ISL\_630204|Original|hCoV-19^^England|Human|Lighthouse Lab in Milton Keynes|Wellcome Sanger Institute for the COVID-19 Genomics UK (COG-UK) consortium|Davies|United Kingdom

>Spike|hCoV-19/England/CAMC-947D67/2020|2020-07-20|EPI\_ISL\_556529|Original|hCoV-19^^England|Human|Lighthouse Lab in Cambridge|Wellcome Sanger Institute for the COVID-19 Genomics UK (COG-UK) consortium|Davies|United Kingdom

>Spike|hCoV-19/Wales/PHWC-4930FF/2020|2020-11-28|EPI\_ISL\_725838|Original|hCoV-19^^Wales|Human|Originating lab|COVID-19 Genomics UK (COG-UK) Consortium|Moore|United Kingdom

>Spike|hCoV-19/Switzerland/BS-UHB-42201258/2020|2020-03-21|EPI\_ISL\_528285|Original|hCoV-19^^Basel-Stadt|Human|University Hospital Basel|University Hospital Basel|Roloff Handschin|Switzerland

>Spike|hCoV-19/Finland/23LS8F3/2020|2020-10-23|EPI\_ISL\_759792|Original|hCoV-19^^Uusimaa|Human|Department of Virology and Immunology|Department of Virology|Smura|Finland

>Spike|hCoV-19/Russia/MOW-RII-MH4105S/2020|2020-05-12|EPI\_ISL\_733163|Original|hCoV-19^^Moscow|Human|Pathogenic Microorganisms Variability Laboratory|WHO National Influenza Centre Russian Federation|Komissarov|Russia

>Spike|hCoV-19/USA/MA-MGH-00798/2020|2020-04-13|EPI\_ISL\_791770|Original|hCoV-19^^Massachusetts|Human|Massachusetts General Hospital|Infectious Disease Program|Park|USA

>Spike|hCoV-19/England/ALDP-AA459C/2020|2020-10-21|EPI\_ISL\_624359|Original|hCoV-19^^England|Human|Lighthouse Lab in Alderley Park|Wellcome Sanger Institute for the COVID-19 Genomics UK (COG-UK) consortium|Davies|United Kingdom

>Spike|hCoV-19/England/MILK-C2FFB7/2020|2020-12-07|EPI\_ISL\_733889|Original|hCoV-19^^England|Human|Lighthouse Lab in Milton Keynes|Wellcome Sanger Institute for the COVID-19 Genomics UK (COG-UK) Consortium|Davies|United Kingdom

>Spike|hCoV-19/Scotland/QEUA-AACA0E/2020|2020-10-21|EPI\_ISL\_652885|Original|hCoV-19^^Scotland|Human|Oxford Viromics|COVID-19 Genomics UK (COG-UK) Consortium|Golubchik|United Kingdom

>Spike|hCoV-19/England/CAMB-76F26/2020|2020-04-01|EPI\_ISL\_439447|Original|hCoV-19^^England|Human|Department of Pathology|Wellcome Sanger Institute for the COVID-19 Genomics UK (COG-UK) consortium|Amato|United Kingdom

>Spike|hCoV-19/Switzerland/AG-ETHZ-190081/2020|2020-07-06|EPI\_ISL\_500937|Original|hCoV-19^^Aargau|Human|Viollier AG|Department of Biosystems Science and Engineering|Nadeau|Switzerland

>Spike|hCoV-19/England/MILK-BFF50A/2020|2020-12-02|EPI\_ISL\_720727|Original|hCoV-19^^England|Human|Lighthouse Lab in Milton Keynes|Wellcome Sanger Institute for the COVID-19 Genomics UK (COG-UK) Consortium|Davies|United Kingdom

>Spike|hCoV-19/Netherlands/NA\_515/2020|2020-04-01|EPI\_ISL\_460688|Original|hCoV-19^^Netherlands|Human|Dutch COVID-19 response team|Erasmus Medical Center|Oude Munnink|Netherlands

>Spike|hCoV-19/USA/WA-S2635/2020|2020-06-20|EPI\_ISL\_497267|Original|hCoV-19^^Washington|Human|Washington State Department of Health|Seattle Flu Study|Lee|USA

>Spike|hCoV-19/Belgium/ULG-10665/2020|2020-10-26|EPI\_ISL\_636641|Original|hCoV-19^^Li\u00e8ge|Human|Department of Clinical Microbiology|GIGA Medical Genomics|Durkin|Belgium

>Spike|hCoV-19/USA/WA-S2555/2020|2020-06-17|EPI\_ISL\_497187|Original|hCoV-19^^Washington|Human|Washington State Department of Health|Seattle Flu Study|Lee|USA

>Spike|hCoV-19/Brazil/RJ-00511/2020|2020-07-27|EPI\_ISL\_717902|Original|hCoV-19^^Rio de Janeiro|Human|LACEN RJ - Noel Nutels|Bioinformatics Laboratory / LNCC|Almeida|Brazil

>Spike|hCoV-19/England/ALDP-9E5888/2020|2020-09-24|EPI\_ISL\_589270|Original|hCoV-19^^England|Human|Lighthouse Lab in Alderley Park|Wellcome Sanger Institute for the COVID-19 Genomics UK (COG-UK) consortium|Davies|United Kingdom

>Spike|hCoV-19/USA/TX-HMH-6489/2020|2020-06-27|EPI\_ISL\_546033|Original|hCoV-19^^Texas|Human|Houston Methodist Hospital|Houston Methodist Hospital|Long|USA

>Spike|hCoV-19/Japan/PG-4997/2020|2020-08-00|EPI\_ISL\_690110|Original|hCoV-19^^Japan|Human|Pathogen Genomics Center|Pathogen Genomics Center|Sekizuka|Japan

>Spike|hCoV-19/Portugal/PT0420/2020|2020-03-25|EPI\_ISL\_454144|Original|hCoV-19^^Portugal|Human|unknown|Instituto Nacional de Saude (INSA)|Borges|Portugal

>Spike|hCoV-19/Malaysia/5760/2020|2020-03-26|EPI\_ISL\_506999|Original|hCoV-19^^Kuala Lumpur|Human|Department of Medical Microbiology|Department of Medical Microbiology|Chan|Malaysia

>Spike|hCoV-19/England/ALDP-4AD362/2020|2020-06-14|EPI\_ISL\_559341|Original|hCoV-19^^England|Human|Lighthouse Lab in Alderley Park|Wellcome Sanger Institute for the COVID-19 Genomics UK (COG-UK) consortium|Davies|United Kingdom

>Spike|hCoV-19/Australia/SAP220/2020|2020-03-15|EPI\_ISL\_467995|Original|hCoV-19^^South Australia|Human|SA Pathology|SA Pathology|Leong|Australia

>Spike|hCoV-19/USA/VA-DCLS-1274/2020|2020-08-12|EPI\_ISL\_529960|Original|hCoV-19^^Virginia|Human|Virginia DCLS|Virginia DCLS|St. Jacques|USA

>Spike|hCoV-19/Denmark/DCGC-1919/2020|2020-04-20|EPI\_ISL\_622512|Original|hCoV-19^^Hovedstaden|Human|Department of Virus and Microbiological Special Diagnostics|Albertsen lab|Michaelsen|Denmark

>Spike|hCoV-19/USA/CA-ALSR-1975/2020|2020-04-22|EPI\_ISL\_512273|Original|hCoV-19^^California|Human|San Diego County Public Health Laboratory|Andersen lab at Scripps Research|Gangavarapu|USA

>Spike|hCoV-19/England/SHEF-CBD91/2020|2020-11-10|EPI\_ISL\_653080|Original|hCoV-19^^England|Human|Virology Department|COVID-19 Genomics UK (COG-UK) Consortium|de Silva|United Kingdom

>Spike|hCoV-19/Wales/PHWC-498F2A/2020|2020-11-30|EPI\_ISL\_727230|Original|hCoV-19^^Wales|Human|Originating lab|COVID-19 Genomics UK (COG-UK) Consortium|Moore|United Kingdom

>Spike|hCoV-19/England/20098017104/2020|2020-02-27|EPI\_ISL\_464192|Original|hCoV-19^^England|Human|Respiratory Virus Unit|Respiratory Virus Unit|Platt|United Kingdom

>Spike|hCoV-19/England/ALDP-B2618E/2020|2020-11-04|EPI\_ISL\_646784|Original|hCoV-19^^England|Human|Lighthouse Lab in Alderley Park|Wellcome Sanger Institute for the COVID-19 Genomics UK (COG-UK) Consortium|Davies|United Kingdom

>Spike|hCoV-19/England/BRIS-1234BF/2020|2020-04-06|EPI\_ISL\_442710|Original|hCoV-19^^England|Human|PHE South West Regional Laboratory|Wellcome Sanger Institute for the COVID-19 Genomics UK (COG-UK) consortium|Amato|United Kingdom

>Spike|hCoV-19/South Africa/R13452-20/2020|2020-07-07|EPI\_ISL\_622940|Original|hCoV-19^^KwaZulu-Natal|Human|National Institute for Communicable Diseases of the National Health Laboratory Service|National Institute for Communicable Diseases of the National Health Laboratory Service|Allam|South Africa

>Spike|hCoV-19/Spain/VC-IBV-98000395/2020|2020-03-13|EPI\_ISL\_539226|Original|hCoV-19^^Comunitat Valenciana|Human|Servicio de Microbiologia. Hospital Clinico Universitario de Valencia|SeqCOVID-SPAIN consortium|IBV (CSIC)|Comas|Spain

>Spike|hCoV-19/USA/MI-MDHHS-SC22298/2020|2020-11-10|EPI\_ISL\_708274|Original|hCoV-19^^Michigan|Human|Michigan Department of Health and Human Services|Michigan Department of Health and Human Services|Jacob|USA

>Spike|hCoV-19/Denmark/DCGC-3537/2020|2020-08-31|EPI\_ISL\_616330|Original|hCoV-19^^Hovedstaden|Human|Department of Virus and Microbiological Special Diagnostics|Albertsen lab|Michaelsen|Denmark

>Spike|hCoV-19/USA/WA-S1146/2020|2020-05-05|EPI\_ISL\_463636|Original|hCoV-19^^Washington|Human|Washington State Department of Health|Seattle Flu Study|Bedford|USA

>Spike|hCoV-19/Denmark/DCGC-9810/2020|2020-11-09|EPI\_ISL\_669198|Original|hCoV-19^^Sjaelland|Human|Department of Virus and Microbiological Special Diagnostics|Albertsen Lab|Michaelsen|Denmark

>Spike|hCoV-19/Australia/VIC8479/2020|2020-07-27|EPI\_ISL\_565044|Original|hCoV-19^^Victoria|Human|Microbiological Diagnostic Unit - Public Health Laboratory (MDU-PHL)|MDU-PHL|Schultz|Australia

>Spike|hCoV-19/USA/TX-HMH-MCoV-14407/2020|2020-10-07|EPI\_ISL\_787692|Original|hCoV-19^^Texas|Human|Houston Methodist Hospital|Houston Methodist Hospital|Long|USA

>Spike|hCoV-19/Greece/42\_36236/2020|2020-03-23|EPI\_ISL\_437899|Original|hCoV-19^^Athens|Human|Laboratory of Microbiology|Laboratory of Biology|Karakasiliotis|Greece

>Spike|hCoV-19/Switzerland/BE-ETHZ-410244/2020|2020-11-27|EPI\_ISL\_737599|Original|hCoV-19^^Bern|Human|Viollier AG|Department of Biosystems Science and Engineering|Nadeau|Switzerland

>Spike|hCoV-19/England/BIRM-60FD4/2020|2020-05-15|EPI\_ISL\_473427|Original|hCoV-19^^England|Human|University of Birmingham|COVID-19 Genomics UK (COG-UK) Consortium|Loman|United Kingdom

>Spike|hCoV-19/England/CAMB-1AF05D/2020|2020-04-30|EPI\_ISL\_459296|Original|hCoV-19^^England|Human|Department of Pathology|Wellcome Sanger Institute for the COVID-19 Genomics UK (COG-UK) consortium|Davies|United Kingdom

>Spike|hCoV-19/England/QEUA-9A4481/2020|2020-09-01|EPI\_ISL\_540173|Original|hCoV-19^^England|Human|Lighthouse Lab in Glasgow|Wellcome Sanger Institute for the COVID-19 Genomics UK (COG-UK) consortium|Davies|United Kingdom

>Spike|hCoV-19/USA/NM-UNM-00555/2020|2020-05-09|EPI\_ISL\_542975|Original|hCoV-19^^New Mexico|Human|TriCore Reference Laboratories|Center for Global Health|Domman|USA

>Spike|hCoV-19/USA/WI-UW-2144/2020|2020-10-15|EPI\_ISL\_677548|Original|hCoV-19^^Wisconsin|Human|University of Wisconsin-Madison AIDS Vaccine Research Laboratories|University of Wisconsin-Madison AIDS Vaccine Research Laboratories|Baczenas|USA

>Spike|hCoV-19/Belgium/ULG-10195/2020|2020-05-18|EPI\_ISL\_471430|Original|hCoV-19^^Liege|Human|Department of Clinical Microbiology|GIGA Medical Genomics|Durkin|Belgium

>Spike|hCoV-19/England/CAMC-B98F23/2020|2020-11-15|EPI\_ISL\_673559|Original|hCoV-19^^England|Human|Lighthouse Lab in Cambridge|Wellcome Sanger Institute for the COVID-19 Genomics UK (COG-UK) Consortium|Davies|United Kingdom

>Spike|hCoV-19/England/ALDP-9ED7FC/2020|2020-05-05|EPI\_ISL\_589336|Original|hCoV-19^^England|Human|Lighthouse Lab in Alderley Park|Wellcome Sanger Institute for the COVID-19 Genomics UK (COG-UK) consortium|Davies|United Kingdom

>Spike|hCoV-19/Wales/PHWC-15D1C4/2020|2020-03-26|EPI\_ISL\_472680|Original|hCoV-19^^Wales|Human|Wales Specialist Virology Centre Sequencing lab|COVID-19 Genomics UK (COG-UK) Consortium|Moore|United Kingdom

>Spike|hCoV-19/USA/TX-HMH-6090/2020|2020-06-29|EPI\_ISL\_547229|Original|hCoV-19^^Texas|Human|Houston Methodist Hospital|Houston Methodist Hospital|Long|USA

>Spike|hCoV-19/Denmark/DCGC-20659/2020|2020-12-21|EPI\_ISL\_759282|Original|hCoV-19^^Hovedstaden|Human|Department of Virus and Microbiological Special Diagnostics|Albertsen Lab|Michaelsen|Denmark

>Spike|hCoV-19/England/BRIS-12EE7A/2020|2020-04-22|EPI\_ISL\_488405|Original|hCoV-19^^England|Human|PHE South West Regional Laboratory|Wellcome Sanger Institute for the COVID-19 Genomics UK (COG-UK) consortium|Davies|United Kingdom

>Spike|hCoV-19/Beijing/IVDC-BJ-005/2020|2020-01-18|EPI\_ISL\_408485|Original|hCoV-19^^Beijing|Human|National Institute for Viral Disease Control and Prevention|National Institute for Viral Disease Control & Prevention|Tan|China

>Spike|hCoV-19/Portugal/PT1217/2020|2020-03-28|EPI\_ISL\_511760|Original|hCoV-19^^Portugal|Human|Instituto Nacional de Saude (INSA)|Instituto Nacional de Saude (INSA) and Instituto Gulbenkian de Ciencia (IGC)|Borges|Portugal

>Spike|hCoV-19/Japan/PG-8504/2020|2020-09-00|EPI\_ISL\_687603|Original|hCoV-19^^Japan|Human|Pathogen Genomics Center|Pathogen Genomics Center|Sekizuka|Japan

>Spike|hCoV-19/Denmark/DCGC-15058/2020|2020-11-23|EPI\_ISL\_713609|Original|hCoV-19^^Hovedstaden|Human|Department of Virus and Microbiological Special Diagnostics|Albertsen Lab|Michaelsen|Denmark

>Spike|hCoV-19/Netherlands/NH-EMC-52/2020|2020-08-31|EPI\_ISL\_577848|Original|hCoV-19^^Noord Holland|Human|Dutch COVID-19 response team|Erasmus Medical Center|Oude Munnink|Netherlands

>Spike|hCoV-19/England/QEUA-C93929/2020|2020-12-17|EPI\_ISL\_777127|Original|hCoV-19^^England|Human|Lighthouse Lab in Glasgow|Wellcome Sanger Institute for the COVID-19 Genomics UK (COG-UK) Consortium|Davies|United Kingdom

>Spike|hCoV-19/Japan/PG-3647/2020|2020-04-00|EPI\_ISL\_691900|Original|hCoV-19^^Japan|Human|Pathogen Genomics Center|Pathogen Genomics Center|Sekizuka|Japan

>Spike|hCoV-19/Vietnam/40230/2020|2020-08-00|EPI\_ISL\_759888|Original|hCoV-19^^Vietnam|Human|National Influenza Center|National Influenza Center|Ung|Vietnam

>Spike|hCoV-19/Scotland/EDB6697/2020|2020-05-07|EPI\_ISL\_507189|Original|hCoV-19^^Scotland|Human|Virology Department|COVID-19 Genomics UK (COG-UK) Consortium|Williams|United Kingdom

>Spike|hCoV-19/USA/NY-NYCPHL-000180/2020|2020-04-15|EPI\_ISL\_631715|Original|hCoV-19^^New York|Human|Flushing Hospital Medical Center|New York City Public Health Laboratory|Wang|USA

>Spike|hCoV-19/USA/TX-HMH-MCoV-19493/2020|2020-11-30|EPI\_ISL\_783877|Original|hCoV-19^^Texas|Human|Houston Methodist Hospital|Houston Methodist Hospital|Long|USA

>Spike|hCoV-19/USA/UT-UPHL-201103306/2020|2020-05-13|EPI\_ISL\_628975|Original|hCoV-19^^Utah|Human|Utah Public Health Laboratory|Utah Public Health Laboratory|Young|USA

>Spike|hCoV-19/USA/CA-ALSR-1504/2020|2020-04-02|EPI\_ISL\_494627|Original|hCoV-19^^California|Human|San Diego County Public Health Laboratory|Andersen lab at Scripps Research|Gangavarapu|USA

>Spike|hCoV-19/Wales/PHWC-49CEDE/2020|2020-12-09|EPI\_ISL\_742704|Original|hCoV-19^^Wales|Human|Wales Specialist Virology Centre Sequencing lab|COVID-19 Genomics UK (COG-UK) Consortium|Moore|United Kingdom

>Spike|hCoV-19/Scotland/CVR1416/2020|2020-04-01|EPI\_ISL\_438801|Original|hCoV-19^^Scotland|Human|West of Scotland Specialist Virology Centre|COVID-19 Genomics UK (COG-UK) Consortium|Robertson|United Kingdom

>Spike|hCoV-19/Australia/VIC6865/2020|2020-07-27|EPI\_ISL\_564103|Original|hCoV-19^^Victoria|Human|Victorian Infectious Diseases Reference Laboratory (VIDRL)|VIDRL and MDU-PHL|Schultz|Australia

>Spike|hCoV-19/USA/IA-GMF-25157/2020|2020-10-11|EPI\_ISL\_660917|Original|hCoV-19^^Iowa|Human|Gundersen Molecular Diagnostics Laboratory|Kabara Cancer Research Institute|Kenny|USA

>Spike|hCoV-19/USA/MI-MDHHS-SC22673/2020|2020-11-18|EPI\_ISL\_737287|Original|hCoV-19^^Michigan|Human|Michigan Department of Health and Human Services|Michigan Department of Health and Human Services|Blankenship|USA

>Spike|hCoV-19/Scotland/GCVR-170AB1/2020|2020-03-25|EPI\_ISL\_459588|Original|hCoV-19^^Scotland|Human|NHSGGC West of Scotland Specialist Virology Centre / MRC-University of Glasgow Centre for Virus Research|Wellcome Sanger Institute for the COVID-19 Genomics UK (COG-UK) consortium|Davies|United Kingdom

>Spike|hCoV-19/England/ALDP-CBF444/2020|2020-12-20|EPI\_ISL\_778044|Original|hCoV-19^^England|Human|Lighthouse Lab in Alderley Park|Wellcome Sanger Institute for the COVID-19 Genomics UK (COG-UK) Consortium|Davies|United Kingdom

>Spike|hCoV-19/England/20172027504/2020|2020-04-20|EPI\_ISL\_465335|Original|hCoV-19^^England|Human|Respiratory Virus Unit|Respiratory Virus Unit|Platt|United Kingdom

>Spike|hCoV-19/Wales/PHWC-1640AF/2020|2020-05-10|EPI\_ISL\_474125|Original|hCoV-19^^Wales|Human|Originating lab|COVID-19 Genomics UK (COG-UK) Consortium|Moore|United Kingdom

>Spike|hCoV-19/England/QEUA-C5BBAF/2020|2020-12-14|EPI\_ISL\_769254|Original|hCoV-19^^England|Human|Lighthouse Lab in Glasgow|Wellcome Sanger Institute for the COVID-19 Genomics UK (COG-UK) Consortium|Davies|United Kingdom

>Spike|hCoV-19/Switzerland/GR-ETHZ-420534/2020|2020-12-22|EPI\_ISL\_768108|Original|hCoV-19^^Graub\u00fcden|Human|Viollier AG|Department of Biosystems Science and Engineering|Nadeau|Switzerland

>Spike|hCoV-19/USA/WA-S137/2020|2020-03-13|EPI\_ISL\_430174|Original|hCoV-19^^Washington|Human|Washington State Department of Health|Seattle Flu Study|Bedford|USA

>Spike|hCoV-19/South Africa/KRISP-K002881/2020|2020-09-04|EPI\_ISL\_602693|Original|hCoV-19^^KwaZulu-Natal|Human|NHLS-IALCH|KRISP|de Oliveira|South Africa

>Spike|hCoV-19/USA/TX-HMH-4248/2020|2020-06-18|EPI\_ISL\_543460|Original|hCoV-19^^Texas|Human|Houston Methodist Hospital|Houston Methodist Hospital|Long|USA

>Spike|hCoV-19/Denmark/DCGC-20931/2020|2020-12-21|EPI\_ISL\_758786|Original|hCoV-19^^Hovedstaden|Human|Department of Virus and Microbiological Special Diagnostics|Albertsen Lab|Michaelsen|Denmark

>Spike|hCoV-19/USA/MI-MDHHS-SC22352/2020|2020-11-17|EPI\_ISL\_708332|Original|hCoV-19^^Michigan|Human|Michigan Department of Health and Human Services|Michigan Department of Health and Human Services|Jacob|USA

>Spike|hCoV-19/Luxembourg/LNS3670718/2020|2020-11-17|EPI\_ISL\_740350|Original|hCoV-19^^Luxembourg|Human|Laboratoire national de sant\u00e9|Laboratoire national de sant\u00e9|Wienecke-Baldacchino|Luxembourg

>Spike|hCoV-19/Belgium/ULG-10980/2020|2020-09-09|EPI\_ISL\_707754|Original|hCoV-19^^Li\u00e8ge|Human|Department of Clinical Microbiology|GIGA Medical Genomics|Durkin|Belgium

>Spike|hCoV-19/Australia/VIC1489/2020|2020-04-27|EPI\_ISL\_456456|Original|hCoV-19^^Victoria|Human|Victorian Infectious Diseases Reference Laboratory (VIDRL)|Microbiological Diagnostic Unit Public Health Laboratory and Victorian Infectious Diseases Reference Laboratory|Schultz|Australia

>Spike|hCoV-19/France/PAC-IHU-1347/2020|2020-08-19|EPI\_ISL\_569131|Original|hCoV-19^^Provence-Alpes-C\u00f4te-d\u00e0z|Human|MEPHI|MEPHI|Levasseur|France

>Spike|hCoV-19/Denmark/DCGC-20286/2020|2020-11-30|EPI\_ISL\_748092|Original|hCoV-19^^Syddanmark|Human|Department of Virus and Microbiological Special Diagnostics|Albertsen Lab|Michaelsen|Denmark

>Spike|hCoV-19/England/20139010904/2020|2020-03-27|EPI\_ISL\_420660|Original|hCoV-19^^England|Human|Respiratory Virus Unit|Respiratory Virus Unit|Platt|United Kingdom

>Spike|hCoV-19/England/MILK-AB7AE2/2020|2020-10-21|EPI\_ISL\_623455|Original|hCoV-19^^England|Human|Lighthouse Lab in Milton Keynes|Wellcome Sanger Institute for the COVID-19 Genomics UK (COG-UK) consortium|Davies|United Kingdom

>Spike|hCoV-19/Costa Rica/01/2020|2020-03-16|EPI\_ISL\_434533|Original|hCoV-19^^Costa Rica|Human|Area de Salud Alajuela Sur|Inciensa|Brenes Porras|Costa Rica

>Spike|hCoV-19/Netherlands/NA\_345/2020|2020-04-05|EPI\_ISL\_455150|Original|hCoV-19^^Netherlands|Human|Dutch COVID-19 response team|Erasmus Medical Center|Oude Munnink|Netherlands

>Spike|hCoV-19/Australia/SAP137/2020|2020-03-26|EPI\_ISL\_451141|Original|hCoV-19^^South Australia|Human|SA Pathology|SA Pathology|Leong|Australia

>Spike|hCoV-19/SaudiArabia/KAUST-MADINAH715/2020|2020-04-01|EPI\_ISL\_513187|Original|hCoV-19^^Madinah|Human|Pathogen Genomics Lab King Abdullah University of Science and Technology(KAUST)|Pathogen Genomics Lab King Abdullah University of Science and Technology(KAUST)|Mohamed Ghazzali|Saudi Arabia

>Spike|hCoV-19/Scotland/QEUA-96EA54/2020|2020-08-19|EPI\_ISL\_534459|Original|hCoV-19^^Scotland|Human|NHSGGC West of Scotland Specialist Virology Centre / MRC-University of Glasgow Centre for Virus Research|Wellcome Sanger Institute for the COVID-19 Genomics UK (COG-UK) consortium|Davies|United Kingdom

>Spike|hCoV-19/Denmark/DCGC-11419/2020|2020-11-02|EPI\_ISL\_670908|Original|hCoV-19^^Hovedstaden|Human|Department of Virus and Microbiological Special Diagnostics|Albertsen Lab|Michaelsen|Denmark

>Spike|hCoV-19/Japan/PG-7649/2020|2020-08-00|EPI\_ISL\_686751|Original|hCoV-19^^Japan|Human|Chiba Prefectural Institute of Public Health|Pathogen Genomics Center|Sekizuka|Japan

>Spike|hCoV-19/England/NOTT-112978/2020|2020-04-21|EPI\_ISL\_493568|Original|hCoV-19^^England|Human|Lincolnshire Hospitals and DeepSeq Nottingham|COVID-19 Genomics UK (COG-UK) Consortium|Loose|United Kingdom

>Spike|hCoV-19/Portugal/PT1797/2020|2020-11-08|EPI\_ISL\_732024|Original|hCoV-19^^Portugal|Human|Instituto Nacional de Saude (INSA)|Instituto Nacional de Saude (INSA)|Borges|Portugal

>Spike|hCoV-19/USA/TX-HMH-4324/2020|2020-06-20|EPI\_ISL\_543533|Original|hCoV-19^^Texas|Human|Houston Methodist Hospital|Houston Methodist Hospital|Long|USA

>Spike|hCoV-19/USA/FL-AB4M/2020|2020-06-23|EPI\_ISL\_513267|Original|hCoV-19^^Florida|Human|University of Miami Immunology and Histocompatibility Laboratory|University of Miami Immunology and Histocompatibility Laboratory|Margolles-Clark|USA

>Spike|hCoV-19/England/SHEF-CCE33/2020|2020-10-14|EPI\_ISL\_613388|Original|hCoV-19^^England|Human|Virology Department|COVID-19 Genomics UK (COG-UK) Consortium|de Silva|United Kingdom

>Spike|hCoV-19/USA/TX-HMH-MCoV-19217/2020|2020-11-24|EPI\_ISL\_783696|Original|hCoV-19^^Texas|Human|Houston Methodist Hospital|Houston Methodist Hospital|Long|USA

>Spike|hCoV-19/Singapore/353/2020|2020-05-14|EPI\_ISL\_469108|Original|hCoV-19^^Singapore|Human|National Public Health Laboratory|National Public Health Laboratory|Mak|Singapore

>Spike|hCoV-19/Scotland/EDB5825/2020|2020-04-27|EPI\_ISL\_487768|Original|hCoV-19^^Scotland|Human|Virology Department|Wellcome Sanger Institute for the COVID-19 Genomics UK (COG-UK) consortium|Davies|United Kingdom

>Spike|hCoV-19/USA/WA-UW-32819/2020|2020-10-16|EPI\_ISL\_737089|Original|hCoV-19^^Washington|Human|UW Virology Lab|UW Virology Lab|Roychoudhury|USA

>Spike|hCoV-19/Russia/KDA-RII-MH3351S/2020|2020-10-07|EPI\_ISL\_733098|Original|hCoV-19^^Krasnodar Krai|Human|HELIX LLC|WHO National Influenza Centre Russian Federation|Komissarov|Russia

>Spike|hCoV-19/Scotland/QEUEH-9FA914/2020|2020-09-29|EPI\_ISL\_600571|Original|hCoV-19^^Scotland|Human|Lighthouse Lab in Glasgow|Wellcome Sanger Institute for the COVID-19 Genomics UK (COG-UK) consortium|Davies|United Kingdom

>Spike|hCoV-19/USA/MN-MDH-1614/2020|2020-04-25|EPI\_ISL\_530210|Original|hCoV-19^^Minnesota|Human|Minnesota Department of Health|Minnesota Department of Health|Garfin|USA

>Spike|hCoV-19/England/NORW-21F594/2020|2020-12-08|EPI\_ISL\_725029|Original|hCoV-19^^England|Human|Quadram Institute Bioscience|COVID-19 Genomics UK (COG-UK) Consortium|Alikhan|United Kingdom

>Spike|hCoV-19/England/20169006104/2020|2020-04-17|EPI\_ISL\_465186|Original|hCoV-19^^England|Human|Respiratory Virus Unit|Respiratory Virus Unit|Platt|United Kingdom

>Spike|hCoV-19/Northern Ireland/NIRE-FB976/2020|2020-03-31|EPI\_ISL\_585256|Original|hCoV-19^^Northern Ireland|Human|Regional Virus Laboratory|COVID-19 Genomics UK (COG-UK) Consortium|Fairley|United Kingdom

>Spike|hCoV-19/England/C200032709/2020|2020-10-15|EPI\_ISL\_636707|Original|hCoV-19^^England|Human|Respiratory Virus Unit|Respiratory Virus Unit|Platt|United Kingdom

>Spike|hCoV-19/England/QEUEH-A63380/2020|2020-10-12|EPI\_ISL\_596117|Original|hCoV-19^^England|Human|Quadram Institute Bioscience|COVID-19 Genomics UK (COG-UK) Consortium|Alikhan|United Kingdom

>Spike|hCoV-19/England/IC19/2020|2020-03-17|EPI\_ISL\_475572|Caco-2 P2|hCoV-19^^England|Human|Imperial College London|Imperial College London|Zhou|United Kingdom

>Spike|hCoV-19/England/ALDP-B5B3B7/2020|2020-11-08|EPI\_ISL\_655288|Original|hCoV-19^^England|Human|Lighthouse Lab in Alderley Park|Wellcome Sanger Institute for the COVID-19 Genomics UK (COG-UK) Consortium|Davies|United Kingdom

>Spike|hCoV-19/Australia/TAS31/2020|2020-04-10|EPI\_ISL\_522708|Original|hCoV-19^^Tasmania|Human|Royal Hobart Hospital Microbiology Department|MDU-PHL|Schultz|Australia

>Spike|hCoV-19/Senegal/68488/2020|2020-06-17|EPI\_ISL\_482877|Original|hCoV-19^^Dakar|Human|Institut Pasteur Dakar|Institut Pasteur de Dakar|Dia|Senegal

>Spike|hCoV-19/England/QEUEH-5DABDC/2020|2020-06-17|EPI\_ISL\_533340|Original|hCoV-19^^England|Human|Lighthouse Lab in Glasgow|Wellcome Sanger Institute for the COVID-19 Genomics UK (COG-UK) consortium|Davies|United Kingdom

>Spike|hCoV-19/Australia/NT47/2020|2020-00-00|EPI\_ISL\_480694|Original|hCoV-19^^Northern Territory|Human|Royal Darwin Hospital Pathology|MDU-PHL|Schultz|Australia

>Spike|hCoV-19/England/MILK-BB149E/2020|2020-11-18|EPI\_ISL\_720084|Original|hCoV-19^^England|Human|Lighthouse Lab in Milton Keynes|Wellcome Sanger Institute for the COVID-19 Genomics UK (COG-UK) Consortium|Davies|United Kingdom

>Spike|hCoV-19/Denmark/DCGC-1951/2020|2020-07-27|EPI\_ISL\_618247|Original|hCoV-19^^Sjaelland|Human|Department of Virus and Microbiological Special Diagnostics|Albertsen lab|Michaelsen|Denmark

>Spike|hCoV-19/USA/TX-DSHS-1184/2020|2020-06-16|EPI\_ISL\_631646|Original|hCoV-19^^Texas|Human|Texas Department of State Health Services|Texas Department of State Health Services|Rahman|USA

>Spike|hCoV-19/England/QEUA-B31A58/2020|2020-11-04|EPI\_ISL\_646229|Original|hCoV-19^^England|Human|Lighthouse Lab in Glasgow|Wellcome Sanger Institute for the COVID-19 Genomics UK (COG-UK) Consortium|Davies|United Kingdom

>Spike|hCoV-19/England/NORW-F06D4/2020|2020-10-14|EPI\_ISL\_595188|Original|hCoV-19^^England|Human|Quadram Institute Bioscience|COVID-19 Genomics UK (COG-UK) Consortium|Alikhan|United Kingdom

>Spike|hCoV-19/USA/WA-S1826/2020|2020-06-02|EPI\_ISL\_496252|Original|hCoV-19^^Washington|Human|Washington State Department of Health|Seattle Flu Study|Lee|USA

>Spike|hCoV-19/Wales/PHWC-48CA64/2020|2020-11-02|EPI\_ISL\_666499|Original|hCoV-19^^Wales|Human|Wales Specialist Virology Centre Sequencing lab|COVID-19 Genomics UK (COG-UK) Consortium|Moore|United Kingdom

>Spike|hCoV-19/Switzerland/BS-ETHZ-360010/2020|2020-11-12|EPI\_ISL\_693870|Original|hCoV-19^^Basel-Stadt|Human|Viollier AG|Department of Biosystems Science and Engineering|Nadeau|Switzerland

>Spike|hCoV-19/USA/WA-UW-21732/2020|2020-08-05|EPI\_ISL\_570995|Original|hCoV-19^^Washington|Human|UW Virology Lab|UW Virology Lab|Roychoudhury|USA

>Spike|hCoV-19/England/CAMC-B345AF/2020|2020-11-05|EPI\_ISL\_659591|Original|hCoV-19^^England|Human|Lighthouse Lab in Cambridge|Wellcome Sanger Institute for the COVID-19 Genomics UK (COG-UK) Consortium|Davies|United Kingdom

>Spike|hCoV-19/England/MILK-A23A2D/2020|2020-10-03|EPI\_ISL\_637371|Original|hCoV-19^^England|Human|Centre for Enzyme Innovation|COVID-19 Genomics UK (COG-UK) Consortium|Robson|United Kingdom

>Spike|hCoV-19/Luxembourg/LNS7986348/2020|2020-11-26|EPI\_ISL\_744665|Original|hCoV-19^^Luxembourg|Human|Laboratoire national de sant\u00e9|Laboratoire national de sant\u00e9|Wienecke-Baldacchino|Luxembourg

>Spike|hCoV-19/England/ALDP-BC86BC/2020|2020-11-23|EPI\_ISL\_721217|Original|hCoV-19^^England|Human|Lighthouse Lab in Alderley Park|Wellcome Sanger Institute for the COVID-19 Genomics UK (COG-UK) Consortium|Davies|United Kingdom

>Spike|hCoV-19/Denmark/DCGC-5060/2020|2020-09-21|EPI\_ISL\_621598|Original|hCoV-19^^Nordjylland|Human|Department of Virus and Microbiological Special Diagnostics|Albertsen lab|Michaelsen|Denmark

>Spike|hCoV-19/England/MILK-8327EA/2020|2020-07-17|EPI\_ISL\_557344|Original|hCoV-19^^England|Human|Lighthouse Lab in Milton Keynes|Wellcome Sanger Institute for the COVID-19 Genomics UK (COG-UK) consortium|Davies|United Kingdom

>Spike|hCoV-19/England/CAMC-A5844F/2020|2020-10-07|EPI\_ISL\_596932|Original|hCoV-19^^England|Human|Lighthouse Lab in Cambridge|Wellcome Sanger Institute for the COVID-19 Genomics UK (COG-UK) consortium|Davies|United Kingdom

>Spike|hCoV-19/France/PAC-IHU-0257/2020|2020-03-30|EPI\_ISL\_569415|Original|hCoV-19^^Provence-Alpes-C\u00f4te-d\u0192Azur|Human|MEPHI|MEPHI|Levasseur|France

>Spike|hCoV-19/England/20136088702/2020|2020-03-25|EPI\_ISL\_420641|Original|hCoV-19^^England|Human|Respiratory Virus Unit|Respiratory Virus Unit|Platt|United Kingdom

>Spike|hCoV-19/USA/CA-ALSR-2437/2020|2020-07-02|EPI\_ISL\_635478|Original|hCoV-19^^California|Human|San Diego County Public Health Laboratory|Andersen lab at Scripps Research|Gangavarapu|USA

>Spike|hCoV-19/Sweden/20-22133/2020|2020-04-02|EPI\_ISL\_660381|Original|hCoV-19^^Orebro|Human|Orebro klinisk mikrobiologi|The Public Health Agency of Sweden|Svartstr\u00f6m|Sweden

>Spike|hCoV-19/Australia/NSW1038/2020|2020-06-28|EPI\_ISL\_593690|Original|hCoV-19^^New South Wales|Human|South Eastern Area Laboratory Services (SEALS)|NSW Health Pathology - Institute of Clinical Pathology and Medical Research; Westmead Hospital; University of Sydney|Gall|Australia

>Spike|hCoV-19/Brazil/CE-L17-CD362/2020|2020-03-31|EPI\_ISL\_476308|Original|hCoV-19^^Cear\u00e1|Human|DB Diagn\u00f3sticos do Brasil|Instituto de Medicina Tropical da Universidade de S\u00e3o Paulo|Faria|Brazil

>Spike|hCoV-19/Scotland/QEUH-964B4C/2020|2020-08-13|EPI\_ISL\_531083|Original|hCoV-19^^Scotland|Human|NHSGGC West of Scotland Specialist Virology Centre / MRC-University of Glasgow Centre for Virus Research|Wellcome Sanger Institute for the COVID-19 Genomics UK (COG-UK) consortium|Davies|United Kingdom

>Spike|hCoV-19/Denmark/DCGC-15210/2020|2020-11-23|EPI\_ISL\_713695|Original|hCoV-19^^Hovedstaden|Human|Department of Virus and Microbiological Special Diagnostics|Albertsen Lab|Michaelsen|Denmark

>Spike|hCoV-19/Australia/VIC3983/2020|2020-07-15|EPI\_ISL\_563989|Original|hCoV-19^^Victoria|Human|Microbiological Diagnostic Unit - Public Health Laboratory (MDU-PHL)|MDU-PHL|Schultz|Australia

>Spike|hCoV-19/England/20134060904/2020|2020-03-21|EPI\_ISL\_423149|Original|hCoV-19^^England|Human|Respiratory Virus Unit|Respiratory Virus Unit|Platt|United Kingdom

>Spike|hCoV-19/USA/UT-08519/2020|2020-05-17|EPI\_ISL\_524282|Original|hCoV-19^^Utah|Human|Utah Public Health Laboratory|Utah Public Health Laboratory|Young|USA

>Spike|hCoV-19/Wales/PHWC-48360F/2020|2020-10-22|EPI\_ISL\_627837|Original|hCoV-19^^Wales|Human|Wales Specialist Virology Centre Sequencing lab|COVID-19 Genomics UK (COG-UK) Consortium|Moore|United Kingdom

>Spike|hCoV-19/England/MILK-467434/2020|2020-05-20|EPI\_ISL\_559723|Original|hCoV-19^^England|Human|Lighthouse Lab in Milton Keynes|Wellcome Sanger Institute for the COVID-19 Genomics UK (COG-UK) consortium|Davies|United Kingdom

>Spike|hCoV-19/Denmark/DCGC-6375/2020|2020-09-21|EPI\_ISL\_622290|Original|hCoV-19^^Hovedstaden|Human|Department of Virus and Microbiological Special Diagnostics|Albertsen lab|Michaelsen|Denmark

>Spike|hCoV-19/England/MILK-BB1865/2020|2020-11-18|EPI\_ISL\_720216|Original|hCoV-19^^England|Human|Lighthouse Lab in Milton Keynes|Wellcome Sanger Institute for the COVID-19 Genomics UK (COG-UK) Consortium|Davies|United Kingdom

>Spike|hCoV-19/USA/OR-OHSU-0534/2020|2020-06-15|EPI\_ISL\_525834|Original|hCoV-19^^Oregon|Human|OHSU Lab Services Molecular Microbiology Lab|Ginkgo Bioworks Clinical Laboratory|O'Roak|USA

>Spike|hCoV-19/Australia/WA412/2020|2020-05-27|EPI\_ISL\_672624|Original|hCoV-19^^Western Australia|Human|PathWest Laboratory Medicine WA|PathWest Laboratory Medicine WA Microbial Surveillance Unit|Sikazwe|Australia

>Spike|hCoV-19/Spain/AR-ISCI-201850/2020|2020-03-09|EPI\_ISL\_539519|Original|hCoV-19^^Aragon|Human|Hospital Universitario Miguel Servet|Instituto de Salud Carlos III|Caballero|Spain

>Spike|hCoV-19/Netherlands/NA\_175/2020|2020-03-22|EPI\_ISL\_422710|Original|hCoV-19^^Netherlands|Human|Dutch COVID-19 response team|Erasmus Medical Center|Oude Munnink|Netherlands

>Spike|hCoV-19/South Africa/KRISP-K004621/2020|2020-11-03|EPI\_ISL\_660639|Original|hCoV-19^^KwaZulu-Natal|Human|NHL-IALCH|KRISP|de Oliveira|South Africa

>Spike|hCoV-19/England/MILK-9A846F/2020|2020-09-02|EPI\_ISL\_550158|Original|hCoV-19^^England|Human|Lighthouse Lab in Milton Keynes|Wellcome Sanger Institute for the COVID-19 Genomics UK (COG-UK) consortium|Davies|United Kingdom

>Spike|hCoV-19/Netherlands/UT-RIVM-20192/2020|2020-11-30|EPI\_ISL\_723346|Original|hCoV-19^^Utrecht|Human|Dutch COVID-19 response team|National Institute for Public Health and the Environment (RIVM)|Meijer|Netherlands

>Spike|hCoV-19/Denmark/DCGC-8943/2020|2020-10-26|EPI\_ISL\_626161|Original|hCoV-19^^Syddanmark|Human|Department of Virus and Microbiological Special Diagnostics|Albertsen lab|Michaelsen|Denmark

>Spike|hCoV-19/England/ALDP-AA0C22/2020|2020-10-21|EPI\_ISL\_624967|Original|hCoV-19^^England|Human|Lighthouse Lab in Alderley Park|Wellcome Sanger Institute for the COVID-19 Genomics UK (COG-UK) consortium|Davies|United Kingdom

>Spike|hCoV-19/USA/VA-DCLS-0033/2020|2020-03-19|EPI\_ISL\_420019|Original|hCoV-19^^Virginia|Human|Virginia DCLS|Virginia DCLS|St. Jacques|USA

>Spike|hCoV-19/Northern Ireland/NIRE-2331F0/2020|2020-09-23|EPI\_ISL\_680266|Original|hCoV-19^^Northern Ireland|Human|Regional Virus Laboratory|COVID-19 Genomics UK (COG-UK) Consortium|Fairley|United Kingdom



>Spike|hCoV-19/Latvia/089/2020|2020-07-09|EPI\_ISL\_512314|Original|hCoV-19^^Latvia|Human|E. Gulbja Laboratorija|Latvian Biomedical Research and Study Centre|Zrelavs|Latvia

>Spike|hCoV-19/USA/OR-OHSU-0235/2020|2020-04-04|EPI\_ISL\_509077|Original|hCoV-19^^Oregon|Human|OHSU Lab Services Molecular Microbiology Lab|Oregon SARS-CoV-2 Genome Sequencing Center|O'Roak|USA

>Spike|hCoV-19/England/MILK-AC9151/2020|2020-10-22|EPI\_ISL\_709918|Original|hCoV-19^^England|Human|Lighthouse Lab in Milton Keynes|Wellcome Sanger Institute for the COVID-19 Genomics UK (COG-UK) Consortium|Davies|United Kingdom

>Spike|hCoV-19/England/MILK-BAA1EC/2020|2020-11-18|EPI\_ISL\_681389|Original|hCoV-19^^England|Human|Lighthouse Lab in Milton Keynes|Wellcome Sanger Institute for the COVID-19 Genomics UK (COG-UK) Consortium|Davies|United Kingdom

>Spike|hCoV-19/Singapore/128/2020|2020-03-21|EPI\_ISL\_443220|Original|hCoV-19^^Singapore|Human|National Public Health Laboratory|National Public Health Laboratory|Mak|Singapore

>Spike|hCoV-19/USA/UT-UPHL-2009643/2020|2020-07-16|EPI\_ISL\_605318|Original|hCoV-19^^Utah|Human|Utah Public Health Laboratory|Utah Public Health Laboratory|Young|USA

>Spike|hCoV-19/England/20168035104/2020|2020-04-16|EPI\_ISL\_466612|Original|hCoV-19^^England|Human|Respiratory Virus Unit|Respiratory Virus Unit|Platt|United Kingdom

>Spike|hCoV-19/England/QEUEH-9F7E54/2020|2020-09-27|EPI\_ISL\_589244|Original|hCoV-19^^England|Human|Lighthouse Lab in Glasgow|Wellcome Sanger Institute for the COVID-19 Genomics UK (COG-UK) consortium|Davies|United Kingdom

>Spike|hCoV-19/USA/CO-CSU-D2373-2/2020|2020-04-22|EPI\_ISL\_527464|Original|hCoV-19^^Colorado|Human|Colorado State University - Ebel Lab|Colorado State University - Ebel Lab|Cline|USA

>Spike|hCoV-19/England/QEUEH-A370F7/2020|2020-10-05|EPI\_ISL\_706928|Original|hCoV-19^^England|Human|Oxford Viromics|COVID-19 Genomics UK (COG-UK) Consortium|Golubchik|United Kingdom

>Spike|hCoV-19/Japan/PG-8175/2020|2020-07-00|EPI\_ISL\_687274|Original|hCoV-19^^Japan|Human|Pathogen Genomics Center|Pathogen Genomics Center|Sekizuka|Japan

>Spike|hCoV-19/England/LOND-DA667/2020|2020-11-10|EPI\_ISL\_724651|Original|hCoV-19^^England|Human|University College London|COVID-19 Genomics UK (COG-UK) Consortium|Roy|United Kingdom

>Spike|hCoV-19/England/NORT-2838DE/2020|2020-04-01|EPI\_ISL\_488577|Original|hCoV-19^^England|Human|NU-OMICS DNA Sequencing research facility|Wellcome Sanger Institute for the COVID-19 Genomics UK (COG-UK) consortium|Davies|United Kingdom

>Spike|hCoV-19/Netherlands/Utrecht\_1/2020|2020-03-03|EPI\_ISL\_414435|Original|hCoV-19^^Utrecht|Human|Dutch COVID-19 response team|Erasmus Medical Center|Oude Munnink|Netherlands

>Spike|hCoV-19/Scotland/EDB10520/2020|2020-11-30|EPI\_ISL\_705777|Original|hCoV-19^^Scotland|Human|Virology Department|COVID-19 Genomics UK (COG-UK) Consortium|McHugh|United Kingdom

>Spike|hCoV-19/England/MILK-994080/2020|2020-08-25|EPI\_ISL\_551652|Original|hCoV-19^^England|Human|Lighthouse Lab in Milton Keynes|Wellcome Sanger Institute for the COVID-19 Genomics UK (COG-UK) consortium|Davies|United Kingdom

>Spike|hCoV-19/USA/NY-NYCPHL-001466/2020|2020-11-27|EPI\_ISL\_683760|Original|hCoV-19^^New York|Human|DOHMH Morrisania|New York City Public Health Laboratory|Wang|USA

>Spike|hCoV-19/Denmark/DCGC-17509/2020|2020-12-14|EPI\_ISL\_751032|Original|hCoV-19^^Denmark|Human|Department of Virus and Microbiological Special Diagnostics|Albertsen Lab|Michaelsen|Denmark

>Spike|hCoV-19/USA/UT-UPHL-2012107439/2020|2020-06-18|EPI\_ISL\_746362|Original|hCoV-19^^Utah|Human|Utah Public Health Laboratory|Utah Public Health Laboratory|Gallagher|USA

>Spike|hCoV-19/Denmark/DCGC-14807/2020|2020-11-23|EPI\_ISL\_711998|Original|hCoV-19^^Hovedstaden|Human|Department of Virus and Microbiological Special Diagnostics|Albertsen Lab|Michaelsen|Denmark

>Spike|hCoV-19/USA/TX-DSHS-1423/2020|2020-06-22|EPI\_ISL\_671627|Original|hCoV-19^^Texas|Human|Texas Department of State Health Services|Texas Department of State Health Services|Rahman|USA

>Spike|hCoV-19/USA/MA-MGH-01290/2020|2020-05-05|EPI\_ISL\_791918|Original|hCoV-19^^Massachusetts|Human|Massachusetts General Hospital|Infectious Disease Program|Park|USA

>Spike|hCoV-19/USA/MN-MDH-2029/2020|2020-11-03|EPI\_ISL\_654710|Original|hCoV-19^^Minnesota|Human|Minnesota Department of Health|Minnesota Department of Health|Lorentz|USA

>Spike|hCoV-19/Japan/PG-8392/2020|2020-07-00|EPI\_ISL\_687491|Original|hCoV-19^^Japan|Human|Pathogen Genomics Center|Pathogen Genomics Center|Sekizuka|Japan

>Spike|hCoV-19/England/CAMC-C44C88/2020|2020-12-10|EPI\_ISL\_718609|Original|hCoV-19^^England|Human|Lighthouse Lab in Cambridge|Wellcome Sanger Institute for the COVID-19 Genomics UK (COG-UK) Consortium|Davies|United Kingdom

>Spike|hCoV-19/USA/TX-HMH-MCoV-15733/2020|2020-07-09|EPI\_ISL\_785417|Original|hCoV-19^^Texas|Human|Houston Methodist Hospital|Houston Methodist Hospital|Long|USA

>Spike|hCoV-19/England/LEED-2AA367/2020|2020-03-29|EPI\_ISL\_538819|Original|hCoV-19^^England|Human|Leeds Teaching Hospitals NHS Trust and Public Health England|Wellcome Sanger Institute for the COVID-19 Genomics UK (COG-UK) consortium|Davies|United Kingdom

>Spike|hCoV-19/Greece/NIC\_4/2020|2020-04-09|EPI\_ISL\_476851|Original|hCoV-19^^Thessaloniki|Human|National Influenza Centre for Northern Greece|National Influenza Centre for Northern Greece|Christoforidi|Greece

>Spike|hCoV-19/England/QEUEH-9F57B5/2020|2020-09-25|EPI\_ISL\_588740|Original|hCoV-19^^England|Human|Lighthouse Lab in Glasgow|Wellcome Sanger Institute for the COVID-19 Genomics UK (COG-UK) consortium|Davies|United Kingdom

>Spike|hCoV-19/India/GJ-GBRC354b/2020|2020-06-25|EPI\_ISL\_514602|Original|hCoV-19^^Gujarat|Human|B.J. Medical College and Civil hospital|Gujarat Biotechnology Research Centre|Joshi|India

>Spike|hCoV-19/Italy/LAZ-INMI-25/2020|2020-07-07|EPI\_ISL\_590693|Original|hCoV-19^^Lazio|Human|INMI Lazzaro Spallanzani IRCCS|INMI Lazzaro Spallanzani IRCCS|Gruber|Italy

>Spike|hCoV-19/USA/CA-QDX-2039/2020|2020-03-18|EPI\_ISL\_604319|Original|hCoV-19^^California|Human|Quest Diagnostics|Quest Diagnostics|Kagan|USA

>Spike|hCoV-19/Wales/QEUEH-B0DE86/2020|2020-11-02|EPI\_ISL\_647803|Original|hCoV-19^^Wales|Human|Lighthouse Lab in Glasgow|Wellcome Sanger Institute for the COVID-19 Genomics UK (COG-UK) Consortium|Davies|United Kingdom

>Spike|hCoV-19/Luxembourg/LNS5454756/2020|2020-03-20|EPI\_ISL\_744233|Original|hCoV-19^^Luxembourg|Human|Laboratoire national de sant\u00e9|Laboratoire national de sant\u00e9|Wienecke-Baldacchino|Luxembourg

>Spike|hCoV-19/Japan/PG-3001/2020|2020-04-00|EPI\_ISL\_691125|Original|hCoV-19^^Japan|Human|Pathogen Genomics Center|Pathogen Genomics Center|Sekizuka|Japan

>Spike|hCoV-19/Luxembourg/LNS5340325/2020|2020-12-28|EPI\_ISL\_771115|Original|hCoV-19^^Luxembourg|Human|Laboratoire national de sant\u00e9|Laboratoire national de sant\u00e9|Wienecke-Baldacchino|Luxembourg

>Spike|hCoV-19/USA/TX-HMH-5006/2020|2020-06-18|EPI\_ISL\_544453|Original|hCoV-19^^Texas|Human|Houston Methodist Hospital|Houston Methodist Hospital|Long|USA

>Spike|hCoV-19/Italy/CAM-IZSM-112/2020|2020-09-12|EPI\_ISL\_572320|Original|hCoV-19^^Campania|Human|IZSM|IZSM|Viscardi|Italy

>Spike|hCoV-19/Singapore/380/2020|2020-04-05|EPI\_ISL\_469129|Original|hCoV-19^^Singapore|Human|National Public Health Laboratory|National Public Health Laboratory|Mak|Singapore

>Spike|hCoV-19/Uganda/UG073/2020|2020-08-24|EPI\_ISL\_737942|Original|hCoV-19^^Uganda|Human|Uganda Central Public Health Lab and Uganda Virus Research Institute|MRC/UVRI & LSHTM Uganda\u00a0Research Unit|Cotten|Uganda

>Spike|hCoV-19/USA/TX-HMH-MCoV-18068/2020|2020-11-13|EPI\_ISL\_784416|Original|hCoV-19^^Texas|Human|Houston Methodist Hospital|Houston Methodist Hospital|Long|USA

>Spike|hCoV-19/Australia/VIC1615/2020|2020-05-07|EPI\_ISL\_456524|Original|hCoV-19^^Victoria|Human|Victorian Infectious Diseases Reference Laboratory (VIDRL)|Microbiological Diagnostic Unit Public Health Laboratory and Victorian Infectious Diseases Reference Laboratory|Schultz|Australia

>Spike|hCoV-19/USA/WI-UW-1302/2020|2020-09-01|EPI\_ISL\_536674|Original|hCoV-19^^Wisconsin|Human|University of Wisconsin-Madison AIDS Vaccine Research

Laboratories|University of Wisconsin-Madison AIDS Vaccine Research  
Laboratories|Baczenas|USA  
>Spike|hCoV-19/United Arab Emirates/L2006030255/2020|2020-06-03|EPI\_ISL\_520678|Original|hCoV-19^^United Arab Emirates|Human|Mohammed Bin Rashid University of Medicine and Health Sciences|Al Jalila Genomics Center|Ramaswamy|United Arab Emirates  
>Spike|hCoV-19/England/ALDP-94DA88/2020|2020-06-17|EPI\_ISL\_555200|Original|hCoV-19^^England|Human|Lighthouse Lab in Alderley Park|Wellcome Sanger Institute for the COVID-19 Genomics UK (COG-UK) consortium|Davies|United Kingdom  
>Spike|hCoV-19/Japan/PG-8233/2020|2020-08-00|EPI\_ISL\_687332|Original|hCoV-19^^Japan|Human|Pathogen Genomics Center|Pathogen Genomics Center|Sekizuka|Japan  
>Spike|hCoV-19/Scotland/QEUH-A21807/2020|2020-10-01|EPI\_ISL\_598845|Original|hCoV-19^^Scotland|Human|Lighthouse Lab in Glasgow|Wellcome Sanger Institute for the COVID-19 Genomics UK (COG-UK) consortium|Davies|United Kingdom  
>Spike|hCoV-19/USA/TX-HMH-MCoV-11777/2020|2020-09-08|EPI\_ISL\_790108|Original|hCoV-19^^Texas|Human|Houston Methodist Hospital|Houston Methodist Hospital|Long|USA  
>Spike|hCoV-19/USA/IL-UW-141/2020|2020-04-07|EPI\_ISL\_427448|Original|hCoV-19^^Illinois|Human|University of Wisconsin-Madison AIDS Vaccine Research Laboratories|University of Wisconsin-Madison AIDS Vaccine Research Laboratories|Baczenas|USA  
>Spike|hCoV-19/Japan/PG-5464/2020|2020-08-00|EPI\_ISL\_690567|Original|hCoV-19^^Japan|Human|Pathogen Genomics Center|Pathogen Genomics Center|Sekizuka|Japan  
>Spike|hCoV-19/England/EXET-13936E/2020|2020-10-26|EPI\_ISL\_665064|Original|hCoV-19^^England|Human|University of Exeter|COVID-19 Genomics UK (COG-UK) Consortium|Temperton|United Kingdom  
>Spike|hCoV-19/Wales/PHWC-49047E/2020|2020-10-30|EPI\_ISL\_706481|Original|hCoV-19^^Wales|Human|Originating lab|COVID-19 Genomics UK (COG-UK) Consortium|Moore|United Kingdom  
>Spike|hCoV-19/Australia/VIC17399/2020|2020-00-00|EPI\_ISL\_663873|Original|hCoV-19^^Victoria|Human|Microbiological Diagnostic Unit - Public Health Laboratory (MDU-PHL)|MDU-PHL|Schultz|Australia  
>Spike|hCoV-19/India/MH-ACTREC-264/2020|2020-07-08|EPI\_ISL\_699916|Original|hCoV-19^^Maharashtra|Human|Hematopathology Laboratory|Hematopathology Laboratory|Patkar|India  
>Spike|hCoV-19/Japan/PG-5279/2020|2020-08-00|EPI\_ISL\_690382|Original|hCoV-19^^Japan|Human|Pathogen Genomics Center|Pathogen Genomics Center|Sekizuka|Japan  
>Spike|hCoV-19/Scotland/CVR2999/2020|2020-04-23|EPI\_ISL\_461615|Original|hCoV-19^^Scotland|Human|West of Scotland Specialist Virology Centre|COVID-19 Genomics UK (COG-UK) Consortium|Robertson|United Kingdom  
>Spike|hCoV-19/Jordan/IR-ALSR-5279/2020|2020-11-03|EPI\_ISL\_730517|Original|hCoV-19^^Irbid|Human|Biolab Diagnostic Laboratories|Andersen lab at Scripps Research|Gangavarapu|Jordan  
>Spike|hCoV-19/Belgium/regA-0317857/2020|2020-03-17|EPI\_ISL\_734506|Original|hCoV-19^^M\u00e9clin|Human|UZ Leuven|KU Leuven|Maes|Belgium  
>Spike|hCoV-19/Argentina/PAIS-A0026/2020|2020-04-18|EPI\_ISL\_430817|Original|hCoV-19^^Ciudad Autonoma de Buenos Aires|Human|Laboratorio de Virolog\u00eda del Hospital de Ni\u00f1os Dr. Ricardo Gutierrez|\u00c1rea de Secuenciaci\u00f3n del Laboratorio de Virolog\u00eda del Hospital de Ni\u00f1os Dr. Ricardo Gutierrez|Viegas|Argentina  
>Spike|hCoV-19/England/CAMC-946199/2020|2020-07-13|EPI\_ISL\_556655|Original|hCoV-19^^England|Human|Lighthouse Lab in Cambridge|Wellcome Sanger Institute for the COVID-19 Genomics UK (COG-UK) consortium|Davies|United Kingdom  
>Spike|hCoV-19/Wales/PHWC-48751D/2020|2020-10-30|EPI\_ISL\_639206|Original|hCoV-19^^Wales|Human|Wales Specialist Virology Centre Sequencing lab|COVID-19 Genomics UK (COG-UK) Consortium|Moore|United Kingdom  
>Spike|hCoV-19/Japan/PG-7534/2020|2020-08-00|EPI\_ISL\_686636|Original|hCoV-19^^Japan|Human|Pathogen Genomics Center|Pathogen Genomics Center|Sekizuka|Japan  
>Spike|hCoV-19/Denmark/DCGC-6274/2020|2020-10-05|EPI\_ISL\_620034|Original|hCoV-19^^Midtjylland|Human|Department of Virus and Microbiological Special Diagnostics|Albertsen lab|Michaelsen|Denmark

>Spike|hCoV-19/USA/NM-DOH-2020616659/2020|2020-12-12|EPI\_ISL\_751823|Original|hCoV-19^^New Mexico|Human|New Mexico Department of Health Scientific Laboratory|New Mexico Department of Health Scientific Laboratory|Malone|USA

>Spike|hCoV-19/Japan/PG-2264/2020|2020-04-00|EPI\_ISL\_685869|Original|hCoV-19^^Japan|Human|Pathogen Genomics Center|Pathogen Genomics Center|Sekizuka|Japan

>Spike|hCoV-19/England/CAMC-B0886F/2020|2020-10-29|EPI\_ISL\_643954|Original|hCoV-19^^England|Human|Lighthouse Lab in Cambridge|Wellcome Sanger Institute for the COVID-19 Genomics UK (COG-UK) Consortium|Davies|United Kingdom

>Spike|hCoV-19/England/MILK-ABBAEE/2020|2020-10-21|EPI\_ISL\_631179|Original|hCoV-19^^England|Human|Lighthouse Lab in Milton Keynes|Wellcome Sanger Institute for the COVID-19 Genomics UK (COG-UK) consortium|Davies|United Kingdom

>Spike|hCoV-19/Austria/CeMM0922/2020|2020-03-16|EPI\_ISL\_583774|Original|hCoV-19^^Austria|Human|Dr. Gernot Walder GmbH|Bergthaler laboratory|Bergthaler|Austria

>Spike|hCoV-19/England/CAMB-7D7CD/2020|2020-04-06|EPI\_ISL\_441732|Original|hCoV-19^^England|Human|Department of Pathology|Wellcome Sanger Institute for the COVID-19 Genomics UK (COG-UK) consortium|Amato|United Kingdom

>Spike|hCoV-19/England/QEUEH-B122FB/2020|2020-11-02|EPI\_ISL\_642507|Original|hCoV-19^^England|Human|Lighthouse Lab in Glasgow|Wellcome Sanger Institute for the COVID-19 Genomics UK (COG-UK) Consortium|Davies|United Kingdom

>Spike|hCoV-19/England/ALDP-C3BBA5/2020|2020-12-11|EPI\_ISL\_731013|Original|hCoV-19^^England|Human|Lighthouse Lab in Alderley Park|Wellcome Sanger Institute for the COVID-19 Genomics UK (COG-UK) Consortium|Davies|United Kingdom

>Spike|hCoV-19/Luxembourg/LNS2325120/2020|2020-12-22|EPI\_ISL\_771053|Original|hCoV-19^^Luxembourg|Human|Laboratoire national de sant\u00e9|Laboratoire national de sant\u00e9|Wienecke-Baldacchino|Luxembourg

>Spike|hCoV-19/England/CAMC-94A326/2020|2020-07-27|EPI\_ISL\_556508|Original|hCoV-19^^England|Human|Lighthouse Lab in Cambridge|Wellcome Sanger Institute for the COVID-19 Genomics UK (COG-UK) consortium|Davies|United Kingdom

>Spike|hCoV-19/Sweden/20-22297/2020|2020-03-29|EPI\_ISL\_660394|Original|hCoV-19^^Ostergotland|Human|Klinsisk mikrobiologi Linkoping|The Public Health Agency of Sweden|Svartstr\u00f6m|Sweden

>Spike|hCoV-19/USA/AZ-TG526048/2020|2020-07-20|EPI\_ISL\_695392|Original|hCoV-19^^Arizona|Human|TGen North|TGen North|French|USA

>Spike|hCoV-19/England/ALDP-B48274/2020|2020-11-07|EPI\_ISL\_649290|Original|hCoV-19^^England|Human|Lighthouse Lab in Alderley Park|Wellcome Sanger Institute for the COVID-19 Genomics UK (COG-UK) Consortium|Davies|United Kingdom

>Spike|hCoV-19/Zimbabwe/ZW-9521/2020|2020-06-01|EPI\_ISL\_644815|Original|hCoV-19^^Zimbabwe|Human|National Microbiology Reference Laboratory|Quadram Institute Bioscience|Alikhan|Zimbabwe

>Spike|hCoV-19/Australia/VIC14655/2020|2020-08-13|EPI\_ISL\_592936|Original|hCoV-19^^Victoria|Human|Microbiological Diagnostic Unit - Public Health Laboratory (MDU-PHL)|MDU-PHL|Schultz|Australia

>Spike|hCoV-19/England/ALDP-BCA0AD/2020|2020-11-23|EPI\_ISL\_703274|Original|hCoV-19^^England|Human|Lighthouse Lab in Alderley Park|Wellcome Sanger Institute for the COVID-19 Genomics UK (COG-UK) Consortium|Davies|United Kingdom

>Spike|hCoV-19/Japan/PG-7837/2020|2020-08-00|EPI\_ISL\_686939|Original|hCoV-19^^Japan|Human|Pathogen Genomics Center|Pathogen Genomics Center|Sekizuka|Japan

>Spike|hCoV-19/Wales/PHWC-2E9D4/2020|2020-04-07|EPI\_ISL\_446096|Original|hCoV-19^^Wales|Human|Wales Specialist Virology Centre|Public Health Wales Microbiology Cardiff|Moore|United Kingdom

>Spike|hCoV-19/USA/WA-S1888/2020|2020-05-28|EPI\_ISL\_496314|Original|hCoV-19^^Washington|Human|Washington State Department of Health|Seattle Flu Study|Lee|USA

>Spike|hCoV-19/England/MILK-A6BDB7/2020|2020-10-09|EPI\_ISL\_609063|Original|hCoV-19^^England|Human|Lighthouse Lab in Milton Keynes|Wellcome Sanger Institute for the COVID-19 Genomics UK (COG-UK) consortium|Davies|United Kingdom

>Spike|hCoV-19/Australia/VIC12230/2020|2020-07-21|EPI\_ISL\_591935|Original|hCoV-19^^Victoria|Human|Microbiological Diagnostic Unit - Public Health Laboratory (MDU-PHL)|MDU-PHL|Schultz|Australia

>Spike|hCoV-19/USA/UT-UPHL-2009381/2020|2020-05-15|EPI\_ISL\_524973|Original|hCoV-19^^Utah|Human|Utah Public Health Laboratory|Utah Public Health Laboratory|Young|USA

>Spike|hCoV-19/Wales/PHWC-16A328/2020|2020-09-06|EPI\_ISL\_535234|Original|hCoV-19^^Wales|Human|Wales Specialist Virology Centre Sequencing lab|COVID-19 Genomics UK (COG-UK) Consortium|Moore|United Kingdom

>Spike|hCoV-19/Australia/VIC4250/2020|2020-07-13|EPI\_ISL\_519578|Original|hCoV-19^^Victoria|Human|Microbiological Diagnostic Unit - Public Health Laboratory (MDU-PHL)|MDU-PHL|Schultz|Australia

>Spike|hCoV-19/Australia/VIC5325/2020|2020-00-00|EPI\_ISL\_520088|Original|hCoV-19^^Victoria|Human|Microbiological Diagnostic Unit - Public Health Laboratory (MDU-PHL)|MDU-PHL|Schultz|Australia

>Spike|hCoV-19/England/CAMC-A57756/2020|2020-10-07|EPI\_ISL\_597427|Original|hCoV-19^^England|Human|Lighthouse Lab in Cambridge|Wellcome Sanger Institute for the COVID-19 Genomics UK (COG-UK) consortium|Davies|United Kingdom

>Spike|hCoV-19/Denmark/ALAB-HH-148/2020|2020-03-12|EPI\_ISL\_452025|Original|hCoV-19^^Denmark|Human|Department of Clinical Microbiology|Albertsen lab|Kirkegaard|Denmark

>Spike|hCoV-19/Scotland/EDB2885/2020|2020-04-01|EPI\_ISL\_488930|Original|hCoV-19^^Scotland|Human|Virology Department|Wellcome Sanger Institute for the COVID-19 Genomics UK (COG-UK) consortium|Davies|United Kingdom

>Spike|hCoV-19/Denmark/DCGC-5310/2020|2020-09-14|EPI\_ISL\_615241|Original|hCoV-19^^Nordjylland|Human|Department of Virus and Microbiological Special Diagnostics|Albertsen lab|Michaelsen|Denmark

>Spike|hCoV-19/England/CAMC-B9A52F/2020|2020-11-16|EPI\_ISL\_673483|Original|hCoV-19^^England|Human|Lighthouse Lab in Cambridge|Wellcome Sanger Institute for the COVID-19 Genomics UK (COG-UK) Consortium|Davies|United Kingdom

>Spike|hCoV-19/England/ALDP-C39BC5/2020|2020-12-09|EPI\_ISL\_730719|Original|hCoV-19^^England|Human|Lighthouse Lab in Alderley Park|Wellcome Sanger Institute for the COVID-19 Genomics UK (COG-UK) Consortium|Davies|United Kingdom

>Spike|hCoV-19/France/HDF-5666/2020|2020-04-03|EPI\_ISL\_443288|Original|hCoV-19^^Hauts-de-France|Human|Laboratoire de Microbiologie - B\u00e2timent A - CH Ren\u00e9 Dubois|National Reference Center for Viruses of Respiratory Infections|Enouf|France

>Spike|hCoV-19/Australia/VIC11013/2020|2020-09-08|EPI\_ISL\_563198|Original|hCoV-19^^Victoria|Human|Microbiological Diagnostic Unit - Public Health Laboratory (MDU-PHL)|MDU-PHL|Schultz|Australia

>Spike|hCoV-19/South Africa/N00133/2020|2020-07-06|EPI\_ISL\_623037|Original|hCoV-19^^Mpumalanga|Human|National Health Laboratory Service|National Institute for Communicable Diseases of the National Health Laboratory Service|Allam|South Africa

>Spike|hCoV-19/England/QEUA-A204E6/2020|2020-10-01|EPI\_ISL\_587636|Original|hCoV-19^^England|Human|Lighthouse Lab in Glasgow|Wellcome Sanger Institute for the COVID-19 Genomics UK (COG-UK) consortium|Davies|United Kingdom

>Spike|hCoV-19/Norway/5057/2020|2020-10-29|EPI\_ISL\_635086|Original|hCoV-19^^Oslo|Human|Furst Medical Laboratory|Norwegian Institute of Public Health|Vollan|Norway

>Spike|hCoV-19/England/QEUA-B7F61E/2020|2020-11-14|EPI\_ISL\_668258|Original|hCoV-19^^England|Human|Lighthouse Lab in Glasgow|Wellcome Sanger Institute for the COVID-19 Genomics UK (COG-UK) Consortium|Davies|United Kingdom

>Spike|hCoV-19/England/201380054/2020|2020-03-25|EPI\_ISL\_421809|Original|hCoV-19^^England|Human|Respiratory Virus Unit|Respiratory Virus Unit|Platt|United Kingdom

>Spike|hCoV-19/Chile/MA-CADIUMAG-34/2020|2020-08-12|EPI\_ISL\_681699|Original|hCoV-19^^Magallanes|Human|Molecular Medicine Laboratory|Centro Asistencial Docente y de Investigacion|Navarrete|Chile

>Spike|hCoV-19/Czech Republic/NRL-10715/2020|2020-11-03|EPI\_ISL\_693684|Original|hCoV-19^^Prague|Human|The National Institute of Public Health|State Veterinary Institute Prague|Nagy|Czech Republic

>Spike|hCoV-19/USA/WA-S2683/2020|2020-06-21|EPI\_ISL\_497315|Original|hCoV-19^^Washington|Human|Washington State Department of Health|Seattle Flu Study|Lee|USA

>Spike|hCoV-19/England/ALDP-A2FB00/2020|2020-10-05|EPI\_ISL\_586938|Original|hCoV-19^^England|Human|Lighthouse Lab in Alderley Park|Wellcome Sanger Institute for the COVID-19 Genomics UK (COG-UK) consortium|Davies|United Kingdom

>Spike|hCoV-19/England/MILK-B026A7/2020|2020-10-24|EPI\_ISL\_642806|Original|hCoV-19^^England|Human|Lighthouse Lab in Milton Keynes|Wellcome Sanger Institute for the COVID-19 Genomics UK (COG-UK) Consortium|Davies|United Kingdom

>Spike|hCoV-19/England/ALDP-A2D847/2020|2020-10-06|EPI\_ISL\_586637|Original|hCoV-19^^England|Human|Lighthouse Lab in Alderley Park|Wellcome Sanger Institute for the COVID-19 Genomics UK (COG-UK) consortium|Davies|United Kingdom

>Spike|hCoV-19/England/LIVE-A0318/2020|2020-05-23|EPI\_ISL\_472102|Original|hCoV-19^^England|Human|Liverpool Clinical Laboratories|COVID-19 Genomics UK (COG-UK) Consortium|Haldenby|United Kingdom

>Spike|hCoV-19/Denmark/DCGC-5505/2020|2020-09-21|EPI\_ISL\_620830|Original|hCoV-19^^Hovedstaden|Human|Department of Virus and Microbiological Special Diagnostics|Albertsen lab|Michaelsen|Denmark

>Spike|hCoV-19/USA/CA-CZB-3671/2020|2020-08-11|EPI\_ISL\_516746|Original|hCoV-19^^California|Human|UCSF Clinical Microbiology Laboratory|Chan-Zuckerberg Biohub|Kamm|USA

>Spike|hCoV-19/USA/TX-HMH-MCoV-10349/2020|2020-07-08|EPI\_ISL\_789431|Original|hCoV-19^^Texas|Human|Houston Methodist Hospital|Houston Methodist Hospital|Long|USA

>Spike|hCoV-19/England/QEUEH-A8C4D9/2020|2020-10-18|EPI\_ISL\_643150|Original|hCoV-19^^England|Human|Lighthouse Lab in Glasgow|Wellcome Sanger Institute for the COVID-19 Genomics UK (COG-UK) Consortium|Davies|United Kingdom

>Spike|hCoV-19/Canada/MB-NML-827/2020|2020-07-13|EPI\_ISL\_582323|Original|hCoV-19^^Manitoba|Human|Cadham Provincial Laboratory|National Microbiology Laboratory (NML)|Majer|Canada

>Spike|hCoV-19/England/NOTT-111DD7/2020|2020-05-03|EPI\_ISL\_472407|Original|hCoV-19^^England|Human|Queens Medical Centre|COVID-19 Genomics UK (COG-UK) Consortium|Loose|United Kingdom

>Spike|hCoV-19/Wales/PHWC-47EACF/2020|2020-10-08|EPI\_ISL\_595549|Original|hCoV-19^^Wales|Human|Originating lab|COVID-19 Genomics UK (COG-UK) Consortium|Moore|United Kingdom

>Spike|hCoV-19/England/BRIS-130CF3/2020|2020-03-24|EPI\_ISL\_492682|Original|hCoV-19^^England|Human|PHE South West Regional Laboratory|Wellcome Sanger Institute for the COVID-19 Genomics UK (COG-UK) consortium|Davies|United Kingdom

>Spike|hCoV-19/England/QEUEH-C92D5B/2020|2020-12-17|EPI\_ISL\_762123|Original|hCoV-19^^England|Human|Lighthouse Lab in Glasgow|Wellcome Sanger Institute for the COVID-19 Genomics UK (COG-UK) Consortium|Davies|United Kingdom

>Spike|hCoV-19/England/QEUEH-B9F4F0/2020|2020-11-18|EPI\_ISL\_720965|Original|hCoV-19^^England|Human|Lighthouse Lab in Glasgow|Wellcome Sanger Institute for the COVID-19 Genomics UK (COG-UK) Consortium|Davies|United Kingdom

>Spike|hCoV-19/USA/CA-CZB-10957/2020|2020-09-16|EPI\_ISL\_583040|Original|hCoV-19^^California|Human|Orange County Public Health Lab|Chan-Zuckerberg Biohub|Bhatt|USA

>Spike|hCoV-19/USA/CA-CZB-2013/2020|2020-05-01|EPI\_ISL\_486267|Original|hCoV-19^^California|Human|Orange County Public Health Laboratory|Chan-Zuckerberg Biohub|McGeever|USA

>Spike|hCoV-19/England/CAMC-B33054/2020|2020-11-05|EPI\_ISL\_659150|Original|hCoV-19^^England|Human|Lighthouse Lab in Cambridge|Wellcome Sanger Institute for the COVID-19 Genomics UK (COG-UK) Consortium|Davies|United Kingdom

>Spike|hCoV-19/Japan/PG-6744/2020|2020-08-00|EPI\_ISL\_687854|Original|hCoV-19^^Japan|Human|Pathogen Genomics Center|Pathogen Genomics Center|Sekizuka|Japan

>Spike|hCoV-19/Wales/PHWC-495D50/2020|2020-11-26|EPI\_ISL\_726477|Original|hCoV-19^^Wales|Human|Originating lab|COVID-19 Genomics UK (COG-UK) Consortium|Moore|United Kingdom

>Spike|hCoV-19/England/MILK-992DE5/2020|2020-08-26|EPI\_ISL\_551977|Original|hCoV-19^^England|Human|Lighthouse Lab in Milton Keynes|Wellcome Sanger Institute for the COVID-19 Genomics UK (COG-UK) consortium|Davies|United Kingdom

>Spike|hCoV-19/Singapore/465/2020|2020-03-05|EPI\_ISL\_475996|Original|hCoV-19^^Singapore|Human|National Public Health Laboratory|National Public Health Laboratory|Mak|Singapore

>Spike|hCoV-19/England/CAMC-9EBBD4/2020|2020-09-23|EPI\_ISL\_584404|Original|hCoV-19^^England|Human|Queens Medical Centre|COVID-19 Genomics UK (COG-UK) Consortium|Loose|United Kingdom

>Spike|hCoV-19/England/20138082704/2020|2020-03-26|EPI\_ISL\_421836|Original|hCoV-19^^England|Human|Respiratory Virus Unit|Respiratory Virus Unit|Platt|United Kingdom

>Spike|hCoV-19/Scotland/QEUH-9E432E/2020|2020-09-23|EPI\_ISL\_600995|Original|hCoV-19^^Scotland|Human|Lighthouse Lab in Glasgow|Wellcome Sanger Institute for the COVID-19 Genomics UK (COG-UK) consortium|Davies|United Kingdom

>Spike|hCoV-19/Scotland/QEUH-BA371E/2020|2020-11-18|EPI\_ISL\_757205|Original|hCoV-19^^Scotland|Human|Lighthouse Lab in Glasgow|Wellcome Sanger Institute for the COVID-19 Genomics UK (COG-UK) Consortium|Davies|United Kingdom

>Spike|hCoV-19/Australia/VIC9532/2020|2020-08-21|EPI\_ISL\_562743|Original|hCoV-19^^Victoria|Human|Microbiological Diagnostic Unit - Public Health Laboratory (MDU-PHL)|MDU-PHL|Schultz|Australia

>Spike|hCoV-19/Japan/PG-6270/2020|2020-08-00|EPI\_ISL\_689381|Original|hCoV-19^^Japan|Human|Pathogen Genomics Center|Pathogen Genomics Center|Sekizuka|Japan

>Spike|hCoV-19/England/QEUH-A8B7FF/2020|2020-10-18|EPI\_ISL\_721536|Original|hCoV-19^^England|Human|Lighthouse Lab in Glasgow|Wellcome Sanger Institute for the COVID-19 Genomics UK (COG-UK) Consortium|Davies|United Kingdom

>Spike|hCoV-19/Denmark/DCGC-7874/2020|2020-10-19|EPI\_ISL\_618846|Original|hCoV-19^^Midtjylland|Human|Department of Virus and Microbiological Special Diagnostics|Albertsen lab|Michaelsen|Denmark

>Spike|hCoV-19/Wales/PHWC-1662E3/2020|2020-06-13|EPI\_ISL\_490861|Original|hCoV-19^^Wales|Human|Wales Specialist Virology Centre Sequencing lab|COVID-19 Genomics UK (COG-UK) Consortium|Moore|United Kingdom

>Spike|hCoV-19/England/MILK-9A854E/2020|2020-09-02|EPI\_ISL\_550021|Original|hCoV-19^^England|Human|Lighthouse Lab in Milton Keynes|Wellcome Sanger Institute for the COVID-19 Genomics UK (COG-UK) consortium|Davies|United Kingdom

>Spike|hCoV-19/Sweden/20-07042/2020|2020-04-04|EPI\_ISL\_434665|Original|hCoV-19^^Uppsala|Human|Uppsala Narakut Aleris|The Public Health Agency of Sweden|Svartstr\u00f6m|Sweden

>Spike|hCoV-19/England/CAMC-B372B4/2020|2020-11-05|EPI\_ISL\_645372|Original|hCoV-19^^England|Human|Lighthouse Lab in Cambridge|Wellcome Sanger Institute for the COVID-19 Genomics UK (COG-UK) Consortium|Davies|United Kingdom

>Spike|hCoV-19/England/QEUH-B6AA83/2020|2020-11-11|EPI\_ISL\_662611|Original|hCoV-19^^England|Human|Lighthouse Lab in Glasgow|Wellcome Sanger Institute for the COVID-19 Genomics UK (COG-UK) Consortium|Davies|United Kingdom

>Spike|hCoV-19/England/CAMC-B21B94/2020|2020-11-01|EPI\_ISL\_647223|Original|hCoV-19^^England|Human|Lighthouse Lab in Cambridge|Wellcome Sanger Institute for the COVID-19 Genomics UK (COG-UK) Consortium|Davies|United Kingdom

>Spike|hCoV-19/England/SHEF-10C903D/2020|2020-12-19|EPI\_ISL\_763427|Original|hCoV-19^^England|Human|Virology Department|COVID-19 Genomics UK (COG-UK) Consortium|de Silva|United Kingdom

>Spike|hCoV-19/Italy/VEN-UniVR-27/2020|2020-08-28|EPI\_ISL\_751345|Original|hCoV-19^^Veneto|Human|IRCCS Sacro Cuore Don Calabria Hospital|University of Verona|Mori|Italy

>Spike|hCoV-19/England/ALDP-CBDC6C/2020|2020-12-19|EPI\_ISL\_760392|Original|hCoV-19^^England|Human|Lighthouse Lab in Alderley Park|Wellcome Sanger Institute for the COVID-19 Genomics UK (COG-UK) Consortium|Davies|United Kingdom

>Spike|hCoV-19/Singapore/348/2020|2020-03-31|EPI\_ISL\_469103|Original|hCoV-19^^Singapore|Human|National Public Health Laboratory|National Public Health Laboratory|Mak|Singapore

>Spike|hCoV-19/England/ALDP-A86536/2020|2020-10-17|EPI\_ISL\_605985|Original|hCoV-19^^England|Human|Lighthouse Lab in Alderley Park|Wellcome Sanger Institute for the COVID-19 Genomics UK (COG-UK) consortium|Davies|United Kingdom

>Spike|hCoV-19/Spain/MD-IBV-99008702/2020|2020-09-08|EPI\_ISL\_654282|Original|hCoV-19^^Madrid|Human|Hospital General Universitario Gregorio Mara\u00f1\u00f3n|SeqCOVID-SPAIN consortium/IBV (CSIC)|Comas|Spain

>Spike|hCoV-19/Wales/PHWC-2CA6A/2020|2020-04-01|EPI\_ISL\_445940|Original|hCoV-19^^Wales|Human|Wales Specialist Virology Centre|Public Health Wales Microbiology Cardiff|Moore|United Kingdom

>Spike|hCoV-19/Wales/PHWC-16483E/2020|2020-04-21|EPI\_ISL\_479312|Original|hCoV-19^^Wales|Human|Wales Specialist Virology Centre Sequencing lab|COVID-19 Genomics UK (COG-UK) Consortium|Moore|United Kingdom

>Spike|hCoV-19/Spain/VC-IBV-98000423/2020|2020-03-26|EPI\_ISL\_539238|Original|hCoV-19^^Comunitat Valenciana|Human|Servicio de Microbiologia. Hospital Clinico Universitario de Valencia|SeqCOVID-SPAIN consortium/IBV(CSIC)|Comas|Spain

>Spike|hCoV-19/Gibraltar/204421173/2020|2020-10-27|EPI\_ISL\_613566|Original|hCoV-19^^Gibraltar|Human|Microbiology|Respiratory Virus Unit|Platt|Gibraltar

>Spike|hCoV-19/USA/ME-HETL-J0078/2020|2020-03-19|EPI\_ISL\_513489|Original|hCoV-19^^Maine|Human|Maine HETL|Tewhey Lab|Tewhey|USA

>Spike|hCoV-19/England/MILK-C51954/2020|2020-12-11|EPI\_ISL\_769855|Original|hCoV-19^^England|Human|Lighthouse Lab in Milton Keynes|Wellcome Sanger Institute for the COVID-19 Genomics UK (COG-UK) Consortium|Davies|United Kingdom

>Spike|hCoV-19/USA/MA-QDX-69/2020|2020-03-15|EPI\_ISL\_467865|Original|hCoV-19^^Massachusetts|Human|Quest Diagnostics|Quest Diagnostics|Kagan|USA

>Spike|hCoV-19/England/QEUA-99041F/2020|2020-08-26|EPI\_ISL\_539961|Original|hCoV-19^^England|Human|Lighthouse Lab in Glasgow|Wellcome Sanger Institute for the COVID-19 Genomics UK (COG-UK) consortium|Davies|United Kingdom

>Spike|hCoV-19/USA/WI-WSLH-200017/2020|2020-04-06|EPI\_ISL\_471183|Original|hCoV-19^^Wisconsin|Human|Wisconsin State Laboratory of Hygiene Communicable Disease Division|Wisconsin State Laboratory of Hygiene Communicable Disease Division|Florek|USA

>Spike|hCoV-19/USA/TX-QDX-2111/2020|2020-03-14|EPI\_ISL\_604485|Original|hCoV-19^^Texas|Human|Quest Diagnostics|Quest Diagnostics|Kagan|USA

>Spike|hCoV-19/England/LOND-D468B/2020|2020-04-08|EPI\_ISL\_444145|Original|hCoV-19^^England|Human|University College London|COVID-19 Genomics UK (COG-UK) Consortium|Roy|United Kingdom

>Spike|hCoV-19/USA/MI-UM-10036630690/2020|2020-10-26|EPI\_ISL\_650020|Original|hCoV-19^^Michigan|Human|University of Michigan Clinical Microbiology Laboratory|Lauring Lab|Valesano|USA

>Spike|hCoV-19/USA/TX-HMH-7387/2020|2020-06-29|EPI\_ISL\_546726|Original|hCoV-19^^Texas|Human|Houston Methodist Hospital|Houston Methodist Hospital|Long|USA

>Spike|hCoV-19/Netherlands/NoordBrabant\_94/2020|2020-03-17|EPI\_ISL\_422888|Original|hCoV-19^^Noord Brabant|Human|Dutch COVID-19 response team|Erasmus Medical Center|Oude Munnink|Netherlands

>Spike|hCoV-19/England/CAMC-B790CB/2020|2020-11-12|EPI\_ISL\_668069|Original|hCoV-19^^England|Human|Lighthouse Lab in Cambridge|Wellcome Sanger Institute for the COVID-19 Genomics UK (COG-UK) Consortium|Davies|United Kingdom

>Spike|hCoV-19/Australia/VIC6728/2020|2020-07-25|EPI\_ISL\_562048|Original|hCoV-19^^Victoria|Human|Victorian Infectious Diseases Reference Laboratory (VIDRL)|VIDRL and MDU-PHL|Schultz|Australia

>Spike|hCoV-19/Scotland/CVR2289/2020|2020-04-11|EPI\_ISL\_490680|Original|hCoV-19^^Scotland|Human|West of Scotland Specialist Virology Centre|COVID-19 Genomics UK (COG-UK) Consortium|Robertson|United Kingdom

>Spike|hCoV-19/Spain/VC-IBV-98003101/2020|2020-03-15|EPI\_ISL\_538037|Original|hCoV-19^^Comunitat Valenciana|Human|Hospital Universitari i Polit\u00e8cnic La Fe de Val\u00e8ncia|SeqCOVID-SPAIN consortium/IBV(CSIC)|Comas|Spain

>Spike|hCoV-19/England/ALDP-59DF8E/2020|2020-06-14|EPI\_ISL\_558708|Original|hCoV-19^^England|Human|Lighthouse Lab in Alderley Park|Wellcome Sanger Institute for the COVID-19 Genomics UK (COG-UK) consortium|Davies|United Kingdom

>Spike|hCoV-19/England/MILK-B95C6B/2020|2020-11-14|EPI\_ISL\_674841|Original|hCoV-19^^England|Human|Lighthouse Lab in Milton Keynes|Wellcome Sanger Institute for the COVID-19 Genomics UK (COG-UK) Consortium|Davies|United Kingdom

>Spike|hCoV-19/USA/WI-UW-1455/2020|2020-09-10|EPI\_ISL\_541587|Original|hCoV-19^^Wisconsin|Human|University of Wisconsin-Madison AIDS Vaccine Research Laboratories|University of Wisconsin-Madison AIDS Vaccine Research Laboratories|Baczenas|USA

>Spike|hCoV-19/Portugal/PT0874/2020|2020-03-27|EPI\_ISL\_511133|Original|hCoV-19^^Portugal|Human|Instituto Nacional de Saude (INSA)|Instituto Nacional de Saude (INSA)|Borges|Portugal



>Spike|hCoV-19/Wuhan/HB-WHCM2-274/2020|2020-02-23|EPI\_ISL\_455008|Original|hCoV-19^^Hubei|Human|Wuhan Chain Medical Labs (CMLabs)|State Key Laboratory of Biotherapy of Sichuan University|Tang|China

>Spike|hCoV-19/USA/MI-MDHHS-SC21665/2020|2020-07-14|EPI\_ISL\_516392|Original|hCoV-19^^Michigan|Human|Michigan Department of Health and Human Services|Michigan Department of Health and Human Services|Blankenship|USA

>Spike|hCoV-19/Denmark/DCGC-18447/2020|2020-12-07|EPI\_ISL\_749972|Original|hCoV-19^^Syddanmark|Human|Department of Virus and Microbiological Special Diagnostics|Albertsen Lab|Michaelsen|Denmark

>Spike|hCoV-19/Wales/PHWC-49F002/2020|2020-12-10|EPI\_ISL\_743156|Original|hCoV-19^^Wales|Human|Wales Specialist Virology Centre Sequencing lab|COVID-19 Genomics UK (COG-UK) Consortium|Moore|United Kingdom

>Spike|hCoV-19/Australia/NSW192/2020|2020-03-25|EPI\_ISL\_427797|Original|hCoV-19^^New South Wales|Human|Centre for Infectious Diseases and Microbiology Public Health|NSW Health Pathology - Institute of Clinical Pathology and Medical Research; Westmead Hospital; University of Sydney|Gall|Australia

>Spike|hCoV-19/Japan/PG-1494/2020|2020-04-00|EPI\_ISL\_685101|Original|hCoV-19^^Japan|Human|Saitama Prefectural Institute of Public Health|Pathogen Genomics Center|Sekizuka|Japan

>Spike|hCoV-19/England/ALDP-6819BB/2020|2020-07-03|EPI\_ISL\_551824|Original|hCoV-19^^England|Human|Lighthouse Lab in Alderley Park|Wellcome Sanger Institute for the COVID-19 Genomics UK (COG-UK) consortium|Davies|United Kingdom

>Spike|hCoV-19/USA/MI-MDHHS-SC21092/2020|2020-03-26|EPI\_ISL\_507868|Original|hCoV-19^^Michigan|Human|Michigan Department of Health and Human Services|Michigan Department of Health and Human Services|Blankenship|USA

>Spike|hCoV-19/USA/NY-Wadsworth-79903-01/2020|2020-05-13|EPI\_ISL\_676910|Original|hCoV-19^^New York|Human|Wadsworth Center|Wadsworth Center|Lasek-Nesselquist|USA

>Spike|hCoV-19/England/MILK-9C489E/2020|2020-09-07|EPI\_ISL\_573258|Original|hCoV-19^^England|Human|Centre for Enzyme Innovation|COVID-19 Genomics UK (COG-UK) Consortium|Robson|United Kingdom

>Spike|hCoV-19/England/CAMC-B534DA/2020|2020-11-08|EPI\_ISL\_656785|Original|hCoV-19^^England|Human|Lighthouse Lab in Cambridge|Wellcome Sanger Institute for the COVID-19 Genomics UK (COG-UK) Consortium|Davies|United Kingdom

>Spike|hCoV-19/Netherlands/Limburg\_11/2020|2020-05-08|EPI\_ISL\_460999|Original|hCoV-19^^Limburg|Human|Dutch COVID-19 response team|Erasmus Medical Center|Oude Munnink|Netherlands

>Spike|hCoV-19/England/MILK-9A5541/2020|2020-09-03|EPI\_ISL\_550172|Original|hCoV-19^^England|Human|Lighthouse Lab in Milton Keynes|Wellcome Sanger Institute for the COVID-19 Genomics UK (COG-UK) consortium|Davies|United Kingdom

>Spike|hCoV-19/Wales/PHWC-1650BD/2020|2020-06-12|EPI\_ISL\_479419|Original|hCoV-19^^Wales|Human|Wales Specialist Virology Centre Sequencing lab|COVID-19 Genomics UK (COG-UK) Consortium|Moore|United Kingdom

>Spike|hCoV-19/Wales/PHWC-4A4AEE/2020|2020-12-14|EPI\_ISL\_764768|Original|hCoV-19^^Wales|Human|Wales Specialist Virology Centre Sequencing lab|COVID-19 Genomics UK (COG-UK) Consortium|Moore|United Kingdom

>Spike|hCoV-19/England/MILK-9AA3CA/2020|2020-09-01|EPI\_ISL\_550898|Original|hCoV-19^^England|Human|Lighthouse Lab in Milton Keynes|Wellcome Sanger Institute for the COVID-19 Genomics UK (COG-UK) consortium|Davies|United Kingdom

>Spike|hCoV-19/England/ALDP-9E9ECE/2020|2020-09-24|EPI\_ISL\_580043|Original|hCoV-19^^England|Human|Lighthouse Lab in Alderley Park|Wellcome Sanger Institute for the COVID-19 Genomics UK (COG-UK) consortium|Davies|United Kingdom

>Spike|hCoV-19/England/MILK-978969/2020|2020-08-01|EPI\_ISL\_550477|Original|hCoV-19^^England|Human|Lighthouse Lab in Milton Keynes|Wellcome Sanger Institute for the COVID-19 Genomics UK (COG-UK) consortium|Davies|United Kingdom

>Spike|hCoV-19/Gibraltar/205121262/2020|2020-00-00|EPI\_ISL\_766381|Original|hCoV-19^^Gibraltar|Human|Microbiology|Respiratory Virus Unit|Platt|Gibraltar

>Spike|hCoV-19/England/CAMC-BC05A8/2020|2020-11-23|EPI\_ISL\_704846|Original|hCoV-19^^England|Human|Lighthouse Lab in Cambridge|Wellcome Sanger Institute for the COVID-19 Genomics UK (COG-UK) Consortium|Davies|United Kingdom

>Spike|hCoV-19/Germany/NW-HHU-298/2020|2020-10-02|EPI\_ISL\_770773|Original|hCoV-19^^North Rhine-Westphalia|Human|ZOTZ KLIMAS MVZ D\u00f0fcsseldorf-Centrum GbR \u00dcBAG f\u00f0fcr Labormedizin|Center of Medical Microbiology|Wienemann|Germany

>Spike|hCoV-19/USA/ME-HETL-J0155/2020|2020-09-11|EPI\_ISL\_755341|Original|hCoV-19^^Maine|Human|Maine Health and Environmental Testing Laboratory|Tewhey Lab|Tewhey|USA

>Spike|hCoV-19/England/LIVE-DB3B86/2020|2020-10-21|EPI\_ISL\_650166|Original|hCoV-19^^England|Human|Liverpool Clinical Laboratories|COVID-19 Genomics UK (COG-UK) Consortium|Haldenby|United Kingdom

>Spike|hCoV-19/England/QEUEH-AD4C16/2020|2020-10-26|EPI\_ISL\_634648|Original|hCoV-19^^England|Human|Lighthouse Lab in Glasgow|Wellcome Sanger Institute for the COVID-19 Genomics UK (COG-UK) consortium|Davies|United Kingdom

>Spike|hCoV-19/United Arab Emirates/0603/2020|2020-05-15|EPI\_ISL\_698761|Original|hCoV-19^^Abu Dhabi|Human|Group 42 (G42) Healthcare|G42 Healthcare|Ogrodzki|United Arab Emirates

>Spike|hCoV-19/England/20099000304/2020|2020-02-28|EPI\_ISL\_464199|Original|hCoV-19^^England|Human|Respiratory Virus Unit|Respiratory Virus Unit|Platt|United Kingdom

>Spike|hCoV-19/Hungary/US-32570w/2020|2020-09-02|EPI\_ISL\_677758|Original|hCoV-19^^Csongr\u00e9ld county|Human|University of Szeged|National Laboratory of Virology|Kemenesi|Hungary

>Spike|hCoV-19/Japan/PG-4798/2020|2020-08-00|EPI\_ISL\_689923|Original|hCoV-19^^Japan|Human|Pathogen Genomics Center|Pathogen Genomics Center|Sekizuka|Japan

>Spike|hCoV-19/England/MILK-5147B4/2020|2020-06-11|EPI\_ISL\_559017|Original|hCoV-19^^England|Human|Lighthouse Lab in Milton Keynes|Wellcome Sanger Institute for the COVID-19 Genomics UK (COG-UK) Consortium|Davies|United Kingdom

>Spike|hCoV-19/USA/TX-HMH-5817/2020|2020-06-28|EPI\_ISL\_547039|Original|hCoV-19^^Texas|Human|Houston Methodist Hospital|Houston Methodist Hospital|Long|USA

>Spike|hCoV-19/England/NORW-E73BB/2020|2020-04-20|EPI\_ISL\_449031|Original|hCoV-19^^England|Human|Quadram Institute Bioscience|COVID-19 Genomics UK (COG-UK) Consortium|Alikhan|United Kingdom

>Spike|hCoV-19/England/MILK-83247A/2020|2020-07-16|EPI\_ISL\_557175|Original|hCoV-19^^England|Human|Lighthouse Lab in Milton Keynes|Wellcome Sanger Institute for the COVID-19 Genomics UK (COG-UK) consortium|Davies|United Kingdom

>Spike|hCoV-19/Japan/PG-4076/2020|2020-07-00|EPI\_ISL\_692317|Original|hCoV-19^^Japan|Human|Gunma Prefectural Institute of Public Health and Environmental Sciences|Pathogen Genomics Center|Sekizuka|Japan

>Spike|hCoV-19/England/MILK-B54C2C/2020|2020-11-05|EPI\_ISL\_657970|Original|hCoV-19^^England|Human|Lighthouse Lab in Milton Keynes|Wellcome Sanger Institute for the COVID-19 Genomics UK (COG-UK) Consortium|Davies|United Kingdom

>Spike|hCoV-19/Japan/IC-0185/2020|2020-10-00|EPI\_ISL\_667614|Original|hCoV-19^^Japan|Human|Pathogen Genomics Center|Pathogen Genomics Center|Sekizuka|Japan

>Spike|hCoV-19/Canada/ON-S1265/2020|2020-05-05|EPI\_ISL\_586318|Original|hCoV-19^^Ontario|Human|Toronto Invasive Bacterial Diseases Network|McMaster University|McArthur|Canada

>Spike|hCoV-19/Japan/PG-1936/2020|2020-04-00|EPI\_ISL\_685542|Original|hCoV-19^^Japan|Human|Pathogen Genomics Center|Pathogen Genomics Center|Sekizuka|Japan

>Spike|hCoV-19/USA/TX-DSHS-1879/2020|2020-07-08|EPI\_ISL\_751508|Original|hCoV-19^^Texas|Human|Texas Department of State Health Services|Texas Department of State Health Services|Rahman|USA

>Spike|hCoV-19/Denmark/DCGC-16149/2020|2020-11-16|EPI\_ISL\_714605|Original|hCoV-19^^Midtjylland|Human|Department of Virus and Microbiological Special Diagnostics|Albertsen Lab|Michaelsen|Denmark

>Spike|hCoV-19/England/LIVE-9C3A6/2020|2020-03-31|EPI\_ISL\_449534|Original|hCoV-19^^England|Human|Liverpool Clinical Laboratories|COVID-19 Genomics UK (COG-UK) Consortium|Haldenby|United Kingdom

>Spike|hCoV-19/England/SHEF-C07F8/2020|2020-03-21|EPI\_ISL\_420175|Original|hCoV-19^^England|Human|Virology Department|Department of Infection|de Silva|United Kingdom

>Spike|hCoV-19/England/MILK-AB76B1/2020|2020-10-19|EPI\_ISL\_623340|Original|hCoV-19^^England|Human|Lighthouse Lab in Milton Keynes|Wellcome Sanger Institute for the COVID-19 Genomics UK (COG-UK) consortium|Davies|United Kingdom

>Spike|hCoV-19/South Africa/R12578-20/2020|2020-06-16|EPI\_ISL\_504194|Original|hCoV-19^^North West|Human|National Institute for Communicable Diseases of the National Health Laboratory Service|National Institute for Communicable Diseases of the National Health Laboratory Service|Allam|South Africa

>Spike|hCoV-19/Denmark/ALAB-SSI-883/2020|2020-03-31|EPI\_ISL\_444954|Original|hCoV-19^^Denmark|Human|Department of Virus and Microbiological Special Diagnostics|Albertsen lab|Kirkegaard|Denmark

>Spike|hCoV-19/Australia/TAS39/2020|2020-04-12|EPI\_ISL\_522716|Original|hCoV-19^^Tasmania|Human|Royal Hobart Hospital Microbiology Department|MDU-PHL|Schultz|Australia

>Spike|hCoV-19/Singapore/221/2020|2020-03-23|EPI\_ISL\_462339|Original|hCoV-19^^Singapore|Human|National Public Health Laboratory|National Public Health Laboratory|Mak|Singapore

>Spike|hCoV-19/Wales/PHWC-48A1BC/2020|2020-11-03|EPI\_ISL\_652532|Original|hCoV-19^^Wales|Human|Wales Specialist Virology Centre Sequencing lab|COVID-19 Genomics UK (COG-UK) Consortium|Moore|United Kingdom

>Spike|hCoV-19/Wales/PHWC-1644EF/2020|2020-04-29|EPI\_ISL\_474186|Original|hCoV-19^^Wales|Human|Originating lab|COVID-19 Genomics UK (COG-UK) Consortium|Moore|United Kingdom

>Spike|hCoV-19/England/CAMC-B77A74/2020|2020-11-12|EPI\_ISL\_783486|Original|hCoV-19^^England|Human|Lighthouse Lab in Cambridge|Wellcome Sanger Institute for the COVID-19 Genomics UK (COG-UK) Consortium|Davies|United Kingdom

>Spike|hCoV-19/Denmark/DCGC-16421/2020|2020-11-16|EPI\_ISL\_714756|Original|hCoV-19^^Nordjylland|Human|Department of Virus and Microbiological Special Diagnostics|Albertsen Lab|Michaelsen|Denmark

>Spike|hCoV-19/Australia/VIC571/2020|2020-03-25|EPI\_ISL\_426831|Original|hCoV-19^^Victoria|Human|Victorian Infectious Diseases Reference Laboratory (VIDRL)|Microbiological Diagnostic Unit Public Health Laboratory and Victorian Infectious Diseases Reference Laboratory|Schultz|Australia

>Spike|hCoV-19/Australia/NSW124/2020|2020-03-26|EPI\_ISL\_427782|Original|hCoV-19^^New South Wales|Human|Centre for Infectious Diseases and Microbiology Public Health|NSW Health Pathology - Institute of Clinical Pathology and Medical Research; Westmead Hospital; University of Sydney|Gall|Australia

>Spike|hCoV-19/Denmark/DCGC-21541/2020|2020-12-21|EPI\_ISL\_758220|Original|hCoV-19^^Syddanmark|Human|Department of Virus and Microbiological Special Diagnostics|Albertsen Lab|Michaelsen|Denmark

>Spike|hCoV-19/England/ALDP-950ED1/2020|2020-06-14|EPI\_ISL\_554296|Original|hCoV-19^^England|Human|Lighthouse Lab in Alderley Park|Wellcome Sanger Institute for the COVID-19 Genomics UK (COG-UK) consortium|Davies|United Kingdom

>Spike|hCoV-19/England/CAMB-79433/2020|2020-04-03|EPI\_ISL\_441140|Original|hCoV-19^^England|Human|Department of Pathology|Wellcome Sanger Institute for the COVID-19 Genomics UK (COG-UK) consortium|Amato|United Kingdom

>Spike|hCoV-19/USA/VA-DCLS-0417/2020|2020-04-28|EPI\_ISL\_477633|Original|hCoV-19^^Virginia|Human|Virginia DCLS|Virginia DCLS|St. Jacques|USA

>Spike|hCoV-19/USA/MI-MDHHS-SC22606/2020|2020-11-19|EPI\_ISL\_737179|Original|hCoV-19^^Michigan|Human|Michigan Department of Health and Human Services|Michigan Department of Health and Human Services|Blankenship|USA

>Spike|hCoV-19/England/ALDP-9EA62F/2020|2020-09-24|EPI\_ISL\_580056|Original|hCoV-19^^England|Human|Lighthouse Lab in Alderley Park|Wellcome Sanger Institute for the COVID-19 Genomics UK (COG-UK) consortium|Davies|United Kingdom

>Spike|hCoV-19/England/MILK-C6398C/2020|2020-12-13|EPI\_ISL\_735590|Original|hCoV-19^^England|Human|Lighthouse Lab in Milton Keynes|Wellcome Sanger Institute for the COVID-19 Genomics UK (COG-UK) Consortium|Davies|United Kingdom

>Spike|hCoV-19/USA/MI-UM-10036561998/2020|2020-10-21|EPI\_ISL\_640179|Original|hCoV-19^^Michigan|Human|University of Michigan Clinical Microbiology Laboratory|Lauring Lab|Valesano|USA

>Spike|hCoV-19/USA/TX-HMH-MCoV-9180/2020|2020-07-02|EPI\_ISL\_780984|Original|hCoV-19^^Texas|Human|Houston Methodist Hospital|Houston Methodist Hospital|Long|USA

>Spike|hCoV-19/Australia/VIC12659/2020|2020-07-31|EPI\_ISL\_641298|Original|hCoV-19^^Victoria|Human|Microbiological Diagnostic Unit - Public Health Laboratory (MDU-PHL)|MDU-PHL|Schultz|Australia

>Spike|hCoV-19/Australia/VIC7923/2020|2020-08-06|EPI\_ISL\_564745|Original|hCoV-19^^Victoria|Human|Microbiological Diagnostic Unit - Public Health Laboratory (MDU-PHL)|MDU-PHL|Schultz|Australia

>Spike|hCoV-19/South Africa/KRISP-0369/2020|2020-06-25|EPI\_ISL\_487320|Original|hCoV-19^^KwaZulu-Natal|Human|NHLs-IALCH|KRISP|de Oliveira|South Africa

>Spike|hCoV-19/England/QEUA-89830C/2020|2020-07-24|EPI\_ISL\_532709|Original|hCoV-19^^England|Human|Lighthouse Lab in Glasgow|Wellcome Sanger Institute for the COVID-19 Genomics UK (COG-UK) consortium|Davies|United Kingdom

>Spike|hCoV-19/England/20108004803/2020|2020-03-03|EPI\_ISL\_417251|Original|hCoV-19^^England|Human|Respiratory Virus Unit|Respiratory Virus Unit|Platt|United Kingdom

>Spike|hCoV-19/Gibraltar/205121199/2020|2020-00-00|EPI\_ISL\_766329|Original|hCoV-19^^Gibraltar|Human|Microbiology|Respiratory Virus Unit|Platt|Gibraltar

>Spike|hCoV-19/USA/TX-HMH-7845/2020|2020-06-30|EPI\_ISL\_545663|Original|hCoV-19^^Texas|Human|Houston Methodist Hospital|Houston Methodist Hospital|Long|USA

>Spike|hCoV-19/USA/WI-WSLH-200155/2020|2020-03-30|EPI\_ISL\_578382|Original|hCoV-19^^Wisconsin|Human|Wisconsin State Laboratory of Hygiene Communicable Disease Division|Wisconsin State Laboratory of Hygiene Communicable Disease Division|Florek|USA

>Spike|hCoV-19/USA/UT-QDX-2090/2020|2020-03-13|EPI\_ISL\_604490|Original|hCoV-19^^Utah|Human|Quest Diagnostics|Quest Diagnostics|Kagan|USA

>Spike|hCoV-19/England/MILK-BDC970/2020|2020-11-27|EPI\_ISL\_709695|Original|hCoV-19^^England|Human|Lighthouse Lab in Milton Keynes|Wellcome Sanger Institute for the COVID-19 Genomics UK (COG-UK) Consortium|Davies|United Kingdom

>Spike|hCoV-19/USA/CA-QDX-03/2020|2020-03-13|EPI\_ISL\_444455|Original|hCoV-19^^California|Human|Molecular Infectious Disease|Molecular Infectious Disease|Anderson|USA

>Spike|hCoV-19/England/QEUA-BA0580/2020|2020-11-18|EPI\_ISL\_719764|Original|hCoV-19^^England|Human|Lighthouse Lab in Glasgow|Wellcome Sanger Institute for the COVID-19 Genomics UK (COG-UK) Consortium|Davies|United Kingdom

>Spike|hCoV-19/Shanghai/SH0127/2020|2020-02-12|EPI\_ISL\_416408|Original|hCoV-19^^Shanghai|Human|Shanghai Public Health Clinical Center|National Research Center for Translational Medicine (Shanghai)|Zhang|China

>Spike|hCoV-19/England/QEUA-B80C18/2020|2020-11-14|EPI\_ISL\_661908|Original|hCoV-19^^England|Human|Lighthouse Lab in Glasgow|Wellcome Sanger Institute for the COVID-19 Genomics UK (COG-UK) Consortium|Davies|United Kingdom

>Spike|hCoV-19/France/NAQ-SC203/2020|2020-03-05|EPI\_ISL\_645169|Original|hCoV-19^^Nouvelle-Aquitaine|Human|CHU Bordeaux|CNR Virus des Infections Respiratoires - France SUD|Bal|France

>Spike|hCoV-19/USA/LA-EVTL1144/2020|2020-12-09|EPI\_ISL\_768413|Original|hCoV-19^^Louisiana|Human|LSUHS Emerging Viral Threat Laboratory|Microbial Genome Sequencing Center|Kamil|USA

>Spike|hCoV-19/Australia/VIC16121/2020|2020-08-09|EPI\_ISL\_641178|Original|hCoV-19^^Victoria|Human|Microbiological Diagnostic Unit - Public Health Laboratory (MDU-PHL)|MDU-PHL|Schultz|Australia

>Spike|hCoV-19/England/BRIS-12E9C4/2020|2020-04-23|EPI\_ISL\_488243|Original|hCoV-19^^England|Human|PHE South West Regional Laboratory|Wellcome Sanger Institute for the COVID-19 Genomics UK (COG-UK) consortium|Davies|United Kingdom

>Spike|hCoV-19/Scotland/CVR3109/2020|2020-04-25|EPI\_ISL\_461682|Original|hCoV-19^^Scotland|Human|West of Scotland Specialist Virology Centre|COVID-19 Genomics UK (COG-UK) Consortium|Robertson|United Kingdom

>Spike|hCoV-19/England/ALDP-9BDB17/2020|2020-09-09|EPI\_ISL\_568193|Original|hCoV-19^^England|Human|Lighthouse Lab in Alderley Park|Wellcome Sanger Institute for the COVID-19 Genomics UK (COG-UK) consortium|Davies|United Kingdom

>Spike|hCoV-19/England/204761666/2020|2020-11-18|EPI\_ISL\_683551|Original|hCoV-19^^England|Human|Respiratory Virus Unit|COVID-19 Genomics UK (COG-UK) Consortium|Platt|United Kingdom

>Spike|hCoV-19/Australia/VIC12885/2020|2020-07-29|EPI\_ISL\_640776|Original|hCoV-19^^Victoria|Human|Microbiological Diagnostic Unit - Public Health Laboratory (MDU-PHL)|MDU-PHL|Schultz|Australia

>Spike|hCoV-19/Russia/Vector\_77628/2020|2020-03-22|EPI\_ISL\_428904|Vero|hCoV-19^^Moscow|Human|State Research Center of Virology and Biotechnology VECTOR|State Research Center of Virology and Biotechnology VECTOR|Shvalov|Russia

>Spike|hCoV-19/USA/TX-HMH-MCoV-15907/2020|2020-07-10|EPI\_ISL\_785591|Original|hCoV-19^^Texas|Human|Houston Methodist Hospital|Houston Methodist Hospital|Long|USA

>Spike|hCoV-19/USA/WA-UW-12359/2020|2020-06-27|EPI\_ISL\_570512|Original|hCoV-19^^Washington|Human|UW Virology Lab|UW Virology Lab|Roychoudhury|USA

>Spike|hCoV-19/Oman/205035516/2020|2020-05-13|EPI\_ISL\_491971|Original|hCoV-19^^Muscat|Human|Oman-NIC|Department of Microbiology and Immunology-SQUH|ALZadjali|Oman

>Spike|hCoV-19/Australia/VIC13286/2020|2020-07-28|EPI\_ISL\_563653|Original|hCoV-19^^Victoria|Human|Microbiological Diagnostic Unit - Public Health Laboratory (MDU-PHL)|MDU-PHL|Schultz|Australia

>Spike|hCoV-19/England/NOTT-110EA8/2020|2020-04-29|EPI\_ISL\_448431|Original|hCoV-19^^England|Human|Queens Medical Centre|COVID-19 Genomics UK (COG-UK) Consortium|Loose|United Kingdom

>Spike|hCoV-19/Wales/PHWC-49B9A1/2020|2020-12-06|EPI\_ISL\_742410|Original|hCoV-19^^Wales|Human|Wales Specialist Virology Centre Sequencing lab|COVID-19 Genomics UK (COG-UK) Consortium|Moore|United Kingdom

>Spike|hCoV-19/England/CAMC-B1FF24/2020|2020-11-01|EPI\_ISL\_647637|Original|hCoV-19^^England|Human|Lighthouse Lab in Cambridge|Wellcome Sanger Institute for the COVID-19 Genomics UK (COG-UK) Consortium|Davies|United Kingdom

>Spike|hCoV-19/Scotland/CVR2366/2020|2020-04-13|EPI\_ISL\_493792|Original|hCoV-19^^Scotland|Human|West of Scotland Specialist Virology Centre|COVID-19 Genomics UK (COG-UK) Consortium|Robertson|United Kingdom

>Spike|hCoV-19/England/MILK-AC77F7/2020|2020-10-21|EPI\_ISL\_630258|Original|hCoV-19^^England|Human|Lighthouse Lab in Milton Keynes|Wellcome Sanger Institute for the COVID-19 Genomics UK (COG-UK) consortium|Davies|United Kingdom

>Spike|hCoV-19/Jordan/SEARCH-5457/2020|2020-09-07|EPI\_ISL\_755245|Original|hCoV-19^^Amman|Human|Biolab Diagnostic Laboratories|Andersen lab at Scripps Research|Gangavarapu|Jordan

>Spike|hCoV-19/Scotland/EDB3976/2020|2020-05-03|EPI\_ISL\_449268|Original|hCoV-19^^Scotland|Human|Virology Department|COVID-19 Genomics UK (COG-UK) Consortium|Williams|United Kingdom

>Spike|hCoV-19/England/LOND-126368C/2020|2020-11-02|EPI\_ISL\_679463|Original|hCoV-19^^England|Human|University College London|COVID-19 Genomics UK (COG-UK) Consortium|Roy|United Kingdom

>Spike|hCoV-19/Australia/VIC16474/2020|2020-08-06|EPI\_ISL\_640879|Original|hCoV-19^^Victoria|Human|Microbiological Diagnostic Unit - Public Health Laboratory (MDU-PHL)|MDU-PHL|Schultz|Australia

>Spike|hCoV-19/USA/WI-UW-331/2020|2020-04-26|EPI\_ISL\_436625|Original|hCoV-19^^Wisconsin|Human|University of Wisconsin-Madison AIDS Vaccine Research Laboratories|University of Wisconsin-Madison AIDS Vaccine Research Laboratories|Baczenas|USA

>Spike|hCoV-19/England/SHEF-CE88E/2020|2020-05-11|EPI\_ISL\_475468|Original|hCoV-19^^England|Human|Virology Department|COVID-19 Genomics UK (COG-UK) Consortium|de Silva|United Kingdom

>Spike|hCoV-19/England/MILK-BAC1AE/2020|2020-11-18|EPI\_ISL\_783234|Original|hCoV-19^^England|Human|Lighthouse Lab in Milton Keynes|Wellcome Sanger Institute for the COVID-19 Genomics UK (COG-UK) Consortium|Davies|United Kingdom

>Spike|hCoV-19/Wales/PHWC-2E0C0/2020|2020-04-10|EPI\_ISL\_446056|Original|hCoV-19^^Wales|Human|Wales Specialist Virology Centre|Public Health Wales Microbiology Cardiff|Moore|United Kingdom

>Spike|hCoV-19/USA/WA-UW-8941/2020|2020-05-12|EPI\_ISL\_776737|Original|hCoV-19^^Washington|Human|UW Virology Lab|UW Virology Lab|Roychoudhury|USA

>Spike|hCoV-19/Northern Ireland/NIRE-FACBA/2020|2020-04-15|EPI\_ISL\_459324|Original|hCoV-19^^Northern Ireland|Human|Regional Virus

Laboratory|Wellcome Sanger Institute for the COVID-19 Genomics UK (COG-UK) consortium|Davies|United Kingdom  
>Spike|hCoV-19/England/ALDP-95309C/2020|2020-06-11|EPI\_ISL\_553685|Original|hCoV-19^^England|Human|Lighthouse Lab in Alderley Park|Wellcome Sanger Institute for the COVID-19 Genomics UK (COG-UK) consortium|Davies|United Kingdom  
>Spike|hCoV-19/England/LIVE-DBD472/2020|2020-10-27|EPI\_ISL\_664345|Original|hCoV-19^^England|Human|Liverpool Clinical Laboratories|COVID-19 Genomics UK (COG-UK) Consortium|Haldenby|United Kingdom  
>Spike|hCoV-19/Austria/CeMM0008/2020|2020-03-10|EPI\_ISL\_419661|Original|hCoV-19^^Austria|Human|Center for Virology|Bergthaler laboratory|Bergthaler|Austria  
>Spike|hCoV-19/Switzerland/AG-ETHZ-420679/2020|2020-12-23|EPI\_ISL\_767975|Original|hCoV-19^^Aargau|Human|Viollier AG|Department of Biosystems Science and Engineering|Nadeau|Switzerland  
>Spike|hCoV-19/Scotland/GCVR-171634/2020|2020-03-30|EPI\_ISL\_469945|Original|hCoV-19^^Scotland|Human|NHSGGC West of Scotland Specialist Virology Centre / MRC-University of Glasgow Centre for Virus Research|Wellcome Sanger Institute for the COVID-19 Genomics UK (COG-UK) consortium|Davies|United Kingdom  
>Spike|hCoV-19/Japan/PG-3696/2020|2020-04-00|EPI\_ISL\_691949|Original|hCoV-19^^Japan|Human|Pathogen Genomics Center|Pathogen Genomics Center|Sekizuka|Japan  
>Spike|hCoV-19/USA/NY-NYCPHL-001274/2020|2020-11-09|EPI\_ISL\_683954|Original|hCoV-19^^New York|Human|DOHMH PHL|New York City Public Health Laboratory|Wang|USA  
>Spike|hCoV-19/Hong Kong/HKU-200723-064/2020|2020-03-13|EPI\_ISL\_497831|Original|hCoV-19^^Hong Kong|Human|Department of Microbiology|Department of Microbiology|Chan|China  
>Spike|hCoV-19/Australia/VIC5000/2020|2020-07-18|EPI\_ISL\_519804|Original|hCoV-19^^Victoria|Human|Microbiological Diagnostic Unit - Public Health Laboratory (MDU-PHL)|MDU-PHL|Schultz|Australia  
>Spike|hCoV-19/France/BRE-IPP9980/2020|2020-10-08|EPI\_ISL\_718237|Original|hCoV-19^^Bretagne|Human|Hospital|National Reference Center for Viruses of Respiratory Infections|Enouf|France  
>Spike|hCoV-19/England/QEUEH-B10E08/2020|2020-11-02|EPI\_ISL\_642322|Original|hCoV-19^^England|Human|Lighthouse Lab in Glasgow|Wellcome Sanger Institute for the COVID-19 Genomics UK (COG-UK) Consortium|Davies|United Kingdom  
>Spike|hCoV-19/Brazil/RJ-INCA-C194/2020|2020-04-30|EPI\_ISL\_513525|Original|hCoV-19^^Rio de Janeiro|Human|Programa de Oncovirologia|Programa de Oncovirologia|Ramos Goes|Brazil  
>Spike|hCoV-19/USA/TX-HMH-5263/2020|2020-06-22|EPI\_ISL\_544635|Original|hCoV-19^^Texas|Human|Houston Methodist Hospital|Houston Methodist Hospital|Long|USA  
>Spike|hCoV-19/England/QEUEH-A1E90A/2020|2020-10-01|EPI\_ISL\_587445|Original|hCoV-19^^England|Human|Lighthouse Lab in Glasgow|Wellcome Sanger Institute for the COVID-19 Genomics UK (COG-UK) consortium|Davies|United Kingdom  
>Spike|hCoV-19/Wales/PHWC-48AD12/2020|2020-11-01|EPI\_ISL\_666149|Original|hCoV-19^^Wales|Human|Wales Specialist Virology Centre Sequencing lab|COVID-19 Genomics UK (COG-UK) Consortium|Moore|United Kingdom  
>Spike|hCoV-19/Denmark/DCGC-2900/2020|2020-08-17|EPI\_ISL\_616534|Original|hCoV-19^^Nordjylland|Human|Department of Virus and Microbiological Special Diagnostics|Albertsen lab|Michaelsen|Denmark  
>Spike|hCoV-19/England/ALDP-AA4B9A/2020|2020-10-21|EPI\_ISL\_624256|Original|hCoV-19^^England|Human|Lighthouse Lab in Alderley Park|Wellcome Sanger Institute for the COVID-19 Genomics UK (COG-UK) consortium|Davies|United Kingdom  
>Spike|hCoV-19/England/QEUEH-B12DDC/2020|2020-11-02|EPI\_ISL\_642494|Original|hCoV-19^^England|Human|Lighthouse Lab in Glasgow|Wellcome Sanger Institute for the COVID-19 Genomics UK (COG-UK) Consortium|Davies|United Kingdom  
>Spike|hCoV-19/Indonesia/JK-EIJK-04/2020|2020-04-01|EPI\_ISL\_437192|Original|hCoV-19^^Jakarta|Human|Mitra Keluarga Kelapa Gading Hospital|Eijkman Institute for Molecular Biology|Soebandrio|Indonesia  
>Spike|hCoV-19/England/ALDP-9CDC20/2020|2020-09-16|EPI\_ISL\_566215|Original|hCoV-19^^England|Human|Lighthouse Lab in Alderley Park|Wellcome Sanger Institute for the COVID-19 Genomics UK (COG-UK) consortium|Davies|United Kingdom

>Spike|hCoV-19/England/CAMB-1AA84B/2020|2020-04-17|EPI\_ISL\_470093|Original|hCoV-19^^England|Human|Department of Pathology|Wellcome Sanger Institute for the COVID-19 Genomics UK (COG-UK) consortium|Davies|United Kingdom

>Spike|hCoV-19/USA/ME-HETL-J0065/2020|2020-03-19|EPI\_ISL\_513476|Original|hCoV-19^^Maine|Human|Maine HETL|Tewhey Lab|Tewhey|USA

>Spike|hCoV-19/Wales/PHWC-4A0AE2/2020|2020-12-10|EPI\_ISL\_743542|Original|hCoV-19^^Wales|Human|Wales Specialist Virology Centre Sequencing lab|COVID-19 Genomics UK (COG-UK) Consortium|Moore|United Kingdom

>Spike|hCoV-19/USA/CO-CDPHE-2009170365/2020|2020-09-16|EPI\_ISL\_710346|Original|hCoV-19^^Colorado|Human|Colorado Department of Public Health and Environment|Colorado Department of Public Health and Environment|Bankers|USA

>Spike|hCoV-19/USA/TX-HMH-MCoV-9712/2020|2020-07-07|EPI\_ISL\_780237|Original|hCoV-19^^Texas|Human|Houston Methodist Hospital|Houston Methodist Hospital|Long|USA

>Spike|hCoV-19/England/CAMB-1B1243/2020|2020-05-07|EPI\_ISL\_459197|Original|hCoV-19^^England|Human|Department of Pathology|Wellcome Sanger Institute for the COVID-19 Genomics UK (COG-UK) consortium|Davies|United Kingdom

>Spike|hCoV-19/England/CAMB-7872C/2020|2020-00-00|EPI\_ISL\_433766|Original|hCoV-19^^England|Human|Department of Pathology|COVID-19 Genomics UK (COG-UK) Consortium|Meredith|United Kingdom

>Spike|hCoV-19/Netherlands/OV-RIVM-21010/2020|2020-12-21|EPI\_ISL\_791027|Original|hCoV-19^^Overijssel|Human|Dutch COVID-19 response team|National Institute for Public Health and the Environment (RIVM)|Meijer|Netherlands

>Spike|hCoV-19/Denmark/DCGC-11476/2020|2020-11-02|EPI\_ISL\_670941|Original|hCoV-19^^Hovedstaden|Human|Department of Virus and Microbiological Special Diagnostics|Albertsen Lab|Michaelsen|Denmark

>Spike|hCoV-19/Mexico/BCN-ALSR-3624/2020|2020-06-12|EPI\_ISL\_636116|Original|hCoV-19^^Sonora|Human|Sharp HealthCare Laboratory|Andersen lab at Scripps Research|Gangavarapu|Mexico

>Spike|hCoV-19/Wales/PHWC-16A425/2020|2020-09-07|EPI\_ISL\_535249|Original|hCoV-19^^Wales|Human|Wales Specialist Virology Centre Sequencing lab|COVID-19 Genomics UK (COG-UK) Consortium|Moore|United Kingdom

>Spike|hCoV-19/England/ALDP-C39DCF/2020|2020-12-09|EPI\_ISL\_730764|Original|hCoV-19^^England|Human|Lighthouse Lab in Alderley Park|Wellcome Sanger Institute for the COVID-19 Genomics UK (COG-UK) Consortium|Davies|United Kingdom

>Spike|hCoV-19/Portugal/PT0715/2020|2020-03-24|EPI\_ISL\_510974|Original|hCoV-19^^Portugal|Human|Instituto Nacional de Saude (INSA)|Instituto Nacional de Saude (INSA)|Borges|Portugal

>Spike|hCoV-19/Norway/4327/2020|2020-10-05|EPI\_ISL\_775469|Original|hCoV-19^^Vestfold og Telemark|Human|Unilabs Laboratory Medicine|Norwegian Institute of Public Health|Vollan|Norway

>Spike|hCoV-19/USA/TX-HMH-MCoV-18930/2020|2020-11-25|EPI\_ISL\_785227|Original|hCoV-19^^Texas|Human|Houston Methodist Hospital|Houston Methodist Hospital|Long|USA

>Spike|hCoV-19/Germany/NW-HHU-341/2020|2020-10-13|EPI\_ISL\_718039|Original|hCoV-19^^North Rhine-Westphalia|Human|ZOTZ KLIMAS MVZ D\u00f0fcsselndorf-Centrum GbR \u00dcBAG f\u00f0r Labormedizin|Center of Medical Microbiology|Wienemann|Germany

>Spike|hCoV-19/Israel/CVL-n17916/2020|2020-06-02|EPI\_ISL\_516889|Original|hCoV-19^^Tel Aviv|Human|Israel Central Virology laboratory|Israel Central Virology laboratory|Zuckerman|Israel

>Spike|hCoV-19/USA/FL-BPHL-1469/2020|2020-05-09|EPI\_ISL\_549251|Original|hCoV-19^^Florida|Human|Florida Bureau of Public Health Laboratories|Florida Bureau of Public Health Laboratories|Blanton|USA

>Spike|hCoV-19/Singapore/392/2020|2020-04-17|EPI\_ISL\_469141|Original|hCoV-19^^Singapore|Human|National Public Health Laboratory|National Public Health Laboratory|Mak|Singapore

>Spike|hCoV-19/Japan/PG-2043/2020|2020-03-00|EPI\_ISL\_685648|Original|hCoV-19^^Japan|Human|Pathogen Genomics Center|Pathogen Genomics Center|Sekizuka|Japan

>Spike|hCoV-19/England/NORT-29EA9E/2020|2020-05-12|EPI\_ISL\_490471|Original|hCoV-19^^England|Human|Northumbria University / South Tees Hospitals NHS Foundation Trust / North Cumbria Integrated Care NHS Foundation Trust / North Tees and Hartlepool NHS

Foundation Trust / Newcastle Hospitals NHS Foundation Trust|COVID-19 Genomics UK (COG-UK) Consortium|Bashton|United Kingdom  
>Spike|hCoV-19/Scotland/EDB5543/2020|2020-04-01|EPI\_ISL\_487721|Original|hCoV-19^^Scotland|Human|Virology Department|Wellcome Sanger Institute for the COVID-19 Genomics UK (COG-UK) consortium|Davies|United Kingdom  
>Spike|hCoV-19/Iceland/321/2020|2020-03-18|EPI\_ISL\_417650|Original|hCoV-19^^Reykjavik|Human|The National University Hospital of Iceland|deCODE genetics|J\u00f3nsson|Iceland  
>Spike|hCoV-19/Spain/VC-FISABIO-178/2020|2020-03-21|EPI\_ISL\_436273|Original|hCoV-19^^Comunitat Valenciana|Human|Servicio de Microbiolog\u00eda. Consorcio Hospital General Universitario de Valencia|Sequencing and Bioinformatics Service and Molecular Epidemiology Research Group. FISABIO-Public Health|Gonzalez-Candelas|Spain  
>Spike|hCoV-19/USA/SC-DHEC-0203/2020|2020-05-18|EPI\_ISL\_529190|Original|hCoV-19^^South Carolina|Human|South Carolina Department of Health and Environmental Control|South Carolina Department of Health and Environmental Control|Flores|USA  
>Spike|hCoV-19/England/ALDP-B5C79C/2020|2020-11-08|EPI\_ISL\_655682|Original|hCoV-19^^England|Human|Lighthouse Lab in Alderley Park|Wellcome Sanger Institute for the COVID-19 Genomics UK (COG-UK) Consortium|Davies|United Kingdom  
>Spike|hCoV-19/England/CAMB-1B8F63/2020|2020-11-02|EPI\_ISL\_651693|Original|hCoV-19^^England|Human|Department of Pathology|COVID-19 Genomics UK (COG-UK) Consortium|Goodfellow|United Kingdom  
>Spike|hCoV-19/Wales/PHWC-162539/2020|2020-05-19|EPI\_ISL\_473085|Original|hCoV-19^^Wales|Human|Wales Specialist Virology Centre Sequencing lab|COVID-19 Genomics UK (COG-UK) Consortium|Moore|United Kingdom  
>Spike|hCoV-19/Wales/PHWC-4957BC/2020|2020-11-23|EPI\_ISL\_726396|Original|hCoV-19^^Wales|Human|Originating lab|COVID-19 Genomics UK (COG-UK) Consortium|Moore|United Kingdom  
>Spike|hCoV-19/Wales/PHWC-31C20/2020|2020-04-13|EPI\_ISL\_446546|Original|hCoV-19^^Wales|Human|Wales Specialist Virology Centre|Public Health Wales Microbiology Cardiff|Moore|United Kingdom  
>Spike|hCoV-19/USA/LA-GBCL-26629240/2020|2020-04-21|EPI\_ISL\_485233|Original|hCoV-19^^Louisiana|Human|River Road Testing Lab|Ginkgo Bioworks Clinical Laboratory|Smith|USA  
>Spike|hCoV-19/England/MILK-A79E95/2020|2020-10-15|EPI\_ISL\_606663|Original|hCoV-19^^England|Human|Lighthouse Lab in Milton Keynes|Wellcome Sanger Institute for the COVID-19 Genomics UK (COG-UK) consortium|Davies|United Kingdom  
>Spike|hCoV-19/Panama/334898/2020|2020-03-31|EPI\_ISL\_496797|Original|hCoV-19^^Panama Center|Human|Gorgas Memorial Laboratory of Health Studies|Gorgas Memorial Laboratory of Health Studies|Martinez|Panama  
>Spike|hCoV-19/Brazil/RJ-INCA-C22/2020|2020-04-16|EPI\_ISL\_513530|Original|hCoV-19^^Rio de Janeiro|Human|Programa de Oncovirologia|Programa de Oncovirologia|Ramos Goes|Brazil  
>Spike|hCoV-19/Australia/NSW2220/2020|2020-03-20|EPI\_ISL\_500671|Original|hCoV-19^^New South Wales|Human|Area of Virology|Area of Virology|Bull|Australia  
>Spike|hCoV-19/Denmark/DCGC-16341/2020|2020-11-16|EPI\_ISL\_714714|Original|hCoV-19^^Midtjylland|Human|Department of Virus and Microbiological Special Diagnostics|Albertsen Lab|Michaelsen|Denmark  
>Spike|hCoV-19/USA/WI-UW-1152/2020|2020-08-13|EPI\_ISL\_522908|Original|hCoV-19^^Wisconsin|Human|University of Wisconsin-Madison AIDS Vaccine Research Laboratories|University of Wisconsin-Madison AIDS Vaccine Research Laboratories|Baczenas|USA  
>Spike|hCoV-19/England/MILK-A7D5D8/2020|2020-10-12|EPI\_ISL\_606366|Original|hCoV-19^^England|Human|Lighthouse Lab in Milton Keynes|Wellcome Sanger Institute for the COVID-19 Genomics UK (COG-UK) consortium|Davies|United Kingdom  
>Spike|hCoV-19/Hong Kong/HKU-200723-057/2020|2020-03-24|EPI\_ISL\_497824|Original|hCoV-19^^Hong Kong|Human|Department of Microbiology|Department of Microbiology|Chan|China  
>Spike|hCoV-19/England/MILK-B5A3F4/2020|2020-11-06|EPI\_ISL\_658308|Original|hCoV-19^^England|Human|Lighthouse Lab in Milton Keynes|Wellcome Sanger Institute for the COVID-19 Genomics UK (COG-UK) Consortium|Davies|United Kingdom



>Spike|hCoV-19/Australia/VIC13245/2020|2020-07-25|EPI\_ISL\_563646|Original|hCoV-19^^Victoria|Human|Microbiological Diagnostic Unit - Public Health Laboratory (MDU-PHL)|MDU-PHL|Schultz|Australia

>Spike|hCoV-19/Japan/PG-0591/2020|2020-04-04|EPI\_ISL\_480223|Original|hCoV-19^^Kanto|Human|Koshigaya City Public Health Center|Pathogen Genomics Center|Sekizuka|Japan

>Spike|hCoV-19/England/CAMC-CB79E3/2020|2020-12-19|EPI\_ISL\_777723|Original|hCoV-19^^England|Human|Lighthouse Lab in Cambridge|Wellcome Sanger Institute for the COVID-19 Genomics UK (COG-UK) Consortium|Davies|United Kingdom

>Spike|hCoV-19/USA/TX-HMH-5964/2020|2020-06-26|EPI\_ISL\_547128|Original|hCoV-19^^Texas|Human|Houston Methodist Hospital|Houston Methodist Hospital|Long|USA

>Spike|hCoV-19/Japan/PG-4695/2020|2020-08-00|EPI\_ISL\_689832|Original|hCoV-19^^Japan|Human|Pathogen Genomics Center|Pathogen Genomics Center|Sekizuka|Japan

>Spike|hCoV-19/USA/MI-UM-10036813449/2020|2020-11-06|EPI\_ISL\_728411|Original|hCoV-19^^Michigan|Human|University of Michigan Clinical Microbiology Laboratory|Lauring Lab|Valesano|USA

>Spike|hCoV-19/England/QEUEH-B7ECB3/2020|2020-11-14|EPI\_ISL\_661645|Original|hCoV-19^^England|Human|Lighthouse Lab in Glasgow|Wellcome Sanger Institute for the COVID-19 Genomics UK (COG-UK) Consortium|Davies|United Kingdom

>Spike|hCoV-19/USA/MI-MDHHS-SC21106/2020|2020-03-24|EPI\_ISL\_507882|Original|hCoV-19^^Michigan|Human|Michigan Department of Health and Human Services|Michigan Department of Health and Human Services|Blankenship|USA

>Spike|hCoV-19/Russia/Buryatia-88903/2020|2020-04-01|EPI\_ISL\_428911|Vero|hCoV-19^^Buryatia|Human|State Research Center of Virology and Biotechnology VECTOR|State Research Center of Virology and Biotechnology VECTOR|Shvalov|Russia

>Spike|hCoV-19/Netherlands/ZH-EMC-592/2020|2020-09-18|EPI\_ISL\_578020|Original|hCoV-19^^Zuid Holland|Human|Dutch COVID-19 response team|Erasmus Medical Center|Oude Munnink|Netherlands

>Spike|hCoV-19/USA/MN-MDH-138/2020|2020-03-22|EPI\_ISL\_427278|Original|hCoV-19^^Minnesota|Human|Minnesota Department of Health|Minnesota Department of Health|Wang|USA

>Spike|hCoV-19/USA/WI-UW-2348/2020|2020-11-13|EPI\_ISL\_728114|Original|hCoV-19^^Wisconsin|Human|University of Wisconsin-Madison AIDS Vaccine Research Laboratories|University of Wisconsin-Madison AIDS Vaccine Research Laboratories|Baczenas|USA

>Spike|hCoV-19/USA/NE-11518/2020|2020-05-05|EPI\_ISL\_475225|Original|hCoV-19^^Nebraska|Human|Nebraska Public Health Laboratory|UNMC COVID-19 Response Team|Pratt|USA

>Spike|hCoV-19/USA/WA-S379/2020|2020-03-27|EPI\_ISL\_434139|Original|hCoV-19^^Washington|Human|Washington State Department of Health|Seattle Flu Study|Bedford|USA

>Spike|hCoV-19/Portugal/PT1325/2020|2020-03-18|EPI\_ISL\_511284|Original|hCoV-19^^Portugal|Human|Instituto Nacional de Saude (INSA) and Instituto Gulbenkian de Ciencia (IGC)|Instituto Nacional de Saude (INSA) and Instituto Gulbenkian de Ciencia (IGC)|Borges|Portugal

>Spike|hCoV-19/Japan/TK-YE63751d/2020|2020-03-00|EPI\_ISL\_582145|Original|hCoV-19^^Tokyo|Human|Tokyo Metropolitan Institute of Public Health|Tokyo Metropolitan Institute of Public Health|Nagashima|Japan

>Spike|hCoV-19/England/MILK-B56BB4/2020|2020-11-04|EPI\_ISL\_656860|Original|hCoV-19^^England|Human|Lighthouse Lab in Milton Keynes|Wellcome Sanger Institute for the COVID-19 Genomics UK (COG-UK) Consortium|Davies|United Kingdom

>Spike|hCoV-19/Australia/VIC7856/2020|2020-07-29|EPI\_ISL\_564707|Original|hCoV-19^^Victoria|Human|Microbiological Diagnostic Unit - Public Health Laboratory (MDU-PHL)|MDU-PHL|Schultz|Australia

>Spike|hCoV-19/USA/TX-HMH-MCoV-10174/2020|2020-07-06|EPI\_ISL\_789352|Original|hCoV-19^^Texas|Human|Houston Methodist Hospital|Houston Methodist Hospital|Long|USA

>Spike|hCoV-19/Netherlands/Limburg\_37/2020|2020-04-23|EPI\_ISL\_461025|Original|hCoV-19^^Limburg|Human|Dutch COVID-19 response team|Erasmus Medical Center|Oude Munnink|Netherlands

>Spike|hCoV-19/USA/TX-HMH-MCoV-18190/2020|2020-11-11|EPI\_ISL\_784538|Original|hCoV-19^^Texas|Human|Houston Methodist Hospital|Houston Methodist Hospital|Long|USA

>Spike|hCoV-19/USA/CA-CZB-14285/2020|2020-08-27|EPI\_ISL\_739059|Original|hCoV-19^^California|Human|Alameda County Public Health Lab|Chan-Zuckerberg Biohub|Kamm|USA

>Spike|hCoV-19/France/PAC-MEPHI-2086/2020|2020-08-30|EPI\_ISL\_644492|Original|hCoV-19^^Provence-Alpes-Cote-d\u2019Azur|Human|MEPHI|MEPHI|Levasseur|France

>Spike|hCoV-19/USA/TX-HMH-7759/2020|2020-06-30|EPI\_ISL\_545621|Original|hCoV-19^^Texas|Human|Houston Methodist Hospital|Houston Methodist Hospital|Long|USA

>Spike|hCoV-19/Scotland/EDB6038/2020|2020-05-07|EPI\_ISL\_487667|Original|hCoV-19^^Scotland|Human|Virology Department|Wellcome Sanger Institute for the COVID-19 Genomics UK (COG-UK) consortium|Davies|United Kingdom

>Spike|hCoV-19/Northern Ireland/QEUI-963FD8/2020|2020-08-12|EPI\_ISL\_536906|Original|hCoV-19^^Northern Ireland|Human|Lighthouse Lab in Glasgow|Wellcome Sanger Institute for the COVID-19 Genomics UK (COG-UK) consortium|Davies|United Kingdom

>Spike|hCoV-19/Spain/VC-FISABIO-171/2020|2020-03-20|EPI\_ISL\_436266|Original|hCoV-19^^Comunitat Valenciana|Human|Servicio de Microbiología. Hospital Universitario Doctor Peset|Sequencing and Bioinformatics Service and Molecular Epidemiology Research Group. FISABIO-Public Health|Gonzalez-Candelas|Spain

>Spike|hCoV-19/Peru/AMZ-UPCH-0265/2020|2020-09-21|EPI\_ISL\_729911|Original|hCoV-19^^Amazonas|Human|Instituto de Medicina Tropical|Laboratorio de Gen\u00f3mica Microbiana|Tsukayama|Peru

>Spike|hCoV-19/Wales/PHWC-490757/2020|2020-11-13|EPI\_ISL\_706507|Original|hCoV-19^^Wales|Human|Originating lab|COVID-19 Genomics UK (COG-UK) Consortium|Moore|United Kingdom

>Spike|hCoV-19/England/NORT-294B4A/2020|2020-03-28|EPI\_ISL\_490464|Original|hCoV-19^^England|Human|Northumbria University / South Tees Hospitals NHS Foundation Trust / North Cumbria Integrated Care NHS Foundation Trust / North Tees and Hartlepool NHS Foundation Trust / Newcastle Hospitals NHS Foundation Trust|COVID-19 Genomics UK (COG-UK) Consortium|Bashton|United Kingdom

>Spike|hCoV-19/Spain/AR-IBV-98010683/2020|2020-10-02|EPI\_ISL\_722269|Original|hCoV-19^^Aragon|Human|Servicio de Microbiología|SeqCOVID-SPAIN consortium|IBV (CSIC)|Comas|Spain

>Spike|hCoV-19/England/MILK-9919C4/2020|2020-08-26|EPI\_ISL\_577010|Original|hCoV-19^^England|Human|Northumbria University / South Tees Hospitals NHS Foundation Trust / North Cumbria Integrated Care NHS Foundation Trust / North Tees and Hartlepool NHS Foundation Trust / Newcastle Hospitals NHS Foundation Trust|COVID-19 Genomics UK (COG-UK) Consortium|Bashton|United Kingdom

>Spike|hCoV-19/England/QEUI-A8C688/2020|2020-10-18|EPI\_ISL\_643265|Original|hCoV-19^^England|Human|Lighthouse Lab in Glasgow|Wellcome Sanger Institute for the COVID-19 Genomics UK (COG-UK) Consortium|Davies|United Kingdom

>Spike|hCoV-19/England/CAMC-C43F71/2020|2020-12-10|EPI\_ISL\_719370|Original|hCoV-19^^England|Human|Lighthouse Lab in Cambridge|Wellcome Sanger Institute for the COVID-19 Genomics UK (COG-UK) Consortium|Davies|United Kingdom

>Spike|hCoV-19/Portugal/PT0702/2020|2020-03-17|EPI\_ISL\_510961|Original|hCoV-19^^Portugal|Human|Instituto Nacional de Saude (INSA)|Instituto Nacional de Saude (INSA)|Borges|Portugal

>Spike|hCoV-19/Finland/8CB1/2020|2020-12-04|EPI\_ISL\_732620|Original|hCoV-19^^Uusimaa|Human|Department of Virology and Immunology|Department of Virology|Smura|Finland

>Spike|hCoV-19/Denmark/ALAB-SSI-805/2020|2020-03-28|EPI\_ISL\_444916|Original|hCoV-19^^Denmark|Human|Department of Virus and Microbiological Special Diagnostics|Albertsen lab|Kirkegaard|Denmark

>Spike|hCoV-19/Wales/PHWC-2EAB3/2020|2020-04-07|EPI\_ISL\_446110|Original|hCoV-19^^Wales|Human|Wales Specialist Virology Centre|Public Health Wales Microbiology Cardiff|Moore|United Kingdom

>Spike|hCoV-19/USA/UT-UPHL-2009691/2020|2020-07-25|EPI\_ISL\_605365|Original|hCoV-19^^Utah|Human|Utah Public Health Laboratory|Utah Public Health Laboratory|Young|USA

>Spike|hCoV-19/England/QEUH-B1161E/2020|2020-11-02|EPI\_ISL\_642481|Original|hCoV-19^^England|Human|Lighthouse Lab in Glasgow|Wellcome Sanger Institute for the COVID-19 Genomics UK (COG-UK) Consortium|Davies|United Kingdom

>Spike|hCoV-19/England/ALDP-B1B553/2020|2020-11-01|EPI\_ISL\_645620|Original|hCoV-19^^England|Human|Lighthouse Lab in Alderley Park|Wellcome Sanger Institute for the COVID-19 Genomics UK (COG-UK) Consortium|Davies|United Kingdom

>Spike|hCoV-19/England/CAMB-80448/2020|2020-04-09|EPI\_ISL\_470366|Original|hCoV-19^^England|Human|Department of Pathology|Wellcome Sanger Institute for the COVID-19 Genomics UK (COG-UK) consortium|Davies|United Kingdom

>Spike|hCoV-19/England/MILK-A45A8F/2020|2020-10-06|EPI\_ISL\_598591|Original|hCoV-19^^England|Human|Lighthouse Lab in Milton Keynes|Wellcome Sanger Institute for the COVID-19 Genomics UK (COG-UK) consortium|Davies|United Kingdom

>Spike|hCoV-19/England/CWAR-24FD94D/2020|2020-04-23|EPI\_ISL\_584453|Original|hCoV-19^^England|Human|UHCW / University of Warwick|COVID-19 Genomics UK (COG-UK) Consortium|Stark|United Kingdom

>Spike|hCoV-19/Switzerland/BS-42210970/2020|2020-03-28|EPI\_ISL\_581811|Original|hCoV-19^^Basel-Stadt|Human|University Hospital Basel|University Hospital Basel|Roloff Handschin|Switzerland

>Spike|hCoV-19/Switzerland/VD-ETHZ-280168/2020|2020-09-08|EPI\_ISL\_560518|Original|hCoV-19^^Vaud|Human|Viollier AG|Department of Biosystems Science and Engineering|Nadeau|Switzerland

>Spike|hCoV-19/Switzerland/BE-UNIBE-178-2905/2020|2020-03-20|EPI\_ISL\_574817|Original|hCoV-19^^Bern|Human|Institute for Infectious Diseases|Institute for Infectious Diseases|Koch|Switzerland

>Spike|hCoV-19/Japan/PG-4426/2020|2020-07-00|EPI\_ISL\_692650|Original|hCoV-19^^Japan|Human|Pathogen Genomics Center|Pathogen Genomics Center|Sekizuka|Japan

>Spike|hCoV-19/Wales/PHWC-4A5C50/2020|2020-12-13|EPI\_ISL\_764963|Original|hCoV-19^^Wales|Human|Wales Specialist Virology Centre Sequencing lab|COVID-19 Genomics UK (COG-UK) Consortium|Moore|United Kingdom

>Spike|hCoV-19/USA/CA-ALSR-2691/2020|2020-07-20|EPI\_ISL\_635634|Original|hCoV-19^^California|Human|San Diego County Public Health Laboratory|Andersen lab at Scripps Research|Gangavarapu|USA

>Spike|hCoV-19/USA/MI-MDHHS-SC22166/2020|2020-10-18|EPI\_ISL\_614217|Original|hCoV-19^^Michigan|Human|Michigan Department of Health and Human Services|Michigan Department of Health and Human Services|Jacob|USA

>Spike|hCoV-19/England/MILK-A1834E/2020|2020-10-01|EPI\_ISL\_595024|Original|hCoV-19^^England|Human|Northumbria University / South Tees Hospitals NHS Foundation Trust / North Cumbria Integrated Care NHS Foundation Trust / North Tees and Hartlepool NHS Foundation Trust / Newcastle Hospitals NHS Foundation Trust|COVID-19 Genomics UK (COG-UK) Consortium|Bashton|United Kingdom

>Spike|hCoV-19/Japan/PG-7252/2020|2020-08-00|EPI\_ISL\_688355|Original|hCoV-19^^Japan|Human|Saitama Prefectural Institute of Public Health|Pathogen Genomics Center|Sekizuka|Japan

>Spike|hCoV-19/Denmark/DCGC-20123/2020|2020-12-07|EPI\_ISL\_747996|Original|hCoV-19^^Hovedstaden|Human|Department of Virus and Microbiological Special Diagnostics|Albertsen Lab|Michaelsen|Denmark

>Spike|hCoV-19/Denmark/DCGC-2014/2020|2020-07-20|EPI\_ISL\_618224|Original|hCoV-19^^Hovedstaden|Human|Department of Virus and Microbiological Special Diagnostics|Albertsen lab|Michaelsen|Denmark

>Spike|hCoV-19/USA/IL-QDX-259/2020|2020-04-29|EPI\_ISL\_498724|Original|hCoV-19^^Illinois|Human|Quest Diagnostics|Quest Diagnostics|Kagan|USA

>Spike|hCoV-19/Scotland/EDB807/2020|2020-04-03|EPI\_ISL\_433249|Original|hCoV-19^^Scotland|Human|Virology Department|COVID-19 Genomics UK (COG-UK) Consortium|Williams|United Kingdom

>Spike|hCoV-19/Spain/PV-IBV-2111/2020|2020-04-11|EPI\_ISL\_468880|Original|hCoV-19^^Basque Country|Human|Servicio de Microbiolog\u00eda. Hospital Universitario Donostia. OSI Donostialdea. \u00clrea de Enfermedades Infecciosas|SeqCOVID-SPAIN consortium/IBV (CSIC) |Comas|Spain

>Spike|hCoV-19/Germany/BY-MVP-0059/2020|2020-03-20|EPI\_ISL\_437258|Original|hCoV-19^^Bavaria|Human|Max von Pettenkofer Institute|Laboratory for Functional Genome Analysis|Graf|Germany

>Spike|hCoV-19/England/MILK-B38945/2020|2020-11-01|EPI\_ISL\_658761|Original|hCoV-19^^England|Human|Lighthouse Lab in Milton Keynes|Wellcome Sanger Institute for the COVID-19 Genomics UK (COG-UK) Consortium|Davies|United Kingdom

>Spike|hCoV-19/England/OXON-B0E7E/2020|2020-04-06|EPI\_ISL\_478971|Original|hCoV-19^^England|Human|Oxford Viromics|COVID-19 Genomics UK (COG-UK) Consortium|Golubchik|United Kingdom

>Spike|hCoV-19/USA/ME-HETL-J0473/2020|2020-12-11|EPI\_ISL\_755564|Original|hCoV-19^^Maine|Human|Maine Health and Environmental Testing Laboratory|Tewhey Lab|Tewhey|USA

>Spike|hCoV-19/Japan/PG-0339/2020|2020-03-29|EPI\_ISL\_480012|Original|hCoV-19^^Kanto|Human|Chiba Prefectural Institute of Public Health|Pathogen Genomics Center|Sekizuka|Japan

>Spike|hCoV-19/USA/MN-MDH-2093/2020|2020-10-23|EPI\_ISL\_683722|Original|hCoV-19^^Minnesota|Human|Mayo Clinic & Mayo Clinic Laboratories|Minnesota Department of Health|Garfin|USA

>Spike|hCoV-19/England/MILK-994105/2020|2020-08-25|EPI\_ISL\_551610|Original|hCoV-19^^England|Human|Lighthouse Lab in Milton Keynes|Wellcome Sanger Institute for the COVID-19 Genomics UK (COG-UK) consortium|Davies|United Kingdom

>Spike|hCoV-19/Denmark/DCGC-6022/2020|2020-09-21|EPI\_ISL\_621131|Original|hCoV-19^^Midtjylland|Human|Department of Virus and Microbiological Special Diagnostics|Albertsen lab|Michaelsen|Denmark

>Spike|hCoV-19/USA/NY-Wadsworth-22874-01/2020|2020-03-19|EPI\_ISL\_426315|Original|hCoV-19^^New York|Human|Wadsworth Center|Wadsworth Center|Lasek-Nesselquist|USA

>Spike|hCoV-19/England/ALDP-9BCF58/2020|2020-09-10|EPI\_ISL\_573083|Original|hCoV-19^^England|Human|Oxford Viromics|COVID-19 Genomics UK (COG-UK) Consortium|Golubchik|United Kingdom

>Spike|hCoV-19/Wales/PHWC-490EF8/2020|2020-11-19|EPI\_ISL\_706585|Original|hCoV-19^^Wales|Human|Originating lab|COVID-19 Genomics UK (COG-UK) Consortium|Moore|United Kingdom

>Spike|hCoV-19/USA/WA-UW-1770/2020|2020-03-22|EPI\_ISL\_424244|Original|hCoV-19^^Washington|Human|UW Virology Lab|UW Virology Lab|Roychoudhury|USA

>Spike|hCoV-19/England/OXON-ACF54/2020|2020-00-00|EPI\_ISL\_448548|Original|hCoV-19^^England|Human|Oxford Viromics|COVID-19 Genomics UK (COG-UK) Consortium|Golubchik|United Kingdom

>Spike|hCoV-19/USA/NY-Wadsworth-286247-01/2020|2020-12-10|EPI\_ISL\_754565|Original|hCoV-19^^New York|Human|Wadsworth Center|Wadsworth Center|Lasek-Nesselquist|USA

>Spike|hCoV-19/England/QEUH-96006F/2020|2020-08-05|EPI\_ISL\_531878|Original|hCoV-19^^England|Human|Lighthouse Lab in Glasgow|Wellcome Sanger Institute for the COVID-19 Genomics UK (COG-UK) consortium|Davies|United Kingdom

>Spike|hCoV-19/Canada/ON-PHL-20-02410/2020|2020-09-00|EPI\_ISL\_671538|Original|hCoV-19^^Ontario|Human|Public Health Ontario Laboratory|Public Health Ontario Laboratory|Guthrie|Canada

>Spike|hCoV-19/Wales/PHWC-15E284/2020|2020-04-06|EPI\_ISL\_472802|Original|hCoV-19^^Wales|Human|Wales Specialist Virology Centre Sequencing lab|COVID-19 Genomics UK (COG-UK) Consortium|Moore|United Kingdom

>Spike|hCoV-19/Spain/VC-IBV-98003434/2020|2020-04-02|EPI\_ISL\_539250|Original|hCoV-19^^Comunitat Valenciana|Human|Hospital Universitario de La Ribera (Alzira|SeqCOVID-SPAIN consortium|IBV (CSIC)|Comas|Spain

>Spike|hCoV-19/Denmark/DCGC-14132/2020|2020-11-30|EPI\_ISL\_711588|Original|hCoV-19^^Hovedstaden|Human|Department of Virus and Microbiological Special Diagnostics|Albertsen Lab|Michaelsen|Denmark

>Spike|hCoV-19/USA/WI-UW-2312/2020|2020-11-10|EPI\_ISL\_728078|Original|hCoV-19^^Wisconsin|Human|University of Wisconsin-Madison AIDS Vaccine Research Laboratories|University of Wisconsin-Madison AIDS Vaccine Research Laboratories|Baczenas|USA

>Spike|hCoV-19/England/LIVE-DB994A/2020|2020-11-09|EPI\_ISL\_704231|Original|hCoV-19^^England|Human|Liverpool Clinical Laboratories|COVID-19 Genomics UK (COG-UK) Consortium|Haldenby|United Kingdom

>Spike|hCoV-19/Wales/PHWC-16EEE7/2020|2020-10-04|EPI\_ISL\_585882|Original|hCoV-19^^Wales|Human|Wales Specialist Virology Centre Sequencing lab|COVID-19 Genomics UK (COG-UK) Consortium|Moore|United Kingdom

>Spike|hCoV-19/Netherlands/NA\_328/2020|2020-04-03|EPI\_ISL\_455133|Original|hCoV-19^^Netherlands|Human|Dutch COVID-19 response team|Erasmus Medical Center|Oude Munnink|Netherlands

>Spike|hCoV-19/Scotland/QEUH-9E5299/2020|2020-09-23|EPI\_ISL\_601016|Original|hCoV-19^^Scotland|Human|Lighthouse Lab in Glasgow|Wellcome Sanger Institute for the COVID-19 Genomics UK (COG-UK) consortium|Davies|United Kingdom

>Spike|hCoV-19/Denmark/DCGC-2058/2020|2020-07-20|EPI\_ISL\_618299|Original|hCoV-19^^Sjaelland|Human|Department of Virus and Microbiological Special Diagnostics|Albertsen lab|Michaelsen|Denmark

>Spike|hCoV-19/England/NORT-281384/2020|2020-03-13|EPI\_ISL\_488834|Original|hCoV-19^^England|Human|NU-OMICS DNA Sequencing research facility|Wellcome Sanger Institute for the COVID-19 Genomics UK (COG-UK) consortium|Davies|United Kingdom

>Spike|hCoV-19/England/QEUH-AA0369/2020|2020-10-20|EPI\_ISL\_611354|Original|hCoV-19^^England|Human|Lighthouse Lab in Glasgow|Wellcome Sanger Institute for the COVID-19 Genomics UK (COG-UK) consortium|Davies|United Kingdom

>Spike|hCoV-19/England/CAMB-1B4BFA/2020|2020-06-10|EPI\_ISL\_473502|Original|hCoV-19^^England|Human|Department of Pathology|COVID-19 Genomics UK (COG-UK) Consortium|Meredith|United Kingdom

>Spike|hCoV-19/USA/AK-PHL015/2020|2020-03-16|EPI\_ISL\_420306|Original|hCoV-19^^Alaska|Human|Alaska State Virology Laboratory|Alaska State Virology Laboratory|Chen|USA

>Spike|hCoV-19/Wales/PHWC-495224/2020|2020-11-21|EPI\_ISL\_726314|Original|hCoV-19^^Wales|Human|Originating lab|COVID-19 Genomics UK (COG-UK) Consortium|Moore|United Kingdom

>Spike|hCoV-19/USA/NY-Wadsworth-233280-01/2020|2020-10-01|EPI\_ISL\_734309|Original|hCoV-19^^New York|Human|Wadsworth Center|Wadsworth Center|Lasek-Nesselquist|USA

>Spike|hCoV-19/Switzerland/ZH-ETHZ-150001plus/2020|2020-06-12|EPI\_ISL\_483649|Original|hCoV-19^^Zurich|Human|Viollier AG|Department of Biosystems Science and Engineering|Nadeau|Switzerland

>Spike|hCoV-19/India/MH-ACTREC-579/2020|2020-09-02|EPI\_ISL\_723059|Original|hCoV-19^^Maharashtra|Human|Hematopathology Laboratory|Hematopathology Laboratory|Patkar|India

>Spike|hCoV-19/Portugal/PT0161/2020|2020-03-28|EPI\_ISL\_453877|Original|hCoV-19^^Portugal|Human|unknown|Instituto Nacional de Saude (INSA)|Borges|Portugal

>Spike|hCoV-19/Germany/BE-ChVir-W1708-6787/2020|2020-08-05|EPI\_ISL\_753998|Original|hCoV-19^^Berlin|Human|Charit\u00e99 Universit\u00e4tsmedizin Berlin|Charit\u00e99 Universit\u00e4tsmedizin Berlin|Muehlemann|Germany

>Spike|hCoV-19/USA/AZ-TG547398/2020|2020-07-07|EPI\_ISL\_695520|Original|hCoV-19^^Arizona|Human|AZ SPHL|TGen North|French|USA

>Spike|hCoV-19/Denmark/DCGC-6160/2020|2020-10-05|EPI\_ISL\_620063|Original|hCoV-19^^Sjaelland|Human|Department of Virus and Microbiological Special Diagnostics|Albertsen lab|Michaelsen|Denmark

>Spike|hCoV-19/England/CAMB-84523/2020|2020-04-17|EPI\_ISL\_443569|Original|hCoV-19^^England|Human|Department of Pathology|Wellcome Sanger Institute for the COVID-19 Genomics UK (COG-UK) consortium|Amato|United Kingdom

>Spike|hCoV-19/England/C200044548/2020|2020-11-06|EPI\_ISL\_664032|Original|hCoV-19^^England|Human|Respiratory Virus Unit|COVID-19 Genomics UK (COG-UK) Consortium|Platt|United Kingdom

>Spike|hCoV-19/USA/TX-HMH-MCoV-15822/2020|2020-07-09|EPI\_ISL\_785506|Original|hCoV-19^^Texas|Human|Houston Methodist Hospital|Houston Methodist Hospital|Long|USA

>Spike|hCoV-19/Netherlands/NH-RIVM-20133/2020|2020-11-15|EPI\_ISL\_723304|Original|hCoV-19^^Noord-Holland|Human|Dutch COVID-19 response team|National Institute for Public Health and the Environment (RIVM)|Meijer|Netherlands

>Spike|hCoV-19/England/NORT-281454/2020|2020-03-15|EPI\_ISL\_488786|Original|hCoV-19^^England|Human|NU-OMICS DNA Sequencing research facility|Wellcome Sanger Institute for the COVID-19 Genomics UK (COG-UK) consortium|Davies|United Kingdom

>Spike|hCoV-19/England/QEUI-B41A55/2020|2020-11-08|EPI\_ISL\_658632|Original|hCoV-19^^England|Human|Lighthouse Lab in Glasgow|Wellcome Sanger Institute for the COVID-19 Genomics UK (COG-UK) Consortium|Davies|United Kingdom

>Spike|hCoV-19/Belgium/ULG-10854/2020|2020-11-10|EPI\_ISL\_666889|Original|hCoV-19^^Li\u00e8ge|Human|Department of Clinical Microbiology|GIGA Medical Genomics|Durkin|Belgium

>Spike|hCoV-19/Spain/MD-IBV-99008736/2020|2020-10-16|EPI\_ISL\_654304|Original|hCoV-19^^Madrid|Human|Hospital General Universitario Gregorio Mara\u00f1\u00f3n|SeqCOVID-SPAIN consortium/IBV (CSIC)|Comas|Spain

>Spike|hCoV-19/India/WB-IK41/2020|2020-05-04|EPI\_ISL\_508369|Original|hCoV-19^^West Bengal|Human|Institute of Post Graduate Medical Education & Research|National Institute of Biomedical Genomics|Maitra|India

>Spike|hCoV-19/Denmark/DCGC-14761/2020|2020-11-23|EPI\_ISL\_711163|Original|hCoV-19^^Hovedstaden|Human|Department of Virus and Microbiological Special Diagnostics|Albertsen Lab|Michaelsen|Denmark

>Spike|hCoV-19/Portugal/PT2033/2020|2020-11-09|EPI\_ISL\_732249|Original|hCoV-19^^Portugal|Human|Instituto Nacional de Saude (INSA) and Instituto Gulbenkian de Ciencia (IGC)|Instituto Nacional de Saude (INSA) and Instituto Gulbenkian de Ciencia (IGC)|Borges|Portugal

>Spike|hCoV-19/England/ALDP-BB54B8/2020|2020-11-21|EPI\_ISL\_701677|Original|hCoV-19^^England|Human|Lighthouse Lab in Alderley Park|Wellcome Sanger Institute for the COVID-19 Genomics UK (COG-UK) Consortium|Davies|United Kingdom

>Spike|hCoV-19/England/QEUI-9FA1FE/2020|2020-09-27|EPI\_ISL\_595792|Original|hCoV-19^^England|Human|Oxford Viromics|COVID-19 Genomics UK (COG-UK) Consortium|Golubchik|United Kingdom

>Spike|hCoV-19/Singapore/331/2020|2020-04-17|EPI\_ISL\_469085|Original|hCoV-19^^Singapore|Human|National Public Health Laboratory|National Public Health Laboratory|Mak|Singapore

>Spike|hCoV-19/Portugal/PT0027/2020|2020-03-06|EPI\_ISL\_418012|Original|hCoV-19^^Portugal|Human|CHULC - H Curry Cabral|Instituto Nacional de Saude (INSA)|Borges|Portugal

>Spike|hCoV-19/USA/WA-UW-22343/2020|2020-08-05|EPI\_ISL\_570665|Original|hCoV-19^^Washington|Human|UW Virology Lab|UW Virology Lab|Roychoudhury|USA

>Spike|hCoV-19/England/LOND-DB183/2020|2020-11-02|EPI\_ISL\_724740|Original|hCoV-19^^England|Human|University College London|COVID-19 Genomics UK (COG-UK) Consortium|Roy|United Kingdom

>Spike|hCoV-19/England/QEUI-A0065F/2020|2020-09-29|EPI\_ISL\_600144|Original|hCoV-19^^England|Human|Lighthouse Lab in Glasgow|Wellcome Sanger Institute for the COVID-19 Genomics UK (COG-UK) consortium|Davies|United Kingdom

>Spike|hCoV-19/England/CAMC-C4705C/2020|2020-12-10|EPI\_ISL\_718817|Original|hCoV-19^^England|Human|Lighthouse Lab in Cambridge|Wellcome Sanger Institute for the COVID-19 Genomics UK (COG-UK) Consortium|Davies|United Kingdom

>Spike|hCoV-19/Canada/BC\_01210684/2020|2020-04-00|EPI\_ISL\_466703|Original|hCoV-19^^British Columbia|Human|BCCDC Public Health Laboratory|BCCDC Public Health Laboratory|Harrigan|Canada

>Spike|hCoV-19/England/CAMB-1BACA6/2020|2020-11-12|EPI\_ISL\_664791|Original|hCoV-19^^England|Human|Department of Pathology|COVID-19 Genomics UK (COG-UK) Consortium|Goodfellow|United Kingdom

>Spike|hCoV-19/Japan/PG-3769/2020|2020-04-00|EPI\_ISL\_692022|Original|hCoV-19^^Japan|Human|Pathogen Genomics Center|Pathogen Genomics Center|Sekizuka|Japan

>Spike|hCoV-19/Australia/VIC10067/2020|2020-08-21|EPI\_ISL\_562783|Original|hCoV-19^^Victoria|Human|Microbiological Diagnostic Unit - Public Health Laboratory (MDU-PHL)|MDU-PHL|Schultz|Australia

>Spike|hCoV-19/USA/FL-BPHL-0127/2020|2020-04-09|EPI\_ISL\_450861|Original|hCoV-19^^Florida|Human|Florida Bureau of Public Health Laboratories|Florida Bureau of Public Health Laboratories|Blanton|USA

>Spike|hCoV-19/England/CAMC-B2210A/2020|2020-11-02|EPI\_ISL\_646102|Original|hCoV-19^^England|Human|Lighthouse Lab in Cambridge|Wellcome Sanger Institute for the COVID-19 Genomics UK (COG-UK) Consortium|Davies|United Kingdom

>Spike|hCoV-19/England/CAMB-83E0B/2020|2020-04-25|EPI\_ISL\_438696|Original|hCoV-19^^England|Human|Department of Pathology|COVID-19 Genomics UK (COG-UK) Consortium|Meredith|United Kingdom

>Spike|hCoV-19/USA/TX-HMH-7977/2020|2020-06-30|EPI\_ISL\_545758|Original|hCoV-19^^Texas|Human|Houston Methodist Hospital|Houston Methodist Hospital|Long|USA

>Spike|hCoV-19/Australia/VIC8457/2020|2020-07-27|EPI\_ISL\_565027|Original|hCoV-19^^Victoria|Human|Microbiological Diagnostic Unit - Public Health Laboratory (MDU-PHL)|MDU-PHL|Schultz|Australia

>Spike|hCoV-19/USA/TX-HMH-MCoV-13324/2020|2020-08-25|EPI\_ISL\_788472|Original|hCoV-19^^Texas|Human|Houston Methodist Hospital|Houston Methodist Hospital|Long|USA

>Spike|hCoV-19/USA/WI-UW-1033/2020|2020-07-30|EPI\_ISL\_516459|Original|hCoV-19^^Wisconsin|Human|University of Wisconsin-Madison AIDS Vaccine Research Laboratories|University of Wisconsin-Madison AIDS Vaccine Research Laboratories|Baczenas|USA

>Spike|hCoV-19/Denmark/DCGC-22085/2020|2020-12-14|EPI\_ISL\_758543|Original|hCoV-19^^Hovedstaden|Human|Department of Virus and Microbiological Special Diagnostics|Albertsen Lab|Michaelsen|Denmark

>Spike|hCoV-19/England/ALDP-B5C4FF/2020|2020-11-10|EPI\_ISL\_655746|Original|hCoV-19^^England|Human|Lighthouse Lab in Alderley Park|Wellcome Sanger Institute for the COVID-19 Genomics UK (COG-UK) Consortium|Davies|United Kingdom

>Spike|hCoV-19/USA/TX-HMH-MCoV-14864/2020|2020-10-13|EPI\_ISL\_786348|Original|hCoV-19^^Texas|Human|Houston Methodist Hospital|Houston Methodist Hospital|Long|USA

>Spike|hCoV-19/England/QEUEH-B9EB1A/2020|2020-11-18|EPI\_ISL\_719950|Original|hCoV-19^^England|Human|Lighthouse Lab in Glasgow|Wellcome Sanger Institute for the COVID-19 Genomics UK (COG-UK) Consortium|Davies|United Kingdom

>Spike|hCoV-19/Wales/PHWC-3599E/2020|2020-04-24|EPI\_ISL\_474505|Original|hCoV-19^^Wales|Human|Originating lab|COVID-19 Genomics UK (COG-UK) Consortium|Moore|United Kingdom

>Spike|hCoV-19/England/NOTT-112F94/2020|2020-08-11|EPI\_ISL\_526432|Original|hCoV-19^^England|Human|Lincolnshire Hospitals and DeepSeq Nottingham|COVID-19 Genomics UK (COG-UK) Consortium|Loose|United Kingdom

>Spike|hCoV-19/Australia/WA176/2020|2020-03-28|EPI\_ISL\_596739|Original|hCoV-19^^Western Australia|Human|PathWest Laboratory Medicine WA|PathWest Laboratory Medicine WA Microbial Surveillance Unit|Sikazwe|Australia

>Spike|hCoV-19/Canada/BC\_13610520/2020|2020-04-00|EPI\_ISL\_467341|Original|hCoV-19^^British Columbia|Human|BCCDC Public Health Laboratory|BCCDC Public Health Laboratory|Harrigan|Canada

>Spike|hCoV-19/Scotland/GCVR-1724FD/2020|2020-03-30|EPI\_ISL\_470011|Original|hCoV-19^^Scotland|Human|NHSGGC West of Scotland Specialist Virology Centre / MRC-University of Glasgow Centre for Virus Research|Wellcome Sanger Institute for the COVID-19 Genomics UK (COG-UK) consortium|Davies|United Kingdom

>Spike|hCoV-19/Wales/PHWC-484D72/2020|2020-10-23|EPI\_ISL\_628107|Original|hCoV-19^^Wales|Human|Wales Specialist Virology Centre Sequencing lab|COVID-19 Genomics UK (COG-UK) Consortium|Moore|United Kingdom

>Spike|hCoV-19/England/CAMB-1AE55F/2020|2020-04-28|EPI\_ISL\_459410|Original|hCoV-19^^England|Human|Department of Pathology|Wellcome Sanger Institute for the COVID-19 Genomics UK (COG-UK) consortium|Davies|United Kingdom

>Spike|hCoV-19/Japan/PG-3362/2020|2020-04-00|EPI\_ISL\_691477|Original|hCoV-19^^Japan|Human|Pathogen Genomics Center|Pathogen Genomics Center|Sekizuka|Japan

>Spike|hCoV-19/USA/CA-CHLA-PLM82118164/2020|2020-11-30|EPI\_ISL\_753431|Original|hCoV-19^^California|Human|Clinical virology Laboratory|Center for Personalized Medicine|Dien Bard|USA

>Spike|hCoV-19/USA/CA-ALSR-0998-IPL/2020|2020-04-23|EPI\_ISL\_483452|Original|hCoV-19^^California|Human|UC San Diego Center for Advanced Laboratory Medicine|Andersen lab at Scripps Research|Gangavarapu|USA

>Spike|hCoV-19/England/SHEF-CA372/2020|2020-09-08|EPI\_ISL\_540748|Original|hCoV-19^^England|Human|Virology Department|COVID-19 Genomics UK (COG-UK) Consortium|de Silva|United Kingdom

>Spike|hCoV-19/Netherlands/NH-RIVM-20058/2020|2020-11-28|EPI\_ISL\_723242|Original|hCoV-19^^Noord-Holland|Human|Dutch COVID-19 response team|National Institute for Public Health and the Environment (RIVM)|Meijer|Netherlands

>Spike|hCoV-19/Australia/VIC6747/2020|2020-07-25|EPI\_ISL\_564026|Original|hCoV-19^^Victoria|Human|Victorian Infectious Diseases Reference Laboratory (VIDRL)|VIDRL and MDU-PHL|Schultz|Australia

>Spike|hCoV-19/England/CAMC-B99739/2020|2020-11-15|EPI\_ISL\_673299|Original|hCoV-19^^England|Human|Lighthouse Lab in Cambridge|Wellcome Sanger Institute for the COVID-19 Genomics UK (COG-UK) Consortium|Davies|United Kingdom

>Spike|hCoV-19/England/MILK-AC7618/2020|2020-10-20|EPI\_ISL\_630069|Original|hCoV-19^^England|Human|Lighthouse Lab in Milton Keynes|Wellcome Sanger Institute for the COVID-19 Genomics UK (COG-UK) consortium|Davies|United Kingdom

>Spike|hCoV-19/Denmark/DCGC-15429/2020|2020-11-23|EPI\_ISL\_713823|Original|hCoV-19^^Midtjylland|Human|Department of Virus and Microbiological Special Diagnostics|Albertsen Lab|Michaelsen|Denmark

>Spike|hCoV-19/USA/VA-DCLS-1686/2020|2020-09-08|EPI\_ISL\_609976|Original|hCoV-19^^Virginia|Human|Virginia DCLS|Virginia DCLS|St. Jacques|USA

>Spike|hCoV-19/India/MH-NIV-216641/2020|2020-09-18|EPI\_ISL\_577662|Original|hCoV-19^^Maharashtra|Human|NIV Influenza|NIV Influenza|Potdar|India

>Spike|hCoV-19/England/BRIS-126FD9/2020|2020-04-22|EPI\_ISL\_469726|Original|hCoV-19^^England|Human|PHE South West Regional Laboratory|Wellcome Sanger Institute for the COVID-19 Genomics UK (COG-UK) consortium|Davies|United Kingdom

>Spike|hCoV-19/England/BIRM-67BE8/2020|2020-11-04|EPI\_ISL\_650253|Original|hCoV-19^^England|Human|University of Birmingham|COVID-19 Genomics UK (COG-UK) Consortium|Loman|United Kingdom

>Spike|hCoV-19/Luxembourg/LNS0459171/2020|2020-10-20|EPI\_ISL\_739778|Original|hCoV-19^^Luxembourg|Human|Laboratoire national de sant\u00e9|Laboratoire national de sant\u00e9|Wienecke-Baldacchino|Luxembourg

>Spike|hCoV-19/England/MILK-B54C77/2020|2020-11-05|EPI\_ISL\_657918|Original|hCoV-19^^England|Human|Lighthouse Lab in Milton Keynes|Wellcome Sanger Institute for the COVID-19 Genomics UK (COG-UK) Consortium|Davies|United Kingdom

>Spike|hCoV-19/USA/VA-DCLS-2019/2020|2020-10-14|EPI\_ISL\_677168|Original|hCoV-19^^Virginia|Human|Virginia Division of Consolidated Laboratory Services|Virginia Division of Consolidated Laboratory Services|St. Jacques|USA

>Spike|hCoV-19/England/CAMC-A3F903/2020|2020-10-07|EPI\_ISL\_609679|Original|hCoV-19^^England|Human|Lighthouse Lab in Cambridge|Wellcome Sanger Institute for the COVID-19 Genomics UK (COG-UK) consortium|Davies|United Kingdom

>Spike|hCoV-19/USA/NY-Wadsworth-013081-01/2020|2020-03-11|EPI\_ISL\_676731|Original|hCoV-19^^New York|Human|Wadsworth Center|Wadsworth Center|Lasek-Nesselquist|USA

>Spike|hCoV-19/Scotland/MILK-A6C0CC/2020|2020-10-09|EPI\_ISL\_625430|Original|hCoV-19^^Scotland|Human|Lighthouse Lab in Milton Keynes|Wellcome Sanger Institute for the COVID-19 Genomics UK (COG-UK) consortium|Davies|United Kingdom

>Spike|hCoV-19/Denmark/DCGC-13449/2020|2020-11-30|EPI\_ISL\_712175|Original|hCoV-19^^Sjaelland|Human|Department of Virus and Microbiological Special Diagnostics|Albertsen Lab|Michaelsen|Denmark

>Spike|hCoV-19/USA/MI-MDHHS-SC21625/2020|2020-03-29|EPI\_ISL\_516352|Original|hCoV-19^^Michigan|Human|Michigan Department of Health and Human Services|Michigan Department of Health and Human Services|Blankenship|USA

>Spike|hCoV-19/USA/CA-CZB-2119/2020|2020-05-13|EPI\_ISL\_486349|Original|hCoV-19^^California|Human|UCSF Clinical Microbiology Laboratory|Chan-Zuckerberg Biohub|McGeever|USA



>Spike|hCoV-19/England/ALDP-A85018/2020|2020-10-16|EPI\_ISL\_610340|Original|hCoV-19^^England|Human|Lighthouse Lab in Alderley Park|Wellcome Sanger Institute for the COVID-19 Genomics UK (COG-UK) consortium|Davies|United Kingdom

>Spike|hCoV-19/Chile/RM-204488/2020|2020-10-12|EPI\_ISL\_746763|Original|hCoV-19^^Region Metropolitana de Santiago|Human|Genetica Molecular and Subdepartamento de Virologia ISP Chile|Instituto de Salud Publica de Chile|Tognarelli|Chile

>Spike|hCoV-19/Scotland/CVR2153/2020|2020-04-11|EPI\_ISL\_438877|Original|hCoV-19^^Scotland|Human|West of Scotland Specialist Virology Centre|COVID-19 Genomics UK (COG-UK) Consortium|Robertson|United Kingdom

>Spike|hCoV-19/Australia/VIC6013/2020|2020-07-10|EPI\_ISL\_518788|Original|hCoV-19^^Victoria|Human|Microbiological Diagnostic Unit - Public Health Laboratory (MDU-PHL)|MDU-PHL|Schultz|Australia

>Spike|hCoV-19/England/ALDP-8E6EE0/2020|2020-06-25|EPI\_ISL\_556617|Original|hCoV-19^^England|Human|Lighthouse Lab in Alderley Park|Wellcome Sanger Institute for the COVID-19 Genomics UK (COG-UK) consortium|Davies|United Kingdom

>Spike|hCoV-19/Australia/VIC5361/2020|2020-07-18|EPI\_ISL\_520124|Original|hCoV-19^^Victoria|Human|Microbiological Diagnostic Unit - Public Health Laboratory (MDU-PHL)|MDU-PHL|Schultz|Australia

>Spike|hCoV-19/USA/CA-CZB-11585/2020|2020-07-24|EPI\_ISL\_625563|Original|hCoV-19^^California|Human|NaN|Chan-Zuckerberg Biohub|Bhatt|USA

>Spike|hCoV-19/England/QEUEH-9FFA94/2020|2020-09-30|EPI\_ISL\_600151|Original|hCoV-19^^England|Human|Lighthouse Lab in Glasgow|Wellcome Sanger Institute for the COVID-19 Genomics UK (COG-UK) consortium|Davies|United Kingdom

>Spike|hCoV-19/Japan/PG-0495/2020|2020-04-06|EPI\_ISL\_480154|Original|hCoV-19^^HokurikuShinsyu|Human|Fukui Prefectural Institute of Public Health and Environmental Science|Pathogen Genomics Center|Sekizuka|Japan

>Spike|hCoV-19/USA/WA-S2819/2020|2020-09-07|EPI\_ISL\_574661|Original|hCoV-19^^Washington|Human|Seattle Flu Study|Seattle Flu Study|Lee|USA

>Spike|hCoV-19/Denmark/DCGC-10645/2020|2020-11-02|EPI\_ISL\_669510|Original|hCoV-19^^Hovedstaden|Human|Department of Virus and Microbiological Special Diagnostics|Albertsen Lab|Michaelsen|Denmark

>Spike|hCoV-19/USA/WI-GMF-30476/2020|2020-10-31|EPI\_ISL\_661037|Original|hCoV-19^^Wisconsin|Human|Gundersen Molecular Diagnostics Laboratory|Kabara Cancer Research Institute|Kenny|USA

>Spike|hCoV-19/India/BR-NCDC-02251/2020|2020-03-28|EPI\_ISL\_435112|Original|hCoV-19^^Bihar|Human|National Centre for Disease control (NCDC)|NCDC/CSIR-IGIB|Faruq|India

>Spike|hCoV-19/Sweden/20-50659/2020|2020-04-05|EPI\_ISL\_475152|Original|hCoV-19^^Stockholm|Human|Folkhalsomyndigheten|The Public Health Agency of Sweden|Svartstr\u00f6m|Sweden

>Spike|hCoV-19/England/CAMB-84918/2020|2020-03-06|EPI\_ISL\_440491|Original|hCoV-19^^England|Human|Department of Pathology|Wellcome Sanger Institute for the COVID-19 Genomics UK (COG-UK) consortium|Amato|United Kingdom

>Spike|hCoV-19/USA/OR-OHSU-0638/2020|2020-06-13|EPI\_ISL\_525863|Original|hCoV-19^^Oregon|Human|OHSU Lab Services Molecular Microbiology Lab|Ginkgo Bioworks Clinical Laboratory|O'Roak|USA

>Spike|hCoV-19/France/PAC-IHU-1382/2020|2020-08-08|EPI\_ISL\_569147|Original|hCoV-19^^Provence-Alpes-C\u00f4te-d\u00e0z|Human|MEPHI|MEPHI|Levasseur|France

>Spike|hCoV-19/Iceland/587/2020|2020-03-28|EPI\_ISL\_424607|Original|hCoV-19^^Reykjavik|Human|The National University Hospital of Iceland|deCODE genetics|J\u00f3nsson|Iceland

>Spike|hCoV-19/England/LIVE-9E0E9/2020|2020-04-03|EPI\_ISL\_453268|Original|hCoV-19^^England|Human|Liverpool Clinical Laboratories|COVID-19 Genomics UK (COG-UK) Consortium|Haldenby|United Kingdom

>Spike|hCoV-19/Denmark/DCGC-22479/2020|2020-12-14|EPI\_ISL\_757396|Original|hCoV-19^^Sjælland|Human|Department of Virus and Microbiological Special Diagnostics|Albertsen Lab|Michaelsen|Denmark

>Spike|hCoV-19/Italy/VEN-IZSVE-20RS2160-28/2020|2020-11-26|EPI\_ISL\_747482|Original|hCoV-19^^Veneto|Human|Ospedale San Bonifacio|Istituto Zooprofilattico Sperimentale delle Venezie|Quaranta|Italy

>Spike|hCoV-19/Japan/PG-1188/2020|2020-03-00|EPI\_ISL\_684798|Original|hCoV-19^^Japan|Human|Yamagata Prefectural Institute of Public Health|Pathogen Genomics Center|Sekizuka|Japan

>Spike|hCoV-19/Wales/PHWC-16429A/2020|2020-05-07|EPI\_ISL\_474153|Original|hCoV-19^^Wales|Human|Originating lab|COVID-19 Genomics UK (COG-UK) Consortium|Moore|United Kingdom

>Spike|hCoV-19/Denmark/DCGC-18859/2020|2020-12-07|EPI\_ISL\_748601|Original|hCoV-19^^Midtjylland|Human|Department of Virus and Microbiological Special Diagnostics|Albertsen Lab|Michaelsen|Denmark

>Spike|hCoV-19/England/QEUEH-9D152E/2020|2020-09-14|EPI\_ISL\_577289|Original|hCoV-19^^England|Human|University of Exeter|COVID-19 Genomics UK (COG-UK) Consortium|Temperton|United Kingdom

>Spike|hCoV-19/USA/MI-MDHHS-SC21973/2020|2020-03-15|EPI\_ISL\_566024|Original|hCoV-19^^Michigan|Human|Michigan Department of Health and Human Services|Michigan Department of Health and Human Services|Blankenship|USA

>Spike|hCoV-19/Japan/PG-8429/2020|2020-09-00|EPI\_ISL\_687528|Original|hCoV-19^^Japan|Human|Pathogen Genomics Center|Pathogen Genomics Center|Sekizuka|Japan

>Spike|hCoV-19/England/MILK-ACCD78/2020|2020-10-21|EPI\_ISL\_630187|Original|hCoV-19^^England|Human|Lighthouse Lab in Milton Keynes|Wellcome Sanger Institute for the COVID-19 Genomics UK (COG-UK) consortium|Davies|United Kingdom

>Spike|hCoV-19/USA/UT-UPHL-2012416147/2020|2020-08-08|EPI\_ISL\_745981|Original|hCoV-19^^Utah|Human|Ginkgo Bioworks Clinical Laboratory|Utah Public Health Laboratory|Young|USA

>Spike|hCoV-19/Northern Ireland/QEUEH-95E84E/2020|2020-08-09|EPI\_ISL\_532481|Original|hCoV-19^^Northern Ireland|Human|Lighthouse Lab in Glasgow|Wellcome Sanger Institute for the COVID-19 Genomics UK (COG-UK) consortium|Davies|United Kingdom

>Spike|hCoV-19/Japan/PG-4050/2020|2020-07-00|EPI\_ISL\_692291|Original|hCoV-19^^Japan|Human|Sakai City Institute of Public Health|Pathogen Genomics Center|Sekizuka|Japan

>Spike|hCoV-19/Japan/PG-0559/2020|2020-04-07|EPI\_ISL\_480209|Original|hCoV-19^^Kansai|Human|Department of Infectious Diseases|Pathogen Genomics Center|Sekizuka|Japan

>Spike|hCoV-19/England/BRIS-126346/2020|2020-04-10|EPI\_ISL\_459046|Original|hCoV-19^^England|Human|PHE South West Regional Laboratory|Wellcome Sanger Institute for the COVID-19 Genomics UK (COG-UK) consortium|Davies|United Kingdom

>Spike|hCoV-19/England/ALDP-BB5DAE/2020|2020-11-20|EPI\_ISL\_703019|Original|hCoV-19^^England|Human|Lighthouse Lab in Alderley Park|Wellcome Sanger Institute for the COVID-19 Genomics UK (COG-UK) Consortium|Davies|United Kingdom

>Spike|hCoV-19/Wales/PHWC-49B19A/2020|2020-10-27|EPI\_ISL\_742305|Original|hCoV-19^^Wales|Human|Wales Specialist Virology Centre Sequencing lab|COVID-19 Genomics UK (COG-UK) Consortium|Moore|United Kingdom

>Spike|hCoV-19/Denmark/DCGC-17527/2020|2020-12-14|EPI\_ISL\_751044|Original|hCoV-19^^Nordjylland|Human|Department of Virus and Microbiological Special Diagnostics|Albertsen Lab|Michaelsen|Denmark

>Spike|hCoV-19/Scotland/GCVR-172FA1/2020|2020-04-06|EPI\_ISL\_524542|Original|hCoV-19^^Scotland|Human|NHSGGC West of Scotland Specialist Virology Centre / MRC-University of Glasgow Centre for Virus Research|Wellcome Sanger Institute for the COVID-19 Genomics UK (COG-UK) consortium|Davies|United Kingdom

>Spike|hCoV-19/India/DL-NCDC-3394/2020|2020-04-09|EPI\_ISL\_436435|Original|hCoV-19^^Delhi|Human|National Centre for Disease control (NCDC)|NCDC/CSIR-IGIB|Singh|India

>Spike|hCoV-19/Wales/PHWC-48CA82/2020|2020-11-08|EPI\_ISL\_666501|Original|hCoV-19^^Wales|Human|Wales Specialist Virology Centre Sequencing lab|COVID-19 Genomics UK (COG-UK) Consortium|Moore|United Kingdom

>Spike|hCoV-19/USA/TX-HMH-6964/2020|2020-06-28|EPI\_ISL\_546391|Original|hCoV-19^^Texas|Human|Houston Methodist Hospital|Houston Methodist Hospital|Long|USA

>Spike|hCoV-19/England/SHEF-C5F73/2020|2020-09-15|EPI\_ISL\_559909|Original|hCoV-19^^England|Human|Virology Department|COVID-19 Genomics UK (COG-UK) Consortium|de Silva|United Kingdom

>Spike|hCoV-19/Russia/SPE-RII-24810V/2020|2020-06-16|EPI\_ISL\_524047|Vero P1|hCoV-19^^Saint Petersburg|Human|WHO National Influenza Centre Russian Federation|WHO National Influenza Centre Russian Federation|Komissarov|Russia

>Spike|hCoV-19/England/SHEF-D1B61/2020|2020-09-09|EPI\_ISL\_540769|Original|hCoV-19^^England|Human|Virology Department|COVID-19 Genomics UK (COG-UK) Consortium|de Silva|United Kingdom

>Spike|hCoV-19/England/20169034004/2020|2020-04-18|EPI\_ISL\_465231|Original|hCoV-19^^England|Human|Respiratory Virus Unit|Respiratory Virus Unit|Platt|United Kingdom

>Spike|hCoV-19/Switzerland/BS-UHB-42190622/2020|2020-03-14|EPI\_ISL\_528074|Original|hCoV-19^^Basel-Stadt|Human|University Hospital Basel|University Hospital Basel|Roloff Handschin|Switzerland

>Spike|hCoV-19/England/LOND-12F094F/2020|2020-11-22|EPI\_ISL\_679593|Original|hCoV-19^^England|Human|University College London|COVID-19 Genomics UK (COG-UK) Consortium|Roy|United Kingdom

>Spike|hCoV-19/South Africa/KRISP-K003501/2020|2020-09-16|EPI\_ISL\_602825|Original|hCoV-19^^KwaZulu-Natal|Human|NHLS-IALCH|KRISP|de Oliveira|South Africa

>Spike|hCoV-19/Wales/PHWC-498C50/2020|2020-11-25|EPI\_ISL\_727192|Original|hCoV-19^^Wales|Human|Originating lab|COVID-19 Genomics UK (COG-UK) Consortium|Moore|United Kingdom

>Spike|hCoV-19/USA/WA-S2245/2020|2020-06-09|EPI\_ISL\_497673|Original|hCoV-19^^Washington|Human|Washington State Department of Health|Seattle Flu Study|Lee|USA

>Spike|hCoV-19/Denmark/DCGC-9775/2020|2020-11-09|EPI\_ISL\_669167|Original|hCoV-19^^Midtjylland|Human|Department of Virus and Microbiological Special Diagnostics|Albertsen Lab|Michaelsen|Denmark

>Spike|hCoV-19/England/OXON-B1411/2020|2020-00-00|EPI\_ISL\_479013|Original|hCoV-19^^England|Human|Oxford Viromics|COVID-19 Genomics UK (COG-UK) Consortium|Golubchik|United Kingdom

>Spike|hCoV-19/England/201400652/2020|2020-03-30|EPI\_ISL\_465886|Original|hCoV-19^^England|Human|Respiratory Virus Unit|Respiratory Virus Unit|Platt|United Kingdom

>Spike|hCoV-19/Scotland/CVR3922/2020|2020-06-02|EPI\_ISL\_512469|Original|hCoV-19^^Scotland|Human|West of Scotland Specialist Virology Centre|COVID-19 Genomics UK (COG-UK) Consortium|Robertson|United Kingdom

>Spike|hCoV-19/Australia/NSW1319/2020|2020-12-20|EPI\_ISL\_767885|Original|hCoV-19^^New South Wales|Human|South Eastern Area Laboratory Services (SEALS)|NSW Health Pathology - Institute of Clinical Pathology and Medical Research; Westmead Hospital; University of Sydney|Gall|Australia

>Spike|hCoV-19/India/TG-CCMB-M70/2020|2020-06-05|EPI\_ISL\_495227|Original|hCoV-19^^Telangana|Human|CSIR-Centre for Cellular and Molecular Biology|CSIR-Centre for Cellular and Molecular Biology|Banu|India

>Spike|hCoV-19/Germany/ST-ChVir-W1702-6718/2020|2020-08-09|EPI\_ISL\_754054|Original|hCoV-19^^Saxony-Anhalt|Human|Charit\u00e99 Universit\u00e4tsmedizin Berlin|Charit\u00e99 Universit\u00e4tsmedizin Berlin|Muehlemann|Germany

>Spike|hCoV-19/Denmark/DCGC-15778/2020|2020-11-23|EPI\_ISL\_714014|Original|hCoV-19^^Nordjylland|Human|Department of Virus and Microbiological Special Diagnostics|Albertsen Lab|Michaelsen|Denmark

>Spike|hCoV-19/United Arab Emirates/0674/2020|2020-05-15|EPI\_ISL\_698827|Original|hCoV-19^^Abu Dhabi|Human|Group 42 (G42) Healthcare|G42 Healthcare|Ogrodzki|United Arab Emirates

>Spike|hCoV-19/Belgium/Rega-0329218/2020|2020-03-29|EPI\_ISL\_458188|Original|hCoV-19^^Mepel|Human|KU Leuven|KU Leuven|Maes|Belgium

>Spike|hCoV-19/India/GJ-GBRC151a/2020|2020-05-02|EPI\_ISL\_461478|Original|hCoV-19^^Gujarat|Human|Government Medical College|Gujarat Biotechnology Research Centre|Joshi|India

>Spike|hCoV-19/USA/TX-HMH-MCoV-18432/2020|2020-11-19|EPI\_ISL\_784780|Original|hCoV-19^^Texas|Human|Houston Methodist Hospital|Houston Methodist Hospital|Long|USA

>Spike|hCoV-19/Portugal/PT1854/2020|2020-11-12|EPI\_ISL\_732073|Original|hCoV-19^^Portugal|Human|Instituto Nacional de Saude (INSA)|Instituto Nacional de Saude (INSA)|Borges|Portugal

>Spike|hCoV-19/Hong Kong/HKU-902b/2020|2020-01-24|EPI\_ISL\_434564|unknown|hCoV-19^^Hong Kong|Human|unknown|Microbiology|Submitter|China

>Spike|hCoV-19/USA/CA-CSMC64/2020|2020-03-28|EPI\_ISL\_475678|Original|hCoV-19^^California|Human|Cedars-Sinai Medical Center|Cedars-Sinai Medical Center|Zhang|USA

>Spike|hCoV-19/USA/TX-HMH-MCoV-12495/2020|2020-09-30|EPI\_ISL\_790365|Original|hCoV-19^^Texas|Human|Houston Methodist Hospital|Houston Methodist Hospital|Long|USA

>Spike|hCoV-19/England/MILK-B54ECC/2020|2020-11-06|EPI\_ISL\_657984|Original|hCoV-19^^England|Human|Lighthouse Lab in Milton Keynes|Wellcome Sanger Institute for the COVID-19 Genomics UK (COG-UK) Consortium|Davies|United Kingdom

>Spike|hCoV-19/England/CAMB-1B3F95/2020|2020-05-31|EPI\_ISL\_477794|Original|hCoV-19^^England|Human|Department of Pathology|COVID-19 Genomics UK (COG-UK) Consortium|Meredith|United Kingdom

>Spike|hCoV-19/USA/AZ-TG408211/2020|2020-06-17|EPI\_ISL\_694947|Original|hCoV-19^^Arizona|Human|AZ SPHL|TGen North|French|USA

>Spike|hCoV-19/Ireland/OY-NVRL-72IRL00307/2020|2020-08-05|EPI\_ISL\_525410|Original|hCoV-19^^Offaly|Human|National Virus Reference Laboratory|National Virus Reference Laboratory|Gonzalez|Ireland

>Spike|hCoV-19/USA/TX-HMH-MCoV-19679/2020|2020-11-25|EPI\_ISL\_784036|Original|hCoV-19^^Texas|Human|Houston Methodist Hospital|Houston Methodist Hospital|Long|USA

>Spike|hCoV-19/USA/WA-S1221/2020|2020-05-08|EPI\_ISL\_495671|Original|hCoV-19^^Washington|Human|Washington State Department of Health|Seattle Flu Study|Lee|USA

>Spike|hCoV-19/Australia/VIC3435/2020|2020-07-05|EPI\_ISL\_521104|Original|hCoV-19^^Victoria|Human|Victorian Infectious Diseases Reference Laboratory (VIDRL)|VIDRL and MDU-PHL|Schultz|Australia

>Spike|hCoV-19/Wales/PHWC-160C63/2020|2020-05-23|EPI\_ISL\_473033|Original|hCoV-19^^Wales|Human|Wales Specialist Virology Centre Sequencing lab|COVID-19 Genomics UK (COG-UK) Consortium|Moore|United Kingdom

>Spike|hCoV-19/England/MILK-ACD393/2020|2020-10-21|EPI\_ISL\_634257|Original|hCoV-19^^England|Human|Lighthouse Lab in Milton Keynes|Wellcome Sanger Institute for the COVID-19 Genomics UK (COG-UK) consortium|Davies|United Kingdom

>Spike|hCoV-19/England/ALDP-A7047E/2020|2020-10-15|EPI\_ISL\_607966|Original|hCoV-19^^England|Human|Lighthouse Lab in Alderley Park|Wellcome Sanger Institute for the COVID-19 Genomics UK (COG-UK) consortium|Davies|United Kingdom

>Spike|hCoV-19/Switzerland/ZH-UZH-IMV139/2020|2020-12-29|EPI\_ISL\_766585|Original|hCoV-19^^Zurich|Human|Triemli Hospital|Institute of Medical Virology|Schmutz|Switzerland

>Spike|hCoV-19/United Arab Emirates/0884/2020|2020-05-19|EPI\_ISL\_699022|Original|hCoV-19^^Abu Dhabi|Human|Group 42 (G42) Healthcare|G42 Healthcare|Ogrodzki|United Arab Emirates

>Spike|hCoV-19/Kenya/C1191/2020|2020-04-19|EPI\_ISL\_457852|Original|hCoV-19^^Kenya|Human|KEMRI-CGMR-C|KEMRI-Wellcome Trust Research Programme/KEMRI-CGMR-C Kilifi|Githinji|Kenya

>Spike|hCoV-19/Burkina Faso/2163/2020|2020-09-02|EPI\_ISL\_660512|Original|hCoV-19^^Bobo Dioulasso|Human|Laboratoire de Microbiologie CHU Souro Sanou|Centre Muraz|Ouedraogo|Burkina Faso

>Spike|hCoV-19/Germany/HH-hpi-p2401/2020|2020-04-22|EPI\_ISL\_776474|Original|hCoV-19^^Hamburg|Human|University Medical Center Hamburg Eppendorf|Heinrich Pette Institute|Robitaille|Germany

>Spike|hCoV-19/USA/FL-BPHL-0876/2020|2020-07-09|EPI\_ISL\_514222|Original|hCoV-19^^Florida|Human|Florida Bureau of Public Health Laboratories|Florida Bureau of Public Health Laboratories|Blanton|USA

>Spike|hCoV-19/Switzerland/GR-ETHZ-250078/2020|2020-08-18|EPI\_ISL\_535601|Original|hCoV-19^^Graub\u00f6nden|Human|Viollier AG|Department of Biosystems Science and Engineering|Nadeau|Switzerland

>Spike|hCoV-19/England/MILK-B55757/2020|2020-11-06|EPI\_ISL\_657438|Original|hCoV-19^^England|Human|Lighthouse Lab in Milton Keynes|Wellcome Sanger Institute for the COVID-19 Genomics UK (COG-UK) Consortium|Davies|United Kingdom

>Spike|hCoV-19/Australia/VIC11378/2020|2020-08-23|EPI\_ISL\_563348|Original|hCoV-19^^Victoria|Human|Microbiological Diagnostic Unit - Public Health Laboratory (MDU-PHL)|MDU-PHL|Schultz|Australia

>Spike|hCoV-19/England/MILK-99DD62/2020|2020-08-31|EPI\_ISL\_550776|Original|hCoV-19^^England|Human|Lighthouse Lab in Milton Keynes|Wellcome Sanger Institute for the COVID-19 Genomics UK (COG-UK) consortium|Davies|United Kingdom

>Spike|hCoV-19/Scotland/CVR1926/2020|2020-04-07|EPI\_ISL\_438856|Original|hCoV-19^^Scotland|Human|West of Scotland Specialist Virology Centre|COVID-19 Genomics UK (COG-UK) Consortium|Robertson|United Kingdom

>Spike|hCoV-19/England/QEUEH-B14411/2020|2020-11-03|EPI\_ISL\_642639|Original|hCoV-19^^England|Human|Lighthouse Lab in Glasgow|Wellcome Sanger Institute for the COVID-19 Genomics UK (COG-UK) Consortium|Davies|United Kingdom

>Spike|hCoV-19/England/QEUEH-997BB9/2020|2020-08-28|EPI\_ISL\_549544|Original|hCoV-19^^England|Human|Oxford Viromics|COVID-19 Genomics UK (COG-UK) Consortium|Golubchik|United Kingdom

>Spike|hCoV-19/England/MILK-9950BC/2020|2020-08-24|EPI\_ISL\_552322|Original|hCoV-19^^England|Human|Lighthouse Lab in Milton Keynes|Wellcome Sanger Institute for the COVID-19 Genomics UK (COG-UK) consortium|Davies|United Kingdom

>Spike|hCoV-19/USA/UT-QDX-1880/2020|2020-03-13|EPI\_ISL\_604281|Original|hCoV-19^^Utah|Human|Quest Diagnostics|Quest Diagnostics|Kagan|USA

>Spike|hCoV-19/Scotland/QEUEH-B7DF51/2020|2020-11-13|EPI\_ISL\_742256|Original|hCoV-19^^Scotland|Human|Oxford Viromics|COVID-19 Genomics UK (COG-UK) Consortium|Golubchik|United Kingdom

>Spike|hCoV-19/England/BRIS-129C93/2020|2020-04-15|EPI\_ISL\_458386|Original|hCoV-19^^England|Human|PHE South West Regional Laboratory|Wellcome Sanger Institute for the COVID-19 Genomics UK (COG-UK) consortium|Davies|United Kingdom

>Spike|hCoV-19/Wales/PHWC-48C660/2020|2020-11-03|EPI\_ISL\_666452|Original|hCoV-19^^Wales|Human|Wales Specialist Virology Centre Sequencing lab|COVID-19 Genomics UK (COG-UK) Consortium|Moore|United Kingdom

>Spike|hCoV-19/England/ALDP-B1C4DD/2020|2020-11-01|EPI\_ISL\_645778|Original|hCoV-19^^England|Human|Lighthouse Lab in Alderley Park|Wellcome Sanger Institute for the COVID-19 Genomics UK (COG-UK) Consortium|Davies|United Kingdom

>Spike|hCoV-19/Wales/PHWC-163583/2020|2020-04-25|EPI\_ISL\_473964|Original|hCoV-19^^Wales|Human|Originating lab|COVID-19 Genomics UK (COG-UK) Consortium|Moore|United Kingdom

>Spike|hCoV-19/USA/CA-CZB-5762/2020|2020-07-12|EPI\_ISL\_672357|Original|hCoV-19^^California|Human|County of San Luis Obispo Public Health Laboratory|Chan-Zuckerberg Biohub|Bhatt|USA

>Spike|hCoV-19/Scotland/QEUEH-98FA99/2020|2020-08-27|EPI\_ISL\_539980|Original|hCoV-19^^Scotland|Human|Lighthouse Lab in Glasgow|Wellcome Sanger Institute for the COVID-19 Genomics UK (COG-UK) consortium|Davies|United Kingdom

>Spike|hCoV-19/England/CAMB-1B1559/2020|2020-05-07|EPI\_ISL\_458563|Original|hCoV-19^^England|Human|Department of Pathology|Wellcome Sanger Institute for the COVID-19 Genomics UK (COG-UK) consortium|Davies|United Kingdom

>Spike|hCoV-19/England/CAMC-B073F6/2020|2020-10-30|EPI\_ISL\_643685|Original|hCoV-19^^England|Human|Lighthouse Lab in Cambridge|Wellcome Sanger Institute for the COVID-19 Genomics UK (COG-UK) Consortium|Davies|United Kingdom

>Spike|hCoV-19/USA/TX-HMH-MCoV-9148/2020|2020-07-02|EPI\_ISL\_780970|Original|hCoV-19^^Texas|Human|Houston Methodist Hospital|Houston Methodist Hospital|Long|USA

>Spike|hCoV-19/USA/TX-HMH-MCoV-18613/2020|2020-11-20|EPI\_ISL\_784961|Original|hCoV-19^^Texas|Human|Houston Methodist Hospital|Houston Methodist Hospital|Long|USA

>Spike|hCoV-19/Portugal/PT1271/2020|2020-03-20|EPI\_ISL\_511232|Original|hCoV-19^^Portugal|Human|Instituto Nacional de Saude (INSA) and Instituto Gulbenkian de Ciencia (IGC)|Instituto Nacional de Saude (INSA) and Instituto Gulbenkian de Ciencia (IGC)|Borges|Portugal

>Spike|hCoV-19/England/GSTT-265E1AA/2020|2020-03-31|EPI\_ISL\_484164|Original|hCoV-19^^England|Human|Centre for Clinical Infection and Diagnostics Research and Genomics Innovation Unit|COVID-19 Genomics UK (COG-UK) Consortium|Awan|United Kingdom

>Spike|hCoV-19/England/LOND-125F823/2020|2020-04-06|EPI\_ISL\_516882|Original|hCoV-19^^England|Human|North West London Pathology|Wellcome Sanger Institute for the COVID-19 Genomics UK (COG-UK) consortium|Davies|United Kingdom

>Spike|hCoV-19/Wales/PHWC-490809/2020|2020-11-13|EPI\_ISL\_703351|Original|hCoV-19^^Wales|Human|Originating lab|COVID-19 Genomics UK (COG-UK) Consortium|Moore|United Kingdom

>Spike|hCoV-19/USA/TX-HMH-1961/2020|2020-05-17|EPI\_ISL\_542922|Original|hCoV-19^^Texas|Human|Houston Methodist Hospital|Houston Methodist Hospital|Long|USA

>Spike|hCoV-19/Japan/PG-1740/2020|2020-05-00|EPI\_ISL\_685346|Original|hCoV-19^^Japan|Human|Pathogen Genomics Center|Pathogen Genomics Center|Sekizuka|Japan

>Spike|hCoV-19/Scotland/EDB1811/2020|2020-04-16|EPI\_ISL\_433135|Original|hCoV-19^^Scotland|Human|Virology Department|COVID-19 Genomics UK (COG-UK) Consortium|Williams|United Kingdom

>Spike|hCoV-19/England/BRIS-12A148/2020|2020-04-16|EPI\_ISL\_458498|Original|hCoV-19^^England|Human|PHE South West Regional Laboratory|Wellcome Sanger Institute for the COVID-19 Genomics UK (COG-UK) consortium|Davies|United Kingdom

>Spike|hCoV-19/USA/CA-CZB-14818/2020|2020-11-18|EPI\_ISL\_739114|Original|hCoV-19^^California|Human|Humboldt County Public Health Laboratory|Chan-Zuckerberg Biohub|Kamm|USA

>Spike|hCoV-19/Japan/PG-2038/2020|2020-05-00|EPI\_ISL\_685643|Original|hCoV-19^^Japan|Human|Pathogen Genomics Center|Pathogen Genomics Center|Sekizuka|Japan

>Spike|hCoV-19/Netherlands/UT-EMC-204/2020|2020-11-16|EPI\_ISL\_722277|Original|hCoV-19^^Utrecht|Human|Dutch COVID-19 response team|Erasmus Medical Center|Oude Munnink|Netherlands

>Spike|hCoV-19/Spain/AR-IBV-005094/2020|2020-04-23|EPI\_ISL\_510375|Original|hCoV-19^^Aragon|Human|Servicio de Microbiolog\u00eda|SeqCOVID-SPAIN consortium|IBV (CSIC) |Comas|Spain

>Spike|hCoV-19/Germany/BY-IMB11609/2020|2020-10-08|EPI\_ISL\_732563|Original|hCoV-19^^Bavaria|Human|Bundeswehr Institute of Microbiology|Bundeswehr Institute of Microbiology|Antwerpen|Germany

>Spike|hCoV-19/Australia/VIC12274/2020|2020-08-07|EPI\_ISL\_591943|Original|hCoV-19^^Victoria|Human|Victorian Infectious Diseases Reference Laboratory (VIDRL)|VIDRL and MDU-PHL|Schultz|Australia

>Spike|hCoV-19/USA/MI-MDHHS-SC22520/2020|2020-11-17|EPI\_ISL\_708223|Original|hCoV-19^^Michigan|Human|Michigan Department of Health and Human Services|Michigan Department of Health and Human Services|Jacob|USA

>Spike|hCoV-19/Australia/VIC6828/2020|2020-07-24|EPI\_ISL\_562152|Original|hCoV-19^^Victoria|Human|Victorian Infectious Diseases Reference Laboratory (VIDRL)|VIDRL and MDU-PHL|Schultz|Australia

>Spike|hCoV-19/Netherlands/Zeeland\_6/2020|2020-04-02|EPI\_ISL\_461288|Original|hCoV-19^^Zeeland|Human|Dutch COVID-19 response team|Erasmus Medical Center|Oude Munnink|Netherlands

>Spike|hCoV-19/Austria/CeMM0210/2020|2020-03-16|EPI\_ISL\_438047|Original|hCoV-19^^Vienna|Human|Center for Virology|Bergthaler laboratory|Bergthaler|Austria

>Spike|hCoV-19/USA/NM-DOH-2020631352/2020|2020-12-19|EPI\_ISL\_766891|Original|hCoV-19^^New Mexico|Human|New Mexico Department of Health Scientific Laboratory|New Mexico Department of Health Scientific Laboratory|Malone|USA

>Spike|hCoV-19/England/NOTT-112BEB/2020|2020-04-29|EPI\_ISL\_493597|Original|hCoV-19^^England|Human|Lincolnshire Hospitals and DeepSeq Nottingham|COVID-19 Genomics UK (COG-UK) Consortium|Loose|United Kingdom

>Spike|hCoV-19/England/NORW-E8D8F/2020|2020-04-26|EPI\_ISL\_453557|Original|hCoV-19^^England|Human|Quadram Institute Bioscience|COVID-19 Genomics UK (COG-UK) Consortium|Alikhan|United Kingdom

>Spike|hCoV-19/Scotland/QEUH-A793D2/2020|2020-10-14|EPI\_ISL\_638995|Original|hCoV-19^^Scotland|Human|Oxford Viromics|COVID-19 Genomics UK (COG-UK) Consortium|Golubchik|United Kingdom

>Spike|hCoV-19/England/LIVE-9C6AD/2020|2020-04-01|EPI\_ISL\_449568|Original|hCoV-19^^England|Human|Liverpool Clinical Laboratories|COVID-19 Genomics UK (COG-UK) Consortium|Haldenby|United Kingdom

>Spike|hCoV-19/USA/TX-HMH-2618/2020|2020-06-05|EPI\_ISL\_545431|Original|hCoV-19^^Texas|Human|Houston Methodist Hospital|Houston Methodist Hospital|Long|USA

>Spike|hCoV-19/England/ALDP-A8726B/2020|2020-10-17|EPI\_ISL\_605971|Original|hCoV-19^^England|Human|Lighthouse Lab in Alderley Park|Wellcome Sanger Institute for the COVID-19 Genomics UK (COG-UK) consortium|Davies|United Kingdom

>Spike|hCoV-19/England/QEUA-AD5A75/2020|2020-10-26|EPI\_ISL\_634549|Original|hCoV-19^^England|Human|Lighthouse Lab in Glasgow|Wellcome Sanger Institute for the COVID-19 Genomics UK (COG-UK) consortium|Davies|United Kingdom

>Spike|hCoV-19/USA/OR-OHSU-1133/2020|2020-07-10|EPI\_ISL\_509147|Original|hCoV-19^^Oregon|Human|OHSU Lab Services Molecular Microbiology Lab|Oregon SARS-CoV-2 Genome Sequencing Center|O'Roak|USA

>Spike|hCoV-19/Germany/BB-ChVir-W1442-8234/2020|2020-06-19|EPI\_ISL\_753857|Original|hCoV-19^^Brandenburg|Human|Charit\u00e9 Universit\u00e4tsmedizin Berlin|Charit\u00e9 Universit\u00e4tsmedizin Berlin|Muehlemann|Germany

>Spike|hCoV-19/England/QEUA-BCBB6F/2020|2020-11-27|EPI\_ISL\_704448|Original|hCoV-19^^England|Human|Lighthouse Lab in Glasgow|Wellcome Sanger Institute for the COVID-19 Genomics UK (COG-UK) Consortium|Davies|United Kingdom

>Spike|hCoV-19/Denmark/DCGC-21558/2020|2020-12-21|EPI\_ISL\_757749|Original|hCoV-19^^Hovedstaden|Human|Department of Virus and Microbiological Special Diagnostics|Albertsen Lab|Michaelsen|Denmark

>Spike|hCoV-19/USA/CA-CZB-10096/2020|2020-06-21|EPI\_ISL\_672211|Original|hCoV-19^^California|Human|The Ashley Laboratory|Chan-Zuckerberg Biohub|Bhatt|USA

>Spike|hCoV-19/Bahrain/340860476/2020|2020-10-14|EPI\_ISL\_632251|Original|hCoV-19^^Bahrain|Human|Communicable Disease Laboratory|Communicable Disease Laboratory|Altaif|Bahrain

>Spike|hCoV-19/Colombia/TOL-GUV-92052/2020|2020-03-31|EPI\_ISL\_447757|Original|hCoV-19^^Tolima|Human|Instituto Nacional de Salud|Grupo de Investigaciones Microbiol\u00f3gicas-UR (GIMUR)|Ram\u00e9dez|Colombia

>Spike|hCoV-19/England/QEUA-9F6453/2020|2020-09-25|EPI\_ISL\_588891|Original|hCoV-19^^England|Human|Lighthouse Lab in Glasgow|Wellcome Sanger Institute for the COVID-19 Genomics UK (COG-UK) consortium|Davies|United Kingdom

>Spike|hCoV-19/India/DL-56417-CSIR-IGIB/2020|2020-08-01|EPI\_ISL\_636745|Original|hCoV-19^^Delhi|Human|National Centre for Disease control (NCDC)|NCDC/CSIR-IGIB|Faruq|India

>Spike|hCoV-19/Australia/VIC15249/2020|2020-09-27|EPI\_ISL\_593218|Original|hCoV-19^^Victoria|Human|Microbiological Diagnostic Unit - Public Health Laboratory (MDU-PHL)|MDU-PHL|Schultz|Australia

>Spike|hCoV-19/England/ALDP-94D903/2020|2020-06-20|EPI\_ISL\_555196|Original|hCoV-19^^England|Human|Lighthouse Lab in Alderley Park|Wellcome Sanger Institute for the COVID-19 Genomics UK (COG-UK) consortium|Davies|United Kingdom

>Spike|hCoV-19/England/ALDP-A6FB22/2020|2020-10-15|EPI\_ISL\_607024|Original|hCoV-19^^England|Human|Lighthouse Lab in Alderley Park|Wellcome Sanger Institute for the COVID-19 Genomics UK (COG-UK) consortium|Davies|United Kingdom

>Spike|hCoV-19/USA/TX-HMH-2928/2020|2020-06-09|EPI\_ISL\_543870|Original|hCoV-19^^Texas|Human|Houston Methodist Hospital|Houston Methodist Hospital|Long|USA

>Spike|hCoV-19/England/MILK-A7B534/2020|2020-10-15|EPI\_ISL\_607521|Original|hCoV-19^^England|Human|Lighthouse Lab in Milton Keynes|Wellcome Sanger Institute for the COVID-19 Genomics UK (COG-UK) consortium|Davies|United Kingdom

>Spike|hCoV-19/USA/NY-SURV0874/2020|2020-03-09|EPI\_ISL\_436076|Original|hCoV-19^^New York|Human|NYC Department of Health and Mental Hygiene|Pathogen Discovery|Queen|USA

>Spike|hCoV-19/England/NORW-EB2AB/2020|2020-05-03|EPI\_ISL\_457415|Original|hCoV-19^^England|Human|Quadram Institute Bioscience|COVID-19 Genomics UK (COG-UK) Consortium|Alikhan|United Kingdom

>Spike|hCoV-19/Costa Rica/INC-0179/2020|2020-11-16|EPI\_ISL\_770024|Original|hCoV-19^^Alajuela|Human|Hle - Asociacion Hogar De Ancianos Santiago Crespo Calvo|Inciensa|Soto-Garita|Costa Rica

>Spike|hCoV-19/Chile/RM-203885/2020|2020-10-10|EPI\_ISL\_746757|Original|hCoV-19^^Region Metropolitana de Santiago|Human|Genetica Molecular and Subdepartamento de Virologia ISP Chile|Instituto de Salud Publica de Chile|Tognarelli|Chile

>Spike|hCoV-19/USA/UT-UPHL-201109633/2020|2020-10-05|EPI\_ISL\_628937|Original|hCoV-19^^Utah|Human|Utah Public Health Laboratory|Utah Public Health Laboratory|Young|USA

>Spike|hCoV-19/Kenya/C6379/2020|2020-05-15|EPI\_ISL\_568797|Original|hCoV-19^^Mombasa|Human|KEMRI-Wellcome Trust Research Programme/KEMRI-CGMR-C Kilifi|KEMRI-Wellcome Trust Research Programme/KEMRI-CGMR-C Kilifi|Githinji|Kenya

>Spike|hCoV-19/Scotland/QEUH-9B73F7/2020|2020-09-09|EPI\_ISL\_602089|Original|hCoV-19^^Scotland|Human|Lighthouse Lab in Glasgow|Wellcome Sanger Institute for the COVID-19 Genomics UK (COG-UK) consortium|Davies|United Kingdom

>Spike|hCoV-19/Portugal/PT0630/2020|2020-03-24|EPI\_ISL\_510891|Original|hCoV-19^^Portugal|Human|Instituto Nacional de Saude (INSA)|Instituto Nacional de Saude (INSA)|Borges|Portugal

>Spike|hCoV-19/Australia/WA435/2020|2020-09-25|EPI\_ISL\_672647|Original|hCoV-19^^Western Australia|Human|PathWest Laboratory Medicine WA|PathWest Laboratory Medicine WA Microbial Surveillance Unit|Sikazwe|Australia

>Spike|hCoV-19/England/ALDP-B46E81/2020|2020-11-07|EPI\_ISL\_656129|Original|hCoV-19^^England|Human|Lighthouse Lab in Alderley Park|Wellcome Sanger Institute for the COVID-19 Genomics UK (COG-UK) Consortium|Davies|United Kingdom

>Spike|hCoV-19/Panama/338832/2020|2020-04-09|EPI\_ISL\_496886|Original|hCoV-19^^Panama Center|Human|Gorgas Memorial Laboratory of Health Studies|Gorgas Memorial Laboratory of Health Studies|Martinez|Panama

>Spike|hCoV-19/USA/TX-HMH-7013/2020|2020-06-28|EPI\_ISL\_546432|Original|hCoV-19^^Texas|Human|Houston Methodist Hospital|Houston Methodist Hospital|Long|USA

>Spike|hCoV-19/Denmark/DCGC-5856/2020|2020-09-28|EPI\_ISL\_621043|Original|hCoV-19^^Midtjylland|Human|Department of Virus and Microbiological Special Diagnostics|Albertsen lab|Michaelsen|Denmark

>Spike|hCoV-19/Scotland/CVR2517/2020|2020-04-15|EPI\_ISL\_477960|Original|hCoV-19^^Scotland|Human|West of Scotland Specialist Virology Centre|COVID-19 Genomics UK (COG-UK) Consortium|Robertson|United Kingdom

>Spike|hCoV-19/England/ALDP-AA219A/2020|2020-10-22|EPI\_ISL\_625052|Original|hCoV-19^^England|Human|Lighthouse Lab in Alderley Park|Wellcome Sanger Institute for the COVID-19 Genomics UK (COG-UK) consortium|Davies|United Kingdom

>Spike|hCoV-19/DRC/3504/2020|2020-04-23|EPI\_ISL\_447604|Original|hCoV-19^^Kinshasa|Human|Viral Respiratory Lab|Pathogen Sequencing Lab|Lusamaki|Democratic Republic of the Congo

>Spike|hCoV-19/USA/MI-MDHHS-SC22647/2020|2020-11-30|EPI\_ISL\_737198|Original|hCoV-19^^Michigan|Human|Michigan Department of Health and Human Services|Michigan Department of Health and Human Services|Blankenship|USA

>Spike|hCoV-19/Belgium/ULG-10405/2020|2020-08-20|EPI\_ISL\_540572|Original|hCoV-19^^Li\u00e8ge|Human|Department of Clinical Microbiology|GIGA Medical Genomics|Durkin|Belgium

>Spike|hCoV-19/Switzerland/ZH-ETHZ-362/2020|2020-04-07|EPI\_ISL\_483668|Original|hCoV-19^^Zurich|Human|University Hospital Zurich|Department of Biosystems Science and Engineering|Nadeau|Switzerland

>Spike|hCoV-19/England/MILK-A46B6D/2020|2020-10-06|EPI\_ISL\_598461|Original|hCoV-19^^England|Human|Lighthouse Lab in Milton Keynes|Wellcome Sanger Institute for the COVID-19 Genomics UK (COG-UK) consortium|Davies|United Kingdom

>Spike|hCoV-19/Scotland/EDB1272/2020|2020-04-09|EPI\_ISL\_491675|Original|hCoV-19^^Scotland|Human|Virology Department|Wellcome Sanger Institute for the COVID-19 Genomics UK (COG-UK) consortium|Davies|United Kingdom

>Spike|hCoV-19/England/NORT-2819DD/2020|2020-03-21|EPI\_ISL\_488815|Original|hCoV-19^^England|Human|NU-OMICS DNA Sequencing research facility|Wellcome Sanger Institute for the COVID-19 Genomics UK (COG-UK) consortium|Davies|United Kingdom

>Spike|hCoV-19/South Africa/KRISP-K001100/2020|2020-07-10|EPI\_ISL\_509349|Original|hCoV-19^^KwaZulu-Natal|Human|NHLs-IALCH|KRISP|de Oliveira|South Africa

>Spike|hCoV-19/Denmark/DCGC-16447/2020|2020-11-16|EPI\_ISL\_714152|Original|hCoV-19^^Hovedstaden|Human|Department of Virus and Microbiological Special Diagnostics|Albertsen Lab|Michaelsen|Denmark

>Spike|hCoV-19/England/GSTT-5745/2020|2020-03-23|EPI\_ISL\_560708|Original|hCoV-19^^England|Human|Centre for Clinical Infection and Diagnostics Research and Genomics



Innovation Unit|Centre for Clinical Infection and Diagnostics Research and Genomics  
Innovation Unit|Awan|United Kingdom  
>Spike|hCoV-19/USA/WI-UW-1593/2020|2020-09-18|EPI\_ISL\_605470|Original|hCoV-  
19^^Wisconsin|Human|University of Wisconsin-Madison AIDS Vaccine Research  
Laboratories|University of Wisconsin-Madison AIDS Vaccine Research  
Laboratories|Baczenas|USA  
>Spike|hCoV-19/England/MILK-9EE852/2020|2020-09-23|EPI\_ISL\_580652|Original|hCoV-  
19^^England|Human|Lighthouse Lab in Milton Keynes|Wellcome Sanger Institute for the  
COVID-19 Genomics UK (COG-UK) consortium|Davies|United Kingdom  
>Spike|hCoV-19/England/GSTT-265D4C0/2020|2020-03-19|EPI\_ISL\_483967|Original|hCoV-  
19^^England|Human|Centre for Clinical Infection and Diagnostics Research and Genomics  
Innovation Unit|COVID-19 Genomics UK (COG-UK) Consortium|Awan|United Kingdom  
>Spike|hCoV-19/Israel/CVL-n4115/2020|2020-03-11|EPI\_ISL\_649106|Original|hCoV-  
19^^Israel|Human|Israel Central Virology laboratory|Israel Central Virology  
laboratory|Zuckerman|Israel  
>Spike|hCoV-19/USA/FL-BPHL-1069/2020|2020-04-22|EPI\_ISL\_526555|Original|hCoV-  
19^^Florida|Human|Florida Bureau of Public Health Laboratories|Florida Bureau of  
Public Health Laboratories|Blanton|USA  
>Spike|hCoV-19/Scotland/CVR3040/2020|2020-04-23|EPI\_ISL\_449183|Original|hCoV-  
19^^Scotland|Human|West of Scotland Specialist Virology Centre|COVID-19 Genomics UK  
(COG-UK) Consortium|Robertson|United Kingdom  
>Spike|hCoV-19/USA/MI-QDX-1635/2020|2020-03-18|EPI\_ISL\_603962|Original|hCoV-  
19^^Michigan|Human|Quest Diagnostics|Quest Diagnostics|Kagan|USA  
>Spike|hCoV-19/Romania/ROSV\_8990/2020|2020-05-18|EPI\_ISL\_491090|Original|hCoV-  
19^^Suceava|Human|Suceava County Emergency Hospital|\Stefan cel Mare\ University  
Metagenomics Lab|Lobiuc|Romania  
>Spike|hCoV-19/Japan/PG-2538/2020|2020-05-00|EPI\_ISL\_690673|Original|hCoV-  
19^^Japan|Human|Saitama Prefectural Institute of Public Health|Pathogen Genomics  
Center|Sekizuka|Japan  
>Spike|hCoV-19/USA/TX-HMH-MCoV-15231/2020|2020-10-20|EPI\_ISL\_786715|Original|hCoV-  
19^^Texas|Human|Houston Methodist Hospital|Houston Methodist Hospital|Long|USA  
>Spike|hCoV-19/USA/UT-08404/2020|2020-05-13|EPI\_ISL\_524183|Original|hCoV-  
19^^Utah|Human|Utah Public Health Laboratory|Utah Public Health Laboratory|Young|USA  
>Spike|hCoV-19/England/ALDP-6BC3C8/2020|2020-07-02|EPI\_ISL\_557912|Original|hCoV-  
19^^England|Human|Lighthouse Lab in Alderley Park|Wellcome Sanger Institute for the  
COVID-19 Genomics UK (COG-UK) consortium|Davies|United Kingdom  
>Spike|hCoV-19/England/QEUA-CC779B/2020|2020-12-21|EPI\_ISL\_760452|Original|hCoV-  
19^^England|Human|Lighthouse Lab in Glasgow|Wellcome Sanger Institute for the COVID-  
19 Genomics UK (COG-UK) Consortium|Davies|United Kingdom  
>Spike|hCoV-19/Japan/PG-5491/2020|2020-08-00|EPI\_ISL\_690593|Original|hCoV-  
19^^Japan|Human|Pathogen Genomics Center|Pathogen Genomics Center|Sekizuka|Japan  
>Spike|hCoV-19/USA/UT-08496/2020|2020-05-18|EPI\_ISL\_524263|Original|hCoV-  
19^^Utah|Human|Utah Public Health Laboratory|Utah Public Health Laboratory|Young|USA  
>Spike|hCoV-19/England/QEUA-B4193A/2020|2020-11-08|EPI\_ISL\_658571|Original|hCoV-  
19^^England|Human|Lighthouse Lab in Glasgow|Wellcome Sanger Institute for the COVID-  
19 Genomics UK (COG-UK) Consortium|Davies|United Kingdom  
>Spike|hCoV-19/India/GJ-GBRC166a/2020|2020-05-27|EPI\_ISL\_461501|Original|hCoV-  
19^^Gujarat|Human|B.J. Medical College and Civil hospital|Gujarat Biotechnology  
Research Centre|Joshi|India  
>Spike|hCoV-19/USA/TX-DSHS-0880/2020|2020-06-16|EPI\_ISL\_610016|Original|hCoV-  
19^^Texas|Human|Texas Department of State Health Services|Texas Department of State  
Health Services|Rahman|USA  
>Spike|hCoV-19/Wales/PHWC-34513/2020|2020-04-16|EPI\_ISL\_446935|Original|hCoV-  
19^^Wales|Human|Wales Specialist Virology Centre|Public Health Wales Microbiology  
Cardiff|Moore|United Kingdom  
>Spike|hCoV-19/Denmark/DCGC-12780/2020|2020-11-09|EPI\_ISL\_682961|Original|hCoV-  
19^^Nordjylland|Human|Department of Virus and Microbiological Special  
Diagnostics|Albertsen Lab|Michaelsen|Denmark

>Spike|hCoV-19/USA/NY-Wadsworth-289876-01/2020|2020-12-22|EPI\_ISL\_767513|Original|hCoV-19^^New York|Human|Wadsworth Center|Wadsworth Center|Lasek-Nesselquist|USA

>Spike|hCoV-19/England/ALDP-BC86CB/2020|2020-11-23|EPI\_ISL\_721413|Original|hCoV-19^^England|Human|Lighthouse Lab in Alderley Park|Wellcome Sanger Institute for the COVID-19 Genomics UK (COG-UK) Consortium|Davies|United Kingdom

>Spike|hCoV-19/Scotland/EDB2915/2020|2020-04-01|EPI\_ISL\_488897|Original|hCoV-19^^Scotland|Human|Virology Department|Wellcome Sanger Institute for the COVID-19 Genomics UK (COG-UK) consortium|Davies|United Kingdom

>Spike|hCoV-19/India/OR-ILSCV35614/2020|2020-06-12|EPI\_ISL\_481203|Original|hCoV-19^^Odisha|Human|Immunogenomics lab|Immunogenomics lab|Raghav|India

>Spike|hCoV-19/Australia/VIC8361/2020|2020-08-13|EPI\_ISL\_562666|Original|hCoV-19^^Victoria|Human|Microbiological Diagnostic Unit - Public Health Laboratory (MDU-PHL)|MDU-PHL|Schultz|Australia

>Spike|hCoV-19/Japan/PG-3262/2020|2020-06-00|EPI\_ISL\_691377|Original|hCoV-19^^Japan|Human|Saitama Prefectural Institute of Public Health|Pathogen Genomics Center|Sekizuka|Japan

>Spike|hCoV-19/England/LIVE-9B77E/2020|2020-04-23|EPI\_ISL\_440875|Original|hCoV-19^^England|Human|Liverpool Clinical Laboratories|COVID-19 Genomics UK (COG-UK) Consortium|Haldenby|United Kingdom

>Spike|hCoV-19/England/ALDP-A961F3/2020|2020-10-19|EPI\_ISL\_624634|Original|hCoV-19^^England|Human|Lighthouse Lab in Alderley Park|Wellcome Sanger Institute for the COVID-19 Genomics UK (COG-UK) consortium|Davies|United Kingdom

>Spike|hCoV-19/Ireland/WH-NVRL-78IRL74241/2020|2020-11-23|EPI\_ISL\_752568|Original|hCoV-19^^Westmeath|Human|National Virus Reference Laboratory|National Virus Reference Laboratory|Gonzalez|Ireland

>Spike|hCoV-19/Denmark/DCGC-18789/2020|2020-12-07|EPI\_ISL\_748557|Original|hCoV-19^^Syddanmark|Human|Department of Virus and Microbiological Special Diagnostics|Albertsen Lab|Michaelsen|Denmark

>Spike|hCoV-19/England/ALDP-A50526/2020|2020-10-07|EPI\_ISL\_597660|Original|hCoV-19^^England|Human|Lighthouse Lab in Alderley Park|Wellcome Sanger Institute for the COVID-19 Genomics UK (COG-UK) consortium|Davies|United Kingdom

>Spike|hCoV-19/England/ALDP-BCA526/2020|2020-11-23|EPI\_ISL\_703785|Original|hCoV-19^^England|Human|Lighthouse Lab in Alderley Park|Wellcome Sanger Institute for the COVID-19 Genomics UK (COG-UK) Consortium|Davies|United Kingdom

>Spike|hCoV-19/USA/MA-MGH-00906/2020|2020-04-17|EPI\_ISL\_791817|Original|hCoV-19^^Massachusetts|Human|Massachusetts General Hospital|Infectious Disease Program|Park|USA

>Spike|hCoV-19/England/ALDP-A6D0F8/2020|2020-10-14|EPI\_ISL\_608298|Original|hCoV-19^^England|Human|Lighthouse Lab in Alderley Park|Wellcome Sanger Institute for the COVID-19 Genomics UK (COG-UK) consortium|Davies|United Kingdom

>Spike|hCoV-19/England/QEUEH-B6A670/2020|2020-11-11|EPI\_ISL\_662469|Original|hCoV-19^^England|Human|Lighthouse Lab in Glasgow|Wellcome Sanger Institute for the COVID-19 Genomics UK (COG-UK) Consortium|Davies|United Kingdom

>Spike|hCoV-19/England/205260306/2020|2020-12-07|EPI\_ISL\_766512|Original|hCoV-19^^England|Human|Respiratory Virus Unit|COVID-19 Genomics UK (COG-UK) Consortium|Platt|United Kingdom

>Spike|hCoV-19/Spain/AR-IBV-005098/2020|2020-04-25|EPI\_ISL\_500355|Original|hCoV-19^^Aragon|Human|Servicio de Microbiolog\u00eda|SeqCOVID-SPAIN consortium|IBV (CSIC)|Comas|Spain

>Spike|hCoV-19/USA/TX-HMH-MCoV-8617/2020|2020-07-01|EPI\_ISL\_780655|Original|hCoV-19^^Texas|Human|Houston Methodist Hospital|Houston Methodist Hospital|Long|USA

>Spike|hCoV-19/England/ALDP-B49282/2020|2020-11-07|EPI\_ISL\_649481|Original|hCoV-19^^England|Human|Lighthouse Lab in Alderley Park|Wellcome Sanger Institute for the COVID-19 Genomics UK (COG-UK) Consortium|Davies|United Kingdom

>Spike|hCoV-19/Scotland/CVR491/2020|2020-03-23|EPI\_ISL\_433304|Original|hCoV-19^^Scotland|Human|West of Scotland Specialist Virology Centre|COVID-19 Genomics UK (COG-UK) Consortium|Robertson|United Kingdom

>Spike|hCoV-19/England/20172045804/2020|2020-04-09|EPI\_ISL\_465348|Original|hCoV-19^^England|Human|Respiratory Virus Unit|Respiratory Virus Unit|Platt|United Kingdom

>Spike|hCoV-19/England/LIVE-AACC8/2020|2020-08-03|EPI\_ISL\_540610|Original|hCoV-19^England|Human|Liverpool Clinical Laboratories|COVID-19 Genomics UK (COG-UK) Consortium|Haldenby|United Kingdom

>Spike|hCoV-19/Turkey/IST-GLAB-250/2020|2020-05-19|EPI\_ISL\_735316|Original|hCoV-19^Istanbul|Human|Genomic Laboratory (GLAB) (Conjoint lab of Health Directorate of Istanbul and Istanbul Technical University)|Genomic Laboratory (GLAB)|Karacan|Turkey

>Spike|hCoV-19/Singapore/1452/2020|2020-12-02|EPI\_ISL\_728188|Original|hCoV-19^Singapore|Human|National Public Health Laboratory|National Public Health Laboratory|Mak|Singapore

>Spike|hCoV-19/Switzerland/TI-ETHZ-100337/2020|2020-03-18|EPI\_ISL\_574965|Original|hCoV-19^Ticino|Human|Viollier AG|Department of Biosystems Science and Engineering|Nadeau|Switzerland

>Spike|hCoV-19/Luxembourg/LNS4139779/2020|2020-11-18|EPI\_ISL\_740426|Original|hCoV-19^Luxembourg|Human|Laboratoire national de sant\u00e9|Laboratoire national de sant\u00e9|Wienecke-Baldacchino|Luxembourg

>Spike|hCoV-19/Denmark/DCGC-12279/2020|2020-11-16|EPI\_ISL\_682460|Original|hCoV-19^Midtjylland|Human|Department of Virus and Microbiological Special Diagnostics|Albertsen Lab|Michaelsen|Denmark

>Spike|hCoV-19/South Africa/NHLS-UCT-GS-2214/2020|2020-08-03|EPI\_ISL\_700466|Original|hCoV-19^Western Cape|Human|Ladismith (Nissenville) Clinic wc LAF|NHLS/UCT|Iranzadeh|South Africa

>Spike|hCoV-19/Sweden/20-09859/2020|2020-11-04|EPI\_ISL\_710597|Original|hCoV-19^Skane|Human|Klinisk mikrobiologi|The Public Health Agency of Sweden|Svartstr\u00f6m|Sweden

>Spike|hCoV-19/USA/UT-UPHL-201013892/2020|2020-04-05|EPI\_ISL\_594086|Original|hCoV-19^Utah|Human|Utah Public Health Laboratory|Utah Public Health Laboratory|Young|USA

>Spike|hCoV-19/England/ALDP-9562DF/2020|2020-06-08|EPI\_ISL\_554046|Original|hCoV-19^England|Human|Lighthouse Lab in Alderley Park|Wellcome Sanger Institute for the COVID-19 Genomics UK (COG-UK) consortium|Davies|United Kingdom

>Spike|hCoV-19/Denmark/DCGC-20298/2020|2020-11-23|EPI\_ISL\_748101|Original|hCoV-19^Sjaelland|Human|Department of Virus and Microbiological Special Diagnostics|Albertsen Lab|Michaelsen|Denmark

>Spike|hCoV-19/South Africa/NHLS-UCT-GS-1990/2020|2020-08-25|EPI\_ISL\_640049|Original|hCoV-19^Western Cape|Human|George Road Sat Clinic wc GWM|NHLS/UCT|Iranzadeh|South Africa

>Spike|hCoV-19/England/CAMC-C440AA/2020|2020-12-10|EPI\_ISL\_719509|Original|hCoV-19^England|Human|Lighthouse Lab in Cambridge|Wellcome Sanger Institute for the COVID-19 Genomics UK (COG-UK) Consortium|Davies|United Kingdom

>Spike|hCoV-19/USA/UT-UPHL-2008872/2020|2020-05-26|EPI\_ISL\_524987|Original|hCoV-19^Utah|Human|Utah Public Health Laboratory|Utah Public Health Laboratory|Young|USA

>Spike|hCoV-19/USA/MA-MGH-00502/2020|2020-03-27|EPI\_ISL\_460156|Original|hCoV-19^Massachusetts|Human|Massachusetts General Hospital|Infectious Disease Program|Lemieux|USA

>Spike|hCoV-19/Iceland/11/2020|2020-03-16|EPI\_ISL\_417539|Original|hCoV-19^Reykjavik|Human|deCODE genetics|deCODE genetics|J\u00f3nsson|Iceland

>Spike|hCoV-19/England/NOTT-111557/2020|2020-05-05|EPI\_ISL\_457579|Original|hCoV-19^England|Human|Queens Medical Centre|COVID-19 Genomics UK (COG-UK) Consortium|Loose|United Kingdom

>Spike|hCoV-19/Netherlands/UT-RIVM-20066/2020|2020-11-24|EPI\_ISL\_723249|Original|hCoV-19^Utrecht|Human|Dutch COVID-19 response team|National Institute for Public Health and the Environment (RIVM)|Meijer|Netherlands

>Spike|hCoV-19/England/BIRM-61D51/2020|2020-03-25|EPI\_ISL\_529607|Original|hCoV-19^England|Human|University of Birmingham|COVID-19 Genomics UK (COG-UK) Consortium|Loman|United Kingdom

>Spike|hCoV-19/Iceland/378/2020|2020-03-19|EPI\_ISL\_424402|Original|hCoV-19^Reykjavik|Human|The National University Hospital of Iceland|deCODE genetics|J\u00f3nsson|Iceland

>Spike|hCoV-19/England/CAMC-9EC54E/2020|2020-09-24|EPI\_ISL\_580286|Original|hCoV-19^England|Human|Lighthouse Lab in Cambridge|Wellcome Sanger Institute for the COVID-19 Genomics UK (COG-UK) consortium|Davies|United Kingdom

>Spike|hCoV-19/England/CAMC-B337B9/2020|2020-11-05|EPI\_ISL\_659126|Original|hCoV-19^^England|Human|Lighthouse Lab in Cambridge|Wellcome Sanger Institute for the COVID-19 Genomics UK (COG-UK) Consortium|Davies|United Kingdom

>Spike|hCoV-19/England/MILK-A46A42/2020|2020-10-06|EPI\_ISL\_598355|Original|hCoV-19^^England|Human|Lighthouse Lab in Milton Keynes|Wellcome Sanger Institute for the COVID-19 Genomics UK (COG-UK) consortium|Davies|United Kingdom

>Spike|hCoV-19/England/QEUH-A00024/2020|2020-10-02|EPI\_ISL\_600354|Original|hCoV-19^^England|Human|Lighthouse Lab in Glasgow|Wellcome Sanger Institute for the COVID-19 Genomics UK (COG-UK) consortium|Davies|United Kingdom

>Spike|hCoV-19/Australia/VIC5537/2020|2020-07-20|EPI\_ISL\_518368|Original|hCoV-19^^Victoria|Human|Microbiological Diagnostic Unit - Public Health Laboratory (MDU-PHL)|MDU-PHL|Schultz|Australia

>Spike|hCoV-19/England/ALDP-B748F5/2020|2020-11-12|EPI\_ISL\_678957|Original|hCoV-19^^England|Human|Queens Medical Centre|COVID-19 Genomics UK (COG-UK) Consortium|Loose|United Kingdom

>Spike|hCoV-19/Germany/HH-hpi-p1502/2020|2020-03-05|EPI\_ISL\_776008|Original|hCoV-19^^Hamburg|Human|University Medical Center Hamburg Eppendorf|Heinrich Pette Institute|Robitaille|Germany

>Spike|hCoV-19/Denmark/DCGC-19107/2020|2020-12-07|EPI\_ISL\_748759|Original|hCoV-19^^Hovedstaden|Human|Department of Virus and Microbiological Special Diagnostics|Albertsen Lab|Michaelsen|Denmark

>Spike|hCoV-19/USA/TX-HMH-MCoV-18908/2020|2020-11-25|EPI\_ISL\_785213|Original|hCoV-19^^Texas|Human|Houston Methodist Hospital|Houston Methodist Hospital|Long|USA

>Spike|hCoV-19/Singapore/1116ilnm/2020|2020-10-26|EPI\_ISL\_626636|Original|hCoV-19^^Singapore|Human|National Public Health Laboratory|National Public Health Laboratory|Mak|Singapore

>Spike|hCoV-19/USA/TX-HMH-MCoV-13803/2020|2020-08-18|EPI\_ISL\_788896|Original|hCoV-19^^Texas|Human|Houston Methodist Hospital|Houston Methodist Hospital|Long|USA

>Spike|hCoV-19/Australia/QLDID928/2020|2020-03-19|EPI\_ISL\_418808|Original|hCoV-19^^Queensland|Human|Pathology Queensland|Public Health Virology Laboratory|Warrilow|Australia

>Spike|hCoV-19/Wales/PHWC-499ADD/2020|2020-12-05|EPI\_ISL\_727400|Original|hCoV-19^^Wales|Human|Originating lab|COVID-19 Genomics UK (COG-UK) Consortium|Moore|United Kingdom

>Spike|hCoV-19/Belgium/ULG-10577/2020|2020-10-23|EPI\_ISL\_626333|Original|hCoV-19^^Li\u00e8ge|Human|Department of Clinical Microbiology|GIGA Medical Genomics|Durkin|Belgium

>Spike|hCoV-19/India/MH-NIV-77268/2020|2020-06-23|EPI\_ISL\_541742|Original|hCoV-19^^Maharashtra|Human|National Institute of Virology|National Institute of Virology|Potdar|India

>Spike|hCoV-19/USA/TX-HMH-MCoV-11179/2020|2020-09-01|EPI\_ISL\_789725|Original|hCoV-19^^Texas|Human|Houston Methodist Hospital|Houston Methodist Hospital|Long|USA

>Spike|hCoV-19/USA/CT-Yale-065/2020|2020-04-02|EPI\_ISL\_428392|Original|hCoV-19^^Connecticut|Human|Yale COVID-19 Biorepository|Grubaugh Lab - Yale School of Public Health|Grubaugh|USA

>Spike|hCoV-19/England/CAMB-1AB25B/2020|2020-04-20|EPI\_ISL\_470201|Original|hCoV-19^^England|Human|Department of Pathology|Wellcome Sanger Institute for the COVID-19 Genomics UK (COG-UK) consortium|Davies|United Kingdom

>Spike|hCoV-19/England/MILK-A8EAC6/2020|2020-10-18|EPI\_ISL\_652112|Original|hCoV-19^^England|Human|Northumbria University / South Tees Hospitals NHS Foundation Trust / North Cumbria Integrated Care NHS Foundation Trust / North Tees and Hartlepool NHS Foundation Trust / Newcastle Hospitals NHS Foundation Trust|COVID-19 Genomics UK (COG-UK) Consortium|Bashton|United Kingdom

>Spike|hCoV-19/Wales/PHWC-16CFC8/2020|2020-09-18|EPI\_ISL\_572782|Original|hCoV-19^^Wales|Human|Wales Specialist Virology Centre Sequencing lab|COVID-19 Genomics UK (COG-UK) Consortium|Moore|United Kingdom

>Spike|hCoV-19/Denmark/DCGC-11231/2020|2020-11-02|EPI\_ISL\_670781|Original|hCoV-19^^Sjaelland|Human|Department of Virus and Microbiological Special Diagnostics|Albertsen Lab|Michaelsen|Denmark

>Spike|hCoV-19/USA/MI-UM-10035772246/2020|2020-09-02|EPI\_ISL\_583290|Original|hCoV-19^^Michigan|Human|University of Michigan Clinical Microbiology Laboratory|Lauring Lab|Valesano|USA

>Spike|hCoV-19/England/ALDP-9550F4/2020|2020-06-12|EPI\_ISL\_553544|Original|hCoV-19^^England|Human|Lighthouse Lab in Alderley Park|Wellcome Sanger Institute for the COVID-19 Genomics UK (COG-UK) consortium|Davies|United Kingdom

>Spike|hCoV-19/England/ALDP-9828F6/2020|2020-08-10|EPI\_ISL\_552618|Original|hCoV-19^^England|Human|Lighthouse Lab in Alderley Park|Wellcome Sanger Institute for the COVID-19 Genomics UK (COG-UK) consortium|Davies|United Kingdom

>Spike|hCoV-19/Japan/PG-3477/2020|2020-07-00|EPI\_ISL\_691587|Original|hCoV-19^^Japan|Human|Pathogen Genomics Center|Pathogen Genomics Center|Sekizuka|Japan

>Spike|hCoV-19/Denmark/DCGC-15018/2020|2020-11-23|EPI\_ISL\_713581|Original|hCoV-19^^Syddanmark|Human|Department of Virus and Microbiological Special Diagnostics|Albertsen Lab|Michaelsen|Denmark

>Spike|hCoV-19/England/QEUA-96BC42/2020|2020-08-13|EPI\_ISL\_531397|Original|hCoV-19^^England|Human|Lighthouse Lab in Glasgow|Wellcome Sanger Institute for the COVID-19 Genomics UK (COG-UK) consortium|Davies|United Kingdom

>Spike|hCoV-19/Slovenia/V0-1288/2020|2020-03-29|EPI\_ISL\_635269|Original|hCoV-19^^Slovenia|Human|Institute of Microbiology and Immunology|Institute of Microbiology and Immunology|Zakotnik|Slovenia

>Spike|hCoV-19/USA/UT-UPHL-2012388417/2020|2020-08-15|EPI\_ISL\_746278|Original|hCoV-19^^Utah|Human|Ginkgo Bioworks Clinical Laboratory|Utah Public Health Laboratory|Young|USA

>Spike|hCoV-19/Northern Ireland/QEUA-95FA29/2020|2020-08-06|EPI\_ISL\_532422|Original|hCoV-19^^Northern Ireland|Human|Lighthouse Lab in Glasgow|Wellcome Sanger Institute for the COVID-19 Genomics UK (COG-UK) consortium|Davies|United Kingdom

>Spike|hCoV-19/Luxembourg/LNS3865386/2020|2020-11-25|EPI\_ISL\_740385|Original|hCoV-19^^Luxembourg|Human|Laboratoire national de sant\u00e9|Laboratoire national de sant\u00e9|Wienecke-Baldacchino|Luxembourg

>Spike|hCoV-19/England/MILK-A7CADA/2020|2020-10-15|EPI\_ISL\_606352|Original|hCoV-19^^England|Human|Lighthouse Lab in Milton Keynes|Wellcome Sanger Institute for the COVID-19 Genomics UK (COG-UK) consortium|Davies|United Kingdom

>Spike|hCoV-19/USA/MI-MDHHS-SC20403/2020|2020-04-30|EPI\_ISL\_452277|Original|hCoV-19^^Michigan|Human|Michigan Department of Health and Human Services|Michigan Department of Health and Human Services|Blankenship|USA

>Spike|hCoV-19/England/QEUA-B2F7FC/2020|2020-11-04|EPI\_ISL\_646312|Original|hCoV-19^^England|Human|Lighthouse Lab in Glasgow|Wellcome Sanger Institute for the COVID-19 Genomics UK (COG-UK) Consortium|Davies|United Kingdom

>Spike|hCoV-19/USA/NY-NYUMC392/2020|2020-04-13|EPI\_ISL\_430419|Original|hCoV-19^^New York|Human|NYU Langone Health|Departments of Pathology and Medicine|Maurano|USA

>Spike|hCoV-19/Germany/BY-MVP-V2011675/2020|2020-03-16|EPI\_ISL\_420907|Original|hCoV-19^^Bavaria|Human|Max von Pettenkofer Institute|Laboratory for Functional Genome Analysis|Graf|Germany

>Spike|hCoV-19/Denmark/DCGC-14048/2020|2020-11-30|EPI\_ISL\_711235|Original|hCoV-19^^Midtjylland|Human|Department of Virus and Microbiological Special Diagnostics|Albertsen Lab|Michaelsen|Denmark

>Spike|hCoV-19/England/QEUA-9F821B/2020|2020-09-27|EPI\_ISL\_588955|Original|hCoV-19^^England|Human|Lighthouse Lab in Glasgow|Wellcome Sanger Institute for the COVID-19 Genomics UK (COG-UK) consortium|Davies|United Kingdom

>Spike|hCoV-19/USA/FL-BPHL-1364/2020|2020-07-17|EPI\_ISL\_541301|Original|hCoV-19^^Florida|Human|Florida Bureau of Public Health Laboratories|Florida Bureau of Public Health Laboratories|Blanton|USA

>Spike|hCoV-19/England/NOTT-10E432/2020|2020-03-22|EPI\_ISL\_425545|Original|hCoV-19^^England|Human|Queens Medical Centre|COVID-19 Genomics UK (COG-UK) Consortium|Loose|United Kingdom

>Spike|hCoV-19/Netherlands/ZH-RIVM-20737/2020|2020-12-23|EPI\_ISL\_790803|Original|hCoV-19^^Zuid-holland|Human|Dutch COVID-19 response team|National Institute for Public Health and the Environment (RIVM)|Meijer|Netherlands

>Spike|hCoV-19/USA/CA-CZB-14643/2020|2020-11-16|EPI\_ISL\_739568|Original|hCoV-19^^California|Human|Orange County Public Health Lab|Chan-Zuckerberg Biohub|Kamm|USA

>Spike|hCoV-19/England/CAMC-B5259C/2020|2020-11-08|EPI\_ISL\_656854|Original|hCoV-19^^England|Human|Lighthouse Lab in Cambridge|Wellcome Sanger Institute for the COVID-19 Genomics UK (COG-UK) Consortium|Davies|United Kingdom

>Spike|hCoV-19/Denmark/DCGC-6488/2020|2020-10-05|EPI\_ISL\_620388|Original|hCoV-19^^Midtjylland|Human|Department of Virus and Microbiological Special Diagnostics|Albertsen lab|Michaelsen|Denmark

>Spike|hCoV-19/Japan/PG-0074/2020|2020-02-27|EPI\_ISL\_479828|Original|hCoV-19^^Hokkaido|Human|Sapporo City Institute of Public Health|Pathogen Genomics Center|Sekizuka|Japan

>Spike|hCoV-19/England/QEUA-AD13D8/2020|2020-10-27|EPI\_ISL\_633923|Original|hCoV-19^^England|Human|Lighthouse Lab in Glasgow|Wellcome Sanger Institute for the COVID-19 Genomics UK (COG-UK) consortium|Davies|United Kingdom

>Spike|hCoV-19/Denmark/DCGC-4598/2020|2020-09-21|EPI\_ISL\_621267|Original|hCoV-19^^Nordjylland|Human|Department of Virus and Microbiological Special Diagnostics|Albertsen lab|Michaelsen|Denmark

>Spike|hCoV-19/England/ALDP-AA09C1/2020|2020-10-22|EPI\_ISL\_630920|Original|hCoV-19^^England|Human|Lighthouse Lab in Alderley Park|Wellcome Sanger Institute for the COVID-19 Genomics UK (COG-UK) consortium|Davies|United Kingdom

>Spike|hCoV-19/USA/WI-GMF-24108/2020|2020-10-05|EPI\_ISL\_660891|Original|hCoV-19^^Wisconsin|Human|Gundersen Molecular Diagnostics Laboratory|Kabara Cancer Research Institute|Kenny|USA

>Spike|hCoV-19/England/ALDP-9EDFC7/2020|2020-05-06|EPI\_ISL\_589455|Original|hCoV-19^^England|Human|Lighthouse Lab in Alderley Park|Wellcome Sanger Institute for the COVID-19 Genomics UK (COG-UK) consortium|Davies|United Kingdom

>Spike|hCoV-19/England/CAMC-A64ED9/2020|2020-10-11|EPI\_ISL\_608666|Original|hCoV-19^^England|Human|Lighthouse Lab in Cambridge|Wellcome Sanger Institute for the COVID-19 Genomics UK (COG-UK) consortium|Davies|United Kingdom

>Spike|hCoV-19/Denmark/DCGC-2057/2020|2020-07-13|EPI\_ISL\_618292|Original|hCoV-19^^Hovedstaden|Human|Department of Virus and Microbiological Special Diagnostics|Albertsen lab|Michaelsen|Denmark

>Spike|hCoV-19/Australia/VIC12368/2020|2020-07-28|EPI\_ISL\_591969|Original|hCoV-19^^Victoria|Human|Microbiological Diagnostic Unit - Public Health Laboratory (MDU-PHL)|MDU-PHL|Schultz|Australia

>Spike|hCoV-19/Spain/CL-IBV-97006322/2020|2020-05-08|EPI\_ISL\_537681|Original|hCoV-19^^Castilla y Leon|Human|Universidad de Le\u00f3n|SeqCOVID-SPAIN consortium/IBV (CSIC)|Comas|Spain

>Spike|hCoV-19/England/SHEF-C291E/2020|2020-04-08|EPI\_ISL\_441932|Original|hCoV-19^^England|Human|Virology Department|COVID-19 Genomics UK (COG-UK) Consortium|de Silva|United Kingdom

>Spike|hCoV-19/USA/AZ-TG648701/2020|2020-04-13|EPI\_ISL\_695897|Original|hCoV-19^^Arizona|Human|Sonora Quest Laboratories|TGen North|French|USA

>Spike|hCoV-19/Senegal/139/2020|2020-03-13|EPI\_ISL\_418217|Original|hCoV-19^^Thies|Human|Institut Pasteur Dakar|Institut Pasteur de Dakar|Dia|Senegal

>Spike|hCoV-19/DRC/16133/2020|2020-06-03|EPI\_ISL\_591083|Original|hCoV-19^^Kinshasa|Human|Viral Respiratory Lab|Pathogen Sequencing Lab|Lokilo|Democratic Republic of the Congo

>Spike|hCoV-19/England/MILK-ACF267/2020|2020-10-22|EPI\_ISL\_629740|Original|hCoV-19^^England|Human|Lighthouse Lab in Milton Keynes|Wellcome Sanger Institute for the COVID-19 Genomics UK (COG-UK) consortium|Davies|United Kingdom

>Spike|hCoV-19/Scotland/EDB3373/2020|2020-04-08|EPI\_ISL\_487700|Original|hCoV-19^^Scotland|Human|Virology Department|Wellcome Sanger Institute for the COVID-19 Genomics UK (COG-UK) consortium|Davies|United Kingdom

>Spike|hCoV-19/Japan/PG-2064/2020|2020-04-00|EPI\_ISL\_685669|Original|hCoV-19^^Japan|Human|Tokyo Metropolitan Institute of Public Health|Pathogen Genomics Center|Sekizuka|Japan

>Spike|hCoV-19/England/CAMC-B9998E/2020|2020-11-15|EPI\_ISL\_673830|Original|hCoV-19^^England|Human|Lighthouse Lab in Cambridge|Wellcome Sanger Institute for the COVID-19 Genomics UK (COG-UK) Consortium|Davies|United Kingdom

>Spike|hCoV-19/USA/AZ-TG640858/2020|2020-04-27|EPI\_ISL\_695798|Original|hCoV-19^^Arizona|Human|Sonora Quest Laboratories|TGen North|French|USA

>Spike|hCoV-19/England/MILK-A7DCC4/2020|2020-10-13|EPI\_ISL\_637861|Original|hCoV-19^^England|Human|Oxford Viromics|COVID-19 Genomics UK (COG-UK) Consortium|Golubchik|United Kingdom

>Spike|hCoV-19/USA/WA-S2310/2020|2020-06-11|EPI\_ISL\_496942|Original|hCoV-19^^Washington|Human|Washington State Department of Health|Seattle Flu Study|Lee|USA

>Spike|hCoV-19/South Korea/KCDC2541/2020|2020-06-21|EPI\_ISL\_514944|Original|hCoV-19^^South Korea|Human|Division of Viral Diseases|Division of Viral Diseases|Kim|South Korea

>Spike|hCoV-19/Denmark/ALAB-SSI263/2020|2020-03-10|EPI\_ISL\_429425|Original|hCoV-19^^Denmark|Human|Department of Virus and Microbiological Special Diagnostics|Albertsen lab|Kirkegaard|Denmark

>Spike|hCoV-19/England/MILK-9AACCf/2020|2020-09-01|EPI\_ISL\_550915|Original|hCoV-19^^England|Human|Lighthouse Lab in Milton Keynes|Wellcome Sanger Institute for the COVID-19 Genomics UK (COG-UK) consortium|Davies|United Kingdom

>Spike|hCoV-19/England/CAMB-1B7AAF/2020|2020-10-20|EPI\_ISL\_637433|Original|hCoV-19^^England|Human|Department of Pathology|COVID-19 Genomics UK (COG-UK) Consortium|Goodfellow|United Kingdom

>Spike|hCoV-19/USA/TX-DSHS-1655/2020|2020-06-24|EPI\_ISL\_710087|Original|hCoV-19^^Texas|Human|Texas Department of State Health Services|Texas Department of State Health Services|Rahman|USA

>Spike|hCoV-19/England/QEuh-9DC68A/2020|2020-09-21|EPI\_ISL\_580899|Original|hCoV-19^^England|Human|Lighthouse Lab in Glasgow|Wellcome Sanger Institute for the COVID-19 Genomics UK (COG-UK) consortium|Davies|United Kingdom

>Spike|hCoV-19/England/MILK-9A5699/2020|2020-09-03|EPI\_ISL\_550042|Original|hCoV-19^^England|Human|Lighthouse Lab in Milton Keynes|Wellcome Sanger Institute for the COVID-19 Genomics UK (COG-UK) consortium|Davies|United Kingdom

>Spike|hCoV-19/Wales/PHWC-165DC5/2020|2020-05-25|EPI\_ISL\_490802|Original|hCoV-19^^Wales|Human|Wales Specialist Virology Centre Sequencing lab|COVID-19 Genomics UK (COG-UK) Consortium|Moore|United Kingdom

>Spike|hCoV-19/Germany/HH-hpi-p2051/2020|2020-03-21|EPI\_ISL\_776340|Original|hCoV-19^^Hamburg|Human|University Medical Center Hamburg Eppendorf|Heinrich Pette Institute|Robitaille|Germany

>Spike|hCoV-19/USA/TX-HMH-4669/2020|2020-06-22|EPI\_ISL\_544242|Original|hCoV-19^^Texas|Human|Houston Methodist Hospital|Houston Methodist Hospital|Long|USA

>Spike|hCoV-19/Japan/PG-6726/2020|2020-08-00|EPI\_ISL\_687837|Original|hCoV-19^^Japan|Human|Pathogen Genomics Center|Pathogen Genomics Center|Sekizuka|Japan

>Spike|hCoV-19/Denmark/DCGC-16610/2020|2020-11-16|EPI\_ISL\_714376|Original|hCoV-19^^Hovedstaden|Human|Department of Virus and Microbiological Special Diagnostics|Albertsen Lab|Michaelsen|Denmark

>Spike|hCoV-19/England/ALDP-94F50D/2020|2020-06-18|EPI\_ISL\_555905|Original|hCoV-19^^England|Human|Lighthouse Lab in Alderley Park|Wellcome Sanger Institute for the COVID-19 Genomics UK (COG-UK) consortium|Davies|United Kingdom

>Spike|hCoV-19/USA/MA-MGH-00054/2020|2020-03-25|EPI\_ISL\_460143|Original|hCoV-19^^Massachusetts|Human|Massachusetts General Hospital|Infectious Disease Program|Lemieux|USA

>Spike|hCoV-19/USA/LA-EVTL1021/2020|2020-08-25|EPI\_ISL\_653712|Original|hCoV-19^^Louisiana|Human|LSUHS Emerging Viral Threat Laboratory|Microbial Genome Sequencing Center|Kamil|USA

>Spike|hCoV-19/Russia/OMS-ORINFI-4895S/2020|2020-05-03|EPI\_ISL\_569857|Original|hCoV-19^^Omsk|Human|Omsk Research Institute of Natural Focal Infections|WHO National Influenza Centre Russian Federation|Komissarov|Russia

>Spike|hCoV-19/England/QEuh-A4CFB6/2020|2020-10-05|EPI\_ISL\_596075|Original|hCoV-19^^England|Human|Quadram Institute Bioscience|COVID-19 Genomics UK (COG-UK) Consortium|Alikhan|United Kingdom

>Spike|hCoV-19/Canada/ON-S1834/2020|2020-11-24|EPI\_ISL\_729298|Original|hCoV-19^^Ontario|Human|Toronto Invasive Bacterial Diseases Network|McMaster University|McArthur|Canada

>Spike|hCoV-19/Latvia/223/2020|2020-09-14|EPI\_ISL\_770057|Original|hCoV-19^^Latvia|Human|E. Gulbja Laboratorija|Latvian Biomedical Research and Study Centre|Zrelavs|Latvia

>Spike|hCoV-19/USA/TX-HMH-2732/2020|2020-06-05|EPI\_ISL\_545511|Original|hCoV-19^^Texas|Human|Houston Methodist Hospital|Houston Methodist Hospital|Long|USA

>Spike|hCoV-19/England/ALDP-AA2604/2020|2020-10-22|EPI\_ISL\_630897|Original|hCoV-19^^England|Human|Lighthouse Lab in Alderley Park|Wellcome Sanger Institute for the COVID-19 Genomics UK (COG-UK) consortium|Davies|United Kingdom

>Spike|hCoV-19/USA/TX-HMH-MCoV-8543/2020|2020-07-01|EPI\_ISL\_780619|Original|hCoV-19^^Texas|Human|Houston Methodist Hospital|Houston Methodist Hospital|Long|USA

>Spike|hCoV-19/Switzerland/GE-ETHZ-310472/2020|2020-10-07|EPI\_ISL\_603543|Original|hCoV-19^^Geneva|Human|Viollier AG|Department of Biosystems Science and Engineering|Nadeau|Switzerland

>Spike|hCoV-19/USA/WI-UW-2497/2020|2020-12-30|EPI\_ISL\_779329|Original|hCoV-19^^Wisconsin|Human|University of Wisconsin-Madison AIDS Vaccine Research Laboratories|University of Wisconsin-Madison AIDS Vaccine Research Laboratories|Moreno|USA

>Spike|hCoV-19/England/MILK-B94947/2020|2020-11-14|EPI\_ISL\_673688|Original|hCoV-19^^England|Human|Lighthouse Lab in Milton Keynes|Wellcome Sanger Institute for the COVID-19 Genomics UK (COG-UK) Consortium|Davies|United Kingdom

>Spike|hCoV-19/Australia/NSW942/2020|2020-08-26|EPI\_ISL\_545014|Original|hCoV-19^^New South Wales|Human|South Eastern Area Laboratory Services (SEALS)|NSW Health Pathology - Institute of Clinical Pathology and Medical Research; Westmead Hospital; University of Sydney|Gall|Australia

>Spike|hCoV-19/USA/CA-SEARCH-5343/2020|2020-12-09|EPI\_ISL\_755160|Original|hCoV-19^^California|Human|UCSD EXCITE lab|Andersen lab at Scripps Research|Gangavarapu|USA

>Spike|hCoV-19/England/LOND-D5453/2020|2020-04-15|EPI\_ISL\_444222|Original|hCoV-19^^England|Human|University College London|COVID-19 Genomics UK (COG-UK) Consortium|Roy|United Kingdom

>Spike|hCoV-19/Wales/PHWC-48C4C0/2020|2020-11-08|EPI\_ISL\_666434|Original|hCoV-19^^Wales|Human|Wales Specialist Virology Centre Sequencing lab|COVID-19 Genomics UK (COG-UK) Consortium|Moore|United Kingdom

>Spike|hCoV-19/Denmark/DCGC-1445/2020|2020-04-27|EPI\_ISL\_622465|Original|hCoV-19^^Hovedstaden|Human|Department of Virus and Microbiological Special Diagnostics|Albertsen lab|Michaelsen|Denmark

>Spike|hCoV-19/England/SHEF-CE6A2/2020|2020-10-02|EPI\_ISL\_585069|Original|hCoV-19^^England|Human|Virology Department|COVID-19 Genomics UK (COG-UK) Consortium|de Silva|United Kingdom

>Spike|hCoV-19/England/NORW-EF984/2020|2020-09-22|EPI\_ISL\_572486|Original|hCoV-19^^England|Human|Quadram Institute Bioscience|COVID-19 Genomics UK (COG-UK) Consortium|Alikhan|United Kingdom

>Spike|hCoV-19/England/CAMC-9D6EE2/2020|2020-09-20|EPI\_ISL\_584335|Original|hCoV-19^^England|Human|Virology Department|COVID-19 Genomics UK (COG-UK) Consortium|de Silva|United Kingdom

>Spike|hCoV-19/England/QEUA-A31242/2020|2020-10-05|EPI\_ISL\_595872|Original|hCoV-19^^England|Human|Quadram Institute Bioscience|COVID-19 Genomics UK (COG-UK) Consortium|Alikhan|United Kingdom

>Spike|hCoV-19/Denmark/DCGC-3604/2020|2020-08-31|EPI\_ISL\_616247|Original|hCoV-19^^Syddanmark|Human|Department of Virus and Microbiological Special Diagnostics|Albertsen lab|Michaelsen|Denmark

>Spike|hCoV-19/USA/MI-QDX-932/2020|2020-03-22|EPI\_ISL\_571636|Original|hCoV-19^^Michigan|Human|Quest Diagnostics|Quest Diagnostics|Kagan|USA

>Spike|hCoV-19/Scotland/QEUA-A4BBFF/2020|2020-10-08|EPI\_ISL\_628516|Original|hCoV-19^^Scotland|Human|Oxford Viromics|COVID-19 Genomics UK (COG-UK) Consortium|Golubchik|United Kingdom

>Spike|hCoV-19/Kenya/C8288/2020|2020-05-19|EPI\_ISL\_568856|Original|hCoV-19^^Mombasa|Human|KEMRI-Wellcome Trust Research Programme|KEMRI-CGMR-C Kilifi|KEMRI-Wellcome Trust Research Programme|KEMRI-CGMR-C Kilifi|Githinji|Kenya



>Spike|hCoV-19/Wales/PHWC-266D5/2020|2020-03-27|EPI\_ISL\_422158|Original|hCoV-19^^Wales|Human|Wales Specialist Virology Centre|Public Health Wales Microbiology Cardiff|Moore|United Kingdom

>Spike|hCoV-19/England/CAMB-7CB3B/2020|2020-04-06|EPI\_ISL\_442082|Original|hCoV-19^^England|Human|Department of Pathology|Wellcome Sanger Institute for the COVID-19 Genomics UK (COG-UK) consortium|Amato|United Kingdom

>Spike|hCoV-19/England/PORT-2D3CC4/2020|2020-04-21|EPI\_ISL\_499321|Original|hCoV-19^^England|Human|Centre for Enzyme Innovation|COVID-19 Genomics UK (COG-UK) Consortium|Robson|United Kingdom

>Spike|hCoV-19/England/ALDP-A870E9/2020|2020-10-17|EPI\_ISL\_606056|Original|hCoV-19^^England|Human|Lighthouse Lab in Alderley Park|Wellcome Sanger Institute for the COVID-19 Genomics UK (COG-UK) consortium|Davies|United Kingdom

>Spike|hCoV-19/USA/NY-NYCPHL-000412/2020|2020-03-27|EPI\_ISL\_631896|Original|hCoV-19^^New York|Human|Jamaica Hospital Medical Center|New York City Public Health Laboratory|Wang|USA

>Spike|hCoV-19/Luxembourg/LNS7593998/2020|2020-10-19|EPI\_ISL\_744595|Original|hCoV-19^^Luxembourg|Human|Laboratoire national de sant\u00e9|Laboratoire national de sant\u00e9|Wienecke-Baldacchino|Luxembourg

>Spike|hCoV-19/England/ALDP-B25064/2020|2020-11-04|EPI\_ISL\_646513|Original|hCoV-19^^England|Human|Lighthouse Lab in Alderley Park|Wellcome Sanger Institute for the COVID-19 Genomics UK (COG-UK) Consortium|Davies|United Kingdom

>Spike|hCoV-19/England/QEUH-AF4946/2020|2020-10-30|EPI\_ISL\_663121|Original|hCoV-19^^England|Human|Lighthouse Lab in Glasgow|Wellcome Sanger Institute for the COVID-19 Genomics UK (COG-UK) Consortium|Davies|United Kingdom

>Spike|hCoV-19/England/CAMC-AEB1A4/2020|2020-10-26|EPI\_ISL\_633223|Original|hCoV-19^^England|Human|Lighthouse Lab in Cambridge|Wellcome Sanger Institute for the COVID-19 Genomics UK (COG-UK) consortium|Davies|United Kingdom

>Spike|hCoV-19/England/20139068504/2020|2020-03-29|EPI\_ISL\_423357|Original|hCoV-19^^England|Human|Respiratory Virus Unit|Respiratory Virus Unit|Platt|United Kingdom

>Spike|hCoV-19/Australia/VIC3288/2020|2020-07-08|EPI\_ISL\_520967|Original|hCoV-19^^Victoria|Human|Microbiological Diagnostic Unit - Public Health Laboratory (MDU-PHL)|MDU-PHL|Schultz|Australia

>Spike|hCoV-19/India/MH-NIV-229715/2020|2020-09-29|EPI\_ISL\_577698|Original|hCoV-19^^Maharashtra|Human|NIV Influenza|NIV Influenza|Potdar|India

>Spike|hCoV-19/England/ALDP-9E9936/2020|2020-09-24|EPI\_ISL\_584266|Original|hCoV-19^^England|Human|Virology Department|COVID-19 Genomics UK (COG-UK) Consortium|de Silva|United Kingdom

>Spike|hCoV-19/Spain/EX-IBV-004991/2020|2020-05-08|EPI\_ISL\_510306|Original|hCoV-19^^Extremadura|Human|Hospital San Pedro de Alc\u00e1ntara (C\u00e9rceres)|SeqCOVID-SPAIN consortium|IBV (CSIC)|Comas|Spain

>Spike|hCoV-19/Singapore/390/2020|2020-06-06|EPI\_ISL\_469139|Original|hCoV-19^^Singapore|Human|National Public Health Laboratory|National Public Health Laboratory|Mak|Singapore

>Spike|hCoV-19/Belgium/ULG-10285/2020|2020-07-23|EPI\_ISL\_540452|Original|hCoV-19^^Li\u00e8ge|Human|University of Li\u00e8ge COVID-19 testing center|GIGA Medical Genomics|Durkin|Belgium

>Spike|hCoV-19/Ecuador/UEES-7352/2020|2020-00-00|EPI\_ISL\_671985|Original|hCoV-19^^Ecuador|Human|UEES BioLab|Omics Sciences Laboratory|Fernandez Cadena|Ecuador

>Spike|hCoV-19/England/MILK-97114A/2020|2020-08-17|EPI\_ISL\_553216|Original|hCoV-19^^England|Human|Lighthouse Lab in Milton Keynes|Wellcome Sanger Institute for the COVID-19 Genomics UK (COG-UK) consortium|Davies|United Kingdom

>Spike|hCoV-19/England/CAMC-B325B0/2020|2020-11-05|EPI\_ISL\_659237|Original|hCoV-19^^England|Human|Lighthouse Lab in Cambridge|Wellcome Sanger Institute for the COVID-19 Genomics UK (COG-UK) Consortium|Davies|United Kingdom

>Spike|hCoV-19/England/OXON-B2A4B/2020|2020-04-06|EPI\_ISL\_534788|Original|hCoV-19^^England|Human|Oxford Viromics|COVID-19 Genomics UK (COG-UK) Consortium|Golubchik|United Kingdom

>Spike|hCoV-19/Australia/VIC6038/2020|2020-07-24|EPI\_ISL\_518079|Original|hCoV-19^^Victoria|Human|Microbiological Diagnostic Unit - Public Health Laboratory (MDU-PHL)|MDU-PHL|Schultz|Australia

>Spike|hCoV-19/USA/FL-BPHL-2191/2020|2020-07-21|EPI\_ISL\_653344|Original|hCoV-19^^Florida|Human|Florida Bureau of Public Health Laboratories|Florida Bureau of Public Health Laboratories|Blanton|USA

>Spike|hCoV-19/England/LOND-DA588/2020|2020-11-16|EPI\_ISL\_724641|Original|hCoV-19^^England|Human|University College London|COVID-19 Genomics UK (COG-UK) Consortium|Roy|United Kingdom

>Spike|hCoV-19/England/QEUEH-96DCE6/2020|2020-08-20|EPI\_ISL\_530724|Original|hCoV-19^^England|Human|Lighthouse Lab in Glasgow|Wellcome Sanger Institute for the COVID-19 Genomics UK (COG-UK) consortium|Davies|United Kingdom

>Spike|hCoV-19/Wales/PHWC-342B2/2020|2020-04-20|EPI\_ISL\_446897|Original|hCoV-19^^Wales|Human|Wales Specialist Virology Centre|Public Health Wales Microbiology Cardiff|Moore|United Kingdom

>Spike|hCoV-19/USA/CA-ALSR-3337/2020|2020-09-17|EPI\_ISL\_635969|Original|hCoV-19^^California|Human|San Diego County Public Health Laboratory|Andersen lab at Scripps Research|Gangavarapu|USA

>Spike|hCoV-19/USA/CA-IGI-0235/2020|2020-07-02|EPI\_ISL\_569904|Original|hCoV-19^^California|Human|Innovative Genomics Institute|Innovative Genomics Institute|Wyman|USA

>Spike|hCoV-19/Denmark/DCGC-18032/2020|2020-12-14|EPI\_ISL\_749714|Original|hCoV-19^^Syddanmark|Human|Department of Virus and Microbiological Special Diagnostics|Albertsen Lab|Michaelsen|Denmark

>Spike|hCoV-19/Wales/PHWC-16E737/2020|2020-10-01|EPI\_ISL\_585762|Original|hCoV-19^^Wales|Human|Wales Specialist Virology Centre Sequencing lab|COVID-19 Genomics UK (COG-UK) Consortium|Moore|United Kingdom

>Spike|hCoV-19/Chile/RM-127204/2020|2020-07-17|EPI\_ISL\_746597|Original|hCoV-19^^Region Metropolitana de Santiago|Human|Genetica Molecular and Subdepartamento de Virologia ISP Chile|Instituto de Salud Publica de Chile|Tognarelli|Chile

>Spike|hCoV-19/Wales/PHWC-494656/2020|2020-11-20|EPI\_ISL\_726148|Original|hCoV-19^^Wales|Human|Originating lab|COVID-19 Genomics UK (COG-UK) Consortium|Moore|United Kingdom

>Spike|hCoV-19/Luxembourg/LNS7948422/2020|2020-10-19|EPI\_ISL\_744660|Original|hCoV-19^^Luxembourg|Human|Laboratoire national de sant\u00e9|Laboratoire national de sant\u00e9|Wienecke-Baldacchino|Luxembourg

>Spike|hCoV-19/USA/WA-S619/2020|2020-04-26|EPI\_ISL\_438172|Original|hCoV-19^^Washington|Human|Seattle Flu Study|Seattle Flu Study|Bedford|USA

>Spike|hCoV-19/England/QEUEH-B6801A/2020|2020-11-11|EPI\_ISL\_662188|Original|hCoV-19^^England|Human|Lighthouse Lab in Glasgow|Wellcome Sanger Institute for the COVID-19 Genomics UK (COG-UK) Consortium|Davies|United Kingdom

>Spike|hCoV-19/USA/TX-HMH-4214/2020|2020-06-19|EPI\_ISL\_543444|Original|hCoV-19^^Texas|Human|Houston Methodist Hospital|Houston Methodist Hospital|Long|USA

>Spike|hCoV-19/Denmark/DCGC-17138/2020|2020-12-14|EPI\_ISL\_750780|Original|hCoV-19^^Midtjylland|Human|Department of Virus and Microbiological Special Diagnostics|Albertsen Lab|Michaelsen|Denmark

>Spike|hCoV-19/Israel/CVL-45199/2020|2020-12-03|EPI\_ISL\_745039|Original|hCoV-19^^Tel Aviv|Human|Israel Central Virology laboratory|Israel Central Virology laboratory|Zuckerman|Israel

>Spike|hCoV-19/England/CAMC-A58E50/2020|2020-10-09|EPI\_ISL\_597061|Original|hCoV-19^^England|Human|Lighthouse Lab in Cambridge|Wellcome Sanger Institute for the COVID-19 Genomics UK (COG-UK) consortium|Davies|United Kingdom

>Spike|hCoV-19/Scotland/EDB8483/2020|2020-10-18|EPI\_ISL\_651959|Original|hCoV-19^^Scotland|Human|Virology Department|COVID-19 Genomics UK (COG-UK) Consortium|McHugh|United Kingdom

>Spike|hCoV-19/Luxembourg/LNS7510950/2020|2020-11-20|EPI\_ISL\_744580|Original|hCoV-19^^Luxembourg|Human|Laboratoire national de sant\u00e9|Laboratoire national de sant\u00e9|Wienecke-Baldacchino|Luxembourg

>Spike|hCoV-19/Denmark/DCGC-21900/2020|2020-12-21|EPI\_ISL\_758442|Original|hCoV-19^^Hovedstaden|Human|Department of Virus and Microbiological Special Diagnostics|Albertsen Lab|Michaelsen|Denmark

>Spike|hCoV-19/Denmark/DCGC-11775/2020|2020-10-26|EPI\_ISL\_671129|Original|hCoV-19^^Sjaelland|Human|Department of Virus and Microbiological Special Diagnostics|Albertsen Lab|Michaelsen|Denmark

>Spike|hCoV-19/Wales/PHWC-4A1771/2020|2020-12-10|EPI\_ISL\_743721|Original|hCoV-19^^Wales|Human|Wales Specialist Virology Centre Sequencing lab|COVID-19 Genomics UK (COG-UK) Consortium|Moore|United Kingdom

>Spike|hCoV-19/Australia/VIC6385/2020|2020-07-24|EPI\_ISL\_521177|Original|hCoV-19^^Victoria|Human|Microbiological Diagnostic Unit - Public Health Laboratory (MDU-PHL) |MDU-PHL|Schultz|Australia

>Spike|hCoV-19/England/LIVE-99EB7/2020|2020-04-14|EPI\_ISL\_439824|Original|hCoV-19^^England|Human|Liverpool Clinical Laboratories|COVID-19 Genomics UK (COG-UK) Consortium|Haldenby|United Kingdom

>Spike|hCoV-19/Scotland/EDB2354/2020|2020-04-22|EPI\_ISL\_491613|Original|hCoV-19^^Scotland|Human|Virology Department|Wellcome Sanger Institute for the COVID-19 Genomics UK (COG-UK) consortium|Davies|United Kingdom

>Spike|hCoV-19/Australia/VIC8642/2020|2020-08-18|EPI\_ISL\_565126|Original|hCoV-19^^Victoria|Human|Microbiological Diagnostic Unit - Public Health Laboratory (MDU-PHL) |MDU-PHL|Schultz|Australia

>Spike|hCoV-19/USA/UT-01979/2020|2020-04-16|EPI\_ISL\_452166|Original|hCoV-19^^Utah|Human|Utah Public Health Laboratory|Utah Public Health Laboratory|Young|USA

>Spike|hCoV-19/Denmark/DCGC-7447/2020|2020-10-12|EPI\_ISL\_619331|Original|hCoV-19^^Hovedstaden|Human|Department of Virus and Microbiological Special Diagnostics|Albertsen lab|Michaelsen|Denmark

>Spike|hCoV-19/Denmark/DCGC-16140/2020|2020-11-16|EPI\_ISL\_714134|Original|hCoV-19^^Sjaelland|Human|Department of Virus and Microbiological Special Diagnostics|Albertsen Lab|Michaelsen|Denmark

>Spike|hCoV-19/England/QEUH-9F6435/2020|2020-09-25|EPI\_ISL\_588919|Original|hCoV-19^^England|Human|Lighthouse Lab in Glasgow|Wellcome Sanger Institute for the COVID-19 Genomics UK (COG-UK) consortium|Davies|United Kingdom

>Spike|hCoV-19/Scotland/QEUH-A1EA61/2020|2020-10-01|EPI\_ISL\_598855|Original|hCoV-19^^Scotland|Human|Lighthouse Lab in Glasgow|Wellcome Sanger Institute for the COVID-19 Genomics UK (COG-UK) consortium|Davies|United Kingdom

>Spike|hCoV-19/England/LOND-DAD62/2020|2020-11-08|EPI\_ISL\_724707|Original|hCoV-19^^England|Human|University College London|COVID-19 Genomics UK (COG-UK) Consortium|Roy|United Kingdom

>Spike|hCoV-19/England/LIVE-9E30E/2020|2020-04-03|EPI\_ISL\_453287|Original|hCoV-19^^England|Human|Liverpool Clinical Laboratories|COVID-19 Genomics UK (COG-UK) Consortium|Haldenby|United Kingdom

>Spike|hCoV-19/Sweden/20-53269/2020|2020-10-26|EPI\_ISL\_648161|Original|hCoV-19^^Sweden|Human|Sundsvall|The Public Health Agency of Sweden|Svartstr\u00f6m|Sweden

>Spike|hCoV-19/Australia/VIC1345/2020|2020-04-14|EPI\_ISL\_430708|Original|hCoV-19^^Victoria|Human|Victorian Infectious Diseases Reference Laboratory (VIDRL) |Microbiological Diagnostic Unit Public Health Laboratory and Victorian Infectious Diseases Reference Laboratory|Schultz|Australia

>Spike|hCoV-19/England/20142023804/2020|2020-03-29|EPI\_ISL\_423449|Original|hCoV-19^^England|Human|Respiratory Virus Unit|Respiratory Virus Unit|Platt|United Kingdom

>Spike|hCoV-19/England/ALDP-95166F/2020|2020-06-10|EPI\_ISL\_554449|Original|hCoV-19^^England|Human|Lighthouse Lab in Alderley Park|Wellcome Sanger Institute for the COVID-19 Genomics UK (COG-UK) consortium|Davies|United Kingdom

>Spike|hCoV-19/Denmark/DCGC-13082/2020|2020-11-30|EPI\_ISL\_712571|Original|hCoV-19^^Hovedstaden|Human|Department of Virus and Microbiological Special Diagnostics|Albertsen Lab|Michaelsen|Denmark

>Spike|hCoV-19/Japan/PG-6513/2020|2020-07-00|EPI\_ISL\_687627|Original|hCoV-19^^Japan|Human|Pathogen Genomics Center|Pathogen Genomics Center|Sekizuka|Japan

>Spike|hCoV-19/Austria/CeMM0078/2020|2020-03-24|EPI\_ISL\_437946|Original|hCoV-19^^Innsbruck|Human|Universitaetsklinik f\u00fcr Innere Medizin II Innsbruck|Bergthaler laboratory|Bergthaler|Austria

>Spike|hCoV-19/Russia/OMS-ORINFI-1639S/2020|2020-06-17|EPI\_ISL\_569842|Original|hCoV-19^^Omsk|Human|Omsk Research Institute of Natural Focal Infections|WHO National Influenza Centre Russian Federation|Komissarov|Russia

>Spike|hCoV-19/Belgium/ULG-10464/2020|2020-08-31|EPI\_ISL\_581635|Original|hCoV-19^^Li\u00e8ge|Human|Department of Clinical Microbiology|GIGA Medical Genomics|Durkin|Belgium

>Spike|hCoV-19/USA/UT-08524/2020|2020-05-18|EPI\_ISL\_524287|Original|hCoV-19^^Utah|Human|Utah Public Health Laboratory|Utah Public Health Laboratory|Young|USA

>Spike|hCoV-19/England/ALDP-B1A712/2020|2020-11-01|EPI\_ISL\_645804|Original|hCoV-19^^England|Human|Lighthouse Lab in Alderley Park|Wellcome Sanger Institute for the COVID-19 Genomics UK (COG-UK) Consortium|Davies|United Kingdom

>Spike|hCoV-19/England/ALDP-B5E28A/2020|2020-11-08|EPI\_ISL\_723646|Original|hCoV-19^^England|Human|Oxford Viromics|COVID-19 Genomics UK (COG-UK) Consortium|Golubchik|United Kingdom

>Spike|hCoV-19/England/ALDP-B753B7/2020|2020-11-12|EPI\_ISL\_664922|Original|hCoV-19^^England|Human|Quadram Institute Bioscience|COVID-19 Genomics UK (COG-UK) Consortium|Alikhan|United Kingdom

>Spike|hCoV-19/England/ALDP-B75144/2020|2020-11-12|EPI\_ISL\_662135|Original|hCoV-19^^England|Human|Lighthouse Lab in Alderley Park|Wellcome Sanger Institute for the COVID-19 Genomics UK (COG-UK) Consortium|Davies|United Kingdom

>Spike|hCoV-19/England/ALDP-AA5021/2020|2020-10-21|EPI\_ISL\_630882|Original|hCoV-19^^England|Human|Lighthouse Lab in Alderley Park|Wellcome Sanger Institute for the COVID-19 Genomics UK (COG-UK) consortium|Davies|United Kingdom

>Spike|hCoV-19/USA/TX-DSHS-0144/2020|2020-05-28|EPI\_ISL\_522970|Original|hCoV-19^^Texas|Human|Texas Department of State Health Services|Texas Department of State Health Services|Rahman|USA

>Spike|hCoV-19/England/QEUEH-9B8EE6/2020|2020-09-07|EPI\_ISL\_549784|Original|hCoV-19^^England|Human|Lighthouse Lab in Glasgow|Wellcome Sanger Institute for the COVID-19 Genomics UK (COG-UK) Consortium|Davies|United Kingdom

>Spike|hCoV-19/England/QEUEH-95DD04/2020|2020-08-07|EPI\_ISL\_537095|Original|hCoV-19^^England|Human|Lighthouse Lab in Glasgow|Wellcome Sanger Institute for the COVID-19 Genomics UK (COG-UK) consortium|Davies|United Kingdom

>Spike|hCoV-19/Denmark/DCGC-6142/2020|2020-09-21|EPI\_ISL\_621176|Original|hCoV-19^^Midtjylland|Human|Department of Virus and Microbiological Special Diagnostics|Albertsen lab|Michaelsen|Denmark

>Spike|hCoV-19/Japan/PG-0386/2020|2020-03-04|EPI\_ISL\_480055|Original|hCoV-19^^Chubu|Human|Nagoya City Public Health Research Institute|Pathogen Genomics Center|Sekizuka|Japan

>Spike|hCoV-19/England/QEUEH-CC336E/2020|2020-12-21|EPI\_ISL\_760605|Original|hCoV-19^^England|Human|Lighthouse Lab in Glasgow|Wellcome Sanger Institute for the COVID-19 Genomics UK (COG-UK) Consortium|Davies|United Kingdom

>Spike|hCoV-19/Australia/VIC4585/2020|2020-07-12|EPI\_ISL\_518986|Original|hCoV-19^^Victoria|Human|Victorian Infectious Diseases Reference Laboratory (VIDRL)|VIDRL and MDU-PHL|Schultz|Australia

>Spike|hCoV-19/Vietnam/HCMC-35010/2020|2020-03-18|EPI\_ISL\_498186|unknown|hCoV-19^^Ho Chi Minh City|Human|OUCRU|OUCRU|Nguyen|Vietnam

>Spike|hCoV-19/Japan/PG-8172/2020|2020-07-00|EPI\_ISL\_687271|Original|hCoV-19^^Japan|Human|Pathogen Genomics Center|Pathogen Genomics Center|Sekizuka|Japan

>Spike|hCoV-19/India/MH-NIV-65813/2020|2020-06-16|EPI\_ISL\_479565|Original|hCoV-19^^Maharashtra|Human|NIV Influenza|NIV Influenza|Potdar|India

>Spike|hCoV-19/England/ALDP-A695FD/2020|2020-10-12|EPI\_ISL\_608998|Original|hCoV-19^^England|Human|Lighthouse Lab in Alderley Park|Wellcome Sanger Institute for the COVID-19 Genomics UK (COG-UK) consortium|Davies|United Kingdom

>Spike|hCoV-19/Canada/ON-UHTC\_0381/2020|2020-11-24|EPI\_ISL\_698103|Original|hCoV-19^^Ontario|Human|Unity Health Toronto|Ontario Institute for Cancer Research|de Borja|Canada

>Spike|hCoV-19/Scotland/QEUEH-96114D/2020|2020-08-05|EPI\_ISL\_532038|Original|hCoV-19^^Scotland|Human|NHSGGC West of Scotland Specialist Virology Centre / MRC - University of Glasgow Centre for Virus Research|Wellcome Sanger Institute for the COVID-19 Genomics UK (COG-UK) consortium|Davies|United Kingdom

>Spike|hCoV-19/England/ALDP-B1F56E/2020|2020-11-01|EPI\_ISL\_645957|Original|hCoV-19^^England|Human|Lighthouse Lab in Alderley Park|Wellcome Sanger Institute for the COVID-19 Genomics UK (COG-UK) Consortium|Davies|United Kingdom

>Spike|hCoV-19/England/ALDP-A5074E/2020|2020-10-07|EPI\_ISL\_597865|Original|hCoV-19^^England|Human|Lighthouse Lab in Alderley Park|Wellcome Sanger Institute for the COVID-19 Genomics UK (COG-UK) consortium|Davies|United Kingdom

>Spike|hCoV-19/USA/WA-S12/2020|2020-03-03|EPI\_ISL\_417065|Original|hCoV-19^^Washington|Human|Washington State Department of Health|Seattle Flu Study|Bedford|USA

>Spike|hCoV-19/Denmark/DCGC-8629/2020|2020-10-26|EPI\_ISL\_625782|Original|hCoV-19^^Nordjylland|Human|Department of Virus and Microbiological Special Diagnostics|Albertsen lab|Michaelsen|Denmark

>Spike|hCoV-19/India/UT-AR52/2020|2020-05-20|EPI\_ISL\_511918|Original|hCoV-19^^Uttarakhand|Human|All india institute of Medical Sciences Rishikesh|National Institute of Biomedical Genomics -\u00a0DBT's PAN-INDIA 1000 SARS--CoV-2 RNA Genome Sequencing Consortium|Maitra|India

>Spike|hCoV-19/England/NORW-E9C54/2020|2020-04-30|EPI\_ISL\_448357|Original|hCoV-19^^England|Human|Quadram Institute Bioscience|COVID-19 Genomics UK (COG-UK) Consortium|Alikhan|United Kingdom

>Spike|hCoV-19/Brazil/RJ-00465/2020|2020-07-06|EPI\_ISL\_717860|Original|hCoV-19^^Rio de Janeiro|Human|Laboratorio de Virologia Molecular / UFRJ|Bioinformatics Laboratory / LNCC|Almeida|Brazil

>Spike|hCoV-19/England/ALDP-B75EE3/2020|2020-11-12|EPI\_ISL\_723715|Original|hCoV-19^^England|Human|Oxford Viromics|COVID-19 Genomics UK (COG-UK) Consortium|Golubchik|United Kingdom

>Spike|hCoV-19/Ireland/LH-NVRL-20ILR11478/2020|2020-11-17|EPI\_ISL\_732505|Original|hCoV-19^^Louth|Human|National Virus Reference Laboratory|National Virus Reference Laboratory|Gonzalez|Ireland

>Spike|hCoV-19/USA/FL-BPHL-1693/2020|2020-08-17|EPI\_ISL\_594382|Original|hCoV-19^^Florida|Human|Florida Bureau of Public Health Laboratories|Florida Bureau of Public Health Laboratories|Blanton|USA

>Spike|hCoV-19/England/EXET-13A154/2020|2020-10-24|EPI\_ISL\_664423|Original|hCoV-19^^England|Human|University of Exeter|COVID-19 Genomics UK (COG-UK) Consortium|Temperton|United Kingdom

>Spike|hCoV-19/Australia/VIC15049/2020|2020-07-29|EPI\_ISL\_593123|Original|hCoV-19^^Victoria|Human|Microbiological Diagnostic Unit - Public Health Laboratory (MDU-PHL) |MDU-PHL|Schultz|Australia

>Spike|hCoV-19/Denmark/DCGC-9879/2020|2020-11-09|EPI\_ISL\_669249|Original|hCoV-19^^Sjaelland|Human|Department of Virus and Microbiological Special Diagnostics|Albertsen Lab|Michaelsen|Denmark

>Spike|hCoV-19/Australia/NSW823/2020|2020-08-07|EPI\_ISL\_526165|Original|hCoV-19^^New South Wales|Human|Pathology West - NSW Health Pathology|NSW Health Pathology - Institute of Clinical Pathology and Medical Research; Westmead Hospital; University of Sydney|Gall|Australia

>Spike|hCoV-19/Denmark/DCGC-2378/2020|2020-08-10|EPI\_ISL\_617558|Original|hCoV-19^^Hovedstaden|Human|Department of Virus and Microbiological Special Diagnostics|Albertsen lab|Michaelsen|Denmark

>Spike|hCoV-19/Japan/PG-4472/2020|2020-07-00|EPI\_ISL\_692695|Original|hCoV-19^^Japan|Human|Pathogen Genomics Center|Pathogen Genomics Center|Sekizuka|Japan

>Spike|hCoV-19/England/CAMC-AEA6A6/2020|2020-10-26|EPI\_ISL\_633236|Original|hCoV-19^^England|Human|Lighthouse Lab in Cambridge|Wellcome Sanger Institute for the COVID-19 Genomics UK (COG-UK) consortium|Davies|United Kingdom

>Spike|hCoV-19/England/NORT-2A4B92/2020|2020-09-17|EPI\_ISL\_573399|Original|hCoV-19^^England|Human|Northumbria University / South Tees Hospitals NHS Foundation Trust / North Cumbria Integrated Care NHS Foundation Trust / North Tees and Hartlepool NHS Foundation Trust / Newcastle Hospitals NHS Foundation Trust|COVID-19 Genomics UK (COG-UK) Consortium|Bashton|United Kingdom

>Spike|hCoV-19/Netherlands/NA\_594/2020|2020-04-14|EPI\_ISL\_460757|Original|hCoV-19^^Netherlands|Human|Dutch COVID-19 response team|Erasmus Medical Center|Oude Munnink|Netherlands

>Spike|hCoV-19/Australia/VIC16742/2020|2020-08-08|EPI\_ISL\_663562|Original|hCoV-19^^Victoria|Human|Microbiological Diagnostic Unit - Public Health Laboratory (MDU-PHL) |MDU-PHL|Schultz|Australia

>Spike|hCoV-19/USA/CA-QDX-796/2020|2020-03-23|EPI\_ISL\_571490|Original|hCoV-19^^California|Human|Quest Diagnostics|Quest Diagnostics|Kagan|USA

>Spike|hCoV-19/USA/TX-HMH-MCoV-12973/2020|2020-08-28|EPI\_ISL\_788125|Original|hCoV-19^^Texas|Human|Houston Methodist Hospital|Houston Methodist Hospital|Long|USA

>Spike|hCoV-19/India/TG-CCMB-M841/2020|2020-06-12|EPI\_ISL\_495254|Original|hCoV-19^^Telangana|Human|CSIR-Centre for Cellular and Molecular Biology|CSIR-Centre for Cellular and Molecular Biology|Banu|India

>Spike|hCoV-19/USA/UT-QDX-49/2020|2020-03-13|EPI\_ISL\_467919|Original|hCoV-19^^Utah|Human|Quest Diagnostics|Quest Diagnostics|Kagan|USA

>Spike|hCoV-19/England/QEUEH-9B8F5C/2020|2020-09-09|EPI\_ISL\_549739|Original|hCoV-19^^England|Human|Lighthouse Lab in Glasgow|Wellcome Sanger Institute for the COVID-19 Genomics UK (COG-UK) consortium|Davies|United Kingdom

>Spike|hCoV-19/USA/WI-GMF-00018/2020|2020-03-18|EPI\_ISL\_418184|Original|hCoV-19^^Wisconsin|Human|Gundersen Molecular Diagnostics Laboratory|Kabara Cancer Research Institute|Kenny|USA

>Spike|hCoV-19/England/LIVE-9EA09/2020|2020-04-11|EPI\_ISL\_453356|Original|hCoV-19^^England|Human|Liverpool Clinical Laboratories|COVID-19 Genomics UK (COG-UK) Consortium|Haldenby|United Kingdom

>Spike|hCoV-19/England/20110023706/2020|2020-03-08|EPI\_ISL\_417307|Original|hCoV-19^^England|Human|Respiratory Virus Unit|Respiratory Virus Unit|Platt|United Kingdom

>Spike|hCoV-19/England/QEUEH-AF58B1/2020|2020-10-30|EPI\_ISL\_663058|Original|hCoV-19^^England|Human|Lighthouse Lab in Glasgow|Wellcome Sanger Institute for the COVID-19 Genomics UK (COG-UK) Consortium|Davies|United Kingdom

>Spike|hCoV-19/USA/CA-ALSR-4636/2020|2020-10-22|EPI\_ISL\_667049|Original|hCoV-19^^California|Human|San Diego County Public Health Laboratory|Andersen lab at Scripps Research|Gangavarapu|USA

>Spike|hCoV-19/Jordan/AM-ALSR-4960/2020|2020-10-03|EPI\_ISL\_730233|Original|hCoV-19^^Amman|Human|Biolab Diagnostic Laboratories|Andersen lab at Scripps Research|Gangavarapu|Jordan

>Spike|hCoV-19/England/QEUEH-9621F1/2020|2020-08-10|EPI\_ISL\_531800|Original|hCoV-19^^England|Human|Lighthouse Lab in Glasgow|Wellcome Sanger Institute for the COVID-19 Genomics UK (COG-UK) consortium|Davies|United Kingdom

>Spike|hCoV-19/USA/WA-S2435/2020|2020-06-15|EPI\_ISL\_497067|Original|hCoV-19^^Washington|Human|Washington State Department of Health|Seattle Flu Study|Lee|USA

>Spike|hCoV-19/Scotland/CVR56/2020|2020-03-12|EPI\_ISL\_425785|Original|hCoV-19^^Scotland|Human|West of Scotland Specialist Virology Centre|COVID-19 Genomics UK (COG-UK) Consortium|Robertson|United Kingdom

>Spike|hCoV-19/USA/CA-CZB-2472/2020|2020-03-30|EPI\_ISL\_513876|Original|hCoV-19^^California|Human|San Francisco Public Health Laboratory|Chan-Zuckerberg Biohub|Kamm|USA

>Spike|hCoV-19/England/QEUEH-BCE258/2020|2020-11-26|EPI\_ISL\_704249|Original|hCoV-19^^England|Human|Lighthouse Lab in Glasgow|Wellcome Sanger Institute for the COVID-19 Genomics UK (COG-UK) Consortium|Davies|United Kingdom

>Spike|hCoV-19/India/TG-CCMB-L1721/2020|2020-05-30|EPI\_ISL\_471625|Original|hCoV-19^^Telangana|Human|CSIR-Centre for Cellular and Molecular Biology|CSIR-Centre for Cellular and Molecular Biology|Banu|India

>Spike|hCoV-19/USA/CA-QDX-2068/2020|2020-03-17|EPI\_ISL\_604323|Original|hCoV-19^^California|Human|Quest Diagnostics|Quest Diagnostics|Kagan|USA

>Spike|hCoV-19/Brazil/MG-0212/2020|2020-03-14|EPI\_ISL\_470579|Original|hCoV-19^^Minas Gerais|Human|Hermes Pardini|Bioinformatics Laboratory / LNCC|Almeida|Brazil

>Spike|hCoV-19/USA/MN-MDH-1419/2020|2020-03-18|EPI\_ISL\_514638|Original|hCoV-19^^Minnesota|Human|Mayo Clinic & Mayo Clinic Laboratories|Minnesota Department of Health|Garfin|USA

>Spike|hCoV-19/USA/IL-UW-349/2020|2020-04-15|EPI\_ISL\_450703|Original|hCoV-19^^Illinois|Human|University of Wisconsin-Madison AIDS Vaccine Research Laboratories|University of Wisconsin-Madison AIDS Vaccine Research Laboratories|Baczenas|USA

>Spike|hCoV-19/USA/CA-ALSR-1049-SAN/2020|2020-06-21|EPI\_ISL\_483482|Original|hCoV-19^^California|Human|UC San Diego Center for Advanced Laboratory Medicine|Andersen lab at Scripps Research|Gangavarapu|USA

>Spike|hCoV-19/England/QEUA-A5E986/2020|2020-10-12|EPI\_ISL\_597408|Original|hCoV-19^^England|Human|Lighthouse Lab in Glasgow|Wellcome Sanger Institute for the COVID-19 Genomics UK (COG-UK) consortium|Davies|United Kingdom

>Spike|hCoV-19/Wales/PHWC-24ACC/2020|2020-03-20|EPI\_ISL\_419480|Original|hCoV-19^^Wales|Human|Wales Specialist Virology Centre|Public Health Wales Microbiology Cardiff|Moore|United Kingdom

>Spike|hCoV-19/Denmark/DCGC-10547/2020|2020-11-02|EPI\_ISL\_670044|Original|hCoV-19^^Syddanmark|Human|Department of Virus and Microbiological Special Diagnostics|Albertsen Lab|Michaelsen|Denmark

>Spike|hCoV-19/Wales/PHWC-47EB62/2020|2020-09-26|EPI\_ISL\_595559|Original|hCoV-19^^Wales|Human|Originating lab|COVID-19 Genomics UK (COG-UK) Consortium|Moore|United Kingdom

>Spike|hCoV-19/England/CAMC-AAFC41/2020|2020-10-22|EPI\_ISL\_623345|Original|hCoV-19^^England|Human|Lighthouse Lab in Cambridge|Wellcome Sanger Institute for the COVID-19 Genomics UK (COG-UK) consortium|Davies|United Kingdom

>Spike|hCoV-19/Japan/Donner4/2020|2020-04-06|EPI\_ISL\_438949|Original|hCoV-19^^Kanto|Human|Keio University School of Medicine|Keio University School of Medicine|Kosaki|Japan

>Spike|hCoV-19/England/MILK-975E9A/2020|2020-08-20|EPI\_ISL\_552738|Original|hCoV-19^^England|Human|Lighthouse Lab in Milton Keynes|Wellcome Sanger Institute for the COVID-19 Genomics UK (COG-UK) consortium|Davies|United Kingdom

>Spike|hCoV-19/USA/WA-UW-12796/2020|2020-06-29|EPI\_ISL\_570841|Original|hCoV-19^^Washington|Human|UW Virology Lab|UW Virology Lab|Roychoudhury|USA

>Spike|hCoV-19/England/NORT-1B8716A/2020|2020-10-27|EPI\_ISL\_724964|Original|hCoV-19^^England|Human|Northumbria University / South Tees Hospitals NHS Foundation Trust / North Cumbria Integrated Care NHS Foundation Trust / North Tees and Hartlepool NHS Foundation Trust / Newcastle Hospitals NHS Foundation Trust|COVID-19 Genomics UK (COG-UK) Consortium|Bashton|United Kingdom

>Spike|hCoV-19/England/QEUA-B3F4D4/2020|2020-11-08|EPI\_ISL\_658719|Original|hCoV-19^^England|Human|Lighthouse Lab in Glasgow|Wellcome Sanger Institute for the COVID-19 Genomics UK (COG-UK) Consortium|Davies|United Kingdom

>Spike|hCoV-19/Morocco/FMP-61/2020|2020-12-21|EPI\_ISL\_775263|Original|hCoV-19^^Rabat|Human|Laboratoire Biolife|Laboratoire de Biotechnologie|Ouahghiri|Morocco

>Spike|hCoV-19/Brazil/SP-L7-CD72/2020|2020-03-24|EPI\_ISL\_476439|Original|hCoV-19^^S\u00e3o Paulo|Human|Hospital da Cl\u00ednicas da Faculdade de Medicina da Universidade de S\u00e3o Paulo|Instituto de Medicina Tropical da Univesidade de S\u00e3o Paulo|Sabino|Brazil

>Spike|hCoV-19/Denmark/DCGC-9915/2020|2020-11-09|EPI\_ISL\_668492|Original|hCoV-19^^Hovedstaden|Human|Department of Virus and Microbiological Special Diagnostics|Albertsen Lab|Michaelsen|Denmark

>Spike|hCoV-19/USA/TX-HMH-5878/2020|2020-06-30|EPI\_ISL\_547081|Original|hCoV-19^^Texas|Human|Houston Methodist Hospital|Houston Methodist Hospital|Long|USA

>Spike|hCoV-19/USA/TX-HMH-870/2020|2020-04-08|EPI\_ISL\_545887|Original|hCoV-19^^Texas|Human|Houston Methodist Hospital|Houston Methodist Hospital|Long|USA

>Spike|hCoV-19/USA/VA-DCLS-0101/2020|2020-04-10|EPI\_ISL\_434595|Original|hCoV-19^^Virginia|Human|Virginia DCLS|Virginia DCLS|St. Jacques|USA

>Spike|hCoV-19/USA/NY-Wadsworth-37640-01/2020|2020-04-03|EPI\_ISL\_525652|Original|hCoV-19^^New York|Human|Wadsworth Center|Wadsworth Center|Plitnick|USA

>Spike|hCoV-19/Northern Ireland/QEUA-95EC06/2020|2020-08-08|EPI\_ISL\_532502|Original|hCoV-19^^Northern Ireland|Human|Lighthouse Lab in Glasgow|Wellcome Sanger Institute for the COVID-19 Genomics UK (COG-UK) consortium|Davies|United Kingdom

>Spike|hCoV-19/USA/UT-UPHL-2012942531/2020|2020-08-09|EPI\_ISL\_745802|Original|hCoV-19^^Utah|Human|Ginkgo Bioworks Clinical Laboratory|Utah Public Health Laboratory|Young|USA

>Spike|hCoV-19/Scotland/QEUA-AE2E79/2020|2020-10-27|EPI\_ISL\_649654|Original|hCoV-19^^Scotland|Human|Lighthouse Lab in Glasgow|Wellcome Sanger Institute for the COVID-19 Genomics UK (COG-UK) Consortium|Davies|United Kingdom

>Spike|hCoV-19/Singapore/455/2020|2020-03-19|EPI\_ISL\_475986|Original|hCoV-19^^Singapore|Human|National Public Health Laboratory|National Public Health Laboratory|Mak|Singapore

>Spike|hCoV-19/Wales/MILK-9D3FA6/2020|2020-09-18|EPI\_ISL\_601636|Original|hCoV-19^^Wales|Human|Lighthouse Lab in Milton Keynes|Wellcome Sanger Institute for the COVID-19 Genomics UK (COG-UK) consortium|Davies|United Kingdom

>Spike|hCoV-19/Denmark/DCGC-21417/2020|2020-12-21|EPI\_ISL\_758096|Original|hCoV-19^^Syddanmark|Human|Department of Virus and Microbiological Special Diagnostics|Albertsen Lab|Michaelsen|Denmark

>Spike|hCoV-19/England/CAMB-1AFCE0/2020|2020-05-04|EPI\_ISL\_459225|Original|hCoV-19^^England|Human|Department of Pathology|Wellcome Sanger Institute for the COVID-19 Genomics UK (COG-UK) consortium|Davies|United Kingdom

>Spike|hCoV-19/Wales/PHWC-2EDF6/2020|2020-04-07|EPI\_ISL\_446157|Original|hCoV-19^^Wales|Human|Wales Specialist Virology Centre|Public Health Wales Microbiology Cardiff|Moore|United Kingdom

>Spike|hCoV-19/Switzerland/SO-ETHZ-410345/2020|2020-12-17|EPI\_ISL\_737799|Original|hCoV-19^^Solothurn|Human|Viollier AG|Department of Biosystems Science and Engineering|Nadeau|Switzerland

>Spike|hCoV-19/USA/NY-Wadsworth-292006-01/2020|2020-00-00|EPI\_ISL\_767628|Original|hCoV-19^^New York|Human|WHITE PLAINS HOSPITAL CENTER LABORATORY|Wadsworth Center|Lasek-Nesselquist|USA

>Spike|hCoV-19/England/CAMB-1B5476/2020|2020-07-01|EPI\_ISL\_490328|Original|hCoV-19^^England|Human|Department of Pathology|COVID-19 Genomics UK (COG-UK) Consortium|Meredith|United Kingdom

>Spike|hCoV-19/USA/WI-GMF-19709/2020|2020-09-11|EPI\_ISL\_547838|Original|hCoV-19^^Wisconsin|Human|Gundersen Molecular Diagnostics Laboratory|Kabara Cancer Research Institute|Kenny|USA

>Spike|hCoV-19/England/204262879/2020|2020-10-15|EPI\_ISL\_649808|Original|hCoV-19^^England|Human|Respiratory Virus Unit|COVID-19 Genomics UK (COG-UK) Consortium|Platt|United Kingdom

>Spike|hCoV-19/Wales/PHWC-48F4BE/2020|2020-11-10|EPI\_ISL\_681100|Original|hCoV-19^^Wales|Human|Wales Specialist Virology Centre Sequencing lab|COVID-19 Genomics UK (COG-UK) Consortium|Moore|United Kingdom

>Spike|hCoV-19/England/20132068204/2020|2020-03-23|EPI\_ISL\_423796|Original|hCoV-19^^England|Human|Respiratory Virus Unit|Respiratory Virus Unit|Platt|United Kingdom

>Spike|hCoV-19/England/ALDP-A85801/2020|2020-10-17|EPI\_ISL\_610628|Original|hCoV-19^^England|Human|Lighthouse Lab in Alderley Park|Wellcome Sanger Institute for the COVID-19 Genomics UK (COG-UK) consortium|Davies|United Kingdom

>Spike|hCoV-19/Australia/NSW2158/2020|2020-03-12|EPI\_ISL\_500636|Original|hCoV-19^^New South Wales|Human|Area of Virology|Area of Virology|Bull|Australia

>Spike|hCoV-19/England/20118177604/2020|2020-03-13|EPI\_ISL\_464998|Original|hCoV-19^^England|Human|Respiratory Virus Unit|Respiratory Virus Unit|Platt|United Kingdom

>Spike|hCoV-19/Peru/LIM-UPCH-0101/2020|2020-06-17|EPI\_ISL\_540979|Original|hCoV-19^^Lima|Human|Laboratorio de Referencia Nacional de Virus Respiratorios|Laboratorio de Gen\u00f3mica Microbiana|Tsukayama|Peru

>Spike|hCoV-19/England/QEUA-B0DDA7/2020|2020-11-02|EPI\_ISL\_642090|Original|hCoV-19^^England|Human|Lighthouse Lab in Glasgow|Wellcome Sanger Institute for the COVID-19 Genomics UK (COG-UK) Consortium|Davies|United Kingdom

>Spike|hCoV-19/Wales/PHWC-4A2CF9/2020|2020-12-14|EPI\_ISL\_744007|Original|hCoV-19^^Wales|Human|Wales Specialist Virology Centre Sequencing lab|COVID-19 Genomics UK (COG-UK) Consortium|Moore|United Kingdom

>Spike|hCoV-19/SaudiArabia/KAUST-JEDDAH469/2020|2020-08-04|EPI\_ISL\_512924|Original|hCoV-19^^Jeddah|Human|Pathogen Genomics Lab King Abdullah University of Science and Technology(KAUST)|Pathogen Genomics Lab King Abdullah University of Science and Technology(KAUST)|Mohamed Ghazzali|Saudi Arabia

>Spike|hCoV-19/England/BRIS-1853E45/2020|2020-04-27|EPI\_ISL\_492421|Original|hCoV-19^^England|Human|PHE South West Regional Laboratory|Wellcome Sanger Institute for the COVID-19 Genomics UK (COG-UK) consortium|Davies|United Kingdom

>Spike|hCoV-19/England/LEED-2A8985/2020|2020-04-05|EPI\_ISL\_539026|Original|hCoV-19^^England|Human|Leeds Teaching Hospitals NHS Trust and Public Health



England|Wellcome Sanger Institute for the COVID-19 Genomics UK (COG-UK) consortium|Davies|United Kingdom  
>Spike|hCoV-19/England/CAMC-B09FB4/2020|2020-10-30|EPI\_ISL\_673047|Original|hCoV-19^^England|Human|Lighthouse Lab in Cambridge|Wellcome Sanger Institute for the COVID-19 Genomics UK (COG-UK) Consortium|Davies|United Kingdom  
>Spike|hCoV-19/Australia/VIC15957/2020|2020-07-31|EPI\_ISL\_640479|Original|hCoV-19^^Victoria|Human|Microbiological Diagnostic Unit - Public Health Laboratory (MDU-PHL)|MDU-PHL|Schultz|Australia  
>Spike|hCoV-19/England/MILK-B54B98/2020|2020-11-05|EPI\_ISL\_657729|Original|hCoV-19^^England|Human|Lighthouse Lab in Milton Keynes|Wellcome Sanger Institute for the COVID-19 Genomics UK (COG-UK) Consortium|Davies|United Kingdom  
>Spike|hCoV-19/England/MILK-BB0D1C/2020|2020-11-18|EPI\_ISL\_720291|Original|hCoV-19^^England|Human|Lighthouse Lab in Milton Keynes|Wellcome Sanger Institute for the COVID-19 Genomics UK (COG-UK) Consortium|Davies|United Kingdom  
>Spike|hCoV-19/USA/WI-QDX-1077/2020|2020-03-18|EPI\_ISL\_571913|Original|hCoV-19^^Wisconsin|Human|Quest Diagnostics|Quest Diagnostics|Kagan|USA  
>Spike|hCoV-19/England/MILK-A192D7/2020|2020-09-30|EPI\_ISL\_612499|Original|hCoV-19^^England|Human|Wales Specialist Virology Centre Sequencing lab|COVID-19 Genomics UK (COG-UK) Consortium|Moore|United Kingdom  
>Spike|hCoV-19/Bahrain/341051813\_S12\_L001/2020|2020-11-22|EPI\_ISL\_678268|Original|hCoV-19^^Bahrain|Human|Communicable Disease Laboratory|Communicable Disease Laboratory|Altaif|Bahrain  
>Spike|hCoV-19/USA/WI-WSLH-200028/2020|2020-04-18|EPI\_ISL\_471193|Original|hCoV-19^^Wisconsin|Human|Wisconsin State Laboratory of Hygiene Communicable Disease Division|Wisconsin State Laboratory of Hygiene Communicable Disease Division|Florek|USA  
>Spike|hCoV-19/Wales/PHWC-49BBC9/2020|2020-12-06|EPI\_ISL\_742442|Original|hCoV-19^^Wales|Human|Wales Specialist Virology Centre Sequencing lab|COVID-19 Genomics UK (COG-UK) Consortium|Moore|United Kingdom  
>Spike|hCoV-19/Denmark/DCGC-20278/2020|2020-11-30|EPI\_ISL\_748089|Original|hCoV-19^^Syddanmark|Human|Department of Virus and Microbiological Special Diagnostics|Albertsen Lab|Michaelsen|Denmark  
>Spike|hCoV-19/Brazil/SP-698/2020|2020-06-30|EPI\_ISL\_693240|Original|hCoV-19^^S\u00e3o Paulo|Human|Centro de Vigil\u00e2ncia a Saude de Diadema|Instituto Adolfo Lutz|Sacchi|Brazil  
>Spike|hCoV-19/Sweden/20-52078/2020|2020-06-15|EPI\_ISL\_510875|Original|hCoV-19^^Ostergotland|Human|Klinsisk mikrobiologi Linkoping|The Public Health Agency of Sweden|Svartstr\u00f6m|Sweden  
>Spike|hCoV-19/England/CAMC-B0897B/2020|2020-10-29|EPI\_ISL\_643594|Original|hCoV-19^^England|Human|Lighthouse Lab in Cambridge|Wellcome Sanger Institute for the COVID-19 Genomics UK (COG-UK) Consortium|Davies|United Kingdom  
>Spike|hCoV-19/Singapore/660/2020|2020-04-21|EPI\_ISL\_493420|Original|hCoV-19^^Singapore|Human|National Public Health Laboratory|National Public Health Laboratory|Mak|Singapore  
>Spike|hCoV-19/England/QEUA-8930A0/2020|2020-07-27|EPI\_ISL\_532803|Original|hCoV-19^^England|Human|Lighthouse Lab in Glasgow|Wellcome Sanger Institute for the COVID-19 Genomics UK (COG-UK) consortium|Davies|United Kingdom  
>Spike|hCoV-19/England/NORT-296C45/2020|2020-04-28|EPI\_ISL\_484275|Original|hCoV-19^^England|Human|Northumbria University / South Tees Hospitals NHS Foundation Trust / North Cumbria Integrated Care NHS Foundation Trust / North Tees and Hartlepool NHS Foundation Trust / Newcastle Hospitals NHS Foundation Trust|COVID-19 Genomics UK (COG-UK) Consortium|Bashton|United Kingdom  
>Spike|hCoV-19/Australia/VIC4713/2020|2020-07-14|EPI\_ISL\_519101|Original|hCoV-19^^Victoria|Human|Microbiological Diagnostic Unit - Public Health Laboratory (MDU-PHL)|MDU-PHL|Schultz|Australia  
>Spike|hCoV-19/Russia/SVE-RII-MH1632S/2020|2020-09-08|EPI\_ISL\_596302|Original|hCoV-19^^Sverdlovsk|Human|HELIX LCC|WHO National Influenza Centre Russian Federation|Komissarov|Russia

>Spike|hCoV-19/USA/MI-MDHHS-SC21655/2020|2020-07-06|EPI\_ISL\_516382|Original|hCoV-19^^Michigan|Human|Michigan Department of Health and Human Services|Michigan Department of Health and Human Services|Blankenship|USA

>Spike|hCoV-19/Denmark/DCGC-3120/2020|2020-08-31|EPI\_ISL\_615937|Original|hCoV-19^^Hovedstaden|Human|Department of Virus and Microbiological Special Diagnostics|Albertsen lab|Michaelsen|Denmark

>Spike|hCoV-19/Denmark/DCGC-17231/2020|2020-12-14|EPI\_ISL\_750341|Original|hCoV-19^^Midtjylland|Human|Department of Virus and Microbiological Special Diagnostics|Albertsen Lab|Michaelsen|Denmark

>Spike|hCoV-19/USA/FL-BPHL-1262/2020|2020-06-04|EPI\_ISL\_541169|Original|hCoV-19^^Florida|Human|Florida Bureau of Public Health Laboratories|Florida Bureau of Public Health Laboratories|Blanton|USA

>Spike|hCoV-19/England/QEUA-9D0D09/2020|2020-09-13|EPI\_ISL\_589861|Original|hCoV-19^^England|Human|Lighthouse Lab in Glasgow|Wellcome Sanger Institute for the COVID-19 Genomics UK (COG-UK) consortium|Davies|United Kingdom

>Spike|hCoV-19/Scotland/CVR3698/2020|2020-05-25|EPI\_ISL\_473761|Original|hCoV-19^^Scotland|Human|West of Scotland Specialist Virology Centre|COVID-19 Genomics UK (COG-UK) Consortium|Robertson|United Kingdom

>Spike|hCoV-19/Canada/ON-S1237/2020|2020-04-16|EPI\_ISL\_586308|Original|hCoV-19^^Ontario|Human|Toronto Invasive Bacterial Diseases Network|McMaster University|McArthur|Canada

>Spike|hCoV-19/Wales/PHWC-16ECFC/2020|2020-10-03|EPI\_ISL\_585852|Original|hCoV-19^^Wales|Human|Wales Specialist Virology Centre Sequencing lab|COVID-19 Genomics UK (COG-UK) Consortium|Moore|United Kingdom

>Spike|hCoV-19/Denmark/DCGC-11579/2020|2020-11-02|EPI\_ISL\_670554|Original|hCoV-19^^Syddanmark|Human|Department of Virus and Microbiological Special Diagnostics|Albertsen Lab|Michaelsen|Denmark

>Spike|hCoV-19/Gambia/NPHL-3206/2020|2020-00-00|EPI\_ISL\_561313|Original|hCoV-19^^Kombo|Human|MRCG at LSHTM Genomics lab|MRCG at LSHTM Genomics lab|Sesay|Gambia

>Spike|hCoV-19/England/QEUA-9B7791/2020|2020-09-08|EPI\_ISL\_590601|Original|hCoV-19^^England|Human|Lighthouse Lab in Glasgow|Wellcome Sanger Institute for the COVID-19 Genomics UK (COG-UK) consortium|Davies|United Kingdom

>Spike|hCoV-19/England/MILK-A79624/2020|2020-10-13|EPI\_ISL\_606762|Original|hCoV-19^^England|Human|Lighthouse Lab in Milton Keynes|Wellcome Sanger Institute for the COVID-19 Genomics UK (COG-UK) consortium|Davies|United Kingdom

>Spike|hCoV-19/England/ALDP-B5BC34/2020|2020-11-09|EPI\_ISL\_655286|Original|hCoV-19^^England|Human|Lighthouse Lab in Alderley Park|Wellcome Sanger Institute for the COVID-19 Genomics UK (COG-UK) Consortium|Davies|United Kingdom

>Spike|hCoV-19/Thailand/Bangkok-CONI-0212/2020|2020-03-18|EPI\_ISL\_512862|Original|hCoV-19^^Bangkok|Human|Ramathibodi Hospital|COVID-19 Network Investigations (CONI) Alliance|Batty|Thailand

>Spike|hCoV-19/India/MH-ACTREC-114/2020|2020-05-25|EPI\_ISL\_699770|Original|hCoV-19^^Maharashtra|Human|Hematopathology Laboratory|Hematopathology Laboratory|Patkar|India

>Spike|hCoV-19/England/204420070/2020|2020-10-26|EPI\_ISL\_637150|Original|hCoV-19^^England|Human|Respiratory Virus Unit|COVID-19 Genomics UK (COG-UK) Consortium|Platt|United Kingdom

>Spike|hCoV-19/Singapore/211/2020|2020-03-02|EPI\_ISL\_462329|Original|hCoV-19^^Singapore|Human|National Public Health Laboratory|National Public Health Laboratory|Mak|Singapore

>Spike|hCoV-19/Germany/ST-MD012/2020|2020-04-16|EPI\_ISL\_728348|Original|hCoV-19^^Saxony-Anhalt|Human|Institute of medical Microbiology and hospital Hygiene|Institute of medical Microbiology and hospital Hygiene|Tersteegen|Germany

>Spike|hCoV-19/Wales/PHWC-16B7EF/2020|2020-09-16|EPI\_ISL\_573904|Original|hCoV-19^^Wales|Human|Wales Specialist Virology Centre Sequencing lab|COVID-19 Genomics UK (COG-UK) Consortium|Moore|United Kingdom

>Spike|hCoV-19/Russia/SVE-RII-MH198S/2020|2020-07-17|EPI\_ISL\_560312|Original|hCoV-19^^Sverdlovsk|Human|UMMC-Health|WHO National Influenza Centre Russian Federation|Komissarov|Russia

>Spike|hCoV-19/USA/CA-ALSR-1191/2020|2020-04-02|EPI\_ISL\_494427|Original|hCoV-19^^California|Human|San Diego County Public Health Laboratory|Andersen lab at Scripps Research|Gangavarapu|USA

>Spike|hCoV-19/Spain/AR-IBV-98008134/2020|2020-10-13|EPI\_ISL\_654462|Original|hCoV-19^^Aragon|Human|Servicio de Microbiolog\u00eda|SeqCOVID-SPAIN consortium/IBV (CSIC) |Comas|Spain

>Spike|hCoV-19/Wales/PHWC-166E67/2020|2020-06-23|EPI\_ISL\_494122|Original|hCoV-19^^Wales|Human|Originating lab|COVID-19 Genomics UK (COG-UK) Consortium|Moore|United Kingdom

>Spike|hCoV-19/USA/UT-UPHL-201006281/2020|2020-07-06|EPI\_ISL\_594048|Original|hCoV-19^^Utah|Human|Utah Public Health Laboratory|Utah Public Health Laboratory|Young|USA

>Spike|hCoV-19/England/20180025604/2020|2020-04-23|EPI\_ISL\_465430|Original|hCoV-19^^England|Human|Respiratory Virus Unit|Respiratory Virus Unit|Platt|United Kingdom

>Spike|hCoV-19/USA/UT-01677/2020|2020-04-13|EPI\_ISL\_454707|Original|hCoV-19^^Utah|Human|Utah Public Health Laboratory|Utah Public Health Laboratory|Young|USA

>Spike|hCoV-19/Denmark/DCGC-22581/2020|2020-12-14|EPI\_ISL\_757458|Original|hCoV-19^^Syddanmark|Human|Department of Virus and Microbiological Special Diagnostics|Albertsen Lab|Michaelsen|Denmark

>Spike|hCoV-19/South Africa/KRISP-K002165/2020|2020-07-22|EPI\_ISL\_515571|Original|hCoV-19^^KwaZulu-Natal|Human|NHLS-IALCH|KRISP|de Oliveira|South Africa

>Spike|hCoV-19/Wales/PHWC-2CAB5/2020|2020-04-01|EPI\_ISL\_445945|Original|hCoV-19^^Wales|Human|Wales Specialist Virology Centre|Public Health Wales Microbiology Cardiff|Moore|United Kingdom

>Spike|hCoV-19/England/CAMC-B9A57A/2020|2020-11-15|EPI\_ISL\_673759|Original|hCoV-19^^England|Human|Lighthouse Lab in Cambridge|Wellcome Sanger Institute for the COVID-19 Genomics UK (COG-UK) Consortium|Davies|United Kingdom

>Spike|hCoV-19/England/QEUEH-BF0B52/2020|2020-12-05|EPI\_ISL\_709133|Original|hCoV-19^^England|Human|Lighthouse Lab in Glasgow|Wellcome Sanger Institute for the COVID-19 Genomics UK (COG-UK) Consortium|Davies|United Kingdom

>Spike|hCoV-19/USA/CA-ALSR-0513-SAN/2020|2020-04-02|EPI\_ISL\_483192|Original|hCoV-19^^California|Human|UC San Diego Center for Advanced Laboratory Medicine|Andersen lab at Scripps Research|Gangavarapu|USA

>Spike|hCoV-19/England/CAMC-A5903B/2020|2020-10-09|EPI\_ISL\_597118|Original|hCoV-19^^England|Human|Lighthouse Lab in Cambridge|Wellcome Sanger Institute for the COVID-19 Genomics UK (COG-UK) consortium|Davies|United Kingdom

>Spike|hCoV-19/England/QEUEH-AA04FD/2020|2020-10-20|EPI\_ISL\_650296|Original|hCoV-19^^England|Human|University of Exeter|COVID-19 Genomics UK (COG-UK) Consortium|Temperton|United Kingdom

>Spike|hCoV-19/Scotland/EDB2714/2020|2020-03-27|EPI\_ISL\_487869|Original|hCoV-19^^Scotland|Human|Virology Department|Wellcome Sanger Institute for the COVID-19 Genomics UK (COG-UK) consortium|Davies|United Kingdom

>Spike|hCoV-19/England/QEUEH-A0C037/2020|2020-10-01|EPI\_ISL\_599274|Original|hCoV-19^^England|Human|Lighthouse Lab in Glasgow|Wellcome Sanger Institute for the COVID-19 Genomics UK (COG-UK) consortium|Davies|United Kingdom

>Spike|hCoV-19/Scotland/QEUEH-9B4F23/2020|2020-09-07|EPI\_ISL\_602078|Original|hCoV-19^^Scotland|Human|Lighthouse Lab in Glasgow|Wellcome Sanger Institute for the COVID-19 Genomics UK (COG-UK) consortium|Davies|United Kingdom

>Spike|hCoV-19/England/OXON-AC6D7/2020|2020-04-05|EPI\_ISL\_448476|Original|hCoV-19^^England|Human|Oxford Viromics|COVID-19 Genomics UK (COG-UK) Consortium|Golubchik|United Kingdom

>Spike|hCoV-19/USA/MN-QDX-2123/2020|2020-03-16|EPI\_ISL\_604480|Original|hCoV-19^^Minnesota|Human|Quest Diagnostics|Quest Diagnostics|Kagan|USA

>Spike|hCoV-19/Spain/VC-FISABIO-272/2020|2020-03-25|EPI\_ISL\_436367|Original|hCoV-19^^Comunitat Valenciana|Human|Servicio de Microbiología. Hospital Clínico Universitario de Valencia|Sequencing and Bioinformatics Service and Molecular Epidemiology Research Group. FISABIO-Public Health|Gonzalez-Candelas|Spain

>Spike|hCoV-19/England/SHEF-10D3276/2020|2020-12-19|EPI\_ISL\_765189|Original|hCoV-19^^England|Human|Virology Department|COVID-19 Genomics UK (COG-UK) Consortium|de Silva|United Kingdom

>Spike|hCoV-19/Australia/ACT0089/2020|2020-07-03|EPI\_ISL\_498547|Original|hCoV-19^^Australian Capital Territory|Human|ACT Pathology|Schwessinger Lab|Hall|Australia

>Spike|hCoV-19/Russia/KL-RII-MH1686S/2020|2020-09-03|EPI\_ISL\_596317|Original|hCoV-19^^Kalmykia|Human|HELIX LCC|WHO National Influenza Centre Russian Federation|Komissarov|Russia

>Spike|hCoV-19/USA/WI-UW-2616/2021|2021-01-01|EPI\_ISL\_791133|Original|hCoV-19^^Wisconsin|Human|University of Wisconsin-Madison AIDS Vaccine Research Laboratories|University of Wisconsin-Madison AIDS Vaccine Research Laboratories|Moreno|USA

>Spike|hCoV-19/United Arab Emirates/0140/2020|2020-05-18|EPI\_ISL\_698327|Original|hCoV-19^^Abu Dhabi|Human|Group 42 (G42) Healthcare|G42 Healthcare|Ogrodzki|United Arab Emirates

>Spike|hCoV-19/England/ALDP-9CAD6C/2020|2020-09-16|EPI\_ISL\_575618|Original|hCoV-19^^England|Human|Lighthouse Lab in Alderley Park|Wellcome Sanger Institute for the COVID-19 Genomics UK (COG-UK) consortium|Davies|United Kingdom

>Spike|hCoV-19/USA/WA-S2489/2020|2020-06-16|EPI\_ISL\_497121|Original|hCoV-19^^Washington|Human|Washington State Department of Health|Seattle Flu Study|Lee|USA

>Spike|hCoV-19/USA/CA-ALSR-3396/2020|2020-08-10|EPI\_ISL\_636002|Original|hCoV-19^^California|Human|San Diego County Public Health Laboratory|Andersen lab at Scripps Research|Gangavarapu|USA

>Spike|hCoV-19/Japan/PG-8451/2020|2020-09-00|EPI\_ISL\_687550|Original|hCoV-19^^Japan|Human|Fukuoka Institute of Health and Environmental Sciences|Pathogen Genomics Center|Sekizuka|Japan

>Spike|hCoV-19/England/MILK-A69E3E/2020|2020-10-09|EPI\_ISL\_608753|Original|hCoV-19^^England|Human|Lighthouse Lab in Milton Keynes|Wellcome Sanger Institute for the COVID-19 Genomics UK (COG-UK) consortium|Davies|United Kingdom

>Spike|hCoV-19/England/CAMB-1B2901/2020|2020-05-18|EPI\_ISL\_456705|Original|hCoV-19^^England|Human|Department of Pathology|COVID-19 Genomics UK (COG-UK) Consortium|Meredith|United Kingdom

>Spike|hCoV-19/England/ALDP-B463DD/2020|2020-11-07|EPI\_ISL\_656285|Original|hCoV-19^^England|Human|Lighthouse Lab in Alderley Park|Wellcome Sanger Institute for the COVID-19 Genomics UK (COG-UK) Consortium|Davies|United Kingdom

>Spike|hCoV-19/England/LIVE-DC46DC/2020|2020-11-10|EPI\_ISL\_705904|Original|hCoV-19^^England|Human|Liverpool Clinical Laboratories|COVID-19 Genomics UK (COG-UK) Consortium|Haldenby|United Kingdom

>Spike|hCoV-19/Japan/PG-1497/2020|2020-04-00|EPI\_ISL\_685104|Original|hCoV-19^^Japan|Human|Saitama Prefectural Institute of Public Health|Pathogen Genomics Center|Sekizuka|Japan

>Spike|hCoV-19/England/CAMB-78CC3/2020|2020-04-03|EPI\_ISL\_441150|Original|hCoV-19^^England|Human|Department of Pathology|Wellcome Sanger Institute for the COVID-19 Genomics UK (COG-UK) consortium|Amato|United Kingdom

>Spike|hCoV-19/England/ALDP-950BDA/2020|2020-06-14|EPI\_ISL\_554463|Original|hCoV-19^^England|Human|Lighthouse Lab in Alderley Park|Wellcome Sanger Institute for the COVID-19 Genomics UK (COG-UK) consortium|Davies|United Kingdom

>Spike|hCoV-19/Hong Kong/HKU-200723-012/2020|2020-07-09|EPI\_ISL\_497779|Original|hCoV-19^^Hong Kong|Human|Department of Microbiology|Department of Microbiology|Chan|China

>Spike|hCoV-19/England/ALDP-A519B0/2020|2020-10-07|EPI\_ISL\_598195|Original|hCoV-19^^England|Human|Lighthouse Lab in Alderley Park|Wellcome Sanger Institute for the COVID-19 Genomics UK (COG-UK) consortium|Davies|United Kingdom

>Spike|hCoV-19/Beijing/BJ287/2020|2020-01-29|EPI\_ISL\_430722|Original|hCoV-19^^Beijing|Human|Chinese PLA Institute for Disease Control and Prevention|Chinese PLA Institute for Disease Control and Prevention|Li|China

>Spike|hCoV-19/England/ALDP-4FA375/2020|2020-06-24|EPI\_ISL\_559209|Original|hCoV-19^^England|Human|Lighthouse Lab in Alderley Park|Wellcome Sanger Institute for the COVID-19 Genomics UK (COG-UK) consortium|Davies|United Kingdom

>Spike|hCoV-19/England/20142082704/2020|2020-03-30|EPI\_ISL\_423463|Original|hCoV-19^^England|Human|Respiratory Virus Unit|Respiratory Virus Unit|Platt|United Kingdom

>Spike|hCoV-19/England/LIVE-AA080/2020|2020-03-23|EPI\_ISL\_517396|Original|hCoV-19^^England|Human|Liverpool Clinical Laboratories|COVID-19 Genomics UK (COG-UK) Consortium|Haldenby|United Kingdom

>Spike|hCoV-19/USA/LA-GBCL-26684432/2020|2020-04-14|EPI\_ISL\_485261|Original|hCoV-19^^Louisiana|Human|River Road Testing Lab|Ginkgo Bioworks Clinical Laboratory|Smith|USA

>Spike|hCoV-19/Russia/StPetersburg-RII15518S/2020|2020-05-15|EPI\_ISL\_507267|Original|hCoV-19^^Saint Petersburg|Human|WHO National Influenza Centre Russian Federation|WHO National Influenza Centre Russian Federation|Komissarov|Russia

>Spike|hCoV-19/Netherlands/NA\_520/2020|2020-03-27|EPI\_ISL\_460693|Original|hCoV-19^^Netherlands|Human|Dutch COVID-19 response team|Erasmus Medical Center|Oude Munnink|Netherlands

>Spike|hCoV-19/England/QEUA-B2C1A6/2020|2020-11-04|EPI\_ISL\_680066|Original|hCoV-19^^England|Human|Department of Pathology|COVID-19 Genomics UK (COG-UK) Consortium|Goodfellow|United Kingdom

>Spike|hCoV-19/Belgium/ULG-10224/2020|2020-05-15|EPI\_ISL\_498130|Original|hCoV-19^^Li\u00e8ge|Human|Department of Clinical Microbiology|GIGA Medical Genomics|Durkin|Belgium

>Spike|hCoV-19/France/ARA-06042/2020|2020-03-04|EPI\_ISL\_417333|Original|hCoV-19^^Auvergne-Rh\u00f4ne-Alpes|Human|Institut des Agents Infectieux (IAI)|CNR Virus des Infections Respiratoires - France SUD|Josset|France

>Spike|hCoV-19/Denmark/DCGC-19192/2020|2020-12-07|EPI\_ISL\_748804|Original|hCoV-19^^Midtjylland|Human|Department of Virus and Microbiological Special Diagnostics|Albertsen Lab|Michaelsen|Denmark

>Spike|hCoV-19/USA/VA-DCLS-1235/2020|2020-08-05|EPI\_ISL\_528654|Original|hCoV-19^^Virginia|Human|Virginia DCLS|Virginia DCLS|St. Jacques|USA

>Spike|hCoV-19/England/MILK-B8F8F7/2020|2020-11-13|EPI\_ISL\_674639|Original|hCoV-19^^England|Human|Lighthouse Lab in Milton Keynes|Wellcome Sanger Institute for the COVID-19 Genomics UK (COG-UK) Consortium|Davies|United Kingdom

>Spike|hCoV-19/USA/TX-DSHS-0271/2020|2020-06-13|EPI\_ISL\_527838|Original|hCoV-19^^Texas|Human|Texas Department of State Health Services|Texas Department of State Health Services|Rahman|USA

>Spike|hCoV-19/Wales/PHWC-16BFBA/2020|2020-09-15|EPI\_ISL\_573998|Original|hCoV-19^^Wales|Human|Wales Specialist Virology Centre Sequencing lab|COVID-19 Genomics UK (COG-UK) Consortium|Moore|United Kingdom

>Spike|hCoV-19/Russia/NVS-RII-MH1097V/2020|2020-07-29|EPI\_ISL\_596265|V1|hCoV-19^^Novosibirsk|Human|WHO National Influenza Centre Russian Federation|WHO National Influenza Centre Russian Federation|Komissarov|Russia

>Spike|hCoV-19/Scotland/QEUA-B2B6C6/2020|2020-11-03|EPI\_ISL\_676435|Original|hCoV-19^^Scotland|Human|Lighthouse Lab in Glasgow|Wellcome Sanger Institute for the COVID-19 Genomics UK (COG-UK) Consortium|Davies|United Kingdom

>Spike|hCoV-19/England/ALDP-B5C732/2020|2020-11-08|EPI\_ISL\_655810|Original|hCoV-19^^England|Human|Lighthouse Lab in Alderley Park|Wellcome Sanger Institute for the COVID-19 Genomics UK (COG-UK) Consortium|Davies|United Kingdom

>Spike|hCoV-19/Denmark/DCGC-13395/2020|2020-11-30|EPI\_ISL\_712271|Original|hCoV-19^^Sjælland|Human|Department of Virus and Microbiological Special Diagnostics|Albertsen Lab|Michaelsen|Denmark

>Spike|hCoV-19/England/NORT-29DC4E/2020|2020-05-07|EPI\_ISL\_484312|Original|hCoV-19^^England|Human|Northumbria University / South Tees Hospitals NHS Foundation Trust / North Cumbria Integrated Care NHS Foundation Trust / North Tees and Hartlepool NHS Foundation Trust / Newcastle Hospitals NHS Foundation Trust|COVID-19 Genomics UK (COG-UK) Consortium|Bashton|United Kingdom

>Spike|hCoV-19/USA/CA-CZB-9529/2020|2020-04-08|EPI\_ISL\_672121|Original|hCoV-19^^California|Human|The Ashley Laboratory|Chan-Zuckerberg Biohub|Bhatt|USA

>Spike|hCoV-19/Northern Ireland/NIRE-FCC21/2020|2020-04-22|EPI\_ISL\_470048|Original|hCoV-19^^Northern Ireland|Human|Regional Virus Laboratory|Wellcome Sanger Institute for the COVID-19 Genomics UK (COG-UK) consortium|Davies|United Kingdom

>Spike|hCoV-19/USA/VA-DCLS-0768/2020|2020-06-09|EPI\_ISL\_526884|Original|hCoV-19^^Virginia|Human|Virginia DCLS|Virginia DCLS|St. Jacques|USA

>Spike|hCoV-19/Denmark/DCGC-13399/2020|2020-11-30|EPI\_ISL\_712774|Original|hCoV-19^^Hovedstaden|Human|Department of Virus and Microbiological Special Diagnostics|Albertsen Lab|Michaelsen|Denmark

>Spike|hCoV-19/Denmark/DCGC-8852/2020|2020-10-26|EPI\_ISL\_626081|Original|hCoV-19^^Midtjylland|Human|Department of Virus and Microbiological Special Diagnostics|Albertsen lab|Michaelsen|Denmark

>Spike|hCoV-19/England/ALDP-A67BFD/2020|2020-10-10|EPI\_ISL\_608621|Original|hCoV-19^^England|Human|Lighthouse Lab in Alderley Park|Wellcome Sanger Institute for the COVID-19 Genomics UK (COG-UK) consortium|Davies|United Kingdom

>Spike|hCoV-19/England/QEUA-960C7A/2020|2020-08-04|EPI\_ISL\_532033|Original|hCoV-19^^England|Human|Lighthouse Lab in Glasgow|Wellcome Sanger Institute for the COVID-19 Genomics UK (COG-UK) consortium|Davies|United Kingdom

>Spike|hCoV-19/USA/WI-UW-2414/2020|2020-12-07|EPI\_ISL\_754674|Original|hCoV-19^^Wisconsin|Human|University of Wisconsin-Madison AIDS Vaccine Research Laboratories|University of Wisconsin-Madison AIDS Vaccine Research Laboratories|Moreno|USA

>Spike|hCoV-19/USA/TX-DSHS-1808/2020|2020-06-15|EPI\_ISL\_738178|Original|hCoV-19^^Texas|Human|Texas Department of State Health Services|Texas Department of State Health Services|Rahman|USA

>Spike|hCoV-19/Wales/QEUA-96BE2E/2020|2020-08-14|EPI\_ISL\_531283|Original|hCoV-19^^Wales|Human|Lighthouse Lab in Glasgow|Wellcome Sanger Institute for the COVID-19 Genomics UK (COG-UK) consortium|Davies|United Kingdom

>Spike|hCoV-19/England/QEUA-AD487C/2020|2020-10-26|EPI\_ISL\_634021|Original|hCoV-19^^England|Human|Lighthouse Lab in Glasgow|Wellcome Sanger Institute for the COVID-19 Genomics UK (COG-UK) consortium|Davies|United Kingdom

>Spike|hCoV-19/Australia/VIC16906/2020|2020-00-00|EPI\_ISL\_663634|Original|hCoV-19^^Victoria|Human|Microbiological Diagnostic Unit - Public Health Laboratory (MDU-PHL)|MDU-PHL|Schultz|Australia

>Spike|hCoV-19/USA/WA-S584/2020|2020-03-24|EPI\_ISL\_434344|Original|hCoV-19^^Washington|Human|Washington State Department of Health|Seattle Flu Study|Bedford|USA

>Spike|hCoV-19/Wales/PHWC-489EC5/2020|2020-10-27|EPI\_ISL\_652503|Original|hCoV-19^^Wales|Human|Wales Specialist Virology Centre Sequencing lab|COVID-19 Genomics UK (COG-UK) Consortium|Moore|United Kingdom

>Spike|hCoV-19/USA/CT-Yale-426/2020|2020-04-27|EPI\_ISL\_738298|Original|hCoV-19^^Connecticut|Human|Connecticut Veterans' Affairs Hospital|Grubaugh Lab - Yale School of Public Health|Grubaugh|USA

>Spike|hCoV-19/England/CAMB-76A34/2020|2020-03-30|EPI\_ISL\_438377|Original|hCoV-19^^England|Human|Department of Pathology|Wellcome Sanger Institute for the COVID-19 Genomics UK (COG-UK) consortium|Amato|United Kingdom

>Spike|hCoV-19/England/CAMC-B3718A/2020|2020-11-05|EPI\_ISL\_645356|Original|hCoV-19^^England|Human|Lighthouse Lab in Cambridge|Wellcome Sanger Institute for the COVID-19 Genomics UK (COG-UK) Consortium|Davies|United Kingdom

>Spike|hCoV-19/Germany/ChVir3098/2020|2020-04-09|EPI\_ISL\_729530|Original|hCoV-19^^Germany|Human|Charit\u00e9 Universit\u00e4tsmedizin Berlin|Charit\u00e9 Universit\u00e4tsmedizin Berlin|Muehlemann|Germany

>Spike|hCoV-19/Wales/PHWC-16619B/2020|2020-06-19|EPI\_ISL\_490845|Original|hCoV-19^^Wales|Human|Wales Specialist Virology Centre Sequencing lab|COVID-19 Genomics UK (COG-UK) Consortium|Moore|United Kingdom

>Spike|hCoV-19/USA/MI-UM-10036710490/2020|2020-10-30|EPI\_ISL\_682137|Original|hCoV-19^^Michigan|Human|University of Michigan Clinical Microbiology Laboratory|Lauring Lab|Valesano|USA

>Spike|hCoV-19/USA/MA-MASPHL-00423/2020|2020-04-27|EPI\_ISL\_693129|Original|hCoV-19^^Massachusetts|Human|Massachusetts State Public Health Laboratory|Massachusetts State Public Health Laboratory|Lang|USA

>Spike|hCoV-19/USA/WA-UW-23371/2020|2020-08-10|EPI\_ISL\_576434|Original|hCoV-19^^Washington|Human|UW Virology Lab|UW Virology Lab|Roychoudhury|USA

>Spike|hCoV-19/Hong Kong/HKU-200723-090/2020|2020-07-11|EPI\_ISL\_497857|Original|hCoV-19^^Hong Kong|Human|Department of Microbiology|Department of Microbiology|Chan|China

>Spike|hCoV-19/Japan/PG-6003/2020|2020-07-00|EPI\_ISL\_689116|Original|hCoV-19^^Japan|Human|Pathogen Genomics Center|Pathogen Genomics Center|Sekizuka|Japan

>Spike|hCoV-19/England/20132087602/2020|2020-03-23|EPI\_ISL\_420512|Original|hCoV-19^^England|Human|Respiratory Virus Unit|Respiratory Virus Unit|Platt|United Kingdom

>Spike|hCoV-19/Denmark/DCGC-16438/2020|2020-11-16|EPI\_ISL\_714767|Original|hCoV-19^^Hovedstaden|Human|Department of Virus and Microbiological Special Diagnostics|Albertsen Lab|Michaelsen|Denmark

>Spike|hCoV-19/Wales/ALDP-BC8898/2020|2020-11-22|EPI\_ISL\_767319|Original|hCoV-19^^Wales|Human|Lighthouse Lab in Alderley Park|Wellcome Sanger Institute for the COVID-19 Genomics UK (COG-UK) Consortium|Davies|United Kingdom

>Spike|hCoV-19/Australia/VIC8897/2020|2020-07-14|EPI\_ISL\_565270|Original|hCoV-19^^Victoria|Human|Microbiological Diagnostic Unit - Public Health Laboratory (MDU-PHL)|MDU-PHL|Schultz|Australia

>Spike|hCoV-19/Denmark/DCGC-17059/2020|2020-12-14|EPI\_ISL\_750736|Original|hCoV-19^^Hovedstaden|Human|Department of Virus and Microbiological Special Diagnostics|Albertsen Lab|Michaelsen|Denmark

>Spike|hCoV-19/Denmark/DCGC-12500/2020|2020-11-16|EPI\_ISL\_682681|Original|hCoV-19^^Sjaelland|Human|Department of Virus and Microbiological Special Diagnostics|Albertsen Lab|Michaelsen|Denmark

>Spike|hCoV-19/England/CAMC-BC1C39/2020|2020-11-22|EPI\_ISL\_704696|Original|hCoV-19^^England|Human|Lighthouse Lab in Cambridge|Wellcome Sanger Institute for the COVID-19 Genomics UK (COG-UK) Consortium|Davies|United Kingdom

>Spike|hCoV-19/England/ALDP-AA37A6/2020|2020-10-22|EPI\_ISL\_624969|Original|hCoV-19^^England|Human|Lighthouse Lab in Alderley Park|Wellcome Sanger Institute for the COVID-19 Genomics UK (COG-UK) consortium|Davies|United Kingdom

>Spike|hCoV-19/Australia/VIC16302/2020|2020-10-13|EPI\_ISL\_641214|Original|hCoV-19^^Victoria|Human|Microbiological Diagnostic Unit - Public Health Laboratory (MDU-PHL)|MDU-PHL|Schultz|Australia

>Spike|hCoV-19/Denmark/DCGC-9332/2020|2020-11-16|EPI\_ISL\_668615|Original|hCoV-19^^Nordjylland|Human|Department of Virus and Microbiological Special Diagnostics|Albertsen Lab|Michaelsen|Denmark

>Spike|hCoV-19/England/ALDP-9C5842/2020|2020-09-11|EPI\_ISL\_567579|Original|hCoV-19^^England|Human|Lighthouse Lab in Alderley Park|Wellcome Sanger Institute for the COVID-19 Genomics UK (COG-UK) consortium|Davies|United Kingdom

>Spike|hCoV-19/England/CAMB-8381C/2020|2020-04-15|EPI\_ISL\_443678|Original|hCoV-19^^England|Human|Department of Pathology|Wellcome Sanger Institute for the COVID-19 Genomics UK (COG-UK) consortium|Amato|United Kingdom

>Spike|hCoV-19/England/PORT-2D17C5/2020|2020-04-12|EPI\_ISL\_484419|Original|hCoV-19^^England|Human|Centre for Enzyme Innovation|COVID-19 Genomics UK (COG-UK) Consortium|Robson|United Kingdom

>Spike|hCoV-19/England/NORW-EB7BB/2020|2020-05-05|EPI\_ISL\_472317|Original|hCoV-19^^England|Human|Quadram Institute Bioscience|COVID-19 Genomics UK (COG-UK) Consortium|Alikhan|United Kingdom

>Spike|hCoV-19/USA/TX-HMH-MCoV-15933/2020|2020-07-10|EPI\_ISL\_785617|Original|hCoV-19^^Texas|Human|Houston Methodist Hospital|Houston Methodist Hospital|Long|USA

>Spike|hCoV-19/Sweden/20-51740/2020|2020-05-25|EPI\_ISL\_510841|Original|hCoV-19^^Vastra Gotaland|Human|Klinisk mikrobiologi NAL Trollhattan|The Public Health Agency of Sweden|Svartstr\u00f6m|Sweden

>Spike|hCoV-19/Australia/QLD1272/2020|2020-03-20|EPI\_ISL\_693274|Original|hCoV-19^^Australia|Human|unknown|Public Health Virology Laboratory|Nguyen|Australia

>Spike|hCoV-19/England/NOTT-1157E4/2020|2020-10-14|EPI\_ISL\_595266|Original|hCoV-19^^England|Human|Queens Medical Centre|COVID-19 Genomics UK (COG-UK) Consortium|Loose|United Kingdom

>Spike|hCoV-19/env/Qingdao/IVDC-08-10/2020|2020-09-24|EPI\_ISL\_591277|Original|hCoV-19^^Shandong|Environment|National Institute for Viral Disease Control and Prevention|National Institute for Viral Disease Control and Prevention|Chen|China

>Spike|hCoV-19/England/LIVE-9D76D/2020|2020-04-15|EPI\_ISL\_453231|Original|hCoV-19^^England|Human|Liverpool Clinical Laboratories|COVID-19 Genomics UK (COG-UK) Consortium|Haldenby|United Kingdom

>Spike|hCoV-19/England/MILK-B942F1/2020|2020-11-13|EPI\_ISL\_676063|Original|hCoV-19^^England|Human|Lighthouse Lab in Milton Keynes|Wellcome Sanger Institute for the COVID-19 Genomics UK (COG-UK) Consortium|Davies|United Kingdom

>Spike|hCoV-19/USA/TX-HMH-1421/2020|2020-04-21|EPI\_ISL\_542713|Original|hCoV-19^^Texas|Human|Houston Methodist Hospital|Houston Methodist Hospital|Long|USA

>Spike|hCoV-19/USA/WI-GMF-27681/2020|2020-10-25|EPI\_ISL\_660985|Original|hCoV-19^^Wisconsin|Human|Gundersen Molecular Diagnostics Laboratory|Kabara Cancer Research Institute|Kenny|USA

>Spike|hCoV-19/Spain/PV-IBV-2099/2020|2020-04-11|EPI\_ISL\_468922|Original|hCoV-19^^Basque Country|Human|Servicio de Microbiolog\u00eda. Hospital Universitario Donostia. OSI Donostialdea. \u00clrea de Enfermedades Infecciosas|SeqCOVID-SPAIN consortium/IBV (CSIC)|Comas|Spain

>Spike|hCoV-19/South Korea/KDCA0319/2020|2020-10-16|EPI\_ISL\_760105|Original|hCoV-19^^South Korea|Human|Division of Emerging Infectious Diseases|Division of Emerging Infectious Diseases|Park|South Korea

>Spike|hCoV-19/Wales/PHWC-16C4C9/2020|2020-05-30|EPI\_ISL\_574060|Original|hCoV-19^^Wales|Human|Wales Specialist Virology Centre Sequencing lab|COVID-19 Genomics UK (COG-UK) Consortium|Moore|United Kingdom

>Spike|hCoV-19/USA/TX-HMH-MCoV-14757/2020|2020-10-12|EPI\_ISL\_786242|Original|hCoV-19^^Texas|Human|Houston Methodist Hospital|Houston Methodist Hospital|Long|USA

>Spike|hCoV-19/USA/MI-UM-10036599140/2020|2020-10-23|EPI\_ISL\_640215|Original|hCoV-19^^Michigan|Human|University of Michigan Clinical Microbiology Laboratory|Lauring Lab|Valesano|USA

>Spike|hCoV-19/Denmark/DCGC-18198/2020|2020-12-14|EPI\_ISL\_749810|Original|hCoV-19^^Nordjylland|Human|Department of Virus and Microbiological Special Diagnostics|Albertsen Lab|Michaelsen|Denmark

>Spike|hCoV-19/USA/MA-MGH-00031/2020|2020-03-25|EPI\_ISL\_460111|Original|hCoV-19^^Massachusetts|Human|Massachusetts General Hospital|Infectious Disease Program|Lemieux|USA

>Spike|hCoV-19/USA/CA-ALSR-2167/2020|2020-06-01|EPI\_ISL\_635368|Original|hCoV-19^^California|Human|San Diego County Public Health Laboratory|Andersen lab at Scripps Research|Gangavarapu|USA

>Spike|hCoV-19/England/ALDP-BCA605/2020|2020-11-23|EPI\_ISL\_703571|Original|hCoV-19^^England|Human|Lighthouse Lab in Alderley Park|Wellcome Sanger Institute for the COVID-19 Genomics UK (COG-UK) Consortium|Davies|United Kingdom

>Spike|hCoV-19/England/QEUEH-B9E1CD/2020|2020-11-16|EPI\_ISL\_720954|Original|hCoV-19^^England|Human|Lighthouse Lab in Glasgow|Wellcome Sanger Institute for the COVID-19 Genomics UK (COG-UK) Consortium|Davies|United Kingdom

>Spike|hCoV-19/Sweden/20-50107/2020|2020-03-03|EPI\_ISL\_454881|Original|hCoV-19^^Stockholm|Human|Karolinska Universitetslaboratoriet|The Public Health Agency of Sweden|Svartstr\u00f6m|Sweden

>Spike|hCoV-19/Denmark/DCGC-11554/2020|2020-11-02|EPI\_ISL\_670680|Original|hCoV-19^^Hovedstaden|Human|Department of Virus and Microbiological Special Diagnostics|Albertsen Lab|Michaelsen|Denmark

>Spike|hCoV-19/USA/TX-HMH-625/2020|2020-04-11|EPI\_ISL\_547340|Original|hCoV-19^^Texas|Human|Houston Methodist Hospital|Houston Methodist Hospital|Long|USA

>Spike|hCoV-19/Netherlands/NA\_435/2020|2020-04-07|EPI\_ISL\_455237|Original|hCoV-19^^Netherlands|Human|Dutch COVID-19 response team|Erasmus Medical Center|Oude Munnink|Netherlands

>Spike|hCoV-19/Wales/PHWC-48C0AE/2020|2020-11-07|EPI\_ISL\_666389|Original|hCoV-19^^Wales|Human|Wales Specialist Virology Centre Sequencing lab|COVID-19 Genomics UK (COG-UK) Consortium|Moore|United Kingdom

>Spike|hCoV-19/England/LCST-24D6A47/2020|2020-06-04|EPI\_ISL\_478322|Original|hCoV-19^^England|Human|University Hospitals Of Leicester NHS Trust and DeepSeq Nottingham|COVID-19 Genomics UK (COG-UK) Consortium|Loose|United Kingdom

>Spike|hCoV-19/Sweden/20-22153/2020|2020-06-02|EPI\_ISL\_623084|Original|hCoV-19^^Skane|Human|Klinisk mikrobiologi|The Public Health Agency of Sweden|Svartstr\u00f6m|Sweden



>Spike|hCoV-19/Netherlands/ZH-EMC-492/2020|2020-00-00|EPI\_ISL\_577921|Original|hCoV-19^^Zuid Holland|Human|Dutch COVID-19 response team|Erasmus Medical Center|Oude Munnink|Netherlands

>Spike|hCoV-19/Australia/VIC5779/2020|2020-07-20|EPI\_ISL\_518577|Original|hCoV-19^^Victoria|Human|Microbiological Diagnostic Unit - Public Health Laboratory (MDU-PHL)|MDU-PHL|Schultz|Australia

>Spike|hCoV-19/England/ALDP-A4FA3A/2020|2020-10-07|EPI\_ISL\_597774|Original|hCoV-19^^England|Human|Lighthouse Lab in Alderley Park|Wellcome Sanger Institute for the COVID-19 Genomics UK (COG-UK) consortium|Davies|United Kingdom

>Spike|hCoV-19/Spain/CT-IBV-99009877/2020|2020-08-01|EPI\_ISL\_660274|Original|hCoV-19^^Catalunya|Human|Servicio de Microbiolog\u00eda|SeqCOVID-SPAIN consortium|IBV (CSIC)|Comas|Spain

>Spike|hCoV-19/England/ALDP-A66B94/2020|2020-10-12|EPI\_ISL\_630378|Original|hCoV-19^^England|Human|Lighthouse Lab in Alderley Park|Wellcome Sanger Institute for the COVID-19 Genomics UK (COG-UK) consortium|Davies|United Kingdom

>Spike|hCoV-19/Denmark/DCGC-11003/2020|2020-11-02|EPI\_ISL\_670338|Original|hCoV-19^^Hovedstaden|Human|Department of Virus and Microbiological Special Diagnostics|Albertsen Lab|Michaelsen|Denmark

>Spike|hCoV-19/USA/RI-CDC-2-3714588/2020|2020-12-03|EPI\_ISL\_751671|Original|hCoV-19^^Rhode Island|Human|RI State Health Laboratories|Genomics and Discovery|Queen|USA

>Spike|hCoV-19/England/ALDP-BBABFA/2020|2020-11-21|EPI\_ISL\_702570|Original|hCoV-19^^England|Human|Lighthouse Lab in Alderley Park|Wellcome Sanger Institute for the COVID-19 Genomics UK (COG-UK) Consortium|Davies|United Kingdom

>Spike|hCoV-19/England/QEUA-B6A1F7/2020|2020-11-11|EPI\_ISL\_662620|Original|hCoV-19^^England|Human|Lighthouse Lab in Glasgow|Wellcome Sanger Institute for the COVID-19 Genomics UK (COG-UK) Consortium|Davies|United Kingdom

>Spike|hCoV-19/England/QEUA-A8B9CC/2020|2020-10-16|EPI\_ISL\_643203|Original|hCoV-19^^England|Human|Lighthouse Lab in Glasgow|Wellcome Sanger Institute for the COVID-19 Genomics UK (COG-UK) Consortium|Davies|United Kingdom

>Spike|hCoV-19/Italy/TUS-UOS-21/2020|2020-04-27|EPI\_ISL\_591331|Original|hCoV-19^^Tuscany|Human|Dipartimento di Biotecnologie Mediche|Dipartimento di Biotecnologie Mediche|Cusi|Italy

>Spike|hCoV-19/England/LIVE-9A593/2020|2020-03-25|EPI\_ISL\_449348|Original|hCoV-19^^England|Human|Liverpool Clinical Laboratories|COVID-19 Genomics UK (COG-UK) Consortium|Haldenby|United Kingdom

>Spike|hCoV-19/Denmark/DCGC-15875/2020|2020-11-23|EPI\_ISL\_714079|Original|hCoV-19^^Nordjylland|Human|Department of Virus and Microbiological Special Diagnostics|Albertsen Lab|Michaelsen|Denmark

>Spike|hCoV-19/England/LOND-126018E/2020|2020-04-07|EPI\_ISL\_524672|Original|hCoV-19^^England|Human|North West London Pathology|Wellcome Sanger Institute for the COVID-19 Genomics UK (COG-UK) consortium|Davies|United Kingdom

>Spike|hCoV-19/England/ALDP-954329/2020|2020-06-13|EPI\_ISL\_553817|Original|hCoV-19^^England|Human|Lighthouse Lab in Alderley Park|Wellcome Sanger Institute for the COVID-19 Genomics UK (COG-UK) consortium|Davies|United Kingdom

>Spike|hCoV-19/USA/WA-UW-11533/2020|2020-06-21|EPI\_ISL\_570432|Original|hCoV-19^^Washington|Human|UW Virology Lab|UW Virology Lab|Roychoudhury|USA

>Spike|hCoV-19/Netherlands/ZH-EMC-393/2020|2020-07-22|EPI\_ISL\_523733|Original|hCoV-19^^Zuid Holland|Human|Dutch COVID-19 response team|Erasmus Medical Center|Oude Munnink|Netherlands

>Spike|hCoV-19/Wales/PHWC-4812D0/2020|2020-10-16|EPI\_ISL\_613052|Original|hCoV-19^^Wales|Human|Wales Specialist Virology Centre Sequencing lab|COVID-19 Genomics UK (COG-UK) Consortium|Moore|United Kingdom

>Spike|hCoV-19/Wales/MILK-9E2065/2020|2020-09-20|EPI\_ISL\_581120|Original|hCoV-19^^Wales|Human|Lighthouse Lab in Milton Keynes|Wellcome Sanger Institute for the COVID-19 Genomics UK (COG-UK) consortium|Davies|United Kingdom

>Spike|hCoV-19/USA/WI-WSLH-200716/2020|2020-06-28|EPI\_ISL\_631472|Original|hCoV-19^^Wisconsin|Human|Wisconsin State Laboratory of Hygiene Communicable Disease Division|Wisconsin State Laboratory of Hygiene Communicable Disease Division|Florek|USA

>Spike|hCoV-19/England/CAMB-7EB75/2020|2020-04-07|EPI\_ISL\_442963|Original|hCoV-19^^England|Human|Department of Pathology|Wellcome Sanger Institute for the COVID-19 Genomics UK (COG-UK) consortium|Amato|United Kingdom

>Spike|hCoV-19/England/ALDP-94F4A6/2020|2020-06-19|EPI\_ISL\_556003|Original|hCoV-19^^England|Human|Lighthouse Lab in Alderley Park|Wellcome Sanger Institute for the COVID-19 Genomics UK (COG-UK) consortium|Davies|United Kingdom

>Spike|hCoV-19/France/ARA-16665/2020|2020-03-30|EPI\_ISL\_508987|Original|hCoV-19^^Auvergne-Rh\u00f4ne-Alpes|Human|CNR Virus des Infections Respiratoires - France SUD|CNR Virus des Infections Respiratoires - France SUD|Josset|France

>Spike|hCoV-19/England/ALDP-B75584/2020|2020-11-12|EPI\_ISL\_662276|Original|hCoV-19^^England|Human|Lighthouse Lab in Alderley Park|Wellcome Sanger Institute for the COVID-19 Genomics UK (COG-UK) Consortium|Davies|United Kingdom

>Spike|hCoV-19/Switzerland/BS-UHB-42197732/2020|2020-03-18|EPI\_ISL\_528217|Original|hCoV-19^^Basel-Stadt|Human|University Hospital Basel|University Hospital Basel|Roloff Handschin|Switzerland

>Spike|hCoV-19/England/BIRM-6AECE/2020|2020-11-13|EPI\_ISL\_679115|Original|hCoV-19^^England|Human|University of Birmingham|COVID-19 Genomics UK (COG-UK) Consortium|Loman|United Kingdom

>Spike|hCoV-19/Japan/PG-4200/2020|2020-07-00|EPI\_ISL\_692438|Original|hCoV-19^^Japan|Human|Pathogen Genomics Center|Pathogen Genomics Center|Sekizuka|Japan

>Spike|hCoV-19/Spain/MD-IBV-99012346/2020|2020-11-20|EPI\_ISL\_779995|Original|hCoV-19^^Madrid|Human|Hospital General Universitario Gregorio Mara\u00f1a|SeqCOVID-SPAIN consortium/IBV (CSIC)|Comas|Spain

>Spike|hCoV-19/Wales/PHWC-4909AC/2020|2020-11-16|EPI\_ISL\_703870|Original|hCoV-19^^Wales|Human|Originating lab|COVID-19 Genomics UK (COG-UK) Consortium|Moore|United Kingdom

>Spike|hCoV-19/England/LIVE-DCB9AF/2020|2020-11-25|EPI\_ISL\_724444|Original|hCoV-19^^England|Human|Liverpool Clinical Laboratories|COVID-19 Genomics UK (COG-UK) Consortium|Haldenby|United Kingdom

>Spike|hCoV-19/Denmark/DCGC-7989/2020|2020-10-26|EPI\_ISL\_617110|Original|hCoV-19^^Syddanmark|Human|Department of Virus and Microbiological Special Diagnostics|Albertsen lab|Michaelsen|Denmark

>Spike|hCoV-19/Egypt/MASRI-3/2020|2020-05-00|EPI\_ISL\_475746|Original|hCoV-19^^Egypt|Human|Medical Ain Shams Research Institute (MASRI)|Medical Ain Shams Research Institute (MASRI)|Moustafa|Egypt

>Spike|hCoV-19/USA/WI-UW-2589/2021|2021-01-03|EPI\_ISL\_791107|Original|hCoV-19^^Wisconsin|Human|University of Wisconsin-Madison AIDS Vaccine Research Laboratories|University of Wisconsin-Madison AIDS Vaccine Research Laboratories|Moreno|USA

>Spike|hCoV-19/USA/UT-UPHL-2012190312/2020|2020-08-15|EPI\_ISL\_746297|Original|hCoV-19^^Utah|Human|Ginkgo Bioworks Clinical Laboratory|Utah Public Health Laboratory|Young|USA

>Spike|hCoV-19/Singapore/865/2020|2020-08-20|EPI\_ISL\_527374|Original|hCoV-19^^Singapore|Human|National Public Health Laboratory|National Public Health Laboratory|Mak|Singapore

>Spike|hCoV-19/England/203480317/2020|2020-08-19|EPI\_ISL\_566068|Original|hCoV-19^^England|Human|Respiratory Virus Unit|Respiratory Virus Unit|Platt|United Kingdom

>Spike|hCoV-19/England/QEUEH-88DA9C/2020|2020-07-27|EPI\_ISL\_532822|Original|hCoV-19^^England|Human|Lighthouse Lab in Glasgow|Wellcome Sanger Institute for the COVID-19 Genomics UK (COG-UK) consortium|Davies|United Kingdom

>Spike|hCoV-19/Scotland/QEUEH-A9EE4F/2020|2020-10-20|EPI\_ISL\_625377|Original|hCoV-19^^Scotland|Human|Lighthouse Lab in Glasgow|Wellcome Sanger Institute for the COVID-19 Genomics UK (COG-UK) consortium|Davies|United Kingdom

>Spike|hCoV-19/England/QEUEH-9963C1/2020|2020-08-27|EPI\_ISL\_549529|Original|hCoV-19^^England|Human|Oxford Viromics|COVID-19 Genomics UK (COG-UK) Consortium|Golubchik|United Kingdom

>Spike|hCoV-19/Denmark/DCGC-4342/2020|2020-09-07|EPI\_ISL\_615544|Original|hCoV-19^^Hovedstaden|Human|Department of Virus and Microbiological Special Diagnostics|Albertsen lab|Michaelsen|Denmark

>Spike|hCoV-19/Saudi Arabia/KAUST-MAKKAH1562/2020|2020-04-14|EPI\_ISL\_678114|Original|hCoV-19^^Makkah|Human|Pathogen Genomics Lab King Abdullah University of Science and Technology(KAUST)|Pathogen Genomics Lab King Abdullah University of Science and Technology(KAUST)|Mohamed Ghazzali|Saudi Arabia

>Spike|hCoV-19/USA/DE-DHSS-F918046/2020|2020-03-27|EPI\_ISL\_593939|Original|hCoV-19^^Delaware|Human|Delaware Public Health Lab|Delaware Public Health Lab|Bajwa|USA

>Spike|hCoV-19/Australia/VIC2900/2020|2020-07-08|EPI\_ISL\_521731|Original|hCoV-19^^Victoria|Human|Microbiological Diagnostic Unit - Public Health Laboratory (MDU-PHL)|MDU-PHL|Schultz|Australia

>Spike|hCoV-19/USA/MI-MDHHS-SC20302/2020|2020-03-25|EPI\_ISL\_447099|Original|hCoV-19^^Michigan|Human|Michigan Department of Health and Human Services|Michigan Department of Health and Human Services|Blankenship|USA

>Spike|hCoV-19/South Africa/LR00149/2020|2020-07-21|EPI\_ISL\_514417|Original|hCoV-19^^Free State|Human|National Institute for Communicable Diseases of the National Health Laboratory Service|National Institute for Communicable Diseases of the National Health Laboratory Service|Allam|South Africa

>Spike|hCoV-19/USA/VA-DCLS-0077/2020|2020-04-04|EPI\_ISL\_429976|Original|hCoV-19^^Virginia|Human|Virginia DCLS|Virginia DCLS|St. Jacques|USA

>Spike|hCoV-19/England/QEUEH-9904B5/2020|2020-08-29|EPI\_ISL\_530379|Original|hCoV-19^^England|Human|Lighthouse Lab in Glasgow|Wellcome Sanger Institute for the COVID-19 Genomics UK (COG-UK) consortium|Davies|United Kingdom

>Spike|hCoV-19/Luxembourg/LNS7147879/2020|2020-11-22|EPI\_ISL\_744523|Original|hCoV-19^^Luxembourg|Human|Laboratoire national de sant\u00e9|Laboratoire national de sant\u00e9|Wienecke-Baldacchino|Luxembourg

>Spike|hCoV-19/Spain/CT-IBV-97009563/2020|2020-07-30|EPI\_ISL\_671860|Original|hCoV-19^^Catalunya|Human|Servicio de Microbiolog\u00eda|SeqCOVID-SPAIN consortium|IBV (CSIC)|Comas|Spain

>Spike|hCoV-19/Australia/QLD1121/2020|2020-09-23|EPI\_ISL\_593636|Original|hCoV-19^^Australia|Human|unknown|Public Health Virology Laboratory|Nguyen|Australia

>Spike|hCoV-19/England/ALDP-B1CD78/2020|2020-11-01|EPI\_ISL\_645715|Original|hCoV-19^^England|Human|Lighthouse Lab in Alderley Park|Wellcome Sanger Institute for the COVID-19 Genomics UK (COG-UK) Consortium|Davies|United Kingdom

>Spike|hCoV-19/USA/CA-CHLA-PLM95751496/2020|2020-11-18|EPI\_ISL\_753376|Original|hCoV-19^^California|Human|Clinical virology Laboratory|Center for Personalized Medicine|Dien Bard|USA

>Spike|hCoV-19/England/GSTT-265DDF2/2020|2020-03-28|EPI\_ISL\_484109|Original|hCoV-19^^England|Human|Centre for Clinical Infection and Diagnostics Research and Genomics Innovation Unit|COVID-19 Genomics UK (COG-UK) Consortium|Awan|United Kingdom

>Spike|hCoV-19/SaudiArabia/KAUST-JEDDAH1055/2020|2020-06-17|EPI\_ISL\_512905|Original|hCoV-19^^Jeddah|Human|Pathogen Genomics Lab King Abdullah University of Science and Technology(KAUST)|Pathogen Genomics Lab King Abdullah University of Science and Technology(KAUST)|Mohamed Ghazzali|Saudi Arabia

>Spike|hCoV-19/England/ALDP-C48C1B/2020|2020-12-12|EPI\_ISL\_736704|Original|hCoV-19^^England|Human|Lighthouse Lab in Alderley Park|Wellcome Sanger Institute for the COVID-19 Genomics UK (COG-UK) Consortium|Davies|United Kingdom

>Spike|hCoV-19/Northern Ireland/NIRE-10336D/2020|2020-04-17|EPI\_ISL\_489266|Original|hCoV-19^^Northern Ireland|Human|Regional Virus Laboratory|Wellcome Sanger Institute for the COVID-19 Genomics UK (COG-UK) consortium|Davies|United Kingdom

>Spike|hCoV-19/USA/CA-ALSR-4221/2020|2020-08-18|EPI\_ISL\_648895|Original|hCoV-19^^California|Human|San Diego County Public Health Laboratory|Andersen lab at Scripps Research|Gangavarapu|USA

>Spike|hCoV-19/Switzerland/BS-UHB-42201473/2020|2020-03-21|EPI\_ISL\_528295|Original|hCoV-19^^Basel-Stadt|Human|University Hospital Basel|University Hospital Basel|Roloff Handschin|Switzerland

>Spike|hCoV-19/England/MILK-9F18A7/2020|2020-09-25|EPI\_ISL\_589636|Original|hCoV-19^^England|Human|Lighthouse Lab in Milton Keynes|Wellcome Sanger Institute for the COVID-19 Genomics UK (COG-UK) consortium|Davies|United Kingdom

>Spike|hCoV-19/USA/NY-NYCPHL-000994/2020|2020-10-01|EPI\_ISL\_633019|Original|hCoV-19^^New York|Human|DOHMH Morrisania|New York City Public Health Laboratory|Wang|USA

>Spike|hCoV-19/USA/FL-BPHL-1761/2020|2020-10-02|EPI\_ISL\_613766|Original|hCoV-19^^Florida|Human|Florida Bureau of Public Health Laboratories|Florida Bureau of Public Health Laboratories|Blanton|USA

>Spike|hCoV-19/England/CAMB-7BFD6/2020|2020-04-13|EPI\_ISL\_433976|Original|hCoV-19^^England|Human|Department of Pathology|COVID-19 Genomics UK (COG-UK) Consortium|Meredith|United Kingdom

>Spike|hCoV-19/England/BHRT-24B3925/2020|2020-05-21|EPI\_ISL\_528790|Original|hCoV-19^^England|Human|Microbiology Department|Wellcome Sanger Institute for the COVID-19 Genomics UK (COG-UK) consortium|Davies|United Kingdom

>Spike|hCoV-19/DRC/11376/2020|2020-05-25|EPI\_ISL\_527513|Original|hCoV-19^^Kinshasa|Human|Viral Respiratory Lab|Pathogen Sequencing Lab|Lokilo|Democratic Republic of the Congo

>Spike|hCoV-19/Australia/NSW895/2020|2020-08-26|EPI\_ISL\_544976|Original|hCoV-19^^New South Wales|Human|Pathology North - Royal North Shore Hospital - NSW Health Pathology|NSW Health Pathology - Institute of Clinical Pathology and Medical Research; Westmead Hospital; University of Sydney|Gall|Australia

>Spike|hCoV-19/South Korea/KDCA0408/2020|2020-11-10|EPI\_ISL\_760192|Original|hCoV-19^^South Korea|Human|Division of Emerging Infectious Diseases|Division of Emerging Infectious Diseases|Park|South Korea

>Spike|hCoV-19/England/BRIS-122D79/2020|2020-04-02|EPI\_ISL\_440702|Original|hCoV-19^^England|Human|PHE South West Regional Laboratory|Wellcome Sanger Institute for the COVID-19 Genomics UK (COG-UK) consortium|Amato|United Kingdom

>Spike|hCoV-19/Hungary/UD-6858/2020|2020-04-08|EPI\_ISL\_476071|Original|hCoV-19^^Debrecen|Human|University of Debrecen|National Laboratory of Virology|Kemenesi|Hungary

>Spike|hCoV-19/England/EXET-13EB25/2020|2020-12-14|EPI\_ISL\_764183|Original|hCoV-19^^England|Human|University of Exeter|COVID-19 Genomics UK (COG-UK) Consortium|Temperton|United Kingdom

>Spike|hCoV-19/England/ALDP-BB357B/2020|2020-11-19|EPI\_ISL\_702741|Original|hCoV-19^^England|Human|Lighthouse Lab in Alderley Park|Wellcome Sanger Institute for the COVID-19 Genomics UK (COG-UK) Consortium|Davies|United Kingdom

>Spike|hCoV-19/Mexico/TAM-INDRE\_38/2020|2020-06-19|EPI\_ISL\_516624|Original|hCoV-19^^Tamaulipas|Human|Instituto de Diagnostico y Referencia Epidemiologicos (INDRE)|Instituto de Diagnostico y Referencia Epidemiologicos (INDRE)|Rodriguez|Mexico

>Spike|hCoV-19/England/20149027404/2020|2020-04-03|EPI\_ISL\_466180|Original|hCoV-19^^England|Human|Respiratory Virus Unit|Respiratory Virus Unit|Platt|United Kingdom

>Spike|hCoV-19/Ukraine/203100356/2020|2020-05-28|EPI\_ISL\_512635|Original|hCoV-19^^Ukraine|Human|National Laboratory for Influenza/Virology reference laboratory|Respiratory Virus Unit|Platt|Ukraine

>Spike|hCoV-19/USA/WY-WPHL-20149634/2020|2020-11-24|EPI\_ISL\_770063|Original|hCoV-19^^Wyoming|Human|Wyoming Public Health Laboratory|Wyoming Public Health Laboratory|Hull|USA

>Spike|hCoV-19/Spain/MD-IBV-99009620/2020|2020-08-06|EPI\_ISL\_654362|Original|hCoV-19^^Madrid|Human|Hospital General Universitario Gregorio Mara\u00f1a|SeqCOVID-SPAIN consortium|IBV (CSIC)|Comas|Spain

>Spike|hCoV-19/Wales/PHWC-49298C/2020|2020-11-20|EPI\_ISL\_725727|Original|hCoV-19^^Wales|Human|Originating lab|COVID-19 Genomics UK (COG-UK) Consortium|Moore|United Kingdom

>Spike|hCoV-19/Japan/PG-2253/2020|2020-04-00|EPI\_ISL\_685858|Original|hCoV-19^^Japan|Human|Pathogen Genomics Center|Pathogen Genomics Center|Sekizuka|Japan

>Spike|hCoV-19/England/CAMC-B510AB/2020|2020-11-08|EPI\_ISL\_657885|Original|hCoV-19^^England|Human|Lighthouse Lab in Cambridge|Wellcome Sanger Institute for the COVID-19 Genomics UK (COG-UK) Consortium|Davies|United Kingdom

>Spike|hCoV-19/England/ALDP-AA1A18/2020|2020-10-22|EPI\_ISL\_624511|Original|hCoV-19^^England|Human|Lighthouse Lab in Alderley Park|Wellcome Sanger Institute for the COVID-19 Genomics UK (COG-UK) consortium|Davies|United Kingdom

>Spike|hCoV-19/Greece/44/2020|2020-03-23|EPI\_ISL\_434465|Original|hCoV-19^^Athens|Human|Laboratory of Microbiology|Laboratory of Biology|Karakasiliotis|Greece

>Spike|hCoV-19/Wuhan/HB-WHCM2-271/2020|2020-02-17|EPI\_ISL\_455006|Original|hCoV-19^^Hubei|Human|Wuhan Chain Medical Labs (CMLabs)|State Key Laboratory of Biotherapy of Sichuan University|Tang|China

>Spike|hCoV-19/Denmark/DCGC-18970/2020|2020-12-07|EPI\_ISL\_748672|Original|hCoV-19^^Hovedstaden|Human|Department of Virus and Microbiological Special Diagnostics|Albertsen Lab|Michaelsen|Denmark

>Spike|hCoV-19/USA/MI-UM-10036361683/2020|2020-10-09|EPI\_ISL\_596619|Original|hCoV-19^^Michigan|Human|University of Michigan Clinical Microbiology Laboratory|Lauring Lab|Valesano|USA

>Spike|hCoV-19/Australia/VIC2578/2020|2020-07-03|EPI\_ISL\_521453|Original|hCoV-19^^Victoria|Human|Microbiological Diagnostic Unit - Public Health Laboratory (MDU-PHL)|MDU-PHL|Schultz|Australia

>Spike|hCoV-19/Japan/PG-7806/2020|2020-07-00|EPI\_ISL\_686908|Original|hCoV-19^^Japan|Human|Pathogen Genomics Center|Pathogen Genomics Center|Sekizuka|Japan

>Spike|hCoV-19/England/QEUA-5317C0/2020|2020-05-18|EPI\_ISL\_532217|Original|hCoV-19^^England|Human|Lighthouse Lab in Glasgow|Wellcome Sanger Institute for the COVID-19 Genomics UK (COG-UK) consortium|Davies|United Kingdom

>Spike|hCoV-19/USA/VA-DCLS-1317/2020|2020-07-09|EPI\_ISL\_572257|Original|hCoV-19^^Virginia|Human|Virginia DCLS|Virginia DCLS|St. Jacques|USA

>Spike|hCoV-19/USA/UT-UPHL-01963/2020|2020-04-15|EPI\_ISL\_575245|Original|hCoV-19^^Utah|Human|Utah Public Health Laboratory|Utah Public Health Laboratory|Young|USA

>Spike|hCoV-19/France/PAC-IHU-0224/2020|2020-03-29|EPI\_ISL\_569387|Original|hCoV-19^^Provence-Alpes-C\u00f4te-d\u00a0Azur|Human|MEPHI|MEPHI|Levasseur|France

>Spike|hCoV-19/New Zealand/20VR2531/2020|2020-00-00|EPI\_ISL\_579276|Original|hCoV-19^^Auckland|Human|LabPLUS|Institute of Environmental Science and Research (ESR)|Wang|New Zealand

>Spike|hCoV-19/Netherlands/Gelderland\_118/2020|2020-05-22|EPI\_ISL\_460879|Original|hCoV-19^^Gelderland|Human|Dutch COVID-19 response team|Erasmus Medical Center|Oude Munnink|Netherlands

>Spike|hCoV-19/England/LIVE-AA75E/2020|2020-03-24|EPI\_ISL\_517496|Original|hCoV-19^^England|Human|Liverpool Clinical Laboratories|COVID-19 Genomics UK (COG-UK) Consortium|Haldenby|United Kingdom

>Spike|hCoV-19/Norway/4917/2020|2020-10-25|EPI\_ISL\_668431|Original|hCoV-19^^Nordland|Human|Nordland Hospital - Bodo|Norwegian Institute of Public Health|Kopperud Riis|Norway

>Spike|hCoV-19/Netherlands/NA\_350/2020|2020-04-06|EPI\_ISL\_455155|Original|hCoV-19^^Netherlands|Human|Dutch COVID-19 response team|Erasmus Medical Center|Oude Munnink|Netherlands

>Spike|hCoV-19/England/20130072404/2020|2020-03-23|EPI\_ISL\_423666|Original|hCoV-19^^England|Human|Respiratory Virus Unit|Respiratory Virus Unit|Platt|United Kingdom

>Spike|hCoV-19/USA/WY-WPHL-20172574/2020|2020-12-31|EPI\_ISL\_770488|Original|hCoV-19^^Wyoming|Human|Wyoming Public Health Laboratory|Wyoming Public Health Laboratory|Hull|USA

>Spike|hCoV-19/Austria/CeMM0617/2020|2020-04-22|EPI\_ISL\_583616|Original|hCoV-19^^Ischgl|Human|Institut f\u00fcr Virologie am Department f\u00fcr Hygiene|Bergthaler laboratory|Bergthaler|Austria

>Spike|hCoV-19/England/205160919/2020|2020-12-11|EPI\_ISL\_766261|Original|hCoV-19^^England|Human|Respiratory Virus Unit|COVID-19 Genomics UK (COG-UK) Consortium|Platt|United Kingdom

>Spike|hCoV-19/USA/CA-CZB-15238/2020|2020-11-24|EPI\_ISL\_739456|Original|hCoV-19^^California|Human|Santa Clara County Public Health Laboratory|Chan-Zuckerberg Biohub|Kamm|USA

>Spike|hCoV-19/South Africa/KRISP-K005332/2020|2020-11-14|EPI\_ISL\_678620|Original|hCoV-19^^KwaZulu-Natal|Human|NHLS-IALCH|KRISP|de Oliveira|South Africa

>Spike|hCoV-19/USA/CO-CSU-D1490-2/2020|2020-04-15|EPI\_ISL\_527440|Original|hCoV-19^^Colorado|Human|Colorado State University - Ebel Lab|Colorado State University - Ebel Lab|Cline|USA

>Spike|hCoV-19/India/GJ-GBRC163a/2020|2020-05-27|EPI\_ISL\_461497|Original|hCoV-19^^Gujarat|Human|B.J. Medical College and Civil hospital|Gujarat Biotechnology Research Centre|Joshi|India

>Spike|hCoV-19/England/CAMB-1AFF6/2020|2020-05-07|EPI\_ISL\_448096|Original|hCoV-19^^England|Human|Department of Pathology|COVID-19 Genomics UK (COG-UK) Consortium|Meredith|United Kingdom

>Spike|hCoV-19/USA/TX-HMH-MCoV-19546/2020|2020-11-17|EPI\_ISL\_783921|Original|hCoV-19^^Texas|Human|Houston Methodist Hospital|Houston Methodist Hospital|Long|USA

>Spike|hCoV-19/Scotland/EDB5348/2020|2020-05-23|EPI\_ISL\_457004|Original|hCoV-19^^Scotland|Human|Virology Department|COVID-19 Genomics UK (COG-UK) Consortium|Williams|United Kingdom

>Spike|hCoV-19/England/CAMC-B22E7C/2020|2020-11-02|EPI\_ISL\_647170|Original|hCoV-19^^England|Human|Lighthouse Lab in Cambridge|Wellcome Sanger Institute for the COVID-19 Genomics UK (COG-UK) Consortium|Davies|United Kingdom

>Spike|hCoV-19/England/BRIS-126F15/2020|2020-04-23|EPI\_ISL\_469755|Original|hCoV-19^^England|Human|PHE South West Regional Laboratory|Wellcome Sanger Institute for the COVID-19 Genomics UK (COG-UK) consortium|Davies|United Kingdom

>Spike|hCoV-19/USA/TX-HMH-MCoV-15749/2020|2020-07-09|EPI\_ISL\_785433|Original|hCoV-19^^Texas|Human|Houston Methodist Hospital|Houston Methodist Hospital|Long|USA

>Spike|hCoV-19/Australia/VIC684/2020|2020-03-29|EPI\_ISL\_426979|Original|hCoV-19^^Victoria|Human|Victorian Infectious Diseases Reference Laboratory (VIDRL)|Microbiological Diagnostic Unit Public Health Laboratory and Victorian Infectious Diseases Reference Laboratory|Schultz|Australia

>Spike|hCoV-19/England/ALDP-B73FD3/2020|2020-11-12|EPI\_ISL\_662047|Original|hCoV-19^^England|Human|Lighthouse Lab in Alderley Park|Wellcome Sanger Institute for the COVID-19 Genomics UK (COG-UK) Consortium|Davies|United Kingdom

>Spike|hCoV-19/England/MILK-ACE480/2020|2020-10-21|EPI\_ISL\_629295|Original|hCoV-19^^England|Human|Lighthouse Lab in Milton Keynes|Wellcome Sanger Institute for the COVID-19 Genomics UK (COG-UK) consortium|Davies|United Kingdom

>Spike|hCoV-19/Hangzhou/HZCDC0048L/2020|2020-01-21|EPI\_ISL\_421232|Original|hCoV-19^^Hangzhou|Human|Hangzhou Center for Diseases Control and Prevention|Hangzhou Center for Diseases Control and Prevention|Li|China

>Spike|hCoV-19/USA/MD-MDH-0526/2020|2020-12-01|EPI\_ISL\_778903|Original|hCoV-19^^Maryland|Human|Maryland Public Health Laboratory|Maryland Public Health Laboratory|Keller|USA

>Spike|hCoV-19/England/MILK-99D1EE/2020|2020-08-30|EPI\_ISL\_550731|Original|hCoV-19^^England|Human|Lighthouse Lab in Milton Keynes|Wellcome Sanger Institute for the COVID-19 Genomics UK (COG-UK) consortium|Davies|United Kingdom

>Spike|hCoV-19/England/CAMB-1BA101/2020|2020-11-06|EPI\_ISL\_651582|Original|hCoV-19^^England|Human|Department of Pathology|COVID-19 Genomics UK (COG-UK) Consortium|Goodfellow|United Kingdom

>Spike|hCoV-19/England/QEUEH-9F3ACD/2020|2020-09-24|EPI\_ISL\_588622|Original|hCoV-19^^England|Human|Lighthouse Lab in Glasgow|Wellcome Sanger Institute for the COVID-19 Genomics UK (COG-UK) consortium|Davies|United Kingdom

>Spike|hCoV-19/Australia/VIC3108/2020|2020-07-06|EPI\_ISL\_520815|Original|hCoV-19^^Victoria|Human|Victorian Infectious Diseases Reference Laboratory (VIDRL)|VIDRL and MDU-PHL|Schultz|Australia

>Spike|hCoV-19/England/NORW-222D2D/2020|2020-12-19|EPI\_ISL\_741519|Original|hCoV-19^^England|Human|Quadram Institute Bioscience|COVID-19 Genomics UK (COG-UK) Consortium|Alikhan|United Kingdom

>Spike|hCoV-19/USA/CA-CZB-11820/2020|2020-10-02|EPI\_ISL\_625658|Original|hCoV-19^^California|Human|Orange County Public Health Lab|Chan-Zuckerberg Biohub|Bhatt|USA

>Spike|hCoV-19/Russia/SVE-RII-MH2038S/2020|2020-09-21|EPI\_ISL\_602386|Original|hCoV-19^^Sverdlovsk|Human|HELIX LLC|WHO National Influenza Centre Russian Federation|Komissarov|Russia

>Spike|hCoV-19/USA/ID-UW-2047/2020|2020-03-22|EPI\_ISL\_477680|Original|hCoV-19^^Idaho|Human|UW Virology Lab|UW Virology Lab|Roychoudhury|USA

>Spike|hCoV-19/England/MILK-A05766/2020|2020-09-30|EPI\_ISL\_599860|Original|hCoV-19^^England|Human|Lighthouse Lab in Milton Keynes|Wellcome Sanger Institute for the COVID-19 Genomics UK (COG-UK) consortium|Davies|United Kingdom

>Spike|hCoV-19/USA/LA-GBCL-26544541/2020|2020-04-18|EPI\_ISL\_485122|Original|hCoV-19^^Louisiana|Human|River Road Testing Lab|Ginkgo Bioworks Clinical Laboratory|Smith|USA

>Spike|hCoV-19/Denmark/DCGC-18836/2020|2020-12-07|EPI\_ISL\_748587|Original|hCoV-19^^Midtjylland|Human|Department of Virus and Microbiological Special Diagnostics|Albertsen Lab|Michaelsen|Denmark

>Spike|hCoV-19/England/QEUA-B14068/2020|2020-11-03|EPI\_ISL\_641793|Original|hCoV-19^^England|Human|Lighthouse Lab in Glasgow|Wellcome Sanger Institute for the COVID-19 Genomics UK (COG-UK) Consortium|Davies|United Kingdom

>Spike|hCoV-19/USA/TX-HMH-MCoV-12736/2020|2020-08-31|EPI\_ISL\_790494|Original|hCoV-19^^Texas|Human|Houston Methodist Hospital|Houston Methodist Hospital|Long|USA

>Spike|hCoV-19/USA/OR-OHSU-2081/2020|2020-08-04|EPI\_ISL\_667111|Original|hCoV-19^^Oregon|Human|OHSU Lab Services Molecular Microbiology Lab|Oregon SARS-CoV-2 Genome Sequencing Center|O'Roak|USA

>Spike|hCoV-19/USA/WI-GMF-18735/2020|2020-09-04|EPI\_ISL\_547781|Original|hCoV-19^^Wisconsin|Human|Gundersen Molecular Diagnostics Laboratory|Kabara Cancer Research Institute|Kenny|USA

>Spike|hCoV-19/USA/FL-BPHL-0427/2020|2020-03-21|EPI\_ISL\_495333|Original|hCoV-19^^Florida|Human|Florida Bureau of Public Health Laboratories|Florida Bureau of Public Health Laboratories|Blanton|USA

>Spike|hCoV-19/USA/AZ-TG408144/2020|2020-06-12|EPI\_ISL\_694900|Original|hCoV-19^^Arizona|Human|AZ SPHL|TGen North|French|USA

>Spike|hCoV-19/Australia/VIC17907/2020|2020-08-21|EPI\_ISL\_779550|Original|hCoV-19^^Victoria|Human|Microbiological Diagnostic Unit - Public Health Laboratory (MDU-PHL)|MDU-PHL|Beck|Australia

>Spike|hCoV-19/England/CAMB-80BBC/2020|2020-04-11|EPI\_ISL\_442949|Original|hCoV-19^^England|Human|Department of Pathology|Wellcome Sanger Institute for the COVID-19 Genomics UK (COG-UK) consortium|Amato|United Kingdom

>Spike|hCoV-19/Australia/VIC12651/2020|2020-07-26|EPI\_ISL\_592045|Original|hCoV-19^^Victoria|Human|Microbiological Diagnostic Unit - Public Health Laboratory (MDU-PHL)|MDU-PHL|Schultz|Australia

>Spike|hCoV-19/USA/WI-UW-2154/2020|2020-10-15|EPI\_ISL\_677558|Original|hCoV-19^^Wisconsin|Human|University of Wisconsin-Madison AIDS Vaccine Research Laboratories|University of Wisconsin-Madison AIDS Vaccine Research Laboratories|Baczenas|USA

>Spike|hCoV-19/England/GSTT-265DEFF/2020|2020-03-28|EPI\_ISL\_484123|Original|hCoV-19^^England|Human|Centre for Clinical Infection and Diagnostics Research and Genomics Innovation Unit|COVID-19 Genomics UK (COG-UK) Consortium|Awan|United Kingdom

>Spike|hCoV-19/England/QEUA-96C86B/2020|2020-08-21|EPI\_ISL\_530656|Original|hCoV-19^^England|Human|Lighthouse Lab in Glasgow|Wellcome Sanger Institute for the COVID-19 Genomics UK (COG-UK) consortium|Davies|United Kingdom

>Spike|hCoV-19/England/BRIS-12EB73/2020|2020-04-24|EPI\_ISL\_488415|Original|hCoV-19^^England|Human|PHE South West Regional Laboratory|Wellcome Sanger Institute for the COVID-19 Genomics UK (COG-UK) consortium|Davies|United Kingdom

>Spike|hCoV-19/England/20134079504/2020|2020-03-24|EPI\_ISL\_423178|Original|hCoV-19^^England|Human|Respiratory Virus Unit|Respiratory Virus Unit|Platt|United Kingdom

>Spike|hCoV-19/England/CAMB-8373D/2020|2020-04-15|EPI\_ISL\_443647|Original|hCoV-19^^England|Human|Department of Pathology|Wellcome Sanger Institute for the COVID-19 Genomics UK (COG-UK) consortium|Amato|United Kingdom

>Spike|hCoV-19/Russia/CRIE4980432/2020|2020-07-16|EPI\_ISL\_534342|Original|hCoV-19^^Moscow|Human|Molecular diagnostic laboratory of Federal Budget Institution of Science \Central Research Institute of Epidemiology\ of The Federal Service on Customers' Rights Protection and Human Well-being Surveillance|Group of Genomics and Postgenomic Technologies of Central Research Institute of Epidemiology|Speranskaya|Russia

>Spike|hCoV-19/USA/WA-UW-5166/2020|2020-04-02|EPI\_ISL\_429653|Original|hCoV-19^^Washington|Human|UW Virology Lab|UW Virology Lab|Roychoudhury|USA

>Spike|hCoV-19/Ireland/D-NVRL-AIIDV0081v2/2020|2020-04-15|EPI\_ISL\_644286|Original|hCoV-19^^Dublin|Human|CEPHR / Vincent's Hospital|Irish

Coronavirus Sequencing Consortium - National Virus Reference

Laboratory|Gonzalez|Ireland

>Spike|hCoV-19/Australia/VIC7442/2020|2020-07-23|EPI\_ISL\_564416|Original|hCoV-19^^Victoria|Human|Microbiological Diagnostic Unit - Public Health Laboratory (MDU-PHL)|MDU-PHL|Schultz|Australia

>Spike|hCoV-19/SaudiArabia/KAUST-MADINAH1048/2020|2020-06-

13|EPI\_ISL\_513079|Original|hCoV-19^^Madinah|Human|Pathogen Genomics Lab King Abdullah University of Science and Technology(KAUST)|Pathogen Genomics Lab King Abdullah University of Science and Technology(KAUST)|Mohamed Ghazzali|Saudi Arabia

>Spike|hCoV-19/USA/IL-NM-0552/2020|2020-04-30|EPI\_ISL\_626455|Original|hCoV-19^^Illinois|Human|Northwestern Memorial Hospital|Ozer Lab|Ozer|USA

>Spike|hCoV-19/USA/AK-PHL602/2020|2020-06-24|EPI\_ISL\_586245|Original|hCoV-19^^Alaska|Human|Alaska State Virology Laboratory|Alaska State Virology Laboratory|Chen|USA

>Spike|hCoV-19/England/QEUEH-B3F744/2020|2020-11-08|EPI\_ISL\_658641|Original|hCoV-19^^England|Human|Lighthouse Lab in Glasgow|Wellcome Sanger Institute for the COVID-19 Genomics UK (COG-UK) Consortium|Davies|United Kingdom

>Spike|hCoV-19/England/CAMB-1AA9A2/2020|2020-04-18|EPI\_ISL\_470199|Original|hCoV-19^^England|Human|Department of Pathology|Wellcome Sanger Institute for the COVID-19 Genomics UK (COG-UK) consortium|Davies|United Kingdom

>Spike|hCoV-19/England/NORT-298751/2020|2020-05-18|EPI\_ISL\_469316|Original|hCoV-19^^England|Human|NU-OMICS DNA Sequencing research facility|Wellcome Sanger Institute for the COVID-19 Genomics UK (COG-UK) consortium|Davies|United Kingdom

>Spike|hCoV-19/Denmark/DCGC-1138/2020|2020-03-23|EPI\_ISL\_614632|Original|hCoV-19^^Nordjylland|Human|Department of Virus and Microbiological Special Diagnostics|Albertsen lab|Michaelsen|Denmark

>Spike|hCoV-19/USA/DE-DHSS-F1010662/2020|2020-10-01|EPI\_ISL\_708429|Original|hCoV-19^^Delaware|Human|Delaware Public Health Lab|Delaware Public Health Lab|Bajwa|USA

>Spike|hCoV-19/Vietnam/VNHN\_4958/2020|2020-04-10|EPI\_ISL\_455718|Original|hCoV-19^^Hanoi|Human|National Hospital of Tropical Diseases|Oxford University Clinical Research Unit|Nguyen|Vietnam

>Spike|hCoV-19/India/MH-NCCS-NR2099/2020|2020-05-21|EPI\_ISL\_496568|Original|hCoV-19^^Maharashtra|Human|National Centre For Cell Science|National Centre For Cell Science|Paul|India

>Spike|hCoV-19/South Africa/KRISP-K002241/2020|2020-07-21|EPI\_ISL\_515632|Original|hCoV-19^^KwaZulu-Natal|Human|NHLs-IALCH|KRISP|de Oliveira|South Africa

>Spike|hCoV-19/Denmark/DCGC-18390/2020|2020-12-07|EPI\_ISL\_749230|Original|hCoV-19^^Hovedstaden|Human|Department of Virus and Microbiological Special Diagnostics|Albertsen Lab|Michaelsen|Denmark

>Spike|hCoV-19/Norway/3272/2020|2020-08-24|EPI\_ISL\_590910|original|hCoV-19^^Oslo|Human|Oslo University Hospital|Norwegian Institute of Public Health|Vollan|Norway

>Spike|hCoV-19/USA/CA-CDPH168/2020|2020-07-19|EPI\_ISL\_754944|Original|hCoV-19^^California|Human|California Department of Public Health|California Department of Public Health|Bell|USA

>Spike|hCoV-19/Belgium/Rega-0328202/2020|2020-03-28|EPI\_ISL\_458172|Original|hCoV-19^^Colfontaine|Human|KU Leuven|KU Leuven|Maes|Belgium

>Spike|hCoV-19/England/MILK-B390F4/2020|2020-11-02|EPI\_ISL\_651289|Original|hCoV-19^^England|Human|University of Exeter|COVID-19 Genomics UK (COG-UK) Consortium|Temperton|United Kingdom

>Spike|hCoV-19/Japan/PG-8146/2020|2020-08-00|EPI\_ISL\_687245|Original|hCoV-19^^Japan|Human|Pathogen Genomics Center|Pathogen Genomics Center|Sekizuka|Japan

>Spike|hCoV-19/Sweden/20-51681/2020|2020-05-25|EPI\_ISL\_476137|Original|hCoV-19^^Vastra Gotaland|Human|Wasterlakarna|The Public Health Agency of Sweden|Svartstr\u00f6m|Sweden

>Spike|hCoV-19/Germany/NW-HHU-265/2020|2020-09-22|EPI\_ISL\_631353|Orginal|hCoV-19^^North Rhine-Westphalia|Human|ZOTZ KLIMAS MVZ D\u00fcrreseldorf-Centrum GbR \u00dcBAG f\u00fcr Labormedizin|Center of Medical Microbiology|Wienemann|Germany



>Spike|hCoV-19/France/ARA-SC316/2020|2020-04-18|EPI\_ISL\_649950|Original|hCoV-19^^Auvergne-Rh\u00f4ne-Alpes|Human|CHU de Saint-\u00c9tienne H\u00f4pital Nord|CNR Virus des Infections Respiratoires - France SUD|Bal|France

>Spike|hCoV-19/Australia/VIC3797/2020|2020-07-12|EPI\_ISL\_520514|Original|hCoV-19^^Victoria|Human|Microbiological Diagnostic Unit - Public Health Laboratory (MDU-PHL)|MDU-PHL|Schultz|Australia

>Spike|hCoV-19/England/ALDP-A92AED/2020|2020-10-19|EPI\_ISL\_611129|Original|hCoV-19^^England|Human|Lighthouse Lab in Alderley Park|Wellcome Sanger Institute for the COVID-19 Genomics UK (COG-UK) consortium|Davies|United Kingdom

>Spike|hCoV-19/England/CAMB-1B1B48/2020|2020-05-13|EPI\_ISL\_453000|Original|hCoV-19^^England|Human|Department of Pathology|COVID-19 Genomics UK (COG-UK) Consortium|Meredith|United Kingdom

>Spike|hCoV-19/England/EXET-13AFE1/2020|2020-11-10|EPI\_ISL\_664417|Original|hCoV-19^^England|Human|University of Exeter|COVID-19 Genomics UK (COG-UK) Consortium|Temperton|United Kingdom

>Spike|hCoV-19/India/TG-CCMB-L1999/2020|2020-06-04|EPI\_ISL\_495180|Original|hCoV-19^^Telangana|Human|CSIR-Centre for Cellular and Molecular Biology|CSIR-Centre for Cellular and Molecular Biology|Banu|India

>Spike|hCoV-19/England/LIVE-A85CF/2020|2020-03-26|EPI\_ISL\_517186|Original|hCoV-19^^England|Human|Liverpool Clinical Laboratories|COVID-19 Genomics UK (COG-UK) Consortium|Haldenby|United Kingdom

>Spike|hCoV-19/Japan/PG-2990/2020|2020-04-00|EPI\_ISL\_691114|Original|hCoV-19^^Japan|Human|Pathogen Genomics Center|Pathogen Genomics Center|Sekizuka|Japan

>Spike|hCoV-19/England/CAMB-78874/2020|2020-04-06|EPI\_ISL\_433782|Original|hCoV-19^^England|Human|Department of Pathology|COVID-19 Genomics UK (COG-UK) Consortium|Meredith|United Kingdom

>Spike|hCoV-19/England/ALDP-9C601C/2020|2020-09-10|EPI\_ISL\_567748|Original|hCoV-19^^England|Human|Lighthouse Lab in Alderley Park|Wellcome Sanger Institute for the COVID-19 Genomics UK (COG-UK) consortium|Davies|United Kingdom

>Spike|hCoV-19/India/GJ-GBRC269/2020|2020-06-13|EPI\_ISL\_483866|Original|hCoV-19^^Gujarat|Human|Department of Microbiology|Gujarat Biotechnology Research Centre|Joshi|India

>Spike|hCoV-19/England/QEUH-AE4F74/2020|2020-10-27|EPI\_ISL\_633202|Original|hCoV-19^^England|Human|Lighthouse Lab in Glasgow|Wellcome Sanger Institute for the COVID-19 Genomics UK (COG-UK) consortium|Davies|United Kingdom

>Spike|hCoV-19/Wales/PHWC-15FF04/2020|2020-04-23|EPI\_ISL\_472871|Original|hCoV-19^^Wales|Human|Wales Specialist Virology Centre Sequencing lab|COVID-19 Genomics UK (COG-UK) Consortium|Moore|United Kingdom

>Spike|hCoV-19/Canada/BC-BCCDC-7553/2020|2020-11-00|EPI\_ISL\_740716|Original|hCoV-19^^British Columbia|Human|BCCDC Public Health Laboratory|BCCDC Public Health Laboratory|Prystajecky|Canada

>Spike|hCoV-19/England/ALDP-9CDC99/2020|2020-09-16|EPI\_ISL\_566111|Original|hCoV-19^^England|Human|Lighthouse Lab in Alderley Park|Wellcome Sanger Institute for the COVID-19 Genomics UK (COG-UK) consortium|Davies|United Kingdom

>Spike|hCoV-19/England/LEED-2AA1D6/2020|2020-04-04|EPI\_ISL\_538895|Original|hCoV-19^^England|Human|Leeds Teaching Hospitals NHS Trust and Public Health England|Wellcome Sanger Institute for the COVID-19 Genomics UK (COG-UK) consortium|Davies|United Kingdom

>Spike|hCoV-19/England/BRIS-1297CF/2020|2020-03-31|EPI\_ISL\_458825|Original|hCoV-19^^England|Human|PHE South West Regional Laboratory|Wellcome Sanger Institute for the COVID-19 Genomics UK (COG-UK) consortium|Davies|United Kingdom

>Spike|hCoV-19/Scotland/EDB3123/2020|2020-04-04|EPI\_ISL\_488914|Original|hCoV-19^^Scotland|Human|Virology Department|Wellcome Sanger Institute for the COVID-19 Genomics UK (COG-UK) consortium|Davies|United Kingdom

>Spike|hCoV-19/Netherlands/ZH-RIVM-20890/2020|2020-10-02|EPI\_ISL\_790928|Original|hCoV-19^^Zuid-holland|Human|Dutch COVID-19 response team|National Institute for Public Health and the Environment (RIVM)|Meijer|Netherlands

>Spike|hCoV-19/England/204761672/2020|2020-11-19|EPI\_ISL\_766274|Original|hCoV-19^^England|Human|Respiratory Virus Unit|COVID-19 Genomics UK (COG-UK) Consortium|Platt|United Kingdom

>Spike|hCoV-19/Luxembourg/LNS9024343/2020|2020-12-28|EPI\_ISL\_771124|Original|hCoV-19^^Luxembourg|Human|Laboratoire national de sant\u00e9|Laboratoire national de sant\u00e9|Wienecke-Baldacchino|Luxembourg

>Spike|hCoV-19/USA/WI-UW-1197/2020|2020-07-29|EPI\_ISL\_527807|Original|hCoV-19^^Wisconsin|Human|University of Wisconsin-Madison AIDS Vaccine Research Laboratories|University of Wisconsin-Madison AIDS Vaccine Research Laboratories|Baczenas|USA

>Spike|hCoV-19/Canada/ON-PHL-20-03678/2020|2020-11-00|EPI\_ISL\_775162|Original|hCoV-19^^Ontario|Human|Public Health Ontario Laboratory|Public Health Ontario Laboratory|Guthrie|Canada

>Spike|hCoV-19/USA/TX-DSHS-0714/2020|2020-09-09|EPI\_ISL\_576357|Original|hCoV-19^^Texas|Human|Texas Department of State Health Services|Texas Department of State Health Services|Rahman|USA

>Spike|hCoV-19/England/BIRM-646BD/2020|2020-09-23|EPI\_ISL\_594504|Original|hCoV-19^^England|Human|University of Birmingham|COVID-19 Genomics UK (COG-UK) Consortium|Loman|United Kingdom

>Spike|hCoV-19/England/SHEF-C0075/2020|2020-03-23|EPI\_ISL\_420271|Original|hCoV-19^^England|Human|Virology Department|Department of Infection|de Silva|United Kingdom

>Spike|hCoV-19/USA/TX-HMH-1970/2020|2020-05-15|EPI\_ISL\_542927|Original|hCoV-19^^Texas|Human|Houston Methodist Hospital|Houston Methodist Hospital|Long|USA

>Spike|hCoV-19/USA/UT-UPHL-2012303126/2020|2020-08-17|EPI\_ISL\_746059|Original|hCoV-19^^Utah|Human|Ginkgo Bioworks Clinical Laboratory|Utah Public Health Laboratory|Young|USA

>Spike|hCoV-19/England/QEUEH-B6C483/2020|2020-11-11|EPI\_ISL\_655272|Original|hCoV-19^^England|Human|Lighthouse Lab in Glasgow|Wellcome Sanger Institute for the COVID-19 Genomics UK (COG-UK) Consortium|Davies|United Kingdom

>Spike|hCoV-19/USA/TX-HMH-4125/2020|2020-06-18|EPI\_ISL\_543391|Original|hCoV-19^^Texas|Human|Houston Methodist Hospital|Houston Methodist Hospital|Long|USA

>Spike|hCoV-19/USA/OR-OHSU-3702/2020|2020-10-19|EPI\_ISL\_667510|Original|hCoV-19^^Oregon|Human|OHSU Lab Services Molecular Microbiology Lab|Oregon SARS-CoV-2 Genome Sequencing Center|O'Roak|USA

>Spike|hCoV-19/England/ALDP-9E9392/2020|2020-09-24|EPI\_ISL\_584210|Original|hCoV-19^^England|Human|Virology Department|COVID-19 Genomics UK (COG-UK) Consortium|de Silva|United Kingdom

>Spike|hCoV-19/England/ALDP-B5BCCB/2020|2020-11-09|EPI\_ISL\_655878|Original|hCoV-19^^England|Human|Lighthouse Lab in Alderley Park|Wellcome Sanger Institute for the COVID-19 Genomics UK (COG-UK) Consortium|Davies|United Kingdom

>Spike|hCoV-19/USA/TX-HMH-MCoV-8256/2020|2020-07-07|EPI\_ISL\_784295|Original|hCoV-19^^Texas|Human|Houston Methodist Hospital|Houston Methodist Hospital|Long|USA

>Spike|hCoV-19/England/QEUEH-B0DE1D/2020|2020-11-02|EPI\_ISL\_641998|Original|hCoV-19^^England|Human|Lighthouse Lab in Glasgow|Wellcome Sanger Institute for the COVID-19 Genomics UK (COG-UK) Consortium|Davies|United Kingdom

>Spike|hCoV-19/England/205260463/2020|2020-12-20|EPI\_ISL\_754319|Original|hCoV-19^^England|Human|Respiratory Virus Unit|COVID-19 Genomics UK (COG-UK) Consortium|Platt|United Kingdom

>Spike|hCoV-19/England/CAMB-7874A/2020|2020-04-06|EPI\_ISL\_433768|Original|hCoV-19^^England|Human|Department of Pathology|COVID-19 Genomics UK (COG-UK) Consortium|Meredith|United Kingdom

>Spike|hCoV-19/South Korea/KUMC01/2020|2020-02-06|EPI\_ISL\_413017|Original|hCoV-19^^South Korea|Human|Department of Microbiology|Department of Microbiology|Park|South Korea

>Spike|hCoV-19/Denmark/DCGC-1485/2020|2020-06-01|EPI\_ISL\_617969|Original|hCoV-19^^Hovedstaden|Human|Department of Virus and Microbiological Special Diagnostics|Albertsen lab|Michaelsen|Denmark

>Spike|hCoV-19/Netherlands/Gelderland\_125/2020|2020-05-22|EPI\_ISL\_460886|Original|hCoV-19^^Gelderland|Human|Dutch COVID-19 response team|Erasmus Medical Center|Oude Munnink|Netherlands

>Spike|hCoV-19/England/SHEF-D1D6B/2020|2020-04-18|EPI\_ISL\_462080|Original|hCoV-19^^England|Human|Virology Department|COVID-19 Genomics UK (COG-UK) Consortium|de Silva|United Kingdom

>Spike|hCoV-19/England/CAMC-B38031/2020|2020-11-05|EPI\_ISL\_658745|Original|hCoV-19^^England|Human|Lighthouse Lab in Cambridge|Wellcome Sanger Institute for the COVID-19 Genomics UK (COG-UK) Consortium|Davies|United Kingdom

>Spike|hCoV-19/England/CAMB-79EBD/2020|2020-04-01|EPI\_ISL\_440613|Original|hCoV-19^^England|Human|Department of Pathology|Wellcome Sanger Institute for the COVID-19 Genomics UK (COG-UK) consortium|Amato|United Kingdom

>Spike|hCoV-19/USA/IL-NM0119/2020|2020-03-21|EPI\_ISL\_444602|Original|hCoV-19^^Illinois|Human|Northwestern Memorial Hospital|Ozer Lab|Ozer|USA

>Spike|hCoV-19/Denmark/DCGC-8784/2020|2020-10-26|EPI\_ISL\_626054|Original|hCoV-19^^Midtjylland|Human|Department of Virus and Microbiological Special Diagnostics|Albertsen lab|Michaelsen|Denmark

>Spike|hCoV-19/England/MILK-A7BA35/2020|2020-10-15|EPI\_ISL\_607477|Original|hCoV-19^^England|Human|Lighthouse Lab in Milton Keynes|Wellcome Sanger Institute for the COVID-19 Genomics UK (COG-UK) consortium|Davies|United Kingdom

>Spike|hCoV-19/Russia/NGR-RII-MH6330S/2020|2020-11-12|EPI\_ISL\_733382|Original|hCoV-19^^Novgorod|Human|HELIX LLC|WHO National Influenza Centre Russian Federation|Komissarov|Russia

>Spike|hCoV-19/England/ALDP-B24706/2020|2020-11-04|EPI\_ISL\_646864|Original|hCoV-19^^England|Human|Lighthouse Lab in Alderley Park|Wellcome Sanger Institute for the COVID-19 Genomics UK (COG-UK) Consortium|Davies|United Kingdom

>Spike|hCoV-19/Netherlands/ZH-EMC-867/2020|2020-10-16|EPI\_ISL\_632751|Original|hCoV-19^^Zuid Holland|Human|Dutch COVID-19 response team|Erasmus Medical Center|Oude Munnink|Netherlands

>Spike|hCoV-19/England/ALDP-952CB7/2020|2020-06-13|EPI\_ISL\_555320|Original|hCoV-19^^England|Human|Lighthouse Lab in Alderley Park|Wellcome Sanger Institute for the COVID-19 Genomics UK (COG-UK) consortium|Davies|United Kingdom

>Spike|hCoV-19/Wales/PHWC-242E2/2020|2020-03-16|EPI\_ISL\_418165|Original|hCoV-19^^Wales|Human|Wales Specialist Virology Centre|Public Health Wales Microbiology Cardiff|Moore|United Kingdom

>Spike|hCoV-19/USA/CA-CZB-2350/2020|2020-05-13|EPI\_ISL\_513798|Original|hCoV-19^^California|Human|Orange County Public Health Laboratory|Chan-Zuckerberg Biohub|Kamm|USA

>Spike|hCoV-19/England/ALDP-AA21E5/2020|2020-10-22|EPI\_ISL\_625104|Original|hCoV-19^^England|Human|Lighthouse Lab in Alderley Park|Wellcome Sanger Institute for the COVID-19 Genomics UK (COG-UK) consortium|Davies|United Kingdom

>Spike|hCoV-19/England/MILK-9942D5/2020|2020-08-26|EPI\_ISL\_551634|Original|hCoV-19^^England|Human|Lighthouse Lab in Milton Keynes|Wellcome Sanger Institute for the COVID-19 Genomics UK (COG-UK) consortium|Davies|United Kingdom

>Spike|hCoV-19/England/ALDP-BB54D6/2020|2020-11-21|EPI\_ISL\_701700|Original|hCoV-19^^England|Human|Lighthouse Lab in Alderley Park|Wellcome Sanger Institute for the COVID-19 Genomics UK (COG-UK) Consortium|Davies|United Kingdom

>Spike|hCoV-19/Scotland/EDB7121/2020|2020-08-05|EPI\_ISL\_514539|Original|hCoV-19^^Scotland|Human|Virology Department|COVID-19 Genomics UK (COG-UK) Consortium|Williams|United Kingdom

>Spike|hCoV-19/Wales/PHWC-497E79/2020|2020-12-01|EPI\_ISL\_726987|Original|hCoV-19^^Wales|Human|Originating lab|COVID-19 Genomics UK (COG-UK) Consortium|Moore|United Kingdom

>Spike|hCoV-19/Denmark/DCGC-5585/2020|2020-09-28|EPI\_ISL\_620910|Original|hCoV-19^^Sjaelland|Human|Department of Virus and Microbiological Special Diagnostics|Albertsen lab|Michaelsen|Denmark

>Spike|hCoV-19/Canada/BC\_23052516/2020|2020-03-00|EPI\_ISL\_462839|Original|hCoV-19^^British Columbia|Human|BCCDC Public Health Laboratory|BCCDC Public Health Laboratory|Harrigan|Canada

>Spike|hCoV-19/USA/NY-PV09121/2020|2020-03-19|EPI\_ISL\_422496|Original|hCoV-19^^New York|Human|MSHS Clinical Microbiology Laboratories|MSHS Pathogen Surveillance Program|van Bakel|USA

>Spike|hCoV-19/India/GJ-GBRC297b/2020|2020-06-15|EPI\_ISL\_495039|Original|hCoV-19^^Gujarat|Human|GMERS Medical College & Hospital|Gujarat Biotechnology Research Centre|Joshi|India

>Spike|hCoV-19/England/MILK-B3D096/2020|2020-11-01|EPI\_ISL\_706217|Original|hCoV-19^^England|Human|Oxford Viromics|COVID-19 Genomics UK (COG-UK) Consortium|Golubchik|United Kingdom

>Spike|hCoV-19/USA/VA-DCLS-0511/2020|2020-05-29|EPI\_ISL\_485822|Original|hCoV-19^^Virginia|Human|Virginia DCLS|Virginia DCLS|St. Jacques|USA

>Spike|hCoV-19/Australia/WA350/2020|2020-04-06|EPI\_ISL\_605827|Original|hCoV-19^^Western Australia|Human|PathWest Laboratory Medicine WA|PathWest Laboratory Medicine WA Microbial Surveillance Unit|Sikazwe|Australia

>Spike|hCoV-19/Scotland/CVR787/2020|2020-03-27|EPI\_ISL\_439110|Original|hCoV-19^^Scotland|Human|West of Scotland Specialist Virology Centre|COVID-19 Genomics UK (COG-UK) Consortium|Robertson|United Kingdom

>Spike|hCoV-19/Denmark/DCGC-8163/2020|2020-10-26|EPI\_ISL\_617230|Original|hCoV-19^^Hovedstaden|Human|Department of Virus and Microbiological Special Diagnostics|Albertsen lab|Michaelsen|Denmark

>Spike|hCoV-19/England/MILK-9A9774/2020|2020-09-01|EPI\_ISL\_551262|Original|hCoV-19^^England|Human|Lighthouse Lab in Milton Keynes|Wellcome Sanger Institute for the COVID-19 Genomics UK (COG-UK) consortium|Davies|United Kingdom

>Spike|hCoV-19/Portugal/PT1261/2020|2020-03-19|EPI\_ISL\_511222|Original|hCoV-19^^Portugal|Human|Instituto Nacional de Saude (INSA) and Instituto Gulbenkian de Ciencia (IGC)|Instituto Nacional de Saude (INSA) and Instituto Gulbenkian de Ciencia (IGC)|Borges|Portugal

>Spike|hCoV-19/England/ALDP-95028A/2020|2020-06-17|EPI\_ISL\_555273|Original|hCoV-19^^England|Human|Lighthouse Lab in Alderley Park|Wellcome Sanger Institute for the COVID-19 Genomics UK (COG-UK) consortium|Davies|United Kingdom

>Spike|hCoV-19/Finland/5LS16H9/2020|2020-10-05|EPI\_ISL\_756046|Original|hCoV-19^^Uusimaa|Human|Department of Virology and Immunology|Department of Virology|Smura|Finland

>Spike|hCoV-19/USA/WA-UW-2743/2020|2020-04-15|EPI\_ISL\_486025|Original|hCoV-19^^Washington|Human|UW Virology Lab|UW Virology Lab|Roychoudhury|USA

>Spike|hCoV-19/England/MILK-9AA1B1/2020|2020-09-01|EPI\_ISL\_550869|Original|hCoV-19^^England|Human|Lighthouse Lab in Milton Keynes|Wellcome Sanger Institute for the COVID-19 Genomics UK (COG-UK) consortium|Davies|United Kingdom

>Spike|hCoV-19/USA/VA-DCLS-1776/2020|2020-09-16|EPI\_ISL\_644866|Original|hCoV-19^^Virginia|Human|Virginia DCLS|Virginia DCLS|St. Jacques|USA

>Spike|hCoV-19/England/QEUA-A9F118/2020|2020-10-20|EPI\_ISL\_611370|Original|hCoV-19^^England|Human|Lighthouse Lab in Glasgow|Wellcome Sanger Institute for the COVID-19 Genomics UK (COG-UK) consortium|Davies|United Kingdom

>Spike|hCoV-19/United Arab Emirates/0825/2020|2020-05-19|EPI\_ISL\_698964|Original|hCoV-19^^Abu Dhabi|Human|Group 42 (G42) Healthcare|G42 Healthcare|Ogrodzki|United Arab Emirates

>Spike|hCoV-19/Switzerland/VD-ETHZ-240074/2020|2020-08-10|EPI\_ISL\_523912|Original|hCoV-19^^Vaud|Human|Viollier AG|Department of Biosystems Science and Engineering|Nadeau|Switzerland

>Spike|hCoV-19/England/ALDP-9521A9/2020|2020-06-09|EPI\_ISL\_553636|Original|hCoV-19^^England|Human|Lighthouse Lab in Alderley Park|Wellcome Sanger Institute for the COVID-19 Genomics UK (COG-UK) consortium|Davies|United Kingdom

>Spike|hCoV-19/USA/UT-08491/2020|2020-05-21|EPI\_ISL\_524259|Original|hCoV-19^^Utah|Human|Utah Public Health Laboratory|Utah Public Health Laboratory|Young|USA

>Spike|hCoV-19/Switzerland/BE-ETHZ-321444/2020|2020-10-14|EPI\_ISL\_603668|Original|hCoV-19^^Bern|Human|Viollier AG|Department of Biosystems Science and Engineering|Nadeau|Switzerland

>Spike|hCoV-19/USA/TX-HMH-MCoV-18175/2020|2020-11-14|EPI\_ISL\_784523|Original|hCoV-19^^Texas|Human|Houston Methodist Hospital|Houston Methodist Hospital|Long|USA

>Spike|hCoV-19/England/CAMC-BFB498/2020|2020-12-04|EPI\_ISL\_709029|Original|hCoV-19^^England|Human|Lighthouse Lab in Cambridge|Wellcome Sanger Institute for the COVID-19 Genomics UK (COG-UK) Consortium|Davies|United Kingdom

>Spike|hCoV-19/Malaysia/IMR-WC124489/2020|2020-07-25|EPI\_ISL\_718284|Original|hCoV-19^^Malaysia|Human|Institute for Medical Research|Institute for Medical Research|Suppiah|Malaysia

>Spike|hCoV-19/England/MILK-99A80A/2020|2020-08-29|EPI\_ISL\_550263|Original|hCoV-19^^England|Human|Lighthouse Lab in Milton Keynes|Wellcome Sanger Institute for the COVID-19 Genomics UK (COG-UK) consortium|Davies|United Kingdom

>Spike|hCoV-19/England/LOND-124DCE0/2020|2020-00-00|EPI\_ISL\_584646|Original|hCoV-19^^England|Human|University College London Hospital|COVID-19 Genomics UK (COG-UK) Consortium|Byott|United Kingdom

>Spike|hCoV-19/Scotland/EDB1481/2020|2020-04-12|EPI\_ISL\_491590|Original|hCoV-19^^Scotland|Human|Virology Department|Wellcome Sanger Institute for the COVID-19 Genomics UK (COG-UK) consortium|Davies|United Kingdom

>Spike|hCoV-19/Australia/VIC15918/2020|2020-07-31|EPI\_ISL\_640778|Original|hCoV-19^^Victoria|Human|Microbiological Diagnostic Unit - Public Health Laboratory (MDU-PHL)|MDU-PHL|Schultz|Australia

>Spike|hCoV-19/England/MILK-99C5C5/2020|2020-08-30|EPI\_ISL\_550766|Original|hCoV-19^^England|Human|Lighthouse Lab in Milton Keynes|Wellcome Sanger Institute for the COVID-19 Genomics UK (COG-UK) consortium|Davies|United Kingdom

>Spike|hCoV-19/England/ALDP-B48010/2020|2020-11-07|EPI\_ISL\_649406|Original|hCoV-19^^England|Human|Lighthouse Lab in Alderley Park|Wellcome Sanger Institute for the COVID-19 Genomics UK (COG-UK) Consortium|Davies|United Kingdom

>Spike|hCoV-19/Australia/VIC2323/2020|2020-06-26|EPI\_ISL\_522044|Original|hCoV-19^^Victoria|Human|Microbiological Diagnostic Unit - Public Health Laboratory (MDU-PHL)|MDU-PHL|Schultz|Australia

>Spike|hCoV-19/England/QEUH-CC2280/2020|2020-12-21|EPI\_ISL\_778145|Original|hCoV-19^^England|Human|Lighthouse Lab in Glasgow|Wellcome Sanger Institute for the COVID-19 Genomics UK (COG-UK) Consortium|Davies|United Kingdom

>Spike|hCoV-19/Wales/PHWC-1658C4/2020|2020-05-11|EPI\_ISL\_490737|Original|hCoV-19^^Wales|Human|Wales Specialist Virology Centre Sequencing lab|COVID-19 Genomics UK (COG-UK) Consortium|Moore|United Kingdom

>Spike|hCoV-19/Chile/RM-128080/2020|2020-07-18|EPI\_ISL\_746614|Original|hCoV-19^^Region Metropolitana de Santiago|Human|Genetica Molecular and Subdepartamento de Virologia ISP Chile|Instituto de Salud Publica de Chile|Tognarelli|Chile

>Spike|hCoV-19/France/OCC-SC493/2020|2020-03-26|EPI\_ISL\_644692|Original|hCoV-19^^Occitanie|Human|CHU Montpellier|CNR Virus des Infections Respiratoires - France SUD|Bal|France

>Spike|hCoV-19/Wales/PHWC-4A0C0A/2020|2020-12-11|EPI\_ISL\_743559|Original|hCoV-19^^Wales|Human|Wales Specialist Virology Centre Sequencing lab|COVID-19 Genomics UK (COG-UK) Consortium|Moore|United Kingdom

>Spike|hCoV-19/Denmark/DCGC-18362/2020|2020-12-07|EPI\_ISL\_749497|Original|hCoV-19^^Syddanmark|Human|Department of Virus and Microbiological Special Diagnostics|Albertsen Lab|Michaelsen|Denmark

>Spike|hCoV-19/Japan/PG-7261/2020|2020-08-00|EPI\_ISL\_688364|Original|hCoV-19^^Japan|Human|Saitama Prefectural Institute of Public Health|Pathogen Genomics Center|Sekizuka|Japan

>Spike|hCoV-19/USA/OR-OHSU-1181/2020|2020-07-11|EPI\_ISL\_509157|Original|hCoV-19^^Oregon|Human|OHSU Lab Services Molecular Microbiology Lab|Oregon SARS-CoV-2 Genome Sequencing Center|O'Roak|USA

>Spike|hCoV-19/USA/MO-WUSTL063/2020|2020-06-19|EPI\_ISL\_493082|Original|hCoV-19^^Missouri|Human|Washington University in St. Louis|Washington University in St. Louis|Tahan|USA

>Spike|hCoV-19/England/ALDP-63CBF5/2020|2020-07-04|EPI\_ISL\_556265|Original|hCoV-19^^England|Human|Lighthouse Lab in Alderley Park|Wellcome Sanger Institute for the COVID-19 Genomics UK (COG-UK) consortium|Davies|United Kingdom

>Spike|hCoV-19/Wales/PHWC-16D219/2020|2020-09-26|EPI\_ISL\_574213|Original|hCoV-19^^Wales|Human|Wales Specialist Virology Centre Sequencing lab|COVID-19 Genomics UK (COG-UK) Consortium|Moore|United Kingdom

>Spike|hCoV-19/USA/AZ-TG359176/2020|2020-06-08|EPI\_ISL\_694443|Original|hCoV-19^^Arizona|Human|TGen North|TGen North|French|USA

>Spike|hCoV-19/USA/UT-UPHL-2012874225/2020|2020-08-03|EPI\_ISL\_745744|Original|hCoV-19^^Utah|Human|Ginkgo Bioworks Clinical Laboratory|Utah Public Health Laboratory|Young|USA

>Spike|hCoV-19/USA/WI-GMF-32385/2020|2020-11-09|EPI\_ISL\_661140|Original|hCoV-19^^Wisconsin|Human|Gundersen Molecular Diagnostics Laboratory|Kabara Cancer Research Institute|Kenny|USA

>Spike|hCoV-19/England/MILK-9F2958/2020|2020-09-22|EPI\_ISL\_589237|Original|hCoV-19^^England|Human|Lighthouse Lab in Milton Keynes|Wellcome Sanger Institute for the COVID-19 Genomics UK (COG-UK) consortium|Davies|United Kingdom

>Spike|hCoV-19/Portugal/PT0077/2020|2020-03-21|EPI\_ISL\_421480|Original|hCoV-19^^Portugal|Human|CH Barreiro Montijo|Instituto Nacional de Saude (INSA)|Borges|Portugal

>Spike|hCoV-19/Spain/MD-IBV-99008607/2020|2020-06-17|EPI\_ISL\_654186|Original|hCoV-19^^Madrid|Human|Hospital General Universitario Gregorio Mara\u00f1a|SeqCOVID-SPAIN consortium/IBV (CSIC)|Comas|Spain

>Spike|hCoV-19/USA/NY-PV09435/2020|2020-03-13|EPI\_ISL\_450112|Original|hCoV-19^^New York|Human|MSSM Clinical Microbiology Laboratories|MSSM Pathogen Surveillance Program|van Bakel|USA

>Spike|hCoV-19/USA/NE-11323/2020|2020-05-04|EPI\_ISL\_466661|Original|hCoV-19^^Nebraska|Human|Nebraska Public Health Laboratory|UNMC COVID-19 Response Team|Pratt|USA

>Spike|hCoV-19/Wales/PHWC-49A0CB/2020|2020-11-30|EPI\_ISL\_727492|Original|hCoV-19^^Wales|Human|Originating lab|COVID-19 Genomics UK (COG-UK) Consortium|Moore|United Kingdom

>Spike|hCoV-19/USA/CA-CZB-15442/2020|2020-12-03|EPI\_ISL\_739401|Original|hCoV-19^^California|Human|Orange County Public Health Lab|Chan-Zuckerberg Biohub|Kamm|USA

>Spike|hCoV-19/USA/MA-MGH-02662/2020|2020-09-23|EPI\_ISL\_765583|Original|hCoV-19^^Massachusetts|Human|Brigham and Womens Hospital|Infectious Disease Program|Park|USA

>Spike|hCoV-19/England/201140388/2020|2020-03-10|EPI\_ISL\_464730|Original|hCoV-19^^England|Human|Respiratory Virus Unit|Respiratory Virus Unit|Platt|United Kingdom

>Spike|hCoV-19/England/ALDP-A86E2C/2020|2020-10-16|EPI\_ISL\_606166|Original|hCoV-19^^England|Human|Lighthouse Lab in Alderley Park|Wellcome Sanger Institute for the COVID-19 Genomics UK (COG-UK) consortium|Davies|United Kingdom

>Spike|hCoV-19/USA/TX-HMH-MCoV-15482/2020|2020-10-25|EPI\_ISL\_786966|Original|hCoV-19^^Texas|Human|Houston Methodist Hospital|Houston Methodist Hospital|Long|USA

>Spike|hCoV-19/France/PAC-IHU-0471/2020|2020-04-05|EPI\_ISL\_569535|Original|hCoV-19^^Provence-Alpes-C\u00f4te-d\u00e0z|Human|MEPHI|MEPHI|Levasseur|France

>Spike|hCoV-19/Denmark/DCGC-19115/2020|2020-12-07|EPI\_ISL\_748193|Original|hCoV-19^^Hovedstaden|Human|Department of Virus and Microbiological Special Diagnostics|Albertsen Lab|Michaelsen|Denmark

>Spike|hCoV-19/England/CAMC-B77A0B/2020|2020-11-11|EPI\_ISL\_661817|Original|hCoV-19^^England|Human|Lighthouse Lab in Cambridge|Wellcome Sanger Institute for the COVID-19 Genomics UK (COG-UK) Consortium|Davies|United Kingdom

>Spike|hCoV-19/Denmark/DCGC-4285/2020|2020-09-07|EPI\_ISL\_615722|Original|hCoV-19^^Hovedstaden|Human|Department of Virus and Microbiological Special Diagnostics|Albertsen lab|Michaelsen|Denmark

>Spike|hCoV-19/England/NORT-283355/2020|2020-00-00|EPI\_ISL\_472239|Original|hCoV-19^^England|Human|Northumbria University / South Tees Hospitals NHS Foundation Trust / North Cumbria Integrated Care NHS Foundation Trust / North Tees and Hartlepool NHS Foundation Trust / Newcastle Hospitals NHS Foundation Trust|COVID-19 Genomics UK (COG-UK) Consortium|Bashton|United Kingdom

>Spike|hCoV-19/England/QEUEH-C321D9/2020|2020-12-11|EPI\_ISL\_782598|Original|hCoV-19^^England|Human|Lighthouse Lab in Glasgow|Wellcome Sanger Institute for the COVID-19 Genomics UK (COG-UK) Consortium|Davies|United Kingdom

>Spike|hCoV-19/Canada/ON-PHL-20-03694/2020|2020-11-00|EPI\_ISL\_775177|Original|hCoV-19^^Ontario|Human|Public Health Ontario Laboratory|Public Health Ontario Laboratory|Guthrie|Canada

>Spike|hCoV-19/England/ALDP-9C5BD0/2020|2020-09-10|EPI\_ISL\_567805|Original|hCoV-19^^England|Human|Lighthouse Lab in Alderley Park|Wellcome Sanger Institute for the COVID-19 Genomics UK (COG-UK) consortium|Davies|United Kingdom

>Spike|hCoV-19/Sweden/20-07896/2020|2020-04-27|EPI\_ISL\_455102|Original|hCoV-19^^Vastmanland|Human|Kungsors VC|The Public Health Agency of Sweden|Svartstr\u00f6m|Sweden

>Spike|hCoV-19/Denmark/DCGC-22337/2020|2020-12-14|EPI\_ISL\_758687|Original|hCoV-19^^Sjaelland|Human|Department of Virus and Microbiological Special Diagnostics|Albertsen Lab|Michaelsen|Denmark

>Spike|hCoV-19/England/ALDP-B1D050/2020|2020-11-01|EPI\_ISL\_645573|Original|hCoV-19^^England|Human|Lighthouse Lab in Alderley Park|Wellcome Sanger Institute for the COVID-19 Genomics UK (COG-UK) Consortium|Davies|United Kingdom

>Spike|hCoV-19/South Africa/R13564-20/2020|2020-07-13|EPI\_ISL\_622907|Original|hCoV-19^^North West|Human|National Institute for Communicable Diseases of the National Health Laboratory Service|National Institute for Communicable Diseases of the National Health Laboratory Service|Allam|South Africa

>Spike|hCoV-19/England/LIVE-DB2CB1/2020|2020-10-27|EPI\_ISL\_637908|Original|hCoV-19^^England|Human|Liverpool Clinical Laboratories|COVID-19 Genomics UK (COG-UK) Consortium|Haldenby|United Kingdom

>Spike|hCoV-19/USA/MD-HP00093/2020|2020-03-31|EPI\_ISL\_457758|Original|hCoV-19^^Maryland|Human|Johns Hopkins Hospital Department of Pathology|Johns Hopkins Hospital Department of Pathology|Ramakrishnan|USA

>Spike|hCoV-19/Gibraltar/205121243/2020|2020-00-00|EPI\_ISL\_766365|Original|hCoV-19^^Gibraltar|Human|Microbiology|Respiratory Virus Unit|Platt|Gibraltar

>Spike|hCoV-19/England/MILK-A7BEFD/2020|2020-10-15|EPI\_ISL\_607369|Original|hCoV-19^^England|Human|Lighthouse Lab in Milton Keynes|Wellcome Sanger Institute for the COVID-19 Genomics UK (COG-UK) consortium|Davies|United Kingdom

>Spike|hCoV-19/England/ALDP-A8667F/2020|2020-10-16|EPI\_ISL\_606035|Original|hCoV-19^^England|Human|Lighthouse Lab in Alderley Park|Wellcome Sanger Institute for the COVID-19 Genomics UK (COG-UK) consortium|Davies|United Kingdom

>Spike|hCoV-19/England/NORW-FA2C7/2020|2020-12-08|EPI\_ISL\_725490|Original|hCoV-19^^England|Human|Quadram Institute Bioscience|COVID-19 Genomics UK (COG-UK) Consortium|Alikhan|United Kingdom

>Spike|hCoV-19/USA/FL-BPHL-0176/2020|2020-04-03|EPI\_ISL\_480827|Original|hCoV-19^^Florida|Human|Florida Bureau of Public Health Laboratories|Florida Bureau of Public Health Laboratories|Blanton|USA

>Spike|hCoV-19/England/ALDP-C3AA5E/2020|2020-12-09|EPI\_ISL\_731570|Original|hCoV-19^^England|Human|Lighthouse Lab in Alderley Park|Wellcome Sanger Institute for the COVID-19 Genomics UK (COG-UK) Consortium|Davies|United Kingdom

>Spike|hCoV-19/USA/WA-UW-2767/2020|2020-03-27|EPI\_ISL\_486030|Original|hCoV-19^^Washington|Human|UW Virology Lab|UW Virology Lab|Roychoudhury|USA

>Spike|hCoV-19/Canada/BC-BCCDC-6460/2020|2020-10-00|EPI\_ISL\_740607|Original|hCoV-19^^British Columbia|Human|BCCDC Public Health Laboratory|BCCDC Public Health Laboratory|Prystajecky|Canada

>Spike|hCoV-19/England/ALDP-B48F9B/2020|2020-11-07|EPI\_ISL\_649413|Original|hCoV-19^^England|Human|Lighthouse Lab in Alderley Park|Wellcome Sanger Institute for the COVID-19 Genomics UK (COG-UK) Consortium|Davies|United Kingdom

>Spike|hCoV-19/England/204590546/2020|2020-11-02|EPI\_ISL\_700647|Original|hCoV-19^^England|Human|Respiratory Virus Unit|COVID-19 Genomics UK (COG-UK) Consortium|Platt|United Kingdom

>Spike|hCoV-19/USA/MI-MDHHS-SC22654/2020|2020-11-16|EPI\_ISL\_737268|Original|hCoV-19^^Michigan|Human|Michigan Department of Health and Human Services|Michigan Department of Health and Human Services|Blankenship|USA

>Spike|hCoV-19/Luxembourg/LNS7693582/2020|2020-10-30|EPI\_ISL\_744616|Original|hCoV-19^^Luxembourg|Human|Laboratoire national de sant\u00e9|Laboratoire national de sant\u00e9|Wienecke-Baldacchino|Luxembourg

>Spike|hCoV-19/Japan/PG-3385/2020|2020-05-00|EPI\_ISL\_691500|Original|hCoV-19^^Japan|Human|Pathogen Genomics Center|Pathogen Genomics Center|Sekizuka|Japan

>Spike|hCoV-19/Wales/PHWC-16443A/2020|2020-05-10|EPI\_ISL\_474177|Original|hCoV-19^^Wales|Human|Originating lab|COVID-19 Genomics UK (COG-UK) Consortium|Moore|United Kingdom

>Spike|hCoV-19/USA/MN-MDH-120/2020|2020-03-20|EPI\_ISL\_427276|Original|hCoV-19^^Minnesota|Human|Minnesota Department of Health|Minnesota Department of Health|Wang|USA

>Spike|hCoV-19/Spain/MD-IBV-003720/2020|2020-04-03|EPI\_ISL\_467236|Original|hCoV-19^^Madrid|Human|Hospital General Universitario Gregorio Mara\u00f1\u00f3n|SeqCOVID-SPAIN consortium/IBV (CSIC)|Comas|Spain

>Spike|hCoV-19/Wales/PHWC-499ABF/2020|2020-12-05|EPI\_ISL\_727399|Original|hCoV-19^^Wales|Human|Originating lab|COVID-19 Genomics UK (COG-UK) Consortium|Moore|United Kingdom

>Spike|hCoV-19/USA/WA-UW-12352/2020|2020-06-27|EPI\_ISL\_570509|Original|hCoV-19^^Washington|Human|UW Virology Lab|UW Virology Lab|Roychoudhury|USA

>Spike|hCoV-19/England/QEUH-A4C8E8/2020|2020-10-05|EPI\_ISL\_628575|Original|hCoV-19^^England|Human|Oxford Viromics|COVID-19 Genomics UK (COG-UK) Consortium|Golubchik|United Kingdom

>Spike|hCoV-19/England/CAMC-A6461D/2020|2020-10-11|EPI\_ISL\_609156|Original|hCoV-19^^England|Human|Lighthouse Lab in Cambridge|Wellcome Sanger Institute for the COVID-19 Genomics UK (COG-UK) consortium|Davies|United Kingdom

>Spike|hCoV-19/England/MILK-ACF12E/2020|2020-10-22|EPI\_ISL\_629629|Original|hCoV-19^^England|Human|Lighthouse Lab in Milton Keynes|Wellcome Sanger Institute for the COVID-19 Genomics UK (COG-UK) consortium|Davies|United Kingdom

>Spike|hCoV-19/England/ALDP-A6F17B/2020|2020-10-15|EPI\_ISL\_607963|Original|hCoV-19^^England|Human|Lighthouse Lab in Alderley Park|Wellcome Sanger Institute for the COVID-19 Genomics UK (COG-UK) consortium|Davies|United Kingdom

>Spike|hCoV-19/USA/TX-HMH-MCoV-12172/2020|2020-09-21|EPI\_ISL\_790233|Original|hCoV-19^^Texas|Human|Houston Methodist Hospital|Houston Methodist Hospital|Long|USA

>Spike|hCoV-19/USA/FL-BPHL-1976/2020|2020-04-16|EPI\_ISL\_653129|Original|hCoV-19^^Florida|Human|Florida Bureau of Public Health Laboratories|Florida Bureau of Public Health Laboratories|Blanton|USA

>Spike|hCoV-19/SaudiArabia/KAUST-MADINAH1061/2020|2020-06-13|EPI\_ISL\_513086|Original|hCoV-19^^Madinah|Human|Pathogen Genomics Lab King Abdullah University of Science and Technology(KAUST)|Pathogen Genomics Lab King Abdullah University of Science and Technology(KAUST)|Mohamed Ghazzali|Saudi Arabia

>Spike|hCoV-19/Scotland/QEUH-9DC4DB/2020|2020-09-22|EPI\_ISL\_601174|Original|hCoV-19^^Scotland|Human|Lighthouse Lab in Glasgow|Wellcome Sanger Institute for the COVID-19 Genomics UK (COG-UK) consortium|Davies|United Kingdom

>Spike|hCoV-19/Germany/BW-MVZ-LS-51/2020|2020-04-15|EPI\_ISL\_640268|Original|hCoV-19^^Baden-W\u00fcrtemberg|Human|MVZ Labor\u00e4rzte Singen|MVZ Labor\u00e4rzte Singen|Schmidt|Germany

>Spike|hCoV-19/South Africa/KRISP-K001408/2020|2020-07-18|EPI\_ISL\_515891|Original|hCoV-19^^KwaZulu-Natal|Human|Medical Disagnostics Services (MDS)|KRISP|de Oliveira|South Africa

>Spike|hCoV-19/France/ARA-9476/2020|2020-03-16|EPI\_ISL\_509004|Original|hCoV-19^^Auvergne-Rh\u00f4ne-Alpes|Human|GH Les Portes du Sud|CNR Virus des Infections Respiratoires - France SUD|Josset|France

>Spike|hCoV-19/USA/TX-HMH-MCoV-19413/2020|2020-11-30|EPI\_ISL\_783825|Original|hCoV-19^^Texas|Human|Houston Methodist Hospital|Houston Methodist Hospital|Long|USA

>Spike|hCoV-19/USA/MI-MDHHS-SC20761/2020|2020-04-22|EPI\_ISL\_471782|Original|hCoV-19^^Michigan|Human|Michigan Department of Health and Human Services|Michigan Department of Health and Human Services|Blankenship|USA

>Spike|hCoV-19/England/MILK-C908B6/2020|2020-12-09|EPI\_ISL\_777295|Original|hCoV-19^^England|Human|Lighthouse Lab in Milton Keynes|Wellcome Sanger Institute for the COVID-19 Genomics UK (COG-UK) Consortium|Davies|United Kingdom

>Spike|hCoV-19/Wales/PHWC-497EC4/2020|2020-11-30|EPI\_ISL\_726992|Original|hCoV-19^^Wales|Human|Originating lab|COVID-19 Genomics UK (COG-UK) Consortium|Moore|United Kingdom



>Spike|hCoV-19/England/ALDP-B5B8B8/2020|2020-11-08|EPI\_ISL\_655389|Original|hCoV-19^^England|Human|Lighthouse Lab in Alderley Park|Wellcome Sanger Institute for the COVID-19 Genomics UK (COG-UK) Consortium|Davies|United Kingdom

>Spike|hCoV-19/France/BRE-IPP11309/2020|2020-12-16|EPI\_ISL\_754855|Original|hCoV-19^^Bretagne|Human|CHU - H\u00f4pital Cavale Blanche - Labo. de Virologie|National Reference Center for Viruses of Respiratory Infections|Enouf|France

>Spike|hCoV-19/England/LIVE-DC9BD8/2020|2020-12-06|EPI\_ISL\_705352|Original|hCoV-19^^England|Human|Liverpool Clinical Laboratories|COVID-19 Genomics UK (COG-UK) Consortium|Haldenby|United Kingdom

>Spike|hCoV-19/Denmark/DCGC-14814/2020|2020-11-23|EPI\_ISL\_712002|Original|hCoV-19^^Syddanmark|Human|Department of Virus and Microbiological Special Diagnostics|Albertsen Lab|Michaelsen|Denmark

>Spike|hCoV-19/Wales/PHWC-4A4F1C/2020|2020-12-09|EPI\_ISL\_763590|Original|hCoV-19^^Wales|Human|Wales Specialist Virology Centre Sequencing lab|COVID-19 Genomics UK (COG-UK) Consortium|Moore|United Kingdom

>Spike|hCoV-19/England/QEUEH-9DE59A/2020|2020-09-21|EPI\_ISL\_581346|Original|hCoV-19^^England|Human|Lighthouse Lab in Glasgow|Wellcome Sanger Institute for the COVID-19 Genomics UK (COG-UK) consortium|Davies|United Kingdom

>Spike|hCoV-19/Denmark/DCGC-4870/2020|2020-09-21|EPI\_ISL\_621556|Original|hCoV-19^^Hovedstaden|Human|Department of Virus and Microbiological Special Diagnostics|Albertsen lab|Michaelsen|Denmark

>Spike|hCoV-19/England/LOND-124C434/2020|2020-04-10|EPI\_ISL\_492887|Original|hCoV-19^^England|Human|Royal Free Hospital / Health Services Laboratories|Wellcome Sanger Institute for the COVID-19 Genomics UK (COG-UK) consortium|Davies|United Kingdom

>Spike|hCoV-19/Denmark/DCGC-12983/2020|2020-12-07|EPI\_ISL\_712507|Original|hCoV-19^^Hovedstaden|Human|Department of Virus and Microbiological Special Diagnostics|Albertsen Lab|Michaelsen|Denmark

>Spike|hCoV-19/Scotland/CVR763/2020|2020-03-26|EPI\_ISL\_439105|Original|hCoV-19^^Scotland|Human|West of Scotland Specialist Virology Centre|COVID-19 Genomics UK (COG-UK) Consortium|Robertson|United Kingdom

>Spike|hCoV-19/England/QEUEH-C53FBA/2020|2020-12-12|EPI\_ISL\_736269|Original|hCoV-19^^England|Human|Lighthouse Lab in Glasgow|Wellcome Sanger Institute for the COVID-19 Genomics UK (COG-UK) Consortium|Davies|United Kingdom

>Spike|hCoV-19/England/MILK-46667B/2020|2020-05-27|EPI\_ISL\_559750|Original|hCoV-19^^England|Human|Lighthouse Lab in Milton Keynes|Wellcome Sanger Institute for the COVID-19 Genomics UK (COG-UK) consortium|Davies|United Kingdom

>Spike|hCoV-19/United Arab Emirates/0348/2020|2020-05-15|EPI\_ISL\_698523|Original|hCoV-19^^Abu Dhabi|Human|Group 42 (G42) Healthcare|G42 Healthcare|Ogrodzki|United Arab Emirates

>Spike|hCoV-19/Russia/OMS-ORINFI-3961S/2020|2020-07-08|EPI\_ISL\_569834|Original|hCoV-19^^Omsk|Human|Omsk Research Institute of Natural Focal Infections|WHO National Influenza Centre Russian Federation|Komissarov|Russia

>Spike|hCoV-19/Thailand/Bangkok-0056/2020|2020-03-28|EPI\_ISL\_446998|Original|hCoV-19^^Bangkok|Human|Ramathibodi Hospital|COVID-19 Network Investigations (CONI) Alliance|Batty|Thailand

>Spike|hCoV-19/Australia/SAP387/2020|2020-04-01|EPI\_ISL\_492152|Original|hCoV-19^^South Australia|Human|SA Pathology|SA Pathology|Leong|Australia

>Spike|hCoV-19/USA/FL-BPHL-0799/2020|2020-07-01|EPI\_ISL\_514145|Original|hCoV-19^^Florida|Human|Florida Bureau of Public Health Laboratories|Florida Bureau of Public Health Laboratories|Blanton|USA

>Spike|hCoV-19/England/ALDP-B47D38/2020|2020-11-07|EPI\_ISL\_649274|Original|hCoV-19^^England|Human|Lighthouse Lab in Alderley Park|Wellcome Sanger Institute for the COVID-19 Genomics UK (COG-UK) Consortium|Davies|United Kingdom

>Spike|hCoV-19/England/ALDP-9D9B7F/2020|2020-09-18|EPI\_ISL\_576796|Original|hCoV-19^^England|Human|Oxford Viromics|COVID-19 Genomics UK (COG-UK) Consortium|Golubchik|United Kingdom

>Spike|hCoV-19/France/OCC-SC473/2020|2020-03-16|EPI\_ISL\_660675|Original|hCoV-19^^Occitanie|Human|CHU Montpellier|CNR Virus des Infections Respiratoires - France SUD|Bal|France

>Spike|hCoV-19/England/CAMB-76278/2020|2020-03-29|EPI\_ISL\_438266|Original|hCoV-19^^England|Human|Department of Pathology|Wellcome Sanger Institute for the COVID-19 Genomics UK (COG-UK) consortium|Amato|United Kingdom

>Spike|hCoV-19/USA/CA-LACPHL-AD00010/2020|2020-10-02|EPI\_ISL\_708507|Original|hCoV-19^^California|Human|Los Angeles County Public Health Laboratory|Los Angeles County Public Health Laboratory|Hemarajata|USA

>Spike|hCoV-19/England/QEUA-CDF8BB/2020|2020-12-26|EPI\_ISL\_782449|Original|hCoV-19^^England|Human|Lighthouse Lab in Glasgow|Wellcome Sanger Institute for the COVID-19 Genomics UK (COG-UK) Consortium|Davies|United Kingdom

>Spike|hCoV-19/England/20134019502/2020|2020-03-23|EPI\_ISL\_423105|Original|hCoV-19^^England|Human|Respiratory Virus Unit|Respiratory Virus Unit|Platt|United Kingdom

>Spike|hCoV-19/England/ALDP-9E6CA9/2020|2020-09-24|EPI\_ISL\_580520|Original|hCoV-19^^England|Human|Lighthouse Lab in Alderley Park|Wellcome Sanger Institute for the COVID-19 Genomics UK (COG-UK) consortium|Davies|United Kingdom

>Spike|hCoV-19/Gibraltar/204462846/2020|2020-10-29|EPI\_ISL\_615016|Original|hCoV-19^^Gibraltar|Human|Microbiology|Respiratory Virus Unit|Platt|Gibraltar

>Spike|hCoV-19/Australia/VIC5016/2020|2020-07-19|EPI\_ISL\_519820|Original|hCoV-19^^Victoria|Human|Microbiological Diagnostic Unit - Public Health Laboratory (MDU-PHL)|MDU-PHL|Schultz|Australia

>Spike|hCoV-19/England/QEUA-A31497/2020|2020-10-05|EPI\_ISL\_595893|Original|hCoV-19^^England|Human|Quadram Institute Bioscience|COVID-19 Genomics UK (COG-UK) Consortium|Alikhan|United Kingdom

>Spike|hCoV-19/England/QEUA-AD1BC1/2020|2020-10-23|EPI\_ISL\_633694|Original|hCoV-19^^England|Human|Lighthouse Lab in Glasgow|Wellcome Sanger Institute for the COVID-19 Genomics UK (COG-UK) consortium|Davies|United Kingdom

>Spike|hCoV-19/USA/NY-Wadsworth-142783-01/2020|2020-04-10|EPI\_ISL\_676976|Original|hCoV-19^^New York|Human|Wadsworth Center|Wadsworth Center|Lasek-Nesselquist|USA

>Spike|hCoV-19/England/CAMB-1B633C/2020|2020-09-21|EPI\_ISL\_576899|Original|hCoV-19^^England|Human|Department of Pathology|COVID-19 Genomics UK (COG-UK) Consortium|Goodfellow|United Kingdom

>Spike|hCoV-19/USA/TX-HMH-5232/2020|2020-06-19|EPI\_ISL\_544611|Original|hCoV-19^^Texas|Human|Houston Methodist Hospital|Houston Methodist Hospital|Long|USA

>Spike|hCoV-19/USA/WA-UW-3600/2020|2020-03-25|EPI\_ISL\_570033|Original|hCoV-19^^Washington|Human|UW Virology Lab|UW Virology Lab|Roychoudhury|USA

>Spike|hCoV-19/England/MILK-A6B2B8/2020|2020-10-09|EPI\_ISL\_608730|Original|hCoV-19^^England|Human|Lighthouse Lab in Milton Keynes|Wellcome Sanger Institute for the COVID-19 Genomics UK (COG-UK) consortium|Davies|United Kingdom

>Spike|hCoV-19/Japan/PG-1173/2020|2020-04-00|EPI\_ISL\_684783|Original|hCoV-19^^Japan|Human|Pathogen Genomics Center|Pathogen Genomics Center|Sekizuka|Japan

>Spike|hCoV-19/Netherlands/NH-RIVM-20633/2020|2020-12-14|EPI\_ISL\_790709|Original|hCoV-19^^Noord-Holland|Human|Dutch COVID-19 response team|National Institute for Public Health and the Environment (RIVM)|Meijer|Netherlands

>Spike|hCoV-19/USA/NJ-QDX-2400/2020|2020-03-16|EPI\_ISL\_604703|Original|hCoV-19^^New Jersey|Human|Quest Diagnostics|Quest Diagnostics|Kagan|USA

>Spike|hCoV-19/Denmark/DCGC-4535/2020|2020-09-21|EPI\_ISL\_621331|Original|hCoV-19^^Hovedstaden|Human|Department of Virus and Microbiological Special Diagnostics|Albertsen lab|Michaelsen|Denmark

>Spike|hCoV-19/USA/OR-OHSU-0267/2020|2020-04-11|EPI\_ISL\_509086|Original|hCoV-19^^Oregon|Human|OHSU Lab Services Molecular Microbiology Lab|Oregon SARS-CoV-2 Genome Sequencing Center|O'Roak|USA

>Spike|hCoV-19/Australia/NSW1188/2020|2020-10-28|EPI\_ISL\_667789|Original|hCoV-19^^New South Wales|Human|South Eastern Area Laboratory Services (SEALS)|NSW Health Pathology - Institute of Clinical Pathology and Medical Research; Westmead Hospital; University of Sydney|Gall|Australia

>Spike|hCoV-19/England/SHEF-C9197/2020|2020-09-17|EPI\_ISL\_585035|Original|hCoV-19^^England|Human|Virology Department|COVID-19 Genomics UK (COG-UK) Consortium|de Silva|United Kingdom

>Spike|hCoV-19/England/201640232/2020|2020-04-14|EPI\_ISL\_466450|Original|hCoV-19^^England|Human|Respiratory Virus Unit|Respiratory Virus Unit|Platt|United Kingdom

>Spike|hCoV-19/England/CAMC-B0B18F/2020|2020-10-29|EPI\_ISL\_643602|Original|hCoV-19^^England|Human|Lighthouse Lab in Cambridge|Wellcome Sanger Institute for the COVID-19 Genomics UK (COG-UK) Consortium|Davies|United Kingdom

>Spike|hCoV-19/England/MILK-97347C/2020|2020-08-19|EPI\_ISL\_575974|Original|hCoV-19^^England|Human|Lighthouse Lab in Milton Keynes|Wellcome Sanger Institute for the COVID-19 Genomics UK (COG-UK) consortium|Davies|United Kingdom

>Spike|hCoV-19/England/ALDP-CB55F0/2020|2020-12-20|EPI\_ISL\_761811|Original|hCoV-19^^England|Human|Lighthouse Lab in Alderley Park|Wellcome Sanger Institute for the COVID-19 Genomics UK (COG-UK) Consortium|Davies|United Kingdom

>Spike|hCoV-19/India/GJ-GBRC192/2020|2020-06-05|EPI\_ISL\_469036|Original|hCoV-19^^Gujarat|Human|Government Medical College|Gujarat Biotechnology Research Centre|Joshi|India

>Spike|hCoV-19/USA/MA-MGH-03353/2020|2020-11-06|EPI\_ISL\_765800|Original|hCoV-19^^Massachusetts|Human|Massachusetts General Hospital|Infectious Disease Program|Park|USA

>Spike|hCoV-19/England/CAMC-9BFFBF/2020|2020-09-07|EPI\_ISL\_573163|Original|hCoV-19^^England|Human|Oxford Viromics|COVID-19 Genomics UK (COG-UK) Consortium|Golubchik|United Kingdom

>Spike|hCoV-19/England/ALDP-9BE044/2020|2020-09-09|EPI\_ISL\_567969|Original|hCoV-19^^England|Human|Lighthouse Lab in Alderley Park|Wellcome Sanger Institute for the COVID-19 Genomics UK (COG-UK) consortium|Davies|United Kingdom

>Spike|hCoV-19/Wales/QEUEH-B3FCBE/2020|2020-11-08|EPI\_ISL\_710886|Original|hCoV-19^^Wales|Human|Lighthouse Lab in Glasgow|Wellcome Sanger Institute for the COVID-19 Genomics UK (COG-UK) Consortium|Davies|United Kingdom

>Spike|hCoV-19/South Korea/KCDC2120/2020|2020-03-15|EPI\_ISL\_498021|Original|hCoV-19^^South Korea|Human|Division of Viral Diseases|Division of Viral Diseases|Kim|South Korea

>Spike|hCoV-19/Australia/VIC12809/2020|2020-09-11|EPI\_ISL\_563597|Original|hCoV-19^^Victoria|Human|Microbiological Diagnostic Unit - Public Health Laboratory (MDU-PHL) |MDU-PHL|Schultz|Australia

>Spike|hCoV-19/Wales/PHWC-48BCD8/2020|2020-11-04|EPI\_ISL\_665585|Original|hCoV-19^^Wales|Human|Wales Specialist Virology Centre Sequencing lab|COVID-19 Genomics UK (COG-UK) Consortium|Moore|United Kingdom

>Spike|hCoV-19/England/CAMC-B9A686/2020|2020-11-15|EPI\_ISL\_673589|Original|hCoV-19^^England|Human|Lighthouse Lab in Cambridge|Wellcome Sanger Institute for the COVID-19 Genomics UK (COG-UK) Consortium|Davies|United Kingdom

>Spike|hCoV-19/England/MILK-9AAB1D/2020|2020-08-31|EPI\_ISL\_550843|Original|hCoV-19^^England|Human|Lighthouse Lab in Milton Keynes|Wellcome Sanger Institute for the COVID-19 Genomics UK (COG-UK) consortium|Davies|United Kingdom

>Spike|hCoV-19/Belgium/ULG-10713/2020|2020-10-26|EPI\_ISL\_636684|Original|hCoV-19^^Li\u00e8ge|Human|Department of Clinical Microbiology|GIGA Medical Genomics|Durkin|Belgium

>Spike|hCoV-19/USA/NY-NYCPHL-000160/2020|2020-04-08|EPI\_ISL\_631696|Original|hCoV-19^^New York|Human|Flushing Hospital Medical Center|New York City Public Health Laboratory|Wang|USA

>Spike|hCoV-19/England/ALDP-6B7284/2020|2020-06-29|EPI\_ISL\_557851|Original|hCoV-19^^England|Human|Lighthouse Lab in Alderley Park|Wellcome Sanger Institute for the COVID-19 Genomics UK (COG-UK) consortium|Davies|United Kingdom

>Spike|hCoV-19/Denmark/DCGC-13937/2020|2020-11-30|EPI\_ISL\_711083|Original|hCoV-19^^Hovedstaden|Human|Department of Virus and Microbiological Special Diagnostics|Albertsen Lab|Michaelsen|Denmark

>Spike|hCoV-19/England/QEUEH-B680DE/2020|2020-11-11|EPI\_ISL\_662092|Original|hCoV-19^^England|Human|Lighthouse Lab in Glasgow|Wellcome Sanger Institute for the COVID-19 Genomics UK (COG-UK) Consortium|Davies|United Kingdom

>Spike|hCoV-19/England/CAMB-1B250D/2020|2020-05-18|EPI\_ISL\_456688|Original|hCoV-19^^England|Human|Department of Pathology|COVID-19 Genomics UK (COG-UK) Consortium|Meredith|United Kingdom

>Spike|hCoV-19/England/ALDP-BC74FF/2020|2020-11-22|EPI\_ISL\_721308|Original|hCoV-19^^England|Human|Lighthouse Lab in Alderley Park|Wellcome Sanger Institute for the COVID-19 Genomics UK (COG-UK) Consortium|Davies|United Kingdom

>Spike|hCoV-19/Wales/PHWC-164D11/2020|2020-05-28|EPI\_ISL\_479374|Original|hCoV-19^^Wales|Human|Wales Specialist Virology Centre Sequencing lab|COVID-19 Genomics UK (COG-UK) Consortium|Moore|United Kingdom

>Spike|hCoV-19/USA/CA-CZB-9750/2020|2020-05-18|EPI\_ISL\_672163|Original|hCoV-19^^California|Human|The Ashley Laboratory|Chan-Zuckerberg Biohub|Bhatt|USA

>Spike|hCoV-19/Mexico/BCN-ALSR-2565/2020|2020-07-06|EPI\_ISL\_635567|Original|hCoV-19^^Baja California|Human|Centro de Diagn\u00221a\u002265stico COVID-19 UABC Tijuana|Andersen lab at Scripps Research|Gangavarapu|Mexico

>Spike|hCoV-19/Japan/PG-8186/2020|2020-08-00|EPI\_ISL\_687285|Original|hCoV-19^^Japan|Human|Pathogen Genomics Center|Pathogen Genomics Center|Sekizuka|Japan

>Spike|hCoV-19/England/MILK-5149CD/2020|2020-06-11|EPI\_ISL\_558932|Original|hCoV-19^^England|Human|Lighthouse Lab in Milton Keynes|Wellcome Sanger Institute for the COVID-19 Genomics UK (COG-UK) consortium|Davies|United Kingdom

>Spike|hCoV-19/USA/NY-Wadsworth-36550-01/2020|2020-04-02|EPI\_ISL\_676797|Original|hCoV-19^^New York|Human|Wadsworth Center|Wadsworth Center|Lasek-Nesselquist|USA

>Spike|hCoV-19/England/QEUEH-9F6383/2020|2020-09-24|EPI\_ISL\_588803|Original|hCoV-19^^England|Human|Lighthouse Lab in Glasgow|Wellcome Sanger Institute for the COVID-19 Genomics UK (COG-UK) consortium|Davies|United Kingdom

>Spike|hCoV-19/Malaysia/6149/2020|2020-04-06|EPI\_ISL\_501217|Original|hCoV-19^^Kuala Lumpur|Human|Department of Medical Microbiology|Department of Medical Microbiology|Chan|Malaysia

>Spike|hCoV-19/USA/CA-CZB-11690/2020|2020-09-28|EPI\_ISL\_625496|Original|hCoV-19^^California|Human|Santa Clara County Public Health Laboratory|Chan-Zuckerberg Biohub|Bhatt|USA

>Spike|hCoV-19/England/CAMB-79BB6/2020|2020-04-01|EPI\_ISL\_440564|Original|hCoV-19^^England|Human|Department of Pathology|Wellcome Sanger Institute for the COVID-19 Genomics UK (COG-UK) consortium|Amato|United Kingdom

>Spike|hCoV-19/Sweden/20-08173/2020|2020-03-12|EPI\_ISL\_429125|Original|hCoV-19^^Halland|Human|Klinisk mikrobiologi och vardhygien Halmstad|The Public Health Agency of Sweden|Svartstr\u00f6m|Sweden

>Spike|hCoV-19/England/MILK-B85E2C/2020|2020-11-13|EPI\_ISL\_673888|Original|hCoV-19^^England|Human|Lighthouse Lab in Milton Keynes|Wellcome Sanger Institute for the COVID-19 Genomics UK (COG-UK) Consortium|Davies|United Kingdom

>Spike|hCoV-19/England/ALDP-B5DB17/2020|2020-11-10|EPI\_ISL\_704467|Original|hCoV-19^^England|Human|Department of Pathology|COVID-19 Genomics UK (COG-UK) Consortium|Goodfellow|United Kingdom

>Spike|hCoV-19/England/MILK-99DC1A/2020|2020-08-31|EPI\_ISL\_550542|Original|hCoV-19^^England|Human|Lighthouse Lab in Milton Keynes|Wellcome Sanger Institute for the COVID-19 Genomics UK (COG-UK) consortium|Davies|United Kingdom

>Spike|hCoV-19/England/QEUEH-9B7236/2020|2020-09-07|EPI\_ISL\_590582|Original|hCoV-19^^England|Human|Lighthouse Lab in Glasgow|Wellcome Sanger Institute for the COVID-19 Genomics UK (COG-UK) consortium|Davies|United Kingdom

>Spike|hCoV-19/England/QEUEH-CAD8D4/2020|2020-12-20|EPI\_ISL\_761015|Original|hCoV-19^^England|Human|Lighthouse Lab in Glasgow|Wellcome Sanger Institute for the COVID-19 Genomics UK (COG-UK) Consortium|Davies|United Kingdom

>Spike|hCoV-19/Switzerland/BS-ETHZ-100825/2020|2020-03-26|EPI\_ISL\_451774|Original|hCoV-19^^Basel-Stadt|Human|Viollier AG|Department of Biosystems Science and Engineering|Nadeau|Switzerland

>Spike|hCoV-19/England/204390340/2020|2020-10-23|EPI\_ISL\_637133|Original|hCoV-19^^England|Human|Respiratory Virus Unit|COVID-19 Genomics UK (COG-UK) Consortium|Platt|United Kingdom

>Spike|hCoV-19/England/MILK-9D3E9A/2020|2020-09-17|EPI\_ISL\_601640|Original|hCoV-19^^England|Human|Lighthouse Lab in Milton Keynes|Wellcome Sanger Institute for the COVID-19 Genomics UK (COG-UK) consortium|Davies|United Kingdom

>Spike|hCoV-19/India/OR-RMRC165/2020|2020-05-07|EPI\_ISL\_455765|Original|hCoV-19^^Odisha|Human|REGIONAL VRDL, ICMR-RMRC BBSR|Immunogenomics lab|Raghav|India

>Spike|hCoV-19/Denmark/DCGC-6069/2020|2020-10-05|EPI\_ISL\_620263|Original|hCoV-19^^Hovedstaden|Human|Department of Virus and Microbiological Special Diagnostics|Albertsen lab|Michaelsen|Denmark

>Spike|hCoV-19/England/OXON-B2762/2020|2020-04-10|EPI\_ISL\_534769|Original|hCoV-19^^England|Human|Oxford Viromics|COVID-19 Genomics UK (COG-UK) Consortium|Golubchik|United Kingdom

>Spike|hCoV-19/USA/TX-DSHS-1665/2020|2020-06-24|EPI\_ISL\_710082|Original|hCoV-19^^Texas|Human|Texas Department of State Health Services|Texas Department of State Health Services|Rahman|USA

>Spike|hCoV-19/England/ALDP-64C4D9/2020|2020-07-04|EPI\_ISL\_558065|Original|hCoV-19^^England|Human|Lighthouse Lab in Alderley Park|Wellcome Sanger Institute for the COVID-19 Genomics UK (COG-UK) consortium|Davies|United Kingdom

>Spike|hCoV-19/USA/NY-Wadsworth-41428-01/2020|2020-04-08|EPI\_ISL\_676825|Original|hCoV-19^^New York|Human|Wadsworth Center|Wadsworth Center|Lasek-Nesselquist|USA

>Spike|hCoV-19/England/ALDP-B62BE2/2020|2020-11-08|EPI\_ISL\_655400|Original|hCoV-19^^England|Human|Lighthouse Lab in Alderley Park|Wellcome Sanger Institute for the COVID-19 Genomics UK (COG-UK) Consortium|Davies|United Kingdom

>Spike|hCoV-19/England/20129148904/2020|2020-03-12|EPI\_ISL\_424117|Original|hCoV-19^^England|Human|Respiratory Virus Unit|Respiratory Virus Unit|Platt|United Kingdom

>Spike|hCoV-19/USA/UT-UPHL-2008883/2020|2020-05-26|EPI\_ISL\_524997|Original|hCoV-19^^Utah|Human|Utah Public Health Laboratory|Utah Public Health Laboratory|Young|USA

>Spike|hCoV-19/Netherlands/ZH-EMC-1142/2020|2020-12-19|EPI\_ISL\_763219|Original|hCoV-19^^Zuid Holland|Human|Dutch COVID-19 response team|Erasmus Medical Center|Oude Munnink|Netherlands

>Spike|hCoV-19/Wales/PHWC-49442F/2020|2020-11-18|EPI\_ISL\_726114|Original|hCoV-19^^Wales|Human|Originating lab|COVID-19 Genomics UK (COG-UK) Consortium|Moore|United Kingdom

>Spike|hCoV-19/Scotland/QEUEH-C14CBE/2020|2020-12-06|EPI\_ISL\_710667|Original|hCoV-19^^Scotland|Human|Lighthouse Lab in Glasgow|Wellcome Sanger Institute for the COVID-19 Genomics UK (COG-UK) Consortium|Davies|United Kingdom

>Spike|hCoV-19/USA/HI-H200669/2020|2020-09-21|EPI\_ISL\_753192|Original|hCoV-19^^Hawaii|Human|State Laboratories Division|State Laboratories Division|Sultana|USA

>Spike|hCoV-19/Luxembourg/LNS0372015/2020|2020-11-25|EPI\_ISL\_739763|Original|hCoV-19^^Luxembourg|Human|Laboratoire national de sant\u00e9|Laboratoire national de sant\u00e9|Wienecke-Baldacchino|Luxembourg

>Spike|hCoV-19/USA/AZ-TG305958/2020|2020-04-28|EPI\_ISL\_694299|Original|hCoV-19^^Arizona|Human|AZ SPHL|TGen North|French|USA

>Spike|hCoV-19/England/BRIS-1258C0/2020|2020-03-29|EPI\_ISL\_443866|Original|hCoV-19^^England|Human|PHE South West Regional Laboratory|Wellcome Sanger Institute for the COVID-19 Genomics UK (COG-UK) consortium|Amato|United Kingdom

>Spike|hCoV-19/England/MILK-B8F7BE/2020|2020-11-13|EPI\_ISL\_674526|Original|hCoV-19^^England|Human|Lighthouse Lab in Milton Keynes|Wellcome Sanger Institute for the COVID-19 Genomics UK (COG-UK) Consortium|Davies|United Kingdom

>Spike|hCoV-19/Denmark/DCGC-17031/2020|2020-12-14|EPI\_ISL\_750322|Original|hCoV-19^^Syddanmark|Human|Department of Virus and Microbiological Special Diagnostics|Albertsen Lab|Michaelsen|Denmark

>Spike|hCoV-19/Japan/PG-1427/2020|2020-04-00|EPI\_ISL\_685034|Original|hCoV-19^^Japan|Human|Saitama Prefectural Institute of Public Health|Pathogen Genomics Center|Sekizuka|Japan

>Spike|hCoV-19/Brazil/RJ-00427/2020|2020-11-04|EPI\_ISL\_717829|Original|hCoV-19^^Rio de Janeiro|Human|Laboratorio de Virologia Molecular / UFRJ|Bioinformatics Laboratory / LNCC|Almeida|Brazil

>Spike|hCoV-19/Wales/PHWC-3565B/2020|2020-04-24|EPI\_ISL\_474458|Original|hCoV-19^^Wales|Human|Originating lab|COVID-19 Genomics UK (COG-UK) Consortium|Moore|United Kingdom

>Spike|hCoV-19/USA/WA-S1525/2020|2020-05-23|EPI\_ISL\_495951|Original|hCoV-19^^Washington|Human|Washington State Department of Health|Seattle Flu Study|Lee|USA

>Spike|hCoV-19/USA/NY-QDX-2414/2020|2020-03-16|EPI\_ISL\_604716|Original|hCoV-19^^New York|Human|Quest Diagnostics|Quest Diagnostics|Kagan|USA

>Spike|hCoV-19/Spain/IB-IBV-2542/2020|2020-03-19|EPI\_ISL\_468975|Original|hCoV-19^^Illes Balears|Human|Servicio de Microbiolog\u00eda|SeqCOVID-SPAIN consortium/IBV (CSIC) |Comas|Spain

>Spike|hCoV-19/England/20166003004/2020|2020-04-14|EPI\_ISL\_527336|Original|hCoV-19^^England|Human|Respiratory Virus Unit|Respiratory Virus Unit|Ledesma|United Kingdom

>Spike|hCoV-19/Japan/PG-2541/2020|2020-05-00|EPI\_ISL\_690676|Original|hCoV-19^^Japan|Human|Saitama Prefectural Institute of Public Health|Pathogen Genomics Center|Sekizuka|Japan

>Spike|hCoV-19/Malaysia/IMR\_WC12286/2020|2020-04-10|EPI\_ISL\_490016|Vero E6|hCoV-19^^Malaysia|Human|Institute for Medical Research|Institute for Medical Research|Suppiah|Malaysia

>Spike|hCoV-19/USA/CA-ALSR-2302/2020|2020-07-09|EPI\_ISL\_635421|Original|hCoV-19^^California|Human|San Diego County Public Health Laboratory|Andersen lab at Scripps Research|Gangavarapu|USA

>Spike|hCoV-19/USA/MI-UM-10036333501/2020|2020-10-07|EPI\_ISL\_596584|Original|hCoV-19^^Michigan|Human|University of Michigan Clinical Microbiology Laboratory|Lauring Lab|Valesano|USA

>Spike|hCoV-19/Australia/VIC5656/2020|2020-07-17|EPI\_ISL\_518466|Original|hCoV-19^^Victoria|Human|Victorian Infectious Diseases Reference Laboratory (VIDRL)|VIDRL and MDU-PHL|Schultz|Australia

>Spike|hCoV-19/USA/IA-GMF-18219/2020|2020-08-31|EPI\_ISL\_547754|Original|hCoV-19^^Iowa|Human|Gundersen Molecular Diagnostics Laboratory|Kabara Cancer Research Institute|Kenny|USA

>Spike|hCoV-19/USA/FL-QDX-272/2020|2020-03-17|EPI\_ISL\_571027|Original|hCoV-19^^Florida|Human|Quest Diagnostics|Quest Diagnostics|Kagan|USA

>Spike|hCoV-19/Finland/5May49S6/2020|2020-05-05|EPI\_ISL\_481703|Original|hCoV-19^^Uusimaa|Human|Department of Virology and Immunology|Department of Virology|Smura|Finland

>Spike|hCoV-19/Canada/BC-BCCDC-6416/2020|2020-10-00|EPI\_ISL\_740570|Original|hCoV-19^^British Columbia|Human|BCCDC Public Health Laboratory|BCCDC Public Health Laboratory|Prystajecky|Canada

>Spike|hCoV-19/USA/UT-UPHL-00017/2020|2020-03-13|EPI\_ISL\_575036|Original|hCoV-19^^Utah|Human|Utah Public Health Laboratory|Utah Public Health Laboratory|Young|USA

>Spike|hCoV-19/Canada/ON-PHL-20-90089/2020|2020-03-00|EPI\_ISL\_548938|Original|hCoV-19^^Ontario|Human|Public Health Ontario Laboratory|Public Health Ontario Laboratory|Guthrie|Canada

>Spike|hCoV-19/USA/TX-DSHS-1333/2020|2020-04-03|EPI\_ISL\_654915|Original|hCoV-19^^Texas|Human|Texas Department of State Health Services|Texas Department of State Health Services|Rahman|USA

>Spike|hCoV-19/USA/FL-BPHL-0804/2020|2020-05-12|EPI\_ISL\_514150|Original|hCoV-19^^Florida|Human|Florida Bureau of Public Health Laboratories|Florida Bureau of Public Health Laboratories|Blanton|USA

>Spike|hCoV-19/Norway/2477/2020|2020-04-27|EPI\_ISL\_481206|Original|hCoV-19^^Norway|Human|Hospital of Southern Norway - Kristiansand|Norwegian Institute of Public Health|Kopperud Riis|Norway

>Spike|hCoV-19/Japan/PG-2417/2020|2020-03-00|EPI\_ISL\_686022|Original|hCoV-19^^Japan|Human|Pathogen Genomics Center|Pathogen Genomics Center|Sekizuka|Japan

>Spike|hCoV-19/France/ARA-112755/2020|2020-11-26|EPI\_ISL\_745338|Original|hCoV-19^^Auvergne-Rh\u00f4ne-Alpes|Human|CNR Virus des Infections Respiratoires - France SUD|CNR Virus des Infections Respiratoires - France SUD|Bal|France

>Spike|hCoV-19/Thailand/UDC300823-3/2020|2020-04-01|EPI\_ISL\_450981|Original|hCoV-19^^Thailand|Human|Center of Excellence in Clinical Virology|Center of Excellence in Clinical Virology|Poovorawan|Thailand

>Spike|hCoV-19/Spain/RI-IBV-99010912/2020|2020-11-04|EPI\_ISL\_732757|Original|hCoV-19^^La Rioja|Human|Centro de Investigaci\u00f3n Biom\u00e9dica de La Rioja - Hospital San Pedro Logro\u00f1o|SeqCOVID-SPAIN consortium/IBV (CSIC) |Comas|Spain

>Spike|hCoV-19/England/MILK-AB74D5/2020|2020-10-21|EPI\_ISL\_623275|Original|hCoV-19^^England|Human|Lighthouse Lab in Milton Keynes|Wellcome Sanger Institute for the COVID-19 Genomics UK (COG-UK) consortium|Davies|United Kingdom

>Spike|hCoV-19/Denmark/DCGC-20556/2020|2020-12-21|EPI\_ISL\_758743|Original|hCoV-19^^Sjaelland|Human|Department of Virus and Microbiological Special Diagnostics|Albertsen Lab|Michaelsen|Denmark

>Spike|hCoV-19/Hong Kong/HKU-200723-033/2020|2020-07-11|EPI\_ISL\_497800|Original|hCoV-19^^Hong Kong|Human|Department of Microbiology|Department of Microbiology|Chan|China

>Spike|hCoV-19/India/UN-770/2020|2020-03-03|EPI\_ISL\_420545|Original|hCoV-19^^India|Human|National Influenza Center|Indian Council of Medical Research-National Institute of Virology|Yadav|India

>Spike|hCoV-19/USA/TX-HMH-MCoV-9228/2020|2020-07-02|EPI\_ISL\_781009|Original|hCoV-19^^Texas|Human|Houston Methodist Hospital|Houston Methodist Hospital|Long|USA

>Spike|hCoV-19/Australia/VIC1137/2020|2020-04-08|EPI\_ISL\_430607|Original|hCoV-19^^Victoria|Human|Victorian Infectious Diseases Reference Laboratory (VIDRL)|Microbiological Diagnostic Unit Public Health Laboratory and Victorian Infectious Diseases Reference Laboratory|Schultz|Australia

>Spike|hCoV-19/Denmark/ALAB-SSI393/2020|2020-03-24|EPI\_ISL\_429488|Original|hCoV-19^^Denmark|Human|Department of Virus and Microbiological Special Diagnostics|Albertsen lab|Kirkegaard|Denmark

>Spike|hCoV-19/Netherlands/NA\_473/2020|2020-04-14|EPI\_ISL\_455275|Original|hCoV-19^^Netherlands|Human|Dutch COVID-19 response team|Erasmus Medical Center|Oude Munnink|Netherlands

>Spike|hCoV-19/Denmark/DCGC-3178/2020|2020-08-31|EPI\_ISL\_616000|Original|hCoV-19^^Hovedstaden|Human|Department of Virus and Microbiological Special Diagnostics|Albertsen lab|Michaelsen|Denmark

>Spike|hCoV-19/USA/WA-S1579/2020|2020-05-26|EPI\_ISL\_496005|Original|hCoV-19^^Washington|Human|Washington State Department of Health|Seattle Flu Study|Lee|USA

>Spike|hCoV-19/Denmark/DCGC-6082/2020|2020-10-05|EPI\_ISL\_620276|Original|hCoV-19^^Hovedstaden|Human|Department of Virus and Microbiological Special Diagnostics|Albertsen lab|Michaelsen|Denmark

>Spike|hCoV-19/India/OR-RMRC171/2020|2020-05-07|EPI\_ISL\_455770|Original|hCoV-19^^Odisha|Human|REGIONAL VRDL, ICMR-RMRC BBSR|Immunogenomics lab|Raghav|India

>Spike|hCoV-19/England/ALDP-9CC31D/2020|2020-09-16|EPI\_ISL\_573098|Original|hCoV-19^^England|Human|Quadram Institute Bioscience|COVID-19 Genomics UK (COG-UK) Consortium|Alikhan|United Kingdom

>Spike|hCoV-19/Denmark/DCGC-9751/2020|2020-11-09|EPI\_ISL\_669148|Original|hCoV-19^^Sjaelland|Human|Department of Virus and Microbiological Special Diagnostics|Albertsen Lab|Michaelsen|Denmark

>Spike|hCoV-19/England/LOND-D62EF/2020|2020-04-21|EPI\_ISL\_482205|Original|hCoV-19^^England|Human|University College London|Wellcome Sanger Institute for the COVID-19 Genomics UK (COG-UK) consortium|Davies|United Kingdom

>Spike|hCoV-19/England/LIVE-A8398/2020|2020-03-26|EPI\_ISL\_517153|Original|hCoV-19^^England|Human|Liverpool Clinical Laboratories|COVID-19 Genomics UK (COG-UK) Consortium|Haldenby|United Kingdom

>Spike|hCoV-19/England/MILK-B050F1/2020|2020-10-24|EPI\_ISL\_638540|Original|hCoV-19^^England|Human|Virology Department|COVID-19 Genomics UK (COG-UK) Consortium|de Silva|United Kingdom

>Spike|hCoV-19/France/ARA-15834/2020|2020-03-28|EPI\_ISL\_678500|Original|hCoV-19^^Auvergne-Rhône-Alpes|Human|CNR Virus des Infections Respiratoires - France SUD|CNR Virus des Infections Respiratoires - France SUD|Bal|France

>Spike|hCoV-19/SaudiArabia/KAUST-MADINAH368/2020|2020-04-23|EPI\_ISL\_513142|Original|hCoV-19^^Madinah|Human|Pathogen Genomics Lab King Abdullah University of Science and Technology(KAUST)|Pathogen Genomics Lab King Abdullah University of Science and Technology(KAUST)|Mohamed Ghazzali|Saudi Arabia

>Spike|hCoV-19/England/ALDP-A2F5A8/2020|2020-10-05|EPI\_ISL\_587022|Original|hCoV-19^^England|Human|Lighthouse Lab in Alderley Park|Wellcome Sanger Institute for the COVID-19 Genomics UK (COG-UK) consortium|Davies|United Kingdom

>Spike|hCoV-19/Scotland/QEUH-96C722/2020|2020-08-07|EPI\_ISL\_530862|Original|hCoV-19^^Scotland|Human|NHSGGC West of Scotland Specialist Virology Centre / MRC-University of Glasgow Centre for Virus Research|Wellcome Sanger Institute for the COVID-19 Genomics UK (COG-UK) consortium|Davies|United Kingdom

>Spike|hCoV-19/USA/CA-CZB-15295/2020|2020-11-20|EPI\_ISL\_739273|Original|hCoV-19^^California|Human|Santa Clara County Public Health Laboratory|Chan-Zuckerberg Biohub|Kamm|USA

>Spike|hCoV-19/Netherlands/ZuidHolland\_43/2020|2020-03-19|EPI\_ISL\_422915|Original|hCoV-19^^Zuid Holland|Human|Dutch COVID-19 response team|Erasmus Medical Center|Oude Munnink|Netherlands

>Spike|hCoV-19/Denmark/DCGC-2832/2020|2020-08-24|EPI\_ISL\_616658|Original|hCoV-19^^Hovedstaden|Human|Department of Virus and Microbiological Special Diagnostics|Albertsen lab|Michaelsen|Denmark

>Spike|hCoV-19/England/SHEF-C15A2/2020|2020-05-22|EPI\_ISL\_462002|Original|hCoV-19^^England|Human|Virology Department|COVID-19 Genomics UK (COG-UK) Consortium|de Silva|United Kingdom

>Spike|hCoV-19/USA/CA-ALSR-2234/2020|2020-06-29|EPI\_ISL\_635397|Original|hCoV-19^^California|Human|San Diego County Public Health Laboratory|Andersen lab at Scripps Research|Gangavarapu|USA

>Spike|hCoV-19/Denmark/DCGC-19676/2020|2020-12-07|EPI\_ISL\_749105|Original|hCoV-19^^Hovedstaden|Human|Department of Virus and Microbiological Special Diagnostics|Albertsen Lab|Michaelsen|Denmark

>Spike|hCoV-19/Netherlands/LI-EMC-95/2020|2020-00-00|EPI\_ISL\_632433|Original|hCoV-19^^Limburg|Human|Dutch COVID-19 response team|Erasmus Medical Center|Oude Munnink|Netherlands

>Spike|hCoV-19/South Korea/KCDC2599/2020|2020-06-30|EPI\_ISL\_515002|Original|hCoV-19^^South Korea|Human|Division of Viral Diseases|Division of Viral Diseases|Kim|South Korea

>Spike|hCoV-19/Netherlands/ZH-EMC-433/2020|2020-08-11|EPI\_ISL\_523771|Original|hCoV-19^^Zuid Holland|Human|Dutch COVID-19 response team|Erasmus Medical Center|Oude Munnink|Netherlands

>Spike|hCoV-19/England/ALDP-A51BD8/2020|2020-10-07|EPI\_ISL\_597884|Original|hCoV-19^^England|Human|Lighthouse Lab in Alderley Park|Wellcome Sanger Institute for the COVID-19 Genomics UK (COG-UK) consortium|Davies|United Kingdom

>Spike|hCoV-19/USA/MI-UM-10036826833/2020|2020-11-06|EPI\_ISL\_728383|Original|hCoV-19^^Michigan|Human|University of Michigan Clinical Microbiology Laboratory|Lauring Lab|Valesano|USA

>Spike|hCoV-19/England/MILK-97337F/2020|2020-08-19|EPI\_ISL\_575832|Original|hCoV-19^^England|Human|Lighthouse Lab in Milton Keynes|Wellcome Sanger Institute for the COVID-19 Genomics UK (COG-UK) consortium|Davies|United Kingdom

>Spike|hCoV-19/Jordan/AM-ALSR-4977/2020|2020-10-03|EPI\_ISL\_730250|Original|hCoV-19^^Amman|Human|Biolab Diagnostic Laboratories|Andersen lab at Scripps Research|Gangavarapu|Jordan

>Spike|hCoV-19/Japan/PG-7414/2020|2020-07-00|EPI\_ISL\_688516|Original|hCoV-19^^Japan|Human|Pathogen Genomics Center|Pathogen Genomics Center|Sekizuka|Japan

>Spike|hCoV-19/Singapore/427/2020|2020-03-20|EPI\_ISL\_475958|Original|hCoV-19^^Singapore|Human|National Public Health Laboratory|National Public Health Laboratory|Mak|Singapore

>Spike|hCoV-19/England/QEUA-B1054F/2020|2020-11-02|EPI\_ISL\_642418|Original|hCoV-19^^England|Human|Lighthouse Lab in Glasgow|Wellcome Sanger Institute for the COVID-19 Genomics UK (COG-UK) Consortium|Davies|United Kingdom

>Spike|hCoV-19/Australia/VIC2270/2020|2020-06-24|EPI\_ISL\_521992|Original|hCoV-19^^Victoria|Human|Microbiological Diagnostic Unit - Public Health Laboratory (MDU-PHL)|MDU-PHL|Schultz|Australia

>Spike|hCoV-19/England/QEUA-A8AA24/2020|2020-10-16|EPI\_ISL\_637871|Original|hCoV-19^^England|Human|Oxford Viromics|COVID-19 Genomics UK (COG-UK) Consortium|Golubchik|United Kingdom

>Spike|hCoV-19/Canada/ON-PHL-20-02295/2020|2020-09-00|EPI\_ISL\_671523|Original|hCoV-19^^Ontario|Human|Public Health Ontario Laboratory|Public Health Ontario Laboratory|Guthrie|Canada

>Spike|hCoV-19/USA/CA-CZB-1107/2020|2020-04-30|EPI\_ISL\_444065|Original|hCoV-19^^California|Human|UCSF Clinical Microbiology Laboratory|Chan-Zuckerberg Biohub|Hao|USA



>Spike|hCoV-19/Singapore/1122/2020|2020-10-26|EPI\_ISL\_626633|Original|hCoV-19^^Singapore|Human|National Public Health Laboratory|National Public Health Laboratory|Mak|Singapore

>Spike|hCoV-19/Japan/PG-6905/2020|2020-09-00|EPI\_ISL\_688013|Original|hCoV-19^^Japan|Human|Pathogen Genomics Center|Pathogen Genomics Center|Sekizuka|Japan

>Spike|hCoV-19/Netherlands/ZuidHolland\_118/2020|2020-04-10|EPI\_ISL\_455307|Original|hCoV-19^^Zuid Holland|Human|Dutch COVID-19 response team|Erasmus Medical Center|Oude Munnink|Netherlands

>Spike|hCoV-19/Wales/PHWC-4870EF/2020|2020-10-31|EPI\_ISL\_637551|Original|hCoV-19^^Wales|Human|Wales Specialist Virology Centre Sequencing lab|COVID-19 Genomics UK (COG-UK) Consortium|Moore|United Kingdom

>Spike|hCoV-19/USA/CA-QDX-2594/2020|2020-03-16|EPI\_ISL\_604885|Original|hCoV-19^^California|Human|Quest Diagnostics|Quest Diagnostics|Kagan|USA

>Spike|hCoV-19/Russia/StPetersburg-RII10289S/2020|2020-04-25|EPI\_ISL\_507230|Original|hCoV-19^^Saint Petersburg|Human|WHO National Influenza Centre Russian Federation|WHO National Influenza Centre Russian Federation|Komissarov|Russia

>Spike|hCoV-19/Belgium/UGent-133/2020|2020-04-28|EPI\_ISL\_481227|Original|hCoV-19^^Ghent|Human|Lab voor klinische biologie|Onderzoeksgroep Virologie|Lambrechts|Belgium

>Spike|hCoV-19/England/LEED-2A8590/2020|2020-03-25|EPI\_ISL\_539064|Original|hCoV-19^^England|Human|Leeds Teaching Hospitals NHS Trust and Public Health England|Wellcome Sanger Institute for the COVID-19 Genomics UK (COG-UK) consortium|Davies|United Kingdom

>Spike|hCoV-19/England/QEUEH-B9F3B7/2020|2020-11-18|EPI\_ISL\_721132|Original|hCoV-19^^England|Human|Lighthouse Lab in Glasgow|Wellcome Sanger Institute for the COVID-19 Genomics UK (COG-UK) Consortium|Davies|United Kingdom

>Spike|hCoV-19/England/QEUEH-CAD731/2020|2020-12-20|EPI\_ISL\_761172|Original|hCoV-19^^England|Human|Lighthouse Lab in Glasgow|Wellcome Sanger Institute for the COVID-19 Genomics UK (COG-UK) Consortium|Davies|United Kingdom

>Spike|hCoV-19/Denmark/DCGC-15134/2020|2020-11-23|EPI\_ISL\_713650|Original|hCoV-19^^Hovedstaden|Human|Department of Virus and Microbiological Special Diagnostics|Albertsen Lab|Michaelsen|Denmark

>Spike|hCoV-19/England/MILK-ACD1B7/2020|2020-10-22|EPI\_ISL\_643984|Original|hCoV-19^^England|Human|Lighthouse Lab in Milton Keynes|Wellcome Sanger Institute for the COVID-19 Genomics UK (COG-UK) Consortium|Davies|United Kingdom

>Spike|hCoV-19/USA/NY-PV09045/2020|2020-03-21|EPI\_ISL\_422488|Original|hCoV-19^^New York|Human|MSHS Clinical Microbiology Laboratories|MSHS Pathogen Surveillance Program|van Bakel|USA

>Spike|hCoV-19/England/ALDP-BB9FFF/2020|2020-11-20|EPI\_ISL\_701942|Original|hCoV-19^^England|Human|Lighthouse Lab in Alderley Park|Wellcome Sanger Institute for the COVID-19 Genomics UK (COG-UK) Consortium|Davies|United Kingdom

>Spike|hCoV-19/USA/CO-CDPHE-2004230207/2020|2020-04-21|EPI\_ISL\_710205|Original|hCoV-19^^Colorado|Human|Colorado Department of Public Health and Environment|Colorado Department of Public Health and Environment|Bankers|USA

>Spike|hCoV-19/England/QEUEH-95E556/2020|2020-08-07|EPI\_ISL\_532413|Original|hCoV-19^^England|Human|Lighthouse Lab in Glasgow|Wellcome Sanger Institute for the COVID-19 Genomics UK (COG-UK) consortium|Davies|United Kingdom

>Spike|hCoV-19/Japan/IC-0271/2020|2020-11-00|EPI\_ISL\_667700|Original|hCoV-19^^Japan|Human|Pathogen Genomics Center|Pathogen Genomics Center|Sekizuka|Japan

>Spike|hCoV-19/England/ALDP-9E8BC8/2020|2020-09-24|EPI\_ISL\_638137|Original|hCoV-19^^England|Human|Centre for Enzyme Innovation|COVID-19 Genomics UK (COG-UK) Consortium|Robson|United Kingdom

>Spike|hCoV-19/England/LOND-D655F/2020|2020-04-22|EPI\_ISL\_487582|Original|hCoV-19^^England|Human|University College London|Wellcome Sanger Institute for the COVID-19 Genomics UK (COG-UK) consortium|Davies|United Kingdom

>Spike|hCoV-19/Switzerland/SH-ETHZ-420714/2020|2020-12-24|EPI\_ISL\_768151|Original|hCoV-19^^Schaffhausen|Human|Viollier AG|Department of Biosystems Science and Engineering|Nadeau|Switzerland

>Spike|hCoV-19/Wales/PHWC-26A9D/2020|2020-03-30|EPI\_ISL\_422130|Original|hCoV-19^^Wales|Human|Wales Specialist Virology Centre|Public Health Wales Microbiology Cardiff|Moore|United Kingdom

>Spike|hCoV-19/England/MILK-9EE816/2020|2020-09-23|EPI\_ISL\_580649|Original|hCoV-19^^England|Human|Lighthouse Lab in Milton Keynes|Wellcome Sanger Institute for the COVID-19 Genomics UK (COG-UK) consortium|Davies|United Kingdom

>Spike|hCoV-19/England/PORT-2E93C6/2020|2020-11-08|EPI\_ISL\_727697|Original|hCoV-19^^England|Human|Centre for Enzyme Innovation|COVID-19 Genomics UK (COG-UK) Consortium|Robson|United Kingdom

>Spike|hCoV-19/England/QEUH-B302CA/2020|2020-11-04|EPI\_ISL\_659906|Original|hCoV-19^^England|Human|Lighthouse Lab in Glasgow|Wellcome Sanger Institute for the COVID-19 Genomics UK (COG-UK) Consortium|Davies|United Kingdom

>Spike|hCoV-19/Switzerland/ZH-ETHZ-942/2020|2020-04-17|EPI\_ISL\_483673|Original|hCoV-19^^Zurich|Human|University Hospital Zurich|Department of Biosystems Science and Engineering|Nadeau|Switzerland

>Spike|hCoV-19/England/QEUH-9614AE/2020|2020-08-02|EPI\_ISL\_537106|Original|hCoV-19^^England|Human|Lighthouse Lab in Glasgow|Wellcome Sanger Institute for the COVID-19 Genomics UK (COG-UK) consortium|Davies|United Kingdom

>Spike|hCoV-19/India/MH-ACTREC-589/2020|2020-09-04|EPI\_ISL\_723063|Original|hCoV-19^^Maharashtra|Human|Hematopathology Laboratory|Hematopathology Laboratory|Patkar|India

>Spike|hCoV-19/USA/MA-MGH-00824/2020|2020-04-13|EPI\_ISL\_791781|Original|hCoV-19^^Massachusetts|Human|Massachusetts General Hospital|Infectious Disease Program|Park|USA

>Spike|hCoV-19/England/CAMC-B7B199/2020|2020-11-12|EPI\_ISL\_723989|Original|hCoV-19^^England|Human|Oxford Viromics|COVID-19 Genomics UK (COG-UK) Consortium|Golubchik|United Kingdom

>Spike|hCoV-19/England/MILK-B8F39C/2020|2020-11-13|EPI\_ISL\_675145|Original|hCoV-19^^England|Human|Lighthouse Lab in Milton Keynes|Wellcome Sanger Institute for the COVID-19 Genomics UK (COG-UK) Consortium|Davies|United Kingdom

>Spike|hCoV-19/Japan/PG-2831/2020|2020-04-00|EPI\_ISL\_690958|Original|hCoV-19^^Japan|Human|Pathogen Genomics Center|Pathogen Genomics Center|Sekizuka|Japan

>Spike|hCoV-19/USA/TX-HMH-2459/2020|2020-05-29|EPI\_ISL\_545321|Original|hCoV-19^^Texas|Human|Houston Methodist Hospital|Houston Methodist Hospital|Long|USA

>Spike|hCoV-19/USA/MN-MDH-1108/2020|2020-06-03|EPI\_ISL\_470788|Original|hCoV-19^^Minnesota|Human|Minnesota Department of Health|Minnesota Department of Health|Garfin|USA

>Spike|hCoV-19/Wales/PHWC-16666F/2020|2020-06-27|EPI\_ISL\_494026|Original|hCoV-19^^Wales|Human|Originating lab|COVID-19 Genomics UK (COG-UK) Consortium|Moore|United Kingdom

>Spike|hCoV-19/Scotland/EDB4172/2020|2020-04-20|EPI\_ISL\_449278|Original|hCoV-19^^Scotland|Human|Virology Department|COVID-19 Genomics UK (COG-UK) Consortium|Williams|United Kingdom

>Spike|hCoV-19/USA/MI-UM-10036578191/2020|2020-10-22|EPI\_ISL\_640183|Original|hCoV-19^^Michigan|Human|University of Michigan Clinical Microbiology Laboratory|Lauring Lab|Valesano|USA

>Spike|hCoV-19/England/ALDP-5BCB94/2020|2020-06-18|EPI\_ISL\_558855|Original|hCoV-19^^England|Human|Lighthouse Lab in Alderley Park|Wellcome Sanger Institute for the COVID-19 Genomics UK (COG-UK) consortium|Davies|United Kingdom

>Spike|hCoV-19/Scotland/CVR5628/2020|2020-10-27|EPI\_ISL\_651877|Original|hCoV-19^^Scotland|Human|West of Scotland Specialist Virology Centre|COVID-19 Genomics UK (COG-UK) Consortium|Robertson|United Kingdom

>Spike|hCoV-19/Scotland/QEUH-A20404/2020|2020-10-01|EPI\_ISL\_599090|Original|hCoV-19^^Scotland|Human|Lighthouse Lab in Glasgow|Wellcome Sanger Institute for the COVID-19 Genomics UK (COG-UK) consortium|Davies|United Kingdom

>Spike|hCoV-19/Wales/PHWC-48107C/2020|2020-10-16|EPI\_ISL\_613031|Original|hCoV-19^^Wales|Human|Wales Specialist Virology Centre Sequencing lab|COVID-19 Genomics UK (COG-UK) Consortium|Moore|United Kingdom

>Spike|hCoV-19/Belgium/reg-03111136/2020|2020-03-11|EPI\_ISL\_734485|Original|hCoV-19^^Stambruges|Human|UZ Leuven|KU Leuven|Maes|Belgium

>Spike|hCoV-19/Wales/MILK-9E2DF5/2020|2020-09-21|EPI\_ISL\_581143|Original|hCoV-19^^Wales|Human|Lighthouse Lab in Milton Keynes|Wellcome Sanger Institute for the COVID-19 Genomics UK (COG-UK) consortium|Davies|United Kingdom

>Spike|hCoV-19/Japan/PG-5091/2020|2020-07-00|EPI\_ISL\_690201|Original|hCoV-19^^Japan|Human|Pathogen Genomics Center|Pathogen Genomics Center|Sekizuka|Japan

>Spike|hCoV-19/USA/MA-MGH-02975/2020|2020-07-10|EPI\_ISL\_765668|Original|hCoV-19^^Massachusetts|Human|Massachusetts General Hospital|Infectious Disease Program|Park|USA

>Spike|hCoV-19/USA/WA-UW-11635/2020|2020-06-19|EPI\_ISL\_570451|Original|hCoV-19^^Washington|Human|UW Virology Lab|UW Virology Lab|Roychoudhury|USA

>Spike|hCoV-19/USA/WI-UW-393/2020|2020-05-14|EPI\_ISL\_480375|Original|hCoV-19^^Wisconsin|Human|University of Wisconsin-Madison AIDS Vaccine Research Laboratories|University of Wisconsin-Madison AIDS Vaccine Research Laboratories|Baczenas|USA

>Spike|hCoV-19/France/ARA-08938-isl/2020|2020-03-14|EPI\_ISL\_578176|BGM P1|hCoV-19^^Auvergne-Rh\u00f4ne-Alpes|Human|CNR Virus des Infections Respiratoires - France SUD|CNR Virus des Infections Respiratoires - France SUD|Josset|France

>Spike|hCoV-19/USA/WA-S2092/2020|2020-06-05|EPI\_ISL\_497520|Original|hCoV-19^^Washington|Human|Washington State Department of Health|Seattle Flu Study|Lee|USA

>Spike|hCoV-19/Denmark/DCGC-9859/2020|2020-11-09|EPI\_ISL\_669234|Original|hCoV-19^^Hovedstaden|Human|Department of Virus and Microbiological Special Diagnostics|Albertsen Lab|Michaelsen|Denmark

>Spike|hCoV-19/England/CAMC-A81999/2020|2020-10-14|EPI\_ISL\_610784|Original|hCoV-19^^England|Human|Lighthouse Lab in Cambridge|Wellcome Sanger Institute for the COVID-19 Genomics UK (COG-UK) consortium|Davies|United Kingdom

>Spike|hCoV-19/Netherlands/NA\_150/2020|2020-03-19|EPI\_ISL\_422686|Original|hCoV-19^^Netherlands|Human|Dutch COVID-19 response team|Erasmus Medical Center|Oude Munnink|Netherlands

>Spike|hCoV-19/England/CAMC-C82143/2020|2020-12-17|EPI\_ISL\_762729|Original|hCoV-19^^England|Human|Lighthouse Lab in Cambridge|Wellcome Sanger Institute for the COVID-19 Genomics UK (COG-UK) Consortium|Davies|United Kingdom

>Spike|hCoV-19/England/ALDP-BB360F/2020|2020-11-19|EPI\_ISL\_702016|Original|hCoV-19^^England|Human|Lighthouse Lab in Alderley Park|Wellcome Sanger Institute for the COVID-19 Genomics UK (COG-UK) Consortium|Davies|United Kingdom

>Spike|hCoV-19/Australia/VIC394/2020|2020-03-24|EPI\_ISL\_426697|Original|hCoV-19^^Victoria|Human|Victorian Infectious Diseases Reference Laboratory (VIDRL)|Microbiological Diagnostic Unit Public Health Laboratory and Victorian Infectious Diseases Reference Laboratory|Schultz|Australia

>Spike|hCoV-19/England/MILK-9EE694/2020|2020-09-23|EPI\_ISL\_580815|Original|hCoV-19^^England|Human|Lighthouse Lab in Milton Keynes|Wellcome Sanger Institute for the COVID-19 Genomics UK (COG-UK) consortium|Davies|United Kingdom

>Spike|hCoV-19/Japan/IC-0006/2020|2020-06-00|EPI\_ISL\_591352|Original|hCoV-19^^Japan|Human|Pathogen Genomics Center|Pathogen Genomics Center|Sekizuka|Japan

>Spike|hCoV-19/Australia/VIC4535/2020|2020-07-16|EPI\_ISL\_518946|Original|hCoV-19^^Victoria|Human|Microbiological Diagnostic Unit - Public Health Laboratory (MDU-PHL)|MDU-PHL|Schultz|Australia

>Spike|hCoV-19/Ireland/KE-NVRL-73IRL28838/2020|2020-09-16|EPI\_ISL\_578296|Original|hCoV-19^^Kildare|Human|National Virus Reference Laboratory|National Virus Reference Laboratory|Gonzalez|Ireland

>Spike|hCoV-19/England/QEUEH-C32CF6/2020|2020-12-11|EPI\_ISL\_782593|Original|hCoV-19^^England|Human|Lighthouse Lab in Glasgow|Wellcome Sanger Institute for the COVID-19 Genomics UK (COG-UK) Consortium|Davies|United Kingdom

>Spike|hCoV-19/England/LIVE-DCAF35/2020|2020-12-09|EPI\_ISL\_724391|Original|hCoV-19^^England|Human|Liverpool Clinical Laboratories|COVID-19 Genomics UK (COG-UK) Consortium|Haldenby|United Kingdom

>Spike|hCoV-19/England/NORW-E96A1/2020|2020-04-22|EPI\_ISL\_453611|Original|hCoV-19^^England|Human|Quadram Institute Bioscience|COVID-19 Genomics UK (COG-UK) Consortium|Alikhan|United Kingdom

>Spike|hCoV-19/USA/MI-QDX-2212/2020|2020-03-15|EPI\_ISL\_604539|Original|hCoV-19^^Michigan|Human|Quest Diagnostics|Quest Diagnostics|Kagan|USA

>Spike|hCoV-19/England/CWAR-24FD97A/2020|2020-04-24|EPI\_ISL\_584456|Original|hCoV-19^^England|Human|UHCW / University of Warwick|COVID-19 Genomics UK (COG-UK) Consortium|Stark|United Kingdom

>Spike|hCoV-19/England/ALDP-B63817/2020|2020-11-09|EPI\_ISL\_656564|Original|hCoV-19^^England|Human|Lighthouse Lab in Alderley Park|Wellcome Sanger Institute for the COVID-19 Genomics UK (COG-UK) Consortium|Davies|United Kingdom

>Spike|hCoV-19/Wales/PHWC-16BBD4/2020|2020-09-18|EPI\_ISL\_573953|Original|hCoV-19^^Wales|Human|Wales Specialist Virology Centre Sequencing lab|COVID-19 Genomics UK (COG-UK) Consortium|Moore|United Kingdom

>Spike|hCoV-19/Japan/PG-6597/2020|2020-08-00|EPI\_ISL\_687709|Original|hCoV-19^^Japan|Human|Niigata Prefectural Institute of Public Health and Environmental Sciences|Pathogen Genomics Center|Sekizuka|Japan

>Spike|hCoV-19/England/CAMB-7BDBE/2020|2020-04-04|EPI\_ISL\_442104|Original|hCoV-19^^England|Human|Department of Pathology|Wellcome Sanger Institute for the COVID-19 Genomics UK (COG-UK) consortium|Amato|United Kingdom

>Spike|hCoV-19/Scotland/CVR5739/2020|2020-11-07|EPI\_ISL\_650876|Original|hCoV-19^^Scotland|Human|West of Scotland Specialist Virology Centre|COVID-19 Genomics UK (COG-UK) Consortium|Robertson|United Kingdom

>Spike|hCoV-19/England/ALDP-68F4BC/2020|2020-07-02|EPI\_ISL\_558051|Original|hCoV-19^^England|Human|Lighthouse Lab in Alderley Park|Wellcome Sanger Institute for the COVID-19 Genomics UK (COG-UK) consortium|Davies|United Kingdom

>Spike|hCoV-19/Wales/PHWC-49DD2B/2020|2020-12-01|EPI\_ISL\_742901|Original|hCoV-19^^Wales|Human|Wales Specialist Virology Centre Sequencing lab|COVID-19 Genomics UK (COG-UK) Consortium|Moore|United Kingdom

>Spike|hCoV-19/England/QEUEH-B0E517/2020|2020-11-02|EPI\_ISL\_642181|Original|hCoV-19^^England|Human|Lighthouse Lab in Glasgow|Wellcome Sanger Institute for the COVID-19 Genomics UK (COG-UK) Consortium|Davies|United Kingdom

>Spike|hCoV-19/Wales/PHWC-4A4231/2020|2020-12-16|EPI\_ISL\_764669|Original|hCoV-19^^Wales|Human|Wales Specialist Virology Centre Sequencing lab|COVID-19 Genomics UK (COG-UK) Consortium|Moore|United Kingdom

>Spike|hCoV-19/India/MH-NIV-22048/2020|2020-05-06|EPI\_ISL\_479518|Original|hCoV-19^^Maharashtra|Human|NIV Influenza|NIV Influenza|Potdar|India

>Spike|hCoV-19/Norway/2803/2020|2020-06-26|EPI\_ISL\_493369|Original|hCoV-19^^Norway|Human|Furst Medical Laboratory|Norwegian Institute of Public Health|Kopperud Riis|Norway

>Spike|hCoV-19/England/QEUEH-C93D87/2020|2020-12-15|EPI\_ISL\_762171|Original|hCoV-19^^England|Human|Lighthouse Lab in Glasgow|Wellcome Sanger Institute for the COVID-19 Genomics UK (COG-UK) Consortium|Davies|United Kingdom

>Spike|hCoV-19/Denmark/DCGC-16943/2020|2020-12-14|EPI\_ISL\_750316|Original|hCoV-19^^Midtjylland|Human|Department of Virus and Microbiological Special Diagnostics|Albertsen Lab|Michaelsen|Denmark

>Spike|hCoV-19/USA/CA-CZB-1508/2020|2020-04-01|EPI\_ISL\_468455|Original|hCoV-19^^California|Human|Humboldt County Public Health Laboratory|Chan-Zuckerberg Biohub|Hao|USA

>Spike|hCoV-19/USA/CA-ALSR-0493-SAN/2020|2020-04-02|EPI\_ISL\_483178|Original|hCoV-19^^California|Human|UC San Diego Center for Advanced Laboratory Medicine|Andersen lab at Scripps Research|Gangavarapu|USA

>Spike|hCoV-19/USA/MI-MDHHS-SC22309/2020|2020-11-10|EPI\_ISL\_708285|Original|hCoV-19^^Michigan|Human|Michigan Department of Health and Human Services|Michigan Department of Health and Human Services|Jacob|USA

>Spike|hCoV-19/England/QEUEH-96FB32/2020|2020-08-17|EPI\_ISL\_540262|Original|hCoV-19^^England|Human|Lighthouse Lab in Glasgow|Wellcome Sanger Institute for the COVID-19 Genomics UK (COG-UK) consortium|Davies|United Kingdom

>Spike|hCoV-19/England/CAMB-1AAE58/2020|2020-04-17|EPI\_ISL\_444319|Original|hCoV-19^^England|Human|Department of Pathology|COVID-19 Genomics UK (COG-UK) Consortium|Meredith|United Kingdom

>Spike|hCoV-19/England/ALDP-C2328D/2020|2020-12-06|EPI\_ISL\_733699|Original|hCoV-19^^England|Human|Lighthouse Lab in Alderley Park|Wellcome Sanger Institute for the COVID-19 Genomics UK (COG-UK) Consortium|Davies|United Kingdom

>Spike|hCoV-19/England/CAMB-78B99/2020|2020-04-03|EPI\_ISL\_441054|Original|hCoV-19^^England|Human|Department of Pathology|Wellcome Sanger Institute for the COVID-19 Genomics UK (COG-UK) consortium|Amato|United Kingdom

>Spike|hCoV-19/Spain/MD-IBV-005351/2020|2020-03-19|EPI\_ISL\_510228|Original|hCoV-19^^Madrid|Human|Hospital General Universitario Gregorio Mara\u00f1\u00f3n|SeqCOVID-SPAIN consortium/IBV (CSIC)|Comas|Spain

>Spike|hCoV-19/Denmark/DCGC-5666/2020|2020-09-28|EPI\_ISL\_619953|Original|hCoV-19^^Midtjylland|Human|Department of Virus and Microbiological Special Diagnostics|Albertsen lab|Michaelsen|Denmark

>Spike|hCoV-19/United Arab Emirates/0901/2020|2020-06-25|EPI\_ISL\_699039|Original|hCoV-19^^Abu Dhabi|Human|Group 42 (G42) Healthcare|G42 Healthcare|Ogrodzki|United Arab Emirates

>Spike|hCoV-19/Netherlands/ZH-EMC-706/2020|2020-09-26|EPI\_ISL\_632554|Original|hCoV-19^^Zuid Holland|Human|Dutch COVID-19 response team|Erasmus Medical Center|Oude Munnink|Netherlands

>Spike|hCoV-19/USA/TX-HMH-MCoV-14736/2020|2020-10-12|EPI\_ISL\_786221|Original|hCoV-19^^Texas|Human|Houston Methodist Hospital|Houston Methodist Hospital|Long|USA

>Spike|hCoV-19/England/QEUEH-B43640/2020|2020-11-08|EPI\_ISL\_657126|Original|hCoV-19^^England|Human|Lighthouse Lab in Glasgow|Wellcome Sanger Institute for the COVID-19 Genomics UK (COG-UK) Consortium|Davies|United Kingdom

>Spike|hCoV-19/England/ALDP-B75CAD/2020|2020-11-12|EPI\_ISL\_723693|Original|hCoV-19^^England|Human|Oxford Viromics|COVID-19 Genomics UK (COG-UK) Consortium|Golubchik|United Kingdom

>Spike|hCoV-19/Wales/PHWC-497ADF/2020|2020-11-23|EPI\_ISL\_726931|Original|hCoV-19^^Wales|Human|Originating lab|COVID-19 Genomics UK (COG-UK) Consortium|Moore|United Kingdom

>Spike|hCoV-19/England/LOND-D64CB/2020|2020-04-22|EPI\_ISL\_487597|Original|hCoV-19^^England|Human|University College London|Wellcome Sanger Institute for the COVID-19 Genomics UK (COG-UK) consortium|Davies|United Kingdom

>Spike|hCoV-19/England/MILK-B8ECB0/2020|2020-11-13|EPI\_ISL\_674709|Original|hCoV-19^^England|Human|Lighthouse Lab in Milton Keynes|Wellcome Sanger Institute for the COVID-19 Genomics UK (COG-UK) Consortium|Davies|United Kingdom

>Spike|hCoV-19/England/ALDP-5B9B79/2020|2020-06-15|EPI\_ISL\_558840|Original|hCoV-19^^England|Human|Lighthouse Lab in Alderley Park|Wellcome Sanger Institute for the COVID-19 Genomics UK (COG-UK) consortium|Davies|United Kingdom

>Spike|hCoV-19/South Korea/KCDC2430/2020|2020-06-04|EPI\_ISL\_514833|Original|hCoV-19^^South Korea|Human|Division of Viral Diseases|Division of Viral Diseases|Kim|South Korea

>Spike|hCoV-19/USA/FL-BPHL-0188/2020|2020-04-03|EPI\_ISL\_480839|Original|hCoV-19^^Florida|Human|Florida Bureau of Public Health Laboratories|Florida Bureau of Public Health Laboratories|Blanton|USA

>Spike|hCoV-19/Japan/PG-7840/2020|2020-08-00|EPI\_ISL\_686941|Original|hCoV-19^^Japan|Human|Pathogen Genomics Center|Pathogen Genomics Center|Sekizuka|Japan

>Spike|hCoV-19/England/MILK-991E5C/2020|2020-08-27|EPI\_ISL\_552064|Original|hCoV-19^^England|Human|Lighthouse Lab in Milton Keynes|Wellcome Sanger Institute for the COVID-19 Genomics UK (COG-UK) consortium|Davies|United Kingdom

>Spike|hCoV-19/England/BRIS-1243A2/2020|2020-04-09|EPI\_ISL\_492824|Original|hCoV-19^^England|Human|PHE South West Regional Laboratory|Wellcome Sanger Institute for the COVID-19 Genomics UK (COG-UK) consortium|Davies|United Kingdom

>Spike|hCoV-19/Switzerland/VD-ETHZ-321426/2020|2020-10-14|EPI\_ISL\_603663|Original|hCoV-19^^Vaud|Human|Viollier AG|Department of Biosystems Science and Engineering|Nadeau|Switzerland

>Spike|hCoV-19/Netherlands/Limburg\_47/2020|2020-04-02|EPI\_ISL\_461035|Original|hCoV-19^^Limburg|Human|Dutch COVID-19 response team|Erasmus Medical Center|Oude Munnink|Netherlands

>Spike|hCoV-19/USA/MA-MGH-00225/2020|2020-03-25|EPI\_ISL\_460369|Original|hCoV-19^^Massachusetts|Human|Massachusetts General Hospital|Infectious Disease Program|Lemieux|USA

>Spike|hCoV-19/England/CAMB-1AAA81/2020|2020-04-19|EPI\_ISL\_470298|Original|hCoV-19^^England|Human|Department of Pathology|Wellcome Sanger Institute for the COVID-19 Genomics UK (COG-UK) consortium|Davies|United Kingdom

>Spike|hCoV-19/England/QEUA-961523/2020|2020-08-01|EPI\_ISL\_537113|Original|hCoV-19^^England|Human|Lighthouse Lab in Glasgow|Wellcome Sanger Institute for the COVID-19 Genomics UK (COG-UK) consortium|Davies|United Kingdom

>Spike|hCoV-19/England/CAMB-1B8CC6/2020|2020-11-02|EPI\_ISL\_651683|Original|hCoV-19^^England|Human|Department of Pathology|COVID-19 Genomics UK (COG-UK) Consortium|Goodfellow|United Kingdom

>Spike|hCoV-19/USA/TX-HMH-MCoV-12709/2020|2020-08-29|EPI\_ISL\_790475|Original|hCoV-19^^Texas|Human|Houston Methodist Hospital|Houston Methodist Hospital|Long|USA

>Spike|hCoV-19/England/CAMB-1ABA71/2020|2020-04-20|EPI\_ISL\_470225|Original|hCoV-19^^England|Human|Department of Pathology|Wellcome Sanger Institute for the COVID-19 Genomics UK (COG-UK) consortium|Davies|United Kingdom

>Spike|hCoV-19/England/ALDP-B63C2A/2020|2020-11-08|EPI\_ISL\_656422|Original|hCoV-19^^England|Human|Lighthouse Lab in Alderley Park|Wellcome Sanger Institute for the COVID-19 Genomics UK (COG-UK) Consortium|Davies|United Kingdom

>Spike|hCoV-19/Wales/PHWC-26602/2020|2020-03-28|EPI\_ISL\_422278|Original|hCoV-19^^Wales|Human|Wales Specialist Virology Centre|Public Health Wales Microbiology Cardiff|Moore|United Kingdom

>Spike|hCoV-19/England/QEUA-B13500/2020|2020-11-02|EPI\_ISL\_641772|Original|hCoV-19^^England|Human|Lighthouse Lab in Glasgow|Wellcome Sanger Institute for the COVID-19 Genomics UK (COG-UK) Consortium|Davies|United Kingdom

>Spike|hCoV-19/Scotland/QEUA-9F8DCF/2020|2020-09-27|EPI\_ISL\_600881|Original|hCoV-19^^Scotland|Human|Lighthouse Lab in Glasgow|Wellcome Sanger Institute for the COVID-19 Genomics UK (COG-UK) consortium|Davies|United Kingdom

>Spike|hCoV-19/England/ALDP-B5B26F/2020|2020-11-09|EPI\_ISL\_655397|Original|hCoV-19^^England|Human|Lighthouse Lab in Alderley Park|Wellcome Sanger Institute for the COVID-19 Genomics UK (COG-UK) Consortium|Davies|United Kingdom

>Spike|hCoV-19/England/ALDP-A6D025/2020|2020-10-14|EPI\_ISL\_608149|Original|hCoV-19^^England|Human|Lighthouse Lab in Alderley Park|Wellcome Sanger Institute for the COVID-19 Genomics UK (COG-UK) consortium|Davies|United Kingdom

>Spike|hCoV-19/Wales/PHWC-4920B4/2020|2020-11-16|EPI\_ISL\_706816|Original|hCoV-19^^Wales|Human|Originating lab|COVID-19 Genomics UK (COG-UK) Consortium|Moore|United Kingdom

>Spike|hCoV-19/Northern Ireland/NIRE-104180/2020|2020-04-14|EPI\_ISL\_482082|Original|hCoV-19^^Northern Ireland|Human|Regional Virus Laboratory|Wellcome Sanger Institute for the COVID-19 Genomics UK (COG-UK) consortium|Davies|United Kingdom

>Spike|hCoV-19/England/CAMB-77E0A/2020|2020-04-01|EPI\_ISL\_440844|Original|hCoV-19^^England|Human|Department of Pathology|Wellcome Sanger Institute for the COVID-19 Genomics UK (COG-UK) consortium|Amato|United Kingdom

>Spike|hCoV-19/Wales/PHWC-4873C8/2020|2020-10-17|EPI\_ISL\_637544|Original|hCoV-19^^Wales|Human|Wales Specialist Virology Centre Sequencing lab|COVID-19 Genomics UK (COG-UK) Consortium|Moore|United Kingdom

>Spike|hCoV-19/USA/TX-HMH-MCoV-12025/2020|2020-09-22|EPI\_ISL\_790170|Original|hCoV-19^^Texas|Human|Houston Methodist Hospital|Houston Methodist Hospital|Long|USA

>Spike|hCoV-19/England/ALDP-95CF0F/2020|2020-06-16|EPI\_ISL\_553385|Original|hCoV-19^^England|Human|Lighthouse Lab in Alderley Park|Wellcome Sanger Institute for the COVID-19 Genomics UK (COG-UK) consortium|Davies|United Kingdom

>Spike|hCoV-19/England/ALDP-98D5E5/2020|2020-07-23|EPI\_ISL\_529260|Original|hCoV-19^^England|Human|Liverpool Clinical Laboratories|COVID-19 Genomics UK (COG-UK) Consortium|Haldenby|United Kingdom

>Spike|hCoV-19/Panama/334611/2020|2020-03-31|EPI\_ISL\_496787|Original|hCoV-19^^Panama Center|Human|Gorgas Memorial Laboratory of Health Studies|Gorgas Memorial Laboratory of Health Studies|Martinez|Panama

>Spike|hCoV-19/England/NORT-289191/2020|2020-03-28|EPI\_ISL\_458698|Original|hCoV-19^^England|Human|NU-OMICS DNA Sequencing research facility|Wellcome Sanger Institute for the COVID-19 Genomics UK (COG-UK) consortium|Davies|United Kingdom

>Spike|hCoV-19/England/MILK-BA9F3E/2020|2020-11-17|EPI\_ISL\_681452|Original|hCoV-19^^England|Human|Lighthouse Lab in Milton Keynes|Wellcome Sanger Institute for the COVID-19 Genomics UK (COG-UK) Consortium|Davies|United Kingdom

>Spike|hCoV-19/England/MILK-ACD4EB/2020|2020-10-21|EPI\_ISL\_634414|Original|hCoV-19^^England|Human|Lighthouse Lab in Milton Keynes|Wellcome Sanger Institute for the COVID-19 Genomics UK (COG-UK) consortium|Davies|United Kingdom

>Spike|hCoV-19/England/LOND-1251AC1/2020|2020-11-24|EPI\_ISL\_705946|Original|hCoV-19^^England|Human|University College London Hospital|COVID-19 Genomics UK (COG-UK) Consortium|Byott|United Kingdom

>Spike|hCoV-19/Scotland/CVR4657/2020|2020-09-24|EPI\_ISL\_612296|Original|hCoV-19^^Scotland|Human|West of Scotland Specialist Virology Centre|COVID-19 Genomics UK (COG-UK) Consortium|Robertson|United Kingdom

>Spike|hCoV-19/USA/AZ-TG666121/2020|2020-05-01|EPI\_ISL\_696207|Original|hCoV-19^^Arizona|Human|Sonora Quest Laboratories|TGen North|French|USA

>Spike|hCoV-19/England/NORW-E8262/2020|2020-04-08|EPI\_ISL\_449130|Original|hCoV-19^^England|Human|Quadram Institute Bioscience|COVID-19 Genomics UK (COG-UK) Consortium|Alikhan|United Kingdom

>Spike|hCoV-19/England/ALDP-B24056/2020|2020-11-04|EPI\_ISL\_646185|Original|hCoV-19^^England|Human|Lighthouse Lab in Alderley Park|Wellcome Sanger Institute for the COVID-19 Genomics UK (COG-UK) Consortium|Davies|United Kingdom

>Spike|hCoV-19/England/ALDP-9CB976/2020|2020-09-16|EPI\_ISL\_575454|Original|hCoV-19^^England|Human|Lighthouse Lab in Alderley Park|Wellcome Sanger Institute for the COVID-19 Genomics UK (COG-UK) consortium|Davies|United Kingdom

>Spike|hCoV-19/Denmark/DCGC-12270/2020|2020-11-16|EPI\_ISL\_682451|Original|hCoV-19^^Hovedstaden|Human|Department of Virus and Microbiological Special Diagnostics|Albertsen Lab|Michaelsen|Denmark

>Spike|hCoV-19/England/QEUH-B9E3B8/2020|2020-11-17|EPI\_ISL\_721074|Original|hCoV-19^^England|Human|Lighthouse Lab in Glasgow|Wellcome Sanger Institute for the COVID-19 Genomics UK (COG-UK) Consortium|Davies|United Kingdom

>Spike|hCoV-19/Belgium/ULG-10325/2020|2020-07-29|EPI\_ISL\_540492|Original|hCoV-19^^Li\u00e8ge|Human|Department of Clinical Microbiology|GIGA Medical Genomics|Durkin|Belgium

>Spike|hCoV-19/USA/TX-HMH-MCoV-14391/2020|2020-10-06|EPI\_ISL\_787676|Original|hCoV-19^^Texas|Human|Houston Methodist Hospital|Houston Methodist Hospital|Long|USA

>Spike|hCoV-19/Switzerland/BL-ETHZ-380270/2020|2020-11-22|EPI\_ISL\_721691|Original|hCoV-19^^Basel-Landschaft|Human|Viollier AG|Department of Biosystems Science and Engineering|Nadeau|Switzerland

>Spike|hCoV-19/Scotland/EDB4724/2020|2020-04-27|EPI\_ISL\_487896|Original|hCoV-19^^Scotland|Human|Virology Department|Wellcome Sanger Institute for the COVID-19 Genomics UK (COG-UK) consortium|Davies|United Kingdom

>Spike|hCoV-19/England/ALDP-B63844/2020|2020-11-09|EPI\_ISL\_656394|Original|hCoV-19^^England|Human|Lighthouse Lab in Alderley Park|Wellcome Sanger Institute for the COVID-19 Genomics UK (COG-UK) Consortium|Davies|United Kingdom

>Spike|hCoV-19/England/MILK-BAC214/2020|2020-11-18|EPI\_ISL\_783082|Original|hCoV-19^^England|Human|Lighthouse Lab in Milton Keynes|Wellcome Sanger Institute for the COVID-19 Genomics UK (COG-UK) Consortium|Davies|United Kingdom

>Spike|hCoV-19/SaudiArabia/KAUST-MADINAH684/2020|2020-05-01|EPI\_ISL\_513176|Original|hCoV-19^^Madinah|Human|Pathogen Genomics Lab King Abdullah University of Science and Technology(KAUST)|Pathogen Genomics Lab King Abdullah University of Science and Technology(KAUST)|Mohamed Ghazzali|Saudi Arabia

>Spike|hCoV-19/England/MILK-97163C/2020|2020-08-18|EPI\_ISL\_553136|Original|hCoV-19^^England|Human|Lighthouse Lab in Milton Keynes|Wellcome Sanger Institute for the COVID-19 Genomics UK (COG-UK) consortium|Davies|United Kingdom

>Spike|hCoV-19/England/MILK-993449/2020|2020-08-26|EPI\_ISL\_551930|Original|hCoV-19^^England|Human|Lighthouse Lab in Milton Keynes|Wellcome Sanger Institute for the COVID-19 Genomics UK (COG-UK) consortium|Davies|United Kingdom

>Spike|hCoV-19/Denmark/DCGC-15421/2020|2020-11-23|EPI\_ISL\_713819|Original|hCoV-19^^Nordjylland|Human|Department of Virus and Microbiological Special Diagnostics|Albertsen Lab|Michaelsen|Denmark

>Spike|hCoV-19/Beijing/231/2020|2020-01-28|EPI\_ISL\_413519|unknown|hCoV-19^^Beijing|Human|Infectious Disease Control Center|Infectious Disease Control Center|Submitter|China

>Spike|hCoV-19/USA/MI-MDHHS-SC21338/2020|2020-04-03|EPI\_ISL\_507593|Original|hCoV-19^^Michigan|Human|Michigan Department of Health and Human Services|Michigan Department of Health and Human Services|Blankenship|USA

>Spike|hCoV-19/France/PAC-IHU-0208/2020|2020-03-28|EPI\_ISL\_569373|Original|hCoV-19^^Provence-Alpes-C\u00f4te-d\u2019Azur|Human|MEPHI|MEPHI|Levasseur|France

>Spike|hCoV-19/USA/WI-UW-1717/2020|2020-09-11|EPI\_ISL\_605590|Original|hCoV-19^^Wisconsin|Human|University of Wisconsin-Madison AIDS Vaccine Research Laboratories|University of Wisconsin-Madison AIDS Vaccine Research Laboratories|Baczenas|USA

>Spike|hCoV-19/England/ALDP-90080F/2020|2020-06-24|EPI\_ISL\_551562|Original|hCoV-19^^England|Human|Lighthouse Lab in Alderley Park|Wellcome Sanger Institute for the COVID-19 Genomics UK (COG-UK) consortium|Davies|United Kingdom

>Spike|hCoV-19/United Arab Emirates/0575/2020|2020-05-16|EPI\_ISL\_698733|Original|hCoV-19^^Abu Dhabi|Human|Group 42 (G42) Healthcare|G42 Healthcare|Ogrodzki|United Arab Emirates

>Spike|hCoV-19/Nigeria/OS060-CV9/2020|2020-03-29|EPI\_ISL\_455419|Original|hCoV-19^^Osun State|Human|Nigeria Centre for Disease Control (NCDC)|African Centre of Excellence for Genomics of Infectious Diseases (ACEGID)|Oluniyi|Nigeria

>Spike|hCoV-19/USA/WI-UW-2291/2020|2020-11-12|EPI\_ISL\_728057|Original|hCoV-19^^Wisconsin|Human|University of Wisconsin-Madison AIDS Vaccine Research Laboratories|University of Wisconsin-Madison AIDS Vaccine Research Laboratories|Baczenas|USA

>Spike|hCoV-19/Scotland/EDB8951/2020|2020-10-28|EPI\_ISL\_651188|Original|hCoV-19^^Scotland|Human|Virology Department|COVID-19 Genomics UK (COG-UK) Consortium|McHugh|United Kingdom

>Spike|hCoV-19/England/ALDP-52AA85/2020|2020-06-01|EPI\_ISL\_559045|Original|hCoV-19^^England|Human|Lighthouse Lab in Alderley Park|Wellcome Sanger Institute for the COVID-19 Genomics UK (COG-UK) consortium|Davies|United Kingdom

>Spike|hCoV-19/Belize/CDC-6840/2020|2020-03-20|EPI\_ISL\_509711|Original|hCoV-19^^Belize|Human|Belize Ministry of Health|Pathogen Discovery|Queen|Belize

>Spike|hCoV-19/England/CAMC-B08823/2020|2020-10-29|EPI\_ISL\_643770|Original|hCoV-19^^England|Human|Lighthouse Lab in Cambridge|Wellcome Sanger Institute for the COVID-19 Genomics UK (COG-UK) Consortium|Davies|United Kingdom

>Spike|hCoV-19/USA/WI-UW-1037/2020|2020-08-04|EPI\_ISL\_516463|Original|hCoV-19^^Wisconsin|Human|University of Wisconsin-Madison AIDS Vaccine Research Laboratories|University of Wisconsin-Madison AIDS Vaccine Research Laboratories|Baczenas|USA

>Spike|hCoV-19/Japan/IC-0001/2020|2020-03-00|EPI\_ISL\_591347|Original|hCoV-19^^Japan|Human|Pathogen Genomics Center|Pathogen Genomics Center|Sekizuka|Japan

>Spike|hCoV-19/England/SHEF-C4D89/2020|2020-11-11|EPI\_ISL\_650134|Original|hCoV-19^^England|Human|Virology Department|COVID-19 Genomics UK (COG-UK) Consortium|de Silva|United Kingdom

>Spike|hCoV-19/Denmark/DCGC-3739/2020|2020-04-27|EPI\_ISL\_622616|Original|hCoV-19^^Hovedstaden|Human|Department of Virus and Microbiological Special Diagnostics|Albertsen lab|Michaelsen|Denmark

>Spike|hCoV-19/England/ALDP-9E59B2/2020|2020-09-24|EPI\_ISL\_589294|Original|hCoV-19^^England|Human|Lighthouse Lab in Alderley Park|Wellcome Sanger Institute for the COVID-19 Genomics UK (COG-UK) consortium|Davies|United Kingdom

>Spike|hCoV-19/England/NORW-E6EBB/2020|2020-04-21|EPI\_ISL\_448988|Original|hCoV-19^^England|Human|Quadram Institute Bioscience|COVID-19 Genomics UK (COG-UK) Consortium|Alikhan|United Kingdom

>Spike|hCoV-19/USA/WA-UW201/2020|2020-03-12|EPI\_ISL\_417350|Original|hCoV-19^^Washington|Human|UW Virology Lab|UW Virology Lab|Roychoudhury|USA

>Spike|hCoV-19/England/CAMB-8126B/2020|2020-04-11|EPI\_ISL\_442846|Original|hCoV-19^^England|Human|Department of Pathology|Wellcome Sanger Institute for the COVID-19 Genomics UK (COG-UK) consortium|Amato|United Kingdom



>Spike|hCoV-19/England/ALDP-C39D92/2020|2020-12-09|EPI\_ISL\_730761|Original|hCoV-19^^England|Human|Lighthouse Lab in Alderley Park|Wellcome Sanger Institute for the COVID-19 Genomics UK (COG-UK) Consortium|Davies|United Kingdom

>Spike|hCoV-19/Denmark/DCGC-3335/2020|2020-08-31|EPI\_ISL\_616089|Original|hCoV-19^^Midtjylland|Human|Department of Virus and Microbiological Special Diagnostics|Albertsen lab|Michaelsen|Denmark

>Spike|hCoV-19/England/MILK-ACE0F5/2020|2020-10-22|EPI\_ISL\_630331|Original|hCoV-19^^England|Human|Lighthouse Lab in Milton Keynes|Wellcome Sanger Institute for the COVID-19 Genomics UK (COG-UK) consortium|Davies|United Kingdom

>Spike|hCoV-19/USA/WA-UW-1796/2020|2020-03-21|EPI\_ISL\_424254|Original|hCoV-19^^Washington|Human|UW Virology Lab|UW Virology Lab|Roychoudhury|USA

>Spike|hCoV-19/England/QEUH-95E77E/2020|2020-08-07|EPI\_ISL\_532332|Original|hCoV-19^^England|Human|Lighthouse Lab in Glasgow|Wellcome Sanger Institute for the COVID-19 Genomics UK (COG-UK) consortium|Davies|United Kingdom

>Spike|hCoV-19/Gibraltar/204641709/2020|2020-00-00|EPI\_ISL\_637190|Original|hCoV-19^^Gibraltar|Human|Microbiology|Respiratory Virus Unit|Platt|Gibraltar

>Spike|hCoV-19/Wales/PHWC-47DE4C/2020|2020-09-27|EPI\_ISL\_595369|Original|hCoV-19^^Wales|Human|Originating lab|COVID-19 Genomics UK (COG-UK) Consortium|Moore|United Kingdom

>Spike|hCoV-19/India/TG-CDFD-N1418/2020|2020-04-14|EPI\_ISL\_528608|Original|hCoV-19^^Telangana|Human|National Genomics Core-Center for DNA Fingerprinting and Diagnostics|National Genomics Core-Center for DNA Fingerprinting and Diagnostics (NGC-CDFD)- DBT's PAN-INDIA-1000 Genome consortium|Vashisht|India

>Spike|hCoV-19/Denmark/ALAB-HH-206/2020|2020-04-27|EPI\_ISL\_452062|Original|hCoV-19^^Denmark|Human|Department of Clinical Microbiology|Albertsen lab|Kirkegaard|Denmark

>Spike|hCoV-19/Norway/5381/2020|2020-10-28|EPI\_ISL\_775453|Original|hCoV-19^^Troms og Finnmark|Human|University Hospital of Northern Norway|Norwegian Institute of Public Health|Vollan|Norway

>Spike|hCoV-19/USA/WA-S865/2020|2020-04-22|EPI\_ISL\_463355|Original|hCoV-19^^Washington|Human|Washington State Department of Health|Seattle Flu Study|Bedford|USA

>Spike|hCoV-19/India/TG-CCMB-R286/2020|2020-08-09|EPI\_ISL\_539745|Original|hCoV-19^^Telangana|Human|CSIR-Centre for Cellular and Molecular Biology|CSIR-Centre for Cellular and Molecular Biology|Mukherjee|India

>Spike|hCoV-19/Portugal/PT0220/2020|2020-03-30|EPI\_ISL\_453934|Original|hCoV-19^^Portugal|Human|unknown|Instituto Nacional de Saude (INSA)|Borges|Portugal

>Spike|hCoV-19/England/CAMC-B078E8/2020|2020-10-30|EPI\_ISL\_643840|Original|hCoV-19^^England|Human|Lighthouse Lab in Cambridge|Wellcome Sanger Institute for the COVID-19 Genomics UK (COG-UK) Consortium|Davies|United Kingdom

>Spike|hCoV-19/USA/WA-S1160/2020|2020-05-06|EPI\_ISL\_463650|Original|hCoV-19^^Washington|Human|Washington State Department of Health|Seattle Flu Study|Bedford|USA

>Spike|hCoV-19/England/20130034904/2020|2020-03-23|EPI\_ISL\_423610|Original|hCoV-19^^England|Human|Respiratory Virus Unit|Respiratory Virus Unit|Platt|United Kingdom

>Spike|hCoV-19/Wales/PHWC-15C110/2020|2020-04-03|EPI\_ISL\_472440|Original|hCoV-19^^Wales|Human|Wales Specialist Virology Centre Sequencing lab|COVID-19 Genomics UK (COG-UK) Consortium|Moore|United Kingdom

>Spike|hCoV-19/England/LIVE-A2A5D/2020|2020-05-19|EPI\_ISL\_499887|Original|hCoV-19^^England|Human|Liverpool Clinical Laboratories|COVID-19 Genomics UK (COG-UK) Consortium|Haldenby|United Kingdom

>Spike|hCoV-19/Spain/VC-FISABIO-33/2020|2020-03-09|EPI\_ISL\_420118|Original|hCoV-19^^Comunitat Valenciana|Human|Servicio de Microbiolog\ueda. Consorcio Hospital General Universitario de Valencia|Sequencing and Bioinformatics Service and Molecular Epidemiology Research Group. FISABIO-Public Health|Gonzalez-Candelas|Spain

>Spike|hCoV-19/USA/TX-HMH-MCoV-15761/2020|2020-07-09|EPI\_ISL\_785445|Original|hCoV-19^^Texas|Human|Houston Methodist Hospital|Houston Methodist Hospital|Long|USA

>Spike|hCoV-19/Northern Ireland/QEUH-7550AB/2020|2020-07-18|EPI\_ISL\_532985|Original|hCoV-19^^Northern Ireland|Human|Lighthouse Lab in

Glasgow|Wellcome Sanger Institute for the COVID-19 Genomics UK (COG-UK) consortium|Davies|United Kingdom  
>Spike|hCoV-19/USA/CA-ALSR-3771/2020|2020-05-27|EPI\_ISL\_636191|Original|hCoV-19^^California|Human|San Diego County Public Health Laboratory|Andersen lab at Scripps Research|Gangavarapu|USA  
>Spike|hCoV-19/Denmark/DCGC-16912/2020|2020-12-14|EPI\_ISL\_750639|Original|hCoV-19^^Midtjylland|Human|Department of Virus and Microbiological Special Diagnostics|Albertsen Lab|Michaelsen|Denmark  
>Spike|hCoV-19/Japan/PG-1063/2020|2020-04-00|EPI\_ISL\_684673|Original|hCoV-19^^Japan|Human|Fukuoka Institute of Health and Environmental Sciences|Pathogen Genomics Center|Sekizuka|Japan  
>Spike|hCoV-19/England/LOND-1267318/2020|2020-12-08|EPI\_ISL\_741271|Original|hCoV-19^^England|Human|University College London|COVID-19 Genomics UK (COG-UK) Consortium|Roy|United Kingdom  
>Spike|hCoV-19/Wales/MILK-9E0E12/2020|2020-09-19|EPI\_ISL\_580882|Original|hCoV-19^^Wales|Human|Lighthouse Lab in Milton Keynes|Wellcome Sanger Institute for the COVID-19 Genomics UK (COG-UK) consortium|Davies|United Kingdom  
>Spike|hCoV-19/Australia/VIC11708/2020|2020-07-25|EPI\_ISL\_563467|Original|hCoV-19^^Victoria|Human|Microbiological Diagnostic Unit - Public Health Laboratory (MDU-PHL)|MDU-PHL|Schultz|Australia  
>Spike|hCoV-19/USA/TX-HMH-4040/2020|2020-06-17|EPI\_ISL\_543318|Original|hCoV-19^^Texas|Human|Houston Methodist Hospital|Houston Methodist Hospital|Long|USA  
>Spike|hCoV-19/Denmark/DCGC-13408/2020|2020-11-30|EPI\_ISL\_712170|Original|hCoV-19^^Sjaelland|Human|Department of Virus and Microbiological Special Diagnostics|Albertsen Lab|Michaelsen|Denmark  
>Spike|hCoV-19/England/MILK-A054D8/2020|2020-09-30|EPI\_ISL\_600007|Original|hCoV-19^^England|Human|Lighthouse Lab in Milton Keynes|Wellcome Sanger Institute for the COVID-19 Genomics UK (COG-UK) consortium|Davies|United Kingdom  
>Spike|hCoV-19/USA/ME-HETL-J0234/2020|2020-09-25|EPI\_ISL\_755391|Original|hCoV-19^^Maine|Human|Maine Health and Environmental Testing Laboratory|Tewhey Lab|Tewhey|USA  
>Spike|hCoV-19/United Arab Emirates/L3290250769/2020|2020-05-20|EPI\_ISL\_520697|Original|hCoV-19^^United Arab Emirates|Human|Mohammed Bin Rashid University of Medicine and Health Sciences|Al Jalila Genomics Center|Ramaswamy|United Arab Emirates  
>Spike|hCoV-19/England/SHEF-D1FA1/2020|2020-05-08|EPI\_ISL\_475501|Original|hCoV-19^^England|Human|Virology Department|COVID-19 Genomics UK (COG-UK) Consortium|de Silva|United Kingdom  
>Spike|hCoV-19/Israel/990307712/2020|2020-03-26|EPI\_ISL\_447263|Original|hCoV-19^^South Coast District|Human|Microbiology laboratory|Stern Lab|Miller|Israel  
>Spike|hCoV-19/England/MILK-BB2600/2020|2020-11-18|EPI\_ISL\_720317|Original|hCoV-19^^England|Human|Lighthouse Lab in Milton Keynes|Wellcome Sanger Institute for the COVID-19 Genomics UK (COG-UK) Consortium|Davies|United Kingdom  
>Spike|hCoV-19/USA/TX-HMH-MCoV-19153/2020|2020-11-23|EPI\_ISL\_783658|Original|hCoV-19^^Texas|Human|Houston Methodist Hospital|Houston Methodist Hospital|Long|USA  
>Spike|hCoV-19/Germany/TH-IIMK-CaSe-15/2020|2020-12-03|EPI\_ISL\_728335|Original|hCoV-19^^Thuringia|Human|Jena University Hospital|Institute of infectious medicine & hospital hygiene|Brandt|Germany  
>Spike|hCoV-19/Canada/ON-S1981/2020|2020-11-24|EPI\_ISL\_755694|Original|hCoV-19^^Ontario|Human|Toronto Invasive Bacterial Diseases Network|McMaster University|McArthur|Canada  
>Spike|hCoV-19/England/ALDP-9B613A/2020|2020-08-28|EPI\_ISL\_572896|Original|hCoV-19^^England|Human|Oxford Viromics|COVID-19 Genomics UK (COG-UK) Consortium|Golubchik|United Kingdom  
>Spike|hCoV-19/USA/NY-Wadsworth-142760-01/2020|2020-04-10|EPI\_ISL\_676968|Original|hCoV-19^^New York|Human|Wadsworth Center|Wadsworth Center|Lasek-Nesselquist|USA  
>Spike|hCoV-19/England/MILK-A69FA4/2020|2020-10-09|EPI\_ISL\_608793|Original|hCoV-19^^England|Human|Lighthouse Lab in Milton Keynes|Wellcome Sanger Institute for the COVID-19 Genomics UK (COG-UK) consortium|Davies|United Kingdom

>Spike|hCoV-19/Faroe Islands/HFS-02/2020|2020-03-05|EPI\_ISL\_526936|Original|hCoV-19^^Faroe Islands|Human|Faroese National Reference Laboratory for Fish and Animal Diseases|Faroese National Reference Laboratory for Fish and Animal Diseases|Dahl|Faroe Islands

>Spike|hCoV-19/Australia/SAP273/2020|2020-03-25|EPI\_ISL\_468029|Original|hCoV-19^^South Australia|Human|SA Pathology|SA Pathology|Leong|Australia

>Spike|hCoV-19/England/BRIS-12BBD0/2020|2020-05-14|EPI\_ISL\_469375|Original|hCoV-19^^England|Human|PHE South West Regional Laboratory|Wellcome Sanger Institute for the COVID-19 Genomics UK (COG-UK) consortium|Davies|United Kingdom

>Spike|hCoV-19/USA/CA-CZB-13831/2020|2020-08-20|EPI\_ISL\_738572|Original|hCoV-19^^California|Human|Alameda County Public Health Lab|Chan-Zuckerberg Biohub|Kamm|USA

>Spike|hCoV-19/Wales/PHWC-48F9A0/2020|2020-11-10|EPI\_ISL\_681168|Original|hCoV-19^^Wales|Human|Wales Specialist Virology Centre Sequencing lab|COVID-19 Genomics UK (COG-UK) Consortium|Moore|United Kingdom

>Spike|hCoV-19/Germany/BE-ChVir-W1084-8118/2020|2020-04-06|EPI\_ISL\_753935|Original|hCoV-19^^Berlin|Human|Charit\u00e9 Universit\u00e4tsmedizin Berlin|Charit\u00e9 Universit\u00e4tsmedizin Berlin|Muehlemann|Germany

>Spike|hCoV-19/USA/MD-MDH-0269/2020|2020-10-13|EPI\_ISL\_629050|Original|hCoV-19^^Maryland|Human|Maryland Public Health Laboratory|Maryland Public Health Laboratory|Keller|USA

>Spike|hCoV-19/England/NOTT-12127B/2020|2020-12-15|EPI\_ISL\_741627|Original|hCoV-19^^England|Human|Queens Medical Centre|COVID-19 Genomics UK (COG-UK) Consortium|Loose|United Kingdom

>Spike|hCoV-19/England/QEUA-9F9F9B/2020|2020-09-27|EPI\_ISL\_595782|Original|hCoV-19^^England|Human|Oxford Viromics|COVID-19 Genomics UK (COG-UK) Consortium|Golubchik|United Kingdom

>Spike|hCoV-19/Russia/RYA-RII-MH3360S/2020|2020-10-07|EPI\_ISL\_733105|Original|hCoV-19^^Ryazan|Human|HELIX LLC|WHO National Influenza Centre Russian Federation|Komissarov|Russia

>Spike|hCoV-19/Wales/PHWC-262D1/2020|2020-03-26|EPI\_ISL\_422247|Original|hCoV-19^^Wales|Human|Wales Specialist Virology Centre|Public Health Wales Microbiology Cardiff|Moore|United Kingdom

>Spike|hCoV-19/Australia/VIC17311/2020|2020-07-24|EPI\_ISL\_663834|Original|hCoV-19^^Victoria|Human|Microbiological Diagnostic Unit - Public Health Laboratory (MDU-PHL)|MDU-PHL|Schultz|Australia

>Spike|hCoV-19/England/QEUA-78589B/2020|2020-07-15|EPI\_ISL\_533180|Original|hCoV-19^^England|Human|Lighthouse Lab in Glasgow|Wellcome Sanger Institute for the COVID-19 Genomics UK (COG-UK) consortium|Davies|United Kingdom

>Spike|hCoV-19/England/QEUA-B816BF/2020|2020-11-14|EPI\_ISL\_667825|Original|hCoV-19^^England|Human|Lighthouse Lab in Glasgow|Wellcome Sanger Institute for the COVID-19 Genomics UK (COG-UK) Consortium|Davies|United Kingdom

>Spike|hCoV-19/England/QEUA-96D2D5/2020|2020-08-18|EPI\_ISL\_530635|Original|hCoV-19^^England|Human|Lighthouse Lab in Glasgow|Wellcome Sanger Institute for the COVID-19 Genomics UK (COG-UK) consortium|Davies|United Kingdom

>Spike|hCoV-19/USA/AZ-TG519189/2020|2020-07-01|EPI\_ISL\_695368|Original|hCoV-19^^Arizona|Human|AZ SPHL|TGen North|French|USA

>Spike|hCoV-19/Denmark/DCGC-1304/2020|2020-06-08|EPI\_ISL\_618087|Original|hCoV-19^^Nordjylland|Human|Department of Virus and Microbiological Special Diagnostics|Albertsen lab|Michaelsen|Denmark

>Spike|hCoV-19/England/SHEF-CD0E1/2020|2020-04-28|EPI\_ISL\_475452|Original|hCoV-19^^England|Human|Virology Department|COVID-19 Genomics UK (COG-UK) Consortium|de Silva|United Kingdom

>Spike|hCoV-19/Denmark/DCGC-3399/2020|2020-08-31|EPI\_ISL\_616158|Original|hCoV-19^^Hovedstaden|Human|Department of Virus and Microbiological Special Diagnostics|Albertsen lab|Michaelsen|Denmark

>Spike|hCoV-19/Finland/22SS6F5/2020|2020-09-22|EPI\_ISL\_757393|Original|hCoV-19^^Uusimaa|Human|Department of Virology and Immunology|Department of Virology|Smura|Finland

>Spike|hCoV-19/USA/CA-CZB-6802/2020|2020-07-14|EPI\_ISL\_582880|Original|hCoV-19^^California|Human|County of Santa Clara Public Health Department|Chan-Zuckerberg Biohub|Bhatt|USA

>Spike|hCoV-19/England/CAMB-80E86/2020|2020-04-17|EPI\_ISL\_444438|Original|hCoV-19^^England|Human|Department of Pathology|COVID-19 Genomics UK (COG-UK) Consortium|Meredith|United Kingdom

>Spike|hCoV-19/India/GJ-GBRC186b/2020|2020-06-03|EPI\_ISL\_469028|Original|hCoV-19^^Gujarat|Human|B.J. Medical College and Civil hospital|Gujarat Biotechnology Research Centre|Joshi|India

>Spike|hCoV-19/Australia/VIC17445/2020|2020-08-13|EPI\_ISL\_663889|Original|hCoV-19^^Victoria|Human|Microbiological Diagnostic Unit - Public Health Laboratory (MDU-PHL)|MDU-PHL|Schultz|Australia

>Spike|hCoV-19/England/BRIS-125E28/2020|2020-03-30|EPI\_ISL\_443699|Original|hCoV-19^^England|Human|PHE South West Regional Laboratory|Wellcome Sanger Institute for the COVID-19 Genomics UK (COG-UK) consortium|Amato|United Kingdom

>Spike|hCoV-19/England/CAMC-B09312/2020|2020-10-29|EPI\_ISL\_673092|Original|hCoV-19^^England|Human|Lighthouse Lab in Cambridge|Wellcome Sanger Institute for the COVID-19 Genomics UK (COG-UK) Consortium|Davies|United Kingdom

>Spike|hCoV-19/Scotland/QEUH-962E45/2020|2020-08-11|EPI\_ISL\_531634|Original|hCoV-19^^Scotland|Human|NHSGGC West of Scotland Specialist Virology Centre / MRC-University of Glasgow Centre for Virus Research|Wellcome Sanger Institute for the COVID-19 Genomics UK (COG-UK) consortium|Davies|United Kingdom

>Spike|hCoV-19/England/C200044512/2020|2020-11-06|EPI\_ISL\_664022|Original|hCoV-19^^England|Human|Respiratory Virus Unit|COVID-19 Genomics UK (COG-UK) Consortium|Platt|United Kingdom

>Spike|hCoV-19/USA/CA-CZB-14555/2020|2020-11-14|EPI\_ISL\_738920|Original|hCoV-19^^California|Human|Santa Clara County Public Health Laboratory|Chan-Zuckerberg Biohub|Kamm|USA

>Spike|hCoV-19/USA/CA-ALSR-4734/2020|2020-10-11|EPI\_ISL\_730113|Original|hCoV-19^^California|Human|San Diego County Public Health Laboratory|Andersen lab at Scripps Research|Gangavarapu|USA

>Spike|hCoV-19/England/ALDP-95C9A7/2020|2020-06-18|EPI\_ISL\_553419|Original|hCoV-19^^England|Human|Lighthouse Lab in Alderley Park|Wellcome Sanger Institute for the COVID-19 Genomics UK (COG-UK) consortium|Davies|United Kingdom

>Spike|hCoV-19/England/MILK-ABC090/2020|2020-10-21|EPI\_ISL\_630993|Original|hCoV-19^^England|Human|Lighthouse Lab in Milton Keynes|Wellcome Sanger Institute for the COVID-19 Genomics UK (COG-UK) consortium|Davies|United Kingdom

>Spike|hCoV-19/Sweden/20-53290/2020|2020-11-02|EPI\_ISL\_661294|Original|hCoV-19^^Sormland|Human|Unilabs|The Public Health Agency of Sweden|Svartstr\u00f6m|Sweden

>Spike|hCoV-19/Denmark/DCGC-21096/2020|2020-12-21|EPI\_ISL\_759552|Original|hCoV-19^^Hovedstaden|Human|Department of Virus and Microbiological Special Diagnostics|Albertsen Lab|Michaelsen|Denmark

>Spike|hCoV-19/England/BRIS-12D3C7/2020|2020-05-04|EPI\_ISL\_481941|Original|hCoV-19^^England|Human|PHE South West Regional Laboratory|Wellcome Sanger Institute for the COVID-19 Genomics UK (COG-UK) consortium|Davies|United Kingdom

>Spike|hCoV-19/Spain/MD-IBV-99008770/2020|2020-10-20|EPI\_ISL\_654252|Original|hCoV-19^^Madrid|Human|Hospital General Universitario Gregorio Mara\u00f1\u00f3n|SeqCOVID-SPAIN consortium|IBV (CSIC)|Comas|Spain

>Spike|hCoV-19/USA/TX-HMH-MCoV-18835/2020|2020-11-23|EPI\_ISL\_785155|Original|hCoV-19^^Texas|Human|Houston Methodist Hospital|Houston Methodist Hospital|Long|USA

>Spike|hCoV-19/England/CAMB-7857D/2020|2020-04-06|EPI\_ISL\_433749|Original|hCoV-19^^England|Human|Department of Pathology|COVID-19 Genomics UK (COG-UK) Consortium|Meredith|United Kingdom

>Spike|hCoV-19/USA/MI-QDX-1150/2020|2020-03-23|EPI\_ISL\_571880|Original|hCoV-19^^Michigan|Human|Quest Diagnostics|Quest Diagnostics|Kagan|USA

>Spike|hCoV-19/Australia/VIC10973/2020|2020-09-08|EPI\_ISL\_563177|Original|hCoV-19^^Victoria|Human|Microbiological Diagnostic Unit - Public Health Laboratory (MDU-PHL)|MDU-PHL|Schultz|Australia

>Spike|hCoV-19/England/CAMC-A64D90/2020|2020-10-11|EPI\_ISL\_608535|Original|hCoV-19^^England|Human|Lighthouse Lab in Cambridge|Wellcome Sanger Institute for the COVID-19 Genomics UK (COG-UK) consortium|Davies|United Kingdom

>Spike|hCoV-19/England/ALDP-A67568/2020|2020-10-09|EPI\_ISL\_630399|Original|hCoV-19^^England|Human|Lighthouse Lab in Alderley Park|Wellcome Sanger Institute for the COVID-19 Genomics UK (COG-UK) consortium|Davies|United Kingdom

>Spike|hCoV-19/England/CAMC-BC22FA/2020|2020-11-22|EPI\_ISL\_704883|Original|hCoV-19^^England|Human|Lighthouse Lab in Cambridge|Wellcome Sanger Institute for the COVID-19 Genomics UK (COG-UK) Consortium|Davies|United Kingdom

>Spike|hCoV-19/USA/TX-HMH-MCoV-16321/2020|2020-11-02|EPI\_ISL\_786005|Original|hCoV-19^^Texas|Human|Houston Methodist Hospital|Houston Methodist Hospital|Long|USA

>Spike|hCoV-19/England/LOND-1261484/2020|2020-04-03|EPI\_ISL\_524693|Original|hCoV-19^^England|Human|North West London Pathology|Wellcome Sanger Institute for the COVID-19 Genomics UK (COG-UK) consortium|Davies|United Kingdom

>Spike|hCoV-19/Scotland/QEUEH-A6398E/2020|2020-10-09|EPI\_ISL\_596171|Original|hCoV-19^^Scotland|Human|Quadram Institute Bioscience|COVID-19 Genomics UK (COG-UK) Consortium|Alikhan|United Kingdom

>Spike|hCoV-19/Sweden/20-14387/2020|2020-05-04|EPI\_ISL\_475514|Original|hCoV-19^^Uppsala|Human|Uppsala Narakut Aleris|The Public Health Agency of Sweden|Svartstr\u00f6m|Sweden

>Spike|hCoV-19/Scotland/QEUEH-A22217/2020|2020-10-01|EPI\_ISL\_598944|Original|hCoV-19^^Scotland|Human|Lighthouse Lab in Glasgow|Wellcome Sanger Institute for the COVID-19 Genomics UK (COG-UK) consortium|Davies|United Kingdom

>Spike|hCoV-19/USA/CA-CZB-15441/2020|2020-12-03|EPI\_ISL\_739488|Original|hCoV-19^^California|Human|Orange County Public Health Lab|Chan-Zuckerberg Biohub|Kamm|USA

>Spike|hCoV-19/Denmark/DCGC-17343/2020|2020-12-14|EPI\_ISL\_750923|Original|hCoV-19^^Midtjylland|Human|Department of Virus and Microbiological Special Diagnostics|Albertsen Lab|Michaelsen|Denmark

>Spike|hCoV-19/USA/CA-CDC-3/2020|2020-01-29|EPI\_ISL\_408008|Original|hCoV-19^^California|Human|California Department of Health|Pathogen Discovery|Queen|USA

>Spike|hCoV-19/England/QEUEH-A5DE00/2020|2020-10-11|EPI\_ISL\_597290|Original|hCoV-19^^England|Human|Lighthouse Lab in Glasgow|Wellcome Sanger Institute for the COVID-19 Genomics UK (COG-UK) consortium|Davies|United Kingdom

>Spike|hCoV-19/Netherlands/ZH-EMC-982/2020|2020-11-09|EPI\_ISL\_722756|Original|hCoV-19^^Zuid Holland|Human|Dutch COVID-19 response team|Erasmus Medical Center|Oude Munnink|Netherlands

>Spike|hCoV-19/USA/VA-DCLS-1874/2020|2020-09-22|EPI\_ISL\_644914|Original|hCoV-19^^Virginia|Human|Virginia DCLS|Virginia DCLS|St. Jacques|USA

>Spike|hCoV-19/England/NORW-F023A/2020|2020-10-15|EPI\_ISL\_627571|Original|hCoV-19^^England|Human|Quadram Institute Bioscience|COVID-19 Genomics UK (COG-UK) Consortium|Alikhan|United Kingdom

>Spike|hCoV-19/Denmark/DCGC-6880/2020|2020-10-12|EPI\_ISL\_619725|Original|hCoV-19^^Syddanmark|Human|Department of Virus and Microbiological Special Diagnostics|Albertsen lab|Michaelsen|Denmark

>Spike|hCoV-19/South Africa/N00149/2020|2020-06-10|EPI\_ISL\_623065|Original|hCoV-19^^Mpumalanga|Human|National Health Laboratory Service|National Institute for Communicable Diseases of the National Health Laboratory Service|Allam|South Africa

>Spike|hCoV-19/Japan/PG-3531/2020|2020-06-00|EPI\_ISL\_691787|Original|hCoV-19^^Japan|Human|Pathogen Genomics Center|Pathogen Genomics Center|Sekizuka|Japan

>Spike|hCoV-19/Scotland/QEUEH-9E4A65/2020|2020-09-23|EPI\_ISL\_601013|Original|hCoV-19^^Scotland|Human|Lighthouse Lab in Glasgow|Wellcome Sanger Institute for the COVID-19 Genomics UK (COG-UK) consortium|Davies|United Kingdom

>Spike|hCoV-19/United Arab Emirates/1008/2020|2020-06-10|EPI\_ISL\_699140|Original|hCoV-19^^Abu Dhabi|Human|Group 42 (G42) Healthcare|G42 Healthcare|Ogrodzki|United Arab Emirates

>Spike|hCoV-19/England/CAMC-AB1CD3/2020|2020-10-22|EPI\_ISL\_623680|Original|hCoV-19^^England|Human|Lighthouse Lab in Cambridge|Wellcome Sanger Institute for the COVID-19 Genomics UK (COG-UK) consortium|Davies|United Kingdom

>Spike|hCoV-19/Scotland/QEUH-9967F2/2020|2020-08-31|EPI\_ISL\_559985|Original|hCoV-19^^Scotland|Human|Oxford Viromics|COVID-19 Genomics UK (COG-UK) Consortium|Golubchik|United Kingdom

>Spike|hCoV-19/England/NOTT-120467/2020|2020-12-08|EPI\_ISL\_725617|Original|hCoV-19^^England|Human|Queens Medical Centre|COVID-19 Genomics UK (COG-UK) Consortium|Loose|United Kingdom

>Spike|hCoV-19/England/NORT-283F42/2020|2020-04-05|EPI\_ISL\_478526|Original|hCoV-19^^England|Human|Northumbria University / South Tees Hospitals NHS Foundation Trust / North Cumbria Integrated Care NHS Foundation Trust / North Tees and Hartlepool NHS Foundation Trust / Newcastle Hospitals NHS Foundation Trust|COVID-19 Genomics UK (COG-UK) Consortium|Bashton|United Kingdom

>Spike|hCoV-19/England/QEUH-AE4D10/2020|2020-10-27|EPI\_ISL\_633274|Original|hCoV-19^^England|Human|Lighthouse Lab in Glasgow|Wellcome Sanger Institute for the COVID-19 Genomics UK (COG-UK) consortium|Davies|United Kingdom

>Spike|hCoV-19/England/QEUH-AF4BF5/2020|2020-10-30|EPI\_ISL\_662973|Original|hCoV-19^^England|Human|Lighthouse Lab in Glasgow|Wellcome Sanger Institute for the COVID-19 Genomics UK (COG-UK) Consortium|Davies|United Kingdom

>Spike|hCoV-19/France/OCC-SC465/2020|2020-03-03|EPI\_ISL\_641556|Original|hCoV-19^^Occitanie|Human|CHU Montpellier|CNR Virus des Infections Respiratoires - France SUD|Bal|France

>Spike|hCoV-19/England/QEUH-96AEC5/2020|2020-08-15|EPI\_ISL\_531277|Original|hCoV-19^^England|Human|Lighthouse Lab in Glasgow|Wellcome Sanger Institute for the COVID-19 Genomics UK (COG-UK) consortium|Davies|United Kingdom

>Spike|hCoV-19/Denmark/DCGC-12545/2020|2020-11-16|EPI\_ISL\_682726|Original|hCoV-19^^Hovedstaden|Human|Department of Virus and Microbiological Special Diagnostics|Albertsen Lab|Michaelsen|Denmark

>Spike|hCoV-19/Russia/Omsk-89001/2020|2020-04-01|EPI\_ISL\_428878|Vero|hCoV-19^^Omsk|Human|State Research Center of Virology and Biotechnology VECTOR|State Research Center of Virology and Biotechnology VECTOR|Shvalov|Russia

>Spike|hCoV-19/Belgium/ULG-10389/2020|2020-08-07|EPI\_ISL\_540556|Original|hCoV-19^^Li\u00e8ge|Human|Department of Clinical Microbiology|GIGA Medical Genomics|Durkin|Belgium

>Spike|hCoV-19/England/QEUH-9B7ED8/2020|2020-09-08|EPI\_ISL\_590467|Original|hCoV-19^^England|Human|Lighthouse Lab in Glasgow|Wellcome Sanger Institute for the COVID-19 Genomics UK (COG-UK) consortium|Davies|United Kingdom

>Spike|hCoV-19/Denmark/DCGC-21845/2020|2020-12-21|EPI\_ISL\_758400|Original|hCoV-19^^Hovedstaden|Human|Department of Virus and Microbiological Special Diagnostics|Albertsen Lab|Michaelsen|Denmark

>Spike|hCoV-19/Brazil/RJ-00333/2020|2020-04-28|EPI\_ISL\_623136|Original|hCoV-19^^Rio de Janeiro|Human|Laboratorio de Virologia Molecular / UFRJ|Bioinformatics Laboratory / LNCC|Almeida|Brazil

>Spike|hCoV-19/England/CAMB-7DC19/2020|2020-04-06|EPI\_ISL\_441760|Original|hCoV-19^^England|Human|Department of Pathology|Wellcome Sanger Institute for the COVID-19 Genomics UK (COG-UK) consortium|Amato|United Kingdom

>Spike|hCoV-19/England/ALDP-B5E69D/2020|2020-11-09|EPI\_ISL\_655605|Original|hCoV-19^^England|Human|Lighthouse Lab in Alderley Park|Wellcome Sanger Institute for the COVID-19 Genomics UK (COG-UK) Consortium|Davies|United Kingdom

>Spike|hCoV-19/England/ALDP-9D933B/2020|2020-09-18|EPI\_ISL\_576720|Original|hCoV-19^^England|Human|Oxford Viromics|COVID-19 Genomics UK (COG-UK) Consortium|Golubchik|United Kingdom

>Spike|hCoV-19/England/MILK-83982C/2020|2020-07-16|EPI\_ISL\_557303|Original|hCoV-19^^England|Human|Lighthouse Lab in Milton Keynes|Wellcome Sanger Institute for the COVID-19 Genomics UK (COG-UK) consortium|Davies|United Kingdom

>Spike|hCoV-19/England/ALDP-6507D9/2020|2020-07-04|EPI\_ISL\_558180|Original|hCoV-19^^England|Human|Lighthouse Lab in Alderley Park|Wellcome Sanger Institute for the COVID-19 Genomics UK (COG-UK) consortium|Davies|United Kingdom

>Spike|hCoV-19/Denmark/DCGC-11249/2020|2020-11-02|EPI\_ISL\_670732|Original|hCoV-19^^Nordjylland|Human|Department of Virus and Microbiological Special Diagnostics|Albertsen Lab|Michaelsen|Denmark

>Spike|hCoV-19/Denmark/DCGC-2151/2020|2020-08-10|EPI\_ISL\_617449|Original|hCoV-19^^Midtjylland|Human|Department of Virus and Microbiological Special Diagnostics|Albertsen lab|Michaelsen|Denmark

>Spike|hCoV-19/Canada/BC\_24340319/2020|2020-03-00|EPI\_ISL\_463213|Original|hCoV-19^^British Columbia|Human|BCCDC Public Health Laboratory|BCCDC Public Health Laboratory|Harrigan|Canada

>Spike|hCoV-19/England/BRIS-1232A6/2020|2020-04-05|EPI\_ISL\_442630|Original|hCoV-19^^England|Human|PHE South West Regional Laboratory|Wellcome Sanger Institute for the COVID-19 Genomics UK (COG-UK) consortium|Amato|United Kingdom

>Spike|hCoV-19/Wales/PHWC-16C256/2020|2020-09-21|EPI\_ISL\_574029|Original|hCoV-19^^Wales|Human|Wales Specialist Virology Centre Sequencing lab|COVID-19 Genomics UK (COG-UK) Consortium|Moore|United Kingdom

>Spike|hCoV-19/Wales/PHWC-4847CF/2020|2020-10-19|EPI\_ISL\_628044|Original|hCoV-19^^Wales|Human|Wales Specialist Virology Centre Sequencing lab|COVID-19 Genomics UK (COG-UK) Consortium|Moore|United Kingdom

>Spike|hCoV-19/USA/UT-UPHL-2008856/2020|2020-06-01|EPI\_ISL\_524872|Original|hCoV-19^^Utah|Human|Utah Public Health Laboratory|Utah Public Health Laboratory|Young|USA

>Spike|hCoV-19/England/BRIS-13113F/2020|2020-05-25|EPI\_ISL\_467707|Original|hCoV-19^^England|Human|PHE South West Regional Laboratory|Wellcome Sanger Institute for the COVID-19 Genomics UK (COG-UK) consortium|Davies|United Kingdom

>Spike|hCoV-19/Canada/NS-NML-1252/2020|2020-04-06|EPI\_ISL\_579643|Original|hCoV-19^^Nova Scotia|Human|QEII Health Sciences Centre|National Microbiology Laboratory (NML)|Majer|Canada

>Spike|hCoV-19/Australia/VIC14854/2020|2020-08-13|EPI\_ISL\_593032|Original|hCoV-19^^Victoria|Human|Microbiological Diagnostic Unit - Public Health Laboratory (MDU-PHL)|MDU-PHL|Schultz|Australia

>Spike|hCoV-19/Portugal/PT0156/2020|2020-03-27|EPI\_ISL\_453872|Original|hCoV-19^^Portugal|Human|unknown|Instituto Nacional de Saude (INSA)|Borges|Portugal

>Spike|hCoV-19/England/CAMC-9EC72A/2020|2020-09-24|EPI\_ISL\_580373|Original|hCoV-19^^England|Human|Lighthouse Lab in Cambridge|Wellcome Sanger Institute for the COVID-19 Genomics UK (COG-UK) consortium|Davies|United Kingdom

>Spike|hCoV-19/Australia/VIC15974/2020|2020-07-31|EPI\_ISL\_641100|Original|hCoV-19^^Victoria|Human|Microbiological Diagnostic Unit - Public Health Laboratory (MDU-PHL)|MDU-PHL|Schultz|Australia

>Spike|hCoV-19/Denmark/DCGC-14548/2020|2020-11-30|EPI\_ISL\_711831|Original|hCoV-19^^Hovedstaden|Human|Department of Virus and Microbiological Special Diagnostics|Albertsen Lab|Michaelsen|Denmark

>Spike|hCoV-19/Wales/PHWC-49AEB2/2020|2020-12-02|EPI\_ISL\_742267|Original|hCoV-19^^Wales|Human|Wales Specialist Virology Centre Sequencing lab|COVID-19 Genomics UK (COG-UK) Consortium|Moore|United Kingdom

>Spike|hCoV-19/USA/NY-NYCPHL-001151/2020|2020-10-26|EPI\_ISL\_671733|Original|hCoV-19^^New York|Human|DOHMH Riverside|New York City Public Health Laboratory|Wang|USA

>Spike|hCoV-19/England/LIVE-DC3628/2020|2020-11-16|EPI\_ISL\_705086|Original|hCoV-19^^England|Human|Liverpool Clinical Laboratories|COVID-19 Genomics UK (COG-UK) Consortium|Haldenby|United Kingdom

>Spike|hCoV-19/USA/MN-MDH-1876/2020|2020-09-27|EPI\_ISL\_603011|Original|hCoV-19^^Minnesota|Human|Mayo Clinic & Mayo Clinic Laboratories|Minnesota Department of Health|Garfin|USA

>Spike|hCoV-19/Scotland/CVR3063/2020|2020-04-24|EPI\_ISL\_461647|Original|hCoV-19^^Scotland|Human|West of Scotland Specialist Virology Centre|COVID-19 Genomics UK (COG-UK) Consortium|Robertson|United Kingdom

>Spike|hCoV-19/Norway/2958/2020|2020-07-29|EPI\_ISL\_549070|Original|hCoV-19^^Vestlandet|Human|Medical Microbiology Unit|Norwegian Institute of Public Health|Kopperud Riis|Norway

>Spike|hCoV-19/Australia/VIC6490/2020|2020-07-22|EPI\_ISL\_521268|Original|hCoV-19^^Victoria|Human|Microbiological Diagnostic Unit - Public Health Laboratory (MDU-PHL)|MDU-PHL|Schultz|Australia

>Spike|hCoV-19/USA/CA-UCLA-137/2020|2020-04-10|EPI\_ISL\_537481|Original|hCoV-19^^California|Human|UCLA Pathology Clinical Microbiology Lab|Kruglyak Lab|Boocock|USA

>Spike|hCoV-19/Netherlands/UT-EMC-107/2020|2020-10-07|EPI\_ISL\_632623|Original|hCoV-19^^Utrecht|Human|Dutch COVID-19 response team|Erasmus Medical Center|Oude Munnink|Netherlands

>Spike|hCoV-19/Australia/VIC450/2020|2020-03-25|EPI\_ISL\_426746|Original|hCoV-19^^Victoria|Human|Victorian Infectious Diseases Reference Laboratory (VIDRL)|Microbiological Diagnostic Unit Public Health Laboratory and Victorian Infectious Diseases Reference Laboratory|Schultz|Australia

>Spike|hCoV-19/Australia/VIC12088/2020|2020-09-11|EPI\_ISL\_563521|Original|hCoV-19^^Victoria|Human|Microbiological Diagnostic Unit - Public Health Laboratory (MDU-PHL)|MDU-PHL|Schultz|Australia

>Spike|hCoV-19/USA/LA-GBCL-26556587/2020|2020-04-14|EPI\_ISL\_485209|Original|hCoV-19^^Louisiana|Human|River Road Testing Lab|Ginkgo Bioworks Clinical Laboratory|Smith|USA

>Spike|hCoV-19/Spain/RI-IBV-99010903/2020|2020-04-20|EPI\_ISL\_732749|Original|hCoV-19^^La\_Rioja|Human|Centro de Investigaci\u00f3n Biom\u00e9dica de La Rioja - Hospital San Pedro Logro\u00f1o|SeqCOVID-SPAIN consortium/IBV (CSIC)|Comas|Spain

>Spike|hCoV-19/England/ALDP-B1B386/2020|2020-10-31|EPI\_ISL\_645749|Original|hCoV-19^^England|Human|Lighthouse Lab in Alderley Park|Wellcome Sanger Institute for the COVID-19 Genomics UK (COG-UK) Consortium|Davies|United Kingdom

>Spike|hCoV-19/USA/TX-DSHS-0643/2020|2020-07-16|EPI\_ISL\_576298|Original|hCoV-19^^Texas|Human|Texas Department of State Health Services|Texas Department of State Health Services|Rahman|USA

>Spike|hCoV-19/India/MH-NIV-729-3/2020|2020-04-07|EPI\_ISL\_454561|Original|hCoV-19^^Maharashtra|Human|NIV Influenza|NIV Influenza|Potdar|India

>Spike|hCoV-19/England/QEUEH-9C7DF6/2020|2020-09-11|EPI\_ISL\_567035|Original|hCoV-19^^England|Human|Lighthouse Lab in Glasgow|Wellcome Sanger Institute for the COVID-19 Genomics UK (COG-UK) consortium|Davies|United Kingdom

>Spike|hCoV-19/England/CAMC-A65421/2020|2020-10-11|EPI\_ISL\_608466|Original|hCoV-19^^England|Human|Lighthouse Lab in Cambridge|Wellcome Sanger Institute for the COVID-19 Genomics UK (COG-UK) consortium|Davies|United Kingdom

>Spike|hCoV-19/USA/NY-UW-MAYO26/2020|2020-03-21|EPI\_ISL\_500505|Original|hCoV-19^^New York|Human|Mayo Clinic Laboratories|University of Washington Virology Lab|Roychoudhury|USA

>Spike|hCoV-19/Switzerland/Vs-ETHZ-100090/2020|2020-03-13|EPI\_ISL\_451682|Original|hCoV-19^^Valais|Human|Viollier AG|Department of Biosystems Science and Engineering|Nadeau|Switzerland

>Spike|hCoV-19/Norway/2093/2020|2020-03-16|EPI\_ISL\_420310|Original|hCoV-19^^Norway|Human|University Hospital of Northern Norway|Norwegian Institute of Public Health|Hungnes|Norway

>Spike|hCoV-19/Denmark/ALAB-SSI-690/2020|2020-03-27|EPI\_ISL\_437040|Original|hCoV-19^^Denmark|Human|Department of Virus and Microbiological Special Diagnostics|Albertsen lab|Kirkegaard|Denmark

>Spike|hCoV-19/Japan/PG-7345/2020|2020-08-00|EPI\_ISL\_688448|Original|hCoV-19^^Japan|Human|Pathogen Genomics Center|Pathogen Genomics Center|Sekizuka|Japan

>Spike|hCoV-19/England/QEUEH-CC933B/2020|2020-12-22|EPI\_ISL\_781953|Original|hCoV-19^^England|Human|Lighthouse Lab in Glasgow|Wellcome Sanger Institute for the COVID-19 Genomics UK (COG-UK) Consortium|Davies|United Kingdom

>Spike|hCoV-19/Australia/VIC15954/2020|2020-07-31|EPI\_ISL\_641113|Original|hCoV-19^^Victoria|Human|Microbiological Diagnostic Unit - Public Health Laboratory (MDU-PHL)|MDU-PHL|Schultz|Australia

>Spike|hCoV-19/England/LOND-124F334/2020|2020-04-23|EPI\_ISL\_664521|Original|hCoV-19^^England|Human|University College London Hospital|COVID-19 Genomics UK (COG-UK) Consortium|Byott|United Kingdom

>Spike|hCoV-19/England/MILK-95713B/2020|2020-06-10|EPI\_ISL\_554240|Original|hCoV-19^^England|Human|Lighthouse Lab in Milton Keynes|Wellcome Sanger Institute for the COVID-19 Genomics UK (COG-UK) consortium|Davies|United Kingdom

>Spike|hCoV-19/Wales/PHWC-3230C/2020|2020-04-08|EPI\_ISL\_446632|Original|hCoV-19^^Wales|Human|Wales Specialist Virology Centre|Public Health Wales Microbiology Cardiff|Moore|United Kingdom



>Spike|hCoV-19/Canada/BC\_24228539/2020|2020-03-00|EPI\_ISL\_463200|Original|hCoV-19^^British Columbia|Human|BCCDC Public Health Laboratory|BCCDC Public Health Laboratory|Harrigan|Canada

>Spike|hCoV-19/Denmark/DCGC-4533/2020|2020-09-21|EPI\_ISL\_621329|Original|hCoV-19^^Hovedstaden|Human|Department of Virus and Microbiological Special Diagnostics|Albertsen lab|Michaelsen|Denmark

>Spike|hCoV-19/Canada/ON-S1843/2020|2020-11-24|EPI\_ISL\_729261|Original|hCoV-19^^Ontario|Human|Toronto Invasive Bacterial Diseases Network|McMaster University|McArthur|Canada

>Spike|hCoV-19/USA/MI-MDHHS-SC21187/2020|2020-04-02|EPI\_ISL\_507444|Original|hCoV-19^^Michigan|Human|Michigan Department of Health and Human Services|Michigan Department of Health and Human Services|Blankenship|USA

>Spike|hCoV-19/England/ALDP-B48405/2020|2020-11-07|EPI\_ISL\_649434|Original|hCoV-19^^England|Human|Lighthouse Lab in Alderley Park|Wellcome Sanger Institute for the COVID-19 Genomics UK (COG-UK) Consortium|Davies|United Kingdom

>Spike|hCoV-19/England/QEUH-B4183D/2020|2020-11-08|EPI\_ISL\_658624|Original|hCoV-19^^England|Human|Lighthouse Lab in Glasgow|Wellcome Sanger Institute for the COVID-19 Genomics UK (COG-UK) Consortium|Davies|United Kingdom

>Spike|hCoV-19/Australia/VIC6979/2020|2020-07-23|EPI\_ISL\_564176|Original|hCoV-19^^Victoria|Human|Microbiological Diagnostic Unit - Public Health Laboratory (MDU-PHL)|MDU-PHL|Schultz|Australia

>Spike|hCoV-19/England/NORT-281BE6/2020|2020-03-23|EPI\_ISL\_488790|Original|hCoV-19^^England|Human|NU-OMICS DNA Sequencing research facility|Wellcome Sanger Institute for the COVID-19 Genomics UK (COG-UK) consortium|Davies|United Kingdom

>Spike|hCoV-19/England/CAMB-74508/2020|2020-03-28|EPI\_ISL\_425300|Original|hCoV-19^^England|Human|Department of Pathology|COVID-19 Genomics UK (COG-UK) Consortium|Meredith|United Kingdom

>Spike|hCoV-19/England/QEUH-9DADE1/2020|2020-09-22|EPI\_ISL\_581081|Original|hCoV-19^^England|Human|Lighthouse Lab in Glasgow|Wellcome Sanger Institute for the COVID-19 Genomics UK (COG-UK) consortium|Davies|United Kingdom

>Spike|hCoV-19/USA/MI-UM-10036876596/2020|2020-11-10|EPI\_ISL\_728485|Original|hCoV-19^^Michigan|Human|University of Michigan Clinical Microbiology Laboratory|Lauring Lab|Valesano|USA

>Spike|hCoV-19/Spain/GA-IBV-98006036/2020|2020-05-09|EPI\_ISL\_541041|Original|hCoV-19^^Galicia|Human|Hospital Cl\u00e9nico Universitario de Santiago de Compostela|SeqCOVID-SPAIN consortium/Institute of Biomedicine of Valencia|Comas|Spain

>Spike|hCoV-19/USA/UT-UPHL-2012375605/2020|2020-08-09|EPI\_ISL\_746265|Original|hCoV-19^^Utah|Human|Ginkgo Bioworks Clinical Laboratory|Utah Public Health Laboratory|Young|USA

>Spike|hCoV-19/Germany/BW-UT-002/2020|2020-05-13|EPI\_ISL\_485810|Original|hCoV-19^^Baden-W\u00fcrttemberg|Human|Institut f\u00fcr Virologie und Epidemiologie der Viruskrankheiten|NGS Competence Center T\u00fcbingen|Angelov|Germany

>Spike|hCoV-19/Scotland/CVR3070/2020|2020-04-24|EPI\_ISL\_461654|Original|hCoV-19^^Scotland|Human|West of Scotland Specialist Virology Centre|COVID-19 Genomics UK (COG-UK) Consortium|Robertson|United Kingdom

>Spike|hCoV-19/England/QEUH-B105E5/2020|2020-11-02|EPI\_ISL\_641844|Original|hCoV-19^^England|Human|Lighthouse Lab in Glasgow|Wellcome Sanger Institute for the COVID-19 Genomics UK (COG-UK) Consortium|Davies|United Kingdom

>Spike|hCoV-19/USA/FL-BPHL-1878/2020|2020-04-06|EPI\_ISL\_613819|Original|hCoV-19^^Florida|Human|Florida Bureau of Public Health Laboratories|Florida Bureau of Public Health Laboratories|Blanton|USA

>Spike|hCoV-19/Iceland/539/2020|2020-03-27|EPI\_ISL\_424559|Original|hCoV-19^^Reykjavik|Human|The National University Hospital of Iceland|deCODE genetics|J\u00f3nsson|Iceland

>Spike|hCoV-19/India/DL-ILBS-9318D/2020|2020-04-05|EPI\_ISL\_605815|Original|hCoV-19^^Delhi|Human|Clinical Virology Laboratory|ILBS - IGIB|Rooge|India

>Spike|hCoV-19/USA/TX-HMH-MCoV-8355/2020|2020-07-07|EPI\_ISL\_784349|Original|hCoV-19^^Texas|Human|Houston Methodist Hospital|Houston Methodist Hospital|Long|USA

>Spike|hCoV-19/England/CAMB-1B1CBE/2020|2020-05-10|EPI\_ISL\_458541|Original|hCoV-19^^England|Human|Department of Pathology|Wellcome Sanger Institute for the COVID-19 Genomics UK (COG-UK) consortium|Davies|United Kingdom

>Spike|hCoV-19/USA/UT-UPHL-2012496161/2020|2020-08-14|EPI\_ISL\_746185|Original|hCoV-19^^Utah|Human|Ginkgo Bioworks Clinical Laboratory|Utah Public Health Laboratory|Young|USA

>Spike|hCoV-19/England/CAMB-1AED84/2020|2020-05-09|EPI\_ISL\_452860|Original|hCoV-19^^England|Human|Department of Pathology|COVID-19 Genomics UK (COG-UK) Consortium|Meredith|United Kingdom

>Spike|hCoV-19/England/QEUH-B40230/2020|2020-11-08|EPI\_ISL\_657242|Original|hCoV-19^^England|Human|Lighthouse Lab in Glasgow|Wellcome Sanger Institute for the COVID-19 Genomics UK (COG-UK) Consortium|Davies|United Kingdom

>Spike|hCoV-19/Scotland/CVR3478/2020|2020-05-11|EPI\_ISL\_456871|Original|hCoV-19^^Scotland|Human|West of Scotland Specialist Virology Centre|COVID-19 Genomics UK (COG-UK) Consortium|Robertson|United Kingdom

>Spike|hCoV-19/Northern Ireland/QEUH-96CC8D/2020|2020-08-21|EPI\_ISL\_530633|Original|hCoV-19^^Northern Ireland|Human|Lighthouse Lab in Glasgow|Wellcome Sanger Institute for the COVID-19 Genomics UK (COG-UK) consortium|Davies|United Kingdom

>Spike|hCoV-19/Denmark/DCGC-17556/2020|2020-12-14|EPI\_ISL\_751066|Original|hCoV-19^^Midtjylland|Human|Department of Virus and Microbiological Special Diagnostics|Albertsen Lab|Michaelsen|Denmark

>Spike|hCoV-19/England/LIVE-A2EBB/2020|2020-05-20|EPI\_ISL\_499881|Original|hCoV-19^^England|Human|Liverpool Clinical Laboratories|COVID-19 Genomics UK (COG-UK) Consortium|Haldenby|United Kingdom

>Spike|hCoV-19/mink/Netherlands/NB-EMC-63-1/2020|2020-10-06|EPI\_ISL\_632483|Original|hCoV-19^^Noord Brabant|Neovison vison|Dutch COVID-19 response team|Erasmus Medical Center|Oude Munnink|Netherlands

>Spike|hCoV-19/USA/CA-CZB-1534/2020|2020-04-29|EPI\_ISL\_468479|Original|hCoV-19^^California|Human|Ventura County Public Health Lab|Chan-Zuckerberg Biohub|Hao|USA

>Spike|hCoV-19/Denmark/DCGC-13402/2020|2020-11-30|EPI\_ISL\_712296|Original|hCoV-19^^Hovedstaden|Human|Department of Virus and Microbiological Special Diagnostics|Albertsen Lab|Michaelsen|Denmark

>Spike|hCoV-19/Denmark/DCGC-1877/2020|2020-07-13|EPI\_ISL\_622572|Original|hCoV-19^^Hovedstaden|Human|Department of Virus and Microbiological Special Diagnostics|Albertsen lab|Michaelsen|Denmark

>Spike|hCoV-19/USA/CA-ALSR-2062/2020|2020-04-22|EPI\_ISL\_635327|Original|hCoV-19^^California|Human|San Diego County Public Health Laboratory|Andersen lab at Scripps Research|Gangavarapu|USA

>Spike|hCoV-19/Spain/AR-IBV-2420/2020|2020-03-28|EPI\_ISL\_468799|Original|hCoV-19^^Aragon|Human|Servicio de Microbiolog\u00eda|SeqCOVID-SPAIN consortium/IBV (CSIC) |Comas|Spain

>Spike|hCoV-19/Netherlands/NA\_476/2020|2020-04-14|EPI\_ISL\_455278|Original|hCoV-19^^Netherlands|Human|Dutch COVID-19 response team|Erasmus Medical Center|Oude Munnink|Netherlands

>Spike|hCoV-19/England/SHEF-D30AC/2020|2020-05-23|EPI\_ISL\_475507|Original|hCoV-19^^England|Human|Virology Department|COVID-19 Genomics UK (COG-UK) Consortium|de Silva|United Kingdom

>Spike|hCoV-19/Portugal/PT0400/2020|2020-04-20|EPI\_ISL\_454124|Original|hCoV-19^^Portugal|Human|unknown|Instituto Nacional de Saude (INSA)|Borges|Portugal

>Spike|hCoV-19/USA/CA-CZB-5743/2020|2020-07-14|EPI\_ISL\_582968|Original|hCoV-19^^California|Human|San Luis Obispo Public Health Department|Chan-Zuckerberg Biohub|Bhatt|USA

>Spike|hCoV-19/Scotland/QEUH-AD62C7/2020|2020-10-24|EPI\_ISL\_644050|Original|hCoV-19^^Scotland|Human|Lighthouse Lab in Glasgow|Wellcome Sanger Institute for the COVID-19 Genomics UK (COG-UK) Consortium|Davies|United Kingdom

>Spike|hCoV-19/USA/CA-QDX-2303/2020|2020-03-15|EPI\_ISL\_604515|Original|hCoV-19^^California|Human|Quest Diagnostics|Quest Diagnostics|Kagan|USA

>Spike|hCoV-19/England/QEUA-B81AA4/2020|2020-11-14|EPI\_ISL\_667970|Original|hCoV-19^^England|Human|Lighthouse Lab in Glasgow|Wellcome Sanger Institute for the COVID-19 Genomics UK (COG-UK) Consortium|Davies|United Kingdom

>Spike|hCoV-19/England/QEUA-9FF50C/2020|2020-09-30|EPI\_ISL\_600504|Original|hCoV-19^^England|Human|Lighthouse Lab in Glasgow|Wellcome Sanger Institute for the COVID-19 Genomics UK (COG-UK) consortium|Davies|United Kingdom

>Spike|hCoV-19/Wales/PHWC-2A8AE/2020|2020-04-07|EPI\_ISL\_445631|Original|hCoV-19^^Wales|Human|Wales Specialist Virology Centre|Public Health Wales Microbiology Cardiff|Moore|United Kingdom

>Spike|hCoV-19/Wales/PHWC-499B70/2020|2020-12-05|EPI\_ISL\_727408|Original|hCoV-19^^Wales|Human|Originating lab|COVID-19 Genomics UK (COG-UK) Consortium|Moore|United Kingdom

>Spike|hCoV-19/Japan/PG-1765/2020|2020-04-00|EPI\_ISL\_685371|Original|hCoV-19^^Japan|Human|Pathogen Genomics Center|Pathogen Genomics Center|Sekizuka|Japan

>Spike|hCoV-19/USA/WI-UW-567/2020|2020-06-25|EPI\_ISL\_484942|Original|hCoV-19^^Wisconsin|Human|University of Wisconsin-Madison AIDS Vaccine Research Laboratories|University of Wisconsin-Madison AIDS Vaccine Research Laboratories|Baczenas|USA

>Spike|hCoV-19/England/20139063604/2020|2020-03-25|EPI\_ISL\_420746|Original|hCoV-19^^England|Human|Respiratory Virus Unit|Respiratory Virus Unit|Platt|United Kingdom

>Spike|hCoV-19/Singapore/511/2020|2020-05-22|EPI\_ISL\_479589|Original|hCoV-19^^Singapore|Human|National Public Health Laboratory|National Public Health Laboratory|Mak|Singapore

>Spike|hCoV-19/England/20138026404/2020|2020-03-25|EPI\_ISL\_423313|Original|hCoV-19^^England|Human|Respiratory Virus Unit|Respiratory Virus Unit|Platt|United Kingdom

>Spike|hCoV-19/England/ALDP-AA0DA7/2020|2020-10-22|EPI\_ISL\_624137|Original|hCoV-19^^England|Human|Lighthouse Lab in Alderley Park|Wellcome Sanger Institute for the COVID-19 Genomics UK (COG-UK) consortium|Davies|United Kingdom

>Spike|hCoV-19/South Korea/KCDC2311/2020|2020-05-25|EPI\_ISL\_510647|Original|hCoV-19^^South Korea|Human|Division of Viral Diseases|Division of Viral Diseases|Kim|South Korea

>Spike|hCoV-19/England/ALDP-9FE01B/2020|2020-10-01|EPI\_ISL\_587978|Original|hCoV-19^^England|Human|Lighthouse Lab in Alderley Park|Wellcome Sanger Institute for the COVID-19 Genomics UK (COG-UK) consortium|Davies|United Kingdom

>Spike|hCoV-19/USA/NY-Wadsworth-50101-01/2020|2020-04-16|EPI\_ISL\_525681|Original|hCoV-19^^New York|Human|Wadsworth Center|Wadsworth Center|Plitnick|USA

>Spike|hCoV-19/Netherlands/NA\_320/2020|2020-04-02|EPI\_ISL\_455125|Original|hCoV-19^^Netherlands|Human|Dutch COVID-19 response team|Erasmus Medical Center|Oude Munnink|Netherlands

>Spike|hCoV-19/Luxembourg/LNS3219758/2020|2020-11-12|EPI\_ISL\_740276|Original|hCoV-19^^Luxembourg|Human|Laboratoire national de sant\u00e9|Laboratoire national de sant\u00e9|Wienecke-Baldacchino|Luxembourg

>Spike|hCoV-19/Japan/IC-0310/2020|2020-10-00|EPI\_ISL\_667739|Original|hCoV-19^^Japan|Human|Pathogen Genomics Center|Pathogen Genomics Center|Sekizuka|Japan

>Spike|hCoV-19/Gibraltar/205000623/2020|2020-12-00|EPI\_ISL\_709959|Original|hCoV-19^^Gibraltar|Human|Microbiology|Respiratory Virus Unit|Platt|Gibraltar

>Spike|hCoV-19/Denmark/DCGC-2112/2020|2020-07-20|EPI\_ISL\_618374|Original|hCoV-19^^Sjaelland|Human|Department of Virus and Microbiological Special Diagnostics|Albertsen lab|Michaelsen|Denmark

>Spike|hCoV-19/England/BRIS-127433/2020|2020-04-22|EPI\_ISL\_469663|Original|hCoV-19^^England|Human|PHE South West Regional Laboratory|Wellcome Sanger Institute for the COVID-19 Genomics UK (COG-UK) consortium|Davies|United Kingdom

>Spike|hCoV-19/USA/TX-HMH-MCoV-10563/2020|2020-07-09|EPI\_ISL\_789536|Original|hCoV-19^^Texas|Human|Houston Methodist Hospital|Houston Methodist Hospital|Long|USA

>Spike|hCoV-19/Belgium/ULG-10482/2020|2020-09-23|EPI\_ISL\_581591|Original|hCoV-19^^Li\u00e8ge|Human|Department of Clinical Microbiology|GIGA Medical Genomics|Durkin|Belgium

>Spike|hCoV-19/South Africa/KRISP-0552/2020|2020-07-14|EPI\_ISL\_498091|Original|hCoV-19^^KwaZulu-Natal|Human|NHL-IALCH|KRISP|de Oliveira|South Africa

>Spike|hCoV-19/England/MILK-B01ECE/2020|2020-10-24|EPI\_ISL\_642901|Original|hCoV-19^^England|Human|Lighthouse Lab in Milton Keynes|Wellcome Sanger Institute for the COVID-19 Genomics UK (COG-UK) Consortium|Davies|United Kingdom

>Spike|hCoV-19/Canada/BC\_00713032/2020|2020-04-00|EPI\_ISL\_466700|Original|hCoV-19^^British Columbia|Human|BCCDC Public Health Laboratory|BCCDC Public Health Laboratory|Harrigan|Canada

>Spike|hCoV-19/Israel/51140539/2020|2020-03-19|EPI\_ISL\_447323|Original|hCoV-19^^South District|Human|Clinical Virology Laboratory|Stern Lab|Miller|Israel

>Spike|hCoV-19/Scotland/CVR5805/2020|2020-11-10|EPI\_ISL\_665535|Original|hCoV-19^^Scotland|Human|West of Scotland Specialist Virology Centre|COVID-19 Genomics UK (COG-UK) Consortium|Robertson|United Kingdom

>Spike|hCoV-19/Scotland/EDB6392/2020|2020-05-13|EPI\_ISL\_473953|Original|hCoV-19^^Scotland|Human|Virology Department|COVID-19 Genomics UK (COG-UK) Consortium|Williams|United Kingdom

>Spike|hCoV-19/Wales/PHWC-16B49D/2020|2020-09-15|EPI\_ISL\_560292|Original|hCoV-19^^Wales|Human|Wales Specialist Virology Centre Sequencing lab|COVID-19 Genomics UK (COG-UK) Consortium|Moore|United Kingdom

>Spike|hCoV-19/England/QEUEH-AF5EDD/2020|2020-10-30|EPI\_ISL\_663170|Original|hCoV-19^^England|Human|Lighthouse Lab in Glasgow|Wellcome Sanger Institute for the COVID-19 Genomics UK (COG-UK) Consortium|Davies|United Kingdom

>Spike|hCoV-19/Bangladesh/DNAS\_DRICM\_isl\_SM-12/2020|2020-07-20|EPI\_ISL\_775016|Original|hCoV-19^^Dhaka|Human|Designated Reference Institute for Chemical Measurements (DRICM)|DNA SOLUTION LTD.|Rabbi|Bangladesh

>Spike|hCoV-19/USA/AZ-TG664561/2020|2020-04-20|EPI\_ISL\_696176|Original|hCoV-19^^Arizona|Human|Sonora Quest Laboratories|TGen North|French|USA

>Spike|hCoV-19/Wales/PHWC-48FD86/2020|2020-11-11|EPI\_ISL\_681226|Original|hCoV-19^^Wales|Human|Wales Specialist Virology Centre Sequencing lab|COVID-19 Genomics UK (COG-UK) Consortium|Moore|United Kingdom

>Spike|hCoV-19/England/LIVE-1D6F6F/2020|2020-09-17|EPI\_ISL\_572737|Original|hCoV-19^^England|Human|Liverpool Clinical Laboratories|COVID-19 Genomics UK (COG-UK) Consortium|Haldenby|United Kingdom

>Spike|hCoV-19/South Korea/KDCA0032/2020|2020-08-29|EPI\_ISL\_747271|Original|hCoV-19^^South Korea|Human|Division of Emerging Infectious Diseases|Division of Emerging Infectious Diseases|Park|South Korea

>Spike|hCoV-19/England/CAMC-A411D9/2020|2020-10-07|EPI\_ISL\_609461|Original|hCoV-19^^England|Human|Lighthouse Lab in Cambridge|Wellcome Sanger Institute for the COVID-19 Genomics UK (COG-UK) consortium|Davies|United Kingdom

>Spike|hCoV-19/Luxembourg/LNS7741644/2020|2020-11-03|EPI\_ISL\_744624|Original|hCoV-19^^Luxembourg|Human|Laboratoire national de sant\u00e9|Laboratoire national de sant\u00e9|Wienecke-Baldacchino|Luxembourg

>Spike|hCoV-19/England/204881301/2020|2020-11-00|EPI\_ISL\_678819|Original|hCoV-19^^England|Human|Respiratory Virus Unit|COVID-19 Genomics UK (COG-UK) Consortium|Platt|United Kingdom

>Spike|hCoV-19/USA/LA-EVTL1307/2020|2020-12-11|EPI\_ISL\_778973|Original|hCoV-19^^Louisiana|Human|LSUHS Emerging Viral Threat Laboratory|Microbial Genome Sequencing Center|Kamil|USA

>Spike|hCoV-19/Denmark/ALAB-HH-114/2020|2020-03-09|EPI\_ISL\_451998|Original|hCoV-19^^Denmark|Human|Department of Clinical Microbiology|Albertsen lab|Kirkegaard|Denmark

>Spike|hCoV-19/England/CAMB-79521/2020|2020-04-03|EPI\_ISL\_441183|Original|hCoV-19^^England|Human|Department of Pathology|Wellcome Sanger Institute for the COVID-19 Genomics UK (COG-UK) consortium|Amato|United Kingdom

>Spike|hCoV-19/Netherlands/ZH-EMC-736/2020|2020-09-13|EPI\_ISL\_632578|Original|hCoV-19^^Zuid Holland|Human|Dutch COVID-19 response team|Erasmus Medical Center|Oude Munnink|Netherlands

>Spike|hCoV-19/Denmark/DCGC-5101/2020|2020-09-21|EPI\_ISL\_621639|Original|hCoV-19^^Sjaelland|Human|Department of Virus and Microbiological Special Diagnostics|Albertsen lab|Michaelsen|Denmark

>Spike|hCoV-19/USA/WI-UW-963/2020|2020-06-04|EPI\_ISL\_509961|Original|hCoV-19^^Wisconsin|Human|University of Wisconsin-Madison AIDS Vaccine Research

Laboratories|University of Wisconsin-Madison AIDS Vaccine Research  
Laboratories|Baczenas|USA  
>Spike|hCoV-19/Australia/WA277/2020|2020-03-23|EPI\_ISL\_596820|Original|hCoV-19^^Western Australia|Human|PathWest Laboratory Medicine WA|PathWest Laboratory Medicine WA Microbial Surveillance Unit|Sikazwe|Australia  
>Spike|hCoV-19/USA/SC\_NHRC\_03/2020|2020-03-26|EPI\_ISL\_444997|Original|hCoV-19^^South Carolina|Human|Naval Health Research Center|Naval Medical Research Center Biological Defense Research Directorate|Voegtly|USA  
>Spike|hCoV-19/USA/TX-HMH-7646/2020|2020-06-26|EPI\_ISL\_546911|Original|hCoV-19^^Texas|Human|Houston Methodist Hospital|Houston Methodist Hospital|Long|USA  
>Spike|hCoV-19/England/NOTT-11ADA1/2020|2020-11-08|EPI\_ISL\_638605|Original|hCoV-19^^England|Human|Queens Medical Centre|COVID-19 Genomics UK (COG-UK) Consortium|Loose|United Kingdom  
>Spike|hCoV-19/England/MILK-C7B75A/2020|2020-12-01|EPI\_ISL\_756865|Original|hCoV-19^^England|Human|Lighthouse Lab in Milton Keynes|Wellcome Sanger Institute for the COVID-19 Genomics UK (COG-UK) Consortium|Davies|United Kingdom  
>Spike|hCoV-19/Scotland/CVR5291/2020|2020-10-20|EPI\_ISL\_651741|Original|hCoV-19^^Scotland|Human|West of Scotland Specialist Virology Centre|COVID-19 Genomics UK (COG-UK) Consortium|Robertson|United Kingdom  
>Spike|hCoV-19/England/ALDP-A5114F/2020|2020-10-07|EPI\_ISL\_597793|Original|hCoV-19^^England|Human|Lighthouse Lab in Alderley Park|Wellcome Sanger Institute for the COVID-19 Genomics UK (COG-UK) consortium|Davies|United Kingdom  
>Spike|hCoV-19/England/QEUEH-B2DF23/2020|2020-11-04|EPI\_ISL\_659763|Original|hCoV-19^^England|Human|Lighthouse Lab in Glasgow|Wellcome Sanger Institute for the COVID-19 Genomics UK (COG-UK) Consortium|Davies|United Kingdom  
>Spike|hCoV-19/India/MH-GA9/2020|2020-06-17|EPI\_ISL\_508284|Original|hCoV-19^^Maharashtra|Human|Government Medical College|National Institute of Biomedical Genomics|Maitra|India  
>Spike|hCoV-19/Switzerland/BS-65245510/2020|2020-05-27|EPI\_ISL\_581890|Original|hCoV-19^^Basel-Stadt|Human|University Hospital Basel|University Hospital Basel|Roloff Handschin|Switzerland  
>Spike|hCoV-19/England/NOTT-118E55/2020|2020-10-29|EPI\_ISL\_627697|Original|hCoV-19^^England|Human|Queens Medical Centre|COVID-19 Genomics UK (COG-UK) Consortium|Loose|United Kingdom  
>Spike|hCoV-19/USA/WA-S1153/2020|2020-05-05|EPI\_ISL\_463643|Original|hCoV-19^^Washington|Human|Washington State Department of Health|Seattle Flu Study|Bedford|USA  
>Spike|hCoV-19/USA/MI-MDHHS-SC22498/2020|2020-11-17|EPI\_ISL\_708201|Original|hCoV-19^^Michigan|Human|Michigan Department of Health and Human Services|Michigan Department of Health and Human Services|Jacob|USA  
>Spike|hCoV-19/England/ALDP-A70292/2020|2020-10-15|EPI\_ISL\_607802|Original|hCoV-19^^England|Human|Lighthouse Lab in Alderley Park|Wellcome Sanger Institute for the COVID-19 Genomics UK (COG-UK) consortium|Davies|United Kingdom  
>Spike|hCoV-19/Spain/VC-IBV-98003444/2020|2020-04-02|EPI\_ISL\_539253|Original|hCoV-19^^Comunitat Valenciana|Human|Hospital Universitario de La Ribera (Alzira)|SeqCOVID-SPAIN consortium|IBV (CSIC)|Comas|Spain  
>Spike|hCoV-19/Netherlands/Utrecht\_10020/2020|2020-03-24|EPI\_ISL\_454769|Original|hCoV-19^^Utrecht|Human|Dutch COVID-19 response team|National Institute for Public Health and the Environment (RIVM)|Meijer|Netherlands  
>Spike|hCoV-19/England/CAMB-7E252/2020|2020-04-14|EPI\_ISL\_434056|Original|hCoV-19^^England|Human|Department of Pathology|COVID-19 Genomics UK (COG-UK) Consortium|Meredith|United Kingdom  
>Spike|hCoV-19/England/MILK-A7BABD/2020|2020-10-15|EPI\_ISL\_607450|Original|hCoV-19^^England|Human|Lighthouse Lab in Milton Keynes|Wellcome Sanger Institute for the COVID-19 Genomics UK (COG-UK) consortium|Davies|United Kingdom  
>Spike|hCoV-19/USA/NY-Wadsworth-41432-01/2020|2020-04-08|EPI\_ISL\_676828|Original|hCoV-19^^New York|Human|Wadsworth Center|Wadsworth Center|Lasek-Nesselquist|USA

>Spike|hCoV-19/Netherlands/NoordHolland\_27/2020|2020-05-06|EPI\_ISL\_461217|Original|hCoV-19^^Noord Holland|Human|Dutch COVID-19 response team|Erasmus Medical Center|Oude Munnink|Netherlands

>Spike|hCoV-19/England/EXET-139D60/2020|2020-00-00|EPI\_ISL\_679341|Original|hCoV-19^^England|Human|University of Exeter|COVID-19 Genomics UK (COG-UK) Consortium|Temperton|United Kingdom

>Spike|hCoV-19/Australia/VIC4263/2020|2020-07-15|EPI\_ISL\_519591|Original|hCoV-19^^Victoria|Human|Microbiological Diagnostic Unit - Public Health Laboratory (MDU-PHL) |MDU-PHL|Schultz|Australia

>Spike|hCoV-19/USA/CA-ALSR-0987-SAN/2020|2020-04-02|EPI\_ISL\_483444|Original|hCoV-19^^California|Human|UC San Diego Center for Advanced Laboratory Medicine|Andersen lab at Scripps Research|Gangavarapu|USA

>Spike|hCoV-19/Denmark/DCGC-1844/2020|2020-07-06|EPI\_ISL\_622567|Original|hCoV-19^^Hovedstaden|Human|Department of Virus and Microbiological Special Diagnostics|Albertsen lab|Michaelsen|Denmark

>Spike|hCoV-19/Scotland/QEUH-96ECD6/2020|2020-08-19|EPI\_ISL\_534484|Original|hCoV-19^^Scotland|Human|NHSGGC West of Scotland Specialist Virology Centre / MRC-University of Glasgow Centre for Virus Research|Wellcome Sanger Institute for the COVID-19 Genomics UK (COG-UK) consortium|Davies|United Kingdom

>Spike|hCoV-19/England/MILK-97344F/2020|2020-08-20|EPI\_ISL\_575798|Original|hCoV-19^^England|Human|Lighthouse Lab in Milton Keynes|Wellcome Sanger Institute for the COVID-19 Genomics UK (COG-UK) consortium|Davies|United Kingdom

>Spike|hCoV-19/England/204221502/2020|2020-00-00|EPI\_ISL\_593830|Original|hCoV-19^^England|Human|Respiratory Virus Unit|Respiratory Virus Unit|Platt|United Kingdom

>Spike|hCoV-19/Canada/Qc-L00241349/2020|2020-03-27|EPI\_ISL\_465703|Original|hCoV-19^^Quebec|Human|H\u00f4pital Pierre-Boucher|Laboratoire de sant\u00e9 publique du Qu\u00e9bec|Moreira|Canada

>Spike|hCoV-19/Brazil/RJ-00422/2020|2020-10-29|EPI\_ISL\_717824|Original|hCoV-19^^Rio de Janeiro|Human|Laboratorio de Virologia Molecular / UFRJ|Bioinformatics Laboratory / LNCC|Almeida|Brazil

>Spike|hCoV-19/France/ARA-33428/2020|2020-05-03|EPI\_ISL\_636487|Original|hCoV-19^^Auvergne-Rhone-Alpes|Human|CNR Virus des Infections Respiratoires - France SUD|CNR Virus des Infections Respiratoires - France SUD|Josset|France

>Spike|hCoV-19/Denmark/DCGC-2008/2020|2020-07-20|EPI\_ISL\_618227|Original|hCoV-19^^Hovedstaden|Human|Department of Virus and Microbiological Special Diagnostics|Albertsen lab|Michaelsen|Denmark

>Spike|hCoV-19/USA/WA-S2216/2020|2020-06-08|EPI\_ISL\_497644|Original|hCoV-19^^Washington|Human|Washington State Department of Health|Seattle Flu Study|Lee|USA

>Spike|hCoV-19/England/ALDP-BBB449/2020|2020-11-21|EPI\_ISL\_701727|Original|hCoV-19^^England|Human|Lighthouse Lab in Alderley Park|Wellcome Sanger Institute for the COVID-19 Genomics UK (COG-UK) Consortium|Davies|United Kingdom

>Spike|hCoV-19/Germany/HH-hpi-pl291/2020|2020-03-15|EPI\_ISL\_775812|Original|hCoV-19^^Hamburg|Human|University Medical Center Hamburg Eppendorf|Heinrich Pette Institute|Robitaille|Germany

>Spike|hCoV-19/Denmark/DCGC-18082/2020|2020-12-14|EPI\_ISL\_749745|Original|hCoV-19^^Midtjylland|Human|Department of Virus and Microbiological Special Diagnostics|Albertsen Lab|Michaelsen|Denmark

>Spike|hCoV-19/England/201580161/2020|2020-04-09|EPI\_ISL\_466356|Original|hCoV-19^^England|Human|Respiratory Virus Unit|Respiratory Virus Unit|Platt|United Kingdom

>Spike|hCoV-19/Switzerland/BE-ETHZ-100831/2020|2020-03-26|EPI\_ISL\_451779|Original|hCoV-19^^Bern|Human|Viollier AG|Department of Biosystems Science and Engineering|Nadeau|Switzerland

>Spike|hCoV-19/England/QEUH-9CA634/2020|2020-09-10|EPI\_ISL\_567465|Original|hCoV-19^^England|Human|Lighthouse Lab in Glasgow|Wellcome Sanger Institute for the COVID-19 Genomics UK (COG-UK) consortium|Davies|United Kingdom

>Spike|hCoV-19/England/QEUH-9E3978/2020|2020-09-24|EPI\_ISL\_584880|Original|hCoV-19^^England|Human|Northumbria University / South Tees Hospitals NHS Foundation Trust / North Cumbria Integrated Care NHS Foundation Trust / North Tees and Hartlepool NHS Foundation Trust / Newcastle Hospitals NHS Foundation Trust|COVID-19 Genomics UK (COG-UK) Consortium|Bashton|United Kingdom

>Spike|hCoV-19/USA/NY-PV09444/2020|2020-03-04|EPI\_ISL\_450120|Original|hCoV-19^^New York|Human|MSHS Clinical Microbiology Laboratories|MSHS Pathogen Surveillance Program|van Bakel|USA

>Spike|hCoV-19/Brazil/SP-L26-CD559/2020|2020-04-20|EPI\_ISL\_672736|Original|hCoV-19^^S\u00e3o Paulo|Human|Hospital das Cl\u00ednicas da Faculdade de Medicina da Universidade de S\u00e3o Paulo (HC-FMUSP)|Laborat\u00f3rio de Parasitologia M\u00e9dica - Instituto de Medicina Tropical - Universidade de S\u00e3o Paulo|de Jesus|Brazil

>Spike|hCoV-19/United Arab Emirates/1073/2020|2020-06-11|EPI\_ISL\_698147|Original|hCoV-19^^Abu Dhabi|Human|Group 42 (G42) Healthcare|G42 Healthcare|Ogrodzki|United Arab Emirates

>Spike|hCoV-19/Netherlands/un-EMC-795/2020|2020-10-13|EPI\_ISL\_632776|Original|hCoV-19^^Netherlands|Human|Dutch COVID-19 response team|Erasmus Medical Center|Oude Munnink|Netherlands

>Spike|hCoV-19/USA/AZ-TG664306/2020|2020-04-28|EPI\_ISL\_696098|Original|hCoV-19^^Arizona|Human|Sonora Quest Laboratories|TGen North|French|USA

>Spike|hCoV-19/England/QEUH-B2CFE8/2020|2020-11-04|EPI\_ISL\_680094|Original|hCoV-19^^England|Human|Department of Pathology|COVID-19 Genomics UK (COG-UK) Consortium|Goodfellow|United Kingdom

>Spike|hCoV-19/Scotland/CVR5981/2020|2020-11-21|EPI\_ISL\_705709|Original|hCoV-19^^Scotland|Human|West of Scotland Specialist Virology Centre|COVID-19 Genomics UK (COG-UK) Consortium|Robertson|United Kingdom

>Spike|hCoV-19/Wales/PHWC-485D08/2020|2020-10-26|EPI\_ISL\_628273|Original|hCoV-19^^Wales|Human|Wales Specialist Virology Centre Sequencing lab|COVID-19 Genomics UK (COG-UK) Consortium|Moore|United Kingdom

>Spike|hCoV-19/Denmark/DCGC-6057/2020|2020-10-05|EPI\_ISL\_620251|Original|hCoV-19^^Hovedstaden|Human|Department of Virus and Microbiological Special Diagnostics|Albertsen lab|Michaelsen|Denmark

>Spike|hCoV-19/USA/WA-UW-14520/2020|2020-07-05|EPI\_ISL\_776672|Original|hCoV-19^^Washington|Human|UW Virology Lab|UW Virology Lab|Roychoudhury|USA

>Spike|hCoV-19/England/QEUH-A620A8/2020|2020-10-12|EPI\_ISL\_706956|Original|hCoV-19^^England|Human|Oxford Viromics|COVID-19 Genomics UK (COG-UK) Consortium|Golubchik|United Kingdom

>Spike|hCoV-19/Wales/PHWC-4A3557/2020|2020-12-14|EPI\_ISL\_744110|Original|hCoV-19^^Wales|Human|Wales Specialist Virology Centre Sequencing lab|COVID-19 Genomics UK (COG-UK) Consortium|Moore|United Kingdom

>Spike|hCoV-19/England/20144073804/2020|2020-03-31|EPI\_ISL\_423561|Original|hCoV-19^^England|Human|Respiratory Virus Unit|Respiratory Virus Unit|Platt|United Kingdom

>Spike|hCoV-19/USA/CA-CZB-7207/2020|2020-08-28|EPI\_ISL\_582942|Original|hCoV-19^^California|Human|County of Santa Clara Public Health Department|Chan-Zuckerberg Biohub|Bhatt|USA

>Spike|hCoV-19/England/MILK-B8D307/2020|2020-11-13|EPI\_ISL\_674011|Original|hCoV-19^^England|Human|Lighthouse Lab in Milton Keynes|Wellcome Sanger Institute for the COVID-19 Genomics UK (COG-UK) Consortium|Davies|United Kingdom

>Spike|hCoV-19/Wales/PHWC-4944E3/2020|2020-11-19|EPI\_ISL\_726126|Original|hCoV-19^^Wales|Human|Originating lab|COVID-19 Genomics UK (COG-UK) Consortium|Moore|United Kingdom

>Spike|hCoV-19/Denmark/DCGC-16876/2020|2020-12-14|EPI\_ISL\_750615|Original|hCoV-19^^Nordjylland|Human|Department of Virus and Microbiological Special Diagnostics|Albertsen Lab|Michaelsen|Denmark

>Spike|hCoV-19/England/ALDP-A68DD8/2020|2020-10-12|EPI\_ISL\_630545|Original|hCoV-19^^England|Human|Lighthouse Lab in Alderley Park|Wellcome Sanger Institute for the COVID-19 Genomics UK (COG-UK) consortium|Davies|United Kingdom

>Spike|hCoV-19/Sweden/20-08186/2020|2020-03-13|EPI\_ISL\_548246|Original|hCoV-19^^Vastra Gotaland|Human|Skovde/Unilabs|The Public Health Agency of Sweden|Svartstr\u00f6m|Sweden

>Spike|hCoV-19/India/KA-nimh-19712/2020|2020-05-16|EPI\_ISL\_515972|Original|hCoV-19^^Karnataka|Human|MIMS|Department of Neurovirology|Pattabiraman|India

>Spike|hCoV-19/Scotland/EDB2963/2020|2020-04-02|EPI\_ISL\_487838|Original|hCoV-19^^Scotland|Human|Virology Department|Wellcome Sanger Institute for the COVID-19 Genomics UK (COG-UK) consortium|Davies|United Kingdom

>Spike|hCoV-19/South Korea/KCDC2622/2020|2020-07-02|EPI\_ISL\_515025|Original|hCoV-19^^South Korea|Human|Division of Viral Diseases|Division of Viral Diseases|Kim|South Korea

>Spike|hCoV-19/United Arab Emirates/0015/2020|2020-05-07|EPI\_ISL\_698225|Original|hCoV-19^^Abu Dhabi|Human|Group 42 (G42) Healthcare|G42 Healthcare|Ogrodzki|United Arab Emirates

>Spike|hCoV-19/Australia/VIC4620/2020|2020-07-12|EPI\_ISL\_519016|Original|hCoV-19^^Victoria|Human|Victorian Infectious Diseases Reference Laboratory (VIDRL)|VIDRL and MDU-PHL|Schultz|Australia

>Spike|hCoV-19/Wales/PHWC-24ABD/2020|2020-03-20|EPI\_ISL\_419479|Original|hCoV-19^^Wales|Human|Wales Specialist Virology Centre|Public Health Wales Microbiology Cardiff|Moore|United Kingdom

>Spike|hCoV-19/Australia/WA147/2020|2020-03-27|EPI\_ISL\_596710|Original|hCoV-19^^Western Australia|Human|PathWest Laboratory Medicine WA|PathWest Laboratory Medicine WA Microbial Surveillance Unit|Sikazwe|Australia

>Spike|hCoV-19/USA/CA-QDX-2383/2020|2020-03-15|EPI\_ISL\_604662|Original|hCoV-19^^California|Human|Quest Diagnostics|Quest Diagnostics|Kagan|USA

>Spike|hCoV-19/Belgium/ULG-10776/2020|2020-10-31|EPI\_ISL\_644622|Original|hCoV-19^^Li\u00e8ge|Human|Department of Clinical Microbiology|GIGA Medical Genomics|Durkin|Belgium

>Spike|hCoV-19/England/ALDP-A6F779/2020|2020-10-14|EPI\_ISL\_607237|Original|hCoV-19^^England|Human|Lighthouse Lab in Alderley Park|Wellcome Sanger Institute for the COVID-19 Genomics UK (COG-UK) consortium|Davies|United Kingdom

>Spike|hCoV-19/Denmark/DCGC-12629/2020|2020-11-16|EPI\_ISL\_682810|Original|hCoV-19^^Syddanmark|Human|Department of Virus and Microbiological Special Diagnostics|Albertsen Lab|Michaelsen|Denmark

>Spike|hCoV-19/England/QEUH-9AEE01/2020|2020-09-03|EPI\_ISL\_573507|Original|hCoV-19^^England|Human|University College London|COVID-19 Genomics UK (COG-UK) Consortium|Roy|United Kingdom

>Spike|hCoV-19/Canada/ON-S948/2020|2020-04-14|EPI\_ISL\_586501|Original|hCoV-19^^Ontario|Human|Toronto Invasive Bacterial Diseases Network|McMaster University|McArthur|Canada

>Spike|hCoV-19/England/20128011804/2020|2020-03-19|EPI\_ISL\_423933|Original|hCoV-19^^England|Human|Respiratory Virus Unit|Respiratory Virus Unit|Platt|United Kingdom

>Spike|hCoV-19/Jordan/AM-ALSR-5004/2020|2020-10-11|EPI\_ISL\_730277|Original|hCoV-19^^Amman|Human|Biolab Diagnostic Laboratories|Andersen lab at Scripps Research|Gangavarapu|Jordan

>Spike|hCoV-19/Chile/NB-207885/2020|2020-10-16|EPI\_ISL\_746544|Original|hCoV-19^^\u00dluble|Human|Genetica Molecular and Subdepartamento de Virologia ISP Chile|Instituto de Salud Publica de Chile|Tognarelli|Chile

>Spike|hCoV-19/England/MILK-976576/2020|2020-08-20|EPI\_ISL\_575815|Original|hCoV-19^^England|Human|Lighthouse Lab in Milton Keynes|Wellcome Sanger Institute for the COVID-19 Genomics UK (COG-UK) consortium|Davies|United Kingdom

>Spike|hCoV-19/USA/TX-HMH-MCoV-11115/2020|2020-09-01|EPI\_ISL\_789707|Original|hCoV-19^^Texas|Human|Houston Methodist Hospital|Houston Methodist Hospital|Long|USA

>Spike|hCoV-19/Spain/MD-HLP-112/2020|2020-03-03|EPI\_ISL\_530041|Original|hCoV-19^^Madrid|Human|Hospital Universitario La Paz|Hospital Universitario La Paz|Viedma|Spain

>Spike|hCoV-19/Netherlands/OV-RIVM-20236/2020|2020-12-05|EPI\_ISL\_723385|Original|hCoV-19^^Overijssel|Human|Dutch COVID-19 response team|National Institute for Public Health and the Environment (RIVM)|Meijer|Netherlands

>Spike|hCoV-19/Scotland/QEUH-9F468C/2020|2020-09-27|EPI\_ISL\_600720|Original|hCoV-19^^Scotland|Human|Lighthouse Lab in Glasgow|Wellcome Sanger Institute for the COVID-19 Genomics UK (COG-UK) consortium|Davies|United Kingdom

>Spike|hCoV-19/Japan/PG-7182/2020|2020-07-00|EPI\_ISL\_688287|Original|hCoV-19^^Japan|Human|Saitama Prefectural Institute of Public Health|Pathogen Genomics Center|Sekizuka|Japan



>Spike|hCoV-19/USA/FL-BPHL-1971/2020|2020-04-16|EPI\_ISL\_653124|Original|hCoV-19^^Florida|Human|Florida Bureau of Public Health Laboratories|Florida Bureau of Public Health Laboratories|Blanton|USA

>Spike|hCoV-19/USA/CT-Yale-402/2020|2020-03-31|EPI\_ISL\_738306|Original|hCoV-19^^Connecticut|Human|Connecticut Veterans' Affairs Hospital|Grubaugh Lab - Yale School of Public Health|Grubaugh|USA

>Spike|hCoV-19/USA/NC-QDX-173/2020|2020-04-27|EPI\_ISL\_494525|Original|hCoV-19^^North Carolina|Human|Quest Diagnostics|Quest Diagnostics|Kagan|USA

>Spike|hCoV-19/England/BRIS-121D2F/2020|2020-03-19|EPI\_ISL\_440100|Original|hCoV-19^^England|Human|PHE South West Regional Laboratory|Wellcome Sanger Institute for the COVID-19 Genomics UK (COG-UK) consortium|Amato|United Kingdom

>Spike|hCoV-19/Spain/MD-IBV-99008494/2020|2020-09-10|EPI\_ISL\_654065|Original|hCoV-19^^Madrid|Human|Hospital General Universitario Gregorio Mara\u00f1\u00f3n|SeqCOVID-SPAIN consortium/IBV (CSIC)|Comas|Spain

>Spike|hCoV-19/England/CAMC-B513EE/2020|2020-11-08|EPI\_ISL\_658056|Original|hCoV-19^^England|Human|Lighthouse Lab in Cambridge|Wellcome Sanger Institute for the COVID-19 Genomics UK (COG-UK) Consortium|Davies|United Kingdom

>Spike|hCoV-19/England/MILK-9AA02D/2020|2020-08-31|EPI\_ISL\_550871|Original|hCoV-19^^England|Human|Lighthouse Lab in Milton Keynes|Wellcome Sanger Institute for the COVID-19 Genomics UK (COG-UK) consortium|Davies|United Kingdom

>Spike|hCoV-19/England/GSTT-5787/2020|2020-03-23|EPI\_ISL\_560715|Original|hCoV-19^^England|Human|Centre for Clinical Infection and Diagnostics Research and Genomics Innovation Unit|Centre for Clinical Infection and Diagnostics Research and Genomics Innovation Unit|Awan|United Kingdom

>Spike|hCoV-19/England/ALDP-B75478/2020|2020-11-12|EPI\_ISL\_740905|Original|hCoV-19^^England|Human|Oxford Viromics|COVID-19 Genomics UK (COG-UK) Consortium|Golubchik|United Kingdom

>Spike|hCoV-19/USA/UT-UPHL-2012061653/2020|2020-11-28|EPI\_ISL\_746845|Original|hCoV-19^^Utah|Human|Utah Public Health Laboratory|Utah Public Health Laboratory|Gallagher|USA

>Spike|hCoV-19/Japan/PG-1193/2020|2020-04-00|EPI\_ISL\_684803|Original|hCoV-19^^Japan|Human|Yamagata Prefectural Institute of Public Health|Pathogen Genomics Center|Sekizuka|Japan

>Spike|hCoV-19/Denmark/ALAB-SSI-1288/2020|2020-04-02|EPI\_ISL\_444846|Original|hCoV-19^^Denmark|Human|Department of Virus and Microbiological Special Diagnostics|Albertsen lab|Kirkegaard|Denmark

>Spike|hCoV-19/Sweden/20-53852/2020|2020-12-21|EPI\_ISL\_775591|Original|hCoV-19^^Vastra Gotalandsregionen|Human|Klinisk mikrobiologi|The Public Health Agency of Sweden|Svartstr\u00f6m|Sweden

>Spike|hCoV-19/South Korea/KDCA0444/2020|2020-11-14|EPI\_ISL\_760228|Original|hCoV-19^^South Korea|Human|Division of Emerging Infectious Diseases|Division of Emerging Infectious Diseases|Park|South Korea

>Spike|hCoV-19/Spain/RI-IBV-98002350/2020|2020-03-31|EPI\_ISL\_537857|Original|hCoV-19^^La Rioja|Human|Centro de Investigaci\u00f3n Biom\u00e9dica de La Rioja - Hospital San Pedro Logro\u00f1o|SeqCOVID-SPAIN consortium/IBV (CSIC)|Comas|Spain

>Spike|hCoV-19/England/CAMC-A3F280/2020|2020-10-05|EPI\_ISL\_609703|Original|hCoV-19^^England|Human|Lighthouse Lab in Cambridge|Wellcome Sanger Institute for the COVID-19 Genomics UK (COG-UK) consortium|Davies|United Kingdom

>Spike|hCoV-19/England/ALDP-AA0E68/2020|2020-10-22|EPI\_ISL\_623858|Original|hCoV-19^^England|Human|Lighthouse Lab in Alderley Park|Wellcome Sanger Institute for the COVID-19 Genomics UK (COG-UK) consortium|Davies|United Kingdom

>Spike|hCoV-19/Brazil/SP-398/2020|2020-06-30|EPI\_ISL\_603028|Original|hCoV-19^^S\u00e3o Paulo|Human|Hospital Municipal Santa Ana|Instituto Adolfo Lutz|Sacchi|Brazil

>Spike|hCoV-19/Denmark/DCGC-18376/2020|2020-12-07|EPI\_ISL\_749926|Original|hCoV-19^^Hovedstaden|Human|Department of Virus and Microbiological Special Diagnostics|Albertsen Lab|Michaelsen|Denmark

>Spike|hCoV-19/Wales/PHWC-482E26/2020|2020-10-13|EPI\_ISL\_627746|Original|hCoV-19^^Wales|Human|Wales Specialist Virology Centre Sequencing lab|COVID-19 Genomics UK (COG-UK) Consortium|Moore|United Kingdom

>Spike|hCoV-19/England/QEUA-9AF608/2020|2020-09-01|EPI\_ISL\_559852|Original|hCoV-19^^England|Human|Oxford Viromics|COVID-19 Genomics UK (COG-UK) Consortium|Golubchik|United Kingdom

>Spike|hCoV-19/Northern Ireland/NIRE-10972F/2020|2020-10-22|EPI\_ISL\_680218|Original|hCoV-19^^Northern Ireland|Human|Regional Virus Laboratory|COVID-19 Genomics UK (COG-UK) Consortium|Fairley|United Kingdom

>Spike|hCoV-19/England/LIVE-A588D/2020|2020-03-20|EPI\_ISL\_499517|Original|hCoV-19^^England|Human|Liverpool Clinical Laboratories|COVID-19 Genomics UK (COG-UK) Consortium|Haldenby|United Kingdom

>Spike|hCoV-19/England/QEUA-B2B417/2020|2020-11-03|EPI\_ISL\_646620|Original|hCoV-19^^England|Human|Lighthouse Lab in Glasgow|Wellcome Sanger Institute for the COVID-19 Genomics UK (COG-UK) Consortium|Davies|United Kingdom

>Spike|hCoV-19/England/CAMC-B09F1E/2020|2020-10-30|EPI\_ISL\_672955|Original|hCoV-19^^England|Human|Lighthouse Lab in Cambridge|Wellcome Sanger Institute for the COVID-19 Genomics UK (COG-UK) Consortium|Davies|United Kingdom

>Spike|hCoV-19/USA/FL-BPHL-0147/2020|2020-03-11|EPI\_ISL\_480798|Original|hCoV-19^^Florida|Human|Florida Bureau of Public Health Laboratories|Florida Bureau of Public Health Laboratories|Blanton|USA

>Spike|hCoV-19/USA/WA-UW234/2020|2020-03-14|EPI\_ISL\_417448|Original|hCoV-19^^Washington|Human|UW Virology Lab|UW Virology Lab|Roychoudhury|USA

>Spike|hCoV-19/Australia/NSW2221/2020|2020-03-20|EPI\_ISL\_500672|Original|hCoV-19^^New South Wales|Human|Area of Virology|Area of Virology|Bull|Australia

>Spike|hCoV-19/England/LOND-12504E2/2020|2020-10-20|EPI\_ISL\_665214|Original|hCoV-19^^England|Human|University College London Hospital|COVID-19 Genomics UK (COG-UK) Consortium|Byott|United Kingdom

>Spike|hCoV-19/England/201161238/2020|2020-03-11|EPI\_ISL\_464827|Original|hCoV-19^^England|Human|Respiratory Virus Unit|Respiratory Virus Unit|Platt|United Kingdom

>Spike|hCoV-19/USA/NY-NYCPHL-000687/2020|2020-03-14|EPI\_ISL\_632104|Original|hCoV-19^^New York|Human|Flushing Hospital Medical Center|New York City Public Health Laboratory|Wang|USA

>Spike|hCoV-19/England/CAMC-B0AD6E/2020|2020-10-30|EPI\_ISL\_643496|Original|hCoV-19^^England|Human|Lighthouse Lab in Cambridge|Wellcome Sanger Institute for the COVID-19 Genomics UK (COG-UK) Consortium|Davies|United Kingdom

>Spike|hCoV-19/USA/MI-MDHHS-SC21553/2020|2020-03-19|EPI\_ISL\_516280|Original|hCoV-19^^Michigan|Human|Michigan Department of Health and Human Services|Michigan Department of Health and Human Services|Blankenship|USA

>Spike|hCoV-19/Denmark/DCGC-5202/2020|2020-09-21|EPI\_ISL\_621740|Original|hCoV-19^^Syddanmark|Human|Department of Virus and Microbiological Special Diagnostics|Albertsen lab|Michaelsen|Denmark

>Spike|hCoV-19/England/ALDP-94E9D5/2020|2020-06-17|EPI\_ISL\_555070|Original|hCoV-19^^England|Human|Lighthouse Lab in Alderley Park|Wellcome Sanger Institute for the COVID-19 Genomics UK (COG-UK) consortium|Davies|United Kingdom

>Spike|hCoV-19/Switzerland/ZH-ETHZ-370446/2020|2020-11-16|EPI\_ISL\_693948|Original|hCoV-19^^Zurich|Human|Viollier AG|Department of Biosystems Science and Engineering|Nadeau|Switzerland

>Spike|hCoV-19/Switzerland/VS-ETHZ-380222/2020|2020-11-24|EPI\_ISL\_721925|Original|hCoV-19^^Valais|Human|Viollier AG|Department of Biosystems Science and Engineering|Nadeau|Switzerland

>Spike|hCoV-19/England/QEUA-95DD40/2020|2020-08-07|EPI\_ISL\_537046|Original|hCoV-19^^England|Human|Lighthouse Lab in Glasgow|Wellcome Sanger Institute for the COVID-19 Genomics UK (COG-UK) consortium|Davies|United Kingdom

>Spike|hCoV-19/Denmark/DCGC-6864/2020|2020-10-12|EPI\_ISL\_619709|Original|hCoV-19^^Hovedstaden|Human|Department of Virus and Microbiological Special Diagnostics|Albertsen lab|Michaelsen|Denmark

>Spike|hCoV-19/England/MILK-B96CE2/2020|2020-11-13|EPI\_ISL\_675005|Original|hCoV-19^^England|Human|Lighthouse Lab in Milton Keynes|Wellcome Sanger Institute for the COVID-19 Genomics UK (COG-UK) Consortium|Davies|United Kingdom

>Spike|hCoV-19/USA/IL-NM056/2020|2020-03-18|EPI\_ISL\_444552|Original|hCoV-19^^Illinois|Human|Northwestern Memorial Hospital|Ozer Lab|Ozer|USA

>Spike|hCoV-19/India/GJ-GBRC-398b/2020|2020-06-25|EPI\_ISL\_586514|Original|hCoV-19^^Gujarat|Human|B.J. Medical College and Civil hospital|Gujarat Biotechnology Research Centre|Joshi|India

>Spike|hCoV-19/USA/CA-ALSR-1763/2020|2020-05-21|EPI\_ISL\_512171|Original|hCoV-19^^California|Human|San Diego County Public Health Laboratory|Andersen lab at Scripps Research|Gangavarapu|USA

>Spike|hCoV-19/India/TG-CDFD-N5451/2020|2020-06-01|EPI\_ISL\_528631|Original|hCoV-19^^Telangana|Human|National Genomics Core-Center for DNA Fingerprinting and Diagnostics|National Genomics Core- Center for DNA Fingerprinting and Diagnostics (NGC-CDFD) - DBT's PAN-INDIA-1000 Genome consortium|Vashisht|India

>Spike|hCoV-19/Mexico/BCN-ALSR-2537/2020|2020-06-24|EPI\_ISL\_635540|Original|hCoV-19^^Baja California|Human|Centro de Diagn\u00f3stico COVID-19 UABC Tijuana|Andersen lab at Scripps Research|Gangavarapu|Mexico

>Spike|hCoV-19/Japan/PG-6913/2020|2020-09-00|EPI\_ISL\_688021|Original|hCoV-19^^Japan|Human|Pathogen Genomics Center|Pathogen Genomics Center|Sekizuka|Japan

>Spike|hCoV-19/USA/UT-02426/2020|2020-04-21|EPI\_ISL\_470675|Original|hCoV-19^^Utah|Human|Utah Public Health Laboratory|Utah Public Health Laboratory|Young|USA

>Spike|hCoV-19/USA/NM-UNM-00585/2020|2020-07-09|EPI\_ISL\_542997|Original|hCoV-19^^New Mexico|Human|TriCore Reference Laboratories|Center for Global Health|Domman|USA

>Spike|hCoV-19/England/CAMC-A41555/2020|2020-10-04|EPI\_ISL\_609340|Original|hCoV-19^^England|Human|Lighthouse Lab in Cambridge|Wellcome Sanger Institute for the COVID-19 Genomics UK (COG-UK) consortium|Davies|United Kingdom

>Spike|hCoV-19/England/ALDP-B84DD5/2020|2020-11-14|EPI\_ISL\_675952|Original|hCoV-19^^England|Human|Lighthouse Lab in Alderley Park|Wellcome Sanger Institute for the COVID-19 Genomics UK (COG-UK) Consortium|Davies|United Kingdom

>Spike|hCoV-19/Wales/PHWC-48A538/2020|2020-10-31|EPI\_ISL\_652566|Original|hCoV-19^^Wales|Human|Wales Specialist Virology Centre Sequencing lab|COVID-19 Genomics UK (COG-UK) Consortium|Moore|United Kingdom

>Spike|hCoV-19/Australia/VIC14320/2020|2020-07-29|EPI\_ISL\_592449|Original|hCoV-19^^Victoria|Human|Microbiological Diagnostic Unit - Public Health Laboratory (MDU-PHL) |MDU-PHL|Schultz|Australia

>Spike|hCoV-19/Luxembourg/LNS4050425/2020|2020-11-25|EPI\_ISL\_740411|Original|hCoV-19^^Luxembourg|Human|Laboratoire national de sant\u00e9|Laboratoire national de sant\u00e9|Wienecke-Baldacchino|Luxembourg

>Spike|hCoV-19/England/LIVE-1D2983/2020|2020-03-29|EPI\_ISL\_611796|Original|hCoV-19^^England|Human|Liverpool Clinical Laboratories|COVID-19 Genomics UK (COG-UK) Consortium|Haldenby|United Kingdom

>Spike|hCoV-19/Canada/ON-UHTC\_0099/2020|2020-05-10|EPI\_ISL\_526256|Original|hCoV-19^^Ontario|Human|Unity Health Toronto|Ontario Institute for Cancer Research|de Borja|Canada

>Spike|hCoV-19/England/CAMC-BD1F6A/2020|2020-11-28|EPI\_ISL\_702358|Original|hCoV-19^^England|Human|Lighthouse Lab in Cambridge|Wellcome Sanger Institute for the COVID-19 Genomics UK (COG-UK) Consortium|Davies|United Kingdom

>Spike|hCoV-19/Belgium/ULG-10135/2020|2020-04-08|EPI\_ISL\_427380|Original|hCoV-19^^Liege|Human|Department of Clinical Microbiology|GIGA Medical Genomics|Durkin|Belgium

>Spike|hCoV-19/USA/MI-QDX-2187/2020|2020-03-18|EPI\_ISL\_604479|Original|hCoV-19^^Michigan|Human|Quest Diagnostics|Quest Diagnostics|Kagan|USA

>Spike|hCoV-19/USA/NY-NYCPHL-000338/2020|2020-04-09|EPI\_ISL\_631850|Original|hCoV-19^^New York|Human|Jamaica Hospital Medical Center|New York City Public Health Laboratory|Wang|USA

>Spike|hCoV-19/England/ALDP-97C947/2020|2020-07-16|EPI\_ISL\_526305|Original|hCoV-19^^England|Human|University of Birmingham|COVID-19 Genomics UK (COG-UK) Consortium|Loman|United Kingdom

>Spike|hCoV-19/Finland/17MR7cE12/2020|2020-11-17|EPI\_ISL\_757317|Original|hCoV-19^^Uusimaa|Human|Department of Virology and Immunology|Department of Virology|Smura|Finland

>Spike|hCoV-19/Scotland/CVR2851/2020|2020-04-21|EPI\_ISL\_473596|Original|hCoV-19^^Scotland|Human|West of Scotland Specialist Virology Centre|COVID-19 Genomics UK (COG-UK) Consortium|Robertson|United Kingdom

>Spike|hCoV-19/Australia/SAP257/2020|2020-04-01|EPI\_ISL\_468010|Original|hCoV-19^^South Australia|Human|SA Pathology|SA Pathology|Leong|Australia

>Spike|hCoV-19/Australia/NSW2212/2020|2020-03-21|EPI\_ISL\_500667|Original|hCoV-19^^New South Wales|Human|Area of Virology|Area of Virology|Bull|Australia

>Spike|hCoV-19/England/ALDP-95D0CF/2020|2020-06-18|EPI\_ISL\_553566|Original|hCoV-19^^England|Human|Lighthouse Lab in Alderley Park|Wellcome Sanger Institute for the COVID-19 Genomics UK (COG-UK) consortium|Davies|United Kingdom

>Spike|hCoV-19/England/CAMB-1B9ECF/2020|2020-11-05|EPI\_ISL\_651565|Original|hCoV-19^^England|Human|Department of Pathology|COVID-19 Genomics UK (COG-UK) Consortium|Goodfellow|United Kingdom

>Spike|hCoV-19/Denmark/DCGC-20795/2020|2020-12-21|EPI\_ISL\_758771|Original|hCoV-19^^Hovedstaden|Human|Department of Virus and Microbiological Special Diagnostics|Albertsen Lab|Michaelsen|Denmark

>Spike|hCoV-19/Hong Kong/MV2007-00689/2020|2020-08-08|EPI\_ISL\_536411|Original|hCoV-19^^Hong Kong|Human|Medtimes Molecular Laboratory|Medtimes Molecular Laboratory|Chan|China

>Spike|hCoV-19/England/QEUA-96FAAE/2020|2020-08-17|EPI\_ISL\_540322|Original|hCoV-19^^England|Human|Lighthouse Lab in Glasgow|Wellcome Sanger Institute for the COVID-19 Genomics UK (COG-UK) consortium|Davies|United Kingdom

>Spike|hCoV-19/England/LIVE-AB9DF/2020|2020-07-14|EPI\_ISL\_611977|Original|hCoV-19^^England|Human|Liverpool Clinical Laboratories|COVID-19 Genomics UK (COG-UK) Consortium|Haldenby|United Kingdom

>Spike|hCoV-19/USA/CA-CZB-13513/2020|2020-10-28|EPI\_ISL\_672512|Original|hCoV-19^^California|Human|Madera County Department of Public Health|Chan-Zuckerberg Biohub|Bhatt|USA

>Spike|hCoV-19/Austria/CeMM0956/2020|2020-03-29|EPI\_ISL\_583805|Original|hCoV-19^^Austria|Human|Dr. Gernot Walder GmbH|Bergthaler laboratory|Bergthaler|Austria

>Spike|hCoV-19/Denmark/DCGC-2977/2020|2020-08-24|EPI\_ISL\_616739|Original|hCoV-19^^Hovedstaden|Human|Department of Virus and Microbiological Special Diagnostics|Albertsen lab|Michaelsen|Denmark

>Spike|hCoV-19/England/NORT-2953AB/2020|2020-03-31|EPI\_ISL\_488712|Original|hCoV-19^^England|Human|NU-OMICS DNA Sequencing research facility|Wellcome Sanger Institute for the COVID-19 Genomics UK (COG-UK) consortium|Davies|United Kingdom

>Spike|hCoV-19/USA/UT-UPHL-201104003/2020|2020-05-12|EPI\_ISL\_628982|Original|hCoV-19^^Utah|Human|Utah Public Health Laboratory|Utah Public Health Laboratory|Young|USA

>Spike|hCoV-19/Denmark/DCGC-17776/2020|2020-12-14|EPI\_ISL\_749561|Original|hCoV-19^^Syddanmark|Human|Department of Virus and Microbiological Special Diagnostics|Albertsen Lab|Michaelsen|Denmark

>Spike|hCoV-19/England/MILK-975B39/2020|2020-08-20|EPI\_ISL\_552687|Original|hCoV-19^^England|Human|Lighthouse Lab in Milton Keynes|Wellcome Sanger Institute for the COVID-19 Genomics UK (COG-UK) consortium|Davies|United Kingdom

>Spike|hCoV-19/United Arab Emirates/L920702211/2020|2020-04-27|EPI\_ISL\_520740|Original|hCoV-19^^United Arab Emirates|Human|Mohammed Bin Rashid University of Medicine and Health Sciences|Al Jalila Genomics Center|Ramaswamy|United Arab Emirates

>Spike|hCoV-19/USA/TX-HMH-MCoV-10149/2020|2020-07-06|EPI\_ISL\_789344|Original|hCoV-19^^Texas|Human|Houston Methodist Hospital|Houston Methodist Hospital|Long|USA

>Spike|hCoV-19/England/CAMC-B5206E/2020|2020-11-08|EPI\_ISL\_658043|Original|hCoV-19^^England|Human|Lighthouse Lab in Cambridge|Wellcome Sanger Institute for the COVID-19 Genomics UK (COG-UK) Consortium|Davies|United Kingdom

>Spike|hCoV-19/USA/WA-S2653/2020|2020-06-20|EPI\_ISL\_497285|Original|hCoV-19^^Washington|Human|Washington State Department of Health|Seattle Flu Study|Lee|USA

>Spike|hCoV-19/England/CAMB-7A818/2020|2020-04-03|EPI\_ISL\_441249|Original|hCoV-19^^England|Human|Department of Pathology|Wellcome Sanger Institute for the COVID-19 Genomics UK (COG-UK) consortium|Amato|United Kingdom

>Spike|hCoV-19/Hungary/UD-57972/2020|2020-09-02|EPI\_ISL\_671442|Original|hCoV-19^^Borsod-Aba\u00faj-Zempl\u00e9n county|Human|University of Debrecen|National Laboratory of Virology|Kemenesi|Hungary

>Spike|hCoV-19/Denmark/DCGC-21362/2020|2020-12-21|EPI\_ISL\_758129|Original|hCoV-19^^Nordjylland|Human|Department of Virus and Microbiological Special Diagnostics|Albertsen Lab|Michaelsen|Denmark

>Spike|hCoV-19/Denmark/DCGC-20650/2020|2020-12-21|EPI\_ISL\_759275|Original|hCoV-19^^Hovedstaden|Human|Department of Virus and Microbiological Special Diagnostics|Albertsen Lab|Michaelsen|Denmark

>Spike|hCoV-19/USA/LA-CDC-2-3714499/2020|2020-11-30|EPI\_ISL\_751752|Original|hCoV-19^^Louisiana|Human|LA Office of Public Health Laboratories|Genomics and Discovery|Queen|USA

>Spike|hCoV-19/USA/TX-HMH-779/2020|2020-04-07|EPI\_ISL\_545637|Original|hCoV-19^^Texas|Human|Houston Methodist Hospital|Houston Methodist Hospital|Long|USA

>Spike|hCoV-19/Belgium/UGent-22/2020|2020-03-24|EPI\_ISL\_425062|Original|hCoV-19^^Ghent|Human|Lab voor klinische biologie|Onderzoeksgroep Virologie|Lambrechts|Belgium

>Spike|hCoV-19/Brazil/RS-15289/2020|2020-08-14|EPI\_ISL\_729854|Original|hCoV-19^^Rio Grande do Sul|Human|Laboratorio Central de Saude Publica do Estado do Rio Grande do Sul (LACEN-RS)|Laboratory of Respiratory Viruses and Measles|Silva|Brazil

>Spike|hCoV-19/Sweden/20-53564/2020|2020-11-25|EPI\_ISL\_710581|Original|hCoV-19^^Ostergotland|Human|The Public Health Agency of Sweden|The Public Health Agency of Sweden|Svartstr\u00f6m|Sweden

>Spike|hCoV-19/Ireland/KK-NVRL-MPQ56853/2020|2020-04-10|EPI\_ISL\_767804|Original|hCoV-19^^Kilkenny|Human|National Virus Reference Laboratory|Irish Coronavirus Sequencing Consortium - Teagasc Moorepark|Walsh|Ireland

>Spike|hCoV-19/USA/AZ-TG408136/2020|2020-06-12|EPI\_ISL\_694895|Original|hCoV-19^^Arizona|Human|AZ SPHL|TGen North|French|USA

>Spike|hCoV-19/USA/WI-UW-2426/2020|2020-12-11|EPI\_ISL\_754630|Original|hCoV-19^^Wisconsin|Human|University of Wisconsin-Madison AIDS Vaccine Research Laboratories|University of Wisconsin-Madison AIDS Vaccine Research Laboratories|Moreno|USA

>Spike|hCoV-19/Switzerland/BE-UNIBE-181-3245/2020|2020-03-20|EPI\_ISL\_574820|Original|hCoV-19^^Bern|Human|Institute for Infectious Diseases|Institute for Infectious Diseases|Koch|Switzerland

>Spike|hCoV-19/USA/CO-CDPHE-2005080095/2020|2020-05-07|EPI\_ISL\_771202|Original|hCoV-19^^Colorado|Human|Colorado Department of Public Health and Environment|Colorado Department of Public Health and Environment|Bankers|USA

>Spike|hCoV-19/England/MILK-A457C4/2020|2020-10-06|EPI\_ISL\_598646|Original|hCoV-19^^England|Human|Lighthouse Lab in Milton Keynes|Wellcome Sanger Institute for the COVID-19 Genomics UK (COG-UK) consortium|Davies|United Kingdom

>Spike|hCoV-19/England/QEUH-AD3CF9/2020|2020-10-26|EPI\_ISL\_634065|Original|hCoV-19^^England|Human|Lighthouse Lab in Glasgow|Wellcome Sanger Institute for the COVID-19 Genomics UK (COG-UK) consortium|Davies|United Kingdom

>Spike|hCoV-19/Australia/VIC9700/2020|2020-08-22|EPI\_ISL\_565662|Original|hCoV-19^^Victoria|Human|Microbiological Diagnostic Unit - Public Health Laboratory (MDU-PHL)|MDU-PHL|Schultz|Australia

>Spike|hCoV-19/England/QEUH-B7D461/2020|2020-11-14|EPI\_ISL\_741863|Original|hCoV-19^^England|Human|Oxford Viromics|COVID-19 Genomics UK (COG-UK) Consortium|Golubchik|United Kingdom

>Spike|hCoV-19/England/QEUH-B11BF1/2020|2020-11-02|EPI\_ISL\_642253|Original|hCoV-19^^England|Human|Lighthouse Lab in Glasgow|Wellcome Sanger Institute for the COVID-19 Genomics UK (COG-UK) Consortium|Davies|United Kingdom

>Spike|hCoV-19/USA/TX-DSHS-0915/2020|2020-06-14|EPI\_ISL\_602213|Original|hCoV-19^^Texas|Human|Texas Department of State Health Services|Texas Department of State Health Services|Rahman|USA

>Spike|hCoV-19/Belgium/ULG-0182/2020|2020-03-23|EPI\_ISL\_447126|Original|hCoV-19^^Liege|Human|Department of Clinical Microbiology|GIGA Medical Genomics|Durkin|Belgium

>Spike|hCoV-19/USA/TX-HMH-MCoV-12479/2020|2020-09-28|EPI\_ISL\_790359|Original|hCoV-19^^Texas|Human|Houston Methodist Hospital|Houston Methodist Hospital|Long|USA

>Spike|hCoV-19/USA/HI-H200603/2020|2020-11-23|EPI\_ISL\_753129|Original|hCoV-19^^Hawaii|Human|State Laboratories Division|State Laboratories Division|Sultana|USA

>Spike|hCoV-19/England/LOND-1264C01/2020|2020-11-23|EPI\_ISL\_724546|Original|hCoV-19^^England|Human|University College London|COVID-19 Genomics UK (COG-UK) Consortium|Roy|United Kingdom

>Spike|hCoV-19/England/QEUEH-B6B69D/2020|2020-11-11|EPI\_ISL\_662591|Original|hCoV-19^^England|Human|Lighthouse Lab in Glasgow|Wellcome Sanger Institute for the COVID-19 Genomics UK (COG-UK) Consortium|Davies|United Kingdom

>Spike|hCoV-19/Wales/PHWC-26A51/2020|2020-03-30|EPI\_ISL\_422051|Original|hCoV-19^^Wales|Human|Wales Specialist Virology Centre|Public Health Wales Microbiology Cardiff|Moore|United Kingdom

>Spike|hCoV-19/England/CAMC-A57932/2020|2020-10-08|EPI\_ISL\_597478|Original|hCoV-19^^England|Human|Lighthouse Lab in Cambridge|Wellcome Sanger Institute for the COVID-19 Genomics UK (COG-UK) consortium|Davies|United Kingdom

>Spike|hCoV-19/France/IDF-221-61/2020|2020-03-18|EPI\_ISL\_469283|Vero E6|hCoV-19^^\u00cele-de-France|Human|Service de Virologie H\u00f4pital Saint-Louis|Laboratory Cell Biology of Viral Infection-INSERM unit 944|Meertens|France

>Spike|hCoV-19/Scotland/EDB4671/2020|2020-05-08|EPI\_ISL\_449319|Original|hCoV-19^^Scotland|Human|Virology Department|COVID-19 Genomics UK (COG-UK) Consortium|Williams|United Kingdom

>Spike|hCoV-19/England/NORT-28AE7B/2020|2020-04-16|EPI\_ISL\_492950|Original|hCoV-19^^England|Human|NU-OMICS DNA Sequencing research facility|Wellcome Sanger Institute for the COVID-19 Genomics UK (COG-UK) consortium|Davies|United Kingdom

>Spike|hCoV-19/England/QEUEH-A8C2A2/2020|2020-10-17|EPI\_ISL\_643252|Original|hCoV-19^^England|Human|Lighthouse Lab in Glasgow|Wellcome Sanger Institute for the COVID-19 Genomics UK (COG-UK) Consortium|Davies|United Kingdom

>Spike|hCoV-19/France/ARA-SC037/2020|2020-03-29|EPI\_ISL\_666660|Original|hCoV-19^^Auvergne-Rh\u00f4ne-Alpes|Human|Laboratoire du Centre Hospitalier Annecy Genevois|CNR Virus des Infections Respiratoires - France SUD|Bal|France

>Spike|hCoV-19/Luxembourg/LNS5186473/2020|2020-11-28|EPI\_ISL\_744199|Original|hCoV-19^^Luxembourg|Human|Laboratoire national de sant\u00e9|Laboratoire national de sant\u00e9|Wienecke-Baldacchino|Luxembourg

>Spike|hCoV-19/Netherlands/NH-RIVM-20926/2020|2020-10-01|EPI\_ISL\_790953|Original|hCoV-19^^Noord-Holland|Human|Dutch COVID-19 response team|National Institute for Public Health and the Environment (RIVM)|Meijer|Netherlands

>Spike|hCoV-19/Japan/PG-0302/2020|2020-03-29|EPI\_ISL\_479978|Original|hCoV-19^^HokurikuShinsyu|Human|Fukui Prefectural Institute of Public Health and Environmental Science|Pathogen Genomics Center|Sekizuka|Japan

>Spike|hCoV-19/USA/WI-UW-1018/2020|2020-07-21|EPI\_ISL\_516444|Original|hCoV-19^^Wisconsin|Human|University of Wisconsin-Madison AIDS Vaccine Research Laboratories|University of Wisconsin-Madison AIDS Vaccine Research Laboratories|Baczenas|USA

>Spike|hCoV-19/England/MILK-B94B9C/2020|2020-11-14|EPI\_ISL\_673833|Original|hCoV-19^^England|Human|Lighthouse Lab in Milton Keynes|Wellcome Sanger Institute for the COVID-19 Genomics UK (COG-UK) Consortium|Davies|United Kingdom

>Spike|hCoV-19/England/BIRM-679B1/2020|2020-11-04|EPI\_ISL\_650416|Original|hCoV-19^^England|Human|University of Birmingham|COVID-19 Genomics UK (COG-UK) Consortium|Loman|United Kingdom

>Spike|hCoV-19/England/QEUEH-9E49FF/2020|2020-09-23|EPI\_ISL\_579812|Original|hCoV-19^^England|Human|Lighthouse Lab in Glasgow|Wellcome Sanger Institute for the COVID-19 Genomics UK (COG-UK) consortium|Davies|United Kingdom

>Spike|hCoV-19/Norway/4599/2020|2020-09-30|EPI\_ISL\_635064|Original|hCoV-19^^Vestland|Human|Foerde Hospital|Norwegian Institute of Public Health|Vollan|Norway

>Spike|hCoV-19/Denmark/DCGC-4541/2020|2020-09-21|EPI\_ISL\_621337|Original|hCoV-19^^Sjaelland|Human|Department of Virus and Microbiological Special Diagnostics|Albertsen lab|Michaelsen|Denmark

>Spike|hCoV-19/Japan/PG-8436/2020|2020-09-00|EPI\_ISL\_687535|Original|hCoV-19^^Japan|Human|Fukuoka Institute of Health and Environmental Sciences|Pathogen Genomics Center|Sekizuka|Japan

>Spike|hCoV-19/Scotland/EDB2678/2020|2020-04-26|EPI\_ISL\_439261|Original|hCoV-19^^Scotland|Human|Virology Department|COVID-19 Genomics UK (COG-UK) Consortium|Williams|United Kingdom

>Spike|hCoV-19/Denmark/DCGC-5794/2020|2020-09-28|EPI\_ISL\_620981|Original|hCoV-19^^Syddanmark|Human|Department of Virus and Microbiological Special Diagnostics|Albertsen lab|Michaelsen|Denmark

>Spike|hCoV-19/Wales/PHWC-481B8A/2020|2020-10-16|EPI\_ISL\_613150|Original|hCoV-19^^Wales|Human|Wales Specialist Virology Centre Sequencing lab|COVID-19 Genomics UK (COG-UK) Consortium|Moore|United Kingdom

>Spike|hCoV-19/England/ALDP-A6FF53/2020|2020-10-15|EPI\_ISL\_608233|Original|hCoV-19^^England|Human|Lighthouse Lab in Alderley Park|Wellcome Sanger Institute for the COVID-19 Genomics UK (COG-UK) consortium|Davies|United Kingdom

>Spike|hCoV-19/USA/CA-IGI-0758/2020|2020-08-06|EPI\_ISL\_756337|Original|hCoV-19^^California|Human|Innovative Genomics Institute|Innovative Genomics Institute|Wyman|USA

>Spike|hCoV-19/Gambia/GC19-3429/2020|2020-07-27|EPI\_ISL\_561178|Original|hCoV-19^^Kombo|Human|MRCG at LSHTM Genomics lab|MRCG at LSHTM Genomics lab|Sesay|Gambia

>Spike|hCoV-19/Ireland/LK-UHL13/2020|2020-03-31|EPI\_ISL\_681728|Original|hCoV-19^^Limerick|Human|University Hospital Limerick|Irish Coronavirus Sequencing Consortium - Teagasc Moorepark|Walsh|Ireland

>Spike|hCoV-19/England/MILK-A7DD49/2020|2020-10-13|EPI\_ISL\_606509|Original|hCoV-19^^England|Human|Lighthouse Lab in Milton Keynes|Wellcome Sanger Institute for the COVID-19 Genomics UK (COG-UK) consortium|Davies|United Kingdom

>Spike|hCoV-19/USA/TX-DSHS-2045/2020|2020-11-23|EPI\_ISL\_766659|Original|hCoV-19^^Texas|Human|Texas Department of State Health Services|Texas Department of State Health Services|Rahman|USA

>Spike|hCoV-19/England/ALDP-5B4DB4/2020|2020-06-19|EPI\_ISL\_558867|Original|hCoV-19^^England|Human|Lighthouse Lab in Alderley Park|Wellcome Sanger Institute for the COVID-19 Genomics UK (COG-UK) consortium|Davies|United Kingdom

>Spike|hCoV-19/Sichuan/SC-MY-058/2020|2020-02-02|EPI\_ISL\_451324|Original|hCoV-19^^Sichuan|Human|West China Hospital of Sichuan University|State Key Laboratory of Biotherapy of Sichuan University|Tang|China

>Spike|hCoV-19/USA/NY-PV09397/2020|2020-03-19|EPI\_ISL\_450078|Original|hCoV-19^^New York|Human|MSSS Clinical Microbiology Laboratories|MSSS Pathogen Surveillance Program|van Bakel|USA

>Spike|hCoV-19/Scotland/EDB8114/2020|2020-10-05|EPI\_ISL\_594829|Original|hCoV-19^^Scotland|Human|Virology Department|COVID-19 Genomics UK (COG-UK) Consortium|McHugh|United Kingdom

>Spike|hCoV-19/USA/TX-DSHS-1323/2020|2020-03-31|EPI\_ISL\_654906|Original|hCoV-19^^Texas|Human|Texas Department of State Health Services|Texas Department of State Health Services|Rahman|USA

>Spike|hCoV-19/England/GSTT-265E140/2020|2020-03-31|EPI\_ISL\_484158|Original|hCoV-19^^England|Human|Centre for Clinical Infection and Diagnostics Research and Genomics Innovation Unit|COVID-19 Genomics UK (COG-UK) Consortium|Awan|United Kingdom

>Spike|hCoV-19/England/CAMC-9B1AF8/2020|2020-09-04|EPI\_ISL\_566661|Original|hCoV-19^^England|Human|Lighthouse Lab in Cambridge|Wellcome Sanger Institute for the COVID-19 Genomics UK (COG-UK) consortium|Davies|United Kingdom

>Spike|hCoV-19/Wales/PHWC-492227/2020|2020-11-17|EPI\_ISL\_706831|Original|hCoV-19^^Wales|Human|Originating lab|COVID-19 Genomics UK (COG-UK) Consortium|Moore|United Kingdom

>Spike|hCoV-19/England/ALDP-5D3696/2020|2020-06-19|EPI\_ISL\_558435|Original|hCoV-19^^England|Human|Lighthouse Lab in Alderley Park|Wellcome Sanger Institute for the COVID-19 Genomics UK (COG-UK) consortium|Davies|United Kingdom

>Spike|hCoV-19/USA/NY-NYCPHL-001346/2020|2020-11-13|EPI\_ISL\_683976|Original|hCoV-19^^New York|Human|DOHMH Central Harlem|New York City Public Health Laboratory|Wang|USA

>Spike|hCoV-19/England/ALDP-9FCA88/2020|2020-10-01|EPI\_ISL\_587888|Original|hCoV-19^^England|Human|Lighthouse Lab in Alderley Park|Wellcome Sanger Institute for the COVID-19 Genomics UK (COG-UK) consortium|Davies|United Kingdom

>Spike|hCoV-19/England/ALDP-A92B44/2020|2020-10-19|EPI\_ISL\_611001|Original|hCoV-19^^England|Human|Lighthouse Lab in Alderley Park|Wellcome Sanger Institute for the COVID-19 Genomics UK (COG-UK) consortium|Davies|United Kingdom

>Spike|hCoV-19/Wales/PHWC-4A4FD0/2020|2020-12-11|EPI\_ISL\_764807|Original|hCoV-19^^Wales|Human|Wales Specialist Virology Centre Sequencing lab|COVID-19 Genomics UK (COG-UK) Consortium|Moore|United Kingdom

>Spike|hCoV-19/Norway/5859/2020|2020-11-14|EPI\_ISL\_775340|Original|hCoV-19^^Viken|Human|Ostfold Hospital Trust - Kalnes|Norwegian Institute of Public Health|Vollan|Norway

>Spike|hCoV-19/France/PAC-IHU-1574/2020|2020-09-02|EPI\_ISL\_569207|Original|hCoV-19^^Provence-Alpes-C\u00f4te-d\u00a9Azur|Human|MEPHI|MEPHI|Levasseur|France

>Spike|hCoV-19/Spain/CT-IBV-005631/2020|2020-04-22|EPI\_ISL\_508664|Original|hCoV-19^^Catalunya|Human|Departamento de Microbiolog\u00eda|SeqCOVID-SPAIN consortium/IBV (CSIC) |Comas|Spain

>Spike|hCoV-19/England/20124021402/2020|2020-03-17|EPI\_ISL\_418704|Original|hCoV-19^^England|Human|Respiratory Virus Unit|Respiratory Virus Unit|Platt|United Kingdom

>Spike|hCoV-19/Belgium/ULG-11066/2020|2020-12-14|EPI\_ISL\_737317|Original|hCoV-19^^Li\u00e8ge|Human|Department of Clinical Microbiology|GIGA Medical Genomics|Durkin|Belgium

>Spike|hCoV-19/Equatorial Guinea/4361/2020|2020-04-28|EPI\_ISL\_648335|Original|hCoV-19^^Bioko Norte|Human|Laboratorio de Investigaciones de Baney|University Hospital Basel|Hosch|Equatorial Guinea

>Spike|hCoV-19/Saudi Arabia/KAIMRC13/2020|2020-03-18|EPI\_ISL\_507019|unknown|hCoV-19^^Saudi Arabia|Human|unknown|Infectious Diseases Research|Submitter|Saudi Arabia

>Spike|hCoV-19/Scotland/EDB5431/2020|2020-04-08|EPI\_ISL\_487819|Original|hCoV-19^^Scotland|Human|Virology Department|Wellcome Sanger Institute for the COVID-19 Genomics UK (COG-UK) consortium|Davies|United Kingdom

>Spike|hCoV-19/England/CAMC-BC1FF4/2020|2020-11-22|EPI\_ISL\_705170|Original|hCoV-19^^England|Human|Lighthouse Lab in Cambridge|Wellcome Sanger Institute for the COVID-19 Genomics UK (COG-UK) Consortium|Davies|United Kingdom

>Spike|hCoV-19/England/CAMB-72221/2020|2020-03-28|EPI\_ISL\_439622|Original|hCoV-19^^England|Human|Department of Pathology|Wellcome Sanger Institute for the COVID-19 Genomics UK (COG-UK) consortium|Amato|United Kingdom

>Spike|hCoV-19/Japan/PG-3637/2020|2020-04-00|EPI\_ISL\_691890|Original|hCoV-19^^Japan|Human|Pathogen Genomics Center|Pathogen Genomics Center|Sekizuka|Japan

>Spike|hCoV-19/Belgium/ULG-0536/2020|2020-03-24|EPI\_ISL\_447133|Original|hCoV-19^^Liege|Human|Department of Clinical Microbiology|GIGA Medical Genomics|Durkin|Belgium

>Spike|hCoV-19/Brazil/SP-L11-CD93/2020|2020-03-25|EPI\_ISL\_476204|Original|hCoV-19^^S\u00e3o Paulo|Human|Hospital da Cl\u00ednicas da Faculdade de Medicina da Universidade de S\u00e3o Paulo|Instituto de Medicina Tropical da Univesidade de S\u00e3o Paulo|Sabino|Brazil

>Spike|hCoV-19/England/20120007504/2020|2020-03-15|EPI\_ISL\_465145|Original|hCoV-19^^England|Human|Respiratory Virus Unit|Respiratory Virus Unit|Platt|United Kingdom

>Spike|hCoV-19/Denmark/DCGC-20150/2020|2020-12-07|EPI\_ISL\_747639|Original|hCoV-19^^Syddanmark|Human|Department of Virus and Microbiological Special Diagnostics|Albertsen Lab|Michaelsen|Denmark

>Spike|hCoV-19/England/QEUEH-B412C6/2020|2020-11-08|EPI\_ISL\_658421|Original|hCoV-19^^England|Human|Lighthouse Lab in Glasgow|Wellcome Sanger Institute for the COVID-19 Genomics UK (COG-UK) Consortium|Davies|United Kingdom

>Spike|hCoV-19/Colombia/BOL-INS-94411/2020|2020-03-30|EPI\_ISL\_498161|Original|hCoV-19^^Bolívar|Human|Instituto Nacional de Salud|Instituto Nacional de Salud|Franco-Mu\u00f1oz|Colombia

>Spike|hCoV-19/USA/TX-HMH-MCoV-18903/2020|2020-11-25|EPI\_ISL\_785210|Original|hCoV-19^^Texas|Human|Houston Methodist Hospital|Houston Methodist Hospital|Long|USA

>Spike|hCoV-19/Netherlands/un-EMC-742/2020|2020-05-06|EPI\_ISL\_523497|Original|hCoV-19^^Netherlands|Human|Dutch COVID-19 response team|Erasmus Medical Center|Oude Munnink|Netherlands



>Spike|hCoV-19/Wales/MILK-9E32B9/2020|2020-09-20|EPI\_ISL\_581284|Original|hCoV-19^^Wales|Human|Lighthouse Lab in Milton Keynes|Wellcome Sanger Institute for the COVID-19 Genomics UK (COG-UK) consortium|Davies|United Kingdom

>Spike|hCoV-19/Luxembourg/LNS2424302/2020|2020-10-12|EPI\_ISL\_740120|Original|hCoV-19^^Luxembourg|Human|Laboratoire national de sant\u00e9|Laboratoire national de sant\u00e9|Wienecke-Baldacchino|Luxembourg

>Spike|hCoV-19/England/ALDP-C48D36/2020|2020-12-12|EPI\_ISL\_736613|Original|hCoV-19^^England|Human|Lighthouse Lab in Alderley Park|Wellcome Sanger Institute for the COVID-19 Genomics UK (COG-UK) Consortium|Davies|United Kingdom

>Spike|hCoV-19/India/GJ-GBRC2/2020|2020-04-13|EPI\_ISL\_435049|Original|hCoV-19^^Gujarat|Human|B.J. Medical College and Civil hospital|Gujarat Biotechnology Research Centre|Joshi|India

>Spike|hCoV-19/USA/LA-EVTL1108/2020|2020-12-04|EPI\_ISL\_768378|Original|hCoV-19^^Louisiana|Human|LSUHS Emerging Viral Threat Laboratory|Microbial Genome Sequencing Center|Kamil|USA

>Spike|hCoV-19/England/ALDP-B632DD/2020|2020-11-08|EPI\_ISL\_656543|Original|hCoV-19^^England|Human|Lighthouse Lab in Alderley Park|Wellcome Sanger Institute for the COVID-19 Genomics UK (COG-UK) Consortium|Davies|United Kingdom

>Spike|hCoV-19/Wales/PHWC-4A15B3/2020|2020-12-11|EPI\_ISL\_743695|Original|hCoV-19^^Wales|Human|Wales Specialist Virology Centre Sequencing lab|COVID-19 Genomics UK (COG-UK) Consortium|Moore|United Kingdom

>Spike|hCoV-19/Switzerland/ZH-ETHZ-130026/2020|2020-05-12|EPI\_ISL\_467014|Original|hCoV-19^^Zurich|Human|Viollier AG|Department of Biosystems Science and Engineering|Nadeau|Switzerland

>Spike|hCoV-19/USA/NY-NYCPHL-001085/2020|2020-10-19|EPI\_ISL\_671678|Original|hCoV-19^^New York|Human|DOHMH Fort Greene|New York City Public Health Laboratory|Wang|USA

>Spike|hCoV-19/Wales/PHWC-48F023/2020|2020-11-04|EPI\_ISL\_681036|Original|hCoV-19^^Wales|Human|Wales Specialist Virology Centre Sequencing lab|COVID-19 Genomics UK (COG-UK) Consortium|Moore|United Kingdom

>Spike|hCoV-19/USA/TX-HMH-4683/2020|2020-06-22|EPI\_ISL\_544254|Original|hCoV-19^^Texas|Human|Houston Methodist Hospital|Houston Methodist Hospital|Long|USA

>Spike|hCoV-19/India/KA-InStem-NCBS-0002/2020|2020-05-26|EPI\_ISL\_477205|Original|hCoV-19^^Karnataka|Human|Institute for Stem Cell Science and Regenerative Medicine|National Centre for Biological Sciences|Ali|India

>Spike|hCoV-19/USA/FL-BPHL-0519/2020|2020-06-16|EPI\_ISL\_508722|Original|hCoV-19^^Florida|Human|Florida Bureau of Public Health Laboratories|Florida Bureau of Public Health Laboratories|Blanton|USA

>Spike|hCoV-19/England/MILK-6F5A0A/2020|2020-06-30|EPI\_ISL\_557410|Original|hCoV-19^^England|Human|Lighthouse Lab in Milton Keynes|Wellcome Sanger Institute for the COVID-19 Genomics UK (COG-UK) consortium|Davies|United Kingdom

>Spike|hCoV-19/Germany/HH-hpi-pl856/2020|2020-03-23|EPI\_ISL\_776205|Original|hCoV-19^^Hamburg|Human|University Medical Center Hamburg Eppendorf|Heinrich Pette Institute|Robitaille|Germany

>Spike|hCoV-19/England/LIVE-AB896/2020|2020-06-18|EPI\_ISL\_612441|Original|hCoV-19^^England|Human|Liverpool Clinical Laboratories|COVID-19 Genomics UK (COG-UK) Consortium|Haldenby|United Kingdom

>Spike|hCoV-19/Switzerland/BS-UHB-42185657/2020|2020-03-11|EPI\_ISL\_527987|Original|hCoV-19^^Basel-Stadt|Human|University Hospital Basel|University Hospital Basel|Roloff Handschin|Switzerland

>Spike|hCoV-19/Wuhan/HB-WHCM-116/2020|2020-02-26|EPI\_ISL\_454996|Original|hCoV-19^^Hubei|Human|Wuhan Chain Medical Labs (CMLabs)|State Key Laboratory of Biotherapy of Sichuan University|Tang|China

>Spike|hCoV-19/England/MILK-A19125/2020|2020-09-30|EPI\_ISL\_627487|Original|hCoV-19^^England|Human|Wales Specialist Virology Centre Sequencing lab|COVID-19 Genomics UK (COG-UK) Consortium|Moore|United Kingdom

>Spike|hCoV-19/DRC/11631/2020|2020-05-25|EPI\_ISL\_527568|Original|hCoV-19^^Kinshasa|Human|Viral Respiratory Lab|Pathogen Sequencing Lab|Lokilo|Democratic Republic of the Congo

>Spike|hCoV-19/Scotland/CVR4346/2020|2020-09-11|EPI\_ISL\_572794|Original|hCoV-19^^Scotland|Human|West of Scotland Specialist Virology Centre|COVID-19 Genomics UK (COG-UK) Consortium|Robertson|United Kingdom

>Spike|hCoV-19/Luxembourg/LNS9803660/2020|2020-10-30|EPI\_ISL\_744988|Original|hCoV-19^^Luxembourg|Human|Laboratoire national de sant\u00e9|Laboratoire national de sant\u00e9|Wienecke-Baldacchino|Luxembourg

>Spike|hCoV-19/USA/TX-HMH-MCoV-11944/2020|2020-09-10|EPI\_ISL\_790142|Original|hCoV-19^^Texas|Human|Houston Methodist Hospital|Houston Methodist Hospital|Long|USA

>Spike|hCoV-19/Australia/VIC1388/2020|2020-04-14|EPI\_ISL\_562080|Original|hCoV-19^^Victoria|Human|Victorian Infectious Diseases Reference Laboratory (VIDRL)|VIDRL and MDU-PHL|Schultz|Australia

>Spike|hCoV-19/England/LIVE-9F22E/2020|2020-05-04|EPI\_ISL\_453438|Original|hCoV-19^^England|Human|Liverpool Clinical Laboratories|COVID-19 Genomics UK (COG-UK) Consortium|Haldenby|United Kingdom

>Spike|hCoV-19/Japan/PG-1865/2020|2020-05-00|EPI\_ISL\_685471|Original|hCoV-19^^Japan|Human|Tokyo Metropolitan Institute of Public Health|Pathogen Genomics Center|Sekizuka|Japan

>Spike|hCoV-19/Netherlands/ZH-EMC-359/2020|2020-08-01|EPI\_ISL\_523699|Original|hCoV-19^^Zuid Holland|Human|Dutch COVID-19 response team|Erasmus Medical Center|Oude Munnink|Netherlands

>Spike|hCoV-19/England/MILK-A91680/2020|2020-10-16|EPI\_ISL\_705974|Original|hCoV-19^^England|Human|Oxford Viromics|COVID-19 Genomics UK (COG-UK) Consortium|Golubchik|United Kingdom

>Spike|hCoV-19/USA/AR-CDC-4213/2020|2020-07-11|EPI\_ISL\_527635|Original|hCoV-19^^Arkansas|Human|AR Dept. of Health-Public Health Lab|Pathogen Discovery|Queen|USA

>Spike|hCoV-19/England/GSTT-265E4DE/2020|2020-03-31|EPI\_ISL\_484210|Original|hCoV-19^^England|Human|Centre for Clinical Infection and Diagnostics Research and Genomics Innovation Unit|COVID-19 Genomics UK (COG-UK) Consortium|Awan|United Kingdom

>Spike|hCoV-19/Denmark/DCGC-9379/2020|2020-11-16|EPI\_ISL\_668519|Original|hCoV-19^^Midtjylland|Human|Department of Virus and Microbiological Special Diagnostics|Albertsen Lab|Michaelsen|Denmark

>Spike|hCoV-19/Denmark/DCGC-17747/2020|2020-12-14|EPI\_ISL\_751183|Original|hCoV-19^^Syddanmark|Human|Department of Virus and Microbiological Special Diagnostics|Albertsen Lab|Michaelsen|Denmark

>Spike|hCoV-19/England/ALDP-4F7114/2020|2020-06-24|EPI\_ISL\_559124|Original|hCoV-19^^England|Human|Lighthouse Lab in Alderley Park|Wellcome Sanger Institute for the COVID-19 Genomics UK (COG-UK) consortium|Davies|United Kingdom

>Spike|hCoV-19/USA/CA-CSMC86/2020|2020-04-04|EPI\_ISL\_475702|Original|hCoV-19^^California|Human|Cedars-Sinai Medical Center|Cedars-Sinai Medical Center|Zhang|USA

>Spike|hCoV-19/Northern Ireland/NIRE-102340/2020|2020-03-22|EPI\_ISL\_453485|Original|hCoV-19^^Northern Ireland|Human|Regional Virus Laboratory|COVID-19 Genomics UK (COG-UK) Consortium|Fairley|United Kingdom

>Spike|hCoV-19/England/CAMC-BBBD8A/2020|2020-11-21|EPI\_ISL\_724105|Original|hCoV-19^^England|Human|Northumbria University / South Tees Hospitals NHS Foundation Trust / North Cumbria Integrated Care NHS Foundation Trust / North Tees and Hartlepool NHS Foundation Trust / Newcastle Hospitals NHS Foundation Trust|COVID-19 Genomics UK (COG-UK) Consortium|Bashton|United Kingdom

>Spike|hCoV-19/United Arab Emirates/0484/2020|2020-05-17|EPI\_ISL\_698652|Original|hCoV-19^^Abu Dhabi|Human|Group 42 (G42) Healthcare|G42 Healthcare|Ogrodzki|United Arab Emirates

>Spike|hCoV-19/USA/WI-WSLH-200679/2020|2020-08-19|EPI\_ISL\_631436|Original|hCoV-19^^Wisconsin|Human|Wisconsin State Laboratory of Hygiene Communicable Disease Division|Wisconsin State Laboratory of Hygiene Communicable Disease Division|Florek|USA

>Spike|hCoV-19/USA/ID-QDX-937/2020|2020-03-22|EPI\_ISL\_571599|Original|hCoV-19^^Idaho|Human|Quest Diagnostics|Quest Diagnostics|Kagan|USA

>Spike|hCoV-19/Singapore/975/2020|2020-03-23|EPI\_ISL\_548983|Original|hCoV-19^^Singapore|Human|National Public Health Laboratory|National Public Health Laboratory|Mak|Singapore

>Spike|hCoV-19/USA/AZ-TG664552/2020|2020-04-18|EPI\_ISL\_696168|Original|hCoV-19^^Arizona|Human|Sonora Quest Laboratories|TGen North|French|USA

>Spike|hCoV-19/Netherlands/ZH-EMC-807/2020|2020-10-14|EPI\_ISL\_632686|Original|hCoV-19^^Zuid Holland|Human|Dutch COVID-19 response team|Erasmus Medical Center|Oude Munnink|Netherlands

>Spike|hCoV-19/England/BRIS-126C78/2020|2020-04-10|EPI\_ISL\_458918|Original|hCoV-19^^England|Human|PHE South West Regional Laboratory|Wellcome Sanger Institute for the COVID-19 Genomics UK (COG-UK) consortium|Davies|United Kingdom

>Spike|hCoV-19/Australia/VIC12868/2020|2020-07-27|EPI\_ISL\_592096|Original|hCoV-19^^Victoria|Human|Microbiological Diagnostic Unit - Public Health Laboratory (MDU-PHL) |MDU-PHL|Schultz|Australia

>Spike|hCoV-19/England/SHEF-D1369/2020|2020-04-21|EPI\_ISL\_453765|Original|hCoV-19^^England|Human|Virology Department|COVID-19 Genomics UK (COG-UK) Consortium|de Silva|United Kingdom

>Spike|hCoV-19/Belgium/ULG-10520/2020|2020-10-23|EPI\_ISL\_626263|Original|hCoV-19^^Li\u00e8ge|Human|Department of Clinical Microbiology|GIGA Medical Genomics|Durkin|Belgium

>Spike|hCoV-19/England/QEUH-BA0131/2020|2020-11-18|EPI\_ISL\_719704|Original|hCoV-19^^England|Human|Lighthouse Lab in Glasgow|Wellcome Sanger Institute for the COVID-19 Genomics UK (COG-UK) Consortium|Davies|United Kingdom

>Spike|hCoV-19/Switzerland/SZ-ETHZ-100097/2020|2020-03-13|EPI\_ISL\_451689|Original|hCoV-19^^Schwyz|Human|Viollier AG|Department of Biosystems Science and Engineering|Nadeau|Switzerland

>Spike|hCoV-19/Wales/PHWC-4951BE/2020|2020-11-19|EPI\_ISL\_726309|Original|hCoV-19^^Wales|Human|Originating lab|COVID-19 Genomics UK (COG-UK) Consortium|Moore|United Kingdom

>Spike|hCoV-19/Wales/PHWC-498300/2020|2020-12-01|EPI\_ISL\_727055|Original|hCoV-19^^Wales|Human|Originating lab|COVID-19 Genomics UK (COG-UK) Consortium|Moore|United Kingdom

>Spike|hCoV-19/Canada/ON-S1779/2020|2020-11-08|EPI\_ISL\_755777|Original|hCoV-19^^Ontario|Human|Toronto Invasive Bacterial Diseases Network|McMaster University|McArthur|Canada

>Spike|hCoV-19/USA/WI-UW-243/2020|2020-03-28|EPI\_ISL\_428339|Original|hCoV-19^^Wisconsin|Human|University of Wisconsin-Madison AIDS Vaccine Research Laboratories|University of Wisconsin-Madison AIDS Vaccine Research Laboratories|Moreno|USA

>Spike|hCoV-19/England/MILK-B88B40/2020|2020-11-14|EPI\_ISL\_675888|Original|hCoV-19^^England|Human|Lighthouse Lab in Milton Keynes|Wellcome Sanger Institute for the COVID-19 Genomics UK (COG-UK) Consortium|Davies|United Kingdom

>Spike|hCoV-19/France/PAC-IHU-0366/2020|2020-03-22|EPI\_ISL\_569475|Original|hCoV-19^^Provence-Alpes-C\u00f4te-d\u0201Azur|Human|MEPHI|MEPHI|Levasseur|France

>Spike|hCoV-19/USA/WI-UW-695/2020|2020-06-29|EPI\_ISL\_491373|Original|hCoV-19^^Wisconsin|Human|University of Wisconsin-Madison AIDS Vaccine Research Laboratories|University of Wisconsin-Madison AIDS Vaccine Research Laboratories|Baczenas|USA

>Spike|hCoV-19/Canada/NS-NML-954/2020|2020-03-27|EPI\_ISL\_579584|Original|hCoV-19^^Nova Scotia|Human|QEII Health Sciences Centre|National Microbiology Laboratory (NML) |Majer|Canada

>Spike|hCoV-19/Austria/CeMM0392/2020|2020-03-19|EPI\_ISL\_475832|Original|hCoV-19^^Austria|Human|Austrian Agency for Health and Food Safety (AGES) |Bergthaler laboratory|Bergthaler|Austria

>Spike|hCoV-19/England/QEUH-9B5247/2020|2020-09-03|EPI\_ISL\_590440|Original|hCoV-19^^England|Human|Lighthouse Lab in Glasgow|Wellcome Sanger Institute for the COVID-19 Genomics UK (COG-UK) consortium|Davies|United Kingdom

>Spike|hCoV-19/USA/TX-HMH-MCoV-15995/2020|2020-07-10|EPI\_ISL\_785679|Original|hCoV-19^^Texas|Human|Houston Methodist Hospital|Houston Methodist Hospital|Long|USA

>Spike|hCoV-19/Wales/PHWC-160BB1/2020|2020-05-23|EPI\_ISL\_473025|Original|hCoV-19^^Wales|Human|Wales Specialist Virology Centre Sequencing lab|COVID-19 Genomics UK (COG-UK) Consortium|Moore|United Kingdom

>Spike|hCoV-19/England/NORW-F4096/2020|2020-11-18|EPI\_ISL\_725186|Original|hCoV-19^^England|Human|Quadram Institute Bioscience|COVID-19 Genomics UK (COG-UK) Consortium|Alikhan|United Kingdom

>Spike|hCoV-19/Denmark/DCGC-20274/2020|2020-11-30|EPI\_ISL\_747755|Original|hCoV-19^^Denmark|Human|Department of Virus and Microbiological Special Diagnostics|Albertsen Lab|Michaelsen|Denmark

>Spike|hCoV-19/Wales/PHWC-49539A/2020|2020-11-21|EPI\_ISL\_726336|Original|hCoV-19^^Wales|Human|Originating lab|COVID-19 Genomics UK (COG-UK) Consortium|Moore|United Kingdom

>Spike|hCoV-19/England/ALDP-954FF8/2020|2020-06-11|EPI\_ISL\_553630|Original|hCoV-19^^England|Human|Lighthouse Lab in Alderley Park|Wellcome Sanger Institute for the COVID-19 Genomics UK (COG-UK) consortium|Davies|United Kingdom

>Spike|hCoV-19/Portugal/PT0922/2020|2020-03-27|EPI\_ISL\_511179|Original|hCoV-19^^Portugal|Human|Instituto Nacional de Saude (INSA)|Instituto Nacional de Saude (INSA)|Borges|Portugal

>Spike|hCoV-19/Scotland/EDB3106/2020|2020-04-04|EPI\_ISL\_487975|Original|hCoV-19^^Scotland|Human|Virology Department|Wellcome Sanger Institute for the COVID-19 Genomics UK (COG-UK) consortium|Davies|United Kingdom

>Spike|hCoV-19/England/MILK-B95542/2020|2020-11-13|EPI\_ISL\_673645|Original|hCoV-19^^England|Human|Lighthouse Lab in Milton Keynes|Wellcome Sanger Institute for the COVID-19 Genomics UK (COG-UK) Consortium|Davies|United Kingdom

>Spike|hCoV-19/England/QEUA-B9EAA4/2020|2020-11-18|EPI\_ISL\_719834|Original|hCoV-19^^England|Human|Lighthouse Lab in Glasgow|Wellcome Sanger Institute for the COVID-19 Genomics UK (COG-UK) Consortium|Davies|United Kingdom

>Spike|hCoV-19/Czech Republic/NRL\_4039/2020|2020-03-18|EPI\_ISL\_491093|Original|hCoV-19^^Zlin|Human|The National Institute of Public Health|The National Institute of Public Health and State Veterinary Institute Prague|Nagy|Czech Republic

>Spike|hCoV-19/USA/TX-HMH-MCoV-13877/2020|2020-08-17|EPI\_ISL\_787170|Original|hCoV-19^^Texas|Human|Houston Methodist Hospital|Houston Methodist Hospital|Long|USA

>Spike|hCoV-19/England/QEUA-BCCABC/2020|2020-11-25|EPI\_ISL\_704645|Original|hCoV-19^^England|Human|Lighthouse Lab in Glasgow|Wellcome Sanger Institute for the COVID-19 Genomics UK (COG-UK) Consortium|Davies|United Kingdom

>Spike|hCoV-19/Australia/VIC3137/2020|2020-07-10|EPI\_ISL\_520844|Original|hCoV-19^^Victoria|Human|Microbiological Diagnostic Unit - Public Health Laboratory (MDU-PHL)|MDU-PHL|Schultz|Australia

>Spike|hCoV-19/Scotland/QEUA-9DBF71/2020|2020-09-22|EPI\_ISL\_575352|Original|hCoV-19^^Scotland|Human|Lighthouse Lab in Glasgow|Wellcome Sanger Institute for the COVID-19 Genomics UK (COG-UK) consortium|Davies|United Kingdom

>Spike|hCoV-19/England/NORW-EE5BE/2020|2020-09-02|EPI\_ISL\_540691|Original|hCoV-19^^England|Human|Quadram Institute Bioscience|COVID-19 Genomics UK (COG-UK) Consortium|Alikhan|United Kingdom

>Spike|hCoV-19/USA/TX-HMH0198/2020|2020-03-24|EPI\_ISL\_434873|Original|hCoV-19^^Texas|Human|Houston Methodist Hospital|Houston Methodist Hospital|Long|USA

>Spike|hCoV-19/Denmark/DCGC-17100/2020|2020-12-14|EPI\_ISL\_750758|Original|hCoV-19^^Nordjylland|Human|Department of Virus and Microbiological Special Diagnostics|Albertsen Lab|Michaelsen|Denmark

>Spike|hCoV-19/USA/UT-08306/2020|2020-05-21|EPI\_ISL\_524102|Original|hCoV-19^^Utah|Human|Utah Public Health Laboratory|Utah Public Health Laboratory|Young|USA

>Spike|hCoV-19/Wales/PHWC-4A0271/2020|2020-12-04|EPI\_ISL\_743419|Original|hCoV-19^^Wales|Human|Wales Specialist Virology Centre Sequencing lab|COVID-19 Genomics UK (COG-UK) Consortium|Moore|United Kingdom

>Spike|hCoV-19/Wales/PHWC-2659C/2020|2020-03-26|EPI\_ISL\_422195|Original|hCoV-19^^Wales|Human|Wales Specialist Virology Centre|Public Health Wales Microbiology Cardiff|Moore|United Kingdom

>Spike|hCoV-19/England/PORT-2D43BF/2020|2020-09-23|EPI\_ISL\_577203|Original|hCoV-19^^England|Human|Centre for Enzyme Innovation|COVID-19 Genomics UK (COG-UK) Consortium|Robson|United Kingdom

>Spike|hCoV-19/Spain/RI-IBV-005933/2020|2020-03-27|EPI\_ISL\_500369|Original|hCoV-19^^La Rioja|Human|Centro de Investigaci\u00f3n Biom\u00e9dica de La Rioja - Hospital San Pedro Logro\u00f1o|SeqCOVID-SPAIN consortium/IBV (CSIC)|Comas|Spain

>Spike|hCoV-19/USA/NY-PV09069/2020|2020-03-20|EPI\_ISL\_422490|Original|hCoV-19^^New York|Human|MSHS Clinical Microbiology Laboratories|MSHS Pathogen Surveillance Program|van Bakel|USA

>Spike|hCoV-19/USA/MI-MDHHS-SC21638/2020|2020-03-31|EPI\_ISL\_516365|Original|hCoV-19^^Michigan|Human|Michigan Department of Health and Human Services|Michigan Department of Health and Human Services|Blankenship|USA

>Spike|hCoV-19/USA/WI-WSLH-200424/2020|2020-04-24|EPI\_ISL\_578585|Original|hCoV-19^^Wisconsin|Human|Wisconsin State Laboratory of Hygiene Communicable Disease Division|Wisconsin State Laboratory of Hygiene Communicable Disease Division|Florek|USA

>Spike|hCoV-19/USA/FL-BPHL-2034/2020|2020-05-26|EPI\_ISL\_653187|Original|hCoV-19^^Florida|Human|Florida Bureau of Public Health Laboratories|Florida Bureau of Public Health Laboratories|Blanton|USA

>Spike|hCoV-19/Belgium/MAC-0324142/2020|2020-03-24|EPI\_ISL\_420399|Original|hCoV-19^^Zoutleeuw|Human|KU Leuven|KU Leuven|Maes|Belgium

>Spike|hCoV-19/Australia/VIC10636/2020|2020-09-06|EPI\_ISL\_563003|Original|hCoV-19^^Victoria|Human|Microbiological Diagnostic Unit - Public Health Laboratory (MDU-PHL)|MDU-PHL|Schultz|Australia

>Spike|hCoV-19/USA/WA-UW-10654/2020|2020-06-09|EPI\_ISL\_570342|Original|hCoV-19^^Washington|Human|UW Virology Lab|UW Virology Lab|Roychoudhury|USA

>Spike|hCoV-19/Scotland/QEUH-9BA5EF/2020|2020-09-09|EPI\_ISL\_573818|Original|hCoV-19^^Scotland|Human|Oxford Viromics|COVID-19 Genomics UK (COG-UK) Consortium|Golubchik|United Kingdom

>Spike|hCoV-19/DRC/3632/2020|2020-04-23|EPI\_ISL\_447607|Original|hCoV-19^^Kinshasa|Human|Viral Respiratory Lab|Pathogen Sequencing Lab|Lusamaki|Democratic Republic of the Congo

>Spike|hCoV-19/England/LOND-DB3BA/2020|2020-11-13|EPI\_ISL\_724762|Original|hCoV-19^^England|Human|University College London|COVID-19 Genomics UK (COG-UK) Consortium|Roy|United Kingdom

>Spike|hCoV-19/England/QEUH-9FF4C3/2020|2020-09-30|EPI\_ISL\_600166|Original|hCoV-19^^England|Human|Lighthouse Lab in Glasgow|Wellcome Sanger Institute for the COVID-19 Genomics UK (COG-UK) consortium|Davies|United Kingdom

>Spike|hCoV-19/England/CAMC-C2C8FB/2020|2020-12-08|EPI\_ISL\_733681|Original|hCoV-19^^England|Human|Lighthouse Lab in Cambridge|Wellcome Sanger Institute for the COVID-19 Genomics UK (COG-UK) Consortium|Davies|United Kingdom

>Spike|hCoV-19/Denmark/DCGC-1834/2020|2020-04-27|EPI\_ISL\_622546|Original|hCoV-19^^Hovedstaden|Human|Department of Virus and Microbiological Special Diagnostics|Albertsen lab|Michaelsen|Denmark

>Spike|hCoV-19/Denmark/DCGC-15416/2020|2020-11-23|EPI\_ISL\_713814|Original|hCoV-19^^Midtjylland|Human|Department of Virus and Microbiological Special Diagnostics|Albertsen Lab|Michaelsen|Denmark

>Spike|hCoV-19/Spain/CL-IBV-97006241/2020|2020-04-15|EPI\_ISL\_537615|Original|hCoV-19^^Castilla y Leon|Human|Universidad de Le\u00f3n|SeqCOVID-SPAIN consortium|IBV (CSIC)|Comas|Spain

>Spike|hCoV-19/USA/AZ-TG640871/2020|2020-04-27|EPI\_ISL\_695803|Original|hCoV-19^^Arizona|Human|Sonora Quest Laboratories|TGen North|French|USA

>Spike|hCoV-19/Singapore/88/2020|2020-04-21|EPI\_ISL\_435693|Original|hCoV-19^^Singapore|Human|National Public Health Laboratory|National Public Health Laboratory|Mak|Singapore

>Spike|hCoV-19/USA/NY-Wadsworth-40040-01/2020|2020-04-07|EPI\_ISL\_676809|Original|hCoV-19^^New York|Human|Wadsworth Center|Wadsworth Center|Lasek-Nesselquist|USA

>Spike|hCoV-19/South Korea/KUMC04/2020|2020-02-27|EPI\_ISL\_413514|Vero P1|hCoV-19^^South Korea|Human|Department of Microbiology|Department of Microbiology|Park|South Korea

>Spike|hCoV-19/Morocco/RMPS-14/2020|2020-04-22|EPI\_ISL\_482739|Original|hCoV-19^^Morocco|Human|LNR National Reference Laboratory|Medical Biotechnology Laboratory|Kartti|Morocco

>Spike|hCoV-19/USA/MI-UM-10036524225/2020|2020-10-19|EPI\_ISL\_628867|Original|hCoV-19^^Michigan|Human|University of Michigan Clinical Microbiology Laboratory|Lauring Lab|Valesano|USA

>Spike|hCoV-19/England/MILK-975F2E/2020|2020-08-20|EPI\_ISL\_552762|Original|hCoV-19^^England|Human|Lighthouse Lab in Milton Keynes|Wellcome Sanger Institute for the COVID-19 Genomics UK (COG-UK) consortium|Davies|United Kingdom

>Spike|hCoV-19/Chile/RM-127636/2020|2020-07-17|EPI\_ISL\_746607|Original|hCoV-19^^Region Metropolitana de Santiago|Human|Genetica Molecular and Subdepartamento de Virologia ISP Chile|Instituto de Salud Publica de Chile|Tognarelli|Chile

>Spike|hCoV-19/England/ALDP-A6D26B/2020|2020-10-14|EPI\_ISL\_608017|Original|hCoV-19^^England|Human|Lighthouse Lab in Alderley Park|Wellcome Sanger Institute for the COVID-19 Genomics UK (COG-UK) consortium|Davies|United Kingdom

>Spike|hCoV-19/England/MILK-D0CDA6/2020|2020-12-20|EPI\_ISL\_781283|Original|hCoV-19^^England|Human|Lighthouse Lab in Milton Keynes|Wellcome Sanger Institute for the COVID-19 Genomics UK (COG-UK) Consortium|Davies|United Kingdom

>Spike|hCoV-19/USA/NY-Wadsworth-131904-01/2020|2020-06-05|EPI\_ISL\_676706|Original|hCoV-19^^New York|Human|Wadsworth Center|Wadsworth Center|Lasek-Nesselquist|USA

>Spike|hCoV-19/England/NORW-F5727/2020|2020-11-05|EPI\_ISL\_665447|Original|hCoV-19^^England|Human|Quadram Institute Bioscience|COVID-19 Genomics UK (COG-UK) Consortium|Alikhan|United Kingdom

>Spike|hCoV-19/England/ALDP-C3A292/2020|2020-12-09|EPI\_ISL\_731188|Original|hCoV-19^^England|Human|Lighthouse Lab in Alderley Park|Wellcome Sanger Institute for the COVID-19 Genomics UK (COG-UK) Consortium|Davies|United Kingdom

>Spike|hCoV-19/United Arab Emirates/0283/2020|2020-05-17|EPI\_ISL\_698463|Original|hCoV-19^^Abu Dhabi|Human|Group 42 (G42) Healthcare|G42 Healthcare|Ogrodzki|United Arab Emirates

>Spike|hCoV-19/Hangzhou/ZJU-01/2020|2020-01-25|EPI\_ISL\_415709|Vero|hCoV-19^^Hangzhou|Human|State Key Laboratory for Diagnosis and Treatment of Infectious Diseases|State Key Laboratory for Diagnosis and Treatment of Infectious Diseases|Jiang|China

>Spike|hCoV-19/USA/CT-UW-6573/2020|2020-04-02|EPI\_ISL\_437870|Original|hCoV-19^^Connecticut|Human|UW Virology Lab|UW Virology Lab|Roychoudhury|USA

>Spike|hCoV-19/USA/CA-ALSR-4571/2020|2020-07-09|EPI\_ISL\_667013|Original|hCoV-19^^California|Human|San Diego County Public Health Laboratory|Andersen lab at Scripps Research|Gangavarapu|USA

>Spike|hCoV-19/Ireland/D-NVRL-77IRL61444/2020|2020-11-03|EPI\_ISL\_732385|Original|hCoV-19^^Dublin|Human|National Virus Reference Laboratory|National Virus Reference Laboratory|Gonzalez|Ireland

>Spike|hCoV-19/England/CAMB-1B7483/2020|2020-10-19|EPI\_ISL\_638321|Original|hCoV-19^^England|Human|Department of Pathology|COVID-19 Genomics UK (COG-UK) Consortium|Goodfellow|United Kingdom

>Spike|hCoV-19/England/ALDP-9C5DBC/2020|2020-09-10|EPI\_ISL\_567816|Original|hCoV-19^^England|Human|Lighthouse Lab in Alderley Park|Wellcome Sanger Institute for the COVID-19 Genomics UK (COG-UK) consortium|Davies|United Kingdom

>Spike|hCoV-19/Singapore/400/2020|2020-04-17|EPI\_ISL\_469149|Original|hCoV-19^^Singapore|Human|National Public Health Laboratory|National Public Health Laboratory|Mak|Singapore

>Spike|hCoV-19/England/ALDP-C25C9C/2020|2020-12-06|EPI\_ISL\_782964|Original|hCoV-19^^England|Human|Lighthouse Lab in Alderley Park|Wellcome Sanger Institute for the COVID-19 Genomics UK (COG-UK) Consortium|Davies|United Kingdom

>Spike|hCoV-19/USA/FL-BPHL-1477/2020|2020-06-25|EPI\_ISL\_549259|Original|hCoV-19^^Florida|Human|Florida Bureau of Public Health Laboratories|Florida Bureau of Public Health Laboratories|Blanton|USA

>Spike|hCoV-19/England/QEUA-A1EE1A/2020|2020-10-01|EPI\_ISL\_587346|Original|hCoV-19^^England|Human|Lighthouse Lab in Glasgow|Wellcome Sanger Institute for the COVID-19 Genomics UK (COG-UK) consortium|Davies|United Kingdom

>Spike|hCoV-19/USA/AZ-TG396333/2020|2020-06-09|EPI\_ISL\_694802|Original|hCoV-19^^Arizona|Human|AZ SPHL|TGen North|French|USA

>Spike|hCoV-19/England/MILK-BB1285/2020|2020-11-17|EPI\_ISL\_720078|Original|hCoV-19^^England|Human|Lighthouse Lab in Milton Keynes|Wellcome Sanger Institute for the COVID-19 Genomics UK (COG-UK) Consortium|Davies|United Kingdom

>Spike|hCoV-19/Japan/PG-6491/2020|2020-09-00|EPI\_ISL\_689593|Original|hCoV-19^^Japan|Human|Pathogen Genomics Center|Pathogen Genomics Center|Sekizuka|Japan

>Spike|hCoV-19/Japan/PG-7608/2020|2020-07-00|EPI\_ISL\_686710|Original|hCoV-19^^Japan|Human|Chiba Prefectural Institute of Public Health|Pathogen Genomics Center|Sekizuka|Japan

>Spike|hCoV-19/England/MILK-9F043B/2020|2020-09-24|EPI\_ISL\_580702|Original|hCoV-19^^England|Human|Lighthouse Lab in Milton Keynes|Wellcome Sanger Institute for the COVID-19 Genomics UK (COG-UK) consortium|Davies|United Kingdom

>Spike|hCoV-19/England/ALDP-C06244/2020|2020-12-06|EPI\_ISL\_709479|Original|hCoV-19^^England|Human|Lighthouse Lab in Alderley Park|Wellcome Sanger Institute for the COVID-19 Genomics UK (COG-UK) Consortium|Davies|United Kingdom

>Spike|hCoV-19/USA/WA-S317/2020|2020-04-04|EPI\_ISL\_434077|Original|hCoV-19^^Washington|Human|Washington State Department of Health|Seattle Flu Study|Bedford|USA

>Spike|hCoV-19/England/CAMC-B215D2/2020|2020-11-03|EPI\_ISL\_647189|Original|hCoV-19^^England|Human|Lighthouse Lab in Cambridge|Wellcome Sanger Institute for the COVID-19 Genomics UK (COG-UK) Consortium|Davies|United Kingdom

>Spike|hCoV-19/Iceland/460/2020|2020-03-20|EPI\_ISL\_424483|Original|hCoV-19^^Reykjavik|Human|The National University Hospital of Iceland|deCODE genetics|J\u00f3nsson|Iceland

>Spike|hCoV-19/Japan/IC-0382/2020|2020-11-00|EPI\_ISL\_721621|Original|hCoV-19^^Japan|Human|Pathogen Genomics Center|Pathogen Genomics Center|Sekizuka|Japan

>Spike|hCoV-19/England/ALDP-AA27B6/2020|2020-10-22|EPI\_ISL\_624406|Original|hCoV-19^^England|Human|Lighthouse Lab in Alderley Park|Wellcome Sanger Institute for the COVID-19 Genomics UK (COG-UK) consortium|Davies|United Kingdom

>Spike|hCoV-19/Spain/AR-IBV-005054/2020|2020-04-21|EPI\_ISL\_500287|Original|hCoV-19^^Aragon|Human|Servicio de Microbiolog\u00eda|SeqCOVID-SPAIN consortium|IBV (CSIC)|Comas|Spain

>Spike|hCoV-19/Wales/PHWC-35B5C/2020|2020-04-27|EPI\_ISL\_474532|Original|hCoV-19^^Wales|Human|Originating lab|COVID-19 Genomics UK (COG-UK) Consortium|Moore|United Kingdom

>Spike|hCoV-19/England/QEUA-9FF1F9/2020|2020-10-02|EPI\_ISL\_600368|Original|hCoV-19^^England|Human|Lighthouse Lab in Glasgow|Wellcome Sanger Institute for the COVID-19 Genomics UK (COG-UK) consortium|Davies|United Kingdom

>Spike|hCoV-19/Australia/VIC1208/2020|2020-04-01|EPI\_ISL\_430498|Original|hCoV-19^^Victoria|Human|Victorian Infectious Diseases Reference Laboratory (VIDRL)|Microbiological Diagnostic Unit Public Health Laboratory and Victorian Infectious Diseases Reference Laboratory|Schultz|Australia

>Spike|hCoV-19/England/PORT-2D2603/2020|2020-12-19|EPI\_ISL\_763676|Original|hCoV-19^^England|Human|Centre for Enzyme Innovation|COVID-19 Genomics UK (COG-UK) Consortium|Robson|United Kingdom

>Spike|hCoV-19/USA/CA-CZB-15438/2020|2020-12-01|EPI\_ISL\_739609|Original|hCoV-19^^California|Human|Orange County Public Health Lab|Chan-Zuckerberg Biohub|Kamm|USA

>Spike|hCoV-19/USA/ME-HETL-J0244/2020|2020-09-26|EPI\_ISL\_755400|Original|hCoV-19^^Maine|Human|Maine Health and Environmental Testing Laboratory|Tewhey Lab|Tewhey|USA

>Spike|hCoV-19/England/QEUA-5FD0C5/2020|2020-06-26|EPI\_ISL\_533247|Original|hCoV-19^^England|Human|Lighthouse Lab in Glasgow|Wellcome Sanger Institute for the COVID-19 Genomics UK (COG-UK) consortium|Davies|United Kingdom

>Spike|hCoV-19/Denmark/DCGC-1599/2020|2020-04-06|EPI\_ISL\_618645|Original|hCoV-19^^Syddanmark|Human|Department of Virus and Microbiological Special Diagnostics|Albertsen lab|Michaelsen|Denmark

>Spike|hCoV-19/France/PAC-IHU-1629/2020|2020-09-11|EPI\_ISL\_569238|Original|hCoV-19^^Provence-Alpes-C\u00f4te-d\u0192Azur|Human|MEPHI|MEPHI|Levasseur|France

>Spike|hCoV-19/USA/MN-GMF-26024/2020|2020-10-15|EPI\_ISL\_660943|Original|hCoV-19^^Minnesota|Human|Gundersen Molecular Diagnostics Laboratory|Kabara Cancer Research Institute|Kenny|USA

>Spike|hCoV-19/England/NORT-289577/2020|2020-03-30|EPI\_ISL\_458680|Original|hCoV-19^^England|Human|NU-OMICS DNA Sequencing research facility|Wellcome Sanger Institute for the COVID-19 Genomics UK (COG-UK) consortium|Davies|United Kingdom

>Spike|hCoV-19/Scotland/EDB8033/2020|2020-10-01|EPI\_ISL\_594816|Original|hCoV-19^^Scotland|Human|Virology Department|COVID-19 Genomics UK (COG-UK) Consortium|McHugh|United Kingdom

>Spike|hCoV-19/USA/UT-QDX-1846/2020|2020-03-16|EPI\_ISL\_604162|Original|hCoV-19^^Utah|Human|Quest Diagnostics|Quest Diagnostics|Kagan|USA

>Spike|hCoV-19/USA/IA-UW-121/2020|2020-04-11|EPI\_ISL\_427428|Original|hCoV-19^^Iowa|Human|University of Wisconsin-Madison AIDS Vaccine Research Laboratories|University of Wisconsin-Madison AIDS Vaccine Research Laboratories|Baczenas|USA

>Spike|hCoV-19/India/MH-ACTREC-370/2020|2020-07-24|EPI\_ISL\_700019|Original|hCoV-19^^Maharashtra|Human|Hematopathology Laboratory|Hematopathology Laboratory|Patkar|India

>Spike|hCoV-19/England/ALDP-CC03F8/2020|2020-12-19|EPI\_ISL\_760726|Original|hCoV-19^^England|Human|Lighthouse Lab in Alderley Park|Wellcome Sanger Institute for the COVID-19 Genomics UK (COG-UK) Consortium|Davies|United Kingdom

>Spike|hCoV-19/Italy/APU-PODV-15961800/2020|2020-09-03|EPI\_ISL\_788951|Original|hCoV-19^^Apulia|Human|Ospedale \Di Venere\|Beaconlab (Bioinformatics|Chiara|Italy

>Spike|hCoV-19/Wales/PHWC-483669/2020|2020-10-12|EPI\_ISL\_627842|Original|hCoV-19^^Wales|Human|Wales Specialist Virology Centre Sequencing lab|COVID-19 Genomics UK (COG-UK) Consortium|Moore|United Kingdom

>Spike|hCoV-19/England/ALDP-B75A0D/2020|2020-11-12|EPI\_ISL\_664358|Original|hCoV-19^^England|Human|Quadram Institute Bioscience|COVID-19 Genomics UK (COG-UK) Consortium|Alikhan|United Kingdom

>Spike|hCoV-19/USA/TX-HMH-7903/2020|2020-06-29|EPI\_ISL\_545694|Original|hCoV-19^^Texas|Human|Houston Methodist Hospital|Houston Methodist Hospital|Long|USA

>Spike|hCoV-19/England/SHEF-10CF125/2020|2020-12-10|EPI\_ISL\_727928|Original|hCoV-19^^England|Human|Virology Department|COVID-19 Genomics UK (COG-UK) Consortium|de Silva|United Kingdom

>Spike|hCoV-19/USA/WI-GMF-18724/2020|2020-09-04|EPI\_ISL\_547778|Original|hCoV-19^^Wisconsin|Human|Gundersen Molecular Diagnostics Laboratory|Kabara Cancer Research Institute|Kenny|USA

>Spike|hCoV-19/Australia/VIC9955/2020|2020-07-23|EPI\_ISL\_565801|Original|hCoV-19^^Victoria|Human|Microbiological Diagnostic Unit - Public Health Laboratory (MDU-PHL)|MDU-PHL|Schultz|Australia

>Spike|hCoV-19/Scotland/QEUA-9B89C7/2020|2020-09-07|EPI\_ISL\_568284|Original|hCoV-19^^Scotland|Human|Lighthouse Lab in Glasgow|Wellcome Sanger Institute for the COVID-19 Genomics UK (COG-UK) consortium|Davies|United Kingdom

>Spike|hCoV-19/Japan/PG-2101/2020|2020-04-00|EPI\_ISL\_685706|Original|hCoV-19^^Japan|Human|Pathogen Genomics Center|Pathogen Genomics Center|Sekizuka|Japan

>Spike|hCoV-19/England/CAMC-CB6B57/2020|2020-12-19|EPI\_ISL\_777824|Original|hCoV-19^^England|Human|Lighthouse Lab in Cambridge|Wellcome Sanger Institute for the COVID-19 Genomics UK (COG-UK) Consortium|Davies|United Kingdom

>Spike|hCoV-19/England/ALDP-CB4F99/2020|2020-12-17|EPI\_ISL\_761828|Original|hCoV-19^^England|Human|Lighthouse Lab in Alderley Park|Wellcome Sanger Institute for the COVID-19 Genomics UK (COG-UK) Consortium|Davies|United Kingdom

>Spike|hCoV-19/USA/TX-HMH-7095/2020|2020-06-28|EPI\_ISL\_546499|Original|hCoV-19^^Texas|Human|Houston Methodist Hospital|Houston Methodist Hospital|Long|USA

>Spike|hCoV-19/France/PAC-IHU-1431/2020|2020-08-10|EPI\_ISL\_569165|Original|hCoV-19^^Provence-Alpes-C\00f4te-d\02019Azur|Human|MEPHI|MEPHI|Levasseur|France

>Spike|hCoV-19/USA/CA-ALSR-4142/2020|2020-06-25|EPI\_ISL\_648846|Original|hCoV-19^^California|Human|San Diego County Public Health Laboratory|Andersen lab at Scripps Research|Gangavarapu|USA

>Spike|hCoV-19/England/QEUA-998A15/2020|2020-08-21|EPI\_ISL\_540061|Original|hCoV-19^^England|Human|Lighthouse Lab in Glasgow|Wellcome Sanger Institute for the COVID-19 Genomics UK (COG-UK) consortium|Davies|United Kingdom

>Spike|hCoV-19/USA/WI-UW-685/2020|2020-06-25|EPI\_ISL\_491366|Original|hCoV-19^^Wisconsin|Human|University of Wisconsin-Madison AIDS Vaccine Research



Laboratories|University of Wisconsin-Madison AIDS Vaccine Research  
Laboratories|Baczenas|USA  
>Spike|hCoV-19/Australia/NSW279/2020|2020-03-28|EPI\_ISL\_451543|Original|hCoV-19^^New South Wales|Human|Pathology Sydney South West - NSW Health Pathology|NSW Health Pathology - Institute of Clinical Pathology and Medical Research; Westmead Hospital; University of Sydney|Gall|Australia  
>Spike|hCoV-19/England/QEUEH-C30A2B/2020|2020-12-09|EPI\_ISL\_731393|Original|hCoV-19^^England|Human|Lighthouse Lab in Glasgow|Wellcome Sanger Institute for the COVID-19 Genomics UK (COG-UK) Consortium|Davies|United Kingdom  
>Spike|hCoV-19/England/ALDP-C3B6D1/2020|2020-12-10|EPI\_ISL\_730925|Original|hCoV-19^^England|Human|Lighthouse Lab in Alderley Park|Wellcome Sanger Institute for the COVID-19 Genomics UK (COG-UK) Consortium|Davies|United Kingdom  
>Spike|hCoV-19/Wales/QEUEH-AD4320/2020|2020-10-26|EPI\_ISL\_647925|Original|hCoV-19^^Wales|Human|Lighthouse Lab in Glasgow|Wellcome Sanger Institute for the COVID-19 Genomics UK (COG-UK) Consortium|Davies|United Kingdom  
>Spike|hCoV-19/England/ALDP-B46197/2020|2020-11-07|EPI\_ISL\_656262|Original|hCoV-19^^England|Human|Lighthouse Lab in Alderley Park|Wellcome Sanger Institute for the COVID-19 Genomics UK (COG-UK) Consortium|Davies|United Kingdom  
>Spike|hCoV-19/Belgium/reg-0617913/2020|2020-06-17|EPI\_ISL\_734768|Original|hCoV-19^^Kortenberg|Human|UZ Leuven|KU Leuven|Maes|Belgium  
>Spike|hCoV-19/Wales/PHWC-49FA22/2020|2020-12-09|EPI\_ISL\_743307|Original|hCoV-19^^Wales|Human|Wales Specialist Virology Centre Sequencing lab|COVID-19 Genomics UK (COG-UK) Consortium|Moore|United Kingdom  
>Spike|hCoV-19/England/201140508/2020|2020-03-11|EPI\_ISL\_464736|Original|hCoV-19^^England|Human|Respiratory Virus Unit|Respiratory Virus Unit|Platt|United Kingdom  
>Spike|hCoV-19/Belgium/reg-10181091/2020|2020-10-18|EPI\_ISL\_735131|Original|hCoV-19^^Huldenberg|Human|UZ Leuven|KU Leuven|Maes|Belgium  
>Spike|hCoV-19/England/CAMB-1B77B7/2020|2020-10-25|EPI\_ISL\_638334|Original|hCoV-19^^England|Human|Department of Pathology|COVID-19 Genomics UK (COG-UK) Consortium|Goodfellow|United Kingdom  
>Spike|hCoV-19/England/ALDP-C39C0E/2020|2020-12-09|EPI\_ISL\_731120|Original|hCoV-19^^England|Human|Lighthouse Lab in Alderley Park|Wellcome Sanger Institute for the COVID-19 Genomics UK (COG-UK) Consortium|Davies|United Kingdom  
>Spike|hCoV-19/Wales/PHWC-4866B1/2020|2020-10-27|EPI\_ISL\_639068|Original|hCoV-19^^Wales|Human|Wales Specialist Virology Centre Sequencing lab|COVID-19 Genomics UK (COG-UK) Consortium|Moore|United Kingdom  
>Spike|hCoV-19/Denmark/DCGC-1017/2020|2020-03-30|EPI\_ISL\_614478|Original|hCoV-19^^Hovedstaden|Human|Department of Virus and Microbiological Special Diagnostics|Albertsen lab|Michaelsen|Denmark  
>Spike|hCoV-19/Spain/VC-IBV-98004498/2020|2020-03-26|EPI\_ISL\_583948|Original|hCoV-19^^Comunitat Valenciana|Human|Servicio de Microbiolog\u00eda. Hospital General Universitario de Castell\u00f3n|SeqCOVID-SPAIN consortium|IBV(CSIC)|Comas|Spain  
>Spike|hCoV-19/Lithuania/MR-LUHS-Eilnr52/2020|2020-04-08|EPI\_ISL\_541864|Original|hCoV-19^^Kauno apskritis|Human|Lithuanian University of Health Sciences Hospital|Lithuanian University of Health Sciences|Zemaitis|Lithuania  
>Spike|hCoV-19/England/MILK-B94EA2/2020|2020-11-14|EPI\_ISL\_709883|Original|hCoV-19^^England|Human|Lighthouse Lab in Milton Keynes|Wellcome Sanger Institute for the COVID-19 Genomics UK (COG-UK) Consortium|Davies|United Kingdom  
>Spike|hCoV-19/England/ALDP-CB60B2/2020|2020-12-20|EPI\_ISL\_761674|Original|hCoV-19^^England|Human|Lighthouse Lab in Alderley Park|Wellcome Sanger Institute for the COVID-19 Genomics UK (COG-UK) Consortium|Davies|United Kingdom  
>Spike|hCoV-19/Scotland/EDB2629/2020|2020-04-25|EPI\_ISL\_473786|Original|hCoV-19^^Scotland|Human|Virology Department|COVID-19 Genomics UK (COG-UK) Consortium|Williams|United Kingdom  
>Spike|hCoV-19/Denmark/DCGC-6204/2020|2020-10-05|EPI\_ISL\_620107|Original|hCoV-19^^Syddanmark|Human|Department of Virus and Microbiological Special Diagnostics|Albertsen lab|Michaelsen|Denmark  
>Spike|hCoV-19/England/NORW-F7039/2020|2020-12-05|EPI\_ISL\_725320|Original|hCoV-19^^England|Human|Quadram Institute Bioscience|COVID-19 Genomics UK (COG-UK) Consortium|Alikhan|United Kingdom

>Spike|hCoV-19/Spain/AN-IBV-98001134/2020|2020-03-27|EPI\_ISL\_538186|Original|hCoV-19^^Andalucia|Human|Servicio de Microbiolog\u00eda y Parasitolog\u00eda cl\u00ednica. UCEIMP. Hospital Universitario Virgen del Roc\u00edo/IBIS/CSIC/US|SeqCOVID-SPAIN consortium/IBV (CSIC) |Comas|Spain

>Spike|hCoV-19/Russia/SPE-RII-22388V/2020|2020-06-09|EPI\_ISL\_524044|Vero P1|hCoV-19^^Saint Petersburg|Human|WHO National Influenza Centre Russian Federation|WHO National Influenza Centre Russian Federation|Komissarov|Russia

>Spike|hCoV-19/Denmark/DCGC-13995/2020|2020-11-30|EPI\_ISL\_711502|Original|hCoV-19^^Hovedstaden|Human|Department of Virus and Microbiological Special Diagnostics|Albertsen Lab|Michaelsen|Denmark

>Spike|hCoV-19/England/ALDP-981EC8/2020|2020-08-09|EPI\_ISL\_552777|Original|hCoV-19^^England|Human|Lighthouse Lab in Alderley Park|Wellcome Sanger Institute for the COVID-19 Genomics UK (COG-UK) consortium|Davies|United Kingdom

>Spike|hCoV-19/England/NORT-294737/2020|2020-08-06|EPI\_ISL\_573354|Original|hCoV-19^^England|Human|Northumbria University / South Tees Hospitals NHS Foundation Trust / North Cumbria Integrated Care NHS Foundation Trust / North Tees and Hartlepool NHS Foundation Trust / Newcastle Hospitals NHS Foundation Trust|COVID-19 Genomics UK (COG-UK) Consortium|Bashton|United Kingdom

>Spike|hCoV-19/Bangladesh/BCSIR-NILMRC-005/2020|2020-05-23|EPI\_ISL\_462093|Original|hCoV-19^^Dhaka|Human|National Institute of Laboratory Medicine and Referral Center|Genomic Research Lab|Khan|Bangladesh

>Spike|hCoV-19/Scotland/QEUH-9C8E3E/2020|2020-09-14|EPI\_ISL\_576019|Original|hCoV-19^^Scotland|Human|Lighthouse Lab in Glasgow|Wellcome Sanger Institute for the COVID-19 Genomics UK (COG-UK) consortium|Davies|United Kingdom

>Spike|hCoV-19/South Africa/KRISP-K002198/2020|2020-07-17|EPI\_ISL\_515596|Original|hCoV-19^^KwaZulu-Natal|Human|NHLs-IALCH|KRISP|de Oliveira|South Africa

>Spike|hCoV-19/Australia/VIC12145/2020|2020-07-23|EPI\_ISL\_640380|Original|hCoV-19^^Victoria|Human|Microbiological Diagnostic Unit - Public Health Laboratory (MDU-PHL) |MDU-PHL|Schultz|Australia

>Spike|hCoV-19/Oman/C-1186/2020|2020-04-21|EPI\_ISL\_491168|Original|hCoV-19^^Dhahirah|Human|Oman-National Influenza Center|Biotechnology & OMICS Laboratory|Al Mahruqi|Oman

>Spike|hCoV-19/France/PAC-MEPHI-0922/2020|2020-04-03|EPI\_ISL\_644391|Original|hCoV-19^^Provence-Alpes-Cote-d\u2019Azur|Human|MEPHI|MEPHI|Levasseur|France

>Spike|hCoV-19/Switzerland/BS-42199846/2020|2020-03-20|EPI\_ISL\_581716|Original|hCoV-19^^Basel-Stadt|Human|University Hospital Basel|University Hospital Basel|Roloff Handschin|Switzerland

>Spike|hCoV-19/USA/WI-UW-1796/2020|2020-09-14|EPI\_ISL\_605668|Original|hCoV-19^^Wisconsin|Human|University of Wisconsin-Madison AIDS Vaccine Research Laboratories|University of Wisconsin-Madison AIDS Vaccine Research Laboratories|Baczenas|USA

>Spike|hCoV-19/Wales/PHWC-16E38E/2020|2020-10-01|EPI\_ISL\_585707|Original|hCoV-19^^Wales|Human|Wales Specialist Virology Centre Sequencing lab|COVID-19 Genomics UK (COG-UK) Consortium|Moore|United Kingdom

>Spike|hCoV-19/Scotland/QEUH-969822/2020|2020-08-14|EPI\_ISL\_531118|Original|hCoV-19^^Scotland|Human|NHSGGC West of Scotland Specialist Virology Centre / MRC-University of Glasgow Centre for Virus Research|Wellcome Sanger Institute for the COVID-19 Genomics UK (COG-UK) consortium|Davies|United Kingdom

>Spike|hCoV-19/England/ALDP-C39855/2020|2020-12-09|EPI\_ISL\_731498|Original|hCoV-19^^England|Human|Lighthouse Lab in Alderley Park|Wellcome Sanger Institute for the COVID-19 Genomics UK (COG-UK) Consortium|Davies|United Kingdom

>Spike|hCoV-19/Japan/IC-0448/2020|2020-12-00|EPI\_ISL\_768657|Original|hCoV-19^^Japan|Human|Pathogen Genomics Center|Pathogen Genomics Center|Sekizuka|Japan

>Spike|hCoV-19/Japan/PG-8102/2020|2020-08-00|EPI\_ISL\_687201|Original|hCoV-19^^Japan|Human|Pathogen Genomics Center|Pathogen Genomics Center|Sekizuka|Japan

>Spike|hCoV-19/England/CAMC-B522FF/2020|2020-11-08|EPI\_ISL\_656986|Original|hCoV-19^^England|Human|Lighthouse Lab in Cambridge|Wellcome Sanger Institute for the COVID-19 Genomics UK (COG-UK) Consortium|Davies|United Kingdom

>Spike|hCoV-19/Scotland/QEUH-AD4B37/2020|2020-10-27|EPI\_ISL\_644026|Original|hCoV-19^^Scotland|Human|Lighthouse Lab in Glasgow|Wellcome Sanger Institute for the COVID-19 Genomics UK (COG-UK) Consortium|Davies|United Kingdom

>Spike|hCoV-19/Australia/VIC4943/2020|2020-07-14|EPI\_ISL\_519317|Original|hCoV-19^^Victoria|Human|Victorian Infectious Diseases Reference Laboratory (VIDRL)|VIDRL and MDU-PHL|Schultz|Australia

>Spike|hCoV-19/England/MILK-A796D9/2020|2020-10-14|EPI\_ISL\_606860|Original|hCoV-19^^England|Human|Lighthouse Lab in Milton Keynes|Wellcome Sanger Institute for the COVID-19 Genomics UK (COG-UK) consortium|Davies|United Kingdom

>Spike|hCoV-19/England/QEUH-AE283F/2020|2020-10-27|EPI\_ISL\_633449|Original|hCoV-19^^England|Human|Lighthouse Lab in Glasgow|Wellcome Sanger Institute for the COVID-19 Genomics UK (COG-UK) consortium|Davies|United Kingdom

>Spike|hCoV-19/United Arab Emirates/1049/2020|2020-06-11|EPI\_ISL\_698124|Original|hCoV-19^^Abu Dhabi|Human|Group 42 (G42) Healthcare|G42 Healthcare|Ogrodzki|United Arab Emirates

>Spike|hCoV-19/Portugal/PT0428/2020|2020-03-28|EPI\_ISL\_454152|Original|hCoV-19^^Portugal|Human|unknown|Instituto Nacional de Saude (INSA)|Borges|Portugal

>Spike|hCoV-19/England/QEUH-B66F5B/2020|2020-11-11|EPI\_ISL\_661414|Original|hCoV-19^^England|Human|Lighthouse Lab in Glasgow|Wellcome Sanger Institute for the COVID-19 Genomics UK (COG-UK) Consortium|Davies|United Kingdom

>Spike|hCoV-19/USA/MI-MDHHS-SC21467/2020|2020-03-30|EPI\_ISL\_516194|Original|hCoV-19^^Michigan|Human|Michigan Department of Health and Human Services|Michigan Department of Health and Human Services|Blankenship|USA

>Spike|hCoV-19/USA/CA-ALSR-3788/2020|2020-05-27|EPI\_ISL\_636201|Original|hCoV-19^^California|Human|San Diego County Public Health Laboratory|Andersen lab at Scripps Research|Gangavarapu|USA

>Spike|hCoV-19/USA/LA-EVTL01/2020|2020-04-09|EPI\_ISL\_435034|Original|hCoV-19^^Louisiana|Human|LSUHS Emerging Viral Threat Laboratory|Microbial Genome Sequencing Center|Kamil|USA

>Spike|hCoV-19/England/EXET-13AEC6/2020|2020-11-10|EPI\_ISL\_665100|Original|hCoV-19^^England|Human|University of Exeter|COVID-19 Genomics UK (COG-UK) Consortium|Temperton|United Kingdom

>Spike|hCoV-19/USA/MN-MDH-2113/2020|2020-11-03|EPI\_ISL\_683742|Original|hCoV-19^^Minnesota|Human|Minnesota Department of Health|Minnesota Department of Health|Garfin|USA

>Spike|hCoV-19/Australia/SAP346/2020|2020-03-22|EPI\_ISL\_483122|Original|hCoV-19^^South Australia|Human|SA Pathology|SA Pathology|Leong|Australia

>Spike|hCoV-19/USA/WA-UW-13242/2020|2020-07-01|EPI\_ISL\_501124|Original|hCoV-19^^Washington|Human|University of Washington Virology Lab|University of Washington Virology Lab|Roychoudhury|USA

>Spike|hCoV-19/Latvia/170/2020|2020-09-23|EPI\_ISL\_639667|Original|hCoV-19^^Latvia|Human|E. Gulbja Laboratorija|Latvian Biomedical Research and Study Centre|Zrelavs|Latvia

>Spike|hCoV-19/USA/TX-HMH-MCoV-19555/2020|2020-11-30|EPI\_ISL\_783927|Original|hCoV-19^^Texas|Human|Houston Methodist Hospital|Houston Methodist Hospital|Long|USA

>Spike|hCoV-19/Scotland/CVR1923/2020|2020-04-09|EPI\_ISL\_453013|Original|hCoV-19^^Scotland|Human|West of Scotland Specialist Virology Centre|COVID-19 Genomics UK (COG-UK) Consortium|Robertson|United Kingdom

>Spike|hCoV-19/Denmark/DCGC-14083/2020|2020-11-30|EPI\_ISL\_711555|Original|hCoV-19^^Syddanmark|Human|Department of Virus and Microbiological Special Diagnostics|Albertsen Lab|Michaelsen|Denmark

>Spike|hCoV-19/England/SHEF-C6BE7/2020|2020-05-10|EPI\_ISL\_475394|Original|hCoV-19^^England|Human|Virology Department|COVID-19 Genomics UK (COG-UK) Consortium|de Silva|United Kingdom

>Spike|hCoV-19/England/MILK-B8EF6C/2020|2020-11-13|EPI\_ISL\_675311|Original|hCoV-19^^England|Human|Lighthouse Lab in Milton Keynes|Wellcome Sanger Institute for the COVID-19 Genomics UK (COG-UK) Consortium|Davies|United Kingdom

>Spike|hCoV-19/USA/WI-UW-1689/2020|2020-09-11|EPI\_ISL\_605562|Original|hCoV-19^^Wisconsin|Human|University of Wisconsin-Madison AIDS Vaccine Research

Laboratories|University of Wisconsin-Madison AIDS Vaccine Research  
Laboratories|Baczenas|USA  
>Spike|hCoV-19/USA/CA-CHLA-PLM12654404/2020|2020-11-30|EPI\_ISL\_753444|Original|hCoV-19^^California|Human|Clinical virology Laboratory|Center for Personalized Medicine|Dien Bard|USA  
>Spike|hCoV-19/England/ALDP-BC62E7/2020|2020-11-23|EPI\_ISL\_721366|Original|hCoV-19^^England|Human|Lighthouse Lab in Alderley Park|Wellcome Sanger Institute for the COVID-19 Genomics UK (COG-UK) Consortium|Davies|United Kingdom  
>Spike|hCoV-19/England/MILK-632FD5/2020|2020-07-04|EPI\_ISL\_556289|Original|hCoV-19^^England|Human|Lighthouse Lab in Milton Keynes|Wellcome Sanger Institute for the COVID-19 Genomics UK (COG-UK) consortium|Davies|United Kingdom  
>Spike|hCoV-19/England/NOTT-11B7A2/2020|2020-11-12|EPI\_ISL\_652377|Original|hCoV-19^^England|Human|Queens Medical Centre|COVID-19 Genomics UK (COG-UK) Consortium|Loose|United Kingdom  
>Spike|hCoV-19/USA/NY-Wadsworth-281330-01/2020|2020-11-30|EPI\_ISL\_754505|Original|hCoV-19^^New York|Human|Wadsworth Center|Wadsworth Center|Lasek-Nesselquist|USA  
>Spike|hCoV-19/England/ALDP-B6320A/2020|2020-11-08|EPI\_ISL\_656583|Original|hCoV-19^^England|Human|Lighthouse Lab in Alderley Park|Wellcome Sanger Institute for the COVID-19 Genomics UK (COG-UK) Consortium|Davies|United Kingdom  
>Spike|hCoV-19/England/MILK-A468C0/2020|2020-10-05|EPI\_ISL\_598573|Original|hCoV-19^^England|Human|Lighthouse Lab in Milton Keynes|Wellcome Sanger Institute for the COVID-19 Genomics UK (COG-UK) consortium|Davies|United Kingdom  
>Spike|hCoV-19/Denmark/DCGC-19913/2020|2020-12-07|EPI\_ISL\_747644|Original|hCoV-19^^Hovedstaden|Human|Department of Virus and Microbiological Special Diagnostics|Albertsen Lab|Michaelsen|Denmark  
>Spike|hCoV-19/Spain/VC-FISABIO-144/2020|2020-03-18|EPI\_ISL\_436239|Original|hCoV-19^^Comunitat Valenciana|Human|Servicio de Microbiologia. Hospital Universitario Doctor Peset|Sequencing and Bioinformatics Service and Molecular Epidemiology Research Group. FISABIO-Public Health|Gonzalez-Candelas|Spain  
>Spike|hCoV-19/Austria/CeMM0576/2020|2020-04-01|EPI\_ISL\_475923|Original|hCoV-19^^Innsbruck|Human|Institut f\u00fcr Virologie am Department f\u00fcr Hygiene|Bergthaler laboratory|Bergthaler|Austria  
>Spike|hCoV-19/England/QEUA-A01797/2020|2020-09-30|EPI\_ISL\_679995|Original|hCoV-19^^England|Human|Virology Department|COVID-19 Genomics UK (COG-UK) Consortium|de Silva|United Kingdom  
>Spike|hCoV-19/England/ALDP-B45E37/2020|2020-11-07|EPI\_ISL\_656086|Original|hCoV-19^^England|Human|Lighthouse Lab in Alderley Park|Wellcome Sanger Institute for the COVID-19 Genomics UK (COG-UK) Consortium|Davies|United Kingdom  
>Spike|hCoV-19/England/LIVE-A5559/2020|2020-03-20|EPI\_ISL\_500125|Original|hCoV-19^^England|Human|Liverpool Clinical Laboratories|COVID-19 Genomics UK (COG-UK) Consortium|Haldenby|United Kingdom  
>Spike|hCoV-19/USA/FL-BPHL-1229/2020|2020-04-06|EPI\_ISL\_541239|Original|hCoV-19^^Florida|Human|Florida Bureau of Public Health Laboratories|Florida Bureau of Public Health Laboratories|Blanton|USA  
>Spike|hCoV-19/Japan/Donner67/2020|2020-07-24|EPI\_ISL\_644971|Original|hCoV-19^^Kanto|Human|Department of Infectious Diseases|Center for Medical Genetics|Kosaki|Japan  
>Spike|hCoV-19/England/QEUA-B6A528/2020|2020-11-11|EPI\_ISL\_662619|Original|hCoV-19^^England|Human|Lighthouse Lab in Glasgow|Wellcome Sanger Institute for the COVID-19 Genomics UK (COG-UK) Consortium|Davies|United Kingdom  
>Spike|hCoV-19/England/CAMB-1B668E/2020|2020-10-01|EPI\_ISL\_612264|Original|hCoV-19^^England|Human|Department of Pathology|COVID-19 Genomics UK (COG-UK) Consortium|Goodfellow|United Kingdom  
>Spike|hCoV-19/Finland/24SS5F9/2020|2020-09-24|EPI\_ISL\_759836|Original|hCoV-19^^Uusimaa|Human|Department of Virology and Immunology|Department of Virology|Smura|Finland  
>Spike|hCoV-19/USA/TX-HMH-MCoV-12241/2020|2020-09-24|EPI\_ISL\_790262|Original|hCoV-19^^Texas|Human|Houston Methodist Hospital|Houston Methodist Hospital|Long|USA

>Spike|hCoV-19/England/QEUEH-B423A4/2020|2020-11-08|EPI\_ISL\_657169|Original|hCoV-19^^England|Human|Lighthouse Lab in Glasgow|Wellcome Sanger Institute for the COVID-19 Genomics UK (COG-UK) Consortium|Davies|United Kingdom

>Spike|hCoV-19/Northern Ireland/QEUEH-962258/2020|2020-08-10|EPI\_ISL\_531644|Original|hCoV-19^^Northern Ireland|Human|Lighthouse Lab in Glasgow|Wellcome Sanger Institute for the COVID-19 Genomics UK (COG-UK) consortium|Davies|United Kingdom

>Spike|hCoV-19/USA/TX-HMH-MCoV-12733/2020|2020-08-29|EPI\_ISL\_789907|Original|hCoV-19^^Texas|Human|Houston Methodist Hospital|Houston Methodist Hospital|Long|USA

>Spike|hCoV-19/England/204720047/2020|2020-11-16|EPI\_ISL\_686601|Original|hCoV-19^^England|Human|Respiratory Virus Unit|COVID-19 Genomics UK (COG-UK) Consortium|Platt|United Kingdom

>Spike|hCoV-19/England/CAMB-1BD0B6/2020|2020-12-03|EPI\_ISL\_740959|Original|hCoV-19^^England|Human|Department of Pathology|COVID-19 Genomics UK (COG-UK) Consortium|Goodfellow|United Kingdom

>Spike|hCoV-19/England/ALDP-A2F906/2020|2020-10-06|EPI\_ISL\_587257|Original|hCoV-19^^England|Human|Lighthouse Lab in Alderley Park|Wellcome Sanger Institute for the COVID-19 Genomics UK (COG-UK) consortium|Davies|United Kingdom

>Spike|hCoV-19/India/MH-ACTREC-037/2020|2020-05-08|EPI\_ISL\_699693|Original|hCoV-19^^Maharashtra|Human|Hematopathology Laboratory|Hematopathology Laboratory|Patkar|India

>Spike|hCoV-19/England/LOND-D96FF/2020|2020-04-14|EPI\_ISL\_487638|Original|hCoV-19^^England|Human|University College London|Wellcome Sanger Institute for the COVID-19 Genomics UK (COG-UK) consortium|Davies|United Kingdom

>Spike|hCoV-19/USA/WI-UW-248/2020|2020-03-28|EPI\_ISL\_428344|Original|hCoV-19^^Wisconsin|Human|University of Wisconsin-Madison AIDS Vaccine Research Laboratories|University of Wisconsin-Madison AIDS Vaccine Research Laboratories|Moreno|USA

>Spike|hCoV-19/Denmark/DCGC-15995/2020|2020-11-23|EPI\_ISL\_714416|Original|hCoV-19^^Hovedstaden|Human|Department of Virus and Microbiological Special Diagnostics|Albertsen Lab|Michaelsen|Denmark

>Spike|hCoV-19/USA/LA-EVTL1380/2020|2020-12-11|EPI\_ISL\_779046|Original|hCoV-19^^Louisiana|Human|LSUHS Emerging Viral Threat Laboratory|Microbial Genome Sequencing Center|Kamil|USA

>Spike|hCoV-19/England/NORT-29AA0B/2020|2020-05-20|EPI\_ISL\_492484|Original|hCoV-19^^England|Human|NU-OMICS DNA Sequencing research facility|Wellcome Sanger Institute for the COVID-19 Genomics UK (COG-UK) consortium|Davies|United Kingdom

>Spike|hCoV-19/England/QEUEH-BA0A63/2020|2020-11-18|EPI\_ISL\_719779|Original|hCoV-19^^England|Human|Lighthouse Lab in Glasgow|Wellcome Sanger Institute for the COVID-19 Genomics UK (COG-UK) Consortium|Davies|United Kingdom

>Spike|hCoV-19/USA/WA-OHSU-2045/2020|2020-08-01|EPI\_ISL\_667102|Original|hCoV-19^^Washington|Human|OHSU Lab Services Molecular Microbiology Lab|Oregon SARS-CoV-2 Genome Sequencing Center|O'Roak|USA

>Spike|hCoV-19/Denmark/DCGC-19529/2020|2020-12-07|EPI\_ISL\_748529|Original|hCoV-19^^Midtjylland|Human|Department of Virus and Microbiological Special Diagnostics|Albertsen Lab|Michaelsen|Denmark

>Spike|hCoV-19/Australia/NSW2254/2020|2020-03-22|EPI\_ISL\_527010|Original|hCoV-19^^New South Wales|Human|Area of Virology|Area of Virology|Yeang|Australia

>Spike|hCoV-19/Spain/PV-IBV-98008380/2020|2020-10-15|EPI\_ISL\_654581|Original|hCoV-19^^Basque Country|Human|Servicio de Microbiolog\u00eda. Hospital Universitario Donostia. OSI Donostialdea. \u00clrea de Enfermedades Infecciosas|SeqCOVID-SPAIN consortium|IBV (CSIC) |Comas|Spain

>Spike|hCoV-19/Scotland/QEUEH-A4CD16/2020|2020-10-08|EPI\_ISL\_596047|Original|hCoV-19^^Scotland|Human|Quadram Institute Bioscience|COVID-19 Genomics UK (COG-UK) Consortium|Alikhan|United Kingdom

>Spike|hCoV-19/USA/MI-UM-10036557572/2020|2020-10-21|EPI\_ISL\_640164|Original|hCoV-19^^Michigan|Human|University of Michigan Clinical Microbiology Laboratory|Lauring Lab|Valesano|USA

>Spike|hCoV-19/Denmark/DCGC-18261/2020|2020-12-14|EPI\_ISL\_749370|Original|hCoV-19^^Sjaelland|Human|Department of Virus and Microbiological Special Diagnostics|Albertsen Lab|Michaelsen|Denmark

>Spike|hCoV-19/England/CAMC-CF8F5D/2020|2020-12-21|EPI\_ISL\_781392|Original|hCoV-19^^England|Human|Lighthouse Lab in Cambridge|Wellcome Sanger Institute for the COVID-19 Genomics UK (COG-UK) Consortium|Davies|United Kingdom

>Spike|hCoV-19/England/ALDP-9C637D/2020|2020-09-10|EPI\_ISL\_567555|Original|hCoV-19^^England|Human|Lighthouse Lab in Alderley Park|Wellcome Sanger Institute for the COVID-19 Genomics UK (COG-UK) consortium|Davies|United Kingdom

>Spike|hCoV-19/Australia/VIC12560/2020|2020-07-27|EPI\_ISL\_640781|Original|hCoV-19^^Victoria|Human|Microbiological Diagnostic Unit - Public Health Laboratory (MDU-PHL)|MDU-PHL|Schultz|Australia

>Spike|hCoV-19/USA/UT-02946/2020|2020-04-30|EPI\_ISL\_509550|Original|hCoV-19^^Utah|Human|Utah Public Health Laboratory|Utah Public Health Laboratory|Butz|USA

>Spike|hCoV-19/USA/TX-HMH-7482/2020|2020-06-26|EPI\_ISL\_546793|Original|hCoV-19^^Texas|Human|Houston Methodist Hospital|Houston Methodist Hospital|Long|USA

>Spike|hCoV-19/Australia/WA43/2020|2020-04-07|EPI\_ISL\_470860|Original|hCoV-19^^Western Australia|Human|PathWest Laboratory Medicine WA|PathWest Laboratory Medicine WA|Sikazwe|Australia

>Spike|hCoV-19/England/NORT-299398/2020|2020-04-23|EPI\_ISL\_493485|Original|hCoV-19^^England|Human|Northumbria University / South Tees Hospitals NHS Foundation Trust / North Cumbria Integrated Care NHS Foundation Trust / North Tees and Hartlepool NHS Foundation Trust / Newcastle Hospitals NHS Foundation Trust|COVID-19 Genomics UK (COG-UK) Consortium|Bashton|United Kingdom

>Spike|hCoV-19/Denmark/DCGC-12006/2020|2020-06-15|EPI\_ISL\_671253|Original|hCoV-19^^Nordjylland|Human|Department of Virus and Microbiological Special Diagnostics|Albertsen Lab|Michaelsen|Denmark

>Spike|hCoV-19/Denmark/DCGC-20516/2020|2020-12-21|EPI\_ISL\_758738|Original|hCoV-19^^Sjaelland|Human|Department of Virus and Microbiological Special Diagnostics|Albertsen Lab|Michaelsen|Denmark

>Spike|hCoV-19/USA/AZ-TG666168/2020|2020-05-01|EPI\_ISL\_696248|Original|hCoV-19^^Arizona|Human|Sonora Quest Laboratories|TGen North|French|USA

>Spike|hCoV-19/England/ALDP-B23A86/2020|2020-11-04|EPI\_ISL\_647025|Original|hCoV-19^^England|Human|Lighthouse Lab in Alderley Park|Wellcome Sanger Institute for the COVID-19 Genomics UK (COG-UK) Consortium|Davies|United Kingdom

>Spike|hCoV-19/England/MILK-B026F2/2020|2020-10-24|EPI\_ISL\_643034|Original|hCoV-19^^England|Human|Lighthouse Lab in Milton Keynes|Wellcome Sanger Institute for the COVID-19 Genomics UK (COG-UK) Consortium|Davies|United Kingdom

>Spike|hCoV-19/England/CAMB-78892/2020|2020-04-07|EPI\_ISL\_433784|Original|hCoV-19^^England|Human|Department of Pathology|COVID-19 Genomics UK (COG-UK) Consortium|Meredith|United Kingdom

>Spike|hCoV-19/England/QEUEH-998EFB/2020|2020-08-24|EPI\_ISL\_541826|Original|hCoV-19^^England|Human|Lighthouse Lab in Glasgow|Wellcome Sanger Institute for the COVID-19 Genomics UK (COG-UK) consortium|Davies|United Kingdom

>Spike|hCoV-19/England/ALDP-9E8366/2020|2020-09-24|EPI\_ISL\_637710|Original|hCoV-19^^England|Human|Department of Pathology|COVID-19 Genomics UK (COG-UK) Consortium|Goodfellow|United Kingdom

>Spike|hCoV-19/USA/TX-HMH-MCoV-19176/2020|2020-11-23|EPI\_ISL\_783560|Original|hCoV-19^^Texas|Human|Houston Methodist Hospital|Houston Methodist Hospital|Long|USA

>Spike|hCoV-19/England/LOND-1250B29/2020|2020-11-02|EPI\_ISL\_665248|Original|hCoV-19^^England|Human|University College London Hospital|COVID-19 Genomics UK (COG-UK) Consortium|Byott|United Kingdom

>Spike|hCoV-19/England/CAMC-B9AC0C/2020|2020-11-15|EPI\_ISL\_673244|Original|hCoV-19^^England|Human|Lighthouse Lab in Cambridge|Wellcome Sanger Institute for the COVID-19 Genomics UK (COG-UK) Consortium|Davies|United Kingdom

>Spike|hCoV-19/Saudi Arabia/KAUST-Jeddah64/2020|2020-04-01|EPI\_ISL\_437475|Original|hCoV-19^^Jeddah|Human|Pathogen Genomics Lab King Abdullah University of Science and Technology(KAUST)|Pathogen Genomics Lab King Abdullah University of Science and Technology(KAUST)|Mohamed Ghazzali|Saudi Arabia

>Spike|hCoV-19/USA/WA-UW-31409/2020|2020-10-14|EPI\_ISL\_735476|Original|hCoV-19^^Washington|Human|UW Virology Lab|UW Virology Lab|Roychoudhury|USA

>Spike|hCoV-19/Norway/7188/2020|2020-12-27|EPI\_ISL\_775436|Original|hCoV-19^^Rogaland|Human|Department of Medical Microbiology - section Molde|Norwegian Institute of Public Health|Vollan|Norway

>Spike|hCoV-19/Belgium/VB-030542/2020|2020-03-05|EPI\_ISL\_418863|Original|hCoV-19^^Komen|Human|KU Leuven|KU Leuven|Maes|Belgium

>Spike|hCoV-19/Denmark/DCGC-13506/2020|2020-11-30|EPI\_ISL\_712842|Original|hCoV-19^^Nordjylland|Human|Department of Virus and Microbiological Special Diagnostics|Albertsen Lab|Michaelsen|Denmark

>Spike|hCoV-19/Wales/PHWC-48BA83/2020|2020-10-28|EPI\_ISL\_666318|Original|hCoV-19^^Wales|Human|Wales Specialist Virology Centre Sequencing lab|COVID-19 Genomics UK (COG-UK) Consortium|Moore|United Kingdom

>Spike|hCoV-19/England/MILK-99C659/2020|2020-08-30|EPI\_ISL\_550584|Original|hCoV-19^^England|Human|Lighthouse Lab in Milton Keynes|Wellcome Sanger Institute for the COVID-19 Genomics UK (COG-UK) consortium|Davies|United Kingdom

>Spike|hCoV-19/USA/WA-UW-1731/2020|2020-03-21|EPI\_ISL\_424231|Original|hCoV-19^^Washington|Human|UW Virology Lab|UW Virology Lab|Roychoudhury|USA

>Spike|hCoV-19/Denmark/DCGC-3996/2020|2020-09-14|EPI\_ISL\_615766|Original|hCoV-19^^Midtjylland|Human|Department of Virus and Microbiological Special Diagnostics|Albertsen lab|Michaelsen|Denmark

>Spike|hCoV-19/England/SHEF-C035E/2020|2020-03-28|EPI\_ISL\_420220|Original|hCoV-19^^England|Human|Virology Department|Department of Infection|de Silva|United Kingdom

>Spike|hCoV-19/Austria/CeMM0590/2020|2020-03-16|EPI\_ISL\_583605|Original|hCoV-19^^Innsbruck|Human|Institut f\u00fcr Virologie am Department f\u00fcr Hygiene|Bergthaler laboratory|Bergthaler|Austria

>Spike|hCoV-19/Latvia/039/2020|2020-03-15|EPI\_ISL\_486422|Original|hCoV-19^^Latvia|Human|Latvijas Infektolo\u0123ijas centrs|Latvian Biomedical Research and Study Centre|Zrelovs|Latvia

>Spike|hCoV-19/Luxembourg/LNS7639610/2020|2020-12-28|EPI\_ISL\_771122|Original|hCoV-19^^Luxembourg|Human|Laboratoire national de sant\u00e9|Laboratoire national de sant\u00e9|Wienecke-Baldacchino|Luxembourg

>Spike|hCoV-19/England/CAMB-7BFA9/2020|2020-04-04|EPI\_ISL\_470391|Original|hCoV-19^^England|Human|Department of Pathology|Wellcome Sanger Institute for the COVID-19 Genomics UK (COG-UK) consortium|Davies|United Kingdom

>Spike|hCoV-19/England/ALDP-9C589D/2020|2020-09-11|EPI\_ISL\_567841|Original|hCoV-19^^England|Human|Lighthouse Lab in Alderley Park|Wellcome Sanger Institute for the COVID-19 Genomics UK (COG-UK) consortium|Davies|United Kingdom

>Spike|hCoV-19/Gambia/GC19-3267/2020|2020-07-27|EPI\_ISL\_561056|Original|hCoV-19^^Kombo|Human|MRCG at LSHTM Genomics lab|MRCG at LSHTM Genomics lab|Sesay|Gambia

>Spike|hCoV-19/Spain/RI-IBV-006004/2020|2020-03-20|EPI\_ISL\_500435|Original|hCoV-19^^La Rioja|Human|Centro de Investigaci\u00f3n Biom\u00e9dica de La Rioja - Hospital San Pedro Logro\u00f1o|SeqCOVID-SPAIN consortium|IBV (CSIC)|Comas|Spain

>Spike|hCoV-19/Canada/ON-PHL-20-03627/2020|2020-11-00|EPI\_ISL\_775133|Original|hCoV-19^^Ontario|Human|Public Health Ontario Laboratory|Public Health Ontario Laboratory|Guthrie|Canada

>Spike|hCoV-19/England/ALDP-A84D12/2020|2020-10-17|EPI\_ISL\_610496|Original|hCoV-19^^England|Human|Lighthouse Lab in Alderley Park|Wellcome Sanger Institute for the COVID-19 Genomics UK (COG-UK) consortium|Davies|United Kingdom

>Spike|hCoV-19/Portugal/PT1078/2020|2020-03-28|EPI\_ISL\_511625|Original|hCoV-19^^Portugal|Human|Instituto Nacional de Saude (INSA)|Instituto Nacional de Saude (INSA)|Borges|Portugal

>Spike|hCoV-19/USA/WI-GMF-M00018/2020|2020-07-06|EPI\_ISL\_547669|Original|hCoV-19^^Wisconsin|Human|Gundersen Clinical Microbiology Laboratory|Kabara Cancer Research Institute|Kenny|USA

>Spike|hCoV-19/USA/NY-NYCPHL-000828/2020|2020-03-24|EPI\_ISL\_632205|Original|hCoV-19^^New York|Human|Richmond University Medical Center|New York City Public Health Laboratory|Wang|USA

>Spike|hCoV-19/USA/CA-IGI-0271/2020|2020-07-06|EPI\_ISL\_569923|Original|hCoV-19^^California|Human|Innovative Genomics Institute|Innovative Genomics Institute|Wyman|USA

>Spike|hCoV-19/England/ALDP-A50C6D/2020|2020-10-07|EPI\_ISL\_597758|Original|hCoV-19^^England|Human|Lighthouse Lab in Alderley Park|Wellcome Sanger Institute for the COVID-19 Genomics UK (COG-UK) consortium|Davies|United Kingdom

>Spike|hCoV-19/USA/TX-HMH0438/2020|2020-04-02|EPI\_ISL\_435021|Original|hCoV-19^^Texas|Human|Houston Methodist Hospital|Houston Methodist Hospital|Long|USA

>Spike|hCoV-19/India/GJ-GBRC155/2020|2020-05-27|EPI\_ISL\_461484|Original|hCoV-19^^Gujarat|Human|B.J. Medical College and Civil hospital|Gujarat Biotechnology Research Centre|Joshi|India

>Spike|hCoV-19/England/NORT-2963B9/2020|2020-05-13|EPI\_ISL\_488045|Original|hCoV-19^^England|Human|NU-OMICS DNA Sequencing research facility|Wellcome Sanger Institute for the COVID-19 Genomics UK (COG-UK) consortium|Davies|United Kingdom

>Spike|hCoV-19/USA/LA-EVTL355/2020|2020-05-25|EPI\_ISL\_578761|Original|hCoV-19^^Louisiana|Human|LSUHS Emerging Viral Threat Laboratory|Microbial Genome Sequencing Center|Kamil|USA

>Spike|hCoV-19/Latvia/055/2020|2020-07-08|EPI\_ISL\_492990|Original|hCoV-19^^Latvia|Human|Centr\u0101l\u0101 laboratorija|Latvian Biomedical Research and Study Centre|Zrelavs|Latvia

>Spike|hCoV-19/Australia/VIC357/2020|2020-03-21|EPI\_ISL\_426665|Original|hCoV-19^^Victoria|Human|Victorian Infectious Diseases Reference Laboratory (VIDRL)|Microbiological Diagnostic Unit Public Health Laboratory and Victorian Infectious Diseases Reference Laboratory|Schultz|Australia

>Spike|hCoV-19/Scotland/CVR2746/2020|2020-04-18|EPI\_ISL\_438944|Original|hCoV-19^^Scotland|Human|West of Scotland Specialist Virology Centre|COVID-19 Genomics UK (COG-UK) Consortium|Robertson|United Kingdom

>Spike|hCoV-19/Brazil/SP-L7-CD66/2020|2020-03-25|EPI\_ISL\_476434|Original|hCoV-19^^S\u00e3o Paulo|Human|Hospital da Cl\u00ednicas da Faculdade de Medicina da Universidade de S\u00e3o Paulo|Instituto de Medicina Tropical da Univesidade de S\u00e3o Paulo|Sabino|Brazil

>Spike|hCoV-19/USA/CA-QDX-2074/2020|2020-03-14|EPI\_ISL\_604393|Original|hCoV-19^^California|Human|Quest Diagnostics|Quest Diagnostics|Kagan|USA

>Spike|hCoV-19/England/BRIS-12DAE0/2020|2020-05-29|EPI\_ISL\_481931|Original|hCoV-19^^England|Human|PHE South West Regional Laboratory|Wellcome Sanger Institute for the COVID-19 Genomics UK (COG-UK) consortium|Davies|United Kingdom

>Spike|hCoV-19/Spain/CL-IBV-97006271/2020|2020-04-21|EPI\_ISL\_537642|Original|hCoV-19^^Castilla y Leon|Human|Universidad de Le\u00f3n|SeqCOVID-SPAIN consortium|IBV (CSIC)|Comas|Spain

>Spike|hCoV-19/USA/NY-NYCPHL-001220/2020|2020-11-04|EPI\_ISL\_683858|Original|hCoV-19^^New York|Human|DOHMH Jamaica|New York City Public Health Laboratory|Wang|USA

>Spike|hCoV-19/USA/MD-MDH-0020/2020|2020-04-01|EPI\_ISL\_481268|Original|hCoV-19^^Maryland|Human|Maryland Department of Health|Maryland Department of Health|Keller|USA

>Spike|hCoV-19/USA/CA-CZB-2751/2020|2020-06-27|EPI\_ISL\_582858|Original|hCoV-19^^California|Human|County of Santa Clara Public Health Department|Chan-Zuckerberg Biohub|Bhatt|USA

>Spike|hCoV-19/England/ALDP-95A97C/2020|2020-06-13|EPI\_ISL\_554894|Original|hCoV-19^^England|Human|Lighthouse Lab in Alderley Park|Wellcome Sanger Institute for the COVID-19 Genomics UK (COG-UK) consortium|Davies|United Kingdom

>Spike|hCoV-19/England/PORT-2D17F2/2020|2020-04-12|EPI\_ISL\_484420|Original|hCoV-19^^England|Human|Centre for Enzyme Innovation|COVID-19 Genomics UK (COG-UK) Consortium|Robson|United Kingdom

>Spike|hCoV-19/Jordan/AM-ALSR-3984/2020|2020-10-03|EPI\_ISL\_636347|Original|hCoV-19^^Amman|Human|Biolab Diagnostic Laboratories|Andersen lab at Scripps Research|Gangavarapu|Jordan

>Spike|hCoV-19/Belgium/DMT-0411408/2020|2020-04-11|EPI\_ISL\_462262|Original|hCoV-19^^Lessines|Human|KU Leuven|KU Leuven|Maes|Belgium



>Spike|hCoV-19/Canada/MB-NML-416/2020|2020-04-02|EPI\_ISL\_582252|Original|hCoV-19^^Manitoba|Human|Cadham Provincial Laboratory|National Microbiology Laboratory (NML)|Majer|Canada

>Spike|hCoV-19/Germany/HH-hpi-p2419/2020|2020-04-20|EPI\_ISL\_776488|Original|hCoV-19^^Hamburg|Human|University Medical Center Hamburg Eppendorf|Heinrich Pette Institute|Robitaille|Germany

>Spike|hCoV-19/USA/WA-S51/2020|2020-03-03|EPI\_ISL\_417104|Original|hCoV-19^^Washington|Human|Washington State Department of Health|Seattle Flu Study|Bedford|USA

>Spike|hCoV-19/England/20196064904/2020|2020-05-04|EPI\_ISL\_465626|Original|hCoV-19^^England|Human|Respiratory Virus Unit|Respiratory Virus Unit|Platt|United Kingdom

>Spike|hCoV-19/Sweden/20-53885/2020|2020-12-13|EPI\_ISL\_789045|Original|hCoV-19^^Orebro lan|Human|Klinisk mikrobiologi|The Public Health Agency of Sweden|Svartstr\u00f6m|Sweden

>Spike|hCoV-19/USA/DE-DHSS-F1009988/2020|2020-10-15|EPI\_ISL\_708399|Original|hCoV-19^^Delaware|Human|Delaware Public Health Lab|Delaware Public Health Lab|Bajwa|USA

>Spike|hCoV-19/USA/CA-CZB-1620/2020|2020-04-21|EPI\_ISL\_468549|Original|hCoV-19^^California|Human|San Joaquin County Public Health Lab|Chan-Zuckerberg Biohub|Hao|USA

>Spike|hCoV-19/England/LOND-D9B87/2020|2020-10-13|EPI\_ISL\_611996|Original|hCoV-19^^England|Human|University College London|COVID-19 Genomics UK (COG-UK) Consortium|Roy|United Kingdom

>Spike|hCoV-19/England/ALDP-AA2BC9/2020|2020-10-21|EPI\_ISL\_624950|Original|hCoV-19^^England|Human|Lighthouse Lab in Alderley Park|Wellcome Sanger Institute for the COVID-19 Genomics UK (COG-UK) consortium|Davies|United Kingdom

>Spike|hCoV-19/Uganda/UG105/2020|2020-07-04|EPI\_ISL\_738012|Original|hCoV-19^^Uganda|Human|Uganda Central Public Health Lab and Uganda Virus Research Institute|MRC/UVRI & LSHTM Uganda\u00a0Research Unit|Cotten|Uganda

>Spike|hCoV-19/England/MILK-CAA39A/2020|2020-12-18|EPI\_ISL\_768849|Original|hCoV-19^^England|Human|Lighthouse Lab in Milton Keynes|Wellcome Sanger Institute for the COVID-19 Genomics UK (COG-UK) Consortium|Davies|United Kingdom

>Spike|hCoV-19/USA/TX-HMH-1728/2020|2020-04-20|EPI\_ISL\_542797|Original|hCoV-19^^Texas|Human|Houston Methodist Hospital|Houston Methodist Hospital|Long|USA

>Spike|hCoV-19/Australia/VIC6883/2020|2020-07-12|EPI\_ISL\_564115|Original|hCoV-19^^Victoria|Human|Microbiological Diagnostic Unit - Public Health Laboratory (MDU-PHL)|MDU-PHL|Schultz|Australia

>Spike|hCoV-19/Wales/PHWC-487665/2020|2020-10-27|EPI\_ISL\_639224|Original|hCoV-19^^Wales|Human|Wales Specialist Virology Centre Sequencing lab|COVID-19 Genomics UK (COG-UK) Consortium|Moore|United Kingdom

>Spike|hCoV-19/USA/MN-MDH-1931/2020|2020-10-06|EPI\_ISL\_613495|Original|hCoV-19^^Minnesota|Human|Public Health Laboratory - Infectious Disease Lab|Minnesota Department of Health|Lorentz|USA

>Spike|hCoV-19/USA/ME-HETL-J0304/2020|2020-12-01|EPI\_ISL\_755442|Original|hCoV-19^^Maine|Human|Maine Health and Environmental Testing Laboratory|Tewhey Lab|Tewhey|USA

>Spike|hCoV-19/Mexico/CMX-INMEGEN-12/2020|2020-08-06|EPI\_ISL\_522942|Original|hCoV-19^^Mexico City|Human|Instituto Nacional de Medicina Gen\u00f3mica|Instituto Nacional de Medicina Gen\u00f3mica|Hidalgo|Mexico

>Spike|hCoV-19/Denmark/DCGC-2423/2020|2020-08-10|EPI\_ISL\_617484|Original|hCoV-19^^Midtjylland|Human|Department of Virus and Microbiological Special Diagnostics|Albertsen lab|Michaelsen|Denmark

>Spike|hCoV-19/USA/AZ-TG376020/2020|2020-06-15|EPI\_ISL\_694609|Original|hCoV-19^^Arizona|Human|TGen North|TGen North|French|USA

>Spike|hCoV-19/England/20118057804/2020|2020-03-12|EPI\_ISL\_464928|Original|hCoV-19^^England|Human|Respiratory Virus Unit|Respiratory Virus Unit|Platt|United Kingdom

>Spike|hCoV-19/Denmark/DCGC-2259/2020|2020-08-10|EPI\_ISL\_617439|Original|hCoV-19^^Nordjylland|Human|Department of Virus and Microbiological Special Diagnostics|Albertsen lab|Michaelsen|Denmark

>Spike|hCoV-19/Switzerland/BE-ETHZ-410242/2020|2020-11-27|EPI\_ISL\_737729|Original|hCoV-19^^Bern|Human|Viollier AG|Department of Biosystems Science and Engineering|Nadeau|Switzerland

>Spike|hCoV-19/Denmark/DCGC-5760/2020|2020-09-28|EPI\_ISL\_619909|Original|hCoV-19^^Hovedstaden|Human|Department of Virus and Microbiological Special Diagnostics|Albertsen lab|Michaelsen|Denmark

>Spike|hCoV-19/USA/WY-WYPHL-20007680/2020|2020-04-03|EPI\_ISL\_493128|Original|hCoV-19^^Wyoming|Human|Wyoming Public Health Laboratory|Wyoming Public Health Laboratory|Sevinsky|USA

>Spike|hCoV-19/Wales/PHWC-30D6A/2020|2020-04-09|EPI\_ISL\_446354|Original|hCoV-19^^Wales|Human|Wales Specialist Virology Centre|Public Health Wales Microbiology Cardiff|Moore|United Kingdom

>Spike|hCoV-19/Scotland/CVR5475/2020|2020-10-30|EPI\_ISL\_650538|Original|hCoV-19^^Scotland|Human|West of Scotland Specialist Virology Centre|COVID-19 Genomics UK (COG-UK) Consortium|Robertson|United Kingdom

>Spike|hCoV-19/Wales/PHWC-1637E7/2020|2020-05-11|EPI\_ISL\_473998|Original|hCoV-19^^Wales|Human|Originating lab|COVID-19 Genomics UK (COG-UK) Consortium|Moore|United Kingdom

>Spike|hCoV-19/USA/TX-HMH-4010/2020|2020-06-16|EPI\_ISL\_543293|Original|hCoV-19^^Texas|Human|Houston Methodist Hospital|Houston Methodist Hospital|Long|USA

>Spike|hCoV-19/USA/FL-BPHL-0837/2020|2020-06-19|EPI\_ISL\_514183|Original|hCoV-19^^Florida|Human|Florida Bureau of Public Health Laboratories|Florida Bureau of Public Health Laboratories|Blanton|USA

>Spike|hCoV-19/USA/WA-UW-45089/2020|2020-12-08|EPI\_ISL\_747207|Original|hCoV-19^^Washington|Human|UW Virology Lab|UW Virology Lab|Roychoudhury|USA

>Spike|hCoV-19/Singapore/320nan/2020|2020-05-20|EPI\_ISL\_648804|Original|hCoV-19^^Singapore|Human|Department of Laboratory Medicine|Department of Laboratory Medicine|Chen|Singapore

>Spike|hCoV-19/England/CAMC-B1FCA5/2020|2020-11-02|EPI\_ISL\_647657|Original|hCoV-19^^England|Human|Lighthouse Lab in Cambridge|Wellcome Sanger Institute for the COVID-19 Genomics UK (COG-UK) Consortium|Davies|United Kingdom

>Spike|hCoV-19/USA/UT-UPHL-2012723027/2020|2020-11-30|EPI\_ISL\_746461|Original|hCoV-19^^Utah|Human|Utah Public Health Laboratory|Utah Public Health Laboratory|Gallagher|USA

>Spike|hCoV-19/Australia/VIC5478/2020|2020-07-20|EPI\_ISL\_520226|Original|hCoV-19^^Victoria|Human|Microbiological Diagnostic Unit - Public Health Laboratory (MDU-PHL)|MDU-PHL|Schultz|Australia

>Spike|hCoV-19/USA/MI-UM-10036589901/2020|2020-10-23|EPI\_ISL\_650002|Original|hCoV-19^^Michigan|Human|University of Michigan Clinical Microbiology Laboratory|Lauring Lab|Valesano|USA

>Spike|hCoV-19/England/BRIS-12758B/2020|2020-03-31|EPI\_ISL\_469577|Original|hCoV-19^^England|Human|PHE South West Regional Laboratory|Wellcome Sanger Institute for the COVID-19 Genomics UK (COG-UK) consortium|Davies|United Kingdom

>Spike|hCoV-19/Denmark/DCGC-12754/2020|2020-11-09|EPI\_ISL\_682935|Original|hCoV-19^^Sjælland|Human|Department of Virus and Microbiological Special Diagnostics|Albertsen Lab|Michaelsen|Denmark

>Spike|hCoV-19/Scotland/CVR4531/2020|2020-09-22|EPI\_ISL\_585391|Original|hCoV-19^^Scotland|Human|Lighthouse Lab in Glasgow / MRC-University of Glasgow Centre for Virus Research|COVID-19 Genomics UK (COG-UK) Consortium|Robertson|United Kingdom

>Spike|hCoV-19/Singapore/652/2020|2020-04-22|EPI\_ISL\_493412|Original|hCoV-19^^Singapore|Human|National Public Health Laboratory|National Public Health Laboratory|Mak|Singapore

>Spike|hCoV-19/England/CAMB-1BA699/2020|2020-11-11|EPI\_ISL\_664992|Original|hCoV-19^^England|Human|Department of Pathology|COVID-19 Genomics UK (COG-UK) Consortium|Goodfellow|United Kingdom

>Spike|hCoV-19/England/PORT-2D0070/2020|2020-05-01|EPI\_ISL\_475250|Original|hCoV-19^^England|Human|Centre for Enzyme Innovation|COVID-19 Genomics UK (COG-UK) Consortium|Robson|United Kingdom

>Spike|hCoV-19/Scotland/QEUH-A00DC3/2020|2020-10-02|EPI\_ISL\_585574|Original|hCoV-19^^Scotland|Human|University of Exeter|COVID-19 Genomics UK (COG-UK) Consortium|Temperton|United Kingdom

>Spike|hCoV-19/England/QEUH-B692B9/2020|2020-11-11|EPI\_ISL\_661630|Original|hCoV-19^^England|Human|Lighthouse Lab in Glasgow|Wellcome Sanger Institute for the COVID-19 Genomics UK (COG-UK) Consortium|Davies|United Kingdom

>Spike|hCoV-19/England/CAMC-AB15C9/2020|2020-10-23|EPI\_ISL\_623721|Original|hCoV-19^^England|Human|Lighthouse Lab in Cambridge|Wellcome Sanger Institute for the COVID-19 Genomics UK (COG-UK) consortium|Davies|United Kingdom

>Spike|hCoV-19/USA/CA-IGI-0092/2020|2020-06-18|EPI\_ISL\_511846|Original|hCoV-19^^California|Human|Innovative Genomics Institute|Innovative Genomics Institute|Wyman|USA

>Spike|hCoV-19/England/NORT-1B62824/2020|2020-11-15|EPI\_ISL\_706279|Original|hCoV-19^^England|Human|Northumbria University / South Tees Hospitals NHS Foundation Trust / North Cumbria Integrated Care NHS Foundation Trust / North Tees and Hartlepool NHS Foundation Trust / Newcastle Hospitals NHS Foundation Trust|COVID-19 Genomics UK (COG-UK) Consortium|Bashton|United Kingdom

>Spike|hCoV-19/USA/WA-UW-23360/2020|2020-08-03|EPI\_ISL\_576432|Original|hCoV-19^^Washington|Human|UW Virology Lab|UW Virology Lab|Roychoudhury|USA

>Spike|hCoV-19/England/QEUH-9CFB8B/2020|2020-09-16|EPI\_ISL\_589915|Original|hCoV-19^^England|Human|Lighthouse Lab in Glasgow|Wellcome Sanger Institute for the COVID-19 Genomics UK (COG-UK) consortium|Davies|United Kingdom

>Spike|hCoV-19/Scotland/CVR849/2020|2020-03-25|EPI\_ISL\_433350|Original|hCoV-19^^Scotland|Human|West of Scotland Specialist Virology Centre|COVID-19 Genomics UK (COG-UK) Consortium|Robertson|United Kingdom

>Spike|hCoV-19/USA/CA-CHLA-PLM97372016/2020|2020-12-02|EPI\_ISL\_753580|Original|hCoV-19^^California|Human|Clinical virology Laboratory|Center for Personalized Medicine|Dien Bard|USA

>Spike|hCoV-19/Australia/VIC541/2020|2020-03-24|EPI\_ISL\_426806|Original|hCoV-19^^Victoria|Human|Victorian Infectious Diseases Reference Laboratory (VIDRL)|Microbiological Diagnostic Unit Public Health Laboratory and Victorian Infectious Diseases Reference Laboratory|Schultz|Australia

>Spike|hCoV-19/Switzerland/ZH-ETHZ-270086/2020|2020-09-02|EPI\_ISL\_541518|Original|hCoV-19^^Zurich|Human|Viollier AG|Department of Biosystems Science and Engineering|Nadeau|Switzerland

>Spike|hCoV-19/Wales/PHWC-4A528B/2020|2020-12-15|EPI\_ISL\_764845|Original|hCoV-19^^Wales|Human|Wales Specialist Virology Centre Sequencing lab|COVID-19 Genomics UK (COG-UK) Consortium|Moore|United Kingdom

>Spike|hCoV-19/England/ALDP-C48783/2020|2020-12-12|EPI\_ISL\_736717|Original|hCoV-19^^England|Human|Lighthouse Lab in Alderley Park|Wellcome Sanger Institute for the COVID-19 Genomics UK (COG-UK) Consortium|Davies|United Kingdom

>Spike|hCoV-19/England/MILK-9A6E63/2020|2020-09-01|EPI\_ISL\_550150|Original|hCoV-19^^England|Human|Lighthouse Lab in Milton Keynes|Wellcome Sanger Institute for the COVID-19 Genomics UK (COG-UK) consortium|Davies|United Kingdom

>Spike|hCoV-19/Russia/StPetersburg-RII11168S/2020|2020-05-02|EPI\_ISL\_507240|Original|hCoV-19^^Saint Petersburg|Human|WHO National Influenza Centre Russian Federation|WHO National Influenza Centre Russian Federation|Komissarov|Russia

>Spike|hCoV-19/United Arab Emirates/DU-A-S8-1\_S3/2020|2020-04-23|EPI\_ISL\_548969|Original|hCoV-19^^Dubai|Human|Expo2020 Emergency Center|Agiomix|Ben Hamda|United Arab Emirates

>Spike|hCoV-19/England/SHEF-C8329/2020|2020-04-12|EPI\_ISL\_442027|Original|hCoV-19^^England|Human|Virology Department|COVID-19 Genomics UK (COG-UK) Consortium|de Silva|United Kingdom

>Spike|hCoV-19/Denmark/DCGC-12807/2020|2020-10-26|EPI\_ISL\_682988|Original|hCoV-19^^Nordjylland|Human|Department of Virus and Microbiological Special Diagnostics|Albertsen Lab|Michaelsen|Denmark

>Spike|hCoV-19/England/20142019704/2020|2020-03-30|EPI\_ISL\_423444|Original|hCoV-19^^England|Human|Respiratory Virus Unit|Respiratory Virus Unit|Platt|United Kingdom

>Spike|hCoV-19/Denmark/DCGC-16093/2020|2020-11-16|EPI\_ISL\_714184|Original|hCoV-19^^Hovedstaden|Human|Department of Virus and Microbiological Special Diagnostics|Albertsen Lab|Michaelsen|Denmark

>Spike|hCoV-19/England/QEUEH-A9FC26/2020|2020-10-20|EPI\_ISL\_665993|Original|hCoV-19^^England|Human|Northumbria University / South Tees Hospitals NHS Foundation Trust / North Cumbria Integrated Care NHS Foundation Trust / North Tees and Hartlepool NHS Foundation Trust / Newcastle Hospitals NHS Foundation Trust|COVID-19 Genomics UK (COG-UK) Consortium|Bashton|United Kingdom

>Spike|hCoV-19/Canada/ON-S946/2020|2020-04-14|EPI\_ISL\_586499|Original|hCoV-19^^Ontario|Human|Toronto Invasive Bacterial Diseases Network|McMaster University|McArthur|Canada

>Spike|hCoV-19/Scotland/QEUEH-AD2182/2020|2020-10-27|EPI\_ISL\_649735|Original|hCoV-19^^Scotland|Human|Lighthouse Lab in Glasgow|Wellcome Sanger Institute for the COVID-19 Genomics UK (COG-UK) Consortium|Davies|United Kingdom

>Spike|hCoV-19/USA/TX-HMH-MCoV-14455/2020|2020-10-07|EPI\_ISL\_787740|Original|hCoV-19^^Texas|Human|Houston Methodist Hospital|Houston Methodist Hospital|Long|USA

>Spike|hCoV-19/Netherlands/ZH-EMC-728/2020|2020-10-05|EPI\_ISL\_632369|Original|hCoV-19^^Zuid Holland|Human|Dutch COVID-19 response team|Erasmus Medical Center|Oude Munnink|Netherlands

>Spike|hCoV-19/England/SHEF-CF5E0/2020|2020-05-19|EPI\_ISL\_529356|Original|hCoV-19^^England|Human|Virology Department|COVID-19 Genomics UK (COG-UK) Consortium|de Silva|United Kingdom

>Spike|hCoV-19/Wales/PHWC-33A8E/2020|2020-04-14|EPI\_ISL\_446780|Original|hCoV-19^^Wales|Human|Wales Specialist Virology Centre|Public Health Wales Microbiology Cardiff|Moore|United Kingdom

>Spike|hCoV-19/England/QEUEH-B9FD6E/2020|2020-11-18|EPI\_ISL\_720947|Original|hCoV-19^^England|Human|Lighthouse Lab in Glasgow|Wellcome Sanger Institute for the COVID-19 Genomics UK (COG-UK) Consortium|Davies|United Kingdom

>Spike|hCoV-19/USA/FL-BPHL-1833/2020|2020-04-06|EPI\_ISL\_613916|Original|hCoV-19^^Florida|Human|Florida Bureau of Public Health Laboratories|Florida Bureau of Public Health Laboratories|Blanton|USA

>Spike|hCoV-19/Denmark/DCGC-7090/2020|2020-10-12|EPI\_ISL\_619132|Original|hCoV-19^^Midtjylland|Human|Department of Virus and Microbiological Special Diagnostics|Albertsen lab|Michaelsen|Denmark

>Spike|hCoV-19/Spain/VC-FISABIO-648/2020|2020-03-31|EPI\_ISL\_455721|Original|hCoV-19^^Comunitat Valenciana|Human|Servicio de Microbiología. Hospital Clínico Universitario de Valencia|Sequencing and Bioinformatics Service and Molecular Epidemiology Research Group. FISABIO-Public Health|Gonzalez-Candelas|Spain

>Spike|hCoV-19/USA/TX-HMH-MCoV-19053/2020|2020-11-24|EPI\_ISL\_783602|Original|hCoV-19^^Texas|Human|Houston Methodist Hospital|Houston Methodist Hospital|Long|USA

>Spike|hCoV-19/Spain/IB-IBV-99011553/2020|2020-12-11|EPI\_ISL\_779868|Original|hCoV-19^^Balear Islands|Human|Servicio de Microbiología|SeqCOVID-SPAIN consortium|IBV (CSIC) |Comas|Spain

>Spike|hCoV-19/Scotland/CVR75/2020|2020-03-06|EPI\_ISL\_425805|Original|hCoV-19^^Scotland|Human|West of Scotland Specialist Virology Centre|COVID-19 Genomics UK (COG-UK) Consortium|Robertson|United Kingdom

>Spike|hCoV-19/New Zealand/20CV0364/2020|2020-09-21|EPI\_ISL\_579107|Original|hCoV-19^^Auckland|Human|LabPLUS|Institute of Environmental Science and Research (ESR)|Wang|New Zealand

>Spike|hCoV-19/England/CAMB-78A50/2020|2020-04-07|EPI\_ISL\_433809|Original|hCoV-19^^England|Human|Department of Pathology|COVID-19 Genomics UK (COG-UK) Consortium|Meredith|United Kingdom

>Spike|hCoV-19/USA/WI-UW-1742/2020|2020-09-22|EPI\_ISL\_605615|Original|hCoV-19^^Wisconsin|Human|University of Wisconsin-Madison AIDS Vaccine Research Laboratories|University of Wisconsin-Madison AIDS Vaccine Research Laboratories|Baczenas|USA

>Spike|hCoV-19/France/PAC-MEPHI-2140/2020|2020-09-25|EPI\_ISL\_644509|Original|hCoV-19^^Provence-Alpes-Cote-d\u2019Azur|Human|MEPHI|MEPHI|Levasseur|France

>Spike|hCoV-19/Brazil/RJ-1943/2020|2020-04-13|EPI\_ISL\_456094|Original|hCoV-19^^Rio de Janeiro|Human|Laboratory of Respiratory Viruses and Measles|Laboratory of Respiratory Viruses and Measles|Silva|Brazil

>Spike|hCoV-19/England/ALDP-9CB721/2020|2020-09-16|EPI\_ISL\_575431|Original|hCoV-19^^England|Human|Lighthouse Lab in Alderley Park|Wellcome Sanger Institute for the COVID-19 Genomics UK (COG-UK) consortium|Davies|United Kingdom

>Spike|hCoV-19/Norway/3603/2020|2020-09-18|EPI\_ISL\_590929|original|hCoV-19^^Viken|Human|Medical Microbiology Unit|Norwegian Institute of Public Health|Vollan|Norway

>Spike|hCoV-19/Switzerland/BE-ETHZ-260146/2020|2020-08-25|EPI\_ISL\_539442|Original|hCoV-19^^Bern|Human|Viollier AG|Department of Biosystems Science and Engineering|Nadeau|Switzerland

>Spike|hCoV-19/USA/LA-EVTL074/2020|2020-05-04|EPI\_ISL\_451235|Original|hCoV-19^^Louisiana|Human|LSUHS Emerging Viral Threat Laboratory|Microbial Genome Sequencing Center|Kamil|USA

>Spike|hCoV-19/USA/HI-H200322/2020|2020-08-17|EPI\_ISL\_752880|Original|hCoV-19^^Hawaii|Human|State Laboratories Division|State Laboratories Division|Sultana|USA

>Spike|hCoV-19/Scotland/EDB8804/2020|2020-10-26|EPI\_ISL\_652000|Original|hCoV-19^^Scotland|Human|Virology Department|COVID-19 Genomics UK (COG-UK) Consortium|McHugh|United Kingdom

>Spike|hCoV-19/Denmark/DCGC-18116/2020|2020-12-14|EPI\_ISL\_749209|Original|hCoV-19^^Syddanmark|Human|Department of Virus and Microbiological Special Diagnostics|Albertsen Lab|Michaelsen|Denmark

>Spike|hCoV-19/England/BRIS-12C744/2020|2020-05-03|EPI\_ISL\_469499|Original|hCoV-19^^England|Human|PHE South West Regional Laboratory|Wellcome Sanger Institute for the COVID-19 Genomics UK (COG-UK) consortium|Davies|United Kingdom

>Spike|hCoV-19/USA/WI-UW-2025/2020|2020-09-26|EPI\_ISL\_677432|Original|hCoV-19^^Wisconsin|Human|University of Wisconsin-Madison AIDS Vaccine Research Laboratories|University of Wisconsin-Madison AIDS Vaccine Research Laboratories|Baczenas|USA

>Spike|hCoV-19/Mexico/GRO-INBRE-92/2020|2020-07-18|EPI\_ISL\_658899|Original|hCoV-19^^Guerrero|Human|Instituto de Diagnostico y Referencia Epidemiologicos (INDRE)|Instituto de Diagnostico y Referencia Epidemiologicos (INDRE)|Rodriguez|Mexico

>Spike|hCoV-19/Australia/VIC14529/2020|2020-08-19|EPI\_ISL\_592878|Original|hCoV-19^^Victoria|Human|Victorian Infectious Diseases Reference Laboratory (VIDRL)|VIDRL and MDU-PHL|Schultz|Australia

>Spike|hCoV-19/USA/TX-HMH-5709/2020|2020-06-25|EPI\_ISL\_546958|Original|hCoV-19^^Texas|Human|Houston Methodist Hospital|Houston Methodist Hospital|Long|USA

>Spike|hCoV-19/England/ALDP-A69496/2020|2020-10-12|EPI\_ISL\_608928|Original|hCoV-19^^England|Human|Lighthouse Lab in Alderley Park|Wellcome Sanger Institute for the COVID-19 Genomics UK (COG-UK) consortium|Davies|United Kingdom

>Spike|hCoV-19/India/TG-CCMB-M882/2020|2020-06-12|EPI\_ISL\_495259|Original|hCoV-19^^Telangana|Human|CSIR-Centre for Cellular and Molecular Biology|CSIR-Centre for Cellular and Molecular Biology|Banu|India

>Spike|hCoV-19/Brazil/SP-L14-CD257/2020|2020-03-27|EPI\_ISL\_476253|Original|hCoV-19^^S\u00e3o Paulo|Human|Hospital da Cl\u00ednicas da Faculdade de Medicina da Universidade de S\u00e3o Paulo|Instituto de Medicina Tropical da Univesidade de S\u00e3o Paulo|Sabino|Brazil

>Spike|hCoV-19/England/ALDP-A84C8E/2020|2020-10-17|EPI\_ISL\_610414|Original|hCoV-19^^England|Human|Lighthouse Lab in Alderley Park|Wellcome Sanger Institute for the COVID-19 Genomics UK (COG-UK) consortium|Davies|United Kingdom

>Spike|hCoV-19/England/MILK-976822/2020|2020-08-20|EPI\_ISL\_575863|Original|hCoV-19^^England|Human|Lighthouse Lab in Milton Keynes|Wellcome Sanger Institute for the COVID-19 Genomics UK (COG-UK) consortium|Davies|United Kingdom

>Spike|hCoV-19/Scotland/QEUH-A9D323/2020|2020-10-20|EPI\_ISL\_680565|Original|hCoV-19^^Scotland|Human|Centre for Enzyme Innovation|COVID-19 Genomics UK (COG-UK) Consortium|Robson|United Kingdom

>Spike|hCoV-19/England/ALDP-B83170/2020|2020-11-14|EPI\_ISL\_675683|Original|hCoV-19^^England|Human|Lighthouse Lab in Alderley Park|Wellcome Sanger Institute for the COVID-19 Genomics UK (COG-UK) Consortium|Davies|United Kingdom

>Spike|hCoV-19/Scotland/QEUH-B2B444/2020|2020-11-03|EPI\_ISL\_676433|Original|hCoV-19^^Scotland|Human|Lighthouse Lab in Glasgow|Wellcome Sanger Institute for the COVID-19 Genomics UK (COG-UK) Consortium|Davies|United Kingdom

>Spike|hCoV-19/England/BRIS-12F046/2020|2020-04-25|EPI\_ISL\_488327|Original|hCoV-19^^England|Human|PHE South West Regional Laboratory|Wellcome Sanger Institute for the COVID-19 Genomics UK (COG-UK) consortium|Davies|United Kingdom

>Spike|hCoV-19/USA/MI-MDHHS-SC20193/2020|2020-03-21|EPI\_ISL\_447164|Original|hCoV-19^^Michigan|Human|Michigan Department of Health and Human Services|Michigan Department of Health and Human Services|Blankenship|USA

>Spike|hCoV-19/USA/CA-QDX-556/2020|2020-03-19|EPI\_ISL\_571278|Original|hCoV-19^^California|Human|Quest Diagnostics|Quest Diagnostics|Kagan|USA

>Spike|hCoV-19/England/NORT-2A4AC2/2020|2020-09-15|EPI\_ISL\_573394|Original|hCoV-19^^England|Human|Northumbria University / South Tees Hospitals NHS Foundation Trust / North Cumbria Integrated Care NHS Foundation Trust / North Tees and Hartlepool NHS Foundation Trust / Newcastle Hospitals NHS Foundation Trust|COVID-19 Genomics UK (COG-UK) Consortium|Bashton|United Kingdom

>Spike|hCoV-19/Denmark/DCGC-11437/2020|2020-11-02|EPI\_ISL\_670921|Original|hCoV-19^^Midtjylland|Human|Department of Virus and Microbiological Special Diagnostics|Albertsen Lab|Michaelsen|Denmark

>Spike|hCoV-19/USA/WI-UW-2263/2020|2020-10-11|EPI\_ISL\_728032|Original|hCoV-19^^Wisconsin|Human|University of Wisconsin-Madison AIDS Vaccine Research Laboratories|University of Wisconsin-Madison AIDS Vaccine Research Laboratories|Baczenas|USA

>Spike|hCoV-19/Canada/QC-LSPQ-L00235552/2020|2020-03-24|EPI\_ISL\_536099|Original|hCoV-19^^Quebec|Human|H\u00f4pital Pierre-Boucher|Laboratoire de sant\u00e9 publique du Qu\u00e9bec|Moreira|Canada

>Spike|hCoV-19/USA/TX-DSHS-1170/2020|2020-07-03|EPI\_ISL\_634970|Original|hCoV-19^^Texas|Human|Texas Department of State Health Services|Texas Department of State Health Services|Rahman|USA

>Spike|hCoV-19/Wales/PHWC-49D13E/2020|2020-12-11|EPI\_ISL\_742738|Original|hCoV-19^^Wales|Human|Wales Specialist Virology Centre Sequencing lab|COVID-19 Genomics UK (COG-UK) Consortium|Moore|United Kingdom

>Spike|hCoV-19/USA/OR-OHSU-2597/2020|2020-08-21|EPI\_ISL\_667260|Original|hCoV-19^^Oregon|Human|OHSU Lab Services Molecular Microbiology Lab|Oregon SARS-CoV-2 Genome Sequencing Center|O'Roak|USA

>Spike|hCoV-19/Wales/PHWC-29098/2020|2020-04-03|EPI\_ISL\_445476|Original|hCoV-19^^Wales|Human|Wales Specialist Virology Centre|Public Health Wales Microbiology Cardiff|Moore|United Kingdom

>Spike|hCoV-19/USA/OR-PROV-028/2020|2020-03-29|EPI\_ISL\_482312|Original|hCoV-19^^Oregon|Human|Providence St. Joseph Health Molecular Genomics Laboratory|Providence St. Joseph Health Molecular Genomics Laboratory|Dowdell|USA

>Spike|hCoV-19/England/LIVE-1D6D56/2020|2020-09-14|EPI\_ISL\_572436|Original|hCoV-19^^England|Human|Liverpool Clinical Laboratories|COVID-19 Genomics UK (COG-UK) Consortium|Haldenby|United Kingdom

>Spike|hCoV-19/USA/TX-HMH-MCoV-11689/2020|2020-09-14|EPI\_ISL\_789985|Original|hCoV-19^^Texas|Human|Houston Methodist Hospital|Houston Methodist Hospital|Long|USA

>Spike|hCoV-19/Wales/PHWC-4A1B75/2020|2020-12-12|EPI\_ISL\_743784|Original|hCoV-19^^Wales|Human|Wales Specialist Virology Centre Sequencing lab|COVID-19 Genomics UK (COG-UK) Consortium|Moore|United Kingdom

>Spike|hCoV-19/Spain/RI-IBV-98002312/2020|2020-03-11|EPI\_ISL\_537834|Original|hCoV-19^^La Rioja|Human|Centro de Investigaci\u00f3n Biom\u00e9dica de La Rioja - Hospital San Pedro Logro\u00f1o|SeqCOVID-SPAIN consortium/IBV (CSIC) |Comas|Spain

>Spike|hCoV-19/England/QEUH-B9F43C/2020|2020-11-18|EPI\_ISL\_721157|Original|hCoV-19^^England|Human|Lighthouse Lab in Glasgow|Wellcome Sanger Institute for the COVID-19 Genomics UK (COG-UK) Consortium|Davies|United Kingdom

>Spike|hCoV-19/England/CAMC-B7AC4E/2020|2020-11-12|EPI\_ISL\_723951|Original|hCoV-19^^England|Human|Oxford Viromics|COVID-19 Genomics UK (COG-UK) Consortium|Golubchik|United Kingdom

>Spike|hCoV-19/USA/OR-OHSU-2313/2020|2020-08-10|EPI\_ISL\_667180|Original|hCoV-19^^Oregon|Human|OHSU Lab Services Molecular Microbiology Lab|Oregon SARS-CoV-2 Genome Sequencing Center|O'Roak|USA

>Spike|hCoV-19/England/NORW-F398D/2020|2020-12-06|EPI\_ISL\_725146|Original|hCoV-19^^England|Human|Quadram Institute Bioscience|COVID-19 Genomics UK (COG-UK) Consortium|Alikhan|United Kingdom

>Spike|hCoV-19/Scotland/CVR5769/2020|2020-11-12|EPI\_ISL\_705639|Original|hCoV-19^^Scotland|Human|West of Scotland Specialist Virology Centre|COVID-19 Genomics UK (COG-UK) Consortium|Robertson|United Kingdom

>Spike|hCoV-19/Japan/PG-1250/2020|2020-00-00|EPI\_ISL\_684860|Original|hCoV-19^^Japan|Human|Pathogen Genomics Center|Pathogen Genomics Center|Sekizuka|Japan

>Spike|hCoV-19/Wales/PHWC-47D78D/2020|2020-10-09|EPI\_ISL\_586189|Original|hCoV-19^^Wales|Human|Wales Specialist Virology Centre Sequencing lab|COVID-19 Genomics UK (COG-UK) Consortium|Moore|United Kingdom

>Spike|hCoV-19/Japan/TK-Y17873/2020|2020-05-00|EPI\_ISL\_486909|Original|hCoV-19^^Tokyo|Human|Tokyo Metropolitan Institute of Public Health|Tokyo Metropolitan Institute of Public Health|Nagashima|Japan

>Spike|hCoV-19/Wales/MILK-A47B5D/2020|2020-10-05|EPI\_ISL\_609265|Original|hCoV-19^^Wales|Human|Lighthouse Lab in Milton Keynes|Wellcome Sanger Institute for the COVID-19 Genomics UK (COG-UK) consortium|Davies|United Kingdom

>Spike|hCoV-19/Denmark/ALAB-SSI424A/2020|2020-03-24|EPI\_ISL\_429522|Original|hCoV-19^^Denmark|Human|Department of Virus and Microbiological Special Diagnostics|Albertsen lab|Kirkegaard|Denmark

>Spike|hCoV-19/USA/MN-MDH-1532/2020|2020-07-21|EPI\_ISL\_527597|Original|hCoV-19^^Minnesota|Human|Minnesota Department of Health|Minnesota Department of Health|Garfin|USA

>Spike|hCoV-19/Wales/PHWC-47D389/2020|2020-10-07|EPI\_ISL\_586134|Original|hCoV-19^^Wales|Human|Wales Specialist Virology Centre Sequencing lab|COVID-19 Genomics UK (COG-UK) Consortium|Moore|United Kingdom

>Spike|hCoV-19/USA/VA-DCLS-1646/2020|2020-08-29|EPI\_ISL\_614046|Original|hCoV-19^^Virginia|Human|Virginia DCLS|Virginia DCLS|St. Jacques|USA

>Spike|hCoV-19/England/QEUEH-B7F757/2020|2020-11-14|EPI\_ISL\_674779|Original|hCoV-19^^England|Human|Lighthouse Lab in Glasgow|Wellcome Sanger Institute for the COVID-19 Genomics UK (COG-UK) Consortium|Davies|United Kingdom

>Spike|hCoV-19/Switzerland/BL-ETHZ-380395/2020|2020-11-23|EPI\_ISL\_721800|Original|hCoV-19^^Basel-Landschaft|Human|Viollier AG|Department of Biosystems Science and Engineering|Nadeau|Switzerland

>Spike|hCoV-19/England/QEUEH-9DD461/2020|2020-09-21|EPI\_ISL\_599743|Original|hCoV-19^^England|Human|Lighthouse Lab in Glasgow|Wellcome Sanger Institute for the COVID-19 Genomics UK (COG-UK) consortium|Davies|United Kingdom

>Spike|hCoV-19/England/NORW-F8214/2020|2020-11-13|EPI\_ISL\_650512|Original|hCoV-19^^England|Human|Quadram Institute Bioscience|COVID-19 Genomics UK (COG-UK) Consortium|Alikhan|United Kingdom

>Spike|hCoV-19/USA/OR-OHSU-0767/2020|2020-06-24|EPI\_ISL\_525894|Original|hCoV-19^^Oregon|Human|OHSU Lab Services Molecular Microbiology Lab|Oregon SARS-CoV-2 Genome Sequencing Center|O'Roak|USA

>Spike|hCoV-19/Singapore/292/2020|2020-03-20|EPI\_ISL\_462410|Original|hCoV-19^^Singapore|Human|National Public Health Laboratory|National Public Health Laboratory|Mak|Singapore

>Spike|hCoV-19/Bangladesh/BCSIR-NILMRC-372/2020|2020-07-31|EPI\_ISL\_514249|Original|hCoV-19^^Dhaka|Human|National Institute of Laboratory Medicine and Referral Center|Genomic Research Lab|Khan|Bangladesh

>Spike|hCoV-19/Scotland/EDB6414/2020|2020-04-12|EPI\_ISL\_487908|Original|hCoV-19^^Scotland|Human|Virology Department|Wellcome Sanger Institute for the COVID-19 Genomics UK (COG-UK) consortium|Davies|United Kingdom

>Spike|hCoV-19/USA/LA-EVTL751/2020|2020-07-20|EPI\_ISL\_653442|Original|hCoV-19^^Louisiana|Human|LSUHS Emerging Viral Threat Laboratory|Microbial Genome Sequencing Center|Kamil|USA

>Spike|hCoV-19/England/MILK-B966E4/2020|2020-11-14|EPI\_ISL\_676070|Original|hCoV-19^^England|Human|Lighthouse Lab in Milton Keynes|Wellcome Sanger Institute for the COVID-19 Genomics UK (COG-UK) Consortium|Davies|United Kingdom

>Spike|hCoV-19/USA/MI-UM-2006S000924/2020|2020-03-26|EPI\_ISL\_484757|Original|hCoV-19^^Michigan|Human|University of Michigan Clinical Microbiology Laboratory|Lauring Lab|Valesano|USA

>Spike|hCoV-19/Russia/AST-RII-MH4591S/2020|2020-09-21|EPI\_ISL\_733217|Original|hCoV-19^^Astrakhan|Human|Pathogenic Microorganisms Variability Laboratory|WHO National Influenza Centre Russian Federation|Komissarov|Russia

>Spike|hCoV-19/South Korea/KCDC2507/2020|2020-06-16|EPI\_ISL\_514910|Original|hCoV-19^^South Korea|Human|Division of Viral Diseases|Division of Viral Diseases|Kim|South Korea

>Spike|hCoV-19/Netherlands/GE-RIVM-20311/2020|2020-11-20|EPI\_ISL\_723450|Original|hCoV-19^^Gelderland|Human|Dutch COVID-19 response team|National Institute for Public Health and the Environment (RIVM)|Meijer|Netherlands

>Spike|hCoV-19/USA/CA-ALSR-0584-SAN/2020|2020-04-15|EPI\_ISL\_483240|Original|hCoV-19^^California|Human|UC San Diego Center for Advanced Laboratory Medicine|Andersen lab at Scripps Research|Gangavarapu|USA

>Spike|hCoV-19/Norway/3842/2020|2020-09-25|EPI\_ISL\_590981|original|hCoV-19^^Vestland|Human|Foerde Hospital|Norwegian Institute of Public Health|Vollan|Norway

>Spike|hCoV-19/England/OXON-B518F/2020|2020-09-27|EPI\_ISL\_595326|Original|hCoV-19^^England|Human|Oxford Viromics|COVID-19 Genomics UK (COG-UK) Consortium|Golubchik|United Kingdom

>Spike|hCoV-19/Italy/TUS-UOS-9/2020|2020-03-21|EPI\_ISL\_591337|Original|hCoV-19^^Tuscany|Human|Dipartimento di Biotechnologie Mediche|Dipartimento di Biotechnologie Mediche|Cusi|Italy

>Spike|hCoV-19/England/CAMC-B21921/2020|2020-11-01|EPI\_ISL\_647214|Original|hCoV-19^^England|Human|Lighthouse Lab in Cambridge|Wellcome Sanger Institute for the COVID-19 Genomics UK (COG-UK) Consortium|Davies|United Kingdom

>Spike|hCoV-19/England/QEUEH-C32018/2020|2020-12-11|EPI\_ISL\_782616|Original|hCoV-19^^England|Human|Lighthouse Lab in Glasgow|Wellcome Sanger Institute for the COVID-19 Genomics UK (COG-UK) Consortium|Davies|United Kingdom

>Spike|hCoV-19/Australia/WA464/2020|2020-03-29|EPI\_ISL\_708758|Original|hCoV-19^^Western Australia|Human|PathWest Laboratory Medicine WA|PathWest Laboratory Medicine WA Microbial Surveillance Unit|Sikazwe|Australia

>Spike|hCoV-19/Italy/LOM-IZSGC-TE38819/2020|2020-05-10|EPI\_ISL\_528948|Original|hCoV-19^^Lombardy|Human|Agenzia di Tutela della Salute di Bergamo|Istituto Zooprofilattico Sperimentale dell'Abruzzo e Molise \G.Caporale\|Lorusso|Italy

>Spike|hCoV-19/Netherlands/GE-EMC-251/2020|2020-00-00|EPI\_ISL\_523230|Original|hCoV-19^^Gelderland|Human|Dutch COVID-19 response team|Erasmus Medical Center|Oude Munnink|Netherlands

>Spike|hCoV-19/England/NORW-E935F/2020|2020-04-27|EPI\_ISL\_453594|Original|hCoV-19^^England|Human|Quadram Institute Bioscience|COVID-19 Genomics UK (COG-UK) Consortium|Alikhan|United Kingdom

>Spike|hCoV-19/England/CAMC-9C17D0/2020|2020-09-10|EPI\_ISL\_572937|Original|hCoV-19^^England|Human|Oxford Viromics|COVID-19 Genomics UK (COG-UK) Consortium|Golubchik|United Kingdom

>Spike|hCoV-19/Germany/BE-ChVir-D2004-8247/2020|2020-10-19|EPI\_ISL\_753894|Original|hCoV-19^^Berlin|Human|Charit\u00e9 Universit\u00e4tsmedizin Berlin|Charit\u00e9 Universit\u00e4tsmedizin Berlin|Muehlemann|Germany

>Spike|hCoV-19/Scotland/QEUEH-A1FAE8/2020|2020-10-01|EPI\_ISL\_599048|Original|hCoV-19^^Scotland|Human|Lighthouse Lab in Glasgow|Wellcome Sanger Institute for the COVID-19 Genomics UK (COG-UK) consortium|Davies|United Kingdom

>Spike|hCoV-19/USA/TX-HMH-MCoV-13109/2020|2020-08-28|EPI\_ISL\_788260|Original|hCoV-19^^Texas|Human|Houston Methodist Hospital|Houston Methodist Hospital|Long|USA



>Spike|hCoV-19/England/MILK-99CF8B/2020|2020-08-30|EPI\_ISL\_549893|Original|hCoV-19^^England|Human|Lighthouse Lab in Milton Keynes|Wellcome Sanger Institute for the COVID-19 Genomics UK (COG-UK) consortium|Davies|United Kingdom

>Spike|hCoV-19/Denmark/DCGC-14792/2020|2020-11-23|EPI\_ISL\_711985|Original|hCoV-19^^Hovedstaden|Human|Department of Virus and Microbiological Special Diagnostics|Albertsen Lab|Michaelsen|Denmark

>Spike|hCoV-19/Denmark/DCGC-15636/2020|2020-11-23|EPI\_ISL\_713183|Original|hCoV-19^^Sjaelland|Human|Department of Virus and Microbiological Special Diagnostics|Albertsen Lab|Michaelsen|Denmark

>Spike|hCoV-19/Wales/PHWC-16ED80/2020|2020-10-06|EPI\_ISL\_585860|Original|hCoV-19^^Wales|Human|Wales Specialist Virology Centre Sequencing lab|COVID-19 Genomics UK (COG-UK) Consortium|Moore|United Kingdom

>Spike|hCoV-19/India/MH-GA70/2020|2020-06-18|EPI\_ISL\_508265|Original|hCoV-19^^Maharashtra|Human|Government Medical College|National Institute of Biomedical Genomics|Maitra|India

>Spike|hCoV-19/Australia/VIC6599/2020|2020-07-18|EPI\_ISL\_521361|Original|hCoV-19^^Victoria|Human|Victorian Infectious Diseases Reference Laboratory (VIDRL)|VIDRL and MDU-PHL|Schultz|Australia

>Spike|hCoV-19/England/ALDP-95A3C9/2020|2020-06-12|EPI\_ISL\_553443|Original|hCoV-19^^England|Human|Lighthouse Lab in Alderley Park|Wellcome Sanger Institute for the COVID-19 Genomics UK (COG-UK) consortium|Davies|United Kingdom

>Spike|hCoV-19/Scotland/QEUA-96C0BE/2020|2020-08-15|EPI\_ISL\_530826|Original|hCoV-19^^Scotland|Human|NHSGGC West of Scotland Specialist Virology Centre / MRC-University of Glasgow Centre for Virus Research|Wellcome Sanger Institute for the COVID-19 Genomics UK (COG-UK) consortium|Davies|United Kingdom

>Spike|hCoV-19/Canada/BC-BCCDC-8417/2020|2020-10-00|EPI\_ISL\_740787|Original|hCoV-19^^British Columbia|Human|BCCDC Public Health Laboratory|BCCDC Public Health Laboratory|Prystajecky|Canada

>Spike|hCoV-19/South Africa/KRISP-K003350/2020|2020-09-05|EPI\_ISL\_602741|Original|hCoV-19^^KwaZulu-Natal|Human|NHLs-IALCH|KRISP|de Oliveira|South Africa

>Spike|hCoV-19/USA/WI-GMF-23618/2020|2020-10-02|EPI\_ISL\_660878|Original|hCoV-19^^Wisconsin|Human|Gundersen Clinical Microbiology Laboratory|Kabara Cancer Research Institute|Kenny|USA

>Spike|hCoV-19/England/MILK-C51884/2020|2020-12-11|EPI\_ISL\_769563|Original|hCoV-19^^England|Human|Lighthouse Lab in Milton Keynes|Wellcome Sanger Institute for the COVID-19 Genomics UK (COG-UK) Consortium|Davies|United Kingdom

>Spike|hCoV-19/England/MILK-A05B3D/2020|2020-09-30|EPI\_ISL\_600048|Original|hCoV-19^^England|Human|Lighthouse Lab in Milton Keynes|Wellcome Sanger Institute for the COVID-19 Genomics UK (COG-UK) consortium|Davies|United Kingdom

>Spike|hCoV-19/USA/CA-CZB-6994/2020|2020-08-04|EPI\_ISL\_582921|Original|hCoV-19^^California|Human|County of Santa Clara Public Health Department|Chan-Zuckerberg Biohub|Bhatt|USA

>Spike|hCoV-19/Wales/PHWC-48FFEA/2020|2020-11-12|EPI\_ISL\_703392|Original|hCoV-19^^Wales|Human|Originating lab|COVID-19 Genomics UK (COG-UK) Consortium|Moore|United Kingdom

>Spike|hCoV-19/England/LOND-D3631/2020|2020-04-02|EPI\_ISL\_440967|Original|hCoV-19^^England|Human|University College London|COVID-19 Genomics UK (COG-UK) Consortium|Roy|United Kingdom

>Spike|hCoV-19/USA/MI-QDX-1780/2020|2020-03-18|EPI\_ISL\_604059|Original|hCoV-19^^Michigan|Human|Quest Diagnostics|Quest Diagnostics|Kagan|USA

>Spike|hCoV-19/New Zealand/20VR3093/2020|2020-00-00|EPI\_ISL\_579417|Original|hCoV-19^^Auckland|Human|LabPLUS|Institute of Environmental Science and Research (ESR)|Wang|New Zealand

>Spike|hCoV-19/France/PAC02005/2020|2020-03-03|EPI\_ISL\_693389|Original|hCoV-19^^Provence-Alpes-C\u00f4te-d\u2019Azur|Human|CHU de Nice - H\u00f4pital Archet 2|CNR Virus des Infections Respiratoires - France SUD|Bal|France

>Spike|hCoV-19/USA/NY-NYUMC218/2020|2020-04-03|EPI\_ISL\_427513|Original|hCoV-19^^New York|Human|NYU Langone Health|Departments of Pathology and Medicine|Maurano|USA

>Spike|hCoV-19/England/LOND-1260133/2020|2020-03-17|EPI\_ISL\_516841|Original|hCoV-19^^England|Human|North West London Pathology|Wellcome Sanger Institute for the COVID-19 Genomics UK (COG-UK) consortium|Davies|United Kingdom

>Spike|hCoV-19/Wales/PHWC-2D53B/2020|2020-04-04|EPI\_ISL\_474317|Original|hCoV-19^^Wales|Human|Originating lab|COVID-19 Genomics UK (COG-UK) Consortium|Moore|United Kingdom

>Spike|hCoV-19/India/MH-AFMC-5727/2020|2020-05-25|EPI\_ISL\_496544|Original|hCoV-19^^Maharashtra|Human|Armed Forces Medical College|National Centre For Cell Science|Paul|India

>Spike|hCoV-19/Denmark/DCGC-21475/2020|2020-12-21|EPI\_ISL\_757737|Original|hCoV-19^^Sjaelland|Human|Department of Virus and Microbiological Special Diagnostics|Albertsen Lab|Michaelsen|Denmark

>Spike|hCoV-19/England/LOND-D6610/2020|2020-04-23|EPI\_ISL\_487626|Original|hCoV-19^^England|Human|University College London|Wellcome Sanger Institute for the COVID-19 Genomics UK (COG-UK) consortium|Davies|United Kingdom

>Spike|hCoV-19/Japan/PG-0803/2020|2020-04-00|EPI\_ISL\_684413|Original|hCoV-19^^Japan|Human|Fukuoka Institute of Health and Environmental Sciences|Pathogen Genomics Center|Sekizuka|Japan

>Spike|hCoV-19/Hungary/SRC\_isolate\_2/2020|2020-03-17|EPI\_ISL\_483637|Vero E6 P3|hCoV-19^^Baranya|Human|National Laboratory of Virology|National Laboratory of Virology|Kemenesi|Hungary

>Spike|hCoV-19/USA/TX-HMH-MCoV-10761/2020|2020-07-09|EPI\_ISL\_789616|Original|hCoV-19^^Texas|Human|Houston Methodist Hospital|Houston Methodist Hospital|Long|USA

>Spike|hCoV-19/England/QEUH-B6742E/2020|2020-11-11|EPI\_ISL\_662251|Original|hCoV-19^^England|Human|Lighthouse Lab in Glasgow|Wellcome Sanger Institute for the COVID-19 Genomics UK (COG-UK) Consortium|Davies|United Kingdom

>Spike|hCoV-19/England/MILK-9F1E96/2020|2020-09-24|EPI\_ISL\_589693|Original|hCoV-19^^England|Human|Lighthouse Lab in Milton Keynes|Wellcome Sanger Institute for the COVID-19 Genomics UK (COG-UK) consortium|Davies|United Kingdom

>Spike|hCoV-19/Netherlands/NA\_257/2020|2020-03-30|EPI\_ISL\_422791|Original|hCoV-19^^Netherlands|Human|Dutch COVID-19 response team|Erasmus Medical Center|Oude Munnink|Netherlands

>Spike|hCoV-19/England/LIVE-A9C14/2020|2020-03-24|EPI\_ISL\_517338|Original|hCoV-19^^England|Human|Liverpool Clinical Laboratories|COVID-19 Genomics UK (COG-UK) Consortium|Haldenby|United Kingdom

>Spike|hCoV-19/Wales/MILK-9E12BB/2020|2020-09-20|EPI\_ISL\_580902|Original|hCoV-19^^Wales|Human|Lighthouse Lab in Milton Keynes|Wellcome Sanger Institute for the COVID-19 Genomics UK (COG-UK) consortium|Davies|United Kingdom

>Spike|hCoV-19/Wales/PHWC-47D231/2020|2020-10-07|EPI\_ISL\_586115|Original|hCoV-19^^Wales|Human|Wales Specialist Virology Centre Sequencing lab|COVID-19 Genomics UK (COG-UK) Consortium|Moore|United Kingdom

>Spike|hCoV-19/England/QEUH-A025BA/2020|2020-09-29|EPI\_ISL\_584913|Original|hCoV-19^^England|Human|Quadram Institute Bioscience|COVID-19 Genomics UK (COG-UK) Consortium|Alikhan|United Kingdom

>Spike|hCoV-19/Wales/PHWC-15CDC1/2020|2020-03-25|EPI\_ISL\_472620|Original|hCoV-19^^Wales|Human|Wales Specialist Virology Centre Sequencing lab|COVID-19 Genomics UK (COG-UK) Consortium|Moore|United Kingdom

>Spike|hCoV-19/USA/WA-S418/2020|2020-03-25|EPI\_ISL\_434178|Original|hCoV-19^^Washington|Human|Washington State Department of Health|Seattle Flu Study|Bedford|USA

>Spike|hCoV-19/England/PORT-2D0BF7/2020|2020-04-30|EPI\_ISL\_475264|Original|hCoV-19^^England|Human|Centre for Enzyme Innovation|COVID-19 Genomics UK (COG-UK) Consortium|Robson|United Kingdom

>Spike|hCoV-19/England/MILK-B5565A/2020|2020-11-03|EPI\_ISL\_657472|Original|hCoV-19^^England|Human|Lighthouse Lab in Milton Keynes|Wellcome Sanger Institute for the COVID-19 Genomics UK (COG-UK) Consortium|Davies|United Kingdom

>Spike|hCoV-19/England/NORT-283B5D/2020|2020-04-02|EPI\_ISL\_488745|Original|hCoV-19^^England|Human|NU-OMICS DNA Sequencing research facility|Wellcome Sanger Institute for the COVID-19 Genomics UK (COG-UK) consortium|Davies|United Kingdom

>Spike|hCoV-19/Czech Republic/NRL\_7917/2020|2020-07-27|EPI\_ISL\_545580|Original|hCoV-19^^Olomouc Region|Human|The National Institute of Public Health|State Veterinary Institute Prague|Nagy|Czech Republic

>Spike|hCoV-19/Scotland/CVR3900/2020|2020-06-18|EPI\_ISL\_490696|Original|hCoV-19^^Scotland|Human|West of Scotland Specialist Virology Centre|COVID-19 Genomics UK (COG-UK) Consortium|Robertson|United Kingdom

>Spike|hCoV-19/England/MILK-ACC385/2020|2020-10-21|EPI\_ISL\_629363|Original|hCoV-19^^England|Human|Lighthouse Lab in Milton Keynes|Wellcome Sanger Institute for the COVID-19 Genomics UK (COG-UK) consortium|Davies|United Kingdom

>Spike|hCoV-19/England/MILK-9C7163/2020|2020-09-08|EPI\_ISL\_572845|Original|hCoV-19^^England|Human|Northumbria University / South Tees Hospitals NHS Foundation Trust / North Cumbria Integrated Care NHS Foundation Trust / North Tees and Hartlepool NHS Foundation Trust / Newcastle Hospitals NHS Foundation Trust|COVID-19 Genomics UK (COG-UK) Consortium|Bashton|United Kingdom

>Spike|hCoV-19/England/MILK-970CFF/2020|2020-08-18|EPI\_ISL\_553089|Original|hCoV-19^^England|Human|Lighthouse Lab in Milton Keynes|Wellcome Sanger Institute for the COVID-19 Genomics UK (COG-UK) consortium|Davies|United Kingdom

>Spike|hCoV-19/England/PORT-2D14CE/2020|2020-04-01|EPI\_ISL\_512395|Original|hCoV-19^^England|Human|Centre for Enzyme Innovation|COVID-19 Genomics UK (COG-UK) Consortium|Robson|United Kingdom

>Spike|hCoV-19/Northern Ireland/QEUA-96EC7C/2020|2020-08-19|EPI\_ISL\_530506|Original|hCoV-19^^Northern Ireland|Human|Lighthouse Lab in Glasgow|Wellcome Sanger Institute for the COVID-19 Genomics UK (COG-UK) consortium|Davies|United Kingdom

>Spike|hCoV-19/England/ALDP-A6CBBC/2020|2020-10-15|EPI\_ISL\_608245|Original|hCoV-19^^England|Human|Lighthouse Lab in Alderley Park|Wellcome Sanger Institute for the COVID-19 Genomics UK (COG-UK) consortium|Davies|United Kingdom

>Spike|hCoV-19/USA/TX-HMH-3769/2020|2020-06-15|EPI\_ISL\_543178|Original|hCoV-19^^Texas|Human|Houston Methodist Hospital|Houston Methodist Hospital|Long|USA

>Spike|hCoV-19/USA/CA-IGI-0805/2020|2020-06-30|EPI\_ISL\_756341|Original|hCoV-19^^California|Human|Innovative Genomics Institute|Innovative Genomics Institute|Wyman|USA

>Spike|hCoV-19/England/ALDP-67D633/2020|2020-07-03|EPI\_ISL\_551832|Original|hCoV-19^^England|Human|Lighthouse Lab in Alderley Park|Wellcome Sanger Institute for the COVID-19 Genomics UK (COG-UK) consortium|Davies|United Kingdom

>Spike|hCoV-19/Japan/PG-6802/2020|2020-07-00|EPI\_ISL\_687911|Original|hCoV-19^^Japan|Human|Pathogen Genomics Center|Pathogen Genomics Center|Sekizuka|Japan

>Spike|hCoV-19/USA/NV-CDC-2-3693483/2020|2020-11-06|EPI\_ISL\_747151|Original|hCoV-19^^Nevada|Human|Respiratory Viruses Branch|Respiratory Viruses Branch|Queen|USA

>Spike|hCoV-19/Scotland/QEUA-9DB08D/2020|2020-09-21|EPI\_ISL\_601186|Original|hCoV-19^^Scotland|Human|Lighthouse Lab in Glasgow|Wellcome Sanger Institute for the COVID-19 Genomics UK (COG-UK) consortium|Davies|United Kingdom

>Spike|hCoV-19/England/QEUA-9B5256/2020|2020-09-07|EPI\_ISL\_590244|Original|hCoV-19^^England|Human|Lighthouse Lab in Glasgow|Wellcome Sanger Institute for the COVID-19 Genomics UK (COG-UK) consortium|Davies|United Kingdom

>Spike|hCoV-19/England/ALDP-A2ED74/2020|2020-10-05|EPI\_ISL\_587114|Original|hCoV-19^^England|Human|Lighthouse Lab in Alderley Park|Wellcome Sanger Institute for the COVID-19 Genomics UK (COG-UK) consortium|Davies|United Kingdom

>Spike|hCoV-19/Latvia/102/2020|2020-08-05|EPI\_ISL\_515189|Original|hCoV-19^^Latvia|Human|E. Gulbja Laboratorija|Latvian Biomedical Research and Study Centre|Zrelavs|Latvia

>Spike|hCoV-19/England/MILK-992301/2020|2020-08-27|EPI\_ISL\_540670|Original|hCoV-19^^England|Human|Queens Medical Centre|COVID-19 Genomics UK (COG-UK) Consortium|Loose|United Kingdom

>Spike|hCoV-19/Denmark/DCGC-4361/2020|2020-08-31|EPI\_ISL\_615563|Original|hCoV-19^^Syddanmark|Human|Department of Virus and Microbiological Special Diagnostics|Albertsen lab|Michaelsen|Denmark

>Spike|hCoV-19/Australia/VIC12657/2020|2020-08-01|EPI\_ISL\_641226|Original|hCoV-19^^Victoria|Human|Microbiological Diagnostic Unit - Public Health Laboratory (MDU-PHL)|MDU-PHL|Schultz|Australia

>Spike|hCoV-19/England/MILK-9A8520/2020|2020-09-06|EPI\_ISL\_550164|Original|hCoV-19^^England|Human|Lighthouse Lab in Milton Keynes|Wellcome Sanger Institute for the COVID-19 Genomics UK (COG-UK) consortium|Davies|United Kingdom

>Spike|hCoV-19/Wales/PHWC-2BFD5/2020|2020-04-02|EPI\_ISL\_474265|Original|hCoV-19^^Wales|Human|Originating lab|COVID-19 Genomics UK (COG-UK) Consortium|Moore|United Kingdom

>Spike|hCoV-19/Denmark/DCGC-18755/2020|2020-12-07|EPI\_ISL\_748537|Original|hCoV-19^^Midtjylland|Human|Department of Virus and Microbiological Special Diagnostics|Albertsen Lab|Michaelsen|Denmark

>Spike|hCoV-19/England/204540356/2020|2020-11-03|EPI\_ISL\_686542|Original|hCoV-19^^England|Human|Respiratory Virus Unit|COVID-19 Genomics UK (COG-UK) Consortium|Platt|United Kingdom

>Spike|hCoV-19/England/ALDP-981059/2020|2020-08-09|EPI\_ISL\_526352|Original|hCoV-19^^England|Human|Queens Medical Centre|COVID-19 Genomics UK (COG-UK) Consortium|Loose|United Kingdom

>Spike|hCoV-19/USA/TX-HMH-5380/2020|2020-06-26|EPI\_ISL\_544732|Original|hCoV-19^^Texas|Human|Houston Methodist Hospital|Houston Methodist Hospital|Long|USA

>Spike|hCoV-19/England/ALDP-C3C62B/2020|2020-12-10|EPI\_ISL\_731234|Original|hCoV-19^^England|Human|Lighthouse Lab in Alderley Park|Wellcome Sanger Institute for the COVID-19 Genomics UK (COG-UK) Consortium|Davies|United Kingdom

>Spike|hCoV-19/Australia/VIC8959/2020|2020-00-00|EPI\_ISL\_565311|Original|hCoV-19^^Victoria|Human|Microbiological Diagnostic Unit - Public Health Laboratory (MDU-PHL)|MDU-PHL|Schultz|Australia

>Spike|hCoV-19/England/CAMC-C98BF1/2020|2020-12-17|EPI\_ISL\_762135|Original|hCoV-19^^England|Human|Lighthouse Lab in Cambridge|Wellcome Sanger Institute for the COVID-19 Genomics UK (COG-UK) Consortium|Davies|United Kingdom

>Spike|hCoV-19/USA/TX-HMH-MCoV-13640/2020|2020-08-20|EPI\_ISL\_788744|Original|hCoV-19^^Texas|Human|Houston Methodist Hospital|Houston Methodist Hospital|Long|USA

>Spike|hCoV-19/England/ALDP-B62CEF/2020|2020-11-08|EPI\_ISL\_655470|Original|hCoV-19^^England|Human|Lighthouse Lab in Alderley Park|Wellcome Sanger Institute for the COVID-19 Genomics UK (COG-UK) Consortium|Davies|United Kingdom

>Spike|hCoV-19/England/QEUEH-B40054/2020|2020-11-08|EPI\_ISL\_657099|Original|hCoV-19^^England|Human|Lighthouse Lab in Glasgow|Wellcome Sanger Institute for the COVID-19 Genomics UK (COG-UK) Consortium|Davies|United Kingdom

>Spike|hCoV-19/England/CAMC-B089D5/2020|2020-10-30|EPI\_ISL\_643893|Original|hCoV-19^^England|Human|Lighthouse Lab in Cambridge|Wellcome Sanger Institute for the COVID-19 Genomics UK (COG-UK) Consortium|Davies|United Kingdom

>Spike|hCoV-19/Denmark/DCGC-22143/2020|2020-12-14|EPI\_ISL\_757819|Original|hCoV-19^^Hovedstaden|Human|Department of Virus and Microbiological Special Diagnostics|Albertsen Lab|Michaelsen|Denmark

>Spike|hCoV-19/USA/UT-UPHL-2012501214/2020|2020-11-25|EPI\_ISL\_747002|Original|hCoV-19^^Utah|Human|Utah Public Health Laboratory|Utah Public Health Laboratory|Gallagher|USA

>Spike|hCoV-19/England/MILK-A47276/2020|2020-10-06|EPI\_ISL\_598335|Original|hCoV-19^^England|Human|Lighthouse Lab in Milton Keynes|Wellcome Sanger Institute for the COVID-19 Genomics UK (COG-UK) consortium|Davies|United Kingdom

>Spike|hCoV-19/USA/WY-WYPHL-20009305/2020|2020-04-16|EPI\_ISL\_539796|Original|hCoV-19^^Wyoming|Human|Wyoming Public Health Laboratory|Wyoming Public Health Laboratory|Sevinsky|USA

>Spike|hCoV-19/Denmark/DCGC-8427/2020|2020-10-26|EPI\_ISL\_617933|Original|hCoV-19^^Nordjylland|Human|Department of Virus and Microbiological Special Diagnostics|Albertsen lab|Michaelsen|Denmark

>Spike|hCoV-19/Spain/MD-IBV-99008668/2020|2020-09-30|EPI\_ISL\_654229|Original|hCoV-19^^Madrid|Human|Hospital General Universitario Gregorio Mara\u00f1a|SeqCOVID-SPAIN consortium/IBV (CSIC)|Comas|Spain

>Spike|hCoV-19/Australia/VIC17527/2020|2020-08-22|EPI\_ISL\_663909|Original|hCoV-19^^Victoria|Human|Microbiological Diagnostic Unit - Public Health Laboratory (MDU-PHL)|MDU-PHL|Schultz|Australia

>Spike|hCoV-19/Scotland/GCVR-1718A7/2020|2020-03-27|EPI\_ISL\_489617|Original|hCoV-19^^Scotland|Human|NHSGGC West of Scotland Specialist Virology Centre / MRC-

University of Glasgow Centre for Virus Research|Wellcome Sanger Institute for the COVID-19 Genomics UK (COG-UK) consortium|Davies|United Kingdom  
>Spike|hCoV-19/England/QEUEH-AD6300/2020|2020-10-24|EPI\_ISL\_629887|Original|hCoV-19^^England|Human|Lighthouse Lab in Glasgow|Wellcome Sanger Institute for the COVID-19 Genomics UK (COG-UK) consortium|Davies|United Kingdom  
>Spike|hCoV-19/England/ALDP-AA2B7E/2020|2020-10-22|EPI\_ISL\_624202|Original|hCoV-19^^England|Human|Lighthouse Lab in Alderley Park|Wellcome Sanger Institute for the COVID-19 Genomics UK (COG-UK) consortium|Davies|United Kingdom  
>Spike|hCoV-19/USA/IA-GMF-13859/2020|2020-08-04|EPI\_ISL\_547662|Original|hCoV-19^^Iowa|Human|Gundersen Molecular Diagnostics Laboratory|Kabara Cancer Research Institute|Kenny|USA  
>Spike|hCoV-19/England/QEUEH-B7D917/2020|2020-11-14|EPI\_ISL\_727832|Original|hCoV-19^^England|Human|Oxford Viromics|COVID-19 Genomics UK (COG-UK) Consortium|Golubchik|United Kingdom  
>Spike|hCoV-19/England/CAMB-76384/2020|2020-03-30|EPI\_ISL\_438345|Original|hCoV-19^^England|Human|Department of Pathology|Wellcome Sanger Institute for the COVID-19 Genomics UK (COG-UK) consortium|Amato|United Kingdom  
>Spike|hCoV-19/England/MILK-99E129/2020|2020-08-30|EPI\_ISL\_550532|Original|hCoV-19^^England|Human|Lighthouse Lab in Milton Keynes|Wellcome Sanger Institute for the COVID-19 Genomics UK (COG-UK) consortium|Davies|United Kingdom  
>Spike|hCoV-19/Wales/PHWC-4A6800/2020|2020-12-17|EPI\_ISL\_765074|Original|hCoV-19^^Wales|Human|Wales Specialist Virology Centre Sequencing lab|COVID-19 Genomics UK (COG-UK) Consortium|Moore|United Kingdom  
>Spike|hCoV-19/Luxembourg/LNS6722271/2020|2020-11-12|EPI\_ISL\_744457|Original|hCoV-19^^Luxembourg|Human|Laboratoire national de sant\u00e9|Laboratoire national de sant\u00e9|Wienecke-Baldacchino|Luxembourg  
>Spike|hCoV-19/Denmark/ALAB-SSI-888/2020|2020-03-30|EPI\_ISL\_444957|Original|hCoV-19^^Denmark|Human|Department of Virus and Microbiological Special Diagnostics|Albertsen lab|Kirkegaard|Denmark  
>Spike|hCoV-19/Scotland/EDB8422/2020|2020-10-15|EPI\_ISL\_612074|Original|hCoV-19^^Scotland|Human|Virology Department|COVID-19 Genomics UK (COG-UK) Consortium|McHugh|United Kingdom  
>Spike|hCoV-19/Uganda/UG019/2020|2020-04-30|EPI\_ISL\_451201|Original|hCoV-19^^Uganda|Human|Uganda Virus Research Institute|MRC/UVRI & LSHTM Uganda\u00a0Research Unit|Cotten|Uganda  
>Spike|hCoV-19/USA/UT-UPHL-2009649/2020|2020-07-25|EPI\_ISL\_605324|Original|hCoV-19^^Utah|Human|Utah Public Health Laboratory|Utah Public Health Laboratory|Young|USA  
>Spike|hCoV-19/USA/WI-UW-622/2020|2020-06-23|EPI\_ISL\_484997|Original|hCoV-19^^Wisconsin|Human|University of Wisconsin-Madison AIDS Vaccine Research Laboratories|University of Wisconsin-Madison AIDS Vaccine Research Laboratories|Baczenas|USA  
>Spike|hCoV-19/USA/TX-HMH-MCoV-18530/2020|2020-11-19|EPI\_ISL\_784878|Original|hCoV-19^^Texas|Human|Houston Methodist Hospital|Houston Methodist Hospital|Long|USA  
>Spike|hCoV-19/USA/TX-HMH-MCoV-8974/2020|2020-07-02|EPI\_ISL\_780869|Original|hCoV-19^^Texas|Human|Houston Methodist Hospital|Houston Methodist Hospital|Long|USA  
>Spike|hCoV-19/Denmark/DCGC-21380/2020|2020-12-21|EPI\_ISL\_758090|Original|hCoV-19^^Syddanmark|Human|Department of Virus and Microbiological Special Diagnostics|Albertsen Lab|Michaelsen|Denmark  
>Spike|hCoV-19/England/CAMB-1AFEF9/2020|2020-05-03|EPI\_ISL\_459223|Original|hCoV-19^^England|Human|Department of Pathology|Wellcome Sanger Institute for the COVID-19 Genomics UK (COG-UK) consortium|Davies|United Kingdom  
>Spike|hCoV-19/mink/Denmark/mDK-517/2020|2020-11-18|EPI\_ISL\_683259|Original|hCoV-19^^Denmark|Neovison vison|Department of Virus and Microbiological Special Diagnostics|Albertsen Lab|Michaelsen|Denmark  
>Spike|hCoV-19/England/QEUEH-A0B108/2020|2020-10-01|EPI\_ISL\_599334|Original|hCoV-19^^England|Human|Lighthouse Lab in Glasgow|Wellcome Sanger Institute for the COVID-19 Genomics UK (COG-UK) consortium|Davies|United Kingdom  
>Spike|hCoV-19/England/C200026725/2020|2020-10-05|EPI\_ISL\_733580|Original|hCoV-19^^England|Human|Respiratory Virus Unit|COVID-19 Genomics UK (COG-UK) Consortium|Lackenby|United Kingdom

>Spike|hCoV-19/England/CAMC-B221EC/2020|2020-11-03|EPI\_ISL\_647235|Original|hCoV-19^^England|Human|Lighthouse Lab in Cambridge|Wellcome Sanger Institute for the COVID-19 Genomics UK (COG-UK) Consortium|Davies|United Kingdom

>Spike|hCoV-19/Wales/PHWC-33C5B/2020|2020-04-16|EPI\_ISL\_446806|Original|hCoV-19^^Wales|Human|Wales Specialist Virology Centre|Public Health Wales Microbiology Cardiff|Moore|United Kingdom

>Spike|hCoV-19/Wales/PHWC-47CD8C/2020|2020-10-10|EPI\_ISL\_586046|Original|hCoV-19^^Wales|Human|Wales Specialist Virology Centre Sequencing lab|COVID-19 Genomics UK (COG-UK) Consortium|Moore|United Kingdom

>Spike|hCoV-19/Sweden/20-50230/2020|2020-03-09|EPI\_ISL\_429155|Original|hCoV-19^^Orebro lan|Human|Klinisk mikrobiologi Orebro|The Public Health Agency of Sweden|Svartstr\u00f6m|Sweden

>Spike|hCoV-19/England/QEUEH-CC78A7/2020|2020-12-21|EPI\_ISL\_760384|Original|hCoV-19^^England|Human|Lighthouse Lab in Glasgow|Wellcome Sanger Institute for the COVID-19 Genomics UK (COG-UK) Consortium|Davies|United Kingdom

>Spike|hCoV-19/England/ALDP-CBE82B/2020|2020-12-20|EPI\_ISL\_760561|Original|hCoV-19^^England|Human|Lighthouse Lab in Alderley Park|Wellcome Sanger Institute for the COVID-19 Genomics UK (COG-UK) Consortium|Davies|United Kingdom

>Spike|hCoV-19/Spain/MD-IBV-99008717/2020|2020-10-12|EPI\_ISL\_654294|Original|hCoV-19^^Madrid|Human|Hospital General Universitario Gregorio Mara\u00f1\u00f3n|SeqCOVID-SPAIN consortium/IBV (CSIC)|Comas|Spain

>Spike|hCoV-19/Japan/PG-2995/2020|2020-04-00|EPI\_ISL\_691119|Original|hCoV-19^^Japan|Human|Pathogen Genomics Center|Pathogen Genomics Center|Sekizuka|Japan

>Spike|hCoV-19/USA/WI-UW-351/2020|2020-04-14|EPI\_ISL\_450705|Original|hCoV-19^^Wisconsin|Human|University of Wisconsin-Madison AIDS Vaccine Research Laboratories|University of Wisconsin-Madison AIDS Vaccine Research Laboratories|Baczenas|USA

>Spike|hCoV-19/Australia/VIC4223/2020|2020-07-18|EPI\_ISL\_519551|Original|hCoV-19^^Victoria|Human|Microbiological Diagnostic Unit - Public Health Laboratory (MDU-PHL)|MDU-PHL|Schultz|Australia

>Spike|hCoV-19/England/CAMC-B7B7D3/2020|2020-11-12|EPI\_ISL\_724035|Original|hCoV-19^^England|Human|Oxford Viromics|COVID-19 Genomics UK (COG-UK) Consortium|Golubchik|United Kingdom

>Spike|hCoV-19/USA/HI-H200143/2020|2020-06-19|EPI\_ISL\_752706|Original|hCoV-19^^Hawaii|Human|State Laboratories Division|State Laboratories Division|Sultana|USA

>Spike|hCoV-19/England/QEUEH-BA2ABC/2020|2020-11-18|EPI\_ISL\_672902|Original|hCoV-19^^England|Human|Lighthouse Lab in Glasgow|Wellcome Sanger Institute for the COVID-19 Genomics UK (COG-UK) Consortium|Davies|United Kingdom

>Spike|hCoV-19/England/NOTT-1196B6/2020|2020-11-02|EPI\_ISL\_627711|Original|hCoV-19^^England|Human|Queens Medical Centre|COVID-19 Genomics UK (COG-UK) Consortium|Loose|United Kingdom

>Spike|hCoV-19/England/MILK-B0463C/2020|2020-10-24|EPI\_ISL\_651022|Original|hCoV-19^^England|Human|Department of Pathology|COVID-19 Genomics UK (COG-UK) Consortium|Goodfellow|United Kingdom

>Spike|hCoV-19/England/CAMB-7BEE8/2020|2020-04-05|EPI\_ISL\_470484|Original|hCoV-19^^England|Human|Department of Pathology|Wellcome Sanger Institute for the COVID-19 Genomics UK (COG-UK) consortium|Davies|United Kingdom

>Spike|hCoV-19/USA/TX-DSHS-0071/2020|2020-05-09|EPI\_ISL\_522356|Original|hCoV-19^^Texas|Human|Texas Department of State Health Services|Texas Department of State Health Services|Rahman|USA

>Spike|hCoV-19/England/QEUEH-AACB47/2020|2020-10-21|EPI\_ISL\_652898|Original|hCoV-19^^England|Human|Oxford Viromics|COVID-19 Genomics UK (COG-UK) Consortium|Golubchik|United Kingdom

>Spike|hCoV-19/England/NOTT-10E818/2020|2020-03-24|EPI\_ISL\_425598|Original|hCoV-19^^England|Human|Queens Medical Centre|COVID-19 Genomics UK (COG-UK) Consortium|Loose|United Kingdom

>Spike|hCoV-19/South Africa/KRISP-K002633/2020|2020-08-03|EPI\_ISL\_535503|Original|hCoV-19^^KwaZulu-Natal|Human|NHLS-IALCH|KRISP|de Oliveira|South Africa

>Spike|hCoV-19/England/ALDP-B46D39/2020|2020-11-06|EPI\_ISL\_656163|Original|hCoV-19^^England|Human|Lighthouse Lab in Alderley Park|Wellcome Sanger Institute for the COVID-19 Genomics UK (COG-UK) Consortium|Davies|United Kingdom

>Spike|hCoV-19/England/201100063/2020|2020-03-06|EPI\_ISL\_464639|Original|hCoV-19^^England|Human|Respiratory Virus Unit|Respiratory Virus Unit|Platt|United Kingdom

>Spike|hCoV-19/England/QEUA-C012A3/2020|2020-12-04|EPI\_ISL\_720787|Original|hCoV-19^^England|Human|Lighthouse Lab in Glasgow|Wellcome Sanger Institute for the COVID-19 Genomics UK (COG-UK) Consortium|Davies|United Kingdom

>Spike|hCoV-19/Switzerland/SG-ETHZ-300290/2020|2020-10-01|EPI\_ISL\_603322|Original|hCoV-19^^St Gallen|Human|Viollier AG|Department of Biosystems Science and Engineering|Nadeau|Switzerland

>Spike|hCoV-19/Northern Ireland/NIRE-106C05/2020|2020-05-18|EPI\_ISL\_500997|Original|hCoV-19^^Northern Ireland|Human|Regional Virus Laboratory|Wellcome Sanger Institute for the COVID-19 Genomics UK (COG-UK) consortium|Davies|United Kingdom

>Spike|hCoV-19/Denmark/DCGC-19471/2020|2020-12-07|EPI\_ISL\_748970|Original|hCoV-19^^Hovedstaden|Human|Department of Virus and Microbiological Special Diagnostics|Albertsen Lab|Michaelsen|Denmark

>Spike|hCoV-19/England/ALDP-94F53A/2020|2020-06-18|EPI\_ISL\_556031|Original|hCoV-19^^England|Human|Lighthouse Lab in Alderley Park|Wellcome Sanger Institute for the COVID-19 Genomics UK (COG-UK) consortium|Davies|United Kingdom

>Spike|hCoV-19/Denmark/ALAB-SSI418/2020|2020-03-10|EPI\_ISL\_429516|Original|hCoV-19^^Denmark|Human|Department of Virus and Microbiological Special Diagnostics|Albertsen lab|Kirkegaard|Denmark

>Spike|hCoV-19/England/QEUA-9B4DB0/2020|2020-09-03|EPI\_ISL\_590409|Original|hCoV-19^^England|Human|Lighthouse Lab in Glasgow|Wellcome Sanger Institute for the COVID-19 Genomics UK (COG-UK) consortium|Davies|United Kingdom

>Spike|hCoV-19/USA/SC-DHEC-1079/2020|2020-07-06|EPI\_ISL\_541664|Original|hCoV-19^^South Carolina|Human|Microbiology Division|Microbiology Division|Flores|USA

>Spike|hCoV-19/USA/CA-ALSR-1381/2020|2020-03-31|EPI\_ISL\_494572|Original|hCoV-19^^California|Human|San Diego County Public Health Laboratory|Andersen lab at Scripps Research|Gangavarapu|USA

>Spike|hCoV-19/USA/TX-HMH-MCoV-10721/2020|2020-07-08|EPI\_ISL\_789603|Original|hCoV-19^^Texas|Human|Houston Methodist Hospital|Houston Methodist Hospital|Long|USA

>Spike|hCoV-19/Wales/PHWC-487137/2020|2020-10-28|EPI\_ISL\_639167|Original|hCoV-19^^Wales|Human|Wales Specialist Virology Centre Sequencing lab|COVID-19 Genomics UK (COG-UK) Consortium|Moore|United Kingdom

>Spike|hCoV-19/Australia/VIC7162/2020|2020-08-03|EPI\_ISL\_564256|Original|hCoV-19^^Victoria|Human|Microbiological Diagnostic Unit - Public Health Laboratory (MDU-PHL)|MDU-PHL|Schultz|Australia

>Spike|hCoV-19/USA/NM-DOH-2020641408/2020|2020-12-26|EPI\_ISL\_767063|Original|hCoV-19^^New Mexico|Human|New Mexico Department of Health Scientific Laboratory|New Mexico Department of Health Scientific Laboratory|Malone|USA

>Spike|hCoV-19/USA/TX-DSHS-1537/2020|2020-06-07|EPI\_ISL\_681844|Original|hCoV-19^^Texas|Human|Texas Department of State Health Services|Texas Department of State Health Services|Rahman|USA

>Spike|hCoV-19/Cote d'Ivoire/BKE0937/2020|2020-08-28|EPI\_ISL\_614392|Original|hCoV-19^^Boauk\u00e9|Human|Molecular diagnostic unit for viral haemorrhagic fevers and emerging viruses|Project group Epidemiology of Highly Pathogenic Microorganisms|Calvignac-Spencer|C\u00f4te d'Ivoire

>Spike|hCoV-19/England/MILK-9A8C76/2020|2020-09-01|EPI\_ISL\_549949|Original|hCoV-19^^England|Human|Lighthouse Lab in Milton Keynes|Wellcome Sanger Institute for the COVID-19 Genomics UK (COG-UK) consortium|Davies|United Kingdom

>Spike|hCoV-19/USA/CA-ALSR-1154/2020|2020-04-27|EPI\_ISL\_494397|Original|hCoV-19^^California|Human|San Diego County Public Health Laboratory|Andersen lab at Scripps Research|Gangavarapu|USA

>Spike|hCoV-19/England/QEUA-A89F17/2020|2020-10-17|EPI\_ISL\_638831|Original|hCoV-19^^England|Human|Oxford Viromics|COVID-19 Genomics UK (COG-UK) Consortium|Golubchik|United Kingdom

>Spike|hCoV-19/USA/UT-UPHL-2012446164/2020|2020-07-25|EPI\_ISL\_745510|Original|hCoV-19^^Utah|Human|Ginkgo Bioworks Clinical Laboratory|Utah Public Health Laboratory|Young|USA

>Spike|hCoV-19/Switzerland/TI-ETHZ-210025/2020|2020-07-21|EPI\_ISL\_510769|Original|hCoV-19^^Ticino|Human|Viollier AG|Department of Biosystems Science and Engineering|Nadeau|Switzerland

>Spike|hCoV-19/Finland/13LS8AA5/2020|2020-10-13|EPI\_ISL\_737232|Original|hCoV-19^^Uusimaa|Human|Department of Virology and Immunology|Department of Virology|Smura|Finland

>Spike|hCoV-19/Denmark/DCGC-10016/2020|2020-11-09|EPI\_ISL\_669336|Original|hCoV-19^^Sjaelland|Human|Department of Virus and Microbiological Special Diagnostics|Albertsen Lab|Michaelsen|Denmark

>Spike|hCoV-19/England/MILK-B94965/2020|2020-11-14|EPI\_ISL\_676044|Original|hCoV-19^^England|Human|Lighthouse Lab in Milton Keynes|Wellcome Sanger Institute for the COVID-19 Genomics UK (COG-UK) Consortium|Davies|United Kingdom

>Spike|hCoV-19/Canada/QC\_AP1/2020|2020-04-06|EPI\_ISL\_463924|Original|hCoV-19^^Quebec|Human|Laboratoire de microbiologie|Smith Laboratory|Smith|Canada

>Spike|hCoV-19/USA/VA-DCLS-1442/2020|2020-08-18|EPI\_ISL\_572309|Original|hCoV-19^^Virginia|Human|Virginia DCLS|Virginia DCLS|St. Jacques|USA

>Spike|hCoV-19/Netherlands/LI-EMC-153/2020|2020-11-25|EPI\_ISL\_763121|Original|hCoV-19^^Limburg|Human|Dutch COVID-19 response team|Erasmus Medical Center|Oude Munnink|Netherlands

>Spike|hCoV-19/Canada/QC-LSPQ-L00220736/2020|2020-03-15|EPI\_ISL\_535802|Original|hCoV-19^^Quebec|Human|CHUM - Microbiologie - H\u00f4pital Saint-Luc|Laboratoire de sant\u00e9 publique du Qu\u00e9bec|Moreira|Canada

>Spike|hCoV-19/USA/NY-NYUMC489/2020|2020-03-18|EPI\_ISL\_436737|Original|hCoV-19^^New York|Human|NYU Langone Health|Departments of Pathology and Medicine|Maurano|USA

>Spike|hCoV-19/England/ALDP-935BBD/2020|2020-06-21|EPI\_ISL\_552899|Original|hCoV-19^^England|Human|Lighthouse Lab in Alderley Park|Wellcome Sanger Institute for the COVID-19 Genomics UK (COG-UK) consortium|Davies|United Kingdom

>Spike|hCoV-19/USA/CA-ALSR-0639-IPL/2020|2020-04-27|EPI\_ISL\_483274|Original|hCoV-19^^California|Human|UC San Diego Center for Advanced Laboratory Medicine|Andersen lab at Scripps Research|Gangavarapu|USA

>Spike|hCoV-19/USA/WA-UW-31233/2020|2020-10-12|EPI\_ISL\_735468|Original|hCoV-19^^Washington|Human|UW Virology Lab|UW Virology Lab|Roychoudhury|USA

>Spike|hCoV-19/England/ALDP-C39873/2020|2020-12-08|EPI\_ISL\_730725|Original|hCoV-19^^England|Human|Lighthouse Lab in Alderley Park|Wellcome Sanger Institute for the COVID-19 Genomics UK (COG-UK) Consortium|Davies|United Kingdom

>Spike|hCoV-19/England/MILK-A7B895/2020|2020-10-15|EPI\_ISL\_607485|Original|hCoV-19^^England|Human|Lighthouse Lab in Milton Keynes|Wellcome Sanger Institute for the COVID-19 Genomics UK (COG-UK) consortium|Davies|United Kingdom

>Spike|hCoV-19/Netherlands/Gelderland\_113/2020|2020-05-22|EPI\_ISL\_460874|Original|hCoV-19^^Gelderland|Human|Dutch COVID-19 response team|Erasmus Medical Center|Oude Munnink|Netherlands

>Spike|hCoV-19/USA/MI-MDHHS-SC20117/2020|2020-03-23|EPI\_ISL\_436838|Original|hCoV-19^^Michigan|Human|Michigan Department of Health and Human Services|Michigan Department of Health and Human Services|Blankenship|USA

>Spike|hCoV-19/USA/MN-CDC-6495/2020|2020-04-05|EPI\_ISL\_527710|Original|hCoV-19^^Minnesota|Human|MN PHL Division|Pathogen Discovery|Queen|USA

>Spike|hCoV-19/Australia/NSW2977/2020|2020-10-27|EPI\_ISL\_707900|Original|hCoV-19^^New South Wales|Human|Area of Virology|Virology Research Laboratory; Area of Virology|Foster|Australia

>Spike|hCoV-19/Scotland/QEUIH-AAF3C4/2020|2020-10-22|EPI\_ISL\_653020|Original|hCoV-19^^Scotland|Human|Oxford Viromics|COVID-19 Genomics UK (COG-UK) Consortium|Golubchik|United Kingdom

>Spike|hCoV-19/Netherlands/NH-RIVM-21052/2020|2020-12-05|EPI\_ISL\_791066|Original|hCoV-19^^Noord-Holland|Human|Dutch COVID-19 response team|National Institute for Public Health and the Environment (RIVM)|Meijer|Netherlands



>Spike|hCoV-19/England/QEUA-B432C4/2020|2020-11-08|EPI\_ISL\_657031|Original|hCoV-19^England|Human|Lighthouse Lab in Glasgow|Wellcome Sanger Institute for the COVID-19 Genomics UK (COG-UK) Consortium|Davies|United Kingdom

>Spike|hCoV-19/England/QEUA-9DCA24/2020|2020-09-22|EPI\_ISL\_581112|Original|hCoV-19^England|Human|Lighthouse Lab in Glasgow|Wellcome Sanger Institute for the COVID-19 Genomics UK (COG-UK) consortium|Davies|United Kingdom

>Spike|hCoV-19/India/TG-CCMB-M343/2020|2020-06-08|EPI\_ISL\_495198|Original|hCoV-19^Telangana|Human|CSIR-Centre for Cellular and Molecular Biology|CSIR-Centre for Cellular and Molecular Biology|Banu|India

>Spike|hCoV-19/England/ALDP-B7690F/2020|2020-11-12|EPI\_ISL\_723784|Original|hCoV-19^England|Human|Oxford Viromics|COVID-19 Genomics UK (COG-UK) Consortium|Golubchik|United Kingdom

>Spike|hCoV-19/Switzerland/BS-42219868/2020|2020-04-04|EPI\_ISL\_581845|Original|hCoV-19^Basel-Stadt|Human|University Hospital Basel|University Hospital Basel|Roloff Handschin|Switzerland

>Spike|hCoV-19/England/LIVE-A818F/2020|2020-03-26|EPI\_ISL\_517123|Original|hCoV-19^England|Human|Liverpool Clinical Laboratories|COVID-19 Genomics UK (COG-UK) Consortium|Haldenby|United Kingdom

>Spike|hCoV-19/USA/CA-CZB-1434/2020|2020-03-25|EPI\_ISL\_468404|Original|hCoV-19^California|Human|County of San Luis Obispo Public Health Laboratory|Chan-Zuckerberg Biohub|Hao|USA

>Spike|hCoV-19/USA/TX-HMH-MCoV-8818/2020|2020-07-01|EPI\_ISL\_780773|Original|hCoV-19^Texas|Human|Houston Methodist Hospital|Houston Methodist Hospital|Long|USA

>Spike|hCoV-19/Denmark/DCGC-16161/2020|2020-11-16|EPI\_ISL\_714613|Original|hCoV-19^Hovedstaden|Human|Department of Virus and Microbiological Special Diagnostics|Albertsen Lab|Michaelsen|Denmark

>Spike|hCoV-19/Australia/VIC6792/2020|2020-07-21|EPI\_ISL\_564058|Original|hCoV-19^Victoria|Human|Victorian Infectious Diseases Reference Laboratory (VIDRL)|VIDRL and MDU-PHL|Schultz|Australia

>Spike|hCoV-19/USA/WA-S2697/2020|2020-06-22|EPI\_ISL\_497329|Original|hCoV-19^Washington|Human|Washington State Department of Health|Seattle Flu Study|Lee|USA

>Spike|hCoV-19/USA/WA-QDX-528/2020|2020-03-18|EPI\_ISL\_571401|Original|hCoV-19^Washington|Human|Quest Diagnostics|Quest Diagnostics|Kagan|USA

>Spike|hCoV-19/Denmark/DCGC-21396/2020|2020-12-21|EPI\_ISL\_758085|Original|hCoV-19^Hovedstaden|Human|Department of Virus and Microbiological Special Diagnostics|Albertsen Lab|Michaelsen|Denmark

>Spike|hCoV-19/Denmark/DCGC-3316/2020|2020-08-31|EPI\_ISL\_616070|Original|hCoV-19^Hovedstaden|Human|Department of Virus and Microbiological Special Diagnostics|Albertsen lab|Michaelsen|Denmark

>Spike|hCoV-19/Northern Ireland/NIRE-103093/2020|2020-04-20|EPI\_ISL\_489307|Original|hCoV-19^Northern Ireland|Human|Regional Virus Laboratory|Wellcome Sanger Institute for the COVID-19 Genomics UK (COG-UK) consortium|Davies|United Kingdom

>Spike|hCoV-19/England/MILK-83782E/2020|2020-07-16|EPI\_ISL\_557283|Original|hCoV-19^England|Human|Lighthouse Lab in Milton Keynes|Wellcome Sanger Institute for the COVID-19 Genomics UK (COG-UK) consortium|Davies|United Kingdom

>Spike|hCoV-19/England/ALDP-9EA14C/2020|2020-09-24|EPI\_ISL\_580113|Original|hCoV-19^England|Human|Lighthouse Lab in Alderley Park|Wellcome Sanger Institute for the COVID-19 Genomics UK (COG-UK) consortium|Davies|United Kingdom

>Spike|hCoV-19/Denmark/DCGC-18862/2020|2020-12-07|EPI\_ISL\_748174|Original|hCoV-19^Hovedstaden|Human|Department of Virus and Microbiological Special Diagnostics|Albertsen Lab|Michaelsen|Denmark

>Spike|hCoV-19/USA/TX-HMH-MCoV-11612/2020|2020-09-11|EPI\_ISL\_790067|Original|hCoV-19^Texas|Human|Houston Methodist Hospital|Houston Methodist Hospital|Long|USA

>Spike|hCoV-19/Wales/QEUA-9C8047/2020|2020-09-11|EPI\_ISL\_567108|Original|hCoV-19^Wales|Human|Lighthouse Lab in Glasgow|Wellcome Sanger Institute for the COVID-19 Genomics UK (COG-UK) consortium|Davies|United Kingdom

>Spike|hCoV-19/England/QEUA-B9F979/2020|2020-11-18|EPI\_ISL\_721030|Original|hCoV-19^England|Human|Lighthouse Lab in Glasgow|Wellcome Sanger Institute for the COVID-19 Genomics UK (COG-UK) Consortium|Davies|United Kingdom

>Spike|hCoV-19/USA/TX-HMH-MCoV-14347/2020|2020-10-05|EPI\_ISL\_787632|Original|hCoV-19^^Texas|Human|Houston Methodist Hospital|Houston Methodist Hospital|Long|USA

>Spike|hCoV-19/Scotland/EDB018/2020|2020-03-12|EPI\_ISL\_425824|Original|hCoV-19^^Scotland|Human|Virology Department|COVID-19 Genomics UK (COG-UK) Consortium|Williams|United Kingdom

>Spike|hCoV-19/England/CAMC-B52AE8/2020|2020-11-09|EPI\_ISL\_657669|Original|hCoV-19^^England|Human|Lighthouse Lab in Cambridge|Wellcome Sanger Institute for the COVID-19 Genomics UK (COG-UK) Consortium|Davies|United Kingdom

>Spike|hCoV-19/USA/VA-DCLS-0684/2020|2020-04-18|EPI\_ISL\_500846|Original|hCoV-19^^Virginia|Human|Virginia DCLS|Virginia DCLS|St. Jacques|USA

>Spike|hCoV-19/Ireland/D-NVRL-AIIDV1438v1/2020|2020-12-01|EPI\_ISL\_791304|Original|hCoV-19^^Dublin|Human|National Virus Reference Laboratory|Irish Coronavirus Sequencing Consortium - Teagasc Moorepark|Walsh|Ireland

>Spike|hCoV-19/Luxembourg/LNS9361630/2020|2020-10-27|EPI\_ISL\_744892|Original|hCoV-19^^Luxembourg|Human|Laboratoire national de sant\u00e9|Laboratoire national de sant\u00e9|Wienecke-Baldacchino|Luxembourg

>Spike|hCoV-19/Netherlands/Gelderland\_1/2020|2020-03-02|EPI\_ISL\_414423|Original|hCoV-19^^Gelderland|Human|Dutch COVID-19 response team|Erasmus Medical Center|Oude Munnink|Netherlands

>Spike|hCoV-19/Lithuania/C20-05-R18/2020|2020-05-25|EPI\_ISL\_560396|Original|hCoV-19^^Vilnius|Human|Vilnius University Hospital Santaros Klinikos|Institute of Biotechnology|Timinskas|Lithuania

>Spike|hCoV-19/USA/CT-Yale-256/2020|2020-04-01|EPI\_ISL\_469182|Original|hCoV-19^^Connecticut|Human|Yale Clinical Virology Laboratory|Grubaugh Lab - Yale School of Public Health|Grubaugh|USA

>Spike|hCoV-19/Luxembourg/LNS9102295/2020|2020-03-19|EPI\_ISL\_429727|Original|hCoV-19^^Luxembourg|Human|Laboratoire National de Sante|Laboratoire National de Sante|Wienecke-Baldacchino|Luxembourg

>Spike|hCoV-19/England/MILK-50E568/2020|2020-06-11|EPI\_ISL\_559083|Original|hCoV-19^^England|Human|Lighthouse Lab in Milton Keynes|Wellcome Sanger Institute for the COVID-19 Genomics UK (COG-UK) consortium|Davies|United Kingdom

>Spike|hCoV-19/France/PAC-IHU-0099/2020|2020-03-22|EPI\_ISL\_569308|Original|hCoV-19^^Provence-Alpes-C\u00f4te-d\u2019Azur|Human|MEPHI|MEPHI|Levasseur|France

>Spike|hCoV-19/Japan/PG-1027/2020|2020-04-00|EPI\_ISL\_684637|Original|hCoV-19^^Japan|Human|Fukuoka Institute of Health and Environmental Sciences|Pathogen Genomics Center|Sekizuka|Japan

>Spike|hCoV-19/Wales/PHWC-491255/2020|2020-11-16|EPI\_ISL\_706631|Original|hCoV-19^^Wales|Human|Originating lab|COVID-19 Genomics UK (COG-UK) Consortium|Moore|United Kingdom

>Spike|hCoV-19/Wales/PHWC-48D456/2020|2020-11-01|EPI\_ISL\_680626|Original|hCoV-19^^Wales|Human|Wales Specialist Virology Centre Sequencing lab|COVID-19 Genomics UK (COG-UK) Consortium|Moore|United Kingdom

>Spike|hCoV-19/England/MILK-99DC83/2020|2020-08-30|EPI\_ISL\_550645|Original|hCoV-19^^England|Human|Lighthouse Lab in Milton Keynes|Wellcome Sanger Institute for the COVID-19 Genomics UK (COG-UK) consortium|Davies|United Kingdom

>Spike|hCoV-19/Japan/PG-3321/2020|2020-04-00|EPI\_ISL\_691436|Original|hCoV-19^^Japan|Human|Pathogen Genomics Center|Pathogen Genomics Center|Sekizuka|Japan

>Spike|hCoV-19/Australia/VIC2461/2020|2020-06-26|EPI\_ISL\_522167|Original|hCoV-19^^Victoria|Human|Victorian Infectious Diseases Reference Laboratory (VIDRL)|VIDRL and MDU-PHL|Schultz|Australia

>Spike|hCoV-19/USA/TX-HMH-MCoV-14265/2020|2020-10-04|EPI\_ISL\_787550|Original|hCoV-19^^Texas|Human|Houston Methodist Hospital|Houston Methodist Hospital|Long|USA

>Spike|hCoV-19/England/OXON-B36FB/2020|2020-04-25|EPI\_ISL\_534881|Original|hCoV-19^^England|Human|Oxford Viromics|COVID-19 Genomics UK (COG-UK) Consortium|Golubchik|United Kingdom

>Spike|hCoV-19/USA/FL-BPHL-1702/2020|2020-08-22|EPI\_ISL\_594391|Original|hCoV-19^^Florida|Human|Florida Bureau of Public Health Laboratories|Florida Bureau of Public Health Laboratories|Blanton|USA

>Spike|hCoV-19/Scotland/QEUH-9E435B/2020|2020-09-23|EPI\_ISL\_601042|Original|hCoV-19^^Scotland|Human|Lighthouse Lab in Glasgow|Wellcome Sanger Institute for the COVID-19 Genomics UK (COG-UK) consortium|Davies|United Kingdom

>Spike|hCoV-19/France/ARA-109325/2020|2020-11-19|EPI\_ISL\_728529|Original|hCoV-19^^Auvergne-Rh\u00f4ne-Alpes|Human|CNR Virus des Infections Respiratoires - France SUD|CNR Virus des Infections Respiratoires - France SUD|Bal|France

>Spike|hCoV-19/England/CAMB-1B7DB5/2020|2020-10-14|EPI\_ISL\_637731|Original|hCoV-19^^England|Human|Department of Pathology|COVID-19 Genomics UK (COG-UK) Consortium|Goodfellow|United Kingdom

>Spike|hCoV-19/England/ALDP-9EA3EC/2020|2020-09-24|EPI\_ISL\_580271|Original|hCoV-19^^England|Human|Lighthouse Lab in Alderley Park|Wellcome Sanger Institute for the COVID-19 Genomics UK (COG-UK) consortium|Davies|United Kingdom

>Spike|hCoV-19/Scotland/CVR5495/2020|2020-10-21|EPI\_ISL\_651819|Original|hCoV-19^^Scotland|Human|West of Scotland Specialist Virology Centre|COVID-19 Genomics UK (COG-UK) Consortium|Robertson|United Kingdom

>Spike|hCoV-19/England/ALDP-B84458/2020|2020-11-14|EPI\_ISL\_674324|Original|hCoV-19^^England|Human|Lighthouse Lab in Alderley Park|Wellcome Sanger Institute for the COVID-19 Genomics UK (COG-UK) Consortium|Davies|United Kingdom

>Spike|hCoV-19/England/MILK-B96C6A/2020|2020-11-13|EPI\_ISL\_675078|Original|hCoV-19^^England|Human|Lighthouse Lab in Milton Keynes|Wellcome Sanger Institute for the COVID-19 Genomics UK (COG-UK) Consortium|Davies|United Kingdom

>Spike|hCoV-19/Japan/DP0078/2020|2020-02-15|EPI\_ISL\_416572|Original|hCoV-19^^Japan|Human|Japanese Quarantine Stations|Pathogen Genomics Center|Sekizuka|Japan

>Spike|hCoV-19/India/GJ-GBRC-432/2020|2020-09-03|EPI\_ISL\_586569|Original|hCoV-19^^Gujarat|Human|GCRI,Ahmedabad|Gujarat Biotechnology Research Centre|Joshi|India

>Spike|hCoV-19/England/ALDP-97BFBF/2020|2020-07-14|EPI\_ISL\_526296|Original|hCoV-19^^England|Human|University of Birmingham|COVID-19 Genomics UK (COG-UK) Consortium|Loman|United Kingdom

>Spike|hCoV-19/Serbia/Srbobran-305963007/2020|2020-07-29|EPI\_ISL\_661198|Original|hCoV-19^^Srbobran|Human|Scientific Veterinary Institute Novi Sad|Veterinary Specialized Institute \Kraljevo\|Vidanovic|Serbia

>Spike|hCoV-19/England/20174052404/2020|2020-04-21|EPI\_ISL\_465409|Original|hCoV-19^^England|Human|Respiratory Virus Unit|Respiratory Virus Unit|Platt|United Kingdom

>Spike|hCoV-19/England/20139052704/2020|2020-03-28|EPI\_ISL\_420704|Original|hCoV-19^^England|Human|Respiratory Virus Unit|Respiratory Virus Unit|Platt|United Kingdom

>Spike|hCoV-19/England/ALDP-9E8FAE/2020|2020-09-24|EPI\_ISL\_584180|Original|hCoV-19^^England|Human|Centre for Enzyme Innovation|COVID-19 Genomics UK (COG-UK) Consortium|Robson|United Kingdom

>Spike|hCoV-19/England/LIVE-A51FB/2020|2020-03-07|EPI\_ISL\_500111|Original|hCoV-19^^England|Human|Liverpool Clinical Laboratories|COVID-19 Genomics UK (COG-UK) Consortium|Haldenby|United Kingdom

>Spike|hCoV-19/Japan/PG-2934/2020|2020-04-00|EPI\_ISL\_691060|Original|hCoV-19^^Japan|Human|Pathogen Genomics Center|Pathogen Genomics Center|Sekizuka|Japan

>Spike|hCoV-19/England/NORT-2A4479/2020|2020-08-19|EPI\_ISL\_572480|Original|hCoV-19^^England|Human|Northumbria University / South Tees Hospitals NHS Foundation Trust / North Cumbria Integrated Care NHS Foundation Trust / North Tees and Hartlepool NHS Foundation Trust / Newcastle Hospitals NHS Foundation Trust|COVID-19 Genomics UK (COG-UK) Consortium|Bashton|United Kingdom

>Spike|hCoV-19/Japan/PG-4723/2020|2020-07-00|EPI\_ISL\_689859|Original|hCoV-19^^Japan|Human|Pathogen Genomics Center|Pathogen Genomics Center|Sekizuka|Japan

>Spike|hCoV-19/USA/OK-ADDL-01/2020|2020-04-10|EPI\_ISL\_535364|Original|hCoV-19^^Oklahoma|Human|Oklahoma Animal Disease Diagnostic Laboratory|Oklahoma Animal Disease Diagnostic Laboratory|Narayanan|USA

>Spike|hCoV-19/England/LOND-D8A12/2020|2020-04-15|EPI\_ISL\_492750|Original|hCoV-19^^England|Human|University College London|Wellcome Sanger Institute for the COVID-19 Genomics UK (COG-UK) Consortium|Davies|United Kingdom

>Spike|hCoV-19/England/CAMC-B52462/2020|2020-11-08|EPI\_ISL\_656704|Original|hCoV-19^^England|Human|Lighthouse Lab in Cambridge|Wellcome Sanger Institute for the COVID-19 Genomics UK (COG-UK) Consortium|Davies|United Kingdom

>Spike|hCoV-19/England/PORT-2EA811/2020|2020-00-00|EPI\_ISL\_703492|Original|hCoV-19^^England|Human|Centre for Enzyme Innovation|COVID-19 Genomics UK (COG-UK) Consortium|Robson|United Kingdom

>Spike|hCoV-19/USA/WI-UW-1918/2020|2020-10-28|EPI\_ISL\_677327|Original|hCoV-19^^Wisconsin|Human|University of Wisconsin-Madison AIDS Vaccine Research Laboratories|University of Wisconsin-Madison AIDS Vaccine Research Laboratories|Baczenas|USA

>Spike|hCoV-19/USA/FL-BPHL-2238/2020|2020-05-22|EPI\_ISL\_666860|Original|hCoV-19^^Florida|Human|Florida Bureau of Public Health Laboratories|Florida Bureau of Public Health Laboratories|Blanton|USA

>Spike|hCoV-19/England/ALDP-AA134A/2020|2020-10-22|EPI\_ISL\_624026|Original|hCoV-19^^England|Human|Lighthouse Lab in Alderley Park|Wellcome Sanger Institute for the COVID-19 Genomics UK (COG-UK) consortium|Davies|United Kingdom

>Spike|hCoV-19/England/HECH-259A1FE/2020|2020-05-24|EPI\_ISL\_488860|Original|hCoV-19^^England|Human|Microbiology Department|Wellcome Sanger Institute for the COVID-19 Genomics UK (COG-UK) consortium|Davies|United Kingdom

>Spike|hCoV-19/New Zealand/20VR0759/2020|2020-03-18|EPI\_ISL\_456164|Original|hCoV-19^^Combined Wellington|Human|Wellington SCL|Institute of Environmental Science and Research (ESR)|de Ligt|New Zealand

>Spike|hCoV-19/Scotland/EDB7803/2020|2020-09-19|EPI\_ISL\_572760|Original|hCoV-19^^Scotland|Human|Virology Department|COVID-19 Genomics UK (COG-UK) Consortium|Williams|United Kingdom

>Spike|hCoV-19/Wales/PHWC-49A289/2020|2020-12-01|EPI\_ISL\_727519|Original|hCoV-19^^Wales|Human|Originating lab|COVID-19 Genomics UK (COG-UK) Consortium|Moore|United Kingdom

>Spike|hCoV-19/England/ALDP-95221F/2020|2020-06-09|EPI\_ISL\_553646|Original|hCoV-19^^England|Human|Lighthouse Lab in Alderley Park|Wellcome Sanger Institute for the COVID-19 Genomics UK (COG-UK) consortium|Davies|United Kingdom

>Spike|hCoV-19/England/OXON-B2146/2020|2020-04-23|EPI\_ISL\_479120|Original|hCoV-19^^England|Human|Oxford Viromics|COVID-19 Genomics UK (COG-UK) Consortium|Golubchik|United Kingdom

>Spike|hCoV-19/USA/AZ-TG580930/2020|2020-08-05|EPI\_ISL\_695629|Original|hCoV-19^^Arizona|Human|TGen North|TGen North|French|USA

>Spike|hCoV-19/England/ALDP-BB4DDC/2020|2020-11-20|EPI\_ISL\_702493|Original|hCoV-19^^England|Human|Lighthouse Lab in Alderley Park|Wellcome Sanger Institute for the COVID-19 Genomics UK (COG-UK) Consortium|Davies|United Kingdom

>Spike|hCoV-19/USA/AZ-TG274754/2020|2020-04-07|EPI\_ISL\_694070|Original|hCoV-19^^Arizona|Human|AZ SPHL|TGen North|French|USA

>Spike|hCoV-19/Australia/VIC14763/2020|2020-09-17|EPI\_ISL\_592988|Original|hCoV-19^^Victoria|Human|Microbiological Diagnostic Unit - Public Health Laboratory (MDU-PHL)|MDU-PHL|Schultz|Australia

>Spike|hCoV-19/England/ALDP-C05FA8/2020|2020-12-06|EPI\_ISL\_709304|Original|hCoV-19^^England|Human|Lighthouse Lab in Alderley Park|Wellcome Sanger Institute for the COVID-19 Genomics UK (COG-UK) Consortium|Davies|United Kingdom

>Spike|hCoV-19/England/CAMC-BD3A94/2020|2020-11-28|EPI\_ISL\_702196|Original|hCoV-19^^England|Human|Lighthouse Lab in Cambridge|Wellcome Sanger Institute for the COVID-19 Genomics UK (COG-UK) Consortium|Davies|United Kingdom

>Spike|hCoV-19/Japan/PG-0553/2020|2020-04-00|EPI\_ISL\_684181|Original|hCoV-19^^Japan|Human|Pathogen Genomics Center|Pathogen Genomics Center|Sekizuka|Japan

>Spike|hCoV-19/Denmark/DCGC-1093/2020|2020-03-16|EPI\_ISL\_614615|Original|hCoV-19^^Hovedstaden|Human|Department of Virus and Microbiological Special Diagnostics|Albertsen lab|Michaelsen|Denmark

>Spike|hCoV-19/Northern Ireland/NIRE-101E8C/2020|2020-03-24|EPI\_ISL\_453471|Original|hCoV-19^^Northern Ireland|Human|Regional Virus Laboratory|COVID-19 Genomics UK (COG-UK) Consortium|Fairley|United Kingdom

>Spike|hCoV-19/USA/TX-HMH-MCoV-15868/2020|2020-07-10|EPI\_ISL\_785552|Original|hCoV-19^^Texas|Human|Houston Methodist Hospital|Houston Methodist Hospital|Long|USA

>Spike|hCoV-19/England/QEUH-C32E1E/2020|2020-12-11|EPI\_ISL\_734000|Original|hCoV-19^^England|Human|Lighthouse Lab in Glasgow|Wellcome Sanger Institute for the COVID-19 Genomics UK (COG-UK) Consortium|Davies|United Kingdom

>Spike|hCoV-19/USA/ME-HETL-J0335/2020|2020-11-24|EPI\_ISL\_755463|Original|hCoV-19^^Maine|Human|Maine Health and Environmental Testing Laboratory|Tewhey Lab|Tewhey|USA

>Spike|hCoV-19/England/BRIS-12B4E4/2020|2020-05-21|EPI\_ISL\_487551|Original|hCoV-19^^England|Human|PHE South West Regional Laboratory|Wellcome Sanger Institute for the COVID-19 Genomics UK (COG-UK) consortium|Davies|United Kingdom

>Spike|hCoV-19/England/QEUH-B41509/2020|2020-11-08|EPI\_ISL\_658666|Original|hCoV-19^^England|Human|Lighthouse Lab in Glasgow|Wellcome Sanger Institute for the COVID-19 Genomics UK (COG-UK) Consortium|Davies|United Kingdom

>Spike|hCoV-19/Japan/PG-0651/2020|2020-04-00|EPI\_ISL\_684261|Original|hCoV-19^^Japan|Human|Gunma Prefectural Institute of Public Health and Environmental Sciences|Pathogen Genomics Center|Sekizuka|Japan

>Spike|hCoV-19/USA/WI-WSLH-200011/2020|2020-03-15|EPI\_ISL\_470540|Original|hCoV-19^^Wisconsin|Human|Wisconsin State Laboratory of Hygiene\nCommunicable Disease Division|Wisconsin State Laboratory of Hygiene\nCommunicable Disease Division|Florek|USA

>Spike|hCoV-19/USA/WI-WSLH-200183/2020|2020-04-05|EPI\_ISL\_578408|Original|hCoV-19^^Wisconsin|Human|Wisconsin State Laboratory of Hygiene Communicable Disease Division|Wisconsin State Laboratory of Hygiene Communicable Disease Division|Florek|USA

>Spike|hCoV-19/England/20130061604/2020|2020-03-21|EPI\_ISL\_423641|Original|hCoV-19^^England|Human|Respiratory Virus Unit|Respiratory Virus Unit|Platt|United Kingdom

>Spike|hCoV-19/England/OXON-B392F/2020|2020-04-04|EPI\_ISL\_534894|Original|hCoV-19^^England|Human|Oxford Viromics|COVID-19 Genomics UK (COG-UK) Consortium|Golubchik|United Kingdom

>Spike|hCoV-19/Hong Kong/VB20073824/2020|2020-05-12|EPI\_ISL\_463304|Original|hCoV-19^^Hong Kong|Human|Mrs Wu York Yu GOPC|Hong Kong Department of Health|Mak|China

>Spike|hCoV-19/England/PORT-2D0F46/2020|2020-04-23|EPI\_ISL\_475308|Original|hCoV-19^^England|Human|Centre for Enzyme Innovation|COVID-19 Genomics UK (COG-UK) Consortium|Robson|United Kingdom

>Spike|hCoV-19/USA/CA-CZB-14067/2020|2020-06-24|EPI\_ISL\_738822|Original|hCoV-19^^California|Human|Alameda County Public Health Lab|Chan-Zuckerberg Biohub|Kamm|USA

>Spike|hCoV-19/Australia/VIC9101/2020|2020-08-20|EPI\_ISL\_565393|Original|hCoV-19^^Victoria|Human|Microbiological Diagnostic Unit - Public Health Laboratory (MDU-PHL) |MDU-PHL|Schultz|Australia

>Spike|hCoV-19/England/CAMB-1ADE91/2020|2020-04-26|EPI\_ISL\_459444|Original|hCoV-19^^England|Human|Department of Pathology|Wellcome Sanger Institute for the COVID-19 Genomics UK (COG-UK) consortium|Davies|United Kingdom

>Spike|hCoV-19/USA/CA-ALSR-4314/2020|2020-09-30|EPI\_ISL\_648963|Original|hCoV-19^^California|Human|San Diego County Public Health Laboratory|Andersen lab at Scripps Research|Gangavarapu|USA

>Spike|hCoV-19/Wales/PHWC-47DBDC/2020|2020-10-08|EPI\_ISL\_595338|Original|hCoV-19^^Wales|Human|Originating lab|COVID-19 Genomics UK (COG-UK) Consortium|Moore|United Kingdom

>Spike|hCoV-19/Wales/PHWC-48EC3F/2020|2020-11-10|EPI\_ISL\_680981|Original|hCoV-19^^Wales|Human|Wales Specialist Virology Centre Sequencing lab|COVID-19 Genomics UK (COG-UK) Consortium|Moore|United Kingdom

>Spike|hCoV-19/USA/CA-QDX-2654/2020|2020-03-16|EPI\_ISL\_604910|Original|hCoV-19^^California|Human|Quest Diagnostics|Quest Diagnostics|Kagan|USA

>Spike|hCoV-19/Tunisia/ADAGE-17786/2020|2020-10-13|EPI\_ISL\_710575|Original|hCoV-19^^Monastir|Human|H\u00f4pital Fattouma-Bourguiba de Monastir|Laboratoire des Proc\u00e9d\u00e9s de Criblage Mol\u00e9culaire et Cellulaire-Centre de Biotechnologie de Sfax|Abid|Tunisia

>Spike|hCoV-19/USA/NC-CDC-0871/2020|2020-04-16|EPI\_ISL\_540441|Original|hCoV-19^^North Carolina|Human|NC State Laboratory of Public Health|Pathogen Discovery|Queen|USA

>Spike|hCoV-19/USA/MI-MDHHS-SC20057/2020|2020-03-21|EPI\_ISL\_437144|Original|hCoV-19^^Michigan|Human|Michigan Department of Health and Human Services|Michigan Department of Health and Human Services|Blankenship|USA

>Spike|hCoV-19/England/LIVE-DBAEA4/2020|2020-11-14|EPI\_ISL\_665121|Original|hCoV-19^^England|Human|Liverpool Clinical Laboratories|COVID-19 Genomics UK (COG-UK) Consortium|Haldenby|United Kingdom

>Spike|hCoV-19/Wales/PHWC-25AAD/2020|2020-03-24|EPI\_ISL\_422345|Original|hCoV-19^^Wales|Human|Wales Specialist Virology Centre|Public Health Wales Microbiology Cardiff|Moore|United Kingdom

>Spike|hCoV-19/Singapore/131/2020|2020-03-20|EPI\_ISL\_443223|Original|hCoV-19^^Singapore|Human|National Public Health Laboratory|National Public Health Laboratory|Mak|Singapore

>Spike|hCoV-19/England/ALDP-936615/2020|2020-06-21|EPI\_ISL\_551354|Original|hCoV-19^^England|Human|Lighthouse Lab in Alderley Park|Wellcome Sanger Institute for the COVID-19 Genomics UK (COG-UK) consortium|Davies|United Kingdom

>Spike|hCoV-19/Russia/MOS-CRIE-13661344/2020|2020-11-09|EPI\_ISL\_745231|Original|hCoV-19^^Moscow|Human|Molecular diagnostic laboratory of Federal Budget Institution of Science \Central Research Institute of Epidemiology\ of The Federal Service on Customers' Rights Protection and Human Well-being Surveillance|Group of Genomics and Postgenomic Technologies of Central Research Institute of Epidemiology|y|Korneenko|Russia

>Spike|hCoV-19/England/QEUEH-9DDAF6/2020|2020-09-21|EPI\_ISL\_599553|Original|hCoV-19^^England|Human|Lighthouse Lab in Glasgow|Wellcome Sanger Institute for the COVID-19 Genomics UK (COG-UK) consortium|Davies|United Kingdom

>Spike|hCoV-19/Netherlands/Naarden\_1364774/2020|2020-03-02|EPI\_ISL\_413577|Original|hCoV-19^^Naarden|Human|MHC Gooi & Vechtstreek|Erasmus Medical Center|Oude Munnink|Netherlands

>Spike|hCoV-19/USA/FL-BPHL-1260/2020|2020-03-26|EPI\_ISL\_541145|Original|hCoV-19^^Florida|Human|Florida Bureau of Public Health Laboratories|Florida Bureau of Public Health Laboratories|Blanton|USA

>Spike|hCoV-19/England/ALDP-B1AEC2/2020|2020-11-01|EPI\_ISL\_645951|Original|hCoV-19^^England|Human|Lighthouse Lab in Alderley Park|Wellcome Sanger Institute for the COVID-19 Genomics UK (COG-UK) Consortium|Davies|United Kingdom

>Spike|hCoV-19/Bangladesh/DNAS-isl-75/2020|2020-05-24|EPI\_ISL\_605911|Original|hCoV-19^^Bangladesh|Human|NGS Lab|NGS Lab|Rabbi|Bangladesh

>Spike|hCoV-19/England/MILK-A7D06E/2020|2020-10-13|EPI\_ISL\_606912|Original|hCoV-19^^England|Human|Lighthouse Lab in Milton Keynes|Wellcome Sanger Institute for the COVID-19 Genomics UK (COG-UK) consortium|Davies|United Kingdom

>Spike|hCoV-19/Canada/BC\_03469645/2020|2020-04-00|EPI\_ISL\_466742|Original|hCoV-19^^British Columbia|Human|BCCDC Public Health Laboratory|BCCDC Public Health Laboratory|Harrigan|Canada

>Spike|hCoV-19/England/QEUEH-C146A1/2020|2020-12-06|EPI\_ISL\_709311|Original|hCoV-19^^England|Human|Lighthouse Lab in Glasgow|Wellcome Sanger Institute for the COVID-19 Genomics UK (COG-UK) Consortium|Davies|United Kingdom

>Spike|hCoV-19/Wales/PHWC-16DA99/2020|2020-09-17|EPI\_ISL\_577485|Original|hCoV-19^^Wales|Human|Wales Specialist Virology Centre Sequencing lab|COVID-19 Genomics UK (COG-UK) Consortium|Moore|United Kingdom

>Spike|hCoV-19/Russia/OMS-ORINFI-7593S/2020|2020-07-20|EPI\_ISL\_569844|Original|hCoV-19^^Omsk|Human|Omsk Research Institute of Natural Focal Infections|WHO National Influenza Centre Russian Federation|Komissarov|Russia

>Spike|hCoV-19/Jordan/AM-ALSR-4010/2020|2020-10-03|EPI\_ISL\_636373|Original|hCoV-19^^Amman|Human|Biolab Diagnostic Laboratories|Andersen lab at Scripps Research|Gangavarapu|Jordan

>Spike|hCoV-19/USA/GA-MDHHS-SC21741/2020|2020-07-21|EPI\_ISL\_529804|Original|hCoV-19^^Georgia|Human|Michigan Department of Health and Human Services|Michigan Department of Health and Human Services|Blankenship|USA

>Spike|hCoV-19/USA/NY-NYCPHL-000311/2020|2020-03-15|EPI\_ISL\_631838|Original|hCoV-19^^New York|Human|Bellevue Hospital Center|New York City Public Health Laboratory|Wang|USA

>Spike|hCoV-19/USA/TX-CDC-2-3714457/2020|2020-11-23|EPI\_ISL\_751787|Original|hCoV-19^^Texas|Human|TX DSHS|Genomics and Discovery|Queen|USA

>Spike|hCoV-19/USA/CA-QDX-2102/2020|2020-03-19|EPI\_ISL\_604411|Original|hCoV-19^^California|Human|Quest Diagnostics|Quest Diagnostics|Kagan|USA

>Spike|hCoV-19/South Africa/KRISP-K002387/2020|2020-07-22|EPI\_ISL\_515753|Original|hCoV-19^^KwaZulu-Natal|Human|NHLS-IALCH|KRISP|de Oliveira|South Africa

>Spike|hCoV-19/Canada/ON-S934/2020|2020-04-13|EPI\_ISL\_586492|Original|hCoV-19^^Ontario|Human|Toronto Invasive Bacterial Diseases Network|McMaster University|McArthur|Canada

>Spike|hCoV-19/USA/AZ-TG648760/2020|2020-04-27|EPI\_ISL\_695933|Original|hCoV-19^^Arizona|Human|Sonora Quest Laboratories|TGen North|French|USA

>Spike|hCoV-19/Brazil/RJ-00551/2020|2020-10-29|EPI\_ISL\_717935|Original|hCoV-19^^Rio de Janeiro|Human|Laboratorio de Virologia Molecular / UFRJ|Bioinformatics Laboratory / LNCC|Almeida|Brazil

>Spike|hCoV-19/England/BRIS-12D85F/2020|2020-05-06|EPI\_ISL\_481856|Original|hCoV-19^^England|Human|PHE South West Regional Laboratory|Wellcome Sanger Institute for the COVID-19 Genomics UK (COG-UK) consortium|Davies|United Kingdom

>Spike|hCoV-19/mink/Netherlands/NB-EMC-33-3/2020|2020-08-17|EPI\_ISL\_577765|Original|hCoV-19^^Noord Brabant|Neovison vison|Dutch COVID-19 response team|Erasmus Medical Center|Oude Munnink|Netherlands

>Spike|hCoV-19/Scotland/CVR4323/2020|2020-08-28|EPI\_ISL\_573774|Original|hCoV-19^^Scotland|Human|West of Scotland Specialist Virology Centre|COVID-19 Genomics UK (COG-UK) Consortium|Robertson|United Kingdom

>Spike|hCoV-19/USA/OR-OHSU-0222/2020|2020-04-03|EPI\_ISL\_509074|Original|hCoV-19^^Oregon|Human|OHSU Lab Services Molecular Microbiology Lab|Oregon SARS-CoV-2 Genome Sequencing Center|O'Roak|USA

>Spike|hCoV-19/Scotland/QEUH-96FBC9/2020|2020-08-18|EPI\_ISL\_568417|Original|hCoV-19^^Scotland|Human|Lighthouse Lab in Glasgow|Wellcome Sanger Institute for the COVID-19 Genomics UK (COG-UK) consortium|Davies|United Kingdom

>Spike|hCoV-19/England/BIRM-67E76/2020|2020-10-31|EPI\_ISL\_650354|Original|hCoV-19^^England|Human|University of Birmingham|COVID-19 Genomics UK (COG-UK) Consortium|Loman|United Kingdom

>Spike|hCoV-19/England/LOND-D5532/2020|2020-04-16|EPI\_ISL\_444231|Original|hCoV-19^^England|Human|University College London|COVID-19 Genomics UK (COG-UK) Consortium|Roy|United Kingdom

>Spike|hCoV-19/Ukraine/203100333/2020|2020-06-24|EPI\_ISL\_512612|Original|hCoV-19^^Ukraine|Human|National Laboratory for Influenza/Virology reference laboratory|Respiratory Virus Unit|Platt|Ukraine

>Spike|hCoV-19/Australia/VIC5407/2020|2020-07-06|EPI\_ISL\_520170|Original|hCoV-19^^Victoria|Human|Microbiological Diagnostic Unit - Public Health Laboratory (MDU-PHL)|MDU-PHL|Schultz|Australia

>Spike|hCoV-19/Wales/PHWC-160234/2020|2020-05-19|EPI\_ISL\_472910|Original|hCoV-19^^Wales|Human|Wales Specialist Virology Centre Sequencing lab|COVID-19 Genomics UK (COG-UK) Consortium|Moore|United Kingdom

>Spike|hCoV-19/Scotland/QEUH-A4B8AD/2020|2020-10-08|EPI\_ISL\_627283|Original|hCoV-19^^Scotland|Human|Oxford Viromics|COVID-19 Genomics UK (COG-UK) Consortium|Golubchik|United Kingdom

>Spike|hCoV-19/Indonesia/BT-MRINUPH-200624-183/2020|2020-06-18|EPI\_ISL\_779387|Original|hCoV-19^^Banten|Human|Siloam Hospital Lippo Village|Mochtar Riady Institute for Nanotechnology-Universitas Pelita Harapan|Suriapranata|Indonesia

>Spike|hCoV-19/England/QEUH-B43455/2020|2020-11-08|EPI\_ISL\_657148|Original|hCoV-19^^England|Human|Lighthouse Lab in Glasgow|Wellcome Sanger Institute for the COVID-19 Genomics UK (COG-UK) Consortium|Davies|United Kingdom

>Spike|hCoV-19/Japan/PG-6885/2020|2020-00-00|EPI\_ISL\_687993|Original|hCoV-19^^Japan|Human|Pathogen Genomics Center|Pathogen Genomics Center|Sekizuka|Japan

>Spike|hCoV-19/USA/NY-QDX-1911/2020|2020-03-15|EPI\_ISL\_604249|Original|hCoV-19^^New York|Human|Quest Diagnostics|Quest Diagnostics|Kagan|USA

>Spike|hCoV-19/Australia/VIC11833/2020|2020-08-10|EPI\_ISL\_591870|Original|hCoV-19^^Victoria|Human|Victorian Infectious Diseases Reference Laboratory (VIDRL)|VIDRL and MDU-PHL|Schultz|Australia

>Spike|hCoV-19/England/NORT-29A731/2020|2020-05-02|EPI\_ISL\_507116|Original|hCoV-19^^England|Human|Northumbria University / South Tees Hospitals NHS Foundation Trust

/ North Cumbria Integrated Care NHS Foundation Trust / North Tees and Hartlepool NHS Foundation Trust / Newcastle Hospitals NHS Foundation Trust|COVID-19 Genomics UK (COG-UK) Consortium|Bashton|United Kingdom

>Spike|hCoV-19/USA/CA-LACPHL-AA00044/2020|2020-10-23|EPI\_ISL\_710426|Original|hCoV-19^^California|Human|Los Angeles County PHL|Los Angeles County PHL|Hemarajata|USA

>Spike|hCoV-19/England/ALDP-9FCE5F/2020|2020-10-01|EPI\_ISL\_587773|Original|hCoV-19^^England|Human|Lighthouse Lab in Alderley Park|Wellcome Sanger Institute for the COVID-19 Genomics UK (COG-UK) consortium|Davies|United Kingdom

>Spike|hCoV-19/England/CAMC-B32FEF/2020|2020-11-05|EPI\_ISL\_659377|Original|hCoV-19^^England|Human|Lighthouse Lab in Cambridge|Wellcome Sanger Institute for the COVID-19 Genomics UK (COG-UK) Consortium|Davies|United Kingdom

>Spike|hCoV-19/India/GJ-GBRC-380a/2020|2020-06-18|EPI\_ISL\_524739|Original|hCoV-19^^Gujarat|Human|GMERS Medical College and Hospital|Gujarat Biotechnology Research Centre|Joshi|India

>Spike|hCoV-19/England/MILK-A6BDC6/2020|2020-10-09|EPI\_ISL\_608870|Original|hCoV-19^^England|Human|Lighthouse Lab in Milton Keynes|Wellcome Sanger Institute for the COVID-19 Genomics UK (COG-UK) consortium|Davies|United Kingdom

>Spike|hCoV-19/Denmark/DCGC-16133/2020|2020-11-16|EPI\_ISL\_714132|Original|hCoV-19^^Hovedstaden|Human|Department of Virus and Microbiological Special Diagnostics|Albertsen Lab|Michaelsen|Denmark

>Spike|hCoV-19/Northern Ireland/NIRE-103D14/2020|2020-04-13|EPI\_ISL\_482051|Original|hCoV-19^^Northern Ireland|Human|Regional Virus Laboratory|Wellcome Sanger Institute for the COVID-19 Genomics UK (COG-UK) consortium|Davies|United Kingdom

>Spike|hCoV-19/Denmark/DCGC-11222/2020|2020-11-02|EPI\_ISL\_670776|Original|hCoV-19^^Hovedstaden|Human|Department of Virus and Microbiological Special Diagnostics|Albertsen Lab|Michaelsen|Denmark

>Spike|hCoV-19/Belgium/ULG-10058/2020|2020-04-05|EPI\_ISL\_424653|Original|hCoV-19^^Li\u00e8ge|Human|Department of Clinical Microbiology|GIGA Medical Genomics|Durkin|Belgium

>Spike|hCoV-19/England/ALDP-B1B82D/2020|2020-11-01|EPI\_ISL\_646005|Original|hCoV-19^^England|Human|Lighthouse Lab in Alderley Park|Wellcome Sanger Institute for the COVID-19 Genomics UK (COG-UK) Consortium|Davies|United Kingdom

>Spike|hCoV-19/USA/TX-HMH-MCoV-19801/2020|2020-11-24|EPI\_ISL\_784136|Original|hCoV-19^^Texas|Human|Houston Methodist Hospital|Houston Methodist Hospital|Long|USA

>Spike|hCoV-19/USA/NC\_200244/2020|2020-03-00|EPI\_ISL\_454802|Original|hCoV-19^^North Carolina|Human|Dirk Dittmer|Dirk Dittmer|Moorad|USA

>Spike|hCoV-19/USA/MI-UM-10035748873/2020|2020-09-01|EPI\_ISL\_583312|Original|hCoV-19^^Michigan|Human|University of Michigan Clinical Microbiology Laboratory|Lauring Lab|Valesano|USA

>Spike|hCoV-19/Northern Ireland/QEUI-9410EC/2020|2020-07-29|EPI\_ISL\_532640|Original|hCoV-19^^Northern Ireland|Human|Lighthouse Lab in Glasgow|Wellcome Sanger Institute for the COVID-19 Genomics UK (COG-UK) consortium|Davies|United Kingdom

>Spike|hCoV-19/England/CAMC-B78D10/2020|2020-11-12|EPI\_ISL\_783397|Original|hCoV-19^^England|Human|Lighthouse Lab in Cambridge|Wellcome Sanger Institute for the COVID-19 Genomics UK (COG-UK) Consortium|Davies|United Kingdom

>Spike|hCoV-19/Wales/PHWC-49FDED/2020|2020-12-08|EPI\_ISL\_743357|Original|hCoV-19^^Wales|Human|Wales Specialist Virology Centre Sequencing lab|COVID-19 Genomics UK (COG-UK) Consortium|Moore|United Kingdom

>Spike|hCoV-19/Spain/VC-IBV-98004319/2020|2020-03-24|EPI\_ISL\_654468|Original|hCoV-19^^Comunitat Valenciana|Human|Servicio de Microbiolog\u00eda. Hospital General Universitario de Castell\u00f3n|SeqCOVID-SPAIN consortium|IBV(CSIC)|Comas|Spain

>Spike|hCoV-19/England/MILK-A563F9/2020|2020-10-07|EPI\_ISL\_665850|Original|hCoV-19^^England|Human|Quadram Institute Bioscience|COVID-19 Genomics UK (COG-UK) Consortium|Alikhan|United Kingdom

>Spike|hCoV-19/Scotland/EDB9915/2020|2020-11-16|EPI\_ISL\_680548|Original|hCoV-19^^Scotland|Human|Virology Department|COVID-19 Genomics UK (COG-UK) Consortium|McHugh|United Kingdom



>Spike|hCoV-19/Japan/PG-2000/2020|2020-05-00|EPI\_ISL\_685605|Original|hCoV-19^^Japan|Human|Pathogen Genomics Center|Pathogen Genomics Center|Sekizuka|Japan

>Spike|hCoV-19/Latvia/046/2020|2020-03-22|EPI\_ISL\_486430|Original|hCoV-19^^Latvia|Human|Latvijas Infektolo\u0123ijas centrs|Latvian Biomedical Research and Study Centre|Zrelavs|Latvia

>Spike|hCoV-19/Switzerland/BL-ETHZ-410182/2020|2020-12-12|EPI\_ISL\_737668|Original|hCoV-19^^Basel-Landschaft|Human|Viollier AG|Department of Biosystems Science and Engineering|Nadeau|Switzerland

>Spike|hCoV-19/India/GJ-GBRC273a/2020|2020-06-13|EPI\_ISL\_483872|Original|hCoV-19^^Gujarat|Human|Department of Microbiology|Gujarat Biotechnology Research Centre|Joshi|India

>Spike|hCoV-19/Scotland/QEUH-A4B658/2020|2020-10-08|EPI\_ISL\_628470|Original|hCoV-19^^Scotland|Human|Oxford Viromics|COVID-19 Genomics UK (COG-UK) Consortium|Golubchik|United Kingdom

>Spike|hCoV-19/Denmark/DCGC-5260/2020|2020-09-07|EPI\_ISL\_615191|Original|hCoV-19^^Sjaelland|Human|Department of Virus and Microbiological Special Diagnostics|Albertsen lab|Michaelsen|Denmark

>Spike|hCoV-19/England/QEUH-BCCACB/2020|2020-11-25|EPI\_ISL\_704256|Original|hCoV-19^^England|Human|Lighthouse Lab in Glasgow|Wellcome Sanger Institute for the COVID-19 Genomics UK (COG-UK) Consortium|Davies|United Kingdom

>Spike|hCoV-19/Wales/PHWC-49261C/2020|2020-11-29|EPI\_ISL\_725675|Original|hCoV-19^^Wales|Human|Originating lab|COVID-19 Genomics UK (COG-UK) Consortium|Moore|United Kingdom

>Spike|hCoV-19/India/TG-CCMB-M22/2020|2020-06-04|EPI\_ISL\_495194|Original|hCoV-19^^Telangana|Human|CSIR-Centre for Cellular and Molecular Biology|CSIR-Centre for Cellular and Molecular Biology|Banu|India

>Spike|hCoV-19/USA/UT-04836/2020|2020-04-19|EPI\_ISL\_470566|Original|hCoV-19^^Utah|Human|Utah Public Health Laboratory|Utah Public Health Laboratory|Young|USA

>Spike|hCoV-19/England/201161657/2020|2020-03-12|EPI\_ISL\_464869|Original|hCoV-19^^England|Human|Respiratory Virus Unit|Respiratory Virus Unit|Platt|United Kingdom

>Spike|hCoV-19/Denmark/DCGC-766/2020|2020-03-09|EPI\_ISL\_614775|Original|hCoV-19^^Syddanmark|Human|Department of Virus and Microbiological Special Diagnostics|Albertsen lab|Michaelsen|Denmark

>Spike|hCoV-19/Chile/RM-134034/2020|2020-07-27|EPI\_ISL\_746642|Original|hCoV-19^^Region Metropolitana de Santiago|Human|Genetica Molecular and Subdepartamento de Virologia ISP Chile|Instituto de Salud Publica de Chile|Tognarelli|Chile

>Spike|hCoV-19/Wales/PHWC-49104C/2020|2020-11-18|EPI\_ISL\_706602|Original|hCoV-19^^Wales|Human|Originating lab|COVID-19 Genomics UK (COG-UK) Consortium|Moore|United Kingdom

>Spike|hCoV-19/Belgium/ULG-10747/2020|2020-09-19|EPI\_ISL\_641589|Original|hCoV-19^^Li\u00e8ge|Human|Department of Clinical Microbiology|GIGA Medical Genomics|Durkin|Belgium

>Spike|hCoV-19/Australia/VIC5240/2020|2020-07-17|EPI\_ISL\_520005|Original|hCoV-19^^Victoria|Human|Microbiological Diagnostic Unit - Public Health Laboratory (MDU-PHL) |MDU-PHL|Schultz|Australia

>Spike|hCoV-19/Switzerland/BS-42220069/2020|2020-04-04|EPI\_ISL\_581849|Original|hCoV-19^^Basel-Stadt|Human|University Hospital Basel|University Hospital Basel|Roloff Handschin|Switzerland

>Spike|hCoV-19/USA/TX-HMH-885/2020|2020-04-15|EPI\_ISL\_545898|Original|hCoV-19^^Texas|Human|Houston Methodist Hospital|Houston Methodist Hospital|Long|USA

>Spike|hCoV-19/Jordan/IR-ALSR-5236/2020|2020-10-06|EPI\_ISL\_730474|Original|hCoV-19^^Irbid|Human|Biolab Diagnostic Laboratories|Andersen lab at Scripps Research|Gangavarapu|Jordan

>Spike|hCoV-19/Denmark/DCGC-15489/2020|2020-11-23|EPI\_ISL\_713851|Original|hCoV-19^^Hovedstaden|Human|Department of Virus and Microbiological Special Diagnostics|Albertsen Lab|Michaelsen|Denmark

>Spike|hCoV-19/Singapore/468/2020|2020-02-14|EPI\_ISL\_475999|Original|hCoV-19^^Singapore|Human|National Public Health Laboratory|National Public Health Laboratory|Mak|Singapore

>Spike|hCoV-19/England/ALDP-C3B2A0/2020|2020-12-09|EPI\_ISL\_731827|Original|hCoV-19^^England|Human|Lighthouse Lab in Alderley Park|Wellcome Sanger Institute for the COVID-19 Genomics UK (COG-UK) Consortium|Davies|United Kingdom

>Spike|hCoV-19/England/20169005404/2020|2020-04-17|EPI\_ISL\_465182|Original|hCoV-19^^England|Human|Respiratory Virus Unit|Respiratory Virus Unit|Platt|United Kingdom

>Spike|hCoV-19/England/MILK-BDBF15/2020|2020-11-26|EPI\_ISL\_709761|Original|hCoV-19^^England|Human|Lighthouse Lab in Milton Keynes|Wellcome Sanger Institute for the COVID-19 Genomics UK (COG-UK) Consortium|Davies|United Kingdom

>Spike|hCoV-19/Netherlands/ZE-EMC-89/2020|2020-00-00|EPI\_ISL\_763190|Original|hCoV-19^^Zeeland|Human|Dutch COVID-19 response team|Erasmus Medical Center|Oude Munnink|Netherlands

>Spike|hCoV-19/England/20140002404/2020|2020-03-27|EPI\_ISL\_465868|Original|hCoV-19^^England|Human|Respiratory Virus Unit|Respiratory Virus Unit|Platt|United Kingdom

>Spike|hCoV-19/England/NORT-2A7FA2/2020|2020-10-10|EPI\_ISL\_612568|Original|hCoV-19^^England|Human|Northumbria University / South Tees Hospitals NHS Foundation Trust / North Cumbria Integrated Care NHS Foundation Trust / North Tees and Hartlepool NHS Foundation Trust / Newcastle Hospitals NHS Foundation Trust|COVID-19 Genomics UK (COG-UK) Consortium|Bashton|United Kingdom

>Spike|hCoV-19/England/CAMB-82AEA/2020|2020-04-22|EPI\_ISL\_438659|Original|hCoV-19^^England|Human|Department of Pathology|COVID-19 Genomics UK (COG-UK) Consortium|Meredith|United Kingdom

>Spike|hCoV-19/Denmark/DCGC-17378/2020|2020-12-14|EPI\_ISL\_750941|Original|hCoV-19^^Midtjylland|Human|Department of Virus and Microbiological Special Diagnostics|Albertsen Lab|Michaelsen|Denmark

>Spike|hCoV-19/England/ALDP-A6D81E/2020|2020-10-14|EPI\_ISL\_608052|Original|hCoV-19^^England|Human|Lighthouse Lab in Alderley Park|Wellcome Sanger Institute for the COVID-19 Genomics UK (COG-UK) consortium|Davies|United Kingdom

>Spike|hCoV-19/England/QEUH-BA12E2/2020|2020-11-18|EPI\_ISL\_672752|Original|hCoV-19^^England|Human|Lighthouse Lab in Glasgow|Wellcome Sanger Institute for the COVID-19 Genomics UK (COG-UK) Consortium|Davies|United Kingdom

>Spike|hCoV-19/Northern Ireland/NIRE-FB93A/2020|2020-03-31|EPI\_ISL\_585252|Original|hCoV-19^^Northern Ireland|Human|Regional Virus Laboratory|COVID-19 Genomics UK (COG-UK) Consortium|Fairley|United Kingdom

>Spike|hCoV-19/Wales/PHWC-489496/2020|2020-11-02|EPI\_ISL\_639580|Original|hCoV-19^^Wales|Human|Wales Specialist Virology Centre Sequencing lab|COVID-19 Genomics UK (COG-UK) Consortium|Moore|United Kingdom

>Spike|hCoV-19/England/ALDP-49AF73/2020|2020-06-12|EPI\_ISL\_559350|Original|hCoV-19^^England|Human|Lighthouse Lab in Alderley Park|Wellcome Sanger Institute for the COVID-19 Genomics UK (COG-UK) consortium|Davies|United Kingdom

>Spike|hCoV-19/USA/TX-HMH-MCoV-9896/2020|2020-07-06|EPI\_ISL\_780329|Original|hCoV-19^^Texas|Human|Houston Methodist Hospital|Houston Methodist Hospital|Long|USA

>Spike|hCoV-19/Scotland/QEUH-9CE982/2020|2020-09-17|EPI\_ISL\_601875|Original|hCoV-19^^Scotland|Human|Lighthouse Lab in Glasgow|Wellcome Sanger Institute for the COVID-19 Genomics UK (COG-UK) consortium|Davies|United Kingdom

>Spike|hCoV-19/Ireland/D-NVRL-AIIDV0432v5/2020|2020-04-09|EPI\_ISL\_644292|Original|hCoV-19^^Dublin|Human|CEPHR / Vincent's Hospital|Irish Coronavirus Sequencing Consortium - National Virus Reference Laboratory|Gonzalez|Ireland

>Spike|hCoV-19/Australia/VIC228/2020|2020-03-20|EPI\_ISL\_419923|Original|hCoV-19^^Victoria|Human|Victorian Infectious Diseases Reference Laboratory (VIDRL)|Victorian Infectious Diseases Reference Laboratory and Microbiological Diagnostic Unit Public Health Laboratory|Schultz|Australia

>Spike|hCoV-19/England/MILK-BAACEB/2020|2020-11-18|EPI\_ISL\_783199|Original|hCoV-19^^England|Human|Lighthouse Lab in Milton Keynes|Wellcome Sanger Institute for the COVID-19 Genomics UK (COG-UK) Consortium|Davies|United Kingdom

>Spike|hCoV-19/USA/UT-03007/2020|2020-04-30|EPI\_ISL\_509557|Original|hCoV-19^^Utah|Human|Utah Public Health Laboratory|Utah Public Health Laboratory|Butz|USA

>Spike|hCoV-19/Spain/AN-IBV-002940/2020|2020-03-26|EPI\_ISL\_474876|Original|hCoV-19^^Andalucia|Human|Hospital Universitario Virgen de las Nieves de Granada-SAS|SeqCOVID-SPAIN consortium/IBV(CSIC)|Comas|Spain

>Spike|hCoV-19/USA/DE-DHSS-F987271/2020|2020-12-03|EPI\_ISL\_766984|Original|hCoV-19^^Delaware|Human|Delaware Public Health Laboratory|Delaware Public Health Laboratory|Bajwa|USA

>Spike|hCoV-19/USA/TX-DSHS-0123/2020|2020-06-11|EPI\_ISL\_522950|Original|hCoV-19^^Texas|Human|Texas Department of State Health Services|Texas Department of State Health Services|Rahman|USA

>Spike|hCoV-19/England/CAMC-B525E7/2020|2020-11-08|EPI\_ISL\_656885|Original|hCoV-19^^England|Human|Lighthouse Lab in Cambridge|Wellcome Sanger Institute for the COVID-19 Genomics UK (COG-UK) Consortium|Davies|United Kingdom

>Spike|hCoV-19/Netherlands/OV-RIVM-20499/2020|2020-11-19|EPI\_ISL\_728714|Original|hCoV-19^^Overijssel|Human|Dutch COVID-19 response team|National Institute for Public Health and the Environment (RIVM)|Meijer|Netherlands

>Spike|hCoV-19/Pakistan/UN-UVAS-Lahore-III/2020|2020-05-11|EPI\_ISL\_548944|Original|hCoV-19^^Pakistan|Human|Institute of Microbiology|Institute of Microbiology|Yaqub,T.|Pakistan

>Spike|hCoV-19/Canada/BC\_20505516/2020|2020-03-00|EPI\_ISL\_462775|Original|hCoV-19^^British Columbia|Human|BCCDC Public Health Laboratory|BCCDC Public Health Laboratory|Harrigan|Canada

>Spike|hCoV-19/USA/NY-PV09328/2020|2020-03-18|EPI\_ISL\_450017|Original|hCoV-19^^New York|Human|MSHS Clinical Microbiology Laboratories|MSHS Pathogen Surveillance Program|van Bakel|USA

>Spike|hCoV-19/Spain/CT-IBV-99009923/2020|2020-08-12|EPI\_ISL\_660319|Original|hCoV-19^^Catalunya|Human|Servicio de Microbiolog\u00eda|SeqCOVID-SPAIN consortium|IBV (CSIC)|Comas|Spain

>Spike|hCoV-19/England/EXET-138AE2/2020|2020-10-19|EPI\_ISL\_627145|Original|hCoV-19^^England|Human|University of Exeter|COVID-19 Genomics UK (COG-UK) Consortium|Temperton|United Kingdom

>Spike|hCoV-19/Switzerland/BS-UHB-42198756/2020|2020-03-19|EPI\_ISL\_528229|Original|hCoV-19^^Basel-Stadt|Human|University Hospital Basel|University Hospital Basel|Roloff Handschin|Switzerland

>Spike|hCoV-19/Scotland/EDB1369/2020|2020-04-10|EPI\_ISL\_491633|Original|hCoV-19^^Scotland|Human|Virology Department|Wellcome Sanger Institute for the COVID-19 Genomics UK (COG-UK) consortium|Davies|United Kingdom

>Spike|hCoV-19/Ireland/D-NVRL-70IRL97963/2020|2020-07-04|EPI\_ISL\_500574|Original|hCoV-19^^Dublin|Human|National Virus Reference Laboratory|National Virus Reference Laboratory|Gonzalez|Ireland

>Spike|hCoV-19/England/MILK-B8F790/2020|2020-11-13|EPI\_ISL\_674741|Original|hCoV-19^^England|Human|Lighthouse Lab in Milton Keynes|Wellcome Sanger Institute for the COVID-19 Genomics UK (COG-UK) Consortium|Davies|United Kingdom

>Spike|hCoV-19/Singapore/1327/2020|2020-05-30|EPI\_ISL\_648816|Original|hCoV-19^^Singapore|Human|Department of Laboratory Medicine|Department of Laboratory Medicine|Chen|Singapore

>Spike|hCoV-19/England/MILK-C63A89/2020|2020-12-13|EPI\_ISL\_735537|Original|hCoV-19^^England|Human|Lighthouse Lab in Milton Keynes|Wellcome Sanger Institute for the COVID-19 Genomics UK (COG-UK) Consortium|Davies|United Kingdom

>Spike|hCoV-19/USA/TX-HMH-7390/2020|2020-06-29|EPI\_ISL\_546729|Original|hCoV-19^^Texas|Human|Houston Methodist Hospital|Houston Methodist Hospital|Long|USA

>Spike|hCoV-19/New Zealand/20VR2657/2020|2020-00-00|EPI\_ISL\_579324|Original|hCoV-19^^Auckland|Human|LabPLUS|Institute of Environmental Science and Research (ESR)|Wang|New Zealand

>Spike|hCoV-19/Canada/ON-PHL-3670/2020|2020-03-00|EPI\_ISL\_418328|Original|hCoV-19^^Ontario|Human|Public Health Ontario Laboratories|Public Health Ontario Laboratories|Eshaghi|Canada

>Spike|hCoV-19/England/ALDP-9CB74F/2020|2020-09-16|EPI\_ISL\_575612|Original|hCoV-19^^England|Human|Lighthouse Lab in Alderley Park|Wellcome Sanger Institute for the COVID-19 Genomics UK (COG-UK) consortium|Davies|United Kingdom

>Spike|hCoV-19/England/ALDP-CB5253/2020|2020-12-18|EPI\_ISL\_761777|Original|hCoV-19^^England|Human|Lighthouse Lab in Alderley Park|Wellcome Sanger Institute for the COVID-19 Genomics UK (COG-UK) Consortium|Davies|United Kingdom

>Spike|hCoV-19/England/QEUA-9F47A7/2020|2020-09-25|EPI\_ISL\_588333|Original|hCoV-19^^England|Human|Lighthouse Lab in Glasgow|Wellcome Sanger Institute for the COVID-19 Genomics UK (COG-UK) consortium|Davies|United Kingdom

>Spike|hCoV-19/Wuhan/HB-WHCM2-272/2020|2020-02-26|EPI\_ISL\_455007|Original|hCoV-19^^Hubei|Human|Wuhan Chain Medical Labs (CMLabs)|State Key Laboratory of Biotherapy of Sichuan University|Tang|China

>Spike|hCoV-19/England/QEUA-B4218C/2020|2020-11-08|EPI\_ISL\_657095|Original|hCoV-19^^England|Human|Lighthouse Lab in Glasgow|Wellcome Sanger Institute for the COVID-19 Genomics UK (COG-UK) Consortium|Davies|United Kingdom

>Spike|hCoV-19/England/QEUA-9FFD8C/2020|2020-10-02|EPI\_ISL\_600385|Original|hCoV-19^^England|Human|Lighthouse Lab in Glasgow|Wellcome Sanger Institute for the COVID-19 Genomics UK (COG-UK) consortium|Davies|United Kingdom

>Spike|hCoV-19/Denmark/DCGC-22076/2020|2020-12-14|EPI\_ISL\_757815|Original|hCoV-19^^Hovedstaden|Human|Department of Virus and Microbiological Special Diagnostics|Albertsen Lab|Michaelsen|Denmark

>Spike|hCoV-19/England/20124003104/2020|2020-03-17|EPI\_ISL\_465772|Original|hCoV-19^^England|Human|Respiratory Virus Unit|Respiratory Virus Unit|Platt|United Kingdom

>Spike|hCoV-19/USA/OR-OHSU-0349/2020|2020-05-18|EPI\_ISL\_509114|Original|hCoV-19^^Oregon|Human|OHSU Lab Services Molecular Microbiology Lab|Oregon SARS-CoV-2 Genome Sequencing Center|O'Roak|USA

>Spike|hCoV-19/Wales/PHWC-2675A/2020|2020-03-28|EPI\_ISL\_422096|Original|hCoV-19^^Wales|Human|Wales Specialist Virology Centre|Public Health Wales Microbiology Cardiff|Moore|United Kingdom

>Spike|hCoV-19/USA/TX-HMH-MCoV-10295/2020|2020-07-08|EPI\_ISL\_789414|Original|hCoV-19^^Texas|Human|Houston Methodist Hospital|Houston Methodist Hospital|Long|USA

>Spike|hCoV-19/England/MILK-9C3A7B/2020|2020-09-09|EPI\_ISL\_566847|Original|hCoV-19^^England|Human|Lighthouse Lab in Milton Keynes|Wellcome Sanger Institute for the COVID-19 Genomics UK (COG-UK) consortium|Davies|United Kingdom

>Spike|hCoV-19/Germany/NW-MPP-34/2020|2020-06-17|EPI\_ISL\_487424|Original|hCoV-19^^North Rhine-Westphalia|Human|Labor Knei\u00dfler GmbH & Co. KG|Heinrich Pette Institute|G\u00fcnter|Germany

>Spike|hCoV-19/England/NORT-1B641AF/2020|2020-08-19|EPI\_ISL\_573311|Original|hCoV-19^^England|Human|Northumbria University / South Tees Hospitals NHS Foundation Trust / North Cumbria Integrated Care NHS Foundation Trust / North Tees and Hartlepool NHS Foundation Trust / Newcastle Hospitals NHS Foundation Trust|COVID-19 Genomics UK (COG-UK) Consortium|Bashton|United Kingdom

>Spike|hCoV-19/England/ALDP-B857F4/2020|2020-11-14|EPI\_ISL\_675303|Original|hCoV-19^^England|Human|Lighthouse Lab in Alderley Park|Wellcome Sanger Institute for the COVID-19 Genomics UK (COG-UK) Consortium|Davies|United Kingdom

>Spike|hCoV-19/England/MILK-A06273/2020|2020-10-01|EPI\_ISL\_600065|Original|hCoV-19^^England|Human|Lighthouse Lab in Milton Keynes|Wellcome Sanger Institute for the COVID-19 Genomics UK (COG-UK) consortium|Davies|United Kingdom

>Spike|hCoV-19/USA/TX-HMH-MCoV-13754/2020|2020-08-17|EPI\_ISL\_788847|Original|hCoV-19^^Texas|Human|Houston Methodist Hospital|Houston Methodist Hospital|Long|USA

>Spike|hCoV-19/England/QEUA-96B1CB/2020|2020-08-15|EPI\_ISL\_531458|Original|hCoV-19^^England|Human|Lighthouse Lab in Glasgow|Wellcome Sanger Institute for the COVID-19 Genomics UK (COG-UK) consortium|Davies|United Kingdom

>Spike|hCoV-19/USA/CA-QDX-699/2020|2020-03-20|EPI\_ISL\_571418|Original|hCoV-19^^California|Human|Quest Diagnostics|Quest Diagnostics|Kagan|USA

>Spike|hCoV-19/England/MILK-9C461C/2020|2020-09-09|EPI\_ISL\_566748|Original|hCoV-19^^England|Human|Lighthouse Lab in Milton Keynes|Wellcome Sanger Institute for the COVID-19 Genomics UK (COG-UK) consortium|Davies|United Kingdom

>Spike|hCoV-19/USA/TX-HMH-8004/2020|2020-07-03|EPI\_ISL\_545782|Original|hCoV-19^^Texas|Human|Houston Methodist Hospital|Houston Methodist Hospital|Long|USA

>Spike|hCoV-19/Ireland/D-NVRL-73IRL25093/2020|2020-09-16|EPI\_ISL\_578263|Original|hCoV-19^^Dublin|Human|National Virus Reference Laboratory|National Virus Reference Laboratory|Gonzalez|Ireland

>Spike|hCoV-19/Australia/VIC14244/2020|2020-08-03|EPI\_ISL\_592412|Original|hCoV-19^^Victoria|Human|Microbiological Diagnostic Unit - Public Health Laboratory (MDU-PHL)|MDU-PHL|Schultz|Australia

>Spike|hCoV-19/England/QEUA-9DDC87/2020|2020-09-21|EPI\_ISL\_599680|Original|hCoV-19^^England|Human|Lighthouse Lab in Glasgow|Wellcome Sanger Institute for the COVID-19 Genomics UK (COG-UK) consortium|Davies|United Kingdom

>Spike|hCoV-19/France/IDF-10020MM/2020|2020-03-00|EPI\_ISL\_447704|Original|hCoV-19^^France|Human|H\u00f4pital Henri-Mondor Ap-Hp|H\u00f4pital Henri-Mondor Ap-Hp|Rodriguez|France

>Spike|hCoV-19/USA/OR-OHSU-1043/2020|2020-07-08|EPI\_ISL\_525957|Original|hCoV-19^^Oregon|Human|OHSU Lab Services Molecular Microbiology Lab|Oregon SARS-CoV-2 Genome Sequencing Center|O'Roak|USA

>Spike|hCoV-19/USA/TX-DSHS-0646/2020|2020-07-16|EPI\_ISL\_576301|Original|hCoV-19^^Texas|Human|Texas Department of State Health Services|Texas Department of State Health Services|Rahman|USA

>Spike|hCoV-19/England/QEUA-BC4726/2020|2020-11-25|EPI\_ISL\_703607|Original|hCoV-19^^England|Human|Lighthouse Lab in Glasgow|Wellcome Sanger Institute for the COVID-19 Genomics UK (COG-UK) Consortium|Davies|United Kingdom

>Spike|hCoV-19/Denmark/DCGC-15837/2020|2020-11-23|EPI\_ISL\_714052|Original|hCoV-19^^Hovedstaden|Human|Department of Virus and Microbiological Special Diagnostics|Albertsen Lab|Michaelsen|Denmark

>Spike|hCoV-19/England/MILK-970327/2020|2020-08-17|EPI\_ISL\_553236|Original|hCoV-19^^England|Human|Lighthouse Lab in Milton Keynes|Wellcome Sanger Institute for the COVID-19 Genomics UK (COG-UK) consortium|Davies|United Kingdom

>Spike|hCoV-19/Scotland/QEUA-9B7CA1/2020|2020-09-08|EPI\_ISL\_602134|Original|hCoV-19^^Scotland|Human|Lighthouse Lab in Glasgow|Wellcome Sanger Institute for the COVID-19 Genomics UK (COG-UK) consortium|Davies|United Kingdom

>Spike|hCoV-19/Hong Kong/VM20001218/2020|2020-01-24|EPI\_ISL\_408995|Original|hCoV-19^^Hong Kong|Human|Tuen Mun Hospital|Hong Kong Department of Health|Mak|China

>Spike|hCoV-19/England/QEUA-C5BC06/2020|2020-12-14|EPI\_ISL\_769316|Original|hCoV-19^^England|Human|Lighthouse Lab in Glasgow|Wellcome Sanger Institute for the COVID-19 Genomics UK (COG-UK) Consortium|Davies|United Kingdom

>Spike|hCoV-19/Wales/PHWC-16A1A6/2020|2020-09-05|EPI\_ISL\_535211|Original|hCoV-19^^Wales|Human|Wales Specialist Virology Centre Sequencing lab|COVID-19 Genomics UK (COG-UK) Consortium|Moore|United Kingdom

>Spike|hCoV-19/Panama/329560/2020|2020-03-12|EPI\_ISL\_496634|Original|hCoV-19^^Panama Center|Human|Gorgas Memorial Laboratory of Health Studies|Gorgas Memorial Laboratory of Health Studies|Martinez|Panama

>Spike|hCoV-19/South Korea/KDCA0274/2020|2020-10-22|EPI\_ISL\_760068|Original|hCoV-19^^South Korea|Human|Division of Emerging Infectious Diseases|Division of Emerging Infectious Diseases|Park|South Korea

>Spike|hCoV-19/USA/UT-UPHL-03068/2020|2020-05-04|EPI\_ISL\_560907|Original|hCoV-19^^Utah|Human|Utah Public Health Laboratory|Utah Public Health Laboratory|Young|USA

>Spike|hCoV-19/Australia/VIC1037/2020|2020-04-03|EPI\_ISL\_430533|Original|hCoV-19^^Victoria|Human|Victorian Infectious Diseases Reference Laboratory (VIDRL)|Microbiological Diagnostic Unit Public Health Laboratory and Victorian Infectious Diseases Reference Laboratory|Schultz|Australia

>Spike|hCoV-19/Netherlands/NA\_336/2020|2020-04-03|EPI\_ISL\_455141|Original|hCoV-19^^Netherlands|Human|Dutch COVID-19 response team|Erasmus Medical Center|Oude Munnink|Netherlands

>Spike|hCoV-19/USA/WA-S1142/2020|2020-05-05|EPI\_ISL\_463632|Original|hCoV-19^^Washington|Human|Washington State Department of Health|Seattle Flu Study|Bedford|USA

>Spike|hCoV-19/USA/WI-UW-836/2020|2020-05-23|EPI\_ISL\_509843|Original|hCoV-19^^Wisconsin|Human|University of Wisconsin-Madison AIDS Vaccine Research Laboratories|University of Wisconsin-Madison AIDS Vaccine Research Laboratories|Baczenas|USA

>Spike|hCoV-19/Denmark/DCGC-14698/2020|2020-11-23|EPI\_ISL\_711915|Original|hCoV-19^^Hovedstaden|Human|Department of Virus and Microbiological Special Diagnostics|Albertsen Lab|Michaelsen|Denmark

>Spike|hCoV-19/USA/MA-MGH-02759/2020|2020-09-26|EPI\_ISL\_765620|Original|hCoV-19^^Massachusetts|Human|Massachusetts General Hospital|Infectious Disease Program|Park|USA

>Spike|hCoV-19/Germany/HH-hpi-p1699/2020|2020-03-18|EPI\_ISL\_776561|Original|hCoV-19^^Hamburg|Human|University Medical Center Hamburg Eppendorf|Heinrich Pette Institute|Robitaille|Germany

>Spike|hCoV-19/USA/CA-ALSR-4398/2020|2020-10-19|EPI\_ISL\_649006|Original|hCoV-19^^California|Human|San Diego County Public Health Laboratory|Andersen lab at Scripps Research|Gangavarapu|USA

>Spike|hCoV-19/England/QEUA-87FF70/2020|2020-07-21|EPI\_ISL\_532706|Original|hCoV-19^^England|Human|Lighthouse Lab in Glasgow|Wellcome Sanger Institute for the COVID-19 Genomics UK (COG-UK) consortium|Davies|United Kingdom

>Spike|hCoV-19/England/QEUA-C7FFC7/2020|2020-12-16|EPI\_ISL\_756947|Original|hCoV-19^^England|Human|Lighthouse Lab in Glasgow|Wellcome Sanger Institute for the COVID-19 Genomics UK (COG-UK) Consortium|Davies|United Kingdom

>Spike|hCoV-19/Brazil/SE-6544/2020|2020-04-26|EPI\_ISL\_541378|Original|hCoV-19^^Sergipe|Human|LACEN/SE|Laboratory of Respiratory Viruses and Measles|Silva|Brazil

>Spike|hCoV-19/USA/UT-01440/2020|2020-04-10|EPI\_ISL\_452153|Original|hCoV-19^^Utah|Human|Utah Public Health Laboratory|Utah Public Health Laboratory|Young|USA

>Spike|hCoV-19/England/ALDP-A861D8/2020|2020-10-17|EPI\_ISL\_606076|Original|hCoV-19^^England|Human|Lighthouse Lab in Alderley Park|Wellcome Sanger Institute for the COVID-19 Genomics UK (COG-UK) consortium|Davies|United Kingdom

>Spike|hCoV-19/USA/WA-S1756/2020|2020-06-01|EPI\_ISL\_496182|Original|hCoV-19^^Washington|Human|Washington State Department of Health|Seattle Flu Study|Lee|USA

>Spike|hCoV-19/Canada/ON-A16/2020|2020-11-24|EPI\_ISL\_755718|Original|hCoV-19^^Ontario|Human|Toronto Invasive Bacterial Diseases Network|McMaster University|McArthur|Canada

>Spike|hCoV-19/Spain/MD-IBV-003724/2020|2020-05-10|EPI\_ISL\_467195|Original|hCoV-19^^Madrid|Human|Hospital General Universitario Gregorio Mara\u00f1a|SeqCOVID-SPAIN consortium|IBV (CSIC)|Comas|Spain

>Spike|hCoV-19/USA/CA-CZB-16176/2020|2020-11-30|EPI\_ISL\_739014|Original|hCoV-19^^California|Human|Renegade|Chan-Zuckerberg Biohub|Kamm|USA

>Spike|hCoV-19/England/ALDP-9FD8E7/2020|2020-10-02|EPI\_ISL\_587740|Original|hCoV-19^^England|Human|Lighthouse Lab in Alderley Park|Wellcome Sanger Institute for the COVID-19 Genomics UK (COG-UK) consortium|Davies|United Kingdom

>Spike|hCoV-19/England/QEUA-B67A1D/2020|2020-11-11|EPI\_ISL\_661608|Original|hCoV-19^^England|Human|Lighthouse Lab in Glasgow|Wellcome Sanger Institute for the COVID-19 Genomics UK (COG-UK) Consortium|Davies|United Kingdom

>Spike|hCoV-19/Wales/PHWC-2BB1D/2020|2020-03-28|EPI\_ISL\_445809|Original|hCoV-19^^Wales|Human|Wales Specialist Virology Centre|Public Health Wales Microbiology Cardiff|Moore|United Kingdom

>Spike|hCoV-19/United Arab Emirates/0926/2020|2020-06-26|EPI\_ISL\_699064|Original|hCoV-19^^Abu Dhabi|Human|Group 42 (G42) Healthcare|G42 Healthcare|Ogrodzki|United Arab Emirates

>Spike|hCoV-19/South Africa/LR00008/2020|2020-06-30|EPI\_ISL\_515138|Original|hCoV-19^^Eastern Cape|Human|National Institute for Communicable Diseases of the National Health Laboratory Service|National Institute for Communicable Diseases of the National Health Laboratory Service|Allam|South Africa

>Spike|hCoV-19/Switzerland/AG-ETHZ-380299/2020|2020-11-25|EPI\_ISL\_721722|Original|hCoV-19^^Aargau|Human|Viollier AG|Department of Biosystems Science and Engineering|Nadeau|Switzerland

>Spike|hCoV-19/Argentina/argenTAG-12C0A026/2020|2020-07-22|EPI\_ISL\_648209|Original|hCoV-19^^Buenos Aires|Human|INBIRS-UBA|Laboratorio Mixto de Biotecnolog\u00eda Acu\u00e9tica (LMBA)|Ezpeleta|Argentina

>Spike|hCoV-19/England/ALDP-CB561B/2020|2020-12-20|EPI\_ISL\_761762|Original|hCoV-19^^England|Human|Lighthouse Lab in Alderley Park|Wellcome Sanger Institute for the COVID-19 Genomics UK (COG-UK) Consortium|Davies|United Kingdom

>Spike|hCoV-19/USA/CA-CHLA-PLM54662360/2020|2020-11-30|EPI\_ISL\_753505|Original|hCoV-19^^California|Human|Clinical virology Laboratory|Center for Personalized Medicine|Dien Bard|USA

>Spike|hCoV-19/USA/NY-Yale-026/2020|2020-03-19|EPI\_ISL\_420094|Original|hCoV-19^^New York|Human|Yale Clinical Virology Laboratory|Grubaugh Lab - Yale School of Public Health|Grubaugh|USA

>Spike|hCoV-19/England/ALDP-BC75ED/2020|2020-11-23|EPI\_ISL\_721227|Original|hCoV-19^^England|Human|Lighthouse Lab in Alderley Park|Wellcome Sanger Institute for the COVID-19 Genomics UK (COG-UK) Consortium|Davies|United Kingdom

>Spike|hCoV-19/England/MILK-975753/2020|2020-08-20|EPI\_ISL\_552661|Original|hCoV-19^^England|Human|Lighthouse Lab in Milton Keynes|Wellcome Sanger Institute for the COVID-19 Genomics UK (COG-UK) consortium|Davies|United Kingdom

>Spike|hCoV-19/Netherlands/Gelderland\_84/2020|2020-05-19|EPI\_ISL\_460983|Original|hCoV-19^^Gelderland|Human|Dutch COVID-19 response team|Erasmus Medical Center|Oude Munnink|Netherlands

>Spike|hCoV-19/USA/TX-DSHS-0116/2020|2020-06-11|EPI\_ISL\_522945|Original|hCoV-19^^Texas|Human|Texas Department of State Health Services|Texas Department of State Health Services|Rahman|USA

>Spike|hCoV-19/Portugal/PT0941/2020|2020-04-08|EPI\_ISL\_511491|Original|hCoV-19^^Portugal|Human|Instituto Nacional de Saude (INSA)|Instituto Nacional de Saude (INSA) and Instituto Gulbenkian de Ciencia (IGC)|Borges|Portugal

>Spike|hCoV-19/England/LIVE-A779D/2020|2020-03-27|EPI\_ISL\_517069|Original|hCoV-19^^England|Human|Liverpool Clinical Laboratories|COVID-19 Genomics UK (COG-UK) Consortium|Haldenby|United Kingdom

>Spike|hCoV-19/USA/TX-HMH-484/2020|2020-04-06|EPI\_ISL\_544368|Original|hCoV-19^^Texas|Human|Houston Methodist Hospital|Houston Methodist Hospital|Long|USA

>Spike|hCoV-19/Japan/PG-0637/2020|2020-04-00|EPI\_ISL\_684247|Original|hCoV-19^^Japan|Human|Gunma Prefectural Institute of Public Health and Environmental Sciences|Pathogen Genomics Center|Sekizuka|Japan

>Spike|hCoV-19/Thailand/Bangkok-CONI-0152/2020|2020-03-16|EPI\_ISL\_455945|Original|hCoV-19^^Bangkok|Human|Ramathibodi Hospital|COVID-19 Network Investigations (CONI) Alliance|Batty|Thailand

>Spike|hCoV-19/USA/NY-NYCPHL-001164/2020|2020-10-28|EPI\_ISL\_671744|Original|hCoV-19^^New York|Human|DOHMH PHL|New York City Public Health Laboratory|Wang|USA

>Spike|hCoV-19/India/MH-ACTREC-281/2020|2020-07-11|EPI\_ISL\_699933|Original|hCoV-19^^Maharashtra|Human|Hematopathology Laboratory|Hematopathology Laboratory|Patkar|India

>Spike|hCoV-19/Israel/2107132/2020|2020-04-14|EPI\_ISL\_447352|Original|hCoV-19^^Jerusalem District|Human|Clinical Virology Unit|Stern Lab|Miller|Israel

>Spike|hCoV-19/Canada/BC\_04903777/2020|2020-04-00|EPI\_ISL\_466771|Original|hCoV-19^^British Columbia|Human|BCCDC Public Health Laboratory|BCCDC Public Health Laboratory|Harrigan|Canada

>Spike|hCoV-19/England/MILK-9E2CE9/2020|2020-09-21|EPI\_ISL\_581305|Original|hCoV-19^^England|Human|Lighthouse Lab in Milton Keynes|Wellcome Sanger Institute for the COVID-19 Genomics UK (COG-UK) consortium|Davies|United Kingdom

>Spike|hCoV-19/England/MILK-95DB91/2020|2020-06-20|EPI\_ISL\_556095|Original|hCoV-19^^England|Human|Lighthouse Lab in Milton Keynes|Wellcome Sanger Institute for the COVID-19 Genomics UK (COG-UK) consortium|Davies|United Kingdom

>Spike|hCoV-19/Belgium/ULG-10669/2020|2020-10-26|EPI\_ISL\_636645|Original|hCoV-19^^Li\u00e8ge|Human|Department of Clinical Microbiology|GIGA Medical Genomics|Durkin|Belgium

>Spike|hCoV-19/Denmark/DCGC-20676/2020|2020-12-21|EPI\_ISL\_759293|Original|hCoV-19^^Syddanmark|Human|Department of Virus and Microbiological Special Diagnostics|Albertsen Lab|Michaelsen|Denmark

>Spike|hCoV-19/England/201420074/2020|2020-03-30|EPI\_ISL\_465911|Original|hCoV-19^^England|Human|Respiratory Virus Unit|Respiratory Virus Unit|Platt|United Kingdom

>Spike|hCoV-19/England/QEUA-A9FC35/2020|2020-10-20|EPI\_ISL\_665994|Original|hCoV-19^^England|Human|Northumbria University / South Tees Hospitals NHS Foundation Trust / North Cumbria Integrated Care NHS Foundation Trust / North Tees and Hartlepool NHS Foundation Trust / Newcastle Hospitals NHS Foundation Trust|COVID-19 Genomics UK (COG-UK) Consortium|Bashton|United Kingdom

>Spike|hCoV-19/USA/CA-CHLA-PLM22375766/2020|2020-12-09|EPI\_ISL\_753667|Original|hCoV-19^^California|Human|Clinical virology Laboratory|Center for Personalized Medicine|Dien Bard|USA

>Spike|hCoV-19/Canada/BC\_17754491/2020|2020-04-00|EPI\_ISL\_468691|Original|hCoV-19^^British Columbia|Human|BCCDC Public Health Laboratory|BCCDC Public Health Laboratory|Harrigan|Canada

>Spike|hCoV-19/Finland/20SS11H1/2020|2020-09-20|EPI\_ISL\_757373|Original|hCoV-19^^Uusimaa|Human|Department of Virology and Immunology|Department of Virology|Smura|Finland

>Spike|hCoV-19/England/ALDP-9E5AFB/2020|2020-09-24|EPI\_ISL\_589318|Original|hCoV-19^^England|Human|Lighthouse Lab in Alderley Park|Wellcome Sanger Institute for the COVID-19 Genomics UK (COG-UK) consortium|Davies|United Kingdom

>Spike|hCoV-19/USA/NY-Wadsworth-250970-01/2020|2020-10-21|EPI\_ISL\_754829|Original|hCoV-19^^New York|Human|Wadsworth Center|Wadsworth Center|Lasèk-Nesselquist|USA

>Spike|hCoV-19/Luxembourg/LNS1929808/2020|2020-09-24|EPI\_ISL\_740023|Original|hCoV-19^^Luxembourg|Human|Laboratoire national de sant\u00e9|Laboratoire national de sant\u00e9|Wienecke-Baldacchino|Luxembourg

>Spike|hCoV-19/DRC/4685/2020|2020-04-30|EPI\_ISL\_514106|Original|hCoV-19^^Kinshasa|Human|Viral Respiratory Lab|Pathogen Sequencing Lab|Lokilo|Democratic Republic of the Congo

>Spike|hCoV-19/England/CAMB-7A0E3/2020|2020-04-01|EPI\_ISL\_441290|Original|hCoV-19^^England|Human|Department of Pathology|Wellcome Sanger Institute for the COVID-19 Genomics UK (COG-UK) consortium|Amato|United Kingdom

>Spike|hCoV-19/Denmark/DCGC-7288/2020|2020-10-12|EPI\_ISL\_618930|Original|hCoV-19^^Midtjylland|Human|Department of Virus and Microbiological Special Diagnostics|Albertsen lab|Michaelsen|Denmark

>Spike|hCoV-19/England/QEUEH-AAE0CE/2020|2020-10-22|EPI\_ISL\_630787|Original|hCoV-19^^England|Human|Lighthouse Lab in Glasgow|Wellcome Sanger Institute for the COVID-19 Genomics UK (COG-UK) consortium|Davies|United Kingdom

>Spike|hCoV-19/England/ALDP-931FC4/2020|2020-06-20|EPI\_ISL\_552951|Original|hCoV-19^^England|Human|Lighthouse Lab in Alderley Park|Wellcome Sanger Institute for the COVID-19 Genomics UK (COG-UK) consortium|Davies|United Kingdom

>Spike|hCoV-19/England/CAMB-838C1/2020|2020-04-16|EPI\_ISL\_443599|Original|hCoV-19^^England|Human|Department of Pathology|Wellcome Sanger Institute for the COVID-19 Genomics UK (COG-UK) consortium|Amato|United Kingdom

>Spike|hCoV-19/South Africa/R13164-20/2020|2020-06-30|EPI\_ISL\_622895|Original|hCoV-19^^Gauteng|Human|National Institute for Communicable Diseases of the National Health Laboratory Service|National Institute for Communicable Diseases of the National Health Laboratory Service|Allam|South Africa

>Spike|hCoV-19/Australia/VPRL002/2020|2020-03-06|EPI\_ISL\_455595|Original|hCoV-19^^South Australia|Human|SA Pathology|VPRL|Leong|Australia

>Spike|hCoV-19/England/CAMC-B9C587/2020|2020-11-15|EPI\_ISL\_673392|Original|hCoV-19^^England|Human|Lighthouse Lab in Cambridge|Wellcome Sanger Institute for the COVID-19 Genomics UK (COG-UK) Consortium|Davies|United Kingdom

>Spike|hCoV-19/Latvia/213/2020|2020-09-15|EPI\_ISL\_770048|Original|hCoV-19^^Latvia|Human|Centr\u0101l\u0101 Laboratorija|Latvian Biomedical Research and Study Centre|Zreløvs|Latvia

>Spike|hCoV-19/England/QEUEH-AD37CB/2020|2020-10-24|EPI\_ISL\_634173|Original|hCoV-19^^England|Human|Lighthouse Lab in Glasgow|Wellcome Sanger Institute for the COVID-19 Genomics UK (COG-UK) consortium|Davies|United Kingdom

>Spike|hCoV-19/France/PDL-SC617/2020|2020-03-30|EPI\_ISL\_663263|Original|hCoV-19^^Pays-de-la-Loire|Human|CHU Nantes|CNR Virus des Infections Respiratoires - France SUD|Bal|France

>Spike|hCoV-19/Hong Kong/VM20072463/2020|2020-07-22|EPI\_ISL\_602600|Original|hCoV-19^^Hong Kong|Human|United Christian Hospital|Hong Kong Department of Health|Mak|China

>Spike|hCoV-19/Australia/VIC535/2020|2020-03-25|EPI\_ISL\_426801|Original|hCoV-19^^Victoria|Human|Victorian Infectious Diseases Reference Laboratory (VIDRL)|Microbiological Diagnostic Unit Public Health Laboratory and Victorian Infectious Diseases Reference Laboratory|Schultz|Australia

>Spike|hCoV-19/USA/MD-MDH-0160/2020|2020-07-15|EPI\_ISL\_524887|Original|hCoV-19^^Maryland|Human|MD PHL|MD PHL|Keller|USA



>Spike|hCoV-19/England/ALDP-B238C8/2020|2020-11-04|EPI\_ISL\_647008|Original|hCoV-19^^England|Human|Lighthouse Lab in Alderley Park|Wellcome Sanger Institute for the COVID-19 Genomics UK (COG-UK) Consortium|Davies|United Kingdom

>Spike|hCoV-19/USA/LA-SR0306/2020|2020-04-07|EPI\_ISL\_445161|Original|hCoV-19^^Louisiana|Human|Robert Garry lab|Andersen lab at Scripps Research|Gangavarapu|USA

>Spike|hCoV-19/Denmark/DCGC-12204/2020|2020-11-16|EPI\_ISL\_682385|Original|hCoV-19^^Hovedstaden|Human|Department of Virus and Microbiological Special Diagnostics|Albertsen Lab|Michaelsen|Denmark

>Spike|hCoV-19/Wales/PHWC-48FB04/2020|2020-11-10|EPI\_ISL\_681188|Original|hCoV-19^^Wales|Human|Wales Specialist Virology Centre Sequencing lab|COVID-19 Genomics UK (COG-UK) Consortium|Moore|United Kingdom

>Spike|hCoV-19/England/QEUEH-B30330/2020|2020-11-04|EPI\_ISL\_659971|Original|hCoV-19^^England|Human|Lighthouse Lab in Glasgow|Wellcome Sanger Institute for the COVID-19 Genomics UK (COG-UK) Consortium|Davies|United Kingdom

>Spike|hCoV-19/England/ALDP-9E59FE/2020|2020-09-24|EPI\_ISL\_589540|Original|hCoV-19^^England|Human|Lighthouse Lab in Alderley Park|Wellcome Sanger Institute for the COVID-19 Genomics UK (COG-UK) consortium|Davies|United Kingdom

>Spike|hCoV-19/England/ALDP-9D98D2/2020|2020-09-18|EPI\_ISL\_576768|Original|hCoV-19^^England|Human|Oxford Viromics|COVID-19 Genomics UK (COG-UK) Consortium|Golubchik|United Kingdom

>Spike|hCoV-19/USA/CA-ALSR-0685-SAN/2020|2020-03-29|EPI\_ISL\_483301|Original|hCoV-19^^California|Human|UC San Diego Center for Advanced Laboratory Medicine|Andersen lab at Scripps Research|Gangavarapu|USA

>Spike|hCoV-19/Australia/NSW631/2020|2020-06-09|EPI\_ISL\_490040|Original|hCoV-19^^New South Wales|Human|South Eastern Area Laboratory Services (SEALS)|NSW Health Pathology - Institute of Clinical Pathology and Medical Research; Westmead Hospital; University of Sydney|Gall|Australia

>Spike|hCoV-19/USA/CA-CZB-1001/2020|2020-04-01|EPI\_ISL\_436642|Original|hCoV-19^^California|Human|County of Santa Clara Public Health Department|Chan-Zuckerberg Biohub|Hao|USA

>Spike|hCoV-19/Scotland/CVR5700/2020|2020-11-02|EPI\_ISL\_651359|Original|hCoV-19^^Scotland|Human|West of Scotland Specialist Virology Centre|COVID-19 Genomics UK (COG-UK) Consortium|Robertson|United Kingdom

>Spike|hCoV-19/England/QEUEH-B67FB4/2020|2020-11-11|EPI\_ISL\_662262|Original|hCoV-19^^England|Human|Lighthouse Lab in Glasgow|Wellcome Sanger Institute for the COVID-19 Genomics UK (COG-UK) Consortium|Davies|United Kingdom

>Spike|hCoV-19/Belgium/ULG-10108/2020|2020-04-06|EPI\_ISL\_427359|Original|hCoV-19^^Liege|Human|Department of Clinical Microbiology|GIGA Medical Genomics|Durkin|Belgium

>Spike|hCoV-19/England/20146061104/2020|2020-04-01|EPI\_ISL\_466045|Original|hCoV-19^^England|Human|Respiratory Virus Unit|Respiratory Virus Unit|Platt|United Kingdom

>Spike|hCoV-19/USA/TX-HMH-MCoV-15131/2020|2020-10-18|EPI\_ISL\_786615|Original|hCoV-19^^Texas|Human|Houston Methodist Hospital|Houston Methodist Hospital|Long|USA

>Spike|hCoV-19/England/ALDP-A95E39/2020|2020-10-20|EPI\_ISL\_624886|Original|hCoV-19^^England|Human|Lighthouse Lab in Alderley Park|Wellcome Sanger Institute for the COVID-19 Genomics UK (COG-UK) consortium|Davies|United Kingdom

>Spike|hCoV-19/Australia/NSW2034/2020|2020-03-22|EPI\_ISL\_509493|Original|hCoV-19^^New South Wales|Human|Area of Virology|Area of Virology|Yeang|Australia

>Spike|hCoV-19/USA/AZ-TG395922/2020|2020-06-08|EPI\_ISL\_694762|Original|hCoV-19^^Arizona|Human|AZ SPHL|TGen North|French|USA

>Spike|hCoV-19/Japan/PG-4777/2020|2020-08-00|EPI\_ISL\_689913|Original|hCoV-19^^Japan|Human|Pathogen Genomics Center|Pathogen Genomics Center|Sekizuka|Japan

>Spike|hCoV-19/Russia/MOS-CRIE-7161283/2020|2020-08-24|EPI\_ISL\_660438|Original|hCoV-19^^Moscow|Human|Molecular diagnostic laboratory of Federal Budget Institution of Science \Central Research Institute of Epidemiology\ of The Federal Service on Customers' Rights Protection and Human Well-being Surveillance|Group of Genomics and Postgenomic Technologies of Central Research Institute of Epidemiology

>|Samoilov|Russia

>Spike|hCoV-19/Portugal/PT0498/2020|2020-03-11|EPI\_ISL\_454222|Original|hCoV-19^^Portugal|Human|unknown|Instituto Nacional de Saude (INSA)|Borges|Portugal

>Spike|hCoV-19/USA/CA-QDX-2035/2020|2020-03-18|EPI\_ISL\_604316|Original|hCoV-19^^California|Human|Quest Diagnostics|Quest Diagnostics|Kagan|USA

>Spike|hCoV-19/England/EXET-13AA95/2020|2020-11-08|EPI\_ISL\_664429|Original|hCoV-19^^England|Human|University of Exeter|COVID-19 Genomics UK (COG-UK) Consortium|Temperton|United Kingdom

>Spike|hCoV-19/USA/CA-CZB-12880/2020|2020-09-03|EPI\_ISL\_672425|Original|hCoV-19^^California|Human|Fresno County Public Health Laboratory|Chan-Zuckerberg Biohub|Bhatt|USA

>Spike|hCoV-19/South Korea/KCDC2652/2020|2020-07-12|EPI\_ISL\_515054|Original|hCoV-19^^South Korea|Human|Division of Viral Diseases|Division of Viral Diseases|Kim|South Korea

>Spike|hCoV-19/USA/WA-S2420/2020|2020-06-15|EPI\_ISL\_497052|Original|hCoV-19^^Washington|Human|Washington State Department of Health|Seattle Flu Study|Lee|USA

>Spike|hCoV-19/Scotland/CVR2889/2020|2020-04-21|EPI\_ISL\_453083|Original|hCoV-19^^Scotland|Human|West of Scotland Specialist Virology Centre|COVID-19 Genomics UK (COG-UK) Consortium|Robertson|United Kingdom

>Spike|hCoV-19/USA/CA-CZB-1138/2020|2020-04-01|EPI\_ISL\_447889|Original|hCoV-19^^California|Human|University of California|Chan-Zuckerberg Biohub|Hao|USA

>Spike|hCoV-19/England/QEUEH-95E046/2020|2020-08-07|EPI\_ISL\_537022|Original|hCoV-19^^England|Human|Lighthouse Lab in Glasgow|Wellcome Sanger Institute for the COVID-19 Genomics UK (COG-UK) consortium|Davies|United Kingdom

>Spike|hCoV-19/USA/NY-Wadsworth-292744-01/2020|2020-12-21|EPI\_ISL\_769923|Original|hCoV-19^^New York|Human|Albany Medical Center Hospital Clinical Laboratories|Wadsworth Center|Lasek-Nesselquist|USA

>Spike|hCoV-19/Bermuda/205081299/2020|2020-11-04|EPI\_ISL\_780408|Original|hCoV-19^^Bermuda|Human|Bermuda Government Molecular Diagnostics Laboratory (MDL)|Respiratory Virus Unit|Platt|Bermuda

>Spike|hCoV-19/England/QEUEH-9C8153/2020|2020-09-11|EPI\_ISL\_567193|Original|hCoV-19^^England|Human|Lighthouse Lab in Glasgow|Wellcome Sanger Institute for the COVID-19 Genomics UK (COG-UK) consortium|Davies|United Kingdom

>Spike|hCoV-19/England/WSFT-25C1334/2020|2020-04-18|EPI\_ISL\_492915|Original|hCoV-19^^England|Human|Department of Medical Microbiology|Wellcome Sanger Institute for the COVID-19 Genomics UK (COG-UK) consortium|Davies|United Kingdom

>Spike|hCoV-19/USA/FL-BPHL-1282/2020|2020-08-25|EPI\_ISL\_541214|Original|hCoV-19^^Florida|Human|Florida Bureau of Public Health Laboratories|Florida Bureau of Public Health Laboratories|Blanton|USA

>Spike|hCoV-19/USA/NY-NYCPHL-000040/2020|2020-03-11|EPI\_ISL\_631535|Original|hCoV-19^^New York|Human|NYC Department Of Health And Mental Hygiene|New York City Public Health Laboratory|Wang|USA

>Spike|hCoV-19/Australia/VIC12968/2020|2020-08-01|EPI\_ISL\_592128|Original|hCoV-19^^Victoria|Human|Microbiological Diagnostic Unit - Public Health Laboratory (MDU-PHL)|MDU-PHL|Schultz|Australia

>Spike|hCoV-19/Denmark/DCGC-1781/2020|2020-07-06|EPI\_ISL\_618189|Original|hCoV-19^^Nordjylland|Human|Department of Virus and Microbiological Special Diagnostics|Albertsen lab|Michaelsen|Denmark

>Spike|hCoV-19/England/ALDP-9D8F83/2020|2020-09-18|EPI\_ISL\_576686|Original|hCoV-19^^England|Human|Oxford Viromics|COVID-19 Genomics UK (COG-UK) Consortium|Golubchik|United Kingdom

>Spike|hCoV-19/USA/NV-NSPHL-A0022/2020|2020-03-17|EPI\_ISL\_515309|Original|hCoV-19^^Nevada|Human|Nevada State Public Health Laboratory|Nevada State Public Health Laboratory|Sevinsky|USA

>Spike|hCoV-19/USA/WA-UW-1552/2020|2020-03-19|EPI\_ISL\_423015|Original|hCoV-19^^Washington|Human|UW Virology Lab|UW Virology Lab|Roychoudhury|USA

>Spike|hCoV-19/England/NORT-2831C4/2020|2020-03-30|EPI\_ISL\_488578|Original|hCoV-19^^England|Human|NU-OMICS DNA Sequencing research facility|Wellcome Sanger Institute for the COVID-19 Genomics UK (COG-UK) consortium|Davies|United Kingdom

>Spike|hCoV-19/Scotland/CVR4083/2020|2020-08-31|EPI\_ISL\_535173|Original|hCoV-19^^Scotland|Human|West of Scotland Specialist Virology Centre|COVID-19 Genomics UK (COG-UK) Consortium|Robertson|United Kingdom

>Spike|hCoV-19/USA/MI-MDHHS-SC21357/2020|2020-04-03|EPI\_ISL\_507611|Original|hCoV-19^^Michigan|Human|Michigan Department of Health and Human Services|Michigan Department of Health and Human Services|Blankenship|USA

>Spike|hCoV-19/USA/MI-MDHHS-SC21532/2020|2020-04-05|EPI\_ISL\_516259|Original|hCoV-19^^Michigan|Human|Michigan Department of Health and Human Services|Michigan Department of Health and Human Services|Blankenship|USA

>Spike|hCoV-19/USA/TX-HMH-MCoV-13121/2020|2020-08-29|EPI\_ISL\_788272|Original|hCoV-19^^Texas|Human|Houston Methodist Hospital|Houston Methodist Hospital|Long|USA

>Spike|hCoV-19/Scotland/QEUH-A4C5D2/2020|2020-10-07|EPI\_ISL\_595983|Original|hCoV-19^^Scotland|Human|Quadram Institute Bioscience|COVID-19 Genomics UK (COG-UK) Consortium|Alikhan|United Kingdom

>Spike|hCoV-19/Denmark/DCGC-2044/2020|2020-07-27|EPI\_ISL\_618269|Original|hCoV-19^^Nordjylland|Human|Department of Virus and Microbiological Special Diagnostics|Albertsen lab|Michaelsen|Denmark

>Spike|hCoV-19/England/CAMC-A655C4/2020|2020-10-10|EPI\_ISL\_608398|Original|hCoV-19^^England|Human|Lighthouse Lab in Cambridge|Wellcome Sanger Institute for the COVID-19 Genomics UK (COG-UK) consortium|Davies|United Kingdom

>Spike|hCoV-19/England/QEUH-AD46FA/2020|2020-10-26|EPI\_ISL\_634525|Original|hCoV-19^^England|Human|Lighthouse Lab in Glasgow|Wellcome Sanger Institute for the COVID-19 Genomics UK (COG-UK) consortium|Davies|United Kingdom

>Spike|hCoV-19/England/ALDP-C3D086/2020|2020-12-10|EPI\_ISL\_731207|Original|hCoV-19^^England|Human|Lighthouse Lab in Alderley Park|Wellcome Sanger Institute for the COVID-19 Genomics UK (COG-UK) Consortium|Davies|United Kingdom

>Spike|hCoV-19/England/PORT-2D3A15/2020|2020-04-17|EPI\_ISL\_529351|Original|hCoV-19^^England|Human|Centre for Enzyme Innovation|COVID-19 Genomics UK (COG-UK) Consortium|Robson|United Kingdom

>Spike|hCoV-19/USA/MN-MDH-1058/2020|2020-05-14|EPI\_ISL\_462903|Original|hCoV-19^^Minnesota|Human|Minnesota Department of Health|Minnesota Department of Health|Garfin|USA

>Spike|hCoV-19/USA/NM-DOH-2020631642/2020|2020-12-19|EPI\_ISL\_766906|Original|hCoV-19^^New Mexico|Human|New Mexico Department of Health Scientific Laboratory|New Mexico Department of Health Scientific Laboratory|Malone|USA

>Spike|hCoV-19/England/QEUH-9651B2/2020|2020-08-13|EPI\_ISL\_536832|Original|hCoV-19^^England|Human|Lighthouse Lab in Glasgow|Wellcome Sanger Institute for the COVID-19 Genomics UK (COG-UK) consortium|Davies|United Kingdom

>Spike|hCoV-19/Scotland/QEUH-A9E999/2020|2020-10-20|EPI\_ISL\_625376|Original|hCoV-19^^Scotland|Human|Lighthouse Lab in Glasgow|Wellcome Sanger Institute for the COVID-19 Genomics UK (COG-UK) consortium|Davies|United Kingdom

>Spike|hCoV-19/USA/MD-HP12075/2020|2020-12-05|EPI\_ISL\_791403|Original|hCoV-19^^Maryland|Human|Johns Hopkins Hospital Department of Pathology|Johns Hopkins Hospital Department of Pathology|Morris|USA

>Spike|hCoV-19/Switzerland/BE-ETHZ-321091/2020|2020-10-14|EPI\_ISL\_737704|Original|hCoV-19^^Bern|Human|Viollier AG|Department of Biosystems Science and Engineering|Nadeau|Switzerland

>Spike|hCoV-19/England/QEUH-B66085/2020|2020-11-09|EPI\_ISL\_655957|Original|hCoV-19^^England|Human|Lighthouse Lab in Glasgow|Wellcome Sanger Institute for the COVID-19 Genomics UK (COG-UK) Consortium|Davies|United Kingdom

>Spike|hCoV-19/Wales/PHWC-49B060/2020|2020-12-06|EPI\_ISL\_742287|Original|hCoV-19^^Wales|Human|Wales Specialist Virology Centre Sequencing lab|COVID-19 Genomics UK (COG-UK) Consortium|Moore|United Kingdom

>Spike|hCoV-19/Wales/PHWC-47F8E2/2020|2020-10-12|EPI\_ISL\_611906|Original|hCoV-19^^Wales|Human|Wales Specialist Virology Centre Sequencing lab|COVID-19 Genomics UK (COG-UK) Consortium|Moore|United Kingdom

>Spike|hCoV-19/England/ALDP-9CD570/2020|2020-09-16|EPI\_ISL\_566389|Original|hCoV-19^^England|Human|Lighthouse Lab in Alderley Park|Wellcome Sanger Institute for the COVID-19 Genomics UK (COG-UK) consortium|Davies|United Kingdom

>Spike|hCoV-19/England/ALDP-AA3102/2020|2020-10-22|EPI\_ISL\_623881|Original|hCoV-19^^England|Human|Lighthouse Lab in Alderley Park|Wellcome Sanger Institute for the COVID-19 Genomics UK (COG-UK) consortium|Davies|United Kingdom

>Spike|hCoV-19/Wales/PHWC-34795/2020|2020-04-20|EPI\_ISL\_446973|Original|hCoV-19^^Wales|Human|Wales Specialist Virology Centre|Public Health Wales Microbiology Cardiff|Moore|United Kingdom

>Spike|hCoV-19/USA/MN-MDH-1483/2020|2020-03-17|EPI\_ISL\_518877|Original|hCoV-19^^Minnesota|Human|Mayo Clinic & Mayo Clinic Laboratories|Minnesota Department of Health|Garfin|USA

>Spike|hCoV-19/England/NORW-EFD3D/2020|2020-00-00|EPI\_ISL\_549370|Original|hCoV-19^^England|Human|Quadram Institute Bioscience|COVID-19 Genomics UK (COG-UK) Consortium|Alikhan|United Kingdom

>Spike|hCoV-19/Scotland/CVR4523/2020|2020-09-22|EPI\_ISL\_585383|Original|hCoV-19^^Scotland|Human|Lighthouse Lab in Glasgow / MRC-University of Glasgow Centre for Virus Research|COVID-19 Genomics UK (COG-UK) Consortium|Robertson|United Kingdom

>Spike|hCoV-19/Belgium/reg-0426604/2020|2020-04-26|EPI\_ISL\_734654|Original|hCoV-19^^Comines-Warneton|Human|UZ Leuven|KU Leuven|Maes|Belgium

>Spike|hCoV-19/USA/TX-HMH-6071/2020|2020-07-04|EPI\_ISL\_547212|Original|hCoV-19^^Texas|Human|Houston Methodist Hospital|Houston Methodist Hospital|Long|USA

>Spike|hCoV-19/Scotland/QEUA-A618DE/2020|2020-10-10|EPI\_ISL\_628641|Original|hCoV-19^^Scotland|Human|Oxford Viromics|COVID-19 Genomics UK (COG-UK) Consortium|Golubchik|United Kingdom

>Spike|hCoV-19/Denmark/DCGC-13719/2020|2020-11-30|EPI\_ISL\_712981|Original|hCoV-19^^Nordjylland|Human|Department of Virus and Microbiological Special Diagnostics|Albertsen Lab|Michaelsen|Denmark

>Spike|hCoV-19/England/CAMC-B7ACA8/2020|2020-11-12|EPI\_ISL\_723956|Original|hCoV-19^^England|Human|Oxford Viromics|COVID-19 Genomics UK (COG-UK) Consortium|Golubchik|United Kingdom

>Spike|hCoV-19/England/20134065804/2020|2020-03-24|EPI\_ISL\_423153|Original|hCoV-19^^England|Human|Respiratory Virus Unit|Respiratory Virus Unit|Platt|United Kingdom

>Spike|hCoV-19/USA/FL-BPHL-1857/2020|2020-04-10|EPI\_ISL\_613758|Original|hCoV-19^^Florida|Human|Florida Bureau of Public Health Laboratories|Florida Bureau of Public Health Laboratories|Blanton|USA

>Spike|hCoV-19/USA/LA-EVTL642/2020|2020-08-06|EPI\_ISL\_579046|Original|hCoV-19^^Louisiana|Human|LSUHS Emerging Viral Threat Laboratory|Microbial Genome Sequencing Center|Kamil|USA

>Spike|hCoV-19/Canada/UN-CRCHUM-PreFreeze-5/2020|2020-09-04|EPI\_ISL\_667762|Original|hCoV-19^^Canada|Human|Microbiology|Microbiology|Benoit, P.|Canada

>Spike|hCoV-19/USA/NY-QDX-880/2020|2020-03-16|EPI\_ISL\_571681|Original|hCoV-19^^New York|Human|Quest Diagnostics|Quest Diagnostics|Kagan|USA

>Spike|hCoV-19/England/QEUA-9D013A/2020|2020-09-15|EPI\_ISL\_589907|Original|hCoV-19^^England|Human|Lighthouse Lab in Glasgow|Wellcome Sanger Institute for the COVID-19 Genomics UK (COG-UK) consortium|Davies|United Kingdom

>Spike|hCoV-19/Denmark/DCGC-17129/2020|2020-12-14|EPI\_ISL\_750227|Original|hCoV-19^^Sjælland|Human|Department of Virus and Microbiological Special Diagnostics|Albertsen Lab|Michaelsen|Denmark

>Spike|hCoV-19/Canada/ON-UHTC\_0010/2020|2020-03-26|EPI\_ISL\_464052|unknown|hCoV-19^^Ontario|Human|Unity Health Toronto|Ontario Institute for Cancer Research|de Borja|Canada

>Spike|hCoV-19/England/MILK-A7A81E/2020|2020-10-15|EPI\_ISL\_606604|Original|hCoV-19^^England|Human|Lighthouse Lab in Milton Keynes|Wellcome Sanger Institute for the COVID-19 Genomics UK (COG-UK) consortium|Davies|United Kingdom

>Spike|hCoV-19/England/QEUA-AD30EE/2020|2020-10-26|EPI\_ISL\_634166|Original|hCoV-19^^England|Human|Lighthouse Lab in Glasgow|Wellcome Sanger Institute for the COVID-19 Genomics UK (COG-UK) consortium|Davies|United Kingdom

>Spike|hCoV-19/England/ALDP-B5B96A/2020|2020-11-08|EPI\_ISL\_655505|Original|hCoV-19^^England|Human|Lighthouse Lab in Alderley Park|Wellcome Sanger Institute for the COVID-19 Genomics UK (COG-UK) Consortium|Davies|United Kingdom

>Spike|hCoV-19/Japan/PG-6296/2020|2020-07-00|EPI\_ISL\_689407|Original|hCoV-19^^Japan|Human|Pathogen Genomics Center|Pathogen Genomics Center|Sekizuka|Japan

>Spike|hCoV-19/USA/TX-HMH0104/2020|2020-03-20|EPI\_ISL\_434809|Original|hCoV-19^^Texas|Human|Houston Methodist Hospital|Houston Methodist Hospital|Long|USA

>Spike|hCoV-19/England/ALDP-9554DA/2020|2020-06-12|EPI\_ISL\_553517|Original|hCoV-19^^England|Human|Lighthouse Lab in Alderley Park|Wellcome Sanger Institute for the COVID-19 Genomics UK (COG-UK) consortium|Davies|United Kingdom

>Spike|hCoV-19/England/QEUH-C30A3A/2020|2020-12-10|EPI\_ISL\_731341|Original|hCoV-19^^England|Human|Lighthouse Lab in Glasgow|Wellcome Sanger Institute for the COVID-19 Genomics UK (COG-UK) Consortium|Davies|United Kingdom

>Spike|hCoV-19/England/ALDP-9ED8AE/2020|2020-05-08|EPI\_ISL\_580696|Original|hCoV-19^^England|Human|Lighthouse Lab in Alderley Park|Wellcome Sanger Institute for the COVID-19 Genomics UK (COG-UK) consortium|Davies|United Kingdom

>Spike|hCoV-19/Gambia/NPHL-2554/2020|2020-00-00|EPI\_ISL\_561275|Original|hCoV-19^^Kombo|Human|MRCG at LSHTM Genomics lab|MRCG at LSHTM Genomics lab|Sesay|Gambia

>Spike|hCoV-19/India/DL-NCDC5719-CSIR-IGIB/2020|2020-05-23|EPI\_ISL\_482610|Original|hCoV-19^^Delhi|Human|National Centre for Disease control (NCDC)|NCDC/CSIR-IGIB|Singh|India

>Spike|hCoV-19/Wales/PHWC-484C1B/2020|2020-10-17|EPI\_ISL\_627094|Original|hCoV-19^^Wales|Human|Wales Specialist Virology Centre Sequencing lab|COVID-19 Genomics UK (COG-UK) Consortium|Moore|United Kingdom

>Spike|hCoV-19/Sweden/20-22156/2020|2020-06-04|EPI\_ISL\_623085|Original|hCoV-19^^Skane|Human|Klinisk mikrobiologi|The Public Health Agency of Sweden|Svartstr\u00f6m|Sweden

>Spike|hCoV-19/Spain/VC-IBV-98003527/2020|2020-03-27|EPI\_ISL\_537960|Original|hCoV-19^^Comunitat Valenciana|Human|Servicio de Microbiolog\u00eda. Hospital General Universitario de Castell\u00f3n|SeqCOVID-SPAIN consortium/IBV(CSIC)|Comas|Spain

>Spike|hCoV-19/England/ALDP-B1B0BC/2020|2020-11-01|EPI\_ISL\_645647|Original|hCoV-19^^England|Human|Lighthouse Lab in Alderley Park|Wellcome Sanger Institute for the COVID-19 Genomics UK (COG-UK) Consortium|Davies|United Kingdom

>Spike|hCoV-19/USA/WA-S2898/2020|2020-10-02|EPI\_ISL\_596429|Original|hCoV-19^^Washington|Human|Seattle Flu Study|Seattle Flu Study|Lee|USA

>Spike|hCoV-19/England/CAMC-A41B62/2020|2020-10-07|EPI\_ISL\_609331|Original|hCoV-19^^England|Human|Lighthouse Lab in Cambridge|Wellcome Sanger Institute for the COVID-19 Genomics UK (COG-UK) consortium|Davies|United Kingdom

>Spike|hCoV-19/Scotland/QEUH-C0113D/2020|2020-12-05|EPI\_ISL\_757235|Original|hCoV-19^^Scotland|Human|Lighthouse Lab in Glasgow|Wellcome Sanger Institute for the COVID-19 Genomics UK (COG-UK) Consortium|Davies|United Kingdom

>Spike|hCoV-19/USA/NY-NYUMC283/2020|2020-04-05|EPI\_ISL\_428797|Original|hCoV-19^^New York|Human|NYU Langone Health|Departments of Pathology and Medicine|Maurano|USA

>Spike|hCoV-19/Japan/PG-1776/2020|2020-04-00|EPI\_ISL\_685382|Original|hCoV-19^^Japan|Human|Pathogen Genomics Center|Pathogen Genomics Center|Sekizuka|Japan

>Spike|hCoV-19/England/20168032404/2020|2020-04-16|EPI\_ISL\_466608|Original|hCoV-19^^England|Human|Respiratory Virus Unit|Respiratory Virus Unit|Platt|United Kingdom

>Spike|hCoV-19/England/CAMC-A82F5A/2020|2020-10-13|EPI\_ISL\_610854|Original|hCoV-19^^England|Human|Lighthouse Lab in Cambridge|Wellcome Sanger Institute for the COVID-19 Genomics UK (COG-UK) consortium|Davies|United Kingdom

>Spike|hCoV-19/England/ALDP-6511CB/2020|2020-07-04|EPI\_ISL\_558033|Original|hCoV-19^^England|Human|Lighthouse Lab in Alderley Park|Wellcome Sanger Institute for the COVID-19 Genomics UK (COG-UK) consortium|Davies|United Kingdom

>Spike|hCoV-19/England/MILK-A79E2C/2020|2020-10-15|EPI\_ISL\_606858|Original|hCoV-19^^England|Human|Lighthouse Lab in Milton Keynes|Wellcome Sanger Institute for the COVID-19 Genomics UK (COG-UK) consortium|Davies|United Kingdom

>Spike|hCoV-19/Switzerland/BS-UHB-42186767/2020|2020-03-11|EPI\_ISL\_528018|Original|hCoV-19^^Basel-Stadt|Human|University Hospital Basel|University Hospital Basel|Roloff Handschin|Switzerland

>Spike|hCoV-19/Italy/CAM-INTPas-16/2020|2020-03-31|EPI\_ISL\_775243|Original|hCoV-19^^Campania|Human|INT Fondazione Pascale|INT Fondazione Pascale|Rachiglio|Italy

>Spike|hCoV-19/England/QEUH-AD1B3A/2020|2020-10-24|EPI\_ISL\_633791|Original|hCoV-19^^England|Human|Lighthouse Lab in Glasgow|Wellcome Sanger Institute for the COVID-19 Genomics UK (COG-UK) consortium|Davies|United Kingdom

>Spike|hCoV-19/Netherlands/UT-EMC-224/2020|2020-12-10|EPI\_ISL\_722456|Original|hCoV-19^^Utrecht|Human|Dutch COVID-19 response team|Erasmus Medical Center|Oude Munnink|Netherlands

>Spike|hCoV-19/England/QEUI-B7CF61/2020|2020-11-14|EPI\_ISL\_741833|Original|hCoV-19^^England|Human|Oxford Viromics|COVID-19 Genomics UK (COG-UK) Consortium|Golubchik|United Kingdom

>Spike|hCoV-19/Germany/HH-hpi-p2377/2020|2020-05-15|EPI\_ISL\_775746|Original|hCoV-19^^Hamburg|Human|University Medical Center Hamburg Eppendorf|Heinrich Pette Institute|Robitaille|Germany

>Spike|hCoV-19/England/OXON-F40F44/2020|2020-12-14|EPI\_ISL\_764556|Original|hCoV-19^^England|Human|Oxford Viromics|COVID-19 Genomics UK (COG-UK) Consortium|Golubchik|United Kingdom

>Spike|hCoV-19/Denmark/DCGC-1883/2020|2020-05-04|EPI\_ISL\_622581|Original|hCoV-19^^Hovedstaden|Human|Department of Virus and Microbiological Special Diagnostics|Albertsen lab|Michaelsen|Denmark

>Spike|hCoV-19/USA/TX-HMH-MCoV-14821/2020|2020-10-13|EPI\_ISL\_786305|Original|hCoV-19^^Texas|Human|Houston Methodist Hospital|Houston Methodist Hospital|Long|USA

>Spike|hCoV-19/USA/MI-MDHHS-SC20205/2020|2020-04-24|EPI\_ISL\_447176|Original|hCoV-19^^Michigan|Human|Michigan Department of Health and Human Services|Michigan Department of Health and Human Services|Blankenship|USA

>Spike|hCoV-19/Singapore/1257/2020|2020-05-03|EPI\_ISL\_648675|Original|hCoV-19^^Singapore|Human|Department of Laboratory Medicine|Department of Laboratory Medicine|Chen|Singapore

>Spike|hCoV-19/England/ALDP-90456E/2020|2020-06-24|EPI\_ISL\_551515|Original|hCoV-19^^England|Human|Lighthouse Lab in Alderley Park|Wellcome Sanger Institute for the COVID-19 Genomics UK (COG-UK) consortium|Davies|United Kingdom

>Spike|hCoV-19/England/MILK-99D421/2020|2020-08-31|EPI\_ISL\_550649|Original|hCoV-19^^England|Human|Lighthouse Lab in Milton Keynes|Wellcome Sanger Institute for the COVID-19 Genomics UK (COG-UK) consortium|Davies|United Kingdom

>Spike|hCoV-19/Scotland/CVR2567/2020|2020-04-16|EPI\_ISL\_484603|Original|hCoV-19^^Scotland|Human|West of Scotland Specialist Virology Centre|COVID-19 Genomics UK (COG-UK) Consortium|Robertson|United Kingdom

>Spike|hCoV-19/England/CAMB-83542/2020|2020-04-15|EPI\_ISL\_443462|Original|hCoV-19^^England|Human|Department of Pathology|Wellcome Sanger Institute for the COVID-19 Genomics UK (COG-UK) consortium|Amato|United Kingdom

>Spike|hCoV-19/England/OXON-B10B3/2020|2020-04-17|EPI\_ISL\_478994|Original|hCoV-19^^England|Human|Oxford Viromics|COVID-19 Genomics UK (COG-UK) Consortium|Golubchik|United Kingdom

>Spike|hCoV-19/England/QEUI-9C9574/2020|2020-09-10|EPI\_ISL\_567483|Original|hCoV-19^^England|Human|Lighthouse Lab in Glasgow|Wellcome Sanger Institute for the COVID-19 Genomics UK (COG-UK) consortium|Davies|United Kingdom

>Spike|hCoV-19/USA/TX-HMH-MCoV-18971/2020|2020-11-26|EPI\_ISL\_785255|Original|hCoV-19^^Texas|Human|Houston Methodist Hospital|Houston Methodist Hospital|Long|USA

>Spike|hCoV-19/England/PORT-2EA3A7/2020|2020-00-00|EPI\_ISL\_665480|Original|hCoV-19^^England|Human|Centre for Enzyme Innovation|COVID-19 Genomics UK (COG-UK) Consortium|Robson|United Kingdom

>Spike|hCoV-19/England/CAMC-BC0F9B/2020|2020-11-23|EPI\_ISL\_704863|Original|hCoV-19^^England|Human|Lighthouse Lab in Cambridge|Wellcome Sanger Institute for the COVID-19 Genomics UK (COG-UK) Consortium|Davies|United Kingdom

>Spike|hCoV-19/England/MILK-ACCF18/2020|2020-10-21|EPI\_ISL\_634368|Original|hCoV-19^^England|Human|Lighthouse Lab in Milton Keynes|Wellcome Sanger Institute for the COVID-19 Genomics UK (COG-UK) consortium|Davies|United Kingdom

>Spike|hCoV-19/USA/AZ-TG366740/2020|2020-06-02|EPI\_ISL\_694497|Original|hCoV-19^^Arizona|Human|AZ SPHL|TGen North|French|USA

>Spike|hCoV-19/England/CAMB-72E2D/2020|2020-03-20|EPI\_ISL\_439968|Original|hCoV-19^^England|Human|Department of Pathology|Wellcome Sanger Institute for the COVID-19 Genomics UK (COG-UK) consortium|Amato|United Kingdom

>Spike|hCoV-19/Spain/CT-IBV-97010116/2020|2020-11-16|EPI\_ISL\_683608|Original|hCoV-19^^Catalunya|Human|Servicio de Microbiolog\u00eda|SeqCOVID-SPAIN consortium|IBV (CSIC) |Comas|Spain

>Spike|hCoV-19/India/GJ-GBRC340/2020|2020-07-09|EPI\_ISL\_514437|Original|hCoV-19^^Gujarat|Human|Dr. RSS Hospital|Gujarat Biotechnology Research Centre|Joshi|India

>Spike|hCoV-19/England/QEUEH-B1398C/2020|2020-11-02|EPI\_ISL\_641724|Original|hCoV-19^^England|Human|Lighthouse Lab in Glasgow|Wellcome Sanger Institute for the COVID-19 Genomics UK (COG-UK) Consortium|Davies|United Kingdom

>Spike|hCoV-19/Switzerland/VD-ETHZ-320530/2020|2020-10-13|EPI\_ISL\_737897|Original|hCoV-19^^Vaud|Human|Viollier AG|Department of Biosystems Science and Engineering|Nadeau|Switzerland

>Spike|hCoV-19/Peru/ANC-INS-059/2020|2020-04-02|EPI\_ISL\_517687|Original|hCoV-19^^Ancash|Human|Laboratorio de Referencia Nacional de Virus Respiratorio. Centro Nacional de Salud Publica. Instituto Nacional de Salud Peru.|Laboratorio de Referencia Nacional de Biotecnolog\u00eda y Biolog\u00eda Molecular. Centro Nacional de Salud Publica. Instituto Nacional de Salud Peru.|Padilla Rojas|Peru

>Spike|hCoV-19/Brazil/SP-776/2020|2020-07-01|EPI\_ISL\_776764|Original|hCoV-19^^S\u00e3o Paulo|Human|Instituto Adolfo Lutz - Regional de Santo Andre|Instituto Adolfo Lutz|Sacchi|Brazil

>Spike|hCoV-19/Denmark/DCGC-14979/2020|2020-11-23|EPI\_ISL\_713316|Original|hCoV-19^^Syddanmark|Human|Department of Virus and Microbiological Special Diagnostics|Albertsen Lab|Michaelsen|Denmark

>Spike|hCoV-19/Wales/PHWC-49A73F/2020|2020-12-02|EPI\_ISL\_727589|Original|hCoV-19^^Wales|Human|Originating lab|COVID-19 Genomics UK (COG-UK) Consortium|Moore|United Kingdom

>Spike|hCoV-19/England/CAMC-B07E04/2020|2020-10-29|EPI\_ISL\_643528|Original|hCoV-19^^England|Human|Lighthouse Lab in Cambridge|Wellcome Sanger Institute for the COVID-19 Genomics UK (COG-UK) Consortium|Davies|United Kingdom

>Spike|hCoV-19/Belgium/VSL-0407279/2020|2020-04-06|EPI\_ISL\_464073|Original|hCoV-19^^Vloesberg|Human|KU Leuven|KU Leuven|Maes|Belgium

>Spike|hCoV-19/England/ALDP-94D4C6/2020|2020-06-16|EPI\_ISL\_553536|Original|hCoV-19^^England|Human|Lighthouse Lab in Alderley Park|Wellcome Sanger Institute for the COVID-19 Genomics UK (COG-UK) consortium|Davies|United Kingdom

>Spike|hCoV-19/Denmark/DCGC-20484/2020|2020-12-21|EPI\_ISL\_759178|Original|hCoV-19^^Hovedstaden|Human|Department of Virus and Microbiological Special Diagnostics|Albertsen Lab|Michaelsen|Denmark

>Spike|hCoV-19/England/MILK-999C2D/2020|2020-08-29|EPI\_ISL\_550283|Original|hCoV-19^^England|Human|Lighthouse Lab in Milton Keynes|Wellcome Sanger Institute for the COVID-19 Genomics UK (COG-UK) consortium|Davies|United Kingdom

>Spike|hCoV-19/Australia/VIC5054/2020|2020-07-17|EPI\_ISL\_519857|Original|hCoV-19^^Victoria|Human|Microbiological Diagnostic Unit - Public Health Laboratory (MDU-PHL)|MDU-PHL|Schultz|Australia

>Spike|hCoV-19/USA/WA-S2556/2020|2020-06-17|EPI\_ISL\_497188|Original|hCoV-19^^Washington|Human|Washington State Department of Health|Seattle Flu Study|Lee|USA

>Spike|hCoV-19/India/OR-ILSCV34480/2020|2020-06-09|EPI\_ISL\_481184|Original|hCoV-19^^Odisha|Human|Immunogenomics lab|Immunogenomics lab|Raghav|India

>Spike|hCoV-19/England/QEUEH-9F4A08/2020|2020-09-25|EPI\_ISL\_588390|Original|hCoV-19^^England|Human|Lighthouse Lab in Glasgow|Wellcome Sanger Institute for the COVID-19 Genomics UK (COG-UK) consortium|Davies|United Kingdom

>Spike|hCoV-19/Wales/MILK-A47D57/2020|2020-10-05|EPI\_ISL\_598261|Original|hCoV-19^^Wales|Human|Lighthouse Lab in Milton Keynes|Wellcome Sanger Institute for the COVID-19 Genomics UK (COG-UK) consortium|Davies|United Kingdom

>Spike|hCoV-19/USA/TX-HMH-MCoV-16306/2020|2020-10-31|EPI\_ISL\_785990|Original|hCoV-19^^Texas|Human|Houston Methodist Hospital|Houston Methodist Hospital|Long|USA

>Spike|hCoV-19/USA/AZ-TG666172/2020|2020-05-02|EPI\_ISL\_696251|Original|hCoV-19^^Arizona|Human|Sonora Quest Laboratories|TGen North|French|USA

>Spike|hCoV-19/England/QEUEH-CC5F95/2020|2020-12-21|EPI\_ISL\_760435|Original|hCoV-19^^England|Human|Lighthouse Lab in Glasgow|Wellcome Sanger Institute for the COVID-19 Genomics UK (COG-UK) Consortium|Davies|United Kingdom

>Spike|hCoV-19/England/LIVE-DC6D4E/2020|2020-11-28|EPI\_ISL\_703850|Original|hCoV-19^^England|Human|Liverpool Clinical Laboratories|COVID-19 Genomics UK (COG-UK) Consortium|Haldenby|United Kingdom

>Spike|hCoV-19/USA/TX-HMH-MCoV-14792/2020|2020-10-13|EPI\_ISL\_786277|Original|hCoV-19^^Texas|Human|Houston Methodist Hospital|Houston Methodist Hospital|Long|USA

>Spike|hCoV-19/Wales/PHWC-4818DE/2020|2020-10-17|EPI\_ISL\_613121|Original|hCoV-19^^Wales|Human|Wales Specialist Virology Centre Sequencing lab|COVID-19 Genomics UK (COG-UK) Consortium|Moore|United Kingdom

>Spike|hCoV-19/England/204900613/2020|2020-11-30|EPI\_ISL\_722976|Original|hCoV-19^^England|Human|Respiratory Virus Unit|COVID-19 Genomics UK (COG-UK) Consortium|Platt|United Kingdom

>Spike|hCoV-19/Spain/PV-IBV-2104/2020|2020-04-11|EPI\_ISL\_468917|Original|hCoV-19^^Basque Country|Human|Servicio de Microbiolog\u00eda. Hospital Universitario Donostia. OSI Donostialdea. \u00c1rea de Enfermedades Infecciosas|SeqCOVID-SPAIN consortium/IBV (CSIC) |Comas|Spain

>Spike|hCoV-19/USA/WA-UW-383/2020|2020-03-11|EPI\_ISL\_570044|Original|hCoV-19^^Washington|Human|UW Virology Lab|UW Virology Lab|Roychoudhury|USA

>Spike|hCoV-19/USA/MI-QDX-562/2020|2020-03-16|EPI\_ISL\_571318|Original|hCoV-19^^Michigan|Human|Quest Diagnostics|Quest Diagnostics|Kagan|USA

>Spike|hCoV-19/England/MILK-A79ED1/2020|2020-10-15|EPI\_ISL\_606698|Original|hCoV-19^^England|Human|Lighthouse Lab in Milton Keynes|Wellcome Sanger Institute for the COVID-19 Genomics UK (COG-UK) consortium|Davies|United Kingdom

>Spike|hCoV-19/USA/NY-NYUMC157/2020|2020-04-01|EPI\_ISL\_424964|Original|hCoV-19^^New York|Human|NYU Langone Health|Departments of Pathology and Medicine|Maurano|USA

>Spike|hCoV-19/England/LIVE-9D4A2/2020|2020-04-16|EPI\_ISL\_453204|Original|hCoV-19^^England|Human|Liverpool Clinical Laboratories|COVID-19 Genomics UK (COG-UK) Consortium|Haldenby|United Kingdom

>Spike|hCoV-19/England/SHEF-D0151/2020|2020-04-29|EPI\_ISL\_475486|Original|hCoV-19^^England|Human|Virology Department|COVID-19 Genomics UK (COG-UK) Consortium|de Silva|United Kingdom

>Spike|hCoV-19/France/ARA-SC004/2020|2020-02-19|EPI\_ISL\_629084|Original|hCoV-19^^Auvergne-Rh\u00f4ne-Alpes|Human|Laboratoire du Centre Hospitalier Annecy Genevois|CNR Virus des Infections Respiratoires - France SUD|Bal|France

>Spike|hCoV-19/England/CAMB-84EFB/2020|2020-03-12|EPI\_ISL\_440440|Original|hCoV-19^^England|Human|Department of Pathology|Wellcome Sanger Institute for the COVID-19 Genomics UK (COG-UK) consortium|Amato|United Kingdom

>Spike|hCoV-19/USA/CA-CZB-3931/2020|2020-07-29|EPI\_ISL\_548508|Original|hCoV-19^^California|Human|Contra Costa Public Health Lab|Chan-Zuckerberg Biohub|Bhatt|USA

>Spike|hCoV-19/England/QEUEH-B67FF0/2020|2020-11-11|EPI\_ISL\_662256|Original|hCoV-19^^England|Human|Lighthouse Lab in Glasgow|Wellcome Sanger Institute for the COVID-19 Genomics UK (COG-UK) Consortium|Davies|United Kingdom

>Spike|hCoV-19/Denmark/DCGC-2744/2020|2020-08-17|EPI\_ISL\_616489|Original|hCoV-19^^Nordjylland|Human|Department of Virus and Microbiological Special Diagnostics|Albertsen lab|Michaelsen|Denmark

>Spike|hCoV-19/Mexico/TLA-INBRE-56/2020|2020-08-13|EPI\_ISL\_576259|Original|hCoV-19^^Tlaxcala|Human|Instituto de Diagnostico y Referencia Epidemiologicos (INDRE)|Instituto de Diagnostico y Referencia Epidemiologicos (INDRE)|Rodriguez|Mexico

>Spike|hCoV-19/Brazil/RJ-L10-CD158/2020|2020-03-16|EPI\_ISL\_476180|Original|hCoV-19^^Rio de Janeiro|Human|DB Diagn\u00f3sticos do Brasil|Instituto de Medicina Tropical da Univesidade de S\u00e3o Paulo|Sabino|Brazil

>Spike|hCoV-19/Switzerland/SZ-ETHZ-310412/2020|2020-10-08|EPI\_ISL\_603486|Original|hCoV-19^^Schwyz|Human|Viollier AG|Department of Biosystems Science and Engineering|Nadeau|Switzerland

>Spike|hCoV-19/England/QEUEH-96A2D8/2020|2020-08-13|EPI\_ISL\_536940|Original|hCoV-19^^England|Human|Lighthouse Lab in Glasgow|Wellcome Sanger Institute for the COVID-19 Genomics UK (COG-UK) consortium|Davies|United Kingdom

>Spike|hCoV-19/England/MILK-957ECB/2020|2020-06-14|EPI\_ISL\_554679|Original|hCoV-19^^England|Human|Lighthouse Lab in Milton Keynes|Wellcome Sanger Institute for the COVID-19 Genomics UK (COG-UK) consortium|Davies|United Kingdom

>Spike|hCoV-19/Denmark/DCGC-11425/2020|2020-11-02|EPI\_ISL\_670912|Original|hCoV-19^^Midtjylland|Human|Department of Virus and Microbiological Special Diagnostics|Albertsen Lab|Michaelsen|Denmark



>Spike|hCoV-19/USA/LA-EVTL846/2020|2020-07-28|EPI\_ISL\_653537|Original|hCoV-19^^Louisiana|Human|LSUHS Emerging Viral Threat Laboratory|Microbial Genome Sequencing Center|Kamil|USA

>Spike|hCoV-19/USA/NY-PV09158/2020|2020-03-22|EPI\_ISL\_422525|Original|hCoV-19^^New York|Human|MSHS Clinical Microbiology Laboratories|MSHS Pathogen Surveillance Program|van Bakel|USA

>Spike|hCoV-19/England/BRIS-12E37B/2020|2020-04-25|EPI\_ISL\_481980|Original|hCoV-19^^England|Human|PHE South West Regional Laboratory|Wellcome Sanger Institute for the COVID-19 Genomics UK (COG-UK) consortium|Davies|United Kingdom

>Spike|hCoV-19/USA/UT-QDX-1484/2020|2020-03-14|EPI\_ISL\_603869|Original|hCoV-19^^Utah|Human|Quest Diagnostics|Quest Diagnostics|Kagan|USA

>Spike|hCoV-19/USA/WY-WPHL-21000146/2021|2021-01-02|EPI\_ISL\_770497|Original|hCoV-19^^Wyoming|Human|Wyoming Public Health Laboratory|Wyoming Public Health Laboratory|Hull|USA

>Spike|hCoV-19/Wales/MILK-B02B4E/2020|2020-10-24|EPI\_ISL\_647838|Original|hCoV-19^^Wales|Human|Lighthouse Lab in Milton Keynes|Wellcome Sanger Institute for the COVID-19 Genomics UK (COG-UK) Consortium|Davies|United Kingdom

>Spike|hCoV-19/England/BIRM-65494/2020|2020-10-06|EPI\_ISL\_594559|Original|hCoV-19^^England|Human|University of Birmingham|COVID-19 Genomics UK (COG-UK) Consortium|Loman|United Kingdom

>Spike|hCoV-19/Austria/CeMM0597/2020|2020-03-15|EPI\_ISL\_583609|Original|hCoV-19^^Kufstein|Human|Institut f\u00fcr Virologie am Department f\u00fcr Hygiene|Bergthaler laboratory|Bergthaler|Austria

>Spike|hCoV-19/USA/MI-MDHHS-SC21444/2020|2020-03-19|EPI\_ISL\_507698|Original|hCoV-19^^Michigan|Human|Michigan Department of Health and Human Services|Michigan Department of Health and Human Services|Blankenship|USA

>Spike|hCoV-19/Northern Ireland/NIRE-108CE5/2020|2020-10-08|EPI\_ISL\_627008|Original|hCoV-19^^Northern Ireland|Human|Regional Virus Laboratory|COVID-19 Genomics UK (COG-UK) Consortium|Fairley|United Kingdom

>Spike|hCoV-19/England/QEUH-9E48D4/2020|2020-09-21|EPI\_ISL\_579863|Original|hCoV-19^^England|Human|Lighthouse Lab in Glasgow|Wellcome Sanger Institute for the COVID-19 Genomics UK (COG-UK) consortium|Davies|United Kingdom

>Spike|hCoV-19/USA/TX-HMH-MCoV-19790/2020|2020-11-24|EPI\_ISL\_784128|Original|hCoV-19^^Texas|Human|Houston Methodist Hospital|Houston Methodist Hospital|Long|USA

>Spike|hCoV-19/Mexico/BCN-ALSR-2504/2020|2020-06-05|EPI\_ISL\_635510|Original|hCoV-19^^Baja California|Human|Centro de Diagn\u00f3stico COVID-19 UABC Tijuana|Andersen lab at Scripps Research|Gangavarapu|Mexico

>Spike|hCoV-19/Luxembourg/LNS8734909/2020|2020-11-16|EPI\_ISL\_744802|Original|hCoV-19^^Luxembourg|Human|Laboratoire national de sant\u00e9|Laboratoire national de sant\u00e9|Wienecke-Baldacchino|Luxembourg

>Spike|hCoV-19/Sweden/20-52716/2020|2020-07-07|EPI\_ISL\_654899|Original|hCoV-19^^Jonkoping|Human|Klinisk mikrobiologi|The Public Health Agency of Sweden|Svartstr\u00f6m|Sweden

>Spike|hCoV-19/England/MILK-B3A239/2020|2020-11-01|EPI\_ISL\_658817|Original|hCoV-19^^England|Human|Lighthouse Lab in Milton Keynes|Wellcome Sanger Institute for the COVID-19 Genomics UK (COG-UK) Consortium|Davies|United Kingdom

>Spike|hCoV-19/USA/OR\_5430/2020|2020-03-01|EPI\_ISL\_420794|Original|hCoV-19^^Oregon|Human|Oregon State Public Health- Virology section|Pathogen Discovery|Queen|USA

>Spike|hCoV-19/England/BRIS-13024C/2020|2020-04-11|EPI\_ISL\_492573|Original|hCoV-19^^England|Human|PHE South West Regional Laboratory|Wellcome Sanger Institute for the COVID-19 Genomics UK (COG-UK) consortium|Davies|United Kingdom

>Spike|hCoV-19/England/204390352/2020|2020-10-23|EPI\_ISL\_637144|Original|hCoV-19^^England|Human|Respiratory Virus Unit|COVID-19 Genomics UK (COG-UK) Consortium|Platt|United Kingdom

>Spike|hCoV-19/United Arab Emirates/0257/2020|2020-05-17|EPI\_ISL\_698438|Original|hCoV-19^^Abu Dhabi|Human|Group 42 (G42) Healthcare|G42 Healthcare|Ogrodzki|United Arab Emirates

>Spike|hCoV-19/USA/FL-BPHL-1611/2020|2020-09-04|EPI\_ISL\_594301|Original|hCoV-19^^Florida|Human|Florida Bureau of Public Health Laboratories|Florida Bureau of Public Health Laboratories|Blanton|USA

>Spike|hCoV-19/England/CAMB-1B5C41/2020|2020-08-17|EPI\_ISL\_529660|Original|hCoV-19^^England|Human|Department of Pathology|COVID-19 Genomics UK (COG-UK) Consortium|Meredith|United Kingdom

>Spike|hCoV-19/England/LOND-D39A1/2020|2020-04-06|EPI\_ISL\_441017|Original|hCoV-19^^England|Human|University College London|COVID-19 Genomics UK (COG-UK) Consortium|Roy|United Kingdom

>Spike|hCoV-19/Thailand/Bangkok-CONI-0164/2020|2020-03-24|EPI\_ISL\_498258|Original|hCoV-19^^Bangkok|Human|Hospital for Tropical Diseases|COVID-19 Network Investigations (CONI) Alliance|Batty|Thailand

>Spike|hCoV-19/Japan/PG-4072/2020|2020-07-00|EPI\_ISL\_692313|Original|hCoV-19^^Japan|Human|Sakai City Institute of Public Health|Pathogen Genomics Center|Sekizuka|Japan

>Spike|hCoV-19/USA/CA-CZB-14882/2020|2020-11-24|EPI\_ISL\_739211|Original|hCoV-19^^California|Human|Orange County Public Health Lab|Chan-Zuckerberg Biohub|Kamm|USA

>Spike|hCoV-19/Belgium/regA-0803746/2020|2020-08-03|EPI\_ISL\_734894|Original|hCoV-19^^Wilrijk|Human|UZ Leuven|KU Leuven|Maes|Belgium

>Spike|hCoV-19/Wales/PHWC-4942F8/2020|2020-11-18|EPI\_ISL\_726098|Original|hCoV-19^^Wales|Human|Originating lab|COVID-19 Genomics UK (COG-UK) Consortium|Moore|United Kingdom

>Spike|hCoV-19/Kenya/C8565/2020|2020-05-18|EPI\_ISL\_568868|Original|hCoV-19^^Kilifi|Human|KEMRI-Wellcome Trust Research Programme/KEMRI-CGMR-C Kilifi|KEMRI-Wellcome Trust Research Programme/KEMRI-CGMR-C Kilifi|Githinji|Kenya

>Spike|hCoV-19/England/ALDP-BC7A39/2020|2020-11-23|EPI\_ISL\_721239|Original|hCoV-19^^England|Human|Lighthouse Lab in Alderley Park|Wellcome Sanger Institute for the COVID-19 Genomics UK (COG-UK) Consortium|Davies|United Kingdom

>Spike|hCoV-19/USA/AZ-TG376069/2020|2020-06-15|EPI\_ISL\_694610|Original|hCoV-19^^Arizona|Human|TGen North|TGen North|French|USA

>Spike|hCoV-19/USA/MI-UM-10036834498/2020|2020-11-07|EPI\_ISL\_728442|Original|hCoV-19^^Michigan|Human|University of Michigan Clinical Microbiology Laboratory|Lauring Lab|Valesano|USA

>Spike|hCoV-19/Scotland/QEUA-9DC9DC/2020|2020-09-22|EPI\_ISL\_601129|Original|hCoV-19^^Scotland|Human|Lighthouse Lab in Glasgow|Wellcome Sanger Institute for the COVID-19 Genomics UK (COG-UK) consortium|Davies|United Kingdom

>Spike|hCoV-19/England/MILK-9C1EF9/2020|2020-09-10|EPI\_ISL\_566558|Original|hCoV-19^^England|Human|Lighthouse Lab in Milton Keynes|Wellcome Sanger Institute for the COVID-19 Genomics UK (COG-UK) consortium|Davies|United Kingdom

>Spike|hCoV-19/Japan/PG-5201/2020|2020-08-00|EPI\_ISL\_690304|Original|hCoV-19^^Japan|Human|Pathogen Genomics Center|Pathogen Genomics Center|Sekizuka|Japan

>Spike|hCoV-19/England/QEUA-B2EE8F/2020|2020-11-03|EPI\_ISL\_659950|Original|hCoV-19^^England|Human|Lighthouse Lab in Glasgow|Wellcome Sanger Institute for the COVID-19 Genomics UK (COG-UK) Consortium|Davies|United Kingdom

>Spike|hCoV-19/England/ALDP-B24733/2020|2020-11-04|EPI\_ISL\_647094|Original|hCoV-19^^England|Human|Lighthouse Lab in Alderley Park|Wellcome Sanger Institute for the COVID-19 Genomics UK (COG-UK) Consortium|Davies|United Kingdom

>Spike|hCoV-19/England/QEUA-99868A/2020|2020-08-24|EPI\_ISL\_539965|Original|hCoV-19^^England|Human|Lighthouse Lab in Glasgow|Wellcome Sanger Institute for the COVID-19 Genomics UK (COG-UK) consortium|Davies|United Kingdom

>Spike|hCoV-19/USA/TX-HMH-MCoV-18636/2020|2020-11-20|EPI\_ISL\_784984|Original|hCoV-19^^Texas|Human|Houston Methodist Hospital|Houston Methodist Hospital|Long|USA

>Spike|hCoV-19/Oman/RESP-20-B-2847/2020|2020-04-24|EPI\_ISL\_518843|Original|hCoV-19^^Muscat|Human|Oman-National Influenza Center|Biotechnology & OMICs Laboratory|Al Mahruqi|Oman

>Spike|hCoV-19/Japan/PG-0532/2020|2020-04-00|EPI\_ISL\_480190|Original|hCoV-19^^Kanto|Human|Ota Health Center Welfare Section|Pathogen Genomics Center|Sekizuka|Japan

>Spike|hCoV-19/England/CAMB-1B3A94/2020|2020-05-27|EPI\_ISL\_461573|Original|hCoV-19^^England|Human|Department of Pathology|COVID-19 Genomics UK (COG-UK) Consortium|Meredit|United Kingdom

>Spike|hCoV-19/England/CAMB-83E56/2020|2020-04-27|EPI\_ISL\_438701|Original|hCoV-19^^England|Human|Department of Pathology|COVID-19 Genomics UK (COG-UK) Consortium|Meredit|United Kingdom

>Spike|hCoV-19/Wales/PHWC-2C11A/2020|2020-04-04|EPI\_ISL\_474277|Original|hCoV-19^^Wales|Human|Originating lab|COVID-19 Genomics UK (COG-UK) Consortium|Moore|United Kingdom

>Spike|hCoV-19/USA/VA-DCLS-0371/2020|2020-05-08|EPI\_ISL\_463127|Original|hCoV-19^^Virginia|Human|Virginia DCLS|Virginia DCLS|St. Jacques|USA

>Spike|hCoV-19/England/CAMB-1ABBAB/2020|2020-04-20|EPI\_ISL\_470266|Original|hCoV-19^^England|Human|Department of Pathology|Wellcome Sanger Institute for the COVID-19 Genomics UK (COG-UK) consortium|Davies|United Kingdom

>Spike|hCoV-19/England/ALDP-C3DE40/2020|2020-12-10|EPI\_ISL\_731095|Original|hCoV-19^^England|Human|Lighthouse Lab in Alderley Park|Wellcome Sanger Institute for the COVID-19 Genomics UK (COG-UK) Consortium|Davies|United Kingdom

>Spike|hCoV-19/USA/UT-02891/2020|2020-04-29|EPI\_ISL\_513683|Original|hCoV-19^^Utah|Human|Utah Public Health Laboratory|Utah Public Health Laboratory|Butz|USA

>Spike|hCoV-19/USA/AZ-TG569537/2020|2020-07-13|EPI\_ISL\_695611|Original|hCoV-19^^Arizona|Human|AZ SPHL|TGen North|French|USA

>Spike|hCoV-19/England/QEUEH-A332B9/2020|2020-10-05|EPI\_ISL\_628370|Original|hCoV-19^^England|Human|Virology Department|COVID-19 Genomics UK (COG-UK) Consortium|de Silva|United Kingdom

>Spike|hCoV-19/England/BRIS-18533FB/2020|2020-04-06|EPI\_ISL\_492435|Original|hCoV-19^^England|Human|PHE South West Regional Laboratory|Wellcome Sanger Institute for the COVID-19 Genomics UK (COG-UK) consortium|Davies|United Kingdom

>Spike|hCoV-19/USA/UT-UPHL-2009501/2020|2020-07-18|EPI\_ISL\_605185|Original|hCoV-19^^Utah|Human|Utah Public Health Laboratory|Utah Public Health Laboratory|Young|USA

>Spike|hCoV-19/England/QEUEH-B1158A/2020|2020-11-02|EPI\_ISL\_642364|Original|hCoV-19^^England|Human|Lighthouse Lab in Glasgow|Wellcome Sanger Institute for the COVID-19 Genomics UK (COG-UK) Consortium|Davies|United Kingdom

>Spike|hCoV-19/Malaysia/IMR-WI112/2020|2020-08-13|EPI\_ISL\_718271|Vero|hCoV-19^^Malaysia|Human|Institute for Medical Research|Institute for Medical Research|Suppiah|Malaysia

>Spike|hCoV-19/Denmark/DCGC-6640/2020|2020-10-12|EPI\_ISL\_619542|Original|hCoV-19^^Midtjylland|Human|Department of Virus and Microbiological Special Diagnostics|Albertsen lab|Michaelsen|Denmark

>Spike|hCoV-19/USA/OR-OHSU-2563/2020|2020-08-20|EPI\_ISL\_667253|Original|hCoV-19^^Oregon|Human|OHSU Lab Services Molecular Microbiology Lab|Oregon SARS-CoV-2 Genome Sequencing Center|O'Roak|USA

>Spike|hCoV-19/USA/MN-MDH-97/2020|2020-03-16|EPI\_ISL\_460077|Original|hCoV-19^^Minnesota|Human|Minnesota Department of Health|Minnesota Department of Health|Garfin|USA

>Spike|hCoV-19/England/ALDP-953A8F/2020|2020-06-08|EPI\_ISL\_553790|Original|hCoV-19^^England|Human|Lighthouse Lab in Alderley Park|Wellcome Sanger Institute for the COVID-19 Genomics UK (COG-UK) consortium|Davies|United Kingdom

>Spike|hCoV-19/USA/TX-HMH-MCoV-14350/2020|2020-10-07|EPI\_ISL\_787635|Original|hCoV-19^^Texas|Human|Houston Methodist Hospital|Houston Methodist Hospital|Long|USA

>Spike|hCoV-19/England/LEED-2A8721/2020|2020-03-29|EPI\_ISL\_539161|Original|hCoV-19^^England|Human|Leeds Teaching Hospitals NHS Trust and Public Health England|Wellcome Sanger Institute for the COVID-19 Genomics UK (COG-UK) consortium|Davies|United Kingdom

>Spike|hCoV-19/England/ALDP-B63B3C/2020|2020-11-08|EPI\_ISL\_656532|Original|hCoV-19^^England|Human|Lighthouse Lab in Alderley Park|Wellcome Sanger Institute for the COVID-19 Genomics UK (COG-UK) Consortium|Davies|United Kingdom

>Spike|hCoV-19/England/SHEF-CF8C9/2020|2020-03-25|EPI\_ISL\_442457|Original|hCoV-19^^England|Human|Virology Department|COVID-19 Genomics UK (COG-UK) Consortium|de Silva|United Kingdom

>Spike|hCoV-19/Luxembourg/LNS6652363/2020|2020-10-23|EPI\_ISL\_744445|Original|hCoV-19^^Luxembourg|Human|Laboratoire national de sant\u00e9|Laboratoire national de sant\u00e9|Wienecke-Baldacchino|Luxembourg

>Spike|hCoV-19/England/ALDP-9CCDF1/2020|2020-09-16|EPI\_ISL\_566253|Original|hCoV-19^^England|Human|Lighthouse Lab in Alderley Park|Wellcome Sanger Institute for the COVID-19 Genomics UK (COG-UK) consortium|Davies|United Kingdom

>Spike|hCoV-19/England/MILK-9E0717/2020|2020-09-20|EPI\_ISL\_601327|Original|hCoV-19^^England|Human|Lighthouse Lab in Milton Keynes|Wellcome Sanger Institute for the COVID-19 Genomics UK (COG-UK) consortium|Davies|United Kingdom

>Spike|hCoV-19/England/20144024204/2020|2020-03-26|EPI\_ISL\_423531|Original|hCoV-19^^England|Human|Respiratory Virus Unit|Respiratory Virus Unit|Platt|United Kingdom

>Spike|hCoV-19/Australia/VIC1067/2020|2020-04-04|EPI\_ISL\_430670|Original|hCoV-19^^Victoria|Human|Microbiological Diagnostic Unit Public Health Laboratory|Microbiological Diagnostic Unit Public Health Laboratory|Schultz|Australia

>Spike|hCoV-19/Wales/PHWC-2ED14/2020|2020-04-06|EPI\_ISL\_446143|Original|hCoV-19^^Wales|Human|Wales Specialist Virology Centre|Public Health Wales Microbiology Cardiff|Moore|United Kingdom

>Spike|hCoV-19/USA/MI-MDHHS-SC20105/2020|2020-03-28|EPI\_ISL\_436882|Original|hCoV-19^^Michigan|Human|Michigan Department of Health and Human Services|Michigan Department of Health and Human Services|Blankenship|USA

>Spike|hCoV-19/USA/ME-HETL-J0017/2020|2020-03-14|EPI\_ISL\_513430|Original|hCoV-19^^Maine|Human|Maine HETL|Tewhey Lab|Tewhey|USA

>Spike|hCoV-19/USA/TX-HMH-5366/2020|2020-06-23|EPI\_ISL\_544720|Original|hCoV-19^^Texas|Human|Houston Methodist Hospital|Houston Methodist Hospital|Long|USA

>Spike|hCoV-19/France/PAC-IHU-0135/2020|2020-03-14|EPI\_ISL\_569330|Original|hCoV-19^^Provence-Alpes-C\u00f4te-d\u00e0z|Human|MEPHI|MEPHI|Levasseur|France

>Spike|hCoV-19/England/ALDP-8FFDBA/2020|2020-06-24|EPI\_ISL\_557164|Original|hCoV-19^^England|Human|Lighthouse Lab in Alderley Park|Wellcome Sanger Institute for the COVID-19 Genomics UK (COG-UK) consortium|Davies|United Kingdom

>Spike|hCoV-19/USA/TX-HMH-MCoV-8201/2020|2020-07-07|EPI\_ISL\_784260|Original|hCoV-19^^Texas|Human|Houston Methodist Hospital|Houston Methodist Hospital|Long|USA

>Spike|hCoV-19/England/ALDP-A2EFC9/2020|2020-10-05|EPI\_ISL\_587055|Original|hCoV-19^^England|Human|Lighthouse Lab in Alderley Park|Wellcome Sanger Institute for the COVID-19 Genomics UK (COG-UK) consortium|Davies|United Kingdom

>Spike|hCoV-19/England/MILK-9AB4D5/2020|2020-08-31|EPI\_ISL\_551099|Original|hCoV-19^^England|Human|Lighthouse Lab in Milton Keynes|Wellcome Sanger Institute for the COVID-19 Genomics UK (COG-UK) consortium|Davies|United Kingdom

>Spike|hCoV-19/Denmark/DCGC-20041/2020|2020-12-07|EPI\_ISL\_747947|Original|hCoV-19^^Hovedstaden|Human|Department of Virus and Microbiological Special Diagnostics|Albertsen Lab|Michaelsen|Denmark

>Spike|hCoV-19/Scotland/CVR63/2020|2020-03-13|EPI\_ISL\_425791|Original|hCoV-19^^Scotland|Human|West of Scotland Specialist Virology Centre|COVID-19 Genomics UK (COG-UK) Consortium|Robertson|United Kingdom

>Spike|hCoV-19/England/CAMC-BC046F/2020|2020-11-22|EPI\_ISL\_705101|Original|hCoV-19^^England|Human|Lighthouse Lab in Cambridge|Wellcome Sanger Institute for the COVID-19 Genomics UK (COG-UK) Consortium|Davies|United Kingdom

>Spike|hCoV-19/Belgium/ULG-10268/2020|2020-07-19|EPI\_ISL\_515075|Original|hCoV-19^^Liege|Human|Department of Clinical Microbiology|GIGA Medical Genomics|Durkin|Belgium

>Spike|hCoV-19/India/GJ-GBRC277b/2020|2020-06-13|EPI\_ISL\_483879|Original|hCoV-19^^Gujarat|Human|Department of Microbiology|Gujarat Biotechnology Research Centre|Joshi|India

>Spike|hCoV-19/Canada/BC\_12793935/2020|2020-04-00|EPI\_ISL\_467338|Original|hCoV-19^^British Columbia|Human|BCCDC Public Health Laboratory|BCCDC Public Health Laboratory|Harrigan|Canada

>Spike|hCoV-19/England/MILK-63353C/2020|2020-07-04|EPI\_ISL\_556165|Original|hCoV-19^^England|Human|Lighthouse Lab in Milton Keynes|Wellcome Sanger Institute for the COVID-19 Genomics UK (COG-UK) consortium|Davies|United Kingdom

>Spike|hCoV-19/USA/MD-HP12049/2020|2020-11-05|EPI\_ISL\_791381|Original|hCoV-19^^Maryland|Human|Johns Hopkins Hospital Department of Pathology|Johns Hopkins Hospital Department of Pathology|Morris|USA

>Spike|hCoV-19/USA/VA-DCLS-1076/2020|2020-06-10|EPI\_ISL\_528674|Original|hCoV-19^^Virginia|Human|Virginia Division of Consolidated Laboratory Services (DCLS)|Virginia Division of Consolidated Laboratory Services (DCLS)|St. Jacques|USA

>Spike|hCoV-19/England/BRIS-125268/2020|2020-03-26|EPI\_ISL\_444012|Original|hCoV-19^^England|Human|PHE South West Regional Laboratory|Wellcome Sanger Institute for the COVID-19 Genomics UK (COG-UK) consortium|Amato|United Kingdom

>Spike|hCoV-19/England/ALDP-9C4F7B/2020|2020-09-10|EPI\_ISL\_567858|Original|hCoV-19^^England|Human|Lighthouse Lab in Alderley Park|Wellcome Sanger Institute for the COVID-19 Genomics UK (COG-UK) consortium|Davies|United Kingdom

>Spike|hCoV-19/Australia/VIC13834/2020|2020-09-14|EPI\_ISL\_563849|Original|hCoV-19^^Victoria|Human|Microbiological Diagnostic Unit - Public Health Laboratory (MDU-PHL)|MDU-PHL|Schultz|Australia

>Spike|hCoV-19/Denmark/DCGC-16033/2020|2020-11-23|EPI\_ISL\_714549|Original|hCoV-19^^Hovedstaden|Human|Department of Virus and Microbiological Special Diagnostics|Albertsen Lab|Michaelsen|Denmark

>Spike|hCoV-19/England/NORT-2840A8/2020|2020-04-03|EPI\_ISL\_472264|Original|hCoV-19^^England|Human|Northumbria University / South Tees Hospitals NHS Foundation Trust / North Cumbria Integrated Care NHS Foundation Trust / North Tees and Hartlepool NHS Foundation Trust / Newcastle Hospitals NHS Foundation Trust|COVID-19 Genomics UK (COG-UK) Consortium|Bashton|United Kingdom

>Spike|hCoV-19/Wales/PHWC-496CAD/2020|2020-11-23|EPI\_ISL\_726711|Original|hCoV-19^^Wales|Human|Originating lab|COVID-19 Genomics UK (COG-UK) Consortium|Moore|United Kingdom

>Spike|hCoV-19/England/QEUA-A0B0B0/2020|2020-10-01|EPI\_ISL\_599319|Original|hCoV-19^^England|Human|Lighthouse Lab in Glasgow|Wellcome Sanger Institute for the COVID-19 Genomics UK (COG-UK) consortium|Davies|United Kingdom

>Spike|hCoV-19/India/TG-CCMB-M780/2020|2020-06-12|EPI\_ISL\_495240|Original|hCoV-19^^Telangana|Human|CSIR-Centre for Cellular and Molecular Biology|CSIR-Centre for Cellular and Molecular Biology|Banu|India

>Spike|hCoV-19/USA/CA-CZB-6732/2020|2020-08-19|EPI\_ISL\_582990|Original|hCoV-19^^California|Human|Orange County Public Health Lab|Chan-Zuckerberg Biohub|Bhatt|USA

>Spike|hCoV-19/England/QEUA-B6C896/2020|2020-11-11|EPI\_ISL\_655205|Original|hCoV-19^^England|Human|Lighthouse Lab in Glasgow|Wellcome Sanger Institute for the COVID-19 Genomics UK (COG-UK) Consortium|Davies|United Kingdom

>Spike|hCoV-19/Scotland/QEUA-B9FCCB/2020|2020-11-18|EPI\_ISL\_757283|Original|hCoV-19^^Scotland|Human|Lighthouse Lab in Glasgow|Wellcome Sanger Institute for the COVID-19 Genomics UK (COG-UK) Consortium|Davies|United Kingdom

>Spike|hCoV-19/Australia/VIC3351/2020|2020-07-08|EPI\_ISL\_521030|Original|hCoV-19^^Victoria|Human|Microbiological Diagnostic Unit - Public Health Laboratory (MDU-PHL)|MDU-PHL|Schultz|Australia

>Spike|hCoV-19/USA/TX-HMH-MCoV-11331/2020|2020-09-03|EPI\_ISL\_789768|Original|hCoV-19^^Texas|Human|Houston Methodist Hospital|Houston Methodist Hospital|Long|USA

>Spike|hCoV-19/Wales/MILK-B02CA5/2020|2020-10-24|EPI\_ISL\_647812|Original|hCoV-19^^Wales|Human|Lighthouse Lab in Milton Keynes|Wellcome Sanger Institute for the COVID-19 Genomics UK (COG-UK) Consortium|Davies|United Kingdom

>Spike|hCoV-19/Australia/VIC12211/2020|2020-07-27|EPI\_ISL\_591931|Original|hCoV-19^^Victoria|Human|Microbiological Diagnostic Unit - Public Health Laboratory (MDU-PHL)|MDU-PHL|Schultz|Australia

>Spike|hCoV-19/USA/WA-S1884/2020|2020-05-28|EPI\_ISL\_496310|Original|hCoV-19^^Washington|Human|Washington State Department of Health|Seattle Flu Study|Lee|USA

>Spike|hCoV-19/England/ALDP-C4862C/2020|2020-12-13|EPI\_ISL\_736500|Original|hCoV-19^^England|Human|Lighthouse Lab in Alderley Park|Wellcome Sanger Institute for the COVID-19 Genomics UK (COG-UK) Consortium|Davies|United Kingdom

>Spike|hCoV-19/Scotland/GCVR-173C9A/2020|2020-04-06|EPI\_ISL\_459153|Original|hCoV-19^^Scotland|Human|NHSGGC West of Scotland Specialist Virology Centre / MRC - University of Glasgow Centre for Virus Research|Wellcome Sanger Institute for the COVID-19 Genomics UK (COG-UK) consortium|Davies|United Kingdom

>Spike|hCoV-19/Wales/PHWC-15FD64/2020|2020-04-25|EPI\_ISL\_472851|Original|hCoV-19^^Wales|Human|Wales Specialist Virology Centre Sequencing lab|COVID-19 Genomics UK (COG-UK) Consortium|Moore|United Kingdom

>Spike|hCoV-19/England/CAMC-C71D16/2020|2020-12-15|EPI\_ISL\_768981|Original|hCoV-19^^England|Human|Lighthouse Lab in Cambridge|Wellcome Sanger Institute for the COVID-19 Genomics UK (COG-UK) Consortium|Davies|United Kingdom

>Spike|hCoV-19/USA/CA-ALSR-4529/2020|2020-10-21|EPI\_ISL\_666989|Original|hCoV-19^^California|Human|San Diego County Public Health Laboratory|Andersen lab at Scripps Research|Gangavarapu|USA

>Spike|hCoV-19/England/NORT-282C79/2020|2020-03-28|EPI\_ISL\_488686|Original|hCoV-19^^England|Human|NU-OMICS DNA Sequencing research facility|Wellcome Sanger Institute for the COVID-19 Genomics UK (COG-UK) consortium|Davies|United Kingdom

>Spike|hCoV-19/Gibraltar/204841768/2020|2020-00-00|EPI\_ISL\_671333|Original|hCoV-19^^Gibraltar|Human|Microbiology|Respiratory Virus Unit|Platt|Gibraltar

>Spike|hCoV-19/England/LIVE-DB4244/2020|2020-10-20|EPI\_ISL\_650710|Original|hCoV-19^^England|Human|Liverpool Clinical Laboratories|COVID-19 Genomics UK (COG-UK) Consortium|Haldenby|United Kingdom

>Spike|hCoV-19/England/LEED-2A9A27/2020|2020-04-22|EPI\_ISL\_538808|Original|hCoV-19^^England|Human|Leeds Teaching Hospitals NHS Trust and Public Health England|Wellcome Sanger Institute for the COVID-19 Genomics UK (COG-UK) consortium|Davies|United Kingdom

>Spike|hCoV-19/USA/MN-MDH-2020/2020|2020-10-30|EPI\_ISL\_654701|Original|hCoV-19^^Minnesota|Human|Minnesota Department of Health|Minnesota Department of Health|Lorentz|USA

>Spike|hCoV-19/Belgium/ULG-10033/2020|2020-03-31|EPI\_ISL\_421207|Original|hCoV-19^^Li\u00e8ge|Human|Department of Clinical Microbiology|GIGA Medical Genomics|Durkin|Belgium

>Spike|hCoV-19/England/ALDP-9BEA82/2020|2020-09-09|EPI\_ISL\_568053|Original|hCoV-19^^England|Human|Lighthouse Lab in Alderley Park|Wellcome Sanger Institute for the COVID-19 Genomics UK (COG-UK) consortium|Davies|United Kingdom

>Spike|hCoV-19/Netherlands/ZH-RIVM-20373/2020|2020-12-11|EPI\_ISL\_728593|Original|hCoV-19^^Zuid-holland|Human|Dutch COVID-19 response team|National Institute for Public Health and the Environment (RIVM)|Meijer|Netherlands

>Spike|hCoV-19/England/ALDP-B75D6E/2020|2020-11-12|EPI\_ISL\_723701|Original|hCoV-19^^England|Human|Oxford Viromics|COVID-19 Genomics UK (COG-UK) Consortium|Golubchik|United Kingdom

>Spike|hCoV-19/Denmark/DCGC-17492/2020|2020-12-14|EPI\_ISL\_751023|Original|hCoV-19^^Midtjylland|Human|Department of Virus and Microbiological Special Diagnostics|Albertsen Lab|Michaelsen|Denmark

>Spike|hCoV-19/India/MH-GA75/2020|2020-06-18|EPI\_ISL\_508269|Original|hCoV-19^^Maharashtra|Human|Government Medical College|National Institute of Biomedical Genomics|Maitra|India

>Spike|hCoV-19/USA/TX-HMH-MCoV-14620/2020|2020-10-09|EPI\_ISL\_787905|Original|hCoV-19^^Texas|Human|Houston Methodist Hospital|Houston Methodist Hospital|Long|USA

>Spike|hCoV-19/England/QEUH-B31C9E/2020|2020-11-04|EPI\_ISL\_646219|Original|hCoV-19^^England|Human|Lighthouse Lab in Glasgow|Wellcome Sanger Institute for the COVID-19 Genomics UK (COG-UK) Consortium|Davies|United Kingdom

>Spike|hCoV-19/Japan/PG-2378/2020|2020-05-00|EPI\_ISL\_685983|Original|hCoV-19^^Japan|Human|Tokyo Metropolitan Institute of Public Health|Pathogen Genomics Center|Sekizuka|Japan

>Spike|hCoV-19/England/LIVE-DB4E6E/2020|2020-10-23|EPI\_ISL\_651149|Original|hCoV-19^^England|Human|Liverpool Clinical Laboratories|COVID-19 Genomics UK (COG-UK) Consortium|Haldenby|United Kingdom

>Spike|hCoV-19/England/QEUH-C3277D/2020|2020-12-11|EPI\_ISL\_782547|Original|hCoV-19^^England|Human|Lighthouse Lab in Glasgow|Wellcome Sanger Institute for the COVID-19 Genomics UK (COG-UK) Consortium|Davies|United Kingdom

>Spike|hCoV-19/South Africa/KRISP-K002215/2020|2020-07-30|EPI\_ISL\_515612|Original|hCoV-19^^KwaZulu-Natal|Human|NHLS-IALCH|KRISP|de Oliveira|South Africa

>Spike|hCoV-19/England/CAMB-7A827/2020|2020-04-02|EPI\_ISL\_440584|Original|hCoV-19^^England|Human|Department of Pathology|Wellcome Sanger Institute for the COVID-19 Genomics UK (COG-UK) consortium|Amato|United Kingdom

>Spike|hCoV-19/England/CAMB-76CD4/2020|2020-03-30|EPI\_ISL\_438368|Original|hCoV-19^^England|Human|Department of Pathology|Wellcome Sanger Institute for the COVID-19 Genomics UK (COG-UK) consortium|Amato|United Kingdom

>Spike|hCoV-19/England/BRIS-12A1B1/2020|2020-04-16|EPI\_ISL\_458457|Original|hCoV-19^^England|Human|PHE South West Regional Laboratory|Wellcome Sanger Institute for the COVID-19 Genomics UK (COG-UK) consortium|Davies|United Kingdom

>Spike|hCoV-19/England/MILK-A7A0E9/2020|2020-10-15|EPI\_ISL\_606853|Original|hCoV-19^^England|Human|Lighthouse Lab in Milton Keynes|Wellcome Sanger Institute for the COVID-19 Genomics UK (COG-UK) consortium|Davies|United Kingdom

>Spike|hCoV-19/France/ARA-SC106/2020|2020-03-14|EPI\_ISL\_666686|Original|hCoV-19^^Auvergne-Rh\u00f4ne-Alpes|Human|Centre hospitalier M\u00e9tropole Savoie|CNR Virus des Infections Respiratoires - France SUD|Bal|France

>Spike|hCoV-19/USA/VA-DCLS-0678/2020|2020-04-18|EPI\_ISL\_500841|Original|hCoV-19^^Virginia|Human|Virginia DCLS|Virginia DCLS|St. Jacques|USA

>Spike|hCoV-19/Australia/NSW28/2020|2020-03-08|EPI\_ISL\_417391|Original|hCoV-19^^New South Wales|Human|Centre for Infectious Diseases and Microbiology Public Health|NSW Health Pathology - Institute of Clinical Pathology and Medical Research; Westmead Hospital; University of Sydney|Eden|Australia

>Spike|hCoV-19/Wales/PHWC-49E1E2/2020|2020-12-07|EPI\_ISL\_742968|Original|hCoV-19^^Wales|Human|Wales Specialist Virology Centre Sequencing lab|COVID-19 Genomics UK (COG-UK) Consortium|Moore|United Kingdom

>Spike|hCoV-19/Switzerland/AG-ETHZ-280191/2020|2020-09-09|EPI\_ISL\_560427|Original|hCoV-19^^Aargau|Human|Viollier AG|Department of Biosystems Science and Engineering|Nadeau|Switzerland

>Spike|hCoV-19/Japan/PG-5996/2020|2020-07-00|EPI\_ISL\_689109|Original|hCoV-19^^Japan|Human|Pathogen Genomics Center|Pathogen Genomics Center|Sekizuka|Japan

>Spike|hCoV-19/England/MILK-AB7C46/2020|2020-10-21|EPI\_ISL\_623738|Original|hCoV-19^^England|Human|Lighthouse Lab in Milton Keynes|Wellcome Sanger Institute for the COVID-19 Genomics UK (COG-UK) consortium|Davies|United Kingdom

>Spike|hCoV-19/Switzerland/BE-ETHZ-100377/2020|2020-03-20|EPI\_ISL\_574928|Original|hCoV-19^^Bern|Human|Viollier AG|Department of Biosystems Science and Engineering|Nadeau|Switzerland

>Spike|hCoV-19/Australia/VIC3202/2020|2020-07-04|EPI\_ISL\_520888|Original|hCoV-19^^Victoria|Human|Victorian Infectious Diseases Reference Laboratory (VIDRL)|VIDRL and MDU-PHL|Schultz|Australia

>Spike|hCoV-19/Australia/VIC317/2020|2020-03-24|EPI\_ISL\_420008|Original|hCoV-19^^Victoria|Human|Microbiological Diagnostic Unit Public Health Laboratory|Microbiological Diagnostic Unit Public Health Laboratory|Schultz|Australia

>Spike|hCoV-19/England/ALDP-B77300/2020|2020-11-12|EPI\_ISL\_664936|Original|hCoV-19^^England|Human|Quadram Institute Bioscience|COVID-19 Genomics UK (COG-UK) Consortium|Alikhan|United Kingdom

>Spike|hCoV-19/England/QEUA-A9F9D4/2020|2020-10-20|EPI\_ISL\_650643|Original|hCoV-19^^England|Human|University of Exeter|COVID-19 Genomics UK (COG-UK) Consortium|Temperton|United Kingdom

>Spike|hCoV-19/USA/TX-HMH-MCoV-10234/2020|2020-07-07|EPI\_ISL\_789383|Original|hCoV-19^^Texas|Human|Houston Methodist Hospital|Houston Methodist Hospital|Long|USA

>Spike|hCoV-19/England/QEUA-B67B29/2020|2020-11-11|EPI\_ISL\_661574|Original|hCoV-19^^England|Human|Lighthouse Lab in Glasgow|Wellcome Sanger Institute for the COVID-19 Genomics UK (COG-UK) Consortium|Davies|United Kingdom

>Spike|hCoV-19/England/210100368/2021|2021-01-00|EPI\_ISL\_791250|Original|hCoV-19^^England|Human|Respiratory Virus Unit|COVID-19 Genomics UK (COG-UK) Consortium|Platt|United Kingdom

>Spike|hCoV-19/England/ALDP-B27378/2020|2020-11-04|EPI\_ISL\_664639|Original|hCoV-19^^England|Human|Northumbria University / South Tees Hospitals NHS Foundation Trust / North Cumbria Integrated Care NHS Foundation Trust / North Tees and Hartlepool NHS Foundation Trust / Newcastle Hospitals NHS Foundation Trust|COVID-19 Genomics UK (COG-UK) Consortium|Bashton|United Kingdom

>Spike|hCoV-19/England/QEUA-A0C51A/2020|2020-10-01|EPI\_ISL\_584983|Original|hCoV-19^^England|Human|Quadram Institute Bioscience|COVID-19 Genomics UK (COG-UK) Consortium|Alikhan|United Kingdom

>Spike|hCoV-19/Japan/PG-0873/2020|2020-00-00|EPI\_ISL\_684483|Original|hCoV-19^^Japan|Human|Fukuoka Institute of Health and Environmental Sciences|Pathogen Genomics Center|Sekizuka|Japan

>Spike|hCoV-19/USA/MA-MGH-00766/2020|2020-04-11|EPI\_ISL\_791755|Original|hCoV-19^^Massachusetts|Human|Massachusetts General Hospital|Infectious Disease Program|Park|USA

>Spike|hCoV-19/Luxembourg/LNS7186551/2020|2020-10-31|EPI\_ISL\_744529|Original|hCoV-19^^Luxembourg|Human|Laboratoire national de sant\u00e9|Laboratoire national de sant\u00e9|Wienecke-Baldacchino|Luxembourg

>Spike|hCoV-19/England/QEUA-BCBB32/2020|2020-11-27|EPI\_ISL\_704569|Original|hCoV-19^^England|Human|Lighthouse Lab in Glasgow|Wellcome Sanger Institute for the COVID-19 Genomics UK (COG-UK) Consortium|Davies|United Kingdom

>Spike|hCoV-19/Scotland/EDB6726/2020|2020-04-07|EPI\_ISL\_491607|Original|hCoV-19^^Scotland|Human|Virology Department|Wellcome Sanger Institute for the COVID-19 Genomics UK (COG-UK) consortium|Davies|United Kingdom

>Spike|hCoV-19/England/ALDP-95207F/2020|2020-06-09|EPI\_ISL\_553641|Original|hCoV-19^^England|Human|Lighthouse Lab in Alderley Park|Wellcome Sanger Institute for the COVID-19 Genomics UK (COG-UK) consortium|Davies|United Kingdom

>Spike|hCoV-19/England/CAMB-1BB72C/2020|2020-11-20|EPI\_ISL\_664381|Original|hCoV-19^^England|Human|Department of Pathology|COVID-19 Genomics UK (COG-UK) Consortium|Goodfellow|United Kingdom

>Spike|hCoV-19/England/LIVE-A5E03/2020|2020-03-21|EPI\_ISL\_499625|Original|hCoV-19^^England|Human|Liverpool Clinical Laboratories|COVID-19 Genomics UK (COG-UK) Consortium|Haldenby|United Kingdom

>Spike|hCoV-19/Brazil/RJ-2369/2020|2020-04-20|EPI\_ISL\_541359|Original|hCoV-19^^Rio de Janeiro|Human|Laboratory of Respiratory Viruses and Measles|Laboratory of Respiratory Viruses and Measles|Silva|Brazil

>Spike|hCoV-19/England/SHEF-CEA3D/2020|2020-10-30|EPI\_ISL\_637585|Original|hCoV-19^^England|Human|Virology Department|COVID-19 Genomics UK (COG-UK) Consortium|de Silva|United Kingdom

>Spike|hCoV-19/Uruguay/TYT-M94/2020|2020-06-26|EPI\_ISL\_750171|Original|hCoV-19^^Treinta y Tres|Human|Sanatorio Americano|Institut Pasteur de Montevideo|Spangenberg|Uruguay

>Spike|hCoV-19/England/C200045642/2020|2020-11-10|EPI\_ISL\_664061|Original|hCoV-19^^England|Human|Respiratory Virus Unit|COVID-19 Genomics UK (COG-UK) Consortium|Platt|United Kingdom

>Spike|hCoV-19/USA/MI-MDHHS-SC22326/2020|2020-11-10|EPI\_ISL\_708302|Original|hCoV-19^^Michigan|Human|Michigan Department of Health and Human Services|Michigan Department of Health and Human Services|Jacob|USA

>Spike|hCoV-19/Scotland/QEUA-9DAB32/2020|2020-09-22|EPI\_ISL\_601116|Original|hCoV-19^^Scotland|Human|Lighthouse Lab in Glasgow|Wellcome Sanger Institute for the COVID-19 Genomics UK (COG-UK) consortium|Davies|United Kingdom

>Spike|hCoV-19/Luxembourg/LNS3693395/2020|2020-07-23|EPI\_ISL\_740360|Original|hCoV-19^^Luxembourg|Human|Laboratoire national de sant\u00e9|Laboratoire national de sant\u00e9|Wienecke-Baldacchino|Luxembourg

>Spike|hCoV-19/India/KA-NCDC-4055/2020|2020-04-10|EPI\_ISL\_436447|Original|hCoV-19^^Karnataka|Human|National Centre for Disease control (NCDC)|NCDC/CSIR-IGIB|Singh|India

>Spike|hCoV-19/England/CAMB-751D6/2020|2020-03-19|EPI\_ISL\_440374|Original|hCoV-19^^England|Human|Department of Pathology|Wellcome Sanger Institute for the COVID-19 Genomics UK (COG-UK) consortium|Amato|United Kingdom

>Spike|hCoV-19/Peru/LIM-UPCH-0149/2020|2020-08-27|EPI\_ISL\_568543|Original|hCoV-19^^Lima|Human|Laboratorio de Referencia Nacional de Virus Respiratorios|Laboratorio de Gen\u00f3mica Microbiana|Tsukayama|Peru

>Spike|hCoV-19/England/QEUA-BCBA26/2020|2020-11-27|EPI\_ISL\_703981|Original|hCoV-19^^England|Human|Lighthouse Lab in Glasgow|Wellcome Sanger Institute for the COVID-19 Genomics UK (COG-UK) Consortium|Davies|United Kingdom



>Spike|hCoV-19/England/ALDP-522B8A/2020|2020-06-02|EPI\_ISL\_559091|Original|hCoV-19^^England|Human|Lighthouse Lab in Alderley Park|Wellcome Sanger Institute for the COVID-19 Genomics UK (COG-UK) consortium|Davies|United Kingdom

>Spike|hCoV-19/England/205160470/2020|2020-12-16|EPI\_ISL\_766419|Original|hCoV-19^^England|Human|Respiratory Virus Unit|COVID-19 Genomics UK (COG-UK) Consortium|Platt|United Kingdom

>Spike|hCoV-19/Wales/QEUA-A203AD/2020|2020-10-01|EPI\_ISL\_599051|Original|hCoV-19^^Wales|Human|Lighthouse Lab in Glasgow|Wellcome Sanger Institute for the COVID-19 Genomics UK (COG-UK) consortium|Davies|United Kingdom

>Spike|hCoV-19/Denmark/DCGC-5018/2020|2020-09-14|EPI\_ISL\_621792|Original|hCoV-19^^Hovedstaden|Human|Department of Virus and Microbiological Special Diagnostics|Albertsen lab|Michaelsen|Denmark

>Spike|hCoV-19/Scotland/QEUA-AF5DFE/2020|2020-10-30|EPI\_ISL\_676482|Original|hCoV-19^^Scotland|Human|Lighthouse Lab in Glasgow|Wellcome Sanger Institute for the COVID-19 Genomics UK (COG-UK) Consortium|Davies|United Kingdom

>Spike|hCoV-19/USA/WI-GMF-22828/2020|2020-09-28|EPI\_ISL\_660861|Original|hCoV-19^^Wisconsin|Human|Gundersen Molecular Diagnostics Laboratory|Kabara Cancer Research Institute|Kenny|USA

>Spike|hCoV-19/Japan/PG-3384/2020|2020-04-00|EPI\_ISL\_691499|Original|hCoV-19^^Japan|Human|Pathogen Genomics Center|Pathogen Genomics Center|Sekizuka|Japan

>Spike|hCoV-19/Portugal/PT1565/2020|2020-06-27|EPI\_ISL\_693575|Original|hCoV-19^^Portugal|Human|Instituto Nacional de Saude (INSA)|Instituto Nacional de Saude (INSA)|Borges|Portugal

>Spike|hCoV-19/Australia/VIC5909/2020|2020-07-20|EPI\_ISL\_518688|Original|hCoV-19^^Victoria|Human|Microbiological Diagnostic Unit - Public Health Laboratory (MDU-PHL)|MDU-PHL|Schultz|Australia

>Spike|hCoV-19/USA/AZ-TG276770/2020|2020-04-17|EPI\_ISL\_694131|Original|hCoV-19^^Arizona|Human|AZ SPHL|TGen North|French|USA

>Spike|hCoV-19/USA/LA-EVTL346/2020|2020-05-25|EPI\_ISL\_578752|Original|hCoV-19^^Louisiana|Human|LSUHS Emerging Viral Threat Laboratory|Microbial Genome Sequencing Center|Kamil|USA

>Spike|hCoV-19/USA/NY-PV09493/2020|2020-03-20|EPI\_ISL\_450165|Original|hCoV-19^^New York|Human|MSSS Clinical Microbiology Laboratories|MSSS Pathogen Surveillance Program|van Bakel|USA

>Spike|hCoV-19/England/ALDP-A2E293/2020|2020-10-06|EPI\_ISL\_586929|Original|hCoV-19^^England|Human|Lighthouse Lab in Alderley Park|Wellcome Sanger Institute for the COVID-19 Genomics UK (COG-UK) consortium|Davies|United Kingdom

>Spike|hCoV-19/Luxembourg/LNS9266699/2020|2020-11-19|EPI\_ISL\_744880|Original|hCoV-19^^Luxembourg|Human|Laboratoire national de sant\u00e9|Laboratoire national de sant\u00e9|Wienecke-Baldacchino|Luxembourg

>Spike|hCoV-19/Japan/PG-6664/2020|2020-07-00|EPI\_ISL\_687775|Original|hCoV-19^^Japan|Human|Pathogen Genomics Center|Pathogen Genomics Center|Sekizuka|Japan

>Spike|hCoV-19/USA/DE-DHSS-F956501/2020|2020-05-27|EPI\_ISL\_693695|Original|hCoV-19^^Delaware|Human|Delaware Public Health Laboratory|Delaware Public Health Laboratory|Bajwa|USA

>Spike|hCoV-19/USA/WI-UW-1746/2020|2020-09-17|EPI\_ISL\_605619|Original|hCoV-19^^Wisconsin|Human|University of Wisconsin-Madison AIDS Vaccine Research Laboratories|University of Wisconsin-Madison AIDS Vaccine Research Laboratories|Baczenas|USA

>Spike|hCoV-19/England/QEUA-B0F006/2020|2020-11-02|EPI\_ISL\_641648|Original|hCoV-19^^England|Human|Lighthouse Lab in Glasgow|Wellcome Sanger Institute for the COVID-19 Genomics UK (COG-UK) Consortium|Davies|United Kingdom

>Spike|hCoV-19/USA/MI-MDHHS-SC20056/2020|2020-03-21|EPI\_ISL\_437143|Original|hCoV-19^^Michigan|Human|Michigan Department of Health and Human Services|Michigan Department of Health and Human Services|Blankenship|USA

>Spike|hCoV-19/Denmark/DCGC-3985/2020|2020-09-14|EPI\_ISL\_615755|Original|hCoV-19^^Nordjylland|Human|Department of Virus and Microbiological Special Diagnostics|Albertsen lab|Michaelsen|Denmark

>Spike|hCoV-19/USA/CA-CZB-3733/2020|2020-07-21|EPI\_ISL\_548464|Original|hCoV-19^^California|Human|Orange County Public Health Laboratory|Chan-Zuckerberg Biohub|Bhatt|USA

>Spike|hCoV-19/Ecuador/UEES-17/2020|2020-00-00|EPI\_ISL\_671991|Original|hCoV-19^^Ecuador|Human|UEES BioLab|Omics Sciences Laboratory|Fernandez Cadena|Ecuador

>Spike|hCoV-19/Canada/QC-LSPQ-L00243746/2020|2020-03-30|EPI\_ISL\_536375|Original|hCoV-19^^Quebec|Human|H\u00f4pital Pierre-Boucher|Laboratoire de sant\u00e9 publique du Qu\u00e9bec|Moreira|Canada

>Spike|hCoV-19/England/LIVE-DC80DA/2020|2020-11-16|EPI\_ISL\_702980|Original|hCoV-19^^England|Human|Liverpool Clinical Laboratories|COVID-19 Genomics UK (COG-UK) Consortium|Haldenby|United Kingdom

>Spike|hCoV-19/Wales/PHWC-166D6A/2020|2020-06-27|EPI\_ISL\_494109|Original|hCoV-19^^Wales|Human|Originating lab|COVID-19 Genomics UK (COG-UK) Consortium|Moore|United Kingdom

>Spike|hCoV-19/Wales/PHWC-496C25/2020|2020-11-24|EPI\_ISL\_726704|Original|hCoV-19^^Wales|Human|Originating lab|COVID-19 Genomics UK (COG-UK) Consortium|Moore|United Kingdom

>Spike|hCoV-19/USA/UT-04117/2020|2020-05-12|EPI\_ISL\_487248|Original|hCoV-19^^Utah|Human|Utah Public Health Laboratory|Utah Public Health Laboratory|Butz|USA

>Spike|hCoV-19/Japan/PG-7672/2020|2020-08-00|EPI\_ISL\_686774|Original|hCoV-19^^Japan|Human|Chiba Prefectural Institute of Public Health|Pathogen Genomics Center|Sekizuka|Japan

>Spike|hCoV-19/Israel/CVL-n26456/2020|2020-07-21|EPI\_ISL\_514303|Original|hCoV-19^^Jerusalem District|Human|Israel Central Virology laboratory|Israel Central Virology laboratory|Zuckerman|Israel

>Spike|hCoV-19/Denmark/DCGC-18435/2020|2020-12-07|EPI\_ISL\_749158|Original|hCoV-19^^Sjaelland|Human|Department of Virus and Microbiological Special Diagnostics|Albertsen Lab|Michaelsen|Denmark

>Spike|hCoV-19/Japan/PG-3277/2020|2020-07-00|EPI\_ISL\_691392|Original|hCoV-19^^Japan|Human|Pathogen Genomics Center|Pathogen Genomics Center|Sekizuka|Japan

>Spike|hCoV-19/Wales/PHWC-15CD94/2020|2020-04-21|EPI\_ISL\_472618|Original|hCoV-19^^Wales|Human|Wales Specialist Virology Centre Sequencing lab|COVID-19 Genomics UK (COG-UK) Consortium|Moore|United Kingdom

>Spike|hCoV-19/Denmark/DCGC-21400/2020|2020-12-21|EPI\_ISL\_758146|Original|hCoV-19^^Hovedstaden|Human|Department of Virus and Microbiological Special Diagnostics|Albertsen Lab|Michaelsen|Denmark

>Spike|hCoV-19/England/QEUEH-AAF29A/2020|2020-10-20|EPI\_ISL\_630731|Original|hCoV-19^^England|Human|Lighthouse Lab in Glasgow|Wellcome Sanger Institute for the COVID-19 Genomics UK (COG-UK) consortium|Davies|United Kingdom

>Spike|hCoV-19/England/20189140604/2020|2020-05-01|EPI\_ISL\_465548|Original|hCoV-19^^England|Human|Respiratory Virus Unit|Respiratory Virus Unit|Platt|United Kingdom

>Spike|hCoV-19/Indonesia/JK-NIHRD-PME1264/2020|2020-06-05|EPI\_ISL\_747234|Original|hCoV-19^^Jakarta|Human|National Institute of Health Research and Development|National Institute of Health Research and Development|Setiawati|Indonesia

>Spike|hCoV-19/England/ALDP-BCA5BD/2020|2020-11-23|EPI\_ISL\_703265|Original|hCoV-19^^England|Human|Lighthouse Lab in Alderley Park|Wellcome Sanger Institute for the COVID-19 Genomics UK (COG-UK) Consortium|Davies|United Kingdom

>Spike|hCoV-19/Netherlands/UT-EMC-153/2020|2020-11-15|EPI\_ISL\_722646|Original|hCoV-19^^Utrecht|Human|Dutch COVID-19 response team|Erasmus Medical Center|Oude Munnink|Netherlands

>Spike|hCoV-19/England/QEUEH-9AE092/2020|2020-09-02|EPI\_ISL\_637590|Original|hCoV-19^^England|Human|Department of Pathology|COVID-19 Genomics UK (COG-UK) Consortium|Goodfellow|United Kingdom

>Spike|hCoV-19/Norway/4696/2020|2020-10-14|EPI\_ISL\_635179|Original|hCoV-19^^Troms og Finnmark|Human|University Hospital of Northern Norway|Norwegian Institute of Public Health|Vollan|Norway

>Spike|hCoV-19/Canada/BC\_04701167/2020|2020-05-00|EPI\_ISL\_477050|Original|hCoV-19^^British Columbia|Human|BCCDC Public Health Laboratory|BCCDC Public Health Laboratory|Harrigan|Canada

>Spike|hCoV-19/USA/UT-UPHL-201122069/2020|2020-04-04|EPI\_ISL\_623175|Original|hCoV-19^^Utah|Human|Utah Public Health Laboratory|Utah Public Health Laboratory|Young|USA

>Spike|hCoV-19/USA/LA-EVTL1394/2020|2020-12-11|EPI\_ISL\_779060|Original|hCoV-19^^Louisiana|Human|LSUHS Emerging Viral Threat Laboratory|Microbial Genome Sequencing Center|Kamil|USA

>Spike|hCoV-19/Japan/PG-2172/2020|2020-05-00|EPI\_ISL\_685777|Original|hCoV-19^^Japan|Human|Pathogen Genomics Center|Pathogen Genomics Center|Sekizuka|Japan

>Spike|hCoV-19/Wales/PHWC-4954A6/2020|2020-11-22|EPI\_ISL\_726352|Original|hCoV-19^^Wales|Human|Originating lab|COVID-19 Genomics UK (COG-UK) Consortium|Moore|United Kingdom

>Spike|hCoV-19/England/ALDP-B27396/2020|2020-11-04|EPI\_ISL\_664394|Original|hCoV-19^^England|Human|Northumbria University / South Tees Hospitals NHS Foundation Trust / North Cumbria Integrated Care NHS Foundation Trust / North Tees and Hartlepool NHS Foundation Trust / Newcastle Hospitals NHS Foundation Trust|COVID-19 Genomics UK (COG-UK) Consortium|Bashton|United Kingdom

>Spike|hCoV-19/Spain/MD-IBV-004929/2020|2020-04-07|EPI\_ISL\_481106|Original|hCoV-19^^Madrid|Human|Hospital General Universitario Gregorio Mara\u00f1\u00f3n|SeqCOVID-SPAIN consortium/IBV (CSIC) |Comas|Spain

>Spike|hCoV-19/England/ALDP-B5C32F/2020|2020-11-10|EPI\_ISL\_655949|Original|hCoV-19^^England|Human|Lighthouse Lab in Alderley Park|Wellcome Sanger Institute for the COVID-19 Genomics UK (COG-UK) Consortium|Davies|United Kingdom

>Spike|hCoV-19/Australia/NSW996/2020|2020-10-07|EPI\_ISL\_591498|Original|hCoV-19^^New South Wales|Human|Pathology West - NSW Health Pathology|NSW Health Pathology - Institute of Clinical Pathology and Medical Research; Westmead Hospital; University of Sydney|Gall|Australia

>Spike|hCoV-19/Panama/333694/2020|2020-03-23|EPI\_ISL\_496753|Original|hCoV-19^^Colon|Human|Gorgas Memorial Laboratory of Health Studies|Gorgas Memorial Laboratory of Health Studies|Martinez|Panama

>Spike|hCoV-19/USA/NY-Wadsworth-152197-01/2020|2020-06-25|EPI\_ISL\_676983|Original|hCoV-19^^New York|Human|Wadsworth Center|Wadsworth Center|Lasek-Nesselquist|USA

>Spike|hCoV-19/Wales/PHWC-1602DA/2020|2020-05-20|EPI\_ISL\_472917|Original|hCoV-19^^Wales|Human|Wales Specialist Virology Centre Sequencing lab|COVID-19 Genomics UK (COG-UK) Consortium|Moore|United Kingdom

>Spike|hCoV-19/USA/WI-UW-1926/2020|2020-10-05|EPI\_ISL\_677335|Original|hCoV-19^^Wisconsin|Human|University of Wisconsin-Madison AIDS Vaccine Research Laboratories|University of Wisconsin-Madison AIDS Vaccine Research Laboratories|Baczenas|USA

>Spike|hCoV-19/USA/WA-UW-571/2020|2020-03-12|EPI\_ISL\_476906|Original|hCoV-19^^Washington|Human|UW Virology Lab|UW Virology Lab|Roychoudhury|USA

>Spike|hCoV-19/Australia/WA29/2020|2020-03-21|EPI\_ISL\_470846|Original|hCoV-19^^Western Australia|Human|PathWest Laboratory Medicine WA|PathWest Laboratory Medicine WA|Sikazwe|Australia

>Spike|hCoV-19/Spain/MD-HLP-89/2020|2020-05-02|EPI\_ISL\_530086|Original|hCoV-19^^Madrid|Human|Hospital Universitario La Paz|Hospital Universitario La Paz|Viedma|Spain

>Spike|hCoV-19/Spain/AS-IBV-98006603/2020|2020-03-13|EPI\_ISL\_654647|Original|hCoV-19^^Asturias|Human|Servicio de Microbiolog\u00eda|SeqCOVID-SPAIN consortium/IBV (CSIC) |Comas|Spain

>Spike|hCoV-19/England/QEUA-A60BD6/2020|2020-10-12|EPI\_ISL\_665395|Original|hCoV-19^^England|Human|Northumbria University / South Tees Hospitals NHS Foundation Trust / North Cumbria Integrated Care NHS Foundation Trust / North Tees and Hartlepool NHS Foundation Trust / Newcastle Hospitals NHS Foundation Trust|COVID-19 Genomics UK (COG-UK) Consortium|Bashton|United Kingdom

>Spike|hCoV-19/England/CAMC-B99B97/2020|2020-11-15|EPI\_ISL\_673399|Original|hCoV-19^^England|Human|Lighthouse Lab in Cambridge|Wellcome Sanger Institute for the COVID-19 Genomics UK (COG-UK) Consortium|Davies|United Kingdom

>Spike|hCoV-19/England/MILK-9C7084/2020|2020-09-08|EPI\_ISL\_573276|Original|hCoV-19^^England|Human|Northumbria University / South Tees Hospitals NHS Foundation Trust / North Cumbria Integrated Care NHS Foundation Trust / North Tees and Hartlepool NHS

Foundation Trust / Newcastle Hospitals NHS Foundation Trust|COVID-19 Genomics UK (COG-UK) Consortium|Bashton|United Kingdom  
>Spike|hCoV-19/Australia/VIC5414/2020|2020-07-06|EPI\_ISL\_520177|Original|hCoV-19^^Victoria|Human|Microbiological Diagnostic Unit - Public Health Laboratory (MDU-PHL)|MDU-PHL|Schultz|Australia  
>Spike|hCoV-19/Belgium/UGent-181/2020|2020-10-12|EPI\_ISL\_634892|Original|hCoV-19^^Ghent|Human|Lab voor klinische biologie|Onderzoeksgroep Virologie|Lambrechts|Belgium  
>Spike|hCoV-19/England/20194106101/2020|2020-05-05|EPI\_ISL\_465615|Original|hCoV-19^^England|Human|Respiratory Virus Unit|Respiratory Virus Unit|Platt|United Kingdom  
>Spike|hCoV-19/England/ALDP-9C4E32/2020|2020-09-10|EPI\_ISL\_567693|Original|hCoV-19^^England|Human|Lighthouse Lab in Alderley Park|Wellcome Sanger Institute for the COVID-19 Genomics UK (COG-UK) consortium|Davies|United Kingdom  
>Spike|hCoV-19/Scotland/CVR2896/2020|2020-04-21|EPI\_ISL\_473619|Original|hCoV-19^^Scotland|Human|West of Scotland Specialist Virology Centre|COVID-19 Genomics UK (COG-UK) Consortium|Robertson|United Kingdom  
>Spike|hCoV-19/Wales/PHWC-168937/2020|2020-05-29|EPI\_ISL\_494307|Original|hCoV-19^^Wales|Human|Originating lab|COVID-19 Genomics UK (COG-UK) Consortium|Moore|United Kingdom  
>Spike|hCoV-19/Denmark/DCGC-6397/2020|2020-09-21|EPI\_ISL\_622294|Original|hCoV-19^^Sjaelland|Human|Department of Virus and Microbiological Special Diagnostics|Albertsen lab|Michaelsen|Denmark  
>Spike|hCoV-19/England/ALDP-A67DD9/2020|2020-10-09|EPI\_ISL\_608425|Original|hCoV-19^^England|Human|Lighthouse Lab in Alderley Park|Wellcome Sanger Institute for the COVID-19 Genomics UK (COG-UK) consortium|Davies|United Kingdom  
>Spike|hCoV-19/Russia/ORE-RII-MH3441S/2020|2020-10-07|EPI\_ISL\_733153|Original|hCoV-19^^Orenburg|Human|HELIX LLC|WHO National Influenza Centre Russian Federation|Komissarov|Russia  
>Spike|hCoV-19/England/EXET-13A8D7/2020|2020-11-07|EPI\_ISL\_665075|Original|hCoV-19^^England|Human|University of Exeter|COVID-19 Genomics UK (COG-UK) Consortium|Temperton|United Kingdom  
>Spike|hCoV-19/USA/LA-EVTL1015/2020|2020-08-25|EPI\_ISL\_653706|Original|hCoV-19^^Louisiana|Human|LSUHS Emerging Viral Threat Laboratory|Microbial Genome Sequencing Center|Kamil|USA  
>Spike|hCoV-19/Scotland/QEUH-A1EE74/2020|2020-10-01|EPI\_ISL\_598854|Original|hCoV-19^^Scotland|Human|Lighthouse Lab in Glasgow|Wellcome Sanger Institute for the COVID-19 Genomics UK (COG-UK) consortium|Davies|United Kingdom  
>Spike|hCoV-19/Finland/7LS13H11/2020|2020-10-07|EPI\_ISL\_756024|Original|hCoV-19^^Uusimaa|Human|Department of Virology and Immunology|Department of Virology|Smura|Finland  
>Spike|hCoV-19/USA/TX-HMH-MCoV-17967/2020|2020-11-16|EPI\_ISL\_786115|Original|hCoV-19^^Texas|Human|Houston Methodist Hospital|Houston Methodist Hospital|Long|USA  
>Spike|hCoV-19/Wales/PHWC-49F99E/2020|2020-12-09|EPI\_ISL\_743298|Original|hCoV-19^^Wales|Human|Wales Specialist Virology Centre Sequencing lab|COVID-19 Genomics UK (COG-UK) Consortium|Moore|United Kingdom  
>Spike|hCoV-19/USA/FL-BPHL-1152/2020|2020-08-18|EPI\_ISL\_526638|Original|hCoV-19^^Florida|Human|Florida Bureau of Public Health Laboratories|Florida Bureau of Public Health Laboratories|Blanton|USA  
>Spike|hCoV-19/England/MILK-B05FC7/2020|2020-10-24|EPI\_ISL\_642913|Original|hCoV-19^^England|Human|Lighthouse Lab in Milton Keynes|Wellcome Sanger Institute for the COVID-19 Genomics UK (COG-UK) Consortium|Davies|United Kingdom  
>Spike|hCoV-19/England/CAMB-82F54/2020|2020-04-12|EPI\_ISL\_443320|Original|hCoV-19^^England|Human|Department of Pathology|Wellcome Sanger Institute for the COVID-19 Genomics UK (COG-UK) consortium|Amato|United Kingdom  
>Spike|hCoV-19/Singapore/688/2020|2020-07-16|EPI\_ISL\_498586|Original|hCoV-19^^Singapore|Human|National Public Health Laboratory|National Public Health Laboratory|Mak|Singapore  
>Spike|hCoV-19/Denmark/DCGC-2360/2020|2020-08-10|EPI\_ISL\_617700|Original|hCoV-19^^Midtjylland|Human|Department of Virus and Microbiological Special Diagnostics|Albertsen lab|Michaelsen|Denmark

>Spike|hCoV-19/USA/MA-MASPHL-00308/2020|2020-04-18|EPI\_ISL\_791717|Original|hCoV-19^^Massachusetts|Human|Massachusetts State Public Health Laboratory|Infectious Disease Program|Park|USA

>Spike|hCoV-19/USA/WI-GMF-05641/2020|2020-06-08|EPI\_ISL\_471147|Original|hCoV-19^^Wisconsin|Human|Gundersen Molecular Diagnostics Laboratory|Kabara Cancer Research Institute|Kenny|USA

>Spike|hCoV-19/Denmark/DCGC-1432/2020|2020-05-11|EPI\_ISL\_622426|Original|hCoV-19^^Hovedstaden|Human|Department of Virus and Microbiological Special Diagnostics|Albertsen lab|Michaelsen|Denmark

>Spike|hCoV-19/England/ALDP-A6E2C4/2020|2020-10-15|EPI\_ISL\_607014|Original|hCoV-19^^England|Human|Lighthouse Lab in Alderley Park|Wellcome Sanger Institute for the COVID-19 Genomics UK (COG-UK) consortium|Davies|United Kingdom

>Spike|hCoV-19/Wales/CAMC-A80D43/2020|2020-10-13|EPI\_ISL\_610641|Original|hCoV-19^^Wales|Human|Lighthouse Lab in Cambridge|Wellcome Sanger Institute for the COVID-19 Genomics UK (COG-UK) consortium|Davies|United Kingdom

>Spike|hCoV-19/England/CAMC-9C1B3E/2020|2020-09-10|EPI\_ISL\_573221|Original|hCoV-19^^England|Human|Oxford Viromics|COVID-19 Genomics UK (COG-UK) Consortium|Golubchik|United Kingdom

>Spike|hCoV-19/England/CAMC-B991B3/2020|2020-11-15|EPI\_ISL\_673373|Original|hCoV-19^^England|Human|Lighthouse Lab in Cambridge|Wellcome Sanger Institute for the COVID-19 Genomics UK (COG-UK) Consortium|Davies|United Kingdom

>Spike|hCoV-19/India/TG-CCMB-J206/2020|2020-04-01|EPI\_ISL\_447569|Original|hCoV-19^^Telangana|Human|CSIR-Centre for Cellular and Molecular Biology|CSIR-Centre for Cellular and Molecular Biology|Banu|India

>Spike|hCoV-19/England/ALDP-CB3AD5/2020|2020-12-19|EPI\_ISL\_761701|Original|hCoV-19^^England|Human|Lighthouse Lab in Alderley Park|Wellcome Sanger Institute for the COVID-19 Genomics UK (COG-UK) Consortium|Davies|United Kingdom

>Spike|hCoV-19/USA/MI-MDHHS-SC22360/2020|2020-11-12|EPI\_ISL\_708340|Original|hCoV-19^^Michigan|Human|Michigan Department of Health and Human Services|Michigan Department of Health and Human Services|Jacob|USA

>Spike|hCoV-19/USA/NY-Wadsworth-281873-01/2020|2020-12-01|EPI\_ISL\_754427|Original|hCoV-19^^New York|Human|Wadsworth Center|Wadsworth Center|Lasek-Nesselquist|USA

>Spike|hCoV-19/England/CAMC-9EC10E/2020|2020-09-23|EPI\_ISL\_580582|Original|hCoV-19^^England|Human|Lighthouse Lab in Cambridge|Wellcome Sanger Institute for the COVID-19 Genomics UK (COG-UK) consortium|Davies|United Kingdom

>Spike|hCoV-19/England/MILK-CA9B1B/2020|2020-12-18|EPI\_ISL\_762354|Original|hCoV-19^^England|Human|Lighthouse Lab in Milton Keynes|Wellcome Sanger Institute for the COVID-19 Genomics UK (COG-UK) Consortium|Davies|United Kingdom

>Spike|hCoV-19/England/CAMB-72898/2020|2020-03-24|EPI\_ISL\_439872|Original|hCoV-19^^England|Human|Department of Pathology|Wellcome Sanger Institute for the COVID-19 Genomics UK (COG-UK) consortium|Amato|United Kingdom

>Spike|hCoV-19/England/ALDP-921C75/2020|2020-06-23|EPI\_ISL\_553306|Original|hCoV-19^^England|Human|Lighthouse Lab in Alderley Park|Wellcome Sanger Institute for the COVID-19 Genomics UK (COG-UK) consortium|Davies|United Kingdom

>Spike|hCoV-19/Germany/BY-IMB03735/2020|2020-04-09|EPI\_ISL\_732553|Original|hCoV-19^^Bavaria|Human|Bundeswehr Institute of Microbiology|Bundeswehr Institute of Microbiology|Antwerpen|Germany

>Spike|hCoV-19/Japan/PG-8630/2020|2020-08-00|EPI\_ISL\_686226|Original|hCoV-19^^Japan|Human|Pathogen Genomics Center|Pathogen Genomics Center|Sekizuka|Japan

>Spike|hCoV-19/South Korea/KCDC2605/2020|2020-07-01|EPI\_ISL\_515008|Original|hCoV-19^^South Korea|Human|Division of Viral Diseases|Division of Viral Diseases|Kim|South Korea

>Spike|hCoV-19/Denmark/DCGC-19276/2020|2020-12-07|EPI\_ISL\_748253|Original|hCoV-19^^Syddanmark|Human|Department of Virus and Microbiological Special Diagnostics|Albertsen Lab|Michaelsen|Denmark

>Spike|hCoV-19/Australia/VIC2866/2020|2020-07-04|EPI\_ISL\_521697|Original|hCoV-19^^Victoria|Human|Microbiological Diagnostic Unit - Public Health Laboratory (MDU-PHL)|MDU-PHL|Schultz|Australia

>Spike|hCoV-19/England/ALDP-9D7810/2020|2020-09-18|EPI\_ISL\_576587|Original|hCoV-19^^England|Human|Oxford Viromics|COVID-19 Genomics UK (COG-UK) Consortium|Golubchik|United Kingdom

>Spike|hCoV-19/England/QEUH-B820B0/2020|2020-11-14|EPI\_ISL\_668143|Original|hCoV-19^^England|Human|Lighthouse Lab in Glasgow|Wellcome Sanger Institute for the COVID-19 Genomics UK (COG-UK) Consortium|Davies|United Kingdom

>Spike|hCoV-19/USA/VA-DCLS-2061/2020|2020-10-20|EPI\_ISL\_677231|Original|hCoV-19^^Virginia|Human|Virginia Division of Consolidated Laboratory Services|Virginia Division of Consolidated Laboratory Services|St. Jacques|USA

>Spike|hCoV-19/Netherlands/NA\_11/2020|2020-03-10|EPI\_ISL\_415467|Original|hCoV-19^^Netherlands|Human|Dutch COVID-19 response team|Erasmus Medical Center|Oude Munnink|Netherlands

>Spike|hCoV-19/England/SHEF-C7BB9/2020|2020-04-07|EPI\_ISL\_432853|Original|hCoV-19^^England|Human|Virology Department|COVID-19 Genomics UK (COG-UK) Consortium|de Silva|United Kingdom

>Spike|hCoV-19/Spain/PV-IBV-98007711/2020|2020-09-17|EPI\_ISL\_582038|Original|hCoV-19^^Basque Country|Human|Servicio de Microbiolog\u00eda. Hospital Universitario Donostia. OSI Donostialdea. \u00c1rea de Enfermedades Infecciosas|SeqCOVID-SPAIN consortium/IBV (CSIC) |Comas|Spain

>Spike|hCoV-19/Scotland/EDB1110/2020|2020-04-06|EPI\_ISL\_433400|Original|hCoV-19^^Scotland|Human|Virology Department|COVID-19 Genomics UK (COG-UK) Consortium|Williams|United Kingdom

>Spike|hCoV-19/USA/NY-Wadsworth-33026-01/2020|2020-03-30|EPI\_ISL\_676788|Original|hCoV-19^^New York|Human|Wadsworth Center|Wadsworth Center|Lasek-Nesselquist|USA

>Spike|hCoV-19/England/204540967/2020|2020-11-02|EPI\_ISL\_678657|Original|hCoV-19^^England|Human|Respiratory Virus Unit|COVID-19 Genomics UK (COG-UK) Consortium|Platt|United Kingdom

>Spike|hCoV-19/Denmark/DCGC-1701/2020|2020-06-29|EPI\_ISL\_618168|Original|hCoV-19^^Hovedstaden|Human|Department of Virus and Microbiological Special Diagnostics|Albertsen lab|Michaelsen|Denmark

>Spike|hCoV-19/Scotland/EDB1650/2020|2020-04-14|EPI\_ISL\_433105|Original|hCoV-19^^Scotland|Human|Virology Department|COVID-19 Genomics UK (COG-UK) Consortium|Williams|United Kingdom

>Spike|hCoV-19/Wales/PHWC-16A05E/2020|2020-09-05|EPI\_ISL\_535192|Original|hCoV-19^^Wales|Human|Wales Specialist Virology Centre Sequencing lab|COVID-19 Genomics UK (COG-UK) Consortium|Moore|United Kingdom

>Spike|hCoV-19/Denmark/DCGC-4265/2020|2020-09-07|EPI\_ISL\_615702|Original|hCoV-19^^Hovedstaden|Human|Department of Virus and Microbiological Special Diagnostics|Albertsen lab|Michaelsen|Denmark

>Spike|hCoV-19/USA/ID-QDX-1088/2020|2020-03-19|EPI\_ISL\_571829|Original|hCoV-19^^Idaho|Human|Quest Diagnostics|Quest Diagnostics|Kagan|USA

>Spike|hCoV-19/Wales/PHWC-317A7/2020|2020-04-12|EPI\_ISL\_446486|Original|hCoV-19^^Wales|Human|Wales Specialist Virology Centre|Public Health Wales Microbiology Cardiff|Moore|United Kingdom

>Spike|hCoV-19/England/ALDP-BCA465/2020|2020-11-23|EPI\_ISL\_703664|Original|hCoV-19^^England|Human|Lighthouse Lab in Alderley Park|Wellcome Sanger Institute for the COVID-19 Genomics UK (COG-UK) Consortium|Davies|United Kingdom

>Spike|hCoV-19/England/NORT-294A89/2020|2020-03-27|EPI\_ISL\_488599|Original|hCoV-19^^England|Human|NU-OMICS DNA Sequencing research facility|Wellcome Sanger Institute for the COVID-19 Genomics UK (COG-UK) consortium|Davies|United Kingdom

>Spike|hCoV-19/Spain/CT-IBV-99009884/2020|2020-08-05|EPI\_ISL\_660281|Original|hCoV-19^^Catalunya|Human|Servicio de Microbiolog\u00eda|SeqCOVID-SPAIN consortium/IBV (CSIC) |Comas|Spain

>Spike|hCoV-19/USA/WA-UW-8851/2020|2020-05-08|EPI\_ISL\_570222|Original|hCoV-19^^Washington|Human|UW Virology Lab|UW Virology Lab|Roychoudhury|USA

>Spike|hCoV-19/USA/TX-HMH-MCoV-12778/2020|2020-08-19|EPI\_ISL\_790518|Original|hCoV-19^^Texas|Human|Houston Methodist Hospital|Houston Methodist Hospital|Long|USA

>Spike|hCoV-19/Denmark/DCGC-6011/2020|2020-09-28|EPI\_ISL\_621120|Original|hCoV-19^^Midtjylland|Human|Department of Virus and Microbiological Special Diagnostics|Albertsen lab|Michaelsen|Denmark

>Spike|hCoV-19/England/CAMC-A57729/2020|2020-10-08|EPI\_ISL\_597239|Original|hCoV-19^^England|Human|Lighthouse Lab in Cambridge|Wellcome Sanger Institute for the COVID-19 Genomics UK (COG-UK) consortium|Davies|United Kingdom

>Spike|hCoV-19/USA/TX-HMH-MCoV-8879/2020|2020-07-02|EPI\_ISL\_780806|Original|hCoV-19^^Texas|Human|Houston Methodist Hospital|Houston Methodist Hospital|Long|USA

>Spike|hCoV-19/Wales/MILK-9EF9A9/2020|2020-09-24|EPI\_ISL\_594963|Original|hCoV-19^^Wales|Human|Queens Medical Centre|COVID-19 Genomics UK (COG-UK) Consortium|Loose|United Kingdom

>Spike|hCoV-19/England/ALDP-9E8F17/2020|2020-09-24|EPI\_ISL\_584178|Original|hCoV-19^^England|Human|Centre for Enzyme Innovation|COVID-19 Genomics UK (COG-UK) Consortium|Robson|United Kingdom

>Spike|hCoV-19/USA/VA-DCLS-0746/2020|2020-06-12|EPI\_ISL\_526864|Original|hCoV-19^^Virginia|Human|Virginia DCLS|Virginia DCLS|St. Jacques|USA

>Spike|hCoV-19/USA/WA-UW-22020/2020|2020-08-06|EPI\_ISL\_570828|Original|hCoV-19^^Washington|Human|UW Virology Lab|UW Virology Lab|Roychoudhury|USA

>Spike|hCoV-19/England/ALDP-A2EA40/2020|2020-10-05|EPI\_ISL\_587028|Original|hCoV-19^^England|Human|Lighthouse Lab in Alderley Park|Wellcome Sanger Institute for the COVID-19 Genomics UK (COG-UK) consortium|Davies|United Kingdom

>Spike|hCoV-19/India/TG-CDFD-C1307/2020|2020-06-06|EPI\_ISL\_528554|Original|hCoV-19^^Telangana|Human|National Genomics Core-Center for DNA Fingerprinting and Diagnostics|National Genomics Core-Center for DNA Fingerprinting and Diagnostics (NGC-CDFD)- DBT's PAN-INDIA-1000 Genome consortium|Vashisht|India

>Spike|hCoV-19/Scotland/QEUA-96EF73/2020|2020-08-18|EPI\_ISL\_534496|Original|hCoV-19^^Scotland|Human|NHSGGC West of Scotland Specialist Virology Centre / MRC-University of Glasgow Centre for Virus Research|Wellcome Sanger Institute for the COVID-19 Genomics UK (COG-UK) consortium|Davies|United Kingdom

>Spike|hCoV-19/England/204742230/2020|2020-00-00|EPI\_ISL\_649932|Original|hCoV-19^^England|Human|Respiratory Virus Unit|COVID-19 Genomics UK (COG-UK) Consortium|Platt|United Kingdom

>Spike|hCoV-19/Northern Ireland/NIRE-2342DE/2020|2020-10-15|EPI\_ISL\_680366|Original|hCoV-19^^Northern Ireland|Human|Regional Virus Laboratory|COVID-19 Genomics UK (COG-UK) Consortium|Fairley|United Kingdom

>Spike|hCoV-19/USA/HI-H200545/2020|2020-11-05|EPI\_ISL\_753076|Original|hCoV-19^^Hawaii|Human|State Laboratories Division|State Laboratories Division|Sultana|USA

>Spike|hCoV-19/England/QEUA-A4C059/2020|2020-10-08|EPI\_ISL\_628540|Original|hCoV-19^^England|Human|Oxford Viromics|COVID-19 Genomics UK (COG-UK) Consortium|Golubchik|United Kingdom

>Spike|hCoV-19/England/CAMB-1ACC5C/2020|2020-04-21|EPI\_ISL\_489463|Original|hCoV-19^^England|Human|Department of Pathology|Wellcome Sanger Institute for the COVID-19 Genomics UK (COG-UK) consortium|Davies|United Kingdom

>Spike|hCoV-19/Wales/PHWC-484440/2020|2020-10-23|EPI\_ISL\_626870|Original|hCoV-19^^Wales|Human|Wales Specialist Virology Centre Sequencing lab|COVID-19 Genomics UK (COG-UK) Consortium|Moore|United Kingdom

>Spike|hCoV-19/USA/WA-S259/2020|2020-03-04|EPI\_ISL\_430113|Original|hCoV-19^^Washington|Human|Seattle Flu Study|Seattle Flu Study|Bedford|USA

>Spike|hCoV-19/England/BRIS-130033/2020|2020-04-11|EPI\_ISL\_492700|Original|hCoV-19^^England|Human|PHE South West Regional Laboratory|Wellcome Sanger Institute for the COVID-19 Genomics UK (COG-UK) consortium|Davies|United Kingdom

>Spike|hCoV-19/USA/CA-ALSR-4189/2020|2020-06-20|EPI\_ISL\_648875|Original|hCoV-19^^California|Human|San Diego County Public Health Laboratory|Andersen lab at Scripps Research|Gangavarapu|USA

>Spike|hCoV-19/England/CAMB-82D96/2020|2020-04-14|EPI\_ISL\_443388|Original|hCoV-19^^England|Human|Department of Pathology|Wellcome Sanger Institute for the COVID-19 Genomics UK (COG-UK) consortium|Amato|United Kingdom

>Spike|hCoV-19/England/ALDP-B5D91D/2020|2020-11-09|EPI\_ISL\_723558|Original|hCoV-19^^England|Human|Northumbria University / South Tees Hospitals NHS Foundation Trust / North Cumbria Integrated Care NHS Foundation Trust / North Tees and Hartlepool NHS

Foundation Trust / Newcastle Hospitals NHS Foundation Trust|COVID-19 Genomics UK  
(COG-UK) Consortium|Bashton|United Kingdom  
>Spike|hCoV-19/USA/TX-HMH-7552/2020|2020-06-25|EPI\_ISL\_546845|Original|hCoV-  
19^^Texas|Human|Houston Methodist Hospital|Houston Methodist Hospital|Long|USA  
>Spike|hCoV-19/England/ALDP-9CBD89/2020|2020-09-16|EPI\_ISL\_575591|Original|hCoV-  
19^^England|Human|Lighthouse Lab in Alderley Park|Wellcome Sanger Institute for the  
COVID-19 Genomics UK (COG-UK) consortium|Davies|United Kingdom  
>Spike|hCoV-19/Chile/LI-ISPCH-3/2020|2020-03-15|EPI\_ISL\_445275|Original|hCoV-  
19^^O'Higgins|Human|HOSPITAL CLINICO FUSAT|Instituto de Salud Publica de  
Chile|Fernandez|Chile  
>Spike|hCoV-19/England/CAMC-9C00D6/2020|2020-09-09|EPI\_ISL\_573169|Original|hCoV-  
19^^England|Human|Oxford Viromics|COVID-19 Genomics UK (COG-UK)  
Consortium|Golubchik|United Kingdom  
>Spike|hCoV-19/England/QEUEH-76ECD8/2020|2020-07-15|EPI\_ISL\_533129|Original|hCoV-  
19^^England|Human|Lighthouse Lab in Glasgow|Wellcome Sanger Institute for the COVID-  
19 Genomics UK (COG-UK) consortium|Davies|United Kingdom  
>Spike|hCoV-19/Wales/PHWC-484950/2020|2020-10-25|EPI\_ISL\_627126|Original|hCoV-  
19^^Wales|Human|Wales Specialist Virology Centre Sequencing lab|COVID-19 Genomics UK  
(COG-UK) Consortium|Moore|United Kingdom  
>Spike|hCoV-19/USA/AZ-TG371441/2020|2020-05-29|EPI\_ISL\_694598|Original|hCoV-  
19^^Arizona|Human|AZ SPHL|TGen North|French|USA  
>Spike|hCoV-19/USA/MI-MDHHS-SC21722/2020|2020-07-16|EPI\_ISL\_529841|Original|hCoV-  
19^^Michigan|Human|Michigan Department of Health and Human Services|Michigan  
Department of Health and Human Services|Blankenship|USA  
>Spike|hCoV-19/England/CAMB-827B6/2020|2020-04-13|EPI\_ISL\_443630|Original|hCoV-  
19^^England|Human|Department of Pathology|Wellcome Sanger Institute for the COVID-19  
Genomics UK (COG-UK) consortium|Amato|United Kingdom  
>Spike|hCoV-19/Singapore/327/2020|2020-04-14|EPI\_ISL\_469081|Original|hCoV-  
19^^Singapore|Human|National Public Health Laboratory|National Public Health  
Laboratory|Mak|Singapore  
>Spike|hCoV-19/England/QEUEH-AD12AE/2020|2020-10-26|EPI\_ISL\_633991|Original|hCoV-  
19^^England|Human|Lighthouse Lab in Glasgow|Wellcome Sanger Institute for the COVID-  
19 Genomics UK (COG-UK) consortium|Davies|United Kingdom  
>Spike|hCoV-19/USA/DE-DHSS-F917751/2020|2020-03-24|EPI\_ISL\_565832|Original|hCoV-  
19^^Delaware|Human|Delaware Public Health Lab|Delaware Public Health Lab|Bajwa|USA  
>Spike|hCoV-19/England/CAMB-1B5DC6/2020|2020-09-03|EPI\_ISL\_549391|Original|hCoV-  
19^^England|Human|Department of Pathology|COVID-19 Genomics UK (COG-UK)  
Consortium|Goodfellow|United Kingdom  
>Spike|hCoV-19/England/QEUEH-C01434/2020|2020-12-04|EPI\_ISL\_720755|Original|hCoV-  
19^^England|Human|Lighthouse Lab in Glasgow|Wellcome Sanger Institute for the COVID-  
19 Genomics UK (COG-UK) Consortium|Davies|United Kingdom  
>Spike|hCoV-19/Denmark/DCGC-2049/2020|2020-04-06|EPI\_ISL\_618979|Original|hCoV-  
19^^Hovedstaden|Human|Department of Virus and Microbiological Special  
Diagnostics|Albertsen lab|Michaelsen|Denmark  
>Spike|hCoV-19/Denmark/ALAB-HH80/2020|2020-03-16|EPI\_ISL\_429321|Original|hCoV-  
19^^Denmark|Human|Department of Clinical Microbiology|Albertsen  
lab|Kirkegaard|Denmark  
>Spike|hCoV-19/USA/VA-DCLS-1038/2020|2020-06-03|EPI\_ISL\_526922|Original|hCoV-  
19^^Virginia|Human|Virginia DCLS|Virginia DCLS|St. Jacques|USA  
>Spike|hCoV-19/Switzerland/BL-UHB-42191950/2020|2020-03-  
15|EPI\_ISL\_528117|Original|hCoV-19^^Basel-Land|Human|University Hospital  
Basel|University Hospital Basel|Roloff Handschin|Switzerland  
>Spike|hCoV-19/England/NORW-EB42D/2020|2020-05-02|EPI\_ISL\_457430|Original|hCoV-  
19^^England|Human|Quadram Institute Bioscience|COVID-19 Genomics UK (COG-UK)  
Consortium|Alikhan|United Kingdom  
>Spike|hCoV-19/USA/UT-UPHL-2012197253/2020|2020-10-20|EPI\_ISL\_746277|Original|hCoV-  
19^^Utah|Human|Ginkgo Bioworks Clinical Laboratory|Utah Public Health  
Laboratory|Young|USA  
>Spike|hCoV-19/England/ALDP-B5DEA5/2020|2020-11-09|EPI\_ISL\_723605|Original|hCoV-  
19^^England|Human|Northumbria University / South Tees Hospitals NHS Foundation Trust



/ North Cumbria Integrated Care NHS Foundation Trust / North Tees and Hartlepool NHS Foundation Trust / Newcastle Hospitals NHS Foundation Trust|COVID-19 Genomics UK (COG-UK) Consortium|Bashton|United Kingdom  
>Spike|hCoV-19/Norway/3007/2020|2020-07-31|EPI\_ISL\_549071|Original|hCoV-19^^Viken|Human|Furst Medical Laboratory|Norwegian Institute of Public Health|Kopperud Riis|Norway  
>Spike|hCoV-19/USA/NY-PV09043/2020|2020-03-21|EPI\_ISL\_421606|Original|hCoV-19^^New York|Human|MSHS Clinical Microbiology Laboratories|MSHS Pathogen Surveillance Program|van Bakel|USA  
>Spike|hCoV-19/USA/NE-10838/2020|2020-05-04|EPI\_ISL\_466654|Original|hCoV-19^^Nebraska|Human|Nebraska Public Health Laboratory|UNMC COVID-19 Response Team|Pratt|USA  
>Spike|hCoV-19/South Korea/KDCA0164/2020|2020-11-20|EPI\_ISL\_747398|Original|hCoV-19^^South Korea|Human|Division of Emerging Infectious Diseases|Division of Emerging Infectious Diseases|Park|South Korea  
>Spike|hCoV-19/England/CAMC-C47520/2020|2020-12-10|EPI\_ISL\_718940|Original|hCoV-19^^England|Human|Lighthouse Lab in Cambridge|Wellcome Sanger Institute for the COVID-19 Genomics UK (COG-UK) Consortium|Davies|United Kingdom  
>Spike|hCoV-19/USA/MN-QDX-1663/2020|2020-03-17|EPI\_ISL\_604002|Original|hCoV-19^^Minnesota|Human|Quest Diagnostics|Quest Diagnostics|Kagan|USA  
>Spike|hCoV-19/England/QEUEH-B2CFCA/2020|2020-11-04|EPI\_ISL\_680093|Original|hCoV-19^^England|Human|Department of Pathology|COVID-19 Genomics UK (COG-UK) Consortium|Goodfellow|United Kingdom  
>Spike|hCoV-19/Denmark/DCGC-8335/2020|2020-10-26|EPI\_ISL\_617343|Original|hCoV-19^^Hovedstaden|Human|Department of Virus and Microbiological Special Diagnostics|Albertsen lab|Michaelsen|Denmark  
>Spike|hCoV-19/Sweden/20-14509/2020|2020-05-12|EPI\_ISL\_475515|Original|hCoV-19^^Vastmanland|Human|Lakargruppen|The Public Health Agency of Sweden|Svartstr\u00f6m|Sweden  
>Spike|hCoV-19/England/PORT-2D1F45/2020|2020-04-05|EPI\_ISL\_499299|Original|hCoV-19^^England|Human|Centre for Enzyme Innovation|COVID-19 Genomics UK (COG-UK) Consortium|Robson|United Kingdom  
>Spike|hCoV-19/Wales/ALDP-B1A1F6/2020|2020-11-01|EPI\_ISL\_710962|Original|hCoV-19^^Wales|Human|Lighthouse Lab in Alderley Park|Wellcome Sanger Institute for the COVID-19 Genomics UK (COG-UK) Consortium|Davies|United Kingdom  
>Spike|hCoV-19/Denmark/DCGC-18077/2020|2020-12-14|EPI\_ISL\_749742|Original|hCoV-19^^Syddanmark|Human|Department of Virus and Microbiological Special Diagnostics|Albertsen Lab|Michaelsen|Denmark  
>Spike|hCoV-19/Singapore/222/2020|2020-04-07|EPI\_ISL\_462340|Original|hCoV-19^^Singapore|Human|National Public Health Laboratory|National Public Health Laboratory|Mak|Singapore  
>Spike|hCoV-19/Wales/PHWC-490E9E/2020|2020-11-18|EPI\_ISL\_706581|Original|hCoV-19^^Wales|Human|Originating lab|COVID-19 Genomics UK (COG-UK) Consortium|Moore|United Kingdom  
>Spike|hCoV-19/Switzerland/LU-UHB-42202805/2020|2020-03-20|EPI\_ISL\_418440|Original|hCoV-19^^Luzern|Human|University Hospital Basel|University Hospital Basel|Roloff Handschin|Switzerland  
>Spike|hCoV-19/Wales/PHWC-16825A/2020|2020-04-19|EPI\_ISL\_494216|Original|hCoV-19^^Wales|Human|Originating lab|COVID-19 Genomics UK (COG-UK) Consortium|Moore|United Kingdom  
>Spike|hCoV-19/Australia/VIC4705/2020|2020-07-16|EPI\_ISL\_519093|Original|hCoV-19^^Victoria|Human|Microbiological Diagnostic Unit - Public Health Laboratory (MDU-PHL)|MDU-PHL|Schultz|Australia  
>Spike|hCoV-19/England/MILK-B39838/2020|2020-11-02|EPI\_ISL\_679643|Original|hCoV-19^^England|Human|Oxford Viromics|COVID-19 Genomics UK (COG-UK) Consortium|Golubchik|United Kingdom  
>Spike|hCoV-19/Iceland/394/2020|2020-03-19|EPI\_ISL\_424418|Original|hCoV-19^^Reykjavik|Human|The National University Hospital of Iceland|deCODE genetics|J\u00f3nsson|Iceland

>Spike|hCoV-19/Switzerland/LU-ETHZ-110451/2020|2020-04-07|EPI\_ISL\_451871|Original|hCoV-19^^Luzern|Human|Viollier AG|Department of Biosystems Science and Engineering|Nadeau|Switzerland

>Spike|hCoV-19/England/204221513/2020|2020-09-08|EPI\_ISL\_593837|Original|hCoV-19^^England|Human|Respiratory Virus Unit|Respiratory Virus Unit|Platt|United Kingdom

>Spike|hCoV-19/Switzerland/BS-UHB-42189386/2020|2020-03-13|EPI\_ISL\_528044|Original|hCoV-19^^Basel-Stadt|Human|University Hospital Basel|University Hospital Basel|Roloff Handschin|Switzerland

>Spike|hCoV-19/Scotland/GCVR-171A92/2020|2020-03-27|EPI\_ISL\_489530|Original|hCoV-19^^Scotland|Human|NHSGGC West of Scotland Specialist Virology Centre / MRC-University of Glasgow Centre for Virus Research|Wellcome Sanger Institute for the COVID-19 Genomics UK (COG-UK) consortium|Davies|United Kingdom

>Spike|hCoV-19/Canada/ON-S1904/2020|2020-11-24|EPI\_ISL\_729320|Original|hCoV-19^^Ontario|Human|Toronto Invasive Bacterial Diseases Network|McMaster University|McArthur|Canada

>Spike|hCoV-19/England/BRIS-130789/2020|2020-04-12|EPI\_ISL\_492653|Original|hCoV-19^^England|Human|PHE South West Regional Laboratory|Wellcome Sanger Institute for the COVID-19 Genomics UK (COG-UK) consortium|Davies|United Kingdom

>Spike|hCoV-19/Scotland/EDB8404/2020|2020-10-15|EPI\_ISL\_612353|Original|hCoV-19^^Scotland|Human|Virology Department|COVID-19 Genomics UK (COG-UK) Consortium|McHugh|United Kingdom

>Spike|hCoV-19/USA/TX-HMH-812/2020|2020-04-10|EPI\_ISL\_545846|Original|hCoV-19^^Texas|Human|Houston Methodist Hospital|Houston Methodist Hospital|Long|USA

>Spike|hCoV-19/England/MILK-99A1D2/2020|2020-08-29|EPI\_ISL\_550310|Original|hCoV-19^^England|Human|Lighthouse Lab in Milton Keynes|Wellcome Sanger Institute for the COVID-19 Genomics UK (COG-UK) consortium|Davies|United Kingdom

>Spike|hCoV-19/England/CAMB-7675B/2020|2020-03-31|EPI\_ISL\_438382|Original|hCoV-19^^England|Human|Department of Pathology|Wellcome Sanger Institute for the COVID-19 Genomics UK (COG-UK) consortium|Amato|United Kingdom

>Spike|hCoV-19/England/QEUH-A5E1F7/2020|2020-10-12|EPI\_ISL\_597291|Original|hCoV-19^^England|Human|Lighthouse Lab in Glasgow|Wellcome Sanger Institute for the COVID-19 Genomics UK (COG-UK) consortium|Davies|United Kingdom

>Spike|hCoV-19/England/CAMB-7566E/2020|2020-00-00|EPI\_ISL\_425419|Original|hCoV-19^^England|Human|Department of Pathology|COVID-19 Genomics UK (COG-UK) Consortium|Meredith|United Kingdom

>Spike|hCoV-19/England/MILK-A7A605/2020|2020-10-15|EPI\_ISL\_606886|Original|hCoV-19^^England|Human|Lighthouse Lab in Milton Keynes|Wellcome Sanger Institute for the COVID-19 Genomics UK (COG-UK) consortium|Davies|United Kingdom

>Spike|hCoV-19/England/ALDP-9EE37F/2020|2020-05-06|EPI\_ISL\_589280|Original|hCoV-19^^England|Human|Lighthouse Lab in Alderley Park|Wellcome Sanger Institute for the COVID-19 Genomics UK (COG-UK) consortium|Davies|United Kingdom

>Spike|hCoV-19/England/MILK-B94EB1/2020|2020-11-13|EPI\_ISL\_676147|Original|hCoV-19^^England|Human|Lighthouse Lab in Milton Keynes|Wellcome Sanger Institute for the COVID-19 Genomics UK (COG-UK) Consortium|Davies|United Kingdom

>Spike|hCoV-19/USA/MI-MDHHS-SC20157/2020|2020-03-26|EPI\_ISL\_436868|Original|hCoV-19^^Michigan|Human|Michigan Department of Health and Human Services|Michigan Department of Health and Human Services|Blankenship|USA

>Spike|hCoV-19/USA/VA-DCLS-2410/2020|2020-11-18|EPI\_ISL\_734181|Original|hCoV-19^^Virginia|Human|Virginia Division of Consolidated Laboratory Services (DCLS)|Virginia Division of Consolidated Laboratory Services (DCLS)|St. Jacques|USA

>Spike|hCoV-19/Wales/PHWC-15E873/2020|2020-05-13|EPI\_ISL\_472839|Original|hCoV-19^^Wales|Human|Wales Specialist Virology Centre Sequencing lab|COVID-19 Genomics UK (COG-UK) Consortium|Moore|United Kingdom

>Spike|hCoV-19/Belgium/ULG-11081/2020|2020-12-15|EPI\_ISL\_737331|Original|hCoV-19^^Li\u00e8ge|Human|Department of Clinical Microbiology|GIGA Medical Genomics|Durkin|Belgium

>Spike|hCoV-19/England/NORT-29E885/2020|2020-04-30|EPI\_ISL\_493530|Original|hCoV-19^^England|Human|Northumbria University / South Tees Hospitals NHS Foundation Trust / North Cumbria Integrated Care NHS Foundation Trust / North Tees and Hartlepool NHS

Foundation Trust / Newcastle Hospitals NHS Foundation Trust|COVID-19 Genomics UK (COG-UK) Consortium|Bashton|United Kingdom  
>Spike|hCoV-19/England/BRIS-12963B/2020|2020-04-20|EPI\_ISL\_458762|Original|hCoV-19^^England|Human|PHE South West Regional Laboratory|Wellcome Sanger Institute for the COVID-19 Genomics UK (COG-UK) consortium|Davies|United Kingdom  
>Spike|hCoV-19/USA/FL-BPHL-1209/2020|2020-07-24|EPI\_ISL\_541182|Original|hCoV-19^^Florida|Human|Florida Bureau of Public Health Laboratories|Florida Bureau of Public Health Laboratories|Blanton|USA  
>Spike|hCoV-19/USA/WA-S750/2020|2020-04-13|EPI\_ISL\_449920|Original|hCoV-19^^Washington|Human|Washington State Department of Health|Seattle Flu Study|Bedford|USA  
>Spike|hCoV-19/Spain/PV-IBV-003264/2020|2020-03-17|EPI\_ISL\_481028|Original|hCoV-19^^Basque Country|Human|Servicio de Microbiolog\u00eda. Hospital Universitario Donostia. OSI Donostialdea. \u00c1rea de Enfermedades Infecciosas|SeqCOVID-SPAIN consortium/IBV (CSIC) |Comas|Spain  
>Spike|hCoV-19/England/BRIS-132FAD/2020|2020-06-20|EPI\_ISL\_511964|Original|hCoV-19^^England|Human|PHE South West Regional Laboratory|Wellcome Sanger Institute for the COVID-19 Genomics UK (COG-UK) consortium|Davies|United Kingdom  
>Spike|hCoV-19/Scotland/EDB6605/2020|2020-05-11|EPI\_ISL\_493962|Original|hCoV-19^^Scotland|Human|Virology Department|COVID-19 Genomics UK (COG-UK) Consortium|Williams|United Kingdom  
>Spike|hCoV-19/Japan/PG-4111/2020|2020-07-00|EPI\_ISL\_692351|Original|hCoV-19^^Japan|Human|Pathogen Genomics Center|Pathogen Genomics Center|Sekizuka|Japan  
>Spike|hCoV-19/England/QEUA-970169/2020|2020-08-17|EPI\_ISL\_540263|Original|hCoV-19^^England|Human|Lighthouse Lab in Glasgow|Wellcome Sanger Institute for the COVID-19 Genomics UK (COG-UK) consortium|Davies|United Kingdom  
>Spike|hCoV-19/Wales/PHWC-35F6F/2020|2020-04-27|EPI\_ISL\_474596|Original|hCoV-19^^Wales|Human|Originating lab|COVID-19 Genomics UK (COG-UK) Consortium|Moore|United Kingdom  
>Spike|hCoV-19/Wales/PHWC-4A38F4/2020|2020-12-16|EPI\_ISL\_764588|Original|hCoV-19^^Wales|Human|Wales Specialist Virology Centre Sequencing lab|COVID-19 Genomics UK (COG-UK) Consortium|Moore|United Kingdom  
>Spike|hCoV-19/Denmark/DCGC-5239/2020|2020-09-14|EPI\_ISL\_615170|Original|hCoV-19^^Sjaelland|Human|Department of Virus and Microbiological Special Diagnostics|Albertsen lab|Michaelsen|Denmark  
>Spike|hCoV-19/Denmark/DCGC-18299/2020|2020-12-07|EPI\_ISL\_749872|Original|hCoV-19^^Hovedstaden|Human|Department of Virus and Microbiological Special Diagnostics|Albertsen Lab|Michaelsen|Denmark  
>Spike|hCoV-19/USA/TX-HMH-MCoV-13591/2020|2020-08-21|EPI\_ISL\_788701|Original|hCoV-19^^Texas|Human|Houston Methodist Hospital|Houston Methodist Hospital|Long|USA  
>Spike|hCoV-19/Denmark/DCGC-2417/2020|2020-08-10|EPI\_ISL\_617599|Original|hCoV-19^^Midtjylland|Human|Department of Virus and Microbiological Special Diagnostics|Albertsen lab|Michaelsen|Denmark  
>Spike|hCoV-19/Scotland/QEUA-BF1993/2020|2020-12-05|EPI\_ISL\_710652|Original|hCoV-19^^Scotland|Human|Lighthouse Lab in Glasgow|Wellcome Sanger Institute for the COVID-19 Genomics UK (COG-UK) Consortium|Davies|United Kingdom  
>Spike|hCoV-19/Scotland/CVR4843/2020|2020-10-02|EPI\_ISL\_594646|Original|hCoV-19^^Scotland|Human|West of Scotland Specialist Virology Centre|COVID-19 Genomics UK (COG-UK) Consortium|Robertson|United Kingdom  
>Spike|hCoV-19/USA/TX-HMH-MCoV-8729/2020|2020-07-01|EPI\_ISL\_780723|Original|hCoV-19^^Texas|Human|Houston Methodist Hospital|Houston Methodist Hospital|Long|USA  
>Spike|hCoV-19/France/PAC-IHU-0200/2020|2020-03-27|EPI\_ISL\_569367|Original|hCoV-19^^Provence-Alpes-C\u00f4te-d\u00e0z|Human|MEPHI|MEPHI|Levasseur|France  
>Spike|hCoV-19/England/CAMC-A66332/2020|2020-10-11|EPI\_ISL\_627317|Original|hCoV-19^^England|Human|University of Exeter|COVID-19 Genomics UK (COG-UK) Consortium|Temperton|United Kingdom  
>Spike|hCoV-19/USA/WA-S1036/2020|2020-05-03|EPI\_ISL\_463526|Original|hCoV-19^^Washington|Human|Washington State Department of Health|Seattle Flu Study|Bedford|USA

>Spike|hCoV-19/Scotland/CVR4201/2020|2020-08-30|EPI\_ISL\_540869|Original|hCoV-19^^Scotland|Human|Lighthouse Lab in Glasgow / MRC-University of Glasgow Centre for Virus Research|COVID-19 Genomics UK (COG-UK) Consortium|Robertson|United Kingdom

>Spike|hCoV-19/England/QEUEH-96B6F9/2020|2020-08-14|EPI\_ISL\_531411|Original|hCoV-19^^England|Human|Lighthouse Lab in Glasgow|Wellcome Sanger Institute for the COVID-19 Genomics UK (COG-UK) consortium|Davies|United Kingdom

>Spike|hCoV-19/USA/TX-HMH-5062/2020|2020-06-24|EPI\_ISL\_544497|Original|hCoV-19^^Texas|Human|Houston Methodist Hospital|Houston Methodist Hospital|Long|USA

>Spike|hCoV-19/USA/TX-HMH-MCoV-12799/2020|2020-08-19|EPI\_ISL\_790532|Original|hCoV-19^^Texas|Human|Houston Methodist Hospital|Houston Methodist Hospital|Long|USA

>Spike|hCoV-19/England/ALDP-A6FA43/2020|2020-10-15|EPI\_ISL\_607788|Original|hCoV-19^^England|Human|Lighthouse Lab in Alderley Park|Wellcome Sanger Institute for the COVID-19 Genomics UK (COG-UK) consortium|Davies|United Kingdom

>Spike|hCoV-19/USA/TX-HMH-4459/2020|2020-06-17|EPI\_ISL\_543636|Original|hCoV-19^^Texas|Human|Houston Methodist Hospital|Houston Methodist Hospital|Long|USA

>Spike|hCoV-19/Wales/ALDP-BB5658/2020|2020-11-20|EPI\_ISL\_710701|Original|hCoV-19^^Wales|Human|Lighthouse Lab in Alderley Park|Wellcome Sanger Institute for the COVID-19 Genomics UK (COG-UK) Consortium|Davies|United Kingdom

>Spike|hCoV-19/USA/TX-HMH-MCoV-13527/2020|2020-08-21|EPI\_ISL\_788652|Original|hCoV-19^^Texas|Human|Houston Methodist Hospital|Houston Methodist Hospital|Long|USA

>Spike|hCoV-19/England/LEED-2AA130/2020|2020-03-12|EPI\_ISL\_538933|Original|hCoV-19^^England|Human|Leeds Teaching Hospitals NHS Trust and Public Health England|Wellcome Sanger Institute for the COVID-19 Genomics UK (COG-UK) consortium|Davies|United Kingdom

>Spike|hCoV-19/India/TG-CCMB-AA19/2020|2020-08-10|EPI\_ISL\_539680|Original|hCoV-19^^Telangana|Human|CSIR-Centre for Cellular and Molecular Biology|CSIR-Centre for Cellular and Molecular Biology|Mukherjee|India

>Spike|hCoV-19/United Arab Emirates/0954/2020|2020-06-28|EPI\_ISL\_699090|Original|hCoV-19^^Abu Dhabi|Human|Group 42 (G42) Healthcare|G42 Healthcare|Ogrodzki|United Arab Emirates

>Spike|hCoV-19/New Zealand/20VR1797/2020|2020-03-23|EPI\_ISL\_456256|Original|hCoV-19^^Counties Manukau|Human|Middlemore Hospital|Institute of Environmental Science and Research (ESR)|de Ligt|New Zealand

>Spike|hCoV-19/Denmark/DCGC-5872/2020|2020-09-28|EPI\_ISL\_621059|Original|hCoV-19^^Midtjylland|Human|Department of Virus and Microbiological Special Diagnostics|Albertsen lab|Michaelsen|Denmark

>Spike|hCoV-19/Switzerland/BE-ETHZ-400055/2020|2020-12-05|EPI\_ISL\_729111|Original|hCoV-19^^Bern|Human|Viollier AG|Department of Biosystems Science and Engineering|Nadeau|Switzerland

>Spike|hCoV-19/Wales/MILK-9D3F88/2020|2020-09-18|EPI\_ISL\_601726|Original|hCoV-19^^Wales|Human|Lighthouse Lab in Milton Keynes|Wellcome Sanger Institute for the COVID-19 Genomics UK (COG-UK) consortium|Davies|United Kingdom

>Spike|hCoV-19/England/ALDP-952F09/2020|2020-06-11|EPI\_ISL\_553694|Original|hCoV-19^^England|Human|Lighthouse Lab in Alderley Park|Wellcome Sanger Institute for the COVID-19 Genomics UK (COG-UK) consortium|Davies|United Kingdom

>Spike|hCoV-19/Wales/PHWC-48993D/2020|2020-10-24|EPI\_ISL\_652427|Original|hCoV-19^^Wales|Human|Wales Specialist Virology Centre Sequencing lab|COVID-19 Genomics UK (COG-UK) Consortium|Moore|United Kingdom

>Spike|hCoV-19/Spain/RI-IBV-98002337/2020|2020-03-26|EPI\_ISL\_537850|Original|hCoV-19^^La Rioja|Human|Centro de Investigaci\u00f3n Biom\u00e9dica de La Rioja - Hospital San Pedro Logro\u00f1o|SeqCOVID-SPAIN consortium/IBV (CSIC)|Comas|Spain

>Spike|hCoV-19/England/ALDP-A2D7B3/2020|2020-10-06|EPI\_ISL\_586807|Original|hCoV-19^^England|Human|Lighthouse Lab in Alderley Park|Wellcome Sanger Institute for the COVID-19 Genomics UK (COG-UK) consortium|Davies|United Kingdom

>Spike|hCoV-19/England/SHEF-CF53B/2020|2020-04-27|EPI\_ISL\_475479|Original|hCoV-19^^England|Human|Virology Department|COVID-19 Genomics UK (COG-UK) Consortium|de Silva|United Kingdom

>Spike|hCoV-19/Northern Ireland/NIRE-1013D8/2020|2020-04-30|EPI\_ISL\_482096|Original|hCoV-19^^Northern Ireland|Human|Regional Virus

Laboratory|Wellcome Sanger Institute for the COVID-19 Genomics UK (COG-UK) consortium|Davies|United Kingdom  
>Spike|hCoV-19/Scotland/QEUH-9DE71C/2020|2020-09-21|EPI\_ISL\_601223|Original|hCoV-19^^Scotland|Human|Lighthouse Lab in Glasgow|Wellcome Sanger Institute for the COVID-19 Genomics UK (COG-UK) consortium|Davies|United Kingdom  
>Spike|hCoV-19/Switzerland/ZH-UZH-IMV109/2020|2020-12-20|EPI\_ISL\_730626|Original|hCoV-19^^Zurich|Human|M\u00e4nnedorf Hospital|Institute of Medical Virology|Schmutz|Switzerland  
>Spike|hCoV-19/Singapore/1499/2020|2020-12-22|EPI\_ISL\_754108|Original|hCoV-19^^Singapore|Human|National Public Health Laboratory|National Public Health Laboratory|Mak|Singapore  
>Spike|hCoV-19/Netherlands/NA\_505/2020|2020-03-26|EPI\_ISL\_460678|Original|hCoV-19^^Netherlands|Human|Dutch COVID-19 response team|Erasmus Medical Center|Oude Munnink|Netherlands  
>Spike|hCoV-19/USA/NY-Wadsworth-241579-01/2020|2020-10-09|EPI\_ISL\_734332|Original|hCoV-19^^New York|Human|Wadsworth Center|Wadsworth Center|Lasek-Nesselquist|USA  
>Spike|hCoV-19/Scotland/CVR5790/2020|2020-11-09|EPI\_ISL\_680447|Original|hCoV-19^^Scotland|Human|West of Scotland Specialist Virology Centre|COVID-19 Genomics UK (COG-UK) Consortium|Robertson|United Kingdom  
>Spike|hCoV-19/England/QEUH-95FDF3/2020|2020-08-04|EPI\_ISL\_531910|Original|hCoV-19^^England|Human|Lighthouse Lab in Glasgow|Wellcome Sanger Institute for the COVID-19 Genomics UK (COG-UK) consortium|Davies|United Kingdom  
>Spike|hCoV-19/Switzerland/VD-ETHZ-321462/2020|2020-10-14|EPI\_ISL\_603677|Original|hCoV-19^^Vaud|Human|Viollier AG|Department of Biosystems Science and Engineering|Nadeau|Switzerland  
>Spike|hCoV-19/England/CAMC-B082BC/2020|2020-10-29|EPI\_ISL\_643637|Original|hCoV-19^^England|Human|Lighthouse Lab in Cambridge|Wellcome Sanger Institute for the COVID-19 Genomics UK (COG-UK) Consortium|Davies|United Kingdom  
>Spike|hCoV-19/England/QEUH-AD389B/2020|2020-10-26|EPI\_ISL\_633913|Original|hCoV-19^^England|Human|Lighthouse Lab in Glasgow|Wellcome Sanger Institute for the COVID-19 Genomics UK (COG-UK) consortium|Davies|United Kingdom  
>Spike|hCoV-19/England/QEUH-B43349/2020|2020-11-08|EPI\_ISL\_657132|Original|hCoV-19^^England|Human|Lighthouse Lab in Glasgow|Wellcome Sanger Institute for the COVID-19 Genomics UK (COG-UK) Consortium|Davies|United Kingdom  
>Spike|hCoV-19/England/LIVE-A4B67/2020|2020-03-13|EPI\_ISL\_499942|Original|hCoV-19^^England|Human|Liverpool Clinical Laboratories|COVID-19 Genomics UK (COG-UK) Consortium|Haldenby|United Kingdom  
>Spike|hCoV-19/Canada/ON-E31/2020|2020-05-25|EPI\_ISL\_593509|Original|hCoV-19^^Ontario|Human|Eastern Ontario Regional Laboratory Association|McMaster University|McArthur|Canada  
>Spike|hCoV-19/Scotland/QEUH-A9EBDF/2020|2020-10-20|EPI\_ISL\_625315|Original|hCoV-19^^Scotland|Human|Lighthouse Lab in Glasgow|Wellcome Sanger Institute for the COVID-19 Genomics UK (COG-UK) consortium|Davies|United Kingdom  
>Spike|hCoV-19/Scotland/QEUH-AAE51A/2020|2020-10-22|EPI\_ISL\_624049|Original|hCoV-19^^Scotland|Human|Lighthouse Lab in Glasgow|Wellcome Sanger Institute for the COVID-19 Genomics UK (COG-UK) consortium|Davies|United Kingdom  
>Spike|hCoV-19/England/20149014604/2020|2020-04-03|EPI\_ISL\_466160|Original|hCoV-19^^England|Human|Respiratory Virus Unit|Respiratory Virus Unit|Platt|United Kingdom  
>Spike|hCoV-19/Netherlands/NH-RIVM-20232/2020|2020-12-01|EPI\_ISL\_723382|Original|hCoV-19^^Noord-Holland|Human|Dutch COVID-19 response team|National Institute for Public Health and the Environment (RIVM)|Meijer|Netherlands  
>Spike|hCoV-19/USA/UT-UPHL-2012460409/2020|2020-10-23|EPI\_ISL\_745540|Original|hCoV-19^^Utah|Human|Ginkgo Bioworks Clinical Laboratory|Utah Public Health Laboratory|Young|USA  
>Spike|hCoV-19/England/204642473/2020|2020-11-11|EPI\_ISL\_683517|Original|hCoV-19^^England|Human|Respiratory Virus Unit|COVID-19 Genomics UK (COG-UK) Consortium|Platt|United Kingdom  
>Spike|hCoV-19/England/LEED-2AA060/2020|2020-04-08|EPI\_ISL\_538875|Original|hCoV-19^^England|Human|Leeds Teaching Hospitals NHS Trust and Public Health

England|Wellcome Sanger Institute for the COVID-19 Genomics UK (COG-UK) consortium|Davies|United Kingdom  
>Spike|hCoV-19/England/QEUH-AD23D7/2020|2020-10-26|EPI\_ISL\_634043|Original|hCoV-19^^England|Human|Lighthouse Lab in Glasgow|Wellcome Sanger Institute for the COVID-19 Genomics UK (COG-UK) consortium|Davies|United Kingdom  
>Spike|hCoV-19/Wales/ALDP-BE8E54/2020|2020-12-03|EPI\_ISL\_710647|Original|hCoV-19^^Wales|Human|Lighthouse Lab in Alderley Park|Wellcome Sanger Institute for the COVID-19 Genomics UK (COG-UK) Consortium|Davies|United Kingdom  
>Spike|hCoV-19/USA/TX-HMH-MCoV-13604/2020|2020-08-21|EPI\_ISL\_788714|Original|hCoV-19^^Texas|Human|Houston Methodist Hospital|Houston Methodist Hospital|Long|USA  
>Spike|hCoV-19/USA/TX-HMH-MCoV-10392/2020|2020-07-08|EPI\_ISL\_789448|Original|hCoV-19^^Texas|Human|Houston Methodist Hospital|Houston Methodist Hospital|Long|USA  
>Spike|hCoV-19/USA/TX-HMH-MCoV-19599/2020|2020-11-28|EPI\_ISL\_783969|Original|hCoV-19^^Texas|Human|Houston Methodist Hospital|Houston Methodist Hospital|Long|USA  
>Spike|hCoV-19/England/BIRM-605C3/2020|2020-05-28|EPI\_ISL\_477733|Original|hCoV-19^^England|Human|University of Birmingham|COVID-19 Genomics UK (COG-UK) Consortium|Loman|United Kingdom  
>Spike|hCoV-19/Wales/PHWC-492685/2020|2020-11-20|EPI\_ISL\_725681|Original|hCoV-19^^Wales|Human|Originating lab|COVID-19 Genomics UK (COG-UK) Consortium|Moore|United Kingdom  
>Spike|hCoV-19/Russia/OMS-ORINFI-3818S/2020|2020-06-02|EPI\_ISL\_639926|Original|hCoV-19^^Omsk|Human|Omsk Research Institute of Natural Focal Infections|WHO National Influenza Centre Russian Federation|Komissarov|Russia  
>Spike|hCoV-19/England/EXET-13E642/2020|2020-00-00|EPI\_ISL\_724338|Original|hCoV-19^^England|Human|University of Exeter|COVID-19 Genomics UK (COG-UK) Consortium|Temperton|United Kingdom  
>Spike|hCoV-19/Denmark/DCGC-21357/2020|2020-12-21|EPI\_ISL\_759699|Original|hCoV-19^^Hovedstaden|Human|Department of Virus and Microbiological Special Diagnostics|Albertsen Lab|Michaelsen|Denmark  
>Spike|hCoV-19/Australia/NSW1083/2020|2020-08-08|EPI\_ISL\_593712|Original|hCoV-19^^New South Wales|Human|South Eastern Area Laboratory Services (SEALS)|NSW Health Pathology - Institute of Clinical Pathology and Medical Research; Westmead Hospital; University of Sydney|Gall|Australia  
>Spike|hCoV-19/Japan/PG-5037/2020|2020-07-00|EPI\_ISL\_690148|Original|hCoV-19^^Japan|Human|Pathogen Genomics Center|Pathogen Genomics Center|Sekizuka|Japan  
>Spike|hCoV-19/England/QEUH-9D2D9E/2020|2020-09-19|EPI\_ISL\_584810|Original|hCoV-19^^England|Human|Centre for Enzyme Innovation|COVID-19 Genomics UK (COG-UK) Consortium|Robson|United Kingdom  
>Spike|hCoV-19/England/NORW-E6ECA/2020|2020-04-20|EPI\_ISL\_448989|Original|hCoV-19^^England|Human|Quadram Institute Bioscience|COVID-19 Genomics UK (COG-UK) Consortium|Alikhan|United Kingdom  
>Spike|hCoV-19/Denmark/DCGC-19288/2020|2020-12-07|EPI\_ISL\_748866|Original|hCoV-19^^Hovedstaden|Human|Department of Virus and Microbiological Special Diagnostics|Albertsen Lab|Michaelsen|Denmark  
>Spike|hCoV-19/Mexico/BCN-ALSR-2544/2020|2020-06-26|EPI\_ISL\_635547|Original|hCoV-19^^Baja California|Human|Centro de Diagn\u00f3stico COVID-19 UABC Tijuana|Andersen lab at Scripps Research|Gangavarapu|Mexico  
>Spike|hCoV-19/USA/AZ-QDX-1802/2020|2020-03-17|EPI\_ISL\_604095|Original|hCoV-19^^Arizona|Human|Quest Diagnostics|Quest Diagnostics|Kagan|USA  
>Spike|hCoV-19/USA/ME-HETL-J0108/2020|2020-08-27|EPI\_ISL\_755312|Original|hCoV-19^^Maine|Human|Maine Health and Environmental Testing Laboratory|Tewhey Lab|Tewhey|USA  
>Spike|hCoV-19/Wales/PHWC-48BCAB/2020|2020-10-31|EPI\_ISL\_666343|Original|hCoV-19^^Wales|Human|Wales Specialist Virology Centre Sequencing lab|COVID-19 Genomics UK (COG-UK) Consortium|Moore|United Kingdom  
>Spike|hCoV-19/Wales/PHWC-49C375/2020|2020-11-18|EPI\_ISL\_742547|Original|hCoV-19^^Wales|Human|Wales Specialist Virology Centre Sequencing lab|COVID-19 Genomics UK (COG-UK) Consortium|Moore|United Kingdom

>Spike|hCoV-19/England/CAMC-B52F9E/2020|2020-11-09|EPI\_ISL\_657691|Original|hCoV-19^^England|Human|Lighthouse Lab in Cambridge|Wellcome Sanger Institute for the COVID-19 Genomics UK (COG-UK) Consortium|Davies|United Kingdom

>Spike|hCoV-19/Portugal/PT1713/2020|2020-08-24|EPI\_ISL\_693640|Original|hCoV-19^^Portugal|Human|Hospital Vila Franca de Xira|Instituto Nacional de Saude (INSA)|Borges|Portugal

>Spike|hCoV-19/England/QEUH-96373A/2020|2020-08-10|EPI\_ISL\_531759|Original|hCoV-19^^England|Human|Lighthouse Lab in Glasgow|Wellcome Sanger Institute for the COVID-19 Genomics UK (COG-UK) consortium|Davies|United Kingdom

>Spike|hCoV-19/India/MH-ACTREC-227/2020|2020-07-02|EPI\_ISL\_699881|Original|hCoV-19^^Maharashtra|Human|Hematopathology Laboratory|Hematopathology Laboratory|Patkar|India

>Spike|hCoV-19/England/NORW-E9FE2/2020|2020-05-02|EPI\_ISL\_448383|Original|hCoV-19^^England|Human|Quadram Institute Bioscience|COVID-19 Genomics UK (COG-UK) Consortium|Alikhan|United Kingdom

>Spike|hCoV-19/Jordan/AQ-ALSR-5242/2020|2020-10-06|EPI\_ISL\_730480|Original|hCoV-19^^Aqaba|Human|Biolab Diagnostic Laboratories|Andersen lab at Scripps Research|Gangavarapu|Jordan

>Spike|hCoV-19/England/ALDP-9BE9D0/2020|2020-09-10|EPI\_ISL\_568093|Original|hCoV-19^^England|Human|Lighthouse Lab in Alderley Park|Wellcome Sanger Institute for the COVID-19 Genomics UK (COG-UK) consortium|Davies|United Kingdom

>Spike|hCoV-19/USA/FL-USAFSAM-S019/2020|2020-04-01|EPI\_ISL\_512793|Original|hCoV-19^^Florida|Human|Public Health|Public Health|Fries|USA

>Spike|hCoV-19/USA/CA-ALSR-4865/2020|2020-10-28|EPI\_ISL\_730185|Original|hCoV-19^^California|Human|San Diego County Public Health Laboratory|Andersen lab at Scripps Research|Gangavarapu|USA

>Spike|hCoV-19/England/LOND-12504C4/2020|2020-10-21|EPI\_ISL\_665213|Original|hCoV-19^^England|Human|University College London Hospital|COVID-19 Genomics UK (COG-UK) Consortium|Byott|United Kingdom

>Spike|hCoV-19/France/PAC-IHU-0822/2020|2020-05-15|EPI\_ISL\_568979|Original|hCoV-19^^Provence-Alpes-C\u00f4te-d\u2019Azur|Human|MEPHI|MEPHI|Levasseur|France

>Spike|hCoV-19/England/CAMB-7FD23/2020|2020-04-18|EPI\_ISL\_444406|Original|hCoV-19^^England|Human|Department of Pathology|COVID-19 Genomics UK (COG-UK) Consortium|Meredith|United Kingdom

>Spike|hCoV-19/Canada/ON-S77/2020|2020-03-19|EPI\_ISL\_586440|Original|hCoV-19^^Ontario|Human|Toronto Invasive Bacterial Diseases Network|McMaster University|McArthur|Canada

>Spike|hCoV-19/England/QEUH-B41387/2020|2020-11-08|EPI\_ISL\_658541|Original|hCoV-19^^England|Human|Lighthouse Lab in Glasgow|Wellcome Sanger Institute for the COVID-19 Genomics UK (COG-UK) Consortium|Davies|United Kingdom

>Spike|hCoV-19/England/CAMB-1B5F84/2020|2020-09-15|EPI\_ISL\_573143|Original|hCoV-19^^England|Human|Department of Pathology|COVID-19 Genomics UK (COG-UK) Consortium|Goodfellow|United Kingdom

>Spike|hCoV-19/Japan/PG-0833/2020|2020-04-00|EPI\_ISL\_684443|Original|hCoV-19^^Japan|Human|Fukuoka Institute of Health and Environmental Sciences|Pathogen Genomics Center|Sekizuka|Japan

>Spike|hCoV-19/United Arab Emirates/0406/2020|2020-05-15|EPI\_ISL\_698581|Original|hCoV-19^^Abu Dhabi|Human|Group 42 (G42) Healthcare|G42 Healthcare|Ogrodzki|United Arab Emirates

>Spike|hCoV-19/Wales/PHWC-49B9FC/2020|2020-12-06|EPI\_ISL\_742414|Original|hCoV-19^^Wales|Human|Wales Specialist Virology Centre Sequencing lab|COVID-19 Genomics UK (COG-UK) Consortium|Moore|United Kingdom

>Spike|hCoV-19/Kenya/C4214/2020|2020-06-05|EPI\_ISL\_568725|Original|hCoV-19^^Mombasa|Human|KEMRI-Wellcome Trust Research Programme|KEMRI-CGMR-C Kilifi|KEMRI-Wellcome Trust Research Programme|KEMRI-CGMR-C Kilifi|Githinji|Kenya

>Spike|hCoV-19/Switzerland/ZH-ETHZ-300401/2020|2020-09-29|EPI\_ISL\_603367|Original|hCoV-19^^Zurich|Human|Viollier AG|Department of Biosystems Science and Engineering|Nadeau|Switzerland

>Spike|hCoV-19/England/MILK-ABB6DB/2020|2020-10-20|EPI\_ISL\_623418|Original|hCoV-19^^England|Human|Lighthouse Lab in Milton Keynes|Wellcome Sanger Institute for the COVID-19 Genomics UK (COG-UK) consortium|Davies|United Kingdom

>Spike|hCoV-19/USA/TX-DSHS-1245/2020|2020-05-29|EPI\_ISL\_644186|Original|hCoV-19^^Texas|Human|Texas Department of State Health Services|Texas Department of State Health Services|Rahman|USA

>Spike|hCoV-19/USA/CA-CZB-1156/2020|2020-04-26|EPI\_ISL\_454617|Original|hCoV-19^^California|Human|UCSF Clinical Microbiology Laboratory|Chan-Zuckerberg Biohub|Hao|USA

>Spike|hCoV-19/USA/WA-S285/2020|2020-03-29|EPI\_ISL\_430139|Original|hCoV-19^^Washington|Human|Seattle Flu Study|Seattle Flu Study|Bedford|USA

>Spike|hCoV-19/Zimbabwe/ZW-6983/2020|2020-05-01|EPI\_ISL\_644763|Original|hCoV-19^^Zimbabwe|Human|National Microbiology Reference Laboratory|Quadram Institute Bioscience|Alikhan|Zimbabwe

>Spike|hCoV-19/mink/Denmark/mDK-156/2020|2020-11-05|EPI\_ISL\_683007|Original|hCoV-19^^Denmark|Neovison vison|Department of Virus and Microbiological Special Diagnostics|Albertsen Lab|Michaelsen|Denmark

>Spike|hCoV-19/Switzerland/SH-ETHZ-410241/2020|2020-11-27|EPI\_ISL\_737772|Original|hCoV-19^^Schaffhausen|Human|Viollier AG|Department of Biosystems Science and Engineering|Nadeau|Switzerland

>Spike|hCoV-19/England/CAMC-9D7160/2020|2020-09-20|EPI\_ISL\_584349|Original|hCoV-19^^England|Human|Virology Department|COVID-19 Genomics UK (COG-UK) Consortium|de Silva|United Kingdom

>Spike|hCoV-19/USA/MI-QDX-1943/2020|2020-03-15|EPI\_ISL\_604226|Original|hCoV-19^^Michigan|Human|Quest Diagnostics|Quest Diagnostics|Kagan|USA

>Spike|hCoV-19/USA/WI-WSLH-200364/2020|2020-04-21|EPI\_ISL\_578534|Original|hCoV-19^^Wisconsin|Human|Wisconsin State Laboratory of Hygiene Communicable Disease Division|Wisconsin State Laboratory of Hygiene Communicable Disease Division|Florek|USA

>Spike|hCoV-19/England/MILK-4BD271/2020|2020-06-06|EPI\_ISL\_559117|Original|hCoV-19^^England|Human|Lighthouse Lab in Milton Keynes|Wellcome Sanger Institute for the COVID-19 Genomics UK (COG-UK) consortium|Davies|United Kingdom

>Spike|hCoV-19/England/ALDP-9E67D5/2020|2020-09-24|EPI\_ISL\_580358|Original|hCoV-19^^England|Human|Lighthouse Lab in Alderley Park|Wellcome Sanger Institute for the COVID-19 Genomics UK (COG-UK) consortium|Davies|United Kingdom

>Spike|hCoV-19/England/MILK-A7D2B3/2020|2020-10-13|EPI\_ISL\_606377|Original|hCoV-19^^England|Human|Lighthouse Lab in Milton Keynes|Wellcome Sanger Institute for the COVID-19 Genomics UK (COG-UK) consortium|Davies|United Kingdom

>Spike|hCoV-19/Wales/PHWC-48C606/2020|2020-11-07|EPI\_ISL\_666448|Original|hCoV-19^^Wales|Human|Wales Specialist Virology Centre Sequencing lab|COVID-19 Genomics UK (COG-UK) Consortium|Moore|United Kingdom

>Spike|hCoV-19/USA/TX-HMH-MCoV-8398/2020|2020-06-29|EPI\_ISL\_784371|Original|hCoV-19^^Texas|Human|Houston Methodist Hospital|Houston Methodist Hospital|Long|USA

>Spike|hCoV-19/Bangladesh/NIB-01/2020|2020-05-11|EPI\_ISL\_447904|Original|hCoV-19^^Bangladesh|Human|National Institute of Biotechnology|National Institute of Biotechnology|Hossain|Bangladesh

>Spike|hCoV-19/Wales/PHWC-16F2CC/2020|2020-09-30|EPI\_ISL\_585942|Original|hCoV-19^^Wales|Human|Wales Specialist Virology Centre Sequencing lab|COVID-19 Genomics UK (COG-UK) Consortium|Moore|United Kingdom

>Spike|hCoV-19/Russia/SVE-RII-MH1918S/2020|2020-09-17|EPI\_ISL\_602366|Original|hCoV-19^^Sverdlovsk|Human|HELIX LLC|WHO National Influenza Centre Russian Federation|Komissarov|Russia

>Spike|hCoV-19/England/ALDP-94ED7F/2020|2020-06-17|EPI\_ISL\_556329|Original|hCoV-19^^England|Human|Lighthouse Lab in Alderley Park|Wellcome Sanger Institute for the COVID-19 Genomics UK (COG-UK) consortium|Davies|United Kingdom

>Spike|hCoV-19/USA/TX-HMH-MCoV-8636/2020|2020-07-01|EPI\_ISL\_780665|Original|hCoV-19^^Texas|Human|Houston Methodist Hospital|Houston Methodist Hospital|Long|USA

>Spike|hCoV-19/South Africa/KRISP-K002847/2020|2020-09-01|EPI\_ISL\_602663|Original|hCoV-19^^KwaZulu-Natal|Human|NHLS-IALCH|KRISP|de Oliveira|South Africa



>Spike|hCoV-19/England/MILK-D070FD/2020|2020-12-19|EPI\_ISL\_781539|Original|hCoV-19^^England|Human|Lighthouse Lab in Milton Keynes|Wellcome Sanger Institute for the COVID-19 Genomics UK (COG-UK) Consortium|Davies|United Kingdom

>Spike|hCoV-19/England/MILK-AC93D3/2020|2020-10-21|EPI\_ISL\_630101|Original|hCoV-19^^England|Human|Lighthouse Lab in Milton Keynes|Wellcome Sanger Institute for the COVID-19 Genomics UK (COG-UK) consortium|Davies|United Kingdom

>Spike|hCoV-19/USA/CA-CZB-14603/2020|2020-10-29|EPI\_ISL\_739315|Original|hCoV-19^^California|Human|Napa-Solano-Yolo- Marin County (NSYM) Public Health Laboratories|Chan-Zuckerberg Biohub|Kamm|USA

>Spike|hCoV-19/England/QEUEH-A1E71F/2020|2020-09-29|EPI\_ISL\_587441|Original|hCoV-19^^England|Human|Lighthouse Lab in Glasgow|Wellcome Sanger Institute for the COVID-19 Genomics UK (COG-UK) consortium|Davies|United Kingdom

>Spike|hCoV-19/Wales/PHWC-49D1F2/2020|2020-12-10|EPI\_ISL\_742749|Original|hCoV-19^^Wales|Human|Wales Specialist Virology Centre Sequencing lab|COVID-19 Genomics UK (COG-UK) Consortium|Moore|United Kingdom

>Spike|hCoV-19/Turkey/IST-GLAB-269/2020|2020-05-21|EPI\_ISL\_735326|Original|hCoV-19^^Istanbul|Human|Genomic Laboratory (GLAB) (Conjoint lab of Health Directorate of Istanbul and Istanbul Technical University)|Genomic Laboratory (GLAB)|Karacan|Turkey

>Spike|hCoV-19/USA/VA-DCLS-1018/2020|2020-06-02|EPI\_ISL\_526908|Original|hCoV-19^^Virginia|Human|Virginia DCLS|Virginia DCLS|St. Jacques|USA

>Spike|hCoV-19/Australia/TAS16/2020|2020-04-10|EPI\_ISL\_522616|Original|hCoV-19^^Tasmania|Human|Royal Hobart Hospital Microbiology Department|MDU-PHL|Schultz|Australia

>Spike|hCoV-19/England/SHEF-C82D1/2020|2020-04-14|EPI\_ISL\_448867|Original|hCoV-19^^England|Human|Virology Department|COVID-19 Genomics UK (COG-UK) Consortium|de Silva|United Kingdom

>Spike|hCoV-19/England/WSFT-25C1194/2020|2020-05-04|EPI\_ISL\_492898|Original|hCoV-19^^England|Human|Department of Medical Microbiology|Wellcome Sanger Institute for the COVID-19 Genomics UK (COG-UK) consortium|Davies|United Kingdom

>Spike|hCoV-19/England/MILK-A7A939/2020|2020-10-15|EPI\_ISL\_606592|Original|hCoV-19^^England|Human|Lighthouse Lab in Milton Keynes|Wellcome Sanger Institute for the COVID-19 Genomics UK (COG-UK) consortium|Davies|United Kingdom

>Spike|hCoV-19/England/ALDP-97C3C1/2020|2020-07-14|EPI\_ISL\_526302|Original|hCoV-19^^England|Human|University of Birmingham|COVID-19 Genomics UK (COG-UK) Consortium|Loman|United Kingdom

>Spike|hCoV-19/England/PORT-2D7361/2020|2020-10-21|EPI\_ISL\_628332|Original|hCoV-19^^England|Human|Centre for Enzyme Innovation|COVID-19 Genomics UK (COG-UK) Consortium|Robson|United Kingdom

>Spike|hCoV-19/USA/TX-HMH-MCoV-8480/2020|2020-07-01|EPI\_ISL\_780585|Original|hCoV-19^^Texas|Human|Houston Methodist Hospital|Houston Methodist Hospital|Long|USA

>Spike|hCoV-19/England/CAMC-B08D60/2020|2020-10-29|EPI\_ISL\_673011|Original|hCoV-19^^England|Human|Lighthouse Lab in Cambridge|Wellcome Sanger Institute for the COVID-19 Genomics UK (COG-UK) Consortium|Davies|United Kingdom

>Spike|hCoV-19/England/ALDP-953111/2020|2020-06-11|EPI\_ISL\_553681|Original|hCoV-19^^England|Human|Lighthouse Lab in Alderley Park|Wellcome Sanger Institute for the COVID-19 Genomics UK (COG-UK) consortium|Davies|United Kingdom

>Spike|hCoV-19/England/ALDP-71C547/2020|2020-07-01|EPI\_ISL\_557690|Original|hCoV-19^^England|Human|Lighthouse Lab in Alderley Park|Wellcome Sanger Institute for the COVID-19 Genomics UK (COG-UK) consortium|Davies|United Kingdom

>Spike|hCoV-19/England/ALDP-B84810/2020|2020-11-14|EPI\_ISL\_675806|Original|hCoV-19^^England|Human|Lighthouse Lab in Alderley Park|Wellcome Sanger Institute for the COVID-19 Genomics UK (COG-UK) Consortium|Davies|United Kingdom

>Spike|hCoV-19/England/OXON-AC868/2020|2020-04-07|EPI\_ISL\_448488|Original|hCoV-19^^England|Human|Oxford Viromics|COVID-19 Genomics UK (COG-UK) Consortium|Golubchik|United Kingdom

>Spike|hCoV-19/Iceland/88/2020|2020-03-10|EPI\_ISL\_417675|Original|hCoV-19^^Reykjavik|Human|The National University Hospital of Iceland|deCODE genetics|J\u00f3nsson|Iceland

>Spike|hCoV-19/USA/CA-IGI-0442/2020|2020-07-10|EPI\_ISL\_677825|Original|hCoV-19^^California|Human|Innovative Genomics Institute|Innovative Genomics Institute|Wyman|USA

>Spike|hCoV-19/USA/FL-BPHL-1559/2020|2020-09-09|EPI\_ISL\_568657|Original|hCoV-19^^Florida|Human|Florida Bureau of Public Health Laboratories|Florida Bureau of Public Health Laboratories|Blanton|USA

>Spike|hCoV-19/England/ALDP-6DAA74/2020|2020-06-30|EPI\_ISL\_556106|Original|hCoV-19^^England|Human|Lighthouse Lab in Alderley Park|Wellcome Sanger Institute for the COVID-19 Genomics UK (COG-UK) consortium|Davies|United Kingdom

>Spike|hCoV-19/Denmark/DCGC-9815/2020|2020-11-09|EPI\_ISL\_669201|Original|hCoV-19^^Denmark|Human|Department of Virus and Microbiological Special Diagnostics|Albertsen Lab|Michaelsen|Denmark

>Spike|hCoV-19/USA/TX-HMH-7227/2020|2020-06-29|EPI\_ISL\_546612|Original|hCoV-19^^Texas|Human|Houston Methodist Hospital|Houston Methodist Hospital|Long|USA

>Spike|hCoV-19/England/QEUA-9C91BC/2020|2020-09-11|EPI\_ISL\_567231|Original|hCoV-19^^England|Human|Lighthouse Lab in Glasgow|Wellcome Sanger Institute for the COVID-19 Genomics UK (COG-UK) Consortium|Davies|United Kingdom

>Spike|hCoV-19/Australia/WA160/2020|2020-03-21|EPI\_ISL\_596723|Original|hCoV-19^^Western Australia|Human|PathWest Laboratory Medicine WA|PathWest Laboratory Medicine WA Microbial Surveillance Unit|Sikazwe|Australia

>Spike|hCoV-19/Denmark/DCGC-4594/2020|2020-09-21|EPI\_ISL\_621263|Original|hCoV-19^^Midtjylland|Human|Department of Virus and Microbiological Special Diagnostics|Albertsen lab|Michaelsen|Denmark

>Spike|hCoV-19/Japan/PG-2357/2020|2020-03-00|EPI\_ISL\_685962|Original|hCoV-19^^Japan|Human|Pathogen Genomics Center|Pathogen Genomics Center|Sekizuka|Japan

>Spike|hCoV-19/USA/TX-HMH-MCoV-16124/2020|2020-10-26|EPI\_ISL\_785808|Original|hCoV-19^^Texas|Human|Houston Methodist Hospital|Houston Methodist Hospital|Long|USA

>Spike|hCoV-19/Japan/PG-0759/2020|2020-04-00|EPI\_ISL\_684369|Original|hCoV-19^^Japan|Human|Pathogen Genomics Center|Pathogen Genomics Center|Sekizuka|Japan

>Spike|hCoV-19/USA/LA-CDC-2-3693755/2020|2020-11-06|EPI\_ISL\_747073|Original|hCoV-19^^Louisiana|Human|Respiratory Viruses Branch|Respiratory Viruses Branch|Queen|USA

>Spike|hCoV-19/England/BIRM-6387C/2020|2020-08-19|EPI\_ISL\_529313|Original|hCoV-19^^England|Human|University of Birmingham|COVID-19 Genomics UK (COG-UK) Consortium|Loman|United Kingdom

>Spike|hCoV-19/England/MILK-AB839B/2020|2020-10-21|EPI\_ISL\_623332|Original|hCoV-19^^England|Human|Lighthouse Lab in Milton Keynes|Wellcome Sanger Institute for the COVID-19 Genomics UK (COG-UK) consortium|Davies|United Kingdom

>Spike|hCoV-19/England/QEUA-BA31A7/2020|2020-11-18|EPI\_ISL\_672835|Original|hCoV-19^^England|Human|Lighthouse Lab in Glasgow|Wellcome Sanger Institute for the COVID-19 Genomics UK (COG-UK) Consortium|Davies|United Kingdom

>Spike|hCoV-19/USA/CA-CHLA-PLM81753386/2020|2020-11-30|EPI\_ISL\_753496|Original|hCoV-19^^California|Human|Clinical virology Laboratory|Center for Personalized Medicine|Dien Bard|USA

>Spike|hCoV-19/England/CAMC-941D12/2020|2020-07-24|EPI\_ISL\_556851|Original|hCoV-19^^England|Human|Lighthouse Lab in Cambridge|Wellcome Sanger Institute for the COVID-19 Genomics UK (COG-UK) consortium|Davies|United Kingdom

>Spike|hCoV-19/USA/FL-BPHL-2166/2020|2020-08-04|EPI\_ISL\_653319|Original|hCoV-19^^Florida|Human|Florida Bureau of Public Health Laboratories|Florida Bureau of Public Health Laboratories|Blanton|USA

>Spike|hCoV-19/England/PORT-2D1C5D/2020|2020-04-03|EPI\_ISL\_493659|Original|hCoV-19^^England|Human|Centre for Enzyme Innovation|COVID-19 Genomics UK (COG-UK) Consortium|Robson|United Kingdom

>Spike|hCoV-19/Luxembourg/LNS6526267/2020|2020-11-18|EPI\_ISL\_744426|Original|hCoV-19^^Luxembourg|Human|Laboratoire national de sant\u00e9|Laboratoire national de sant\u00e9|Wienecke-Baldacchino|Luxembourg

>Spike|hCoV-19/USA/WA-S2220/2020|2020-06-08|EPI\_ISL\_497648|Original|hCoV-19^^Washington|Human|Washington State Department of Health|Seattle Flu Study|Lee|USA

>Spike|hCoV-19/USA/CA-ALSR-3258/2020|2020-09-06|EPI\_ISL\_635934|Original|hCoV-19^^California|Human|San Diego County Public Health Laboratory|Andersen lab at Scripps Research|Gangavarapu|USA

>Spike|hCoV-19/Switzerland/SG-ETHZ-390432/2020|2020-11-04|EPI\_ISL\_729076|Original|hCoV-19^^St Gallen|Human|Viollier AG|Department of Biosystems Science and Engineering|Nadeau|Switzerland

>Spike|hCoV-19/USA/TX-HMH-MCoV-18307/2020|2020-11-17|EPI\_ISL\_784655|Original|hCoV-19^^Texas|Human|Houston Methodist Hospital|Houston Methodist Hospital|Long|USA

>Spike|hCoV-19/England/QEUA-AF5550/2020|2020-10-30|EPI\_ISL\_662897|Original|hCoV-19^^England|Human|Lighthouse Lab in Glasgow|Wellcome Sanger Institute for the COVID-19 Genomics UK (COG-UK) Consortium|Davies|United Kingdom

>Spike|hCoV-19/England/QEUA-CADB08/2020|2020-12-20|EPI\_ISL\_760811|Original|hCoV-19^^England|Human|Lighthouse Lab in Glasgow|Wellcome Sanger Institute for the COVID-19 Genomics UK (COG-UK) Consortium|Davies|United Kingdom

>Spike|hCoV-19/Switzerland/BS-42402248/2020|2020-08-19|EPI\_ISL\_581972|Original|hCoV-19^^Basel-Stadt|Human|University Hospital Basel|University Hospital Basel|Roloff Handschin|Switzerland

>Spike|hCoV-19/USA/CA-ALSR-2979/2020|2020-09-02|EPI\_ISL\_635768|Original|hCoV-19^^California|Human|San Diego County Public Health Laboratory|Andersen lab at Scripps Research|Gangavarapu|USA

>Spike|hCoV-19/Northern Ireland/QEUA-96207C/2020|2020-08-10|EPI\_ISL\_531696|Original|hCoV-19^^Northern Ireland|Human|Lighthouse Lab in Glasgow|Wellcome Sanger Institute for the COVID-19 Genomics UK (COG-UK) consortium|Davies|United Kingdom

>Spike|hCoV-19/Serbia/Titel-059642304/2020|2020-04-22|EPI\_ISL\_676598|Original|hCoV-19^^Titel|Human|Scientific Veterinary Institute Novi Sad|Veterinary Specialized Institute \Kraljevo\|Vidanovic|Serbia

>Spike|hCoV-19/England/ALDP-A51BE7/2020|2020-10-07|EPI\_ISL\_598217|Original|hCoV-19^^England|Human|Lighthouse Lab in Alderley Park|Wellcome Sanger Institute for the COVID-19 Genomics UK (COG-UK) consortium|Davies|United Kingdom

>Spike|hCoV-19/Finland/7May75S23/2020|2020-05-07|EPI\_ISL\_481717|Original|hCoV-19^^Uusimaa|Human|Department of Virology and Immunology|Department of Virology|Smura|Finland

>Spike|hCoV-19/England/MILK-B8C3F9/2020|2020-11-13|EPI\_ISL\_674291|Original|hCoV-19^^England|Human|Lighthouse Lab in Milton Keynes|Wellcome Sanger Institute for the COVID-19 Genomics UK (COG-UK) Consortium|Davies|United Kingdom

>Spike|hCoV-19/England/MILK-B8CB3D/2020|2020-11-13|EPI\_ISL\_675827|Original|hCoV-19^^England|Human|Lighthouse Lab in Milton Keynes|Wellcome Sanger Institute for the COVID-19 Genomics UK (COG-UK) Consortium|Davies|United Kingdom

>Spike|hCoV-19/England/QEUA-960A70/2020|2020-08-06|EPI\_ISL\_531999|Original|hCoV-19^^England|Human|Lighthouse Lab in Glasgow|Wellcome Sanger Institute for the COVID-19 Genomics UK (COG-UK) consortium|Davies|United Kingdom

>Spike|hCoV-19/Japan/PG-3251/2020|2020-06-00|EPI\_ISL\_691366|Original|hCoV-19^^Japan|Human|Saitama Prefectural Institute of Public Health|Pathogen Genomics Center|Sekizuka|Japan

>Spike|hCoV-19/USA/LA-GBCL-26556576/2020|2020-04-14|EPI\_ISL\_485203|Original|hCoV-19^^Louisiana|Human|River Road Testing Lab|Ginkgo Bioworks Clinical Laboratory|Smith|USA

>Spike|hCoV-19/Wuhan/HB-WH6-247/2020|2020-03-15|EPI\_ISL\_454984|Original|hCoV-19^^Hubei|Human|Wuhan Chain Medical Labs (CMLabs)|State Key Laboratory of Biotherapy of Sichuan University|Tang|China

>Spike|hCoV-19/Denmark/DCGC-21330/2020|2020-12-21|EPI\_ISL\_758858|Original|hCoV-19^^Hovedstaden|Human|Department of Virus and Microbiological Special Diagnostics|Albertsen Lab|Michaelsen|Denmark

>Spike|hCoV-19/England/CAMB-1AFD74/2020|2020-05-11|EPI\_ISL\_452879|Original|hCoV-19^^England|Human|Department of Pathology|COVID-19 Genomics UK (COG-UK) Consortium|Meredith|United Kingdom

>Spike|hCoV-19/USA/AZ-TG276173/2020|2020-04-10|EPI\_ISL\_694096|Original|hCoV-19^^Arizona|Human|AZ SPHL|TGen North|French|USA

>Spike|hCoV-19/Wales/PHWC-49A40B/2020|2020-12-02|EPI\_ISL\_727542|Original|hCoV-19^^Wales|Human|Originating lab|COVID-19 Genomics UK (COG-UK) Consortium|Moore|United Kingdom

>Spike|hCoV-19/England/MILK-992E3D/2020|2020-08-26|EPI\_ISL\_552044|Original|hCoV-19^^England|Human|Lighthouse Lab in Milton Keynes|Wellcome Sanger Institute for the COVID-19 Genomics UK (COG-UK) consortium|Davies|United Kingdom

>Spike|hCoV-19/England/QEUB-9F63CF/2020|2020-09-25|EPI\_ISL\_588951|Original|hCoV-19^^England|Human|Lighthouse Lab in Glasgow|Wellcome Sanger Institute for the COVID-19 Genomics UK (COG-UK) consortium|Davies|United Kingdom

>Spike|hCoV-19/England/CAMB-1B011A/2020|2020-05-06|EPI\_ISL\_448111|Original|hCoV-19^^England|Human|Department of Pathology|COVID-19 Genomics UK (COG-UK) Consortium|Meredith|United Kingdom

>Spike|hCoV-19/England/CAMB-83937/2020|2020-04-15|EPI\_ISL\_443383|Original|hCoV-19^^England|Human|Department of Pathology|Wellcome Sanger Institute for the COVID-19 Genomics UK (COG-UK) consortium|Amato|United Kingdom

>Spike|hCoV-19/USA/VA-DCLS-0408/2020|2020-04-23|EPI\_ISL\_467802|Original|hCoV-19^^Virginia|Human|Virginia DCLS|Virginia DCLS|St. Jacques|USA

>Spike|hCoV-19/England/ALDP-A6E18B/2020|2020-10-15|EPI\_ISL\_607652|Original|hCoV-19^^England|Human|Lighthouse Lab in Alderley Park|Wellcome Sanger Institute for the COVID-19 Genomics UK (COG-UK) consortium|Davies|United Kingdom

>Spike|hCoV-19/Australia/VIC4989/2020|2020-07-16|EPI\_ISL\_519793|Original|hCoV-19^^Victoria|Human|Microbiological Diagnostic Unit - Public Health Laboratory (MDU-PHL)|MDU-PHL|Schultz|Australia

>Spike|hCoV-19/Canada/ON-S107/2020|2020-03-21|EPI\_ISL\_586284|Original|hCoV-19^^Ontario|Human|Toronto Invasive Bacterial Diseases Network|McMaster University|McArthur|Canada

>Spike|hCoV-19/England/QEUB-B404C1/2020|2020-11-08|EPI\_ISL\_657106|Original|hCoV-19^^England|Human|Lighthouse Lab in Glasgow|Wellcome Sanger Institute for the COVID-19 Genomics UK (COG-UK) Consortium|Davies|United Kingdom

>Spike|hCoV-19/Germany/BE-ChVir-W1706-8239/2020|2020-08-15|EPI\_ISL\_753997|Original|hCoV-19^^Berlin|Human|Charit\u00e9 Universit\u00e4tsmedizin Berlin|Charit\u00e9 Universit\u00e4tsmedizin Berlin|Muehlemann|Germany

>Spike|hCoV-19/England/QEUB-AE1E3E/2020|2020-10-27|EPI\_ISL\_633628|Original|hCoV-19^^England|Human|Lighthouse Lab in Glasgow|Wellcome Sanger Institute for the COVID-19 Genomics UK (COG-UK) consortium|Davies|United Kingdom

>Spike|hCoV-19/USA/UT-UPHL-201217823/2020|2020-04-06|EPI\_ISL\_672534|Original|hCoV-19^^Utah|Human|Utah Public Health Laboratory|Utah Public Health Laboratory|Young|USA

>Spike|hCoV-19/Spain/MD-HLP-73/2020|2020-05-22|EPI\_ISL\_530072|Original|hCoV-19^^Madrid|Human|Hospital Universitario La Paz|Hospital Universitario La Paz|Viedma|Spain

>Spike|hCoV-19/Spain/MD-IBV-003659/2020|2020-04-01|EPI\_ISL\_467208|Original|hCoV-19^^Madrid|Human|Hospital General Universitario Gregorio Mara\u00f1a|SeqCOVID-SPAIN consortium|IBV (CSIC)|Comas|Spain

>Spike|hCoV-19/England/QEUB-B3FB39/2020|2020-11-08|EPI\_ISL\_658680|Original|hCoV-19^^England|Human|Lighthouse Lab in Glasgow|Wellcome Sanger Institute for the COVID-19 Genomics UK (COG-UK) Consortium|Davies|United Kingdom

>Spike|hCoV-19/England/CAMC-B99326/2020|2020-11-15|EPI\_ISL\_673296|Original|hCoV-19^^England|Human|Lighthouse Lab in Cambridge|Wellcome Sanger Institute for the COVID-19 Genomics UK (COG-UK) Consortium|Davies|United Kingdom

>Spike|hCoV-19/South Africa/N00120/2020|2020-06-23|EPI\_ISL\_622991|Original|hCoV-19^^Mpumalanga|Human|National Health Laboratory Service|National Institute for Communicable Diseases of the National Health Laboratory Service|Allam|South Africa

>Spike|hCoV-19/Denmark/DCGC-815/2020|2020-04-20|EPI\_ISL\_614708|Original|hCoV-19^^Hovedstaden|Human|Department of Virus and Microbiological Special Diagnostics|Albertsen lab|Michaelsen|Denmark

>Spike|hCoV-19/England/ALDP-9835FE/2020|2020-07-21|EPI\_ISL\_529306|Original|hCoV-19^^England|Human|Queens Medical Centre|COVID-19 Genomics UK (COG-UK) Consortium|Loose|United Kingdom

>Spike|hCoV-19/Hungary/US-57479w/2020|2020-10-01|EPI\_ISL\_677782|Original|hCoV-19^^Csongr\u00e9ld county|Human|University of Szeged|National Laboratory of Virology|Kemenesi|Hungary

>Spike|hCoV-19/Denmark/DCGC-17172/2020|2020-12-14|EPI\_ISL\_750336|Original|hCoV-19^^Syddanmark|Human|Department of Virus and Microbiological Special Diagnostics|Albertsen Lab|Michaelsen|Denmark

>Spike|hCoV-19/USA/NM-NMDOH-2020327026/2020|2020-09-03|EPI\_ISL\_569643|Original|hCoV-19^^New Mexico|Human|New Mexico Department of Health Scientific Laboratory|New Mexico Department of Health Scientific Laboratory|Johnson|USA

>Spike|hCoV-19/USA/WA-UW-9190/2020|2020-05-15|EPI\_ISL\_570229|Original|hCoV-19^^Washington|Human|UW Virology Lab|UW Virology Lab|Roychoudhury|USA

>Spike|hCoV-19/England/ALDP-9CD8D1/2020|2020-09-16|EPI\_ISL\_566225|Original|hCoV-19^^England|Human|Lighthouse Lab in Alderley Park|Wellcome Sanger Institute for the COVID-19 Genomics UK (COG-UK) consortium|Davies|United Kingdom

>Spike|hCoV-19/South Korea/KDCA0152/2020|2020-11-16|EPI\_ISL\_747386|Original|hCoV-19^^South Korea|Human|Division of Emerging Infectious Diseases|Division of Emerging Infectious Diseases|Park|South Korea

>Spike|hCoV-19/USA/WA-S1017/2020|2020-04-30|EPI\_ISL\_463507|Original|hCoV-19^^Washington|Human|Washington State Department of Health|Seattle Flu Study|Bedford|USA

>Spike|hCoV-19/England/CAMB-71AEE/2020|2020-03-31|EPI\_ISL\_439578|Original|hCoV-19^^England|Human|Department of Pathology|Wellcome Sanger Institute for the COVID-19 Genomics UK (COG-UK) consortium|Amato|United Kingdom

>Spike|hCoV-19/South Africa/KRISP-K002552/2020|2020-07-30|EPI\_ISL\_535421|Original|hCoV-19^^KwaZulu-Natal|Human|NHL-S-IALCH|KRISP|de Oliveira|South Africa

>Spike|hCoV-19/India/MH-ACTREC-521/2020|2020-08-21|EPI\_ISL\_700167|Original|hCoV-19^^Maharashtra|Human|Hematopathology Laboratory|Hematopathology Laboratory|Patkar|India

>Spike|hCoV-19/USA/UT-UPHL-201214906/2020|2020-12-01|EPI\_ISL\_684021|Original|hCoV-19^^Utah|Human|Utah Public Health Laboratory|Utah Public Health Laboratory|Young|USA

>Spike|hCoV-19/Scotland/CVR4418/2020|2020-09-19|EPI\_ISL\_585292|Original|hCoV-19^^Scotland|Human|West of Scotland Specialist Virology Centre|COVID-19 Genomics UK (COG-UK) Consortium|Robertson|United Kingdom

>Spike|hCoV-19/USA/TX-HMH-2338/2020|2020-05-31|EPI\_ISL\_545252|Original|hCoV-19^^Texas|Human|Houston Methodist Hospital|Houston Methodist Hospital|Long|USA

>Spike|hCoV-19/South Korea/KCDC2154/2020|2020-02-27|EPI\_ISL\_506948|Original|hCoV-19^^South Korea|Human|Division of Viral Diseases|Division of Viral Diseases|Kim|South Korea

>Spike|hCoV-19/England/ALDP-6C7843/2020|2020-07-01|EPI\_ISL\_556113|Original|hCoV-19^^England|Human|Lighthouse Lab in Alderley Park|Wellcome Sanger Institute for the COVID-19 Genomics UK (COG-UK) consortium|Davies|United Kingdom

>Spike|hCoV-19/USA/WA-S2321/2020|2020-06-11|EPI\_ISL\_496953|Original|hCoV-19^^Washington|Human|Washington State Department of Health|Seattle Flu Study|Lee|USA

>Spike|hCoV-19/Belgium/UGent-77/2020|2020-03-25|EPI\_ISL\_468728|Original|hCoV-19^^Ghent|Human|Lab voor klinische biologie|Onderzoeksgroep Virologie|Lambrechts|Belgium

>Spike|hCoV-19/Denmark/ALAB-HH-213/2020|2020-04-27|EPI\_ISL\_452068|Original|hCoV-19^^Denmark|Human|Department of Clinical Microbiology|Albertsen lab|Kirkegaard|Denmark

>Spike|hCoV-19/Scotland/QEUEH-963530/2020|2020-08-10|EPI\_ISL\_531862|Original|hCoV-19^^Scotland|Human|NHSGGC West of Scotland Specialist Virology Centre / MRC-University of Glasgow Centre for Virus Research|Wellcome Sanger Institute for the COVID-19 Genomics UK (COG-UK) consortium|Davies|United Kingdom

>Spike|hCoV-19/Norway/4818/2020|2020-10-26|EPI\_ISL\_635076|Original|hCoV-19^^Oslo|Human|Norwegian Institute of Public Health|Norwegian Institute of Public Health|Vollan|Norway

>Spike|hCoV-19/Brazil/RJ-00486/2020|2020-10-26|EPI\_ISL\_717880|Original|hCoV-19^^Rio de Janeiro|Human|Laboratorio de Virologia Molecular / UFRJ|Bioinformatics Laboratory / LNCC|Almeida|Brazil

>Spike|hCoV-19/USA/CA-ALSR-2814/2020|2020-07-24|EPI\_ISL\_635693|Original|hCoV-19^^California|Human|San Diego County Public Health Laboratory|Andersen lab at Scripps Research|Gangavarapu|USA

>Spike|hCoV-19/USA/CA-CZB-2374/2020|2020-05-15|EPI\_ISL\_513814|Original|hCoV-19^^California|Human|Orange County Public Health Laboratory|Chan-Zuckerberg Biohub|Kamm|USA

>Spike|hCoV-19/England/20146001804/2020|2020-04-01|EPI\_ISL\_466012|Original|hCoV-19^^England|Human|Respiratory Virus Unit|Respiratory Virus Unit|Platt|United Kingdom

>Spike|hCoV-19/England/ALDP-9CD394/2020|2020-09-15|EPI\_ISL\_566178|Original|hCoV-19^^England|Human|Lighthouse Lab in Alderley Park|Wellcome Sanger Institute for the COVID-19 Genomics UK (COG-UK) consortium|Davies|United Kingdom

>Spike|hCoV-19/England/QEUA-9F3C6D/2020|2020-09-24|EPI\_ISL\_588718|Original|hCoV-19^^England|Human|Lighthouse Lab in Glasgow|Wellcome Sanger Institute for the COVID-19 Genomics UK (COG-UK) consortium|Davies|United Kingdom

>Spike|hCoV-19/England/CAMC-C804D3/2020|2020-12-17|EPI\_ISL\_762806|Original|hCoV-19^^England|Human|Lighthouse Lab in Cambridge|Wellcome Sanger Institute for the COVID-19 Genomics UK (COG-UK) Consortium|Davies|United Kingdom

>Spike|hCoV-19/England/LOND-D96A4/2020|2020-04-14|EPI\_ISL\_487642|Original|hCoV-19^^England|Human|University College London|Wellcome Sanger Institute for the COVID-19 Genomics UK (COG-UK) consortium|Davies|United Kingdom

>Spike|hCoV-19/Wales/PHWC-486BC1/2020|2020-10-27|EPI\_ISL\_639116|Original|hCoV-19^^Wales|Human|Wales Specialist Virology Centre Sequencing lab|COVID-19 Genomics UK (COG-UK) Consortium|Moore|United Kingdom

>Spike|hCoV-19/Canada/ON-S1769/2020|2020-11-08|EPI\_ISL\_755770|Original|hCoV-19^^Ontario|Human|Toronto Invasive Bacterial Diseases Network|McMaster University|McArthur|Canada

>Spike|hCoV-19/England/QEUA-9C8AC1/2020|2020-09-11|EPI\_ISL\_567097|Original|hCoV-19^^England|Human|Lighthouse Lab in Glasgow|Wellcome Sanger Institute for the COVID-19 Genomics UK (COG-UK) consortium|Davies|United Kingdom

>Spike|hCoV-19/USA/CA-CZB-12838/2020|2020-10-20|EPI\_ISL\_648484|Original|hCoV-19^^California|Human|Santa Clara County Public Health Laboratory|Chan-Zuckerberg Biohub|Bhatt|USA

>Spike|hCoV-19/Spain/MD-IBV-99012368/2020|2020-11-21|EPI\_ISL\_780009|Original|hCoV-19^^Madrid|Human|Hospital General Universitario Gregorio Marañón|SeqCOVID-SPAIN consortium|IBV (CSIC)|Comas|Spain

>Spike|hCoV-19/USA/VA-DCLS-1764/2020|2020-09-10|EPI\_ISL\_644858|Original|hCoV-19^^Virginia|Human|Virginia DCLS|Virginia DCLS|St. Jacques|USA

>Spike|hCoV-19/France/PDL-SC652/2020|2020-04-20|EPI\_ISL\_666721|Original|hCoV-19^^Pays-de-la-Loire|Human|CHU Nantes|CNR Virus des Infections Respiratoires - France SUD|Bal|France

>Spike|hCoV-19/England/MILK-B96A15/2020|2020-11-13|EPI\_ISL\_676035|Original|hCoV-19^^England|Human|Lighthouse Lab in Milton Keynes|Wellcome Sanger Institute for the COVID-19 Genomics UK (COG-UK) Consortium|Davies|United Kingdom

>Spike|hCoV-19/mink/Netherlands/NB-EMC-10-8/2020|2020-06-07|EPI\_ISL\_522990|Original|hCoV-19^^Noord Brabant|Neovison vison|Dutch COVID-19 response team|Erasmus Medical Center|Oude Munnink|Netherlands

>Spike|hCoV-19/cat/USA/TX-TAMU-078/2020|2020-07-29|EPI\_ISL\_699509|Original|hCoV-19^^Texas|Felis catus|Diagnostic Virology Laboratory|Diagnostic Virology Laboratory|Torchetti|USA

>Spike|hCoV-19/New Zealand/20VR2935/2020|2020-00-00|EPI\_ISL\_579359|Original|hCoV-19^^Auckland|Human|LabPLUS|Institute of Environmental Science and Research (ESR)|Wang|New Zealand

>Spike|hCoV-19/England/C200044530/2020|2020-11-06|EPI\_ISL\_664028|Original|hCoV-19^^England|Human|Respiratory Virus Unit|COVID-19 Genomics UK (COG-UK) Consortium|Platt|United Kingdom

>Spike|hCoV-19/England/MILK-ACBCD6/2020|2020-10-20|EPI\_ISL\_629307|Original|hCoV-19^^England|Human|Lighthouse Lab in Milton Keynes|Wellcome Sanger Institute for the COVID-19 Genomics UK (COG-UK) consortium|Davies|United Kingdom

>Spike|hCoV-19/USA/TX-HMH-7420/2020|2020-06-30|EPI\_ISL\_546754|Original|hCoV-19^^Texas|Human|Houston Methodist Hospital|Houston Methodist Hospital|Long|USA

>Spike|hCoV-19/England/CAMB-7F4E2/2020|2020-04-08|EPI\_ISL\_470448|Original|hCoV-19^^England|Human|Department of Pathology|Wellcome Sanger Institute for the COVID-19 Genomics UK (COG-UK) consortium|Davies|United Kingdom

>Spike|hCoV-19/USA/MI-MDHHS-SC20690/2020|2020-05-20|EPI\_ISL\_471714|Original|hCoV-19^^Michigan|Human|Michigan Department of Health and Human Services|Michigan Department of Health and Human Services|Blankenship|USA

>Spike|hCoV-19/Australia/NSW162/2020|2020-03-23|EPI\_ISL\_427758|Original|hCoV-19^^New South Wales|Human|Centre for Infectious Diseases and Microbiology Public Health|NSW Health Pathology - Institute of Clinical Pathology and Medical Research; Westmead Hospital; University of Sydney|Gall|Australia

>Spike|hCoV-19/Denmark/DCGC-19912/2020|2020-12-07|EPI\_ISL\_747862|Original|hCoV-19^^Hovedstaden|Human|Department of Virus and Microbiological Special Diagnostics|Albertsen Lab|Michaelsen|Denmark

>Spike|hCoV-19/Canada/QC\_AM1/2020|2020-04-09|EPI\_ISL\_476508|Original|hCoV-19^^Quebec|Human|Laboratoire de microbiologie|Smith Laboratory|Smith|Canada

>Spike|hCoV-19/Wales/PHWC-4A029F/2020|2020-12-04|EPI\_ISL\_743421|Original|hCoV-19^^Wales|Human|Wales Specialist Virology Centre Sequencing lab|COVID-19 Genomics UK (COG-UK) Consortium|Moore|United Kingdom

>Spike|hCoV-19/USA/TX-HMH-5220/2020|2020-06-26|EPI\_ISL\_544605|Original|hCoV-19^^Texas|Human|Houston Methodist Hospital|Houston Methodist Hospital|Long|USA

>Spike|hCoV-19/England/ALDP-954ABB/2020|2020-06-11|EPI\_ISL\_553555|Original|hCoV-19^^England|Human|Lighthouse Lab in Alderley Park|Wellcome Sanger Institute for the COVID-19 Genomics UK (COG-UK) consortium|Davies|United Kingdom

>Spike|hCoV-19/USA/MI-UM-10036147209/2020|2020-09-26|EPI\_ISL\_590725|Original|hCoV-19^^Michigan|Human|University of Michigan Clinical Microbiology Laboratory|Lauring Lab|Valesano|USA

>Spike|hCoV-19/England/MILK-BAADD9/2020|2020-11-18|EPI\_ISL\_783204|Original|hCoV-19^^England|Human|Lighthouse Lab in Milton Keynes|Wellcome Sanger Institute for the COVID-19 Genomics UK (COG-UK) Consortium|Davies|United Kingdom

>Spike|hCoV-19/England/CAMC-B373C0/2020|2020-11-05|EPI\_ISL\_645253|Original|hCoV-19^^England|Human|Lighthouse Lab in Cambridge|Wellcome Sanger Institute for the COVID-19 Genomics UK (COG-UK) Consortium|Davies|United Kingdom

>Spike|hCoV-19/Australia/VIC6151/2020|2020-07-22|EPI\_ISL\_518162|Original|hCoV-19^^Victoria|Human|Victorian Infectious Diseases Reference Laboratory (VIDRL)|VIDRL and MDU-PHL|Schultz|Australia

>Spike|hCoV-19/England/CAMC-B32B72/2020|2020-11-05|EPI\_ISL\_659694|Original|hCoV-19^^England|Human|Lighthouse Lab in Cambridge|Wellcome Sanger Institute for the COVID-19 Genomics UK (COG-UK) Consortium|Davies|United Kingdom

>Spike|hCoV-19/Switzerland/BS-42216174/2020|2020-04-01|EPI\_ISL\_581668|Original|hCoV-19^^Basel-Stadt|Human|University Hospital Basel|University Hospital Basel|Roloff Handschin|Switzerland

>Spike|hCoV-19/England/ALDP-AC5D06/2020|2020-10-14|EPI\_ISL\_631189|Original|hCoV-19^^England|Human|Lighthouse Lab in Alderley Park|Wellcome Sanger Institute for the COVID-19 Genomics UK (COG-UK) consortium|Davies|United Kingdom

>Spike|hCoV-19/Australia/VIC1562/2020|2020-05-04|EPI\_ISL\_456492|Original|hCoV-19^^Victoria|Human|Victorian Infectious Diseases Reference Laboratory (VIDRL)|Microbiological Diagnostic Unit Public Health Laboratory and Victorian Infectious Diseases Reference Laboratory|Schultz|Australia

>Spike|hCoV-19/England/NOTT-112EF1/2020|2020-08-10|EPI\_ISL\_514454|Original|hCoV-19^^England|Human|Queens Medical Centre|COVID-19 Genomics UK (COG-UK) Consortium|Loose|United Kingdom

>Spike|hCoV-19/USA/NY-PV09370/2020|2020-03-19|EPI\_ISL\_450055|Original|hCoV-19^^New York|Human|MSHS Clinical Microbiology Laboratories|MSHS Pathogen Surveillance Program|van Bakel|USA

>Spike|hCoV-19/Netherlands/NA\_243/2020|2020-03-29|EPI\_ISL\_422777|Original|hCoV-19^^Netherlands|Human|Dutch COVID-19 response team|Erasmus Medical Center|Oude Munnink|Netherlands

>Spike|hCoV-19/Scotland/CVR3421/2020|2020-05-07|EPI\_ISL\_456842|Original|hCoV-19^^Scotland|Human|West of Scotland Specialist Virology Centre|COVID-19 Genomics UK (COG-UK) Consortium|Robertson|United Kingdom

>Spike|hCoV-19/Netherlands/GR-RIVM-20835/2020|2020-12-15|EPI\_ISL\_790890|Original|hCoV-19^^Groningen|Human|Dutch COVID-19 response

team|National Institute for Public Health and the Environment  
(RIVM)|Meijer|Netherlands  
>Spike|hCoV-19/Denmark/DCGC-17242/2020|2020-12-14|EPI\_ISL\_750850|Original|hCoV-  
19^^Syddanmark|Human|Department of Virus and Microbiological Special  
Diagnostics|Albertsen Lab|Michaelsen|Denmark  
>Spike|hCoV-19/USA/WI-GMF-28119/2020|2020-10-27|EPI\_ISL\_661007|Original|hCoV-  
19^^Wisconsin|Human|Gundersen Molecular Diagnostics Laboratory|Kabara Cancer Research  
Institute|Kenny|USA  
>Spike|hCoV-19/Jordan/AM-ALSR-3954/2020|2020-09-30|EPI\_ISL\_636317|Original|hCoV-  
19^^Amman|Human|Biolab Diagnostic Laboratories|Andersen lab at Scripps  
Research|Gangavarapu|Jordan  
>Spike|hCoV-19/USA/TX-HMH-7894/2020|2020-06-30|EPI\_ISL\_545686|Original|hCoV-  
19^^Texas|Human|Houston Methodist Hospital|Houston Methodist Hospital|Long|USA  
>Spike|hCoV-19/England/ALDP-C3A8FA/2020|2020-12-09|EPI\_ISL\_731639|Original|hCoV-  
19^^England|Human|Lighthouse Lab in Alderley Park|Wellcome Sanger Institute for the  
COVID-19 Genomics UK (COG-UK) Consortium|Davies|United Kingdom  
>Spike|hCoV-19/Lithuania/MR-LUHS-Eilnr238236/2020|2020-12-  
22|EPI\_ISL\_770525|Original|hCoV-19^^Kauno apskritis|Human|Lithuanian University of  
Health Sciences Hospital|Lithuanian University of Health Sciences|Zemaitis|Lithuania  
>Spike|hCoV-19/USA/TX-HMH-6426/2020|2020-07-05|EPI\_ISL\_545989|Original|hCoV-  
19^^Texas|Human|Houston Methodist Hospital|Houston Methodist Hospital|Long|USA  
>Spike|hCoV-19/England/ALDP-92CF44/2020|2020-06-20|EPI\_ISL\_551486|Original|hCoV-  
19^^England|Human|Lighthouse Lab in Alderley Park|Wellcome Sanger Institute for the  
COVID-19 Genomics UK (COG-UK) consortium|Davies|United Kingdom  
>Spike|hCoV-19/USA/LA-EVTL747/2020|2020-07-20|EPI\_ISL\_653438|Original|hCoV-  
19^^Louisiana|Human|LSUHS Emerging Viral Threat Laboratory|Microbial Genome  
Sequencing Center|Kamil|USA  
>Spike|hCoV-19/Spain/MD-IBV-003660/2020|2020-04-01|EPI\_ISL\_467222|Original|hCoV-  
19^^Madrid|Human|Hospital General Universitario Gregorio Mara\u00f1\u00f3n|SeqCOVID-  
SPAIN consortium|IBV (CSIC)|Comas|Spain  
>Spike|hCoV-19/USA/UT-02227/2020|2020-04-14|EPI\_ISL\_436925|Original|hCoV-  
19^^Utah|Human|Utah Public Health Laboratory|Utah Public Health Laboratory|Young|USA  
>Spike|hCoV-19/England/QEUEH-9F4D3C/2020|2020-09-25|EPI\_ISL\_600739|Original|hCoV-  
19^^England|Human|Lighthouse Lab in Glasgow|Wellcome Sanger Institute for the COVID-  
19 Genomics UK (COG-UK) consortium|Davies|United Kingdom  
>Spike|hCoV-19/Luxembourg/LNS9787705/2020|2020-12-02|EPI\_ISL\_770977|Original|hCoV-  
19^^Luxembourg|Human|Laboratoire national de sant\u00e9|Laboratoire national de  
sant\u00e9|Wienecke-Baldacchino|Luxembourg  
>Spike|hCoV-19/USA/MI-MDHHS-SC21221/2020|2020-04-06|EPI\_ISL\_507477|Original|hCoV-  
19^^Michigan|Human|Michigan Department of Health and Human Services|Michigan  
Department of Health and Human Services|Blankenship|USA  
>Spike|hCoV-19/Denmark/DCGC-3867/2020|2020-09-07|EPI\_ISL\_615585|Original|hCoV-  
19^^Hovedstaden|Human|Department of Virus and Microbiological Special  
Diagnostics|Albertsen lab|Michaelsen|Denmark  
>Spike|hCoV-19/England/20132035304/2020|2020-03-24|EPI\_ISL\_423776|Original|hCoV-  
19^^England|Human|Respiratory Virus Unit|Respiratory Virus Unit|Platt|United Kingdom  
>Spike|hCoV-19/England/ALDP-9CB606/2020|2020-09-16|EPI\_ISL\_575650|Original|hCoV-  
19^^England|Human|Lighthouse Lab in Alderley Park|Wellcome Sanger Institute for the  
COVID-19 Genomics UK (COG-UK) consortium|Davies|United Kingdom  
>Spike|hCoV-19/USA/TX-HMH-960/2020|2020-04-07|EPI\_ISL\_545934|Original|hCoV-  
19^^Texas|Human|Houston Methodist Hospital|Houston Methodist Hospital|Long|USA  
>Spike|hCoV-19/England/201090682/2020|2020-03-05|EPI\_ISL\_464597|Original|hCoV-  
19^^England|Human|Respiratory Virus Unit|Respiratory Virus Unit|Platt|United Kingdom  
>Spike|hCoV-19/England/BRIS-126D48/2020|2020-04-08|EPI\_ISL\_459076|Original|hCoV-  
19^^England|Human|PHE South West Regional Laboratory|Wellcome Sanger Institute for  
the COVID-19 Genomics UK (COG-UK) consortium|Davies|United Kingdom  
>Spike|hCoV-19/England/ALDP-9E8A52/2020|2020-09-24|EPI\_ISL\_638275|Original|hCoV-  
19^^England|Human|Centre for Enzyme Innovation|COVID-19 Genomics UK (COG-UK)  
Consortium|Robson|United Kingdom



>Spike|hCoV-19/Spain/PV-IBV-98008378/2020|2020-10-15|EPI\_ISL\_654579|Original|hCoV-19^^Basque Country|Human|Servicio de Microbiolog\u00eda. Hospital Universitario Donostia. OSI Donostialdea. \u00c1rea de Enfermedades Infecciosas|SeqCOVID-SPAIN consortium/IBV (CSIC) |Comas|Spain

>Spike|hCoV-19/England/SHEF-10D83E7/2020|2020-12-07|EPI\_ISL\_727987|Original|hCoV-19^^England|Human|Virology Department|COVID-19 Genomics UK (COG-UK) Consortium|de Silva|United Kingdom

>Spike|hCoV-19/England/MILK-A23E9A/2020|2020-10-04|EPI\_ISL\_650568|Original|hCoV-19^^England|Human|Centre for Enzyme Innovation|COVID-19 Genomics UK (COG-UK) Consortium|Robson|United Kingdom

>Spike|hCoV-19/Australia/NSW619/2020|2020-06-19|EPI\_ISL\_490028|Original|hCoV-19^^New South Wales|Human|South Eastern Area Laboratory Services (SEALS)|NSW Health Pathology - Institute of Clinical Pathology and Medical Research; Westmead Hospital; University of Sydney|Gall|Australia

>Spike|hCoV-19/USA/WI-UW-1369/2020|2020-09-08|EPI\_ISL\_536740|Original|hCoV-19^^Wisconsin|Human|University of Wisconsin-Madison AIDS Vaccine Research Laboratories|University of Wisconsin-Madison AIDS Vaccine Research Laboratories|Baczenas|USA

>Spike|hCoV-19/Germany/BY-MVP-0098/2020|2020-04-04|EPI\_ISL\_452104|Original|hCoV-19^^Bavaria|Human|Max von Pettenkofer Institute|Laboratory for Functional Genome Analysis|Graf|Germany

>Spike|hCoV-19/England/ALDP-B45E64/2020|2020-11-07|EPI\_ISL\_656323|Original|hCoV-19^^England|Human|Lighthouse Lab in Alderley Park|Wellcome Sanger Institute for the COVID-19 Genomics UK (COG-UK) Consortium|Davies|United Kingdom

>Spike|hCoV-19/Scotland/EDB4044/2020|2020-04-15|EPI\_ISL\_473794|Original|hCoV-19^^Scotland|Human|Virology Department|COVID-19 Genomics UK (COG-UK) Consortium|Williams|United Kingdom

>Spike|hCoV-19/USA/HI-H200577/2020|2020-09-24|EPI\_ISL\_753104|Original|hCoV-19^^Hawaii|Human|State Laboratories Division|State Laboratories Division|Sultana|USA

>Spike|hCoV-19/USA/CA-ALSR-4474/2020|2020-09-24|EPI\_ISL\_649051|Original|hCoV-19^^California|Human|San Diego County Public Health Laboratory|Andersen lab at Scripps Research|Gangavarapu|USA

>Spike|hCoV-19/Italy/LAZ-INMI-103/2020|2020-11-20|EPI\_ISL\_721626|Original|hCoV-19^^Lazio|Human|National Institute for Infectious Diseases|National Institute for Infectious Diseases|Gruber|Italy

>Spike|hCoV-19/Denmark/DCGC-22345/2020|2020-12-14|EPI\_ISL\_758693|Original|hCoV-19^^Sjaelland|Human|Department of Virus and Microbiological Special Diagnostics|Albertsen Lab|Michaelsen|Denmark

>Spike|hCoV-19/USA/NY-NYUMC243/2020|2020-03-30|EPI\_ISL\_428757|Original|hCoV-19^^New York|Human|NYU Langone Health|Departments of Pathology and Medicine|Maurano|USA

>Spike|hCoV-19/Wales/PHWC-2A686/2020|2020-04-07|EPI\_ISL\_445602|Original|hCoV-19^^Wales|Human|Wales Specialist Virology Centre|Public Health Wales Microbiology Cardiff|Moore|United Kingdom

>Spike|hCoV-19/England/QEUA-A20291/2020|2020-10-01|EPI\_ISL\_587644|Original|hCoV-19^^England|Human|Lighthouse Lab in Glasgow|Wellcome Sanger Institute for the COVID-19 Genomics UK (COG-UK) consortium|Davies|United Kingdom

>Spike|hCoV-19/India/MH-ACTREC-082/2020|2020-05-21|EPI\_ISL\_699738|Original|hCoV-19^^Maharashtra|Human|Hematopathology Laboratory|Hematopathology Laboratory|Patkar|India

>Spike|hCoV-19/Japan/PG-6604/2020|2020-08-00|EPI\_ISL\_687716|Original|hCoV-19^^Japan|Human|Niigata Prefectural Institute of Public Health and Environmental Sciences|Pathogen Genomics Center|Sekizuka|Japan

>Spike|hCoV-19/USA/MN-MDH-2078/2020|2020-10-31|EPI\_ISL\_683707|Original|hCoV-19^^Minnesota|Human|Essentia Health-St. Mary's Medical Center|Minnesota Department of Health|Garfin|USA

>Spike|hCoV-19/USA/NY-Wadsworth-142311-01/2020|2020-06-16|EPI\_ISL\_676701|Original|hCoV-19^^New York|Human|Wadsworth Center|Wadsworth Center|Lasek-Nesselquist|USA

>Spike|hCoV-19/USA/UT-03945/2020|2020-04-17|EPI\_ISL\_470679|Original|hCoV-19^^Utah|Human|Utah Public Health Laboratory|Utah Public Health Laboratory|Young|USA

>Spike|hCoV-19/USA/CA-ALSR-1014-SAN/2020|2020-04-19|EPI\_ISL\_483462|Original|hCoV-19^^California|Human|UC San Diego Center for Advanced Laboratory Medicine|Andersen lab at Scripps Research|Gangavarapu|USA

>Spike|hCoV-19/USA/ME-HETL-J0442/2020|2020-12-17|EPI\_ISL\_755541|Original|hCoV-19^^Maine|Human|Maine Health and Environmental Testing Laboratory|Tewhey Lab|Tewhey|USA

>Spike|hCoV-19/England/ALDP-95A8CA/2020|2020-06-13|EPI\_ISL\_553439|Original|hCoV-19^^England|Human|Lighthouse Lab in Alderley Park|Wellcome Sanger Institute for the COVID-19 Genomics UK (COG-UK) consortium|Davies|United Kingdom

>Spike|hCoV-19/England/QEUEH-AD50BF/2020|2020-10-26|EPI\_ISL\_634048|Original|hCoV-19^^England|Human|Lighthouse Lab in Glasgow|Wellcome Sanger Institute for the COVID-19 Genomics UK (COG-UK) consortium|Davies|United Kingdom

>Spike|hCoV-19/England/MILK-AB762A/2020|2020-10-20|EPI\_ISL\_623318|Original|hCoV-19^^England|Human|Lighthouse Lab in Milton Keynes|Wellcome Sanger Institute for the COVID-19 Genomics UK (COG-UK) consortium|Davies|United Kingdom

>Spike|hCoV-19/Germany/NW-HHU-302/2020|2020-10-05|EPI\_ISL\_631305|Original|hCoV-19^^North Rhine-Westphalia|Human|ZOTZ KLIMAS MVZ D\u00f0fcsseldorf-Centrum GbR \u00dcBAG f\u00f0r Labormedizin|Center of Medical Microbiology|Wienemann|Germany

>Spike|hCoV-19/USA/TX-HMH-2119/2020|2020-05-20|EPI\_ISL\_545130|Original|hCoV-19^^Texas|Human|Houston Methodist Hospital|Houston Methodist Hospital|Long|USA

>Spike|hCoV-19/Singapore/957/2020|2020-04-08|EPI\_ISL\_538491|Original|hCoV-19^^Singapore|Human|Department of Laboratory Medicine|Department of Laboratory Medicine|Chen|Singapore

>Spike|hCoV-19/Australia/NSW107/2020|2020-03-26|EPI\_ISL\_427772|Original|hCoV-19^^New South Wales|Human|Centre for Infectious Diseases and Microbiology Public Health|NSW Health Pathology - Institute of Clinical Pathology and Medical Research; Westmead Hospital; University of Sydney|Gall|Australia

>Spike|hCoV-19/USA/CT-Yale-525/2020|2020-11-04|EPI\_ISL\_729742|Original|hCoV-19^^Connecticut|Human|Yale Pathology Lab|Grubaugh Lab - Yale School of Public Health|Grubaugh|USA

>Spike|hCoV-19/Denmark/DCGC-3584/2020|2020-08-31|EPI\_ISL\_616225|Original|hCoV-19^^NA|Human|Department of Virus and Microbiological Special Diagnostics|Albertsen lab|Michaelsen|Denmark

>Spike|hCoV-19/Australia/VIC8022/2020|2020-08-13|EPI\_ISL\_564807|Original|hCoV-19^^Victoria|Human|Microbiological Diagnostic Unit - Public Health Laboratory (MDU-PHL) |MDU-PHL|Schultz|Australia

>Spike|hCoV-19/England/LIVE-9BFC1/2020|2020-03-25|EPI\_ISL\_449497|Original|hCoV-19^^England|Human|Liverpool Clinical Laboratories|COVID-19 Genomics UK (COG-UK) Consortium|Haldenby|United Kingdom

>Spike|hCoV-19/Denmark/DCGC-6293/2020|2020-10-05|EPI\_ISL\_620053|Original|hCoV-19^^Hovedstaden|Human|Department of Virus and Microbiological Special Diagnostics|Albertsen lab|Michaelsen|Denmark

>Spike|hCoV-19/USA/MD-MDH-0437/2020|2020-11-10|EPI\_ISL\_666804|Original|hCoV-19^^Maryland|Human|Maryland Public Health Laboratory|Maryland Public Health Laboratory|Keller|USA

>Spike|hCoV-19/England/MILK-AB7D8F/2020|2020-10-21|EPI\_ISL\_623406|Original|hCoV-19^^England|Human|Lighthouse Lab in Milton Keynes|Wellcome Sanger Institute for the COVID-19 Genomics UK (COG-UK) consortium|Davies|United Kingdom

>Spike|hCoV-19/USA/NY-QDX-2543/2020|2020-03-14|EPI\_ISL\_604832|Original|hCoV-19^^New York|Human|Quest Diagnostics|Quest Diagnostics|Kagan|USA

>Spike|hCoV-19/England/QEUEH-B9FF59/2020|2020-11-18|EPI\_ISL\_719729|Original|hCoV-19^^England|Human|Lighthouse Lab in Glasgow|Wellcome Sanger Institute for the COVID-19 Genomics UK (COG-UK) Consortium|Davies|United Kingdom

>Spike|hCoV-19/England/ALDP-C3A326/2020|2020-12-09|EPI\_ISL\_731074|Original|hCoV-19^^England|Human|Lighthouse Lab in Alderley Park|Wellcome Sanger Institute for the COVID-19 Genomics UK (COG-UK) Consortium|Davies|United Kingdom

>Spike|hCoV-19/Italy/APU-PODV-15940388/2020|2020-08-25|EPI\_ISL\_788956|Original|hCoV-19^^Apulia|Human|Ospedale \Di Venere\|Beaconlab (Bioinformatics|Chiara|Italy

>Spike|hCoV-19/USA/TX-HMH-MCoV-15405/2020|2020-10-21|EPI\_ISL\_786889|Original|hCoV-19^^Texas|Human|Houston Methodist Hospital|Houston Methodist Hospital|Long|USA

>Spike|hCoV-19/DRC/10324/2020|2020-05-22|EPI\_ISL\_527545|Original|hCoV-19^^Kinshasa|Human|Viral Respiratory Lab|Pathogen Sequencing Lab|Lokilo|Democratic Republic of the Congo

>Spike|hCoV-19/USA/MI-MDHHS-SC20640/2020|2020-04-24|EPI\_ISL\_462722|Original|hCoV-19^^Michigan|Human|Michigan Department of Health and Human Services|Michigan Department of Health and Human Services|Blankenship|USA

>Spike|hCoV-19/England/SHEF-CEC73/2020|2020-05-10|EPI\_ISL\_475472|Original|hCoV-19^^England|Human|Virology Department|COVID-19 Genomics UK (COG-UK) Consortium|de Silva|United Kingdom

>Spike|hCoV-19/Netherlands/GE-RIVM-20528/2020|2020-12-04|EPI\_ISL\_728743|Original|hCoV-19^^Gelderland|Human|Dutch COVID-19 response team|National Institute for Public Health and the Environment (RIVM)|Meijer|Netherlands

>Spike|hCoV-19/Australia/NSW1212/2020|2020-11-19|EPI\_ISL\_672656|Original|hCoV-19^^New South Wales|Human|South Eastern Area Laboratory Services (SEALS)|NSW Health Pathology - Institute of Clinical Pathology and Medical Research; Westmead Hospital; University of Sydney|Gall|Australia

>Spike|hCoV-19/Japan/IC-0112/2020|2020-07-00|EPI\_ISL\_591453|Original|hCoV-19^^Japan|Human|Pathogen Genomics Center|Pathogen Genomics Center|Sekizuka|Japan

>Spike|hCoV-19/Wales/PHWC-28C1D/2020|2020-04-01|EPI\_ISL\_445419|Original|hCoV-19^^Wales|Human|Wales Specialist Virology Centre|Public Health Wales Microbiology Cardiff|Moore|United Kingdom

>Spike|hCoV-19/England/BRIS-12BC37/2020|2020-05-15|EPI\_ISL\_469355|Original|hCoV-19^^England|Human|PHE South West Regional Laboratory|Wellcome Sanger Institute for the COVID-19 Genomics UK (COG-UK) consortium|Davies|United Kingdom

>Spike|hCoV-19/USA/TX-HMH-MCoV-10505/2020|2020-07-08|EPI\_ISL\_789505|Original|hCoV-19^^Texas|Human|Houston Methodist Hospital|Houston Methodist Hospital|Long|USA

>Spike|hCoV-19/England/QEUH-A0BA1C/2020|2020-10-03|EPI\_ISL\_599471|Original|hCoV-19^^England|Human|Lighthouse Lab in Glasgow|Wellcome Sanger Institute for the COVID-19 Genomics UK (COG-UK) consortium|Davies|United Kingdom

>Spike|hCoV-19/Wales/PHWC-48C6AC/2020|2020-11-05|EPI\_ISL\_666456|Original|hCoV-19^^Wales|Human|Wales Specialist Virology Centre Sequencing lab|COVID-19 Genomics UK (COG-UK) Consortium|Moore|United Kingdom

>Spike|hCoV-19/Denmark/DCGC-1658/2020|2020-04-27|EPI\_ISL\_622407|Original|hCoV-19^^Hovedstaden|Human|Department of Virus and Microbiological Special Diagnostics|Albertsen lab|Michaelsen|Denmark

>Spike|hCoV-19/Denmark/DCGC-15673/2020|2020-11-23|EPI\_ISL\_713955|Original|hCoV-19^^Hovedstaden|Human|Department of Virus and Microbiological Special Diagnostics|Albertsen Lab|Michaelsen|Denmark

>Spike|hCoV-19/Switzerland/UR-ETHZ-300265/2020|2020-09-30|EPI\_ISL\_603297|Original|hCoV-19^^Uri|Human|Viollier AG|Department of Biosystems Science and Engineering|Nadeau|Switzerland

>Spike|hCoV-19/USA/MN-MDH-2209/2020|2020-12-01|EPI\_ISL\_770783|Original|hCoV-19^^Minnesota|Human|Minnesota Department of Health|Minnesota Department of Health|Lorentz|USA

>Spike|hCoV-19/Netherlands/GE-EMC-346/2020|2020-10-19|EPI\_ISL\_632745|Original|hCoV-19^^Gelderland|Human|Dutch COVID-19 response team|Erasmus Medical Center|Oude Munnink|Netherlands

>Spike|hCoV-19/England/MILK-9EF7CD/2020|2020-09-23|EPI\_ISL\_594942|Original|hCoV-19^^England|Human|Queens Medical Centre|COVID-19 Genomics UK (COG-UK) Consortium|Loose|United Kingdom

>Spike|hCoV-19/Netherlands/ZH-RIVM-20390/2020|2020-12-07|EPI\_ISL\_728610|Original|hCoV-19^^Zuid-holland|Human|Dutch COVID-19 response team|National Institute for Public Health and the Environment (RIVM)|Meijer|Netherlands

>Spike|hCoV-19/Luxembourg/LNS4046187/2020|2020-10-19|EPI\_ISL\_740408|Original|hCoV-19^^Luxembourg|Human|Laboratoire national de sant\u00e9|Laboratoire national de sant\u00e9|Wienecke-Baldacchino|Luxembourg

>Spike|hCoV-19/mink/Netherlands/NB-EMC-6-17/2020|2020-05-30|EPI\_ISL\_523102|Original|hCoV-19^^Noord Brabant|Neovison vison|Dutch COVID-19 response team|Erasmus Medical Center|Oude Munnink|Netherlands

>Spike|hCoV-19/England/NORT-292ECB/2020|2020-05-16|EPI\_ISL\_472285|Original|hCoV-19^^England|Human|Northumbria University / South Tees Hospitals NHS Foundation Trust / North Cumbria Integrated Care NHS Foundation Trust / North Tees and Hartlepool NHS Foundation Trust / Newcastle Hospitals NHS Foundation Trust|COVID-19 Genomics UK (COG-UK) Consortium|Bashton|United Kingdom

>Spike|hCoV-19/USA/CA-ALSR-3868/2020|2020-06-30|EPI\_ISL\_636251|Original|hCoV-19^^California|Human|San Diego County Public Health Laboratory|Andersen lab at Scripps Research|Gangavarapu|USA

>Spike|hCoV-19/England/MILK-B96972/2020|2020-11-13|EPI\_ISL\_676211|Original|hCoV-19^^England|Human|Lighthouse Lab in Milton Keynes|Wellcome Sanger Institute for the COVID-19 Genomics UK (COG-UK) Consortium|Davies|United Kingdom

>Spike|hCoV-19/England/CAMB-7AD82/2020|2020-04-08|EPI\_ISL\_433873|Original|hCoV-19^^England|Human|Department of Pathology|COVID-19 Genomics UK (COG-UK) Consortium|Meredith|United Kingdom

>Spike|hCoV-19/USA/FL-BPHL-1659/2020|2020-07-05|EPI\_ISL\_594348|Original|hCoV-19^^Florida|Human|Florida Bureau of Public Health Laboratories|Florida Bureau of Public Health Laboratories|Blanton|USA

>Spike|hCoV-19/USA/CA-ALSR-2638/2020|2020-07-12|EPI\_ISL\_635604|Original|hCoV-19^^California|Human|San Diego County Public Health Laboratory|Andersen lab at Scripps Research|Gangavarapu|USA

>Spike|hCoV-19/USA/WA-S2460/2020|2020-06-16|EPI\_ISL\_497092|Original|hCoV-19^^Washington|Human|Washington State Department of Health|Seattle Flu Study|Lee|USA

>Spike|hCoV-19/Wales/PHWC-48CAEC/2020|2020-11-04|EPI\_ISL\_666505|Original|hCoV-19^^Wales|Human|Wales Specialist Virology Centre Sequencing lab|COVID-19 Genomics UK (COG-UK) Consortium|Moore|United Kingdom

>Spike|hCoV-19/England/204742204/2020|2020-00-00|EPI\_ISL\_649913|Original|hCoV-19^^England|Human|Respiratory Virus Unit|COVID-19 Genomics UK (COG-UK) Consortium|Platt|United Kingdom

>Spike|hCoV-19/England/ALDP-9CCD00/2020|2020-09-16|EPI\_ISL\_566152|Original|hCoV-19^^England|Human|Lighthouse Lab in Alderley Park|Wellcome Sanger Institute for the COVID-19 Genomics UK (COG-UK) consortium|Davies|United Kingdom

>Spike|hCoV-19/USA/WA-UW-1661/2020|2020-03-20|EPI\_ISL\_424194|Original|hCoV-19^^Washington|Human|UW Virology Lab|UW Virology Lab|Roychoudhury|USA

>Spike|hCoV-19/England/ALDP-9B5D82/2020|2020-08-29|EPI\_ISL\_572958|Original|hCoV-19^^England|Human|Oxford Viromics|COVID-19 Genomics UK (COG-UK) Consortium|Golubchik|United Kingdom

>Spike|hCoV-19/USA/TX-DSHS-0501/2020|2020-06-21|EPI\_ISL\_560945|Original|hCoV-19^^Texas|Human|Texas Department of State Health Services|Texas Department of State Health Services|Rahman|USA

>Spike|hCoV-19/Spain/VC-IBV-98003453/2020|2020-04-03|EPI\_ISL\_539260|Original|hCoV-19^^Comunitat Valenciana|Human|Hospital Universitario de La Ribera (Alzira|SeqCOVID-SPAIN consortium|IBV (CSIC)|Comas|Spain

>Spike|hCoV-19/Italy/ABR-IZSGC-TE6202/2020|2020-03-23|EPI\_ISL\_528927|Original|hCoV-19^^Abruzzo|Human|Ospedale \Giuseppe Mazzini\ -Teramo|Istituto Zooprofilattico Sperimentale dell'Abruzzo e Molise \G.Caporale\|Lorusso|Italy

>Spike|hCoV-19/England/QEUEH-9D0EAC/2020|2020-09-15|EPI\_ISL\_589881|Original|hCoV-19^^England|Human|Lighthouse Lab in Glasgow|Wellcome Sanger Institute for the COVID-19 Genomics UK (COG-UK) consortium|Davies|United Kingdom

>Spike|hCoV-19/USA/TX-HMH-MCoV-15547/2020|2020-10-26|EPI\_ISL\_787031|Original|hCoV-19^^Texas|Human|Houston Methodist Hospital|Houston Methodist Hospital|Long|USA

>Spike|hCoV-19/England/CAMB-1B99CE/2020|2020-11-07|EPI\_ISL\_664454|Original|hCoV-19^^England|Human|Department of Pathology|COVID-19 Genomics UK (COG-UK) Consortium|Goodfellow|United Kingdom

>Spike|hCoV-19/England/MILK-55ED52/2020|2020-06-11|EPI\_ISL\_558306|Original|hCoV-19^^England|Human|Lighthouse Lab in Milton Keynes|Wellcome Sanger Institute for the COVID-19 Genomics UK (COG-UK) consortium|Davies|United Kingdom

>Spike|hCoV-19/England/BIRM-64723/2020|2020-09-23|EPI\_ISL\_594510|Original|hCoV-19^^England|Human|University of Birmingham|COVID-19 Genomics UK (COG-UK) Consortium|Loman|United Kingdom

>Spike|hCoV-19/USA/TX-HMH-4510/2020|2020-06-19|EPI\_ISL\_543680|Original|hCoV-19^^Texas|Human|Houston Methodist Hospital|Houston Methodist Hospital|Long|USA

>Spike|hCoV-19/England/LIVE-A64D3/2020|2020-03-18|EPI\_ISL\_499715|Original|hCoV-19^^England|Human|Liverpool Clinical Laboratories|COVID-19 Genomics UK (COG-UK) Consortium|Haldenby|United Kingdom

>Spike|hCoV-19/USA/CA-CZB-2181/2020|2020-05-26|EPI\_ISL\_513731|Original|hCoV-19^^California|Human|Orange County Public Health Lab|Chan-Zuckerberg Biohub|Kamm|USA

>Spike|hCoV-19/Bahrain/03/2020|2020-06-23|EPI\_ISL\_486888|Original|hCoV-19^^Bahrain|Human|National Influenza Center|National Influenza Center|Altaif|Bahrain

>Spike|hCoV-19/Northern Ireland/NIRE-108BE8/2020|2020-10-07|EPI\_ISL\_627544|Original|hCoV-19^^Northern Ireland|Human|Regional Virus Laboratory|COVID-19 Genomics UK (COG-UK) Consortium|Fairley|United Kingdom

>Spike|hCoV-19/England/QEUEH-9AE37B/2020|2020-09-02|EPI\_ISL\_638636|Original|hCoV-19^^England|Human|Department of Pathology|COVID-19 Genomics UK (COG-UK) Consortium|Goodfellow|United Kingdom

>Spike|hCoV-19/USA/WA-S1100/2020|2020-05-04|EPI\_ISL\_463590|Original|hCoV-19^^Washington|Human|Washington State Department of Health|Seattle Flu Study|Bedford|USA

>Spike|hCoV-19/England/ALDP-C3AC0D/2020|2020-12-09|EPI\_ISL\_731863|Original|hCoV-19^^England|Human|Lighthouse Lab in Alderley Park|Wellcome Sanger Institute for the COVID-19 Genomics UK (COG-UK) Consortium|Davies|United Kingdom

>Spike|hCoV-19/Russia/MOS-CRIE-13672306/2020|2020-11-09|EPI\_ISL\_745253|Original|hCoV-19^^Moscow|Human|Molecular diagnostic laboratory of Federal Budget Institution of Science \Central Research Institute of Epidemiology\ of The Federal Service on Customers' Rights Protection and Human Well-being Surveillance|Group of Genomics and Postgenomic Technologies of Central Research Institute of Epidemiology|y|Korneenko|Russia

>Spike|hCoV-19/Norway/2805/2020|2020-06-27|EPI\_ISL\_493370|Original|hCoV-19^^Norway|Human|Furst Medical Laboratory|Norwegian Institute of Public Health|Kopperud Riis|Norway

>Spike|hCoV-19/England/ALDP-B23E4E/2020|2020-11-04|EPI\_ISL\_646189|Original|hCoV-19^^England|Human|Lighthouse Lab in Alderley Park|Wellcome Sanger Institute for the COVID-19 Genomics UK (COG-UK) Consortium|Davies|United Kingdom

>Spike|hCoV-19/Denmark/DCGC-13148/2020|2020-11-30|EPI\_ISL\_712143|Original|hCoV-19^^Hovedstaden|Human|Department of Virus and Microbiological Special Diagnostics|Albertsen Lab|Michaelsen|Denmark

>Spike|hCoV-19/Denmark/DCGC-8379/2020|2020-10-26|EPI\_ISL\_617364|Original|hCoV-19^^Syddanmark|Human|Department of Virus and Microbiological Special Diagnostics|Albertsen lab|Michaelsen|Denmark

>Spike|hCoV-19/Singapore/149/2020|2020-03-18|EPI\_ISL\_443241|Original|hCoV-19^^Singapore|Human|National Public Health Laboratory|National Public Health Laboratory|Mak|Singapore

>Spike|hCoV-19/England/MILK-A79E0E/2020|2020-10-15|EPI\_ISL\_606823|Original|hCoV-19^^England|Human|Lighthouse Lab in Milton Keynes|Wellcome Sanger Institute for the COVID-19 Genomics UK (COG-UK) consortium|Davies|United Kingdom

>Spike|hCoV-19/Japan/IC-0416/2020|2020-12-00|EPI\_ISL\_736922|Original|hCoV-19^^Japan|Human|Pathogen Genomics Center|Pathogen Genomics Center|Sekizuka|Japan

>Spike|hCoV-19/United Arab Emirates/0626/2020|2020-05-15|EPI\_ISL\_698782|Original|hCoV-19^^Abu Dhabi|Human|Group 42 (G42) Healthcare|G42 Healthcare|Ogrodzki|United Arab Emirates

>Spike|hCoV-19/England/NORT-2941A2/2020|2020-07-27|EPI\_ISL\_573340|Original|hCoV-19^^England|Human|Northumbria University / South Tees Hospitals NHS Foundation Trust / North Cumbria Integrated Care NHS Foundation Trust / North Tees and Hartlepool NHS Foundation Trust / Newcastle Hospitals NHS Foundation Trust|COVID-19 Genomics UK (COG-UK) Consortium|Bashton|United Kingdom

>Spike|hCoV-19/USA/FL-BPHL-0991/2020|2020-07-02|EPI\_ISL\_517881|Original|hCoV-19^^Florida|Human|Florida Bureau of Public Health Laboratories|Florida Bureau of Public Health Laboratories|Blanton|USA

>Spike|hCoV-19/USA/WA-S815/2020|2020-04-17|EPI\_ISL\_449985|Original|hCoV-19^^Washington|Human|Washington State Department of Health|Seattle Flu Study|Bedford|USA

>Spike|hCoV-19/Germany/BB-ChVir-W1423-8226/2020|2020-06-19|EPI\_ISL\_753855|Original|hCoV-19^^Brandenburg|Human|Charit\u00e9 Universit\u00e4tsmedizin Berlin|Charit\u00e9 Universit\u00e4tsmedizin Berlin|Muehlemann|Germany

>Spike|hCoV-19/England/ALDP-6CB4D2/2020|2020-07-02|EPI\_ISL\_556277|Original|hCoV-19^^England|Human|Lighthouse Lab in Alderley Park|Wellcome Sanger Institute for the COVID-19 Genomics UK (COG-UK) consortium|Davies|United Kingdom

>Spike|hCoV-19/Wales/PHWC-48EDF0/2020|2020-11-11|EPI\_ISL\_681008|Original|hCoV-19^^Wales|Human|Wales Specialist Virology Centre Sequencing lab|COVID-19 Genomics UK (COG-UK) Consortium|Moore|United Kingdom

>Spike|hCoV-19/Japan/PG-5109/2020|2020-08-00|EPI\_ISL\_690218|Original|hCoV-19^^Japan|Human|Gunma Prefectural Institute of Public Health and Environmental Sciences|Pathogen Genomics Center|Sekizuka|Japan

>Spike|hCoV-19/USA/TX-HMH-5857/2020|2020-06-29|EPI\_ISL\_547067|Original|hCoV-19^^Texas|Human|Houston Methodist Hospital|Houston Methodist Hospital|Long|USA

>Spike|hCoV-19/England/QEUI-BCE513/2020|2020-11-26|EPI\_ISL\_704212|Original|hCoV-19^^England|Human|Lighthouse Lab in Glasgow|Wellcome Sanger Institute for the COVID-19 Genomics UK (COG-UK) Consortium|Davies|United Kingdom

>Spike|hCoV-19/Japan/IC-0380/2020|2020-11-00|EPI\_ISL\_721620|Original|hCoV-19^^Japan|Human|Pathogen Genomics Center|Pathogen Genomics Center|Sekizuka|Japan

>Spike|hCoV-19/Wales/PHWC-4A2637/2020|2020-12-15|EPI\_ISL\_743919|Original|hCoV-19^^Wales|Human|Wales Specialist Virology Centre Sequencing lab|COVID-19 Genomics UK (COG-UK) Consortium|Moore|United Kingdom

>Spike|hCoV-19/Canada/NS-NML-1359/2020|2020-04-14|EPI\_ISL\_579736|Original|hCoV-19^^Nova Scotia|Human|QEII Health Sciences Centre|National Microbiology Laboratory (NML)|Majer|Canada

>Spike|hCoV-19/England/CAMC-A58C47/2020|2020-10-07|EPI\_ISL\_597156|Original|hCoV-19^^England|Human|Lighthouse Lab in Cambridge|Wellcome Sanger Institute for the COVID-19 Genomics UK (COG-UK) consortium|Davies|United Kingdom

>Spike|hCoV-19/England/ALDP-94CC65/2020|2020-06-15|EPI\_ISL\_555990|Original|hCoV-19^^England|Human|Lighthouse Lab in Alderley Park|Wellcome Sanger Institute for the COVID-19 Genomics UK (COG-UK) Consortium|Davies|United Kingdom

>Spike|hCoV-19/Canada/ON-E69b/2020|2020-04-03|EPI\_ISL\_770822|Original|hCoV-19^^Ontario|Human|Eastern Ontario Regional Laboratory Association|McMaster University|McArthur|Canada

>Spike|hCoV-19/Israel/2023920/2020|2020-03-17|EPI\_ISL\_447408|Original|hCoV-19^^Jerusalem District|Human|Clinical Virology Unit|Stern Lab|Miller|Israel

>Spike|hCoV-19/USA/MA-MGH-02702/2020|2020-09-23|EPI\_ISL\_765591|Original|hCoV-19^^Massachusetts|Human|Brigham and Womens Hospital|Infectious Disease Program|Park|USA

>Spike|hCoV-19/Wales/PHWC-489487/2020|2020-10-26|EPI\_ISL\_639579|Original|hCoV-19^^Wales|Human|Wales Specialist Virology Centre Sequencing lab|COVID-19 Genomics UK (COG-UK) Consortium|Moore|United Kingdom

>Spike|hCoV-19/Denmark/DCGC-18571/2020|2020-12-07|EPI\_ISL\_750052|Original|hCoV-19^^Hovedstaden|Human|Department of Virus and Microbiological Special Diagnostics|Albertsen Lab|Michaelsen|Denmark

>Spike|hCoV-19/Saudi Arabia/KAUST-MAKKAH725/2020|2020-04-16|EPI\_ISL\_513227|Original|hCoV-19^^Makkah|Human|Pathogen Genomics Lab King Abdullah University of Science and Technology(KAUST)|Pathogen Genomics Lab King Abdullah University of Science and Technology(KAUST)|Mohamed Ghazzali|Saudi Arabia

>Spike|hCoV-19/France/PAC-IHU-0975/2020|2020-07-22|EPI\_ISL\_569022|Original|hCoV-19^^Provence-Alpes-C\u00f4te-d\u00e0z|Human|MEPHI|MEPHI|Levasseur|France

>Spike|hCoV-19/Scotland/EDB2723/2020|2020-03-27|EPI\_ISL\_487728|Original|hCoV-19^^Scotland|Human|Virology Department|Wellcome Sanger Institute for the COVID-19 Genomics UK (COG-UK) consortium|Davies|United Kingdom

>Spike|hCoV-19/USA/MI-MDHHS-SC21961/2020|2020-03-20|EPI\_ISL\_566012|Original|hCoV-19^^Michigan|Human|Michigan Department of Health and Human Services|Michigan Department of Health and Human Services|Blankenship|USA

>Spike|hCoV-19/USA/MI-QDX-613/2020|2020-03-18|EPI\_ISL\_571342|Original|hCoV-19^^Michigan|Human|Quest Diagnostics|Quest Diagnostics|Kagan|USA

>Spike|hCoV-19/Belgium/reg-0909931/2020|2020-09-09|EPI\_ISL\_734920|Original|hCoV-19^^Tervuren|Human|UZ Leuven|KU Leuven|Maes|Belgium

>Spike|hCoV-19/England/ALDP-AA173F/2020|2020-10-22|EPI\_ISL\_624051|Original|hCoV-19^^England|Human|Lighthouse Lab in Alderley Park|Wellcome Sanger Institute for the COVID-19 Genomics UK (COG-UK) consortium|Davies|United Kingdom

>Spike|hCoV-19/Switzerland/SO-ETHZ-360210/2020|2020-11-09|EPI\_ISL\_729254|Original|hCoV-19^^Solothurn|Human|Viollier AG|Department of Biosystems Science and Engineering|Nadeau|Switzerland

>Spike|hCoV-19/Russia/OMS-ORINFI-9642S/2020|2020-07-27|EPI\_ISL\_569794|Original|hCoV-19^^Omsk|Human|Omsk Research Institute of Natural Focal Infections|WHO National Influenza Centre Russian Federation|Komissarov|Russia

>Spike|hCoV-19/England/BRIS-12D78F/2020|2020-05-08|EPI\_ISL\_481889|Original|hCoV-19^^England|Human|PHE South West Regional Laboratory|Wellcome Sanger Institute for the COVID-19 Genomics UK (COG-UK) consortium|Davies|United Kingdom

>Spike|hCoV-19/England/QEUEH-B0F26A/2020|2020-11-02|EPI\_ISL\_642573|Original|hCoV-19^^England|Human|Lighthouse Lab in Glasgow|Wellcome Sanger Institute for the COVID-19 Genomics UK (COG-UK) Consortium|Davies|United Kingdom

>Spike|hCoV-19/Brazil/RJ-00307/2020|2020-04-24|EPI\_ISL\_623110|Original|hCoV-19^^Rio de Janeiro|Human|Laboratorio de Virologia Molecular / UFRJ|Bioinformatics Laboratory / LNCC|Almeida|Brazil

>Spike|hCoV-19/Spain/AN-IBV-001977/2020|2020-03-15|EPI\_ISL\_452407|Original|hCoV-19^^Andalucia|Human|Servicio de Microbiolog\u00eda. HRU de M\u00e9llaga. Servicio Andaluz de Salud|SeqCOVID-SPAIN consortium|IBV(CSIC)|Comas|Spain

>Spike|hCoV-19/Denmark/DCGC-8509/2020|2020-10-26|EPI\_ISL\_625907|Original|hCoV-19^^Sjaelland|Human|Department of Virus and Microbiological Special Diagnostics|Albertsen lab|Michaelsen|Denmark

>Spike|hCoV-19/Australia/VIC8692/2020|2020-07-21|EPI\_ISL\_565142|Original|hCoV-19^^Victoria|Human|Victorian Infectious Diseases Reference Laboratory (VIDRL)|VIDRL and MDU-PHL|Schultz|Australia

>Spike|hCoV-19/Scotland/CVR5264/2020|2020-10-16|EPI\_ISL\_626758|Original|hCoV-19^^Scotland|Human|West of Scotland Specialist Virology Centre|COVID-19 Genomics UK (COG-UK) Consortium|Robertson|United Kingdom

>Spike|hCoV-19/Wales/PHWC-49F5E5/2020|2020-12-08|EPI\_ISL\_743240|Original|hCoV-19^^Wales|Human|Wales Specialist Virology Centre Sequencing lab|COVID-19 Genomics UK (COG-UK) Consortium|Moore|United Kingdom

>Spike|hCoV-19/Japan/PG-8247/2020|2020-08-00|EPI\_ISL\_687346|Original|hCoV-19^^Japan|Human|Pathogen Genomics Center|Pathogen Genomics Center|Sekizuka|Japan

>Spike|hCoV-19/USA/MN-MDH-1243/2020|2020-05-26|EPI\_ISL\_482964|Original|hCoV-19^^Minnesota|Human|Minnesota Department of Health|Minnesota Department of Health|Garfin|USA

>Spike|hCoV-19/Switzerland/ZH-ETHZ-370526/2020|2020-11-19|EPI\_ISL\_694007|Original|hCoV-19^^Zurich|Human|Viollier AG|Department of Biosystems Science and Engineering|Nadeau|Switzerland

>Spike|hCoV-19/England/LIVE-DBD6A9/2020|2020-10-28|EPI\_ISL\_664649|Original|hCoV-19^^England|Human|Liverpool Clinical Laboratories|COVID-19 Genomics UK (COG-UK) Consortium|Haldenby|United Kingdom

>Spike|hCoV-19/Hungary/MBL-003/2020|2020-03-25|EPI\_ISL\_435421|Original|hCoV-19^^Balatonfured|Human|Virological Research Group|Bioinformatics Research Group|Herczeg|Hungary

>Spike|hCoV-19/USA/MA-JLL-161N/2020|2020-00-00|EPI\_ISL\_632300|Original|hCoV-19^^Massachusetts|Human|Brigham and Women's Hospital|Jonathan Li laboratory|Choudhary|USA

>Spike|hCoV-19/England/QEUEH-9FFF4A/2020|2020-09-30|EPI\_ISL\_600287|Original|hCoV-19^^England|Human|Lighthouse Lab in Glasgow|Wellcome Sanger Institute for the COVID-19 Genomics UK (COG-UK) consortium|Davies|United Kingdom

>Spike|hCoV-19/Luxembourg/LNS4836560/2020|2020-03-16|EPI\_ISL\_419588|Original|hCoV-19^^Luxembourg|Human|Laboratoire National de Sant\u00e9|Laboratoire National de Sant\u00e9|Wienecke-Baldacchino|Luxembourg

>Spike|hCoV-19/Scotland/QEUEH-9F656F/2020|2020-09-27|EPI\_ISL\_600679|Original|hCoV-19^^Scotland|Human|Lighthouse Lab in Glasgow|Wellcome Sanger Institute for the COVID-19 Genomics UK (COG-UK) consortium|Davies|United Kingdom

>Spike|hCoV-19/South Africa/KRISP-K003461/2020|2020-09-13|EPI\_ISL\_602795|Original|hCoV-19^^KwaZulu-Natal|Human|NHL-S-IALCH|KRISP|de Oliveira|South Africa

>Spike|hCoV-19/Germany/HH-hpi-p1519/2020|2020-03-15|EPI\_ISL\_776020|Original|hCoV-19^^Hamburg|Human|University Medical Center Hamburg Eppendorf|Heinrich Pette Institute|Robitaille|Germany

>Spike|hCoV-19/USA/WA-S1186/2020|2020-05-06|EPI\_ISL\_463676|Original|hCoV-19^^Washington|Human|Washington State Department of Health|Seattle Flu Study|Bedford|USA

>Spike|hCoV-19/Ireland/D-NVRL-MPA71880/2020|2020-04-11|EPI\_ISL\_767788|Original|hCoV-19^^Dublin|Human|National Virus Reference Laboratory|Irish Coronavirus Sequencing Consortium - Teagasc Moorepark|Walsh|Ireland

>Spike|hCoV-19/England/QEUEH-A341D9/2020|2020-10-05|EPI\_ISL\_628421|Original|hCoV-19^^England|Human|Virology Department|COVID-19 Genomics UK (COG-UK) Consortium|de Silva|United Kingdom

>Spike|hCoV-19/England/NOTT-120519/2020|2020-12-08|EPI\_ISL\_725624|Original|hCoV-19^^England|Human|Queens Medical Centre|COVID-19 Genomics UK (COG-UK) Consortium|Loose|United Kingdom

>Spike|hCoV-19/England/CAMB-81007/2020|2020-04-20|EPI\_ISL\_438555|Original|hCoV-19^^England|Human|Department of Pathology|COVID-19 Genomics UK (COG-UK) Consortium|Meredith|United Kingdom

>Spike|hCoV-19/USA/UT-04139/2020|2020-05-13|EPI\_ISL\_493038|Original|hCoV-19^^Utah|Human|Utah Public Health Laboratory|Utah Public Health Laboratory|Butz|USA

>Spike|hCoV-19/England/QEUEH-BC3A00/2020|2020-11-25|EPI\_ISL\_704207|Original|hCoV-19^^England|Human|Lighthouse Lab in Glasgow|Wellcome Sanger Institute for the COVID-19 Genomics UK (COG-UK) Consortium|Davies|United Kingdom

>Spike|hCoV-19/England/NOTT-11772E/2020|2020-10-23|EPI\_ISL\_612584|Original|hCoV-19^^England|Human|Queens Medical Centre|COVID-19 Genomics UK (COG-UK) Consortium|Loose|United Kingdom

>Spike|hCoV-19/England/20140064404/2020|2020-03-30|EPI\_ISL\_465884|Original|hCoV-19^^England|Human|Respiratory Virus Unit|Respiratory Virus Unit|Platt|United Kingdom

>Spike|hCoV-19/Austria/CeMM0686/2020|2020-05-14|EPI\_ISL\_583646|Original|hCoV-19^^Austria|Human|Austrian Agency for Health and Food Safety (AGES)|Bergthaler laboratory|Bergthaler|Austria

>Spike|hCoV-19/England/SHEF-C04E2/2020|2020-03-24|EPI\_ISL\_420263|Original|hCoV-19^^England|Human|Virology Department|Department of Infection|de Silva|United Kingdom

>Spike|hCoV-19/England/MILK-ACC965/2020|2020-10-21|EPI\_ISL\_634306|Original|hCoV-19^^England|Human|Lighthouse Lab in Milton Keynes|Wellcome Sanger Institute for the COVID-19 Genomics UK (COG-UK) consortium|Davies|United Kingdom

>Spike|hCoV-19/England/204541206/2020|2020-11-04|EPI\_ISL\_678670|Original|hCoV-19^^England|Human|Respiratory Virus Unit|COVID-19 Genomics UK (COG-UK) Consortium|Platt|United Kingdom

>Spike|hCoV-19/England/CAMC-A81E4F/2020|2020-10-12|EPI\_ISL\_610887|Original|hCoV-19^^England|Human|Lighthouse Lab in Cambridge|Wellcome Sanger Institute for the COVID-19 Genomics UK (COG-UK) consortium|Davies|United Kingdom

>Spike|hCoV-19/Serbia/NP363-04/2020|2020-04-04|EPI\_ISL\_437436|Original|hCoV-19^^Novi Pazar|Human|Veterinary Specialized Institue Kraljevo|Veterinary Specialized Institue Kraljevo|Volkening|Serbia

>Spike|hCoV-19/Portugal/R473/2020|2020-05-28|EPI\_ISL\_491289|Original|hCoV-19^^Portugal|Human|Instituto Gulbenkian de Ci\u00eancia|Instituto Gulbenkian de Ci\u00eancia|Leite|Portugal



>Spike|hCoV-19/USA/MN-UMGC-3/2020|2020-04-02|EPI\_ISL\_443254|Original|hCoV-19^^Minnesota|Human|M Health Fairview|University of Minnesota Genomics Center|Garbe|USA

>Spike|hCoV-19/Wales/MILK-9E2153/2020|2020-09-20|EPI\_ISL\_581212|Original|hCoV-19^^Wales|Human|Lighthouse Lab in Milton Keynes|Wellcome Sanger Institute for the COVID-19 Genomics UK (COG-UK) consortium|Davies|United Kingdom

>Spike|hCoV-19/England/ALDP-6C7816/2020|2020-07-01|EPI\_ISL\_556182|Original|hCoV-19^^England|Human|Lighthouse Lab in Alderley Park|Wellcome Sanger Institute for the COVID-19 Genomics UK (COG-UK) consortium|Davies|United Kingdom

>Spike|hCoV-19/USA/NM-UNM-00574/2020|2020-08-07|EPI\_ISL\_542988|Original|hCoV-19^^New Mexico|Human|TriCore Reference Laboratories|Center for Global Health|Domman|USA

>Spike|hCoV-19/Japan/PG-6978/2020|2020-07-00|EPI\_ISL\_688083|Original|hCoV-19^^Japan|Human|Pathogen Genomics Center|Pathogen Genomics Center|Sekizuka|Japan

>Spike|hCoV-19/Netherlands/NB-EMC-279/2020|2020-05-08|EPI\_ISL\_523401|Original|hCoV-19^^Noord Brabant|Human|Dutch COVID-19 response team|Erasmus Medical Center|Oude Munnink|Netherlands

>Spike|hCoV-19/USA/WI-GMF-32468/2020|2020-11-09|EPI\_ISL\_661147|Original|hCoV-19^^Wisconsin|Human|Gundersen Molecular Diagnostics Laboratory|Kabara Cancer Research Institute|Kenny|USA

>Spike|hCoV-19/Scotland/EDB5682/2020|2020-05-28|EPI\_ISL\_473835|Original|hCoV-19^^Scotland|Human|Virology Department|COVID-19 Genomics UK (COG-UK) Consortium|Williams|United Kingdom

>Spike|hCoV-19/Finland/S12A1/2020|2020-09-10|EPI\_ISL\_737061|Original|hCoV-19^^Uusimaa|Human|Department of Virology and Immunology|Department of Virology|Smura|Finland

>Spike|hCoV-19/USA/UT-UPHL-04319/2020|2020-05-16|EPI\_ISL\_575148|Original|hCoV-19^^Utah|Human|Utah Public Health Laboratory|Utah Public Health Laboratory|Young|USA

>Spike|hCoV-19/Wales/PHWC-495A3B/2020|2020-11-25|EPI\_ISL\_726429|Original|hCoV-19^^Wales|Human|Originating lab|COVID-19 Genomics UK (COG-UK) Consortium|Moore|United Kingdom

>Spike|hCoV-19/Canada/ON-UHTC-0316/2020|2020-09-20|EPI\_ISL\_671653|Original|hCoV-19^^Ontario|Human|Unity Health Toronto|Ontario Institute for Cancer Research|de Borja|Canada

>Spike|hCoV-19/USA/TX-HMH-MCoV-18849/2020|2020-11-26|EPI\_ISL\_785166|Original|hCoV-19^^Texas|Human|Houston Methodist Hospital|Houston Methodist Hospital|Long|USA

>Spike|hCoV-19/France/OCC-SC504/2020|2020-04-21|EPI\_ISL\_644695|Original|hCoV-19^^Occitanie|Human|CHU Montpellier|CNR Virus des Infections Respiratoires - France SUD|Bal|France

>Spike|hCoV-19/Switzerland/BE-ETHZ-270157/2020|2020-08-28|EPI\_ISL\_541437|Original|hCoV-19^^Bern|Human|Viollier AG|Department of Biosystems Science and Engineering|Nadeau|Switzerland

>Spike|hCoV-19/USA/TX-HMH-MCoV-10396/2020|2020-07-08|EPI\_ISL\_789450|Original|hCoV-19^^Texas|Human|Houston Methodist Hospital|Houston Methodist Hospital|Long|USA

>Spike|hCoV-19/USA/TX-HMH-MCoV-15779/2020|2020-07-10|EPI\_ISL\_785463|Original|hCoV-19^^Texas|Human|Houston Methodist Hospital|Houston Methodist Hospital|Long|USA

>Spike|hCoV-19/Switzerland/SZ-ETHZ-310400/2020|2020-10-08|EPI\_ISL\_603474|Original|hCoV-19^^Schwyz|Human|Viollier AG|Department of Biosystems Science and Engineering|Nadeau|Switzerland

>Spike|hCoV-19/Luxembourg/LNS1202747/2020|2020-11-25|EPI\_ISL\_739907|Original|hCoV-19^^Luxembourg|Human|Laboratoire national de sant\u00e9|Laboratoire national de sant\u00e9|Wienecke-Baldacchino|Luxembourg

>Spike|hCoV-19/Australia/NSW1071/2020|2020-08-09|EPI\_ISL\_593659|Original|hCoV-19^^New South Wales|Human|Pathology North - Royal North Shore Hospital - NSW Health Pathology|NSW Health Pathology - Institute of Clinical Pathology and Medical Research; Westmead Hospital; University of Sydney|Gall|Australia

>Spike|hCoV-19/Wales/PHWC-26CF1/2020|2020-03-30|EPI\_ISL\_422261|Original|hCoV-19^^Wales|Human|Wales Specialist Virology Centre|Public Health Wales Microbiology Cardiff|Moore|United Kingdom

>Spike|hCoV-19/England/OXON-B2401/2020|2020-04-02|EPI\_ISL\_479142|Original|hCoV-19^^England|Human|Oxford Viromics|COVID-19 Genomics UK (COG-UK) Consortium|Golubchik|United Kingdom

>Spike|hCoV-19/England/ALDP-509248/2020|2020-06-25|EPI\_ISL\_559252|Original|hCoV-19^^England|Human|Lighthouse Lab in Alderley Park|Wellcome Sanger Institute for the COVID-19 Genomics UK (COG-UK) consortium|Davies|United Kingdom

>Spike|hCoV-19/Russia/IVA-RII-MH9268S/2020|2020-10-14|EPI\_ISL\_733426|Original|hCoV-19^^Ivanovo|Human|HELIX LLC|WHO National Influenza Centre Russian Federation|Komissarov|Russia

>Spike|hCoV-19/England/LIVE-9F9A1/2020|2020-06-07|EPI\_ISL\_472030|Original|hCoV-19^^England|Human|Liverpool Clinical Laboratories|COVID-19 Genomics UK (COG-UK) Consortium|Haldenby|United Kingdom

>Spike|hCoV-19/USA/UT-08695/2020|2020-05-26|EPI\_ISL\_524413|Original|hCoV-19^^Utah|Human|Utah Public Health Laboratory|Utah Public Health Laboratory|Young|USA

>Spike|hCoV-19/USA/WI-WSLH-200444/2020|2020-05-19|EPI\_ISL\_578591|Original|hCoV-19^^Wisconsin|Human|Wisconsin State Laboratory of Hygiene Communicable Disease Division|Wisconsin State Laboratory of Hygiene Communicable Disease Division|Florek|USA

>Spike|hCoV-19/Australia/WA358/2020|2020-10-18|EPI\_ISL\_605835|Original|hCoV-19^^Western Australia|Human|PathWest Laboratory Medicine WA|PathWest Laboratory Medicine WA Microbial Surveillance Unit|Sikazwe|Australia

>Spike|hCoV-19/Brazil/SP-429/2020|2020-07-16|EPI\_ISL\_603022|Original|hCoV-19^^S\u00e3o Paulo|Human|Departamento de Vigil\u00e2ncia \u00e0 Sa\u00fade|Instituto Adolfo Lutz|Sacchi|Brazil

>Spike|hCoV-19/England/ALDP-AA0F92/2020|2020-10-22|EPI\_ISL\_624541|Original|hCoV-19^^England|Human|Lighthouse Lab in Alderley Park|Wellcome Sanger Institute for the COVID-19 Genomics UK (COG-UK) consortium|Davies|United Kingdom

>Spike|hCoV-19/USA/CA-CDPH003/2020|2020-03-20|EPI\_ISL\_515896|Original|hCoV-19^^California|Human|California Department of Public Health|California Department of Public Health|Bell|USA

>Spike|hCoV-19/USA/MA-MGH-03182/2020|2020-09-25|EPI\_ISL\_765737|Original|hCoV-19^^Massachusetts|Human|Massachusetts General Hospital|Infectious Disease Program|Park|USA

>Spike|hCoV-19/Malaysia/IMR-CV139158/2020|2020-09-01|EPI\_ISL\_718296|Original|hCoV-19^^Malaysia|Human|Institute for Medical Research|Institute for Medical Research|Suppiah|Malaysia

>Spike|hCoV-19/USA/FL-BPHL-0874/2020|2020-07-08|EPI\_ISL\_514220|Original|hCoV-19^^Florida|Human|Florida Bureau of Public Health Laboratories|Florida Bureau of Public Health Laboratories|Blanton|USA

>Spike|hCoV-19/Wales/PHWC-1643C4/2020|2020-05-06|EPI\_ISL\_474170|Original|hCoV-19^^Wales|Human|Originating lab|COVID-19 Genomics UK (COG-UK) Consortium|Moore|United Kingdom

>Spike|hCoV-19/Netherlands/NoordBrabant\_57/2020|2020-03-11|EPI\_ISL\_415513|Original|hCoV-19^^Noord Brabant|Human|Dutch COVID-19 response team|Erasmus Medical Center|Oude Munnink|Netherlands

>Spike|hCoV-19/Wales/PHWC-1606ED/2020|2020-04-22|EPI\_ISL\_472967|Original|hCoV-19^^Wales|Human|Wales Specialist Virology Centre Sequencing lab|COVID-19 Genomics UK (COG-UK) Consortium|Moore|United Kingdom

>Spike|hCoV-19/Scotland/EDB1196/2020|2020-04-08|EPI\_ISL\_491582|Original|hCoV-19^^Scotland|Human|Virology Department|Wellcome Sanger Institute for the COVID-19 Genomics UK (COG-UK) consortium|Davies|United Kingdom

>Spike|hCoV-19/Denmark/DCGC-3878/2020|2020-09-07|EPI\_ISL\_615596|Original|hCoV-19^^Hovedstaden|Human|Department of Virus and Microbiological Special Diagnostics|Albertsen lab|Michaelsen|Denmark

>Spike|hCoV-19/Canada/BC-BCCDC-6452/2020|2020-10-00|EPI\_ISL\_740600|Original|hCoV-19^^British Columbia|Human|BCCDC Public Health Laboratory|BCCDC Public Health Laboratory|Prystajecky|Canada

>Spike|hCoV-19/England/ALDP-B25E97/2020|2020-11-04|EPI\_ISL\_646697|Original|hCoV-19^^England|Human|Lighthouse Lab in Alderley Park|Wellcome Sanger Institute for the COVID-19 Genomics UK (COG-UK) Consortium|Davies|United Kingdom

>Spike|hCoV-19/USA/AZ-TG408209/2020|2020-06-17|EPI\_ISL\_694945|Original|hCoV-19^^Arizona|Human|AZ SPHL|TGen North|French|USA

>Spike|hCoV-19/Singapore/1496/2020|2020-12-14|EPI\_ISL\_754105|Original|hCoV-19^^Singapore|Human|National Public Health Laboratory|National Public Health Laboratory|Mak|Singapore

>Spike|hCoV-19/Japan/PG-1596/2020|2020-04-00|EPI\_ISL\_685202|Original|hCoV-19^^Japan|Human|Pathogen Genomics Center|Pathogen Genomics Center|Sekizuka|Japan

>Spike|hCoV-19/England/BIRM-60253/2020|2020-07-20|EPI\_ISL\_529421|Original|hCoV-19^^England|Human|University of Birmingham|COVID-19 Genomics UK (COG-UK) Consortium|Loman|United Kingdom

>Spike|hCoV-19/Nigeria/OY627-CV184/2020|2020-06-13|EPI\_ISL\_527911|Original|hCoV-19^^Oyo|Human|Nigeria Centre for Disease Control (NCDC)|African Centre of Excellence for Genomics of Infectious Diseases (ACEGID)|Oluniyi|Nigeria

>Spike|hCoV-19/New Zealand/20CV0339/2020|2020-09-10|EPI\_ISL\_579095|Original|hCoV-19^^Auckland|Human|North Shore Hospital|Institute of Environmental Science and Research (ESR)|Wang|New Zealand

>Spike|hCoV-19/Switzerland/SO-ETHZ-380237/2020|2020-11-21|EPI\_ISL\_721869|Original|hCoV-19^^Solothurn|Human|Viollier AG|Department of Biosystems Science and Engineering|Nadeau|Switzerland

>Spike|hCoV-19/Austria/CeMM0384/2020|2020-04-01|EPI\_ISL\_475826|Original|hCoV-19^^Mayrhofen|Human|Institut f\u00fcr Virologie am Department f\u00fcr Hygiene|Bergthaler laboratory|Bergthaler|Austria

>Spike|hCoV-19/Canada/MB-NML-1107/2020|2020-08-04|EPI\_ISL\_582449|Original|hCoV-19^^Manitoba|Human|Cadham Provincial Laboratory|National Microbiology Laboratory (NML)|Majer|Canada

>Spike|hCoV-19/England/OXON-AFA50/2020|2020-04-16|EPI\_ISL\_478799|Original|hCoV-19^^England|Human|Oxford Viromics|COVID-19 Genomics UK (COG-UK) Consortium|Golubchik|United Kingdom

>Spike|hCoV-19/Spain/MD-IBV-99008526/2020|2020-09-10|EPI\_ISL\_654050|Original|hCoV-19^^Madrid|Human|Hospital General Universitario Gregorio Mara\u00f1a|SeqCOVID-SPAIN consortium|IBV (CSIC)|Comas|Spain

>Spike|hCoV-19/England/NORW-ED84D/2020|2020-00-00|EPI\_ISL\_490501|Original|hCoV-19^^England|Human|Quadram Institute Bioscience|COVID-19 Genomics UK (COG-UK) Consortium|Alikhan|United Kingdom

>Spike|hCoV-19/Denmark/DCGC-940/2020|2020-03-30|EPI\_ISL\_614515|Original|hCoV-19^^Sjaelland|Human|Department of Virus and Microbiological Special Diagnostics|Albertsen lab|Michaelsen|Denmark

>Spike|hCoV-19/Denmark/DCGC-8034/2020|2020-10-26|EPI\_ISL\_617140|Original|hCoV-19^^Sjaelland|Human|Department of Virus and Microbiological Special Diagnostics|Albertsen lab|Michaelsen|Denmark

>Spike|hCoV-19/USA/WI-UW-2642/2020|2020-12-31|EPI\_ISL\_791157|Original|hCoV-19^^Wisconsin|Human|University of Wisconsin-Madison AIDS Vaccine Research Laboratories|University of Wisconsin-Madison AIDS Vaccine Research Laboratories|Moreno|USA

>Spike|hCoV-19/Germany/HH-hpi-p2354/2020|2020-03-14|EPI\_ISL\_776449|Original|hCoV-19^^Hamburg|Human|University Medical Center Hamburg Eppendorf|Heinrich Pette Institute|Robitaille|Germany

>Spike|hCoV-19/England/ALDP-49A702/2020|2020-06-13|EPI\_ISL\_559435|Original|hCoV-19^^England|Human|Lighthouse Lab in Alderley Park|Wellcome Sanger Institute for the COVID-19 Genomics UK (COG-UK) consortium|Davies|United Kingdom

>Spike|hCoV-19/England/ALDP-C060A4/2020|2020-12-05|EPI\_ISL\_709501|Original|hCoV-19^^England|Human|Lighthouse Lab in Alderley Park|Wellcome Sanger Institute for the COVID-19 Genomics UK (COG-UK) Consortium|Davies|United Kingdom

>Spike|hCoV-19/England/BIRM-61717/2020|2020-04-28|EPI\_ISL\_493451|Original|hCoV-19^^England|Human|University of Birmingham|COVID-19 Genomics UK (COG-UK) Consortium|Loman|United Kingdom

>Spike|hCoV-19/England/QEUH-A0B126/2020|2020-10-01|EPI\_ISL\_599448|Original|hCoV-19^^England|Human|Lighthouse Lab in Glasgow|Wellcome Sanger Institute for the COVID-19 Genomics UK (COG-UK) consortium|Davies|United Kingdom

>Spike|hCoV-19/Scotland/QEUH-969FE1/2020|2020-08-15|EPI\_ISL\_530923|Original|hCoV-19^^Scotland|Human|NHSGGC West of Scotland Specialist Virology Centre / MRC-University of Glasgow Centre for Virus Research|Wellcome Sanger Institute for the COVID-19 Genomics UK (COG-UK) consortium|Davies|United Kingdom

>Spike|hCoV-19/England/LIVE-AAC9B/2020|2020-07-29|EPI\_ISL\_540607|Original|hCoV-19^^England|Human|Liverpool Clinical Laboratories|COVID-19 Genomics UK (COG-UK) Consortium|Haldenby|United Kingdom

>Spike|hCoV-19/Luxembourg/LNS8164261/2020|2020-10-19|EPI\_ISL\_744693|Original|hCoV-19^^Luxembourg|Human|Laboratoire national de sant\u00e9|Laboratoire national de sant\u00e9|Wienecke-Baldacchino|Luxembourg

>Spike|hCoV-19/Sweden/20-08147/2020|2020-03-11|EPI\_ISL\_430849|Original|hCoV-19^^Halland|Human|Klinisk mikrobiologi och vardhygien Halmstad|The Public Health Agency of Sweden|Svartstr\u00f6m|Sweden

>Spike|hCoV-19/Thailand/SI205457-NST/2020|2020-03-16|EPI\_ISL\_437607|unknown|hCoV-19^^Thailand|Human|unknown|Faculty of Medicine|Submitter|Thailand

>Spike|hCoV-19/England/CAMC-B52514/2020|2020-11-08|EPI\_ISL\_657857|Original|hCoV-19^^England|Human|Lighthouse Lab in Cambridge|Wellcome Sanger Institute for the COVID-19 Genomics UK (COG-UK) Consortium|Davies|United Kingdom

>Spike|hCoV-19/England/MILK-9C26F0/2020|2020-09-05|EPI\_ISL\_566580|Original|hCoV-19^^England|Human|Lighthouse Lab in Milton Keynes|Wellcome Sanger Institute for the COVID-19 Genomics UK (COG-UK) consortium|Davies|United Kingdom

>Spike|hCoV-19/USA/LA-SR0270/2020|2020-04-01|EPI\_ISL\_445125|Original|hCoV-19^^Louisiana|Human|Robert Garry lab|Andersen lab at Scripps Research|Gangavarapu|USA

>Spike|hCoV-19/England/201421152/2020|2020-03-30|EPI\_ISL\_465955|Original|hCoV-19^^England|Human|Respiratory Virus Unit|Respiratory Virus Unit|Platt|United Kingdom

>Spike|hCoV-19/Australia/VIC10676/2020|2020-09-06|EPI\_ISL\_563028|Original|hCoV-19^^Victoria|Human|Microbiological Diagnostic Unit - Public Health Laboratory (MDU-PHL)|MDU-PHL|Schultz|Australia

>Spike|hCoV-19/Scotland/EDB8101/2020|2020-10-04|EPI\_ISL\_594828|Original|hCoV-19^^Scotland|Human|Virology Department|COVID-19 Genomics UK (COG-UK) Consortium|McHugh|United Kingdom

>Spike|hCoV-19/USA/FL-BPHL-1134/2020|2020-08-14|EPI\_ISL\_526620|Original|hCoV-19^^Florida|Human|Florida Bureau of Public Health Laboratories|Florida Bureau of Public Health Laboratories|Blanton|USA

>Spike|hCoV-19/England/NOTT-112064/2020|2020-04-06|EPI\_ISL\_478724|Original|hCoV-19^^England|Human|Queens Medical Centre|COVID-19 Genomics UK (COG-UK) Consortium|Loose|United Kingdom

>Spike|hCoV-19/England/ALDP-9FD6A1/2020|2020-10-01|EPI\_ISL\_588000|Original|hCoV-19^^England|Human|Lighthouse Lab in Alderley Park|Wellcome Sanger Institute for the COVID-19 Genomics UK (COG-UK) consortium|Davies|United Kingdom

>Spike|hCoV-19/India/UP-NBRI-N15-TCR325/2020|2020-04-02|EPI\_ISL\_516944|Original|hCoV-19^^Uttar Pradesh|Human|King Georges Medical University|CSIR-National Botanical Research Institute|Bag|India

>Spike|hCoV-19/England/LIVE-DC2A4B/2020|2020-11-24|EPI\_ISL\_705833|Original|hCoV-19^^England|Human|Liverpool Clinical Laboratories|COVID-19 Genomics UK (COG-UK) Consortium|Haldenby|United Kingdom

>Spike|hCoV-19/England/CAMC-B334C1/2020|2020-11-05|EPI\_ISL\_659131|Original|hCoV-19^^England|Human|Lighthouse Lab in Cambridge|Wellcome Sanger Institute for the COVID-19 Genomics UK (COG-UK) Consortium|Davies|United Kingdom

>Spike|hCoV-19/USA/CA-CZB-1520/2020|2020-05-11|EPI\_ISL\_468466|Original|hCoV-19^^California|Human|Ventura County Public Health Lab|Chan-Zuckerberg Biohub|Hao|USA

>Spike|hCoV-19/USA/CA-ALSR-3761/2020|2020-06-05|EPI\_ISL\_636188|Original|hCoV-19^^California|Human|San Diego County Public Health Laboratory|Andersen lab at Scripps Research|Gangavarapu|USA

>Spike|hCoV-19/Spain/Donostia-San\_Sebastian2087/2020|2020-04-10|EPI\_ISL\_468889|Original|hCoV-19^^Basque\_Country|Human|Servicio de Microbiolog\u00eda. Hospital Universitario Donostia. OSI Donostialdea. \u00c1rea de Enfermedades Infecciosas|SeqCOVID-SPAIN consortium/IBV(CSIC)|Comas|Spain

>Spike|hCoV-19/USA/FL-BPHL-0635/2020|2020-04-06|EPI\_ISL\_508839|Original|hCoV-19^^Florida|Human|Florida Bureau of Public Health Laboratories|Florida Bureau of Public Health Laboratories|Blanton|USA

>Spike|hCoV-19/Denmark/DCGC-15903/2020|2020-11-23|EPI\_ISL\_714094|Original|hCoV-19^^Sjaelland|Human|Department of Virus and Microbiological Special Diagnostics|Albertsen Lab|Michaelsen|Denmark

>Spike|hCoV-19/Wales/PHWC-48BEA5/2020|2020-10-20|EPI\_ISL\_666364|Original|hCoV-19^^Wales|Human|Wales Specialist Virology Centre Sequencing lab|COVID-19 Genomics UK (COG-UK) Consortium|Moore|United Kingdom

>Spike|hCoV-19/England/MILK-B97337/2020|2020-11-14|EPI\_ISL\_675025|Original|hCoV-19^^England|Human|Lighthouse Lab in Milton Keynes|Wellcome Sanger Institute for the COVID-19 Genomics UK (COG-UK) Consortium|Davies|United Kingdom

>Spike|hCoV-19/England/MILK-9A9FD6/2020|2020-09-01|EPI\_ISL\_550917|Original|hCoV-19^^England|Human|Lighthouse Lab in Milton Keynes|Wellcome Sanger Institute for the COVID-19 Genomics UK (COG-UK) consortium|Davies|United Kingdom

>Spike|hCoV-19/England/CAMB-72DF3/2020|2020-03-20|EPI\_ISL\_440066|Original|hCoV-19^^England|Human|Department of Pathology|Wellcome Sanger Institute for the COVID-19 Genomics UK (COG-UK) consortium|Amato|United Kingdom

>Spike|hCoV-19/USA/TX-HMH-MCoV-13788/2020|2020-08-17|EPI\_ISL\_788881|Original|hCoV-19^^Texas|Human|Houston Methodist Hospital|Houston Methodist Hospital|Long|USA

>Spike|hCoV-19/USA/VA-DCLS-1885/2020|2020-09-23|EPI\_ISL\_644918|Original|hCoV-19^^Virginia|Human|Virginia DCLS|Virginia DCLS|St. Jacques|USA

>Spike|hCoV-19/USA/CA-ALSR-3662/2020|2020-09-24|EPI\_ISL\_636135|Original|hCoV-19^^California|Human|San Diego County Public Health Laboratory|Andersen lab at Scripps Research|Gangavarapu|USA

>Spike|hCoV-19/England/CAMC-A579E7/2020|2020-10-09|EPI\_ISL\_597479|Original|hCoV-19^^England|Human|Lighthouse Lab in Cambridge|Wellcome Sanger Institute for the COVID-19 Genomics UK (COG-UK) consortium|Davies|United Kingdom

>Spike|hCoV-19/Canada/ON-SK-20H-328MM0935/2020|2020-11-24|EPI\_ISL\_791501|Original|hCoV-19^^Ontario|Human|The Hospital for Sick Children|The Hospital for Sick Children|Lau|Canada

>Spike|hCoV-19/Denmark/DCGC-7819/2020|2020-10-19|EPI\_ISL\_618795|Original|hCoV-19^^Hovedstaden|Human|Department of Virus and Microbiological Special Diagnostics|Albertsen lab|Michaelsen|Denmark

>Spike|hCoV-19/USA/CA-QDX-2371/2020|2020-03-16|EPI\_ISL\_604657|Original|hCoV-19^^California|Human|Quest Diagnostics|Quest Diagnostics|Kagan|USA

>Spike|hCoV-19/England/ALDP-49F0B7/2020|2020-06-01|EPI\_ISL\_559566|Original|hCoV-19^^England|Human|Lighthouse Lab in Alderley Park|Wellcome Sanger Institute for the COVID-19 Genomics UK (COG-UK) consortium|Davies|United Kingdom

>Spike|hCoV-19/Scotland/QEUH-B10AC8/2020|2020-11-02|EPI\_ISL\_649578|Original|hCoV-19^^Scotland|Human|Lighthouse Lab in Glasgow|Wellcome Sanger Institute for the COVID-19 Genomics UK (COG-UK) Consortium|Davies|United Kingdom

>Spike|hCoV-19/USA/AZ-TG395881/2020|2020-06-05|EPI\_ISL\_694726|Original|hCoV-19^^Arizona|Human|AZ SPHL|TGen North|French|USA

>Spike|hCoV-19/South Korea/KCDC2322/2020|2020-05-26|EPI\_ISL\_510658|Original|hCoV-19^^South Korea|Human|Division of Viral Diseases|Division of Viral Diseases|Kim|South Korea

>Spike|hCoV-19/Netherlands/UT-RIVM-10161/2020|2020-00-00|EPI\_ISL\_547548|Original|hCoV-19^^Utrecht|Human|Dutch COVID-19 response team|National Institute for Public Health and the Environment (RIVM)|Meijer|Netherlands

>Spike|hCoV-19/Denmark/DCGC-13327/2020|2020-11-30|EPI\_ISL\_712731|Original|hCoV-19^^Midtjylland|Human|Department of Virus and Microbiological Special Diagnostics|Albertsen Lab|Michaelsen|Denmark

>Spike|hCoV-19/Wales/PHWC-2C8CA/2020|2020-04-01|EPI\_ISL\_445921|Original|hCoV-19^^Wales|Human|Wales Specialist Virology Centre|Public Health Wales Microbiology Cardiff|Moore|United Kingdom

>Spike|hCoV-19/England/QEUH-B809E4/2020|2020-11-14|EPI\_ISL\_661720|Original|hCoV-19^^England|Human|Lighthouse Lab in Glasgow|Wellcome Sanger Institute for the COVID-19 Genomics UK (COG-UK) Consortium|Davies|United Kingdom

>Spike|hCoV-19/USA/MI-UM-10036595909/2020|2020-10-23|EPI\_ISL\_649997|Original|hCoV-19^^Michigan|Human|University of Michigan Clinical Microbiology Laboratory|Lauring Lab|Valesano|USA

>Spike|hCoV-19/Denmark/DCGC-14658/2020|2020-11-23|EPI\_ISL\_711895|Original|hCoV-19^^Hovedstaden|Human|Department of Virus and Microbiological Special Diagnostics|Albertsen Lab|Michaelsen|Denmark

>Spike|hCoV-19/USA/AZ-TG569490/2020|2020-07-10|EPI\_ISL\_695581|Original|hCoV-19^^Arizona|Human|AZ SPHL|TGen North|French|USA

>Spike|hCoV-19/England/CAMB-1BA3DE/2020|2020-11-11|EPI\_ISL\_664979|Original|hCoV-19^^England|Human|Department of Pathology|COVID-19 Genomics UK (COG-UK) Consortium|Goodfellow|United Kingdom

>Spike|hCoV-19/England/ALDP-9E5879/2020|2020-09-24|EPI\_ISL\_589349|Original|hCoV-19^^England|Human|Lighthouse Lab in Alderley Park|Wellcome Sanger Institute for the COVID-19 Genomics UK (COG-UK) consortium|Davies|United Kingdom

>Spike|hCoV-19/England/QEUEH-BC4A69/2020|2020-11-25|EPI\_ISL\_704023|Original|hCoV-19^^England|Human|Lighthouse Lab in Glasgow|Wellcome Sanger Institute for the COVID-19 Genomics UK (COG-UK) Consortium|Davies|United Kingdom

>Spike|hCoV-19/England/MILK-C7B936/2020|2020-12-15|EPI\_ISL\_756994|Original|hCoV-19^^England|Human|Lighthouse Lab in Milton Keynes|Wellcome Sanger Institute for the COVID-19 Genomics UK (COG-UK) Consortium|Davies|United Kingdom

>Spike|hCoV-19/USA/TX-HMH033/2020|2020-03-11|EPI\_ISL\_434742|Original|hCoV-19^^Texas|Human|Houston Methodist Hospital|Houston Methodist Hospital|Long|USA

>Spike|hCoV-19/Australia/VIC8006/2020|2020-08-12|EPI\_ISL\_564799|Original|hCoV-19^^Victoria|Human|Microbiological Diagnostic Unit - Public Health Laboratory (MDU-PHL)|MDU-PHL|Schultz|Australia

>Spike|hCoV-19/England/QEUEH-964B2E/2020|2020-08-10|EPI\_ISL\_531060|Original|hCoV-19^^England|Human|Lighthouse Lab in Glasgow|Wellcome Sanger Institute for the COVID-19 Genomics UK (COG-UK) consortium|Davies|United Kingdom

>Spike|hCoV-19/England/ALDP-B272F3/2020|2020-11-03|EPI\_ISL\_664373|Original|hCoV-19^^England|Human|Northumbria University / South Tees Hospitals NHS Foundation Trust / North Cumbria Integrated Care NHS Foundation Trust / North Tees and Hartlepool NHS Foundation Trust / Newcastle Hospitals NHS Foundation Trust|COVID-19 Genomics UK (COG-UK) Consortium|Bashton|United Kingdom

>Spike|hCoV-19/Australia/VIC5650/2020|2020-07-16|EPI\_ISL\_518461|Original|hCoV-19^^Victoria|Human|Victorian Infectious Diseases Reference Laboratory (VIDRL)|VIDRL and MDU-PHL|Schultz|Australia

>Spike|hCoV-19/Wales/PHWC-2B834/2020|2020-04-09|EPI\_ISL\_445768|Original|hCoV-19^^Wales|Human|Wales Specialist Virology Centre|Public Health Wales Microbiology Cardiff|Moore|United Kingdom

>Spike|hCoV-19/Wales/PHWC-4982F4/2020|2020-12-01|EPI\_ISL\_727054|Original|hCoV-19^^Wales|Human|Originating lab|COVID-19 Genomics UK (COG-UK) Consortium|Moore|United Kingdom

>Spike|hCoV-19/England/CAMC-9C014C/2020|2020-09-09|EPI\_ISL\_573171|Original|hCoV-19^^England|Human|Oxford Viromics|COVID-19 Genomics UK (COG-UK) Consortium|Golubchik|United Kingdom

>Spike|hCoV-19/Wales/PHWC-4951AF/2020|2020-11-19|EPI\_ISL\_726308|Original|hCoV-19^^Wales|Human|Originating lab|COVID-19 Genomics UK (COG-UK) Consortium|Moore|United Kingdom

>Spike|hCoV-19/Japan/PG-1622/2020|2020-04-00|EPI\_ISL\_685228|Original|hCoV-19^^Japan|Human|Tokyo Metropolitan Institute of Public Health|Pathogen Genomics Center|Sekizuka|Japan

>Spike|hCoV-19/USA/UT-UPHL-2012433014/2020|2020-08-14|EPI\_ISL\_746132|Original|hCoV-19^^Utah|Human|Ginkgo Bioworks Clinical Laboratory|Utah Public Health Laboratory|Young|USA

>Spike|hCoV-19/Spain/IB-IBV-2500/2020|2020-03-19|EPI\_ISL\_468972|Original|hCoV-19^^Illes Balears|Human|Servicio de Microbiolog\u00eda|SeqCOVID-SPAIN consortium|IBV (CSIC)|Comas|Spain

>Spike|hCoV-19/England/NOTT-110312/2020|2020-04-11|EPI\_ISL\_441499|Original|hCoV-19^^England|Human|Queens Medical Centre|COVID-19 Genomics UK (COG-UK) Consortium|Loose|United Kingdom

>Spike|hCoV-19/USA/UT-03782/2020|2020-04-01|EPI\_ISL\_509591|Original|hCoV-19^^Utah|Human|Utah Public Health Laboratory|Utah Public Health Laboratory|Butz|USA

>Spike|hCoV-19/England/SHEF-C95C8/2020|2020-06-03|EPI\_ISL\_479235|Original|hCoV-19^^England|Human|Virology Department|COVID-19 Genomics UK (COG-UK) Consortium|de Silva|United Kingdom

>Spike|hCoV-19/England/SHEF-10CB29F/2020|2020-12-22|EPI\_ISL\_764144|Original|hCoV-19^^England|Human|Virology Department|COVID-19 Genomics UK (COG-UK) Consortium|de Silva|United Kingdom

>Spike|hCoV-19/France/OCC-168/2020|2020-10-16|EPI\_ISL\_751487|Original|hCoV-19^^Occitanie|Human|CHU Purpan - Laboratoire de Virologie - Institut F\u00e9deratif de Biologie|CHU Purpan - Laboratoire de Virologie - Institut F\u00e9deratif de Biologie|Latour|France

>Spike|hCoV-19/England/MILK-9C7251/2020|2020-09-08|EPI\_ISL\_573291|Original|hCoV-19^^England|Human|Northumbria University / South Tees Hospitals NHS Foundation Trust / North Cumbria Integrated Care NHS Foundation Trust / North Tees and Hartlepool NHS Foundation Trust / Newcastle Hospitals NHS Foundation Trust|COVID-19 Genomics UK (COG-UK) Consortium|Bashton|United Kingdom

>Spike|hCoV-19/USA/CA-CZB-13123/2020|2020-10-26|EPI\_ISL\_672022|Original|hCoV-19^^California|Human|Madera County Department of Public Health|Chan-Zuckerberg Biohub|Bhatt|USA

>Spike|hCoV-19/USA/FL-BPHL-1082/2020|2020-05-18|EPI\_ISL\_526568|Original|hCoV-19^^Florida|Human|Florida Bureau of Public Health Laboratories|Florida Bureau of Public Health Laboratories|Blanton|USA

>Spike|hCoV-19/Denmark/DCGC-14542/2020|2020-11-30|EPI\_ISL\_711828|Original|hCoV-19^^Hovedstaden|Human|Department of Virus and Microbiological Special Diagnostics|Albertsen Lab|Michaelsen|Denmark

>Spike|hCoV-19/USA/AZ-TG455737/2020|2020-06-29|EPI\_ISL\_695039|Original|hCoV-19^^Arizona|Human|TGen North|TGen North|French|USA

>Spike|hCoV-19/USA/CA-IGI-0421/2020|2020-07-09|EPI\_ISL\_756323|Original|hCoV-19^^California|Human|Innovative Genomics Institute|Innovative Genomics Institute|Wyman|USA

>Spike|hCoV-19/Netherlands/ZH-EMC-720/2020|2020-10-02|EPI\_ISL\_632567|Original|hCoV-19^^Zuid Holland|Human|Dutch COVID-19 response team|Erasmus Medical Center|Oude Munnink|Netherlands

>Spike|hCoV-19/Taiwan/NTU11/2020|2020-03-16|EPI\_ISL\_422413|Vero E6|hCoV-19^^Taipei|Human|Department of Laboratory Medicine|Microbial Genomics Core Lab|Lin|Taiwan

>Spike|hCoV-19/Brazil/MG-CV21/2020|2020-03-16|EPI\_ISL\_429681|Original|hCoV-19^^Minas Gerais|Human|Central Public Health Laboratory/Oct\u00e9lvio Magalh\u00e3es Institute (IOM) from the Ezequiel Dias Foundation (FUNED)|Instituto Oct\u00e9lvio Magalh\u00e3es / Funda\u00e7\u00e3o Ezequiel Dias (IOM/Funed)|Giovanetti|Brazil

>Spike|hCoV-19/USA/WA-UW214/2020|2020-03-14|EPI\_ISL\_417363|Original|hCoV-19^^Washington|Human|UW Virology Lab|UW Virology Lab|Roychoudhury|USA

>Spike|hCoV-19/USA/WI-UW-573/2020|2020-06-19|EPI\_ISL\_484948|Original|hCoV-19^^Wisconsin|Human|University of Wisconsin-Madison AIDS Vaccine Research Laboratories|University of Wisconsin-Madison AIDS Vaccine Research Laboratories|Baczenas|USA

>Spike|hCoV-19/Malaysia/3499/2020|2020-03-30|EPI\_ISL\_501205|Original|hCoV-19^^Kuala Lumpur|Human|Department of Medical Microbiology|Department of Medical Microbiology|Chan|Malaysia

>Spike|hCoV-19/USA/CA-ALSR-0528-SAN/2020|2020-04-03|EPI\_ISL\_483203|Original|hCoV-19^^California|Human|UC San Diego Center for Advanced Laboratory Medicine|Andersen lab at Scripps Research|Gangavarapu|USA

>Spike|hCoV-19/England/SHEF-10D4E62/2020|2020-12-03|EPI\_ISL\_742070|Original|hCoV-19^^England|Human|Virology Department|COVID-19 Genomics UK (COG-UK) Consortium|de Silva|United Kingdom

>Spike|hCoV-19/Australia/NSW1245/2020|2020-12-16|EPI\_ISL\_740876|Original|hCoV-19^^New South Wales|Human|Pathology North - Royal North Shore Hospital - NSW Health Pathology|NSW Health Pathology - Institute of Clinical Pathology and Medical Research; Westmead Hospital; University of Sydney|Gall|Australia

>Spike|hCoV-19/Luxembourg/LNS4574827/2020|2020-11-02|EPI\_ISL\_740499|Original|hCoV-19^^Luxembourg|Human|Laboratoire national de sant\u00e9|Laboratoire national de sant\u00e9|Wienecke-Baldacchino|Luxembourg

>Spike|hCoV-19/Japan/PG-7409/2020|2020-07-00|EPI\_ISL\_688511|Original|hCoV-19^^Japan|Human|Pathogen Genomics Center|Pathogen Genomics Center|Sekizuka|Japan

>Spike|hCoV-19/England/QEUA-78498A/2020|2020-07-15|EPI\_ISL\_533062|Original|hCoV-19^^England|Human|Lighthouse Lab in Glasgow|Wellcome Sanger Institute for the COVID-19 Genomics UK (COG-UK) consortium|Davies|United Kingdom

>Spike|hCoV-19/England/NORT-2948BC/2020|2020-03-27|EPI\_ISL\_490447|Original|hCoV-19^^England|Human|Northumbria University / South Tees Hospitals NHS Foundation Trust / North Cumbria Integrated Care NHS Foundation Trust / North Tees and Hartlepool NHS Foundation Trust / Newcastle Hospitals NHS Foundation Trust|COVID-19 Genomics UK (COG-UK) Consortium|Bashton|United Kingdom

>Spike|hCoV-19/Scotland/QEUA-95DF95/2020|2020-08-07|EPI\_ISL\_534426|Original|hCoV-19^^Scotland|Human|NHSGGC West of Scotland Specialist Virology Centre / MRC-University of Glasgow Centre for Virus Research|Wellcome Sanger Institute for the COVID-19 Genomics UK (COG-UK) consortium|Davies|United Kingdom

>Spike|hCoV-19/USA/CA-ALSR-2819/2020|2020-07-20|EPI\_ISL\_635695|Original|hCoV-19^^California|Human|San Diego County Public Health Laboratory|Andersen lab at Scripps Research|Gangavarapu|USA

>Spike|hCoV-19/England/CAMB-71CF7/2020|2020-03-30|EPI\_ISL\_439623|Original|hCoV-19^^England|Human|Department of Pathology|Wellcome Sanger Institute for the COVID-19 Genomics UK (COG-UK) consortium|Amato|United Kingdom

>Spike|hCoV-19/Japan/PG-2366/2020|2020-05-00|EPI\_ISL\_685971|Original|hCoV-19^^Japan|Human|Tokyo Metropolitan Institute of Public Health|Pathogen Genomics Center|Sekizuka|Japan

>Spike|hCoV-19/Denmark/DCGC-15565/2020|2020-11-23|EPI\_ISL\_713897|Original|hCoV-19^^Sjaelland|Human|Department of Virus and Microbiological Special Diagnostics|Albertsen Lab|Michaelsen|Denmark

>Spike|hCoV-19/England/ALDP-B73ED6/2020|2020-11-12|EPI\_ISL\_664897|Original|hCoV-19^^England|Human|Quadram Institute Bioscience|COVID-19 Genomics UK (COG-UK) Consortium|Alikhan|United Kingdom

>Spike|hCoV-19/South Korea/KDCA0241/2020|2020-08-26|EPI\_ISL\_760006|Original|hCoV-19^^South Korea|Human|Division of Emerging Infectious Diseases|Division of Emerging Infectious Diseases|Park|South Korea

>Spike|hCoV-19/England/CAMC-A648DB/2020|2020-10-11|EPI\_ISL\_608671|Original|hCoV-19^^England|Human|Lighthouse Lab in Cambridge|Wellcome Sanger Institute for the COVID-19 Genomics UK (COG-UK) consortium|Davies|United Kingdom

>Spike|hCoV-19/Belgium/un-EMC-6/2020/2020|2020-09-30|EPI\_ISL\_722840|Original|hCoV-19^^Belgium|Human|Dutch COVID-19 response team|Erasmus Medical Center|Oude Munnink|Belgium

>Spike|hCoV-19/England/ALDP-B74989/2020|2020-11-12|EPI\_ISL\_662080|Original|hCoV-19^^England|Human|Lighthouse Lab in Alderley Park|Wellcome Sanger Institute for the COVID-19 Genomics UK (COG-UK) Consortium|Davies|United Kingdom

>Spike|hCoV-19/Denmark/DCGC-22497/2020|2020-12-14|EPI\_ISL\_757429|Original|hCoV-19^^Midtjylland|Human|Department of Virus and Microbiological Special Diagnostics|Albertsen Lab|Michaelsen|Denmark

>Spike|hCoV-19/Denmark/DCGC-11530/2020|2020-11-02|EPI\_ISL\_670977|Original|hCoV-19^^Syddanmark|Human|Department of Virus and Microbiological Special Diagnostics|Albertsen Lab|Michaelsen|Denmark

>Spike|hCoV-19/USA/MA-MASPHL-00002/2020|2020-03-03|EPI\_ISL\_791514|Original|hCoV-19^^Massachusetts|Human|Massachusetts State Public Health Laboratory|Infectious Disease Program|Park|USA

>Spike|hCoV-19/England/MILK-B96DC1/2020|2020-11-13|EPI\_ISL\_674966|Original|hCoV-19^^England|Human|Lighthouse Lab in Milton Keynes|Wellcome Sanger Institute for the COVID-19 Genomics UK (COG-UK) Consortium|Davies|United Kingdom

>Spike|hCoV-19/Vietnam/VNHN\_0837/2020|2020-03-15|EPI\_ISL\_435315|Original|hCoV-19^^Vietnam|Human|National Hospital of Tropical Diseases|Oxford University Clinical Research Unit|Nguyen|Vietnam



>Spike|hCoV-19/Wales/PHWC-16A66B/2020|2020-09-12|EPI\_ISL\_560083|Original|hCoV-19^^Wales|Human|Wales Specialist Virology Centre Sequencing lab|COVID-19 Genomics UK (COG-UK) Consortium|Moore|United Kingdom

>Spike|hCoV-19/England/MILK-A79C40/2020|2020-10-15|EPI\_ISL\_606713|Original|hCoV-19^^England|Human|Lighthouse Lab in Milton Keynes|Wellcome Sanger Institute for the COVID-19 Genomics UK (COG-UK) consortium|Davies|United Kingdom

>Spike|hCoV-19/Netherlands/ZuidHolland\_40/2020|2020-03-17|EPI\_ISL\_422912|Original|hCoV-19^^Zuid Holland|Human|Dutch COVID-19 response team|Erasmus Medical Center|Oude Munnink|Netherlands

>Spike|hCoV-19/England/QEUEH-BC48D8/2020|2020-11-25|EPI\_ISL\_703534|Original|hCoV-19^^England|Human|Lighthouse Lab in Glasgow|Wellcome Sanger Institute for the COVID-19 Genomics UK (COG-UK) Consortium|Davies|United Kingdom

>Spike|hCoV-19/India/MH-GA32/2020|2020-06-20|EPI\_ISL\_508226|Original|hCoV-19^^Maharashtra|Human|Government Medical College|National Institute of Biomedical Genomics|Maitra|India

>Spike|hCoV-19/England/ALDP-A69205/2020|2020-10-10|EPI\_ISL\_609095|Original|hCoV-19^^England|Human|Lighthouse Lab in Alderley Park|Wellcome Sanger Institute for the COVID-19 Genomics UK (COG-UK) consortium|Davies|United Kingdom

>Spike|hCoV-19/Denmark/DCGC-1857/2020|2020-05-04|EPI\_ISL\_622578|Original|hCoV-19^^Hovedstaden|Human|Department of Virus and Microbiological Special Diagnostics|Albertsen lab|Michaelsen|Denmark

>Spike|hCoV-19/England/ALDP-94D183/2020|2020-06-14|EPI\_ISL\_555912|Original|hCoV-19^^England|Human|Lighthouse Lab in Alderley Park|Wellcome Sanger Institute for the COVID-19 Genomics UK (COG-UK) consortium|Davies|United Kingdom

>Spike|hCoV-19/Northern Ireland/QEUEH-943E0E/2020|2020-07-28|EPI\_ISL\_532566|Original|hCoV-19^^Northern Ireland|Human|Lighthouse Lab in Glasgow|Wellcome Sanger Institute for the COVID-19 Genomics UK (COG-UK) consortium|Davies|United Kingdom

>Spike|hCoV-19/USA/CO-CDPHE-2011020263/2020|2020-11-01|EPI\_ISL\_710370|Original|hCoV-19^^Colorado|Human|Colorado Department of Public Health and Environment|Colorado Department of Public Health and Environment|Bankers|USA

>Spike|hCoV-19/England/ALDP-9CD473/2020|2020-09-16|EPI\_ISL\_566223|Original|hCoV-19^^England|Human|Lighthouse Lab in Alderley Park|Wellcome Sanger Institute for the COVID-19 Genomics UK (COG-UK) consortium|Davies|United Kingdom

>Spike|hCoV-19/England/CAMB-1BC9DA/2020|2020-00-00|EPI\_ISL\_704475|Original|hCoV-19^^England|Human|Department of Pathology|COVID-19 Genomics UK (COG-UK) Consortium|Goodfellow|United Kingdom

>Spike|hCoV-19/Wales/PHWC-16BDED/2020|2020-09-17|EPI\_ISL\_573975|Original|hCoV-19^^Wales|Human|Wales Specialist Virology Centre Sequencing lab|COVID-19 Genomics UK (COG-UK) Consortium|Moore|United Kingdom

>Spike|hCoV-19/Wales/PHWC-4A626C/2020|2020-12-16|EPI\_ISL\_765016|Original|hCoV-19^^Wales|Human|Wales Specialist Virology Centre Sequencing lab|COVID-19 Genomics UK (COG-UK) Consortium|Moore|United Kingdom

>Spike|hCoV-19/Canada/QC-LSPQ-L00244326/2020|2020-03-31|EPI\_ISL\_536392|Original|hCoV-19^^Quebec|Human|H\u00f4pital de Hull|Laboratoire de sant\u00e9 publique du Qu\u00e9bec|Moreira|Canada

>Spike|hCoV-19/USA/TX-HMH-MCoV-15035/2020|2020-10-16|EPI\_ISL\_786519|Original|hCoV-19^^Texas|Human|Houston Methodist Hospital|Houston Methodist Hospital|Long|USA

>Spike|hCoV-19/Wales/PHWC-31367/2020|2020-04-12|EPI\_ISL\_446436|Original|hCoV-19^^Wales|Human|Wales Specialist Virology Centre|Public Health Wales Microbiology Cardiff|Moore|United Kingdom

>Spike|hCoV-19/England/SHEF-10C9C93/2020|2020-12-08|EPI\_ISL\_706976|Original|hCoV-19^^England|Human|Virology Department|COVID-19 Genomics UK (COG-UK) Consortium|de Silva|United Kingdom

>Spike|hCoV-19/England/ALDP-A67155/2020|2020-10-12|EPI\_ISL\_630685|Original|hCoV-19^^England|Human|Lighthouse Lab in Alderley Park|Wellcome Sanger Institute for the COVID-19 Genomics UK (COG-UK) consortium|Davies|United Kingdom

>Spike|hCoV-19/Wales/PHWC-165EFF/2020|2020-05-28|EPI\_ISL\_490815|Original|hCoV-19^^Wales|Human|Wales Specialist Virology Centre Sequencing lab|COVID-19 Genomics UK (COG-UK) Consortium|Moore|United Kingdom

>Spike|hCoV-19/Luxembourg/LNS2425583/2020|2020-11-09|EPI\_ISL\_740121|Original|hCoV-19^^Luxembourg|Human|Laboratoire national de sant\u00e9|Laboratoire national de sant\u00e9|Wienecke-Baldacchino|Luxembourg

>Spike|hCoV-19/USA/UT-UPHL-201029534/2020|2020-05-31|EPI\_ISL\_594084|Original|hCoV-19^^Utah|Human|Utah Public Health Laboratory|Utah Public Health Laboratory|Young|USA

>Spike|hCoV-19/Denmark/DCGC-7349/2020|2020-10-12|EPI\_ISL\_619284|Original|hCoV-19^^Syddanmark|Human|Department of Virus and Microbiological Special Diagnostics|Albertsen lab|Michaelsen|Denmark

>Spike|hCoV-19/Brazil/SP-577/2020|2020-06-22|EPI\_ISL\_693205|Original|hCoV-19^^S\u00e3o Paulo|Human|Hospital de Campanha Covid-19 Assis|Instituto Adolfo Lutz|Sacchi|Brazil

>Spike|hCoV-19/England/QEUA-A490A7/2020|2020-10-06|EPI\_ISL\_665959|Original|hCoV-19^^England|Human|Quadram Institute Bioscience|COVID-19 Genomics UK (COG-UK) Consortium|Alikhan|United Kingdom

>Spike|hCoV-19/Wales/PHWC-49336F/2020|2020-11-28|EPI\_ISL\_725873|Original|hCoV-19^^Wales|Human|Originating lab|COVID-19 Genomics UK (COG-UK) Consortium|Moore|United Kingdom

>Spike|hCoV-19/England/ALDP-6BBD9E/2020|2020-07-02|EPI\_ISL\_557931|Original|hCoV-19^^England|Human|Lighthouse Lab in Alderley Park|Wellcome Sanger Institute for the COVID-19 Genomics UK (COG-UK) consortium|Davies|United Kingdom

>Spike|hCoV-19/England/LCST-24D6D20/2020|2020-06-10|EPI\_ISL\_484230|Original|hCoV-19^^England|Human|University Hospitals Of Leicester NHS Trust and DeepSeq Nottingham|COVID-19 Genomics UK (COG-UK) Consortium|Loose|United Kingdom

>Spike|hCoV-19/Netherlands/NB-RIVM-10362/2020|2020-06-23|EPI\_ISL\_636557|Original|hCoV-19^^NoordBrabant|Human|Dutch COVID-19 response team|National Institute for Public Health and the Environment (RIVM)|Meijer|Netherlands

>Spike|hCoV-19/Bosnia and Herzegovina/ChVir7382/2020|2020-04-01|EPI\_ISL\_462472|Original|hCoV-19^^DZ Vitez|Human|Clinical Center|Charite Universitatsmedizin Berlin|Muehlemann|Bosnia and Herzegovina

>Spike|hCoV-19/Austria/CeMM0962/2020|2020-03-29|EPI\_ISL\_583811|Original|hCoV-19^^Austria|Human|Dr. Gernot Walder GmbH|Bergthaler laboratory|Bergthaler|Austria

>Spike|hCoV-19/Canada/Qc-L00241042/2020|2020-03-27|EPI\_ISL\_450310|Original|hCoV-19^^Quebec|Human|H\u00f4pital Charles-LeMoine|Laboratoire de sant\u00e9 publique du Qu\u00e9bec|Moreira|Canada

>Spike|hCoV-19/Morocco/6906/2020|2020-04-06|EPI\_ISL\_459984|Original|hCoV-19^^Morocco|Human|Institut Pasteur du Maroc|Institut Pasteur du Maroc|Enouf|Morocco

>Spike|hCoV-19/Portugal/PT1504/2020|2020-03-17|EPI\_ISL\_511463|Original|hCoV-19^^Portugal|Human|Instituto Nacional de Saude (INSA)|Instituto Nacional de Saude (INSA)|Borges|Portugal

>Spike|hCoV-19/Belgium/ULG-11047/2020|2020-12-01|EPI\_ISL\_722932|Original|hCoV-19^^Liege|Human|Department of Clinical Microbiology|GIGA Medical Genomics|Durkin|Belgium

>Spike|hCoV-19/Spain/AS-IBV-98006657/2020|2020-04-28|EPI\_ISL\_654681|Original|hCoV-19^^Asturias|Human|Servicio de Microbiolog\u00eda|SeqCOVID-SPAIN consortium|IBV (CSIC)|Comas|Spain

>Spike|hCoV-19/Scotland/EDB1127/2020|2020-04-07|EPI\_ISL\_491589|Original|hCoV-19^^Scotland|Human|Virology Department|Wellcome Sanger Institute for the COVID-19 Genomics UK (COG-UK) consortium|Davies|United Kingdom

>Spike|hCoV-19/Singapore/571/2020|2020-04-14|EPI\_ISL\_483594|Original|hCoV-19^^Singapore|Human|National Public Health Laboratory|National Public Health Laboratory|Mak|Singapore

>Spike|hCoV-19/France/PAC-IHU-1623/2020|2020-09-10|EPI\_ISL\_569232|Original|hCoV-19^^Provence-Alpes-C\u00f4te-d\u00e0z|Human|MEPHI|MEPHI|Levasseur|France

>Spike|hCoV-19/England/QEUA-AD0412/2020|2020-10-25|EPI\_ISL\_634103|Original|hCoV-19^^England|Human|Lighthouse Lab in Glasgow|Wellcome Sanger Institute for the COVID-19 Genomics UK (COG-UK) consortium|Davies|United Kingdom

>Spike|hCoV-19/England/QEUA-960366/2020|2020-08-02|EPI\_ISL\_532111|Original|hCoV-19^^England|Human|Lighthouse Lab in Glasgow|Wellcome Sanger Institute for the COVID-19 Genomics UK (COG-UK) consortium|Davies|United Kingdom

>Spike|hCoV-19/Netherlands/UT-RIVM-20178/2020|2020-11-30|EPI\_ISL\_723339|Original|hCoV-19^^Utrecht|Human|Dutch COVID-19 response team|National Institute for Public Health and the Environment (RIVM)|Meijer|Netherlands

>Spike|hCoV-19/Gibraltar/205000632/2020|2020-12-00|EPI\_ISL\_709967|Original|hCoV-19^^Gibraltar|Human|Microbiology|Respiratory Virus Unit|Platt|Gibraltar

>Spike|hCoV-19/England/QEUA-9D06D1/2020|2020-09-16|EPI\_ISL\_589962|Original|hCoV-19^^England|Human|Lighthouse Lab in Glasgow|Wellcome Sanger Institute for the COVID-19 Genomics UK (COG-UK) consortium|Davies|United Kingdom

>Spike|hCoV-19/USA/CA-IGI-0077/2020|2020-06-11|EPI\_ISL\_511831|Original|hCoV-19^^California|Human|Innovative Genomics Institute|Innovative Genomics Institute|Wyman|USA

>Spike|hCoV-19/Japan/PG-6844/2020|2020-09-00|EPI\_ISL\_687952|Original|hCoV-19^^Japan|Human|Pathogen Genomics Center|Pathogen Genomics Center|Sekizuka|Japan

>Spike|hCoV-19/Australia/QLD1178/2020|2020-03-25|EPI\_ISL\_639769|Original|hCoV-19^^Australia|Human|unknown|Public Health Virology Laboratory|Nguyen|Australia

>Spike|hCoV-19/Canada/BC-BCCDC-6400/2020|2020-10-00|EPI\_ISL\_740556|Original|hCoV-19^^British Columbia|Human|BCCDC Public Health Laboratory|BCCDC Public Health Laboratory|Prystajecky|Canada

>Spike|hCoV-19/USA/MI-MDHHS-SC20860/2020|2020-04-29|EPI\_ISL\_471881|Original|hCoV-19^^Michigan|Human|Michigan Department of Health and Human Services|Michigan Department of Health and Human Services|Blankenship|USA

>Spike|hCoV-19/Scotland/CVR786/2020|2020-03-26|EPI\_ISL\_439109|Original|hCoV-19^^Scotland|Human|West of Scotland Specialist Virology Centre|COVID-19 Genomics UK (COG-UK) Consortium|Robertson|United Kingdom

>Spike|hCoV-19/Australia/NSW1095/2020|2020-08-29|EPI\_ISL\_593652|Original|hCoV-19^^New South Wales|Human|Histopath|NSW Health Pathology - Institute of Clinical Pathology and Medical Research; Westmead Hospital; University of Sydney|Gall|Australia

>Spike|hCoV-19/Wales/PHWC-49579E/2020|2020-11-23|EPI\_ISL\_726394|Original|hCoV-19^^Wales|Human|Originating lab|COVID-19 Genomics UK (COG-UK) Consortium|Moore|United Kingdom

>Spike|hCoV-19/England/MILK-9A6A41/2020|2020-09-02|EPI\_ISL\_550127|Original|hCoV-19^^England|Human|Lighthouse Lab in Milton Keynes|Wellcome Sanger Institute for the COVID-19 Genomics UK (COG-UK) consortium|Davies|United Kingdom

>Spike|hCoV-19/SaudiArabia/KAUST-JEDDAH561/2020|2020-04-22|EPI\_ISL\_512961|Original|hCoV-19^^Jeddah|Human|Pathogen Genomics Lab King Abdullah University of Science and Technology(KAUST)|Pathogen Genomics Lab King Abdullah University of Science and Technology(KAUST)|Mohamed Ghazzali|Saudi Arabia

>Spike|hCoV-19/Wales/ALDP-A5080F/2020|2020-10-07|EPI\_ISL\_609207|Original|hCoV-19^^Wales|Human|Lighthouse Lab in Alderley Park|Wellcome Sanger Institute for the COVID-19 Genomics UK (COG-UK) consortium|Davies|United Kingdom

>Spike|hCoV-19/Wales/PHWC-496B46/2020|2020-11-23|EPI\_ISL\_726691|Original|hCoV-19^^Wales|Human|Originating lab|COVID-19 Genomics UK (COG-UK) Consortium|Moore|United Kingdom

>Spike|hCoV-19/England/ALDP-A2DF42/2020|2020-10-06|EPI\_ISL\_586801|Original|hCoV-19^^England|Human|Lighthouse Lab in Alderley Park|Wellcome Sanger Institute for the COVID-19 Genomics UK (COG-UK) consortium|Davies|United Kingdom

>Spike|hCoV-19/Wales/PHWC-36890/2020|2020-04-28|EPI\_ISL\_474723|Original|hCoV-19^^Wales|Human|Originating lab|COVID-19 Genomics UK (COG-UK) Consortium|Moore|United Kingdom

>Spike|hCoV-19/England/BIRM-676C9/2020|2020-10-30|EPI\_ISL\_651127|Original|hCoV-19^^England|Human|University of Birmingham|COVID-19 Genomics UK (COG-UK) Consortium|Loman|United Kingdom

>Spike|hCoV-19/India/MH-GA11/2020|2020-06-17|EPI\_ISL\_508207|Original|hCoV-19^^Maharashtra|Human|Government Medical College|National Institute of Biomedical Genomics|Maitra|India

>Spike|hCoV-19/USA/FL-BPHL-1246/2020|2020-08-03|EPI\_ISL\_541139|Original|hCoV-19^^Florida|Human|Florida Bureau of Public Health Laboratories|Florida Bureau of Public Health Laboratories|Blanton|USA

>Spike|hCoV-19/Australia/VIC2771/2020|2020-07-06|EPI\_ISL\_521606|Original|hCoV-19^^Victoria|Human|Microbiological Diagnostic Unit - Public Health Laboratory (MDU-PHL)|MDU-PHL|Schultz|Australia

>Spike|hCoV-19/USA/UN-UW-7781/2020|2020-04-20|EPI\_ISL\_576516|Original|hCoV-19^^USA|Human|UW Virology Lab|UW Virology Lab|Roychoudhury|USA

>Spike|hCoV-19/Wales/PHWC-49C83A/2020|2020-11-18|EPI\_ISL\_742609|Original|hCoV-19^^Wales|Human|Wales Specialist Virology Centre Sequencing lab|COVID-19 Genomics UK (COG-UK) Consortium|Moore|United Kingdom

>Spike|hCoV-19/Denmark/DCGC-19807/2020|2020-12-07|EPI\_ISL\_747544|Original|hCoV-19^^Hovedstaden|Human|Department of Virus and Microbiological Special Diagnostics|Albertsen Lab|Michaelsen|Denmark

>Spike|hCoV-19/New Zealand/20VR2547/2020|2020-00-00|EPI\_ISL\_579290|Original|hCoV-19^^Auckland|Human|LabPLUS|Institute of Environmental Science and Research (ESR)|Wang|New Zealand

>Spike|hCoV-19/England/CAMC-A8102B/2020|2020-10-14|EPI\_ISL\_610831|Original|hCoV-19^^England|Human|Lighthouse Lab in Cambridge|Wellcome Sanger Institute for the COVID-19 Genomics UK (COG-UK) consortium|Davies|United Kingdom

>Spike|hCoV-19/England/QEUH-964C49/2020|2020-08-11|EPI\_ISL\_531112|Original|hCoV-19^^England|Human|Lighthouse Lab in Glasgow|Wellcome Sanger Institute for the COVID-19 Genomics UK (COG-UK) consortium|Davies|United Kingdom

>Spike|hCoV-19/England/SHEF-10C77FE/2020|2020-12-08|EPI\_ISL\_727871|Original|hCoV-19^^England|Human|Virology Department|COVID-19 Genomics UK (COG-UK) Consortium|de Silva|United Kingdom

>Spike|hCoV-19/USA/WI-GMF-10983/2020|2020-07-16|EPI\_ISL\_547621|Original|hCoV-19^^Wisconsin|Human|Gundersen Molecular Diagnostics Laboratory|Kabara Cancer Research Institute|Kenny|USA

>Spike|hCoV-19/Denmark/DCGC-12262/2020|2020-11-16|EPI\_ISL\_682443|Original|hCoV-19^^Hovedstaden|Human|Department of Virus and Microbiological Special Diagnostics|Albertsen Lab|Michaelsen|Denmark

>Spike|hCoV-19/England/ALDP-95567A/2020|2020-06-12|EPI\_ISL\_554560|Original|hCoV-19^^England|Human|Lighthouse Lab in Alderley Park|Wellcome Sanger Institute for the COVID-19 Genomics UK (COG-UK) consortium|Davies|United Kingdom

>Spike|hCoV-19/Scotland/EDB7081/2020|2020-08-02|EPI\_ISL\_514520|Original|hCoV-19^^Scotland|Human|Virology Department|COVID-19 Genomics UK (COG-UK) Consortium|Williams|United Kingdom

>Spike|hCoV-19/Belgium/ULG-10534/2020|2020-10-23|EPI\_ISL\_626310|Original|hCoV-19^^Li\u00e8ge|Human|Department of Clinical Microbiology|GIGA Medical Genomics|Durkin|Belgium

>Spike|hCoV-19/Canada/QC-LSPQ-L00226938/2020|2020-03-17|EPI\_ISL\_535854|Original|hCoV-19^^Quebec|Human|Centre de SSS de la Haute-Yamaska|Laboratoire de sant\u00e9 publique du Qu\u00e9bec|Moreira|Canada

>Spike|hCoV-19/England/QEUH-AD5B72/2020|2020-10-26|EPI\_ISL\_634608|Original|hCoV-19^^England|Human|Lighthouse Lab in Glasgow|Wellcome Sanger Institute for the COVID-19 Genomics UK (COG-UK) consortium|Davies|United Kingdom

>Spike|hCoV-19/England/CAMC-B54257/2020|2020-11-08|EPI\_ISL\_656931|Original|hCoV-19^^England|Human|Lighthouse Lab in Cambridge|Wellcome Sanger Institute for the COVID-19 Genomics UK (COG-UK) Consortium|Davies|United Kingdom

>Spike|hCoV-19/Hong Kong/VM20030720/2020|2020-07-07|EPI\_ISL\_510089|Original|hCoV-19^^Hong Kong|Human|Queen Elizabeth Hospital|Hong Kong Department of Health|Mak|China

>Spike|hCoV-19/Wales/PHWC-33F52/2020|2020-04-17|EPI\_ISL\_446845|Original|hCoV-19^^Wales|Human|Wales Specialist Virology Centre|Public Health Wales Microbiology Cardiff|Moore|United Kingdom

>Spike|hCoV-19/USA/NY-NYCPHL-000051/2020|2020-03-05|EPI\_ISL\_631545|Original|hCoV-19^^New York|Human|New York Presbyterian-Brooklyn Methodist Hospital|New York City Public Health Laboratory|Wang|USA

>Spike|hCoV-19/England/MILK-9AA96E/2020|2020-08-31|EPI\_ISL\_550923|Original|hCoV-19^^England|Human|Lighthouse Lab in Milton Keynes|Wellcome Sanger Institute for the COVID-19 Genomics UK (COG-UK) consortium|Davies|United Kingdom

>Spike|hCoV-19/Netherlands/Overijssel\_32/2020|2020-00-00|EPI\_ISL\_460822|Original|hCoV-19^^Overijssel|Human|Dutch COVID-19 response team|Erasmus Medical Center|Oude Munnink|Netherlands

>Spike|hCoV-19/Russia/SVE-RII-MH183S/2020|2020-07-08|EPI\_ISL\_732990|Original|hCoV-19^^Sverdlovsk|Human|UMMC-Health|WHO National Influenza Centre Russian Federation|Komissarov|Russia

>Spike|hCoV-19/USA/CA-ALSR-4885/2020|2020-11-02|EPI\_ISL\_730196|Original|hCoV-19^^California|Human|San Diego County Public Health Laboratory|Andersen lab at Scripps Research|Gangavarapu|USA

>Spike|hCoV-19/Thailand/Bangkok-CONI-0221/2020|2020-03-20|EPI\_ISL\_568585|Original|hCoV-19^^Bangkok|Human|Ramathibodi Hospital|COVID-19 Network Investigations (CONI) Alliance|Batty|Thailand

>Spike|hCoV-19/England/ALDP-A6827F/2020|2020-10-12|EPI\_ISL\_609009|Original|hCoV-19^^England|Human|Lighthouse Lab in Alderley Park|Wellcome Sanger Institute for the COVID-19 Genomics UK (COG-UK) consortium|Davies|United Kingdom

>Spike|hCoV-19/USA/FL-BPHL-0932/2020|2020-07-13|EPI\_ISL\_517822|Original|hCoV-19^^Florida|Human|Florida Bureau of Public Health Laboratories|Florida Bureau of Public Health Laboratories|Blanton|USA

>Spike|hCoV-19/England/QEUEH-B0E9DF/2020|2020-11-02|EPI\_ISL\_641981|Original|hCoV-19^^England|Human|Lighthouse Lab in Glasgow|Wellcome Sanger Institute for the COVID-19 Genomics UK (COG-UK) Consortium|Davies|United Kingdom

>Spike|hCoV-19/England/MILK-B9520F/2020|2020-11-13|EPI\_ISL\_673709|Original|hCoV-19^^England|Human|Lighthouse Lab in Milton Keynes|Wellcome Sanger Institute for the COVID-19 Genomics UK (COG-UK) Consortium|Davies|United Kingdom

>Spike|hCoV-19/USA/NY-QDX-2046/2020|2020-03-16|EPI\_ISL\_604366|Original|hCoV-19^^New York|Human|Quest Diagnostics|Quest Diagnostics|Kagan|USA

>Spike|hCoV-19/England/NOTT-110B65/2020|2020-05-01|EPI\_ISL\_448390|Original|hCoV-19^^England|Human|Queens Medical Centre|COVID-19 Genomics UK (COG-UK) Consortium|Loose|United Kingdom

>Spike|hCoV-19/England/CAMC-A59499/2020|2020-10-08|EPI\_ISL\_597148|Original|hCoV-19^^England|Human|Lighthouse Lab in Cambridge|Wellcome Sanger Institute for the COVID-19 Genomics UK (COG-UK) consortium|Davies|United Kingdom

>Spike|hCoV-19/USA/WA-S2761/2020|2020-07-29|EPI\_ISL\_525751|Original|hCoV-19^^Washington|Human|Seattle Flu Study|Seattle Flu Study|Lee|USA

>Spike|hCoV-19/Wales/PHWC-16F2EA/2020|2020-10-06|EPI\_ISL\_585944|Original|hCoV-19^^Wales|Human|Wales Specialist Virology Centre Sequencing lab|COVID-19 Genomics UK (COG-UK) Consortium|Moore|United Kingdom

>Spike|hCoV-19/USA/TX-HMH-6415/2020|2020-07-05|EPI\_ISL\_545984|Original|hCoV-19^^Texas|Human|Houston Methodist Hospital|Houston Methodist Hospital|Long|USA

>Spike|hCoV-19/England/MILK-AB9BA1/2020|2020-10-22|EPI\_ISL\_623743|Original|hCoV-19^^England|Human|Lighthouse Lab in Milton Keynes|Wellcome Sanger Institute for the COVID-19 Genomics UK (COG-UK) consortium|Davies|United Kingdom

>Spike|hCoV-19/South Korea/KDCA0168/2020|2020-11-17|EPI\_ISL\_747402|Original|hCoV-19^^South Korea|Human|Division of Emerging Infectious Diseases|Division of Emerging Infectious Diseases|Park|South Korea

>Spike|hCoV-19/Scotland/QEUEH-96C6AD/2020|2020-08-07|EPI\_ISL\_530902|Original|hCoV-19^^Scotland|Human|Lighthouse Lab in Glasgow|Wellcome Sanger Institute for the COVID-19 Genomics UK (COG-UK) consortium|Davies|United Kingdom

>Spike|hCoV-19/England/QEUEH-5EDAAC/2020|2020-06-16|EPI\_ISL\_533258|Original|hCoV-19^^England|Human|Lighthouse Lab in Glasgow|Wellcome Sanger Institute for the COVID-19 Genomics UK (COG-UK) consortium|Davies|United Kingdom

>Spike|hCoV-19/Wales/PHWC-166BAC/2020|2020-06-21|EPI\_ISL\_494089|Original|hCoV-19^^Wales|Human|Originating lab|COVID-19 Genomics UK (COG-UK) Consortium|Moore|United Kingdom

>Spike|hCoV-19/England/ALDP-9EA6F2/2020|2020-09-24|EPI\_ISL\_580003|Original|hCoV-19^^England|Human|Lighthouse Lab in Alderley Park|Wellcome Sanger Institute for the COVID-19 Genomics UK (COG-UK) consortium|Davies|United Kingdom

>Spike|hCoV-19/Wales/PHWC-36960/2020|2020-04-24|EPI\_ISL\_474736|Original|hCoV-19^^Wales|Human|Originating lab|COVID-19 Genomics UK (COG-UK) Consortium|Moore|United Kingdom

>Spike|hCoV-19/England/200960515/2020|2020-02-25|EPI\_ISL\_414009|Original|hCoV-19^^England|Human|Respiratory Virus Unit|Respiratory Virus Unit|Platt|United Kingdom

>Spike|hCoV-19/USA/IL-UW-130/2020|2020-04-13|EPI\_ISL\_427437|Original|hCoV-19^^Illinois|Human|University of Wisconsin-Madison AIDS Vaccine Research Laboratories|University of Wisconsin-Madison AIDS Vaccine Research Laboratories|Baczenas|USA

>Spike|hCoV-19/England/ALDP-A94580/2020|2020-10-20|EPI\_ISL\_624602|Original|hCoV-19^^England|Human|Lighthouse Lab in Alderley Park|Wellcome Sanger Institute for the COVID-19 Genomics UK (COG-UK) consortium|Davies|United Kingdom

>Spike|hCoV-19/USA/TX-HMH-MCoV-13935/2020|2020-08-16|EPI\_ISL\_787227|Original|hCoV-19^^Texas|Human|Houston Methodist Hospital|Houston Methodist Hospital|Long|USA

>Spike|hCoV-19/USA/CA-CHLA-PLM67055611/2020|2020-11-12|EPI\_ISL\_753307|Original|hCoV-19^^California|Human|Clinical virology Laboratory|Center for Personalized Medicine|Dien Bard|USA

>Spike|hCoV-19/England/MILK-B38356/2020|2020-11-01|EPI\_ISL\_658915|Original|hCoV-19^^England|Human|Lighthouse Lab in Milton Keynes|Wellcome Sanger Institute for the COVID-19 Genomics UK (COG-UK) Consortium|Davies|United Kingdom

>Spike|hCoV-19/USA/WI-GMF-18563/2020|2020-09-03|EPI\_ISL\_547767|Original|hCoV-19^^Wisconsin|Human|Gundersen Molecular Diagnostics Laboratory|Kabara Cancer Research Institute|Kenny|USA

>Spike|hCoV-19/England/SHEF-C11CC/2020|2020-05-26|EPI\_ISL\_535045|Original|hCoV-19^^England|Human|Virology Department|COVID-19 Genomics UK (COG-UK) Consortium|de Silva|United Kingdom

>Spike|hCoV-19/Japan/PG-2114/2020|2020-05-00|EPI\_ISL\_685719|Original|hCoV-19^^Japan|Human|Pathogen Genomics Center|Pathogen Genomics Center|Sekizuka|Japan

>Spike|hCoV-19/Australia/VIC7072/2020|2020-07-25|EPI\_ISL\_564215|Original|hCoV-19^^Victoria|Human|Victorian Infectious Diseases Reference Laboratory (VIDRL)|VIDRL and MDU-PHL|Schultz|Australia

>Spike|hCoV-19/USA/WI-UW-1112/2020|2020-07-27|EPI\_ISL\_516537|Original|hCoV-19^^Wisconsin|Human|University of Wisconsin-Madison AIDS Vaccine Research Laboratories|University of Wisconsin-Madison AIDS Vaccine Research Laboratories|Baczenas|USA

>Spike|hCoV-19/Spain/PV-IBV-98008361/2020|2020-10-13|EPI\_ISL\_654574|Original|hCoV-19^^Basque Country|Human|Servicio de Microbiolog\u00eda. Hospital Universitario Donostia. OSI Donostialdea. \u00clrea de Enfermedades Infecciosas|SeqCOVID-SPAIN consortium/IBV (CSIC)|Comas|Spain

>Spike|hCoV-19/England/20126002704/2020|2020-03-18|EPI\_ISL\_423874|Original|hCoV-19^^England|Human|Respiratory Virus Unit|Respiratory Virus Unit|Platt|United Kingdom

>Spike|hCoV-19/Spain/PV-IBV-005158/2020|2020-06-23|EPI\_ISL\_509645|Original|hCoV-19^^Basque Country|Human|Servicio de Microbiolog\u00eda. Hospital Universitario Donostia. OSI Donostialdea. \u00clrea de Enfermedades Infecciosas|SeqCOVID-SPAIN consortium/IBV (CSIC)|Comas|Spain

>Spike|hCoV-19/Netherlands/LI-RIVM-20243/2020|2020-12-02|EPI\_ISL\_723391|Original|hCoV-19^^Limburg|Human|Dutch COVID-19 response team|National Institute for Public Health and the Environment (RIVM)|Meijer|Netherlands

>Spike|hCoV-19/Scotland/QEUEH-9F4CB7/2020|2020-09-27|EPI\_ISL\_600734|Original|hCoV-19^^Scotland|Human|Lighthouse Lab in Glasgow|Wellcome Sanger Institute for the COVID-19 Genomics UK (COG-UK) consortium|Davies|United Kingdom

>Spike|hCoV-19/USA/CA-CZB-1274/2020|2020-04-16|EPI\_ISL\_454611|Original|hCoV-19^^California|Human|Alameda County Public Health Lab|Chan-Zuckerberg Biohub|Hao|USA

>Spike|hCoV-19/England/QEUEH-AAB0B2/2020|2020-10-21|EPI\_ISL\_652769|Original|hCoV-19^^England|Human|Oxford Viromics|COVID-19 Genomics UK (COG-UK) Consortium|Golubchik|United Kingdom

>Spike|hCoV-19/USA/FL-BPHL-1977/2020|2020-04-17|EPI\_ISL\_653130|Original|hCoV-19^^Florida|Human|Florida Bureau of Public Health Laboratories|Florida Bureau of Public Health Laboratories|Blanton|USA

>Spike|hCoV-19/Japan/PG-4688/2020|2020-08-00|EPI\_ISL\_689825|Original|hCoV-19^^Japan|Human|Fukuoka Institute of Health and Environmental Sciences|Pathogen Genomics Center|Sekizuka|Japan

>Spike|hCoV-19/Denmark/DCGC-5667/2020|2020-09-28|EPI\_ISL\_619954|Original|hCoV-19^^Midtjylland|Human|Department of Virus and Microbiological Special Diagnostics|Albertsen lab|Michaelsen|Denmark

>Spike|hCoV-19/England/MILK-ACEE73/2020|2020-10-21|EPI\_ISL\_629630|Original|hCoV-19^^England|Human|Lighthouse Lab in Milton Keynes|Wellcome Sanger Institute for the COVID-19 Genomics UK (COG-UK) consortium|Davies|United Kingdom

>Spike|hCoV-19/Netherlands/GE-RIVM-20288/2020|2020-11-10|EPI\_ISL\_723427|Original|hCoV-19^^Gelderland|Human|Dutch COVID-19 response team|National Institute for Public Health and the Environment (RIVM)|Meijer|Netherlands

>Spike|hCoV-19/USA/TX-HMH-MCoV-18928/2020|2020-11-25|EPI\_ISL\_785225|Original|hCoV-19^^Texas|Human|Houston Methodist Hospital|Houston Methodist Hospital|Long|USA

>Spike|hCoV-19/England/SHEF-C319D/2020|2020-04-01|EPI\_ISL\_432765|Original|hCoV-19^^England|Human|Virology Department|COVID-19 Genomics UK (COG-UK) Consortium|de Silva|United Kingdom

>Spike|hCoV-19/Netherlands/OV-EMC-122/2020|2020-11-15|EPI\_ISL\_763162|Original|hCoV-19^^Overijssel|Human|Dutch COVID-19 response team|Erasmus Medical Center|Oude Munnink|Netherlands

>Spike|hCoV-19/Wales/PHWC-49C30C/2020|2020-11-18|EPI\_ISL\_742541|Original|hCoV-19^^Wales|Human|Wales Specialist Virology Centre Sequencing lab|COVID-19 Genomics UK (COG-UK) Consortium|Moore|United Kingdom

>Spike|hCoV-19/England/QEUEH-7A2EE1/2020|2020-07-11|EPI\_ISL\_533056|Original|hCoV-19^^England|Human|Lighthouse Lab in Glasgow|Wellcome Sanger Institute for the COVID-19 Genomics UK (COG-UK) consortium|Davies|United Kingdom

>Spike|hCoV-19/Netherlands/NoordBrabant\_126/2020|2020-03-28|EPI\_ISL\_461161|Original|hCoV-19^^Noord Brabant|Human|Dutch COVID-19 response team|Erasmus Medical Center|Oude Munnink|Netherlands

>Spike|hCoV-19/USA/TX-HMH-MCoV-16036/2020|2020-10-27|EPI\_ISL\_785720|Original|hCoV-19^^Texas|Human|Houston Methodist Hospital|Houston Methodist Hospital|Long|USA

>Spike|hCoV-19/England/NORT-282C00/2020|2020-03-28|EPI\_ISL\_472220|Original|hCoV-19^^England|Human|Northumbria University / South Tees Hospitals NHS Foundation Trust / North Cumbria Integrated Care NHS Foundation Trust / North Tees and Hartlepool NHS Foundation Trust / Newcastle Hospitals NHS Foundation Trust|COVID-19 Genomics UK (COG-UK) Consortium|Bashton|United Kingdom

>Spike|hCoV-19/Denmark/DCGC-3923/2020|2020-09-14|EPI\_ISL\_615834|Original|hCoV-19^^Hovedstaden|Human|Department of Virus and Microbiological Special Diagnostics|Albertsen lab|Michaelsen|Denmark

>Spike|hCoV-19/England/20132048802/2020|2020-03-22|EPI\_ISL\_420498|Original|hCoV-19^^England|Human|Respiratory Virus Unit|Respiratory Virus Unit|Platt|United Kingdom

>Spike|hCoV-19/England/MILK-9F22D5/2020|2020-09-24|EPI\_ISL\_589173|Original|hCoV-19^^England|Human|Lighthouse Lab in Milton Keynes|Wellcome Sanger Institute for the COVID-19 Genomics UK (COG-UK) consortium|Davies|United Kingdom

>Spike|hCoV-19/France/ARA-10552/2020|2020-03-17|EPI\_ISL\_419168|Original|hCoV-19^^Auvergne-Rh\u00f4ne-Alpes|Human|Centre Hospitalier de Valence|CNR Virus des Infections Respiratoires - France SUD|Josset|France

>Spike|hCoV-19/USA/MN-MDH-1900/2020|2020-10-14|EPI\_ISL\_613526|Original|hCoV-19^^Minnesota|Human|Public Health Laboratory - Infectious Disease Lab|Minnesota Department of Health|Lorentz|USA

>Spike|hCoV-19/Belgium/ULG-10782/2020|2020-11-16|EPI\_ISL\_661204|Original|hCoV-19^^Li\u00e8ge|Human|Department of Clinical Microbiology|GIGA Medical Genomics|Durkin|Belgium

>Spike|hCoV-19/USA/CT-UW-6790/2020|2020-04-08|EPI\_ISL\_570146|Original|hCoV-19^^Connecticut|Human|UW Virology Lab|UW Virology Lab|Roychoudhury|USA

>Spike|hCoV-19/Hong Kong/VM20123554/2020|2020-09-18|EPI\_ISL\_760032|Original|hCoV-19^^Hong Kong|Human|Hong Kong Department of Health|School of Public Health|Chu|China

>Spike|hCoV-19/Denmark/DCGC-7726/2020|2020-10-19|EPI\_ISL\_618709|Original|hCoV-19^^Hovedstaden|Human|Department of Virus and Microbiological Special Diagnostics|Albertsen lab|Michaelsen|Denmark

>Spike|hCoV-19/USA/WI-UW-758/2020|2020-07-07|EPI\_ISL\_495463|Original|hCoV-19^^Wisconsin|Human|University of Wisconsin-Madison AIDS Vaccine Research

Laboratories|University of Wisconsin-Madison AIDS Vaccine Research  
Laboratories|Baczenas|USA  
>Spike|hCoV-19/Brazil/SP-L39-CD1041/2020|2020-05-13|EPI\_ISL\_722123|Original|hCoV-19^^S\u00e3o Paulo|Human|Hospital das Cl\u00ednicas Universidade de S\u00e3o Paulo Medical School|Laborat\u00f3rio de Parasitologia M\u00e9dica - Instituto de Medicina Tropical - Universidade de S\u00e3o Paulo|de Jesus|Brazil  
>Spike|hCoV-19/England/ALDP-C47D0A/2020|2020-12-12|EPI\_ISL\_718663|Original|hCoV-19^^England|Human|Lighthouse Lab in Alderley Park|Wellcome Sanger Institute for the COVID-19 Genomics UK (COG-UK) Consortium|Davies|United Kingdom  
>Spike|hCoV-19/Singapore/94/2020|2020-03-18|EPI\_ISL\_435699|Original|hCoV-19^^Singapore|Human|National Public Health Laboratory|National Public Health Laboratory|Mak|Singapore  
>Spike|hCoV-19/Wales/MILK-971010/2020|2020-08-16|EPI\_ISL\_553131|Original|hCoV-19^^Wales|Human|Lighthouse Lab in Milton Keynes|Wellcome Sanger Institute for the COVID-19 Genomics UK (COG-UK) consortium|Davies|United Kingdom  
>Spike|hCoV-19/USA/TX-HMH-MCoV-9532/2020|2020-07-03|EPI\_ISL\_781169|Original|hCoV-19^^Texas|Human|Houston Methodist Hospital|Houston Methodist Hospital|Long|USA  
>Spike|hCoV-19/England/ALDP-95076D/2020|2020-06-18|EPI\_ISL\_554390|Original|hCoV-19^^England|Human|Lighthouse Lab in Alderley Park|Wellcome Sanger Institute for the COVID-19 Genomics UK (COG-UK) consortium|Davies|United Kingdom  
>Spike|hCoV-19/England/CAMB-786E3/2020|2020-04-05|EPI\_ISL\_433764|Original|hCoV-19^^England|Human|Department of Pathology|COVID-19 Genomics UK (COG-UK) Consortium|Meredith|United Kingdom  
>Spike|hCoV-19/England/QEUA-B1070D/2020|2020-11-02|EPI\_ISL\_641626|Original|hCoV-19^^England|Human|Lighthouse Lab in Glasgow|Wellcome Sanger Institute for the COVID-19 Genomics UK (COG-UK) Consortium|Davies|United Kingdom  
>Spike|hCoV-19/England/EXET-13A89B/2020|2020-11-09|EPI\_ISL\_664214|Original|hCoV-19^^England|Human|University of Exeter|COVID-19 Genomics UK (COG-UK) Consortium|Temperton|United Kingdom  
>Spike|hCoV-19/Ireland/KE-NVRL-73IRL29510/2020|2020-09-16|EPI\_ISL\_578239|Original|hCoV-19^^Kildare|Human|National Virus Reference Laboratory|National Virus Reference Laboratory|Gonzalez|Ireland  
>Spike|hCoV-19/India/MH-AFMC-5868/2020|2020-05-26|EPI\_ISL\_496533|Original|hCoV-19^^Maharashtra|Human|Armed Forces Medical College|National Centre For Cell Science|Paul|India  
>Spike|hCoV-19/Germany/HH-hpi-p2120/2020|2020-03-22|EPI\_ISL\_776363|Original|hCoV-19^^Hamburg|Human|University Medical Center Hamburg Eppendorf|Heinrich Pette Institute|Robitaille|Germany  
>Spike|hCoV-19/Denmark/DCGC-15232/2020|2020-11-23|EPI\_ISL\_713711|Original|hCoV-19^^Hovedstaden|Human|Department of Virus and Microbiological Special Diagnostics|Albertsen Lab|Michaelsen|Denmark  
>Spike|hCoV-19/Czech Republic/NRL\_1751/2020|2020-03-09|EPI\_ISL\_471528|Original|hCoV-19^^Litomerice-Brnay|Human|The National Institute of Public Health|State Veterinary Institute Prague and The National Institute of Public Health|Nagy|Czech Republic  
>Spike|hCoV-19/Wales/PHWC-2EA86/2020|2020-04-07|EPI\_ISL\_446107|Original|hCoV-19^^Wales|Human|Wales Specialist Virology Centre|Public Health Wales Microbiology Cardiff|Moore|United Kingdom  
>Spike|hCoV-19/Bangladesh/CU-CTG-24/2020|2020-11-23|EPI\_ISL\_735496|Original|hCoV-19^^Chittagong|Human|Chattogram Veterinary and Animal Sciences University|Central Biological Research Laboratory and Department of Biochemistry and Molecular Biology|Faruque|Bangladesh  
>Spike|hCoV-19/England/20146007004/2020|2020-03-31|EPI\_ISL\_423575|Original|hCoV-19^^England|Human|Respiratory Virus Unit|Respiratory Virus Unit|Platt|United Kingdom  
>Spike|hCoV-19/Japan/PG-8546/2020|2020-08-00|EPI\_ISL\_686142|Original|hCoV-19^^Japan|Human|Pathogen Genomics Center|Pathogen Genomics Center|Sekizuka|Japan  
>Spike|hCoV-19/Luxembourg/LNS2402544/2020|2020-10-23|EPI\_ISL\_740115|Original|hCoV-19^^Luxembourg|Human|Laboratoire national de sant\u00e9|Laboratoire national de sant\u00e9|Wienecke-Baldacchino|Luxembourg



>Spike|hCoV-19/Israel/CVL-n-6136/2020|2020-03-15|EPI\_ISL\_475003|Original|hCoV-19^^Elkana|Human|Israel Central Virology laboratory|Israel Central Virology laboratory|Zuckerman|Israel

>Spike|hCoV-19/USA/AZ-TG637328/2020|2020-07-31|EPI\_ISL\_695739|Original|hCoV-19^^Arizona|Human|AZ SPHL|TGen North|French|USA

>Spike|hCoV-19/England/MILK-A068EA/2020|2020-10-01|EPI\_ISL\_600000|Original|hCoV-19^^England|Human|Lighthouse Lab in Milton Keynes|Wellcome Sanger Institute for the COVID-19 Genomics UK (COG-UK) consortium|Davies|United Kingdom

>Spike|hCoV-19/Netherlands/LI-RIVM-20417/2020|2020-12-02|EPI\_ISL\_728637|Original|hCoV-19^^Limburg|Human|Dutch COVID-19 response team|National Institute for Public Health and the Environment (RIVM)|Meijer|Netherlands

>Spike|hCoV-19/Denmark/ALAB-SSI384/2020|2020-03-24|EPI\_ISL\_429484|Original|hCoV-19^^Denmark|Human|Department of Virus and Microbiological Special Diagnostics|Albertsen lab|Kirkegaard|Denmark

>Spike|hCoV-19/USA/TX-HMH-MCoV-10031/2020|2020-07-06|EPI\_ISL\_789294|Original|hCoV-19^^Texas|Human|Houston Methodist Hospital|Houston Methodist Hospital|Long|USA

>Spike|hCoV-19/England/CAMB-1B0A5B/2020|2020-05-11|EPI\_ISL\_452932|Original|hCoV-19^^England|Human|Department of Pathology|COVID-19 Genomics UK (COG-UK) Consortium|Meredith|United Kingdom

>Spike|hCoV-19/Spain/PV-IBV-98007702/2020|2020-09-16|EPI\_ISL\_582083|Original|hCoV-19^^Basque Country|Human|Servicio de Microbiolog\u00eda. Hospital Universitario Donostia. OSI Donostialdea. \u00c1rea de Enfermedades Infecciosas|SeqCOVID-SPAIN consortium|IBV (CSIC)|Comas|Spain

>Spike|hCoV-19/England/ALDP-BB312C/2020|2020-11-19|EPI\_ISL\_702663|Original|hCoV-19^^England|Human|Lighthouse Lab in Alderley Park|Wellcome Sanger Institute for the COVID-19 Genomics UK (COG-UK) Consortium|Davies|United Kingdom

>Spike|hCoV-19/USA/UT-UPHL-04471/2020|2020-05-21|EPI\_ISL\_525338|Original|hCoV-19^^Utah|Human|Utah Public Health Laboratory|Utah Public Health Laboratory|Young|USA

>Spike|hCoV-19/Australia/VIC6744/2020|2020-07-25|EPI\_ISL\_564024|Original|hCoV-19^^Victoria|Human|Victorian Infectious Diseases Reference Laboratory (VIDRL)|VIDRL and MDU-PHL|Schultz|Australia

>Spike|hCoV-19/England/ALDP-B83E88/2020|2020-11-14|EPI\_ISL\_675366|Original|hCoV-19^^England|Human|Lighthouse Lab in Alderley Park|Wellcome Sanger Institute for the COVID-19 Genomics UK (COG-UK) Consortium|Davies|United Kingdom

>Spike|hCoV-19/USA/AZ-TG395959/2020|2020-06-09|EPI\_ISL\_694785|Original|hCoV-19^^Arizona|Human|AZ SPHL|TGen North|French|USA

>Spike|hCoV-19/England/MILK-B398CF/2020|2020-11-01|EPI\_ISL\_679650|Original|hCoV-19^^England|Human|Oxford Viromics|COVID-19 Genomics UK (COG-UK) Consortium|Golubchik|United Kingdom

>Spike|hCoV-19/USA/MI-MDHHS-SC21476/2020|2020-07-16|EPI\_ISL\_516203|Original|hCoV-19^^Michigan|Human|Michigan Department of Health and Human Services|Michigan Department of Health and Human Services|Blankenship|USA

>Spike|hCoV-19/England/QEUB-96E0CB/2020|2020-08-17|EPI\_ISL\_530481|Original|hCoV-19^^England|Human|Lighthouse Lab in Glasgow|Wellcome Sanger Institute for the COVID-19 Genomics UK (COG-UK) consortium|Davies|United Kingdom

>Spike|hCoV-19/USA/CA-CZB-7194/2020|2020-09-11|EPI\_ISL\_648382|Original|hCoV-19^^California|Human|Santa Clara County Public Health Laboratory|Chan-Zuckerberg Biohub|Bhatt|USA

>Spike|hCoV-19/England/ALDP-59B2E1/2020|2020-06-15|EPI\_ISL\_558321|Original|hCoV-19^^England|Human|Lighthouse Lab in Alderley Park|Wellcome Sanger Institute for the COVID-19 Genomics UK (COG-UK) consortium|Davies|United Kingdom

>Spike|hCoV-19/Australia/VIC5528/2020|2020-07-20|EPI\_ISL\_518361|Original|hCoV-19^^Victoria|Human|Microbiological Diagnostic Unit - Public Health Laboratory (MDU-PHL)|MDU-PHL|Schultz|Australia

>Spike|hCoV-19/USA/NY-Wadsworth-46320-01/2020|2020-04-11|EPI\_ISL\_525680|Original|hCoV-19^^New York|Human|Wadsworth Center|Wadsworth Center|Plitnick|USA

>Spike|hCoV-19/England/ALDP-B45E19/2020|2020-11-07|EPI\_ISL\_656311|Original|hCoV-19^^England|Human|Lighthouse Lab in Alderley Park|Wellcome Sanger Institute for the COVID-19 Genomics UK (COG-UK) Consortium|Davies|United Kingdom

>Spike|hCoV-19/England/204180123/2020|2020-09-25|EPI\_ISL\_583968|Original|hCoV-19^^England|Human|Respiratory Virus Unit|Respiratory Virus Unit|Platt|United Kingdom

>Spike|hCoV-19/England/20138026204/2020|2020-03-25|EPI\_ISL\_423312|Original|hCoV-19^^England|Human|Respiratory Virus Unit|Respiratory Virus Unit|Platt|United Kingdom

>Spike|hCoV-19/USA/NM-NMDOH-2020126556/2020|2020-06-15|EPI\_ISL\_535274|Original|hCoV-19^^New Mexico|Human|New Mexico Department of Health Scientific Laboratory|New Mexico Department of Health Scientific Laboratory|Johnson|USA

>Spike|hCoV-19/Denmark/DCGC-15577/2020|2020-11-23|EPI\_ISL\_713473|Original|hCoV-19^^Syddanmark|Human|Department of Virus and Microbiological Special Diagnostics|Albertsen Lab|Michaelsen|Denmark

>Spike|hCoV-19/England/MILK-C4FE5A/2020|2020-12-11|EPI\_ISL\_769596|Original|hCoV-19^^England|Human|Lighthouse Lab in Milton Keynes|Wellcome Sanger Institute for the COVID-19 Genomics UK (COG-UK) Consortium|Davies|United Kingdom

>Spike|hCoV-19/Japan/TKYE63442/2020|2020-03-00|EPI\_ISL\_468725|unknown|hCoV-19^^Japan|Human|unknown|Contact|Submitter|Japan

>Spike|hCoV-19/USA/UN-UW219/2020|2020-03-13|EPI\_ISL\_417368|Original|hCoV-19^^USA|Human|UW Virology Lab|UW Virology Lab|Roychoudhury|USA

>Spike|hCoV-19/Scotland/CVR4711/2020|2020-09-21|EPI\_ISL\_611715|Original|hCoV-19^^Scotland|Human|West of Scotland Specialist Virology Centre|COVID-19 Genomics UK (COG-UK) Consortium|Robertson|United Kingdom

>Spike|hCoV-19/England/ALDP-AA0730/2020|2020-10-22|EPI\_ISL\_624065|Original|hCoV-19^^England|Human|Lighthouse Lab in Alderley Park|Wellcome Sanger Institute for the COVID-19 Genomics UK (COG-UK) consortium|Davies|United Kingdom

>Spike|hCoV-19/England/MILK-9E09D5/2020|2020-09-21|EPI\_ISL\_575367|Original|hCoV-19^^England|Human|Lighthouse Lab in Milton Keynes|Wellcome Sanger Institute for the COVID-19 Genomics UK (COG-UK) consortium|Davies|United Kingdom

>Spike|hCoV-19/Spain/IB-IBV-2513/2020|2020-03-20|EPI\_ISL\_468979|Original|hCoV-19^^Illes Balears|Human|Servicio de Microbiolog\u00eda|SeqCOVID-SPAIN consortium/IBV (CSIC) |Comas|Spain

>Spike|hCoV-19/Taiwan/NTU16/2020|2020-03-19|EPI\_ISL\_422418|Vero E6|hCoV-19^^Taipei|Human|Department of Laboratory Medicine|Microbial Genomics Core Lab|Lin|Taiwan

>Spike|hCoV-19/England/MILK-562D5B/2020|2020-06-10|EPI\_ISL\_558272|Original|hCoV-19^^England|Human|Lighthouse Lab in Milton Keynes|Wellcome Sanger Institute for the COVID-19 Genomics UK (COG-UK) consortium|Davies|United Kingdom

>Spike|hCoV-19/England/CAMC-9D743A/2020|2020-09-17|EPI\_ISL\_584370|Original|hCoV-19^^England|Human|Virology Department|COVID-19 Genomics UK (COG-UK) Consortium|de Silva|United Kingdom

>Spike|hCoV-19/Scotland/CVR5687/2020|2020-11-09|EPI\_ISL\_651909|Original|hCoV-19^^Scotland|Human|West of Scotland Specialist Virology Centre|COVID-19 Genomics UK (COG-UK) Consortium|Robertson|United Kingdom

>Spike|hCoV-19/Scotland/QEUH-C542CF/2020|2020-12-12|EPI\_ISL\_757074|Original|hCoV-19^^Scotland|Human|Lighthouse Lab in Glasgow|Wellcome Sanger Institute for the COVID-19 Genomics UK (COG-UK) Consortium|Davies|United Kingdom

>Spike|hCoV-19/USA/FL-BPHL-0855/2020|2020-06-27|EPI\_ISL\_514201|Original|hCoV-19^^Florida|Human|Florida Bureau of Public Health Laboratories|Florida Bureau of Public Health Laboratories|Blanton|USA

>Spike|hCoV-19/Switzerland/Vs-ETHZ-410095/2020|2020-12-17|EPI\_ISL\_737844|Original|hCoV-19^^Valais|Human|Viollier AG|Department of Biosystems Science and Engineering|Nadeau|Switzerland

>Spike|hCoV-19/Denmark/DCGC-4690/2020|2020-09-21|EPI\_ISL\_621922|Original|hCoV-19^^Hovedstaden|Human|Department of Virus and Microbiological Special Diagnostics|Albertsen lab|Michaelsen|Denmark

>Spike|hCoV-19/USA/MI-QDX-352/2020|2020-03-23|EPI\_ISL\_571096|Original|hCoV-19^^Michigan|Human|Quest Diagnostics|Quest Diagnostics|Kagan|USA

>Spike|hCoV-19/England/LIVE-A9CE7/2020|2020-03-25|EPI\_ISL\_517351|Original|hCoV-19^^England|Human|Liverpool Clinical Laboratories|COVID-19 Genomics UK (COG-UK) Consortium|Haldenby|United Kingdom

>Spike|hCoV-19/Luxembourg/LNS9788943/2020|2020-11-17|EPI\_ISL\_744982|Original|hCoV-19^^Luxembourg|Human|Laboratoire national de sant\u00e9|Laboratoire national de sant\u00e9|Wienecke-Baldacchino|Luxembourg

>Spike|hCoV-19/Japan/IC-0515/2020|2020-12-00|EPI\_ISL\_768724|Original|hCoV-19^^Japan|Human|Pathogen Genomics Center|Pathogen Genomics Center|Sekizuka|Japan

>Spike|hCoV-19/England/QEUEH-9FF9E2/2020|2020-10-02|EPI\_ISL\_600153|Original|hCoV-19^^England|Human|Lighthouse Lab in Glasgow|Wellcome Sanger Institute for the COVID-19 Genomics UK (COG-UK) consortium|Davies|United Kingdom

>Spike|hCoV-19/England/ALDP-A7011D/2020|2020-10-15|EPI\_ISL\_608171|Original|hCoV-19^^England|Human|Lighthouse Lab in Alderley Park|Wellcome Sanger Institute for the COVID-19 Genomics UK (COG-UK) consortium|Davies|United Kingdom

>Spike|hCoV-19/Northern Ireland/NIRE-106582/2020|2020-05-02|EPI\_ISL\_500956|Original|hCoV-19^^Northern Ireland|Human|Regional Virus Laboratory|Wellcome Sanger Institute for the COVID-19 Genomics UK (COG-UK) consortium|Davies|United Kingdom

>Spike|hCoV-19/Palestine/51/2020|2020-08-19|EPI\_ISL\_596535|Original|hCoV-19^^Jerusalem|Human|Palestinian Ministry of Health|Molecular Genetics Lab|van Dorp|Palestine

>Spike|hCoV-19/England/CAMB-84338/2020|2020-04-16|EPI\_ISL\_443623|Original|hCoV-19^^England|Human|Department of Pathology|Wellcome Sanger Institute for the COVID-19 Genomics UK (COG-UK) consortium|Amato|United Kingdom

>Spike|hCoV-19/England/QEUEH-79C8EC/2020|2020-07-15|EPI\_ISL\_533187|Original|hCoV-19^^England|Human|Lighthouse Lab in Glasgow|Wellcome Sanger Institute for the COVID-19 Genomics UK (COG-UK) consortium|Davies|United Kingdom

>Spike|hCoV-19/USA/IA-GMF-18345/2020|2020-09-01|EPI\_ISL\_547758|Original|hCoV-19^^Iowa|Human|Gundersen Molecular Diagnostics Laboratory|Kabara Cancer Research Institute|Kenny|USA

>Spike|hCoV-19/England/SHEF-CD755/2020|2020-05-14|EPI\_ISL\_493712|Original|hCoV-19^^England|Human|Virology Department|COVID-19 Genomics UK (COG-UK) Consortium|de Silva|United Kingdom

>Spike|hCoV-19/India/GJ-GBRC51/2020|2020-05-02|EPI\_ISL\_444482|Original|hCoV-19^^Gujarat|Human|Gujarat Biotechnology Research Centre|Gujarat Biotechnology Research Centre|Joshi|India

>Spike|hCoV-19/England/CAMC-BD2AB3/2020|2020-11-28|EPI\_ISL\_702235|Original|hCoV-19^^England|Human|Lighthouse Lab in Cambridge|Wellcome Sanger Institute for the COVID-19 Genomics UK (COG-UK) Consortium|Davies|United Kingdom

>Spike|hCoV-19/England/MILK-993C7E/2020|2020-08-23|EPI\_ISL\_552301|Original|hCoV-19^^England|Human|Lighthouse Lab in Milton Keynes|Wellcome Sanger Institute for the COVID-19 Genomics UK (COG-UK) consortium|Davies|United Kingdom

>Spike|hCoV-19/Denmark/DCGC-2538/2020|2020-08-17|EPI\_ISL\_617809|Original|hCoV-19^^NA|Human|Department of Virus and Microbiological Special Diagnostics|Albertsen lab|Michaelsen|Denmark

>Spike|hCoV-19/USA/TX-HMH-MCoV-9967/2020|2020-07-06|EPI\_ISL\_780359|Original|hCoV-19^^Texas|Human|Houston Methodist Hospital|Houston Methodist Hospital|Long|USA

>Spike|hCoV-19/Zhejiang/WZ-01/2020|2020-01-16|EPI\_ISL\_404227|Original|hCoV-19^^Zhejiang|Human|Zhejiang Provincial Center for Disease Control and Prevention|Department of Microbiology|Chen|China

>Spike|hCoV-19/England/ALDP-95570E/2020|2020-06-17|EPI\_ISL\_553558|Original|hCoV-19^^England|Human|Lighthouse Lab in Alderley Park|Wellcome Sanger Institute for the COVID-19 Genomics UK (COG-UK) consortium|Davies|United Kingdom

>Spike|hCoV-19/Denmark/DCGC-4785/2020|2020-09-21|EPI\_ISL\_621395|Original|hCoV-19^^Sjaelland|Human|Department of Virus and Microbiological Special Diagnostics|Albertsen lab|Michaelsen|Denmark

>Spike|hCoV-19/England/ALDP-8E3320/2020|2020-06-25|EPI\_ISL\_556615|Original|hCoV-19^^England|Human|Lighthouse Lab in Alderley Park|Wellcome Sanger Institute for the COVID-19 Genomics UK (COG-UK) consortium|Davies|United Kingdom

>Spike|hCoV-19/Japan/NF-04/2020|2020-03-00|EPI\_ISL\_591474|Original|hCoV-19^^Japan|Human|Pathogen Genomics Center|Pathogen Genomics Center|Sekizuka|Japan

>Spike|hCoV-19/Denmark/DCGC-8931/2020|2020-11-02|EPI\_ISL\_626134|Original|hCoV-19^^Hovedstaden|Human|Department of Virus and Microbiological Special Diagnostics|Albertsen lab|Michaelsen|Denmark

>Spike|hCoV-19/USA/TX-HMH-MCoV-15827/2020|2020-07-10|EPI\_ISL\_785511|Original|hCoV-19^^Texas|Human|Houston Methodist Hospital|Houston Methodist Hospital|Long|USA

>Spike|hCoV-19/England/QEUIH-96BD5E/2020|2020-08-14|EPI\_ISL\_531270|Original|hCoV-19^^England|Human|Lighthouse Lab in Glasgow|Wellcome Sanger Institute for the COVID-19 Genomics UK (COG-UK) consortium|Davies|United Kingdom

>Spike|hCoV-19/England/MILK-99DFF3/2020|2020-08-30|EPI\_ISL\_550613|Original|hCoV-19^^England|Human|Lighthouse Lab in Milton Keynes|Wellcome Sanger Institute for the COVID-19 Genomics UK (COG-UK) consortium|Davies|United Kingdom

>Spike|hCoV-19/England/CAMC-B35438/2020|2020-11-05|EPI\_ISL\_659482|Original|hCoV-19^^England|Human|Lighthouse Lab in Cambridge|Wellcome Sanger Institute for the COVID-19 Genomics UK (COG-UK) Consortium|Davies|United Kingdom

>Spike|hCoV-19/Brazil/RJ-2682/2020|2020-04-24|EPI\_ISL\_467356|Original|hCoV-19^^Rio de Janeiro|Human|Laboratory of Respiratory Viruses and Measles|Laboratory of Respiratory Viruses and Measles|Silva|Brazil

>Spike|hCoV-19/England/CAMB-7E261/2020|2020-04-15|EPI\_ISL\_434057|Original|hCoV-19^^England|Human|Department of Pathology|COVID-19 Genomics UK (COG-UK) Consortium|Meredith|United Kingdom

>Spike|hCoV-19/Spain/AR-IBV-005062/2020|2020-04-21|EPI\_ISL\_510356|Original|hCoV-19^^Aragon|Human|Servicio de Microbiolog\u00eda|SeqCOVID-SPAIN consortium|IBV (CSIC) |Comas|Spain

>Spike|hCoV-19/Northern Ireland/NIRE-109103/2020|2020-10-19|EPI\_ISL\_652315|Original|hCoV-19^^Northern Ireland|Human|Regional Virus Laboratory|COVID-19 Genomics UK (COG-UK) Consortium|Fairley|United Kingdom

>Spike|hCoV-19/Canada/NS-NML-1340/2020|2020-04-12|EPI\_ISL\_579717|Original|hCoV-19^^Nova Scotia|Human|QEII Health Sciences Centre|National Microbiology Laboratory (NML) |Majer|Canada

>Spike|hCoV-19/England/ALDP-AA44BD/2020|2020-10-21|EPI\_ISL\_624426|Original|hCoV-19^^England|Human|Lighthouse Lab in Alderley Park|Wellcome Sanger Institute for the COVID-19 Genomics UK (COG-UK) consortium|Davies|United Kingdom

>Spike|hCoV-19/Spain/VC-IBV-98003571/2020|2020-03-21|EPI\_ISL\_537987|Original|hCoV-19^^Comunitat Valenciana|Human|Servicio de Microbiolog\u00eda. Hospital General Universitario de Castell\u00f3n|SeqCOVID-SPAIN consortium|IBV (CSIC) |Comas|Spain

>Spike|hCoV-19/Wales/PHWC-4879B7/2020|2020-10-31|EPI\_ISL\_637868|Original|hCoV-19^^Wales|Human|Wales Specialist Virology Centre Sequencing lab|COVID-19 Genomics UK (COG-UK) Consortium|Moore|United Kingdom

>Spike|hCoV-19/USA/CA-CZB-3718/2020|2020-08-01|EPI\_ISL\_548420|Original|hCoV-19^^California|Human|County of Santa Clara Public Health Department|Chan-Zuckerberg Biohub|Bhatt|USA

>Spike|hCoV-19/England/CAMB-79FE7/2020|2020-04-01|EPI\_ISL\_440568|Original|hCoV-19^^England|Human|Department of Pathology|Wellcome Sanger Institute for the COVID-19 Genomics UK (COG-UK) consortium|Amato|United Kingdom

>Spike|hCoV-19/England/NOTT-1110FC/2020|2020-05-04|EPI\_ISL\_453629|Original|hCoV-19^^England|Human|Queens Medical Centre|COVID-19 Genomics UK (COG-UK) Consortium|Loose|United Kingdom

>Spike|hCoV-19/USA/WA-UW-1758/2020|2020-03-21|EPI\_ISL\_424246|Original|hCoV-19^^Washington|Human|UW Virology Lab|UW Virology Lab|Roychoudhury|USA

>Spike|hCoV-19/Wales/PHWC-49876E/2020|2020-12-01|EPI\_ISL\_727119|Original|hCoV-19^^Wales|Human|Originating lab|COVID-19 Genomics UK (COG-UK) Consortium|Moore|United Kingdom

>Spike|hCoV-19/England/CAMB-83481/2020|2020-04-25|EPI\_ISL\_438681|Original|hCoV-19^^England|Human|Department of Pathology|COVID-19 Genomics UK (COG-UK) Consortium|Meredith|United Kingdom

>Spike|hCoV-19/England/QEUIH-B6A2A9/2020|2020-11-10|EPI\_ISL\_655254|Original|hCoV-19^^England|Human|Lighthouse Lab in Glasgow|Wellcome Sanger Institute for the COVID-19 Genomics UK (COG-UK) Consortium|Davies|United Kingdom

>Spike|hCoV-19/England/QEUA-A8C934/2020|2020-10-16|EPI\_ISL\_643258|Original|hCoV-19^^England|Human|Lighthouse Lab in Glasgow|Wellcome Sanger Institute for the COVID-19 Genomics UK (COG-UK) Consortium|Davies|United Kingdom

>Spike|hCoV-19/USA/CO-CSU-D0789-1/2020|2020-04-22|EPI\_ISL\_527424|Original|hCoV-19^^Colorado|Human|Colorado State University - Ebel Lab|Colorado State University - Ebel Lab|Cline|USA

>Spike|hCoV-19/USA/WA-UW-22920/2020|2020-08-10|EPI\_ISL\_570734|Original|hCoV-19^^Washington|Human|UW Virology Lab|UW Virology Lab|Roychoudhury|USA

>Spike|hCoV-19/England/CAMB-72124/2020|2020-03-28|EPI\_ISL\_439560|Original|hCoV-19^^England|Human|Department of Pathology|Wellcome Sanger Institute for the COVID-19 Genomics UK (COG-UK) consortium|Amato|United Kingdom

>Spike|hCoV-19/USA/NMDOH-2020305802/2020|2020-08-21|EPI\_ISL\_542056|Original|hCoV-19^^New Mexico|Human|New Mexico Department of Health Scientific Laboratory|New Mexico Department of Health Scientific Laboratory|Johnson|USA

>Spike|hCoV-19/Scotland/EDB9115/2020|2020-10-24|EPI\_ISL\_652048|Original|hCoV-19^^Scotland|Human|Virology Department|COVID-19 Genomics UK (COG-UK) Consortium|McHugh|United Kingdom

>Spike|hCoV-19/England/ALDP-666DDE/2020|2020-07-03|EPI\_ISL\_555603|Original|hCoV-19^^England|Human|Lighthouse Lab in Alderley Park|Wellcome Sanger Institute for the COVID-19 Genomics UK (COG-UK) consortium|Davies|United Kingdom

>Spike|hCoV-19/USA/OR-OHSU-0919/2020|2020-07-02|EPI\_ISL\_525927|Original|hCoV-19^^Oregon|Human|OHSU Lab Services Molecular Microbiology Lab|Oregon SARS-CoV-2 Genome Sequencing Center|O'Roak|USA

>Spike|hCoV-19/Wales/PHWC-263ED/2020|2020-03-27|EPI\_ISL\_422306|Original|hCoV-19^^Wales|Human|Wales Specialist Virology Centre|Public Health Wales Microbiology Cardiff|Moore|United Kingdom

>Spike|hCoV-19/England/ALDP-AA55F5/2020|2020-10-22|EPI\_ISL\_625122|Original|hCoV-19^^England|Human|Lighthouse Lab in Alderley Park|Wellcome Sanger Institute for the COVID-19 Genomics UK (COG-UK) consortium|Davies|United Kingdom

>Spike|hCoV-19/USA/TX-HMH-MCoV-19573/2020|2020-11-17|EPI\_ISL\_783945|Original|hCoV-19^^Texas|Human|Houston Methodist Hospital|Houston Methodist Hospital|Long|USA

>Spike|hCoV-19/Sweden/20-50199/2020|2020-03-06|EPI\_ISL\_455866|Original|hCoV-19^^Stockholm|Human|Karolinska Universitetslaboratoriet|The Public Health Agency of Sweden|Svartstr\u00f6m|Sweden

>Spike|hCoV-19/Wales/PHWC-48CD7A/2020|2020-11-03|EPI\_ISL\_666537|Original|hCoV-19^^Wales|Human|Wales Specialist Virology Centre Sequencing lab|COVID-19 Genomics UK (COG-UK) Consortium|Moore|United Kingdom

>Spike|hCoV-19/Japan/PG-5181/2020|2020-08-00|EPI\_ISL\_690284|Original|hCoV-19^^Japan|Human|Pathogen Genomics Center|Pathogen Genomics Center|Sekizuka|Japan

>Spike|hCoV-19/Belgium/regal-12111381/2020|2020-12-11|EPI\_ISL\_738433|Original|hCoV-19^^Mol|Human|UZ Leuven|KU Leuven|Maes|Belgium

>Spike|hCoV-19/England/ALDP-59AAF9/2020|2020-06-15|EPI\_ISL\_558389|Original|hCoV-19^^England|Human|Lighthouse Lab in Alderley Park|Wellcome Sanger Institute for the COVID-19 Genomics UK (COG-UK) consortium|Davies|United Kingdom

>Spike|hCoV-19/Ireland/D-NVRL-20Z04751/2020|2020-04-16|EPI\_ISL\_671362|Original|hCoV-19^^Dublin|Human|National Virus Reference Laboratory|Irish Coronavirus Sequencing Consortium - Teagasc Moorepark|Walsh|Ireland

>Spike|hCoV-19/USA/WA-UW-5617/2020|2020-04-08|EPI\_ISL\_430911|Original|hCoV-19^^Washington|Human|UW Virology Lab|UW Virology Lab|Roychoudhury|USA

>Spike|hCoV-19/Taiwan/CGMH-CGU-12/2020|2020-03-14|EPI\_ISL\_417525|LLC-MK2|hCoV-19^^Taoyuan|Human|Laboratory Medicine|Department of Laboratory Medicine|Yi Chun|Taiwan

>Spike|hCoV-19/Sweden/20-08866/2020|2020-04-09|EPI\_ISL\_476146|Original|hCoV-19^^Jamtland Harjedalen|Human|Ostersund klinisk mikrobiologi|The Public Health Agency of Sweden|Svartstr\u00f6m|Sweden

>Spike|hCoV-19/USA/NY-NYCPHL-000815/2020|2020-03-30|EPI\_ISL\_632192|Original|hCoV-19^^New York|Human|NYC HH Lincoln Medical And Mental Health Center|New York City Public Health Laboratory|Wang|USA

>Spike|hCoV-19/Denmark/DCGC-14053/2020|2020-11-30|EPI\_ISL\_711537|Original|hCoV-19^^Sjaelland|Human|Department of Virus and Microbiological Special Diagnostics|Albertsen Lab|Michaelsen|Denmark

>Spike|hCoV-19/South Africa/KRISP-K003997/2020|2020-09-25|EPI\_ISL\_634985|Original|hCoV-19^^KwaZulu-Natal|Human|National Health Laboratory Service - Inkosi Albert Luthuli Central Hospital (NHLS-IALCH)|KRISP|de Oliveira|South Africa

>Spike|hCoV-19/South Africa/N00142/2020|2020-05-20|EPI\_ISL\_622989|Original|hCoV-19^^Mpumalanga|Human|National Health Laboratory Service|National Institute for Communicable Diseases of the National Health Laboratory Service|Allam|South Africa

>Spike|hCoV-19/Scotland/GCVR-170D4F/2020|2020-03-25|EPI\_ISL\_459609|Original|hCoV-19^^Scotland|Human|NHSGGC West of Scotland Specialist Virology Centre / MRC-University of Glasgow Centre for Virus Research|Wellcome Sanger Institute for the COVID-19 Genomics UK (COG-UK) consortium|Davies|United Kingdom

>Spike|hCoV-19/Gibraltar/204421243/2020|2020-10-27|EPI\_ISL\_613702|Original|hCoV-19^^Gibraltar|Human|Microbiology|Respiratory Virus Unit|Platt|Gibraltar

>Spike|hCoV-19/USA/WI-GMF-28421/2020|2020-10-28|EPI\_ISL\_661020|Original|hCoV-19^^Wisconsin|Human|Gundersen Molecular Diagnostics Laboratory|Kabara Cancer Research Institute|Kenny|USA

>Spike|hCoV-19/India/MH-NIV-QC-795/2020|2020-04-21|EPI\_ISL\_454566|Original|hCoV-19^^Maharashtra|Human|NIV Influenza|NIV Influenza|Potdar|India

>Spike|hCoV-19/Jordan/AM-ALSR-3967/2020|2020-10-02|EPI\_ISL\_636330|Original|hCoV-19^^Amman|Human|Biolab Diagnostic Laboratories|Andersen lab at Scripps Research|Gangavarapu|Jordan

>Spike|hCoV-19/England/MILK-AC95CE/2020|2020-10-22|EPI\_ISL\_629547|Original|hCoV-19^^England|Human|Lighthouse Lab in Milton Keynes|Wellcome Sanger Institute for the COVID-19 Genomics UK (COG-UK) consortium|Davies|United Kingdom

>Spike|hCoV-19/USA/WA-S2834/2020|2020-09-13|EPI\_ISL\_574676|Original|hCoV-19^^Washington|Human|Seattle Flu Study|Seattle Flu Study|Lee|USA

>Spike|hCoV-19/England/MILK-A6A301/2020|2020-10-09|EPI\_ISL\_627498|Original|hCoV-19^^England|Human|Virology Department|COVID-19 Genomics UK (COG-UK) Consortium|de Silva|United Kingdom

>Spike|hCoV-19/Switzerland/VD-SNRCI-29965615/2020|2020-03-01|EPI\_ISL\_414023|Original|hCoV-19^^Vaud|Human|Laboratoire de Virologie|Swiss National Reference Centre for Influenza|Gon\u00e7alves Cabecinhas|Switzerland

>Spike|hCoV-19/USA/WI-GMF-01602/2020|2020-04-23|EPI\_ISL\_435400|Original|hCoV-19^^Wisconsin|Human|Gundersen Molecular Diagnostics Laboratory|Kabara Cancer Research Institute|Kenny|USA

>Spike|hCoV-19/USA/MN-MDH-1709/2020|2020-08-27|EPI\_ISL\_560796|Original|hCoV-19^^Minnesota|Human|Mayo Clinic & Mayo Clinic Laboratories|Minnesota Department of Health|Garfin|USA

>Spike|hCoV-19/Luxembourg/LNS8179404/2020|2020-11-24|EPI\_ISL\_744698|Original|hCoV-19^^Luxembourg|Human|Laboratoire national de sant\u00e9|Laboratoire national de sant\u00e9|Wienecke-Baldacchino|Luxembourg

>Spike|hCoV-19/USA/CA-ALSR-1089-SAN/2020|2020-06-15|EPI\_ISL\_483516|Original|hCoV-19^^California|Human|UC San Diego Center for Advanced Laboratory Medicine|Andersen lab at Scripps Research|Gangavarapu|USA

>Spike|hCoV-19/Singapore/1458/2020|2020-12-06|EPI\_ISL\_728194|Original|hCoV-19^^Singapore|Human|National Public Health Laboratory|National Public Health Laboratory|Mak|Singapore

>Spike|hCoV-19/England/ALDP-8F6D95/2020|2020-06-24|EPI\_ISL\_556600|Original|hCoV-19^^England|Human|Lighthouse Lab in Alderley Park|Wellcome Sanger Institute for the COVID-19 Genomics UK (COG-UK) consortium|Davies|United Kingdom

>Spike|hCoV-19/Japan/PG-7986/2020|2020-08-00|EPI\_ISL\_687087|Original|hCoV-19^^Japan|Human|Pathogen Genomics Center|Pathogen Genomics Center|Sekizuka|Japan

>Spike|hCoV-19/USA/TX-HMH-MCoV-14522/2020|2020-10-09|EPI\_ISL\_787807|Original|hCoV-19^^Texas|Human|Houston Methodist Hospital|Houston Methodist Hospital|Long|USA

>Spike|hCoV-19/Canada/ON-S113/2020|2020-03-22|EPI\_ISL\_586289|Original|hCoV-19^^Ontario|Human|Toronto Invasive Bacterial Diseases Network|McMaster University|McArthur|Canada

>Spike|hCoV-19/Scotland/QEUA-C54159/2020|2020-12-12|EPI\_ISL\_757061|Original|hCoV-19^^Scotland|Human|Lighthouse Lab in Glasgow|Wellcome Sanger Institute for the COVID-19 Genomics UK (COG-UK) Consortium|Davies|United Kingdom

>Spike|hCoV-19/England/ALDP-95C136/2020|2020-06-17|EPI\_ISL\_555108|Original|hCoV-19^^England|Human|Lighthouse Lab in Alderley Park|Wellcome Sanger Institute for the COVID-19 Genomics UK (COG-UK) consortium|Davies|United Kingdom

>Spike|hCoV-19/England/ALDP-9CBA73/2020|2020-09-16|EPI\_ISL\_575677|Original|hCoV-19^^England|Human|Lighthouse Lab in Alderley Park|Wellcome Sanger Institute for the COVID-19 Genomics UK (COG-UK) consortium|Davies|United Kingdom

>Spike|hCoV-19/Scotland/EDB4649/2020|2020-05-08|EPI\_ISL\_478177|Original|hCoV-19^^Scotland|Human|Virology Department|COVID-19 Genomics UK (COG-UK) Consortium|Williams|United Kingdom

>Spike|hCoV-19/USA/UT-00971/2020|2020-04-08|EPI\_ISL\_436902|Original|hCoV-19^^Utah|Human|Utah Public Health Laboratory|Utah Public Health Laboratory|Young|USA

>Spike|hCoV-19/England/QEUA-B2EEE9/2020|2020-11-03|EPI\_ISL\_660021|Original|hCoV-19^^England|Human|Lighthouse Lab in Glasgow|Wellcome Sanger Institute for the COVID-19 Genomics UK (COG-UK) Consortium|Davies|United Kingdom

>Spike|hCoV-19/England/QEUA-C32C32/2020|2020-12-11|EPI\_ISL\_782718|Original|hCoV-19^^England|Human|Lighthouse Lab in Glasgow|Wellcome Sanger Institute for the COVID-19 Genomics UK (COG-UK) Consortium|Davies|United Kingdom

>Spike|hCoV-19/Denmark/DCGC-6158/2020|2020-10-05|EPI\_ISL\_620061|Original|hCoV-19^^Midtjylland|Human|Department of Virus and Microbiological Special Diagnostics|Albertsen lab|Michaelsen|Denmark

>Spike|hCoV-19/England/CAMB-1AABAC/2020|2020-04-18|EPI\_ISL\_470155|Original|hCoV-19^^England|Human|Department of Pathology|Wellcome Sanger Institute for the COVID-19 Genomics UK (COG-UK) consortium|Davies|United Kingdom

>Spike|hCoV-19/England/QEUA-B7F48D/2020|2020-11-14|EPI\_ISL\_674724|Original|hCoV-19^^England|Human|Lighthouse Lab in Glasgow|Wellcome Sanger Institute for the COVID-19 Genomics UK (COG-UK) Consortium|Davies|United Kingdom

>Spike|hCoV-19/USA/VI-CDC-3688/2020|2020-03-23|EPI\_ISL\_452123|Original|hCoV-19^^Virgin Islands|Human|VI-US Virgin Islands Department of Health|Pathogen Discovery|Queen|USA

>Spike|hCoV-19/USA/WI-WSLH-200664/2020|2020-06-22|EPI\_ISL\_631429|Original|hCoV-19^^Wisconsin|Human|Wisconsin State Laboratory of Hygiene Communicable Disease Division|Wisconsin State Laboratory of Hygiene Communicable Disease Division|Florek|USA

>Spike|hCoV-19/USA/FL-BPHL-1371/2020|2020-07-20|EPI\_ISL\_541308|Original|hCoV-19^^Florida|Human|Florida Bureau of Public Health Laboratories|Florida Bureau of Public Health Laboratories|Blanton|USA

>Spike|hCoV-19/England/MILK-B5A38B/2020|2020-11-05|EPI\_ISL\_658068|Original|hCoV-19^^England|Human|Lighthouse Lab in Milton Keynes|Wellcome Sanger Institute for the COVID-19 Genomics UK (COG-UK) Consortium|Davies|United Kingdom

>Spike|hCoV-19/Netherlands/ZH-EMC-827/2020|2020-10-06|EPI\_ISL\_632699|Original|hCoV-19^^Zuid Holland|Human|Dutch COVID-19 response team|Erasmus Medical Center|Oude Munnink|Netherlands

>Spike|hCoV-19/Wales/PHWC-2B8BC/2020|2020-04-09|EPI\_ISL\_445776|Original|hCoV-19^^Wales|Human|Wales Specialist Virology Centre|Public Health Wales Microbiology Cardiff|Moore|United Kingdom

>Spike|hCoV-19/Canada/QC-LSPQ-L00230895/2020|2020-03-21|EPI\_ISL\_535938|Original|hCoV-19^^Quebec|Human|H\u00f4pital Pierre-Le Gardeur|Laboratoire de sant\u00e9 publique du Qu\u00e9bec|Moreira|Canada

>Spike|hCoV-19/England/C200042029/2020|2020-11-02|EPI\_ISL\_649797|Original|hCoV-19^^England|Human|Respiratory Virus Unit|COVID-19 Genomics UK (COG-UK) Consortium|Platt|United Kingdom

>Spike|hCoV-19/Spain/GA-USC-001/2020|2020-05-11|EPI\_ISL\_468331|Original|hCoV-19^^Galicia|Human|Microbiology Service|Genomes & Disease|Garcia-Souto|Spain

>Spike|hCoV-19/Wales/PHWC-4A1832/2020|2020-12-10|EPI\_ISL\_743733|Original|hCoV-19^^Wales|Human|Wales Specialist Virology Centre Sequencing lab|COVID-19 Genomics UK (COG-UK) Consortium|Moore|United Kingdom

>Spike|hCoV-19/England/QEUA-A02990/2020|2020-09-29|EPI\_ISL\_584938|Original|hCoV-19^^England|Human|Quadram Institute Bioscience|COVID-19 Genomics UK (COG-UK) Consortium|Alikhan|United Kingdom

>Spike|hCoV-19/India/MH-NIV-14614/2020|2020-04-25|EPI\_ISL\_479499|Original|hCoV-19^^Maharashtra|Human|NIV Influenza|NIV Influenza|Potdar|India

>Spike|hCoV-19/Spain/CT-IBV-005576/2020|2020-03-17|EPI\_ISL\_508684|Original|hCoV-19^^Catalunya|Human|Departamento de Microbiolog\u00eda|SeqCOVID-SPAIN consortium/IBV (CSIC) |Comas|Spain

>Spike|hCoV-19/England/CAMC-B09DAB/2020|2020-10-31|EPI\_ISL\_672981|Original|hCoV-19^^England|Human|Lighthouse Lab in Cambridge|Wellcome Sanger Institute for the COVID-19 Genomics UK (COG-UK) Consortium|Davies|United Kingdom

>Spike|hCoV-19/Denmark/DCGC-18921/2020|2020-12-07|EPI\_ISL\_748641|Original|hCoV-19^^Hovedstaden|Human|Department of Virus and Microbiological Special Diagnostics|Albertsen Lab|Michaelsen|Denmark

>Spike|hCoV-19/USA/GA-CDC-6368/2020|2020-09-19|EPI\_ISL\_576195|Original|hCoV-19^^Georgia|Human|GA Department of Public Health Laboratory|Pathogen Discovery|Queen|USA

>Spike|hCoV-19/USA/TX-DSHS-0824/2020|2020-06-03|EPI\_ISL\_593567|Original|hCoV-19^^Texas|Human|Texas Department of State Health Services|Texas Department of State Health Services|Rahman|USA

>Spike|hCoV-19/England/QEUA-AAA88E/2020|2020-10-21|EPI\_ISL\_652714|Original|hCoV-19^^England|Human|Oxford Viromics|COVID-19 Genomics UK (COG-UK) Consortium|Golubchik|United Kingdom

>Spike|hCoV-19/Denmark/DCGC-11875/2020|2020-10-26|EPI\_ISL\_670482|Original|hCoV-19^^Denmark|Human|Department of Virus and Microbiological Special Diagnostics|Albertsen Lab|Michaelsen|Denmark

>Spike|hCoV-19/Equatorial Guinea/46215/2020|2020-08-02|EPI\_ISL\_649172|Original|hCoV-19^^Bioko Norte|Human|Laboratorio de Investigaciones de Baney|University Hospital Basel|Hosch|Equatorial Guinea

>Spike|hCoV-19/England/MILK-A91741/2020|2020-10-19|EPI\_ISL\_705981|Original|hCoV-19^^England|Human|Oxford Viromics|COVID-19 Genomics UK (COG-UK) Consortium|Golubchik|United Kingdom

>Spike|hCoV-19/Ireland/D-NVRL-20G32325/2020|2020-03-18|EPI\_ISL\_605101|Original|hCoV-19^^Dublin|Human|National Virus Reference Laboratory|Irish Coronavirus Sequencing Consortium - Helixworks|Chalapati|Ireland

>Spike|hCoV-19/England/MILK-9A83AE/2020|2020-09-02|EPI\_ISL\_549977|Original|hCoV-19^^England|Human|Lighthouse Lab in Milton Keynes|Wellcome Sanger Institute for the COVID-19 Genomics UK (COG-UK) consortium|Davies|United Kingdom

>Spike|hCoV-19/Faroe Islands/HFS-74/2020|2020-08-05|EPI\_ISL\_614311|Original|hCoV-19^^Faroe Islands|Human|Faroese National Reference Laboratory for Fish and Animal Diseases|Faroese National Reference Laboratory for Fish and Animal Diseases|Dahl|Faroe Islands

>Spike|hCoV-19/India/DL-MaxCov0049-CSIR-IGIB/2020|2020-05-01|EPI\_ISL\_459951|Original|hCoV-19^^Delhi|Human|Devki Devi Foundation|CSIR-IGIB/Max|Pandey|India

>Spike|hCoV-19/Romania/ROSV\_2778/2020|2020-04-16|EPI\_ISL\_491059|Original|hCoV-19^^Suceava|Human|Suceava County Emergency Hospital|\Stefan cel Mare\ University Metagenomics Lab|Lobiuc|Romania

>Spike|hCoV-19/Australia/NSW549/2020|2020-03-21|EPI\_ISL\_455088|Original|hCoV-19^^New South Wales|Human|South Eastern Area Laboratory Services|NSW Health Pathology - Institute of Clinical Pathology and Medical Research; Westmead Hospital; University of Sydney|Gall|Australia

>Spike|hCoV-19/Brazil/MG-CV13/2020|2020-03-15|EPI\_ISL\_429675|Original|hCoV-19^^Minas Gerais|Human|Central Public Health Laboratory/Oct\u00e9lvio Magalh\u00e3es Institute (IOM) from the Ezequiel Dias Foundation (FUNED)|Instituto Oct\u00e9lvio Magalh\u00e3es / Funda\u00e7\u00e3o Ezequiel Dias (IOM/Funed)|Giovanetti|Brazil

>Spike|hCoV-19/England/ALDP-B5E387/2020|2020-11-08|EPI\_ISL\_723654|Original|hCoV-19^^England|Human|Oxford Viromics|COVID-19 Genomics UK (COG-UK) Consortium|Golubchik|United Kingdom



>Spike|hCoV-19/Italy/FVG-ICGEB-S8/2020|2020-03-01|EPI\_ISL\_417421|Vero E6 P1|hCoV-19^^Friuli Venezia Giulia|Human|Laboratory of Molecular Virology International Center for Genetic Engineering and Biotechnology (ICGEB)|ARGO Open Lab Platform for Genome sequencing|Marcello|Italy

>Spike|hCoV-19/Spain/MD-H12-R17/2020|2020-03-04|EPI\_ISL\_530095|Original|hCoV-19^^Madrid|Human|Hospital Universitario Ram\u00f3n y Cajal|Hospital Universitario 12 de Octubre|Viedma|Spain

>Spike|hCoV-19/England/LIVE-9FCA8/2020|2020-06-02|EPI\_ISL\_472053|Original|hCoV-19^^England|Human|Liverpool Clinical Laboratories|COVID-19 Genomics UK (COG-UK) Consortium|Haldenby|United Kingdom

>Spike|hCoV-19/USA/UT-UPHL-2009236/2020|2020-05-14|EPI\_ISL\_525229|Original|hCoV-19^^Utah|Human|Utah Public Health Laboratory|Utah Public Health Laboratory|Young|USA

>Spike|hCoV-19/USA/WA-UW-8467/2020|2020-04-30|EPI\_ISL\_776748|Original|hCoV-19^^Washington|Human|UW Virology Lab|UW Virology Lab|Roychoudhury|USA

>Spike|hCoV-19/Denmark/DCGC-16614/2020|2020-11-16|EPI\_ISL\_714871|Original|hCoV-19^^Midtjylland|Human|Department of Virus and Microbiological Special Diagnostics|Albertsen Lab|Michaelsen|Denmark

>Spike|hCoV-19/Switzerland/ZH-ETHZ-190053/2020|2020-07-09|EPI\_ISL\_500914|Original|hCoV-19^^Zurich|Human|Viollier AG|Department of Biosystems Science and Engineering|Nadeau|Switzerland

>Spike|hCoV-19/Scotland/QEUH-A1E050/2020|2020-10-01|EPI\_ISL\_598847|Original|hCoV-19^^Scotland|Human|Lighthouse Lab in Glasgow|Wellcome Sanger Institute for the COVID-19 Genomics UK (COG-UK) consortium|Davies|United Kingdom

>Spike|hCoV-19/England/MILK-B02021/2020|2020-10-24|EPI\_ISL\_642957|Original|hCoV-19^^England|Human|Lighthouse Lab in Milton Keynes|Wellcome Sanger Institute for the COVID-19 Genomics UK (COG-UK) Consortium|Davies|United Kingdom

>Spike|hCoV-19/DRC/4075/2020|2020-04-27|EPI\_ISL\_471406|Original|hCoV-19^^Kinshasa|Human|Viral Respiratory Lab|Pathogen Sequencing Lab|Lusamaki|Democratic Republic of the Congo

>Spike|hCoV-19/England/CAMC-BC1E9D/2020|2020-11-22|EPI\_ISL\_705633|Original|hCoV-19^^England|Human|Department of Pathology|COVID-19 Genomics UK (COG-UK) Consortium|Goodfellow|United Kingdom

>Spike|hCoV-19/USA/OR-OHSU-0484/2020|2020-06-15|EPI\_ISL\_525823|Original|hCoV-19^^Oregon|Human|OHSU Lab Services Molecular Microbiology Lab|Ginkgo Bioworks Clinical Laboratory|O'Roak|USA

>Spike|hCoV-19/Wales/PHWC-25EA1/2020|2020-03-25|EPI\_ISL\_422202|Original|hCoV-19^^Wales|Human|Wales Specialist Virology Centre|Public Health Wales Microbiology Cardiff|Moore|United Kingdom

>Spike|hCoV-19/Gambia/GC19-3613/2020|2020-07-27|EPI\_ISL\_561198|Original|hCoV-19^^Kombo|Human|MRCG at LSHTM Genomics lab|MRCG at LSHTM Genomics lab|Sesay|Gambia

>Spike|hCoV-19/USA/HI-H200231/2020|2020-08-11|EPI\_ISL\_752790|Original|hCoV-19^^Hawaii|Human|State Laboratories Division|State Laboratories Division|Sultana|USA

>Spike|hCoV-19/England/NORT-28A0EE/2020|2020-04-08|EPI\_ISL\_453523|Original|hCoV-19^^England|Human|Northumbria University / South Tees Hospitals NHS Foundation Trust / North Cumbria Integrated Care NHS Foundation Trust / North Tees and Hartlepool NHS Foundation Trust / Newcastle Hospitals NHS Foundation Trust|COVID-19 Genomics UK (COG-UK) Consortium|Bashton|United Kingdom

>Spike|hCoV-19/England/ALDP-A6886E/2020|2020-10-12|EPI\_ISL\_608685|Original|hCoV-19^^England|Human|Lighthouse Lab in Alderley Park|Wellcome Sanger Institute for the COVID-19 Genomics UK (COG-UK) consortium|Davies|United Kingdom

>Spike|hCoV-19/Jamaica/JM-CDC-0869/2020|2020-03-09|EPI\_ISL\_450793|Original|hCoV-19^^Jamaica|Human|Jamaica Ministry of Health and Wellness|Pathogen Discovery|Queen|Jamaica

>Spike|hCoV-19/Japan/Donner20/2020|2020-04-14|EPI\_ISL\_438964|Original|hCoV-19^^Kanto|Human|Keio University School of Medicine|Keio University School of Medicine|Kosaki|Japan

>Spike|hCoV-19/England/OXON-B099B/2020|2020-04-21|EPI\_ISL\_478924|Original|hCoV-19^^England|Human|Oxford Viromics|COVID-19 Genomics UK (COG-UK) Consortium|Golubchik|United Kingdom

>Spike|hCoV-19/Australia/VIC10323/2020|2020-08-31|EPI\_ISL\_562871|Original|hCoV-19^^Victoria|Human|Microbiological Diagnostic Unit - Public Health Laboratory (MDU-PHL) |MDU-PHL|Schultz|Australia

>Spike|hCoV-19/USA/CA-ALSR-0917-SAN/2020|2020-04-24|EPI\_ISL\_483412|Original|hCoV-19^^California|Human|UC San Diego Center for Advanced Laboratory Medicine|Andersen lab at Scripps Research|Gangavarapu|USA

>Spike|hCoV-19/England/LIVE-AA1E7/2020|2020-03-23|EPI\_ISL\_517418|Original|hCoV-19^^England|Human|Liverpool Clinical Laboratories|COVID-19 Genomics UK (COG-UK) Consortium|Haldenby|United Kingdom

>Spike|hCoV-19/USA/AK-PHL1881/2020|2020-07-22|EPI\_ISL\_528510|Original|hCoV-19^^Alaska|Human|Alaska State Virology Laboratory|Alaska State Virology Laboratory|Drown|USA

>Spike|hCoV-19/England/CAMB-73EFF/2020|2020-03-19|EPI\_ISL\_440367|Original|hCoV-19^^England|Human|Department of Pathology|Wellcome Sanger Institute for the COVID-19 Genomics UK (COG-UK) consortium|Amato|United Kingdom

>Spike|hCoV-19/Denmark/DCGC-15706/2020|2020-11-23|EPI\_ISL\_713189|Original|hCoV-19^^Hovedstaden|Human|Department of Virus and Microbiological Special Diagnostics|Albertsen Lab|Michaelsen|Denmark

>Spike|hCoV-19/USA/FL-BPHL-1248/2020|2020-04-14|EPI\_ISL\_541151|Original|hCoV-19^^Florida|Human|Florida Bureau of Public Health Laboratories|Florida Bureau of Public Health Laboratories|Blanton|USA

>Spike|hCoV-19/England/QEUH-9D0316/2020|2020-09-16|EPI\_ISL\_589859|Original|hCoV-19^^England|Human|Lighthouse Lab in Glasgow|Wellcome Sanger Institute for the COVID-19 Genomics UK (COG-UK) consortium|Davies|United Kingdom

>Spike|hCoV-19/England/QEUH-9BACCC/2020|2020-09-07|EPI\_ISL\_573633|Original|hCoV-19^^England|Human|Oxford Viromics|COVID-19 Genomics UK (COG-UK) Consortium|Golubchik|United Kingdom

>Spike|hCoV-19/Australia/VIC145/2020|2020-03-17|EPI\_ISL\_419842|Original|hCoV-19^^Victoria|Human|Victorian Infectious Diseases Reference Laboratory (VIDRL) |Victorian Infectious Diseases Reference Laboratory and Microbiological Diagnostic Unit Public Health Laboratory|Schultz|Australia

>Spike|hCoV-19/Netherlands/GE-EMC-185/2020|2020-05-27|EPI\_ISL\_523167|Original|hCoV-19^^Gelderland|Human|Dutch COVID-19 response team|Erasmus Medical Center|Oude Munnink|Netherlands

>Spike|hCoV-19/Scotland/QEUH-95FF39/2020|2020-08-07|EPI\_ISL\_531890|Original|hCoV-19^^Scotland|Human|NHSGGC West of Scotland Specialist Virology Centre / MRC-University of Glasgow Centre for Virus Research|Wellcome Sanger Institute for the COVID-19 Genomics UK (COG-UK) consortium|Davies|United Kingdom

>Spike|hCoV-19/England/204290232/2020|2020-10-16|EPI\_ISL\_613606|Original|hCoV-19^^England|Human|Respiratory Virus Unit|Respiratory Virus Unit|Platt|United Kingdom

>Spike|hCoV-19/England/20168031304/2020|2020-04-16|EPI\_ISL\_466605|Original|hCoV-19^^England|Human|Respiratory Virus Unit|Respiratory Virus Unit|Platt|United Kingdom

>Spike|hCoV-19/USA/LA-EVTL335/2020|2020-05-21|EPI\_ISL\_578741|Original|hCoV-19^^Louisiana|Human|LSUHS Emerging Viral Threat Laboratory|Microbial Genome Sequencing Center|Kamil|USA

>Spike|hCoV-19/USA/CA-QDX-2640/2020|2020-03-16|EPI\_ISL\_604904|Original|hCoV-19^^California|Human|Quest Diagnostics|Quest Diagnostics|Kagan|USA

>Spike|hCoV-19/USA/TX-HMH-MCoV-15418/2020|2020-10-21|EPI\_ISL\_786902|Original|hCoV-19^^Texas|Human|Houston Methodist Hospital|Houston Methodist Hospital|Long|USA

>Spike|hCoV-19/England/SHEF-10D0ABD/2020|2020-12-03|EPI\_ISL\_706982|Original|hCoV-19^^England|Human|Virology Department|COVID-19 Genomics UK (COG-UK) Consortium|de Silva|United Kingdom

>Spike|hCoV-19/Japan/PG-1377/2020|2020-04-00|EPI\_ISL\_684984|Original|hCoV-19^^Japan|Human|Saitama Prefectural Institute of Public Health|Pathogen Genomics Center|Sekizuka|Japan

>Spike|hCoV-19/Australia/VIC17752/2020|2020-08-22|EPI\_ISL\_779425|Original|hCoV-19^^Victoria|Human|Microbiological Diagnostic Unit - Public Health Laboratory (MDU-PHL) |MDU-PHL|Beck|Australia

>Spike|hCoV-19/Denmark/DCGC-13535/2020|2020-11-30|EPI\_ISL\_712862|Original|hCoV-19^^Hovedstaden|Human|Department of Virus and Microbiological Special Diagnostics|Albertsen Lab|Michaelsen|Denmark

>Spike|hCoV-19/England/QEUH-888FDE/2020|2020-07-27|EPI\_ISL\_532672|Original|hCoV-19^^England|Human|Lighthouse Lab in Glasgow|Wellcome Sanger Institute for the COVID-19 Genomics UK (COG-UK) consortium|Davies|United Kingdom

>Spike|hCoV-19/USA/FL-BPHL-0259/2020|2020-05-04|EPI\_ISL\_480910|Original|hCoV-19^^Florida|Human|Florida Bureau of Public Health Laboratories|Florida Bureau of Public Health Laboratories|Blanton|USA

>Spike|hCoV-19/England/LIVE-A8F94/2020|2020-03-26|EPI\_ISL\_517240|Original|hCoV-19^^England|Human|Liverpool Clinical Laboratories|COVID-19 Genomics UK (COG-UK) Consortium|Haldenby|United Kingdom

>Spike|hCoV-19/USA/TX-HMH-MCoV-12986/2020|2020-08-28|EPI\_ISL\_788137|Original|hCoV-19^^Texas|Human|Houston Methodist Hospital|Houston Methodist Hospital|Long|USA

>Spike|hCoV-19/England/CAMC-C4663D/2020|2020-12-10|EPI\_ISL\_718543|Original|hCoV-19^^England|Human|Lighthouse Lab in Cambridge|Wellcome Sanger Institute for the COVID-19 Genomics UK (COG-UK) Consortium|Davies|United Kingdom

>Spike|hCoV-19/Switzerland/ZH-ETHZ-390215/2020|2020-11-26|EPI\_ISL\_721959|Original|hCoV-19^^Zurich|Human|Viollier AG|Department of Biosystems Science and Engineering|Nadeau|Switzerland

>Spike|hCoV-19/USA/UT-UPHL-2008921/2020|2020-05-23|EPI\_ISL\_525027|Original|hCoV-19^^Utah|Human|Utah Public Health Laboratory|Utah Public Health Laboratory|Young|USA

>Spike|hCoV-19/Costa Rica/INC-0135/2020|2020-08-11|EPI\_ISL\_682273|Original|hCoV-19^^Limon|Human|HOSPITAL SAN JUAN DE DIOS|Inciensa|Soto-Garita|Costa Rica

>Spike|hCoV-19/USA/PA-MGEL-00001/2020|2020-03-24|EPI\_ISL\_681929|Original|hCoV-19^^Pennsylvania|Human|UPMC Clinical Microbiology Laboratory|Microbial Genomic Epidemiology Laboratory|Griffith|USA

>Spike|hCoV-19/England/ALDP-BBB555/2020|2020-11-20|EPI\_ISL\_702399|Original|hCoV-19^^England|Human|Lighthouse Lab in Alderley Park|Wellcome Sanger Institute for the COVID-19 Genomics UK (COG-UK) Consortium|Davies|United Kingdom

>Spike|hCoV-19/India/TG-CCMB-L1487/2020|2020-05-25|EPI\_ISL\_471608|Original|hCoV-19^^Telangana|Human|CSIR-Centre for Cellular and Molecular Biology|CSIR-Centre for Cellular and Molecular Biology|Banu|India

>Spike|hCoV-19/Scotland/CVR4665/2020|2020-09-28|EPI\_ISL\_612302|Original|hCoV-19^^Scotland|Human|West of Scotland Specialist Virology Centre|COVID-19 Genomics UK (COG-UK) Consortium|Robertson|United Kingdom

>Spike|hCoV-19/Germany/HH-hpi-p1561/2020|2020-03-15|EPI\_ISL\_776043|Original|hCoV-19^^Hamburg|Human|University Medical Center Hamburg Eppendorf|Heinrich Pette Institute|Robitaille|Germany

>Spike|hCoV-19/England/CAMC-C749A6/2020|2020-12-15|EPI\_ISL\_768987|Original|hCoV-19^^England|Human|Lighthouse Lab in Cambridge|Wellcome Sanger Institute for the COVID-19 Genomics UK (COG-UK) Consortium|Davies|United Kingdom

>Spike|hCoV-19/Northern Ireland/NIRE-FBC5F/2020|2020-04-10|EPI\_ISL\_470051|Original|hCoV-19^^Northern Ireland|Human|Regional Virus Laboratory|Wellcome Sanger Institute for the COVID-19 Genomics UK (COG-UK) consortium|Davies|United Kingdom

>Spike|hCoV-19/Scotland/CVR1476/2020|2020-04-01|EPI\_ISL\_438822|Original|hCoV-19^^Scotland|Human|West of Scotland Specialist Virology Centre|COVID-19 Genomics UK (COG-UK) Consortium|Robertson|United Kingdom

>Spike|hCoV-19/Spain/RI-IBV-99010975/2020|2020-10-08|EPI\_ISL\_732803|Original|hCoV-19^^La Rioja|Human|Centro de Investigaci\u00f3n Biom\u00e9dica de La Rioja - Hospital San Pedro Logro\u00f1o|SeqCOVID-SPAIN consortium|IBV (CSIC)|Comas|Spain

>Spike|hCoV-19/USA/CA-ALSR-1441/2020|2020-03-28|EPI\_ISL\_494604|Original|hCoV-19^^California|Human|Scripps Medical Laboratory|Andersen lab at Scripps Research|Gangavarapu|USA

>Spike|hCoV-19/England/CAMB-837C4/2020|2020-04-16|EPI\_ISL\_443594|Original|hCoV-19^^England|Human|Department of Pathology|Wellcome Sanger Institute for the COVID-19 Genomics UK (COG-UK) consortium|Amato|United Kingdom

>Spike|hCoV-19/Australia/VIC3746/2020|2020-07-11|EPI\_ISL\_520474|Original|hCoV-19^^Victoria|Human|Microbiological Diagnostic Unit - Public Health Laboratory (MDU-PHL)|MDU-PHL|Schultz|Australia

>Spike|hCoV-19/Wales/LIVE-DBB210/2020|2020-11-13|EPI\_ISL\_665696|Original|hCoV-19^^Wales|Human|Liverpool Clinical Laboratories|COVID-19 Genomics UK (COG-UK) Consortium|Haldenby|United Kingdom

>Spike|hCoV-19/Australia/VIC4798/2020|2020-07-18|EPI\_ISL\_519184|Original|hCoV-19^^Victoria|Human|Microbiological Diagnostic Unit - Public Health Laboratory (MDU-PHL)|MDU-PHL|Schultz|Australia

>Spike|hCoV-19/India/DL-MaxCov0042-CSIR-IGIB/2020|2020-05-01|EPI\_ISL\_459944|Original|hCoV-19^^Delhi|Human|Devki Devi Foundation|CSIR-IGIB/Max|Pandey|India

>Spike|hCoV-19/England/ALDP-A6D650/2020|2020-10-14|EPI\_ISL\_607045|Original|hCoV-19^^England|Human|Lighthouse Lab in Alderley Park|Wellcome Sanger Institute for the COVID-19 Genomics UK (COG-UK) consortium|Davies|United Kingdom

>Spike|hCoV-19/USA/TX-HMH-MCoV-10957/2020|2020-07-09|EPI\_ISL\_789695|Original|hCoV-19^^Texas|Human|Houston Methodist Hospital|Houston Methodist Hospital|Long|USA

>Spike|hCoV-19/England/CAMB-8268C/2020|2020-04-13|EPI\_ISL\_443674|Original|hCoV-19^^England|Human|Department of Pathology|Wellcome Sanger Institute for the COVID-19 Genomics UK (COG-UK) consortium|Amato|United Kingdom

>Spike|hCoV-19/Luxembourg/LNS1665793/2020|2020-12-18|EPI\_ISL\_739971|Original|hCoV-19^^Luxembourg|Human|Laboratoire national de sant\u00e9|Laboratoire national de sant\u00e9|Wienecke-Baldacchino|Luxembourg

>Spike|hCoV-19/Germany/NW-HHU-545/2020|2020-12-16|EPI\_ISL\_779931|Original|hCoV-19^^North Rhine-Westphalia|Human|Center of Medical Microbiology|Center of Medical Microbiology|Wienemann|Germany

>Spike|hCoV-19/England/ALDP-CB35B6/2020|2020-12-20|EPI\_ISL\_761108|Original|hCoV-19^^England|Human|Lighthouse Lab in Alderley Park|Wellcome Sanger Institute for the COVID-19 Genomics UK (COG-UK) Consortium|Davies|United Kingdom

>Spike|hCoV-19/England/MILK-993FA2/2020|2020-08-25|EPI\_ISL\_551703|Original|hCoV-19^^England|Human|Lighthouse Lab in Milton Keynes|Wellcome Sanger Institute for the COVID-19 Genomics UK (COG-UK) consortium|Davies|United Kingdom

>Spike|hCoV-19/USA/MD-HP00069/2020|2020-03-21|EPI\_ISL\_438228|Original|hCoV-19^^Maryland|Human|Johns Hopkins Hospital Department of Pathology|Johns Hopkins Hospital Department of Pathology|Ramakrishnan|USA

>Spike|hCoV-19/England/CAMB-1B15C2/2020|2020-05-06|EPI\_ISL\_458517|Original|hCoV-19^^England|Human|Department of Pathology|Wellcome Sanger Institute for the COVID-19 Genomics UK (COG-UK) consortium|Davies|United Kingdom

>Spike|hCoV-19/England/GSTT-265DE0E/2020|2020-03-28|EPI\_ISL\_484110|Original|hCoV-19^^England|Human|Centre for Clinical Infection and Diagnostics Research and Genomics Innovation Unit|COVID-19 Genomics UK (COG-UK) Consortium|Awan|United Kingdom

>Spike|hCoV-19/England/LOND-D5A15/2020|2020-04-17|EPI\_ISL\_457291|Original|hCoV-19^^England|Human|University College London|COVID-19 Genomics UK (COG-UK) Consortium|Roy|United Kingdom

>Spike|hCoV-19/Scotland/CVR1056/2020|2020-03-28|EPI\_ISL\_433502|Original|hCoV-19^^Scotland|Human|West of Scotland Specialist Virology Centre|COVID-19 Genomics UK (COG-UK) Consortium|Robertson|United Kingdom

>Spike|hCoV-19/USA/TN-QDX-2517/2020|2020-03-14|EPI\_ISL\_604842|Original|hCoV-19^^Tennessee|Human|Quest Diagnostics|Quest Diagnostics|Kagan|USA

>Spike|hCoV-19/New Zealand/20VR0914/2020|2020-03-20|EPI\_ISL\_456170|Original|hCoV-19^^Wairarapa|Human|Wellington SCL|Institute of Environmental Science and Research (ESR)|de Ligt|New Zealand

>Spike|hCoV-19/USA/AZ-TG522518/2020|2020-07-20|EPI\_ISL\_695385|Original|hCoV-19^^Arizona|Human|TGen North|TGen North|French|USA

>Spike|hCoV-19/England/QEUH-96589F/2020|2020-08-14|EPI\_ISL\_531081|Original|hCoV-19^^England|Human|Lighthouse Lab in Glasgow|Wellcome Sanger Institute for the COVID-19 Genomics UK (COG-UK) consortium|Davies|United Kingdom

>Spike|hCoV-19/England/20132003304/2020|2020-03-22|EPI\_ISL\_423713|Original|hCoV-19^^England|Human|Respiratory Virus Unit|Respiratory Virus Unit|Platt|United Kingdom

>Spike|hCoV-19/Germany/HH-hpi-p2170/2020|2020-03-28|EPI\_ISL\_776400|Original|hCoV-19^^Hamburg|Human|University Medical Center Hamburg Eppendorf|Heinrich Pette Institute|Robitaille|Germany

>Spike|hCoV-19/USA/LA-GBCL-26544525/2020|2020-04-20|EPI\_ISL\_485111|Original|hCoV-19^^Louisiana|Human|River Road Testing Lab|Ginkgo Bioworks Clinical Laboratory|Smith|USA

>Spike|hCoV-19/USA/LA-EVTL1264/2020|2020-12-04|EPI\_ISL\_778930|Original|hCoV-19^^Louisiana|Human|LSUHS Emerging Viral Threat Laboratory|Microbial Genome Sequencing Center|Kamil|USA

>Spike|hCoV-19/England/CAMC-A41D20/2020|2020-10-05|EPI\_ISL\_609422|Original|hCoV-19^^England|Human|Lighthouse Lab in Cambridge|Wellcome Sanger Institute for the COVID-19 Genomics UK (COG-UK) consortium|Davies|United Kingdom

>Spike|hCoV-19/USA/WA-S1981/2020|2020-06-03|EPI\_ISL\_497409|Original|hCoV-19^^Washington|Human|Washington State Department of Health|Seattle Flu Study|Lee|USA

>Spike|hCoV-19/Italy/CAM-IZSM-166/2020|2020-09-12|EPI\_ISL\_572322|Original|hCoV-19^^Campania|Human|IZSM|IZSM|Viscardi|Italy

>Spike|hCoV-19/Denmark/DCGC-19847/2020|2020-12-07|EPI\_ISL\_747664|Original|hCoV-19^^Syddanmark|Human|Department of Virus and Microbiological Special Diagnostics|Albertsen Lab|Michaelsen|Denmark

>Spike|hCoV-19/Canada/QC-LSPQ-L00225185/2020|2020-03-16|EPI\_ISL\_535829|Original|hCoV-19^^Quebec|Human|H\u00f4pital de Chicoutimi|Laboratoire de sant\u00e9 publique du Qu\u00e9bec|Moreira|Canada

>Spike|hCoV-19/South Africa/N00104/2020|2020-06-11|EPI\_ISL\_623020|Original|hCoV-19^^Mpumalanga|Human|National Health Laboratory Service|National Institute for Communicable Diseases of the National Health Laboratory Service|Allam|South Africa

>Spike|hCoV-19/England/CAMC-B517A6/2020|2020-11-08|EPI\_ISL\_658179|Original|hCoV-19^^England|Human|Lighthouse Lab in Cambridge|Wellcome Sanger Institute for the COVID-19 Genomics UK (COG-UK) Consortium|Davies|United Kingdom

>Spike|hCoV-19/USA/TX-HMH-2255/2020|2020-05-23|EPI\_ISL\_545208|Original|hCoV-19^^Texas|Human|Houston Methodist Hospital|Houston Methodist Hospital|Long|USA

>Spike|hCoV-19/Denmark/DCGC-5325/2020|2020-09-14|EPI\_ISL\_615256|Original|hCoV-19^^Syddanmark|Human|Department of Virus and Microbiological Special Diagnostics|Albertsen lab|Michaelsen|Denmark

>Spike|hCoV-19/England/QEUA-AF49A0/2020|2020-10-30|EPI\_ISL\_662936|Original|hCoV-19^^England|Human|Lighthouse Lab in Glasgow|Wellcome Sanger Institute for the COVID-19 Genomics UK (COG-UK) Consortium|Davies|United Kingdom

>Spike|hCoV-19/United Arab Emirates/0051/2020|2020-05-18|EPI\_ISL\_698259|Original|hCoV-19^^Abu Dhabi|Human|Group 42 (G42) Healthcare|G42 Healthcare|Ogrodzki|United Arab Emirates

>Spike|hCoV-19/Wales/PHWC-35C86/2020|2020-04-27|EPI\_ISL\_474550|Original|hCoV-19^^Wales|Human|Originating lab|COVID-19 Genomics UK (COG-UK) Consortium|Moore|United Kingdom

>Spike|hCoV-19/England/202822187/2020|2020-06-14|EPI\_ISL\_490243|Original|hCoV-19^^England|Human|Respiratory Virus Unit|Respiratory Virus Unit|Platt|United Kingdom

>Spike|hCoV-19/Spain/CL-IBV-97006313/2020|2020-05-02|EPI\_ISL\_537677|Original|hCoV-19^^Castilla y Leon|Human|Universidad de Le\u00f3n|SeqCOVID-SPAIN consortium|IBV (CSIC) |Comas|Spain

>Spike|hCoV-19/USA/WA-UW-11832/2020|2020-06-25|EPI\_ISL\_501104|Original|hCoV-19^^Washington|Human|University of Washington Virology Lab|University of Washington Virology Lab|Roychoudhury|USA

>Spike|hCoV-19/USA/WY-UNM-00137/2020|2020-06-19|EPI\_ISL\_614257|Original|hCoV-19^^Wyoming|Human|Wyoming Public Health Laboratory|Center for Global Health|Domman|USA

>Spike|hCoV-19/USA/FL-BPHL-1649/2020|2020-07-03|EPI\_ISL\_594338|Original|hCoV-19^^Florida|Human|Florida Bureau of Public Health Laboratories|Florida Bureau of Public Health Laboratories|Blanton|USA

>Spike|hCoV-19/England/NORT-28CBDC/2020|2020-08-20|EPI\_ISL\_573323|Original|hCoV-19^^England|Human|Northumbria University / South Tees Hospitals NHS Foundation Trust / North Cumbria Integrated Care NHS Foundation Trust / North Tees and Hartlepool NHS

Foundation Trust / Newcastle Hospitals NHS Foundation Trust|COVID-19 Genomics UK (COG-UK) Consortium|Bashton|United Kingdom  
>Spike|hCoV-19/England/BRIS-12291B/2020|2020-04-03|EPI\_ISL\_440677|Original|hCoV-19^^England|Human|PHE South West Regional Laboratory|Wellcome Sanger Institute for the COVID-19 Genomics UK (COG-UK) consortium|Amato|United Kingdom  
>Spike|hCoV-19/England/MILK-A7B8FF/2020|2020-10-15|EPI\_ISL\_607413|Original|hCoV-19^^England|Human|Lighthouse Lab in Milton Keynes|Wellcome Sanger Institute for the COVID-19 Genomics UK (COG-UK) consortium|Davies|United Kingdom  
>Spike|hCoV-19/England/MILK-A056B4/2020|2020-09-30|EPI\_ISL\_600057|Original|hCoV-19^^England|Human|Lighthouse Lab in Milton Keynes|Wellcome Sanger Institute for the COVID-19 Genomics UK (COG-UK) consortium|Davies|United Kingdom  
>Spike|hCoV-19/Australia/VIC12962/2020|2020-07-31|EPI\_ISL\_592125|Original|hCoV-19^^Victoria|Human|Microbiological Diagnostic Unit - Public Health Laboratory (MDU-PHL)|MDU-PHL|Schultz|Australia  
>Spike|hCoV-19/England/CAMB-1BAAE8/2020|2020-11-13|EPI\_ISL\_664779|Original|hCoV-19^^England|Human|Department of Pathology|COVID-19 Genomics UK (COG-UK) Consortium|Goodfellow|United Kingdom  
>Spike|hCoV-19/Switzerland/GE-ETHZ-240058/2020|2020-08-12|EPI\_ISL\_523898|Original|hCoV-19^^Geneve|Human|Viollier AG|Department of Biosystems Science and Engineering|Nadeau|Switzerland  
>Spike|hCoV-19/USA/TX-HMH-1057/2020|2020-04-06|EPI\_ISL\_542511|Original|hCoV-19^^Texas|Human|Houston Methodist Hospital|Houston Methodist Hospital|Long|USA  
>Spike|hCoV-19/England/ALDP-A94B42/2020|2020-10-20|EPI\_ISL\_624706|Original|hCoV-19^^England|Human|Lighthouse Lab in Alderley Park|Wellcome Sanger Institute for the COVID-19 Genomics UK (COG-UK) consortium|Davies|United Kingdom  
>Spike|hCoV-19/England/LIVE-9CE4B/2020|2020-04-26|EPI\_ISL\_440947|Original|hCoV-19^^England|Human|Liverpool Clinical Laboratories|COVID-19 Genomics UK (COG-UK) Consortium|Haldenby|United Kingdom  
>Spike|hCoV-19/USA/WA-S1635/2020|2020-05-27|EPI\_ISL\_496061|Original|hCoV-19^^Washington|Human|Washington State Department of Health|Seattle Flu Study|Lee|USA  
>Spike|hCoV-19/USA/TX-HMH-MCoV-9608/2020|2020-07-04|EPI\_ISL\_780182|Original|hCoV-19^^Texas|Human|Houston Methodist Hospital|Houston Methodist Hospital|Long|USA  
>Spike|hCoV-19/Wales/PHWC-3264F/2020|2020-04-15|EPI\_ISL\_474337|Original|hCoV-19^^Wales|Human|Originating lab|COVID-19 Genomics UK (COG-UK) Consortium|Moore|United Kingdom  
>Spike|hCoV-19/USA/NY-Wadsworth-250997-01/2020|2020-10-21|EPI\_ISL\_734298|Original|hCoV-19^^New York|Human|Wadsworth Center|Wadsworth Center|Lasek-Nesselquist|USA  
>Spike|hCoV-19/Jordan/AM-ALSR-5016/2020|2020-10-05|EPI\_ISL\_730289|Original|hCoV-19^^Amman|Human|Biolab Diagnostic Laboratories|Andersen lab at Scripps Research|Gangavarapu|Jordan  
>Spike|hCoV-19/Australia/VIC3801/2020|2020-07-15|EPI\_ISL\_520518|Original|hCoV-19^^Victoria|Human|Microbiological Diagnostic Unit - Public Health Laboratory (MDU-PHL)|MDU-PHL|Schultz|Australia  
>Spike|hCoV-19/England/QEUH-9FF3A8/2020|2020-10-02|EPI\_ISL\_600388|Original|hCoV-19^^England|Human|Lighthouse Lab in Glasgow|Wellcome Sanger Institute for the COVID-19 Genomics UK (COG-UK) consortium|Davies|United Kingdom  
>Spike|hCoV-19/USA/MA-MASPHL-00529/2020|2020-05-05|EPI\_ISL\_693049|Original|hCoV-19^^Massachusetts|Human|Massachusetts State Public Health Laboratory|Massachusetts State Public Health Laboratory|Lang|USA  
>Spike|hCoV-19/Germany/BE-ChVir-W1648-8286/2020|2020-07-01|EPI\_ISL\_753809|Original|hCoV-19^^Berlin|Human|Charit\u00e9 Universit\u00e4tsmedizin Berlin|Charit\u00e9 Universit\u00e4tsmedizin Berlin|Muehlemann|Germany  
>Spike|hCoV-19/England/BRIS-124876/2020|2020-03-25|EPI\_ISL\_443817|Original|hCoV-19^^England|Human|PHE South West Regional Laboratory|Wellcome Sanger Institute for the COVID-19 Genomics UK (COG-UK) consortium|Amato|United Kingdom  
>Spike|hCoV-19/Wales/ALDP-A67832/2020|2020-10-09|EPI\_ISL\_630506|Original|hCoV-19^^Wales|Human|Lighthouse Lab in Alderley Park|Wellcome Sanger Institute for the COVID-19 Genomics UK (COG-UK) consortium|Davies|United Kingdom

>Spike|hCoV-19/Colombia/HUI-GVI-97855/2020|2020-04-04|EPI\_ISL\_447806|Original|hCoV-19^^Huila|Human|Instituto Nacional de Salud|Grupo de Investigaciones Microbiol\u00f3gicas-UR (GIMUR)|Ram\u00e9drez|Colombia

>Spike|hCoV-19/USA/TX-HMH-MCoV-14644/2020|2020-10-09|EPI\_ISL\_787929|Original|hCoV-19^^Texas|Human|Houston Methodist Hospital|Houston Methodist Hospital|Long|USA

>Spike|hCoV-19/USA/TX-QDX-1285/2020|2020-03-15|EPI\_ISL\_572040|Original|hCoV-19^^Texas|Human|Quest Diagnostics|Quest Diagnostics|Kagan|USA

>Spike|hCoV-19/England/20148067304/2020|2020-04-02|EPI\_ISL\_466077|Original|hCoV-19^^England|Human|Respiratory Virus Unit|Respiratory Virus Unit|Platt|United Kingdom

>Spike|hCoV-19/England/NORW-F887C/2020|2020-12-10|EPI\_ISL\_725368|Original|hCoV-19^^England|Human|Quadram Institute Bioscience|COVID-19 Genomics UK (COG-UK) Consortium|Alikhan|United Kingdom

>Spike|hCoV-19/Wales/PHWC-497459/2020|2020-11-27|EPI\_ISL\_726832|Original|hCoV-19^^Wales|Human|Originating lab|COVID-19 Genomics UK (COG-UK) Consortium|Moore|United Kingdom

>Spike|hCoV-19/England/ALDP-C585D1/2020|2020-12-14|EPI\_ISL\_736029|Original|hCoV-19^^England|Human|Lighthouse Lab in Alderley Park|Wellcome Sanger Institute for the COVID-19 Genomics UK (COG-UK) Consortium|Davies|United Kingdom

>Spike|hCoV-19/Thailand/Samut Sakorn\_887/2020|2020-12-19|EPI\_ISL\_768542|Original|hCoV-19^^Samut Sakorn|Human|Regional Medical Sciences Center 5 Samut Songkhram|National Institute of Health|Phuygun|Thailand

>Spike|hCoV-19/England/NOTT-11A961/2020|2020-11-07|EPI\_ISL\_638599|Original|hCoV-19^^England|Human|Queens Medical Centre|COVID-19 Genomics UK (COG-UK) Consortium|Loose|United Kingdom

>Spike|hCoV-19/England/CAMC-B7A7E3/2020|2020-11-12|EPI\_ISL\_741143|Original|hCoV-19^^England|Human|Oxford Viromics|COVID-19 Genomics UK (COG-UK) Consortium|Golubchik|United Kingdom

>Spike|hCoV-19/Japan/PG-5137/2020|2020-08-00|EPI\_ISL\_690244|Original|hCoV-19^^Japan|Human|Gunma Prefectural Institute of Public Health and Environmental Sciences|Pathogen Genomics Center|Sekizuka|Japan

>Spike|hCoV-19/Denmark/DCGC-14704/2020|2020-11-23|EPI\_ISL\_711918|Original|hCoV-19^^Hovedstaden|Human|Department of Virus and Microbiological Special Diagnostics|Albertsen Lab|Michaelsen|Denmark

>Spike|hCoV-19/Belgium/Rega-0330253/2020|2020-03-30|EPI\_ISL\_458223|Original|hCoV-19^^Sint-Genesius-Rode|Human|KU Leuven|KU Leuven|Maes|Belgium

>Spike|hCoV-19/United Arab Emirates/0304/2020|2020-05-18|EPI\_ISL\_698483|Original|hCoV-19^^Abu Dhabi|Human|Group 42 (G42) Healthcare|G42 Healthcare|Ogrodzki|United Arab Emirates

>Spike|hCoV-19/England/204881987/2020|2020-11-27|EPI\_ISL\_766278|Original|hCoV-19^^England|Human|Respiratory Virus Unit|COVID-19 Genomics UK (COG-UK) Consortium|Platt|United Kingdom

>Spike|hCoV-19/Gibraltar/204421231/2020|2020-10-27|EPI\_ISL\_613691|Original|hCoV-19^^Gibraltar|Human|Microbiology|Respiratory Virus Unit|Platt|Gibraltar

>Spike|hCoV-19/England/CAMB-7AE25/2020|2020-04-09|EPI\_ISL\_433881|Original|hCoV-19^^England|Human|Department of Pathology|COVID-19 Genomics UK (COG-UK) Consortium|Meredith|United Kingdom

>Spike|hCoV-19/England/QEUA-A4B166/2020|2020-10-05|EPI\_ISL\_637815|Original|hCoV-19^^England|Human|Department of Pathology|COVID-19 Genomics UK (COG-UK) Consortium|Goodfellow|United Kingdom

>Spike|hCoV-19/Australia/VIC7733/2020|2020-08-06|EPI\_ISL\_564614|Original|hCoV-19^^Victoria|Human|Microbiological Diagnostic Unit - Public Health Laboratory (MDU-PHL)|MDU-PHL|Schultz|Australia

>Spike|hCoV-19/Australia/VIC3933/2020|2020-07-13|EPI\_ISL\_520645|Original|hCoV-19^^Victoria|Human|Microbiological Diagnostic Unit - Public Health Laboratory (MDU-PHL)|MDU-PHL|Schultz|Australia

>Spike|hCoV-19/England/QEUA-B2C0C7/2020|2020-11-02|EPI\_ISL\_680055|Original|hCoV-19^^England|Human|Department of Pathology|COVID-19 Genomics UK (COG-UK) Consortium|Goodfellow|United Kingdom

>Spike|hCoV-19/England/ALDP-51E1AD/2020|2020-06-02|EPI\_ISL\_558943|Original|hCoV-19^^England|Human|Lighthouse Lab in Alderley Park|Wellcome Sanger Institute for the COVID-19 Genomics UK (COG-UK) consortium|Davies|United Kingdom

>Spike|hCoV-19/England/ALDP-A92625/2020|2020-10-19|EPI\_ISL\_611278|Original|hCoV-19^^England|Human|Lighthouse Lab in Alderley Park|Wellcome Sanger Institute for the COVID-19 Genomics UK (COG-UK) consortium|Davies|United Kingdom

>Spike|hCoV-19/England/QEUA-A8C6F1/2020|2020-10-18|EPI\_ISL\_643225|Original|hCoV-19^^England|Human|Lighthouse Lab in Glasgow|Wellcome Sanger Institute for the COVID-19 Genomics UK (COG-UK) Consortium|Davies|United Kingdom

>Spike|hCoV-19/USA/MN-MDH-1178/2020|2020-06-03|EPI\_ISL\_476763|Original|hCoV-19^^Minnesota|Human|Minnesota Department of Health|Minnesota Department of Health|Garfin|USA

>Spike|hCoV-19/Japan/PG-4736/2020|2020-07-00|EPI\_ISL\_689872|Original|hCoV-19^^Japan|Human|Pathogen Genomics Center|Pathogen Genomics Center|Sekizuka|Japan

>Spike|hCoV-19/Japan/PG-7946/2020|2020-05-00|EPI\_ISL\_687047|Original|hCoV-19^^Japan|Human|Kanagawa Prefectural Institute of Public Health|Pathogen Genomics Center|Sekizuka|Japan

>Spike|hCoV-19/England/MILK-9A90A6/2020|2020-08-31|EPI\_ISL\_551164|Original|hCoV-19^^England|Human|Lighthouse Lab in Milton Keynes|Wellcome Sanger Institute for the COVID-19 Genomics UK (COG-UK) consortium|Davies|United Kingdom

>Spike|hCoV-19/South Africa/LR00003/2020|2020-07-03|EPI\_ISL\_515135|Original|hCoV-19^^Gauteng|Human|National Institute for Communicable Diseases of the National Health Laboratory Service|National Institute for Communicable Diseases of the National Health Laboratory Service|Allam|South Africa

>Spike|hCoV-19/USA/WA-S131/2020|2020-03-13|EPI\_ISL\_430168|Original|hCoV-19^^Washington|Human|Washington State Department of Health|Seattle Flu Study|Bedford|USA

>Spike|hCoV-19/USA/TX-HMH-7680/2020|2020-06-26|EPI\_ISL\_545581|Original|hCoV-19^^Texas|Human|Houston Methodist Hospital|Houston Methodist Hospital|Long|USA

>Spike|hCoV-19/India/TG-CCMB-OM38/2020|2020-05-24|EPI\_ISL\_644732|Original|hCoV-19^^Telangana|Human|Osmania Medical College|CSIR-Centre for Cellular and Molecular Biology|Mukherjee|India

>Spike|hCoV-19/USA/TX-HMH0264/2020|2020-03-26|EPI\_ISL\_434893|Original|hCoV-19^^Texas|Human|Houston Methodist Hospital|Houston Methodist Hospital|Long|USA

>Spike|hCoV-19/Jordan/SEARCH-5399/2020|2020-10-11|EPI\_ISL\_755210|Original|hCoV-19^^Amman|Human|Biolab Diagnostic Laboratories|Andersen lab at Scripps Research|Gangavarapu|Jordan

>Spike|hCoV-19/Denmark/DCGC-2069/2020|2020-06-08|EPI\_ISL\_618055|Original|hCoV-19^^Sjaelland|Human|Department of Virus and Microbiological Special Diagnostics|Albertsen lab|Michaelsen|Denmark

>Spike|hCoV-19/Hungary/SRC-1014/2020|2020-09-02|EPI\_ISL\_671414|Original|hCoV-19^^Baranya county|Human|National Laboratory of Virology|National Laboratory of Virology|Kemenesi|Hungary

>Spike|hCoV-19/England/NORW-F94FF/2020|2020-11-26|EPI\_ISL\_706414|Original|hCoV-19^^England|Human|Quadram Institute Bioscience|COVID-19 Genomics UK (COG-UK) Consortium|Alikhan|United Kingdom

>Spike|hCoV-19/Australia/VIC13984/2020|2020-09-18|EPI\_ISL\_563909|Original|hCoV-19^^Victoria|Human|Microbiological Diagnostic Unit - Public Health Laboratory (MDU-PHL)|MDU-PHL|Schultz|Australia

>Spike|hCoV-19/Wales/PHWC-1624C3/2020|2020-05-22|EPI\_ISL\_473078|Original|hCoV-19^^Wales|Human|Wales Specialist Virology Centre Sequencing lab|COVID-19 Genomics UK (COG-UK) Consortium|Moore|United Kingdom

>Spike|hCoV-19/England/CAMB-757B6/2020|2020-03-12|EPI\_ISL\_440446|Original|hCoV-19^^England|Human|Department of Pathology|Wellcome Sanger Institute for the COVID-19 Genomics UK (COG-UK) consortium|Amato|United Kingdom

>Spike|hCoV-19/Spain/CT-IBV-97009549/2020|2020-07-10|EPI\_ISL\_671846|Original|hCoV-19^^Catalunya|Human|Servicio de Microbiolog\u00eda|SeqCOVID-SPAIN consortium/IBV (CSIC)|Comas|Spain



>Spike|hCoV-19/England/ALDP-AA473C/2020|2020-10-22|EPI\_ISL\_624350|Original|hCoV-19^^England|Human|Lighthouse Lab in Alderley Park|Wellcome Sanger Institute for the COVID-19 Genomics UK (COG-UK) Consortium|Davies|United Kingdom

>Spike|hCoV-19/England/NOTT-11185E/2020|2020-05-21|EPI\_ISL\_461932|Original|hCoV-19^^England|Human|Queens Medical Centre|COVID-19 Genomics UK (COG-UK) Consortium|Loose|United Kingdom

>Spike|hCoV-19/Switzerland/GR-ETHZ-400290/2020|2020-12-06|EPI\_ISL\_729155|Original|hCoV-19^^Graub\u00fcnden|Human|Viollier AG|Department of Biosystems Science and Engineering|Nadeau|Switzerland

>Spike|hCoV-19/England/NOTT-111D13/2020|2020-06-05|EPI\_ISL\_472399|Original|hCoV-19^^England|Human|Queens Medical Centre|COVID-19 Genomics UK (COG-UK) Consortium|Loose|United Kingdom

>Spike|hCoV-19/Brazil/SP-L3-CAMPI23/2020|2020-04-09|EPI\_ISL\_476388|Original|hCoV-19^^S\u00e3o Paulo|Human|Laborat\u00f3rio de Patologia Cl\u00ednica - UNICAMP|Laborat\u00f3rio de Estudos de V\u00edrus Emergentes - UNICAMP|Faria|Brazil

>Spike|hCoV-19/England/QEUEH-A4CE04/2020|2020-10-05|EPI\_ISL\_596058|Original|hCoV-19^^England|Human|Quadram Institute Bioscience|COVID-19 Genomics UK (COG-UK) Consortium|Alikhan|United Kingdom

>Spike|hCoV-19/England/MILK-9E2A0D/2020|2020-09-20|EPI\_ISL\_581308|Original|hCoV-19^^England|Human|Lighthouse Lab in Milton Keynes|Wellcome Sanger Institute for the COVID-19 Genomics UK (COG-UK) consortium|Davies|United Kingdom

>Spike|hCoV-19/USA/CA-SR0189/2020|2020-03-26|EPI\_ISL\_437591|Original|hCoV-19^^California|Human|Scripps Medical Laboratory|Andersen lab at Scripps Research|Gangavarapu|USA

>Spike|hCoV-19/USA/TX-DSHS-0119/2020|2020-06-11|EPI\_ISL\_522948|Original|hCoV-19^^Texas|Human|Texas Department of State Health Services|Texas Department of State Health Services|Rahman|USA

>Spike|hCoV-19/Scotland/EDB1002/2020|2020-04-06|EPI\_ISL\_491576|Original|hCoV-19^^Scotland|Human|Virology Department|Wellcome Sanger Institute for the COVID-19 Genomics UK (COG-UK) consortium|Davies|United Kingdom

>Spike|hCoV-19/USA/TX-HMH-5297/2020|2020-06-18|EPI\_ISL\_544660|Original|hCoV-19^^Texas|Human|Houston Methodist Hospital|Houston Methodist Hospital|Long|USA

>Spike|hCoV-19/USA/MN-MDH-470/2020|2020-04-10|EPI\_ISL\_437374|Original|hCoV-19^^Minnesota|Human|Minnesota Department of Health|Minnesota Department of Health|Garfin|USA

>Spike|hCoV-19/England/MILK-ACD023/2020|2020-10-21|EPI\_ISL\_630150|Original|hCoV-19^^England|Human|Lighthouse Lab in Milton Keynes|Wellcome Sanger Institute for the COVID-19 Genomics UK (COG-UK) consortium|Davies|United Kingdom

>Spike|hCoV-19/England/QEUEH-B2B839/2020|2020-11-02|EPI\_ISL\_646663|Original|hCoV-19^^England|Human|Lighthouse Lab in Glasgow|Wellcome Sanger Institute for the COVID-19 Genomics UK (COG-UK) Consortium|Davies|United Kingdom

>Spike|hCoV-19/Australia/NSW967/2020|2020-09-15|EPI\_ISL\_545039|Original|hCoV-19^^New South Wales|Human|Sydney South West Pathology Service (SSWPS) - Royal Prince Alfred Hospital - NSW Health Pathology|NSW Health Pathology - Institute of Clinical Pathology and Medical Research; Westmead Hospital; University of Sydney|Gall|Australia

>Spike|hCoV-19/Spain/PV-IBV-004270/2020|2020-04-07|EPI\_ISL\_500334|Original|hCoV-19^^Basque Country|Human|Servicio de Microbiolog\u00eda. Hospital Universitario Donostia. OSI Donostialdea. \u00c1rea de Enfermedades Infecciosas|SeqCOVID-SPAIN consortium|IBV (CSIC) |Comas|Spain

>Spike|hCoV-19/England/CAMB-1ACFF9/2020|2020-04-29|EPI\_ISL\_447955|Original|hCoV-19^^England|Human|Department of Pathology|COVID-19 Genomics UK (COG-UK) Consortium|Meredith|United Kingdom

>Spike|hCoV-19/USA/WA-S801/2020|2020-04-16|EPI\_ISL\_449971|Original|hCoV-19^^Washington|Human|Washington State Department of Health|Seattle Flu Study|Bedford|USA

>Spike|hCoV-19/Denmark/DCGC-10388/2020|2020-11-02|EPI\_ISL\_669761|Original|hCoV-19^^Syddanmark|Human|Department of Virus and Microbiological Special Diagnostics|Albertsen Lab|Michaelsen|Denmark

>Spike|hCoV-19/England/ALDP-95C206/2020|2020-06-18|EPI\_ISL\_555033|Original|hCoV-19^^England|Human|Lighthouse Lab in Alderley Park|Wellcome Sanger Institute for the COVID-19 Genomics UK (COG-UK) consortium|Davies|United Kingdom

>Spike|hCoV-19/Scotland/CVR5521/2020|2020-11-01|EPI\_ISL\_651827|Original|hCoV-19^^Scotland|Human|West of Scotland Specialist Virology Centre|COVID-19 Genomics UK (COG-UK) Consortium|Robertson|United Kingdom

>Spike|hCoV-19/Denmark/DCGC-8175/2020|2020-10-26|EPI\_ISL\_617070|Original|hCoV-19^^Hovedstaden|Human|Department of Virus and Microbiological Special Diagnostics|Albertsen lab|Michaelsen|Denmark

>Spike|hCoV-19/England/MILK-B060F0/2020|2020-10-24|EPI\_ISL\_642789|Original|hCoV-19^^England|Human|Lighthouse Lab in Milton Keynes|Wellcome Sanger Institute for the COVID-19 Genomics UK (COG-UK) Consortium|Davies|United Kingdom

>Spike|hCoV-19/England/BRIS-129149/2020|2020-04-18|EPI\_ISL\_458733|Original|hCoV-19^^England|Human|PHE South West Regional Laboratory|Wellcome Sanger Institute for the COVID-19 Genomics UK (COG-UK) consortium|Davies|United Kingdom

>Spike|hCoV-19/Japan/PG-8305/2020|2020-08-00|EPI\_ISL\_687404|Original|hCoV-19^^Japan|Human|Pathogen Genomics Center|Pathogen Genomics Center|Sekizuka|Japan

>Spike|hCoV-19/USA/MI-UM-10033809081/2020|2020-03-30|EPI\_ISL\_578126|Original|hCoV-19^^Michigan|Human|University of Michigan Clinical Microbiology Laboratory|Lauring Lab|Valesano|USA

>Spike|hCoV-19/Portugal/PT0063/2020|2020-03-20|EPI\_ISL\_421466|Original|hCoV-19^^Portugal|Human|H Evora|Instituto Nacional de Saude (INSA)|Borges|Portugal

>Spike|hCoV-19/USA/CA-ALSR-0642-SAN/2020|2020-04-23|EPI\_ISL\_483275|Original|hCoV-19^^California|Human|UC San Diego Center for Advanced Laboratory Medicine|Andersen lab at Scripps Research|Gangavarapu|USA

>Spike|hCoV-19/USA/TX-HMH-MCoV-10291/2020|2020-07-08|EPI\_ISL\_789254|Original|hCoV-19^^Texas|Human|Houston Methodist Hospital|Houston Methodist Hospital|Long|USA

>Spike|hCoV-19/Italy/VEN-UniVR-35/2020|2020-03-07|EPI\_ISL\_751347|Original|hCoV-19^^Veneto|Human|IRCCS Sacro Cuore Don Calabria Hospital|University of Verona|Mori|Italy

>Spike|hCoV-19/England/QEUA-A0ACCC/2020|2020-10-03|EPI\_ISL\_599320|Original|hCoV-19^^England|Human|Lighthouse Lab in Glasgow|Wellcome Sanger Institute for the COVID-19 Genomics UK (COG-UK) consortium|Davies|United Kingdom

>Spike|hCoV-19/England/NORT-2A5E6B/2020|2020-10-06|EPI\_ISL\_611768|Original|hCoV-19^^England|Human|Northumbria University / South Tees Hospitals NHS Foundation Trust / North Cumbria Integrated Care NHS Foundation Trust / North Tees and Hartlepool NHS Foundation Trust / Newcastle Hospitals NHS Foundation Trust|COVID-19 Genomics UK (COG-UK) Consortium|Bashton|United Kingdom

>Spike|hCoV-19/England/EXET-13F3D1/2020|2020-12-16|EPI\_ISL\_764381|Original|hCoV-19^^England|Human|University of Exeter|COVID-19 Genomics UK (COG-UK) Consortium|Temperton|United Kingdom

>Spike|hCoV-19/Brazil/SP-887/2020|2020-12-12|EPI\_ISL\_755653|Original|hCoV-19^^S\u00e3o Paulo|Human|Instituto Adolfo Lutz - Central|Instituto Adolfo Lutz|Sacchi|Brazil

>Spike|hCoV-19/Wales/PHWC-169ACA/2020|2020-08-01|EPI\_ISL\_514577|Original|hCoV-19^^Wales|Human|Wales Specialist Virology Centre Sequencing lab|COVID-19 Genomics UK (COG-UK) Consortium|Moore|United Kingdom

>Spike|hCoV-19/USA/NY-QDX-2228/2020|2020-03-16|EPI\_ISL\_604569|Original|hCoV-19^^New York|Human|Quest Diagnostics|Quest Diagnostics|Kagan|USA

>Spike|hCoV-19/England/NORT-1B6C110/2020|2020-10-06|EPI\_ISL\_612565|Original|hCoV-19^^England|Human|Northumbria University / South Tees Hospitals NHS Foundation Trust / North Cumbria Integrated Care NHS Foundation Trust / North Tees and Hartlepool NHS Foundation Trust / Newcastle Hospitals NHS Foundation Trust|COVID-19 Genomics UK (COG-UK) Consortium|Bashton|United Kingdom

>Spike|hCoV-19/Wales/PHWC-49E0B8/2020|2020-12-08|EPI\_ISL\_742951|Original|hCoV-19^^Wales|Human|Wales Specialist Virology Centre Sequencing lab|COVID-19 Genomics UK (COG-UK) Consortium|Moore|United Kingdom

>Spike|hCoV-19/Switzerland/BE-ETHZ-410124/2020|2020-12-17|EPI\_ISL\_737538|Original|hCoV-19^^Bern|Human|Viollier AG|Department of Biosystems Science and Engineering|Nadeau|Switzerland

>Spike|hCoV-19/Northern Ireland/NIRE-FB712/2020|2020-03-25|EPI\_ISL\_448970|Original|hCoV-19^^Northern Ireland|Human|Regional Virus Laboratory|COVID-19 Genomics UK (COG-UK) Consortium|Fairley|United Kingdom

>Spike|hCoV-19/England/LOND-D672C/2020|2020-04-22|EPI\_ISL\_482194|Original|hCoV-19^^England|Human|University College London|Wellcome Sanger Institute for the COVID-19 Genomics UK (COG-UK) consortium|Davies|United Kingdom

>Spike|hCoV-19/Belgium/rega-0701805/2020|2020-07-01|EPI\_ISL\_734788|Original|hCoV-19^^Sint-jans-molenbeek|Human|UZ Leuven|KU Leuven|Maes|Belgium

>Spike|hCoV-19/Sweden/20-07298/2020|2020-04-14|EPI\_ISL\_434667|Original|hCoV-19^^Uppsala|Human|Ulltuna Vardcentral|The Public Health Agency of Sweden|Svartstr\u00f6m|Sweden

>Spike|hCoV-19/Switzerland/VD-ETHZ-310354/2020|2020-10-07|EPI\_ISL\_603428|Original|hCoV-19^^Vaud|Human|Viollier AG|Department of Biosystems Science and Engineering|Nadeau|Switzerland

>Spike|hCoV-19/England/MILK-9AB61B/2020|2020-08-31|EPI\_ISL\_549449|Original|hCoV-19^^England|Human|Oxford Viromics|COVID-19 Genomics UK (COG-UK) Consortium|Golubchik|United Kingdom

>Spike|hCoV-19/Scotland/EDB689/2020|2020-04-03|EPI\_ISL\_433223|Original|hCoV-19^^Scotland|Human|Virology Department|COVID-19 Genomics UK (COG-UK) Consortium|Williams|United Kingdom

>Spike|hCoV-19/Wales/PHWC-29335/2020|2020-04-04|EPI\_ISL\_445510|Original|hCoV-19^^Wales|Human|Wales Specialist Virology Centre|Public Health Wales Microbiology Cardiff|Moore|United Kingdom

>Spike|hCoV-19/Egypt/MASRI-025/2020|2020-05-10|EPI\_ISL\_482771|Original|hCoV-19^^Egypt|Human|Medical Ain Shams Research Institute (MASRI)|Medical Ain Shams Research Institute (MASRI)|Moustafa|Egypt

>Spike|hCoV-19/England/ALDP-A669D6/2020|2020-10-12|EPI\_ISL\_630513|Original|hCoV-19^^England|Human|Lighthouse Lab in Alderley Park|Wellcome Sanger Institute for the COVID-19 Genomics UK (COG-UK) consortium|Davies|United Kingdom

>Spike|hCoV-19/USA/MA-MGH-01344/2020|2020-05-05|EPI\_ISL\_791930|Original|hCoV-19^^Massachusetts|Human|Massachusetts General Hospital|Infectious Disease Program|Park|USA

>Spike|hCoV-19/Scotland/EDB5012/2020|2020-05-15|EPI\_ISL\_493933|Original|hCoV-19^^Scotland|Human|Virology Department|COVID-19 Genomics UK (COG-UK) Consortium|Williams|United Kingdom

>Spike|hCoV-19/USA/MN-MDH-1350/2020|2020-04-20|EPI\_ISL\_507939|Original|hCoV-19^^Minnesota|Human|Minnesota Department of Health|Minnesota Department of Health|Garfin|USA

>Spike|hCoV-19/Japan/PG-3183/2020|2020-04-00|EPI\_ISL\_691303|Original|hCoV-19^^Japan|Human|Pathogen Genomics Center|Pathogen Genomics Center|Sekizuka|Japan

>Spike|hCoV-19/USA/CA-SR0199/2020|2020-03-15|EPI\_ISL\_437584|Original|hCoV-19^^California|Human|Scripps Medical Laboratory|Andersen lab at Scripps Research|Gangavarapu|USA

>Spike|hCoV-19/Finland/1LS1D11/2020|2020-10-01|EPI\_ISL\_757354|Original|hCoV-19^^Uusimaa|Human|Department of Virology and Immunology|Department of Virology|Smura|Finland

>Spike|hCoV-19/South Korea/KCDC2023/2020|2020-02-19|EPI\_ISL\_471439|Original|hCoV-19^^South Korea|Human|Division of Viral Diseases|Division of Viral Diseases|Kim|South Korea

>Spike|hCoV-19/USA/TX-HMH-MCoV-17991/2020|2020-11-16|EPI\_ISL\_786139|Original|hCoV-19^^Texas|Human|Houston Methodist Hospital|Houston Methodist Hospital|Long|USA

>Spike|hCoV-19/England/20146005204/2020|2020-04-01|EPI\_ISL\_421967|Original|hCoV-19^^England|Human|Respiratory Virus Unit|Respiratory Virus Unit|Platt|United Kingdom

>Spike|hCoV-19/England/MILK-999FBB/2020|2020-08-30|EPI\_ISL\_550290|Original|hCoV-19^^England|Human|Lighthouse Lab in Milton Keynes|Wellcome Sanger Institute for the COVID-19 Genomics UK (COG-UK) consortium|Davies|United Kingdom

>Spike|hCoV-19/Wales/PHWC-358EC/2020|2020-04-24|EPI\_ISL\_474494|Original|hCoV-19^^Wales|Human|Originating lab|COVID-19 Genomics UK (COG-UK) Consortium|Moore|United Kingdom

>Spike|hCoV-19/India/TG-NGC-CDFD-28/2020|2020-05-30|EPI\_ISL\_466866|Original|hCoV-19^^Telangana|Human|National Genomics Core-Center for DNA Fingerprinting and Diagnostics|National Genomics Core- Center for DNA Fingerprinting and Diagnostics (NGC-CDFD) - DBT's PAN-INDIA-1000 Genome consortium|Vashisht|India

>Spike|hCoV-19/Denmark/DCGC-12012/2020|2020-06-15|EPI\_ISL\_671259|Original|hCoV-19^^Nordjylland|Human|Department of Virus and Microbiological Special Diagnostics|Albertsen Lab|Michaelsen|Denmark

>Spike|hCoV-19/Denmark/DCGC-8897/2020|2020-11-02|EPI\_ISL\_626149|Original|hCoV-19^^Syddanmark|Human|Department of Virus and Microbiological Special Diagnostics|Albertsen lab|Michaelsen|Denmark

>Spike|hCoV-19/England/MILK-9586E0/2020|2020-06-09|EPI\_ISL\_554784|Original|hCoV-19^^England|Human|Lighthouse Lab in Milton Keynes|Wellcome Sanger Institute for the COVID-19 Genomics UK (COG-UK) consortium|Davies|United Kingdom

>Spike|hCoV-19/England/QEUH-B415FA/2020|2020-11-08|EPI\_ISL\_658658|Original|hCoV-19^^England|Human|Lighthouse Lab in Glasgow|Wellcome Sanger Institute for the COVID-19 Genomics UK (COG-UK) Consortium|Davies|United Kingdom

>Spike|hCoV-19/Australia/NSW2131/2020|2020-04-05|EPI\_ISL\_500624|Original|hCoV-19^^New South Wales|Human|Area of Virology|Area of Virology|Bull|Australia

>Spike|hCoV-19/England/PORT-2EA459/2020|2020-00-00|EPI\_ISL\_665304|Original|hCoV-19^^England|Human|Centre for Enzyme Innovation|COVID-19 Genomics UK (COG-UK) Consortium|Robson|United Kingdom

>Spike|hCoV-19/England/ALDP-A8577D/2020|2020-10-17|EPI\_ISL\_610382|Original|hCoV-19^^England|Human|Lighthouse Lab in Alderley Park|Wellcome Sanger Institute for the COVID-19 Genomics UK (COG-UK) consortium|Davies|United Kingdom

>Spike|hCoV-19/Australia/QLD1192/2020|2020-03-28|EPI\_ISL\_639783|Original|hCoV-19^^Australia|Human|unknown|Public Health Virology Laboratory|Nguyen|Australia

>Spike|hCoV-19/England/MILK-9F1E4B/2020|2020-09-24|EPI\_ISL\_589687|Original|hCoV-19^^England|Human|Lighthouse Lab in Milton Keynes|Wellcome Sanger Institute for the COVID-19 Genomics UK (COG-UK) consortium|Davies|United Kingdom

>Spike|hCoV-19/England/ALDP-B843F1/2020|2020-11-14|EPI\_ISL\_674249|Original|hCoV-19^^England|Human|Lighthouse Lab in Alderley Park|Wellcome Sanger Institute for the COVID-19 Genomics UK (COG-UK) Consortium|Davies|United Kingdom

>Spike|hCoV-19/India/GJ-GBRC327a/2020|2020-06-25|EPI\_ISL\_512061|Original|hCoV-19^^Gujarat|Human|B.J. Medical College and Civil hospital|Gujarat Biotechnology Research Centre|Joshi|India

>Spike|hCoV-19/South Africa/KRISP-0136/2020|2020-05-14|EPI\_ISL\_467488|Original|hCoV-19^^KwaZulu-Natal|Human|Molecular Diagnostics Services (MDS)|KRISP|de Oliveira|South Africa

>Spike|hCoV-19/England/ALDP-944025/2020|2020-06-06|EPI\_ISL\_554836|Original|hCoV-19^^England|Human|Lighthouse Lab in Alderley Park|Wellcome Sanger Institute for the COVID-19 Genomics UK (COG-UK) consortium|Davies|United Kingdom

>Spike|hCoV-19/South Korea/KCDC2797/2020|2020-07-27|EPI\_ISL\_526731|Original|hCoV-19^^South Korea|Human|Center for Laboratory Control of Infectious Diseases|Center for Laboratory Control of Infectious Diseases|Kim|South Korea

>Spike|hCoV-19/Germany/HH-hpi-pl982/2020|2020-03-26|EPI\_ISL\_776300|Original|hCoV-19^^Hamburg|Human|University Medical Center Hamburg Eppendorf|Heinrich Pette Institute|Robitaille|Germany

>Spike|hCoV-19/USA/WA-UW-1586/2020|2020-03-19|EPI\_ISL\_423013|Original|hCoV-19^^Washington|Human|UW Virology Lab|UW Virology Lab|Roychoudhury|USA

>Spike|hCoV-19/Switzerland/ZH-ETHZ-240052/2020|2020-08-12|EPI\_ISL\_523893|Original|hCoV-19^^Zurich|Human|Viollier AG|Department of Biosystems Science and Engineering|Nadeau|Switzerland

>Spike|hCoV-19/USA/UT-UPHL-2009076/2020|2020-05-14|EPI\_ISL\_525084|Original|hCoV-19^^Utah|Human|Utah Public Health Laboratory|Utah Public Health Laboratory|Young|USA

>Spike|hCoV-19/USA/SD-SDPHL-0004/2020|2020-07-07|EPI\_ISL\_569612|Original|hCoV-19^^South Dakota|Human|Cheyenne River Health Center|South Dakota Public Health Laboratory|Carlson|USA

>Spike|hCoV-19/Switzerland/ZH-ETHZ-370515/2020|2020-11-19|EPI\_ISL\_693997|Original|hCoV-19^^Zurich|Human|Viollier AG|Department of Biosystems Science and Engineering|Nadeau|Switzerland

>Spike|hCoV-19/Denmark/DCGC-21756/2020|2020-12-21|EPI\_ISL\_758345|Original|hCoV-19^^Midtjylland|Human|Department of Virus and Microbiological Special Diagnostics|Albertsen Lab|Michaelsen|Denmark

>Spike|hCoV-19/USA/NY-Wadsworth-281378-01/2020|2020-10-13|EPI\_ISL\_734449|Original|hCoV-19^^New York|Human|Masonic Medical Research Institute|Wadsworth Center|Lasek-Nesselquist|USA

>Spike|hCoV-19/England/MILK-99D773/2020|2020-08-31|EPI\_ISL\_549887|Original|hCoV-19^^England|Human|Lighthouse Lab in Milton Keynes|Wellcome Sanger Institute for the COVID-19 Genomics UK (COG-UK) consortium|Davies|United Kingdom

>Spike|hCoV-19/USA/UT-UPHL-2012145663/2020|2020-08-10|EPI\_ISL\_745831|Original|hCoV-19^^Utah|Human|Ginkgo Bioworks Clinical Laboratory|Utah Public Health Laboratory|Young|USA

>Spike|hCoV-19/England/MILK-970512/2020|2020-08-18|EPI\_ISL\_553152|Original|hCoV-19^^England|Human|Lighthouse Lab in Milton Keynes|Wellcome Sanger Institute for the COVID-19 Genomics UK (COG-UK) consortium|Davies|United Kingdom

>Spike|hCoV-19/England/QEUEH-A224D5/2020|2020-10-01|EPI\_ISL\_587577|Original|hCoV-19^^England|Human|Lighthouse Lab in Glasgow|Wellcome Sanger Institute for the COVID-19 Genomics UK (COG-UK) consortium|Davies|United Kingdom

>Spike|hCoV-19/England/MILK-ABB7C9/2020|2020-10-21|EPI\_ISL\_623376|Original|hCoV-19^^England|Human|Lighthouse Lab in Milton Keynes|Wellcome Sanger Institute for the COVID-19 Genomics UK (COG-UK) consortium|Davies|United Kingdom

>Spike|hCoV-19/England/QEUEH-9DDCE1/2020|2020-09-21|EPI\_ISL\_599559|Original|hCoV-19^^England|Human|Lighthouse Lab in Glasgow|Wellcome Sanger Institute for the COVID-19 Genomics UK (COG-UK) consortium|Davies|United Kingdom

>Spike|hCoV-19/USA/HI-H200173/2020|2020-07-25|EPI\_ISL\_752733|Original|hCoV-19^^Hawaii|Human|State Laboratories Division|State Laboratories Division|Sultana|USA

>Spike|hCoV-19/Australia/NSW827/2020|2020-08-08|EPI\_ISL\_526169|Original|hCoV-19^^New South Wales|Human|Austech Medical Laboratories|NSW Health Pathology - Institute of Clinical Pathology and Medical Research; Westmead Hospital; University of Sydney|Gall|Australia

>Spike|hCoV-19/USA/NE-CDC-2-3714192/2020|2020-10-28|EPI\_ISL\_751583|Original|hCoV-19^^Nebraska|Human|NE Public Health Laboratory|Genomics and Discovery|Queen|USA

>Spike|hCoV-19/England/MILK-9D4BED/2020|2020-09-19|EPI\_ISL\_601558|Original|hCoV-19^^England|Human|Lighthouse Lab in Milton Keynes|Wellcome Sanger Institute for the COVID-19 Genomics UK (COG-UK) consortium|Davies|United Kingdom

>Spike|hCoV-19/Scotland/QEUEH-9FA3BC/2020|2020-09-29|EPI\_ISL\_600604|Original|hCoV-19^^Scotland|Human|Lighthouse Lab in Glasgow|Wellcome Sanger Institute for the COVID-19 Genomics UK (COG-UK) consortium|Davies|United Kingdom

>Spike|hCoV-19/USA/NY-NYCPHL-001110/2020|2020-10-19|EPI\_ISL\_671693|Original|hCoV-19^^New York|Human|DOHMH Chelsea|New York City Public Health Laboratory|Wang|USA

>Spike|hCoV-19/India/MH-NIV-229461/2020|2020-09-28|EPI\_ISL\_577681|Original|hCoV-19^^Maharashtra|Human|NIV Influenza|NIV Influenza|Potdar|India

>Spike|hCoV-19/England/QEUEH-9E535A/2020|2020-09-24|EPI\_ISL\_579851|Original|hCoV-19^^England|Human|Lighthouse Lab in Glasgow|Wellcome Sanger Institute for the COVID-19 Genomics UK (COG-UK) consortium|Davies|United Kingdom

>Spike|hCoV-19/England/NORW-F7D7E/2020|2020-11-13|EPI\_ISL\_650455|Original|hCoV-19^^England|Human|Quadram Institute Bioscience|COVID-19 Genomics UK (COG-UK) Consortium|Alikhan|United Kingdom

>Spike|hCoV-19/Japan/PG-4351/2020|2020-07-00|EPI\_ISL\_692579|Original|hCoV-19^^Japan|Human|Pathogen Genomics Center|Pathogen Genomics Center|Sekizuka|Japan

>Spike|hCoV-19/Colombia/VAC-GVI-93470/2020|2020-04-01|EPI\_ISL\_447780|Original|hCoV-19^^Valle del Cauca|Human|Instituto Nacional de Salud|Grupo de Investigaciones Microbiol\u00f3gicas-UR (GIMUR)|Ram\u00e9drez|Colombia

>Spike|hCoV-19/Denmark/DCGC-20754/2020|2020-12-21|EPI\_ISL\_759344|Original|hCoV-19^^Sjaelland|Human|Department of Virus and Microbiological Special Diagnostics|Albertsen Lab|Michaelsen|Denmark

>Spike|hCoV-19/Norway/3739/2020|2020-09-02|EPI\_ISL\_590995|Original|hCoV-19^^Viken|Human|Ostfold Hospital Trust - Kalnes|Norwegian Institute of Public Health|Vollan|Norway

>Spike|hCoV-19/Belgium/regA-0508545/2020|2020-05-08|EPI\_ISL\_734714|Original|hCoV-19^^Auderghem|Human|UZ Leuven|KU Leuven|Maes|Belgium

>Spike|hCoV-19/Denmark/DCGC-19858/2020|2020-12-07|EPI\_ISL\_747833|Original|hCoV-19^^Hovedstaden|Human|Department of Virus and Microbiological Special Diagnostics|Albertsen Lab|Michaelsen|Denmark

>Spike|hCoV-19/USA/WI-UW-929/2020|2020-07-10|EPI\_ISL\_509929|Original|hCoV-19^^Wisconsin|Human|University of Wisconsin-Madison AIDS Vaccine Research Laboratories|University of Wisconsin-Madison AIDS Vaccine Research Laboratories|Baczenas|USA

>Spike|hCoV-19/England/QEUA-C7F853/2020|2020-12-16|EPI\_ISL\_762904|Original|hCoV-19^^England|Human|Lighthouse Lab in Glasgow|Wellcome Sanger Institute for the COVID-19 Genomics UK (COG-UK) Consortium|Davies|United Kingdom

>Spike|hCoV-19/Netherlands/NB-EMC-254/2020|2020-05-22|EPI\_ISL\_523377|Original|hCoV-19^^Noord Brabant|Human|Dutch COVID-19 response team|Erasmus Medical Center|Oude Munnink|Netherlands

>Spike|hCoV-19/Luxembourg/LNS6243765/2020|2020-11-29|EPI\_ISL\_770919|Original|hCoV-19^^Luxembourg|Human|Laboratoire national de sant\u00e9|Laboratoire national de sant\u00e9|Wienecke-Baldacchino|Luxembourg

>Spike|hCoV-19/England/QEUA-A89B04/2020|2020-10-14|EPI\_ISL\_638811|Original|hCoV-19^^England|Human|Oxford Viromics|COVID-19 Genomics UK (COG-UK) Consortium|Golubchik|United Kingdom

>Spike|hCoV-19/USA/CA-ALSR-3430/2020|2020-05-30|EPI\_ISL\_636024|Original|hCoV-19^^California|Human|San Diego County Public Health Laboratory|Andersen lab at Scripps Research|Gangavarapu|USA

>Spike|hCoV-19/Denmark/DCGC-11374/2020|2020-11-02|EPI\_ISL\_670873|Original|hCoV-19^^Hovedstaden|Human|Department of Virus and Microbiological Special Diagnostics|Albertsen Lab|Michaelsen|Denmark

>Spike|hCoV-19/USA/CA-CZB-1003/2020|2020-04-02|EPI\_ISL\_436644|Original|hCoV-19^^California|Human|County of Santa Clara Public Health Department|Chan-Zuckerberg Biohub|Hao|USA

>Spike|hCoV-19/Finland/3LS12BE5/2020|2020-10-03|EPI\_ISL\_756094|Original|hCoV-19^^Uusimaa|Human|Department of Virology and Immunology|Department of Virology|Smura|Finland

>Spike|hCoV-19/England/ALDP-A6D31D/2020|2020-10-15|EPI\_ISL\_608190|Original|hCoV-19^^England|Human|Lighthouse Lab in Alderley Park|Wellcome Sanger Institute for the COVID-19 Genomics UK (COG-UK) consortium|Davies|United Kingdom

>Spike|hCoV-19/Australia/NSW637/2020|2020-07-10|EPI\_ISL\_490046|Original|hCoV-19^^New South Wales|Human|Pathology West - NSW Health Pathology|NSW Health Pathology - Institute of Clinical Pathology and Medical Research; Westmead Hospital; University of Sydney|Gall|Australia

>Spike|hCoV-19/England/PORT-2D132B/2020|2020-00-00|EPI\_ISL\_479182|Original|hCoV-19^^England|Human|Centre for Enzyme Innovation|COVID-19 Genomics UK (COG-UK) Consortium|Robson|United Kingdom

>Spike|hCoV-19/Australia/NSW1047/2020|2020-07-08|EPI\_ISL\_593699|Original|hCoV-19^^New South Wales|Human|South Eastern Area Laboratory Services (SEALS)|NSW Health Pathology - Institute of Clinical Pathology and Medical Research; Westmead Hospital; University of Sydney|Gall|Australia

>Spike|hCoV-19/Denmark/DCGC-7709/2020|2020-10-19|EPI\_ISL\_618564|Original|hCoV-19^^Sjaelland|Human|Department of Virus and Microbiological Special Diagnostics|Albertsen lab|Michaelsen|Denmark

>Spike|hCoV-19/Switzerland/AG-ETHZ-230003/2020|2020-07-31|EPI\_ISL\_516554|Original|hCoV-19^^Aargau|Human|Viollier AG|Department of Biosystems Science and Engineering|Nadeau|Switzerland

>Spike|hCoV-19/USA/TX-HMH-MCoV-10781/2020|2020-07-05|EPI\_ISL\_789623|Original|hCoV-19^^Texas|Human|Houston Methodist Hospital|Houston Methodist Hospital|Long|USA

>Spike|hCoV-19/Belgium/ULG-10351/2020|2020-08-04|EPI\_ISL\_540518|Original|hCoV-19^^Li\u00e8ge|Human|Department of Clinical Microbiology|GIGA Medical Genomics|Durkin|Belgium

>Spike|hCoV-19/England/MILK-B3E2CC/2020|2020-11-01|EPI\_ISL\_679850|Original|hCoV-19^^England|Human|Oxford Viromics|COVID-19 Genomics UK (COG-UK) Consortium|Golubchik|United Kingdom

>Spike|hCoV-19/USA/MI-MDHHS-SC20955/2020|2020-03-24|EPI\_ISL\_507744|Original|hCoV-19^^Michigan|Human|Michigan Department of Health and Human Services|Michigan Department of Health and Human Services|Blankenship|USA

>Spike|hCoV-19/USA/CA-CZB-14429/2020|2020-11-04|EPI\_ISL\_739090|Original|hCoV-19^^California|Human|Alameda County Public Health Lab|Chan-Zuckerberg Biohub|Kamm|USA

>Spike|hCoV-19/Australia/QLD1107/2020|2020-03-22|EPI\_ISL\_593624|Original|hCoV-19^^Australia|Human|unknown|Public Health Virology Laboratory|Nguyen|Australia

>Spike|hCoV-19/Spain/PV-IBV-001556/2020|2020-03-16|EPI\_ISL\_467111|Original|hCoV-19^^Basque Country|Human|Hospital Universitario Araba. Vitoria-Gasteiz|SeqCOVID-SPAIN consortium/IBV (CSIC) |Comas|Spain

>Spike|hCoV-19/England/MILK-CA6853/2020|2020-12-16|EPI\_ISL\_761406|Original|hCoV-19^^England|Human|Lighthouse Lab in Milton Keynes|Wellcome Sanger Institute for the COVID-19 Genomics UK (COG-UK) Consortium|Davies|United Kingdom

>Spike|hCoV-19/Israel/CVL1198/2020|2020-06-28|EPI\_ISL\_516906|Original|hCoV-19^^Northern District|Human|Israel Central Virology laboratory|Israel Central Virology laboratory|Zuckerman|Israel

>Spike|hCoV-19/Chile/VS-ISPCH-4/2020|2020-03-19|EPI\_ISL\_445287|Original|hCoV-19^^Valparaiso|Human|CLINICA CIUDAD DEL MAR|Instituto de Salud Publica de Chile|Fernandez|Chile

>Spike|hCoV-19/Japan/PG-1264/2020|2020-00-00|EPI\_ISL\_684874|Original|hCoV-19^^Japan|Human|Pathogen Genomics Center|Pathogen Genomics Center|Sekizuka|Japan

>Spike|hCoV-19/England/ALDP-59F63C/2020|2020-06-14|EPI\_ISL\_558899|Original|hCoV-19^^England|Human|Lighthouse Lab in Alderley Park|Wellcome Sanger Institute for the COVID-19 Genomics UK (COG-UK) consortium|Davies|United Kingdom

>Spike|hCoV-19/Wales/PHWC-49F961/2020|2020-12-09|EPI\_ISL\_743295|Original|hCoV-19^^Wales|Human|Wales Specialist Virology Centre Sequencing lab|COVID-19 Genomics UK (COG-UK) Consortium|Moore|United Kingdom

>Spike|hCoV-19/England/MILK-B01D76/2020|2020-10-24|EPI\_ISL\_642949|Original|hCoV-19^^England|Human|Lighthouse Lab in Milton Keynes|Wellcome Sanger Institute for the COVID-19 Genomics UK (COG-UK) Consortium|Davies|United Kingdom

>Spike|hCoV-19/USA/CA-ALSR-3592/2020|2020-06-26|EPI\_ISL\_636099|Original|hCoV-19^^California|Human|San Diego County Public Health Laboratory|Andersen lab at Scripps Research|Gangavarapu|USA

>Spike|hCoV-19/England/QEUEH-B3FC18/2020|2020-11-08|EPI\_ISL\_658679|Original|hCoV-19^^England|Human|Lighthouse Lab in Glasgow|Wellcome Sanger Institute for the COVID-19 Genomics UK (COG-UK) Consortium|Davies|United Kingdom

>Spike|hCoV-19/Wales/PHWC-16F1DE/2020|2020-10-04|EPI\_ISL\_585927|Original|hCoV-19^^Wales|Human|Wales Specialist Virology Centre Sequencing lab|COVID-19 Genomics UK (COG-UK) Consortium|Moore|United Kingdom

>Spike|hCoV-19/England/QEUEH-9AF161/2020|2020-09-03|EPI\_ISL\_559825|Original|hCoV-19^^England|Human|Oxford Viromics|COVID-19 Genomics UK (COG-UK) Consortium|Golubchik|United Kingdom

>Spike|hCoV-19/Wales/PHWC-169CC4/2020|2020-08-18|EPI\_ISL\_529701|Original|hCoV-19^^Wales|Human|Wales Specialist Virology Centre Sequencing lab|COVID-19 Genomics UK (COG-UK) Consortium|Moore|United Kingdom

>Spike|hCoV-19/Australia/VIC17144/2020|2020-08-15|EPI\_ISL\_663760|Original|hCoV-19^^Victoria|Human|Microbiological Diagnostic Unit - Public Health Laboratory (MDU-PHL) |MDU-PHL|Schultz|Australia

>Spike|hCoV-19/England/MILK-ACFFBB/2020|2020-10-18|EPI\_ISL\_709911|Original|hCoV-19^^England|Human|Lighthouse Lab in Milton Keynes|Wellcome Sanger Institute for the COVID-19 Genomics UK (COG-UK) Consortium|Davies|United Kingdom

>Spike|hCoV-19/Germany/NW-UBI-22/2020|2020-06-20|EPI\_ISL\_602303|original|hCoV-19^^North Rhine-Westphalia|Human|Evangelisches Klinikum Bethel|Bielefeld University|Brandt|Germany

>Spike|hCoV-19/England/QEUEH-96F877/2020|2020-08-19|EPI\_ISL\_540340|Original|hCoV-19^^England|Human|Lighthouse Lab in Glasgow|Wellcome Sanger Institute for the COVID-19 Genomics UK (COG-UK) consortium|Davies|United Kingdom

>Spike|hCoV-19/Australia/VIC9746/2020|2020-08-23|EPI\_ISL\_565689|Original|hCoV-19^^Victoria|Human|Microbiological Diagnostic Unit - Public Health Laboratory (MDU-PHL) |MDU-PHL|Schultz|Australia

>Spike|hCoV-19/USA/WA-UW-11556/2020|2020-06-22|EPI\_ISL\_570435|Original|hCoV-19^^Washington|Human|UW Virology Lab|UW Virology Lab|Roychoudhury|USA

>Spike|hCoV-19/England/MILK-B939DF/2020|2020-11-13|EPI\_ISL\_676122|Original|hCoV-19^^England|Human|Lighthouse Lab in Milton Keynes|Wellcome Sanger Institute for the COVID-19 Genomics UK (COG-UK) Consortium|Davies|United Kingdom

>Spike|hCoV-19/Lithuania/MR-LUHS-Eilnr449/2020|2020-09-07|EPI\_ISL\_636888|Original|hCoV-19^^Kauno apskritis|Human|Lithuanian University of Health Sciences Hospital|Lithuanian University of Health Sciences|Zemaitis|Lithuania

>Spike|hCoV-19/Japan/PG-8331/2020|2020-08-00|EPI\_ISL\_687430|Original|hCoV-19^^Japan|Human|Pathogen Genomics Center|Pathogen Genomics Center|Sekizuka|Japan

>Spike|hCoV-19/Canada/BC-BCCDC-8587/2020|2020-11-00|EPI\_ISL\_740834|Original|hCoV-19^^British Columbia|Human|BCCDC Public Health Laboratory|BCCDC Public Health Laboratory|Prystajeky|Canada

>Spike|hCoV-19/Belgium/reg-0503641/2020|2020-05-03|EPI\_ISL\_734701|Original|hCoV-19^^Callenelle|Human|UZ Leuven|KU Leuven|Maes|Belgium

>Spike|hCoV-19/England/ALDP-A6D993/2020|2020-10-14|EPI\_ISL\_607255|Original|hCoV-19^^England|Human|Lighthouse Lab in Alderley Park|Wellcome Sanger Institute for the COVID-19 Genomics UK (COG-UK) consortium|Davies|United Kingdom

>Spike|hCoV-19/Denmark/DCGC-14224/2020|2020-11-30|EPI\_ISL\_711636|Original|hCoV-19^^Midtjylland|Human|Department of Virus and Microbiological Special Diagnostics|Albertsen Lab|Michaelsen|Denmark

>Spike|hCoV-19/Scotland/QEUA-A8A8B1/2020|2020-10-16|EPI\_ISL\_639001|Original|hCoV-19^^Scotland|Human|Oxford Viromics|COVID-19 Genomics UK (COG-UK) Consortium|Golubchik|United Kingdom

>Spike|hCoV-19/India/OR-RMRC94/2020|2020-05-04|EPI\_ISL\_455788|Original|hCoV-19^^Odisha|Human|REGIONAL VRDL, ICMR-RMRC BBSR|Immunogenomics lab|Raghav|India

>Spike|hCoV-19/Scotland/QEUA-B2C23A/2020|2020-11-03|EPI\_ISL\_680571|Original|hCoV-19^^Scotland|Human|Department of Pathology|COVID-19 Genomics UK (COG-UK) Consortium|Goodfellow|United Kingdom

>Spike|hCoV-19/England/MILK-B8C854/2020|2020-11-13|EPI\_ISL\_675998|Original|hCoV-19^^England|Human|Lighthouse Lab in Milton Keynes|Wellcome Sanger Institute for the COVID-19 Genomics UK (COG-UK) Consortium|Davies|United Kingdom

>Spike|hCoV-19/England/QEUA-9C7BDE/2020|2020-09-12|EPI\_ISL\_567180|Original|hCoV-19^^England|Human|Lighthouse Lab in Glasgow|Wellcome Sanger Institute for the COVID-19 Genomics UK (COG-UK) consortium|Davies|United Kingdom

>Spike|hCoV-19/Spain/MD-IBV-001372/2020|2020-03-13|EPI\_ISL\_452529|Original|hCoV-19^^Madrid|Human|Cl\u00ednica Universidad de Navarra. Servicio de Enfermedades Infecciosas y Microbiolog\u00eda cl\u00ednica|SeqCOVID-SPAIN consortium/IBV (CSIC) |Comas|Spain

>Spike|hCoV-19/England/MILK-B95120/2020|2020-11-13|EPI\_ISL\_673865|Original|hCoV-19^^England|Human|Lighthouse Lab in Milton Keynes|Wellcome Sanger Institute for the COVID-19 Genomics UK (COG-UK) Consortium|Davies|United Kingdom

>Spike|hCoV-19/USA/AZ-TG366732/2020|2020-06-02|EPI\_ISL\_694491|Original|hCoV-19^^Arizona|Human|AZ SPHL|TGen North|French|USA

>Spike|hCoV-19/Spain/IB-IBV-002493/2020|2020-03-14|EPI\_ISL\_467057|Original|hCoV-19^^Illes Balears|Human|Servicio de Microbiolog\u00eda|SeqCOVID-SPAIN consortium/IBV (CSIC) |Comas|Spain

>Spike|hCoV-19/USA/WI-UW-198/2020|2020-03-24|EPI\_ISL\_428294|Original|hCoV-19^^Wisconsin|Human|University of Wisconsin-Madison AIDS Vaccine Research Laboratories|University of Wisconsin-Madison AIDS Vaccine Research Laboratories|Moreno|USA

>Spike|hCoV-19/England/LIVE-DC9DD2/2020|2020-12-03|EPI\_ISL\_724348|Original|hCoV-19^^England|Human|Liverpool Clinical Laboratories|COVID-19 Genomics UK (COG-UK) Consortium|Haldenby|United Kingdom

>Spike|hCoV-19/England/200920118/2020|2020-02-24|EPI\_ISL\_485604|Original|hCoV-19^^England|Human|Respiratory Virus Unit|Respiratory Virus Unit|Ledesma|United Kingdom



>Spike|hCoV-19/USA/WI-GMF-12532/2020|2020-07-27|EPI\_ISL\_547642|Original|hCoV-19^^Wisconsin|Human|Gundersen Molecular Diagnostics Laboratory|Kabara Cancer Research Institute|Kenny|USA

>Spike|hCoV-19/Denmark/DCGC-1197/2020|2020-05-18|EPI\_ISL\_614843|Original|hCoV-19^^Hovedstaden|Human|Department of Virus and Microbiological Special Diagnostics|Albertsen lab|Michaelsen|Denmark

>Spike|hCoV-19/England/QEUA-C4BD60/2020|2020-12-14|EPI\_ISL\_736650|Original|hCoV-19^^England|Human|Lighthouse Lab in Glasgow|Wellcome Sanger Institute for the COVID-19 Genomics UK (COG-UK) Consortium|Davies|United Kingdom

>Spike|hCoV-19/England/QEUA-9F7B3F/2020|2020-09-27|EPI\_ISL\_589258|Original|hCoV-19^^England|Human|Lighthouse Lab in Glasgow|Wellcome Sanger Institute for the COVID-19 Genomics UK (COG-UK) consortium|Davies|United Kingdom

>Spike|hCoV-19/England/NORW-F8D13/2020|2020-11-26|EPI\_ISL\_702925|Original|hCoV-19^^England|Human|Quadram Institute Bioscience|COVID-19 Genomics UK (COG-UK) Consortium|Alikhan|United Kingdom

>Spike|hCoV-19/England/MILK-9C42BE/2020|2020-09-09|EPI\_ISL\_566764|Original|hCoV-19^^England|Human|Lighthouse Lab in Milton Keynes|Wellcome Sanger Institute for the COVID-19 Genomics UK (COG-UK) consortium|Davies|United Kingdom

>Spike|hCoV-19/England/QEUA-963DDE/2020|2020-08-11|EPI\_ISL\_531474|Original|hCoV-19^^England|Human|Lighthouse Lab in Glasgow|Wellcome Sanger Institute for the COVID-19 Genomics UK (COG-UK) consortium|Davies|United Kingdom

>Spike|hCoV-19/Italy/ABR-IZSGC-TE5674/2020|2020-03-20|EPI\_ISL\_429228|Original|hCoV-19^^Abruzzo|Human|Ospedale Civile Giuseppe Mazzini|Istituto Zooprofilattico Sperimentale dell'Abruzzo e Molise \G. Caporale\|Lorusso|Italy

>Spike|hCoV-19/Scotland/QEUA-B11E07/2020|2020-11-02|EPI\_ISL\_649592|Original|hCoV-19^^Scotland|Human|Lighthouse Lab in Glasgow|Wellcome Sanger Institute for the COVID-19 Genomics UK (COG-UK) Consortium|Davies|United Kingdom

>Spike|hCoV-19/Denmark/DCGC-22283/2020|2020-12-14|EPI\_ISL\_758655|Original|hCoV-19^^Syddanmark|Human|Department of Virus and Microbiological Special Diagnostics|Albertsen Lab|Michaelsen|Denmark

>Spike|hCoV-19/Wales/PHWC-1692A4/2020|2020-06-23|EPI\_ISL\_499426|Original|hCoV-19^^Wales|Human|Wales Specialist Virology Centre Sequencing lab|COVID-19 Genomics UK (COG-UK) Consortium|Moore|United Kingdom

>Spike|hCoV-19/Japan/IC-0208/2020|2020-10-00|EPI\_ISL\_667637|Original|hCoV-19^^Japan|Human|Pathogen Genomics Center|Pathogen Genomics Center|Sekizuka|Japan

>Spike|hCoV-19/Saudi Arabia/KAUST-Makkah181/2020|2020-04-06|EPI\_ISL\_437703|Original|hCoV-19^^Makkah|Human|Pathogen Genomics Lab King Abdullah University of Science and Technology(KAUST)|Pathogen Genomics Lab King Abdullah University of Science and Technology(KAUST)|Mohamed Ghazzali|Saudi Arabia

>Spike|hCoV-19/England/20422147704/2020|2020-09-00|EPI\_ISL\_584064|Original|hCoV-19^^England|Human|Respiratory Virus Unit|Respiratory Virus Unit|Platt|United Kingdom

>Spike|hCoV-19/USA/CA-CZB-11171/2020|2020-09-15|EPI\_ISL\_625528|Original|hCoV-19^^California|Human|Alameda County Public Health Lab|Chan-Zuckerberg Biohub|Bhatt|USA

>Spike|hCoV-19/England/MILK-CA71EE/2020|2020-12-18|EPI\_ISL\_761413|Original|hCoV-19^^England|Human|Lighthouse Lab in Milton Keynes|Wellcome Sanger Institute for the COVID-19 Genomics UK (COG-UK) Consortium|Davies|United Kingdom

>Spike|hCoV-19/England/ALDP-9E7297/2020|2020-09-24|EPI\_ISL\_580570|Original|hCoV-19^^England|Human|Lighthouse Lab in Alderley Park|Wellcome Sanger Institute for the COVID-19 Genomics UK (COG-UK) consortium|Davies|United Kingdom

>Spike|hCoV-19/England/20154029904/2020|2020-04-07|EPI\_ISL\_466258|Original|hCoV-19^^England|Human|Respiratory Virus Unit|Respiratory Virus Unit|Platt|United Kingdom

>Spike|hCoV-19/Germany/HH-hpi-p1915/2020|2020-03-25|EPI\_ISL\_776246|Original|hCoV-19^^Hamburg|Human|University Medical Center Hamburg Eppendorf|Heinrich Pette Institute|Robitaille|Germany

>Spike|hCoV-19/England/MILK-B3E095/2020|2020-10-31|EPI\_ISL\_679845|Original|hCoV-19^^England|Human|Oxford Viromics|COVID-19 Genomics UK (COG-UK) Consortium|Golubchik|United Kingdom

>Spike|hCoV-19/England/NORW-F39C9/2020|2020-12-05|EPI\_ISL\_725147|Original|hCoV-19^^England|Human|Quadram Institute Bioscience|COVID-19 Genomics UK (COG-UK) Consortium|Alikhan|United Kingdom

>Spike|hCoV-19/Northern Ireland/NIRE-106995/2020|2020-05-16|EPI\_ISL\_501049|Original|hCoV-19^^Northern Ireland|Human|Regional Virus Laboratory|Wellcome Sanger Institute for the COVID-19 Genomics UK (COG-UK) consortium|Davies|United Kingdom

>Spike|hCoV-19/Kenya/C2738/2020|2020-04-26|EPI\_ISL\_457885|Original|hCoV-19^^Kenya|Human|KEMRI-CGMR-C|KEMRI-Wellcome Trust Research Programme/KEMRI-CGMR-C Kilifi|Githinji|Kenya

>Spike|hCoV-19/Australia/VIC14206/2020|2020-08-04|EPI\_ISL\_592388|Original|hCoV-19^^Victoria|Human|Microbiological Diagnostic Unit - Public Health Laboratory (MDU-PHL)|MDU-PHL|Schultz|Australia

>Spike|hCoV-19/Scotland/QEUH-96F69B/2020|2020-08-19|EPI\_ISL\_568408|Original|hCoV-19^^Scotland|Human|Lighthouse Lab in Glasgow|Wellcome Sanger Institute for the COVID-19 Genomics UK (COG-UK) consortium|Davies|United Kingdom

>Spike|hCoV-19/USA/CA-CZB-10895/2020|2020-08-13|EPI\_ISL\_583125|Original|hCoV-19^^California|Human|Humboldt County Public Health Laboratory|Chan-Zuckerberg Biohub|Bhatt|USA

>Spike|hCoV-19/England/ALDP-A2EC68/2020|2020-10-05|EPI\_ISL\_587134|Original|hCoV-19^^England|Human|Lighthouse Lab in Alderley Park|Wellcome Sanger Institute for the COVID-19 Genomics UK (COG-UK) consortium|Davies|United Kingdom

>Spike|hCoV-19/Denmark/DCGC-21512/2020|2020-12-21|EPI\_ISL\_758203|Original|hCoV-19^^Midtjylland|Human|Department of Virus and Microbiological Special Diagnostics|Albertsen Lab|Michaelsen|Denmark

>Spike|hCoV-19/India/TG-NGC-CDFD-14/2020|2020-05-27|EPI\_ISL\_466852|Original|hCoV-19^^Telangana|Human|National Genomics Core-Center for DNA Fingerprinting and Diagnostics|National Genomics Core-Center for DNA Fingerprinting and Diagnostics (NGC-CDFD)- DBT's PAN-INDIA-1000 Genome consortium|Vashisht|India

>Spike|hCoV-19/USA/CA-CZB-4010/2020|2020-08-01|EPI\_ISL\_548672|Original|hCoV-19^^California|Human|County of Santa Clara Public Health Department|Chan-Zuckerberg Biohub|Bhatt|USA

>Spike|hCoV-19/Wales/PHWC-16AD57/2020|2020-09-10|EPI\_ISL\_560192|Original|hCoV-19^^Wales|Human|Wales Specialist Virology Centre Sequencing lab|COVID-19 Genomics UK (COG-UK) Consortium|Moore|United Kingdom

>Spike|hCoV-19/USA/LA-EVTL1161/2020|2020-12-10|EPI\_ISL\_768430|Original|hCoV-19^^Louisiana|Human|LSUHS Emerging Viral Threat Laboratory|Microbial Genome Sequencing Center|Kamil|USA

>Spike|hCoV-19/Netherlands/ZH-EMC-326/2020|2020-06-24|EPI\_ISL\_523667|Original|hCoV-19^^Zuid Holland|Human|Dutch COVID-19 response team|Erasmus Medical Center|Oude Munnink|Netherlands

>Spike|hCoV-19/Scotland/EDB3556/2020|2020-04-14|EPI\_ISL\_487909|Original|hCoV-19^^Scotland|Human|Virology Department|Wellcome Sanger Institute for the COVID-19 Genomics UK (COG-UK) consortium|Davies|United Kingdom

>Spike|hCoV-19/Moldova/ChVir7776/2020|2020-03-11|EPI\_ISL\_523968|Original|hCoV-19^^Chisinau|Human|National Agency for Public Health|Charite Universitatsmedizin Berlin|Muehlemann|Moldova

>Spike|hCoV-19/Wales/PHWC-498054/2020|2020-11-30|EPI\_ISL\_727016|Original|hCoV-19^^Wales|Human|Originating lab|COVID-19 Genomics UK (COG-UK) Consortium|Moore|United Kingdom

>Spike|hCoV-19/France/BRE-IPP9955/2020|2020-09-14|EPI\_ISL\_693763|Original|hCoV-19^^Bretagne|Human|Hospital|National Reference Center for Viruses of Respiratory Infections|Enouf|France

>Spike|hCoV-19/England/CAMC-A653D9/2020|2020-10-10|EPI\_ISL\_608480|Original|hCoV-19^^England|Human|Lighthouse Lab in Cambridge|Wellcome Sanger Institute for the COVID-19 Genomics UK (COG-UK) consortium|Davies|United Kingdom

>Spike|hCoV-19/Australia/VIC1838/2020|2020-05-30|EPI\_ISL\_521884|Original|hCoV-19^^Victoria|Human|Victorian Infectious Diseases Reference Laboratory (VIDRL)|VIDRL and MDU-PHL|Schultz|Australia

>Spike|hCoV-19/Wales/PHWC-160E5E/2020|2020-04-23|EPI\_ISL\_473059|Original|hCoV-19^^Wales|Human|Wales Specialist Virology Centre Sequencing lab|COVID-19 Genomics UK (COG-UK) Consortium|Moore|United Kingdom

>Spike|hCoV-19/England/CAMC-B33CBA/2020|2020-11-05|EPI\_ISL\_659368|Original|hCoV-19^^England|Human|Lighthouse Lab in Cambridge|Wellcome Sanger Institute for the COVID-19 Genomics UK (COG-UK) Consortium|Davies|United Kingdom

>Spike|hCoV-19/Portugal/PT0366/2020|2020-03-19|EPI\_ISL\_454082|Original|hCoV-19^^Portugal|Human|unknown|Instituto Nacional de Saude (INSA)|Borges|Portugal

>Spike|hCoV-19/USA/NY-Wadsworth-146786-01/2020|2020-06-20|EPI\_ISL\_676694|Original|hCoV-19^^New York|Human|Wadsworth Center|Wadsworth Center|Lasek-Nesselquist|USA

>Spike|hCoV-19/England/NOTT-115939/2020|2020-10-15|EPI\_ISL\_595274|Original|hCoV-19^^England|Human|Queens Medical Centre|COVID-19 Genomics UK (COG-UK) Consortium|Loose|United Kingdom

>Spike|hCoV-19/USA/CA-IGI-0404/2020|2020-07-20|EPI\_ISL\_754887|Original|hCoV-19^^California|Human|Innovative Genomics Institute|Innovative Genomics Institute|Wyman|USA

>Spike|hCoV-19/Netherlands/ZH-EMC-245/2020|2020-00-00|EPI\_ISL\_523587|Original|hCoV-19^^Zuid Holland|Human|Dutch COVID-19 response team|Erasmus Medical Center|Oude Munnink|Netherlands

>Spike|hCoV-19/England/ALDP-B4858A/2020|2020-11-07|EPI\_ISL\_649299|Original|hCoV-19^^England|Human|Lighthouse Lab in Alderley Park|Wellcome Sanger Institute for the COVID-19 Genomics UK (COG-UK) Consortium|Davies|United Kingdom

>Spike|hCoV-19/France/PAC-IHU-0249/2020|2020-03-30|EPI\_ISL\_569409|Original|hCoV-19^^Provence-Alpes-C\u00f4te-d\u2019Azur|Human|MEPHI|MEPHI|Levasseur|France

>Spike|hCoV-19/Malaysia/MGI-MAEPS41/2020|2020-06-03|EPI\_ISL\_582124|Original|hCoV-19^^Selangor|Human|Malaysia Genome Institute|Malaysia Genome Institute|Mat Isa|Malaysia

>Spike|hCoV-19/India/MH-ACTREC-036/2020|2020-05-08|EPI\_ISL\_699692|Original|hCoV-19^^Maharashtra|Human|Hematopathology Laboratory|Hematopathology Laboratory|Patkar|India

>Spike|hCoV-19/Wales/PHWC-498124/2020|2020-11-30|EPI\_ISL\_727029|Original|hCoV-19^^Wales|Human|Originating lab|COVID-19 Genomics UK (COG-UK) Consortium|Moore|United Kingdom

>Spike|hCoV-19/Jordan/AM-ALSR-5140/2020|2020-10-12|EPI\_ISL\_730379|Original|hCoV-19^^Amman|Human|Biolab Diagnostic Laboratories|Andersen lab at Scripps Research|Gangavarapu|Jordan

>Spike|hCoV-19/Wales/PHWC-4A1674/2020|2020-12-10|EPI\_ISL\_743707|Original|hCoV-19^^Wales|Human|Wales Specialist Virology Centre Sequencing lab|COVID-19 Genomics UK (COG-UK) Consortium|Moore|United Kingdom

>Spike|hCoV-19/England/LIVE-1DDE3E/2020|2020-10-09|EPI\_ISL\_611630|Original|hCoV-19^^England|Human|Liverpool Clinical Laboratories|COVID-19 Genomics UK (COG-UK) Consortium|Haldenby|United Kingdom

>Spike|hCoV-19/England/204821479/2020|2020-11-21|EPI\_ISL\_678774|Original|hCoV-19^^England|Human|Respiratory Virus Unit|COVID-19 Genomics UK (COG-UK) Consortium|Platt|United Kingdom

>Spike|hCoV-19/England/QEUEH-AD5E79/2020|2020-10-26|EPI\_ISL\_634707|Original|hCoV-19^^England|Human|Lighthouse Lab in Glasgow|Wellcome Sanger Institute for the COVID-19 Genomics UK (COG-UK) consortium|Davies|United Kingdom

>Spike|hCoV-19/Denmark/DCGC-11677/2020|2020-10-26|EPI\_ISL\_670756|Original|hCoV-19^^Hovedstaden|Human|Department of Virus and Microbiological Special Diagnostics|Albertsen Lab|Michaelsen|Denmark

>Spike|hCoV-19/England/ALDP-AA2947/2020|2020-10-21|EPI\_ISL\_630716|Original|hCoV-19^^England|Human|Lighthouse Lab in Alderley Park|Wellcome Sanger Institute for the COVID-19 Genomics UK (COG-UK) consortium|Davies|United Kingdom

>Spike|hCoV-19/France/NAQ-SC254/2020|2020-03-11|EPI\_ISL\_645175|Original|hCoV-19^^Nouvelle-Aquitaine|Human|CHU de Limoges|CNR Virus des Infections Respiratoires - France SUD|Bal|France

>Spike|hCoV-19/England/ALDP-9E72D3/2020|2020-09-24|EPI\_ISL\_580317|Original|hCoV-19^^England|Human|Lighthouse Lab in Alderley Park|Wellcome Sanger Institute for the COVID-19 Genomics UK (COG-UK) consortium|Davies|United Kingdom

>Spike|hCoV-19/England/QEUA-B6C90C/2020|2020-11-11|EPI\_ISL\_655084|Original|hCoV-19^^England|Human|Lighthouse Lab in Glasgow|Wellcome Sanger Institute for the COVID-19 Genomics UK (COG-UK) Consortium|Davies|United Kingdom

>Spike|hCoV-19/England/ALDP-A69487/2020|2020-10-12|EPI\_ISL\_609106|Original|hCoV-19^^England|Human|Lighthouse Lab in Alderley Park|Wellcome Sanger Institute for the COVID-19 Genomics UK (COG-UK) consortium|Davies|United Kingdom

>Spike|hCoV-19/USA/SC-DHEC-1180/2020|2020-07-13|EPI\_ISL\_574548|Original|hCoV-19^^South Carolina|Human|Microbiology Division|Microbiology Division|Flores|USA

>Spike|hCoV-19/England/MILK-B3923A/2020|2020-11-01|EPI\_ISL\_652298|Original|hCoV-19^^England|Human|University of Exeter|COVID-19 Genomics UK (COG-UK) Consortium|Temperton|United Kingdom

>Spike|hCoV-19/Canada/QC-LSPQ-L00234169/2020|2020-03-23|EPI\_ISL\_560415|Original|hCoV-19^^Quebec|Human|Centre Hospitalier R\u00e9gional de Lanaud\u00e9re|Laboratoire de sant\u00e9 publique du Qu\u00e9bec|Moreira|Canada

>Spike|hCoV-19/England/ALDP-B85A19/2020|2020-11-11|EPI\_ISL\_675746|Original|hCoV-19^^England|Human|Lighthouse Lab in Alderley Park|Wellcome Sanger Institute for the COVID-19 Genomics UK (COG-UK) Consortium|Davies|United Kingdom

>Spike|hCoV-19/Brazil/SP-L35-CD900/2020|2020-04-25|EPI\_ISL\_722039|Original|hCoV-19^^S\u00e3o Paulo|Human|Hospital das Cl\u00ednicas Universidade de S\u00e3o Paulo Medical School|Laborat\u00f3rio de Parasitologia M\u00e9dica - Instituto de Medicina Tropical - Universidade de S\u00e3o Paulo|de Jesus|Brazil

>Spike|hCoV-19/Australia/VIC6859/2020|2020-07-26|EPI\_ISL\_564101|Original|hCoV-19^^Victoria|Human|Victorian Infectious Diseases Reference Laboratory (VIDRL)|VIDRL and MDU-PHL|Schultz|Australia

>Spike|hCoV-19/USA/TX-HMH-MCoV-9061/2020|2020-07-02|EPI\_ISL\_780925|Original|hCoV-19^^Texas|Human|Houston Methodist Hospital|Houston Methodist Hospital|Long|USA

>Spike|hCoV-19/England/ALDP-B2740C/2020|2020-11-04|EPI\_ISL\_646972|Original|hCoV-19^^England|Human|Lighthouse Lab in Alderley Park|Wellcome Sanger Institute for the COVID-19 Genomics UK (COG-UK) Consortium|Davies|United Kingdom

>Spike|hCoV-19/England/ALDP-A6D5AE/2020|2020-10-14|EPI\_ISL\_606932|Original|hCoV-19^^England|Human|Lighthouse Lab in Alderley Park|Wellcome Sanger Institute for the COVID-19 Genomics UK (COG-UK) consortium|Davies|United Kingdom

>Spike|hCoV-19/England/QEUA-A63F8C/2020|2020-10-12|EPI\_ISL\_628678|Original|hCoV-19^^England|Human|Oxford Viromics|COVID-19 Genomics UK (COG-UK) Consortium|Golubchik|United Kingdom

>Spike|hCoV-19/Netherlands/un-EMC-749/2020|2020-03-30|EPI\_ISL\_523505|Original|hCoV-19^^Netherlands|Human|Dutch COVID-19 response team|Erasmus Medical Center|Oude Munnink|Netherlands

>Spike|hCoV-19/India/TN-CCMB-C5/2020|2020-04-29|EPI\_ISL\_458033|Original|hCoV-19^^Tamil Nadu|Human|King Institute of Preventive Medicine & Research|CSIR-Centre for Cellular and Molecular Biology|Banu|India

>Spike|hCoV-19/England/CAMB-760E7/2020|2020-03-30|EPI\_ISL\_439450|Original|hCoV-19^^England|Human|Department of Pathology|Wellcome Sanger Institute for the COVID-19 Genomics UK (COG-UK) consortium|Amato|United Kingdom

>Spike|hCoV-19/England/NOTT-10E793/2020|2020-03-25|EPI\_ISL\_425592|Original|hCoV-19^^England|Human|Queens Medical Centre|COVID-19 Genomics UK (COG-UK) Consortium|Loose|United Kingdom

>Spike|hCoV-19/Chile/RM-87464-TC1/2020|2020-06-02|EPI\_ISL\_746818|Vero E6|hCoV-19^^Region Metropolitana de Santiago|Human|Genetica Molecular and Subdepartamento de Virologia ISP Chile|Instituto de Salud Publica de Chile|Tognarelli|Chile

>Spike|hCoV-19/Scotland/CVR2371/2020|2020-04-13|EPI\_ISL\_477920|Original|hCoV-19^^Scotland|Human|West of Scotland Specialist Virology Centre|COVID-19 Genomics UK (COG-UK) Consortium|Robertson|United Kingdom

>Spike|hCoV-19/USA/WI-GMF-30636/2020|2020-11-01|EPI\_ISL\_661043|Original|hCoV-19^^Wisconsin|Human|Gundersen Molecular Diagnostics Laboratory|Kabara Cancer Research Institute|Kenny|USA

>Spike|hCoV-19/Australia/VIC12711/2020|2020-07-29|EPI\_ISL\_640460|Original|hCoV-19^^Victoria|Human|Microbiological Diagnostic Unit - Public Health Laboratory (MDU-PHL)|MDU-PHL|Schultz|Australia

>Spike|hCoV-19/Switzerland/BS-UHB-42201335/2020|2020-03-21|EPI\_ISL\_528292|Original|hCoV-19^^Basel-Stadt|Human|University Hospital Basel|University Hospital Basel|Roloff Handschin|Switzerland

>Spike|hCoV-19/Russia/StPetersburg-RII5654S/2020|2020-04-14|EPI\_ISL\_430098|Original|hCoV-19^^Saint Petersburg|Human|WHO National Influenza Centre Russian Federation|WHO National Influenza Centre Russian Federation|Komissarov|Russia

>Spike|hCoV-19/England/LIVE-A0776/2020|2020-06-02|EPI\_ISL\_472134|Original|hCoV-19^^England|Human|Liverpool Clinical Laboratories|COVID-19 Genomics UK (COG-UK) Consortium|Haldenby|United Kingdom

>Spike|hCoV-19/Netherlands/NA\_269/2020|2020-03-30|EPI\_ISL\_422580|Original|hCoV-19^^Netherlands|Human|Dutch COVID-19 response team|Erasmus Medical Center|Oude Munnink|Netherlands

>Spike|hCoV-19/Japan/PG-0697/2020|2020-04-00|EPI\_ISL\_684307|Original|hCoV-19^^Japan|Human|Pathogen Genomics Center|Pathogen Genomics Center|Sekizuka|Japan

>Spike|hCoV-19/Canada/MB-NML-796/2020|2020-06-15|EPI\_ISL\_582315|Original|hCoV-19^^Manitoba|Human|Cadham Provincial Laboratory|National Microbiology Laboratory (NML)|Majer|Canada

>Spike|hCoV-19/Scotland/CVR180/2020|2020-03-17|EPI\_ISL\_425721|Original|hCoV-19^^Scotland|Human|West of Scotland Specialist Virology Centre|COVID-19 Genomics UK (COG-UK) Consortium|Robertson|United Kingdom

>Spike|hCoV-19/England/MILK-9A9CC0/2020|2020-09-01|EPI\_ISL\_551094|Original|hCoV-19^^England|Human|Lighthouse Lab in Milton Keynes|Wellcome Sanger Institute for the COVID-19 Genomics UK (COG-UK) consortium|Davies|United Kingdom

>Spike|hCoV-19/Sweden/20-08082/2020|2020-03-05|EPI\_ISL\_454456|Original|hCoV-19^^Stockholm|Human|Karolinska Universitetslaboratoriet|The Public Health Agency of Sweden|Svartstr\u00f6m|Sweden

>Spike|hCoV-19/Spain/VC-IBV-98003524/2020|2020-03-27|EPI\_ISL\_537959|Original|hCoV-19^^Comunitat Valenciana|Human|Servicio de Microbiolog\u00eda. Hospital General Universitario de Castell\u00f3n|SeqCOVID-SPAIN consortium|IBV(CSIC)|Comas|Spain

>Spike|hCoV-19/Netherlands/GE-EMC-170/2020|2020-05-22|EPI\_ISL\_523153|Original|hCoV-19^^Gelderland|Human|Dutch COVID-19 response team|Erasmus Medical Center|Oude Munnink|Netherlands

>Spike|hCoV-19/Japan/PG-6640/2020|2020-06-00|EPI\_ISL\_687752|Original|hCoV-19^^Japan|Human|Pathogen Genomics Center|Pathogen Genomics Center|Sekizuka|Japan

>Spike|hCoV-19/Japan/PG-5299/2020|2020-08-00|EPI\_ISL\_690402|Original|hCoV-19^^Japan|Human|Pathogen Genomics Center|Pathogen Genomics Center|Sekizuka|Japan

>Spike|hCoV-19/Germany/BB-ChVir-W1132-8159/2020|2020-04-07|EPI\_ISL\_753718|Original|hCoV-19^^Brandenburg|Human|Charit\u00e9 Universit\u00e4tsmedizin Berlin|Charit\u00e9 Universit\u00e4tsmedizin Berlin|Muehleemann|Germany

>Spike|hCoV-19/USA/NY-Wadsworth-18758-01/2020|2020-03-16|EPI\_ISL\_676745|Original|hCoV-19^^New York|Human|Wadsworth Center|Wadsworth Center|Lasek-Nesselquist|USA

>Spike|hCoV-19/USA/MI-MDHHS-SC22145/2020|2020-10-06|EPI\_ISL\_614196|Original|hCoV-19^^Michigan|Human|Michigan Department of Health and Human Services|Michigan Department of Health and Human Services|Jacob|USA

>Spike|hCoV-19/Vietnam/PIHCM-638/2020|2020-04-01|EPI\_ISL\_654881|Vero E6|hCoV-19^^Ho Chi Minh city|Human|Pasteur Institute in Ho Chi Minh city|Department of Microbiology and Immunology - Pasteur Institute in Ho Chi Minh city|Vu|Viet Nam

>Spike|hCoV-19/England/MILK-B8ED17/2020|2020-11-13|EPI\_ISL\_674614|Original|hCoV-19^^England|Human|Lighthouse Lab in Milton Keynes|Wellcome Sanger Institute for the COVID-19 Genomics UK (COG-UK) Consortium|Davies|United Kingdom

>Spike|hCoV-19/Denmark/DCGC-10262/2020|2020-11-09|EPI\_ISL\_669865|Original|hCoV-19^^Sjaelland|Human|Department of Virus and Microbiological Special Diagnostics|Albertsen Lab|Michaelsen|Denmark

>Spike|hCoV-19/England/ALDP-B63AE4/2020|2020-11-09|EPI\_ISL\_656582|Original|hCoV-19^^England|Human|Lighthouse Lab in Alderley Park|Wellcome Sanger Institute for the COVID-19 Genomics UK (COG-UK) Consortium|Davies|United Kingdom

>Spike|hCoV-19/Canada/QC-LSPQ-L00243257/2020|2020-03-30|EPI\_ISL\_536352|Original|hCoV-19^^Quebec|Human|H\u00f4pital Pierre-Boucher|Laboratoire de sant\u00e9 publique du Qu\u00e9bec|Moreira|Canada

>Spike|hCoV-19/Russia/DA-RII-MH2744S/2020|2020-09-25|EPI\_ISL\_602422|Original|hCoV-19^^Dagestan|Human|HELIX LLC|WHO National Influenza Centre Russian Federation|Komissarov|Russia

>Spike|hCoV-19/Germany/HH-hpi-p2167/2020|2020-03-28|EPI\_ISL\_776397|Original|hCoV-19^^Hamburg|Human|University Medical Center Hamburg Eppendorf|Heinrich Pette Institute|Robitaille|Germany

>Spike|hCoV-19/Finland/5May26S2/2020|2020-05-05|EPI\_ISL\_481697|Original|hCoV-19^^Uusimaa|Human|Department of Virology and Immunology|Department of Virology|Smura|Finland

>Spike|hCoV-19/England/MILK-A699B5/2020|2020-10-09|EPI\_ISL\_665856|Original|hCoV-19^^England|Human|University of Exeter|COVID-19 Genomics UK (COG-UK) Consortium|Temperton|United Kingdom

>Spike|hCoV-19/Bangladesh/BCSIR-NILMRC-278/2020|2020-07-19|EPI\_ISL\_498418|Original|hCoV-19^^Chittagong|Human|National Institute of Laboratory Medicine and Referral Center|Genomic Research Lab|Khan|Bangladesh

>Spike|hCoV-19/USA/TX-HMH-MCoV-18087/2020|2020-11-16|EPI\_ISL\_784435|Original|hCoV-19^^Texas|Human|Houston Methodist Hospital|Houston Methodist Hospital|Long|USA

>Spike|hCoV-19/USA/HI-H200614/2020|2020-11-23|EPI\_ISL\_753140|Original|hCoV-19^^Hawaii|Human|State Laboratories Division|State Laboratories Division|Sultana|USA

>Spike|hCoV-19/Netherlands/NH-RIVM-20695/2020|2020-12-14|EPI\_ISL\_790635|Original|hCoV-19^^Noord-Holland|Human|Dutch COVID-19 response team|National Institute for Public Health and the Environment (RIVM)|Meijer|Netherlands

>Spike|hCoV-19/France/PAC-IHU-0689/2020|2020-04-14|EPI\_ISL\_568936|Original|hCoV-19^^Provence-Alpes-C\u00f4te-d\u0201Azur|Human|MEPHI|MEPHI|Levasseur|France

>Spike|hCoV-19/England/LIVE-DC4D22/2020|2020-11-10|EPI\_ISL\_705409|Original|hCoV-19^^England|Human|Liverpool Clinical Laboratories|COVID-19 Genomics UK (COG-UK) Consortium|Haldenby|United Kingdom

>Spike|hCoV-19/England/ALDP-CB37DE/2020|2020-12-20|EPI\_ISL\_761327|Original|hCoV-19^^England|Human|Lighthouse Lab in Alderley Park|Wellcome Sanger Institute for the COVID-19 Genomics UK (COG-UK) Consortium|Davies|United Kingdom

>Spike|hCoV-19/England/QEUH-B0F14F/2020|2020-11-02|EPI\_ISL\_642679|Original|hCoV-19^^England|Human|Lighthouse Lab in Glasgow|Wellcome Sanger Institute for the COVID-19 Genomics UK (COG-UK) Consortium|Davies|United Kingdom

>Spike|hCoV-19/England/QEUH-C34113/2020|2020-12-11|EPI\_ISL\_734020|Original|hCoV-19^^England|Human|Lighthouse Lab in Glasgow|Wellcome Sanger Institute for the COVID-19 Genomics UK (COG-UK) Consortium|Davies|United Kingdom

>Spike|hCoV-19/Wales/PHWC-16A7C2/2020|2020-09-10|EPI\_ISL\_560105|Original|hCoV-19^^Wales|Human|Wales Specialist Virology Centre Sequencing lab|COVID-19 Genomics UK (COG-UK) Consortium|Moore|United Kingdom

>Spike|hCoV-19/England/LIVE-DC4C52/2020|2020-11-11|EPI\_ISL\_702753|Original|hCoV-19^^England|Human|Liverpool Clinical Laboratories|COVID-19 Genomics UK (COG-UK) Consortium|Haldenby|United Kingdom

>Spike|hCoV-19/England/QEUH-9AE92E/2020|2020-09-02|EPI\_ISL\_577255|Original|hCoV-19^^England|Human|University of Exeter|COVID-19 Genomics UK (COG-UK) Consortium|Temperton|United Kingdom

>Spike|hCoV-19/France/IDF-9157/2020|2020-09-01|EPI\_ISL\_593914|Original|hCoV-19^^\u00cele-de-France|Human|Hospital|National Reference Center for Viruses of Respiratory Infections|Enouf|France

>Spike|hCoV-19/England/ALDP-94A97F/2020|2020-06-11|EPI\_ISL\_555829|Original|hCoV-19^^England|Human|Lighthouse Lab in Alderley Park|Wellcome Sanger Institute for the COVID-19 Genomics UK (COG-UK) consortium|Davies|United Kingdom

>Spike|hCoV-19/Denmark/DCGC-12378/2020|2020-11-16|EPI\_ISL\_682559|Original|hCoV-19^^Syddanmark|Human|Department of Virus and Microbiological Special Diagnostics|Albertsen Lab|Michaelsen|Denmark

>Spike|hCoV-19/England/PORT-2D180E/2020|2020-04-12|EPI\_ISL\_484421|Original|hCoV-19^^England|Human|Centre for Enzyme Innovation|COVID-19 Genomics UK (COG-UK) Consortium|Robson|United Kingdom

>Spike|hCoV-19/Palestine/80/2020|2020-07-09|EPI\_ISL\_596556|Original|hCoV-19^^Nablus|Human|Palestinian Ministry of Health|Molecular Genetics Lab|van Dorp|Palestine

>Spike|hCoV-19/Italy/PIE-SLL-MS55/2020|2020-03-31|EPI\_ISL\_569871|Original|hCoV-19^^Piedmont|Human|Amedeo di savoia|Crosetto lab|Harbers|Italy

>Spike|hCoV-19/Jordan/AM-ALSR-3983/2020|2020-10-03|EPI\_ISL\_636346|Original|hCoV-19^^Amman|Human|Biolab Diagnostic Laboratories|Andersen lab at Scripps Research|Gangavarapu|Jordan

>Spike|hCoV-19/USA/CA-QDX-2136/2020|2020-03-21|EPI\_ISL\_604424|Original|hCoV-19^^California|Human|Quest Diagnostics|Quest Diagnostics|Kagan|USA

>Spike|hCoV-19/Wales/PHWC-482BA7/2020|2020-10-18|EPI\_ISL\_613271|Original|hCoV-19^^Wales|Human|Wales Specialist Virology Centre Sequencing lab|COVID-19 Genomics UK (COG-UK) Consortium|Moore|United Kingdom

>Spike|hCoV-19/England/MILK-AB8119/2020|2020-10-22|EPI\_ISL\_623442|Original|hCoV-19^^England|Human|Lighthouse Lab in Milton Keynes|Wellcome Sanger Institute for the COVID-19 Genomics UK (COG-UK) consortium|Davies|United Kingdom

>Spike|hCoV-19/England/20108034006/2020|2020-03-06|EPI\_ISL\_417258|Original|hCoV-19^^England|Human|Respiratory Virus Unit|Respiratory Virus Unit|Platt|United Kingdom

>Spike|hCoV-19/England/MILK-A7D4EA/2020|2020-10-13|EPI\_ISL\_606575|Original|hCoV-19^^England|Human|Lighthouse Lab in Milton Keynes|Wellcome Sanger Institute for the COVID-19 Genomics UK (COG-UK) consortium|Davies|United Kingdom

>Spike|hCoV-19/Scotland/CVR2616/2020|2020-04-15|EPI\_ISL\_477988|Original|hCoV-19^^Scotland|Human|West of Scotland Specialist Virology Centre|COVID-19 Genomics UK (COG-UK) Consortium|Robertson|United Kingdom

>Spike|hCoV-19/Luxembourg/LNS3649868/2020|2020-10-22|EPI\_ISL\_740347|Original|hCoV-19^^Luxembourg|Human|Laboratoire national de sant\u00e9|Laboratoire national de sant\u00e9|Wienecke-Baldacchino|Luxembourg

>Spike|hCoV-19/USA/TX-HMH-MCoV-8433/2020|2020-07-01|EPI\_ISL\_784396|Original|hCoV-19^^Texas|Human|Houston Methodist Hospital|Houston Methodist Hospital|Long|USA

>Spike|hCoV-19/Denmark/DCGC-19137/2020|2020-12-07|EPI\_ISL\_748365|Original|hCoV-19^^Syddanmark|Human|Department of Virus and Microbiological Special Diagnostics|Albertsen Lab|Michaelsen|Denmark

>Spike|hCoV-19/Australia/VIC8092/2020|2020-08-16|EPI\_ISL\_564843|Original|hCoV-19^^Victoria|Human|Microbiological Diagnostic Unit - Public Health Laboratory (MDU-PHL)|MDU-PHL|Schultz|Australia

>Spike|hCoV-19/USA/CA-CHLA-PLM48846138/2020|2020-11-30|EPI\_ISL\_753503|Original|hCoV-19^^California|Human|Clinical virology Laboratory|Center for Personalized Medicine|Dien Bard|USA

>Spike|hCoV-19/USA/MI-MDHHS-SC21169/2020|2020-04-03|EPI\_ISL\_507426|Original|hCoV-19^^Michigan|Human|Michigan Department of Health and Human Services|Michigan Department of Health and Human Services|Blankenship|USA

>Spike|hCoV-19/England/CAMC-B77A29/2020|2020-11-12|EPI\_ISL\_783432|Original|hCoV-19^^England|Human|Lighthouse Lab in Cambridge|Wellcome Sanger Institute for the COVID-19 Genomics UK (COG-UK) Consortium|Davies|United Kingdom

>Spike|hCoV-19/France/PAC-IHU-1173/2020|2020-08-14|EPI\_ISL\_569075|Original|hCoV-19^^Provence-Alpes-C\u00f4te-d\u0192Azur|Human|MEPHI|MEPHI|Levasseur|France

>Spike|hCoV-19/USA/TX-HMH-7957/2020|2020-06-29|EPI\_ISL\_545739|Original|hCoV-19^^Texas|Human|Houston Methodist Hospital|Houston Methodist Hospital|Long|USA

>Spike|hCoV-19/USA/TX-DSHS-0653/2020|2020-07-19|EPI\_ISL\_576307|Original|hCoV-19^^Texas|Human|Texas Department of State Health Services|Texas Department of State Health Services|Rahman|USA

>Spike|hCoV-19/Spain/AR-IBV-98010584/2020|2020-10-05|EPI\_ISL\_722222|Original|hCoV-19^^Aragon|Human|Servicio de Microbiolog\u00eda|SeqCOVID-SPAIN consortium|IBV (CSIC)|Comas|Spain

>Spike|hCoV-19/Switzerland/ZH-ETHZ-390419/2020|2020-12-03|EPI\_ISL\_721978|Original|hCoV-19^^Zurich|Human|Viollier AG|Department of Biosystems Science and Engineering|Nadeau|Switzerland

>Spike|hCoV-19/USA/MI-UM-10035752975/2020|2020-09-01|EPI\_ISL\_583301|Original|hCoV-19^^Michigan|Human|University of Michigan Clinical Microbiology Laboratory|Lauring Lab|Valesano|USA

>Spike|hCoV-19/Wales/PHWC-480787/2020|2020-10-17|EPI\_ISL\_612929|Original|hCoV-19^^Wales|Human|Wales Specialist Virology Centre Sequencing lab|COVID-19 Genomics UK (COG-UK) Consortium|Moore|United Kingdom

>Spike|hCoV-19/Australia/VIC4497/2020|2020-07-16|EPI\_ISL\_518908|Original|hCoV-19^^Victoria|Human|Microbiological Diagnostic Unit - Public Health Laboratory (MDU-PHL)|MDU-PHL|Schultz|Australia

>Spike|hCoV-19/Wales/MILK-9E0D7F/2020|2020-09-19|EPI\_ISL\_601382|Original|hCoV-19^^Wales|Human|Lighthouse Lab in Milton Keynes|Wellcome Sanger Institute for the COVID-19 Genomics UK (COG-UK) consortium|Davies|United Kingdom

>Spike|hCoV-19/Belgium/UGent-98/2020|2020-03-17|EPI\_ISL\_468746|Original|hCoV-19^^Ghent|Human|Lab voor klinische biologie|Onderzoeksgroep Virologie|Lambrechts|Belgium

>Spike|hCoV-19/Japan/PG-5881/2020|2020-08-00|EPI\_ISL\_688996|Original|hCoV-19^^Japan|Human|Pathogen Genomics Center|Pathogen Genomics Center|Sekizuka|Japan

>Spike|hCoV-19/USA/FL-ACYH/2020|2020-06-26|EPI\_ISL\_513270|Original|hCoV-19^^Florida|Human|University of Miami Immunology and Histocompatibility Laboratory|University of Miami Immunology and Histocompatibility Laboratory|Margolles-Clark|USA

>Spike|hCoV-19/Wales/PHWC-496E4D/2020|2020-11-25|EPI\_ISL\_726736|Original|hCoV-19^^Wales|Human|Originating lab|COVID-19 Genomics UK (COG-UK) Consortium|Moore|United Kingdom

>Spike|hCoV-19/USA/UT-UPHL-2009721/2020|2020-07-27|EPI\_ISL\_605393|Original|hCoV-19^^Utah|Human|Utah Public Health Laboratory|Utah Public Health Laboratory|Young|USA

>Spike|hCoV-19/England/LEED-2AA4A0/2020|2020-04-08|EPI\_ISL\_538892|Original|hCoV-19^^England|Human|Leeds Teaching Hospitals NHS Trust and Public Health England|Wellcome Sanger Institute for the COVID-19 Genomics UK (COG-UK) consortium|Davies|United Kingdom

>Spike|hCoV-19/USA/UT-UPHL-2009355/2020|2020-05-17|EPI\_ISL\_524950|Original|hCoV-19^^Utah|Human|Utah Public Health Laboratory|Utah Public Health Laboratory|Young|USA

>Spike|hCoV-19/England/MILK-999D48/2020|2020-08-29|EPI\_ISL\_550360|Original|hCoV-19^^England|Human|Lighthouse Lab in Milton Keynes|Wellcome Sanger Institute for the COVID-19 Genomics UK (COG-UK) consortium|Davies|United Kingdom

>Spike|hCoV-19/USA/MA-MGH-02769/2020|2020-09-24|EPI\_ISL\_765626|Original|hCoV-19^^Massachusetts|Human|Massachusetts General Hospital|Infectious Disease Program|Park|USA

>Spike|hCoV-19/Luxembourg/LNS2902167/2020|2020-12-17|EPI\_ISL\_740214|Original|hCoV-19^^Luxembourg|Human|Laboratoire national de sant\u00e9|Laboratoire national de sant\u00e9|Wienecke-Baldacchino|Luxembourg

>Spike|hCoV-19/Australia/VIC1039/2020|2020-04-03|EPI\_ISL\_430535|Original|hCoV-19^^Victoria|Human|Victorian Infectious Diseases Reference Laboratory (VIDRL)|Microbiological Diagnostic Unit Public Health Laboratory and Victorian Infectious Diseases Reference Laboratory|Schultz|Australia

>Spike|hCoV-19/Scotland/QEUH-9E52D5/2020|2020-09-24|EPI\_ISL\_601062|Original|hCoV-19^^Scotland|Human|Lighthouse Lab in Glasgow|Wellcome Sanger Institute for the COVID-19 Genomics UK (COG-UK) consortium|Davies|United Kingdom

>Spike|hCoV-19/England/NORT-1B71AA4/2020|2020-11-16|EPI\_ISL\_706314|Original|hCoV-19^^England|Human|Northumbria University / South Tees Hospitals NHS Foundation Trust / North Cumbria Integrated Care NHS Foundation Trust / North Tees and Hartlepool NHS Foundation Trust / Newcastle Hospitals NHS Foundation Trust|COVID-19 Genomics UK (COG-UK) Consortium|Bashton|United Kingdom

>Spike|hCoV-19/England/NORW-E9D7F/2020|2020-05-03|EPI\_ISL\_448364|Original|hCoV-19^^England|Human|Quadram Institute Bioscience|COVID-19 Genomics UK (COG-UK) Consortium|Alikhan|United Kingdom



>Spike|hCoV-19/England/MILK-B860BC/2020|2020-11-13|EPI\_ISL\_674059|Original|hCoV-19^^England|Human|Lighthouse Lab in Milton Keynes|Wellcome Sanger Institute for the COVID-19 Genomics UK (COG-UK) Consortium|Davies|United Kingdom

>Spike|hCoV-19/Denmark/DCGC-1247/2020|2020-04-27|EPI\_ISL\_614766|Original|hCoV-19^^Hovedstaden|Human|Department of Virus and Microbiological Special Diagnostics|Albertsen lab|Michaelsen|Denmark

>Spike|hCoV-19/India/HR-IMT-BZ140/2020|2020-08-25|EPI\_ISL\_547588|Original|hCoV-19^^Haryana|Human|Civil Hospital|CSIR-Institute of Microbial Technology|Patil|India

>Spike|hCoV-19/Switzerland/VD-ETHZ-270066/2020|2020-09-02|EPI\_ISL\_541475|Original|hCoV-19^^Vaud|Human|Viollier AG|Department of Biosystems Science and Engineering|Nadeau|Switzerland

>Spike|hCoV-19/England/CAMC-B21B85/2020|2020-11-01|EPI\_ISL\_647282|Original|hCoV-19^^England|Human|Lighthouse Lab in Cambridge|Wellcome Sanger Institute for the COVID-19 Genomics UK (COG-UK) Consortium|Davies|United Kingdom

>Spike|hCoV-19/Denmark/DCGC-18440/2020|2020-12-07|EPI\_ISL\_749237|Original|hCoV-19^^Sjaelland|Human|Department of Virus and Microbiological Special Diagnostics|Albertsen Lab|Michaelsen|Denmark

>Spike|hCoV-19/England/20144023904/2020|2020-03-27|EPI\_ISL\_423529|Original|hCoV-19^^England|Human|Respiratory Virus Unit|Respiratory Virus Unit|Platt|United Kingdom

>Spike|hCoV-19/Wales/PHWC-4895EE/2020|2020-11-02|EPI\_ISL\_639593|Original|hCoV-19^^Wales|Human|Wales Specialist Virology Centre Sequencing lab|COVID-19 Genomics UK (COG-UK) Consortium|Moore|United Kingdom

>Spike|hCoV-19/Scotland/EDB1031/2020|2020-04-06|EPI\_ISL\_705741|Original|hCoV-19^^Scotland|Human|Virology Department|COVID-19 Genomics UK (COG-UK) Consortium|McHugh|United Kingdom

>Spike|hCoV-19/USA/MN-MDH-1611/2020|2020-04-27|EPI\_ISL\_530207|Original|hCoV-19^^Minnesota|Human|Minnesota Department of Health|Minnesota Department of Health|Garfin|USA

>Spike|hCoV-19/Australia/VIC2194/2020|2020-06-24|EPI\_ISL\_521940|Original|hCoV-19^^Victoria|Human|Microbiological Diagnostic Unit - Public Health Laboratory (MDU-PHL)|MDU-PHL|Schultz|Australia

>Spike|hCoV-19/USA/CA-ALSR-1290/2020|2020-05-01|EPI\_ISL\_494483|Original|hCoV-19^^California|Human|San Diego County Public Health Laboratory|Andersen lab at Scripps Research|Gangavarapu|USA

>Spike|hCoV-19/South Africa/KRISP-K004731/2020|2020-10-20|EPI\_ISL\_660259|Original|hCoV-19^^KwaZulu-Natal|Human|Molecular Diagnostic Services (MDS)|KRISP|de Oliveira|South Africa

>Spike|hCoV-19/England/QEUEH-B145F0/2020|2020-11-03|EPI\_ISL\_642620|Original|hCoV-19^^England|Human|Lighthouse Lab in Glasgow|Wellcome Sanger Institute for the COVID-19 Genomics UK (COG-UK) Consortium|Davies|United Kingdom

>Spike|hCoV-19/England/LEED-2AA455/2020|2020-03-28|EPI\_ISL\_538925|Original|hCoV-19^^England|Human|Leeds Teaching Hospitals NHS Trust and Public Health England|Wellcome Sanger Institute for the COVID-19 Genomics UK (COG-UK) consortium|Davies|United Kingdom

>Spike|hCoV-19/England/NORT-29C66F/2020|2020-04-23|EPI\_ISL\_499506|Original|hCoV-19^^England|Human|Northumbria University / South Tees Hospitals NHS Foundation Trust / North Cumbria Integrated Care NHS Foundation Trust / North Tees and Hartlepool NHS Foundation Trust / Newcastle Hospitals NHS Foundation Trust|COVID-19 Genomics UK (COG-UK) Consortium|Bashton|United Kingdom

>Spike|hCoV-19/USA/TX-HMH-MCoV-18329/2020|2020-11-18|EPI\_ISL\_784677|Original|hCoV-19^^Texas|Human|Houston Methodist Hospital|Houston Methodist Hospital|Long|USA

>Spike|hCoV-19/England/QEUEH-C33C9B/2020|2020-12-11|EPI\_ISL\_734079|Original|hCoV-19^^England|Human|Lighthouse Lab in Glasgow|Wellcome Sanger Institute for the COVID-19 Genomics UK (COG-UK) Consortium|Davies|United Kingdom

>Spike|hCoV-19/England/QEUEH-BC48C9/2020|2020-11-25|EPI\_ISL\_703456|Original|hCoV-19^^England|Human|Lighthouse Lab in Glasgow|Wellcome Sanger Institute for the COVID-19 Genomics UK (COG-UK) Consortium|Davies|United Kingdom

>Spike|hCoV-19/USA/DE-DHSS-F918154/2020|2020-03-27|EPI\_ISL\_576150|Original|hCoV-19^^Delaware|Human|Delaware Public Health Lab|Delaware Public Health Lab|Bajwa|USA

>Spike|hCoV-19/England/MILK-A7DAF7/2020|2020-10-13|EPI\_ISL\_606374|Original|hCoV-19^^England|Human|Lighthouse Lab in Milton Keynes|Wellcome Sanger Institute for the COVID-19 Genomics UK (COG-UK) consortium|Davies|United Kingdom

>Spike|hCoV-19/Scotland/CVR1622/2020|2020-04-04|EPI\_ISL\_433632|Original|hCoV-19^^Scotland|Human|West of Scotland Specialist Virology Centre|COVID-19 Genomics UK (COG-UK) Consortium|Robertson|United Kingdom

>Spike|hCoV-19/USA/FL-BPHL-0409/2020|2020-05-14|EPI\_ISL\_489818|Original|hCoV-19^^Florida|Human|Florida Bureau of Public Health Laboratories|Florida Bureau of Public Health Laboratories|Blanton|USA

>Spike|hCoV-19/Cote d'Ivoire/BKE0258/2020|2020-06-19|EPI\_ISL\_614369|Original|hCoV-19^^Boauk\u00e9|Human|Molecular diagnostic unit for viral haemorrhagic fevers and emerging viruses|Project group Epidemiology of Highly Pathogenic Microorganisms|Calvignac-Spencer|C\u00f4te d'Ivoire

>Spike|hCoV-19/Brazil/SP-442/2020|2020-07-17|EPI\_ISL\_603039|Original|hCoV-19^^S\u00e3o Paulo|Human|Hospital Municipal M\u00e9lrio Gatti|Instituto Adolfo Lutz|Sacchi|Brazil

>Spike|hCoV-19/England/MILK-B3B07A/2020|2020-11-01|EPI\_ISL\_679739|Original|hCoV-19^^England|Human|Oxford Viromics|COVID-19 Genomics UK (COG-UK) Consortium|Golubchik|United Kingdom

>Spike|hCoV-19/England/QEUA-B421D7/2020|2020-11-08|EPI\_ISL\_657199|Original|hCoV-19^^England|Human|Lighthouse Lab in Glasgow|Wellcome Sanger Institute for the COVID-19 Genomics UK (COG-UK) Consortium|Davies|United Kingdom

>Spike|hCoV-19/Scotland/QEUA-AD1C37/2020|2020-10-26|EPI\_ISL\_643993|Original|hCoV-19^^Scotland|Human|Lighthouse Lab in Glasgow|Wellcome Sanger Institute for the COVID-19 Genomics UK (COG-UK) Consortium|Davies|United Kingdom

>Spike|hCoV-19/Luxembourg/LNS7357799/2020|2020-12-17|EPI\_ISL\_744557|Original|hCoV-19^^Luxembourg|Human|Laboratoire national de sant\u00e9|Laboratoire national de sant\u00e9|Wienecke-Baldacchino|Luxembourg

>Spike|hCoV-19/Switzerland/VD-ETHZ-100240/2020|2020-03-18|EPI\_ISL\_575000|Original|hCoV-19^^Vaud|Human|Viollier AG|Department of Biosystems Science and Engineering|Nadeau|Switzerland

>Spike|hCoV-19/USA/WA-S229/2020|2020-03-19|EPI\_ISL\_430267|Original|hCoV-19^^Washington|Human|Washington State Department of Health|Seattle Flu Study|Bedford|USA

>Spike|hCoV-19/Canada/ON-PHL-20-03776/2020|2020-11-00|EPI\_ISL\_775085|Original|hCoV-19^^Ontario|Human|Public Health Ontario Laboratory|Public Health Ontario Laboratory|Guthrie|Canada

>Spike|hCoV-19/Spain/PV-HUB-56574576/2020|2020-06-09|EPI\_ISL\_490977|Original|hCoV-19^^Basque Country|Human|Clinical Microbiology Laboratory- Basurto University Hospital|Biocruces-Bizkaia|Urrutikoetxea-Gutierrez|Spain

>Spike|hCoV-19/England/HECH-259A01F/2020|2020-05-15|EPI\_ISL\_482080|Original|hCoV-19^^England|Human|Microbiology Department|Wellcome Sanger Institute for the COVID-19 Genomics UK (COG-UK) consortium|Davies|United Kingdom

>Spike|hCoV-19/Australia/VIC6144/2020|2020-07-22|EPI\_ISL\_518155|Original|hCoV-19^^Victoria|Human|Victorian Infectious Diseases Reference Laboratory (VIDRL)|VIDRL and MDU-PHL|Schultz|Australia

>Spike|hCoV-19/USA/WA-S2649/2020|2020-06-20|EPI\_ISL\_497281|Original|hCoV-19^^Washington|Human|Washington State Department of Health|Seattle Flu Study|Lee|USA

>Spike|hCoV-19/Spain/MD-IBV-99008511/2020|2020-09-10|EPI\_ISL\_654074|Original|hCoV-19^^Madrid|Human|Hospital General Universitario Gregorio Marañ\u00f1\u00f3n|SeqCOVID-SPAIN consortium|IBV (CSIC)|Comas|Spain

>Spike|hCoV-19/England/MILK-A7BD5A/2020|2020-10-15|EPI\_ISL\_607375|Original|hCoV-19^^England|Human|Lighthouse Lab in Milton Keynes|Wellcome Sanger Institute for the COVID-19 Genomics UK (COG-UK) consortium|Davies|United Kingdom

>Spike|hCoV-19/England/QEUA-AA0211/2020|2020-10-20|EPI\_ISL\_611379|Original|hCoV-19^^England|Human|Lighthouse Lab in Glasgow|Wellcome Sanger Institute for the COVID-19 Genomics UK (COG-UK) consortium|Davies|United Kingdom

>Spike|hCoV-19/England/MILK-B04CC1/2020|2020-10-23|EPI\_ISL\_651339|Original|hCoV-19^^England|Human|Department of Pathology|COVID-19 Genomics UK (COG-UK) Consortium|Goodfellow|United Kingdom

>Spike|hCoV-19/England/204761558/2020|2020-11-18|EPI\_ISL\_678738|Original|hCoV-19^^England|Human|Respiratory Virus Unit|COVID-19 Genomics UK (COG-UK) Consortium|Platt|United Kingdom

>Spike|hCoV-19/England/CAMB-1BCB4D/2020|2020-12-02|EPI\_ISL\_764295|Original|hCoV-19^^England|Human|Department of Pathology|COVID-19 Genomics UK (COG-UK) Consortium|Goodfellow|United Kingdom

>Spike|hCoV-19/Wales/PHWC-4932AE/2020|2020-11-29|EPI\_ISL\_725863|Original|hCoV-19^^Wales|Human|Originating lab|COVID-19 Genomics UK (COG-UK) Consortium|Moore|United Kingdom

>Spike|hCoV-19/England/QEUEH-95E50B/2020|2020-08-07|EPI\_ISL\_537111|Original|hCoV-19^^England|Human|Lighthouse Lab in Glasgow|Wellcome Sanger Institute for the COVID-19 Genomics UK (COG-UK) consortium|Davies|United Kingdom

>Spike|hCoV-19/USA/WI-UW-1495/2020|2020-09-15|EPI\_ISL\_541622|Original|hCoV-19^^Wisconsin|Human|University of Wisconsin-Madison AIDS Vaccine Research Laboratories|University of Wisconsin-Madison AIDS Vaccine Research Laboratories|Baczenas|USA

>Spike|hCoV-19/Denmark/DCGC-14527/2020|2020-11-30|EPI\_ISL\_711819|Original|hCoV-19^^Hovedstaden|Human|Department of Virus and Microbiological Special Diagnostics|Albertsen Lab|Michaelsen|Denmark

>Spike|hCoV-19/USA/AZ-TG332555/2020|2020-05-26|EPI\_ISL\_694354|Original|hCoV-19^^Arizona|Human|TGen North|TGen North|French|USA

>Spike|hCoV-19/England/MILK-BAFC04/2020|2020-11-17|EPI\_ISL\_720421|Original|hCoV-19^^England|Human|Lighthouse Lab in Milton Keynes|Wellcome Sanger Institute for the COVID-19 Genomics UK (COG-UK) Consortium|Davies|United Kingdom

>Spike|hCoV-19/South Africa/LR00040/2020|2020-07-04|EPI\_ISL\_515167|Original|hCoV-19^^Gauteng|Human|National Institute for Communicable Diseases of the National Health Laboratory Service|National Institute for Communicable Diseases of the National Health Laboratory Service|Allam|South Africa

>Spike|hCoV-19/Brazil/RS-00643/2020|2020-11-25|EPI\_ISL\_770590|Original|hCoV-19^^Rio Grande do Sul|Human|Laborat\u00f3rio de Microbiologia Molecular - Universidade FEEVALE|Bioinformatics Laboratory / LNCC|Almeida|Brazil

>Spike|hCoV-19/USA/CA-CZB-13506/2020|2020-10-28|EPI\_ISL\_672516|Original|hCoV-19^^California|Human|Madera County Department of Public Health|Chan-Zuckerberg Biohub|Bhatt|USA

>Spike|hCoV-19/England/BRIS-12CAF0/2020|2020-04-18|EPI\_ISL\_481887|Original|hCoV-19^^England|Human|PHE South West Regional Laboratory|Wellcome Sanger Institute for the COVID-19 Genomics UK (COG-UK) consortium|Davies|United Kingdom

>Spike|hCoV-19/England/QEUEH-B40591/2020|2020-11-08|EPI\_ISL\_657124|Original|hCoV-19^^England|Human|Lighthouse Lab in Glasgow|Wellcome Sanger Institute for the COVID-19 Genomics UK (COG-UK) Consortium|Davies|United Kingdom

>Spike|hCoV-19/USA/NV-NSPHL-A0210/2020|2020-05-04|EPI\_ISL\_515462|Original|hCoV-19^^Nevada|Human|Nevada State Public Health Laboratory|Nevada State Public Health Laboratory|Sevinsky|USA

>Spike|hCoV-19/Japan/PG-8411/2020|2020-08-00|EPI\_ISL\_687510|Original|hCoV-19^^Japan|Human|Pathogen Genomics Center|Pathogen Genomics Center|Sekizuka|Japan

>Spike|hCoV-19/Netherlands/DR-RIVM-20247/2020|2020-11-23|EPI\_ISL\_723394|Original|hCoV-19^^Drenthe|Human|Dutch COVID-19 response team|National Institute for Public Health and the Environment (RIVM)|Meijer|Netherlands

>Spike|hCoV-19/England/ALDP-C39257/2020|2020-12-08|EPI\_ISL\_731389|Original|hCoV-19^^England|Human|Lighthouse Lab in Alderley Park|Wellcome Sanger Institute for the COVID-19 Genomics UK (COG-UK) Consortium|Davies|United Kingdom

>Spike|hCoV-19/England/CAMB-84C3D/2020|2020-03-11|EPI\_ISL\_440547|Original|hCoV-19^^England|Human|Department of Pathology|Wellcome Sanger Institute for the COVID-19 Genomics UK (COG-UK) consortium|Amato|United Kingdom

>Spike|hCoV-19/Australia/VIC1369/2020|2020-04-13|EPI\_ISL\_563808|Original|hCoV-19^^Victoria|Human|Victorian Infectious Diseases Reference Laboratory (VIDRL)|VIDRL and MDU-PHL|Schultz|Australia

>Spike|hCoV-19/England/ALDP-94A450/2020|2020-06-11|EPI\_ISL\_556421|Original|hCoV-19^^England|Human|Lighthouse Lab in Alderley Park|Wellcome Sanger Institute for the COVID-19 Genomics UK (COG-UK) consortium|Davies|United Kingdom

>Spike|hCoV-19/Hong Kong/VM20031414/2020|2020-07-07|EPI\_ISL\_510099|Original|hCoV-19^^Hong Kong|Human|Queen Mary Hospital|Hong Kong Department of Health|Mak|China

>Spike|hCoV-19/USA/OR-OHSU-3995/2020|2020-11-06|EPI\_ISL\_667519|Original|hCoV-19^^Oregon|Human|OHSU Lab Services Molecular Microbiology Lab|Oregon SARS-CoV-2 Genome Sequencing Center|O'Roak|USA

>Spike|hCoV-19/England/CAMC-AB211F/2020|2020-10-23|EPI\_ISL\_623548|Original|hCoV-19^^England|Human|Lighthouse Lab in Cambridge|Wellcome Sanger Institute for the COVID-19 Genomics UK (COG-UK) consortium|Davies|United Kingdom

>Spike|hCoV-19/England/CAMB-1AEBF3/2020|2020-05-04|EPI\_ISL\_448060|Original|hCoV-19^^England|Human|Department of Pathology|COVID-19 Genomics UK (COG-UK) Consortium|Meredith|United Kingdom

>Spike|hCoV-19/England/QEUH-9C90EC/2020|2020-09-14|EPI\_ISL\_567213|Original|hCoV-19^^England|Human|Lighthouse Lab in Glasgow|Wellcome Sanger Institute for the COVID-19 Genomics UK (COG-UK) consortium|Davies|United Kingdom

>Spike|hCoV-19/England/CAMC-C993AD/2020|2020-12-18|EPI\_ISL\_777367|Original|hCoV-19^^England|Human|Lighthouse Lab in Cambridge|Wellcome Sanger Institute for the COVID-19 Genomics UK (COG-UK) Consortium|Davies|United Kingdom

>Spike|hCoV-19/England/MILK-ACC8C2/2020|2020-10-21|EPI\_ISL\_629263|Original|hCoV-19^^England|Human|Lighthouse Lab in Milton Keynes|Wellcome Sanger Institute for the COVID-19 Genomics UK (COG-UK) consortium|Davies|United Kingdom

>Spike|hCoV-19/England/SHEF-C0206/2020|2020-03-28|EPI\_ISL\_420198|Original|hCoV-19^^England|Human|Virology Department|Department of Infection|de Silva|United Kingdom

>Spike|hCoV-19/England/204580491/2020|2020-11-05|EPI\_ISL\_683452|Original|hCoV-19^^England|Human|Respiratory Virus Unit|COVID-19 Genomics UK (COG-UK) Consortium|Platt|United Kingdom

>Spike|hCoV-19/England/MILK-BB17D1/2020|2020-11-18|EPI\_ISL\_720077|Original|hCoV-19^^England|Human|Lighthouse Lab in Milton Keynes|Wellcome Sanger Institute for the COVID-19 Genomics UK (COG-UK) Consortium|Davies|United Kingdom

>Spike|hCoV-19/England/CAMC-B981C3/2020|2020-11-15|EPI\_ISL\_674957|Original|hCoV-19^^England|Human|Lighthouse Lab in Cambridge|Wellcome Sanger Institute for the COVID-19 Genomics UK (COG-UK) Consortium|Davies|United Kingdom

>Spike|hCoV-19/England/ALDP-A67D06/2020|2020-10-10|EPI\_ISL\_609019|Original|hCoV-19^^England|Human|Lighthouse Lab in Alderley Park|Wellcome Sanger Institute for the COVID-19 Genomics UK (COG-UK) consortium|Davies|United Kingdom

>Spike|hCoV-19/USA/UT-010/2020|2020-03-10|EPI\_ISL\_417958|Original|hCoV-19^^Utah|Human|Utah Public Health Laboratory|Utah Public Health Laboratory|Young|USA

>Spike|hCoV-19/England/MILK-971845/2020|2020-08-18|EPI\_ISL\_553189|Original|hCoV-19^^England|Human|Lighthouse Lab in Milton Keynes|Wellcome Sanger Institute for the COVID-19 Genomics UK (COG-UK) consortium|Davies|United Kingdom

>Spike|hCoV-19/England/ALDP-AA3E38/2020|2020-10-22|EPI\_ISL\_624409|Original|hCoV-19^^England|Human|Lighthouse Lab in Alderley Park|Wellcome Sanger Institute for the COVID-19 Genomics UK (COG-UK) consortium|Davies|United Kingdom

>Spike|hCoV-19/USA/VA-DCLS-0131/2020|2020-04-14|EPI\_ISL\_437770|Original|hCoV-19^^Virginia|Human|Virginia DCLS|Virginia DCLS|St. Jacques|USA

>Spike|hCoV-19/England/BIRM-62998/2020|2020-08-25|EPI\_ISL\_529634|Original|hCoV-19^^England|Human|University of Birmingham|COVID-19 Genomics UK (COG-UK) Consortium|Loman|United Kingdom

>Spike|hCoV-19/USA/MI-MDHHS-SC22316/2020|2020-11-09|EPI\_ISL\_708292|Original|hCoV-19^^Michigan|Human|Michigan Department of Health and Human Services|Michigan Department of Health and Human Services|Jacob|USA

>Spike|hCoV-19/South Africa/R12683-20/2020|2020-06-16|EPI\_ISL\_504224|Original|hCoV-19^^North West|Human|National Institute for Communicable Diseases of the National Health Laboratory Service|National Institute for Communicable Diseases of the National Health Laboratory Service|Allam|South Africa

>Spike|hCoV-19/England/MILK-9715B7/2020|2020-08-18|EPI\_ISL\_553134|Original|hCoV-19^^England|Human|Lighthouse Lab in Milton Keynes|Wellcome Sanger Institute for the COVID-19 Genomics UK (COG-UK) consortium|Davies|United Kingdom

>Spike|hCoV-19/Denmark/DCGC-10490/2020|2020-11-02|EPI\_ISL\_670011|Original|hCoV-19^^Nordjylland|Human|Department of Virus and Microbiological Special Diagnostics|Albertsen Lab|Michaelsen|Denmark

>Spike|hCoV-19/Scotland/EDB885/2020|2020-04-04|EPI\_ISL\_433264|Original|hCoV-19^^Scotland|Human|Virology Department|COVID-19 Genomics UK (COG-UK) Consortium|Williams|United Kingdom

>Spike|hCoV-19/USA/FL-BPHL-0509/2020|2020-06-10|EPI\_ISL\_508712|Original|hCoV-19^^Florida|Human|Florida Bureau of Public Health Laboratories|Florida Bureau of Public Health Laboratories|Blanton|USA

>Spike|hCoV-19/Denmark/DCGC-3688/2020|2020-09-07|EPI\_ISL\_615463|Original|hCoV-19^^Hovedstaden|Human|Department of Virus and Microbiological Special Diagnostics|Albertsen lab|Michaelsen|Denmark

>Spike|hCoV-19/USA/NY-Wadsworth-277985-01/2020|2020-11-22|EPI\_ISL\_754615|Original|hCoV-19^^New York|Human|Wadsworth Center|Wadsworth Center|Lasek-Nesselquist|USA

>Spike|hCoV-19/Morocco/RMPS-11/2020|2020-04-24|EPI\_ISL\_482736|Original|hCoV-19^^Morocco|Human|LNR National Reference Laboratory|Medical Biotechnology Laboratory|Kartti|Morocco

>Spike|hCoV-19/Australia/VIC10149/2020|2020-08-14|EPI\_ISL\_562809|Original|hCoV-19^^Victoria|Human|Victorian Infectious Diseases Reference Laboratory (VIDRL)|VIDRL and MDU-PHL|Schultz|Australia

>Spike|hCoV-19/England/OXON-ADDF/2020|2020-00-00|EPI\_ISL\_448638|Original|hCoV-19^^England|Human|Oxford Viromics|COVID-19 Genomics UK (COG-UK) Consortium|Golubchik|United Kingdom

>Spike|hCoV-19/England/SHEF-D1F38/2020|2020-08-29|EPI\_ISL\_540770|Original|hCoV-19^^England|Human|Virology Department|COVID-19 Genomics UK (COG-UK) Consortium|de Silva|United Kingdom

>Spike|hCoV-19/USA/DE-DHSS-F918750/2020|2020-03-11|EPI\_ISL\_561353|Original|hCoV-19^^Delaware|Human|Delaware Public Health Lab|Delaware Public Health Lab|Bajwa|USA

>Spike|hCoV-19/USA/TX-HMH-6542/2020|2020-06-26|EPI\_ISL\_546068|Original|hCoV-19^^Texas|Human|Houston Methodist Hospital|Houston Methodist Hospital|Long|USA

>Spike|hCoV-19/USA/TX-HMH-6240/2020|2020-07-02|EPI\_ISL\_547334|Original|hCoV-19^^Texas|Human|Houston Methodist Hospital|Houston Methodist Hospital|Long|USA

>Spike|hCoV-19/England/CAMB-7FB56/2020|2020-04-17|EPI\_ISL\_433481|Original|hCoV-19^^England|Human|Department of Pathology|COVID-19 Genomics UK (COG-UK) Consortium|Meredith|United Kingdom

>Spike|hCoV-19/England/CAMB-1B02CC/2020|2020-05-01|EPI\_ISL\_459270|Original|hCoV-19^^England|Human|Department of Pathology|Wellcome Sanger Institute for the COVID-19 Genomics UK (COG-UK) consortium|Davies|United Kingdom

>Spike|hCoV-19/England/NORT-295BB2/2020|2020-04-03|EPI\_ISL\_478653|Original|hCoV-19^^England|Human|Northumbria University / South Tees Hospitals NHS Foundation Trust / North Cumbria Integrated Care NHS Foundation Trust / North Tees and Hartlepool NHS Foundation Trust / Newcastle Hospitals NHS Foundation Trust|COVID-19 Genomics UK (COG-UK) Consortium|Bashton|United Kingdom

>Spike|hCoV-19/Denmark/DCGC-9223/2020|2020-11-16|EPI\_ISL\_668727|Original|hCoV-19^^Nordjylland|Human|Department of Virus and Microbiological Special Diagnostics|Albertsen Lab|Michaelsen|Denmark

>Spike|hCoV-19/France/OCC-5/2020|2020-03-00|EPI\_ISL\_434620|Vero|hCoV-19^^Occitanie|Human|CHU Purpan - Laboratoire de Virologie - Institut F\u00e9d\u00e9ratif de Biologie|Laboratoire de virologie - \u00e9cole Nationale V\u00e9t\u00e9rinaire de Toulouse|Croville|France

>Spike|hCoV-19/Denmark/DCGC-1184/2020|2020-05-25|EPI\_ISL\_614830|Original|hCoV-19^^Syddanmark|Human|Department of Virus and Microbiological Special Diagnostics|Albertsen lab|Michaelsen|Denmark

>Spike|hCoV-19/Scotland/QEUA-B12914/2020|2020-11-02|EPI\_ISL\_649601|Original|hCoV-19^^Scotland|Human|Lighthouse Lab in Glasgow|Wellcome Sanger Institute for the COVID-19 Genomics UK (COG-UK) Consortium|Davies|United Kingdom

>Spike|hCoV-19/United Arab Emirates/0423/2020|2020-05-16|EPI\_ISL\_698597|Original|hCoV-19^^Abu Dhabi|Human|Group 42 (G42) Healthcare|G42 Healthcare|Ogrodzki|United Arab Emirates

>Spike|hCoV-19/France/PAC-MEPHI-2099/2020|2020-09-27|EPI\_ISL\_644495|Original|hCoV-19^^Provence-Alpes-Cote-d\u00e9Azur|Human|MEPHI|MEPHI|Levasseur|France

>Spike|hCoV-19/England/NORW-ED3F1/2020|2020-05-28|EPI\_ISL\_472363|Original|hCoV-19^^England|Human|Quadram Institute Bioscience|COVID-19 Genomics UK (COG-UK) Consortium|Alikhan|United Kingdom

>Spike|hCoV-19/England/SHEF-CB292/2020|2020-04-21|EPI\_ISL\_453740|Original|hCoV-19^^England|Human|Virology Department|COVID-19 Genomics UK (COG-UK) Consortium|de Silva|United Kingdom

>Spike|hCoV-19/England/ALDP-B75223/2020|2020-11-12|EPI\_ISL\_740901|Original|hCoV-19^^England|Human|Oxford Viromics|COVID-19 Genomics UK (COG-UK) Consortium|Golubchik|United Kingdom

>Spike|hCoV-19/England/20189054201/2020|2020-04-30|EPI\_ISL\_465536|Original|hCoV-19^^England|Human|Respiratory Virus Unit|Respiratory Virus Unit|Platt|United Kingdom

>Spike|hCoV-19/England/PORT-2D46F2/2020|2020-10-08|EPI\_ISL\_611589|Original|hCoV-19^^England|Human|Centre for Enzyme Innovation|COVID-19 Genomics UK (COG-UK) Consortium|Robson|United Kingdom

>Spike|hCoV-19/Netherlands/NB-EMC-181/2020|2020-05-08|EPI\_ISL\_523304|Original|hCoV-19^^Noord Brabant|Human|Dutch COVID-19 response team|Erasmus Medical Center|Oude Munnink|Netherlands

>Spike|hCoV-19/Netherlands/NB-RIVM-10305/2020|2020-03-04|EPI\_ISL\_636552|Original|hCoV-19^^NoordBrabant|Human|Dutch COVID-19 response team|National Institute for Public Health and the Environment (RIVM)|Meijer|Netherlands

>Spike|hCoV-19/Denmark/DCGC-19869/2020|2020-12-07|EPI\_ISL\_747840|Original|hCoV-19^^Hovedstaden|Human|Department of Virus and Microbiological Special Diagnostics|Albertsen Lab|Michaelsen|Denmark

>Spike|hCoV-19/Japan/PG-2201/2020|2020-04-00|EPI\_ISL\_685806|Original|hCoV-19^^Japan|Human|Pathogen Genomics Center|Pathogen Genomics Center|Sekizuka|Japan

>Spike|hCoV-19/Denmark/DCGC-16556/2020|2020-11-16|EPI\_ISL\_714216|Original|hCoV-19^^Syddanmark|Human|Department of Virus and Microbiological Special Diagnostics|Albertsen Lab|Michaelsen|Denmark

>Spike|hCoV-19/Italy/LOM-UniMI12/2020|2020-03-17|EPI\_ISL\_780376|Original|hCoV-19^^Lombardy|Human|Laboratory of Infectious Diseases|Laboratory of Infectious Diseases|Lai|Italy

>Spike|hCoV-19/England/NORT-29C9EE/2020|2020-05-01|EPI\_ISL\_484288|Original|hCoV-19^^England|Human|Northumbria University / South Tees Hospitals NHS Foundation Trust / North Cumbria Integrated Care NHS Foundation Trust / North Tees and Hartlepool NHS Foundation Trust / Newcastle Hospitals NHS Foundation Trust|COVID-19 Genomics UK (COG-UK) Consortium|Bashton|United Kingdom

>Spike|hCoV-19/Switzerland/AG-ETHZ-260060/2020|2020-08-23|EPI\_ISL\_539386|Original|hCoV-19^^Aargau|Human|Viollier AG|Department of Biosystems Science and Engineering|Nadeau|Switzerland

>Spike|hCoV-19/Indonesia/YO-UGM-107727/2020|2020-07-30|EPI\_ISL\_576145|Original|hCoV-19^^Special Region of Yogyakarta|Human|RSA Universitas Gadjah Mada|Genetics Working Group (Pokja Genetik) Faculty of Medicine|Gunadi|Indonesia

>Spike|hCoV-19/England/SHEF-10B2FA3/2020|2020-05-24|EPI\_ISL\_537259|Original|hCoV-19^^England|Human|Virology Department|Wellcome Sanger Institute for the COVID-19 Genomics UK (COG-UK) consortium|Davies|United Kingdom

>Spike|hCoV-19/USA/NY-Wadsworth-103611-01/2020|2020-05-15|EPI\_ISL\_676940|Original|hCoV-19^^New York|Human|Wadsworth Center|Wadsworth Center|Lasek-Nesselquist|USA

>Spike|hCoV-19/Switzerland/GE-SNRCI-29943121/2020|2020-02-27|EPI\_ISL\_414019|Original|hCoV-19^^Geneve|Human|Laboratoire de Virologie|Swiss National Reference Centre for Influenza|Gon\u00e7alves Cabecinhas|Switzerland

>Spike|hCoV-19/Norway/4995/2020|2020-10-23|EPI\_ISL\_708034|Original|hCoV-19^^Oslo|Human|Oslo University Hospital|Norwegian Institute of Public Health|Kopperud Riis|Norway

>Spike|hCoV-19/USA/UT-UPHL-2012216158/2020|2020-11-30|EPI\_ISL\_746841|Original|hCoV-19^^Utah|Human|Utah Public Health Laboratory|Utah Public Health Laboratory|Gallagher|USA

>Spike|hCoV-19/Scotland/QEUA-A5E616/2020|2020-10-12|EPI\_ISL\_609202|Original|hCoV-19^^Scotland|Human|Lighthouse Lab in Glasgow|Wellcome Sanger Institute for the COVID-19 Genomics UK (COG-UK) consortium|Davies|United Kingdom

>Spike|hCoV-19/England/MILK-9D48B9/2020|2020-09-19|EPI\_ISL\_601725|Original|hCoV-19^^England|Human|Lighthouse Lab in Milton Keynes|Wellcome Sanger Institute for the COVID-19 Genomics UK (COG-UK) consortium|Davies|United Kingdom

>Spike|hCoV-19/England/201421353/2020|2020-03-30|EPI\_ISL\_465964|Original|hCoV-19^^England|Human|Respiratory Virus Unit|Respiratory Virus Unit|Platt|United Kingdom

>Spike|hCoV-19/Wales/PHWC-489900/2020|2020-10-23|EPI\_ISL\_652424|Original|hCoV-19^^Wales|Human|Wales Specialist Virology Centre Sequencing lab|COVID-19 Genomics UK (COG-UK) Consortium|Moore|United Kingdom

>Spike|hCoV-19/USA/UT-03033/2020|2020-05-01|EPI\_ISL\_522305|Original|hCoV-19^^Utah|Human|Utah Public Health Laboratory|Utah Public Health Laboratory|Young|USA

>Spike|hCoV-19/England/ALDP-9CD4CE/2020|2020-09-16|EPI\_ISL\_566354|Original|hCoV-19^^England|Human|Lighthouse Lab in Alderley Park|Wellcome Sanger Institute for the COVID-19 Genomics UK (COG-UK) consortium|Davies|United Kingdom

>Spike|hCoV-19/Portugal/PT2057/2020|2020-11-09|EPI\_ISL\_732271|Original|hCoV-19^^Portugal|Human|Instituto Nacional de Saude (INSA) and Instituto Gulbenkian de Ciencia (IGC)|Instituto Nacional de Saude (INSA) and Instituto Gulbenkian de Ciencia (IGC)|Borges|Portugal

>Spike|hCoV-19/Japan/PG-8958/2020|2020-09-00|EPI\_ISL\_686504|Original|hCoV-19^^Japan|Human|Pathogen Genomics Center|Pathogen Genomics Center|Sekizuka|Japan

>Spike|hCoV-19/Denmark/DCGC-4103/2020|2020-09-14|EPI\_ISL\_622059|Original|hCoV-19^^Midtjylland|Human|Department of Virus and Microbiological Special Diagnostics|Albertsen lab|Michaelsen|Denmark

>Spike|hCoV-19/Bangladesh/BCSIR-NILMRC-083/2020|2020-06-01|EPI\_ISL\_464161|Original|hCoV-19^^Dhaka|Human|National Institute of Laboratory Medicine and Referral Center|Genomic Research Lab|Khan|Bangladesh

>Spike|hCoV-19/Denmark/DCGC-10481/2020|2020-11-02|EPI\_ISL\_670004|Original|hCoV-19^^Hovedstaden|Human|Department of Virus and Microbiological Special Diagnostics|Albertsen Lab|Michaelsen|Denmark

>Spike|hCoV-19/Scotland/CVR1993/2020|2020-04-09|EPI\_ISL\_433271|Original|hCoV-19^^Scotland|Human|West of Scotland Specialist Virology Centre|COVID-19 Genomics UK (COG-UK) Consortium|Robertson|United Kingdom

>Spike|hCoV-19/England/QEUA-AF11D8/2020|2020-10-29|EPI\_ISL\_666008|Original|hCoV-19^^England|Human|Northumbria University / South Tees Hospitals NHS Foundation Trust / North Cumbria Integrated Care NHS Foundation Trust / North Tees and Hartlepool NHS Foundation Trust / Newcastle Hospitals NHS Foundation Trust|COVID-19 Genomics UK (COG-UK) Consortium|Bashton|United Kingdom

>Spike|hCoV-19/South Africa/R12701-20/2020|2020-06-16|EPI\_ISL\_504231|Original|hCoV-19^^North West|Human|National Institute for Communicable Diseases of the National Health Laboratory Service|National Institute for Communicable Diseases of the National Health Laboratory Service|Allam|South Africa

>Spike|hCoV-19/Denmark/DCGC-5228/2020|2020-09-14|EPI\_ISL\_615899|Original|hCoV-19^^Nordjylland|Human|Department of Virus and Microbiological Special Diagnostics|Albertsen lab|Michaelsen|Denmark

>Spike|hCoV-19/England/LIVE-A84B3/2020|2020-03-26|EPI\_ISL\_517170|Original|hCoV-19^^England|Human|Liverpool Clinical Laboratories|COVID-19 Genomics UK (COG-UK) Consortium|Haldenby|United Kingdom

>Spike|hCoV-19/Russia/MOS-CRIE7150916/2020|2020-08-24|EPI\_ISL\_653924|Original|hCoV-19^^Moscow|Human|Molecular diagnostic laboratory of Federal Budget Institution of Science \Central Research Institute of Epidemiology\ of The Federal Service on Customers' Rights Protection and Human Well-being Surveillance|Group of Genomics and Postgenomic Technologies of Central Research Institute of Epidemiology|Samoilov|Russia

>Spike|hCoV-19/England/201360170/2020|2020-03-24|EPI\_ISL\_421769|Original|hCoV-19^^England|Human|Respiratory Virus Unit|Respiratory Virus Unit|Platt|United Kingdom

>Spike|hCoV-19/USA/CA-CZB-2293/2020|2020-06-20|EPI\_ISL\_513784|Original|hCoV-19^^California|Human|County of Santa Clara Public Health Department|Chan-Zuckerberg Biohub|Kamm|USA

>Spike|hCoV-19/Germany/SH-ChVir3214/2020|2020-03-23|EPI\_ISL\_729544|Original|hCoV-19^^Schleswig-Holstein|Human|A. Krumbholz|Charit\u00e9 Universit\u00e4tsmedizin Berlin|Muehleemann|Germany

>Spike|hCoV-19/Australia/VIC15223/2020|2020-08-03|EPI\_ISL\_593201|Original|hCoV-19^^Victoria|Human|Microbiological Diagnostic Unit - Public Health Laboratory (MDU-PHL)|MDU-PHL|Schultz|Australia

>Spike|hCoV-19/England/201160067/2020|2020-03-11|EPI\_ISL\_464784|Original|hCoV-19^^England|Human|Respiratory Virus Unit|Respiratory Virus Unit|Platt|United Kingdom

>Spike|hCoV-19/England/NOTT-10E0F2/2020|2020-03-19|EPI\_ISL\_425498|Original|hCoV-19^^England|Human|Queens Medical Centre|COVID-19 Genomics UK (COG-UK) Consortium|Loose|United Kingdom

>Spike|hCoV-19/Wales/PHWC-16608F/2020|2020-05-15|EPI\_ISL\_490831|Original|hCoV-19^^Wales|Human|Wales Specialist Virology Centre Sequencing lab|COVID-19 Genomics UK (COG-UK) Consortium|Moore|United Kingdom

>Spike|hCoV-19/Wales/PHWC-49FA31/2020|2020-12-09|EPI\_ISL\_743308|Original|hCoV-19^^Wales|Human|Wales Specialist Virology Centre Sequencing lab|COVID-19 Genomics UK (COG-UK) Consortium|Moore|United Kingdom

>Spike|hCoV-19/Wales/PHWC-167F36/2020|2020-05-28|EPI\_ISL\_494177|Original|hCoV-19^^Wales|Human|Originating lab|COVID-19 Genomics UK (COG-UK) Consortium|Moore|United Kingdom

>Spike|hCoV-19/Malaysia/7618/2020|2020-03-17|EPI\_ISL\_501221|Original|hCoV-19^^Kuala Lumpur|Human|Department of Medical Microbiology|Department of Medical Microbiology|Chan|Malaysia

>Spike|hCoV-19/Portugal/PT0707/2020|2020-03-22|EPI\_ISL\_510966|Original|hCoV-19^^Portugal|Human|Instituto Nacional de Saude (INSA)|Instituto Nacional de Saude (INSA)|Borges|Portugal

>Spike|hCoV-19/Denmark/DCGC-1571/2020|2020-06-15|EPI\_ISL\_618141|Original|hCoV-19^^Hovedstaden|Human|Department of Virus and Microbiological Special Diagnostics|Albertsen lab|Michaelsen|Denmark

>Spike|hCoV-19/Japan/P2-2/2020|2020-03-10|EPI\_ISL\_419298|Original|hCoV-19^^Chiba|Human|Chiba Prefectural Institute of Public Health|Pathogen Genomics Center|Sekizuka|Japan

>Spike|hCoV-19/Japan/PG-0264/2020|2020-03-00|EPI\_ISL\_479948|Original|hCoV-19^^Kansai|Human|Osaka Institute of Public Health|Pathogen Genomics Center|Sekizuka|Japan

>Spike|hCoV-19/Uganda/UG032/2020|2020-05-07|EPI\_ISL\_737938|Original|hCoV-19^^Uganda|Human|Uganda Central Public Health Lab and Uganda Virus Research Institute|MRC/UVRI & LSHTM Uganda\u00a0Research Unit|Cotten|Uganda

>Spike|hCoV-19/England/QEUH-C93464/2020|2020-12-16|EPI\_ISL\_761974|Original|hCoV-19^^England|Human|Lighthouse Lab in Glasgow|Wellcome Sanger Institute for the COVID-19 Genomics UK (COG-UK) Consortium|Davies|United Kingdom

>Spike|hCoV-19/England/CAMC-AAF8A7/2020|2020-10-23|EPI\_ISL\_631045|Original|hCoV-19^^England|Human|Lighthouse Lab in Cambridge|Wellcome Sanger Institute for the COVID-19 Genomics UK (COG-UK) consortium|Davies|United Kingdom

>Spike|hCoV-19/England/MILK-AC90FA/2020|2020-10-21|EPI\_ISL\_630319|Original|hCoV-19^^England|Human|Lighthouse Lab in Milton Keynes|Wellcome Sanger Institute for the COVID-19 Genomics UK (COG-UK) consortium|Davies|United Kingdom

>Spike|hCoV-19/USA/TX-HMH-4519/2020|2020-06-19|EPI\_ISL\_543688|Original|hCoV-19^^Texas|Human|Houston Methodist Hospital|Houston Methodist Hospital|Long|USA

>Spike|hCoV-19/Australia/VIC1882/2020|2020-04-16|EPI\_ISL\_480592|Original|hCoV-19^^Victoria|Human|Victorian Infectious Diseases Reference Laboratory (VIDRL)|VIDRL and MDU-PHL|Schultz|Australia

>Spike|hCoV-19/Wales/PHWC-2C7BE/2020|2020-03-31|EPI\_ISL\_445910|Original|hCoV-19^^Wales|Human|Wales Specialist Virology Centre|Public Health Wales Microbiology Cardiff|Moore|United Kingdom

>Spike|hCoV-19/USA/WI-UW-1000/2020|2020-07-17|EPI\_ISL\_509809|Original|hCoV-19^^Wisconsin|Human|University of Wisconsin-Madison AIDS Vaccine Research Laboratories|University of Wisconsin-Madison AIDS Vaccine Research Laboratories|Baczenas|USA



>Spike|hCoV-19/Australia/WA151/2020|2020-03-11|EPI\_ISL\_596714|Original|hCoV-19^^Western Australia|Human|PathWest Laboratory Medicine WA|PathWest Laboratory Medicine WA Microbial Surveillance Unit|Sikazwe|Australia

>Spike|hCoV-19/England/ALDP-9E592B/2020|2020-09-24|EPI\_ISL\_589466|Original|hCoV-19^^England|Human|Lighthouse Lab in Alderley Park|Wellcome Sanger Institute for the COVID-19 Genomics UK (COG-UK) consortium|Davies|United Kingdom

>Spike|hCoV-19/Scotland/EDB8381/2020|2020-10-14|EPI\_ISL\_612350|Original|hCoV-19^^Scotland|Human|Virology Department|COVID-19 Genomics UK (COG-UK) Consortium|McHugh|United Kingdom

>Spike|hCoV-19/England/ALDP-A70362/2020|2020-10-15|EPI\_ISL\_607806|Original|hCoV-19^^England|Human|Lighthouse Lab in Alderley Park|Wellcome Sanger Institute for the COVID-19 Genomics UK (COG-UK) consortium|Davies|United Kingdom

>Spike|hCoV-19/Switzerland/VD-ETHZ-320579/2020|2020-10-12|EPI\_ISL\_737608|Original|hCoV-19^^Vaud|Human|Viollier AG|Department of Biosystems Science and Engineering|Nadeau|Switzerland

>Spike|hCoV-19/France/OCC-75/2020|2020-08-24|EPI\_ISL\_593889|Original|hCoV-19^^Occitanie|Human|CHU Purpan - Laboratoire de Virologie - Institut F\u00e9d\u00e9ratif de Biologie|CHU Purpan - Laboratoire de Virologie - Institut F\u00e9d\u00e9ratif de Biologie|Latour|France

>Spike|hCoV-19/Scotland/GCVR-1724EE/2020|2020-03-30|EPI\_ISL\_470003|Original|hCoV-19^^Scotland|Human|NHSGGC West of Scotland Specialist Virology Centre / MRC-University of Glasgow Centre for Virus Research|Wellcome Sanger Institute for the COVID-19 Genomics UK (COG-UK) consortium|Davies|United Kingdom

>Spike|hCoV-19/USA/AZ-TG547302/2020|2020-07-01|EPI\_ISL\_695474|Original|hCoV-19^^Arizona|Human|AZ SPHL|TGen North|French|USA

>Spike|hCoV-19/Sweden/20-50303/2020|2020-03-10|EPI\_ISL\_560972|Original|hCoV-19^^Vastmanland|Human|Orebro klinisk mikrobiologi|The Public Health Agency of Sweden|Svartstr\u00f6m|Sweden

>Spike|hCoV-19/Australia/VIC9920/2020|2020-08-26|EPI\_ISL\_562174|Original|hCoV-19^^Victoria|Human|Microbiological Diagnostic Unit - Public Health Laboratory (MDU-PHL)|MDU-PHL|Schultz|Australia

>Spike|hCoV-19/Australia/VIC2424/2020|2020-06-27|EPI\_ISL\_522134|Original|hCoV-19^^Victoria|Human|Victorian Infectious Diseases Reference Laboratory (VIDRL)|VIDRL and MDU-PHL|Schultz|Australia

>Spike|hCoV-19/England/LOND-D3FCD/2020|2020-04-04|EPI\_ISL\_444079|Original|hCoV-19^^England|Human|University College London|COVID-19 Genomics UK (COG-UK) Consortium|Roy|United Kingdom

>Spike|hCoV-19/England/BRIS-12231D/2020|2020-03-23|EPI\_ISL\_440068|Original|hCoV-19^^England|Human|PHE South West Regional Laboratory|Wellcome Sanger Institute for the COVID-19 Genomics UK (COG-UK) consortium|Amato|United Kingdom

>Spike|hCoV-19/USA/VA-DCLS-0191/2020|2020-04-15|EPI\_ISL\_437407|Original|hCoV-19^^Virginia|Human|Virginia DCLS|Virginia DCLS|St. Jacques|USA

>Spike|hCoV-19/England/QEUEH-B2CEDC/2020|2020-11-04|EPI\_ISL\_659767|Original|hCoV-19^^England|Human|Lighthouse Lab in Glasgow|Wellcome Sanger Institute for the COVID-19 Genomics UK (COG-UK) Consortium|Davies|United Kingdom

>Spike|hCoV-19/England/QEUEH-C33F29/2020|2020-12-11|EPI\_ISL\_733916|Original|hCoV-19^^England|Human|Lighthouse Lab in Glasgow|Wellcome Sanger Institute for the COVID-19 Genomics UK (COG-UK) Consortium|Davies|United Kingdom

>Spike|hCoV-19/Nigeria/NI-CV244/2020|2020-07-02|EPI\_ISL\_729929|Original|hCoV-19^^Niger State|Human|Nigeria Centre for Disease Control (NCDC)|African Centre of Excellence for Genomics of Infectious Diseases (ACEGID)|Oluniyi|Nigeria

>Spike|hCoV-19/Austria/CeMM0735/2020|2020-05-15|EPI\_ISL\_583677|Original|hCoV-19^^Austria|Human|Austrian Agency for Health and Food Safety (AGES)|Bergthaler laboratory|Bergthaler|Austria

>Spike|hCoV-19/USA/MDH-8137/2020|2020-03-13|EPI\_ISL\_454430|Original|hCoV-19^^Maryland|Human|Maryland Department of Health Laboratories Administration|Maryland Department of Health Laboratories Administration|Vepachedu|USA

>Spike|hCoV-19/England/CAMB-A985B9/2020|2020-12-24|EPI\_ISL\_764351|Original|hCoV-19^^England|Human|Department of Pathology|COVID-19 Genomics UK (COG-UK) Consortium|Goodfellow|United Kingdom

>Spike|hCoV-19/Netherlands/NA\_467/2020|2020-04-13|EPI\_ISL\_455269|Original|hCoV-19^^Netherlands|Human|Dutch COVID-19 response team|Erasmus Medical Center|Oude Munnink|Netherlands

>Spike|hCoV-19/Wales/PHWC-4A4046/2020|2020-12-14|EPI\_ISL\_764654|Original|hCoV-19^^Wales|Human|Wales Specialist Virology Centre Sequencing lab|COVID-19 Genomics UK (COG-UK) Consortium|Moore|United Kingdom

>Spike|hCoV-19/England/MILK-975FB5/2020|2020-08-20|EPI\_ISL\_552747|Original|hCoV-19^^England|Human|Lighthouse Lab in Milton Keynes|Wellcome Sanger Institute for the COVID-19 Genomics UK (COG-UK) consortium|Davies|United Kingdom

>Spike|hCoV-19/Japan/PG-7686/2020|2020-08-00|EPI\_ISL\_686788|Original|hCoV-19^^Japan|Human|Chiba Prefectural Institute of Public Health|Pathogen Genomics Center|Sekizuka|Japan

>Spike|hCoV-19/Spain/CL-IBV-97006258/2020|2020-04-20|EPI\_ISL\_537630|Original|hCoV-19^^Castilla y Leon|Human|Universidad de Le\u00f3n|SeqCOVID-SPAIN consortium/IBV (CSIC) |Comas|Spain

>Spike|hCoV-19/Wales/PHWC-2D4D4/2020|2020-04-04|EPI\_ISL\_445992|Original|hCoV-19^^Wales|Human|Wales Specialist Virology Centre|Public Health Wales Microbiology Cardiff|Moore|United Kingdom

>Spike|hCoV-19/Denmark/DCGC-1896/2020|2020-07-06|EPI\_ISL\_622563|Original|hCoV-19^^Hovedstaden|Human|Department of Virus and Microbiological Special Diagnostics|Albertsen lab|Michaelsen|Denmark

>Spike|hCoV-19/New Zealand/20VR2032/2020|2020-04-01|EPI\_ISL\_456339|Original|hCoV-19^^Combined Wellington|Human|Wellington SCL|Institute of Environmental Science and Research (ESR) |de Ligt|New Zealand

>Spike|hCoV-19/England/CAMB-7A881/2020|2020-04-02|EPI\_ISL\_441069|Original|hCoV-19^^England|Human|Department of Pathology|Wellcome Sanger Institute for the COVID-19 Genomics UK (COG-UK) consortium|Amato|United Kingdom

>Spike|hCoV-19/Switzerland/BS-42217811/2020|2020-04-02|EPI\_ISL\_581829|Original|hCoV-19^^Basel-Stadt|Human|University Hospital Basel|University Hospital Basel|Roloff Handschin|Switzerland

>Spike|hCoV-19/USA/CA-UCLA-139/2020|2020-04-10|EPI\_ISL\_537483|Original|hCoV-19^^California|Human|UCLA Pathology Clinical Microbiology Lab|Kruglyak Lab|Boocock|USA

>Spike|hCoV-19/Wales/PHWC-49160E/2020|2020-10-28|EPI\_ISL\_703299|Original|hCoV-19^^Wales|Human|Originating lab|COVID-19 Genomics UK (COG-UK) Consortium|Moore|United Kingdom

>Spike|hCoV-19/South Korea/KCDC2048/2020|2020-02-21|EPI\_ISL\_471454|Original|hCoV-19^^South Korea|Human|Division of Viral Diseases|Division of Viral Diseases|Kim|South Korea

>Spike|hCoV-19/England/QEUA-99B159/2020|2020-08-30|EPI\_ISL\_559766|Original|hCoV-19^^England|Human|Oxford Viromics|COVID-19 Genomics UK (COG-UK) Consortium|Golubchik|United Kingdom

>Spike|hCoV-19/USA/LA-EVTL615/2020|2020-08-06|EPI\_ISL\_579019|Original|hCoV-19^^Louisiana|Human|LSUHS Emerging Viral Threat Laboratory|Microbial Genome Sequencing Center|Kamil|USA

>Spike|hCoV-19/Ireland/LK-NVRL-78IRL74498/2020|2020-11-23|EPI\_ISL\_752571|Original|hCoV-19^^Limerick|Human|National Virus Reference Laboratory|National Virus Reference Laboratory|Gonzalez|Ireland

>Spike|hCoV-19/Sweden/KI-CTMR-V300056977-4A/2020|2020-03-00|EPI\_ISL\_444492|Original|hCoV-19^^Stockholm|Human|Karolinska Universitetslaboratoriet|CTMR|Hu|Sweden

>Spike|hCoV-19/England/QEUA-B668F6/2020|2020-11-11|EPI\_ISL\_662295|Original|hCoV-19^^England|Human|Lighthouse Lab in Glasgow|Wellcome Sanger Institute for the COVID-19 Genomics UK (COG-UK) Consortium|Davies|United Kingdom

>Spike|hCoV-19/England/ALDP-C58D06/2020|2020-12-14|EPI\_ISL\_735905|Original|hCoV-19^^England|Human|Lighthouse Lab in Alderley Park|Wellcome Sanger Institute for the COVID-19 Genomics UK (COG-UK) Consortium|Davies|United Kingdom

>Spike|hCoV-19/Spain/MD-IBV-97010022/2020|2020-03-22|EPI\_ISL\_683676|Original|hCoV-19^^Madrid|Human|IdISSC/Hospital Cl\u00e9nico San Carlos de Madrid\u00b9|SeqCOVID-SPAIN consortium/IBV (CSIC) |Comas|Spain

>Spike|hCoV-19/England/MILK-B3ABC5/2020|2020-11-01|EPI\_ISL\_679713|Original|hCoV-19^^England|Human|Oxford Viromics|COVID-19 Genomics UK (COG-UK) Consortium|Golubchik|United Kingdom

>Spike|hCoV-19/England/MILK-BFCD23/2020|2020-12-02|EPI\_ISL\_720859|Original|hCoV-19^^England|Human|Lighthouse Lab in Milton Keynes|Wellcome Sanger Institute for the COVID-19 Genomics UK (COG-UK) Consortium|Davies|United Kingdom

>Spike|hCoV-19/Costa Rica/INC-0161/2020|2020-10-09|EPI\_ISL\_770002|Original|hCoV-19^^Guanacaste|Human|Area De Salud La Cruz|Inciensa|Soto-Garita|Costa Rica

>Spike|hCoV-19/Wales/PHWC-491A5D/2020|2020-11-10|EPI\_ISL\_706731|Original|hCoV-19^^Wales|Human|Originating lab|COVID-19 Genomics UK (COG-UK) Consortium|Moore|United Kingdom

>Spike|hCoV-19/Wales/PHWC-160568/2020|2020-05-20|EPI\_ISL\_479293|Original|hCoV-19^^Wales|Human|Wales Specialist Virology Centre Sequencing lab|COVID-19 Genomics UK (COG-UK) Consortium|Moore|United Kingdom

>Spike|hCoV-19/Australia/VIC2346/2020|2020-06-25|EPI\_ISL\_522067|Original|hCoV-19^^Victoria|Human|Victorian Infectious Diseases Reference Laboratory (VIDRL)|VIDRL and MDU-PHL|Schultz|Australia

>Spike|hCoV-19/Germany/HH-hpi-p1768/2020|2020-03-19|EPI\_ISL\_776142|Original|hCoV-19^^Hamburg|Human|University Medical Center Hamburg Eppendorf|Heinrich Pette Institute|Robitaille|Germany

>Spike|hCoV-19/England/QEUAH-96AD8C/2020|2020-08-15|EPI\_ISL\_531326|Original|hCoV-19^^England|Human|Lighthouse Lab in Glasgow|Wellcome Sanger Institute for the COVID-19 Genomics UK (COG-UK) consortium|Davies|United Kingdom

>Spike|hCoV-19/England/MILK-5660D6/2020|2020-06-15|EPI\_ISL\_558262|Original|hCoV-19^^England|Human|Lighthouse Lab in Milton Keynes|Wellcome Sanger Institute for the COVID-19 Genomics UK (COG-UK) consortium|Davies|United Kingdom

>Spike|hCoV-19/England/ALDP-A964BE/2020|2020-10-20|EPI\_ISL\_624570|Original|hCoV-19^^England|Human|Lighthouse Lab in Alderley Park|Wellcome Sanger Institute for the COVID-19 Genomics UK (COG-UK) consortium|Davies|United Kingdom

>Spike|hCoV-19/England/CAMB-7D411/2020|2020-04-06|EPI\_ISL\_442337|Original|hCoV-19^^England|Human|Department of Pathology|Wellcome Sanger Institute for the COVID-19 Genomics UK (COG-UK) consortium|Amato|United Kingdom

>Spike|hCoV-19/England/ALDP-CB587F/2020|2020-12-16|EPI\_ISL\_761717|Original|hCoV-19^^England|Human|Lighthouse Lab in Alderley Park|Wellcome Sanger Institute for the COVID-19 Genomics UK (COG-UK) Consortium|Davies|United Kingdom

>Spike|hCoV-19/England/ALDP-B84DB7/2020|2020-11-14|EPI\_ISL\_675892|Original|hCoV-19^^England|Human|Lighthouse Lab in Alderley Park|Wellcome Sanger Institute for the COVID-19 Genomics UK (COG-UK) Consortium|Davies|United Kingdom

>Spike|hCoV-19/Bangladesh/DNAS\_DRICM\_isl\_Al-52/2020|2020-07-19|EPI\_ISL\_775012|Original|hCoV-19^^Dhaka|Human|Designated Reference Institute for Chemical Measurements (DRICM)|DNA SOLUTION LTD.|Rabbi|Bangladesh

>Spike|hCoV-19/England/LIVE-A28F9/2020|2020-06-10|EPI\_ISL\_500011|Original|hCoV-19^^England|Human|Liverpool Clinical Laboratories|COVID-19 Genomics UK (COG-UK) Consortium|Haldenby|United Kingdom

>Spike|hCoV-19/USA/CA-ALSR-4190/2020|2020-08-13|EPI\_ISL\_648876|Original|hCoV-19^^California|Human|San Diego County Public Health Laboratory|Andersen lab at Scripps Research|Gangavarapu|USA

>Spike|hCoV-19/England/MILK-B3C932/2020|2020-11-02|EPI\_ISL\_706169|Original|hCoV-19^^England|Human|Oxford Viromics|COVID-19 Genomics UK (COG-UK) Consortium|Golubchik|United Kingdom

>Spike|hCoV-19/Spain/MD-IBV-99012376/2020|2020-11-18|EPI\_ISL\_780014|Original|hCoV-19^^Madrid|Human|Hospital General Universitario Gregorio Mara\u00f1a|SeqCOVID-SPAIN consortium|IBV (CSIC)|Comas|Spain

>Spike|hCoV-19/France/ARA-12371/2020|2020-03-23|EPI\_ISL\_420604|Original|hCoV-19^^Auvergne-Rh\u00f4ne-Alpes|Human|Institut des Agents Infectieux (IAI)|CNR Virus des Infections Respiratoires - France SUD|Josset|France

>Spike|hCoV-19/England/CAMB-1B4C8E/2020|2020-06-14|EPI\_ISL\_473505|Original|hCoV-19^^England|Human|Department of Pathology|COVID-19 Genomics UK (COG-UK) Consortium|Meredith|United Kingdom

>Spike|hCoV-19/England/NOTT-10E47E/2020|2020-03-22|EPI\_ISL\_425549|Original|hCoV-19^^England|Human|Queens Medical Centre|COVID-19 Genomics UK (COG-UK) Consortium|Loose|United Kingdom

>Spike|hCoV-19/Wales/PHWC-49DF07/2020|2020-12-05|EPI\_ISL\_742929|Original|hCoV-19^^Wales|Human|Wales Specialist Virology Centre Sequencing lab|COVID-19 Genomics UK (COG-UK) Consortium|Moore|United Kingdom

>Spike|hCoV-19/England/LIVE-9EC5E/2020|2020-04-03|EPI\_ISL\_453381|Original|hCoV-19^^England|Human|Liverpool Clinical Laboratories|COVID-19 Genomics UK (COG-UK) Consortium|Haldenby|United Kingdom

>Spike|hCoV-19/India/DL-62368-CSIR-IGIB/2020|2020-08-08|EPI\_ISL\_636776|Original|hCoV-19^^Delhi|Human|National Centre for Disease control (NCDC)|NCDC/CSIR-IGIB|Faruq|India

>Spike|hCoV-19/USA/MD-HP12021/2020|2020-11-07|EPI\_ISL\_791342|Original|hCoV-19^^Maryland|Human|Johns Hopkins Hospital Department of Pathology|Johns Hopkins Hospital Department of Pathology|Morris|USA

>Spike|hCoV-19/England/ALDP-95AFB6/2020|2020-06-15|EPI\_ISL\_555613|Original|hCoV-19^^England|Human|Lighthouse Lab in Alderley Park|Wellcome Sanger Institute for the COVID-19 Genomics UK (COG-UK) consortium|Davies|United Kingdom

>Spike|hCoV-19/USA/TX-HMH-MCoV-12045/2020|2020-09-19|EPI\_ISL\_789794|Original|hCoV-19^^Texas|Human|Houston Methodist Hospital|Houston Methodist Hospital|Long|USA

>Spike|hCoV-19/England/CAMB-1AB789/2020|2020-04-28|EPI\_ISL\_444331|Original|hCoV-19^^England|Human|Department of Pathology|COVID-19 Genomics UK (COG-UK) Consortium|Meredith|United Kingdom

>Spike|hCoV-19/England/MILK-A18478/2020|2020-10-01|EPI\_ISL\_595036|Original|hCoV-19^^England|Human|Northumbria University / South Tees Hospitals NHS Foundation Trust / North Cumbria Integrated Care NHS Foundation Trust / North Tees and Hartlepool NHS Foundation Trust / Newcastle Hospitals NHS Foundation Trust|COVID-19 Genomics UK (COG-UK) Consortium|Bashton|United Kingdom

>Spike|hCoV-19/USA/AZ-TG305869/2020|2020-04-28|EPI\_ISL\_694285|Original|hCoV-19^^Arizona|Human|AZ SPHL|TGen North|French|USA

>Spike|hCoV-19/USA/TX-HMH-2982/2020|2020-04-17|EPI\_ISL\_543910|Original|hCoV-19^^Texas|Human|Houston Methodist Hospital|Houston Methodist Hospital|Long|USA

>Spike|hCoV-19/Singapore/1333/2020|2020-06-02|EPI\_ISL\_648682|Original|hCoV-19^^Singapore|Human|Department of Laboratory Medicine|Department of Laboratory Medicine|Chen|Singapore

>Spike|hCoV-19/Netherlands/NoordHolland\_16/2020|2020-04-27|EPI\_ISL\_461206|Original|hCoV-19^^Noord Holland|Human|Dutch COVID-19 response team|Erasmus Medical Center|Oude Munnink|Netherlands

>Spike|hCoV-19/Denmark/DCGC-809/2020|2020-04-20|EPI\_ISL\_614700|Original|hCoV-19^^Hovedstaden|Human|Department of Virus and Microbiological Special Diagnostics|Albertsen lab|Michaelsen|Denmark

>Spike|hCoV-19/Denmark/DCGC-13434/2020|2020-11-30|EPI\_ISL\_712797|Original|hCoV-19^^Hovedstaden|Human|Department of Virus and Microbiological Special Diagnostics|Albertsen Lab|Michaelsen|Denmark

>Spike|hCoV-19/USA/ID-CDC-2-3714453/2020|2020-11-15|EPI\_ISL\_751567|Original|hCoV-19^^Idaho|Human|ID Bureau of Laboratories|Genomics and Discovery|Queen|USA

>Spike|hCoV-19/USA/TX-HMH-4337/2020|2020-06-19|EPI\_ISL\_543542|Original|hCoV-19^^Texas|Human|Houston Methodist Hospital|Houston Methodist Hospital|Long|USA

>Spike|hCoV-19/Luxembourg/LNS8577854/2020|2020-06-15|EPI\_ISL\_744766|Original|hCoV-19^^Luxembourg|Human|Laboratoire national de sant\u00e9|Laboratoire national de sant\u00e9|Wienecke-Baldacchino|Luxembourg

>Spike|hCoV-19/Scotland/EDB3798/2020|2020-04-29|EPI\_ISL\_439328|Original|hCoV-19^^Scotland|Human|Virology Department|COVID-19 Genomics UK (COG-UK) Consortium|Williams|United Kingdom

>Spike|hCoV-19/South Africa/KRISP-K004278-CE1/2020|2020-11-05|EPI\_ISL\_660162|Original|hCoV-19^^KwaZulu-Natal|Human|NHLS-IALCH|KRISP|de Oliveira|South Africa

>Spike|hCoV-19/Wales/PHWC-48A7E7/2020|2020-11-04|EPI\_ISL\_652600|Original|hCoV-19^^Wales|Human|Wales Specialist Virology Centre Sequencing lab|COVID-19 Genomics UK (COG-UK) Consortium|Moore|United Kingdom

>Spike|hCoV-19/England/QEUH-BCBE1B/2020|2020-11-27|EPI\_ISL\_704223|Original|hCoV-19^^England|Human|Lighthouse Lab in Glasgow|Wellcome Sanger Institute for the COVID-19 Genomics UK (COG-UK) Consortium|Davies|United Kingdom

>Spike|hCoV-19/Luxembourg/LNS5628764/2020|2020-11-19|EPI\_ISL\_744263|Original|hCoV-19^^Luxembourg|Human|Laboratoire national de sant\u00e9|Laboratoire national de sant\u00e9|Wienecke-Baldacchino|Luxembourg

>Spike|hCoV-19/Canada/QC-LSPQ-L00218308/2020|2020-03-14|EPI\_ISL\_535774|Original|hCoV-19^^Quebec|Human|CHUL-LABO MULTI / MICRO|Laboratoire de sant\u00e9 publique du Qu\u00e9bec|Moreira|Canada

>Spike|hCoV-19/USA/WA-S739/2020|2020-04-13|EPI\_ISL\_449909|Original|hCoV-19^^Washington|Human|Washington State Department of Health|Seattle Flu Study|Bedford|USA

>Spike|hCoV-19/Hungary/US-31849w/2020|2020-08-31|EPI\_ISL\_677737|Original|hCoV-19^^Csongr\u00e9ld county|Human|University of Szeged|National Laboratory of Virology|Kemenesi|Hungary

>Spike|hCoV-19/USA/NY-NYCPHL-001340/2020|2020-11-13|EPI\_ISL\_683882|Original|hCoV-19^^New York|Human|DOHMH Central Harlem|New York City Public Health Laboratory|Wang|USA

>Spike|hCoV-19/France/GES-8539/2020|2020-05-28|EPI\_ISL\_560588|Original|hCoV-19^^Grand-Est|Human|Hopital|National Reference Center for Viruses of Respiratory Infections|Enouf|France

>Spike|hCoV-19/England/EXET-13A0EE/2020|2020-11-08|EPI\_ISL\_664293|Original|hCoV-19^^England|Human|University of Exeter|COVID-19 Genomics UK (COG-UK) Consortium|Temperton|United Kingdom

>Spike|hCoV-19/Wuhan/YB012504/2020|2020-01-25|EPI\_ISL\_450489|Original|hCoV-19^^Hubei|Human|Wuhan Institute of Virology|Wuhan Institute of Virology|Shi|China

>Spike|hCoV-19/Switzerland/BS-ETHZ-110004/2020|2020-04-01|EPI\_ISL\_486445|Original|hCoV-19^^Basel-Stadt|Human|Viollier AG|Department of Biosystems Science and Engineering|Nadeau|Switzerland

>Spike|hCoV-19/Wales/PHWC-49869E/2020|2020-11-23|EPI\_ISL\_727109|Original|hCoV-19^^Wales|Human|Originating lab|COVID-19 Genomics UK (COG-UK) Consortium|Moore|United Kingdom

>Spike|hCoV-19/Switzerland/BE-ETHZ-240029/2020|2020-08-10|EPI\_ISL\_523877|Original|hCoV-19^^Bern|Human|Viollier AG|Department of Biosystems Science and Engineering|Nadeau|Switzerland

>Spike|hCoV-19/Japan/PG-6234/2020|2020-08-00|EPI\_ISL\_689346|Original|hCoV-19^^Japan|Human|Pathogen Genomics Center|Pathogen Genomics Center|Sekizuka|Japan

>Spike|hCoV-19/England/MILK-BABC08/2020|2020-11-18|EPI\_ISL\_681364|Original|hCoV-19^^England|Human|Lighthouse Lab in Milton Keynes|Wellcome Sanger Institute for the COVID-19 Genomics UK (COG-UK) Consortium|Davies|United Kingdom

>Spike|hCoV-19/England/ALDP-9D8D10/2020|2020-09-18|EPI\_ISL\_576664|Original|hCoV-19^^England|Human|Oxford Viromics|COVID-19 Genomics UK (COG-UK) Consortium|Golubchik|United Kingdom

>Spike|hCoV-19/Denmark/DCGC-15807/2020|2020-11-23|EPI\_ISL\_714032|Original|hCoV-19^^Nordjylland|Human|Department of Virus and Microbiological Special Diagnostics|Albertsen Lab|Michaelsen|Denmark

>Spike|hCoV-19/Australia/VIC7821/2020|2020-08-09|EPI\_ISL\_564679|Original|hCoV-19^^Victoria|Human|Microbiological Diagnostic Unit - Public Health Laboratory (MDU-PHL)|MDU-PHL|Schultz|Australia

>Spike|hCoV-19/Australia/VIC17190/2020|2020-08-07|EPI\_ISL\_663784|Original|hCoV-19^^Victoria|Human|Microbiological Diagnostic Unit - Public Health Laboratory (MDU-PHL)|MDU-PHL|Schultz|Australia

>Spike|hCoV-19/England/ALDP-B85008/2020|2020-11-13|EPI\_ISL\_675788|Original|hCoV-19^^England|Human|Lighthouse Lab in Alderley Park|Wellcome Sanger Institute for the COVID-19 Genomics UK (COG-UK) Consortium|Davies|United Kingdom

>Spike|hCoV-19/Ireland/D-NVRL-20ILR10844/2020|2020-11-18|EPI\_ISL\_732403|Original|hCoV-19^^Dublin|Human|National Virus Reference Laboratory|National Virus Reference Laboratory|Gonzalez|Ireland

>Spike|hCoV-19/Iceland/218/2020|2020-03-16|EPI\_ISL\_417834|Original|hCoV-19^^Reykjavik|Human|The National University Hospital of Iceland|deCODE genetics|J\u00f3nsson|Iceland

>Spike|hCoV-19/USA/AZ-TG668371/2020|2020-05-13|EPI\_ISL\_696287|Original|hCoV-19^^Arizona|Human|Sonora Quest Laboratories|TGen North|French|USA

>Spike|hCoV-19/England/CAMC-B99177/2020|2020-11-15|EPI\_ISL\_673675|Original|hCoV-19^^England|Human|Lighthouse Lab in Cambridge|Wellcome Sanger Institute for the COVID-19 Genomics UK (COG-UK) Consortium|Davies|United Kingdom

>Spike|hCoV-19/USA/UT-UPHL-2012255913/2020|2020-08-14|EPI\_ISL\_745569|Original|hCoV-19^^Utah|Human|Ginkgo Bioworks Clinical Laboratory|Utah Public Health Laboratory|Young|USA

>Spike|hCoV-19/Denmark/DCGC-13248/2020|2020-11-30|EPI\_ISL\_712679|Original|hCoV-19^^Hovedstaden|Human|Department of Virus and Microbiological Special Diagnostics|Albertsen Lab|Michaelsen|Denmark

>Spike|hCoV-19/Luxembourg/LNS5239699/2020|2020-11-30|EPI\_ISL\_770940|Original|hCoV-19^^Luxembourg|Human|Laboratoire national de sant\u00e9|Laboratoire national de sant\u00e9|Wienecke-Baldacchino|Luxembourg

>Spike|hCoV-19/Denmark/DCGC-22463/2020|2020-12-14|EPI\_ISL\_757574|Original|hCoV-19^^Sjaelland|Human|Department of Virus and Microbiological Special Diagnostics|Albertsen Lab|Michaelsen|Denmark

>Spike|hCoV-19/Belgium/reg-0804735/2020|2020-08-04|EPI\_ISL\_734911|Original|hCoV-19^^Deurne|Human|UZ Leuven|KU Leuven|Maes|Belgium

>Spike|hCoV-19/England/ALDP-AA1492/2020|2020-10-22|EPI\_ISL\_624060|Original|hCoV-19^^England|Human|Lighthouse Lab in Alderley Park|Wellcome Sanger Institute for the COVID-19 Genomics UK (COG-UK) consortium|Davies|United Kingdom

>Spike|hCoV-19/England/ALDP-AA2710/2020|2020-10-22|EPI\_ISL\_630765|Original|hCoV-19^^England|Human|Lighthouse Lab in Alderley Park|Wellcome Sanger Institute for the COVID-19 Genomics UK (COG-UK) consortium|Davies|United Kingdom

>Spike|hCoV-19/Germany/MV-ChVir1689/2020|2020-03-02|EPI\_ISL\_729480|Original|hCoV-19^^Mecklenburg-Western Pomerania|Human|Charit\u00e9 Universit\u00e4tsmedizin Berlin|Charit\u00e9 Universit\u00e4tsmedizin Berlin|Muehlemann|Germany

>Spike|hCoV-19/Norway/6515/2020|2020-10-30|EPI\_ISL\_775502|Original|hCoV-19^^Vestfold og Telemark|Human|Vestfold Hospital|Norwegian Institute of Public Health|Vollan|Norway

>Spike|hCoV-19/England/MILK-822D18/2020|2020-07-15|EPI\_ISL\_557314|Original|hCoV-19^^England|Human|Lighthouse Lab in Milton Keynes|Wellcome Sanger Institute for the COVID-19 Genomics UK (COG-UK) consortium|Davies|United Kingdom

>Spike|hCoV-19/England/LIVE-A9643/2020|2020-07-26|EPI\_ISL\_526383|Original|hCoV-19^^England|Human|Liverpool Clinical Laboratories|COVID-19 Genomics UK (COG-UK) Consortium|Haldenby|United Kingdom

>Spike|hCoV-19/England/QEUH-AD1CA0/2020|2020-10-26|EPI\_ISL\_629905|Original|hCoV-19^^England|Human|Lighthouse Lab in Glasgow|Wellcome Sanger Institute for the COVID-19 Genomics UK (COG-UK) consortium|Davies|United Kingdom

>Spike|hCoV-19/Ireland/LK-UHL140/2020|2020-04-08|EPI\_ISL\_681732|Original|hCoV-19^^Limerick|Human|University Hospital Limerick|Irish Coronavirus Sequencing Consortium - Teagasc Moorepark|Walsh|Ireland

>Spike|hCoV-19/USA/MN-MDH-1723/2020|2020-09-16|EPI\_ISL\_576232|Original|hCoV-19^^Minnesota|Human|Minnesota Department of Health|Minnesota Department of Health|Garfin|USA

>Spike|hCoV-19/England/NOTT-110D14/2020|2020-04-29|EPI\_ISL\_448409|Original|hCoV-19^^England|Human|Queens Medical Centre|COVID-19 Genomics UK (COG-UK) Consortium|Loose|United Kingdom

>Spike|hCoV-19/Ireland/D-NVRL-75IRL86068/2020|2020-10-14|EPI\_ISL\_671896|Original|hCoV-19^^Dublin|Human|National Virus Reference Laboratory|National Virus Reference Laboratory|Gonzalez|Ireland

>Spike|hCoV-19/England/MILK-9F186B/2020|2020-09-25|EPI\_ISL\_589642|Original|hCoV-19^^England|Human|Lighthouse Lab in Milton Keynes|Wellcome Sanger Institute for the COVID-19 Genomics UK (COG-UK) consortium|Davies|United Kingdom

>Spike|hCoV-19/Norway/4308/2020|2020-10-06|EPI\_ISL\_635190|Original|hCoV-19^^Troms og Finnmark|Human|University Hospital of Northern Norway|Norwegian Institute of Public Health|Vollan|Norway

>Spike|hCoV-19/England/CAMB-7AFAA/2020|2020-04-09|EPI\_ISL\_433902|Original|hCoV-19^^England|Human|Department of Pathology|COVID-19 Genomics UK (COG-UK) Consortium|Meredit|United Kingdom

>Spike|hCoV-19/Switzerland/ZH-ETHZ-350018/2020|2020-11-03|EPI\_ISL\_693792|Original|hCoV-19^^Zurich|Human|Viollier AG|Department of Biosystems Science and Engineering|Nadeau|Switzerland

>Spike|hCoV-19/USA/TX-HMH-MCoV-14960/2020|2020-10-14|EPI\_ISL\_786444|Original|hCoV-19^^Texas|Human|Houston Methodist Hospital|Houston Methodist Hospital|Long|USA

>Spike|hCoV-19/Scotland/EDB6336/2020|2020-06-04|EPI\_ISL\_473942|Original|hCoV-19^^Scotland|Human|Virology Department|COVID-19 Genomics UK (COG-UK) Consortium|Williams|United Kingdom

>Spike|hCoV-19/Portugal/PT1253/2020|2020-03-17|EPI\_ISL\_511214|Original|hCoV-19^^Portugal|Human|Instituto Nacional de Saude (INSA) and Instituto Gulbenkian de Ciencia (IGC)|Instituto Nacional de Saude (INSA) and Instituto Gulbenkian de Ciencia (IGC)|Borges|Portugal

>Spike|hCoV-19/Denmark/ALAB-SSI-709/2020|2020-03-28|EPI\_ISL\_444868|Original|hCoV-19^^Denmark|Human|Department of Virus and Microbiological Special Diagnostics|Albertsen lab|Kirkegaard|Denmark

>Spike|hCoV-19/Denmark/DCGC-1555/2020|2020-04-13|EPI\_ISL\_618660|Original|hCoV-19^^Hovedstaden|Human|Department of Virus and Microbiological Special Diagnostics|Albertsen lab|Michaelsen|Denmark

>Spike|hCoV-19/USA/MI-MDHHS-SC22698/2020|2020-12-08|EPI\_ISL\_767347|Original|hCoV-19^^Michigan|Human|Michigan Department of Health and Human Services|Michigan Department of Health and Human Services|Jacob|USA

>Spike|hCoV-19/England/ALDP-BB8C35/2020|2020-11-20|EPI\_ISL\_702735|Original|hCoV-19^^England|Human|Lighthouse Lab in Alderley Park|Wellcome Sanger Institute for the COVID-19 Genomics UK (COG-UK) Consortium|Davies|United Kingdom

>Spike|hCoV-19/England/LOND-1252064/2020|2020-11-30|EPI\_ISL\_703886|Original|hCoV-19^^England|Human|University College London Hospital|COVID-19 Genomics UK (COG-UK) Consortium|Byott|United Kingdom

>Spike|hCoV-19/Japan/IC-0299/2020|2020-11-00|EPI\_ISL\_667728|Original|hCoV-19^^Japan|Human|Pathogen Genomics Center|Pathogen Genomics Center|Sekizuka|Japan

>Spike|hCoV-19/England/ALDP-8B9903/2020|2020-06-29|EPI\_ISL\_557049|Original|hCoV-19^^England|Human|Lighthouse Lab in Alderley Park|Wellcome Sanger Institute for the COVID-19 Genomics UK (COG-UK) consortium|Davies|United Kingdom

>Spike|hCoV-19/Sweden/20-13099/2020|2020-12-29|EPI\_ISL\_789022|Original|hCoV-19^^Stockholm|Human|ABC|The Public Health Agency of Sweden|Svartstr\u00f6m|Sweden

>Spike|hCoV-19/England/LIVE-A737B/2020|2020-03-28|EPI\_ISL\_517009|Original|hCoV-19^^England|Human|Liverpool Clinical Laboratories|COVID-19 Genomics UK (COG-UK) Consortium|Haldenby|United Kingdom

>Spike|hCoV-19/England/CAMB-1B82A6/2020|2020-10-22|EPI\_ISL\_637699|Original|hCoV-19^^England|Human|Department of Pathology|COVID-19 Genomics UK (COG-UK) Consortium|Goodfellow|United Kingdom

>Spike|hCoV-19/India/MH-ACTREC-569/2020|2020-08-31|EPI\_ISL\_700213|Original|hCoV-19^^Maharashtra|Human|Hematopathology Laboratory|Hematopathology Laboratory|Patkar|India

>Spike|hCoV-19/England/204481774/2020|2020-10-30|EPI\_ISL\_653992|Original|hCoV-19^^England|Human|Respiratory Virus Unit|COVID-19 Genomics UK (COG-UK) Consortium|Platt|United Kingdom

>Spike|hCoV-19/Germany/SH-ChVir9280/2020|2020-10-02|EPI\_ISL\_729612|Original|hCoV-19^^Schleswig-Holstein|Human|A. Krumbholz|Charit\u00e9 Universit\u00e4tsmedizin Berlin|Muehlemann|Germany

>Spike|hCoV-19/England/CAMC-A65281/2020|2020-10-11|EPI\_ISL\_637756|Original|hCoV-19^^England|Human|Department of Pathology|COVID-19 Genomics UK (COG-UK) Consortium|Goodfellow|United Kingdom

>Spike|hCoV-19/England/NORW-F7093/2020|2020-12-07|EPI\_ISL\_725324|Original|hCoV-19^^England|Human|Quadram Institute Bioscience|COVID-19 Genomics UK (COG-UK) Consortium|Alikhan|United Kingdom

>Spike|hCoV-19/England/CAMC-B098C8/2020|2020-10-30|EPI\_ISL\_673202|Original|hCoV-19^^England|Human|Lighthouse Lab in Cambridge|Wellcome Sanger Institute for the COVID-19 Genomics UK (COG-UK) Consortium|Davies|United Kingdom

>Spike|hCoV-19/England/PORT-2D764A/2020|2020-11-04|EPI\_ISL\_652621|Original|hCoV-19^^England|Human|Centre for Enzyme Innovation|COVID-19 Genomics UK (COG-UK) Consortium|Robson|United Kingdom

>Spike|hCoV-19/England/QEUEH-9D0738/2020|2020-09-16|EPI\_ISL\_590007|Original|hCoV-19^^England|Human|Lighthouse Lab in Glasgow|Wellcome Sanger Institute for the COVID-19 Genomics UK (COG-UK) consortium|Davies|United Kingdom

>Spike|hCoV-19/Netherlands/NA\_557/2020|2020-04-11|EPI\_ISL\_460723|Original|hCoV-19^^Netherlands|Human|Dutch COVID-19 response team|Erasmus Medical Center|Oude Munnink|Netherlands

>Spike|hCoV-19/England/ALDP-A51613/2020|2020-10-07|EPI\_ISL\_598025|Original|hCoV-19^^England|Human|Lighthouse Lab in Alderley Park|Wellcome Sanger Institute for the COVID-19 Genomics UK (COG-UK) consortium|Davies|United Kingdom

>Spike|hCoV-19/South Africa/N00030/2020|2020-08-11|EPI\_ISL\_623053|Original|hCoV-19^^Eastern Cape|Human|National Health Laboratory Service|National Institute for Communicable Diseases of the National Health Laboratory Service|Allam|South Africa

>Spike|hCoV-19/England/CAMC-B99E52/2020|2020-11-15|EPI\_ISL\_673808|Original|hCoV-19^^England|Human|Lighthouse Lab in Cambridge|Wellcome Sanger Institute for the COVID-19 Genomics UK (COG-UK) Consortium|Davies|United Kingdom

>Spike|hCoV-19/USA/CA-ALSR-1283/2020|2020-05-06|EPI\_ISL\_494479|Original|hCoV-19^^California|Human|San Diego County Public Health Laboratory|Andersen lab at Scripps Research|Gangavarapu|USA

>Spike|hCoV-19/Denmark/DCGC-5993/2020|2020-09-28|EPI\_ISL\_621102|Original|hCoV-19^^Midtjylland|Human|Department of Virus and Microbiological Special Diagnostics|Albertsen lab|Michaelsen|Denmark

>Spike|hCoV-19/England/ALDP-9CB91C/2020|2020-09-16|EPI\_ISL\_575448|Original|hCoV-19^^England|Human|Lighthouse Lab in Alderley Park|Wellcome Sanger Institute for the COVID-19 Genomics UK (COG-UK) consortium|Davies|United Kingdom

>Spike|hCoV-19/United Arab Emirates/0309/2020|2020-05-18|EPI\_ISL\_698177|Original|hCoV-19^^Abu Dhabi|Human|Group 42 (G42) Healthcare|G42 Healthcare|Ogrodzki|United Arab Emirates

>Spike|hCoV-19/England/CAMB-1BAF07/2020|2020-11-11|EPI\_ISL\_664805|Original|hCoV-19^^England|Human|Department of Pathology|COVID-19 Genomics UK (COG-UK) Consortium|Goodfellow|United Kingdom

>Spike|hCoV-19/France/ARA-74594/2020|2020-09-17|EPI\_ISL\_693500|Original|hCoV-19^^Auvergne-Rh\u00f4ne-Alpes|Human|CNR Virus des Infections Respiratoires - France SUD|CNR Virus des Infections Respiratoires - France SUD|Bal|France

>Spike|hCoV-19/Denmark/DCGC-2409/2020|2020-08-10|EPI\_ISL\_617591|Original|hCoV-19^^Hovedstaden|Human|Department of Virus and Microbiological Special Diagnostics|Albertsen lab|Michaelsen|Denmark

>Spike|hCoV-19/Denmark/DCGC-16528/2020|2020-11-16|EPI\_ISL\_714817|Original|hCoV-19^^Hovedstaden|Human|Department of Virus and Microbiological Special Diagnostics|Albertsen Lab|Michaelsen|Denmark

>Spike|hCoV-19/Peru/LIM-UPCH-0032/2020|2020-06-17|EPI\_ISL\_540932|Original|hCoV-19^^Lima|Human|Laboratorio de Referencia Nacional de Virus Respiratorios|Laboratorio de Gen\u00f3mica Microbiana|Tsukayama|Peru

>Spike|hCoV-19/Spain/MD-IBV-005283/2020|2020-03-12|EPI\_ISL\_510169|Original|hCoV-19^^Madrid|Human|Hospital General Universitario Gregorio Mara\u00f1a|SeqCOVID-SPAIN consortium|IBV (CSIC)|Comas|Spain

>Spike|hCoV-19/Japan/PG-8257/2020|2020-08-00|EPI\_ISL\_687356|Original|hCoV-19^^Japan|Human|Pathogen Genomics Center|Pathogen Genomics Center|Sekizuka|Japan

>Spike|hCoV-19/Denmark/DCGC-9549/2020|2020-11-09|EPI\_ISL\_669033|Original|hCoV-19^^Syddanmark|Human|Department of Virus and Microbiological Special Diagnostics|Albertsen Lab|Michaelsen|Denmark



>Spike|hCoV-19/United Arab Emirates/0346/2020|2020-05-15|EPI\_ISL\_698521|Original|hCoV-19^^Abu Dhabi|Human|Group 42 (G42) Healthcare|G42 Healthcare|Ogrodzki|United Arab Emirates

>Spike|hCoV-19/England/ALDP-AA556E/2020|2020-10-22|EPI\_ISL\_625040|Original|hCoV-19^^England|Human|Lighthouse Lab in Alderley Park|Wellcome Sanger Institute for the COVID-19 Genomics UK (COG-UK) consortium|Davies|United Kingdom

>Spike|hCoV-19/USA/CA-ALSR-1430/2020|2020-03-28|EPI\_ISL\_494597|Original|hCoV-19^^California|Human|Scripps Medical Laboratory|Andersen lab at Scripps Research|Gangavarapu|USA

>Spike|hCoV-19/England/20134027904/2020|2020-03-23|EPI\_ISL\_423138|Original|hCoV-19^^England|Human|Respiratory Virus Unit|Respiratory Virus Unit|Platt|United Kingdom

>Spike|hCoV-19/Wales/PHWC-482E62/2020|2020-10-16|EPI\_ISL\_627749|Original|hCoV-19^^Wales|Human|Wales Specialist Virology Centre Sequencing lab|COVID-19 Genomics UK (COG-UK) Consortium|Moore|United Kingdom

>Spike|hCoV-19/Wales/MILK-9F23E1/2020|2020-09-24|EPI\_ISL\_589086|Original|hCoV-19^^Wales|Human|Lighthouse Lab in Milton Keynes|Wellcome Sanger Institute for the COVID-19 Genomics UK (COG-UK) consortium|Davies|United Kingdom

>Spike|hCoV-19/England/MILK-BB0BD6/2020|2020-11-17|EPI\_ISL\_720482|Original|hCoV-19^^England|Human|Lighthouse Lab in Milton Keynes|Wellcome Sanger Institute for the COVID-19 Genomics UK (COG-UK) Consortium|Davies|United Kingdom

>Spike|hCoV-19/USA/VA-DCLS-0534/2020|2020-03-13|EPI\_ISL\_485835|Original|hCoV-19^^Virginia|Human|Virginia DCLS|Virginia DCLS|St. Jacques|USA

>Spike|hCoV-19/Denmark/DCGC-17621/2020|2020-12-14|EPI\_ISL\_751110|Original|hCoV-19^^Syddanmark|Human|Department of Virus and Microbiological Special Diagnostics|Albertsen Lab|Michaelsen|Denmark

>Spike|hCoV-19/England/MILK-B38D58/2020|2020-11-01|EPI\_ISL\_659058|Original|hCoV-19^^England|Human|Lighthouse Lab in Milton Keynes|Wellcome Sanger Institute for the COVID-19 Genomics UK (COG-UK) Consortium|Davies|United Kingdom

>Spike|hCoV-19/Denmark/DCGC-11891/2020|2020-10-26|EPI\_ISL\_671200|Original|hCoV-19^^Sjaelland|Human|Department of Virus and Microbiological Special Diagnostics|Albertsen Lab|Michaelsen|Denmark

>Spike|hCoV-19/Switzerland/GR-ETHZ-100319/2020|2020-03-18|EPI\_ISL\_574948|Original|hCoV-19^^Graub\u00f6nden|Human|Viollier AG|Department of Biosystems Science and Engineering|Nadeau|Switzerland

>Spike|hCoV-19/USA/CT-Yale-615/2020|2020-05-09|EPI\_ISL\_730076|Original|hCoV-19^^Connecticut|Human|Yale Clinical Virology Laboratory|Grubaugh Lab - Yale School of Public Health|Grubaugh|USA

>Spike|hCoV-19/USA/MI-UM-2006S005728/2020|2020-03-30|EPI\_ISL\_495596|Original|hCoV-19^^Michigan|Human|University of Michigan Clinical Microbiology Laboratory|Lauring Lab|Valesano|USA

>Spike|hCoV-19/USA/CA-CZB-15069/2020|2020-11-19|EPI\_ISL\_738903|Original|hCoV-19^^California|Human|Santa Clara County Public Health Laboratory|Chan-Zuckerberg Biohub|Kamm|USA

>Spike|hCoV-19/England/QEUIH-AAB0FE/2020|2020-10-21|EPI\_ISL\_652772|Original|hCoV-19^^England|Human|Oxford Viromics|COVID-19 Genomics UK (COG-UK) Consortium|Golubchik|United Kingdom

>Spike|hCoV-19/England/CAMC-AEA970/2020|2020-10-26|EPI\_ISL\_633311|Original|hCoV-19^^England|Human|Lighthouse Lab in Cambridge|Wellcome Sanger Institute for the COVID-19 Genomics UK (COG-UK) consortium|Davies|United Kingdom

>Spike|hCoV-19/Wales/PHWC-4A5537/2020|2020-12-15|EPI\_ISL\_764881|Original|hCoV-19^^Wales|Human|Wales Specialist Virology Centre Sequencing lab|COVID-19 Genomics UK (COG-UK) Consortium|Moore|United Kingdom

>Spike|hCoV-19/Scotland/QEUIH-963354/2020|2020-08-11|EPI\_ISL\_531617|Original|hCoV-19^^Scotland|Human|NHSGGC West of Scotland Specialist Virology Centre / MRC - University of Glasgow Centre for Virus Research|Wellcome Sanger Institute for the COVID-19 Genomics UK (COG-UK) consortium|Davies|United Kingdom

>Spike|hCoV-19/Canada/ON-S293/2020|2020-03-28|EPI\_ISL\_755856|Original|hCoV-19^^Ontario|Human|Toronto Invasive Bacterial Diseases Network|McMaster University|McArthur|Canada

>Spike|hCoV-19/England/201060019/2020|2020-03-03|EPI\_ISL\_464364|Original|hCoV-19^^England|Human|Respiratory Virus Unit|Respiratory Virus Unit|Platt|United Kingdom

>Spike|hCoV-19/England/MILK-AC736C/2020|2020-10-22|EPI\_ISL\_630241|Original|hCoV-19^^England|Human|Lighthouse Lab in Milton Keynes|Wellcome Sanger Institute for the COVID-19 Genomics UK (COG-UK) consortium|Davies|United Kingdom

>Spike|hCoV-19/USA/MA-MGH-00051/2020|2020-03-24|EPI\_ISL\_460375|Original|hCoV-19^^Massachusetts|Human|Massachusetts General Hospital|Infectious Disease Program|Lemieux|USA

>Spike|hCoV-19/Kenya/C4730/2020|2020-05-08|EPI\_ISL\_568738|Original|hCoV-19^^Mombasa|Human|KEMRI-Wellcome Trust Research Programme/KEMRI-CGMR-C Kilifi|KEMRI-Wellcome Trust Research Programme/KEMRI-CGMR-C Kilifi|Githinji|Kenya

>Spike|hCoV-19/Brazil/RJ-2062/2020|2020-04-16|EPI\_ISL\_456103|Original|hCoV-19^^Rio de Janeiro|Human|Laboratory of Respiratory Viruses and Measles|Laboratory of Respiratory Viruses and Measles|Silva|Brazil

>Spike|hCoV-19/Denmark/DCGC-21369/2020|2020-12-21|EPI\_ISL\_758133|Original|hCoV-19^^Hovedstaden|Human|Department of Virus and Microbiological Special Diagnostics|Albertsen Lab|Michaelsen|Denmark

>Spike|hCoV-19/Iceland/601/2020|2020-03-28|EPI\_ISL\_424621|Original|hCoV-19^^Reykjavik|Human|The National University Hospital of Iceland|deCODE genetics|J\u00f3nsson|Iceland

>Spike|hCoV-19/Scotland/CVR5252/2020|2020-10-15|EPI\_ISL\_627414|Original|hCoV-19^^Scotland|Human|West of Scotland Specialist Virology Centre|COVID-19 Genomics UK (COG-UK) Consortium|Robertson|United Kingdom

>Spike|hCoV-19/England/WSFT-25C0FD7/2020|2020-05-16|EPI\_ISL\_492838|Original|hCoV-19^^England|Human|Department of Medical Microbiology|Wellcome Sanger Institute for the COVID-19 Genomics UK (COG-UK) consortium|Davies|United Kingdom

>Spike|hCoV-19/England/ALDP-C3C6B2/2020|2020-12-10|EPI\_ISL\_731572|Original|hCoV-19^^England|Human|Lighthouse Lab in Alderley Park|Wellcome Sanger Institute for the COVID-19 Genomics UK (COG-UK) Consortium|Davies|United Kingdom

>Spike|hCoV-19/Netherlands/FR-RIVM-20386/2020|2020-12-07|EPI\_ISL\_728606|Original|hCoV-19^^Friesland|Human|Dutch COVID-19 response team|National Institute for Public Health and the Environment (RIVM)|Meijer|Netherlands

>Spike|hCoV-19/England/MILK-9AA1A2/2020|2020-09-01|EPI\_ISL\_550985|Original|hCoV-19^^England|Human|Lighthouse Lab in Milton Keynes|Wellcome Sanger Institute for the COVID-19 Genomics UK (COG-UK) consortium|Davies|United Kingdom

>Spike|hCoV-19/USA/WA-S1936/2020|2020-06-03|EPI\_ISL\_497364|Original|hCoV-19^^Washington|Human|Washington State Department of Health|Seattle Flu Study|Lee|USA

>Spike|hCoV-19/England/NOTT-11F7CC/2020|2020-11-26|EPI\_ISL\_725569|Original|hCoV-19^^England|Human|Lincolnshire Hospitals and DeepSeq Nottingham|COVID-19 Genomics UK (COG-UK) Consortium|Loose|United Kingdom

>Spike|hCoV-19/United Arab Emirates/0739/2020|2020-05-15|EPI\_ISL\_698888|Original|hCoV-19^^Abu Dhabi|Human|Group 42 (G42) Healthcare|G42 Healthcare|Ogrodzki|United Arab Emirates

>Spike|hCoV-19/England/ALDP-903BA9/2020|2020-06-23|EPI\_ISL\_552869|Original|hCoV-19^^England|Human|Lighthouse Lab in Alderley Park|Wellcome Sanger Institute for the COVID-19 Genomics UK (COG-UK) consortium|Davies|United Kingdom

>Spike|hCoV-19/Scotland/QEUAH-A1F57E/2020|2020-10-01|EPI\_ISL\_598967|Original|hCoV-19^^Scotland|Human|Lighthouse Lab in Glasgow|Wellcome Sanger Institute for the COVID-19 Genomics UK (COG-UK) consortium|Davies|United Kingdom

>Spike|hCoV-19/Wales/PHWC-2607D/2020|2020-03-25|EPI\_ISL\_422322|Original|hCoV-19^^Wales|Human|Wales Specialist Virology Centre|Public Health Wales Microbiology Cardiff|Moore|United Kingdom

>Spike|hCoV-19/England/ALDP-B6345F/2020|2020-11-09|EPI\_ISL\_656578|Original|hCoV-19^^England|Human|Lighthouse Lab in Alderley Park|Wellcome Sanger Institute for the COVID-19 Genomics UK (COG-UK) Consortium|Davies|United Kingdom

>Spike|hCoV-19/Wales/PHWC-495AFF/2020|2020-11-24|EPI\_ISL\_726439|Original|hCoV-19^^Wales|Human|Originating lab|COVID-19 Genomics UK (COG-UK) Consortium|Moore|United Kingdom

>Spike|hCoV-19/Wales/PHWC-1683A2/2020|2020-05-22|EPI\_ISL\_494234|Original|hCoV-19^^Wales|Human|Originating lab|COVID-19 Genomics UK (COG-UK) Consortium|Moore|United Kingdom

>Spike|hCoV-19/Denmark/DCGC-17812/2020|2020-12-14|EPI\_ISL\_749185|Original|hCoV-19^^Hovedstaden|Human|Department of Virus and Microbiological Special Diagnostics|Albertsen Lab|Michaelsen|Denmark

>Spike|hCoV-19/England/NORW-E9814/2020|2020-04-23|EPI\_ISL\_448336|Original|hCoV-19^^England|Human|Quadram Institute Bioscience|COVID-19 Genomics UK (COG-UK) Consortium|Alikhan|United Kingdom

>Spike|hCoV-19/USA/TX-DSHS-1406/2020|2020-06-09|EPI\_ISL\_671643|Original|hCoV-19^^Texas|Human|Texas Department of State Health Services|Texas Department of State Health Services|Rahman|USA

>Spike|hCoV-19/Portugal/PT0834/2020|2020-03-22|EPI\_ISL\_511093|Original|hCoV-19^^Portugal|Human|Instituto Nacional de Saude (INSA)|Instituto Nacional de Saude (INSA)|Borges|Portugal

>Spike|hCoV-19/France/OCC-SC471/2020|2020-03-10|EPI\_ISL\_644685|Original|hCoV-19^^Occitanie|Human|CHU Montpellier|CNR Virus des Infections Respiratoires - France SUD|Bal|France

>Spike|hCoV-19/England/QEUA-96074C/2020|2020-08-04|EPI\_ISL\_532059|Original|hCoV-19^^England|Human|Lighthouse Lab in Glasgow|Wellcome Sanger Institute for the COVID-19 Genomics UK (COG-UK) consortium|Davies|United Kingdom

>Spike|hCoV-19/England/QEUA-AF15EB/2020|2020-10-29|EPI\_ISL\_666016|Original|hCoV-19^^England|Human|Northumbria University / South Tees Hospitals NHS Foundation Trust / North Cumbria Integrated Care NHS Foundation Trust / North Tees and Hartlepool NHS Foundation Trust / Newcastle Hospitals NHS Foundation Trust|COVID-19 Genomics UK (COG-UK) Consortium|Bashton|United Kingdom

>Spike|hCoV-19/England/ALDP-49C102/2020|2020-06-12|EPI\_ISL\_559549|Original|hCoV-19^^England|Human|Lighthouse Lab in Alderley Park|Wellcome Sanger Institute for the COVID-19 Genomics UK (COG-UK) consortium|Davies|United Kingdom

>Spike|hCoV-19/England/ALDP-9E93DE/2020|2020-09-24|EPI\_ISL\_584212|Original|hCoV-19^^England|Human|Centre for Enzyme Innovation|COVID-19 Genomics UK (COG-UK) Consortium|Robson|United Kingdom

>Spike|hCoV-19/Denmark/DCGC-15172/2020|2020-11-23|EPI\_ISL\_713147|Original|hCoV-19^^Hovedstaden|Human|Department of Virus and Microbiological Special Diagnostics|Albertsen Lab|Michaelsen|Denmark

>Spike|hCoV-19/England/20130056303/2020|2020-03-20|EPI\_ISL\_420496|Original|hCoV-19^^England|Human|Respiratory Virus Unit|Respiratory Virus Unit|Platt|United Kingdom

>Spike|hCoV-19/England/ALDP-A692E7/2020|2020-10-10|EPI\_ISL\_609012|Original|hCoV-19^^England|Human|Lighthouse Lab in Alderley Park|Wellcome Sanger Institute for the COVID-19 Genomics UK (COG-UK) consortium|Davies|United Kingdom

>Spike|hCoV-19/Spain/AR-IBV-98010715/2020|2020-10-07|EPI\_ISL\_722270|Original|hCoV-19^^Aragon|Human|Servicio de Microbiolog\u00eda|SeqCOVID-SPAIN consortium|IBV (CSIC)|Comas|Spain

>Spike|hCoV-19/Denmark/DCGC-15953/2020|2020-11-23|EPI\_ISL\_714503|Original|hCoV-19^^Hovedstaden|Human|Department of Virus and Microbiological Special Diagnostics|Albertsen Lab|Michaelsen|Denmark

>Spike|hCoV-19/Sweden/20-53878/2020|2020-12-22|EPI\_ISL\_766724|Original|hCoV-19^^Vastra Gotalandsregionen|Human|TATAA Biocenter|The Public Health Agency of Sweden|Svartstr\u00f6m|Sweden

>Spike|hCoV-19/Scotland/EDB3222/2020|2020-04-06|EPI\_ISL\_488941|Original|hCoV-19^^Scotland|Human|Virology Department|Wellcome Sanger Institute for the COVID-19 Genomics UK (COG-UK) consortium|Davies|United Kingdom

>Spike|hCoV-19/USA/MA-MGH-02707/2020|2020-09-22|EPI\_ISL\_765594|Original|hCoV-19^^Massachusetts|Human|Brigham and Womens Hospital|Infectious Disease Program|Park|USA

>Spike|hCoV-19/Singapore/36/2020|2020-02-16|EPI\_ISL\_422429|Original|hCoV-19^^Singapore|Human|National Public Health Laboratory|National Public Health Laboratory|Mak|Singapore

>Spike|hCoV-19/Denmark/DCGC-3149/2020|2020-08-31|EPI\_ISL\_615969|Original|hCoV-19^^Hovedstaden|Human|Department of Virus and Microbiological Special Diagnostics|Albertsen lab|Michaelsen|Denmark

>Spike|hCoV-19/England/MILK-C6203D/2020|2020-12-13|EPI\_ISL\_735696|Original|hCoV-19^^England|Human|Lighthouse Lab in Milton Keynes|Wellcome Sanger Institute for the COVID-19 Genomics UK (COG-UK) Consortium|Davies|United Kingdom

>Spike|hCoV-19/England/QEUH-98F316/2020|2020-08-25|EPI\_ISL\_540390|Original|hCoV-19^^England|Human|Lighthouse Lab in Glasgow|Wellcome Sanger Institute for the COVID-19 Genomics UK (COG-UK) consortium|Davies|United Kingdom

>Spike|hCoV-19/Bangladesh/DNAS-BSH-isl-1/2020|2020-04-29|EPI\_ISL\_605898|Original|hCoV-19^^Bangladesh|Human|NGS Lab|NGS Lab|Rabbi|Bangladesh

>Spike|hCoV-19/Australia/NSW288/2020|2020-03-30|EPI\_ISL\_451552|Original|hCoV-19^^New South Wales|Human|Pathology North - NSW Health Pathology|NSW Health Pathology - Institute of Clinical Pathology and Medical Research; Westmead Hospital; University of Sydney|Gall|Australia

>Spike|hCoV-19/England/ALDP-5BCD52/2020|2020-06-18|EPI\_ISL\_558746|Original|hCoV-19^^England|Human|Lighthouse Lab in Alderley Park|Wellcome Sanger Institute for the COVID-19 Genomics UK (COG-UK) consortium|Davies|United Kingdom

>Spike|hCoV-19/USA/WA-S360/2020|2020-03-25|EPI\_ISL\_434120|Original|hCoV-19^^Washington|Human|Washington State Department of Health|Seattle Flu Study|Bedford|USA

>Spike|hCoV-19/England/CAMC-945CD5/2020|2020-07-13|EPI\_ISL\_556699|Original|hCoV-19^^England|Human|Lighthouse Lab in Cambridge|Wellcome Sanger Institute for the COVID-19 Genomics UK (COG-UK) consortium|Davies|United Kingdom

>Spike|hCoV-19/Russia/Pskov-83602/2020|2020-03-25|EPI\_ISL\_428908|Vero|hCoV-19^^Pskov|Human|State Research Center of Virology and Biotechnology VECTOR|State Research Center of Virology and Biotechnology VECTOR|Shvalov|Russia

>Spike|hCoV-19/USA/AZ-TG664536/2020|2020-04-20|EPI\_ISL\_696153|Original|hCoV-19^^Arizona|Human|Sonora Quest Laboratories|TGen North|French|USA

>Spike|hCoV-19/USA/CA-SR0225/2020|2020-04-06|EPI\_ISL\_437575|Original|hCoV-19^^California|Human|Scripps Medical Laboratory|Andersen lab at Scripps Research|Gangavarapu|USA

>Spike|hCoV-19/Switzerland/BL-ETHZ-240072/2020|2020-08-10|EPI\_ISL\_523910|Original|hCoV-19^^Basel-Landschaft|Human|Viollier AG|Department of Biosystems Science and Engineering|Nadeau|Switzerland

>Spike|hCoV-19/USA/NY-Wadsworth-280624-01/2020|2020-11-30|EPI\_ISL\_754410|Original|hCoV-19^^New York|Human|Wadsworth Center|Wadsworth Center|Lasek-Nesselquist|USA

>Spike|hCoV-19/USA/TX-HMH-5155/2020|2020-06-20|EPI\_ISL\_544564|Original|hCoV-19^^Texas|Human|Houston Methodist Hospital|Houston Methodist Hospital|Long|USA

>Spike|hCoV-19/Denmark/DCGC-2312/2020|2020-08-10|EPI\_ISL\_617737|Original|hCoV-19^^Midtjylland|Human|Department of Virus and Microbiological Special Diagnostics|Albertsen lab|Michaelsen|Denmark

>Spike|hCoV-19/USA/WI-GMF-28099/2020|2020-10-27|EPI\_ISL\_661004|Original|hCoV-19^^Wisconsin|Human|Gundersen Molecular Diagnostics Laboratory|Kabara Cancer Research Institute|Kenny|USA

>Spike|hCoV-19/USA/FL-BPHL-1911/2020|2020-07-17|EPI\_ISL\_613726|Original|hCoV-19^^Florida|Human|Florida Bureau of Public Health Laboratories|Florida Bureau of Public Health Laboratories|Blanton|USA

>Spike|hCoV-19/USA/TX-HMH-MCoV-18625/2020|2020-11-22|EPI\_ISL\_784973|Original|hCoV-19^^Texas|Human|Houston Methodist Hospital|Houston Methodist Hospital|Long|USA

>Spike|hCoV-19/Scotland/QEUH-A4C7EB/2020|2020-10-08|EPI\_ISL\_596001|Original|hCoV-19^^Scotland|Human|Quadram Institute Bioscience|COVID-19 Genomics UK (COG-UK) Consortium|Alikhan|United Kingdom

>Spike|hCoV-19/USA/CA-CHLA-PLM51850514/2020|2020-11-13|EPI\_ISL\_753309|Original|hCoV-19^^California|Human|Clinical virology Laboratory|Center for Personalized Medicine|Dien Bard|USA

>Spike|hCoV-19/England/MILK-9AB4A8/2020|2020-08-31|EPI\_ISL\_551260|Original|hCoV-19^^England|Human|Lighthouse Lab in Milton Keynes|Wellcome Sanger Institute for the COVID-19 Genomics UK (COG-UK) consortium|Davies|United Kingdom

>Spike|hCoV-19/Luxembourg/LNS2048918/2020|2020-07-23|EPI\_ISL\_740048|Original|hCoV-19^^Luxembourg|Human|Laboratoire national de sant\u00e9|Laboratoire national de sant\u00e9|Wienecke-Baldacchino|Luxembourg

>Spike|hCoV-19/Switzerland/VD-ETHZ-260076/2020|2020-08-25|EPI\_ISL\_539398|Original|hCoV-19^^Vaud|Human|Viollier AG|Department of Biosystems Science and Engineering|Nadeau|Switzerland

>Spike|hCoV-19/England/MILK-9C3185/2020|2020-09-10|EPI\_ISL\_566940|Original|hCoV-19^^England|Human|Lighthouse Lab in Milton Keynes|Wellcome Sanger Institute for the COVID-19 Genomics UK (COG-UK) consortium|Davies|United Kingdom

>Spike|hCoV-19/England/BRIS-12DB0B/2020|2020-05-31|EPI\_ISL\_481831|Original|hCoV-19^^England|Human|PHE South West Regional Laboratory|Wellcome Sanger Institute for the COVID-19 Genomics UK (COG-UK) consortium|Davies|United Kingdom

>Spike|hCoV-19/Denmark/DCGC-15657/2020|2020-11-23|EPI\_ISL\_713943|Original|hCoV-19^^Midtjylland|Human|Department of Virus and Microbiological Special Diagnostics|Albertsen Lab|Michaelsen|Denmark

>Spike|hCoV-19/England/MILK-A5639F/2020|2020-10-08|EPI\_ISL\_595151|Original|hCoV-19^^England|Human|Quadram Institute Bioscience|COVID-19 Genomics UK (COG-UK) Consortium|Alikhan|United Kingdom

>Spike|hCoV-19/USA/CA-ALSR-2938/2020|2020-07-16|EPI\_ISL\_635741|Original|hCoV-19^^California|Human|San Diego County Public Health Laboratory|Andersen lab at Scripps Research|Gangavarapu|USA

>Spike|hCoV-19/England/LOND-D5EBF/2020|2020-04-19|EPI\_ISL\_444256|Original|hCoV-19^^England|Human|University College London|COVID-19 Genomics UK (COG-UK) Consortium|Roy|United Kingdom

>Spike|hCoV-19/England/ALDP-955B02/2020|2020-06-12|EPI\_ISL\_553986|Original|hCoV-19^^England|Human|Lighthouse Lab in Alderley Park|Wellcome Sanger Institute for the COVID-19 Genomics UK (COG-UK) consortium|Davies|United Kingdom

>Spike|hCoV-19/England/MILK-A46365/2020|2020-10-02|EPI\_ISL\_598704|Original|hCoV-19^^England|Human|Lighthouse Lab in Milton Keynes|Wellcome Sanger Institute for the COVID-19 Genomics UK (COG-UK) consortium|Davies|United Kingdom

>Spike|hCoV-19/Australia/VIC9792/2020|2020-07-24|EPI\_ISL\_565720|Original|hCoV-19^^Victoria|Human|Microbiological Diagnostic Unit - Public Health Laboratory (MDU-PHL)|MDU-PHL|Schultz|Australia

>Spike|hCoV-19/England/LIVE-DC2DCA/2020|2020-11-24|EPI\_ISL\_703167|Original|hCoV-19^^England|Human|Liverpool Clinical Laboratories|COVID-19 Genomics UK (COG-UK) Consortium|Haldenby|United Kingdom

>Spike|hCoV-19/Scotland/EDB4732/2020|2020-04-27|EPI\_ISL\_453139|Original|hCoV-19^^Scotland|Human|Virology Department|COVID-19 Genomics UK (COG-UK) Consortium|Williams|United Kingdom

>Spike|hCoV-19/Japan/IC-0581/2020|2020-10-00|EPI\_ISL\_779667|Original|hCoV-19^^Japan|Human|Pathogen Genomics Center|Pathogen Genomics Center|Sekizuka|Japan

>Spike|hCoV-19/USA/TX-HMH-MCoV-12650/2020|2020-08-31|EPI\_ISL\_790443|Original|hCoV-19^^Texas|Human|Houston Methodist Hospital|Houston Methodist Hospital|Long|USA

>Spike|hCoV-19/England/ALDP-A50957/2020|2020-10-07|EPI\_ISL\_597667|Original|hCoV-19^^England|Human|Lighthouse Lab in Alderley Park|Wellcome Sanger Institute for the COVID-19 Genomics UK (COG-UK) consortium|Davies|United Kingdom

>Spike|hCoV-19/Chile/RM-MSHS-op4d1/2020|2020-03-08|EPI\_ISL\_415661|Original|hCoV-19^^Region Metropolitana de Santiago|Human|Laboratory of Molecular Virology|MSHS Pathogen Surveillance Program|van Bakel|Chile

>Spike|hCoV-19/Spain/MD-H12-45/2020|2020-08-04|EPI\_ISL\_534328|Original|hCoV-19^^Madrid|Human|Hospital Universitario 12 de Octubre|Hospital Universitario 12 de Octubre|Viedma|Spain

>Spike|hCoV-19/USA/UT-04229/2020|2020-05-15|EPI\_ISL\_522324|Original|hCoV-19^^Utah|Human|Utah Public Health Laboratory|Utah Public Health Laboratory|Young|USA

>Spike|hCoV-19/Scotland/EDB8284/2020|2020-10-10|EPI\_ISL\_594838|Original|hCoV-19^^Scotland|Human|Virology Department|COVID-19 Genomics UK (COG-UK) Consortium|McHugh|United Kingdom

>Spike|hCoV-19/Northern Ireland/NIRE-103075/2020|2020-04-20|EPI\_ISL\_489226|Original|hCoV-19^^Northern Ireland|Human|Regional Virus

Laboratory|Wellcome Sanger Institute for the COVID-19 Genomics UK (COG-UK) consortium|Davies|United Kingdom  
>Spike|hCoV-19/England/BRIS-121BAD/2020|2020-03-17|EPI\_ISL\_440198|Original|hCoV-19^^England|Human|PHE South West Regional Laboratory|Wellcome Sanger Institute for the COVID-19 Genomics UK (COG-UK) consortium|Amato|United Kingdom  
>Spike|hCoV-19/Japan/PG-3255/2020|2020-06-00|EPI\_ISL\_691370|Original|hCoV-19^^Japan|Human|Saitama Prefectural Institute of Public Health|Pathogen Genomics Center|Sekizuka|Japan  
>Spike|hCoV-19/Switzerland/ZH-ETHZ-220029/2020|2020-07-28|EPI\_ISL\_512012|Original|hCoV-19^^Zurich|Human|Viollier AG|Department of Biosystems Science and Engineering|Nadeau|Switzerland  
>Spike|hCoV-19/England/CAMB-7EF79/2020|2020-04-07|EPI\_ISL\_442923|Original|hCoV-19^^England|Human|Department of Pathology|Wellcome Sanger Institute for the COVID-19 Genomics UK (COG-UK) consortium|Amato|United Kingdom  
>Spike|hCoV-19/Denmark/DCGC-13316/2020|2020-11-30|EPI\_ISL\_712097|Original|hCoV-19^^Hovedstaden|Human|Department of Virus and Microbiological Special Diagnostics|Albertsen Lab|Michaelsen|Denmark  
>Spike|hCoV-19/USA/MI-QDX-354/2020|2020-03-23|EPI\_ISL\_571098|Original|hCoV-19^^Michigan|Human|Quest Diagnostics|Quest Diagnostics|Kagan|USA  
>Spike|hCoV-19/Scotland/EDB2361/2020|2020-04-22|EPI\_ISL\_439190|Original|hCoV-19^^Scotland|Human|Virology Department|COVID-19 Genomics UK (COG-UK) Consortium|Williams|United Kingdom  
>Spike|hCoV-19/Australia/VIC11630/2020|2020-07-24|EPI\_ISL\_591828|Original|hCoV-19^^Victoria|Human|Microbiological Diagnostic Unit - Public Health Laboratory (MDU-PHL)|MDU-PHL|Schultz|Australia  
>Spike|hCoV-19/England/NOTT-1108B9/2020|2020-04-29|EPI\_ISL\_441873|Original|hCoV-19^^England|Human|Queens Medical Centre|COVID-19 Genomics UK (COG-UK) Consortium|Loose|United Kingdom  
>Spike|hCoV-19/USA/WA-UW-12378/2020|2020-06-27|EPI\_ISL\_570521|Original|hCoV-19^^Washington|Human|UW Virology Lab|UW Virology Lab|Roychoudhury|USA  
>Spike|hCoV-19/Canada/MB-NML-598/2020|2020-05-07|EPI\_ISL\_582283|Original|hCoV-19^^Manitoba|Human|Cadham Provincial Laboratory|National Microbiology Laboratory (NML)|Majer|Canada  
>Spike|hCoV-19/Guadeloupe/IPG-7347/2020|2020-03-30|EPI\_ISL\_613444|Original|hCoV-19^^Baie-Mahault|Human|Institut Pasteur de la Guadeloupe|Institut Pasteur de la Guadeloupe|Enouf|Guadeloupe  
>Spike|hCoV-19/England/QEUEH-C7F835/2020|2020-12-16|EPI\_ISL\_762956|Original|hCoV-19^^England|Human|Lighthouse Lab in Glasgow|Wellcome Sanger Institute for the COVID-19 Genomics UK (COG-UK) Consortium|Davies|United Kingdom  
>Spike|hCoV-19/England/ALDP-94B8F9/2020|2020-06-11|EPI\_ISL\_556415|Original|hCoV-19^^England|Human|Lighthouse Lab in Alderley Park|Wellcome Sanger Institute for the COVID-19 Genomics UK (COG-UK) consortium|Davies|United Kingdom  
>Spike|hCoV-19/USA/FL-BPHL-0669/2020|2020-03-13|EPI\_ISL\_509727|Original|hCoV-19^^Florida|Human|Florida Bureau of Public Health Laboratories|Florida Bureau of Public Health Laboratories|Blanton|USA  
>Spike|hCoV-19/Austria/CeMM0722/2020|2020-05-14|EPI\_ISL\_583669|Original|hCoV-19^^Austria|Human|Austrian Agency for Health and Food Safety (AGES)|Bergthaler laboratory|Bergthaler|Austria  
>Spike|hCoV-19/England/ALDP-B83F0D/2020|2020-11-14|EPI\_ISL\_674369|Original|hCoV-19^^England|Human|Lighthouse Lab in Alderley Park|Wellcome Sanger Institute for the COVID-19 Genomics UK (COG-UK) Consortium|Davies|United Kingdom  
>Spike|hCoV-19/England/CAMC-B07A3D/2020|2020-10-29|EPI\_ISL\_643746|Original|hCoV-19^^England|Human|Lighthouse Lab in Cambridge|Wellcome Sanger Institute for the COVID-19 Genomics UK (COG-UK) Consortium|Davies|United Kingdom  
>Spike|hCoV-19/England/CAMB-1B2804/2020|2020-05-13|EPI\_ISL\_469898|Original|hCoV-19^^England|Human|Department of Pathology|Wellcome Sanger Institute for the COVID-19 Genomics UK (COG-UK) consortium|Davies|United Kingdom  
>Spike|hCoV-19/Jordan/SR-0335/2020|2020-04-08|EPI\_ISL\_450187|Original|hCoV-19^^Amman|Human|Biolab Diagnostic Laboratories|Andersen lab at Scripps Research|Gangavarapu|Jordan

>Spike|hCoV-19/Scotland/CVR4417/2020|2020-09-18|EPI\_ISL\_585291|Original|hCoV-19^^Scotland|Human|West of Scotland Specialist Virology Centre|COVID-19 Genomics UK (COG-UK) Consortium|Robertson|United Kingdom

>Spike|hCoV-19/England/QEUEH-9AEFC2/2020|2020-09-03|EPI\_ISL\_573522|Original|hCoV-19^^England|Human|University College London|COVID-19 Genomics UK (COG-UK) Consortium|Roy|United Kingdom

>Spike|hCoV-19/England/QEUEH-9DED83/2020|2020-09-21|EPI\_ISL\_584827|Original|hCoV-19^^England|Human|University College London|COVID-19 Genomics UK (COG-UK) Consortium|Roy|United Kingdom

>Spike|hCoV-19/Netherlands/un-EMC-738/2020|2020-06-10|EPI\_ISL\_523493|Original|hCoV-19^^Netherlands|Human|Dutch COVID-19 response team|Erasmus Medical Center|Oude Munnink|Netherlands

>Spike|hCoV-19/Iraq/ICGEB-5T/2020|2020-06-30|EPI\_ISL\_582030|Original|hCoV-19^^Al-Muthanna Province|Human|Biology Department|International Centre for Genetic Engineering and Biotechnology (ICGEB) and ARGO Open Lab Platform|Marcello|Iraq

>Spike|hCoV-19/England/ALDP-B82B19/2020|2020-11-14|EPI\_ISL\_675530|Original|hCoV-19^^England|Human|Lighthouse Lab in Alderley Park|Wellcome Sanger Institute for the COVID-19 Genomics UK (COG-UK) Consortium|Davies|United Kingdom

>Spike|hCoV-19/USA/FL\_1177/2020|2020-03-06|EPI\_ISL\_424857|Original|hCoV-19^^Florida|Human|FL Bur. of Public Health Laboratories-Jacksonville|Pathogen Discovery|Queen|USA

>Spike|hCoV-19/England/BRIS-1291C1/2020|2020-04-19|EPI\_ISL\_458740|Original|hCoV-19^^England|Human|PHE South West Regional Laboratory|Wellcome Sanger Institute for the COVID-19 Genomics UK (COG-UK) consortium|Davies|United Kingdom

>Spike|hCoV-19/Taiwan/NTU03/2020|2020-03-02|EPI\_ISL\_413592|Vero E6|hCoV-19^^Taipei|Human|Department of Laboratory Medicine|Microbial Genomics Core Lab|Lin|Taiwan

>Spike|hCoV-19/Scotland/CVR2694/2020|2020-04-18|EPI\_ISL\_484642|Original|hCoV-19^^Scotland|Human|West of Scotland Specialist Virology Centre|COVID-19 Genomics UK (COG-UK) Consortium|Robertson|United Kingdom

>Spike|hCoV-19/Portugal/PT0553/2020|2020-04-07|EPI\_ISL\_454276|Original|hCoV-19^^Portugal|Human|unknown|Instituto Nacional de Saude (INSA)|Borges|Portugal

>Spike|hCoV-19/Wales/QEUEH-A8B294/2020|2020-10-16|EPI\_ISL\_647858|Original|hCoV-19^^Wales|Human|Lighthouse Lab in Glasgow|Wellcome Sanger Institute for the COVID-19 Genomics UK (COG-UK) Consortium|Davies|United Kingdom

>Spike|hCoV-19/Belgium/regal-12111443/2020|2020-12-11|EPI\_ISL\_738495|Original|hCoV-19^^Mol|Human|UZ Leuven|KU Leuven|Maes|Belgium

>Spike|hCoV-19/USA/CA-CZB-1926/2020|2020-04-23|EPI\_ISL\_486216|Original|hCoV-19^^California|Human|Orange County Public Health Laboratory|Chan-Zuckerberg Biohub|McGeever|USA

>Spike|hCoV-19/England/QEUEH-AD4C43/2020|2020-10-26|EPI\_ISL\_634571|Original|hCoV-19^^England|Human|Lighthouse Lab in Glasgow|Wellcome Sanger Institute for the COVID-19 Genomics UK (COG-UK) consortium|Davies|United Kingdom

>Spike|hCoV-19/Luxembourg/LNS0434313/2020|2020-11-13|EPI\_ISL\_739774|Original|hCoV-19^^Luxembourg|Human|Laboratoire national de sant\u00e9|Laboratoire national de sant\u00e9|Wienecke-Baldacchino|Luxembourg

>Spike|hCoV-19/Scotland/EDB4389/2020|2020-05-04|EPI\_ISL\_526483|Original|hCoV-19^^Scotland|Human|Virology Department|COVID-19 Genomics UK (COG-UK) Consortium|Williams|United Kingdom

>Spike|hCoV-19/Denmark/DCGC-16243/2020|2020-11-16|EPI\_ISL\_714661|Original|hCoV-19^^Syddanmark|Human|Department of Virus and Microbiological Special Diagnostics|Albertsen Lab|Michaelsen|Denmark

>Spike|hCoV-19/South Africa/KRISP-0175/2020|2020-06-05|EPI\_ISL\_482702|Original|hCoV-19^^KwaZulu-Natal|Human|Molecular Diagnostics Services (MDS)|KRISP|de Oliveira|South Africa

>Spike|hCoV-19/Canada/ON-PHL-20-03721/2020|2020-11-00|EPI\_ISL\_775202|Original|hCoV-19^^Ontario|Human|Public Health Ontario Laboratory|Public Health Ontario Laboratory|Guthrie|Canada

>Spike|hCoV-19/Denmark/DCGC-8766/2020|2020-10-26|EPI\_ISL\_626069|Original|hCoV-19^^Midtjylland|Human|Department of Virus and Microbiological Special Diagnostics|Albertsen lab|Michaelsen|Denmark

>Spike|hCoV-19/Scotland/EDB821/2020|2020-04-04|EPI\_ISL\_433250|Original|hCoV-19^^Scotland|Human|Virology Department|COVID-19 Genomics UK (COG-UK) Consortium|Williams|United Kingdom

>Spike|hCoV-19/England/QEUA-9B7306/2020|2020-09-07|EPI\_ISL\_590675|Original|hCoV-19^^England|Human|Lighthouse Lab in Glasgow|Wellcome Sanger Institute for the COVID-19 Genomics UK (COG-UK) consortium|Davies|United Kingdom

>Spike|hCoV-19/England/QEUA-A216A3/2020|2020-10-01|EPI\_ISL\_587525|Original|hCoV-19^^England|Human|Lighthouse Lab in Glasgow|Wellcome Sanger Institute for the COVID-19 Genomics UK (COG-UK) consortium|Davies|United Kingdom

>Spike|hCoV-19/USA/ID-UNM-IBL068/2020|2020-03-20|EPI\_ISL\_632863|Original|hCoV-19^^Idaho|Human|Idaho Bureau of Laboratories|Center for Global Health|Domman|USA

>Spike|hCoV-19/USA/MO-QDX-674/2020|2020-03-18|EPI\_ISL\_571473|Original|hCoV-19^^Missouri|Human|Quest Diagnostics|Quest Diagnostics|Kagan|USA

>Spike|hCoV-19/England/PORT-2D1E39/2020|2020-04-06|EPI\_ISL\_499284|Original|hCoV-19^^England|Human|Centre for Enzyme Innovation|COVID-19 Genomics UK (COG-UK) Consortium|Robson|United Kingdom

>Spike|hCoV-19/England/QEUA-AADDAA/2020|2020-10-20|EPI\_ISL\_721547|Original|hCoV-19^^England|Human|Lighthouse Lab in Glasgow|Wellcome Sanger Institute for the COVID-19 Genomics UK (COG-UK) Consortium|Davies|United Kingdom

>Spike|hCoV-19/USA/WA-S551/2020|2020-03-24|EPI\_ISL\_434311|Original|hCoV-19^^Washington|Human|Washington State Department of Health|Seattle Flu Study|Bedford|USA

>Spike|hCoV-19/England/NORW-E8DAD/2020|2020-04-28|EPI\_ISL\_461807|Original|hCoV-19^^England|Human|Quadram Institute Bioscience|COVID-19 Genomics UK (COG-UK) Consortium|Alikhan|United Kingdom

>Spike|hCoV-19/Scotland/GCVR-16FDCB/2020|2020-03-22|EPI\_ISL\_489670|Original|hCoV-19^^Scotland|Human|NHSGGC West of Scotland Specialist Virology Centre / MRC-University of Glasgow Centre for Virus Research|Wellcome Sanger Institute for the COVID-19 Genomics UK (COG-UK) consortium|Davies|United Kingdom

>Spike|hCoV-19/Australia/VIC8570/2020|2020-08-17|EPI\_ISL\_565096|Original|hCoV-19^^Victoria|Human|Microbiological Diagnostic Unit - Public Health Laboratory (MDU-PHL) |MDU-PHL|Schultz|Australia

>Spike|hCoV-19/Wales/PHWC-16E500/2020|2020-09-29|EPI\_ISL\_585729|Original|hCoV-19^^Wales|Human|Wales Specialist Virology Centre Sequencing lab|COVID-19 Genomics UK (COG-UK) Consortium|Moore|United Kingdom

>Spike|hCoV-19/England/ALDP-B77090/2020|2020-11-12|EPI\_ISL\_723844|Original|hCoV-19^^England|Human|Oxford Viromics|COVID-19 Genomics UK (COG-UK) Consortium|Golubchik|United Kingdom

>Spike|hCoV-19/Spain/VC-FISABIO-211/2020|2020-03-28|EPI\_ISL\_436306|Original|hCoV-19^^Comunitat Valenciana|Human|Servicio de Microbiologia. Hospital Clinico Universitario de Valencia|Sequencing and Bioinformatics Service and Molecular Epidemiology Research Group. FISABIO-Public Health|Gonzalez-Candelas|Spain

>Spike|hCoV-19/Wales/PHWC-2723A/2020|2020-03-30|EPI\_ISL\_432317|Original|hCoV-19^^Wales|Human|Wales Specialist Virology Centre|Public Health Wales Microbiology Cardiff|Moore|United Kingdom

>Spike|hCoV-19/England/CAMB-1B958E/2020|2020-11-02|EPI\_ISL\_679140|Original|hCoV-19^^England|Human|Department of Pathology|COVID-19 Genomics UK (COG-UK) Consortium|Goodfellow|United Kingdom

>Spike|hCoV-19/Scotland/EDB2766/2020|2020-03-29|EPI\_ISL\_487654|Original|hCoV-19^^Scotland|Human|Virology Department|Wellcome Sanger Institute for the COVID-19 Genomics UK (COG-UK) consortium|Davies|United Kingdom

>Spike|hCoV-19/England/ALDP-A52384/2020|2020-10-07|EPI\_ISL\_598149|Original|hCoV-19^^England|Human|Lighthouse Lab in Alderley Park|Wellcome Sanger Institute for the COVID-19 Genomics UK (COG-UK) consortium|Davies|United Kingdom

>Spike|hCoV-19/England/LOND-125186D/2020|2020-11-20|EPI\_ISL\_679445|Original|hCoV-19^^England|Human|University College London Hospital|COVID-19 Genomics UK (COG-UK) Consortium|Byott|United Kingdom



>Spike|hCoV-19/England/CAMC-BD2AE0/2020|2020-11-28|EPI\_ISL\_702173|Original|hCoV-19^^England|Human|Lighthouse Lab in Cambridge|Wellcome Sanger Institute for the COVID-19 Genomics UK (COG-UK) Consortium|Davies|United Kingdom

>Spike|hCoV-19/Denmark/ALAB-SSI497/2020|2020-03-26|EPI\_ISL\_429571|Original|hCoV-19^^Denmark|Human|Department of Virus and Microbiological Special Diagnostics|Albertsen lab|Kirkegaard|Denmark

>Spike|hCoV-19/Germany/HH-hpi-p1776/2020|2020-03-19|EPI\_ISL\_776149|Original|hCoV-19^^Hamburg|Human|University Medical Center Hamburg Eppendorf|Heinrich Pette Institute|Robitaille|Germany

>Spike|hCoV-19/England/ALDP-BC6205/2020|2020-11-22|EPI\_ISL\_721259|Original|hCoV-19^^England|Human|Lighthouse Lab in Alderley Park|Wellcome Sanger Institute for the COVID-19 Genomics UK (COG-UK) Consortium|Davies|United Kingdom

>Spike|hCoV-19/Wales/PHWC-16C1A4/2020|2020-09-20|EPI\_ISL\_574020|Original|hCoV-19^^Wales|Human|Wales Specialist Virology Centre Sequencing lab|COVID-19 Genomics UK (COG-UK) Consortium|Moore|United Kingdom

>Spike|hCoV-19/Italy/BAS-IZSPB-358PT/2020|2020-10-29|EPI\_ISL\_722903|Original|hCoV-19^^Basilicata|Human|Istituto Zooprofilattico Sperimentale della Puglia e della Basilicata|Istituto Zooprofilattico Sperimentale della Puglia e della Basilicata|Parisi|Italy

>Spike|hCoV-19/USA/MN-MDH-1991/2020|2020-10-22|EPI\_ISL\_634865|Original|hCoV-19^^Minnesota|Human|HealthPartners Central Lab|Minnesota Department of Health|Lorentz|USA

>Spike|hCoV-19/England/QEUEH-9D15A6/2020|2020-09-14|EPI\_ISL\_577290|Original|hCoV-19^^England|Human|University of Exeter|COVID-19 Genomics UK (COG-UK) Consortium|Temperton|United Kingdom

>Spike|hCoV-19/England/QEUEH-CC52C9/2020|2020-12-21|EPI\_ISL\_760440|Original|hCoV-19^^England|Human|Lighthouse Lab in Glasgow|Wellcome Sanger Institute for the COVID-19 Genomics UK (COG-UK) Consortium|Davies|United Kingdom

>Spike|hCoV-19/USA/OR-OHSU-0260/2020|2020-04-11|EPI\_ISL\_509084|Original|hCoV-19^^Oregon|Human|OHSU Lab Services Molecular Microbiology Lab|Oregon SARS-CoV-2 Genome Sequencing Center|O'Roak|USA

>Spike|hCoV-19/England/LIVE-DC9A80/2020|2020-12-05|EPI\_ISL\_705032|Original|hCoV-19^^England|Human|Liverpool Clinical Laboratories|COVID-19 Genomics UK (COG-UK) Consortium|Haldenby|United Kingdom

>Spike|hCoV-19/England/ALDP-C6B1F5/2020|2020-12-14|EPI\_ISL\_778593|Original|hCoV-19^^England|Human|Lighthouse Lab in Alderley Park|Wellcome Sanger Institute for the COVID-19 Genomics UK (COG-UK) Consortium|Davies|United Kingdom

>Spike|hCoV-19/England/CAMC-C2D317/2020|2020-12-07|EPI\_ISL\_733741|Original|hCoV-19^^England|Human|Lighthouse Lab in Cambridge|Wellcome Sanger Institute for the COVID-19 Genomics UK (COG-UK) Consortium|Davies|United Kingdom

>Spike|hCoV-19/Japan/PG-2959/2020|2020-04-00|EPI\_ISL\_691085|Original|hCoV-19^^Japan|Human|Pathogen Genomics Center|Pathogen Genomics Center|Sekizuka|Japan

>Spike|hCoV-19/USA/OR-PROV-061/2020|2020-04-13|EPI\_ISL\_482341|Original|hCoV-19^^Oregon|Human|Providence St. Joseph Health Molecular Genomics Laboratory|Providence St. Joseph Health Molecular Genomics Laboratory|Dowdell|USA

>Spike|hCoV-19/Australia/VIC11877/2020|2020-08-10|EPI\_ISL\_591880|Original|hCoV-19^^Victoria|Human|Victorian Infectious Diseases Reference Laboratory (VIDRL)|VIDRL and MDU-PHL|Schultz|Australia

>Spike|hCoV-19/Denmark/DCGC-17066/2020|2020-12-14|EPI\_ISL\_750273|Original|hCoV-19^^Syddanmark|Human|Department of Virus and Microbiological Special Diagnostics|Albertsen Lab|Michaelsen|Denmark

>Spike|hCoV-19/SaudiArabia/KAUST-JEDDAH833/2020|2020-05-24|EPI\_ISL\_513006|Original|hCoV-19^^Jeddah|Human|Pathogen Genomics Lab King Abdullah University of Science and Technology(KAUST)|Pathogen Genomics Lab King Abdullah University of Science and Technology(KAUST)|Mohamed Ghazzali|Saudi Arabia

>Spike|hCoV-19/Japan/PG-6855/2020|2020-09-00|EPI\_ISL\_687963|Original|hCoV-19^^Japan|Human|Pathogen Genomics Center|Pathogen Genomics Center|Sekizuka|Japan

>Spike|hCoV-19/Denmark/DCGC-10725/2020|2020-11-02|EPI\_ISL\_670163|Original|hCoV-19^^Sjaelland|Human|Department of Virus and Microbiological Special Diagnostics|Albertsen Lab|Michaelsen|Denmark

>Spike|hCoV-19/USA/WA-S631/2020|2020-04-17|EPI\_ISL\_438184|Original|hCoV-19^^Washington|Human|Washington State Department of Health|Seattle Flu Study|Bedford|USA

>Spike|hCoV-19/England/CAMC-B20843/2020|2020-11-01|EPI\_ISL\_649493|Original|hCoV-19^^England|Human|Lighthouse Lab in Cambridge|Wellcome Sanger Institute for the COVID-19 Genomics UK (COG-UK) Consortium|Davies|United Kingdom

>Spike|hCoV-19/USA/CA-LACPHL-AF00068/2020|2020-12-21|EPI\_ISL\_766005|Original|hCoV-19^^California|Human|Los Angeles County PHL|Los Angeles County PHL|Hemarajata|USA

>Spike|hCoV-19/Denmark/DCGC-6825/2020|2020-10-12|EPI\_ISL\_619522|Original|hCoV-19^^Hovedstaden|Human|Department of Virus and Microbiological Special Diagnostics|Albertsen lab|Michaelsen|Denmark

>Spike|hCoV-19/USA/TX-HMH-6110/2020|2020-07-04|EPI\_ISL\_547246|Original|hCoV-19^^Texas|Human|Houston Methodist Hospital|Houston Methodist Hospital|Long|USA

>Spike|hCoV-19/England/ALDP-A2F9BB/2020|2020-10-05|EPI\_ISL\_587286|Original|hCoV-19^^England|Human|Lighthouse Lab in Alderley Park|Wellcome Sanger Institute for the COVID-19 Genomics UK (COG-UK) consortium|Davies|United Kingdom

>Spike|hCoV-19/USA/AZ-TG520830/2020|2020-07-20|EPI\_ISL\_695374|Original|hCoV-19^^Arizona|Human|TGen North|TGen North|French|USA

>Spike|hCoV-19/Luxembourg/LNS2117299/2020|2020-07-10|EPI\_ISL\_740062|Original|hCoV-19^^Luxembourg|Human|Laboratoire national de sant\u00e9|Laboratoire national de sant\u00e9|Wienecke-Baldacchino|Luxembourg

>Spike|hCoV-19/USA/FL-BPHL-0801/2020|2020-07-14|EPI\_ISL\_514147|Original|hCoV-19^^Florida|Human|Florida Bureau of Public Health Laboratories|Florida Bureau of Public Health Laboratories|Blanton|USA

>Spike|hCoV-19/England/ALDP-A945EA/2020|2020-10-19|EPI\_ISL\_624626|Original|hCoV-19^^England|Human|Lighthouse Lab in Alderley Park|Wellcome Sanger Institute for the COVID-19 Genomics UK (COG-UK) consortium|Davies|United Kingdom

>Spike|hCoV-19/Denmark/DCGC-4164/2020|2020-09-21|EPI\_ISL\_621984|Original|hCoV-19^^Hovedstaden|Human|Department of Virus and Microbiological Special Diagnostics|Albertsen lab|Michaelsen|Denmark

>Spike|hCoV-19/Canada/QC\_AB1/2020|2020-04-05|EPI\_ISL\_444499|Original|hCoV-19^^Quebec|Human|Laboratoire de microbiologie|Smith Laboratory|Smith|Canada

>Spike|hCoV-19/USA/LA-EVTL1431/2020|2020-12-15|EPI\_ISL\_779097|Original|hCoV-19^^Louisiana|Human|LSUHS Emerging Viral Threat Laboratory|Microbial Genome Sequencing Center|Kamil|USA

>Spike|hCoV-19/England/20139027104/2020|2020-03-26|EPI\_ISL\_421901|Original|hCoV-19^^England|Human|Respiratory Virus Unit|Respiratory Virus Unit|Platt|United Kingdom

>Spike|hCoV-19/Scotland/EDB131/2020|2020-03-23|EPI\_ISL\_425910|Original|hCoV-19^^Scotland|Human|Virology Department|COVID-19 Genomics UK (COG-UK) Consortium|Williams|United Kingdom

>Spike|hCoV-19/England/QEUEH-B11344/2020|2020-11-02|EPI\_ISL\_642752|Original|hCoV-19^^England|Human|Lighthouse Lab in Glasgow|Wellcome Sanger Institute for the COVID-19 Genomics UK (COG-UK) Consortium|Davies|United Kingdom

>Spike|hCoV-19/USA/NM-DOH-2020321221/2020|2020-09-03|EPI\_ISL\_575292|Original|hCoV-19^^New Mexico|Human|Molecular Biology|Molecular Biology|Johnson|USA

>Spike|hCoV-19/USA/UT-UPHL-2008881/2020|2020-05-22|EPI\_ISL\_524995|Original|hCoV-19^^Utah|Human|Utah Public Health Laboratory|Utah Public Health Laboratory|Young|USA

>Spike|hCoV-19/Japan/PG-7681/2020|2020-08-00|EPI\_ISL\_686783|Original|hCoV-19^^Japan|Human|Chiba Prefectural Institute of Public Health|Pathogen Genomics Center|Sekizuka|Japan

>Spike|hCoV-19/England/OXON-ADB9B/2020|2020-00-00|EPI\_ISL\_448619|Original|hCoV-19^^England|Human|Oxford Viromics|COVID-19 Genomics UK (COG-UK) Consortium|Golubchik|United Kingdom

>Spike|hCoV-19/England/203020505/2020|2020-07-10|EPI\_ISL\_500711|Original|hCoV-19^^England|Human|Respiratory Virus Unit|Respiratory Virus Unit|Platt|United Kingdom

>Spike|hCoV-19/England/MILK-BAB7F8/2020|2020-11-18|EPI\_ISL\_681522|Original|hCoV-19^^England|Human|Lighthouse Lab in Milton Keynes|Wellcome Sanger Institute for the COVID-19 Genomics UK (COG-UK) Consortium|Davies|United Kingdom

>Spike|hCoV-19/USA/CO-CDPHE-2005210130/2020|2020-05-20|EPI\_ISL\_677291|Original|hCoV-19^^Colorado|Human|Colorado Department of Public Health and Environment|Colorado Department of Public Health and Environment|Bankers|USA

>Spike|hCoV-19/Denmark/DCGC-16892/2020|2020-12-14|EPI\_ISL\_750625|Original|hCoV-19^^Midtjylland|Human|Department of Virus and Microbiological Special Diagnostics|Albertsen Lab|Michaelsen|Denmark

>Spike|hCoV-19/England/NORT-1B72A49/2020|2020-12-06|EPI\_ISL\_724910|Original|hCoV-19^^England|Human|Northumbria University / South Tees Hospitals NHS Foundation Trust / North Cumbria Integrated Care NHS Foundation Trust / North Tees and Hartlepool NHS Foundation Trust / Newcastle Hospitals NHS Foundation Trust|COVID-19 Genomics UK (COG-UK) Consortium|Bashton|United Kingdom

>Spike|hCoV-19/England/ALDP-95CEF3/2020|2020-06-16|EPI\_ISL\_553410|Original|hCoV-19^^England|Human|Lighthouse Lab in Alderley Park|Wellcome Sanger Institute for the COVID-19 Genomics UK (COG-UK) consortium|Davies|United Kingdom

>Spike|hCoV-19/England/MILK-C52EBE/2020|2020-12-11|EPI\_ISL\_736307|Original|hCoV-19^^England|Human|Lighthouse Lab in Milton Keynes|Wellcome Sanger Institute for the COVID-19 Genomics UK (COG-UK) Consortium|Davies|United Kingdom

>Spike|hCoV-19/England/CAMB-1BBECD/2020|2020-00-00|EPI\_ISL\_723851|Original|hCoV-19^^England|Human|Department of Pathology|COVID-19 Genomics UK (COG-UK) Consortium|Goodfellow|United Kingdom

>Spike|hCoV-19/Denmark/DCGC-6945/2020|2020-10-12|EPI\_ISL\_619791|Original|hCoV-19^^Hovedstaden|Human|Department of Virus and Microbiological Special Diagnostics|Albertsen lab|Michaelsen|Denmark

>Spike|hCoV-19/England/201580189/2020|2020-04-09|EPI\_ISL\_466359|Original|hCoV-19^^England|Human|Respiratory Virus Unit|Respiratory Virus Unit|Platt|United Kingdom

>Spike|hCoV-19/England/CAMC-9EC1D1/2020|2020-09-24|EPI\_ISL\_580471|Original|hCoV-19^^England|Human|Lighthouse Lab in Cambridge|Wellcome Sanger Institute for the COVID-19 Genomics UK (COG-UK) consortium|Davies|United Kingdom

>Spike|hCoV-19/India/DL-69843-CSIR-IGIB/2020|2020-08-14|EPI\_ISL\_636768|Original|hCoV-19^^Delhi|Human|National Centre for Disease control (NCDC)|NCDC/CSIR-IGIB|Faruq|India

>Spike|hCoV-19/England/CAMB-7BE15/2020|2020-04-05|EPI\_ISL\_442132|Original|hCoV-19^^England|Human|Department of Pathology|Wellcome Sanger Institute for the COVID-19 Genomics UK (COG-UK) consortium|Amato|United Kingdom

>Spike|hCoV-19/Brazil/SP-L26-CD565/2020|2020-04-21|EPI\_ISL\_672739|Original|hCoV-19^^S\u00e3o Paulo|Human|Hospital das Cl\u00ednicas da Faculdade de Medicina da Universidade de S\u00e3o Paulo (HC-FMUSP)|Laborat\u00f3rio de Parasitologia M\u00e9dica - Instituto de Medicina Tropical - Universidade de S\u00e3o Paulo|de Jesus|Brazil

>Spike|hCoV-19/Australia/VIC7799/2020|2020-08-02|EPI\_ISL\_564667|Original|hCoV-19^^Victoria|Human|Microbiological Diagnostic Unit - Public Health Laboratory (MDU-PHL)|MDU-PHL|Schultz|Australia

>Spike|hCoV-19/England/CAMC-BC0DFB/2020|2020-11-22|EPI\_ISL\_704837|Original|hCoV-19^^England|Human|Lighthouse Lab in Cambridge|Wellcome Sanger Institute for the COVID-19 Genomics UK (COG-UK) Consortium|Davies|United Kingdom

>Spike|hCoV-19/Japan/PG-6671/2020|2020-07-00|EPI\_ISL\_687782|Original|hCoV-19^^Japan|Human|Pathogen Genomics Center|Pathogen Genomics Center|Sekizuka|Japan

>Spike|hCoV-19/England/QEUEH-AD15F0/2020|2020-10-24|EPI\_ISL\_633877|Original|hCoV-19^^England|Human|Lighthouse Lab in Glasgow|Wellcome Sanger Institute for the COVID-19 Genomics UK (COG-UK) consortium|Davies|United Kingdom

>Spike|hCoV-19/Jordan/AM-ALSR-4974/2020|2020-10-06|EPI\_ISL\_730247|Original|hCoV-19^^Amman|Human|Biolab Diagnostic Laboratories|Andersen lab at Scripps Research|Gangavarapu|Jordan

>Spike|hCoV-19/Switzerland/BL-ETHZ-240018/2020|2020-08-10|EPI\_ISL\_523869|Original|hCoV-19^^Basel-Landschaft|Human|Viollier AG|Department of Biosystems Science and Engineering|Nadeau|Switzerland

>Spike|hCoV-19/Netherlands/ZH-EMC-427/2020|2020-08-11|EPI\_ISL\_523766|Original|hCoV-19^^Zuid Holland|Human|Dutch COVID-19 response team|Erasmus Medical Center|Oude Munnink|Netherlands

>Spike|hCoV-19/USA/CA-CZB-10855/2020|2020-07-29|EPI\_ISL\_583099|Original|hCoV-19^^California|Human|Humboldt County Public Health Laboratory|Chan-Zuckerberg Biohub|Bhatt|USA

>Spike|hCoV-19/USA/CA-CZB-13417/2020|2020-09-03|EPI\_ISL\_672464|Original|hCoV-19^^California|Human|Alameda County Public Health Lab|Chan-Zuckerberg Biohub|Bhatt|USA

>Spike|hCoV-19/USA/MI-MDHHS-SC22692/2020|2020-11-19|EPI\_ISL\_737306|Original|hCoV-19^^Michigan|Human|Michigan Department of Health and Human Services|Michigan Department of Health and Human Services|Blankenship|USA

>Spike|hCoV-19/Australia/VIC3260/2020|2020-07-13|EPI\_ISL\_520939|Original|hCoV-19^^Victoria|Human|Microbiological Diagnostic Unit - Public Health Laboratory (MDU-PHL)|MDU-PHL|Schultz|Australia

>Spike|hCoV-19/Iceland/268/2020|2020-03-17|EPI\_ISL\_417596|Original|hCoV-19^^Reykjavik|Human|The National University Hospital of Iceland|deCODE genetics|J\u00f3nsson|Iceland

>Spike|hCoV-19/Luxembourg/LNS8628138/2020|2020-10-26|EPI\_ISL\_744778|Original|hCoV-19^^Luxembourg|Human|Laboratoire national de sant\u00e9|Laboratoire national de sant\u00e9|Wienecke-Baldacchino|Luxembourg

>Spike|hCoV-19/Japan/PG-8363/2020|2020-07-00|EPI\_ISL\_687462|Original|hCoV-19^^Japan|Human|Pathogen Genomics Center|Pathogen Genomics Center|Sekizuka|Japan

>Spike|hCoV-19/USA/WA-UW-7016/2020|2020-04-06|EPI\_ISL\_570162|Original|hCoV-19^^Washington|Human|UW Virology Lab|UW Virology Lab|Roychoudhury|USA

>Spike|hCoV-19/Switzerland/BE-ETHZ-420299/2020|2020-12-20|EPI\_ISL\_768034|Original|hCoV-19^^Bern|Human|Viollier AG|Department of Biosystems Science and Engineering|Nadeau|Switzerland

>Spike|hCoV-19/Belgium/ULG-10784/2020|2020-11-16|EPI\_ISL\_661220|Original|hCoV-19^^Li\u00e8ge|Human|Department of Clinical Microbiology|GIGA Medical Genomics|Durkin|Belgium

>Spike|hCoV-19/England/ALDP-AA5003/2020|2020-10-22|EPI\_ISL\_630927|Original|hCoV-19^^England|Human|Lighthouse Lab in Alderley Park|Wellcome Sanger Institute for the COVID-19 Genomics UK (COG-UK) consortium|Davies|United Kingdom

>Spike|hCoV-19/England/SHEF-C0989/2020|2020-05-02|EPI\_ISL\_457581|Original|hCoV-19^^England|Human|Virology Department|COVID-19 Genomics UK (COG-UK) Consortium|de Silva|United Kingdom

>Spike|hCoV-19/England/ALDP-B5D564/2020|2020-11-09|EPI\_ISL\_678912|Original|hCoV-19^^England|Human|Department of Pathology|COVID-19 Genomics UK (COG-UK) Consortium|Goodfellow|United Kingdom

>Spike|hCoV-19/England/ALDP-9CDDC3/2020|2020-09-16|EPI\_ISL\_566139|Original|hCoV-19^^England|Human|Lighthouse Lab in Alderley Park|Wellcome Sanger Institute for the COVID-19 Genomics UK (COG-UK) consortium|Davies|United Kingdom

>Spike|hCoV-19/England/NORT-2898F6/2020|2020-04-01|EPI\_ISL\_458702|Original|hCoV-19^^England|Human|NU-OMICS DNA Sequencing research facility|Wellcome Sanger Institute for the COVID-19 Genomics UK (COG-UK) consortium|Davies|United Kingdom

>Spike|hCoV-19/England/QEUEH-C321E8/2020|2020-12-11|EPI\_ISL\_782612|Original|hCoV-19^^England|Human|Lighthouse Lab in Glasgow|Wellcome Sanger Institute for the COVID-19 Genomics UK (COG-UK) Consortium|Davies|United Kingdom

>Spike|hCoV-19/USA/WI-UW-2254/2020|2020-10-07|EPI\_ISL\_728023|Original|hCoV-19^^Wisconsin|Human|University of Wisconsin-Madison AIDS Vaccine Research Laboratories|University of Wisconsin-Madison AIDS Vaccine Research Laboratories|Baczenas|USA

>Spike|hCoV-19/England/ALDP-6FEA6B/2020|2020-06-29|EPI\_ISL\_581427|Original|hCoV-19^^England|Human|Lighthouse Lab in Alderley Park|Wellcome Sanger Institute for the COVID-19 Genomics UK (COG-UK) consortium|Davies|United Kingdom

>Spike|hCoV-19/USA/WA-S1892/2020|2020-05-28|EPI\_ISL\_496318|Original|hCoV-19^^Washington|Human|Washington State Department of Health|Seattle Flu Study|Lee|USA

>Spike|hCoV-19/England/CAMB-7971C/2020|2020-04-04|EPI\_ISL\_441088|Original|hCoV-19^^England|Human|Department of Pathology|Wellcome Sanger Institute for the COVID-19 Genomics UK (COG-UK) consortium|Amato|United Kingdom

>Spike|hCoV-19/England/ALDP-BB92D8/2020|2020-11-21|EPI\_ISL\_702397|Original|hCoV-19^^England|Human|Lighthouse Lab in Alderley Park|Wellcome Sanger Institute for the COVID-19 Genomics UK (COG-UK) Consortium|Davies|United Kingdom

>Spike|hCoV-19/Spain/VC-IBV-98004430/2020|2020-04-14|EPI\_ISL\_583924|Original|hCoV-19^^Comunitat\_Valenciana|Human|Servicio de Microbiolog\u00eda. Hospital General Universitario de Castell\u00f3n|SeqCOVID-SPAIN consortium/IBV(CSIC)|Comas|Spain

>Spike|hCoV-19/Australia/VIC3868/2020|2020-07-13|EPI\_ISL\_520581|Original|hCoV-19^^Victoria|Human|Microbiological Diagnostic Unit - Public Health Laboratory (MDU-PHL)|MDU-PHL|Schultz|Australia

>Spike|hCoV-19/Denmark/DCGC-19382/2020|2020-12-07|EPI\_ISL\_748219|Original|hCoV-19^^Hovedstaden|Human|Department of Virus and Microbiological Special Diagnostics|Albertsen Lab|Michaelsen|Denmark

>Spike|hCoV-19/Iceland/292/2020|2020-03-18|EPI\_ISL\_417621|Original|hCoV-19^^Reykjavik|Human|The National University Hospital of Iceland|deCODE genetics|J\u00f3nsson|Iceland

>Spike|hCoV-19/India/MH-MW5/2020|2020-04-27|EPI\_ISL\_508439|Original|hCoV-19^^Maharashtra|Human|Mahatma Gandhi Institute of Medical Sciences|National Institute of Biomedical Genomics|Maitra|India

>Spike|hCoV-19/England/BRIS-125BF4/2020|2020-03-30|EPI\_ISL\_443781|Original|hCoV-19^^England|Human|PHE South West Regional Laboratory|Wellcome Sanger Institute for the COVID-19 Genomics UK (COG-UK) consortium|Amato|United Kingdom

>Spike|hCoV-19/Scotland/QEUH-B2CF33/2020|2020-11-04|EPI\_ISL\_680574|Original|hCoV-19^^Scotland|Human|Department of Pathology|COVID-19 Genomics UK (COG-UK) Consortium|Goodfellow|United Kingdom

>Spike|hCoV-19/Denmark/DCGC-3766/2020|2020-04-20|EPI\_ISL\_622662|Original|hCoV-19^^Hovedstaden|Human|Department of Virus and Microbiological Special Diagnostics|Albertsen lab|Michaelsen|Denmark

>Spike|hCoV-19/France/HDF-5650/2020|2020-04-02|EPI\_ISL\_443284|Original|hCoV-19^^Hauts-de-France|Human|Laboratoire de Microbiologie - B\u00e2timent A - CH Ren\u00e9 Dubois|National Reference Center for Viruses of Respiratory Infections|Enouf|France

>Spike|hCoV-19/Denmark/DCGC-12696/2020|2020-11-16|EPI\_ISL\_682877|Original|hCoV-19^^Nordjylland|Human|Department of Virus and Microbiological Special Diagnostics|Albertsen Lab|Michaelsen|Denmark

>Spike|hCoV-19/France/GES-8771/2020|2020-03-10|EPI\_ISL\_560621|Original|hCoV-19^^Grand-Est|Human|Hospital|National Reference Center for Viruses of Respiratory Infections|Enouf|France

>Spike|hCoV-19/Wales/MILK-9AA6B2/2020|2020-08-30|EPI\_ISL\_550945|Original|hCoV-19^^Wales|Human|Lighthouse Lab in Milton Keynes|Wellcome Sanger Institute for the COVID-19 Genomics UK (COG-UK) consortium|Davies|United Kingdom

>Spike|hCoV-19/Northern Ireland/NIRE-FB150/2020|2020-03-25|EPI\_ISL\_448941|Original|hCoV-19^^Northern Ireland|Human|Regional Virus Laboratory|COVID-19 Genomics UK (COG-UK) Consortium|Fairley|United Kingdom

>Spike|hCoV-19/Australia/NSW41/2020|2020-03-10|EPI\_ISL\_417399|Original|hCoV-19^^New South Wales|Human|Centre for Infectious Diseases and Microbiology Public Health|NSW Health Pathology - Institute of Clinical Pathology and Medical Research; Westmead Hospital; University of Sydney|Eden|Australia

>Spike|hCoV-19/USA/AZ-TG498744/2020|2020-07-14|EPI\_ISL\_695270|Original|hCoV-19^^Arizona|Human|TGen North|TGen North|French|USA

>Spike|hCoV-19/Australia/VIC17845/2020|2020-07-27|EPI\_ISL\_779496|Original|hCoV-19^^Victoria|Human|Microbiological Diagnostic Unit - Public Health Laboratory (MDU-PHL)|MDU-PHL|Beck|Australia

>Spike|hCoV-19/England/ALDP-A95EB1/2020|2020-10-19|EPI\_ISL\_624722|Original|hCoV-19^^England|Human|Lighthouse Lab in Alderley Park|Wellcome Sanger Institute for the COVID-19 Genomics UK (COG-UK) consortium|Davies|United Kingdom

>Spike|hCoV-19/Wales/PHWC-2EF0F/2020|2020-04-07|EPI\_ISL\_446174|Original|hCoV-19^^Wales|Human|Wales Specialist Virology Centre|Public Health Wales Microbiology Cardiff|Moore|United Kingdom

>Spike|hCoV-19/USA/MI-MDHHS-SC21353/2020|2020-04-03|EPI\_ISL\_507607|Original|hCoV-19^^Michigan|Human|Michigan Department of Health and Human Services|Michigan Department of Health and Human Services|Blankenship|USA

>Spike|hCoV-19/England/CAMB-1AB26A/2020|2020-04-20|EPI\_ISL\_470302|Original|hCoV-19^^England|Human|Department of Pathology|Wellcome Sanger Institute for the COVID-19 Genomics UK (COG-UK) consortium|Davies|United Kingdom

>Spike|hCoV-19/Scotland/CVR2067/2020|2020-04-10|EPI\_ISL\_477849|Original|hCoV-19^^Scotland|Human|West of Scotland Specialist Virology Centre|COVID-19 Genomics UK (COG-UK) Consortium|Robertson|United Kingdom

>Spike|hCoV-19/Luxembourg/LNS0205443/2020|2020-11-15|EPI\_ISL\_739736|Original|hCoV-19^^Luxembourg|Human|Laboratoire national de sant\u00e9|Laboratoire national de sant\u00e9|Wienecke-Baldacchino|Luxembourg

>Spike|hCoV-19/England/CAMC-BC18DB/2020|2020-11-21|EPI\_ISL\_703076|Original|hCoV-19^^England|Human|Department of Pathology|COVID-19 Genomics UK (COG-UK) Consortium|Goodfellow|United Kingdom

>Spike|hCoV-19/Wales/PHWC-163143/2020|2020-05-21|EPI\_ISL\_473252|Original|hCoV-19^^Wales|Human|Wales Specialist Virology Centre Sequencing lab|COVID-19 Genomics UK (COG-UK) Consortium|Moore|United Kingdom

>Spike|hCoV-19/Canada/QC-LSPQ-L00233702/2020|2020-03-23|EPI\_ISL\_536035|Original|hCoV-19^^Quebec|Human|Centre de SSS de Trois-Rivi\u00e8res|Laboratoire de sant\u00e9 publique du Qu\u00e9bec|Moreira|Canada

>Spike|hCoV-19/England/MILK-A46893/2020|2020-10-05|EPI\_ISL\_598615|Original|hCoV-19^^England|Human|Lighthouse Lab in Milton Keynes|Wellcome Sanger Institute for the COVID-19 Genomics UK (COG-UK) consortium|Davies|United Kingdom

>Spike|hCoV-19/Canada/NB\_245/2020|2020-03-24|EPI\_ISL\_481743|Original|hCoV-19^^New Brunswick|Human|Dr. Georges-L.-Dumont University Hospital Centre|National Microbiology Laboratory|Grudeski|Canada

>Spike|hCoV-19/Germany/HH-hpi-p1908/2020|2020-03-24|EPI\_ISL\_776243|Original|hCoV-19^^Hamburg|Human|University Medical Center Hamburg Eppendorf|Heinrich Pette Institute|Robitaille|Germany

>Spike|hCoV-19/England/QEUH-B7C365/2020|2020-11-13|EPI\_ISL\_668307|Original|hCoV-19^^England|Human|Lighthouse Lab in Glasgow|Wellcome Sanger Institute for the COVID-19 Genomics UK (COG-UK) Consortium|Davies|United Kingdom

>Spike|hCoV-19/England/QEUH-A9D1A1/2020|2020-10-20|EPI\_ISL\_665982|Original|hCoV-19^^England|Human|Queens Medical Centre|COVID-19 Genomics UK (COG-UK) Consortium|Loose|United Kingdom

>Spike|hCoV-19/Canada/ON-S920/2020|2020-04-13|EPI\_ISL\_586488|Original|hCoV-19^^Ontario|Human|Toronto Invasive Bacterial Diseases Network|McMaster University|McArthur|Canada

>Spike|hCoV-19/USA/CA-ALSR-3081/2020|2020-09-01|EPI\_ISL\_635833|Original|hCoV-19^^California|Human|San Diego County Public Health Laboratory|Andersen lab at Scripps Research|Gangavarapu|USA

>Spike|hCoV-19/Denmark/DCGC-19791/2020|2020-12-07|EPI\_ISL\_747791|Original|hCoV-19^^Sjaelland|Human|Department of Virus and Microbiological Special Diagnostics|Albertsen Lab|Michaelsen|Denmark

>Spike|hCoV-19/USA/MN-UW264/2020|2020-03-13|EPI\_ISL\_418049|Original|hCoV-19^^Minnesota|Human|UW Virology Lab|UW Virology Lab|Roychoudhury|USA

>Spike|hCoV-19/USA/AZ-TG517452/2020|2020-06-26|EPI\_ISL\_695323|Original|hCoV-19^^Arizona|Human|AZ SPHL|TGen North|French|USA

>Spike|hCoV-19/England/20422147304/2020|2020-09-20|EPI\_ISL\_584061|Original|hCoV-19^^England|Human|Respiratory Virus Unit|Respiratory Virus Unit|Platt|United Kingdom

>Spike|hCoV-19/England/CAMC-B9A2EC/2020|2020-11-14|EPI\_ISL\_673561|Original|hCoV-19^^England|Human|Lighthouse Lab in Cambridge|Wellcome Sanger Institute for the COVID-19 Genomics UK (COG-UK) Consortium|Davies|United Kingdom

>Spike|hCoV-19/Wales/PHWC-49F8CE/2020|2020-12-09|EPI\_ISL\_743285|Original|hCoV-19^^Wales|Human|Wales Specialist Virology Centre Sequencing lab|COVID-19 Genomics UK (COG-UK) Consortium|Moore|United Kingdom

>Spike|hCoV-19/Spain/PV-IBV-000792/2020|2020-03-09|EPI\_ISL\_452722|Original|hCoV-19^^Basque Country|Human|Hospital Universitario Araba. Vitoria-Gasteiz,|SeqCOVID-SPAIN consortium|IBV (CSIC)|Comas|Spain

>Spike|hCoV-19/Wales/PHWC-48AC42/2020|2020-11-06|EPI\_ISL\_666138|Original|hCoV-19^^Wales|Human|Wales Specialist Virology Centre Sequencing lab|COVID-19 Genomics UK (COG-UK) Consortium|Moore|United Kingdom

>Spike|hCoV-19/England/20129020504/2020|2020-03-20|EPI\_ISL\_424011|Original|hCoV-19^^England|Human|Respiratory Virus Unit|Respiratory Virus Unit|Platt|United Kingdom

>Spike|hCoV-19/Australia/VIC556/2020|2020-03-25|EPI\_ISL\_426817|Original|hCoV-19^^Victoria|Human|Victorian Infectious Diseases Reference Laboratory (VIDRL)|Microbiological Diagnostic Unit Public Health Laboratory and Victorian Infectious Diseases Reference Laboratory|Schultz|Australia

>Spike|hCoV-19/Japan/PG-6293/2020|2020-07-00|EPI\_ISL\_689404|Original|hCoV-19^^Japan|Human|Pathogen Genomics Center|Pathogen Genomics Center|Sekizuka|Japan

>Spike|hCoV-19/USA/MN-MDH-1001/2020|2020-04-30|EPI\_ISL\_462846|Original|hCoV-19^^Minnesota|Human|Minnesota Department of Health|Minnesota Department of Health|Garfin|USA

>Spike|hCoV-19/USA/CO-CDPHE-2100014301/2020|2020-11-19|EPI\_ISL\_771302|Original|hCoV-19^^Colorado|Human|Colorado Department of Public Health and Environment|Colorado Department of Public Health and Environment|Bankers|USA

>Spike|hCoV-19/England/SHEF-C20EC/2020|2020-08-06|EPI\_ISL\_517545|Original|hCoV-19^^England|Human|Virology Department|COVID-19 Genomics UK (COG-UK) Consortium|de Silva|United Kingdom

>Spike|hCoV-19/Australia/VIC17156/2020|2020-08-15|EPI\_ISL\_663770|Original|hCoV-19^^Victoria|Human|Microbiological Diagnostic Unit - Public Health Laboratory (MDU-PHL)|MDU-PHL|Schultz|Australia

>Spike|hCoV-19/USA/FL-BPHL-1728/2020|2020-10-01|EPI\_ISL\_613854|Original|hCoV-19^^Florida|Human|Florida Bureau of Public Health Laboratories|Florida Bureau of Public Health Laboratories|Blanton|USA

>Spike|hCoV-19/Italy/APU-IZSPB\_321PT/2020|2020-04-11|EPI\_ISL\_653814|Original|hCoV-19^^Apulia|Human|I.R.C.C.S. \S. De Bellis\ - Ente Ospedaliero|Istituto Zooprofilattico Sperimentale della Puglia e della Basilicata|Parisi|Italy

>Spike|hCoV-19/Denmark/DCGC-11167/2020|2020-11-02|EPI\_ISL\_670431|Original|hCoV-19^^Nordjylland|Human|Department of Virus and Microbiological Special Diagnostics|Albertsen Lab|Michaelsen|Denmark

>Spike|hCoV-19/South Africa/KRISP-K001361/2020|2020-07-16|EPI\_ISL\_515846|Original|hCoV-19^^KwaZulu-Natal|Human|Medical Diagnostics Services (MDS)|KRISP|de Oliveira|South Africa

>Spike|hCoV-19/England/LIVE-DC7E3B/2020|2020-11-16|EPI\_ISL\_705932|Original|hCoV-19^^England|Human|Liverpool Clinical Laboratories|COVID-19 Genomics UK (COG-UK) Consortium|Haldenby|United Kingdom

>Spike|hCoV-19/Japan/PG-4021/2020|2020-07-00|EPI\_ISL\_692262|Original|hCoV-19^^Japan|Human|Pathogen Genomics Center|Pathogen Genomics Center|Sekizuka|Japan

>Spike|hCoV-19/USA/WA-S2485/2020|2020-06-16|EPI\_ISL\_497117|Original|hCoV-19^^Washington|Human|Washington State Department of Health|Seattle Flu Study|Lee|USA

>Spike|hCoV-19/England/CAMC-B79A90/2020|2020-11-12|EPI\_ISL\_741034|Original|hCoV-19^^England|Human|Oxford Viromics|COVID-19 Genomics UK (COG-UK) Consortium|Golubchik|United Kingdom

>Spike|hCoV-19/Japan/PG-5230/2020|2020-08-00|EPI\_ISL\_690333|Original|hCoV-19^^Japan|Human|Pathogen Genomics Center|Pathogen Genomics Center|Sekizuka|Japan

>Spike|hCoV-19/Japan/PG-7962/2020|2020-05-00|EPI\_ISL\_687063|Original|hCoV-19^^Japan|Human|Kanagawa Prefectural Institute of Public Health|Pathogen Genomics Center|Sekizuka|Japan

>Spike|hCoV-19/USA/MI-UM-10036835348/2020|2020-11-07|EPI\_ISL\_728475|Original|hCoV-19^^Michigan|Human|University of Michigan Clinical Microbiology Laboratory|Lauring Lab|Valesano|USA

>Spike|hCoV-19/Denmark/DCGC-3098/2020|2020-08-31|EPI\_ISL\_615914|Original|hCoV-19^^Hovedstaden|Human|Department of Virus and Microbiological Special Diagnostics|Albertsen lab|Michaelsen|Denmark

>Spike|hCoV-19/Portugal/PT1446/2020|2020-03-26|EPI\_ISL\_511405|Original|hCoV-19^^Portugal|Human|Instituto Nacional de Saude (INSA)|Instituto Nacional de Saude (INSA)|Borges|Portugal

>Spike|hCoV-19/England/QEUH-A1DFFA/2020|2020-10-01|EPI\_ISL\_587489|Original|hCoV-19^^England|Human|Lighthouse Lab in Glasgow|Wellcome Sanger Institute for the COVID-19 Genomics UK (COG-UK) consortium|Davies|United Kingdom

>Spike|hCoV-19/Scotland/CVR2260/2020|2020-04-11|EPI\_ISL\_438884|Original|hCoV-19^^Scotland|Human|West of Scotland Specialist Virology Centre|COVID-19 Genomics UK (COG-UK) Consortium|Robertson|United Kingdom

>Spike|hCoV-19/England/ALDP-4A4B18/2020|2020-06-07|EPI\_ISL\_559467|Original|hCoV-19^^England|Human|Lighthouse Lab in Alderley Park|Wellcome Sanger Institute for the COVID-19 Genomics UK (COG-UK) consortium|Davies|United Kingdom

>Spike|hCoV-19/England/QEUA-AAB814/2020|2020-10-21|EPI\_ISL\_652815|Original|hCoV-19^^England|Human|Oxford Viromics|COVID-19 Genomics UK (COG-UK) Consortium|Golubchik|United Kingdom

>Spike|hCoV-19/England/QEUA-A02918/2020|2020-09-29|EPI\_ISL\_584936|Original|hCoV-19^^England|Human|Quadram Institute Bioscience|COVID-19 Genomics UK (COG-UK) Consortium|Alikhan|United Kingdom

>Spike|hCoV-19/Japan/PG-6995/2020|2020-08-00|EPI\_ISL\_688100|Original|hCoV-19^^Japan|Human|Pathogen Genomics Center|Pathogen Genomics Center|Sekizuka|Japan

>Spike|hCoV-19/Turkey/IMU-SP-01/2020|2020-04-15|EPI\_ISL\_460618|Original|hCoV-19^^Turkey|Human|unknown|Physiology|Submitter|Turkey

>Spike|hCoV-19/Switzerland/BE-ETHZ-220084/2020|2020-07-28|EPI\_ISL\_512050|Original|hCoV-19^^Bern|Human|Viollier AG|Department of Biosystems Science and Engineering|Nadeau|Switzerland

>Spike|hCoV-19/Scotland/CVR2110/2020|2020-04-10|EPI\_ISL\_448145|Original|hCoV-19^^Scotland|Human|West of Scotland Specialist Virology Centre|COVID-19 Genomics UK (COG-UK) Consortium|Robertson|United Kingdom

>Spike|hCoV-19/Denmark/DCGC-1454/2020|2020-03-30|EPI\_ISL\_622234|Original|hCoV-19^^Sjaelland|Human|Department of Virus and Microbiological Special Diagnostics|Albertsen lab|Michaelsen|Denmark

>Spike|hCoV-19/Wales/PHWC-16B354/2020|2020-09-15|EPI\_ISL\_560277|Original|hCoV-19^^Wales|Human|Wales Specialist Virology Centre Sequencing lab|COVID-19 Genomics UK (COG-UK) Consortium|Moore|United Kingdom

>Spike|hCoV-19/England/ALDP-B27202/2020|2020-11-04|EPI\_ISL\_664389|Original|hCoV-19^^England|Human|Northumbria University / South Tees Hospitals NHS Foundation Trust / North Cumbria Integrated Care NHS Foundation Trust / North Tees and Hartlepool NHS Foundation Trust / Newcastle Hospitals NHS Foundation Trust|COVID-19 Genomics UK (COG-UK) Consortium|Bashton|United Kingdom

>Spike|hCoV-19/USA/TX-HMH-5092/2020|2020-06-24|EPI\_ISL\_544519|Original|hCoV-19^^Texas|Human|Houston Methodist Hospital|Houston Methodist Hospital|Long|USA

>Spike|hCoV-19/USA/MI-MDHHS-SC20382/2020|2020-03-24|EPI\_ISL\_450593|Original|hCoV-19^^Michigan|Human|Michigan Department of Health and Human Services|Michigan Department of Health and Human Services|Blankenship|USA

>Spike|hCoV-19/USA/CA-IGI-0258/2020|2020-07-09|EPI\_ISL\_569918|Original|hCoV-19^^California|Human|Innovative Genomics Institute|Innovative Genomics Institute|Wyman|USA

>Spike|hCoV-19/USA/DE-DHSS-F981807/2020|2020-08-09|EPI\_ISL\_708414|Original|hCoV-19^^Delaware|Human|Delaware Public Health Lab|Delaware Public Health Lab|Bajwa|USA

>Spike|hCoV-19/England/201390256/2020|2020-03-26|EPI\_ISL\_465841|Original|hCoV-19^^England|Human|Respiratory Virus Unit|Respiratory Virus Unit|Platt|United Kingdom

>Spike|hCoV-19/India/GJ-GBRC180a/2020|2020-06-03|EPI\_ISL\_467047|Original|hCoV-19^^Gujarat|Human|B.J. Medical College and Civil hospital|Gujarat Biotechnology Research Centre|Joshi|India

>Spike|hCoV-19/Australia/VIC5762/2020|2020-07-21|EPI\_ISL\_518560|Original|hCoV-19^^Victoria|Human|Microbiological Diagnostic Unit - Public Health Laboratory (MDU-PHL)|MDU-PHL|Schultz|Australia

>Spike|hCoV-19/Nigeria/EK291-CV115/2020|2020-06-02|EPI\_ISL\_527887|Original|hCoV-19^^Ekiti|Human|Nigeria Centre for Disease Control (NCDC)|African Centre of Excellence for Genomics of Infectious Diseases (ACEGID)|Oluniyi|Nigeria

>Spike|hCoV-19/England/QEUA-CC2FA7/2020|2020-12-21|EPI\_ISL\_760309|Original|hCoV-19^^England|Human|Lighthouse Lab in Glasgow|Wellcome Sanger Institute for the COVID-19 Genomics UK (COG-UK) Consortium|Davies|United Kingdom

>Spike|hCoV-19/England/ALDP-B76DD6/2020|2020-11-12|EPI\_ISL\_723813|Original|hCoV-19^^England|Human|Oxford Viromics|COVID-19 Genomics UK (COG-UK) Consortium|Golubchik|United Kingdom



>Spike|hCoV-19/England/QEUA-9F4D1E/2020|2020-09-25|EPI\_ISL\_588411|Original|hCoV-19^^England|Human|Lighthouse Lab in Glasgow|Wellcome Sanger Institute for the COVID-19 Genomics UK (COG-UK) consortium|Davies|United Kingdom

>Spike|hCoV-19/Japan/PG-3515/2020|2020-06-00|EPI\_ISL\_691771|Original|hCoV-19^^Japan|Human|Pathogen Genomics Center|Pathogen Genomics Center|Sekizuka|Japan

>Spike|hCoV-19/Australia/VIC4973/2020|2020-07-15|EPI\_ISL\_519339|Original|hCoV-19^^Victoria|Human|Microbiological Diagnostic Unit - Public Health Laboratory (MDU-PHL)|MDU-PHL|Schultz|Australia

>Spike|hCoV-19/England/ALDP-6440BF/2020|2020-07-04|EPI\_ISL\_558025|Original|hCoV-19^^England|Human|Lighthouse Lab in Alderley Park|Wellcome Sanger Institute for the COVID-19 Genomics UK (COG-UK) consortium|Davies|United Kingdom

>Spike|hCoV-19/South Africa/NHLS-UCT-GS-0017/2020|2020-08-13|EPI\_ISL\_640019|Original|hCoV-19^^Western Cape|Human|Thembaletu CDC wc THC|NHLS/UCT|Iranzadeh|South Africa

>Spike|hCoV-19/USA/WI-UW-2029/2020|2020-09-23|EPI\_ISL\_677436|Original|hCoV-19^^Wisconsin|Human|University of Wisconsin-Madison AIDS Vaccine Research Laboratories|University of Wisconsin-Madison AIDS Vaccine Research Laboratories|Baczenas|USA

>Spike|hCoV-19/Wales/PHWC-48E929/2020|2020-11-13|EPI\_ISL\_680933|Original|hCoV-19^^Wales|Human|Wales Specialist Virology Centre Sequencing lab|COVID-19 Genomics UK (COG-UK) Consortium|Moore|United Kingdom

>Spike|hCoV-19/Denmark/DCGC-11566/2020|2020-11-02|EPI\_ISL\_670998|Original|hCoV-19^^Hovedstaden|Human|Department of Virus and Microbiological Special Diagnostics|Albertsen Lab|Michaelsen|Denmark

>Spike|hCoV-19/Germany/NW-MPP-29/2020|2020-06-15|EPI\_ISL\_487418|Original|hCoV-19^^North Rhine-Westphalia|Human|Labor Knei\u00dfler GmbH & Co. KG|Heinrich Pette Institute|G\u00fcnter|Germany

>Spike|hCoV-19/USA/WY-WPHL-20153943/2020|2020-11-30|EPI\_ISL\_770118|Original|hCoV-19^^Wyoming|Human|Wyoming Public Health Laboratory|Wyoming Public Health Laboratory|Hull|USA

>Spike|hCoV-19/England/QEUA-C34517/2020|2020-12-11|EPI\_ISL\_734149|Original|hCoV-19^^England|Human|Lighthouse Lab in Glasgow|Wellcome Sanger Institute for the COVID-19 Genomics UK (COG-UK) Consortium|Davies|United Kingdom

>Spike|hCoV-19/Pakistan/JRCGR-KHI30/2020|2020-06-02|EPI\_ISL\_779266|Original|hCoV-19^^Karachi|Human|Jamil-ur-Rahman Center for Genome Research|Jamil-ur-Rahman Center for Genome Research|Shakeel|Pakistan

>Spike|hCoV-19/Denmark/DCGC-22268/2020|2020-12-14|EPI\_ISL\_758645|Original|hCoV-19^^Hovedstaden|Human|Department of Virus and Microbiological Special Diagnostics|Albertsen Lab|Michaelsen|Denmark

>Spike|hCoV-19/England/ALDP-B73C72/2020|2020-11-12|EPI\_ISL\_664878|Original|hCoV-19^^England|Human|Quadram Institute Bioscience|COVID-19 Genomics UK (COG-UK) Consortium|Alikhan|United Kingdom

>Spike|hCoV-19/Canada/BC-BCCDC-8430/2020|2020-11-00|EPI\_ISL\_740796|Original|hCoV-19^^British Columbia|Human|BCCDC Public Health Laboratory|BCCDC Public Health Laboratory|Prystajecky|Canada

>Spike|hCoV-19/Japan/PG-5932/2020|2020-00-00|EPI\_ISL\_689047|Original|hCoV-19^^Japan|Human|Gunma Prefectural Institute of Public Health and Environmental Sciences|Pathogen Genomics Center|Sekizuka|Japan

>Spike|hCoV-19/USA/TX-HMH-MCoV-9747/2020|2020-06-23|EPI\_ISL\_780253|Original|hCoV-19^^Texas|Human|Houston Methodist Hospital|Houston Methodist Hospital|Long|USA

>Spike|hCoV-19/Scotland/EDB8300/2020|2020-10-12|EPI\_ISL\_612319|Original|hCoV-19^^Scotland|Human|Virology Department|COVID-19 Genomics UK (COG-UK) Consortium|McHugh|United Kingdom

>Spike|hCoV-19/USA/TX-HMH-MCoV-16165/2020|2020-10-30|EPI\_ISL\_785849|Original|hCoV-19^^Texas|Human|Houston Methodist Hospital|Houston Methodist Hospital|Long|USA

>Spike|hCoV-19/USA/MN-CDC-6593/2020|2020-06-13|EPI\_ISL\_527735|Original|hCoV-19^^Minnesota|Human|MN PHL Division|Pathogen Discovery|Queen|USA

>Spike|hCoV-19/Wales/PHWC-4917FC/2020|2020-11-05|EPI\_ISL\_706696|Original|hCoV-19^^Wales|Human|Originating lab|COVID-19 Genomics UK (COG-UK) Consortium|Moore|United Kingdom

>Spike|hCoV-19/England/ALDP-A945F9/2020|2020-10-19|EPI\_ISL\_624885|Original|hCoV-19^^England|Human|Lighthouse Lab in Alderley Park|Wellcome Sanger Institute for the COVID-19 Genomics UK (COG-UK) consortium|Davies|United Kingdom

>Spike|hCoV-19/England/QEUH-9BB0B0/2020|2020-09-07|EPI\_ISL\_572926|Original|hCoV-19^^England|Human|Oxford Viromics|COVID-19 Genomics UK (COG-UK) Consortium|Golubchik|United Kingdom

>Spike|hCoV-19/England/CAMC-C3FC35/2020|2020-12-10|EPI\_ISL\_719301|Original|hCoV-19^^England|Human|Lighthouse Lab in Cambridge|Wellcome Sanger Institute for the COVID-19 Genomics UK (COG-UK) Consortium|Davies|United Kingdom

>Spike|hCoV-19/USA/WA-UW-4698/2020|2020-04-06|EPI\_ISL\_461402|Original|hCoV-19^^Washington|Human|UW Virology Lab|UW Virology Lab|Roychoudhury|USA

>Spike|hCoV-19/England/MILK-B38BE5/2020|2020-11-01|EPI\_ISL\_662637|Original|hCoV-19^^England|Human|Lighthouse Lab in Milton Keynes|Wellcome Sanger Institute for the COVID-19 Genomics UK (COG-UK) Consortium|Davies|United Kingdom

>Spike|hCoV-19/USA/TX-HMH-MCoV-13281/2020|2020-08-24|EPI\_ISL\_788429|Original|hCoV-19^^Texas|Human|Houston Methodist Hospital|Houston Methodist Hospital|Long|USA

>Spike|hCoV-19/England/PORT-2CF223/2020|2020-04-26|EPI\_ISL\_453665|Original|hCoV-19^^England|Human|Centre for Enzyme Innovation|University of Portsmouth|Robson|United Kingdom

>Spike|hCoV-19/France/ARA-SC162/2020|2020-04-09|EPI\_ISL\_634827|Original|hCoV-19^^Auvergne-Rhone-Alpes|Human|Laboratoire de virologie|CNR Virus des Infections Respiratoires - France SUD|Bal|France

>Spike|hCoV-19/Spain/MD-IBV-003691/2020|2020-04-02|EPI\_ISL\_467249|Original|hCoV-19^^Madrid|Human|Hospital General Universitario Gregorio Mara\u00f1a|SeqCOVID-SPAIN consortium/IBV (CSIC)|Comas|Spain

>Spike|hCoV-19/USA/PA-MGEL89/2020|2020-03-31|EPI\_ISL\_454372|Original|hCoV-19^^Pennsylvania|Human|UPMC Clinical Microbiology Laboratory|Microbial Genome Sequencing Center|Mustapha|USA

>Spike|hCoV-19/USA/IN-CDC-6387/2020|2020-07-21|EPI\_ISL\_527666|Original|hCoV-19^^Indiana|Human|IN State Department of Health Laboratory Services|Pathogen Discovery|Queen|USA

>Spike|hCoV-19/Wales/PHWC-48CA19/2020|2020-11-07|EPI\_ISL\_666495|Original|hCoV-19^^Wales|Human|Wales Specialist Virology Centre Sequencing lab|COVID-19 Genomics UK (COG-UK) Consortium|Moore|United Kingdom

>Spike|hCoV-19/Equatorial Guinea/41660/2020|2020-07-22|EPI\_ISL\_649169|Original|hCoV-19^^Bioko Norte|Human|Laboratorio de Investigaciones de Baney|University Hospital Basel|Hosch|Equatorial Guinea

>Spike|hCoV-19/Norway/3075/2020|2020-08-07|EPI\_ISL\_549086|Original|hCoV-19^^Viken|Human|Medical Microbiology Unit|Norwegian Institute of Public Health|Kopperud Riis|Norway

>Spike|hCoV-19/USA/TX-HMH-MCoV-10785/2020|2020-07-05|EPI\_ISL\_789626|Original|hCoV-19^^Texas|Human|Houston Methodist Hospital|Houston Methodist Hospital|Long|USA

>Spike|hCoV-19/Australia/VIC14031/2020|2020-09-16|EPI\_ISL\_563938|Original|hCoV-19^^Victoria|Human|Victorian Infectious Diseases Reference Laboratory (VIDRL)|VIDRL and MDU-PHL|Schultz|Australia

>Spike|hCoV-19/Wales/PHWC-16B239/2020|2020-09-16|EPI\_ISL\_560262|Original|hCoV-19^^Wales|Human|Wales Specialist Virology Centre Sequencing lab|COVID-19 Genomics UK (COG-UK) Consortium|Moore|United Kingdom

>Spike|hCoV-19/USA/MA-MGH-00447/2020|2020-04-01|EPI\_ISL\_460308|Original|hCoV-19^^Massachusetts|Human|Massachusetts General Hospital|Infectious Disease Program|Lemieux|USA

>Spike|hCoV-19/England/CAMC-D03D90/2020|2020-12-21|EPI\_ISL\_781604|Original|hCoV-19^^England|Human|Lighthouse Lab in Cambridge|Wellcome Sanger Institute for the COVID-19 Genomics UK (COG-UK) Consortium|Davies|United Kingdom

>Spike|hCoV-19/England/QEUH-B67FC3/2020|2020-11-11|EPI\_ISL\_662261|Original|hCoV-19^^England|Human|Lighthouse Lab in Glasgow|Wellcome Sanger Institute for the COVID-19 Genomics UK (COG-UK) Consortium|Davies|United Kingdom

>Spike|hCoV-19/France/ARA-20869/2020|2020-04-06|EPI\_ISL\_508990|Original|hCoV-19^^Auvergne-Rh\u00f4ne-Alpes|Human|CNR Virus des Infections Respiratoires - France SUD|CNR Virus des Infections Respiratoires - France SUD|Josset|France

>Spike|hCoV-19/India/GJ-GBRC-377b/2020|2020-07-11|EPI\_ISL\_524736|Original|hCoV-19^^Gujarat|Human|Government General Hospital|Gujarat Biotechnology Research Centre|Joshi|India

>Spike|hCoV-19/Japan/PG-0112/2020|2020-03-00|EPI\_ISL\_684126|Original|hCoV-19^^Japan|Human|Pathogen Genomics Center|Pathogen Genomics Center|Sekizuka|Japan

>Spike|hCoV-19/USA/CA-IGI-0422/2020|2020-07-06|EPI\_ISL\_754897|Original|hCoV-19^^California|Human|Innovative Genomics Institute|Innovative Genomics Institute|Wyman|USA

>Spike|hCoV-19/England/ALDP-BE93EB/2020|2020-12-02|EPI\_ISL\_708915|Original|hCoV-19^^England|Human|Lighthouse Lab in Alderley Park|Wellcome Sanger Institute for the COVID-19 Genomics UK (COG-UK) Consortium|Davies|United Kingdom

>Spike|hCoV-19/France/HDF-3295/2020|2020-03-23|EPI\_ISL\_421511|Original|hCoV-19^^Hauts-de-France|Human|CH Compi\u00e8gne Laboratoire de Biologie|National Reference Center for Viruses of Respiratory Infections|Enouf|France

>Spike|hCoV-19/Kenya/C5011/2020|2020-05-08|EPI\_ISL\_568745|Original|hCoV-19^^Mombasa|Human|KEMRI-Wellcome Trust Research Programme/KEMRI-CGMR-C Kilifi|KEMRI-Wellcome Trust Research Programme/KEMRI-CGMR-C Kilifi|Githinji|Kenya

>Spike|hCoV-19/United Arab Emirates/558/2020|2020-06-30|EPI\_ISL\_528705|Original|hCoV-19^^Abu Dhabi|Human|Alsafar - Khalifa University Abu Dhabi|Alsafar - Khalifa University Abu Dhabi|Daw Elbait|United Arab Emirates

>Spike|hCoV-19/USA/CA-CZB-2758/2020|2020-06-27|EPI\_ISL\_582863|Original|hCoV-19^^California|Human|County of Santa Clara Public Health Department|Chan-Zuckerberg Biohub|Bhatt|USA

>Spike|hCoV-19/New Zealand/20CV0306/2020|2020-03-30|EPI\_ISL\_622799|Original|hCoV-19^^Whanganui|Human|Canterbury Health Laboratories|Institute of Environmental Science and Research (ESR)|Wang|New Zealand

>Spike|hCoV-19/England/MILK-C5075B/2020|2020-12-11|EPI\_ISL\_736713|Original|hCoV-19^^England|Human|Lighthouse Lab in Milton Keynes|Wellcome Sanger Institute for the COVID-19 Genomics UK (COG-UK) Consortium|Davies|United Kingdom

>Spike|hCoV-19/England/QEUH-BCB90B/2020|2020-11-27|EPI\_ISL\_704071|Original|hCoV-19^^England|Human|Lighthouse Lab in Glasgow|Wellcome Sanger Institute for the COVID-19 Genomics UK (COG-UK) Consortium|Davies|United Kingdom

>Spike|hCoV-19/Wales/PHWC-168FF9/2020|2020-06-25|EPI\_ISL\_499380|Original|hCoV-19^^Wales|Human|Originating lab|COVID-19 Genomics UK (COG-UK) Consortium|Moore|United Kingdom

>Spike|hCoV-19/England/ALDP-9B5890/2020|2020-08-28|EPI\_ISL\_590194|Original|hCoV-19^^England|Human|Lighthouse Lab in Alderley Park|Wellcome Sanger Institute for the COVID-19 Genomics UK (COG-UK) consortium|Davies|United Kingdom

>Spike|hCoV-19/Spain/PV-IBV-001553/2020|2020-03-12|EPI\_ISL\_467114|Original|hCoV-19^^Basque Country|Human|Hospital Universitario Araba. Vitoria-Gasteiz|SeqCOVID-SPAIN consortium/IBV (CSIC)|Comas|Spain

>Spike|hCoV-19/Spain/IB-IBV-99010825/2020|2020-08-03|EPI\_ISL\_691622|Original|hCoV-19^^Balear Islands|Human|Servicio de Microbiolog\u00eda|SeqCOVID-SPAIN consortium/IBV (CSIC)|Comas|Spain

>Spike|hCoV-19/Ireland/MO-NVRL-78IRL68999/2020|2020-11-22|EPI\_ISL\_752538|Original|hCoV-19^^Mayo|Human|National Virus Reference Laboratory|National Virus Reference Laboratory|Gonzalez|Ireland

>Spike|hCoV-19/England/PORT-2D54AC/2020|2020-00-00|EPI\_ISL\_765117|Original|hCoV-19^^England|Human|Centre for Enzyme Innovation|COVID-19 Genomics UK (COG-UK) Consortium|Robson|United Kingdom

>Spike|hCoV-19/Wales/PHWC-48F797/2020|2020-11-10|EPI\_ISL\_681136|Original|hCoV-19^^Wales|Human|Wales Specialist Virology Centre Sequencing lab|COVID-19 Genomics UK (COG-UK) Consortium|Moore|United Kingdom

>Spike|hCoV-19/England/CAMC-94B60E/2020|2020-07-27|EPI\_ISL\_556349|Original|hCoV-19^^England|Human|Lighthouse Lab in Cambridge|Wellcome Sanger Institute for the COVID-19 Genomics UK (COG-UK) consortium|Davies|United Kingdom

>Spike|hCoV-19/USA/WA-S2858/2020|2020-09-16|EPI\_ISL\_596389|Original|hCoV-19^^Washington|Human|Seattle Flu Study|Seattle Flu Study|Lee|USA

>Spike|hCoV-19/England/QEUEH-98EE34/2020|2020-08-28|EPI\_ISL\_540345|Original|hCoV-19^^England|Human|Lighthouse Lab in Glasgow|Wellcome Sanger Institute for the COVID-19 Genomics UK (COG-UK) consortium|Davies|United Kingdom

>Spike|hCoV-19/England/MILK-A7C2C3/2020|2020-10-15|EPI\_ISL\_606317|Original|hCoV-19^^England|Human|Lighthouse Lab in Milton Keynes|Wellcome Sanger Institute for the COVID-19 Genomics UK (COG-UK) consortium|Davies|United Kingdom

>Spike|hCoV-19/England/20132074102/2020|2020-03-23|EPI\_ISL\_420510|Original|hCoV-19^^England|Human|Respiratory Virus Unit|Respiratory Virus Unit|Platt|United Kingdom

>Spike|hCoV-19/England/OXON-AE65D/2020|2020-00-00|EPI\_ISL\_448708|Original|hCoV-19^^England|Human|Oxford Viromics|COVID-19 Genomics UK (COG-UK) Consortium|Golubchik|United Kingdom

>Spike|hCoV-19/Australia/QLD1045/2020|2020-09-01|EPI\_ISL\_576133|Original|hCoV-19^^Australia|Human|unknown|Public Health Virology Laboratory|Nguyen|Australia

>Spike|hCoV-19/Switzerland/GE-ETHZ-100309/2020|2020-03-19|EPI\_ISL\_574935|Original|hCoV-19^^Geneva|Human|Viollier AG|Department of Biosystems Science and Engineering|Nadeau|Switzerland

>Spike|hCoV-19/Wales/PHWC-49D09B/2020|2020-12-10|EPI\_ISL\_742729|Original|hCoV-19^^Wales|Human|Wales Specialist Virology Centre Sequencing lab|COVID-19 Genomics UK (COG-UK) Consortium|Moore|United Kingdom

>Spike|hCoV-19/England/BIRM-5F11E/2020|2020-05-04|EPI\_ISL\_473314|Original|hCoV-19^^England|Human|University of Birmingham|COVID-19 Genomics UK (COG-UK) Consortium|Loman|United Kingdom

>Spike|hCoV-19/Denmark/DCGC-19647/2020|2020-12-07|EPI\_ISL\_749081|Original|hCoV-19^^Hovedstaden|Human|Department of Virus and Microbiological Special Diagnostics|Albertsen Lab|Michaelsen|Denmark

>Spike|hCoV-19/Denmark/DCGC-14256/2020|2020-11-30|EPI\_ISL\_711112|Original|hCoV-19^^Sjaelland|Human|Department of Virus and Microbiological Special Diagnostics|Albertsen Lab|Michaelsen|Denmark

>Spike|hCoV-19/England/OXON-AE963/2020|2020-00-00|EPI\_ISL\_448737|Original|hCoV-19^^England|Human|Oxford Viromics|COVID-19 Genomics UK (COG-UK) Consortium|Golubchik|United Kingdom

>Spike|hCoV-19/England/ALDP-ABD220/2020|2020-10-04|EPI\_ISL\_631202|Original|hCoV-19^^England|Human|Lighthouse Lab in Alderley Park|Wellcome Sanger Institute for the COVID-19 Genomics UK (COG-UK) consortium|Davies|United Kingdom

>Spike|hCoV-19/England/CAMB-74D00/2020|2020-03-18|EPI\_ISL\_425367|Original|hCoV-19^^England|Human|Department of Pathology|COVID-19 Genomics UK (COG-UK) Consortium|Meredith|United Kingdom

>Spike|hCoV-19/France/ARA-20756/2020|2020-04-06|EPI\_ISL\_508912|Original|hCoV-19^^Auvergne-Rh\u00f4ne-Alpes|Human|CNR Virus des Infections Respiratoires - France SUD|CNR Virus des Infections Respiratoires - France SUD|Josset|France

>Spike|hCoV-19/Denmark/DCGC-3380/2020|2020-08-31|EPI\_ISL\_616139|Original|hCoV-19^^Midtjylland|Human|Department of Virus and Microbiological Special Diagnostics|Albertsen lab|Michaelsen|Denmark

>Spike|hCoV-19/England/SHEF-CAFBA/2020|2020-04-30|EPI\_ISL\_475433|Original|hCoV-19^^England|Human|Virology Department|COVID-19 Genomics UK (COG-UK) Consortium|de Silva|United Kingdom

>Spike|hCoV-19/Portugal/PT1318/2020|2020-03-18|EPI\_ISL\_511277|Original|hCoV-19^^Portugal|Human|Instituto Nacional de Saude (INSA) and Instituto Gulbenkian de Ciencia (IGC)|Instituto Nacional de Saude (INSA) and Instituto Gulbenkian de Ciencia (IGC)|Borges|Portugal

>Spike|hCoV-19/USA/TX-HMH-6679/2020|2020-06-24|EPI\_ISL\_546167|Original|hCoV-19^^Texas|Human|Houston Methodist Hospital|Houston Methodist Hospital|Long|USA

>Spike|hCoV-19/England/QEUEH-B0E0CB/2020|2020-11-02|EPI\_ISL\_642099|Original|hCoV-19^^England|Human|Lighthouse Lab in Glasgow|Wellcome Sanger Institute for the COVID-19 Genomics UK (COG-UK) Consortium|Davies|United Kingdom

>Spike|hCoV-19/Belgium/regal-10151119/2020|2020-10-15|EPI\_ISL\_735099|Original|hCoV-19^^Boutersem|Human|UZ Leuven|KU Leuven|Maes|Belgium

>Spike|hCoV-19/Belgium/ULG-10421/2020|2020-08-14|EPI\_ISL\_581603|Original|hCoV-19^^Li\u00e8ge|Human|Department of Clinical Microbiology|GIGA Medical Genomics|Durkin|Belgium

>Spike|hCoV-19/Italy/PIE-SLL-MS58/2020|2020-03-31|EPI\_ISL\_569874|Original|hCoV-19^^Piedmont|Human|Amedeo di savoia|Crosetto lab|Harbers|Italy

>Spike|hCoV-19/Wales/PHWC-483335/2020|2020-10-20|EPI\_ISL\_627804|Original|hCoV-19^^Wales|Human|Wales Specialist Virology Centre Sequencing lab|COVID-19 Genomics UK (COG-UK) Consortium|Moore|United Kingdom

>Spike|hCoV-19/South Africa/KRISP-K002399/2020|2020-07-30|EPI\_ISL\_515763|Original|hCoV-19^^KwaZulu-Natal|Human|NHLs-IALCH|KRISP|de Oliveira|South Africa

>Spike|hCoV-19/England/NOTT-121615/2020|2020-12-17|EPI\_ISL\_741646|Original|hCoV-19^^England|Human|Queens Medical Centre|COVID-19 Genomics UK (COG-UK) Consortium|Loose|United Kingdom

>Spike|hCoV-19/England/QEUH-BA4188/2020|2020-11-18|EPI\_ISL\_721179|Original|hCoV-19^^England|Human|Lighthouse Lab in Glasgow|Wellcome Sanger Institute for the COVID-19 Genomics UK (COG-UK) Consortium|Davies|United Kingdom

>Spike|hCoV-19/Suriname/SR-21/2020|2020-06-25|EPI\_ISL\_517632|Original|hCoV-19^^Suriname|Human|Academic Hospital Paramaribo|Erasmus Medical Center|M\u00f0fcnger|Suriname

>Spike|hCoV-19/USA/NY-Wadsworth-283483-01/2020|2020-12-06|EPI\_ISL\_754447|Original|hCoV-19^^New York|Human|Wadsworth Center|Wadsworth Center|Lasek-Nesselquist|USA

>Spike|hCoV-19/India/MH-ACTREC-026/2020|2020-05-04|EPI\_ISL\_699682|Original|hCoV-19^^Maharashtra|Human|Hematopathology Laboratory|Hematopathology Laboratory|Patkar|India

>Spike|hCoV-19/Australia/VIC1471/2020|2020-04-22|EPI\_ISL\_456444|Original|hCoV-19^^Victoria|Human|Victorian Infectious Diseases Reference Laboratory (VIDRL)|Microbiological Diagnostic Unit Public Health Laboratory and Victorian Infectious Diseases Reference Laboratory|Schultz|Australia

>Spike|hCoV-19/USA/UT-UPHL-201006663/2020|2020-04-04|EPI\_ISL\_594402|Original|hCoV-19^^Utah|Human|Utah Public Health Laboratory|Utah Public Health Laboratory|Young|USA

>Spike|hCoV-19/Japan/PG-4636/2020|2020-07-00|EPI\_ISL\_689773|Original|hCoV-19^^Japan|Human|Fukuoka Institute of Health and Environmental Sciences|Pathogen Genomics Center|Sekizuka|Japan

>Spike|hCoV-19/USA/WI-UW-2453/2020|2020-12-21|EPI\_ISL\_759728|Original|hCoV-19^^Wisconsin|Human|University of Wisconsin-Madison AIDS Vaccine Research Laboratories|University of Wisconsin-Madison AIDS Vaccine Research Laboratories|Moreno|USA

>Spike|hCoV-19/USA/TX-HMH-6167/2020|2020-06-22|EPI\_ISL\_547286|Original|hCoV-19^^Texas|Human|Houston Methodist Hospital|Houston Methodist Hospital|Long|USA

>Spike|hCoV-19/New Zealand/20CV0119/2020|2020-08-16|EPI\_ISL\_548005|Original|hCoV-19^^Combined Auckland|Human|Middlemore Hospital|Institute of Environmental Science and Research (ESR)|Wang|New Zealand

>Spike|hCoV-19/England/MILK-ACFA14/2020|2020-10-22|EPI\_ISL\_629589|Original|hCoV-19^^England|Human|Lighthouse Lab in Milton Keynes|Wellcome Sanger Institute for the COVID-19 Genomics UK (COG-UK) consortium|Davies|United Kingdom

>Spike|hCoV-19/Singapore/316/2020|2020-06-02|EPI\_ISL\_482684|Original|hCoV-19^^Singapore|Human|Singapore General Hospital|Department of Microbiology|Abdul Rahman|Singapore

>Spike|hCoV-19/England/CAMB-1B5C05/2020|2020-08-17|EPI\_ISL\_529283|Original|hCoV-19^^England|Human|Department of Pathology|COVID-19 Genomics UK (COG-UK) Consortium|Meredith|United Kingdom

>Spike|hCoV-19/USA/WI-UW-2204/2020|2020-10-22|EPI\_ISL\_677607|Original|hCoV-19^^Wisconsin|Human|University of Wisconsin-Madison AIDS Vaccine Research Laboratories|University of Wisconsin-Madison AIDS Vaccine Research Laboratories|Baczenas|USA

>Spike|hCoV-19/Switzerland/NE-ETHZ-350194/2020|2020-11-04|EPI\_ISL\_693843|Original|hCoV-19^^Neuch\u00e2tel|Human|Viollier AG|Department of Biosystems Science and Engineering|Nadeau|Switzerland

>Spike|hCoV-19/England/BRIS-1853E90/2020|2020-04-27|EPI\_ISL\_492270|Original|hCoV-19^^England|Human|PHE South West Regional Laboratory|Wellcome Sanger Institute for the COVID-19 Genomics UK (COG-UK) consortium|Davies|United Kingdom

>Spike|hCoV-19/England/ALDP-9D7A29/2020|2020-09-18|EPI\_ISL\_576607|Original|hCoV-19^^England|Human|Oxford Viromics|COVID-19 Genomics UK (COG-UK) Consortium|Golubchik|United Kingdom

>Spike|hCoV-19/USA/NY-WCMP10H01P/2020|2020-03-15|EPI\_ISL\_427580|Original|hCoV-19^^New York|Human|NewYork-Presbyterian & Mason Lab|Mason Lab|Mason|USA

>Spike|hCoV-19/USA/UT-UPHL-2009724/2020|2020-07-26|EPI\_ISL\_605396|Original|hCoV-19^^Utah|Human|Utah Public Health Laboratory|Utah Public Health Laboratory|Young|USA

>Spike|hCoV-19/USA/WI-UW-550/2020|2020-06-22|EPI\_ISL\_484925|Original|hCoV-19^^Wisconsin|Human|University of Wisconsin-Madison AIDS Vaccine Research Laboratories|University of Wisconsin-Madison AIDS Vaccine Research Laboratories|Baczenas|USA

>Spike|hCoV-19/Denmark/DCGC-5336/2020|2020-09-14|EPI\_ISL\_615267|Original|hCoV-19^^Syddanmark|Human|Department of Virus and Microbiological Special Diagnostics|Albertsen lab|Michaelsen|Denmark

>Spike|hCoV-19/Denmark/DCGC-3784/2020|2020-04-20|EPI\_ISL\_622648|Original|hCoV-19^^Hovedstaden|Human|Department of Virus and Microbiological Special Diagnostics|Albertsen lab|Michaelsen|Denmark

>Spike|hCoV-19/Denmark/DCGC-14197/2020|2020-11-30|EPI\_ISL\_711619|Original|hCoV-19^^Midtjylland|Human|Department of Virus and Microbiological Special Diagnostics|Albertsen Lab|Michaelsen|Denmark

>Spike|hCoV-19/Belgium/regal-10191267/2020|2020-10-19|EPI\_ISL\_735177|Original|hCoV-19^^Berchem|Human|UZ Leuven|KU Leuven|Maes|Belgium

>Spike|hCoV-19/Brazil/SP-L15-CD275/2020|2020-03-30|EPI\_ISL\_476268|Original|hCoV-19^^S\u00e3o Paulo|Human|Hospital da Cl\u00ednicas da Faculdade de Medicina da Universidade de S\u00e3o Paulo|Instituto de Medicina Tropical da Univesidade de S\u00e3o Paulo|Sabino|Brazil

>Spike|hCoV-19/England/CAMB-1BC73A/2020|2020-11-29|EPI\_ISL\_723891|Original|hCoV-19^^England|Human|Department of Pathology|COVID-19 Genomics UK (COG-UK) Consortium|Goodfellow|United Kingdom

>Spike|hCoV-19/England/EXET-13AE99/2020|2020-11-09|EPI\_ISL\_664415|Original|hCoV-19^^England|Human|University of Exeter|COVID-19 Genomics UK (COG-UK) Consortium|Temperton|United Kingdom

>Spike|hCoV-19/England/ALDP-A6F0AB/2020|2020-10-14|EPI\_ISL\_607870|Original|hCoV-19^^England|Human|Lighthouse Lab in Alderley Park|Wellcome Sanger Institute for the COVID-19 Genomics UK (COG-UK) consortium|Davies|United Kingdom

>Spike|hCoV-19/USA/TX-HMH-MCoV-16192/2020|2020-10-28|EPI\_ISL\_785876|Original|hCoV-19^^Texas|Human|Houston Methodist Hospital|Houston Methodist Hospital|Long|USA

>Spike|hCoV-19/England/QEUI-BCD453/2020|2020-11-26|EPI\_ISL\_704240|Original|hCoV-19^^England|Human|Lighthouse Lab in Glasgow|Wellcome Sanger Institute for the COVID-19 Genomics UK (COG-UK) Consortium|Davies|United Kingdom

>Spike|hCoV-19/Switzerland/SZ-ETHZ-360105/2020|2020-11-08|EPI\_ISL\_693910|Original|hCoV-19^^Schwyz|Human|Viollier AG|Department of Biosystems Science and Engineering|Nadeau|Switzerland

>Spike|hCoV-19/England/QEUI-964450/2020|2020-08-11|EPI\_ISL\_536948|Original|hCoV-19^^England|Human|Lighthouse Lab in Glasgow|Wellcome Sanger Institute for the COVID-19 Genomics UK (COG-UK) consortium|Davies|United Kingdom

>Spike|hCoV-19/USA/WI-UW-40/2020|2020-03-24|EPI\_ISL\_421298|Original|hCoV-19^^Wisconsin|Human|University of Wisconsin-Madison AIDS Vaccine Research Laboratories|University of Wisconsin-Madison AIDS Vaccine Research Laboratories|Baczenas|USA

>Spike|hCoV-19/England/CAMB-1B6439/2020|2020-09-22|EPI\_ISL\_576908|Original|hCoV-19^^England|Human|Department of Pathology|COVID-19 Genomics UK (COG-UK) Consortium|Goodfellow|United Kingdom

>Spike|hCoV-19/England/NORT-28216B/2020|2020-03-26|EPI\_ISL\_472199|Original|hCoV-19^^England|Human|Northumbria University / South Tees Hospitals NHS Foundation Trust / North Cumbria Integrated Care NHS Foundation Trust / North Tees and Hartlepool NHS Foundation Trust / Newcastle Hospitals NHS Foundation Trust|COVID-19 Genomics UK (COG-UK) Consortium|Bashton|United Kingdom

>Spike|hCoV-19/England/ALDP-944702/2020|2020-06-07|EPI\_ISL\_555590|Original|hCoV-19^^England|Human|Lighthouse Lab in Alderley Park|Wellcome Sanger Institute for the COVID-19 Genomics UK (COG-UK) consortium|Davies|United Kingdom

>Spike|hCoV-19/Germany/BY-MVP-0030/2020|2020-03-14|EPI\_ISL\_437229|Original|hCoV-19^^Bavaria|Human|Max von Pettenkofer Institute|Laboratory for Functional Genome Analysis|Graf|Germany

>Spike|hCoV-19/England/CAMC-B22629/2020|2020-11-03|EPI\_ISL\_647167|Original|hCoV-19^^England|Human|Lighthouse Lab in Cambridge|Wellcome Sanger Institute for the COVID-19 Genomics UK (COG-UK) Consortium|Davies|United Kingdom

>Spike|hCoV-19/Spain/PV-IBV-004281/2020|2020-04-08|EPI\_ISL\_510398|Original|hCoV-19^^Basque Country|Human|Servicio de Microbiolog\u00eda. Hospital Universitario Donostia. OSI Donostialdea. \u00clrea de Enfermedades Infecciosas|SeqCOVID-SPAIN consortium/IBV (CSIC)|Comas|Spain

>Spike|hCoV-19/England/ALDP-95C093/2020|2020-06-12|EPI\_ISL\_555095|Original|hCoV-19^^England|Human|Lighthouse Lab in Alderley Park|Wellcome Sanger Institute for the COVID-19 Genomics UK (COG-UK) consortium|Davies|United Kingdom

>Spike|hCoV-19/Wales/PHWC-16965D/2020|2020-03-30|EPI\_ISL\_512491|Original|hCoV-19^^Wales|Human|Wales Specialist Virology Centre Sequencing lab|COVID-19 Genomics UK (COG-UK) Consortium|Moore|United Kingdom

>Spike|hCoV-19/Scotland/QEUH-9DD4DA/2020|2020-09-22|EPI\_ISL\_599683|Original|hCoV-19^^Scotland|Human|Lighthouse Lab in Glasgow|Wellcome Sanger Institute for the COVID-19 Genomics UK (COG-UK) consortium|Davies|United Kingdom

>Spike|hCoV-19/England/ALDP-C3BB1E/2020|2020-12-10|EPI\_ISL\_731831|Original|hCoV-19^^England|Human|Lighthouse Lab in Alderley Park|Wellcome Sanger Institute for the COVID-19 Genomics UK (COG-UK) Consortium|Davies|United Kingdom

>Spike|hCoV-19/England/NOTT-11DE6F/2020|2020-11-25|EPI\_ISL\_679939|Original|hCoV-19^^England|Human|Queens Medical Centre|COVID-19 Genomics UK (COG-UK) Consortium|Loose|United Kingdom

>Spike|hCoV-19/England/ALDP-BBB36A/2020|2020-11-21|EPI\_ISL\_701755|Original|hCoV-19^^England|Human|Lighthouse Lab in Alderley Park|Wellcome Sanger Institute for the COVID-19 Genomics UK (COG-UK) Consortium|Davies|United Kingdom

>Spike|hCoV-19/Thailand/Chonburi\_PN0160/2020|2020-11-25|EPI\_ISL\_768611|Original|hCoV-19^^Chonburi|Human|Regional medical sciences center 6 Chonburi|National Institute of Health|Phuygun|Thailand

>Spike|hCoV-19/USA/NY-NYUMC453/2020|2020-04-20|EPI\_ISL\_435520|Original|hCoV-19^^New York|Human|NYU Langone Health|Departments of Pathology and Medicine|Maurano|USA

>Spike|hCoV-19/USA/FL-BPHL-1358/2020|2020-07-17|EPI\_ISL\_541295|Original|hCoV-19^^Florida|Human|Florida Bureau of Public Health Laboratories|Florida Bureau of Public Health Laboratories|Blanton|USA

>Spike|hCoV-19/Singapore/121/2020|2020-04-08|EPI\_ISL\_443213|Original|hCoV-19^^Singapore|Human|National Public Health Laboratory|National Public Health Laboratory|Mak|Singapore

>Spike|hCoV-19/England/QEUH-A8BAC9/2020|2020-10-16|EPI\_ISL\_643296|Original|hCoV-19^^England|Human|Lighthouse Lab in Glasgow|Wellcome Sanger Institute for the COVID-19 Genomics UK (COG-UK) Consortium|Davies|United Kingdom

>Spike|hCoV-19/Wales/PHWC-23F55/2020|2020-03-15|EPI\_ISL\_418130|Original|hCoV-19^^Wales|Human|Wales Specialist Virology Centre|Public Health Wales Microbiology Cardiff|Moore|United Kingdom

>Spike|hCoV-19/Scotland/QEUH-9F630B/2020|2020-09-25|EPI\_ISL\_600877|Original|hCoV-19^^Scotland|Human|Lighthouse Lab in Glasgow|Wellcome Sanger Institute for the COVID-19 Genomics UK (COG-UK) consortium|Davies|United Kingdom

>Spike|hCoV-19/England/20139030304/2020|2020-03-26|EPI\_ISL\_420667|Original|hCoV-19^^England|Human|Respiratory Virus Unit|Respiratory Virus Unit|Platt|United Kingdom

>Spike|hCoV-19/England/ALDP-B1F610/2020|2020-11-01|EPI\_ISL\_646020|Original|hCoV-19^^England|Human|Lighthouse Lab in Alderley Park|Wellcome Sanger Institute for the COVID-19 Genomics UK (COG-UK) Consortium|Davies|United Kingdom

>Spike|hCoV-19/USA/VA-DCLS-0652/2020|2020-04-10|EPI\_ISL\_495324|Original|hCoV-19^^Virginia|Human|Virginia DCLS|Virginia DCLS|St. Jacques|USA

>Spike|hCoV-19/Germany/NW-HHU-105/2020|2020-08-28|EPI\_ISL\_539582|Original|hCoV-19^^North Rhine-Westphalia|Human|ZOTZ KLIMAS MVZ D\u00f0fcsseldorf-Centrum GbR \u00dcBAG f\u00f0fcr Labormedizin|Center of Medical Microbiology|Wienemann|Germany

>Spike|hCoV-19/USA/WI-UW-244/2020|2020-03-28|EPI\_ISL\_428340|Original|hCoV-19^^Wisconsin|Human|University of Wisconsin-Madison AIDS Vaccine Research Laboratories|University of Wisconsin-Madison AIDS Vaccine Research Laboratories|Moreno|USA

>Spike|hCoV-19/Wales/PHWC-30C9A/2020|2020-04-11|EPI\_ISL\_446345|Original|hCoV-19^^Wales|Human|Wales Specialist Virology Centre|Public Health Wales Microbiology Cardiff|Moore|United Kingdom

>Spike|hCoV-19/England/LOND-D8AE5/2020|2020-04-16|EPI\_ISL\_492760|Original|hCoV-19^^England|Human|University College London|Wellcome Sanger Institute for the COVID-19 Genomics UK (COG-UK) consortium|Davies|United Kingdom

>Spike|hCoV-19/England/CAMC-B35F37/2020|2020-11-05|EPI\_ISL\_645475|Original|hCoV-19^^England|Human|Lighthouse Lab in Cambridge|Wellcome Sanger Institute for the COVID-19 Genomics UK (COG-UK) Consortium|Davies|United Kingdom

>Spike|hCoV-19/USA/TX-HMH-MCoV-15878/2020|2020-07-10|EPI\_ISL\_785562|Original|hCoV-19^^Texas|Human|Houston Methodist Hospital|Houston Methodist Hospital|Long|USA

>Spike|hCoV-19/England/CAMC-9D1D62/2020|2020-09-19|EPI\_ISL\_601499|Original|hCoV-19^^England|Human|Lighthouse Lab in Cambridge|Wellcome Sanger Institute for the COVID-19 Genomics UK (COG-UK) consortium|Davies|United Kingdom

>Spike|hCoV-19/Wales/PHWC-492E6F/2020|2020-11-27|EPI\_ISL\_725798|Original|hCoV-19^^Wales|Human|Originating lab|COVID-19 Genomics UK (COG-UK) Consortium|Moore|United Kingdom

>Spike|hCoV-19/Wales/PHWC-48C1AB/2020|2020-11-06|EPI\_ISL\_666402|Original|hCoV-19^^Wales|Human|Wales Specialist Virology Centre Sequencing lab|COVID-19 Genomics UK (COG-UK) Consortium|Moore|United Kingdom

>Spike|hCoV-19/USA/LA-GBCL-26556558/2020|2020-04-15|EPI\_ISL\_485188|Original|hCoV-19^^Louisiana|Human|River Road Testing Lab|Ginkgo Bioworks Clinical Laboratory|Smith|USA

>Spike|hCoV-19/USA/TX-HMH-MCoV-18719/2020|2020-11-21|EPI\_ISL\_785067|Original|hCoV-19^^Texas|Human|Houston Methodist Hospital|Houston Methodist Hospital|Long|USA

>Spike|hCoV-19/USA/WA-S721/2020|2020-04-12|EPI\_ISL\_449891|Original|hCoV-19^^Washington|Human|Washington State Department of Health|Seattle Flu Study|Bedford|USA

>Spike|hCoV-19/Denmark/DCGC-19662/2020|2020-12-07|EPI\_ISL\_749094|Original|hCoV-19^^Syddanmark|Human|Department of Virus and Microbiological Special Diagnostics|Albertsen Lab|Michaelsen|Denmark

>Spike|hCoV-19/USA/TX-HMH-MCoV-15998/2020|2020-07-10|EPI\_ISL\_785682|Original|hCoV-19^^Texas|Human|Houston Methodist Hospital|Houston Methodist Hospital|Long|USA

>Spike|hCoV-19/USA/OR-OHSU-0454/2020|2020-06-09|EPI\_ISL\_525812|Original|hCoV-19^^Oregon|Human|OHSU Lab Services Molecular Microbiology Lab|Ginkgo Bioworks Clinical Laboratory|O'Roak|USA

>Spike|hCoV-19/England/QEUEH-B820FC/2020|2020-11-14|EPI\_ISL\_668338|Original|hCoV-19^^England|Human|Lighthouse Lab in Glasgow|Wellcome Sanger Institute for the COVID-19 Genomics UK (COG-UK) Consortium|Davies|United Kingdom

>Spike|hCoV-19/England/QEUEH-CC5B0A/2020|2020-12-22|EPI\_ISL\_760270|Original|hCoV-19^^England|Human|Lighthouse Lab in Glasgow|Wellcome Sanger Institute for the COVID-19 Genomics UK (COG-UK) Consortium|Davies|United Kingdom

>Spike|hCoV-19/United Arab Emirates/0401/2020|2020-05-19|EPI\_ISL\_698576|Original|hCoV-19^^Abu Dhabi|Human|Group 42 (G42) Healthcare|G42 Healthcare|Ogrodzki|United Arab Emirates

>Spike|hCoV-19/USA/MA-MGH-00779/2020|2020-04-12|EPI\_ISL\_791762|Original|hCoV-19^^Massachusetts|Human|Massachusetts General Hospital|Infectious Disease Program|Park|USA

>Spike|hCoV-19/Scotland/QEUEH-AACB38/2020|2020-10-21|EPI\_ISL\_652897|Original|hCoV-19^^Scotland|Human|Oxford Viromics|COVID-19 Genomics UK (COG-UK) Consortium|Golubchik|United Kingdom



>Spike|hCoV-19/England/GSTT-265DFB0/2020|2020-03-28|EPI\_ISL\_484134|Original|hCoV-19^^England|Human|Centre for Clinical Infection and Diagnostics Research and Genomics Innovation Unit|COVID-19 Genomics UK (COG-UK) Consortium|Awan|United Kingdom

>Spike|hCoV-19/Australia/NSW893/2020|2020-08-24|EPI\_ISL\_544974|Original|hCoV-19^^New South Wales|Human|Sydney South West Pathology Service (SSWPS) - Royal Prince Alfred Hospital - NSW Health Pathology|NSW Health Pathology - Institute of Clinical Pathology and Medical Research; Westmead Hospital; University of Sydney|Gall|Australia

>Spike|hCoV-19/England/NORT-297DBA/2020|2020-04-24|EPI\_ISL\_488107|Original|hCoV-19^^England|Human|NU-OMICS DNA Sequencing research facility|Wellcome Sanger Institute for the COVID-19 Genomics UK (COG-UK) consortium|Davies|United Kingdom

>Spike|hCoV-19/Norway/5371/2020|2020-11-02|EPI\_ISL\_708068|Original|hCoV-19^^Troms og Finnmark|Human|University Hospital of Northern Norway|Norwegian Institute of Public Health|Kopperud Riis|Norway

>Spike|hCoV-19/USA/WI-UW-712/2020|2020-07-02|EPI\_ISL\_491388|Original|hCoV-19^^Wisconsin|Human|University of Wisconsin-Madison AIDS Vaccine Research Laboratories|University of Wisconsin-Madison AIDS Vaccine Research Laboratories|Baczenas|USA

>Spike|hCoV-19/Wales/PHWC-482A31/2020|2020-10-21|EPI\_ISL\_613261|Original|hCoV-19^^Wales|Human|Wales Specialist Virology Centre Sequencing lab|COVID-19 Genomics UK (COG-UK) Consortium|Moore|United Kingdom

>Spike|hCoV-19/USA/WI-WSLH-200482/2020|2020-05-19|EPI\_ISL\_578623|Original|hCoV-19^^Wisconsin|Human|Wisconsin State Laboratory of Hygiene Communicable Disease Division|Wisconsin State Laboratory of Hygiene Communicable Disease Division|Florek|USA

>Spike|hCoV-19/Senegal/62184/2020|2020-06-09|EPI\_ISL\_498245|Original|hCoV-19^^Dakar|Human|Institut Pasteur de Dakar|Institut Pasteur de Dakar|Dia|Senegal

>Spike|hCoV-19/England/CAMC-B08304/2020|2020-10-29|EPI\_ISL\_643889|Original|hCoV-19^^England|Human|Lighthouse Lab in Cambridge|Wellcome Sanger Institute for the COVID-19 Genomics UK (COG-UK) Consortium|Davies|United Kingdom

>Spike|hCoV-19/Denmark/DCGC-21981/2020|2020-12-14|EPI\_ISL\_757803|Original|hCoV-19^^Hovedstaden|Human|Department of Virus and Microbiological Special Diagnostics|Albertsen Lab|Michaelsen|Denmark

>Spike|hCoV-19/England/LOND-DC595/2020|2020-11-11|EPI\_ISL\_679623|Original|hCoV-19^^England|Human|University College London|COVID-19 Genomics UK (COG-UK) Consortium|Roy|United Kingdom

>Spike|hCoV-19/Australia/VIC176/2020|2020-03-18|EPI\_ISL\_419873|Original|hCoV-19^^Victoria|Human|Victorian Infectious Diseases Reference Laboratory (VIDRL)|Victorian Infectious Diseases Reference Laboratory and Microbiological Diagnostic Unit Public Health Laboratory|Schultz|Australia

>Spike|hCoV-19/USA/OR-OHSU-2773/2020|2020-08-29|EPI\_ISL\_667308|Original|hCoV-19^^Oregon|Human|OHSU Lab Services Molecular Microbiology Lab|Oregon SARS-CoV-2 Genome Sequencing Center|O'Roak|USA

>Spike|hCoV-19/England/ALDP-B747AD/2020|2020-11-12|EPI\_ISL\_662045|Original|hCoV-19^^England|Human|Lighthouse Lab in Alderley Park|Wellcome Sanger Institute for the COVID-19 Genomics UK (COG-UK) Consortium|Davies|United Kingdom

>Spike|hCoV-19/England/MILK-9C746A/2020|2020-09-08|EPI\_ISL\_573307|Original|hCoV-19^^England|Human|Northumbria University / South Tees Hospitals NHS Foundation Trust / North Cumbria Integrated Care NHS Foundation Trust / North Tees and Hartlepool NHS Foundation Trust / Newcastle Hospitals NHS Foundation Trust|COVID-19 Genomics UK (COG-UK) Consortium|Bashton|United Kingdom

>Spike|hCoV-19/England/EXET-139B84/2020|2020-00-00|EPI\_ISL\_679326|Original|hCoV-19^^England|Human|University of Exeter|COVID-19 Genomics UK (COG-UK) Consortium|Temperton|United Kingdom

>Spike|hCoV-19/Denmark/DCGC-13121/2020|2020-11-30|EPI\_ISL\_712104|Original|hCoV-19^^Hovedstaden|Human|Department of Virus and Microbiological Special Diagnostics|Albertsen Lab|Michaelsen|Denmark

>Spike|hCoV-19/Scotland/QEUH-B9E5A3/2020|2020-11-18|EPI\_ISL\_757209|Original|hCoV-19^^Scotland|Human|Lighthouse Lab in Glasgow|Wellcome Sanger Institute for the COVID-19 Genomics UK (COG-UK) Consortium|Davies|United Kingdom

>Spike|hCoV-19/England/QEUH-AF1651/2020|2020-10-29|EPI\_ISL\_665401|Original|hCoV-19^^England|Human|Northumbria University / South Tees Hospitals NHS Foundation Trust / North Cumbria Integrated Care NHS Foundation Trust / North Tees and Hartlepool NHS Foundation Trust / Newcastle Hospitals NHS Foundation Trust|COVID-19 Genomics UK (COG-UK) Consortium|Bashton|United Kingdom

>Spike|hCoV-19/South Africa/NHLS-UCT-GS-0032/2020|2020-08-19|EPI\_ISL\_640033|Original|hCoV-19^^Western Cape|Human|False Bay Hospital wc FBH|NHLS/UCT|Iranzadeh|South Africa

>Spike|hCoV-19/England/QEUH-B68A2B/2020|2020-11-11|EPI\_ISL\_661410|Original|hCoV-19^^England|Human|Lighthouse Lab in Glasgow|Wellcome Sanger Institute for the COVID-19 Genomics UK (COG-UK) Consortium|Davies|United Kingdom

>Spike|hCoV-19/England/ALDP-951508/2020|2020-06-13|EPI\_ISL\_554539|Original|hCoV-19^^England|Human|Lighthouse Lab in Alderley Park|Wellcome Sanger Institute for the COVID-19 Genomics UK (COG-UK) consortium|Davies|United Kingdom

>Spike|hCoV-19/France/ARA-10170/2020|2020-03-17|EPI\_ISL\_418420|Original|hCoV-19^^Auvergne-Rh\u00f4ne-Alpes|Human|Institut des Agents Infectieux (IAI)|CNR Virus des Infections Respiratoires - France SUD|Josset|France

>Spike|hCoV-19/Wales/QEUH-B13913/2020|2020-11-02|EPI\_ISL\_647797|Original|hCoV-19^^Wales|Human|Lighthouse Lab in Glasgow|Wellcome Sanger Institute for the COVID-19 Genomics UK (COG-UK) Consortium|Davies|United Kingdom

>Spike|hCoV-19/USA/NY-QDX-2222/2020|2020-03-16|EPI\_ISL\_604567|Original|hCoV-19^^New York|Human|Quest Diagnostics|Quest Diagnostics|Kagan|USA

>Spike|hCoV-19/Kuwait/KU17/2020|2020-03-02|EPI\_ISL\_416542|Original|hCoV-19^^Dasman|Human|Dasman Diabetes Institute|Dasman Diabetes Institute|Al-Mulla|Kuwait

>Spike|hCoV-19/India/GJ-GBRC-426b/2020|2020-07-14|EPI\_ISL\_586559|Original|hCoV-19^^Gujarat|Human|CCC,Veraval|Gujarat Biotechnology Research Centre|Joshi|India

>Spike|hCoV-19/England/ALDP-B635C5/2020|2020-11-09|EPI\_ISL\_656587|Original|hCoV-19^^England|Human|Lighthouse Lab in Alderley Park|Wellcome Sanger Institute for the COVID-19 Genomics UK (COG-UK) Consortium|Davies|United Kingdom

>Spike|hCoV-19/England/201340120/2020|2020-03-24|EPI\_ISL\_423081|Original|hCoV-19^^England|Human|Respiratory Virus Unit|Respiratory Virus Unit|Platt|United Kingdom

>Spike|hCoV-19/Latvia/049/2020|2020-03-16|EPI\_ISL\_486433|Original|hCoV-19^^Latvia|Human|Latvijas Infektolo\u0123ijas centrs|Latvian Biomedical Research and Study Centre|Zrelovs|Latvia

>Spike|hCoV-19/USA/TX-DSHS-0351/2020|2020-06-13|EPI\_ISL\_538288|Original|hCoV-19^^Texas|Human|Texas Department of State Health Services|Texas Department of State Health Services|Rahman|USA

>Spike|hCoV-19/Wales/PHWC-480848/2020|2020-10-10|EPI\_ISL\_612939|Original|hCoV-19^^Wales|Human|Wales Specialist Virology Centre Sequencing lab|COVID-19 Genomics UK (COG-UK) Consortium|Moore|United Kingdom

>Spike|hCoV-19/Australia/VIC17509/2020|2020-08-21|EPI\_ISL\_779414|Original|hCoV-19^^Victoria|Human|Microbiological Diagnostic Unit - Public Health Laboratory (MDU-PHL)|MDU-PHL|Beck|Australia

>Spike|hCoV-19/England/ALDP-52C40D/2020|2020-06-01|EPI\_ISL\_558958|Original|hCoV-19^^England|Human|Lighthouse Lab in Alderley Park|Wellcome Sanger Institute for the COVID-19 Genomics UK (COG-UK) consortium|Davies|United Kingdom

>Spike|hCoV-19/England/MILK-D0AD8A/2020|2020-12-21|EPI\_ISL\_781278|Original|hCoV-19^^England|Human|Lighthouse Lab in Milton Keynes|Wellcome Sanger Institute for the COVID-19 Genomics UK (COG-UK) Consortium|Davies|United Kingdom

>Spike|hCoV-19/USA/NY-NYUMC490/2020|2020-03-18|EPI\_ISL\_436738|Original|hCoV-19^^New York|Human|NYU Langone Health|Departments of Pathology and Medicine|Maurano|USA

>Spike|hCoV-19/USA/WI-UW-1280/2020|2020-08-25|EPI\_ISL\_536652|Original|hCoV-19^^Wisconsin|Human|University of Wisconsin-Madison AIDS Vaccine Research Laboratories|University of Wisconsin-Madison AIDS Vaccine Research Laboratories|Baczenas|USA

>Spike|hCoV-19/Turkey/HSGM-5711/2020|2020-03-18|EPI\_ISL\_428716|Original|hCoV-19^^Ankara|Human|Ministry of Health Turkey|Ministry of Health Turkey|Bayrakdar|Turkey

>Spike|hCoV-19/Canada/BC-BCCDC-7534/2020|2020-11-00|EPI\_ISL\_740701|Original|hCoV-19^^British Columbia|Human|BCCDC Public Health Laboratory|BCCDC Public Health Laboratory|Prystajek|Canada

>Spike|hCoV-19/Scotland/CVR4550/2020|2020-09-22|EPI\_ISL\_585409|Original|hCoV-19^^Scotland|Human|Lighthouse Lab in Glasgow / MRC-University of Glasgow Centre for Virus Research|COVID-19 Genomics UK (COG-UK) Consortium|Robertson|United Kingdom

>Spike|hCoV-19/USA/TX-HMH-806/2020|2020-04-06|EPI\_ISL\_545826|Original|hCoV-19^^Texas|Human|Houston Methodist Hospital|Houston Methodist Hospital|Long|USA

>Spike|hCoV-19/England/NORW-F38DB/2020|2020-10-30|EPI\_ISL\_638582|Original|hCoV-19^^England|Human|Quadram Institute Bioscience|COVID-19 Genomics UK (COG-UK) Consortium|Alikhan|United Kingdom

>Spike|hCoV-19/Japan/PG-7138/2020|2020-08-00|EPI\_ISL\_688243|Original|hCoV-19^^Japan|Human|Pathogen Genomics Center|Pathogen Genomics Center|Sekizuka|Japan

>Spike|hCoV-19/Spain/MD-IBV-99009663/2020|2020-10-23|EPI\_ISL\_654341|Original|hCoV-19^^Madrid|Human|Hospital General Universitario Gregorio Marañón|SeqCOVID-SPAIN consortium/IBV (CSIC) |Comas|Spain

>Spike|hCoV-19/Denmark/DCGC-21537/2020|2020-12-21|EPI\_ISL\_758218|Original|hCoV-19^^Sjaelland|Human|Department of Virus and Microbiological Special Diagnostics|Albertsen Lab|Michaelsen|Denmark

>Spike|hCoV-19/England/204341615/2020|2020-10-20|EPI\_ISL\_649835|Original|hCoV-19^^England|Human|Respiratory Virus Unit|COVID-19 Genomics UK (COG-UK) Consortium|Platt|United Kingdom

>Spike|hCoV-19/USA/UT-UPHL-2012500123/2020|2020-10-20|EPI\_ISL\_746236|Original|hCoV-19^^Utah|Human|Ginkgo Bioworks Clinical Laboratory|Utah Public Health Laboratory|Young|USA

>Spike|hCoV-19/England/20172000704/2020|2020-04-19|EPI\_ISL\_465313|Original|hCoV-19^^England|Human|Respiratory Virus Unit|Respiratory Virus Unit|Platt|United Kingdom

>Spike|hCoV-19/Australia/VIC2378/2020|2020-06-28|EPI\_ISL\_522098|Original|hCoV-19^^Victoria|Human|Victorian Infectious Diseases Reference Laboratory (VIDRL)|VIDRL and MDU-PHL|Schultz|Australia

>Spike|hCoV-19/Denmark/DCGC-1593/2020|2020-04-13|EPI\_ISL\_618637|Original|hCoV-19^^Syddanmark|Human|Department of Virus and Microbiological Special Diagnostics|Albertsen lab|Michaelsen|Denmark

>Spike|hCoV-19/Australia/VIC6900/2020|2020-07-17|EPI\_ISL\_564125|Original|hCoV-19^^Victoria|Human|Microbiological Diagnostic Unit - Public Health Laboratory (MDU-PHL) |MDU-PHL|Schultz|Australia

>Spike|hCoV-19/Russia/MOS-RII-MH9369S/2020|2020-10-14|EPI\_ISL\_733455|Original|hCoV-19^^Moscow Region|Human|HELIX LLC|WHO National Influenza Centre Russian Federation|Komissarov|Russia

>Spike|hCoV-19/USA/TX-HMH-MCoV-18562/2020|2020-11-20|EPI\_ISL\_784910|Original|hCoV-19^^Texas|Human|Houston Methodist Hospital|Houston Methodist Hospital|Long|USA

>Spike|hCoV-19/Denmark/ALAB-SSI520/2020|2020-03-26|EPI\_ISL\_429585|Original|hCoV-19^^Denmark|Human|Department of Virus and Microbiological Special Diagnostics|Albertsen lab|Kirkegaard|Denmark

>Spike|hCoV-19/Scotland/EDB2168/2020|2020-04-20|EPI\_ISL\_439171|Original|hCoV-19^^Scotland|Human|Virology Department|COVID-19 Genomics UK (COG-UK) Consortium|Williams|United Kingdom

>Spike|hCoV-19/Scotland/ALDP-9CD25B/2020|2020-09-16|EPI\_ISL\_575982|Original|hCoV-19^^Scotland|Human|Lighthouse Lab in Alderley Park|Wellcome Sanger Institute for the COVID-19 Genomics UK (COG-UK) consortium|Davies|United Kingdom

>Spike|hCoV-19/England/QEUH-9FF26F/2020|2020-09-30|EPI\_ISL\_600404|Original|hCoV-19^^England|Human|Lighthouse Lab in Glasgow|Wellcome Sanger Institute for the COVID-19 Genomics UK (COG-UK) consortium|Davies|United Kingdom

>Spike|hCoV-19/England/QEUH-B138CB/2020|2020-11-02|EPI\_ISL\_641718|Original|hCoV-19^^England|Human|Lighthouse Lab in Glasgow|Wellcome Sanger Institute for the COVID-19 Genomics UK (COG-UK) Consortium|Davies|United Kingdom

>Spike|hCoV-19/England/ALDP-5C789F/2020|2020-06-19|EPI\_ISL\_558478|Original|hCoV-19^^England|Human|Lighthouse Lab in Alderley Park|Wellcome Sanger Institute for the COVID-19 Genomics UK (COG-UK) consortium|Davies|United Kingdom

>Spike|hCoV-19/mink/Netherlands/NB-EMC-6-14/2020|2020-05-30|EPI\_ISL\_523099|Original|hCoV-19^^Noord Brabant|Neovison vison|Dutch COVID-19 response team|Erasmus Medical Center|Oude Munnink|Netherlands

>Spike|hCoV-19/Scotland/CVR5505/2020|2020-10-29|EPI\_ISL\_650508|Original|hCoV-19^^Scotland|Human|West of Scotland Specialist Virology Centre|COVID-19 Genomics UK (COG-UK) Consortium|Robertson|United Kingdom

>Spike|hCoV-19/USA/LA-EVTL1397/2020|2020-12-11|EPI\_ISL\_779063|Original|hCoV-19^^Louisiana|Human|LSUHS Emerging Viral Threat Laboratory|Microbial Genome Sequencing Center|Kamil|USA

>Spike|hCoV-19/Denmark/DCGC-6588/2020|2020-10-12|EPI\_ISL\_619636|Original|hCoV-19^^Hovedstaden|Human|Department of Virus and Microbiological Special Diagnostics|Albertsen lab|Michaelsen|Denmark

>Spike|hCoV-19/England/ALDP-B48326/2020|2020-11-07|EPI\_ISL\_649282|Original|hCoV-19^^England|Human|Lighthouse Lab in Alderley Park|Wellcome Sanger Institute for the COVID-19 Genomics UK (COG-UK) Consortium|Davies|United Kingdom

>Spike|hCoV-19/England/LIVE-A99C2/2020|2020-03-24|EPI\_ISL\_517303|Original|hCoV-19^^England|Human|Liverpool Clinical Laboratories|COVID-19 Genomics UK (COG-UK) Consortium|Haldenby|United Kingdom

>Spike|hCoV-19/England/QEUA-A5E90E/2020|2020-10-10|EPI\_ISL\_597383|Original|hCoV-19^^England|Human|Lighthouse Lab in Glasgow|Wellcome Sanger Institute for the COVID-19 Genomics UK (COG-UK) consortium|Davies|United Kingdom

>Spike|hCoV-19/USA/UT-UPHL-2008806/2020|2020-05-29|EPI\_ISL\_524832|Original|hCoV-19^^Utah|Human|Utah Public Health Laboratory|Utah Public Health Laboratory|Young|USA

>Spike|hCoV-19/USA/UT-UPHL-2008957/2020|2020-05-11|EPI\_ISL\_525284|Original|hCoV-19^^Utah|Human|Utah Public Health Laboratory|Utah Public Health Laboratory|Young|USA

>Spike|hCoV-19/Wales/PHWC-16029E/2020|2020-05-17|EPI\_ISL\_472914|Original|hCoV-19^^Wales|Human|Wales Specialist Virology Centre Sequencing lab|COVID-19 Genomics UK (COG-UK) Consortium|Moore|United Kingdom

>Spike|hCoV-19/Switzerland/VD-ETHZ-100174/2020|2020-03-16|EPI\_ISL\_574983|Original|hCoV-19^^Vaud|Human|Viollier AG|Department of Biosystems Science and Engineering|Nadeau|Switzerland

>Spike|hCoV-19/England/ALDP-9ED880/2020|2020-05-09|EPI\_ISL\_580636|Original|hCoV-19^^England|Human|Lighthouse Lab in Alderley Park|Wellcome Sanger Institute for the COVID-19 Genomics UK (COG-UK) consortium|Davies|United Kingdom

>Spike|hCoV-19/Germany/HH-hpi-p2175/2020|2020-03-21|EPI\_ISL\_776405|Original|hCoV-19^^Hamburg|Human|University Medical Center Hamburg Eppendorf|Heinrich Pette Institute|Robitaille|Germany

>Spike|hCoV-19/Spain/MD-IBV-005367/2020|2020-04-01|EPI\_ISL\_510242|Original|hCoV-19^^Madrid|Human|Hospital General Universitario Gregorio Mara\u00f1a|SeqCOVID-SPAIN consortium|IBV (CSIC)|Comas|Spain

>Spike|hCoV-19/USA/WI-UW-2230/2020|2020-11-02|EPI\_ISL\_677633|Original|hCoV-19^^Wisconsin|Human|University of Wisconsin-Madison AIDS Vaccine Research Laboratories|University of Wisconsin-Madison AIDS Vaccine Research Laboratories|Baczenas|USA

>Spike|hCoV-19/USA/MI-MDHHS-SC22335/2020|2020-11-07|EPI\_ISL\_708314|Original|hCoV-19^^Michigan|Human|Michigan Department of Health and Human Services|Michigan Department of Health and Human Services|Jacob|USA

>Spike|hCoV-19/USA/TX-HMH-MCoV-13824/2020|2020-08-17|EPI\_ISL\_787117|Original|hCoV-19^^Texas|Human|Houston Methodist Hospital|Houston Methodist Hospital|Long|USA

>Spike|hCoV-19/Australia/VIC16026/2020|2020-08-02|EPI\_ISL\_640945|Original|hCoV-19^^Victoria|Human|Microbiological Diagnostic Unit - Public Health Laboratory (MDU-PHL)|MDU-PHL|Schultz|Australia

>Spike|hCoV-19/Mexico/GRO-INDRE-91/2020|2020-06-08|EPI\_ISL\_658896|Original|hCoV-19^^Guerrero|Human|Instituto de Diagnostico y Referencia Epidemiologicos (INDRE)|Instituto de Diagnostico y Referencia Epidemiologicos (INDRE)|Rodriguez|Mexico

>Spike|hCoV-19/USA/TX-HMH-MCoV-18960/2020|2020-11-27|EPI\_ISL\_785248|Original|hCoV-19^^Texas|Human|Houston Methodist Hospital|Houston Methodist Hospital|Long|USA

>Spike|hCoV-19/Chile/RM-ISPCH-71/2020|2020-03-21|EPI\_ISL\_445367|Original|hCoV-19^^Region Metropolitana de Santiago|Human|ASISTENCIA PUBLICA DR.ALEJANDRO DEL RIO|Instituto de Salud Publica de Chile|Fernandez|Chile

>Spike|hCoV-19/USA/CA-CZB-14677/2020|2020-11-17|EPI\_ISL\_738729|Original|hCoV-19^^California|Human|Orange County Public Health Lab|Chan-Zuckerberg Biohub|Kamm|USA

>Spike|hCoV-19/Netherlands/ZuidHolland\_107/2020|2020-04-04|EPI\_ISL\_455296|Original|hCoV-19^^Zuid Holland|Human|Dutch COVID-19 response team|Erasmus Medical Center|Oude Munnink|Netherlands

>Spike|hCoV-19/England/ALDP-C3A793/2020|2020-12-09|EPI\_ISL\_731457|Original|hCoV-19^^England|Human|Lighthouse Lab in Alderley Park|Wellcome Sanger Institute for the COVID-19 Genomics UK (COG-UK) Consortium|Davies|United Kingdom

>Spike|hCoV-19/France/PAC-IHU-1064/2020|2020-08-04|EPI\_ISL\_569044|Original|hCoV-19^^Provence-Alpes-C\u00f4te-d\u00a9Azur|Human|MEPHI|MEPHI|Levasseur|France

>Spike|hCoV-19/England/CAMB-72C41/2020|2020-03-22|EPI\_ISL\_439975|Original|hCoV-19^^England|Human|Department of Pathology|Wellcome Sanger Institute for the COVID-19 Genomics UK (COG-UK) consortium|Amato|United Kingdom

>Spike|hCoV-19/Australia/VIC14426/2020|2020-08-22|EPI\_ISL\_592498|Original|hCoV-19^^Victoria|Human|Victorian Infectious Diseases Reference Laboratory (VIDRL)|VIDRL and MDU-PHL|Schultz|Australia

>Spike|hCoV-19/England/LOND-124CD48/2020|2020-04-24|EPI\_ISL\_507041|Original|hCoV-19^^England|Human|University College London Hospital|COVID-19 Genomics UK (COG-UK) Consortium|Byott|United Kingdom

>Spike|hCoV-19/Sweden/20-52962/2020|2020-09-07|EPI\_ISL\_660430|Original|hCoV-19^^Vastmanland|Human|Klinisk Mikrobiologi|The Public Health Agency of Sweden|Svartstr\u00f6m|Sweden

>Spike|hCoV-19/USA/NY-PV09151/2020|2020-03-22|EPI\_ISL\_422519|Original|hCoV-19^^New York|Human|MSSM Clinical Microbiology Laboratories|MSSM Pathogen Surveillance Program|van Bakel|USA

>Spike|hCoV-19/Hungary/US-32618w/2020|2020-09-02|EPI\_ISL\_677760|Original|hCoV-19^^B\u00e1n\u00e1s-Kiskun county|Human|University of Szeged|National Laboratory of Virology|Kemenesi|Hungary

>Spike|hCoV-19/Denmark/DCGC-4206/2020|2020-09-14|EPI\_ISL\_622099|Original|hCoV-19^^Hovedstaden|Human|Department of Virus and Microbiological Special Diagnostics|Albertsen lab|Michaelsen|Denmark

>Spike|hCoV-19/USA/CA-QDX-554/2020|2020-03-19|EPI\_ISL\_571277|Original|hCoV-19^^California|Human|Quest Diagnostics|Quest Diagnostics|Kagan|USA

>Spike|hCoV-19/South Korea/KCDC2277/2020|2020-05-14|EPI\_ISL\_510614|Original|hCoV-19^^South Korea|Human|Division of Viral Diseases|Division of Viral Diseases|Kim|South Korea

>Spike|hCoV-19/England/ALDP-9CD66E/2020|2020-09-15|EPI\_ISL\_566127|Original|hCoV-19^^England|Human|Lighthouse Lab in Alderley Park|Wellcome Sanger Institute for the COVID-19 Genomics UK (COG-UK) consortium|Davies|United Kingdom

>Spike|hCoV-19/USA/MI-UM-10033782000/2020|2020-03-26|EPI\_ISL\_578109|Original|hCoV-19^^Michigan|Human|University of Michigan Clinical Microbiology Laboratory|Lauring Lab|Valesano|USA

>Spike|hCoV-19/USA/AL-SV101V1/2020|2020-04-13|EPI\_ISL\_509426|Original|hCoV-19^^Alabama|Human|Microbiology and Immunology|Microbiology and Immunology|Rayner|USA

>Spike|hCoV-19/Japan/PG-8397/2020|2020-08-00|EPI\_ISL\_687496|Original|hCoV-19^^Japan|Human|Pathogen Genomics Center|Pathogen Genomics Center|Sekizuka|Japan

>Spike|hCoV-19/USA/WY-WPHL-20153282/2020|2020-11-30|EPI\_ISL\_770113|Original|hCoV-19^^Wyoming|Human|Wyoming Public Health Laboratory|Wyoming Public Health Laboratory|Hull|USA

>Spike|hCoV-19/England/CAMB-1BB81A/2020|2020-11-18|EPI\_ISL\_664199|Original|hCoV-19^^England|Human|Department of Pathology|COVID-19 Genomics UK (COG-UK) Consortium|Goodfellow|United Kingdom

>Spike|hCoV-19/Scotland/QEUIH-9DD7E0/2020|2020-09-21|EPI\_ISL\_599557|Original|hCoV-19^^Scotland|Human|Lighthouse Lab in Glasgow|Wellcome Sanger Institute for the COVID-19 Genomics UK (COG-UK) consortium|Davies|United Kingdom

>Spike|hCoV-19/USA/WA-UW-12140/2020|2020-06-26|EPI\_ISL\_570493|Original|hCoV-19^^Washington|Human|UW Virology Lab|UW Virology Lab|Roychoudhury|USA

>Spike|hCoV-19/Switzerland/BE-ETHZ-101166/2020|2020-03-31|EPI\_ISL\_451830|Original|hCoV-19^^Bern|Human|Viollier AG|Department of Biosystems Science and Engineering|Nadeau|Switzerland

>Spike|hCoV-19/England/MILK-A1D4A0/2020|2020-10-03|EPI\_ISL\_595061|Original|hCoV-19^^England|Human|Queens Medical Centre|COVID-19 Genomics UK (COG-UK) Consortium|Loose|United Kingdom

>Spike|hCoV-19/USA/NY-CDC-2-3693757/2020|2020-10-01|EPI\_ISL\_747039|Original|hCoV-19^^New York|Human|Respiratory Viruses Branch|Respiratory Viruses Branch|Queen|USA

>Spike|hCoV-19/USA/MI-MDHHS-SC21140/2020|2020-03-24|EPI\_ISL\_507916|Original|hCoV-19^^Michigan|Human|Michigan Department of Health and Human Services|Michigan Department of Health and Human Services|Blankenship|USA

>Spike|hCoV-19/Australia/SAP329/2020|2020-03-29|EPI\_ISL\_483107|Original|hCoV-19^^South Australia|Human|SA Pathology|SA Pathology|Leong|Australia

>Spike|hCoV-19/Brazil/RJ-00467/2020|2020-07-08|EPI\_ISL\_717862|Original|hCoV-19^^Rio de Janeiro|Human|Laboratorio de Virologia Molecular / UFRJ|Bioinformatics Laboratory / LNCC|Almeida|Brazil

>Spike|hCoV-19/England/203660546/2020|2020-03-17|EPI\_ISL\_534722|Original|hCoV-19^^England|Human|Respiratory Virus Unit|Respiratory Virus Unit|Platt|United Kingdom

>Spike|hCoV-19/India/MH-ACTREC-490/2020|2020-08-13|EPI\_ISL\_700138|Original|hCoV-19^^Maharashtra|Human|Hematopathology Laboratory|Hematopathology Laboratory|Patkar|India

>Spike|hCoV-19/USA/MS-CDC-6579/2020|2020-03-31|EPI\_ISL\_648030|Original|hCoV-19^^Mississippi|Human|MS Public Health Laboratory|Pathogen Discovery|Queen|USA

>Spike|hCoV-19/Australia/VIC17836/2020|2020-07-27|EPI\_ISL\_779488|Original|hCoV-19^^Victoria|Human|Microbiological Diagnostic Unit - Public Health Laboratory (MDU-PHL) |MDU-PHL|Beck|Australia

>Spike|hCoV-19/USA/CA-UCLA-67/2020|2020-04-01|EPI\_ISL\_537592|Original|hCoV-19^^California|Human|UCLA Pathology Clinical Microbiology Lab|Kruglyak Lab|Boocock|USA

>Spike|hCoV-19/Singapore/1483/2020|2020-12-14|EPI\_ISL\_754098|Original|hCoV-19^^Singapore|Human|National Public Health Laboratory|National Public Health Laboratory|Mak|Singapore

>Spike|hCoV-19/England/GSTT-5433/2020|2020-03-20|EPI\_ISL\_560682|Original|hCoV-19^^England|Human|Centre for Clinical Infection and Diagnostics Research and Genomics Innovation Unit|Centre for Clinical Infection and Diagnostics Research and Genomics Innovation Unit|Awan|United Kingdom

>Spike|hCoV-19/Sweden/20-08136/2020|2020-03-10|EPI\_ISL\_475554|Original|hCoV-19^^Vastra Gotaland|Human|Skovde/Unilabs|The Public Health Agency of Sweden|Svartstr\u00f6m|Sweden

>Spike|hCoV-19/England/CAMB-1B0CBF/2020|2020-05-12|EPI\_ISL\_452960|Original|hCoV-19^^England|Human|Department of Pathology|COVID-19 Genomics UK (COG-UK) Consortium|Meredith|United Kingdom

>Spike|hCoV-19/England/ALDP-A514BF/2020|2020-10-06|EPI\_ISL\_598115|Original|hCoV-19^^England|Human|Lighthouse Lab in Alderley Park|Wellcome Sanger Institute for the COVID-19 Genomics UK (COG-UK) consortium|Davies|United Kingdom

>Spike|hCoV-19/USA/TX-HMH-7510/2020|2020-06-25|EPI\_ISL\_546811|Original|hCoV-19^^Texas|Human|Houston Methodist Hospital|Houston Methodist Hospital|Long|USA

>Spike|hCoV-19/Wales/PHWC-49DC00/2020|2020-11-25|EPI\_ISL\_742885|Original|hCoV-19^^Wales|Human|Wales Specialist Virology Centre Sequencing lab|COVID-19 Genomics UK (COG-UK) Consortium|Moore|United Kingdom

>Spike|hCoV-19/Wales/PHWC-169E55/2020|2020-08-19|EPI\_ISL\_529447|Original|hCoV-19^^Wales|Human|Wales Specialist Virology Centre Sequencing lab|COVID-19 Genomics UK (COG-UK) Consortium|Moore|United Kingdom

>Spike|hCoV-19/Wales/PHWC-4A3399/2020|2020-12-14|EPI\_ISL\_744092|Original|hCoV-19^^Wales|Human|Wales Specialist Virology Centre Sequencing lab|COVID-19 Genomics UK (COG-UK) Consortium|Moore|United Kingdom

>Spike|hCoV-19/Denmark/DCGC-17313/2020|2020-12-14|EPI\_ISL\_750898|Original|hCoV-19^^Nordjylland|Human|Department of Virus and Microbiological Special Diagnostics|Albertsen Lab|Michaelsen|Denmark

>Spike|hCoV-19/USA/MI-MDHHS-SC20387/2020|2020-03-26|EPI\_ISL\_450598|Original|hCoV-19^^Michigan|Human|Michigan Department of Health and Human Services|Michigan Department of Health and Human Services|Blankenship|USA

>Spike|hCoV-19/England/NORW-EE9C1/2020|2020-05-12|EPI\_ISL\_490558|Original|hCoV-19^^England|Human|Quadram Institute Bioscience|COVID-19 Genomics UK (COG-UK) Consortium|Alikhan|United Kingdom

>Spike|hCoV-19/England/LIVE-99F78/2020|2020-04-14|EPI\_ISL\_439833|Original|hCoV-19^^England|Human|Liverpool Clinical Laboratories|COVID-19 Genomics UK (COG-UK) Consortium|Haldenby|United Kingdom

>Spike|hCoV-19/USA/CA-ALSR-3157/2020|2020-08-24|EPI\_ISL\_635885|Original|hCoV-19^^California|Human|San Diego County Public Health Laboratory|Andersen lab at Scripps Research|Gangavarapu|USA

>Spike|hCoV-19/England/QEUEH-BA00E9/2020|2020-11-18|EPI\_ISL\_719749|Original|hCoV-19^^England|Human|Lighthouse Lab in Glasgow|Wellcome Sanger Institute for the COVID-19 Genomics UK (COG-UK) Consortium|Davies|United Kingdom

>Spike|hCoV-19/Canada/BC\_04579295/2020|2020-05-00|EPI\_ISL\_477046|Original|hCoV-19^^British Columbia|Human|BCCDC Public Health Laboratory|BCCDC Public Health Laboratory|Harrigan|Canada

>Spike|hCoV-19/England/MILK-A9179C/2020|2020-10-19|EPI\_ISL\_705984|Original|hCoV-19^^England|Human|Oxford Viromics|COVID-19 Genomics UK (COG-UK) Consortium|Golubchik|United Kingdom

>Spike|hCoV-19/Japan/PG-6874/2020|2020-06-00|EPI\_ISL\_687982|Original|hCoV-19^^Japan|Human|Pathogen Genomics Center|Pathogen Genomics Center|Sekizuka|Japan

>Spike|hCoV-19/England/CAMB-1B959D/2020|2020-11-05|EPI\_ISL\_664567|Original|hCoV-19^^England|Human|Department of Pathology|COVID-19 Genomics UK (COG-UK) Consortium|Goodfellow|United Kingdom

>Spike|hCoV-19/Australia/VIC6287/2020|2020-07-21|EPI\_ISL\_518275|Original|hCoV-19^^Victoria|Human|Microbiological Diagnostic Unit - Public Health Laboratory (MDU-PHL)|MDU-PHL|Schultz|Australia

>Spike|hCoV-19/USA/WI-UW-932/2020|2020-07-12|EPI\_ISL\_509932|Original|hCoV-19^^Wisconsin|Human|University of Wisconsin-Madison AIDS Vaccine Research Laboratories|University of Wisconsin-Madison AIDS Vaccine Research Laboratories|Baczenas|USA

>Spike|hCoV-19/South Africa/UFS-VIRO-NGS-12/2020|2020-10-15|EPI\_ISL\_682325|Original|hCoV-19^^Free State|Human|NHLS Universitas Academic|UFS Virology|Bester|South Africa

>Spike|hCoV-19/Norway/2972/2020|2020-07-24|EPI\_ISL\_549098|Original|hCoV-19^^Viken|Human|Ostfold Hospital Trust - Kalnes|Norwegian Institute of Public Health|Kopperud Riis|Norway

>Spike|hCoV-19/USA/MI-MDHHS-SC22546/2020|2020-11-02|EPI\_ISL\_708604|Original|hCoV-19^^Michigan|Human|Michigan Department of Health and Human Services|Michigan Department of Health and Human Services|Jacob|USA

>Spike|hCoV-19/England/ALDP-944131/2020|2020-06-07|EPI\_ISL\_554703|Original|hCoV-19^^England|Human|Lighthouse Lab in Alderley Park|Wellcome Sanger Institute for the COVID-19 Genomics UK (COG-UK) consortium|Davies|United Kingdom

>Spike|hCoV-19/Egypt/EGY-021/2020|2020-08-14|EPI\_ISL\_526976|Original|hCoV-19^^Egypt|Human|Biological prevention|Biological prevention|Seadawy|Egypt

>Spike|hCoV-19/England/QEUEH-96421A/2020|2020-08-11|EPI\_ISL\_536887|Original|hCoV-19^^England|Human|Lighthouse Lab in Glasgow|Wellcome Sanger Institute for the COVID-19 Genomics UK (COG-UK) consortium|Davies|United Kingdom

>Spike|hCoV-19/England/CAMB-1B2F69/2020|2020-05-20|EPI\_ISL\_456738|Original|hCoV-19^^England|Human|Department of Pathology|COVID-19 Genomics UK (COG-UK) Consortium|Meredith|United Kingdom

>Spike|hCoV-19/USA/WI-GMF-25375/2020|2020-10-12|EPI\_ISL\_660924|Original|hCoV-19^^Wisconsin|Human|Gundersen Molecular Diagnostics Laboratory|Kabara Cancer Research Institute|Kenny|USA

>Spike|hCoV-19/Uganda/UG130/2020|2020-09-01|EPI\_ISL\_738037|Original|hCoV-19^^Uganda|Human|Uganda Central Public Health Lab and Uganda Virus Research Institute|MRC/UVRI & LSHTM Uganda Research Unit|Cotten|Uganda

>Spike|hCoV-19/USA/MI-MDHHS-SC21074/2020|2020-03-25|EPI\_ISL\_507850|Original|hCoV-19^^Michigan|Human|Michigan Department of Health and Human Services|Michigan Department of Health and Human Services|Blankenship|USA

>Spike|hCoV-19/England/CAMC-B517B5/2020|2020-11-08|EPI\_ISL\_658367|Original|hCoV-19^^England|Human|Lighthouse Lab in Cambridge|Wellcome Sanger Institute for the COVID-19 Genomics UK (COG-UK) Consortium|Davies|United Kingdom

>Spike|hCoV-19/England/ALDP-A515AD/2020|2020-10-07|EPI\_ISL\_597921|Original|hCoV-19^^England|Human|Lighthouse Lab in Alderley Park|Wellcome Sanger Institute for the COVID-19 Genomics UK (COG-UK) consortium|Davies|United Kingdom

>Spike|hCoV-19/Australia/VIC14693/2020|2020-08-08|EPI\_ISL\_603044|Original|hCoV-19^^Victoria|Human|MDU-PHL|MDU-PHL|Seemann|Australia

>Spike|hCoV-19/Germany/BAV-MVP0109/2020|2020-03-11|EPI\_ISL\_549025|Original|hCoV-19^^Bavaria|Human|Max von Pettenkofer Institute|Laboratory for Functional Genome Analysis|Graf|Germany

>Spike|hCoV-19/USA/FL-BPHL-1753/2020|2020-10-02|EPI\_ISL\_613750|Original|hCoV-19^^Florida|Human|Florida Bureau of Public Health Laboratories|Florida Bureau of Public Health Laboratories|Blanton|USA

>Spike|hCoV-19/Canada/ON-OICR-SLB2825/2020|2020-04-02|EPI\_ISL\_538352|Original|hCoV-19^^Ontario|Human|Kingston Health Sciences Centre / Queen's University|Ontario Institute for Cancer Research|de Borja|Canada

>Spike|hCoV-19/Portugal/PT1633/2020|2020-04-17|EPI\_ISL\_731943|Original|hCoV-19^^Portugal|Human|Instituto Nacional de Saude (INSA)|Instituto Nacional de Saude (INSA)|Borges|Portugal

>Spike|hCoV-19/Belgium/ULG-10519/2020|2020-10-23|EPI\_ISL\_626293|Original|hCoV-19^^Li\u00e8ge|Human|Department of Clinical Microbiology|GIGA Medical Genomics|Durkin|Belgium

>Spike|hCoV-19/England/MILK-9F1133/2020|2020-09-25|EPI\_ISL\_589600|Original|hCoV-19^^England|Human|Lighthouse Lab in Milton Keynes|Wellcome Sanger Institute for the COVID-19 Genomics UK (COG-UK) consortium|Davies|United Kingdom

>Spike|hCoV-19/Australia/VIC4896/2020|2020-07-12|EPI\_ISL\_519274|Original|hCoV-19^^Victoria|Human|Victorian Infectious Diseases Reference Laboratory (VIDRL)|VIDRL and MDU-PHL|Schultz|Australia

>Spike|hCoV-19/England/QEUEH-9AEBDD/2020|2020-09-03|EPI\_ISL\_573485|Original|hCoV-19^^England|Human|University College London|COVID-19 Genomics UK (COG-UK) Consortium|Roy|United Kingdom

>Spike|hCoV-19/USA/MI-MDHHS-SC21517/2020|2020-04-03|EPI\_ISL\_516244|Original|hCoV-19^^Michigan|Human|Michigan Department of Health and Human Services|Michigan Department of Health and Human Services|Blankenship|USA

>Spike|hCoV-19/Latvia/160/2020|2020-08-30|EPI\_ISL\_639657|Original|hCoV-19^^Latvia|Human|Centr\u0101l\u0101 Laboratorija|Latvian Biomedical Research and Study Centre|Zrelavs|Latvia

>Spike|hCoV-19/England/QEUEH-A8C916/2020|2020-10-16|EPI\_ISL\_643157|Original|hCoV-19^^England|Human|Lighthouse Lab in Glasgow|Wellcome Sanger Institute for the COVID-19 Genomics UK (COG-UK) Consortium|Davies|United Kingdom

>Spike|hCoV-19/India/DL-NCDC-4205/2020|2020-04-13|EPI\_ISL\_436451|Original|hCoV-19^^Delhi|Human|National Centre for Disease control (NCDC)|NCDC/CSIR-IGIB|Singh|India

>Spike|hCoV-19/England/CAMC-C425BC/2020|2020-12-10|EPI\_ISL\_719042|Original|hCoV-19^^England|Human|Lighthouse Lab in Cambridge|Wellcome Sanger Institute for the COVID-19 Genomics UK (COG-UK) Consortium|Davies|United Kingdom

>Spike|hCoV-19/England/OXON-B0922/2020|2020-00-00|EPI\_ISL\_478921|Original|hCoV-19^^England|Human|Oxford Viromics|COVID-19 Genomics UK (COG-UK) Consortium|Golubchik|United Kingdom

>Spike|hCoV-19/England/QEUEH-96C485/2020|2020-08-13|EPI\_ISL\_530829|Original|hCoV-19^^England|Human|Lighthouse Lab in Glasgow|Wellcome Sanger Institute for the COVID-19 Genomics UK (COG-UK) consortium|Davies|United Kingdom

>Spike|hCoV-19/Germany/BY-MVP-0007/2020|2020-04-11|EPI\_ISL\_437208|Original|hCoV-19^^Bavaria|Human|Max von Pettenkofer Institute|Laboratory for Functional Genome Analysis|Graf|Germany

>Spike|hCoV-19/Netherlands/Utrecht\_48/2020|2020-05-20|EPI\_ISL\_461244|Original|hCoV-19^^Utrecht|Human|Dutch COVID-19 response team|Erasmus Medical Center|Oude Munnink|Netherlands



>Spike|hCoV-19/Switzerland/BE-ETHZ-260166/2020|2020-08-27|EPI\_ISL\_539458|Original|hCoV-19^^Bern|Human|Viollier AG|Department of Biosystems Science and Engineering|Nadeau|Switzerland

>Spike|hCoV-19/USA/TX-HMH-MCoV-8941/2020|2020-07-02|EPI\_ISL\_780847|Original|hCoV-19^^Texas|Human|Houston Methodist Hospital|Houston Methodist Hospital|Long|USA

>Spike|hCoV-19/USA/CO-CSU-D3084-2/2020|2020-04-15|EPI\_ISL\_527476|Original|hCoV-19^^Colorado|Human|Colorado State University - Ebel Lab|Colorado State University - Ebel Lab|Cline|USA

>Spike|hCoV-19/Sweden/20-50155/2020|2020-03-04|EPI\_ISL\_454888|Original|hCoV-19^^Stockholm|Human|Karolinska Universitetslaboratoriet|The Public Health Agency of Sweden|Svartstr\u00f6m|Sweden

>Spike|hCoV-19/USA/CT-Yale-260/2020|2020-04-01|EPI\_ISL\_469186|Original|hCoV-19^^Connecticut|Human|Yale Clinical Virology Laboratory|Grubaugh Lab - Yale School of Public Health|Grubaugh|USA

>Spike|hCoV-19/USA/LA-EVTL1065/2020|2020-11-27|EPI\_ISL\_768335|Original|hCoV-19^^Louisiana|Human|LSUHS Emerging Viral Threat Laboratory|Microbial Genome Sequencing Center|Kamil|USA

>Spike|hCoV-19/Australia/VIC4325/2020|2020-07-13|EPI\_ISL\_519622|Original|hCoV-19^^Victoria|Human|Microbiological Diagnostic Unit - Public Health Laboratory (MDU-PHL)|MDU-PHL|Schultz|Australia

>Spike|hCoV-19/France/PAC-MEPHI-2151/2020|2020-09-23|EPI\_ISL\_644513|Original|hCoV-19^^Provence-Alpes-Cote-d\u2019Azur|Human|MEPHI|MEPHI|Levasseur|France

>Spike|hCoV-19/Germany/HH-hpi-p2319/2020|2020-03-22|EPI\_ISL\_775841|Original|hCoV-19^^Hamburg|Human|University Medical Center Hamburg Eppendorf|Heinrich Pette Institute|Robitaille|Germany

>Spike|hCoV-19/England/ALDP-C3B03D/2020|2020-12-09|EPI\_ISL\_731810|Original|hCoV-19^^England|Human|Lighthouse Lab in Alderley Park|Wellcome Sanger Institute for the COVID-19 Genomics UK (COG-UK) Consortium|Davies|United Kingdom

>Spike|hCoV-19/Wales/PHWC-16BAC8/2020|2020-09-16|EPI\_ISL\_573939|Original|hCoV-19^^Wales|Human|Wales Specialist Virology Centre Sequencing lab|COVID-19 Genomics UK (COG-UK) Consortium|Moore|United Kingdom

>Spike|hCoV-19/England/QEUH-CC2824/2020|2020-12-21|EPI\_ISL\_778279|Original|hCoV-19^^England|Human|Lighthouse Lab in Glasgow|Wellcome Sanger Institute for the COVID-19 Genomics UK (COG-UK) Consortium|Davies|United Kingdom

>Spike|hCoV-19/USA/FL-QDX-422/2020|2020-03-17|EPI\_ISL\_571182|Original|hCoV-19^^Florida|Human|Quest Diagnostics|Quest Diagnostics|Kagan|USA

>Spike|hCoV-19/India/TG-CCMB-M80/2020|2020-06-05|EPI\_ISL\_495243|Original|hCoV-19^^Telangana|Human|CSIR-Centre for Cellular and Molecular Biology|CSIR-Centre for Cellular and Molecular Biology|Banu|India

>Spike|hCoV-19/Italy/TUS-UOS-15/2020|2020-05-14|EPI\_ISL\_591338|Original|hCoV-19^^Tuscany|Human|Dipartimento di Biotecnologie Mediche|Dipartimento di Biotecnologie Mediche|Cusi|Italy

>Spike|hCoV-19/USA/NY-NYCPHL-000032/2020|2020-03-12|EPI\_ISL\_631528|Original|hCoV-19^^New York|Human|Maimonides Medical Center|New York City Public Health Laboratory|Wang|USA

>Spike|hCoV-19/India/GJ-GBRC21/2020|2020-04-26|EPI\_ISL\_437450|Original|hCoV-19^^Gujarat|Human|B.J. Medical College and Civil hospital|Gujarat Biotechnology Research Centre|Joshi|India

>Spike|hCoV-19/Singapore/1170/2020|2020-04-09|EPI\_ISL\_648098|Original|hCoV-19^^Singapore|Human|Department of Laboratory Medicine|Department of Laboratory Medicine|Chen|Singapore

>Spike|hCoV-19/England/CAMC-B3677A/2020|2020-11-05|EPI\_ISL\_645512|Original|hCoV-19^^England|Human|Lighthouse Lab in Cambridge|Wellcome Sanger Institute for the COVID-19 Genomics UK (COG-UK) Consortium|Davies|United Kingdom

>Spike|hCoV-19/Lithuania/MR-LUHS-Eilnr431/2020|2020-09-04|EPI\_ISL\_636886|Original|hCoV-19^^Kauno apskritis|Human|Lithuanian University of Health Sciences Hospital|Lithuanian University of Health Sciences|Zemaitis|Lithuania

>Spike|hCoV-19/USA/MI-MDHHS-SC22419/2020|2020-11-18|EPI\_ISL\_708252|Original|hCoV-19^^Michigan|Human|Michigan Department of Health and Human Services|Michigan Department of Health and Human Services|Jacob|USA

>Spike|hCoV-19/Wales/MILK-99D01E/2020|2020-08-30|EPI\_ISL\_549821|Original|hCoV-19^^Wales|Human|Lighthouse Lab in Milton Keynes|Wellcome Sanger Institute for the COVID-19 Genomics UK (COG-UK) consortium|Davies|United Kingdom

>Spike|hCoV-19/Scotland/EDB3575/2020|2020-04-27|EPI\_ISL\_487854|Original|hCoV-19^^Scotland|Human|Virology Department|Wellcome Sanger Institute for the COVID-19 Genomics UK (COG-UK) consortium|Davies|United Kingdom

>Spike|hCoV-19/England/MILK-9AAF3F/2020|2020-08-31|EPI\_ISL\_551018|Original|hCoV-19^^England|Human|Lighthouse Lab in Milton Keynes|Wellcome Sanger Institute for the COVID-19 Genomics UK (COG-UK) consortium|Davies|United Kingdom

>Spike|hCoV-19/Denmark/DCGC-5698/2020|2020-09-21|EPI\_ISL\_621203|Original|hCoV-19^^Nordjylland|Human|Department of Virus and Microbiological Special Diagnostics|Albertsen lab|Michaelsen|Denmark

>Spike|hCoV-19/England/ALDP-C57F3E/2020|2020-12-14|EPI\_ISL\_736039|Original|hCoV-19^^England|Human|Lighthouse Lab in Alderley Park|Wellcome Sanger Institute for the COVID-19 Genomics UK (COG-UK) Consortium|Davies|United Kingdom

>Spike|hCoV-19/England/NOTT-11293C/2020|2020-04-20|EPI\_ISL\_493564|Original|hCoV-19^^England|Human|Lincolnshire Hospitals and DeepSeq Nottingham|COVID-19 Genomics UK (COG-UK) Consortium|Loose|United Kingdom

>Spike|hCoV-19/USA/TX-HMH-MCoV-14848/2020|2020-10-12|EPI\_ISL\_786332|Original|hCoV-19^^Texas|Human|Houston Methodist Hospital|Houston Methodist Hospital|Long|USA

>Spike|hCoV-19/Canada/ON\_QGLO-034/2020|2020-03-29|EPI\_ISL\_459885|Original|hCoV-19^^Ontario|Human|Kingston Health Sciences Center|Queen's Genomics Lab at Ongwanada (Q-GLO)|Sjaarda|Canada

>Spike|hCoV-19/Belgium/ULG-0183/2020|2020-03-23|EPI\_ISL\_447141|Original|hCoV-19^^Liege|Human|Department of Clinical Microbiology|GIGA Medical Genomics|Durkin|Belgium

>Spike|hCoV-19/England/BRIS-12E50C/2020|2020-04-21|EPI\_ISL\_488302|Original|hCoV-19^^England|Human|PHE South West Regional Laboratory|Wellcome Sanger Institute for the COVID-19 Genomics UK (COG-UK) consortium|Davies|United Kingdom

>Spike|hCoV-19/Japan/PG-8662/2020|2020-09-00|EPI\_ISL\_686258|Original|hCoV-19^^Japan|Human|Pathogen Genomics Center|Pathogen Genomics Center|Sekizuka|Japan

>Spike|hCoV-19/England/LOND-12F16CF/2020|2020-12-16|EPI\_ISL\_764384|Original|hCoV-19^^England|Human|University College London|COVID-19 Genomics UK (COG-UK) Consortium|Roy|United Kingdom

>Spike|hCoV-19/Northern Ireland/NIRE-FA85C/2020|2020-03-31|EPI\_ISL\_441659|Original|hCoV-19^^Northern Ireland|Human|Regional Virus Laboratory|Wellcome Sanger Institute for the COVID-19 Genomics UK (COG-UK) consortium|Amato|United Kingdom

>Spike|hCoV-19/Netherlands/NA\_691/2020|2020-03-26|EPI\_ISL\_461126|Original|hCoV-19^^Netherlands|Human|Dutch COVID-19 response team|Erasmus Medical Center|Oude Munnink|Netherlands

>Spike|hCoV-19/England/LOND-12605CE/2020|2020-04-06|EPI\_ISL\_524644|Original|hCoV-19^^England|Human|North West London Pathology|Wellcome Sanger Institute for the COVID-19 Genomics UK (COG-UK) consortium|Davies|United Kingdom

>Spike|hCoV-19/Scotland/QEUH-9B70F0/2020|2020-09-09|EPI\_ISL\_602129|Original|hCoV-19^^Scotland|Human|Lighthouse Lab in Glasgow|Wellcome Sanger Institute for the COVID-19 Genomics UK (COG-UK) consortium|Davies|United Kingdom

>Spike|hCoV-19/Denmark/DCGC-5348/2020|2020-09-14|EPI\_ISL\_615279|Original|hCoV-19^^Hovedstaden|Human|Department of Virus and Microbiological Special Diagnostics|Albertsen lab|Michaelsen|Denmark

>Spike|hCoV-19/USA/TX-HMH-MCoV-18980/2020|2020-11-26|EPI\_ISL\_785262|Original|hCoV-19^^Texas|Human|Houston Methodist Hospital|Houston Methodist Hospital|Long|USA

>Spike|hCoV-19/Wales/PHWC-47CE4D/2020|2020-10-01|EPI\_ISL\_586057|Original|hCoV-19^^Wales|Human|Wales Specialist Virology Centre Sequencing lab|COVID-19 Genomics UK (COG-UK) Consortium|Moore|United Kingdom

>Spike|hCoV-19/England/QEUH-AE285D/2020|2020-10-27|EPI\_ISL\_633446|Original|hCoV-19^^England|Human|Lighthouse Lab in Glasgow|Wellcome Sanger Institute for the COVID-19 Genomics UK (COG-UK) consortium|Davies|United Kingdom

>Spike|hCoV-19/England/MILK-9C3A3F/2020|2020-09-07|EPI\_ISL\_566755|Original|hCoV-19^^England|Human|Lighthouse Lab in Milton Keynes|Wellcome Sanger Institute for the COVID-19 Genomics UK (COG-UK) consortium|Davies|United Kingdom

>Spike|hCoV-19/Scotland/EDB014/2020|2020-03-11|EPI\_ISL\_425820|Original|hCoV-19^^Scotland|Human|Virology Department|COVID-19 Genomics UK (COG-UK) Consortium|Williams|United Kingdom

>Spike|hCoV-19/USA/TX-HMH-MCoV-19106/2020|2020-11-24|EPI\_ISL\_783627|Original|hCoV-19^^Texas|Human|Houston Methodist Hospital|Houston Methodist Hospital|Long|USA

>Spike|hCoV-19/India/DL-NCDC1555-CSIR-IGIB/2020|2020-05-16|EPI\_ISL\_482494|Original|hCoV-19^^Delhi|Human|National Centre for Disease control (NCDC)|NCDC/CSIR-IGIB|Pandey|India

>Spike|hCoV-19/USA/CA-IGI-0219/2020|2020-06-30|EPI\_ISL\_569939|Original|hCoV-19^^California|Human|Innovative Genomics Institute|Innovative Genomics Institute|Wyman|USA

>Spike|hCoV-19/England/ALDP-B6260F/2020|2020-11-08|EPI\_ISL\_656531|Original|hCoV-19^^England|Human|Lighthouse Lab in Alderley Park|Wellcome Sanger Institute for the COVID-19 Genomics UK (COG-UK) Consortium|Davies|United Kingdom

>Spike|hCoV-19/Wales/PHWC-162CCB/2020|2020-05-27|EPI\_ISL\_473186|Original|hCoV-19^^Wales|Human|Wales Specialist Virology Centre Sequencing lab|COVID-19 Genomics UK (COG-UK) Consortium|Moore|United Kingdom

>Spike|hCoV-19/Ireland/D-NVRL-20ILR10835/2020|2020-11-14|EPI\_ISL\_732375|Original|hCoV-19^^Dublin|Human|National Virus Reference Laboratory|National Virus Reference Laboratory|Gonzalez|Ireland

>Spike|hCoV-19/Wales/PHWC-16B80A/2020|2020-09-19|EPI\_ISL\_573906|Original|hCoV-19^^Wales|Human|Wales Specialist Virology Centre Sequencing lab|COVID-19 Genomics UK (COG-UK) Consortium|Moore|United Kingdom

>Spike|hCoV-19/England/EXET-138174/2020|2020-10-05|EPI\_ISL\_612385|Original|hCoV-19^^England|Human|University of Exeter|COVID-19 Genomics UK (COG-UK) Consortium|Temperton|United Kingdom

>Spike|hCoV-19/England/MILK-993713/2020|2020-08-24|EPI\_ISL\_551970|Original|hCoV-19^^England|Human|Lighthouse Lab in Milton Keynes|Wellcome Sanger Institute for the COVID-19 Genomics UK (COG-UK) consortium|Davies|United Kingdom

>Spike|hCoV-19/England/MILK-81BEA6/2020|2020-07-18|EPI\_ISL\_557167|Original|hCoV-19^^England|Human|Lighthouse Lab in Milton Keynes|Wellcome Sanger Institute for the COVID-19 Genomics UK (COG-UK) consortium|Davies|United Kingdom

>Spike|hCoV-19/England/QEUIH-B7C963/2020|2020-11-14|EPI\_ISL\_741804|Original|hCoV-19^^England|Human|Oxford Viromics|COVID-19 Genomics UK (COG-UK) Consortium|Golubchik|United Kingdom

>Spike|hCoV-19/USA/TX-HMH-5901/2020|2020-06-30|EPI\_ISL\_547096|Original|hCoV-19^^Texas|Human|Houston Methodist Hospital|Houston Methodist Hospital|Long|USA

>Spike|hCoV-19/USA/TX-DSHS-1083/2020|2020-04-28|EPI\_ISL\_615124|Original|hCoV-19^^Texas|Human|Texas Department of State Health Services|Texas Department of State Health Services|Rahman|USA

>Spike|hCoV-19/Spain/MD-IBV-99008683/2020|2020-10-06|EPI\_ISL\_654238|Original|hCoV-19^^Madrid|Human|Hospital General Universitario Gregorio Mara\u00f1a|SeqCOVID-SPAIN consortium/IBV (CSIC)|Comas|Spain

>Spike|hCoV-19/Denmark/DCGC-16925/2020|2020-12-14|EPI\_ISL\_750646|Original|hCoV-19^^Hovedstaden|Human|Department of Virus and Microbiological Special Diagnostics|Albertsen Lab|Michaelsen|Denmark

>Spike|hCoV-19/Iceland/170/2020|2020-03-17|EPI\_ISL\_417548|Original|hCoV-19^^Reykjavik|Human|deCODE genetics|deCODE genetics|J\u00f3nsson|Iceland

>Spike|hCoV-19/USA/CA-CZB-14117/2020|2020-05-23|EPI\_ISL\_739207|Original|hCoV-19^^California|Human|Alameda County Public Health Lab|Chan-Zuckerberg Biohub|Kamm|USA

>Spike|hCoV-19/USA/NY-Wadsworth-194595-01/2020|2020-08-07|EPI\_ISL\_677041|Original|hCoV-19^^New York|Human|Wadsworth Center|Wadsworth Center|Lasek-Nesselquist|USA

>Spike|hCoV-19/Switzerland/ZH-ETHZ-420661/2020|2020-12-24|EPI\_ISL\_768259|Original|hCoV-19^^Zurich|Human|Viollier AG|Department of Biosystems Science and Engineering|Nadeau|Switzerland

>Spike|hCoV-19/USA/UT-UPHL-2012354078/2020|2020-08-11|EPI\_ISL\_745649|Original|hCoV-19^^Utah|Human|Ginkgo Bioworks Clinical Laboratory|Utah Public Health Laboratory|Young|USA

>Spike|hCoV-19/Denmark/DCGC-15051/2020|2020-11-23|EPI\_ISL\_713605|Original|hCoV-19^^Syddanmark|Human|Department of Virus and Microbiological Special Diagnostics|Albertsen Lab|Michaelsen|Denmark

>Spike|hCoV-19/England/ALDP-A93ABF/2020|2020-10-19|EPI\_ISL\_610930|Original|hCoV-19^^England|Human|Lighthouse Lab in Alderley Park|Wellcome Sanger Institute for the COVID-19 Genomics UK (COG-UK) consortium|Davies|United Kingdom

>Spike|hCoV-19/USA/TX-HMH-MCoV-11896/2020|2020-09-14|EPI\_ISL\_790130|Original|hCoV-19^^Texas|Human|Houston Methodist Hospital|Houston Methodist Hospital|Long|USA

>Spike|hCoV-19/USA/NY-NYUMC173/2020|2020-04-01|EPI\_ISL\_427470|Original|hCoV-19^^New York|Human|NYU Langone Health|Departments of Pathology and Medicine|Maurano|USA

>Spike|hCoV-19/England/MILK-9E1FA5/2020|2020-09-17|EPI\_ISL\_581318|Original|hCoV-19^^England|Human|Lighthouse Lab in Milton Keynes|Wellcome Sanger Institute for the COVID-19 Genomics UK (COG-UK) consortium|Davies|United Kingdom

>Spike|hCoV-19/England/SHEF-C6DA5/2020|2020-03-24|EPI\_ISL\_442002|Original|hCoV-19^^England|Human|Virology Department|COVID-19 Genomics UK (COG-UK) Consortium|de Silva|United Kingdom

>Spike|hCoV-19/England/ALDP-95513D/2020|2020-06-12|EPI\_ISL\_553520|Original|hCoV-19^^England|Human|Lighthouse Lab in Alderley Park|Wellcome Sanger Institute for the COVID-19 Genomics UK (COG-UK) consortium|Davies|United Kingdom

>Spike|hCoV-19/USA/UT-UPHL-2009213/2020|2020-05-14|EPI\_ISL\_525213|Original|hCoV-19^^Utah|Human|Utah Public Health Laboratory|Utah Public Health Laboratory|Young|USA

>Spike|hCoV-19/Denmark/DCGC-9376/2020|2020-11-16|EPI\_ISL\_668939|Original|hCoV-19^^Midtjylland|Human|Department of Virus and Microbiological Special Diagnostics|Albertsen Lab|Michaelsen|Denmark

>Spike|hCoV-19/Netherlands/ZuidHolland\_155/2020|2020-04-27|EPI\_ISL\_461328|Original|hCoV-19^^Zuid Holland|Human|Dutch COVID-19 response team|Erasmus Medical Center|Oude Munnink|Netherlands

>Spike|hCoV-19/England/ALDP-A6F4DC/2020|2020-10-14|EPI\_ISL\_607980|Original|hCoV-19^^England|Human|Lighthouse Lab in Alderley Park|Wellcome Sanger Institute for the COVID-19 Genomics UK (COG-UK) consortium|Davies|United Kingdom

>Spike|hCoV-19/Australia/NSW79/2020|2020-03-23|EPI\_ISL\_427790|Original|hCoV-19^^New South Wales|Human|Centre for Infectious Diseases and Microbiology Public Health|NSW Health Pathology - Institute of Clinical Pathology and Medical Research; Westmead Hospital; University of Sydney|Gall|Australia

>Spike|hCoV-19/Romania/ROSV\_2899/2020|2020-04-17|EPI\_ISL\_491063|Original|hCoV-19^^Suceava|Human|Suceava County Emergency Hospital|\Stefan cel Mare\ University Metagenomics Lab|Lobiuc|Romania

>Spike|hCoV-19/Denmark/DCGC-1647/2020|2020-04-06|EPI\_ISL\_622458|Original|hCoV-19^^Hovedstaden|Human|Department of Virus and Microbiological Special Diagnostics|Albertsen lab|Michaelsen|Denmark

>Spike|hCoV-19/England/QEUH-9F4895/2020|2020-09-25|EPI\_ISL\_588386|Original|hCoV-19^^England|Human|Lighthouse Lab in Glasgow|Wellcome Sanger Institute for the COVID-19 Genomics UK (COG-UK) consortium|Davies|United Kingdom

>Spike|hCoV-19/USA/CA-CZB-3640/2020|2020-03-23|EPI\_ISL\_548346|Original|hCoV-19^^California|Human|Ventura County Public Health Lab|Chan-Zuckerberg Biohub|Bhatt|USA

>Spike|hCoV-19/Scotland/CVR2917/2020|2020-04-22|EPI\_ISL\_473630|Original|hCoV-19^^Scotland|Human|West of Scotland Specialist Virology Centre|COVID-19 Genomics UK (COG-UK) Consortium|Robertson|United Kingdom

>Spike|hCoV-19/Scotland/EDB6684/2020|2020-05-12|EPI\_ISL\_507185|Original|hCoV-19^^Scotland|Human|Virology Department|COVID-19 Genomics UK (COG-UK) Consortium|Williams|United Kingdom

>Spike|hCoV-19/USA/MI-MDHHS-SC21668/2020|2020-07-12|EPI\_ISL\_516395|Original|hCoV-19^^Michigan|Human|Michigan Department of Health and Human Services|Michigan Department of Health and Human Services|Blankenship|USA

>Spike|hCoV-19/Netherlands/ZH-EMC-673/2020|2020-10-02|EPI\_ISL\_632514|Original|hCoV-19^^Zuid Holland|Human|Dutch COVID-19 response team|Erasmus Medical Center|Oude Munnink|Netherlands

>Spike|hCoV-19/England/201620642/2020|2020-04-10|EPI\_ISL\_466431|Original|hCoV-19^^England|Human|Respiratory Virus Unit|Respiratory Virus Unit|Platt|United Kingdom

>Spike|hCoV-19/Finland/24SS6E1/2020|2020-09-24|EPI\_ISL\_759839|Original|hCoV-19^^Uusimaa|Human|Department of Virology and Immunology|Department of Virology|Smura|Finland

>Spike|hCoV-19/USA/WI-UW-286/2020|2020-04-06|EPI\_ISL\_436580|Original|hCoV-19^^Wisconsin|Human|University of Wisconsin-Madison AIDS Vaccine Research Laboratories|University of Wisconsin-Madison AIDS Vaccine Research Laboratories|Baczenas|USA

>Spike|hCoV-19/India/MH-ACTREC-344/2020|2020-07-21|EPI\_ISL\_699993|Original|hCoV-19^^Maharashtra|Human|Hematopathology Laboratory|Hematopathology Laboratory|Patkar|India

>Spike|hCoV-19/England/201360202/2020|2020-03-24|EPI\_ISL\_423239|Original|hCoV-19^^England|Human|Respiratory Virus Unit|Respiratory Virus Unit|Platt|United Kingdom

>Spike|hCoV-19/England/NORT-2A4DC9/2020|2020-09-17|EPI\_ISL\_573407|Original|hCoV-19^^England|Human|Northumbria University / South Tees Hospitals NHS Foundation Trust / North Cumbria Integrated Care NHS Foundation Trust / North Tees and Hartlepool NHS Foundation Trust / Newcastle Hospitals NHS Foundation Trust|COVID-19 Genomics UK (COG-UK) Consortium|Bashton|United Kingdom

>Spike|hCoV-19/USA/UT-UPHL-2012182830/2020|2020-08-14|EPI\_ISL\_746141|Original|hCoV-19^^Utah|Human|Ginkgo Bioworks Clinical Laboratory|Utah Public Health Laboratory|Young|USA

>Spike|hCoV-19/USA/TX-HMH-MCoV-18639/2020|2020-11-19|EPI\_ISL\_784987|Original|hCoV-19^^Texas|Human|Houston Methodist Hospital|Houston Methodist Hospital|Long|USA

>Spike|hCoV-19/Northern Ireland/NIRE-235826/2020|2020-11-05|EPI\_ISL\_742150|Original|hCoV-19^^Northern Ireland|Human|Regional Virus Laboratory|COVID-19 Genomics UK (COG-UK) Consortium|Fairley|United Kingdom

>Spike|hCoV-19/England/LIVE-1E45A8/2020|2020-10-17|EPI\_ISL\_627448|Original|hCoV-19^^England|Human|Liverpool Clinical Laboratories|COVID-19 Genomics UK (COG-UK) Consortium|Haldenby|United Kingdom

>Spike|hCoV-19/Denmark/DCGC-19475/2020|2020-12-07|EPI\_ISL\_748974|Original|hCoV-19^^Sjaelland|Human|Department of Virus and Microbiological Special Diagnostics|Albertsen Lab|Michaelsen|Denmark

>Spike|hCoV-19/Canada/ON-S1995/2020|2020-11-24|EPI\_ISL\_755705|Original|hCoV-19^^Ontario|Human|Toronto Invasive Bacterial Diseases Network|McMaster University|McArthur|Canada

>Spike|hCoV-19/Spain/CT-IBV-97007961/2020|2020-10-07|EPI\_ISL\_654533|Original|hCoV-19^^Catalunya|Human|Servicio de Microbiolog\u00eda|SeqCOVID-SPAIN consortium|IBV (CSIC) |Comas|Spain

>Spike|hCoV-19/Australia/ACT0087/2020|2020-07-03|EPI\_ISL\_498545|Original|hCoV-19^^Australian Capital Territory|Human|ACT Pathology|Schwessinger Lab|Hall|Australia

>Spike|hCoV-19/Canada/NB\_1/2020|2020-03-09|EPI\_ISL\_429806|Original|hCoV-19^^New Brunswick|Human|Dr. Georges-L.-Dumont University Hospital Centre|National Microbiology Laboratory|Majer|Canada

>Spike|hCoV-19/Australia/NSW863/2020|2020-08-09|EPI\_ISL\_526205|Original|hCoV-19^^New South Wales|Human|The Children's Hospital at Westmead|NSW Health Pathology - Institute of Clinical Pathology and Medical Research; Westmead Hospital; University of Sydney|Gall|Australia

>Spike|hCoV-19/Japan/PG-8837/2020|2020-08-00|EPI\_ISL\_686415|Original|hCoV-19^^Japan|Human|Pathogen Genomics Center|Pathogen Genomics Center|Sekizuka|Japan

>Spike|hCoV-19/England/204390665/2020|2020-10-22|EPI\_ISL\_637147|Original|hCoV-19^^England|Human|Respiratory Virus Unit|COVID-19 Genomics UK (COG-UK) Consortium|Platt|United Kingdom

>Spike|hCoV-19/France/PAC-MEPHI-2321/2020|2020-10-08|EPI\_ISL\_644539|Original|hCoV-19^^Provence-Alpes-Cote-d\u2019Azur|Human|MEPHI|MEPHI|Levasseur|France

>Spike|hCoV-19/Scotland/EDB029/2020|2020-03-12|EPI\_ISL\_425835|Original|hCoV-19^^Scotland|Human|Virology Department|COVID-19 Genomics UK (COG-UK) Consortium|Williams|United Kingdom

>Spike|hCoV-19/Spain/AN-IBV-001904/2020|2020-03-16|EPI\_ISL\_467073|Original|hCoV-19^^Andalucia|Human|Hospital Universitario Puerta del Mar de C\u00e9ldiz - INIBICA|SeqCOVID-SPAIN consortium/IBV (CSIC)|Comas|Spain

>Spike|hCoV-19/USA/UN-CDC-7404/2020|2020-04-20|EPI\_ISL\_514062|Original|hCoV-19^^USA|Human|Navy and Marine Corps Public Health Center|Pathogen Discovery|Queen|USA

>Spike|hCoV-19/Northern Ireland/NIRE-FB660/2020|2020-03-28|EPI\_ISL\_448960|Original|hCoV-19^^Northern Ireland|Human|Regional Virus Laboratory|COVID-19 Genomics UK (COG-UK) Consortium|Fairley|United Kingdom

>Spike|hCoV-19/USA/NY-PV09487/2020|2020-03-20|EPI\_ISL\_450159|Original|hCoV-19^^New York|Human|MSHS Clinical Microbiology Laboratories|MSHS Pathogen Surveillance Program|van Bakel|USA

>Spike|hCoV-19/Wales/PHWC-1632C8/2020|2020-05-28|EPI\_ISL\_473273|Original|hCoV-19^^Wales|Human|Wales Specialist Virology Centre Sequencing lab|COVID-19 Genomics UK (COG-UK) Consortium|Moore|United Kingdom

>Spike|hCoV-19/Portugal/PT1530/2020|2020-04-17|EPI\_ISL\_693549|Original|hCoV-19^^Portugal|Human|Instituto Nacional de Saude (INSA)|Instituto Nacional de Saude (INSA)|Borges|Portugal

>Spike|hCoV-19/Egypt/MASRI-008/2020|2020-04-30|EPI\_ISL\_482761|Original|hCoV-19^^Egypt|Human|Medical Ain Shams Research Institute (MASRI)|Medical Ain Shams Research Institute (MASRI)|Moustafa|Egypt

>Spike|hCoV-19/England/20128035202/2020|2020-03-18|EPI\_ISL\_420477|Original|hCoV-19^^England|Human|Respiratory Virus Unit|Respiratory Virus Unit|Platt|United Kingdom

>Spike|hCoV-19/Switzerland/GE-SNRCI-7733/2020|2020-03-00|EPI\_ISL\_548200|Original|hCoV-19^^Geneve|Human|Laboratoire de Virologie|Swiss National Reference Centre for Influenza|Gon\u00e7alves Cabecinhas|Switzerland

>Spike|hCoV-19/England/BRIS-1853F33/2020|2020-04-27|EPI\_ISL\_492395|Original|hCoV-19^^England|Human|PHE South West Regional Laboratory|Wellcome Sanger Institute for the COVID-19 Genomics UK (COG-UK) consortium|Davies|United Kingdom

>Spike|hCoV-19/Wales/PHWC-16EC83/2020|2020-10-03|EPI\_ISL\_585845|Original|hCoV-19^^Wales|Human|Wales Specialist Virology Centre Sequencing lab|COVID-19 Genomics UK (COG-UK) Consortium|Moore|United Kingdom

>Spike|hCoV-19/Iceland/442/2020|2020-03-20|EPI\_ISL\_424466|Original|hCoV-19^^Reykjavik|Human|The National University Hospital of Iceland|deCODE genetics|J\u00f3nsson|Iceland

>Spike|hCoV-19/England/QEUH-9B554E/2020|2020-09-03|EPI\_ISL\_590313|Original|hCoV-19^^England|Human|Lighthouse Lab in Glasgow|Wellcome Sanger Institute for the COVID-19 Genomics UK (COG-UK) consortium|Davies|United Kingdom

>Spike|hCoV-19/Wales/PHWC-49E5AA/2020|2020-12-07|EPI\_ISL\_743017|Original|hCoV-19^^Wales|Human|Wales Specialist Virology Centre Sequencing lab|COVID-19 Genomics UK (COG-UK) Consortium|Moore|United Kingdom

>Spike|hCoV-19/Australia/VIC2810/2020|2020-07-01|EPI\_ISL\_521641|Original|hCoV-19^^Victoria|Human|Microbiological Diagnostic Unit - Public Health Laboratory (MDU-PHL)|MDU-PHL|Schultz|Australia

>Spike|hCoV-19/Wales/PHWC-495C9F/2020|2020-11-25|EPI\_ISL\_726465|Original|hCoV-19^^Wales|Human|Originating lab|COVID-19 Genomics UK (COG-UK) Consortium|Moore|United Kingdom

>Spike|hCoV-19/Japan/PG-1433/2020|2020-04-00|EPI\_ISL\_685040|Original|hCoV-19^^Japan|Human|Saitama Prefectural Institute of Public Health|Pathogen Genomics Center|Sekizuka|Japan

>Spike|hCoV-19/USA/TX-HMH-3538/2020|2020-06-15|EPI\_ISL\_544233|Original|hCoV-19^^Texas|Human|Houston Methodist Hospital|Houston Methodist Hospital|Long|USA

>Spike|hCoV-19/England/QEUH-999258/2020|2020-08-24|EPI\_ISL\_541829|Original|hCoV-19^^England|Human|Lighthouse Lab in Glasgow|Wellcome Sanger Institute for the COVID-19 Genomics UK (COG-UK) consortium|Davies|United Kingdom

>Spike|hCoV-19/Scotland/QEUH-9CEA25/2020|2020-09-17|EPI\_ISL\_601986|Original|hCoV-19^^Scotland|Human|Lighthouse Lab in Glasgow|Wellcome Sanger Institute for the COVID-19 Genomics UK (COG-UK) consortium|Davies|United Kingdom

>Spike|hCoV-19/Netherlands/NA\_344/2020|2020-04-04|EPI\_ISL\_455149|Original|hCoV-19^^Netherlands|Human|Dutch COVID-19 response team|Erasmus Medical Center|Oude Munnink|Netherlands

>Spike|hCoV-19/Russia/SVE-RII-MH1028S/2020|2020-09-05|EPI\_ISL\_596253|Original|hCoV-19^^Sverdlovsk|Human|HELIX LCC|WHO National Influenza Centre Russian Federation|Komissarov|Russia

>Spike|hCoV-19/USA/CA-CSMC26/2020|2020-03-25|EPI\_ISL\_475636|Original|hCoV-19^^California|Human|Cedars-Sinai Medical Center|Cedars-Sinai Medical Center|Zhang|USA

>Spike|hCoV-19/England/LIVE-A5753/2020|2020-03-20|EPI\_ISL\_499850|Original|hCoV-19^^England|Human|Liverpool Clinical Laboratories|COVID-19 Genomics UK (COG-UK) Consortium|Haldenby|United Kingdom

>Spike|hCoV-19/India/TG-CCMB-L1726/2020|2020-05-30|EPI\_ISL\_471627|Original|hCoV-19^^Telangana|Human|CSIR-Centre for Cellular and Molecular Biology|CSIR-Centre for Cellular and Molecular Biology|Banu|India

>Spike|hCoV-19/Australia/VIC13451/2020|2020-09-07|EPI\_ISL\_592242|Original|hCoV-19^^Victoria|Human|Microbiological Diagnostic Unit - Public Health Laboratory (MDU-PHL)|MDU-PHL|Schultz|Australia

>Spike|hCoV-19/Canada/ON-PHL-20-02449/2020|2020-09-00|EPI\_ISL\_671542|Original|hCoV-19^^Ontario|Human|Public Health Ontario Laboratory|Public Health Ontario Laboratory|Guthrie|Canada

>Spike|hCoV-19/Wales/PHWC-47CD40/2020|2020-10-10|EPI\_ISL\_586042|Original|hCoV-19^^Wales|Human|Wales Specialist Virology Centre Sequencing lab|COVID-19 Genomics UK (COG-UK) Consortium|Moore|United Kingdom

>Spike|hCoV-19/Portugal/PT0073/2020|2020-03-21|EPI\_ISL\_421476|Original|hCoV-19^^Portugal|Human|Instituto Nacional de Saude (INSA)|Instituto Nacional de Saude (INSA)|Borges|Portugal

>Spike|hCoV-19/South Korea/KCDC2532/2020|2020-06-18|EPI\_ISL\_514935|Original|hCoV-19^^South Korea|Human|Division of Viral Diseases|Division of Viral Diseases|Kim|South Korea

>Spike|hCoV-19/Scotland/EDB098/2020|2020-03-20|EPI\_ISL\_425888|Original|hCoV-19^^Scotland|Human|Virology Department|COVID-19 Genomics UK (COG-UK) Consortium|Williams|United Kingdom

>Spike|hCoV-19/England/CAMB-1B7F55/2020|2020-10-16|EPI\_ISL\_638379|Original|hCoV-19^^England|Human|Department of Pathology|COVID-19 Genomics UK (COG-UK) Consortium|Goodfellow|United Kingdom

>Spike|hCoV-19/Australia/VIC11230/2020|2020-08-28|EPI\_ISL\_563306|Original|hCoV-19^^Victoria|Human|Microbiological Diagnostic Unit - Public Health Laboratory (MDU-PHL)|MDU-PHL|Schultz|Australia

>Spike|hCoV-19/England/ALDP-9DA130/2020|2020-09-18|EPI\_ISL\_576850|Original|hCoV-19^^England|Human|Oxford Viromics|COVID-19 Genomics UK (COG-UK) Consortium|Golubchik|United Kingdom

>Spike|hCoV-19/USA/MI-UM-2006S000963/2020|2020-03-27|EPI\_ISL\_484772|Original|hCoV-19^^Michigan|Human|University of Michigan Clinical Microbiology Laboratory|Lauring Lab|Valesano|USA

>Spike|hCoV-19/Denmark/DCGC-17818/2020|2020-12-14|EPI\_ISL\_749532|Original|hCoV-19^^Sjaelland|Human|Department of Virus and Microbiological Special Diagnostics|Albertsen Lab|Michaelsen|Denmark

>Spike|hCoV-19/Denmark/DCGC-4548/2020|2020-09-21|EPI\_ISL\_621345|Original|hCoV-19^^Sjaelland|Human|Department of Virus and Microbiological Special Diagnostics|Albertsen lab|Michaelsen|Denmark

>Spike|hCoV-19/Cote d'Ivoire/BKE0712/2020|2020-07-24|EPI\_ISL\_614383|Original|hCoV-19^^Bouafle|Human|Molecular diagnostic unit for viral haemorrhagic fevers and emerging viruses|Project group Epidemiology of Highly Pathogenic Microorganisms|Calvignac-Spencer|C\u00f4te d'Ivoire

>Spike|hCoV-19/Australia/NSW144/2020|2020-03-21|EPI\_ISL\_427738|Original|hCoV-19^^New South Wales|Human|Centre for Infectious Diseases and Microbiology Public Health|NSW Health Pathology - Institute of Clinical Pathology and Medical Research; Westmead Hospital; University of Sydney|Gall|Australia

>Spike|hCoV-19/England/SHEF-CA8BF/2020|2020-09-17|EPI\_ISL\_585041|Original|hCoV-19^^England|Human|Virology Department|COVID-19 Genomics UK (COG-UK) Consortium|de Silva|United Kingdom

>Spike|hCoV-19/England/ALDP-4F7FA1/2020|2020-06-24|EPI\_ISL\_559143|Original|hCoV-19^^England|Human|Lighthouse Lab in Alderley Park|Wellcome Sanger Institute for the COVID-19 Genomics UK (COG-UK) consortium|Davies|United Kingdom

>Spike|hCoV-19/Denmark/DCGC-19572/2020|2020-12-07|EPI\_ISL\_749037|Original|hCoV-19^^Hovedstaden|Human|Department of Virus and Microbiological Special Diagnostics|Albertsen Lab|Michaelsen|Denmark

>Spike|hCoV-19/Greece/138/2020|2020-03-11|EPI\_ISL\_434479|Original|hCoV-19^^Athens|Human|Laboratory of Microbiology|Laboratory of Biology|Karakasiliotis|Greece

>Spike|hCoV-19/England/ALDP-C8C46E/2020|2020-12-13|EPI\_ISL\_777183|Original|hCoV-19^^England|Human|Lighthouse Lab in Alderley Park|Wellcome Sanger Institute for the COVID-19 Genomics UK (COG-UK) Consortium|Davies|United Kingdom

>Spike|hCoV-19/England/CAMC-B32CAC/2020|2020-11-06|EPI\_ISL\_659649|Original|hCoV-19^^England|Human|Lighthouse Lab in Cambridge|Wellcome Sanger Institute for the COVID-19 Genomics UK (COG-UK) Consortium|Davies|United Kingdom

>Spike|hCoV-19/USA/NM-DOH-2020642540/2020|2020-12-26|EPI\_ISL\_767072|Original|hCoV-19^^New Mexico|Human|New Mexico Department of Health Scientific Laboratory|New Mexico Department of Health Scientific Laboratory|Malone|USA

>Spike|hCoV-19/Singapore/755/2020|2020-06-06|EPI\_ISL\_500569|Original|hCoV-19^^Singapore|Human|Singapore General Hospital|Department of Microbiology|Abdul Rahman|Singapore

>Spike|hCoV-19/Wales/PHWC-16B1B4/2020|2020-09-16|EPI\_ISL\_560256|Original|hCoV-19^^Wales|Human|Wales Specialist Virology Centre Sequencing lab|COVID-19 Genomics UK (COG-UK) Consortium|Moore|United Kingdom

>Spike|hCoV-19/Switzerland/Vs-ETHZ-320205/2020|2020-10-10|EPI\_ISL\_737829|Original|hCoV-19^^Valais|Human|Viollier AG|Department of Biosystems Science and Engineering|Nadeau|Switzerland

>Spike|hCoV-19/England/QEuh-9DCB5E/2020|2020-09-21|EPI\_ISL\_580906|Original|hCoV-19^^England|Human|Lighthouse Lab in Glasgow|Wellcome Sanger Institute for the COVID-19 Genomics UK (COG-UK) consortium|Davies|United Kingdom

>Spike|hCoV-19/USA/OR-OHSU-0005/2020|2020-04-09|EPI\_ISL\_437529|Original|hCoV-19^^Oregon|Human|OHSU Lab Services Molecular Microbiology Lab|Oregon SARS-CoV-2 Genome Sequencing Center|O'Roak|USA

>Spike|hCoV-19/Denmark/DCGC-20572/2020|2020-12-21|EPI\_ISL\_759226|Original|hCoV-19^^Hovedstaden|Human|Department of Virus and Microbiological Special Diagnostics|Albertsen Lab|Michaelsen|Denmark

>Spike|hCoV-19/England/ALDP-C0650F/2020|2020-12-05|EPI\_ISL\_709397|Original|hCoV-19^^England|Human|Lighthouse Lab in Alderley Park|Wellcome Sanger Institute for the COVID-19 Genomics UK (COG-UK) Consortium|Davies|United Kingdom

>Spike|hCoV-19/England/MILK-B3C02E/2020|2020-11-01|EPI\_ISL\_706114|Original|hCoV-19^^England|Human|Oxford Viromics|COVID-19 Genomics UK (COG-UK) Consortium|Golubchik|United Kingdom

>Spike|hCoV-19/Brazil/SP-871/2020|2020-11-27|EPI\_ISL\_776767|Original|hCoV-19^^S\u00e3o Paulo|Human|Instituto Adolfo Lutz - Regional de Marilia|Instituto Adolfo Lutz|Sacchi|Brazil

>Spike|hCoV-19/Finland/7LS11AE7/2020|2020-10-07|EPI\_ISL\_756018|Original|hCoV-19^^Uusimaa|Human|Department of Virology and Immunology|Department of Virology|Smura|Finland

>Spike|hCoV-19/England/ALDP-B48F7D/2020|2020-11-07|EPI\_ISL\_649200|Original|hCoV-19^^England|Human|Lighthouse Lab in Alderley Park|Wellcome Sanger Institute for the COVID-19 Genomics UK (COG-UK) Consortium|Davies|United Kingdom

>Spike|hCoV-19/England/CAMC-B534F8/2020|2020-11-08|EPI\_ISL\_656898|Original|hCoV-19^^England|Human|Lighthouse Lab in Cambridge|Wellcome Sanger Institute for the COVID-19 Genomics UK (COG-UK) Consortium|Davies|United Kingdom

>Spike|hCoV-19/USA/TX-HMH-MCoV-15715/2020|2020-07-09|EPI\_ISL\_785399|Original|hCoV-19^^Texas|Human|Houston Methodist Hospital|Houston Methodist Hospital|Long|USA



>Spike|hCoV-19/Scotland/QEUH-AACA95/2020|2020-10-21|EPI\_ISL\_652889|Original|hCoV-19^^Scotland|Human|Oxford Viromics|COVID-19 Genomics UK (COG-UK) Consortium|Golubchik|United Kingdom

>Spike|hCoV-19/England/OXON-AF610/2020|2020-04-13|EPI\_ISL\_478757|Original|hCoV-19^^England|Human|Oxford Viromics|COVID-19 Genomics UK (COG-UK) Consortium|Golubchik|United Kingdom

>Spike|hCoV-19/Scotland/QEUH-A1E700/2020|2020-10-01|EPI\_ISL\_598868|Original|hCoV-19^^Scotland|Human|Lighthouse Lab in Glasgow|Wellcome Sanger Institute for the COVID-19 Genomics UK (COG-UK) consortium|Davies|United Kingdom

>Spike|hCoV-19/England/ALDP-9CD7E3/2020|2020-09-16|EPI\_ISL\_566316|Original|hCoV-19^^England|Human|Lighthouse Lab in Alderley Park|Wellcome Sanger Institute for the COVID-19 Genomics UK (COG-UK) consortium|Davies|United Kingdom

>Spike|hCoV-19/England/QEUH-B80735/2020|2020-11-14|EPI\_ISL\_668326|Original|hCoV-19^^England|Human|Lighthouse Lab in Glasgow|Wellcome Sanger Institute for the COVID-19 Genomics UK (COG-UK) Consortium|Davies|United Kingdom

>Spike|hCoV-19/England/ALDP-9E65AE/2020|2020-09-24|EPI\_ISL\_580554|Original|hCoV-19^^England|Human|Lighthouse Lab in Alderley Park|Wellcome Sanger Institute for the COVID-19 Genomics UK (COG-UK) consortium|Davies|United Kingdom

>Spike|hCoV-19/England/MILK-9D401B/2020|2020-09-18|EPI\_ISL\_601767|Original|hCoV-19^^England|Human|Lighthouse Lab in Milton Keynes|Wellcome Sanger Institute for the COVID-19 Genomics UK (COG-UK) consortium|Davies|United Kingdom

>Spike|hCoV-19/India/MH-NIV-6311/2020|2020-03-30|EPI\_ISL\_452206|Original|hCoV-19^^Maharashtra|Human|NIV Influenza|NIV Influenza|Potdar|India

>Spike|hCoV-19/England/QEUH-9F6620/2020|2020-09-24|EPI\_ISL\_588393|Original|hCoV-19^^England|Human|Lighthouse Lab in Glasgow|Wellcome Sanger Institute for the COVID-19 Genomics UK (COG-UK) consortium|Davies|United Kingdom

>Spike|hCoV-19/Argentina/Heritas\_HG009/2020|2020-05-14|EPI\_ISL\_476568|Original|hCoV-19^^Ciudad Autonoma de Buenos Aires|Human|Hospital de Pediatria \u00eda \Prof. Dr. Juan P Garrahan \H \u00e9ritas|Rohr|Argentina

>Spike|hCoV-19/England/ALDP-C3D138/2020|2020-12-10|EPI\_ISL\_731666|Original|hCoV-19^^England|Human|Lighthouse Lab in Alderley Park|Wellcome Sanger Institute for the COVID-19 Genomics UK (COG-UK) Consortium|Davies|United Kingdom

>Spike|hCoV-19/USA/UT-UPHL-2012290335/2020|2020-10-21|EPI\_ISL\_746209|Original|hCoV-19^^Utah|Human|Ginkgo Bioworks Clinical Laboratory|Utah Public Health Laboratory|Young|USA

>Spike|hCoV-19/USA/DE-DHSS-F995957/2020|2020-09-17|EPI\_ISL\_708396|Original|hCoV-19^^Delaware|Human|Delaware Public Health Lab|Delaware Public Health Lab|Bajwa|USA

>Spike|hCoV-19/USA/CA-SEARCH-5329/2020|2020-12-08|EPI\_ISL\_755148|Original|hCoV-19^^California|Human|UCSD EXCITE lab|Andersen lab at Scripps Research|Gangavarapu|USA

>Spike|hCoV-19/Switzerland/GR-ETHZ-390064/2020|2020-11-28|EPI\_ISL\_728806|Original|hCoV-19^^Graub \u00fncnden|Human|Viollier AG|Department of Biosystems Science and Engineering|Nadeau|Switzerland

>Spike|hCoV-19/Germany/BY-MVP-0183/2020|2020-04-13|EPI\_ISL\_466876|Original|hCoV-19^^Bavaria|Human|Max von Pettenkofer Institute|Laboratory for Functional Genome Analysis|Graf|Germany

>Spike|hCoV-19/USA/MI-UM-10036187521/2020|2020-09-29|EPI\_ISL\_590745|Original|hCoV-19^^Michigan|Human|University of Michigan Clinical Microbiology Laboratory|Lauring Lab|Valesano|USA

>Spike|hCoV-19/Israel/CVL-455-ngs/2020|2020-12-27|EPI\_ISL\_776868|Original|hCoV-19^^Israel|Human|Israel Central Virology laboratory|Israel Central Virology laboratory|Zuckerman|Israel

>Spike|hCoV-19/Ukraine/203100350/2020|2020-06-24|EPI\_ISL\_512629|Original|hCoV-19^^Ukraine|Human|National Laboratory for Influenza/Virology reference laboratory|Respiratory Virus Unit|Platt|Ukraine

>Spike|hCoV-19/USA/CA-IGI-0837/2020|2020-06-30|EPI\_ISL\_756356|Original|hCoV-19^^California|Human|Innovative Genomics Institute|Innovative Genomics Institute|Wyman|USA

>Spike|hCoV-19/USA/AR-CDC-4227/2020|2020-07-13|EPI\_ISL\_527641|Original|hCoV-19^^Arkansas|Human|AR Dept. of Health-Public Health Lab|Pathogen Discovery|Queen|USA

>Spike|hCoV-19/England/QEUA-CCDD75/2020|2020-12-23|EPI\_ISL\_782276|Original|hCoV-19^^England|Human|Lighthouse Lab in Glasgow|Wellcome Sanger Institute for the COVID-19 Genomics UK (COG-UK) Consortium|Davies|United Kingdom

>Spike|hCoV-19/Denmark/DCGC-3109/2020|2020-08-31|EPI\_ISL\_615926|Original|hCoV-19^^Sjaelland|Human|Department of Virus and Microbiological Special Diagnostics|Albertsen lab|Michaelsen|Denmark

>Spike|hCoV-19/USA/OR-OHSU-1739/2020|2020-07-24|EPI\_ISL\_526018|Original|hCoV-19^^Oregon|Human|OHSU Lab Services Molecular Microbiology Lab|Oregon SARS-CoV-2 Genome Sequencing Center|O'Roak|USA

>Spike|hCoV-19/USA/LA-EVTL1253/2020|2020-12-04|EPI\_ISL\_778919|Original|hCoV-19^^Louisiana|Human|LSUHS Emerging Viral Threat Laboratory|Microbial Genome Sequencing Center|Kamil|USA

>Spike|hCoV-19/Denmark/ALAB-SSI-559/2020|2020-03-29|EPI\_ISL\_436969|Original|hCoV-19^^Denmark|Human|Department of Virus and Microbiological Special Diagnostics|Albertsen lab|Kirkegaard|Denmark

>Spike|hCoV-19/England/NOTT-10FA5D/2020|2020-04-05|EPI\_ISL\_432677|Original|hCoV-19^^England|Human|Queens Medical Centre|COVID-19 Genomics UK (COG-UK) Consortium|Loose|United Kingdom

>Spike|hCoV-19/England/QEUA-B4043A/2020|2020-11-08|EPI\_ISL\_657280|Original|hCoV-19^^England|Human|Lighthouse Lab in Glasgow|Wellcome Sanger Institute for the COVID-19 Genomics UK (COG-UK) Consortium|Davies|United Kingdom

>Spike|hCoV-19/Iceland/7/2020|2020-03-15|EPI\_ISL\_417740|Original|hCoV-19^^Reykjavik|Human|The National University Hospital of Iceland|deCODE genetics|J\u00f3nsson|Iceland

>Spike|hCoV-19/England/204981804/2020|2020-12-03|EPI\_ISL\_723030|Original|hCoV-19^^England|Human|Respiratory Virus Unit|COVID-19 Genomics UK (COG-UK) Consortium|Platt|United Kingdom

>Spike|hCoV-19/England/CAMB-1B228E/2020|2020-05-06|EPI\_ISL\_469906|Original|hCoV-19^^England|Human|Department of Pathology|Wellcome Sanger Institute for the COVID-19 Genomics UK (COG-UK) consortium|Davies|United Kingdom

>Spike|hCoV-19/USA/UT-UPHL-01379/2020|2020-04-01|EPI\_ISL\_575044|Original|hCoV-19^^Utah|Human|Utah Public Health Laboratory|Utah Public Health Laboratory|Young|USA

>Spike|hCoV-19/Australia/NSW2473/2020|2020-07-02|EPI\_ISL\_527019|Original|hCoV-19^^New South Wales|Human|Area of Virology|Area of Virology|Yeang|Australia

>Spike|hCoV-19/Japan/PG-8510/2020|2020-07-00|EPI\_ISL\_687609|Original|hCoV-19^^Japan|Human|Pathogen Genomics Center|Pathogen Genomics Center|Sekizuka|Japan

>Spike|hCoV-19/Denmark/DCGC-19301/2020|2020-12-07|EPI\_ISL\_748520|Original|hCoV-19^^Hovedstaden|Human|Department of Virus and Microbiological Special Diagnostics|Albertsen Lab|Michaelsen|Denmark

>Spike|hCoV-19/England/MILK-B5554E/2020|2020-11-05|EPI\_ISL\_657738|Original|hCoV-19^^England|Human|Lighthouse Lab in Milton Keynes|Wellcome Sanger Institute for the COVID-19 Genomics UK (COG-UK) Consortium|Davies|United Kingdom

>Spike|hCoV-19/USA/NY-NYCPHL-000284/2020|2020-03-20|EPI\_ISL\_631810|Original|hCoV-19^^New York|Human|Jamaica Hospital Medical Center|New York City Public Health Laboratory|Wang|USA

>Spike|hCoV-19/Wales/PHWC-31983/2020|2020-04-10|EPI\_ISL\_446510|Original|hCoV-19^^Wales|Human|Wales Specialist Virology Centre|Public Health Wales Microbiology Cardiff|Moore|United Kingdom

>Spike|hCoV-19/Spain/CT-IBV-97009553/2020|2020-07-19|EPI\_ISL\_671850|Original|hCoV-19^^Catalunya|Human|Servicio de Microbiolog\u00eda|SeqCOVID-SPAIN consortium|IBV (CSIC) |Comas|Spain

>Spike|hCoV-19/England/QEUA-9FA4F5/2020|2020-09-29|EPI\_ISL\_588060|Original|hCoV-19^^England|Human|Lighthouse Lab in Glasgow|Wellcome Sanger Institute for the COVID-19 Genomics UK (COG-UK) consortium|Davies|United Kingdom

>Spike|hCoV-19/England/ALDP-B5DD5D/2020|2020-11-09|EPI\_ISL\_723588|Original|hCoV-19^^England|Human|Northumbria University / South Tees Hospitals NHS Foundation Trust / North Cumbria Integrated Care NHS Foundation Trust / North Tees and Hartlepool NHS Foundation Trust / Newcastle Hospitals NHS Foundation Trust|COVID-19 Genomics UK (COG-UK) Consortium|Bashton|United Kingdom

>Spike|hCoV-19/USA/NY-Wadsworth-80578-01/2020|2020-05-05|EPI\_ISL\_676911|Original|hCoV-19^^New York|Human|Wadsworth Center|Wadsworth Center|Lasek-Nesselquist|USA

>Spike|hCoV-19/Denmark/DCGC-1160/2020|2020-03-16|EPI\_ISL\_614628|Original|hCoV-19^^Sjaelland|Human|Department of Virus and Microbiological Special Diagnostics|Albertsen lab|Michaelsen|Denmark

>Spike|hCoV-19/New Zealand/20VR3033/2020|2020-00-00|EPI\_ISL\_579397|Original|hCoV-19^^Combined Wellington|Human|Wellington SCL (WN)|Institute of Environmental Science and Research (ESR)|Wang|New Zealand

>Spike|hCoV-19/England/LIVE-DC0A2F/2020|2020-11-04|EPI\_ISL\_703412|Original|hCoV-19^^England|Human|Liverpool Clinical Laboratories|COVID-19 Genomics UK (COG-UK) Consortium|Haldenby|United Kingdom

>Spike|hCoV-19/England/ALDP-7444FE/2020|2020-06-29|EPI\_ISL\_557537|Original|hCoV-19^^England|Human|Lighthouse Lab in Alderley Park|Wellcome Sanger Institute for the COVID-19 Genomics UK (COG-UK) consortium|Davies|United Kingdom

>Spike|hCoV-19/Denmark/DCGC-2197/2020|2020-08-10|EPI\_ISL\_617498|Original|hCoV-19^^Midtjylland|Human|Department of Virus and Microbiological Special Diagnostics|Albertsen lab|Michaelsen|Denmark

>Spike|hCoV-19/USA/TX-HMH-MCoV-8331/2020|2020-07-08|EPI\_ISL\_784336|Original|hCoV-19^^Texas|Human|Houston Methodist Hospital|Houston Methodist Hospital|Long|USA

>Spike|hCoV-19/France/IDF-9143/2020|2020-09-14|EPI\_ISL\_593909|Original|hCoV-19^^\u00cele-de-France|Human|Labo Analyses Med|National Reference Center for Viruses of Respiratory Infections|Enouf|France

>Spike|hCoV-19/Denmark/DCGC-19669/2020|2020-12-07|EPI\_ISL\_749099|Original|hCoV-19^^Hovedstaden|Human|Department of Virus and Microbiological Special Diagnostics|Albertsen Lab|Michaelsen|Denmark

>Spike|hCoV-19/Japan/PG-6269/2020|2020-08-00|EPI\_ISL\_689380|Original|hCoV-19^^Japan|Human|Pathogen Genomics Center|Pathogen Genomics Center|Sekizuka|Japan

>Spike|hCoV-19/England/20186132304/2020|2020-04-30|EPI\_ISL\_465489|Original|hCoV-19^^England|Human|Respiratory Virus Unit|Respiratory Virus Unit|Platt|United Kingdom

>Spike|hCoV-19/New Zealand/20VR3110/2020|2020-04-21|EPI\_ISL\_579421|Original|hCoV-19^^Combined Auckland|Human|LabTests|Institute of Environmental Science and Research (ESR)|Wang|New Zealand

>Spike|hCoV-19/Australia/VIC15329/2020|2020-08-03|EPI\_ISL\_593250|Original|hCoV-19^^Victoria|Human|Microbiological Diagnostic Unit - Public Health Laboratory (MDU-PHL)|MDU-PHL|Schultz|Australia

>Spike|hCoV-19/England/ALDP-A2E4F7/2020|2020-10-06|EPI\_ISL\_586906|Original|hCoV-19^^England|Human|Lighthouse Lab in Alderley Park|Wellcome Sanger Institute for the COVID-19 Genomics UK (COG-UK) consortium|Davies|United Kingdom

>Spike|hCoV-19/Scotland/CVR4714/2020|2020-09-21|EPI\_ISL\_612063|Original|hCoV-19^^Scotland|Human|West of Scotland Specialist Virology Centre|COVID-19 Genomics UK (COG-UK) Consortium|Robertson|United Kingdom

>Spike|hCoV-19/Luxembourg/LNS6608981/2020|2020-11-02|EPI\_ISL\_744440|Original|hCoV-19^^Luxembourg|Human|Laboratoire national de sant\u00e9|Laboratoire national de sant\u00e9|Wienecke-Baldacchino|Luxembourg

>Spike|hCoV-19/Wales/PHWC-16E70A/2020|2020-09-29|EPI\_ISL\_585759|Original|hCoV-19^^Wales|Human|Wales Specialist Virology Centre Sequencing lab|COVID-19 Genomics UK (COG-UK) Consortium|Moore|United Kingdom

>Spike|hCoV-19/England/ALDP-5D0A60/2020|2020-06-19|EPI\_ISL\_558507|Original|hCoV-19^^England|Human|Lighthouse Lab in Alderley Park|Wellcome Sanger Institute for the COVID-19 Genomics UK (COG-UK) consortium|Davies|United Kingdom

>Spike|hCoV-19/USA/TX-HMH-882/2020|2020-04-20|EPI\_ISL\_545896|Original|hCoV-19^^Texas|Human|Houston Methodist Hospital|Houston Methodist Hospital|Long|USA

>Spike|hCoV-19/USA/FL-BPHL-0073/2020|2020-04-20|EPI\_ISL\_445016|Original|hCoV-19^^Florida|Human|Florida Bureau of Public Health Laboratories|Florida Bureau of Public Health Laboratories|Blanton|USA

>Spike|hCoV-19/England/MILK-A06307/2020|2020-10-01|EPI\_ISL\_599994|Original|hCoV-19^^England|Human|Lighthouse Lab in Milton Keynes|Wellcome Sanger Institute for the COVID-19 Genomics UK (COG-UK) consortium|Davies|United Kingdom

>Spike|hCoV-19/Saudi Arabia/KAUST-Madinah248/2020|2020-03-31|EPI\_ISL\_437734|Original|hCoV-19^^Madinah|Human|Pathogen Genomics Lab King Abdullah University of Science and Technology(KAUST)|Pathogen Genomics Lab King Abdullah University of Science and Technology(KAUST)|Mohamed Ghazzali|Saudi Arabia

>Spike|hCoV-19/Denmark/DCGC-17272/2020|2020-12-14|EPI\_ISL\_750345|Original|hCoV-19^^Midtjylland|Human|Department of Virus and Microbiological Special Diagnostics|Albertsen Lab|Michaelsen|Denmark

>Spike|hCoV-19/Denmark/DCGC-3655/2020|2020-08-31|EPI\_ISL\_615427|Original|hCoV-19^^Hovedstaden|Human|Department of Virus and Microbiological Special Diagnostics|Albertsen lab|Michaelsen|Denmark

>Spike|hCoV-19/England/QEUIH-9B7E14/2020|2020-09-07|EPI\_ISL\_590605|Original|hCoV-19^^England|Human|Lighthouse Lab in Glasgow|Wellcome Sanger Institute for the COVID-19 Genomics UK (COG-UK) consortium|Davies|United Kingdom

>Spike|hCoV-19/Portugal/PT1875/2020|2020-11-11|EPI\_ISL\_732093|Original|hCoV-19^^Portugal|Human|Instituto Nacional de Saude (INSA)|Instituto Nacional de Saude (INSA)|Borges|Portugal

>Spike|hCoV-19/England/LEED-2AA4BF/2020|2020-04-01|EPI\_ISL\_538832|Original|hCoV-19^^England|Human|Leeds Teaching Hospitals NHS Trust and Public Health England|Wellcome Sanger Institute for the COVID-19 Genomics UK (COG-UK) consortium|Davies|United Kingdom

>Spike|hCoV-19/Egypt/MASRI-026/2020|2020-05-10|EPI\_ISL\_482772|Original|hCoV-19^^Egypt|Human|Medical Ain Shams Research Institute (MASRI)|Medical Ain Shams Research Institute (MASRI)|Moustafa|Egypt

>Spike|hCoV-19/Japan/Donner14/2020|2020-04-10|EPI\_ISL\_438958|Original|hCoV-19^^Kanto|Human|Keio University School of Medicine|Keio University School of Medicine|Kosaki|Japan

>Spike|hCoV-19/USA/CO-CDPHE-2011210222/2020|2020-11-19|EPI\_ISL\_771263|Original|hCoV-19^^Colorado|Human|Colorado Department of Public Health and Environment|Colorado Department of Public Health and Environment|Bankers|USA

>Spike|hCoV-19/Wales/PHWC-16C9BB/2020|2020-09-16|EPI\_ISL\_574116|Original|hCoV-19^^Wales|Human|Wales Specialist Virology Centre Sequencing lab|COVID-19 Genomics UK (COG-UK) Consortium|Moore|United Kingdom

>Spike|hCoV-19/Singapore/1228/2020|2020-04-24|EPI\_ISL\_648644|Original|hCoV-19^^Singapore|Human|Department of Laboratory Medicine|Department of Laboratory Medicine|Chen|Singapore

>Spike|hCoV-19/Wales/PHWC-16485C/2020|2020-05-21|EPI\_ISL\_479313|Original|hCoV-19^^Wales|Human|Wales Specialist Virology Centre Sequencing lab|COVID-19 Genomics UK (COG-UK) Consortium|Moore|United Kingdom

>Spike|hCoV-19/England/QEUIH-7B903C/2020|2020-07-22|EPI\_ISL\_532941|Original|hCoV-19^^England|Human|Lighthouse Lab in Glasgow|Wellcome Sanger Institute for the COVID-19 Genomics UK (COG-UK) consortium|Davies|United Kingdom

>Spike|hCoV-19/Netherlands/Gelderland\_115/2020|2020-05-22|EPI\_ISL\_460876|Original|hCoV-19^^Gelderland|Human|Dutch COVID-19 response team|Erasmus Medical Center|Oude Munnink|Netherlands

>Spike|hCoV-19/Denmark/DCGC-11413/2020|2020-11-02|EPI\_ISL\_670902|Original|hCoV-19^^Hovedstaden|Human|Department of Virus and Microbiological Special Diagnostics|Albertsen Lab|Michaelsen|Denmark

>Spike|hCoV-19/USA/MA-MASPHL-00065/2020|2020-04-03|EPI\_ISL\_791561|Original|hCoV-19^^Massachusetts|Human|Massachusetts State Public Health Laboratory|Infectious Disease Program|Park|USA

>Spike|hCoV-19/Luxembourg/LNS5328839/2020|2020-11-02|EPI\_ISL\_744218|Original|hCoV-19^^Luxembourg|Human|Laboratoire national de sant\u00e9|Laboratoire national de sant\u00e9|Wienecke-Baldacchino|Luxembourg

>Spike|hCoV-19/Scotland/QEUIH-96E386/2020|2020-08-18|EPI\_ISL\_534453|Original|hCoV-19^^Scotland|Human|NHSGGC West of Scotland Specialist Virology Centre / MRC-University of Glasgow Centre for Virus Research|Wellcome Sanger Institute for the COVID-19 Genomics UK (COG-UK) consortium|Davies|United Kingdom

>Spike|hCoV-19/England/CAMC-B7AA44/2020|2020-11-12|EPI\_ISL\_741155|Original|hCoV-19^^England|Human|Oxford Viromics|COVID-19 Genomics UK (COG-UK) Consortium|Golubchik|United Kingdom

>Spike|hCoV-19/USA/AZ-TG269439/2020|2020-03-20|EPI\_ISL\_426524|Original|hCoV-19^^Arizona|Human|TGen North|TGen North|Lemmer|USA

>Spike|hCoV-19/USA/TX-HMH-MCoV-14850/2020|2020-10-12|EPI\_ISL\_786334|Original|hCoV-19^^Texas|Human|Houston Methodist Hospital|Houston Methodist Hospital|Long|USA

>Spike|hCoV-19/USA/WY-WPHL-20044834/2020|2020-07-17|EPI\_ISL\_769907|Original|hCoV-19^^Wyoming|Human|Wyoming Public Health Laboratory|Wyoming Public Health Laboratory|Hull|USA

>Spike|hCoV-19/Brazil/SP-L15-CD278/2020|2020-03-30|EPI\_ISL\_476270|Original|hCoV-19^^S\u00e3o Paulo|Human|Hospital da Cl\u00ednicas da Faculdade de Medicina da Universidade de S\u00e3o Paulo|Instituto de Medicina Tropical da Univesidade de S\u00e3o Paulo|Sabino|Brazil

>Spike|hCoV-19/England/QEUH-963846/2020|2020-08-12|EPI\_ISL\_531811|Original|hCoV-19^^England|Human|Lighthouse Lab in Glasgow|Wellcome Sanger Institute for the COVID-19 Genomics UK (COG-UK) consortium|Davies|United Kingdom

>Spike|hCoV-19/Wales/PHWC-498AED/2020|2020-12-03|EPI\_ISL\_727172|Original|hCoV-19^^Wales|Human|Originating lab|COVID-19 Genomics UK (COG-UK) Consortium|Moore|United Kingdom

>Spike|hCoV-19/USA/CA-CZB-2220/2020|2020-05-31|EPI\_ISL\_513768|Original|hCoV-19^^California|Human|Orange County Public Health Lab|Chan-Zuckerberg Biohub|Kamm|USA

>Spike|hCoV-19/USA/NV-NSPHL-A0119/2020|2020-04-20|EPI\_ISL\_515390|Original|hCoV-19^^Nevada|Human|Nevada State Public Health Laboratory|Nevada State Public Health Laboratory|Sevinsky|USA

>Spike|hCoV-19/England/CAMC-C448DF/2020|2020-12-10|EPI\_ISL\_719326|Original|hCoV-19^^England|Human|Lighthouse Lab in Cambridge|Wellcome Sanger Institute for the COVID-19 Genomics UK (COG-UK) Consortium|Davies|United Kingdom

>Spike|hCoV-19/England/ALDP-B2388C/2020|2020-11-04|EPI\_ISL\_646894|Original|hCoV-19^^England|Human|Lighthouse Lab in Alderley Park|Wellcome Sanger Institute for the COVID-19 Genomics UK (COG-UK) Consortium|Davies|United Kingdom

>Spike|hCoV-19/England/QEUH-C5BA84/2020|2020-12-14|EPI\_ISL\_769413|Original|hCoV-19^^England|Human|Lighthouse Lab in Glasgow|Wellcome Sanger Institute for the COVID-19 Genomics UK (COG-UK) Consortium|Davies|United Kingdom

>Spike|hCoV-19/Belgium/BG-030955/2020|2020-03-09|EPI\_ISL\_418984|Original|hCoV-19^^Kaulile|Human|KU Leuven|KU Leuven|Maes|Belgium

>Spike|hCoV-19/England/CAMB-1BB522/2020|2020-11-16|EPI\_ISL\_664616|Original|hCoV-19^^England|Human|Department of Pathology|COVID-19 Genomics UK (COG-UK) Consortium|Goodfellow|United Kingdom

>Spike|hCoV-19/Beijing/BJ556/2020|2020-02-04|EPI\_ISL\_430733|Original|hCoV-19^^Beijing|Human|Chinese PLA Institute for Disease Control and Prevention|Chinese PLA Institute for Disease Control and Prevention|Li|China

>Spike|hCoV-19/Wales/PHWC-49D66C/2020|2020-12-12|EPI\_ISL\_742814|Original|hCoV-19^^Wales|Human|Wales Specialist Virology Centre Sequencing lab|COVID-19 Genomics UK (COG-UK) Consortium|Moore|United Kingdom

>Spike|hCoV-19/Brazil/RO-07/2020|2020-05-05|EPI\_ISL\_514137|Original|hCoV-19^^Rond\u00f4nia|Human|Rond\u00f4nia Central Public Health Laboratory (LACEN/RO)|Molecular Virology Laboratory of Oswaldo Cruz Foundation of Rond\u00f4nia|Souza Botelho|Brazil

>Spike|hCoV-19/Wales/PHWC-483380/2020|2020-10-17|EPI\_ISL\_627809|Original|hCoV-19^^Wales|Human|Wales Specialist Virology Centre Sequencing lab|COVID-19 Genomics UK (COG-UK) Consortium|Moore|United Kingdom

>Spike|hCoV-19/England/CWAR-24FDEF3/2020|2020-06-14|EPI\_ISL\_584543|Original|hCoV-19^^England|Human|UHCW / University of Warwick|COVID-19 Genomics UK (COG-UK) Consortium|Stark|United Kingdom

>Spike|hCoV-19/England/CAMC-B7AF72/2020|2020-11-12|EPI\_ISL\_723972|Original|hCoV-19^^England|Human|Oxford Viromics|COVID-19 Genomics UK (COG-UK) Consortium|Golubchik|United Kingdom

>Spike|hCoV-19/England/QEUH-CAD7B9/2020|2020-12-20|EPI\_ISL\_761134|Original|hCoV-19^^England|Human|Lighthouse Lab in Glasgow|Wellcome Sanger Institute for the COVID-19 Genomics UK (COG-UK) Consortium|Davies|United Kingdom

>Spike|hCoV-19/England/SHEF-D0B9F/2020|2020-09-18|EPI\_ISL\_573749|Original|hCoV-19^^England|Human|Virology Department|COVID-19 Genomics UK (COG-UK) Consortium|de Silva|United Kingdom

>Spike|hCoV-19/Germany/BE-ChVir-W1417-8240/2020|2020-06-22|EPI\_ISL\_753959|Original|hCoV-19^^Berlin|Human|Charit\u00e9 Universit\u00e4tsmedizin Berlin|Charit\u00e9 Universit\u00e4tsmedizin Berlin|Muehlemann|Germany

>Spike|hCoV-19/England/201090490/2020|2020-03-08|EPI\_ISL\_464573|Original|hCoV-19^^England|Human|Respiratory Virus Unit|Respiratory Virus Unit|Platt|United Kingdom

>Spike|hCoV-19/Denmark/DCGC-2643/2020|2020-08-17|EPI\_ISL\_617862|Original|hCoV-19^^Midtjylland|Human|Department of Virus and Microbiological Special Diagnostics|Albertsen lab|Michaelsen|Denmark

>Spike|hCoV-19/England/ALDP-CB3F5E/2020|2020-12-18|EPI\_ISL\_760862|Original|hCoV-19^^England|Human|Lighthouse Lab in Alderley Park|Wellcome Sanger Institute for the COVID-19 Genomics UK (COG-UK) Consortium|Davies|United Kingdom

>Spike|hCoV-19/South Korea/KDCA0222/2020|2020-11-05|EPI\_ISL\_747456|Original|hCoV-19^^South Korea|Human|Division of Emerging Infectious Diseases|Division of Emerging Infectious Diseases|Park|South Korea

>Spike|hCoV-19/Netherlands/NA\_60/2020|2020-03-09|EPI\_ISL\_422821|Original|hCoV-19^^Netherlands|Human|Dutch COVID-19 response team|Erasmus Medical Center|Oude Munnink|Netherlands

>Spike|hCoV-19/USA/OR-OHSU-2539/2020|2020-08-19|EPI\_ISL\_667243|Original|hCoV-19^^Oregon|Human|OHSU Lab Services Molecular Microbiology Lab|Oregon SARS-CoV-2 Genome Sequencing Center|O'Roak|USA

>Spike|hCoV-19/Netherlands/Gelderland\_30/2020|2020-04-06|EPI\_ISL\_460930|Original|hCoV-19^^Gelderland|Human|Dutch COVID-19 response team|Erasmus Medical Center|Oude Munnink|Netherlands

>Spike|hCoV-19/Wales/CAMC-AB2391/2020|2020-10-22|EPI\_ISL\_634815|Original|hCoV-19^^Wales|Human|Lighthouse Lab in Cambridge|Wellcome Sanger Institute for the COVID-19 Genomics UK (COG-UK) consortium|Davies|United Kingdom

>Spike|hCoV-19/USA/TX-HMH-7681/2020|2020-06-26|EPI\_ISL\_545582|Original|hCoV-19^^Texas|Human|Houston Methodist Hospital|Houston Methodist Hospital|Long|USA

>Spike|hCoV-19/USA/MI-UM-10036855102/2020|2020-11-09|EPI\_ISL\_728452|Original|hCoV-19^^Michigan|Human|University of Michigan Clinical Microbiology Laboratory|Lauring Lab|Valesano|USA

>Spike|hCoV-19/England/ALDP-B46D48/2020|2020-11-06|EPI\_ISL\_656229|Original|hCoV-19^^England|Human|Lighthouse Lab in Alderley Park|Wellcome Sanger Institute for the COVID-19 Genomics UK (COG-UK) Consortium|Davies|United Kingdom

>Spike|hCoV-19/USA/AR-CDC-4378/2020|2020-07-03|EPI\_ISL\_527654|Original|hCoV-19^^Arkansas|Human|AR Dept. of Health-Public Health Lab|Pathogen Discovery|Queen|USA

>Spike|hCoV-19/Canada/ON-PHL-3501/2020|2020-03-00|EPI\_ISL\_418333|Original|hCoV-19^^Ontario|Human|Public Health Ontario Laboratories|Public Health Ontario Laboratories|Eshaghi|Canada

>Spike|hCoV-19/USA/UT-01598/2020|2020-04-06|EPI\_ISL\_449834|Original|hCoV-19^^Utah|Human|Utah Public Health Laboratory|Utah Public Health Laboratory|Young|USA

>Spike|hCoV-19/USA/WI-UW-299/2020|2020-04-13|EPI\_ISL\_436593|Original|hCoV-19^^Wisconsin|Human|University of Wisconsin-Madison AIDS Vaccine Research Laboratories|University of Wisconsin-Madison AIDS Vaccine Research Laboratories|Baczenas|USA

>Spike|hCoV-19/England/204980132/2020|2020-12-03|EPI\_ISL\_723025|Original|hCoV-19^^England|Human|Respiratory Virus Unit|COVID-19 Genomics UK (COG-UK) Consortium|Platt|United Kingdom

>Spike|hCoV-19/England/QEUEH-98F49B/2020|2020-08-27|EPI\_ISL\_539975|Original|hCoV-19^^England|Human|Lighthouse Lab in Glasgow|Wellcome Sanger Institute for the COVID-19 Genomics UK (COG-UK) consortium|Davies|United Kingdom

>Spike|hCoV-19/England/ALDP-9EA15B/2020|2020-09-24|EPI\_ISL\_579935|Original|hCoV-19^^England|Human|Lighthouse Lab in Alderley Park|Wellcome Sanger Institute for the COVID-19 Genomics UK (COG-UK) consortium|Davies|United Kingdom

>Spike|hCoV-19/USA/MN-MDH-1265/2020|2020-06-09|EPI\_ISL\_482986|Original|hCoV-19^^Minnesota|Human|Mayo Clinic & Mayo Clinic Laboratories|Minnesota Department of Health|Garfin|USA

>Spike|hCoV-19/England/LIVE-1D4435/2020|2020-09-13|EPI\_ISL\_549354|Original|hCoV-19^^England|Human|Liverpool Clinical Laboratories|COVID-19 Genomics UK (COG-UK) Consortium|Haldenby|United Kingdom

>Spike|hCoV-19/England/CAMC-B52444/2020|2020-11-08|EPI\_ISL\_656823|Original|hCoV-19^^England|Human|Lighthouse Lab in Cambridge|Wellcome Sanger Institute for the COVID-19 Genomics UK (COG-UK) Consortium|Davies|United Kingdom

>Spike|hCoV-19/USA/CA-CZB-15162/2020|2020-11-23|EPI\_ISL\_738643|Original|hCoV-19^^California|Human|Santa Clara County Public Health Laboratory|Chan-Zuckerberg Biohub|Kamm|USA

>Spike|hCoV-19/England/QEUEH-9DC8EE/2020|2020-09-21|EPI\_ISL\_581105|Original|hCoV-19^^England|Human|Lighthouse Lab in Glasgow|Wellcome Sanger Institute for the COVID-19 Genomics UK (COG-UK) consortium|Davies|United Kingdom

>Spike|hCoV-19/England/LIVE-A8608/2020|2020-03-26|EPI\_ISL\_517189|Original|hCoV-19^^England|Human|Liverpool Clinical Laboratories|COVID-19 Genomics UK (COG-UK) Consortium|Haldenby|United Kingdom

>Spike|hCoV-19/Scotland/CVR5541/2020|2020-11-02|EPI\_ISL\_651831|Original|hCoV-19^^Scotland|Human|West of Scotland Specialist Virology Centre|COVID-19 Genomics UK (COG-UK) Consortium|Robertson|United Kingdom

>Spike|hCoV-19/Northern Ireland/NIRE-107141/2020|2020-03-27|EPI\_ISL\_585114|Original|hCoV-19^^Northern Ireland|Human|Regional Virus Laboratory|COVID-19 Genomics UK (COG-UK) Consortium|Fairley|United Kingdom

>Spike|hCoV-19/Portugal/PT0244/2020|2020-03-31|EPI\_ISL\_453958|Original|hCoV-19^^Portugal|Human|unknown|Instituto Nacional de Saude (INSA)|Borges|Portugal

>Spike|hCoV-19/England/ALDP-94D754/2020|2020-06-16|EPI\_ISL\_555025|Original|hCoV-19^^England|Human|Lighthouse Lab in Alderley Park|Wellcome Sanger Institute for the COVID-19 Genomics UK (COG-UK) consortium|Davies|United Kingdom

>Spike|hCoV-19/England/PORT-2D118B/2020|2020-04-22|EPI\_ISL\_475335|Original|hCoV-19^^England|Human|Centre for Enzyme Innovation|COVID-19 Genomics UK (COG-UK) Consortium|Robson|United Kingdom

>Spike|hCoV-19/England/MILK-97073A/2020|2020-08-17|EPI\_ISL\_581400|Original|hCoV-19^^England|Human|Lighthouse Lab in Milton Keynes|Wellcome Sanger Institute for the COVID-19 Genomics UK (COG-UK) consortium|Davies|United Kingdom

>Spike|hCoV-19/Algeria/G38599-8859/2020|2020-06-20|EPI\_ISL\_766871|Original|hCoV-19^^Laghouat|Human|NIC Viral Respiratory Unit - Institut Pasteur of Algeria|National Reference Center for Viruses of Respiratory Infections|Enouf|Algeria

>Spike|hCoV-19/Switzerland/SZ-ETHZ-310409/2020|2020-10-08|EPI\_ISL\_603483|Original|hCoV-19^^Schwyz|Human|Viollier AG|Department of Biosystems Science and Engineering|Nadeau|Switzerland

>Spike|hCoV-19/England/NORW-F61FB/2020|2020-11-27|EPI\_ISL\_704847|Original|hCoV-19^^England|Human|Quadram Institute Bioscience|COVID-19 Genomics UK (COG-UK) Consortium|Alikhan|United Kingdom

>Spike|hCoV-19/Australia/VIC7737/2020|2020-08-05|EPI\_ISL\_564617|Original|hCoV-19^^Victoria|Human|Microbiological Diagnostic Unit - Public Health Laboratory (MDU-PHL)|MDU-PHL|Schultz|Australia

>Spike|hCoV-19/Wales/PHWC-488FE1/2020|2020-11-01|EPI\_ISL\_639526|Original|hCoV-19^^Wales|Human|Wales Specialist Virology Centre Sequencing lab|COVID-19 Genomics UK (COG-UK) Consortium|Moore|United Kingdom

>Spike|hCoV-19/England/C200026732/2020|2020-00-00|EPI\_ISL\_733582|Original|hCoV-19^^England|Human|Respiratory Virus Unit|COVID-19 Genomics UK (COG-UK) Consortium|Lackenby|United Kingdom

>Spike|hCoV-19/England/20110000806/2020|2020-03-05|EPI\_ISL\_417303|Original|hCoV-19^^England|Human|Respiratory Virus Unit|Respiratory Virus Unit|Platt|United Kingdom

>Spike|hCoV-19/Wales/PHWC-16B56D/2020|2020-09-15|EPI\_ISL\_560303|Original|hCoV-19^^Wales|Human|Wales Specialist Virology Centre Sequencing lab|COVID-19 Genomics UK (COG-UK) Consortium|Moore|United Kingdom

>Spike|hCoV-19/Gibraltar/204421232/2020|2020-10-27|EPI\_ISL\_613692|Original|hCoV-19^^Gibraltar|Human|Microbiology|Respiratory Virus Unit|Platt|Gibraltar

>Spike|hCoV-19/England/ALDP-C580D0/2020|2020-12-13|EPI\_ISL\_735890|Original|hCoV-19^^England|Human|Lighthouse Lab in Alderley Park|Wellcome Sanger Institute for the COVID-19 Genomics UK (COG-UK) Consortium|Davies|United Kingdom

>Spike|hCoV-19/USA/WA-UW-1741/2020|2020-03-21|EPI\_ISL\_424238|Original|hCoV-19^^Washington|Human|UW Virology Lab|UW Virology Lab|Roychoudhury|USA

>Spike|hCoV-19/Canada/QC\_AC3/2020|2020-04-06|EPI\_ISL\_444507|Original|hCoV-19^^Quebec|Human|Laboratoire de microbiologie|Smith Laboratory|Smith|Canada

>Spike|hCoV-19/England/MILK-9D47BC/2020|2020-09-18|EPI\_ISL\_601632|Original|hCoV-19^^England|Human|Lighthouse Lab in Milton Keynes|Wellcome Sanger Institute for the COVID-19 Genomics UK (COG-UK) consortium|Davies|United Kingdom

>Spike|hCoV-19/USA/TX-HMH-MCoV-15095/2020|2020-10-18|EPI\_ISL\_786579|Original|hCoV-19^^Texas|Human|Houston Methodist Hospital|Houston Methodist Hospital|Long|USA

>Spike|hCoV-19/Australia/VIC49/2020|2020-03-12|EPI\_ISL\_419764|Original|hCoV-19^^Victoria|Human|Victorian Infectious Diseases Reference Laboratory (VIDRL)|Victorian Infectious Diseases Reference Laboratory and Microbiological Diagnostic Unit Public Health Laboratory|Schultz|Australia

>Spike|hCoV-19/USA/LA-EVTL042/2020|2020-05-02|EPI\_ISL\_451203|Original|hCoV-19^^Louisiana|Human|LSUHS Emerging Viral Threat Laboratory|Microbial Genome Sequencing Center|Kamil|USA

>Spike|hCoV-19/England/ALDP-B459DC/2020|2020-11-07|EPI\_ISL\_656027|Original|hCoV-19^^England|Human|Lighthouse Lab in Alderley Park|Wellcome Sanger Institute for the COVID-19 Genomics UK (COG-UK) Consortium|Davies|United Kingdom

>Spike|hCoV-19/Scotland/QEUA-9E5141/2020|2020-09-24|EPI\_ISL\_600981|Original|hCoV-19^^Scotland|Human|Lighthouse Lab in Glasgow|Wellcome Sanger Institute for the COVID-19 Genomics UK (COG-UK) consortium|Davies|United Kingdom

>Spike|hCoV-19/England/LIVE-DC19F4/2020|2020-11-20|EPI\_ISL\_702907|Original|hCoV-19^^England|Human|Liverpool Clinical Laboratories|COVID-19 Genomics UK (COG-UK) Consortium|Haldenby|United Kingdom

>Spike|hCoV-19/USA/NH\_0004/2020|2020-02-29|EPI\_ISL\_420791|Original|hCoV-19^^New Hampshire|Human|NH Department of Health and Human Services Public Health Labs|Pathogen Discovery|Queen|USA

>Spike|hCoV-19/Netherlands/OV-RIVM-20616/2020|2020-11-20|EPI\_ISL\_790695|Original|hCoV-19^^Overijssel|Human|Dutch COVID-19 response team|National Institute for Public Health and the Environment (RIVM)|Meijer|Netherlands

>Spike|hCoV-19/Scotland/EDB924/2020|2020-04-05|EPI\_ISL\_432883|Original|hCoV-19^^Scotland|Human|Virology Department|COVID-19 Genomics UK (COG-UK) Consortium|Williams|United Kingdom

>Spike|hCoV-19/Denmark/DCGC-16939/2020|2020-12-14|EPI\_ISL\_750655|Original|hCoV-19^^Hovedstaden|Human|Department of Virus and Microbiological Special Diagnostics|Albertsen Lab|Michaelsen|Denmark

>Spike|hCoV-19/USA/ME-HETL-J0410/2020|2020-12-16|EPI\_ISL\_755518|Original|hCoV-19^^Maine|Human|Maine Health and Environmental Testing Laboratory|Tewhey Lab|Tewhey|USA

>Spike|hCoV-19/Netherlands/Zeeland\_3/2020|2020-03-29|EPI\_ISL\_461268|Original|hCoV-19^^Zeeland|Human|Dutch COVID-19 response team|Erasmus Medical Center|Oude Munnink|Netherlands

>Spike|hCoV-19/England/QEUA-B1438D/2020|2020-11-03|EPI\_ISL\_642722|Original|hCoV-19^^England|Human|Lighthouse Lab in Glasgow|Wellcome Sanger Institute for the COVID-19 Genomics UK (COG-UK) Consortium|Davies|United Kingdom

>Spike|hCoV-19/USA/UT-UPHL-2012984128/2020|2020-11-24|EPI\_ISL\_747000|Original|hCoV-19^^Utah|Human|Utah Public Health Laboratory|Utah Public Health Laboratory|Gallagher|USA

>Spike|hCoV-19/Germany/NW-MPP-26/2020|2020-06-16|EPI\_ISL\_487415|Original|hCoV-19^^North Rhine-Westphalia|Human|Labor Knei\u00dfler GmbH & Co. KG|Heinrich Pette Institute|G\u00f6ttingen|Germany

>Spike|hCoV-19/England/ALDP-B74D7E/2020|2020-11-12|EPI\_ISL\_662062|Original|hCoV-19^^England|Human|Lighthouse Lab in Alderley Park|Wellcome Sanger Institute for the COVID-19 Genomics UK (COG-UK) Consortium|Davies|United Kingdom



>Spike|hCoV-19/Wales/PHWC-47EB9F/2020|2020-09-25|EPI\_ISL\_595562|Original|hCoV-19^^Wales|Human|Originating lab|COVID-19 Genomics UK (COG-UK) Consortium|Moore|United Kingdom

>Spike|hCoV-19/USA/NM-NMDOH-2020325112/2020|2020-09-02|EPI\_ISL\_632839|Original|hCoV-19^^New Mexico|Human|New Mexico Department of Health Scientific Laboratory|New Mexico Department of Health Scientific Laboratory|Johnson|USA

>Spike|hCoV-19/USA/WY-UNM-00131/2020|2020-06-11|EPI\_ISL\_614254|Original|hCoV-19^^Wyoming|Human|Wyoming Public Health Laboratory|Center for Global Health|Domman|USA

>Spike|hCoV-19/England/SHEF-D0CBA/2020|2020-04-02|EPI\_ISL\_442478|Original|hCoV-19^^England|Human|Virology Department|COVID-19 Genomics UK (COG-UK) Consortium|de Silva|United Kingdom

>Spike|hCoV-19/Czech Republic/NRL\_10749/2020|2020-11-02|EPI\_ISL\_737014|Original|hCoV-19^^\u00dast\u00ed nad Labem Region|Human|The National Institute of Public Health|State Veterinary Institute Prague|Nagy|Czech Republic

>Spike|hCoV-19/Denmark/DCGC-16740/2020|2020-06-15|EPI\_ISL\_714934|Original|hCoV-19^^Nordjylland|Human|Department of Virus and Microbiological Special Diagnostics|Albertsen Lab|Michaelsen|Denmark

>Spike|hCoV-19/Wales/PHWC-49E294/2020|2020-12-07|EPI\_ISL\_742978|Original|hCoV-19^^Wales|Human|Wales Specialist Virology Centre Sequencing lab|COVID-19 Genomics UK (COG-UK) Consortium|Moore|United Kingdom

>Spike|hCoV-19/USA/CO-CSU-D2399-1/2020|2020-04-02|EPI\_ISL\_527465|Original|hCoV-19^^Colorado|Human|Colorado State University - Ebel Lab|Colorado State University - Ebel Lab|Cline|USA

>Spike|hCoV-19/USA/TX-HMH-6453/2020|2020-06-27|EPI\_ISL\_546006|Original|hCoV-19^^Texas|Human|Houston Methodist Hospital|Houston Methodist Hospital|Long|USA

>Spike|hCoV-19/England/BRIS-12948C/2020|2020-04-19|EPI\_ISL\_458815|Original|hCoV-19^^England|Human|PHE South West Regional Laboratory|Wellcome Sanger Institute for the COVID-19 Genomics UK (COG-UK) consortium|Davies|United Kingdom

>Spike|hCoV-19/Australia/VIC7750/2020|2020-07-28|EPI\_ISL\_564628|Original|hCoV-19^^Victoria|Human|Microbiological Diagnostic Unit - Public Health Laboratory (MDU-PHL)|MDU-PHL|Schultz|Australia

>Spike|hCoV-19/England/QEUA-A8C1B4/2020|2020-10-16|EPI\_ISL\_643219|Original|hCoV-19^^England|Human|Lighthouse Lab in Glasgow|Wellcome Sanger Institute for the COVID-19 Genomics UK (COG-UK) Consortium|Davies|United Kingdom

>Spike|hCoV-19/Germany/NW-HHU-384/2020|2020-11-20|EPI\_ISL\_718050|Original|hCoV-19^^North Rhine-Westphalia|Human|ZOTZ KLIMAS MVZ D\u00f0fcsseldorf-Centrum GbR \u00dcBAG f\u00f0r Labormedizin|Center of Medical Microbiology|Wienemann|Germany

>Spike|hCoV-19/Australia/VIC1617/2020|2020-05-06|EPI\_ISL\_456525|Original|hCoV-19^^Victoria|Human|Victorian Infectious Diseases Reference Laboratory (VIDRL)|Microbiological Diagnostic Unit Public Health Laboratory and Victorian Infectious Diseases Reference Laboratory|Schultz|Australia

>Spike|hCoV-19/South Africa/NHLS-UCT-GP-5241/2020|2020-04-29|EPI\_ISL\_700486|Original|hCoV-19^^Western Cape|Human|Nyanga CDC wc NGC|NHLS/UCT|Iranzadeh|South Africa

>Spike|hCoV-19/Denmark/DCGC-12299/2020|2020-11-16|EPI\_ISL\_682480|Original|hCoV-19^^Hovedstaden|Human|Department of Virus and Microbiological Special Diagnostics|Albertsen Lab|Michaelsen|Denmark

>Spike|hCoV-19/England/ALDP-9E99FA/2020|2020-09-24|EPI\_ISL\_584277|Original|hCoV-19^^England|Human|Virology Department|COVID-19 Genomics UK (COG-UK) Consortium|de Silva|United Kingdom

>Spike|hCoV-19/USA/NY-QDX-2702/2020|2020-03-14|EPI\_ISL\_605044|Original|hCoV-19^^New York|Human|Quest Diagnostics|Quest Diagnostics|Kagan|USA

>Spike|hCoV-19/Luxembourg/LNS3162972/2020|2020-04-14|EPI\_ISL\_434513|Original|hCoV-19^^Luxembourg|Human|Laboratoire National de Sante|Laboratoire National de Sante|Wienecke-Baldacchino|Luxembourg

>Spike|hCoV-19/Wales/PHWC-35CB3/2020|2020-04-27|EPI\_ISL\_474553|Original|hCoV-19^^Wales|Human|Originating lab|COVID-19 Genomics UK (COG-UK) Consortium|Moore|United Kingdom

>Spike|hCoV-19/England/CAMB-79758/2020|2020-04-01|EPI\_ISL\_441090|Original|hCoV-19^^England|Human|Department of Pathology|Wellcome Sanger Institute for the COVID-19 Genomics UK (COG-UK) consortium|Amato|United Kingdom

>Spike|hCoV-19/Israel/CVL-n26800/2020|2020-07-24|EPI\_ISL\_514306|Original|hCoV-19^^Israel|Human|Israel Central Virology laboratory|Israel Central Virology laboratory|Zuckerman|Israel

>Spike|hCoV-19/Canada/BC\_11028219/2020|2020-04-00|EPI\_ISL\_467317|Original|hCoV-19^^British Columbia|Human|BCCDC Public Health Laboratory|BCCDC Public Health Laboratory|Harrigan|Canada

>Spike|hCoV-19/England/ALDP-BC790F/2020|2020-11-22|EPI\_ISL\_721345|Original|hCoV-19^^England|Human|Lighthouse Lab in Alderley Park|Wellcome Sanger Institute for the COVID-19 Genomics UK (COG-UK) Consortium|Davies|United Kingdom

>Spike|hCoV-19/England/MILK-99C8BD/2020|2020-08-30|EPI\_ISL\_550652|Original|hCoV-19^^England|Human|Lighthouse Lab in Milton Keynes|Wellcome Sanger Institute for the COVID-19 Genomics UK (COG-UK) consortium|Davies|United Kingdom

>Spike|hCoV-19/England/QEUEH-96BD12/2020|2020-08-13|EPI\_ISL\_531231|Original|hCoV-19^^England|Human|Lighthouse Lab in Glasgow|Wellcome Sanger Institute for the COVID-19 Genomics UK (COG-UK) consortium|Davies|United Kingdom

>Spike|hCoV-19/Belgium/ULG-10343/2020|2020-08-04|EPI\_ISL\_540510|Original|hCoV-19^^Li\u00e8ge|Human|Department of Clinical Microbiology|GIGA Medical Genomics|Durkin|Belgium

>Spike|hCoV-19/France/PAC-IHU-1296/2020|2020-08-18|EPI\_ISL\_569111|Original|hCoV-19^^Provence-Alpes-C\u00f4te-d\u00e0z|Human|MEPHI|MEPHI|Levasseur|France

>Spike|hCoV-19/England/QEUEH-969585/2020|2020-08-11|EPI\_ISL\_531082|Original|hCoV-19^^England|Human|Lighthouse Lab in Glasgow|Wellcome Sanger Institute for the COVID-19 Genomics UK (COG-UK) consortium|Davies|United Kingdom

>Spike|hCoV-19/England/ALDP-B26212/2020|2020-11-04|EPI\_ISL\_646502|Original|hCoV-19^^England|Human|Lighthouse Lab in Alderley Park|Wellcome Sanger Institute for the COVID-19 Genomics UK (COG-UK) Consortium|Davies|United Kingdom

>Spike|hCoV-19/Ireland/CW-NVRL-78IRL78764/2020|2020-11-24|EPI\_ISL\_752588|Original|hCoV-19^^Carlow|Human|National Virus Reference Laboratory|National Virus Reference Laboratory|Gonzalez|Ireland

>Spike|hCoV-19/USA/WA-UW-2875/2020|2020-03-29|EPI\_ISL\_486042|Original|hCoV-19^^Washington|Human|UW Virology Lab|UW Virology Lab|Roychoudhury|USA

>Spike|hCoV-19/England/ALDP-C3AB6A/2020|2020-12-09|EPI\_ISL\_731502|Original|hCoV-19^^England|Human|Lighthouse Lab in Alderley Park|Wellcome Sanger Institute for the COVID-19 Genomics UK (COG-UK) Consortium|Davies|United Kingdom

>Spike|hCoV-19/Brazil/RJ-1830/2020|2020-04-04|EPI\_ISL\_541349|Original|hCoV-19^^Rio de Janeiro|Human|Laboratory of Respiratory Viruses and Measles|Laboratory of Respiratory Viruses and Measles|Silva|Brazil

>Spike|hCoV-19/France/BRE-IPP10875/2020|2020-12-10|EPI\_ISL\_754170|Original|hCoV-19^^Bretagne|Human|Laboratoire de Microbiologie|National Reference Center for Viruses of Respiratory Infections|Enouf|France

>Spike|hCoV-19/USA/SC-QDX-2484/2020|2020-03-14|EPI\_ISL\_604841|Original|hCoV-19^^South Carolina|Human|Quest Diagnostics|Quest Diagnostics|Kagan|USA

>Spike|hCoV-19/Germany/NW-HHU-429/2020|2020-11-13|EPI\_ISL\_718103|Original|hCoV-19^^North Rhine-Westphalia|Human|ZOTZ KLIMAS MVZ D\u00fcsseldorf-Centrum GbR \u00dcBAG f\u00fcr Labormedizin|Center of Medical Microbiology|Wienemann|Germany

>Spike|hCoV-19/New Zealand/20VR0988/2020|2020-03-18|EPI\_ISL\_456173|Original|hCoV-19^^Auckland|Human|LabPLUS|Institute of Environmental Science and Research (ESR)|de Ligt|New Zealand

>Spike|hCoV-19/Chile/RM-73246/2020|2020-05-23|EPI\_ISL\_746788|Original|hCoV-19^^Region Metropolitana de Santiago|Human|Genetica Molecular and Subdepartamento de Virologia ISP Chile|Instituto de Salud Publica de Chile|Tognarelli|Chile

>Spike|hCoV-19/England/QEUEH-9C8180/2020|2020-09-03|EPI\_ISL\_566998|Original|hCoV-19^^England|Human|Lighthouse Lab in Glasgow|Wellcome Sanger Institute for the COVID-19 Genomics UK (COG-UK) consortium|Davies|United Kingdom

>Spike|hCoV-19/USA/WI-CDC-6234/2020|2020-03-24|EPI\_ISL\_576183|Original|hCoV-19^^Wisconsin|Human|WI State Laboratory of Hygiene|Pathogen Discovery|Queen|USA

>Spike|hCoV-19/England/NORT-2819BF/2020|2020-03-21|EPI\_ISL\_488778|Original|hCoV-19^^England|Human|NU-OMICS DNA Sequencing research facility|Wellcome Sanger Institute for the COVID-19 Genomics UK (COG-UK) consortium|Davies|United Kingdom

>Spike|hCoV-19/England/QEUEH-9F35DB/2020|2020-09-24|EPI\_ISL\_588612|Original|hCoV-19^^England|Human|Lighthouse Lab in Glasgow|Wellcome Sanger Institute for the COVID-19 Genomics UK (COG-UK) consortium|Davies|United Kingdom

>Spike|hCoV-19/USA/UT-UPHL-05209/2020|2020-05-30|EPI\_ISL\_560865|Original|hCoV-19^^Utah|Human|Utah Public Health Laboratory|Utah Public Health Laboratory|Young|USA

>Spike|hCoV-19/Wales/PHWC-48FADA/2020|2020-11-10|EPI\_ISL\_681186|Original|hCoV-19^^Wales|Human|Wales Specialist Virology Centre Sequencing lab|COVID-19 Genomics UK (COG-UK) Consortium|Moore|United Kingdom

>Spike|hCoV-19/France/ARA-27275/2020|2020-04-19|EPI\_ISL\_676569|Original|hCoV-19^^Auvergne-Rh\u00f4ne-Alpes|Human|CNR Virus des Infections Respiratoires - France SUD|CNR Virus des Infections Respiratoires - France SUD|Bal|France

>Spike|hCoV-19/Wales/PHWC-2BD26/2020|2020-04-07|EPI\_ISL\_445838|Original|hCoV-19^^Wales|Human|Wales Specialist Virology Centre|Public Health Wales Microbiology Cardiff|Moore|United Kingdom

>Spike|hCoV-19/USA/CA-CZB-189/2020|2020-05-08|EPI\_ISL\_583185|Original|hCoV-19^^California|Human|San Bernardino County Public Health Lab|Chan-Zuckerberg Biohub|Bhatt|USA

>Spike|hCoV-19/Switzerland/BLETHZ-360012/2020|2020-11-12|EPI\_ISL\_693871|Original|hCoV-19^^Basel-Landschaft|Human|Viollier AG|Department of Biosystems Science and Engineering|Nadeau|Switzerland

>Spike|hCoV-19/Denmark/DCGC-13869/2020|2020-11-30|EPI\_ISL\_713071|Original|hCoV-19^^Midtjylland|Human|Department of Virus and Microbiological Special Diagnostics|Albertsen Lab|Michaelsen|Denmark

>Spike|hCoV-19/England/QEUEH-BCE4BC/2020|2020-11-26|EPI\_ISL\_704321|Original|hCoV-19^^England|Human|Lighthouse Lab in Glasgow|Wellcome Sanger Institute for the COVID-19 Genomics UK (COG-UK) Consortium|Davies|United Kingdom

>Spike|hCoV-19/England/ALDP-B5E220/2020|2020-11-09|EPI\_ISL\_723642|Original|hCoV-19^^England|Human|Oxford Viromics|COVID-19 Genomics UK (COG-UK) Consortium|Golubchik|United Kingdom

>Spike|hCoV-19/Australia/VIC4802/2020|2020-07-17|EPI\_ISL\_519187|Original|hCoV-19^^Victoria|Human|Microbiological Diagnostic Unit - Public Health Laboratory (MDU-PHL)|MDU-PHL|Schultz|Australia

>Spike|hCoV-19/Denmark/DCGC-7502/2020|2020-10-12|EPI\_ISL\_619068|Original|hCoV-19^^Midtjylland|Human|Department of Virus and Microbiological Special Diagnostics|Albertsen lab|Michaelsen|Denmark

>Spike|hCoV-19/USA/OR-OHSU-0233/2020|2020-04-04|EPI\_ISL\_509076|Original|hCoV-19^^Oregon|Human|OHSU Lab Services Molecular Microbiology Lab|Oregon SARS-CoV-2 Genome Sequencing Center|O'Roak|USA

>Spike|hCoV-19/Denmark/DCGC-18427/2020|2020-12-07|EPI\_ISL\_749959|Original|hCoV-19^^Syddanmark|Human|Department of Virus and Microbiological Special Diagnostics|Albertsen Lab|Michaelsen|Denmark

>Spike|hCoV-19/Australia/VIC17153/2020|2020-08-15|EPI\_ISL\_663768|Original|hCoV-19^^Victoria|Human|Microbiological Diagnostic Unit - Public Health Laboratory (MDU-PHL)|MDU-PHL|Schultz|Australia

>Spike|hCoV-19/England/MILK-A7B68C/2020|2020-10-15|EPI\_ISL\_607543|Original|hCoV-19^^England|Human|Lighthouse Lab in Milton Keynes|Wellcome Sanger Institute for the COVID-19 Genomics UK (COG-UK) consortium|Davies|United Kingdom

>Spike|hCoV-19/Wales/PHWC-16DAC6/2020|2020-09-18|EPI\_ISL\_577487|Original|hCoV-19^^Wales|Human|Wales Specialist Virology Centre Sequencing lab|COVID-19 Genomics UK (COG-UK) Consortium|Moore|United Kingdom

>Spike|hCoV-19/England/QEUEH-96DC22/2020|2020-08-18|EPI\_ISL\_530666|Original|hCoV-19^^England|Human|Lighthouse Lab in Glasgow|Wellcome Sanger Institute for the COVID-19 Genomics UK (COG-UK) consortium|Davies|United Kingdom

>Spike|hCoV-19/Wales/PHWC-1651D8/2020|2020-05-29|EPI\_ISL\_479432|Original|hCoV-19^^Wales|Human|Wales Specialist Virology Centre Sequencing lab|COVID-19 Genomics UK (COG-UK) Consortium|Moore|United Kingdom

>Spike|hCoV-19/France/ARA-115793/2020|2020-12-04|EPI\_ISL\_745360|Original|hCoV-19^^Auvergne-Rh\u00f4ne-Alpes|Human|CNR Virus des Infections Respiratoires - France SUD|CNR Virus des Infections Respiratoires - France SUD|Bal|France

>Spike|hCoV-19/England/MILK-95702F/2020|2020-06-10|EPI\_ISL\_554148|Original|hCoV-19^^England|Human|Lighthouse Lab in Milton Keynes|Wellcome Sanger Institute for the COVID-19 Genomics UK (COG-UK) consortium|Davies|United Kingdom

>Spike|hCoV-19/Australia/VIC3410/2020|2020-00-00|EPI\_ISL\_563988|Original|hCoV-19^^Victoria|Human|Microbiological Diagnostic Unit - Public Health Laboratory (MDU-PHL)|MDU-PHL|Schultz|Australia

>Spike|hCoV-19/Spain/PV-IBV-001549/2020|2020-03-16|EPI\_ISL\_467119|Original|hCoV-19^^Basque Country|Human|Hospital Universitario Araba. Vitoria-Gasteiz|SeqCOVID-SPAIN consortium/IBV (CSIC)|Comas|Spain

>Spike|hCoV-19/England/ALDP-B84616/2020|2020-11-15|EPI\_ISL\_675181|Original|hCoV-19^^England|Human|Lighthouse Lab in Alderley Park|Wellcome Sanger Institute for the COVID-19 Genomics UK (COG-UK) Consortium|Davies|United Kingdom

>Spike|hCoV-19/South Africa/NHLS-UCT-GP-5720/2020|2020-05-18|EPI\_ISL\_700568|Original|hCoV-19^^Western Cape|Human|Dr Abdurahman CDC wc DAC|NHLS/UCT|Iranzadeh|South Africa

>Spike|hCoV-19/Scotland/QEUH-96A126/2020|2020-08-15|EPI\_ISL\_534372|Original|hCoV-19^^Scotland|Human|NHSGGC West of Scotland Specialist Virology Centre / MRC-University of Glasgow Centre for Virus Research|Wellcome Sanger Institute for the COVID-19 Genomics UK (COG-UK) consortium|Davies|United Kingdom

>Spike|hCoV-19/England/ALDP-5C5BB6/2020|2020-06-18|EPI\_ISL\_558585|Original|hCoV-19^^England|Human|Lighthouse Lab in Alderley Park|Wellcome Sanger Institute for the COVID-19 Genomics UK (COG-UK) consortium|Davies|United Kingdom

>Spike|hCoV-19/USA/CA-CZB-16075/2020|2020-11-29|EPI\_ISL\_739466|Original|hCoV-19^^California|Human|Renegade|Chan-Zuckerberg Biohub|Kamm|USA

>Spike|hCoV-19/Wales/PHWC-48ED2D/2020|2020-11-10|EPI\_ISL\_680996|Original|hCoV-19^^Wales|Human|Wales Specialist Virology Centre Sequencing lab|COVID-19 Genomics UK (COG-UK) Consortium|Moore|United Kingdom

>Spike|hCoV-19/England/BRIS-121F29/2020|2020-03-19|EPI\_ISL\_440039|Original|hCoV-19^^England|Human|PHE South West Regional Laboratory|Wellcome Sanger Institute for the COVID-19 Genomics UK (COG-UK) consortium|Amato|United Kingdom

>Spike|hCoV-19/Portugal/PT0647/2020|2020-03-30|EPI\_ISL\_510908|Original|hCoV-19^^Portugal|Human|Instituto Nacional de Saude (INSA)|Instituto Nacional de Saude (INSA)|Borges|Portugal

>Spike|hCoV-19/England/QEUH-9B7290/2020|2020-09-07|EPI\_ISL\_590687|Original|hCoV-19^^England|Human|Lighthouse Lab in Glasgow|Wellcome Sanger Institute for the COVID-19 Genomics UK (COG-UK) consortium|Davies|United Kingdom

>Spike|hCoV-19/England/CAMB-7D851/2020|2020-04-06|EPI\_ISL\_441580|Original|hCoV-19^^England|Human|Department of Pathology|Wellcome Sanger Institute for the COVID-19 Genomics UK (COG-UK) consortium|Amato|United Kingdom

>Spike|hCoV-19/India/MH-ACTREC-646/2020|2020-09-14|EPI\_ISL\_700276|Original|hCoV-19^^Maharashtra|Human|Hematopathology Laboratory|Hematopathology Laboratory|Patkar|India

>Spike|hCoV-19/Spain/VC-IBV-98004446/2020|2020-03-24|EPI\_ISL\_583929|Original|hCoV-19^^Comunitat Valenciana|Human|Servicio de Microbiolog\u00eda. Hospital General Universitario de Castell\u00f3n|SeqCOVID-SPAIN consortium/IBV (CSIC)|Comas|Spain

>Spike|hCoV-19/Uruguay/TYT-M49/2020|2020-06-18|EPI\_ISL\_749148|Original|hCoV-19^^Treinta y Tres|Human|Sanatorio Americano|Institut Pasteur de Montevideo|Spangenberg|Uruguay

>Spike|hCoV-19/Denmark/DCGC-19283/2020|2020-12-07|EPI\_ISL\_748214|Original|hCoV-19^^Hovedstaden|Human|Department of Virus and Microbiological Special Diagnostics|Albertsen Lab|Michaelsen|Denmark

>Spike|hCoV-19/India/TG-CCMB-AC528/2020|2020-08-19|EPI\_ISL\_539703|Original|hCoV-19^^Telangana|Human|CSIR-Centre for Cellular and Molecular Biology|CSIR-Centre for Cellular and Molecular Biology|Mukherjee|India

>Spike|hCoV-19/Australia/VIC1220/2020|2020-04-01|EPI\_ISL\_430517|Original|hCoV-19^^Victoria|Human|Victorian Infectious Diseases Reference Laboratory

(VIDRL)|Microbiological Diagnostic Unit Public Health Laboratory and Victorian Infectious Diseases Reference Laboratory|Schultz|Australia  
>Spike|hCoV-19/USA/OR-OHSU-0398/2020|2020-05-12|EPI\_ISL\_509130|Original|hCoV-19^^Oregon|Human|OHSU Lab Services Molecular Microbiology Lab|Oregon SARS-CoV-2 Genome Sequencing Center|O'Roak|USA  
>Spike|hCoV-19/England/CAMB-741AA/2020|2020-03-20|EPI\_ISL\_440364|Original|hCoV-19^^England|Human|Department of Pathology|Wellcome Sanger Institute for the COVID-19 Genomics UK (COG-UK) consortium|Amato|United Kingdom  
>Spike|hCoV-19/Canada/ON-S1285/2020|2020-05-08|EPI\_ISL\_586333|Original|hCoV-19^^Ontario|Human|Toronto Invasive Bacterial Diseases Network|McMaster University|McArthur|Canada  
>Spike|hCoV-19/Luxembourg/LNS0756265/2020|2020-03-30|EPI\_ISL\_429725|Original|hCoV-19^^Luxembourg|Human|Laboratoire National de Sante|Laboratoire National de Sante|Wienecke-Baldacchino|Luxembourg  
>Spike|hCoV-19/USA/CT-UW-7290/2020|2020-04-04|EPI\_ISL\_570185|Original|hCoV-19^^Connecticut|Human|UW Virology Lab|UW Virology Lab|Roychoudhury|USA  
>Spike|hCoV-19/USA/WA-S3/2020|2020-02-28|EPI\_ISL\_413560|Original|hCoV-19^^Washington|Human|Seattle Flu Study|Seattle Flu Study|Bedford|USA  
>Spike|hCoV-19/Australia/NSW653/2020|2020-07-11|EPI\_ISL\_498772|Original|hCoV-19^^New South Wales|Human|Laverty Pathology|NSW Health Pathology - Institute of Clinical Pathology and Medical Research; Westmead Hospital; University of Sydney|Gall|Australia  
>Spike|hCoV-19/South Africa/KRISP-K003357/2020|2020-09-04|EPI\_ISL\_602748|Original|hCoV-19^^KwaZulu-Natal|Human|NHLs-IALCH|KRISP|de Oliveira|South Africa  
>Spike|hCoV-19/Wales/PHWC-1659C1/2020|2020-06-15|EPI\_ISL\_490750|Original|hCoV-19^^Wales|Human|Wales Specialist Virology Centre Sequencing lab|COVID-19 Genomics UK (COG-UK) Consortium|Moore|United Kingdom  
>Spike|hCoV-19/USA/CA-CZB-3672/2020|2020-08-11|EPI\_ISL\_516747|Original|hCoV-19^^California|Human|UCSF Clinical Microbiology Laboratory|Chan-Zuckerberg Biohub|Kamm|USA  
>Spike|hCoV-19/England/OXON-ADEB0/2020|2020-00-00|EPI\_ISL\_448643|Original|hCoV-19^^England|Human|Oxford Viromics|COVID-19 Genomics UK (COG-UK) Consortium|Golubchik|United Kingdom  
>Spike|hCoV-19/USA/TX-HMH-6460/2020|2020-06-27|EPI\_ISL\_546013|Original|hCoV-19^^Texas|Human|Houston Methodist Hospital|Houston Methodist Hospital|Long|USA  
>Spike|hCoV-19/USA/TX-HMH-MCoV-13038/2020|2020-08-28|EPI\_ISL\_788189|Original|hCoV-19^^Texas|Human|Houston Methodist Hospital|Houston Methodist Hospital|Long|USA  
>Spike|hCoV-19/Wales/PHWC-48C071/2020|2020-11-05|EPI\_ISL\_666386|Original|hCoV-19^^Wales|Human|Wales Specialist Virology Centre Sequencing lab|COVID-19 Genomics UK (COG-UK) Consortium|Moore|United Kingdom  
>Spike|hCoV-19/Australia/VIC16005/2020|2020-08-03|EPI\_ISL\_640504|Original|hCoV-19^^Victoria|Human|Microbiological Diagnostic Unit - Public Health Laboratory (MDU-PHL)|MDU-PHL|Schultz|Australia  
>Spike|hCoV-19/Denmark/DCGC-7589/2020|2020-10-12|EPI\_ISL\_618497|Original|hCoV-19^^Syddanmark|Human|Department of Virus and Microbiological Special Diagnostics|Albertsen lab|Michaelsen|Denmark  
>Spike|hCoV-19/Australia/VIC7403/2020|2020-07-30|EPI\_ISL\_564385|Original|hCoV-19^^Victoria|Human|Victorian Infectious Diseases Reference Laboratory (VIDRL)|VIDRL and MDU-PHL|Schultz|Australia  
>Spike|hCoV-19/England/ALDP-B74DD8/2020|2020-11-12|EPI\_ISL\_662124|Original|hCoV-19^^England|Human|Lighthouse Lab in Alderley Park|Wellcome Sanger Institute for the COVID-19 Genomics UK (COG-UK) Consortium|Davies|United Kingdom  
>Spike|hCoV-19/England/BRIS-122571/2020|2020-04-04|EPI\_ISL\_440732|Original|hCoV-19^^England|Human|PHE South West Regional Laboratory|Wellcome Sanger Institute for the COVID-19 Genomics UK (COG-UK) consortium|Amato|United Kingdom  
>Spike|hCoV-19/England/MILK-BFD566/2020|2020-12-03|EPI\_ISL\_720808|Original|hCoV-19^^England|Human|Lighthouse Lab in Milton Keynes|Wellcome Sanger Institute for the COVID-19 Genomics UK (COG-UK) Consortium|Davies|United Kingdom

>Spike|hCoV-19/Denmark/DCGC-20450/2020|2020-12-21|EPI\_ISL\_759157|Original|hCoV-19^^Syddanmark|Human|Department of Virus and Microbiological Special Diagnostics|Albertsen Lab|Michaelsen|Denmark

>Spike|hCoV-19/England/ALDP-9C4FA8/2020|2020-09-10|EPI\_ISL\_567683|Original|hCoV-19^^England|Human|Lighthouse Lab in Alderley Park|Wellcome Sanger Institute for the COVID-19 Genomics UK (COG-UK) consortium|Davies|United Kingdom

>Spike|hCoV-19/Northern Ireland/NIRE-233266/2020|2020-09-23|EPI\_ISL\_680272|Original|hCoV-19^^Northern Ireland|Human|Regional Virus Laboratory|COVID-19 Genomics UK (COG-UK) Consortium|Fairley|United Kingdom

>Spike|hCoV-19/Brazil/MG-CV16/2020|2020-03-16|EPI\_ISL\_429676|Original|hCoV-19^^Minas Gerais|Human|Central Public Health Laboratory/Oct\u00e9lvio Magalh\u00e3es Institute (IOM) from the Ezequiel Dias Foundation (FUNED)|Instituto Oct\u00e9lvio Magalh\u00e3es / Funda\u00e7\u00e3o Ezequiel Dias (IOM/Funed)|Giovanetti|Brazil

>Spike|hCoV-19/India/MH-ACTREC-429/2020|2020-07-31|EPI\_ISL\_700078|Original|hCoV-19^^Maharashtra|Human|Hematopathology Laboratory|Hematopathology Laboratory|Patkar|India

>Spike|hCoV-19/Peru/LIM-UPCH-0079/2020|2020-06-17|EPI\_ISL\_540957|Original|hCoV-19^^Lima|Human|Laboratorio de Referencia Nacional de Virus Respiratorios|Laboratorio de Gen\u00f3mica Microbiana|Tsukayama|Peru

>Spike|hCoV-19/Russia/MOS-RII-MH9341S/2020|2020-10-14|EPI\_ISL\_733446|Original|hCoV-19^^Moscow Region|Human|HELIX LLC|WHO National Influenza Centre Russian Federation|Komissarov|Russia

>Spike|hCoV-19/Scotland/CVR3407/2020|2020-05-06|EPI\_ISL\_456831|Original|hCoV-19^^Scotland|Human|West of Scotland Specialist Virology Centre|COVID-19 Genomics UK (COG-UK) Consortium|Robertson|United Kingdom

>Spike|hCoV-19/USA/MI-UM-10036535367/2020|2020-10-20|EPI\_ISL\_640152|Original|hCoV-19^^Michigan|Human|University of Michigan Clinical Microbiology Laboratory|Lauring Lab|Valesano|USA

>Spike|hCoV-19/England/MILK-C61915/2020|2020-12-13|EPI\_ISL\_769439|Original|hCoV-19^^England|Human|Lighthouse Lab in Milton Keynes|Wellcome Sanger Institute for the COVID-19 Genomics UK (COG-UK) Consortium|Davies|United Kingdom

>Spike|hCoV-19/Scotland/CVR4466/2020|2020-09-20|EPI\_ISL\_585330|Original|hCoV-19^^Scotland|Human|Lighthouse Lab in Glasgow / MRC-University of Glasgow Centre for Virus Research|COVID-19 Genomics UK (COG-UK) Consortium|Robertson|United Kingdom

>Spike|hCoV-19/USA/CA-CZB-13757/2020|2020-09-16|EPI\_ISL\_739535|Original|hCoV-19^^California|Human|Alameda County Public Health Lab|Chan-Zuckerberg Biohub|Kamm|USA

>Spike|hCoV-19/France/ARA-2068/2020|2020-04-06|EPI\_ISL\_508988|Original|hCoV-19^^Auvergne-Rh\u00f4ne-Alpes|Human|CNR Virus des Infections Respiratoires - France SUD|CNR Virus des Infections Respiratoires - France SUD|Josset|France

>Spike|hCoV-19/Japan/PG-2807/2020|2020-04-00|EPI\_ISL\_690934|Original|hCoV-19^^Japan|Human|Pathogen Genomics Center|Pathogen Genomics Center|Sekizuka|Japan

>Spike|hCoV-19/England/CAMB-760D8/2020|2020-03-30|EPI\_ISL\_438283|Original|hCoV-19^^England|Human|Department of Pathology|Wellcome Sanger Institute for the COVID-19 Genomics UK (COG-UK) consortium|Amato|United Kingdom

>Spike|hCoV-19/England/QEUA-B2C892/2020|2020-11-02|EPI\_ISL\_646517|Original|hCoV-19^^England|Human|Lighthouse Lab in Glasgow|Wellcome Sanger Institute for the COVID-19 Genomics UK (COG-UK) Consortium|Davies|United Kingdom

>Spike|hCoV-19/England/C200042014/2020|2020-11-02|EPI\_ISL\_649794|Original|hCoV-19^^England|Human|Respiratory Virus Unit|COVID-19 Genomics UK (COG-UK) Consortium|Platt|United Kingdom

>Spike|hCoV-19/England/QEUA-B7FF22/2020|2020-11-14|EPI\_ISL\_661923|Original|hCoV-19^^England|Human|Lighthouse Lab in Glasgow|Wellcome Sanger Institute for the COVID-19 Genomics UK (COG-UK) Consortium|Davies|United Kingdom

>Spike|hCoV-19/England/205100233/2020|2020-12-11|EPI\_ISL\_766302|Original|hCoV-19^^England|Human|Respiratory Virus Unit|COVID-19 Genomics UK (COG-UK) Consortium|Platt|United Kingdom

>Spike|hCoV-19/Scotland/EDB931/2020|2020-04-04|EPI\_ISL\_491602|Original|hCoV-19^^Scotland|Human|Virology Department|Wellcome Sanger Institute for the COVID-19 Genomics UK (COG-UK) consortium|Davies|United Kingdom

>Spike|hCoV-19/Switzerland/BL-UHB-42183868/2020|2020-03-10|EPI\_ISL\_527971|Original|hCoV-19^^Basel-Land|Human|University Hospital Basel|University Hospital Basel|Roloff Handschin|Switzerland

>Spike|hCoV-19/Switzerland/GE-ETHZ-340099/2020|2020-10-26|EPI\_ISL\_721809|Original|hCoV-19^^Geneva|Human|Viollier AG|Department of Biosystems Science and Engineering|Nadeau|Switzerland

>Spike|hCoV-19/England/MILK-AB78E8/2020|2020-10-21|EPI\_ISL\_623780|Original|hCoV-19^^England|Human|Lighthouse Lab in Milton Keynes|Wellcome Sanger Institute for the COVID-19 Genomics UK (COG-UK) consortium|Davies|United Kingdom

>Spike|hCoV-19/Bangladesh/BCSIR-NILMRC-368/2020|2020-07-21|EPI\_ISL\_514240|Original|hCoV-19^^Chittagong|Human|National Institute of Laboratory Medicine and Referral Center|Genomic Research Lab|Khan|Bangladesh

>Spike|hCoV-19/England/NORT-292326/2020|2020-05-09|EPI\_ISL\_489134|Original|hCoV-19^^England|Human|NU-OMICS DNA Sequencing research facility|Wellcome Sanger Institute for the COVID-19 Genomics UK (COG-UK) consortium|Davies|United Kingdom

>Spike|hCoV-19/USA/NV-NSPHL-A0155/2020|2020-05-14|EPI\_ISL\_515419|Original|hCoV-19^^Nevada|Human|Nevada State Public Health Laboratory|Nevada State Public Health Laboratory|Sevinsky|USA

>Spike|hCoV-19/Portugal/PT1449/2020|2020-03-26|EPI\_ISL\_511408|Original|hCoV-19^^Portugal|Human|Instituto Nacional de Saude (INSA)|Instituto Nacional de Saude (INSA)|Borges|Portugal

>Spike|hCoV-19/Wales/PHWC-48B063/2020|2020-11-05|EPI\_ISL\_666188|Original|hCoV-19^^Wales|Human|Wales Specialist Virology Centre Sequencing lab|COVID-19 Genomics UK (COG-UK) Consortium|Moore|United Kingdom

>Spike|hCoV-19/England/CAMC-9EC450/2020|2020-09-24|EPI\_ISL\_580625|Original|hCoV-19^^England|Human|Lighthouse Lab in Cambridge|Wellcome Sanger Institute for the COVID-19 Genomics UK (COG-UK) consortium|Davies|United Kingdom

>Spike|hCoV-19/USA/WA-S390/2020|2020-03-27|EPI\_ISL\_434150|Original|hCoV-19^^Washington|Human|Washington State Department of Health|Seattle Flu Study|Bedford|USA

>Spike|hCoV-19/Wales/PHWC-47F9FE/2020|2020-10-12|EPI\_ISL\_612757|Original|hCoV-19^^Wales|Human|Wales Specialist Virology Centre Sequencing lab|COVID-19 Genomics UK (COG-UK) Consortium|Moore|United Kingdom

>Spike|hCoV-19/England/MILK-A7B66E/2020|2020-10-15|EPI\_ISL\_607424|Original|hCoV-19^^England|Human|Lighthouse Lab in Milton Keynes|Wellcome Sanger Institute for the COVID-19 Genomics UK (COG-UK) consortium|Davies|United Kingdom

>Spike|hCoV-19/England/ALDP-C061B0/2020|2020-12-05|EPI\_ISL\_709491|Original|hCoV-19^^England|Human|Lighthouse Lab in Alderley Park|Wellcome Sanger Institute for the COVID-19 Genomics UK (COG-UK) Consortium|Davies|United Kingdom

>Spike|hCoV-19/Australia/VIC5250/2020|2020-07-07|EPI\_ISL\_520015|Original|hCoV-19^^Victoria|Human|Microbiological Diagnostic Unit - Public Health Laboratory (MDU-PHL)|MDU-PHL|Schultz|Australia

>Spike|hCoV-19/Saudi Arabia/4637/2020|2020-03-15|EPI\_ISL\_469241|Original|hCoV-19^^Jeddah|Human|Special Infectious Agents Unit|Special Infectious Agents Unit|Submitter|Saudi Arabia

>Spike|hCoV-19/Ireland/D-NVRL-71IRL94252/2020|2020-07-29|EPI\_ISL\_525358|Original|hCoV-19^^Dublin|Human|National Virus Reference Laboratory|National Virus Reference Laboratory|Gonzalez|Ireland

>Spike|hCoV-19/USA/TX-DSHS-1437/2020|2020-06-24|EPI\_ISL\_671612|Original|hCoV-19^^Texas|Human|Texas Department of State Health Services|Texas Department of State Health Services|Rahman|USA

>Spike|hCoV-19/England/MILK-C6F4F8/2020|2020-12-13|EPI\_ISL\_778406|Original|hCoV-19^^England|Human|Lighthouse Lab in Milton Keynes|Wellcome Sanger Institute for the COVID-19 Genomics UK (COG-UK) Consortium|Davies|United Kingdom

>Spike|hCoV-19/England/MILK-622B4D/2020|2020-07-06|EPI\_ISL\_557895|Original|hCoV-19^^England|Human|Lighthouse Lab in Milton Keynes|Wellcome Sanger Institute for the COVID-19 Genomics UK (COG-UK) consortium|Davies|United Kingdom

>Spike|hCoV-19/England/ALDP-C3CE9C/2020|2020-12-10|EPI\_ISL\_731738|Original|hCoV-19^^England|Human|Lighthouse Lab in Alderley Park|Wellcome Sanger Institute for the COVID-19 Genomics UK (COG-UK) Consortium|Davies|United Kingdom

>Spike|hCoV-19/Ireland/D-NVRL-73IRL26673/2020|2020-09-16|EPI\_ISL\_578266|Original|hCoV-19^^Dublin|Human|National Virus Reference Laboratory|National Virus Reference Laboratory|Gonzalez|Ireland

>Spike|hCoV-19/USA/CA-LACPHL-AE00059/2020|2020-07-14|EPI\_ISL\_765997|Original|hCoV-19^^California|Human|USC Clinical Lab|Los Angeles County PHL|Hemarajata|USA

>Spike|hCoV-19/Wales/PHWC-1696B7/2020|2020-07-24|EPI\_ISL\_512497|Original|hCoV-19^^Wales|Human|Wales Specialist Virology Centre Sequencing lab|COVID-19 Genomics UK (COG-UK) Consortium|Moore|United Kingdom

>Spike|hCoV-19/Sweden/20-08124/2020|2020-03-09|EPI\_ISL\_454440|Original|hCoV-19^^Halland|Human|Halmstad klinisk mikrobiologi|The Public Health Agency of Sweden|Svartstr\u00f6m|Sweden

>Spike|hCoV-19/England/MILK-BDB59B/2020|2020-11-26|EPI\_ISL\_709771|Original|hCoV-19^^England|Human|Lighthouse Lab in Milton Keynes|Wellcome Sanger Institute for the COVID-19 Genomics UK (COG-UK) Consortium|Davies|United Kingdom

>Spike|hCoV-19/USA/WA-S2875/2020|2020-09-22|EPI\_ISL\_596406|Original|hCoV-19^^Washington|Human|Seattle Flu Study|Seattle Flu Study|Lee|USA

>Spike|hCoV-19/Wales/PHWC-480D3A/2020|2020-10-22|EPI\_ISL\_612997|Original|hCoV-19^^Wales|Human|Wales Specialist Virology Centre Sequencing lab|COVID-19 Genomics UK (COG-UK) Consortium|Moore|United Kingdom

>Spike|hCoV-19/Denmark/DCGC-17391/2020|2020-12-14|EPI\_ISL\_750951|Original|hCoV-19^^Nordjylland|Human|Department of Virus and Microbiological Special Diagnostics|Albertsen Lab|Michaelsen|Denmark

>Spike|hCoV-19/Sweden/20-14611/2020|2020-05-13|EPI\_ISL\_475566|Original|hCoV-19^^Ostergotland|Human|Vardcentralen Brinken|The Public Health Agency of Sweden|Svartstr\u00f6m|Sweden

>Spike|hCoV-19/USA/MI-MDHHS-SC20234/2020|2020-03-28|EPI\_ISL\_447204|Original|hCoV-19^^Michigan|Human|Michigan Department of Health and Human Services|Michigan Department of Health and Human Services|Blankenship|USA

>Spike|hCoV-19/England/ALDP-49B631/2020|2020-06-11|EPI\_ISL\_559340|Original|hCoV-19^^England|Human|Lighthouse Lab in Alderley Park|Wellcome Sanger Institute for the COVID-19 Genomics UK (COG-UK) consortium|Davies|United Kingdom

>Spike|hCoV-19/USA/UT-UPHL-201025792/2020|2020-07-06|EPI\_ISL\_594052|Original|hCoV-19^^Utah|Human|Utah Public Health Laboratory|Utah Public Health Laboratory|Young|USA

>Spike|hCoV-19/Australia/VIC16277/2020|2020-08-06|EPI\_ISL\_640977|Original|hCoV-19^^Victoria|Human|Microbiological Diagnostic Unit - Public Health Laboratory (MDU-PHL)|MDU-PHL|Schultz|Australia

>Spike|hCoV-19/England/ALDP-C3AD73/2020|2020-12-09|EPI\_ISL\_731465|Original|hCoV-19^^England|Human|Lighthouse Lab in Alderley Park|Wellcome Sanger Institute for the COVID-19 Genomics UK (COG-UK) Consortium|Davies|United Kingdom

>Spike|hCoV-19/England/MILK-971739/2020|2020-08-18|EPI\_ISL\_553233|Original|hCoV-19^^England|Human|Lighthouse Lab in Milton Keynes|Wellcome Sanger Institute for the COVID-19 Genomics UK (COG-UK) consortium|Davies|United Kingdom

>Spike|hCoV-19/England/QEUH-8835E0/2020|2020-08-04|EPI\_ISL\_532650|Original|hCoV-19^^England|Human|Lighthouse Lab in Glasgow|Wellcome Sanger Institute for the COVID-19 Genomics UK (COG-UK) consortium|Davies|United Kingdom

>Spike|hCoV-19/Japan/PG-4779/2020|2020-08-00|EPI\_ISL\_689626|Original|hCoV-19^^Japan|Human|Pathogen Genomics Center|Pathogen Genomics Center|Sekizuka|Japan

>Spike|hCoV-19/England/CAMB-1B7DA6/2020|2020-10-13|EPI\_ISL\_638374|Original|hCoV-19^^England|Human|Department of Pathology|COVID-19 Genomics UK (COG-UK) Consortium|Goodfellow|United Kingdom

>Spike|hCoV-19/England/CAMC-B34BAD/2020|2020-11-05|EPI\_ISL\_659717|Original|hCoV-19^^England|Human|Lighthouse Lab in Cambridge|Wellcome Sanger Institute for the COVID-19 Genomics UK (COG-UK) Consortium|Davies|United Kingdom

>Spike|hCoV-19/England/ALDP-71E0DB/2020|2020-07-01|EPI\_ISL\_557727|Original|hCoV-19^^England|Human|Lighthouse Lab in Alderley Park|Wellcome Sanger Institute for the COVID-19 Genomics UK (COG-UK) consortium|Davies|United Kingdom

>Spike|hCoV-19/Spain/RI-IBV-006006/2020|2020-03-25|EPI\_ISL\_500437|Original|hCoV-19^^La Rioja|Human|Centro de Investigaci\u00f3n Biom\u00e9dica de La Rioja - Hospital San Pedro Logro\u00f1o|SeqCOVID-SPAIN consortium/IBV (CSIC)|Comas|Spain



>Spike|hCoV-19/England/ALDP-9CD0BB/2020|2020-09-16|EPI\_ISL\_566410|Original|hCoV-19^^England|Human|Lighthouse Lab in Alderley Park|Wellcome Sanger Institute for the COVID-19 Genomics UK (COG-UK) consortium|Davies|United Kingdom

>Spike|hCoV-19/USA/CA-CZB-2484/2020|2020-04-15|EPI\_ISL\_513879|Original|hCoV-19^^California|Human|San Francisco Public Health Laboratory|Chan-Zuckerberg Biohub|Kamm|USA

>Spike|hCoV-19/Denmark/DCGC-1535/2020|2020-06-01|EPI\_ISL\_617987|Original|hCoV-19^^Hovedstaden|Human|Department of Virus and Microbiological Special Diagnostics|Albertsen lab|Michaelsen|Denmark

>Spike|hCoV-19/England/QEUA-BA276A/2020|2020-11-18|EPI\_ISL\_719932|Original|hCoV-19^^England|Human|Lighthouse Lab in Glasgow|Wellcome Sanger Institute for the COVID-19 Genomics UK (COG-UK) Consortium|Davies|United Kingdom

>Spike|hCoV-19/Netherlands/NA\_339/2020|2020-04-04|EPI\_ISL\_455144|Original|hCoV-19^^Netherlands|Human|Dutch COVID-19 response team|Erasmus Medical Center|Oude Munnink|Netherlands

>Spike|hCoV-19/England/CAMC-B082E9/2020|2020-10-29|EPI\_ISL\_643827|Original|hCoV-19^^England|Human|Lighthouse Lab in Cambridge|Wellcome Sanger Institute for the COVID-19 Genomics UK (COG-UK) Consortium|Davies|United Kingdom

>Spike|hCoV-19/USA/LA-ALSR-0071-NBG/2020|2020-03-26|EPI\_ISL\_434527|Original|hCoV-19^^Louisiana|Human|Robert Garry lab|Andersen lab at Scripps Research|Gangavarapu|USA

>Spike|hCoV-19/South Korea/KCDC2289/2020|2020-05-20|EPI\_ISL\_510626|Original|hCoV-19^^South Korea|Human|Division of Viral Diseases|Division of Viral Diseases|Kim|South Korea

>Spike|hCoV-19/USA/ID-UW-6464/2020|2020-04-02|EPI\_ISL\_570119|Original|hCoV-19^^Idaho|Human|UW Virology Lab|UW Virology Lab|Roychoudhury|USA

>Spike|hCoV-19/England/ALDP-67D2B7/2020|2020-07-03|EPI\_ISL\_551789|Original|hCoV-19^^England|Human|Lighthouse Lab in Alderley Park|Wellcome Sanger Institute for the COVID-19 Genomics UK (COG-UK) consortium|Davies|United Kingdom

>Spike|hCoV-19/Switzerland/BE-ETHZ-420290/2020|2020-12-20|EPI\_ISL\_767995|Original|hCoV-19^^Bern|Human|Viollier AG|Department of Biosystems Science and Engineering|Nadeau|Switzerland

>Spike|hCoV-19/Canada/QC-LSPQ-L00238742/2020|2020-03-26|EPI\_ISL\_536217|Original|hCoV-19^^Quebec|Human|CSSS Haut-Richelieu/Rouville (H\u00f4pital)|Laboratoire de sant\u00e9 publique du Qu\u00e9bec|Moreira|Canada

>Spike|hCoV-19/Spain/MD-IBV-003722/2020|2020-05-07|EPI\_ISL\_467190|Original|hCoV-19^^Madrid|Human|Hospital General Universitario Gregorio Mara\u00f1\u00f3n|SeqCOVID-SPAIN consortium/IBV (CSIC)|Comas|Spain

>Spike|hCoV-19/England/QEUA-A9EF1F/2020|2020-10-20|EPI\_ISL\_611323|Original|hCoV-19^^England|Human|Lighthouse Lab in Glasgow|Wellcome Sanger Institute for the COVID-19 Genomics UK (COG-UK) consortium|Davies|United Kingdom

>Spike|hCoV-19/England/CAMB-1B4626/2020|2020-06-02|EPI\_ISL\_492196|Original|hCoV-19^^England|Human|Department of Pathology|Wellcome Sanger Institute for the COVID-19 Genomics UK (COG-UK) consortium|Davies|United Kingdom

>Spike|hCoV-19/USA/UT-01449/2020|2020-04-10|EPI\_ISL\_452156|Original|hCoV-19^^Utah|Human|Utah Public Health Laboratory|Utah Public Health Laboratory|Young|USA

>Spike|hCoV-19/England/HECH-259A0E2/2020|2020-05-20|EPI\_ISL\_488843|Original|hCoV-19^^England|Human|Microbiology Department|Wellcome Sanger Institute for the COVID-19 Genomics UK (COG-UK) consortium|Davies|United Kingdom

>Spike|hCoV-19/USA/TX-HMH-7541/2020|2020-06-25|EPI\_ISL\_546836|Original|hCoV-19^^Texas|Human|Houston Methodist Hospital|Houston Methodist Hospital|Long|USA

>Spike|hCoV-19/USA/AZ-TG664469/2020|2020-04-20|EPI\_ISL\_696102|Original|hCoV-19^^Arizona|Human|Sonora Quest Laboratories|TGen North|French|USA

>Spike|hCoV-19/USA/CA-CZB-14754/2020|2020-11-02|EPI\_ISL\_738947|Original|hCoV-19^^California|Human|Humboldt County Public Health Laboratory|Chan-Zuckerberg Biohub|Kamm|USA

>Spike|hCoV-19/USA/NY-NYCPHL-000549/2020|2020-03-23|EPI\_ISL\_632009|Original|hCoV-19^^New York|Human|Jamaica Hospital Medical Center|New York City Public Health Laboratory|Wang|USA

>Spike|hCoV-19/England/QEUA-AAAC64/2020|2020-10-21|EPI\_ISL\_652736|Original|hCoV-19^^England|Human|Oxford Viromics|COVID-19 Genomics UK (COG-UK) Consortium|Golubchik|United Kingdom

>Spike|hCoV-19/England/QEUA-B69C06/2020|2020-11-11|EPI\_ISL\_655092|Original|hCoV-19^^England|Human|Lighthouse Lab in Glasgow|Wellcome Sanger Institute for the COVID-19 Genomics UK (COG-UK) Consortium|Davies|United Kingdom

>Spike|hCoV-19/Canada/ON-S2031/2020|2020-12-21|EPI\_ISL\_755812|Original|hCoV-19^^Ontario|Human|Toronto Invasive Bacterial Diseases Network|McMaster University|McArthur|Canada

>Spike|hCoV-19/England/MILK-C7B769/2020|2020-12-01|EPI\_ISL\_757014|Original|hCoV-19^^England|Human|Lighthouse Lab in Milton Keynes|Wellcome Sanger Institute for the COVID-19 Genomics UK (COG-UK) Consortium|Davies|United Kingdom

>Spike|hCoV-19/Canada/ON-PHL-5710/2020|2020-03-00|EPI\_ISL\_418338|Original|hCoV-19^^Ontario|Human|Public Health Ontario Laboratories|Public Health Ontario Laboratories|Eshaghi|Canada

>Spike|hCoV-19/Denmark/DCGC-3121/2020|2020-08-31|EPI\_ISL\_615938|Original|hCoV-19^^Sjaelland|Human|Department of Virus and Microbiological Special Diagnostics|Albertsen lab|Michaelsen|Denmark

>Spike|hCoV-19/England/CAMC-9EC511/2020|2020-09-24|EPI\_ISL\_580301|Original|hCoV-19^^England|Human|Lighthouse Lab in Cambridge|Wellcome Sanger Institute for the COVID-19 Genomics UK (COG-UK) consortium|Davies|United Kingdom

>Spike|hCoV-19/India/KA-nimh-4377/2020|2020-04-24|EPI\_ISL\_486396|Original|hCoV-19^^Karnataka|Human|Jayanagar General Hospital to Victoria Hospital|Department of Neurovirology|Pattabiraman|India

>Spike|hCoV-19/India/WB-S5/2020|2020-03-28|EPI\_ISL\_430465|Original|hCoV-19^^West Bengal|Human|ICMR-National Institute of Cholera and Enteric Diseases|National Institute of Biomedical Genomics|Maitra|India

>Spike|hCoV-19/South Africa/LR00060/2020|2020-07-10|EPI\_ISL\_515180|Original|hCoV-19^^Gauteng|Human|National Institute for Communicable Diseases of the National Health Laboratory Service|National Institute for Communicable Diseases of the National Health Laboratory Service|Allam|South Africa

>Spike|hCoV-19/England/ALDP-94A362/2020|2020-06-11|EPI\_ISL\_556370|Original|hCoV-19^^England|Human|Lighthouse Lab in Alderley Park|Wellcome Sanger Institute for the COVID-19 Genomics UK (COG-UK) consortium|Davies|United Kingdom

>Spike|hCoV-19/Australia/NSW161/2020|2020-03-24|EPI\_ISL\_427788|Original|hCoV-19^^New South Wales|Human|Centre for Infectious Diseases and Microbiology Public Health|NSW Health Pathology - Institute of Clinical Pathology and Medical Research; Westmead Hospital; University of Sydney|Gall|Australia

>Spike|hCoV-19/Wales/PHWC-4A4F0D/2020|2020-12-09|EPI\_ISL\_764192|Original|hCoV-19^^Wales|Human|Wales Specialist Virology Centre Sequencing lab|COVID-19 Genomics UK (COG-UK) Consortium|Moore|United Kingdom

>Spike|hCoV-19/Uganda/UG103/2020|2020-07-04|EPI\_ISL\_738010|Original|hCoV-19^^Uganda|Human|Uganda Central Public Health Lab and Uganda Virus Research Institute|MRC/UVRI & LSHTM Uganda Research Unit|Cotten|Uganda

>Spike|hCoV-19/Zimbabwe/ZW-25BY/2020|2020-04-01|EPI\_ISL\_644787|Original|hCoV-19^^Zimbabwe|Human|National Microbiology Reference Laboratory|Quadram Institute Bioscience|Alikhan|Zimbabwe

>Spike|hCoV-19/Mexico/CMX-INMEGEN-10/2020|2020-08-01|EPI\_ISL\_522940|Original|hCoV-19^^Mexico City|Human|Instituto Nacional de Medicina Genómica|Instituto Nacional de Medicina Genómica|Hidalgo|Mexico

>Spike|hCoV-19/France/ARA-114869/2020|2020-12-02|EPI\_ISL\_745354|Original|hCoV-19^^Auvergne-Rhône-Alpes|Human|CNR Virus des Infections Respiratoires - France SUD|CNR Virus des Infections Respiratoires - France SUD|Bal|France

>Spike|hCoV-19/England/ALDP-9ED3DA/2020|2020-05-05|EPI\_ISL\_589322|Original|hCoV-19^^England|Human|Lighthouse Lab in Alderley Park|Wellcome Sanger Institute for the COVID-19 Genomics UK (COG-UK) consortium|Davies|United Kingdom

>Spike|hCoV-19/USA/UT-UPHL-2012361831/2020|2020-08-09|EPI\_ISL\_745651|Original|hCoV-19^^Utah|Human|Ginkgo Bioworks Clinical Laboratory|Utah Public Health Laboratory|Young|USA

>Spike|hCoV-19/Scotland/EDB3507/2020|2020-04-13|EPI\_ISL\_487692|Original|hCoV-19^^Scotland|Human|Virology Department|Wellcome Sanger Institute for the COVID-19 Genomics UK (COG-UK) consortium|Davies|United Kingdom

>Spike|hCoV-19/USA/CA-QDX-2142/2020|2020-03-18|EPI\_ISL\_604427|Original|hCoV-19^^California|Human|Quest Diagnostics|Quest Diagnostics|Kagan|USA

>Spike|hCoV-19/England/LOND-D4CD4/2020|2020-04-15|EPI\_ISL\_449676|Original|hCoV-19^^England|Human|University College London|COVID-19 Genomics UK (COG-UK) Consortium|Roy|United Kingdom

>Spike|hCoV-19/England/QEUEH-B11B5B/2020|2020-11-02|EPI\_ISL\_642461|Original|hCoV-19^^England|Human|Lighthouse Lab in Glasgow|Wellcome Sanger Institute for the COVID-19 Genomics UK (COG-UK) Consortium|Davies|United Kingdom

>Spike|hCoV-19/England/BIRM-65027/2020|2020-09-29|EPI\_ISL\_594542|Original|hCoV-19^^England|Human|University of Birmingham|COVID-19 Genomics UK (COG-UK) Consortium|Loman|United Kingdom

>Spike|hCoV-19/England/QEUEH-9F3DD3/2020|2020-09-24|EPI\_ISL\_588480|Original|hCoV-19^^England|Human|Lighthouse Lab in Glasgow|Wellcome Sanger Institute for the COVID-19 Genomics UK (COG-UK) consortium|Davies|United Kingdom

>Spike|hCoV-19/England/ALDP-C3A1A4/2020|2020-12-09|EPI\_ISL\_731470|Original|hCoV-19^^England|Human|Lighthouse Lab in Alderley Park|Wellcome Sanger Institute for the COVID-19 Genomics UK (COG-UK) Consortium|Davies|United Kingdom

>Spike|hCoV-19/Australia/VIC9443/2020|2020-08-18|EPI\_ISL\_565555|Original|hCoV-19^^Victoria|Human|Microbiological Diagnostic Unit - Public Health Laboratory (MDU-PHL)|MDU-PHL|Schultz|Australia

>Spike|hCoV-19/England/LIVE-A5586/2020|2020-03-19|EPI\_ISL\_500127|Original|hCoV-19^^England|Human|Liverpool Clinical Laboratories|COVID-19 Genomics UK (COG-UK) Consortium|Haldenby|United Kingdom

>Spike|hCoV-19/England/MILK-8315D2/2020|2020-07-17|EPI\_ISL\_557237|Original|hCoV-19^^England|Human|Lighthouse Lab in Milton Keynes|Wellcome Sanger Institute for the COVID-19 Genomics UK (COG-UK) consortium|Davies|United Kingdom

>Spike|hCoV-19/England/MILK-9A56E4/2020|2020-09-04|EPI\_ISL\_550096|Original|hCoV-19^^England|Human|Lighthouse Lab in Milton Keynes|Wellcome Sanger Institute for the COVID-19 Genomics UK (COG-UK) consortium|Davies|United Kingdom

>Spike|hCoV-19/Scotland/QEUEH-9F949C/2020|2020-09-27|EPI\_ISL\_600922|Original|hCoV-19^^Scotland|Human|Lighthouse Lab in Glasgow|Wellcome Sanger Institute for the COVID-19 Genomics UK (COG-UK) consortium|Davies|United Kingdom

>Spike|hCoV-19/Wales/PHWC-47F105/2020|2020-10-16|EPI\_ISL\_612630|Original|hCoV-19^^Wales|Human|Wales Specialist Virology Centre Sequencing lab|COVID-19 Genomics UK (COG-UK) Consortium|Moore|United Kingdom

>Spike|hCoV-19/England/ALDP-5B0240/2020|2020-06-17|EPI\_ISL\_558651|Original|hCoV-19^^England|Human|Lighthouse Lab in Alderley Park|Wellcome Sanger Institute for the COVID-19 Genomics UK (COG-UK) consortium|Davies|United Kingdom

>Spike|hCoV-19/USA/UT-01679/2020|2020-04-13|EPI\_ISL\_454708|Original|hCoV-19^^Utah|Human|Utah Public Health Laboratory|Utah Public Health Laboratory|Young|USA

>Spike|hCoV-19/Denmark/DCGC-12560/2020|2020-11-16|EPI\_ISL\_682741|Original|hCoV-19^^Hovedstaden|Human|Department of Virus and Microbiological Special Diagnostics|Albertsen Lab|Michaelsen|Denmark

>Spike|hCoV-19/England/MILK-C62219/2020|2020-12-13|EPI\_ISL\_735781|Original|hCoV-19^^England|Human|Lighthouse Lab in Milton Keynes|Wellcome Sanger Institute for the COVID-19 Genomics UK (COG-UK) Consortium|Davies|United Kingdom

>Spike|hCoV-19/India/TG-CCMB-AC338/2020|2020-08-19|EPI\_ISL\_539737|Original|hCoV-19^^Telangana|Human|CSIR-Centre for Cellular and Molecular Biology|CSIR-Centre for Cellular and Molecular Biology|Mukherjee|India

>Spike|hCoV-19/England/QEUEH-B9E6DD/2020|2020-11-18|EPI\_ISL\_719927|Original|hCoV-19^^England|Human|Lighthouse Lab in Glasgow|Wellcome Sanger Institute for the COVID-19 Genomics UK (COG-UK) Consortium|Davies|United Kingdom

>Spike|hCoV-19/England/CAMC-B983EB/2020|2020-11-15|EPI\_ISL\_673756|Original|hCoV-19^^England|Human|Lighthouse Lab in Cambridge|Wellcome Sanger Institute for the COVID-19 Genomics UK (COG-UK) Consortium|Davies|United Kingdom

>Spike|hCoV-19/England/LOND-124D1E1/2020|2020-03-23|EPI\_ISL\_507066|Original|hCoV-19^^England|Human|University College London Hospital|COVID-19 Genomics UK (COG-UK) Consortium|Byott|United Kingdom

>Spike|hCoV-19/Wales/PHWC-48C8F1/2020|2020-11-07|EPI\_ISL\_725670|Original|hCoV-19^^Wales|Human|Originating lab|COVID-19 Genomics UK (COG-UK) Consortium|Moore|United Kingdom

>Spike|hCoV-19/Peru/LIM-INS-111/2020|2020-05-04|EPI\_ISL\_536509|Original|hCoV-19^^Lima|Human|Instituto Nacional de Salud|Laboratorio de Infecciones Respiratorias Agudas|Lopez|Peru

>Spike|hCoV-19/USA/CA-CDPH246/2020|2020-11-15|EPI\_ISL\_755003|Original|hCoV-19^^California|Human|California Department of Public Health|California Department of Public Health|Bell|USA

>Spike|hCoV-19/Denmark/DCGC-17480/2020|2020-12-14|EPI\_ISL\_751012|Original|hCoV-19^^Nordjylland|Human|Department of Virus and Microbiological Special Diagnostics|Albertsen Lab|Michaelsen|Denmark

>Spike|hCoV-19/England/20122071004/2020|2020-03-15|EPI\_ISL\_465762|Original|hCoV-19^^England|Human|Respiratory Virus Unit|Respiratory Virus Unit|Platt|United Kingdom

>Spike|hCoV-19/Wales/ALDP-C3911E/2020|2020-12-09|EPI\_ISL\_767264|Original|hCoV-19^^Wales|Human|Lighthouse Lab in Alderley Park|Wellcome Sanger Institute for the COVID-19 Genomics UK (COG-UK) Consortium|Davies|United Kingdom

>Spike|hCoV-19/Wales/PHWC-49487E/2020|2020-11-21|EPI\_ISL\_726178|Original|hCoV-19^^Wales|Human|Originating lab|COVID-19 Genomics UK (COG-UK) Consortium|Moore|United Kingdom

>Spike|hCoV-19/England/QEUA-A9FA59/2020|2020-10-20|EPI\_ISL\_665407|Original|hCoV-19^^England|Human|Northumbria University / South Tees Hospitals NHS Foundation Trust / North Cumbria Integrated Care NHS Foundation Trust / North Tees and Hartlepool NHS Foundation Trust / Newcastle Hospitals NHS Foundation Trust|COVID-19 Genomics UK (COG-UK) Consortium|Bashton|United Kingdom

>Spike|hCoV-19/England/ALDP-68B90C/2020|2020-07-02|EPI\_ISL\_558009|Original|hCoV-19^^England|Human|Lighthouse Lab in Alderley Park|Wellcome Sanger Institute for the COVID-19 Genomics UK (COG-UK) consortium|Davies|United Kingdom

>Spike|hCoV-19/England/CAMC-B374BE/2020|2020-11-05|EPI\_ISL\_645378|Original|hCoV-19^^England|Human|Lighthouse Lab in Cambridge|Wellcome Sanger Institute for the COVID-19 Genomics UK (COG-UK) Consortium|Davies|United Kingdom

>Spike|hCoV-19/South Korea/KCDC2587/2020|2020-06-28|EPI\_ISL\_514990|Original|hCoV-19^^South Korea|Human|Division of Viral Diseases|Division of Viral Diseases|Kim|South Korea

>Spike|hCoV-19/Bangladesh/JUST-GC40.86/2020|2020-06-11|EPI\_ISL\_475573|Original|hCoV-19^^Khulna|Human|Genome Center|Genome Center|Alam|Bangladesh

>Spike|hCoV-19/Denmark/DCGC-18260/2020|2020-12-14|EPI\_ISL\_749221|Original|hCoV-19^^Sjaelland|Human|Department of Virus and Microbiological Special Diagnostics|Albertsen Lab|Michaelsen|Denmark

>Spike|hCoV-19/Northern Ireland/QEUA-96DA64/2020|2020-08-20|EPI\_ISL\_530714|Original|hCoV-19^^Northern Ireland|Human|Lighthouse Lab in Glasgow|Wellcome Sanger Institute for the COVID-19 Genomics UK (COG-UK) consortium|Davies|United Kingdom

>Spike|hCoV-19/England/GSTT-265DACE/2020|2020-03-27|EPI\_ISL\_484061|Original|hCoV-19^^England|Human|Centre for Clinical Infection and Diagnostics Research and Genomics Innovation Unit|COVID-19 Genomics UK (COG-UK) Consortium|Awan|United Kingdom

>Spike|hCoV-19/USA/CA-CDPH205/2020|2020-11-12|EPI\_ISL\_754955|Original|hCoV-19^^California|Human|California Department of Public Health|California Department of Public Health|Bell|USA

>Spike|hCoV-19/USA/NY-NYCPHL-000481/2020|2020-05-06|EPI\_ISL\_631948|Original|hCoV-19^^New York|Human|St Barnabas Hospital|New York City Public Health Laboratory|Wang|USA

>Spike|hCoV-19/Australia/VIC2216/2020|2020-06-14|EPI\_ISL\_521956|Original|hCoV-19^^Victoria|Human|Victorian Infectious Diseases Reference Laboratory (VIDRL)|VIDRL and MDU-PHL|Schultz|Australia

>Spike|hCoV-19/England/MILK-C61EBC/2020|2020-12-13|EPI\_ISL\_735833|Original|hCoV-19^^England|Human|Lighthouse Lab in Milton Keynes|Wellcome Sanger Institute for the COVID-19 Genomics UK (COG-UK) Consortium|Davies|United Kingdom

>Spike|hCoV-19/Wales/PHWC-16D48C/2020|2020-06-01|EPI\_ISL\_574240|Original|hCoV-19^^Wales|Human|Wales Specialist Virology Centre Sequencing lab|COVID-19 Genomics UK (COG-UK) Consortium|Moore|United Kingdom

>Spike|hCoV-19/USA/WA-S2197/2020|2020-06-08|EPI\_ISL\_497625|Original|hCoV-19^^Washington|Human|Washington State Department of Health|Seattle Flu Study|Lee|USA

>Spike|hCoV-19/England/20138018204/2020|2020-03-27|EPI\_ISL\_423289|Original|hCoV-19^^England|Human|Respiratory Virus Unit|Respiratory Virus Unit|Platt|United Kingdom

>Spike|hCoV-19/Brazil/DF-891/2020|2020-03-22|EPI\_ISL\_427298|Original|hCoV-19^^Distrito Federal|Human|Instituto Oswaldo Cruz FIOCRUZ - Laboratory of Respiratory Viruses and Measles (LVRS)|Instituto Oswaldo Cruz FIOCRUZ - Laboratory of Respiratory Viruses and Measles (LVRS)|Silva|Brazil

>Spike|hCoV-19/Wales/PHWC-491BC3/2020|2020-11-10|EPI\_ISL\_706754|Original|hCoV-19^^Wales|Human|Originating lab|COVID-19 Genomics UK (COG-UK) Consortium|Moore|United Kingdom

>Spike|hCoV-19/Wales/PHWC-487762/2020|2020-10-30|EPI\_ISL\_639233|Original|hCoV-19^^Wales|Human|Wales Specialist Virology Centre Sequencing lab|COVID-19 Genomics UK (COG-UK) Consortium|Moore|United Kingdom

>Spike|hCoV-19/USA/TX-HMH-7480/2020|2020-06-30|EPI\_ISL\_546791|Original|hCoV-19^^Texas|Human|Houston Methodist Hospital|Houston Methodist Hospital|Long|USA

>Spike|hCoV-19/Denmark/DCGC-15582/2020|2020-11-23|EPI\_ISL\_713907|Original|hCoV-19^^Nordjylland|Human|Department of Virus and Microbiological Special Diagnostics|Albertsen Lab|Michaelsen|Denmark

>Spike|hCoV-19/USA/TX-HMH-MCoV-18713/2020|2020-11-22|EPI\_ISL\_785061|Original|hCoV-19^^Texas|Human|Houston Methodist Hospital|Houston Methodist Hospital|Long|USA

>Spike|hCoV-19/India/MH-ACTREC-271/2020|2020-07-10|EPI\_ISL\_699923|Original|hCoV-19^^Maharashtra|Human|Hematopathology Laboratory|Hematopathology Laboratory|Patkar|India

>Spike|hCoV-19/Japan/PG-8503/2020|2020-09-00|EPI\_ISL\_687602|Original|hCoV-19^^Japan|Human|Pathogen Genomics Center|Pathogen Genomics Center|Sekizuka|Japan

>Spike|hCoV-19/England/MILK-995711/2020|2020-08-18|EPI\_ISL\_551721|Original|hCoV-19^^England|Human|Lighthouse Lab in Milton Keynes|Wellcome Sanger Institute for the COVID-19 Genomics UK (COG-UK) consortium|Davies|United Kingdom

>Spike|hCoV-19/USA/TX-HMH-706/2020|2020-04-18|EPI\_ISL\_546471|Original|hCoV-19^^Texas|Human|Houston Methodist Hospital|Houston Methodist Hospital|Long|USA

>Spike|hCoV-19/Netherlands/OV-RIVM-20496/2020|2020-11-21|EPI\_ISL\_728711|Original|hCoV-19^^Overijssel|Human|Dutch COVID-19 response team|National Institute for Public Health and the Environment (RIVM)|Meijer|Netherlands

>Spike|hCoV-19/Wales/MILK-A0657A/2020|2020-10-01|EPI\_ISL\_600126|Original|hCoV-19^^Wales|Human|Lighthouse Lab in Milton Keynes|Wellcome Sanger Institute for the COVID-19 Genomics UK (COG-UK) consortium|Davies|United Kingdom

>Spike|hCoV-19/Denmark/DCGC-16576/2020|2020-11-16|EPI\_ISL\_714846|Original|hCoV-19^^Midtjylland|Human|Department of Virus and Microbiological Special Diagnostics|Albertsen Lab|Michaelsen|Denmark

>Spike|hCoV-19/USA/TX-HMH-609/2020|2020-04-11|EPI\_ISL\_547228|Original|hCoV-19^^Texas|Human|Houston Methodist Hospital|Houston Methodist Hospital|Long|USA

>Spike|hCoV-19/England/CAMB-77B8B/2020|2020-04-01|EPI\_ISL\_439453|Original|hCoV-19^^England|Human|Department of Pathology|Wellcome Sanger Institute for the COVID-19 Genomics UK (COG-UK) consortium|Amato|United Kingdom

>Spike|hCoV-19/Hangzhou/HZCDC6228/2020|2020-03-07|EPI\_ISL\_482577|Original|hCoV-19^^Zhejiang|Human|Hangzhou Center for Diseases Control and Prevention|Hangzhou Center for Diseases Control and Prevention|Li|China

>Spike|hCoV-19/Peru/LAM-INS-071/2020|2020-03-16|EPI\_ISL\_523954|Original|hCoV-19^^Lambayeque|Human|Laboratorio de Referencia Nacional de Virus Respiratorio. Centro Nacional de Salud Publica. Instituto Nacional de Salud Peru.|Laboratorio de Referencia Nacional de Biotecnolog\u00eda y Biolog\u00eda Molecular. Centro Nacional de Salud Publica. Instituto Nacional de Salud Peru.|Padilla Rojas|Peru

>Spike|hCoV-19/USA/TX-HMH-MCoV-18217/2020|2020-11-11|EPI\_ISL\_784565|Original|hCoV-19^^Texas|Human|Houston Methodist Hospital|Houston Methodist Hospital|Long|USA

>Spike|hCoV-19/France/PAC-IHU-1346/2020|2020-08-19|EPI\_ISL\_569130|Original|hCoV-19^^Provence-Alpes-C\u00f4te-d\u0027Azur|Human|MEPHI|MEPHI|Levasseur|France

>Spike|hCoV-19/Belgium/HP-0319108/2020|2020-03-19|EPI\_ISL\_420364|Original|hCoV-19^^Anderlecht|Human|KU Leuven|KU Leuven|Maes|Belgium

>Spike|hCoV-19/England/PORT-2D1455/2020|2020-00-00|EPI\_ISL\_512389|Original|hCoV-19^^England|Human|Centre for Enzyme Innovation|COVID-19 Genomics UK (COG-UK) Consortium|Robson|United Kingdom

>Spike|hCoV-19/England/QEUA-AE2AEE/2020|2020-10-26|EPI\_ISL\_633645|Original|hCoV-19^^England|Human|Lighthouse Lab in Glasgow|Wellcome Sanger Institute for the COVID-19 Genomics UK (COG-UK) consortium|Davies|United Kingdom

>Spike|hCoV-19/England/CAMB-78B11/2020|2020-04-03|EPI\_ISL\_441808|Original|hCoV-19^^England|Human|Department of Pathology|Wellcome Sanger Institute for the COVID-19 Genomics UK (COG-UK) consortium|Amato|United Kingdom

>Spike|hCoV-19/USA/MI-MDHHS-SC21671/2020|2020-07-07|EPI\_ISL\_516398|Original|hCoV-19^^Michigan|Human|Michigan Department of Health and Human Services|Michigan Department of Health and Human Services|Blankenship|USA

>Spike|hCoV-19/USA/MA-MGH-03263/2020|2020-10-19|EPI\_ISL\_765763|Original|hCoV-19^^Massachusetts|Human|Massachusetts General Hospital|Infectious Disease Program|Park|USA

>Spike|hCoV-19/England/ALDP-A6927E/2020|2020-10-12|EPI\_ISL\_609105|Original|hCoV-19^^England|Human|Lighthouse Lab in Alderley Park|Wellcome Sanger Institute for the COVID-19 Genomics UK (COG-UK) consortium|Davies|United Kingdom

>Spike|hCoV-19/Bermuda/204990921/2020|2020-11-08|EPI\_ISL\_780391|Original|hCoV-19^^Bermuda|Human|Bermuda Government Molecular Diagnostics Laboratory (MDL)|Respiratory Virus Unit|Platt|Bermuda

>Spike|hCoV-19/England/NORT-281A8F/2020|2020-03-22|EPI\_ISL\_488759|Original|hCoV-19^^England|Human|NU-OMICS DNA Sequencing research facility|Wellcome Sanger Institute for the COVID-19 Genomics UK (COG-UK) consortium|Davies|United Kingdom

>Spike|hCoV-19/USA/TX-HMH-4249/2020|2020-06-20|EPI\_ISL\_543461|Original|hCoV-19^^Texas|Human|Houston Methodist Hospital|Houston Methodist Hospital|Long|USA

>Spike|hCoV-19/Australia/VIC3097/2020|2020-07-04|EPI\_ISL\_520804|Original|hCoV-19^^Victoria|Human|Victorian Infectious Diseases Reference Laboratory (VIDRL)|VIDRL and MDU-PHL|Schultz|Australia

>Spike|hCoV-19/England/MILK-95862C/2020|2020-06-11|EPI\_ISL\_554731|Original|hCoV-19^^England|Human|Lighthouse Lab in Milton Keynes|Wellcome Sanger Institute for the COVID-19 Genomics UK (COG-UK) consortium|Davies|United Kingdom

>Spike|hCoV-19/England/ALDP-B5D26D/2020|2020-11-09|EPI\_ISL\_678878|Original|hCoV-19^^England|Human|Department of Pathology|COVID-19 Genomics UK (COG-UK) Consortium|Goodfellow|United Kingdom

>Spike|hCoV-19/England/MILK-99E38D/2020|2020-08-31|EPI\_ISL\_550720|Original|hCoV-19^^England|Human|Lighthouse Lab in Milton Keynes|Wellcome Sanger Institute for the COVID-19 Genomics UK (COG-UK) consortium|Davies|United Kingdom

>Spike|hCoV-19/England/ALDP-B47309/2020|2020-11-07|EPI\_ISL\_656208|Original|hCoV-19^^England|Human|Lighthouse Lab in Alderley Park|Wellcome Sanger Institute for the COVID-19 Genomics UK (COG-UK) Consortium|Davies|United Kingdom

>Spike|hCoV-19/England/ALDP-A6C4C0/2020|2020-10-14|EPI\_ISL\_608266|Original|hCoV-19^^England|Human|Lighthouse Lab in Alderley Park|Wellcome Sanger Institute for the COVID-19 Genomics UK (COG-UK) consortium|Davies|United Kingdom

>Spike|hCoV-19/England/MILK-BAB8D7/2020|2020-11-17|EPI\_ISL\_720451|Original|hCoV-19^^England|Human|Lighthouse Lab in Milton Keynes|Wellcome Sanger Institute for the COVID-19 Genomics UK (COG-UK) Consortium|Davies|United Kingdom

>Spike|hCoV-19/Northern Ireland/NIRE-234E52/2020|2020-10-23|EPI\_ISL\_764400|Original|hCoV-19^^Northern Ireland|Human|Regional Virus Laboratory|COVID-19 Genomics UK (COG-UK) Consortium|Fairley|United Kingdom

>Spike|hCoV-19/England/BIRM-5E373/2020|2020-04-14|EPI\_ISL\_444290|Original|hCoV-19^^England|Human|University of Birmingham|COVID-19 Genomics UK (COG-UK) Consortium|Loman|United Kingdom

>Spike|hCoV-19/Denmark/DCGC-5634/2020|2020-09-28|EPI\_ISL\_619921|Original|hCoV-19^^Hovedstaden|Human|Department of Virus and Microbiological Special Diagnostics|Albertsen lab|Michaelsen|Denmark

>Spike|hCoV-19/Australia/VIC11295/2020|2020-07-18|EPI\_ISL\_563321|Original|hCoV-19^^Victoria|Human|Microbiological Diagnostic Unit - Public Health Laboratory (MDU-PHL)|MDU-PHL|Schultz|Australia

>Spike|hCoV-19/Slovenia/V0-282/2020|2020-03-27|EPI\_ISL\_635282|Original|hCoV-19^^Slovenia|Human|Institute of Microbiology and Immunology|Institute of Microbiology and Immunology|Zakotnik|Slovenia

>Spike|hCoV-19/England/LIVE-1D2534/2020|2020-05-11|EPI\_ISL\_572769|Original|hCoV-19^^England|Human|Liverpool Clinical Laboratories|COVID-19 Genomics UK (COG-UK) Consortium|Haldenby|United Kingdom

>Spike|hCoV-19/England/C200044492/2020|2020-11-06|EPI\_ISL\_666766|Original|hCoV-19^^England|Human|Respiratory Virus Unit|COVID-19 Genomics UK (COG-UK) Consortium|Platt|United Kingdom

>Spike|hCoV-19/USA/CA-IGI-0397/2020|2020-07-15|EPI\_ISL\_754884|Original|hCoV-19^^California|Human|Innovative Genomics Institute|Innovative Genomics Institute|Wyman|USA

>Spike|hCoV-19/Belgium/reg-a-09221001/2020|2020-09-22|EPI\_ISL\_735008|Original|hCoV-19^^Hoeilaart|Human|UZ Leuven|KU Leuven|Maes|Belgium

>Spike|hCoV-19/England/ALDP-BB4D45/2020|2020-11-19|EPI\_ISL\_702427|Original|hCoV-19^^England|Human|Lighthouse Lab in Alderley Park|Wellcome Sanger Institute for the COVID-19 Genomics UK (COG-UK) Consortium|Davies|United Kingdom

>Spike|hCoV-19/USA/MI-MDHHS-SC20384/2020|2020-03-24|EPI\_ISL\_450595|Original|hCoV-19^^Michigan|Human|Michigan Department of Health and Human Services|Michigan Department of Health and Human Services|Blankenship|USA

>Spike|hCoV-19/Canada/QC-LSPQ-L00241435/2020|2020-03-27|EPI\_ISL\_536280|Original|hCoV-19^^Quebec|Human|H\u00f4pital Charles-LeMoine|Laboratoire de sant\u00e9 publique du Qu\u00e9bec|Moreira|Canada

>Spike|hCoV-19/England/MILK-AB9BDE/2020|2020-10-22|EPI\_ISL\_623839|Original|hCoV-19^^England|Human|Lighthouse Lab in Milton Keynes|Wellcome Sanger Institute for the COVID-19 Genomics UK (COG-UK) consortium|Davies|United Kingdom

>Spike|hCoV-19/Japan/PG-4251/2020|2020-07-00|EPI\_ISL\_692481|Original|hCoV-19^^Japan|Human|Fukuoka Institute of Health and Environmental Sciences|Pathogen Genomics Center|Sekizuka|Japan

>Spike|hCoV-19/Netherlands/un-EMC-780/2020|2020-06-06|EPI\_ISL\_577876|Original|hCoV-19^^Netherlands|Human|Dutch COVID-19 response team|Erasmus Medical Center|Oude Munnink|Netherlands

>Spike|hCoV-19/USA/TX-HMH-454/2020|2020-04-03|EPI\_ISL\_543703|Original|hCoV-19^^Texas|Human|Houston Methodist Hospital|Houston Methodist Hospital|Long|USA

>Spike|hCoV-19/Scotland/GCVR-1721F6/2020|2020-03-30|EPI\_ISL\_469932|Original|hCoV-19^^Scotland|Human|NHSGGC West of Scotland Specialist Virology Centre / MRC-University of Glasgow Centre for Virus Research|Wellcome Sanger Institute for the COVID-19 Genomics UK (COG-UK) consortium|Davies|United Kingdom

>Spike|hCoV-19/Wales/CAMC-9B1E1A/2020|2020-09-04|EPI\_ISL\_573867|Original|hCoV-19^^Wales|Human|Oxford Viromics|COVID-19 Genomics UK (COG-UK) Consortium|Golubchik|United Kingdom

>Spike|hCoV-19/USA/MI-QDX-317/2020|2020-03-22|EPI\_ISL\_571061|Original|hCoV-19^^Michigan|Human|Quest Diagnostics|Quest Diagnostics|Kagan|USA

>Spike|hCoV-19/England/ALDP-B46AF6/2020|2020-11-06|EPI\_ISL\_656155|Original|hCoV-19^^England|Human|Lighthouse Lab in Alderley Park|Wellcome Sanger Institute for the COVID-19 Genomics UK (COG-UK) Consortium|Davies|United Kingdom

>Spike|hCoV-19/DRC/11057/2020|2020-05-24|EPI\_ISL\_527528|Original|hCoV-19^^Kinshasa|Human|Viral Respiratory Lab|Pathogen Sequencing Lab|Lokilo|Democratic Republic of the Congo

>Spike|hCoV-19/DRC/4681/2020|2020-04-30|EPI\_ISL\_514116|Original|hCoV-19^^Kinshasa|Human|Viral Respiratory Lab|Pathogen Sequencing Lab|Lokilo|Democratic Republic of the Congo

>Spike|hCoV-19/England/QEUA-A1E1B7/2020|2020-10-01|EPI\_ISL\_587432|Original|hCoV-19^^England|Human|Lighthouse Lab in Glasgow|Wellcome Sanger Institute for the COVID-19 Genomics UK (COG-UK) consortium|Davies|United Kingdom

>Spike|hCoV-19/USA/AZ-TG668353/2020|2020-05-13|EPI\_ISL\_696275|Original|hCoV-19^^Arizona|Human|Sonora Quest Laboratories|TGen North|French|USA

>Spike|hCoV-19/Scotland/CVR3301/2020|2020-04-30|EPI\_ISL\_493857|Original|hCoV-19^^Scotland|Human|West of Scotland Specialist Virology Centre|COVID-19 Genomics UK (COG-UK) Consortium|Robertson|United Kingdom

>Spike|hCoV-19/USA/TX-HMH-MCoV-9868/2020|2020-07-06|EPI\_ISL\_780313|Original|hCoV-19^^Texas|Human|Houston Methodist Hospital|Houston Methodist Hospital|Long|USA

>Spike|hCoV-19/Denmark/DCGC-21507/2020|2020-12-21|EPI\_ISL\_758200|Original|hCoV-19^^Hovedstaden|Human|Department of Virus and Microbiological Special Diagnostics|Albertsen Lab|Michaelsen|Denmark

>Spike|hCoV-19/Denmark/DCGC-18629/2020|2020-12-07|EPI\_ISL\_750091|Original|hCoV-19^^Hovedstaden|Human|Department of Virus and Microbiological Special Diagnostics|Albertsen Lab|Michaelsen|Denmark

>Spike|hCoV-19/Wales/PHWC-48E859/2020|2020-11-13|EPI\_ISL\_680920|Original|hCoV-19^^Wales|Human|Wales Specialist Virology Centre Sequencing lab|COVID-19 Genomics UK (COG-UK) Consortium|Moore|United Kingdom

>Spike|hCoV-19/USA/AZ-TG501912/2020|2020-07-15|EPI\_ISL\_695276|Original|hCoV-19^^Arizona|Human|TGen North|TGen North|French|USA

>Spike|hCoV-19/England/LEED-2A8F1A/2020|2020-04-06|EPI\_ISL\_539150|Original|hCoV-19^^England|Human|Leeds Teaching Hospitals NHS Trust and Public Health England|Wellcome Sanger Institute for the COVID-19 Genomics UK (COG-UK) Consortium|Davies|United Kingdom

>Spike|hCoV-19/England/ALDP-AA4C2E/2020|2020-10-21|EPI\_ISL\_624221|Original|hCoV-19^^England|Human|Lighthouse Lab in Alderley Park|Wellcome Sanger Institute for the COVID-19 Genomics UK (COG-UK) consortium|Davies|United Kingdom

>Spike|hCoV-19/Australia/VIC3404/2020|2020-07-07|EPI\_ISL\_521083|Original|hCoV-19^^Victoria|Human|Microbiological Diagnostic Unit - Public Health Laboratory (MDU-PHL)|MDU-PHL|Schultz|Australia

>Spike|hCoV-19/Canada/QC-LSPQ-L00229319/2020|2020-03-20|EPI\_ISL\_535889|Original|hCoV-19^^Quebec|Human|H\u00f4pital de Saint-Eustache|Laboratoire de sant\u00e9 publique du Qu\u00e9bec|Moreira|Canada

>Spike|hCoV-19/England/LIVE-DC2D7F/2020|2020-11-25|EPI\_ISL\_703695|Original|hCoV-19^^England|Human|Liverpool Clinical Laboratories|COVID-19 Genomics UK (COG-UK) Consortium|Haldenby|United Kingdom

>Spike|hCoV-19/England/ALDP-9CD428/2020|2020-09-16|EPI\_ISL\_566262|Original|hCoV-19^^England|Human|Lighthouse Lab in Alderley Park|Wellcome Sanger Institute for the COVID-19 Genomics UK (COG-UK) consortium|Davies|United Kingdom

>Spike|hCoV-19/Sweden/20-22147/2020|2020-06-26|EPI\_ISL\_623080|Original|hCoV-19^^Skane|Human|Klinisk mikrobiologi|The Public Health Agency of Sweden|Svartstr\u00f6m|Sweden

>Spike|hCoV-19/Austria/CeMM0756/2020|2020-04-23|EPI\_ISL\_583690|Original|hCoV-19^^Austria|Human|Austrian Agency for Health and Food Safety (AGES)|Bergthaler laboratory|Bergthaler|Austria

>Spike|hCoV-19/England/ALDP-B76A66/2020|2020-11-12|EPI\_ISL\_723800|Original|hCoV-19^^England|Human|Oxford Viromics|COVID-19 Genomics UK (COG-UK) Consortium|Golubchik|United Kingdom

>Spike|hCoV-19/USA/CA-ALSR-1953/2020|2020-06-25|EPI\_ISL\_512258|Original|hCoV-19^^California|Human|San Diego County Public Health Laboratory|Andersen lab at Scripps Research|Gangavarapu|USA

>Spike|hCoV-19/Wales/PHWC-48F31B/2020|2020-11-08|EPI\_ISL\_681076|Original|hCoV-19^^Wales|Human|Wales Specialist Virology Centre Sequencing lab|COVID-19 Genomics UK (COG-UK) Consortium|Moore|United Kingdom

>Spike|hCoV-19/England/ALDP-BB55A6/2020|2020-11-21|EPI\_ISL\_703070|Original|hCoV-19^^England|Human|Lighthouse Lab in Alderley Park|Wellcome Sanger Institute for the COVID-19 Genomics UK (COG-UK) Consortium|Davies|United Kingdom



>Spike|hCoV-19/Denmark/DCGC-4995/2020|2020-09-14|EPI\_ISL\_621789|Original|hCoV-19^^Hovedstaden|Human|Department of Virus and Microbiological Special Diagnostics|Albertsen Lab|Michaelsen|Denmark

>Spike|hCoV-19/Australia/VIC2835/2020|2020-07-04|EPI\_ISL\_521666|Original|hCoV-19^^Victoria|Human|Microbiological Diagnostic Unit - Public Health Laboratory (MDU-PHL)|MDU-PHL|Schultz|Australia

>Spike|hCoV-19/Northern Ireland/QEUA-96322A/2020|2020-08-11|EPI\_ISL\_531797|Original|hCoV-19^^Northern Ireland|Human|Lighthouse Lab in Glasgow|Wellcome Sanger Institute for the COVID-19 Genomics UK (COG-UK) consortium|Davies|United Kingdom

>Spike|hCoV-19/Denmark/DCGC-9222/2020|2020-11-16|EPI\_ISL\_668858|Original|hCoV-19^^Nordjylland|Human|Department of Virus and Microbiological Special Diagnostics|Albertsen Lab|Michaelsen|Denmark

>Spike|hCoV-19/USA/MI-UM-10036464855/2020|2020-10-15|EPI\_ISL\_628818|Original|hCoV-19^^Michigan|Human|University of Michigan Clinical Microbiology Laboratory|Lauring Lab|Valesano|USA

>Spike|hCoV-19/Denmark/DCGC-14101/2020|2020-11-30|EPI\_ISL\_711568|Original|hCoV-19^^Midtjylland|Human|Department of Virus and Microbiological Special Diagnostics|Albertsen Lab|Michaelsen|Denmark

>Spike|hCoV-19/England/205120475/2020|2020-12-11|EPI\_ISL\_766107|Original|hCoV-19^^England|Human|Respiratory Virus Unit|COVID-19 Genomics UK (COG-UK) Consortium|Platt|United Kingdom

>Spike|hCoV-19/England/CAMC-C70D53/2020|2020-12-16|EPI\_ISL\_768932|Original|hCoV-19^^England|Human|Lighthouse Lab in Cambridge|Wellcome Sanger Institute for the COVID-19 Genomics UK (COG-UK) Consortium|Davies|United Kingdom

>Spike|hCoV-19/England/CAMC-AAFD4E/2020|2020-10-21|EPI\_ISL\_623360|Original|hCoV-19^^England|Human|Lighthouse Lab in Cambridge|Wellcome Sanger Institute for the COVID-19 Genomics UK (COG-UK) consortium|Davies|United Kingdom

>Spike|hCoV-19/England/MILK-ACCD2D/2020|2020-10-21|EPI\_ISL\_630021|Original|hCoV-19^^England|Human|Lighthouse Lab in Milton Keynes|Wellcome Sanger Institute for the COVID-19 Genomics UK (COG-UK) consortium|Davies|United Kingdom

>Spike|hCoV-19/USA/TX-DSHS-1507/2020|2020-06-22|EPI\_ISL\_683422|Original|hCoV-19^^Texas|Human|Texas Department of State Health Services|Texas Department of State Health Services|Rahman|USA

>Spike|hCoV-19/Denmark/DCGC-22483/2020|2020-12-14|EPI\_ISL\_757468|Original|hCoV-19^^Hovedstaden|Human|Department of Virus and Microbiological Special Diagnostics|Albertsen Lab|Michaelsen|Denmark

>Spike|hCoV-19/Scotland/EDB3919/2020|2020-05-02|EPI\_ISL\_439367|Original|hCoV-19^^Scotland|Human|Virology Department|COVID-19 Genomics UK (COG-UK) Consortium|Williams|United Kingdom

>Spike|hCoV-19/USA/CA-CHLA-PLM02129348/2020|2020-11-30|EPI\_ISL\_753479|Original|hCoV-19^^California|Human|Clinical virology Laboratory|Center for Personalized Medicine|Dien Bard|USA

>Spike|hCoV-19/Australia/VIC13492/2020|2020-08-03|EPI\_ISL\_592265|Original|hCoV-19^^Victoria|Human|Microbiological Diagnostic Unit - Public Health Laboratory (MDU-PHL)|MDU-PHL|Schultz|Australia

>Spike|hCoV-19/USA/WI-WSLH-200189/2020|2020-04-08|EPI\_ISL\_578414|Original|hCoV-19^^Wisconsin|Human|Wisconsin State Laboratory of Hygiene Communicable Disease Division|Wisconsin State Laboratory of Hygiene Communicable Disease Division|Florek|USA

>Spike|hCoV-19/Scotland/QEUA-B319B5/2020|2020-11-04|EPI\_ISL\_676424|Original|hCoV-19^^Scotland|Human|Lighthouse Lab in Glasgow|Wellcome Sanger Institute for the COVID-19 Genomics UK (COG-UK) Consortium|Davies|United Kingdom

>Spike|hCoV-19/Denmark/DCGC-13175/2020|2020-11-30|EPI\_ISL\_712260|Original|hCoV-19^^Midtjylland|Human|Department of Virus and Microbiological Special Diagnostics|Albertsen Lab|Michaelsen|Denmark

>Spike|hCoV-19/Sweden/20-50244/2020|2020-03-08|EPI\_ISL\_455884|Original|hCoV-19^^Stockholm|Human|Karolinska Universitetslaboratoriet|The Public Health Agency of Sweden|Svartstr\u00f6m|Sweden

>Spike|hCoV-19/England/CAMC-B7AB23/2020|2020-11-13|EPI\_ISL\_741161|Original|hCoV-19^^England|Human|Oxford Viromics|COVID-19 Genomics UK (COG-UK) Consortium|Golubchik|United Kingdom

>Spike|hCoV-19/England/ALDP-A6D1B9/2020|2020-10-14|EPI\_ISL\_608335|Original|hCoV-19^^England|Human|Lighthouse Lab in Alderley Park|Wellcome Sanger Institute for the COVID-19 Genomics UK (COG-UK) consortium|Davies|United Kingdom

>Spike|hCoV-19/USA/UT-08635/2020|2020-05-07|EPI\_ISL\_524373|Original|hCoV-19^^Utah|Human|Utah Public Health Laboratory|Utah Public Health Laboratory|Young|USA

>Spike|hCoV-19/Scotland/EDB5503/2020|2020-04-26|EPI\_ISL\_487756|Original|hCoV-19^^Scotland|Human|Virology Department|Wellcome Sanger Institute for the COVID-19 Genomics UK (COG-UK) consortium|Davies|United Kingdom

>Spike|hCoV-19/USA/FL-BPHL-0705/2020|2020-03-27|EPI\_ISL\_509763|Original|hCoV-19^^Florida|Human|Florida Bureau of Public Health Laboratories|Florida Bureau of Public Health Laboratories|Blanton|USA

>Spike|hCoV-19/South Africa/KRISP-K004052/2020|2020-10-19|EPI\_ISL\_635031|Original|hCoV-19^^KwaZulu-Natal|Human|National Health Laboratory Service - Inkosi Albert Luthuli Central Hospital (NHLS-IALCH)|KRISP|de Oliveira|South Africa

>Spike|hCoV-19/England/SHEF-C02AC/2020|2020-03-28|EPI\_ISL\_420208|Original|hCoV-19^^England|Human|Virology Department|Department of Infection|de Silva|United Kingdom

>Spike|hCoV-19/England/BRIS-12BF4D/2020|2020-05-09|EPI\_ISL\_469433|Original|hCoV-19^^England|Human|PHE South West Regional Laboratory|Wellcome Sanger Institute for the COVID-19 Genomics UK (COG-UK) consortium|Davies|United Kingdom

>Spike|hCoV-19/Panama/341269/2020|2020-04-15|EPI\_ISL\_496914|Original|hCoV-19^^Guna Yala|Human|Gorgas Memorial Laboratory of Health Studies|Gorgas Memorial Laboratory of Health Studies|Martinez|Panama

>Spike|hCoV-19/USA/MI-MDHHS-SC22017/2020|2020-09-02|EPI\_ISL\_577577|Original|hCoV-19^^Michigan|Human|Michigan Department of Health and Human Services|Michigan Department of Health and Human Services|Jacob|USA

>Spike|hCoV-19/Bangladesh/BCSIR-NILMRC\_426/2020|2020-10-05|EPI\_ISL\_603247|Original|hCoV-19^^Dhaka|Human|National Institute of Laboratory Medicine and Referral Center|Genomic Research Lab|Khan|Bangladesh

>Spike|hCoV-19/Singapore/1167/2020|2020-04-08|EPI\_ISL\_648095|Original|hCoV-19^^Singapore|Human|Department of Laboratory Medicine|Department of Laboratory Medicine|Chen|Singapore

>Spike|hCoV-19/Canada/ON-PHL-20-02302/2020|2020-09-00|EPI\_ISL\_671565|Original|hCoV-19^^Ontario|Human|Public Health Ontario Laboratory|Public Health Ontario Laboratory|Guthrie|Canada

>Spike|hCoV-19/England/LOND-D5AF7/2020|2020-04-18|EPI\_ISL\_457299|Original|hCoV-19^^England|Human|University College London|COVID-19 Genomics UK (COG-UK) Consortium|Roy|United Kingdom

>Spike|hCoV-19/England/ALDP-9CB985/2020|2020-09-16|EPI\_ISL\_575560|Original|hCoV-19^^England|Human|Lighthouse Lab in Alderley Park|Wellcome Sanger Institute for the COVID-19 Genomics UK (COG-UK) consortium|Davies|United Kingdom

>Spike|hCoV-19/England/ALDP-CBF3CF/2020|2020-12-18|EPI\_ISL\_760759|Original|hCoV-19^^England|Human|Lighthouse Lab in Alderley Park|Wellcome Sanger Institute for the COVID-19 Genomics UK (COG-UK) Consortium|Davies|United Kingdom

>Spike|hCoV-19/Italy/LAZ-INMI-124/2020|2020-12-18|EPI\_ISL\_746831|Original|hCoV-19^^Lazio|Human|National Institute for Infectious Diseases|National Institute for Infectious Diseases|Gruber|Italy

>Spike|hCoV-19/England/LOND-DAD71/2020|2020-11-03|EPI\_ISL\_724708|Original|hCoV-19^^England|Human|University College London|COVID-19 Genomics UK (COG-UK) Consortium|Roy|United Kingdom

>Spike|hCoV-19/Switzerland/BS-ETHZ-330433/2020|2020-10-18|EPI\_ISL\_614906|Original|hCoV-19^^Basel-Stadt|Human|Viollier AG|Department of Biosystems Science and Engineering|Nadeau|Switzerland

>Spike|hCoV-19/France/OCC-SC545/2020|2020-04-02|EPI\_ISL\_645201|Original|hCoV-19^^Occitanie|Human|CHU N\u00eemes|CNR Virus des Infections Respiratoires - France SUD|Bal|France

>Spike|hCoV-19/England/ALDP-A2E0F3/2020|2020-10-06|EPI\_ISL\_586874|Original|hCoV-19^^England|Human|Lighthouse Lab in Alderley Park|Wellcome Sanger Institute for the COVID-19 Genomics UK (COG-UK) consortium|Davies|United Kingdom

>Spike|hCoV-19/England/MILK-978741/2020|2020-07-31|EPI\_ISL\_550457|Original|hCoV-19^^England|Human|Lighthouse Lab in Milton Keynes|Wellcome Sanger Institute for the COVID-19 Genomics UK (COG-UK) consortium|Davies|United Kingdom

>Spike|hCoV-19/Australia/NSW1351/2020|2020-12-28|EPI\_ISL\_767917|Original|hCoV-19^^New South Wales|Human|Australian Clinical Labs|NSW Health Pathology - Institute of Clinical Pathology and Medical Research; Westmead Hospital; University of Sydney|Gall|Australia

>Spike|hCoV-19/USA/WI-GMF-15627/2020|2020-08-16|EPI\_ISL\_547707|Original|hCoV-19^^Wisconsin|Human|Gundersen Molecular Diagnostics Laboratory|Kabara Cancer Research Institute|Kenny|USA

>Spike|hCoV-19/USA/TX-DSHS-0091/2020|2020-05-24|EPI\_ISL\_522375|Original|hCoV-19^^Texas|Human|Texas Department of State Health Services|Texas Department of State Health Services|Rahman|USA

>Spike|hCoV-19/England/CAMC-B0A5C0/2020|2020-10-29|EPI\_ISL\_673077|Original|hCoV-19^^England|Human|Lighthouse Lab in Cambridge|Wellcome Sanger Institute for the COVID-19 Genomics UK (COG-UK) Consortium|Davies|United Kingdom

>Spike|hCoV-19/Spain/PV-IBV-001504/2020|2020-03-19|EPI\_ISL\_467112|Original|hCoV-19^^Basque Country|Human|Hospital Universitario Araba. Vitoria-Gasteiz|SeqCOVID-SPAIN consortium|IBV (CSIC)|Comas|Spain

>Spike|hCoV-19/England/20142010304/2020|2020-03-29|EPI\_ISL\_465914|Original|hCoV-19^^England|Human|Respiratory Virus Unit|Respiratory Virus Unit|Platt|United Kingdom

>Spike|hCoV-19/Australia/VIC8785/2020|2020-07-30|EPI\_ISL\_565194|Original|hCoV-19^^Victoria|Human|Victorian Infectious Diseases Reference Laboratory (VIDRL)|VIDRL and MDU-PHL|Schultz|Australia

>Spike|hCoV-19/Switzerland/SO-ETHZ-400307/2020|2020-12-07|EPI\_ISL\_729162|Original|hCoV-19^^Solothurn|Human|Viollier AG|Department of Biosystems Science and Engineering|Nadeau|Switzerland

>Spike|hCoV-19/Romania/ROSV\_12587/2020|2020-06-09|EPI\_ISL\_491044|Original|hCoV-19^^Suceava|Human|Suceava County Emergency Hospital|\Stefan cel Mare\ University Metagenomics Lab|Lobiuc|Romania

>Spike|hCoV-19/England/MILK-B86359/2020|2020-11-13|EPI\_ISL\_674136|Original|hCoV-19^^England|Human|Lighthouse Lab in Milton Keynes|Wellcome Sanger Institute for the COVID-19 Genomics UK (COG-UK) Consortium|Davies|United Kingdom

>Spike|hCoV-19/England/SHEF-10B2A48/2020|2020-05-03|EPI\_ISL\_537229|Original|hCoV-19^^England|Human|Virology Department|Wellcome Sanger Institute for the COVID-19 Genomics UK (COG-UK) consortium|Davies|United Kingdom

>Spike|hCoV-19/England/204441534/2020|2020-10-17|EPI\_ISL\_622890|Original|hCoV-19^^England|Human|Respiratory Virus Unit|Respiratory Virus Unit|Platt|United Kingdom

>Spike|hCoV-19/England/CAMC-B52B9A/2020|2020-11-09|EPI\_ISL\_657444|Original|hCoV-19^^England|Human|Lighthouse Lab in Cambridge|Wellcome Sanger Institute for the COVID-19 Genomics UK (COG-UK) Consortium|Davies|United Kingdom

>Spike|hCoV-19/England/20118046304/2020|2020-03-11|EPI\_ISL\_464915|Original|hCoV-19^^England|Human|Respiratory Virus Unit|Respiratory Virus Unit|Platt|United Kingdom

>Spike|hCoV-19/USA/TX-HMH-6736/2020|2020-06-25|EPI\_ISL\_546203|Original|hCoV-19^^Texas|Human|Houston Methodist Hospital|Houston Methodist Hospital|Long|USA

>Spike|hCoV-19/Turkey/IST-GLAB-156/2020|2020-05-02|EPI\_ISL\_480254|Original|hCoV-19^^Istanbul|Human|Genomic Laboratory (GLAB) (Conjoint lab of Health Directorate of Istanbul and Istanbul Technical University)|Genomic Laboratory (GLAB)|Karacan|Turkey

>Spike|hCoV-19/England/ALDP-9FDEB8/2020|2020-10-01|EPI\_ISL\_587875|Original|hCoV-19^^England|Human|Lighthouse Lab in Alderley Park|Wellcome Sanger Institute for the COVID-19 Genomics UK (COG-UK) consortium|Davies|United Kingdom

>Spike|hCoV-19/Australia/VIC13808/2020|2020-08-06|EPI\_ISL\_592323|Original|hCoV-19^^Victoria|Human|Microbiological Diagnostic Unit - Public Health Laboratory (MDU-PHL)|MDU-PHL|Schultz|Australia

>Spike|hCoV-19/USA/MA-MASPHL-00327/2020|2020-04-28|EPI\_ISL\_693190|Original|hCoV-19^^Massachusetts|Human|Massachusetts State Public Health Laboratory|Massachusetts State Public Health Laboratory|Lang|USA

>Spike|hCoV-19/Italy/FVG-ICGEB-S217/2020|2020-07-07|EPI\_ISL\_498562|Original|hCoV-19^^Friuli Venezia Giulia|Human|Laboratory of Molecular Virology International Center for Genetic Engineering and Biotechnology (ICGEB)|ARGO Open Lab Platform for Genome Sequencing|Marcello|Italy

>Spike|hCoV-19/India/GJ-GBRC29/2020|2020-04-30|EPI\_ISL\_444460|Original|hCoV-19^^Gujarat|Human|B.J. Medical College and Civil hospital|Gujarat Biotechnology Research Centre|Joshi|India

>Spike|hCoV-19/Saudi Arabia/KAUST-JEDDAH1319/2020|2020-06-30|EPI\_ISL\_677931|Original|hCoV-19^^Jeddah|Human|Pathogen Genomics Lab King Abdullah University of Science and Technology(KAUST)|Pathogen Genomics Lab King Abdullah University of Science and Technology(KAUST)|Mohamed Ghazzali|Saudi Arabia

>Spike|hCoV-19/USA/CA-QDX-1287/2020|2020-03-17|EPI\_ISL\_571923|Original|hCoV-19^^California|Human|Quest Diagnostics|Quest Diagnostics|Kagan|USA

>Spike|hCoV-19/England/ALDP-AA1456/2020|2020-10-22|EPI\_ISL\_623891|Original|hCoV-19^^England|Human|Lighthouse Lab in Alderley Park|Wellcome Sanger Institute for the COVID-19 Genomics UK (COG-UK) consortium|Davies|United Kingdom

>Spike|hCoV-19/Mexico/HID-INDRE-65/2020|2020-08-25|EPI\_ISL\_576268|Original|hCoV-19^^Hidalgo|Human|Instituto de Diagnostico y Referencia Epidemiologicos (INDRE)|Instituto de Diagnostico y Referencia Epidemiologicos (INDRE)|Rodriguez|Mexico

>Spike|hCoV-19/England/CAMB-1B337B/2020|2020-05-25|EPI\_ISL\_461557|Original|hCoV-19^^England|Human|Department of Pathology|COVID-19 Genomics UK (COG-UK) Consortium|Meredith|United Kingdom

>Spike|hCoV-19/Japan/PG-7824/2020|2020-08-00|EPI\_ISL\_686926|Original|hCoV-19^^Japan|Human|Pathogen Genomics Center|Pathogen Genomics Center|Sekizuka|Japan

>Spike|hCoV-19/Bulgaria/36/2020|2020-03-30|EPI\_ISL\_480307|Original|hCoV-19^^Sofia|Human|National Reference Laboratory \Influenza and acute respiratory diseases\|NRL-HIV|Ivanov|Bulgaria

>Spike|hCoV-19/England/QEUH-BCB5AD/2020|2020-11-27|EPI\_ISL\_704279|Original|hCoV-19^^England|Human|Lighthouse Lab in Glasgow|Wellcome Sanger Institute for the COVID-19 Genomics UK (COG-UK) Consortium|Davies|United Kingdom

>Spike|hCoV-19/England/LIVE-98F79/2020|2020-04-07|EPI\_ISL\_439677|Original|hCoV-19^^England|Human|Liverpool Clinical Laboratories|COVID-19 Genomics UK (COG-UK) Consortium|Haldenby|United Kingdom

>Spike|hCoV-19/England/MILK-9E31BC/2020|2020-09-20|EPI\_ISL\_581131|Original|hCoV-19^^England|Human|Lighthouse Lab in Milton Keynes|Wellcome Sanger Institute for the COVID-19 Genomics UK (COG-UK) consortium|Davies|United Kingdom

>Spike|hCoV-19/Scotland/CVR5409/2020|2020-09-22|EPI\_ISL\_651805|Original|hCoV-19^^Scotland|Human|Lighthouse Lab in Glasgow / MRC-University of Glasgow Centre for Virus Research|COVID-19 Genomics UK (COG-UK) Consortium|Robertson|United Kingdom

>Spike|hCoV-19/USA/TX-HMH-1310/2020|2020-04-13|EPI\_ISL\_542644|Original|hCoV-19^^Texas|Human|Houston Methodist Hospital|Houston Methodist Hospital|Long|USA

>Spike|hCoV-19/Scotland/CVR4732/2020|2020-09-28|EPI\_ISL\_585425|Original|hCoV-19^^Scotland|Human|West of Scotland Specialist Virology Centre|COVID-19 Genomics UK (COG-UK) Consortium|Robertson|United Kingdom

>Spike|hCoV-19/Scotland/EDB407/2020|2020-03-30|EPI\_ISL\_426000|Original|hCoV-19^^Scotland|Human|Virology Department|COVID-19 Genomics UK (COG-UK) Consortium|Williams|United Kingdom

>Spike|hCoV-19/New Zealand/20VR2504/2020|2020-00-00|EPI\_ISL\_579258|Original|hCoV-19^^Auckland|Human|LabPLUS|Institute of Environmental Science and Research (ESR)|Wang|New Zealand

>Spike|hCoV-19/England/QEUH-C33527/2020|2020-12-11|EPI\_ISL\_782601|Original|hCoV-19^^England|Human|Lighthouse Lab in Glasgow|Wellcome Sanger Institute for the COVID-19 Genomics UK (COG-UK) Consortium|Davies|United Kingdom

>Spike|hCoV-19/Wales/ALDP-B1D524/2020|2020-11-01|EPI\_ISL\_710993|Original|hCoV-19^^Wales|Human|Lighthouse Lab in Alderley Park|Wellcome Sanger Institute for the COVID-19 Genomics UK (COG-UK) Consortium|Davies|United Kingdom

>Spike|hCoV-19/England/QEUH-9C98B7/2020|2020-09-10|EPI\_ISL\_567493|Original|hCoV-19^^England|Human|Lighthouse Lab in Glasgow|Wellcome Sanger Institute for the COVID-19 Genomics UK (COG-UK) consortium|Davies|United Kingdom

>Spike|hCoV-19/USA/TX-DSHS-1844/2020|2020-06-23|EPI\_ISL\_745285|Original|hCoV-19^^Texas|Human|Texas Department of State Health Services|Texas Department of State Health Services|Rahman|USA

>Spike|hCoV-19/Denmark/ALAB-SSI354/2020|2020-03-23|EPI\_ISL\_429466|Original|hCoV-19^^Denmark|Human|Department of Virus and Microbiological Special Diagnostics|Albertsen lab|Kirkegaard|Denmark

>Spike|hCoV-19/Canada/ON-PHL-20-01278/2020|2020-06-00|EPI\_ISL\_548885|Original|hCoV-19^^Ontario|Human|Public Health Ontario Laboratory|Public Health Ontario Laboratory|Guthrie|Canada

>Spike|hCoV-19/South Africa/KRISP-K004045/2020|2020-10-15|EPI\_ISL\_635024|Original|hCoV-19^^KwaZulu-Natal|Human|National Health Laboratory Service - Inkosi Albert Luthuli Central Hospital (NHLS-IALCH)|KRISP|de Oliveira|South Africa

>Spike|hCoV-19/USA/UT-UPHL-201108464/2020|2020-05-13|EPI\_ISL\_648585|Original|hCoV-19^^Utah|Human|Utah Public Health Laboratory|Utah Public Health Laboratory|Young|USA

>Spike|hCoV-19/England/QEUEH-AD500A/2020|2020-10-25|EPI\_ISL\_633833|Original|hCoV-19^^England|Human|Lighthouse Lab in Glasgow|Wellcome Sanger Institute for the COVID-19 Genomics UK (COG-UK) consortium|Davies|United Kingdom

>Spike|hCoV-19/Denmark/DCGC-12255/2020|2020-11-16|EPI\_ISL\_682436|Original|hCoV-19^^Nordjylland|Human|Department of Virus and Microbiological Special Diagnostics|Albertsen Lab|Michaelsen|Denmark

>Spike|hCoV-19/England/MILK-9957B7/2020|2020-08-23|EPI\_ISL\_551658|Original|hCoV-19^^England|Human|Lighthouse Lab in Milton Keynes|Wellcome Sanger Institute for the COVID-19 Genomics UK (COG-UK) consortium|Davies|United Kingdom

>Spike|hCoV-19/Denmark/DCGC-6145/2020|2020-09-14|EPI\_ISL\_621179|Original|hCoV-19^^Midtjylland|Human|Department of Virus and Microbiological Special Diagnostics|Albertsen lab|Michaelsen|Denmark

>Spike|hCoV-19/England/LIVE-DBD15D/2020|2020-10-27|EPI\_ISL\_665128|Original|hCoV-19^^England|Human|Liverpool Clinical Laboratories|COVID-19 Genomics UK (COG-UK) Consortium|Haldenby|United Kingdom

>Spike|hCoV-19/Wales/PHWC-49E249/2020|2020-12-07|EPI\_ISL\_742973|Original|hCoV-19^^Wales|Human|Wales Specialist Virology Centre Sequencing lab|COVID-19 Genomics UK (COG-UK) Consortium|Moore|United Kingdom

>Spike|hCoV-19/England/CAMB-7BC57/2020|2020-04-04|EPI\_ISL\_442176|Original|hCoV-19^^England|Human|Department of Pathology|Wellcome Sanger Institute for the COVID-19 Genomics UK (COG-UK) consortium|Amato|United Kingdom

>Spike|hCoV-19/England/QEUEH-BA11C7/2020|2020-11-18|EPI\_ISL\_672872|Original|hCoV-19^^England|Human|Lighthouse Lab in Glasgow|Wellcome Sanger Institute for the COVID-19 Genomics UK (COG-UK) Consortium|Davies|United Kingdom

>Spike|hCoV-19/India/UT-8570838-CSIR-IGIB/2020|2020-08-07|EPI\_ISL\_636823|Original|hCoV-19^^Uttarakhand|Human|National Centre for Disease control (NCDC)|NCDC/CSIR-IGIB|Faruq|India

>Spike|hCoV-19/England/MILK-A6B740/2020|2020-10-09|EPI\_ISL\_608698|Original|hCoV-19^^England|Human|Lighthouse Lab in Milton Keynes|Wellcome Sanger Institute for the COVID-19 Genomics UK (COG-UK) consortium|Davies|United Kingdom

>Spike|hCoV-19/England/NOTT-11325E/2020|2020-09-13|EPI\_ISL\_540715|Original|hCoV-19^^England|Human|Queens Medical Centre|COVID-19 Genomics UK (COG-UK) Consortium|Loose|United Kingdom

>Spike|hCoV-19/England/BIRM-638A9/2020|2020-08-20|EPI\_ISL\_529651|Original|hCoV-19^^England|Human|University of Birmingham|COVID-19 Genomics UK (COG-UK) Consortium|Loman|United Kingdom

>Spike|hCoV-19/England/20122030404/2020|2020-03-15|EPI\_ISL\_465748|Original|hCoV-19^^England|Human|Respiratory Virus Unit|Respiratory Virus Unit|Platt|United Kingdom

>Spike|hCoV-19/England/CAMC-B223D7/2020|2020-11-02|EPI\_ISL\_645958|Original|hCoV-19^^England|Human|Lighthouse Lab in Cambridge|Wellcome Sanger Institute for the COVID-19 Genomics UK (COG-UK) Consortium|Davies|United Kingdom

>Spike|hCoV-19/Switzerland/BE-ETHZ-370510/2020|2020-11-19|EPI\_ISL\_693994|Original|hCoV-19^^Bern|Human|Viollier AG|Department of Biosystems Science and Engineering|Nadeau|Switzerland

>Spike|hCoV-19/Denmark/DCGC-14741/2020|2020-11-23|EPI\_ISL\_711078|Original|hCoV-19^^Sjaelland|Human|Department of Virus and Microbiological Special Diagnostics|Albertsen Lab|Michaelsen|Denmark

>Spike|hCoV-19/Wales/PHWC-16EAF2/2020|2020-10-06|EPI\_ISL\_585820|Original|hCoV-19^^Wales|Human|Wales Specialist Virology Centre Sequencing lab|COVID-19 Genomics UK (COG-UK) Consortium|Moore|United Kingdom

>Spike|hCoV-19/India/MH-GA97/2020|2020-06-17|EPI\_ISL\_511940|Original|hCoV-19^^Maharashtra|Human|Government Medical College|National Institute of Biomedical Genomics -\u00a0DBT's PAN-INDIA 1000 SARS--CoV-2 RNA Genome Sequencing Consortium|Maitra|India

>Spike|hCoV-19/England/MILK-A4590A/2020|2020-10-06|EPI\_ISL\_598651|Original|hCoV-19^^England|Human|Lighthouse Lab in Milton Keynes|Wellcome Sanger Institute for the COVID-19 Genomics UK (COG-UK) consortium|Davies|United Kingdom

>Spike|hCoV-19/Northern Ireland/QEUH-9607D3/2020|2020-08-05|EPI\_ISL\_532060|Original|hCoV-19^^Northern Ireland|Human|Lighthouse Lab in Glasgow|Wellcome Sanger Institute for the COVID-19 Genomics UK (COG-UK) consortium|Davies|United Kingdom

>Spike|hCoV-19/England/CAMB-1AEF60/2020|2020-04-30|EPI\_ISL\_459242|Original|hCoV-19^^England|Human|Department of Pathology|Wellcome Sanger Institute for the COVID-19 Genomics UK (COG-UK) consortium|Davies|United Kingdom

>Spike|hCoV-19/Scotland/QEUH-C0116A/2020|2020-12-05|EPI\_ISL\_757272|Original|hCoV-19^^Scotland|Human|Lighthouse Lab in Glasgow|Wellcome Sanger Institute for the COVID-19 Genomics UK (COG-UK) Consortium|Davies|United Kingdom

>Spike|hCoV-19/Wales/PHWC-48EAF9/2020|2020-11-03|EPI\_ISL\_680962|Original|hCoV-19^^Wales|Human|Wales Specialist Virology Centre Sequencing lab|COVID-19 Genomics UK (COG-UK) Consortium|Moore|United Kingdom

>Spike|hCoV-19/England/ALDP-955FF7/2020|2020-06-08|EPI\_ISL\_554047|Original|hCoV-19^^England|Human|Lighthouse Lab in Alderley Park|Wellcome Sanger Institute for the COVID-19 Genomics UK (COG-UK) consortium|Davies|United Kingdom

>Spike|hCoV-19/England/ALDP-B492BF/2020|2020-11-07|EPI\_ISL\_649336|Original|hCoV-19^^England|Human|Lighthouse Lab in Alderley Park|Wellcome Sanger Institute for the COVID-19 Genomics UK (COG-UK) Consortium|Davies|United Kingdom

>Spike|hCoV-19/England/ALDP-49B5E9/2020|2020-06-11|EPI\_ISL\_559328|Original|hCoV-19^^England|Human|Lighthouse Lab in Alderley Park|Wellcome Sanger Institute for the COVID-19 Genomics UK (COG-UK) consortium|Davies|United Kingdom

>Spike|hCoV-19/Denmark/DCGC-7308/2020|2020-10-12|EPI\_ISL\_619287|Original|hCoV-19^^Hovedstaden|Human|Department of Virus and Microbiological Special Diagnostics|Albertsen lab|Michaelsen|Denmark

>Spike|hCoV-19/Guangzhou/GZMU0117/2020|2020-02-26|EPI\_ISL\_457698|Original|hCoV-19^^Guangzhou|Human|The First Affiliated Hospital of Guangzhou Medical University|BGI-shenzhen & The First Affiliated Hospital of Guangzhou Medical University|Ji|China

>Spike|hCoV-19/Denmark/DCGC-15258/2020|2020-11-23|EPI\_ISL\_713726|Original|hCoV-19^^Hovedstaden|Human|Department of Virus and Microbiological Special Diagnostics|Albertsen Lab|Michaelsen|Denmark

>Spike|hCoV-19/England/ALDP-AA13C2/2020|2020-10-22|EPI\_ISL\_623928|Original|hCoV-19^^England|Human|Lighthouse Lab in Alderley Park|Wellcome Sanger Institute for the COVID-19 Genomics UK (COG-UK) consortium|Davies|United Kingdom

>Spike|hCoV-19/Spain/VC-FISABIO-151/2020|2020-03-19|EPI\_ISL\_436246|Original|hCoV-19^^Comunitat Valenciana|Human|Servicio de Microbiologia. Hospital Universitario Doctor Peset|Sequencing and Bioinformatics Service and Molecular Epidemiology Research Group. FISABIO-Public Health|Gonzalez-Candelas|Spain

>Spike|hCoV-19/Nigeria/FC-CV246/2020|2020-07-07|EPI\_ISL\_729931|Original|hCoV-19^^Abuja|Human|Nigeria Centre for Disease Control (NCDC)|African Centre of Excellence for Genomics of Infectious Diseases (ACEGID)|Oluniyi|Nigeria

>Spike|hCoV-19/England/20126102404/2020|2020-03-19|EPI\_ISL\_423910|Original|hCoV-19^^England|Human|Respiratory Virus Unit|Respiratory Virus Unit|Platt|United Kingdom

>Spike|hCoV-19/England/LOND-1251029/2020|2020-11-10|EPI\_ISL\_665828|Original|hCoV-19^^England|Human|University College London Hospital|COVID-19 Genomics UK (COG-UK) Consortium|Byott|United Kingdom

>Spike|hCoV-19/Bangladesh/BCSIR-NILMRC-282/2020|2020-07-21|EPI\_ISL\_498466|Original|hCoV-19^^Chittagong|Human|National Institute of Laboratory Medicine and Referral Center|Genomic Research Lab|Khan|Bangladesh

>Spike|hCoV-19/Wales/PHWC-2762F/2020|2020-03-30|EPI\_ISL\_432257|Original|hCoV-19^^Wales|Human|Wales Specialist Virology Centre|Public Health Wales Microbiology Cardiff|Moore|United Kingdom

>Spike|hCoV-19/England/ALDP-AA381C/2020|2020-10-22|EPI\_ISL\_625182|Original|hCoV-19^^England|Human|Lighthouse Lab in Alderley Park|Wellcome Sanger Institute for the COVID-19 Genomics UK (COG-UK) consortium|Davies|United Kingdom

>Spike|hCoV-19/USA/NV-CDC-2-3714159/2020|2020-12-04|EPI\_ISL\_751637|Original|hCoV-19^^Nevada|Human|NV State Public Health Laboratory|Genomics and Discovery|Queen|USA

>Spike|hCoV-19/Australia/VIC7382/2020|2020-07-29|EPI\_ISL\_564371|Original|hCoV-19^^Victoria|Human|Victorian Infectious Diseases Reference Laboratory (VIDRL)|VIDRL and MDU-PHL|Schultz|Australia

>Spike|hCoV-19/USA/VA-DCLS-1590/2020|2020-08-14|EPI\_ISL\_610144|Original|hCoV-19^^Virginia|Human|Virginia DCLS|Virginia DCLS|St. Jacques|USA

>Spike|hCoV-19/England/ALDP-B82E5C/2020|2020-11-14|EPI\_ISL\_675536|Original|hCoV-19^^England|Human|Lighthouse Lab in Alderley Park|Wellcome Sanger Institute for the COVID-19 Genomics UK (COG-UK) Consortium|Davies|United Kingdom

>Spike|hCoV-19/Japan/PG-6909/2020|2020-09-00|EPI\_ISL\_688017|Original|hCoV-19^^Japan|Human|Pathogen Genomics Center|Pathogen Genomics Center|Sekizuka|Japan

>Spike|hCoV-19/England/204220524/2020|2020-10-13|EPI\_ISL\_603205|Original|hCoV-19^^England|Human|Respiratory Virus Unit|Respiratory Virus Unit|Platt|United Kingdom

>Spike|hCoV-19/England/QEUA-A0B4F0/2020|2020-10-01|EPI\_ISL\_599355|Original|hCoV-19^^England|Human|Lighthouse Lab in Glasgow|Wellcome Sanger Institute for the COVID-19 Genomics UK (COG-UK) consortium|Davies|United Kingdom

>Spike|hCoV-19/USA/WA-S2324/2020|2020-06-11|EPI\_ISL\_496956|Original|hCoV-19^^Washington|Human|Washington State Department of Health|Seattle Flu Study|Lee|USA

>Spike|hCoV-19/England/ALDP-BC885C/2020|2020-11-22|EPI\_ISL\_721319|Original|hCoV-19^^England|Human|Lighthouse Lab in Alderley Park|Wellcome Sanger Institute for the COVID-19 Genomics UK (COG-UK) Consortium|Davies|United Kingdom

>Spike|hCoV-19/USA/WA-S27/2020|2020-03-01|EPI\_ISL\_417080|Original|hCoV-19^^Washington|Human|Washington State Department of Health|Seattle Flu Study|Bedford|USA

>Spike|hCoV-19/USA/NY-NYUMC18/2020|2020-03-17|EPI\_ISL\_418203|Original|hCoV-19^^New York|Human|NYU Langone Health|Department of Pathology and Medicine|Maurano|USA

>Spike|hCoV-19/Norway/CS-17/2020|2020-06-19|EPI\_ISL\_666597|Original|hCoV-19^^Viken|Human|Dept. of Microbiology and Infection Control|Dept. of Microbiology and Infection Control|Hesselberg L\u00f8vestad|Norway

>Spike|hCoV-19/England/ALDP-9C5208/2020|2020-09-10|EPI\_ISL\_567724|Original|hCoV-19^^England|Human|Lighthouse Lab in Alderley Park|Wellcome Sanger Institute for the COVID-19 Genomics UK (COG-UK) consortium|Davies|United Kingdom

>Spike|hCoV-19/England/CAMB-1B004A/2020|2020-05-07|EPI\_ISL\_448101|Original|hCoV-19^^England|Human|Department of Pathology|COVID-19 Genomics UK (COG-UK) Consortium|Meredith|United Kingdom

>Spike|hCoV-19/Australia/VIC12866/2020|2020-07-26|EPI\_ISL\_592094|Original|hCoV-19^^Victoria|Human|Microbiological Diagnostic Unit - Public Health Laboratory (MDU-PHL)|MDU-PHL|Schultz|Australia

>Spike|hCoV-19/USA/AR-CDC-4187/2020|2020-07-08|EPI\_ISL\_509672|Original|hCoV-19^^Arkansas|Human|AR Dept. of Health-Public Health Lab|Pathogen Discovery|Queen|USA

>Spike|hCoV-19/Luxembourg/LNS1798053/2020|2020-10-27|EPI\_ISL\_739993|Original|hCoV-19^^Luxembourg|Human|Laboratoire national de sant\u00e9|Laboratoire national de sant\u00e9|Wienecke-Baldacchino|Luxembourg

>Spike|hCoV-19/England/ALDP-9BEDE3/2020|2020-09-10|EPI\_ISL\_567978|Original|hCoV-19^^England|Human|Lighthouse Lab in Alderley Park|Wellcome Sanger Institute for the COVID-19 Genomics UK (COG-UK) consortium|Davies|United Kingdom

>Spike|hCoV-19/England/QEUA-9B4828/2020|2020-09-02|EPI\_ISL\_590298|Original|hCoV-19^^England|Human|Lighthouse Lab in Glasgow|Wellcome Sanger Institute for the COVID-19 Genomics UK (COG-UK) consortium|Davies|United Kingdom

>Spike|hCoV-19/England/ALDP-9566F1/2020|2020-06-08|EPI\_ISL\_553902|Original|hCoV-19^^England|Human|Lighthouse Lab in Alderley Park|Wellcome Sanger Institute for the COVID-19 Genomics UK (COG-UK) consortium|Davies|United Kingdom

>Spike|hCoV-19/Scotland/CVR5677/2020|2020-11-08|EPI\_ISL\_651901|Original|hCoV-19^^Scotland|Human|West of Scotland Specialist Virology Centre|COVID-19 Genomics UK (COG-UK) Consortium|Robertson|United Kingdom

>Spike|hCoV-19/England/CAMB-81711/2020|2020-04-11|EPI\_ISL\_443073|Original|hCoV-19^^England|Human|Department of Pathology|Wellcome Sanger Institute for the COVID-19 Genomics UK (COG-UK) consortium|Amato|United Kingdom

>Spike|hCoV-19/mink/Netherlands/NB-EMC-39-5/2020|2020-08-24|EPI\_ISL\_577786|Original|hCoV-19^^Limburg|Neovison vison|Dutch COVID-19 response team|Erasmus Medical Center|Oude Munnink|Netherlands

>Spike|hCoV-19/Northern Ireland/NIRE-2333BE/2020|2020-04-06|EPI\_ISL\_680286|Original|hCoV-19^^Northern Ireland|Human|Regional Virus Laboratory|COVID-19 Genomics UK (COG-UK) Consortium|Fairley|United Kingdom

>Spike|hCoV-19/Australia/VIC3193/2020|2020-07-04|EPI\_ISL\_520879|Original|hCoV-19^^Victoria|Human|Victorian Infectious Diseases Reference Laboratory (VIDRL)|VIDRL and MDU-PHL|Schultz|Australia

>Spike|hCoV-19/Denmark/DCGC-5809/2020|2020-09-28|EPI\_ISL\_620996|Original|hCoV-19^^Sjaelland|Human|Department of Virus and Microbiological Special Diagnostics|Albertsen lab|Michaelsen|Denmark

>Spike|hCoV-19/Denmark/DCGC-14930/2020|2020-11-23|EPI\_ISL\_713528|Original|hCoV-19^^Hovedstaden|Human|Department of Virus and Microbiological Special Diagnostics|Albertsen Lab|Michaelsen|Denmark

>Spike|hCoV-19/USA/WA-S359/2020|2020-03-25|EPI\_ISL\_434119|Original|hCoV-19^^Washington|Human|Washington State Department of Health|Seattle Flu Study|Bedford|USA

>Spike|hCoV-19/Canada/BC-BCCDC-7525/2020|2020-11-00|EPI\_ISL\_740694|Original|hCoV-19^^British Columbia|Human|BCCDC Public Health Laboratory|BCCDC Public Health Laboratory|Prystajecky|Canada

>Spike|hCoV-19/Denmark/DCGC-3723/2020|2020-08-31|EPI\_ISL\_615502|Original|hCoV-19^^Hovedstaden|Human|Department of Virus and Microbiological Special Diagnostics|Albertsen lab|Michaelsen|Denmark

>Spike|hCoV-19/England/20186102804/2020|2020-04-29|EPI\_ISL\_528409|Original|hCoV-19^^England|Human|Respiratory Virus Unit|Respiratory Virus Unit|Miah|United Kingdom

>Spike|hCoV-19/USA/CO-CDPHE-2008181078/2020|2020-08-17|EPI\_ISL\_710220|Original|hCoV-19^^Colorado|Human|Colorado Department of Public Health and Environment|Colorado Department of Public Health and Environment|Bankers|USA

>Spike|hCoV-19/South Africa/KRISP-K001317/2020|2020-07-17|EPI\_ISL\_515802|Original|hCoV-19^^KwaZulu-Natal|Human|Medical Disagnostics Services (MDS)|KRISP|de Oliveira|South Africa

>Spike|hCoV-19/England/MILK-CA4B89/2020|2020-12-15|EPI\_ISL\_762502|Original|hCoV-19^^England|Human|Lighthouse Lab in Milton Keynes|Wellcome Sanger Institute for the COVID-19 Genomics UK (COG-UK) Consortium|Davies|United Kingdom

>Spike|hCoV-19/England/ALDP-5CEF48/2020|2020-06-15|EPI\_ISL\_558422|Original|hCoV-19^^England|Human|Lighthouse Lab in Alderley Park|Wellcome Sanger Institute for the COVID-19 Genomics UK (COG-UK) Consortium|Davies|United Kingdom

>Spike|hCoV-19/India/MH-BJMC-22738/2020|2020-07-18|EPI\_ISL\_728269|Original|hCoV-19^^Maharashtra|Human|B.J. Govt. Medical College|National Centre For Cell Science|Paul|India

>Spike|hCoV-19/India/OR-ILSCV35574/2020|2020-06-11|EPI\_ISL\_481202|Original|hCoV-19^^Odisha|Human|Immunogenomics lab|Immunogenomics lab|Raghav|India

>Spike|hCoV-19/England/BRIS-12C638/2020|2020-05-04|EPI\_ISL\_469464|Original|hCoV-19^^England|Human|PHE South West Regional Laboratory|Wellcome Sanger Institute for the COVID-19 Genomics UK (COG-UK) consortium|Davies|United Kingdom

>Spike|hCoV-19/Australia/SAP036/2020|2020-03-19|EPI\_ISL\_450194|Original|hCoV-19^^South Australia|Human|SA Pathology|SA Pathology|Leong|Australia

>Spike|hCoV-19/USA/UT-08567/2020|2020-05-18|EPI\_ISL\_524324|Original|hCoV-19^^Utah|Human|Utah Public Health Laboratory|Utah Public Health Laboratory|Young|USA



>Spike|hCoV-19/England/QEUA-B3F726/2020|2020-11-08|EPI\_ISL\_658436|Original|hCoV-19^^England|Human|Lighthouse Lab in Glasgow|Wellcome Sanger Institute for the COVID-19 Genomics UK (COG-UK) Consortium|Davies|United Kingdom

>Spike|hCoV-19/Wales/PHWC-4986BC/2020|2020-11-24|EPI\_ISL\_727111|Original|hCoV-19^^Wales|Human|Originating lab|COVID-19 Genomics UK (COG-UK) Consortium|Moore|United Kingdom

>Spike|hCoV-19/Nigeria/FC-CV238/2020|2020-06-02|EPI\_ISL\_729924|Original|hCoV-19^^Abuja|Human|Nigeria Centre for Disease Control (NCDC)|African Centre of Excellence for Genomics of Infectious Diseases (ACEGID)|Oluniyi|Nigeria

>Spike|hCoV-19/USA/TX-HMH-MCoV-14873/2020|2020-10-14|EPI\_ISL\_786357|Original|hCoV-19^^Texas|Human|Houston Methodist Hospital|Houston Methodist Hospital|Long|USA

>Spike|hCoV-19/USA/FL-BPHL-1409/2020|2020-05-27|EPI\_ISL\_549191|Original|hCoV-19^^Florida|Human|Florida Bureau of Public Health Laboratories|Florida Bureau of Public Health Laboratories|Blanton|USA

>Spike|hCoV-19/England/SHEF-C419C/2020|2020-04-18|EPI\_ISL\_462013|Original|hCoV-19^^England|Human|Virology Department|COVID-19 Genomics UK (COG-UK) Consortium|de Silva|United Kingdom

>Spike|hCoV-19/England/ALDP-AA3964/2020|2020-10-22|EPI\_ISL\_630921|Original|hCoV-19^^England|Human|Lighthouse Lab in Alderley Park|Wellcome Sanger Institute for the COVID-19 Genomics UK (COG-UK) consortium|Davies|United Kingdom

>Spike|hCoV-19/USA/CA-QDX-1436/2020|2020-03-18|EPI\_ISL\_572088|Original|hCoV-19^^California|Human|Quest Diagnostics|Quest Diagnostics|Kagan|USA

>Spike|hCoV-19/Japan/PG-1929/2020|2020-04-00|EPI\_ISL\_685535|Original|hCoV-19^^Japan|Human|Pathogen Genomics Center|Pathogen Genomics Center|Sekizuka|Japan

>Spike|hCoV-19/England/CAMC-B0B107/2020|2020-10-29|EPI\_ISL\_643408|Original|hCoV-19^^England|Human|Lighthouse Lab in Cambridge|Wellcome Sanger Institute for the COVID-19 Genomics UK (COG-UK) Consortium|Davies|United Kingdom

>Spike|hCoV-19/USA/MN-MDH-1371/2020|2020-06-22|EPI\_ISL\_507959|Original|hCoV-19^^Minnesota|Human|Mayo Clinic & Mayo Clinic Laboratories|Minnesota Department of Health|Garfin|USA

>Spike|hCoV-19/Wales/PHWC-168278/2020|2020-03-31|EPI\_ISL\_494218|Original|hCoV-19^^Wales|Human|Originating lab|COVID-19 Genomics UK (COG-UK) Consortium|Moore|United Kingdom

>Spike|hCoV-19/England/ALDP-94CAB6/2020|2020-06-16|EPI\_ISL\_555904|Original|hCoV-19^^England|Human|Lighthouse Lab in Alderley Park|Wellcome Sanger Institute for the COVID-19 Genomics UK (COG-UK) consortium|Davies|United Kingdom

>Spike|hCoV-19/Australia/VIC5212/2020|2020-07-19|EPI\_ISL\_519977|Original|hCoV-19^^Victoria|Human|Microbiological Diagnostic Unit - Public Health Laboratory (MDU-PHL)|MDU-PHL|Schultz|Australia

>Spike|hCoV-19/England/ALDP-A92B17/2020|2020-10-19|EPI\_ISL\_611150|Original|hCoV-19^^England|Human|Lighthouse Lab in Alderley Park|Wellcome Sanger Institute for the COVID-19 Genomics UK (COG-UK) consortium|Davies|United Kingdom

>Spike|hCoV-19/USA/MA-MGH-00152/2020|2020-03-26|EPI\_ISL\_460447|Original|hCoV-19^^Massachusetts|Human|Massachusetts General Hospital|Infectious Disease Program|Lemieux|USA

>Spike|hCoV-19/USA/TX-HMH-MCoV-12519/2020|2020-09-30|EPI\_ISL\_789883|Original|hCoV-19^^Texas|Human|Houston Methodist Hospital|Houston Methodist Hospital|Long|USA

>Spike|hCoV-19/Wales/PHWC-311F4/2020|2020-04-10|EPI\_ISL\_446420|Original|hCoV-19^^Wales|Human|Wales Specialist Virology Centre|Public Health Wales Microbiology Cardiff|Moore|United Kingdom

>Spike|hCoV-19/England/20129056104/2020|2020-03-11|EPI\_ISL\_465805|Original|hCoV-19^^England|Human|Respiratory Virus Unit|Respiratory Virus Unit|Platt|United Kingdom

>Spike|hCoV-19/Japan/PG-4357/2020|2020-07-00|EPI\_ISL\_692585|Original|hCoV-19^^Japan|Human|Pathogen Genomics Center|Pathogen Genomics Center|Sekizuka|Japan

>Spike|hCoV-19/England/ALDP-A5078A/2020|2020-10-07|EPI\_ISL\_597727|Original|hCoV-19^^England|Human|Lighthouse Lab in Alderley Park|Wellcome Sanger Institute for the COVID-19 Genomics UK (COG-UK) consortium|Davies|United Kingdom

>Spike|hCoV-19/USA/WI-UW-1309/2020|2020-08-31|EPI\_ISL\_536681|Original|hCoV-19^^Wisconsin|Human|University of Wisconsin-Madison AIDS Vaccine Research

Laboratories|University of Wisconsin-Madison AIDS Vaccine Research  
Laboratories|Baczenas|USA  
>Spike|hCoV-19/USA/TX-HMH-MCoV-11383/2020|2020-09-05|EPI\_ISL\_790006|Original|hCoV-19^^Texas|Human|Houston Methodist Hospital|Houston Methodist Hospital|Long|USA  
>Spike|hCoV-19/England/QEUA-9FA422/2020|2020-09-28|EPI\_ISL\_588150|Original|hCoV-19^^England|Human|Lighthouse Lab in Glasgow|Wellcome Sanger Institute for the COVID-19 Genomics UK (COG-UK) consortium|Davies|United Kingdom  
>Spike|hCoV-19/England/QEUA-A005AD/2020|2020-10-02|EPI\_ISL\_584889|Original|hCoV-19^^England|Human|University of Exeter|COVID-19 Genomics UK (COG-UK) Consortium|Temperton|United Kingdom  
>Spike|hCoV-19/Scotland/CVR1554/2020|2020-04-03|EPI\_ISL\_433615|Original|hCoV-19^^Scotland|Human|West of Scotland Specialist Virology Centre|COVID-19 Genomics UK (COG-UK) Consortium|Robertson|United Kingdom  
>Spike|hCoV-19/USA/MN-QDX-1377/2020|2020-03-15|EPI\_ISL\_572166|Original|hCoV-19^^Minnesota|Human|Quest Diagnostics|Quest Diagnostics|Kagan|USA  
>Spike|hCoV-19/England/MILK-BABC35/2020|2020-11-18|EPI\_ISL\_681477|Original|hCoV-19^^England|Human|Lighthouse Lab in Milton Keynes|Wellcome Sanger Institute for the COVID-19 Genomics UK (COG-UK) Consortium|Davies|United Kingdom  
>Spike|hCoV-19/Canada/MB-NML-644/2020|2020-03-25|EPI\_ISL\_632923|Original|hCoV-19^^Manitoba|Human|Cadham Provincial laboratory|Cadham Provincial laboratory|Majer|Canada  
>Spike|hCoV-19/England/MILK-B8EFA8/2020|2020-11-13|EPI\_ISL\_675228|Original|hCoV-19^^England|Human|Lighthouse Lab in Milton Keynes|Wellcome Sanger Institute for the COVID-19 Genomics UK (COG-UK) Consortium|Davies|United Kingdom  
>Spike|hCoV-19/Australia/VIC12878/2020|2020-07-31|EPI\_ISL\_641252|Original|hCoV-19^^Victoria|Human|Microbiological Diagnostic Unit - Public Health Laboratory (MDU-PHL)|MDU-PHL|Schultz|Australia  
>Spike|hCoV-19/Wales/MILK-9C1DFC/2020|2020-09-10|EPI\_ISL\_566663|Original|hCoV-19^^Wales|Human|Lighthouse Lab in Milton Keynes|Wellcome Sanger Institute for the COVID-19 Genomics UK (COG-UK) consortium|Davies|United Kingdom  
>Spike|hCoV-19/Denmark/DCGC-18766/2020|2020-12-07|EPI\_ISL\_748543|Original|hCoV-19^^Syddanmark|Human|Department of Virus and Microbiological Special Diagnostics|Albertsen Lab|Michaelsen|Denmark  
>Spike|hCoV-19/USA/TX-HMH-MCoV-13448/2020|2020-08-22|EPI\_ISL\_788583|Original|hCoV-19^^Texas|Human|Houston Methodist Hospital|Houston Methodist Hospital|Long|USA  
>Spike|hCoV-19/England/QEUA-9F374E/2020|2020-09-24|EPI\_ISL\_588506|Original|hCoV-19^^England|Human|Lighthouse Lab in Glasgow|Wellcome Sanger Institute for the COVID-19 Genomics UK (COG-UK) consortium|Davies|United Kingdom  
>Spike|hCoV-19/England/ALDP-955874/2020|2020-06-12|EPI\_ISL\_554404|Original|hCoV-19^^England|Human|Lighthouse Lab in Alderley Park|Wellcome Sanger Institute for the COVID-19 Genomics UK (COG-UK) consortium|Davies|United Kingdom  
>Spike|hCoV-19/England/CAMC-AAF661/2020|2020-10-23|EPI\_ISL\_631199|Original|hCoV-19^^England|Human|Lighthouse Lab in Cambridge|Wellcome Sanger Institute for the COVID-19 Genomics UK (COG-UK) consortium|Davies|United Kingdom  
>Spike|hCoV-19/England/MILK-97496D/2020|2020-08-21|EPI\_ISL\_575970|Original|hCoV-19^^England|Human|Lighthouse Lab in Milton Keynes|Wellcome Sanger Institute for the COVID-19 Genomics UK (COG-UK) consortium|Davies|United Kingdom  
>Spike|hCoV-19/Japan/PG-0076/2020|2020-02-28|EPI\_ISL\_479829|Original|hCoV-19^^Hokkaido|Human|Sapporo City Institute of Public Health|Pathogen Genomics Center|Sekizuka|Japan  
>Spike|hCoV-19/England/CAMB-1B9A52/2020|2020-11-08|EPI\_ISL\_679146|Original|hCoV-19^^England|Human|Department of Pathology|COVID-19 Genomics UK (COG-UK) Consortium|Goodfellow|United Kingdom  
>Spike|hCoV-19/Australia/VIC7111/2020|2020-08-02|EPI\_ISL\_564237|Original|hCoV-19^^Victoria|Human|Victorian Infectious Diseases Reference Laboratory (VIDRL)|VIDRL and MDU-PHL|Schultz|Australia  
>Spike|hCoV-19/England/ALDP-9BE590/2020|2020-09-10|EPI\_ISL\_568204|Original|hCoV-19^^England|Human|Lighthouse Lab in Alderley Park|Wellcome Sanger Institute for the COVID-19 Genomics UK (COG-UK) consortium|Davies|United Kingdom

>Spike|hCoV-19/USA/MD-HP00101/2020|2020-03-18|EPI\_ISL\_457763|Original|hCoV-19^^Maryland|Human|Johns Hopkins Hospital Department of Pathology|Johns Hopkins Hospital Department of Pathology|Ramakrishnan|USA

>Spike|hCoV-19/Jordan/SEARCH-5498/2020|2020-09-08|EPI\_ISL\_755265|Original|hCoV-19^^Amman|Human|Biolab Diagnostic Laboratories|Andersen lab at Scripps Research|Gangavarapu|Jordan

>Spike|hCoV-19/Belgium/reg-0417514/2020|2020-04-17|EPI\_ISL\_734606|Original|hCoV-19^^Enghien|Human|UZ Leuven|KU Leuven|Maes|Belgium

>Spike|hCoV-19/Singapore/986/2020|2020-03-23|EPI\_ISL\_548994|Original|hCoV-19^^Singapore|Human|National Public Health Laboratory|National Public Health Laboratory|Mak|Singapore

>Spike|hCoV-19/Denmark/DCGC-20616/2020|2020-12-21|EPI\_ISL\_759256|Original|hCoV-19^^Midtjylland|Human|Department of Virus and Microbiological Special Diagnostics|Albertsen Lab|Michaelsen|Denmark

>Spike|hCoV-19/Wales/PHWC-47FD4D/2020|2020-10-09|EPI\_ISL\_612804|Original|hCoV-19^^Wales|Human|Wales Specialist Virology Centre Sequencing lab|COVID-19 Genomics UK (COG-UK) Consortium|Moore|United Kingdom

>Spike|hCoV-19/England/201101364/2020|2020-03-09|EPI\_ISL\_464658|Original|hCoV-19^^England|Human|Respiratory Virus Unit|Respiratory Virus Unit|Platt|United Kingdom

>Spike|hCoV-19/USA/CA-CZB-15420/2020|2020-12-02|EPI\_ISL\_738635|Original|hCoV-19^^California|Human|Orange County Public Health Lab|Chan-Zuckerberg Biohub|Kamm|USA

>Spike|hCoV-19/USA/AZ-TG276152/2020|2020-04-09|EPI\_ISL\_694093|Original|hCoV-19^^Arizona|Human|AZ SPHL|TGen North|French|USA

>Spike|hCoV-19/Japan/PG-7046/2020|2020-08-00|EPI\_ISL\_688151|Original|hCoV-19^^Japan|Human|Pathogen Genomics Center|Pathogen Genomics Center|Sekizuka|Japan

>Spike|hCoV-19/Australia/VIC12776/2020|2020-09-10|EPI\_ISL\_563593|Original|hCoV-19^^Victoria|Human|Microbiological Diagnostic Unit - Public Health Laboratory (MDU-PHL)|MDU-PHL|Schultz|Australia

>Spike|hCoV-19/United Arab Emirates/0476/2020|2020-05-18|EPI\_ISL\_698645|Original|hCoV-19^^Abu Dhabi|Human|Group 42 (G42) Healthcare|G42 Healthcare|Ogrodzki|United Arab Emirates

>Spike|hCoV-19/England/QEUA-B3FD33/2020|2020-11-08|EPI\_ISL\_658685|Original|hCoV-19^^England|Human|Lighthouse Lab in Glasgow|Wellcome Sanger Institute for the COVID-19 Genomics UK (COG-UK) Consortium|Davies|United Kingdom

>Spike|hCoV-19/England/QEUA-B2EC2B/2020|2020-11-04|EPI\_ISL\_660029|Original|hCoV-19^^England|Human|Lighthouse Lab in Glasgow|Wellcome Sanger Institute for the COVID-19 Genomics UK (COG-UK) Consortium|Davies|United Kingdom

>Spike|hCoV-19/England/NORT-285A12/2020|2020-05-13|EPI\_ISL\_493452|Original|hCoV-19^^England|Human|Northumbria University / South Tees Hospitals NHS Foundation Trust / North Cumbria Integrated Care NHS Foundation Trust / North Tees and Hartlepool NHS Foundation Trust / Newcastle Hospitals NHS Foundation Trust|COVID-19 Genomics UK (COG-UK) Consortium|Bashton|United Kingdom

>Spike|hCoV-19/England/QEUA-CC27BE/2020|2020-12-21|EPI\_ISL\_778090|Original|hCoV-19^^England|Human|Lighthouse Lab in Glasgow|Wellcome Sanger Institute for the COVID-19 Genomics UK (COG-UK) Consortium|Davies|United Kingdom

>Spike|hCoV-19/USA/UT-UPHL-2012820748/2020|2020-08-08|EPI\_ISL\_745571|Original|hCoV-19^^Utah|Human|Ginkgo Bioworks Clinical Laboratory|Utah Public Health Laboratory|Young|USA

>Spike|hCoV-19/Wales/PHWC-355C7/2020|2020-04-24|EPI\_ISL\_474449|Original|hCoV-19^^Wales|Human|Originating lab|COVID-19 Genomics UK (COG-UK) Consortium|Moore|United Kingdom

>Spike|hCoV-19/England/BRIS-133838/2020|2020-08-04|EPI\_ISL\_524492|Original|hCoV-19^^England|Human|PHE South West Regional Laboratory|Wellcome Sanger Institute for the COVID-19 Genomics UK (COG-UK) consortium|Davies|United Kingdom

>Spike|hCoV-19/USA/MI-MDHHS-SC20279/2020|2020-04-20|EPI\_ISL\_447077|Original|hCoV-19^^Michigan|Human|Michigan Department of Health and Human Services|Michigan Department of Health and Human Services|Blankenship|USA

>Spike|hCoV-19/England/201640255/2020|2020-04-14|EPI\_ISL\_466454|Original|hCoV-19^^England|Human|Respiratory Virus Unit|Respiratory Virus Unit|Platt|United Kingdom

>Spike|hCoV-19/Japan/PG-0573/2020|2020-04-09|EPI\_ISL\_480216|Original|hCoV-19^^Kansai|Human|Department of Infectious Diseases|Pathogen Genomics Center|Sekizuka|Japan

>Spike|hCoV-19/England/QEUA-A5E27C/2020|2020-10-12|EPI\_ISL\_597516|Original|hCoV-19^^England|Human|Lighthouse Lab in Glasgow|Wellcome Sanger Institute for the COVID-19 Genomics UK (COG-UK) consortium|Davies|United Kingdom

>Spike|hCoV-19/Scotland/EDB2007/2020|2020-04-18|EPI\_ISL\_491581|Original|hCoV-19^^Scotland|Human|Virology Department|Wellcome Sanger Institute for the COVID-19 Genomics UK (COG-UK) consortium|Davies|United Kingdom

>Spike|hCoV-19/England/QEUA-BA1C02/2020|2020-11-18|EPI\_ISL\_719823|Original|hCoV-19^^England|Human|Lighthouse Lab in Glasgow|Wellcome Sanger Institute for the COVID-19 Genomics UK (COG-UK) Consortium|Davies|United Kingdom

>Spike|hCoV-19/Scotland/QEUA-9DABAB/2020|2020-09-22|EPI\_ISL\_601170|Original|hCoV-19^^Scotland|Human|Lighthouse Lab in Glasgow|Wellcome Sanger Institute for the COVID-19 Genomics UK (COG-UK) consortium|Davies|United Kingdom

>Spike|hCoV-19/England/BRIS-1260D6/2020|2020-04-09|EPI\_ISL\_459066|Original|hCoV-19^^England|Human|PHE South West Regional Laboratory|Wellcome Sanger Institute for the COVID-19 Genomics UK (COG-UK) consortium|Davies|United Kingdom

>Spike|hCoV-19/India/DL-NCDC1995-CSIR-IGIB/2020|2020-05-18|EPI\_ISL\_482520|Original|hCoV-19^^Delhi|Human|National Centre for Disease control (NCDC)|NCDC/CSIR-IGIB|Pandey|India

>Spike|hCoV-19/USA/CA-CZB-15947/2020|2020-11-30|EPI\_ISL\_739053|Original|hCoV-19^^California|Human|Santa Clara County Public Health Laboratory|Chan-Zuckerberg Biohub|Kamm|USA

>Spike|hCoV-19/NorthernIreland/QEUA-9B459A/2020|2020-09-04|EPI\_ISL\_590457|Original|hCoV-19^^Northern Ireland|Human|Lighthouse Lab in Glasgow|Wellcome Sanger Institute for the COVID-19 Genomics UK (COG-UK) consortium|Davies|United Kingdom

>Spike|hCoV-19/England/QEUA-9B8DCB/2020|2020-09-07|EPI\_ISL\_549618|Original|hCoV-19^^England|Human|Lighthouse Lab in Glasgow|Wellcome Sanger Institute for the COVID-19 Genomics UK (COG-UK) consortium|Davies|United Kingdom

>Spike|hCoV-19/Denmark/DCGC-9649/2020|2020-11-09|EPI\_ISL\_669088|Original|hCoV-19^^Hovedstaden|Human|Department of Virus and Microbiological Special Diagnostics|Albertsen Lab|Michaelsen|Denmark

>Spike|hCoV-19/USA/TX-HMH-MCoV-10182/2020|2020-07-06|EPI\_ISL\_789358|Original|hCoV-19^^Texas|Human|Houston Methodist Hospital|Houston Methodist Hospital|Long|USA

>Spike|hCoV-19/England/NORT-2942CD/2020|2020-07-29|EPI\_ISL\_572701|Original|hCoV-19^^England|Human|Northumbria University / South Tees Hospitals NHS Foundation Trust / North Cumbria Integrated Care NHS Foundation Trust / North Tees and Hartlepool NHS Foundation Trust / Newcastle Hospitals NHS Foundation Trust|COVID-19 Genomics UK (COG-UK) Consortium|Bashton|United Kingdom

>Spike|hCoV-19/England/NORT-281524/2020|2020-03-15|EPI\_ISL\_488801|Original|hCoV-19^^England|Human|NU-OMICS DNA Sequencing research facility|Wellcome Sanger Institute for the COVID-19 Genomics UK (COG-UK) consortium|Davies|United Kingdom

>Spike|hCoV-19/Scotland/QEUA-A0BF0E/2020|2020-10-03|EPI\_ISL\_599291|Original|hCoV-19^^Scotland|Human|Lighthouse Lab in Glasgow|Wellcome Sanger Institute for the COVID-19 Genomics UK (COG-UK) consortium|Davies|United Kingdom

>Spike|hCoV-19/Wales/PHWC-496BDD/2020|2020-11-23|EPI\_ISL\_726699|Original|hCoV-19^^Wales|Human|Originating lab|COVID-19 Genomics UK (COG-UK) Consortium|Moore|United Kingdom

>Spike|hCoV-19/USA/TX-HMH-2568/2020|2020-06-03|EPI\_ISL\_545393|Original|hCoV-19^^Texas|Human|Houston Methodist Hospital|Houston Methodist Hospital|Long|USA

>Spike|hCoV-19/France/ARA-102965/2020|2020-11-06|EPI\_ISL\_683341|Original|hCoV-19^^Auvergne-Rh\u00f4ne-Alpes|Human|CNR Virus des Infections Respiratoires - France SUD|CNR Virus des Infections Respiratoires - France SUD|Bal|France

>Spike|hCoV-19/Australia/SAP404/2020|2020-03-21|EPI\_ISL\_492169|Original|hCoV-19^^South Australia|Human|SA Pathology|SA Pathology|Leong|Australia

>Spike|hCoV-19/England/CAMB-7B167/2020|2020-04-11|EPI\_ISL\_433925|Original|hCoV-19^^England|Human|Department of Pathology|COVID-19 Genomics UK (COG-UK) Consortium|Meredith|United Kingdom

>Spike|hCoV-19/Luxembourg/LNS1174515/2020|2020-11-08|EPI\_ISL\_739904|Original|hCoV-19^^Luxembourg|Human|Laboratoire national de sant\u00e9|Laboratoire national de sant\u00e9|Wienecke-Baldacchino|Luxembourg

>Spike|hCoV-19/England/QEUH-9982B3/2020|2020-08-26|EPI\_ISL\_539981|Original|hCoV-19^^England|Human|Lighthouse Lab in Glasgow|Wellcome Sanger Institute for the COVID-19 Genomics UK (COG-UK) consortium|Davies|United Kingdom

>Spike|hCoV-19/USA/UT-03036/2020|2020-05-01|EPI\_ISL\_522308|Original|hCoV-19^^Utah|Human|Utah Public Health Laboratory|Utah Public Health Laboratory|Young|USA

>Spike|hCoV-19/England/BRIS-1853DEE/2020|2020-04-28|EPI\_ISL\_492289|Original|hCoV-19^^England|Human|PHE South West Regional Laboratory|Wellcome Sanger Institute for the COVID-19 Genomics UK (COG-UK) consortium|Davies|United Kingdom

>Spike|hCoV-19/Wales/PHWC-48A046/2020|2020-11-03|EPI\_ISL\_650320|Original|hCoV-19^^Wales|Human|Wales Specialist Virology Centre Sequencing lab|COVID-19 Genomics UK (COG-UK) Consortium|Moore|United Kingdom

>Spike|hCoV-19/France/ARA-10821/2020|2020-03-18|EPI\_ISL\_509000|Original|hCoV-19^^Auvergne-Rh\u00f4ne-Alpes|Human|CNR Virus des Infections Respiratoires - France SUD|CNR Virus des Infections Respiratoires - France SUD|Josset|France

>Spike|hCoV-19/Wales/PHWC-487A3C/2020|2020-10-26|EPI\_ISL\_639264|Original|hCoV-19^^Wales|Human|Wales Specialist Virology Centre Sequencing lab|COVID-19 Genomics UK (COG-UK) Consortium|Moore|United Kingdom

>Spike|hCoV-19/England/MILK-A44F63/2020|2020-10-06|EPI\_ISL\_598728|Original|hCoV-19^^England|Human|Lighthouse Lab in Milton Keynes|Wellcome Sanger Institute for the COVID-19 Genomics UK (COG-UK) consortium|Davies|United Kingdom

>Spike|hCoV-19/USA/MI-MDHHS-SC22711/2020|2020-11-14|EPI\_ISL\_767360|Original|hCoV-19^^Michigan|Human|Michigan Department of Health and Human Services|Michigan Department of Health and Human Services|Jacob|USA

>Spike|hCoV-19/Japan/IC-0115/2020|2020-07-00|EPI\_ISL\_591456|Original|hCoV-19^^Japan|Human|Pathogen Genomics Center|Pathogen Genomics Center|Sekizuka|Japan

>Spike|hCoV-19/Denmark/DCGC-20890/2020|2020-12-21|EPI\_ISL\_759431|Original|hCoV-19^^Hovedstaden|Human|Department of Virus and Microbiological Special Diagnostics|Albertsen Lab|Michaelsen|Denmark

>Spike|hCoV-19/Israel/CVL-n-6134/2020|2020-03-15|EPI\_ISL\_475021|Original|hCoV-19^^Tel-Aviv|Human|Israel Central Virology laboratory|Israel Central Virology laboratory|Zuckerman|Israel

>Spike|hCoV-19/England/CWAR-24FD9A7/2020|2020-04-30|EPI\_ISL\_584459|Original|hCoV-19^^England|Human|UHCW / University of Warwick|COVID-19 Genomics UK (COG-UK) Consortium|Stark|United Kingdom

>Spike|hCoV-19/England/ALDP-BB51C0/2020|2020-11-20|EPI\_ISL\_701711|Original|hCoV-19^^England|Human|Lighthouse Lab in Alderley Park|Wellcome Sanger Institute for the COVID-19 Genomics UK (COG-UK) Consortium|Davies|United Kingdom

>Spike|hCoV-19/Australia/VIC1995/2020|2020-03-26|EPI\_ISL\_521901|Original|hCoV-19^^Victoria|Human|Victorian Infectious Diseases Reference Laboratory (VIDRL)|VIDRL and MDU-PHL|Schultz|Australia

>Spike|hCoV-19/Australia/VIC10904/2020|2020-08-05|EPI\_ISL\_563147|Original|hCoV-19^^Victoria|Human|Microbiological Diagnostic Unit - Public Health Laboratory (MDU-PHL)|MDU-PHL|Schultz|Australia

>Spike|hCoV-19/England/EXET-13E4DF/2020|2020-12-06|EPI\_ISL\_724323|Original|hCoV-19^^England|Human|University of Exeter|COVID-19 Genomics UK (COG-UK) Consortium|Temperton|United Kingdom

>Spike|hCoV-19/Japan/PG-1351/2020|2020-04-00|EPI\_ISL\_684959|Original|hCoV-19^^Japan|Human|Saitama Prefectural Institute of Public Health|Pathogen Genomics Center|Sekizuka|Japan

>Spike|hCoV-19/Wales/PHWC-4A4204/2020|2020-12-16|EPI\_ISL\_764666|Original|hCoV-19^^Wales|Human|Wales Specialist Virology Centre Sequencing lab|COVID-19 Genomics UK (COG-UK) Consortium|Moore|United Kingdom

>Spike|hCoV-19/Scotland/QEUH-96DE0E/2020|2020-08-21|EPI\_ISL\_530743|Original|hCoV-19^^Scotland|Human|NHSGGC West of Scotland Specialist Virology Centre / MRC - University of Glasgow Centre for Virus Research|Wellcome Sanger Institute for the COVID-19 Genomics UK (COG-UK) consortium|Davies|United Kingdom

>Spike|hCoV-19/United Arab Emirates/0638/2020|2020-05-15|EPI\_ISL\_698794|Original|hCoV-19^^Abu Dhabi|Human|Group 42 (G42) Healthcare|G42 Healthcare|Ogrodzki|United Arab Emirates

>Spike|hCoV-19/Scotland/CVR243/2020|2020-03-19|EPI\_ISL\_438904|Original|hCoV-19^^Scotland|Human|West of Scotland Specialist Virology Centre|COVID-19 Genomics UK (COG-UK) Consortium|Robertson|United Kingdom

>Spike|hCoV-19/Netherlands/ZH-EMC-1145/2020|2020-12-19|EPI\_ISL\_763222|Original|hCoV-19^^Zuid Holland|Human|Dutch COVID-19 response team|Erasmus Medical Center|Oude Munnink|Netherlands

>Spike|hCoV-19/Wales/PHWC-49C7A6/2020|2020-11-18|EPI\_ISL\_742601|Original|hCoV-19^^Wales|Human|Wales Specialist Virology Centre Sequencing lab|COVID-19 Genomics UK (COG-UK) Consortium|Moore|United Kingdom

>Spike|hCoV-19/USA/CA-ALSR-1028-IPL/2020|2020-04-22|EPI\_ISL\_483472|Original|hCoV-19^^California|Human|UC San Diego Center for Advanced Laboratory Medicine|Andersen lab at Scripps Research|Gangavarapu|USA

>Spike|hCoV-19/Australia/VIC5294/2020|2020-07-17|EPI\_ISL\_520057|Original|hCoV-19^^Victoria|Human|Microbiological Diagnostic Unit - Public Health Laboratory (MDU-PHL) |MDU-PHL|Schultz|Australia

>Spike|hCoV-19/USA/TX-HMH-7350/2020|2020-06-29|EPI\_ISL\_546695|Original|hCoV-19^^Texas|Human|Houston Methodist Hospital|Houston Methodist Hospital|Long|USA

>Spike|hCoV-19/Switzerland/SZ-ETHZ-310403/2020|2020-10-08|EPI\_ISL\_603477|Original|hCoV-19^^Schwyz|Human|Viollier AG|Department of Biosystems Science and Engineering|Nadeau|Switzerland

>Spike|hCoV-19/Wales/PHWC-49B18B/2020|2020-10-27|EPI\_ISL\_742304|Original|hCoV-19^^Wales|Human|Wales Specialist Virology Centre Sequencing lab|COVID-19 Genomics UK (COG-UK) Consortium|Moore|United Kingdom

>Spike|hCoV-19/Chile/RM-CMM-25669/2020|2020-03-17|EPI\_ISL\_459862|Original|hCoV-19^^Region Metropolitana de Santiago|Human|Center for Genome Regulation (CRG)|Center for Mathematical Modeling and Center for Genome Regulation. Santiago|Palma V\|u00e9jares|Chile

>Spike|hCoV-19/USA/TX-HMH-MCoV-18848/2020|2020-11-26|EPI\_ISL\_785165|Original|hCoV-19^^Texas|Human|Houston Methodist Hospital|Houston Methodist Hospital|Long|USA

>Spike|hCoV-19/Norway/3745/2020|2020-09-04|EPI\_ISL\_591000|Original|hCoV-19^^Viken|Human|Ostfold Hospital Trust - Kalnes|Norwegian Institute of Public Health|Vollan|Norway

>Spike|hCoV-19/USA/TX-HMH-MCoV-8162/2020|2020-06-29|EPI\_ISL\_784239|Original|hCoV-19^^Texas|Human|Houston Methodist Hospital|Houston Methodist Hospital|Long|USA

>Spike|hCoV-19/Wales/PHWC-28600/2020|2020-04-01|EPI\_ISL\_432425|Original|hCoV-19^^Wales|Human|Wales Specialist Virology Centre|Public Health Wales Microbiology Cardiff|Moore|United Kingdom

>Spike|hCoV-19/USA/CA-SCCPHD-UC160/2020|2020-03-12|EPI\_ISL\_435639|Original|hCoV-19^^California|Human|Santa Clara County Public Health Department|Chiu Laboratory|Chiu|USA

>Spike|hCoV-19/England/CAMC-A58F3F/2020|2020-10-09|EPI\_ISL\_597140|Original|hCoV-19^^England|Human|Lighthouse Lab in Cambridge|Wellcome Sanger Institute for the COVID-19 Genomics UK (COG-UK) consortium|Davies|United Kingdom

>Spike|hCoV-19/England/QEUEH-AD3163/2020|2020-10-26|EPI\_ISL\_633741|Original|hCoV-19^^England|Human|Lighthouse Lab in Glasgow|Wellcome Sanger Institute for the COVID-19 Genomics UK (COG-UK) consortium|Davies|United Kingdom

>Spike|hCoV-19/India/MH-ACTREC-571/2020|2020-08-31|EPI\_ISL\_700215|Original|hCoV-19^^Maharashtra|Human|Hematopathology Laboratory|Hematopathology Laboratory|Patkar|India

>Spike|hCoV-19/USA/PA-MGSC41-05/2020|2020-03-26|EPI\_ISL\_436489|Original|hCoV-19^^Pennsylvania|Human|UPMC Clinical Laboratory|Microbial Genome Sequencing Center|Cooper|USA

>Spike|hCoV-19/USA/CA-SR0392/2020|2020-04-29|EPI\_ISL\_458269|Original|hCoV-19^^California|Human|Scripps Medical Laboratory|Andersen lab at Scripps Research|Gangavarapu|USA

>Spike|hCoV-19/USA/CO-CDPHE-2100001027/2020|2020-11-18|EPI\_ISL\_771282|Original|hCoV-19^^Colorado|Human|Colorado Department of Public Health and Environment|Colorado Department of Public Health and Environment|Bankers|USA

>Spike|hCoV-19/England/QEUEH-A9BFF4/2020|2020-10-18|EPI\_ISL\_652627|Original|hCoV-19^^England|Human|Queens Medical Centre|COVID-19 Genomics UK (COG-UK) Consortium|Loose|United Kingdom

>Spike|hCoV-19/Australia/VIC2388/2020|2020-06-29|EPI\_ISL\_522106|Original|hCoV-19^^Victoria|Human|Victorian Infectious Diseases Reference Laboratory (VIDRL)|VIDRL and MDU-PHL|Schultz|Australia

>Spike|hCoV-19/USA/WA-UW-1338/2020|2020-03-18|EPI\_ISL\_422986|Original|hCoV-19^^Washington|Human|UW Virology Lab|UW Virology Lab|Roychoudhury|USA

>Spike|hCoV-19/USA/TX-HMH-MCoV-11677/2020|2020-09-14|EPI\_ISL\_790084|Original|hCoV-19^^Texas|Human|Houston Methodist Hospital|Houston Methodist Hospital|Long|USA

>Spike|hCoV-19/England/SHEF-10D374A/2020|2020-12-11|EPI\_ISL\_742059|Original|hCoV-19^^England|Human|Virology Department|COVID-19 Genomics UK (COG-UK) Consortium|de Silva|United Kingdom

>Spike|hCoV-19/United Arab Emirates/0673/2020|2020-05-15|EPI\_ISL\_698826|Original|hCoV-19^^Abu Dhabi|Human|Group 42 (G42) Healthcare|G42 Healthcare|Ogrodzki|United Arab Emirates

>Spike|hCoV-19/England/CAMC-B523ED/2020|2020-11-08|EPI\_ISL\_656939|Original|hCoV-19^^England|Human|Lighthouse Lab in Cambridge|Wellcome Sanger Institute for the COVID-19 Genomics UK (COG-UK) Consortium|Davies|United Kingdom

>Spike|hCoV-19/New Zealand/20CV0205/2020|2020-08-29|EPI\_ISL\_548112|Original|hCoV-19^^Auckland|Human|Middlemore Hospital|Institute of Environmental Science and Research (ESR)|Wang|New Zealand

>Spike|hCoV-19/England/CAMC-C99659/2020|2020-12-18|EPI\_ISL\_761979|Original|hCoV-19^^England|Human|Lighthouse Lab in Cambridge|Wellcome Sanger Institute for the COVID-19 Genomics UK (COG-UK) Consortium|Davies|United Kingdom

>Spike|hCoV-19/India/MH-ACTREC-139/2020|2020-05-28|EPI\_ISL\_699795|Original|hCoV-19^^Maharashtra|Human|Hematopathology Laboratory|Hematopathology Laboratory|Patkar|India

>Spike|hCoV-19/England/202881398/2020|2020-07-04|EPI\_ISL\_491732|Original|hCoV-19^^England|Human|Respiratory Virus Unit|Respiratory Virus Unit|Platt|United Kingdom

>Spike|hCoV-19/USA/WA-UW-1827/2020|2020-03-22|EPI\_ISL\_424271|Original|hCoV-19^^Washington|Human|UW Virology Lab|UW Virology Lab|Roychoudhury|USA

>Spike|hCoV-19/Wales/PHWC-252E1/2020|2020-03-22|EPI\_ISL\_432386|Original|hCoV-19^^Wales|Human|Wales Specialist Virology Centre|Public Health Wales Microbiology Cardiff|Moore|United Kingdom

>Spike|hCoV-19/Germany/NW-RKI-NP-0045/2020|2020-12-09|EPI\_ISL\_765893|Original|hCoV-19^^North Rhine-Westphalia|Human|Unit 17|Project group Epidemiology of Highly Pathogenic Microorganisms|Schubert|Germany

>Spike|hCoV-19/Denmark/DCGC-17250/2020|2020-12-14|EPI\_ISL\_750855|Original|hCoV-19^^Syddanmark|Human|Department of Virus and Microbiological Special Diagnostics|Albertsen Lab|Michaelsen|Denmark

>Spike|hCoV-19/Scotland/QEUEH-BCCC98/2020|2020-11-26|EPI\_ISL\_710815|Original|hCoV-19^^Scotland|Human|Lighthouse Lab in Glasgow|Wellcome Sanger Institute for the COVID-19 Genomics UK (COG-UK) Consortium|Davies|United Kingdom

>Spike|hCoV-19/England/ALDP-B62E43/2020|2020-11-08|EPI\_ISL\_655398|Original|hCoV-19^^England|Human|Lighthouse Lab in Alderley Park|Wellcome Sanger Institute for the COVID-19 Genomics UK (COG-UK) Consortium|Davies|United Kingdom

>Spike|hCoV-19/Denmark/DCGC-16502/2020|2020-11-16|EPI\_ISL\_714804|Original|hCoV-19^^Hovedstaden|Human|Department of Virus and Microbiological Special Diagnostics|Albertsen Lab|Michaelsen|Denmark

>Spike|hCoV-19/England/QEUEH-C961A6/2020|2020-12-17|EPI\_ISL\_777461|Original|hCoV-19^^England|Human|Lighthouse Lab in Glasgow|Wellcome Sanger Institute for the COVID-19 Genomics UK (COG-UK) Consortium|Davies|United Kingdom

>Spike|hCoV-19/USA/MN-MDH-1808/2020|2020-04-14|EPI\_ISL\_590810|Original|hCoV-19^^Minnesota|Human|Minnesota Department of Health|Minnesota Department of Health|Lorentz|USA

>Spike|hCoV-19/England/LEED-2A9CF4/2020|2020-03-29|EPI\_ISL\_538928|Original|hCoV-19^^England|Human|Leeds Teaching Hospitals NHS Trust and Public Health England|Wellcome Sanger Institute for the COVID-19 Genomics UK (COG-UK) consortium|Davies|United Kingdom

>Spike|hCoV-19/Denmark/DCGC-8816/2020|2020-10-26|EPI\_ISL\_626103|Original|hCoV-19^^Hovedstaden|Human|Department of Virus and Microbiological Special Diagnostics|Albertsen lab|Michaelsen|Denmark

>Spike|hCoV-19/England/QEUA-CC245D/2020|2020-12-21|EPI\_ISL\_778007|Original|hCoV-19^^England|Human|Lighthouse Lab in Glasgow|Wellcome Sanger Institute for the COVID-19 Genomics UK (COG-UK) Consortium|Davies|United Kingdom

>Spike|hCoV-19/Wales/PHWC-47E3F1/2020|2020-09-28|EPI\_ISL\_595452|Original|hCoV-19^^Wales|Human|Originating lab|COVID-19 Genomics UK (COG-UK) Consortium|Moore|United Kingdom

>Spike|hCoV-19/Japan/PG-5598/2020|2020-08-00|EPI\_ISL\_688723|Original|hCoV-19^^Japan|Human|Pathogen Genomics Center|Pathogen Genomics Center|Sekizuka|Japan

>Spike|hCoV-19/Israel/CVL-276-ngs/2020|2020-12-27|EPI\_ISL\_776832|Original|hCoV-19^^Israel|Human|Israel Central Virology laboratory|Israel Central Virology laboratory|Zuckerman|Israel

>Spike|hCoV-19/Scotland/QEUA-9D0219/2020|2020-09-16|EPI\_ISL\_601832|Original|hCoV-19^^Scotland|Human|Lighthouse Lab in Glasgow|Wellcome Sanger Institute for the COVID-19 Genomics UK (COG-UK) consortium|Davies|United Kingdom

>Spike|hCoV-19/England/SHEF-C8972/2020|2020-09-21|EPI\_ISL\_573715|Original|hCoV-19^^England|Human|Virology Department|COVID-19 Genomics UK (COG-UK) Consortium|de Silva|United Kingdom

>Spike|hCoV-19/Denmark/DCGC-19290/2020|2020-12-07|EPI\_ISL\_748331|Original|hCoV-19^^Hovedstaden|Human|Department of Virus and Microbiological Special Diagnostics|Albertsen Lab|Michaelsen|Denmark

>Spike|hCoV-19/USA/WI-UW-942/2020|2020-05-10|EPI\_ISL\_509942|Original|hCoV-19^^Wisconsin|Human|University of Wisconsin-Madison AIDS Vaccine Research Laboratories|University of Wisconsin-Madison AIDS Vaccine Research Laboratories|Baczenas|USA

>Spike|hCoV-19/USA/NY-NYUMC405/2020|2020-04-13|EPI\_ISL\_430432|Original|hCoV-19^^New York|Human|NYU Langone Health|Departments of Pathology and Medicine|Maurano|USA

>Spike|hCoV-19/England/CAMC-9D7133/2020|2020-09-20|EPI\_ISL\_584347|Original|hCoV-19^^England|Human|Virology Department|COVID-19 Genomics UK (COG-UK) Consortium|de Silva|United Kingdom

>Spike|hCoV-19/England/NORW-F54A8/2020|2020-10-27|EPI\_ISL\_725264|Original|hCoV-19^^England|Human|Quadram Institute Bioscience|COVID-19 Genomics UK (COG-UK) Consortium|Alikhan|United Kingdom

>Spike|hCoV-19/USA/CA-CHLA-PLM19042682/2020|2020-11-30|EPI\_ISL\_753557|Original|hCoV-19^^California|Human|Clinical virology Laboratory|Center for Personalized Medicine|Dien Bard|USA

>Spike|hCoV-19/Wales/PHWC-484941/2020|2020-10-23|EPI\_ISL\_628061|Original|hCoV-19^^Wales|Human|Wales Specialist Virology Centre Sequencing lab|COVID-19 Genomics UK (COG-UK) Consortium|Moore|United Kingdom

>Spike|hCoV-19/England/CAMC-B36789/2020|2020-11-05|EPI\_ISL\_645431|Original|hCoV-19^^England|Human|Lighthouse Lab in Cambridge|Wellcome Sanger Institute for the COVID-19 Genomics UK (COG-UK) Consortium|Davies|United Kingdom

>Spike|hCoV-19/USA/OR-OHSU-2983/2020|2020-09-09|EPI\_ISL\_667447|Original|hCoV-19^^Oregon|Human|OHSU Lab Services Molecular Microbiology Lab|Oregon SARS-CoV-2 Genome Sequencing Center|O'Roak|USA

>Spike|hCoV-19/USA/TX-HMH-7570/2020|2020-06-25|EPI\_ISL\_546861|Original|hCoV-19^^Texas|Human|Houston Methodist Hospital|Houston Methodist Hospital|Long|USA

>Spike|hCoV-19/USA/FL-BPHL-0454/2020|2020-03-23|EPI\_ISL\_495360|Original|hCoV-19^^Florida|Human|Florida Bureau of Public Health Laboratories|Florida Bureau of Public Health Laboratories|Blanton|USA

>Spike|hCoV-19/England/CAMB-7DAB5/2020|2020-04-06|EPI\_ISL\_441745|Original|hCoV-19^^England|Human|Department of Pathology|Wellcome Sanger Institute for the COVID-19 Genomics UK (COG-UK) consortium|Amato|United Kingdom



>Spike|hCoV-19/Germany/HH-hpi-p1960/2020|2020-03-25|EPI\_ISL\_776285|Original|hCoV-19^^Hamburg|Human|University Medical Center Hamburg Eppendorf|Heinrich Pette Institute|Robitaille|Germany

>Spike|hCoV-19/England/SHEF-10D6D54/2020|2020-12-04|EPI\_ISL\_727982|Original|hCoV-19^^England|Human|Virology Department|COVID-19 Genomics UK (COG-UK) Consortium|de Silva|United Kingdom

>Spike|hCoV-19/England/CAMB-1BCC95/2020|2020-12-02|EPI\_ISL\_764298|Original|hCoV-19^^England|Human|Department of Pathology|COVID-19 Genomics UK (COG-UK) Consortium|Goodfellow|United Kingdom

>Spike|hCoV-19/Japan/PG-4203/2020|2020-07-00|EPI\_ISL\_692441|Original|hCoV-19^^Japan|Human|Pathogen Genomics Center|Pathogen Genomics Center|Sekizuka|Japan

>Spike|hCoV-19/USA/TX-DSHS-1620/2020|2020-10-14|EPI\_ISL\_700705|Original|hCoV-19^^Texas|Human|Texas Department of State Health Services|Texas Department of State Health Services|Rahman|USA

>Spike|hCoV-19/England/MILK-B3E280/2020|2020-11-01|EPI\_ISL\_741419|Original|hCoV-19^^England|Human|Oxford Viromics|COVID-19 Genomics UK (COG-UK) Consortium|Golubchik|United Kingdom

>Spike|hCoV-19/Panama/330547/2020|2020-03-14|EPI\_ISL\_496666|Original|hCoV-19^^Cocle|Human|Gorgas Memorial Laboratory of Health Studies|Gorgas Memorial Laboratory of Health Studies|Martinez|Panama

>Spike|hCoV-19/England/20146011404/2020|2020-04-01|EPI\_ISL\_466028|Original|hCoV-19^^England|Human|Respiratory Virus Unit|Respiratory Virus Unit|Platt|United Kingdom

>Spike|hCoV-19/Wales/MILK-A058FA/2020|2020-09-30|EPI\_ISL\_599960|Original|hCoV-19^^Wales|Human|Lighthouse Lab in Milton Keynes|Wellcome Sanger Institute for the COVID-19 Genomics UK (COG-UK) Consortium|Davies|United Kingdom

>Spike|hCoV-19/Wales/MILK-9E2144/2020|2020-09-20|EPI\_ISL\_581159|Original|hCoV-19^^Wales|Human|Lighthouse Lab in Milton Keynes|Wellcome Sanger Institute for the COVID-19 Genomics UK (COG-UK) consortium|Davies|United Kingdom

>Spike|hCoV-19/Germany/HH-hpi-p1361/2020|2020-03-28|EPI\_ISL\_775783|Original|hCoV-19^^Hamburg|Human|University Medical Center Hamburg Eppendorf|Heinrich Pette Institute|Robitaille|Germany

>Spike|hCoV-19/Hong Kong/HKU-908b/2020|2020-01-29|EPI\_ISL\_434570|unknown|hCoV-19^^Hong Kong|Human|unknown|Microbiology|Submitter|China

>Spike|hCoV-19/USA/TX-HMH-MCoV-16044/2020|2020-10-29|EPI\_ISL\_785728|Original|hCoV-19^^Texas|Human|Houston Methodist Hospital|Houston Methodist Hospital|Long|USA

>Spike|hCoV-19/Wales/PHWC-494EB8/2020|2020-11-26|EPI\_ISL\_726267|Original|hCoV-19^^Wales|Human|Originating lab|COVID-19 Genomics UK (COG-UK) Consortium|Moore|United Kingdom

>Spike|hCoV-19/England/LOND-125FAA5/2020|2020-04-06|EPI\_ISL\_516883|Original|hCoV-19^^England|Human|North West London Pathology|Wellcome Sanger Institute for the COVID-19 Genomics UK (COG-UK) consortium|Davies|United Kingdom

>Spike|hCoV-19/Hong Kong/VM20031163/2020|2020-07-07|EPI\_ISL\_510094|Original|hCoV-19^^Hong Kong|Human|Queen Elizabeth Hospital|Hong Kong Department of Health|Mak|China

>Spike|hCoV-19/England/ALDP-A925DD/2020|2020-10-19|EPI\_ISL\_611227|Original|hCoV-19^^England|Human|Lighthouse Lab in Alderley Park|Wellcome Sanger Institute for the COVID-19 Genomics UK (COG-UK) consortium|Davies|United Kingdom

>Spike|hCoV-19/England/QEUEH-9D0950/2020|2020-09-16|EPI\_ISL\_590014|Original|hCoV-19^^England|Human|Lighthouse Lab in Glasgow|Wellcome Sanger Institute for the COVID-19 Genomics UK (COG-UK) consortium|Davies|United Kingdom

>Spike|hCoV-19/USA/WI-UW-599/2020|2020-06-28|EPI\_ISL\_484974|Original|hCoV-19^^Wisconsin|Human|University of Wisconsin-Madison AIDS Vaccine Research Laboratories|University of Wisconsin-Madison AIDS Vaccine Research Laboratories|Baczenas|USA

>Spike|hCoV-19/Finland/3LS7BD7/2020|2020-10-03|EPI\_ISL\_756111|Original|hCoV-19^^Uusimaa|Human|Department of Virology and Immunology|Department of Virology|Smura|Finland

>Spike|hCoV-19/England/QEUEH-96D5FA/2020|2020-08-20|EPI\_ISL\_530756|Original|hCoV-19^^England|Human|Lighthouse Lab in Glasgow|Wellcome Sanger Institute for the COVID-19 Genomics UK (COG-UK) consortium|Davies|United Kingdom

>Spike|hCoV-19/England/NOTT-10DFD8/2020|2020-03-16|EPI\_ISL\_425480|Original|hCoV-19^^England|Human|Queens Medical Centre|COVID-19 Genomics UK (COG-UK) Consortium|Loose|United Kingdom

>Spike|hCoV-19/England/ALDP-95CDE7/2020|2020-06-16|EPI\_ISL\_554992|Original|hCoV-19^^England|Human|Lighthouse Lab in Alderley Park|Wellcome Sanger Institute for the COVID-19 Genomics UK (COG-UK) consortium|Davies|United Kingdom

>Spike|hCoV-19/England/ALDP-4A9B7D/2020|2020-06-10|EPI\_ISL\_559612|Original|hCoV-19^^England|Human|Lighthouse Lab in Alderley Park|Wellcome Sanger Institute for the COVID-19 Genomics UK (COG-UK) consortium|Davies|United Kingdom

>Spike|hCoV-19/Scotland/EDB5443/2020|2020-04-12|EPI\_ISL\_473823|Original|hCoV-19^^Scotland|Human|Virology Department|COVID-19 Genomics UK (COG-UK) Consortium|Williams|United Kingdom

>Spike|hCoV-19/Denmark/DCGC-2325/2020|2020-08-10|EPI\_ISL\_617662|Original|hCoV-19^^Sjaelland|Human|Department of Virus and Microbiological Special Diagnostics|Albertsen lab|Michaelsen|Denmark

>Spike|hCoV-19/Canada/ON-S1307/2020|2020-04-11|EPI\_ISL\_586345|Original|hCoV-19^^Ontario|Human|Toronto Invasive Bacterial Diseases Network|McMaster University|McArthur|Canada

>Spike|hCoV-19/England/QEUEH-B663C8/2020|2020-11-11|EPI\_ISL\_662504|Original|hCoV-19^^England|Human|Lighthouse Lab in Glasgow|Wellcome Sanger Institute for the COVID-19 Genomics UK (COG-UK) Consortium|Davies|United Kingdom

>Spike|hCoV-19/Scotland/QEUEH-9CEE47/2020|2020-09-17|EPI\_ISL\_601961|Original|hCoV-19^^Scotland|Human|Lighthouse Lab in Glasgow|Wellcome Sanger Institute for the COVID-19 Genomics UK (COG-UK) consortium|Davies|United Kingdom

>Spike|hCoV-19/USA/CA-CZB-7128/2020|2020-08-31|EPI\_ISL\_583008|Original|hCoV-19^^California|Human|Orange County Public Health Lab|Chan-Zuckerberg Biohub|Bhatt|USA

>Spike|hCoV-19/England/ALDP-B74655/2020|2020-11-12|EPI\_ISL\_662001|Original|hCoV-19^^England|Human|Lighthouse Lab in Alderley Park|Wellcome Sanger Institute for the COVID-19 Genomics UK (COG-UK) Consortium|Davies|United Kingdom

>Spike|hCoV-19/Denmark/DCGC-4085/2020|2020-09-14|EPI\_ISL\_622041|Original|hCoV-19^^Hovedstaden|Human|Department of Virus and Microbiological Special Diagnostics|Albertsen lab|Michaelsen|Denmark

>Spike|hCoV-19/England/NORT-281AF8/2020|2020-03-23|EPI\_ISL\_472175|Original|hCoV-19^^England|Human|Northumbria University / South Tees Hospitals NHS Foundation Trust / North Cumbria Integrated Care NHS Foundation Trust / North Tees and Hartlepool NHS Foundation Trust / Newcastle Hospitals NHS Foundation Trust|COVID-19 Genomics UK (COG-UK) Consortium|Bashton|United Kingdom

>Spike|hCoV-19/Scotland/QEUEH-A793C3/2020|2020-10-14|EPI\_ISL\_638994|Original|hCoV-19^^Scotland|Human|Oxford Viromics|COVID-19 Genomics UK (COG-UK) Consortium|Golubchik|United Kingdom

>Spike|hCoV-19/Spain/CL-IBV-97006165/2020|2020-04-05|EPI\_ISL\_537312|Original|hCoV-19^^Castilla y Leon|Human|Universidad de Le\u00f3n|SeqCOVID-SPAIN consortium|IBV (CSIC) |Comas|Spain

>Spike|hCoV-19/Belgium/ULG-10096/2020|2020-04-05|EPI\_ISL\_427389|Original|hCoV-19^^Liege|Human|Department of Clinical Microbiology|GIGA Medical Genomics|Durkin|Belgium

>Spike|hCoV-19/Portugal/PT1901/2020|2020-12-02|EPI\_ISL\_732115|Original|hCoV-19^^Portugal|Human|Instituto Nacional de Saude (INSA)|Instituto Nacional de Saude (INSA) |Borges|Portugal

>Spike|hCoV-19/England/MILK-99C783/2020|2020-08-30|EPI\_ISL\_550743|Original|hCoV-19^^England|Human|Lighthouse Lab in Milton Keynes|Wellcome Sanger Institute for the COVID-19 Genomics UK (COG-UK) consortium|Davies|United Kingdom

>Spike|hCoV-19/New Zealand/20VR2724/2020|2020-00-00|EPI\_ISL\_579342|Original|hCoV-19^^Auckland|Human|LabPLUS|Institute of Environmental Science and Research (ESR) |Wang|New Zealand

>Spike|hCoV-19/Japan/PG-7938/2020|2020-07-00|EPI\_ISL\_687039|Original|hCoV-19^^Japan|Human|Pathogen Genomics Center|Pathogen Genomics Center|Sekizuka|Japan

>Spike|hCoV-19/England/QEUEH-95F4A3/2020|2020-08-06|EPI\_ISL\_532495|Original|hCoV-19^^England|Human|Lighthouse Lab in Glasgow|Wellcome Sanger Institute for the COVID-19 Genomics UK (COG-UK) consortium|Davies|United Kingdom

>Spike|hCoV-19/Singapore/1388/2020|2020-10-29|EPI\_ISL\_645115|Original|hCoV-19^^Singapore|Human|National Public Health Laboratory|National Public Health Laboratory|Mak|Singapore

>Spike|hCoV-19/England/CAMB-1B824C/2020|2020-10-22|EPI\_ISL\_637637|Original|hCoV-19^^England|Human|Department of Pathology|COVID-19 Genomics UK (COG-UK) Consortium|Goodfellow|United Kingdom

>Spike|hCoV-19/Australia/NSW521/2020|2020-05-03|EPI\_ISL\_455061|Original|hCoV-19^^New South Wales|Human|Pathology West - NSW Health Pathology|NSW Health Pathology - Institute of Clinical Pathology and Medical Research; Westmead Hospital; University of Sydney|Gall|Australia

>Spike|hCoV-19/England/QEUH-A605E7/2020|2020-10-13|EPI\_ISL\_665965|Original|hCoV-19^^England|Human|Northumbria University / South Tees Hospitals NHS Foundation Trust / North Cumbria Integrated Care NHS Foundation Trust / North Tees and Hartlepool NHS Foundation Trust / Newcastle Hospitals NHS Foundation Trust|COVID-19 Genomics UK (COG-UK) Consortium|Bashton|United Kingdom

>Spike|hCoV-19/England/CAMB-7FEB7/2020|2020-04-19|EPI\_ISL\_444429|Original|hCoV-19^^England|Human|Department of Pathology|COVID-19 Genomics UK (COG-UK) Consortium|Meredith|United Kingdom

>Spike|hCoV-19/Netherlands/UT-EMC-81/2020|2020-08-26|EPI\_ISL\_577897|Original|hCoV-19^^Utrecht|Human|Dutch COVID-19 response team|Erasmus Medical Center|Oude Munnink|Netherlands

>Spike|hCoV-19/Australia/VIC16829/2020|2020-08-12|EPI\_ISL\_663477|Original|hCoV-19^^Victoria|Human|Microbiological Diagnostic Unit - Public Health Laboratory (MDU-PHL) |MDU-PHL|Schultz|Australia

>Spike|hCoV-19/Scotland/CVR5532/2020|2020-11-01|EPI\_ISL\_651315|Original|hCoV-19^^Scotland|Human|West of Scotland Specialist Virology Centre|COVID-19 Genomics UK (COG-UK) Consortium|Robertson|United Kingdom

>Spike|hCoV-19/USA/GA-CDC-8816/2020|2020-03-21|EPI\_ISL\_452120|Original|hCoV-19^^Georgia|Human|Georgia Department of Health|Pathogen Discovery|Queen|USA

>Spike|hCoV-19/USA/WA-S2578/2020|2020-06-18|EPI\_ISL\_497210|Original|hCoV-19^^Washington|Human|Washington State Department of Health|Seattle Flu Study|Lee|USA

>Spike|hCoV-19/USA/MA-MASPHL-00918/2020|2020-04-28|EPI\_ISL\_692832|Original|hCoV-19^^Massachusetts|Human|Massachusetts State Public Health Laboratory|Massachusetts State Public Health Laboratory|Lang|USA

>Spike|hCoV-19/Portugal/PT1246/2020|2020-03-31|EPI\_ISL\_511207|Original|hCoV-19^^Portugal|Human|Instituto Nacional de Saude (INSA) and Instituto Gulbenkian de Ciencia (IGC)|Instituto Nacional de Saude (INSA) and Instituto Gulbenkian de Ciencia (IGC)|Borges|Portugal

>Spike|hCoV-19/USA/WI-WSLH-200742/2020|2020-09-18|EPI\_ISL\_631497|Original|hCoV-19^^Wisconsin|Human|Wisconsin State Laboratory of Hygiene Communicable Disease Division|Wisconsin State Laboratory of Hygiene Communicable Disease Division|Florek|USA

>Spike|hCoV-19/USA/MI-QDX-821/2020|2020-03-20|EPI\_ISL\_571538|Original|hCoV-19^^Michigan|Human|Quest Diagnostics|Quest Diagnostics|Kagan|USA

>Spike|hCoV-19/England/BRIS-128177/2020|2020-04-16|EPI\_ISL\_469581|Original|hCoV-19^^England|Human|PHE South West Regional Laboratory|Wellcome Sanger Institute for the COVID-19 Genomics UK (COG-UK) consortium|Davies|United Kingdom

>Spike|hCoV-19/England/SHEF-CC1C1/2020|2020-04-30|EPI\_ISL\_475443|Original|hCoV-19^^England|Human|Virology Department|COVID-19 Genomics UK (COG-UK) Consortium|de Silva|United Kingdom

>Spike|hCoV-19/Japan/PG-1682/2020|2020-05-00|EPI\_ISL\_685288|Original|hCoV-19^^Japan|Human|Pathogen Genomics Center|Pathogen Genomics Center|Sekizuka|Japan

>Spike|hCoV-19/England/ALDP-688DA9/2020|2020-07-02|EPI\_ISL\_551742|Original|hCoV-19^^England|Human|Lighthouse Lab in Alderley Park|Wellcome Sanger Institute for the COVID-19 Genomics UK (COG-UK) consortium|Davies|United Kingdom

>Spike|hCoV-19/USA/MA-MASPHL-00292/2020|2020-04-17|EPI\_ISL\_791707|Original|hCoV-19^^Massachusetts|Human|Massachusetts State Public Health Laboratory|Infectious Disease Program|Park|USA

>Spike|hCoV-19/USA/MI-MDHHS-SC21725/2020|2020-08-03|EPI\_ISL\_529844|Original|hCoV-19^^Michigan|Human|Michigan Department of Health and Human Services|Michigan Department of Health and Human Services|Blankenship|USA

>Spike|hCoV-19/South Africa/KRISP-109/2020|2020-03-31|EPI\_ISL\_455639|Original|hCoV-19^^KwaZulu-Natal|Human|KRISP|KRISP|de Oliveira|South Africa

>Spike|hCoV-19/Scotland/EDB4329/2020|2020-04-24|EPI\_ISL\_453121|Original|hCoV-19^^Scotland|Human|Virology Department|COVID-19 Genomics UK (COG-UK) Consortium|Williams|United Kingdom

>Spike|hCoV-19/Netherlands/ZH-EMC-344/2020|2020-07-20|EPI\_ISL\_523685|Original|hCoV-19^^Zuid Holland|Human|Dutch COVID-19 response team|Erasmus Medical Center|Oude Munnink|Netherlands

>Spike|hCoV-19/England/CAMB-73606/2020|2020-03-22|EPI\_ISL\_440260|Original|hCoV-19^^England|Human|Department of Pathology|Wellcome Sanger Institute for the COVID-19 Genomics UK (COG-UK) consortium|Amato|United Kingdom

>Spike|hCoV-19/USA/UT-08707/2020|2020-05-21|EPI\_ISL\_524424|Original|hCoV-19^^Utah|Human|Utah Public Health Laboratory|Utah Public Health Laboratory|Young|USA

>Spike|hCoV-19/Northern Ireland/NIRE-1097F2/2020|2020-10-14|EPI\_ISL\_680225|Original|hCoV-19^^Northern Ireland|Human|Regional Virus Laboratory|COVID-19 Genomics UK (COG-UK) Consortium|Fairley|United Kingdom

>Spike|hCoV-19/USA/MN39-MDH39/2020|2020-03-12|EPI\_ISL\_417475|Original|hCoV-19^^Minnesota|Human|Minnesota Department of Health|Minnesota Department of Health|Wang|USA

>Spike|hCoV-19/England/QEUH-A0C86C/2020|2020-10-03|EPI\_ISL\_599440|Original|hCoV-19^^England|Human|Lighthouse Lab in Glasgow|Wellcome Sanger Institute for the COVID-19 Genomics UK (COG-UK) consortium|Davies|United Kingdom

>Spike|hCoV-19/Wales/PHWC-32779/2020|2020-04-15|EPI\_ISL\_474349|Original|hCoV-19^^Wales|Human|Originating lab|COVID-19 Genomics UK (COG-UK) Consortium|Moore|United Kingdom

>Spike|hCoV-19/Denmark/DCGC-6021/2020|2020-09-21|EPI\_ISL\_621130|Original|hCoV-19^^Midtjylland|Human|Department of Virus and Microbiological Special Diagnostics|Albertsen lab|Michaelsen|Denmark

>Spike|hCoV-19/USA/CA-ALSR-3885/2020|2020-06-29|EPI\_ISL\_636260|Original|hCoV-19^^California|Human|San Diego County Public Health Laboratory|Andersen lab at Scripps Research|Gangavarapu|USA

>Spike|hCoV-19/England/ALDP-9BDDE4/2020|2020-09-09|EPI\_ISL\_567888|Original|hCoV-19^^England|Human|Lighthouse Lab in Alderley Park|Wellcome Sanger Institute for the COVID-19 Genomics UK (COG-UK) consortium|Davies|United Kingdom

>Spike|hCoV-19/England/LIVE-9ED6A/2020|2020-04-04|EPI\_ISL\_453392|Original|hCoV-19^^England|Human|Liverpool Clinical Laboratories|COVID-19 Genomics UK (COG-UK) Consortium|Haldenby|United Kingdom

>Spike|hCoV-19/Netherlands/OV-EMC-52/2020|2020-05-04|EPI\_ISL\_523436|Original|hCoV-19^^Overijssel|Human|Dutch COVID-19 response team|Erasmus Medical Center|Oude Munnink|Netherlands

>Spike|hCoV-19/England/ALDP-CED1A0/2020|2020-12-17|EPI\_ISL\_782010|Original|hCoV-19^^England|Human|Lighthouse Lab in Alderley Park|Wellcome Sanger Institute for the COVID-19 Genomics UK (COG-UK) Consortium|Davies|United Kingdom

>Spike|hCoV-19/USA/TX-HMH-MCoV-15770/2020|2020-07-10|EPI\_ISL\_785454|Original|hCoV-19^^Texas|Human|Houston Methodist Hospital|Houston Methodist Hospital|Long|USA

>Spike|hCoV-19/USA/WI-GMF-21043/2020|2020-09-18|EPI\_ISL\_660826|Original|hCoV-19^^Wisconsin|Human|Gundersen Molecular Diagnostics Laboratory|Kabara Cancer Research Institute|Kenny|USA

>Spike|hCoV-19/Switzerland/BE-ETHZ-180019/2020|2020-06-29|EPI\_ISL\_489967|Original|hCoV-19^^Bern|Human|Viollier AG|Department of Biosystems Science and Engineering|Nadeau|Switzerland

>Spike|hCoV-19/England/NORW-F6207/2020|2020-11-23|EPI\_ISL\_706361|Original|hCoV-19^^England|Human|Quadram Institute Bioscience|COVID-19 Genomics UK (COG-UK) Consortium|Alikhan|United Kingdom

>Spike|hCoV-19/England/ALDP-AA3C5C/2020|2020-10-22|EPI\_ISL\_624498|Original|hCoV-19^^England|Human|Lighthouse Lab in Alderley Park|Wellcome Sanger Institute for the COVID-19 Genomics UK (COG-UK) consortium|Davies|United Kingdom

>Spike|hCoV-19/Japan/PG-3575/2020|2020-06-00|EPI\_ISL\_691831|Original|hCoV-19^^Japan|Human|Pathogen Genomics Center|Pathogen Genomics Center|Sekizuka|Japan

>Spike|hCoV-19/Denmark/DCGC-15462/2020|2020-11-23|EPI\_ISL\_713837|Original|hCoV-19^^Midtjylland|Human|Department of Virus and Microbiological Special Diagnostics|Albertsen Lab|Michaelsen|Denmark

>Spike|hCoV-19/England/QEUH-A3395A/2020|2020-10-05|EPI\_ISL\_628416|Original|hCoV-19^^England|Human|Oxford Viromics|COVID-19 Genomics UK (COG-UK) Consortium|Golubchik|United Kingdom

>Spike|hCoV-19/Portugal/PT0750/2020|2020-03-23|EPI\_ISL\_511009|Original|hCoV-19^^Portugal|Human|Instituto Nacional de Saude (INSA)|Instituto Nacional de Saude (INSA)|Borges|Portugal

>Spike|hCoV-19/Netherlands/NA\_327/2020|2020-04-03|EPI\_ISL\_455132|Original|hCoV-19^^Netherlands|Human|Dutch COVID-19 response team|Erasmus Medical Center|Oude Munnink|Netherlands

>Spike|hCoV-19/USA/HI-H200220/2020|2020-08-10|EPI\_ISL\_752779|Original|hCoV-19^^Hawaii|Human|State Laboratories Division|State Laboratories Division|Sultana|USA

>Spike|hCoV-19/USA/MN-MDH-1422/2020|2020-03-23|EPI\_ISL\_514641|Original|hCoV-19^^Minnesota|Human|St. Luke's Hospital|Minnesota Department of Health|Garfin|USA

>Spike|hCoV-19/England/NORW-F0461/2020|2020-10-07|EPI\_ISL\_584730|Original|hCoV-19^^England|Human|Quadram Institute Bioscience|COVID-19 Genomics UK (COG-UK) Consortium|Alikhan|United Kingdom

>Spike|hCoV-19/Denmark/DCGC-14138/2020|2020-11-30|EPI\_ISL\_711589|Original|hCoV-19^^Hovedstaden|Human|Department of Virus and Microbiological Special Diagnostics|Albertsen Lab|Michaelsen|Denmark

>Spike|hCoV-19/Australia/VIC15800/2020|2020-08-09|EPI\_ISL\_593460|Original|hCoV-19^^Victoria|Human|Microbiological Diagnostic Unit - Public Health Laboratory (MDU-PHL)|MDU-PHL|Schultz|Australia

>Spike|hCoV-19/Switzerland/BL-ETHZ-100343/2020|2020-03-19|EPI\_ISL\_574894|Original|hCoV-19^^Basel-Landschaft|Human|Viollier AG|Department of Biosystems Science and Engineering|Nadeau|Switzerland

>Spike|hCoV-19/Japan/IC-0025/2020|2020-04-00|EPI\_ISL\_591369|Original|hCoV-19^^Japan|Human|Pathogen Genomics Center|Pathogen Genomics Center|Sekizuka|Japan

>Spike|hCoV-19/Wales/MILK-99A5F4/2020|2020-08-29|EPI\_ISL\_602147|Original|hCoV-19^^Wales|Human|Lighthouse Lab in Milton Keynes|Wellcome Sanger Institute for the COVID-19 Genomics UK (COG-UK) consortium|Davies|United Kingdom

>Spike|hCoV-19/Denmark/DCGC-19256/2020|2020-12-07|EPI\_ISL\_748849|Original|hCoV-19^^Sjaelland|Human|Department of Virus and Microbiological Special Diagnostics|Albertsen Lab|Michaelsen|Denmark

>Spike|hCoV-19/Denmark/DCGC-18597/2020|2020-12-07|EPI\_ISL\_750070|Original|hCoV-19^^Sjaelland|Human|Department of Virus and Microbiological Special Diagnostics|Albertsen Lab|Michaelsen|Denmark

>Spike|hCoV-19/USA/CA-CZB-3699/2020|2020-07-17|EPI\_ISL\_548423|Original|hCoV-19^^California|Human|County of Santa Clara Public Health Department|Chan-Zuckerberg Biohub|Bhatt|USA

>Spike|hCoV-19/Japan/PG-4511/2020|2020-07-00|EPI\_ISL\_689650|Original|hCoV-19^^Japan|Human|Pathogen Genomics Center|Pathogen Genomics Center|Sekizuka|Japan

>Spike|hCoV-19/USA/CA-CZB-14347/2020|2020-07-17|EPI\_ISL\_739134|Original|hCoV-19^^California|Human|Alameda County Public Health Lab|Chan-Zuckerberg Biohub|Kamm|USA

>Spike|hCoV-19/USA/OR-PROV-205/2020|2020-04-18|EPI\_ISL\_482447|Original|hCoV-19^^Oregon|Human|Providence St. Joseph Health Molecular Genomics Laboratory|Providence St. Joseph Health Molecular Genomics Laboratory|Dowdell|USA

>Spike|hCoV-19/Gambia/GC19-1527/2020|2020-05-16|EPI\_ISL\_561022|Original|hCoV-19^^Kombo|Human|MRCG at LSHTM Genomics lab|MRCG at LSHTM Genomics lab|Sesay|Gambia

>Spike|hCoV-19/England/MILK-B55159/2020|2020-11-06|EPI\_ISL\_657745|Original|hCoV-19^^England|Human|Lighthouse Lab in Milton Keynes|Wellcome Sanger Institute for the COVID-19 Genomics UK (COG-UK) Consortium|Davies|United Kingdom

>Spike|hCoV-19/Austria/CeMM0025/2020|2020-03-09|EPI\_ISL\_437915|Original|hCoV-19^^Ischgl|Human|Institut f\u00fcr Virologie am Department f\u00fcr Hygiene|Bergthaler laboratory|Bergthaler|Austria

>Spike|hCoV-19/England/NOTT-11C71A/2020|2020-11-17|EPI\_ISL\_652408|Original|hCoV-19^^England|Human|Queens Medical Centre|COVID-19 Genomics UK (COG-UK) Consortium|Loose|United Kingdom

>Spike|hCoV-19/Scotland/EDB6346/2020|2020-06-04|EPI\_ISL\_473944|Original|hCoV-19^^Scotland|Human|Virology Department|COVID-19 Genomics UK (COG-UK) Consortium|Williams|United Kingdom

>Spike|hCoV-19/England/LIVE-DB2C93/2020|2020-10-26|EPI\_ISL\_637990|Original|hCoV-19^^England|Human|Liverpool Clinical Laboratories|COVID-19 Genomics UK (COG-UK) Consortium|Haldenby|United Kingdom

>Spike|hCoV-19/England/CAMB-1B1850/2020|2020-05-07|EPI\_ISL\_458543|Original|hCoV-19^^England|Human|Department of Pathology|Wellcome Sanger Institute for the COVID-19 Genomics UK (COG-UK) consortium|Davies|United Kingdom

>Spike|hCoV-19/USA/TX-HMH-6983/2020|2020-06-28|EPI\_ISL\_546407|Original|hCoV-19^^Texas|Human|Houston Methodist Hospital|Houston Methodist Hospital|Long|USA

>Spike|hCoV-19/England/QEUA-CCDB1/2020|2020-12-24|EPI\_ISL\_782156|Original|hCoV-19^^England|Human|Lighthouse Lab in Glasgow|Wellcome Sanger Institute for the COVID-19 Genomics UK (COG-UK) Consortium|Davies|United Kingdom

>Spike|hCoV-19/Australia/VIC12157/2020|2020-07-27|EPI\_ISL\_563530|Original|hCoV-19^^Victoria|Human|Microbiological Diagnostic Unit - Public Health Laboratory (MDU-PHL) |MDU-PHL|Schultz|Australia

>Spike|hCoV-19/USA/WA-UW-47340/2020|2020-12-11|EPI\_ISL\_776709|Original|hCoV-19^^Washington|Human|UW Virology Lab|UW Virology Lab|Roychoudhury|USA

>Spike|hCoV-19/England/MILK-CA7227/2020|2020-12-18|EPI\_ISL\_761459|Original|hCoV-19^^England|Human|Lighthouse Lab in Milton Keynes|Wellcome Sanger Institute for the COVID-19 Genomics UK (COG-UK) Consortium|Davies|United Kingdom

>Spike|hCoV-19/Japan/PG-1114/2020|2020-04-00|EPI\_ISL\_684724|Original|hCoV-19^^Japan|Human|Fukuoka Institute of Health and Environmental Sciences|Pathogen Genomics Center|Sekizuka|Japan

>Spike|hCoV-19/England/QEUA-A0C398/2020|2020-10-01|EPI\_ISL\_599455|Original|hCoV-19^^England|Human|Lighthouse Lab in Glasgow|Wellcome Sanger Institute for the COVID-19 Genomics UK (COG-UK) consortium|Davies|United Kingdom

>Spike|hCoV-19/England/MILK-A46778/2020|2020-10-05|EPI\_ISL\_598709|Original|hCoV-19^^England|Human|Lighthouse Lab in Milton Keynes|Wellcome Sanger Institute for the COVID-19 Genomics UK (COG-UK) consortium|Davies|United Kingdom

>Spike|hCoV-19/USA/HI-H200119/2020|2020-06-10|EPI\_ISL\_752682|Original|hCoV-19^^Hawaii|Human|State Laboratories Division|State Laboratories Division|Sultana|USA

>Spike|hCoV-19/Brazil/RJ-00576/2020|2020-10-09|EPI\_ISL\_717960|Original|hCoV-19^^Rio de Janeiro|Human|Laboratorio de Virologia Molecular / UFRJ|Bioinformatics Laboratory / LNCC|Almeida|Brazil

>Spike|hCoV-19/Denmark/DCGC-2471/2020|2020-08-03|EPI\_ISL\_618363|Original|hCoV-19^^Nordjylland|Human|Department of Virus and Microbiological Special Diagnostics|Albertsen lab|Michaelsen|Denmark

>Spike|hCoV-19/USA/WI-GMF-20170/2020|2020-09-14|EPI\_ISL\_547854|Original|hCoV-19^^Wisconsin|Human|Gundersen Molecular Diagnostics Laboratory|Kabara Cancer Research Institute|Kenny|USA

>Spike|hCoV-19/England/SHEF-10CC3AA/2020|2020-12-17|EPI\_ISL\_741991|Original|hCoV-19^^England|Human|Virology Department|COVID-19 Genomics UK (COG-UK) Consortium|de Silva|United Kingdom

>Spike|hCoV-19/England/QEUA-BA0DA6/2020|2020-11-18|EPI\_ISL\_719802|Original|hCoV-19^^England|Human|Lighthouse Lab in Glasgow|Wellcome Sanger Institute for the COVID-19 Genomics UK (COG-UK) Consortium|Davies|United Kingdom

>Spike|hCoV-19/Peru/CUS-INS-068/2020|2020-03-10|EPI\_ISL\_517958|Original|hCoV-19^^CUSCO|Human|Laboratorio de Referencia Nacional de Virus Respiratorio. Centro Nacional de Salud Publica. Instituto Nacional de Salud Peru. |Laboratorio de Referencia Nacional de Biotecnolog\u00eda y Biolog\u00eda Molecular. Centro Nacional de Salud Publica. Instituto Nacional de Salud Peru. |Padilla Rojas|Peru

>Spike|hCoV-19/England/QEUA-C54511/2020|2020-12-12|EPI\_ISL\_736414|Original|hCoV-19^^England|Human|Lighthouse Lab in Glasgow|Wellcome Sanger Institute for the COVID-19 Genomics UK (COG-UK) Consortium|Davies|United Kingdom

>Spike|hCoV-19/Netherlands/ZuidHolland\_27/2020|2020-03-09|EPI\_ISL\_415531|Original|hCoV-19^^Zuid Holland|Human|Dutch COVID-19 response team|Erasmus Medical Center|Oude Munnink|Netherlands

>Spike|hCoV-19/Canada/BC\_24234949/2020|2020-03-00|EPI\_ISL\_463202|Original|hCoV-19^^British Columbia|Human|BCCDC Public Health Laboratory|BCCDC Public Health Laboratory|Harrigan|Canada

>Spike|hCoV-19/USA/CA-CHLA-PLM41746412/2020|2020-12-01|EPI\_ISL\_753563|Original|hCoV-19^^California|Human|Clinical virology Laboratory|Center for Personalized Medicine|Dien Bard|USA

>Spike|hCoV-19/Austria/CeMM0358/2020|2020-03-31|EPI\_ISL\_438121|Vero P1|hCoV-19^^Vienna|Human|Center for Virology|Bergthaler laboratory|Bergthaler|Austria

>Spike|hCoV-19/Japan/PG-2850/2020|2020-05-00|EPI\_ISL\_690976|Original|hCoV-19^^Japan|Human|Pathogen Genomics Center|Pathogen Genomics Center|Sekizuka|Japan

>Spike|hCoV-19/England/QEUH-AA033C/2020|2020-10-20|EPI\_ISL\_611340|Original|hCoV-19^^England|Human|Lighthouse Lab in Glasgow|Wellcome Sanger Institute for the COVID-19 Genomics UK (COG-UK) consortium|Davies|United Kingdom

>Spike|hCoV-19/USA/OR-OHSU-3081/2020|2020-10-01|EPI\_ISL\_667473|Original|hCoV-19^^Oregon|Human|OHSU Lab Services Molecular Microbiology Lab|Oregon SARS-CoV-2 Genome Sequencing Center|O'Roak|USA

>Spike|hCoV-19/England/ALDP-9E832A/2020|2020-09-24|EPI\_ISL\_638244|Original|hCoV-19^^England|Human|Department of Pathology|COVID-19 Genomics UK (COG-UK) Consortium|Goodfellow|United Kingdom

>Spike|hCoV-19/Gibraltar/205121214/2020|2020-00-00|EPI\_ISL\_766340|Original|hCoV-19^^Gibraltar|Human|Microbiology|Respiratory Virus Unit|Platt|Gibraltar

>Spike|hCoV-19/Brazil/RJ-00324/2020|2020-04-22|EPI\_ISL\_623127|Original|hCoV-19^^Rio de Janeiro|Human|Laboratorio de Virologia Molecular / UFRJ|Bioinformatics Laboratory / LNCC|Almeida|Brazil

>Spike|hCoV-19/USA/WA-S861/2020|2020-04-23|EPI\_ISL\_463351|Original|hCoV-19^^Washington|Human|Washington State Department of Health|Seattle Flu Study|Bedford|USA

>Spike|hCoV-19/England/MILK-BAA86F/2020|2020-11-17|EPI\_ISL\_681587|Original|hCoV-19^^England|Human|Lighthouse Lab in Milton Keynes|Wellcome Sanger Institute for the COVID-19 Genomics UK (COG-UK) Consortium|Davies|United Kingdom

>Spike|hCoV-19/Nigeria/OS070-CV11/2020|2020-03-29|EPI\_ISL\_455422|Original|hCoV-19^^Osun State|Human|Nigeria Centre for Disease Control|African Centre of Excellence for Genomics of Infectious Diseases (ACEGID)|Oluniyi|Nigeria

>Spike|hCoV-19/England/ALDP-9532D2/2020|2020-06-11|EPI\_ISL\_554614|Original|hCoV-19^^England|Human|Lighthouse Lab in Alderley Park|Wellcome Sanger Institute for the COVID-19 Genomics UK (COG-UK) consortium|Davies|United Kingdom

>Spike|hCoV-19/Germany/HH-hpi-pl494/2020|2020-03-12|EPI\_ISL\_776002|Original|hCoV-19^^Hamburg|Human|University Medical Center Hamburg Eppendorf|Heinrich Pette Institute|Robitaille|Germany

>Spike|hCoV-19/England/ALDP-92E8FC/2020|2020-06-22|EPI\_ISL\_551559|Original|hCoV-19^^England|Human|Lighthouse Lab in Alderley Park|Wellcome Sanger Institute for the COVID-19 Genomics UK (COG-UK) consortium|Davies|United Kingdom

>Spike|hCoV-19/Australia/VIC5529/2020|2020-07-21|EPI\_ISL\_518362|Original|hCoV-19^^Victoria|Human|Microbiological Diagnostic Unit - Public Health Laboratory (MDU-PHL)|MDU-PHL|Schultz|Australia

>Spike|hCoV-19/England/CAMC-B3369E/2020|2020-11-05|EPI\_ISL\_659191|Original|hCoV-19^^England|Human|Lighthouse Lab in Cambridge|Wellcome Sanger Institute for the COVID-19 Genomics UK (COG-UK) Consortium|Davies|United Kingdom

>Spike|hCoV-19/Germany/BY-IMB05401/2020|2020-05-07|EPI\_ISL\_732556|Original|hCoV-19^^Bavaria|Human|Bundeswehr Institute of Microbiology|Bundeswehr Institute of Microbiology|Antwerpen|Germany

>Spike|hCoV-19/England/CAMC-B7A5DA/2020|2020-11-12|EPI\_ISL\_741128|Original|hCoV-19^^England|Human|Oxford Viromics|COVID-19 Genomics UK (COG-UK) Consortium|Golubchik|United Kingdom

>Spike|hCoV-19/England/EXET-13A585/2020|2020-11-03|EPI\_ISL\_664295|Original|hCoV-19^^England|Human|University of Exeter|COVID-19 Genomics UK (COG-UK) Consortium|Temperton|United Kingdom

>Spike|hCoV-19/USA/CA-ALSR-3381/2020|2020-05-29|EPI\_ISL\_635992|Original|hCoV-19^^California|Human|San Diego County Public Health Laboratory|Andersen lab at Scripps Research|Gangavarapu|USA

>Spike|hCoV-19/Japan/PG-3540/2020|2020-06-00|EPI\_ISL\_691796|Original|hCoV-19^^Japan|Human|Pathogen Genomics Center|Pathogen Genomics Center|Sekizuka|Japan

>Spike|hCoV-19/Wales/PHWC-48BFFD/2020|2020-11-01|EPI\_ISL\_666379|Original|hCoV-19^^Wales|Human|Wales Specialist Virology Centre Sequencing lab|COVID-19 Genomics UK (COG-UK) Consortium|Moore|United Kingdom

>Spike|hCoV-19/England/SHEF-C0637/2020|2020-03-26|EPI\_ISL\_420241|Original|hCoV-19^^England|Human|Virology Department|Department of Infection|de Silva|United Kingdom

>Spike|hCoV-19/Scotland/QEUH-98F862/2020|2020-08-27|EPI\_ISL\_568349|Original|hCoV-19^^Scotland|Human|Lighthouse Lab in Glasgow|Wellcome Sanger Institute for the COVID-19 Genomics UK (COG-UK) consortium|Davies|United Kingdom

>Spike|hCoV-19/Wales/PHWC-16A0A9/2020|2020-09-05|EPI\_ISL\_535197|Original|hCoV-19^^Wales|Human|Wales Specialist Virology Centre Sequencing lab|COVID-19 Genomics UK (COG-UK) Consortium|Moore|United Kingdom

>Spike|hCoV-19/Japan/PG-7417/2020|2020-07-00|EPI\_ISL\_688519|Original|hCoV-19^^Japan|Human|Pathogen Genomics Center|Pathogen Genomics Center|Sekizuka|Japan

>Spike|hCoV-19/USA/CA-ALSR-4284/2020|2020-10-09|EPI\_ISL\_648936|Original|hCoV-19^^California|Human|San Diego County Public Health Laboratory|Andersen lab at Scripps Research|Gangavarapu|USA

>Spike|hCoV-19/USA/HI-H200304/2020|2020-08-12|EPI\_ISL\_752863|Original|hCoV-19^^Hawaii|Human|State Laboratories Division|State Laboratories Division|Sultana|USA

>Spike|hCoV-19/England/QEUH-C5CAB0/2020|2020-12-14|EPI\_ISL\_769528|Original|hCoV-19^^England|Human|Lighthouse Lab in Glasgow|Wellcome Sanger Institute for the COVID-19 Genomics UK (COG-UK) Consortium|Davies|United Kingdom

>Spike|hCoV-19/England/LOND-1261026/2020|2020-04-03|EPI\_ISL\_524682|Original|hCoV-19^^England|Human|North West London Pathology|Wellcome Sanger Institute for the COVID-19 Genomics UK (COG-UK) consortium|Davies|United Kingdom

>Spike|hCoV-19/USA/LA-EVTL438/2020|2020-06-11|EPI\_ISL\_578700|Original|hCoV-19^^Louisiana|Human|LSUHS Emerging Viral Threat Laboratory|Microbial Genome Sequencing Center|Kamil|USA

>Spike|hCoV-19/England/ALDP-52C115/2020|2020-06-01|EPI\_ISL\_558995|Original|hCoV-19^^England|Human|Lighthouse Lab in Alderley Park|Wellcome Sanger Institute for the COVID-19 Genomics UK (COG-UK) consortium|Davies|United Kingdom

>Spike|hCoV-19/Luxembourg/LNS1034986/2020|2020-11-19|EPI\_ISL\_739876|Original|hCoV-19^^Luxembourg|Human|Laboratoire national de sant\u00e9|Laboratoire national de sant\u00e9|Wienecke-Baldacchino|Luxembourg

>Spike|hCoV-19/Singapore/1075/2020|2020-04-08|EPI\_ISL\_596465|Original|hCoV-19^^Singapore|Human|National Public Health Laboratory|National Public Health Laboratory|Mak|Singapore

>Spike|hCoV-19/Denmark/DCGC-20099/2020|2020-12-07|EPI\_ISL\_747982|Original|hCoV-19^^Midtjylland|Human|Department of Virus and Microbiological Special Diagnostics|Albertsen Lab|Michaelsen|Denmark

>Spike|hCoV-19/Canada/ON-S171/2020|2020-03-24|EPI\_ISL\_586371|Original|hCoV-19^^Ontario|Human|Toronto Invasive Bacterial Diseases Network|McMaster University|McArthur|Canada

>Spike|hCoV-19/Spain/MD-IBV-99008689/2020|2020-10-07|EPI\_ISL\_654243|Original|hCoV-19^^Madrid|Human|Hospital General Universitario Gregorio Mara\u00f1a|SeqCOVID-SPAIN consortium|IBV (CSIC)|Comas|Spain

>Spike|hCoV-19/Denmark/DCGC-1863/2020|2020-07-06|EPI\_ISL\_622570|Original|hCoV-19^^Hovedstaden|Human|Department of Virus and Microbiological Special Diagnostics|Albertsen lab|Michaelsen|Denmark

>Spike|hCoV-19/Saudi Arabia/KAUST-Madinah266/2020|2020-03-30|EPI\_ISL\_437749|Original|hCoV-19^^Madinah|Human|Pathogen Genomics Lab King Abdullah University of Science and Technology(KAUST)|Pathogen Genomics Lab King Abdullah University of Science and Technology(KAUST)|Mohamed Ghazzali|Saudi Arabia

>Spike|hCoV-19/Canada/BC\_19677621/2020|2020-04-00|EPI\_ISL\_469222|Original|hCoV-19^^British Columbia|Human|BCCDC Public Health Laboratory|BCCDC Public Health Laboratory|Harrigan|Canada



>Spike|hCoV-19/Scotland/QEUEH-9B0BD8/2020|2020-09-03|EPI\_ISL\_560036|Original|hCoV-19^^Scotland|Human|Oxford Viromics|COVID-19 Genomics UK (COG-UK) Consortium|Golubchik|United Kingdom

>Spike|hCoV-19/England/QEUEH-5EA5EA/2020|2020-06-16|EPI\_ISL\_533337|Original|hCoV-19^^England|Human|Lighthouse Lab in Glasgow|Wellcome Sanger Institute for the COVID-19 Genomics UK (COG-UK) consortium|Davies|United Kingdom

>Spike|hCoV-19/England/BRIS-122C8B/2020|2020-04-02|EPI\_ISL\_440623|Original|hCoV-19^^England|Human|PHE South West Regional Laboratory|Wellcome Sanger Institute for the COVID-19 Genomics UK (COG-UK) consortium|Amato|United Kingdom

>Spike|hCoV-19/France/PAC-IHU-0172/2020|2020-03-25|EPI\_ISL\_569348|Original|hCoV-19^^Provence-Alpes-C\u00f4te-d\u00a9Azur|Human|MEPHI|MEPHI|Levasseur|France

>Spike|hCoV-19/USA/TX-HMH-MCoV-13063/2020|2020-08-27|EPI\_ISL\_788214|Original|hCoV-19^^Texas|Human|Houston Methodist Hospital|Houston Methodist Hospital|Long|USA

>Spike|hCoV-19/Scotland/QEUEH-9E48A7/2020|2020-09-23|EPI\_ISL\_601080|Original|hCoV-19^^Scotland|Human|Lighthouse Lab in Glasgow|Wellcome Sanger Institute for the COVID-19 Genomics UK (COG-UK) consortium|Davies|United Kingdom

>Spike|hCoV-19/England/QEUEH-94382E/2020|2020-07-14|EPI\_ISL\_532551|Original|hCoV-19^^England|Human|Lighthouse Lab in Glasgow|Wellcome Sanger Institute for the COVID-19 Genomics UK (COG-UK) consortium|Davies|United Kingdom

>Spike|hCoV-19/England/QEUEH-AD5B90/2020|2020-10-26|EPI\_ISL\_634543|Original|hCoV-19^^England|Human|Lighthouse Lab in Glasgow|Wellcome Sanger Institute for the COVID-19 Genomics UK (COG-UK) consortium|Davies|United Kingdom

>Spike|hCoV-19/Denmark/DCGC-21718/2020|2020-12-21|EPI\_ISL\_758325|Original|hCoV-19^^Hovedstaden|Human|Department of Virus and Microbiological Special Diagnostics|Albertsen Lab|Michaelsen|Denmark

>Spike|hCoV-19/Wales/PHWC-4926B2/2020|2020-11-23|EPI\_ISL\_725684|Original|hCoV-19^^Wales|Human|Originating lab|COVID-19 Genomics UK (COG-UK) Consortium|Moore|United Kingdom

>Spike|hCoV-19/England/QEUEH-9B4F9C/2020|2020-09-07|EPI\_ISL\_590342|Original|hCoV-19^^England|Human|Lighthouse Lab in Glasgow|Wellcome Sanger Institute for the COVID-19 Genomics UK (COG-UK) consortium|Davies|United Kingdom

>Spike|hCoV-19/USA/MI-MDHHS-SC22049/2020|2020-08-26|EPI\_ISL\_583506|Original|hCoV-19^^Michigan|Human|Michigan Department of Health and Human Services|Michigan Department of Health and Human Services|Blankenship|USA

>Spike|hCoV-19/England/CAMC-B99863/2020|2020-11-15|EPI\_ISL\_673442|Original|hCoV-19^^England|Human|Lighthouse Lab in Cambridge|Wellcome Sanger Institute for the COVID-19 Genomics UK (COG-UK) Consortium|Davies|United Kingdom

>Spike|hCoV-19/England/CAMB-7D648/2020|2020-04-06|EPI\_ISL\_442115|Original|hCoV-19^^England|Human|Department of Pathology|Wellcome Sanger Institute for the COVID-19 Genomics UK (COG-UK) consortium|Amato|United Kingdom

>Spike|hCoV-19/Germany/BE-ChVir7623/2020|2020-06-05|EPI\_ISL\_729557|Original|hCoV-19^^Berlin|Human|Charit\u00e9 Universit\u00e4tsmedizin Berlin|Charit\u00e9 Universit\u00e4tsmedizin Berlin|Muehlemann|Germany

>Spike|hCoV-19/Denmark/DCGC-6052/2020|2020-10-05|EPI\_ISL\_620246|Original|hCoV-19^^Midtjylland|Human|Department of Virus and Microbiological Special Diagnostics|Albertsen lab|Michaelsen|Denmark

>Spike|hCoV-19/England/QEUEH-C32713/2020|2020-12-11|EPI\_ISL\_782582|Original|hCoV-19^^England|Human|Lighthouse Lab in Glasgow|Wellcome Sanger Institute for the COVID-19 Genomics UK (COG-UK) Consortium|Davies|United Kingdom

>Spike|hCoV-19/USA/LA-EVTL994/2020|2020-08-20|EPI\_ISL\_653685|Original|hCoV-19^^Louisiana|Human|LSUHS Emerging Viral Threat Laboratory|Microbial Genome Sequencing Center|Kamil|USA

>Spike|hCoV-19/Scotland/EDB6269/2020|2020-04-07|EPI\_ISL\_487720|Original|hCoV-19^^Scotland|Human|Virology Department|Wellcome Sanger Institute for the COVID-19 Genomics UK (COG-UK) consortium|Davies|United Kingdom

>Spike|hCoV-19/England/ALDP-A856DA/2020|2020-10-17|EPI\_ISL\_610475|Original|hCoV-19^^England|Human|Lighthouse Lab in Alderley Park|Wellcome Sanger Institute for the COVID-19 Genomics UK (COG-UK) consortium|Davies|United Kingdom

>Spike|hCoV-19/France/HDF-rega-0417684/2020|2020-04-17|EPI\_ISL\_738242|Original|hCoV-19^^Hauts-de-France|Human|UZ Leuven|KU Leuven|Maes|France

>Spike|hCoV-19/USA/LA-EVTL376/2020|2020-06-03|EPI\_ISL\_578782|Original|hCoV-19^^Louisiana|Human|LSUHS Emerging Viral Threat Laboratory|Microbial Genome Sequencing Center|Kamil|USA

>Spike|hCoV-19/India/TG-CCMB-L1459/2020|2020-05-25|EPI\_ISL\_471596|Original|hCoV-19^^Telangana|Human|CSIR-Centre for Cellular and Molecular Biology|CSIR-Centre for Cellular and Molecular Biology|Banu|India

>Spike|hCoV-19/Portugal/PT0716/2020|2020-03-24|EPI\_ISL\_510975|Original|hCoV-19^^Portugal|Human|Instituto Nacional de Saude (INSA)|Instituto Nacional de Saude (INSA)|Borges|Portugal

>Spike|hCoV-19/Belgium/reg-a-0620851/2020|2020-06-20|EPI\_ISL\_734774|Original|hCoV-19^^Antwerpen|Human|UZ Leuven|KU Leuven|Maes|Belgium

>Spike|hCoV-19/USA/FL-BPHL-1334/2020|2020-07-14|EPI\_ISL\_541272|Original|hCoV-19^^Florida|Human|Florida Bureau of Public Health Laboratories|Florida Bureau of Public Health Laboratories|Blanton|USA

>Spike|hCoV-19/Wales/PHWC-167E48/2020|2020-04-19|EPI\_ISL\_494164|Original|hCoV-19^^Wales|Human|Originating lab|COVID-19 Genomics UK (COG-UK) Consortium|Moore|United Kingdom

>Spike|hCoV-19/Belgium/Rega-0329227/2020|2020-03-29|EPI\_ISL\_458197|Original|hCoV-19^^Jurbise|Human|KU Leuven|KU Leuven|Maes|Belgium

>Spike|hCoV-19/England/QEUH-9DE970/2020|2020-09-21|EPI\_ISL\_584815|Original|hCoV-19^^England|Human|University College London|COVID-19 Genomics UK (COG-UK) Consortium|Roy|United Kingdom

>Spike|hCoV-19/Australia/VIC4132/2020|2020-07-12|EPI\_ISL\_519504|Original|hCoV-19^^Victoria|Human|Microbiological Diagnostic Unit - Public Health Laboratory (MDU-PHL)|MDU-PHL|Schultz|Australia

>Spike|hCoV-19/Scotland/EDB895/2020|2020-04-05|EPI\_ISL\_432869|Original|hCoV-19^^Scotland|Human|Virology Department|COVID-19 Genomics UK (COG-UK) Consortium|Williams|United Kingdom

>Spike|hCoV-19/Hong Kong/VM20109237/2020|2020-08-16|EPI\_ISL\_760031|Original|hCoV-19^^Hong Kong|Human|Hong Kong Department of Health|School of Public Health|Chu|China

>Spike|hCoV-19/USA/TX-HMH0408/2020|2020-03-31|EPI\_ISL\_434994|Original|hCoV-19^^Texas|Human|Houston Methodist Hospital|Houston Methodist Hospital|Long|USA

>Spike|hCoV-19/Australia/VIC2019/2020|2020-05-15|EPI\_ISL\_480661|Original|hCoV-19^^Victoria|Human|Victorian Infectious Diseases Reference Laboratory (VIDRL)|VIDRL and MDU-PHL|Schultz|Australia

>Spike|hCoV-19/England/ALDP-94F479/2020|2020-06-20|EPI\_ISL\_555998|Original|hCoV-19^^England|Human|Lighthouse Lab in Alderley Park|Wellcome Sanger Institute for the COVID-19 Genomics UK (COG-UK) consortium|Davies|United Kingdom

>Spike|hCoV-19/Netherlands/ZH-EMC-401/2020|2020-07-23|EPI\_ISL\_523741|Original|hCoV-19^^Zuid Holland|Human|Dutch COVID-19 response team|Erasmus Medical Center|Oude Munnink|Netherlands

>Spike|hCoV-19/England/ALDP-9C4FE4/2020|2020-09-10|EPI\_ISL\_567710|Original|hCoV-19^^England|Human|Lighthouse Lab in Alderley Park|Wellcome Sanger Institute for the COVID-19 Genomics UK (COG-UK) consortium|Davies|United Kingdom

>Spike|hCoV-19/Wales/PHWC-49F679/2020|2020-12-08|EPI\_ISL\_743248|Original|hCoV-19^^Wales|Human|Wales Specialist Virology Centre Sequencing lab|COVID-19 Genomics UK (COG-UK) Consortium|Moore|United Kingdom

>Spike|hCoV-19/India/GJ-GBRC-389b/2020|2020-07-06|EPI\_ISL\_524753|Original|hCoV-19^^Gujarat|Human|GMERS Medical College and Hospital|Gujarat Biotechnology Research Centre|Joshi|India

>Spike|hCoV-19/USA/VA-DCLS-0024/2020|2020-03-13|EPI\_ISL\_420628|Original|hCoV-19^^Virginia|Human|Virginia DCLS|Virginia DCLS|St. Jacques|USA

>Spike|hCoV-19/Kenya/C4074/2020|2020-05-05|EPI\_ISL\_568720|Original|hCoV-19^^Mombasa|Human|KEMRI-Wellcome Trust Research Programme|KEMRI-CGMR-C Kilifi|KEMRI-Wellcome Trust Research Programme|KEMRI-CGMR-C Kilifi|Githinji|Kenya

>Spike|hCoV-19/Scotland/QEUH-A1E5CA/2020|2020-10-01|EPI\_ISL\_598884|Original|hCoV-19^^Scotland|Human|Lighthouse Lab in Glasgow|Wellcome Sanger Institute for the COVID-19 Genomics UK (COG-UK) consortium|Davies|United Kingdom

>Spike|hCoV-19/England/ALDP-95219A/2020|2020-06-09|EPI\_ISL\_553639|Original|hCoV-19^^England|Human|Lighthouse Lab in Alderley Park|Wellcome Sanger Institute for the COVID-19 Genomics UK (COG-UK) consortium|Davies|United Kingdom

>Spike|hCoV-19/Norway/3563/2020|2020-08-06|EPI\_ISL\_635114|Original|hCoV-19^^Troms og Finnmark|Human|University Hospital of Northern Norway|Norwegian Institute of Public Health|Vollan|Norway

>Spike|hCoV-19/Brazil/RS-00650/2020|2020-11-25|EPI\_ISL\_770596|Original|hCoV-19^^Rio Grande do Sul|Human|Laborat\u00f3rio de Microbiologia Molecular - Universidade FEEVALE|Bioinformatics Laboratory / LNCC|Almeida|Brazil

>Spike|hCoV-19/Wuhan/0126-C45/2020|2020-01-26|EPI\_ISL\_493176|Original|hCoV-19^^Hubei|Human|National Virus Resource Center|Computational Virology Group|Liu|China

>Spike|hCoV-19/Singapore/1017/2020|2020-03-22|EPI\_ISL\_574502|Original|hCoV-19^^Singapore|Human|National Public Health Laboratory|National Public Health Laboratory|Mak|Singapore

>Spike|hCoV-19/Netherlands/ZH-EMC-270/2020|2020-00-00|EPI\_ISL\_523612|Original|hCoV-19^^Zuid Holland|Human|Dutch COVID-19 response team|Erasmus Medical Center|Oude Munnink|Netherlands

>Spike|hCoV-19/England/NOTT-11C9AB/2020|2020-11-18|EPI\_ISL\_665345|Original|hCoV-19^^England|Human|Queens Medical Centre|COVID-19 Genomics UK (COG-UK) Consortium|Loose|United Kingdom

>Spike|hCoV-19/Bangladesh/DNAS\_DRICM\_isl\_19189/2020|2020-06-28|EPI\_ISL\_774968|Original|hCoV-19^^Dhaka|Human|Designated Reference Institute for Chemical Measurements (DRICM)|DNA SOLUTION LTD.|Rabbi|Bangladesh

>Spike|hCoV-19/England/NORT-298C07/2020|2020-04-21|EPI\_ISL\_493473|Original|hCoV-19^^England|Human|Northumbria University / South Tees Hospitals NHS Foundation Trust / North Cumbria Integrated Care NHS Foundation Trust / North Tees and Hartlepool NHS Foundation Trust / Newcastle Hospitals NHS Foundation Trust|COVID-19 Genomics UK (COG-UK) Consortium|Bashton|United Kingdom

>Spike|hCoV-19/England/NORT-289094/2020|2020-03-26|EPI\_ISL\_458621|Original|hCoV-19^^England|Human|NU-OMICS DNA Sequencing research facility|Wellcome Sanger Institute for the COVID-19 Genomics UK (COG-UK) consortium|Davies|United Kingdom

>Spike|hCoV-19/England/ALDP-8BE379/2020|2020-06-27|EPI\_ISL\_556629|Original|hCoV-19^^England|Human|Lighthouse Lab in Alderley Park|Wellcome Sanger Institute for the COVID-19 Genomics UK (COG-UK) consortium|Davies|United Kingdom

>Spike|hCoV-19/Denmark/DCGC-18983/2020|2020-12-07|EPI\_ISL\_748682|Original|hCoV-19^^Hovedstaden|Human|Department of Virus and Microbiological Special Diagnostics|Albertsen Lab|Michaelsen|Denmark

>Spike|hCoV-19/Netherlands/NB-RIVM-20725/2020|2020-12-19|EPI\_ISL\_790791|Original|hCoV-19^^Noord-Brabant|Human|Dutch COVID-19 response team|National Institute for Public Health and the Environment (RIVM)|Meijer|Netherlands

>Spike|hCoV-19/Wales/PHWC-497E88/2020|2020-11-30|EPI\_ISL\_726988|Original|hCoV-19^^Wales|Human|Originating lab|COVID-19 Genomics UK (COG-UK) Consortium|Moore|United Kingdom

>Spike|hCoV-19/England/LOND-1251A67/2020|2020-11-23|EPI\_ISL\_705942|Original|hCoV-19^^England|Human|University College London Hospital|COVID-19 Genomics UK (COG-UK) Consortium|Byott|United Kingdom

>Spike|hCoV-19/USA/TX-HMH-6421/2020|2020-07-04|EPI\_ISL\_545987|Original|hCoV-19^^Texas|Human|Houston Methodist Hospital|Houston Methodist Hospital|Long|USA

>Spike|hCoV-19/USA/VA-DCLS-0452/2020|2020-05-05|EPI\_ISL\_477665|Original|hCoV-19^^Virginia|Human|Virginia DCLS|Virginia DCLS|St. Jacques|USA

>Spike|hCoV-19/USA/CA-CZB-10921/2020|2020-08-28|EPI\_ISL\_583150|Original|hCoV-19^^California|Human|Humboldt County Public Health Laboratory|Chan-Zuckerberg Biohub|Bhatt|USA

>Spike|hCoV-19/USA/LA-EVTL631/2020|2020-08-06|EPI\_ISL\_579035|Original|hCoV-19^^Louisiana|Human|LSUHS Emerging Viral Threat Laboratory|Microbial Genome Sequencing Center|Kamil|USA

>Spike|hCoV-19/England/20140007702/2020|2020-03-28|EPI\_ISL\_421926|Original|hCoV-19^^England|Human|Respiratory Virus Unit|Respiratory Virus Unit|Platt|United Kingdom

>Spike|hCoV-19/Scotland/QEUH-9696CE/2020|2020-08-14|EPI\_ISL\_531057|Original|hCoV-19^^Scotland|Human|NHSGGC West of Scotland Specialist Virology Centre / MRC-University of Glasgow Centre for Virus Research|Wellcome Sanger Institute for the COVID-19 Genomics UK (COG-UK) consortium|Davies|United Kingdom

>Spike|hCoV-19/South Africa/NHLS-UCT-GS-1312/2020|2020-11-02|EPI\_ISL\_700500|Original|hCoV-19^^Western Cape|Human|Plettenberg Bay Clinic w PLC|NHLS/UCT|Iranzadeh|South Africa

>Spike|hCoV-19/USA/TX-HMH-4638/2020|2020-06-22|EPI\_ISL\_543775|Original|hCoV-19^^Texas|Human|Houston Methodist Hospital|Houston Methodist Hospital|Long|USA

>Spike|hCoV-19/Hungary/SRC-03597w/2020|2020-03-28|EPI\_ISL\_435429|Original|hCoV-19^^Szeged|Human|Virological Research Group|Bioinformatics Research Group|Herczeg|Hungary

>Spike|hCoV-19/Scotland/QEUH-9DEE17/2020|2020-09-21|EPI\_ISL\_601233|Original|hCoV-19^^Scotland|Human|Lighthouse Lab in Glasgow|Wellcome Sanger Institute for the COVID-19 Genomics UK (COG-UK) consortium|Davies|United Kingdom

>Spike|hCoV-19/USA/WA-UW-8613/2020|2020-05-06|EPI\_ISL\_776736|Original|hCoV-19^^Washington|Human|UW Virology Lab|UW Virology Lab|Roychoudhury|USA

>Spike|hCoV-19/Australia/VIC13776/2020|2020-08-18|EPI\_ISL\_562653|Original|hCoV-19^^Victoria|Human|Microbiological Diagnostic Unit - Public Health Laboratory (MDU-PHL)|MDU-PHL|Schultz|Australia

>Spike|hCoV-19/England/ALDP-951580/2020|2020-06-13|EPI\_ISL\_554120|Original|hCoV-19^^England|Human|Lighthouse Lab in Alderley Park|Wellcome Sanger Institute for the COVID-19 Genomics UK (COG-UK) consortium|Davies|United Kingdom

>Spike|hCoV-19/England/QEUH-9628B0/2020|2020-08-10|EPI\_ISL\_531552|Original|hCoV-19^^England|Human|Lighthouse Lab in Glasgow|Wellcome Sanger Institute for the COVID-19 Genomics UK (COG-UK) consortium|Davies|United Kingdom

>Spike|hCoV-19/England/LOND-D5B21/2020|2020-04-17|EPI\_ISL\_457301|Original|hCoV-19^^England|Human|University College London|COVID-19 Genomics UK (COG-UK) Consortium|Roy|United Kingdom

>Spike|hCoV-19/England/CAMB-1AECF0/2020|2020-00-00|EPI\_ISL\_448073|Original|hCoV-19^^England|Human|Department of Pathology|COVID-19 Genomics UK (COG-UK) Consortium|Meredith|United Kingdom

>Spike|hCoV-19/England/LOND-12640F6/2020|2020-11-15|EPI\_ISL\_679524|Original|hCoV-19^^England|Human|University College London|COVID-19 Genomics UK (COG-UK) Consortium|Roy|United Kingdom

>Spike|hCoV-19/England/LIVE-DB6303/2020|2020-11-07|EPI\_ISL\_650420|Original|hCoV-19^^England|Human|Liverpool Clinical Laboratories|COVID-19 Genomics UK (COG-UK) Consortium|Haldenby|United Kingdom

>Spike|hCoV-19/Canada/ON\_MU-S13/2020|2020-03-14|EPI\_ISL\_463971|Original|hCoV-19^^Ontario|Human|Toronto Invasive Bacterial Diseases Network|McMaster University|McArthur|Canada

>Spike|hCoV-19/USA/NY-Wadsworth-292783-01/2020|2020-12-28|EPI\_ISL\_769950|Original|hCoV-19^^New York|Human|Albany Medical Center Hospital Clinical Laboratories|Wadsworth Center|Lasek-Nesselquist|USA

>Spike|hCoV-19/Germany/HH-hpi-pl306/2020|2020-03-20|EPI\_ISL\_775892|Original|hCoV-19^^Hamburg|Human|University Medical Center Hamburg Eppendorf|Heinrich Pette Institute|Robitaille|Germany

>Spike|hCoV-19/Ireland/KE-NVRL-73IRL25898/2020|2020-09-16|EPI\_ISL\_578292|Original|hCoV-19^^Kildare|Human|National Virus Reference Laboratory|National Virus Reference Laboratory|Gonzalez|Ireland

>Spike|hCoV-19/USA/OH-CDC-2-3714454/2020|2020-11-16|EPI\_ISL\_751616|Original|hCoV-19^^Ohio|Human|OH Department of Health Laboratory|Genomics and Discovery|Queen|USA

>Spike|hCoV-19/USA/UT-04131/2020|2020-05-13|EPI\_ISL\_493030|Original|hCoV-19^^Utah|Human|Utah Public Health Laboratory|Utah Public Health Laboratory|Butz|USA

>Spike|hCoV-19/England/QEUH-A8C4AC/2020|2020-10-18|EPI\_ISL\_643184|Original|hCoV-19^^England|Human|Lighthouse Lab in Glasgow|Wellcome Sanger Institute for the COVID-19 Genomics UK (COG-UK) Consortium|Davies|United Kingdom

>Spike|hCoV-19/England/QEUH-B69B90/2020|2020-11-11|EPI\_ISL\_655188|Original|hCoV-19^^England|Human|Lighthouse Lab in Glasgow|Wellcome Sanger Institute for the COVID-19 Genomics UK (COG-UK) Consortium|Davies|United Kingdom

>Spike|hCoV-19/Northern Ireland/NIRE-1074A2/2020|2020-03-30|EPI\_ISL\_585156|Original|hCoV-19^^Northern Ireland|Human|Regional Virus Laboratory|COVID-19 Genomics UK (COG-UK) Consortium|Fairley|United Kingdom

>Spike|hCoV-19/Scotland/QEUH-9E541B/2020|2020-09-24|EPI\_ISL\_601028|Original|hCoV-19^^Scotland|Human|Lighthouse Lab in Glasgow|Wellcome Sanger Institute for the COVID-19 Genomics UK (COG-UK) consortium|Davies|United Kingdom

>Spike|hCoV-19/Italy/APU-IZSPB-184PT/2020|2020-08-28|EPI\_ISL\_722862|Original|hCoV-19^^Apulia|Human|I.R.C.C.S. \S. De Bellis\ - Ente Ospedaliero|Istituto Zooprofilattico Sperimentale della Puglia e della Basilicata|Parisi|Italy

>Spike|hCoV-19/Belgium/ULG-11084/2020|2020-12-15|EPI\_ISL\_737334|Original|hCoV-19^^Li\u00e8ge|Human|Department of Clinical Microbiology|GIGA Medical Genomics|Durkin|Belgium

>Spike|hCoV-19/England/ALDP-905DCF/2020|2020-06-24|EPI\_ISL\_551573|Original|hCoV-19^^England|Human|Lighthouse Lab in Alderley Park|Wellcome Sanger Institute for the COVID-19 Genomics UK (COG-UK) consortium|Davies|United Kingdom

>Spike|hCoV-19/England/BRIS-12946E/2020|2020-04-19|EPI\_ISL\_458767|Original|hCoV-19^^England|Human|PHE South West Regional Laboratory|Wellcome Sanger Institute for the COVID-19 Genomics UK (COG-UK) consortium|Davies|United Kingdom

>Spike|hCoV-19/England/BRIS-12325B/2020|2020-04-04|EPI\_ISL\_442758|Original|hCoV-19^^England|Human|PHE South West Regional Laboratory|Wellcome Sanger Institute for the COVID-19 Genomics UK (COG-UK) consortium|Amato|United Kingdom

>Spike|hCoV-19/England/QEUH-9DE0F3/2020|2020-09-21|EPI\_ISL\_599591|Original|hCoV-19^^England|Human|Lighthouse Lab in Glasgow|Wellcome Sanger Institute for the COVID-19 Genomics UK (COG-UK) consortium|Davies|United Kingdom

>Spike|hCoV-19/USA/NY-NYUMC704/2020|2020-03-26|EPI\_ISL\_451419|Original|hCoV-19^^New York|Human|NYU Langone Health|Departments of Pathology and Medicine|Maurano|USA

>Spike|hCoV-19/USA/NY-Wadsworth-41088-01/2020|2020-04-07|EPI\_ISL\_676815|Original|hCoV-19^^New York|Human|Wadsworth Center|Wadsworth Center|Lasek-Nesselquist|USA

>Spike|hCoV-19/England/QEUH-96C616/2020|2020-08-13|EPI\_ISL\_530847|Original|hCoV-19^^England|Human|Lighthouse Lab in Glasgow|Wellcome Sanger Institute for the COVID-19 Genomics UK (COG-UK) consortium|Davies|United Kingdom

>Spike|hCoV-19/England/ALDP-A926BC/2020|2020-10-19|EPI\_ISL\_611164|Original|hCoV-19^^England|Human|Lighthouse Lab in Alderley Park|Wellcome Sanger Institute for the COVID-19 Genomics UK (COG-UK) consortium|Davies|United Kingdom

>Spike|hCoV-19/Scotland/CVR350/2020|2020-03-21|EPI\_ISL\_439059|Original|hCoV-19^^Scotland|Human|West of Scotland Specialist Virology Centre|COVID-19 Genomics UK (COG-UK) Consortium|Robertson|United Kingdom

>Spike|hCoV-19/USA/WA-S576/2020|2020-03-29|EPI\_ISL\_434336|Original|hCoV-19^^Washington|Human|Washington State Department of Health|Seattle Flu Study|Bedford|USA

>Spike|hCoV-19/Denmark/DCGC-6059/2020|2020-10-05|EPI\_ISL\_620253|Original|hCoV-19^^Hovedstaden|Human|Department of Virus and Microbiological Special Diagnostics|Albertsen lab|Michaelsen|Denmark

>Spike|hCoV-19/England/MILK-B8C827/2020|2020-11-13|EPI\_ISL\_675945|Original|hCoV-19^^England|Human|Lighthouse Lab in Milton Keynes|Wellcome Sanger Institute for the COVID-19 Genomics UK (COG-UK) Consortium|Davies|United Kingdom

>Spike|hCoV-19/England/ALDP-9EA461/2020|2020-09-24|EPI\_ISL\_580146|Original|hCoV-19^^England|Human|Lighthouse Lab in Alderley Park|Wellcome Sanger Institute for the COVID-19 Genomics UK (COG-UK) consortium|Davies|United Kingdom

>Spike|hCoV-19/USA/WI-UW-2040/2020|2020-10-01|EPI\_ISL\_677446|Original|hCoV-19^^Wisconsin|Human|University of Wisconsin-Madison AIDS Vaccine Research Laboratories|University of Wisconsin-Madison AIDS Vaccine Research Laboratories|Baczenas|USA

>Spike|hCoV-19/England/ALDP-A2F317/2020|2020-10-05|EPI\_ISL\_586951|Original|hCoV-19^^England|Human|Lighthouse Lab in Alderley Park|Wellcome Sanger Institute for the COVID-19 Genomics UK (COG-UK) consortium|Davies|United Kingdom

>Spike|hCoV-19/England/MILK-AB90A2/2020|2020-10-21|EPI\_ISL\_623755|Original|hCoV-19^^England|Human|Lighthouse Lab in Milton Keynes|Wellcome Sanger Institute for the COVID-19 Genomics UK (COG-UK) consortium|Davies|United Kingdom

>Spike|hCoV-19/Belgium/ULG-10937/2020|2020-11-24|EPI\_ISL\_678476|Original|hCoV-19^^Li\u00e8ge|Human|Department of Clinical Microbiology|GIGA Medical Genomics|Durkin|Belgium

>Spike|hCoV-19/Japan/PG-3959/2020|2020-07-00|EPI\_ISL\_692207|Original|hCoV-19^^Japan|Human|Pathogen Genomics Center|Pathogen Genomics Center|Sekizuka|Japan

>Spike|hCoV-19/Romania/ChVir7248/2020|2020-04-28|EPI\_ISL\_467781|Original|hCoV-19^^Constanta|Human|National Influenza Centre Romania|Charite Universitatsmedizin Berlin|Muehlemann|Romania

>Spike|hCoV-19/USA/CA-IGI-0078/2020|2020-06-18|EPI\_ISL\_511832|Original|hCoV-19^^California|Human|Innovative Genomics Institute|Innovative Genomics Institute|Wyman|USA

>Spike|hCoV-19/USA/CA-CZB-15065/2020|2020-11-18|EPI\_ISL\_739305|Original|hCoV-19^^California|Human|Santa Clara County Public Health Laboratory|Chan-Zuckerberg Biohub|Kamm|USA

>Spike|hCoV-19/USA/MI-UM-10036119854/2020|2020-09-24|EPI\_ISL\_590701|Original|hCoV-19^^Michigan|Human|University of Michigan Clinical Microbiology Laboratory|Lauring Lab|Valesano|USA

>Spike|hCoV-19/Spain/GA-IBV-002755/2020|2020-04-13|EPI\_ISL\_467284|Original|hCoV-19^^Galicia|Human|Hospital Cl\u00e9nico Universitario de Santiago de Compostela|SeqCOVID-SPAIN consortium|IBV (CSIC)|Comas|Spain

>Spike|hCoV-19/Scotland/ALDP-BB50A5/2020|2020-11-20|EPI\_ISL\_710704|Original|hCoV-19^^Scotland|Human|Lighthouse Lab in Alderley Park|Wellcome Sanger Institute for the COVID-19 Genomics UK (COG-UK) Consortium|Davies|United Kingdom

>Spike|hCoV-19/England/MILK-BFCF69/2020|2020-12-03|EPI\_ISL\_720860|Original|hCoV-19^^England|Human|Lighthouse Lab in Milton Keynes|Wellcome Sanger Institute for the COVID-19 Genomics UK (COG-UK) Consortium|Davies|United Kingdom

>Spike|hCoV-19/England/PORT-2D0EA3/2020|2020-03-31|EPI\_ISL\_475299|Original|hCoV-19^^England|Human|Centre for Enzyme Innovation|COVID-19 Genomics UK (COG-UK) Consortium|Robson|United Kingdom

>Spike|hCoV-19/England/LIVE-DB9DC6/2020|2020-11-06|EPI\_ISL\_664654|Original|hCoV-19^^England|Human|Liverpool Clinical Laboratories|COVID-19 Genomics UK (COG-UK) Consortium|Haldenby|United Kingdom

>Spike|hCoV-19/Wales/PHWC-48071E/2020|2020-10-10|EPI\_ISL\_612167|Original|hCoV-19^^Wales|Human|Wales Specialist Virology Centre Sequencing lab|COVID-19 Genomics UK (COG-UK) Consortium|Moore|United Kingdom

>Spike|hCoV-19/England/ALDP-A2E63D/2020|2020-10-06|EPI\_ISL\_586802|Original|hCoV-19^^England|Human|Lighthouse Lab in Alderley Park|Wellcome Sanger Institute for the COVID-19 Genomics UK (COG-UK) consortium|Davies|United Kingdom

>Spike|hCoV-19/England/QEUA-CAD977/2020|2020-12-20|EPI\_ISL\_761176|Original|hCoV-19^^England|Human|Lighthouse Lab in Glasgow|Wellcome Sanger Institute for the COVID-19 Genomics UK (COG-UK) Consortium|Davies|United Kingdom

>Spike|hCoV-19/England/MILK-B3CC75/2020|2020-11-01|EPI\_ISL\_679825|Original|hCoV-19^^England|Human|Oxford Viromics|COVID-19 Genomics UK (COG-UK) Consortium|Golubchik|United Kingdom

>Spike|hCoV-19/Denmark/DCGC-2728/2020|2020-08-17|EPI\_ISL\_616473|Original|hCoV-19^^Nordjylland|Human|Department of Virus and Microbiological Special Diagnostics|Albertsen lab|Michaelsen|Denmark

>Spike|hCoV-19/USA/WA-S236/2020|2020-03-01|EPI\_ISL\_430274|Original|hCoV-19^^Washington|Human|Washington State Department of Health|Seattle Flu Study|Bedford|USA

>Spike|hCoV-19/England/SHEF-CC4AA/2020|2020-04-23|EPI\_ISL\_453746|Original|hCoV-19^^England|Human|Virology Department|COVID-19 Genomics UK (COG-UK) Consortium|de Silva|United Kingdom

>Spike|hCoV-19/England/ALDP-9EAE36/2020|2020-09-24|EPI\_ISL\_579977|Original|hCoV-19^^England|Human|Lighthouse Lab in Alderley Park|Wellcome Sanger Institute for the COVID-19 Genomics UK (COG-UK) consortium|Davies|United Kingdom

>Spike|hCoV-19/England/ALDP-9BE563/2020|2020-09-10|EPI\_ISL\_567959|Original|hCoV-19^^England|Human|Lighthouse Lab in Alderley Park|Wellcome Sanger Institute for the COVID-19 Genomics UK (COG-UK) consortium|Davies|United Kingdom

>Spike|hCoV-19/England/QEUEH-AAF115/2020|2020-10-20|EPI\_ISL\_630749|Original|hCoV-19^^England|Human|Lighthouse Lab in Glasgow|Wellcome Sanger Institute for the COVID-19 Genomics UK (COG-UK) consortium|Davies|United Kingdom

>Spike|hCoV-19/Wales/PHWC-47FF1A/2020|2020-10-08|EPI\_ISL\_612830|Original|hCoV-19^^Wales|Human|Wales Specialist Virology Centre Sequencing lab|COVID-19 Genomics UK (COG-UK) Consortium|Moore|United Kingdom

>Spike|hCoV-19/England/CAMC-B0C68F/2020|2020-10-29|EPI\_ISL\_643337|Original|hCoV-19^^England|Human|Lighthouse Lab in Cambridge|Wellcome Sanger Institute for the COVID-19 Genomics UK (COG-UK) Consortium|Davies|United Kingdom

>Spike|hCoV-19/Canada/BC\_05075921/2020|2020-04-00|EPI\_ISL\_466780|Original|hCoV-19^^British Columbia|Human|BCCDC Public Health Laboratory|BCCDC Public Health Laboratory|Harrigan|Canada

>Spike|hCoV-19/Denmark/DCGC-1259/2020|2020-06-01|EPI\_ISL\_618014|Original|hCoV-19^^Hovedstaden|Human|Department of Virus and Microbiological Special Diagnostics|Albertsen lab|Michaelsen|Denmark

>Spike|hCoV-19/England/QEUEH-9F84D9/2020|2020-09-27|EPI\_ISL\_588960|Original|hCoV-19^^England|Human|Lighthouse Lab in Glasgow|Wellcome Sanger Institute for the COVID-19 Genomics UK (COG-UK) consortium|Davies|United Kingdom

>Spike|hCoV-19/Japan/PG-2517/2020|2020-04-00|EPI\_ISL\_690653|Original|hCoV-19^^Japan|Human|Saitama Prefectural Institute of Public Health|Pathogen Genomics Center|Sekizuka|Japan

>Spike|hCoV-19/Russia/Khabarovsk-88201/2020|2020-03-31|EPI\_ISL\_428910|Vero|hCoV-19^^Khabarovsk|Human|State Research Center of Virology and Biotechnology VECTOR|State Research Center of Virology and Biotechnology VECTOR|Shvalov|Russia

>Spike|hCoV-19/England/ALDP-9D9D88/2020|2020-09-18|EPI\_ISL\_576814|Original|hCoV-19^^England|Human|Oxford Viromics|COVID-19 Genomics UK (COG-UK) Consortium|Golubchik|United Kingdom

>Spike|hCoV-19/Spain/AS-IBV-98006591/2020|2020-03-11|EPI\_ISL\_654682|Original|hCoV-19^^Asturias|Human|Servicio de Microbiolog\u00eda|SeqCOVID-SPAIN consortium|IBV (CSIC) |Comas|Spain

>Spike|hCoV-19/England/ALDP-952B7E/2020|2020-06-11|EPI\_ISL\_555431|Original|hCoV-19^^England|Human|Lighthouse Lab in Alderley Park|Wellcome Sanger Institute for the COVID-19 Genomics UK (COG-UK) consortium|Davies|United Kingdom

>Spike|hCoV-19/England/BRIS-12B763/2020|2020-05-19|EPI\_ISL\_487586|Original|hCoV-19^^England|Human|PHE South West Regional Laboratory|Wellcome Sanger Institute for the COVID-19 Genomics UK (COG-UK) consortium|Davies|United Kingdom

>Spike|hCoV-19/United Arab Emirates/0504/2020|2020-05-18|EPI\_ISL\_698671|Original|hCoV-19^^Abu Dhabi|Human|Group 42 (G42) Healthcare|G42 Healthcare|Ogrodzki|United Arab Emirates

>Spike|hCoV-19/USA/WI-UW-2349/2020|2020-11-13|EPI\_ISL\_728115|Original|hCoV-19^^Wisconsin|Human|University of Wisconsin-Madison AIDS Vaccine Research Laboratories|University of Wisconsin-Madison AIDS Vaccine Research Laboratories|Baczenas|USA

>Spike|hCoV-19/Austria/CeMM0963/2020|2020-03-29|EPI\_ISL\_583812|Original|hCoV-19^^Austria|Human|Dr. Gernot Walder GmbH|Bergthaler laboratory|Bergthaler|Austria

>Spike|hCoV-19/Denmark/DCGC-8090/2020|2020-10-26|EPI\_ISL\_617177|Original|hCoV-19^^Hovedstaden|Human|Department of Virus and Microbiological Special Diagnostics|Albertsen lab|Michaelsen|Denmark

>Spike|hCoV-19/Bosnia and Herzegovina/ChVir7370/2020|2020-03-28|EPI\_ISL\_462471|Original|hCoV-19^^Ilijas|Human|Clinical Center|Charite Universitatsmedizin Berlin|Muehlemann|Bosnia and Herzegovina

>Spike|hCoV-19/Spain/PV-HUD-98203801/2020|2020-03-27|EPI\_ISL\_475721|Original|hCoV-19^^Basque Country|Human|Microbiology|Microbiology|Submitter|Spain

>Spike|hCoV-19/USA/FL-BPHL-1973/2020|2020-04-16|EPI\_ISL\_653126|Original|hCoV-19^^Florida|Human|Florida Bureau of Public Health Laboratories|Florida Bureau of Public Health Laboratories|Blanton|USA

>Spike|hCoV-19/Denmark/DCGC-14051/2020|2020-11-30|EPI\_ISL\_711095|Original|hCoV-19^^Hovedstaden|Human|Department of Virus and Microbiological Special Diagnostics|Albertsen Lab|Michaelsen|Denmark

>Spike|hCoV-19/mink/Netherlands/NB-EMC-55-19/2020|2020-09-23|EPI\_ISL\_632430|Original|hCoV-19^^Noord Brabant|Neovison vison|Dutch COVID-19 response team|Erasmus Medical Center|Oude Munnink|Netherlands

>Spike|hCoV-19/England/CAMC-A64AE4/2020|2020-10-11|EPI\_ISL\_608370|Original|hCoV-19^^England|Human|Lighthouse Lab in Cambridge|Wellcome Sanger Institute for the COVID-19 Genomics UK (COG-UK) consortium|Davies|United Kingdom

>Spike|hCoV-19/Scotland/EDB8089/2020|2020-10-02|EPI\_ISL\_585475|Original|hCoV-19^^Scotland|Human|Virology Department|COVID-19 Genomics UK (COG-UK) Consortium|McHugh|United Kingdom

>Spike|hCoV-19/Scotland/QEUH-9F4516/2020|2020-09-27|EPI\_ISL\_600657|Original|hCoV-19^^Scotland|Human|Lighthouse Lab in Glasgow|Wellcome Sanger Institute for the COVID-19 Genomics UK (COG-UK) consortium|Davies|United Kingdom

>Spike|hCoV-19/England/ALDP-900C4F/2020|2020-06-24|EPI\_ISL\_551555|Original|hCoV-19^^England|Human|Lighthouse Lab in Alderley Park|Wellcome Sanger Institute for the COVID-19 Genomics UK (COG-UK) consortium|Davies|United Kingdom

>Spike|hCoV-19/England/QEUH-9C91E9/2020|2020-09-11|EPI\_ISL\_567226|Original|hCoV-19^^England|Human|Lighthouse Lab in Glasgow|Wellcome Sanger Institute for the COVID-19 Genomics UK (COG-UK) consortium|Davies|United Kingdom

>Spike|hCoV-19/England/MILK-BB20F3/2020|2020-11-18|EPI\_ISL\_720042|Original|hCoV-19^^England|Human|Lighthouse Lab in Milton Keynes|Wellcome Sanger Institute for the COVID-19 Genomics UK (COG-UK) Consortium|Davies|United Kingdom

>Spike|hCoV-19/England/ALDP-497CBB/2020|2020-06-04|EPI\_ISL\_559392|Original|hCoV-19^^England|Human|Lighthouse Lab in Alderley Park|Wellcome Sanger Institute for the COVID-19 Genomics UK (COG-UK) consortium|Davies|United Kingdom

>Spike|hCoV-19/England/MILK-B3A679/2020|2020-11-02|EPI\_ISL\_706025|Original|hCoV-19^^England|Human|Oxford Viromics|COVID-19 Genomics UK (COG-UK) Consortium|Golubchik|United Kingdom

>Spike|hCoV-19/USA/UT-UPHL-201213149/2020|2020-12-01|EPI\_ISL\_684023|Original|hCoV-19^^Utah|Human|Utah Public Health Laboratory|Utah Public Health Laboratory|Young|USA

>Spike|hCoV-19/Scotland/CVR4416/2020|2020-09-18|EPI\_ISL\_585290|Original|hCoV-19^^Scotland|Human|West of Scotland Specialist Virology Centre|COVID-19 Genomics UK (COG-UK) Consortium|Robertson|United Kingdom

>Spike|hCoV-19/France/ARA-SC056/2020|2020-04-09|EPI\_ISL\_666670|Original|hCoV-19^^Auvergne-Rh\u00f4ne-Alpes|Human|Laboratoire du Centre Hospitalier Annecy Genevois|CNR Virus des Infections Respiratoires - France SUD|Bal|France

>Spike|hCoV-19/England/ALDP-A6EDF0/2020|2020-10-15|EPI\_ISL\_607213|Original|hCoV-19^^England|Human|Lighthouse Lab in Alderley Park|Wellcome Sanger Institute for the COVID-19 Genomics UK (COG-UK) consortium|Davies|United Kingdom

>Spike|hCoV-19/Luxembourg/LNS2803003/2020|2020-10-23|EPI\_ISL\_740198|Original|hCoV-19^^Luxembourg|Human|Laboratoire national de sant\u00e9|Laboratoire national de sant\u00e9|Wienecke-Baldacchino|Luxembourg

>Spike|hCoV-19/England/OXON-ACFDC/2020|2020-00-00|EPI\_ISL\_448550|Original|hCoV-19^^England|Human|Oxford Viromics|COVID-19 Genomics UK (COG-UK) Consortium|Golubchik|United Kingdom

>Spike|hCoV-19/England/ALDP-AA54DA/2020|2020-10-21|EPI\_ISL\_625185|Original|hCoV-19^^England|Human|Lighthouse Lab in Alderley Park|Wellcome Sanger Institute for the COVID-19 Genomics UK (COG-UK) consortium|Davies|United Kingdom

>Spike|hCoV-19/France/PAC-IHU-0971/2020|2020-07-20|EPI\_ISL\_569019|Original|hCoV-19^^Provence-Alpes-C\u00f4te-d\u00e0z|Human|MEPHI|MEPHI|Levasseur|France

>Spike|hCoV-19/England/CAMC-CB8DC8/2020|2020-12-19|EPI\_ISL\_778231|Original|hCoV-19^^England|Human|Lighthouse Lab in Cambridge|Wellcome Sanger Institute for the COVID-19 Genomics UK (COG-UK) Consortium|Davies|United Kingdom

>Spike|hCoV-19/England/MILK-B9708B/2020|2020-11-13|EPI\_ISL\_675089|Original|hCoV-19^^England|Human|Lighthouse Lab in Milton Keynes|Wellcome Sanger Institute for the COVID-19 Genomics UK (COG-UK) Consortium|Davies|United Kingdom

>Spike|hCoV-19/England/ALDP-C3ABE2/2020|2020-12-09|EPI\_ISL\_731858|Original|hCoV-19^^England|Human|Lighthouse Lab in Alderley Park|Wellcome Sanger Institute for the COVID-19 Genomics UK (COG-UK) Consortium|Davies|United Kingdom



>Spike|hCoV-19/USA/OR-OHSU-2025/2020|2020-07-31|EPI\_ISL\_667094|Original|hCoV-19^^Oregon|Human|OHSU Lab Services Molecular Microbiology Lab|Oregon SARS-CoV-2 Genome Sequencing Center|O'Roak|USA

>Spike|hCoV-19/Japan/PG-7796/2020|2020-07-00|EPI\_ISL\_686898|Original|hCoV-19^^Japan|Human|Pathogen Genomics Center|Pathogen Genomics Center|Sekizuka|Japan

>Spike|hCoV-19/USA/TX-HMH-MCoV-16334/2020|2020-11-02|EPI\_ISL\_786018|Original|hCoV-19^^Texas|Human|Houston Methodist Hospital|Houston Methodist Hospital|Long|USA

>Spike|hCoV-19/USA/WI-UW-1322/2020|2020-08-27|EPI\_ISL\_536693|Original|hCoV-19^^Wisconsin|Human|University of Wisconsin-Madison AIDS Vaccine Research Laboratories|University of Wisconsin-Madison AIDS Vaccine Research Laboratories|Baczenas|USA

>Spike|hCoV-19/USA/FL-BPHL-0624/2020|2020-04-04|EPI\_ISL\_508828|Original|hCoV-19^^Florida|Human|Florida Bureau of Public Health Laboratories|Florida Bureau of Public Health Laboratories|Blanton|USA

>Spike|hCoV-19/Oman/205041592/2020|2020-06-05|EPI\_ISL\_492017|Original|hCoV-19^^Muscat|Human|Oman-NIC|Department of Microbiology and Immunology-SQUH|ALZadjali|Oman

>Spike|hCoV-19/England/ALDP-9CB633/2020|2020-09-16|EPI\_ISL\_575463|Original|hCoV-19^^England|Human|Lighthouse Lab in Alderley Park|Wellcome Sanger Institute for the COVID-19 Genomics UK (COG-UK) consortium|Davies|United Kingdom

>Spike|hCoV-19/Japan/IC-0411/2020|2020-12-00|EPI\_ISL\_736919|Original|hCoV-19^^Japan|Human|Pathogen Genomics Center|Pathogen Genomics Center|Sekizuka|Japan

>Spike|hCoV-19/Switzerland/BE-ETHZ-100023/2020|2020-03-10|EPI\_ISL\_466947|Original|hCoV-19^^Bern|Human|Viollier AG|Department of Biosystems Science and Engineering|Nadeau|Switzerland

>Spike|hCoV-19/Scotland/CVR4898/2020|2020-10-05|EPI\_ISL\_594665|Original|hCoV-19^^Scotland|Human|West of Scotland Specialist Virology Centre|COVID-19 Genomics UK (COG-UK) Consortium|Robertson|United Kingdom

>Spike|hCoV-19/USA/CA-ALSR-2064/2020|2020-04-22|EPI\_ISL\_635329|Original|hCoV-19^^California|Human|San Diego County Public Health Laboratory|Andersen lab at Scripps Research|Gangavarapu|USA

>Spike|hCoV-19/Zhejiang/SX0715/2020|2020-07-15|EPI\_ISL\_497950|Original|hCoV-19^^Zhejiang|Human|Shaoxing CDC|Zhejiang Provincial Center for Disease Control and Prevention|Chen|China

>Spike|hCoV-19/Germany/SH-ChVir20758/2020|2020-11-23|EPI\_ISL\_729684|Original|hCoV-19^^Schleswig-Holstein|Human|A. Krumbholz|Charit University of Medicine Berlin|Muehlemann|Germany

>Spike|hCoV-19/Denmark/DCGC-16293/2020|2020-11-16|EPI\_ISL\_714365|Original|hCoV-19^^Sjaelland|Human|Department of Virus and Microbiological Special Diagnostics|Albertsen Lab|Michaelsen|Denmark

>Spike|hCoV-19/SaudiArabia/KAUST-MADINAH364/2020|2020-04-23|EPI\_ISL\_513141|Original|hCoV-19^^Madinah|Human|Pathogen Genomics Lab King Abdullah University of Science and Technology(KAUST)|Pathogen Genomics Lab King Abdullah University of Science and Technology(KAUST)|Mohamed Ghazzali|Saudi Arabia

>Spike|hCoV-19/Northern Ireland/QEUA-94385B/2020|2020-07-12|EPI\_ISL\_532562|Original|hCoV-19^^Northern Ireland|Human|Lighthouse Lab in Glasgow|Wellcome Sanger Institute for the COVID-19 Genomics UK (COG-UK) consortium|Davies|United Kingdom

>Spike|hCoV-19/England/QEUA-B0E016/2020|2020-11-02|EPI\_ISL\_641919|Original|hCoV-19^^England|Human|Lighthouse Lab in Glasgow|Wellcome Sanger Institute for the COVID-19 Genomics UK (COG-UK) Consortium|Davies|United Kingdom

>Spike|hCoV-19/South Africa/Tygerberg-407/2020|2020-12-04|EPI\_ISL\_745188|Original|hCoV-19^^Northern Cape|Human|Nababeep Hospital|National Health Laboratory Service (NHLS)|de Oliveira|South Africa

>Spike|hCoV-19/England/ALDP-9317F9/2020|2020-06-21|EPI\_ISL\_552904|Original|hCoV-19^^England|Human|Lighthouse Lab in Alderley Park|Wellcome Sanger Institute for the COVID-19 Genomics UK (COG-UK) consortium|Davies|United Kingdom

>Spike|hCoV-19/England/ALDP-BCA90C/2020|2020-11-23|EPI\_ISL\_703783|Original|hCoV-19^^England|Human|Lighthouse Lab in Alderley Park|Wellcome Sanger Institute for the COVID-19 Genomics UK (COG-UK) Consortium|Davies|United Kingdom

>Spike|hCoV-19/Switzerland/AG-ETHZ-420711/2020|2020-12-24|EPI\_ISL\_767947|Original|hCoV-19^^Aargau|Human|Viollier AG|Department of Biosystems Science and Engineering|Nadeau|Switzerland

>Spike|hCoV-19/USA/CO-CDPHE-2009131699/2020|2020-09-12|EPI\_ISL\_710227|Original|hCoV-19^^Colorado|Human|Colorado Department of Public Health and Environment|Colorado Department of Public Health and Environment|Bankers|USA

>Spike|hCoV-19/Belgium/reg-0408897/2020|2020-04-08|EPI\_ISL\_734549|Original|hCoV-19^^Wavre|Human|UZ Leuven|KU Leuven|Maes|Belgium

>Spike|hCoV-19/USA/TX-HMH-MCoV-13223/2020|2020-08-25|EPI\_ISL\_788374|Original|hCoV-19^^Texas|Human|Houston Methodist Hospital|Houston Methodist Hospital|Long|USA

>Spike|hCoV-19/Scotland/CVR3488/2020|2020-05-12|EPI\_ISL\_473647|Original|hCoV-19^^Scotland|Human|West of Scotland Specialist Virology Centre|COVID-19 Genomics UK (COG-UK) Consortium|Robertson|United Kingdom

>Spike|hCoV-19/Japan/IC-0293/2020|2020-11-00|EPI\_ISL\_667722|Original|hCoV-19^^Japan|Human|Pathogen Genomics Center|Pathogen Genomics Center|Sekizuka|Japan

>Spike|hCoV-19/Switzerland/BE-ETHZ-360087/2020|2020-11-08|EPI\_ISL\_693897|Original|hCoV-19^^Bern|Human|Viollier AG|Department of Biosystems Science and Engineering|Nadeau|Switzerland

>Spike|hCoV-19/England/QEUA-96349D/2020|2020-08-11|EPI\_ISL\_531681|Original|hCoV-19^^England|Human|Lighthouse Lab in Glasgow|Wellcome Sanger Institute for the COVID-19 Genomics UK (COG-UK) consortium|Davies|United Kingdom

>Spike|hCoV-19/Australia/VIC6501/2020|2020-07-21|EPI\_ISL\_521275|Original|hCoV-19^^Victoria|Human|Victorian Infectious Diseases Reference Laboratory (VIDRL)|VIDRL and MDU-PHL|Schultz|Australia

>Spike|hCoV-19/Wales/PHWC-4878C9/2020|2020-10-30|EPI\_ISL\_639249|Original|hCoV-19^^Wales|Human|Wales Specialist Virology Centre Sequencing lab|COVID-19 Genomics UK (COG-UK) Consortium|Moore|United Kingdom

>Spike|hCoV-19/Northern Ireland/NIRE-FB40C/2020|2020-03-17|EPI\_ISL\_441420|Original|hCoV-19^^Northern Ireland|Human|Regional Virus Laboratory|COVID-19 Genomics UK (COG-UK) Consortium|Fairley|United Kingdom

>Spike|hCoV-19/England/QEUA-AD302A/2020|2020-10-25|EPI\_ISL\_634126|Original|hCoV-19^^England|Human|Lighthouse Lab in Glasgow|Wellcome Sanger Institute for the COVID-19 Genomics UK (COG-UK) consortium|Davies|United Kingdom

>Spike|hCoV-19/Netherlands/NA\_85/2020|2020-03-12|EPI\_ISL\_422845|Original|hCoV-19^^Netherlands|Human|Dutch COVID-19 response team|Erasmus Medical Center|Oude Munnink|Netherlands

>Spike|hCoV-19/England/MILK-A7CD2C/2020|2020-10-13|EPI\_ISL\_606644|Original|hCoV-19^^England|Human|Lighthouse Lab in Milton Keynes|Wellcome Sanger Institute for the COVID-19 Genomics UK (COG-UK) consortium|Davies|United Kingdom

>Spike|hCoV-19/England/QEUA-C31969/2020|2020-12-11|EPI\_ISL\_782702|Original|hCoV-19^^England|Human|Lighthouse Lab in Glasgow|Wellcome Sanger Institute for the COVID-19 Genomics UK (COG-UK) Consortium|Davies|United Kingdom

>Spike|hCoV-19/USA/VA-DCLS-1546/2020|2020-08-07|EPI\_ISL\_581537|Original|hCoV-19^^Virginia|Human|Virginia DCLS|Virginia DCLS|St. Jacques|USA

>Spike|hCoV-19/Netherlands/ZH-EMC-579/2020|2020-09-18|EPI\_ISL\_578007|Original|hCoV-19^^Zuid Holland|Human|Dutch COVID-19 response team|Erasmus Medical Center|Oude Munnink|Netherlands

>Spike|hCoV-19/Wales/PHWC-160559/2020|2020-05-26|EPI\_ISL\_472949|Original|hCoV-19^^Wales|Human|Wales Specialist Virology Centre Sequencing lab|COVID-19 Genomics UK (COG-UK) Consortium|Moore|United Kingdom

>Spike|hCoV-19/USA/NY-QDX-2389/2020|2020-03-16|EPI\_ISL\_604715|Original|hCoV-19^^New York|Human|Quest Diagnostics|Quest Diagnostics|Kagan|USA

>Spike|hCoV-19/Wales/PHWC-491ED9/2020|2020-11-16|EPI\_ISL\_706793|Original|hCoV-19^^Wales|Human|Originating lab|COVID-19 Genomics UK (COG-UK) Consortium|Moore|United Kingdom

>Spike|hCoV-19/USA/LA-EVTL1302/2020|2020-12-11|EPI\_ISL\_778968|Original|hCoV-19^^Louisiana|Human|LSUHS Emerging Viral Threat Laboratory|Microbial Genome Sequencing Center|Kamil|USA

>Spike|hCoV-19/England/QEUA-96A2E7/2020|2020-08-15|EPI\_ISL\_536872|Original|hCoV-19^England|Human|Lighthouse Lab in Glasgow|Wellcome Sanger Institute for the COVID-19 Genomics UK (COG-UK) consortium|Davies|United Kingdom

>Spike|hCoV-19/Belgium/ULG-9641/2020|2020-03-22|EPI\_ISL\_418652|Original|hCoV-19^Li\u00e8ge|Human|Department of Clinical Microbiology|GIGA Medical Genomics|Durkin|Belgium

>Spike|hCoV-19/Wales/PHWC-30C21/2020|2020-04-10|EPI\_ISL\_446339|Original|hCoV-19^Wales|Human|Wales Specialist Virology Centre|Public Health Wales Microbiology Cardiff|Moore|United Kingdom

>Spike|hCoV-19/England/NORW-220F74/2020|2020-12-17|EPI\_ISL\_764445|Original|hCoV-19^England|Human|Quadram Institute Bioscience|COVID-19 Genomics UK (COG-UK) Consortium|Alikhan|United Kingdom

>Spike|hCoV-19/USA/DE-DHSS-FLW00407861/2020|2020-12-02|EPI\_ISL\_767010|Original|hCoV-19^Delaware|Human|Delaware Public Health Laboratory|Delaware Public Health Laboratory|Bajwa|USA

>Spike|hCoV-19/Switzerland/ZH-ETHZ-420301/2020|2020-12-20|EPI\_ISL\_768293|Original|hCoV-19^Zurich|Human|Viollier AG|Department of Biosystems Science and Engineering|Nadeau|Switzerland

>Spike|hCoV-19/Jordan/AM-ALSR-4037/2020|2020-10-03|EPI\_ISL\_636397|Original|hCoV-19^Amman|Human|Biolab Diagnostic Laboratories|Andersen lab at Scripps Research|Gangavarapu|Jordan

>Spike|hCoV-19/England/BRIS-125D1C/2020|2020-03-30|EPI\_ISL\_443691|Original|hCoV-19^England|Human|PHE South West Regional Laboratory|Wellcome Sanger Institute for the COVID-19 Genomics UK (COG-UK) consortium|Amato|United Kingdom

>Spike|hCoV-19/England/ALDP-BBA608/2020|2020-11-20|EPI\_ISL\_702462|Original|hCoV-19^England|Human|Lighthouse Lab in Alderley Park|Wellcome Sanger Institute for the COVID-19 Genomics UK (COG-UK) Consortium|Davies|United Kingdom

>Spike|hCoV-19/England/CAMC-BOCCE7/2020|2020-10-30|EPI\_ISL\_643614|Original|hCoV-19^England|Human|Lighthouse Lab in Cambridge|Wellcome Sanger Institute for the COVID-19 Genomics UK (COG-UK) Consortium|Davies|United Kingdom

>Spike|hCoV-19/Wales/PHWC-1664B0/2020|2020-06-14|EPI\_ISL\_494004|Original|hCoV-19^Wales|Human|Originating lab|COVID-19 Genomics UK (COG-UK) Consortium|Moore|United Kingdom

>Spike|hCoV-19/England/BRIS-12E0FC/2020|2020-04-19|EPI\_ISL\_482008|Original|hCoV-19^England|Human|PHE South West Regional Laboratory|Wellcome Sanger Institute for the COVID-19 Genomics UK (COG-UK) consortium|Davies|United Kingdom

>Spike|hCoV-19/England/OXON-AF962/2020|2020-00-00|EPI\_ISL\_478788|Original|hCoV-19^England|Human|Oxford Viromics|COVID-19 Genomics UK (COG-UK) Consortium|Golubchik|United Kingdom

>Spike|hCoV-19/England/QEUA-A62512/2020|2020-10-10|EPI\_ISL\_706967|Original|hCoV-19^England|Human|Oxford Viromics|COVID-19 Genomics UK (COG-UK) Consortium|Golubchik|United Kingdom

>Spike|hCoV-19/USA/UT-UPHL-04849/2020|2020-05-24|EPI\_ISL\_575173|Original|hCoV-19^Utah|Human|Utah Public Health Laboratory|Utah Public Health Laboratory|Young|USA

>Spike|hCoV-19/Northern Ireland/QEUA-95EDC7/2020|2020-08-08|EPI\_ISL\_532392|Original|hCoV-19^Northern Ireland|Human|Lighthouse Lab in Glasgow|Wellcome Sanger Institute for the COVID-19 Genomics UK (COG-UK) consortium|Davies|United Kingdom

>Spike|hCoV-19/England/QEUA-BCD954/2020|2020-11-26|EPI\_ISL\_704281|Original|hCoV-19^England|Human|Lighthouse Lab in Glasgow|Wellcome Sanger Institute for the COVID-19 Genomics UK (COG-UK) Consortium|Davies|United Kingdom

>Spike|hCoV-19/Australia/VIC5205/2020|2020-07-18|EPI\_ISL\_519970|Original|hCoV-19^Victoria|Human|Microbiological Diagnostic Unit - Public Health Laboratory (MDU-PHL)|MDU-PHL|Schultz|Australia

>Spike|hCoV-19/USA/HI-H200668/2020|2020-12-01|EPI\_ISL\_753191|Original|hCoV-19^Hawaii|Human|State Laboratories Division|State Laboratories Division|Sultana|USA

>Spike|hCoV-19/England/205260873/2020|2020-12-22|EPI\_ISL\_754330|Original|hCoV-19^England|Human|Respiratory Virus Unit|COVID-19 Genomics UK (COG-UK) Consortium|Platt|United Kingdom

>Spike|hCoV-19/Wales/PHWC-162DF5/2020|2020-05-30|EPI\_ISL\_473204|Original|hCoV-19^^Wales|Human|Wales Specialist Virology Centre Sequencing lab|COVID-19 Genomics UK (COG-UK) Consortium|Moore|United Kingdom

>Spike|hCoV-19/South Africa/KRISP-0201/2020|2020-06-11|EPI\_ISL\_482716|Original|hCoV-19^^KwaZulu-Natal|Human|Molecular Diagnostics Services (MDS)|KRISP|de Oliveira|South Africa

>Spike|hCoV-19/Denmark/DCGC-16271/2020|2020-11-16|EPI\_ISL\_714675|Original|hCoV-19^^Midtjylland|Human|Department of Virus and Microbiological Special Diagnostics|Albertsen Lab|Michaelsen|Denmark

>Spike|hCoV-19/Scotland/QEUH-9C8E6B/2020|2020-09-14|EPI\_ISL\_576023|Original|hCoV-19^^Scotland|Human|Lighthouse Lab in Glasgow|Wellcome Sanger Institute for the COVID-19 Genomics UK (COG-UK) consortium|Davies|United Kingdom

>Spike|hCoV-19/Scotland/QEUH-C1691F/2020|2020-12-06|EPI\_ISL\_710664|Original|hCoV-19^^Scotland|Human|Lighthouse Lab in Glasgow|Wellcome Sanger Institute for the COVID-19 Genomics UK (COG-UK) Consortium|Davies|United Kingdom

>Spike|hCoV-19/England/ALDP-59DDFD/2020|2020-06-14|EPI\_ISL\_558683|Original|hCoV-19^^England|Human|Lighthouse Lab in Alderley Park|Wellcome Sanger Institute for the COVID-19 Genomics UK (COG-UK) consortium|Davies|United Kingdom

>Spike|hCoV-19/South Korea/KDCA0252/2020|2020-08-18|EPI\_ISL\_760017|Original|hCoV-19^^South Korea|Human|Division of Emerging Infectious Diseases|Division of Emerging Infectious Diseases|Park|South Korea

>Spike|hCoV-19/England/ALDP-B73D42/2020|2020-11-12|EPI\_ISL\_664886|Original|hCoV-19^^England|Human|Quadram Institute Bioscience|COVID-19 Genomics UK (COG-UK) Consortium|Alikhan|United Kingdom

>Spike|hCoV-19/England/CAMB-1ACD2C/2020|2020-04-22|EPI\_ISL\_489539|Original|hCoV-19^^England|Human|Department of Pathology|Wellcome Sanger Institute for the COVID-19 Genomics UK (COG-UK) consortium|Davies|United Kingdom

>Spike|hCoV-19/England/LOND-1250752/2020|2020-10-26|EPI\_ISL\_665230|Original|hCoV-19^^England|Human|University College London Hospital|COVID-19 Genomics UK (COG-UK) Consortium|Byott|United Kingdom

>Spike|hCoV-19/Spain/AR-IBV-005072/2020|2020-04-22|EPI\_ISL\_510359|Original|hCoV-19^^Aragon|Human|Servicio de Microbiolog\u00eda|SeqCOVID-SPAIN consortium|IBV (CSIC)|Comas|Spain

>Spike|hCoV-19/England/20284212304/2020|2020-06-16|EPI\_ISL\_493003|Original|hCoV-19^^England|Human|Respiratory Virus Unit|Respiratory Virus Unit|Platt|United Kingdom

>Spike|hCoV-19/England/QEUH-B6B0DB/2020|2020-11-11|EPI\_ISL\_662594|Original|hCoV-19^^England|Human|Lighthouse Lab in Glasgow|Wellcome Sanger Institute for the COVID-19 Genomics UK (COG-UK) Consortium|Davies|United Kingdom

>Spike|hCoV-19/England/CAMB-75367/2020|2020-03-16|EPI\_ISL\_440382|Original|hCoV-19^^England|Human|Department of Pathology|Wellcome Sanger Institute for the COVID-19 Genomics UK (COG-UK) consortium|Amato|United Kingdom

>Spike|hCoV-19/England/ALDP-AA1FDD/2020|2020-10-22|EPI\_ISL\_624429|Original|hCoV-19^^England|Human|Lighthouse Lab in Alderley Park|Wellcome Sanger Institute for the COVID-19 Genomics UK (COG-UK) consortium|Davies|United Kingdom

>Spike|hCoV-19/USA/AZ-TG271864/2020|2020-03-23|EPI\_ISL\_426540|Original|hCoV-19^^Arizona|Human|AZ SPHL|TGen North|Lemmer|USA

>Spike|hCoV-19/Denmark/DCGC-19691/2020|2020-12-07|EPI\_ISL\_749113|Original|hCoV-19^^Hovedstaden|Human|Department of Virus and Microbiological Special Diagnostics|Albertsen Lab|Michaelsen|Denmark

>Spike|hCoV-19/USA/IL-NM085/2020|2020-03-19|EPI\_ISL\_444576|Original|hCoV-19^^Illinois|Human|Northwestern Memorial Hospital|Ozer Lab|Ozer|USA

>Spike|hCoV-19/Spain/AR-IBV-98008106/2020|2020-10-07|EPI\_ISL\_654402|Original|hCoV-19^^Aragon|Human|Servicio de Microbiolog\u00eda|SeqCOVID-SPAIN consortium|IBV (CSIC)|Comas|Spain

>Spike|hCoV-19/Spain/VC-FISABIO-159/2020|2020-03-19|EPI\_ISL\_436254|Original|hCoV-19^^Comunitat Valenciana|Human|Servicio de Microbiologia. Hospital Universitario Doctor Peset|Sequencing and Bioinformatics Service and Molecular Epidemiology Research Group. FISABIO-Public Health|Gonzalez-Candelas|Spain

>Spike|hCoV-19/Wales/PHWC-48439E/2020|2020-10-21|EPI\_ISL\_627996|Original|hCoV-19^^Wales|Human|Wales Specialist Virology Centre Sequencing lab|COVID-19 Genomics UK (COG-UK) Consortium|Moore|United Kingdom

>Spike|hCoV-19/Denmark/DCGC-17457/2020|2020-12-14|EPI\_ISL\_750996|Original|hCoV-19^^Midtjylland|Human|Department of Virus and Microbiological Special Diagnostics|Albertsen Lab|Michaelsen|Denmark

>Spike|hCoV-19/Wales/PHWC-480918/2020|2020-10-10|EPI\_ISL\_612950|Original|hCoV-19^^Wales|Human|Wales Specialist Virology Centre Sequencing lab|COVID-19 Genomics UK (COG-UK) Consortium|Moore|United Kingdom

>Spike|hCoV-19/Canada/ON-PHL-20-02401/2020|2020-09-00|EPI\_ISL\_671535|Original|hCoV-19^^Ontario|Human|Public Health Ontario Laboratory|Public Health Ontario Laboratory|Guthrie|Canada

>Spike|hCoV-19/England/ALDP-94E489/2020|2020-06-17|EPI\_ISL\_554902|Original|hCoV-19^^England|Human|Lighthouse Lab in Alderley Park|Wellcome Sanger Institute for the COVID-19 Genomics UK (COG-UK) consortium|Davies|United Kingdom

>Spike|hCoV-19/England/ALDP-BBB018/2020|2020-11-21|EPI\_ISL\_702021|Original|hCoV-19^^England|Human|Lighthouse Lab in Alderley Park|Wellcome Sanger Institute for the COVID-19 Genomics UK (COG-UK) Consortium|Davies|United Kingdom

>Spike|hCoV-19/England/CAMC-A660FF/2020|2020-10-11|EPI\_ISL\_637488|Original|hCoV-19^^England|Human|Department of Pathology|COVID-19 Genomics UK (COG-UK) Consortium|Goodfellow|United Kingdom

>Spike|hCoV-19/England/QEUEH-A0C2D7/2020|2020-10-03|EPI\_ISL\_599347|Original|hCoV-19^^England|Human|Lighthouse Lab in Glasgow|Wellcome Sanger Institute for the COVID-19 Genomics UK (COG-UK) consortium|Davies|United Kingdom

>Spike|hCoV-19/England/ALDP-A6C518/2020|2020-10-15|EPI\_ISL\_608236|Original|hCoV-19^^England|Human|Lighthouse Lab in Alderley Park|Wellcome Sanger Institute for the COVID-19 Genomics UK (COG-UK) consortium|Davies|United Kingdom

>Spike|hCoV-19/England/QEUEH-96F376/2020|2020-08-17|EPI\_ISL\_530575|Original|hCoV-19^^England|Human|Lighthouse Lab in Glasgow|Wellcome Sanger Institute for the COVID-19 Genomics UK (COG-UK) consortium|Davies|United Kingdom

>Spike|hCoV-19/England/ALDP-9C628F/2020|2020-09-10|EPI\_ISL\_567665|Original|hCoV-19^^England|Human|Lighthouse Lab in Alderley Park|Wellcome Sanger Institute for the COVID-19 Genomics UK (COG-UK) consortium|Davies|United Kingdom

>Spike|hCoV-19/Wales/PHWC-2C587/2020|2020-03-31|EPI\_ISL\_445876|Original|hCoV-19^^Wales|Human|Wales Specialist Virology Centre|Public Health Wales Microbiology Cardiff|Moore|United Kingdom

>Spike|hCoV-19/Panama/332702/2020|2020-03-15|EPI\_ISL\_496718|Original|hCoV-19^^Panama Center|Human|Gorgas Memorial Laboratory of Health Studies|Gorgas Memorial Laboratory of Health Studies|Martinez|Panama

>Spike|hCoV-19/USA/NV-NSPHL-A0186/2020|2020-05-20|EPI\_ISL\_515442|Original|hCoV-19^^Nevada|Human|Nevada State Public Health Laboratory|Nevada State Public Health Laboratory|Sevinsky|USA

>Spike|hCoV-19/Spain/VC-IBV-98003116/2020|2020-03-16|EPI\_ISL\_538052|Original|hCoV-19^^Comunitat Valenciana|Human|Hospital Universitari i Polit\u00e8cnic La Fe de Val\u00e8ncia|SeqCOVID-SPAIN consortium/IBV(CSIC)|Comas|Spain

>Spike|hCoV-19/USA/NE-11480/2020|2020-05-05|EPI\_ISL\_475217|Original|hCoV-19^^Nebraska|Human|Nebraska Public Health Laboratory|UNMC COVID-19 Response Team|Pratt|USA

>Spike|hCoV-19/England/204291029/2020|2020-10-16|EPI\_ISL\_622868|Original|hCoV-19^^England|Human|Respiratory Virus Unit|Respiratory Virus Unit|Platt|United Kingdom

>Spike|hCoV-19/USA/OR-OHSU-0058/2020|2020-04-21|EPI\_ISL\_468089|Original|hCoV-19^^Oregon|Human|OHSU Lab Services Molecular Microbiology Lab|Oregon SARS-CoV-2 Genome Sequencing Center|O'Roak|USA

>Spike|hCoV-19/Ireland/D-SVUH-R7287/2020|2020-04-10|EPI\_ISL\_596672|Original|hCoV-19^^Dublin|Human|St.Vincent's University Hospital|St.Vincent's University Hospital|Gonzalez|Ireland

>Spike|hCoV-19/England/QEUEH-A9F36D/2020|2020-10-20|EPI\_ISL\_611359|Original|hCoV-19^^England|Human|Lighthouse Lab in Glasgow|Wellcome Sanger Institute for the COVID-19 Genomics UK (COG-UK) consortium|Davies|United Kingdom

>Spike|hCoV-19/Wales/PHWC-49A3E0/2020|2020-12-01|EPI\_ISL\_727540|Original|hCoV-19^^Wales|Human|Originating lab|COVID-19 Genomics UK (COG-UK) Consortium|Moore|United Kingdom

>Spike|hCoV-19/USA/HI-H200382/2020|2020-09-24|EPI\_ISL\_752929|Original|hCoV-19^^Hawaii|Human|State Laboratories Division|State Laboratories Division|Sultana|USA

>Spike|hCoV-19/Denmark/DCGC-12791/2020|2020-11-02|EPI\_ISL\_682972|Original|hCoV-19^^Nordjylland|Human|Department of Virus and Microbiological Special Diagnostics|Albertsen Lab|Michaelsen|Denmark

>Spike|hCoV-19/England/QEUA-9F8D29/2020|2020-09-27|EPI\_ISL\_588953|Original|hCoV-19^^England|Human|Lighthouse Lab in Glasgow|Wellcome Sanger Institute for the COVID-19 Genomics UK (COG-UK) consortium|Davies|United Kingdom

>Spike|hCoV-19/England/ALDP-B74998/2020|2020-11-12|EPI\_ISL\_661978|Original|hCoV-19^^England|Human|Lighthouse Lab in Alderley Park|Wellcome Sanger Institute for the COVID-19 Genomics UK (COG-UK) Consortium|Davies|United Kingdom

>Spike|hCoV-19/England/QEUA-9C81BD/2020|2020-09-03|EPI\_ISL\_567080|Original|hCoV-19^^England|Human|Lighthouse Lab in Glasgow|Wellcome Sanger Institute for the COVID-19 Genomics UK (COG-UK) consortium|Davies|United Kingdom

>Spike|hCoV-19/Romania/USAFSAM-S557/2020|2020-11-28|EPI\_ISL\_738337|Original|hCoV-19^^Romania|Human|Landstuhl Regional Medical Center|United States Air Force School of Aerospace Medicine|Fries|Romania

>Spike|hCoV-19/Wales/PHWC-493147/2020|2020-11-29|EPI\_ISL\_725843|Original|hCoV-19^^Wales|Human|Originating lab|COVID-19 Genomics UK (COG-UK) Consortium|Moore|United Kingdom

>Spike|hCoV-19/Luxembourg/LNS1705026/2020|2020-10-28|EPI\_ISL\_739981|Original|hCoV-19^^Luxembourg|Human|Laboratoire national de sant\u00e9|Laboratoire national de sant\u00e9|Wienecke-Baldacchino|Luxembourg

>Spike|hCoV-19/Denmark/DCGC-12339/2020|2020-11-16|EPI\_ISL\_682520|Original|hCoV-19^^Hovedstaden|Human|Department of Virus and Microbiological Special Diagnostics|Albertsen Lab|Michaelsen|Denmark

>Spike|hCoV-19/Iceland/149/2020|2020-03-13|EPI\_ISL\_417799|Original|hCoV-19^^Reykjavik|Human|The National University Hospital of Iceland|deCODE genetics|J\u00f3nsson|Iceland

>Spike|hCoV-19/England/ALDP-9FCAC4/2020|2020-10-01|EPI\_ISL\_587782|Original|hCoV-19^^England|Human|Lighthouse Lab in Alderley Park|Wellcome Sanger Institute for the COVID-19 Genomics UK (COG-UK) consortium|Davies|United Kingdom

>Spike|hCoV-19/Portugal/PT2028/2020|2020-11-23|EPI\_ISL\_732244|Original|hCoV-19^^Portugal|Human|Instituto Nacional de Saude (INSA) and Instituto Gulbenkian de Ciencia (IGC)|Instituto Nacional de Saude (INSA) and Instituto Gulbenkian de Ciencia (IGC)|Borges|Portugal

>Spike|hCoV-19/USA/NY-Wadsworth-279952-01/2020|2020-00-00|EPI\_ISL\_754486|Original|hCoV-19^^New York|Human|Wadsworth Center|Wadsworth Center|Lasek-Nesselquist|USA

>Spike|hCoV-19/USA/VA-DCLS-1212/2020|2020-06-22|EPI\_ISL\_572281|Original|hCoV-19^^Virginia|Human|Virginia DCLS|Virginia DCLS|St. Jacques|USA

>Spike|hCoV-19/Netherlands/ZH-EMC-227/2020|2020-05-15|EPI\_ISL\_523569|Original|hCoV-19^^Zuid Holland|Human|Dutch COVID-19 response team|Erasmus Medical Center|Oude Munnink|Netherlands

>Spike|hCoV-19/USA/TX-HMH-3855/2020|2020-06-17|EPI\_ISL\_543256|Original|hCoV-19^^Texas|Human|Houston Methodist Hospital|Houston Methodist Hospital|Long|USA

>Spike|hCoV-19/USA/FL-BPHL-2095/2020|2020-05-18|EPI\_ISL\_653248|Original|hCoV-19^^Florida|Human|Florida Bureau of Public Health Laboratories|Florida Bureau of Public Health Laboratories|Blanton|USA

>Spike|hCoV-19/Northern Ireland/NIRE-10360A/2020|2020-04-17|EPI\_ISL\_489232|Original|hCoV-19^^Northern Ireland|Human|Regional Virus Laboratory|Wellcome Sanger Institute for the COVID-19 Genomics UK (COG-UK) consortium|Davies|United Kingdom

>Spike|hCoV-19/England/CAMB-1B776C/2020|2020-10-22|EPI\_ISL\_637566|Original|hCoV-19^^England|Human|Department of Pathology|COVID-19 Genomics UK (COG-UK) Consortium|Goodfellow|United Kingdom

>Spike|hCoV-19/Wales/PHWC-28C77/2020|2020-04-02|EPI\_ISL\_445424|Original|hCoV-19^^Wales|Human|Wales Specialist Virology Centre|Public Health Wales Microbiology Cardiff|Moore|United Kingdom

>Spike|hCoV-19/England/MILK-ACCE39/2020|2020-10-21|EPI\_ISL\_630122|Original|hCoV-19^^England|Human|Lighthouse Lab in Milton Keynes|Wellcome Sanger Institute for the COVID-19 Genomics UK (COG-UK) consortium|Davies|United Kingdom

>Spike|hCoV-19/USA/ME-HETL-J0093/2020|2020-03-21|EPI\_ISL\_513502|Original|hCoV-19^^Maine|Human|Maine HETL|Tewhey Lab|Tewhey|USA

>Spike|hCoV-19/England/LIVE-9B1AD/2020|2020-03-25|EPI\_ISL\_449417|Original|hCoV-19^^England|Human|Liverpool Clinical Laboratories|COVID-19 Genomics UK (COG-UK) Consortium|Haldenby|United Kingdom

>Spike|hCoV-19/Australia/QLD1156/2020|2020-04-01|EPI\_ISL\_639759|Original|hCoV-19^^Australia|Human|unknown|Public Health Virology Laboratory|Nguyen|Australia

>Spike|hCoV-19/USA/WI-UW-77/2020|2020-03-19|EPI\_ISL\_421335|Original|hCoV-19^^Wisconsin|Human|University of Wisconsin-Madison AIDS Vaccine Research Laboratories|University of Wisconsin-Madison AIDS Vaccine Research Laboratories|Baczenas|USA

>Spike|hCoV-19/England/QEUEH-997A8F/2020|2020-08-28|EPI\_ISL\_549542|Original|hCoV-19^^England|Human|Oxford Viromics|COVID-19 Genomics UK (COG-UK) Consortium|Golubchik|United Kingdom

>Spike|hCoV-19/USA/NY-SURV0407/2020|2020-03-17|EPI\_ISL\_436065|Original|hCoV-19^^New York|Human|NYC Department of Health and Mental Hygiene|Pathogen Discovery|Queen|USA

>Spike|hCoV-19/England/CAMC-B08489/2020|2020-10-30|EPI\_ISL\_643563|Original|hCoV-19^^England|Human|Lighthouse Lab in Cambridge|Wellcome Sanger Institute for the COVID-19 Genomics UK (COG-UK) Consortium|Davies|United Kingdom

>Spike|hCoV-19/England/20129089504/2020|2020-03-11|EPI\_ISL\_424078|Original|hCoV-19^^England|Human|Respiratory Virus Unit|Respiratory Virus Unit|Platt|United Kingdom

>Spike|hCoV-19/USA/WA6-UW3/2020|2020-02-29|EPI\_ISL\_413457|Original|hCoV-19^^Washington|Human|Washington State Public Health Lab|UW Virology Lab|Roychoudhury|USA

>Spike|hCoV-19/USA/VA-DCLS-0880/2020|2020-04-30|EPI\_ISL\_516670|Original|hCoV-19^^Virginia|Human|Virginia DCLS|Virginia DCLS|St. Jacques|USA

>Spike|hCoV-19/USA/CA-ALSR-1588/2020|2020-04-22|EPI\_ISL\_494676|Original|hCoV-19^^California|Human|Scripps Medical Laboratory|Andersen lab at Scripps Research|Gangavarapu|USA

>Spike|hCoV-19/Netherlands/UT-RIVM-20175/2020|2020-11-30|EPI\_ISL\_723336|Original|hCoV-19^^Utrecht|Human|Dutch COVID-19 response team|National Institute for Public Health and the Environment (RIVM)|Meijer|Netherlands

>Spike|hCoV-19/USA/WI-UW-1149/2020|2020-08-12|EPI\_ISL\_522905|Original|hCoV-19^^Wisconsin|Human|University of Wisconsin-Madison AIDS Vaccine Research Laboratories|University of Wisconsin-Madison AIDS Vaccine Research Laboratories|Baczenas|USA

>Spike|hCoV-19/Denmark/DCGC-13922/2020|2020-11-30|EPI\_ISL\_711454|Original|hCoV-19^^Hovedstaden|Human|Department of Virus and Microbiological Special Diagnostics|Albertsen Lab|Michaelsen|Denmark

>Spike|hCoV-19/Canada/ON-UHTC\_0335/2020|2020-09-09|EPI\_ISL\_609802|Original|hCoV-19^^Ontario|Human|Unity Health Toronto|Ontario Institute for Cancer Research|de Borja|Canada

>Spike|hCoV-19/USA/MI-MDHHS-SC22568/2020|2020-11-10|EPI\_ISL\_737136|Original|hCoV-19^^Michigan|Human|Michigan Department of Health and Human Services|Michigan Department of Health and Human Services|Blankenship|USA

>Spike|hCoV-19/Australia/VIC4417/2020|2020-07-16|EPI\_ISL\_519713|Original|hCoV-19^^Victoria|Human|Microbiological Diagnostic Unit - Public Health Laboratory (MDU-PHL)|MDU-PHL|Schultz|Australia

>Spike|hCoV-19/France/BRE-IPP11310/2020|2020-09-16|EPI\_ISL\_754856|Original|hCoV-19^^Bretagne|Human|CHU - H\u00f4pital Cavale Blanche - Labo. de Virologie|National Reference Center for Viruses of Respiratory Infections|Enouf|France

>Spike|hCoV-19/USA/MA-MASPHL-00991/2020|2020-11-04|EPI\_ISL\_692801|Original|hCoV-19^^Massachusetts|Human|Massachusetts State Public Health Laboratory|Massachusetts State Public Health Laboratory|Lang|USA

>Spike|hCoV-19/Denmark/DCGC-4869/2020|2020-09-21|EPI\_ISL\_621555|Original|hCoV-19^^Nordjylland|Human|Department of Virus and Microbiological Special Diagnostics|Albertsen lab|Michaelsen|Denmark

>Spike|hCoV-19/England/NORT-297AD1/2020|2020-04-22|EPI\_ISL\_488151|Original|hCoV-19^^England|Human|NU-OMICS DNA Sequencing research facility|Wellcome Sanger Institute for the COVID-19 Genomics UK (COG-UK) consortium|Davies|United Kingdom

>Spike|hCoV-19/USA/WI-UW-513/2020|2020-06-07|EPI\_ISL\_484888|Original|hCoV-19^^Wisconsin|Human|University of Wisconsin-Madison AIDS Vaccine Research Laboratories|University of Wisconsin-Madison AIDS Vaccine Research Laboratories|Baczenas|USA

>Spike|hCoV-19/Denmark/SSI-01/2020|2020-02-26|EPI\_ISL\_416142|Original|hCoV-19^^Copenhagen|Human|Department of Virus and Microbiological Special diagnostics|Statens Serum Institute|Rasmussen|Denmark

>Spike|hCoV-19/Russia/StPetersburg-RII18089S/2020|2020-05-27|EPI\_ISL\_507285|Original|hCoV-19^^Saint Petersburg|Human|WHO National Influenza Centre Russian Federation|WHO National Influenza Centre Russian Federation|Komissarov|Russia

>Spike|hCoV-19/England/CAMC-B225B3/2020|2020-11-01|EPI\_ISL\_646076|Original|hCoV-19^^England|Human|Lighthouse Lab in Cambridge|Wellcome Sanger Institute for the COVID-19 Genomics UK (COG-UK) Consortium|Davies|United Kingdom

>Spike|hCoV-19/USA/WI-UW-460/2020|2020-06-17|EPI\_ISL\_484835|Original|hCoV-19^^Wisconsin|Human|University of Wisconsin-Madison AIDS Vaccine Research Laboratories|University of Wisconsin-Madison AIDS Vaccine Research Laboratories|Baczenas|USA

>Spike|hCoV-19/England/BIRM-6781E/2020|2020-11-01|EPI\_ISL\_651623|Original|hCoV-19^^England|Human|University of Birmingham|COVID-19 Genomics UK (COG-UK) Consortium|Loman|United Kingdom

>Spike|hCoV-19/England/CAMB-1ABCD5/2020|2020-04-22|EPI\_ISL\_470285|Original|hCoV-19^^England|Human|Department of Pathology|Wellcome Sanger Institute for the COVID-19 Genomics UK (COG-UK) consortium|Davies|United Kingdom

>Spike|hCoV-19/Belgium/ULG-10394/2020|2020-08-10|EPI\_ISL\_540561|Original|hCoV-19^^Li\u00e8ge|Human|Department of Clinical Microbiology|GIGA Medical Genomics|Durkin|Belgium

>Spike|hCoV-19/Belgium/rega-10061193/2020|2020-10-06|EPI\_ISL\_735067|Original|hCoV-19^^Bost|Human|UZ Leuven|KU Leuven|Maes|Belgium

>Spike|hCoV-19/Australia/VIC3433/2020|2020-07-06|EPI\_ISL\_521102|Original|hCoV-19^^Victoria|Human|Victorian Infectious Diseases Reference Laboratory (VIDRL)|VIDRL and MDU-PHL|Schultz|Australia

>Spike|hCoV-19/Netherlands/ZH-EMC-925/2020|2020-10-24|EPI\_ISL\_722337|Original|hCoV-19^^Zuid Holland|Human|Dutch COVID-19 response team|Erasmus Medical Center|Oude Munnink|Netherlands

>Spike|hCoV-19/Ireland/D-NVRL-20ILR10845/2020|2020-11-19|EPI\_ISL\_732423|Original|hCoV-19^^Dublin|Human|National Virus Reference Laboratory|National Virus Reference Laboratory|Gonzalez|Ireland

>Spike|hCoV-19/Switzerland/GE-ETHZ-350100/2020|2020-11-02|EPI\_ISL\_693800|Original|hCoV-19^^Geneva|Human|Viollier AG|Department of Biosystems Science and Engineering|Nadeau|Switzerland

>Spike|hCoV-19/Luxembourg/LNS3388064/2020|2020-11-24|EPI\_ISL\_740301|Original|hCoV-19^^Luxembourg|Human|Laboratoire national de sant\u00e9|Laboratoire national de sant\u00e9|Wienecke-Baldacchino|Luxembourg

>Spike|hCoV-19/Denmark/ALAB-SSI-884/2020|2020-03-30|EPI\_ISL\_437681|Original|hCoV-19^^Denmark|Human|Department of Virus and Microbiological Special Diagnostics|Albertsen lab|Kirkegaard|Denmark

>Spike|hCoV-19/Australia/NSW78/2020|2020-03-23|EPI\_ISL\_427770|Original|hCoV-19^^New South Wales|Human|Centre for Infectious Diseases and Microbiology Public Health|NSW Health Pathology - Institute of Clinical Pathology and Medical Research; Westmead Hospital; University of Sydney|Gall|Australia

>Spike|hCoV-19/Australia/VIC14271/2020|2020-09-05|EPI\_ISL\_591803|Original|hCoV-19^^Victoria|Human|Microbiological Diagnostic Unit - Public Health Laboratory (MDU-PHL)|MDU-PHL|Schultz|Australia



>Spike|hCoV-19/England/ALDP-AA2446/2020|2020-10-22|EPI\_ISL\_624545|Original|hCoV-19^^England|Human|Lighthouse Lab in Alderley Park|Wellcome Sanger Institute for the COVID-19 Genomics UK (COG-UK) consortium|Davies|United Kingdom

>Spike|hCoV-19/Australia/VIC14160/2020|2020-08-03|EPI\_ISL\_592359|Original|hCoV-19^^Victoria|Human|Microbiological Diagnostic Unit - Public Health Laboratory (MDU-PHL)|MDU-PHL|Schultz|Australia

>Spike|hCoV-19/USA/CT-Yale-501/2020|2020-10-12|EPI\_ISL\_729740|Original|hCoV-19^^Connecticut|Human|Grubaugh Lab - Yale School of Public Health|Grubaugh Lab - Yale School of Public Health|Grubaugh|USA

>Spike|hCoV-19/Japan/PG-7551/2020|2020-08-00|EPI\_ISL\_686653|Original|hCoV-19^^Japan|Human|Pathogen Genomics Center|Pathogen Genomics Center|Sekizuka|Japan

>Spike|hCoV-19/England/CAMB-7EAA5/2020|2020-04-06|EPI\_ISL\_442607|Original|hCoV-19^^England|Human|Department of Pathology|Wellcome Sanger Institute for the COVID-19 Genomics UK (COG-UK) consortium|Amato|United Kingdom

>Spike|hCoV-19/England/ALDP-CB30B5/2020|2020-12-07|EPI\_ISL\_760891|Original|hCoV-19^^England|Human|Lighthouse Lab in Alderley Park|Wellcome Sanger Institute for the COVID-19 Genomics UK (COG-UK) Consortium|Davies|United Kingdom

>Spike|hCoV-19/Australia/VIC08/2020|2020-03-15|EPI\_ISL\_416514|Original|hCoV-19^^Victoria|Human|Victorian Infectious Diseases Reference Laboratory (VIDRL)|Victorian Infectious Diseases Reference Laboratory and Microbiological Diagnostic Unit Public Health Laboratory|Schultz|Australia

>Spike|hCoV-19/Spain/MD-H12-68/2020|2020-04-11|EPI\_ISL\_529999|Original|hCoV-19^^Madrid|Human|Hospital Universitario 12 de Octubre|Hospital Universitario 12 de Octubre|Viedma|Spain

>Spike|hCoV-19/England/201140411/2020|2020-03-10|EPI\_ISL\_464733|Original|hCoV-19^^England|Human|Respiratory Virus Unit|Respiratory Virus Unit|Platt|United Kingdom

>Spike|hCoV-19/India/TG-CCMB-M66/2020|2020-06-05|EPI\_ISL\_495221|Original|hCoV-19^^Telangana|Human|CSIR-Centre for Cellular and Molecular Biology|CSIR-Centre for Cellular and Molecular Biology|Banu|India

>Spike|hCoV-19/England/ALDP-B627FD/2020|2020-11-08|EPI\_ISL\_656631|Original|hCoV-19^^England|Human|Lighthouse Lab in Alderley Park|Wellcome Sanger Institute for the COVID-19 Genomics UK (COG-UK) Consortium|Davies|United Kingdom

>Spike|hCoV-19/Norway/2873/2020|2020-07-10|EPI\_ISL\_500792|Original|hCoV-19^^Norway|Human|Hospital of Southern Norway - Kristiansand|Norwegian Institute of Public Health|Kopperud Riis|Norway

>Spike|hCoV-19/England/MILK-99A169/2020|2020-08-28|EPI\_ISL\_550326|Original|hCoV-19^^England|Human|Lighthouse Lab in Milton Keynes|Wellcome Sanger Institute for the COVID-19 Genomics UK (COG-UK) consortium|Davies|United Kingdom

>Spike|hCoV-19/Scotland/QEUA-A48FAB/2020|2020-10-08|EPI\_ISL\_595941|Original|hCoV-19^^Scotland|Human|Quadram Institute Bioscience|COVID-19 Genomics UK (COG-UK) Consortium|Alikhan|United Kingdom

>Spike|hCoV-19/Spain/PV-IBV-004233/2020|2020-04-05|EPI\_ISL\_500297|Original|hCoV-19^^Basque Country|Human|Servicio de Microbiolog\u00eda. Hospital Universitario Donostia. OSI Donostialdea. \u00clrea de Enfermedades Infecciosas|SeqCOVID-SPAIN consortium|IBV (CSIC)|Comas|Spain

>Spike|hCoV-19/England/LIVE-A4F3E/2020|2020-03-06|EPI\_ISL\_499818|Original|hCoV-19^^England|Human|Liverpool Clinical Laboratories|COVID-19 Genomics UK (COG-UK) Consortium|Haldenby|United Kingdom

>Spike|hCoV-19/England/MILK-56381D/2020|2020-06-10|EPI\_ISL\_558304|Original|hCoV-19^^England|Human|Lighthouse Lab in Milton Keynes|Wellcome Sanger Institute for the COVID-19 Genomics UK (COG-UK) consortium|Davies|United Kingdom

>Spike|hCoV-19/Scotland/QEUA-A4B9AA/2020|2020-10-08|EPI\_ISL\_628498|Original|hCoV-19^^Scotland|Human|Oxford Viromics|COVID-19 Genomics UK (COG-UK) Consortium|Golubchik|United Kingdom

>Spike|hCoV-19/India/DL-NCDC-3271/2020|2020-04-05|EPI\_ISL\_436433|Original|hCoV-19^^Delhi|Human|National Centre for Disease control (NCDC)|NCDC/CSIR-IGIB|Singh|India

>Spike|hCoV-19/Denmark/DCGC-8261/2020|2020-10-26|EPI\_ISL\_617095|Original|hCoV-19^^Midtjylland|Human|Department of Virus and Microbiological Special Diagnostics|Albertsen lab|Michaelsen|Denmark

>Spike|hCoV-19/Netherlands/NH-RIVM-21075/2020|2020-12-11|EPI\_ISL\_791082|Original|hCoV-19^^Noord-Holland|Human|Dutch COVID-19 response team|National Institute for Public Health and the Environment (RIVM)|Meijer|Netherlands

>Spike|hCoV-19/USA/UN-UW-2874/2020|2020-04-15|EPI\_ISL\_485967|Original|hCoV-19^^USA|Human|UW Virology Lab|UW Virology Lab|Roychoudhury|USA

>Spike|hCoV-19/Singapore/952/2020|2020-04-07|EPI\_ISL\_538486|Original|hCoV-19^^Singapore|Human|Department of Laboratory Medicine|Department of Laboratory Medicine|Chen|Singapore

>Spike|hCoV-19/Russia/CE-RII-MH2523V/2020|2020-09-26|EPI\_ISL\_733394|Vero|hCoV-19^^Chechen|Human|WHO National Influenza Centre Russian Federation|WHO National Influenza Centre Russian Federation|Komissarov|Russia

>Spike|hCoV-19/Japan/PG-5537/2020|2020-08-00|EPI\_ISL\_688662|Original|hCoV-19^^Japan|Human|Pathogen Genomics Center|Pathogen Genomics Center|Sekizuka|Japan

>Spike|hCoV-19/USA/TX-HMH0314/2020|2020-03-28|EPI\_ISL\_434930|Original|hCoV-19^^Texas|Human|Houston Methodist Hospital|Houston Methodist Hospital|Long|USA

>Spike|hCoV-19/USA/UT-0885/2020|2020-04-05|EPI\_ISL\_435386|Original|hCoV-19^^Utah|Human|Utah Public Health Laboratory|Utah Public Health Laboratory|Young|USA

>Spike|hCoV-19/USA/WI-UW-775/2020|2020-07-03|EPI\_ISL\_495479|Original|hCoV-19^^Wisconsin|Human|University of Wisconsin-Madison AIDS Vaccine Research Laboratories|University of Wisconsin-Madison AIDS Vaccine Research Laboratories|Baczenas|USA

>Spike|hCoV-19/England/ALDP-952015/2020|2020-06-09|EPI\_ISL\_551327|Original|hCoV-19^^England|Human|Lighthouse Lab in Alderley Park|Wellcome Sanger Institute for the COVID-19 Genomics UK (COG-UK) Consortium|Davies|United Kingdom

>Spike|hCoV-19/Japan/PG-8562/2020|2020-08-00|EPI\_ISL\_686158|Original|hCoV-19^^Japan|Human|Pathogen Genomics Center|Pathogen Genomics Center|Sekizuka|Japan

>Spike|hCoV-19/Wales/PHWC-15DEEB/2020|2020-05-14|EPI\_ISL\_472782|Original|hCoV-19^^Wales|Human|Wales Specialist Virology Centre Sequencing lab|COVID-19 Genomics UK (COG-UK) Consortium|Moore|United Kingdom

>Spike|hCoV-19/England/QEUH-A36A36/2020|2020-10-05|EPI\_ISL\_638689|Original|hCoV-19^^England|Human|Wales Specialist Virology Centre Sequencing lab|COVID-19 Genomics UK (COG-UK) Consortium|Moore|United Kingdom

>Spike|hCoV-19/USA/CA-CZB-10065/2020|2020-06-20|EPI\_ISL\_672202|Original|hCoV-19^^California|Human|The Ashley Laboratory|Chan-Zuckerberg Biohub|Bhatt|USA

>Spike|hCoV-19/USA/TX-HMH-MCoV-13369/2020|2020-08-23|EPI\_ISL\_788513|Original|hCoV-19^^Texas|Human|Houston Methodist Hospital|Houston Methodist Hospital|Long|USA

>Spike|hCoV-19/USA/WA-UW96/2020|2020-03-10|EPI\_ISL\_416452|Original|hCoV-19^^Washington|Human|UW Virology Lab|UW Virology Lab|Roychoudhury|USA

>Spike|hCoV-19/Japan/PG-7377/2020|2020-07-00|EPI\_ISL\_688479|Original|hCoV-19^^Japan|Human|Pathogen Genomics Center|Pathogen Genomics Center|Sekizuka|Japan

>Spike|hCoV-19/England/ALDP-C57FA7/2020|2020-12-14|EPI\_ISL\_735998|Original|hCoV-19^^England|Human|Lighthouse Lab in Alderley Park|Wellcome Sanger Institute for the COVID-19 Genomics UK (COG-UK) Consortium|Davies|United Kingdom

>Spike|hCoV-19/England/NOTT-11D88F/2020|2020-11-24|EPI\_ISL\_665943|Original|hCoV-19^^England|Human|Queens Medical Centre|COVID-19 Genomics UK (COG-UK) Consortium|Loose|United Kingdom

>Spike|hCoV-19/Wales/ALDP-90C77F/2020|2020-06-26|EPI\_ISL\_553330|Original|hCoV-19^^Wales|Human|Lighthouse Lab in Alderley Park|Wellcome Sanger Institute for the COVID-19 Genomics UK (COG-UK) consortium|Davies|United Kingdom

>Spike|hCoV-19/USA/CA-CZB-15033/2020|2020-11-18|EPI\_ISL\_738618|Original|hCoV-19^^California|Human|Santa Clara County Public Health Laboratory|Chan-Zuckerberg Biohub|Kamm|USA

>Spike|hCoV-19/Colombia/ANT-INS-79253/2020|2020-03-10|EPI\_ISL\_456117|Original|hCoV-19^^Antioquia|Human|Instituto Nacional de Salud - Unidad de Secuenciación y Análisis Genómico|Instituto Nacional de Salud|Díaz|Colombia

>Spike|hCoV-19/England/CAMC-94C306/2020|2020-07-18|EPI\_ISL\_556698|Original|hCoV-19^^England|Human|Lighthouse Lab in Cambridge|Wellcome Sanger Institute for the COVID-19 Genomics UK (COG-UK) Consortium|Davies|United Kingdom

>Spike|hCoV-19/USA/MI-MDHHS-SC20705/2020|2020-04-26|EPI\_ISL\_471729|Original|hCoV-19^^Michigan|Human|Michigan Department of Health and Human Services|Michigan Department of Health and Human Services|Blankenship|USA

>Spike|hCoV-19/England/ALDP-CB637D/2020|2020-12-18|EPI\_ISL\_761737|Original|hCoV-19^^England|Human|Lighthouse Lab in Alderley Park|Wellcome Sanger Institute for the COVID-19 Genomics UK (COG-UK) Consortium|Davies|United Kingdom

>Spike|hCoV-19/South Korea/KCDC2763/2020|2020-07-22|EPI\_ISL\_522542|Original|hCoV-19^^South Korea|Human|Division of Viral Diseases|Division of Viral Diseases|Kim|South Korea

>Spike|hCoV-19/USA/TX-HMH-5966/2020|2020-06-30|EPI\_ISL\_547130|Original|hCoV-19^^Texas|Human|Houston Methodist Hospital|Houston Methodist Hospital|Long|USA

>Spike|hCoV-19/USA/LA-GBCL-26556538/2020|2020-04-15|EPI\_ISL\_485176|Original|hCoV-19^^Louisiana|Human|River Road Testing Lab|Ginkgo Bioworks Clinical Laboratory|Smith|USA

>Spike|hCoV-19/Belgium/reg-0414493/2020|2020-04-14|EPI\_ISL\_734576|Original|hCoV-19^^Honnelles|Human|UZ Leuven|KU Leuven|Maes|Belgium

>Spike|hCoV-19/Denmark/DCGC-17614/2020|2020-12-14|EPI\_ISL\_751104|Original|hCoV-19^^Sjaelland|Human|Department of Virus and Microbiological Special Diagnostics|Albertsen Lab|Michaelsen|Denmark

>Spike|hCoV-19/Denmark/DCGC-2091/2020|2020-07-27|EPI\_ISL\_618350|Original|hCoV-19^^Midtjylland|Human|Department of Virus and Microbiological Special Diagnostics|Albertsen lab|Michaelsen|Denmark

>Spike|hCoV-19/USA/AZ-WL171/2020|2020-03-19|EPI\_ISL\_426484|Original|hCoV-19^^Arizona|Human|n/a|Worobey Lab on behalf of the Arizona COVID-19 Genomics Union|Larsen|USA

>Spike|hCoV-19/USA/NY-QDX-2439/2020|2020-03-15|EPI\_ISL\_604797|Original|hCoV-19^^New York|Human|Quest Diagnostics|Quest Diagnostics|Kagan|USA

>Spike|hCoV-19/England/MILK-9C470A/2020|2020-09-07|EPI\_ISL\_566941|Original|hCoV-19^^England|Human|Lighthouse Lab in Milton Keynes|Wellcome Sanger Institute for the COVID-19 Genomics UK (COG-UK) consortium|Davies|United Kingdom

>Spike|hCoV-19/England/ALDP-9517F3/2020|2020-06-10|EPI\_ISL\_555495|Original|hCoV-19^^England|Human|Lighthouse Lab in Alderley Park|Wellcome Sanger Institute for the COVID-19 Genomics UK (COG-UK) consortium|Davies|United Kingdom

>Spike|hCoV-19/Wales/PHWC-47E43A/2020|2020-09-30|EPI\_ISL\_595455|Original|hCoV-19^^Wales|Human|Originating lab|COVID-19 Genomics UK (COG-UK) Consortium|Moore|United Kingdom

>Spike|hCoV-19/USA/MI-MDHHS-SC20893/2020|2020-05-22|EPI\_ISL\_476030|Original|hCoV-19^^Michigan|Human|Michigan Department of Health and Human Services|Michigan Department of Health and Human Services|Blankenship|USA

>Spike|hCoV-19/Scotland/QEUH-A4C7DC/2020|2020-10-08|EPI\_ISL\_596000|Original|hCoV-19^^Scotland|Human|Quadram Institute Bioscience|COVID-19 Genomics UK (COG-UK) Consortium|Alikhan|United Kingdom

>Spike|hCoV-19/England/GSTT-265E27A/2020|2020-03-31|EPI\_ISL\_484177|Original|hCoV-19^^England|Human|Centre for Clinical Infection and Diagnostics Research and Genomics Innovation Unit|COVID-19 Genomics UK (COG-UK) Consortium|Awan|United Kingdom

>Spike|hCoV-19/England/ALDP-A67BDF/2020|2020-10-10|EPI\_ISL\_608444|Original|hCoV-19^^England|Human|Lighthouse Lab in Alderley Park|Wellcome Sanger Institute for the COVID-19 Genomics UK (COG-UK) consortium|Davies|United Kingdom

>Spike|hCoV-19/England/ALDP-A85B08/2020|2020-10-17|EPI\_ISL\_610597|Original|hCoV-19^^England|Human|Lighthouse Lab in Alderley Park|Wellcome Sanger Institute for the COVID-19 Genomics UK (COG-UK) consortium|Davies|United Kingdom

>Spike|hCoV-19/Scotland/CVR797/2020|2020-03-27|EPI\_ISL\_439113|Original|hCoV-19^^Scotland|Human|West of Scotland Specialist Virology Centre|COVID-19 Genomics UK (COG-UK) Consortium|Robertson|United Kingdom

>Spike|hCoV-19/England/CAMC-9D1CB0/2020|2020-09-18|EPI\_ISL\_601589|Original|hCoV-19^^England|Human|Lighthouse Lab in Cambridge|Wellcome Sanger Institute for the COVID-19 Genomics UK (COG-UK) consortium|Davies|United Kingdom

>Spike|hCoV-19/Wales/PHWC-48552E/2020|2020-10-22|EPI\_ISL\_628188|Original|hCoV-19^^Wales|Human|Wales Specialist Virology Centre Sequencing lab|COVID-19 Genomics UK (COG-UK) Consortium|Moore|United Kingdom

>Spike|hCoV-19/Australia/VIC642/2020|2020-03-29|EPI\_ISL\_426938|Original|hCoV-19^^Victoria|Human|Victorian Infectious Diseases Reference Laboratory (VIDRL)|Microbiological Diagnostic Unit Public Health Laboratory and Victorian Infectious Diseases Reference Laboratory|Schultz|Australia

>Spike|hCoV-19/Scotland/CVR38/2020|2020-03-13|EPI\_ISL\_425767|Original|hCoV-19^^Scotland|Human|West of Scotland Specialist Virology Centre|COVID-19 Genomics UK (COG-UK) Consortium|Robertson|United Kingdom

>Spike|hCoV-19/Scotland/EDB5411/2020|2020-04-06|EPI\_ISL\_487791|Original|hCoV-19^^Scotland|Human|Virology Department|Wellcome Sanger Institute for the COVID-19 Genomics UK (COG-UK) consortium|Davies|United Kingdom

>Spike|hCoV-19/Netherlands/NoordBrabant\_4/2020|2020-03-06|EPI\_ISL\_414450|Original|hCoV-19^^Noord Brabant|Human|Dutch COVID-19 response team|Erasmus Medical Center|Oude Munnink|Netherlands

>Spike|hCoV-19/USA/PA-MGEL154/2020|2020-04-05|EPI\_ISL\_454410|Original|hCoV-19^^Pennsylvania|Human|UPMC Clinical Microbiology Laboratory|Microbial Genome Sequencing Center|Mustapha|USA

>Spike|hCoV-19/Switzerland/BS-42232888/2020|2020-04-15|EPI\_ISL\_581706|Original|hCoV-19^^Basel-Stadt|Human|University Hospital Basel|University Hospital Basel|Roloff Handschin|Switzerland

>Spike|hCoV-19/Denmark/DCGC-2905/2020|2020-08-17|EPI\_ISL\_616539|Original|hCoV-19^^Syddanmark|Human|Department of Virus and Microbiological Special Diagnostics|Albertsen lab|Michaelsen|Denmark

>Spike|hCoV-19/Scotland/CVR6030/2020|2020-11-28|EPI\_ISL\_705712|Original|hCoV-19^^Scotland|Human|West of Scotland Specialist Virology Centre|COVID-19 Genomics UK (COG-UK) Consortium|Robertson|United Kingdom

>Spike|hCoV-19/Finland/S11AA3/2020|2020-10-11|EPI\_ISL\_737070|Original|hCoV-19^^Uusimaa|Human|Department of Virology and Immunology|Department of Virology|Smura|Finland

>Spike|hCoV-19/India/TG-CCMB-OM3/2020|2020-05-13|EPI\_ISL\_495289|Original|hCoV-19^^Telangana|Human|Osmania Medical College|CSIR-Centre for Cellular and Molecular Biology|Banu|India

>Spike|hCoV-19/Japan/IC-0438/2020|2020-10-00|EPI\_ISL\_768647|Original|hCoV-19^^Japan|Human|Pathogen Genomics Center|Pathogen Genomics Center|Sekizuka|Japan

>Spike|hCoV-19/England/ALDP-B24126/2020|2020-11-04|EPI\_ISL\_646867|Original|hCoV-19^^England|Human|Lighthouse Lab in Alderley Park|Wellcome Sanger Institute for the COVID-19 Genomics UK (COG-UK) Consortium|Davies|United Kingdom

>Spike|hCoV-19/England/ALDP-A6CE86/2020|2020-10-15|EPI\_ISL\_608012|Original|hCoV-19^^England|Human|Lighthouse Lab in Alderley Park|Wellcome Sanger Institute for the COVID-19 Genomics UK (COG-UK) consortium|Davies|United Kingdom

>Spike|hCoV-19/England/LOND-D66C5/2020|2020-04-23|EPI\_ISL\_482164|Original|hCoV-19^^England|Human|University College London|Wellcome Sanger Institute for the COVID-19 Genomics UK (COG-UK) consortium|Davies|United Kingdom

>Spike|hCoV-19/India/TG-CCMB-M739/2020|2020-06-11|EPI\_ISL\_495234|Original|hCoV-19^^Telangana|Human|CSIR-Centre for Cellular and Molecular Biology|CSIR-Centre for Cellular and Molecular Biology|Banu|India

>Spike|hCoV-19/USA/UT-UPHL-201006328/2020|2020-05-08|EPI\_ISL\_594002|Original|hCoV-19^^Utah|Human|Utah Public Health Laboratory|Utah Public Health Laboratory|Young|USA

>Spike|hCoV-19/Denmark/DCGC-5300/2020|2020-09-14|EPI\_ISL\_615231|Original|hCoV-19^^Hovedstaden|Human|Department of Virus and Microbiological Special Diagnostics|Albertsen lab|Michaelsen|Denmark

>Spike|hCoV-19/England/ALDP-B1F62F/2020|2020-11-01|EPI\_ISL\_646130|Original|hCoV-19^^England|Human|Lighthouse Lab in Alderley Park|Wellcome Sanger Institute for the COVID-19 Genomics UK (COG-UK) Consortium|Davies|United Kingdom

>Spike|hCoV-19/Gambia/3725/2020|2020-07-30|EPI\_ISL\_561004|Original|hCoV-19^^Kombo|Human|MRCG at LSHTM Genomics lab|MRCG at LSHTM Genomics lab|Sesay|Gambia

>Spike|hCoV-19/USA/FL-BPHL-0661/2020|2020-03-14|EPI\_ISL\_509719|Original|hCoV-19^^Florida|Human|Florida Bureau of Public Health Laboratories|Florida Bureau of Public Health Laboratories|Blanton|USA

>Spike|hCoV-19/England/QEUA-9B8569/2020|2020-09-07|EPI\_ISL\_549759|Original|hCoV-19^^England|Human|Lighthouse Lab in Glasgow|Wellcome Sanger Institute for the COVID-19 Genomics UK (COG-UK) consortium|Davies|United Kingdom

>Spike|hCoV-19/England/LIVE-DBD120/2020|2020-10-27|EPI\_ISL\_664443|Original|hCoV-19^^England|Human|Liverpool Clinical Laboratories|COVID-19 Genomics UK (COG-UK) Consortium|Haldenby|United Kingdom

>Spike|hCoV-19/Japan/PG-4858/2020|2020-08-00|EPI\_ISL\_689979|Original|hCoV-19^^Japan|Human|Pathogen Genomics Center|Pathogen Genomics Center|Sekizuka|Japan

>Spike|hCoV-19/USA/TX-HMH-MCoV-8257/2020|2020-07-07|EPI\_ISL\_784296|Original|hCoV-19^^Texas|Human|Houston Methodist Hospital|Houston Methodist Hospital|Long|USA

>Spike|hCoV-19/Italy/LAZ-INMI-101/2020|2020-11-17|EPI\_ISL\_721624|Original|hCoV-19^^Lazio|Human|National Institute for Infectious Diseases|National Institute for Infectious Diseases|Gruber|Italy

>Spike|hCoV-19/Canada/ON-S1840/2020|2020-11-24|EPI\_ISL\_729303|Original|hCoV-19^^Ontario|Human|Toronto Invasive Bacterial Diseases Network|McMaster University|McArthur|Canada

>Spike|hCoV-19/Scotland/QEUA-A9C39D/2020|2020-10-20|EPI\_ISL\_652635|Original|hCoV-19^^Scotland|Human|Queens Medical Centre|COVID-19 Genomics UK (COG-UK) Consortium|Loose|United Kingdom

>Spike|hCoV-19/Australia/NSW2181/2020|2020-03-19|EPI\_ISL\_500648|Original|hCoV-19^^New South Wales|Human|Area of Virology|Area of Virology|Bull|Australia

>Spike|hCoV-19/Switzerland/ZH-ETHZ-310444/2020|2020-10-08|EPI\_ISL\_603517|Original|hCoV-19^^Zurich|Human|Viollier AG|Department of Biosystems Science and Engineering|Nadeau|Switzerland

>Spike|hCoV-19/USA/NY-MSK-17B/2020|2020-05-02|EPI\_ISL\_583478|Original|hCoV-19^^New York|Human|Memorial Sloan Kettering Cancer Center|van Bakel Laboratory|van Bakel|USA

>Spike|hCoV-19/Netherlands/ZuidHolland\_169/2020|2020-04-26|EPI\_ISL\_461341|Original|hCoV-19^^Zuid Holland|Human|Dutch COVID-19 response team|Erasmus Medical Center|Oude Munnink|Netherlands

>Spike|hCoV-19/England/ALDP-B1A545/2020|2020-10-31|EPI\_ISL\_647546|Original|hCoV-19^^England|Human|Lighthouse Lab in Alderley Park|Wellcome Sanger Institute for the COVID-19 Genomics UK (COG-UK) Consortium|Davies|United Kingdom

>Spike|hCoV-19/USA/TX-HMH-MCoV-15816/2020|2020-07-10|EPI\_ISL\_785500|Original|hCoV-19^^Texas|Human|Houston Methodist Hospital|Houston Methodist Hospital|Long|USA

>Spike|hCoV-19/England/ALDP-C6B975/2020|2020-12-14|EPI\_ISL\_778524|Original|hCoV-19^^England|Human|Lighthouse Lab in Alderley Park|Wellcome Sanger Institute for the COVID-19 Genomics UK (COG-UK) Consortium|Davies|United Kingdom

>Spike|hCoV-19/Scotland/CVR5276/2020|2020-10-22|EPI\_ISL\_650313|Original|hCoV-19^^Scotland|Human|West of Scotland Specialist Virology Centre|COVID-19 Genomics UK (COG-UK) Consortium|Robertson|United Kingdom

>Spike|hCoV-19/USA/VA-DCLS-0432/2020|2020-05-01|EPI\_ISL\_477648|Original|hCoV-19^^Virginia|Human|Virginia DCLS|Virginia DCLS|St. Jacques|USA

>Spike|hCoV-19/England/LEED-2A8B8F/2020|2020-03-23|EPI\_ISL\_539058|Original|hCoV-19^^England|Human|Leeds Teaching Hospitals NHS Trust and Public Health England|Wellcome Sanger Institute for the COVID-19 Genomics UK (COG-UK) consortium|Davies|United Kingdom

>Spike|hCoV-19/India/LA-NCDC-01441/2020|2020-03-15|EPI\_ISL\_435101|Original|hCoV-19^^Ladakh|Human|National Centre for Disease control (NCDC)|NCDC/CSIR-IGIB|Faruq|India

>Spike|hCoV-19/Sweden/20-50457/2020|2020-03-23|EPI\_ISL\_475141|Original|hCoV-19^^Stockholm|Human|Karolinska Universitetslaboratoriet|The Public Health Agency of Sweden|Svartstr\u00f6m|Sweden

>Spike|hCoV-19/Russia/TUL-RII-MH3372S/2020|2020-10-07|EPI\_ISL\_733113|Original|hCoV-19^^Tula|Human|HELIX LLC|WHO National Influenza Centre Russian Federation|Komissarov|Russia

>Spike|hCoV-19/England/MILK-6A5BBB/2020|2020-07-02|EPI\_ISL\_551745|Original|hCoV-19^^England|Human|Lighthouse Lab in Milton Keynes|Wellcome Sanger Institute for the COVID-19 Genomics UK (COG-UK) consortium|Davies|United Kingdom

>Spike|hCoV-19/Austria/CeMM0946/2020|2020-03-27|EPI\_ISL\_583798|Original|hCoV-19^^Austria|Human|Dr. Gernot Walder GmbH|Bergthaler laboratory|Bergthaler|Austria

>Spike|hCoV-19/England/CAMC-A3F48A/2020|2020-10-06|EPI\_ISL\_609739|Original|hCoV-19^^England|Human|Lighthouse Lab in Cambridge|Wellcome Sanger Institute for the COVID-19 Genomics UK (COG-UK) consortium|Davies|United Kingdom

>Spike|hCoV-19/Australia/VIC4838/2020|2020-07-17|EPI\_ISL\_519222|Original|hCoV-19^^Victoria|Human|Microbiological Diagnostic Unit - Public Health Laboratory (MDU-PHL)|MDU-PHL|Schultz|Australia

>Spike|hCoV-19/Australia/VIC7976/2020|2020-08-12|EPI\_ISL\_564783|Original|hCoV-19^^Victoria|Human|Microbiological Diagnostic Unit - Public Health Laboratory (MDU-PHL)|MDU-PHL|Schultz|Australia

>Spike|hCoV-19/USA/UT-02137/2020|2020-04-14|EPI\_ISL\_470709|Original|hCoV-19^^Utah|Human|Utah Public Health Laboratory|Utah Public Health Laboratory|Young|USA

>Spike|hCoV-19/England/CAMB-1B5DE4/2020|2020-09-05|EPI\_ISL\_549393|Original|hCoV-19^^England|Human|Department of Pathology|COVID-19 Genomics UK (COG-UK) Consortium|Goodfellow|United Kingdom

>Spike|hCoV-19/Denmark/DCGC-14863/2020|2020-11-23|EPI\_ISL\_712035|Original|hCoV-19^^Hovedstaden|Human|Department of Virus and Microbiological Special Diagnostics|Albertsen Lab|Michaelsen|Denmark

>Spike|hCoV-19/England/ALDP-68CF45/2020|2020-07-02|EPI\_ISL\_558183|Original|hCoV-19^^England|Human|Lighthouse Lab in Alderley Park|Wellcome Sanger Institute for the COVID-19 Genomics UK (COG-UK) consortium|Davies|United Kingdom

>Spike|hCoV-19/England/204700725/2020|2020-11-16|EPI\_ISL\_678713|Original|hCoV-19^^England|Human|Respiratory Virus Unit|COVID-19 Genomics UK (COG-UK) Consortium|Platt|United Kingdom

>Spike|hCoV-19/England/QEUEH-A783E2/2020|2020-10-12|EPI\_ISL\_638753|Original|hCoV-19^^England|Human|Oxford Viromics|COVID-19 Genomics UK (COG-UK) Consortium|Golubchik|United Kingdom

>Spike|hCoV-19/Denmark/DCGC-22011/2020|2020-12-14|EPI\_ISL\_758106|Original|hCoV-19^^Sjaelland|Human|Department of Virus and Microbiological Special Diagnostics|Albertsen Lab|Michaelsen|Denmark

>Spike|hCoV-19/England/QEUEH-52DB8F/2020|2020-05-18|EPI\_ISL\_532277|Original|hCoV-19^^England|Human|Lighthouse Lab in Glasgow|Wellcome Sanger Institute for the COVID-19 Genomics UK (COG-UK) consortium|Davies|United Kingdom

>Spike|hCoV-19/England/ALDP-C22E8A/2020|2020-12-06|EPI\_ISL\_733844|Original|hCoV-19^^England|Human|Lighthouse Lab in Alderley Park|Wellcome Sanger Institute for the COVID-19 Genomics UK (COG-UK) Consortium|Davies|United Kingdom

>Spike|hCoV-19/England/NOTT-118CA6/2020|2020-10-29|EPI\_ISL\_704581|Original|hCoV-19^^England|Human|Queens Medical Centre|COVID-19 Genomics UK (COG-UK) Consortium|Loose|United Kingdom

>Spike|hCoV-19/Netherlands/UT-EMC-74/2020|2020-08-27|EPI\_ISL\_577890|Original|hCoV-19^^Utrecht|Human|Dutch COVID-19 response team|Erasmus Medical Center|Oude Munnink|Netherlands

>Spike|hCoV-19/USA/MA-MGH-00615/2020|2020-03-28|EPI\_ISL\_460340|Original|hCoV-19^^Massachusetts|Human|Massachusetts General Hospital|Infectious Disease Program|Lemieux|USA

>Spike|hCoV-19/Japan/PG-4041/2020|2020-07-00|EPI\_ISL\_692282|Original|hCoV-19^^Japan|Human|Pathogen Genomics Center|Pathogen Genomics Center|Sekizuka|Japan

>Spike|hCoV-19/England/QEUEH-BA2120/2020|2020-11-18|EPI\_ISL\_719810|Original|hCoV-19^^England|Human|Lighthouse Lab in Glasgow|Wellcome Sanger Institute for the COVID-19 Genomics UK (COG-UK) Consortium|Davies|United Kingdom

>Spike|hCoV-19/England/MILK-BAC162/2020|2020-11-18|EPI\_ISL\_783145|Original|hCoV-19^^England|Human|Lighthouse Lab in Milton Keynes|Wellcome Sanger Institute for the COVID-19 Genomics UK (COG-UK) Consortium|Davies|United Kingdom

>Spike|hCoV-19/England/CAMC-A660C2/2020|2020-10-11|EPI\_ISL\_637630|Original|hCoV-19^^England|Human|Department of Pathology|COVID-19 Genomics UK (COG-UK) Consortium|Goodfellow|United Kingdom

>Spike|hCoV-19/England/CAMC-BD14B6/2020|2020-11-29|EPI\_ISL\_702299|Original|hCoV-19^^England|Human|Lighthouse Lab in Cambridge|Wellcome Sanger Institute for the COVID-19 Genomics UK (COG-UK) Consortium|Davies|United Kingdom

>Spike|hCoV-19/USA/NY-QDX-855/2020|2020-03-16|EPI\_ISL\_571662|Original|hCoV-19^^New York|Human|Quest Diagnostics|Quest Diagnostics|Kagan|USA

>Spike|hCoV-19/USA/TX-HMH-3655/2020|2020-06-15|EPI\_ISL\_543100|Original|hCoV-19^^Texas|Human|Houston Methodist Hospital|Houston Methodist Hospital|Long|USA

>Spike|hCoV-19/England/QEUEH-9AE153/2020|2020-09-01|EPI\_ISL\_637335|Original|hCoV-19^^England|Human|Department of Pathology|COVID-19 Genomics UK (COG-UK) Consortium|Goodfellow|United Kingdom

>Spike|hCoV-19/Denmark/DCGC-2955/2020|2020-08-24|EPI\_ISL\_616716|Original|hCoV-19^^Hovedstaden|Human|Department of Virus and Microbiological Special Diagnostics|Albertsen lab|Michaelsen|Denmark

>Spike|hCoV-19/USA/CA-CZB-15063/2020|2020-11-18|EPI\_ISL\_738936|Original|hCoV-19^^California|Human|Santa Clara County Public Health Laboratory|Chan-Zuckerberg Biohub|Kamm|USA

>Spike|hCoV-19/Wales/PHWC-47F660/2020|2020-10-04|EPI\_ISL\_612707|Original|hCoV-19^^Wales|Human|Wales Specialist Virology Centre Sequencing lab|COVID-19 Genomics UK (COG-UK) Consortium|Moore|United Kingdom

>Spike|hCoV-19/England/C200044550/2020|2020-11-06|EPI\_ISL\_664034|Original|hCoV-19^^England|Human|Respiratory Virus Unit|COVID-19 Genomics UK (COG-UK) Consortium|Platt|United Kingdom

>Spike|hCoV-19/England/QEUEH-BCD189/2020|2020-11-25|EPI\_ISL\_704661|Original|hCoV-19^^England|Human|Lighthouse Lab in Glasgow|Wellcome Sanger Institute for the COVID-19 Genomics UK (COG-UK) Consortium|Davies|United Kingdom

>Spike|hCoV-19/Spain/IB-IBV-99011563/2020|2020-12-01|EPI\_ISL\_779899|Original|hCoV-19^^Balear Islands|Human|Servicio de Microbiolog\u00eda|SeqCOVID-SPAIN consortium/IBV (CSIC) |Comas|Spain

>Spike|hCoV-19/England/ALDP-9BC9A5/2020|2020-09-09|EPI\_ISL\_573038|Original|hCoV-19^^England|Human|Oxford Viromics|COVID-19 Genomics UK (COG-UK) Consortium|Golubchik|United Kingdom

>Spike|hCoV-19/Scotland/QEUEH-AD3FF0/2020|2020-10-26|EPI\_ISL\_649697|Original|hCoV-19^^Scotland|Human|Lighthouse Lab in Glasgow|Wellcome Sanger Institute for the COVID-19 Genomics UK (COG-UK) Consortium|Davies|United Kingdom

>Spike|hCoV-19/England/ALDP-B5C1CB/2020|2020-11-08|EPI\_ISL\_655755|Original|hCoV-19^^England|Human|Lighthouse Lab in Alderley Park|Wellcome Sanger Institute for the COVID-19 Genomics UK (COG-UK) Consortium|Davies|United Kingdom

>Spike|hCoV-19/Denmark/DCGC-9003/2020|2020-10-26|EPI\_ISL\_625871|Original|hCoV-19^^Nordjylland|Human|Department of Virus and Microbiological Special Diagnostics|Albertsen lab|Michaelsen|Denmark

>Spike|hCoV-19/Denmark/DCGC-15356/2020|2020-11-23|EPI\_ISL\_713782|Original|hCoV-19^^Hovedstaden|Human|Department of Virus and Microbiological Special Diagnostics|Albertsen Lab|Michaelsen|Denmark

>Spike|hCoV-19/England/MILK-9705D6/2020|2020-08-18|EPI\_ISL\_553242|Original|hCoV-19^^England|Human|Lighthouse Lab in Milton Keynes|Wellcome Sanger Institute for the COVID-19 Genomics UK (COG-UK) consortium|Davies|United Kingdom

>Spike|hCoV-19/Scotland/QEUEH-943439/2020|2020-08-01|EPI\_ISL\_532621|Original|hCoV-19^^Scotland|Human|NHSGGC West of Scotland Specialist Virology Centre / MRC-University of Glasgow Centre for Virus Research|Wellcome Sanger Institute for the COVID-19 Genomics UK (COG-UK) consortium|Davies|United Kingdom

>Spike|hCoV-19/USA/HI-H200312/2020|2020-08-16|EPI\_ISL\_752871|Original|hCoV-19^^Hawaii|Human|State Laboratories Division|State Laboratories Division|Sultana|USA

>Spike|hCoV-19/England/CAMC-A65E32/2020|2020-10-11|EPI\_ISL\_637483|Original|hCoV-19^^England|Human|Department of Pathology|COVID-19 Genomics UK (COG-UK) Consortium|Goodfellow|United Kingdom

>Spike|hCoV-19/USA/CA-ALSR-0553-IPL/2020|2020-05-04|EPI\_ISL\_483219|Original|hCoV-19^^California|Human|UC San Diego Center for Advanced Laboratory Medicine|Andersen lab at Scripps Research|Gangavarapu|USA

>Spike|hCoV-19/England/QEUEH-98FBE1/2020|2020-08-26|EPI\_ISL\_540103|Original|hCoV-19^^England|Human|Lighthouse Lab in Glasgow|Wellcome Sanger Institute for the COVID-19 Genomics UK (COG-UK) consortium|Davies|United Kingdom

>Spike|hCoV-19/Wales/PHWC-48A91E/2020|2020-11-03|EPI\_ISL\_652614|Original|hCoV-19^^Wales|Human|Wales Specialist Virology Centre Sequencing lab|COVID-19 Genomics UK (COG-UK) Consortium|Moore|United Kingdom

>Spike|hCoV-19/USA/WA-UW-12637/2020|2020-06-28|EPI\_ISL\_570882|Original|hCoV-19^^Washington|Human|UW Virology Lab|UW Virology Lab|Roychoudhury|USA

>Spike|hCoV-19/Netherlands/UT-RIVM-10160/2020|2020-00-00|EPI\_ISL\_547547|Original|hCoV-19^^Utrecht|Human|Dutch COVID-19 response team|National Institute for Public Health and the Environment (RIVM)|Meijer|Netherlands

>Spike|hCoV-19/USA/AZ-TG547304/2020|2020-07-02|EPI\_ISL\_695475|Original|hCoV-19^^Arizona|Human|AZ SPHL|TGen North|French|USA

>Spike|hCoV-19/England/NORT-1B62A6A/2020|2020-11-28|EPI\_ISL\_703096|Original|hCoV-19^^England|Human|Northumbria University / South Tees Hospitals NHS Foundation Trust / North Cumbria Integrated Care NHS Foundation Trust / North Tees and Hartlepool NHS Foundation Trust / Newcastle Hospitals NHS Foundation Trust|COVID-19 Genomics UK (COG-UK) Consortium|Bashton|United Kingdom

>Spike|hCoV-19/Australia/VIC2849/2020|2020-07-03|EPI\_ISL\_521680|Original|hCoV-19^^Victoria|Human|Microbiological Diagnostic Unit - Public Health Laboratory (MDU-PHL)|MDU-PHL|Schultz|Australia

>Spike|hCoV-19/England/205260864/2020|2020-12-16|EPI\_ISL\_754386|Original|hCoV-19^^England|Human|Respiratory Virus Unit|COVID-19 Genomics UK (COG-UK) Consortium|Platt|United Kingdom

>Spike|hCoV-19/England/NORT-286255/2020|2020-09-16|EPI\_ISL\_572581|Original|hCoV-19^^England|Human|Northumbria University / South Tees Hospitals NHS Foundation Trust / North Cumbria Integrated Care NHS Foundation Trust / North Tees and Hartlepool NHS Foundation Trust / Newcastle Hospitals NHS Foundation Trust|COVID-19 Genomics UK (COG-UK) Consortium|Bashton|United Kingdom

>Spike|hCoV-19/Japan/PG-6777/2020|2020-08-00|EPI\_ISL\_687887|Original|hCoV-19^^Japan|Human|Pathogen Genomics Center|Pathogen Genomics Center|Sekizuka|Japan

>Spike|hCoV-19/Portugal/PT0208/2020|2020-03-30|EPI\_ISL\_453922|Original|hCoV-19^^Portugal|Human|unknown|Instituto Nacional de Saude (INSA)|Borges|Portugal

>Spike|hCoV-19/USA/FL-BPHL-0929/2020|2020-07-10|EPI\_ISL\_517819|Original|hCoV-19^^Florida|Human|Florida Bureau of Public Health Laboratories|Florida Bureau of Public Health Laboratories|Blanton|USA

>Spike|hCoV-19/England/QEUEH-CC3B57/2020|2020-12-21|EPI\_ISL\_760519|Original|hCoV-19^^England|Human|Lighthouse Lab in Glasgow|Wellcome Sanger Institute for the COVID-19 Genomics UK (COG-UK) Consortium|Davies|United Kingdom

>Spike|hCoV-19/India/MH-GA86/2020|2020-06-18|EPI\_ISL\_508281|Original|hCoV-19^^Maharashtra|Human|Government Medical College|National Institute of Biomedical Genomics|Maitra|India

>Spike|hCoV-19/Lithuania/MR-LUHS-Eilnr33/2020|2020-04-06|EPI\_ISL\_541855|Original|hCoV-19^^Marijampoles apskritis|Human|Lithuanian University of Health Sciences Hospital|Lithuanian University of Health Sciences|Zemaitis|Lithuania

>Spike|hCoV-19/Japan/PG-8635/2020|2020-09-00|EPI\_ISL\_686231|Original|hCoV-19^^Japan|Human|Pathogen Genomics Center|Pathogen Genomics Center|Sekizuka|Japan

>Spike|hCoV-19/USA/CA-CDPH211/2020|2020-11-15|EPI\_ISL\_755067|Original|hCoV-19^^California|Human|California Department of Public Health|California Department of Public Health|Bell|USA

>Spike|hCoV-19/USA/UN-UW-2820/2020|2020-04-15|EPI\_ISL\_485953|Original|hCoV-19^^USA|Human|UW Virology Lab|UW Virology Lab|Roychoudhury|USA

>Spike|hCoV-19/USA/ME-HETL-J0471/2020|2020-12-11|EPI\_ISL\_755562|Original|hCoV-19^^Maine|Human|Maine Health and Environmental Testing Laboratory|Tewhey Lab|Tewhey|USA

>Spike|hCoV-19/England/ALDP-A96393/2020|2020-10-20|EPI\_ISL\_624870|Original|hCoV-19^^England|Human|Lighthouse Lab in Alderley Park|Wellcome Sanger Institute for the COVID-19 Genomics UK (COG-UK) consortium|Davies|United Kingdom

>Spike|hCoV-19/Scotland/CVR5826/2020|2020-11-14|EPI\_ISL\_666036|Original|hCoV-19^^Scotland|Human|West of Scotland Specialist Virology Centre|COVID-19 Genomics UK (COG-UK) Consortium|Robertson|United Kingdom

>Spike|hCoV-19/Pingxiang/JX5/2020|2020-01-11|EPI\_ISL\_421252|Original|hCoV-19^^Jiangxi|Human|Jiangxi Province Center for Disease Control and Prevention|Jiangxi Province Center for Disease Control and Prevention|Xiong|China



>Spike|hCoV-19/USA/WI-GMF-20912/2020|2020-09-18|EPI\_ISL\_660821|Original|hCoV-19^^Wisconsin|Human|Gundersen Molecular Diagnostics Laboratory|Kabara Cancer Research Institute|Kenny|USA

>Spike|hCoV-19/Japan/PG-5842/2020|2020-08-00|EPI\_ISL\_688959|Original|hCoV-19^^Japan|Human|Fukuoka Institute of Health and Environmental Sciences|Pathogen Genomics Center|Sekizuka|Japan

>Spike|hCoV-19/Norway/5750/2020|2020-10-29|EPI\_ISL\_708159|Original|hCoV-19^^Vestfold og Telemark|Human|Vestfold Hospital|Norwegian Institute of Public Health|Kopperud Riis|Norway

>Spike|hCoV-19/USA/CA-CZB-6717/2020|2020-08-18|EPI\_ISL\_582978|Original|hCoV-19^^California|Human|Orange County Public Health Lab|Chan-Zuckerberg Biohub|Bhatt|USA

>Spike|hCoV-19/England/MILK-50FE7B/2020|2020-06-10|EPI\_ISL\_558987|Original|hCoV-19^^England|Human|Lighthouse Lab in Milton Keynes|Wellcome Sanger Institute for the COVID-19 Genomics UK (COG-UK) consortium|Davies|United Kingdom

>Spike|hCoV-19/England/CAMB-8290B/2020|2020-04-22|EPI\_ISL\_438638|Original|hCoV-19^^England|Human|Department of Pathology|COVID-19 Genomics UK (COG-UK) Consortium|Meredith|United Kingdom

>Spike|hCoV-19/England/ALDP-4A4D6D/2020|2020-06-09|EPI\_ISL\_559634|Original|hCoV-19^^England|Human|Lighthouse Lab in Alderley Park|Wellcome Sanger Institute for the COVID-19 Genomics UK (COG-UK) consortium|Davies|United Kingdom

>Spike|hCoV-19/Australia/VIC4378/2020|2020-07-14|EPI\_ISL\_519674|Original|hCoV-19^^Victoria|Human|Microbiological Diagnostic Unit - Public Health Laboratory (MDU-PHL)|MDU-PHL|Schultz|Australia

>Spike|hCoV-19/England/ALDP-5D65A5/2020|2020-06-19|EPI\_ISL\_558568|Original|hCoV-19^^England|Human|Lighthouse Lab in Alderley Park|Wellcome Sanger Institute for the COVID-19 Genomics UK (COG-UK) consortium|Davies|United Kingdom

>Spike|hCoV-19/Denmark/DCGC-11709/2020|2020-10-26|EPI\_ISL\_671086|Original|hCoV-19^^Sjaelland|Human|Department of Virus and Microbiological Special Diagnostics|Albertsen Lab|Michaelsen|Denmark

>Spike|hCoV-19/Northern Ireland/NIRE-FA977/2020|2020-03-26|EPI\_ISL\_441776|Original|hCoV-19^^Northern Ireland|Human|Regional Virus Laboratory|Wellcome Sanger Institute for the COVID-19 Genomics UK (COG-UK) consortium|Amato|United Kingdom

>Spike|hCoV-19/USA/DC-CDC-8465/2020|2020-03-20|EPI\_ISL\_594460|original|hCoV-19^^District of Columbia|Human|DC Department of Forensic Sciences|Pathogen Discovery|Queen|USA

>Spike|hCoV-19/England/LIVE-A9634/2020|2020-07-25|EPI\_ISL\_526382|Original|hCoV-19^^England|Human|Liverpool Clinical Laboratories|COVID-19 Genomics UK (COG-UK) Consortium|Haldenby|United Kingdom

>Spike|hCoV-19/Suriname/SR-39/2020|2020-06-26|EPI\_ISL\_517650|Original|hCoV-19^^Suriname|Human|Academic Hospital Paramaribo|Erasmus Medical Center|M\u00fcnger|Suriname

>Spike|hCoV-19/England/QEUH-5319CA/2020|2020-05-18|EPI\_ISL\_532262|Original|hCoV-19^^England|Human|Lighthouse Lab in Glasgow|Wellcome Sanger Institute for the COVID-19 Genomics UK (COG-UK) consortium|Davies|United Kingdom

>Spike|hCoV-19/England/LIVE-DB8064/2020|2020-10-30|EPI\_ISL\_651307|Original|hCoV-19^^England|Human|Liverpool Clinical Laboratories|COVID-19 Genomics UK (COG-UK) Consortium|Haldenby|United Kingdom

>Spike|hCoV-19/Finland/22SS11E3/2020|2020-09-22|EPI\_ISL\_757390|Original|hCoV-19^^Uusimaa|Human|Department of Virology and Immunology|Department of Virology|Smura|Finland

>Spike|hCoV-19/England/MILK-BEEDCA/2020|2020-11-30|EPI\_ISL\_708948|Original|hCoV-19^^England|Human|Lighthouse Lab in Milton Keynes|Wellcome Sanger Institute for the COVID-19 Genomics UK (COG-UK) Consortium|Davies|United Kingdom

>Spike|hCoV-19/Australia/VIC15945/2020|2020-08-01|EPI\_ISL\_640840|Original|hCoV-19^^Victoria|Human|Microbiological Diagnostic Unit - Public Health Laboratory (MDU-PHL)|MDU-PHL|Schultz|Australia

>Spike|hCoV-19/England/QEUH-A781BB/2020|2020-10-14|EPI\_ISL\_638746|Original|hCoV-19^^England|Human|Oxford Viromics|COVID-19 Genomics UK (COG-UK) Consortium|Golubchik|United Kingdom

>Spike|hCoV-19/England/QEUA-B2E8AF/2020|2020-11-03|EPI\_ISL\_660030|Original|hCoV-19^^England|Human|Lighthouse Lab in Glasgow|Wellcome Sanger Institute for the COVID-19 Genomics UK (COG-UK) Consortium|Davies|United Kingdom

>Spike|hCoV-19/Switzerland/GE-ETHZ-250118/2020|2020-08-20|EPI\_ISL\_535626|Original|hCoV-19^^Geneva|Human|Viollier AG|Department of Biosystems Science and Engineering|Nadeau|Switzerland

>Spike|hCoV-19/Denmark/DCGC-13782/2020|2020-11-30|EPI\_ISL\_713021|Original|hCoV-19^^Hovedstaden|Human|Department of Virus and Microbiological Special Diagnostics|Albertsen Lab|Michaelsen|Denmark

>Spike|hCoV-19/England/ALDP-B45B12/2020|2020-11-07|EPI\_ISL\_656246|Original|hCoV-19^^England|Human|Lighthouse Lab in Alderley Park|Wellcome Sanger Institute for the COVID-19 Genomics UK (COG-UK) Consortium|Davies|United Kingdom

>Spike|hCoV-19/Wales/CAMC-AEAF05/2020|2020-10-26|EPI\_ISL\_647901|Original|hCoV-19^^Wales|Human|Lighthouse Lab in Cambridge|Wellcome Sanger Institute for the COVID-19 Genomics UK (COG-UK) Consortium|Davies|United Kingdom

>Spike|hCoV-19/Italy/APU-IZSPB-98APT/2020|2020-04-10|EPI\_ISL\_649189|Vero|hCoV-19^^Apulia|Human|Istituto Zooprofilattico Sperimentale della Puglia e della Basilicata|Istituto Zooprofilattico Sperimentale della Puglia e della Basilicata|Parisi|Italy

>Spike|hCoV-19/Japan/PG-6037/2020|2020-07-00|EPI\_ISL\_689149|Original|hCoV-19^^Japan|Human|Pathogen Genomics Center|Pathogen Genomics Center|Sekizuka|Japan

>Spike|hCoV-19/England/CAMC-BC112B/2020|2020-11-20|EPI\_ISL\_705090|Original|hCoV-19^^England|Human|Lighthouse Lab in Cambridge|Wellcome Sanger Institute for the COVID-19 Genomics UK (COG-UK) Consortium|Davies|United Kingdom

>Spike|hCoV-19/USA/WA-UW-23564/2020|2020-08-11|EPI\_ISL\_570596|Original|hCoV-19^^Washington|Human|UW Virology Lab|UW Virology Lab|Roychoudhury|USA

>Spike|hCoV-19/England/ALDP-8D740E/2020|2020-06-24|EPI\_ISL\_557048|Original|hCoV-19^^England|Human|Lighthouse Lab in Alderley Park|Wellcome Sanger Institute for the COVID-19 Genomics UK (COG-UK) consortium|Davies|United Kingdom

>Spike|hCoV-19/England/BRIS-12D039/2020|2020-04-25|EPI\_ISL\_481804|Original|hCoV-19^^England|Human|PHE South West Regional Laboratory|Wellcome Sanger Institute for the COVID-19 Genomics UK (COG-UK) consortium|Davies|United Kingdom

>Spike|hCoV-19/England/MILK-B3D0D2/2020|2020-11-01|EPI\_ISL\_706220|Original|hCoV-19^^England|Human|Oxford Viromics|COVID-19 Genomics UK (COG-UK) Consortium|Golubchik|United Kingdom

>Spike|hCoV-19/Denmark/DCGC-17661/2020|2020-12-14|EPI\_ISL\_751130|Original|hCoV-19^^Nordjylland|Human|Department of Virus and Microbiological Special Diagnostics|Albertsen Lab|Michaelsen|Denmark

>Spike|hCoV-19/USA/CA-CZB-14245/2020|2020-08-28|EPI\_ISL\_739328|Original|hCoV-19^^California|Human|Alameda County Public Health Lab|Chan-Zuckerberg Biohub|Kamm|USA

>Spike|hCoV-19/Canada/ON-UHTC\_0076/2020|2020-04-13|EPI\_ISL\_464019|unknown|hCoV-19^^Ontario|Human|Unity Health Toronto|Ontario Institute for Cancer Research|de Borja|Canada

>Spike|hCoV-19/Japan/PG-5585/2020|2020-08-00|EPI\_ISL\_688710|Original|hCoV-19^^Japan|Human|Pathogen Genomics Center|Pathogen Genomics Center|Sekizuka|Japan

>Spike|hCoV-19/Germany/NW-HHU-22/2020|2020-03-15|EPI\_ISL\_417467|Original|hCoV-19^^North Rhine-Westphalia|Human|Center of Medical Microbiology|Center of Medical Microbiology|Wienemann|Germany

>Spike|hCoV-19/Denmark/DCGC-17121/2020|2020-12-14|EPI\_ISL\_750769|Original|hCoV-19^^Midtjylland|Human|Department of Virus and Microbiological Special Diagnostics|Albertsen Lab|Michaelsen|Denmark

>Spike|hCoV-19/Wales/PHWC-499457/2020|2020-12-03|EPI\_ISL\_727306|Original|hCoV-19^^Wales|Human|Originating lab|COVID-19 Genomics UK (COG-UK) Consortium|Moore|United Kingdom

>Spike|hCoV-19/USA/ME-HETL-J0278/2020|2020-10-04|EPI\_ISL\_755424|Original|hCoV-19^^Maine|Human|Maine Health and Environmental Testing Laboratory|Tewhey Lab|Tewhey|USA

>Spike|hCoV-19/USA/MD-MDH-0427/2020|2020-10-14|EPI\_ISL\_666795|Original|hCoV-19^^Maryland|Human|Maryland Public Health Laboratory|Maryland Public Health Laboratory|Keller|USA

>Spike|hCoV-19/Denmark/DCGC-11038/2020|2020-11-02|EPI\_ISL\_669516|Original|hCoV-19^^Hovedstaden|Human|Department of Virus and Microbiological Special Diagnostics|Albertsen Lab|Michaelsen|Denmark

>Spike|hCoV-19/England/NORT-297CBD/2020|2020-04-24|EPI\_ISL\_488170|Original|hCoV-19^^England|Human|NU-OMICS DNA Sequencing research facility|Wellcome Sanger Institute for the COVID-19 Genomics UK (COG-UK) consortium|Davies|United Kingdom

>Spike|hCoV-19/England/ALDP-9E8849/2020|2020-09-24|EPI\_ISL\_637578|Original|hCoV-19^^England|Human|Department of Pathology|COVID-19 Genomics UK (COG-UK) Consortium|Goodfellow|United Kingdom

>Spike|hCoV-19/England/QEUH-9FF3B7/2020|2020-09-30|EPI\_ISL\_600157|Original|hCoV-19^^England|Human|Lighthouse Lab in Glasgow|Wellcome Sanger Institute for the COVID-19 Genomics UK (COG-UK) consortium|Davies|United Kingdom

>Spike|hCoV-19/USA/WI-WSLH-200122/2020|2020-04-14|EPI\_ISL\_578351|Original|hCoV-19^^Wisconsin|Human|Wisconsin State Laboratory of Hygiene Communicable Disease Division|Wisconsin State Laboratory of Hygiene Communicable Disease Division|Florek|USA

>Spike|hCoV-19/England/NORW-2224CE/2020|2020-12-17|EPI\_ISL\_741497|Original|hCoV-19^^England|Human|Quadram Institute Bioscience|COVID-19 Genomics UK (COG-UK) Consortium|Alikhan|United Kingdom

>Spike|hCoV-19/England/QEUH-BA266D/2020|2020-11-18|EPI\_ISL\_672829|Original|hCoV-19^^England|Human|Lighthouse Lab in Glasgow|Wellcome Sanger Institute for the COVID-19 Genomics UK (COG-UK) Consortium|Davies|United Kingdom

>Spike|hCoV-19/USA/TX-HMH-MCoV-10436/2020|2020-07-08|EPI\_ISL\_789475|Original|hCoV-19^^Texas|Human|Houston Methodist Hospital|Houston Methodist Hospital|Long|USA

>Spike|hCoV-19/USA/CA-ALSR-1000-SAN/2020|2020-04-22|EPI\_ISL\_483454|Original|hCoV-19^^California|Human|UC San Diego Center for Advanced Laboratory Medicine|Andersen lab at Scripps Research|Gangavarapu|USA

>Spike|hCoV-19/England/EXET-139EC7/2020|2020-00-00|EPI\_ISL\_679351|Original|hCoV-19^^England|Human|University of Exeter|COVID-19 Genomics UK (COG-UK) Consortium|Temperton|United Kingdom

>Spike|hCoV-19/England/ALDP-A87359/2020|2020-10-17|EPI\_ISL\_606219|Original|hCoV-19^^England|Human|Lighthouse Lab in Alderley Park|Wellcome Sanger Institute for the COVID-19 Genomics UK (COG-UK) consortium|Davies|United Kingdom

>Spike|hCoV-19/India/MH-GA35/2020|2020-06-20|EPI\_ISL\_508229|Original|hCoV-19^^Maharashtra|Human|Government Medical College|National Institute of Biomedical Genomics|Maitra|India

>Spike|hCoV-19/France/ARA-37861/2020|2020-05-15|EPI\_ISL\_678508|Original|hCoV-19^^Auvergne-Rh\u00f4ne-Alpes|Human|CNR Virus des Infections Respiratoires - France SUD|CNR Virus des Infections Respiratoires - France SUD|Bal|France

>Spike|hCoV-19/USA/TX-HMH-2077/2020|2020-05-09|EPI\_ISL\_545106|Original|hCoV-19^^Texas|Human|Houston Methodist Hospital|Houston Methodist Hospital|Long|USA

>Spike|hCoV-19/Scotland/QEUH-A2253C/2020|2020-10-01|EPI\_ISL\_599004|Original|hCoV-19^^Scotland|Human|Lighthouse Lab in Glasgow|Wellcome Sanger Institute for the COVID-19 Genomics UK (COG-UK) consortium|Davies|United Kingdom

>Spike|hCoV-19/Japan/PG-1422/2020|2020-04-00|EPI\_ISL\_685029|Original|hCoV-19^^Japan|Human|Saitama Prefectural Institute of Public Health|Pathogen Genomics Center|Sekizuka|Japan

>Spike|hCoV-19/England/QEUH-B7FF6E/2020|2020-11-14|EPI\_ISL\_661787|Original|hCoV-19^^England|Human|Lighthouse Lab in Glasgow|Wellcome Sanger Institute for the COVID-19 Genomics UK (COG-UK) Consortium|Davies|United Kingdom

>Spike|hCoV-19/Luxembourg/LNS0211710/2020|2020-03-22|EPI\_ISL\_429760|Original|hCoV-19^^Luxembourg|Human|Laboratoire National de Sante|Laboratoire National de Sante|Wienecke-Baldacchino|Luxembourg

>Spike|hCoV-19/Northern Ireland/NIRE-2342B0/2020|2020-10-15|EPI\_ISL\_680364|Original|hCoV-19^^Northern Ireland|Human|Regional Virus Laboratory|COVID-19 Genomics UK (COG-UK) Consortium|Fairley|United Kingdom

>Spike|hCoV-19/England/EXET-13DFC0/2020|2020-12-03|EPI\_ISL\_724305|Original|hCoV-19^^England|Human|University of Exeter|COVID-19 Genomics UK (COG-UK) Consortium|Temperton|United Kingdom

>Spike|hCoV-19/USA/MN-MDH-2102/2020|2020-11-11|EPI\_ISL\_683731|Original|hCoV-19^^Minnesota|Human|Minnesota Department of Health|Minnesota Department of Health|Garfin|USA

>Spike|hCoV-19/England/CAMB-7ABE2/2020|2020-04-06|EPI\_ISL\_433850|Original|hCoV-19^^England|Human|Department of Pathology|COVID-19 Genomics UK (COG-UK) Consortium|Meredith|United Kingdom

>Spike|hCoV-19/USA/CA-QDX-2245/2020|2020-03-15|EPI\_ISL\_604510|Original|hCoV-19^^California|Human|Quest Diagnostics|Quest Diagnostics|Kagan|USA

>Spike|hCoV-19/England/ALDP-519719/2020|2020-06-02|EPI\_ISL\_558992|Original|hCoV-19^^England|Human|Lighthouse Lab in Alderley Park|Wellcome Sanger Institute for the COVID-19 Genomics UK (COG-UK) consortium|Davies|United Kingdom

>Spike|hCoV-19/Scotland/QEUH-ALFEDD/2020|2020-10-01|EPI\_ISL\_598952|Original|hCoV-19^^Scotland|Human|Lighthouse Lab in Glasgow|Wellcome Sanger Institute for the COVID-19 Genomics UK (COG-UK) consortium|Davies|United Kingdom

>Spike|hCoV-19/England/ALDP-B46C87/2020|2020-11-06|EPI\_ISL\_656048|Original|hCoV-19^^England|Human|Lighthouse Lab in Alderley Park|Wellcome Sanger Institute for the COVID-19 Genomics UK (COG-UK) Consortium|Davies|United Kingdom

>Spike|hCoV-19/Denmark/DCGC-8349/2020|2020-10-26|EPI\_ISL\_617354|Original|hCoV-19^^Syddanmark|Human|Department of Virus and Microbiological Special Diagnostics|Albertsen lab|Michaelsen|Denmark

>Spike|hCoV-19/Australia/VIC9555/2020|2020-08-16|EPI\_ISL\_565599|Original|hCoV-19^^Victoria|Human|Microbiological Diagnostic Unit - Public Health Laboratory (MDU-PHL) |MDU-PHL|Schultz|Australia

>Spike|hCoV-19/Belgium/VPE-030650/2020|2020-03-06|EPI\_ISL\_418805|Original|hCoV-19^^Deinze|Human|KU Leuven|KU Leuven|Maes|Belgium

>Spike|hCoV-19/Denmark/DCGC-7260/2020|2020-10-12|EPI\_ISL\_619236|Original|hCoV-19^^NA|Human|Department of Virus and Microbiological Special Diagnostics|Albertsen lab|Michaelsen|Denmark

>Spike|hCoV-19/England/CAMC-B33027/2020|2020-11-05|EPI\_ISL\_659276|Original|hCoV-19^^England|Human|Lighthouse Lab in Cambridge|Wellcome Sanger Institute for the COVID-19 Genomics UK (COG-UK) Consortium|Davies|United Kingdom

>Spike|hCoV-19/Australia/VIC1680/2020|2020-05-12|EPI\_ISL\_456575|Original|hCoV-19^^Victoria|Human|Victorian Infectious Diseases Reference Laboratory (VIDRL) |Microbiological Diagnostic Unit Public Health Laboratory and Victorian Infectious Diseases Reference Laboratory|Schultz|Australia

>Spike|hCoV-19/Denmark/DCGC-16793/2020|2020-12-14|EPI\_ISL\_750567|Original|hCoV-19^^Hovedstaden|Human|Department of Virus and Microbiological Special Diagnostics|Albertsen Lab|Michaelsen|Denmark

>Spike|hCoV-19/England/LIVE-9D985/2020|2020-04-27|EPI\_ISL\_449607|Original|hCoV-19^^England|Human|Liverpool Clinical Laboratories|COVID-19 Genomics UK (COG-UK) Consortium|Haldenby|United Kingdom

>Spike|hCoV-19/England/MILK-9C7066/2020|2020-09-09|EPI\_ISL\_572594|Original|hCoV-19^^England|Human|Northumbria University / South Tees Hospitals NHS Foundation Trust / North Cumbria Integrated Care NHS Foundation Trust / North Tees and Hartlepool NHS Foundation Trust / Newcastle Hospitals NHS Foundation Trust|COVID-19 Genomics UK (COG-UK) Consortium|Bashton|United Kingdom

>Spike|hCoV-19/Puerto Rico/CDC-S3/2020|2020-03-23|EPI\_ISL\_434543|Original|hCoV-19^^Puerto Rico|Human|Puerto Rico Department of Health|Centers for Disease Control and Prevention|Santiago|USA

>Spike|hCoV-19/India/KA-nimh-0130/2020|2020-04-06|EPI\_ISL\_428481|Original|hCoV-19^^Karnataka|Human|District Surveillance Unit|Department of Neurovirology|Pattabiraman|India

>Spike|hCoV-19/USA/TX-DSHS-0524/2020|2020-06-23|EPI\_ISL\_560966|Original|hCoV-19^^Texas|Human|Texas Department of State Health Services|Texas Department of State Health Services|Rahman|USA

>Spike|hCoV-19/Belgium/reg-0801762/2020|2020-08-01|EPI\_ISL\_734843|Original|hCoV-19^^Willebroek|Human|UZ Leuven|KU Leuven|Maes|Belgium

>Spike|hCoV-19/England/QEUH-9F3483/2020|2020-09-24|EPI\_ISL\_588711|Original|hCoV-19^^England|Human|Lighthouse Lab in Glasgow|Wellcome Sanger Institute for the COVID-19 Genomics UK (COG-UK) consortium|Davies|United Kingdom

>Spike|hCoV-19/USA/NM-NMDOH-2020126502/2020|2020-06-15|EPI\_ISL\_535270|Original|hCoV-19^^New Mexico|Human|New Mexico Department of Health Scientific Laboratory|New Mexico Department of Health Scientific Laboratory|Johnson|USA

>Spike|hCoV-19/Scotland/CVR2775/2020|2020-04-20|EPI\_ISL\_478035|Original|hCoV-19^^Scotland|Human|West of Scotland Specialist Virology Centre|COVID-19 Genomics UK (COG-UK) Consortium|Robertson|United Kingdom

>Spike|hCoV-19/Wales/MILK-9F02E6/2020|2020-09-24|EPI\_ISL\_580733|Original|hCoV-19^^Wales|Human|Lighthouse Lab in Milton Keynes|Wellcome Sanger Institute for the COVID-19 Genomics UK (COG-UK) consortium|Davies|United Kingdom

>Spike|hCoV-19/England/CAMB-1BAB5E/2020|2020-11-12|EPI\_ISL\_664172|Original|hCoV-19^^England|Human|Department of Pathology|COVID-19 Genomics UK (COG-UK) Consortium|Goodfellow|United Kingdom

>Spike|hCoV-19/England/ALDP-5A3A0C/2020|2020-06-14|EPI\_ISL\_558620|Original|hCoV-19^^England|Human|Lighthouse Lab in Alderley Park|Wellcome Sanger Institute for the COVID-19 Genomics UK (COG-UK) consortium|Davies|United Kingdom

>Spike|hCoV-19/England/ALDP-A6FFF9/2020|2020-10-15|EPI\_ISL\_608344|Original|hCoV-19^^England|Human|Lighthouse Lab in Alderley Park|Wellcome Sanger Institute for the COVID-19 Genomics UK (COG-UK) consortium|Davies|United Kingdom

>Spike|hCoV-19/England/MILK-99BAF4/2020|2020-08-30|EPI\_ISL\_550338|Original|hCoV-19^^England|Human|Lighthouse Lab in Milton Keynes|Wellcome Sanger Institute for the COVID-19 Genomics UK (COG-UK) consortium|Davies|United Kingdom

>Spike|hCoV-19/England/CAMC-B2189D/2020|2020-11-01|EPI\_ISL\_647187|Original|hCoV-19^^England|Human|Lighthouse Lab in Cambridge|Wellcome Sanger Institute for the COVID-19 Genomics UK (COG-UK) Consortium|Davies|United Kingdom

>Spike|hCoV-19/Scotland/CVR5601/2020|2020-11-02|EPI\_ISL\_651861|Original|hCoV-19^^Scotland|Human|West of Scotland Specialist Virology Centre|COVID-19 Genomics UK (COG-UK) Consortium|Robertson|United Kingdom

>Spike|hCoV-19/England/CAMC-B0CD20/2020|2020-10-30|EPI\_ISL\_643493|Original|hCoV-19^^England|Human|Lighthouse Lab in Cambridge|Wellcome Sanger Institute for the COVID-19 Genomics UK (COG-UK) Consortium|Davies|United Kingdom

>Spike|hCoV-19/USA/MI-UM-10033971920/2020|2020-04-20|EPI\_ISL\_578160|Original|hCoV-19^^Michigan|Human|University of Michigan Clinical Microbiology Laboratory|Lauring Lab|Valesano|USA

>Spike|hCoV-19/England/ALDP-4AE352/2020|2020-06-17|EPI\_ISL\_559543|Original|hCoV-19^^England|Human|Lighthouse Lab in Alderley Park|Wellcome Sanger Institute for the COVID-19 Genomics UK (COG-UK) consortium|Davies|United Kingdom

>Spike|hCoV-19/Canada/ON-S1850/2020|2020-11-24|EPI\_ISL\_729308|Original|hCoV-19^^Ontario|Human|Toronto Invasive Bacterial Diseases Network|McMaster University|McArthur|Canada

>Spike|hCoV-19/Wales/PHWC-33FE9/2020|2020-04-16|EPI\_ISL\_446854|Original|hCoV-19^^Wales|Human|Wales Specialist Virology Centre|Public Health Wales Microbiology Cardiff|Moore|United Kingdom

>Spike|hCoV-19/Germany/NW-HHU-357/2020|2020-09-10|EPI\_ISL\_666644|Original|hCoV-19^^North Rhine-Westphalia|Human|ZOTZ KLIMAS MVZ D\u00fcsseldorf-Centrum GbR \u00dcBAG f\u00fcr Labormedizin|Center of Medical Microbiology|Wienemann|Germany

>Spike|hCoV-19/Denmark/DCGC-3734/2020|2020-04-27|EPI\_ISL\_622615|Original|hCoV-19^^Hovedstaden|Human|Department of Virus and Microbiological Special Diagnostics|Albertsen lab|Michaelsen|Denmark

>Spike|hCoV-19/England/ALDP-95C27F/2020|2020-06-17|EPI\_ISL\_554923|Original|hCoV-19^^England|Human|Lighthouse Lab in Alderley Park|Wellcome Sanger Institute for the COVID-19 Genomics UK (COG-UK) consortium|Davies|United Kingdom

>Spike|hCoV-19/USA/FL-BPHL-1337/2020|2020-07-14|EPI\_ISL\_541275|Original|hCoV-19^^Florida|Human|Florida Bureau of Public Health Laboratories|Florida Bureau of Public Health Laboratories|Blanton|USA

>Spike|hCoV-19/USA/CA-ALSR-0577-IPL/2020|2020-05-13|EPI\_ISL\_483233|Original|hCoV-19^^California|Human|UC San Diego Center for Advanced Laboratory Medicine|Andersen lab at Scripps Research|Gangavarapu|USA

>Spike|hCoV-19/Switzerland/BS-UHB-42202280/2020|2020-03-22|EPI\_ISL\_528331|Original|hCoV-19^^Basel-Stadt|Human|University Hospital Basel|University Hospital Basel|Roloff Handschin|Switzerland

>Spike|hCoV-19/Denmark/DCGC-11592/2020|2020-11-02|EPI\_ISL\_671011|Original|hCoV-19^^Midtjylland|Human|Department of Virus and Microbiological Special Diagnostics|Albertsen Lab|Michaelsen|Denmark

>Spike|hCoV-19/England/20169003404/2020|2020-04-17|EPI\_ISL\_465174|Original|hCoV-19^^England|Human|Respiratory Virus Unit|Respiratory Virus Unit|Platt|United Kingdom

>Spike|hCoV-19/USA/TX-HMH-7980/2020|2020-06-30|EPI\_ISL\_545761|Original|hCoV-19^^Texas|Human|Houston Methodist Hospital|Houston Methodist Hospital|Long|USA

>Spike|hCoV-19/Hong Kong/VM20002453/2020|2020-02-08|EPI\_ISL\_426384|Original|hCoV-19^^Hong Kong|Human|Ruttonjee Hospital|Hong Kong Department of Health|Mak|China

>Spike|hCoV-19/USA/WY-WPHL-20161554/2020|2020-12-08|EPI\_ISL\_765971|Original|hCoV-19^^Wyoming|Human|Wyoming Public Health Laboratory|Wyoming Public Health Laboratory|Hull|USA

>Spike|hCoV-19/USA/AZ-TG618509/2020|2020-08-17|EPI\_ISL\_695702|Original|hCoV-19^^Arizona|Human|TGen North|TGen North|French|USA

>Spike|hCoV-19/England/MILK-B8C890/2020|2020-11-12|EPI\_ISL\_675957|Original|hCoV-19^^England|Human|Lighthouse Lab in Milton Keynes|Wellcome Sanger Institute for the COVID-19 Genomics UK (COG-UK) Consortium|Davies|United Kingdom

>Spike|hCoV-19/Denmark/DCGC-10314/2020|2020-11-02|EPI\_ISL\_669895|Original|hCoV-19^^Hovedstaden|Human|Department of Virus and Microbiological Special Diagnostics|Albertsen Lab|Michaelsen|Denmark

>Spike|hCoV-19/USA/WI-UW-1801/2020|2020-09-10|EPI\_ISL\_605673|Original|hCoV-19^^Wisconsin|Human|University of Wisconsin-Madison AIDS Vaccine Research Laboratories|University of Wisconsin-Madison AIDS Vaccine Research Laboratories|Baczenas|USA

>Spike|hCoV-19/Saudi Arabia/KAUST-Madinah51/2020|2020-03-26|EPI\_ISL\_437491|Original|hCoV-19^^Madinah|Human|Pathogen Genomics Lab King Abdullah University of Science and Technology(KAUST)|Pathogen Genomics Lab King Abdullah University of Science and Technology(KAUST)|Mohamed Ghazzali|Saudi Arabia

>Spike|hCoV-19/United Arab Emirates/1095/2020|2020-05-15|EPI\_ISL\_698168|Original|hCoV-19^^Abu Dhabi|Human|Group 42 (G42) Healthcare|G42 Healthcare|Ogrodzki|United Arab Emirates

>Spike|hCoV-19/Netherlands/ZH-EMC-879/2020|2020-10-16|EPI\_ISL\_632759|Original|hCoV-19^^Zuid Holland|Human|Dutch COVID-19 response team|Erasmus Medical Center|Oude Munnink|Netherlands

>Spike|hCoV-19/Japan/PG-5856/2020|2020-08-00|EPI\_ISL\_688973|Original|hCoV-19^^Japan|Human|Pathogen Genomics Center|Pathogen Genomics Center|Sekizuka|Japan

>Spike|hCoV-19/Brazil/SP-L1-CAMPI5/2020|2020-04-02|EPI\_ISL\_476168|Original|hCoV-19^^S\u00e3o Paulo|Human|Laborat\u00f3rio de Patologia Cl\u00ednica - UNICAMP|Laborat\u00f3rio de Estudos de V\u00edrus Emergentes - UNICAMP|Faria|Brazil

>Spike|hCoV-19/USA/TX-HMH-MCoV-8265/2020|2020-07-07|EPI\_ISL\_783584|Original|hCoV-19^^Texas|Human|Houston Methodist Hospital|Houston Methodist Hospital|Long|USA

>Spike|hCoV-19/Australia/VIC16944/2020|2020-08-06|EPI\_ISL\_663654|Original|hCoV-19^^Victoria|Human|Microbiological Diagnostic Unit - Public Health Laboratory (MDU-PHL)|MDU-PHL|Schultz|Australia

>Spike|hCoV-19/Spain/MD-IBV-004951/2020|2020-04-19|EPI\_ISL\_481082|Original|hCoV-19^^Madrid|Human|Hospital General Universitario Gregorio Mara\u00f1\u00f3n|SeqCOVID-SPAIN consortium|IBV (CSIC)|Comas|Spain

>Spike|hCoV-19/Scotland/EDB4309/2020|2020-04-23|EPI\_ISL\_487895|Original|hCoV-19^^Scotland|Human|Virology Department|Wellcome Sanger Institute for the COVID-19 Genomics UK (COG-UK) consortium|Davies|United Kingdom

>Spike|hCoV-19/Japan/IC-0615/2020|2020-11-00|EPI\_ISL\_779701|Original|hCoV-19^^Japan|Human|Pathogen Genomics Center|Pathogen Genomics Center|Sekizuka|Japan

>Spike|hCoV-19/USA/MI-MDHHS-SC21511/2020|2020-04-02|EPI\_ISL\_516238|Original|hCoV-19^^Michigan|Human|Michigan Department of Health and Human Services|Michigan Department of Health and Human Services|Blankenship|USA

>Spike|hCoV-19/England/ALDP-B63B78/2020|2020-11-08|EPI\_ISL\_656397|Original|hCoV-19^^England|Human|Lighthouse Lab in Alderley Park|Wellcome Sanger Institute for the COVID-19 Genomics UK (COG-UK) Consortium|Davies|United Kingdom

>Spike|hCoV-19/Brazil/MG-0285/2020|2020-04-08|EPI\_ISL\_470590|Original|hCoV-19^^Minas Gerais|Human|Simile|Bioinformatics Laboratory / LNCC|Almeida|Brazil

>Spike|hCoV-19/England/NORT-286BA5/2020|2020-10-16|EPI\_ISL\_638577|Original|hCoV-19^^England|Human|Northumbria University / South Tees Hospitals NHS Foundation Trust / North Cumbria Integrated Care NHS Foundation Trust / North Tees and Hartlepool NHS Foundation Trust / Newcastle Hospitals NHS Foundation Trust|COVID-19 Genomics UK (COG-UK) Consortium|Bashton|United Kingdom

>Spike|hCoV-19/Japan/PG-4105/2020|2020-06-00|EPI\_ISL\_692346|Original|hCoV-19^^Japan|Human|Pathogen Genomics Center|Pathogen Genomics Center|Sekizuka|Japan

>Spike|hCoV-19/England/NOTT-11BD73/2020|2020-11-13|EPI\_ISL\_652386|Original|hCoV-19^^England|Human|Queens Medical Centre|COVID-19 Genomics UK (COG-UK) Consortium|Loose|United Kingdom

>Spike|hCoV-19/USA/FL-BPHL-0821/2020|2020-06-13|EPI\_ISL\_514167|Original|hCoV-19^^Florida|Human|Florida Bureau of Public Health Laboratories|Florida Bureau of Public Health Laboratories|Blanton|USA

>Spike|hCoV-19/England/20139047104/2020|2020-03-29|EPI\_ISL\_420692|Original|hCoV-19^^England|Human|Respiratory Virus Unit|Respiratory Virus Unit|Platt|United Kingdom

>Spike|hCoV-19/England/MILK-957BF1/2020|2020-06-10|EPI\_ISL\_554127|Original|hCoV-19^^England|Human|Lighthouse Lab in Milton Keynes|Wellcome Sanger Institute for the COVID-19 Genomics UK (COG-UK) consortium|Davies|United Kingdom

>Spike|hCoV-19/Japan/PG-2410/2020|2020-04-00|EPI\_ISL\_686015|Original|hCoV-19^^Japan|Human|Pathogen Genomics Center|Pathogen Genomics Center|Sekizuka|Japan

>Spike|hCoV-19/Switzerland/VD-ETHZ-330259/2020|2020-10-17|EPI\_ISL\_614962|Original|hCoV-19^^Vaud|Human|Viollier AG|Department of Biosystems Science and Engineering|Nadeau|Switzerland

>Spike|hCoV-19/Germany/NW-HHU-100/2020|2020-08-28|EPI\_ISL\_539577|Original|hCoV-19^^North Rhine-Westphalia|Human|ZOTZ KLIMAS MVZ D\u00f0fcsseldorf-Centrum GbR \u00dcBAG f\u00fcr Labormedizin|Center of Medical Microbiology|Wienemann|Germany

>Spike|hCoV-19/England/ALDP-4F551A/2020|2020-06-24|EPI\_ISL\_559248|Original|hCoV-19^^England|Human|Lighthouse Lab in Alderley Park|Wellcome Sanger Institute for the COVID-19 Genomics UK (COG-UK) consortium|Davies|United Kingdom

>Spike|hCoV-19/Canada/BC\_02018462/2020|2020-03-00|EPI\_ISL\_477087|Original|hCoV-19^^British Columbia|Human|BCCDC Public Health Laboratory|BCCDC Public Health Laboratory|Harrigan|Canada

>Spike|hCoV-19/England/QEUH-B824B4/2020|2020-11-14|EPI\_ISL\_668370|Original|hCoV-19^^England|Human|Lighthouse Lab in Glasgow|Wellcome Sanger Institute for the COVID-19 Genomics UK (COG-UK) Consortium|Davies|United Kingdom

>Spike|hCoV-19/Spain/PV-IBV-001619/2020|2020-03-18|EPI\_ISL\_467176|Original|hCoV-19^^Basque Country|Human|Hospital Universitario Araba. Vitoria-Gasteiz|SeqCOVID-SPAIN consortium|IBV (CSIC) |Comas|Spain

>Spike|hCoV-19/England/CAMB-81CE5/2020|2020-04-12|EPI\_ISL\_442544|Original|hCoV-19^^England|Human|Department of Pathology|Wellcome Sanger Institute for the COVID-19 Genomics UK (COG-UK) consortium|Amato|United Kingdom

>Spike|hCoV-19/USA/CA-SR0103/2020|2020-03-16|EPI\_ISL\_445100|Original|hCoV-19^^California|Human|UC San Diego Center for Advanced Laboratory Medicine|Andersen lab at Scripps Research|Gangavarapu|USA

>Spike|hCoV-19/England/ALDP-A2F14A/2020|2020-10-05|EPI\_ISL\_587146|Original|hCoV-19^^England|Human|Lighthouse Lab in Alderley Park|Wellcome Sanger Institute for the COVID-19 Genomics UK (COG-UK) consortium|Davies|United Kingdom

>Spike|hCoV-19/Australia/VIC17051/2020|2020-08-01|EPI\_ISL\_663707|Original|hCoV-19^^Victoria|Human|Microbiological Diagnostic Unit - Public Health Laboratory (MDU-PHL) |MDU-PHL|Schultz|Australia

>Spike|hCoV-19/Scotland/CVR2870/2020|2020-04-21|EPI\_ISL\_493826|Original|hCoV-19^^Scotland|Human|West of Scotland Specialist Virology Centre|COVID-19 Genomics UK (COG-UK) Consortium|Robertson|United Kingdom

>Spike|hCoV-19/Belgium/ULG-10924/2020|2020-11-24|EPI\_ISL\_678464|Original|hCoV-19^^Li\u00e8ge|Human|Department of Clinical Microbiology|GIGA Medical Genomics|Durkin|Belgium

>Spike|hCoV-19/England/ALDP-8B5FBA/2020|2020-06-29|EPI\_ISL\_557077|Original|hCoV-19^^England|Human|Lighthouse Lab in Alderley Park|Wellcome Sanger Institute for the COVID-19 Genomics UK (COG-UK) consortium|Davies|United Kingdom

>Spike|hCoV-19/Netherlands/GE-EMC-404/2020|2020-10-30|EPI\_ISL\_722571|Original|hCoV-19^^Gelderland|Human|Dutch COVID-19 response team|Erasmus Medical Center|Oude Munnink|Netherlands

>Spike|hCoV-19/USA/AZ-TG666118/2020|2020-05-02|EPI\_ISL\_696204|Original|hCoV-19^^Arizona|Human|Sonora Quest Laboratories|TGen North|French|USA

>Spike|hCoV-19/Belgium/reg-09181049/2020|2020-09-18|EPI\_ISL\_734992|Original|hCoV-19^^Bost|Human|UZ Leuven|KU Leuven|Maes|Belgium

>Spike|hCoV-19/England/MILK-B8E737/2020|2020-11-13|EPI\_ISL\_674152|Original|hCoV-19^^England|Human|Lighthouse Lab in Milton Keynes|Wellcome Sanger Institute for the COVID-19 Genomics UK (COG-UK) Consortium|Davies|United Kingdom

>Spike|hCoV-19/USA/NY-NYUMC642/2020|2020-04-03|EPI\_ISL\_444759|Original|hCoV-19^^New York|Human|NYU Langone Health|Departments of Pathology and Medicine|Maurano|USA

>Spike|hCoV-19/England/20129071204/2020|2020-03-12|EPI\_ISL\_424066|Original|hCoV-19^^England|Human|Respiratory Virus Unit|Respiratory Virus Unit|Platt|United Kingdom

>Spike|hCoV-19/England/PORT-2D3699/2020|2020-04-15|EPI\_ISL\_517532|Original|hCoV-19^^England|Human|Centre for Enzyme Innovation|COVID-19 Genomics UK (COG-UK) Consortium|Robson|United Kingdom

>Spike|hCoV-19/Denmark/DCGC-10062/2020|2020-11-09|EPI\_ISL\_669371|Original|hCoV-19^^Sjaelland|Human|Department of Virus and Microbiological Special Diagnostics|Albertsen Lab|Michaelsen|Denmark

>Spike|hCoV-19/USA/NY-PV08445/2020|2020-03-18|EPI\_ISL\_421396|Original|hCoV-19^^New York|Human|MSSS Clinical Microbiology Laboratories|MSSS Pathogen Surveillance Program|van Bakel|USA

>Spike|hCoV-19/England/QEUA-AF0072/2020|2020-10-29|EPI\_ISL\_662809|Original|hCoV-19^^England|Human|Lighthouse Lab in Glasgow|Wellcome Sanger Institute for the COVID-19 Genomics UK (COG-UK) Consortium|Davies|United Kingdom

>Spike|hCoV-19/United Arab Emirates/0496/2020|2020-05-18|EPI\_ISL\_698663|Original|hCoV-19^^Abu Dhabi|Human|Group 42 (G42) Healthcare|G42 Healthcare|Ogrodzki|United Arab Emirates

>Spike|hCoV-19/Zimbabwe/ZW-9515/2020|2020-06-01|EPI\_ISL\_644761|Original|hCoV-19^^Zimbabwe|Human|National Microbiology Reference Laboratory|Quadram Institute Bioscience|Alikhan|Zimbabwe

>Spike|hCoV-19/Bangladesh/DNAS-CPH-isl-430/2020|2020-04-29|EPI\_ISL\_605892|Original|hCoV-19^^Bangladesh|Human|NGS Lab|NGS Lab|Rabbi|Bangladesh

>Spike|hCoV-19/Wuhan/0126-C13/2020|2020-01-26|EPI\_ISL\_493171|Original|hCoV-19^^Hubei|Human|National Virus Resource Center|Computational Virology Group|Liu|China

>Spike|hCoV-19/Reunion/RUN-PIMIT20/2020|2020-03-31|EPI\_ISL\_522549|Vero E6|hCoV-19^^Reunion|Human|F\u00e9lix Guyon Hospital|UMR PIMIT Universit\u00e9 de La R\u00e9union|Wilkinson|Reunion

>Spike|hCoV-19/Denmark/DCGC-5078/2020|2020-09-21|EPI\_ISL\_621616|Original|hCoV-19^^Sjaelland|Human|Department of Virus and Microbiological Special Diagnostics|Albertsen lab|Michaelsen|Denmark

>Spike|hCoV-19/Finland/23LS3E11/2020|2020-10-23|EPI\_ISL\_759775|Original|hCoV-19^^Uusimaa|Human|Department of Virology and Immunology|Department of Virology|Smura|Finland

>Spike|hCoV-19/England/CAMB-7C02D/2020|2020-04-13|EPI\_ISL\_433981|Original|hCoV-19^^England|Human|Department of Pathology|COVID-19 Genomics UK (COG-UK) Consortium|Meredith|United Kingdom

>Spike|hCoV-19/Denmark/DCGC-19426/2020|2020-12-07|EPI\_ISL\_748937|Original|hCoV-19^^Denmark|Human|Department of Virus and Microbiological Special Diagnostics|Albertsen Lab|Michaelsen|Denmark

>Spike|hCoV-19/Switzerland/SH-ETHZ-410827/2020|2020-12-12|EPI\_ISL\_737490|Original|hCoV-19^^Schaffhausen|Human|Viollier AG|Department of Biosystems Science and Engineering|Nadeau|Switzerland

>Spike|hCoV-19/Wales/ALDP-CBF040/2020|2020-12-19|EPI\_ISL\_760780|Original|hCoV-19^^Wales|Human|Lighthouse Lab in Alderley Park|Wellcome Sanger Institute for the COVID-19 Genomics UK (COG-UK) Consortium|Davies|United Kingdom

>Spike|hCoV-19/USA/TX-HMH-MCoV-15688/2020|2020-07-09|EPI\_ISL\_785372|Original|hCoV-19^^Texas|Human|Houston Methodist Hospital|Houston Methodist Hospital|Long|USA



>Spike|hCoV-19/USA/TX-DSHS-1030/2020|2020-03-29|EPI\_ISL\_644184|Original|hCoV-19^^Texas|Human|Texas Department of State Health Services|Texas Department of State Health Services|Rahman|USA

>Spike|hCoV-19/England/BRIS-123F54/2020|2020-04-08|EPI\_ISL\_492827|Original|hCoV-19^^England|Human|PHE South West Regional Laboratory|Wellcome Sanger Institute for the COVID-19 Genomics UK (COG-UK) consortium|Davies|United Kingdom

>Spike|hCoV-19/Northern Ireland/QEUI-88F0D4/2020|2020-07-27|EPI\_ISL\_532758|Original|hCoV-19^^Northern Ireland|Human|Lighthouse Lab in Glasgow|Wellcome Sanger Institute for the COVID-19 Genomics UK (COG-UK) consortium|Davies|United Kingdom

>Spike|hCoV-19/USA/NM-UNM-00573/2020|2020-08-07|EPI\_ISL\_542987|Original|hCoV-19^^New Mexico|Human|TriCore Reference Laboratories|Center for Global Health|Domman|USA

>Spike|hCoV-19/Northern Ireland/NIRE-100184/2020|2020-05-03|EPI\_ISL\_489355|Original|hCoV-19^^Northern Ireland|Human|Regional Virus Laboratory|Wellcome Sanger Institute for the COVID-19 Genomics UK (COG-UK) consortium|Davies|United Kingdom

>Spike|hCoV-19/Denmark/ALAB-SSI-795/2020|2020-03-30|EPI\_ISL\_444910|Original|hCoV-19^^Denmark|Human|Department of Virus and Microbiological Special Diagnostics|Albertsen lab|Kirkegaard|Denmark

>Spike|hCoV-19/England/ALDP-B23EA8/2020|2020-11-04|EPI\_ISL\_646193|Original|hCoV-19^^England|Human|Lighthouse Lab in Alderley Park|Wellcome Sanger Institute for the COVID-19 Genomics UK (COG-UK) Consortium|Davies|United Kingdom

>Spike|hCoV-19/England/QEUI-A62002/2020|2020-10-11|EPI\_ISL\_706953|Original|hCoV-19^^England|Human|Oxford Viromics|COVID-19 Genomics UK (COG-UK) Consortium|Golubchik|United Kingdom

>Spike|hCoV-19/England/LEED-2A8CF5/2020|2020-03-31|EPI\_ISL\_539134|Original|hCoV-19^^England|Human|Leeds Teaching Hospitals NHS Trust and Public Health England|Wellcome Sanger Institute for the COVID-19 Genomics UK (COG-UK) consortium|Davies|United Kingdom

>Spike|hCoV-19/Denmark/DCGC-10293/2020|2020-11-09|EPI\_ISL\_669880|Original|hCoV-19^^Nordjylland|Human|Department of Virus and Microbiological Special Diagnostics|Albertsen Lab|Michaelsen|Denmark

>Spike|hCoV-19/Denmark/DCGC-2551/2020|2020-08-17|EPI\_ISL\_616527|Original|hCoV-19^^Hovedstaden|Human|Department of Virus and Microbiological Special Diagnostics|Albertsen lab|Michaelsen|Denmark

>Spike|hCoV-19/England/CAMB-1BC345/2020|2020-11-29|EPI\_ISL\_723864|Original|hCoV-19^^England|Human|Department of Pathology|COVID-19 Genomics UK (COG-UK) Consortium|Goodfellow|United Kingdom

>Spike|hCoV-19/England/PORT-2D5CE0/2020|2020-12-19|EPI\_ISL\_763824|Original|hCoV-19^^England|Human|Centre for Enzyme Innovation|COVID-19 Genomics UK (COG-UK) Consortium|Robson|United Kingdom

>Spike|hCoV-19/USA/CA-CZB-1964/2020|2020-05-06|EPI\_ISL\_486236|Original|hCoV-19^^California|Human|Orange County Public Health Laboratory|Chan-Zuckerberg Biohub|McGeever|USA

>Spike|hCoV-19/USA/FL-BPHL-0104/2020|2020-04-27|EPI\_ISL\_445046|Original|hCoV-19^^Florida|Human|Florida Bureau of Public Health Laboratories|Florida Bureau of Public Health Laboratories|Blanton|USA

>Spike|hCoV-19/Shanghai/SH0038/2020|2020-02-06|EPI\_ISL\_416347|Original|hCoV-19^^Shanghai|Human|Shanghai Public Health Clinical Center|National Research Center for Translational Medicine (Shanghai)|Zhang|China

>Spike|hCoV-19/England/QEUI-AD3576/2020|2020-10-26|EPI\_ISL\_634551|Original|hCoV-19^^England|Human|Lighthouse Lab in Glasgow|Wellcome Sanger Institute for the COVID-19 Genomics UK (COG-UK) consortium|Davies|United Kingdom

>Spike|hCoV-19/England/MILK-B8ECDE/2020|2020-11-13|EPI\_ISL\_674511|Original|hCoV-19^^England|Human|Lighthouse Lab in Milton Keynes|Wellcome Sanger Institute for the COVID-19 Genomics UK (COG-UK) Consortium|Davies|United Kingdom

>Spike|hCoV-19/Australia/VIC6537/2020|2020-07-25|EPI\_ISL\_521307|Original|hCoV-19^^Victoria|Human|Microbiological Diagnostic Unit - Public Health Laboratory (MDU-PHL)|MDU-PHL|Schultz|Australia

>Spike|hCoV-19/Japan/PG-4433/2020|2020-07-00|EPI\_ISL\_692656|Original|hCoV-19^^Japan|Human|Sakai City Institute of Public Health|Pathogen Genomics Center|Sekizuka|Japan

>Spike|hCoV-19/England/CAMC-9ECBA6/2020|2020-09-23|EPI\_ISL\_594644|Original|hCoV-19^^England|Human|Oxford Viromics|COVID-19 Genomics UK (COG-UK) Consortium|Golubchik|United Kingdom

>Spike|hCoV-19/Wales/PHWC-162FD1/2020|2020-05-29|EPI\_ISL\_473230|Original|hCoV-19^^Wales|Human|Wales Specialist Virology Centre Sequencing lab|COVID-19 Genomics UK (COG-UK) Consortium|Moore|United Kingdom

>Spike|hCoV-19/Scotland/QEUA-9DD391/2020|2020-09-22|EPI\_ISL\_599596|Original|hCoV-19^^Scotland|Human|Lighthouse Lab in Glasgow|Wellcome Sanger Institute for the COVID-19 Genomics UK (COG-UK) consortium|Davies|United Kingdom

>Spike|hCoV-19/Denmark/DCGC-9864/2020|2020-11-09|EPI\_ISL\_669237|Original|hCoV-19^^Hovedstaden|Human|Department of Virus and Microbiological Special Diagnostics|Albertsen Lab|Michaelsen|Denmark

>Spike|hCoV-19/England/ALDP-C3DEF5/2020|2020-12-10|EPI\_ISL\_730878|Original|hCoV-19^^England|Human|Lighthouse Lab in Alderley Park|Wellcome Sanger Institute for the COVID-19 Genomics UK (COG-UK) Consortium|Davies|United Kingdom

>Spike|hCoV-19/Ireland/D-NVRL-AIIDV0102v2/2020|2020-04-17|EPI\_ISL\_644322|Original|hCoV-19^^Dublin|Human|CEPHR / Vincent's Hospital|Irish Coronavirus Sequencing Consortium - National Virus Reference Laboratory|Gonzalez|Ireland

>Spike|hCoV-19/England/CAMB-79C86/2020|2020-04-02|EPI\_ISL\_470538|Original|hCoV-19^^England|Human|Department of Pathology|Wellcome Sanger Institute for the COVID-19 Genomics UK (COG-UK) consortium|Davies|United Kingdom

>Spike|hCoV-19/England/LIVE-A4AA6/2020|2020-03-11|EPI\_ISL\_499813|Original|hCoV-19^^England|Human|Liverpool Clinical Laboratories|COVID-19 Genomics UK (COG-UK) Consortium|Haldenby|United Kingdom

>Spike|hCoV-19/Spain/VC-IBV-98004491/2020|2020-03-25|EPI\_ISL\_583946|Original|hCoV-19^^Comunitat\_Valenciana|Human|Servicio de Microbiolog\u00eda. Hospital General Universitario de Castell\u00f3n|SeqCOVID-SPAIN consortium|IBV(CSIC)|Comas|Spain

>Spike|hCoV-19/USA/NM-UNM-00860/2020|2020-05-03|EPI\_ISL\_610282|Original|hCoV-19^^New Mexico|Human|TriCore Reference Laboratories|Center for Global Health|Domman|USA

>Spike|hCoV-19/England/ALDP-94E780/2020|2020-06-17|EPI\_ISL\_555060|Original|hCoV-19^^England|Human|Lighthouse Lab in Alderley Park|Wellcome Sanger Institute for the COVID-19 Genomics UK (COG-UK) consortium|Davies|United Kingdom

>Spike|hCoV-19/Denmark/DCGC-10597/2020|2020-11-02|EPI\_ISL\_669732|Original|hCoV-19^^Nordjylland|Human|Department of Virus and Microbiological Special Diagnostics|Albertsen Lab|Michaelsen|Denmark

>Spike|hCoV-19/South Korea/KCDC2250/2020|2020-05-10|EPI\_ISL\_510588|Original|hCoV-19^^South Korea|Human|Division of Viral Diseases|Division of Viral Diseases|Kim|South Korea

>Spike|hCoV-19/England/QEUA-AF40D8/2020|2020-10-30|EPI\_ISL\_663019|Original|hCoV-19^^England|Human|Lighthouse Lab in Glasgow|Wellcome Sanger Institute for the COVID-19 Genomics UK (COG-UK) Consortium|Davies|United Kingdom

>Spike|hCoV-19/Switzerland/BS-UHB-42202184/2020|2020-03-22|EPI\_ISL\_528324|Original|hCoV-19^^Basel-Stadt|Human|University Hospital Basel|University Hospital Basel|Roloff Handschin|Switzerland

>Spike|hCoV-19/Scotland/EDB4712/2020|2020-04-27|EPI\_ISL\_449328|Original|hCoV-19^^Scotland|Human|Virology Department|COVID-19 Genomics UK (COG-UK) Consortium|Williams|United Kingdom

>Spike|hCoV-19/Australia/VIC387/2020|2020-03-23|EPI\_ISL\_426694|Original|hCoV-19^^Victoria|Human|Victorian Infectious Diseases Reference Laboratory (VIDRL)|Microbiological Diagnostic Unit Public Health Laboratory and Victorian Infectious Diseases Reference Laboratory|Schultz|Australia

>Spike|hCoV-19/England/QEUA-A0BEB6/2020|2020-09-30|EPI\_ISL\_599373|Original|hCoV-19^^England|Human|Lighthouse Lab in Glasgow|Wellcome Sanger Institute for the COVID-19 Genomics UK (COG-UK) consortium|Davies|United Kingdom

>Spike|hCoV-19/USA/TX-HMH-2375/2020|2020-05-29|EPI\_ISL\_545271|Original|hCoV-19^^Texas|Human|Houston Methodist Hospital|Houston Methodist Hospital|Long|USA

>Spike|hCoV-19/Netherlands/UT-RIVM-20936/2020|2020-12-22|EPI\_ISL\_790962|Original|hCoV-19^^Utrecht|Human|Dutch COVID-19 response team|National Institute for Public Health and the Environment (RIVM)|Meijer|Netherlands

>Spike|hCoV-19/India/OR-ILSCV33972/2020|2020-06-08|EPI\_ISL\_481179|Original|hCoV-19^^Odisha|Human|Immunogenomics lab|Immunogenomics lab|Raghav|India

>Spike|hCoV-19/England/ALDP-9C5235/2020|2020-09-10|EPI\_ISL\_567651|Original|hCoV-19^^England|Human|Lighthouse Lab in Alderley Park|Wellcome Sanger Institute for the COVID-19 Genomics UK (COG-UK) consortium|Davies|United Kingdom

>Spike|hCoV-19/England/CAMC-B36886/2020|2020-11-05|EPI\_ISL\_645428|Original|hCoV-19^^England|Human|Lighthouse Lab in Cambridge|Wellcome Sanger Institute for the COVID-19 Genomics UK (COG-UK) Consortium|Davies|United Kingdom

>Spike|hCoV-19/England/CAMC-BBCF56/2020|2020-11-21|EPI\_ISL\_679295|Original|hCoV-19^^England|Human|Queens Medical Centre|COVID-19 Genomics UK (COG-UK) Consortium|Loose|United Kingdom

>Spike|hCoV-19/Netherlands/FR-RIVM-20862/2020|2020-12-21|EPI\_ISL\_790831|Original|hCoV-19^^Friesland|Human|Dutch COVID-19 response team|National Institute for Public Health and the Environment (RIVM)|Meijer|Netherlands

>Spike|hCoV-19/Wales/PHWC-23BAC/2020|2020-03-12|EPI\_ISL\_418096|Original|hCoV-19^^Wales|Human|Wales Specialist Virology Centre|Public Health Wales Microbiology Cardiff|Moore|United Kingdom

>Spike|hCoV-19/Japan/PG-7057/2020|2020-08-00|EPI\_ISL\_688162|Original|hCoV-19^^Japan|Human|Pathogen Genomics Center|Pathogen Genomics Center|Sekizuka|Japan

>Spike|hCoV-19/Denmark/DCGC-17999/2020|2020-12-14|EPI\_ISL\_749691|Original|hCoV-19^^Syddanmark|Human|Department of Virus and Microbiological Special Diagnostics|Albertsen Lab|Michaelsen|Denmark

>Spike|hCoV-19/Saudi Arabia/KAUST-JEDDAH63/2020|2020-03-25|EPI\_ISL\_677940|Original|hCoV-19^^Jeddah|Human|Pathogen Genomics Lab King Abdullah University of Science and Technology(KAUST)|Pathogen Genomics Lab King Abdullah University of Science and Technology(KAUST)|Mohamed Ghazzali|Saudi Arabia

>Spike|hCoV-19/England/20126001604/2020|2020-03-19|EPI\_ISL\_423865|Original|hCoV-19^^England|Human|Respiratory Virus Unit|Respiratory Virus Unit|Platt|United Kingdom

>Spike|hCoV-19/Wales/PHWC-495743/2020|2020-11-23|EPI\_ISL\_726390|Original|hCoV-19^^Wales|Human|Originating lab|COVID-19 Genomics UK (COG-UK) Consortium|Moore|United Kingdom

>Spike|hCoV-19/England/CAMB-764DC/2020|2020-03-30|EPI\_ISL\_439408|Original|hCoV-19^^England|Human|Department of Pathology|Wellcome Sanger Institute for the COVID-19 Genomics UK (COG-UK) consortium|Amato|United Kingdom

>Spike|hCoV-19/USA/FL-BPHL-1124/2020|2020-08-11|EPI\_ISL\_526610|Original|hCoV-19^^Florida|Human|Florida Bureau of Public Health Laboratories|Florida Bureau of Public Health Laboratories|Blanton|USA

>Spike|hCoV-19/England/GSTT-265E1F5/2020|2020-03-31|EPI\_ISL\_484169|Original|hCoV-19^^England|Human|Centre for Clinical Infection and Diagnostics Research and Genomics Innovation Unit|COVID-19 Genomics UK (COG-UK) Consortium|Awan|United Kingdom

>Spike|hCoV-19/Belgium/UGent-128/2020|2020-05-15|EPI\_ISL\_481224|Original|hCoV-19^^Ghent|Human|Lab voor klinische biologie|Onderzoeksgroep Virologie|Lambrechts|Belgium

>Spike|hCoV-19/England/CAMC-B364DD/2020|2020-11-05|EPI\_ISL\_645495|Original|hCoV-19^^England|Human|Lighthouse Lab in Cambridge|Wellcome Sanger Institute for the COVID-19 Genomics UK (COG-UK) Consortium|Davies|United Kingdom

>Spike|hCoV-19/England/CAMC-B356E7/2020|2020-11-05|EPI\_ISL\_659557|Original|hCoV-19^^England|Human|Lighthouse Lab in Cambridge|Wellcome Sanger Institute for the COVID-19 Genomics UK (COG-UK) Consortium|Davies|United Kingdom

>Spike|hCoV-19/Australia/VIC6945/2020|2020-07-21|EPI\_ISL\_564159|Original|hCoV-19^^Victoria|Human|Microbiological Diagnostic Unit - Public Health Laboratory (MDU-PHL)|MDU-PHL|Schultz|Australia

>Spike|hCoV-19/Wales/PHWC-47FBF8/2020|2020-10-12|EPI\_ISL\_612785|Original|hCoV-19^^Wales|Human|Wales Specialist Virology Centre Sequencing lab|COVID-19 Genomics UK (COG-UK) Consortium|Moore|United Kingdom

>Spike|hCoV-19/Turkey/IST-GLAB-283/2020|2020-05-21|EPI\_ISL\_735331|Original|hCoV-19^^Istanbul|Human|Genomic Laboratory (GLAB) (Conjoint lab of Health Directorate of Istanbul and Istanbul Technical University)|Genomic Laboratory (GLAB)|Karacan|Turkey

>Spike|hCoV-19/USA/LA-BIE-044/2020|2020-04-07|EPI\_ISL\_463292|Original|hCoV-19^^Louisiana|Human|Ochsner Health|Bioinfoexperts|Cross|USA

>Spike|hCoV-19/Wales/PHWC-28B89/2020|2020-04-03|EPI\_ISL\_445410|Original|hCoV-19^^Wales|Human|Wales Specialist Virology Centre|Public Health Wales Microbiology Cardiff|Moore|United Kingdom

>Spike|hCoV-19/England/ALDP-8FEF3D/2020|2020-06-24|EPI\_ISL\_557062|Original|hCoV-19^^England|Human|Lighthouse Lab in Alderley Park|Wellcome Sanger Institute for the COVID-19 Genomics UK (COG-UK) consortium|Davies|United Kingdom

>Spike|hCoV-19/England/QEUH-B7DB6C/2020|2020-11-14|EPI\_ISL\_741901|Original|hCoV-19^^England|Human|Oxford Viromics|COVID-19 Genomics UK (COG-UK) Consortium|Golubchik|United Kingdom

>Spike|hCoV-19/USA/VA-DCLS-0389/2020|2020-04-18|EPI\_ISL\_467786|Original|hCoV-19^^Virginia|Human|Virginia DCLS|Virginia DCLS|St. Jacques|USA

>Spike|hCoV-19/Denmark/DCGC-17627/2020|2020-12-14|EPI\_ISL\_750246|Original|hCoV-19^^Syddanmark|Human|Department of Virus and Microbiological Special Diagnostics|Albertsen Lab|Michaelsen|Denmark

>Spike|hCoV-19/England/ALDP-A671FB/2020|2020-10-12|EPI\_ISL\_630413|Original|hCoV-19^^England|Human|Lighthouse Lab in Alderley Park|Wellcome Sanger Institute for the COVID-19 Genomics UK (COG-UK) consortium|Davies|United Kingdom

>Spike|hCoV-19/England/20109008804/2020|2020-03-05|EPI\_ISL\_464536|Original|hCoV-19^^England|Human|Respiratory Virus Unit|Respiratory Virus Unit|Platt|United Kingdom

>Spike|hCoV-19/England/ALDP-A9467E/2020|2020-10-19|EPI\_ISL\_611030|Original|hCoV-19^^England|Human|Lighthouse Lab in Alderley Park|Wellcome Sanger Institute for the COVID-19 Genomics UK (COG-UK) consortium|Davies|United Kingdom

>Spike|hCoV-19/England/LIVE-DC2832/2020|2020-11-24|EPI\_ISL\_703110|Original|hCoV-19^^England|Human|Liverpool Clinical Laboratories|COVID-19 Genomics UK (COG-UK) Consortium|Haldenby|United Kingdom

>Spike|hCoV-19/England/SHEF-10C89D9/2020|2020-12-18|EPI\_ISL\_741956|Original|hCoV-19^^England|Human|Virology Department|COVID-19 Genomics UK (COG-UK) Consortium|de Silva|United Kingdom

>Spike|hCoV-19/Australia/VIC9875/2020|2020-08-15|EPI\_ISL\_565757|Original|hCoV-19^^Victoria|Human|Microbiological Diagnostic Unit - Public Health Laboratory (MDU-PHL)|MDU-PHL|Schultz|Australia

>Spike|hCoV-19/USA/TX-HMH-MCoV-16303/2020|2020-10-30|EPI\_ISL\_785987|Original|hCoV-19^^Texas|Human|Houston Methodist Hospital|Houston Methodist Hospital|Long|USA

>Spike|hCoV-19/USA/WA-S1573/2020|2020-05-26|EPI\_ISL\_495999|Original|hCoV-19^^Washington|Human|Washington State Department of Health|Seattle Flu Study|Lee|USA

>Spike|hCoV-19/Iceland/499/2020|2020-03-21|EPI\_ISL\_424521|Original|hCoV-19^^Reykjavik|Human|The National University Hospital of Iceland|deCODE genetics|J\u00f3nsson|Iceland

>Spike|hCoV-19/Scotland/QEUH-AAB46B/2020|2020-10-21|EPI\_ISL\_652792|Original|hCoV-19^^Scotland|Human|Oxford Viromics|COVID-19 Genomics UK (COG-UK) Consortium|Golubchik|United Kingdom

>Spike|hCoV-19/Scotland/QEUH-BC399A/2020|2020-11-25|EPI\_ISL\_710754|Original|hCoV-19^^Scotland|Human|Lighthouse Lab in Glasgow|Wellcome Sanger Institute for the COVID-19 Genomics UK (COG-UK) Consortium|Davies|United Kingdom

>Spike|hCoV-19/Denmark/DCGC-6638/2020|2020-10-12|EPI\_ISL\_619540|Original|hCoV-19^^Midtjylland|Human|Department of Virus and Microbiological Special Diagnostics|Albertsen lab|Michaelsen|Denmark

>Spike|hCoV-19/Australia/VIC10461/2020|2020-07-13|EPI\_ISL\_562919|Original|hCoV-19^^Victoria|Human|Microbiological Diagnostic Unit - Public Health Laboratory (MDU-PHL)|MDU-PHL|Schultz|Australia

>Spike|hCoV-19/USA/MI-MDHHS-SC21225/2020|2020-04-09|EPI\_ISL\_507481|Original|hCoV-19^^Michigan|Human|Michigan Department of Health and Human Services|Michigan Department of Health and Human Services|Blankenship|USA

>Spike|hCoV-19/Netherlands/NA\_73/2020|2020-03-10|EPI\_ISL\_422833|Original|hCoV-19^^Netherlands|Human|Dutch COVID-19 response team|Erasmus Medical Center|Oude Munnink|Netherlands

>Spike|hCoV-19/USA/TX-HMH020/2020|2020-03-13|EPI\_ISL\_434730|Original|hCoV-19^^Texas|Human|Houston Methodist Hospital|Houston Methodist Hospital|Long|USA

>Spike|hCoV-19/England/LIVE-AA071/2020|2020-03-23|EPI\_ISL\_517395|Original|hCoV-19^^England|Human|Liverpool Clinical Laboratories|COVID-19 Genomics UK (COG-UK) Consortium|Haldenby|United Kingdom

>Spike|hCoV-19/England/ALDP-B1C4EC/2020|2020-11-01|EPI\_ISL\_645722|Original|hCoV-19^^England|Human|Lighthouse Lab in Alderley Park|Wellcome Sanger Institute for the COVID-19 Genomics UK (COG-UK) Consortium|Davies|United Kingdom

>Spike|hCoV-19/USA/TX-HMH-MCoV-14954/2020|2020-10-15|EPI\_ISL\_786438|Original|hCoV-19^^Texas|Human|Houston Methodist Hospital|Houston Methodist Hospital|Long|USA

>Spike|hCoV-19/Ireland/LD-NVRL-77IRL69816/2020|2020-11-05|EPI\_ISL\_752518|Original|hCoV-19^^Longford|Human|National Virus Reference Laboratory|National Virus Reference Laboratory|Gonzalez|Ireland

>Spike|hCoV-19/England/ALDP-BBADE5/2020|2020-11-20|EPI\_ISL\_702414|Original|hCoV-19^^England|Human|Lighthouse Lab in Alderley Park|Wellcome Sanger Institute for the COVID-19 Genomics UK (COG-UK) Consortium|Davies|United Kingdom

>Spike|hCoV-19/USA/LA-EVTL1382/2020|2020-12-11|EPI\_ISL\_779048|Original|hCoV-19^^Louisiana|Human|LSUHS Emerging Viral Threat Laboratory|Microbial Genome Sequencing Center|Kamil|USA

>Spike|hCoV-19/Australia/NSW696/2020|2020-07-21|EPI\_ISL\_513339|Original|hCoV-19^^New South Wales|Human|Pathology West - NSW Health Pathology|NSW Health Pathology - Institute of Clinical Pathology and Medical Research; Westmead Hospital; University of Sydney|Gall|Australia

>Spike|hCoV-19/England/QEUA-A0AD32/2020|2020-10-03|EPI\_ISL\_599277|Original|hCoV-19^^England|Human|Lighthouse Lab in Glasgow|Wellcome Sanger Institute for the COVID-19 Genomics UK (COG-UK) consortium|Davies|United Kingdom

>Spike|hCoV-19/USA/MN-MDH-1273/2020|2020-03-10|EPI\_ISL\_482994|Original|hCoV-19^^Minnesota|Human|Minnesota Department of Health|Minnesota Department of Health|Garfin|USA

>Spike|hCoV-19/USA/AZ-TG376112/2020|2020-06-15|EPI\_ISL\_694612|Original|hCoV-19^^Arizona|Human|TGen North|TGen North|French|USA

>Spike|hCoV-19/England/ALDP-8CED1E/2020|2020-06-26|EPI\_ISL\_557088|Original|hCoV-19^^England|Human|Lighthouse Lab in Alderley Park|Wellcome Sanger Institute for the COVID-19 Genomics UK (COG-UK) consortium|Davies|United Kingdom

>Spike|hCoV-19/Austria/CeMM0227/2020|2020-03-18|EPI\_ISL\_475771|Original|hCoV-19^^Vienna|Human|Center for Virology|Bergthaler laboratory|Bergthaler|Austria

>Spike|hCoV-19/Portugal/PT0629/2020|2020-04-06|EPI\_ISL\_454352|Original|hCoV-19^^Portugal|Human|unknown|Instituto Nacional de Saude (INSA)|Borges|Portugal

>Spike|hCoV-19/USA/UT-UPHL-201219634/2020|2020-04-01|EPI\_ISL\_672555|Original|hCoV-19^^Utah|Human|Utah Public Health Laboratory|Utah Public Health Laboratory|Young|USA

>Spike|hCoV-19/England/QEUA-A0C8F3/2020|2020-10-03|EPI\_ISL\_599197|Original|hCoV-19^^England|Human|Lighthouse Lab in Glasgow|Wellcome Sanger Institute for the COVID-19 Genomics UK (COG-UK) consortium|Davies|United Kingdom

>Spike|hCoV-19/England/QEUA-BA27B5/2020|2020-11-18|EPI\_ISL\_719878|Original|hCoV-19^^England|Human|Lighthouse Lab in Glasgow|Wellcome Sanger Institute for the COVID-19 Genomics UK (COG-UK) Consortium|Davies|United Kingdom

>Spike|hCoV-19/England/QEUA-CC3BFD/2020|2020-12-21|EPI\_ISL\_760422|Original|hCoV-19^^England|Human|Lighthouse Lab in Glasgow|Wellcome Sanger Institute for the COVID-19 Genomics UK (COG-UK) Consortium|Davies|United Kingdom

>Spike|hCoV-19/USA/AZ-TG310667/2020|2020-05-15|EPI\_ISL\_694317|Original|hCoV-19^^Arizona|Human|TGen North|TGen North|French|USA

>Spike|hCoV-19/England/QEUA-B2BFCB/2020|2020-11-04|EPI\_ISL\_680044|Original|hCoV-19^^England|Human|Department of Pathology|COVID-19 Genomics UK (COG-UK) Consortium|Goodfellow|United Kingdom

>Spike|hCoV-19/USA/UT-05583/2020|2020-06-01|EPI\_ISL\_487260|Original|hCoV-19^^Utah|Human|Utah Public Health Laboratory|Utah Public Health Laboratory|Butz|USA

>Spike|hCoV-19/England/QEUA-A8C05D/2020|2020-10-16|EPI\_ISL\_643234|Original|hCoV-19^^England|Human|Lighthouse Lab in Glasgow|Wellcome Sanger Institute for the COVID-19 Genomics UK (COG-UK) Consortium|Davies|United Kingdom

>Spike|hCoV-19/England/QEUA-9FADFA/2020|2020-09-27|EPI\_ISL\_588189|Original|hCoV-19^^England|Human|Lighthouse Lab in Glasgow|Wellcome Sanger Institute for the COVID-19 Genomics UK (COG-UK) consortium|Davies|United Kingdom

>Spike|hCoV-19/USA/CA-CZB-1755/2020|2020-03-23|EPI\_ISL\_476772|Original|hCoV-19^^California|Human|Stanford clinical virology lab|Chan-Zuckerberg Biohub|Kamm|USA

>Spike|hCoV-19/USA/TX-HMH-7939/2020|2020-06-24|EPI\_ISL\_545723|Original|hCoV-19^^Texas|Human|Houston Methodist Hospital|Houston Methodist Hospital|Long|USA

>Spike|hCoV-19/Switzerland/ZH-ETHZ-390224/2020|2020-11-27|EPI\_ISL\_721962|Original|hCoV-19^^Zurich|Human|Viollier AG|Department of Biosystems Science and Engineering|Nadeau|Switzerland

>Spike|hCoV-19/Germany/HH-hpi-p2168/2020|2020-03-27|EPI\_ISL\_776398|Original|hCoV-19^^Hamburg|Human|University Medical Center Hamburg Eppendorf|Heinrich Pette Institute|Robitaille|Germany

>Spike|hCoV-19/Australia/VIC6335/2020|2020-07-25|EPI\_ISL\_518318|Original|hCoV-19^^Victoria|Human|Microbiological Diagnostic Unit - Public Health Laboratory (MDU-PHL)|MDU-PHL|Schultz|Australia

>Spike|hCoV-19/Scotland/QEUA-9E54EE/2020|2020-09-24|EPI\_ISL\_601078|Original|hCoV-19^^Scotland|Human|Lighthouse Lab in Glasgow|Wellcome Sanger Institute for the COVID-19 Genomics UK (COG-UK) consortium|Davies|United Kingdom

>Spike|hCoV-19/USA/WI-UW-794/2020|2020-07-05|EPI\_ISL\_495498|Original|hCoV-19^^Wisconsin|Human|University of Wisconsin-Madison AIDS Vaccine Research Laboratories|University of Wisconsin-Madison AIDS Vaccine Research Laboratories|Baczenas|USA

>Spike|hCoV-19/Wales/PHWC-2663F/2020|2020-03-27|EPI\_ISL\_422037|Original|hCoV-19^^Wales|Human|Wales Specialist Virology Centre|Public Health Wales Microbiology Cardiff|Moore|United Kingdom

>Spike|hCoV-19/France/PAC-IHU-0694/2020|2020-04-14|EPI\_ISL\_568939|Original|hCoV-19^^Provence-Alpes-C\u00f4te-d\u2019Azur|Human|MEPHI|MEPHI|Levasseur|France

>Spike|hCoV-19/USA/NY-Wadsworth-10528-01/2020|2020-03-03|EPI\_ISL\_426026|Original|hCoV-19^^New York|Human|Wadsworth Center|Wadsworth Center|Lasek-Nesselquist|USA

>Spike|hCoV-19/England/CAMB-744A1/2020|2020-03-20|EPI\_ISL\_425296|Original|hCoV-19^^England|Human|Department of Pathology|COVID-19 Genomics UK (COG-UK) Consortium|Meredith|United Kingdom

>Spike|hCoV-19/England/BRIS-130516/2020|2020-04-11|EPI\_ISL\_492684|Original|hCoV-19^^England|Human|PHE South West Regional Laboratory|Wellcome Sanger Institute for the COVID-19 Genomics UK (COG-UK) consortium|Davies|United Kingdom

>Spike|hCoV-19/Wales/MILK-A46C1F/2020|2020-10-06|EPI\_ISL\_598325|Original|hCoV-19^^Wales|Human|Lighthouse Lab in Milton Keynes|Wellcome Sanger Institute for the COVID-19 Genomics UK (COG-UK) consortium|Davies|United Kingdom

>Spike|hCoV-19/Australia/VIC9564/2020|2020-08-06|EPI\_ISL\_565604|Original|hCoV-19^^Victoria|Human|Microbiological Diagnostic Unit - Public Health Laboratory (MDU-PHL)|MDU-PHL|Schultz|Australia

>Spike|hCoV-19/England/CAMC-B07833/2020|2020-10-30|EPI\_ISL\_643883|Original|hCoV-19^^England|Human|Lighthouse Lab in Cambridge|Wellcome Sanger Institute for the COVID-19 Genomics UK (COG-UK) Consortium|Davies|United Kingdom

>Spike|hCoV-19/Germany/HH-hpi-pl605/2020|2020-03-16|EPI\_ISL\_775770|Original|hCoV-19^^Hamburg|Human|University Medical Center Hamburg Eppendorf|Heinrich Pette Institute|Robitaille|Germany

>Spike|hCoV-19/England/QEUA-A8C828/2020|2020-10-16|EPI\_ISL\_643169|Original|hCoV-19^^England|Human|Lighthouse Lab in Glasgow|Wellcome Sanger Institute for the COVID-19 Genomics UK (COG-UK) Consortium|Davies|United Kingdom

>Spike|hCoV-19/England/ALDP-5CF9B2/2020|2020-06-20|EPI\_ISL\_558500|Original|hCoV-19^^England|Human|Lighthouse Lab in Alderley Park|Wellcome Sanger Institute for the COVID-19 Genomics UK (COG-UK) consortium|Davies|United Kingdom

>Spike|hCoV-19/England/CAMB-1ABC99/2020|2020-04-20|EPI\_ISL\_470337|Original|hCoV-19^^England|Human|Department of Pathology|Wellcome Sanger Institute for the COVID-19 Genomics UK (COG-UK) consortium|Davies|United Kingdom

>Spike|hCoV-19/USA/TX-HMH-MCoV-14352/2020|2020-10-06|EPI\_ISL\_787637|Original|hCoV-19^^Texas|Human|Houston Methodist Hospital|Houston Methodist Hospital|Long|USA

>Spike|hCoV-19/USA/CA-ALSR-1335/2020|2020-04-30|EPI\_ISL\_494499|Original|hCoV-19^^California|Human|San Diego County Public Health Laboratory|Andersen lab at Scripps Research|Gangavarapu|USA

>Spike|hCoV-19/England/NOTT-1185D8/2020|2020-10-27|EPI\_ISL\_679926|Original|hCoV-19^^England|Human|Queens Medical Centre|COVID-19 Genomics UK (COG-UK) Consortium|Loose|United Kingdom

>Spike|hCoV-19/Luxembourg/LNS6665496/2020|2020-11-14|EPI\_ISL\_744447|Original|hCoV-19^^Luxembourg|Human|Laboratoire national de sant\u00e9|Laboratoire national de sant\u00e9|Wienecke-Baldacchino|Luxembourg

>Spike|hCoV-19/Japan/PG-4544/2020|2020-07-00|EPI\_ISL\_689682|Original|hCoV-19^^Japan|Human|Pathogen Genomics Center|Pathogen Genomics Center|Sekizuka|Japan

>Spike|hCoV-19/Denmark/DCGC-8328/2020|2020-10-26|EPI\_ISL\_617329|Original|hCoV-19^^Hovedstaden|Human|Department of Virus and Microbiological Special Diagnostics|Albertsen lab|Michaelsen|Denmark

>Spike|hCoV-19/USA/WA-S1644/2020|2020-05-27|EPI\_ISL\_496070|Original|hCoV-19^^Washington|Human|Washington State Department of Health|Seattle Flu Study|Lee|USA

>Spike|hCoV-19/USA/AK-PHL154/2020|2020-04-07|EPI\_ISL\_492061|Original|hCoV-19^^Alaska|Human|Alaska State Virology Laboratory|Alaska State Virology Laboratory|Drown|USA

>Spike|hCoV-19/Luxembourg/LNS4826464/2020|2020-10-25|EPI\_ISL\_744142|Original|hCoV-19^^Luxembourg|Human|Laboratoire national de sant\u00e9|Laboratoire national de sant\u00e9|Wienecke-Baldacchino|Luxembourg

>Spike|hCoV-19/England/QEUA-A02620/2020|2020-09-29|EPI\_ISL\_584916|Original|hCoV-19^^England|Human|Quadram Institute Bioscience|COVID-19 Genomics UK (COG-UK) Consortium|Alikhan|United Kingdom

>Spike|hCoV-19/USA/CA-QDX-2584/2020|2020-03-16|EPI\_ISL\_604879|Original|hCoV-19^^California|Human|Quest Diagnostics|Quest Diagnostics|Kagan|USA

>Spike|hCoV-19/USA/TX-HMH-MCoV-15641/2020|2020-07-09|EPI\_ISL\_785325|Original|hCoV-19^^Texas|Human|Houston Methodist Hospital|Houston Methodist Hospital|Long|USA

>Spike|hCoV-19/England/CAMC-94ACD0/2020|2020-07-27|EPI\_ISL\_556021|Original|hCoV-19^^England|Human|Lighthouse Lab in Cambridge|Wellcome Sanger Institute for the COVID-19 Genomics UK (COG-UK) consortium|Davies|United Kingdom

>Spike|hCoV-19/USA/WA-UW-45091/2020|2020-12-08|EPI\_ISL\_747209|Original|hCoV-19^^Washington|Human|UW Virology Lab|UW Virology Lab|Roychoudhury|USA

>Spike|hCoV-19/USA/TX-HMH-2524/2020|2020-06-03|EPI\_ISL\_545360|Original|hCoV-19^^Texas|Human|Houston Methodist Hospital|Houston Methodist Hospital|Long|USA

>Spike|hCoV-19/England/CAMC-A666DF/2020|2020-10-11|EPI\_ISL\_627159|Original|hCoV-19^^England|Human|University of Exeter|COVID-19 Genomics UK (COG-UK) Consortium|Temperton|United Kingdom

>Spike|hCoV-19/England/SHEF-C2BDC/2020|2020-04-23|EPI\_ISL\_453703|Original|hCoV-19^^England|Human|Virology Department|COVID-19 Genomics UK (COG-UK) Consortium|de Silva|United Kingdom

>Spike|hCoV-19/England/QEUA-9605E8/2020|2020-08-03|EPI\_ISL\_531950|Original|hCoV-19^^England|Human|Lighthouse Lab in Glasgow|Wellcome Sanger Institute for the COVID-19 Genomics UK (COG-UK) consortium|Davies|United Kingdom

>Spike|hCoV-19/USA/WI-QDX-1072/2020|2020-03-19|EPI\_ISL\_571910|Original|hCoV-19^^Wisconsin|Human|Quest Diagnostics|Quest Diagnostics|Kagan|USA

>Spike|hCoV-19/England/ALDP-95658B/2020|2020-06-08|EPI\_ISL\_553966|Original|hCoV-19^^England|Human|Lighthouse Lab in Alderley Park|Wellcome Sanger Institute for the COVID-19 Genomics UK (COG-UK) consortium|Davies|United Kingdom

>Spike|hCoV-19/Canada/Qc-L00241074/2020|2020-03-27|EPI\_ISL\_465695|Original|hCoV-19^^Quebec|Human|H\u00f4pital Pierre-Boucher|Laboratoire de sant\u00e9 publique du Qu\u00e9bec|Moreira|Canada

>Spike|hCoV-19/Spain/PV-IBV-98006693/2020|2020-07-10|EPI\_ISL\_541091|Original|hCoV-19^^Basque Country|Human|Servicio de Microbiolog\u00eda. Hospital Universitario

Donostia. OSI Donostialdea. \u00clrea de Enfermedades Infecciosas|SeqCOVID-SPAIN consortium/Institute of Biomedicine of Valencia|Comas|Spain

>Spike|hCoV-19/Russia/SPE-RII-MH1628S/2020|2020-09-07|EPI\_ISL\_596301|Original|hCoV-19^^Saint Petersburg|Human|HELIX LCC|WHO National Influenza Centre Russian Federation|Komissarov|Russia

>Spike|hCoV-19/Netherlands/NB-EMC-224/2020|2020-07-06|EPI\_ISL\_523347|Original|hCoV-19^^Noord Brabant|Human|Dutch COVID-19 response team|Erasmus Medical Center|Oude Munnink|Netherlands

>Spike|hCoV-19/England/MILK-BB0FE9/2020|2020-11-17|EPI\_ISL\_720172|Original|hCoV-19^^England|Human|Lighthouse Lab in Milton Keynes|Wellcome Sanger Institute for the COVID-19 Genomics UK (COG-UK) Consortium|Davies|United Kingdom

>Spike|hCoV-19/Wales/PHWC-2765C/2020|2020-03-31|EPI\_ISL\_432080|Original|hCoV-19^^Wales|Human|Wales Specialist Virology Centre|Public Health Wales Microbiology Cardiff|Moore|United Kingdom

>Spike|hCoV-19/England/CAMB-83409/2020|2020-04-14|EPI\_ISL\_443512|Original|hCoV-19^^England|Human|Department of Pathology|Wellcome Sanger Institute for the COVID-19 Genomics UK (COG-UK) consortium|Amato|United Kingdom

>Spike|hCoV-19/Slovenia/5551/2020|2020-03-10|EPI\_ISL\_635219|Original|hCoV-19^^Slovenia|Human|Institute of Microbiology and Immunology|Institute of Microbiology and Immunology|Zakotnik|Slovenia

>Spike|hCoV-19/Belgium/TVMT-0404277/2020|2020-04-04|EPI\_ISL\_464071|Original|hCoV-19^^Ciney|Human|KU Leuven|KU Leuven|Maes|Belgium

>Spike|hCoV-19/Wales/PHWC-484B0F/2020|2020-10-24|EPI\_ISL\_627204|Original|hCoV-19^^Wales|Human|Wales Specialist Virology Centre Sequencing lab|COVID-19 Genomics UK (COG-UK) Consortium|Moore|United Kingdom

>Spike|hCoV-19/England/MILK-A7DD2B/2020|2020-10-13|EPI\_ISL\_638473|Original|hCoV-19^^England|Human|Oxford Viromics|COVID-19 Genomics UK (COG-UK) Consortium|Golubchik|United Kingdom

>Spike|hCoV-19/England/MILK-9C6E21/2020|2020-09-09|EPI\_ISL\_572412|Original|hCoV-19^^England|Human|Northumbria University / South Tees Hospitals NHS Foundation Trust / North Cumbria Integrated Care NHS Foundation Trust / North Tees and Hartlepool NHS Foundation Trust / Newcastle Hospitals NHS Foundation Trust|COVID-19 Genomics UK (COG-UK) Consortium|Bashton|United Kingdom

>Spike|hCoV-19/England/CAMC-990DC9/2020|2020-08-26|EPI\_ISL\_551837|Original|hCoV-19^^England|Human|Lighthouse Lab in Cambridge|Wellcome Sanger Institute for the COVID-19 Genomics UK (COG-UK) consortium|Davies|United Kingdom

>Spike|hCoV-19/USA/WI-GMF-30863/2020|2020-11-02|EPI\_ISL\_661059|Original|hCoV-19^^Wisconsin|Human|Gundersen Molecular Diagnostics Laboratory|Kabara Cancer Research Institute|Kenny|USA

>Spike|hCoV-19/USA/CA-SR0182/2020|2020-03-22|EPI\_ISL\_437595|Original|hCoV-19^^California|Human|Scripps Medical Laboratory|Andersen lab at Scripps Research|Gangavarapu|USA

>Spike|hCoV-19/England/201121365/2020|2020-03-10|EPI\_ISL\_464694|Original|hCoV-19^^England|Human|Respiratory Virus Unit|Respiratory Virus Unit|Platt|United Kingdom

>Spike|hCoV-19/Belgium/ULG-10193/2020|2020-05-20|EPI\_ISL\_471428|Original|hCoV-19^^Liege|Human|Department of Clinical Microbiology|GIGA Medical Genomics|Durkin|Belgium

>Spike|hCoV-19/England/QEUA-B6BD6B/2020|2020-11-11|EPI\_ISL\_655170|Original|hCoV-19^^England|Human|Lighthouse Lab in Glasgow|Wellcome Sanger Institute for the COVID-19 Genomics UK (COG-UK) Consortium|Davies|United Kingdom

>Spike|hCoV-19/Saudi Arabia/KAUST-Makkah230/2020|2020-04-06|EPI\_ISL\_437726|Original|hCoV-19^^Makkah|Human|Pathogen Genomics Lab King Abdullah University of Science and Technology(KAUST)|Pathogen Genomics Lab King Abdullah University of Science and Technology(KAUST)|Mohamed Ghazzali|Saudi Arabia

>Spike|hCoV-19/Scotland/EDB808/2020|2020-04-03|EPI\_ISL\_457019|Original|hCoV-19^^Scotland|Human|Virology Department|COVID-19 Genomics UK (COG-UK) Consortium|Williams|United Kingdom

>Spike|hCoV-19/England/QEUA-B1197F/2020|2020-11-02|EPI\_ISL\_642220|Original|hCoV-19^^England|Human|Lighthouse Lab in Glasgow|Wellcome Sanger Institute for the COVID-19 Genomics UK (COG-UK) Consortium|Davies|United Kingdom



>Spike|hCoV-19/USA/TX-HMH-3076/2020|2020-06-10|EPI\_ISL\_543979|Original|hCoV-19^^Texas|Human|Houston Methodist Hospital|Houston Methodist Hospital|Long|USA

>Spike|hCoV-19/Japan/PG-4877/2020|2020-08-00|EPI\_ISL\_689998|Original|hCoV-19^^Japan|Human|Pathogen Genomics Center|Pathogen Genomics Center|Sekizuka|Japan

>Spike|hCoV-19/Japan/PG-4070/2020|2020-07-00|EPI\_ISL\_692311|Original|hCoV-19^^Japan|Human|Sakai City Institute of Public Health|Pathogen Genomics Center|Sekizuka|Japan

>Spike|hCoV-19/Wales/PHWC-169462/2020|2020-04-01|EPI\_ISL\_499403|Original|hCoV-19^^Wales|Human|Wales Specialist Virology Centre Sequencing lab|COVID-19 Genomics UK (COG-UK) Consortium|Moore|United Kingdom

>Spike|hCoV-19/South Africa/Tygerberg\_11/2020|2020-04-07|EPI\_ISL\_464122|Original|hCoV-19^^Western Cape|Human|National Health Laboratory Service (NHLS)|Division of Medical Virology|Engelbrecht|South Africa

>Spike|hCoV-19/Japan/PG-6472/2020|2020-08-00|EPI\_ISL\_689577|Original|hCoV-19^^Japan|Human|Pathogen Genomics Center|Pathogen Genomics Center|Sekizuka|Japan

>Spike|hCoV-19/USA/WA-UW-1327/2020|2020-03-18|EPI\_ISL\_422975|Original|hCoV-19^^Washington|Human|UW Virology Lab|UW Virology Lab|Roychoudhury|USA

>Spike|hCoV-19/Belgium/regal-11031209/2020|2020-11-03|EPI\_ISL\_735220|Original|hCoV-19^^Antwerpen|Human|UZ Leuven|KU Leuven|Maes|Belgium

>Spike|hCoV-19/USA/TX-HMH-6283/2020|2020-06-30|EPI\_ISL\_547362|Original|hCoV-19^^Texas|Human|Houston Methodist Hospital|Houston Methodist Hospital|Long|USA

>Spike|hCoV-19/Israel/CVL-48-ngs/2020|2020-12-24|EPI\_ISL\_776635|Original|hCoV-19^^Israel|Human|Israel Central Virology laboratory|Israel Central Virology laboratory|Zuckerman|Israel

>Spike|hCoV-19/Norway/2358/2020|2020-03-30|EPI\_ISL\_590918|original|hCoV-19^^Oslo|Human|Oslo University Hospital|Norwegian Institute of Public Health|Vollan|Norway

>Spike|hCoV-19/Scotland/CVR4051/2020|2020-08-30|EPI\_ISL\_535145|Original|hCoV-19^^Scotland|Human|West of Scotland Specialist Virology Centre|COVID-19 Genomics UK (COG-UK) Consortium|Robertson|United Kingdom

>Spike|hCoV-19/Wales/PHWC-4858F8/2020|2020-10-26|EPI\_ISL\_628234|Original|hCoV-19^^Wales|Human|Wales Specialist Virology Centre Sequencing lab|COVID-19 Genomics UK (COG-UK) Consortium|Moore|United Kingdom

>Spike|hCoV-19/Wales/PHWC-4869E5/2020|2020-10-25|EPI\_ISL\_639099|Original|hCoV-19^^Wales|Human|Wales Specialist Virology Centre Sequencing lab|COVID-19 Genomics UK (COG-UK) Consortium|Moore|United Kingdom

>Spike|hCoV-19/England/ALDP-5CD1BC/2020|2020-06-19|EPI\_ISL\_558515|Original|hCoV-19^^England|Human|Lighthouse Lab in Alderley Park|Wellcome Sanger Institute for the COVID-19 Genomics UK (COG-UK) consortium|Davies|United Kingdom

>Spike|hCoV-19/England/LEED-2A8E4A/2020|2020-03-31|EPI\_ISL\_539176|Original|hCoV-19^^England|Human|Leeds Teaching Hospitals NHS Trust and Public Health England|Wellcome Sanger Institute for the COVID-19 Genomics UK (COG-UK) consortium|Davies|United Kingdom

>Spike|hCoV-19/England/ALDP-4A4AB1/2020|2020-06-07|EPI\_ISL\_559649|Original|hCoV-19^^England|Human|Lighthouse Lab in Alderley Park|Wellcome Sanger Institute for the COVID-19 Genomics UK (COG-UK) consortium|Davies|United Kingdom

>Spike|hCoV-19/USA/FL-BPHL-0687/2020|2020-03-26|EPI\_ISL\_509745|Original|hCoV-19^^Florida|Human|Florida Bureau of Public Health Laboratories|Florida Bureau of Public Health Laboratories|Blanton|USA

>Spike|hCoV-19/USA/CA-QDX-1510/2020|2020-03-17|EPI\_ISL\_603764|Original|hCoV-19^^California|Human|Quest Diagnostics|Quest Diagnostics|Kagan|USA

>Spike|hCoV-19/Denmark/DCGC-11647/2020|2020-10-26|EPI\_ISL\_671046|Original|hCoV-19^^Midtjylland|Human|Department of Virus and Microbiological Special Diagnostics|Albertsen Lab|Michaelsen|Denmark

>Spike|hCoV-19/Scotland/CVR4984/2020|2020-10-07|EPI\_ISL\_651739|Original|hCoV-19^^Scotland|Human|West of Scotland Specialist Virology Centre|COVID-19 Genomics UK (COG-UK) Consortium|Robertson|United Kingdom

>Spike|hCoV-19/Denmark/DCGC-21316/2020|2020-12-21|EPI\_ISL\_759671|Original|hCoV-19^^Midtjylland|Human|Department of Virus and Microbiological Special Diagnostics|Albertsen Lab|Michaelsen|Denmark

>Spike|hCoV-19/Scotland/QEUH-B2B5F6/2020|2020-11-04|EPI\_ISL\_646469|Original|hCoV-19^^Scotland|Human|Lighthouse Lab in Glasgow|Wellcome Sanger Institute for the COVID-19 Genomics UK (COG-UK) Consortium|Davies|United Kingdom

>Spike|hCoV-19/Scotland/EDB099/2020|2020-03-20|EPI\_ISL\_425889|Original|hCoV-19^^Scotland|Human|Virology Department|COVID-19 Genomics UK (COG-UK) Consortium|Williams|United Kingdom

>Spike|hCoV-19/Wales/PHWC-15DDA2/2020|2020-05-15|EPI\_ISL\_472776|Original|hCoV-19^^Wales|Human|Wales Specialist Virology Centre Sequencing lab|COVID-19 Genomics UK (COG-UK) Consortium|Moore|United Kingdom

>Spike|hCoV-19/England/NOTT-10DEEA/2020|2020-03-11|EPI\_ISL\_425466|Original|hCoV-19^^England|Human|Queens Medical Centre|COVID-19 Genomics UK (COG-UK) Consortium|Loose|United Kingdom

>Spike|hCoV-19/Portugal/PT1434/2020|2020-03-24|EPI\_ISL\_511393|Original|hCoV-19^^Portugal|Human|Instituto Nacional de Saude (INSA)|Instituto Nacional de Saude (INSA)|Borges|Portugal

>Spike|hCoV-19/Netherlands/GR-RIVM-20779/2020|2020-12-15|EPI\_ISL\_790920|Original|hCoV-19^^Groningen|Human|Dutch COVID-19 response team|National Institute for Public Health and the Environment (RIVM)|Meijer|Netherlands

>Spike|hCoV-19/Italy/ABR-IZSGC-TE26539/2020|2020-04-27|EPI\_ISL\_436727|Original|hCoV-19^^Abruzzo|Human|SERVIZIO DI IGIENE E SANIT\u00c0 PUBBLICA ASL Teramo|Istituto Zooprofilattico Sperimentale dell'Abruzzo e Molise \G.Caporale\|Lorusso|Italy

>Spike|hCoV-19/England/MILK-9AA667/2020|2020-08-30|EPI\_ISL\_550965|Original|hCoV-19^^England|Human|Lighthouse Lab in Milton Keynes|Wellcome Sanger Institute for the COVID-19 Genomics UK (COG-UK) consortium|Davies|United Kingdom

>Spike|hCoV-19/England/MILK-992F1C/2020|2020-08-26|EPI\_ISL\_552163|Original|hCoV-19^^England|Human|Lighthouse Lab in Milton Keynes|Wellcome Sanger Institute for the COVID-19 Genomics UK (COG-UK) consortium|Davies|United Kingdom

>Spike|hCoV-19/England/20118000204/2020|2020-03-11|EPI\_ISL\_464875|Original|hCoV-19^^England|Human|Respiratory Virus Unit|Respiratory Virus Unit|Platt|United Kingdom

>Spike|hCoV-19/Denmark/DCGC-20047/2020|2020-12-07|EPI\_ISL\_747950|Original|hCoV-19^^Midtjylland|Human|Department of Virus and Microbiological Special Diagnostics|Albertsen Lab|Michaelsen|Denmark

>Spike|hCoV-19/England/ALDP-B769D2/2020|2020-11-12|EPI\_ISL\_723794|Original|hCoV-19^^England|Human|Oxford Viromics|COVID-19 Genomics UK (COG-UK) Consortium|Golubchik|United Kingdom

>Spike|hCoV-19/England/BRIS-12F028/2020|2020-04-24|EPI\_ISL\_488316|Original|hCoV-19^^England|Human|PHE South West Regional Laboratory|Wellcome Sanger Institute for the COVID-19 Genomics UK (COG-UK) consortium|Davies|United Kingdom

>Spike|hCoV-19/England/20166069804/2020|2020-04-16|EPI\_ISL\_466576|Original|hCoV-19^^England|Human|Respiratory Virus Unit|Respiratory Virus Unit|Platt|United Kingdom

>Spike|hCoV-19/Switzerland/AG-ETHZ-220012/2020|2020-07-27|EPI\_ISL\_511999|Original|hCoV-19^^Aargau|Human|Viollier AG|Department of Biosystems Science and Engineering|Nadeau|Switzerland

>Spike|hCoV-19/Wales/PHWC-2F171/2020|2020-04-06|EPI\_ISL\_446209|Original|hCoV-19^^Wales|Human|Wales Specialist Virology Centre|Public Health Wales Microbiology Cardiff|Moore|United Kingdom

>Spike|hCoV-19/Singapore/60/2020|2020-04-08|EPI\_ISL\_428839|Original|hCoV-19^^Singapore|Human|National Public Health Laboratory|National Public Health Laboratory|Mak|Singapore

>Spike|hCoV-19/Wales/PHWC-4972E6/2020|2020-11-26|EPI\_ISL\_726809|Original|hCoV-19^^Wales|Human|Originating lab|COVID-19 Genomics UK (COG-UK) Consortium|Moore|United Kingdom

>Spike|hCoV-19/USA/NY-NYCPHL-000789/2020|2020-03-21|EPI\_ISL\_632169|Original|hCoV-19^^New York|Human|Jamaica Hospital Medical Center|New York City Public Health Laboratory|Wang|USA

>Spike|hCoV-19/Luxembourg/LNS2958675/2020|2020-10-31|EPI\_ISL\_740224|Original|hCoV-19^^Luxembourg|Human|Laboratoire national de sant\u00e9|Laboratoire national de sant\u00e9|Wienecke-Baldacchino|Luxembourg

>Spike|hCoV-19/Australia/VIC6352/2020|2020-07-21|EPI\_ISL\_518332|Original|hCoV-19^^Victoria|Human|Microbiological Diagnostic Unit - Public Health Laboratory (MDU-PHL) |MDU-PHL|Schultz|Australia

>Spike|hCoV-19/Portugal/PT0246/2020|2020-04-02|EPI\_ISL\_453960|Original|hCoV-19^^Portugal|Human|unknown|Instituto Nacional de Saude (INSA)|Borges|Portugal

>Spike|hCoV-19/Scotland/CVR5414/2020|2020-09-22|EPI\_ISL\_651809|Original|hCoV-19^^Scotland|Human|Lighthouse Lab in Glasgow / MRC-University of Glasgow Centre for Virus Research|COVID-19 Genomics UK (COG-UK) Consortium|Robertson|United Kingdom

>Spike|hCoV-19/England/CAMC-B070E0/2020|2020-10-29|EPI\_ISL\_643814|Original|hCoV-19^^England|Human|Lighthouse Lab in Cambridge|Wellcome Sanger Institute for the COVID-19 Genomics UK (COG-UK) Consortium|Davies|United Kingdom

>Spike|hCoV-19/England/CAMB-1B93DF/2020|2020-11-03|EPI\_ISL\_651706|Original|hCoV-19^^England|Human|Department of Pathology|COVID-19 Genomics UK (COG-UK) Consortium|Goodfellow|United Kingdom

>Spike|hCoV-19/Canada/ON-UHTC\_0160/2020|2020-06-20|EPI\_ISL\_526286|Original|hCoV-19^^Ontario|Human|Unity Health Toronto|Ontario Institute for Cancer Research|de Borja|Canada

>Spike|hCoV-19/Uganda/UG075/2020|2020-08-24|EPI\_ISL\_737944|Original|hCoV-19^^Uganda|Human|Uganda Central Public Health Lab and Uganda Virus Research Institute|MRC/UVRI & LSHTM Uganda Research Unit|Cotten|Uganda

>Spike|hCoV-19/USA/NC\_200325/2020|2020-03-00|EPI\_ISL\_454821|Original|hCoV-19^^North Carolina|Human|Dirk Dittmer|Dirk Dittmer|Moorad|USA

>Spike|hCoV-19/USA/AZ-TG403691/2020|2020-06-23|EPI\_ISL\_694864|Original|hCoV-19^^Arizona|Human|TGen North|TGen North|French|USA

>Spike|hCoV-19/USA/UT-UPHL-2012967418/2020|2020-08-17|EPI\_ISL\_746039|Original|hCoV-19^^Utah|Human|Ginkgo Bioworks Clinical Laboratory|Utah Public Health Laboratory|Young|USA

>Spike|hCoV-19/Australia/VIC11614/2020|2020-07-25|EPI\_ISL\_563433|Original|hCoV-19^^Victoria|Human|Microbiological Diagnostic Unit - Public Health Laboratory (MDU-PHL) |MDU-PHL|Schultz|Australia

>Spike|hCoV-19/Northern Ireland/NIRE-1034A6/2020|2020-04-17|EPI\_ISL\_489328|Original|hCoV-19^^Northern Ireland|Human|Regional Virus Laboratory|Wellcome Sanger Institute for the COVID-19 Genomics UK (COG-UK) consortium|Davies|United Kingdom

>Spike|hCoV-19/England/BRIS-12C595/2020|2020-05-07|EPI\_ISL\_469497|Original|hCoV-19^^England|Human|PHE South West Regional Laboratory|Wellcome Sanger Institute for the COVID-19 Genomics UK (COG-UK) consortium|Davies|United Kingdom

>Spike|hCoV-19/Scotland/QEUIH-AD2AB4/2020|2020-10-27|EPI\_ISL\_644002|Original|hCoV-19^^Scotland|Human|Lighthouse Lab in Glasgow|Wellcome Sanger Institute for the COVID-19 Genomics UK (COG-UK) Consortium|Davies|United Kingdom

>Spike|hCoV-19/USA/TX-HMH-1066/2020|2020-04-05|EPI\_ISL\_542515|Original|hCoV-19^^Texas|Human|Houston Methodist Hospital|Houston Methodist Hospital|Long|USA

>Spike|hCoV-19/England/LEED-2A89A3/2020|2020-03-12|EPI\_ISL\_539149|Original|hCoV-19^^England|Human|Leeds Teaching Hospitals NHS Trust and Public Health England|Wellcome Sanger Institute for the COVID-19 Genomics UK (COG-UK) consortium|Davies|United Kingdom

>Spike|hCoV-19/Ireland/D-NVRL-20ILR05741/2020|2020-08-00|EPI\_ISL\_578255|Original|hCoV-19^^Dublin|Human|National Virus Reference Laboratory|National Virus Reference Laboratory|Gonzalez|Ireland

>Spike|hCoV-19/England/ALDP-A4FF59/2020|2020-10-07|EPI\_ISL\_597769|Original|hCoV-19^^England|Human|Lighthouse Lab in Alderley Park|Wellcome Sanger Institute for the COVID-19 Genomics UK (COG-UK) consortium|Davies|United Kingdom

>Spike|hCoV-19/France/OCC-62/2020|2020-07-29|EPI\_ISL\_593877|Original|hCoV-19^^Occitanie|Human|CHU Purpan - Laboratoire de Virologie - Institut F\u00e9d\u00e9ratif de Biologie|CHU Purpan - Laboratoire de Virologie - Institut F\u00e9d\u00e9ratif de Biologie|Latour|France

>Spike|hCoV-19/USA/OR-OHSU-0382/2020|2020-05-08|EPI\_ISL\_509122|Original|hCoV-19^^Oregon|Human|OHSU Lab Services Molecular Microbiology Lab|Oregon SARS-CoV-2 Genome Sequencing Center|O'Roak|USA

>Spike|hCoV-19/England/ALDP-B82A58/2020|2020-11-14|EPI\_ISL\_675630|Original|hCoV-19^^England|Human|Lighthouse Lab in Alderley Park|Wellcome Sanger Institute for the COVID-19 Genomics UK (COG-UK) Consortium|Davies|United Kingdom

>Spike|hCoV-19/England/LOND-12F0AC4/2020|2020-11-23|EPI\_ISL\_679603|Original|hCoV-19^^England|Human|University College London|COVID-19 Genomics UK (COG-UK) Consortium|Roy|United Kingdom

>Spike|hCoV-19/Wales/PHWC-16CF22/2020|2020-06-03|EPI\_ISL\_574186|Original|hCoV-19^^Wales|Human|Wales Specialist Virology Centre Sequencing lab|COVID-19 Genomics UK (COG-UK) Consortium|Moore|United Kingdom

>Spike|hCoV-19/England/CAMC-BBC0DB/2020|2020-11-21|EPI\_ISL\_705491|Original|hCoV-19^^England|Human|Quadram Institute Bioscience|COVID-19 Genomics UK (COG-UK) Consortium|Alikhan|United Kingdom

>Spike|hCoV-19/Belgium/ULG-10522/2020|2020-10-23|EPI\_ISL\_626287|Original|hCoV-19^^Li\u00e8ge|Human|Department of Clinical Microbiology|GIGA Medical Genomics|Durkin|Belgium

>Spike|hCoV-19/Wales/MILK-9D4EC6/2020|2020-09-19|EPI\_ISL\_601759|Original|hCoV-19^^Wales|Human|Lighthouse Lab in Milton Keynes|Wellcome Sanger Institute for the COVID-19 Genomics UK (COG-UK) consortium|Davies|United Kingdom

>Spike|hCoV-19/Hungary/UD-93998/2020|2020-10-08|EPI\_ISL\_671492|Original|hCoV-19^^Hajd\u00fa-Bihar county|Human|University of Debrecen|National Laboratory of Virology|Kemenesi|Hungary

>Spike|hCoV-19/England/CAMB-7665E/2020|2020-03-29|EPI\_ISL\_439475|Original|hCoV-19^^England|Human|Department of Pathology|Wellcome Sanger Institute for the COVID-19 Genomics UK (COG-UK) consortium|Amato|United Kingdom

>Spike|hCoV-19/Denmark/DCGC-13267/2020|2020-11-30|EPI\_ISL\_712692|Original|hCoV-19^^Sjaelland|Human|Department of Virus and Microbiological Special Diagnostics|Albertsen Lab|Michaelsen|Denmark

>Spike|hCoV-19/England/BRIS-12B842/2020|2020-05-18|EPI\_ISL\_487541|Original|hCoV-19^^England|Human|PHE South West Regional Laboratory|Wellcome Sanger Institute for the COVID-19 Genomics UK (COG-UK) consortium|Davies|United Kingdom

>Spike|hCoV-19/Denmark/DCGC-1592/2020|2020-04-13|EPI\_ISL\_618636|Original|hCoV-19^^Syddanmark|Human|Department of Virus and Microbiological Special Diagnostics|Albertsen lab|Michaelsen|Denmark

>Spike|hCoV-19/England/MILK-BAAAF0/2020|2020-11-18|EPI\_ISL\_681439|Original|hCoV-19^^England|Human|Lighthouse Lab in Milton Keynes|Wellcome Sanger Institute for the COVID-19 Genomics UK (COG-UK) Consortium|Davies|United Kingdom

>Spike|hCoV-19/England/OXON-AE57E/2020|2020-00-00|EPI\_ISL\_448702|Original|hCoV-19^^England|Human|Oxford Viromics|COVID-19 Genomics UK (COG-UK) Consortium|Golubchik|United Kingdom

>Spike|hCoV-19/USA/MI-QDX-899/2020|2020-03-19|EPI\_ISL\_571620|Original|hCoV-19^^Michigan|Human|Quest Diagnostics|Quest Diagnostics|Kagan|USA

>Spike|hCoV-19/Northern Ireland/NIRE-235219/2020|2020-10-16|EPI\_ISL\_764419|Original|hCoV-19^^Northern Ireland|Human|Regional Virus Laboratory|COVID-19 Genomics UK (COG-UK) Consortium|Fairley|United Kingdom

>Spike|hCoV-19/England/CAMC-9EC256/2020|2020-09-24|EPI\_ISL\_580332|Original|hCoV-19^^England|Human|Lighthouse Lab in Cambridge|Wellcome Sanger Institute for the COVID-19 Genomics UK (COG-UK) Consortium|Davies|United Kingdom

>Spike|hCoV-19/USA/TX-HMH-MCoV-12206/2020|2020-09-22|EPI\_ISL\_790246|Original|hCoV-19^^Texas|Human|Houston Methodist Hospital|Houston Methodist Hospital|Long|USA

>Spike|hCoV-19/Philippines/RITM-03/2020|2020-03-21|EPI\_ISL\_430456|Original|hCoV-19^^Philippines|Human|Rizal Medical Center|Research Institute for Tropical Medicine|Polotan|Philippines

>Spike|hCoV-19/Luxembourg/LNS6971732/2020|2020-11-29|EPI\_ISL\_770916|Original|hCoV-19^^Luxembourg|Human|Laboratoire national de sant\u00e9|Laboratoire national de sant\u00e9|Wienecke-Baldacchino|Luxembourg

>Spike|hCoV-19/England/QEUH-A1E23C/2020|2020-10-01|EPI\_ISL\_587496|Original|hCoV-19^^England|Human|Lighthouse Lab in Glasgow|Wellcome Sanger Institute for the COVID-19 Genomics UK (COG-UK) consortium|Davies|United Kingdom

>Spike|hCoV-19/USA/WI-UW-1537/2020|2020-09-14|EPI\_ISL\_605415|Original|hCoV-19^^Wisconsin|Human|University of Wisconsin-Madison AIDS Vaccine Research

Laboratories|University of Wisconsin-Madison AIDS Vaccine Research  
Laboratories|Baczenas|USA  
>Spike|hCoV-19/England/NOTT-10F000/2020|2020-03-30|EPI\_ISL\_432955|Original|hCoV-19^^England|Human|Queens Medical Centre|COVID-19 Genomics UK (COG-UK) Consortium|Loose|United Kingdom  
>Spike|hCoV-19/Wales/PHWC-163F1C/2020|2020-04-25|EPI\_ISL\_474102|Original|hCoV-19^^Wales|Human|Originating lab|COVID-19 Genomics UK (COG-UK) Consortium|Moore|United Kingdom  
>Spike|hCoV-19/England/20109050706/2020|2020-03-05|EPI\_ISL\_417268|Original|hCoV-19^^England|Human|Respiratory Virus Unit|Respiratory Virus Unit|Platt|United Kingdom  
>Spike|hCoV-19/Japan/PG-1664/2020|2020-04-00|EPI\_ISL\_685270|Original|hCoV-19^^Japan|Human|Pathogen Genomics Center|Pathogen Genomics Center|Sekizuka|Japan  
>Spike|hCoV-19/Australia/VIC15642/2020|2020-07-31|EPI\_ISL\_593393|Original|hCoV-19^^Victoria|Human|Microbiological Diagnostic Unit - Public Health Laboratory (MDU-PHL)|MDU-PHL|Schultz|Australia  
>Spike|hCoV-19/England/QEUA-9AE029/2020|2020-09-02|EPI\_ISL\_637592|Original|hCoV-19^^England|Human|Department of Pathology|COVID-19 Genomics UK (COG-UK) Consortium|Goodfellow|United Kingdom  
>Spike|hCoV-19/USA/CA-CZB-1689/2020|2020-04-02|EPI\_ISL\_468625|Original|hCoV-19^^California|Human|Contra Costa Public Health Lab|Chan-Zuckerberg Biohub|McGeever|USA  
>Spike|hCoV-19/Denmark/DCGC-16216/2020|2020-11-16|EPI\_ISL\_714137|Original|hCoV-19^^Hovedstaden|Human|Department of Virus and Microbiological Special Diagnostics|Albertsen Lab|Michaelsen|Denmark  
>Spike|hCoV-19/England/CAMC-B087F9/2020|2020-10-30|EPI\_ISL\_643648|Original|hCoV-19^^England|Human|Lighthouse Lab in Cambridge|Wellcome Sanger Institute for the COVID-19 Genomics UK (COG-UK) Consortium|Davies|United Kingdom  
>Spike|hCoV-19/England/LIVE-DC29E4/2020|2020-11-23|EPI\_ISL\_703762|Original|hCoV-19^^England|Human|Liverpool Clinical Laboratories|COVID-19 Genomics UK (COG-UK) Consortium|Haldenby|United Kingdom  
>Spike|hCoV-19/USA/MD-MDH-0305/2020|2020-10-17|EPI\_ISL\_633086|Original|hCoV-19^^Maryland|Human|MD PHL|MD PHL|Keller|USA  
>Spike|hCoV-19/England/MILK-BDB7B3/2020|2020-11-26|EPI\_ISL\_709757|Original|hCoV-19^^England|Human|Lighthouse Lab in Milton Keynes|Wellcome Sanger Institute for the COVID-19 Genomics UK (COG-UK) Consortium|Davies|United Kingdom  
>Spike|hCoV-19/Switzerland/BL-42208623/2020|2020-03-26|EPI\_ISL\_581770|Original|hCoV-19^^Basel-Land|Human|University Hospital Basel|University Hospital Basel|Roloff Handschin|Switzerland  
>Spike|hCoV-19/England/QEUA-78C630/2020|2020-07-15|EPI\_ISL\_533092|Original|hCoV-19^^England|Human|Lighthouse Lab in Glasgow|Wellcome Sanger Institute for the COVID-19 Genomics UK (COG-UK) consortium|Davies|United Kingdom  
>Spike|hCoV-19/England/NOTT-112CBB/2020|2020-07-11|EPI\_ISL\_493607|Original|hCoV-19^^England|Human|Queens Medical Centre|COVID-19 Genomics UK (COG-UK) Consortium|Loose|United Kingdom  
>Spike|hCoV-19/England/QEUA-AE2802/2020|2020-10-27|EPI\_ISL\_633478|Original|hCoV-19^^England|Human|Lighthouse Lab in Glasgow|Wellcome Sanger Institute for the COVID-19 Genomics UK (COG-UK) consortium|Davies|United Kingdom  
>Spike|hCoV-19/USA/LA-EVTL339/2020|2020-05-20|EPI\_ISL\_578745|Original|hCoV-19^^Louisiana|Human|LSUHS Emerging Viral Threat Laboratory|Microbial Genome Sequencing Center|Kamil|USA  
>Spike|hCoV-19/Australia/VIC4958/2020|2020-07-14|EPI\_ISL\_519326|Original|hCoV-19^^Victoria|Human|Victorian Infectious Diseases Reference Laboratory (VIDRL)|VIDRL and MDU-PHL|Schultz|Australia  
>Spike|hCoV-19/USA/WA-UW-24775/2020|2020-08-13|EPI\_ISL\_570767|Original|hCoV-19^^Washington|Human|UW Virology Lab|UW Virology Lab|Roychoudhury|USA  
>Spike|hCoV-19/England/LOND-DA597/2020|2020-11-09|EPI\_ISL\_724642|Original|hCoV-19^^England|Human|University College London|COVID-19 Genomics UK (COG-UK) Consortium|Roy|United Kingdom

>Spike|hCoV-19/England/LIVE-1D275C/2020|2020-08-22|EPI\_ISL\_534736|Original|hCoV-19^^England|Human|Liverpool Clinical Laboratories|COVID-19 Genomics UK (COG-UK) Consortium|Haldenby|United Kingdom

>Spike|hCoV-19/Australia/NSW35/2020|2020-03-08|EPI\_ISL\_417393|Original|hCoV-19^^New South Wales|Human|Centre for Infectious Diseases and Microbiology Public Health|NSW Health Pathology - Institute of Clinical Pathology and Medical Research; Westmead Hospital; University of Sydney|Eden|Australia

>Spike|hCoV-19/Wales/PHWC-49CC4D/2020|2020-12-07|EPI\_ISL\_742665|Original|hCoV-19^^Wales|Human|Wales Specialist Virology Centre Sequencing lab|COVID-19 Genomics UK (COG-UK) Consortium|Moore|United Kingdom

>Spike|hCoV-19/Wales/PHWC-164EF0/2020|2020-06-09|EPI\_ISL\_479396|Original|hCoV-19^^Wales|Human|Wales Specialist Virology Centre Sequencing lab|COVID-19 Genomics UK (COG-UK) Consortium|Moore|United Kingdom

>Spike|hCoV-19/Germany/NW-HHU-238/2020|2020-09-15|EPI\_ISL\_631371|Original|hCoV-19^^North Rhine-Westphalia|Human|ZOTZ KLIMAS MVZ D\u00f0fcsseldorf-Centrum GbR \u00dcBAG f\u00fcr Labormedizin|Center of Medical Microbiology|Wienemann|Germany

>Spike|hCoV-19/Australia/VIC15205/2020|2020-08-03|EPI\_ISL\_593188|Original|hCoV-19^^Victoria|Human|Microbiological Diagnostic Unit - Public Health Laboratory (MDU-PHL) |MDU-PHL|Schultz|Australia

>Spike|hCoV-19/England/CAMB-741F5/2020|2020-03-20|EPI\_ISL\_440363|Original|hCoV-19^^England|Human|Department of Pathology|Wellcome Sanger Institute for the COVID-19 Genomics UK (COG-UK) consortium|Amato|United Kingdom

>Spike|hCoV-19/USA/CA-ALSR-2763/2020|2020-07-15|EPI\_ISL\_635665|Original|hCoV-19^^California|Human|San Diego County Public Health Laboratory|Andersen lab at Scripps Research|Gangavarapu|USA

>Spike|hCoV-19/England/ALDP-A68D9C/2020|2020-10-12|EPI\_ISL\_630528|Original|hCoV-19^^England|Human|Lighthouse Lab in Alderley Park|Wellcome Sanger Institute for the COVID-19 Genomics UK (COG-UK) consortium|Davies|United Kingdom

>Spike|hCoV-19/USA/TX-HMH-MCoV-18769/2020|2020-11-24|EPI\_ISL\_785101|Original|hCoV-19^^Texas|Human|Houston Methodist Hospital|Houston Methodist Hospital|Long|USA

>Spike|hCoV-19/England/CAMC-A586D0/2020|2020-10-09|EPI\_ISL\_597124|Original|hCoV-19^^England|Human|Lighthouse Lab in Cambridge|Wellcome Sanger Institute for the COVID-19 Genomics UK (COG-UK) consortium|Davies|United Kingdom

>Spike|hCoV-19/USA/TX-HMH-MCoV-15566/2020|2020-10-23|EPI\_ISL\_787050|Original|hCoV-19^^Texas|Human|Houston Methodist Hospital|Houston Methodist Hospital|Long|USA

>Spike|hCoV-19/England/QEUEH-B9E716/2020|2020-11-18|EPI\_ISL\_719914|Original|hCoV-19^^England|Human|Lighthouse Lab in Glasgow|Wellcome Sanger Institute for the COVID-19 Genomics UK (COG-UK) Consortium|Davies|United Kingdom

>Spike|hCoV-19/USA/NY-NYCPHL-001106/2020|2020-10-19|EPI\_ISL\_671689|Original|hCoV-19^^New York|Human|DOHMH Central Harlem|New York City Public Health Laboratory|Wang|USA

>Spike|hCoV-19/Portugal/PT0800/2020|2020-03-19|EPI\_ISL\_511059|Original|hCoV-19^^Portugal|Human|Instituto Nacional de Saude (INSA)|Instituto Nacional de Saude (INSA)|Borges|Portugal

>Spike|hCoV-19/USA/CA-CZB-14759/2020|2020-11-05|EPI\_ISL\_738832|Original|hCoV-19^^California|Human|Humboldt County Public Health Laboratory|Chan-Zuckerberg Biohub|Kamm|USA

>Spike|hCoV-19/Jordan/SR-057/2020|2020-03-24|EPI\_ISL\_430015|Original|hCoV-19^^Amman|Human|Biolab Diagnostic Laboratories|Andersen lab at Scripps Research|Gangavarapu|Jordan

>Spike|hCoV-19/France/PAC-IHU-0635/2020|2020-04-13|EPI\_ISL\_568906|Original|hCoV-19^^Provence-Alpes-C\u00f0f4te-d\u0201Azur|Human|MEPHI|MEPHI|Levasseur|France

>Spike|hCoV-19/South Africa/Tygerberg\_312\_CC2/2020|2020-10-07|EPI\_ISL\_660121|Original|hCoV-19^^Western Cape|Human|Ampath|National Health Laboratory Service (NHLS)|de Oliveira|South Africa

>Spike|hCoV-19/England/QEUEH-AD50A0/2020|2020-10-26|EPI\_ISL\_634081|Original|hCoV-19^^England|Human|Lighthouse Lab in Glasgow|Wellcome Sanger Institute for the COVID-19 Genomics UK (COG-UK) consortium|Davies|United Kingdom

>Spike|hCoV-19/USA/AZ-TG532121/2020|2020-07-02|EPI\_ISL\_695422|Original|hCoV-19^^Arizona|Human|AZ SPHL|TGen North|French|USA

>Spike|hCoV-19/Canada/BC\_8150537/2020|2020-03-12|EPI\_ISL\_418847|Original|hCoV-19^^British Columbia|Human|BCCDC Public Health Laboratory|BCCDC Public Health Laboratory|Harrigan|Canada

>Spike|hCoV-19/Northern Ireland/NIRE-108A18/2020|2020-10-10|EPI\_ISL\_627525|Original|hCoV-19^^Northern Ireland|Human|Regional Virus Laboratory|COVID-19 Genomics UK (COG-UK) Consortium|Fairley|United Kingdom

>Spike|hCoV-19/Japan/PG-1373/2020|2020-04-00|EPI\_ISL\_684980|Original|hCoV-19^^Japan|Human|Saitama Prefectural Institute of Public Health|Pathogen Genomics Center|Sekizuka|Japan

>Spike|hCoV-19/Spain/PV-IBV-98007679/2020|2020-09-13|EPI\_ISL\_582078|Original|hCoV-19^^Basque Country|Human|Servicio de Microbiolog\u00eda. Hospital Universitario Donostia. OSI Donostialdea. \u00c1rea de Enfermedades Infecciosas|SeqCOVID-SPAIN consortium|IBV (CSIC)|Comas|Spain

>Spike|hCoV-19/Denmark/DCGC-6087/2020|2020-10-05|EPI\_ISL\_620281|Original|hCoV-19^^Sjaelland|Human|Department of Virus and Microbiological Special Diagnostics|Albertsen lab|Michaelsen|Denmark

>Spike|hCoV-19/Denmark/DCGC-6925/2020|2020-10-12|EPI\_ISL\_619771|Original|hCoV-19^^Hovedstaden|Human|Department of Virus and Microbiological Special Diagnostics|Albertsen lab|Michaelsen|Denmark

>Spike|hCoV-19/Luxembourg/LNS6982714/2020|2020-12-21|EPI\_ISL\_771106|Original|hCoV-19^^Luxembourg|Human|Laboratoire national de sant\u00e9|Laboratoire national de sant\u00e9|Wienecke-Baldacchino|Luxembourg

>Spike|hCoV-19/Wales/PHWC-16BEBD/2020|2020-09-19|EPI\_ISL\_573985|Original|hCoV-19^^Wales|Human|Wales Specialist Virology Centre Sequencing lab|COVID-19 Genomics UK (COG-UK) Consortium|Moore|United Kingdom

>Spike|hCoV-19/USA/CA-ALSR-4658/2020|2020-11-02|EPI\_ISL\_667060|Original|hCoV-19^^California|Human|San Diego County Public Health Laboratory|Andersen lab at Scripps Research|Gangavarapu|USA

>Spike|hCoV-19/USA/MD-MDH-0371/2020|2020-10-26|EPI\_ISL\_660072|Original|hCoV-19^^Maryland|Human|MD PHL|MD PHL|Keller|USA

>Spike|hCoV-19/India/TG-CCMB-GC28/2020|2020-05-30|EPI\_ISL\_528815|Original|hCoV-19^^Telangana|Human|Department of Medicine|CSIR-Centre for Cellular and Molecular Biology|Banu|India

>Spike|hCoV-19/Kenya/C8240/2020|2020-05-19|EPI\_ISL\_568855|Original|hCoV-19^^Mombasa|Human|KEMRI-Wellcome Trust Research Programme|KEMRI-CGMR-C Kilifi|KEMRI-Wellcome Trust Research Programme|KEMRI-CGMR-C Kilifi|Githinji|Kenya

>Spike|hCoV-19/England/MILK-5747C1/2020|2020-06-10|EPI\_ISL\_558731|Original|hCoV-19^^England|Human|Lighthouse Lab in Milton Keynes|Wellcome Sanger Institute for the COVID-19 Genomics UK (COG-UK) consortium|Davies|United Kingdom

>Spike|hCoV-19/USA/WA-S292/2020|2020-03-05|EPI\_ISL\_430146|Original|hCoV-19^^Washington|Human|Seattle Flu Study|Seattle Flu Study|Bedford|USA

>Spike|hCoV-19/England/202840488/2020|2020-07-07|EPI\_ISL\_566060|Original|hCoV-19^^England|Human|Respiratory Virus Unit|Respiratory Virus Unit|Platt|United Kingdom

>Spike|hCoV-19/England/QEUA-A1E22D/2020|2020-10-01|EPI\_ISL\_587483|Original|hCoV-19^^England|Human|Lighthouse Lab in Glasgow|Wellcome Sanger Institute for the COVID-19 Genomics UK (COG-UK) consortium|Davies|United Kingdom

>Spike|hCoV-19/England/BIRM-662E4/2020|2020-10-07|EPI\_ISL\_612255|Original|hCoV-19^^England|Human|University of Birmingham|COVID-19 Genomics UK (COG-UK) Consortium|Loman|United Kingdom

>Spike|hCoV-19/England/CAMC-B0828F/2020|2020-10-30|EPI\_ISL\_643952|Original|hCoV-19^^England|Human|Lighthouse Lab in Cambridge|Wellcome Sanger Institute for the COVID-19 Genomics UK (COG-UK) Consortium|Davies|United Kingdom

>Spike|hCoV-19/USA/MA-MGH-03220/2020|2020-10-05|EPI\_ISL\_765750|Original|hCoV-19^^Massachusetts|Human|Massachusetts General Hospital|Infectious Disease Program|Park|USA

>Spike|hCoV-19/USA/HI-H200481/2020|2020-09-14|EPI\_ISL\_753023|Original|hCoV-19^^Hawaii|Human|State Laboratories Division|State Laboratories Division|Sultana|USA

>Spike|hCoV-19/England/LOND-124D530/2020|2020-06-04|EPI\_ISL\_507106|Original|hCoV-19^^England|Human|University College London Hospital|COVID-19 Genomics UK (COG-UK) Consortium|Byott|United Kingdom

>Spike|hCoV-19/Brazil/SP-470/2020|2020-04-25|EPI\_ISL\_574578|Original|hCoV-19^^S\u00e3o Paulo|Human|Hospital Municipal M\u00e9rio Gatti|Instituto Adolfo Lutz|Sacchi|Brazil

>Spike|hCoV-19/Wales/PHWC-4A1F97/2020|2020-12-14|EPI\_ISL\_743838|Original|hCoV-19^^Wales|Human|Wales Specialist Virology Centre Sequencing lab|COVID-19 Genomics UK (COG-UK) Consortium|Moore|United Kingdom

>Spike|hCoV-19/Canada/ON-S250/2020|2020-03-27|EPI\_ISL\_755834|Original|hCoV-19^^Ontario|Human|Toronto Invasive Bacterial Diseases Network|McMaster University|McArthur|Canada

>Spike|hCoV-19/Canada/QC-LSPQ-L00239061/2020|2020-03-26|EPI\_ISL\_536231|Original|hCoV-19^^Quebec|Human|H\u00f4pital Pierre-Boucher|Laboratoire de sant\u00e9 publique du Qu\u00e9bec|Moreira|Canada

>Spike|hCoV-19/Spain/IB-IBV-99010811/2020|2020-07-20|EPI\_ISL\_691680|Original|hCoV-19^^Balear Islands|Human|Servicio de Microbiolog\u00eda|SeqCOVID-SPAIN consortium/IBV (CSIC)|Comas|Spain

>Spike|hCoV-19/England/SHEF-C88A2/2020|2020-04-21|EPI\_ISL\_453729|Original|hCoV-19^^England|Human|Virology Department|COVID-19 Genomics UK (COG-UK) Consortium|de Silva|United Kingdom

>Spike|hCoV-19/England/MILK-B862E3/2020|2020-11-13|EPI\_ISL\_673939|Original|hCoV-19^^England|Human|Lighthouse Lab in Milton Keynes|Wellcome Sanger Institute for the COVID-19 Genomics UK (COG-UK) Consortium|Davies|United Kingdom

>Spike|hCoV-19/Austria/CeMM0409/2020|2020-03-26|EPI\_ISL\_475841|Original|hCoV-19^^Austria|Human|Austrian Agency for Health and Food Safety (AGES)|Bergthaler laboratory|Bergthaler|Austria

>Spike|hCoV-19/Germany/BY-UHR-9ZK/2020|2020-03-29|EPI\_ISL\_513306|Viral culture|hCoV-19^^Bavaria|Human|Department of Infection Prevention and Infectious Diseases|University Hospital Regensburg|Fritsch|Germany

>Spike|hCoV-19/USA/WA-UW347/2020|2020-03-16|EPI\_ISL\_418914|Original|hCoV-19^^Washington|Human|UW Virology Lab|UW Virology Lab|Roychoudhury|USA

>Spike|hCoV-19/England/204780726/2020|2020-11-19|EPI\_ISL\_678744|Original|hCoV-19^^England|Human|Respiratory Virus Unit|COVID-19 Genomics UK (COG-UK) Consortium|Platt|United Kingdom

>Spike|hCoV-19/Wales/PHWC-488A86/2020|2020-10-20|EPI\_ISL\_639458|Original|hCoV-19^^Wales|Human|Wales Specialist Virology Centre Sequencing lab|COVID-19 Genomics UK (COG-UK) Consortium|Moore|United Kingdom

>Spike|hCoV-19/New Zealand/20CV0149/2020|2020-08-25|EPI\_ISL\_548025|Original|hCoV-19^^Auckland|Human|LabPLUS|Institute of Environmental Science and Research (ESR)|Wang|New Zealand

>Spike|hCoV-19/Ireland/D-NVRL-AIIDV0363v2/2020|2020-05-05|EPI\_ISL\_768762|Original|hCoV-19^^Dublin|Human|AIID|Irish Coronavirus Sequencing Consortium - National Virus Reference Laboratory|Gonzalez|Ireland

>Spike|hCoV-19/USA/TX-HMH-MCoV-9042/2020|2020-07-02|EPI\_ISL\_780915|Original|hCoV-19^^Texas|Human|Houston Methodist Hospital|Houston Methodist Hospital|Long|USA

>Spike|hCoV-19/Australia/VIC12073/2020|2020-08-10|EPI\_ISL\_641209|Original|hCoV-19^^Victoria|Human|Microbiological Diagnostic Unit - Public Health Laboratory (MDU-PHL)|MDU-PHL|Schultz|Australia

>Spike|hCoV-19/USA/CA-CZB-11170/2020|2020-09-15|EPI\_ISL\_625527|Original|hCoV-19^^California|Human|Alameda County Public Health Lab|Chan-Zuckerberg Biohub|Bhatt|USA

>Spike|hCoV-19/Guinea/CERFIG-1340/2020|2020-06-09|EPI\_ISL\_788937|Original|hCoV-19^^Conakry|Human|Centre de Recherche et de Formation en Infectiologie Guin\u00e9e|TransVIHMI|Keita|Guinea

>Spike|hCoV-19/England/ALDP-5AE5E2/2020|2020-06-17|EPI\_ISL\_558883|Original|hCoV-19^^England|Human|Lighthouse Lab in Alderley Park|Wellcome Sanger Institute for the COVID-19 Genomics UK (COG-UK) consortium|Davies|United Kingdom

>Spike|hCoV-19/USA/WA-UW-10531/2020|2020-06-08|EPI\_ISL\_570331|Original|hCoV-19^^Washington|Human|UW Virology Lab|UW Virology Lab|Roychoudhury|USA

>Spike|hCoV-19/Wales/PHWC-2BA5C/2020|2020-03-28|EPI\_ISL\_445798|Original|hCoV-19^^Wales|Human|Wales Specialist Virology Centre|Public Health Wales Microbiology Cardiff|Moore|United Kingdom



>Spike|hCoV-19/Ireland/LH-NVRL-77IRL73961/2020|2020-11-05|EPI\_ISL\_752527|Original|hCoV-19^^Louth|Human|National Virus Reference Laboratory|National Virus Reference Laboratory|Gonzalez|Ireland

>Spike|hCoV-19/England/ALDP-B82F68/2020|2020-11-14|EPI\_ISL\_675193|Original|hCoV-19^^England|Human|Lighthouse Lab in Alderley Park|Wellcome Sanger Institute for the COVID-19 Genomics UK (COG-UK) Consortium|Davies|United Kingdom

>Spike|hCoV-19/Australia/NSW945/2020|2020-08-27|EPI\_ISL\_545017|Original|hCoV-19^^New South Wales|Human|Sydney South West Pathology Service (SSWPS) - Royal Prince Alfred Hospital - NSW Health Pathology|NSW Health Pathology - Institute of Clinical Pathology and Medical Research; Westmead Hospital; University of Sydney|Gall|Australia

>Spike|hCoV-19/Wales/PHWC-2C6DF/2020|2020-03-31|EPI\_ISL\_445897|Original|hCoV-19^^Wales|Human|Wales Specialist Virology Centre|Public Health Wales Microbiology Cardiff|Moore|United Kingdom

>Spike|hCoV-19/USA/NY-Wadsworth-291674-01/2020|2020-12-24|EPI\_ISL\_767601|Original|hCoV-19^^New York|Human|SARATOGA HOSPITAL LABORATORY|Wadsworth Center|Lasek-Nesselquist|USA

>Spike|hCoV-19/USA/CA-SEARCH-5348/2020|2020-12-10|EPI\_ISL\_755163|Original|hCoV-19^^California|Human|UCSD EXCITE lab|Andersen lab at Scripps Research|Gangavarapu|USA

>Spike|hCoV-19/USA/TX-HMH-2826/2020|2020-06-08|EPI\_ISL\_543800|Original|hCoV-19^^Texas|Human|Houston Methodist Hospital|Houston Methodist Hospital|Long|USA

>Spike|hCoV-19/England/PORT-2EE80E/2020|2020-12-15|EPI\_ISL\_763610|Original|hCoV-19^^England|Human|Centre for Enzyme Innovation|COVID-19 Genomics UK (COG-UK) Consortium|Robson|United Kingdom

>Spike|hCoV-19/USA/TX-QDX-835/2020|2020-03-16|EPI\_ISL\_571688|Original|hCoV-19^^Texas|Human|Quest Diagnostics|Quest Diagnostics|Kagan|USA

>Spike|hCoV-19/England/LOND-D5444/2020|2020-04-15|EPI\_ISL\_444221|Original|hCoV-19^^England|Human|University College London|COVID-19 Genomics UK (COG-UK) Consortium|Roy|United Kingdom

>Spike|hCoV-19/USA/MA-MGH-01061/2020|2020-05-01|EPI\_ISL\_791858|Original|hCoV-19^^Massachusetts|Human|Massachusetts General Hospital|Infectious Disease Program|Park|USA

>Spike|hCoV-19/Gibraltar/204462882/2020|2020-10-29|EPI\_ISL\_615049|Original|hCoV-19^^Gibraltar|Human|Microbiology|Respiratory Virus Unit|Platt|Gibraltar

>Spike|hCoV-19/Scotland/QEUH-96D457/2020|2020-08-20|EPI\_ISL\_534585|Original|hCoV-19^^Scotland|Human|NHSGGC West of Scotland Specialist Virology Centre / MRC-University of Glasgow Centre for Virus Research|Wellcome Sanger Institute for the COVID-19 Genomics UK (COG-UK) consortium|Davies|United Kingdom

>Spike|hCoV-19/Scotland/QEUH-A9CED8/2020|2020-10-20|EPI\_ISL\_650641|Original|hCoV-19^^Scotland|Human|Queens Medical Centre|COVID-19 Genomics UK (COG-UK) Consortium|Loose|United Kingdom

>Spike|hCoV-19/Denmark/DCGC-12572/2020|2020-11-16|EPI\_ISL\_682753|Original|hCoV-19^^Syddanmark|Human|Department of Virus and Microbiological Special Diagnostics|Albertsen Lab|Michaelsen|Denmark

>Spike|hCoV-19/Wales/PHWC-491079/2020|2020-11-11|EPI\_ISL\_705418|Original|hCoV-19^^Wales|Human|Originating lab|COVID-19 Genomics UK (COG-UK) Consortium|Moore|United Kingdom

>Spike|hCoV-19/Luxembourg/LNS8213159/2020|2020-11-17|EPI\_ISL\_744704|Original|hCoV-19^^Luxembourg|Human|Laboratoire national de sant\u00e9|Laboratoire national de sant\u00e9|Wienecke-Baldacchino|Luxembourg

>Spike|hCoV-19/India/TG-CCMB-M118/2020|2020-06-06|EPI\_ISL\_495183|Original|hCoV-19^^Telangana|Human|CSIR-Centre for Cellular and Molecular Biology|CSIR-Centre for Cellular and Molecular Biology|Banu|India

>Spike|hCoV-19/England/LIVE-A85B0/2020|2020-03-26|EPI\_ISL\_517185|Original|hCoV-19^^England|Human|Liverpool Clinical Laboratories|COVID-19 Genomics UK (COG-UK) Consortium|Haldenby|United Kingdom

>Spike|hCoV-19/England/CAMC-A57CC0/2020|2020-10-08|EPI\_ISL\_597105|Original|hCoV-19^^England|Human|Lighthouse Lab in Cambridge|Wellcome Sanger Institute for the COVID-19 Genomics UK (COG-UK) consortium|Davies|United Kingdom

>Spike|hCoV-19/USA/TX-HMH-3563/2020|2020-06-15|EPI\_ISL\_543025|Original|hCoV-19^^Texas|Human|Houston Methodist Hospital|Houston Methodist Hospital|Long|USA

>Spike|hCoV-19/USA/LA-QDX-1070/2020|2020-03-19|EPI\_ISL\_571848|Original|hCoV-19^^Louisiana|Human|Quest Diagnostics|Quest Diagnostics|Kagan|USA

>Spike|hCoV-19/USA/NY-Wadsworth-263950-01/2020|2020-11-04|EPI\_ISL\_754515|Original|hCoV-19^^New York|Human|Wadsworth Center|Wadsworth Center|Lasek-Nesselquist|USA

>Spike|hCoV-19/Wales/PHWC-49C1A8/2020|2020-12-07|EPI\_ISL\_742519|Original|hCoV-19^^Wales|Human|Wales Specialist Virology Centre Sequencing lab|COVID-19 Genomics UK (COG-UK) Consortium|Moore|United Kingdom

>Spike|hCoV-19/England/ALDP-BCA83C/2020|2020-11-23|EPI\_ISL\_703605|Original|hCoV-19^^England|Human|Lighthouse Lab in Alderley Park|Wellcome Sanger Institute for the COVID-19 Genomics UK (COG-UK) Consortium|Davies|United Kingdom

>Spike|hCoV-19/USA/WA-S2307/2020|2020-06-11|EPI\_ISL\_496939|Original|hCoV-19^^Washington|Human|Washington State Department of Health|Seattle Flu Study|Lee|USA

>Spike|hCoV-19/Wales/MILK-9712CF/2020|2020-08-18|EPI\_ISL\_553234|Original|hCoV-19^^Wales|Human|Lighthouse Lab in Milton Keynes|Wellcome Sanger Institute for the COVID-19 Genomics UK (COG-UK) consortium|Davies|United Kingdom

>Spike|hCoV-19/England/LIVE-DB3ED8/2020|2020-10-20|EPI\_ISL\_650881|Original|hCoV-19^^England|Human|Liverpool Clinical Laboratories|COVID-19 Genomics UK (COG-UK) Consortium|Haldenby|United Kingdom

>Spike|hCoV-19/Japan/PG-1711/2020|2020-04-00|EPI\_ISL\_685317|Original|hCoV-19^^Japan|Human|Pathogen Genomics Center|Pathogen Genomics Center|Sekizuka|Japan

>Spike|hCoV-19/Wales/PHWC-47CDAA/2020|2020-10-02|EPI\_ISL\_586048|Original|hCoV-19^^Wales|Human|Wales Specialist Virology Centre Sequencing lab|COVID-19 Genomics UK (COG-UK) Consortium|Moore|United Kingdom

>Spike|hCoV-19/Denmark/DCGC-8354/2020|2020-10-26|EPI\_ISL\_617337|Original|hCoV-19^^Syddanmark|Human|Department of Virus and Microbiological Special Diagnostics|Albertsen lab|Michaelsen|Denmark

>Spike|hCoV-19/New Zealand/20VR3146/2020|2020-03-21|EPI\_ISL\_579438|Original|hCoV-19^^Canterbury|Human|Canterbury Health Laboratories|Institute of Environmental Science and Research (ESR)|Wang|New Zealand

>Spike|hCoV-19/USA/LA-EVTL674/2020|2020-07-13|EPI\_ISL\_653366|Original|hCoV-19^^Louisiana|Human|LSUHS Emerging Viral Threat Laboratory|Microbial Genome Sequencing Center|Kamil|USA

>Spike|hCoV-19/USA/MI-MDHHS-SC20233/2020|2020-03-29|EPI\_ISL\_447203|Original|hCoV-19^^Michigan|Human|Michigan Department of Health and Human Services|Michigan Department of Health and Human Services|Blankenship|USA

>Spike|hCoV-19/England/205141177/2020|2020-12-16|EPI\_ISL\_756141|Original|hCoV-19^^England|Human|Respiratory Virus Unit|COVID-19 Genomics UK (COG-UK) Consortium|Miah|United Kingdom

>Spike|hCoV-19/England/ALDP-9519B1/2020|2020-06-10|EPI\_ISL\_555374|Original|hCoV-19^^England|Human|Lighthouse Lab in Alderley Park|Wellcome Sanger Institute for the COVID-19 Genomics UK (COG-UK) consortium|Davies|United Kingdom

>Spike|hCoV-19/England/SHEF-C3CC9/2020|2020-04-15|EPI\_ISL\_432780|Original|hCoV-19^^England|Human|Virology Department|COVID-19 Genomics UK (COG-UK) Consortium|de Silva|United Kingdom

>Spike|hCoV-19/England/CAMC-B528FD/2020|2020-11-08|EPI\_ISL\_657672|Original|hCoV-19^^England|Human|Lighthouse Lab in Cambridge|Wellcome Sanger Institute for the COVID-19 Genomics UK (COG-UK) Consortium|Davies|United Kingdom

>Spike|hCoV-19/Luxembourg/LNS6734577/2020|2020-10-29|EPI\_ISL\_744459|Original|hCoV-19^^Luxembourg|Human|Laboratoire national de sant\u00e9|Laboratoire national de sant\u00e9|Wienecke-Baldacchino|Luxembourg

>Spike|hCoV-19/Denmark/DCGC-17465/2020|2020-12-14|EPI\_ISL\_751000|Original|hCoV-19^^Nordjylland|Human|Department of Virus and Microbiological Special Diagnostics|Albertsen Lab|Michaelsen|Denmark

>Spike|hCoV-19/Japan/PG-4872/2020|2020-08-00|EPI\_ISL\_689993|Original|hCoV-19^^Japan|Human|Pathogen Genomics Center|Pathogen Genomics Center|Sekizuka|Japan

>Spike|hCoV-19/USA/NC\_200429/2020|2020-04-00|EPI\_ISL\_458291|Original|hCoV-19^^North Carolina|Human|Dirk Dittmer|Dirk Dittmer|Moorad|USA

>Spike|hCoV-19/Netherlands/NH-RIVM-20030/2020|2020-11-21|EPI\_ISL\_723227|Original|hCoV-19^^Noord-Holland|Human|Dutch COVID-19 response team|National Institute for Public Health and the Environment (RIVM)|Meijer|Netherlands

>Spike|hCoV-19/Switzerland/BE-UNIBE-223-2673/2020|2020-04-11|EPI\_ISL\_574858|Original|hCoV-19^^Bern|Human|Institute for Infectious Diseases|Institute for Infectious Diseases|Koch|Switzerland

>Spike|hCoV-19/England/QEUA-B411AB/2020|2020-11-08|EPI\_ISL\_658711|Original|hCoV-19^^England|Human|Lighthouse Lab in Glasgow|Wellcome Sanger Institute for the COVID-19 Genomics UK (COG-UK) Consortium|Davies|United Kingdom

>Spike|hCoV-19/Switzerland/VD-ETHZ-310358/2020|2020-10-07|EPI\_ISL\_603432|Original|hCoV-19^^Vaud|Human|Viollier AG|Department of Biosystems Science and Engineering|Nadeau|Switzerland

>Spike|hCoV-19/USA/CA-CZB-14259/2020|2020-08-25|EPI\_ISL\_739218|Original|hCoV-19^^California|Human|Alameda County Public Health Lab|Chan-Zuckerberg Biohub|Kamm|USA

>Spike|hCoV-19/USA/MI-MDHHS-SC22478/2020|2020-11-02|EPI\_ISL\_708579|Original|hCoV-19^^Michigan|Human|Michigan Department of Health and Human Services|Michigan Department of Health and Human Services|Jacob|USA

>Spike|hCoV-19/England/MILK-BDC767/2020|2020-11-27|EPI\_ISL\_709625|Original|hCoV-19^^England|Human|Lighthouse Lab in Milton Keynes|Wellcome Sanger Institute for the COVID-19 Genomics UK (COG-UK) Consortium|Davies|United Kingdom

>Spike|hCoV-19/Spain/CT-IBV-97009552/2020|2020-07-17|EPI\_ISL\_671849|Original|hCoV-19^^Catalunya|Human|Servicio de Microbiolog\u00eda|SeqCOVID-SPAIN consortium/IBV (CSIC) |Comas|Spain

>Spike|hCoV-19/Switzerland/BE-ETHZ-190073/2020|2020-07-04|EPI\_ISL\_500931|Original|hCoV-19^^Bern|Human|Viollier AG|Department of Biosystems Science and Engineering|Nadeau|Switzerland

>Spike|hCoV-19/England/CAMB-74CF4/2020|2020-03-17|EPI\_ISL\_425366|Original|hCoV-19^^England|Human|Department of Pathology|COVID-19 Genomics UK (COG-UK) Consortium|Meredith|United Kingdom

>Spike|hCoV-19/England/BRIS-1227C6/2020|2020-04-04|EPI\_ISL\_440714|Original|hCoV-19^^England|Human|PHE South West Regional Laboratory|Wellcome Sanger Institute for the COVID-19 Genomics UK (COG-UK) consortium|Amato|United Kingdom

>Spike|hCoV-19/England/ALDP-B4662F/2020|2020-11-07|EPI\_ISL\_656298|Original|hCoV-19^^England|Human|Lighthouse Lab in Alderley Park|Wellcome Sanger Institute for the COVID-19 Genomics UK (COG-UK) Consortium|Davies|United Kingdom

>Spike|hCoV-19/Japan/PG-1512/2020|2020-04-00|EPI\_ISL\_685119|Original|hCoV-19^^Japan|Human|Saitama Prefectural Institute of Public Health|Pathogen Genomics Center|Sekizuka|Japan

>Spike|hCoV-19/England/20132005704/2020|2020-03-23|EPI\_ISL\_423723|Original|hCoV-19^^England|Human|Respiratory Virus Unit|Respiratory Virus Unit|Platt|United Kingdom

>Spike|hCoV-19/USA/TX-HMH-MCoV-16240/2020|2020-10-30|EPI\_ISL\_785924|Original|hCoV-19^^Texas|Human|Houston Methodist Hospital|Houston Methodist Hospital|Long|USA

>Spike|hCoV-19/England/CAMC-99126F/2020|2020-08-27|EPI\_ISL\_551881|Original|hCoV-19^^England|Human|Lighthouse Lab in Cambridge|Wellcome Sanger Institute for the COVID-19 Genomics UK (COG-UK) consortium|Davies|United Kingdom

>Spike|hCoV-19/USA/WA-S1834/2020|2020-05-27|EPI\_ISL\_496260|Original|hCoV-19^^Washington|Human|Washington State Department of Health|Seattle Flu Study|Lee|USA

>Spike|hCoV-19/South Africa/KRISP-K002793/2020|2020-08-24|EPI\_ISL\_529787|Original|hCoV-19^^KwaZulu-Natal|Human|NHLS-IALCH|KRISP|de Oliveira|South Africa

>Spike|hCoV-19/Ireland/SO-NVRL-76IRL31587/2020|2020-10-18|EPI\_ISL\_732461|Original|hCoV-19^^Sligo|Human|National Virus Reference Laboratory|National Virus Reference Laboratory|Gonzalez|Ireland

>Spike|hCoV-19/England/ALDP-AA4FE9/2020|2020-10-21|EPI\_ISL\_630808|Original|hCoV-19^^England|Human|Lighthouse Lab in Alderley Park|Wellcome Sanger Institute for the COVID-19 Genomics UK (COG-UK) consortium|Davies|United Kingdom

>Spike|hCoV-19/England/ALDP-AA132C/2020|2020-10-22|EPI\_ISL\_624002|Original|hCoV-19^^England|Human|Lighthouse Lab in Alderley Park|Wellcome Sanger Institute for the COVID-19 Genomics UK (COG-UK) consortium|Davies|United Kingdom

>Spike|hCoV-19/England/CAMC-9EC62D/2020|2020-09-23|EPI\_ISL\_580603|Original|hCoV-19^^England|Human|Lighthouse Lab in Cambridge|Wellcome Sanger Institute for the COVID-19 Genomics UK (COG-UK) consortium|Davies|United Kingdom

>Spike|hCoV-19/Australia/NSW2243/2020|2020-03-22|EPI\_ISL\_500683|Original|hCoV-19^^New South Wales|Human|Area of Virology|Area of Virology|Bull|Australia

>Spike|hCoV-19/Australia/VIC912/2020|2020-03-24|EPI\_ISL\_426881|Original|hCoV-19^^Victoria|Human|Victorian Infectious Diseases Reference Laboratory (VIDRL)|Microbiological Diagnostic Unit Public Health Laboratory and Victorian Infectious Diseases Reference Laboratory|Schultz|Australia

>Spike|hCoV-19/England/204821548\_2/2020|2020-11-23|EPI\_ISL\_686611|Original|hCoV-19^^England|Human|Respiratory Virus Unit|COVID-19 Genomics UK (COG-UK) Consortium|Platt|United Kingdom

>Spike|hCoV-19/Netherlands/NoordBrabant\_96/2020|2020-03-18|EPI\_ISL\_422890|Original|hCoV-19^^Noord Brabant|Human|Dutch COVID-19 response team|Erasmus Medical Center|Oude Munnink|Netherlands

>Spike|hCoV-19/England/MILK-BB1249/2020|2020-11-17|EPI\_ISL\_720179|Original|hCoV-19^^England|Human|Lighthouse Lab in Milton Keynes|Wellcome Sanger Institute for the COVID-19 Genomics UK (COG-UK) Consortium|Davies|United Kingdom

>Spike|hCoV-19/Brazil/SP-735/2020|2020-07-06|EPI\_ISL\_693248|Original|hCoV-19^^S\u00e3o Paulo|Human|Centro Municipal de Epidemiologia e Imuniza\u00e7\u00e3o|Instituto Adolfo Lutz|Sacchi|Brazil

>Spike|hCoV-19/England/ALDP-A92BEA/2020|2020-10-19|EPI\_ISL\_610992|Original|hCoV-19^^England|Human|Lighthouse Lab in Alderley Park|Wellcome Sanger Institute for the COVID-19 Genomics UK (COG-UK) consortium|Davies|United Kingdom

>Spike|hCoV-19/USA/AZ-TG408148/2020|2020-06-16|EPI\_ISL\_694903|Original|hCoV-19^^Arizona|Human|AZ SPHL|TGen North|French|USA

>Spike|hCoV-19/USA/FL-BPHL-0215/2020|2020-04-20|EPI\_ISL\_480866|Original|hCoV-19^^Florida|Human|Florida Bureau of Public Health Laboratories|Florida Bureau of Public Health Laboratories|Blanton|USA

>Spike|hCoV-19/England/QEUH-B14253/2020|2020-11-02|EPI\_ISL\_641790|Original|hCoV-19^^England|Human|Lighthouse Lab in Glasgow|Wellcome Sanger Institute for the COVID-19 Genomics UK (COG-UK) Consortium|Davies|United Kingdom

>Spike|hCoV-19/Canada/ON-PHL-20-03804/2020|2020-11-00|EPI\_ISL\_775065|Original|hCoV-19^^Ontario|Human|Public Health Ontario Laboratory|Public Health Ontario Laboratory|Guthrie|Canada

>Spike|hCoV-19/England/LIVE-99CEA/2020|2020-04-14|EPI\_ISL\_439813|Original|hCoV-19^^England|Human|Liverpool Clinical Laboratories|COVID-19 Genomics UK (COG-UK) Consortium|Haldenby|United Kingdom

>Spike|hCoV-19/USA/MA-MGH-00698/2020|2020-04-06|EPI\_ISL\_460336|Original|hCoV-19^^Massachusetts|Human|Massachusetts General Hospital|Infectious Disease Program|Lemieux|USA

>Spike|hCoV-19/Austria/CeMM0900/2020|2020-03-29|EPI\_ISL\_583753|Original|hCoV-19^^Austria|Human|Dr. Gernot Walder GmbH|Bergthaler laboratory|Bergthaler|Austria

>Spike|hCoV-19/Canada/BC\_08859333/2020|2020-05-00|EPI\_ISL\_477066|Original|hCoV-19^^British Columbia|Human|BCCDC Public Health Laboratory|BCCDC Public Health Laboratory|Harrigan|Canada

>Spike|hCoV-19/England/NOTT-11D00F/2020|2020-11-20|EPI\_ISL\_665914|Original|hCoV-19^^England|Human|Queens Medical Centre|COVID-19 Genomics UK (COG-UK) Consortium|Loose|United Kingdom

>Spike|hCoV-19/Canada/ON-UHTC\_0067/2020|2020-04-10|EPI\_ISL\_463997|unknown|hCoV-19^^Ontario|Human|Unity Health Toronto|Ontario Institute for Cancer Research|de Borja|Canada

>Spike|hCoV-19/USA/MN-MDH-2118/2020|2020-10-30|EPI\_ISL\_683747|Original|hCoV-19^^Minnesota|Human|Minnesota Department of Health|Minnesota Department of Health|Garfin|USA

>Spike|hCoV-19/USA/CA-ALSR-3793/2020|2020-06-05|EPI\_ISL\_636204|Original|hCoV-19^^California|Human|San Diego County Public Health Laboratory|Andersen lab at Scripps Research|Gangavarapu|USA

>Spike|hCoV-19/England/CAMB-76032/2020|2020-03-30|EPI\_ISL\_439507|Original|hCoV-19^^England|Human|Department of Pathology|Wellcome Sanger Institute for the COVID-19 Genomics UK (COG-UK) consortium|Amato|United Kingdom

>Spike|hCoV-19/Scotland/QEUEH-A20E06/2020|2020-10-01|EPI\_ISL\_598924|Original|hCoV-19^^Scotland|Human|Lighthouse Lab in Glasgow|Wellcome Sanger Institute for the COVID-19 Genomics UK (COG-UK) consortium|Davies|United Kingdom

>Spike|hCoV-19/Australia/VIC11551/2020|2020-08-25|EPI\_ISL\_563412|Original|hCoV-19^^Victoria|Human|Victorian Infectious Diseases Reference Laboratory (VIDRL)|VIDRL and MDU-PHL|Schultz|Australia

>Spike|hCoV-19/Wales/PHWC-48E82C/2020|2020-11-13|EPI\_ISL\_680918|Original|hCoV-19^^Wales|Human|Wales Specialist Virology Centre Sequencing lab|COVID-19 Genomics UK (COG-UK) Consortium|Moore|United Kingdom

>Spike|hCoV-19/USA/NY-Wadsworth-288823-01/2020|2020-12-18|EPI\_ISL\_767486|Original|hCoV-19^^New York|Human|Wadsworth Center|Wadsworth Center|Lasek-Nesselquist|USA

>Spike|hCoV-19/USA/CA-CSMC10/2020|2020-03-27|EPI\_ISL\_475574|Original|hCoV-19^^California|Human|Cedars-Sinai Medical Center|Cedars-Sinai Medical Center|Zhang|USA

>Spike|hCoV-19/England/20144037404/2020|2020-03-31|EPI\_ISL\_423538|Original|hCoV-19^^England|Human|Respiratory Virus Unit|Respiratory Virus Unit|Platt|United Kingdom

>Spike|hCoV-19/Spain/CT-IrsiCaixa-2020030095/2020|2020-03-13|EPI\_ISL\_510689|Vero|hCoV-19^^Catalunya|Human|Hospital Universitari Germans Trias i Pujol (HUGTiP)/Fundaci\u00f3 Lluita contra la SIDA (FLSida)/IRTA-CReSA|IrsiCaixa AIDS Research Lab|Noguera-Julian|Spain

>Spike|hCoV-19/England/MILK-ACD867/2020|2020-10-21|EPI\_ISL\_630019|Original|hCoV-19^^England|Human|Lighthouse Lab in Milton Keynes|Wellcome Sanger Institute for the COVID-19 Genomics UK (COG-UK) consortium|Davies|United Kingdom

>Spike|hCoV-19/England/CAMC-B21217/2020|2020-11-03|EPI\_ISL\_647476|Original|hCoV-19^^England|Human|Lighthouse Lab in Cambridge|Wellcome Sanger Institute for the COVID-19 Genomics UK (COG-UK) Consortium|Davies|United Kingdom

>Spike|hCoV-19/England/QEUEH-AD07BF/2020|2020-10-24|EPI\_ISL\_634008|Original|hCoV-19^^England|Human|Lighthouse Lab in Glasgow|Wellcome Sanger Institute for the COVID-19 Genomics UK (COG-UK) consortium|Davies|United Kingdom

>Spike|hCoV-19/England/QEUEH-B0E1AA/2020|2020-11-02|EPI\_ISL\_641964|Original|hCoV-19^^England|Human|Lighthouse Lab in Glasgow|Wellcome Sanger Institute for the COVID-19 Genomics UK (COG-UK) Consortium|Davies|United Kingdom

>Spike|hCoV-19/Northern Ireland/NIRE-105213/2020|2020-03-31|EPI\_ISL\_461774|Original|hCoV-19^^Northern Ireland|Human|Regional Virus Laboratory|COVID-19 Genomics UK (COG-UK) Consortium|Fairley|United Kingdom

>Spike|hCoV-19/England/CAMB-783EC/2020|2020-04-05|EPI\_ISL\_433729|Original|hCoV-19^^England|Human|Department of Pathology|COVID-19 Genomics UK (COG-UK) Consortium|Meredith|United Kingdom

>Spike|hCoV-19/England/201080042/2020|2020-03-05|EPI\_ISL\_464439|Original|hCoV-19^^England|Human|Respiratory Virus Unit|Respiratory Virus Unit|Platt|United Kingdom

>Spike|hCoV-19/England/NORW-E738E/2020|2020-04-20|EPI\_ISL\_449029|Original|hCoV-19^^England|Human|Quadram Institute Bioscience|COVID-19 Genomics UK (COG-UK) Consortium|Alikhan|United Kingdom

>Spike|hCoV-19/Switzerland/BL-UHB-42175213/2020|2020-03-03|EPI\_ISL\_418279|Original|hCoV-19^^Basel|Human|University Hospital Basel|University Hospital Basel|Roloff Handschin|Switzerland

>Spike|hCoV-19/Japan/PG-7655/2020|2020-08-00|EPI\_ISL\_686757|Original|hCoV-19^^Japan|Human|Chiba Prefectural Institute of Public Health|Pathogen Genomics Center|Sekizuka|Japan

>Spike|hCoV-19/England/ALDP-65EB66/2020|2020-07-03|EPI\_ISL\_555539|Original|hCoV-19^^England|Human|Lighthouse Lab in Alderley Park|Wellcome Sanger Institute for the COVID-19 Genomics UK (COG-UK) consortium|Davies|United Kingdom

>Spike|hCoV-19/England/CAMC-B992FC/2020|2020-11-15|EPI\_ISL\_673254|Original|hCoV-19^^England|Human|Lighthouse Lab in Cambridge|Wellcome Sanger Institute for the COVID-19 Genomics UK (COG-UK) Consortium|Davies|United Kingdom

>Spike|hCoV-19/England/CAMC-AEAE08/2020|2020-10-26|EPI\_ISL\_633214|Original|hCoV-19^^England|Human|Lighthouse Lab in Cambridge|Wellcome Sanger Institute for the COVID-19 Genomics UK (COG-UK) consortium|Davies|United Kingdom

>Spike|hCoV-19/Netherlands/LI-RIVM-20614/2020|2020-11-19|EPI\_ISL\_790631|Original|hCoV-19^^Limburg|Human|Dutch COVID-19 response team|National Institute for Public Health and the Environment (RIVM)|Meijer|Netherlands

>Spike|hCoV-19/USA/TX-HMH-3411/2020|2020-06-14|EPI\_ISL\_544171|Original|hCoV-19^^Texas|Human|Houston Methodist Hospital|Houston Methodist Hospital|Long|USA

>Spike|hCoV-19/England/TBSD-2488710/2020|2020-04-18|EPI\_ISL\_482126|Original|hCoV-19^^England|Human|The Department of Microbiology|Wellcome Sanger Institute for the COVID-19 Genomics UK (COG-UK) consortium|Davies|United Kingdom

>Spike|hCoV-19/England/CAMC-B786AC/2020|2020-11-12|EPI\_ISL\_783395|Original|hCoV-19^^England|Human|Lighthouse Lab in Cambridge|Wellcome Sanger Institute for the COVID-19 Genomics UK (COG-UK) Consortium|Davies|United Kingdom

>Spike|hCoV-19/Japan/PG-4792/2020|2020-08-00|EPI\_ISL\_689634|Original|hCoV-19^^Japan|Human|Pathogen Genomics Center|Pathogen Genomics Center|Sekizuka|Japan

>Spike|hCoV-19/England/MILK-B883A2/2020|2020-11-14|EPI\_ISL\_674315|Original|hCoV-19^^England|Human|Lighthouse Lab in Milton Keynes|Wellcome Sanger Institute for the COVID-19 Genomics UK (COG-UK) Consortium|Davies|United Kingdom

>Spike|hCoV-19/England/QEUEH-C342C5/2020|2020-12-11|EPI\_ISL\_733974|Original|hCoV-19^^England|Human|Lighthouse Lab in Glasgow|Wellcome Sanger Institute for the COVID-19 Genomics UK (COG-UK) Consortium|Davies|United Kingdom

>Spike|hCoV-19/USA/TX-HMH-5034/2020|2020-06-23|EPI\_ISL\_544474|Original|hCoV-19^^Texas|Human|Houston Methodist Hospital|Houston Methodist Hospital|Long|USA

>Spike|hCoV-19/Panama/334256/2020|2020-03-26|EPI\_ISL\_496770|Original|hCoV-19^^Guna Yala|Human|Gorgas Memorial Laboratory of Health Studies|Gorgas Memorial Laboratory of Health Studies|Martinez|Panama

>Spike|hCoV-19/South Korea/KCDC2373/2020|2020-05-31|EPI\_ISL\_514776|Original|hCoV-19^^South Korea|Human|Division of Viral Diseases|Division of Viral Diseases|Kim|South Korea

>Spike|hCoV-19/USA/MI-MDHHS-SC21180/2020|2020-04-02|EPI\_ISL\_507437|Original|hCoV-19^^Michigan|Human|Michigan Department of Health and Human Services|Michigan Department of Health and Human Services|Blankenship|USA

>Spike|hCoV-19/Netherlands/Gelderland\_29/2020|2020-04-08|EPI\_ISL\_460929|Original|hCoV-19^^Gelderland|Human|Dutch COVID-19 response team|Erasmus Medical Center|Oude Munnink|Netherlands

>Spike|hCoV-19/England/20118070504/2020|2020-03-12|EPI\_ISL\_464938|Original|hCoV-19^^England|Human|Respiratory Virus Unit|Respiratory Virus Unit|Platt|United Kingdom

>Spike|hCoV-19/England/C200045617/2020|2020-11-09|EPI\_ISL\_664057|Original|hCoV-19^^England|Human|Respiratory Virus Unit|COVID-19 Genomics UK (COG-UK) Consortium|Platt|United Kingdom

>Spike|hCoV-19/England/CAMB-75E1B/2020|2020-03-28|EPI\_ISL\_438455|Original|hCoV-19^^England|Human|Department of Pathology|Wellcome Sanger Institute for the COVID-19 Genomics UK (COG-UK) consortium|Amato|United Kingdom

>Spike|hCoV-19/Switzerland/BE-ETHZ-410739/2020|2020-12-12|EPI\_ISL\_737739|Original|hCoV-19^^Bern|Human|Viollier AG|Department of Biosystems Science and Engineering|Nadeau|Switzerland

>Spike|hCoV-19/Turkey/IST-GLAB-195/2020|2020-05-07|EPI\_ISL\_480279|Original|hCoV-19^^Istanbul|Human|Genomic Laboratory (GLAB) (Conjoint lab of Health Directorate of Istanbul and Istanbul Technical University)|Genomic Laboratory (GLAB)|Karacan|Turkey

>Spike|hCoV-19/Bahrain/600022987/2020|2020-10-13|EPI\_ISL\_682310|Original|hCoV-19^^Bahrain|Human|Communicable Disease Laboratory|Communicable Disease Laboratory|Altaif|Bahrain

>Spike|hCoV-19/England/CAMB-1B6624/2020|2020-00-00|EPI\_ISL\_612261|Original|hCoV-19^^England|Human|Department of Pathology|COVID-19 Genomics UK (COG-UK) Consortium|Goodfellow|United Kingdom

>Spike|hCoV-19/USA/UT-UPHL-2009154/2020|2020-05-30|EPI\_ISL\_525144|Original|hCoV-19^^Utah|Human|Utah Public Health Laboratory|Utah Public Health Laboratory|Young|USA

>Spike|hCoV-19/USA/WA-S254/2020|2020-02-24|EPI\_ISL\_430292|Original|hCoV-19^^Washington|Human|Washington State Department of Health|Seattle Flu Study|Bedford|USA

>Spike|hCoV-19/England/NOTT-113E78/2020|2020-10-01|EPI\_ISL\_577119|Original|hCoV-19^^England|Human|Queens Medical Centre|COVID-19 Genomics UK (COG-UK) Consortium|Loose|United Kingdom

>Spike|hCoV-19/Netherlands/ZH-EMC-947/2020|2020-10-09|EPI\_ISL\_722360|Original|hCoV-19^^Zuid Holland|Human|Dutch COVID-19 response team|Erasmus Medical Center|Oude Munnink|Netherlands

>Spike|hCoV-19/USA/UT-UPHL-201008588/2020|2020-04-18|EPI\_ISL\_594113|Original|hCoV-19^^Utah|Human|Utah Public Health Laboratory|Utah Public Health Laboratory|Young|USA

>Spike|hCoV-19/England/QEUH-9DC8C0/2020|2020-09-21|EPI\_ISL\_580919|Original|hCoV-19^^England|Human|Lighthouse Lab in Glasgow|Wellcome Sanger Institute for the COVID-19 Genomics UK (COG-UK) consortium|Davies|United Kingdom

>Spike|hCoV-19/USA/OR-OHSU-2902/2020|2020-09-04|EPI\_ISL\_667402|Original|hCoV-19^^Oregon|Human|OHSU Lab Services Molecular Microbiology Lab|Oregon SARS-CoV-2 Genome Sequencing Center|O'Roak|USA

>Spike|hCoV-19/SaudiArabia/KAUST-JEDDAH595/2020|2020-04-23|EPI\_ISL\_512984|Original|hCoV-19^^Jeddah|Human|Pathogen Genomics Lab King Abdullah University of Science and Technology(KAUST)|Pathogen Genomics Lab King Abdullah University of Science and Technology(KAUST)|Mohamed Ghazzali|Saudi Arabia

>Spike|hCoV-19/Wales/PHWC-4A6730/2020|2020-12-17|EPI\_ISL\_763579|Original|hCoV-19^^Wales|Human|Wales Specialist Virology Centre Sequencing lab|COVID-19 Genomics UK (COG-UK) Consortium|Moore|United Kingdom

>Spike|hCoV-19/England/ALDP-C8E569/2020|2020-12-15|EPI\_ISL\_777424|Original|hCoV-19^^England|Human|Lighthouse Lab in Alderley Park|Wellcome Sanger Institute for the COVID-19 Genomics UK (COG-UK) Consortium|Davies|United Kingdom

>Spike|hCoV-19/Japan/PG-8201/2020|2020-08-00|EPI\_ISL\_687300|Original|hCoV-19^^Japan|Human|Pathogen Genomics Center|Pathogen Genomics Center|Sekizuka|Japan

>Spike|hCoV-19/Australia/NSW894/2020|2020-08-26|EPI\_ISL\_544975|Original|hCoV-19^^New South Wales|Human|Histopath|NSW Health Pathology - Institute of Clinical Pathology and Medical Research; Westmead Hospital; University of Sydney|Gall|Australia

>Spike|hCoV-19/USA/FL-BPHL-0492/2020|2020-03-25|EPI\_ISL\_495398|Original|hCoV-19^^Florida|Human|Florida Bureau of Public Health Laboratories|Florida Bureau of Public Health Laboratories|Blanton|USA

>Spike|hCoV-19/England/MILK-A057A2/2020|2020-09-30|EPI\_ISL\_600121|Original|hCoV-19^^England|Human|Lighthouse Lab in Milton Keynes|Wellcome Sanger Institute for the COVID-19 Genomics UK (COG-UK) consortium|Davies|United Kingdom

>Spike|hCoV-19/Spain/VC-IBV-98006457/2020|2020-06-30|EPI\_ISL\_538662|Original|hCoV-19^^Comunitat Valenciana|Human|Servicio de Microbiolog\u00eda. Hospital General Universitario de Castell\u00f3n|SeqCOVID-SPAIN consortium|IBV(CSIC)|Comas|Spain

>Spike|hCoV-19/England/OXON-B4D13/2020|2020-04-30|EPI\_ISL\_535008|Original|hCoV-19^^England|Human|Oxford Viromics|COVID-19 Genomics UK (COG-UK) Consortium|Golubchik|United Kingdom

>Spike|hCoV-19/USA/CA-CZB-13022/2020|2020-05-11|EPI\_ISL\_672306|Original|hCoV-19^^California|Human|Alameda County Public Health Lab|Chan-Zuckerberg Biohub|Bhatt|USA

>Spike|hCoV-19/Denmark/DCGC-20460/2020|2020-12-21|EPI\_ISL\_759164|Original|hCoV-19^^Midtjylland|Human|Department of Virus and Microbiological Special Diagnostics|Albertsen Lab|Michaelsen|Denmark

>Spike|hCoV-19/England/204300697/2020|2020-10-19|EPI\_ISL\_649815|Original|hCoV-19^^England|Human|Respiratory Virus Unit|COVID-19 Genomics UK (COG-UK) Consortium|Platt|United Kingdom

>Spike|hCoV-19/India/GJ-GBRC320/2020|2020-06-17|EPI\_ISL\_495078|Original|hCoV-19^^Gujarat|Human|Department of MicroBiology|Gujarat Biotechnology Research Centre|Joshi|India

>Spike|hCoV-19/USA/CA-ALSR-1495/2020|2020-04-30|EPI\_ISL\_494621|Original|hCoV-19^^California|Human|San Diego County Public Health Laboratory|Andersen lab at Scripps Research|Gangavarapu|USA

>Spike|hCoV-19/USA/UT-08362/2020|2020-05-20|EPI\_ISL\_524145|Original|hCoV-19^^Utah|Human|Utah Public Health Laboratory|Utah Public Health Laboratory|Young|USA

>Spike|hCoV-19/Scotland/QEUH-AAB5A4/2020|2020-10-21|EPI\_ISL\_652799|Original|hCoV-19^^Scotland|Human|Oxford Viromics|COVID-19 Genomics UK (COG-UK) Consortium|Golubchik|United Kingdom

>Spike|hCoV-19/England/ALDP-B83D5E/2020|2020-11-14|EPI\_ISL\_674421|Original|hCoV-19^^England|Human|Lighthouse Lab in Alderley Park|Wellcome Sanger Institute for the COVID-19 Genomics UK (COG-UK) Consortium|Davies|United Kingdom

>Spike|hCoV-19/Scotland/QEUH-9CFDA3/2020|2020-09-16|EPI\_ISL\_601848|Original|hCoV-19^^Scotland|Human|Lighthouse Lab in Glasgow|Wellcome Sanger Institute for the COVID-19 Genomics UK (COG-UK) consortium|Davies|United Kingdom

>Spike|hCoV-19/Canada/ON-S1457/2020|2020-08-26|EPI\_ISL\_755882|Original|hCoV-19^^Ontario|Human|Toronto Invasive Bacterial Diseases Network|McMaster University|McArthur|Canada

>Spike|hCoV-19/England/ALDP-9B5BD3/2020|2020-08-28|EPI\_ISL\_590260|Original|hCoV-19^^England|Human|Lighthouse Lab in Alderley Park|Wellcome Sanger Institute for the COVID-19 Genomics UK (COG-UK) consortium|Davies|United Kingdom

>Spike|hCoV-19/England/CAMC-B999CA/2020|2020-11-15|EPI\_ISL\_673680|Original|hCoV-19^^England|Human|Lighthouse Lab in Cambridge|Wellcome Sanger Institute for the COVID-19 Genomics UK (COG-UK) Consortium|Davies|United Kingdom

>Spike|hCoV-19/Japan/PG-3686/2020|2020-04-00|EPI\_ISL\_691939|Original|hCoV-19^^Japan|Human|Pathogen Genomics Center|Pathogen Genomics Center|Sekizuka|Japan

>Spike|hCoV-19/Wales/PHWC-163486/2020|2020-04-24|EPI\_ISL\_473300|Original|hCoV-19^^Wales|Human|Wales Specialist Virology Centre Sequencing lab|COVID-19 Genomics UK (COG-UK) Consortium|Moore|United Kingdom

>Spike|hCoV-19/USA/WI-UW-2489/2020|2020-12-30|EPI\_ISL\_779321|Original|hCoV-19^^Wisconsin|Human|University of Wisconsin-Madison AIDS Vaccine Research Laboratories|University of Wisconsin-Madison AIDS Vaccine Research Laboratories|Moreno|USA

>Spike|hCoV-19/England/CAMC-AB0348/2020|2020-10-21|EPI\_ISL\_623234|Original|hCoV-19^^England|Human|Lighthouse Lab in Cambridge|Wellcome Sanger Institute for the COVID-19 Genomics UK (COG-UK) consortium|Davies|United Kingdom

>Spike|hCoV-19/Netherlands/NA\_46/2020|2020-03-08|EPI\_ISL\_422807|Original|hCoV-19^^Netherlands|Human|Dutch COVID-19 response team|Erasmus Medical Center|Oude Munnink|Netherlands

>Spike|hCoV-19/France/ARA-67717/2020|2020-09-04|EPI\_ISL\_692766|Original|hCoV-19^^Auvergne-Rh\u00f4ne-Alpes|Human|CNR Virus des Infections Respiratoires - France SUD|CNR Virus des Infections Respiratoires - France SUD|Bal|France

>Spike|hCoV-19/USA/UT-UPHL-2009575/2020|2020-07-18|EPI\_ISL\_605253|Original|hCoV-19^^Utah|Human|Utah Public Health Laboratory|Utah Public Health Laboratory|Young|USA

>Spike|hCoV-19/USA/WI-UW-1412/2020|2020-09-04|EPI\_ISL\_536782|Original|hCoV-19^^Wisconsin|Human|University of Wisconsin-Madison AIDS Vaccine Research Laboratories|University of Wisconsin-Madison AIDS Vaccine Research Laboratories|Baczenas|USA

>Spike|hCoV-19/USA/TX-HMH-7031/2020|2020-06-28|EPI\_ISL\_546449|Original|hCoV-19^^Texas|Human|Houston Methodist Hospital|Houston Methodist Hospital|Long|USA

>Spike|hCoV-19/Portugal/PT1640/2020|2020-11-09|EPI\_ISL\_731949|Original|hCoV-19^^Portugal|Human|Instituto Nacional de Saude (INSA)|Instituto Nacional de Saude (INSA)|Borges|Portugal

>Spike|hCoV-19/Australia/VIC8774/2020|2020-07-29|EPI\_ISL\_565186|Original|hCoV-19^^Victoria|Human|Victorian Infectious Diseases Reference Laboratory (VIDRL)|VIDRL and MDU-PHL|Schultz|Australia

>Spike|hCoV-19/Norway/4590/2020|2020-10-18|EPI\_ISL\_635165|Original|hCoV-19^^Tr\u00f8ndelag|Human|Department of Medical Microbiology|Norwegian Institute of Public Health|Vollan|Norway

>Spike|hCoV-19/England/CAMB-7580E/2020|2020-03-14|EPI\_ISL\_440463|Original|hCoV-19^^England|Human|Department of Pathology|Wellcome Sanger Institute for the COVID-19 Genomics UK (COG-UK) consortium|Amato|United Kingdom



>Spike|hCoV-19/Scotland/CVR4858/2020|2020-10-02|EPI\_ISL\_650517|Original|hCoV-19^^Scotland|Human|West of Scotland Specialist Virology Centre|COVID-19 Genomics UK (COG-UK) Consortium|Robertson|United Kingdom

>Spike|hCoV-19/USA/WA-UW-11285/2020|2020-06-19|EPI\_ISL\_570387|Original|hCoV-19^^Washington|Human|UW Virology Lab|UW Virology Lab|Roychoudhury|USA

>Spike|hCoV-19/Singapore/728/2020|2020-06-23|EPI\_ISL\_500549|Original|hCoV-19^^Singapore|Human|Singapore General Hospital|Department of Microbiology|Abdul Rahman|Singapore

>Spike|hCoV-19/England/LIVE-9D6D9/2020|2020-04-11|EPI\_ISL\_453227|Original|hCoV-19^^England|Human|Liverpool Clinical Laboratories|COVID-19 Genomics UK (COG-UK) Consortium|Haldenby|United Kingdom

>Spike|hCoV-19/England/SHEF-D1F56/2020|2020-03-30|EPI\_ISL\_432644|Original|hCoV-19^^England|Human|Virology Department|COVID-19 Genomics UK (COG-UK) Consortium|de Silva|United Kingdom

>Spike|hCoV-19/USA/CA-CZB-14157/2020|2020-10-17|EPI\_ISL\_739539|Original|hCoV-19^^California|Human|Madera County Department of Public Health|Chan-Zuckerberg Biohub|Kamm|USA

>Spike|hCoV-19/England/QEUEH-9F8C86/2020|2020-09-27|EPI\_ISL\_588904|Original|hCoV-19^^England|Human|Lighthouse Lab in Glasgow|Wellcome Sanger Institute for the COVID-19 Genomics UK (COG-UK) consortium|Davies|United Kingdom

>Spike|hCoV-19/England/QEUEH-9B895E/2020|2020-09-07|EPI\_ISL\_549597|Original|hCoV-19^^England|Human|Lighthouse Lab in Glasgow|Wellcome Sanger Institute for the COVID-19 Genomics UK (COG-UK) consortium|Davies|United Kingdom

>Spike|hCoV-19/England/MILK-BABAC2/2020|2020-11-18|EPI\_ISL\_720456|Original|hCoV-19^^England|Human|Lighthouse Lab in Milton Keynes|Wellcome Sanger Institute for the COVID-19 Genomics UK (COG-UK) Consortium|Davies|United Kingdom

>Spike|hCoV-19/England/MILK-ACF249/2020|2020-10-22|EPI\_ISL\_629642|Original|hCoV-19^^England|Human|Lighthouse Lab in Milton Keynes|Wellcome Sanger Institute for the COVID-19 Genomics UK (COG-UK) consortium|Davies|United Kingdom

>Spike|hCoV-19/Wales/PHWC-48C8C4/2020|2020-11-04|EPI\_ISL\_666481|Original|hCoV-19^^Wales|Human|Wales Specialist Virology Centre Sequencing lab|COVID-19 Genomics UK (COG-UK) Consortium|Moore|United Kingdom

>Spike|hCoV-19/USA/UT-UPHL-201208296/2020|2020-04-07|EPI\_ISL\_672561|Original|hCoV-19^^Utah|Human|Utah Public Health Laboratory|Utah Public Health Laboratory|Young|USA

>Spike|hCoV-19/USA/TX-HMH-MCoV-10468/2020|2020-07-08|EPI\_ISL\_789264|Original|hCoV-19^^Texas|Human|Houston Methodist Hospital|Houston Methodist Hospital|Long|USA

>Spike|hCoV-19/USA/WI-UW-254/2020|2020-04-01|EPI\_ISL\_428728|Original|hCoV-19^^Wisconsin|Human|University of Wisconsin-Madison AIDS Vaccine Research Laboratories|University of Wisconsin-Madison AIDS Vaccine Research Laboratories|Baczenas|USA

>Spike|hCoV-19/USA/IL-NM08/2020|2020-03-17|EPI\_ISL\_444521|Original|hCoV-19^^Illinois|Human|Northwestern Memorial Hospital|Ozer Lab|Ozer|USA

>Spike|hCoV-19/England/CAMC-B08207/2020|2020-10-29|EPI\_ISL\_643705|Original|hCoV-19^^England|Human|Lighthouse Lab in Cambridge|Wellcome Sanger Institute for the COVID-19 Genomics UK (COG-UK) Consortium|Davies|United Kingdom

>Spike|hCoV-19/Mexico/NLE-UANL-388/2020|2020-03-22|EPI\_ISL\_648597|Original|hCoV-19^^Nuevo Leon|Human|Laboratorio de Infectolog\u00eda\nServicio de Infectolog\u00eda\nHospital Universitario Dr. Jos\u00e9 Eleuterio Gonz\u00e1lez - Universidad Aut\u00f3noma de Nuevo Le\u00f3n|Laboratorio de Infectolog\u00eda Molecular\nDepartamento de Bioqu\u00edmica y Medicina Molecular\nFacultad de Medicina - Univer

sidad Aut\u00f3noma de Nuevo Le\u00f3n|Gal\u00e9n|Mexico

>Spike|hCoV-19/USA/TX-DSHS-0318/2020|2020-06-13|EPI\_ISL\_534285|Original|hCoV-19^^Texas|Human|Texas Department of State Health Services|Texas Department of State Health Services|Rahman|USA

>Spike|hCoV-19/USA/UT-UPHL-04909/2020|2020-05-26|EPI\_ISL\_575199|Original|hCoV-19^^Utah|Human|Utah Public Health Laboratory|Utah Public Health Laboratory|Young|USA

>Spike|hCoV-19/Wales/QEUEH-95F69E/2020|2020-08-05|EPI\_ISL\_532378|Original|hCoV-19^^Wales|Human|Lighthouse Lab in Glasgow|Wellcome Sanger Institute for the COVID-19 Genomics UK (COG-UK) consortium|Davies|United Kingdom

>Spike|hCoV-19/England/MILK-9754E3/2020|2020-08-21|EPI\_ISL\_552447|Original|hCoV-19^^England|Human|Lighthouse Lab in Milton Keynes|Wellcome Sanger Institute for the COVID-19 Genomics UK (COG-UK) consortium|Davies|United Kingdom

>Spike|hCoV-19/England/CAMB-795A9/2020|2020-04-03|EPI\_ISL\_441089|Original|hCoV-19^^England|Human|Department of Pathology|Wellcome Sanger Institute for the COVID-19 Genomics UK (COG-UK) consortium|Amato|United Kingdom

>Spike|hCoV-19/India/TG-CCMB-L1484/2020|2020-05-25|EPI\_ISL\_471607|Original|hCoV-19^^Telangana|Human|CSIR-Centre for Cellular and Molecular Biology|CSIR-Centre for Cellular and Molecular Biology|Banu|India

>Spike|hCoV-19/Singapore/922/2020|2020-03-24|EPI\_ISL\_538453|Original|hCoV-19^^Singapore|Human|Department of Laboratory Medicine|Department of Laboratory Medicine|Chen|Singapore

>Spike|hCoV-19/Netherlands/GE-EMC-256/2020|2020-04-18|EPI\_ISL\_523235|Original|hCoV-19^^Gelderland|Human|Dutch COVID-19 response team|Erasmus Medical Center|Oude Munnink|Netherlands

>Spike|hCoV-19/England/NORW-21FAD1/2020|2020-12-15|EPI\_ISL\_741463|Original|hCoV-19^^England|Human|Quadram Institute Bioscience|COVID-19 Genomics UK (COG-UK) Consortium|Alikhan|United Kingdom

>Spike|hCoV-19/England/ALDP-A2D935/2020|2020-10-06|EPI\_ISL\_586687|Original|hCoV-19^^England|Human|Lighthouse Lab in Alderley Park|Wellcome Sanger Institute for the COVID-19 Genomics UK (COG-UK) consortium|Davies|United Kingdom

>Spike|hCoV-19/South Africa/KRISP-K003353/2020|2020-09-07|EPI\_ISL\_602744|Original|hCoV-19^^KwaZulu-Natal|Human|NHLs-IALCH|KRISP|de Oliveira|South Africa

>Spike|hCoV-19/Denmark/DCGC-22279/2020|2020-12-14|EPI\_ISL\_758651|Original|hCoV-19^^Hovedstaden|Human|Department of Virus and Microbiological Special Diagnostics|Albertsen Lab|Michaelsen|Denmark

>Spike|hCoV-19/Australia/VIC6807/2020|2020-07-21|EPI\_ISL\_564069|Original|hCoV-19^^Victoria|Human|Victorian Infectious Diseases Reference Laboratory (VIDRL)|VIDRL and MDU-PHL|Schultz|Australia

>Spike|hCoV-19/England/QEUEH-B0F9DE/2020|2020-11-02|EPI\_ISL\_642201|Original|hCoV-19^^England|Human|Lighthouse Lab in Glasgow|Wellcome Sanger Institute for the COVID-19 Genomics UK (COG-UK) Consortium|Davies|United Kingdom

>Spike|hCoV-19/Switzerland/BS-42296829/2020|2020-06-04|EPI\_ISL\_581874|Original|hCoV-19^^Basel-Stadt|Human|University Hospital Basel|University Hospital Basel|Roloff Handschin|Switzerland

>Spike|hCoV-19/Denmark/DCGC-8438/2020|2020-10-26|EPI\_ISL\_617917|Original|hCoV-19^^Syddanmark|Human|Department of Virus and Microbiological Special Diagnostics|Albertsen lab|Michaelsen|Denmark

>Spike|hCoV-19/India/MH-GA66/2020|2020-06-18|EPI\_ISL\_508260|Original|hCoV-19^^Maharashtra|Human|Government Medical College|National Institute of Biomedical Genomics|Maitra|India

>Spike|hCoV-19/USA/TX-HMH-3052/2020|2020-04-16|EPI\_ISL\_543958|Original|hCoV-19^^Texas|Human|Houston Methodist Hospital|Houston Methodist Hospital|Long|USA

>Spike|hCoV-19/Mexico/NLE-UANL-031/2020|2020-11-18|EPI\_ISL\_779192|Original|hCoV-19^^Nuevo Leon|Human|Laboratorio Estatal de Salud P\u00fablica de Nuevo Le\u00f3n|Laboratorio de Infectolog\u00eda Molecular|Gal\u00e9n|Mexico

>Spike|hCoV-19/Wales/PHWC-485764/2020|2020-10-25|EPI\_ISL\_628215|Original|hCoV-19^^Wales|Human|Wales Specialist Virology Centre Sequencing lab|COVID-19 Genomics UK (COG-UK) Consortium|Moore|United Kingdom

>Spike|hCoV-19/England/MILK-9EF5E1/2020|2020-09-25|EPI\_ISL\_589759|Original|hCoV-19^^England|Human|Lighthouse Lab in Milton Keynes|Wellcome Sanger Institute for the COVID-19 Genomics UK (COG-UK) consortium|Davies|United Kingdom

>Spike|hCoV-19/Australia/VIC734/2020|2020-03-30|EPI\_ISL\_427013|Original|hCoV-19^^Victoria|Human|Victorian Infectious Diseases Reference Laboratory (VIDRL)|Microbiological Diagnostic Unit Public Health Laboratory and Victorian Infectious Diseases Reference Laboratory|Schultz|Australia

>Spike|hCoV-19/France/PAC-MEPHI-2165/2020|2020-09-28|EPI\_ISL\_644519|Original|hCoV-19^^Provence-Alpes-Cote-d\u2019Azur|Human|MEPHI|MEPHI|Levasseur|France

>Spike|hCoV-19/Belgium/UGent-34/2020|2020-03-26|EPI\_ISL\_434352|Original|hCoV-19^^Ghent|Human|Lab voor klinische biologie|Onderzoeksgroep Virologie|Lambrechts|Belgium

>Spike|hCoV-19/Northern Ireland/NIRE-FAFFD/2020|2020-03-24|EPI\_ISL\_448940|Original|hCoV-19^^Northern Ireland|Human|Regional Virus Laboratory|COVID-19 Genomics UK (COG-UK) Consortium|Fairley|United Kingdom

>Spike|hCoV-19/USA/MI-UM-10035907994/2020|2020-09-11|EPI\_ISL\_583392|Original|hCoV-19^^Michigan|Human|University of Michigan Clinical Microbiology Laboratory|Lauring Lab|Valesano|USA

>Spike|hCoV-19/USA/TX-HMH-6255/2020|2020-06-22|EPI\_ISL\_547343|Original|hCoV-19^^Texas|Human|Houston Methodist Hospital|Houston Methodist Hospital|Long|USA

>Spike|hCoV-19/Spain/AN-IBV-004098/2020|2020-04-17|EPI\_ISL\_510053|Original|hCoV-19^^Andalucia|Human|Servicio de Microbiolog\u00eda. HRU de M\u00ellaga. Servicio Andaluz de Salud|SeqCOVID-SPAIN consortium|IBV(CSIC)|Comas|Spain

>Spike|hCoV-19/USA/NY-Wadsworth-290376-01/2020|2020-12-18|EPI\_ISL\_765555|Original|hCoV-19^^New York|Human|MONTEFIORE MEDICAL CENTER LABORATORIES|Wadsworth Center|Lasek-Nesselquist|USA

>Spike|hCoV-19/England/CAMB-727C8/2020|2020-03-23|EPI\_ISL\_439538|Original|hCoV-19^^England|Human|Department of Pathology|Wellcome Sanger Institute for the COVID-19 Genomics UK (COG-UK) consortium|Amato|United Kingdom

>Spike|hCoV-19/Japan/PG-5786/2020|2020-08-00|EPI\_ISL\_688905|Original|hCoV-19^^Japan|Human|Fukuoka Institute of Health and Environmental Sciences|Pathogen Genomics Center|Sekizuka|Japan

>Spike|hCoV-19/USA/LA-EVTL064/2020|2020-04-30|EPI\_ISL\_451225|Original|hCoV-19^^Louisiana|Human|LSUHS Emerging Viral Threat Laboratory|Microbial Genome Sequencing Center|Kamil|USA

>Spike|hCoV-19/Japan/PG-1774/2020|2020-04-00|EPI\_ISL\_685380|Original|hCoV-19^^Japan|Human|Pathogen Genomics Center|Pathogen Genomics Center|Sekizuka|Japan

>Spike|hCoV-19/France/OCC-SC494/2020|2020-03-26|EPI\_ISL\_660689|Original|hCoV-19^^Occitanie|Human|CHU Montpellier|CNR Virus des Infections Respiratoires - France SUD|Bal|France

>Spike|hCoV-19/USA/UT-UPHL-2012787729/2020|2020-08-17|EPI\_ISL\_746161|Original|hCoV-19^^Utah|Human|Ginkgo Bioworks Clinical Laboratory|Utah Public Health Laboratory|Young|USA

>Spike|hCoV-19/Switzerland/VD-ETHZ-300274/2020|2020-10-01|EPI\_ISL\_603306|Original|hCoV-19^^Vaud|Human|Viollier AG|Department of Biosystems Science and Engineering|Nadeau|Switzerland

>Spike|hCoV-19/Japan/PG-6136/2020|2020-08-00|EPI\_ISL\_689248|Original|hCoV-19^^Japan|Human|Pathogen Genomics Center|Pathogen Genomics Center|Sekizuka|Japan

>Spike|hCoV-19/England/ALDP-C6B8D2/2020|2020-12-14|EPI\_ISL\_778630|Original|hCoV-19^^England|Human|Lighthouse Lab in Alderley Park|Wellcome Sanger Institute for the COVID-19 Genomics UK (COG-UK) Consortium|Davies|United Kingdom

>Spike|hCoV-19/USA/UT-08460/2020|2020-05-26|EPI\_ISL\_524232|Original|hCoV-19^^Utah|Human|Utah Public Health Laboratory|Utah Public Health Laboratory|Young|USA

>Spike|hCoV-19/Sweden/20-50216/2020|2020-03-06|EPI\_ISL\_469077|Original|hCoV-19^^Stockholm|Human|Karolinska Universitetslaboratoriet|The Public Health Agency of Sweden|Svartstr\u00f6m|Sweden

>Spike|hCoV-19/Canada/ON-S6/2020|2020-03-13|EPI\_ISL\_586421|Original|hCoV-19^^Ontario|Human|Toronto Invasive Bacterial Diseases Network|McMaster University|McArthur|Canada

>Spike|hCoV-19/USA/TX-HMH-MCoV-15930/2020|2020-07-10|EPI\_ISL\_785614|Original|hCoV-19^^Texas|Human|Houston Methodist Hospital|Houston Methodist Hospital|Long|USA

>Spike|hCoV-19/Denmark/DCGC-15214/2020|2020-11-23|EPI\_ISL\_713698|Original|hCoV-19^^Hovedstaden|Human|Department of Virus and Microbiological Special Diagnostics|Albertsen Lab|Michaelsen|Denmark

>Spike|hCoV-19/England/20132082004/2020|2020-03-23|EPI\_ISL\_423813|Original|hCoV-19^^England|Human|Respiratory Virus Unit|Respiratory Virus Unit|Platt|United Kingdom

>Spike|hCoV-19/England/CAMC-B339A4/2020|2020-11-05|EPI\_ISL\_659099|Original|hCoV-19^^England|Human|Lighthouse Lab in Cambridge|Wellcome Sanger Institute for the COVID-19 Genomics UK (COG-UK) Consortium|Davies|United Kingdom

>Spike|hCoV-19/Wales/PHWC-26EA0/2020|2020-03-30|EPI\_ISL\_422145|Original|hCoV-19^^Wales|Human|Wales Specialist Virology Centre|Public Health Wales Microbiology Cardiff|Moore|United Kingdom

>Spike|hCoV-19/England/MILK-B95DD1/2020|2020-11-13|EPI\_ISL\_676060|Original|hCoV-19^^England|Human|Lighthouse Lab in Milton Keynes|Wellcome Sanger Institute for the COVID-19 Genomics UK (COG-UK) Consortium|Davies|United Kingdom

>Spike|hCoV-19/USA/WA-S389/2020|2020-03-28|EPI\_ISL\_434149|Original|hCoV-19^^Washington|Human|Washington State Department of Health|Seattle Flu Study|Bedford|USA

>Spike|hCoV-19/Wales/PHWC-16C502/2020|2020-09-18|EPI\_ISL\_574063|Original|hCoV-19^^Wales|Human|Wales Specialist Virology Centre Sequencing lab|COVID-19 Genomics UK (COG-UK) Consortium|Moore|United Kingdom

>Spike|hCoV-19/England/ALDP-9DA358/2020|2020-09-18|EPI\_ISL\_576865|Original|hCoV-19^^England|Human|Oxford Viromics|COVID-19 Genomics UK (COG-UK) Consortium|Golubchik|United Kingdom

>Spike|hCoV-19/England/QEUH-89E315/2020|2020-07-24|EPI\_ISL\_532834|Original|hCoV-19^^England|Human|Lighthouse Lab in Glasgow|Wellcome Sanger Institute for the COVID-19 Genomics UK (COG-UK) consortium|Davies|United Kingdom

>Spike|hCoV-19/Luxembourg/LNS8005266/2020|2020-10-31|EPI\_ISL\_744668|Original|hCoV-19^^Luxembourg|Human|Laboratoire national de sant\u00e9|Laboratoire national de sant\u00e9|Wienecke-Baldacchino|Luxembourg

>Spike|hCoV-19/England/ALDP-B5D0DC/2020|2020-11-09|EPI\_ISL\_678855|Original|hCoV-19^^England|Human|Department of Pathology|COVID-19 Genomics UK (COG-UK) Consortium|Goodfellow|United Kingdom

>Spike|hCoV-19/England/ALDP-745730/2020|2020-06-29|EPI\_ISL\_557511|Original|hCoV-19^^England|Human|Lighthouse Lab in Alderley Park|Wellcome Sanger Institute for the COVID-19 Genomics UK (COG-UK) consortium|Davies|United Kingdom

>Spike|hCoV-19/Scotland/QEUH-BCC2F0/2020|2020-11-27|EPI\_ISL\_710775|Original|hCoV-19^^Scotland|Human|Lighthouse Lab in Glasgow|Wellcome Sanger Institute for the COVID-19 Genomics UK (COG-UK) Consortium|Davies|United Kingdom

>Spike|hCoV-19/England/CAMC-9EBA9B/2020|2020-09-24|EPI\_ISL\_584395|Original|hCoV-19^^England|Human|Queens Medical Centre|COVID-19 Genomics UK (COG-UK) Consortium|Loose|United Kingdom

>Spike|hCoV-19/England/ALDP-9CBEB3/2020|2020-09-15|EPI\_ISL\_575687|Original|hCoV-19^^England|Human|Lighthouse Lab in Alderley Park|Wellcome Sanger Institute for the COVID-19 Genomics UK (COG-UK) consortium|Davies|United Kingdom

>Spike|hCoV-19/Sweden/20-08546/2020|2020-03-28|EPI\_ISL\_475108|Original|hCoV-19^^Sormland|Human|Skovde/Unilabs|The Public Health Agency of Sweden|Svartstr\u00f6m|Sweden

>Spike|hCoV-19/England/QEUH-A9FCAE/2020|2020-10-20|EPI\_ISL\_665996|Original|hCoV-19^^England|Human|Northumbria University / South Tees Hospitals NHS Foundation Trust / North Cumbria Integrated Care NHS Foundation Trust / North Tees and Hartlepool NHS Foundation Trust / Newcastle Hospitals NHS Foundation Trust|COVID-19 Genomics UK (COG-UK) Consortium|Bashton|United Kingdom

>Spike|hCoV-19/England/MILK-ACE17A/2020|2020-10-20|EPI\_ISL\_630280|Original|hCoV-19^^England|Human|Lighthouse Lab in Milton Keynes|Wellcome Sanger Institute for the COVID-19 Genomics UK (COG-UK) consortium|Davies|United Kingdom

>Spike|hCoV-19/England/NORT-1B71ED5/2020|2020-11-23|EPI\_ISL\_704575|Original|hCoV-19^^England|Human|Northumbria University / South Tees Hospitals NHS Foundation Trust / North Cumbria Integrated Care NHS Foundation Trust / North Tees and Hartlepool NHS Foundation Trust / Newcastle Hospitals NHS Foundation Trust|COVID-19 Genomics UK (COG-UK) Consortium|Bashton|United Kingdom

>Spike|hCoV-19/USA/UT-UPHL-01636/2020|2020-04-08|EPI\_ISL\_575062|Original|hCoV-19^^Utah|Human|Utah Public Health Laboratory|Utah Public Health Laboratory|Young|USA

>Spike|hCoV-19/Scotland/CVR4465/2020|2020-09-20|EPI\_ISL\_585329|Original|hCoV-19^^Scotland|Human|Lighthouse Lab in Glasgow / MRC-University of Glasgow Centre for Virus Research|COVID-19 Genomics UK (COG-UK) Consortium|Robertson|United Kingdom

>Spike|hCoV-19/England/MILK-A8EA6C/2020|2020-10-18|EPI\_ISL\_650950|Original|hCoV-19^^England|Human|Northumbria University / South Tees Hospitals NHS Foundation Trust / North Cumbria Integrated Care NHS Foundation Trust / North Tees and Hartlepool NHS

Foundation Trust / Newcastle Hospitals NHS Foundation Trust|COVID-19 Genomics UK (COG-UK) Consortium|Bashton|United Kingdom

>Spike|hCoV-19/Sweden/20-52742/2020|2020-08-04|EPI\_ISL\_648169|Original|hCoV-19^^Vastra Gotaland|Human|Klinisk mikrobiologi NAL Trollhattan|The Public Health Agency of Sweden|Svartstr\u00f6m|Sweden

>Spike|hCoV-19/England/CAMB-79DB0/2020|2020-04-02|EPI\_ISL\_441292|Original|hCoV-19^^England|Human|Department of Pathology|Wellcome Sanger Institute for the COVID-19 Genomics UK (COG-UK) consortium|Amato|United Kingdom

>Spike|hCoV-19/Wales/PHWC-47D84E/2020|2020-10-06|EPI\_ISL\_586199|Original|hCoV-19^^Wales|Human|Wales Specialist Virology Centre Sequencing lab|COVID-19 Genomics UK (COG-UK) Consortium|Moore|United Kingdom

>Spike|hCoV-19/USA/CA-CZB-14637/2020|2020-11-16|EPI\_ISL\_739591|Original|hCoV-19^^California|Human|Orange County Public Health Lab|Chan-Zuckerberg Biohub|Kamm|USA

>Spike|hCoV-19/USA/AZ-TG670118/2020|2020-05-02|EPI\_ISL\_696334|Original|hCoV-19^^Arizona|Human|Sonora Quest Laboratories|TGen North|French|USA

>Spike|hCoV-19/Burkina Faso/2496/2020|2020-09-11|EPI\_ISL\_660487|Original|hCoV-19^^Bobo Dioulasso|Human|Laboratoire de Microbiologie CHU Sourou Sanou|Centre Muraz|Ouedraogo|Burkina Faso

>Spike|hCoV-19/Spain/CL-IBV-97006314/2020|2020-05-02|EPI\_ISL\_537678|Original|hCoV-19^^Castilla y Leon|Human|Universidad de Le\u00f3n|SeqCOVID-SPAIN consortium|IBV (CSIC) |Comas|Spain

>Spike|hCoV-19/USA/CO-CDPHE-2008170978/2020|2020-08-16|EPI\_ISL\_710323|Original|hCoV-19^^Colorado|Human|Colorado Department of Public Health and Environment|Colorado Department of Public Health and Environment|Bankers|USA

>Spike|hCoV-19/Australia/VIC12443/2020|2020-07-26|EPI\_ISL\_591990|Original|hCoV-19^^Victoria|Human|Microbiological Diagnostic Unit - Public Health Laboratory (MDU-PHL) |MDU-PHL|Schultz|Australia

>Spike|hCoV-19/Scotland/QEUA-A1FECE/2020|2020-10-01|EPI\_ISL\_599058|Original|hCoV-19^^Scotland|Human|Lighthouse Lab in Glasgow|Wellcome Sanger Institute for the COVID-19 Genomics UK (COG-UK) consortium|Davies|United Kingdom

>Spike|hCoV-19/England/NOTT-116A80/2020|2020-10-15|EPI\_ISL\_627666|Original|hCoV-19^^England|Human|Queens Medical Centre|COVID-19 Genomics UK (COG-UK) Consortium|Loose|United Kingdom

>Spike|hCoV-19/Malaysia/IMR-CV140273/2020|2020-09-01|EPI\_ISL\_718301|Original|hCoV-19^^Malaysia|Human|Institute for Medical Research|Institute for Medical Research|Suppiah|Malaysia

>Spike|hCoV-19/Scotland/QEUA-96C212/2020|2020-08-15|EPI\_ISL\_530836|Original|hCoV-19^^Scotland|Human|NHSGGC West of Scotland Specialist Virology Centre / MRC-University of Glasgow Centre for Virus Research|Wellcome Sanger Institute for the COVID-19 Genomics UK (COG-UK) consortium|Davies|United Kingdom

>Spike|hCoV-19/Wales/PHWC-498DA8/2020|2020-11-28|EPI\_ISL\_727209|Original|hCoV-19^^Wales|Human|Originating lab|COVID-19 Genomics UK (COG-UK) Consortium|Moore|United Kingdom

>Spike|hCoV-19/England/MILK-876A1E/2020|2020-07-20|EPI\_ISL\_557442|Original|hCoV-19^^England|Human|Lighthouse Lab in Milton Keynes|Wellcome Sanger Institute for the COVID-19 Genomics UK (COG-UK) consortium|Davies|United Kingdom

>Spike|hCoV-19/Australia/VIC6609/2020|2020-07-19|EPI\_ISL\_521371|Original|hCoV-19^^Victoria|Human|Victorian Infectious Diseases Reference Laboratory (VIDRL) |VIDRL and MDU-PHL|Schultz|Australia

>Spike|hCoV-19/England/QEUA-BA26C7/2020|2020-11-18|EPI\_ISL\_672875|Original|hCoV-19^^England|Human|Lighthouse Lab in Glasgow|Wellcome Sanger Institute for the COVID-19 Genomics UK (COG-UK) Consortium|Davies|United Kingdom

>Spike|hCoV-19/USA/TX-HMH-MCoV-8791/2020|2020-07-01|EPI\_ISL\_780757|Original|hCoV-19^^Texas|Human|Houston Methodist Hospital|Houston Methodist Hospital|Long|USA

>Spike|hCoV-19/Wales/PHWC-4821C3/2020|2020-10-15|EPI\_ISL\_612045|Original|hCoV-19^^Wales|Human|Wales Specialist Virology Centre Sequencing lab|COVID-19 Genomics UK (COG-UK) Consortium|Moore|United Kingdom

>Spike|hCoV-19/USA/WA-S1062/2020|2020-04-30|EPI\_ISL\_463552|Original|hCoV-19^^Washington|Human|Washington State Department of Health|Seattle Flu Study|Bedford|USA

>Spike|hCoV-19/Australia/VIC17829/2020|2020-07-13|EPI\_ISL\_779482|Original|hCoV-19^^Victoria|Human|Microbiological Diagnostic Unit - Public Health Laboratory (MDU-PHL)|MDU-PHL|Beck|Australia

>Spike|hCoV-19/USA/WA-UW-26849/2020|2020-09-01|EPI\_ISL\_570779|Original|hCoV-19^^Washington|Human|UW Virology Lab|UW Virology Lab|Roychoudhury|USA

>Spike|hCoV-19/Singapore/804/2020|2020-07-27|EPI\_ISL\_512840|Original|hCoV-19^^Singapore|Human|National Public Health Laboratory|National Public Health Laboratory|Mak|Singapore

>Spike|hCoV-19/USA/UT-UPHL-2012893348/2020|2020-11-19|EPI\_ISL\_746965|Original|hCoV-19^^Utah|Human|Utah Public Health Laboratory|Utah Public Health Laboratory|Gallagher|USA

>Spike|hCoV-19/South Africa/KRISP-K004734/2020|2020-10-21|EPI\_ISL\_660262|Original|hCoV-19^^KwaZulu-Natal|Human|Molecular Diagnostic Services (MDS)|KRISP|de Oliveira|South Africa

>Spike|hCoV-19/England/LEED-2A8F0B/2020|2020-04-04|EPI\_ISL\_539142|Original|hCoV-19^^England|Human|Leeds Teaching Hospitals NHS Trust and Public Health England|Wellcome Sanger Institute for the COVID-19 Genomics UK (COG-UK) consortium|Davies|United Kingdom

>Spike|hCoV-19/England/ALDP-CB45A6/2020|2020-12-19|EPI\_ISL\_761054|Original|hCoV-19^^England|Human|Lighthouse Lab in Alderley Park|Wellcome Sanger Institute for the COVID-19 Genomics UK (COG-UK) Consortium|Davies|United Kingdom

>Spike|hCoV-19/England/QEUA-B9F93D/2020|2020-11-18|EPI\_ISL\_721014|Original|hCoV-19^^England|Human|Lighthouse Lab in Glasgow|Wellcome Sanger Institute for the COVID-19 Genomics UK (COG-UK) Consortium|Davies|United Kingdom

>Spike|hCoV-19/Northern Ireland/QEUA-964FB9/2020|2020-08-13|EPI\_ISL\_531160|Original|hCoV-19^^Northern Ireland|Human|Lighthouse Lab in Glasgow|Wellcome Sanger Institute for the COVID-19 Genomics UK (COG-UK) consortium|Davies|United Kingdom

>Spike|hCoV-19/Australia/VIC4384/2020|2020-07-14|EPI\_ISL\_519680|Original|hCoV-19^^Victoria|Human|Microbiological Diagnostic Unit - Public Health Laboratory (MDU-PHL)|MDU-PHL|Schultz|Australia

>Spike|hCoV-19/USA/UT-UPHL-2012105256/2020|2020-08-09|EPI\_ISL\_745787|Original|hCoV-19^^Utah|Human|Ginkgo Bioworks Clinical Laboratory|Utah Public Health Laboratory|Young|USA

>Spike|hCoV-19/USA/UT-UPHL-2012289777/2020|2020-08-03|EPI\_ISL\_746032|Original|hCoV-19^^Utah|Human|Ginkgo Bioworks Clinical Laboratory|Utah Public Health Laboratory|Young|USA

>Spike|hCoV-19/Wales/PHWC-488EE4/2020|2020-10-31|EPI\_ISL\_639515|Original|hCoV-19^^Wales|Human|Wales Specialist Virology Centre Sequencing lab|COVID-19 Genomics UK (COG-UK) Consortium|Moore|United Kingdom

>Spike|hCoV-19/England/SHEF-10CFD8B/2020|2020-12-10|EPI\_ISL\_742023|Original|hCoV-19^^England|Human|Virology Department|COVID-19 Genomics UK (COG-UK) Consortium|de Silva|United Kingdom

>Spike|hCoV-19/England/LIVE-DB887B/2020|2020-10-26|EPI\_ISL\_651208|Original|hCoV-19^^England|Human|Liverpool Clinical Laboratories|COVID-19 Genomics UK (COG-UK) Consortium|Haldenby|United Kingdom

>Spike|hCoV-19/England/MILK-B89CD3/2020|2020-11-13|EPI\_ISL\_675566|Original|hCoV-19^^England|Human|Lighthouse Lab in Milton Keynes|Wellcome Sanger Institute for the COVID-19 Genomics UK (COG-UK) Consortium|Davies|United Kingdom

>Spike|hCoV-19/England/ALDP-BB9AA3/2020|2020-11-20|EPI\_ISL\_702989|Original|hCoV-19^^England|Human|Lighthouse Lab in Alderley Park|Wellcome Sanger Institute for the COVID-19 Genomics UK (COG-UK) Consortium|Davies|United Kingdom

>Spike|hCoV-19/USA/VA-DCLS-1238/2020|2020-07-30|EPI\_ISL\_528657|Original|hCoV-19^^Virginia|Human|Virginia DCLS|Virginia DCLS|St. Jacques|USA

>Spike|hCoV-19/USA/VA-DCLS-0772/2020|2020-06-09|EPI\_ISL\_526887|Original|hCoV-19^^Virginia|Human|Virginia DCLS|Virginia DCLS|St. Jacques|USA

>Spike|hCoV-19/England/ALDP-AA509A/2020|2020-10-21|EPI\_ISL\_630964|Original|hCoV-19^^England|Human|Lighthouse Lab in Alderley Park|Wellcome Sanger Institute for the COVID-19 Genomics UK (COG-UK) consortium|Davies|United Kingdom

>Spike|hCoV-19/England/201161452/2020|2020-03-11|EPI\_ISL\_464841|Original|hCoV-19^^England|Human|Respiratory Virus Unit|Respiratory Virus Unit|Platt|United Kingdom

>Spike|hCoV-19/England/ALDP-CB67AE/2020|2020-12-18|EPI\_ISL\_761309|Original|hCoV-19^^England|Human|Lighthouse Lab in Alderley Park|Wellcome Sanger Institute for the COVID-19 Genomics UK (COG-UK) Consortium|Davies|United Kingdom

>Spike|hCoV-19/England/MILK-9E2636/2020|2020-09-21|EPI\_ISL\_581136|Original|hCoV-19^^England|Human|Lighthouse Lab in Milton Keynes|Wellcome Sanger Institute for the COVID-19 Genomics UK (COG-UK) consortium|Davies|United Kingdom

>Spike|hCoV-19/Australia/VIC4677/2020|2020-07-16|EPI\_ISL\_519065|Original|hCoV-19^^Victoria|Human|Microbiological Diagnostic Unit - Public Health Laboratory (MDU-PHL) |MDU-PHL|Schultz|Australia

>Spike|hCoV-19/USA/PA-MGEL-00445/2020|2020-07-25|EPI\_ISL\_681933|Original|hCoV-19^^Pennsylvania|Human|UPMC Clinical Microbiology Laboratory|Microbial Genomic Epidemiology Laboratory|Griffith|USA

>Spike|hCoV-19/England/QEUEH-B3039A/2020|2020-11-04|EPI\_ISL\_659820|Original|hCoV-19^^England|Human|Lighthouse Lab in Glasgow|Wellcome Sanger Institute for the COVID-19 Genomics UK (COG-UK) Consortium|Davies|United Kingdom

>Spike|hCoV-19/Wales/PHWC-3091B/2020|2020-04-08|EPI\_ISL\_446293|Original|hCoV-19^^Wales|Human|Wales Specialist Virology Centre|Public Health Wales Microbiology Cardiff|Moore|United Kingdom

>Spike|hCoV-19/USA/SC-DHEC-0050/2020|2020-03-26|EPI\_ISL\_491103|Original|hCoV-19^^South Carolina|Human|SC Department of Health and Environmental Control|SC Department of Health and Environmental Control|Flores|USA

>Spike|hCoV-19/Wales/PHWC-48D025/2020|2020-11-08|EPI\_ISL\_666569|Original|hCoV-19^^Wales|Human|Wales Specialist Virology Centre Sequencing lab|COVID-19 Genomics UK (COG-UK) Consortium|Moore|United Kingdom

>Spike|hCoV-19/England/BIRM-60693/2020|2020-06-02|EPI\_ISL\_477741|Original|hCoV-19^^England|Human|University of Birmingham|COVID-19 Genomics UK (COG-UK) Consortium|Loman|United Kingdom

>Spike|hCoV-19/Spain/IB-IBV-002494/2020|2020-03-15|EPI\_ISL\_467055|Original|hCoV-19^^Illes Balears|Human|Servicio de Microbiolog\u00eda|SeqCOVID-SPAIN consortium/IBV (CSIC) |Comas|Spain

>Spike|hCoV-19/Northern Ireland/QEUEH-9696FB/2020|2020-08-14|EPI\_ISL\_531173|Original|hCoV-19^^Northern Ireland|Human|Lighthouse Lab in Glasgow|Wellcome Sanger Institute for the COVID-19 Genomics UK (COG-UK) consortium|Davies|United Kingdom

>Spike|hCoV-19/India/WB-S94/2020|2020-06-03|EPI\_ISL\_508483|Original|hCoV-19^^West Bengal|Human|ICMR-National Institute of Cholera and Enteric Diseases|National Institute of Biomedical Genomics|Maitra|India

>Spike|hCoV-19/Scotland/QEUEH-AE49EF/2020|2020-10-27|EPI\_ISL\_649670|Original|hCoV-19^^Scotland|Human|Lighthouse Lab in Glasgow|Wellcome Sanger Institute for the COVID-19 Genomics UK (COG-UK) Consortium|Davies|United Kingdom

>Spike|hCoV-19/England/ALDP-B85527/2020|2020-11-15|EPI\_ISL\_674391|Original|hCoV-19^^England|Human|Lighthouse Lab in Alderley Park|Wellcome Sanger Institute for the COVID-19 Genomics UK (COG-UK) Consortium|Davies|United Kingdom

>Spike|hCoV-19/USA/NY-Wadsworth-31766-01/2020|2020-03-27|EPI\_ISL\_676778|Original|hCoV-19^^New York|Human|Wadsworth Center|Wadsworth Center|Lasek-Nesselquist|USA

>Spike|hCoV-19/England/LOND-D3604/2020|2020-04-02|EPI\_ISL\_440964|Original|hCoV-19^^England|Human|University College London|COVID-19 Genomics UK (COG-UK) Consortium|Roy|United Kingdom

>Spike|hCoV-19/England/ALDP-BC7B63/2020|2020-11-23|EPI\_ISL\_721502|Original|hCoV-19^^England|Human|Lighthouse Lab in Alderley Park|Wellcome Sanger Institute for the COVID-19 Genomics UK (COG-UK) Consortium|Davies|United Kingdom

>Spike|hCoV-19/USA/TX-HMH-MCoV-13776/2020|2020-08-17|EPI\_ISL\_788869|Original|hCoV-19^^Texas|Human|Houston Methodist Hospital|Houston Methodist Hospital|Long|USA

>Spike|hCoV-19/USA/MI-UM-10036711844/2020|2020-10-30|EPI\_ISL\_682127|Original|hCoV-19^^Michigan|Human|University of Michigan Clinical Microbiology Laboratory|Lauring Lab|Valesano|USA

>Spike|hCoV-19/USA/TX-HMH-4083/2020|2020-06-18|EPI\_ISL\_543354|Original|hCoV-19^^Texas|Human|Houston Methodist Hospital|Houston Methodist Hospital|Long|USA

>Spike|hCoV-19/Wales/MILK-9C36A4/2020|2020-09-10|EPI\_ISL\_566766|Original|hCoV-19^^Wales|Human|Lighthouse Lab in Milton Keynes|Wellcome Sanger Institute for the COVID-19 Genomics UK (COG-UK) consortium|Davies|United Kingdom

>Spike|hCoV-19/England/QEUA-9F8512/2020|2020-09-27|EPI\_ISL\_588851|Original|hCoV-19^^England|Human|Lighthouse Lab in Glasgow|Wellcome Sanger Institute for the COVID-19 Genomics UK (COG-UK) consortium|Davies|United Kingdom

>Spike|hCoV-19/England/CAMC-A41B9F/2020|2020-10-07|EPI\_ISL\_609388|Original|hCoV-19^^England|Human|Lighthouse Lab in Cambridge|Wellcome Sanger Institute for the COVID-19 Genomics UK (COG-UK) consortium|Davies|United Kingdom

>Spike|hCoV-19/Spain/MD-IBV-99008805/2020|2020-09-21|EPI\_ISL\_654156|Original|hCoV-19^^Madrid|Human|Hospital General Universitario Gregorio Mara\u00f1a|SeqCOVID-SPAIN consortium/IBV (CSIC)|Comas|Spain

>Spike|hCoV-19/USA/FL-BPHL-1506/2020|2020-07-24|EPI\_ISL\_568604|Original|hCoV-19^^Florida|Human|Florida Bureau of Public Health Laboratories|Florida Bureau of Public Health Laboratories|Blanton|USA

>Spike|hCoV-19/England/QEUA-78A395/2020|2020-07-15|EPI\_ISL\_533022|Original|hCoV-19^^England|Human|Lighthouse Lab in Glasgow|Wellcome Sanger Institute for the COVID-19 Genomics UK (COG-UK) consortium|Davies|United Kingdom

>Spike|hCoV-19/Wales/CAMC-9DF256/2020|2020-09-20|EPI\_ISL\_639003|Original|hCoV-19^^Wales|Human|Department of Pathology|COVID-19 Genomics UK (COG-UK) Consortium|Goodfellow|United Kingdom

>Spike|hCoV-19/England/QEUA-BA19CF/2020|2020-11-18|EPI\_ISL\_719616|Original|hCoV-19^^England|Human|Lighthouse Lab in Glasgow|Wellcome Sanger Institute for the COVID-19 Genomics UK (COG-UK) Consortium|Davies|United Kingdom

>Spike|hCoV-19/Spain/AR-IBV-98008079/2020|2020-09-30|EPI\_ISL\_654453|Original|hCoV-19^^Aragon|Human|Servicio de Microbiolog\u00eda|SeqCOVID-SPAIN consortium/IBV (CSIC)|Comas|Spain

>Spike|hCoV-19/England/NORW-F6C36/2020|2020-11-30|EPI\_ISL\_706381|Original|hCoV-19^^England|Human|Quadram Institute Bioscience|COVID-19 Genomics UK (COG-UK) Consortium|Alikhan|United Kingdom

>Spike|hCoV-19/England/ALDP-A7013B/2020|2020-10-15|EPI\_ISL\_608334|Original|hCoV-19^^England|Human|Lighthouse Lab in Alderley Park|Wellcome Sanger Institute for the COVID-19 Genomics UK (COG-UK) consortium|Davies|United Kingdom

>Spike|hCoV-19/USA/TX-HMH-MCoV-15120/2020|2020-10-18|EPI\_ISL\_786604|Original|hCoV-19^^Texas|Human|Houston Methodist Hospital|Houston Methodist Hospital|Long|USA

>Spike|hCoV-19/Australia/VIC2076/2020|2020-04-02|EPI\_ISL\_480616|Original|hCoV-19^^Victoria|Human|Microbiological Diagnostic Unit - Public Health Laboratory (MDU-PHL)|MDU-PHL|Schultz|Australia

>Spike|hCoV-19/Wales/PHWC-164959/2020|2020-05-16|EPI\_ISL\_479326|Original|hCoV-19^^Wales|Human|Wales Specialist Virology Centre Sequencing lab|COVID-19 Genomics UK (COG-UK) Consortium|Moore|United Kingdom

>Spike|hCoV-19/England/QEUA-997E47/2020|2020-08-24|EPI\_ISL\_537160|Original|hCoV-19^^England|Human|Lighthouse Lab in Glasgow|Wellcome Sanger Institute for the COVID-19 Genomics UK (COG-UK) consortium|Davies|United Kingdom

>Spike|hCoV-19/Germany/BW-RKI-NP-0025/2020|2020-12-04|EPI\_ISL\_763045|Original|hCoV-19^^Baden-W\u00fcrtemberg|Human|Unit 17|Project group Epidemiology of Highly Pathogenic Microorganisms|Schubert|Germany

>Spike|hCoV-19/Scotland/QEUA-B4035B/2020|2020-11-09|EPI\_ISL\_676393|Original|hCoV-19^^Scotland|Human|Lighthouse Lab in Glasgow|Wellcome Sanger Institute for the COVID-19 Genomics UK (COG-UK) Consortium|Davies|United Kingdom

>Spike|hCoV-19/England/ALDP-AA0C31/2020|2020-10-22|EPI\_ISL\_625092|Original|hCoV-19^^England|Human|Lighthouse Lab in Alderley Park|Wellcome Sanger Institute for the COVID-19 Genomics UK (COG-UK) consortium|Davies|United Kingdom

>Spike|hCoV-19/USA/NY-NYCPHL-000414/2020|2020-03-28|EPI\_ISL\_631898|Original|hCoV-19^^New York|Human|OCME Office Of Chief Medical Examiner|New York City Public Health Laboratory|Wang|USA

>Spike|hCoV-19/Japan/PG-7299/2020|2020-08-00|EPI\_ISL\_688402|Original|hCoV-19^^Japan|Human|Pathogen Genomics Center|Pathogen Genomics Center|Sekizuka|Japan



>Spike|hCoV-19/England/SHEF-C7ECF/2020|2020-04-22|EPI\_ISL\_453724|Original|hCoV-19^^England|Human|Virology Department|COVID-19 Genomics UK (COG-UK) Consortium|de Silva|United Kingdom

>Spike|hCoV-19/England/QEUA-AD28C9/2020|2020-10-26|EPI\_ISL\_633974|Original|hCoV-19^^England|Human|Lighthouse Lab in Glasgow|Wellcome Sanger Institute for the COVID-19 Genomics UK (COG-UK) consortium|Davies|United Kingdom

>Spike|hCoV-19/England/SHEF-C0AD1/2020|2020-03-25|EPI\_ISL\_479195|Original|hCoV-19^^England|Human|Virology Department|COVID-19 Genomics UK (COG-UK) Consortium|de Silva|United Kingdom

>Spike|hCoV-19/USA/UT-UPHL-2012067167/2020|2020-08-14|EPI\_ISL\_746172|Original|hCoV-19^^Utah|Human|Ginkgo Bioworks Clinical Laboratory|Utah Public Health Laboratory|Young|USA

>Spike|hCoV-19/USA/CA-CZB-15164/2020|2020-11-23|EPI\_ISL\_738663|Original|hCoV-19^^California|Human|Santa Clara County Public Health Laboratory|Chan-Zuckerberg Biohub|Kamm|USA

>Spike|hCoV-19/USA/MI-UM-10036608384/2020|2020-10-24|EPI\_ISL\_650014|Original|hCoV-19^^Michigan|Human|University of Michigan Clinical Microbiology Laboratory|Lauring Lab|Valesano|USA

>Spike|hCoV-19/England/20189155304/2020|2020-05-02|EPI\_ISL\_465552|Original|hCoV-19^^England|Human|Respiratory Virus Unit|Respiratory Virus Unit|Platt|United Kingdom

>Spike|hCoV-19/Wales/PHWC-49DC4C/2020|2020-11-26|EPI\_ISL\_742889|Original|hCoV-19^^Wales|Human|Wales Specialist Virology Centre Sequencing lab|COVID-19 Genomics UK (COG-UK) Consortium|Moore|United Kingdom

>Spike|hCoV-19/Denmark/DCGC-3845/2020|2020-09-07|EPI\_ISL\_622736|Original|hCoV-19^^Hovedstaden|Human|Department of Virus and Microbiological Special Diagnostics|Albertsen lab|Michaelsen|Denmark

>Spike|hCoV-19/USA/VA-DCLS-0220/2020|2020-04-03|EPI\_ISL\_452798|Original|hCoV-19^^Virginia|Human|Virginia DCLS|Virginia DCLS|St. Jacques|USA

>Spike|hCoV-19/Singapore/862/2020|2020-04-12|EPI\_ISL\_527371|Original|hCoV-19^^Singapore|Human|National Public Health Laboratory|National Public Health Laboratory|Mak|Singapore

>Spike|hCoV-19/Spain/MD-H12-95/2020|2020-04-19|EPI\_ISL\_530021|Original|hCoV-19^^Madrid|Human|Hospital Universitario 12 de Octubre|Hospital Universitario 12 de Octubre|Viedma|Spain

>Spike|hCoV-19/Northern Ireland/QEUA-87CACD/2020|2020-07-25|EPI\_ISL\_532827|Original|hCoV-19^^Northern Ireland|Human|Lighthouse Lab in Glasgow|Wellcome Sanger Institute for the COVID-19 Genomics UK (COG-UK) consortium|Davies|United Kingdom

>Spike|hCoV-19/England/ALDP-BB37A2/2020|2020-11-19|EPI\_ISL\_701999|Original|hCoV-19^^England|Human|Lighthouse Lab in Alderley Park|Wellcome Sanger Institute for the COVID-19 Genomics UK (COG-UK) Consortium|Davies|United Kingdom

>Spike|hCoV-19/England/NORT-2945D3/2020|2020-08-03|EPI\_ISL\_572488|Original|hCoV-19^^England|Human|Northumbria University / South Tees Hospitals NHS Foundation Trust / North Cumbria Integrated Care NHS Foundation Trust / North Tees and Hartlepool NHS Foundation Trust / Newcastle Hospitals NHS Foundation Trust|COVID-19 Genomics UK (COG-UK) Consortium|Bashton|United Kingdom

>Spike|hCoV-19/Denmark/DCGC-15726/2020|2020-11-23|EPI\_ISL\_713984|Original|hCoV-19^^Syddanmark|Human|Department of Virus and Microbiological Special Diagnostics|Albertsen Lab|Michaelsen|Denmark

>Spike|hCoV-19/England/ALDP-503CB9/2020|2020-06-25|EPI\_ISL\_559165|Original|hCoV-19^^England|Human|Lighthouse Lab in Alderley Park|Wellcome Sanger Institute for the COVID-19 Genomics UK (COG-UK) consortium|Davies|United Kingdom

>Spike|hCoV-19/Japan/PG-3729/2020|2020-04-00|EPI\_ISL\_691982|Original|hCoV-19^^Japan|Human|Pathogen Genomics Center|Pathogen Genomics Center|Sekizuka|Japan

>Spike|hCoV-19/Scotland/QEUA-96D83D/2020|2020-08-20|EPI\_ISL\_534535|Original|hCoV-19^^Scotland|Human|NHSGGC West of Scotland Specialist Virology Centre / MRC-University of Glasgow Centre for Virus Research|Wellcome Sanger Institute for the COVID-19 Genomics UK (COG-UK) consortium|Davies|United Kingdom

>Spike|hCoV-19/Switzerland/AG-ETHZ-280247/2020|2020-09-10|EPI\_ISL\_560428|Original|hCoV-19^^Aargau|Human|Viollier AG|Department of Biosystems Science and Engineering|Nadeau|Switzerland

>Spike|hCoV-19/England/ALDP-9E61C8/2020|2020-09-24|EPI\_ISL\_580397|Original|hCoV-19^^England|Human|Lighthouse Lab in Alderley Park|Wellcome Sanger Institute for the COVID-19 Genomics UK (COG-UK) consortium|Davies|United Kingdom

>Spike|hCoV-19/USA/CA-CZB-2057/2020|2020-04-22|EPI\_ISL\_486300|Original|hCoV-19^^California|Human|San Joaquin County Public Health Lab|Chan-Zuckerberg Biohub|McGeever|USA

>Spike|hCoV-19/England/20104003104/2020|2020-03-02|EPI\_ISL\_459958|Original|hCoV-19^^England|Human|Respiratory Virus Unit|Respiratory Virus Unit|Platt|United Kingdom

>Spike|hCoV-19/SaudiArabia/KAUST-JEDDAH927/2020|2020-04-06|EPI\_ISL\_513056|Original|hCoV-19^^Jeddah|Human|Pathogen Genomics Lab King Abdullah University of Science and Technology(KAUST)|Pathogen Genomics Lab King Abdullah University of Science and Technology(KAUST)|Mohamed Ghazzali|Saudi Arabia

>Spike|hCoV-19/England/ALDP-A6EBF6/2020|2020-10-15|EPI\_ISL\_607059|Original|hCoV-19^^England|Human|Lighthouse Lab in Alderley Park|Wellcome Sanger Institute for the COVID-19 Genomics UK (COG-UK) consortium|Davies|United Kingdom

>Spike|hCoV-19/Italy/APU-IZSPB\_319PT/2020|2020-04-11|EPI\_ISL\_653813|Original|hCoV-19^^Apulia|Human|Istituto Zooprofilattico Sperimentale della Puglia e della Basilicata|Istituto Zooprofilattico Sperimentale della Puglia e della Basilicata|Parisi|Italy

>Spike|hCoV-19/Wales/PHWC-493D16/2020|2020-11-19|EPI\_ISL\_726015|Original|hCoV-19^^Wales|Human|Originating lab|COVID-19 Genomics UK (COG-UK) Consortium|Moore|United Kingdom

>Spike|hCoV-19/Scotland/QEUA-969AFF/2020|2020-08-12|EPI\_ISL\_530976|Original|hCoV-19^^Scotland|Human|NHSGGC West of Scotland Specialist Virology Centre / MRC-University of Glasgow Centre for Virus Research|Wellcome Sanger Institute for the COVID-19 Genomics UK (COG-UK) consortium|Davies|United Kingdom

>Spike|hCoV-19/Australia/VIC316/2020|2020-03-24|EPI\_ISL\_420007|Original|hCoV-19^^Victoria|Human|Microbiological Diagnostic Unit Public Health Laboratory|Microbiological Diagnostic Unit Public Health Laboratory|Schultz|Australia

>Spike|hCoV-19/England/QEUA-B12BE1/2020|2020-11-02|EPI\_ISL\_642651|Original|hCoV-19^^England|Human|Lighthouse Lab in Glasgow|Wellcome Sanger Institute for the COVID-19 Genomics UK (COG-UK) Consortium|Davies|United Kingdom

>Spike|hCoV-19/Canada/BC\_16537755/2020|2020-04-00|EPI\_ISL\_468680|Original|hCoV-19^^British Columbia|Human|BCCDC Public Health Laboratory|BCCDC Public Health Laboratory|Harrigan|Canada

>Spike|hCoV-19/SaudiArabia/KAUST-JEDDAH1031/2020|2020-06-23|EPI\_ISL\_512900|Original|hCoV-19^^Jeddah|Human|Pathogen Genomics Lab King Abdullah University of Science and Technology(KAUST)|Pathogen Genomics Lab King Abdullah University of Science and Technology(KAUST)|Mohamed Ghazzali|Saudi Arabia

>Spike|hCoV-19/Denmark/DCGC-10990/2020|2020-11-02|EPI\_ISL\_669559|Original|hCoV-19^^Syddanmark|Human|Department of Virus and Microbiological Special Diagnostics|Albertsen Lab|Michaelsen|Denmark

>Spike|hCoV-19/England/QEUA-A61962/2020|2020-10-12|EPI\_ISL\_628645|Original|hCoV-19^^England|Human|Oxford Viromics|COVID-19 Genomics UK (COG-UK) Consortium|Golubchik|United Kingdom

>Spike|hCoV-19/South Africa/KRISP-K002668/2020|2020-08-01|EPI\_ISL\_535534|Original|hCoV-19^^KwaZulu-Natal|Human|NHLS-IALCH|KRISP|de Oliveira|South Africa

>Spike|hCoV-19/England/MILK-B8C9D9/2020|2020-11-13|EPI\_ISL\_675874|Original|hCoV-19^^England|Human|Lighthouse Lab in Milton Keynes|Wellcome Sanger Institute for the COVID-19 Genomics UK (COG-UK) Consortium|Davies|United Kingdom

>Spike|hCoV-19/USA/NY-Wadsworth-200238-01/2020|2020-07-15|EPI\_ISL\_677072|Original|hCoV-19^^New York|Human|Masonic Medical Research Institute|Wadsworth Center|Lasek-Nesselquist|USA

>Spike|hCoV-19/England/ALDP-A4FE7A/2020|2020-10-07|EPI\_ISL\_597622|Original|hCoV-19^^England|Human|Lighthouse Lab in Alderley Park|Wellcome Sanger Institute for the COVID-19 Genomics UK (COG-UK) consortium|Davies|United Kingdom

>Spike|hCoV-19/USA/WA-UW59/2020|2020-03-09|EPI\_ISL\_415624|Original|hCoV-19^^Washington|Human|UW Virology Lab|UW Virology Lab|Roychoudhury|USA

>Spike|hCoV-19/England/QEUA-9B8693/2020|2020-09-10|EPI\_ISL\_549737|Original|hCoV-19^^England|Human|Lighthouse Lab in Glasgow|Wellcome Sanger Institute for the COVID-19 Genomics UK (COG-UK) consortium|Davies|United Kingdom

>Spike|hCoV-19/France/PAC-IHU-1086/2020|2020-08-05|EPI\_ISL\_569048|Original|hCoV-19^^Provence-Alpes-C\u00f4te-d\u00a0Azur|Human|MEPHI|MEPHI|Levasseur|France

>Spike|hCoV-19/England/QEUA-B7C5D8/2020|2020-11-14|EPI\_ISL\_741790|Original|hCoV-19^^England|Human|Oxford Viromics|COVID-19 Genomics UK (COG-UK) Consortium|Golubchik|United Kingdom

>Spike|hCoV-19/Chile/MA-201641/2020|2020-10-08|EPI\_ISL\_746531|Original|hCoV-19^^Magallanes|Human|Genetica Molecular and Subdepartamento de Virologia ISP Chile|Instituto de Salud Publica de Chile|Tognarelli|Chile

>Spike|hCoV-19/USA/CA-CZB-2199/2020|2020-05-27|EPI\_ISL\_513748|Original|hCoV-19^^California|Human|Orange County Public Health Lab|Chan-Zuckerberg Biohub|Kamm|USA

>Spike|hCoV-19/USA/TX-HMH-MCoV-19778/2020|2020-11-28|EPI\_ISL\_784118|Original|hCoV-19^^Texas|Human|Houston Methodist Hospital|Houston Methodist Hospital|Long|USA

>Spike|hCoV-19/England/QEUA-A8C21B/2020|2020-10-16|EPI\_ISL\_643213|Original|hCoV-19^^England|Human|Lighthouse Lab in Glasgow|Wellcome Sanger Institute for the COVID-19 Genomics UK (COG-UK) Consortium|Davies|United Kingdom

>Spike|hCoV-19/Singapore/1155/2020|2020-03-24|EPI\_ISL\_648081|Original|hCoV-19^^Singapore|Human|Department of Laboratory Medicine|Department of Laboratory Medicine|Chen|Singapore

>Spike|hCoV-19/Germany/NW-HHU-499/2020|2020-12-03|EPI\_ISL\_770747|Original|hCoV-19^^North Rhine-Westphalia|Human|ZOTZ KLIMAS MVZ D\u00fcsseldorf-Centrum GbR \u00dcBAG f\u00fcr Labormedizin|Center of Medical Microbiology|Wienemann|Germany

>Spike|hCoV-19/USA/TX-DSHS-1664/2020|2020-06-24|EPI\_ISL\_710078|Original|hCoV-19^^Texas|Human|Texas Department of State Health Services|Texas Department of State Health Services|Rahman|USA

>Spike|hCoV-19/England/20126007002/2020|2020-03-18|EPI\_ISL\_418750|Original|hCoV-19^^England|Human|Respiratory Virus Unit|Respiratory Virus Unit|Platt|United Kingdom

>Spike|hCoV-19/England/QEUA-9BA4B5/2020|2020-09-08|EPI\_ISL\_572921|Original|hCoV-19^^England|Human|Oxford Viromics|COVID-19 Genomics UK (COG-UK) Consortium|Golubchik|United Kingdom

>Spike|hCoV-19/Australia/NSW2071/2020|2020-03-20|EPI\_ISL\_509497|Original|hCoV-19^^New South Wales|Human|Area of Virology|Area of Virology|Yeang|Australia

>Spike|hCoV-19/Belgium/regA-0722815/2020|2020-07-22|EPI\_ISL\_734819|Original|hCoV-19^^Sint-Niklaas|Human|UZ Leuven|KU Leuven|Maes|Belgium

>Spike|hCoV-19/Scotland/CVR4730/2020|2020-09-17|EPI\_ISL\_585424|Original|hCoV-19^^Scotland|Human|West of Scotland Specialist Virology Centre|COVID-19 Genomics UK (COG-UK) Consortium|Robertson|United Kingdom

>Spike|hCoV-19/England/OXON-B0FE4/2020|2020-00-00|EPI\_ISL\_478985|Original|hCoV-19^^England|Human|Oxford Viromics|COVID-19 Genomics UK (COG-UK) Consortium|Golubchik|United Kingdom

>Spike|hCoV-19/England/LEED-2A874F/2020|2020-04-01|EPI\_ISL\_539219|Original|hCoV-19^^England|Human|Leeds Teaching Hospitals NHS Trust and Public Health England|Wellcome Sanger Institute for the COVID-19 Genomics UK (COG-UK) consortium|Davies|United Kingdom

>Spike|hCoV-19/Scotland/GCVR-173A81/2020|2020-04-07|EPI\_ISL\_459149|Original|hCoV-19^^Scotland|Human|NHSGGC West of Scotland Specialist Virology Centre / MRC-University of Glasgow Centre for Virus Research|Wellcome Sanger Institute for the COVID-19 Genomics UK (COG-UK) consortium|Davies|United Kingdom

>Spike|hCoV-19/Denmark/DCGC-20066/2020|2020-12-07|EPI\_ISL\_747962|Original|hCoV-19^^Midtjylland|Human|Department of Virus and Microbiological Special Diagnostics|Albertsen Lab|Michaelsen|Denmark

>Spike|hCoV-19/USA/UT-04162/2020|2020-05-14|EPI\_ISL\_493047|Original|hCoV-19^^Utah|Human|Utah Public Health Laboratory|Utah Public Health Laboratory|Butz|USA

>Spike|hCoV-19/England/CAMC-B071FC/2020|2020-10-30|EPI\_ISL\_643819|Original|hCoV-19^^England|Human|Lighthouse Lab in Cambridge|Wellcome Sanger Institute for the COVID-19 Genomics UK (COG-UK) Consortium|Davies|United Kingdom

>Spike|hCoV-19/England/NORT-1B71707/2020|2020-11-16|EPI\_ISL\_703064|Original|hCoV-19^^England|Human|Northumbria University / South Tees Hospitals NHS Foundation Trust / North Cumbria Integrated Care NHS Foundation Trust / North Tees and Hartlepool NHS Foundation Trust / Newcastle Hospitals NHS Foundation Trust|COVID-19 Genomics UK (COG-UK) Consortium|Bashton|United Kingdom

>Spike|hCoV-19/England/CAMC-A58E6F/2020|2020-10-09|EPI\_ISL\_597181|Original|hCoV-19^^England|Human|Lighthouse Lab in Cambridge|Wellcome Sanger Institute for the COVID-19 Genomics UK (COG-UK) consortium|Davies|United Kingdom

>Spike|hCoV-19/Japan/PG-6765/2020|2020-08-00|EPI\_ISL\_687875|Original|hCoV-19^^Japan|Human|Pathogen Genomics Center|Pathogen Genomics Center|Sekizuka|Japan

>Spike|hCoV-19/England/CAMC-B33A0B/2020|2020-11-05|EPI\_ISL\_659171|Original|hCoV-19^^England|Human|Lighthouse Lab in Cambridge|Wellcome Sanger Institute for the COVID-19 Genomics UK (COG-UK) Consortium|Davies|United Kingdom

>Spike|hCoV-19/Wales/PHWC-162593/2020|2020-05-31|EPI\_ISL\_473240|Original|hCoV-19^^Wales|Human|Wales Specialist Virology Centre Sequencing lab|COVID-19 Genomics UK (COG-UK) Consortium|Moore|United Kingdom

>Spike|hCoV-19/Luxembourg/LNS8646215/2020|2020-12-17|EPI\_ISL\_744780|Original|hCoV-19^^Luxembourg|Human|Laboratoire national de sant\u00e9|Laboratoire national de sant\u00e9|Wienecke-Baldacchino|Luxembourg

>Spike|hCoV-19/England/ALDP-A2DB11/2020|2020-10-06|EPI\_ISL\_586629|Original|hCoV-19^^England|Human|Lighthouse Lab in Alderley Park|Wellcome Sanger Institute for the COVID-19 Genomics UK (COG-UK) consortium|Davies|United Kingdom

>Spike|hCoV-19/USA/NM-NMDOH-2020324516/2020|2020-09-02|EPI\_ISL\_632833|Original|hCoV-19^^New Mexico|Human|New Mexico Department of Health Scientific Laboratory|New Mexico Department of Health Scientific Laboratory|Johnson|USA

>Spike|hCoV-19/England/QEUA-AF5B21/2020|2020-10-30|EPI\_ISL\_662982|Original|hCoV-19^^England|Human|Lighthouse Lab in Glasgow|Wellcome Sanger Institute for the COVID-19 Genomics UK (COG-UK) Consortium|Davies|United Kingdom

>Spike|hCoV-19/England/MILK-B394DA/2020|2020-11-02|EPI\_ISL\_658827|Original|hCoV-19^^England|Human|Lighthouse Lab in Milton Keynes|Wellcome Sanger Institute for the COVID-19 Genomics UK (COG-UK) Consortium|Davies|United Kingdom

>Spike|hCoV-19/Ireland/WW-NVRL-AIIDV1434v1s1/2020|2020-12-01|EPI\_ISL\_791319|Original|hCoV-19^^Wicklow|Human|National Virus Reference Laboratory|Irish Coronavirus Sequencing Consortium - Teagasc Moorepark|Walsh|Ireland

>Spike|hCoV-19/USA/LA-EVTL075/2020|2020-05-04|EPI\_ISL\_451236|Original|hCoV-19^^Louisiana|Human|LSUHS Emerging Viral Threat Laboratory|Microbial Genome Sequencing Center|Kamil|USA

>Spike|hCoV-19/England/MILK-C53CE0/2020|2020-12-11|EPI\_ISL\_736342|Original|hCoV-19^^England|Human|Lighthouse Lab in Milton Keynes|Wellcome Sanger Institute for the COVID-19 Genomics UK (COG-UK) Consortium|Davies|United Kingdom

>Spike|hCoV-19/England/QEUA-9F465F/2020|2020-09-24|EPI\_ISL\_588416|Original|hCoV-19^^England|Human|Lighthouse Lab in Glasgow|Wellcome Sanger Institute for the COVID-19 Genomics UK (COG-UK) consortium|Davies|United Kingdom

>Spike|hCoV-19/Japan/PG-3520/2020|2020-06-00|EPI\_ISL\_691776|Original|hCoV-19^^Japan|Human|Pathogen Genomics Center|Pathogen Genomics Center|Sekizuka|Japan

>Spike|hCoV-19/England/MILK-9955AE/2020|2020-08-25|EPI\_ISL\_551659|Original|hCoV-19^^England|Human|Lighthouse Lab in Milton Keynes|Wellcome Sanger Institute for the COVID-19 Genomics UK (COG-UK) consortium|Davies|United Kingdom

>Spike|hCoV-19/USA/NY-Wadsworth-278122-01/2020|2020-11-22|EPI\_ISL\_754591|Original|hCoV-19^^New York|Human|Wadsworth Center|Wadsworth Center|Lasek-Nesselquist|USA

>Spike|hCoV-19/USA/WI-UW-1743/2020|2020-09-22|EPI\_ISL\_605616|Original|hCoV-19^^Wisconsin|Human|University of Wisconsin-Madison AIDS Vaccine Research Laboratories|University of Wisconsin-Madison AIDS Vaccine Research Laboratories|Baczenas|USA

>Spike|hCoV-19/England/CAMC-B09AFF/2020|2020-10-30|EPI\_ISL\_672920|Original|hCoV-19^^England|Human|Lighthouse Lab in Cambridge|Wellcome Sanger Institute for the COVID-19 Genomics UK (COG-UK) Consortium|Davies|United Kingdom

>Spike|hCoV-19/England/CAMC-B1FEAF/2020|2020-11-01|EPI\_ISL\_647509|Original|hCoV-19^^England|Human|Lighthouse Lab in Cambridge|Wellcome Sanger Institute for the COVID-19 Genomics UK (COG-UK) Consortium|Davies|United Kingdom

>Spike|hCoV-19/Japan/PG-1169/2020|2020-04-00|EPI\_ISL\_684779|Original|hCoV-19^^Japan|Human|Pathogen Genomics Center|Pathogen Genomics Center|Sekizuka|Japan

>Spike|hCoV-19/England/PORT-2D745F/2020|2020-10-22|EPI\_ISL\_626880|Original|hCoV-19^^England|Human|Centre for Enzyme Innovation|COVID-19 Genomics UK (COG-UK) Consortium|Robson|United Kingdom

>Spike|hCoV-19/USA/HI-H200557/2020|2020-10-24|EPI\_ISL\_753086|Original|hCoV-19^^Hawaii|Human|State Laboratories Division|State Laboratories Division|Sultana|USA

>Spike|hCoV-19/Italy/APU-IZSPB\_312PT/2020|2020-11-03|EPI\_ISL\_653806|Original|hCoV-19^^Apulia|Human|I.R.C.C.S. \S. De Bellis\ - Ente Ospedaliero|Istituto Zooprofilattico Sperimentale della Puglia e della Basilicata|Parisi|Italy

>Spike|hCoV-19/Jordan/AQ-ALSR-5271/2020|2020-10-06|EPI\_ISL\_730509|Original|hCoV-19^^Aqaba|Human|Biolab Diagnostic Laboratories|Andersen lab at Scripps Research|Gangavarapu|Jordan

>Spike|hCoV-19/Lithuania/MR-LUHS-Eilnr507/2020|2020-12-00|EPI\_ISL\_770549|Original|hCoV-19^^Jonavos apskritis|Human|Private lab|Lithuanian University of Health Sciences|Zemaitis|Lithuania

>Spike|hCoV-19/England/ALDP-9358C5/2020|2020-06-21|EPI\_ISL\_553003|Original|hCoV-19^^England|Human|Lighthouse Lab in Alderley Park|Wellcome Sanger Institute for the COVID-19 Genomics UK (COG-UK) consortium|Davies|United Kingdom

>Spike|hCoV-19/Australia/NSW1156/2020|2020-10-30|EPI\_ISL\_629009|Original|hCoV-19^^New South Wales|Human|Laverty Pathology|NSW Health Pathology - Institute of Clinical Pathology and Medical Research; Westmead Hospital; University of Sydney|Gall|Australia

>Spike|hCoV-19/England/SHEF-10B22B9/2020|2020-04-20|EPI\_ISL\_469926|Original|hCoV-19^^England|Human|Virology Department|Wellcome Sanger Institute for the COVID-19 Genomics UK (COG-UK) consortium|Davies|United Kingdom

>Spike|hCoV-19/USA/TX-HMH-MCoV-12600/2020|2020-08-31|EPI\_ISL\_790413|Original|hCoV-19^^Texas|Human|Houston Methodist Hospital|Houston Methodist Hospital|Long|USA

>Spike|hCoV-19/Denmark/DCGC-19779/2020|2020-12-07|EPI\_ISL\_747783|Original|hCoV-19^^Hovedstaden|Human|Department of Virus and Microbiological Special Diagnostics|Albertsen Lab|Michaelsen|Denmark

>Spike|hCoV-19/Poland/Sla6/2020|2020-05-05|EPI\_ISL\_451660|Original|hCoV-19^^Slask|Human|State Sanitary Inspectorate|Laboratory of Recombinant Vaccines|Rabalski|Poland

>Spike|hCoV-19/Australia/VIC3549/2020|2020-07-06|EPI\_ISL\_520298|Original|hCoV-19^^Victoria|Human|Victorian Infectious Diseases Reference Laboratory (VIDRL)|VIDRL and MDU-PHL|Schultz|Australia

>Spike|hCoV-19/South Africa/KRISP-K004606/2020|2020-11-08|EPI\_ISL\_660632|Original|hCoV-19^^KwaZulu-Natal|Human|NHLS-IALCH|KRISP|de Oliveira|South Africa

>Spike|hCoV-19/USA/WA-S2838/2020|2020-09-13|EPI\_ISL\_574680|Original|hCoV-19^^Washington|Human|Seattle Flu Study|Seattle Flu Study|Lee|USA

>Spike|hCoV-19/USA/DE-DHSS-F918110/2020|2020-03-26|EPI\_ISL\_582133|Original|hCoV-19^^Delaware|Human|Delaware Public Health Lab|Delaware Public Health Lab|Bajwa|USA

>Spike|hCoV-19/Switzerland/VD-ETHZ-300268/2020|2020-10-01|EPI\_ISL\_603300|Original|hCoV-19^^Vaud|Human|Viollier AG|Department of Biosystems Science and Engineering|Nadeau|Switzerland

>Spike|hCoV-19/USA/MI-UM-10036739832/2020|2020-11-02|EPI\_ISL\_650001|Original|hCoV-19^^Michigan|Human|University of Michigan Clinical Microbiology Laboratory|Lauring Lab|Valesano|USA

>Spike|hCoV-19/England/LOND-12643B1/2020|2020-11-16|EPI\_ISL\_705397|Original|hCoV-19^^England|Human|University College London|COVID-19 Genomics UK (COG-UK) Consortium|Roy|United Kingdom

>Spike|hCoV-19/England/CAMC-B21666/2020|2020-11-03|EPI\_ISL\_647351|Original|hCoV-19^^England|Human|Lighthouse Lab in Cambridge|Wellcome Sanger Institute for the COVID-19 Genomics UK (COG-UK) Consortium|Davies|United Kingdom

>Spike|hCoV-19/Sweden/20-51748/2020|2020-05-20|EPI\_ISL\_510844|Original|hCoV-19^^Vastra Gotaland|Human|Klinisk mikrobiologi NAL Trollhattan|The Public Health Agency of Sweden|Svartstr\u00f6m|Sweden

>Spike|hCoV-19/England/NORW-EB742/2020|2020-05-04|EPI\_ISL\_472312|Original|hCoV-19^^England|Human|Quadram Institute Bioscience|COVID-19 Genomics UK (COG-UK) Consortium|Alikhan|United Kingdom

>Spike|hCoV-19/England/CAMC-B1FECD/2020|2020-11-02|EPI\_ISL\_647654|Original|hCoV-19^^England|Human|Lighthouse Lab in Cambridge|Wellcome Sanger Institute for the COVID-19 Genomics UK (COG-UK) Consortium|Davies|United Kingdom

>Spike|hCoV-19/Denmark/DCGC-11773/2020|2020-10-26|EPI\_ISL\_671127|Original|hCoV-19^^Nordjylland|Human|Department of Virus and Microbiological Special Diagnostics|Albertsen Lab|Michaelsen|Denmark

>Spike|hCoV-19/USA/UT-UPHL-2009185/2020|2020-05-30|EPI\_ISL\_525168|Original|hCoV-19^^Utah|Human|Utah Public Health Laboratory|Utah Public Health Laboratory|Young|USA

>Spike|hCoV-19/England/NOTT-11DAF2/2020|2020-11-24|EPI\_ISL\_706422|Original|hCoV-19^^England|Human|Queens Medical Centre|COVID-19 Genomics UK (COG-UK) Consortium|Loose|United Kingdom

>Spike|hCoV-19/Wales/PHWC-16B266/2020|2020-09-15|EPI\_ISL\_560265|Original|hCoV-19^^Wales|Human|Wales Specialist Virology Centre Sequencing lab|COVID-19 Genomics UK (COG-UK) Consortium|Moore|United Kingdom

>Spike|hCoV-19/Denmark/DCGC-14568/2020|2020-11-30|EPI\_ISL\_711197|Original|hCoV-19^^Syddanmark|Human|Department of Virus and Microbiological Special Diagnostics|Albertsen Lab|Michaelsen|Denmark

>Spike|hCoV-19/USA/NY-QDX-1889/2020|2020-03-16|EPI\_ISL\_604241|Original|hCoV-19^^New York|Human|Quest Diagnostics|Quest Diagnostics|Kagan|USA

>Spike|hCoV-19/England/BRIS-1225F9/2020|2020-04-04|EPI\_ISL\_440790|Original|hCoV-19^^England|Human|PHE South West Regional Laboratory|Wellcome Sanger Institute for the COVID-19 Genomics UK (COG-UK) consortium|Amato|United Kingdom

>Spike|hCoV-19/USA/NY-NYUMC664/2020|2020-03-18|EPI\_ISL\_444781|Original|hCoV-19^^New York|Human|NYU Langone Health|Departments of Pathology and Medicine|Maurano|USA

>Spike|hCoV-19/Netherlands/Gelderland\_145/2020|2020-05-22|EPI\_ISL\_460905|Original|hCoV-19^^Gelderland|Human|Dutch COVID-19 response team|Erasmus Medical Center|Oude Munnink|Netherlands

>Spike|hCoV-19/Russia/SVE-RII-MH2025S/2020|2020-09-20|EPI\_ISL\_602383|Original|hCoV-19^^Sverdlovsk|Human|HELIX LLC|WHO National Influenza Centre Russian Federation|Komissarov|Russia

>Spike|hCoV-19/USA/TX-DSHS-0441/2020|2020-06-05|EPI\_ISL\_541976|Original|hCoV-19^^Texas|Human|Texas Department of State Health Services|Texas Department of State Health Services|Rahman|USA

>Spike|hCoV-19/Luxembourg/LNS6079967/2020|2020-10-24|EPI\_ISL\_744354|Original|hCoV-19^^Luxembourg|Human|Laboratoire national de sant\u00e9|Laboratoire national de sant\u00e9|Wienecke-Baldacchino|Luxembourg

>Spike|hCoV-19/England/ALDP-94CE6F/2020|2020-06-15|EPI\_ISL\_555896|Original|hCoV-19^^England|Human|Lighthouse Lab in Alderley Park|Wellcome Sanger Institute for the COVID-19 Genomics UK (COG-UK) consortium|Davies|United Kingdom

>Spike|hCoV-19/USA/VA-DCLS-0060/2020|2020-03-31|EPI\_ISL\_426468|Original|hCoV-19^^Virginia|Human|Virginia DCLS|Virginia DCLS|St. Jacques|USA

>Spike|hCoV-19/Netherlands/GE-RIVM-10112/2020|2020-03-16|EPI\_ISL\_547464|Original|hCoV-19^^Gelderland|Human|Dutch COVID-19 response team|National Institute for Public Health and the Environment (RIVM)|Meijer|Netherlands

>Spike|hCoV-19/Japan/PG-3436/2020|2020-07-00|EPI\_ISL\_691547|Original|hCoV-19^^Japan|Human|Pathogen Genomics Center|Pathogen Genomics Center|Sekizuka|Japan

>Spike|hCoV-19/USA/OR-OHSU-1701/2020|2020-07-23|EPI\_ISL\_526007|Original|hCoV-19^^Oregon|Human|OHSU Lab Services Molecular Microbiology Lab|Oregon SARS-CoV-2 Genome Sequencing Center|O'Roak|USA

>Spike|hCoV-19/USA/MI-QDX-561/2020|2020-03-17|EPI\_ISL\_571317|Original|hCoV-19^^Michigan|Human|Quest Diagnostics|Quest Diagnostics|Kagan|USA

>Spike|hCoV-19/England/ALDP-9440CB/2020|2020-06-07|EPI\_ISL\_554725|Original|hCoV-19^^England|Human|Lighthouse Lab in Alderley Park|Wellcome Sanger Institute for the COVID-19 Genomics UK (COG-UK) consortium|Davies|United Kingdom

>Spike|hCoV-19/Denmark/DCGC-3210/2020|2020-08-24|EPI\_ISL\_616766|Original|hCoV-19^^Hovedstaden|Human|Department of Virus and Microbiological Special Diagnostics|Albertsen lab|Michaelsen|Denmark

>Spike|hCoV-19/England/MILK-B93D00/2020|2020-11-13|EPI\_ISL\_676059|Original|hCoV-19^^England|Human|Lighthouse Lab in Milton Keynes|Wellcome Sanger Institute for the COVID-19 Genomics UK (COG-UK) Consortium|Davies|United Kingdom

>Spike|hCoV-19/Australia/VIC12589/2020|2020-08-02|EPI\_ISL\_640825|Original|hCoV-19^^Victoria|Human|Microbiological Diagnostic Unit - Public Health Laboratory (MDU-PHL)|MDU-PHL|Schultz|Australia

>Spike|hCoV-19/England/NOTT-117445/2020|2020-10-22|EPI\_ISL\_612192|Original|hCoV-19^^England|Human|Queens Medical Centre|COVID-19 Genomics UK (COG-UK) Consortium|Loose|United Kingdom

>Spike|hCoV-19/Denmark/DCGC-13615/2020|2020-11-30|EPI\_ISL\_712912|Original|hCoV-19^^Hovedstaden|Human|Department of Virus and Microbiological Special Diagnostics|Albertsen Lab|Michaelsen|Denmark

>Spike|hCoV-19/Denmark/DCGC-3265/2020|2020-08-31|EPI\_ISL\_616183|Original|hCoV-19^^Midtjylland|Human|Department of Virus and Microbiological Special Diagnostics|Albertsen lab|Michaelsen|Denmark

>Spike|hCoV-19/Netherlands/ZH-EMC-1001/2020|2020-11-19|EPI\_ISL\_722676|Original|hCoV-19^^Zuid Holland|Human|Dutch COVID-19 response team|Erasmus Medical Center|Oude Munnink|Netherlands

>Spike|hCoV-19/USA/LA-ALSR-0165-NBG/2020|2020-04-08|EPI\_ISL\_529164|Original|hCoV-19^^Louisiana|Human|Department of Immunology|Andersen lab at Scripps Research|Gangavarapu|USA

>Spike|hCoV-19/England/MILK-BB08C0/2020|2020-11-17|EPI\_ISL\_720222|Original|hCoV-19^^England|Human|Lighthouse Lab in Milton Keynes|Wellcome Sanger Institute for the COVID-19 Genomics UK (COG-UK) Consortium|Davies|United Kingdom

>Spike|hCoV-19/Russia/CRIE161122/2020|2020-03-31|EPI\_ISL\_534347|Original|hCoV-19^^Moscow|Human|Molecular diagnostic laboratory of Federal Budget Institution of Science \Central Research Institute of Epidemiology\ of The Federal Service on Customers' Rights Protection and Human Well-being Surveillance|Group of Genomics and Postgenomic Technologies of Central Research Institute of Epidemiology|Spera>nskaya|Russia

>Spike|hCoV-19/Switzerland/VD-ETHZ-300425/2020|2020-09-30|EPI\_ISL\_603382|Original|hCoV-19^^Vaud|Human|Viollier AG|Department of Biosystems Science and Engineering|Nadeau|Switzerland

>Spike|hCoV-19/Denmark/DCGC-4973/2020|2020-09-21|EPI\_ISL\_621511|Original|hCoV-19^^Hovedstaden|Human|Department of Virus and Microbiological Special Diagnostics|Albertsen lab|Michaelsen|Denmark

>Spike|hCoV-19/Switzerland/GE-ETHZ-331454/2020|2020-10-21|EPI\_ISL\_614938|Original|hCoV-19^^Geneva|Human|Viollier AG|Department of Biosystems Science and Engineering|Nadeau|Switzerland

>Spike|hCoV-19/Germany/BAV-MVP0214/2020|2020-04-21|EPI\_ISL\_548955|Original|hCoV-19^^Bavaria|Human|Max von Pettenkofer Institute|Laboratory for Functional Genome Analysis|Graf|Germany

>Spike|hCoV-19/Netherlands/NA\_189/2020|2020-03-23|EPI\_ISL\_422724|Original|hCoV-19^^Netherlands|Human|Dutch COVID-19 response team|Erasmus Medical Center|Oude Munnink|Netherlands

>Spike|hCoV-19/England/MILK-9E2F77/2020|2020-09-21|EPI\_ISL\_581301|Original|hCoV-19^^England|Human|Lighthouse Lab in Milton Keynes|Wellcome Sanger Institute for the COVID-19 Genomics UK (COG-UK) consortium|Davies|United Kingdom

>Spike|hCoV-19/England/MILK-A7C8FE/2020|2020-10-15|EPI\_ISL\_607576|Original|hCoV-19^^England|Human|Lighthouse Lab in Milton Keynes|Wellcome Sanger Institute for the COVID-19 Genomics UK (COG-UK) consortium|Davies|United Kingdom

>Spike|hCoV-19/United Arab Emirates/0521/2020|2020-05-18|EPI\_ISL\_698684|Original|hCoV-19^^Abu Dhabi|Human|Group 42 (G42) Healthcare|G42 Healthcare|Ogrodzki|United Arab Emirates

>Spike|hCoV-19/Scotland/CVR1447/2020|2020-04-01|EPI\_ISL\_438814|Original|hCoV-19^^Scotland|Human|West of Scotland Specialist Virology Centre|COVID-19 Genomics UK (COG-UK) Consortium|Robertson|United Kingdom

>Spike|hCoV-19/Switzerland/SO-ETHZ-410302/2020|2020-12-15|EPI\_ISL\_737797|Original|hCoV-19^^Solothurn|Human|Viollier AG|Department of Biosystems Science and Engineering|Nadeau|Switzerland

>Spike|hCoV-19/England/ALDP-B24548/2020|2020-11-04|EPI\_ISL\_647033|Original|hCoV-19^^England|Human|Lighthouse Lab in Alderley Park|Wellcome Sanger Institute for the COVID-19 Genomics UK (COG-UK) Consortium|Davies|United Kingdom

>Spike|hCoV-19/Jordan/SEARCH-5470/2020|2020-09-10|EPI\_ISL\_755144|Original|hCoV-19^^Amman|Human|Biolab Diagnostic Laboratories|Andersen lab at Scripps Research|Gangavarapu|Jordan

>Spike|hCoV-19/England/210100359/2021|2021-01-00|EPI\_ISL\_791195|Original|hCoV-19^^England|Human|Respiratory Virus Unit|COVID-19 Genomics UK (COG-UK) Consortium|Platt|United Kingdom

>Spike|hCoV-19/Belgium/Rega-0328207/2020|2020-03-28|EPI\_ISL\_458177|Original|hCoV-19^^Oudergem|Human|KU Leuven|KU Leuven|Maes|Belgium

>Spike|hCoV-19/Belgium/reg-0707711/2020|2020-07-07|EPI\_ISL\_734794|Original|hCoV-19^^Molenstede|Human|UZ Leuven|KU Leuven|Maes|Belgium

>Spike|hCoV-19/Denmark/DCGC-18434/2020|2020-12-07|EPI\_ISL\_749235|Original|hCoV-19^^Syddanmark|Human|Department of Virus and Microbiological Special Diagnostics|Albertsen Lab|Michaelsen|Denmark

>Spike|hCoV-19/Denmark/DCGC-4904/2020|2020-09-21|EPI\_ISL\_621442|Original|hCoV-19^^Syddanmark|Human|Department of Virus and Microbiological Special Diagnostics|Albertsen lab|Michaelsen|Denmark

>Spike|hCoV-19/USA/NY-Wadsworth-288935-01/2020|2020-12-21|EPI\_ISL\_767495|Original|hCoV-19^^New York|Human|Wadsworth Center|Wadsworth Center|Lasek-Nesselquist|USA

>Spike|hCoV-19/USA/LA-EVTL356/2020|2020-05-25|EPI\_ISL\_578762|Original|hCoV-19^^Louisiana|Human|LSUHS Emerging Viral Threat Laboratory|Microbial Genome Sequencing Center|Kamil|USA

>Spike|hCoV-19/England/QEUH-9E53E1/2020|2020-09-23|EPI\_ISL\_589775|Original|hCoV-19^^England|Human|Lighthouse Lab in Glasgow|Wellcome Sanger Institute for the COVID-19 Genomics UK (COG-UK) consortium|Davies|United Kingdom

>Spike|hCoV-19/Scotland/QEUH-998101/2020|2020-08-27|EPI\_ISL\_568396|Original|hCoV-19^^Scotland|Human|Lighthouse Lab in Glasgow|Wellcome Sanger Institute for the COVID-19 Genomics UK (COG-UK) consortium|Davies|United Kingdom

>Spike|hCoV-19/England/ALDP-B1C4BF/2020|2020-11-01|EPI\_ISL\_645669|Original|hCoV-19^^England|Human|Lighthouse Lab in Alderley Park|Wellcome Sanger Institute for the COVID-19 Genomics UK (COG-UK) Consortium|Davies|United Kingdom

>Spike|hCoV-19/Denmark/DCGC-18058/2020|2020-12-14|EPI\_ISL\_749730|Original|hCoV-19^^Hovedstaden|Human|Department of Virus and Microbiological Special Diagnostics|Albertsen Lab|Michaelsen|Denmark

>Spike|hCoV-19/Switzerland/BS-ETHZ-101136/2020|2020-03-30|EPI\_ISL\_451803|Original|hCoV-19^^Basel-Stadt|Human|Viollier AG|Department of Biosystems Science and Engineering|Nadeau|Switzerland

>Spike|hCoV-19/USA/TX-HMH-872/2020|2020-04-06|EPI\_ISL\_545889|Original|hCoV-19^^Texas|Human|Houston Methodist Hospital|Houston Methodist Hospital|Long|USA

>Spike|hCoV-19/USA/AK-PHL896/2020|2020-07-06|EPI\_ISL\_528533|Original|hCoV-19^^Alaska|Human|Alaska State Virology Laboratory|Alaska State Virology Laboratory|Drown|USA

>Spike|hCoV-19/USA/TX-HMH-MCoV-19559/2020|2020-11-17|EPI\_ISL\_783931|Original|hCoV-19^^Texas|Human|Houston Methodist Hospital|Houston Methodist Hospital|Long|USA

>Spike|hCoV-19/Spain/MD-IBV-99007124/2020|2020-07-30|EPI\_ISL\_541898|Original|hCoV-19^^Madrid|Human|Hospital General Universitario Gregorio Mara\u00f1a|SeqCOVID-SPAIN consortium|IBV (CSIC)|Comas|Spain

>Spike|hCoV-19/USA/CA-CZB-2031/2020|2020-05-11|EPI\_ISL\_486279|Original|hCoV-19^^California|Human|Orange County Public Health Laboratory|Chan-Zuckerberg Biohub|McGeever|USA



>Spike|hCoV-19/Latvia/174/2020|2020-10-02|EPI\_ISL\_639671|Original|hCoV-19^^Latvia|Human|E. Gulbja Laboratorija|Latvian Biomedical Research and Study Centre|Zrelavs|Latvia

>Spike|hCoV-19/England/LIVE-A063D/2020|2020-05-26|EPI\_ISL\_472123|Original|hCoV-19^^England|Human|Liverpool Clinical Laboratories|COVID-19 Genomics UK (COG-UK) Consortium|Haldenby|United Kingdom

>Spike|hCoV-19/England/QEUA-C33642/2020|2020-12-11|EPI\_ISL\_782682|Original|hCoV-19^^England|Human|Lighthouse Lab in Glasgow|Wellcome Sanger Institute for the COVID-19 Genomics UK (COG-UK) Consortium|Davies|United Kingdom

>Spike|hCoV-19/Switzerland/VD-ETHZ-270075/2020|2020-09-03|EPI\_ISL\_541477|Original|hCoV-19^^Vaud|Human|Viollier AG|Department of Biosystems Science and Engineering|Nadeau|Switzerland

>Spike|hCoV-19/USA/MI-UM-10036484282/2020|2020-10-16|EPI\_ISL\_628833|Original|hCoV-19^^Michigan|Human|University of Michigan Clinical Microbiology Laboratory|Lauring Lab|Valesano|USA

>Spike|hCoV-19/USA/TX-HMH-2672/2020|2020-06-04|EPI\_ISL\_545466|Original|hCoV-19^^Texas|Human|Houston Methodist Hospital|Houston Methodist Hospital|Long|USA

>Spike|hCoV-19/USA/AZ-TG532070/2020|2020-07-01|EPI\_ISL\_695405|Original|hCoV-19^^Arizona|Human|AZ SPHL|TGen North|French|USA

>Spike|hCoV-19/England/CAMC-BC0AD6/2020|2020-11-22|EPI\_ISL\_704742|Original|hCoV-19^^England|Human|Lighthouse Lab in Cambridge|Wellcome Sanger Institute for the COVID-19 Genomics UK (COG-UK) Consortium|Davies|United Kingdom

>Spike|hCoV-19/Japan/PG-8319/2020|2020-08-00|EPI\_ISL\_687418|Original|hCoV-19^^Japan|Human|Pathogen Genomics Center|Pathogen Genomics Center|Sekizuka|Japan

>Spike|hCoV-19/Wales/PHWC-32E92/2020|2020-04-14|EPI\_ISL\_446701|Original|hCoV-19^^Wales|Human|Wales Specialist Virology Centre|Public Health Wales Microbiology Cardiff|Moore|United Kingdom

>Spike|hCoV-19/England/ALDP-AA567A/2020|2020-10-22|EPI\_ISL\_624157|Original|hCoV-19^^England|Human|Lighthouse Lab in Alderley Park|Wellcome Sanger Institute for the COVID-19 Genomics UK (COG-UK) consortium|Davies|United Kingdom

>Spike|hCoV-19/England/LOND-124D257/2020|2020-03-25|EPI\_ISL\_507072|Original|hCoV-19^^England|Human|University College London Hospital|COVID-19 Genomics UK (COG-UK) Consortium|Byott|United Kingdom

>Spike|hCoV-19/England/QEUA-AD4EF2/2020|2020-10-26|EPI\_ISL\_633702|Original|hCoV-19^^England|Human|Lighthouse Lab in Glasgow|Wellcome Sanger Institute for the COVID-19 Genomics UK (COG-UK) consortium|Davies|United Kingdom

>Spike|hCoV-19/SaudiArabia/KAUST-MADINAH854/2020|2020-05-27|EPI\_ISL\_513192|Original|hCoV-19^^Madinah|Human|Pathogen Genomics Lab King Abdullah University of Science and Technology(KAUST)|Pathogen Genomics Lab King Abdullah University of Science and Technology(KAUST)|Mohamed Ghazzali|Saudi Arabia

>Spike|hCoV-19/USA/UT-QDX-1481/2020|2020-03-15|EPI\_ISL\_603866|Original|hCoV-19^^Utah|Human|Quest Diagnostics|Quest Diagnostics|Kagan|USA

>Spike|hCoV-19/Denmark/DCGC-19566/2020|2020-12-07|EPI\_ISL\_748234|Original|hCoV-19^^Sjaelland|Human|Department of Virus and Microbiological Special Diagnostics|Albertsen Lab|Michaelsen|Denmark

>Spike|hCoV-19/England/ALDP-A6DF28/2020|2020-10-14|EPI\_ISL\_607778|Original|hCoV-19^^England|Human|Lighthouse Lab in Alderley Park|Wellcome Sanger Institute for the COVID-19 Genomics UK (COG-UK) consortium|Davies|United Kingdom

>Spike|hCoV-19/Wales/PHWC-28F05/2020|2020-04-02|EPI\_ISL\_431964|Original|hCoV-19^^Wales|Human|Wales Specialist Virology Centre|Public Health Wales Microbiology Cardiff|Moore|United Kingdom

>Spike|hCoV-19/England/QEUA-9B8068/2020|2020-09-04|EPI\_ISL\_590547|Original|hCoV-19^^England|Human|Lighthouse Lab in Glasgow|Wellcome Sanger Institute for the COVID-19 Genomics UK (COG-UK) consortium|Davies|United Kingdom

>Spike|hCoV-19/England/MILK-B88339/2020|2020-11-14|EPI\_ISL\_674306|Original|hCoV-19^^England|Human|Lighthouse Lab in Milton Keynes|Wellcome Sanger Institute for the COVID-19 Genomics UK (COG-UK) Consortium|Davies|United Kingdom

>Spike|hCoV-19/England/MILK-A44BBA/2020|2020-10-04|EPI\_ISL\_598565|Original|hCoV-19^^England|Human|Lighthouse Lab in Milton Keynes|Wellcome Sanger Institute for the COVID-19 Genomics UK (COG-UK) consortium|Davies|United Kingdom

>Spike|hCoV-19/Australia/VIC808/2020|2020-03-28|EPI\_ISL\_427082|Original|hCoV-19^^Victoria|Human|Victorian Infectious Diseases Reference Laboratory (VIDRL)|Microbiological Diagnostic Unit Public Health Laboratory and Victorian Infectious Diseases Reference Laboratory|Schultz|Australia

>Spike|hCoV-19/Portugal/PT1616/2020|2020-07-08|EPI\_ISL\_693618|Original|hCoV-19^^Portugal|Human|Instituto Nacional de Saude (INSA)|Instituto Nacional de Saude (INSA)|Borges|Portugal

>Spike|hCoV-19/England/MILK-AB86FC/2020|2020-10-21|EPI\_ISL\_623513|Original|hCoV-19^^England|Human|Lighthouse Lab in Milton Keynes|Wellcome Sanger Institute for the COVID-19 Genomics UK (COG-UK) consortium|Davies|United Kingdom

>Spike|hCoV-19/England/QEUK-B6B985/2020|2020-11-11|EPI\_ISL\_655220|Original|hCoV-19^^England|Human|Lighthouse Lab in Glasgow|Wellcome Sanger Institute for the COVID-19 Genomics UK (COG-UK) Consortium|Davies|United Kingdom

>Spike|hCoV-19/England/QEUK-9E34A4/2020|2020-09-22|EPI\_ISL\_584848|Original|hCoV-19^^England|Human|Northumbria University / South Tees Hospitals NHS Foundation Trust / North Cumbria Integrated Care NHS Foundation Trust / North Tees and Hartlepool NHS Foundation Trust / Newcastle Hospitals NHS Foundation Trust|COVID-19 Genomics UK (COG-UK) Consortium|Bashton|United Kingdom

>Spike|hCoV-19/England/NOTT-11F902/2020|2020-11-27|EPI\_ISL\_725584|Original|hCoV-19^^England|Human|Lincolnshire Hospitals and DeepSeq Nottingham|COVID-19 Genomics UK (COG-UK) Consortium|Loose|United Kingdom

>Spike|hCoV-19/USA/CA-ALSR-0630-IPL/2020|2020-04-23|EPI\_ISL\_483269|Original|hCoV-19^^California|Human|UC San Diego Center for Advanced Laboratory Medicine|Andersen lab at Scripps Research|Gangavarapu|USA

>Spike|hCoV-19/England/BRIS-1293E9/2020|2020-04-20|EPI\_ISL\_458820|Original|hCoV-19^^England|Human|PHE South West Regional Laboratory|Wellcome Sanger Institute for the COVID-19 Genomics UK (COG-UK) consortium|Davies|United Kingdom

>Spike|hCoV-19/England/MILK-4B830A/2020|2020-06-05|EPI\_ISL\_559207|Original|hCoV-19^^England|Human|Lighthouse Lab in Milton Keynes|Wellcome Sanger Institute for the COVID-19 Genomics UK (COG-UK) consortium|Davies|United Kingdom

>Spike|hCoV-19/England/ALDP-A6CA0A/2020|2020-10-14|EPI\_ISL\_606930|Original|hCoV-19^^England|Human|Lighthouse Lab in Alderley Park|Wellcome Sanger Institute for the COVID-19 Genomics UK (COG-UK) consortium|Davies|United Kingdom

>Spike|hCoV-19/Switzerland/BE-ETHZ-300444/2020|2020-09-30|EPI\_ISL\_603397|Original|hCoV-19^^Bern|Human|Viollier AG|Department of Biosystems Science and Engineering|Nadeau|Switzerland

>Spike|hCoV-19/USA/WA-UW-4585/2020|2020-03-31|EPI\_ISL\_515274|Original|hCoV-19^^Washington|Human|University of Washington Virology Lab|University of Washington Virology Lab|Roychoudhury|USA

>Spike|hCoV-19/Spain/PV-IBV-001603/2020|2020-03-12|EPI\_ISL\_467139|Original|hCoV-19^^Basque Country|Human|Hospital Universitario Araba. Vitoria-Gasteiz|SeqCOVID-SPAIN consortium|IBV (CSIC)|Comas|Spain

>Spike|hCoV-19/Scotland/EDB3419/2020|2020-04-10|EPI\_ISL\_487686|Original|hCoV-19^^Scotland|Human|Virology Department|Wellcome Sanger Institute for the COVID-19 Genomics UK (COG-UK) consortium|Davies|United Kingdom

>Spike|hCoV-19/England/MILK-AB754B/2020|2020-10-21|EPI\_ISL\_623807|Original|hCoV-19^^England|Human|Lighthouse Lab in Milton Keynes|Wellcome Sanger Institute for the COVID-19 Genomics UK (COG-UK) consortium|Davies|United Kingdom

>Spike|hCoV-19/Australia/VIC17334/2020|2020-00-00|EPI\_ISL\_663847|Original|hCoV-19^^Victoria|Human|Microbiological Diagnostic Unit - Public Health Laboratory (MDU-PHL)|MDU-PHL|Schultz|Australia

>Spike|hCoV-19/Luxembourg/LNS7124526/2020|2020-12-11|EPI\_ISL\_744519|Original|hCoV-19^^Luxembourg|Human|Laboratoire national de sant\u00e9|Laboratoire national de sant\u00e9|Wienecke-Baldacchino|Luxembourg

>Spike|hCoV-19/England/MILK-B04A7C/2020|2020-10-24|EPI\_ISL\_650593|Original|hCoV-19^^England|Human|Department of Pathology|COVID-19 Genomics UK (COG-UK) Consortium|Goodfellow|United Kingdom

>Spike|hCoV-19/Denmark/DCGC-9605/2020|2020-11-09|EPI\_ISL\_669063|Original|hCoV-19^^Hovedstaden|Human|Department of Virus and Microbiological Special Diagnostics|Albertsen Lab|Michaelsen|Denmark

>Spike|hCoV-19/South Africa/NHLS-UCT-GS-1353/2020|2020-11-02|EPI\_ISL\_700548|Original|hCoV-19^^Western Cape|Human|Alma CDC wc AHC|NHLS/UCT|Iranzadeh|South Africa

>Spike|hCoV-19/Scotland/EDB11077/2020|2020-12-15|EPI\_ISL\_742201|Original|hCoV-19^^Scotland|Human|Virology Department|COVID-19 Genomics UK (COG-UK) Consortium|McHugh|United Kingdom

>Spike|hCoV-19/USA/WA-S59/2020|2020-03-02|EPI\_ISL\_417112|Original|hCoV-19^^Washington|Human|Washington State Department of Health|Seattle Flu Study|Bedford|USA

>Spike|hCoV-19/USA/NE-001-17/2020|2020-09-26|EPI\_ISL\_732820|Original|hCoV-19^^Nebraska|Human|Nebraska Public Health Laboratory|UNMC COVID-19 Response Team|Pratt|USA

>Spike|hCoV-19/Denmark/DCGC-1113/2020|2020-03-16|EPI\_ISL\_614622|Original|hCoV-19^^Nordjylland|Human|Department of Virus and Microbiological Special Diagnostics|Albertsen lab|Michaelsen|Denmark

>Spike|hCoV-19/USA/TX-HMH-MCoV-18291/2020|2020-11-15|EPI\_ISL\_784639|Original|hCoV-19^^Texas|Human|Houston Methodist Hospital|Houston Methodist Hospital|Long|USA

>Spike|hCoV-19/Scotland/QEUH-AA06AC/2020|2020-10-21|EPI\_ISL\_666100|Original|hCoV-19^^Scotland|Human|Northumbria University / South Tees Hospitals NHS Foundation Trust / North Cumbria Integrated Care NHS Foundation Trust / North Tees and Hartlepool NHS Foundation Trust / Newcastle Hospitals NHS Foundation Trust|COVID-19 Genomics UK (COG-UK) Consortium|Bashton|United Kingdom

>Spike|hCoV-19/England/CAMC-B37102/2020|2020-11-05|EPI\_ISL\_645472|Original|hCoV-19^^England|Human|Lighthouse Lab in Cambridge|Wellcome Sanger Institute for the COVID-19 Genomics UK (COG-UK) Consortium|Davies|United Kingdom

>Spike|hCoV-19/USA/TX-HMH-MCoV-15284/2020|2020-10-19|EPI\_ISL\_786768|Original|hCoV-19^^Texas|Human|Houston Methodist Hospital|Houston Methodist Hospital|Long|USA

>Spike|hCoV-19/England/CAMB-1AB14F/2020|2020-04-19|EPI\_ISL\_470134|Original|hCoV-19^^England|Human|Department of Pathology|Wellcome Sanger Institute for the COVID-19 Genomics UK (COG-UK) consortium|Davies|United Kingdom

>Spike|hCoV-19/USA/MD-HP12128/2020|2020-12-21|EPI\_ISL\_791438|Original|hCoV-19^^Maryland|Human|Johns Hopkins Hospital Department of Pathology|Johns Hopkins Hospital Department of Pathology|Morris|USA

>Spike|hCoV-19/England/CAMC-C85FCE/2020|2020-12-17|EPI\_ISL\_756659|Original|hCoV-19^^England|Human|Lighthouse Lab in Cambridge|Wellcome Sanger Institute for the COVID-19 Genomics UK (COG-UK) Consortium|Davies|United Kingdom

>Spike|hCoV-19/England/CAMB-1BCA31/2020|2020-00-00|EPI\_ISL\_705558|Original|hCoV-19^^England|Human|Department of Pathology|COVID-19 Genomics UK (COG-UK) Consortium|Goodfellow|United Kingdom

>Spike|hCoV-19/USA/UT-UPHL-201228458/2020|2020-04-01|EPI\_ISL\_672558|Original|hCoV-19^^Utah|Human|Utah Public Health Laboratory|Utah Public Health Laboratory|Young|USA

>Spike|hCoV-19/England/CAMB-1BB2D0/2020|2020-11-13|EPI\_ISL\_664554|Original|hCoV-19^^England|Human|Department of Pathology|COVID-19 Genomics UK (COG-UK) Consortium|Goodfellow|United Kingdom

>Spike|hCoV-19/USA/CA-QDX-1669/2020|2020-03-18|EPI\_ISL\_603920|Original|hCoV-19^^California|Human|Quest Diagnostics|Quest Diagnostics|Kagan|USA

>Spike|hCoV-19/USA/MI-QDX-886/2020|2020-03-18|EPI\_ISL\_571607|Original|hCoV-19^^Michigan|Human|Quest Diagnostics|Quest Diagnostics|Kagan|USA

>Spike|hCoV-19/England/MILK-9A51E3/2020|2020-09-02|EPI\_ISL\_550224|Original|hCoV-19^^England|Human|Lighthouse Lab in Milton Keynes|Wellcome Sanger Institute for the COVID-19 Genomics UK (COG-UK) consortium|Davies|United Kingdom

>Spike|hCoV-19/Japan/PG-2931/2020|2020-04-00|EPI\_ISL\_691057|Original|hCoV-19^^Japan|Human|Pathogen Genomics Center|Pathogen Genomics Center|Sekizuka|Japan

>Spike|hCoV-19/Switzerland/AG-ETHZ-380338/2020|2020-11-26|EPI\_ISL\_721733|Original|hCoV-19^^Aargau|Human|Viollier AG|Department of Biosystems Science and Engineering|Nadeau|Switzerland

>Spike|hCoV-19/England/QEUH-960A16/2020|2020-08-03|EPI\_ISL\_531948|Original|hCoV-19^^England|Human|Lighthouse Lab in Glasgow|Wellcome Sanger Institute for the COVID-19 Genomics UK (COG-UK) consortium|Davies|United Kingdom

>Spike|hCoV-19/England/LIVE-DAE3C2/2020|2020-10-15|EPI\_ISL\_627141|Original|hCoV-19^^England|Human|Liverpool Clinical Laboratories|COVID-19 Genomics UK (COG-UK) Consortium|Haldenby|United Kingdom

>Spike|hCoV-19/England/NOTT-10F5C5/2020|2020-04-03|EPI\_ISL\_433024|Original|hCoV-19^^England|Human|Queens Medical Centre|COVID-19 Genomics UK (COG-UK) Consortium|Loose|United Kingdom

>Spike|hCoV-19/USA/SC-DHEC-0014/2020|2020-03-14|EPI\_ISL\_529171|Original|hCoV-19^^South Carolina|Human|South Carolina Department of Health and Environmental Control|South Carolina Department of Health and Environmental Control|Flores|USA

>Spike|hCoV-19/Austria/CeMM0878/2020|2020-05-06|EPI\_ISL\_583740|Original|hCoV-19^^Austria|Human|Dr. Gernot Walder GmbH|Bergthaler laboratory|Bergthaler|Austria

>Spike|hCoV-19/USA/TX-HMH-MCoV-12044/2020|2020-09-20|EPI\_ISL\_790181|Original|hCoV-19^^Texas|Human|Houston Methodist Hospital|Houston Methodist Hospital|Long|USA

>Spike|hCoV-19/Denmark/DCGC-5394/2020|2020-09-07|EPI\_ISL\_615326|Original|hCoV-19^^Midtjylland|Human|Department of Virus and Microbiological Special Diagnostics|Albertsen lab|Michaelsen|Denmark

>Spike|hCoV-19/Kenya/C5455/2020|2020-05-10|EPI\_ISL\_568768|Original|hCoV-19^^Mombasa|Human|KEMRI-Wellcome Trust Research Programme/KEMRI-CGMR-C Kilifi|KEMRI-Wellcome Trust Research Programme/KEMRI-CGMR-C Kilifi|Githinji|Kenya

>Spike|hCoV-19/USA/OR-OHSU-0050/2020|2020-04-16|EPI\_ISL\_437530|Original|hCoV-19^^Oregon|Human|OHSU Lab Services Molecular Microbiology Lab|Oregon SARS-CoV-2 Genome Sequencing Center|O'Roak|USA

>Spike|hCoV-19/Wuhan/HB-WH4-205/2020|2020-03-01|EPI\_ISL\_454955|Original|hCoV-19^^Hubei|Human|Wuhan Chain Medical Labs (CMLabs)|State Key Laboratory of Biotherapy of Sichuan University|Tang|China

>Spike|hCoV-19/England/EXET-138DCB/2020|2020-09-10|EPI\_ISL\_627444|Original|hCoV-19^^England|Human|University of Exeter|COVID-19 Genomics UK (COG-UK) Consortium|Temperton|United Kingdom

>Spike|hCoV-19/Portugal/PT0233/2020|2020-03-31|EPI\_ISL\_453947|Original|hCoV-19^^Portugal|Human|unknown|Instituto Nacional de Saude (INSA)|Borges|Portugal

>Spike|hCoV-19/Scotland/CVR3986/2020|2020-08-30|EPI\_ISL\_540783|Original|hCoV-19^^Scotland|Human|West of Scotland Specialist Virology Centre|COVID-19 Genomics UK (COG-UK) Consortium|Robertson|United Kingdom

>Spike|hCoV-19/England/ALDP-9442B6/2020|2020-06-07|EPI\_ISL\_554663|Original|hCoV-19^^England|Human|Lighthouse Lab in Alderley Park|Wellcome Sanger Institute for the COVID-19 Genomics UK (COG-UK) consortium|Davies|United Kingdom

>Spike|hCoV-19/South Korea/KDCA0285/2020|2020-10-24|EPI\_ISL\_760079|Original|hCoV-19^^South Korea|Human|Division of Emerging Infectious Diseases|Division of Emerging Infectious Diseases|Park|South Korea

>Spike|hCoV-19/Germany/HH-hpi-pl623/2020|2020-03-17|EPI\_ISL\_776075|Original|hCoV-19^^Hamburg|Human|University Medical Center Hamburg Eppendorf|Heinrich Pette Institute|Robitaille|Germany

>Spike|hCoV-19/England/CAMC-B33DE4/2020|2020-11-05|EPI\_ISL\_659206|Original|hCoV-19^^England|Human|Lighthouse Lab in Cambridge|Wellcome Sanger Institute for the COVID-19 Genomics UK (COG-UK) Consortium|Davies|United Kingdom

>Spike|hCoV-19/Australia/VIC2659/2020|2020-07-01|EPI\_ISL\_521505|Original|hCoV-19^^Victoria|Human|Victorian Infectious Diseases Reference Laboratory (VIDRL)|VIDRL and MDU-PHL|Schultz|Australia

>Spike|hCoV-19/England/QEUEH-B2E502/2020|2020-11-03|EPI\_ISL\_646174|Original|hCoV-19^^England|Human|Lighthouse Lab in Glasgow|Wellcome Sanger Institute for the COVID-19 Genomics UK (COG-UK) Consortium|Davies|United Kingdom

>Spike|hCoV-19/USA/MI-UM-10035790107/2020|2020-09-03|EPI\_ISL\_583316|Original|hCoV-19^^Michigan|Human|University of Michigan Clinical Microbiology Laboratory|Lauring Lab|Valesano|USA

>Spike|hCoV-19/England/20134015704/2020|2020-03-24|EPI\_ISL\_423086|Original|hCoV-19^^England|Human|Respiratory Virus Unit|Respiratory Virus Unit|Platt|United Kingdom

>Spike|hCoV-19/USA/WA-S1325/2020|2020-05-15|EPI\_ISL\_495775|Original|hCoV-19^^Washington|Human|Washington State Department of Health|Seattle Flu Study|Lee|USA

>Spike|hCoV-19/Japan/PG-0213/2020|2020-02-28|EPI\_ISL\_479913|Original|hCoV-19^^Kanto|Human|Niigata City Public Health Research Institute|Pathogen Genomics Center|Sekizuka|Japan

>Spike|hCoV-19/England/CAMB-846D5/2020|2020-03-10|EPI\_ISL\_440509|Original|hCoV-19^^England|Human|Department of Pathology|Wellcome Sanger Institute for the COVID-19 Genomics UK (COG-UK) consortium|Amato|United Kingdom

>Spike|hCoV-19/Switzerland/ZH-ETHZ-420097/2020|2020-12-18|EPI\_ISL\_768306|Original|hCoV-19^^Zurich|Human|Viollier AG|Department of Biosystems Science and Engineering|Nadeau|Switzerland

>Spike|hCoV-19/Sweden/20-08079/2020|2020-03-05|EPI\_ISL\_454454|Original|hCoV-19^^Stockholm|Human|Karolinska Universitetslaboratoriet|The Public Health Agency of Sweden|Svartstr\u00f6m|Sweden

>Spike|hCoV-19/England/ALDP-AA53EC/2020|2020-10-21|EPI\_ISL\_625143|Original|hCoV-19^^England|Human|Lighthouse Lab in Alderley Park|Wellcome Sanger Institute for the COVID-19 Genomics UK (COG-UK) consortium|Davies|United Kingdom

>Spike|hCoV-19/England/CAMC-B799DF/2020|2020-11-12|EPI\_ISL\_667905|Original|hCoV-19^^England|Human|Lighthouse Lab in Cambridge|Wellcome Sanger Institute for the COVID-19 Genomics UK (COG-UK) Consortium|Davies|United Kingdom

>Spike|hCoV-19/Netherlands/ZH-EMC-848/2020|2020-09-27|EPI\_ISL\_632716|Original|hCoV-19^^Zuid Holland|Human|Dutch COVID-19 response team|Erasmus Medical Center|Oude Munnink|Netherlands

>Spike|hCoV-19/USA/MN-QDX-1711/2020|2020-03-17|EPI\_ISL\_604065|Original|hCoV-19^^Minnesota|Human|Quest Diagnostics|Quest Diagnostics|Kagan|USA

>Spike|hCoV-19/Netherlands/NA\_114/2020|2020-03-10|EPI\_ISL\_422662|Original|hCoV-19^^Netherlands|Human|Dutch COVID-19 response team|Erasmus Medical Center|Oude Munnink|Netherlands

>Spike|hCoV-19/England/QEUEH-CC33C8/2020|2020-12-21|EPI\_ISL\_760621|Original|hCoV-19^^England|Human|Lighthouse Lab in Glasgow|Wellcome Sanger Institute for the COVID-19 Genomics UK (COG-UK) Consortium|Davies|United Kingdom

>Spike|hCoV-19/South Africa/KRISP-K002593/2020|2020-08-01|EPI\_ISL\_535458|Original|hCoV-19^^KwaZulu-Natal|Human|NHLs-IALCH|KRISP|de Oliveira|South Africa

>Spike|hCoV-19/Denmark/DCGC-14085/2020|2020-11-30|EPI\_ISL\_711556|Original|hCoV-19^^Syddanmark|Human|Department of Virus and Microbiological Special Diagnostics|Albertsen Lab|Michaelsen|Denmark

>Spike|hCoV-19/USA/CO-CDPHE-2011210297/2020|2020-11-19|EPI\_ISL\_771269|Original|hCoV-19^^Colorado|Human|Colorado Department of Public Health and Environment|Colorado Department of Public Health and Environment|Bankers|USA

>Spike|hCoV-19/Switzerland/GE-HUG-4807/2020|2020-03-23|EPI\_ISL\_429215|Original|hCoV-19^^Geneve|Human|University Hospitals of Geneva Laboratory of Virology|University Hospitals of Geneva Laboratory of Virology|Cordey|Switzerland

>Spike|hCoV-19/Turkey/KU-018/2020|2020-04-29|EPI\_ISL\_495428|Original|hCoV-19^^Kars Province|Human|Kafkas University|Kafkas University|Karamese|Turkey

>Spike|hCoV-19/England/MILK-B55775/2020|2020-11-06|EPI\_ISL\_657581|Original|hCoV-19^^England|Human|Lighthouse Lab in Milton Keynes|Wellcome Sanger Institute for the COVID-19 Genomics UK (COG-UK) Consortium|Davies|United Kingdom

>Spike|hCoV-19/England/CAMC-B0B26E/2020|2020-10-29|EPI\_ISL\_643461|Original|hCoV-19^^England|Human|Lighthouse Lab in Cambridge|Wellcome Sanger Institute for the COVID-19 Genomics UK (COG-UK) Consortium|Davies|United Kingdom

>Spike|hCoV-19/England/LOND-1263482/2020|2020-11-01|EPI\_ISL\_651179|Original|hCoV-19^^England|Human|University College London|COVID-19 Genomics UK (COG-UK) Consortium|Roy|United Kingdom

>Spike|hCoV-19/England/QEUEH-A310B1/2020|2020-10-02|EPI\_ISL\_595862|Original|hCoV-19^^England|Human|Quadram Institute Bioscience|COVID-19 Genomics UK (COG-UK) Consortium|Alikhan|United Kingdom

>Spike|hCoV-19/England/CAMC-B78378/2020|2020-11-12|EPI\_ISL\_661638|Original|hCoV-19^^England|Human|Lighthouse Lab in Cambridge|Wellcome Sanger Institute for the COVID-19 Genomics UK (COG-UK) Consortium|Davies|United Kingdom

>Spike|hCoV-19/England/20132003004/2020|2020-03-22|EPI\_ISL\_423711|Original|hCoV-19^^England|Human|Respiratory Virus Unit|Respiratory Virus Unit|Platt|United Kingdom

>Spike|hCoV-19/England/ALDP-A6E983/2020|2020-10-15|EPI\_ISL\_607910|Original|hCoV-19^^England|Human|Lighthouse Lab in Alderley Park|Wellcome Sanger Institute for the COVID-19 Genomics UK (COG-UK) consortium|Davies|United Kingdom

>Spike|hCoV-19/Australia/VIC14950/2020|2020-09-23|EPI\_ISL\_593075|Original|hCoV-19^^Victoria|Human|Microbiological Diagnostic Unit - Public Health Laboratory (MDU-PHL)|MDU-PHL|Schultz|Australia

>Spike|hCoV-19/Scotland/ALDP-B73850/2020|2020-11-12|EPI\_ISL\_662488|Original|hCoV-19^^Scotland|Human|Lighthouse Lab in Alderley Park|Wellcome Sanger Institute for the COVID-19 Genomics UK (COG-UK) Consortium|Davies|United Kingdom

>Spike|hCoV-19/USA/TX-HMH-MCoV-14130/2020|2020-10-02|EPI\_ISL\_787415|Original|hCoV-19^^Texas|Human|Houston Methodist Hospital|Houston Methodist Hospital|Long|USA

>Spike|hCoV-19/New Zealand/20CV0499/2020|2020-10-25|EPI\_ISL\_622827|Original|hCoV-19^^South Canterbury|Human|Canterbury Health Laboratories|Institute of Environmental Science and Research (ESR)|Wang|New Zealand

>Spike|hCoV-19/England/NORT-2896A1/2020|2020-03-31|EPI\_ISL\_458648|Original|hCoV-19^^England|Human|NU-OMICS DNA Sequencing research facility|Wellcome Sanger Institute for the COVID-19 Genomics UK (COG-UK) consortium|Davies|United Kingdom

>Spike|hCoV-19/Portugal/PT1689/2020|2020-11-12|EPI\_ISL\_732156|Original|hCoV-19^^Portugal|Human|Instituto Nacional de Saude (INSA) and Instituto Gulbenkian de Ciencia (IGC)|Instituto Nacional de Saude (INSA) and Instituto Gulbenkian de Ciencia (IGC)|Borges|Portugal

>Spike|hCoV-19/Curacao/CW-RIVM-10092/2020|2020-03-10|EPI\_ISL\_547450|Original|hCoV-19^^Curacao|Human|Dutch COVID-19 response team|National Institute for Public Health and the Environment (RIVM)|Meijer|Curacao

>Spike|hCoV-19/England/LIVE-DBE8C0/2020|2020-10-29|EPI\_ISL\_664695|Original|hCoV-19^^England|Human|Liverpool Clinical Laboratories|COVID-19 Genomics UK (COG-UK) Consortium|Haldenby|United Kingdom

>Spike|hCoV-19/England/CAMC-B51DC2/2020|2020-11-08|EPI\_ISL\_658028|Original|hCoV-19^^England|Human|Lighthouse Lab in Cambridge|Wellcome Sanger Institute for the COVID-19 Genomics UK (COG-UK) Consortium|Davies|United Kingdom

>Spike|hCoV-19/USA/WA-UW340/2020|2020-03-16|EPI\_ISL\_418907|Original|hCoV-19^^Washington|Human|UW Virology Lab|UW Virology Lab|Roychoudhury|USA

>Spike|hCoV-19/Scotland/EDB2778/2020|2020-03-30|EPI\_ISL\_456898|Original|hCoV-19^^Scotland|Human|Virology Department|COVID-19 Genomics UK (COG-UK) Consortium|Williams|United Kingdom

>Spike|hCoV-19/England/CAMC-A64729/2020|2020-10-09|EPI\_ISL\_608873|Original|hCoV-19^^England|Human|Lighthouse Lab in Cambridge|Wellcome Sanger Institute for the COVID-19 Genomics UK (COG-UK) consortium|Davies|United Kingdom

>Spike|hCoV-19/Japan/PG-3281/2020|2020-04-00|EPI\_ISL\_691396|Original|hCoV-19^^Japan|Human|Pathogen Genomics Center|Pathogen Genomics Center|Sekizuka|Japan

>Spike|hCoV-19/USA/MI-UM-1003555295/2020|2020-08-19|EPI\_ISL\_583264|Original|hCoV-19^^Michigan|Human|University of Michigan Clinical Microbiology Laboratory|Lauring Lab|Valesano|USA

>Spike|hCoV-19/England/ALDP-A4FEA7/2020|2020-10-07|EPI\_ISL\_597681|Original|hCoV-19^^England|Human|Lighthouse Lab in Alderley Park|Wellcome Sanger Institute for the COVID-19 Genomics UK (COG-UK) consortium|Davies|United Kingdom

>Spike|hCoV-19/USA/NY-NYCPHL-001079/2020|2020-10-16|EPI\_ISL\_633080|Original|hCoV-19^^New York|Human|DOHMH Morrisania|New York City Public Health Laboratory|Wang|USA

>Spike|hCoV-19/Denmark/DCGC-3883/2020|2020-09-14|EPI\_ISL\_615602|Original|hCoV-19^^Hovedstaden|Human|Department of Virus and Microbiological Special Diagnostics|Albertsen lab|Michaelsen|Denmark

>Spike|hCoV-19/Spain/PV-IBV-98001476/2020|2020-03-17|EPI\_ISL\_537894|Original|hCoV-19^^Basque Country|Human|Hospital Universitario Araba. Vitoria-Gasteiz|SeqCOVID-SPAIN consortium|IBV (CSIC)|Comas|Spain

>Spike|hCoV-19/USA/WA-UW81/2020|2020-03-10|EPI\_ISL\_416437|Original|hCoV-19^^Washington|Human|UW Virology Lab|UW Virology Lab|Roychoudhury|USA

>Spike|hCoV-19/Denmark/ALAB-SSI-640/2020|2020-03-26|EPI\_ISL\_437014|Original|hCoV-19^^Denmark|Human|Department of Virus and Microbiological Special Diagnostics|Albertsen lab|Kirkegaard|Denmark

>Spike|hCoV-19/England/MILK-ACCE48/2020|2020-10-20|EPI\_ISL\_630230|Original|hCoV-19^^England|Human|Lighthouse Lab in Milton Keynes|Wellcome Sanger Institute for the COVID-19 Genomics UK (COG-UK) consortium|Davies|United Kingdom

>Spike|hCoV-19/USA/CA-CZB-15360/2020|2020-05-22|EPI\_ISL\_739024|Original|hCoV-19^^California|Human|Santa Clara County Public Health Laboratory|Chan-Zuckerberg Biohub|Kamm|USA

>Spike|hCoV-19/USA/TX-HMH-MCoV-15935/2020|2020-07-10|EPI\_ISL\_785619|Original|hCoV-19^^Texas|Human|Houston Methodist Hospital|Houston Methodist Hospital|Long|USA

>Spike|hCoV-19/England/ALDP-9CD09D/2020|2020-09-16|EPI\_ISL\_566393|Original|hCoV-19^^England|Human|Lighthouse Lab in Alderley Park|Wellcome Sanger Institute for the COVID-19 Genomics UK (COG-UK) consortium|Davies|United Kingdom

>Spike|hCoV-19/England/BRIS-12F4B3/2020|2020-04-13|EPI\_ISL\_488424|Original|hCoV-19^^England|Human|PHE South West Regional Laboratory|Wellcome Sanger Institute for the COVID-19 Genomics UK (COG-UK) consortium|Davies|United Kingdom

>Spike|hCoV-19/England/ALDP-AA44F9/2020|2020-10-22|EPI\_ISL\_625031|Original|hCoV-19^^England|Human|Lighthouse Lab in Alderley Park|Wellcome Sanger Institute for the COVID-19 Genomics UK (COG-UK) consortium|Davies|United Kingdom

>Spike|hCoV-19/England/CAMB-1ABCF3/2020|2020-04-21|EPI\_ISL\_470248|Original|hCoV-19^^England|Human|Department of Pathology|Wellcome Sanger Institute for the COVID-19 Genomics UK (COG-UK) consortium|Davies|United Kingdom

>Spike|hCoV-19/England/ALDP-B82DAA/2020|2020-11-14|EPI\_ISL\_675180|Original|hCoV-19^^England|Human|Lighthouse Lab in Alderley Park|Wellcome Sanger Institute for the COVID-19 Genomics UK (COG-UK) Consortium|Davies|United Kingdom

>Spike|hCoV-19/USA/CA-CHLA-PLM80644511/2020|2020-12-07|EPI\_ISL\_753668|Original|hCoV-19^^California|Human|Clinical virology Laboratory|Center for Personalized Medicine|Dien Bard|USA

>Spike|hCoV-19/Australia/VIC4103/2020|2020-07-13|EPI\_ISL\_519483|Original|hCoV-19^^Victoria|Human|Microbiological Diagnostic Unit - Public Health Laboratory (MDU-PHL)|MDU-PHL|Schultz|Australia

>Spike|hCoV-19/Wales/PHWC-48AAFD/2020|2020-11-05|EPI\_ISL\_666121|Original|hCoV-19^^Wales|Human|Wales Specialist Virology Centre Sequencing lab|COVID-19 Genomics UK (COG-UK) Consortium|Moore|United Kingdom

>Spike|hCoV-19/England/ALDP-AC121A/2020|2020-10-10|EPI\_ISL\_631231|Original|hCoV-19^^England|Human|Lighthouse Lab in Alderley Park|Wellcome Sanger Institute for the COVID-19 Genomics UK (COG-UK) consortium|Davies|United Kingdom

>Spike|hCoV-19/England/ALDP-A2F13B/2020|2020-10-05|EPI\_ISL\_587128|Original|hCoV-19^^England|Human|Lighthouse Lab in Alderley Park|Wellcome Sanger Institute for the COVID-19 Genomics UK (COG-UK) consortium|Davies|United Kingdom

>Spike|hCoV-19/USA/CA-CZB-15332/2020|2020-11-25|EPI\_ISL\_738520|Original|hCoV-19^^California|Human|Santa Clara County Public Health Laboratory|Chan-Zuckerberg Biohub|Kamm|USA

>Spike|hCoV-19/England/QEUA-B699F0/2020|2020-11-11|EPI\_ISL\_661436|Original|hCoV-19^^England|Human|Lighthouse Lab in Glasgow|Wellcome Sanger Institute for the COVID-19 Genomics UK (COG-UK) Consortium|Davies|United Kingdom

>Spike|hCoV-19/England/GSTT-5505/2020|2020-03-22|EPI\_ISL\_560685|Original|hCoV-19^^England|Human|Centre for Clinical Infection and Diagnostics Research and Genomics Innovation Unit|Centre for Clinical Infection and Diagnostics Research and Genomics Innovation Unit|Awan|United Kingdom

>Spike|hCoV-19/USA/LA-EVTL662/2020|2020-07-13|EPI\_ISL\_653354|Original|hCoV-19^^Louisiana|Human|LSUHS Emerging Viral Threat Laboratory|Microbial Genome Sequencing Center|Kamil|USA

>Spike|hCoV-19/South Africa/KRISP-0269/2020|2020-06-17|EPI\_ISL\_482856|Original|hCoV-19^^KwaZulu-Natal|Human|Molecular Diagnostics Services (MDS)|KRISP|de Oliveira|South Africa

>Spike|hCoV-19/Brazil/AP-IEC-164082/2020|2020-04-15|EPI\_ISL\_458143|Original|hCoV-19^^Amapa|Human|\uffeffEvandro Chagas Institute|\uffeffEvandro Chagas Institute|Sousa J\u00fanior|Brazil

>Spike|hCoV-19/England/QEUA-79EE24/2020|2020-07-15|EPI\_ISL\_533081|Original|hCoV-19^^England|Human|Lighthouse Lab in Glasgow|Wellcome Sanger Institute for the COVID-19 Genomics UK (COG-UK) consortium|Davies|United Kingdom

>Spike|hCoV-19/USA/NY-NYCPHL-000856/2020|2020-03-26|EPI\_ISL\_632232|Original|hCoV-19^^New York|Human|Richmond University Medical Center|New York City Public Health Laboratory|Wang|USA

>Spike|hCoV-19/USA/CT-Yale-579/2020|2020-05-14|EPI\_ISL\_738296|Original|hCoV-19^^Connecticut|Human|Yale Pathology Lab|Grubaugh Lab - Yale School of Public Health|Grubaugh|USA

>Spike|hCoV-19/Scotland/CVR2035/2020|2020-04-08|EPI\_ISL\_484544|Original|hCoV-19^^Scotland|Human|West of Scotland Specialist Virology Centre|COVID-19 Genomics UK (COG-UK) Consortium|Robertson|United Kingdom

>Spike|hCoV-19/Latvia/130/2020|2020-08-25|EPI\_ISL\_534220|Original|hCoV-19^^Latvia|Human|Centr\u0101l\u0101 laboratorija|Latvian Biomedical Research and Study Centre|Zrelavs|Latvia

>Spike|hCoV-19/Netherlands/GE-EMC-188/2020|2020-04-22|EPI\_ISL\_523170|Original|hCoV-19^^Gelderland|Human|Dutch COVID-19 response team|Erasmus Medical Center|Oude Munnink|Netherlands

>Spike|hCoV-19/England/MILK-9F095A/2020|2020-09-24|EPI\_ISL\_589741|Original|hCoV-19^^England|Human|Lighthouse Lab in Milton Keynes|Wellcome Sanger Institute for the COVID-19 Genomics UK (COG-UK) consortium|Davies|United Kingdom

>Spike|hCoV-19/USA/NY-Wadsworth-44557-01/2020|2020-04-10|EPI\_ISL\_525668|Original|hCoV-19^^New York|Human|Wadsworth Center|Wadsworth Center|Plitnick|USA

>Spike|hCoV-19/Wales/PHWC-4A4DD6/2020|2020-12-09|EPI\_ISL\_763750|Original|hCoV-19^^Wales|Human|Wales Specialist Virology Centre Sequencing lab|COVID-19 Genomics UK (COG-UK) Consortium|Moore|United Kingdom

>Spike|hCoV-19/Scotland/QEUA-AF4ADA/2020|2020-10-29|EPI\_ISL\_676486|Original|hCoV-19^^Scotland|Human|Lighthouse Lab in Glasgow|Wellcome Sanger Institute for the COVID-19 Genomics UK (COG-UK) Consortium|Davies|United Kingdom

>Spike|hCoV-19/Scotland/EDB9233/2020|2020-11-03|EPI\_ISL\_651158|Original|hCoV-19^^Scotland|Human|Virology Department|COVID-19 Genomics UK (COG-UK) Consortium|McHugh|United Kingdom

>Spike|hCoV-19/USA/MD-MDH-0236/2020|2020-09-27|EPI\_ISL\_602259|Original|hCoV-19^^Maryland|Human|MD PHL|MD PHL|Keller|USA

>Spike|hCoV-19/England/CAMC-945E2A/2020|2020-07-15|EPI\_ISL\_556713|Original|hCoV-19^^England|Human|Lighthouse Lab in Cambridge|Wellcome Sanger Institute for the COVID-19 Genomics UK (COG-UK) consortium|Davies|United Kingdom

>Spike|hCoV-19/Wales/PHWC-498D4E/2020|2020-11-27|EPI\_ISL\_727204|Original|hCoV-19^^Wales|Human|Originating lab|COVID-19 Genomics UK (COG-UK) Consortium|Moore|United Kingdom

>Spike|hCoV-19/Wales/CAMC-A81FA6/2020|2020-10-11|EPI\_ISL\_625282|Original|hCoV-19^^Wales|Human|Lighthouse Lab in Cambridge|Wellcome Sanger Institute for the COVID-19 Genomics UK (COG-UK) consortium|Davies|United Kingdom

>Spike|hCoV-19/England/MILK-9C4773/2020|2020-09-10|EPI\_ISL\_549461|Original|hCoV-19^^England|Human|Centre for Enzyme Innovation|COVID-19 Genomics UK (COG-UK) Consortium|Robson|United Kingdom

>Spike|hCoV-19/USA/WA-UW-7675/2020|2020-04-18|EPI\_ISL\_570191|Original|hCoV-19^^Washington|Human|UW Virology Lab|UW Virology Lab|Roychoudhury|USA

>Spike|hCoV-19/Israel/130710062/2020|2020-04-14|EPI\_ISL\_447469|Original|hCoV-19^^Tel Aviv District|Human|Clinical Microbiology Laboratory|Stern Lab|Miller|Israel

>Spike|hCoV-19/England/QEUA-AD201C/2020|2020-10-26|EPI\_ISL\_634092|Original|hCoV-19^^England|Human|Lighthouse Lab in Glasgow|Wellcome Sanger Institute for the COVID-19 Genomics UK (COG-UK) consortium|Davies|United Kingdom

>Spike|hCoV-19/Germany/BE-ChVir-D1997-8209/2020|2020-10-05|EPI\_ISL\_753889|Original|hCoV-19^^Berlin|Human|Charit\u00e9 Universit\u00e4tsmedizin Berlin|Charit\u00e9 Universit\u00e4tsmedizin Berlin|Muehlemann|Germany

>Spike|hCoV-19/England/MILK-5104B1/2020|2020-06-11|EPI\_ISL\_559028|Original|hCoV-19^^England|Human|Lighthouse Lab in Milton Keynes|Wellcome Sanger Institute for the COVID-19 Genomics UK (COG-UK) consortium|Davies|United Kingdom



>Spike|hCoV-19/England/NORT-292DCE/2020|2020-05-19|EPI\_ISL\_489073|Original|hCoV-19^^England|Human|NU-OMICS DNA Sequencing research facility|Wellcome Sanger Institute for the COVID-19 Genomics UK (COG-UK) consortium|Davies|United Kingdom

>Spike|hCoV-19/Denmark/DCGC-3272/2020|2020-08-31|EPI\_ISL\_616304|Original|hCoV-19^^Hovedstaden|Human|Department of Virus and Microbiological Special Diagnostics|Albertsen lab|Michaelsen|Denmark

>Spike|hCoV-19/Luxembourg/LNS9272998/2020|2020-04-17|EPI\_ISL\_434512|Original|hCoV-19^^Luxembourg|Human|Laboratoire National de Sante|Laboratoire National de Sante|Wienecke-Baldacchino|Luxembourg

>Spike|hCoV-19/Wales/PHWC-4A2AE0/2020|2020-12-11|EPI\_ISL\_743978|Original|hCoV-19^^Wales|Human|Wales Specialist Virology Centre Sequencing lab|COVID-19 Genomics UK (COG-UK) Consortium|Moore|United Kingdom

>Spike|hCoV-19/Finland/8LS13F1/2020|2020-10-08|EPI\_ISL\_755974|Original|hCoV-19^^Uusimaa|Human|Department of Virology and Immunology|Department of Virology|Smura|Finland

>Spike|hCoV-19/South Korea/KCDC2694/2020|2020-07-04|EPI\_ISL\_522474|Original|hCoV-19^^South Korea|Human|Division of Viral Diseases|Division of Viral Diseases|Kim|South Korea

>Spike|hCoV-19/England/QEUEH-998F25/2020|2020-08-24|EPI\_ISL\_541811|Original|hCoV-19^^England|Human|Lighthouse Lab in Glasgow|Wellcome Sanger Institute for the COVID-19 Genomics UK (COG-UK) consortium|Davies|United Kingdom

>Spike|hCoV-19/Denmark/DCGC-6097/2020|2020-10-05|EPI\_ISL\_620292|Original|hCoV-19^^Hovedstaden|Human|Department of Virus and Microbiological Special Diagnostics|Albertsen lab|Michaelsen|Denmark

>Spike|hCoV-19/England/QEUEH-BCE8CF/2020|2020-11-26|EPI\_ISL\_704496|Original|hCoV-19^^England|Human|Lighthouse Lab in Glasgow|Wellcome Sanger Institute for the COVID-19 Genomics UK (COG-UK) Consortium|Davies|United Kingdom

>Spike|hCoV-19/Scotland/CVR739/2020|2020-03-26|EPI\_ISL\_439098|Original|hCoV-19^^Scotland|Human|West of Scotland Specialist Virology Centre|COVID-19 Genomics UK (COG-UK) Consortium|Robertson|United Kingdom

>Spike|hCoV-19/England/ALDP-A67D15/2020|2020-10-09|EPI\_ISL\_608920|Original|hCoV-19^^England|Human|Lighthouse Lab in Alderley Park|Wellcome Sanger Institute for the COVID-19 Genomics UK (COG-UK) consortium|Davies|United Kingdom

>Spike|hCoV-19/Norway/6601/2020|2020-12-03|EPI\_ISL\_775401|Original|hCoV-19^^Nordland|Human|Nordland Hospital - Bodo|Norwegian Institute of Public Health|Vollan|Norway

>Spike|hCoV-19/Denmark/DCGC-13554/2020|2020-11-30|EPI\_ISL\_712875|Original|hCoV-19^^Midtjylland|Human|Department of Virus and Microbiological Special Diagnostics|Albertsen Lab|Michaelsen|Denmark

>Spike|hCoV-19/USA/TX-DSHS-1648/2020|2020-06-24|EPI\_ISL\_710073|Original|hCoV-19^^Texas|Human|Texas Department of State Health Services|Texas Department of State Health Services|Rahman|USA

>Spike|hCoV-19/Japan/PG-3824/2020|2020-07-00|EPI\_ISL\_692075|Original|hCoV-19^^Japan|Human|Pathogen Genomics Center|Pathogen Genomics Center|Sekizuka|Japan

>Spike|hCoV-19/Netherlands/NA\_588/2020|2020-00-00|EPI\_ISL\_460752|Original|hCoV-19^^Netherlands|Human|Dutch COVID-19 response team|Erasmus Medical Center|Oude Munnink|Netherlands

>Spike|hCoV-19/England/20139054704/2020|2020-03-27|EPI\_ISL\_420712|Original|hCoV-19^^England|Human|Respiratory Virus Unit|Respiratory Virus Unit|Platt|United Kingdom

>Spike|hCoV-19/USA/CA-QDX-2665/2020|2020-03-16|EPI\_ISL\_604913|Original|hCoV-19^^California|Human|Quest Diagnostics|Quest Diagnostics|Kagan|USA

>Spike|hCoV-19/USA/WA-S2614/2020|2020-06-19|EPI\_ISL\_497246|Original|hCoV-19^^Washington|Human|Washington State Department of Health|Seattle Flu Study|Lee|USA

>Spike|hCoV-19/England/MILK-9E136D/2020|2020-09-20|EPI\_ISL\_580996|Original|hCoV-19^^England|Human|Lighthouse Lab in Milton Keynes|Wellcome Sanger Institute for the COVID-19 Genomics UK (COG-UK) consortium|Davies|United Kingdom

>Spike|hCoV-19/Finland/20MS4A7/2020|2020-03-20|EPI\_ISL\_757369|Original|hCoV-19^^Uusimaa|Human|Department of Virology and Immunology|Department of Virology|Smura|Finland

>Spike|hCoV-19/Scotland/QEUH-A33583/2020|2020-10-04|EPI\_ISL\_626791|Original|hCoV-19^^Scotland|Human|Virology Department|COVID-19 Genomics UK (COG-UK) Consortium|de Silva|United Kingdom

>Spike|hCoV-19/Switzerland/BE-ETHZ-331067/2020|2020-10-20|EPI\_ISL\_614919|Original|hCoV-19^^Bern|Human|Viollier AG|Department of Biosystems Science and Engineering|Nadeau|Switzerland

>Spike|hCoV-19/USA/TX-DSHS-1469/2020|2020-06-22|EPI\_ISL\_676620|Original|hCoV-19^^Texas|Human|Texas Department of State Health Services|Texas Department of State Health Services|Rahman|USA

>Spike|hCoV-19/Myanmar/NIH-4385/2020|2020-00-00|EPI\_ISL\_434709|Original|hCoV-19^^Myanmar|Human|unknown|National Institute of Health. Department of medical Sciences|Okada|Myanmar

>Spike|hCoV-19/USA/MI-MDHHS-SC21818/2020|2020-03-13|EPI\_ISL\_565861|Original|hCoV-19^^Michigan|Human|Michigan Department of Health and Human Services|Michigan Department of Health and Human Services|Blankenship|USA

>Spike|hCoV-19/Canada/ON-S916/2020|2020-04-13|EPI\_ISL\_586484|Original|hCoV-19^^Ontario|Human|Toronto Invasive Bacterial Diseases Network|McMaster University|McArthur|Canada

>Spike|hCoV-19/England/QEUH-AF671D/2020|2020-10-30|EPI\_ISL\_663199|Original|hCoV-19^^England|Human|Lighthouse Lab in Glasgow|Wellcome Sanger Institute for the COVID-19 Genomics UK (COG-UK) Consortium|Davies|United Kingdom

>Spike|hCoV-19/Scotland/MILK-9C3817/2020|2020-09-08|EPI\_ISL\_575990|Original|hCoV-19^^Scotland|Human|Lighthouse Lab in Milton Keynes|Wellcome Sanger Institute for the COVID-19 Genomics UK (COG-UK) consortium|Davies|United Kingdom

>Spike|hCoV-19/Russia/OMS-ORINFI-9975S/2020|2020-06-22|EPI\_ISL\_569852|Original|hCoV-19^^Omsk|Human|Omsk Research Institute of Natural Focal Infections|WHO National Influenza Centre Russian Federation|Komissarov|Russia

>Spike|hCoV-19/England/ALDP-A8495A/2020|2020-10-18|EPI\_ISL\_610302|Original|hCoV-19^^England|Human|Lighthouse Lab in Alderley Park|Wellcome Sanger Institute for the COVID-19 Genomics UK (COG-UK) consortium|Davies|United Kingdom

>Spike|hCoV-19/England/20192150801/2020|2020-05-04|EPI\_ISL\_465604|Original|hCoV-19^^England|Human|Respiratory Virus Unit|Respiratory Virus Unit|Platt|United Kingdom

>Spike|hCoV-19/USA/WA-S2859/2020|2020-09-17|EPI\_ISL\_596390|Original|hCoV-19^^Washington|Human|Seattle Flu Study|Seattle Flu Study|Lee|USA

>Spike|hCoV-19/England/MILK-A7BADB/2020|2020-10-15|EPI\_ISL\_607557|Original|hCoV-19^^England|Human|Lighthouse Lab in Milton Keynes|Wellcome Sanger Institute for the COVID-19 Genomics UK (COG-UK) consortium|Davies|United Kingdom

>Spike|hCoV-19/Israel/CVL-158-ngs/2020|2020-12-27|EPI\_ISL\_776845|Original|hCoV-19^^Israel|Human|Israel Central Virology laboratory|Israel Central Virology laboratory|Zuckerman|Israel

>Spike|hCoV-19/England/MILK-87248D/2020|2020-07-17|EPI\_ISL\_557509|Original|hCoV-19^^England|Human|Lighthouse Lab in Milton Keynes|Wellcome Sanger Institute for the COVID-19 Genomics UK (COG-UK) consortium|Davies|United Kingdom

>Spike|hCoV-19/England/MILK-BFCD7E/2020|2020-12-03|EPI\_ISL\_720809|Original|hCoV-19^^England|Human|Lighthouse Lab in Milton Keynes|Wellcome Sanger Institute for the COVID-19 Genomics UK (COG-UK) Consortium|Davies|United Kingdom

>Spike|hCoV-19/Scotland/CVR3794/2020|2020-05-31|EPI\_ISL\_478122|Original|hCoV-19^^Scotland|Human|West of Scotland Specialist Virology Centre|COVID-19 Genomics UK (COG-UK) Consortium|Robertson|United Kingdom

>Spike|hCoV-19/England/QEUH-96B019/2020|2020-08-15|EPI\_ISL\_531376|Original|hCoV-19^^England|Human|Lighthouse Lab in Glasgow|Wellcome Sanger Institute for the COVID-19 Genomics UK (COG-UK) consortium|Davies|United Kingdom

>Spike|hCoV-19/USA/TX-HMH-MCoV-13572/2020|2020-08-21|EPI\_ISL\_788683|Original|hCoV-19^^Texas|Human|Houston Methodist Hospital|Houston Methodist Hospital|Long|USA

>Spike|hCoV-19/Denmark/DCGC-4571/2020|2020-09-21|EPI\_ISL\_621368|Original|hCoV-19^^Hovedstaden|Human|Department of Virus and Microbiological Special Diagnostics|Albertsen lab|Michaelsen|Denmark

>Spike|hCoV-19/Ireland/D-SVUH-R9588/2020|2020-04-29|EPI\_ISL\_596628|Original|hCoV-19^^Dublin|Human|St.Vincent's University Hospital|St.Vincent's University Hospital|Gonzalez|Ireland

>Spike|hCoV-19/Scotland/CVR233/2020|2020-03-19|EPI\_ISL\_438888|Original|hCoV-19^^Scotland|Human|West of Scotland Specialist Virology Centre|COVID-19 Genomics UK (COG-UK) Consortium|Robertson|United Kingdom

>Spike|hCoV-19/Denmark/DCGC-7791/2020|2020-10-19|EPI\_ISL\_618698|Original|hCoV-19^^Hovedstaden|Human|Department of Virus and Microbiological Special Diagnostics|Albertsen lab|Michaelsen|Denmark

>Spike|hCoV-19/USA/MI-QDX-928/2020|2020-03-22|EPI\_ISL\_571633|Original|hCoV-19^^Michigan|Human|Quest Diagnostics|Quest Diagnostics|Kagan|USA

>Spike|hCoV-19/England/20162010504/2020|2020-04-12|EPI\_ISL\_466409|Original|hCoV-19^^England|Human|Respiratory Virus Unit|Respiratory Virus Unit|Platt|United Kingdom

>Spike|hCoV-19/England/MILK-A7D2FF/2020|2020-10-13|EPI\_ISL\_606556|Original|hCoV-19^^England|Human|Lighthouse Lab in Milton Keynes|Wellcome Sanger Institute for the COVID-19 Genomics UK (COG-UK) consortium|Davies|United Kingdom

>Spike|hCoV-19/England/QEUK-AD3BCF/2020|2020-10-26|EPI\_ISL\_634234|Original|hCoV-19^^England|Human|Lighthouse Lab in Glasgow|Wellcome Sanger Institute for the COVID-19 Genomics UK (COG-UK) consortium|Davies|United Kingdom

>Spike|hCoV-19/Australia/NSW1033/2020|2020-06-26|EPI\_ISL\_593685|Original|hCoV-19^^New South Wales|Human|South Eastern Area Laboratory Services (SEALS)|NSW Health Pathology - Institute of Clinical Pathology and Medical Research; Westmead Hospital; University of Sydney|Gall|Australia

>Spike|hCoV-19/England/ALDP-9BE2E4/2020|2020-09-10|EPI\_ISL\_567930|Original|hCoV-19^^England|Human|Lighthouse Lab in Alderley Park|Wellcome Sanger Institute for the COVID-19 Genomics UK (COG-UK) consortium|Davies|United Kingdom

>Spike|hCoV-19/Scotland/CVR5973/2020|2020-10-27|EPI\_ISL\_703771|Original|hCoV-19^^Scotland|Human|West of Scotland Specialist Virology Centre|COVID-19 Genomics UK (COG-UK) Consortium|Robertson|United Kingdom

>Spike|hCoV-19/Singapore/723/2020|2020-06-24|EPI\_ISL\_500544|Original|hCoV-19^^Singapore|Human|Singapore General Hospital|Department of Microbiology|Abdul Rahman|Singapore

>Spike|hCoV-19/Canada/ON-PHL-20-03759/2020|2020-11-00|EPI\_ISL\_775042|Original|hCoV-19^^Ontario|Human|Public Health Ontario Laboratory|Public Health Ontario Laboratory|Guthrie|Canada

>Spike|hCoV-19/England/MILK-B56A02/2020|2020-11-05|EPI\_ISL\_656808|Original|hCoV-19^^England|Human|Lighthouse Lab in Milton Keynes|Wellcome Sanger Institute for the COVID-19 Genomics UK (COG-UK) Consortium|Davies|United Kingdom

>Spike|hCoV-19/England/MILK-60EEF3/2020|2020-07-06|EPI\_ISL\_557808|Original|hCoV-19^^England|Human|Lighthouse Lab in Milton Keynes|Wellcome Sanger Institute for the COVID-19 Genomics UK (COG-UK) consortium|Davies|United Kingdom

>Spike|hCoV-19/Spain/GA-IBV-004065/2020|2020-03-18|EPI\_ISL\_510303|Original|hCoV-19^^Galicia|Human|Hospital Cl\u00e9nico Universitario de Santiago de Compostela|SeqCOVID-SPAIN consortium|IBV (CSIC)|Comas|Spain

>Spike|hCoV-19/USA/MN-QDX-959/2020|2020-03-14|EPI\_ISL\_571760|Original|hCoV-19^^Minnesota|Human|Quest Diagnostics|Quest Diagnostics|Kagan|USA

>Spike|hCoV-19/England/LOND-124D0C6/2020|2020-03-17|EPI\_ISL\_507053|Original|hCoV-19^^England|Human|University College London Hospital|COVID-19 Genomics UK (COG-UK) Consortium|Byott|United Kingdom

>Spike|hCoV-19/Poland/PL\_MCB\_11/2020|2020-04-22|EPI\_ISL\_645010|Original|hCoV-19^^Poland|Human|Human Genome Variation Research Group|Human Genome Variation Research Group||Poland

>Spike|hCoV-19/England/MILK-566C5A/2020|2020-06-12|EPI\_ISL\_558361|Original|hCoV-19^^England|Human|Lighthouse Lab in Milton Keynes|Wellcome Sanger Institute for the COVID-19 Genomics UK (COG-UK) consortium|Davies|United Kingdom

>Spike|hCoV-19/USA/UT-QDX-2289/2020|2020-03-13|EPI\_ISL\_604609|Original|hCoV-19^^Utah|Human|Quest Diagnostics|Quest Diagnostics|Kagan|USA

>Spike|hCoV-19/England/201161565/2020|2020-03-11|EPI\_ISL\_464859|Original|hCoV-19^^England|Human|Respiratory Virus Unit|Respiratory Virus Unit|Platt|United Kingdom

>Spike|hCoV-19/Netherlands/Friesland\_33/2020|2020-04-14|EPI\_ISL\_460848|Original|hCoV-19^^Friesland|Human|Dutch COVID-19 response team|Erasmus Medical Center|Oude Munnink|Netherlands

>Spike|hCoV-19/England/ALDP-A87948/2020|2020-10-16|EPI\_ISL\_606100|Original|hCoV-19^^England|Human|Lighthouse Lab in Alderley Park|Wellcome Sanger Institute for the COVID-19 Genomics UK (COG-UK) consortium|Davies|United Kingdom

>Spike|hCoV-19/USA/UT-UPHL-201030943/2020|2020-05-30|EPI\_ISL\_594072|Original|hCoV-19^^Utah|Human|Utah Public Health Laboratory|Utah Public Health Laboratory|Young|USA

>Spike|hCoV-19/India/RJ-SMSCOV161/2020|2020-04-21|EPI\_ISL\_454832|Original|hCoV-19^^Rajasthan|Human|SMS Medical College|CSIR Institute of Genomics and Integrative Biology|Scaria|India

>Spike|hCoV-19/Japan/PG-3809/2020|2020-05-00|EPI\_ISL\_692060|Original|hCoV-19^^Japan|Human|Pathogen Genomics Center|Pathogen Genomics Center|Sekizuka|Japan

>Spike|hCoV-19/Wales/PHWC-166E1C/2020|2020-06-27|EPI\_ISL\_494118|Original|hCoV-19^^Wales|Human|Originating lab|COVID-19 Genomics UK (COG-UK) Consortium|Moore|United Kingdom

>Spike|hCoV-19/England/BRIS-12BF2F/2020|2020-05-09|EPI\_ISL\_469439|Original|hCoV-19^^England|Human|PHE South West Regional Laboratory|Wellcome Sanger Institute for the COVID-19 Genomics UK (COG-UK) consortium|Davies|United Kingdom

>Spike|hCoV-19/Wales/PHWC-162681/2020|2020-06-04|EPI\_ISL\_473103|Original|hCoV-19^^Wales|Human|Wales Specialist Virology Centre Sequencing lab|COVID-19 Genomics UK (COG-UK) Consortium|Moore|United Kingdom

>Spike|hCoV-19/England/CAMC-C402D5/2020|2020-12-10|EPI\_ISL\_718541|Original|hCoV-19^^England|Human|Lighthouse Lab in Cambridge|Wellcome Sanger Institute for the COVID-19 Genomics UK (COG-UK) Consortium|Davies|United Kingdom

>Spike|hCoV-19/USA/UT-QDX-118/2020|2020-03-13|EPI\_ISL\_467909|Original|hCoV-19^^Utah|Human|Quest Diagnostics|Quest Diagnostics|Kagan|USA

>Spike|hCoV-19/Belgium/reg-10191107/2020|2020-10-19|EPI\_ISL\_735151|Original|hCoV-19^^Tervuren|Human|UZ Leuven|KU Leuven|Maes|Belgium

>Spike|hCoV-19/England/QEUEH-C33C6E/2020|2020-12-11|EPI\_ISL\_733946|Original|hCoV-19^^England|Human|Lighthouse Lab in Glasgow|Wellcome Sanger Institute for the COVID-19 Genomics UK (COG-UK) Consortium|Davies|United Kingdom

>Spike|hCoV-19/Australia/ACT0026/2020|2020-03-23|EPI\_ISL\_498493|Original|hCoV-19^^Australian Capital Territory|Human|ACT Pathology|Schwessinger Lab|Hall|Australia

>Spike|hCoV-19/Scotland/QEUEH-95FE78/2020|2020-08-07|EPI\_ISL\_531892|Original|hCoV-19^^Scotland|Human|NHSGGC West of Scotland Specialist Virology Centre / MRC-University of Glasgow Centre for Virus Research|Wellcome Sanger Institute for the COVID-19 Genomics UK (COG-UK) consortium|Davies|United Kingdom

>Spike|hCoV-19/Australia/VIC5781/2020|2020-07-19|EPI\_ISL\_518579|Original|hCoV-19^^Victoria|Human|Microbiological Diagnostic Unit - Public Health Laboratory (MDU-PHL)|MDU-PHL|Schultz|Australia

>Spike|hCoV-19/England/ALDP-5D19BD/2020|2020-06-19|EPI\_ISL\_558539|Original|hCoV-19^^England|Human|Lighthouse Lab in Alderley Park|Wellcome Sanger Institute for the COVID-19 Genomics UK (COG-UK) consortium|Davies|United Kingdom

>Spike|hCoV-19/England/CAMB-808E2/2020|2020-04-10|EPI\_ISL\_442883|Original|hCoV-19^^England|Human|Department of Pathology|Wellcome Sanger Institute for the COVID-19 Genomics UK (COG-UK) consortium|Amato|United Kingdom

>Spike|hCoV-19/Bangladesh/CHRF-0059/2020|2020-08-04|EPI\_ISL\_625472|Original|hCoV-19^^Bangladesh|Human|Child Health Research Foundation|Child Health Research Foundation|Saha|Bangladesh

>Spike|hCoV-19/USA/TX-HMH-MCoV-8932/2020|2020-07-02|EPI\_ISL\_780840|Original|hCoV-19^^Texas|Human|Houston Methodist Hospital|Houston Methodist Hospital|Long|USA

>Spike|hCoV-19/England/MILK-9E327D/2020|2020-09-20|EPI\_ISL\_581273|Original|hCoV-19^^England|Human|Lighthouse Lab in Milton Keynes|Wellcome Sanger Institute for the COVID-19 Genomics UK (COG-UK) consortium|Davies|United Kingdom

>Spike|hCoV-19/Japan/PG-8385/2020|2020-07-00|EPI\_ISL\_687484|Original|hCoV-19^^Japan|Human|Pathogen Genomics Center|Pathogen Genomics Center|Sekizuka|Japan

>Spike|hCoV-19/USA/CT-UW-4343/2020|2020-03-30|EPI\_ISL\_430944|Original|hCoV-19^^Connecticut|Human|UW Virology Lab|UW Virology Lab|Roychoudhury|USA

>Spike|hCoV-19/England/NORT-1B61227/2020|2020-10-19|EPI\_ISL\_638009|Original|hCoV-19^^England|Human|Northumbria University / South Tees Hospitals NHS Foundation Trust / North Cumbria Integrated Care NHS Foundation Trust / North Tees and Hartlepool NHS

Foundation Trust / Newcastle Hospitals NHS Foundation Trust|COVID-19 Genomics UK  
(COG-UK) Consortium|Bashton|United Kingdom  
>Spike|hCoV-19/New Zealand/20VR2085/2020|2020-04-12|EPI\_ISL\_456369|Original|hCoV-  
19^^Canterbury|Human|Canterbury Health Laboratories|Institute of Environmental  
Science and Research (ESR)|de Ligt|New Zealand  
>Spike|hCoV-19/Wales/PHWC-48CFA1/2020|2020-11-05|EPI\_ISL\_666562|Original|hCoV-  
19^^Wales|Human|Wales Specialist Virology Centre Sequencing lab|COVID-19 Genomics UK  
(COG-UK) Consortium|Moore|United Kingdom  
>Spike|hCoV-19/Luxembourg/LNS9984061/2020|2020-03-19|EPI\_ISL\_429724|Original|hCoV-  
19^^Luxembourg|Human|Laboratoire National de Sante|Laboratoire National de  
Sante|Wienecke-Baldacchino|Luxembourg  
>Spike|hCoV-19/United Arab Emirates/skmc-0532493/2020|2020-02-  
21|EPI\_ISL\_582619|Original|hCoV-19^^United Arab Emirates|Human|Sheikh Khalifa Medical  
City|Molecular/Surveillance lab\nSheikh Khalifa Medical City|Amirtharaj|United Arab  
Emirates  
>Spike|hCoV-19/Germany/BY-MVP-0031/2020|2020-03-22|EPI\_ISL\_437230|Original|hCoV-  
19^^Bavaria|Human|Max von Pettenkofer Institute|Laboratory for Functional Genome  
Analysis|Graf|Germany  
>Spike|hCoV-19/USA/CA-CZB-14356/2020|2020-07-15|EPI\_ISL\_739200|Original|hCoV-  
19^^California|Human|Alameda County Public Health Lab|Chan-Zuckerberg Biohub|Kamm|USA  
>Spike|hCoV-19/Denmark/DCGC-22298/2020|2020-12-14|EPI\_ISL\_758663|Original|hCoV-  
19^^Sjaelland|Human|Department of Virus and Microbiological Special  
Diagnostics|Albertsen Lab|Michaelsen|Denmark  
>Spike|hCoV-19/Belgium/regal-11271180/2020|2020-11-27|EPI\_ISL\_735233|Original|hCoV-  
19^^Bilzen|Human|UZ Leuven|KU Leuven|Maes|Belgium  
>Spike|hCoV-19/USA/WA-S320/2020|2020-04-01|EPI\_ISL\_434080|Original|hCoV-  
19^^Washington|Human|Washington State Department of Health|Seattle Flu  
Study|Bedford|USA  
>Spike|hCoV-19/USA/WI-UW-2431/2020|2020-12-16|EPI\_ISL\_754650|Original|hCoV-  
19^^Wisconsin|Human|University of Wisconsin-Madison AIDS Vaccine Research  
Laboratories|University of Wisconsin-Madison AIDS Vaccine Research  
Laboratories|Moreno|USA  
>Spike|hCoV-19/USA/NY-NYUMC888/2020|2020-04-03|EPI\_ISL\_467381|Original|hCoV-19^^New  
York|Human|NYU Langone Health|Departments of Pathology and Medicine|Maurano|USA  
>Spike|hCoV-19/England/QEUEH-9B4C86/2020|2020-09-02|EPI\_ISL\_590301|Original|hCoV-  
19^^England|Human|Lighthouse Lab in Glasgow|Wellcome Sanger Institute for the COVID-  
19 Genomics UK (COG-UK) consortium|Davies|United Kingdom  
>Spike|hCoV-19/USA/TX-HMH-MCoV-14904/2020|2020-10-15|EPI\_ISL\_786388|Original|hCoV-  
19^^Texas|Human|Houston Methodist Hospital|Houston Methodist Hospital|Long|USA  
>Spike|hCoV-19/England/LIVE-1D15F9/2020|2020-05-14|EPI\_ISL\_572552|Original|hCoV-  
19^^England|Human|Liverpool Clinical Laboratories|COVID-19 Genomics UK (COG-UK)  
Consortium|Haldenby|United Kingdom  
>Spike|hCoV-19/England/MILK-971168/2020|2020-08-17|EPI\_ISL\_553171|Original|hCoV-  
19^^England|Human|Lighthouse Lab in Milton Keynes|Wellcome Sanger Institute for the  
COVID-19 Genomics UK (COG-UK) consortium|Davies|United Kingdom  
>Spike|hCoV-19/England/QEUEH-9A407E/2020|2020-09-01|EPI\_ISL\_540230|Original|hCoV-  
19^^England|Human|Lighthouse Lab in Glasgow|Wellcome Sanger Institute for the COVID-  
19 Genomics UK (COG-UK) consortium|Davies|United Kingdom  
>Spike|hCoV-19/USA/CA-CDPH035/2020|2020-06-25|EPI\_ISL\_515926|Original|hCoV-  
19^^California|Human|California Department of Public Health|California Department of  
Public Health|Bell|USA  
>Spike|hCoV-19/England/ALDP-94D11A/2020|2020-06-16|EPI\_ISL\_555966|Original|hCoV-  
19^^England|Human|Lighthouse Lab in Alderley Park|Wellcome Sanger Institute for the  
COVID-19 Genomics UK (COG-UK) consortium|Davies|United Kingdom  
>Spike|hCoV-19/Australia/VIC2511/2020|2020-06-29|EPI\_ISL\_522206|Original|hCoV-  
19^^Victoria|Human|Microbiological Diagnostic Unit - Public Health Laboratory (MDU-  
PHL)|MDU-PHL|Schultz|Australia  
>Spike|hCoV-19/Ireland/G-NVRL-75IRL71302/2020|2020-10-  
12|EPI\_ISL\_671902|Original|hCoV-19^^Galway|Human|National Virus Reference  
Laboratory|National Virus Reference Laboratory|Gonzalez|Ireland

>Spike|hCoV-19/Switzerland/ZH-ETHZ-110050/2020|2020-04-01|EPI\_ISL\_486482|Original|hCoV-19^^Zurich|Human|Viollier AG|Department of Biosystems Science and Engineering|Nadeau|Switzerland

>Spike|hCoV-19/England/CAMC-9416DB/2020|2020-07-25|EPI\_ISL\_556836|Original|hCoV-19^^England|Human|Lighthouse Lab in Cambridge|Wellcome Sanger Institute for the COVID-19 Genomics UK (COG-UK) consortium|Davies|United Kingdom

>Spike|hCoV-19/Norway/6387/2020|2020-12-03|EPI\_ISL\_775496|Original|hCoV-19^^Viken|Human|Furst Medical Laboratory|Norwegian Institute of Public Health|Vollan|Norway

>Spike|hCoV-19/England/MILK-82A8E2/2020|2020-07-18|EPI\_ISL\_557280|Original|hCoV-19^^England|Human|Lighthouse Lab in Milton Keynes|Wellcome Sanger Institute for the COVID-19 Genomics UK (COG-UK) consortium|Davies|United Kingdom

>Spike|hCoV-19/Netherlands/NA\_122/2020|2020-03-18|EPI\_ISL\_422669|Original|hCoV-19^^Netherlands|Human|Dutch COVID-19 response team|Erasmus Medical Center|Oude Munnink|Netherlands

>Spike|hCoV-19/Wales/PHWC-2ED50/2020|2020-04-06|EPI\_ISL\_446147|Original|hCoV-19^^Wales|Human|Wales Specialist Virology Centre|Public Health Wales Microbiology Cardiff|Moore|United Kingdom

>Spike|hCoV-19/Bangladesh/BCSIR-NILMRC-069/2020|2020-05-26|EPI\_ISL\_466638|Original|hCoV-19^^Chittagong|Human|National Institute of Laboratory Medicine and Referral Center|Genomic Research Lab|Khan|Bangladesh

>Spike|hCoV-19/Wales/PHWC-48B986/2020|2020-10-29|EPI\_ISL\_666305|Original|hCoV-19^^Wales|Human|Wales Specialist Virology Centre Sequencing lab|COVID-19 Genomics UK (COG-UK) Consortium|Moore|United Kingdom

>Spike|hCoV-19/Portugal/PT1138/2020|2020-03-20|EPI\_ISL\_511685|Original|hCoV-19^^Portugal|Human|Instituto Nacional de Saude (INSA)|Instituto Nacional de Saude (INSA)|Borges|Portugal

>Spike|hCoV-19/England/ALDP-9C510B/2020|2020-09-10|EPI\_ISL\_567753|Original|hCoV-19^^England|Human|Lighthouse Lab in Alderley Park|Wellcome Sanger Institute for the COVID-19 Genomics UK (COG-UK) consortium|Davies|United Kingdom

>Spike|hCoV-19/USA/WY-WPHL-20172467/2020|2020-12-30|EPI\_ISL\_770486|Original|hCoV-19^^Wyoming|Human|Wyoming Public Health Laboratory|Wyoming Public Health Laboratory|Hull|USA

>Spike|hCoV-19/Netherlands/GE-EMC-227/2020|2020-06-09|EPI\_ISL\_523207|Original|hCoV-19^^Gelderland|Human|Dutch COVID-19 response team|Erasmus Medical Center|Oude Munnink|Netherlands

>Spike|hCoV-19/Scotland/CVR3991/2020|2020-09-02|EPI\_ISL\_540788|Original|hCoV-19^^Scotland|Human|West of Scotland Specialist Virology Centre|COVID-19 Genomics UK (COG-UK) Consortium|Robertson|United Kingdom

>Spike|hCoV-19/England/ALDP-4A69D0/2020|2020-06-08|EPI\_ISL\_559507|Original|hCoV-19^^England|Human|Lighthouse Lab in Alderley Park|Wellcome Sanger Institute for the COVID-19 Genomics UK (COG-UK) consortium|Davies|United Kingdom

>Spike|hCoV-19/Canada/ON-S36/2020|2020-03-17|EPI\_ISL\_586406|Original|hCoV-19^^Ontario|Human|Toronto Invasive Bacterial Diseases Network|McMaster University|McArthur|Canada

>Spike|hCoV-19/USA/UT-UPHL-2012391352/2020|2020-06-19|EPI\_ISL\_746443|Original|hCoV-19^^Utah|Human|Utah Public Health Laboratory|Utah Public Health Laboratory|Gallagher|USA

>Spike|hCoV-19/England/ALDP-B1CCD5/2020|2020-11-01|EPI\_ISL\_645799|Original|hCoV-19^^England|Human|Lighthouse Lab in Alderley Park|Wellcome Sanger Institute for the COVID-19 Genomics UK (COG-UK) Consortium|Davies|United Kingdom

>Spike|hCoV-19/Denmark/DCGC-21442/2020|2020-12-21|EPI\_ISL\_758168|Original|hCoV-19^^Midtjylland|Human|Department of Virus and Microbiological Special Diagnostics|Albertsen Lab|Michaelsen|Denmark

>Spike|hCoV-19/England/ALDP-9ED3E9/2020|2020-05-05|EPI\_ISL\_589380|Original|hCoV-19^^England|Human|Lighthouse Lab in Alderley Park|Wellcome Sanger Institute for the COVID-19 Genomics UK (COG-UK) consortium|Davies|United Kingdom

>Spike|hCoV-19/England/ALDP-B1DCD4/2020|2020-11-01|EPI\_ISL\_723534|Original|hCoV-19^^England|Human|Centre for Enzyme Innovation|COVID-19 Genomics UK (COG-UK) Consortium|Robson|United Kingdom

>Spike|hCoV-19/England/SHEF-C0AA4/2020|2020-11-20|EPI\_ISL\_680111|Original|hCoV-19^^England|Human|Virology Department|COVID-19 Genomics UK (COG-UK) Consortium|de Silva|United Kingdom

>Spike|hCoV-19/England/NORT-2894D4/2020|2020-03-30|EPI\_ISL\_458662|Original|hCoV-19^^England|Human|NU-OMICS DNA Sequencing research facility|Wellcome Sanger Institute for the COVID-19 Genomics UK (COG-UK) consortium|Davies|United Kingdom

>Spike|hCoV-19/Australia/NT11/2020|2020-00-00|EPI\_ISL\_426899|Original|hCoV-19^^Northern territory|Human|Royal Darwin Hospital Pathology|Microbiological Diagnostic Unit Public Health Laboratory and Victorian Infectious Diseases Reference Laboratory|Schultz|Australia

>Spike|hCoV-19/England/CAMC-B20F99/2020|2020-11-01|EPI\_ISL\_647595|Original|hCoV-19^^England|Human|Lighthouse Lab in Cambridge|Wellcome Sanger Institute for the COVID-19 Genomics UK (COG-UK) Consortium|Davies|United Kingdom

>Spike|hCoV-19/USA/LA-CDC-2155/2020|2020-05-29|EPI\_ISL\_535358|Original|hCoV-19^^Louisiana|Human|LA Office of Public Health Laboratories|Pathogen Discovery|Queen|USA

>Spike|hCoV-19/Poland/79297/2020|2020-11-00|EPI\_ISL\_732896|Original|hCoV-19^^Poland|Human|genXone SA|genXone SA|Kaszuba|Poland

>Spike|hCoV-19/England/ALDP-4AC873/2020|2020-06-14|EPI\_ISL\_559454|Original|hCoV-19^^England|Human|Lighthouse Lab in Alderley Park|Wellcome Sanger Institute for the COVID-19 Genomics UK (COG-UK) consortium|Davies|United Kingdom

>Spike|hCoV-19/Wales/PHWC-26611/2020|2020-03-27|EPI\_ISL\_422162|Original|hCoV-19^^Wales|Human|Wales Specialist Virology Centre|Public Health Wales Microbiology Cardiff|Moore|United Kingdom

>Spike|hCoV-19/USA/MA-MGH-03277/2020|2020-10-23|EPI\_ISL\_765769|Original|hCoV-19^^Massachusetts|Human|Massachusetts General Hospital|Infectious Disease Program|Park|USA

>Spike|hCoV-19/England/LOND-D6C96/2020|2020-03-31|EPI\_ISL\_478418|Original|hCoV-19^^England|Human|University College London|COVID-19 Genomics UK (COG-UK) Consortium|Roy|United Kingdom

>Spike|hCoV-19/England/QEUEH-B66665/2020|2020-11-11|EPI\_ISL\_661612|Original|hCoV-19^^England|Human|Lighthouse Lab in Glasgow|Wellcome Sanger Institute for the COVID-19 Genomics UK (COG-UK) Consortium|Davies|United Kingdom

>Spike|hCoV-19/USA/TX-HMH-MCoV-14781/2020|2020-10-13|EPI\_ISL\_786266|Original|hCoV-19^^Texas|Human|Houston Methodist Hospital|Houston Methodist Hospital|Long|USA

>Spike|hCoV-19/Australia/VIC11810/2020|2020-08-09|EPI\_ISL\_591859|Original|hCoV-19^^Victoria|Human|Victorian Infectious Diseases Reference Laboratory (VIDRL)|VIDRL and MDU-PHL|Schultz|Australia

>Spike|hCoV-19/USA/TX-HMH-MCoV-9892/2020|2020-07-06|EPI\_ISL\_780326|Original|hCoV-19^^Texas|Human|Houston Methodist Hospital|Houston Methodist Hospital|Long|USA

>Spike|hCoV-19/England/MILK-BABEA8/2020|2020-11-18|EPI\_ISL\_783196|Original|hCoV-19^^England|Human|Lighthouse Lab in Milton Keynes|Wellcome Sanger Institute for the COVID-19 Genomics UK (COG-UK) Consortium|Davies|United Kingdom

>Spike|hCoV-19/England/MILK-A47285/2020|2020-10-06|EPI\_ISL\_598270|Original|hCoV-19^^England|Human|Lighthouse Lab in Milton Keynes|Wellcome Sanger Institute for the COVID-19 Genomics UK (COG-UK) consortium|Davies|United Kingdom

>Spike|hCoV-19/England/QEUEH-BA0E67/2020|2020-11-18|EPI\_ISL\_672901|Original|hCoV-19^^England|Human|Lighthouse Lab in Glasgow|Wellcome Sanger Institute for the COVID-19 Genomics UK (COG-UK) Consortium|Davies|United Kingdom

>Spike|hCoV-19/USA/TX-HMH-MCoV-8551/2020|2020-07-01|EPI\_ISL\_780623|Original|hCoV-19^^Texas|Human|Houston Methodist Hospital|Houston Methodist Hospital|Long|USA

>Spike|hCoV-19/England/NOTT-10FE51/2020|2020-04-09|EPI\_ISL\_441450|Original|hCoV-19^^England|Human|Queens Medical Centre|COVID-19 Genomics UK (COG-UK) Consortium|Loose|United Kingdom

>Spike|hCoV-19/Wales/PHWC-4877CC/2020|2020-10-30|EPI\_ISL\_639239|Original|hCoV-19^^Wales|Human|Wales Specialist Virology Centre Sequencing lab|COVID-19 Genomics UK (COG-UK) Consortium|Moore|United Kingdom

>Spike|hCoV-19/South Korea/KDCA0207/2020|2020-11-26|EPI\_ISL\_747442|Original|hCoV-19^^South Korea|Human|Division of Emerging Infectious Diseases|Division of Emerging Infectious Diseases|Park|South Korea

>Spike|hCoV-19/Brazil/AL-837/2020|2020-03-18|EPI\_ISL\_427292|Original|hCoV-19^^Alagoas|Human|LACEN-AL - Laboratorio Central de Alagoas|Instituto Oswaldo Cruz FIOCRUZ - Laboratory of Respiratory Viruses and Measles (LVRS)|Silva|Brazil

>Spike|hCoV-19/England/CAMC-9D203B/2020|2020-09-18|EPI\_ISL\_601495|Original|hCoV-19^^England|Human|Lighthouse Lab in Cambridge|Wellcome Sanger Institute for the COVID-19 Genomics UK (COG-UK) consortium|Davies|United Kingdom

>Spike|hCoV-19/Australia/VIC5396/2020|2020-07-19|EPI\_ISL\_520159|Original|hCoV-19^^Victoria|Human|Microbiological Diagnostic Unit - Public Health Laboratory (MDU-PHL)|MDU-PHL|Schultz|Australia

>Spike|hCoV-19/Australia/VIC16615/2020|2020-08-05|EPI\_ISL\_641230|Original|hCoV-19^^Victoria|Human|Microbiological Diagnostic Unit - Public Health Laboratory (MDU-PHL)|MDU-PHL|Schultz|Australia

>Spike|hCoV-19/USA/CA-ALSR-0852-NBG/2020|2020-05-14|EPI\_ISL\_483399|Original|hCoV-19^^Louisiana|Human|UC San Diego Center for Advanced Laboratory Medicine|Andersen lab at Scripps Research|Gangavarapu|USA

>Spike|hCoV-19/England/MILK-B59823/2020|2020-11-06|EPI\_ISL\_679873|Original|hCoV-19^^England|Human|Virology Department|COVID-19 Genomics UK (COG-UK) Consortium|de Silva|United Kingdom

>Spike|hCoV-19/Wales/PHWC-480462/2020|2020-10-22|EPI\_ISL\_611684|Original|hCoV-19^^Wales|Human|Wales Specialist Virology Centre Sequencing lab|COVID-19 Genomics UK (COG-UK) Consortium|Moore|United Kingdom

>Spike|hCoV-19/England/BRIS-1853443/2020|2020-04-07|EPI\_ISL\_492431|Original|hCoV-19^^England|Human|PHE South West Regional Laboratory|Wellcome Sanger Institute for the COVID-19 Genomics UK (COG-UK) consortium|Davies|United Kingdom

>Spike|hCoV-19/Austria/CeMM0111/2020|2020-03-12|EPI\_ISL\_437969|Original|hCoV-19^^Innsbruck|Human|Universitaetsklinik f\u00fcr Innere Medizin II Innsbruck|Bergthaler laboratory|Bergthaler|Austria

>Spike|hCoV-19/Brazil/SP-878/2020|2020-12-08|EPI\_ISL\_755644|Original|hCoV-19^^S\u00e3o Paulo|Human|Lab LOC - Itapecerica da Serra|Instituto Adolfo Lutz|Sacchi|Brazil

>Spike|hCoV-19/England/ALDP-BBA978/2020|2020-11-20|EPI\_ISL\_702554|Original|hCoV-19^^England|Human|Lighthouse Lab in Alderley Park|Wellcome Sanger Institute for the COVID-19 Genomics UK (COG-UK) Consortium|Davies|United Kingdom

>Spike|hCoV-19/USA/MN-CDC-2-3714097/2020|2020-11-30|EPI\_ISL\_751655|Original|hCoV-19^^Minnesota|Human|MN PHL Division|Genomics and Discovery|Queen|USA

>Spike|hCoV-19/United Arab Emirates/0302/2020|2020-05-17|EPI\_ISL\_698481|Original|hCoV-19^^Abu Dhabi|Human|Group 42 (G42) Healthcare|G42 Healthcare|Ogrodzki|United Arab Emirates

>Spike|hCoV-19/England/CAMC-B092F7/2020|2020-10-30|EPI\_ISL\_643722|Original|hCoV-19^^England|Human|Lighthouse Lab in Cambridge|Wellcome Sanger Institute for the COVID-19 Genomics UK (COG-UK) Consortium|Davies|United Kingdom

>Spike|hCoV-19/England/QEUH-9E4616/2020|2020-09-23|EPI\_ISL\_579867|Original|hCoV-19^^England|Human|Lighthouse Lab in Glasgow|Wellcome Sanger Institute for the COVID-19 Genomics UK (COG-UK) consortium|Davies|United Kingdom

>Spike|hCoV-19/Japan/PG-7738/2020|2020-09-00|EPI\_ISL\_686840|Original|hCoV-19^^Japan|Human|Chiba Prefectural Institute of Public Health|Pathogen Genomics Center|Sekizuka|Japan

>Spike|hCoV-19/England/EXET-13EB43/2020|2020-12-14|EPI\_ISL\_763432|Original|hCoV-19^^England|Human|University of Exeter|COVID-19 Genomics UK (COG-UK) Consortium|Temperton|United Kingdom

>Spike|hCoV-19/Wales/ALDP-95C2CA/2020|2020-06-16|EPI\_ISL\_554972|Original|hCoV-19^^Wales|Human|Lighthouse Lab in Alderley Park|Wellcome Sanger Institute for the COVID-19 Genomics UK (COG-UK) consortium|Davies|United Kingdom

>Spike|hCoV-19/England/QEUH-9A465E/2020|2020-08-29|EPI\_ISL\_540178|Original|hCoV-19^^England|Human|Lighthouse Lab in Glasgow|Wellcome Sanger Institute for the COVID-19 Genomics UK (COG-UK) consortium|Davies|United Kingdom

>Spike|hCoV-19/Canada/BC\_11726488/2020|2020-04-00|EPI\_ISL\_467329|Original|hCoV-19^^British Columbia|Human|BCCDC Public Health Laboratory|BCCDC Public Health Laboratory|Harrigan|Canada



>Spike|hCoV-19/England/MILK-B966A8/2020|2020-11-14|EPI\_ISL\_676101|Original|hCoV-19^^England|Human|Lighthouse Lab in Milton Keynes|Wellcome Sanger Institute for the COVID-19 Genomics UK (COG-UK) Consortium|Davies|United Kingdom

>Spike|hCoV-19/Netherlands/Gelderland\_101/2020|2020-05-21|EPI\_ISL\_460862|Original|hCoV-19^^Gelderland|Human|Dutch COVID-19 response team|Erasmus Medical Center|Oude Munnink|Netherlands

>Spike|hCoV-19/England/20140003804/2020|2020-03-28|EPI\_ISL\_423378|Original|hCoV-19^^England|Human|Respiratory Virus Unit|Respiratory Virus Unit|Platt|United Kingdom

>Spike|hCoV-19/Malaysia/1399/2020|2020-03-25|EPI\_ISL\_501184|Original|hCoV-19^^Kuala Lumpur|Human|Department of Medical Microbiology|Department of Medical Microbiology|Chan|Malaysia

>Spike|hCoV-19/USA/WA-S1414/2020|2020-05-19|EPI\_ISL\_495864|Original|hCoV-19^^Washington|Human|Washington State Department of Health|Seattle Flu Study|Lee|USA

>Spike|hCoV-19/Scotland/QEUEH-9CE427/2020|2020-09-16|EPI\_ISL\_601981|Original|hCoV-19^^Scotland|Human|Lighthouse Lab in Glasgow|Wellcome Sanger Institute for the COVID-19 Genomics UK (COG-UK) consortium|Davies|United Kingdom

>Spike|hCoV-19/England/NORT-29F1C5/2020|2020-05-12|EPI\_ISL\_484323|Original|hCoV-19^^England|Human|Northumbria University / South Tees Hospitals NHS Foundation Trust / North Cumbria Integrated Care NHS Foundation Trust / North Tees and Hartlepool NHS Foundation Trust / Newcastle Hospitals NHS Foundation Trust|COVID-19 Genomics UK (COG-UK) Consortium|Bashton|United Kingdom

>Spike|hCoV-19/Spain/MD-IBV-99007119/2020|2020-07-28|EPI\_ISL\_541893|Original|hCoV-19^^Madrid|Human|Hospital General Universitario Gregorio Mara\u00f1a|SeqCOVID-SPAIN consortium/IBV (CSIC)|Comas|Spain

>Spike|hCoV-19/England/MILK-ACDA16/2020|2020-10-21|EPI\_ISL\_634515|Original|hCoV-19^^England|Human|Lighthouse Lab in Milton Keynes|Wellcome Sanger Institute for the COVID-19 Genomics UK (COG-UK) consortium|Davies|United Kingdom

>Spike|hCoV-19/England/QEUEH-B2E0B6/2020|2020-11-02|EPI\_ISL\_646237|Original|hCoV-19^^England|Human|Lighthouse Lab in Glasgow|Wellcome Sanger Institute for the COVID-19 Genomics UK (COG-UK) Consortium|Davies|United Kingdom

>Spike|hCoV-19/Switzerland/LU-ETHZ-101141/2020|2020-03-31|EPI\_ISL\_451808|Original|hCoV-19^^Luzern|Human|Viollier AG|Department of Biosystems Science and Engineering|Nadeau|Switzerland

>Spike|hCoV-19/England/204400735/2020|2020-10-26|EPI\_ISL\_653961|Original|hCoV-19^^England|Human|Respiratory Virus Unit|COVID-19 Genomics UK (COG-UK) Consortium|Platt|United Kingdom

>Spike|hCoV-19/England/CAMC-B3441B/2020|2020-11-05|EPI\_ISL\_659440|Original|hCoV-19^^England|Human|Lighthouse Lab in Cambridge|Wellcome Sanger Institute for the COVID-19 Genomics UK (COG-UK) Consortium|Davies|United Kingdom

>Spike|hCoV-19/USA/WI-UW-2435/2020|2020-12-15|EPI\_ISL\_754645|Original|hCoV-19^^Wisconsin|Human|University of Wisconsin-Madison AIDS Vaccine Research Laboratories|University of Wisconsin-Madison AIDS Vaccine Research Laboratories|Moreno|USA

>Spike|hCoV-19/Wales/PHWC-1632D7/2020|2020-05-29|EPI\_ISL\_473274|Original|hCoV-19^^Wales|Human|Wales Specialist Virology Centre Sequencing lab|COVID-19 Genomics UK (COG-UK) Consortium|Moore|United Kingdom

>Spike|hCoV-19/England/QEUEH-9B7AD4/2020|2020-09-04|EPI\_ISL\_590611|Original|hCoV-19^^England|Human|Lighthouse Lab in Glasgow|Wellcome Sanger Institute for the COVID-19 Genomics UK (COG-UK) consortium|Davies|United Kingdom

>Spike|hCoV-19/England/PORT-2EA2F5/2020|2020-00-00|EPI\_ISL\_665418|Original|hCoV-19^^England|Human|Centre for Enzyme Innovation|COVID-19 Genomics UK (COG-UK) Consortium|Robson|United Kingdom

>Spike|hCoV-19/USA/WI-UW-619/2020|2020-06-24|EPI\_ISL\_484994|Original|hCoV-19^^Wisconsin|Human|University of Wisconsin-Madison AIDS Vaccine Research Laboratories|University of Wisconsin-Madison AIDS Vaccine Research Laboratories|Baczenas|USA

>Spike|hCoV-19/England/CAMC-948BF3/2020|2020-07-20|EPI\_ISL\_556823|Original|hCoV-19^^England|Human|Lighthouse Lab in Cambridge|Wellcome Sanger Institute for the COVID-19 Genomics UK (COG-UK) consortium|Davies|United Kingdom

>Spike|hCoV-19/USA/WA-S1637/2020|2020-05-27|EPI\_ISL\_496063|Original|hCoV-19^^Washington|Human|Washington State Department of Health|Seattle Flu Study|Lee|USA

>Spike|hCoV-19/England/MILK-A7A7D5/2020|2020-10-15|EPI\_ISL\_606492|Original|hCoV-19^^England|Human|Lighthouse Lab in Milton Keynes|Wellcome Sanger Institute for the COVID-19 Genomics UK (COG-UK) consortium|Davies|United Kingdom

>Spike|hCoV-19/England/20138019704/2020|2020-03-26|EPI\_ISL\_423296|Original|hCoV-19^^England|Human|Respiratory Virus Unit|Respiratory Virus Unit|Platt|United Kingdom

>Spike|hCoV-19/England/QEUA-A89BC8/2020|2020-10-16|EPI\_ISL\_638170|Original|hCoV-19^^England|Human|Oxford Viromics|COVID-19 Genomics UK (COG-UK) Consortium|Golubchik|United Kingdom

>Spike|hCoV-19/Wales/ALDP-BC88C5/2020|2020-11-22|EPI\_ISL\_767328|Original|hCoV-19^^Wales|Human|Lighthouse Lab in Alderley Park|Wellcome Sanger Institute for the COVID-19 Genomics UK (COG-UK) Consortium|Davies|United Kingdom

>Spike|hCoV-19/USA/MI-UM-10036212950/2020|2020-09-30|EPI\_ISL\_590742|Original|hCoV-19^^Michigan|Human|University of Michigan Clinical Microbiology Laboratory|Lauring Lab|Valesano|USA

>Spike|hCoV-19/England/MILK-99DC47/2020|2020-08-30|EPI\_ISL\_550782|Original|hCoV-19^^England|Human|Lighthouse Lab in Milton Keynes|Wellcome Sanger Institute for the COVID-19 Genomics UK (COG-UK) consortium|Davies|United Kingdom

>Spike|hCoV-19/Denmark/DCGC-20966/2020|2020-12-21|EPI\_ISL\_759479|Original|hCoV-19^^Nordjylland|Human|Department of Virus and Microbiological Special Diagnostics|Albertsen Lab|Michaelsen|Denmark

>Spike|hCoV-19/USA/CO-CDPHE-2011020172/2020|2020-11-01|EPI\_ISL\_710242|Original|hCoV-19^^Colorado|Human|Colorado Department of Public Health and Environment|Colorado Department of Public Health and Environment|Bankers|USA

>Spike|hCoV-19/England/ALDP-A84DF4/2020|2020-10-17|EPI\_ISL\_610328|Original|hCoV-19^^England|Human|Lighthouse Lab in Alderley Park|Wellcome Sanger Institute for the COVID-19 Genomics UK (COG-UK) consortium|Davies|United Kingdom

>Spike|hCoV-19/USA/CA-CZB-3636/2020|2020-03-13|EPI\_ISL\_548354|Original|hCoV-19^^California|Human|Ventura County Public Health Lab|Chan-Zuckerberg Biohub|Bhatt|USA

>Spike|hCoV-19/Denmark/DCGC-2644/2020|2020-08-17|EPI\_ISL\_617863|Original|hCoV-19^^Midtjylland|Human|Department of Virus and Microbiological Special Diagnostics|Albertsen lab|Michaelsen|Denmark

>Spike|hCoV-19/England/CAMB-1AA6D8/2020|2020-04-17|EPI\_ISL\_470277|Original|hCoV-19^^England|Human|Department of Pathology|Wellcome Sanger Institute for the COVID-19 Genomics UK (COG-UK) consortium|Davies|United Kingdom

>Spike|hCoV-19/Gibraltar/205121276/2020|2020-00-00|EPI\_ISL\_766394|Original|hCoV-19^^Gibraltar|Human|Microbiology|Respiratory Virus Unit|Platt|Gibraltar

>Spike|hCoV-19/Scotland/EDB1219/2020|2020-04-08|EPI\_ISL\_491694|Original|hCoV-19^^Scotland|Human|Virology Department|Wellcome Sanger Institute for the COVID-19 Genomics UK (COG-UK) consortium|Davies|United Kingdom

>Spike|hCoV-19/Germany/BW-UKT-a044/2020|2020-03-26|EPI\_ISL\_723099|Original|hCoV-19^^Baden-Wuerttemberg|Human|Institute of Medical Genetics and Applied Genomics|Institute of Medical Genetics and Applied Genomics|Gross|Germany

>Spike|hCoV-19/USA/CA-ALSR-3051/2020|2020-08-28|EPI\_ISL\_635815|Original|hCoV-19^^California|Human|San Diego County Public Health Laboratory|Andersen lab at Scripps Research|Gangavarapu|USA

>Spike|hCoV-19/USA/WI-GMF-16891/2020|2020-08-24|EPI\_ISL\_547732|Original|hCoV-19^^Wisconsin|Human|Gundersen Molecular Diagnostics Laboratory|Kabara Cancer Research Institute|Kenny|USA

>Spike|hCoV-19/England/QEUA-BCE971/2020|2020-11-26|EPI\_ISL\_704547|Original|hCoV-19^^England|Human|Lighthouse Lab in Glasgow|Wellcome Sanger Institute for the COVID-19 Genomics UK (COG-UK) Consortium|Davies|United Kingdom

>Spike|hCoV-19/England/201060144/2020|2020-03-04|EPI\_ISL\_464397|Original|hCoV-19^^England|Human|Respiratory Virus Unit|Respiratory Virus Unit|Platt|United Kingdom

>Spike|hCoV-19/Wales/PHWC-482CA4/2020|2020-10-16|EPI\_ISL\_613278|Original|hCoV-19^^Wales|Human|Wales Specialist Virology Centre Sequencing lab|COVID-19 Genomics UK (COG-UK) Consortium|Moore|United Kingdom

>Spike|hCoV-19/USA/WI-UW-155/2020|2020-04-10|EPI\_ISL\_427462|Original|hCoV-19^^Wisconsin|Human|University of Wisconsin-Madison AIDS Vaccine Research Laboratories|University of Wisconsin-Madison AIDS Vaccine Research Laboratories|Baczenas|USA

>Spike|hCoV-19/Denmark/DCGC-16595/2020|2020-11-16|EPI\_ISL\_714859|Original|hCoV-19^^Hovedstaden|Human|Department of Virus and Microbiological Special Diagnostics|Albertsen Lab|Michaelsen|Denmark

>Spike|hCoV-19/Wales/PHWC-488B92/2020|2020-11-02|EPI\_ISL\_639474|Original|hCoV-19^^Wales|Human|Wales Specialist Virology Centre Sequencing lab|COVID-19 Genomics UK (COG-UK) Consortium|Moore|United Kingdom

>Spike|hCoV-19/England/ALDP-A86EFF/2020|2020-10-17|EPI\_ISL\_606079|Original|hCoV-19^^England|Human|Lighthouse Lab in Alderley Park|Wellcome Sanger Institute for the COVID-19 Genomics UK (COG-UK) consortium|Davies|United Kingdom

>Spike|hCoV-19/England/ALDP-982A1E/2020|2020-08-10|EPI\_ISL\_552533|Original|hCoV-19^^England|Human|Lighthouse Lab in Alderley Park|Wellcome Sanger Institute for the COVID-19 Genomics UK (COG-UK) consortium|Davies|United Kingdom

>Spike|hCoV-19/USA/TX-HMH-MCoV-15012/2020|2020-10-16|EPI\_ISL\_786496|Original|hCoV-19^^Texas|Human|Houston Methodist Hospital|Houston Methodist Hospital|Long|USA

>Spike|hCoV-19/Denmark/DCGC-8601/2020|2020-10-26|EPI\_ISL\_625959|Original|hCoV-19^^Sjaelland|Human|Department of Virus and Microbiological Special Diagnostics|Albertsen lab|Michaelsen|Denmark

>Spike|hCoV-19/Australia/VIC4716/2020|2020-07-14|EPI\_ISL\_519104|Original|hCoV-19^^Victoria|Human|Microbiological Diagnostic Unit - Public Health Laboratory (MDU-PHL)|MDU-PHL|Schultz|Australia

>Spike|hCoV-19/Netherlands/ZH-EMC-665/2020|2020-09-25|EPI\_ISL\_632506|Original|hCoV-19^^Zuid Holland|Human|Dutch COVID-19 response team|Erasmus Medical Center|Oude Munnink|Netherlands

>Spike|hCoV-19/USA/TX-HMH-2957/2020|2020-06-09|EPI\_ISL\_543891|Original|hCoV-19^^Texas|Human|Houston Methodist Hospital|Houston Methodist Hospital|Long|USA

>Spike|hCoV-19/England/ALDP-A6FB04/2020|2020-10-15|EPI\_ISL\_608246|Original|hCoV-19^^England|Human|Lighthouse Lab in Alderley Park|Wellcome Sanger Institute for the COVID-19 Genomics UK (COG-UK) consortium|Davies|United Kingdom

>Spike|hCoV-19/England/MILK-B968C0/2020|2020-11-14|EPI\_ISL\_676052|Original|hCoV-19^^England|Human|Lighthouse Lab in Milton Keynes|Wellcome Sanger Institute for the COVID-19 Genomics UK (COG-UK) Consortium|Davies|United Kingdom

>Spike|hCoV-19/England/ALDP-AA1BF7/2020|2020-10-22|EPI\_ISL\_630805|Original|hCoV-19^^England|Human|Lighthouse Lab in Alderley Park|Wellcome Sanger Institute for the COVID-19 Genomics UK (COG-UK) consortium|Davies|United Kingdom

>Spike|hCoV-19/USA/CA-ALSR-4692/2020|2020-09-29|EPI\_ISL\_730085|Original|hCoV-19^^California|Human|San Diego County Public Health Laboratory|Andersen lab at Scripps Research|Gangavarapu|USA

>Spike|hCoV-19/England/CAMC-B0AAFE/2020|2020-10-30|EPI\_ISL\_643591|Original|hCoV-19^^England|Human|Lighthouse Lab in Cambridge|Wellcome Sanger Institute for the COVID-19 Genomics UK (COG-UK) Consortium|Davies|United Kingdom

>Spike|hCoV-19/England/ALDP-9ED63B/2020|2020-05-05|EPI\_ISL\_589570|Original|hCoV-19^^England|Human|Lighthouse Lab in Alderley Park|Wellcome Sanger Institute for the COVID-19 Genomics UK (COG-UK) consortium|Davies|United Kingdom

>Spike|hCoV-19/USA/UT-UPHL-2012384680/2020|2020-10-23|EPI\_ISL\_745506|Original|hCoV-19^^Utah|Human|Ginkgo Bioworks Clinical Laboratory|Utah Public Health Laboratory|Young|USA

>Spike|hCoV-19/Wales/PHWC-488EF3/2020|2020-11-01|EPI\_ISL\_637319|Original|hCoV-19^^Wales|Human|Wales Specialist Virology Centre Sequencing lab|COVID-19 Genomics UK (COG-UK) Consortium|Moore|United Kingdom

>Spike|hCoV-19/England/BRIS-12B3F6/2020|2020-05-02|EPI\_ISL\_487592|Original|hCoV-19^^England|Human|PHE South West Regional Laboratory|Wellcome Sanger Institute for the COVID-19 Genomics UK (COG-UK) consortium|Davies|United Kingdom

>Spike|hCoV-19/England/ALDP-B49334/2020|2020-11-07|EPI\_ISL\_649408|Original|hCoV-19^^England|Human|Lighthouse Lab in Alderley Park|Wellcome Sanger Institute for the COVID-19 Genomics UK (COG-UK) Consortium|Davies|United Kingdom

>Spike|hCoV-19/Switzerland/BL-UHB-42195724/2020|2020-03-17|EPI\_ISL\_528184|Original|hCoV-19^^Basel-Land|Human|University Hospital Basel|University Hospital Basel|Roloff Handschin|Switzerland

>Spike|hCoV-19/USA/MI-UM-2006S000868/2020|2020-03-27|EPI\_ISL\_484722|Original|hCoV-19^^Michigan|Human|University of Michigan Clinical Microbiology Laboratory|Lauring Lab|Valesano|USA

>Spike|hCoV-19/Gibraltar/203360722/2020|2020-08-10|EPI\_ISL\_547438|Original|hCoV-19^^Gibraltar|Human|Microbiology|Respiratory Virus Unit|Platt|Gibraltar

>Spike|hCoV-19/Wales/PHWC-481DEE/2020|2020-10-18|EPI\_ISL\_613172|Original|hCoV-19^^Wales|Human|Wales Specialist Virology Centre Sequencing lab|COVID-19 Genomics UK (COG-UK) Consortium|Moore|United Kingdom

>Spike|hCoV-19/Canada/Qc-L00240954/2020|2020-03-27|EPI\_ISL\_450307|Original|hCoV-19^^Quebec|Human|H\u00f4pital du Suro\u00eet|Laboratoire de sant\u00e9 publique du Qu\u00e9bec|Moreira|Canada

>Spike|hCoV-19/Denmark/DCGC-2669/2020|2020-08-17|EPI\_ISL\_617889|Original|hCoV-19^^Hovedstaden|Human|Department of Virus and Microbiological Special Diagnostics|Albertsen lab|Michaelsen|Denmark

>Spike|hCoV-19/Switzerland/SH-ETHZ-410535/2020|2020-11-26|EPI\_ISL\_737776|Original|hCoV-19^^Schaffhausen|Human|Viollier AG|Department of Biosystems Science and Engineering|Nadeau|Switzerland

>Spike|hCoV-19/USA/CA-IGI-0395/2020|2020-07-10|EPI\_ISL\_756315|Original|hCoV-19^^California|Human|Innovative Genomics Institute|Innovative Genomics Institute|Wyman|USA

>Spike|hCoV-19/Singapore/733/2020|2020-06-22|EPI\_ISL\_500539|Original|hCoV-19^^Singapore|Human|Singapore General Hospital|Department of Microbiology|Abdul Rahman|Singapore

>Spike|hCoV-19/Australia/ACT0033/2020|2020-03-24|EPI\_ISL\_498500|Original|hCoV-19^^Australian Capital Territory|Human|ACT Pathology|Schwessinger Lab|Hall|Australia

>Spike|hCoV-19/England/MILK-977399/2020|2020-07-24|EPI\_ISL\_550488|Original|hCoV-19^^England|Human|Lighthouse Lab in Milton Keynes|Wellcome Sanger Institute for the COVID-19 Genomics UK (COG-UK) consortium|Davies|United Kingdom

>Spike|hCoV-19/England/SHEF-10D8A97/2020|2020-12-18|EPI\_ISL\_742115|Original|hCoV-19^^England|Human|Virology Department|COVID-19 Genomics UK (COG-UK) Consortium|de Silva|United Kingdom

>Spike|hCoV-19/Wales/PHWC-36CC1/2020|2020-05-01|EPI\_ISL\_474789|Original|hCoV-19^^Wales|Human|Originating lab|COVID-19 Genomics UK (COG-UK) Consortium|Moore|United Kingdom

>Spike|hCoV-19/England/MILK-B02786/2020|2020-10-24|EPI\_ISL\_642995|Original|hCoV-19^^England|Human|Lighthouse Lab in Milton Keynes|Wellcome Sanger Institute for the COVID-19 Genomics UK (COG-UK) Consortium|Davies|United Kingdom

>Spike|hCoV-19/England/ALDP-BE9424/2020|2020-12-02|EPI\_ISL\_708971|Original|hCoV-19^^England|Human|Lighthouse Lab in Alderley Park|Wellcome Sanger Institute for the COVID-19 Genomics UK (COG-UK) Consortium|Davies|United Kingdom

>Spike|hCoV-19/England/QEUA-A02B12/2020|2020-10-01|EPI\_ISL\_584947|Original|hCoV-19^^England|Human|Quadram Institute Bioscience|COVID-19 Genomics UK (COG-UK) Consortium|Alikhan|United Kingdom

>Spike|hCoV-19/Wales/PHWC-4A3117/2020|2020-12-14|EPI\_ISL\_744055|Original|hCoV-19^^Wales|Human|Wales Specialist Virology Centre Sequencing lab|COVID-19 Genomics UK (COG-UK) Consortium|Moore|United Kingdom

>Spike|hCoV-19/USA/MA-JLL-22S/2020|2020-00-00|EPI\_ISL\_632309|Original|hCoV-19^^Massachusetts|Human|Brigham and Women's Hospital|Jonathan Li laboratory|Choudhary|USA

>Spike|hCoV-19/USA/CA-ALSR-3090/2020|2020-09-04|EPI\_ISL\_635842|Original|hCoV-19^^California|Human|San Diego County Public Health Laboratory|Andersen lab at Scripps Research|Gangavarapu|USA

>Spike|hCoV-19/England/ALDP-950AEC/2020|2020-06-14|EPI\_ISL\_554424|Original|hCoV-19^^England|Human|Lighthouse Lab in Alderley Park|Wellcome Sanger Institute for the COVID-19 Genomics UK (COG-UK) consortium|Davies|United Kingdom

>Spike|hCoV-19/USA/CO-CDPHE-2007242803/2020|2020-07-24|EPI\_ISL\_710215|Original|hCoV-19^^Colorado|Human|Colorado Department of Public Health and Environment|Colorado Department of Public Health and Environment|Bankers|USA

>Spike|hCoV-19/USA/RI-CDC-8135/2020|2020-04-22|EPI\_ISL\_647985|Original|hCoV-19^^Rhode Island|Human|RI State Health Laboratories|Pathogen Discovery|Queen|USA

>Spike|hCoV-19/England/LIVE-1D23A3/2020|2020-05-11|EPI\_ISL\_572443|Original|hCoV-19^^England|Human|Liverpool Clinical Laboratories|COVID-19 Genomics UK (COG-UK) Consortium|Haldenby|United Kingdom

>Spike|hCoV-19/USA/NY-Wadsworth-249912-01/2020|2020-10-20|EPI\_ISL\_754741|Original|hCoV-19^^New York|Human|Wadsworth Center|Wadsworth Center|Lasek-Nesselquist|USA

>Spike|hCoV-19/USA/WA-S431/2020|2020-03-28|EPI\_ISL\_434191|Original|hCoV-19^^Washington|Human|Washington State Department of Health|Seattle Flu Study|Bedford|USA

>Spike|hCoV-19/Wales/PHWC-494094/2020|2020-11-16|EPI\_ISL\_726063|Original|hCoV-19^^Wales|Human|Originating lab|COVID-19 Genomics UK (COG-UK) Consortium|Moore|United Kingdom

>Spike|hCoV-19/England/QEUEH-B41518/2020|2020-11-08|EPI\_ISL\_658618|Original|hCoV-19^^England|Human|Lighthouse Lab in Glasgow|Wellcome Sanger Institute for the COVID-19 Genomics UK (COG-UK) Consortium|Davies|United Kingdom

>Spike|hCoV-19/Switzerland/ZH-ETHZ-260071/2020|2020-08-23|EPI\_ISL\_539394|Original|hCoV-19^^Zurich|Human|Viollier AG|Department of Biosystems Science and Engineering|Nadeau|Switzerland

>Spike|hCoV-19/USA/NY-Wadsworth-114731-01/2020|2020-05-22|EPI\_ISL\_676952|Original|hCoV-19^^New York|Human|Wadsworth Center|Wadsworth Center|Lasek-Nesselquist|USA

>Spike|hCoV-19/USA/TX-HMH-MCoV-18322/2020|2020-11-17|EPI\_ISL\_784670|Original|hCoV-19^^Texas|Human|Houston Methodist Hospital|Houston Methodist Hospital|Long|USA

>Spike|hCoV-19/England/ALDP-A50B51/2020|2020-10-07|EPI\_ISL\_597707|Original|hCoV-19^^England|Human|Lighthouse Lab in Alderley Park|Wellcome Sanger Institute for the COVID-19 Genomics UK (COG-UK) consortium|Davies|United Kingdom

>Spike|hCoV-19/Japan/PG-5346/2020|2020-08-00|EPI\_ISL\_690449|Original|hCoV-19^^Japan|Human|Fukuoka Institute of Health and Environmental Sciences|Pathogen Genomics Center|Sekizuka|Japan

>Spike|hCoV-19/USA/TX-DSHS-0742/2020|2020-05-14|EPI\_ISL\_584143|Original|hCoV-19^^Texas|Human|Texas Department of State Health Services|Texas Department of State Health Services|Rahman|USA

>Spike|hCoV-19/USA/LA-EVTL094/2020|2020-05-06|EPI\_ISL\_451255|Original|hCoV-19^^Louisiana|Human|LSUHS Emerging Viral Threat Laboratory|Microbial Genome Sequencing Center|Kamil|USA

>Spike|hCoV-19/USA/UT-UPHL-2009696/2020|2020-07-26|EPI\_ISL\_605370|Original|hCoV-19^^Utah|Human|Utah Public Health Laboratory|Utah Public Health Laboratory|Young|USA

>Spike|hCoV-19/France/OCC-12/2020|2020-03-26|EPI\_ISL\_434627|Original|hCoV-19^^Occitanie|Human|CHU Purpan - Laboratoire de Virologie - Institut F\u00e9d\u00e9ratif de Biologie|Laboratoire de virologie - \u00c9cole Nationale V\u00e9t\u00e9rinaire de Toulouse|Croville|France

>Spike|hCoV-19/Wales/PHWC-4A5E2D/2020|2020-12-14|EPI\_ISL\_764976|Original|hCoV-19^^Wales|Human|Wales Specialist Virology Centre Sequencing lab|COVID-19 Genomics UK (COG-UK) Consortium|Moore|United Kingdom

>Spike|hCoV-19/Spain/CL-IBV-97006171/2020|2020-04-05|EPI\_ISL\_537318|Original|hCoV-19^^Castilla y Leon|Human|Universidad de Le\u00f3n|SeqCOVID-SPAIN consortium|IBV (CSIC) |Comas|Spain

>Spike|hCoV-19/England/BIRM-676F6/2020|2020-10-30|EPI\_ISL\_650769|Original|hCoV-19^^England|Human|University of Birmingham|COVID-19 Genomics UK (COG-UK) Consortium|Loman|United Kingdom

>Spike|hCoV-19/England/QEUEH-9F571F/2020|2020-09-27|EPI\_ISL\_588795|Original|hCoV-19^^England|Human|Lighthouse Lab in Glasgow|Wellcome Sanger Institute for the COVID-19 Genomics UK (COG-UK) consortium|Davies|United Kingdom

>Spike|hCoV-19/England/CAMC-9B2444/2020|2020-09-03|EPI\_ISL\_549409|Original|hCoV-19^^England|Human|Oxford Viromics|COVID-19 Genomics UK (COG-UK) Consortium|Golubchik|United Kingdom

>Spike|hCoV-19/England/BRIS-133C69/2020|2020-08-20|EPI\_ISL\_529336|Original|hCoV-19^^England|Human|University of Birmingham|COVID-19 Genomics UK (COG-UK) Consortium|Loman|United Kingdom

>Spike|hCoV-19/Canada/ON-PHL-20-00080/2020|2020-00-00|EPI\_ISL\_548755|Original|hCoV-19^^Ontario|Human|Public Health Ontario Laboratory|Public Health Ontario Laboratory|Guthrie|Canada

>Spike|hCoV-19/USA/CA-CZB-2524/2020|2020-04-29|EPI\_ISL\_513899|Original|hCoV-19^^California|Human|UCSF Clinical Microbiology Laboratory|Chan-Zuckerberg Biohub|Kamm|USA

>Spike|hCoV-19/England/QEUEH-9B4D74/2020|2020-09-07|EPI\_ISL\_590343|Original|hCoV-19^^England|Human|Lighthouse Lab in Glasgow|Wellcome Sanger Institute for the COVID-19 Genomics UK (COG-UK) consortium|Davies|United Kingdom

>Spike|hCoV-19/Belgium/BA-02291/2020|2020-02-29|EPI\_ISL\_415159|Original|hCoV-19^^Leuven|Human|KU Leuven|KU Leuven|Maes|Belgium

>Spike|hCoV-19/Switzerland/SO-ETHZ-410336/2020|2020-12-17|EPI\_ISL\_737625|Original|hCoV-19^^Solothurn|Human|Viollier AG|Department of Biosystems Science and Engineering|Nadeau|Switzerland

>Spike|hCoV-19/India/MH-ACTREC-232/2020|2020-07-03|EPI\_ISL\_699885|Original|hCoV-19^^Maharashtra|Human|Hematopathology Laboratory|Hematopathology Laboratory|Patkar|India

>Spike|hCoV-19/USA/WA-UW-11576/2020|2020-06-22|EPI\_ISL\_570441|Original|hCoV-19^^Washington|Human|UW Virology Lab|UW Virology Lab|Roychoudhury|USA

>Spike|hCoV-19/England/NORT-295693/2020|2020-04-01|EPI\_ISL\_488642|Original|hCoV-19^^England|Human|NU-OMICS DNA Sequencing research facility|Wellcome Sanger Institute for the COVID-19 Genomics UK (COG-UK) consortium|Davies|United Kingdom

>Spike|hCoV-19/England/CAMB-1AA3FF/2020|2020-04-16|EPI\_ISL\_443410|Original|hCoV-19^^England|Human|Department of Pathology|Wellcome Sanger Institute for the COVID-19 Genomics UK (COG-UK) consortium|Amato|United Kingdom

>Spike|hCoV-19/England/MILK-9D4FD2/2020|2020-09-17|EPI\_ISL\_601539|Original|hCoV-19^^England|Human|Lighthouse Lab in Milton Keynes|Wellcome Sanger Institute for the COVID-19 Genomics UK (COG-UK) consortium|Davies|United Kingdom

>Spike|hCoV-19/Wales/PHWC-2531B/2020|2020-03-22|EPI\_ISL\_432182|Original|hCoV-19^^Wales|Human|Wales Specialist Virology Centre|Public Health Wales Microbiology Cardiff|Moore|United Kingdom

>Spike|hCoV-19/USA/UT-UPHL-05500/2020|2020-05-30|EPI\_ISL\_575209|Original|hCoV-19^^Utah|Human|Utah Public Health Laboratory|Utah Public Health Laboratory|Young|USA

>Spike|hCoV-19/USA/FL-UF-13/2020|2020-05-06|EPI\_ISL\_468718|Original|hCoV-19^^Florida|Human|Environmental and Global Health|Environmental and Global Health|Submitter|USA

>Spike|hCoV-19/Wales/PHWC-33FCB/2020|2020-04-18|EPI\_ISL\_446852|Original|hCoV-19^^Wales|Human|Wales Specialist Virology Centre|Public Health Wales Microbiology Cardiff|Moore|United Kingdom

>Spike|hCoV-19/England/CAMB-7F37C/2020|2020-04-08|EPI\_ISL\_442843|Original|hCoV-19^^England|Human|Department of Pathology|Wellcome Sanger Institute for the COVID-19 Genomics UK (COG-UK) consortium|Amato|United Kingdom

>Spike|hCoV-19/Singapore/438/2020|2020-03-20|EPI\_ISL\_475969|Original|hCoV-19^^Singapore|Human|National Public Health Laboratory|National Public Health Laboratory|Mak|Singapore

>Spike|hCoV-19/Denmark/DCGC-21225/2020|2020-12-21|EPI\_ISL\_759620|Original|hCoV-19^^Syddanmark|Human|Department of Virus and Microbiological Special Diagnostics|Albertsen Lab|Michaelsen|Denmark

>Spike|hCoV-19/USA/OR-OHSU-0617/2020|2020-06-13|EPI\_ISL\_525849|Original|hCoV-19^^Oregon|Human|OHSU Lab Services Molecular Microbiology Lab|Oregon SARS-CoV-2 Genome Sequencing Center|O'Roak|USA

>Spike|hCoV-19/USA/CA-ALSR-3119/2020|2020-07-14|EPI\_ISL\_635857|Original|hCoV-19^^California|Human|San Diego County Public Health Laboratory|Andersen lab at Scripps Research|Gangavarapu|USA

>Spike|hCoV-19/England/PORT-2CF6AF/2020|2020-05-12|EPI\_ISL\_461972|Original|hCoV-19^^England|Human|Centre for Enzyme Innovation|COVID-19 Genomics UK (COG-UK) Consortium|Robson|United Kingdom

>Spike|hCoV-19/USA/NY-Wadsworth-192882-01/2020|2020-07-02|EPI\_ISL\_677011|Original|hCoV-19^^New York|Human|Masonic Medical Research Institute|Wadsworth Center|Lasek-Nesselquist|USA

>Spike|hCoV-19/Northern Ireland/NIRE-FBA64/2020|2020-04-11|EPI\_ISL\_459331|Original|hCoV-19^^Northern Ireland|Human|Regional Virus Laboratory|Wellcome Sanger Institute for the COVID-19 Genomics UK (COG-UK) consortium|Davies|United Kingdom

>Spike|hCoV-19/Spain/MD-IBV-99012467/2020|2020-11-14|EPI\_ISL\_780091|Original|hCoV-19^^Madrid|Human|Hospital General Universitario Gregorio Mara\u00f1a\u00f3n|SeqCOVID-SPAIN consortium/IBV (CSIC)|Comas|Spain

>Spike|hCoV-19/Luxembourg/LNS2064422/2020|2020-08-10|EPI\_ISL\_740051|Original|hCoV-19^^Luxembourg|Human|Laboratoire national de sant\u00e9|Laboratoire national de sant\u00e9|Wienecke-Baldacchino|Luxembourg

>Spike|hCoV-19/USA/FL-BPHL-0828/2020|2020-06-12|EPI\_ISL\_514174|Original|hCoV-19^^Florida|Human|Florida Bureau of Public Health Laboratories|Florida Bureau of Public Health Laboratories|Blanton|USA

>Spike|hCoV-19/Italy/APU-PODV-15949439/2020|2020-08-29|EPI\_ISL\_788959|Original|hCoV-19^^Apulia|Human|Ospedale \Di Venere\|Beaconlab (Bioinformatics|Chiara|Italy

>Spike|hCoV-19/England/ALDP-68EAF7/2020|2020-07-02|EPI\_ISL\_558107|Original|hCoV-19^^England|Human|Lighthouse Lab in Alderley Park|Wellcome Sanger Institute for the COVID-19 Genomics UK (COG-UK) consortium|Davies|United Kingdom

>Spike|hCoV-19/England/LIVE-9A2C9/2020|2020-04-17|EPI\_ISL\_440854|Original|hCoV-19^^England|Human|Liverpool Clinical Laboratories|COVID-19 Genomics UK (COG-UK) Consortium|Haldenby|United Kingdom

>Spike|hCoV-19/England/QEUEH-B10B7A/2020|2020-11-02|EPI\_ISL\_642632|Original|hCoV-19^^England|Human|Lighthouse Lab in Glasgow|Wellcome Sanger Institute for the COVID-19 Genomics UK (COG-UK) Consortium|Davies|United Kingdom

>Spike|hCoV-19/USA/UT-UPHL-2009257/2020|2020-05-15|EPI\_ISL\_525243|Original|hCoV-19^^Utah|Human|Utah Public Health Laboratory|Utah Public Health Laboratory|Young|USA

>Spike|hCoV-19/Denmark/DCGC-17079/2020|2020-12-14|EPI\_ISL\_750745|Original|hCoV-19^^Hovedstaden|Human|Department of Virus and Microbiological Special Diagnostics|Albertsen Lab|Michaelsen|Denmark

>Spike|hCoV-19/Gambia/NPHL-1168/2020|2020-06-27|EPI\_ISL\_561212|Original|hCoV-19^^Kombo|Human|MRCG at LSHTM Genomics lab|MRCG at LSHTM Genomics lab|Sesay|Gambia

>Spike|hCoV-19/England/QEUEH-B12880/2020|2020-11-02|EPI\_ISL\_642337|Original|hCoV-19^^England|Human|Lighthouse Lab in Glasgow|Wellcome Sanger Institute for the COVID-19 Genomics UK (COG-UK) Consortium|Davies|United Kingdom

>Spike|hCoV-19/Malaysia/UNIMAS-B026/2020|2020-10-24|EPI\_ISL\_718222|Original|hCoV-19^^Sarawak|Human|Borneo Medical Centre|Institute of Health and Community Medicine|Jonathan|Malaysia

>Spike|hCoV-19/Wales/PHWC-16F37E/2020|2020-10-04|EPI\_ISL\_585953|Original|hCoV-19^^Wales|Human|Wales Specialist Virology Centre Sequencing lab|COVID-19 Genomics UK (COG-UK) Consortium|Moore|United Kingdom

>Spike|hCoV-19/USA/WA-UW-23410/2020|2020-08-10|EPI\_ISL\_576447|Original|hCoV-19^^Washington|Human|UW Virology Lab|UW Virology Lab|Roychoudhury|USA

>Spike|hCoV-19/Netherlands/UT-EMC-183/2020|2020-10-28|EPI\_ISL\_722562|Original|hCoV-19^^Utrecht|Human|Dutch COVID-19 response team|Erasmus Medical Center|Oude Munnink|Netherlands

>Spike|hCoV-19/Japan/PG-7906/2020|2020-08-00|EPI\_ISL\_687007|Original|hCoV-19^^Japan|Human|Pathogen Genomics Center|Pathogen Genomics Center|Sekizuka|Japan

>Spike|hCoV-19/Denmark/DCGC-3150/2020|2020-08-31|EPI\_ISL\_615970|Original|hCoV-19^^Hovedstaden|Human|Department of Virus and Microbiological Special Diagnostics|Albertsen lab|Michaelsen|Denmark

>Spike|hCoV-19/England/MILK-A7B2D3/2020|2020-10-14|EPI\_ISL\_607582|Original|hCoV-19^^England|Human|Lighthouse Lab in Milton Keynes|Wellcome Sanger Institute for the COVID-19 Genomics UK (COG-UK) consortium|Davies|United Kingdom

>Spike|hCoV-19/Belgium/LEV-0409294/2020|2020-04-09|EPI\_ISL\_464088|Original|hCoV-19^^Zolder|Human|KU Leuven|KU Leuven|Maes|Belgium

>Spike|hCoV-19/England/BRIS-12B53C/2020|2020-05-21|EPI\_ISL\_487587|Original|hCoV-19^^England|Human|PHE South West Regional Laboratory|Wellcome Sanger Institute for the COVID-19 Genomics UK (COG-UK) consortium|Davies|United Kingdom

>Spike|hCoV-19/USA/WI-WSLH-200645/2020|2020-06-12|EPI\_ISL\_631414|Original|hCoV-19^^Wisconsin|Human|Wisconsin State Laboratory of Hygiene Communicable Disease Division|Wisconsin State Laboratory of Hygiene Communicable Disease Division|Florek|USA

>Spike|hCoV-19/England/QEUEH-AAC7AD/2020|2020-10-21|EPI\_ISL\_652871|Original|hCoV-19^^England|Human|Oxford Viromics|COVID-19 Genomics UK (COG-UK) Consortium|Golubchik|United Kingdom

>Spike|hCoV-19/England/SHEF-D0F84/2020|2020-03-21|EPI\_ISL\_432621|Original|hCoV-19^^England|Human|Virology Department|COVID-19 Genomics UK (COG-UK) Consortium|de Silva|United Kingdom

>Spike|hCoV-19/Scotland/CVR5256/2020|2020-10-19|EPI\_ISL\_627418|Original|hCoV-19^^Scotland|Human|West of Scotland Specialist Virology Centre|COVID-19 Genomics UK (COG-UK) Consortium|Robertson|United Kingdom

>Spike|hCoV-19/USA/WA-S2661/2020|2020-06-20|EPI\_ISL\_497293|Original|hCoV-19^^Washington|Human|Washington State Department of Health|Seattle Flu Study|Lee|USA

>Spike|hCoV-19/USA/VA-DCLS-1619/2020|2020-08-20|EPI\_ISL\_614026|Original|hCoV-19^^Virginia|Human|Virginia DCLS|Virginia DCLS|St. Jacques|USA

>Spike|hCoV-19/Denmark/DCGC-19395/2020|2020-12-07|EPI\_ISL\_748924|Original|hCoV-19^^Sjaelland|Human|Department of Virus and Microbiological Special Diagnostics|Albertsen Lab|Michaelsen|Denmark

>Spike|hCoV-19/Switzerland/SH-ETHZ-380211/2020|2020-11-23|EPI\_ISL\_721860|Original|hCoV-19^^Schaffhausen|Human|Viollier AG|Department of Biosystems Science and Engineering|Nadeau|Switzerland

>Spike|hCoV-19/Scotland/QEUEH-9DD4E9/2020|2020-09-22|EPI\_ISL\_599723|Original|hCoV-19^^Scotland|Human|Lighthouse Lab in Glasgow|Wellcome Sanger Institute for the COVID-19 Genomics UK (COG-UK) consortium|Davies|United Kingdom

>Spike|hCoV-19/Scotland/CVR3870/2020|2020-05-25|EPI\_ISL\_484664|Original|hCoV-19^^Scotland|Human|West of Scotland Specialist Virology Centre|COVID-19 Genomics UK (COG-UK) Consortium|Robertson|United Kingdom

>Spike|hCoV-19/England/MILK-B94121/2020|2020-11-13|EPI\_ISL\_676143|Original|hCoV-19^^England|Human|Lighthouse Lab in Milton Keynes|Wellcome Sanger Institute for the COVID-19 Genomics UK (COG-UK) Consortium|Davies|United Kingdom

>Spike|hCoV-19/Netherlands/Overijssel\_30/2020|2020-03-22|EPI\_ISL\_460820|Original|hCoV-19^^Overijssel|Human|Dutch COVID-19 response team|Erasmus Medical Center|Oude Munnink|Netherlands

>Spike|hCoV-19/Wales/PHWC-4949B7/2020|2020-11-21|EPI\_ISL\_726198|Original|hCoV-19^^Wales|Human|Originating lab|COVID-19 Genomics UK (COG-UK) Consortium|Moore|United Kingdom

>Spike|hCoV-19/England/QEUEH-B10FE7/2020|2020-11-03|EPI\_ISL\_641983|Original|hCoV-19^^England|Human|Lighthouse Lab in Glasgow|Wellcome Sanger Institute for the COVID-19 Genomics UK (COG-UK) Consortium|Davies|United Kingdom

>Spike|hCoV-19/England/QEUEH-BF0B16/2020|2020-12-05|EPI\_ISL\_709161|Original|hCoV-19^^England|Human|Lighthouse Lab in Glasgow|Wellcome Sanger Institute for the COVID-19 Genomics UK (COG-UK) Consortium|Davies|United Kingdom

>Spike|hCoV-19/England/NORT-282F9E/2020|2020-03-30|EPI\_ISL\_472237|Original|hCoV-19^^England|Human|Northumbria University / South Tees Hospitals NHS Foundation Trust / North Cumbria Integrated Care NHS Foundation Trust / North Tees and Hartlepool NHS Foundation Trust / Newcastle Hospitals NHS Foundation Trust|COVID-19 Genomics UK (COG-UK) Consortium|Bashton|United Kingdom

>Spike|hCoV-19/England/QEUEH-9F6ECE/2020|2020-09-27|EPI\_ISL\_595643|Original|hCoV-19^^England|Human|Oxford Viromics|COVID-19 Genomics UK (COG-UK) Consortium|Golubchik|United Kingdom

>Spike|hCoV-19/Wales/ALDP-C3999E/2020|2020-12-08|EPI\_ISL\_767164|Original|hCoV-19^^Wales|Human|Lighthouse Lab in Alderley Park|Wellcome Sanger Institute for the COVID-19 Genomics UK (COG-UK) Consortium|Davies|United Kingdom



>Spike|hCoV-19/Wales/PHWC-15D513/2020|2020-05-04|EPI\_ISL\_472732|Original|hCoV-19^^Wales|Human|Wales Specialist Virology Centre Sequencing lab|COVID-19 Genomics UK (COG-UK) Consortium|Moore|United Kingdom

>Spike|hCoV-19/USA/TX-HMH-MCoV-15484/2020|2020-10-24|EPI\_ISL\_786968|Original|hCoV-19^^Texas|Human|Houston Methodist Hospital|Houston Methodist Hospital|Long|USA

>Spike|hCoV-19/England/SHEF-C3485/2020|2020-03-31|EPI\_ISL\_432772|Original|hCoV-19^^England|Human|Virology Department|COVID-19 Genomics UK (COG-UK) Consortium|de Silva|United Kingdom

>Spike|hCoV-19/Chile/LI-1-4/2020|2020-08-03|EPI\_ISL\_755303|Original|hCoV-19^^O'Higgins|Human|Laboratorio de Bioingenier\u00eda|Center for Mathematical Modeling and Center for Genome Regulation. Santiago|Palma V\u00e9jares|Chile

>Spike|hCoV-19/England/MILK-B55A21/2020|2020-11-05|EPI\_ISL\_657385|Original|hCoV-19^^England|Human|Lighthouse Lab in Milton Keynes|Wellcome Sanger Institute for the COVID-19 Genomics UK (COG-UK) Consortium|Davies|United Kingdom

>Spike|hCoV-19/Australia/VIC11654/2020|2020-07-22|EPI\_ISL\_563448|Original|hCoV-19^^Victoria|Human|Microbiological Diagnostic Unit - Public Health Laboratory (MDU-PHL)|MDU-PHL|Schultz|Australia

>Spike|hCoV-19/Wales/PHWC-4A3584/2020|2020-12-14|EPI\_ISL\_744113|Original|hCoV-19^^Wales|Human|Wales Specialist Virology Centre Sequencing lab|COVID-19 Genomics UK (COG-UK) Consortium|Moore|United Kingdom

>Spike|hCoV-19/Denmark/DCGC-7871/2020|2020-10-26|EPI\_ISL\_618811|Original|hCoV-19^^Syddanmark|Human|Department of Virus and Microbiological Special Diagnostics|Albertsen lab|Michaelsen|Denmark

>Spike|hCoV-19/Wales/ALDP-B1E2C2/2020|2020-11-01|EPI\_ISL\_710959|Original|hCoV-19^^Wales|Human|Lighthouse Lab in Alderley Park|Wellcome Sanger Institute for the COVID-19 Genomics UK (COG-UK) Consortium|Davies|United Kingdom

>Spike|hCoV-19/Luxembourg/LNS6449164/2020|2020-10-19|EPI\_ISL\_744416|Original|hCoV-19^^Luxembourg|Human|Laboratoire national de sant\u00e9|Laboratoire national de sant\u00e9|Wienecke-Baldacchino|Luxembourg

>Spike|hCoV-19/Australia/VIC5139/2020|2020-07-18|EPI\_ISL\_519942|Original|hCoV-19^^Victoria|Human|Microbiological Diagnostic Unit - Public Health Laboratory (MDU-PHL)|MDU-PHL|Schultz|Australia

>Spike|hCoV-19/USA/TX-HMH-MCoV-16201/2020|2020-10-29|EPI\_ISL\_785885|Original|hCoV-19^^Texas|Human|Houston Methodist Hospital|Houston Methodist Hospital|Long|USA

>Spike|hCoV-19/England/NORW-EC750/2020|2020-05-11|EPI\_ISL\_457558|Original|hCoV-19^^England|Human|Quadram Institute Bioscience|COVID-19 Genomics UK (COG-UK) Consortium|Alikhan|United Kingdom

>Spike|hCoV-19/Finland/17A93S13/2020|2020-04-17|EPI\_ISL\_481594|Original|hCoV-19^^Uusimaa|Human|Department of Virology and Immunology|Department of Virology|Smura|Finland

>Spike|hCoV-19/England/ALDP-C4811C/2020|2020-12-12|EPI\_ISL\_718674|Original|hCoV-19^^England|Human|Lighthouse Lab in Alderley Park|Wellcome Sanger Institute for the COVID-19 Genomics UK (COG-UK) Consortium|Davies|United Kingdom

>Spike|hCoV-19/Wales/PHWC-2A282/2020|2020-04-06|EPI\_ISL\_445545|Original|hCoV-19^^Wales|Human|Wales Specialist Virology Centre|Public Health Wales Microbiology Cardiff|Moore|United Kingdom

>Spike|hCoV-19/India/MP-DRDE-4096/2020|2020-05-17|EPI\_ISL\_476891|Original|hCoV-19^^Madhya Pradesh|Human|Defence Research & Development Establishment (DRDE)|Defence Research & Development Establishment (DRDE)|Dash|India

>Spike|hCoV-19/USA/TX-HMH-MCoV-19045/2020|2020-11-23|EPI\_ISL\_783597|Original|hCoV-19^^Texas|Human|Houston Methodist Hospital|Houston Methodist Hospital|Long|USA

>Spike|hCoV-19/England/QEUEH-A9F9B6/2020|2020-10-20|EPI\_ISL\_652690|Original|hCoV-19^^England|Human|University of Exeter|COVID-19 Genomics UK (COG-UK) Consortium|Temperton|United Kingdom

>Spike|hCoV-19/Denmark/DCGC-19842/2020|2020-12-07|EPI\_ISL\_747546|Original|hCoV-19^^Hovedstaden|Human|Department of Virus and Microbiological Special Diagnostics|Albertsen Lab|Michaelsen|Denmark

>Spike|hCoV-19/Norway/3102/2020|2020-08-04|EPI\_ISL\_549126|Original|hCoV-19^^Viken|Human|Ostfold Hospital Trust - Kalnes|Norwegian Institute of Public Health|Kopperud Riis|Norway

>Spike|hCoV-19/USA/CA-CZB-12309/2020|2020-10-07|EPI\_ISL\_648395|Original|hCoV-19^^California|Human|Santa Clara County Public Health Laboratory|Chan-Zuckerberg Biohub|Bhatt|USA

>Spike|hCoV-19/England/204221506/2020|2020-00-00|EPI\_ISL\_593833|Original|hCoV-19^^England|Human|Respiratory Virus Unit|Respiratory Virus Unit|Platt|United Kingdom

>Spike|hCoV-19/Wales/PHWC-48CD5C/2020|2020-11-08|EPI\_ISL\_666535|Original|hCoV-19^^Wales|Human|Wales Specialist Virology Centre Sequencing lab|COVID-19 Genomics UK (COG-UK) Consortium|Moore|United Kingdom

>Spike|hCoV-19/USA/MI-MDHHS-SC21487/2020|2020-07-24|EPI\_ISL\_516214|Original|hCoV-19^^Michigan|Human|Michigan Department of Health and Human Services|Michigan Department of Health and Human Services|Blankenship|USA

>Spike|hCoV-19/France/ARA-36541/2020|2020-05-11|EPI\_ISL\_636484|Original|hCoV-19^^Auvergne-Rhone-Alpes|Human|CNR Virus des Infections Respiratoires - France SUD|CNR Virus des Infections Respiratoires - France SUD|Josset|France

>Spike|hCoV-19/England/MILK-970406/2020|2020-08-17|EPI\_ISL\_553119|Original|hCoV-19^^England|Human|Lighthouse Lab in Milton Keynes|Wellcome Sanger Institute for the COVID-19 Genomics UK (COG-UK) consortium|Davies|United Kingdom

>Spike|hCoV-19/Wales/PHWC-2D51D/2020|2020-04-04|EPI\_ISL\_445995|Original|hCoV-19^^Wales|Human|Wales Specialist Virology Centre|Public Health Wales Microbiology Cardiff|Moore|United Kingdom

>Spike|hCoV-19/USA/CA-CZB-14137/2020|2020-05-25|EPI\_ISL\_739268|Original|hCoV-19^^California|Human|Alameda County Public Health Lab|Chan-Zuckerberg Biohub|Kamm|USA

>Spike|hCoV-19/Wales/PHWC-47E90E/2020|2020-10-11|EPI\_ISL\_595521|Original|hCoV-19^^Wales|Human|Originating lab|COVID-19 Genomics UK (COG-UK) Consortium|Moore|United Kingdom

>Spike|hCoV-19/England/NORW-EC87B/2020|2020-05-13|EPI\_ISL\_457567|Original|hCoV-19^^England|Human|Quadram Institute Bioscience|COVID-19 Genomics UK (COG-UK) Consortium|Alikhan|United Kingdom

>Spike|hCoV-19/Spain/VC-FISABIO-561/2020|2020-03-27|EPI\_ISL\_447496|Original|hCoV-19^^Comunitat Valenciana|Human|Servicio de Microbiologia. Hospital Clinico Universitario de Valencia|Sequencing and Bioinformatics Service and Molecular Epidemiology Research Group. FISABIO-Public Health|Gonzalez-Candelas|Spain

>Spike|hCoV-19/Denmark/DCGC-10209/2020|2020-11-09|EPI\_ISL\_669456|Original|hCoV-19^^Midtjylland|Human|Department of Virus and Microbiological Special Diagnostics|Albertsen Lab|Michaelsen|Denmark

>Spike|hCoV-19/England/MILK-AC929A/2020|2020-10-21|EPI\_ISL\_629416|Original|hCoV-19^^England|Human|Lighthouse Lab in Milton Keynes|Wellcome Sanger Institute for the COVID-19 Genomics UK (COG-UK) consortium|Davies|United Kingdom

>Spike|hCoV-19/New Zealand/20VR3158/2020|2020-03-23|EPI\_ISL\_579448|Original|hCoV-19^^Canterbury|Human|Canterbury Health Laboratories|Institute of Environmental Science and Research (ESR)|Wang|New Zealand

>Spike|hCoV-19/USA/TX-HMH-MCoV-10009/2020|2020-07-06|EPI\_ISL\_789283|Original|hCoV-19^^Texas|Human|Houston Methodist Hospital|Houston Methodist Hospital|Long|USA

>Spike|hCoV-19/Guangzhou/GZMU0074/2020|2020-02-11|EPI\_ISL\_457687|Original|hCoV-19^^Guangzhou|Human|The First Affiliated Hospital of Guangzhou Medical University|BGI-shenzhen & The First Affiliated Hospital of Guangzhou Medical University|Ji|China

>Spike|hCoV-19/USA/WA-S2219/2020|2020-06-08|EPI\_ISL\_497647|Original|hCoV-19^^Washington|Human|Washington State Department of Health|Seattle Flu Study|Lee|USA

>Spike|hCoV-19/England/MILK-ACE365/2020|2020-10-21|EPI\_ISL\_629113|Original|hCoV-19^^England|Human|Lighthouse Lab in Milton Keynes|Wellcome Sanger Institute for the COVID-19 Genomics UK (COG-UK) consortium|Davies|United Kingdom

>Spike|hCoV-19/Denmark/DCGC-15279/2020|2020-11-23|EPI\_ISL\_713739|Original|hCoV-19^^Hovedstaden|Human|Department of Virus and Microbiological Special Diagnostics|Albertsen Lab|Michaelsen|Denmark

>Spike|hCoV-19/Australia/VIC109/2020|2020-03-18|EPI\_ISL\_419718|Original|hCoV-19^^Victoria|Human|Microbiological Diagnostic Unit Public Health Laboratory|Microbiological Diagnostic Unit Public Health Laboratory|Schultz|Australia

>Spike|hCoV-19/Switzerland/GE-HUG-3144/2020|2020-03-18|EPI\_ISL\_429196|Original|hCoV-19^^Geneve|Human|University Hospitals of Geneva Laboratory of Virology|University Hospitals of Geneva Laboratory of Virology|Cordey|Switzerland

>Spike|hCoV-19/England/20134003304/2020|2020-03-24|EPI\_ISL\_423058|Original|hCoV-19^^England|Human|Respiratory Virus Unit|Respiratory Virus Unit|Platt|United Kingdom

>Spike|hCoV-19/USA/CA-CZB-10143/2020|2020-06-16|EPI\_ISL\_672230|Original|hCoV-19^^California|Human|The Ashley Laboratory|Chan-Zuckerberg Biohub|Bhatt|USA

>Spike|hCoV-19/England/MILK-A47FE8/2020|2020-10-06|EPI\_ISL\_598513|Original|hCoV-19^^England|Human|Lighthouse Lab in Milton Keynes|Wellcome Sanger Institute for the COVID-19 Genomics UK (COG-UK) consortium|Davies|United Kingdom

>Spike|hCoV-19/USA/ID-QDX-1109/2020|2020-03-19|EPI\_ISL\_571838|Original|hCoV-19^^Idaho|Human|Quest Diagnostics|Quest Diagnostics|Kagan|USA

>Spike|hCoV-19/United Arab Emirates/0659/2020|2020-05-16|EPI\_ISL\_698813|Original|hCoV-19^^Abu Dhabi|Human|Group 42 (G42) Healthcare|G42 Healthcare|Ogrodzki|United Arab Emirates

>Spike|hCoV-19/England/QEUEH-B0EAE8/2020|2020-11-02|EPI\_ISL\_642106|Original|hCoV-19^^England|Human|Lighthouse Lab in Glasgow|Wellcome Sanger Institute for the COVID-19 Genomics UK (COG-UK) Consortium|Davies|United Kingdom

>Spike|hCoV-19/England/ALDP-9B5E07/2020|2020-08-29|EPI\_ISL\_572968|Original|hCoV-19^^England|Human|Oxford Viromics|COVID-19 Genomics UK (COG-UK) Consortium|Golubchik|United Kingdom

>Spike|hCoV-19/Panama/329728/2020|2020-03-14|EPI\_ISL\_496646|Original|hCoV-19^^Panama Center|Human|Gorgas Memorial Laboratory of Health Studies|Gorgas Memorial Laboratory of Health Studies|Martinez|Panama

>Spike|hCoV-19/England/ALDP-9CB220/2020|2020-09-16|EPI\_ISL\_575726|Original|hCoV-19^^England|Human|Lighthouse Lab in Alderley Park|Wellcome Sanger Institute for the COVID-19 Genomics UK (COG-UK) consortium|Davies|United Kingdom

>Spike|hCoV-19/Scotland/EDB5412/2020|2020-04-06|EPI\_ISL\_487804|Original|hCoV-19^^Scotland|Human|Virology Department|Wellcome Sanger Institute for the COVID-19 Genomics UK (COG-UK) consortium|Davies|United Kingdom

>Spike|hCoV-19/USA/MA-MGH-02828/2020|2020-10-21|EPI\_ISL\_765652|Original|hCoV-19^^Massachusetts|Human|Massachusetts General Hospital|Infectious Disease Program|Park|USA

>Spike|hCoV-19/Portugal/PT0749/2020|2020-03-22|EPI\_ISL\_511008|Original|hCoV-19^^Portugal|Human|Instituto Nacional de Saude (INSA)|Instituto Nacional de Saude (INSA)|Borges|Portugal

>Spike|hCoV-19/Australia/VIC16678/2020|2020-08-03|EPI\_ISL\_641056|Original|hCoV-19^^Victoria|Human|Microbiological Diagnostic Unit - Public Health Laboratory (MDU-PHL)|MDU-PHL|Schultz|Australia

>Spike|hCoV-19/Scotland/QEUEH-AF4D2C/2020|2020-10-30|EPI\_ISL\_676479|Original|hCoV-19^^Scotland|Human|Lighthouse Lab in Glasgow|Wellcome Sanger Institute for the COVID-19 Genomics UK (COG-UK) Consortium|Davies|United Kingdom

>Spike|hCoV-19/Scotland/EDB8431/2020|2020-10-16|EPI\_ISL\_612357|Original|hCoV-19^^Scotland|Human|Virology Department|COVID-19 Genomics UK (COG-UK) Consortium|McHugh|United Kingdom

>Spike|hCoV-19/Scotland/QEUEH-96BF3A/2020|2020-08-17|EPI\_ISL\_534689|Original|hCoV-19^^Scotland|Human|NHSGGC West of Scotland Specialist Virology Centre / MRC-University of Glasgow Centre for Virus Research|Wellcome Sanger Institute for the COVID-19 Genomics UK (COG-UK) consortium|Davies|United Kingdom

>Spike|hCoV-19/England/QEUEH-998BF4/2020|2020-08-26|EPI\_ISL\_540056|Original|hCoV-19^^England|Human|Lighthouse Lab in Glasgow|Wellcome Sanger Institute for the COVID-19 Genomics UK (COG-UK) consortium|Davies|United Kingdom

>Spike|hCoV-19/Wales/PHWC-488594/2020|2020-10-28|EPI\_ISL\_639409|Original|hCoV-19^^Wales|Human|Wales Specialist Virology Centre Sequencing lab|COVID-19 Genomics UK (COG-UK) Consortium|Moore|United Kingdom

>Spike|hCoV-19/USA/TX-HMH-3171/2020|2020-06-11|EPI\_ISL\_544047|Original|hCoV-19^^Texas|Human|Houston Methodist Hospital|Houston Methodist Hospital|Long|USA

>Spike|hCoV-19/USA/OR-OHSU-2257/2020|2020-08-08|EPI\_ISL\_667162|Original|hCoV-19^^Oregon|Human|OHSU Lab Services Molecular Microbiology Lab|Oregon SARS-CoV-2 Genome Sequencing Center|O'Roak|USA

>Spike|hCoV-19/England/MILK-A7C5E8/2020|2020-10-15|EPI\_ISL\_606501|Original|hCoV-19^^England|Human|Lighthouse Lab in Milton Keynes|Wellcome Sanger Institute for the COVID-19 Genomics UK (COG-UK) consortium|Davies|United Kingdom

>Spike|hCoV-19/England/ALDP-9EADB1/2020|2020-09-24|EPI\_ISL\_579949|Original|hCoV-19^^England|Human|Lighthouse Lab in Alderley Park|Wellcome Sanger Institute for the COVID-19 Genomics UK (COG-UK) consortium|Davies|United Kingdom

>Spike|hCoV-19/France/PAC-IHU-1403/2020|2020-08-10|EPI\_ISL\_569152|Original|hCoV-19^^Provence-Alpes-C\u00f4te-d\u2019Azur|Human|MEPHI|MEPHI|Levasseur|France

>Spike|hCoV-19/USA/CA-ALSR-5051/2020|2020-09-21|EPI\_ISL\_730318|Original|hCoV-19^^California|Human|San Diego County Public Health Laboratory|Andersen lab at Scripps Research|Gangavarapu|USA

>Spike|hCoV-19/Japan/PG-5265/2020|2020-07-00|EPI\_ISL\_690368|Original|hCoV-19^^Japan|Human|Pathogen Genomics Center|Pathogen Genomics Center|Sekizuka|Japan

>Spike|hCoV-19/England/QEUI-9F5CF2/2020|2020-09-25|EPI\_ISL\_588354|Original|hCoV-19^^England|Human|Lighthouse Lab in Glasgow|Wellcome Sanger Institute for the COVID-19 Genomics UK (COG-UK) consortium|Davies|United Kingdom

>Spike|hCoV-19/USA/UT-UPHL-2012782986/2020|2020-09-22|EPI\_ISL\_745994|Original|hCoV-19^^Utah|Human|Ginkgo Bioworks Clinical Laboratory|Utah Public Health Laboratory|Young|USA

>Spike|hCoV-19/Canada/NS-NML-1256/2020|2020-04-06|EPI\_ISL\_579646|Original|hCoV-19^^Nova Scotia|Human|QEII Health Sciences Centre|National Microbiology Laboratory (NML)|Majer|Canada

>Spike|hCoV-19/Australia/VIC13166/2020|2020-08-17|EPI\_ISL\_641105|Original|hCoV-19^^Victoria|Human|Microbiological Diagnostic Unit - Public Health Laboratory (MDU-PHL)|MDU-PHL|Schultz|Australia

>Spike|hCoV-19/England/CAMC-A4177D/2020|2020-10-07|EPI\_ISL\_609462|Original|hCoV-19^^England|Human|Lighthouse Lab in Cambridge|Wellcome Sanger Institute for the COVID-19 Genomics UK (COG-UK) consortium|Davies|United Kingdom

>Spike|hCoV-19/USA/WA-S2021/2020|2020-06-05|EPI\_ISL\_497449|Original|hCoV-19^^Washington|Human|Washington State Department of Health|Seattle Flu Study|Lee|USA

>Spike|hCoV-19/Slovenia/12886/2020|2020-03-25|EPI\_ISL\_635262|Original|hCoV-19^^Slovenia|Human|Institute of Microbiology and Immunology|Institute of Microbiology and Immunology|Zakotnik|Slovenia

>Spike|hCoV-19/USA/TX-HMH0152/2020|2020-03-22|EPI\_ISL\_434851|Original|hCoV-19^^Texas|Human|Houston Methodist Hospital|Houston Methodist Hospital|Long|USA

>Spike|hCoV-19/Wales/PHWC-2AD90/2020|2020-04-05|EPI\_ISL\_432046|Original|hCoV-19^^Wales|Human|Wales Specialist Virology Centre|Public Health Wales Microbiology Cardiff|Moore|United Kingdom

>Spike|hCoV-19/USA/MN-MDH-1120/2020|2020-05-05|EPI\_ISL\_470800|Original|hCoV-19^^Minnesota|Human|M Health Fairview|Minnesota Department of Health|Garfin|USA

>Spike|hCoV-19/USA/MI-MDHHS-SC22706/2020|2020-12-10|EPI\_ISL\_767355|Original|hCoV-19^^Michigan|Human|Michigan Department of Health and Human Services|Michigan Department of Health and Human Services|Jacob|USA

>Spike|hCoV-19/Chile/RM-72433/2020|2020-05-23|EPI\_ISL\_746776|Original|hCoV-19^^Region Metropolitana de Santiago|Human|Genetica Molecular and Subdepartamento de Virologia ISP Chile|Instituto de Salud Publica de Chile|Tognarelli|Chile

>Spike|hCoV-19/England/MILK-975489/2020|2020-08-21|EPI\_ISL\_552613|Original|hCoV-19^^England|Human|Lighthouse Lab in Milton Keynes|Wellcome Sanger Institute for the COVID-19 Genomics UK (COG-UK) consortium|Davies|United Kingdom

>Spike|hCoV-19/Wales/PHWC-4878E7/2020|2020-10-26|EPI\_ISL\_639251|Original|hCoV-19^^Wales|Human|Wales Specialist Virology Centre Sequencing lab|COVID-19 Genomics UK (COG-UK) Consortium|Moore|United Kingdom

>Spike|hCoV-19/USA/MN-CDC-6295/2020|2020-05-04|EPI\_ISL\_527695|Original|hCoV-19^^Minnesota|Human|MN PHL Division|Pathogen Discovery|Queen|USA

>Spike|hCoV-19/England/MILK-B06F7B/2020|2020-10-29|EPI\_ISL\_651049|Original|hCoV-19^^England|Human|Department of Pathology|COVID-19 Genomics UK (COG-UK) Consortium|Goodfellow|United Kingdom

>Spike|hCoV-19/USA/MA-MGH-00883/2020|2020-04-14|EPI\_ISL\_791809|Original|hCoV-19^^Massachusetts|Human|Massachusetts General Hospital|Infectious Disease Program|Park|USA

>Spike|hCoV-19/England/ALDP-C8B5C6/2020|2020-12-16|EPI\_ISL\_756382|Original|hCoV-19^^England|Human|Lighthouse Lab in Alderley Park|Wellcome Sanger Institute for the COVID-19 Genomics UK (COG-UK) Consortium|Davies|United Kingdom

>Spike|hCoV-19/Poland/P\_348r/2020|2020-06-00|EPI\_ISL\_509035|Original|hCoV-19^^Lodzkie|Human|genXone SA|genXone SA|Kaszuba|Poland

>Spike|hCoV-19/USA/UT-UPHL-2012750625/2020|2020-08-11|EPI\_ISL\_745929|Original|hCoV-19^^Utah|Human|Ginkgo Bioworks Clinical Laboratory|Utah Public Health Laboratory|Young|USA

>Spike|hCoV-19/England/ALDP-BB3CA3/2020|2020-11-20|EPI\_ISL\_701978|Original|hCoV-19^^England|Human|Lighthouse Lab in Alderley Park|Wellcome Sanger Institute for the COVID-19 Genomics UK (COG-UK) Consortium|Davies|United Kingdom

>Spike|hCoV-19/South Korea/KDCA0430/2020|2020-11-07|EPI\_ISL\_760214|Original|hCoV-19^^South Korea|Human|Division of Emerging Infectious Diseases|Division of Emerging Infectious Diseases|Park|South Korea

>Spike|hCoV-19/England/CAMC-A654B8/2020|2020-10-11|EPI\_ISL\_608463|Original|hCoV-19^^England|Human|Lighthouse Lab in Cambridge|Wellcome Sanger Institute for the COVID-19 Genomics UK (COG-UK) consortium|Davies|United Kingdom

>Spike|hCoV-19/England/ALDP-C8EA6A/2020|2020-12-15|EPI\_ISL\_777144|Original|hCoV-19^^England|Human|Lighthouse Lab in Alderley Park|Wellcome Sanger Institute for the COVID-19 Genomics UK (COG-UK) Consortium|Davies|United Kingdom

>Spike|hCoV-19/France/PAC-MEPHI-0762/2020|2020-03-16|EPI\_ISL\_644410|Original|hCoV-19^^Provence-Alpes-Cote-d\u2019Azur|Human|MEPHI|MEPHI|Levasseur|France

>Spike|hCoV-19/England/CAMB-8306F/2020|2020-04-13|EPI\_ISL\_443634|Original|hCoV-19^^England|Human|Department of Pathology|Wellcome Sanger Institute for the COVID-19 Genomics UK (COG-UK) consortium|Amato|United Kingdom

>Spike|hCoV-19/India/TG-CCMB-L1063/2020|2020-05-12|EPI\_ISL\_458052|Original|hCoV-19^^Telangana|Human|CSIR-Centre for Cellular and Molecular Biology|CSIR-Centre for Cellular and Molecular Biology|Banu|India

>Spike|hCoV-19/England/QEUEH-9F8E62/2020|2020-09-27|EPI\_ISL\_588818|Original|hCoV-19^^England|Human|Lighthouse Lab in Glasgow|Wellcome Sanger Institute for the COVID-19 Genomics UK (COG-UK) consortium|Davies|United Kingdom

>Spike|hCoV-19/England/ALDP-C8874B/2020|2020-12-17|EPI\_ISL\_762706|Original|hCoV-19^^England|Human|Lighthouse Lab in Alderley Park|Wellcome Sanger Institute for the COVID-19 Genomics UK (COG-UK) Consortium|Davies|United Kingdom

>Spike|hCoV-19/Gibraltar/205000701/2020|2020-12-00|EPI\_ISL\_710024|Original|hCoV-19^^Gibraltar|Human|Microbiology|Respiratory Virus Unit|Platt|Gibraltar

>Spike|hCoV-19/Spain/CT-HUVH-VH5081/2020|2020-03-21|EPI\_ISL\_444981|Original|hCoV-19^^Catalunya|Human|Hospital Universitari Vall d'Hebron - Vall d'hebron Institut de Recerca|Hospital Universitari Vall d'Hebron|Anton|Spain

>Spike|hCoV-19/Japan/PG-7726/2020|2020-08-00|EPI\_ISL\_686828|Original|hCoV-19^^Japan|Human|Chiba Prefectural Institute of Public Health|Pathogen Genomics Center|Sekizuka|Japan

>Spike|hCoV-19/Gibraltar/204641717/2020|2020-00-00|EPI\_ISL\_637195|Original|hCoV-19^^Gibraltar|Human|Microbiology|Respiratory Virus Unit|Platt|Gibraltar

>Spike|hCoV-19/Wales/PHWC-2B324/2020|2020-04-07|EPI\_ISL\_431907|Original|hCoV-19^^Wales|Human|Wales Specialist Virology Centre|Public Health Wales Microbiology Cardiff|Moore|United Kingdom

>Spike|hCoV-19/England/MILK-ACD57F/2020|2020-10-21|EPI\_ISL\_634325|Original|hCoV-19^^England|Human|Lighthouse Lab in Milton Keynes|Wellcome Sanger Institute for the COVID-19 Genomics UK (COG-UK) consortium|Davies|United Kingdom

>Spike|hCoV-19/England/ALDP-A6F68B/2020|2020-10-15|EPI\_ISL\_607814|Original|hCoV-19^^England|Human|Lighthouse Lab in Alderley Park|Wellcome Sanger Institute for the COVID-19 Genomics UK (COG-UK) consortium|Davies|United Kingdom

>Spike|hCoV-19/USA/NY-Wadsworth-282054-01/2020|2020-12-02|EPI\_ISL\_754395|Original|hCoV-19^^New York|Human|Wadsworth Center|Wadsworth Center|Lasek-Nesselquist|USA

>Spike|hCoV-19/Netherlands/NA\_321/2020|2020-04-02|EPI\_ISL\_455126|Original|hCoV-19^^Netherlands|Human|Dutch COVID-19 response team|Erasmus Medical Center|Oude Munnink|Netherlands

>Spike|hCoV-19/Switzerland/VS-ETHZ-370489/2020|2020-11-17|EPI\_ISL\_693974|Original|hCoV-19^^Valais|Human|Viollier AG|Department of Biosystems Science and Engineering|Nadeau|Switzerland

>Spike|hCoV-19/Canada/ON-S1574/2020|2020-09-01|EPI\_ISL\_755923|Original|hCoV-19^^Ontario|Human|Toronto Invasive Bacterial Diseases Network|McMaster University|McArthur|Canada

>Spike|hCoV-19/Ireland/KE-NVRL-71IRL96376/2020|2020-08-01|EPI\_ISL\_525387|Original|hCoV-19^^Kildare|Human|National Virus Reference Laboratory|National Virus Reference Laboratory|Gonzalez|Ireland

>Spike|hCoV-19/Scotland/QEUH-A8C12D/2020|2020-10-16|EPI\_ISL\_649564|Original|hCoV-19^^Scotland|Human|Lighthouse Lab in Glasgow|Wellcome Sanger Institute for the COVID-19 Genomics UK (COG-UK) Consortium|Davies|United Kingdom

>Spike|hCoV-19/Netherlands/UT-RIVM-10167/2020|2020-00-00|EPI\_ISL\_547554|Original|hCoV-19^^Utrecht|Human|Dutch COVID-19 response team|National Institute for Public Health and the Environment (RIVM)|Meijer|Netherlands

>Spike|hCoV-19/Denmark/DCGC-7775/2020|2020-10-19|EPI\_ISL\_618734|Original|hCoV-19^^Nordjylland|Human|Department of Virus and Microbiological Special Diagnostics|Albertsen lab|Michaelsen|Denmark

>Spike|hCoV-19/England/ALDP-955540/2020|2020-06-12|EPI\_ISL\_553409|Original|hCoV-19^^England|Human|Lighthouse Lab in Alderley Park|Wellcome Sanger Institute for the COVID-19 Genomics UK (COG-UK) consortium|Davies|United Kingdom

>Spike|hCoV-19/Denmark/DCGC-806/2020|2020-04-20|EPI\_ISL\_614707|Original|hCoV-19^^Hovedstaden|Human|Department of Virus and Microbiological Special Diagnostics|Albertsen lab|Michaelsen|Denmark

>Spike|hCoV-19/Switzerland/BS-UHB-42189866/2020|2020-03-13|EPI\_ISL\_528055|Original|hCoV-19^^Basel-Stadt|Human|University Hospital Basel|University Hospital Basel|Roloff Handschin|Switzerland

>Spike|hCoV-19/England/QEUH-95E40E/2020|2020-08-10|EPI\_ISL\_536991|Original|hCoV-19^^England|Human|Lighthouse Lab in Glasgow|Wellcome Sanger Institute for the COVID-19 Genomics UK (COG-UK) consortium|Davies|United Kingdom

>Spike|hCoV-19/England/MILK-9A8951/2020|2020-09-01|EPI\_ISL\_549436|Original|hCoV-19^^England|Human|Oxford Viromics|COVID-19 Genomics UK (COG-UK) Consortium|Golubchik|United Kingdom

>Spike|hCoV-19/England/CAMC-A83056/2020|2020-10-13|EPI\_ISL\_610716|Original|hCoV-19^^England|Human|Lighthouse Lab in Cambridge|Wellcome Sanger Institute for the COVID-19 Genomics UK (COG-UK) consortium|Davies|United Kingdom

>Spike|hCoV-19/USA/TX-DSHS-1751/2020|2020-06-20|EPI\_ISL\_710379|Original|hCoV-19^^Texas|Human|Texas Department of State Health Services|Texas Department of State Health Services|Rahman|USA

>Spike|hCoV-19/USA/NY-NYCPHL-001246/2020|2020-11-06|EPI\_ISL\_683838|Original|hCoV-19^^New York|Human|DOHMH Jamaica|New York City Public Health Laboratory|Wang|USA

>Spike|hCoV-19/USA/TX-HMH-2993/2020|2020-05-31|EPI\_ISL\_543917|Original|hCoV-19^^Texas|Human|Houston Methodist Hospital|Houston Methodist Hospital|Long|USA

>Spike|hCoV-19/England/LIVE-991DC/2020|2020-04-07|EPI\_ISL\_439697|Original|hCoV-19^^England|Human|Liverpool Clinical Laboratories|COVID-19 Genomics UK (COG-UK) Consortium|Haldenby|United Kingdom

>Spike|hCoV-19/Chile/AT-CMM-ATAC14/2020|2020-08-07|EPI\_ISL\_626560|Original|hCoV-19^^Atacama|Human|Laboratorio de Biología Molecular|Center for Mathematical Modeling and Center for Genome Regulation. Santiago|Palma Valdeavellanos|Chile

>Spike|hCoV-19/Denmark/DCGC-7039/2020|2020-10-12|EPI\_ISL\_619887|Original|hCoV-19^^Syddanmark|Human|Department of Virus and Microbiological Special Diagnostics|Albertsen lab|Michaelsen|Denmark

>Spike|hCoV-19/USA/TX-HMH-MCoV-8129/2020|2020-06-30|EPI\_ISL\_784219|Original|hCoV-19^^Texas|Human|Houston Methodist Hospital|Houston Methodist Hospital|Long|USA

>Spike|hCoV-19/Japan/PG-7236/2020|2020-08-00|EPI\_ISL\_688340|Original|hCoV-19^^Japan|Human|Saitama Prefectural Institute of Public Health|Pathogen Genomics Center|Sekizuka|Japan

>Spike|hCoV-19/England/CAMC-B095FE/2020|2020-10-29|EPI\_ISL\_673179|Original|hCoV-19^^England|Human|Lighthouse Lab in Cambridge|Wellcome Sanger Institute for the COVID-19 Genomics UK (COG-UK) Consortium|Davies|United Kingdom

>Spike|hCoV-19/England/QEUA-C3231F/2020|2020-12-11|EPI\_ISL\_782501|Original|hCoV-19^^England|Human|Lighthouse Lab in Glasgow|Wellcome Sanger Institute for the COVID-19 Genomics UK (COG-UK) Consortium|Davies|United Kingdom

>Spike|hCoV-19/Denmark/DCGC-11724/2020|2020-10-26|EPI\_ISL\_671095|Original|hCoV-19^^Midtjylland|Human|Department of Virus and Microbiological Special Diagnostics|Albertsen Lab|Michaelsen|Denmark

>Spike|hCoV-19/Turkey/HSGM-4701/2020|2020-03-17|EPI\_ISL\_429869|Original|hCoV-19^^Konya|Human|Ministry of Health Turkey|Ministry of Health Turkey|Bayrakdar|Turkey

>Spike|hCoV-19/Denmark/DCGC-15893/2020|2020-11-23|EPI\_ISL\_714088|Original|hCoV-19^^Sjaelland|Human|Department of Virus and Microbiological Special Diagnostics|Albertsen Lab|Michaelsen|Denmark

>Spike|hCoV-19/Australia/VIC1138/2020|2020-04-08|EPI\_ISL\_430609|Original|hCoV-19^^Victoria|Human|Victorian Infectious Diseases Reference Laboratory (VIDRL)|Microbiological Diagnostic Unit Public Health Laboratory and Victorian Infectious Diseases Reference Laboratory|Schultz|Australia

>Spike|hCoV-19/Japan/PG-1372/2020|2020-04-00|EPI\_ISL\_684979|Original|hCoV-19^^Japan|Human|Saitama Prefectural Institute of Public Health|Pathogen Genomics Center|Sekizuka|Japan

>Spike|hCoV-19/USA/WA-UW-22839/2020|2020-08-05|EPI\_ISL\_570723|Original|hCoV-19^^Washington|Human|UW Virology Lab|UW Virology Lab|Roychoudhury|USA

>Spike|hCoV-19/England/QEUA-A33608/2020|2020-10-05|EPI\_ISL\_626680|Original|hCoV-19^^England|Human|Virology Department|COVID-19 Genomics UK (COG-UK) Consortium|de Silva|United Kingdom

>Spike|hCoV-19/Wales/PHWC-168CE3/2020|2020-05-19|EPI\_ISL\_494354|Original|hCoV-19^^Wales|Human|Originating lab|COVID-19 Genomics UK (COG-UK) Consortium|Moore|United Kingdom

>Spike|hCoV-19/Japan/PG-3723/2020|2020-04-00|EPI\_ISL\_691976|Original|hCoV-19^^Japan|Human|Pathogen Genomics Center|Pathogen Genomics Center|Sekizuka|Japan

>Spike|hCoV-19/England/MILK-993C23/2020|2020-08-27|EPI\_ISL\_552303|Original|hCoV-19^^England|Human|Lighthouse Lab in Milton Keynes|Wellcome Sanger Institute for the COVID-19 Genomics UK (COG-UK) consortium|Davies|United Kingdom

>Spike|hCoV-19/USA/MN-MDH-1866/2020|2020-09-24|EPI\_ISL\_603001|Original|hCoV-19^^Minnesota|Human|Sanford South University Medical Center|Minnesota Department of Health|Garfin|USA

>Spike|hCoV-19/England/MILK-A458B2/2020|2020-10-06|EPI\_ISL\_598708|Original|hCoV-19^^England|Human|Lighthouse Lab in Milton Keynes|Wellcome Sanger Institute for the COVID-19 Genomics UK (COG-UK) consortium|Davies|United Kingdom

>Spike|hCoV-19/Israel/CVL-452-ngs/2020|2020-12-27|EPI\_ISL\_776807|Original|hCoV-19^^Israel|Human|Israel Central Virology laboratory|Israel Central Virology laboratory|Zuckerman|Israel

>Spike|hCoV-19/Australia/VIC604/2020|2020-03-26|EPI\_ISL\_426859|Original|hCoV-19^^Victoria|Human|Victorian Infectious Diseases Reference Laboratory (VIDRL)|Microbiological Diagnostic Unit Public Health Laboratory and Victorian Infectious Diseases Reference Laboratory|Schultz|Australia

>Spike|hCoV-19/Denmark/DCGC-20856/2020|2020-12-21|EPI\_ISL\_759411|Original|hCoV-19^^Hovedstaden|Human|Department of Virus and Microbiological Special Diagnostics|Albertsen Lab|Michaelsen|Denmark

>Spike|hCoV-19/Denmark/DCGC-11940/2020|2020-10-12|EPI\_ISL\_671226|Original|hCoV-19^^Nordjylland|Human|Department of Virus and Microbiological Special Diagnostics|Albertsen Lab|Michaelsen|Denmark

>Spike|hCoV-19/USA/UT-03433/2020|2020-04-20|EPI\_ISL\_498662|Original|hCoV-19^^Utah|Human|Utah Public Health Laboratory|Utah Public Health Laboratory|Butz|USA

>Spike|hCoV-19/England/ALDP-B83C24/2020|2020-11-14|EPI\_ISL\_675237|Original|hCoV-19^^England|Human|Lighthouse Lab in Alderley Park|Wellcome Sanger Institute for the COVID-19 Genomics UK (COG-UK) Consortium|Davies|United Kingdom

>Spike|hCoV-19/England/CAMB-1AEDB1/2020|2020-05-11|EPI\_ISL\_452863|Original|hCoV-19^^England|Human|Department of Pathology|COVID-19 Genomics UK (COG-UK) Consortium|Meredit|United Kingdom

>Spike|hCoV-19/USA/UT-QDX-1816/2020|2020-03-16|EPI\_ISL\_604140|Original|hCoV-19^^Utah|Human|Quest Diagnostics|Quest Diagnostics|Kagan|USA

>Spike|hCoV-19/Spain/RI-IBV-99010919/2020|2020-04-21|EPI\_ISL\_732759|Original|hCoV-19^^La Rioja|Human|Centro de Investigaci\u00f3n Biom\u00e9dica de La Rioja - Hospital San Pedro Logro\u00f1o|SeqCOVID-SPAIN consortium/IBV (CSIC)|Comas|Spain

>Spike|hCoV-19/USA/MN-MDH-1231/2020|2020-05-18|EPI\_ISL\_482952|Original|hCoV-19^^Minnesota|Human|Minnesota Department of Health|Minnesota Department of Health|Garfin|USA

>Spike|hCoV-19/England/NOTT-1133B5/2020|2020-09-15|EPI\_ISL\_549380|Original|hCoV-19^^England|Human|Queens Medical Centre|COVID-19 Genomics UK (COG-UK) Consortium|Loose|United Kingdom

>Spike|hCoV-19/Belgium/FCA-0327348/2020|2020-03-27|EPI\_ISL\_462202|Original|hCoV-19^^Assebroek|Human|KU Leuven|KU Leuven|Maes|Belgium

>Spike|hCoV-19/Denmark/DCGC-2822/2020|2020-08-17|EPI\_ISL\_616458|Original|hCoV-19^^Midtjylland|Human|Department of Virus and Microbiological Special Diagnostics|Albertsen lab|Michaelsen|Denmark

>Spike|hCoV-19/Wales/PHWC-48B8C5/2020|2020-11-05|EPI\_ISL\_666296|Original|hCoV-19^^Wales|Human|Wales Specialist Virology Centre Sequencing lab|COVID-19 Genomics UK (COG-UK) Consortium|Moore|United Kingdom

>Spike|hCoV-19/Denmark/DCGC-22657/2020|2020-12-07|EPI\_ISL\_757693|Original|hCoV-19^^Hovedstaden|Human|Department of Virus and Microbiological Special Diagnostics|Albertsen Lab|Michaelsen|Denmark

>Spike|hCoV-19/Northern Ireland/NIRE-FAC6F/2020|2020-03-26|EPI\_ISL\_441770|Original|hCoV-19^^Northern Ireland|Human|Regional Virus Laboratory|Wellcome Sanger Institute for the COVID-19 Genomics UK (COG-UK) consortium|Amato|United Kingdom

>Spike|hCoV-19/England/BRIS-128E61/2020|2020-04-18|EPI\_ISL\_458910|Original|hCoV-19^^England|Human|PHE South West Regional Laboratory|Wellcome Sanger Institute for the COVID-19 Genomics UK (COG-UK) consortium|Davies|United Kingdom

>Spike|hCoV-19/Scotland/QEUA-A35D6B/2020|2020-10-04|EPI\_ISL\_706891|Original|hCoV-19^^Scotland|Human|Oxford Viromics|COVID-19 Genomics UK (COG-UK) Consortium|Golubchik|United Kingdom

>Spike|hCoV-19/England/EXET-138A3D/2020|2020-10-19|EPI\_ISL\_627432|Original|hCoV-19^^England|Human|University of Exeter|COVID-19 Genomics UK (COG-UK) Consortium|Temperton|United Kingdom

>Spike|hCoV-19/Australia/VIC16120/2020|2020-08-06|EPI\_ISL\_640846|Original|hCoV-19^^Victoria|Human|Microbiological Diagnostic Unit - Public Health Laboratory (MDU-PHL)|MDU-PHL|Schultz|Australia

>Spike|hCoV-19/USA/MA\_8932/2020|2020-03-05|EPI\_ISL\_424908|Original|hCoV-19^^Massachusetts|Human|MA State Public Health Laboratory|Pathogen Discovery|Queen|USA

>Spike|hCoV-19/Wales/PHWC-24D2D/2020|2020-03-20|EPI\_ISL\_419503|Original|hCoV-19^^Wales|Human|Wales Specialist Virology Centre|Public Health Wales Microbiology Cardiff|Moore|United Kingdom

>Spike|hCoV-19/Wales/QEUA-AE4AEC/2020|2020-10-27|EPI\_ISL\_647907|Original|hCoV-19^^Wales|Human|Lighthouse Lab in Glasgow|Wellcome Sanger Institute for the COVID-19 Genomics UK (COG-UK) Consortium|Davies|United Kingdom

>Spike|hCoV-19/England/NORW-E9665/2020|2020-04-22|EPI\_ISL\_448324|Original|hCoV-19^^England|Human|Quadram Institute Bioscience|COVID-19 Genomics UK (COG-UK) Consortium|Alikhan|United Kingdom

>Spike|hCoV-19/Ireland/CO-NVRL-MPZ33926/2020|2020-04-11|EPI\_ISL\_767737|Original|hCoV-19^^Cork|Human|National Virus Reference Laboratory|Irish Coronavirus Sequencing Consortium - Teagasc Moorepark|Walsh|Ireland

>Spike|hCoV-19/Brazil/SP-L9-CD126/2020|2020-03-24|EPI\_ISL\_476475|Original|hCoV-19^^S\u00e3o Paulo|Human|Hospital da Cl\u00ednicas da Faculdade de Medicina da Universidade de S\u00e3o Paulo|Instituto de Medicina Tropical da Univesidade de S\u00e3o Paulo|Sabino|Brazil



>Spike|hCoV-19/England/SHEF-BFE06/2020|2020-03-17|EPI\_ISL\_418295|Original|hCoV-19^^England|Human|Virology Department|Department of Infection|de Silva|United Kingdom

>Spike|hCoV-19/USA/MD-MDH-0117/2020|2020-05-26|EPI\_ISL\_522850|Original|hCoV-19^^Maryland|Human|Maryland Department of Health|Maryland Department of Health|Keller|USA

>Spike|hCoV-19/Wales/PHWC-27AF6/2020|2020-03-30|EPI\_ISL\_432121|Original|hCoV-19^^Wales|Human|Wales Specialist Virology Centre|Public Health Wales Microbiology Cardiff|Moore|United Kingdom

>Spike|hCoV-19/Australia/NSW993/2020|2020-07-23|EPI\_ISL\_591504|Original|hCoV-19^^New South Wales|Human|South Eastern Area Laboratory Services (SEALS)|NSW Health Pathology - Institute of Clinical Pathology and Medical Research; Westmead Hospital; University of Sydney|Gall|Australia

>Spike|hCoV-19/United Arab Emirates/skmc-3115511/2020|2020-08-28|EPI\_ISL\_582645|Original|hCoV-19^^United Arab Emirates|Human|Sheikh Khalifa Medical City|Molecular/Surveillance lab\nSheikh Khalifa Medical City|Amirtharaj|United Arab Emirates

>Spike|hCoV-19/South Korea/KDCA0299/2020|2020-10-27|EPI\_ISL\_760093|Original|hCoV-19^^South Korea|Human|Division of Emerging Infectious Diseases|Division of Emerging Infectious Diseases|Park|South Korea

>Spike|hCoV-19/Wales/MILK-994C31/2020|2020-08-25|EPI\_ISL\_552191|Original|hCoV-19^^Wales|Human|Lighthouse Lab in Milton Keynes|Wellcome Sanger Institute for the COVID-19 Genomics UK (COG-UK) consortium|Davies|United Kingdom

>Spike|hCoV-19/Wales/ALDP-6CE81F/2020|2020-07-02|EPI\_ISL\_556180|Original|hCoV-19^^Wales|Human|Lighthouse Lab in Alderley Park|Wellcome Sanger Institute for the COVID-19 Genomics UK (COG-UK) consortium|Davies|United Kingdom

>Spike|hCoV-19/Wales/ALDP-B1E2A4/2020|2020-11-01|EPI\_ISL\_710952|Original|hCoV-19^^Wales|Human|Lighthouse Lab in Alderley Park|Wellcome Sanger Institute for the COVID-19 Genomics UK (COG-UK) Consortium|Davies|United Kingdom

>Spike|hCoV-19/Portugal/PT1402/2020|2020-04-06|EPI\_ISL\_511361|Original|hCoV-19^^Portugal|Human|Instituto Nacional de Saude (INSA)|Instituto Nacional de Saude (INSA)|Borges|Portugal

>Spike|hCoV-19/Poland/Masovia-2772/2020|2020-05-16|EPI\_ISL\_754903|Original|hCoV-19^^Masovia|Human|Laboratory Diagnostics and Clinical Immunology of Developmental Age|genXone SA|Kaszuba|Poland

>Spike|hCoV-19/Portugal/PT0082/2020|2020-03-22|EPI\_ISL\_421485|Original|hCoV-19^^Portugal|Human|CH Barreiro Montijo|Instituto Nacional de Saude (INSA)|Borges|Portugal

>Spike|hCoV-19/France/ARA-107421/2020|2020-11-16|EPI\_ISL\_728311|Original|hCoV-19^^Auvergne-Rh\u00f4ne-Alpes|Human|CNR Virus des Infections Respiratoires - France SUD|CNR Virus des Infections Respiratoires - France SUD|Bal|France

>Spike|hCoV-19/USA/WI-GMF-32409/2020|2020-11-09|EPI\_ISL\_661145|Original|hCoV-19^^Wisconsin|Human|Gundersen Molecular Diagnostics Laboratory|Kabara Cancer Research Institute|Kenny|USA

>Spike|hCoV-19/USA/LA-EVTL1081/2020|2020-11-28|EPI\_ISL\_768351|Original|hCoV-19^^Louisiana|Human|LSUHS Emerging Viral Threat Laboratory|Microbial Genome Sequencing Center|Kamil|USA

>Spike|hCoV-19/USA/MI-QDX-2199/2020|2020-03-13|EPI\_ISL\_604537|Original|hCoV-19^^Michigan|Human|Quest Diagnostics|Quest Diagnostics|Kagan|USA

>Spike|hCoV-19/England/ALDP-950A0A/2020|2020-06-14|EPI\_ISL\_554569|Original|hCoV-19^^England|Human|Lighthouse Lab in Alderley Park|Wellcome Sanger Institute for the COVID-19 Genomics UK (COG-UK) consortium|Davies|United Kingdom

>Spike|hCoV-19/South Africa/KRISP-K002298/2020|2020-07-23|EPI\_ISL\_515675|Original|hCoV-19^^KwaZulu-Natal|Human|NHLS-IALCH|KRISP|de Oliveira|South Africa

>Spike|hCoV-19/Ireland/WW-NVRL-MPN63349/2020|2020-04-04|EPI\_ISL\_767838|Original|hCoV-19^^Wicklow|Human|National Virus Reference Laboratory|Irish Coronavirus Sequencing Consortium - Teagasc Moorepark|Walsh|Ireland

>Spike|hCoV-19/England/QEUH-BC3FA7/2020|2020-11-24|EPI\_ISL\_703641|Original|hCoV-19^^England|Human|Lighthouse Lab in Glasgow|Wellcome Sanger Institute for the COVID-19 Genomics UK (COG-UK) Consortium|Davies|United Kingdom

>Spike|hCoV-19/Switzerland/ZH-ETHZ-340167/2020|2020-10-28|EPI\_ISL\_721938|Original|hCoV-19^^Zurich|Human|Viollier AG|Department of Biosystems Science and Engineering|Nadeau|Switzerland

>Spike|hCoV-19/India/OR-ILSCV27412/2020|2020-05-21|EPI\_ISL\_463091|Original|hCoV-19^^Odisha|Human|Institute of Life Sciences|Immunogenomics lab|Raghav|India

>Spike|hCoV-19/England/QEUEH-C3408F/2020|2020-12-11|EPI\_ISL\_733925|Original|hCoV-19^^England|Human|Lighthouse Lab in Glasgow|Wellcome Sanger Institute for the COVID-19 Genomics UK (COG-UK) Consortium|Davies|United Kingdom

>Spike|hCoV-19/USA/TX-HMH-MCoV-8453/2020|2020-07-01|EPI\_ISL\_780471|Original|hCoV-19^^Texas|Human|Houston Methodist Hospital|Houston Methodist Hospital|Long|USA

>Spike|hCoV-19/Japan/PG-7707/2020|2020-08-00|EPI\_ISL\_686809|Original|hCoV-19^^Japan|Human|Chiba Prefectural Institute of Public Health|Pathogen Genomics Center|Sekizuka|Japan

>Spike|hCoV-19/Rwanda/NRLNAT1003/2020|2020-08-30|EPI\_ISL\_735437|Original|hCoV-19^^Rwanda|Human|Nucleic Acid Testing - Rwanda National Reference Laboratory|GIGA Medical Genomics|Butera|Rwanda

>Spike|hCoV-19/USA/WA-S1671/2020|2020-05-30|EPI\_ISL\_496097|Original|hCoV-19^^Washington|Human|Washington State Department of Health|Seattle Flu Study|Lee|USA

>Spike|hCoV-19/England/NORW-E6F21/2020|2020-00-00|EPI\_ISL\_448993|Original|hCoV-19^^England|Human|Quadram Institute Bioscience|COVID-19 Genomics UK (COG-UK) Consortium|Alikhan|United Kingdom

>Spike|hCoV-19/Scotland/CVR5722/2020|2020-11-09|EPI\_ISL\_651496|Original|hCoV-19^^Scotland|Human|West of Scotland Specialist Virology Centre|COVID-19 Genomics UK (COG-UK) Consortium|Robertson|United Kingdom

>Spike|hCoV-19/England/ALDP-BC633F/2020|2020-11-20|EPI\_ISL\_721332|Original|hCoV-19^^England|Human|Lighthouse Lab in Alderley Park|Wellcome Sanger Institute for the COVID-19 Genomics UK (COG-UK) Consortium|Davies|United Kingdom

>Spike|hCoV-19/England/BRIS-12F231/2020|2020-04-13|EPI\_ISL\_488359|Original|hCoV-19^^England|Human|PHE South West Regional Laboratory|Wellcome Sanger Institute for the COVID-19 Genomics UK (COG-UK) consortium|Davies|United Kingdom

>Spike|hCoV-19/USA/MI-MDHHS-SC22403/2020|2020-11-18|EPI\_ISL\_708236|Original|hCoV-19^^Michigan|Human|Michigan Department of Health and Human Services|Michigan Department of Health and Human Services|Jacob|USA

>Spike|hCoV-19/Northern Ireland/NIRE-10923D/2020|2020-10-21|EPI\_ISL\_652323|Original|hCoV-19^^Northern Ireland|Human|Regional Virus Laboratory|COVID-19 Genomics UK (COG-UK) Consortium|Fairley|United Kingdom

>Spike|hCoV-19/England/ALDP-950C6E/2020|2020-06-14|EPI\_ISL\_554331|Original|hCoV-19^^England|Human|Lighthouse Lab in Alderley Park|Wellcome Sanger Institute for the COVID-19 Genomics UK (COG-UK) consortium|Davies|United Kingdom

>Spike|hCoV-19/England/BRIS-18536E3/2020|2020-04-14|EPI\_ISL\_492366|Original|hCoV-19^^England|Human|PHE South West Regional Laboratory|Wellcome Sanger Institute for the COVID-19 Genomics UK (COG-UK) consortium|Davies|United Kingdom

>Spike|hCoV-19/Scotland/GCVR-172C22/2020|2020-04-06|EPI\_ISL\_459134|Original|hCoV-19^^Scotland|Human|NHSGGC West of Scotland Specialist Virology Centre / MRC-University of Glasgow Centre for Virus Research|Wellcome Sanger Institute for the COVID-19 Genomics UK (COG-UK) consortium|Davies|United Kingdom

>Spike|hCoV-19/USA/FL-BPHL-0171/2020|2020-04-02|EPI\_ISL\_480822|Original|hCoV-19^^Florida|Human|Florida Bureau of Public Health Laboratories|Florida Bureau of Public Health Laboratories|Blanton|USA

>Spike|hCoV-19/England/LIVE-A9E87/2020|2020-07-22|EPI\_ISL\_517372|Original|hCoV-19^^England|Human|Liverpool Clinical Laboratories|COVID-19 Genomics UK (COG-UK) Consortium|Haldenby|United Kingdom

>Spike|hCoV-19/England/20102112102/2020|2020-03-02|EPI\_ISL\_417218|Original|hCoV-19^^England|Human|Respiratory Virus Unit|Respiratory Virus Unit|Platt|United Kingdom

>Spike|hCoV-19/England/QEUEH-9CE8A3/2020|2020-09-17|EPI\_ISL\_590153|Original|hCoV-19^^England|Human|Lighthouse Lab in Glasgow|Wellcome Sanger Institute for the COVID-19 Genomics UK (COG-UK) consortium|Davies|United Kingdom

>Spike|hCoV-19/England/QEUEH-5574FA/2020|2020-05-11|EPI\_ISL\_532245|Original|hCoV-19^^England|Human|Lighthouse Lab in Glasgow|Wellcome Sanger Institute for the COVID-19 Genomics UK (COG-UK) consortium|Davies|United Kingdom

>Spike|hCoV-19/Scotland/CVR5798/2020|2020-11-11|EPI\_ISL\_680448|Original|hCoV-19^^Scotland|Human|West of Scotland Specialist Virology Centre|COVID-19 Genomics UK (COG-UK) Consortium|Robertson|United Kingdom

>Spike|hCoV-19/USA/CA-CZB-1309/2020|2020-05-06|EPI\_ISL\_468350|Original|hCoV-19^^California|Human|County of Santa Clara Public Health Department|Chan-Zuckerberg Biohub|Hao|USA

>Spike|hCoV-19/England/MILK-B599A8/2020|2020-11-06|EPI\_ISL\_679892|Original|hCoV-19^^England|Human|Virology Department|COVID-19 Genomics UK (COG-UK) Consortium|de Silva|United Kingdom

>Spike|hCoV-19/USA/MI-MDHHS-SC21113/2020|2020-03-30|EPI\_ISL\_507889|Original|hCoV-19^^Michigan|Human|Michigan Department of Health and Human Services|Michigan Department of Health and Human Services|Blankenship|USA

>Spike|hCoV-19/USA/TX-HMH-MCoV-12182/2020|2020-09-23|EPI\_ISL\_790236|Original|hCoV-19^^Texas|Human|Houston Methodist Hospital|Houston Methodist Hospital|Long|USA

>Spike|hCoV-19/USA/MI-MDHHS-SC22385/2020|2020-11-13|EPI\_ISL\_708365|Original|hCoV-19^^Michigan|Human|Michigan Department of Health and Human Services|Michigan Department of Health and Human Services|Jacob|USA

>Spike|hCoV-19/England/ALDP-B75C52/2020|2020-11-12|EPI\_ISL\_723688|Original|hCoV-19^^England|Human|Oxford Viromics|COVID-19 Genomics UK (COG-UK) Consortium|Golubchik|United Kingdom

>Spike|hCoV-19/South Africa/UFS-VIRO-NGS-34/2020|2020-10-08|EPI\_ISL\_682341|Original|hCoV-19^^Free State|Human|NHLs Universitas Academic|UFS Virology|Bester|South Africa

>Spike|hCoV-19/England/ALDP-9CBACE/2020|2020-09-16|EPI\_ISL\_575641|Original|hCoV-19^^England|Human|Lighthouse Lab in Alderley Park|Wellcome Sanger Institute for the COVID-19 Genomics UK (COG-UK) consortium|Davies|United Kingdom

>Spike|hCoV-19/England/204240984/2020|2020-10-12|EPI\_ISL\_622851|Original|hCoV-19^^England|Human|Respiratory Virus Unit|Respiratory Virus Unit|Platt|United Kingdom

>Spike|hCoV-19/Switzerland/NE-ETHZ-360250/2020|2020-11-09|EPI\_ISL\_729243|Original|hCoV-19^^Neuch\u00e2tel|Human|Viollier AG|Department of Biosystems Science and Engineering|Nadeau|Switzerland

>Spike|hCoV-19/USA/LA-EVTL738/2020|2020-07-17|EPI\_ISL\_653429|Original|hCoV-19^^Louisiana|Human|LSUHS Emerging Viral Threat Laboratory|Microbial Genome Sequencing Center|Kamil|USA

>Spike|hCoV-19/England/ALDP-AA0E3B/2020|2020-10-22|EPI\_ISL\_624046|Original|hCoV-19^^England|Human|Lighthouse Lab in Alderley Park|Wellcome Sanger Institute for the COVID-19 Genomics UK (COG-UK) consortium|Davies|United Kingdom

>Spike|hCoV-19/England/ALDP-B25125/2020|2020-11-04|EPI\_ISL\_646695|Original|hCoV-19^^England|Human|Lighthouse Lab in Alderley Park|Wellcome Sanger Institute for the COVID-19 Genomics UK (COG-UK) Consortium|Davies|United Kingdom

>Spike|hCoV-19/USA/UT-UPHL-2008822/2020|2020-05-29|EPI\_ISL\_524843|Original|hCoV-19^^Utah|Human|Utah Public Health Laboratory|Utah Public Health Laboratory|Young|USA

>Spike|hCoV-19/England/MILK-BDC1B4/2020|2020-11-26|EPI\_ISL\_709581|Original|hCoV-19^^England|Human|Lighthouse Lab in Milton Keynes|Wellcome Sanger Institute for the COVID-19 Genomics UK (COG-UK) Consortium|Davies|United Kingdom

>Spike|hCoV-19/USA/CA-ALSR-1093-SAN/2020|2020-06-18|EPI\_ISL\_483520|Original|hCoV-19^^California|Human|UC San Diego Center for Advanced Laboratory Medicine|Andersen lab at Scripps Research|Gangavarapu|USA

>Spike|hCoV-19/Netherlands/UT-RIVM-20163/2020|2020-11-29|EPI\_ISL\_723330|Original|hCoV-19^^Utrecht|Human|Dutch COVID-19 response team|National Institute for Public Health and the Environment (RIVM)|Meijer|Netherlands

>Spike|hCoV-19/England/QEUA-B3F3AA/2020|2020-11-08|EPI\_ISL\_658606|Original|hCoV-19^^England|Human|Lighthouse Lab in Glasgow|Wellcome Sanger Institute for the COVID-19 Genomics UK (COG-UK) Consortium|Davies|United Kingdom

>Spike|hCoV-19/Australia/VIC6937/2020|2020-07-23|EPI\_ISL\_564154|Original|hCoV-19^^Victoria|Human|Microbiological Diagnostic Unit - Public Health Laboratory (MDU-PHL)|MDU-PHL|Schultz|Australia

>Spike|hCoV-19/England/CAMB-1B7429/2020|2020-00-00|EPI\_ISL\_638139|Original|hCoV-19^^England|Human|Department of Pathology|COVID-19 Genomics UK (COG-UK) Consortium|Goodfellow|United Kingdom

>Spike|hCoV-19/Wales/MILK-9F1BDB/2020|2020-09-24|EPI\_ISL\_589584|Original|hCoV-19^^Wales|Human|Lighthouse Lab in Milton Keynes|Wellcome Sanger Institute for the COVID-19 Genomics UK (COG-UK) consortium|Davies|United Kingdom

>Spike|hCoV-19/USA/FL-BPHL-0139/2020|2020-03-06|EPI\_ISL\_480790|Original|hCoV-19^^Florida|Human|Florida Bureau of Public Health Laboratories|Florida Bureau of Public Health Laboratories|Blanton|USA

>Spike|hCoV-19/England/ALDP-9BDA0B/2020|2020-09-09|EPI\_ISL\_568167|Original|hCoV-19^^England|Human|Lighthouse Lab in Alderley Park|Wellcome Sanger Institute for the COVID-19 Genomics UK (COG-UK) consortium|Davies|United Kingdom

>Spike|hCoV-19/Australia/VIC277/2020|2020-03-22|EPI\_ISL\_419970|Original|hCoV-19^^Victoria|Human|Victorian Infectious Diseases Reference Laboratory (VIDRL)|Victorian Infectious Diseases Reference Laboratory and Microbiological Diagnostic Unit Public Health Laboratory|Schultz|Australia

>Spike|hCoV-19/Denmark/DCGC-15666/2020|2020-11-23|EPI\_ISL\_713951|Original|hCoV-19^^Nordjylland|Human|Department of Virus and Microbiological Special Diagnostics|Albertsen Lab|Michaelsen|Denmark

>Spike|hCoV-19/USA/MA-MASPHL-00394/2020|2020-04-30|EPI\_ISL\_693151|Original|hCoV-19^^Massachusetts|Human|Massachusetts State Public Health Laboratory|Massachusetts State Public Health Laboratory|Lang|USA

>Spike|hCoV-19/England/QEUA-B10819/2020|2020-11-02|EPI\_ISL\_641866|Original|hCoV-19^^England|Human|Lighthouse Lab in Glasgow|Wellcome Sanger Institute for the COVID-19 Genomics UK (COG-UK) Consortium|Davies|United Kingdom

>Spike|hCoV-19/USA/MA-MGH-00732/2020|2020-04-09|EPI\_ISL\_791732|Original|hCoV-19^^Massachusetts|Human|Massachusetts General Hospital|Infectious Disease Program|Park|USA

>Spike|hCoV-19/England/201421465/2020|2020-03-30|EPI\_ISL\_465968|Original|hCoV-19^^England|Human|Respiratory Virus Unit|Respiratory Virus Unit|Platt|United Kingdom

>Spike|hCoV-19/USA/WA-UW-10698/2020|2020-06-10|EPI\_ISL\_570354|Original|hCoV-19^^Washington|Human|UW Virology Lab|UW Virology Lab|Roychoudhury|USA

>Spike|hCoV-19/USA/AZ-TG366775/2020|2020-06-05|EPI\_ISL\_694515|Original|hCoV-19^^Arizona|Human|AZ SPHL|TGen North|French|USA

>Spike|hCoV-19/England/MILK-BB2424/2020|2020-11-18|EPI\_ISL\_720260|Original|hCoV-19^^England|Human|Lighthouse Lab in Milton Keynes|Wellcome Sanger Institute for the COVID-19 Genomics UK (COG-UK) Consortium|Davies|United Kingdom

>Spike|hCoV-19/Netherlands/NA\_658/2020|2020-00-00|EPI\_ISL\_461093|Original|hCoV-19^^Netherlands|Human|Dutch COVID-19 response team|Erasmus Medical Center|Oude Munnink|Netherlands

>Spike|hCoV-19/England/ALDP-939CC5/2020|2020-06-21|EPI\_ISL\_552928|Original|hCoV-19^^England|Human|Lighthouse Lab in Alderley Park|Wellcome Sanger Institute for the COVID-19 Genomics UK (COG-UK) consortium|Davies|United Kingdom

>Spike|hCoV-19/England/ALDP-9846EB/2020|2020-07-28|EPI\_ISL\_529565|Original|hCoV-19^^England|Human|Quadram Institute Bioscience|COVID-19 Genomics UK (COG-UK) Consortium|Alikhan|United Kingdom

>Spike|hCoV-19/Scotland/QEUA-9E428B/2020|2020-09-23|EPI\_ISL\_600961|Original|hCoV-19^^Scotland|Human|Lighthouse Lab in Glasgow|Wellcome Sanger Institute for the COVID-19 Genomics UK (COG-UK) consortium|Davies|United Kingdom

>Spike|hCoV-19/United Arab Emirates/0679/2020|2020-05-15|EPI\_ISL\_698832|Original|hCoV-19^^Abu Dhabi|Human|Group 42 (G42) Healthcare|G42 Healthcare|Ogrodzki|United Arab Emirates

>Spike|hCoV-19/England/LIVE-9A00B/2020|2020-04-14|EPI\_ISL\_449330|Original|hCoV-19^^England|Human|Liverpool Clinical Laboratories|COVID-19 Genomics UK (COG-UK) Consortium|Haldenby|United Kingdom

>Spike|hCoV-19/England/MILK-9701E1/2020|2020-08-17|EPI\_ISL\_553265|Original|hCoV-19^^England|Human|Lighthouse Lab in Milton Keynes|Wellcome Sanger Institute for the COVID-19 Genomics UK (COG-UK) consortium|Davies|United Kingdom

>Spike|hCoV-19/England/LOND-1250DE7/2020|2020-11-12|EPI\_ISL\_665816|Original|hCoV-19^^England|Human|University College London Hospital|COVID-19 Genomics UK (COG-UK) Consortium|Byott|United Kingdom

>Spike|hCoV-19/USA/MA-MGH-00287/2020|2020-04-01|EPI\_ISL\_460234|Original|hCoV-19^^Massachusetts|Human|Massachusetts General Hospital|Infectious Disease Program|Lemieux|USA

>Spike|hCoV-19/Switzerland/BE-ETHZ-120019/2020|2020-04-17|EPI\_ISL\_468216|Original|hCoV-19^^Bern|Human|Viollier AG|Department of Biosystems Science and Engineering|Nadeau|Switzerland

>Spike|hCoV-19/England/MILK-639D2F/2020|2020-07-04|EPI\_ISL\_557771|Original|hCoV-19^^England|Human|Lighthouse Lab in Milton Keynes|Wellcome Sanger Institute for the COVID-19 Genomics UK (COG-UK) consortium|Davies|United Kingdom

>Spike|hCoV-19/Wales/PHWC-4A1076/2020|2020-11-24|EPI\_ISL\_743614|Original|hCoV-19^^Wales|Human|Wales Specialist Virology Centre Sequencing lab|COVID-19 Genomics UK (COG-UK) Consortium|Moore|United Kingdom

>Spike|hCoV-19/England/MILK-A7D65D/2020|2020-10-12|EPI\_ISL\_606296|Original|hCoV-19^^England|Human|Lighthouse Lab in Milton Keynes|Wellcome Sanger Institute for the COVID-19 Genomics UK (COG-UK) consortium|Davies|United Kingdom

>Spike|hCoV-19/USA/FL-BPHL-1501/2020|2020-07-23|EPI\_ISL\_568599|Original|hCoV-19^^Florida|Human|Florida Bureau of Public Health Laboratories|Florida Bureau of Public Health Laboratories|Blanton|USA

>Spike|hCoV-19/Mexico/BCN-ALSR-1701/2020|2020-04-22|EPI\_ISL\_496362|Original|hCoV-19^^Baja California|Human|Infectolab|Andersen lab at Scripps Research|Gangavarapu|Mexico

>Spike|hCoV-19/Equatorial Guinea/11727/2020|2020-05-27|EPI\_ISL\_648309|Original|hCoV-19^^Bioko Norte|Human|Laboratorio de Investigaciones de Baney|University Hospital Basel|Hosch|Equatorial Guinea

>Spike|hCoV-19/England/EXET-13803B/2020|2020-09-25|EPI\_ISL\_612376|Original|hCoV-19^^England|Human|University of Exeter|COVID-19 Genomics UK (COG-UK) Consortium|Temperton|United Kingdom

>Spike|hCoV-19/USA/MN-QDX-2704/2020|2020-03-14|EPI\_ISL\_605026|Original|hCoV-19^^Minnesota|Human|Quest Diagnostics|Quest Diagnostics|Kagan|USA

>Spike|hCoV-19/USA/MA-QDX-1495/2020|2020-03-17|EPI\_ISL\_603831|Original|hCoV-19^^Massachusetts|Human|Quest Diagnostics|Quest Diagnostics|Kagan|USA

>Spike|hCoV-19/Spain/VC-FISABIO-103/2020|2020-03-18|EPI\_ISL\_436198|Original|hCoV-19^^Comunitat Valenciana|Human|Servicio de Microbiolog\u00eda. Consorcio Hospital General Universitario de Valencia|Sequencing and Bioinformatics Service and Molecular Epidemiology Research Group. FISABIO-Public Health|Gonzalez-Candelas|Spain

>Spike|hCoV-19/England/ALDP-987721/2020|2020-08-08|EPI\_ISL\_529380|Original|hCoV-19^^England|Human|Quadram Institute Bioscience|COVID-19 Genomics UK (COG-UK) Consortium|Alikhan|United Kingdom

>Spike|hCoV-19/USA/MI-MDHHS-SC21265/2020|2020-04-03|EPI\_ISL\_507520|Original|hCoV-19^^Michigan|Human|Michigan Department of Health and Human Services|Michigan Department of Health and Human Services|Blankenship|USA

>Spike|hCoV-19/Switzerland/AG-HUG-7120/2020|2020-02-29|EPI\_ISL\_415457|Original|hCoV-19^^Aargau|Human|University Hospitals of Geneva Laboratory of Virology|University Hospitals of Geneva Laboratory of Virology|Cordey|Switzerland

>Spike|hCoV-19/USA/CA-LACPHL-AE00034/2020|2020-04-17|EPI\_ISL\_708726|Original|hCoV-19^^California|Human|Los Angeles County Public Health Laboratory|Los Angeles County Public Health Laboratory|Hemarajata|USA

>Spike|hCoV-19/Wales/PHWC-26013/2020|2020-03-25|EPI\_ISL\_422078|Original|hCoV-19^^Wales|Human|Wales Specialist Virology Centre|Public Health Wales Microbiology Cardiff|Moore|United Kingdom

>Spike|hCoV-19/England/MILK-A6A27D/2020|2020-10-08|EPI\_ISL\_626906|Original|hCoV-19^^England|Human|Virology Department|COVID-19 Genomics UK (COG-UK) Consortium|de Silva|United Kingdom

>Spike|hCoV-19/USA/WI-UW-1649/2020|2020-09-09|EPI\_ISL\_605523|Original|hCoV-19^^Wisconsin|Human|University of Wisconsin-Madison AIDS Vaccine Research Laboratories|University of Wisconsin-Madison AIDS Vaccine Research Laboratories|Baczenas|USA

>Spike|hCoV-19/Wales/PHWC-33848/2020|2020-04-17|EPI\_ISL\_446756|Original|hCoV-19^^Wales|Human|Wales Specialist Virology Centre|Public Health Wales Microbiology Cardiff|Moore|United Kingdom

>Spike|hCoV-19/Ireland/D-NVRL-MPS28761/2020|2020-04-25|EPI\_ISL\_671341|Original|hCoV-19^^Dublin|Human|National Virus Reference Laboratory|Irish Coronavirus Sequencing Consortium - Teagasc Moorepark|Walsh|Ireland

>Spike|hCoV-19/Denmark/DCGC-7737/2020|2020-10-19|EPI\_ISL\_618700|Original|hCoV-19^^Sjaelland|Human|Department of Virus and Microbiological Special Diagnostics|Albertsen lab|Michaelsen|Denmark

>Spike|hCoV-19/England/CAMC-B217DC/2020|2020-11-03|EPI\_ISL\_647137|Original|hCoV-19^^England|Human|Lighthouse Lab in Cambridge|Wellcome Sanger Institute for the COVID-19 Genomics UK (COG-UK) Consortium|Davies|United Kingdom

>Spike|hCoV-19/England/BIRM-5E7A4/2020|2020-03-24|EPI\_ISL\_444302|Original|hCoV-19^^England|Human|University of Birmingham|COVID-19 Genomics UK (COG-UK) Consortium|Loman|United Kingdom

>Spike|hCoV-19/Spain/MD-IBV-99008720/2020|2020-10-16|EPI\_ISL\_654276|Original|hCoV-19^^Madrid|Human|Hospital General Universitario Gregorio Mara\u00f1\u00f3n|SeqCOVID-SPAIN consortium/IBV (CSIC)|Comas|Spain

>Spike|hCoV-19/England/QEUEH-9E3EC4/2020|2020-09-24|EPI\_ISL\_579789|Original|hCoV-19^^England|Human|Lighthouse Lab in Glasgow|Wellcome Sanger Institute for the COVID-19 Genomics UK (COG-UK) consortium|Davies|United Kingdom

>Spike|hCoV-19/USA/WA-UW-2020/2020|2020-03-24|EPI\_ISL\_485974|Original|hCoV-19^^Washington|Human|UW Virology Lab|UW Virology Lab|Roychoudhury|USA

>Spike|hCoV-19/Australia/VIC139/2020|2020-03-15|EPI\_ISL\_419836|Original|hCoV-19^^Victoria|Human|Victorian Infectious Diseases Reference Laboratory (VIDRL)|Victorian Infectious Diseases Reference Laboratory and Microbiological Diagnostic Unit Public Health Laboratory|Schultz|Australia

>Spike|hCoV-19/USA/WI-UW-MAYO9/2020|2020-03-23|EPI\_ISL\_501165|Original|hCoV-19^^Wisconsin|Human|Mayo Clinic Laboratories|University of Washington Virology Lab|Roychoudhury|USA

>Spike|hCoV-19/Portugal/PT1124/2020|2020-03-25|EPI\_ISL\_511671|Original|hCoV-19^^Portugal|Human|Instituto Nacional de Saude (INSA)|Instituto Nacional de Saude (INSA)|Borges|Portugal

>Spike|hCoV-19/Japan/PG-7489/2020|2020-08-00|EPI\_ISL\_688591|Original|hCoV-19^^Japan|Human|Tokyo Metropolitan Institute of Public Health|Pathogen Genomics Center|Sekizuka|Japan

>Spike|hCoV-19/USA/MA-MASPHL-00228/2020|2020-04-15|EPI\_ISL\_791674|Original|hCoV-19^^Massachusetts|Human|Massachusetts State Public Health Laboratory|Infectious Disease Program|Park|USA

>Spike|hCoV-19/Wales/PHWC-32937/2020|2020-04-15|EPI\_ISL\_474369|Original|hCoV-19^^Wales|Human|Originating lab|COVID-19 Genomics UK (COG-UK) Consortium|Moore|United Kingdom

>Spike|hCoV-19/USA/TX-HMH-6535/2020|2020-06-27|EPI\_ISL\_546064|Original|hCoV-19^^Texas|Human|Houston Methodist Hospital|Houston Methodist Hospital|Long|USA

>Spike|hCoV-19/Netherlands/UT-RIVM-20381/2020|2020-12-07|EPI\_ISL\_728601|Original|hCoV-19^^Utrecht|Human|Dutch COVID-19 response team|National Institute for Public Health and the Environment (RIVM)|Meijer|Netherlands

>Spike|hCoV-19/Taiwan/TSGH-03/2020|2020-03-17|EPI\_ISL\_426631|Original|hCoV-19^^New Taipei City|Human|TSGH-CP molecular lab|TSGH-CP molecular lab|Shang|Taiwan

>Spike|hCoV-19/India/MH-NIV-211414/2020|2020-09-14|EPI\_ISL\_577705|Original|hCoV-19^^Maharashtra|Human|NIV Influenza|NIV Influenza|Potdar|India

>Spike|hCoV-19/Japan/PG-0604/2020|2020-04-00|EPI\_ISL\_684214|Original|hCoV-19^^Japan|Human|Pathogen Genomics Center|Pathogen Genomics Center|Sekizuka|Japan

>Spike|hCoV-19/France/ARA-SC377/2020|2020-03-11|EPI\_ISL\_645188|Original|hCoV-19^^Auvergne-Rhone-Alpes|Human|CHU Clermont-Ferrand|CNR Virus des Infections Respiratoires - France SUD|Bal|France

>Spike|hCoV-19/USA/WI-GMF-20276/2020|2020-09-14|EPI\_ISL\_547861|Original|hCoV-19^^Wisconsin|Human|Gundersen Molecular Diagnostics Laboratory|Kabara Cancer Research Institute|Kenny|USA

>Spike|hCoV-19/USA/TX-HMH0195/2020|2020-03-23|EPI\_ISL\_434870|Original|hCoV-19^^Texas|Human|Houston Methodist Hospital|Houston Methodist Hospital|Long|USA

>Spike|hCoV-19/Panama/334647/2020|2020-03-31|EPI\_ISL\_496789|Original|hCoV-19^^Cocle|Human|Gorgas Memorial Laboratory of Health Studies|Gorgas Memorial Laboratory of Health Studies|Martinez|Panama

>Spike|hCoV-19/Northern Ireland/NIRE-FB3F0/2020|2020-03-16|EPI\_ISL\_441419|Original|hCoV-19^^Northern Ireland|Human|Regional Virus Laboratory|COVID-19 Genomics UK (COG-UK) Consortium|Fairley|United Kingdom

>Spike|hCoV-19/USA/WI-UW-1441/2020|2020-09-11|EPI\_ISL\_541573|Original|hCoV-19^^Wisconsin|Human|University of Wisconsin-Madison AIDS Vaccine Research Laboratories|University of Wisconsin-Madison AIDS Vaccine Research Laboratories|Baczenas|USA

>Spike|hCoV-19/Norway/6252/2020|2020-11-25|EPI\_ISL\_775369|Original|hCoV-19^^Vestland|Human|Foerde Hospital|Norwegian Institute of Public Health|Vollan|Norway

>Spike|hCoV-19/USA/MA-MASPHL-00959/2020|2020-10-31|EPI\_ISL\_692812|Original|hCoV-19^^Massachusetts|Human|Massachusetts State Public Health Laboratory|Massachusetts State Public Health Laboratory|Lang|USA

>Spike|hCoV-19/England/GSTT-265E210/2020|2020-03-31|EPI\_ISL\_484171|Original|hCoV-19^^England|Human|Centre for Clinical Infection and Diagnostics Research and Genomics Innovation Unit|COVID-19 Genomics UK (COG-UK) Consortium|Awan|United Kingdom

>Spike|hCoV-19/Canada/BC\_02472119/2020|2020-04-00|EPI\_ISL\_466722|Original|hCoV-19^^British Columbia|Human|BCCDC Public Health Laboratory|BCCDC Public Health Laboratory|Harrigan|Canada

>Spike|hCoV-19/USA/UT-UPHL-2009548/2020|2020-07-19|EPI\_ISL\_605228|Original|hCoV-19^^Utah|Human|Utah Public Health Laboratory|Utah Public Health Laboratory|Young|USA

>Spike|hCoV-19/USA/NY-Wadsworth-34012-01/2020|2020-03-30|EPI\_ISL\_676656|Original|hCoV-19^^New York|Human|Wadsworth Center|Wadsworth Center|Lasek-Nesselquist|USA

>Spike|hCoV-19/Scotland/QEUH-990673/2020|2020-08-30|EPI\_ISL\_568292|Original|hCoV-19^^Scotland|Human|Lighthouse Lab in Glasgow|Wellcome Sanger Institute for the COVID-19 Genomics UK (COG-UK) consortium|Davies|United Kingdom

>Spike|hCoV-19/England/ALDP-CB49E6/2020|2020-12-19|EPI\_ISL\_761169|Original|hCoV-19^^England|Human|Lighthouse Lab in Alderley Park|Wellcome Sanger Institute for the COVID-19 Genomics UK (COG-UK) Consortium|Davies|United Kingdom

>Spike|hCoV-19/Netherlands/NA\_651/2020|2020-05-07|EPI\_ISL\_461086|Original|hCoV-19^^Netherlands|Human|Dutch COVID-19 response team|Erasmus Medical Center|Oude Munnink|Netherlands

>Spike|hCoV-19/Russia/MOS-RII-MH3406S/2020|2020-10-07|EPI\_ISL\_733134|Original|hCoV-19^^Moscow Region|Human|HELIX LLC|WHO National Influenza Centre Russian Federation|Komissarov|Russia

>Spike|hCoV-19/England/CAMB-1B13C8/2020|2020-05-08|EPI\_ISL\_458576|Original|hCoV-19^^England|Human|Department of Pathology|Wellcome Sanger Institute for the COVID-19 Genomics UK (COG-UK) consortium|Davies|United Kingdom

>Spike|hCoV-19/England/ALDP-B6299D/2020|2020-11-09|EPI\_ISL\_656491|Original|hCoV-19^^England|Human|Lighthouse Lab in Alderley Park|Wellcome Sanger Institute for the COVID-19 Genomics UK (COG-UK) Consortium|Davies|United Kingdom

>Spike|hCoV-19/England/20146062804/2020|2020-03-31|EPI\_ISL\_421991|Original|hCoV-19^^England|Human|Respiratory Virus Unit|Respiratory Virus Unit|Platt|United Kingdom

>Spike|hCoV-19/Italy/APU-UniMI-804/2020|2020-03-20|EPI\_ISL\_469019|Original|hCoV-19^^Apulia|Human|Istituto Zooprofilattico Sperimentale Puglia e Basilicata; Dipartimento di Bioscienze|Beaconlab (Bioinformatics)|Chiara|Italy

>Spike|hCoV-19/USA/WI-UW-209/2020|2020-03-25|EPI\_ISL\_428305|Original|hCoV-19^^Wisconsin|Human|University of Wisconsin-Madison AIDS Vaccine Research Laboratories|University of Wisconsin-Madison AIDS Vaccine Research Laboratories|Moreno|USA

>Spike|hCoV-19/New Zealand/20CV0292/2020|2020-03-26|EPI\_ISL\_579082|Original|hCoV-19^^Auckland|Human|Canterbury Health Laboratories|Institute of Environmental Science and Research (ESR)|Wang|New Zealand

>Spike|hCoV-19/England/ALDP-9BDFFD/2020|2020-09-09|EPI\_ISL\_567946|Original|hCoV-19^^England|Human|Lighthouse Lab in Alderley Park|Wellcome Sanger Institute for the COVID-19 Genomics UK (COG-UK) consortium|Davies|United Kingdom

>Spike|hCoV-19/Japan/PG-4202/2020|2020-07-00|EPI\_ISL\_692440|Original|hCoV-19^^Japan|Human|Pathogen Genomics Center|Pathogen Genomics Center|Sekizuka|Japan

>Spike|hCoV-19/England/ALDP-928B71/2020|2020-06-22|EPI\_ISL\_552980|Original|hCoV-19^^England|Human|Lighthouse Lab in Alderley Park|Wellcome Sanger Institute for the COVID-19 Genomics UK (COG-UK) consortium|Davies|United Kingdom

>Spike|hCoV-19/England/QEUEH-B0E623/2020|2020-11-01|EPI\_ISL\_642074|Original|hCoV-19^^England|Human|Lighthouse Lab in Glasgow|Wellcome Sanger Institute for the COVID-19 Genomics UK (COG-UK) Consortium|Davies|United Kingdom

>Spike|hCoV-19/England/ALDP-A512E2/2020|2020-10-08|EPI\_ISL\_598164|Original|hCoV-19^^England|Human|Lighthouse Lab in Alderley Park|Wellcome Sanger Institute for the COVID-19 Genomics UK (COG-UK) consortium|Davies|United Kingdom

>Spike|hCoV-19/England/QEUEH-547378/2020|2020-05-14|EPI\_ISL\_533409|Original|hCoV-19^^England|Human|Lighthouse Lab in Glasgow|Wellcome Sanger Institute for the COVID-19 Genomics UK (COG-UK) consortium|Davies|United Kingdom

>Spike|hCoV-19/USA/MI-MDHHS-SC22664/2020|2020-11-10|EPI\_ISL\_737278|Original|hCoV-19^^Michigan|Human|Michigan Department of Health and Human Services|Michigan Department of Health and Human Services|Blankenship|USA

>Spike|hCoV-19/England/LOND-124DB4D/2020|2020-00-00|EPI\_ISL\_584643|Original|hCoV-19^^England|Human|University College London Hospital|COVID-19 Genomics UK (COG-UK) Consortium|Byott|United Kingdom

>Spike|hCoV-19/USA/FL-BPHL-2193/2020|2020-07-23|EPI\_ISL\_666815|Original|hCoV-19^^Florida|Human|Florida Bureau of Public Health Laboratories|Florida Bureau of Public Health Laboratories|Blanton|USA

>Spike|hCoV-19/USA/TX-HMH-5326/2020|2020-06-25|EPI\_ISL\_544683|Original|hCoV-19^^Texas|Human|Houston Methodist Hospital|Houston Methodist Hospital|Long|USA

>Spike|hCoV-19/India/TG-CCMB-AB443/2020|2020-08-14|EPI\_ISL\_539627|Original|hCoV-19^^Telangana|Human|CSIR-Centre for Cellular and Molecular Biology|CSIR-Centre for Cellular and Molecular Biology|Mukherjee|India

>Spike|hCoV-19/Wales/PHWC-16C292/2020|2020-09-25|EPI\_ISL\_574032|Original|hCoV-19^^Wales|Human|Wales Specialist Virology Centre Sequencing lab|COVID-19 Genomics UK (COG-UK) Consortium|Moore|United Kingdom

>Spike|hCoV-19/Portugal/PT1481/2020|2020-03-19|EPI\_ISL\_511440|Original|hCoV-19^^Portugal|Human|Instituto Nacional de Saude (INSA)|Instituto Nacional de Saude (INSA)|Borges|Portugal

>Spike|hCoV-19/England/QEUEH-A8A7A5/2020|2020-10-16|EPI\_ISL\_638844|Original|hCoV-19^^England|Human|Oxford Viromics|COVID-19 Genomics UK (COG-UK) Consortium|Golubchik|United Kingdom

>Spike|hCoV-19/Wales/PHWC-48DF55/2020|2020-11-09|EPI\_ISL\_680782|Original|hCoV-19^^Wales|Human|Wales Specialist Virology Centre Sequencing lab|COVID-19 Genomics UK (COG-UK) Consortium|Moore|United Kingdom

>Spike|hCoV-19/Denmark/DCGC-4525/2020|2020-09-21|EPI\_ISL\_621321|Original|hCoV-19^^Hovedstaden|Human|Department of Virus and Microbiological Special Diagnostics|Albertsen lab|Michaelsen|Denmark

>Spike|hCoV-19/USA/SC\_3570/2020|2020-03-07|EPI\_ISL\_424903|Original|hCoV-19^^South Carolina|Human|SC Dept of Health and Env. Control-Bureau of Laboratories|Pathogen Discovery|Queen|USA

>Spike|hCoV-19/USA/IA-GMF-08606/2020|2020-06-29|EPI\_ISL\_489896|Original|hCoV-19^^Iowa|Human|Gundersen Molecular Diagnostics Laboratory|Kabara Cancer Research Institute|Kenny|USA

>Spike|hCoV-19/England/SHEF-C6385/2020|2020-09-19|EPI\_ISL\_585025|Original|hCoV-19^^England|Human|Virology Department|COVID-19 Genomics UK (COG-UK) Consortium|de Silva|United Kingdom

>Spike|hCoV-19/Portugal/PT0599/2020|2020-03-28|EPI\_ISL\_454322|Original|hCoV-19^^Portugal|Human|unknown|Instituto Nacional de Saude (INSA)|Borges|Portugal

>Spike|hCoV-19/England/MILK-B86007/2020|2020-11-13|EPI\_ISL\_673976|Original|hCoV-19^^England|Human|Lighthouse Lab in Milton Keynes|Wellcome Sanger Institute for the COVID-19 Genomics UK (COG-UK) Consortium|Davies|United Kingdom

>Spike|hCoV-19/England/CAMB-80E68/2020|2020-04-17|EPI\_ISL\_444436|Original|hCoV-19^^England|Human|Department of Pathology|COVID-19 Genomics UK (COG-UK) Consortium|Meredith|United Kingdom



>Spike|hCoV-19/USA/CA-QDX-138/2020|2020-03-16|EPI\_ISL\_467813|Original|hCoV-19^^California|Human|Quest Diagnostics|Quest Diagnostics|Kagan|USA

>Spike|hCoV-19/England/QEUEH-AD334F/2020|2020-10-26|EPI\_ISL\_633936|Original|hCoV-19^^England|Human|Lighthouse Lab in Glasgow|Wellcome Sanger Institute for the COVID-19 Genomics UK (COG-UK) consortium|Davies|United Kingdom

>Spike|hCoV-19/USA/TX-HMH-MCoV-15961/2020|2020-07-10|EPI\_ISL\_785645|Original|hCoV-19^^Texas|Human|Houston Methodist Hospital|Houston Methodist Hospital|Long|USA

>Spike|hCoV-19/England/ALDP-9EAE18/2020|2020-09-24|EPI\_ISL\_579957|Original|hCoV-19^^England|Human|Lighthouse Lab in Alderley Park|Wellcome Sanger Institute for the COVID-19 Genomics UK (COG-UK) consortium|Davies|United Kingdom

>Spike|hCoV-19/Wales/PHWC-2B087/2020|2020-04-07|EPI\_ISL\_432305|Original|hCoV-19^^Wales|Human|Wales Specialist Virology Centre|Public Health Wales Microbiology Cardiff|Moore|United Kingdom

>Spike|hCoV-19/Australia/VIC10773/2020|2020-08-31|EPI\_ISL\_563082|Original|hCoV-19^^Victoria|Human|Microbiological Diagnostic Unit - Public Health Laboratory (MDU-PHL)|MDU-PHL|Schultz|Australia

>Spike|hCoV-19/USA/TX-HMH-7719/2020|2020-06-26|EPI\_ISL\_545600|Original|hCoV-19^^Texas|Human|Houston Methodist Hospital|Houston Methodist Hospital|Long|USA

>Spike|hCoV-19/Wales/PHWC-16B011/2020|2020-09-16|EPI\_ISL\_560232|Original|hCoV-19^^Wales|Human|Wales Specialist Virology Centre Sequencing lab|COVID-19 Genomics UK (COG-UK) Consortium|Moore|United Kingdom

>Spike|hCoV-19/England/QEUEH-9986C6/2020|2020-08-24|EPI\_ISL\_540048|Original|hCoV-19^^England|Human|Lighthouse Lab in Glasgow|Wellcome Sanger Institute for the COVID-19 Genomics UK (COG-UK) consortium|Davies|United Kingdom

>Spike|hCoV-19/England/ALDP-B7584F/2020|2020-11-12|EPI\_ISL\_740927|Original|hCoV-19^^England|Human|Oxford Viromics|COVID-19 Genomics UK (COG-UK) Consortium|Golubchik|United Kingdom

>Spike|hCoV-19/Wales/PHWC-49DB12/2020|2020-12-09|EPI\_ISL\_742876|Original|hCoV-19^^Wales|Human|Wales Specialist Virology Centre Sequencing lab|COVID-19 Genomics UK (COG-UK) Consortium|Moore|United Kingdom

>Spike|hCoV-19/Scotland/CVR1197/2020|2020-03-30|EPI\_ISL\_438773|Original|hCoV-19^^Scotland|Human|West of Scotland Specialist Virology Centre|COVID-19 Genomics UK (COG-UK) Consortium|Robertson|United Kingdom

>Spike|hCoV-19/Denmark/DCGC-11252/2020|2020-11-02|EPI\_ISL\_670794|Original|hCoV-19^^Hovedstaden|Human|Department of Virus and Microbiological Special Diagnostics|Albertsen Lab|Michaelsen|Denmark

>Spike|hCoV-19/France/OCC-SC425/2020|2020-04-13|EPI\_ISL\_660665|Original|hCoV-19^^Occitanie|Human|CHU Toulouse|CNR Virus des Infections Respiratoires - France SUD|Bal|France

>Spike|hCoV-19/USA/TX-HMH-MCoV-11942/2020|2020-09-17|EPI\_ISL\_790141|Original|hCoV-19^^Texas|Human|Houston Methodist Hospital|Houston Methodist Hospital|Long|USA

>Spike|hCoV-19/Scotland/CVR1495/2020|2020-04-02|EPI\_ISL\_433601|Original|hCoV-19^^Scotland|Human|West of Scotland Specialist Virology Centre|COVID-19 Genomics UK (COG-UK) Consortium|Robertson|United Kingdom

>Spike|hCoV-19/England/NORW-EFFEC/2020|2020-10-09|EPI\_ISL\_595169|Original|hCoV-19^^England|Human|Quadram Institute Bioscience|COVID-19 Genomics UK (COG-UK) Consortium|Alikhan|United Kingdom

>Spike|hCoV-19/Wales/PHWC-496250/2020|2020-11-25|EPI\_ISL\_726552|Original|hCoV-19^^Wales|Human|Originating lab|COVID-19 Genomics UK (COG-UK) Consortium|Moore|United Kingdom

>Spike|hCoV-19/England/QEUEH-95F582/2020|2020-08-06|EPI\_ISL\_532437|Original|hCoV-19^^England|Human|Lighthouse Lab in Glasgow|Wellcome Sanger Institute for the COVID-19 Genomics UK (COG-UK) consortium|Davies|United Kingdom

>Spike|hCoV-19/Australia/VIC14989/2020|2020-08-18|EPI\_ISL\_593094|Original|hCoV-19^^Victoria|Human|Microbiological Diagnostic Unit - Public Health Laboratory (MDU-PHL)|MDU-PHL|Schultz|Australia

>Spike|hCoV-19/England/ALDP-BB945A/2020|2020-11-20|EPI\_ISL\_703160|Original|hCoV-19^^England|Human|Lighthouse Lab in Alderley Park|Wellcome Sanger Institute for the COVID-19 Genomics UK (COG-UK) Consortium|Davies|United Kingdom

>Spike|hCoV-19/Denmark/DCGC-16380/2020|2020-11-16|EPI\_ISL\_714230|Original|hCoV-19^^Midtjylland|Human|Department of Virus and Microbiological Special Diagnostics|Albertsen Lab|Michaelsen|Denmark

>Spike|hCoV-19/Wales/PHWC-2B069/2020|2020-04-08|EPI\_ISL\_432058|Original|hCoV-19^^Wales|Human|Wales Specialist Virology Centre|Public Health Wales Microbiology Cardiff|Moore|United Kingdom

>Spike|hCoV-19/England/MILK-ACDB6E/2020|2020-10-20|EPI\_ISL\_630131|Original|hCoV-19^^England|Human|Lighthouse Lab in Milton Keynes|Wellcome Sanger Institute for the COVID-19 Genomics UK (COG-UK) consortium|Davies|United Kingdom

>Spike|hCoV-19/Canada/ON-UHTC\_0048/2020|2020-04-04|EPI\_ISL\_464014|unknown|hCoV-19^^Ontario|Human|Unity Health Toronto|Ontario Institute for Cancer Research|de Borja|Canada

>Spike|hCoV-19/England/QEUEH-AEFFC4/2020|2020-10-29|EPI\_ISL\_662886|Original|hCoV-19^^England|Human|Lighthouse Lab in Glasgow|Wellcome Sanger Institute for the COVID-19 Genomics UK (COG-UK) Consortium|Davies|United Kingdom

>Spike|hCoV-19/England/MILK-74C001/2020|2020-06-29|EPI\_ISL\_557540|Original|hCoV-19^^England|Human|Lighthouse Lab in Milton Keynes|Wellcome Sanger Institute for the COVID-19 Genomics UK (COG-UK) consortium|Davies|United Kingdom

>Spike|hCoV-19/Netherlands/ZH-EMC-538/2020|2020-09-16|EPI\_ISL\_577966|Original|hCoV-19^^Zuid Holland|Human|Dutch COVID-19 response team|Erasmus Medical Center|Oude Munnink|Netherlands

>Spike|hCoV-19/Italy/EMR-AMVRC-206/2020|2020-02-22|EPI\_ISL\_457699|Vero E6|hCoV-19^^Emilia-Romagna|Human|Department of Infectious Diseases|Army Medical and Veterinary Research Center|Lista|Italy

>Spike|hCoV-19/England/ALDP-9BC6AE/2020|2020-09-09|EPI\_ISL\_567897|Original|hCoV-19^^England|Human|Lighthouse Lab in Alderley Park|Wellcome Sanger Institute for the COVID-19 Genomics UK (COG-UK) consortium|Davies|United Kingdom

>Spike|hCoV-19/South Africa/KRISP-K002556/2020|2020-07-29|EPI\_ISL\_535425|Original|hCoV-19^^KwaZulu-Natal|Human|NHLs-IALCH|KRISP|de Oliveira|South Africa

>Spike|hCoV-19/USA/MI-UM-10036741616/2020|2020-11-02|EPI\_ISL\_682165|Original|hCoV-19^^Michigan|Human|University of Michigan Clinical Microbiology Laboratory|Lauring Lab|Valesano|USA

>Spike|hCoV-19/England/CAMB-7C96E/2020|2020-04-06|EPI\_ISL\_442120|Original|hCoV-19^^England|Human|Department of Pathology|Wellcome Sanger Institute for the COVID-19 Genomics UK (COG-UK) consortium|Amato|United Kingdom

>Spike|hCoV-19/Denmark/DCGC-21092/2020|2020-12-21|EPI\_ISL\_759549|Original|hCoV-19^^Syddanmark|Human|Department of Virus and Microbiological Special Diagnostics|Albertsen Lab|Michaelsen|Denmark

>Spike|hCoV-19/England/BRIS-122562/2020|2020-04-04|EPI\_ISL\_440629|Original|hCoV-19^^England|Human|PHE South West Regional Laboratory|Wellcome Sanger Institute for the COVID-19 Genomics UK (COG-UK) consortium|Amato|United Kingdom

>Spike|hCoV-19/England/CAMC-B32C24/2020|2020-11-05|EPI\_ISL\_659423|Original|hCoV-19^^England|Human|Lighthouse Lab in Cambridge|Wellcome Sanger Institute for the COVID-19 Genomics UK (COG-UK) Consortium|Davies|United Kingdom

>Spike|hCoV-19/England/NORW-F1DCF/2020|2020-10-19|EPI\_ISL\_627637|Original|hCoV-19^^England|Human|Quadram Institute Bioscience|COVID-19 Genomics UK (COG-UK) Consortium|Alikhan|United Kingdom

>Spike|hCoV-19/Japan/PG-8698/2020|2020-08-00|EPI\_ISL\_686294|Original|hCoV-19^^Japan|Human|Pathogen Genomics Center|Pathogen Genomics Center|Sekizuka|Japan

>Spike|hCoV-19/Scotland/QEUEH-96E16E/2020|2020-08-20|EPI\_ISL\_530488|Original|hCoV-19^^Scotland|Human|NHSGGC West of Scotland Specialist Virology Centre / MRC-University of Glasgow Centre for Virus Research|Wellcome Sanger Institute for the COVID-19 Genomics UK (COG-UK) consortium|Davies|United Kingdom

>Spike|hCoV-19/USA/MN-QDX-997/2020|2020-03-14|EPI\_ISL\_571794|Original|hCoV-19^^Minnesota|Human|Quest Diagnostics|Quest Diagnostics|Kagan|USA

>Spike|hCoV-19/England/205260472/2020|2020-12-19|EPI\_ISL\_754323|Original|hCoV-19^^England|Human|Respiratory Virus Unit|COVID-19 Genomics UK (COG-UK) Consortium|Platt|United Kingdom

>Spike|hCoV-19/USA/TN-CDC-2-3693660/2020|2020-11-06|EPI\_ISL\_747062|Original|hCoV-19^^Tennessee|Human|Respiratory Viruses Branch|Respiratory Viruses Branch|Queen|USA

>Spike|hCoV-19/USA/WA-S1357/2020|2020-05-17|EPI\_ISL\_495807|Original|hCoV-19^^Washington|Human|Washington State Department of Health|Seattle Flu Study|Lee|USA

>Spike|hCoV-19/England/ALDP-A6888C/2020|2020-10-12|EPI\_ISL\_608376|Original|hCoV-19^^England|Human|Lighthouse Lab in Alderley Park|Wellcome Sanger Institute for the COVID-19 Genomics UK (COG-UK) consortium|Davies|United Kingdom

>Spike|hCoV-19/England/QEUA-9F957B/2020|2020-09-25|EPI\_ISL\_589145|Original|hCoV-19^^England|Human|Lighthouse Lab in Glasgow|Wellcome Sanger Institute for the COVID-19 Genomics UK (COG-UK) consortium|Davies|United Kingdom

>Spike|hCoV-19/Scotland/EDB8378/2020|2020-10-14|EPI\_ISL\_612349|Original|hCoV-19^^Scotland|Human|Virology Department|COVID-19 Genomics UK (COG-UK) Consortium|McHugh|United Kingdom

>Spike|hCoV-19/Japan/PG-2586/2020|2020-04-00|EPI\_ISL\_690720|Original|hCoV-19^^Japan|Human|Pathogen Genomics Center|Pathogen Genomics Center|Sekizuka|Japan

>Spike|hCoV-19/England/QEUA-546713/2020|2020-05-14|EPI\_ISL\_533380|Original|hCoV-19^^England|Human|Lighthouse Lab in Glasgow|Wellcome Sanger Institute for the COVID-19 Genomics UK (COG-UK) consortium|Davies|United Kingdom

>Spike|hCoV-19/Denmark/DCGC-4603/2020|2020-09-21|EPI\_ISL\_621272|Original|hCoV-19^^Nordjylland|Human|Department of Virus and Microbiological Special Diagnostics|Albertsen lab|Michaelsen|Denmark

>Spike|hCoV-19/Wales/PHWC-4808A2/2020|2020-10-22|EPI\_ISL\_612943|Original|hCoV-19^^Wales|Human|Wales Specialist Virology Centre Sequencing lab|COVID-19 Genomics UK (COG-UK) Consortium|Moore|United Kingdom

>Spike|hCoV-19/USA/TX-HMH-MCoV-15465/2020|2020-10-24|EPI\_ISL\_786949|Original|hCoV-19^^Texas|Human|Houston Methodist Hospital|Houston Methodist Hospital|Long|USA

>Spike|hCoV-19/Colombia/NAR-INS-94679/2020|2020-03-30|EPI\_ISL\_498162|Original|hCoV-19^^Narino|Human|Instituto Nacional de Salud|Instituto Nacional de Salud|Franco-Mu\u00f1oz|Colombia

>Spike|hCoV-19/USA/CO-CSU-E0983-3/2020|2020-04-22|EPI\_ISL\_527485|Original|hCoV-19^^Colorado|Human|Colorado State University - Ebel Lab|Colorado State University - Ebel Lab|Cline|USA

>Spike|hCoV-19/Denmark/DCGC-5277/2020|2020-09-14|EPI\_ISL\_615208|Original|hCoV-19^^Hovedstaden|Human|Department of Virus and Microbiological Special Diagnostics|Albertsen lab|Michaelsen|Denmark

>Spike|hCoV-19/USA/WI-UW-1255/2020|2020-08-20|EPI\_ISL\_536628|Original|hCoV-19^^Wisconsin|Human|University of Wisconsin-Madison AIDS Vaccine Research Laboratories|University of Wisconsin-Madison AIDS Vaccine Research Laboratories|Baczenas|USA

>Spike|hCoV-19/USA/AZ-WL-CVG00007/2020|2020-10-05|EPI\_ISL\_765943|Original|hCoV-19^^Arizona|Human|Worobey Lab|Worobey Lab|Larsen|USA

>Spike|hCoV-19/England/MILK-A1885E/2020|2020-10-03|EPI\_ISL\_612457|Original|hCoV-19^^England|Human|University College London|COVID-19 Genomics UK (COG-UK) Consortium|Roy|United Kingdom

>Spike|hCoV-19/England/CAMB-1B592C/2020|2020-07-27|EPI\_ISL\_514445|Original|hCoV-19^^England|Human|Department of Pathology|COVID-19 Genomics UK (COG-UK) Consortium|Meredith|United Kingdom

>Spike|hCoV-19/Denmark/DCGC-15150/2020|2020-11-23|EPI\_ISL\_713661|Original|hCoV-19^^Nordjylland|Human|Department of Virus and Microbiological Special Diagnostics|Albertsen Lab|Michaelsen|Denmark

>Spike|hCoV-19/England/CAMC-B367D4/2020|2020-11-05|EPI\_ISL\_645242|Original|hCoV-19^^England|Human|Lighthouse Lab in Cambridge|Wellcome Sanger Institute for the COVID-19 Genomics UK (COG-UK) Consortium|Davies|United Kingdom

>Spike|hCoV-19/Australia/VIC15567/2020|2020-07-31|EPI\_ISL\_593361|Original|hCoV-19^^Victoria|Human|Microbiological Diagnostic Unit - Public Health Laboratory (MDU-PHL)|MDU-PHL|Schultz|Australia

>Spike|hCoV-19/Spain/MD-IBV-99007342/2020|2020-08-25|EPI\_ISL\_582826|Original|hCoV-19^^Madrid|Human|Hospital General Universitario Gregorio Marañ\u00f1a|SeqCOVID-SPAIN consortium/IBV (CSIC)|Comas|Spain

>Spike|hCoV-19/France/ARA-18437/2020|2020-04-02|EPI\_ISL\_508968|Original|hCoV-19^^Auvergne-Rh\u00f4ne-Alpes|Human|Centre Hospitalier de Bourg en Bresse|CNR Virus des Infections Respiratoires - France SUD|Josset|France

>Spike|hCoV-19/USA/TX-HMH046/2020|2020-03-14|EPI\_ISL\_434755|Original|hCoV-19^^Texas|Human|Houston Methodist Hospital|Houston Methodist Hospital|Long|USA

>Spike|hCoV-19/England/ALDP-A2F3AE/2020|2020-10-06|EPI\_ISL\_587281|Original|hCoV-19^^England|Human|Lighthouse Lab in Alderley Park|Wellcome Sanger Institute for the COVID-19 Genomics UK (COG-UK) consortium|Davies|United Kingdom

>Spike|hCoV-19/Belgium/ULG-10847/2020|2020-10-29|EPI\_ISL\_666882|Original|hCoV-19^^Li\u00e8ge|Human|Department of Clinical Microbiology|GIGA Medical Genomics|Durkin|Belgium

>Spike|hCoV-19/England/C200045839/2020|2020-11-10|EPI\_ISL\_664084|Original|hCoV-19^^England|Human|Respiratory Virus Unit|COVID-19 Genomics UK (COG-UK) Consortium|Platt|United Kingdom

>Spike|hCoV-19/Japan/PG-1861/2020|2020-05-00|EPI\_ISL\_685467|Original|hCoV-19^^Japan|Human|Tokyo Metropolitan Institute of Public Health|Pathogen Genomics Center|Sekizuka|Japan

>Spike|hCoV-19/USA/MI-MDHHS-SC20471/2020|2020-03-31|EPI\_ISL\_460010|Original|hCoV-19^^Michigan|Human|Michigan Department of Health and Human Services|Michigan Department of Health and Human Services|Blankenship|USA

>Spike|hCoV-19/Canada/ON-PHL-20-01782/2020|2020-07-00|EPI\_ISL\_636933|Original|hCoV-19^^Ontario|Human|Public Health Ontario Laboratory|Public Health Ontario Laboratory|Guthrie|Canada

>Spike|hCoV-19/England/ALDP-BB5342/2020|2020-11-20|EPI\_ISL\_701973|Original|hCoV-19^^England|Human|Lighthouse Lab in Alderley Park|Wellcome Sanger Institute for the COVID-19 Genomics UK (COG-UK) Consortium|Davies|United Kingdom

>Spike|hCoV-19/USA/WA-UW-3167/2020|2020-03-28|EPI\_ISL\_491007|Original|hCoV-19^^Washington|Human|UW Virology Lab|UW Virology Lab|Roychoudhury|USA

>Spike|hCoV-19/England/ALDP-B84449/2020|2020-11-14|EPI\_ISL\_674470|Original|hCoV-19^^England|Human|Lighthouse Lab in Alderley Park|Wellcome Sanger Institute for the COVID-19 Genomics UK (COG-UK) Consortium|Davies|United Kingdom

>Spike|hCoV-19/Wales/PHWC-15C59C/2020|2020-05-05|EPI\_ISL\_472508|Original|hCoV-19^^Wales|Human|Wales Specialist Virology Centre Sequencing lab|COVID-19 Genomics UK (COG-UK) Consortium|Moore|United Kingdom

>Spike|hCoV-19/USA/WI-WSLH-200330/2020|2020-04-20|EPI\_ISL\_578511|Original|hCoV-19^^Wisconsin|Human|Wisconsin State Laboratory of Hygiene Communicable Disease Division|Wisconsin State Laboratory of Hygiene Communicable Disease Division|Florek|USA

>Spike|hCoV-19/USA/CA-IGI-0559/2020|2020-07-24|EPI\_ISL\_756334|Original|hCoV-19^^California|Human|Innovative Genomics Institute|Innovative Genomics Institute|Wyman|USA

>Spike|hCoV-19/Scotland/QEUH-AAEF1C/2020|2020-10-22|EPI\_ISL\_624079|Original|hCoV-19^^Scotland|Human|Lighthouse Lab in Glasgow|Wellcome Sanger Institute for the COVID-19 Genomics UK (COG-UK) consortium|Davies|United Kingdom

>Spike|hCoV-19/England/LIVE-DAE78A/2020|2020-10-23|EPI\_ISL\_637338|Original|hCoV-19^^England|Human|Liverpool Clinical Laboratories|COVID-19 Genomics UK (COG-UK) Consortium|Haldenby|United Kingdom

>Spike|hCoV-19/South Korea/KDCA0357/2020|2020-10-20|EPI\_ISL\_760142|Original|hCoV-19^^South Korea|Human|Division of Emerging Infectious Diseases|Division of Emerging Infectious Diseases|Park|South Korea

>Spike|hCoV-19/Ireland/D-NVRL-AIIDV1332v1/2020|2020-11-02|EPI\_ISL\_768785|Original|hCoV-19^^Dublin|Human|AIID|Irish Coronavirus Sequencing Consortium - National Virus Reference Laboratory|Gonzalez|Ireland

>Spike|hCoV-19/USA/WI-UW-310/2020|2020-04-15|EPI\_ISL\_436604|Original|hCoV-19^^Wisconsin|Human|University of Wisconsin-Madison AIDS Vaccine Research Laboratories|University of Wisconsin-Madison AIDS Vaccine Research Laboratories|Baczenas|USA

>Spike|hCoV-19/England/LIVE-9F5DA/2020|2020-05-13|EPI\_ISL\_457267|Original|hCoV-19^^England|Human|Liverpool Clinical Laboratories|COVID-19 Genomics UK (COG-UK) Consortium|Haldenby|United Kingdom

>Spike|hCoV-19/USA/WA-UW23/2020|2020-03-06|EPI\_ISL\_414592|Original|hCoV-19^^Washington|Human|UW Virology Lab|UW Virology Lab|Roychoudhury|USA

>Spike|hCoV-19/England/QEUEH-9B92DA/2020|2020-09-07|EPI\_ISL\_549626|Original|hCoV-19^^England|Human|Lighthouse Lab in Glasgow|Wellcome Sanger Institute for the COVID-19 Genomics UK (COG-UK) consortium|Davies|United Kingdom

>Spike|hCoV-19/Australia/VIC6628/2020|2020-07-19|EPI\_ISL\_521388|Original|hCoV-19^^Victoria|Human|Victorian Infectious Diseases Reference Laboratory (VIDRL)|VIDRL and MDU-PHL|Schultz|Australia

>Spike|hCoV-19/Australia/VIC1891/2020|2020-05-30|EPI\_ISL\_480641|Original|hCoV-19^^Victoria|Human|Victorian Infectious Diseases Reference Laboratory (VIDRL)|VIDRL and MDU-PHL|Schultz|Australia

>Spike|hCoV-19/USA/WA-S2083/2020|2020-06-06|EPI\_ISL\_497511|Original|hCoV-19^^Washington|Human|Washington State Department of Health|Seattle Flu Study|Lee|USA

>Spike|hCoV-19/Scotland/QEUEH-A61416/2020|2020-10-13|EPI\_ISL\_666086|Original|hCoV-19^^Scotland|Human|Northumbria University / South Tees Hospitals NHS Foundation Trust / North Cumbria Integrated Care NHS Foundation Trust / North Tees and Hartlepool NHS Foundation Trust / Newcastle Hospitals NHS Foundation Trust|COVID-19 Genomics UK (COG-UK) Consortium|Bashton|United Kingdom

>Spike|hCoV-19/USA/WI-WSLH-200594/2020|2020-04-22|EPI\_ISL\_631396|Original|hCoV-19^^Wisconsin|Human|Wisconsin State Laboratory of Hygiene Communicable Disease Division|Wisconsin State Laboratory of Hygiene Communicable Disease Division|Florek|USA

>Spike|hCoV-19/England/NORT-29DEDF/2020|2020-05-06|EPI\_ISL\_493500|Original|hCoV-19^^England|Human|Northumbria University / South Tees Hospitals NHS Foundation Trust / North Cumbria Integrated Care NHS Foundation Trust / North Tees and Hartlepool NHS Foundation Trust / Newcastle Hospitals NHS Foundation Trust|COVID-19 Genomics UK (COG-UK) Consortium|Bashton|United Kingdom

>Spike|hCoV-19/Northern Ireland/NIRE-107518/2020|2020-03-30|EPI\_ISL\_585163|Original|hCoV-19^^Northern Ireland|Human|Regional Virus Laboratory|COVID-19 Genomics UK (COG-UK) Consortium|Fairley|United Kingdom

>Spike|hCoV-19/Denmark/DCGC-4043/2020|2020-09-14|EPI\_ISL\_615817|Original|hCoV-19^^Hovedstaden|Human|Department of Virus and Microbiological Special Diagnostics|Albertsen lab|Michaelsen|Denmark

>Spike|hCoV-19/Scotland/QEUEH-95E18F/2020|2020-08-07|EPI\_ISL\_534431|Original|hCoV-19^^Scotland|Human|NHSGGC West of Scotland Specialist Virology Centre / MRC-University of Glasgow Centre for Virus Research|Wellcome Sanger Institute for the COVID-19 Genomics UK (COG-UK) consortium|Davies|United Kingdom

>Spike|hCoV-19/England/BIRM-6A022/2020|2020-11-09|EPI\_ISL\_679014|Original|hCoV-19^^England|Human|University of Birmingham|COVID-19 Genomics UK (COG-UK) Consortium|Loman|United Kingdom

>Spike|hCoV-19/Scotland/QEUEH-9600F6/2020|2020-08-06|EPI\_ISL\_531873|Original|hCoV-19^^Scotland|Human|NHSGGC West of Scotland Specialist Virology Centre / MRC-University of Glasgow Centre for Virus Research|Wellcome Sanger Institute for the COVID-19 Genomics UK (COG-UK) consortium|Davies|United Kingdom

>Spike|hCoV-19/England/OXON-ACE84/2020|2020-04-05|EPI\_ISL\_448543|Original|hCoV-19^^England|Human|Oxford Viromics|COVID-19 Genomics UK (COG-UK) Consortium|Golubchik|United Kingdom

>Spike|hCoV-19/Scotland/EDB9430/2020|2020-10-31|EPI\_ISL\_680524|Original|hCoV-19^^Scotland|Human|Virology Department|COVID-19 Genomics UK (COG-UK) Consortium|McHugh|United Kingdom

>Spike|hCoV-19/Wales/PHWC-48BEC3/2020|2020-11-05|EPI\_ISL\_666366|Original|hCoV-19^^Wales|Human|Wales Specialist Virology Centre Sequencing lab|COVID-19 Genomics UK (COG-UK) Consortium|Moore|United Kingdom

>Spike|hCoV-19/Wales/PHWC-27962/2020|2020-03-01|EPI\_ISL\_431919|Original|hCoV-19^^Wales|Human|Wales Specialist Virology Centre|Public Health Wales Microbiology Cardiff|Moore|United Kingdom

>Spike|hCoV-19/Netherlands/GE-EMC-202/2020|2020-05-14|EPI\_ISL\_523184|Original|hCoV-19^^Gelderland|Human|Dutch COVID-19 response team|Erasmus Medical Center|Oude Munnink|Netherlands

>Spike|hCoV-19/England/GSTT-5326/2020|2020-03-19|EPI\_ISL\_560671|Original|hCoV-19^^England|Human|Centre for Clinical Infection and Diagnostics Research and Genomics Innovation Unit|Centre for Clinical Infection and Diagnostics Research and Genomics Innovation Unit|Awan|United Kingdom

>Spike|hCoV-19/Spain/MD-IBV-99008561/2020|2020-09-21|EPI\_ISL\_654101|Original|hCoV-19^^Madrid|Human|Hospital General Universitario Gregorio Mara\u00f1a|SeqCOVID-SPAIN consortium/IBV (CSIC)|Comas|Spain

>Spike|hCoV-19/Wales/PHWC-47DE79/2020|2020-10-10|EPI\_ISL\_595372|Original|hCoV-19^^Wales|Human|Originating lab|COVID-19 Genomics UK (COG-UK) Consortium|Moore|United Kingdom

>Spike|hCoV-19/USA/CA-CZB-13777/2020|2020-09-22|EPI\_ISL\_738767|Original|hCoV-19^^California|Human|Alameda County Public Health Lab|Chan-Zuckerberg Biohub|Kamm|USA

>Spike|hCoV-19/Wales/PHWC-15D364/2020|2020-03-27|EPI\_ISL\_472706|Original|hCoV-19^^Wales|Human|Wales Specialist Virology Centre Sequencing lab|COVID-19 Genomics UK (COG-UK) Consortium|Moore|United Kingdom

>Spike|hCoV-19/England/CAMB-7CC1A/2020|2020-04-05|EPI\_ISL\_442135|Original|hCoV-19^^England|Human|Department of Pathology|Wellcome Sanger Institute for the COVID-19 Genomics UK (COG-UK) consortium|Amato|United Kingdom

>Spike|hCoV-19/Denmark/DCGC-13569/2020|2020-11-30|EPI\_ISL\_712881|Original|hCoV-19^^Sjaelland|Human|Department of Virus and Microbiological Special Diagnostics|Albertsen Lab|Michaelsen|Denmark

>Spike|hCoV-19/Japan/PG-3830/2020|2020-07-00|EPI\_ISL\_692081|Original|hCoV-19^^Japan|Human|Pathogen Genomics Center|Pathogen Genomics Center|Sekizuka|Japan

>Spike|hCoV-19/Australia/VIC15280/2020|2020-08-04|EPI\_ISL\_593232|Original|hCoV-19^^Victoria|Human|Microbiological Diagnostic Unit - Public Health Laboratory (MDU-PHL)|MDU-PHL|Schultz|Australia

>Spike|hCoV-19/Scotland/QEUH-C01B6C/2020|2020-12-05|EPI\_ISL\_757266|Original|hCoV-19^^Scotland|Human|Lighthouse Lab in Glasgow|Wellcome Sanger Institute for the COVID-19 Genomics UK (COG-UK) Consortium|Davies|United Kingdom

>Spike|hCoV-19/England/CAMC-941A75/2020|2020-07-25|EPI\_ISL\_556855|Original|hCoV-19^^England|Human|Lighthouse Lab in Cambridge|Wellcome Sanger Institute for the COVID-19 Genomics UK (COG-UK) consortium|Davies|United Kingdom

>Spike|hCoV-19/Australia/VIC8547/2020|2020-08-17|EPI\_ISL\_565084|Original|hCoV-19^^Victoria|Human|Microbiological Diagnostic Unit - Public Health Laboratory (MDU-PHL)|MDU-PHL|Schultz|Australia

>Spike|hCoV-19/Australia/VIC13959/2020|2020-09-18|EPI\_ISL\_563893|Original|hCoV-19^^Victoria|Human|Microbiological Diagnostic Unit - Public Health Laboratory (MDU-PHL)|MDU-PHL|Schultz|Australia

>Spike|hCoV-19/England/ALDP-C3BB78/2020|2020-12-10|EPI\_ISL\_731744|Original|hCoV-19^^England|Human|Lighthouse Lab in Alderley Park|Wellcome Sanger Institute for the COVID-19 Genomics UK (COG-UK) Consortium|Davies|United Kingdom

>Spike|hCoV-19/India/KA-nimh-11068/2020|2020-05-04|EPI\_ISL\_515945|Original|hCoV-19^^Karnataka|Human|DH|Department of Neurovirology|Pattabiraman|India

>Spike|hCoV-19/England/ALDP-A502D4/2020|2020-10-07|EPI\_ISL\_597829|Original|hCoV-19^^England|Human|Lighthouse Lab in Alderley Park|Wellcome Sanger Institute for the COVID-19 Genomics UK (COG-UK) consortium|Davies|United Kingdom

>Spike|hCoV-19/England/NORT-1B72BFB/2020|2020-12-07|EPI\_ISL\_724917|Original|hCoV-19^^England|Human|Northumbria University / South Tees Hospitals NHS Foundation Trust / North Cumbria Integrated Care NHS Foundation Trust / North Tees and Hartlepool NHS Foundation Trust / Newcastle Hospitals NHS Foundation Trust|COVID-19 Genomics UK (COG-UK) Consortium|Bashton|United Kingdom

>Spike|hCoV-19/England/QEUH-B1452D/2020|2020-11-03|EPI\_ISL\_642755|Original|hCoV-19^^England|Human|Lighthouse Lab in Glasgow|Wellcome Sanger Institute for the COVID-19 Genomics UK (COG-UK) Consortium|Davies|United Kingdom

>Spike|hCoV-19/USA/ID-UNM-IBL028/2020|2020-03-15|EPI\_ISL\_632871|Original|hCoV-19^^Idaho|Human|Idaho Bureau of Laboratories|Center for Global Health|Domman|USA

>Spike|hCoV-19/USA/OR-OHSU-2864/2020|2020-09-03|EPI\_ISL\_667367|Original|hCoV-19^^Oregon|Human|OHSU Lab Services Molecular Microbiology Lab|Oregon SARS-CoV-2 Genome Sequencing Center|O'Roak|USA

>Spike|hCoV-19/Ireland/LK-NVRL-72IRL34726/2020|2020-08-15|EPI\_ISL\_578310|Original|hCoV-19^^Limerick|Human|National Virus Reference Laboratory|National Virus Reference Laboratory|Gonzalez|Ireland

>Spike|hCoV-19/USA/UT-08529/2020|2020-05-18|EPI\_ISL\_524292|Original|hCoV-19^^Utah|Human|Utah Public Health Laboratory|Utah Public Health Laboratory|Young|USA

>Spike|hCoV-19/Scotland/EDB6176/2020|2020-05-16|EPI\_ISL\_473902|Original|hCoV-19^^Scotland|Human|Virology Department|COVID-19 Genomics UK (COG-UK) Consortium|Williams|United Kingdom

>Spike|hCoV-19/Denmark/DCGC-19803/2020|2020-12-07|EPI\_ISL\_747798|Original|hCoV-19^^Hovedstaden|Human|Department of Virus and Microbiological Special Diagnostics|Albertsen Lab|Michaelsen|Denmark

>Spike|hCoV-19/Guangzhou/GZMU0052/2020|2020-01-29|EPI\_ISL\_429097|Original|hCoV-19^^Guangzhou|Human|The First Affiliated Hospital of Guangzhou Medical University|BGI-shenzhen & The First Affiliated Hospital of Guangzhou Medical University|Ji|China

>Spike|hCoV-19/England/QEUA-990549/2020|2020-08-26|EPI\_ISL\_530372|Original|hCoV-19^^England|Human|Lighthouse Lab in Glasgow|Wellcome Sanger Institute for the COVID-19 Genomics UK (COG-UK) consortium|Davies|United Kingdom

>Spike|hCoV-19/Denmark/DCGC-6380/2020|2020-09-21|EPI\_ISL\_622280|Original|hCoV-19^^Hovedstaden|Human|Department of Virus and Microbiological Special Diagnostics|Albertsen lab|Michaelsen|Denmark

>Spike|hCoV-19/Netherlands/NA\_165/2020|2020-03-21|EPI\_ISL\_422700|Original|hCoV-19^^Netherlands|Human|Dutch COVID-19 response team|Erasmus Medical Center|Oude Munnink|Netherlands

>Spike|hCoV-19/England/MILK-B050B5/2020|2020-10-24|EPI\_ISL\_637539|Original|hCoV-19^^England|Human|Virology Department|COVID-19 Genomics UK (COG-UK) Consortium|de Silva|United Kingdom

>Spike|hCoV-19/Netherlands/LI-RIVM-20506/2020|2020-12-07|EPI\_ISL\_728721|Original|hCoV-19^^Limburg|Human|Dutch COVID-19 response team|National Institute for Public Health and the Environment (RIVM)|Meijer|Netherlands

>Spike|hCoV-19/Denmark/DCGC-14073/2020|2020-11-30|EPI\_ISL\_711434|Original|hCoV-19^^Hovedstaden|Human|Department of Virus and Microbiological Special Diagnostics|Albertsen Lab|Michaelsen|Denmark

>Spike|hCoV-19/Scotland/QEUA-A0B84F/2020|2020-10-03|EPI\_ISL\_599413|Original|hCoV-19^^Scotland|Human|Lighthouse Lab in Glasgow|Wellcome Sanger Institute for the COVID-19 Genomics UK (COG-UK) consortium|Davies|United Kingdom

>Spike|hCoV-19/Spain/AS-IBV-98006610/2020|2020-03-13|EPI\_ISL\_654653|Original|hCoV-19^^Asturias|Human|Servicio de Microbiolog\u00eda|SeqCOVID-SPAIN consortium|IBV (CSIC)|Comas|Spain

>Spike|hCoV-19/Wales/PHWC-49AABE/2020|2020-12-03|EPI\_ISL\_727642|Original|hCoV-19^^Wales|Human|Originating lab|COVID-19 Genomics UK (COG-UK) Consortium|Moore|United Kingdom

>Spike|hCoV-19/Malaysia/IMR\_WC9127/2020|2020-03-30|EPI\_ISL\_459956|Original|hCoV-19^^Malaysia|Human|Institute for Medical Research|Institute for Medical Research|Suppiah|Malaysia

>Spike|hCoV-19/Northern Ireland/NIRE-2332C0/2020|2020-09-27|EPI\_ISL\_680276|Original|hCoV-19^^Northern Ireland|Human|Regional Virus Laboratory|COVID-19 Genomics UK (COG-UK) Consortium|Fairley|United Kingdom

>Spike|hCoV-19/Scotland/EDB4885/2020|2020-05-13|EPI\_ISL\_453172|Original|hCoV-19^^Scotland|Human|Virology Department|COVID-19 Genomics UK (COG-UK) Consortium|Williams|United Kingdom

>Spike|hCoV-19/USA/CA-CZB-10899/2020|2020-08-18|EPI\_ISL\_583129|Original|hCoV-19^^California|Human|Humboldt County Public Health Laboratory|Chan-Zuckerberg Biohub|Bhatt|USA

>Spike|hCoV-19/Australia/VIC13884/2020|2020-08-28|EPI\_ISL\_592339|Original|hCoV-19^^Victoria|Human|Microbiological Diagnostic Unit - Public Health Laboratory (MDU-PHL)|MDU-PHL|Schultz|Australia

>Spike|hCoV-19/USA/HI-H200477/2020|2020-08-11|EPI\_ISL\_753020|Original|hCoV-19^^Hawaii|Human|State Laboratories Division|State Laboratories Division|Sultana|USA

>Spike|hCoV-19/USA/TX-HMH-3742/2020|2020-06-16|EPI\_ISL\_543154|Original|hCoV-19^^Texas|Human|Houston Methodist Hospital|Houston Methodist Hospital|Long|USA

>Spike|hCoV-19/England/MILK-B8C0C5/2020|2020-11-13|EPI\_ISL\_674494|Original|hCoV-19^^England|Human|Lighthouse Lab in Milton Keynes|Wellcome Sanger Institute for the COVID-19 Genomics UK (COG-UK) Consortium|Davies|United Kingdom

>Spike|hCoV-19/Wales/PHWC-49D49F/2020|2020-12-10|EPI\_ISL\_742788|Original|hCoV-19^^Wales|Human|Wales Specialist Virology Centre Sequencing lab|COVID-19 Genomics UK (COG-UK) Consortium|Moore|United Kingdom

>Spike|hCoV-19/England/CAMB-1AD699/2020|2020-04-25|EPI\_ISL\_489435|Original|hCoV-19^^England|Human|Department of Pathology|Wellcome Sanger Institute for the COVID-19 Genomics UK (COG-UK) consortium|Davies|United Kingdom

>Spike|hCoV-19/Denmark/DCGC-6271/2020|2020-10-05|EPI\_ISL\_620031|Original|hCoV-19^^Hovedstaden|Human|Department of Virus and Microbiological Special Diagnostics|Albertsen lab|Michaelsen|Denmark

>Spike|hCoV-19/USA/WA-S394/2020|2020-03-30|EPI\_ISL\_434154|Original|hCoV-19^^Washington|Human|Washington State Department of Health|Seattle Flu Study|Bedford|USA

>Spike|hCoV-19/USA/OH-QDX-1392/2020|2020-03-17|EPI\_ISL\_572183|Original|hCoV-19^^Ohio|Human|Quest Diagnostics|Quest Diagnostics|Kagan|USA

>Spike|hCoV-19/England/QEUEH-963F6F/2020|2020-08-12|EPI\_ISL\_536838|Original|hCoV-19^^England|Human|Lighthouse Lab in Glasgow|Wellcome Sanger Institute for the COVID-19 Genomics UK (COG-UK) consortium|Davies|United Kingdom

>Spike|hCoV-19/Switzerland/VD-ETHZ-200069/2020|2020-07-15|EPI\_ISL\_510750|Original|hCoV-19^^Vaud|Human|Viollier AG|Department of Biosystems Science and Engineering|Nadeau|Switzerland

>Spike|hCoV-19/Denmark/DCGC-10747/2020|2020-11-02|EPI\_ISL\_670180|Original|hCoV-19^^Hovedstaden|Human|Department of Virus and Microbiological Special Diagnostics|Albertsen Lab|Michaelsen|Denmark

>Spike|hCoV-19/USA/CA-QDX-222/2020|2020-04-10|EPI\_ISL\_498698|Original|hCoV-19^^California|Human|Quest Diagnostics|Quest Diagnostics|Kagan|USA

>Spike|hCoV-19/USA/UT-UPHL-2008799/2020|2020-05-25|EPI\_ISL\_524825|Original|hCoV-19^^Utah|Human|Utah Public Health Laboratory|Utah Public Health Laboratory|Young|USA

>Spike|hCoV-19/England/ALDP-9D9966/2020|2020-09-18|EPI\_ISL\_576777|Original|hCoV-19^^England|Human|Oxford Viromics|COVID-19 Genomics UK (COG-UK) Consortium|Golubchik|United Kingdom

>Spike|hCoV-19/USA/WA-UW-2929/2020|2020-03-29|EPI\_ISL\_486053|Original|hCoV-19^^Washington|Human|UW Virology Lab|UW Virology Lab|Roychoudhury|USA

>Spike|hCoV-19/Denmark/DCGC-3858/2020|2020-08-31|EPI\_ISL\_622738|Original|hCoV-19^^Hovedstaden|Human|Department of Virus and Microbiological Special Diagnostics|Albertsen lab|Michaelsen|Denmark

>Spike|hCoV-19/England/HECH-259A2BF/2020|2020-06-02|EPI\_ISL\_488866|Original|hCoV-19^^England|Human|Microbiology Department|Wellcome Sanger Institute for the COVID-19 Genomics UK (COG-UK) consortium|Davies|United Kingdom

>Spike|hCoV-19/Luxembourg/LNS7426149/2020|2020-12-22|EPI\_ISL\_771056|Original|hCoV-19^^Luxembourg|Human|Laboratoire national de sant\u00e9|Laboratoire national de sant\u00e9|Wienecke-Baldacchino|Luxembourg

>Spike|hCoV-19/Canada/QC-LSPQ-L00232003/2020|2020-03-22|EPI\_ISL\_535968|Original|hCoV-19^^Quebec|Human|H\u00f4pital du Centre-de-la-Mauricie|Laboratoire de sant\u00e9 publique du Qu\u00e9bec|Moreira|Canada

>Spike|hCoV-19/England/ALDP-A4FB82/2020|2020-10-07|EPI\_ISL\_597691|Original|hCoV-19^^England|Human|Lighthouse Lab in Alderley Park|Wellcome Sanger Institute for the COVID-19 Genomics UK (COG-UK) consortium|Davies|United Kingdom

>Spike|hCoV-19/Singapore/680/2020|2020-06-22|EPI\_ISL\_498578|Original|hCoV-19^^Singapore|Human|National Public Health Laboratory|National Public Health Laboratory|Mak|Singapore

>Spike|hCoV-19/Wales/QEUEH-B1245F/2020|2020-11-02|EPI\_ISL\_642502|Original|hCoV-19^^Wales|Human|Lighthouse Lab in Glasgow|Wellcome Sanger Institute for the COVID-19 Genomics UK (COG-UK) Consortium|Davies|United Kingdom



>Spike|hCoV-19/England/CAMC-AAF625/2020|2020-10-23|EPI\_ISL\_630979|Original|hCoV-19^^England|Human|Lighthouse Lab in Cambridge|Wellcome Sanger Institute for the COVID-19 Genomics UK (COG-UK) consortium|Davies|United Kingdom

>Spike|hCoV-19/England/20130064704/2020|2020-03-23|EPI\_ISL\_423652|Original|hCoV-19^^England|Human|Respiratory Virus Unit|Respiratory Virus Unit|Platt|United Kingdom

>Spike|hCoV-19/Denmark/DCGC-19247/2020|2020-12-07|EPI\_ISL\_748210|Original|hCoV-19^^Hovedstaden|Human|Department of Virus and Microbiological Special Diagnostics|Albertsen Lab|Michaelsen|Denmark

>Spike|hCoV-19/USA/UT-UPHL-2012896384/2020|2020-08-12|EPI\_ISL\_745895|Original|hCoV-19^^Utah|Human|Ginkgo Bioworks Clinical Laboratory|Utah Public Health Laboratory|Young|USA

>Spike|hCoV-19/Wales/PHWC-2F223/2020|2020-04-06|EPI\_ISL\_446220|Original|hCoV-19^^Wales|Human|Wales Specialist Virology Centre|Public Health Wales Microbiology Cardiff|Moore|United Kingdom

>Spike|hCoV-19/Australia/VIC6342/2020|2020-07-25|EPI\_ISL\_518324|Original|hCoV-19^^Victoria|Human|Microbiological Diagnostic Unit - Public Health Laboratory (MDU-PHL) |MDU-PHL|Schultz|Australia

>Spike|hCoV-19/Peru/LOR-INS-058/2020|2020-04-02|EPI\_ISL\_514317|Original|hCoV-19^^Loreto|Human|Laboratorio de Referencia Nacional de Virus Respiratorio. Instituto Nacional de Salud Per\u00fa|Laboratorio de Referencia Nacional de Biotecnolog\u00eda y Biolog\u00eda Molecular. Instituto Nacional de Salud Per\u00fa|Padilla Rojas|Peru

>Spike|hCoV-19/Luxembourg/LNS2994623/2020|2020-10-29|EPI\_ISL\_740232|Original|hCoV-19^^Luxembourg|Human|Laboratoire national de sant\u00e9|Laboratoire national de sant\u00e9|Wienecke-Baldacchino|Luxembourg

>Spike|hCoV-19/USA/WA-S1885/2020|2020-05-28|EPI\_ISL\_496311|Original|hCoV-19^^Washington|Human|Washington State Department of Health|Seattle Flu Study|Lee|USA

>Spike|hCoV-19/Denmark/DCGC-20277/2020|2020-11-30|EPI\_ISL\_747676|Original|hCoV-19^^Syddanmark|Human|Department of Virus and Microbiological Special Diagnostics|Albertsen Lab|Michaelsen|Denmark

>Spike|hCoV-19/England/CWAR-24FDB38/2020|2020-05-03|EPI\_ISL\_584483|Original|hCoV-19^^England|Human|UHCW / University of Warwick|COVID-19 Genomics UK (COG-UK) Consortium|Stark|United Kingdom

>Spike|hCoV-19/USA/MI-MDHHS-SC20070/2020|2020-03-24|EPI\_ISL\_437157|Original|hCoV-19^^Michigan|Human|Michigan Department of Health and Human Services|Michigan Department of Health and Human Services|Blankenship|USA

>Spike|hCoV-19/England/QEUH-881BC2/2020|2020-07-25|EPI\_ISL\_532675|Original|hCoV-19^^England|Human|Lighthouse Lab in Glasgow|Wellcome Sanger Institute for the COVID-19 Genomics UK (COG-UK) consortium|Davies|United Kingdom

>Spike|hCoV-19/France/GES-8795/2020|2020-04-02|EPI\_ISL\_560628|Original|hCoV-19^^Grand-Est|Human|Hospital|National Reference Center for Viruses of Respiratory Infections|Enouf|France

>Spike|hCoV-19/England/CAMC-B380E6/2020|2020-11-05|EPI\_ISL\_658881|Original|hCoV-19^^England|Human|Lighthouse Lab in Cambridge|Wellcome Sanger Institute for the COVID-19 Genomics UK (COG-UK) Consortium|Davies|United Kingdom

>Spike|hCoV-19/England/20139051704/2020|2020-03-27|EPI\_ISL\_420702|Original|hCoV-19^^England|Human|Respiratory Virus Unit|Respiratory Virus Unit|Platt|United Kingdom

>Spike|hCoV-19/USA/VA-DCLS-0912/2020|2020-05-13|EPI\_ISL\_522784|Original|hCoV-19^^Virginia|Human|Virginia DCLS|Virginia DCLS|St. Jacques|USA

>Spike|hCoV-19/Belgium/regal-12141317/2020|2020-12-14|EPI\_ISL\_745222|Original|hCoV-19^^Mol|Human|UZ Leuven|KU Leuven|Maes|Belgium

>Spike|hCoV-19/USA/AZ-TG502097/2020|2020-07-15|EPI\_ISL\_695279|Original|hCoV-19^^Arizona|Human|TGen North|TGen North|French|USA

>Spike|hCoV-19/England/QEUH-961B21/2020|2020-08-03|EPI\_ISL\_537080|Original|hCoV-19^^England|Human|Lighthouse Lab in Glasgow|Wellcome Sanger Institute for the COVID-19 Genomics UK (COG-UK) consortium|Davies|United Kingdom

>Spike|hCoV-19/Brazil/RJ-00480/2020|2020-10-09|EPI\_ISL\_717875|Original|hCoV-19^^Rio de Janeiro|Human|Laboratorio de Virologia Molecular / UFRJ|Bioinformatics Laboratory / LNCC|Almeida|Brazil

>Spike|hCoV-19/England/ALDP-BBB388/2020|2020-11-21|EPI\_ISL\_701879|Original|hCoV-19^^England|Human|Lighthouse Lab in Alderley Park|Wellcome Sanger Institute for the COVID-19 Genomics UK (COG-UK) Consortium|Davies|United Kingdom

>Spike|hCoV-19/USA/OR-OHSU-0422/2020|2020-05-25|EPI\_ISL\_509134|Original|hCoV-19^^Oregon|Human|OHSU Lab Services Molecular Microbiology Lab|Oregon SARS-CoV-2 Genome Sequencing Center|O'Roak|USA

>Spike|hCoV-19/Bangladesh/BCSIR-NILMRC-273/2020|2020-07-19|EPI\_ISL\_498273|Original|hCoV-19^^Chittagong|Human|National Institute of Laboratory Medicine and Referral Center|Genomic Research Lab|Khan|Bangladesh

>Spike|hCoV-19/England/NOTT-111D40/2020|2020-06-08|EPI\_ISL\_472402|Original|hCoV-19^^England|Human|Queens Medical Centre|COVID-19 Genomics UK (COG-UK) Consortium|Loose|United Kingdom

>Spike|hCoV-19/England/QEUEH-C6448A/2020|2020-12-14|EPI\_ISL\_778423|Original|hCoV-19^^England|Human|Lighthouse Lab in Glasgow|Wellcome Sanger Institute for the COVID-19 Genomics UK (COG-UK) Consortium|Davies|United Kingdom

>Spike|hCoV-19/India/MH-ACTREC-185/2020|2020-06-18|EPI\_ISL\_699840|Original|hCoV-19^^Maharashtra|Human|Hematopathology Laboratory|Hematopathology Laboratory|Patkar|India

>Spike|hCoV-19/England/QEUEH-54933A/2020|2020-05-13|EPI\_ISL\_533371|Original|hCoV-19^^England|Human|Lighthouse Lab in Glasgow|Wellcome Sanger Institute for the COVID-19 Genomics UK (COG-UK) consortium|Davies|United Kingdom

>Spike|hCoV-19/USA/TX-HMH-2635/2020|2020-06-04|EPI\_ISL\_545442|Original|hCoV-19^^Texas|Human|Houston Methodist Hospital|Houston Methodist Hospital|Long|USA

>Spike|hCoV-19/USA/MI-UM-10036475782/2020|2020-10-16|EPI\_ISL\_628817|Original|hCoV-19^^Michigan|Human|University of Michigan Clinical Microbiology Laboratory|Lauring Lab|Valesano|USA

>Spike|hCoV-19/USA/MN-MDH-2019/2020|2020-10-30|EPI\_ISL\_654700|Original|hCoV-19^^Minnesota|Human|Minnesota Department of Health|Minnesota Department of Health|Lorentz|USA

>Spike|hCoV-19/Portugal/PT1460/2020|2020-03-29|EPI\_ISL\_511419|Original|hCoV-19^^Portugal|Human|Instituto Nacional de Saude (INSA)|Instituto Nacional de Saude (INSA)|Borges|Portugal

>Spike|hCoV-19/Denmark/DCGC-22371/2020|2020-12-14|EPI\_ISL\_757521|Original|hCoV-19^^Hovedstaden|Human|Department of Virus and Microbiological Special Diagnostics|Albertsen Lab|Michaelsen|Denmark

>Spike|hCoV-19/England/ALDP-C57F98/2020|2020-12-14|EPI\_ISL\_736142|Original|hCoV-19^^England|Human|Lighthouse Lab in Alderley Park|Wellcome Sanger Institute for the COVID-19 Genomics UK (COG-UK) Consortium|Davies|United Kingdom

>Spike|hCoV-19/USA/CA-CZB-16138/2020|2020-12-01|EPI\_ISL\_738977|Original|hCoV-19^^California|Human|Renegade|Chan-Zuckerberg Biohub|Kamm|USA

>Spike|hCoV-19/USA/WA-UW-21707/2020|2020-08-03|EPI\_ISL\_570990|Original|hCoV-19^^Washington|Human|UW Virology Lab|UW Virology Lab|Roychoudhury|USA

>Spike|hCoV-19/England/MILK-B94E66/2020|2020-11-13|EPI\_ISL\_676068|Original|hCoV-19^^England|Human|Lighthouse Lab in Milton Keynes|Wellcome Sanger Institute for the COVID-19 Genomics UK (COG-UK) Consortium|Davies|United Kingdom

>Spike|hCoV-19/Wales/PHWC-163EF1/2020|2020-04-29|EPI\_ISL\_474101|Original|hCoV-19^^Wales|Human|Originating lab|COVID-19 Genomics UK (COG-UK) Consortium|Moore|United Kingdom

>Spike|hCoV-19/USA/TX-DSHS-1694/2020|2020-06-15|EPI\_ISL\_708613|Original|hCoV-19^^Texas|Human|Texas Department of State Health Services|Texas Department of State Health Services|Rahman|USA

>Spike|hCoV-19/England/CAMB-75EFD/2020|2020-03-30|EPI\_ISL\_438477|Original|hCoV-19^^England|Human|Department of Pathology|Wellcome Sanger Institute for the COVID-19 Genomics UK (COG-UK) consortium|Amato|United Kingdom

>Spike|hCoV-19/USA/WI-UW-2228/2020|2020-10-06|EPI\_ISL\_677631|Original|hCoV-19^^Wisconsin|Human|University of Wisconsin-Madison AIDS Vaccine Research Laboratories|University of Wisconsin-Madison AIDS Vaccine Research Laboratories|Baczenas|USA

>Spike|hCoV-19/England/BRIS-12FB27/2020|2020-04-03|EPI\_ISL\_488279|Original|hCoV-19^^England|Human|PHE South West Regional Laboratory|Wellcome Sanger Institute for the COVID-19 Genomics UK (COG-UK) consortium|Davies|United Kingdom

>Spike|hCoV-19/England/CAMB-1B95D9/2020|2020-11-06|EPI\_ISL\_664570|Original|hCoV-19^^England|Human|Department of Pathology|COVID-19 Genomics UK (COG-UK) Consortium|Goodfellow|United Kingdom

>Spike|hCoV-19/Canada/NS-NML-1200/2020|2020-04-02|EPI\_ISL\_579601|Original|hCoV-19^^Nova Scotia|Human|QEII Health Sciences Centre|National Microbiology Laboratory (NML)|Majer|Canada

>Spike|hCoV-19/England/QEIH-AE2626/2020|2020-10-27|EPI\_ISL\_633660|Original|hCoV-19^^England|Human|Lighthouse Lab in Glasgow|Wellcome Sanger Institute for the COVID-19 Genomics UK (COG-UK) consortium|Davies|United Kingdom

>Spike|hCoV-19/USA/WI-UW-1526/2020|2020-09-14|EPI\_ISL\_541648|Original|hCoV-19^^Wisconsin|Human|University of Wisconsin-Madison AIDS Vaccine Research Laboratories|University of Wisconsin-Madison AIDS Vaccine Research Laboratories|Baczenas|USA

>Spike|hCoV-19/USA/FL-BPHL-0743/2020|2020-06-19|EPI\_ISL\_512549|Original|hCoV-19^^Florida|Human|Florida Bureau of Public Health Laboratories|Florida Bureau of Public Health Laboratories|Blanton|USA

>Spike|hCoV-19/Wales/PHWC-15CDA3/2020|2020-03-31|EPI\_ISL\_472619|Original|hCoV-19^^Wales|Human|Wales Specialist Virology Centre Sequencing lab|COVID-19 Genomics UK (COG-UK) Consortium|Moore|United Kingdom

>Spike|hCoV-19/USA/CA-CZB-15400/2020|2020-11-30|EPI\_ISL\_739524|Original|hCoV-19^^California|Human|Orange County Public Health Lab|Chan-Zuckerberg Biohub|Kamm|USA

>Spike|hCoV-19/Russia/CRIE145922/2020|2020-03-29|EPI\_ISL\_460604|Original|hCoV-19^^Moscow|Human|Molecular diagnostic laboratory of Federal Budget Institution of Science \Central Research Institute of Epidemiology\ of The Federal Service on Customers' Rights Protection and Human Well-being Surveillance|Group of Genomics and Postgenomic Technologies of Central Research Institute of Epidemiology|Spera  
>nskaya|Russia

>Spike|hCoV-19/USA/WA-UW-2902/2020|2020-03-29|EPI\_ISL\_486046|Original|hCoV-19^^Washington|Human|UW Virology Lab|UW Virology Lab|Roychoudhury|USA

>Spike|hCoV-19/Denmark/DCGC-16602/2020|2020-11-16|EPI\_ISL\_714863|Original|hCoV-19^^Syddanmark|Human|Department of Virus and Microbiological Special Diagnostics|Albertsen Lab|Michaelsen|Denmark

>Spike|hCoV-19/Australia/WA409/2020|2020-05-25|EPI\_ISL\_672621|Original|hCoV-19^^Western Australia|Human|PathWest Laboratory Medicine WA|PathWest Laboratory Medicine WA Microbial Surveillance Unit|Sikazwe|Australia

>Spike|hCoV-19/USA/WI-WSLH-200458/2020|2020-05-18|EPI\_ISL\_578600|Original|hCoV-19^^Wisconsin|Human|Wisconsin State Laboratory of Hygiene Communicable Disease Division|Wisconsin State Laboratory of Hygiene Communicable Disease Division|Florek|USA

>Spike|hCoV-19/India/DL-IGIB11305034/2020|2020-08-00|EPI\_ISL\_751284|Original|hCoV-19^^Delhi|Human|Devki Devi Foundation|CSIR-IGIB/Max|Pandey|India

>Spike|hCoV-19/USA/CA-SEARCH-5562/2020|2020-11-18|EPI\_ISL\_755295|Original|hCoV-19^^California|Human|San Diego County Public Health Laboratory|Andersen lab at Scripps Research|Gangavarapu|USA

>Spike|hCoV-19/Canada/ON-S1795/2020|2020-11-15|EPI\_ISL\_755790|Original|hCoV-19^^Ontario|Human|Toronto Invasive Bacterial Diseases Network|McMaster University|McArthur|Canada

>Spike|hCoV-19/England/ALDP-A51288/2020|2020-10-07|EPI\_ISL\_597936|Original|hCoV-19^^England|Human|Lighthouse Lab in Alderley Park|Wellcome Sanger Institute for the COVID-19 Genomics UK (COG-UK) consortium|Davies|United Kingdom

>Spike|hCoV-19/USA/TX-HMH-MCoV-9313/2020|2020-07-03|EPI\_ISL\_781055|Original|hCoV-19^^Texas|Human|Houston Methodist Hospital|Houston Methodist Hospital|Long|USA

>Spike|hCoV-19/England/MILK-C6F67A/2020|2020-12-13|EPI\_ISL\_778565|Original|hCoV-19^^England|Human|Lighthouse Lab in Milton Keynes|Wellcome Sanger Institute for the COVID-19 Genomics UK (COG-UK) Consortium|Davies|United Kingdom

>Spike|hCoV-19/England/ALDP-B24A58/2020|2020-11-04|EPI\_ISL\_647002|Original|hCoV-19^^England|Human|Lighthouse Lab in Alderley Park|Wellcome Sanger Institute for the COVID-19 Genomics UK (COG-UK) Consortium|Davies|United Kingdom

>Spike|hCoV-19/mink/Netherlands/NB-EMC-32-7/2020|2020-08-15|EPI\_ISL\_577763|Original|hCoV-19^^Limburg|Neovison vison|Dutch COVID-19 response team|Erasmus Medical Center|Oude Munnink|Netherlands

>Spike|hCoV-19/India/DL-MaxCov0041-CSIR-IGIB/2020|2020-05-01|EPI\_ISL\_459943|Original|hCoV-19^^Delhi|Human|Devki Devi Foundation|CSIR-IGIB/Max|Pandey|India

>Spike|hCoV-19/England/LOND-D5787/2020|2020-04-17|EPI\_ISL\_453462|Original|hCoV-19^^England|Human|University College London|COVID-19 Genomics UK (COG-UK) Consortium|Roy|United Kingdom

>Spike|hCoV-19/Singapore/1299/2020|2020-05-13|EPI\_ISL\_648784|Original|hCoV-19^^Singapore|Human|Department of Laboratory Medicine|Department of Laboratory Medicine|Chen|Singapore

>Spike|hCoV-19/England/CAMB-83A34/2020|2020-04-15|EPI\_ISL\_443593|Original|hCoV-19^^England|Human|Department of Pathology|Wellcome Sanger Institute for the COVID-19 Genomics UK (COG-UK) consortium|Amato|United Kingdom

>Spike|hCoV-19/Netherlands/GE-EMC-193/2020|2020-05-01|EPI\_ISL\_523175|Original|hCoV-19^^Gelderland|Human|Dutch COVID-19 response team|Erasmus Medical Center|Oude Munnink|Netherlands

>Spike|hCoV-19/Luxembourg/LNS0747135/2020|2020-11-01|EPI\_ISL\_739825|Original|hCoV-19^^Luxembourg|Human|Laboratoire national de sant\u00e9|Laboratoire national de sant\u00e9|Wienecke-Baldacchino|Luxembourg

>Spike|hCoV-19/Singapore/185/2020|2020-04-28|EPI\_ISL\_462303|Original|hCoV-19^^Singapore|Human|National Public Health Laboratory|National Public Health Laboratory|Mak|Singapore

>Spike|hCoV-19/Denmark/DCGC-2865/2020|2020-08-17|EPI\_ISL\_616559|Original|hCoV-19^^Sjaelland|Human|Department of Virus and Microbiological Special Diagnostics|Albertsen lab|Michaelsen|Denmark

>Spike|hCoV-19/France/ARA97311/2020|2020-10-29|EPI\_ISL\_640010|Original|hCoV-19^^Auvergne-Rhone-Alpes|Human|CNR Virus des Infections Respiratoires - France SUD|CNR Virus des Infections Respiratoires - France SUD|Josset|France

>Spike|hCoV-19/Denmark/DCGC-4935/2020|2020-09-21|EPI\_ISL\_621473|Original|hCoV-19^^Nordjylland|Human|Department of Virus and Microbiological Special Diagnostics|Albertsen lab|Michaelsen|Denmark

>Spike|hCoV-19/United Arab Emirates/skmc-227578/2020|2020-04-20|EPI\_ISL\_582636|Original|hCoV-19^^United Arab Emirates|Human|Sheikh Khalifa Medical City|Molecular/Surveillance lab\nSheikh Khalifa Medical City|Amirtharaj|United Arab Emirates

>Spike|hCoV-19/Netherlands/ZuidHolland\_81/2020|2020-03-27|EPI\_ISL\_422949|Original|hCoV-19^^Zuid Holland|Human|Dutch COVID-19 response team|Erasmus Medical Center|Oude Munnink|Netherlands

>Spike|hCoV-19/USA/NY-NYUMC544/2020|2020-03-30|EPI\_ISL\_444661|Original|hCoV-19^^New York|Human|NYU Langone Health|Departments of Pathology and Medicine|Maurano|USA

>Spike|hCoV-19/Netherlands/ZH-EMC-1175/2020|2020-12-20|EPI\_ISL\_763250|Original|hCoV-19^^Zuid Holland|Human|Dutch COVID-19 response team|Erasmus Medical Center|Oude Munnink|Netherlands

>Spike|hCoV-19/USA/WI-UW-2316/2020|2020-11-13|EPI\_ISL\_728082|Original|hCoV-19^^Wisconsin|Human|University of Wisconsin-Madison AIDS Vaccine Research Laboratories|University of Wisconsin-Madison AIDS Vaccine Research Laboratories|Baczenas|USA

>Spike|hCoV-19/Japan/PG-1014/2020|2020-03-00|EPI\_ISL\_684624|Original|hCoV-19^^Japan|Human|Tokyo Metropolitan Institute of Public Health|Pathogen Genomics Center|Sekizuka|Japan

>Spike|hCoV-19/Russia/CRIE7171114/2020|2020-08-24|EPI\_ISL\_610241|Original|hCoV-19^^Moscow|Human|Molecular diagnostic laboratory of Federal Budget Institution of Science \Central Research Institute of Epidemiology\ of The Federal Service on Customers' Rights Protection and Human Well-being Surveillance|Group of Genomics and Postgenomic Technologies of Central Research Institute of Epidemiology|Samo

>ilov|Russia  
>Spike|hCoV-19/Japan/PG-8092/2020|2020-08-00|EPI\_ISL\_687191|Original|hCoV-19^^Japan|Human|Pathogen Genomics Center|Pathogen Genomics Center|Sekizuka|Japan  
>Spike|hCoV-19/England/CAMB-7524C/2020|2020-03-12|EPI\_ISL\_440375|Original|hCoV-19^^England|Human|Department of Pathology|Wellcome Sanger Institute for the COVID-19 Genomics UK (COG-UK) consortium|Amato|United Kingdom  
>Spike|hCoV-19/Denmark/DCGC-15528/2020|2020-11-23|EPI\_ISL\_713871|Original|hCoV-19^^Syddanmark|Human|Department of Virus and Microbiological Special Diagnostics|Albertsen Lab|Michaelsen|Denmark  
>Spike|hCoV-19/Ireland/D-NVRL-MPB54775/2020|2020-04-11|EPI\_ISL\_767744|Original|hCoV-19^^Dublin|Human|National Virus Reference Laboratory|Irish Coronavirus Sequencing Consortium - Teagasc Moorepark|Walsh|Ireland  
>Spike|hCoV-19/USA/MI-MDHHS-SC21526/2020|2020-04-04|EPI\_ISL\_516253|Original|hCoV-19^^Michigan|Human|Michigan Department of Health and Human Services|Michigan Department of Health and Human Services|Blankenship|USA  
>Spike|hCoV-19/England/ALDP-B5D889/2020|2020-11-08|EPI\_ISL\_704276|Original|hCoV-19^^England|Human|Department of Pathology|COVID-19 Genomics UK (COG-UK) Consortium|Goodfellow|United Kingdom  
>Spike|hCoV-19/India/MH-ACTREC-634/2020|2020-09-12|EPI\_ISL\_700267|Original|hCoV-19^^Maharashtra|Human|Hematopathology Laboratory|Hematopathology Laboratory|Patkar|India  
>Spike|hCoV-19/Australia/VIC12193/2020|2020-07-28|EPI\_ISL\_591925|Original|hCoV-19^^Victoria|Human|Victorian Infectious Diseases Reference Laboratory (VIDRL)|VIDRL and MDU-PHL|Schultz|Australia  
>Spike|hCoV-19/Netherlands/NA\_371/2020|2020-04-08|EPI\_ISL\_455174|Original|hCoV-19^^Netherlands|Human|Dutch COVID-19 response team|Erasmus Medical Center|Oude Munnink|Netherlands  
>Spike|hCoV-19/Wales/PHWC-35CFF/2020|2020-04-27|EPI\_ISL\_474557|Original|hCoV-19^^Wales|Human|Originating lab|COVID-19 Genomics UK (COG-UK) Consortium|Moore|United Kingdom  
>Spike|hCoV-19/England/ALDP-B62A7C/2020|2020-11-09|EPI\_ISL\_656644|Original|hCoV-19^^England|Human|Lighthouse Lab in Alderley Park|Wellcome Sanger Institute for the COVID-19 Genomics UK (COG-UK) Consortium|Davies|United Kingdom  
>Spike|hCoV-19/Denmark/DCGC-20761/2020|2020-12-21|EPI\_ISL\_759348|Original|hCoV-19^^Syddanmark|Human|Department of Virus and Microbiological Special Diagnostics|Albertsen Lab|Michaelsen|Denmark  
>Spike|hCoV-19/England/ALDP-A691AE/2020|2020-10-12|EPI\_ISL\_608925|Original|hCoV-19^^England|Human|Lighthouse Lab in Alderley Park|Wellcome Sanger Institute for the COVID-19 Genomics UK (COG-UK) consortium|Davies|United Kingdom  
>Spike|hCoV-19/England/HECH-2599DBF/2020|2020-05-06|EPI\_ISL\_482104|Original|hCoV-19^^England|Human|Microbiology Department|Wellcome Sanger Institute for the COVID-19 Genomics UK (COG-UK) consortium|Davies|United Kingdom  
>Spike|hCoV-19/Germany/NW-HHU-501/2020|2020-12-03|EPI\_ISL\_770749|Original|hCoV-19^^North Rhine-Westphalia|Human|ZOTZ KLIMAS MVZ D\u00f0fcsselldorf-Centrum GbR \u00dcBAG f\u00f0fcr Labormedizin|Center of Medical Microbiology|Wienemann|Germany  
>Spike|hCoV-19/Denmark/DCGC-5039/2020|2020-09-21|EPI\_ISL\_621821|Original|hCoV-19^^Hovedstaden|Human|Department of Virus and Microbiological Special Diagnostics|Albertsen lab|Michaelsen|Denmark  
>Spike|hCoV-19/Spain/AR-IBV-98008055/2020|2020-10-01|EPI\_ISL\_654448|Original|hCoV-19^^Aragon|Human|Servicio de Microbiolog\u00eda|SeqCOVID-SPAIN consortium|IBV (CSIC) |Comas|Spain  
>Spike|hCoV-19/Australia/VIC3638/2020|2020-07-07|EPI\_ISL\_520378|Original|hCoV-19^^Victoria|Human|Victorian Infectious Diseases Reference Laboratory (VIDRL)|VIDRL and MDU-PHL|Schultz|Australia  
>Spike|hCoV-19/Wales/PHWC-4A4486/2020|2020-12-16|EPI\_ISL\_764696|Original|hCoV-19^^Wales|Human|Wales Specialist Virology Centre Sequencing lab|COVID-19 Genomics UK (COG-UK) Consortium|Moore|United Kingdom  
>Spike|hCoV-19/Norway/CS-29/2020|2020-04-24|EPI\_ISL\_666610|Original|hCoV-19^^Viken|Human|Dept. of Microbiology and Infection Control|Dept. of Microbiology and Infection Control|Hesselberg L\u00f0f8vestad|Norway

>Spike|hCoV-19/USA/TX-HMH-MCoV-19001/2020|2020-11-25|EPI\_ISL\_785275|Original|hCoV-19^^Texas|Human|Houston Methodist Hospital|Houston Methodist Hospital|Long|USA

>Spike|hCoV-19/USA/MD-HP12063/2020|2020-11-22|EPI\_ISL\_791395|Original|hCoV-19^^Maryland|Human|Johns Hopkins Hospital Department of Pathology|Johns Hopkins Hospital Department of Pathology|Morris|USA

>Spike|hCoV-19/Denmark/DCGC-12673/2020|2020-11-16|EPI\_ISL\_682854|Original|hCoV-19^^Syddanmark|Human|Department of Virus and Microbiological Special Diagnostics|Albertsen Lab|Michaelsen|Denmark

>Spike|hCoV-19/Denmark/DCGC-18068/2020|2020-12-14|EPI\_ISL\_749286|Original|hCoV-19^^Hovedstaden|Human|Department of Virus and Microbiological Special Diagnostics|Albertsen Lab|Michaelsen|Denmark

>Spike|hCoV-19/England/BRIS-12B97C/2020|2020-05-18|EPI\_ISL\_469416|Original|hCoV-19^^England|Human|PHE South West Regional Laboratory|Wellcome Sanger Institute for the COVID-19 Genomics UK (COG-UK) consortium|Davies|United Kingdom

>Spike|hCoV-19/Canada/ON-UHTC-0288/2020|2020-07-26|EPI\_ISL\_569993|Original|hCoV-19^^Ontario|Human|Unity Health Toronto|Ontario Institute for Cancer Research|de Borja|Canada

>Spike|hCoV-19/England/QEUEH-B3F4C5/2020|2020-11-08|EPI\_ISL\_658444|Original|hCoV-19^^England|Human|Lighthouse Lab in Glasgow|Wellcome Sanger Institute for the COVID-19 Genomics UK (COG-UK) Consortium|Davies|United Kingdom

>Spike|hCoV-19/Ireland/LH-NVRL-20Z06935/2020|2020-04-17|EPI\_ISL\_681904|Original|hCoV-19^^Louth|Human|National Virus Reference Laboratory|Irish Coronavirus Sequencing Consortium - Teagasc Moorepark|Walsh|Ireland

>Spike|hCoV-19/Scotland/EDB3305/2020|2020-04-08|EPI\_ISL\_489049|Original|hCoV-19^^Scotland|Human|Virology Department|Wellcome Sanger Institute for the COVID-19 Genomics UK (COG-UK) consortium|Davies|United Kingdom

>Spike|hCoV-19/Denmark/DCGC-21174/2020|2020-12-21|EPI\_ISL\_759592|Original|hCoV-19^^Hovedstaden|Human|Department of Virus and Microbiological Special Diagnostics|Albertsen Lab|Michaelsen|Denmark

>Spike|hCoV-19/Singapore/1238/2020|2020-04-27|EPI\_ISL\_648655|Original|hCoV-19^^Singapore|Human|Department of Laboratory Medicine|Department of Laboratory Medicine|Chen|Singapore

>Spike|hCoV-19/Wales/PHWC-4A60EA/2020|2020-12-16|EPI\_ISL\_764999|Original|hCoV-19^^Wales|Human|Wales Specialist Virology Centre Sequencing lab|COVID-19 Genomics UK (COG-UK) Consortium|Moore|United Kingdom

>Spike|hCoV-19/England/QEUEH-B7C1C5/2020|2020-11-13|EPI\_ISL\_668197|Original|hCoV-19^^England|Human|Lighthouse Lab in Glasgow|Wellcome Sanger Institute for the COVID-19 Genomics UK (COG-UK) Consortium|Davies|United Kingdom

>Spike|hCoV-19/USA/CA-ALSR-2106/2020|2020-05-22|EPI\_ISL\_635349|Original|hCoV-19^^California|Human|San Diego County Public Health Laboratory|Andersen lab at Scripps Research|Gangavarapu|USA

>Spike|hCoV-19/Switzerland/VD-ETHZ-270077/2020|2020-09-03|EPI\_ISL\_541479|Original|hCoV-19^^Vaud|Human|Viollier AG|Department of Biosystems Science and Engineering|Nadeau|Switzerland

>Spike|hCoV-19/USA/WI-GMF-02263/2020|2020-05-02|EPI\_ISL\_436896|Original|hCoV-19^^Wisconsin|Human|Gundersen Molecular Diagnostics Laboratory|Kabara Cancer Research Institute|Kenny|USA

>Spike|hCoV-19/England/ALDP-A93C9B/2020|2020-10-19|EPI\_ISL\_611122|Original|hCoV-19^^England|Human|Lighthouse Lab in Alderley Park|Wellcome Sanger Institute for the COVID-19 Genomics UK (COG-UK) consortium|Davies|United Kingdom

>Spike|hCoV-19/England/QEUEH-BA22A5/2020|2020-11-18|EPI\_ISL\_719980|Original|hCoV-19^^England|Human|Lighthouse Lab in Glasgow|Wellcome Sanger Institute for the COVID-19 Genomics UK (COG-UK) Consortium|Davies|United Kingdom

>Spike|hCoV-19/USA/SC-DHEC-0537/2020|2020-06-04|EPI\_ISL\_529084|Original|hCoV-19^^South Carolina|Human|Microbiology Division|Microbiology Division|Flores,H.|USA

>Spike|hCoV-19/USA/UT-UPHL-03756/2020|2020-03-31|EPI\_ISL\_575106|Original|hCoV-19^^Utah|Human|Utah Public Health Laboratory|Utah Public Health Laboratory|Young|USA

>Spike|hCoV-19/Denmark/DCGC-22161/2020|2020-12-14|EPI\_ISL\_758593|Original|hCoV-19^^Hovedstaden|Human|Department of Virus and Microbiological Special Diagnostics|Albertsen Lab|Michaelsen|Denmark

>Spike|hCoV-19/Scotland/GCVR-1714B2/2020|2020-03-29|EPI\_ISL\_489611|Original|hCoV-19^^Scotland|Human|NHSGGC West of Scotland Specialist Virology Centre / MRC-University of Glasgow Centre for Virus Research|Wellcome Sanger Institute for the COVID-19 Genomics UK (COG-UK) consortium|Davies|United Kingdom

>Spike|hCoV-19/England/NORW-EA7CB/2020|2020-05-17|EPI\_ISL\_461866|Original|hCoV-19^^England|Human|Quadram Institute Bioscience|COVID-19 Genomics UK (COG-UK) Consortium|Alikhan|United Kingdom

>Spike|hCoV-19/Japan/PG-3120/2020|2020-03-00|EPI\_ISL\_691242|Original|hCoV-19^^Japan|Human|Pathogen Genomics Center|Pathogen Genomics Center|Sekizuka|Japan

>Spike|hCoV-19/South Africa/KRISP-K003687/2020|2020-10-06|EPI\_ISL\_602869|Original|hCoV-19^^KwaZulu-Natal|Human|NHLS-IALCH|KRISP|de Oliveira|South Africa

>Spike|hCoV-19/Russia/OMS-ORINFI-5900S/2020|2020-06-01|EPI\_ISL\_569772|Original|hCoV-19^^Omsk|Human|Omsk Research Institute of Natural Focal Infections|WHO National Influenza Centre Russian Federation|Komissarov|Russia

>Spike|hCoV-19/Australia/VIC17132/2020|2020-08-03|EPI\_ISL\_663753|Original|hCoV-19^^Victoria|Human|Microbiological Diagnostic Unit - Public Health Laboratory (MDU-PHL) |MDU-PHL|Schultz|Australia

>Spike|hCoV-19/USA/WA-S56/2020|2020-03-05|EPI\_ISL\_417109|Original|hCoV-19^^Washington|Human|Washington State Department of Health|Seattle Flu Study|Bedford|USA

>Spike|hCoV-19/Northern Ireland/QEUA-95FADE/2020|2020-08-06|EPI\_ISL\_532451|Original|hCoV-19^^Northern Ireland|Human|Lighthouse Lab in Glasgow|Wellcome Sanger Institute for the COVID-19 Genomics UK (COG-UK) consortium|Davies|United Kingdom

>Spike|hCoV-19/England/NOTT-10FD63/2020|2020-04-08|EPI\_ISL\_441440|Original|hCoV-19^^England|Human|Queens Medical Centre|COVID-19 Genomics UK (COG-UK) Consortium|Loose|United Kingdom

>Spike|hCoV-19/USA/LA-EVTL526/2020|2020-08-03|EPI\_ISL\_578930|Original|hCoV-19^^Louisiana|Human|LSUHS Emerging Viral Threat Laboratory|Microbial Genome Sequencing Center|Kamil|USA

>Spike|hCoV-19/South Africa/KRISP-0481/2020|2020-07-05|EPI\_ISL\_495560|Original|hCoV-19^^KwaZulu-Natal|Human|NHLS-IALCH|KRISP|de Oliveira|South Africa

>Spike|hCoV-19/Denmark/DCGC-1288/2020|2020-03-16|EPI\_ISL\_619556|Original|hCoV-19^^Sjaelland|Human|Department of Virus and Microbiological Special Diagnostics|Albertsen lab|Michaelsen|Denmark

>Spike|hCoV-19/Australia/VIC8861/2020|2020-07-23|EPI\_ISL\_565244|Original|hCoV-19^^Victoria|Human|Microbiological Diagnostic Unit - Public Health Laboratory (MDU-PHL) |MDU-PHL|Schultz|Australia

>Spike|hCoV-19/Denmark/DCGC-7969/2020|2020-10-26|EPI\_ISL\_618905|Original|hCoV-19^^Hovedstaden|Human|Department of Virus and Microbiological Special Diagnostics|Albertsen lab|Michaelsen|Denmark

>Spike|hCoV-19/Russia/StPetersburg-RII15675S/2020|2020-05-15|EPI\_ISL\_507272|Original|hCoV-19^^Saint Petersburg|Human|WHO National Influenza Centre Russian Federation|WHO National Influenza Centre Russian Federation|Komissarov|Russia

>Spike|hCoV-19/USA/WI-UW-719/2020|2020-06-29|EPI\_ISL\_491394|Original|hCoV-19^^Wisconsin|Human|University of Wisconsin-Madison AIDS Vaccine Research Laboratories|University of Wisconsin-Madison AIDS Vaccine Research Laboratories|Baczenas|USA

>Spike|hCoV-19/England/MILK-B0453F/2020|2020-10-24|EPI\_ISL\_652161|Original|hCoV-19^^England|Human|Department of Pathology|COVID-19 Genomics UK (COG-UK) Consortium|Goodfellow|United Kingdom

>Spike|hCoV-19/Beijing/BJ1112/2020|2020-02-25|EPI\_ISL\_430737|Original|hCoV-19^^Beijing|Human|Chinese PLA Institute for Disease Control and Prevention|Chinese PLA Institute for Disease Control and Prevention|Li|China

>Spike|hCoV-19/England/QEUA-A79220/2020|2020-10-12|EPI\_ISL\_638790|Original|hCoV-19^^England|Human|Oxford Viromics|COVID-19 Genomics UK (COG-UK) Consortium|Golubchik|United Kingdom

>Spike|hCoV-19/Spain/CT-IBV-97010121/2020|2020-11-16|EPI\_ISL\_683609|Original|hCoV-19^^Catalunya|Human|Servicio de Microbiolog\u00eda|SeqCOVID-SPAIN consortium/IBV (CSIC) |Comas|Spain

>Spike|hCoV-19/USA/NY-NYCPHL-000275/2020|2020-03-18|EPI\_ISL\_631801|Original|hCoV-19^^New York|Human|Richmond University Medical Center|New York City Public Health Laboratory|Wang|USA

>Spike|hCoV-19/India/WB-S4/2020|2020-03-27|EPI\_ISL\_455640|Original|hCoV-19^^West Bengal|Human|ICMR-National Institute of Cholera and Enteric Diseases|National Institute of Biomedical Genomics|Maitra|India

>Spike|hCoV-19/England/MILK-B56C75/2020|2020-11-04|EPI\_ISL\_656827|Original|hCoV-19^^England|Human|Lighthouse Lab in Milton Keynes|Wellcome Sanger Institute for the COVID-19 Genomics UK (COG-UK) Consortium|Davies|United Kingdom

>Spike|hCoV-19/England/LOND-D47D3/2020|2020-04-13|EPI\_ISL\_444155|Original|hCoV-19^^England|Human|University College London|COVID-19 Genomics UK (COG-UK) Consortium|Roy|United Kingdom

>Spike|hCoV-19/England/QEUA-9F8C3B/2020|2020-09-27|EPI\_ISL\_588926|Original|hCoV-19^^England|Human|Lighthouse Lab in Glasgow|Wellcome Sanger Institute for the COVID-19 Genomics UK (COG-UK) consortium|Davies|United Kingdom

>Spike|hCoV-19/Panama/337640/2020|2020-07-04|EPI\_ISL\_496862|Original|hCoV-19^^Chiriqui|Human|Gorgas Memorial Laboratory of Health Studies|Gorgas Memorial Laboratory of Health Studies|Martinez|Panama

>Spike|hCoV-19/England/CAMC-B5215C/2020|2020-11-08|EPI\_ISL\_658012|Original|hCoV-19^^England|Human|Lighthouse Lab in Cambridge|Wellcome Sanger Institute for the COVID-19 Genomics UK (COG-UK) Consortium|Davies|United Kingdom

>Spike|hCoV-19/USA/WI-UW-636/2020|2020-06-26|EPI\_ISL\_491329|Original|hCoV-19^^Wisconsin|Human|University of Wisconsin-Madison AIDS Vaccine Research Laboratories|University of Wisconsin-Madison AIDS Vaccine Research Laboratories|Baczenas|USA

>Spike|hCoV-19/USA/UT-UPHL-2012798490/2020|2020-07-27|EPI\_ISL\_745503|Original|hCoV-19^^Utah|Human|Ginkgo Bioworks Clinical Laboratory|Utah Public Health Laboratory|Young|USA

>Spike|hCoV-19/England/CAMC-C44875/2020|2020-12-10|EPI\_ISL\_719481|Original|hCoV-19^^England|Human|Lighthouse Lab in Cambridge|Wellcome Sanger Institute for the COVID-19 Genomics UK (COG-UK) Consortium|Davies|United Kingdom

>Spike|hCoV-19/England/ALDP-8FCCDE/2020|2020-06-24|EPI\_ISL\_551466|Original|hCoV-19^^England|Human|Lighthouse Lab in Alderley Park|Wellcome Sanger Institute for the COVID-19 Genomics UK (COG-UK) consortium|Davies|United Kingdom

>Spike|hCoV-19/England/201100832/2020|2020-03-08|EPI\_ISL\_566049|Original|hCoV-19^^England|Human|Respiratory Virus Unit|Respiratory Virus Unit|Platt|United Kingdom

>Spike|hCoV-19/England/QEUA-B2DEF9/2020|2020-11-04|EPI\_ISL\_659944|Original|hCoV-19^^England|Human|Lighthouse Lab in Glasgow|Wellcome Sanger Institute for the COVID-19 Genomics UK (COG-UK) Consortium|Davies|United Kingdom

>Spike|hCoV-19/England/ALDP-9C4BD1/2020|2020-09-11|EPI\_ISL\_567610|Original|hCoV-19^^England|Human|Lighthouse Lab in Alderley Park|Wellcome Sanger Institute for the COVID-19 Genomics UK (COG-UK) consortium|Davies|United Kingdom

>Spike|hCoV-19/USA/UT-01587/2020|2020-04-07|EPI\_ISL\_449830|Original|hCoV-19^^Utah|Human|Utah Public Health Laboratory|Utah Public Health Laboratory|Young|USA

>Spike|hCoV-19/Australia/VIC12851/2020|2020-09-10|EPI\_ISL\_563601|Original|hCoV-19^^Victoria|Human|Microbiological Diagnostic Unit - Public Health Laboratory (MDU-PHL) |MDU-PHL|Schultz|Australia

>Spike|hCoV-19/England/LIVE-A3EE7/2020|2020-06-27|EPI\_ISL\_490395|Original|hCoV-19^^England|Human|Liverpool Clinical Laboratories|COVID-19 Genomics UK (COG-UK) Consortium|Haldenby|United Kingdom

>Spike|hCoV-19/USA/LA-EVTL1147/2020|2020-12-09|EPI\_ISL\_768416|Original|hCoV-19^^Louisiana|Human|LSUHS Emerging Viral Threat Laboratory|Microbial Genome Sequencing Center|Kamil|USA

>Spike|hCoV-19/Japan/PG-4739/2020|2020-07-00|EPI\_ISL\_689875|Original|hCoV-19^^Japan|Human|Pathogen Genomics Center|Pathogen Genomics Center|Sekizuka|Japan



>Spike|hCoV-19/Denmark/DCGC-8019/2020|2020-10-26|EPI\_ISL\_617131|Original|hCoV-19^^Nordjylland|Human|Department of Virus and Microbiological Special Diagnostics|Albertsen lab|Michaelsen|Denmark

>Spike|hCoV-19/England/205161239/2020|2020-12-16|EPI\_ISL\_766432|Original|hCoV-19^^England|Human|Respiratory Virus Unit|COVID-19 Genomics UK (COG-UK) Consortium|Platt|United Kingdom

>Spike|hCoV-19/England/MILK-970336/2020|2020-08-17|EPI\_ISL\_553174|Original|hCoV-19^^England|Human|Lighthouse Lab in Milton Keynes|Wellcome Sanger Institute for the COVID-19 Genomics UK (COG-UK) consortium|Davies|United Kingdom

>Spike|hCoV-19/England/NORW-F1F7E/2020|2020-10-19|EPI\_ISL\_627644|Original|hCoV-19^^England|Human|Quadram Institute Bioscience|COVID-19 Genomics UK (COG-UK) Consortium|Alikhan|United Kingdom

>Spike|hCoV-19/England/ALDP-A93ED1/2020|2020-10-19|EPI\_ISL\_611137|Original|hCoV-19^^England|Human|Lighthouse Lab in Alderley Park|Wellcome Sanger Institute for the COVID-19 Genomics UK (COG-UK) consortium|Davies|United Kingdom

>Spike|hCoV-19/USA/MI-UM-10036485871/2020|2020-10-16|EPI\_ISL\_628828|Original|hCoV-19^^Michigan|Human|University of Michigan Clinical Microbiology Laboratory|Lauring Lab|Valesano|USA

>Spike|hCoV-19/USA/VA-DCLS-0798/2020|2020-07-07|EPI\_ISL\_522809|Original|hCoV-19^^Virginia|Human|Virginia DCLS|Virginia DCLS|St. Jacques|USA

>Spike|hCoV-19/England/CAMC-B34DF2/2020|2020-11-05|EPI\_ISL\_659450|Original|hCoV-19^^England|Human|Lighthouse Lab in Cambridge|Wellcome Sanger Institute for the COVID-19 Genomics UK (COG-UK) Consortium|Davies|United Kingdom

>Spike|hCoV-19/Shangrao/JX105/2020|2020-01-26|EPI\_ISL\_421239|Original|hCoV-19^^Jiangxi|Human|Jiangxi Province Center for Disease Control and Prevention|Jiangxi Province Center for Disease Control and Prevention|Xiong|China

>Spike|hCoV-19/USA/MN-MDH-1185/2020|2020-05-20|EPI\_ISL\_477275|Original|hCoV-19^^Minnesota|Human|Mayo Clinic & Mayo Clinic Laboratories|Minnesota Department of Health|Garfin|USA

>Spike|hCoV-19/England/MILK-9E0629/2020|2020-09-21|EPI\_ISL\_601326|Original|hCoV-19^^England|Human|Lighthouse Lab in Milton Keynes|Wellcome Sanger Institute for the COVID-19 Genomics UK (COG-UK) consortium|Davies|United Kingdom

>Spike|hCoV-19/Australia/VIC15333/2020|2020-08-03|EPI\_ISL\_593254|Original|hCoV-19^^Victoria|Human|Microbiological Diagnostic Unit - Public Health Laboratory (MDU-PHL)|MDU-PHL|Schultz|Australia

>Spike|hCoV-19/Scotland/EDB8972/2020|2020-10-30|EPI\_ISL\_652027|Original|hCoV-19^^Scotland|Human|Virology Department|COVID-19 Genomics UK (COG-UK) Consortium|McHugh|United Kingdom

>Spike|hCoV-19/England/QEUEH-AE2D03/2020|2020-10-27|EPI\_ISL\_633444|Original|hCoV-19^^England|Human|Lighthouse Lab in Glasgow|Wellcome Sanger Institute for the COVID-19 Genomics UK (COG-UK) consortium|Davies|United Kingdom

>Spike|hCoV-19/Denmark/DCGC-19348/2020|2020-12-07|EPI\_ISL\_748898|Original|hCoV-19^^Hovedstaden|Human|Department of Virus and Microbiological Special Diagnostics|Albertsen Lab|Michaelsen|Denmark

>Spike|hCoV-19/Switzerland/AG-ETHZ-100133/2020|2020-03-16|EPI\_ISL\_451717|Original|hCoV-19^^Aargau|Human|Viollier AG|Department of Biosystems Science and Engineering|Nadeau|Switzerland

>Spike|hCoV-19/USA/MI-QDX-359/2020|2020-03-22|EPI\_ISL\_571102|Original|hCoV-19^^Michigan|Human|Quest Diagnostics|Quest Diagnostics|Kagan|USA

>Spike|hCoV-19/Denmark/DCGC-22148/2020|2020-12-14|EPI\_ISL\_758586|Original|hCoV-19^^Midtjylland|Human|Department of Virus and Microbiological Special Diagnostics|Albertsen Lab|Michaelsen|Denmark

>Spike|hCoV-19/Wales/PHWC-169A51/2020|2020-07-28|EPI\_ISL\_514570|Original|hCoV-19^^Wales|Human|Wales Specialist Virology Centre Sequencing lab|COVID-19 Genomics UK (COG-UK) Consortium|Moore|United Kingdom

>Spike|hCoV-19/England/ALDP-95564D/2020|2020-06-14|EPI\_ISL\_554530|Original|hCoV-19^^England|Human|Lighthouse Lab in Alderley Park|Wellcome Sanger Institute for the COVID-19 Genomics UK (COG-UK) consortium|Davies|United Kingdom

>Spike|hCoV-19/England/QEUA-9F5A52/2020|2020-09-27|EPI\_ISL\_588432|Original|hCoV-19^^England|Human|Lighthouse Lab in Glasgow|Wellcome Sanger Institute for the COVID-19 Genomics UK (COG-UK) consortium|Davies|United Kingdom

>Spike|hCoV-19/Ecuador/USFQ-207/2020|2020-04-07|EPI\_ISL\_527819|Original|hCoV-19^^Guayas|Human|Centro de Investigaciones|Institute of Microbiology|Cardenas|Ecuador

>Spike|hCoV-19/Netherlands/ZH-EMC-472/2020|2020-08-16|EPI\_ISL\_523808|Original|hCoV-19^^Zuid Holland|Human|Dutch COVID-19 response team|Erasmus Medical Center|Oude Munnink|Netherlands

>Spike|hCoV-19/Wales/PHWC-48B91D/2020|2020-11-09|EPI\_ISL\_666300|Original|hCoV-19^^Wales|Human|Wales Specialist Virology Centre Sequencing lab|COVID-19 Genomics UK (COG-UK) Consortium|Moore|United Kingdom

>Spike|hCoV-19/England/QEUA-9F50BA/2020|2020-09-27|EPI\_ISL\_637807|Original|hCoV-19^^England|Human|Department of Pathology|COVID-19 Genomics UK (COG-UK) Consortium|Goodfellow|United Kingdom

>Spike|hCoV-19/England/QEUA-C314E0/2020|2020-12-09|EPI\_ISL\_730723|Original|hCoV-19^^England|Human|Lighthouse Lab in Glasgow|Wellcome Sanger Institute for the COVID-19 Genomics UK (COG-UK) Consortium|Davies|United Kingdom

>Spike|hCoV-19/USA/UT-UPHL-04314\_2/2020|2020-05-15|EPI\_ISL\_591305|Original|hCoV-19^^Utah|Human|Utah Public Health Laboratory|Utah Public Health Laboratory|Young|USA

>Spike|hCoV-19/England/CAMB-7C3CA/2020|2020-04-14|EPI\_ISL\_434038|Original|hCoV-19^^England|Human|Department of Pathology|COVID-19 Genomics UK (COG-UK) Consortium|Meredith|United Kingdom

>Spike|hCoV-19/Netherlands/Gelderland\_111/2020|2020-05-22|EPI\_ISL\_460872|Original|hCoV-19^^Gelderland|Human|Dutch COVID-19 response team|Erasmus Medical Center|Oude Munnink|Netherlands

>Spike|hCoV-19/England/MILK-C7AE65/2020|2020-12-15|EPI\_ISL\_756704|Original|hCoV-19^^England|Human|Lighthouse Lab in Milton Keynes|Wellcome Sanger Institute for the COVID-19 Genomics UK (COG-UK) Consortium|Davies|United Kingdom

>Spike|hCoV-19/USA/UT-UPHL-03087/2020|2020-05-04|EPI\_ISL\_560918|Original|hCoV-19^^Utah|Human|Utah Public Health Laboratory|Utah Public Health Laboratory|Young|USA

>Spike|hCoV-19/Australia/VIC1801/2020|2020-05-28|EPI\_ISL\_480627|Original|hCoV-19^^Victoria|Human|Victorian Infectious Diseases Reference Laboratory (VIDRL)|VIDRL and MDU-PHL|Schultz|Australia

>Spike|hCoV-19/USA/WA-S2149/2020|2020-06-08|EPI\_ISL\_497577|Original|hCoV-19^^Washington|Human|Washington State Department of Health|Seattle Flu Study|Lee|USA

>Spike|hCoV-19/Luxembourg/LNS8330290/2020|2020-07-27|EPI\_ISL\_744719|Original|hCoV-19^^Luxembourg|Human|Laboratoire national de sant\u00e9|Laboratoire national de sant\u00e9|Wienecke-Baldacchino|Luxembourg

>Spike|hCoV-19/Denmark/DCGC-21167/2020|2020-12-21|EPI\_ISL\_759587|Original|hCoV-19^^Hovedstaden|Human|Department of Virus and Microbiological Special Diagnostics|Albertsen Lab|Michaelsen|Denmark

>Spike|hCoV-19/USA/MN-MDH-1396/2020|2020-03-28|EPI\_ISL\_507983|Original|hCoV-19^^Minnesota|Human|Minnesota Department of Health|Minnesota Department of Health|Garfin|USA

>Spike|hCoV-19/Australia/VIC12229/2020|2020-07-24|EPI\_ISL\_640367|Original|hCoV-19^^Victoria|Human|Microbiological Diagnostic Unit - Public Health Laboratory (MDU-PHL)|MDU-PHL|Schultz|Australia

>Spike|hCoV-19/England/OXON-F41295/2020|2020-12-16|EPI\_ISL\_764563|Original|hCoV-19^^England|Human|Oxford Viromics|COVID-19 Genomics UK (COG-UK) Consortium|Golubchik|United Kingdom

>Spike|hCoV-19/Wales/PHWC-15C3B0/2020|2020-05-07|EPI\_ISL\_472480|Original|hCoV-19^^Wales|Human|Wales Specialist Virology Centre Sequencing lab|COVID-19 Genomics UK (COG-UK) Consortium|Moore|United Kingdom

>Spike|hCoV-19/England/ALDP-A6FDE0/2020|2020-10-14|EPI\_ISL\_607186|Original|hCoV-19^^England|Human|Lighthouse Lab in Alderley Park|Wellcome Sanger Institute for the COVID-19 Genomics UK (COG-UK) consortium|Davies|United Kingdom

>Spike|hCoV-19/England/QEUA-B2CDFD/2020|2020-11-04|EPI\_ISL\_659802|Original|hCoV-19^^England|Human|Lighthouse Lab in Glasgow|Wellcome Sanger Institute for the COVID-19 Genomics UK (COG-UK) Consortium|Davies|United Kingdom

>Spike|hCoV-19/Australia/VIC13549/2020|2020-09-15|EPI\_ISL\_563747|Original|hCoV-19^^Victoria|Human|Microbiological Diagnostic Unit - Public Health Laboratory (MDU-PHL)|MDU-PHL|Schultz|Australia

>Spike|hCoV-19/USA/TX-HMH-3579/2020|2020-06-15|EPI\_ISL\_543038|Original|hCoV-19^^Texas|Human|Houston Methodist Hospital|Houston Methodist Hospital|Long|USA

>Spike|hCoV-19/Japan/PG-0533/2020|2020-04-00|EPI\_ISL\_480191|Original|hCoV-19^^Kanto|Human|Ota Health Center Welfare Section|Pathogen Genomics Center|Sekizuka|Japan

>Spike|hCoV-19/England/ALDP-CB51CF/2020|2020-12-17|EPI\_ISL\_761872|Original|hCoV-19^^England|Human|Lighthouse Lab in Alderley Park|Wellcome Sanger Institute for the COVID-19 Genomics UK (COG-UK) Consortium|Davies|United Kingdom

>Spike|hCoV-19/England/QEUEH-7953F1/2020|2020-07-15|EPI\_ISL\_533140|Original|hCoV-19^^England|Human|Lighthouse Lab in Glasgow|Wellcome Sanger Institute for the COVID-19 Genomics UK (COG-UK) consortium|Davies|United Kingdom

>Spike|hCoV-19/England/BIRM-6B0E5/2020|2020-11-14|EPI\_ISL\_679121|Original|hCoV-19^^England|Human|University of Birmingham|COVID-19 Genomics UK (COG-UK) Consortium|Loman|United Kingdom

>Spike|hCoV-19/England/QEUEH-CC99B1/2020|2020-12-23|EPI\_ISL\_781928|Original|hCoV-19^^England|Human|Lighthouse Lab in Glasgow|Wellcome Sanger Institute for the COVID-19 Genomics UK (COG-UK) Consortium|Davies|United Kingdom

>Spike|hCoV-19/Austria/CeMM0997/2020|2020-04-13|EPI\_ISL\_583841|Original|hCoV-19^^Austria|Human|Dr. Gernot Walder GmbH|Bergthaler laboratory|Bergthaler|Austria

>Spike|hCoV-19/England/ALDP-B5C8E4/2020|2020-11-08|EPI\_ISL\_655962|Original|hCoV-19^^England|Human|Lighthouse Lab in Alderley Park|Wellcome Sanger Institute for the COVID-19 Genomics UK (COG-UK) Consortium|Davies|United Kingdom

>Spike|hCoV-19/Cote d'Ivoire/BKE0901/2020|2020-08-20|EPI\_ISL\_681842|Original|hCoV-19^^Boauk\u00e9|Human|Molecular diagnostic unit for viral haemorrhagic fevers and emerging viruses|Project group Epidemiology of Highly Pathogenic Microorganisms|Schubert|C\u00f4te d'Ivoire

>Spike|hCoV-19/England/QEUEH-B2CE90/2020|2020-11-04|EPI\_ISL\_659951|Original|hCoV-19^^England|Human|Lighthouse Lab in Glasgow|Wellcome Sanger Institute for the COVID-19 Genomics UK (COG-UK) Consortium|Davies|United Kingdom

>Spike|hCoV-19/USA/NM-DOH-2020616527/2020|2020-12-12|EPI\_ISL\_751819|Original|hCoV-19^^New Mexico|Human|New Mexico Department of Health Scientific Laboratory|New Mexico Department of Health Scientific Laboratory|Malone|USA

>Spike|hCoV-19/USA/MI-UM-10036782661/2020|2020-11-04|EPI\_ISL\_707855|Original|hCoV-19^^Michigan|Human|University of Michigan Clinical Microbiology Laboratory|Lauring Lab|Valesano|USA

>Spike|hCoV-19/England/CAMC-BBFEED/2020|2020-11-20|EPI\_ISL\_705053|Original|hCoV-19^^England|Human|Lighthouse Lab in Cambridge|Wellcome Sanger Institute for the COVID-19 Genomics UK (COG-UK) Consortium|Davies|United Kingdom

>Spike|hCoV-19/USA/WI-UW-1450/2020|2020-09-11|EPI\_ISL\_541582|Original|hCoV-19^^Wisconsin|Human|University of Wisconsin-Madison AIDS Vaccine Research Laboratories|University of Wisconsin-Madison AIDS Vaccine Research Laboratories|Baczenas|USA

>Spike|hCoV-19/Wales/PHWC-27B8A/2020|2020-04-01|EPI\_ISL\_432096|Original|hCoV-19^^Wales|Human|Wales Specialist Virology Centre|Public Health Wales Microbiology Cardiff|Moore|United Kingdom

>Spike|hCoV-19/England/NORW-2225F8/2020|2020-12-20|EPI\_ISL\_741507|Original|hCoV-19^^England|Human|Quadram Institute Bioscience|COVID-19 Genomics UK (COG-UK) Consortium|Alikhan|United Kingdom

>Spike|hCoV-19/Wales/PHWC-160814/2020|2020-05-26|EPI\_ISL\_472981|Original|hCoV-19^^Wales|Human|Wales Specialist Virology Centre Sequencing lab|COVID-19 Genomics UK (COG-UK) Consortium|Moore|United Kingdom

>Spike|hCoV-19/Belgium/reg-0418422/2020|2020-04-18|EPI\_ISL\_476990|Original|hCoV-19^^Lummen|Human|KU Leuven|KU Leuven|Maes|Belgium

>Spike|hCoV-19/England/LEED-2A9E0D/2020|2020-03-22|EPI\_ISL\_538965|Original|hCoV-19^^England|Human|Leeds Teaching Hospitals NHS Trust and Public Health England|Wellcome Sanger Institute for the COVID-19 Genomics UK (COG-UK) consortium|Davies|United Kingdom

>Spike|hCoV-19/England/NORT-29AF0C/2020|2020-05-26|EPI\_ISL\_493488|Original|hCoV-19^^England|Human|Northumbria University / South Tees Hospitals NHS Foundation Trust / North Cumbria Integrated Care NHS Foundation Trust / North Tees and Hartlepool NHS Foundation Trust / Newcastle Hospitals NHS Foundation Trust|COVID-19 Genomics UK (COG-UK) Consortium|Bashton|United Kingdom

>Spike|hCoV-19/Wales/PHWC-48F5E8/2020|2020-11-10|EPI\_ISL\_681115|Original|hCoV-19^^Wales|Human|Wales Specialist Virology Centre Sequencing lab|COVID-19 Genomics UK (COG-UK) Consortium|Moore|United Kingdom

>Spike|hCoV-19/Denmark/DCGC-15584/2020|2020-11-23|EPI\_ISL\_713908|Original|hCoV-19^^Syddanmark|Human|Department of Virus and Microbiological Special Diagnostics|Albertsen Lab|Michaelsen|Denmark

>Spike|hCoV-19/Switzerland/BL-ETHZ-380269/2020|2020-11-22|EPI\_ISL\_721780|Original|hCoV-19^^Basel-Landschaft|Human|Viollier AG|Department of Biosystems Science and Engineering|Nadeau|Switzerland

>Spike|hCoV-19/USA/TX-HMH-MCoV-9888/2020|2020-07-06|EPI\_ISL\_780323|Original|hCoV-19^^Texas|Human|Houston Methodist Hospital|Houston Methodist Hospital|Long|USA

>Spike|hCoV-19/England/BRIS-126AD8/2020|2020-04-09|EPI\_ISL\_459083|Original|hCoV-19^^England|Human|PHE South West Regional Laboratory|Wellcome Sanger Institute for the COVID-19 Genomics UK (COG-UK) consortium|Davies|United Kingdom

>Spike|hCoV-19/Spain/CT-IBV-99009916/2020|2020-08-11|EPI\_ISL\_660313|Original|hCoV-19^^Catalunya|Human|Servicio de Microbiolog\u00eda|SeqCOVID-SPAIN consortium|IBV (CSIC) |Comas|Spain

>Spike|hCoV-19/USA/FL-BPHL-0348/2020|2020-04-13|EPI\_ISL\_489757|Original|hCoV-19^^Florida|Human|Florida Bureau of Public Health Laboratories|Florida Bureau of Public Health Laboratories|Blanton|USA

>Spike|hCoV-19/USA/IA-GMF-16252/2020|2020-08-20|EPI\_ISL\_547722|Original|hCoV-19^^Iowa|Human|Gundersen Molecular Diagnostics Laboratory|Kabara Cancer Research Institute|Kenny|USA

>Spike|hCoV-19/England/BRIS-185447F/2020|2020-04-29|EPI\_ISL\_492434|Original|hCoV-19^^England|Human|PHE South West Regional Laboratory|Wellcome Sanger Institute for the COVID-19 Genomics UK (COG-UK) consortium|Davies|United Kingdom

>Spike|hCoV-19/Wales/PHWC-2D692/2020|2020-04-04|EPI\_ISL\_446011|Original|hCoV-19^^Wales|Human|Wales Specialist Virology Centre|Public Health Wales Microbiology Cardiff|Moore|United Kingdom

>Spike|hCoV-19/Singapore/12Clin/2020|2020-02-28|EPI\_ISL\_418995|Original|hCoV-19^^Singapore|Human|National Public Health Laboratory|National Public Health Laboratory|Mak|Singapore

>Spike|hCoV-19/USA/MI-UM-10036578598/2020|2020-10-22|EPI\_ISL\_640169|Original|hCoV-19^^Michigan|Human|University of Michigan Clinical Microbiology Laboratory|Lauring Lab|Valesano|USA

>Spike|hCoV-19/Norway/5330/2020|2020-11-02|EPI\_ISL\_708061|Original|hCoV-19^^Vestfold og Telemark|Human|Unilabs Laboratory Medicine|Norwegian Institute of Public Health|Kopperud Riis|Norway

>Spike|hCoV-19/Japan/PG-7769/2020|2020-04-00|EPI\_ISL\_686871|Original|hCoV-19^^Japan|Human|Pathogen Genomics Center|Pathogen Genomics Center|Sekizuka|Japan

>Spike|hCoV-19/USA/MN-MDH-1165/2020|2020-05-05|EPI\_ISL\_476750|Original|hCoV-19^^Minnesota|Human|Minnesota Department of Health|Minnesota Department of Health|Garfin|USA

>Spike|hCoV-19/South Africa/KRISP-K000625/2020|2020-07-11|EPI\_ISL\_509277|Original|hCoV-19^^KwaZulu-Natal|Human|NHLS-IALCH|KRISP|de Oliveira|South Africa

>Spike|hCoV-19/Switzerland/ZH-ETHZ-380220/2020|2020-11-23|EPI\_ISL\_721940|Original|hCoV-19^^Zurich|Human|Viollier AG|Department of Biosystems Science and Engineering|Nadeau|Switzerland

>Spike|hCoV-19/USA/NY-Wadsworth-233298-01/2020|2020-10-01|EPI\_ISL\_754529|Original|hCoV-19^^New York|Human|Wadsworth Center|Wadsworth Center|Lasek-Nesselquist|USA

>Spike|hCoV-19/England/PORT-2D206F/2020|2020-03-20|EPI\_ISL\_512411|Original|hCoV-19^^England|Human|Centre for Enzyme Innovation|COVID-19 Genomics UK (COG-UK) Consortium|Robson|United Kingdom

>Spike|hCoV-19/Australia/VIC14415/2020|2020-08-14|EPI\_ISL\_592491|Original|hCoV-19^^Victoria|Human|Victorian Infectious Diseases Reference Laboratory (VIDRL)|VIDRL and MDU-PHL|Schultz|Australia

>Spike|hCoV-19/Australia/VIC10985/2020|2020-09-07|EPI\_ISL\_563183|Original|hCoV-19^^Victoria|Human|Microbiological Diagnostic Unit - Public Health Laboratory (MDU-PHL)|MDU-PHL|Schultz|Australia

>Spike|hCoV-19/Denmark/DCGC-21271/2020|2020-12-21|EPI\_ISL\_759646|Original|hCoV-19^^Hovedstaden|Human|Department of Virus and Microbiological Special Diagnostics|Albertsen Lab|Michaelsen|Denmark

>Spike|hCoV-19/Wales/PHWC-2A10D/2020|2020-04-04|EPI\_ISL\_432204|Original|hCoV-19^^Wales|Human|Wales Specialist Virology Centre|Public Health Wales Microbiology Cardiff|Moore|United Kingdom

>Spike|hCoV-19/USA/NY-PV09139/2020|2020-03-20|EPI\_ISL\_422510|Original|hCoV-19^^New York|Human|MSHS Clinical Microbiology Laboratories|MSHS Pathogen Surveillance Program|van Bakel|USA

>Spike|hCoV-19/England/LIVE-A57CC/2020|2020-03-19|EPI\_ISL\_499866|Original|hCoV-19^^England|Human|Liverpool Clinical Laboratories|COVID-19 Genomics UK (COG-UK) Consortium|Haldenby|United Kingdom

>Spike|hCoV-19/England/ALDP-9E9A06/2020|2020-09-24|EPI\_ISL\_584278|Original|hCoV-19^^England|Human|Virology Department|COVID-19 Genomics UK (COG-UK) Consortium|de Silva|United Kingdom

>Spike|hCoV-19/England/ALDP-9FDE5E/2020|2020-10-01|EPI\_ISL\_587922|Original|hCoV-19^^England|Human|Lighthouse Lab in Alderley Park|Wellcome Sanger Institute for the COVID-19 Genomics UK (COG-UK) consortium|Davies|United Kingdom

>Spike|hCoV-19/USA/AZ-TG268183/2020|2020-03-17|EPI\_ISL\_426501|Original|hCoV-19^^Arizona|Human|TGen North|TGen North|Lemmer|USA

>Spike|hCoV-19/USA/TX-HMH-3557/2020|2020-06-14|EPI\_ISL\_543019|Original|hCoV-19^^Texas|Human|Houston Methodist Hospital|Houston Methodist Hospital|Long|USA

>Spike|hCoV-19/Equatorial Guinea/18828/2020|2020-06-14|EPI\_ISL\_648364|Original|hCoV-19^^Bioko Norte|Human|Laboratorio de Investigaciones de Baney|University Hospital Basel|Hosch|Equatorial Guinea

>Spike|hCoV-19/England/CAMB-1AE65C/2020|2020-04-27|EPI\_ISL\_459449|Original|hCoV-19^^England|Human|Department of Pathology|Wellcome Sanger Institute for the COVID-19 Genomics UK (COG-UK) consortium|Davies|United Kingdom

>Spike|hCoV-19/Denmark/DCGC-15609/2020|2020-11-23|EPI\_ISL\_713428|Original|hCoV-19^^Hovedstaden|Human|Department of Virus and Microbiological Special Diagnostics|Albertsen Lab|Michaelsen|Denmark

>Spike|hCoV-19/Brazil/SP-636/2020|2020-03-25|EPI\_ISL\_515550|Original|hCoV-19^^S\u00e3o Paulo|Human|UPA Vila Santa Catarina|Instituto Adolfo Lutz|Sacchi|Brazil

>Spike|hCoV-19/Denmark/DCGC-4197/2020|2020-09-14|EPI\_ISL\_622090|Original|hCoV-19^^Hovedstaden|Human|Department of Virus and Microbiological Special Diagnostics|Albertsen lab|Michaelsen|Denmark

>Spike|hCoV-19/Wales/PHWC-4A5713/2020|2020-12-16|EPI\_ISL\_764910|Original|hCoV-19^^Wales|Human|Wales Specialist Virology Centre Sequencing lab|COVID-19 Genomics UK (COG-UK) Consortium|Moore|United Kingdom

>Spike|hCoV-19/Belgium/regal-11031205/2020|2020-11-03|EPI\_ISL\_735217|Original|hCoV-19^^Roeselare|Human|UZ Leuven|KU Leuven|Maes|Belgium

>Spike|hCoV-19/USA/WI-UW-2323/2020|2020-12-05|EPI\_ISL\_728089|Original|hCoV-19^^Wisconsin|Human|University of Wisconsin-Madison AIDS Vaccine Research Laboratories|University of Wisconsin-Madison AIDS Vaccine Research Laboratories|Baczenas|USA

>Spike|hCoV-19/USA/MI-UM-10036484001/2020|2020-10-16|EPI\_ISL\_628809|Original|hCoV-19^^Michigan|Human|University of Michigan Clinical Microbiology Laboratory|Lauring Lab|Valesano|USA

>Spike|hCoV-19/England/MILK-870CD2/2020|2020-07-15|EPI\_ISL\_557441|Original|hCoV-19^^England|Human|Lighthouse Lab in Milton Keynes|Wellcome Sanger Institute for the COVID-19 Genomics UK (COG-UK) consortium|Davies|United Kingdom

>Spike|hCoV-19/Denmark/DCGC-10585/2020|2020-11-02|EPI\_ISL\_670070|Original|hCoV-19^^Hovedstaden|Human|Department of Virus and Microbiological Special Diagnostics|Albertsen Lab|Michaelsen|Denmark

>Spike|hCoV-19/England/MILK-970248/2020|2020-08-17|EPI\_ISL\_553155|Original|hCoV-19^^England|Human|Lighthouse Lab in Milton Keynes|Wellcome Sanger Institute for the COVID-19 Genomics UK (COG-UK) consortium|Davies|United Kingdom

>Spike|hCoV-19/USA/CA-ALSR-1944/2020|2020-07-08|EPI\_ISL\_512249|Original|hCoV-19^^California|Human|San Diego County Public Health Laboratory|Andersen lab at Scripps Research|Gangavarapu|USA

>Spike|hCoV-19/Wales/PHWC-495BDE/2020|2020-11-25|EPI\_ISL\_726453|Original|hCoV-19^^Wales|Human|Originating lab|COVID-19 Genomics UK (COG-UK) Consortium|Moore|United Kingdom

>Spike|hCoV-19/England/MILK-A9128C/2020|2020-10-16|EPI\_ISL\_638517|Original|hCoV-19^^England|Human|Oxford Viromics|COVID-19 Genomics UK (COG-UK) Consortium|Golubchik|United Kingdom

>Spike|hCoV-19/England/QEUH-B1160F/2020|2020-11-02|EPI\_ISL\_642217|Original|hCoV-19^^England|Human|Lighthouse Lab in Glasgow|Wellcome Sanger Institute for the COVID-19 Genomics UK (COG-UK) Consortium|Davies|United Kingdom

>Spike|hCoV-19/Spain/MD-IBV-97010075/2020|2020-03-18|EPI\_ISL\_779761|Original|hCoV-19^^Madrid|Human|IdISSC/Hospital Cl\u00e9dnico San Carlos de Madrid\u200b|SeqCOVID-SPAIN consortium/IBV (CSIC)|Comas|Spain

>Spike|hCoV-19/USA/TX-HMH-MCoV-15065/2020|2020-10-16|EPI\_ISL\_786549|Original|hCoV-19^^Texas|Human|Houston Methodist Hospital|Houston Methodist Hospital|Long|USA

>Spike|hCoV-19/Scotland/QEUH-95FCF6/2020|2020-08-07|EPI\_ISL\_531889|Original|hCoV-19^^Scotland|Human|NHSGGC West of Scotland Specialist Virology Centre / MRC-University of Glasgow Centre for Virus Research|Wellcome Sanger Institute for the COVID-19 Genomics UK (COG-UK) consortium|Davies|United Kingdom

>Spike|hCoV-19/Austria/CeMM0743/2020|2020-04-21|EPI\_ISL\_583681|Original|hCoV-19^^Austria|Human|Austrian Agency for Health and Food Safety (AGES)|Bergthaler laboratory|Bergthaler|Austria

>Spike|hCoV-19/Australia/VIC6026/2020|2020-07-24|EPI\_ISL\_518067|Original|hCoV-19^^Victoria|Human|Microbiological Diagnostic Unit - Public Health Laboratory (MDU-PHL)|MDU-PHL|Schultz|Australia

>Spike|hCoV-19/USA/HI-H200328/2020|2020-08-20|EPI\_ISL\_752886|Original|hCoV-19^^Hawaii|Human|State Laboratories Division|State Laboratories Division|Sultana|USA

>Spike|hCoV-19/Japan/PG-5794/2020|2020-08-00|EPI\_ISL\_688913|Original|hCoV-19^^Japan|Human|Fukuoka Institute of Health and Environmental Sciences|Pathogen Genomics Center|Sekizuka|Japan

>Spike|hCoV-19/Japan/PG-3156/2020|2020-06-00|EPI\_ISL\_691276|Original|hCoV-19^^Japan|Human|Pathogen Genomics Center|Pathogen Genomics Center|Sekizuka|Japan

>Spike|hCoV-19/England/ALDP-9563AF/2020|2020-06-08|EPI\_ISL\_554014|Original|hCoV-19^^England|Human|Lighthouse Lab in Alderley Park|Wellcome Sanger Institute for the COVID-19 Genomics UK (COG-UK) consortium|Davies|United Kingdom

>Spike|hCoV-19/Germany/BE-ChVir-W1443-8219/2020|2020-06-25|EPI\_ISL\_753969|Original|hCoV-19^^Berlin|Human|Charit\u00e99 Universit\u00e4tsmedizin Berlin|Charit\u00e99 Universit\u00e4tsmedizin Berlin|Muehlemann|Germany

>Spike|hCoV-19/USA/CA-CZB-2067/2020|2020-04-27|EPI\_ISL\_486310|Original|hCoV-19^^California|Human|San Joaquin County Public Health Lab|Chan-Zuckerberg Biohub|McGeever|USA

>Spike|hCoV-19/England/ALDP-A9426B/2020|2020-10-20|EPI\_ISL\_624586|Original|hCoV-19^^England|Human|Lighthouse Lab in Alderley Park|Wellcome Sanger Institute for the COVID-19 Genomics UK (COG-UK) consortium|Davies|United Kingdom

>Spike|hCoV-19/Australia/VIC2893/2020|2020-07-02|EPI\_ISL\_521724|Original|hCoV-19^^Victoria|Human|Microbiological Diagnostic Unit - Public Health Laboratory (MDU-PHL)|MDU-PHL|Schultz|Australia

>Spike|hCoV-19/Australia/NSW552/2020|2020-05-13|EPI\_ISL\_455091|Original|hCoV-19^^New South Wales|Human|South Eastern Area Laboratory Services|NSW Health Pathology - Institute of Clinical Pathology and Medical Research; Westmead Hospital; University of Sydney|Gall|Australia

>Spike|hCoV-19/New Zealand/20VR1499/2020|2020-03-22|EPI\_ISL\_456221|Original|hCoV-19^^Bay of Plenty|Human|PathLab Bay of Plenty|Institute of Environmental Science and Research (ESR)|de Ligt|New Zealand

>Spike|hCoV-19/England/QEUA-B135C4/2020|2020-11-03|EPI\_ISL\_642344|Original|hCoV-19^^England|Human|Lighthouse Lab in Glasgow|Wellcome Sanger Institute for the COVID-19 Genomics UK (COG-UK) Consortium|Davies|United Kingdom

>Spike|hCoV-19/USA/OR-OHSU-0244/2020|2020-04-06|EPI\_ISL\_509079|Original|hCoV-19^^Oregon|Human|OHSU Lab Services Molecular Microbiology Lab|Oregon SARS-CoV-2 Genome Sequencing Center|O'Roak|USA

>Spike|hCoV-19/Spain/MD-IBV-99009596/2020|2020-09-16|EPI\_ISL\_654348|Original|hCoV-19^^Madrid|Human|Hospital General Universitario Gregorio Mara\u00f1a|SeqCOVID-SPAIN consortium/IBV (CSIC)|Comas|Spain

>Spike|hCoV-19/Bahrein/BAH-17/2020|2020-04-08|EPI\_ISL\_483558|Original|hCoV-19^^Bahrain|Human|Kingdom of Bahrain Ministry of Health|Erasmus Medical Center|Oude Munnink|Bahrain

>Spike|hCoV-19/Switzerland/VD-ETHZ-350338/2020|2020-11-03|EPI\_ISL\_728830|Original|hCoV-19^^Vaud|Human|Viollier AG|Department of Biosystems Science and Engineering|Nadeau|Switzerland

>Spike|hCoV-19/USA/LA-EVTL500/2020|2020-07-30|EPI\_ISL\_578904|Original|hCoV-19^^Louisiana|Human|LSUHS Emerging Viral Threat Laboratory|Microbial Genome Sequencing Center|Kamil|USA

>Spike|hCoV-19/England/LEED-2AA798/2020|2020-03-30|EPI\_ISL\_538944|Original|hCoV-19^^England|Human|Leeds Teaching Hospitals NHS Trust and Public Health England|Wellcome Sanger Institute for the COVID-19 Genomics UK (COG-UK) consortium|Davies|United Kingdom

>Spike|hCoV-19/Denmark/ALAB-SSI-1264/2020|2020-03-09|EPI\_ISL\_444836|Original|hCoV-19^^Denmark|Human|Department of Virus and Microbiological Special Diagnostics|Albertsen lab|Kirkegaard|Denmark

>Spike|hCoV-19/USA/NY-NYUMC920/2020|2020-03-18|EPI\_ISL\_467413|Original|hCoV-19^^New York|Human|NYU Langone Health|Departments of Pathology and Medicine|Maurano|USA

>Spike|hCoV-19/Wales/CAMC-AAF82F/2020|2020-10-21|EPI\_ISL\_634797|Original|hCoV-19^^Wales|Human|Lighthouse Lab in Cambridge|Wellcome Sanger Institute for the COVID-19 Genomics UK (COG-UK) consortium|Davies|United Kingdom

>Spike|hCoV-19/India/MH-ACTREC-413/2020|2020-07-29|EPI\_ISL\_700062|Original|hCoV-19^^Maharashtra|Human|Hematopathology Laboratory|Hematopathology Laboratory|Patkar|India

>Spike|hCoV-19/England/ALDP-9CB19C/2020|2020-09-16|EPI\_ISL\_575564|Original|hCoV-19^^England|Human|Lighthouse Lab in Alderley Park|Wellcome Sanger Institute for the COVID-19 Genomics UK (COG-UK) consortium|Davies|United Kingdom

>Spike|hCoV-19/England/ALDP-BC8458/2020|2020-11-23|EPI\_ISL\_721441|Original|hCoV-19^^England|Human|Lighthouse Lab in Alderley Park|Wellcome Sanger Institute for the COVID-19 Genomics UK (COG-UK) Consortium|Davies|United Kingdom

>Spike|hCoV-19/England/CAMC-9B2839/2020|2020-09-05|EPI\_ISL\_566625|Original|hCoV-19^^England|Human|Lighthouse Lab in Cambridge|Wellcome Sanger Institute for the COVID-19 Genomics UK (COG-UK) consortium|Davies|United Kingdom

>Spike|hCoV-19/Chile/MA-ISPCH-3/2020|2020-03-17|EPI\_ISL\_445280|Original|hCoV-19^^Magallanes|Human|HOSPITAL REG.LAUTARO NAVARRO AVARIA|Instituto de Salud Publica de Chile|Fernandez|Chile

>Spike|hCoV-19/Scotland/EDB227/2020|2020-03-26|EPI\_ISL\_425950|Original|hCoV-19^^Scotland|Human|Virology Department|COVID-19 Genomics UK (COG-UK) Consortium|Williams|United Kingdom

>Spike|hCoV-19/USA/TX-HMH-MCoV-12607/2020|2020-08-31|EPI\_ISL\_790416|Original|hCoV-19^^Texas|Human|Houston Methodist Hospital|Houston Methodist Hospital|Long|USA

>Spike|hCoV-19/USA/CA-CHLA-PLM94843102/2020|2020-12-08|EPI\_ISL\_753666|Original|hCoV-19^^California|Human|Clinical virology Laboratory|Center for Personalized Medicine|Dien Bard|USA

>Spike|hCoV-19/USA/MD-HP00055/2020|2020-03-20|EPI\_ISL\_457798|Original|hCoV-19^^Maryland|Human|Johns Hopkins Hospital Department of Pathology|Johns Hopkins Hospital Department of Pathology|Ramakrishnan|USA

>Spike|hCoV-19/Spain/VC-FISABIO-5/2020|2020-02-27|EPI\_ISL\_416484|unknown|hCoV-19^^Comunitat Valenciana|Human|Servicio de Microbiolog\u00eda. Consorcio Hospital General Universitario de Valencia|Sequencing and Bioinformatics Service and Molecular Epidemiology Research Group. FISABIO-Public Health|Gonzalez-Candelas|Spain

>Spike|hCoV-19/Denmark/DCGC-7699/2020|2020-10-19|EPI\_ISL\_618563|Original|hCoV-19^^Hovedstaden|Human|Department of Virus and Microbiological Special Diagnostics|Albertsen lab|Michaelsen|Denmark

>Spike|hCoV-19/Wales/PHWC-497F85/2020|2020-11-30|EPI\_ISL\_727004|Original|hCoV-19^^Wales|Human|Originating lab|COVID-19 Genomics UK (COG-UK) Consortium|Moore|United Kingdom

>Spike|hCoV-19/England/QEUA-AAD3A8/2020|2020-10-17|EPI\_ISL\_623895|Original|hCoV-19^^England|Human|Lighthouse Lab in Glasgow|Wellcome Sanger Institute for the COVID-19 Genomics UK (COG-UK) consortium|Davies|United Kingdom

>Spike|hCoV-19/England/MILK-ABB820/2020|2020-10-20|EPI\_ISL\_631162|Original|hCoV-19^^England|Human|Lighthouse Lab in Milton Keynes|Wellcome Sanger Institute for the COVID-19 Genomics UK (COG-UK) consortium|Davies|United Kingdom

>Spike|hCoV-19/Estonia/ChVir4286/2020|2020-03-00|EPI\_ISL\_457725|Original|hCoV-19^^Estonia|Human|SYNLAB Eesti OU\u0308|Charite Universitatsmedizin Berlin|Muehlemann|Estonia

>Spike|hCoV-19/Wales/PHWC-166869/2020|2020-06-27|EPI\_ISL\_494050|Original|hCoV-19^^Wales|Human|Originating lab|COVID-19 Genomics UK (COG-UK) Consortium|Moore|United Kingdom

>Spike|hCoV-19/Japan/PG-0105/2020|2020-03-00|EPI\_ISL\_684124|Original|hCoV-19^^Japan|Human|Pathogen Genomics Center|Pathogen Genomics Center|Sekizuka|Japan

>Spike|hCoV-19/England/QEUA-9DC866/2020|2020-09-21|EPI\_ISL\_580930|Original|hCoV-19^^England|Human|Lighthouse Lab in Glasgow|Wellcome Sanger Institute for the COVID-19 Genomics UK (COG-UK) consortium|Davies|United Kingdom

>Spike|hCoV-19/Switzerland/BL-ETHZ-250076/2020|2020-08-19|EPI\_ISL\_535599|Original|hCoV-19^^Basel-Landschaft|Human|Viollier AG|Department of Biosystems Science and Engineering|Nadeau|Switzerland

>Spike|hCoV-19/Denmark/DCGC-3073/2020|2020-08-31|EPI\_ISL\_616853|Original|hCoV-19^^Hovedstaden|Human|Department of Virus and Microbiological Special Diagnostics|Albertsen lab|Michaelsen|Denmark

>Spike|hCoV-19/South Africa/KRISP-0492/2020|2020-07-07|EPI\_ISL\_498063|Original|hCoV-19^^KwaZulu-Natal|Human|NHLS-IALCH|KRISP|de Oliveira|South Africa

>Spike|hCoV-19/Australia/VIC10608/2020|2020-08-04|EPI\_ISL\_562986|Original|hCoV-19^^Victoria|Human|Microbiological Diagnostic Unit - Public Health Laboratory (MDU-PHL)|MDU-PHL|Schultz|Australia

>Spike|hCoV-19/England/PORT-2D0113/2020|2020-05-01|EPI\_ISL\_475256|Original|hCoV-19^^England|Human|Centre for Enzyme Innovation|COVID-19 Genomics UK (COG-UK) Consortium|Robson|United Kingdom

>Spike|hCoV-19/Wales/PHWC-24DD2/2020|2020-03-21|EPI\_ISL\_420940|Original|hCoV-19^^Wales|Human|Wales Specialist Virology Centre|Public Health Wales Microbiology Cardiff|Moore|United Kingdom

>Spike|hCoV-19/Hong Kong/VM20002508/2020|2020-02-10|EPI\_ISL\_413494|Original|hCoV-19^^Hong Kong|Human|Princess Margaret Hospital|Hong Kong Department of Health|Mak|China

>Spike|hCoV-19/Scotland/EDB2534/2020|2020-04-24|EPI\_ISL\_439225|Original|hCoV-19^^Scotland|Human|Virology Department|COVID-19 Genomics UK (COG-UK) Consortium|Williams|United Kingdom

>Spike|hCoV-19/Wales/PHWC-497C42/2020|2020-11-25|EPI\_ISL\_726952|Original|hCoV-19^^Wales|Human|Originating lab|COVID-19 Genomics UK (COG-UK) Consortium|Moore|United Kingdom

>Spike|hCoV-19/England/204393754/2020|2020-10-24|EPI\_ISL\_649881|Original|hCoV-19^^England|Human|Respiratory Virus Unit|COVID-19 Genomics UK (COG-UK) Consortium|Platt|United Kingdom

>Spike|hCoV-19/Japan/PG-8732/2020|2020-08-00|EPI\_ISL\_686328|Original|hCoV-19^^Japan|Human|Pathogen Genomics Center|Pathogen Genomics Center|Sekizuka|Japan

>Spike|hCoV-19/England/QEUA-B2F738/2020|2020-11-04|EPI\_ISL\_659970|Original|hCoV-19^^England|Human|Lighthouse Lab in Glasgow|Wellcome Sanger Institute for the COVID-19 Genomics UK (COG-UK) Consortium|Davies|United Kingdom

>Spike|hCoV-19/Iceland/421/2020|2020-03-19|EPI\_ISL\_424445|Original|hCoV-19^^Reykjavik|Human|The National University Hospital of Iceland|deCODE genetics|J\u00f3nsson|Iceland



>Spike|hCoV-19/USA/TX-HMH-MCoV-8190/2020|2020-07-07|EPI\_ISL\_784255|Original|hCoV-19^^Texas|Human|Houston Methodist Hospital|Houston Methodist Hospital|Long|USA

>Spike|hCoV-19/Sweden/20-52714/2020|2020-08-27|EPI\_ISL\_615112|Original|hCoV-19^^Orebro|Human|Orebro klinisk mikrobiologi|The Public Health Agency of Sweden|Svartstr\u00f6m|Sweden

>Spike|hCoV-19/India/MP-NCDC-4867/2020|2020-04-16|EPI\_ISL\_436458|Original|hCoV-19^^Madhya Pradesh|Human|National Centre for Disease control (NCDC)|NCDC/CSIR-IGIB|Singh|India

>Spike|hCoV-19/Guangdong/20SF813/2020|2020-01-28|EPI\_ISL\_428476|Original|hCoV-19^^Guangdong|Human|Guangdong Provincial Center for Diseases Control and Prevention;Guangdong Provincial Institute of Public Health|School of Public Health|Gu|China

>Spike|hCoV-19/Belgium/reg-10191298/2020|2020-10-19|EPI\_ISL\_735202|Original|hCoV-19^^Hannut|Human|UZ Leuven|KU Leuven|Maes|Belgium

>Spike|hCoV-19/USA/WI-UW-2408/2020|2020-12-04|EPI\_ISL\_754661|Original|hCoV-19^^Wisconsin|Human|University of Wisconsin-Madison AIDS Vaccine Research Laboratories|University of Wisconsin-Madison AIDS Vaccine Research Laboratories|Moreno|USA

>Spike|hCoV-19/Scotland/QEUH-9C927D/2020|2020-09-14|EPI\_ISL\_576077|Original|hCoV-19^^Scotland|Human|Lighthouse Lab in Glasgow|Wellcome Sanger Institute for the COVID-19 Genomics UK (COG-UK) consortium|Davies|United Kingdom

>Spike|hCoV-19/England/CAMC-AEACOE/2020|2020-10-26|EPI\_ISL\_633295|Original|hCoV-19^^England|Human|Lighthouse Lab in Cambridge|Wellcome Sanger Institute for the COVID-19 Genomics UK (COG-UK) consortium|Davies|United Kingdom

>Spike|hCoV-19/USA/WI-UW-728/2020|2020-07-01|EPI\_ISL\_491403|Original|hCoV-19^^Wisconsin|Human|University of Wisconsin-Madison AIDS Vaccine Research Laboratories|University of Wisconsin-Madison AIDS Vaccine Research Laboratories|Baczenas|USA

>Spike|hCoV-19/Northern Ireland/NIRE-FB19C/2020|2020-03-25|EPI\_ISL\_448943|Original|hCoV-19^^Northern Ireland|Human|Regional Virus Laboratory|COVID-19 Genomics UK (COG-UK) Consortium|Fairley|United Kingdom

>Spike|hCoV-19/England/QEUH-9FA8AE/2020|2020-09-28|EPI\_ISL\_588103|Original|hCoV-19^^England|Human|Lighthouse Lab in Glasgow|Wellcome Sanger Institute for the COVID-19 Genomics UK (COG-UK) consortium|Davies|United Kingdom

>Spike|hCoV-19/Denmark/DCGC-13125/2020|2020-11-30|EPI\_ISL\_712139|Original|hCoV-19^^Hovedstaden|Human|Department of Virus and Microbiological Special Diagnostics|Albertsen Lab|Michaelsen|Denmark

>Spike|hCoV-19/England/QEUH-9F772C/2020|2020-09-27|EPI\_ISL\_595698|Original|hCoV-19^^England|Human|Oxford Viromics|COVID-19 Genomics UK (COG-UK) Consortium|Golubchik|United Kingdom

>Spike|hCoV-19/England/ALDP-B76CE8/2020|2020-11-12|EPI\_ISL\_723804|Original|hCoV-19^^England|Human|Oxford Viromics|COVID-19 Genomics UK (COG-UK) Consortium|Golubchik|United Kingdom

>Spike|hCoV-19/Australia/VIC731/2020|2020-03-30|EPI\_ISL\_427010|Original|hCoV-19^^Victoria|Human|Victorian Infectious Diseases Reference Laboratory (VIDRL)|Microbiological Diagnostic Unit Public Health Laboratory and Victorian Infectious Diseases Reference Laboratory|Schultz|Australia

>Spike|hCoV-19/Spain/VC-FISABIO-614/2020|2020-03-31|EPI\_ISL\_455732|Original|hCoV-19^^Comunitat Valenciana|Human|Servicio de Microbiologia. Hospital Clinico Universitario de Valencia|Sequencing and Bioinformatics Service and Molecular Epidemiology Research Group. FISABIO-Public Health|Gonzalez-Candelas|Spain

>Spike|hCoV-19/USA/TX-HMH-MCoV-13335/2020|2020-08-24|EPI\_ISL\_788483|Original|hCoV-19^^Texas|Human|Houston Methodist Hospital|Houston Methodist Hospital|Long|USA

>Spike|hCoV-19/Wales/PHWC-2764D/2020|2020-03-30|EPI\_ISL\_432211|Original|hCoV-19^^Wales|Human|Wales Specialist Virology Centre|Public Health Wales Microbiology Cardiff|Moore|United Kingdom

>Spike|hCoV-19/Wales/PHWC-485281/2020|2020-10-24|EPI\_ISL\_627028|Original|hCoV-19^^Wales|Human|Wales Specialist Virology Centre Sequencing lab|COVID-19 Genomics UK (COG-UK) Consortium|Moore|United Kingdom

>Spike|hCoV-19/USA/TX-HMH-5000/2020|2020-06-22|EPI\_ISL\_544448|Original|hCoV-19^^Texas|Human|Houston Methodist Hospital|Houston Methodist Hospital|Long|USA

>Spike|hCoV-19/USA/VA-DCLS-2170/2020|2020-11-06|EPI\_ISL\_677199|Original|hCoV-19^^Virginia|Human|Virginia Division of Consolidated Laboratory Services|Virginia Division of Consolidated Laboratory Services|St. Jacques|USA

>Spike|hCoV-19/England/OXON-B2999/2020|2020-04-08|EPI\_ISL\_534783|Original|hCoV-19^^England|Human|Oxford Viromics|COVID-19 Genomics UK (COG-UK) Consortium|Golubchik|United Kingdom

>Spike|hCoV-19/England/LIVE-9EC12/2020|2020-04-03|EPI\_ISL\_453377|Original|hCoV-19^^England|Human|Liverpool Clinical Laboratories|COVID-19 Genomics UK (COG-UK) Consortium|Haldenby|United Kingdom

>Spike|hCoV-19/Denmark/DCGC-20777/2020|2020-12-21|EPI\_ISL\_759356|Original|hCoV-19^^Syddanmark|Human|Department of Virus and Microbiological Special Diagnostics|Albertsen Lab|Michaelsen|Denmark

>Spike|hCoV-19/England/ALDP-A957B6/2020|2020-10-20|EPI\_ISL\_624892|Original|hCoV-19^^England|Human|Lighthouse Lab in Alderley Park|Wellcome Sanger Institute for the COVID-19 Genomics UK (COG-UK) consortium|Davies|United Kingdom

>Spike|hCoV-19/England/QEUEH-A5DE5B/2020|2020-10-12|EPI\_ISL\_597429|Original|hCoV-19^^England|Human|Lighthouse Lab in Glasgow|Wellcome Sanger Institute for the COVID-19 Genomics UK (COG-UK) consortium|Davies|United Kingdom

>Spike|hCoV-19/Wales/PHWC-4A29B6/2020|2020-12-10|EPI\_ISL\_743963|Original|hCoV-19^^Wales|Human|Wales Specialist Virology Centre Sequencing lab|COVID-19 Genomics UK (COG-UK) Consortium|Moore|United Kingdom

>Spike|hCoV-19/South Korea/KCDC2638/2020|2020-07-08|EPI\_ISL\_515040|Original|hCoV-19^^South Korea|Human|Division of Viral Diseases|Division of Viral Diseases|Kim|South Korea

>Spike|hCoV-19/England/20130071404/2020|2020-03-23|EPI\_ISL\_423659|Original|hCoV-19^^England|Human|Respiratory Virus Unit|Respiratory Virus Unit|Platt|United Kingdom

>Spike|hCoV-19/USA/WA-S2848/2020|2020-09-18|EPI\_ISL\_574690|Original|hCoV-19^^Washington|Human|Seattle Flu Study|Seattle Flu Study|Lee|USA

>Spike|hCoV-19/England/CAMB-7BC0C/2020|2020-04-05|EPI\_ISL\_442089|Original|hCoV-19^^England|Human|Department of Pathology|Wellcome Sanger Institute for the COVID-19 Genomics UK (COG-UK) consortium|Amato|United Kingdom

>Spike|hCoV-19/Belgium/reg-0426605/2020|2020-04-26|EPI\_ISL\_734655|Original|hCoV-19^^Estaimbourg|Human|UZ Leuven|KU Leuven|Maes|Belgium

>Spike|hCoV-19/Switzerland/VD-ETHZ-321366/2020|2020-10-13|EPI\_ISL\_603615|Original|hCoV-19^^Vaud|Human|Viollier AG|Department of Biosystems Science and Engineering|Nadeau|Switzerland

>Spike|hCoV-19/USA/LA-EVTL261/2020|2020-08-22|EPI\_ISL\_574395|Original|hCoV-19^^Louisiana|Human|LSUHS Emerging Viral Threat Laboratory|Microbial Genome Sequencing Center|Kamil|USA

>Spike|hCoV-19/England/ALDP-A850CD/2020|2020-10-16|EPI\_ISL\_610554|Original|hCoV-19^^England|Human|Lighthouse Lab in Alderley Park|Wellcome Sanger Institute for the COVID-19 Genomics UK (COG-UK) consortium|Davies|United Kingdom

>Spike|hCoV-19/Australia/VIC5489/2020|2020-07-20|EPI\_ISL\_520235|Original|hCoV-19^^Victoria|Human|Microbiological Diagnostic Unit - Public Health Laboratory (MDU-PHL)|MDU-PHL|Schultz|Australia

>Spike|hCoV-19/USA/NY-Wadsworth-243895-01/2020|2020-10-12|EPI\_ISL\_734350|Original|hCoV-19^^New York|Human|Wadsworth Center|Wadsworth Center|Lasek-Nesselquist|USA

>Spike|hCoV-19/England/QEUEH-99C149/2020|2020-08-27|EPI\_ISL\_559785|Original|hCoV-19^^England|Human|Oxford Viromics|COVID-19 Genomics UK (COG-UK) Consortium|Golubchik|United Kingdom

>Spike|hCoV-19/Australia/VIC5693/2020|2020-07-20|EPI\_ISL\_518499|Original|hCoV-19^^Victoria|Human|Microbiological Diagnostic Unit - Public Health Laboratory (MDU-PHL)|MDU-PHL|Schultz|Australia

>Spike|hCoV-19/England/QEUEH-787C60/2020|2020-07-15|EPI\_ISL\_533174|Original|hCoV-19^^England|Human|Lighthouse Lab in Glasgow|Wellcome Sanger Institute for the COVID-19 Genomics UK (COG-UK) consortium|Davies|United Kingdom

>Spike|hCoV-19/England/QEUA-960ACB/2020|2020-08-04|EPI\_ISL\_531972|Original|hCoV-19^^England|Human|Lighthouse Lab in Glasgow|Wellcome Sanger Institute for the COVID-19 Genomics UK (COG-UK) consortium|Davies|United Kingdom

>Spike|hCoV-19/Switzerland/BE-ETHZ-321092/2020|2020-10-14|EPI\_ISL\_737705|Original|hCoV-19^^Bern|Human|Viollier AG|Department of Biosystems Science and Engineering|Nadeau|Switzerland

>Spike|hCoV-19/USA/LA-EVTL1168/2020|2020-12-10|EPI\_ISL\_768437|Original|hCoV-19^^Louisiana|Human|LSUHS Emerging Viral Threat Laboratory|Microbial Genome Sequencing Center|Kamil|USA

>Spike|hCoV-19/Japan/PG-2848/2020|2020-05-00|EPI\_ISL\_690634|Original|hCoV-19^^Japan|Human|Pathogen Genomics Center|Pathogen Genomics Center|Sekizuka|Japan

>Spike|hCoV-19/Wales/PHWC-497BFA/2020|2020-11-24|EPI\_ISL\_726947|Original|hCoV-19^^Wales|Human|Originating lab|COVID-19 Genomics UK (COG-UK) Consortium|Moore|United Kingdom

>Spike|hCoV-19/USA/TX-HMH-MCoV-15268/2020|2020-10-19|EPI\_ISL\_786752|Original|hCoV-19^^Texas|Human|Houston Methodist Hospital|Houston Methodist Hospital|Long|USA

>Spike|hCoV-19/Chile/RM-82478/2020|2020-05-29|EPI\_ISL\_746792|Original|hCoV-19^^Region Metropolitana de Santiago|Human|Genetica Molecular and Subdepartamento de Virologia ISP Chile|Instituto de Salud Publica de Chile|Tognarelli|Chile

>Spike|hCoV-19/USA/WA-UW33/2020|2020-03-08|EPI\_ISL\_414620|Original|hCoV-19^^Washington|Human|UW Virology Lab|UW Virology Lab|Roychoudhury|USA

>Spike|hCoV-19/France/PAC-IHU-0030/2020|2020-03-17|EPI\_ISL\_569256|Original|hCoV-19^^Provence-Alpes-C\u00f4te-d\u00a0Azur|Human|MEPHI|MEPHI|Levasseur|France

>Spike|hCoV-19/Australia/VIC2364/2020|2020-06-25|EPI\_ISL\_522084|Original|hCoV-19^^Victoria|Human|Victorian Infectious Diseases Reference Laboratory (VIDRL)|VIDRL and MDU-PHL|Schultz|Australia

>Spike|hCoV-19/Wales/PHWC-16A944/2020|2020-09-07|EPI\_ISL\_560128|Original|hCoV-19^^Wales|Human|Wales Specialist Virology Centre Sequencing lab|COVID-19 Genomics UK (COG-UK) Consortium|Moore|United Kingdom

>Spike|hCoV-19/Australia/TAS115/2020|2020-04-08|EPI\_ISL\_522581|Original|hCoV-19^^Tasmania|Human|Royal Hobart Hospital Microbiology Department|MDU-PHL|Schultz|Australia

>Spike|hCoV-19/England/BRIS-125F43/2020|2020-03-30|EPI\_ISL\_443962|Original|hCoV-19^^England|Human|PHE South West Regional Laboratory|Wellcome Sanger Institute for the COVID-19 Genomics UK (COG-UK) consortium|Amato|United Kingdom

>Spike|hCoV-19/Australia/VIC5074/2020|2020-07-17|EPI\_ISL\_519877|Original|hCoV-19^^Victoria|Human|Microbiological Diagnostic Unit - Public Health Laboratory (MDU-PHL)|MDU-PHL|Schultz|Australia

>Spike|hCoV-19/England/ALDP-A9277D/2020|2020-10-19|EPI\_ISL\_611050|Original|hCoV-19^^England|Human|Lighthouse Lab in Alderley Park|Wellcome Sanger Institute for the COVID-19 Genomics UK (COG-UK) consortium|Davies|United Kingdom

>Spike|hCoV-19/Iceland/494/2020|2020-03-20|EPI\_ISL\_424516|Original|hCoV-19^^Reykjavik|Human|The National University Hospital of Iceland|deCODE genetics|J\u00f3nsson|Iceland

>Spike|hCoV-19/Kenya/C2579/2020|2020-04-25|EPI\_ISL\_457882|Original|hCoV-19^^Kenya|Human|KEMRI-CGMR-C|KEMRI-Wellcome Trust Research Programme/KEMRI-CGMR-C Kilifi|Githinji|Kenya

>Spike|hCoV-19/England/MILK-9F086C/2020|2020-09-24|EPI\_ISL\_589609|Original|hCoV-19^^England|Human|Lighthouse Lab in Milton Keynes|Wellcome Sanger Institute for the COVID-19 Genomics UK (COG-UK) consortium|Davies|United Kingdom

>Spike|hCoV-19/USA/WA-S442/2020|2020-03-26|EPI\_ISL\_434202|Original|hCoV-19^^Washington|Human|Washington State Department of Health|Seattle Flu Study|Bedford|USA

>Spike|hCoV-19/Denmark/DCGC-19011/2020|2020-12-07|EPI\_ISL\_748510|Original|hCoV-19^^Sjaelland|Human|Department of Virus and Microbiological Special Diagnostics|Albertsen Lab|Michaelsen|Denmark

>Spike|hCoV-19/Spain/PV-IBV-001587/2020|2020-03-12|EPI\_ISL\_467103|Original|hCoV-19^^Basque Country|Human|Hospital Universitario Araba. Vitoria-Gasteiz|SeqCOVID-SPAIN consortium|IBV (CSIC) |Comas|Spain

>Spike|hCoV-19/Northern Ireland/NIRE-FC80F/2020|2020-04-21|EPI\_ISL\_459357|Original|hCoV-19^^Northern Ireland|Human|Regional Virus Laboratory|Wellcome Sanger Institute for the COVID-19 Genomics UK (COG-UK) consortium|Davies|United Kingdom

>Spike|hCoV-19/Spain/MD-IBV-006352/2020|2020-05-14|EPI\_ISL\_510103|Original|hCoV-19^^Madrid|Human|Hospital General Universitario Gregorio Mara\u00f1\u00f3n|SeqCOVID-SPAIN consortium/IBV (CSIC)|Comas|Spain

>Spike|hCoV-19/England/QEUEH-A0C583/2020|2020-09-30|EPI\_ISL\_584989|Original|hCoV-19^^England|Human|Quadram Institute Bioscience|COVID-19 Genomics UK (COG-UK) Consortium|Alikhan|United Kingdom

>Spike|hCoV-19/England/CAMC-A585D3/2020|2020-10-07|EPI\_ISL\_596994|Original|hCoV-19^^England|Human|Lighthouse Lab in Cambridge|Wellcome Sanger Institute for the COVID-19 Genomics UK (COG-UK) consortium|Davies|United Kingdom

>Spike|hCoV-19/USA/WA-UW-47422/2020|2020-12-11|EPI\_ISL\_776744|Original|hCoV-19^^Washington|Human|UW Virology Lab|UW Virology Lab|Roychoudhury|USA

>Spike|hCoV-19/DRC/7200/2020|2020-05-13|EPI\_ISL\_514112|Original|hCoV-19^^Kinshasa|Human|Viral Respiratory Lab|Pathogen Sequencing Lab|Lokilo|Democratic Republic of the Congo

>Spike|hCoV-19/England/CAMB-77BC7/2020|2020-04-01|EPI\_ISL\_440832|Original|hCoV-19^^England|Human|Department of Pathology|Wellcome Sanger Institute for the COVID-19 Genomics UK (COG-UK) consortium|Amato|United Kingdom

>Spike|hCoV-19/Australia/NSW1373/2021|2021-01-01|EPI\_ISL\_767939|Original|hCoV-19^^New South Wales|Human|Sydney South West Pathology Service (SSWPS) - Liverpool Hospital - NSW Health Pathology|NSW Health Pathology - Institute of Clinical Pathology and Medical Research; Westmead Hospital; University of Sydney|Gall|Australia

>Spike|hCoV-19/Chile/RM-CMM-0000E/2020|2020-03-19|EPI\_ISL\_629026|Original|hCoV-19^^Region Metropolitana de Santiago|Human|Centro de Biotecnolog\u00eda Vegetal|Center for Mathematical Modeling and Center for Genome Regulation. Santiago|Palma V\u00e9jares|Chile

>Spike|hCoV-19/Jordan/AM-ALSR-3991/2020|2020-10-03|EPI\_ISL\_636354|Original|hCoV-19^^Amman|Human|Biolab Diagnostic Laboratories|Andersen lab at Scripps Research|Gangavarapu|Jordan

>Spike|hCoV-19/USA/NY-Wadsworth-199767-01/2020|2020-08-17|EPI\_ISL\_677048|Original|hCoV-19^^New York|Human|Wadsworth Center|Wadsworth Center|Lasek-Nesselquist|USA

>Spike|hCoV-19/England/ALDP-9ED3BC/2020|2020-05-05|EPI\_ISL\_589333|Original|hCoV-19^^England|Human|Lighthouse Lab in Alderley Park|Wellcome Sanger Institute for the COVID-19 Genomics UK (COG-UK) consortium|Davies|United Kingdom

>Spike|hCoV-19/England/ALDP-BE921B/2020|2020-12-03|EPI\_ISL\_708980|Original|hCoV-19^^England|Human|Lighthouse Lab in Alderley Park|Wellcome Sanger Institute for the COVID-19 Genomics UK (COG-UK) Consortium|Davies|United Kingdom

>Spike|hCoV-19/USA/WA-UW-4563/2020|2020-03-30|EPI\_ISL\_515271|Original|hCoV-19^^Washington|Human|University of Washington Virology Lab|University of Washington Virology Lab|Roychoudhury|USA

>Spike|hCoV-19/England/MILK-9A91D0/2020|2020-08-31|EPI\_ISL\_551220|Original|hCoV-19^^England|Human|Lighthouse Lab in Milton Keynes|Wellcome Sanger Institute for the COVID-19 Genomics UK (COG-UK) consortium|Davies|United Kingdom

>Spike|hCoV-19/USA/NY-PV09327/2020|2020-03-18|EPI\_ISL\_450016|Original|hCoV-19^^New York|Human|MSHS Clinical Microbiology Laboratories|MSHS Pathogen Surveillance Program|van Bakel|USA

>Spike|hCoV-19/England/QEUEH-B2DA31/2020|2020-11-03|EPI\_ISL\_646975|Original|hCoV-19^^England|Human|Lighthouse Lab in Glasgow|Wellcome Sanger Institute for the COVID-19 Genomics UK (COG-UK) Consortium|Davies|United Kingdom

>Spike|hCoV-19/Wales/PHWC-482A8C/2020|2020-10-20|EPI\_ISL\_613263|Original|hCoV-19^^Wales|Human|Wales Specialist Virology Centre Sequencing lab|COVID-19 Genomics UK (COG-UK) Consortium|Moore|United Kingdom

>Spike|hCoV-19/Australia/WA49/2020|2020-03-31|EPI\_ISL\_470866|Original|hCoV-19^^Western Australia|Human|PathWest Laboratory Medicine WA|PathWest Laboratory Medicine WA|Sikazwe|Australia

>Spike|hCoV-19/USA/MN-MDH-1940/2020|2020-09-22|EPI\_ISL\_613486|Original|hCoV-19^^Minnesota|Human|Public Health Laboratory - Infectious Disease Lab|Minnesota Department of Health|Lorentz|USA

>Spike|hCoV-19/England/CAMC-BBCD2F/2020|2020-11-21|EPI\_ISL\_679277|Original|hCoV-19^^England|Human|Queens Medical Centre|COVID-19 Genomics UK (COG-UK) Consortium|Loose|United Kingdom

>Spike|hCoV-19/Finland/13M64/2020|2020-03-13|EPI\_ISL\_418394|Original|hCoV-19^^Finland|Human|Department of Virology and Immunology|Department of Virology|Smura|Finland

>Spike|hCoV-19/England/PORT-2D1BBA/2020|2020-04-02|EPI\_ISL\_507131|Original|hCoV-19^^England|Human|Centre for Enzyme Innovation|COVID-19 Genomics UK (COG-UK) Consortium|Robson|United Kingdom

>Spike|hCoV-19/Scotland/EDB6906/2020|2020-05-01|EPI\_ISL\_526512|Original|hCoV-19^^Scotland|Human|Virology Department|COVID-19 Genomics UK (COG-UK) Consortium|Williams|United Kingdom

>Spike|hCoV-19/India/MH-ACTREC-690/2020|2020-09-24|EPI\_ISL\_700315|Original|hCoV-19^^Maharashtra|Human|Hematopathology Laboratory|Hematopathology Laboratory|Patkar|India

>Spike|hCoV-19/Finland/24SS1E11/2020|2020-09-24|EPI\_ISL\_759830|Original|hCoV-19^^Uusimaa|Human|Department of Virology and Immunology|Department of Virology|Smura|Finland

>Spike|hCoV-19/England/CAMB-1BB0D6/2020|2020-11-11|EPI\_ISL\_664551|Original|hCoV-19^^England|Human|Department of Pathology|COVID-19 Genomics UK (COG-UK) Consortium|Goodfellow|United Kingdom

>Spike|hCoV-19/USA/MI-MDHHS-SC20747/2020|2020-04-30|EPI\_ISL\_471768|Original|hCoV-19^^Michigan|Human|Michigan Department of Health and Human Services|Michigan Department of Health and Human Services|Blankenship|USA

>Spike|hCoV-19/England/ALDP-647D3D/2020|2020-07-04|EPI\_ISL\_558203|Original|hCoV-19^^England|Human|Lighthouse Lab in Alderley Park|Wellcome Sanger Institute for the COVID-19 Genomics UK (COG-UK) consortium|Davies|United Kingdom

>Spike|hCoV-19/USA/CA-QDX-1676/2020|2020-03-19|EPI\_ISL\_603925|Original|hCoV-19^^California|Human|Quest Diagnostics|Quest Diagnostics|Kagan|USA

>Spike|hCoV-19/USA/TX-HMH-MCoV-18333/2020|2020-11-18|EPI\_ISL\_784681|Original|hCoV-19^^Texas|Human|Houston Methodist Hospital|Houston Methodist Hospital|Long|USA

>Spike|hCoV-19/England/ALDP-7003E2/2020|2020-06-29|EPI\_ISL\_557585|Original|hCoV-19^^England|Human|Lighthouse Lab in Alderley Park|Wellcome Sanger Institute for the COVID-19 Genomics UK (COG-UK) consortium|Davies|United Kingdom

>Spike|hCoV-19/England/QEUA-A9F41F/2020|2020-10-20|EPI\_ISL\_611332|Original|hCoV-19^^England|Human|Lighthouse Lab in Glasgow|Wellcome Sanger Institute for the COVID-19 Genomics UK (COG-UK) consortium|Davies|United Kingdom

>Spike|hCoV-19/USA/MN67-MDH67/2020|2020-03-14|EPI\_ISL\_419395|Original|hCoV-19^^Minnesota|Human|Minnesota Department of Health|Minnesota Department of Health|Wang|USA

>Spike|hCoV-19/Spain/RI-IBV-99010969/2020|2020-11-05|EPI\_ISL\_732797|Original|hCoV-19^^La Rioja|Human|Centro de Investigaci\u00f3n Biom\u00e9dica de La Rioja - Hospital San Pedro Logro\u00f1o|SeqCOVID-SPAIN consortium|IBV (CSIC)|Comas|Spain

>Spike|hCoV-19/Scotland/CVR2316/2020|2020-04-13|EPI\_ISL\_448178|Original|hCoV-19^^Scotland|Human|West of Scotland Specialist Virology Centre|COVID-19 Genomics UK (COG-UK) Consortium|Robertson|United Kingdom

>Spike|hCoV-19/Wales/PHWC-496A67/2020|2020-11-23|EPI\_ISL\_726677|Original|hCoV-19^^Wales|Human|Originating lab|COVID-19 Genomics UK (COG-UK) Consortium|Moore|United Kingdom

>Spike|hCoV-19/USA/WI-GMF-19220/2020|2020-09-08|EPI\_ISL\_547794|Original|hCoV-19^^Wisconsin|Human|Gundersen Molecular Diagnostics Laboratory|Kabara Cancer Research Institute|Kenny|USA

>Spike|hCoV-19/USA/TX-DSHS-1753/2020|2020-06-23|EPI\_ISL\_710401|Original|hCoV-19^^Texas|Human|Texas Department of State Health Services|Texas Department of State Health Services|Rahman|USA

>Spike|hCoV-19/England/20144021704/2020|2020-03-29|EPI\_ISL\_465987|Original|hCoV-19^^England|Human|Respiratory Virus Unit|Respiratory Virus Unit|Platt|United Kingdom

>Spike|hCoV-19/England/MILK-CA9902/2020|2020-12-17|EPI\_ISL\_762323|Original|hCoV-19^^England|Human|Lighthouse Lab in Milton Keynes|Wellcome Sanger Institute for the COVID-19 Genomics UK (COG-UK) Consortium|Davies|United Kingdom

>Spike|hCoV-19/Switzerland/SZ-ETHZ-100062/2020|2020-03-12|EPI\_ISL\_466984|Original|hCoV-19^^Schwyz|Human|Viollier AG|Department of Biosystems Science and Engineering|Nadeau|Switzerland

>Spike|hCoV-19/England/QEUH-9C8038/2020|2020-09-11|EPI\_ISL\_567258|Original|hCoV-19^^England|Human|Lighthouse Lab in Glasgow|Wellcome Sanger Institute for the COVID-19 Genomics UK (COG-UK) consortium|Davies|United Kingdom

>Spike|hCoV-19/USA/ME-HETL-J0076/2020|2020-03-18|EPI\_ISL\_513487|Original|hCoV-19^^Maine|Human|Maine HETL|Tewhey Lab|Tewhey|USA

>Spike|hCoV-19/USA/TX-HMH-5471/2020|2020-06-26|EPI\_ISL\_544797|Original|hCoV-19^^Texas|Human|Houston Methodist Hospital|Houston Methodist Hospital|Long|USA

>Spike|hCoV-19/Australia/WA467/2020|2020-04-03|EPI\_ISL\_708761|Original|hCoV-19^^Western Australia|Human|PathWest Laboratory Medicine WA|PathWest Laboratory Medicine WA Microbial Surveillance Unit|Sikazwe|Australia

>Spike|hCoV-19/Scotland/QEUH-A4B6B2/2020|2020-10-08|EPI\_ISL\_628471|Original|hCoV-19^^Scotland|Human|Oxford Viromics|COVID-19 Genomics UK (COG-UK) Consortium|Golubchik|United Kingdom

>Spike|hCoV-19/England/BRIS-18532C1/2020|2020-04-02|EPI\_ISL\_492334|Original|hCoV-19^^England|Human|PHE South West Regional Laboratory|Wellcome Sanger Institute for the COVID-19 Genomics UK (COG-UK) consortium|Davies|United Kingdom

>Spike|hCoV-19/Uruguay/UY-NYUMC857/2020|2020-03-23|EPI\_ISL\_457953|Original|hCoV-19^^Montevideo|Human|Laboratorio de Biología Molecular Asociada España|Departments of Pathology and Medicine|Maurano|Uruguay

>Spike|hCoV-19/Denmark/DCGC-19407/2020|2020-12-07|EPI\_ISL\_748224|Original|hCoV-19^^Syddanmark|Human|Department of Virus and Microbiological Special Diagnostics|Albertsen Lab|Michaelsen|Denmark

>Spike|hCoV-19/USA/WA-UW-1700/2020|2020-03-20|EPI\_ISL\_424222|Original|hCoV-19^^Washington|Human|UW Virology Lab|UW Virology Lab|Roychoudhury|USA

>Spike|hCoV-19/Spain/NC-IBV-001390/2020|2020-03-17|EPI\_ISL\_452511|Original|hCoV-19^^Navarra|Human|Clínica Universidad de Navarra. Servicio de Enfermedades Infecciosas y Microbiología|SeqCOVID-SPAIN consortium/IBV (CSIC)|Comas|Spain

>Spike|hCoV-19/Netherlands/ZH-EMC-467/2020|2020-08-17|EPI\_ISL\_523803|Original|hCoV-19^^Zuid Holland|Human|Dutch COVID-19 response team|Erasmus Medical Center|Oude Munnink|Netherlands

>Spike|hCoV-19/Denmark/DCGC-16837/2020|2020-12-14|EPI\_ISL\_750512|Original|hCoV-19^^Midtjylland|Human|Department of Virus and Microbiological Special Diagnostics|Albertsen Lab|Michaelsen|Denmark

>Spike|hCoV-19/USA/NM-NMDOH-2020329076/2020|2020-09-04|EPI\_ISL\_644598|Original|hCoV-19^^New Mexico|Human|New Mexico Department of Health Scientific Laboratory|New Mexico Department of Health Scientific Laboratory|Johnson|USA

>Spike|hCoV-19/USA/WI-UW-1812/2020|2020-09-09|EPI\_ISL\_605684|Original|hCoV-19^^Wisconsin|Human|University of Wisconsin-Madison AIDS Vaccine Research Laboratories|University of Wisconsin-Madison AIDS Vaccine Research Laboratories|Baczenas|USA

>Spike|hCoV-19/Japan/PG-4326/2020|2020-07-00|EPI\_ISL\_692554|Original|hCoV-19^^Japan|Human|Pathogen Genomics Center|Pathogen Genomics Center|Sekizuka|Japan

>Spike|hCoV-19/England/ALDP-A2E961/2020|2020-10-05|EPI\_ISL\_587302|Original|hCoV-19^^England|Human|Lighthouse Lab in Alderley Park|Wellcome Sanger Institute for the COVID-19 Genomics UK (COG-UK) consortium|Davies|United Kingdom

>Spike|hCoV-19/Wales/MILK-9F1A29/2020|2020-09-23|EPI\_ISL\_600926|Original|hCoV-19^^Wales|Human|Lighthouse Lab in Milton Keynes|Wellcome Sanger Institute for the COVID-19 Genomics UK (COG-UK) consortium|Davies|United Kingdom

>Spike|hCoV-19/USA/UT-01845/2020|2020-04-13|EPI\_ISL\_470687|Original|hCoV-19^^Utah|Human|Utah Public Health Laboratory|Utah Public Health Laboratory|Young|USA

>Spike|hCoV-19/England/CAMC-B325DE/2020|2020-11-05|EPI\_ISL\_659203|Original|hCoV-19^^England|Human|Lighthouse Lab in Cambridge|Wellcome Sanger Institute for the COVID-19 Genomics UK (COG-UK) Consortium|Davies|United Kingdom

>Spike|hCoV-19/Wales/PHWC-499FDE/2020|2020-11-26|EPI\_ISL\_727478|Original|hCoV-19^^Wales|Human|Originating lab|COVID-19 Genomics UK (COG-UK) Consortium|Moore|United Kingdom

>Spike|hCoV-19/England/ALDP-A682F7/2020|2020-10-12|EPI\_ISL\_608904|Original|hCoV-19^^England|Human|Lighthouse Lab in Alderley Park|Wellcome Sanger Institute for the COVID-19 Genomics UK (COG-UK) consortium|Davies|United Kingdom

>Spike|hCoV-19/England/SHEF-10D174C/2020|2020-12-19|EPI\_ISL\_763429|Original|hCoV-19^^England|Human|Virology Department|COVID-19 Genomics UK (COG-UK) Consortium|de Silva|United Kingdom

>Spike|hCoV-19/Senegal/9369/2020|2020-04-25|EPI\_ISL\_486863|Original|hCoV-19^^Dakar|Human|Institut Pasteur Dakar|Institut Pasteur de Dakar|Dia|Senegal

>Spike|hCoV-19/USA/FL-BPHL-1585/2020|2020-03-21|EPI\_ISL\_568683|Original|hCoV-19^^Florida|Human|Florida Bureau of Public Health Laboratories|Florida Bureau of Public Health Laboratories|Blanton|USA

>Spike|hCoV-19/USA/FL-BPHL-0652/2020|2020-04-06|EPI\_ISL\_508856|Original|hCoV-19^^Florida|Human|Florida Bureau of Public Health Laboratories|Florida Bureau of Public Health Laboratories|Blanton|USA

>Spike|hCoV-19/England/QEUEH-9F4B50/2020|2020-09-24|EPI\_ISL\_588439|Original|hCoV-19^^England|Human|Lighthouse Lab in Glasgow|Wellcome Sanger Institute for the COVID-19 Genomics UK (COG-UK) consortium|Davies|United Kingdom

>Spike|hCoV-19/England/QEUEH-9C7E02/2020|2020-09-11|EPI\_ISL\_567105|Original|hCoV-19^^England|Human|Lighthouse Lab in Glasgow|Wellcome Sanger Institute for the COVID-19 Genomics UK (COG-UK) consortium|Davies|United Kingdom

>Spike|hCoV-19/Portugal/PT1089/2020|2020-03-27|EPI\_ISL\_511636|Original|hCoV-19^^Portugal|Human|Instituto Nacional de Saude (INSA)|Instituto Nacional de Saude (INSA)|Borges|Portugal

>Spike|hCoV-19/England/20169005704/2020|2020-04-17|EPI\_ISL\_465183|Original|hCoV-19^^England|Human|Respiratory Virus Unit|Respiratory Virus Unit|Platt|United Kingdom

>Spike|hCoV-19/Switzerland/ZH-ETHZ-420644/2020|2020-12-23|EPI\_ISL\_768303|Original|hCoV-19^^Zurich|Human|Viollier AG|Department of Biosystems Science and Engineering|Nadeau|Switzerland

>Spike|hCoV-19/Wales/ALDP-C39A13/2020|2020-12-07|EPI\_ISL\_767180|Original|hCoV-19^^Wales|Human|Lighthouse Lab in Alderley Park|Wellcome Sanger Institute for the COVID-19 Genomics UK (COG-UK) Consortium|Davies|United Kingdom

>Spike|hCoV-19/USA/MA-MASPHL-00168/2020|2020-04-03|EPI\_ISL\_791633|Original|hCoV-19^^Massachusetts|Human|Massachusetts State Public Health Laboratory|Infectious Disease Program|Park|USA

>Spike|hCoV-19/Wales/PHWC-169602/2020|2020-07-15|EPI\_ISL\_512486|Original|hCoV-19^^Wales|Human|Wales Specialist Virology Centre Sequencing lab|COVID-19 Genomics UK (COG-UK) Consortium|Moore|United Kingdom

>Spike|hCoV-19/USA/TX-HMH-886/2020|2020-04-15|EPI\_ISL\_545899|Original|hCoV-19^^Texas|Human|Houston Methodist Hospital|Houston Methodist Hospital|Long|USA

>Spike|hCoV-19/Beijing/DT-travelHU01/2020|2020-03-19|EPI\_ISL\_452349|Original|hCoV-19^^Beijing|Human|Laboratory of Infectious Diseases Center of Beijing Ditan Hospital|Laboratory of Infectious Diseases Center of Beijing Ditan Hospital|Yang|China

>Spike|hCoV-19/France/OCC-40/2020|2020-06-11|EPI\_ISL\_593855|Original|hCoV-19^^Occitanie|Human|CHU Purpan - Laboratoire de Virologie - Institut F\u00e9d\u00e9ratif de Biologie|CHU Purpan - Laboratoire de Virologie - Institut F\u00e9d\u00e9ratif de Biologie|Latour|France

>Spike|hCoV-19/USA/MI-MDHHS-SC21545/2020|2020-03-20|EPI\_ISL\_516272|Original|hCoV-19^^Michigan|Human|Michigan Department of Health and Human Services|Michigan Department of Health and Human Services|Blankenship|USA

>Spike|hCoV-19/Wales/PHWC-4A632D/2020|2020-12-16|EPI\_ISL\_763774|Original|hCoV-19^^Wales|Human|Wales Specialist Virology Centre Sequencing lab|COVID-19 Genomics UK (COG-UK) Consortium|Moore|United Kingdom

>Spike|hCoV-19/USA/CA-CSMC81/2020|2020-04-04|EPI\_ISL\_475697|Original|hCoV-19^^California|Human|Cedars-Sinai Medical Center|Cedars-Sinai Medical Center|Zhang|USA

>Spike|hCoV-19/Latvia/164/2020|2020-09-09|EPI\_ISL\_639661|Original|hCoV-19^^Latvia|Human|E. Gulbja Laboratorija|Latvian Biomedical Research and Study Centre|Zrelavs|Latvia

>Spike|hCoV-19/England/MILK-A7BF27/2020|2020-10-15|EPI\_ISL\_607435|Original|hCoV-19^^England|Human|Lighthouse Lab in Milton Keynes|Wellcome Sanger Institute for the COVID-19 Genomics UK (COG-UK) consortium|Davies|United Kingdom

>Spike|hCoV-19/England/CAMC-A8242E/2020|2020-10-10|EPI\_ISL\_610765|Original|hCoV-19^^England|Human|Lighthouse Lab in Cambridge|Wellcome Sanger Institute for the COVID-19 Genomics UK (COG-UK) consortium|Davies|United Kingdom

>Spike|hCoV-19/England/BRIS-122508/2020|2020-04-04|EPI\_ISL\_440651|Original|hCoV-19^^England|Human|PHE South West Regional Laboratory|Wellcome Sanger Institute for the COVID-19 Genomics UK (COG-UK) consortium|Amato|United Kingdom

>Spike|hCoV-19/England/ALDP-B1BABE/2020|2020-11-01|EPI\_ISL\_645599|Original|hCoV-19^^England|Human|Lighthouse Lab in Alderley Park|Wellcome Sanger Institute for the COVID-19 Genomics UK (COG-UK) Consortium|Davies|United Kingdom

>Spike|hCoV-19/Denmark/DCGC-14080/2020|2020-11-30|EPI\_ISL\_711553|Original|hCoV-19^^Midtjylland|Human|Department of Virus and Microbiological Special Diagnostics|Albertsen Lab|Michaelsen|Denmark

>Spike|hCoV-19/Wales/ALDP-C3A678/2020|2020-12-09|EPI\_ISL\_767260|Original|hCoV-19^^Wales|Human|Lighthouse Lab in Alderley Park|Wellcome Sanger Institute for the COVID-19 Genomics UK (COG-UK) Consortium|Davies|United Kingdom

>Spike|hCoV-19/England/ALDP-C067DC/2020|2020-12-02|EPI\_ISL\_709480|Original|hCoV-19^^England|Human|Lighthouse Lab in Alderley Park|Wellcome Sanger Institute for the COVID-19 Genomics UK (COG-UK) Consortium|Davies|United Kingdom

>Spike|hCoV-19/Gambia/NPHL-483B/2020|2020-00-00|EPI\_ISL\_561318|Original|hCoV-19^^Kombo|Human|MRCG at LSHTM Genomics lab|MRCG at LSHTM Genomics lab|Sesay|Gambia

>Spike|hCoV-19/Netherlands/ZH-EMC-1198/2020|2020-12-21|EPI\_ISL\_763271|Original|hCoV-19^^Zuid Holland|Human|Dutch COVID-19 response team|Erasmus Medical Center|Oude Munnink|Netherlands

>Spike|hCoV-19/Netherlands/NH-RIVM-20038/2020|2020-11-21|EPI\_ISL\_723231|Original|hCoV-19^^Noord-Holland|Human|Dutch COVID-19 response team|National Institute for Public Health and the Environment (RIVM)|Meijer|Netherlands

>Spike|hCoV-19/Uruguay/RIV-M40/2020|2020-05-21|EPI\_ISL\_748667|Original|hCoV-19^^Rivera|Human|Sanatorio Americano|Institut Pasteur de Montevideo|Spangenberg|Uruguay

>Spike|hCoV-19/USA/OR-OHSU-1681/2020|2020-07-22|EPI\_ISL\_526002|Original|hCoV-19^^Oregon|Human|OHSU Lab Services Molecular Microbiology Lab|Oregon SARS-CoV-2 Genome Sequencing Center|O'Roak|USA

>Spike|hCoV-19/England/NORW-F5271/2020|2020-11-16|EPI\_ISL\_725237|Original|hCoV-19^^England|Human|Quadram Institute Bioscience|COVID-19 Genomics UK (COG-UK) Consortium|Alikhan|United Kingdom

>Spike|hCoV-19/USA/UT-UPHL-2012938614/2020|2020-08-17|EPI\_ISL\_745508|Original|hCoV-19^^Utah|Human|Ginkgo Bioworks Clinical Laboratory|Utah Public Health Laboratory|Young|USA

>Spike|hCoV-19/England/CAMC-A41036/2020|2020-10-06|EPI\_ISL\_609411|Original|hCoV-19^^England|Human|Lighthouse Lab in Cambridge|Wellcome Sanger Institute for the COVID-19 Genomics UK (COG-UK) consortium|Davies|United Kingdom

>Spike|hCoV-19/England/MILK-BAC7E8/2020|2020-11-18|EPI\_ISL\_783130|Original|hCoV-19^^England|Human|Lighthouse Lab in Milton Keynes|Wellcome Sanger Institute for the COVID-19 Genomics UK (COG-UK) Consortium|Davies|United Kingdom

>Spike|hCoV-19/Denmark/DCGC-18981/2020|2020-12-07|EPI\_ISL\_748362|Original|hCoV-19^^Syddanmark|Human|Department of Virus and Microbiological Special Diagnostics|Albertsen Lab|Michaelsen|Denmark

>Spike|hCoV-19/Finland/24LS6C12/2020|2020-10-24|EPI\_ISL\_759825|Original|hCoV-19^^Uusimaa|Human|Department of Virology and Immunology|Department of Virology|Smura|Finland

>Spike|hCoV-19/Wales/PHWC-30D00/2020|2020-04-11|EPI\_ISL\_446352|Original|hCoV-19^^Wales|Human|Wales Specialist Virology Centre|Public Health Wales Microbiology Cardiff|Moore|United Kingdom



>Spike|hCoV-19/South Africa/KRISP-K002790/2020|2020-08-23|EPI\_ISL\_529784|Original|hCoV-19^^KwaZulu-Natal|Human|NHLS-IALCH|KRISP|de Oliveira|South Africa

>Spike|hCoV-19/England/MILK-C78A54/2020|2020-12-15|EPI\_ISL\_757010|Original|hCoV-19^^England|Human|Lighthouse Lab in Milton Keynes|Wellcome Sanger Institute for the COVID-19 Genomics UK (COG-UK) Consortium|Davies|United Kingdom

>Spike|hCoV-19/England/GSTT-265D2B7/2020|2020-03-17|EPI\_ISL\_483935|Original|hCoV-19^^England|Human|Centre for Clinical Infection and Diagnostics Research and Genomics Innovation Unit|COVID-19 Genomics UK (COG-UK) Consortium|Awan|United Kingdom

>Spike|hCoV-19/England/CAMB-768C1/2020|2020-03-30|EPI\_ISL\_438443|Original|hCoV-19^^England|Human|Department of Pathology|Wellcome Sanger Institute for the COVID-19 Genomics UK (COG-UK) consortium|Amato|United Kingdom

>Spike|hCoV-19/England/QEUH-AAB36E/2020|2020-10-21|EPI\_ISL\_651087|Original|hCoV-19^^England|Human|Oxford Viromics|COVID-19 Genomics UK (COG-UK) Consortium|Golubchik|United Kingdom

>Spike|hCoV-19/Scotland/EDB3318/2020|2020-04-08|EPI\_ISL\_487924|Original|hCoV-19^^Scotland|Human|Virology Department|Wellcome Sanger Institute for the COVID-19 Genomics UK (COG-UK) consortium|Davies|United Kingdom

>Spike|hCoV-19/England/PORT-2CFC8F/2020|2020-05-05|EPI\_ISL\_461983|Original|hCoV-19^^England|Human|Centre for Enzyme Innovation|COVID-19 Genomics UK (COG-UK) Consortium|Robson|United Kingdom

>Spike|hCoV-19/DRC/7434/2020|2020-05-14|EPI\_ISL\_513621|Original|hCoV-19^^Kinshasa|Human|Viral Respiratory Lab|Pathogen Sequencing Lab|Lokilo|Democratic Republic of the Congo

>Spike|hCoV-19/England/20119056704/2020|2020-03-12|EPI\_ISL\_465078|Original|hCoV-19^^England|Human|Respiratory Virus Unit|Respiratory Virus Unit|Platt|United Kingdom

>Spike|hCoV-19/Panama/338477/2020|2020-04-09|EPI\_ISL\_496869|Original|hCoV-19^^Panama West|Human|Gorgas Memorial Laboratory of Health Studies|Gorgas Memorial Laboratory of Health Studies|Martinez|Panama

>Spike|hCoV-19/England/QEUH-B0E140/2020|2020-11-02|EPI\_ISL\_642026|Original|hCoV-19^^England|Human|Lighthouse Lab in Glasgow|Wellcome Sanger Institute for the COVID-19 Genomics UK (COG-UK) Consortium|Davies|United Kingdom

>Spike|hCoV-19/Wales/PHWC-15D267/2020|2020-03-31|EPI\_ISL\_472690|Original|hCoV-19^^Wales|Human|Wales Specialist Virology Centre Sequencing lab|COVID-19 Genomics UK (COG-UK) Consortium|Moore|United Kingdom

>Spike|hCoV-19/England/CAMB-76102/2020|2020-03-30|EPI\_ISL\_439442|Original|hCoV-19^^England|Human|Department of Pathology|Wellcome Sanger Institute for the COVID-19 Genomics UK (COG-UK) consortium|Amato|United Kingdom

>Spike|hCoV-19/Wales/PHWC-4A4BCD/2020|2020-12-09|EPI\_ISL\_764773|Original|hCoV-19^^Wales|Human|Wales Specialist Virology Centre Sequencing lab|COVID-19 Genomics UK (COG-UK) Consortium|Moore|United Kingdom

>Spike|hCoV-19/Australia/VIC2984/2020|2020-07-05|EPI\_ISL\_521814|Original|hCoV-19^^Victoria|Human|Microbiological Diagnostic Unit - Public Health Laboratory (MDU-PHL)|MDU-PHL|Schultz|Australia

>Spike|hCoV-19/Scotland/QEUH-9BAEA8/2020|2020-09-09|EPI\_ISL\_573849|Original|hCoV-19^^Scotland|Human|Oxford Viromics|COVID-19 Genomics UK (COG-UK) Consortium|Golubchik|United Kingdom

>Spike|hCoV-19/England/PORT-2D1868/2020|2020-04-12|EPI\_ISL\_484426|Original|hCoV-19^^England|Human|Centre for Enzyme Innovation|COVID-19 Genomics UK (COG-UK) Consortium|Robson|United Kingdom

>Spike|hCoV-19/Jordan/SEARCH-5433/2020|2020-09-09|EPI\_ISL\_755141|Original|hCoV-19^^Amman|Human|Biolab Diagnostic Laboratories|Andersen lab at Scripps Research|Gangavarapu|Jordan

>Spike|hCoV-19/Canada/ON-PHL-20-01817/2020|2020-04-00|EPI\_ISL\_639727|Original|hCoV-19^^Ontario|Human|Public Health Ontario Laboratory|Public Health Ontario Laboratory|Guthrie|Canada

>Spike|hCoV-19/Japan/PG-6017/2020|2020-07-00|EPI\_ISL\_689129|Original|hCoV-19^^Japan|Human|Pathogen Genomics Center|Pathogen Genomics Center|Sekizuka|Japan

>Spike|hCoV-19/England/QEUEH-9B4F41/2020|2020-09-07|EPI\_ISL\_590249|Original|hCoV-19^^England|Human|Lighthouse Lab in Glasgow|Wellcome Sanger Institute for the COVID-19 Genomics UK (COG-UK) consortium|Davies|United Kingdom

>Spike|hCoV-19/England/MILK-9C34F5/2020|2020-09-10|EPI\_ISL\_566915|Original|hCoV-19^^England|Human|Lighthouse Lab in Milton Keynes|Wellcome Sanger Institute for the COVID-19 Genomics UK (COG-UK) consortium|Davies|United Kingdom

>Spike|hCoV-19/England/BRIS-12B7AF/2020|2020-05-19|EPI\_ISL\_487576|Original|hCoV-19^^England|Human|PHE South West Regional Laboratory|Wellcome Sanger Institute for the COVID-19 Genomics UK (COG-UK) consortium|Davies|United Kingdom

>Spike|hCoV-19/England/20129037802/2020|2020-03-20|EPI\_ISL\_424039|Original|hCoV-19^^England|Human|Respiratory Virus Unit|Respiratory Virus Unit|Platt|United Kingdom

>Spike|hCoV-19/Wales/PHWC-28855/2020|2020-04-01|EPI\_ISL\_432035|Original|hCoV-19^^Wales|Human|Wales Specialist Virology Centre|Public Health Wales Microbiology Cardiff|Moore|United Kingdom

>Spike|hCoV-19/England/QEUEH-B81AFF/2020|2020-11-14|EPI\_ISL\_667915|Original|hCoV-19^^England|Human|Lighthouse Lab in Glasgow|Wellcome Sanger Institute for the COVID-19 Genomics UK (COG-UK) Consortium|Davies|United Kingdom

>Spike|hCoV-19/Denmark/DCGC-3314/2020|2020-08-31|EPI\_ISL\_616068|Original|hCoV-19^^Syddanmark|Human|Department of Virus and Microbiological Special Diagnostics|Albertsen lab|Michaelsen|Denmark

>Spike|hCoV-19/England/204561483/2020|2020-11-04|EPI\_ISL\_678688|Original|hCoV-19^^England|Human|Respiratory Virus Unit|COVID-19 Genomics UK (COG-UK) Consortium|Platt|United Kingdom

>Spike|hCoV-19/South Africa/KRISP-0280/2020|2020-06-16|EPI\_ISL\_482867|Original|hCoV-19^^KwaZulu-Natal|Human|Molecular Diagnostics Services (MDS)|KRISP|de Oliveira|South Africa

>Spike|hCoV-19/Switzerland/BE-ETHZ-410881/2020|2020-12-14|EPI\_ISL\_737521|Original|hCoV-19^^Bern|Human|Viollier AG|Department of Biosystems Science and Engineering|Nadeau|Switzerland

>Spike|hCoV-19/USA/CO-CSU-D1990-2/2020|2020-04-08|EPI\_ISL\_527455|Original|hCoV-19^^Colorado|Human|Colorado State University - Ebel Lab|Colorado State University - Ebel Lab|Cline|USA

>Spike|hCoV-19/Denmark/DCGC-7849/2020|2020-10-19|EPI\_ISL\_618752|Original|hCoV-19^^Hovedstaden|Human|Department of Virus and Microbiological Special Diagnostics|Albertsen lab|Michaelsen|Denmark

>Spike|hCoV-19/Australia/VIC6764/2020|2020-07-27|EPI\_ISL\_564040|Original|hCoV-19^^Victoria|Human|Victorian Infectious Diseases Reference Laboratory (VIDRL)|VIDRL and MDU-PHL|Schultz|Australia

>Spike|hCoV-19/England/ALDP-95AE22/2020|2020-06-15|EPI\_ISL\_555592|Original|hCoV-19^^England|Human|Lighthouse Lab in Alderley Park|Wellcome Sanger Institute for the COVID-19 Genomics UK (COG-UK) consortium|Davies|United Kingdom

>Spike|hCoV-19/USA/TX-HMH-MCoV-15742/2020|2020-07-10|EPI\_ISL\_785426|Original|hCoV-19^^Texas|Human|Houston Methodist Hospital|Houston Methodist Hospital|Long|USA

>Spike|hCoV-19/Latvia/177/2020|2020-10-13|EPI\_ISL\_639674|Original|hCoV-19^^Latvia|Human|E. Gulbja Laboratorija|Latvian Biomedical Research and Study Centre|Zrelavs|Latvia

>Spike|hCoV-19/Spain/CL-IBV-97006273/2020|2020-04-21|EPI\_ISL\_537644|Original|hCoV-19^^Castilla y Leon|Human|Universidad de Le\u00f3n|SeqCOVID-SPAIN consortium|IBV (CSIC)|Comas|Spain

>Spike|hCoV-19/England/NORW-E9D60/2020|2020-05-01|EPI\_ISL\_448363|Original|hCoV-19^^England|Human|Quadram Institute Bioscience|COVID-19 Genomics UK (COG-UK) Consortium|Alikhan|United Kingdom

>Spike|hCoV-19/USA/WA-UW-13317/2020|2020-07-02|EPI\_ISL\_501137|Original|hCoV-19^^Washington|Human|University of Washington Virology Lab|University of Washington Virology Lab|Roychoudhury|USA

>Spike|hCoV-19/USA/CA-ALSR-2728/2020|2020-07-22|EPI\_ISL\_635647|Original|hCoV-19^^California|Human|San Diego County Public Health Laboratory|Andersen lab at Scripps Research|Gangavarapu|USA

>Spike|hCoV-19/USA/MD-MDH-0245/2020|2020-10-02|EPI\_ISL\_602268|Original|hCoV-19^^Maryland|Human|MD PHL|MD PHL|Keller|USA

>Spike|hCoV-19/England/ALDP-A509B1/2020|2020-10-07|EPI\_ISL\_597851|Original|hCoV-19^^England|Human|Lighthouse Lab in Alderley Park|Wellcome Sanger Institute for the COVID-19 Genomics UK (COG-UK) consortium|Davies|United Kingdom

>Spike|hCoV-19/Scotland/EDB8330/2020|2020-09-29|EPI\_ISL\_612324|Original|hCoV-19^^Scotland|Human|Virology Department|COVID-19 Genomics UK (COG-UK) Consortium|McHugh|United Kingdom

>Spike|hCoV-19/SaudiArabia/KAUST-MADINAH862/2020|2020-05-26|EPI\_ISL\_513197|Original|hCoV-19^^Madinah|Human|Pathogen Genomics Lab King Abdullah University of Science and Technology(KAUST)|Pathogen Genomics Lab King Abdullah University of Science and Technology(KAUST)|Mohamed Ghazzali|Saudi Arabia

>Spike|hCoV-19/England/NOTT-11AE08/2020|2020-11-08|EPI\_ISL\_652364|Original|hCoV-19^^England|Human|Queens Medical Centre|COVID-19 Genomics UK (COG-UK) Consortium|Loose|United Kingdom

>Spike|hCoV-19/South Korea/KCDC2085/2020|2020-02-24|EPI\_ISL\_497986|Original|hCoV-19^^South Korea|Human|Division of Viral Diseases|Division of Viral Diseases|Kim|South Korea

>Spike|hCoV-19/Finland/9LS11AH3/2020|2020-10-09|EPI\_ISL\_755945|Original|hCoV-19^^Uusimaa|Human|Department of Virology and Immunology|Department of Virology|Smura|Finland

>Spike|hCoV-19/USA/WI-UW-781/2020|2020-07-05|EPI\_ISL\_495485|Original|hCoV-19^^Wisconsin|Human|University of Wisconsin-Madison AIDS Vaccine Research Laboratories|University of Wisconsin-Madison AIDS Vaccine Research Laboratories|Baczenas|USA

>Spike|hCoV-19/Luxembourg/LNS8235233/2020|2020-11-29|EPI\_ISL\_744707|Original|hCoV-19^^Luxembourg|Human|Laboratoire national de sant\u00e9|Laboratoire national de sant\u00e9|Wienecke-Baldacchino|Luxembourg

>Spike|hCoV-19/USA/AZ-TG664253/2020|2020-04-28|EPI\_ISL\_696055|Original|hCoV-19^^Arizona|Human|Sonora Quest Laboratories|TGen North|French|USA

>Spike|hCoV-19/Japan/PG-3793/2020|2020-05-00|EPI\_ISL\_692044|Original|hCoV-19^^Japan|Human|Pathogen Genomics Center|Pathogen Genomics Center|Sekizuka|Japan

>Spike|hCoV-19/England/SHEF-D094A/2020|2020-10-13|EPI\_ISL\_613398|Original|hCoV-19^^England|Human|Virology Department|COVID-19 Genomics UK (COG-UK) Consortium|de Silva|United Kingdom

>Spike|hCoV-19/Japan/PG-1708/2020|2020-04-00|EPI\_ISL\_685314|Original|hCoV-19^^Japan|Human|Pathogen Genomics Center|Pathogen Genomics Center|Sekizuka|Japan

>Spike|hCoV-19/England/QEUE-B0E1C8/2020|2020-11-02|EPI\_ISL\_642175|Original|hCoV-19^^England|Human|Lighthouse Lab in Glasgow|Wellcome Sanger Institute for the COVID-19 Genomics UK (COG-UK) Consortium|Davies|United Kingdom

>Spike|hCoV-19/England/QEUE-A21324/2020|2020-10-01|EPI\_ISL\_587317|Original|hCoV-19^^England|Human|Lighthouse Lab in Glasgow|Wellcome Sanger Institute for the COVID-19 Genomics UK (COG-UK) consortium|Davies|United Kingdom

>Spike|hCoV-19/England/MILK-A23EF4/2020|2020-10-04|EPI\_ISL\_650168|Original|hCoV-19^^England|Human|Centre for Enzyme Innovation|COVID-19 Genomics UK (COG-UK) Consortium|Robson|United Kingdom

>Spike|hCoV-19/Wales/PHWC-48A662/2020|2020-11-04|EPI\_ISL\_652581|Original|hCoV-19^^Wales|Human|Wales Specialist Virology Centre Sequencing lab|COVID-19 Genomics UK (COG-UK) Consortium|Moore|United Kingdom

>Spike|hCoV-19/England/PORT-2D2111/2020|2020-03-21|EPI\_ISL\_611771|Original|hCoV-19^^England|Human|Centre for Enzyme Innovation|COVID-19 Genomics UK (COG-UK) Consortium|Robson|United Kingdom

>Spike|hCoV-19/Switzerland/BS-ETHZ-110037/2020|2020-04-01|EPI\_ISL\_486473|Original|hCoV-19^^Basel-Stadt|Human|Viollier AG|Department of Biosystems Science and Engineering|Nadeau|Switzerland

>Spike|hCoV-19/Australia/VIC13660/2020|2020-08-21|EPI\_ISL\_563801|Original|hCoV-19^^Victoria|Human|Microbiological Diagnostic Unit - Public Health Laboratory (MDU-PHL)|MDU-PHL|Schultz|Australia

>Spike|hCoV-19/Wales/PHWC-482372/2020|2020-10-21|EPI\_ISL\_611726|Original|hCoV-19^^Wales|Human|Wales Specialist Virology Centre Sequencing lab|COVID-19 Genomics UK (COG-UK) Consortium|Moore|United Kingdom

>Spike|hCoV-19/England/ALDP-B5C84E/2020|2020-11-10|EPI\_ISL\_655777|Original|hCoV-19^^England|Human|Lighthouse Lab in Alderley Park|Wellcome Sanger Institute for the COVID-19 Genomics UK (COG-UK) Consortium|Davies|United Kingdom

>Spike|hCoV-19/Netherlands/NA\_163/2020|2020-03-21|EPI\_ISL\_422698|Original|hCoV-19^^Netherlands|Human|Dutch COVID-19 response team|Erasmus Medical Center|Oude Munnink|Netherlands

>Spike|hCoV-19/Scotland/QEUH-990136/2020|2020-08-25|EPI\_ISL\_540121|Original|hCoV-19^^Scotland|Human|Lighthouse Lab in Glasgow|Wellcome Sanger Institute for the COVID-19 Genomics UK (COG-UK) consortium|Davies|United Kingdom

>Spike|hCoV-19/USA/MN-MDH-1153/2020|2020-05-02|EPI\_ISL\_476738|Original|hCoV-19^^Minnesota|Human|Minnesota Department of Health|Minnesota Department of Health|Garfin|USA

>Spike|hCoV-19/Wales/PHWC-15D4E9/2020|2020-05-05|EPI\_ISL\_472729|Original|hCoV-19^^Wales|Human|Wales Specialist Virology Centre Sequencing lab|COVID-19 Genomics UK (COG-UK) Consortium|Moore|United Kingdom

>Spike|hCoV-19/Australia/VIC4547/2020|2020-07-11|EPI\_ISL\_518958|Original|hCoV-19^^Victoria|Human|Microbiological Diagnostic Unit - Public Health Laboratory (MDU-PHL)|MDU-PHL|Schultz|Australia

>Spike|hCoV-19/England/CAMC-AEAB3E/2020|2020-10-26|EPI\_ISL\_633255|Original|hCoV-19^^England|Human|Lighthouse Lab in Cambridge|Wellcome Sanger Institute for the COVID-19 Genomics UK (COG-UK) consortium|Davies|United Kingdom

>Spike|hCoV-19/USA/TX-HMH-1281/2020|2020-04-13|EPI\_ISL\_542628|Original|hCoV-19^^Texas|Human|Houston Methodist Hospital|Houston Methodist Hospital|Long|USA

>Spike|hCoV-19/Mexico/NLE-UANL-7088/2020|2020-07-05|EPI\_ISL\_648609|Original|hCoV-19^^Nuevo Leon|Human|Laboratorio de Infectolog\u00eda|Laboratorio de Infectolog\u00eda Molecular|Gal\u00e9n|Mexico

>Spike|hCoV-19/Japan/PG-3331/2020|2020-04-00|EPI\_ISL\_691446|Original|hCoV-19^^Japan|Human|Pathogen Genomics Center|Pathogen Genomics Center|Sekizuka|Japan

>Spike|hCoV-19/USA/CA-CHLA-PLM88317027/2020|2020-11-20|EPI\_ISL\_753400|Original|hCoV-19^^California|Human|Clinical virology Laboratory|Center for Personalized Medicine|Dien Bard|USA

>Spike|hCoV-19/Australia/VIC694/2020|2020-03-28|EPI\_ISL\_426986|Original|hCoV-19^^Victoria|Human|Victorian Infectious Diseases Reference Laboratory (VIDRL)|Microbiological Diagnostic Unit Public Health Laboratory and Victorian Infectious Diseases Reference Laboratory|Schultz|Australia

>Spike|hCoV-19/Scotland/EDB8491/2020|2020-10-19|EPI\_ISL\_612373|Original|hCoV-19^^Scotland|Human|Virology Department|COVID-19 Genomics UK (COG-UK) Consortium|McHugh|United Kingdom

>Spike|hCoV-19/Poland/PL\_MCB\_64/2020|2020-06-06|EPI\_ISL\_645063|Original|hCoV-19^^Poland|Human|Human Genome Variation Research Group|Human Genome Variation Research Group||Poland

>Spike|hCoV-19/USA/CA-CZB-2052/2020|2020-04-22|EPI\_ISL\_486296|Original|hCoV-19^^California|Human|San Joaquin County Public Health Lab|Chan-Zuckerberg Biohub|McGeever|USA

>Spike|hCoV-19/England/QEUH-9D0C39/2020|2020-09-16|EPI\_ISL\_589895|Original|hCoV-19^^England|Human|Lighthouse Lab in Glasgow|Wellcome Sanger Institute for the COVID-19 Genomics UK (COG-UK) consortium|Davies|United Kingdom

>Spike|hCoV-19/England/SHEF-C666E/2020|2020-05-19|EPI\_ISL\_529680|Original|hCoV-19^^England|Human|Virology Department|COVID-19 Genomics UK (COG-UK) Consortium|de Silva|United Kingdom

>Spike|hCoV-19/Scotland/QEUH-C4BE12/2020|2020-12-14|EPI\_ISL\_757114|Original|hCoV-19^^Scotland|Human|Lighthouse Lab in Glasgow|Wellcome Sanger Institute for the COVID-19 Genomics UK (COG-UK) Consortium|Davies|United Kingdom

>Spike|hCoV-19/USA/MN-MDH-1390/2020|2020-03-27|EPI\_ISL\_507977|Original|hCoV-19^^Minnesota|Human|Minnesota Department of Health|Minnesota Department of Health|Garfin|USA

>Spike|hCoV-19/England/QEUH-B6B080/2020|2020-11-11|EPI\_ISL\_662500|Original|hCoV-19^^England|Human|Lighthouse Lab in Glasgow|Wellcome Sanger Institute for the COVID-19 Genomics UK (COG-UK) Consortium|Davies|United Kingdom

>Spike|hCoV-19/England/NORT-1B79E37/2020|2020-11-21|EPI\_ISL\_724938|Original|hCoV-19^^England|Human|Northumbria University / South Tees Hospitals NHS Foundation Trust / North Cumbria Integrated Care NHS Foundation Trust / North Tees and Hartlepool NHS Foundation Trust / Newcastle Hospitals NHS Foundation Trust|COVID-19 Genomics UK (COG-UK) Consortium|Bashton|United Kingdom

>Spike|hCoV-19/Wales/PHWC-16577C/2020|2020-06-14|EPI\_ISL\_490722|Original|hCoV-19^^Wales|Human|Wales Specialist Virology Centre Sequencing lab|COVID-19 Genomics UK (COG-UK) Consortium|Moore|United Kingdom

>Spike|hCoV-19/England/NORT-2818C1/2020|2020-03-21|EPI\_ISL\_472171|Original|hCoV-19^^England|Human|Northumbria University / South Tees Hospitals NHS Foundation Trust / North Cumbria Integrated Care NHS Foundation Trust / North Tees and Hartlepool NHS Foundation Trust / Newcastle Hospitals NHS Foundation Trust|COVID-19 Genomics UK (COG-UK) Consortium|Bashton|United Kingdom

>Spike|hCoV-19/Wales/PHWC-3647E/2020|2020-04-30|EPI\_ISL\_474669|Original|hCoV-19^^Wales|Human|Originating lab|COVID-19 Genomics UK (COG-UK) Consortium|Moore|United Kingdom

>Spike|hCoV-19/England/QEUH-9F921A/2020|2020-09-25|EPI\_ISL\_588894|Original|hCoV-19^^England|Human|Lighthouse Lab in Glasgow|Wellcome Sanger Institute for the COVID-19 Genomics UK (COG-UK) consortium|Davies|United Kingdom

>Spike|hCoV-19/Scotland/QEUH-A637FD/2020|2020-10-09|EPI\_ISL\_596150|Original|hCoV-19^^Scotland|Human|Quadram Institute Bioscience|COVID-19 Genomics UK (COG-UK) Consortium|Alikhan|United Kingdom

>Spike|hCoV-19/Netherlands/NA\_316/2020|2020-04-02|EPI\_ISL\_422625|Original|hCoV-19^^Netherlands|Human|Dutch COVID-19 response team|Erasmus Medical Center|Oude Munnink|Netherlands

>Spike|hCoV-19/England/ALDP-49687C/2020|2020-06-07|EPI\_ISL\_559313|Original|hCoV-19^^England|Human|Lighthouse Lab in Alderley Park|Wellcome Sanger Institute for the COVID-19 Genomics UK (COG-UK) consortium|Davies|United Kingdom

>Spike|hCoV-19/USA/MN-MDH-2223/2020|2020-08-31|EPI\_ISL\_770797|Original|hCoV-19^^Minnesota|Human|Hennepin County Medical Center|Minnesota Department of Health|Lorentz|USA

>Spike|hCoV-19/England/LOND-124F167/2020|2020-03-28|EPI\_ISL\_665144|Original|hCoV-19^^England|Human|University College London Hospital|COVID-19 Genomics UK (COG-UK) Consortium|Byott|United Kingdom

>Spike|hCoV-19/Australia/VIC6924/2020|2020-07-22|EPI\_ISL\_564144|Original|hCoV-19^^Victoria|Human|Microbiological Diagnostic Unit - Public Health Laboratory (MDU-PHL) |MDU-PHL|Schultz|Australia

>Spike|hCoV-19/USA/NY-QDX-2428/2020|2020-03-16|EPI\_ISL\_604794|Original|hCoV-19^^New York|Human|Quest Diagnostics|Quest Diagnostics|Kagan|USA

>Spike|hCoV-19/Denmark/ALAB-SSI-617/2020|2020-03-25|EPI\_ISL\_436999|Original|hCoV-19^^Denmark|Human|Department of Virus and Microbiological Special Diagnostics|Albertsen lab|Kirkegaard|Denmark

>Spike|hCoV-19/Sweden/20-50360/2020|2020-03-16|EPI\_ISL\_430864|Original|hCoV-19^^Gavleborgs lan|Human|The Public Health Agency of Sweden|The Public Health Agency of Sweden|Svartstr\u00f6m|Sweden

>Spike|hCoV-19/England/MILK-9F1EB4/2020|2020-09-25|EPI\_ISL\_589594|Original|hCoV-19^^England|Human|Lighthouse Lab in Milton Keynes|Wellcome Sanger Institute for the COVID-19 Genomics UK (COG-UK) consortium|Davies|United Kingdom

>Spike|hCoV-19/Denmark/DCGC-1174/2020|2020-03-16|EPI\_ISL\_614665|Original|hCoV-19^^Hovedstaden|Human|Department of Virus and Microbiological Special Diagnostics|Albertsen lab|Michaelsen|Denmark

>Spike|hCoV-19/England/LIVE-A202E/2020|2020-05-18|EPI\_ISL\_490374|Original|hCoV-19^^England|Human|Liverpool Clinical Laboratories|COVID-19 Genomics UK (COG-UK) Consortium|Haldenby|United Kingdom

>Spike|hCoV-19/USA/CA-IGI-0074/2020|2020-06-08|EPI\_ISL\_511828|Original|hCoV-19^^California|Human|Innovative Genomics Institute|Innovative Genomics Institute|Wyman|USA

>Spike|hCoV-19/England/ALDP-950053/2020|2020-06-15|EPI\_ISL\_555193|Original|hCoV-19^^England|Human|Lighthouse Lab in Alderley Park|Wellcome Sanger Institute for the COVID-19 Genomics UK (COG-UK) consortium|Davies|United Kingdom

>Spike|hCoV-19/Scotland/QEUH-9D0E15/2020|2020-09-16|EPI\_ISL\_601836|Original|hCoV-19^^Scotland|Human|Lighthouse Lab in Glasgow|Wellcome Sanger Institute for the COVID-19 Genomics UK (COG-UK) consortium|Davies|United Kingdom

>Spike|hCoV-19/Malaysia/IMR-WC280757/2020|2020-11-18|EPI\_ISL\_728252|Original|hCoV-19^^Malaysia|Human|Institute for Medical Research|Institute for Medical Research|Suppiah|Malaysia

>Spike|hCoV-19/England/Sheff01/2020|2020-03-04|EPI\_ISL\_414500|Original|hCoV-19^^England|Human|Virology Department|Department of Infection|de Silva|United Kingdom

>Spike|hCoV-19/England/CAMC-AB1936/2020|2020-10-23|EPI\_ISL\_623840|Original|hCoV-19^^England|Human|Lighthouse Lab in Cambridge|Wellcome Sanger Institute for the COVID-19 Genomics UK (COG-UK) consortium|Davies|United Kingdom

>Spike|hCoV-19/England/ALDP-C5852C/2020|2020-12-14|EPI\_ISL\_735926|Original|hCoV-19^^England|Human|Lighthouse Lab in Alderley Park|Wellcome Sanger Institute for the COVID-19 Genomics UK (COG-UK) Consortium|Davies|United Kingdom

>Spike|hCoV-19/South Africa/KRISP-K002368/2020|2020-07-22|EPI\_ISL\_515736|Original|hCoV-19^^KwaZulu-Natal|Human|NHLS-IALCH|KRISP|de Oliveira|South Africa

>Spike|hCoV-19/England/ALDP-94B89F/2020|2020-06-14|EPI\_ISL\_555776|Original|hCoV-19^^England|Human|Lighthouse Lab in Alderley Park|Wellcome Sanger Institute for the COVID-19 Genomics UK (COG-UK) consortium|Davies|United Kingdom

>Spike|hCoV-19/Japan/PG-5411/2020|2020-08-00|EPI\_ISL\_690514|Original|hCoV-19^^Japan|Human|Fukuoka Institute of Health and Environmental Sciences|Pathogen Genomics Center|Sekizuka|Japan

>Spike|hCoV-19/Australia/WA430/2020|2020-09-23|EPI\_ISL\_672642|Original|hCoV-19^^Western Australia|Human|PathWest Laboratory Medicine WA|PathWest Laboratory Medicine WA Microbial Surveillance Unit|Sikazwe|Australia

>Spike|hCoV-19/Ireland/D-NVRL-71IRL74709/2020|2020-07-23|EPI\_ISL\_512092|Original|hCoV-19^^Dublin|Human|National Virus Reference Laboratory|National Virus Reference Laboratory|Gonzalez|Ireland

>Spike|hCoV-19/Sweden/20-52800/2020|2020-06-29|EPI\_ISL\_582809|Original|hCoV-19^^Gavleborg|Human|Gavle klinisk mikrobiologi|The Public Health Agency of Sweden|Svartstr\u00f6m|Sweden

>Spike|hCoV-19/England/CAMC-B381A7/2020|2020-11-05|EPI\_ISL\_658919|Original|hCoV-19^^England|Human|Lighthouse Lab in Cambridge|Wellcome Sanger Institute for the COVID-19 Genomics UK (COG-UK) Consortium|Davies|United Kingdom

>Spike|hCoV-19/Denmark/DCGC-14836/2020|2020-11-23|EPI\_ISL\_712017|Original|hCoV-19^^Hovedstaden|Human|Department of Virus and Microbiological Special Diagnostics|Albertsen Lab|Michaelsen|Denmark

>Spike|hCoV-19/France/ARA-104350/2020|2020-11-09|EPI\_ISL\_683350|Original|hCoV-19^^Auvergne-Rh\u00f4ne-Alpes|Human|CNR Virus des Infections Respiratoires - France SUD|CNR Virus des Infections Respiratoires - France SUD|Bal|France

>Spike|hCoV-19/England/CAMC-B0B33E/2020|2020-10-30|EPI\_ISL\_643390|Original|hCoV-19^^England|Human|Lighthouse Lab in Cambridge|Wellcome Sanger Institute for the COVID-19 Genomics UK (COG-UK) Consortium|Davies|United Kingdom

>Spike|hCoV-19/Canada/NS-NML-952/2020|2020-03-26|EPI\_ISL\_579582|Original|hCoV-19^^Nova Scotia|Human|QEII Health Sciences Centre|National Microbiology Laboratory (NML)|Majer|Canada

>Spike|hCoV-19/USA/AZ-TG664534/2020|2020-04-20|EPI\_ISL\_696151|Original|hCoV-19^^Arizona|Human|Sonora Quest Laboratories|TGen North|French|USA

>Spike|hCoV-19/England/EXET-136AE4/2020|2020-04-23|EPI\_ISL\_457248|Original|hCoV-19^^England|Human|University of Exeter|COVID-19 Genomics UK (COG-UK) Consortium|Temperton|United Kingdom

>Spike|hCoV-19/New Zealand/20CV0183/2020|2020-08-27|EPI\_ISL\_548050|Original|hCoV-19^^Auckland|Human|LabPLUS|Institute of Environmental Science and Research (ESR)|Wang|New Zealand

>Spike|hCoV-19/Denmark/DCGC-2516/2020|2020-08-10|EPI\_ISL\_617788|Original|hCoV-19^^Hovedstaden|Human|Department of Virus and Microbiological Special Diagnostics|Albertsen lab|Michaelsen|Denmark

>Spike|hCoV-19/USA/UT-UPHL-2009104/2020|2020-05-14|EPI\_ISL\_525105|Original|hCoV-19^^Utah|Human|Utah Public Health Laboratory|Utah Public Health Laboratory|Young|USA

>Spike|hCoV-19/Japan/PG-4589/2020|2020-08-00|EPI\_ISL\_689726|Original|hCoV-19^^Japan|Human|Pathogen Genomics Center|Pathogen Genomics Center|Sekizuka|Japan

>Spike|hCoV-19/USA/CA-CZB-1072/2020|2020-04-21|EPI\_ISL\_437072|Original|hCoV-19^^California|Human|County of Santa Clara Public Health|Chan-Zuckerberg Biohub|Hao|USA

>Spike|hCoV-19/Scotland/CVR3141/2020|2020-04-28|EPI\_ISL\_449186|Original|hCoV-19^^Scotland|Human|West of Scotland Specialist Virology Centre|COVID-19 Genomics UK (COG-UK) Consortium|Robertson|United Kingdom

>Spike|hCoV-19/USA/CO-CDPHE-2009163722/2020|2020-09-16|EPI\_ISL\_677652|Original|hCoV-19^^Colorado|Human|Colorado Department of Public Health and Environment|Colorado Department of Public Health and Environment|Bankers|USA

>Spike|hCoV-19/USA/UT-UPHL-2009486/2020|2020-07-14|EPI\_ISL\_605170|Original|hCoV-19^^Utah|Human|Utah Public Health Laboratory|Utah Public Health Laboratory|Young|USA

>Spike|hCoV-19/England/SHEF-CF489/2020|2020-07-20|EPI\_ISL\_507173|Original|hCoV-19^^England|Human|Virology Department|COVID-19 Genomics UK (COG-UK) Consortium|de Silva|United Kingdom

>Spike|hCoV-19/England/MILK-9E0BDF/2020|2020-09-21|EPI\_ISL\_601464|Original|hCoV-19^^England|Human|Lighthouse Lab in Milton Keynes|Wellcome Sanger Institute for the COVID-19 Genomics UK (COG-UK) consortium|Davies|United Kingdom

>Spike|hCoV-19/England/LEED-2A83F0/2020|2020-03-21|EPI\_ISL\_538991|Original|hCoV-19^^England|Human|Leeds Teaching Hospitals NHS Trust and Public Health England|Wellcome Sanger Institute for the COVID-19 Genomics UK (COG-UK) consortium|Davies|United Kingdom

>Spike|hCoV-19/England/204590575/2020|2020-11-06|EPI\_ISL\_700652|Original|hCoV-19^^England|Human|Respiratory Virus Unit|COVID-19 Genomics UK (COG-UK) Consortium|Platt|United Kingdom

>Spike|hCoV-19/England/NORT-2813DF/2020|2020-03-13|EPI\_ISL\_472164|Original|hCoV-19^^England|Human|Northumbria University / South Tees Hospitals NHS Foundation Trust / North Cumbria Integrated Care NHS Foundation Trust / North Tees and Hartlepool NHS Foundation Trust / Newcastle Hospitals NHS Foundation Trust|COVID-19 Genomics UK (COG-UK) Consortium|Bashton|United Kingdom

>Spike|hCoV-19/Switzerland/BS-UHB-42190507/2020|2020-03-14|EPI\_ISL\_528071|Original|hCoV-19^^Basel-Stadt|Human|University Hospital Basel|University Hospital Basel|Roloff Handschin|Switzerland

>Spike|hCoV-19/England/20140060304/2020|2020-03-30|EPI\_ISL\_423389|Original|hCoV-19^^England|Human|Respiratory Virus Unit|Respiratory Virus Unit|Platt|United Kingdom

>Spike|hCoV-19/USA/TX-HMH-MCoV-9536/2020|2020-07-05|EPI\_ISL\_781170|Original|hCoV-19^^Texas|Human|Houston Methodist Hospital|Houston Methodist Hospital|Long|USA

>Spike|hCoV-19/England/CAMC-B214E4/2020|2020-11-03|EPI\_ISL\_647127|Original|hCoV-19^^England|Human|Lighthouse Lab in Cambridge|Wellcome Sanger Institute for the COVID-19 Genomics UK (COG-UK) Consortium|Davies|United Kingdom

>Spike|hCoV-19/Denmark/DCGC-17524/2020|2020-12-14|EPI\_ISL\_751041|Original|hCoV-19^^Hovedstaden|Human|Department of Virus and Microbiological Special Diagnostics|Albertsen Lab|Michaelsen|Denmark

>Spike|hCoV-19/Indonesia/JK-EIJK-01/2020|2020-03-26|EPI\_ISL\_437189|Original|hCoV-19^^Jakarta|Human|Pusat Pertamina Hospital|Eijkman Institute for Molecular Biology|Soebandrio|Indonesia

>Spike|hCoV-19/Wales/PHWC-16BC68/2020|2020-09-14|EPI\_ISL\_573958|Original|hCoV-19^^Wales|Human|Wales Specialist Virology Centre Sequencing lab|COVID-19 Genomics UK (COG-UK) Consortium|Moore|United Kingdom

>Spike|hCoV-19/England/MILK-B96778/2020|2020-11-13|EPI\_ISL\_676210|Original|hCoV-19^^England|Human|Lighthouse Lab in Milton Keynes|Wellcome Sanger Institute for the COVID-19 Genomics UK (COG-UK) Consortium|Davies|United Kingdom

>Spike|hCoV-19/England/BRIS-125DC1/2020|2020-03-30|EPI\_ISL\_443756|Original|hCoV-19^^England|Human|PHE South West Regional Laboratory|Wellcome Sanger Institute for the COVID-19 Genomics UK (COG-UK) consortium|Amato|United Kingdom

>Spike|hCoV-19/Anhui/HN012/2020|2020-02-03|EPI\_ISL\_450417|unknown|hCoV-19^^Anhui|Human|unknown|Anhui Provincial Center for Disease Control|Submitter|China

>Spike|hCoV-19/India/MH-NIV-20134/2020|2020-05-04|EPI\_ISL\_479513|Original|hCoV-19^^Maharashtra|Human|NIV Influenza|NIV Influenza|Potdar|India

>Spike|hCoV-19/Norway/3978/2020|2020-09-24|EPI\_ISL\_590952|original|hCoV-19^^Innlandet|Human|Akershus University Hospital|Norwegian Institute of Public Health|Vollan|Norway

>Spike|hCoV-19/England/ALDP-CED4D4/2020|2020-12-17|EPI\_ISL\_782020|Original|hCoV-19^^England|Human|Lighthouse Lab in Alderley Park|Wellcome Sanger Institute for the COVID-19 Genomics UK (COG-UK) Consortium|Davies|United Kingdom

>Spike|hCoV-19/England/ALDP-9EA66B/2020|2020-09-24|EPI\_ISL\_580149|Original|hCoV-19^^England|Human|Lighthouse Lab in Alderley Park|Wellcome Sanger Institute for the COVID-19 Genomics UK (COG-UK) consortium|Davies|United Kingdom

>Spike|hCoV-19/England/ALDP-91012F/2020|2020-06-22|EPI\_ISL\_551399|Original|hCoV-19^^England|Human|Lighthouse Lab in Alderley Park|Wellcome Sanger Institute for the COVID-19 Genomics UK (COG-UK) consortium|Davies|United Kingdom

>Spike|hCoV-19/India/TG-CDFD-N5426/2020|2020-06-01|EPI\_ISL\_528629|Original|hCoV-19^^Telangana|Human|National Genomics Core-Center for DNA Fingerprinting and Diagnostics|National Genomics Core- Center for DNA Fingerprinting and Diagnostics (NGC-CDFD) - DBT's PAN-INDIA-1000 Genome consortium|Vashisht|India

>Spike|hCoV-19/England/ALDP-B84D02/2020|2020-11-15|EPI\_ISL\_674341|Original|hCoV-19^^England|Human|Lighthouse Lab in Alderley Park|Wellcome Sanger Institute for the COVID-19 Genomics UK (COG-UK) Consortium|Davies|United Kingdom

>Spike|hCoV-19/England/MILK-ACDF80/2020|2020-10-21|EPI\_ISL\_630310|Original|hCoV-19^^England|Human|Lighthouse Lab in Milton Keynes|Wellcome Sanger Institute for the COVID-19 Genomics UK (COG-UK) consortium|Davies|United Kingdom

>Spike|hCoV-19/Luxembourg/LNS3116383/2020|2020-07-29|EPI\_ISL\_740251|Original|hCoV-19^^Luxembourg|Human|Laboratoire national de sant\u00e9|Laboratoire national de sant\u00e9|Wienecke-Baldacchino|Luxembourg

>Spike|hCoV-19/USA/TX-HMH-MCoV-8235/2020|2020-06-30|EPI\_ISL\_784280|Original|hCoV-19^^Texas|Human|Houston Methodist Hospital|Houston Methodist Hospital|Long|USA

>Spike|hCoV-19/Netherlands/NB-EMC-407/2020|2020-00-00|EPI\_ISL\_722482|Original|hCoV-19^^Noord Brabant|Human|Dutch COVID-19 response team|Erasmus Medical Center|Oude Munnink|Netherlands

>Spike|hCoV-19/England/MILK-C307F7/2020|2020-12-07|EPI\_ISL\_783021|Original|hCoV-19^^England|Human|Lighthouse Lab in Milton Keynes|Wellcome Sanger Institute for the COVID-19 Genomics UK (COG-UK) Consortium|Davies|United Kingdom

>Spike|hCoV-19/Japan/TKYE6968/2020|2020-02-00|EPI\_ISL\_434561|unknown|hCoV-19^^Japan|Human|Department of Microbiology; Ryota Kumagai Tokyo Metropolitan Institute of Public Health|Department of Microbiology; Ryota Kumagai Tokyo Metropolitan Institute of Public Health|Nagashima|Japan

>Spike|hCoV-19/New Zealand/20VR2061/2020|2020-04-04|EPI\_ISL\_579221|Original|hCoV-19^^Canterbury|Human|Canterbury Health Laboratories|Institute of Environmental Science and Research (ESR)|Wang|New Zealand

>Spike|hCoV-19/Russia/StPetersburg-RII4693S/2020|2020-04-07|EPI\_ISL\_427325|Original|hCoV-19^^Saint Petersburg|Human|WHO National Influenza Centre Russian Federation|WHO National Influenza Centre Russian Federation|Komissarov|Russia

>Spike|hCoV-19/Belgium/PAN-030681/2020|2020-03-05|EPI\_ISL\_420337|Original|hCoV-19^^Herve|Human|KU Leuven|KU Leuven|Maes|Belgium

>Spike|hCoV-19/England/QEUEH-B0F1A9/2020|2020-11-02|EPI\_ISL\_642561|Original|hCoV-19^^England|Human|Lighthouse Lab in Glasgow|Wellcome Sanger Institute for the COVID-19 Genomics UK (COG-UK) Consortium|Davies|United Kingdom

>Spike|hCoV-19/England/QEUEH-9F3070/2020|2020-09-24|EPI\_ISL\_600822|Original|hCoV-19^^England|Human|Lighthouse Lab in Glasgow|Wellcome Sanger Institute for the COVID-19 Genomics UK (COG-UK) consortium|Davies|United Kingdom

>Spike|hCoV-19/Japan/PG-6124/2020|2020-08-00|EPI\_ISL\_689236|Original|hCoV-19^^Japan|Human|Pathogen Genomics Center|Pathogen Genomics Center|Sekizuka|Japan

>Spike|hCoV-19/USA/LA-GBCL-26684459/2020|2020-04-11|EPI\_ISL\_485280|Original|hCoV-19^^Louisiana|Human|River Road Testing Lab|Ginkgo Bioworks Clinical Laboratory|Smith|USA

>Spike|hCoV-19/Japan/PG-1599/2020|2020-04-00|EPI\_ISL\_685205|Original|hCoV-19^^Japan|Human|Pathogen Genomics Center|Pathogen Genomics Center|Sekizuka|Japan



>Spike|hCoV-19/USA/WI-UW-1933/2020|2020-10-02|EPI\_ISL\_677342|Original|hCoV-19^^Wisconsin|Human|University of Wisconsin-Madison AIDS Vaccine Research Laboratories|University of Wisconsin-Madison AIDS Vaccine Research Laboratories|Baczenas|USA

>Spike|hCoV-19/England/MILK-992477/2020|2020-08-27|EPI\_ISL\_540682|Original|hCoV-19^^England|Human|Queens Medical Centre|COVID-19 Genomics UK (COG-UK) Consortium|Loose|United Kingdom

>Spike|hCoV-19/England/QEUIH-C1640F/2020|2020-12-05|EPI\_ISL\_709539|Original|hCoV-19^^England|Human|Lighthouse Lab in Glasgow|Wellcome Sanger Institute for the COVID-19 Genomics UK (COG-UK) Consortium|Davies|United Kingdom

>Spike|hCoV-19/Denmark/DCGC-14507/2020|2020-11-30|EPI\_ISL\_711805|Original|hCoV-19^^Hovedstaden|Human|Department of Virus and Microbiological Special Diagnostics|Albertsen Lab|Michaelsen|Denmark

>Spike|hCoV-19/England/BIRM-65FOC/2020|2020-10-09|EPI\_ISL\_612235|Original|hCoV-19^^England|Human|University of Birmingham|COVID-19 Genomics UK (COG-UK) Consortium|Loman|United Kingdom

>Spike|hCoV-19/Kenya/C1351/2020|2020-04-20|EPI\_ISL\_457857|Original|hCoV-19^^Kenya|Human|KEMRI-CGMR-C|KEMRI-Wellcome Trust Research Programme/KEMRI-CGMR-C Kilifi|Githinji|Kenya

>Spike|hCoV-19/USA/NY-PV09099/2020|2020-03-18|EPI\_ISL\_421633|Original|hCoV-19^^New York|Human|MSHS Clinical Microbiology Laboratories|MSHS Pathogen Surveillance Program|van Bakel|USA

>Spike|hCoV-19/USA/UT-UPHL-2012838775/2020|2020-08-12|EPI\_ISL\_745918|Original|hCoV-19^^Utah|Human|Ginkgo Bioworks Clinical Laboratory|Utah Public Health Laboratory|Young|USA

>Spike|hCoV-19/England/EXET-13F3FF/2020|2020-12-16|EPI\_ISL\_763670|Original|hCoV-19^^England|Human|University of Exeter|COVID-19 Genomics UK (COG-UK) Consortium|Temperton|United Kingdom

>Spike|hCoV-19/Brazil/RJ-00561/2020|2020-11-03|EPI\_ISL\_717945|Original|hCoV-19^^Rio de Janeiro|Human|Laboratorio de Virologia Molecular / UFRJ|Bioinformatics Laboratory / LNCC|Almeida|Brazil

>Spike|hCoV-19/Spain/AS-IBV-98006660/2020|2020-05-06|EPI\_ISL\_654630|Original|hCoV-19^^Asturias|Human|Servicio de Microbiolog\u00eda|SeqCOVID-SPAIN consortium|IBV (CSIC) |Comas|Spain

>Spike|hCoV-19/Denmark/DCGC-8825/2020|2020-10-26|EPI\_ISL\_626112|Original|hCoV-19^^Nordjylland|Human|Department of Virus and Microbiological Special Diagnostics|Albertsen lab|Michaelsen|Denmark

>Spike|hCoV-19/Scotland/QEUIH-96D75E/2020|2020-08-20|EPI\_ISL\_534605|Original|hCoV-19^^Scotland|Human|NHSGGC West of Scotland Specialist Virology Centre / MRC-University of Glasgow Centre for Virus Research|Wellcome Sanger Institute for the COVID-19 Genomics UK (COG-UK) consortium|Davies|United Kingdom

>Spike|hCoV-19/Portugal/PT1276/2020|2020-03-21|EPI\_ISL\_511237|Original|hCoV-19^^Portugal|Human|Instituto Nacional de Saude (INSA) and Instituto Gulbenkian de Ciencia (IGC)|Instituto Nacional de Saude (INSA) and Instituto Gulbenkian de Ciencia (IGC) |Borges|Portugal

>Spike|hCoV-19/Wales/PHWC-48264C/2020|2020-10-20|EPI\_ISL\_613234|Original|hCoV-19^^Wales|Human|Wales Specialist Virology Centre Sequencing lab|COVID-19 Genomics UK (COG-UK) Consortium|Moore|United Kingdom

>Spike|hCoV-19/Australia/VIC9962/2020|2020-07-23|EPI\_ISL\_565807|Original|hCoV-19^^Victoria|Human|Microbiological Diagnostic Unit - Public Health Laboratory (MDU-PHL) |MDU-PHL|Schultz|Australia

>Spike|hCoV-19/England/ALDP-A85EB4/2020|2020-10-17|EPI\_ISL\_610581|Original|hCoV-19^^England|Human|Lighthouse Lab in Alderley Park|Wellcome Sanger Institute for the COVID-19 Genomics UK (COG-UK) consortium|Davies|United Kingdom

>Spike|hCoV-19/mink/Netherlands/NB-EMC-19-19/2020|2020-07-05|EPI\_ISL\_523050|Original|hCoV-19^^Noord Brabant|Neovison vison|Dutch COVID-19 response team|Erasmus Medical Center|Oude Munnink|Netherlands

>Spike|hCoV-19/USA/MI-MDHHS-SC22447/2020|2020-11-08|EPI\_ISL\_708538|Original|hCoV-19^^Michigan|Human|Michigan Department of Health and Human Services|Michigan Department of Health and Human Services|Jacob|USA

>Spike|hCoV-19/Scotland/EDB2797/2020|2020-03-30|EPI\_ISL\_488887|Original|hCoV-19^^Scotland|Human|Virology Department|Wellcome Sanger Institute for the COVID-19 Genomics UK (COG-UK) consortium|Davies|United Kingdom

>Spike|hCoV-19/England/QEUH-A4DB66/2020|2020-10-05|EPI\_ISL\_628617|Original|hCoV-19^^England|Human|Oxford Viromics|COVID-19 Genomics UK (COG-UK) Consortium|Golubchik|United Kingdom

>Spike|hCoV-19/England/CAMC-A57510/2020|2020-10-09|EPI\_ISL\_597375|Original|hCoV-19^^England|Human|Lighthouse Lab in Cambridge|Wellcome Sanger Institute for the COVID-19 Genomics UK (COG-UK) consortium|Davies|United Kingdom

>Spike|hCoV-19/England/ALDP-C8B57B/2020|2020-12-16|EPI\_ISL\_756569|Original|hCoV-19^^England|Human|Lighthouse Lab in Alderley Park|Wellcome Sanger Institute for the COVID-19 Genomics UK (COG-UK) Consortium|Davies|United Kingdom

>Spike|hCoV-19/Germany/HH-hpi-p1871/2020|2020-03-23|EPI\_ISL\_776216|Original|hCoV-19^^Hamburg|Human|University Medical Center Hamburg Eppendorf|Heinrich Pette Institute|Robitaille|Germany

>Spike|hCoV-19/Bangladesh/NGRI-NSTU-03/2020|2020-07-22|EPI\_ISL\_514440|Original|hCoV-19^^Chittagong|Human|NSTU COVID-19 Diagnostic Center|NSU Genome Research Institute (NGRI)|Hossain|Bangladesh

>Spike|hCoV-19/England/CAMB-1BCE08/2020|2020-00-00|EPI\_ISL\_723900|Original|hCoV-19^^England|Human|Department of Pathology|COVID-19 Genomics UK (COG-UK) Consortium|Goodfellow|United Kingdom

>Spike|hCoV-19/USA/MN-GMF-17485/2020|2020-08-28|EPI\_ISL\_547741|Original|hCoV-19^^Minnesota|Human|Gundersen Molecular Diagnostics Laboratory|Kabara Cancer Research Institute|Kenny|USA

>Spike|hCoV-19/Scotland/QEUH-9BAC26/2020|2020-09-07|EPI\_ISL\_573834|Original|hCoV-19^^Scotland|Human|Oxford Viromics|COVID-19 Genomics UK (COG-UK) Consortium|Golubchik|United Kingdom

>Spike|hCoV-19/Scotland/GCVR-170BFA/2020|2020-03-24|EPI\_ISL\_459605|Original|hCoV-19^^Scotland|Human|NHSGGC West of Scotland Specialist Virology Centre / MRC-University of Glasgow Centre for Virus Research|Wellcome Sanger Institute for the COVID-19 Genomics UK (COG-UK) consortium|Davies|United Kingdom

>Spike|hCoV-19/Scotland/CVR5915/2020|2020-11-20|EPI\_ISL\_705668|Original|hCoV-19^^Scotland|Human|West of Scotland Specialist Virology Centre|COVID-19 Genomics UK (COG-UK) Consortium|Robertson|United Kingdom

>Spike|hCoV-19/USA/FL-BPHL-0325/2020|2020-04-13|EPI\_ISL\_489734|Original|hCoV-19^^Florida|Human|Florida Bureau of Public Health Laboratories|Florida Bureau of Public Health Laboratories|Blanton|USA

>Spike|hCoV-19/Chile/AN-195430/2020|2020-10-01|EPI\_ISL\_746498|Original|hCoV-19^^Antofagasta|Human|Genetica Molecular and Subdepartamento de Virologia ISP Chile|Instituto de Salud Publica de Chile|Tognarelli|Chile

>Spike|hCoV-19/Australia/VIC585/2020|2020-03-25|EPI\_ISL\_426842|Original|hCoV-19^^Victoria|Human|Victorian Infectious Diseases Reference Laboratory (VIDRL)|Microbiological Diagnostic Unit Public Health Laboratory and Victorian Infectious Diseases Reference Laboratory|Schultz|Australia

>Spike|hCoV-19/Australia/VIC8846/2020|2020-07-23|EPI\_ISL\_565232|Original|hCoV-19^^Victoria|Human|Microbiological Diagnostic Unit - Public Health Laboratory (MDU-PHL)|MDU-PHL|Schultz|Australia

>Spike|hCoV-19/Italy/LOM-ASST-20/2020|2020-02-26|EPI\_ISL\_486657|Original|hCoV-19^^Lombardy|Human|Microbiology|Microbiology|Comandatore|Italy

>Spike|hCoV-19/England/ALDP-954CC4/2020|2020-06-12|EPI\_ISL\_553541|Original|hCoV-19^^England|Human|Lighthouse Lab in Alderley Park|Wellcome Sanger Institute for the COVID-19 Genomics UK (COG-UK) consortium|Davies|United Kingdom

>Spike|hCoV-19/USA/GA-EHC-055C/2020|2020-03-15|EPI\_ISL\_754765|Original|hCoV-19^^Georgia|Human|Emory Molecular Diagnostics Laboratory|Piantadosi Lab|Piantadosi|USA

>Spike|hCoV-19/England/ALDP-A4FAA3/2020|2020-10-07|EPI\_ISL\_597590|Original|hCoV-19^^England|Human|Lighthouse Lab in Alderley Park|Wellcome Sanger Institute for the COVID-19 Genomics UK (COG-UK) consortium|Davies|United Kingdom

>Spike|hCoV-19/South Africa/KRISP-0295/2020|2020-06-26|EPI\_ISL\_495516|Original|hCoV-19^^KwaZulu-Natal|Human|NHLs-IALCH|KRISP|de Oliveira|South Africa

>Spike|hCoV-19/USA/UT-UPHL-2012478835/2020|2020-07-26|EPI\_ISL\_745575|Original|hCoV-19^^Utah|Human|Ginkgo Bioworks Clinical Laboratory|Utah Public Health Laboratory|Young|USA

>Spike|hCoV-19/USA/WA-UW-4217/2020|2020-03-31|EPI\_ISL\_427249|Original|hCoV-19^^Washington|Human|UW Virology Lab|UW Virology Lab|Roychoudhury|USA

>Spike|hCoV-19/England/QEUEH-9B53BD/2020|2020-09-03|EPI\_ISL\_590289|Original|hCoV-19^^England|Human|Lighthouse Lab in Glasgow|Wellcome Sanger Institute for the COVID-19 Genomics UK (COG-UK) consortium|Davies|United Kingdom

>Spike|hCoV-19/England/GSTT-265E465/2020|2020-03-31|EPI\_ISL\_484203|Original|hCoV-19^^England|Human|Centre for Clinical Infection and Diagnostics Research and Genomics Innovation Unit|COVID-19 Genomics UK (COG-UK) Consortium|Awan|United Kingdom

>Spike|hCoV-19/Germany/BW-MVZ-LS-40/2020|2020-04-21|EPI\_ISL\_640257|Original|hCoV-19^^Baden-W\u00fcrtemberg|Human|MVZ Labor\u00e4rzte Singen|MVZ Labor\u00e4rzte Singen|Schmidt|Germany

>Spike|hCoV-19/Sweden/20-21491/2020|2020-04-17|EPI\_ISL\_676524|Original|hCoV-19^^Uppsala|Human|Uppsala klinisk mikrobiologi|The Public Health Agency of Sweden|Svartstr\u00f6m|Sweden

>Spike|hCoV-19/Netherlands/ZH-EMC-732/2020|2020-10-09|EPI\_ISL\_632575|Original|hCoV-19^^Zuid Holland|Human|Dutch COVID-19 response team|Erasmus Medical Center|Oude Munnink|Netherlands

>Spike|hCoV-19/Australia/VIC10792/2020|2020-07-30|EPI\_ISL\_563092|Original|hCoV-19^^Victoria|Human|Microbiological Diagnostic Unit - Public Health Laboratory (MDU-PHL)|MDU-PHL|Schultz|Australia

>Spike|hCoV-19/Wales/PHWC-4A1A78/2020|2020-12-11|EPI\_ISL\_743768|Original|hCoV-19^^Wales|Human|Wales Specialist Virology Centre Sequencing lab|COVID-19 Genomics UK (COG-UK) Consortium|Moore|United Kingdom

>Spike|hCoV-19/Australia/VIC17467/2020|2020-08-21|EPI\_ISL\_663897|Original|hCoV-19^^Victoria|Human|Microbiological Diagnostic Unit - Public Health Laboratory (MDU-PHL)|MDU-PHL|Schultz|Australia

>Spike|hCoV-19/Netherlands/un-EMC-792/2020|2020-09-25|EPI\_ISL\_632390|Original|hCoV-19^^Netherlands|Human|Dutch COVID-19 response team|Erasmus Medical Center|Oude Munnink|Netherlands

>Spike|hCoV-19/England/LIVE-9E18C/2020|2020-04-03|EPI\_ISL\_453273|Original|hCoV-19^^England|Human|Liverpool Clinical Laboratories|COVID-19 Genomics UK (COG-UK) Consortium|Haldenby|United Kingdom

>Spike|hCoV-19/Australia/VIC7899/2020|2020-08-07|EPI\_ISL\_564736|Original|hCoV-19^^Victoria|Human|Microbiological Diagnostic Unit - Public Health Laboratory (MDU-PHL)|MDU-PHL|Schultz|Australia

>Spike|hCoV-19/Australia/NSW716/2020|2020-07-28|EPI\_ISL\_513359|Original|hCoV-19^^New South Wales|Human|Pathology West - NSW Health Pathology|NSW Health Pathology - Institute of Clinical Pathology and Medical Research; Westmead Hospital; University of Sydney|Gall|Australia

>Spike|hCoV-19/England/GSTT-6749/2020|2020-03-29|EPI\_ISL\_560727|Original|hCoV-19^^England|Human|Centre for Clinical Infection and Diagnostics Research and Genomics Innovation Unit|Centre for Clinical Infection and Diagnostics Research and Genomics Innovation Unit|Awan|United Kingdom

>Spike|hCoV-19/England/CAMB-1AC2F0/2020|2020-04-28|EPI\_ISL\_444390|Original|hCoV-19^^England|Human|Department of Pathology|COVID-19 Genomics UK (COG-UK) Consortium|Meredith|United Kingdom

>Spike|hCoV-19/Equatorial Guinea/3350/2020|2020-04-24|EPI\_ISL\_648326|Original|hCoV-19^^Litoral|Human|Laboratorio de Investigaciones de Baney|University Hospital Basel|Hosch|Equatorial Guinea

>Spike|hCoV-19/USA/TX-HMH-1237/2020|2020-04-15|EPI\_ISL\_542602|Original|hCoV-19^^Texas|Human|Houston Methodist Hospital|Houston Methodist Hospital|Long|USA

>Spike|hCoV-19/Scotland/EDB9576/2020|2020-11-09|EPI\_ISL\_666083|Original|hCoV-19^^Scotland|Human|Virology Department|COVID-19 Genomics UK (COG-UK) Consortium|McHugh|United Kingdom

>Spike|hCoV-19/England/NORT-29E023/2020|2020-05-05|EPI\_ISL\_493505|Original|hCoV-19^^England|Human|Northumbria University / South Tees Hospitals NHS Foundation Trust / North Cumbria Integrated Care NHS Foundation Trust / North Tees and Hartlepool NHS

Foundation Trust / Newcastle Hospitals NHS Foundation Trust|COVID-19 Genomics UK (COG-UK) Consortium|Bashton|United Kingdom  
>Spike|hCoV-19/England/QEUA-C32A1A/2020|2020-12-10|EPI\_ISL\_782647|Original|hCoV-19^^England|Human|Lighthouse Lab in Glasgow|Wellcome Sanger Institute for the COVID-19 Genomics UK (COG-UK) Consortium|Davies|United Kingdom  
>Spike|hCoV-19/England/NORT-28498F/2020|2020-03-25|EPI\_ISL\_488666|Original|hCoV-19^^England|Human|NU-OMICS DNA Sequencing research facility|Wellcome Sanger Institute for the COVID-19 Genomics UK (COG-UK) consortium|Davies|United Kingdom  
>Spike|hCoV-19/England/QEUA-A8C424/2020|2020-10-18|EPI\_ISL\_643254|Original|hCoV-19^^England|Human|Lighthouse Lab in Glasgow|Wellcome Sanger Institute for the COVID-19 Genomics UK (COG-UK) Consortium|Davies|United Kingdom  
>Spike|hCoV-19/Singapore/513/2020|2020-05-23|EPI\_ISL\_479591|Original|hCoV-19^^Singapore|Human|National Public Health Laboratory|National Public Health Laboratory|Mak|Singapore  
>Spike|hCoV-19/Japan/IC-0021/2020|2020-04-00|EPI\_ISL\_591366|Original|hCoV-19^^Japan|Human|Pathogen Genomics Center|Pathogen Genomics Center|Sekizuka|Japan  
>Spike|hCoV-19/Denmark/DCGC-12641/2020|2020-11-16|EPI\_ISL\_682822|Original|hCoV-19^^Sjaelland|Human|Department of Virus and Microbiological Special Diagnostics|Albertsen Lab|Michaelsen|Denmark  
>Spike|hCoV-19/England/ALDP-499624/2020|2020-05-27|EPI\_ISL\_559384|Original|hCoV-19^^England|Human|Lighthouse Lab in Alderley Park|Wellcome Sanger Institute for the COVID-19 Genomics UK (COG-UK) consortium|Davies|United Kingdom  
>Spike|hCoV-19/England/ALDP-A84D30/2020|2020-10-17|EPI\_ISL\_610450|Original|hCoV-19^^England|Human|Lighthouse Lab in Alderley Park|Wellcome Sanger Institute for the COVID-19 Genomics UK (COG-UK) consortium|Davies|United Kingdom  
>Spike|hCoV-19/England/QEUA-9F7267/2020|2020-09-27|EPI\_ISL\_595672|Original|hCoV-19^^England|Human|Oxford Viromics|COVID-19 Genomics UK (COG-UK) Consortium|Golubchik|United Kingdom  
>Spike|hCoV-19/Germany/BE-ChVir-D1944-8293/2020|2020-10-01|EPI\_ISL\_753777|Original|hCoV-19^^Berlin|Human|Charit\u00e9 Universit\u00e4tsmedizin Berlin|Charit\u00e9 Universit\u00e4tsmedizin Berlin|Muehlemann|Germany  
>Spike|hCoV-19/Luxembourg/LNS4235848/2020|2020-11-02|EPI\_ISL\_740436|Original|hCoV-19^^Luxembourg|Human|Laboratoire national de sant\u00e9|Laboratoire national de sant\u00e9|Wienecke-Baldacchino|Luxembourg  
>Spike|hCoV-19/England/LIVE-DBE7E1/2020|2020-10-27|EPI\_ISL\_664232|Original|hCoV-19^^England|Human|Liverpool Clinical Laboratories|COVID-19 Genomics UK (COG-UK) Consortium|Haldenby|United Kingdom  
>Spike|hCoV-19/Netherlands/OV-EMC-55/2020|2020-05-07|EPI\_ISL\_523439|Original|hCoV-19^^Overijssel|Human|Dutch COVID-19 response team|Erasmus Medical Center|Oude Munnink|Netherlands  
>Spike|hCoV-19/Northern Ireland/QEUA-96B811/2020|2020-08-16|EPI\_ISL\_531424|Original|hCoV-19^^Northern Ireland|Human|Lighthouse Lab in Glasgow|Wellcome Sanger Institute for the COVID-19 Genomics UK (COG-UK) consortium|Davies|United Kingdom  
>Spike|hCoV-19/Northern Ireland/QEUA-96CBF9/2020|2020-08-21|EPI\_ISL\_530778|Original|hCoV-19^^Northern Ireland|Human|Lighthouse Lab in Glasgow|Wellcome Sanger Institute for the COVID-19 Genomics UK (COG-UK) consortium|Davies|United Kingdom  
>Spike|hCoV-19/USA/VA-DCLS-0111/2020|2020-04-08|EPI\_ISL\_434603|Original|hCoV-19^^Virginia|Human|Virginia DCLS|Virginia DCLS|St. Jacques|USA  
>Spike|hCoV-19/USA/LA-EVTL110/2020|2020-05-06|EPI\_ISL\_451271|Original|hCoV-19^^Louisiana|Human|LSUHS Emerging Viral Threat Laboratory|Microbial Genome Sequencing Center|Kamil|USA  
>Spike|hCoV-19/Wales/PHWC-4A5AA1/2020|2020-12-11|EPI\_ISL\_764952|Original|hCoV-19^^Wales|Human|Wales Specialist Virology Centre Sequencing lab|COVID-19 Genomics UK (COG-UK) Consortium|Moore|United Kingdom  
>Spike|hCoV-19/Hong Kong/HKPU-3138/2020|2020-07-30|EPI\_ISL\_610208|Original|hCoV-19^^Hong Kong|Human|Department of Health Technology and Informatics|Department of Health Technology and Informatics|Leung|China

>Spike|hCoV-19/USA/FL-BPHL-1687/2020|2020-08-13|EPI\_ISL\_594376|Original|hCoV-19^^Florida|Human|Florida Bureau of Public Health Laboratories|Florida Bureau of Public Health Laboratories|Blanton|USA

>Spike|hCoV-19/England/BIRM-61F1F/2020|2020-03-27|EPI\_ISL\_529617|Original|hCoV-19^^England|Human|University of Birmingham|COVID-19 Genomics UK (COG-UK) Consortium|Loman|United Kingdom

>Spike|hCoV-19/England/CAMC-B520D7/2020|2020-11-07|EPI\_ISL\_657903|Original|hCoV-19^^England|Human|Lighthouse Lab in Cambridge|Wellcome Sanger Institute for the COVID-19 Genomics UK (COG-UK) Consortium|Davies|United Kingdom

>Spike|hCoV-19/England/CAMB-1AE328/2020|2020-04-26|EPI\_ISL\_524578|Original|hCoV-19^^England|Human|Department of Pathology|Wellcome Sanger Institute for the COVID-19 Genomics UK (COG-UK) consortium|Davies|United Kingdom

>Spike|hCoV-19/India/KA-IB63/2020|2020-05-19|EPI\_ISL\_511951|Original|hCoV-19^^Karnataka|Human|Indian Institute of Science|National Institute of Biomedical Genomics -\u00a0DBT's PAN-INDIA 1000 SARS--CoV-2 RNA Genome Sequencing Consortium|Maitra|India

>Spike|hCoV-19/Japan/PG-0683/2020|2020-04-00|EPI\_ISL\_684293|Original|hCoV-19^^Japan|Human|Pathogen Genomics Center|Pathogen Genomics Center|Sekizuka|Japan

>Spike|hCoV-19/Netherlands/ZH-EMC-713/2020|2020-10-02|EPI\_ISL\_632560|Original|hCoV-19^^Zuid Holland|Human|Dutch COVID-19 response team|Erasmus Medical Center|Oude Munnink|Netherlands

>Spike|hCoV-19/Denmark/DCGC-13795/2020|2020-11-30|EPI\_ISL\_713029|Original|hCoV-19^^Nordjylland|Human|Department of Virus and Microbiological Special Diagnostics|Albertsen Lab|Michaelsen|Denmark

>Spike|hCoV-19/England/ALDP-A6D2B6/2020|2020-10-14|EPI\_ISL\_608220|Original|hCoV-19^^England|Human|Lighthouse Lab in Alderley Park|Wellcome Sanger Institute for the COVID-19 Genomics UK (COG-UK) consortium|Davies|United Kingdom

>Spike|hCoV-19/France/OCC-161/2020|2020-10-09|EPI\_ISL\_751480|Original|hCoV-19^^Occitanie|Human|CHU Purpan - Laboratoire de Virologie - Institut F\u00e9deratif de Biologie|CHU Purpan - Laboratoire de Virologie - Institut F\u00e9deratif de Biologie|Latour|France

>Spike|hCoV-19/England/QEUA-AD05A6/2020|2020-10-26|EPI\_ISL\_634198|Original|hCoV-19^^England|Human|Lighthouse Lab in Glasgow|Wellcome Sanger Institute for the COVID-19 Genomics UK (COG-UK) consortium|Davies|United Kingdom

>Spike|hCoV-19/England/MILK-B8F147/2020|2020-11-13|EPI\_ISL\_675284|Original|hCoV-19^^England|Human|Lighthouse Lab in Milton Keynes|Wellcome Sanger Institute for the COVID-19 Genomics UK (COG-UK) Consortium|Davies|United Kingdom

>Spike|hCoV-19/Denmark/DCGC-13236/2020|2020-11-30|EPI\_ISL\_712670|Original|hCoV-19^^Hovedstaden|Human|Department of Virus and Microbiological Special Diagnostics|Albertsen Lab|Michaelsen|Denmark

>Spike|hCoV-19/USA/FL-BPHL-1374/2020|2020-07-21|EPI\_ISL\_541311|Original|hCoV-19^^Florida|Human|Florida Bureau of Public Health Laboratories|Florida Bureau of Public Health Laboratories|Blanton|USA

>Spike|hCoV-19/Scotland/EDB3954/2020|2020-05-03|EPI\_ISL\_449259|Original|hCoV-19^^Scotland|Human|Virology Department|COVID-19 Genomics UK (COG-UK) Consortium|Williams|United Kingdom

>Spike|hCoV-19/England/CAMC-B5374A/2020|2020-11-08|EPI\_ISL\_656844|Original|hCoV-19^^England|Human|Lighthouse Lab in Cambridge|Wellcome Sanger Institute for the COVID-19 Genomics UK (COG-UK) Consortium|Davies|United Kingdom

>Spike|hCoV-19/Kenya/C1298/2020|2020-04-21|EPI\_ISL\_568710|Original|hCoV-19^^Mombasa|Human|KEMRI-Wellcome Trust Research Programme/KEMRI-CGMR-C Kilifi|KEMRI-Wellcome Trust Research Programme/KEMRI-CGMR-C Kilifi|Githinji|Kenya

>Spike|hCoV-19/Italy/CAM-TIGEM-591/2020|2020-04-14|EPI\_ISL\_778664|Original|hCoV-19^^Campania|Human|Istituto Zooprofilattico Sperimentale del Mezzogiorno|TIGEM|Grimaldi|Italy

>Spike|hCoV-19/Wales/PHWC-47FE1D/2020|2020-10-15|EPI\_ISL\_612815|Original|hCoV-19^^Wales|Human|Wales Specialist Virology Centre Sequencing lab|COVID-19 Genomics UK (COG-UK) Consortium|Moore|United Kingdom

>Spike|hCoV-19/Denmark/DCGC-20598/2020|2020-12-21|EPI\_ISL\_759247|Original|hCoV-19^^Midtjylland|Human|Department of Virus and Microbiological Special Diagnostics|Albertsen Lab|Michaelsen|Denmark

>Spike|hCoV-19/England/201100347/2020|2020-03-06|EPI\_ISL\_464649|Original|hCoV-19^^England|Human|Respiratory Virus Unit|Respiratory Virus Unit|Platt|United Kingdom

>Spike|hCoV-19/England/QEUH-769280/2020|2020-07-15|EPI\_ISL\_533136|Original|hCoV-19^^England|Human|Lighthouse Lab in Glasgow|Wellcome Sanger Institute for the COVID-19 Genomics UK (COG-UK) consortium|Davies|United Kingdom

>Spike|hCoV-19/Japan/PG-0866/2020|2020-00-00|EPI\_ISL\_684476|Original|hCoV-19^^Japan|Human|Fukuoka Institute of Health and Environmental Sciences|Pathogen Genomics Center|Sekizuka|Japan

>Spike|hCoV-19/USA/NY-Wadsworth-233888-01/2020|2020-10-01|EPI\_ISL\_734312|Original|hCoV-19^^New York|Human|Wadsworth Center|Wadsworth Center|Lasek-Nesselquist|USA

>Spike|hCoV-19/Denmark/DCGC-10821/2020|2020-11-02|EPI\_ISL\_670229|Original|hCoV-19^^Sjaelland|Human|Department of Virus and Microbiological Special Diagnostics|Albertsen Lab|Michaelsen|Denmark

>Spike|hCoV-19/Denmark/DCGC-11850/2020|2020-10-26|EPI\_ISL\_671175|Original|hCoV-19^^Denmark|Human|Department of Virus and Microbiological Special Diagnostics|Albertsen Lab|Michaelsen|Denmark

>Spike|hCoV-19/England/LIVE-1E1A24/2020|2020-10-12|EPI\_ISL\_627139|Original|hCoV-19^^England|Human|Liverpool Clinical Laboratories|COVID-19 Genomics UK (COG-UK) Consortium|Haldenby|United Kingdom

>Spike|hCoV-19/Australia/ACT0071/2020|2020-03-22|EPI\_ISL\_498531|Original|hCoV-19^^Australian Capital Territory|Human|ACT Pathology|Schwessinger Lab|Hall|Australia

>Spike|hCoV-19/England/CAMB-7522E/2020|2020-03-17|EPI\_ISL\_440422|Original|hCoV-19^^England|Human|Department of Pathology|Wellcome Sanger Institute for the COVID-19 Genomics UK (COG-UK) consortium|Amato|United Kingdom

>Spike|hCoV-19/Netherlands/Limburg\_13/2020|2020-03-10|EPI\_ISL\_461001|Original|hCoV-19^^Limburg|Human|Dutch COVID-19 response team|Erasmus Medical Center|Oude Munnink|Netherlands

>Spike|hCoV-19/Peru/LIM-UPCH-0203/2020|2020-10-15|EPI\_ISL\_729866|Original|hCoV-19^^Lima|Human|Laboratorio de Referencia Nacional de Virus Respiratorios|Laboratorio de Gen\u00f3mica Microbiana|Tsukayama|Peru

>Spike|hCoV-19/Tunisia/61689/2020|2020-11-23|EPI\_ISL\_699655|Original|hCoV-19^^Nabeul|Human|1-Laboratory of Microbiology|1-Clinical and Experimental Pharmacology Lab|Boutiba-Ben Boubaker|Tunisia

>Spike|hCoV-19/Spain/PV-IBV-001570/2020|2020-03-13|EPI\_ISL\_467141|Original|hCoV-19^^Basque Country|Human|Hospital Universitario Araba. Vitoria-Gasteiz|SeqCOVID-SPAIN consortium|IBV (CSIC) |Comas|Spain

>Spike|hCoV-19/Senegal/65428/2020|2020-06-14|EPI\_ISL\_485712|Original|hCoV-19^^Dakar|Human|Institut Pasteur|Institut Pasteur de Dakar|Dia|Senegal

>Spike|hCoV-19/USA/CA-CZB-12775/2020|2020-10-14|EPI\_ISL\_648438|Original|hCoV-19^^California|Human|Santa Clara County Public Health Laboratory|Chan-Zuckerberg Biohub|Bhatt|USA

>Spike|hCoV-19/Wales/PHWC-4860A4/2020|2020-10-26|EPI\_ISL\_628307|Original|hCoV-19^^Wales|Human|Wales Specialist Virology Centre Sequencing lab|COVID-19 Genomics UK (COG-UK) Consortium|Moore|United Kingdom

>Spike|hCoV-19/England/SHEF-CD6B2/2020|2020-04-29|EPI\_ISL\_475459|Original|hCoV-19^^England|Human|Virology Department|COVID-19 Genomics UK (COG-UK) Consortium|de Silva|United Kingdom

>Spike|hCoV-19/Hungary/SRC-00055/2020|2020-03-20|EPI\_ISL\_435419|Original|hCoV-19^^Baranya|Human|Virological Research Group|Bioinformatics Research Group|Herczeg|Hungary

>Spike|hCoV-19/England/MILK-C7B541/2020|2020-12-15|EPI\_ISL\_756993|Original|hCoV-19^^England|Human|Lighthouse Lab in Milton Keynes|Wellcome Sanger Institute for the COVID-19 Genomics UK (COG-UK) Consortium|Davies|United Kingdom

>Spike|hCoV-19/Luxembourg/LNS2190207/2020|2020-11-18|EPI\_ISL\_740075|Original|hCoV-19^^Luxembourg|Human|Laboratoire national de sant\u00e9|Laboratoire national de sant\u00e9|Wienecke-Baldacchino|Luxembourg

>Spike|hCoV-19/USA/WA-S1730/2020|2020-06-01|EPI\_ISL\_496156|Original|hCoV-19^^Washington|Human|Washington State Department of Health|Seattle Flu Study|Lee|USA

>Spike|hCoV-19/England/ALDP-9BECE6/2020|2020-09-10|EPI\_ISL\_568148|Original|hCoV-19^^England|Human|Lighthouse Lab in Alderley Park|Wellcome Sanger Institute for the COVID-19 Genomics UK (COG-UK) consortium|Davies|United Kingdom

>Spike|hCoV-19/England/LEED-2AA112/2020|2020-03-14|EPI\_ISL\_538913|Original|hCoV-19^^England|Human|Leeds Teaching Hospitals NHS Trust and Public Health England|Wellcome Sanger Institute for the COVID-19 Genomics UK (COG-UK) consortium|Davies|United Kingdom

>Spike|hCoV-19/England/MILK-A79D7A/2020|2020-10-15|EPI\_ISL\_606647|Original|hCoV-19^^England|Human|Lighthouse Lab in Milton Keynes|Wellcome Sanger Institute for the COVID-19 Genomics UK (COG-UK) consortium|Davies|United Kingdom

>Spike|hCoV-19/England/ALDP-C3CA89/2020|2020-12-10|EPI\_ISL\_731607|Original|hCoV-19^^England|Human|Lighthouse Lab in Alderley Park|Wellcome Sanger Institute for the COVID-19 Genomics UK (COG-UK) Consortium|Davies|United Kingdom

>Spike|hCoV-19/England/CAMB-1B7FFB/2020|2020-10-16|EPI\_ISL\_637690|Original|hCoV-19^^England|Human|Department of Pathology|COVID-19 Genomics UK (COG-UK) Consortium|Goodfellow|United Kingdom

>Spike|hCoV-19/USA/LA-SR0282/2020|2020-04-01|EPI\_ISL\_445137|Original|hCoV-19^^Louisiana|Human|Robert Garry lab|Andersen lab at Scripps Research|Gangavarapu|USA

>Spike|hCoV-19/India/WB-IK45/2020|2020-05-04|EPI\_ISL\_508372|Original|hCoV-19^^West Bengal|Human|Institute of Post Graduate Medical Education & Research|National Institute of Biomedical Genomics|Maitra|India

>Spike|hCoV-19/Scotland/CVR5302/2020|2020-10-22|EPI\_ISL\_650857|Original|hCoV-19^^Scotland|Human|West of Scotland Specialist Virology Centre|COVID-19 Genomics UK (COG-UK) Consortium|Robertson|United Kingdom

>Spike|hCoV-19/Scotland/QEUH-BA4249/2020|2020-11-18|EPI\_ISL\_757276|Original|hCoV-19^^Scotland|Human|Lighthouse Lab in Glasgow|Wellcome Sanger Institute for the COVID-19 Genomics UK (COG-UK) Consortium|Davies|United Kingdom

>Spike|hCoV-19/South Africa/KRISP-K002550/2020|2020-07-29|EPI\_ISL\_535420|Original|hCoV-19^^KwaZulu-Natal|Human|NHLs-IALCH|KRISP|de Oliveira|South Africa

>Spike|hCoV-19/Canada/QC-LSPQ-L00244354/2020|2020-03-31|EPI\_ISL\_536395|Original|hCoV-19^^Quebec|Human|H\u00f4pital Pierre-Boucher|Laboratoire de sant\u00e9 publique du Qu\u00e9bec|Moreira|Canada

>Spike|hCoV-19/Wales/PHWC-4A1595/2020|2020-12-10|EPI\_ISL\_743693|Original|hCoV-19^^Wales|Human|Wales Specialist Virology Centre Sequencing lab|COVID-19 Genomics UK (COG-UK) Consortium|Moore|United Kingdom

>Spike|hCoV-19/France/OCC-126/2020|2020-10-07|EPI\_ISL\_671971|Original|hCoV-19^^Occitanie|Human|CHU Purpan - Laboratoire de Virologie - Institut F\u00e9d\u00e9ratif de Biologie|CHU Purpan - Laboratoire de Virologie - Institut F\u00e9d\u00e9ratif de Biologie|Latour|France

>Spike|hCoV-19/England/ALDP-5D4D72/2020|2020-06-19|EPI\_ISL\_558575|Original|hCoV-19^^England|Human|Lighthouse Lab in Alderley Park|Wellcome Sanger Institute for the COVID-19 Genomics UK (COG-UK) consortium|Davies|United Kingdom

>Spike|hCoV-19/Nigeria/AK-CV314/2020|2020-06-29|EPI\_ISL\_729988|Original|hCoV-19^^Akwa-Ibom State|Human|Nigeria Centre for Disease Control (NCDC)|African Centre of Excellence for Genomics of Infectious Diseases (ACEGID)|Oluniyi|Nigeria

>Spike|hCoV-19/USA/IA-GMF-10147/2020|2020-07-10|EPI\_ISL\_547607|Original|hCoV-19^^Iowa|Human|Gundersen Molecular Diagnostics Laboratory|Kabara Cancer Research Institute|Kenny|USA

>Spike|hCoV-19/India/KA-nimh-13894/2020|2020-05-09|EPI\_ISL\_515955|Original|hCoV-19^^Karnataka|Human|DH|Department of Neurovirology|Pattabiraman|India

>Spike|hCoV-19/England/ALDP-A67911/2020|2020-10-12|EPI\_ISL\_630562|Original|hCoV-19^^England|Human|Lighthouse Lab in Alderley Park|Wellcome Sanger Institute for the COVID-19 Genomics UK (COG-UK) consortium|Davies|United Kingdom

>Spike|hCoV-19/USA/NY-QDX-1260/2020|2020-03-16|EPI\_ISL\_572024|Original|hCoV-19^^New York|Human|Quest Diagnostics|Quest Diagnostics|Kagan|USA

>Spike|hCoV-19/England/NORT-1B72988/2020|2020-12-04|EPI\_ISL\_724907|Original|hCoV-19^^England|Human|Northumbria University / South Tees Hospitals NHS Foundation Trust

/ North Cumbria Integrated Care NHS Foundation Trust / North Tees and Hartlepool NHS Foundation Trust / Newcastle Hospitals NHS Foundation Trust|COVID-19 Genomics UK (COG-UK) Consortium|Bashton|United Kingdom  
>Spike|hCoV-19/England/SHEF-C9D2A/2020|2020-09-09|EPI\_ISL\_540746|Original|hCoV-19^England|Human|Virology Department|COVID-19 Genomics UK (COG-UK) Consortium|de Silva|United Kingdom  
>Spike|hCoV-19/Australia/NT17/2020|2020-00-00|EPI\_ISL\_426904|Original|hCoV-19^Northern territory|Human|Royal Darwin Hospital Pathology|Microbiological Diagnostic Unit Public Health Laboratory and Victorian Infectious Diseases Reference Laboratory|Schultz|Australia  
>Spike|hCoV-19/South Africa/Tygerberg\_31/2020|2020-03-29|EPI\_ISL\_464142|Original|hCoV-19^Western Cape|Human|National Health Laboratory Service (NHLS)|Division of Medical Virology|Engelbrecht|South Africa  
>Spike|hCoV-19/England/MILK-A7C454/2020|2020-10-15|EPI\_ISL\_607448|Original|hCoV-19^England|Human|Lighthouse Lab in Milton Keynes|Wellcome Sanger Institute for the COVID-19 Genomics UK (COG-UK) Consortium|Davies|United Kingdom  
>Spike|hCoV-19/Switzerland/BE-ETHZ-420075/2020|2020-12-18|EPI\_ISL\_768023|Original|hCoV-19^Bern|Human|Viollier AG|Department of Biosystems Science and Engineering|Nadeau|Switzerland  
>Spike|hCoV-19/England/ALDP-B63C84/2020|2020-11-08|EPI\_ISL\_656618|Original|hCoV-19^England|Human|Lighthouse Lab in Alderley Park|Wellcome Sanger Institute for the COVID-19 Genomics UK (COG-UK) Consortium|Davies|United Kingdom  
>Spike|hCoV-19/USA/TX-HMH-MCoV-14862/2020|2020-10-12|EPI\_ISL\_786346|Original|hCoV-19^Texas|Human|Houston Methodist Hospital|Houston Methodist Hospital|Long|USA  
>Spike|hCoV-19/England/LIVE-DC438A/2020|2020-11-14|EPI\_ISL\_703961|Original|hCoV-19^England|Human|Liverpool Clinical Laboratories|COVID-19 Genomics UK (COG-UK) Consortium|Haldenby|United Kingdom  
>Spike|hCoV-19/England/CAMC-A655A6/2020|2020-10-11|EPI\_ISL\_608373|Original|hCoV-19^England|Human|Lighthouse Lab in Cambridge|Wellcome Sanger Institute for the COVID-19 Genomics UK (COG-UK) consortium|Davies|United Kingdom  
>Spike|hCoV-19/Australia/VIC13433/2020|2020-08-06|EPI\_ISL\_563731|Original|hCoV-19^Victoria|Human|Microbiological Diagnostic Unit - Public Health Laboratory (MDU-PHL)|MDU-PHL|Schultz|Australia  
>Spike|hCoV-19/USA/MT-CDC-2-3714096/2020|2020-12-02|EPI\_ISL\_751633|Original|hCoV-19^Montana|Human|MT Public Health Laboratory|Genomics and Discovery|Queen|USA  
>Spike|hCoV-19/Wales/PHWC-2F029/2020|2020-04-04|EPI\_ISL\_446189|Original|hCoV-19^Wales|Human|Wales Specialist Virology Centre|Public Health Wales Microbiology Cardiff|Moore|United Kingdom  
>Spike|hCoV-19/USA/UT-02566/2020|2020-04-24|EPI\_ISL\_487215|Original|hCoV-19^Utah|Human|Utah Public Health Laboratory|Utah Public Health Laboratory|Butz|USA  
>Spike|hCoV-19/Wales/PHWC-489162/2020|2020-11-02|EPI\_ISL\_639541|Original|hCoV-19^Wales|Human|Wales Specialist Virology Centre Sequencing lab|COVID-19 Genomics UK (COG-UK) Consortium|Moore|United Kingdom  
>Spike|hCoV-19/South Korea/KCDC2155/2020|2020-02-27|EPI\_ISL\_506949|Original|hCoV-19^South Korea|Human|Division of Viral Diseases|Division of Viral Diseases|Kim|South Korea  
>Spike|hCoV-19/Wales/PHWC-16DD81/2020|2020-09-28|EPI\_ISL\_577531|Original|hCoV-19^Wales|Human|Wales Specialist Virology Centre Sequencing lab|COVID-19 Genomics UK (COG-UK) Consortium|Moore|United Kingdom  
>Spike|hCoV-19/England/CAMB-83E29/2020|2020-04-25|EPI\_ISL\_438698|Original|hCoV-19^England|Human|Department of Pathology|COVID-19 Genomics UK (COG-UK) Consortium|Meredith|United Kingdom  
>Spike|hCoV-19/Wales/PHWC-47DDA9/2020|2020-10-12|EPI\_ISL\_595362|Original|hCoV-19^Wales|Human|Originating lab|COVID-19 Genomics UK (COG-UK) Consortium|Moore|United Kingdom  
>Spike|hCoV-19/England/ALDP-64CEBD/2020|2020-07-04|EPI\_ISL\_558102|Original|hCoV-19^England|Human|Lighthouse Lab in Alderley Park|Wellcome Sanger Institute for the COVID-19 Genomics UK (COG-UK) consortium|Davies|United Kingdom



>Spike|hCoV-19/Sichuan/SC-GA-065/2020|2020-02-01|EPI\_ISL\_451316|Original|hCoV-19^^Sichuan|Human|West China Hospital of Sichuan University|State Key Laboratory of Biotherapy of Sichuan University|Tang|China

>Spike|hCoV-19/Canada/ON-PHL-20-01316/2020|2020-06-00|EPI\_ISL\_548919|Original|hCoV-19^^Ontario|Human|Public Health Ontario Laboratory|Public Health Ontario Laboratory|Guthrie|Canada

>Spike|hCoV-19/Spain/RI-IBV-99010941/2020|2020-07-17|EPI\_ISL\_732776|Original|hCoV-19^^La Rioja|Human|Centro de Investigaci\u00f3n Biom\u00e9dica de La Rioja - Hospital San Pedro Logro\u00f1o|SeqCOVID-SPAIN consortium/IBV (CSIC)|Comas|Spain

>Spike|hCoV-19/USA/CA-CHLA-PLM86899666/2020|2020-11-13|EPI\_ISL\_753315|Original|hCoV-19^^California|Human|Clinical virology Laboratory|Center for Personalized Medicine|Dien Bard|USA

>Spike|hCoV-19/Scotland/CVR1043/2020|2020-03-29|EPI\_ISL\_438757|Original|hCoV-19^^Scotland|Human|West of Scotland Specialist Virology Centre|COVID-19 Genomics UK (COG-UK) Consortium|Robertson|United Kingdom

>Spike|hCoV-19/India/MH-NIV-119994/2020|2020-07-17|EPI\_ISL\_541688|Original|hCoV-19^^Maharashtra|Human|National Institute of Virology|National Institute of Virology|Potdar|India

>Spike|hCoV-19/USA/MI-MDHHS-SC20865/2020|2020-04-29|EPI\_ISL\_471886|Original|hCoV-19^^Michigan|Human|Michigan Department of Health and Human Services|Michigan Department of Health and Human Services|Blankenship|USA

>Spike|hCoV-19/England/QEUEH-B9E8C8/2020|2020-11-18|EPI\_ISL\_719891|Original|hCoV-19^^England|Human|Lighthouse Lab in Glasgow|Wellcome Sanger Institute for the COVID-19 Genomics UK (COG-UK) Consortium|Davies|United Kingdom

>Spike|hCoV-19/Australia/VIC5010/2020|2020-00-00|EPI\_ISL\_519814|Original|hCoV-19^^Victoria|Human|Microbiological Diagnostic Unit - Public Health Laboratory (MDU-PHL)|MDU-PHL|Schultz|Australia

>Spike|hCoV-19/Ireland/MO-NVRL-76IRL31264/2020|2020-10-18|EPI\_ISL\_732496|Original|hCoV-19^^Mayo|Human|National Virus Reference Laboratory|National Virus Reference Laboratory|Gonzalez|Ireland

>Spike|hCoV-19/Wales/PHWC-16F3AB/2020|2020-10-06|EPI\_ISL\_585956|Original|hCoV-19^^Wales|Human|Wales Specialist Virology Centre Sequencing lab|COVID-19 Genomics UK (COG-UK) Consortium|Moore|United Kingdom

>Spike|hCoV-19/England/NOTT-10EA4F/2020|2020-03-29|EPI\_ISL\_425629|Original|hCoV-19^^England|Human|Queens Medical Centre|COVID-19 Genomics UK (COG-UK) Consortium|Loose|United Kingdom

>Spike|hCoV-19/Spain/GA-IBV-002740/2020|2020-04-15|EPI\_ISL\_467280|Original|hCoV-19^^Galicia|Human|Hospital Cl\u00e9nico Universitario de Santiago de Compostela|SeqCOVID-SPAIN consortium/IBV (CSIC)|Comas|Spain

>Spike|hCoV-19/USA/MI-UM-10033767074/2020|2020-03-24|EPI\_ISL\_578098|Original|hCoV-19^^Michigan|Human|University of Michigan Clinical Microbiology Laboratory|Lauring Lab|Valesano|USA

>Spike|hCoV-19/England/CAMC-B32BBE/2020|2020-11-05|EPI\_ISL\_659554|Original|hCoV-19^^England|Human|Lighthouse Lab in Cambridge|Wellcome Sanger Institute for the COVID-19 Genomics UK (COG-UK) Consortium|Davies|United Kingdom

>Spike|hCoV-19/Wales/ALDP-BB5685/2020|2020-11-20|EPI\_ISL\_710700|Original|hCoV-19^^Wales|Human|Lighthouse Lab in Alderley Park|Wellcome Sanger Institute for the COVID-19 Genomics UK (COG-UK) Consortium|Davies|United Kingdom

>Spike|hCoV-19/Switzerland/GE-ETHZ-100367/2020|2020-03-19|EPI\_ISL\_574941|Original|hCoV-19^^Geneva|Human|Viollier AG|Department of Biosystems Science and Engineering|Nadeau|Switzerland

>Spike|hCoV-19/USA/WI-UW-2509/2020|2020-12-30|EPI\_ISL\_779341|Original|hCoV-19^^Wisconsin|Human|University of Wisconsin-Madison AIDS Vaccine Research Laboratories|University of Wisconsin-Madison AIDS Vaccine Research Laboratories|Moreno|USA

>Spike|hCoV-19/Canada/BC\_08848124/2020|2020-04-00|EPI\_ISL\_466836|Original|hCoV-19^^British Columbia|Human|BCCDC Public Health Laboratory|BCCDC Public Health Laboratory|Harrigan|Canada

>Spike|hCoV-19/Switzerland/ZH-ETHZ-210047/2020|2020-07-17|EPI\_ISL\_510785|Original|hCoV-19^^Zurich|Human|Viollier AG|Department of Biosystems Science and Engineering|Nadeau|Switzerland

>Spike|hCoV-19/Denmark/DCGC-20707/2020|2020-12-21|EPI\_ISL\_758762|Original|hCoV-19^^Hovedstaden|Human|Department of Virus and Microbiological Special Diagnostics|Albertsen Lab|Michaelsen|Denmark

>Spike|hCoV-19/USA/TX-HMH-MCoV-8641/2020|2020-07-02|EPI\_ISL\_780671|Original|hCoV-19^^Texas|Human|Houston Methodist Hospital|Houston Methodist Hospital|Long|USA

>Spike|hCoV-19/England/CAMC-BBCF74/2020|2020-11-18|EPI\_ISL\_679296|Original|hCoV-19^^England|Human|Queens Medical Centre|COVID-19 Genomics UK (COG-UK) Consortium|Loose|United Kingdom

>Spike|hCoV-19/England/CAMC-A570C4/2020|2020-10-09|EPI\_ISL\_597519|Original|hCoV-19^^England|Human|Lighthouse Lab in Cambridge|Wellcome Sanger Institute for the COVID-19 Genomics UK (COG-UK) consortium|Davies|United Kingdom

>Spike|hCoV-19/Spain/MD-HLP-43/2020|2020-04-12|EPI\_ISL\_530047|Original|hCoV-19^^Madrid|Human|Hospital Universitario La Paz|Hospital Universitario La Paz|Viedma|Spain

>Spike|hCoV-19/Spain/IB-IBV-h2536/2020|2020-03-21|EPI\_ISL\_468954|Original|hCoV-19^^Illes Balears|Human|Servicio de Microbiolog\u00eda|SeqCOVID-SPAIN consortium/IBV (CSIC) |Comas|Spain

>Spike|hCoV-19/England/QEUH-AF1590/2020|2020-10-29|EPI\_ISL\_665651|Original|hCoV-19^^England|Human|Northumbria University / South Tees Hospitals NHS Foundation Trust / North Cumbria Integrated Care NHS Foundation Trust / North Tees and Hartlepool NHS Foundation Trust / Newcastle Hospitals NHS Foundation Trust|COVID-19 Genomics UK (COG-UK) Consortium|Bashton|United Kingdom

>Spike|hCoV-19/Netherlands/ZH-EMC-261/2020|2020-04-26|EPI\_ISL\_523603|Original|hCoV-19^^Zuid Holland|Human|Dutch COVID-19 response team|Erasmus Medical Center|Oude Munnink|Netherlands

>Spike|hCoV-19/Scotland/QEUH-C541B3/2020|2020-12-12|EPI\_ISL\_757059|Original|hCoV-19^^Scotland|Human|Lighthouse Lab in Glasgow|Wellcome Sanger Institute for the COVID-19 Genomics UK (COG-UK) Consortium|Davies|United Kingdom

>Spike|hCoV-19/England/MILK-A05C2B/2020|2020-09-30|EPI\_ISL\_599829|Original|hCoV-19^^England|Human|Lighthouse Lab in Milton Keynes|Wellcome Sanger Institute for the COVID-19 Genomics UK (COG-UK) consortium|Davies|United Kingdom

>Spike|hCoV-19/England/QEUH-9601D5/2020|2020-08-06|EPI\_ISL\_531911|Original|hCoV-19^^England|Human|Lighthouse Lab in Glasgow|Wellcome Sanger Institute for the COVID-19 Genomics UK (COG-UK) consortium|Davies|United Kingdom

>Spike|hCoV-19/England/QEUH-9F79DB/2020|2020-09-27|EPI\_ISL\_595715|Original|hCoV-19^^England|Human|Oxford Viromics|COVID-19 Genomics UK (COG-UK) Consortium|Golubchik|United Kingdom

>Spike|hCoV-19/Netherlands/Limburg\_32/2020|2020-04-22|EPI\_ISL\_461020|Original|hCoV-19^^Limburg|Human|Dutch COVID-19 response team|Erasmus Medical Center|Oude Munnink|Netherlands

>Spike|hCoV-19/England/ALDP-A70308/2020|2020-10-15|EPI\_ISL\_607667|Original|hCoV-19^^England|Human|Lighthouse Lab in Alderley Park|Wellcome Sanger Institute for the COVID-19 Genomics UK (COG-UK) consortium|Davies|United Kingdom

>Spike|hCoV-19/Wales/PHWC-4A5FB1/2020|2020-12-15|EPI\_ISL\_764282|Original|hCoV-19^^Wales|Human|Wales Specialist Virology Centre Sequencing lab|COVID-19 Genomics UK (COG-UK) Consortium|Moore|United Kingdom

>Spike|hCoV-19/Scotland/QEUH-A0B4D2/2020|2020-10-03|EPI\_ISL\_599223|Original|hCoV-19^^Scotland|Human|Lighthouse Lab in Glasgow|Wellcome Sanger Institute for the COVID-19 Genomics UK (COG-UK) consortium|Davies|United Kingdom

>Spike|hCoV-19/Wales/PHWC-47D4C2/2020|2020-10-07|EPI\_ISL\_586151|Original|hCoV-19^^Wales|Human|Wales Specialist Virology Centre Sequencing lab|COVID-19 Genomics UK (COG-UK) Consortium|Moore|United Kingdom

>Spike|hCoV-19/USA/WI-WSLH-200642/2020|2020-06-15|EPI\_ISL\_631411|Original|hCoV-19^^Wisconsin|Human|Wisconsin State Laboratory of Hygiene Communicable Disease Division|Wisconsin State Laboratory of Hygiene Communicable Disease Division|Florek|USA

>Spike|hCoV-19/Portugal/PT1322/2020|2020-03-18|EPI\_ISL\_511281|Original|hCoV-19^^Portugal|Human|Instituto Nacional de Saude (INSA) and Instituto Gulbenkian de Ciencia (IGC)|Instituto Nacional de Saude (INSA) and Instituto Gulbenkian de Ciencia (IGC)|Borges|Portugal

>Spike|hCoV-19/Australia/NSW916/2020|2020-08-28|EPI\_ISL\_544997|Original|hCoV-19^^New South Wales|Human|St Vincent's Pathology (SydPath)|NSW Health Pathology - Institute of Clinical Pathology and Medical Research; Westmead Hospital; University of Sydney|Gall|Australia

>Spike|hCoV-19/Ireland/D-NVRL-AIIDV0002v1/2020|2020-03-26|EPI\_ISL\_644321|Original|hCoV-19^^Dublin|Human|CEPHR / Vincent's Hospital|Irish Coronavirus Sequencing Consortium - National Virus Reference Laboratory|Gonzalez|Ireland

>Spike|hCoV-19/USA/CA-SCCPHD-UC157/2020|2020-03-11|EPI\_ISL\_435636|Original|hCoV-19^^California|Human|Santa Clara County Public Health Department|Chiu Laboratory|Chiu|USA

>Spike|hCoV-19/England/CAMB-8182D/2020|2020-04-11|EPI\_ISL\_443105|Original|hCoV-19^^England|Human|Department of Pathology|Wellcome Sanger Institute for the COVID-19 Genomics UK (COG-UK) consortium|Amato|United Kingdom

>Spike|hCoV-19/Japan/PG-8050/2020|2020-09-00|EPI\_ISL\_687151|Original|hCoV-19^^Japan|Human|Pathogen Genomics Center|Pathogen Genomics Center|Sekizuka|Japan

>Spike|hCoV-19/Lithuania/MR-LUHS-Eilnr65/2020|2020-04-11|EPI\_ISL\_541869|Original|hCoV-19^^Marijampoles apskritis|Human|Lithuanian University of Health Sciences Hospital|Lithuanian University of Health Sciences|Zemaitis|Lithuania

>Spike|hCoV-19/Denmark/DCGC-10248/2020|2020-11-09|EPI\_ISL\_669731|Original|hCoV-19^^Denmark|Human|Department of Virus and Microbiological Special Diagnostics|Albertsen Lab|Michaelsen|Denmark

>Spike|hCoV-19/England/CAMC-B52A51/2020|2020-11-09|EPI\_ISL\_657565|Original|hCoV-19^^England|Human|Lighthouse Lab in Cambridge|Wellcome Sanger Institute for the COVID-19 Genomics UK (COG-UK) Consortium|Davies|United Kingdom

>Spike|hCoV-19/USA/CA-QDX-2387/2020|2020-03-17|EPI\_ISL\_604664|Original|hCoV-19^^California|Human|Quest Diagnostics|Quest Diagnostics|Kagan|USA

>Spike|hCoV-19/Vietnam/HCMC-35016/2020|2020-03-20|EPI\_ISL\_450741|Original|hCoV-19^^Ho Chi Minh City|Human|OUCRU/HTD|OUCRU/HTD|Tan|Vietnam

>Spike|hCoV-19/USA/TX-HMH0398/2020|2020-03-31|EPI\_ISL\_434985|Original|hCoV-19^^Texas|Human|Houston Methodist Hospital|Houston Methodist Hospital|Long|USA

>Spike|hCoV-19/USA/LA-EVTL699/2020|2020-07-14|EPI\_ISL\_653391|Original|hCoV-19^^Louisiana|Human|LSUHS Emerging Viral Threat Laboratory|Microbial Genome Sequencing Center|Kamil|USA

>Spike|hCoV-19/England/CAMC-BC0854/2020|2020-11-20|EPI\_ISL\_704801|Original|hCoV-19^^England|Human|Lighthouse Lab in Cambridge|Wellcome Sanger Institute for the COVID-19 Genomics UK (COG-UK) Consortium|Davies|United Kingdom

>Spike|hCoV-19/Wales/PHWC-16F684/2020|2020-10-02|EPI\_ISL\_586002|Original|hCoV-19^^Wales|Human|Wales Specialist Virology Centre Sequencing lab|COVID-19 Genomics UK (COG-UK) Consortium|Moore|United Kingdom

>Spike|hCoV-19/England/20120037806/2020|2020-03-14|EPI\_ISL\_465162|Original|hCoV-19^^England|Human|Respiratory Virus Unit|Respiratory Virus Unit|Platt|United Kingdom

>Spike|hCoV-19/England/CAMB-84963/2020|2020-03-07|EPI\_ISL\_440550|Original|hCoV-19^^England|Human|Department of Pathology|Wellcome Sanger Institute for the COVID-19 Genomics UK (COG-UK) consortium|Amato|United Kingdom

>Spike|hCoV-19/Germany/NW-HHU-205/2020|2020-04-08|EPI\_ISL\_602479|Original|hCoV-19^^North Rhine-Westphalia|Human|Institute for Virology|Center of Medical Microbiology|Wienemann|Germany

>Spike|hCoV-19/England/20139008404/2020|2020-03-27|EPI\_ISL\_421864|Original|hCoV-19^^England|Human|Respiratory Virus Unit|Respiratory Virus Unit|Platt|United Kingdom

>Spike|hCoV-19/Luxembourg/LNS4009709/2020|2020-10-25|EPI\_ISL\_740402|Original|hCoV-19^^Luxembourg|Human|Laboratoire national de sant\u00e9|Laboratoire national de sant\u00e9|Wienecke-Baldacchino|Luxembourg

>Spike|hCoV-19/England/CAMC-BF84E6/2020|2020-12-04|EPI\_ISL\_761021|Original|hCoV-19^^England|Human|Lighthouse Lab in Cambridge|Wellcome Sanger Institute for the COVID-19 Genomics UK (COG-UK) Consortium|Davies|United Kingdom

>Spike|hCoV-19/USA/NY-WCMP10G05P/2020|2020-03-15|EPI\_ISL\_427576|Original|hCoV-19^^New York|Human|NewYork-Presbyterian & Mason Lab|Mason Lab|Mason|USA

>Spike|hCoV-19/South Korea/KCDC2054/2020|2020-02-21|EPI\_ISL\_481374|Original|hCoV-19^^South Korea|Human|Division of Viral Diseases|Division of Viral Diseases|Kim|South Korea

>Spike|hCoV-19/USA/TX-HMH-MCoV-8233/2020|2020-07-07|EPI\_ISL\_783592|Original|hCoV-19^^Texas|Human|Houston Methodist Hospital|Houston Methodist Hospital|Long|USA

>Spike|hCoV-19/Scotland/CVR4844/2020|2020-10-02|EPI\_ISL\_594647|Original|hCoV-19^^Scotland|Human|West of Scotland Specialist Virology Centre|COVID-19 Genomics UK (COG-UK) Consortium|Robertson|United Kingdom

>Spike|hCoV-19/USA/TX-DSHS-1235/2020|2020-04-30|EPI\_ISL\_654768|Original|hCoV-19^^Texas|Human|Texas Department of State Health Services|Texas Department of State Health Services|Rahman|USA

>Spike|hCoV-19/USA/WA-UW-5884/2020|2020-04-07|EPI\_ISL\_430929|Original|hCoV-19^^Washington|Human|UW Virology Lab|UW Virology Lab|Roychoudhury|USA

>Spike|hCoV-19/England/QEUEH-B11890/2020|2020-11-02|EPI\_ISL\_642261|Original|hCoV-19^^England|Human|Lighthouse Lab in Glasgow|Wellcome Sanger Institute for the COVID-19 Genomics UK (COG-UK) Consortium|Davies|United Kingdom

>Spike|hCoV-19/USA/TX-DSHS-1284/2020|2020-03-31|EPI\_ISL\_648254|Original|hCoV-19^^Texas|Human|Texas Department of State Health Services|Texas Department of State Health Services|Rahman|USA

>Spike|hCoV-19/Switzerland/SO-ETHZ-140009/2020|2020-05-16|EPI\_ISL\_476085|Original|hCoV-19^^Solothurn|Human|Viollier AG|Department of Biosystems Science and Engineering|Nadeau|Switzerland

>Spike|hCoV-19/USA/AZ-TG381246/2020|2020-06-15|EPI\_ISL\_694653|Original|hCoV-19^^Arizona|Human|TGen North|TGen North|French|USA

>Spike|hCoV-19/England/ALDP-AA4022/2020|2020-10-22|EPI\_ISL\_630857|Original|hCoV-19^^England|Human|Lighthouse Lab in Alderley Park|Wellcome Sanger Institute for the COVID-19 Genomics UK (COG-UK) consortium|Davies|United Kingdom

>Spike|hCoV-19/Suriname/SR-51/2020|2020-07-16|EPI\_ISL\_518800|Original|hCoV-19^^Suriname|Human|Academic Hospital Paramaribo|Erasmus Medical Center|M\u00f0fcnger|Suriname

>Spike|hCoV-19/Panama/336044/2020|2020-04-03|EPI\_ISL\_496835|Original|hCoV-19^^Colon|Human|Gorgas Memorial Laboratory of Health Studies|Gorgas Memorial Laboratory of Health Studies|Martinez|Panama

>Spike|hCoV-19/England/MILK-B02908/2020|2020-10-24|EPI\_ISL\_642990|Original|hCoV-19^^England|Human|Lighthouse Lab in Milton Keynes|Wellcome Sanger Institute for the COVID-19 Genomics UK (COG-UK) Consortium|Davies|United Kingdom

>Spike|hCoV-19/England/MILK-B3C3E9/2020|2020-11-01|EPI\_ISL\_706141|Original|hCoV-19^^England|Human|Oxford Viromics|COVID-19 Genomics UK (COG-UK) Consortium|Golubchik|United Kingdom

>Spike|hCoV-19/Australia/NSW613/2020|2020-06-07|EPI\_ISL\_490022|Original|hCoV-19^^New South Wales|Human|South Eastern Area Laboratory Services (SEALS)|NSW Health Pathology - Institute of Clinical Pathology and Medical Research; Westmead Hospital; University of Sydney|Gall|Australia

>Spike|hCoV-19/Brazil/SP-591/2020|2020-07-05|EPI\_ISL\_693217|Original|hCoV-19^^S\u00e3o Paulo|Human|Unidade de Vigil\u00e2ncia Epidemiol\u00f3gica de Araras|Instituto Adolfo Lutz|Sacchi|Brazil

>Spike|hCoV-19/Switzerland/ZH-UZH-IMV115/2020|2020-12-20|EPI\_ISL\_730632|Original|hCoV-19^^Zurich|Human|M\u00e4nnedorf Hospital|Institute of Medical Virology|Schmutz|Switzerland

>Spike|hCoV-19/Scotland/CVR2432/2020|2020-04-14|EPI\_ISL\_493797|Original|hCoV-19^^Scotland|Human|West of Scotland Specialist Virology Centre|COVID-19 Genomics UK (COG-UK) Consortium|Robertson|United Kingdom

>Spike|hCoV-19/France/PAC-MEPHI-2050/2020|2020-08-31|EPI\_ISL\_644482|Original|hCoV-19^^Provence-Alpes-Cote-d\u2019Azur|Human|MEPHI|MEPHI|Levasseur|France

>Spike|hCoV-19/USA/UT-UPHL-2012034659/2020|2020-06-20|EPI\_ISL\_746404|Original|hCoV-19^^Utah|Human|Utah Public Health Laboratory|Utah Public Health Laboratory|Gallagher|USA

>Spike|hCoV-19/England/MILK-B3D2FA/2020|2020-11-01|EPI\_ISL\_679834|Original|hCoV-19^^England|Human|Oxford Viromics|COVID-19 Genomics UK (COG-UK) Consortium|Golubchik|United Kingdom

>Spike|hCoV-19/Australia/VIC9976/2020|2020-07-23|EPI\_ISL\_565819|Original|hCoV-19^^Victoria|Human|Microbiological Diagnostic Unit - Public Health Laboratory (MDU-PHL) |MDU-PHL|Schultz|Australia

>Spike|hCoV-19/Belgium/OS-0325137/2020|2020-03-25|EPI\_ISL\_420394|Original|hCoV-19^^Sint-Pieter-Woluwe|Human|KU Leuven|KU Leuven|Maes|Belgium

>Spike|hCoV-19/England/CAMC-B094B5/2020|2020-10-30|EPI\_ISL\_673010|Original|hCoV-19^^England|Human|Lighthouse Lab in Cambridge|Wellcome Sanger Institute for the COVID-19 Genomics UK (COG-UK) Consortium|Davies|United Kingdom

>Spike|hCoV-19/India/MH-BJMC-8677/2020|2020-06-02|EPI\_ISL\_728259|Original|hCoV-19^^Maharashtra|Human|B.J. Govt. Medical College|National Centre For Cell Science|Paul|India

>Spike|hCoV-19/United Arab Emirates/L1076/2020|2020-03-15|EPI\_ISL\_435128|Original|hCoV-19^^United Arab Emirates|Human|Mohammed Bin Rashid University of Medicine and Health Sciences|Al Jalila Genomics Center|Ramaswamy|United Arab Emirates

>Spike|hCoV-19/England/ALDP-C24486/2020|2020-12-06|EPI\_ISL\_736772|Original|hCoV-19^^England|Human|Lighthouse Lab in Alderley Park|Wellcome Sanger Institute for the COVID-19 Genomics UK (COG-UK) Consortium|Davies|United Kingdom

>Spike|hCoV-19/South Africa/KRISP-K002684/2020|2020-08-01|EPI\_ISL\_535547|Original|hCoV-19^^KwaZulu-Natal|Human|NHLs-IALCH|KRISP|de Oliveira|South Africa

>Spike|hCoV-19/USA/FL-BPHL-0818/2020|2020-06-11|EPI\_ISL\_514164|Original|hCoV-19^^Florida|Human|Florida Bureau of Public Health Laboratories|Florida Bureau of Public Health Laboratories|Blanton|USA

>Spike|hCoV-19/England/QEUEH-9DC14D/2020|2020-09-21|EPI\_ISL\_601237|Original|hCoV-19^^England|Human|Lighthouse Lab in Glasgow|Wellcome Sanger Institute for the COVID-19 Genomics UK (COG-UK) consortium|Davies|United Kingdom

>Spike|hCoV-19/Italy/SIC-IZSBM169-57/2020|2020-06-00|EPI\_ISL\_582802|Original|hCoV-19^^Sicily|Human|Laboratorio di Riferimento Regionale della Sicilia Occidentale per l'Emergenza COVID-19|Istituto Zooprofilattico Sperimentale della Sicilia|Reale|Italy

>Spike|hCoV-19/USA/WA-UW-379/2020|2020-03-11|EPI\_ISL\_486093|Original|hCoV-19^^Washington|Human|UW Virology Lab|UW Virology Lab|Roychoudhury|USA

>Spike|hCoV-19/England/NORT-29360E/2020|2020-06-27|EPI\_ISL\_499504|Original|hCoV-19^^England|Human|Northumbria University / South Tees Hospitals NHS Foundation Trust / North Cumbria Integrated Care NHS Foundation Trust / North Tees and Hartlepool NHS Foundation Trust / Newcastle Hospitals NHS Foundation Trust|COVID-19 Genomics UK (COG-UK) Consortium|Bashton|United Kingdom

>Spike|hCoV-19/England/LEED-2A9483/2020|2020-04-20|EPI\_ISL\_538927|Original|hCoV-19^^England|Human|Leeds Teaching Hospitals NHS Trust and Public Health England|Wellcome Sanger Institute for the COVID-19 Genomics UK (COG-UK) consortium|Davies|United Kingdom

>Spike|hCoV-19/England/ALDP-95A745/2020|2020-06-13|EPI\_ISL\_553560|Original|hCoV-19^^England|Human|Lighthouse Lab in Alderley Park|Wellcome Sanger Institute for the COVID-19 Genomics UK (COG-UK) consortium|Davies|United Kingdom

>Spike|hCoV-19/USA/WA-S1856/2020|2020-05-27|EPI\_ISL\_496282|Original|hCoV-19^^Washington|Human|Washington State Department of Health|Seattle Flu Study|Lee|USA

>Spike|hCoV-19/England/ALDP-B8433D/2020|2020-11-14|EPI\_ISL\_674454|Original|hCoV-19^^England|Human|Lighthouse Lab in Alderley Park|Wellcome Sanger Institute for the COVID-19 Genomics UK (COG-UK) Consortium|Davies|United Kingdom

>Spike|hCoV-19/Switzerland/BS-42393291/2020|2020-08-13|EPI\_ISL\_581952|Original|hCoV-19^^Basel-Stadt|Human|University Hospital Basel|University Hospital Basel|Roloff Handschin|Switzerland

>Spike|hCoV-19/USA/CA-CZB-10925/2020|2020-08-31|EPI\_ISL\_583154|Original|hCoV-19^^California|Human|Humboldt County Public Health Laboratory|Chan-Zuckerberg Biohub|Bhatt|USA

>Spike|hCoV-19/Denmark/DCGC-17326/2020|2020-12-14|EPI\_ISL\_750909|Original|hCoV-19^^Midtjylland|Human|Department of Virus and Microbiological Special Diagnostics|Albertsen Lab|Michaelsen|Denmark

>Spike|hCoV-19/Wales/PHWC-49DDFE/2020|2020-12-04|EPI\_ISL\_742914|Original|hCoV-19^^Wales|Human|Wales Specialist Virology Centre Sequencing lab|COVID-19 Genomics UK (COG-UK) Consortium|Moore|United Kingdom

>Spike|hCoV-19/USA/AZ-TG491659/2020|2020-06-25|EPI\_ISL\_695204|Original|hCoV-19^^Arizona|Human|AZ SPHL|TGen North|French|USA

>Spike|hCoV-19/USA/AZ-TG280804/2020|2020-04-20|EPI\_ISL\_694158|Original|hCoV-19^^Arizona|Human|AZ SPHL|TGen North|French|USA

>Spike|hCoV-19/South Africa/KRISP-0173/2020|2020-06-02|EPI\_ISL\_467523|Original|hCoV-19^^KwaZulu-Natal|Human|NHLIS-IALCH|KRISP|de Oliveira|South Africa

>Spike|hCoV-19/England/MILK-ACEC97/2020|2020-10-21|EPI\_ISL\_644069|Original|hCoV-19^^England|Human|Lighthouse Lab in Milton Keynes|Wellcome Sanger Institute for the COVID-19 Genomics UK (COG-UK) Consortium|Davies|United Kingdom

>Spike|hCoV-19/Australia/VIC2557/2020|2020-06-24|EPI\_ISL\_522241|Original|hCoV-19^^Victoria|Human|Victorian Infectious Diseases Reference Laboratory (VIDRL)|VIDRL and MDU-PHL|Schultz|Australia

>Spike|hCoV-19/England/CAMB-76867/2020|2020-03-30|EPI\_ISL\_438314|Original|hCoV-19^^England|Human|Department of Pathology|Wellcome Sanger Institute for the COVID-19 Genomics UK (COG-UK) consortium|Amato|United Kingdom

>Spike|hCoV-19/England/LCST-24D7026/2020|2020-06-17|EPI\_ISL\_478354|Original|hCoV-19^^England|Human|University Hospitals Of Leicester NHS Trust and DeepSeq Nottingham|COVID-19 Genomics UK (COG-UK) Consortium|Loose|United Kingdom

>Spike|hCoV-19/USA/CA-CZB-2344/2020|2020-05-13|EPI\_ISL\_513793|Original|hCoV-19^^California|Human|Orange County Public Health Laboratory|Chan-Zuckerberg Biohub|Kamm|USA

>Spike|hCoV-19/Denmark/DCGC-21708/2020|2020-12-21|EPI\_ISL\_758321|Original|hCoV-19^^Hovedstaden|Human|Department of Virus and Microbiological Special Diagnostics|Albertsen Lab|Michaelsen|Denmark

>Spike|hCoV-19/England/MILK-99A9AD/2020|2020-08-29|EPI\_ISL\_550386|Original|hCoV-19^^England|Human|Lighthouse Lab in Milton Keynes|Wellcome Sanger Institute for the COVID-19 Genomics UK (COG-UK) consortium|Davies|United Kingdom

>Spike|hCoV-19/England/CAMB-786C5/2020|2020-04-06|EPI\_ISL\_433763|Original|hCoV-19^^England|Human|Department of Pathology|COVID-19 Genomics UK (COG-UK) Consortium|Meredith|United Kingdom

>Spike|hCoV-19/USA/TX-HMH-MCoV-14694/2020|2020-10-01|EPI\_ISL\_787979|Original|hCoV-19^^Texas|Human|Houston Methodist Hospital|Houston Methodist Hospital|Long|USA

>Spike|hCoV-19/USA/LA-GBCL-26513050/2020|2020-04-21|EPI\_ISL\_485090|Original|hCoV-19^^Louisiana|Human|River Road Testing Lab|Ginkgo Bioworks Clinical Laboratory|Smith|USA

>Spike|hCoV-19/England/QEUH-B7D0C7/2020|2020-11-14|EPI\_ISL\_741844|Original|hCoV-19^^England|Human|Oxford Viromics|COVID-19 Genomics UK (COG-UK) Consortium|Golubchik|United Kingdom

>Spike|hCoV-19/England/QEUH-9BB0A1/2020|2020-09-07|EPI\_ISL\_573649|Original|hCoV-19^^England|Human|Oxford Viromics|COVID-19 Genomics UK (COG-UK) Consortium|Golubchik|United Kingdom

>Spike|hCoV-19/Oman/C-11911/2020|2020-05-01|EPI\_ISL\_491170|Original|hCoV-19^^South Batinah|Human|Oman-National Influenza Center|Biotechnology & OMICs Laboratory|Al Mahruqi|Oman

>Spike|hCoV-19/England/ALDP-A6D8B4/2020|2020-10-14|EPI\_ISL\_607893|Original|hCoV-19^^England|Human|Lighthouse Lab in Alderley Park|Wellcome Sanger Institute for the COVID-19 Genomics UK (COG-UK) consortium|Davies|United Kingdom

>Spike|hCoV-19/England/NORW-E8E13/2020|2020-04-25|EPI\_ISL\_453559|Original|hCoV-19^^England|Human|Quadram Institute Bioscience|COVID-19 Genomics UK (COG-UK) Consortium|Alikhan|United Kingdom

>Spike|hCoV-19/USA/NY-QDX-1234/2020|2020-03-17|EPI\_ISL\_572010|Original|hCoV-19^^New York|Human|Quest Diagnostics|Quest Diagnostics|Kagan|USA

>Spike|hCoV-19/USA/WI-UW-759/2020|2020-07-06|EPI\_ISL\_495464|Original|hCoV-19^^Wisconsin|Human|University of Wisconsin-Madison AIDS Vaccine Research Laboratories|University of Wisconsin-Madison AIDS Vaccine Research Laboratories|Baczenas|USA

>Spike|hCoV-19/Russia/Moscow-35I/2020|2020-04-02|EPI\_ISL\_428852|Vero P1|hCoV-19^^Moscow|Human|FSBSI \Chumakov Federal Scientific Center for Research and Development of Immune-and-Biological Products of Russian Academy of Sciences\|FSBSI \Chumakov Federal Scientific Center for Research and Development of Immune-and-Biological Products of Russian Academy of Sciences\ & NRC \Kurchatov institute\|Kozlovskaya|Russia

>Spike|hCoV-19/Israel/2046434/2020|2020-04-01|EPI\_ISL\_447404|Original|hCoV-19^^North District|Human|Clinical Microbiology Laboratory|Stern Lab|Miller|Israel

>Spike|hCoV-19/Australia/VIC189/2020|2020-03-19|EPI\_ISL\_419885|Original|hCoV-19^^Victoria|Human|Victorian Infectious Diseases Reference Laboratory (VIDRL)|Victorian Infectious Diseases Reference Laboratory and Microbiological Diagnostic Unit Public Health Laboratory|Schultz|Australia

>Spike|hCoV-19/England/MILK-BAC320/2020|2020-11-18|EPI\_ISL\_720395|Original|hCoV-19^^England|Human|Lighthouse Lab in Milton Keynes|Wellcome Sanger Institute for the COVID-19 Genomics UK (COG-UK) Consortium|Davies|United Kingdom

>Spike|hCoV-19/Spain/AR-IBV-98008160/2020|2020-10-14|EPI\_ISL\_654420|Original|hCoV-19^^Aragon|Human|Servicio de Microbiolog\u00eda|SeqCOVID-SPAIN consortium|IBV (CSIC)|Comas|Spain

>Spike|hCoV-19/England/MILK-ABC027/2020|2020-10-22|EPI\_ISL\_631052|Original|hCoV-19^^England|Human|Lighthouse Lab in Milton Keynes|Wellcome Sanger Institute for the COVID-19 Genomics UK (COG-UK) consortium|Davies|United Kingdom

>Spike|hCoV-19/England/QEUH-9E4968/2020|2020-09-23|EPI\_ISL\_579835|Original|hCoV-19^^England|Human|Lighthouse Lab in Glasgow|Wellcome Sanger Institute for the COVID-19 Genomics UK (COG-UK) Consortium|Davies|United Kingdom

>Spike|hCoV-19/USA/CA-ALSR-1264/2020|2020-05-07|EPI\_ISL\_494465|Original|hCoV-19^^California|Human|San Diego County Public Health Laboratory|Andersen lab at Scripps Research|Gangavarapu|USA

>Spike|hCoV-19/USA/IN-CDC-STM-P053/2020|2020-12-18|EPI\_ISL\_755616|Original|hCoV-19^^Indiana|Human|Helix/Illumina|Genomics and Discovery|Cook|USA

>Spike|hCoV-19/Scotland/QEUH-961F34/2020|2020-08-10|EPI\_ISL\_531857|Original|hCoV-19^^Scotland|Human|NHSGGC West of Scotland Specialist Virology Centre / MRC-University of Glasgow Centre for Virus Research|Wellcome Sanger Institute for the COVID-19 Genomics UK (COG-UK) consortium|Davies|United Kingdom

>Spike|hCoV-19/Switzerland/ZH-ETHZ-110046/2020|2020-04-01|EPI\_ISL\_486478|Original|hCoV-19^^Zurich|Human|Viollier AG|Department of Biosystems Science and Engineering|Nadeau|Switzerland

>Spike|hCoV-19/England/QEUH-B4178B/2020|2020-11-08|EPI\_ISL\_658413|Original|hCoV-19^^England|Human|Lighthouse Lab in Glasgow|Wellcome Sanger Institute for the COVID-19 Genomics UK (COG-UK) Consortium|Davies|United Kingdom

>Spike|hCoV-19/England/LOND-12641C6/2020|2020-11-14|EPI\_ISL\_679535|Original|hCoV-19^^England|Human|University College London|COVID-19 Genomics UK (COG-UK) Consortium|Roy|United Kingdom

>Spike|hCoV-19/USA/NY-Wadsworth-287929-01/2020|2020-12-15|EPI\_ISL\_767471|Original|hCoV-19^^New York|Human|Wadsworth Center|Wadsworth Center|Lasek-Nesselquist|USA

>Spike|hCoV-19/South Africa/N00105/2020|2020-06-11|EPI\_ISL\_623070|Original|hCoV-19^^Mpumalanga|Human|National Health Laboratory Service|National Institute for Communicable Diseases of the National Health Laboratory Service|Allam|South Africa

>Spike|hCoV-19/Brazil/SC-L12-CD163/2020|2020-03-13|EPI\_ISL\_476209|Original|hCoV-19^^Santa Catarina|Human|DB Diagn\u00f3sticos do Brasil|Instituto de Medicina Tropical da Univesidade de S\u00e3o Paulo|Sabino|Brazil

>Spike|hCoV-19/Brazil/RJ-00534/2020|2020-07-29|EPI\_ISL\_717785|Original|hCoV-19^^Rio de Janeiro|Human|LACEN RJ - Noel Nutels|Bioinformatics Laboratory / LNCC|Almeida|Brazil

>Spike|hCoV-19/England/202881383/2020|2020-06-30|EPI\_ISL\_491717|Original|hCoV-19^^England|Human|Respiratory Virus Unit|Respiratory Virus Unit|Platt|United Kingdom

>Spike|hCoV-19/Wales/PHWC-490933/2020|2020-11-15|EPI\_ISL\_706528|Original|hCoV-19^^Wales|Human|Originating lab|COVID-19 Genomics UK (COG-UK) Consortium|Moore|United Kingdom

>Spike|hCoV-19/Denmark/DCGC-14297/2020|2020-11-30|EPI\_ISL\_711678|Original|hCoV-19^^Hovedstaden|Human|Department of Virus and Microbiological Special Diagnostics|Albertsen Lab|Michaelsen|Denmark

>Spike|hCoV-19/Switzerland/BL-ETHZ-120038/2020|2020-04-20|EPI\_ISL\_468227|Original|hCoV-19^^Basel-Landschaft|Human|Viollier AG|Department of Biosystems Science and Engineering|Nadeau|Switzerland

>Spike|hCoV-19/Belgium/reg-10181076/2020|2020-10-18|EPI\_ISL\_735116|Original|hCoV-19^^Leuven|Human|UZ Leuven|KU Leuven|Maes|Belgium

>Spike|hCoV-19/England/QEUH-AF09D1/2020|2020-10-29|EPI\_ISL\_662669|Original|hCoV-19^^England|Human|Lighthouse Lab in Glasgow|Wellcome Sanger Institute for the COVID-19 Genomics UK (COG-UK) Consortium|Davies|United Kingdom

>Spike|hCoV-19/USA/UT-UPHL-201016479/2020|2020-06-01|EPI\_ISL\_594035|Original|hCoV-19^^Utah|Human|Utah Public Health Laboratory|Utah Public Health Laboratory|Young|USA

>Spike|hCoV-19/USA/CA-ALSR-2599/2020|2020-07-09|EPI\_ISL\_635579|Original|hCoV-19^^California|Human|San Diego County Public Health Laboratory|Andersen lab at Scripps Research|Gangavarapu|USA

>Spike|hCoV-19/Denmark/DCGC-15804/2020|2020-11-23|EPI\_ISL\_714030|Original|hCoV-19^^Sjaelland|Human|Department of Virus and Microbiological Special Diagnostics|Albertsen Lab|Michaelsen|Denmark

>Spike|hCoV-19/England/CAMB-1BAD0D/2020|2020-11-12|EPI\_ISL\_664794|Original|hCoV-19^^England|Human|Department of Pathology|COVID-19 Genomics UK (COG-UK) Consortium|Goodfellow|United Kingdom

>Spike|hCoV-19/USA/WI-UW-569/2020|2020-06-25|EPI\_ISL\_484944|Original|hCoV-19^^Wisconsin|Human|University of Wisconsin-Madison AIDS Vaccine Research Laboratories|University of Wisconsin-Madison AIDS Vaccine Research Laboratories|Baczenas|USA

>Spike|hCoV-19/Japan/PG-1771/2020|2020-04-00|EPI\_ISL\_685377|Original|hCoV-19^^Japan|Human|Pathogen Genomics Center|Pathogen Genomics Center|Sekizuka|Japan

>Spike|hCoV-19/England/CAMB-1AE1B5/2020|2020-04-27|EPI\_ISL\_459415|Original|hCoV-19^^England|Human|Department of Pathology|Wellcome Sanger Institute for the COVID-19 Genomics UK (COG-UK) consortium|Davies|United Kingdom

>Spike|hCoV-19/USA/HI-H200209/2020|2020-08-12|EPI\_ISL\_752768|Original|hCoV-19^^Hawaii|Human|State Laboratories Division|State Laboratories Division|Sultana|USA

>Spike|hCoV-19/Wales/PHWC-49CE74/2020|2020-12-10|EPI\_ISL\_742699|Original|hCoV-19^^Wales|Human|Wales Specialist Virology Centre Sequencing lab|COVID-19 Genomics UK (COG-UK) Consortium|Moore|United Kingdom

>Spike|hCoV-19/Germany/BY-IMB03120/2020|2020-03-31|EPI\_ISL\_732552|Original|hCoV-19^^Bavaria|Human|Bundeswehr Institute of Microbiology|Bundeswehr Institute of Microbiology|Antwerpen|Germany

>Spike|hCoV-19/USA/AZ-TG491552/2020|2020-06-23|EPI\_ISL\_695166|Original|hCoV-19^^Arizona|Human|AZ SPHL|TGen North|French|USA

>Spike|hCoV-19/Canada/ON-S1581/2020|2020-09-04|EPI\_ISL\_755926|Original|hCoV-19^^Ontario|Human|Toronto Invasive Bacterial Diseases Network|McMaster University|McArthur|Canada

>Spike|hCoV-19/USA/CA-ALSR-2825/2020|2020-07-21|EPI\_ISL\_635699|Original|hCoV-19^^California|Human|San Diego County Public Health Laboratory|Andersen lab at Scripps Research|Gangavarapu|USA

>Spike|hCoV-19/USA/CA-CZB-13239/2020|2020-10-26|EPI\_ISL\_672478|Original|hCoV-19^^California|Human|Orange County Public Health Lab|Chan-Zuckerberg Biohub|Bhatt|USA

>Spike|hCoV-19/Scotland/QEUH-9E5493/2020|2020-09-24|EPI\_ISL\_601006|Original|hCoV-19^^Scotland|Human|Lighthouse Lab in Glasgow|Wellcome Sanger Institute for the COVID-19 Genomics UK (COG-UK) consortium|Davies|United Kingdom

>Spike|hCoV-19/England/CAMB-7DCEC/2020|2020-04-07|EPI\_ISL\_442273|Original|hCoV-19^^England|Human|Department of Pathology|Wellcome Sanger Institute for the COVID-19 Genomics UK (COG-UK) consortium|Amato|United Kingdom



>Spike|hCoV-19/England/ALDP-B4663E/2020|2020-11-07|EPI\_ISL\_656316|Original|hCoV-19^^England|Human|Lighthouse Lab in Alderley Park|Wellcome Sanger Institute for the COVID-19 Genomics UK (COG-UK) Consortium|Davies|United Kingdom

>Spike|hCoV-19/Japan/IC-0250/2020|2020-10-00|EPI\_ISL\_667679|Original|hCoV-19^^Japan|Human|Pathogen Genomics Center|Pathogen Genomics Center|Sekizuka|Japan

>Spike|hCoV-19/Chile/AT-CMM-ATAC20/2020|2020-07-26|EPI\_ISL\_626565|Original|hCoV-19^^Atacama|Human|Laboratorio de Biología Molecular|Center for Mathematical Modeling and Center for Genome Regulation. Santiago|Palma Vera|Chile

>Spike|hCoV-19/England/CAMC-A646FF/2020|2020-10-10|EPI\_ISL\_609099|Original|hCoV-19^^England|Human|Lighthouse Lab in Cambridge|Wellcome Sanger Institute for the COVID-19 Genomics UK (COG-UK) consortium|Davies|United Kingdom

>Spike|hCoV-19/USA/TX-HMH-MCoV-19586/2020|2020-11-19|EPI\_ISL\_783957|Original|hCoV-19^^Texas|Human|Houston Methodist Hospital|Houston Methodist Hospital|Long|USA

>Spike|hCoV-19/Jordan/AM-ALSR-5164/2020|2020-10-20|EPI\_ISL\_730403|Original|hCoV-19^^Amman|Human|Biolab Diagnostic Laboratories|Andersen lab at Scripps Research|Gangavarapu|Jordan

>Spike|hCoV-19/England/ALDP-B761AD/2020|2020-11-12|EPI\_ISL\_723742|Original|hCoV-19^^England|Human|Oxford Viromics|COVID-19 Genomics UK (COG-UK) Consortium|Golubchik|United Kingdom

>Spike|hCoV-19/USA/MI-MDHHS-SC21477/2020|2020-07-22|EPI\_ISL\_516204|Original|hCoV-19^^Michigan|Human|Michigan Department of Health and Human Services|Michigan Department of Health and Human Services|Blankenship|USA

>Spike|hCoV-19/England/BRIS-126EEB/2020|2020-04-23|EPI\_ISL\_469723|Original|hCoV-19^^England|Human|PHE South West Regional Laboratory|Wellcome Sanger Institute for the COVID-19 Genomics UK (COG-UK) consortium|Davies|United Kingdom

>Spike|hCoV-19/England/NOTT-111539/2020|2020-05-02|EPI\_ISL\_457577|Original|hCoV-19^^England|Human|Queens Medical Centre|COVID-19 Genomics UK (COG-UK) Consortium|Loose|United Kingdom

>Spike|hCoV-19/England/ALDP-CC099C/2020|2020-12-20|EPI\_ISL\_778164|Original|hCoV-19^^England|Human|Lighthouse Lab in Alderley Park|Wellcome Sanger Institute for the COVID-19 Genomics UK (COG-UK) Consortium|Davies|United Kingdom

>Spike|hCoV-19/USA/VA-DCLS-0748/2020|2020-06-15|EPI\_ISL\_526865|Original|hCoV-19^^Virginia|Human|Virginia DCLS|Virginia DCLS|St. Jacques|USA

>Spike|hCoV-19/Scotland/CVR2515/2020|2020-04-15|EPI\_ISL\_438921|Original|hCoV-19^^Scotland|Human|West of Scotland Specialist Virology Centre|COVID-19 Genomics UK (COG-UK) Consortium|Robertson|United Kingdom

>Spike|hCoV-19/England/QEUA-9F7B20/2020|2020-09-27|EPI\_ISL\_589216|Original|hCoV-19^^England|Human|Lighthouse Lab in Glasgow|Wellcome Sanger Institute for the COVID-19 Genomics UK (COG-UK) consortium|Davies|United Kingdom

>Spike|hCoV-19/USA/CA-CDPH040/2020|2020-04-27|EPI\_ISL\_754927|Original|hCoV-19^^California|Human|California Department of Public Health|California Department of Public Health|Bell|USA

>Spike|hCoV-19/Portugal/PT1386/2020|2020-03-27|EPI\_ISL\_511345|Original|hCoV-19^^Portugal|Human|Instituto Nacional de Saude (INSA)|Instituto Nacional de Saude (INSA)|Borges|Portugal

>Spike|hCoV-19/England/QEUA-9CE7E2/2020|2020-09-17|EPI\_ISL\_590099|Original|hCoV-19^^England|Human|Lighthouse Lab in Glasgow|Wellcome Sanger Institute for the COVID-19 Genomics UK (COG-UK) consortium|Davies|United Kingdom

>Spike|hCoV-19/Brazil/SP-L26-CD547/2020|2020-04-17|EPI\_ISL\_672725|Original|hCoV-19^^S\u00e3o Paulo|Human|Hospital das Cl\u00ednicas da Faculdade de Medicina da Universidade de S\u00e3o Paulo (HC-FMUSP)|Laborat\u00f3rio de Parasitologia M\u00e9dica - Instituto de Medicina Tropical - Universidade de S\u00e3o Paulo|de Jesus|Brazil

>Spike|hCoV-19/England/MILK-AC9388/2020|2020-10-21|EPI\_ISL\_644056|Original|hCoV-19^^England|Human|Lighthouse Lab in Milton Keynes|Wellcome Sanger Institute for the COVID-19 Genomics UK (COG-UK) Consortium|Davies|United Kingdom

>Spike|hCoV-19/England/QEUA-BCD9EB/2020|2020-11-26|EPI\_ISL\_704479|Original|hCoV-19^^England|Human|Lighthouse Lab in Glasgow|Wellcome Sanger Institute for the COVID-19 Genomics UK (COG-UK) Consortium|Davies|United Kingdom

>Spike|hCoV-19/Singapore/1071/2020|2020-10-02|EPI\_ISL\_596461|Original|hCoV-19^^Singapore|Human|National Public Health Laboratory|National Public Health Laboratory|Mak|Singapore

>Spike|hCoV-19/USA/NY-NYUMC648/2020|2020-03-30|EPI\_ISL\_444765|Original|hCoV-19^^New York|Human|NYU Langone Health|Departments of Pathology and Medicine|Maurano|USA

>Spike|hCoV-19/England/ALDP-B85B16/2020|2020-11-14|EPI\_ISL\_675232|Original|hCoV-19^^England|Human|Lighthouse Lab in Alderley Park|Wellcome Sanger Institute for the COVID-19 Genomics UK (COG-UK) Consortium|Davies|United Kingdom

>Spike|hCoV-19/Spain/CM-IBV-003755/2020|2020-04-02|EPI\_ISL\_474801|Original|hCoV-19^^Castilla La Mancha|Human|Complejo Hospitalario Universitario de Albacete|SeqCOVID-SPAIN consortium|IBV(CSIC)|Comas|Spain

>Spike|hCoV-19/Japan/PG-1110/2020|2020-04-00|EPI\_ISL\_684720|Original|hCoV-19^^Japan|Human|Pathogen Genomics Center|Pathogen Genomics Center|Sekizuka|Japan

>Spike|hCoV-19/Scotland/QEUA-A9F0FD/2020|2020-10-20|EPI\_ISL\_625383|Original|hCoV-19^^Scotland|Human|Lighthouse Lab in Glasgow|Wellcome Sanger Institute for the COVID-19 Genomics UK (COG-UK) consortium|Davies|United Kingdom

>Spike|hCoV-19/USA/CA-ALSR-1545/2020|2020-05-04|EPI\_ISL\_494654|Original|hCoV-19^^California|Human|Scripps Medical Laboratory|Andersen lab at Scripps Research|Gangavarapu|USA

>Spike|hCoV-19/Australia/VIC10579/2020|2020-08-03|EPI\_ISL\_562967|Original|hCoV-19^^Victoria|Human|Microbiological Diagnostic Unit - Public Health Laboratory (MDU-PHL)|MDU-PHL|Schultz|Australia

>Spike|hCoV-19/USA/MN-MDH-1869/2020|2020-09-28|EPI\_ISL\_603004|Original|hCoV-19^^Minnesota|Human|Essentia Health-St. Mary's Medical Center|Minnesota Department of Health|Garfin|USA

>Spike|hCoV-19/Japan/PG-2974/2020|2020-04-00|EPI\_ISL\_691099|Original|hCoV-19^^Japan|Human|Pathogen Genomics Center|Pathogen Genomics Center|Sekizuka|Japan

>Spike|hCoV-19/Japan/PG-2288/2020|2020-04-00|EPI\_ISL\_685893|Original|hCoV-19^^Japan|Human|Pathogen Genomics Center|Pathogen Genomics Center|Sekizuka|Japan

>Spike|hCoV-19/Lithuania/MR-LUHS-Eilnr236584/2020|2020-12-20|EPI\_ISL\_770510|Original|hCoV-19^^Kauno apskritis|Human|Lithuanian University of Health Sciences Hospital|Lithuanian University of Health Sciences|Zemaitis|Lithuania

>Spike|hCoV-19/USA/UT-UPHL-2012434776/2020|2020-10-12|EPI\_ISL\_746263|Original|hCoV-19^^Utah|Human|Ginkgo Bioworks Clinical Laboratory|Utah Public Health Laboratory|Young|USA

>Spike|hCoV-19/USA/LA-EVTL227/2020|2020-08-22|EPI\_ISL\_574361|Original|hCoV-19^^Louisiana|Human|LSUHS Emerging Viral Threat Laboratory|Microbial Genome Sequencing Center|Kamil|USA

>Spike|hCoV-19/England/QEUA-C935E9/2020|2020-12-16|EPI\_ISL\_777154|Original|hCoV-19^^England|Human|Lighthouse Lab in Glasgow|Wellcome Sanger Institute for the COVID-19 Genomics UK (COG-UK) Consortium|Davies|United Kingdom

>Spike|hCoV-19/England/SHEF-CDBB3/2020|2020-05-11|EPI\_ISL\_493715|Original|hCoV-19^^England|Human|Virology Department|COVID-19 Genomics UK (COG-UK) Consortium|de Silva|United Kingdom

>Spike|hCoV-19/Japan/PG-5417/2020|2020-08-00|EPI\_ISL\_690520|Original|hCoV-19^^Japan|Human|Fukuoka Institute of Health and Environmental Sciences|Pathogen Genomics Center|Sekizuka|Japan

>Spike|hCoV-19/USA/MA-MASPHL-00306/2020|2020-04-18|EPI\_ISL\_791716|Original|hCoV-19^^Massachusetts|Human|Massachusetts State Public Health Laboratory|Infectious Disease Program|Park|USA

>Spike|hCoV-19/United Arab Emirates/0326/2020|2020-05-18|EPI\_ISL\_698502|Original|hCoV-19^^Abu Dhabi|Human|Group 42 (G42) Healthcare|G42 Healthcare|Ogrodzki|United Arab Emirates

>Spike|hCoV-19/Wales/PHWC-16E139/2020|2020-10-02|EPI\_ISL\_585673|Original|hCoV-19^^Wales|Human|Wales Specialist Virology Centre Sequencing lab|COVID-19 Genomics UK (COG-UK) Consortium|Moore|United Kingdom

>Spike|hCoV-19/India/TN-CCMB-C18/2020|2020-05-06|EPI\_ISL\_458042|Original|hCoV-19^^Tamil Nadu|Human|King Institute of Preventive Medicine & Research|CSIR-Centre for Cellular and Molecular Biology|Banu|India

>Spike|hCoV-19/England/LOND-DB280/2020|2020-11-07|EPI\_ISL\_724750|Original|hCoV-19^^England|Human|University College London|COVID-19 Genomics UK (COG-UK) Consortium|Roy|United Kingdom

>Spike|hCoV-19/Wales/PHWC-49DB30/2020|2020-12-07|EPI\_ISL\_742878|Original|hCoV-19^^Wales|Human|Wales Specialist Virology Centre Sequencing lab|COVID-19 Genomics UK (COG-UK) Consortium|Moore|United Kingdom

>Spike|hCoV-19/USA/NY-PV09377/2020|2020-03-19|EPI\_ISL\_450060|Original|hCoV-19^^New York|Human|MSHS Clinical Microbiology Laboratories|MSHS Pathogen Surveillance Program|van Bakel|USA

>Spike|hCoV-19/England/CAMB-82EA2/2020|2020-04-13|EPI\_ISL\_443321|Original|hCoV-19^^England|Human|Department of Pathology|Wellcome Sanger Institute for the COVID-19 Genomics UK (COG-UK) consortium|Amato|United Kingdom

>Spike|hCoV-19/Japan/PG-2489/2020|2020-04-00|EPI\_ISL\_686094|Original|hCoV-19^^Japan|Human|Saitama Prefectural Institute of Public Health|Pathogen Genomics Center|Sekizuka|Japan

>Spike|hCoV-19/Scotland/CVR1358/2020|2020-03-31|EPI\_ISL\_433552|Original|hCoV-19^^Scotland|Human|West of Scotland Specialist Virology Centre|COVID-19 Genomics UK (COG-UK) Consortium|Robertson|United Kingdom

>Spike|hCoV-19/England/NORT-284354/2020|2020-03-19|EPI\_ISL\_488824|Original|hCoV-19^^England|Human|NU-OMICS DNA Sequencing research facility|Wellcome Sanger Institute for the COVID-19 Genomics UK (COG-UK) consortium|Davies|United Kingdom

>Spike|hCoV-19/England/SHEF-D00AF/2020|2020-05-19|EPI\_ISL\_529407|Original|hCoV-19^^England|Human|Virology Department|COVID-19 Genomics UK (COG-UK) Consortium|de Silva|United Kingdom

>Spike|hCoV-19/England/MILK-9AB6B1/2020|2020-08-31|EPI\_ISL\_549338|Original|hCoV-19^^England|Human|Oxford Viromics|COVID-19 Genomics UK (COG-UK) Consortium|Golubchik|United Kingdom

>Spike|hCoV-19/England/ALDP-A2DDEE/2020|2020-10-05|EPI\_ISL\_586891|Original|hCoV-19^^England|Human|Lighthouse Lab in Alderley Park|Wellcome Sanger Institute for the COVID-19 Genomics UK (COG-UK) consortium|Davies|United Kingdom

>Spike|hCoV-19/USA/OR-OHSU-2295/2020|2020-08-10|EPI\_ISL\_667172|Original|hCoV-19^^Oregon|Human|OHSU Lab Services Molecular Microbiology Lab|Oregon SARS-CoV-2 Genome Sequencing Center|O'Roak|USA

>Spike|hCoV-19/Switzerland/SO-UHB-42177923/2020|2020-03-05|EPI\_ISL\_527937|Original|hCoV-19^^Solothurn|Human|University Hospital Basel|University Hospital Basel|Roloff Handschin|Switzerland

>Spike|hCoV-19/England/ALDP-A68DE7/2020|2020-10-12|EPI\_ISL\_630487|Original|hCoV-19^^England|Human|Lighthouse Lab in Alderley Park|Wellcome Sanger Institute for the COVID-19 Genomics UK (COG-UK) consortium|Davies|United Kingdom

>Spike|hCoV-19/Japan/PG-8783/2020|2020-08-00|EPI\_ISL\_686374|Original|hCoV-19^^Japan|Human|Pathogen Genomics Center|Pathogen Genomics Center|Sekizuka|Japan

>Spike|hCoV-19/England/QEUEH-9DDF15/2020|2020-09-21|EPI\_ISL\_599803|Original|hCoV-19^^England|Human|Lighthouse Lab in Glasgow|Wellcome Sanger Institute for the COVID-19 Genomics UK (COG-UK) consortium|Davies|United Kingdom

>Spike|hCoV-19/Denmark/DCGC-13783/2020|2020-11-30|EPI\_ISL\_713022|Original|hCoV-19^^Midtjylland|Human|Department of Virus and Microbiological Special Diagnostics|Albertsen Lab|Michaelsen|Denmark

>Spike|hCoV-19/Iceland/221/2020|2020-03-16|EPI\_ISL\_417836|Original|hCoV-19^^Reykjavik|Human|The National University Hospital of Iceland|deCODE genetics|J\|u00f3nsson|Iceland

>Spike|hCoV-19/Poland/PL\_MCB\_105/2020|2020-04-22|EPI\_ISL\_645104|Original|hCoV-19^^Poland|Human|Human Genome Variation Research Group|Human Genome Variation Research Group||Poland

>Spike|hCoV-19/USA/CA-CHLA-PLM08071546/2020|2020-12-01|EPI\_ISL\_753567|Original|hCoV-19^^California|Human|Clinical virology Laboratory|Center for Personalized Medicine|Dien Bard|USA

>Spike|hCoV-19/England/ALDP-944447/2020|2020-06-07|EPI\_ISL\_554743|Original|hCoV-19^^England|Human|Lighthouse Lab in Alderley Park|Wellcome Sanger Institute for the COVID-19 Genomics UK (COG-UK) consortium|Davies|United Kingdom

>Spike|hCoV-19/Spain/MD-IBV-003678/2020|2020-04-02|EPI\_ISL\_467217|Original|hCoV-19^^Madrid|Human|Hospital General Universitario Gregorio Mara\u00f1\u00f3n|SeqCOVID-SPAIN consortium/IBV (CSIC)|Comas|Spain

>Spike|hCoV-19/USA/WA-UW-4315/2020|2020-03-31|EPI\_ISL\_427257|Original|hCoV-19^^Washington|Human|UW Virology Lab|UW Virology Lab|Roychoudhury|USA

>Spike|hCoV-19/England/QEUEH-C15F5A/2020|2020-12-06|EPI\_ISL\_709518|Original|hCoV-19^^England|Human|Lighthouse Lab in Glasgow|Wellcome Sanger Institute for the COVID-19 Genomics UK (COG-UK) Consortium|Davies|United Kingdom

>Spike|hCoV-19/Gambia/NPHL-2573/2020|2020-00-00|EPI\_ISL\_561280|Original|hCoV-19^^Kombo|Human|MRCG at LSHTM Genomics lab|MRCG at LSHTM Genomics lab|Sesay|Gambia

>Spike|hCoV-19/England/ALDP-9ED738/2020|2020-05-09|EPI\_ISL\_580663|Original|hCoV-19^^England|Human|Lighthouse Lab in Alderley Park|Wellcome Sanger Institute for the COVID-19 Genomics UK (COG-UK) consortium|Davies|United Kingdom

>Spike|hCoV-19/USA/UT-08272/2020|2020-05-20|EPI\_ISL\_524076|Original|hCoV-19^^Utah|Human|Utah Public Health Laboratory|Utah Public Health Laboratory|Young|USA

>Spike|hCoV-19/Denmark/DCGC-4108/2020|2020-09-14|EPI\_ISL\_622064|Original|hCoV-19^^Hovedstaden|Human|Department of Virus and Microbiological Special Diagnostics|Albertsen lab|Michaelsen|Denmark

>Spike|hCoV-19/England/QEUEH-AD3707/2020|2020-10-26|EPI\_ISL\_634068|Original|hCoV-19^^England|Human|Lighthouse Lab in Glasgow|Wellcome Sanger Institute for the COVID-19 Genomics UK (COG-UK) consortium|Davies|United Kingdom

>Spike|hCoV-19/Scotland/CVR1202/2020|2020-03-30|EPI\_ISL\_529319|Original|hCoV-19^^Scotland|Human|West of Scotland Specialist Virology Centre|COVID-19 Genomics UK (COG-UK) Consortium|Robertson|United Kingdom

>Spike|hCoV-19/Northern Ireland/NIRE-234344/2020|2020-10-15|EPI\_ISL\_680372|Original|hCoV-19^^Northern Ireland|Human|Regional Virus Laboratory|COVID-19 Genomics UK (COG-UK) Consortium|Fairley|United Kingdom

>Spike|hCoV-19/Wales/PHWC-49E926/2020|2020-12-08|EPI\_ISL\_743068|Original|hCoV-19^^Wales|Human|Wales Specialist Virology Centre Sequencing lab|COVID-19 Genomics UK (COG-UK) Consortium|Moore|United Kingdom

>Spike|hCoV-19/Italy/LAZ-INMI-35/2020|2020-06-17|EPI\_ISL\_603142|Original|hCoV-19^^Lazio|Human|INMI Lazzaro Spallanzani IRCCS|INMI Lazzaro Spallanzani IRCCS|Gruber|Italy

>Spike|hCoV-19/India/TG-CCMB-BB561/2020|2020-12-25|EPI\_ISL\_745195|Original|hCoV-19^^Telangana|Human|Osmania Medical College|CSIR-Centre for Cellular and Molecular Biology|Banu|India

>Spike|hCoV-19/England/LIVE-99048/2020|2020-04-07|EPI\_ISL\_439687|Original|hCoV-19^^England|Human|Liverpool Clinical Laboratories|COVID-19 Genomics UK (COG-UK) Consortium|Haldenby|United Kingdom

>Spike|hCoV-19/Denmark/DCGC-6074/2020|2020-10-05|EPI\_ISL\_620268|Original|hCoV-19^^Hovedstaden|Human|Department of Virus and Microbiological Special Diagnostics|Albertsen lab|Michaelsen|Denmark

>Spike|hCoV-19/Israel/CVL-n-7451/2020|2020-04-11|EPI\_ISL\_475011|Original|hCoV-19^^Jerusalem|Human|Israel Central Virology laboratory|Israel Central Virology laboratory|Zuckerman|Israel

>Spike|hCoV-19/Wales/PHWC-483D28/2020|2020-10-21|EPI\_ISL\_627923|Original|hCoV-19^^Wales|Human|Wales Specialist Virology Centre Sequencing lab|COVID-19 Genomics UK (COG-UK) Consortium|Moore|United Kingdom

>Spike|hCoV-19/United Arab Emirates/0263/2020|2020-05-17|EPI\_ISL\_698444|Original|hCoV-19^^Abu Dhabi|Human|Group 42 (G42) Healthcare|G42 Healthcare|Ogrodzki|United Arab Emirates

>Spike|hCoV-19/USA/AZ-TG366713/2020|2020-06-02|EPI\_ISL\_694477|Original|hCoV-19^^Arizona|Human|AZ SPHL|TGen North|French|USA

>Spike|hCoV-19/USA/TX-HMH-4424/2020|2020-06-17|EPI\_ISL\_543608|Original|hCoV-19^^Texas|Human|Houston Methodist Hospital|Houston Methodist Hospital|Long|USA

>Spike|hCoV-19/England/PORT-2CF584/2020|2020-05-02|EPI\_ISL\_453693|Original|hCoV-19^^England|Human|Centre for Enzyme Innovation|COVID-19 Genomics UK (COG-UK) Consortium|Robson|United Kingdom

>Spike|hCoV-19/England/QEUH-B7E275/2020|2020-11-14|EPI\_ISL\_727849|Original|hCoV-19^^England|Human|Oxford Viromics|COVID-19 Genomics UK (COG-UK) Consortium|Golubchik|United Kingdom

>Spike|hCoV-19/Japan/PG-7783/2020|2020-07-00|EPI\_ISL\_686885|Original|hCoV-19^^Japan|Human|Pathogen Genomics Center|Pathogen Genomics Center|Sekizuka|Japan

>Spike|hCoV-19/Northern Ireland/NIRE-FB3A5/2020|2020-08-29|EPI\_ISL\_585230|Original|hCoV-19^^Northern Ireland|Human|Regional Virus Laboratory|COVID-19 Genomics UK (COG-UK) Consortium|Fairley|United Kingdom

>Spike|hCoV-19/Netherlands/ZH-EMC-892/2020|2020-10-29|EPI\_ISL\_632770|Original|hCoV-19^^Zuid Holland|Human|Dutch COVID-19 response team|Erasmus Medical Center|Oude Munnink|Netherlands

>Spike|hCoV-19/Denmark/ALAB-SSI403A/2020|2020-03-23|EPI\_ISL\_429496|Original|hCoV-19^^Denmark|Human|Department of Virus and Microbiological Special Diagnostics|Albertsen lab|Kirkegaard|Denmark

>Spike|hCoV-19/USA/AZ-TG408142/2020|2020-06-14|EPI\_ISL\_694898|Original|hCoV-19^^Arizona|Human|AZ SPHL|TGen North|French|USA

>Spike|hCoV-19/England/NOTT-11ABE3/2020|2020-11-08|EPI\_ISL\_638603|Original|hCoV-19^^England|Human|Queens Medical Centre|COVID-19 Genomics UK (COG-UK) Consortium|Loose|United Kingdom

>Spike|hCoV-19/USA/UT-UPHL-2012903953/2020|2020-08-04|EPI\_ISL\_746078|Original|hCoV-19^^Utah|Human|Ginkgo Bioworks Clinical Laboratory|Utah Public Health Laboratory|Young|USA

>Spike|hCoV-19/USA/WI-UW-1260/2020|2020-08-21|EPI\_ISL\_536633|Original|hCoV-19^^Wisconsin|Human|University of Wisconsin-Madison AIDS Vaccine Research Laboratories|University of Wisconsin-Madison AIDS Vaccine Research Laboratories|Baczenas|USA

>Spike|hCoV-19/England/ALDP-980B59/2020|2020-08-08|EPI\_ISL\_529541|Original|hCoV-19^^England|Human|Queens Medical Centre|COVID-19 Genomics UK (COG-UK) Consortium|Loose|United Kingdom

>Spike|hCoV-19/USA/NY-PV08463/2020|2020-03-18|EPI\_ISL\_421409|Original|hCoV-19^^New York|Human|MHS Clinical Microbiology Laboratories|MHS Pathogen Surveillance Program|van Bakel|USA

>Spike|hCoV-19/Spain/AR-IBV-98010604/2020|2020-10-02|EPI\_ISL\_722253|Original|hCoV-19^^Aragon|Human|Servicio de Microbiolog\u00eda|SeqCOVID-SPAIN consortium|IBV (CSIC)|Comas|Spain

>Spike|hCoV-19/England/ALDP-94B695/2020|2020-06-11|EPI\_ISL\_556409|Original|hCoV-19^^England|Human|Lighthouse Lab in Alderley Park|Wellcome Sanger Institute for the COVID-19 Genomics UK (COG-UK) consortium|Davies|United Kingdom

>Spike|hCoV-19/USA/OR-PROV-201/2020|2020-05-08|EPI\_ISL\_482443|Original|hCoV-19^^Oregon|Human|Providence St. Joseph Health Molecular Genomics Laboratory|Providence St. Joseph Health Molecular Genomics Laboratory|Dowdell|USA

>Spike|hCoV-19/England/CAMC-A651FD/2020|2020-10-11|EPI\_ISL\_608588|Original|hCoV-19^^England|Human|Lighthouse Lab in Cambridge|Wellcome Sanger Institute for the COVID-19 Genomics UK (COG-UK) consortium|Davies|United Kingdom

>Spike|hCoV-19/England/EXET-137245/2020|2020-04-01|EPI\_ISL\_471957|Original|hCoV-19^^England|Human|University of Exeter|COVID-19 Genomics UK (COG-UK) Consortium|Temperton|United Kingdom

>Spike|hCoV-19/USA/TX-HMH-MCoV-12472/2020|2020-09-27|EPI\_ISL\_790354|Original|hCoV-19^^Texas|Human|Houston Methodist Hospital|Houston Methodist Hospital|Long|USA

>Spike|hCoV-19/USA/LA-GBCL-26159756/2020|2020-04-11|EPI\_ISL\_485007|Original|hCoV-19^^Louisiana|Human|River Road Testing Lab|Ginkgo Bioworks Clinical Laboratory|Smith|USA

>Spike|hCoV-19/France/BRE-1623/2020|2020-02-26|EPI\_ISL\_418219|Original|hCoV-19^^Bretagne|Human|CHU - H\u00f4pital Cavale Blanche - Labo. de Virologie|National Reference Center for Viruses of Respiratory Infections|Enouf|France

>Spike|hCoV-19/Brazil/RJ-2233/2020|2020-04-17|EPI\_ISL\_467351|Original|hCoV-19^^Rio de Janeiro|Human|Laboratory of Respiratory Viruses and Measles|Laboratory of Respiratory Viruses and Measles|Silva|Brazil

>Spike|hCoV-19/England/ALDP-AA331B/2020|2020-10-22|EPI\_ISL\_624124|Original|hCoV-19^^England|Human|Lighthouse Lab in Alderley Park|Wellcome Sanger Institute for the COVID-19 Genomics UK (COG-UK) consortium|Davies|United Kingdom

>Spike|hCoV-19/Denmark/DCGC-1753/2020|2020-03-09|EPI\_ISL\_620135|Original|hCoV-19^^Midtjylland|Human|Department of Virus and Microbiological Special Diagnostics|Albertsen lab|Michaelsen|Denmark

>Spike|hCoV-19/Denmark/DCGC-19079/2020|2020-12-07|EPI\_ISL\_748742|Original|hCoV-19^^Midtjylland|Human|Department of Virus and Microbiological Special Diagnostics|Albertsen Lab|Michaelsen|Denmark

>Spike|hCoV-19/USA/TX-HMH-4356/2020|2020-06-19|EPI\_ISL\_543555|Original|hCoV-19^^Texas|Human|Houston Methodist Hospital|Houston Methodist Hospital|Long|USA

>Spike|hCoV-19/England/ALDP-5D4CC0/2020|2020-06-19|EPI\_ISL\_558485|Original|hCoV-19^^England|Human|Lighthouse Lab in Alderley Park|Wellcome Sanger Institute for the COVID-19 Genomics UK (COG-UK) consortium|Davies|United Kingdom

>Spike|hCoV-19/USA/VA-DCLS-1392/2020|2020-07-04|EPI\_ISL\_572234|Original|hCoV-19^^Virginia|Human|Virginia DCLS|Virginia DCLS|St. Jacques|USA

>Spike|hCoV-19/Denmark/DCGC-16567/2020|2020-11-16|EPI\_ISL\_714473|Original|hCoV-19^^Sjaelland|Human|Department of Virus and Microbiological Special Diagnostics|Albertsen Lab|Michaelsen|Denmark

>Spike|hCoV-19/England/NOTT-10F729/2020|2020-04-04|EPI\_ISL\_433042|Original|hCoV-19^^England|Human|Queens Medical Centre|COVID-19 Genomics UK (COG-UK) Consortium|Loose|United Kingdom

>Spike|hCoV-19/England/ALDP-A6E1B8/2020|2020-10-15|EPI\_ISL\_607658|Original|hCoV-19^^England|Human|Lighthouse Lab in Alderley Park|Wellcome Sanger Institute for the COVID-19 Genomics UK (COG-UK) consortium|Davies|United Kingdom

>Spike|hCoV-19/England/QEUA-AF4A07/2020|2020-10-30|EPI\_ISL\_663176|Original|hCoV-19^^England|Human|Lighthouse Lab in Glasgow|Wellcome Sanger Institute for the COVID-19 Genomics UK (COG-UK) Consortium|Davies|United Kingdom

>Spike|hCoV-19/England/ALDP-B83F58/2020|2020-11-14|EPI\_ISL\_674226|Original|hCoV-19^^England|Human|Lighthouse Lab in Alderley Park|Wellcome Sanger Institute for the COVID-19 Genomics UK (COG-UK) Consortium|Davies|United Kingdom

>Spike|hCoV-19/South Korea/KDCA0038/2020|2020-09-01|EPI\_ISL\_747277|Original|hCoV-19^^South Korea|Human|Division of Emerging Infectious Diseases|Division of Emerging Infectious Diseases|Park|South Korea

>Spike|hCoV-19/USA/TX-DSHS-2034/2020|2020-08-06|EPI\_ISL\_766654|Original|hCoV-19^^Texas|Human|Texas Department of State Health Services|Texas Department of State Health Services|Rahman|USA

>Spike|hCoV-19/USA/CO-CDPHE-2009163628/2020|2020-09-16|EPI\_ISL\_710167|Original|hCoV-19^^Colorado|Human|Colorado Department of Public Health and Environment|Colorado Department of Public Health and Environment|Bankers|USA

>Spike|hCoV-19/Australia/VIC14712/2020|2020-08-05|EPI\_ISL\_592964|Original|hCoV-19^^Victoria|Human|Microbiological Diagnostic Unit - Public Health Laboratory (MDU-PHL)|MDU-PHL|Schultz|Australia

>Spike|hCoV-19/England/LIVE-9E22F/2020|2020-04-03|EPI\_ISL\_453278|Original|hCoV-19^^England|Human|Liverpool Clinical Laboratories|COVID-19 Genomics UK (COG-UK) Consortium|Haldenby|United Kingdom

>Spike|hCoV-19/USA/NY-QDX-2364/2020|2020-03-14|EPI\_ISL\_604708|Original|hCoV-19^^New York|Human|Quest Diagnostics|Quest Diagnostics|Kagan|USA

>Spike|hCoV-19/England/CAMC-B366AA/2020|2020-11-03|EPI\_ISL\_645414|Original|hCoV-19^^England|Human|Lighthouse Lab in Cambridge|Wellcome Sanger Institute for the COVID-19 Genomics UK (COG-UK) Consortium|Davies|United Kingdom

>Spike|hCoV-19/England/QEUA-9F377B/2020|2020-09-24|EPI\_ISL\_588654|Original|hCoV-19^^England|Human|Lighthouse Lab in Glasgow|Wellcome Sanger Institute for the COVID-19 Genomics UK (COG-UK) consortium|Davies|United Kingdom

>Spike|hCoV-19/USA/MI-MDHHS-SC21200/2020|2020-04-01|EPI\_ISL\_507457|Original|hCoV-19^^Michigan|Human|Michigan Department of Health and Human Services|Michigan Department of Health and Human Services|Blankenship|USA

>Spike|hCoV-19/USA/CT-Yale-045/2020|2020-03-23|EPI\_ISL\_419513|Original|hCoV-19^^Connecticut|Human|Yale COVID-19 Biorepository|Grubaugh Lab - Yale School of Public Health|Grubaugh|USA

>Spike|hCoV-19/Australia/VIC11687/2020|2020-07-24|EPI\_ISL\_591834|Original|hCoV-19^^Victoria|Human|Microbiological Diagnostic Unit - Public Health Laboratory (MDU-PHL)|MDU-PHL|Schultz|Australia

>Spike|hCoV-19/USA/WI-UW-969/2020|2020-07-06|EPI\_ISL\_509967|Original|hCoV-19^^Wisconsin|Human|University of Wisconsin-Madison AIDS Vaccine Research Laboratories|University of Wisconsin-Madison AIDS Vaccine Research Laboratories|Baczenas|USA

>Spike|hCoV-19/England/QEUA-96271D/2020|2020-08-10|EPI\_ISL\_531621|Original|hCoV-19^^England|Human|Lighthouse Lab in Glasgow|Wellcome Sanger Institute for the COVID-19 Genomics UK (COG-UK) consortium|Davies|United Kingdom

>Spike|hCoV-19/England/MILK-9C24D8/2020|2020-09-07|EPI\_ISL\_566531|Original|hCoV-19^^England|Human|Lighthouse Lab in Milton Keynes|Wellcome Sanger Institute for the COVID-19 Genomics UK (COG-UK) consortium|Davies|United Kingdom

>Spike|hCoV-19/England/QEUA-B2D336/2020|2020-11-04|EPI\_ISL\_659939|Original|hCoV-19^^England|Human|Lighthouse Lab in Glasgow|Wellcome Sanger Institute for the COVID-19 Genomics UK (COG-UK) Consortium|Davies|United Kingdom

>Spike|hCoV-19/Australia/TAS05/2020|2020-04-12|EPI\_ISL\_522560|Original|hCoV-19^^Tasmania|Human|Royal Hobart Hospital Microbiology Department|MDU-PHL|Schultz|Australia

>Spike|hCoV-19/USA/TX-HMH-3659/2020|2020-06-15|EPI\_ISL\_543103|Original|hCoV-19^^Texas|Human|Houston Methodist Hospital|Houston Methodist Hospital|Long|USA

>Spike|hCoV-19/England/QEUA-9F6909/2020|2020-09-25|EPI\_ISL\_588351|Original|hCoV-19^^England|Human|Lighthouse Lab in Glasgow|Wellcome Sanger Institute for the COVID-19 Genomics UK (COG-UK) consortium|Davies|United Kingdom

>Spike|hCoV-19/England/ALDP-A6D571/2020|2020-10-14|EPI\_ISL\_607000|Original|hCoV-19^^England|Human|Lighthouse Lab in Alderley Park|Wellcome Sanger Institute for the COVID-19 Genomics UK (COG-UK) consortium|Davies|United Kingdom

>Spike|hCoV-19/Scotland/CAMC-99093E/2020|2020-08-26|EPI\_ISL\_568453|Original|hCoV-19^^Scotland|Human|Lighthouse Lab in Cambridge|Wellcome Sanger Institute for the COVID-19 Genomics UK (COG-UK) consortium|Davies|United Kingdom

>Spike|hCoV-19/England/SHEF-10B2DE5/2020|2020-05-16|EPI\_ISL\_537264|Original|hCoV-19^^England|Human|Virology Department|Wellcome Sanger Institute for the COVID-19 Genomics UK (COG-UK) consortium|Davies|United Kingdom

>Spike|hCoV-19/England/QEUA-C34887/2020|2020-12-11|EPI\_ISL\_734051|Original|hCoV-19^^England|Human|Lighthouse Lab in Glasgow|Wellcome Sanger Institute for the COVID-19 Genomics UK (COG-UK) Consortium|Davies|United Kingdom

>Spike|hCoV-19/Japan/PG-1125/2020|2020-04-00|EPI\_ISL\_684735|Original|hCoV-19^^Japan|Human|Tokyo Metropolitan Institute of Public Health|Pathogen Genomics Center|Sekizuka|Japan

>Spike|hCoV-19/Chile/RM-208669/2020|2020-10-16|EPI\_ISL\_746773|Original|hCoV-19^^Region Metropolitana de Santiago|Human|Genetica Molecular and Subdepartamento de Virologia ISP Chile|Instituto de Salud Publica de Chile|Tognarelli|Chile

>Spike|hCoV-19/Nigeria/OG-CV387/2020|2020-05-29|EPI\_ISL\_730040|Original|hCoV-19^^Ogun State|Human|Nigeria Centre for Disease Control (NCDC)|African Centre of Excellence for Genomics of Infectious Diseases (ACEGID)|Oluniyi|Nigeria

>Spike|hCoV-19/Slovenia/V0-10433/2020|2020-04-16|EPI\_ISL\_635267|Original|hCoV-19^^Slovenia|Human|Institute of Microbiology and Immunology|Institute of Microbiology and Immunology|Zakotnik|Slovenia

>Spike|hCoV-19/England/CAMB-745DB/2020|2020-03-28|EPI\_ISL\_425313|Original|hCoV-19^^England|Human|Department of Pathology|COVID-19 Genomics UK (COG-UK) Consortium|Meredith|United Kingdom

>Spike|hCoV-19/Scotland/QEUA-A007A7/2020|2020-10-02|EPI\_ISL\_600141|Original|hCoV-19^^Scotland|Human|Lighthouse Lab in Glasgow|Wellcome Sanger Institute for the COVID-19 Genomics UK (COG-UK) consortium|Davies|United Kingdom

>Spike|hCoV-19/Portugal/PT0348/2020|2020-03-17|EPI\_ISL\_454064|Original|hCoV-19^^Portugal|Human|unknown|Instituto Nacional de Saude (INSA)|Borges|Portugal

>Spike|hCoV-19/England/MILK-B39504/2020|2020-11-02|EPI\_ISL\_658938|Original|hCoV-19^^England|Human|Lighthouse Lab in Milton Keynes|Wellcome Sanger Institute for the COVID-19 Genomics UK (COG-UK) Consortium|Davies|United Kingdom

>Spike|hCoV-19/Taiwan/NCKUH-012/2020|2020-03-28|EPI\_ISL\_493205|Vero E6 P1|hCoV-19^^Tainan|Human|Virology Lab, Department of Pathology|Virology Lab, Department of Pathology|Tsai|Taiwan

>Spike|hCoV-19/Japan/PG-8261/2020|2020-09-00|EPI\_ISL\_687360|Original|hCoV-19^^Japan|Human|Pathogen Genomics Center|Pathogen Genomics Center|Sekizuka|Japan

>Spike|hCoV-19/England/QEUEH-79EED9/2020|2020-07-15|EPI\_ISL\_533195|Original|hCoV-19^^England|Human|Lighthouse Lab in Glasgow|Wellcome Sanger Institute for the COVID-19 Genomics UK (COG-UK) consortium|Davies|United Kingdom

>Spike|hCoV-19/Switzerland/BL-ETHZ-350011/2020|2020-11-03|EPI\_ISL\_693785|Original|hCoV-19^^Basel-Landschaft|Human|Viollier AG|Department of Biosystems Science and Engineering|Nadeau|Switzerland

>Spike|hCoV-19/England/NOTT-1119B5/2020|2020-05-31|EPI\_ISL\_461948|Original|hCoV-19^^England|Human|Queens Medical Centre|COVID-19 Genomics UK (COG-UK) Consortium|Loose|United Kingdom

>Spike|hCoV-19/Denmark/DCGC-17868/2020|2020-12-14|EPI\_ISL\_749610|Original|hCoV-19^^Hovedstaden|Human|Department of Virus and Microbiological Special Diagnostics|Albertsen Lab|Michaelsen|Denmark

>Spike|hCoV-19/Morocco/FMP-4/2020|2020-11-00|EPI\_ISL\_728273|Original|hCoV-19^^Rabat|Human|Laboratoire Biolife|Laboratoire de Biotechnologie|Ouahgiri|Morocco

>Spike|hCoV-19/England/ALDP-9CDDE1/2020|2020-09-16|EPI\_ISL\_566369|Original|hCoV-19^^England|Human|Lighthouse Lab in Alderley Park|Wellcome Sanger Institute for the COVID-19 Genomics UK (COG-UK) consortium|Davies|United Kingdom

>Spike|hCoV-19/USA/MI-MDHHS-SC22627/2020|2020-12-01|EPI\_ISL\_737101|Original|hCoV-19^^Michigan|Human|Michigan Department of Health and Human Services|Michigan Department of Health and Human Services|Blankenship|USA

>Spike|hCoV-19/Ecuador/USFQ-178/2020|2020-08-12|EPI\_ISL\_525432|Original|hCoV-19^^Zamora-Chinchipec|Human|Institute of Microbiology|Institute of Microbiology|Cardenas|Ecuador

>Spike|hCoV-19/USA/TX-HMH-3176/2020|2020-06-11|EPI\_ISL\_544051|Original|hCoV-19^^Texas|Human|Houston Methodist Hospital|Houston Methodist Hospital|Long|USA

>Spike|hCoV-19/Japan/PG-1616/2020|2020-04-00|EPI\_ISL\_685222|Original|hCoV-19^^Japan|Human|Tokyo Metropolitan Institute of Public Health|Pathogen Genomics Center|Sekizuka|Japan

>Spike|hCoV-19/Spain/MD-IBV-99012361/2020|2020-11-22|EPI\_ISL\_780005|Original|hCoV-19^^Madrid|Human|Hospital General Universitario Gregorio Mara\u00f1a|SeqCOVID-SPAIN consortium|IBV (CSIC)|Comas|Spain

>Spike|hCoV-19/England/CAMB-79DCF/2020|2020-04-02|EPI\_ISL\_441276|Original|hCoV-19^^England|Human|Department of Pathology|Wellcome Sanger Institute for the COVID-19 Genomics UK (COG-UK) consortium|Amato|United Kingdom

>Spike|hCoV-19/Denmark/DCGC-3031/2020|2020-08-24|EPI\_ISL\_616809|Original|hCoV-19^^Midtjylland|Human|Department of Virus and Microbiological Special Diagnostics|Albertsen lab|Michaelsen|Denmark

>Spike|hCoV-19/USA/FL-BPHL-0382/2020|2020-04-23|EPI\_ISL\_489791|Original|hCoV-19^^Florida|Human|Florida Bureau of Public Health Laboratories|Florida Bureau of Public Health Laboratories|Blanton|USA

>Spike|hCoV-19/USA/VA-DCLS-1382/2020|2020-07-07|EPI\_ISL\_572227|Original|hCoV-19^^Virginia|Human|Virginia DCLS|Virginia DCLS|St. Jacques|USA

>Spike|hCoV-19/England/ALDP-9BDC7E/2020|2020-09-09|EPI\_ISL\_568218|Original|hCoV-19^^England|Human|Lighthouse Lab in Alderley Park|Wellcome Sanger Institute for the COVID-19 Genomics UK (COG-UK) consortium|Davies|United Kingdom

>Spike|hCoV-19/Belgium/reg-0504484/2020|2020-05-04|EPI\_ISL\_477000|Original|hCoV-19^^Beverloot|Human|KU Leuven|KU Leuven|Maes|Belgium

>Spike|hCoV-19/Denmark/DCGC-10814/2020|2020-11-02|EPI\_ISL\_670224|Original|hCoV-19^^Syddanmark|Human|Department of Virus and Microbiological Special Diagnostics|Albertsen Lab|Michaelsen|Denmark

>Spike|hCoV-19/Spain/AN-IBV-001947/2020|2020-03-13|EPI\_ISL\_452432|Original|hCoV-19^^Andalucia|Human|Servicio de Microbiolog\u00eda. HRU de M\u00e9llaga. Servicio Andaluz de Salud|SeqCOVID-SPAIN consortium|IBV (CSIC)|Comas|Spain



>Spike|hCoV-19/Switzerland/ZH-ETHZ-250108/2020|2020-08-20|EPI\_ISL\_535623|Original|hCoV-19^^Zurich|Human|Viollier AG|Department of Biosystems Science and Engineering|Nadeau|Switzerland

>Spike|hCoV-19/England/LOND-D7257/2020|2020-04-11|EPI\_ISL\_478466|Original|hCoV-19^^England|Human|University College London|COVID-19 Genomics UK (COG-UK) Consortium|Roy|United Kingdom

>Spike|hCoV-19/Israel/CVL-46323/2020|2020-12-13|EPI\_ISL\_745068|Original|hCoV-19^^Central|Human|Israel Central Virology laboratory|Israel Central Virology laboratory|Zuckerman|Israel

>Spike|hCoV-19/Denmark/DCGC-14920/2020|2020-11-23|EPI\_ISL\_713521|Original|hCoV-19^^Hovedstaden|Human|Department of Virus and Microbiological Special Diagnostics|Albertsen Lab|Michaelsen|Denmark

>Spike|hCoV-19/Singapore/1283/2020|2020-05-09|EPI\_ISL\_648768|Original|hCoV-19^^Singapore|Human|Department of Laboratory Medicine|Department of Laboratory Medicine|Chen|Singapore

>Spike|hCoV-19/USA/LA-CDC-1285/2020|2020-06-10|EPI\_ISL\_535326|Vero P1|hCoV-19^^Louisiana|Human|LA Office of Public Health Laboratories|Pathogen Discovery|Queen|USA

>Spike|hCoV-19/Denmark/DCGC-4760/2020|2020-09-14|EPI\_ISL\_622199|Original|hCoV-19^^Syddanmark|Human|Department of Virus and Microbiological Special Diagnostics|Albertsen lab|Michaelsen|Denmark

>Spike|hCoV-19/USA/CA-CZB-13024/2020|2020-05-11|EPI\_ISL\_672095|Original|hCoV-19^^California|Human|Alameda County Public Health Lab|Chan-Zuckerberg Biohub|Bhatt|USA

>Spike|hCoV-19/Australia/VIC5364/2020|2020-07-19|EPI\_ISL\_520127|Original|hCoV-19^^Victoria|Human|Microbiological Diagnostic Unit - Public Health Laboratory (MDU-PHL) |MDU-PHL|Schultz|Australia

>Spike|hCoV-19/England/ALDP-AA2BD8/2020|2020-10-22|EPI\_ISL\_624933|Original|hCoV-19^^England|Human|Lighthouse Lab in Alderley Park|Wellcome Sanger Institute for the COVID-19 Genomics UK (COG-UK) consortium|Davies|United Kingdom

>Spike|hCoV-19/Netherlands/NB-EMC-275/2020|2020-00-00|EPI\_ISL\_523397|Original|hCoV-19^^Noord Brabant|Human|Dutch COVID-19 response team|Erasmus Medical Center|Oude Munnink|Netherlands

>Spike|hCoV-19/Northern Ireland/NIRE-232E90/2020|2020-09-25|EPI\_ISL\_680232|Original|hCoV-19^^Northern Ireland|Human|Regional Virus Laboratory|COVID-19 Genomics UK (COG-UK) Consortium|Fairley|United Kingdom

>Spike|hCoV-19/England/ALDP-9FD225/2020|2020-10-02|EPI\_ISL\_587896|Original|hCoV-19^^England|Human|Lighthouse Lab in Alderley Park|Wellcome Sanger Institute for the COVID-19 Genomics UK (COG-UK) consortium|Davies|United Kingdom

>Spike|hCoV-19/USA/WI-GMF-20177/2020|2020-09-14|EPI\_ISL\_547856|Original|hCoV-19^^Wisconsin|Human|Gundersen Molecular Diagnostics Laboratory|Kabara Cancer Research Institute|Kenny|USA

>Spike|hCoV-19/USA/TX-HMH-MCoV-19373/2020|2020-11-27|EPI\_ISL\_783802|Original|hCoV-19^^Texas|Human|Houston Methodist Hospital|Houston Methodist Hospital|Long|USA

>Spike|hCoV-19/England/ALDP-B1DBC8/2020|2020-11-01|EPI\_ISL\_645855|Original|hCoV-19^^England|Human|Lighthouse Lab in Alderley Park|Wellcome Sanger Institute for the COVID-19 Genomics UK (COG-UK) Consortium|Davies|United Kingdom

>Spike|hCoV-19/Switzerland/SO-ETHZ-420317/2020|2020-12-20|EPI\_ISL\_768220|Original|hCoV-19^^Solothurn|Human|Viollier AG|Department of Biosystems Science and Engineering|Nadeau|Switzerland

>Spike|hCoV-19/USA/NY-Wadsworth-194589-01/2020|2020-08-07|EPI\_ISL\_677038|Original|hCoV-19^^New York|Human|Wadsworth Center|Wadsworth Center|Lasek-Nesselquist|USA

>Spike|hCoV-19/Switzerland/BE-ETHZ-350096/2020|2020-11-02|EPI\_ISL\_693796|Original|hCoV-19^^Bern|Human|Viollier AG|Department of Biosystems Science and Engineering|Nadeau|Switzerland

>Spike|hCoV-19/England/CAMC-B2301B/2020|2020-11-02|EPI\_ISL\_665025|Original|hCoV-19^^England|Human|Virology Department|COVID-19 Genomics UK (COG-UK) Consortium|de Silva|United Kingdom

>Spike|hCoV-19/Spain/MD-IBV-97010006/2020|2020-03-12|EPI\_ISL\_683667|Original|hCoV-19^^Madrid|Human|IdISSC/Hospital Cl\u00e9nico San Carlos de Madrid\u200b|SeqCOVID-SPAIN consortium/IBV (CSIC)|Comas|Spain

>Spike|hCoV-19/USA/UT-UPHL-201020573/2020|2020-06-24|EPI\_ISL\_602954|Original|hCoV-19^^Utah|Human|Utah Public Health Laboratory|Utah Public Health Laboratory|Young|USA

>Spike|hCoV-19/USA/MN-MDH-1695/2020|2020-04-08|EPI\_ISL\_560782|Original|hCoV-19^^Minnesota|Human|Minnesota Department of Health|Minnesota Department of Health|Garfin|USA

>Spike|hCoV-19/Wales/PHWC-165466/2020|2020-05-23|EPI\_ISL\_479467|Original|hCoV-19^^Wales|Human|Wales Specialist Virology Centre Sequencing lab|COVID-19 Genomics UK (COG-UK) Consortium|Moore|United Kingdom

>Spike|hCoV-19/England/GSTT-265E08F/2020|2020-03-30|EPI\_ISL\_484146|Original|hCoV-19^^England|Human|Centre for Clinical Infection and Diagnostics Research and Genomics Innovation Unit|COVID-19 Genomics UK (COG-UK) Consortium|Awan|United Kingdom

>Spike|hCoV-19/USA/MN-MDH-1491/2020|2020-03-22|EPI\_ISL\_518884|Original|hCoV-19^^Minnesota|Human|Mayo Clinic & Mayo Clinic Laboratories|Minnesota Department of Health|Garfin|USA

>Spike|hCoV-19/Denmark/DCGC-17263/2020|2020-12-14|EPI\_ISL\_750863|Original|hCoV-19^^Sjaelland|Human|Department of Virus and Microbiological Special Diagnostics|Albertsen Lab|Michaelsen|Denmark

>Spike|hCoV-19/USA/TX-HMH-MCoV-18825/2020|2020-11-25|EPI\_ISL\_785146|Original|hCoV-19^^Texas|Human|Houston Methodist Hospital|Houston Methodist Hospital|Long|USA

>Spike|hCoV-19/Scotland/QEUH-9C925F/2020|2020-09-14|EPI\_ISL\_576038|Original|hCoV-19^^Scotland|Human|Lighthouse Lab in Glasgow|Wellcome Sanger Institute for the COVID-19 Genomics UK (COG-UK) consortium|Davies|United Kingdom

>Spike|hCoV-19/Mexico/CMX-INMEGEN-01/2020|2020-07-31|EPI\_ISL\_522872|Original|hCoV-19^^Mexico City|Human|Instituto Nacional de Medicina Gen\u00f3mica|Instituto Nacional de Medicina Gen\u00f3mica|Hidalgo|Mexico

>Spike|hCoV-19/England/OXON-B0E05/2020|2020-04-27|EPI\_ISL\_478967|Original|hCoV-19^^England|Human|Oxford Viromics|COVID-19 Genomics UK (COG-UK) Consortium|Golubchik|United Kingdom

>Spike|hCoV-19/Wales/ALDP-C3AE52/2020|2020-12-07|EPI\_ISL\_767210|Original|hCoV-19^^Wales|Human|Lighthouse Lab in Alderley Park|Wellcome Sanger Institute for the COVID-19 Genomics UK (COG-UK) Consortium|Davies|United Kingdom

>Spike|hCoV-19/USA/MD-MDH-0071/2020|2020-05-25|EPI\_ISL\_509475|Original|hCoV-19^^Maryland|Human|Maryland Department of Health|Maryland Department of Health|Keller|USA

>Spike|hCoV-19/South Africa/KRISP-K002896/2020|2020-09-03|EPI\_ISL\_602708|Original|hCoV-19^^KwaZulu-Natal|Human|NHLs-IALCH|KRISP|de Oliveira|South Africa

>Spike|hCoV-19/Wales/PHWC-47EA0B/2020|2020-10-11|EPI\_ISL\_595537|Original|hCoV-19^^Wales|Human|Originating lab|COVID-19 Genomics UK (COG-UK) Consortium|Moore|United Kingdom

>Spike|hCoV-19/Australia/VIC11176/2020|2020-07-25|EPI\_ISL\_563284|Original|hCoV-19^^Victoria|Human|Microbiological Diagnostic Unit - Public Health Laboratory (MDU-PHL)|MDU-PHL|Schultz|Australia

>Spike|hCoV-19/England/20169022304/2020|2020-04-17|EPI\_ISL\_465213|Original|hCoV-19^^England|Human|Respiratory Virus Unit|Respiratory Virus Unit|Platt|United Kingdom

>Spike|hCoV-19/Chile/RM-CMM-HRG4342/2020|2020-05-29|EPI\_ISL\_591526|Original|hCoV-19^^Region Metropolitana de Santiago|Human|Medicina Norte U Chile - Servicio Medico Legal|Center for Mathematical Modeling and Center for Genome Regulation. Santiago|Palma V\u00e9jares|Chile

>Spike|hCoV-19/USA/WA-S1926/2020|2020-06-03|EPI\_ISL\_497354|Original|hCoV-19^^Washington|Human|Washington State Department of Health|Seattle Flu Study|Lee|USA

>Spike|hCoV-19/Wales/PHWC-2426A/2020|2020-03-16|EPI\_ISL\_418157|Original|hCoV-19^^Wales|Human|Wales Specialist Virology Centre|Public Health Wales Microbiology Cardiff|Moore|United Kingdom

>Spike|hCoV-19/England/CAMB-821A9/2020|2020-04-20|EPI\_ISL\_438628|Original|hCoV-19^^England|Human|Department of Pathology|COVID-19 Genomics UK (COG-UK) Consortium|Meredith|United Kingdom

>Spike|hCoV-19/Wales/PHWC-48A4A4/2020|2020-11-02|EPI\_ISL\_652559|Original|hCoV-19^^Wales|Human|Wales Specialist Virology Centre Sequencing lab|COVID-19 Genomics UK (COG-UK) Consortium|Moore|United Kingdom

>Spike|hCoV-19/France/ARA-SC742/2020|2020-11-17|EPI\_ISL\_779834|Original|hCoV-19^^Auvergne-Rh\u00f4ne-Alpes|Human|Laboratoire de virologie|CNR Virus des Infections Respiratoires - France SUD|Bal|France

>Spike|hCoV-19/USA/MN-GMF-32870/2020|2020-11-10|EPI\_ISL\_661167|Original|hCoV-19^^Minnesota|Human|Gundersen Molecular Diagnostics Laboratory|Kabara Cancer Research Institute|Kenny|USA

>Spike|hCoV-19/England/QEUA-9C8A1C/2020|2020-09-10|EPI\_ISL\_567175|Original|hCoV-19^^England|Human|Lighthouse Lab in Glasgow|Wellcome Sanger Institute for the COVID-19 Genomics UK (COG-UK) consortium|Davies|United Kingdom

>Spike|hCoV-19/England/QEUA-CC77B9/2020|2020-12-21|EPI\_ISL\_760351|Original|hCoV-19^^England|Human|Lighthouse Lab in Glasgow|Wellcome Sanger Institute for the COVID-19 Genomics UK (COG-UK) Consortium|Davies|United Kingdom

>Spike|hCoV-19/USA/WA-UW-1840/2020|2020-03-23|EPI\_ISL\_424252|Original|hCoV-19^^Washington|Human|UW Virology Lab|UW Virology Lab|Roychoudhury|USA

>Spike|hCoV-19/USA/CA-CZB-3717/2020|2020-08-01|EPI\_ISL\_548434|Original|hCoV-19^^California|Human|County of Santa Clara Public Health Department|Chan-Zuckerberg Biohub|Bhatt|USA

>Spike|hCoV-19/Spain/VC-IBV-98003580/2020|2020-03-30|EPI\_ISL\_537993|Original|hCoV-19^^Comunitat Valenciana|Human|Servicio de Microbiolog\u00eda. Hospital General Universitario de Castell\u00f3n|SeqCOVID-SPAIN consortium/IBV(CSIC)|Comas|Spain

>Spike|hCoV-19/Scotland/EDB4391/2020|2020-05-01|EPI\_ISL\_449307|Original|hCoV-19^^Scotland|Human|Virology Department|COVID-19 Genomics UK (COG-UK) Consortium|Williams|United Kingdom

>Spike|hCoV-19/Italy/APU-UniMI-5410/2020|2020-04-11|EPI\_ISL\_525561|Original|hCoV-19^^Apulia|Human|Istituto Zooprofilattico Sperimentale Puglia e Basilicata; Dipartimento di Bioscienze|Beaconlab (Bioinformatics)|Chiara|Italy

>Spike|hCoV-19/Scotland/QEUA-9E4537/2020|2020-09-23|EPI\_ISL\_600956|Original|hCoV-19^^Scotland|Human|Lighthouse Lab in Glasgow|Wellcome Sanger Institute for the COVID-19 Genomics UK (COG-UK) consortium|Davies|United Kingdom

>Spike|hCoV-19/Wales/ALDP-5C2102/2020|2020-06-15|EPI\_ISL\_558625|Original|hCoV-19^^Wales|Human|Lighthouse Lab in Alderley Park|Wellcome Sanger Institute for the COVID-19 Genomics UK (COG-UK) consortium|Davies|United Kingdom

>Spike|hCoV-19/Wales/PHWC-48A84E/2020|2020-11-03|EPI\_ISL\_652604|Original|hCoV-19^^Wales|Human|Wales Specialist Virology Centre Sequencing lab|COVID-19 Genomics UK (COG-UK) Consortium|Moore|United Kingdom

>Spike|hCoV-19/England/QEUA-A20905/2020|2020-10-01|EPI\_ISL\_587597|Original|hCoV-19^^England|Human|Lighthouse Lab in Glasgow|Wellcome Sanger Institute for the COVID-19 Genomics UK (COG-UK) consortium|Davies|United Kingdom

>Spike|hCoV-19/England/CAMB-806D9/2020|2020-04-10|EPI\_ISL\_470517|Original|hCoV-19^^England|Human|Department of Pathology|Wellcome Sanger Institute for the COVID-19 Genomics UK (COG-UK) consortium|Davies|United Kingdom

>Spike|hCoV-19/England/BRIS-121A37/2020|2020-03-13|EPI\_ISL\_440262|Original|hCoV-19^^England|Human|PHE South West Regional Laboratory|Wellcome Sanger Institute for the COVID-19 Genomics UK (COG-UK) consortium|Amato|United Kingdom

>Spike|hCoV-19/England/ALDP-B47D0B/2020|2020-11-07|EPI\_ISL\_649199|Original|hCoV-19^^England|Human|Lighthouse Lab in Alderley Park|Wellcome Sanger Institute for the COVID-19 Genomics UK (COG-UK) Consortium|Davies|United Kingdom

>Spike|hCoV-19/Canada/QC\_AQ3/2020|2020-04-03|EPI\_ISL\_476511|Original|hCoV-19^^Quebec|Human|Laboratoire de microbiologie|Smith Laboratory|Smith|Canada

>Spike|hCoV-19/England/MILK-B388DF/2020|2020-11-01|EPI\_ISL\_659068|Original|hCoV-19^^England|Human|Lighthouse Lab in Milton Keynes|Wellcome Sanger Institute for the COVID-19 Genomics UK (COG-UK) Consortium|Davies|United Kingdom

>Spike|hCoV-19/Denmark/DCGC-22203/2020|2020-12-14|EPI\_ISL\_757937|Original|hCoV-19^^Syddanmark|Human|Department of Virus and Microbiological Special Diagnostics|Albertsen Lab|Michaelsen|Denmark

>Spike|hCoV-19/England/QEUEH-C5C40D/2020|2020-12-14|EPI\_ISL\_769289|Original|hCoV-19^^England|Human|Lighthouse Lab in Glasgow|Wellcome Sanger Institute for the COVID-19 Genomics UK (COG-UK) Consortium|Davies|United Kingdom

>Spike|hCoV-19/Scotland/QEUEH-A0113F/2020|2020-10-02|EPI\_ISL\_585580|Original|hCoV-19^^Scotland|Human|University of Exeter|COVID-19 Genomics UK (COG-UK) Consortium|Temperton|United Kingdom

>Spike|hCoV-19/Denmark/DCGC-11395/2020|2020-11-02|EPI\_ISL\_670886|Original|hCoV-19^^Hovedstaden|Human|Department of Virus and Microbiological Special Diagnostics|Albertsen Lab|Michaelsen|Denmark

>Spike|hCoV-19/England/CAMC-9C1D83/2020|2020-09-09|EPI\_ISL\_573233|Original|hCoV-19^^England|Human|Oxford Viromics|COVID-19 Genomics UK (COG-UK) Consortium|Golubchik|United Kingdom

>Spike|hCoV-19/USA/FL-BPHL-0802/2020|2020-07-14|EPI\_ISL\_514148|Original|hCoV-19^^Florida|Human|Florida Bureau of Public Health Laboratories|Florida Bureau of Public Health Laboratories|Blanton|USA

>Spike|hCoV-19/England/MILK-B8DD63/2020|2020-11-13|EPI\_ISL\_674798|Original|hCoV-19^^England|Human|Lighthouse Lab in Milton Keynes|Wellcome Sanger Institute for the COVID-19 Genomics UK (COG-UK) Consortium|Davies|United Kingdom

>Spike|hCoV-19/Japan/PG-8267/2020|2020-08-00|EPI\_ISL\_687366|Original|hCoV-19^^Japan|Human|Pathogen Genomics Center|Pathogen Genomics Center|Sekizuka|Japan

>Spike|hCoV-19/Denmark/DCGC-8173/2020|2020-10-26|EPI\_ISL\_617217|Original|hCoV-19^^Hovedstaden|Human|Department of Virus and Microbiological Special Diagnostics|Albertsen lab|Michaelsen|Denmark

>Spike|hCoV-19/USA/MI-MDHHS-SC20365/2020|2020-03-14|EPI\_ISL\_450576|Original|hCoV-19^^Michigan|Human|Michigan Department of Health and Human Services|Michigan Department of Health and Human Services|Blankenship|USA

>Spike|hCoV-19/Spain/MD-IBV-99012311/2020|2020-11-18|EPI\_ISL\_779972|Original|hCoV-19^^Madrid|Human|Hospital General Universitario Gregorio Mara\u00f1a|SeqCOVID-SPAIN consortium/IBV (CSIC)|Comas|Spain

>Spike|hCoV-19/Greece/153\_33892/2020|2020-03-14|EPI\_ISL\_437902|Original|hCoV-19^^Athens|Human|Laboratory of Microbiology|Laboratory of Biology|Karakasiliotis|Greece

>Spike|hCoV-19/England/QEUEH-9B5432/2020|2020-09-03|EPI\_ISL\_590461|Original|hCoV-19^^England|Human|Lighthouse Lab in Glasgow|Wellcome Sanger Institute for the COVID-19 Genomics UK (COG-UK) consortium|Davies|United Kingdom

>Spike|hCoV-19/England/MILK-B8C4AB/2020|2020-11-13|EPI\_ISL\_674220|Original|hCoV-19^^England|Human|Lighthouse Lab in Milton Keynes|Wellcome Sanger Institute for the COVID-19 Genomics UK (COG-UK) Consortium|Davies|United Kingdom

>Spike|hCoV-19/Denmark/DCGC-12412/2020|2020-11-16|EPI\_ISL\_682593|Original|hCoV-19^^Hovedstaden|Human|Department of Virus and Microbiological Special Diagnostics|Albertsen Lab|Michaelsen|Denmark

>Spike|hCoV-19/England/QEUEH-AD2DD9/2020|2020-10-26|EPI\_ISL\_629914|Original|hCoV-19^^England|Human|Lighthouse Lab in Glasgow|Wellcome Sanger Institute for the COVID-19 Genomics UK (COG-UK) consortium|Davies|United Kingdom

>Spike|hCoV-19/USA/DE-DHSS-F917945/2020|2020-03-25|EPI\_ISL\_576223|Original|hCoV-19^^Delaware|Human|Delaware Public Health Lab|Delaware Public Health Lab|Bajwa|USA

>Spike|hCoV-19/Kenya/C1102/2020|2020-04-19|EPI\_ISL\_568708|Original|hCoV-19^^Mombasa|Human|KEMRI-Wellcome Trust Research Programme/KEMRI-CGMR-C Kilifi|KEMRI-Wellcome Trust Research Programme/KEMRI-CGMR-C Kilifi|Githinji|Kenya

>Spike|hCoV-19/England/ALDP-AA269B/2020|2020-10-22|EPI\_ISL\_630774|Original|hCoV-19^^England|Human|Lighthouse Lab in Alderley Park|Wellcome Sanger Institute for the COVID-19 Genomics UK (COG-UK) consortium|Davies|United Kingdom

>Spike|hCoV-19/England/ALDP-9D940B/2020|2020-09-18|EPI\_ISL\_576726|Original|hCoV-19^^England|Human|Oxford Viromics|COVID-19 Genomics UK (COG-UK) Consortium|Golubchik|United Kingdom

>Spike|hCoV-19/England/204591532/2020|2020-11-07|EPI\_ISL\_700675|Original|hCoV-19^^England|Human|Respiratory Virus Unit|COVID-19 Genomics UK (COG-UK) Consortium|Platt|United Kingdom

>Spike|hCoV-19/Wales/PHWC-484783/2020|2020-10-24|EPI\_ISL\_628042|Original|hCoV-19^^Wales|Human|Wales Specialist Virology Centre Sequencing lab|COVID-19 Genomics UK (COG-UK) Consortium|Moore|United Kingdom

>Spike|hCoV-19/England/NOTT-110233/2020|2020-04-11|EPI\_ISL\_441486|Original|hCoV-19^^England|Human|Queens Medical Centre|COVID-19 Genomics UK (COG-UK) Consortium|Loose|United Kingdom

>Spike|hCoV-19/Australia/VIC8075/2020|2020-08-15|EPI\_ISL\_564834|Original|hCoV-19^^Victoria|Human|Microbiological Diagnostic Unit - Public Health Laboratory (MDU-PHL)|MDU-PHL|Schultz|Australia

>Spike|hCoV-19/USA/OR-OHSU-2685/2020|2020-08-25|EPI\_ISL\_667281|Original|hCoV-19^^Oregon|Human|OHSU Lab Services Molecular Microbiology Lab|Oregon SARS-CoV-2 Genome Sequencing Center|O'Roak|USA

>Spike|hCoV-19/Australia/VIC8916/2020|2020-07-22|EPI\_ISL\_565282|Original|hCoV-19^^Victoria|Human|Microbiological Diagnostic Unit - Public Health Laboratory (MDU-PHL)|MDU-PHL|Schultz|Australia

>Spike|hCoV-19/England/QEUA-9F4877/2020|2020-09-25|EPI\_ISL\_588357|Original|hCoV-19^^England|Human|Lighthouse Lab in Glasgow|Wellcome Sanger Institute for the COVID-19 Genomics UK (COG-UK) consortium|Davies|United Kingdom

>Spike|hCoV-19/England/MILK-ACC543/2020|2020-10-21|EPI\_ISL\_634485|Original|hCoV-19^^England|Human|Lighthouse Lab in Milton Keynes|Wellcome Sanger Institute for the COVID-19 Genomics UK (COG-UK) consortium|Davies|United Kingdom

>Spike|hCoV-19/England/ALDP-A945AE/2020|2020-10-20|EPI\_ISL\_624574|Original|hCoV-19^^England|Human|Lighthouse Lab in Alderley Park|Wellcome Sanger Institute for the COVID-19 Genomics UK (COG-UK) consortium|Davies|United Kingdom

>Spike|hCoV-19/England/ALDP-A6E9CF/2020|2020-10-15|EPI\_ISL\_607951|Original|hCoV-19^^England|Human|Lighthouse Lab in Alderley Park|Wellcome Sanger Institute for the COVID-19 Genomics UK (COG-UK) consortium|Davies|United Kingdom

>Spike|hCoV-19/Australia/VIC6230/2020|2020-07-22|EPI\_ISL\_518226|Original|hCoV-19^^Victoria|Human|Victorian Infectious Diseases Reference Laboratory (VIDRL)|VIDRL and MDU-PHL|Schultz|Australia

>Spike|hCoV-19/Wales/PHWC-49F1F0/2020|2020-12-08|EPI\_ISL\_743180|Original|hCoV-19^^Wales|Human|Wales Specialist Virology Centre Sequencing lab|COVID-19 Genomics UK (COG-UK) Consortium|Moore|United Kingdom

>Spike|hCoV-19/England/QEUA-963BA7/2020|2020-08-11|EPI\_ISL\_531494|Original|hCoV-19^^England|Human|Lighthouse Lab in Glasgow|Wellcome Sanger Institute for the COVID-19 Genomics UK (COG-UK) consortium|Davies|United Kingdom

>Spike|hCoV-19/Australia/VIC17818/2020|2020-07-27|EPI\_ISL\_779473|Original|hCoV-19^^Victoria|Human|Microbiological Diagnostic Unit - Public Health Laboratory (MDU-PHL)|MDU-PHL|Beck|Australia

>Spike|hCoV-19/England/MILK-970424/2020|2020-08-18|EPI\_ISL\_553247|Original|hCoV-19^^England|Human|Lighthouse Lab in Milton Keynes|Wellcome Sanger Institute for the COVID-19 Genomics UK (COG-UK) consortium|Davies|United Kingdom

>Spike|hCoV-19/England/CAMC-B3243B/2020|2020-11-05|EPI\_ISL\_659266|Original|hCoV-19^^England|Human|Lighthouse Lab in Cambridge|Wellcome Sanger Institute for the COVID-19 Genomics UK (COG-UK) Consortium|Davies|United Kingdom

>Spike|hCoV-19/England/MILK-B88551/2020|2020-11-13|EPI\_ISL\_674373|Original|hCoV-19^^England|Human|Lighthouse Lab in Milton Keynes|Wellcome Sanger Institute for the COVID-19 Genomics UK (COG-UK) Consortium|Davies|United Kingdom

>Spike|hCoV-19/Scotland/EDB3360/2020|2020-04-09|EPI\_ISL\_487708|Original|hCoV-19^^Scotland|Human|Virology Department|Wellcome Sanger Institute for the COVID-19 Genomics UK (COG-UK) consortium|Davies|United Kingdom

>Spike|hCoV-19/Japan/PG-2056/2020|2020-04-00|EPI\_ISL\_685661|Original|hCoV-19^^Japan|Human|Pathogen Genomics Center|Pathogen Genomics Center|Sekizuka|Japan

>Spike|hCoV-19/England/ALDP-9537C4/2020|2020-06-08|EPI\_ISL\_553742|Original|hCoV-19^^England|Human|Lighthouse Lab in Alderley Park|Wellcome Sanger Institute for the COVID-19 Genomics UK (COG-UK) consortium|Davies|United Kingdom

>Spike|hCoV-19/North Macedonia/9360/2020|2020-08-05|EPI\_ISL\_677726|Original|hCoV-19^^Ohrid|Human|General Hospital - Ohrid|Research Center for Genetic Engineering and Biotechnology \Georgi D. Efremov\u201d|Dimovski|North Macedonia

>Spike|hCoV-19/USA/NM-UNM-00134/2020|2020-04-02|EPI\_ISL\_467652|Original|hCoV-19^^New Mexico|Human|New Mexico Department of Health Scientific Laboratory Division|Center for Global Health|Domman|USA

>Spike|hCoV-19/Wales/PHWC-3009E/2020|2020-04-01|EPI\_ISL\_446271|Original|hCoV-19^^Wales|Human|Wales Specialist Virology Centre|Public Health Wales Microbiology Cardiff|Moore|United Kingdom

>Spike|hCoV-19/Ireland/D-NVRL-AIIDV0084v1/2020|2020-04-13|EPI\_ISL\_644318|Original|hCoV-19^^Dublin|Human|CEPHR / Vincent's Hospital|Irish Coronavirus Sequencing Consortium - National Virus Reference Laboratory|Gonzalez|Ireland

>Spike|hCoV-19/England/CAMC-B3336A/2020|2020-11-05|EPI\_ISL\_659186|Original|hCoV-19^^England|Human|Lighthouse Lab in Cambridge|Wellcome Sanger Institute for the COVID-19 Genomics UK (COG-UK) Consortium|Davies|United Kingdom

>Spike|hCoV-19/Russia/SPE-RII-MH5887S/2020|2020-11-05|EPI\_ISL\_733318|Original|hCoV-19^^Saint Petersburg|Human|HELIX LLC|WHO National Influenza Centre Russian Federation|Komissarov|Russia

>Spike|hCoV-19/USA/MN-MDH-2228/2020|2020-12-04|EPI\_ISL\_770802|Original|hCoV-19^^Minnesota|Human|Vault Health|Minnesota Department of Health|Lorentz|USA

>Spike|hCoV-19/USA/CA-CZB-14642/2020|2020-11-16|EPI\_ISL\_738860|Original|hCoV-19^^California|Human|Orange County Public Health Lab|Chan-Zuckerberg Biohub|Kamm|USA

>Spike|hCoV-19/Singapore/474/2020|2020-03-08|EPI\_ISL\_476810|Original|hCoV-19^^Singapore|Human|Department of Laboratory Medicine\nTan Tock Seng Hospital|Department of Laboratory Medicine\nTan Tock Seng Hospital|Chen|Singapore

>Spike|hCoV-19/Scotland/QEUH-9AE77F/2020|2020-09-02|EPI\_ISL\_577371|Original|hCoV-19^^Scotland|Human|University of Exeter|COVID-19 Genomics UK (COG-UK) Consortium|Temperton|United Kingdom

>Spike|hCoV-19/USA/NY-NYCPHL-000135/2020|2020-04-02|EPI\_ISL\_631626|Original|hCoV-19^^New York|Human|Richmond University Medical Center|New York City Public Health Laboratory|Wang|USA

>Spike|hCoV-19/Denmark/DCGC-15460/2020|2020-11-23|EPI\_ISL\_713835|Original|hCoV-19^^Hovedstaden|Human|Department of Virus and Microbiological Special Diagnostics|Albertsen Lab|Michaelsen|Denmark

>Spike|hCoV-19/Japan/PG-4130/2020|2020-07-00|EPI\_ISL\_692369|Original|hCoV-19^^Japan|Human|Pathogen Genomics Center|Pathogen Genomics Center|Sekizuka|Japan

>Spike|hCoV-19/Finland/S7AA11/2020|2020-10-10|EPI\_ISL\_737054|Original|hCoV-19^^Uusimaa|Human|Department of Virology and Immunology|Department of Virology|Smura|Finland

>Spike|hCoV-19/Denmark/DCGC-11706/2020|2020-10-26|EPI\_ISL\_671083|Original|hCoV-19^^Nordjylland|Human|Department of Virus and Microbiological Special Diagnostics|Albertsen Lab|Michaelsen|Denmark

>Spike|hCoV-19/Denmark/DCGC-12923/2020|2020-12-07|EPI\_ISL\_712466|Original|hCoV-19^^Midtjylland|Human|Department of Virus and Microbiological Special Diagnostics|Albertsen Lab|Michaelsen|Denmark

>Spike|hCoV-19/England/ALDP-C3D736/2020|2020-12-10|EPI\_ISL\_731843|Original|hCoV-19^^England|Human|Lighthouse Lab in Alderley Park|Wellcome Sanger Institute for the COVID-19 Genomics UK (COG-UK) Consortium|Davies|United Kingdom

>Spike|hCoV-19/USA/CA-ALSR-3263/2020|2020-09-07|EPI\_ISL\_635938|Original|hCoV-19^^California|Human|San Diego County Public Health Laboratory|Andersen lab at Scripps Research|Gangavarapu|USA

>Spike|hCoV-19/India/MH-BJMC-29654/2020|2020-07-28|EPI\_ISL\_728326|Original|hCoV-19^^Maharashtra|Human|B.J. Govt. Medical College|National Centre For Cell Science|Paul|India

>Spike|hCoV-19/USA/LA-EVTL310/2020|2020-05-12|EPI\_ISL\_578717|Original|hCoV-19^^Louisiana|Human|LSUHS Emerging Viral Threat Laboratory|Microbial Genome Sequencing Center|Kamil|USA

>Spike|hCoV-19/England/QEUH-B6932F/2020|2020-11-11|EPI\_ISL\_661477|Original|hCoV-19^^England|Human|Lighthouse Lab in Glasgow|Wellcome Sanger Institute for the COVID-19 Genomics UK (COG-UK) Consortium|Davies|United Kingdom

>Spike|hCoV-19/USA/WI-UW-1316/2020|2020-08-27|EPI\_ISL\_536688|Original|hCoV-19^^Wisconsin|Human|University of Wisconsin-Madison AIDS Vaccine Research

Laboratories|University of Wisconsin-Madison AIDS Vaccine Research  
Laboratories|Baczenas|USA  
>Spike|hCoV-19/England/CAMB-75BAB/2020|2020-03-28|EPI\_ISL\_438307|Original|hCoV-19^^England|Human|Department of Pathology|Wellcome Sanger Institute for the COVID-19 Genomics UK (COG-UK) consortium|Amato|United Kingdom  
>Spike|hCoV-19/England/MILK-D07EE4/2020|2020-12-19|EPI\_ISL\_781798|Original|hCoV-19^^England|Human|Lighthouse Lab in Milton Keynes|Wellcome Sanger Institute for the COVID-19 Genomics UK (COG-UK) Consortium|Davies|United Kingdom  
>Spike|hCoV-19/England/ALDP-5CFFDE/2020|2020-06-20|EPI\_ISL\_558552|Original|hCoV-19^^England|Human|Lighthouse Lab in Alderley Park|Wellcome Sanger Institute for the COVID-19 Genomics UK (COG-UK) consortium|Davies|United Kingdom  
>Spike|hCoV-19/USA/VA-DCLS-2106/2020|2020-10-21|EPI\_ISL\_677141|Original|hCoV-19^^Virginia|Human|Virginia Division of Consolidated Laboratory Services|Virginia Division of Consolidated Laboratory Services|St. Jacques|USA  
>Spike|hCoV-19/England/CAMC-A41D4E/2020|2020-10-06|EPI\_ISL\_609355|Original|hCoV-19^^England|Human|Lighthouse Lab in Cambridge|Wellcome Sanger Institute for the COVID-19 Genomics UK (COG-UK) consortium|Davies|United Kingdom  
>Spike|hCoV-19/USA/TX-HMH-MCoV-13715/2020|2020-08-20|EPI\_ISL\_788809|Original|hCoV-19^^Texas|Human|Houston Methodist Hospital|Houston Methodist Hospital|Long|USA  
>Spike|hCoV-19/England/CAMB-7C89E/2020|2020-04-04|EPI\_ISL\_442102|Original|hCoV-19^^England|Human|Department of Pathology|Wellcome Sanger Institute for the COVID-19 Genomics UK (COG-UK) consortium|Amato|United Kingdom  
>Spike|hCoV-19/Northern Ireland/NIRE-108869/2020|2020-09-12|EPI\_ISL\_585209|Original|hCoV-19^^Northern Ireland|Human|Regional Virus Laboratory|COVID-19 Genomics UK (COG-UK) Consortium|Fairley|United Kingdom  
>Spike|hCoV-19/England/CAMB-7BAC6/2020|2020-04-04|EPI\_ISL\_441557|Original|hCoV-19^^England|Human|Department of Pathology|Wellcome Sanger Institute for the COVID-19 Genomics UK (COG-UK) consortium|Amato|United Kingdom  
>Spike|hCoV-19/Germany/BY-MVP-0067/2020|2020-03-25|EPI\_ISL\_437264|Original|hCoV-19^^Bavaria|Human|Max von Pettenkofer Institute|Laboratory for Functional Genome Analysis|Graf|Germany  
>Spike|hCoV-19/Scotland/QEUH-A79035/2020|2020-10-13|EPI\_ISL\_638988|Original|hCoV-19^^Scotland|Human|Oxford Viromics|COVID-19 Genomics UK (COG-UK) Consortium|Golubchik|United Kingdom  
>Spike|hCoV-19/England/LIVE-9C75F/2020|2020-04-02|EPI\_ISL\_449575|Original|hCoV-19^^England|Human|Liverpool Clinical Laboratories|COVID-19 Genomics UK (COG-UK) Consortium|Haldenby|United Kingdom  
>Spike|hCoV-19/Chile/RM-128531/2020|2020-07-19|EPI\_ISL\_746619|Original|hCoV-19^^Region Metropolitana de Santiago|Human|Genetica Molecular and Subdepartamento de Virologia ISP Chile|Instituto de Salud Publica de Chile|Tognarelli|Chile  
>Spike|hCoV-19/Denmark/DCGC-1487/2020|2020-05-25|EPI\_ISL\_617971|Original|hCoV-19^^Hovedstaden|Human|Department of Virus and Microbiological Special Diagnostics|Albertsen lab|Michaelsen|Denmark  
>Spike|hCoV-19/England/CAMC-B54934/2020|2020-11-09|EPI\_ISL\_658258|Original|hCoV-19^^England|Human|Lighthouse Lab in Cambridge|Wellcome Sanger Institute for the COVID-19 Genomics UK (COG-UK) Consortium|Davies|United Kingdom  
>Spike|hCoV-19/England/NORW-E7791/2020|2020-05-04|EPI\_ISL\_449070|Original|hCoV-19^^England|Human|Quadram Institute Bioscience|COVID-19 Genomics UK (COG-UK) Consortium|Alikhan|United Kingdom  
>Spike|hCoV-19/England/CAMB-7224F/2020|2020-03-28|EPI\_ISL\_439603|Original|hCoV-19^^England|Human|Department of Pathology|Wellcome Sanger Institute for the COVID-19 Genomics UK (COG-UK) consortium|Amato|United Kingdom  
>Spike|hCoV-19/England/SHEF-CA6E2/2020|2020-04-03|EPI\_ISL\_432491|Original|hCoV-19^^England|Human|Virology Department|COVID-19 Genomics UK (COG-UK) Consortium|de Silva|United Kingdom  
>Spike|hCoV-19/England/CAMC-A6546D/2020|2020-10-11|EPI\_ISL\_608354|Original|hCoV-19^^England|Human|Lighthouse Lab in Cambridge|Wellcome Sanger Institute for the COVID-19 Genomics UK (COG-UK) consortium|Davies|United Kingdom

>Spike|hCoV-19/England/NOTT-117490/2020|2020-10-22|EPI\_ISL\_611831|Original|hCoV-19^^England|Human|Queens Medical Centre|COVID-19 Genomics UK (COG-UK) Consortium|Loose|United Kingdom

>Spike|hCoV-19/USA/TX-HMH-MCoV-14877/2020|2020-10-14|EPI\_ISL\_786361|Original|hCoV-19^^Texas|Human|Houston Methodist Hospital|Houston Methodist Hospital|Long|USA

>Spike|hCoV-19/Spain/AR-IBV-2467/2020|2020-03-18|EPI\_ISL\_468801|Original|hCoV-19^^Aragon|Human|Servicio de Microbiolog\u00eda|SeqCOVID-SPAIN consortium/IBV (CSIC) |Comas|Spain

>Spike|hCoV-19/USA/WA-UW-6971/2020|2020-03-30|EPI\_ISL\_570152|Original|hCoV-19^^Washington|Human|UW Virology Lab|UW Virology Lab|Roychoudhury|USA

>Spike|hCoV-19/Scotland/QEUH-9F5D77/2020|2020-09-27|EPI\_ISL\_600673|Original|hCoV-19^^Scotland|Human|Lighthouse Lab in Glasgow|Wellcome Sanger Institute for the COVID-19 Genomics UK (COG-UK) consortium|Davies|United Kingdom

>Spike|hCoV-19/USA/UT-UPHL-201131031/2020|2020-05-01|EPI\_ISL\_634906|Original|hCoV-19^^Utah|Human|Utah Public Health Laboratory|Utah Public Health Laboratory|Young|USA

>Spike|hCoV-19/USA/TX-HMH-MCoV-14253/2020|2020-10-04|EPI\_ISL\_787538|Original|hCoV-19^^Texas|Human|Houston Methodist Hospital|Houston Methodist Hospital|Long|USA

>Spike|hCoV-19/England/ALDP-C8E9E5/2020|2020-12-15|EPI\_ISL\_777593|Original|hCoV-19^^England|Human|Lighthouse Lab in Alderley Park|Wellcome Sanger Institute for the COVID-19 Genomics UK (COG-UK) Consortium|Davies|United Kingdom

>Spike|hCoV-19/Netherlands/GE-RIVM-20294/2020|2020-11-17|EPI\_ISL\_723433|Original|hCoV-19^^Gelderland|Human|Dutch COVID-19 response team|National Institute for Public Health and the Environment (RIVM)|Meijer|Netherlands

>Spike|hCoV-19/England/CAMB-1AEC2/2020|2020-05-06|EPI\_ISL\_448071|Original|hCoV-19^^England|Human|Department of Pathology|COVID-19 Genomics UK (COG-UK) Consortium|Meredith|United Kingdom

>Spike|hCoV-19/Wales/PHWC-499C5F/2020|2020-12-02|EPI\_ISL\_727422|Original|hCoV-19^^Wales|Human|Originating lab|COVID-19 Genomics UK (COG-UK) Consortium|Moore|United Kingdom

>Spike|hCoV-19/USA/MN-QDX-1766/2020|2020-03-17|EPI\_ISL\_604087|Original|hCoV-19^^Minnesota|Human|Quest Diagnostics|Quest Diagnostics|Kagan|USA

>Spike|hCoV-19/USA/MA-Yale-441/2020|2020-04-11|EPI\_ISL\_738255|Original|hCoV-19^^Massachusetts|Human|Connecticut Veterans' Affairs Hospital|Grubaugh Lab - Yale School of Public Health|Grubaugh|USA

>Spike|hCoV-19/England/QEUH-9B90A3/2020|2020-09-07|EPI\_ISL\_549742|Original|hCoV-19^^England|Human|Lighthouse Lab in Glasgow|Wellcome Sanger Institute for the COVID-19 Genomics UK (COG-UK) consortium|Davies|United Kingdom

>Spike|hCoV-19/England/MILK-B5A321/2020|2020-11-06|EPI\_ISL\_658400|Original|hCoV-19^^England|Human|Lighthouse Lab in Milton Keynes|Wellcome Sanger Institute for the COVID-19 Genomics UK (COG-UK) Consortium|Davies|United Kingdom

>Spike|hCoV-19/England/SHEF-C57E4/2020|2020-06-02|EPI\_ISL\_479215|Original|hCoV-19^^England|Human|Virology Department|COVID-19 Genomics UK (COG-UK) Consortium|de Silva|United Kingdom

>Spike|hCoV-19/England/QEUH-9646B4/2020|2020-08-12|EPI\_ISL\_536856|Original|hCoV-19^^England|Human|Lighthouse Lab in Glasgow|Wellcome Sanger Institute for the COVID-19 Genomics UK (COG-UK) consortium|Davies|United Kingdom

>Spike|hCoV-19/England/205180773/2020|2020-12-16|EPI\_ISL\_766088|Original|hCoV-19^^England|Human|Respiratory Virus Unit|COVID-19 Genomics UK (COG-UK) Consortium|Platt|United Kingdom

>Spike|hCoV-19/Canada/ON-S300/2020|2020-03-28|EPI\_ISL\_755859|Original|hCoV-19^^Ontario|Human|Toronto Invasive Bacterial Diseases Network|McMaster University|McArthur|Canada

>Spike|hCoV-19/England/NORW-221A18/2020|2020-12-19|EPI\_ISL\_764461|Original|hCoV-19^^England|Human|Quadram Institute Bioscience|COVID-19 Genomics UK (COG-UK) Consortium|Alikhan|United Kingdom

>Spike|hCoV-19/Denmark/DCGC-19631/2020|2020-12-07|EPI\_ISL\_749071|Original|hCoV-19^^Hovedstaden|Human|Department of Virus and Microbiological Special Diagnostics|Albertsen Lab|Michaelsen|Denmark

>Spike|hCoV-19/Austria/CeMM0961/2020|2020-03-29|EPI\_ISL\_583810|Original|hCoV-19^^Austria|Human|Dr. Gernot Walder GmbH|Bergthaler laboratory|Bergthaler|Austria



>Spike|hCoV-19/Ireland/D-NVRL-AIIDV0053v1/2020|2020-04-07|EPI\_ISL\_644274|Original|hCoV-19^^Dublin|Human|CEPHR / Vincent's Hospital|Irish Coronavirus Sequencing Consortium - National Virus Reference Laboratory|Gonzalez|Ireland

>Spike|hCoV-19/Wales/PHWC-2B6D0/2020|2020-04-00|EPI\_ISL\_445748|Original|hCoV-19^^Wales|Human|Wales Specialist Virology Centre|Public Health Wales Microbiology Cardiff|Moore|United Kingdom

>Spike|hCoV-19/Italy/PIE-SLL-NZ146/2020|2020-04-08|EPI\_ISL\_569884|Original|hCoV-19^^Piedmont|Human|Amedeo di savoia|Crosetto lab|Harbers|Italy

>Spike|hCoV-19/England/QEUH-769754/2020|2020-07-15|EPI\_ISL\_533111|Original|hCoV-19^^England|Human|Lighthouse Lab in Glasgow|Wellcome Sanger Institute for the COVID-19 Genomics UK (COG-UK) consortium|Davies|United Kingdom

>Spike|hCoV-19/Scotland/EDB5974/2020|2020-05-04|EPI\_ISL\_487664|Original|hCoV-19^^Scotland|Human|Virology Department|Wellcome Sanger Institute for the COVID-19 Genomics UK (COG-UK) consortium|Davies|United Kingdom

>Spike|hCoV-19/USA/VA-CDC-2-3714461/2020|2020-11-11|EPI\_ISL\_751747|Original|hCoV-19^^Virginia|Human|VA-Division of Consolidated Laboratory Services|Genomics and Discovery|Queen|USA

>Spike|hCoV-19/USA/CA-ALSR-5059/2020|2020-11-27|EPI\_ISL\_730324|Original|hCoV-19^^California|Human|San Diego County Public Health Laboratory|Andersen lab at Scripps Research|Gangavarapu|USA

>Spike|hCoV-19/England/CAMC-B0AC34/2020|2020-10-30|EPI\_ISL\_643335|Original|hCoV-19^^England|Human|Lighthouse Lab in Cambridge|Wellcome Sanger Institute for the COVID-19 Genomics UK (COG-UK) Consortium|Davies|United Kingdom

>Spike|hCoV-19/England/ALDP-9D932C/2020|2020-09-18|EPI\_ISL\_576719|Original|hCoV-19^^England|Human|Oxford Viromics|COVID-19 Genomics UK (COG-UK) Consortium|Golubchik|United Kingdom

>Spike|hCoV-19/USA/TX-HMH-MCoV-10170/2020|2020-07-06|EPI\_ISL\_789351|Original|hCoV-19^^Texas|Human|Houston Methodist Hospital|Houston Methodist Hospital|Long|USA

>Spike|hCoV-19/Wales/PHWC-16D792/2020|2020-09-25|EPI\_ISL\_577445|Original|hCoV-19^^Wales|Human|Wales Specialist Virology Centre Sequencing lab|COVID-19 Genomics UK (COG-UK) Consortium|Moore|United Kingdom

>Spike|hCoV-19/USA/CA-QDX-2592/2020|2020-03-16|EPI\_ISL\_604883|Original|hCoV-19^^California|Human|Quest Diagnostics|Quest Diagnostics|Kagan|USA

>Spike|hCoV-19/India/UP-NBRI-N42-TCX099/2020|2020-04-16|EPI\_ISL\_516971|Original|hCoV-19^^Uttar Pradesh|Human|King Georges Medical University|CSIR-National Botanical Research Institute|Bag|India

>Spike|hCoV-19/USA/CA-IGI-0382/2020|2020-07-20|EPI\_ISL\_754858|Original|hCoV-19^^California|Human|Innovative Genomics Institute|Innovative Genomics Institute|Wyman|USA

>Spike|hCoV-19/Netherlands/ZuidHolland\_112/2020|2020-04-07|EPI\_ISL\_455301|Original|hCoV-19^^Zuid Holland|Human|Dutch COVID-19 response team|Erasmus Medical Center|Oude Munnink|Netherlands

>Spike|hCoV-19/Germany/BE-ChVir8981/2020|2020-09-22|EPI\_ISL\_729413|Original|hCoV-19^^Berlin|Human|Charit\u00e9 Universit\u00e4tsmedizin Berlin|Charit\u00e9 Universit\u00e4tsmedizin Berlin|Muehlemann|Germany

>Spike|hCoV-19/Hong Kong/VM20069002/2020|2020-07-22|EPI\_ISL\_602591|Original|hCoV-19^^Hong Kong|Human|Queen Elizabeth Hospital|Hong Kong Department of Health|Mak|China

>Spike|hCoV-19/England/SHEF-C7630/2020|2020-06-15|EPI\_ISL\_484469|Original|hCoV-19^^England|Human|Virology Department|COVID-19 Genomics UK (COG-UK) Consortium|de Silva|United Kingdom

>Spike|hCoV-19/England/ALDP-7091C1/2020|2020-06-30|EPI\_ISL\_557682|Original|hCoV-19^^England|Human|Lighthouse Lab in Alderley Park|Wellcome Sanger Institute for the COVID-19 Genomics UK (COG-UK) consortium|Davies|United Kingdom

>Spike|hCoV-19/England/SHEF-C36AD/2020|2020-05-04|EPI\_ISL\_490589|Original|hCoV-19^^England|Human|Virology Department|COVID-19 Genomics UK (COG-UK) Consortium|de Silva|United Kingdom

>Spike|hCoV-19/Israel/CVL-n26389/2020|2020-07-21|EPI\_ISL\_514297|Original|hCoV-19^^Jerusalem District|Human|Israel Central Virology laboratory|Israel Central Virology laboratory|Zuckerman|Israel

>Spike|hCoV-19/England/ALDP-A92C7E/2020|2020-10-19|EPI\_ISL\_611035|Original|hCoV-19^^England|Human|Lighthouse Lab in Alderley Park|Wellcome Sanger Institute for the COVID-19 Genomics UK (COG-UK) consortium|Davies|United Kingdom

>Spike|hCoV-19/USA/CT-Yale-624/2020|2020-06-03|EPI\_ISL\_730079|Original|hCoV-19^^Connecticut|Human|Yale Clinical Virology Laboratory|Grubaugh Lab - Yale School of Public Health|Grubaugh|USA

>Spike|hCoV-19/England/NORT-1B723B7/2020|2020-11-27|EPI\_ISL\_724873|Original|hCoV-19^^England|Human|Northumbria University / South Tees Hospitals NHS Foundation Trust / North Cumbria Integrated Care NHS Foundation Trust / North Tees and Hartlepool NHS Foundation Trust / Newcastle Hospitals NHS Foundation Trust|COVID-19 Genomics UK (COG-UK) Consortium|Bashton|United Kingdom

>Spike|hCoV-19/England/QEUEH-9612E0/2020|2020-08-04|EPI\_ISL\_532110|Original|hCoV-19^^England|Human|Lighthouse Lab in Glasgow|Wellcome Sanger Institute for the COVID-19 Genomics UK (COG-UK) consortium|Davies|United Kingdom

>Spike|hCoV-19/England/BRIS-12BA1F/2020|2020-05-18|EPI\_ISL\_469359|Original|hCoV-19^^England|Human|PHE South West Regional Laboratory|Wellcome Sanger Institute for the COVID-19 Genomics UK (COG-UK) consortium|Davies|United Kingdom

>Spike|hCoV-19/Australia/SAP236/2020|2020-03-31|EPI\_ISL\_468005|Original|hCoV-19^^South Australia|Human|SA Pathology|SA Pathology|Leong|Australia

>Spike|hCoV-19/South Africa/KRISP-0383/2020|2020-06-25|EPI\_ISL\_495524|Original|hCoV-19^^KwaZulu-Natal|Human|NHLs-IALCH|KRISP|de Oliveira|South Africa

>Spike|hCoV-19/USA/MA-MASPHL-00015/2020|2020-03-30|EPI\_ISL\_791521|Original|hCoV-19^^Massachusetts|Human|Massachusetts State Public Health Laboratory|Infectious Disease Program|Park|USA

>Spike|hCoV-19/England/ALDP-AA4F8F/2020|2020-10-21|EPI\_ISL\_630902|Original|hCoV-19^^England|Human|Lighthouse Lab in Alderley Park|Wellcome Sanger Institute for the COVID-19 Genomics UK (COG-UK) consortium|Davies|United Kingdom

>Spike|hCoV-19/England/MILK-9EEC0B/2020|2020-09-24|EPI\_ISL\_580709|Original|hCoV-19^^England|Human|Lighthouse Lab in Milton Keynes|Wellcome Sanger Institute for the COVID-19 Genomics UK (COG-UK) consortium|Davies|United Kingdom

>Spike|hCoV-19/USA/WA-UW-6806/2020|2020-04-10|EPI\_ISL\_570147|Original|hCoV-19^^Washington|Human|UW Virology Lab|UW Virology Lab|Roychoudhury|USA

>Spike|hCoV-19/Scotland/CVR5605/2020|2020-11-02|EPI\_ISL\_651864|Original|hCoV-19^^Scotland|Human|West of Scotland Specialist Virology Centre|COVID-19 Genomics UK (COG-UK) Consortium|Robertson|United Kingdom

>Spike|hCoV-19/England/ALDP-9FCEE6/2020|2020-10-01|EPI\_ISL\_587947|Original|hCoV-19^^England|Human|Lighthouse Lab in Alderley Park|Wellcome Sanger Institute for the COVID-19 Genomics UK (COG-UK) consortium|Davies|United Kingdom

>Spike|hCoV-19/Ireland/KE-NVRL-MPA57711/2020|2020-04-11|EPI\_ISL\_767797|Original|hCoV-19^^Kildare|Human|National Virus Reference Laboratory|Irish Coronavirus Sequencing Consortium - Teagasc Moorepark|Walsh|Ireland

>Spike|hCoV-19/USA/OH-QDX-2050/2020|2020-03-18|EPI\_ISL\_604372|Original|hCoV-19^^Ohio|Human|Quest Diagnostics|Quest Diagnostics|Kagan|USA

>Spike|hCoV-19/South Korea/KCDC2628/2020|2020-07-03|EPI\_ISL\_515030|Original|hCoV-19^^South Korea|Human|Division of Viral Diseases|Division of Viral Diseases|Kim|South Korea

>Spike|hCoV-19/England/QEUEH-A8B883/2020|2020-10-16|EPI\_ISL\_643193|Original|hCoV-19^^England|Human|Lighthouse Lab in Glasgow|Wellcome Sanger Institute for the COVID-19 Genomics UK (COG-UK) Consortium|Davies|United Kingdom

>Spike|hCoV-19/USA/AZ-TG280870/2020|2020-04-22|EPI\_ISL\_694203|Original|hCoV-19^^Arizona|Human|AZ SPHL|TGen North|French|USA

>Spike|hCoV-19/England/MILK-9AB323/2020|2020-08-31|EPI\_ISL\_551061|Original|hCoV-19^^England|Human|Lighthouse Lab in Milton Keynes|Wellcome Sanger Institute for the COVID-19 Genomics UK (COG-UK) consortium|Davies|United Kingdom

>Spike|hCoV-19/Wales/QEUEH-9FB51F/2020|2020-09-28|EPI\_ISL\_600586|Original|hCoV-19^^Wales|Human|Lighthouse Lab in Glasgow|Wellcome Sanger Institute for the COVID-19 Genomics UK (COG-UK) consortium|Davies|United Kingdom

>Spike|hCoV-19/England/QEUEH-9B7EE7/2020|2020-09-08|EPI\_ISL\_590518|Original|hCoV-19^^England|Human|Lighthouse Lab in Glasgow|Wellcome Sanger Institute for the COVID-19 Genomics UK (COG-UK) consortium|Davies|United Kingdom

>Spike|hCoV-19/Gibraltar/205000694/2020|2020-12-00|EPI\_ISL\_710018|Original|hCoV-19^^Gibraltar|Human|Microbiology|Respiratory Virus Unit|Platt|Gibraltar

>Spike|hCoV-19/England/QEUH-AAD047/2020|2020-10-21|EPI\_ISL\_652934|Original|hCoV-19^^England|Human|Oxford Viromics|COVID-19 Genomics UK (COG-UK) Consortium|Golubchik|United Kingdom

>Spike|hCoV-19/Iran/SA-Isf-56/2020|2020-05-10|EPI\_ISL\_591341|Original|hCoV-19^^Iran|Human|Infectious Diseases and Tropical Medicine Research Center|Infectious Diseases and Tropical Medicine Research Center|Haghjooy Javanmard,S.|Iran

>Spike|hCoV-19/USA/FL-BPHL-0615/2020|2020-04-03|EPI\_ISL\_508819|Original|hCoV-19^^Florida|Human|Florida Bureau of Public Health Laboratories|Florida Bureau of Public Health Laboratories|Blanton|USA

>Spike|hCoV-19/Japan/PG-8547/2020|2020-08-00|EPI\_ISL\_686143|Original|hCoV-19^^Japan|Human|Pathogen Genomics Center|Pathogen Genomics Center|Sekizuka|Japan

>Spike|hCoV-19/Luxembourg/LNS2399095/2020|2020-10-30|EPI\_ISL\_740114|Original|hCoV-19^^Luxembourg|Human|Laboratoire national de sant\u00e9|Laboratoire national de sant\u00e9|Wienecke-Baldacchino|Luxembourg

>Spike|hCoV-19/Scotland/GCVR-17191D/2020|2020-03-28|EPI\_ISL\_489640|Original|hCoV-19^^Scotland|Human|NHSGGC West of Scotland Specialist Virology Centre / MRC-University of Glasgow Centre for Virus Research|Wellcome Sanger Institute for the COVID-19 Genomics UK (COG-UK) consortium|Davies|United Kingdom

>Spike|hCoV-19/Scotland/EDB7110/2020|2020-08-03|EPI\_ISL\_514534|Original|hCoV-19^^Scotland|Human|Virology Department|COVID-19 Genomics UK (COG-UK) Consortium|Williams|United Kingdom

>Spike|hCoV-19/USA/AZ-TG619658/2020|2020-08-18|EPI\_ISL\_695707|Original|hCoV-19^^Arizona|Human|TGen North|TGen North|French|USA

>Spike|hCoV-19/Spain/MD-ISCI-2014656/2020|2020-08-18|EPI\_ISL\_691716|Original|hCoV-19^^Madrid|Human|Hospital Cl\u00ednico San Carlos|Instituto de Salud Carlos III|Caballero|Spain

>Spike|hCoV-19/USA/AZ-TG640880/2020|2020-03-26|EPI\_ISL\_695808|Original|hCoV-19^^Arizona|Human|Sonora Quest Laboratories|TGen North|French|USA

>Spike|hCoV-19/Wales/PHWC-15C3A1/2020|2020-03-29|EPI\_ISL\_472479|Original|hCoV-19^^Wales|Human|Wales Specialist Virology Centre Sequencing lab|COVID-19 Genomics UK (COG-UK) Consortium|Moore|United Kingdom

>Spike|hCoV-19/United Arab Emirates/0632/2020|2020-05-15|EPI\_ISL\_698788|Original|hCoV-19^^Abu Dhabi|Human|Group 42 (G42) Healthcare|G42 Healthcare|Ogrodzki|United Arab Emirates

>Spike|hCoV-19/Australia/VIC6547/2020|2020-07-17|EPI\_ISL\_521317|Original|hCoV-19^^Victoria|Human|Victorian Infectious Diseases Reference Laboratory (VIDRL)|VIDRL and MDU-PHL|Schultz|Australia

>Spike|hCoV-19/Scotland/EDB868/2020|2020-04-04|EPI\_ISL\_433260|Original|hCoV-19^^Scotland|Human|Virology Department|COVID-19 Genomics UK (COG-UK) Consortium|Williams|United Kingdom

>Spike|hCoV-19/England/ALDP-952E48/2020|2020-06-11|EPI\_ISL\_553686|Original|hCoV-19^^England|Human|Lighthouse Lab in Alderley Park|Wellcome Sanger Institute for the COVID-19 Genomics UK (COG-UK) consortium|Davies|United Kingdom

>Spike|hCoV-19/England/CWAR-24FDD41/2020|2020-05-05|EPI\_ISL\_584516|Original|hCoV-19^^England|Human|UHCW / University of Warwick|COVID-19 Genomics UK (COG-UK) Consortium|Stark|United Kingdom

>Spike|hCoV-19/Australia/VIC16419/2020|2020-08-09|EPI\_ISL\_640428|Original|hCoV-19^^Victoria|Human|Microbiological Diagnostic Unit - Public Health Laboratory (MDU-PHL)|MDU-PHL|Schultz|Australia

>Spike|hCoV-19/Luxembourg/LNS7330392/2020|2020-10-24|EPI\_ISL\_744553|Original|hCoV-19^^Luxembourg|Human|Laboratoire national de sant\u00e9|Laboratoire national de sant\u00e9|Wienecke-Baldacchino|Luxembourg

>Spike|hCoV-19/South Korea/KCDC2485/2020|2020-06-11|EPI\_ISL\_514888|Original|hCoV-19^^South Korea|Human|Division of Viral Diseases|Division of Viral Diseases|Kim|South Korea

>Spike|hCoV-19/Denmark/DCGC-18564/2020|2020-12-07|EPI\_ISL\_749339|Original|hCoV-19^^Midtjylland|Human|Department of Virus and Microbiological Special Diagnostics|Albertsen Lab|Michaelsen|Denmark

>Spike|hCoV-19/USA/UT-UPHL-2009540/2020|2020-07-19|EPI\_ISL\_605220|Original|hCoV-19^^Utah|Human|Utah Public Health Laboratory|Utah Public Health Laboratory|Young|USA

>Spike|hCoV-19/South Africa/KRISP-K002676/2020|2020-08-02|EPI\_ISL\_535541|Original|hCoV-19^^KwaZulu-Natal|Human|NHLs-IALCH|KRISP|de Oliveira|South Africa

>Spike|hCoV-19/Spain/MD-IBV-99012459/2020|2020-11-19|EPI\_ISL\_780087|Original|hCoV-19^^Madrid|Human|Hospital General Universitario Gregorio Mara\u00f1a|SeqCOVID-SPAIN consortium/IBV (CSIC)|Comas|Spain

>Spike|hCoV-19/Russia/Novy\_Urengoy-RII24787S/2020|2020-05-00|EPI\_ISL\_507223|Original|hCoV-19^^Yamalo-Nenets|Human|WHO National Influenza Centre Russian Federation|WHO National Influenza Centre Russian Federation|Komissarov|Russia

>Spike|hCoV-19/Denmark/ALAB-SSI-612/2020|2020-03-26|EPI\_ISL\_436994|Original|hCoV-19^^Denmark|Human|Department of Virus and Microbiological Special Diagnostics|Albertsen lab|Kirkegaard|Denmark

>Spike|hCoV-19/USA/CA-CZB-3997/2020|2020-07-30|EPI\_ISL\_548605|Original|hCoV-19^^California|Human|County of Santa Clara Public Health Department|Chan-Zuckerberg Biohub|Bhatt|USA

>Spike|hCoV-19/France/PAC-IHU-1609/2020|2020-09-04|EPI\_ISL\_569226|Original|hCoV-19^^Provence-Alpes-C\u00f4te-d\u00e0z|Human|MEPHI|MEPHI|Levasseur|France

>Spike|hCoV-19/England/MILK-B38541/2020|2020-11-01|EPI\_ISL\_659042|Original|hCoV-19^^England|Human|Lighthouse Lab in Milton Keynes|Wellcome Sanger Institute for the COVID-19 Genomics UK (COG-UK) Consortium|Davies|United Kingdom

>Spike|hCoV-19/USA/IN-CDC-4982/2020|2020-04-23|EPI\_ISL\_647986|Original|hCoV-19^^Indiana|Human|Indiana State Department of Health|Pathogen Discovery|Queen|USA

>Spike|hCoV-19/Australia/VIC2910/2020|2020-07-07|EPI\_ISL\_521741|Original|hCoV-19^^Victoria|Human|Microbiological Diagnostic Unit - Public Health Laboratory (MDU-PHL)|MDU-PHL|Schultz|Australia

>Spike|hCoV-19/USA/TX-DSHS-0463/2020|2020-06-21|EPI\_ISL\_541994|Original|hCoV-19^^Texas|Human|Texas Department of State Health Services|Texas Department of State Health Services|Rahman|USA

>Spike|hCoV-19/England/ALDP-C48817/2020|2020-12-12|EPI\_ISL\_736494|Original|hCoV-19^^England|Human|Lighthouse Lab in Alderley Park|Wellcome Sanger Institute for the COVID-19 Genomics UK (COG-UK) Consortium|Davies|United Kingdom

>Spike|hCoV-19/Australia/VIC14036/2020|2020-09-16|EPI\_ISL\_592342|Original|hCoV-19^^Victoria|Human|Microbiological Diagnostic Unit - Public Health Laboratory (MDU-PHL)|MDU-PHL|Schultz|Australia

>Spike|hCoV-19/USA/MN-MDH-1536/2020|2020-07-27|EPI\_ISL\_527601|Original|hCoV-19^^Minnesota|Human|Minnesota Department of Health|Minnesota Department of Health|Garfin|USA

>Spike|hCoV-19/England/LCST-24D6BCC/2020|2020-06-09|EPI\_ISL\_484224|Original|hCoV-19^^England|Human|University Hospitals Of Leicester NHS Trust and DeepSeq Nottingham|COVID-19 Genomics UK (COG-UK) Consortium|Loose|United Kingdom

>Spike|hCoV-19/Spain/MD-IBV-99007159/2020|2020-08-18|EPI\_ISL\_541929|Original|hCoV-19^^Madrid|Human|Hospital General Universitario Gregorio Mara\u00f1a|SeqCOVID-SPAIN consortium/IBV (CSIC)|Comas|Spain

>Spike|hCoV-19/Singapore/1015/2020|2020-03-23|EPI\_ISL\_574500|Original|hCoV-19^^Singapore|Human|National Public Health Laboratory|National Public Health Laboratory|Mak|Singapore

>Spike|hCoV-19/England/ALDP-A70089/2020|2020-10-15|EPI\_ISL\_608212|Original|hCoV-19^^England|Human|Lighthouse Lab in Alderley Park|Wellcome Sanger Institute for the COVID-19 Genomics UK (COG-UK) consortium|Davies|United Kingdom

>Spike|hCoV-19/England/MILK-AC843B/2020|2020-10-21|EPI\_ISL\_629334|Original|hCoV-19^^England|Human|Lighthouse Lab in Milton Keynes|Wellcome Sanger Institute for the COVID-19 Genomics UK (COG-UK) consortium|Davies|United Kingdom

>Spike|hCoV-19/England/SHEF-C2082/2020|2020-04-24|EPI\_ISL\_479200|Original|hCoV-19^^England|Human|Virology Department|COVID-19 Genomics UK (COG-UK) Consortium|de Silva|United Kingdom

>Spike|hCoV-19/USA/NY-NYUMC429/2020|2020-04-15|EPI\_ISL\_435496|Original|hCoV-19^^New York|Human|NYU Langone Health|Departments of Pathology and Medicine|Maurano|USA

>Spike|hCoV-19/England/QEUA-9F82FD/2020|2020-09-27|EPI\_ISL\_588977|Original|hCoV-19^^England|Human|Lighthouse Lab in Glasgow|Wellcome Sanger Institute for the COVID-19 Genomics UK (COG-UK) consortium|Davies|United Kingdom

>Spike|hCoV-19/Jordan/SEARCH-5459/2020|2020-09-13|EPI\_ISL\_755246|Original|hCoV-19^^Amman|Human|Biolab Diagnostic Laboratories|Andersen lab at Scripps Research|Gangavarapu|Jordan

>Spike|hCoV-19/USA/TX-DSHS-1027/2020|2020-03-27|EPI\_ISL\_644181|Original|hCoV-19^^Texas|Human|Texas Department of State Health Services|Texas Department of State Health Services|Rahman|USA

>Spike|hCoV-19/USA/NM-UNM-00726/2020|2020-05-04|EPI\_ISL\_582153|Original|hCoV-19^^New Mexico|Human|TriCore Reference Laboratories|Center for Global Health|Domman|USA

>Spike|hCoV-19/USA/LA-GBCL-26684485/2020|2020-04-04|EPI\_ISL\_485298|Original|hCoV-19^^Louisiana|Human|River Road Testing Lab|Ginkgo Bioworks Clinical Laboratory|Smith|USA

>Spike|hCoV-19/Canada/ON-S746/2020|2020-04-09|EPI\_ISL\_591212|Original|hCoV-19^^Ontario|Human|Toronto Invasive Bacterial Diseases Network|McMaster University|McArthur|Canada

>Spike|hCoV-19/Wales/PHWC-47D43B/2020|2020-10-06|EPI\_ISL\_586142|Original|hCoV-19^^Wales|Human|Wales Specialist Virology Centre Sequencing lab|COVID-19 Genomics UK (COG-UK) Consortium|Moore|United Kingdom

>Spike|hCoV-19/Wales/PHWC-489D6E/2020|2020-10-26|EPI\_ISL\_652488|Original|hCoV-19^^Wales|Human|Wales Specialist Virology Centre Sequencing lab|COVID-19 Genomics UK (COG-UK) Consortium|Moore|United Kingdom

>Spike|hCoV-19/Japan/PG-2113/2020|2020-05-00|EPI\_ISL\_685718|Original|hCoV-19^^Japan|Human|Pathogen Genomics Center|Pathogen Genomics Center|Sekizuka|Japan

>Spike|hCoV-19/Denmark/DCGC-7643/2020|2020-10-19|EPI\_ISL\_618506|Original|hCoV-19^^Sjaelland|Human|Department of Virus and Microbiological Special Diagnostics|Albertsen lab|Michaelsen|Denmark

>Spike|hCoV-19/USA/WI-UW-1111/2020|2020-07-30|EPI\_ISL\_516536|Original|hCoV-19^^Wisconsin|Human|University of Wisconsin-Madison AIDS Vaccine Research Laboratories|University of Wisconsin-Madison AIDS Vaccine Research Laboratories|Baczenas|USA

>Spike|hCoV-19/England/MILK-97487F/2020|2020-08-21|EPI\_ISL\_575953|Original|hCoV-19^^England|Human|Lighthouse Lab in Milton Keynes|Wellcome Sanger Institute for the COVID-19 Genomics UK (COG-UK) consortium|Davies|United Kingdom

>Spike|hCoV-19/England/SHEF-CD500/2020|2020-04-22|EPI\_ISL\_453751|Original|hCoV-19^^England|Human|Virology Department|COVID-19 Genomics UK (COG-UK) Consortium|de Silva|United Kingdom

>Spike|hCoV-19/England/20126002904/2020|2020-03-18|EPI\_ISL\_423875|Original|hCoV-19^^England|Human|Respiratory Virus Unit|Respiratory Virus Unit|Platt|United Kingdom

>Spike|hCoV-19/England/QEUA-9F781A/2020|2020-09-27|EPI\_ISL\_595706|Original|hCoV-19^^England|Human|Oxford Viromics|COVID-19 Genomics UK (COG-UK) Consortium|Golubchik|United Kingdom

>Spike|hCoV-19/England/MILK-A1937A/2020|2020-10-03|EPI\_ISL\_612507|Original|hCoV-19^^England|Human|Wales Specialist Virology Centre Sequencing lab|COVID-19 Genomics UK (COG-UK) Consortium|Moore|United Kingdom

>Spike|hCoV-19/India/OR-ILSCV11165/2020|2020-05-07|EPI\_ISL\_463010|Original|hCoV-19^^Odisha|Human|Institute of Life Sciences|Immunogenomics lab|Raghav|India

>Spike|hCoV-19/England/ALDP-9CD349/2020|2020-09-15|EPI\_ISL\_566237|Original|hCoV-19^^England|Human|Lighthouse Lab in Alderley Park|Wellcome Sanger Institute for the COVID-19 Genomics UK (COG-UK) consortium|Davies|United Kingdom

>Spike|hCoV-19/USA/WI-GMF-10819/2020|2020-07-14|EPI\_ISL\_547614|Original|hCoV-19^^Wisconsin|Human|Gundersen Molecular Diagnostics Laboratory|Kabara Cancer Research Institute|Kenny|USA

>Spike|hCoV-19/England/MILK-99426C/2020|2020-08-24|EPI\_ISL\_551618|Original|hCoV-19^^England|Human|Lighthouse Lab in Milton Keynes|Wellcome Sanger Institute for the COVID-19 Genomics UK (COG-UK) consortium|Davies|United Kingdom

>Spike|hCoV-19/England/NORW-21F707/2020|2020-12-07|EPI\_ISL\_725042|Original|hCoV-19^^England|Human|Quadram Institute Bioscience|COVID-19 Genomics UK (COG-UK) Consortium|Alikhan|United Kingdom

>Spike|hCoV-19/England/BIRM-6591D/2020|2020-10-02|EPI\_ISL\_594595|Original|hCoV-19^^England|Human|University of Birmingham|COVID-19 Genomics UK (COG-UK) Consortium|Loman|United Kingdom

>Spike|hCoV-19/Spain/AR-IBV-2488/2020|2020-03-24|EPI\_ISL\_468787|Original|hCoV-19^^Aragon|Human|Servicio de Microbiolog\u00eda|SeqCOVID-SPAIN consortium/IBV (CSIC) |Comas|Spain

>Spike|hCoV-19/Japan/PG-7786/2020|2020-07-00|EPI\_ISL\_686888|Original|hCoV-19^^Japan|Human|Pathogen Genomics Center|Pathogen Genomics Center|Sekizuka|Japan

>Spike|hCoV-19/England/ALDP-A962E1/2020|2020-10-20|EPI\_ISL\_624771|Original|hCoV-19^^England|Human|Lighthouse Lab in Alderley Park|Wellcome Sanger Institute for the COVID-19 Genomics UK (COG-UK) consortium|Davies|United Kingdom

>Spike|hCoV-19/Singapore/816/2020|2020-08-11|EPI\_ISL\_516816|Original|hCoV-19^^Singapore|Human|National Public Health Laboratory|National Public Health Laboratory|Mak|Singapore

>Spike|hCoV-19/England/QEUA-BC3D16/2020|2020-11-25|EPI\_ISL\_704164|Original|hCoV-19^^England|Human|Lighthouse Lab in Glasgow|Wellcome Sanger Institute for the COVID-19 Genomics UK (COG-UK) Consortium|Davies|United Kingdom

>Spike|hCoV-19/England/PORT-2D1F09/2020|2020-04-06|EPI\_ISL\_499295|Original|hCoV-19^^England|Human|Centre for Enzyme Innovation|COVID-19 Genomics UK (COG-UK) Consortium|Robson|United Kingdom

>Spike|hCoV-19/United Arab Emirates/skmc-3883762/2020|2020-09-22|EPI\_ISL\_582679|Original|hCoV-19^^United Arab Emirates|Human|Sheikh Khalifa Medical City|Molecular/Surveillance lab\nSheikh Khalifa Medical City|Amirtharaj|United Arab Emirates

>Spike|hCoV-19/Wales/PHWC-162DC8/2020|2020-05-31|EPI\_ISL\_473201|Original|hCoV-19^^Wales|Human|Wales Specialist Virology Centre Sequencing lab|COVID-19 Genomics UK (COG-UK) Consortium|Moore|United Kingdom

>Spike|hCoV-19/England/20129145002/2020|2020-03-10|EPI\_ISL\_424111|Original|hCoV-19^^England|Human|Respiratory Virus Unit|Respiratory Virus Unit|Platt|United Kingdom

>Spike|hCoV-19/Netherlands/ZH-EMC-1035/2020|2020-11-23|EPI\_ISL\_722406|Original|hCoV-19^^Zuid Holland|Human|Dutch COVID-19 response team|Erasmus Medical Center|Oude Munnink|Netherlands

>Spike|hCoV-19/USA/CA-IGI-0331/2020|2020-07-16|EPI\_ISL\_576523|Original|hCoV-19^^California|Human|Innovative Genomics Institute|Innovative Genomics Institute|Wyman|USA

>Spike|hCoV-19/Wales/PHWC-2B1B1/2020|2020-04-07|EPI\_ISL\_432418|Original|hCoV-19^^Wales|Human|Wales Specialist Virology Centre|Public Health Wales Microbiology Cardiff|Moore|United Kingdom

>Spike|hCoV-19/Shanghai/SH0073/2020|2020-02-05|EPI\_ISL\_416376|Original|hCoV-19^^Shanghai|Human|Shanghai Public Health Clinical Center|National Research Center for Translational Medicine (Shanghai)|Zhang|China

>Spike|hCoV-19/England/SHEF-D0995/2020|2020-10-08|EPI\_ISL\_596221|Original|hCoV-19^^England|Human|Virology Department|COVID-19 Genomics UK (COG-UK) Consortium|de Silva|United Kingdom

>Spike|hCoV-19/England/QEUA-B660B2/2020|2020-11-10|EPI\_ISL\_655854|Original|hCoV-19^^England|Human|Lighthouse Lab in Glasgow|Wellcome Sanger Institute for the COVID-19 Genomics UK (COG-UK) Consortium|Davies|United Kingdom

>Spike|hCoV-19/England/NOTT-112222/2020|2020-04-30|EPI\_ISL\_484356|Original|hCoV-19^^England|Human|Lincolnshire Hospitals and DeepSeq Nottingham|COVID-19 Genomics UK (COG-UK) Consortium|Loose|United Kingdom

>Spike|hCoV-19/USA/CA-SR0371/2020|2020-04-29|EPI\_ISL\_458254|Original|hCoV-19^^California|Human|Scripps Medical Laboratory|Andersen lab at Scripps Research|Gangavarapu|USA

>Spike|hCoV-19/England/CAMB-71C9D/2020|2020-03-31|EPI\_ISL\_439637|Original|hCoV-19^^England|Human|Department of Pathology|Wellcome Sanger Institute for the COVID-19 Genomics UK (COG-UK) consortium|Amato|United Kingdom

>Spike|hCoV-19/England/MILK-B55951/2020|2020-11-05|EPI\_ISL\_657557|Original|hCoV-19^^England|Human|Lighthouse Lab in Milton Keynes|Wellcome Sanger Institute for the COVID-19 Genomics UK (COG-UK) Consortium|Davies|United Kingdom

>Spike|hCoV-19/England/QEUA-C15989/2020|2020-12-05|EPI\_ISL\_709453|Original|hCoV-19^^England|Human|Lighthouse Lab in Glasgow|Wellcome Sanger Institute for the COVID-19 Genomics UK (COG-UK) Consortium|Davies|United Kingdom

>Spike|hCoV-19/USA/MN-MDH-313/2020|2020-03-30|EPI\_ISL\_450773|Original|hCoV-19^^Minnesota|Human|Minnesota Department of Health|Minnesota Department of Health|Garfin|USA

>Spike|hCoV-19/England/QEUA-B68F0E/2020|2020-11-11|EPI\_ISL\_662094|Original|hCoV-19^^England|Human|Lighthouse Lab in Glasgow|Wellcome Sanger Institute for the COVID-19 Genomics UK (COG-UK) Consortium|Davies|United Kingdom

>Spike|hCoV-19/USA/HI-H200211/2020|2020-08-13|EPI\_ISL\_752770|Original|hCoV-19^^Hawaii|Human|State Laboratories Division|State Laboratories Division|Sultana|USA

>Spike|hCoV-19/USA/CA-CZB-14646/2020|2020-11-16|EPI\_ISL\_739438|Original|hCoV-19^^California|Human|Orange County Public Health Lab|Chan-Zuckerberg Biohub|Kamm|USA

>Spike|hCoV-19/USA/AZ-WL-CVG00023/2020|2020-10-05|EPI\_ISL\_765955|Original|hCoV-19^^Arizona|Human|Worobey Lab|Worobey Lab|Larsen|USA

>Spike|hCoV-19/Jordan/AM-ALSR-4970/2020|2020-10-03|EPI\_ISL\_730243|Original|hCoV-19^^Amman|Human|Biolab Diagnostic Laboratories|Andersen lab at Scripps Research|Gangavarapu|Jordan

>Spike|hCoV-19/Switzerland/ZG-ETHZ-410276/2020|2020-12-15|EPI\_ISL\_737908|Original|hCoV-19^^Zug|Human|Viollier AG|Department of Biosystems Science and Engineering|Nadeau|Switzerland

>Spike|hCoV-19/Spain/AR-IBV-98008108/2020|2020-10-07|EPI\_ISL\_654407|Original|hCoV-19^^Aragon|Human|Servicio de Microbiolog\u00eda|SeqCOVID-SPAIN consortium/IBV (CSIC) |Comas|Spain

>Spike|hCoV-19/England/QEUA-AAAE5F/2020|2020-10-21|EPI\_ISL\_652749|Original|hCoV-19^^England|Human|Oxford Viromics|COVID-19 Genomics UK (COG-UK) Consortium|Golubchik|United Kingdom

>Spike|hCoV-19/USA/NE-11443/2020|2020-05-05|EPI\_ISL\_475212|Original|hCoV-19^^Nebraska|Human|Nebraska Public Health Laboratory|UNMC COVID-19 Response Team|Pratt|USA

>Spike|hCoV-19/England/MILK-B95DA4/2020|2020-11-13|EPI\_ISL\_676027|Original|hCoV-19^^England|Human|Lighthouse Lab in Milton Keynes|Wellcome Sanger Institute for the COVID-19 Genomics UK (COG-UK) Consortium|Davies|United Kingdom

>Spike|hCoV-19/England/ALDP-A2D2B2/2020|2020-10-06|EPI\_ISL\_586786|Original|hCoV-19^^England|Human|Lighthouse Lab in Alderley Park|Wellcome Sanger Institute for the COVID-19 Genomics UK (COG-UK) consortium|Davies|United Kingdom

>Spike|hCoV-19/Belgium/ULG-8810/2020|2020-03-19|EPI\_ISL\_418642|Original|hCoV-19^^Li\u00e8ge|Human|Department of Clinical Microbiology|GIGA Medical Genomics|Durkin|Belgium

>Spike|hCoV-19/England/QEUA-7C7226/2020|2020-07-23|EPI\_ISL\_532873|Original|hCoV-19^^England|Human|Lighthouse Lab in Glasgow|Wellcome Sanger Institute for the COVID-19 Genomics UK (COG-UK) consortium|Davies|United Kingdom

>Spike|hCoV-19/USA/CA-LACPHL-AF00016/2020|2020-12-15|EPI\_ISL\_737251|Original|hCoV-19^^California|Human|Los Angeles County PHL|Los Angeles County PHL|Hemarajata|USA

>Spike|hCoV-19/Australia/VIC2103/2020|2020-06-15|EPI\_ISL\_480711|Original|hCoV-19^^Victoria|Human|Victorian Infectious Diseases Reference Laboratory (VIDRL)|VIDRL and MDU-PHL|Schultz|Australia

>Spike|hCoV-19/Spain/IB-IBV-2591/2020|2020-04-15|EPI\_ISL\_468966|Original|hCoV-19^^Illes Balears|Human|Servicio de Microbiolog\u00eda|SeqCOVID-SPAIN consortium/IBV (CSIC) |Comas|Spain

>Spike|hCoV-19/USA/UT-03769/2020|2020-04-03|EPI\_ISL\_509585|Original|hCoV-19^^Utah|Human|Utah Public Health Laboratory|Utah Public Health Laboratory|Butz|USA

>Spike|hCoV-19/South Korea/KDCA0356/2020|2020-10-20|EPI\_ISL\_760141|Original|hCoV-19^^South Korea|Human|Division of Emerging Infectious Diseases|Division of Emerging Infectious Diseases|Park|South Korea

>Spike|hCoV-19/Denmark/DCGC-7981/2020|2020-10-26|EPI\_ISL\_617141|Original|hCoV-19^^Hovedstaden|Human|Department of Virus and Microbiological Special Diagnostics|Albertsen lab|Michaelsen|Denmark

>Spike|hCoV-19/Russia/SPE-RII-MH983S/2020|2020-09-04|EPI\_ISL\_596372|Original|hCoV-19^^Saint Petersburg|Human|HELIX LCC|WHO National Influenza Centre Russian Federation|Komissarov|Russia

>Spike|hCoV-19/India/MH-CCMB-NIV5/2020|2020-03-17|EPI\_ISL\_450325|Original|hCoV-19^^Maharashtra|Human|NIV Pune|CSIR-Centre for Cellular and Molecular Biology|Banu|India

>Spike|hCoV-19/England/NORT-281C6B/2020|2020-03-23|EPI\_ISL\_478478|Original|hCoV-19^^England|Human|Northumbria University / South Tees Hospitals NHS Foundation Trust / North Cumbria Integrated Care NHS Foundation Trust / North Tees and Hartlepool NHS Foundation Trust / Newcastle Hospitals NHS Foundation Trust|COVID-19 Genomics UK (COG-UK) Consortium|Bashton|United Kingdom

>Spike|hCoV-19/Canada/ON-S106/2020|2020-03-21|EPI\_ISL\_586283|Original|hCoV-19^^Ontario|Human|Toronto Invasive Bacterial Diseases Network|McMaster University|McArthur|Canada

>Spike|hCoV-19/Ireland/LH-NVRL-20ILR08021/2020|2020-11-09|EPI\_ISL\_732419|Original|hCoV-19^^Louth|Human|National Virus Reference Laboratory|National Virus Reference Laboratory|Gonzalez|Ireland

>Spike|hCoV-19/USA/TX-HMH-6787/2020|2020-06-25|EPI\_ISL\_546243|Original|hCoV-19^^Texas|Human|Houston Methodist Hospital|Houston Methodist Hospital|Long|USA

>Spike|hCoV-19/Scotland/EDB10112/2020|2020-10-07|EPI\_ISL\_680474|Original|hCoV-19^^Scotland|Human|Virology Department|COVID-19 Genomics UK (COG-UK) Consortium|McHugh|United Kingdom

>Spike|hCoV-19/England/QEUH-76BC17/2020|2020-07-16|EPI\_ISL\_533125|Original|hCoV-19^^England|Human|Lighthouse Lab in Glasgow|Wellcome Sanger Institute for the COVID-19 Genomics UK (COG-UK) consortium|Davies|United Kingdom

>Spike|hCoV-19/Brazil/SP-L2-CAMPI61/2020|2020-04-18|EPI\_ISL\_476342|Original|hCoV-19^^S\u00e3o Paulo|Human|Laborat\u00f3rio de Patologia Cl\u00ednica - UNICAMP|Laborat\u00f3rio de Estudos de V\u00edrus Emergentes - UNICAMP|Faria|Brazil

>Spike|hCoV-19/England/ALDP-A6E9FC/2020|2020-10-15|EPI\_ISL\_607655|Original|hCoV-19^^England|Human|Lighthouse Lab in Alderley Park|Wellcome Sanger Institute for the COVID-19 Genomics UK (COG-UK) consortium|Davies|United Kingdom

>Spike|hCoV-19/England/QEUH-C643E7/2020|2020-12-14|EPI\_ISL\_778372|Original|hCoV-19^^England|Human|Lighthouse Lab in Glasgow|Wellcome Sanger Institute for the COVID-19 Genomics UK (COG-UK) Consortium|Davies|United Kingdom

>Spike|hCoV-19/Japan/PG-7865/2020|2020-07-00|EPI\_ISL\_686966|Original|hCoV-19^^Japan|Human|Pathogen Genomics Center|Pathogen Genomics Center|Sekizuka|Japan

>Spike|hCoV-19/Hong Kong/VM20134146/2020|2020-10-18|EPI\_ISL\_730615|Original|hCoV-19^^Hong Kong|Human|United Christian Hospital|Hong Kong Department of Health|Mak|China

>Spike|hCoV-19/England/QEUH-C7FE51/2020|2020-12-16|EPI\_ISL\_762648|Original|hCoV-19^^England|Human|Lighthouse Lab in Glasgow|Wellcome Sanger Institute for the COVID-19 Genomics UK (COG-UK) Consortium|Davies|United Kingdom

>Spike|hCoV-19/Northern Ireland/QEUH-96DB16/2020|2020-08-20|EPI\_ISL\_530690|Original|hCoV-19^^Northern Ireland|Human|Lighthouse Lab in Glasgow|Wellcome Sanger Institute for the COVID-19 Genomics UK (COG-UK) consortium|Davies|United Kingdom

>Spike|hCoV-19/USA/CA-CHLA-PLM14752712/2020|2020-11-09|EPI\_ISL\_753327|Original|hCoV-19^^California|Human|Clinical virology Laboratory|Center for Personalized Medicine|Dien Bard|USA

>Spike|hCoV-19/Wales/PHWC-4A327E/2020|2020-12-14|EPI\_ISL\_744077|Original|hCoV-19^^Wales|Human|Wales Specialist Virology Centre Sequencing lab|COVID-19 Genomics UK (COG-UK) Consortium|Moore|United Kingdom

>Spike|hCoV-19/USA/MN-MDH-2163/2020|2020-12-03|EPI\_ISL\_708501|Original|hCoV-19^^Minnesota|Human|Minnesota Department of Health|Minnesota Department of Health|Lorentz|USA

>Spike|hCoV-19/Denmark/DCGC-18763/2020|2020-12-07|EPI\_ISL\_748541|Original|hCoV-19^^Midtjylland|Human|Department of Virus and Microbiological Special Diagnostics|Albertsen Lab|Michaelsen|Denmark



>Spike|hCoV-19/Brazil/SP-RP21/2020|2020-04-05|EPI\_ISL\_613708|Original|hCoV-19^^S\u00e3o Paulo|Human|Laboratory of Molecular Biology|Laboratory of Molecular Biology|Slavov|Brazil

>Spike|hCoV-19/Switzerland/BL-ETHZ-350014/2020|2020-11-03|EPI\_ISL\_693788|Original|hCoV-19^^Basel-Landschaft|Human|Viollier AG|Department of Biosystems Science and Engineering|Nadeau|Switzerland

>Spike|hCoV-19/USA/TX-HMH-2891/2020|2020-06-09|EPI\_ISL\_543859|Original|hCoV-19^^Texas|Human|Houston Methodist Hospital|Houston Methodist Hospital|Long|USA

>Spike|hCoV-19/USA/PA-MGEL113/2020|2020-00-00|EPI\_ISL\_454389|Original|hCoV-19^^Pennsylvania|Human|UPMC Clinical Microbiology Laboratory|Microbial Genome Sequencing Center|Mustapha|USA

>Spike|hCoV-19/Scotland/EDB11104/2020|2020-12-04|EPI\_ISL\_763649|Original|hCoV-19^^Scotland|Human|Virology Department|COVID-19 Genomics UK (COG-UK) Consortium|McHugh|United Kingdom

>Spike|hCoV-19/USA/WI-GMF-19968/2020|2020-09-12|EPI\_ISL\_547848|Original|hCoV-19^^Wisconsin|Human|Gundersen Molecular Diagnostics Laboratory|Kabara Cancer Research Institute|Kenny|USA

>Spike|hCoV-19/England/QEUEH-B11D19/2020|2020-11-02|EPI\_ISL\_642300|Original|hCoV-19^^England|Human|Lighthouse Lab in Glasgow|Wellcome Sanger Institute for the COVID-19 Genomics UK (COG-UK) Consortium|Davies|United Kingdom

>Spike|hCoV-19/England/QEUEH-9B0DF0/2020|2020-09-03|EPI\_ISL\_559866|Original|hCoV-19^^England|Human|Oxford Viromics|COVID-19 Genomics UK (COG-UK) Consortium|Golubchik|United Kingdom

>Spike|hCoV-19/USA/TN-CDC-8411/2020|2020-03-09|EPI\_ISL\_576175|Original|hCoV-19^^Tennessee|Human|TN Division of Laboratory Services|Pathogen Discovery|Queen|USA

>Spike|hCoV-19/England/ALDP-700221/2020|2020-06-29|EPI\_ISL\_557556|Original|hCoV-19^^England|Human|Lighthouse Lab in Alderley Park|Wellcome Sanger Institute for the COVID-19 Genomics UK (COG-UK) consortium|Davies|United Kingdom

>Spike|hCoV-19/Turkey/IST-GLAB-233/2020|2020-05-15|EPI\_ISL\_735300|Original|hCoV-19^^Istanbul|Human|Genomic Laboratory (GLAB) (Conjoint lab of Health Directorate of Istanbul and Istanbul Technical University)|Genomic Laboratory (GLAB)|Karacan|Turkey

>Spike|hCoV-19/England/LIVE-AAC8C/2020|2020-07-28|EPI\_ISL\_540606|Original|hCoV-19^^England|Human|Liverpool Clinical Laboratories|COVID-19 Genomics UK (COG-UK) Consortium|Haldenby|United Kingdom

>Spike|hCoV-19/England/CAMC-A82E5D/2020|2020-10-13|EPI\_ISL\_610658|Original|hCoV-19^^England|Human|Lighthouse Lab in Cambridge|Wellcome Sanger Institute for the COVID-19 Genomics UK (COG-UK) consortium|Davies|United Kingdom

>Spike|hCoV-19/Netherlands/NA\_95/2020|2020-03-17|EPI\_ISL\_422855|Original|hCoV-19^^Netherlands|Human|Dutch COVID-19 response team|Erasmus Medical Center|Oude Munnink|Netherlands

>Spike|hCoV-19/Germany/NW-HHU-247/2020|2020-09-19|EPI\_ISL\_631380|Original|hCoV-19^^North Rhine-Westphalia|Human|University Hospital Cologne|Center of Medical Microbiology|Wienemann|Germany

>Spike|hCoV-19/USA/UT-UPHL-2009341/2020|2020-05-15|EPI\_ISL\_524939|Original|hCoV-19^^Utah|Human|Utah Public Health Laboratory|Utah Public Health Laboratory|Young|USA

>Spike|hCoV-19/Australia/VIC8391/2020|2020-08-12|EPI\_ISL\_564979|Original|hCoV-19^^Victoria|Human|Microbiological Diagnostic Unit - Public Health Laboratory (MDU-PHL)|MDU-PHL|Schultz|Australia

>Spike|hCoV-19/England/LOND-12505EF/2020|2020-10-23|EPI\_ISL\_665220|Original|hCoV-19^^England|Human|University College London Hospital|COVID-19 Genomics UK (COG-UK) Consortium|Byott|United Kingdom

>Spike|hCoV-19/USA/WI-UW-2299/2020|2020-11-25|EPI\_ISL\_728065|Original|hCoV-19^^Wisconsin|Human|University of Wisconsin-Madison AIDS Vaccine Research Laboratories|University of Wisconsin-Madison AIDS Vaccine Research Laboratories|Baczenas|USA

>Spike|hCoV-19/USA/WA-S29/2020|2020-03-02|EPI\_ISL\_417082|Original|hCoV-19^^Washington|Human|Washington State Department of Health|Seattle Flu Study|Bedford|USA

>Spike|hCoV-19/USA/TX-HMH-5847/2020|2020-06-30|EPI\_ISL\_547059|Original|hCoV-19^^Texas|Human|Houston Methodist Hospital|Houston Methodist Hospital|Long|USA

>Spike|hCoV-19/England/QEUA-9FF4D2/2020|2020-09-29|EPI\_ISL\_600357|Original|hCoV-19^^England|Human|Lighthouse Lab in Glasgow|Wellcome Sanger Institute for the COVID-19 Genomics UK (COG-UK) consortium|Davies|United Kingdom

>Spike|hCoV-19/England/CAMC-A57EBB/2020|2020-10-08|EPI\_ISL\_597168|Original|hCoV-19^^England|Human|Lighthouse Lab in Cambridge|Wellcome Sanger Institute for the COVID-19 Genomics UK (COG-UK) consortium|Davies|United Kingdom

>Spike|hCoV-19/Scotland/EDB9354/2020|2020-11-07|EPI\_ISL\_665725|Original|hCoV-19^^Scotland|Human|Virology Department|COVID-19 Genomics UK (COG-UK) Consortium|McHugh|United Kingdom

>Spike|hCoV-19/England/ALDP-A68497/2020|2020-10-12|EPI\_ISL\_608590|Original|hCoV-19^^England|Human|Lighthouse Lab in Alderley Park|Wellcome Sanger Institute for the COVID-19 Genomics UK (COG-UK) consortium|Davies|United Kingdom

>Spike|hCoV-19/Serbia/Kraljevo-01242507/2020|2020-07-24|EPI\_ISL\_582531|Original|hCoV-19^^Kraljevo|Human|Veterinary Specialized Institute \Kraljevo\|Veterinary Specialized Institute \Kraljevo\|Vidanovic|Serbia

>Spike|hCoV-19/Luxembourg/LNS4573955/2020|2020-10-30|EPI\_ISL\_740498|Original|hCoV-19^^Luxembourg|Human|Laboratoire national de sant\u00e9|Laboratoire national de sant\u00e9|Wienecke-Baldacchino|Luxembourg

>Spike|hCoV-19/England/ALDP-CC09AB/2020|2020-12-20|EPI\_ISL\_778234|Original|hCoV-19^^England|Human|Lighthouse Lab in Alderley Park|Wellcome Sanger Institute for the COVID-19 Genomics UK (COG-UK) Consortium|Davies|United Kingdom

>Spike|hCoV-19/Canada/QC-LSPQ-L00228636/2020|2020-03-20|EPI\_ISL\_535874|Original|hCoV-19^^Quebec|Human|H\u00f4pital Charles-LeMoine|Laboratoire de sant\u00e9 publique du Qu\u00e9bec|Moreira|Canada

>Spike|hCoV-19/Wales/PHWC-16E913/2020|2020-10-02|EPI\_ISL\_585790|Original|hCoV-19^^Wales|Human|Wales Specialist Virology Centre Sequencing lab|COVID-19 Genomics UK (COG-UK) Consortium|Moore|United Kingdom

>Spike|hCoV-19/Thailand/Bangkok-14712/2020|2020-09-24|EPI\_ISL\_708815|Vero P1|hCoV-19^^Bangkok|Human|Urban Institute for Disease Prevention and Control|National Institute of Health|Phuygun|Thailand

>Spike|hCoV-19/Denmark/DCGC-3782/2020|2020-05-04|EPI\_ISL\_622624|Original|hCoV-19^^Hovedstaden|Human|Department of Virus and Microbiological Special Diagnostics|Albertsen lab|Michaelsen|Denmark

>Spike|hCoV-19/England/MILK-9EE588/2020|2020-09-23|EPI\_ISL\_580832|Original|hCoV-19^^England|Human|Lighthouse Lab in Milton Keynes|Wellcome Sanger Institute for the COVID-19 Genomics UK (COG-UK) consortium|Davies|United Kingdom

>Spike|hCoV-19/Italy/VEN-UniVR-43/2020|2020-03-12|EPI\_ISL\_751330|Original|hCoV-19^^Veneto|Human|IRCCS Sacro Cuore Don Calabria Hospital|University of Verona|Mori|Italy

>Spike|hCoV-19/Portugal/PT0468/2020|2020-04-18|EPI\_ISL\_454192|Original|hCoV-19^^Portugal|Human|unknown|Instituto Nacional de Saude (INSA)|Borges|Portugal

>Spike|hCoV-19/England/NORT-297D6F/2020|2020-04-23|EPI\_ISL\_488090|Original|hCoV-19^^England|Human|NU-OMICS DNA Sequencing research facility|Wellcome Sanger Institute for the COVID-19 Genomics UK (COG-UK) consortium|Davies|United Kingdom

>Spike|hCoV-19/USA/AZ-TG493821/2020|2020-07-13|EPI\_ISL\_695236|Original|hCoV-19^^Arizona|Human|TGen North|TGen North|French|USA

>Spike|hCoV-19/Denmark/DCGC-20820/2020|2020-12-21|EPI\_ISL\_758919|Original|hCoV-19^^Sjaelland|Human|Department of Virus and Microbiological Special Diagnostics|Albertsen Lab|Michaelsen|Denmark

>Spike|hCoV-19/Scotland/EDB9453/2020|2020-10-31|EPI\_ISL\_652057|Original|hCoV-19^^Scotland|Human|Virology Department|COVID-19 Genomics UK (COG-UK) Consortium|McHugh|United Kingdom

>Spike|hCoV-19/Wales/CAMC-A410DC/2020|2020-10-06|EPI\_ISL\_625438|Original|hCoV-19^^Wales|Human|Lighthouse Lab in Cambridge|Wellcome Sanger Institute for the COVID-19 Genomics UK (COG-UK) consortium|Davies|United Kingdom

>Spike|hCoV-19/Japan/PG-3846/2020|2020-07-00|EPI\_ISL\_692097|Original|hCoV-19^^Japan|Human|Yamagata Prefectural Institute of Public Health|Pathogen Genomics Center|Sekizuka|Japan

>Spike|hCoV-19/Canada/ON-S1986/2020|2020-11-24|EPI\_ISL\_755699|Original|hCoV-19^^Ontario|Human|Toronto Invasive Bacterial Diseases Network|McMaster University|McArthur|Canada

>Spike|hCoV-19/England/CWAR-24FDA68/2020|2020-05-01|EPI\_ISL\_584471|Original|hCoV-19^^England|Human|UHCW / University of Warwick|COVID-19 Genomics UK (COG-UK) Consortium|Stark|United Kingdom

>Spike|hCoV-19/England/QEUA-B13236/2020|2020-11-02|EPI\_ISL\_642246|Original|hCoV-19^^England|Human|Lighthouse Lab in Glasgow|Wellcome Sanger Institute for the COVID-19 Genomics UK (COG-UK) Consortium|Davies|United Kingdom

>Spike|hCoV-19/Switzerland/AG-ETHZ-110445/2020|2020-04-07|EPI\_ISL\_451868|Original|hCoV-19^^Aargau|Human|Viollier AG|Department of Biosystems Science and Engineering|Nadeau|Switzerland

>Spike|hCoV-19/England/QEUA-B32064/2020|2020-11-04|EPI\_ISL\_646257|Original|hCoV-19^^England|Human|Lighthouse Lab in Glasgow|Wellcome Sanger Institute for the COVID-19 Genomics UK (COG-UK) Consortium|Davies|United Kingdom

>Spike|hCoV-19/Wales/PHWC-49E944/2020|2020-12-08|EPI\_ISL\_743070|Original|hCoV-19^^Wales|Human|Wales Specialist Virology Centre Sequencing lab|COVID-19 Genomics UK (COG-UK) Consortium|Moore|United Kingdom

>Spike|hCoV-19/Hungary/US-57523w/2020|2020-10-02|EPI\_ISL\_677785|Original|hCoV-19^^B\u00e9lcs-Kiskun county|Human|University of Szeged|National Laboratory of Virology|Kemenesi|Hungary

>Spike|hCoV-19/USA/AZ-TG670168/2020|2020-04-30|EPI\_ISL\_696366|Original|hCoV-19^^Arizona|Human|Sonora Quest Laboratories|TGen North|French|USA

>Spike|hCoV-19/England/CAMC-9907F8/2020|2020-08-29|EPI\_ISL\_551902|Original|hCoV-19^^England|Human|Lighthouse Lab in Cambridge|Wellcome Sanger Institute for the COVID-19 Genomics UK (COG-UK) consortium|Davies|United Kingdom

>Spike|hCoV-19/USA/UT-UPHL-2008867/2020|2020-05-27|EPI\_ISL\_524984|Original|hCoV-19^^Utah|Human|Utah Public Health Laboratory|Utah Public Health Laboratory|Young|USA

>Spike|hCoV-19/England/CAMB-7DC46/2020|2020-04-07|EPI\_ISL\_441576|Original|hCoV-19^^England|Human|Department of Pathology|Wellcome Sanger Institute for the COVID-19 Genomics UK (COG-UK) consortium|Amato|United Kingdom

>Spike|hCoV-19/Australia/VIC10245/2020|2020-08-14|EPI\_ISL\_562839|Original|hCoV-19^^Victoria|Human|Victorian Infectious Diseases Reference Laboratory (VIDRL)|VIDRL and MDU-PHL|Schultz|Australia

>Spike|hCoV-19/South Korea/KDCA0425/2020|2020-11-14|EPI\_ISL\_760209|Original|hCoV-19^^South Korea|Human|Division of Emerging Infectious Diseases|Division of Emerging Infectious Diseases|Park|South Korea

>Spike|hCoV-19/USA/NY-NYCPHL-000360/2020|2020-03-12|EPI\_ISL\_631864|Original|hCoV-19^^New York|Human|Brookdale University Hospital Medical Center|New York City Public Health Laboratory|Wang|USA

>Spike|hCoV-19/USA/TX-HMH-MCoV-14432/2020|2020-10-07|EPI\_ISL\_787717|Original|hCoV-19^^Texas|Human|Houston Methodist Hospital|Houston Methodist Hospital|Long|USA

>Spike|hCoV-19/Australia/VIC5649/2020|2020-07-16|EPI\_ISL\_518460|Original|hCoV-19^^Victoria|Human|Victorian Infectious Diseases Reference Laboratory (VIDRL)|VIDRL and MDU-PHL|Schultz|Australia

>Spike|hCoV-19/USA/WI-UW-1839/2020|2020-09-11|EPI\_ISL\_605711|Original|hCoV-19^^Wisconsin|Human|University of Wisconsin-Madison AIDS Vaccine Research Laboratories|University of Wisconsin-Madison AIDS Vaccine Research Laboratories|Baczenas|USA

>Spike|hCoV-19/Canada/ON-UHTC\_0011/2020|2020-03-27|EPI\_ISL\_464017|unknown|hCoV-19^^Ontario|Human|Unity Health Toronto|Ontario Institute for Cancer Research|de Borja|Canada

>Spike|hCoV-19/Brazil/SP-L32-CD840/2020|2020-04-14|EPI\_ISL\_722045|Original|hCoV-19^^S\u00e3o Paulo|Human|Hospital das Cl\u00ednicas Universidade de S\u00e3o Paulo Medical School|Laborat\u00f3rio de Parasitologia M\u00e9dica - Instituto de Medicina Tropical - Universidade de S\u00e3o Paulo|de Jesus|Brazil

>Spike|hCoV-19/England/QEUA-9B3FBB/2020|2020-09-03|EPI\_ISL\_559873|Original|hCoV-19^^England|Human|Oxford Viromics|COVID-19 Genomics UK (COG-UK) Consortium|Golubchik|United Kingdom

>Spike|hCoV-19/England/CAMC-AB23DD/2020|2020-10-23|EPI\_ISL\_623776|Original|hCoV-19^^England|Human|Lighthouse Lab in Cambridge|Wellcome Sanger Institute for the COVID-19 Genomics UK (COG-UK) consortium|Davies|United Kingdom

>Spike|hCoV-19/England/CAMB-77F61/2020|2020-04-01|EPI\_ISL\_441120|Original|hCoV-19^^England|Human|Department of Pathology|Wellcome Sanger Institute for the COVID-19 Genomics UK (COG-UK) consortium|Amato|United Kingdom

>Spike|hCoV-19/Japan/PG-0618/2020|2020-04-00|EPI\_ISL\_684228|Original|hCoV-19^^Japan|Human|Gunma Prefectural Institute of Public Health and Environmental Sciences|Pathogen Genomics Center|Sekizuka|Japan

>Spike|hCoV-19/Ecuador/52872/2020|2020-05-28|EPI\_ISL\_491946|Original|hCoV-19^^Los Rios|Human|Instituto Nacional de Investigaci\u00f3n en Salud P\u00fablica - INSPI|INSPI - Charit\u00e9|Bruno Caicedo|Ecuador

>Spike|hCoV-19/England/ALDP-9CACD8/2020|2020-09-16|EPI\_ISL\_575668|Original|hCoV-19^^England|Human|Lighthouse Lab in Alderley Park|Wellcome Sanger Institute for the COVID-19 Genomics UK (COG-UK) consortium|Davies|United Kingdom

>Spike|hCoV-19/USA/CA-IGI-0420/2020|2020-07-20|EPI\_ISL\_756322|Original|hCoV-19^^California|Human|Innovative Genomics Institute|Innovative Genomics Institute|Wyman|USA

>Spike|hCoV-19/USA/MI-MDHHS-SC20261/2020|2020-03-18|EPI\_ISL\_447060|Original|hCoV-19^^Michigan|Human|Michigan Department of Health and Human Services|Michigan Department of Health and Human Services|Blankenship|USA

>Spike|hCoV-19/USA/CA-CZB-11793/2020|2020-09-22|EPI\_ISL\_625636|Original|hCoV-19^^California|Human|Orange County Public Health Lab|Chan-Zuckerberg Biohub|Bhatt|USA

>Spike|hCoV-19/USA/UT-UPHL-2009385/2020|2020-05-22|EPI\_ISL\_605149|Original|hCoV-19^^Utah|Human|Utah Public Health Laboratory|Utah Public Health Laboratory|Young|USA

>Spike|hCoV-19/Taiwan/NTU09/2020|2020-03-14|EPI\_ISL\_422412|Vero E6|hCoV-19^^Taipei|Human|Department of Laboratory Medicine|Microbial Genomics Core Lab|Lin|Taiwan

>Spike|hCoV-19/Scotland/QEUH-9DCB21/2020|2020-09-22|EPI\_ISL\_601158|Original|hCoV-19^^Scotland|Human|Lighthouse Lab in Glasgow|Wellcome Sanger Institute for the COVID-19 Genomics UK (COG-UK) consortium|Davies|United Kingdom

>Spike|hCoV-19/Denmark/DCGC-19597/2020|2020-12-07|EPI\_ISL\_749050|Original|hCoV-19^^Midtjylland|Human|Department of Virus and Microbiological Special Diagnostics|Albertsen Lab|Michaelsen|Denmark

>Spike|hCoV-19/Denmark/ALAB-SSI172/2020|2020-03-09|EPI\_ISL\_429385|Original|hCoV-19^^Denmark|Human|Department of Virus and Microbiological Special Diagnostics|Albertsen lab|Kirkegaard|Denmark

>Spike|hCoV-19/Denmark/DCGC-2153/2020|2020-08-10|EPI\_ISL\_617451|Original|hCoV-19^^Midtjylland|Human|Department of Virus and Microbiological Special Diagnostics|Albertsen lab|Michaelsen|Denmark

>Spike|hCoV-19/USA/TX-HMH-MCoV-10707/2020|2020-07-08|EPI\_ISL\_789595|Original|hCoV-19^^Texas|Human|Houston Methodist Hospital|Houston Methodist Hospital|Long|USA

>Spike|hCoV-19/USA/MN-MDH-2000/2020|2020-10-29|EPI\_ISL\_634874|Original|hCoV-19^^Minnesota|Human|Minnesota Department of Health|Minnesota Department of Health|Lorentz|USA

>Spike|hCoV-19/Kenya/C6958/2020|2020-05-15|EPI\_ISL\_568819|Original|hCoV-19^^Taita Taveta|Human|KEMRI-Wellcome Trust Research Programme|KEMRI-CGMR-C Kilifi|KEMRI-Wellcome Trust Research Programme|KEMRI-CGMR-C Kilifi|Githinji|Kenya

>Spike|hCoV-19/Germany/BY-MVP-V2012622/2020|2020-03-19|EPI\_ISL\_420911|Original|hCoV-19^^Bavaria|Human|Max von Pettenkofer Institute|Laboratory for Functional Genome Analysis|Graf|Germany

>Spike|hCoV-19/England/MILK-B3DB59/2020|2020-11-01|EPI\_ISL\_741392|Original|hCoV-19^^England|Human|Oxford Viromics|COVID-19 Genomics UK (COG-UK) Consortium|Golubchik|United Kingdom

>Spike|hCoV-19/Denmark/DCGC-16635/2020|2020-11-16|EPI\_ISL\_714884|Original|hCoV-19^^Hovedstaden|Human|Department of Virus and Microbiological Special Diagnostics|Albertsen Lab|Michaelsen|Denmark

>Spike|hCoV-19/Northern Ireland/QEUH-96DD10/2020|2020-08-20|EPI\_ISL\_530685|Original|hCoV-19^^Northern Ireland|Human|Lighthouse Lab in

Glasgow|Wellcome Sanger Institute for the COVID-19 Genomics UK (COG-UK) consortium|Davies|United Kingdom  
>Spike|hCoV-19/Canada/ON-S780/2020|2020-04-00|EPI\_ISL\_591226|Original|hCoV-19^^Ontario|Human|Toronto Invasive Bacterial Diseases Network|McMaster University|McArthur|Canada  
>Spike|hCoV-19/Japan/PG-0510/2020|2020-04-00|EPI\_ISL\_684175|Original|hCoV-19^^Japan|Human|Pathogen Genomics Center|Pathogen Genomics Center|Sekizuka|Japan  
>Spike|hCoV-19/England/NORW-ECD6D/2020|2020-05-29|EPI\_ISL\_472346|Original|hCoV-19^^England|Human|Quadram Institute Bioscience|COVID-19 Genomics UK (COG-UK) Consortium|Alikhan|United Kingdom  
>Spike|hCoV-19/USA/MD-HP00143/2020|2020-03-17|EPI\_ISL\_457774|Original|hCoV-19^^Maryland|Human|Johns Hopkins Hospital Department of Pathology|Johns Hopkins Hospital Department of Pathology|Ramakrishnan|USA  
>Spike|hCoV-19/England/QEUH-9F812D/2020|2020-09-27|EPI\_ISL\_595732|Original|hCoV-19^^England|Human|Oxford Viromics|COVID-19 Genomics UK (COG-UK) Consortium|Golubchik|United Kingdom  
>Spike|hCoV-19/Spain/PV-IBV-98008321/2020|2020-10-08|EPI\_ISL\_654541|Original|hCoV-19^^Basque Country|Human|Servicio de Microbiolog\u00eda. Hospital Universitario Donostia. OSI Donostialdea. \u00c1rea de Enfermedades Infecciosas|SeqCOVID-SPAIN consortium/IBV (CSIC) |Comas|Spain  
>Spike|hCoV-19/Australia/VIC4485/2020|2020-07-16|EPI\_ISL\_519781|Original|hCoV-19^^Victoria|Human|Microbiological Diagnostic Unit - Public Health Laboratory (MDU-PHL) |MDU-PHL|Schultz|Australia  
>Spike|hCoV-19/India/GJ-GBRC185a/2020|2020-06-03|EPI\_ISL\_469025|Original|hCoV-19^^Gujarat|Human|B.J. Medical College and Civil hospital|Gujarat Biotechnology Research Centre|Joshi|India  
>Spike|hCoV-19/England/201120239/2020|2020-03-09|EPI\_ISL\_464670|Original|hCoV-19^^England|Human|Respiratory Virus Unit|Respiratory Virus Unit|Platt|United Kingdom  
>Spike|hCoV-19/England/ALDP-B84142/2020|2020-11-14|EPI\_ISL\_675458|Original|hCoV-19^^England|Human|Lighthouse Lab in Alderley Park|Wellcome Sanger Institute for the COVID-19 Genomics UK (COG-UK) Consortium|Davies|United Kingdom  
>Spike|hCoV-19/Japan/PG-6113/2020|2020-08-00|EPI\_ISL\_689225|Original|hCoV-19^^Japan|Human|Pathogen Genomics Center|Pathogen Genomics Center|Sekizuka|Japan  
>Spike|hCoV-19/Denmark/DCGC-19430/2020|2020-12-07|EPI\_ISL\_748939|Original|hCoV-19^^Hovedstaden|Human|Department of Virus and Microbiological Special Diagnostics|Albertsen Lab|Michaelsen|Denmark  
>Spike|hCoV-19/Switzerland/BE-ETHZ-220059/2020|2020-07-25|EPI\_ISL\_512029|Original|hCoV-19^^Bern|Human|Viollier AG|Department of Biosystems Science and Engineering|Nadeau|Switzerland  
>Spike|hCoV-19/USA/TX-HMH-7573/2020|2020-06-25|EPI\_ISL\_546863|Original|hCoV-19^^Texas|Human|Houston Methodist Hospital|Houston Methodist Hospital|Long|USA  
>Spike|hCoV-19/Panama/336231/2020|2020-04-04|EPI\_ISL\_496838|Original|hCoV-19^^Panama Center|Human|Gorgas Memorial Laboratory of Health Studies|Gorgas Memorial Laboratory of Health Studies|Martinez|Panama  
>Spike|hCoV-19/England/ALDP-9509FE/2020|2020-06-14|EPI\_ISL\_554491|Original|hCoV-19^^England|Human|Lighthouse Lab in Alderley Park|Wellcome Sanger Institute for the COVID-19 Genomics UK (COG-UK) consortium|Davies|United Kingdom  
>Spike|hCoV-19/England/QEUH-AD34F1/2020|2020-10-26|EPI\_ISL\_634241|Original|hCoV-19^^England|Human|Lighthouse Lab in Glasgow|Wellcome Sanger Institute for the COVID-19 Genomics UK (COG-UK) consortium|Davies|United Kingdom  
>Spike|hCoV-19/USA/MI-MDHHS-SC21936/2020|2020-09-26|EPI\_ISL\_576202|Original|hCoV-19^^Michigan|Human|Michigan Department of Health and Human Services|Michigan Department of Health and Human Services|Blankenship|USA  
>Spike|hCoV-19/Gibraltar/205121257/2020|2020-00-00|EPI\_ISL\_766376|Original|hCoV-19^^Gibraltar|Human|Microbiology|Respiratory Virus Unit|Platt|Gibraltar  
>Spike|hCoV-19/England/BRIS-18531E2/2020|2020-04-02|EPI\_ISL\_492223|Original|hCoV-19^^England|Human|PHE South West Regional Laboratory|Wellcome Sanger Institute for the COVID-19 Genomics UK (COG-UK) consortium|Davies|United Kingdom

>Spike|hCoV-19/Denmark/DCGC-3594/2020|2020-08-31|EPI\_ISL\_616237|Original|hCoV-19^^Syddanmark|Human|Department of Virus and Microbiological Special Diagnostics|Albertsen lab|Michaelsen|Denmark

>Spike|hCoV-19/England/CAMC-B07781/2020|2020-10-30|EPI\_ISL\_643921|Original|hCoV-19^^England|Human|Lighthouse Lab in Cambridge|Wellcome Sanger Institute for the COVID-19 Genomics UK (COG-UK) Consortium|Davies|United Kingdom

>Spike|hCoV-19/Netherlands/ZH-EMC-712/2020|2020-10-02|EPI\_ISL\_632559|Original|hCoV-19^^Zuid Holland|Human|Dutch COVID-19 response team|Erasmus Medical Center|Oude Munnink|Netherlands

>Spike|hCoV-19/Japan/PG-3399/2020|2020-04-00|EPI\_ISL\_691513|Original|hCoV-19^^Japan|Human|Sakai City Institute of Public Health|Pathogen Genomics Center|Sekizuka|Japan

>Spike|hCoV-19/Scotland/CVR3965/2020|2020-08-10|EPI\_ISL\_517581|Original|hCoV-19^^Scotland|Human|West of Scotland Specialist Virology Centre|COVID-19 Genomics UK (COG-UK) Consortium|Robertson|United Kingdom

>Spike|hCoV-19/Japan/IC-0100/2020|2020-07-00|EPI\_ISL\_591441|Original|hCoV-19^^Japan|Human|Pathogen Genomics Center|Pathogen Genomics Center|Sekizuka|Japan

>Spike|hCoV-19/England/CAMB-1B98C1/2020|2020-11-07|EPI\_ISL\_664947|Original|hCoV-19^^England|Human|Department of Pathology|COVID-19 Genomics UK (COG-UK) Consortium|Goodfellow|United Kingdom

>Spike|hCoV-19/Denmark/DCGC-4217/2020|2020-09-14|EPI\_ISL\_622110|Original|hCoV-19^^Hovedstaden|Human|Department of Virus and Microbiological Special Diagnostics|Albertsen lab|Michaelsen|Denmark

>Spike|hCoV-19/Costa Rica/INC-0156/2020|2020-10-01|EPI\_ISL\_770027|Original|hCoV-19^^Heredia|Human|Area De Salud La Cruz|Inciensa|Soto-Garita|Costa Rica

>Spike|hCoV-19/Denmark/DCGC-9442/2020|2020-11-09|EPI\_ISL\_668974|Original|hCoV-19^^Hovedstaden|Human|Department of Virus and Microbiological Special Diagnostics|Albertsen Lab|Michaelsen|Denmark

>Spike|hCoV-19/England/OXON-B3F3C/2020|2020-04-10|EPI\_ISL\_534919|Original|hCoV-19^^England|Human|Oxford Viromics|COVID-19 Genomics UK (COG-UK) Consortium|Golubchik|United Kingdom

>Spike|hCoV-19/England/BRIS-12B8D9/2020|2020-05-18|EPI\_ISL\_469347|Original|hCoV-19^^England|Human|PHE South West Regional Laboratory|Wellcome Sanger Institute for the COVID-19 Genomics UK (COG-UK) consortium|Davies|United Kingdom

>Spike|hCoV-19/Denmark/DCGC-20395/2020|2020-12-21|EPI\_ISL\_759123|Original|hCoV-19^^Hovedstaden|Human|Department of Virus and Microbiological Special Diagnostics|Albertsen Lab|Michaelsen|Denmark

>Spike|hCoV-19/Spain/GA-IBV-004060/2020|2020-03-18|EPI\_ISL\_510298|Original|hCoV-19^^Galicia|Human|Hospital Cl\u00e9nico Universitario de Santiago de Compostela|SeqCOVID-SPAIN consortium|IBV (CSIC)|Comas|Spain

>Spike|hCoV-19/USA/TX-HMH-2005/2020|2020-05-18|EPI\_ISL\_545064|Original|hCoV-19^^Texas|Human|Houston Methodist Hospital|Houston Methodist Hospital|Long|USA

>Spike|hCoV-19/Australia/VIC273/2020|2020-03-22|EPI\_ISL\_419966|Original|hCoV-19^^Victoria|Human|Victorian Infectious Diseases Reference Laboratory (VIDRL)|Victorian Infectious Diseases Reference Laboratory and Microbiological Diagnostic Unit Public Health Laboratory|Schultz|Australia

>Spike|hCoV-19/USA/TX-HMH-MCoV-8490/2020|2020-07-01|EPI\_ISL\_780589|Original|hCoV-19^^Texas|Human|Houston Methodist Hospital|Houston Methodist Hospital|Long|USA

>Spike|hCoV-19/Japan/PG-6528/2020|2020-08-00|EPI\_ISL\_687642|Original|hCoV-19^^Japan|Human|Pathogen Genomics Center|Pathogen Genomics Center|Sekizuka|Japan

>Spike|hCoV-19/England/20119068004/2020|2020-03-14|EPI\_ISL\_465094|Original|hCoV-19^^England|Human|Respiratory Virus Unit|Respiratory Virus Unit|Platt|United Kingdom

>Spike|hCoV-19/England/QEUEH-99036D/2020|2020-08-26|EPI\_ISL\_539996|Original|hCoV-19^^England|Human|Lighthouse Lab in Glasgow|Wellcome Sanger Institute for the COVID-19 Genomics UK (COG-UK) consortium|Davies|United Kingdom

>Spike|hCoV-19/Luxembourg/LNS1274513/2020|2020-11-15|EPI\_ISL\_739913|Original|hCoV-19^^Luxembourg|Human|Laboratoire national de sant\u00e9|Laboratoire national de sant\u00e9|Wienecke-Baldacchino|Luxembourg

>Spike|hCoV-19/USA/MA-MGH-03579/2020|2020-12-02|EPI\_ISL\_765891|Original|hCoV-19^^Massachusetts|Human|Massachusetts General Hospital|Infectious Disease Program|Park|USA

>Spike|hCoV-19/USA/MI-QDX-2168/2020|2020-03-17|EPI\_ISL\_604472|Original|hCoV-19^^Michigan|Human|Quest Diagnostics|Quest Diagnostics|Kagan|USA

>Spike|hCoV-19/Denmark/DCGC-19489/2020|2020-12-07|EPI\_ISL\_748984|Original|hCoV-19^^Hovedstaden|Human|Department of Virus and Microbiological Special Diagnostics|Albertsen Lab|Michaelsen|Denmark

>Spike|hCoV-19/England/MILK-AC8EC4/2020|2020-10-22|EPI\_ISL\_629567|Original|hCoV-19^^England|Human|Lighthouse Lab in Milton Keynes|Wellcome Sanger Institute for the COVID-19 Genomics UK (COG-UK) consortium|Davies|United Kingdom

>Spike|hCoV-19/Wales/ALDP-A52991/2020|2020-10-07|EPI\_ISL\_609218|Original|hCoV-19^^Wales|Human|Lighthouse Lab in Alderley Park|Wellcome Sanger Institute for the COVID-19 Genomics UK (COG-UK) consortium|Davies|United Kingdom

>Spike|hCoV-19/USA/TX-HMH-MCoV-19594/2020|2020-11-23|EPI\_ISL\_783965|Original|hCoV-19^^Texas|Human|Houston Methodist Hospital|Houston Methodist Hospital|Long|USA

>Spike|hCoV-19/England/QEUEH-9F4BBA/2020|2020-09-25|EPI\_ISL\_588298|Original|hCoV-19^^England|Human|Lighthouse Lab in Glasgow|Wellcome Sanger Institute for the COVID-19 Genomics UK (COG-UK) consortium|Davies|United Kingdom

>Spike|hCoV-19/Italy/LAZ-INMI-58/2020|2020-06-04|EPI\_ISL\_603165|Original|hCoV-19^^Lazio|Human|INMI Lazzaro Spallanzani IRCCS|INMI Lazzaro Spallanzani IRCCS|Gruber|Italy

>Spike|hCoV-19/England/NORT-28D50A/2020|2020-11-17|EPI\_ISL\_706342|Original|hCoV-19^^England|Human|Northumbria University / South Tees Hospitals NHS Foundation Trust / North Cumbria Integrated Care NHS Foundation Trust / North Tees and Hartlepool NHS Foundation Trust / Newcastle Hospitals NHS Foundation Trust|COVID-19 Genomics UK (COG-UK) Consortium|Bashton|United Kingdom

>Spike|hCoV-19/England/QEUEH-B7D11F/2020|2020-11-14|EPI\_ISL\_741849|Original|hCoV-19^^England|Human|Oxford Viromics|COVID-19 Genomics UK (COG-UK) Consortium|Golubchik|United Kingdom

>Spike|hCoV-19/USA/WA-UW121/2020|2020-03-11|EPI\_ISL\_416659|Original|hCoV-19^^Washington|Human|UW Virology Lab|UW Virology Lab|Roychoudhury|USA

>Spike|hCoV-19/Russia/MUR-RII-MH6337S/2020|2020-11-11|EPI\_ISL\_733384|Original|hCoV-19^^Murmansk|Human|HELIX LLC|WHO National Influenza Centre Russian Federation|Komissarov|Russia

>Spike|hCoV-19/Denmark/DCGC-22236/2020|2020-12-14|EPI\_ISL\_758629|Original|hCoV-19^^Nordjylland|Human|Department of Virus and Microbiological Special Diagnostics|Albertsen Lab|Michaelsen|Denmark

>Spike|hCoV-19/England/ALDP-A2D0F4/2020|2020-10-06|EPI\_ISL\_586642|Original|hCoV-19^^England|Human|Lighthouse Lab in Alderley Park|Wellcome Sanger Institute for the COVID-19 Genomics UK (COG-UK) consortium|Davies|United Kingdom

>Spike|hCoV-19/Denmark/DCGC-14014/2020|2020-11-30|EPI\_ISL\_711517|Original|hCoV-19^^Nordjylland|Human|Department of Virus and Microbiological Special Diagnostics|Albertsen Lab|Michaelsen|Denmark

>Spike|hCoV-19/England/201180172/2020|2020-03-10|EPI\_ISL\_464891|Original|hCoV-19^^England|Human|Respiratory Virus Unit|Respiratory Virus Unit|Platt|United Kingdom

>Spike|hCoV-19/Scotland/QEUEH-A1F505/2020|2020-10-01|EPI\_ISL\_598963|Original|hCoV-19^^Scotland|Human|Lighthouse Lab in Glasgow|Wellcome Sanger Institute for the COVID-19 Genomics UK (COG-UK) consortium|Davies|United Kingdom

>Spike|hCoV-19/Japan/PG-3096/2020|2020-04-00|EPI\_ISL\_691218|Original|hCoV-19^^Japan|Human|Pathogen Genomics Center|Pathogen Genomics Center|Sekizuka|Japan

>Spike|hCoV-19/Latvia/070/2020|2020-06-05|EPI\_ISL\_501286|Original|hCoV-19^^Latvia|Human|Centr\u0101l\u0101 laboratorija|Latvian Biomedical Research and Study Centre|Zrelavs|Latvia

>Spike|hCoV-19/England/HECH-259A905/2020|2020-00-00|EPI\_ISL\_652068|Original|hCoV-19^^England|Human|University of Birmingham|COVID-19 Genomics UK (COG-UK) Consortium|Loman|United Kingdom

>Spike|hCoV-19/Wales/MILK-A6B106/2020|2020-10-09|EPI\_ISL\_625407|Original|hCoV-19^^Wales|Human|Lighthouse Lab in Milton Keynes|Wellcome Sanger Institute for the COVID-19 Genomics UK (COG-UK) consortium|Davies|United Kingdom

>Spike|hCoV-19/Australia/VIC10910/2020|2020-09-05|EPI\_ISL\_563150|Original|hCoV-19^^Victoria|Human|Microbiological Diagnostic Unit - Public Health Laboratory (MDU-PHL)|MDU-PHL|Schultz|Australia

>Spike|hCoV-19/Switzerland/SH-ETHZ-100808/2020|2020-03-26|EPI\_ISL\_451758|Original|hCoV-19^^Schaffhausen|Human|Viollier AG|Department of Biosystems Science and Engineering|Nadeau|Switzerland

>Spike|hCoV-19/USA/CA-CZB-10097/2020|2020-06-30|EPI\_ISL\_672212|Original|hCoV-19^^California|Human|The Ashley Laboratory|Chan-Zuckerberg Biohub|Bhatt|USA

>Spike|hCoV-19/Wales/PHWC-31130/2020|2020-04-11|EPI\_ISL\_446408|Original|hCoV-19^^Wales|Human|Wales Specialist Virology Centre|Public Health Wales Microbiology Cardiff|Moore|United Kingdom

>Spike|hCoV-19/USA/VA-DCLS-1147/2020|2020-04-25|EPI\_ISL\_529934|Original|hCoV-19^^Virginia|Human|Virginia Division of Consolidated Laboratory Services|Virginia Division of Consolidated Laboratory Services|St. Jacques|USA

>Spike|hCoV-19/Scotland/CVR5328/2020|2020-10-24|EPI\_ISL\_651760|Original|hCoV-19^^Scotland|Human|West of Scotland Specialist Virology Centre|COVID-19 Genomics UK (COG-UK) Consortium|Robertson|United Kingdom

>Spike|hCoV-19/England/ALDP-B5C00A/2020|2020-11-10|EPI\_ISL\_655771|Original|hCoV-19^^England|Human|Lighthouse Lab in Alderley Park|Wellcome Sanger Institute for the COVID-19 Genomics UK (COG-UK) Consortium|Davies|United Kingdom

>Spike|hCoV-19/USA/TX-HMH-4526/2020|2020-06-19|EPI\_ISL\_543692|Original|hCoV-19^^Texas|Human|Houston Methodist Hospital|Houston Methodist Hospital|Long|USA

>Spike|hCoV-19/Northern Ireland/QEUA-95ECBB/2020|2020-08-08|EPI\_ISL\_532300|Original|hCoV-19^^Northern Ireland|Human|Lighthouse Lab in Glasgow|Wellcome Sanger Institute for the COVID-19 Genomics UK (COG-UK) consortium|Davies|United Kingdom

>Spike|hCoV-19/Brazil/SP-292/2020|2020-04-16|EPI\_ISL\_527856|Original|hCoV-19^^S\u00e3o Paulo|Human|Hospital Municipal Prof. Waldomiro de Paula|Instituto Adolfo Lutz|Sacchi|Brazil

>Spike|hCoV-19/USA/TX-HMH-MCoV-13297/2020|2020-08-24|EPI\_ISL\_788445|Original|hCoV-19^^Texas|Human|Houston Methodist Hospital|Houston Methodist Hospital|Long|USA

>Spike|hCoV-19/England/QEUA-C4BDD9/2020|2020-12-14|EPI\_ISL\_736691|Original|hCoV-19^^England|Human|Lighthouse Lab in Glasgow|Wellcome Sanger Institute for the COVID-19 Genomics UK (COG-UK) Consortium|Davies|United Kingdom

>Spike|hCoV-19/England/20142061804/2020|2020-03-30|EPI\_ISL\_420772|Original|hCoV-19^^England|Human|Respiratory Virus Unit|Respiratory Virus Unit|Platt|United Kingdom

>Spike|hCoV-19/England/EXET-1383E7/2020|2020-09-12|EPI\_ISL\_612095|Original|hCoV-19^^England|Human|University of Exeter|COVID-19 Genomics UK (COG-UK) Consortium|Temperton|United Kingdom

>Spike|hCoV-19/USA/TX-HMH-MCoV-8839/2020|2020-07-01|EPI\_ISL\_780787|Original|hCoV-19^^Texas|Human|Houston Methodist Hospital|Houston Methodist Hospital|Long|USA

>Spike|hCoV-19/USA/TX-HMH-4375/2020|2020-06-17|EPI\_ISL\_543572|Original|hCoV-19^^Texas|Human|Houston Methodist Hospital|Houston Methodist Hospital|Long|USA

>Spike|hCoV-19/Wales/PHWC-249ED/2020|2020-03-19|EPI\_ISL\_419467|Original|hCoV-19^^Wales|Human|Wales Specialist Virology Centre|Public Health Wales Microbiology Cardiff|Moore|United Kingdom

>Spike|hCoV-19/Scotland/CVR3897/2020|2020-06-18|EPI\_ISL\_484679|Original|hCoV-19^^Scotland|Human|West of Scotland Specialist Virology Centre|COVID-19 Genomics UK (COG-UK) Consortium|Robertson|United Kingdom

>Spike|hCoV-19/England/QEUA-AD2780/2020|2020-10-26|EPI\_ISL\_629769|Original|hCoV-19^^England|Human|Lighthouse Lab in Glasgow|Wellcome Sanger Institute for the COVID-19 Genomics UK (COG-UK) consortium|Davies|United Kingdom

>Spike|hCoV-19/India/MH-ACTREC-557/2020|2020-08-29|EPI\_ISL\_700202|Original|hCoV-19^^Maharashtra|Human|Hematopathology Laboratory|Hematopathology Laboratory|Patkar|India

>Spike|hCoV-19/USA/CA-CZB-2046/2020|2020-04-11|EPI\_ISL\_486290|Original|hCoV-19^^California|Human|San Joaquin County Public Health Lab|Chan-Zuckerberg Biohub|McGeever|USA



>Spike|hCoV-19/England/MILK-99CCA2/2020|2020-08-30|EPI\_ISL\_549853|Original|hCoV-19^^England|Human|Lighthouse Lab in Milton Keynes|Wellcome Sanger Institute for the COVID-19 Genomics UK (COG-UK) consortium|Davies|United Kingdom

>Spike|hCoV-19/England/SHEF-C5562/2020|2020-09-21|EPI\_ISL\_573702|Original|hCoV-19^^England|Human|Virology Department|COVID-19 Genomics UK (COG-UK) Consortium|de Silva|United Kingdom

>Spike|hCoV-19/England/QEUA-A004CE/2020|2020-09-30|EPI\_ISL\_600293|Original|hCoV-19^^England|Human|Lighthouse Lab in Glasgow|Wellcome Sanger Institute for the COVID-19 Genomics UK (COG-UK) consortium|Davies|United Kingdom

>Spike|hCoV-19/England/20206139404/2020|2020-05-14|EPI\_ISL\_465664|Original|hCoV-19^^England|Human|Respiratory Virus Unit|Respiratory Virus Unit|Platt|United Kingdom

>Spike|hCoV-19/USA/TX-HMH-MCoV-19409/2020|2020-11-30|EPI\_ISL\_783823|Original|hCoV-19^^Texas|Human|Houston Methodist Hospital|Houston Methodist Hospital|Long|USA

>Spike|hCoV-19/Denmark/ALAB-SSI-1280/2020|2020-04-02|EPI\_ISL\_437639|Original|hCoV-19^^Denmark|Human|Department of Virus and Microbiological Special Diagnostics|Albertsen lab|Kirkegaard|Denmark

>Spike|hCoV-19/England/QEUA-A8C6E2/2020|2020-10-18|EPI\_ISL\_643063|Original|hCoV-19^^England|Human|Lighthouse Lab in Glasgow|Wellcome Sanger Institute for the COVID-19 Genomics UK (COG-UK) Consortium|Davies|United Kingdom

>Spike|hCoV-19/England/ALDP-C04B69/2020|2020-12-04|EPI\_ISL\_720869|Original|hCoV-19^^England|Human|Lighthouse Lab in Alderley Park|Wellcome Sanger Institute for the COVID-19 Genomics UK (COG-UK) Consortium|Davies|United Kingdom

>Spike|hCoV-19/Wales/PHWC-49D20E/2020|2020-12-10|EPI\_ISL\_742750|Original|hCoV-19^^Wales|Human|Wales Specialist Virology Centre Sequencing lab|COVID-19 Genomics UK (COG-UK) Consortium|Moore|United Kingdom

>Spike|hCoV-19/England/ALDP-959FC6/2020|2020-06-10|EPI\_ISL\_553578|Original|hCoV-19^^England|Human|Lighthouse Lab in Alderley Park|Wellcome Sanger Institute for the COVID-19 Genomics UK (COG-UK) consortium|Davies|United Kingdom

>Spike|hCoV-19/England/MILK-975911/2020|2020-08-20|EPI\_ISL\_552624|Original|hCoV-19^^England|Human|Lighthouse Lab in Milton Keynes|Wellcome Sanger Institute for the COVID-19 Genomics UK (COG-UK) consortium|Davies|United Kingdom

>Spike|hCoV-19/USA/TX-HMH-MCoV-15297/2020|2020-10-21|EPI\_ISL\_786781|Original|hCoV-19^^Texas|Human|Houston Methodist Hospital|Houston Methodist Hospital|Long|USA

>Spike|hCoV-19/Wales/PHWC-368FA/2020|2020-04-28|EPI\_ISL\_474729|Original|hCoV-19^^Wales|Human|Originating lab|COVID-19 Genomics UK (COG-UK) Consortium|Moore|United Kingdom

>Spike|hCoV-19/USA/UT-03173/2020|2020-04-23|EPI\_ISL\_470738|Original|hCoV-19^^Utah|Human|Utah Public Health Laboratory|Utah Public Health Laboratory|Butz|USA

>Spike|hCoV-19/Scotland/CVR4487/2020|2020-09-20|EPI\_ISL\_585351|Original|hCoV-19^^Scotland|Human|Lighthouse Lab in Glasgow / MRC-University of Glasgow Centre for Virus Research|COVID-19 Genomics UK (COG-UK) Consortium|Robertson|United Kingdom

>Spike|hCoV-19/England/QEUA-9DD5E6/2020|2020-09-21|EPI\_ISL\_599796|Original|hCoV-19^^England|Human|Lighthouse Lab in Glasgow|Wellcome Sanger Institute for the COVID-19 Genomics UK (COG-UK) consortium|Davies|United Kingdom

>Spike|hCoV-19/Germany/NW-HHU-536/2020|2020-12-15|EPI\_ISL\_779946|Original|hCoV-19^^North Rhine-Westphalia|Human|Center of Medical Microbiology|Center of Medical Microbiology|Wienemann|Germany

>Spike|hCoV-19/Scotland/GCVR-172475/2020|2020-03-30|EPI\_ISL\_469958|Original|hCoV-19^^Scotland|Human|NHSGGC West of Scotland Specialist Virology Centre / MRC-University of Glasgow Centre for Virus Research|Wellcome Sanger Institute for the COVID-19 Genomics UK (COG-UK) consortium|Davies|United Kingdom

>Spike|hCoV-19/USA/AZ-TG670276/2020|2020-05-01|EPI\_ISL\_696447|Original|hCoV-19^^Arizona|Human|Sonora Quest Laboratories|TGen North|French|USA

>Spike|hCoV-19/England/QEUA-9F7A14/2020|2020-09-27|EPI\_ISL\_595718|Original|hCoV-19^^England|Human|Oxford Viromics|COVID-19 Genomics UK (COG-UK) Consortium|Golubchik|United Kingdom

>Spike|hCoV-19/USA/CA-LACPHL-AE00053/2020|2020-07-15|EPI\_ISL\_735382|Original|hCoV-19^^California|Human|Los Angeles County Public Health Laboratory|Los Angeles County Public Health Laboratory|Hemarajata|USA

>Spike|hCoV-19/USA/VA-DCLS-1521/2020|2020-08-08|EPI\_ISL\_581518|Original|hCoV-19^^Virginia|Human|Virginia DCLS|Virginia DCLS|St. Jacques|USA

>Spike|hCoV-19/Russia/Buryatia-87106/2020|2020-03-30|EPI\_ISL\_428919|Vero|hCoV-19^^Buryatia|Human|State Research Center of Virology and Biotechnology VECTOR|State Research Center of Virology and Biotechnology VECTOR|Shvalov|Russia

>Spike|hCoV-19/Japan/PG-5665/2020|2020-04-00|EPI\_ISL\_688789|Original|hCoV-19^^Japan|Human|Pathogen Genomics Center|Pathogen Genomics Center|Sekizuka|Japan

>Spike|hCoV-19/USA/MI-MDHHS-SC22386/2020|2020-11-17|EPI\_ISL\_708366|Original|hCoV-19^^Michigan|Human|Michigan Department of Health and Human Services|Michigan Department of Health and Human Services|Jacob|USA

>Spike|hCoV-19/Denmark/DCGC-10171/2020|2020-11-09|EPI\_ISL\_668533|Original|hCoV-19^^Hovedstaden|Human|Department of Virus and Microbiological Special Diagnostics|Albertsen Lab|Michaelsen|Denmark

>Spike|hCoV-19/England/QEUH-B114F6/2020|2020-11-02|EPI\_ISL\_642382|Original|hCoV-19^^England|Human|Lighthouse Lab in Glasgow|Wellcome Sanger Institute for the COVID-19 Genomics UK (COG-UK) Consortium|Davies|United Kingdom

>Spike|hCoV-19/USA/CT-Yale-070/2020|2020-03-26|EPI\_ISL\_428745|Original|hCoV-19^^Connecticut|Human|Yale COVID-19 Biorepository|Grubaugh Lab - Yale School of Public Health|Grubaugh|USA

>Spike|hCoV-19/England/ALDP-A67DBB/2020|2020-10-10|EPI\_ISL\_608955|Original|hCoV-19^^England|Human|Lighthouse Lab in Alderley Park|Wellcome Sanger Institute for the COVID-19 Genomics UK (COG-UK) consortium|Davies|United Kingdom

>Spike|hCoV-19/USA/NM-DOH-2020308126/2020|2020-08-24|EPI\_ISL\_602171|Original|hCoV-19^^New Mexico|Human|New Mexico Department of Health Scientific Laboratory|New Mexico Department of Health Scientific Laboratory|Johnson|USA

>Spike|hCoV-19/USA/MI-UM-10035836175/2020|2020-09-07|EPI\_ISL\_583342|Original|hCoV-19^^Michigan|Human|University of Michigan Clinical Microbiology Laboratory|Lauring Lab|Valesano|USA

>Spike|hCoV-19/USA/WI-CDC-8099/2020|2020-04-15|EPI\_ISL\_540437|original|hCoV-19^^Wisconsin|Human|WI State Laboratory of Hygiene|Pathogen Discovery|Queen|USA

>Spike|hCoV-19/England/BIRM-6A1E3/2020|2020-11-09|EPI\_ISL\_679028|Original|hCoV-19^^England|Human|University of Birmingham|COVID-19 Genomics UK (COG-UK) Consortium|Loman|United Kingdom

>Spike|hCoV-19/England/BRIS-12FC15/2020|2020-04-04|EPI\_ISL\_492580|Original|hCoV-19^^England|Human|PHE South West Regional Laboratory|Wellcome Sanger Institute for the COVID-19 Genomics UK (COG-UK) consortium|Davies|United Kingdom

>Spike|hCoV-19/Scotland/QEUH-C4C066/2020|2020-12-14|EPI\_ISL\_757107|Original|hCoV-19^^Scotland|Human|Lighthouse Lab in Glasgow|Wellcome Sanger Institute for the COVID-19 Genomics UK (COG-UK) Consortium|Davies|United Kingdom

>Spike|hCoV-19/USA/AZ-TG491518/2020|2020-06-19|EPI\_ISL\_695141|Original|hCoV-19^^Arizona|Human|AZ SPHL|TGen North|French|USA

>Spike|hCoV-19/Denmark/DCGC-6972/2020|2020-10-12|EPI\_ISL\_619818|Original|hCoV-19^^Hovedstaden|Human|Department of Virus and Microbiological Special Diagnostics|Albertsen lab|Michaelsen|Denmark

>Spike|hCoV-19/France/ARA-12125/2020|2020-03-22|EPI\_ISL\_419177|Original|hCoV-19^^Auvergne-Rh\u00f4ne-Alpes|Human|Institut des Agents Infectieux (IAI)|CNR Virus des Infections Respiratoires - France SUD|Josset|France

>Spike|hCoV-19/Denmark/DCGC-2223/2020|2020-08-10|EPI\_ISL\_617528|Original|hCoV-19^^Midtjylland|Human|Department of Virus and Microbiological Special Diagnostics|Albertsen lab|Michaelsen|Denmark

>Spike|hCoV-19/England/MILK-B5561E/2020|2020-11-05|EPI\_ISL\_657568|Original|hCoV-19^^England|Human|Lighthouse Lab in Milton Keynes|Wellcome Sanger Institute for the COVID-19 Genomics UK (COG-UK) Consortium|Davies|United Kingdom

>Spike|hCoV-19/England/CAMB-7E2CB/2020|2020-04-17|EPI\_ISL\_434062|Original|hCoV-19^^England|Human|Department of Pathology|COVID-19 Genomics UK (COG-UK) Consortium|Meredith|United Kingdom

>Spike|hCoV-19/Australia/QLDID937/2020|2020-03-22|EPI\_ISL\_444611|Original|hCoV-19^^Queensland|Human|Pathology Queensland|Public Health Virology Laboratory|Warrilow|Australia

>Spike|hCoV-19/Northern Ireland/NIRE-234089/2020|2020-10-12|EPI\_ISL\_680340|Original|hCoV-19^^Northern Ireland|Human|Regional Virus Laboratory|COVID-19 Genomics UK (COG-UK) Consortium|Fairley|United Kingdom

>Spike|hCoV-19/USA/MD-MDH-0182/2020|2020-03-11|EPI\_ISL\_538266|Original|hCoV-19^^Maryland|Human|Maryland Public Health Laboratory|Maryland Public Health Laboratory|Keller|USA

>Spike|hCoV-19/Wales/PHWC-48A635/2020|2020-11-04|EPI\_ISL\_652578|Original|hCoV-19^^Wales|Human|Wales Specialist Virology Centre Sequencing lab|COVID-19 Genomics UK (COG-UK) Consortium|Moore|United Kingdom

>Spike|hCoV-19/England/MILK-9F1151/2020|2020-09-25|EPI\_ISL\_589734|Original|hCoV-19^^England|Human|Lighthouse Lab in Milton Keynes|Wellcome Sanger Institute for the COVID-19 Genomics UK (COG-UK) consortium|Davies|United Kingdom

>Spike|hCoV-19/Spain/VC-IBV-98007306/2020|2020-09-14|EPI\_ISL\_654485|Original|hCoV-19^^Comunitat\_Valenciana|Human|Servicio de Microbiolog\u00eda. Hospital Cl\u00ednico Universitario de Valencia|SeqCOVID-SPAIN consortium|IBV (CSIC)|Comas|Spain

>Spike|hCoV-19/England/ALDP-A6ED87/2020|2020-10-15|EPI\_ISL\_607784|Original|hCoV-19^^England|Human|Lighthouse Lab in Alderley Park|Wellcome Sanger Institute for the COVID-19 Genomics UK (COG-UK) consortium|Davies|United Kingdom

>Spike|hCoV-19/DRC/3806/2020|2020-04-24|EPI\_ISL\_447244|Original|hCoV-19^^Kinshasa|Human|Viral Respiratory Lab|Pathogen Sequencing Lab|Amuri|Democratic Republic of the Congo

>Spike|hCoV-19/Australia/VIC4974/2020|2020-07-15|EPI\_ISL\_519340|Original|hCoV-19^^Victoria|Human|Microbiological Diagnostic Unit - Public Health Laboratory (MDU-PHL)|MDU-PHL|Schultz|Australia

>Spike|hCoV-19/England/CAMB-1B06FD/2020|2020-05-08|EPI\_ISL\_452912|Original|hCoV-19^^England|Human|Department of Pathology|COVID-19 Genomics UK (COG-UK) Consortium|Meredith|United Kingdom

>Spike|hCoV-19/USA/TX-HMH-MCoV-8902/2020|2020-07-02|EPI\_ISL\_780820|Original|hCoV-19^^Texas|Human|Houston Methodist Hospital|Houston Methodist Hospital|Long|USA

>Spike|hCoV-19/Portugal/PT0389a/2020|2020-04-14|EPI\_ISL\_454105|Original|hCoV-19^^Portugal|Human|unknown|Instituto Nacional de Saude (INSA)|Borges|Portugal

>Spike|hCoV-19/England/ALDP-C48A20/2020|2020-12-11|EPI\_ISL\_736639|Original|hCoV-19^^England|Human|Lighthouse Lab in Alderley Park|Wellcome Sanger Institute for the COVID-19 Genomics UK (COG-UK) Consortium|Davies|United Kingdom

>Spike|hCoV-19/Switzerland/ZH-ETHZ-410108/2020|2020-12-14|EPI\_ISL\_737565|Original|hCoV-19^^Zurich|Human|Viollier AG|Department of Biosystems Science and Engineering|Nadeau|Switzerland

>Spike|hCoV-19/Italy/VEN-UniVR-6/2020|2020-03-08|EPI\_ISL\_492985|Original|hCoV-19^^Veneto|Human|IRCCS Sacro Cuore Don Calabria Hospital|University of Verona|Mori|Italy

>Spike|hCoV-19/USA/NY-Wadsworth-18534-01/2020|2020-03-15|EPI\_ISL\_676744|Original|hCoV-19^^New York|Human|Wadsworth Center|Wadsworth Center|Lasek-Nesselquist|USA

>Spike|hCoV-19/England/MILK-BAC311/2020|2020-11-18|EPI\_ISL\_720662|Original|hCoV-19^^England|Human|Lighthouse Lab in Milton Keynes|Wellcome Sanger Institute for the COVID-19 Genomics UK (COG-UK) Consortium|Davies|United Kingdom

>Spike|hCoV-19/England/MILK-AC8BCD/2020|2020-10-21|EPI\_ISL\_629476|Original|hCoV-19^^England|Human|Lighthouse Lab in Milton Keynes|Wellcome Sanger Institute for the COVID-19 Genomics UK (COG-UK) consortium|Davies|United Kingdom

>Spike|hCoV-19/Switzerland/BS-42205257/2020|2020-03-24|EPI\_ISL\_581741|Original|hCoV-19^^Basel-Stadt|Human|University Hospital Basel|University Hospital Basel|Roloff Handschin|Switzerland

>Spike|hCoV-19/USA/CA-CZB-12392/2020|2020-10-08|EPI\_ISL\_648510|Original|hCoV-19^^California|Human|Orange County Public Health Lab|Chan-Zuckerberg Biohub|Bhatt|USA

>Spike|hCoV-19/Australia/VIC10825/2020|2020-00-00|EPI\_ISL\_563112|Original|hCoV-19^^Victoria|Human|Microbiological Diagnostic Unit - Public Health Laboratory (MDU-PHL)|MDU-PHL|Schultz|Australia

>Spike|hCoV-19/Switzerland/ZH-ETHZ-280171/2020|2020-09-08|EPI\_ISL\_560547|Original|hCoV-19^^Zurich|Human|Viollier AG|Department of Biosystems Science and Engineering|Nadeau|Switzerland

>Spike|hCoV-19/USA/UT-UPHL-2012681088/2020|2020-06-15|EPI\_ISL\_746340|Original|hCoV-19^^Utah|Human|Utah Public Health Laboratory|Utah Public Health Laboratory|Gallagher|USA

>Spike|hCoV-19/Spain/AR-IBV-005127/2020|2020-05-04|EPI\_ISL\_510389|Original|hCoV-19^^Aragon|Human|Servicio de Microbiolog\u00eda|SeqCOVID-SPAIN consortium/IBV (CSIC) |Comas|Spain

>Spike|hCoV-19/Japan/IC-0569/2020|2020-09-00|EPI\_ISL\_779248|Original|hCoV-19^^Japan|Human|Pathogen Genomics Center|Pathogen Genomics Center|Sekizuka|Japan

>Spike|hCoV-19/Wales/PHWC-1691D4/2020|2020-06-23|EPI\_ISL\_499418|Original|hCoV-19^^Wales|Human|Wales Specialist Virology Centre Sequencing lab|COVID-19 Genomics UK (COG-UK) Consortium|Moore|United Kingdom

>Spike|hCoV-19/England/LEED-2AA3EF/2020|2020-04-03|EPI\_ISL\_538886|Original|hCoV-19^^England|Human|Leeds Teaching Hospitals NHS Trust and Public Health England|Wellcome Sanger Institute for the COVID-19 Genomics UK (COG-UK) consortium|Davies|United Kingdom

>Spike|hCoV-19/USA/TX-HMH-4321/2020|2020-06-20|EPI\_ISL\_543530|Original|hCoV-19^^Texas|Human|Houston Methodist Hospital|Houston Methodist Hospital|Long|USA

>Spike|hCoV-19/England/MILK-95897E/2020|2020-06-15|EPI\_ISL\_554660|Original|hCoV-19^^England|Human|Lighthouse Lab in Milton Keynes|Wellcome Sanger Institute for the COVID-19 Genomics UK (COG-UK) consortium|Davies|United Kingdom

>Spike|hCoV-19/Scotland/QEUH-B31760/2020|2020-11-04|EPI\_ISL\_676419|Original|hCoV-19^^Scotland|Human|Lighthouse Lab in Glasgow|Wellcome Sanger Institute for the COVID-19 Genomics UK (COG-UK) Consortium|Davies|United Kingdom

>Spike|hCoV-19/Finland/5May25S4/2020|2020-05-05|EPI\_ISL\_481696|Original|hCoV-19^^Uusimaa|Human|Department of Virology and Immunology|Department of Virology|Smura|Finland

>Spike|hCoV-19/Wales/PHWC-1628A9/2020|2020-05-19|EPI\_ISL\_473134|Original|hCoV-19^^Wales|Human|Wales Specialist Virology Centre Sequencing lab|COVID-19 Genomics UK (COG-UK) Consortium|Moore|United Kingdom

>Spike|hCoV-19/Ireland/D-NVRL-20G35434/2020|2020-03-20|EPI\_ISL\_605134|Original|hCoV-19^^Dublin|Human|National Virus Reference Laboratory|Irish Coronavirus Sequencing Consortium - Helixworks|Chalapati|Ireland

>Spike|hCoV-19/England/20132018704/2020|2020-03-23|EPI\_ISL\_423733|Original|hCoV-19^^England|Human|Respiratory Virus Unit|Respiratory Virus Unit|Platt|United Kingdom

>Spike|hCoV-19/Scotland/EDB3524/2020|2020-04-13|EPI\_ISL\_487937|Original|hCoV-19^^Scotland|Human|Virology Department|Wellcome Sanger Institute for the COVID-19 Genomics UK (COG-UK) consortium|Davies|United Kingdom

>Spike|hCoV-19/Japan/PG-2928/2020|2020-04-00|EPI\_ISL\_691054|Original|hCoV-19^^Japan|Human|Pathogen Genomics Center|Pathogen Genomics Center|Sekizuka|Japan

>Spike|hCoV-19/USA/TX-HMH-6028/2020|2020-06-30|EPI\_ISL\_547177|Original|hCoV-19^^Texas|Human|Houston Methodist Hospital|Houston Methodist Hospital|Long|USA

>Spike|hCoV-19/England/QEUH-A8BB8A/2020|2020-10-15|EPI\_ISL\_643089|Original|hCoV-19^^England|Human|Lighthouse Lab in Glasgow|Wellcome Sanger Institute for the COVID-19 Genomics UK (COG-UK) Consortium|Davies|United Kingdom

>Spike|hCoV-19/England/MILK-BB0444/2020|2020-11-17|EPI\_ISL\_720169|Original|hCoV-19^^England|Human|Lighthouse Lab in Milton Keynes|Wellcome Sanger Institute for the COVID-19 Genomics UK (COG-UK) Consortium|Davies|United Kingdom

>Spike|hCoV-19/Denmark/DCGC-22633/2020|2020-12-14|EPI\_ISL\_757506|Original|hCoV-19^^Hovedstaden|Human|Department of Virus and Microbiological Special Diagnostics|Albertsen Lab|Michaelsen|Denmark

>Spike|hCoV-19/England/BIRM-640CE/2020|2020-10-19|EPI\_ISL\_651591|Original|hCoV-19^^England|Human|University of Birmingham|COVID-19 Genomics UK (COG-UK) Consortium|Loman|United Kingdom

>Spike|hCoV-19/England/LIVE-A4BC1/2020|2020-03-10|EPI\_ISL\_500076|Original|hCoV-19^^England|Human|Liverpool Clinical Laboratories|COVID-19 Genomics UK (COG-UK) Consortium|Haldenby|United Kingdom

>Spike|hCoV-19/USA/TX-HMH-1774/2020|2020-05-14|EPI\_ISL\_542830|Original|hCoV-19^^Texas|Human|Houston Methodist Hospital|Houston Methodist Hospital|Long|USA

>Spike|hCoV-19/India/GJ-GBRC-365/2020|2020-06-18|EPI\_ISL\_524718|Original|hCoV-19^^Gujarat|Human|B.J. Medical College and Civil hospital|Gujarat Biotechnology Research Centre|Joshi|India

>Spike|hCoV-19/Scotland/QEUH-9B52ED/2020|2020-09-03|EPI\_ISL\_602075|Original|hCoV-19^^Scotland|Human|Lighthouse Lab in Glasgow|Wellcome Sanger Institute for the COVID-19 Genomics UK (COG-UK) consortium|Davies|United Kingdom

>Spike|hCoV-19/England/QEUH-B0F428/2020|2020-11-02|EPI\_ISL\_642035|Original|hCoV-19^^England|Human|Lighthouse Lab in Glasgow|Wellcome Sanger Institute for the COVID-19 Genomics UK (COG-UK) Consortium|Davies|United Kingdom

>Spike|hCoV-19/England/NORW-EE7E5/2020|2020-00-00|EPI\_ISL\_529477|Original|hCoV-19^^England|Human|Quadram Institute Bioscience|COVID-19 Genomics UK (COG-UK) Consortium|Alikhan|United Kingdom

>Spike|hCoV-19/England/PORT-2CFD31/2020|2020-05-07|EPI\_ISL\_461990|Original|hCoV-19^^England|Human|Centre for Enzyme Innovation|COVID-19 Genomics UK (COG-UK) Consortium|Robson|United Kingdom

>Spike|hCoV-19/Australia/VIC13995/2020|2020-07-23|EPI\_ISL\_563916|Original|hCoV-19^^Victoria|Human|Microbiological Diagnostic Unit - Public Health Laboratory (MDU-PHL)|MDU-PHL|Schultz|Australia

>Spike|hCoV-19/USA/UT-UPHL-201017152/2020|2020-04-07|EPI\_ISL\_594413|Original|hCoV-19^^Utah|Human|Utah Public Health Laboratory|Utah Public Health Laboratory|Young|USA

>Spike|hCoV-19/Canada/ON-OICR-SLB2841/2020|2020-04-03|EPI\_ISL\_538362|Original|hCoV-19^^Ontario|Human|Kingston Health Sciences Centre / Queen's University|Ontario Institute for Cancer Research|de Borja|Canada

>Spike|hCoV-19/Greece/238\_31927/2020|2020-03-09|EPI\_ISL\_447645|unknown|hCoV-19^^Athens|Human|unknown|Department of Medicine|Submitter|Greece

>Spike|hCoV-19/England/MILK-A06334/2020|2020-10-01|EPI\_ISL\_600124|Original|hCoV-19^^England|Human|Lighthouse Lab in Milton Keynes|Wellcome Sanger Institute for the COVID-19 Genomics UK (COG-UK) consortium|Davies|United Kingdom

>Spike|hCoV-19/USA/VA-DCLS-0241/2020|2020-04-16|EPI\_ISL\_452816|Original|hCoV-19^^Virginia|Human|Virginia DCLS|Virginia DCLS|St. Jacques|USA

>Spike|hCoV-19/Bangladesh/BCSIR-NILMRC-235/2020|2020-07-06|EPI\_ISL\_487380|Original|hCoV-19^^Barisal|Human|National Institute of Laboratory Medicine and Referral Center|Genomic Research Lab|Khan|Bangladesh

>Spike|hCoV-19/Australia/VIC12689/2020|2020-07-25|EPI\_ISL\_592056|Original|hCoV-19^^Victoria|Human|Microbiological Diagnostic Unit - Public Health Laboratory (MDU-PHL)|MDU-PHL|Schultz|Australia

>Spike|hCoV-19/Norway/5412/2020|2020-11-03|EPI\_ISL\_775328|Original|hCoV-19^^Rogaland|Human|Dept. of Medical Microbiology|Norwegian Institute of Public Health|Vollan|Norway

>Spike|hCoV-19/Faroe Islands/HFS-43/2020|2020-03-16|EPI\_ISL\_526946|Original|hCoV-19^^Faroe Islands|Human|Faroese National Reference Laboratory for Fish and Animal Diseases|Faroese National Reference Laboratory for Fish and Animal Diseases|Dahl|Faroe Islands

>Spike|hCoV-19/England/BRIS-12B5B4/2020|2020-05-22|EPI\_ISL\_487565|Original|hCoV-19^^England|Human|PHE South West Regional Laboratory|Wellcome Sanger Institute for the COVID-19 Genomics UK (COG-UK) consortium|Davies|United Kingdom

>Spike|hCoV-19/USA/TX-HMH0131/2020|2020-03-21|EPI\_ISL\_434831|Original|hCoV-19^^Texas|Human|Houston Methodist Hospital|Houston Methodist Hospital|Long|USA

>Spike|hCoV-19/Denmark/DCGC-10075/2020|2020-11-09|EPI\_ISL\_669380|Original|hCoV-19^^Midtjylland|Human|Department of Virus and Microbiological Special Diagnostics|Albertsen Lab|Michaelsen|Denmark

>Spike|hCoV-19/England/LIVE-9FE1B/2020|2020-06-02|EPI\_ISL\_472066|Original|hCoV-19^^England|Human|Liverpool Clinical Laboratories|COVID-19 Genomics UK (COG-UK) Consortium|Haldenby|United Kingdom

>Spike|hCoV-19/England/LIVE-DC4988/2020|2020-11-10|EPI\_ISL\_705909|Original|hCoV-19^^England|Human|Liverpool Clinical Laboratories|COVID-19 Genomics UK (COG-UK) Consortium|Haldenby|United Kingdom

>Spike|hCoV-19/USA/UT-UPHL-2012988875/2020|2020-10-22|EPI\_ISL\_746213|Original|hCoV-19^^Utah|Human|Ginkgo Bioworks Clinical Laboratory|Utah Public Health Laboratory|Young|USA

>Spike|hCoV-19/Spain/CN-IBV-97006493/2020|2020-03-26|EPI\_ISL\_537704|Original|hCoV-19^^Canary Islands|Human|Hospital Universitario de Gran Canaria Dr. Negr\u00ededn|SeqCOVID-SPAIN consortium|IBV(CSIC)|Comas|Spain

>Spike|hCoV-19/USA/CA-CZB-3638/2020|2020-03-17|EPI\_ISL\_548349|Original|hCoV-19^^California|Human|Ventura County Public Health Lab|Chan-Zuckerberg Biohub|Bhatt|USA

>Spike|hCoV-19/Switzerland/SH-ETHZ-410734/2020|2020-12-12|EPI\_ISL\_737781|Original|hCoV-19^^Schaffhausen|Human|Viollier AG|Department of Biosystems Science and Engineering|Nadeau|Switzerland

>Spike|hCoV-19/Scotland/QEUIH-962003/2020|2020-08-10|EPI\_ISL\_531702|Original|hCoV-19^^Scotland|Human|NHSGGC West of Scotland Specialist Virology Centre / MRC-University of Glasgow Centre for Virus Research|Wellcome Sanger Institute for the COVID-19 Genomics UK (COG-UK) consortium|Davies|United Kingdom

>Spike|hCoV-19/England/QEUIH-BCD198/2020|2020-11-25|EPI\_ISL\_704244|Original|hCoV-19^^England|Human|Lighthouse Lab in Glasgow|Wellcome Sanger Institute for the COVID-19 Genomics UK (COG-UK) Consortium|Davies|United Kingdom

>Spike|hCoV-19/Luxembourg/LNS2904387/2020|2020-11-04|EPI\_ISL\_740215|Original|hCoV-19^^Luxembourg|Human|Laboratoire national de sant\u00e9|Laboratoire national de sant\u00e9|Wienecke-Baldacchino|Luxembourg

>Spike|hCoV-19/England/EXET-13ACF9/2020|2020-11-10|EPI\_ISL\_664411|Original|hCoV-19^^England|Human|University of Exeter|COVID-19 Genomics UK (COG-UK) Consortium|Temperton|United Kingdom

>Spike|hCoV-19/England/CAMC-B07736/2020|2020-10-30|EPI\_ISL\_643825|Original|hCoV-19^^England|Human|Lighthouse Lab in Cambridge|Wellcome Sanger Institute for the COVID-19 Genomics UK (COG-UK) Consortium|Davies|United Kingdom

>Spike|hCoV-19/Netherlands/UT-RIVM-10128/2020|2020-04-01|EPI\_ISL\_547534|Original|hCoV-19^^Utrecht|Human|Dutch COVID-19 response team|National Institute for Public Health and the Environment (RIVM)|Meijer|Netherlands

>Spike|hCoV-19/Scotland/QEUIH-964A4F/2020|2020-08-11|EPI\_ISL\_531207|Original|hCoV-19^^Scotland|Human|NHSGGC West of Scotland Specialist Virology Centre / MRC-University of Glasgow Centre for Virus Research|Wellcome Sanger Institute for the COVID-19 Genomics UK (COG-UK) consortium|Davies|United Kingdom

>Spike|hCoV-19/Switzerland/UR-ETHZ-130001/2020|2020-05-05|EPI\_ISL\_466997|Original|hCoV-19^^Uri|Human|Viollier AG|Department of Biosystems Science and Engineering|Nadeau|Switzerland

>Spike|hCoV-19/England/MILK-99DF5D/2020|2020-08-30|EPI\_ISL\_550664|Original|hCoV-19^^England|Human|Lighthouse Lab in Milton Keynes|Wellcome Sanger Institute for the COVID-19 Genomics UK (COG-UK) consortium|Davies|United Kingdom

>Spike|hCoV-19/USA/NY-NYUMC737/2020|2020-03-21|EPI\_ISL\_451452|Original|hCoV-19^^New York|Human|NYU Langone Health|Departments of Pathology and Medicine|Maurano|USA

>Spike|hCoV-19/Netherlands/NA\_602/2020|2020-03-25|EPI\_ISL\_460765|Original|hCoV-19^^Netherlands|Human|Dutch COVID-19 response team|Erasmus Medical Center|Oude Munnink|Netherlands

>Spike|hCoV-19/Australia/VIC16660/2020|2020-08-06|EPI\_ISL\_663550|Original|hCoV-19^^Victoria|Human|Microbiological Diagnostic Unit - Public Health Laboratory (MDU-PHL)|MDU-PHL|Schultz|Australia

>Spike|hCoV-19/USA/OR-OHSU-4387/2020|2020-11-04|EPI\_ISL\_667541|Original|hCoV-19^^Oregon|Human|OHSU Lab Services Molecular Microbiology Lab|Oregon SARS-CoV-2 Genome Sequencing Center|O'Roak|USA

>Spike|hCoV-19/USA/CA-SCCPHD-UC120/2020|2020-03-05|EPI\_ISL\_435599|Original|hCoV-19^^California|Human|Santa Clara County Public Health Department|Chiu Laboratory|Chiu|USA

>Spike|hCoV-19/England/QEUIH-9F53EE/2020|2020-09-25|EPI\_ISL\_638673|Original|hCoV-19^^England|Human|Department of Pathology|COVID-19 Genomics UK (COG-UK) Consortium|Goodfellow|United Kingdom

>Spike|hCoV-19/Scotland/CVR4886/2020|2020-10-06|EPI\_ISL\_651737|Original|hCoV-19^^Scotland|Human|West of Scotland Specialist Virology Centre|COVID-19 Genomics UK (COG-UK) Consortium|Robertson|United Kingdom

>Spike|hCoV-19/England/CAMB-1BC794/2020|2020-11-29|EPI\_ISL\_723895|Original|hCoV-19^^England|Human|Department of Pathology|COVID-19 Genomics UK (COG-UK) Consortium|Goodfellow|United Kingdom

>Spike|hCoV-19/Wales/PHWC-329FB/2020|2020-04-13|EPI\_ISL\_474380|Original|hCoV-19^^Wales|Human|Originating lab|COVID-19 Genomics UK (COG-UK) Consortium|Moore|United Kingdom

>Spike|hCoV-19/England/CAMC-B22BEE/2020|2020-11-02|EPI\_ISL\_647283|Original|hCoV-19^^England|Human|Lighthouse Lab in Cambridge|Wellcome Sanger Institute for the COVID-19 Genomics UK (COG-UK) Consortium|Davies|United Kingdom

>Spike|hCoV-19/USA/CO-CSU-D1977/2020|2020-04-02|EPI\_ISL\_527453|Original|hCoV-19^^Colorado|Human|Colorado State University - Ebel Lab|Colorado State University - Ebel Lab|Cline|USA

>Spike|hCoV-19/Wales/PHWC-167FEB/2020|2020-05-30|EPI\_ISL\_494187|Original|hCoV-19^^Wales|Human|Originating lab|COVID-19 Genomics UK (COG-UK) Consortium|Moore|United Kingdom

>Spike|hCoV-19/USA/NY-WCMP4H03P/2020|2020-03-13|EPI\_ISL\_427539|Original|hCoV-19^^New York|Human|NewYork-Presbyterian & Mason Lab|Mason Lab|Mason|USA

>Spike|hCoV-19/Northern Ireland/NIRE-FB5BE/2020|2020-08-26|EPI\_ISL\_585240|Original|hCoV-19^^Northern Ireland|Human|Regional Virus Laboratory|COVID-19 Genomics UK (COG-UK) Consortium|Fairley|United Kingdom

>Spike|hCoV-19/England/CAMC-A8296B/2020|2020-10-12|EPI\_ISL\_610879|Original|hCoV-19^^England|Human|Lighthouse Lab in Cambridge|Wellcome Sanger Institute for the COVID-19 Genomics UK (COG-UK) consortium|Davies|United Kingdom

>Spike|hCoV-19/USA/TX-HMH0390/2020|2020-03-30|EPI\_ISL\_434977|Original|hCoV-19^^Texas|Human|Houston Methodist Hospital|Houston Methodist Hospital|Long|USA

>Spike|hCoV-19/USA/TX-HMH-4409/2020|2020-06-17|EPI\_ISL\_543598|Original|hCoV-19^^Texas|Human|Houston Methodist Hospital|Houston Methodist Hospital|Long|USA

>Spike|hCoV-19/England/QEUEH-9B7324/2020|2020-09-07|EPI\_ISL\_590619|Original|hCoV-19^^England|Human|Lighthouse Lab in Glasgow|Wellcome Sanger Institute for the COVID-19 Genomics UK (COG-UK) consortium|Davies|United Kingdom

>Spike|hCoV-19/USA/ME-HETL-J0402/2020|2020-12-16|EPI\_ISL\_755511|Original|hCoV-19^^Maine|Human|Maine Health and Environmental Testing Laboratory|Tewhey Lab|Tewhey|USA

>Spike|hCoV-19/England/SHEF-C483D/2020|2020-05-25|EPI\_ISL\_540728|Original|hCoV-19^^England|Human|Virology Department|COVID-19 Genomics UK (COG-UK) Consortium|de Silva|United Kingdom

>Spike|hCoV-19/Australia/VIC6773/2020|2020-07-30|EPI\_ISL\_564046|Original|hCoV-19^^Victoria|Human|Victorian Infectious Diseases Reference Laboratory (VIDRL)|VIDRL and MDU-PHL|Schultz|Australia

>Spike|hCoV-19/South Africa/R10403/2020|2020-06-02|EPI\_ISL\_490276|Original|hCoV-19^^Western Cape|Human|National Institute for Communicable Diseases of the National Health Laboratory Service|National Institute for Communicable Diseases of the National Health Laboratory Service|Allam|South Africa

>Spike|hCoV-19/Northern Ireland/NIRE-2335C7/2020|2020-09-18|EPI\_ISL\_680302|Original|hCoV-19^^Northern Ireland|Human|Regional Virus Laboratory|COVID-19 Genomics UK (COG-UK) Consortium|Fairley|United Kingdom

>Spike|hCoV-19/England/ALDP-A6FF71/2020|2020-10-15|EPI\_ISL\_608113|Original|hCoV-19^^England|Human|Lighthouse Lab in Alderley Park|Wellcome Sanger Institute for the COVID-19 Genomics UK (COG-UK) consortium|Davies|United Kingdom

>Spike|hCoV-19/England/ALDP-B5DDD5/2020|2020-11-08|EPI\_ISL\_723594|Original|hCoV-19^^England|Human|Northumbria University / South Tees Hospitals NHS Foundation Trust / North Cumbria Integrated Care NHS Foundation Trust / North Tees and Hartlepool NHS Foundation Trust / Newcastle Hospitals NHS Foundation Trust|COVID-19 Genomics UK (COG-UK) Consortium|Bashton|United Kingdom

>Spike|hCoV-19/England/MILK-C61DCE/2020|2020-12-13|EPI\_ISL\_735598|Original|hCoV-19^^England|Human|Lighthouse Lab in Milton Keynes|Wellcome Sanger Institute for the COVID-19 Genomics UK (COG-UK) Consortium|Davies|United Kingdom

>Spike|hCoV-19/USA/TX-HMH-MCoV-16009/2020|2020-07-10|EPI\_ISL\_785693|Original|hCoV-19^^Texas|Human|Houston Methodist Hospital|Houston Methodist Hospital|Long|USA

>Spike|hCoV-19/England/NOTT-111CAD/2020|2020-06-05|EPI\_ISL\_472393|Original|hCoV-19^^England|Human|Queens Medical Centre|COVID-19 Genomics UK (COG-UK) Consortium|Loose|United Kingdom

>Spike|hCoV-19/England/OXON-B1EF5/2020|2020-04-15|EPI\_ISL\_479101|Original|hCoV-19^^England|Human|Oxford Viromics|COVID-19 Genomics UK (COG-UK) Consortium|Golubchik|United Kingdom

>Spike|hCoV-19/England/20146011804/2020|2020-04-01|EPI\_ISL\_421978|Original|hCoV-19^^England|Human|Respiratory Virus Unit|Respiratory Virus Unit|Platt|United Kingdom

>Spike|hCoV-19/Ghana/TTH10/2020|2020-03-27|EPI\_ISL\_515182|Original|hCoV-19^^Ghana|Human|Kumasi Centre for Collaborative Research in Tropical Medicine|Institute of Virology|El-Duah|Ghana

>Spike|hCoV-19/Denmark/DCGC-20476/2020|2020-12-21|EPI\_ISL\_759174|Original|hCoV-19^^Hovedstaden|Human|Department of Virus and Microbiological Special Diagnostics|Albertsen Lab|Michaelsen|Denmark

>Spike|hCoV-19/Scotland/CVR123/2020|2020-03-13|EPI\_ISL\_425666|Original|hCoV-19^^Scotland|Human|West of Scotland Specialist Virology Centre|COVID-19 Genomics UK (COG-UK) Consortium|Robertson|United Kingdom

>Spike|hCoV-19/USA/TX-HMH-MCoV-13168/2020|2020-08-26|EPI\_ISL\_788319|Original|hCoV-19^^Texas|Human|Houston Methodist Hospital|Houston Methodist Hospital|Long|USA

>Spike|hCoV-19/England/204121763/2020|2020-10-05|EPI\_ISL\_609845|Original|hCoV-19^^England|Human|Respiratory Virus Unit|Respiratory Virus Unit|Platt|United Kingdom

>Spike|hCoV-19/Wales/PHWC-168B40/2020|2020-05-30|EPI\_ISL\_494334|Original|hCoV-19^^Wales|Human|Originating lab|COVID-19 Genomics UK (COG-UK) Consortium|Moore|United Kingdom

>Spike|hCoV-19/England/MILK-B3DBC2/2020|2020-11-01|EPI\_ISL\_706246|Original|hCoV-19^^England|Human|Oxford Viromics|COVID-19 Genomics UK (COG-UK) Consortium|Golubchik|United Kingdom

>Spike|hCoV-19/Switzerland/VD-ETHZ-310495/2020|2020-10-08|EPI\_ISL\_603564|Original|hCoV-19^^Vaud|Human|Viollier AG|Department of Biosystems Science and Engineering|Nadeau|Switzerland

>Spike|hCoV-19/USA/WA-S587/2020|2020-04-01|EPI\_ISL\_438140|Original|hCoV-19^^Washington|Human|Seattle Flu Study|Seattle Flu Study|Bedford|USA

>Spike|hCoV-19/USA/UT-UPHL-2008769/2020|2020-06-01|EPI\_ISL\_524802|Original|hCoV-19^^Utah|Human|Utah Public Health Laboratory|Utah Public Health Laboratory|Young|USA

>Spike|hCoV-19/England/ALDP-C39E44/2020|2020-12-08|EPI\_ISL\_730967|Original|hCoV-19^^England|Human|Lighthouse Lab in Alderley Park|Wellcome Sanger Institute for the COVID-19 Genomics UK (COG-UK) Consortium|Davies|United Kingdom

>Spike|hCoV-19/USA/CA-CZB-13989/2020|2020-06-16|EPI\_ISL\_738945|Original|hCoV-19^^California|Human|Alameda County Public Health Lab|Chan-Zuckerberg Biohub|Kamm|USA

>Spike|hCoV-19/USA/MD-MDH-0528/2020|2020-12-01|EPI\_ISL\_778905|Original|hCoV-19^^Maryland|Human|Maryland Public Health Laboratory|Maryland Public Health Laboratory|Keller|USA

>Spike|hCoV-19/Zimbabwe/ZW-7113/2020|2020-05-01|EPI\_ISL\_644738|Original|hCoV-19^^Zimbabwe|Human|National Microbiology Reference Laboratory|Quadram Institute Bioscience|Alikhan|Zimbabwe

>Spike|hCoV-19/England/ALDP-5A7130/2020|2020-06-13|EPI\_ISL\_558715|Original|hCoV-19^^England|Human|Lighthouse Lab in Alderley Park|Wellcome Sanger Institute for the COVID-19 Genomics UK (COG-UK) consortium|Davies|United Kingdom

>Spike|hCoV-19/England/QEUEH-A36E49/2020|2020-10-05|EPI\_ISL\_637346|Original|hCoV-19^^England|Human|Wales Specialist Virology Centre Sequencing lab|COVID-19 Genomics UK (COG-UK) Consortium|Moore|United Kingdom

>Spike|hCoV-19/Switzerland/BS-ETHZ-250134/2020|2020-08-16|EPI\_ISL\_535640|Original|hCoV-19^^Basel-Stadt|Human|Viollier AG|Department of Biosystems Science and Engineering|Nadeau|Switzerland

>Spike|hCoV-19/USA/LA-GBCL-26544543/2020|2020-04-18|EPI\_ISL\_485124|Original|hCoV-19^^Louisiana|Human|River Road Testing Lab|Ginkgo Bioworks Clinical Laboratory|Smith|USA

>Spike|hCoV-19/Japan/PG-4742/2020|2020-08-00|EPI\_ISL\_689878|Original|hCoV-19^^Japan|Human|Pathogen Genomics Center|Pathogen Genomics Center|Sekizuka|Japan



>Spike|hCoV-19/Ireland/MH-NVRL-20G32450/2020|2020-03-18|EPI\_ISL\_605121|Original|hCoV-19^^Meath|Human|National Virus Reference Laboratory|Irish Coronavirus Sequencing Consortium - Helixworks|Chalapati|Ireland

>Spike|hCoV-19/Canada/BC\_08312782/2020|2020-05-00|EPI\_ISL\_477063|Original|hCoV-19^^British Columbia|Human|BCCDC Public Health Laboratory|BCCDC Public Health Laboratory|Harrigan|Canada

>Spike|hCoV-19/Brazil/RS-2539/2020|2020-03-19|EPI\_ISL\_729808|Original|hCoV-19^^Rio Grande do Sul|Human|Laboratorio Central de Saude Publica do Estado do Rio Grande do Sul (LACEN-RS)|Laboratory of Respiratory Viruses and Measles|Silva|Brazil

>Spike|hCoV-19/England/CAMC-B07C46/2020|2020-10-29|EPI\_ISL\_643679|Original|hCoV-19^^England|Human|Lighthouse Lab in Cambridge|Wellcome Sanger Institute for the COVID-19 Genomics UK (COG-UK) Consortium|Davies|United Kingdom

>Spike|hCoV-19/Spain/VC-FISABIO-19/2020|2020-03-08|EPI\_ISL\_419683|Original|hCoV-19^^Comunitat Valenciana|Human|Servicio de Microbiolog\u00eda. Consorcio Hospital General Universitario de Valencia|Sequencing and Bioinformatics Service and Molecular Epidemiology Research Group. FISABIO-Public Health|Gonzalez-Candelas|Spain

>Spike|hCoV-19/England/MILK-A7C269/2020|2020-10-15|EPI\_ISL\_606574|Original|hCoV-19^^England|Human|Lighthouse Lab in Milton Keynes|Wellcome Sanger Institute for the COVID-19 Genomics UK (COG-UK) consortium|Davies|United Kingdom

>Spike|hCoV-19/USA/VA-DCLS-1409/2020|2020-07-11|EPI\_ISL\_572244|Original|hCoV-19^^Virginia|Human|Virginia DCLS|Virginia DCLS|St. Jacques|USA

>Spike|hCoV-19/Scotland/CVR1311/2020|2020-03-27|EPI\_ISL\_433537|Original|hCoV-19^^Scotland|Human|West of Scotland Specialist Virology Centre|COVID-19 Genomics UK (COG-UK) Consortium|Robertson|United Kingdom

>Spike|hCoV-19/Denmark/DCGC-5398/2020|2020-09-14|EPI\_ISL\_615330|Original|hCoV-19^^Midtjylland|Human|Department of Virus and Microbiological Special Diagnostics|Albertsen lab|Michaelsen|Denmark

>Spike|hCoV-19/England/MILK-9A98DB/2020|2020-08-31|EPI\_ISL\_550838|Original|hCoV-19^^England|Human|Lighthouse Lab in Milton Keynes|Wellcome Sanger Institute for the COVID-19 Genomics UK (COG-UK) consortium|Davies|United Kingdom

>Spike|hCoV-19/England/QEUH-98FB78/2020|2020-08-25|EPI\_ISL\_540023|Original|hCoV-19^^England|Human|Lighthouse Lab in Glasgow|Wellcome Sanger Institute for the COVID-19 Genomics UK (COG-UK) consortium|Davies|United Kingdom

>Spike|hCoV-19/South Korea/KCDC2466/2020|2020-06-08|EPI\_ISL\_514869|Original|hCoV-19^^South Korea|Human|Division of Viral Diseases|Division of Viral Diseases|Kim|South Korea

>Spike|hCoV-19/England/LIVE-A9BBD/2020|2020-03-24|EPI\_ISL\_517333|Original|hCoV-19^^England|Human|Liverpool Clinical Laboratories|COVID-19 Genomics UK (COG-UK) Consortium|Haldenby|United Kingdom

>Spike|hCoV-19/Canada/ON-S62/2020|2020-03-19|EPI\_ISL\_586424|Original|hCoV-19^^Ontario|Human|Toronto Invasive Bacterial Diseases Network|McMaster University|McArthur|Canada

>Spike|hCoV-19/USA/CT-UW428/2020|2020-03-27|EPI\_ISL\_529158|Original|hCoV-19^^Connecticut|Human|University of Washington|University of Washington|Roychoudhury|USA

>Spike|hCoV-19/Singapore/580/2020|2020-05-20|EPI\_ISL\_483603|Original|hCoV-19^^Singapore|Human|National Public Health Laboratory|National Public Health Laboratory|Mak|Singapore

>Spike|hCoV-19/Finland/3LS14AG3/2020|2020-10-03|EPI\_ISL\_756095|Original|hCoV-19^^Uusimaa|Human|Department of Virology and Immunology|Department of Virology|Smura|Finland

>Spike|hCoV-19/USA/CA-ALSR-2420/2020|2020-07-06|EPI\_ISL\_635470|Original|hCoV-19^^California|Human|San Diego County Public Health Laboratory|Andersen lab at Scripps Research|Gangavarapu|USA

>Spike|hCoV-19/USA/TX-HMH-MCoV-19694/2020|2020-11-24|EPI\_ISL\_784048|Original|hCoV-19^^Texas|Human|Houston Methodist Hospital|Houston Methodist Hospital|Long|USA

>Spike|hCoV-19/France/ARA-21399/2020|2020-04-07|EPI\_ISL\_508994|Original|hCoV-19^^Auvergne-Rh\u00f4ne-Alpes|Human|CNR Virus des Infections Respiratoires - France SUD|CNR Virus des Infections Respiratoires - France SUD|Josset|France

>Spike|hCoV-19/USA/TX-HMH-MCoV-10118/2020|2020-07-07|EPI\_ISL\_789327|Original|hCoV-19^^Texas|Human|Houston Methodist Hospital|Houston Methodist Hospital|Long|USA

>Spike|hCoV-19/England/QEUH-96A1EA/2020|2020-08-13|EPI\_ISL\_536820|Original|hCoV-19^^England|Human|Lighthouse Lab in Glasgow|Wellcome Sanger Institute for the COVID-19 Genomics UK (COG-UK) consortium|Davies|United Kingdom

>Spike|hCoV-19/Australia/VIC11339/2020|2020-08-24|EPI\_ISL\_563336|Original|hCoV-19^^Victoria|Human|Microbiological Diagnostic Unit - Public Health Laboratory (MDU-PHL)|MDU-PHL|Schultz|Australia

>Spike|hCoV-19/Luxembourg/LNS9352817/2020|2020-11-29|EPI\_ISL\_770918|Original|hCoV-19^^Luxembourg|Human|Laboratoire national de sant\u00e9|Laboratoire national de sant\u00e9|Wienecke-Baldacchino|Luxembourg

>Spike|hCoV-19/England/201180472/2020|2020-03-11|EPI\_ISL\_464917|Original|hCoV-19^^England|Human|Respiratory Virus Unit|Respiratory Virus Unit|Platt|United Kingdom

>Spike|hCoV-19/England/MILK-9C4175/2020|2020-09-07|EPI\_ISL\_566991|Original|hCoV-19^^England|Human|Lighthouse Lab in Milton Keynes|Wellcome Sanger Institute for the COVID-19 Genomics UK (COG-UK) consortium|Davies|United Kingdom

>Spike|hCoV-19/England/CAMC-BC06E1/2020|2020-11-22|EPI\_ISL\_705074|Original|hCoV-19^^England|Human|Lighthouse Lab in Cambridge|Wellcome Sanger Institute for the COVID-19 Genomics UK (COG-UK) Consortium|Davies|United Kingdom

>Spike|hCoV-19/USA/CA-SR0312/2020|2020-03-22|EPI\_ISL\_445166|Original|hCoV-19^^California|Human|Scripps Medical Laboratory|Andersen lab at Scripps Research|Gangavarapu|USA

>Spike|hCoV-19/Wales/PHWC-16F1CF/2020|2020-09-28|EPI\_ISL\_585926|Original|hCoV-19^^Wales|Human|Wales Specialist Virology Centre Sequencing lab|COVID-19 Genomics UK (COG-UK) Consortium|Moore|United Kingdom

>Spike|hCoV-19/USA/AZ-QDX-1056/2020|2020-03-17|EPI\_ISL\_571693|Original|hCoV-19^^Arizona|Human|Quest Diagnostics|Quest Diagnostics|Kagan|USA

>Spike|hCoV-19/Germany/NW-UBI-21/2020|2020-04-07|EPI\_ISL\_602302|original|hCoV-19^^North Rhine-Westphalia|Human|Evangelisches Klinikum Bethel|Bielefeld University|Brandt|Germany

>Spike|hCoV-19/Senegal/64166/2020|2020-06-12|EPI\_ISL\_476558|Original|hCoV-19^^Dakar|Human|Institut Pasteur Dakar|Institut Pasteur de Dakar|Dia|Senegal

>Spike|hCoV-19/England/CAMC-B98D65/2020|2020-11-15|EPI\_ISL\_673690|Original|hCoV-19^^England|Human|Lighthouse Lab in Cambridge|Wellcome Sanger Institute for the COVID-19 Genomics UK (COG-UK) Consortium|Davies|United Kingdom

>Spike|hCoV-19/England/ALDP-B5B19F/2020|2020-11-08|EPI\_ISL\_655517|Original|hCoV-19^^England|Human|Lighthouse Lab in Alderley Park|Wellcome Sanger Institute for the COVID-19 Genomics UK (COG-UK) Consortium|Davies|United Kingdom

>Spike|hCoV-19/England/BIRM-5F0D5/2020|2020-05-05|EPI\_ISL\_473310|Original|hCoV-19^^England|Human|University of Birmingham|COVID-19 Genomics UK (COG-UK) Consortium|Loman|United Kingdom

>Spike|hCoV-19/England/QEUH-A21685/2020|2020-10-01|EPI\_ISL\_587425|Original|hCoV-19^^England|Human|Lighthouse Lab in Glasgow|Wellcome Sanger Institute for the COVID-19 Genomics UK (COG-UK) consortium|Davies|United Kingdom

>Spike|hCoV-19/England/CAMC-B35474/2020|2020-11-05|EPI\_ISL\_659524|Original|hCoV-19^^England|Human|Lighthouse Lab in Cambridge|Wellcome Sanger Institute for the COVID-19 Genomics UK (COG-UK) Consortium|Davies|United Kingdom

>Spike|hCoV-19/England/MILK-A4614D/2020|2020-10-06|EPI\_ISL\_598757|Original|hCoV-19^^England|Human|Lighthouse Lab in Milton Keynes|Wellcome Sanger Institute for the COVID-19 Genomics UK (COG-UK) consortium|Davies|United Kingdom

>Spike|hCoV-19/New Zealand/20CV0258/2020|2020-09-07|EPI\_ISL\_548083|Original|hCoV-19^^Auckland|Human|LabPLUS|Institute of Environmental Science and Research (ESR)|Wang|New Zealand

>Spike|hCoV-19/Brazil/SP-822/2020|2020-04-29|EPI\_ISL\_776757|Original|hCoV-19^^S\u00e3o Paulo|Human|Instituto Adolfo Lutz - Regional de Marilia|Instituto Adolfo Lutz|Sacchi|Brazil

>Spike|hCoV-19/England/NORT-2A5FC2/2020|2020-10-12|EPI\_ISL\_637521|Original|hCoV-19^^England|Human|Northumbria University / South Tees Hospitals NHS Foundation Trust / North Cumbria Integrated Care NHS Foundation Trust / North Tees and Hartlepool NHS

Foundation Trust / Newcastle Hospitals NHS Foundation Trust|COVID-19 Genomics UK (COG-UK) Consortium|Bashton|United Kingdom

>Spike|hCoV-19/South Korea/KDCA0044/2020|2020-09-17|EPI\_ISL\_747285|Original|hCoV-19^^South Korea|Human|Division of Emerging Infectious Diseases|Division of Emerging Infectious Diseases|Park|South Korea

>Spike|hCoV-19/USA/TX-HMH-MCoV-13953/2020|2020-08-15|EPI\_ISL\_787245|Original|hCoV-19^^Texas|Human|Houston Methodist Hospital|Houston Methodist Hospital|Long|USA

>Spike|hCoV-19/USA/CO-CDPHE-2004220771/2020|2020-04-22|EPI\_ISL\_710195|Original|hCoV-19^^Colorado|Human|Colorado Department of Public Health and Environment|Colorado Department of Public Health and Environment|Bankers|USA

>Spike|hCoV-19/USA/CA-CZB-12818/2020|2020-09-30|EPI\_ISL\_648469|Original|hCoV-19^^California|Human|Santa Clara County Public Health Laboratory|Chan-Zuckerberg Biohub|Bhatt|USA

>Spike|hCoV-19/USA/TX-HMH-MCoV-12591/2020|2020-08-31|EPI\_ISL\_790410|Original|hCoV-19^^Texas|Human|Houston Methodist Hospital|Houston Methodist Hospital|Long|USA

>Spike|hCoV-19/Scotland/EDB580/2020|2020-04-01|EPI\_ISL\_433203|Original|hCoV-19^^Scotland|Human|Virology Department|COVID-19 Genomics UK (COG-UK) Consortium|Williams|United Kingdom

>Spike|hCoV-19/India/DL-65112-CSIR-IGIB/2020|2020-08-11|EPI\_ISL\_636821|Original|hCoV-19^^Delhi|Human|National Centre for Disease control (NCDC)|NCDC/CSIR-IGIB|Faruq|India

>Spike|hCoV-19/England/BIRM-5F327/2020|2020-05-04|EPI\_ISL\_456671|Original|hCoV-19^^England|Human|University of Birmingham|COVID-19 Genomics UK (COG-UK) Consortium|Loman|United Kingdom

>Spike|hCoV-19/England/NORT-293E06/2020|2020-07-20|EPI\_ISL\_573329|Original|hCoV-19^^England|Human|Northumbria University / South Tees Hospitals NHS Foundation Trust / North Cumbria Integrated Care NHS Foundation Trust / North Tees and Hartlepool NHS Foundation Trust / Newcastle Hospitals NHS Foundation Trust|COVID-19 Genomics UK (COG-UK) Consortium|Bashton|United Kingdom

>Spike|hCoV-19/Gambia/NPHL-956/2020|2020-00-00|EPI\_ISL\_561334|Original|hCoV-19^^Kombo|Human|MRCG at LSHTM Genomics lab|MRCG at LSHTM Genomics lab|Sesay|Gambia

>Spike|hCoV-19/Australia/VIC6612/2020|2020-07-19|EPI\_ISL\_521374|Original|hCoV-19^^Victoria|Human|Victorian Infectious Diseases Reference Laboratory (VIDRL)|VIDRL and MDU-PHL|Schultz|Australia

>Spike|hCoV-19/England/MILK-9C2520/2020|2020-09-07|EPI\_ISL\_566490|Original|hCoV-19^^England|Human|Lighthouse Lab in Milton Keynes|Wellcome Sanger Institute for the COVID-19 Genomics UK (COG-UK) consortium|Davies|United Kingdom

>Spike|hCoV-19/Spain/MD-IBV-97010091/2020|2020-03-26|EPI\_ISL\_779767|Original|hCoV-19^^Madrid|Human|IdISSC/Hospital Cl\u00ednico San Carlos de Madrid\u200b|SeqCOVID-SPAIN consortium/IBV (CSIC)|Comas|Spain

>Spike|hCoV-19/Wales/PHWC-49E64D/2020|2020-12-07|EPI\_ISL\_743027|Original|hCoV-19^^Wales|Human|Wales Specialist Virology Centre Sequencing lab|COVID-19 Genomics UK (COG-UK) Consortium|Moore|United Kingdom

>Spike|hCoV-19/SaudiArabia/KAUST-MADINAH1109/2020|2020-06-11|EPI\_ISL\_513113|Original|hCoV-19^^Madinah|Human|Pathogen Genomics Lab King Abdullah University of Science and Technology(KAUST)|Pathogen Genomics Lab King Abdullah University of Science and Technology(KAUST)|Mohamed Ghazzali|Saudi Arabia

>Spike|hCoV-19/England/ALDP-955935/2020|2020-06-12|EPI\_ISL\_554517|Original|hCoV-19^^England|Human|Lighthouse Lab in Alderley Park|Wellcome Sanger Institute for the COVID-19 Genomics UK (COG-UK) consortium|Davies|United Kingdom

>Spike|hCoV-19/Luxembourg/LNS6748939/2020|2020-10-21|EPI\_ISL\_744463|Original|hCoV-19^^Luxembourg|Human|Laboratoire national de sant\u00e9|Laboratoire national de sant\u00e9|Wienecke-Baldacchino|Luxembourg

>Spike|hCoV-19/USA/VA-DCLS-2095/2020|2020-10-21|EPI\_ISL\_677137|Original|hCoV-19^^Virginia|Human|Virginia Division of Consolidated Laboratory Services|Virginia Division of Consolidated Laboratory Services|St. Jacques|USA

>Spike|hCoV-19/Wales/PHWC-16617D/2020|2020-05-15|EPI\_ISL\_490843|Original|hCoV-19^^Wales|Human|Wales Specialist Virology Centre Sequencing lab|COVID-19 Genomics UK (COG-UK) Consortium|Moore|United Kingdom

>Spike|hCoV-19/England/MILK-9EF781/2020|2020-09-23|EPI\_ISL\_594938|Original|hCoV-19^^England|Human|Queens Medical Centre|COVID-19 Genomics UK (COG-UK) Consortium|Loose|United Kingdom

>Spike|hCoV-19/Germany/NW-HHU-385/2020|2020-11-20|EPI\_ISL\_718059|Original|hCoV-19^^North Rhine-Westphalia|Human|ZOTZ KLIMAS MVZ D\u00f0fcsseldorf-Centrum GbR \u00dcBAG f\u00f0fcr Labormedizin|Center of Medical Microbiology|Wienemann|Germany

>Spike|hCoV-19/England/ALDP-A6D641/2020|2020-10-14|EPI\_ISL\_607241|Original|hCoV-19^^England|Human|Lighthouse Lab in Alderley Park|Wellcome Sanger Institute for the COVID-19 Genomics UK (COG-UK) consortium|Davies|United Kingdom

>Spike|hCoV-19/England/ALDP-51DEF2/2020|2020-06-02|EPI\_ISL\_558976|Original|hCoV-19^^England|Human|Lighthouse Lab in Alderley Park|Wellcome Sanger Institute for the COVID-19 Genomics UK (COG-UK) consortium|Davies|United Kingdom

>Spike|hCoV-19/Iran/K1r-119/2020|2020-05-00|EPI\_ISL\_591322|Original|hCoV-19^^Iran|Human|Virology|Virology|Ranjbar|Iran

>Spike|hCoV-19/England/QEUEH-9BA02A/2020|2020-09-07|EPI\_ISL\_573571|Original|hCoV-19^^England|Human|Oxford Viromics|COVID-19 Genomics UK (COG-UK) Consortium|Golubchik|United Kingdom

>Spike|hCoV-19/Canada/BC-BCCDC-8561/2020|2020-11-00|EPI\_ISL\_740820|Original|hCoV-19^^British Columbia|Human|BCCDC Public Health Laboratory|BCCDC Public Health Laboratory|Prystajecky|Canada

>Spike|hCoV-19/South Korea/KCDC2502/2020|2020-06-15|EPI\_ISL\_514905|Original|hCoV-19^^South Korea|Human|Division of Viral Diseases|Division of Viral Diseases|Kim|South Korea

>Spike|hCoV-19/England/QEUEH-9F9265/2020|2020-09-26|EPI\_ISL\_588847|Original|hCoV-19^^England|Human|Lighthouse Lab in Glasgow|Wellcome Sanger Institute for the COVID-19 Genomics UK (COG-UK) consortium|Davies|United Kingdom

>Spike|hCoV-19/Denmark/ALAB-SSI351/2020|2020-03-23|EPI\_ISL\_429464|Original|hCoV-19^^Denmark|Human|Department of Virus and Microbiological Special Diagnostics|Albertsen lab|Kirkegaard|Denmark

>Spike|hCoV-19/England/BRIS-12BD9E/2020|2020-05-09|EPI\_ISL\_469424|Original|hCoV-19^^England|Human|PHE South West Regional Laboratory|Wellcome Sanger Institute for the COVID-19 Genomics UK (COG-UK) consortium|Davies|United Kingdom

>Spike|hCoV-19/USA/AZ-TG366721/2020|2020-06-02|EPI\_ISL\_694485|Original|hCoV-19^^Arizona|Human|AZ SPHL|TGen North|French|USA

>Spike|hCoV-19/USA/FL-BPHL-0716/2020|2020-03-31|EPI\_ISL\_509774|Original|hCoV-19^^Florida|Human|Florida Bureau of Public Health Laboratories|Florida Bureau of Public Health Laboratories|Blanton|USA

>Spike|hCoV-19/USA/MI-MDHHS-SC21935/2020|2020-03-24|EPI\_ISL\_565992|Original|hCoV-19^^Michigan|Human|Michigan Department of Health and Human Services|Michigan Department of Health and Human Services|Blankenship|USA

>Spike|hCoV-19/England/ALDP-A2E55E/2020|2020-10-06|EPI\_ISL\_586577|Original|hCoV-19^^England|Human|Lighthouse Lab in Alderley Park|Wellcome Sanger Institute for the COVID-19 Genomics UK (COG-UK) consortium|Davies|United Kingdom

>Spike|hCoV-19/Wales/PHWC-490DDD/2020|2020-11-16|EPI\_ISL\_706572|Original|hCoV-19^^Wales|Human|Originating lab|COVID-19 Genomics UK (COG-UK) Consortium|Moore|United Kingdom

>Spike|hCoV-19/England/QEUEH-79A20E/2020|2020-07-15|EPI\_ISL\_533034|Original|hCoV-19^^England|Human|Lighthouse Lab in Glasgow|Wellcome Sanger Institute for the COVID-19 Genomics UK (COG-UK) consortium|Davies|United Kingdom

>Spike|hCoV-19/India/MH-NCCS-NR-11688/2020|2020-07-14|EPI\_ISL\_721649|Original|hCoV-19^^Maharashtra|Human|National Centre For Cell Science|National Centre For Cell Science|Paul|India

>Spike|hCoV-19/USA/MN-CDC-6566/2020|2020-04-28|EPI\_ISL\_527731|Original|hCoV-19^^Minnesota|Human|MN PHL Division|Pathogen Discovery|Queen|USA

>Spike|hCoV-19/Australia/VIC16546/2020|2020-08-09|EPI\_ISL\_640340|Original|hCoV-19^^Victoria|Human|Microbiological Diagnostic Unit - Public Health Laboratory (MDU-PHL)|MDU-PHL|Schultz|Australia

>Spike|hCoV-19/Scotland/CVR2598/2020|2020-04-16|EPI\_ISL\_484611|Original|hCoV-19^^Scotland|Human|West of Scotland Specialist Virology Centre|COVID-19 Genomics UK (COG-UK) Consortium|Robertson|United Kingdom

>Spike|hCoV-19/USA/NY-NYCPHL-001547/2020|2020-12-02|EPI\_ISL\_745462|Original|hCoV-19^^New York|Human|DOHMH Corona|New York City Public Health Laboratory|Wang|USA

>Spike|hCoV-19/Denmark/DCGC-9874/2020|2020-11-09|EPI\_ISL\_669244|Original|hCoV-19^^Midtjylland|Human|Department of Virus and Microbiological Special Diagnostics|Albertsen Lab|Michaelsen|Denmark

>Spike|hCoV-19/Wales/PHWC-485218/2020|2020-10-22|EPI\_ISL\_628158|Original|hCoV-19^^Wales|Human|Wales Specialist Virology Centre Sequencing lab|COVID-19 Genomics UK (COG-UK) Consortium|Moore|United Kingdom

>Spike|hCoV-19/Hong Kong/VB20211407/2020|2020-10-08|EPI\_ISL\_760050|Original|hCoV-19^^Hong Kong|Human|Hong Kong Department of Health|School of Public Health|Chu|China

>Spike|hCoV-19/USA/WI-UW-1674/2020|2020-09-11|EPI\_ISL\_605548|Original|hCoV-19^^Wisconsin|Human|University of Wisconsin-Madison AIDS Vaccine Research Laboratories|University of Wisconsin-Madison AIDS Vaccine Research Laboratories|Baczenas|USA

>Spike|hCoV-19/Egypt/EGY-024/2020|2020-08-14|EPI\_ISL\_526979|Original|hCoV-19^^Egypt|Human|Biological prevention|Biological prevention|Seadawy|Egypt

>Spike|hCoV-19/England/CAMC-B9954E/2020|2020-11-15|EPI\_ISL\_673380|Original|hCoV-19^^England|Human|Lighthouse Lab in Cambridge|Wellcome Sanger Institute for the COVID-19 Genomics UK (COG-UK) Consortium|Davies|United Kingdom

>Spike|hCoV-19/Australia/VIC10477/2020|2020-07-17|EPI\_ISL\_562928|Original|hCoV-19^^Victoria|Human|Microbiological Diagnostic Unit - Public Health Laboratory (MDU-PHL)|MDU-PHL|Schultz|Australia

>Spike|hCoV-19/Japan/PG-7581/2020|2020-07-00|EPI\_ISL\_686683|Original|hCoV-19^^Japan|Human|Chiba Prefectural Institute of Public Health|Pathogen Genomics Center|Sekizuka|Japan

>Spike|hCoV-19/USA/UT-UPHL-2012317157/2020|2020-08-03|EPI\_ISL\_745599|Original|hCoV-19^^Utah|Human|Ginkgo Bioworks Clinical Laboratory|Utah Public Health Laboratory|Young|USA

>Spike|hCoV-19/Scotland/QEUEH-9DBFDB/2020|2020-09-22|EPI\_ISL\_575392|Original|hCoV-19^^Scotland|Human|Lighthouse Lab in Glasgow|Wellcome Sanger Institute for the COVID-19 Genomics UK (COG-UK) consortium|Davies|United Kingdom

>Spike|hCoV-19/England/LIVE-DC4751/2020|2020-11-10|EPI\_ISL\_703121|Original|hCoV-19^^England|Human|Liverpool Clinical Laboratories|COVID-19 Genomics UK (COG-UK) Consortium|Haldenby|United Kingdom

>Spike|hCoV-19/England/ALDP-8E153B/2020|2020-06-25|EPI\_ISL\_557004|Original|hCoV-19^^England|Human|Lighthouse Lab in Alderley Park|Wellcome Sanger Institute for the COVID-19 Genomics UK (COG-UK) consortium|Davies|United Kingdom

>Spike|hCoV-19/USA/CT-Yale-517/2020|2020-11-05|EPI\_ISL\_729790|Original|hCoV-19^^Connecticut|Human|Grubaugh Lab - Yale School of Public Health|Grubaugh Lab - Yale School of Public Health|Grubaugh|USA

>Spike|hCoV-19/Italy/APU-IZSPB\_316PT/2020|2020-10-31|EPI\_ISL\_653810|Original|hCoV-19^^Apulia|Human|I.R.C.C.S. \S. De Bellis\ - Ente Ospedaliero|Istituto Zooprofilattico Sperimentale della Puglia e della Basilicata|Parisi|Italy

>Spike|hCoV-19/Poland/PL\_P18/2020|2020-03-31|EPI\_ISL\_451979|Original|hCoV-19^^Malopolska|Human|1. ViroGenetics - BSL3 Laboratory of Virology|1. ViroGenetics - BSL3 Laboratory of Virology|Pyrz|Poland

>Spike|hCoV-19/Wales/PHWC-2614D/2020|2020-03-25|EPI\_ISL\_422208|Original|hCoV-19^^Wales|Human|Wales Specialist Virology Centre|Public Health Wales Microbiology Cardiff|Moore|United Kingdom

>Spike|hCoV-19/England/CAMB-1AB31C/2020|2020-04-19|EPI\_ISL\_470255|Original|hCoV-19^^England|Human|Department of Pathology|Wellcome Sanger Institute for the COVID-19 Genomics UK (COG-UK) consortium|Davies|United Kingdom

>Spike|hCoV-19/England/QEUEH-9B7EF6/2020|2020-09-08|EPI\_ISL\_590480|Original|hCoV-19^^England|Human|Lighthouse Lab in Glasgow|Wellcome Sanger Institute for the COVID-19 Genomics UK (COG-UK) consortium|Davies|United Kingdom

>Spike|hCoV-19/England/20422147804/2020|2020-09-00|EPI\_ISL\_584065|Original|hCoV-19^^England|Human|Respiratory Virus Unit|Respiratory Virus Unit|Platt|United Kingdom

>Spike|hCoV-19/USA/NY-NYUMC907/2020|2020-05-07|EPI\_ISL\_467400|Original|hCoV-19^^New York|Human|NYU Langone Health|Departments of Pathology and Medicine|Maurano|USA

>Spike|hCoV-19/Belgium/ULG-10696/2020|2020-10-26|EPI\_ISL\_636668|Original|hCoV-19^^Li\u00e8ge|Human|Department of Clinical Microbiology|GIGA Medical Genomics|Durkin|Belgium

>Spike|hCoV-19/England/20142024404/2020|2020-03-29|EPI\_ISL\_423451|Original|hCoV-19^^England|Human|Respiratory Virus Unit|Respiratory Virus Unit|Platt|United Kingdom

>Spike|hCoV-19/England/NORW-F9DE5/2020|2020-12-08|EPI\_ISL\_725443|Original|hCoV-19^^England|Human|Quadram Institute Bioscience|COVID-19 Genomics UK (COG-UK) Consortium|Alikhan|United Kingdom

>Spike|hCoV-19/USA/MD-MDH-0467/2020|2020-11-11|EPI\_ISL\_682077|Original|hCoV-19^^Maryland|Human|Maryland Public Health Laboratory|Maryland Public Health Laboratory|Keller|USA

>Spike|hCoV-19/England/CAMC-B330AF/2020|2020-11-05|EPI\_ISL\_659369|Original|hCoV-19^^England|Human|Lighthouse Lab in Cambridge|Wellcome Sanger Institute for the COVID-19 Genomics UK (COG-UK) Consortium|Davies|United Kingdom

>Spike|hCoV-19/Wales/PHWC-1667F3/2020|2020-06-27|EPI\_ISL\_494043|Original|hCoV-19^^Wales|Human|Originating lab|COVID-19 Genomics UK (COG-UK) Consortium|Moore|United Kingdom

>Spike|hCoV-19/England/ALDP-744B9F/2020|2020-06-29|EPI\_ISL\_557359|Original|hCoV-19^^England|Human|Lighthouse Lab in Alderley Park|Wellcome Sanger Institute for the COVID-19 Genomics UK (COG-UK) consortium|Davies|United Kingdom

>Spike|hCoV-19/India/MH-NIV-10176/2020|2020-04-15|EPI\_ISL\_479493|Original|hCoV-19^^Maharashtra|Human|NIV Influenza|NIV Influenza|Potdar|India

>Spike|hCoV-19/Denmark/DCGC-11304/2020|2020-11-02|EPI\_ISL\_670768|Original|hCoV-19^^Hovedstaden|Human|Department of Virus and Microbiological Special Diagnostics|Albertsen Lab|Michaelsen|Denmark

>Spike|hCoV-19/USA/CA-CZB-1009/2020|2020-04-05|EPI\_ISL\_436650|Original|hCoV-19^^California|Human|County of Santa Clara Public Health Department|Chan-Zuckerberg Biohub|Hao|USA

>Spike|hCoV-19/USA/MI-UM-10035692627/2020|2020-08-28|EPI\_ISL\_583279|Original|hCoV-19^^Michigan|Human|University of Michigan Clinical Microbiology Laboratory|Lauring Lab|Valesano|USA

>Spike|hCoV-19/Germany/TH-IIMK-CaSe-5/2020|2020-05-19|EPI\_ISL\_728294|Original|hCoV-19^^Thuringia|Human|Jena University Hospital|Institute of infectious medicine & hospital hygiene|Brandt|Germany

>Spike|hCoV-19/England/MILK-974D61/2020|2020-08-21|EPI\_ISL\_552511|Original|hCoV-19^^England|Human|Lighthouse Lab in Milton Keynes|Wellcome Sanger Institute for the COVID-19 Genomics UK (COG-UK) consortium|Davies|United Kingdom

>Spike|hCoV-19/England/ALDP-AA4A8E/2020|2020-10-21|EPI\_ISL\_625091|Original|hCoV-19^^England|Human|Lighthouse Lab in Alderley Park|Wellcome Sanger Institute for the COVID-19 Genomics UK (COG-UK) consortium|Davies|United Kingdom

>Spike|hCoV-19/England/ALDP-B74D23/2020|2020-11-12|EPI\_ISL\_662270|Original|hCoV-19^^England|Human|Lighthouse Lab in Alderley Park|Wellcome Sanger Institute for the COVID-19 Genomics UK (COG-UK) Consortium|Davies|United Kingdom

>Spike|hCoV-19/Wales/PHWC-29FF5/2020|2020-04-03|EPI\_ISL\_432344|Original|hCoV-19^^Wales|Human|Wales Specialist Virology Centre|Public Health Wales Microbiology Cardiff|Moore|United Kingdom

>Spike|hCoV-19/Russia/MOW-RII-MH1979S/2020|2020-05-28|EPI\_ISL\_596325|Original|hCoV-19^^Moscow|Human|Pathogenic Microorganisms Variability Laboratory|WHO National Influenza Centre Russian Federation|Komissarov|Russia

>Spike|hCoV-19/England/CAMC-A587FB/2020|2020-10-08|EPI\_ISL\_597079|Original|hCoV-19^^England|Human|Lighthouse Lab in Cambridge|Wellcome Sanger Institute for the COVID-19 Genomics UK (COG-UK) consortium|Davies|United Kingdom

>Spike|hCoV-19/England/CAMC-9D6F67/2020|2020-09-20|EPI\_ISL\_584338|Original|hCoV-19^^England|Human|Virology Department|COVID-19 Genomics UK (COG-UK) Consortium|de Silva|United Kingdom

>Spike|hCoV-19/Wales/PHWC-2713D/2020|2020-03-29|EPI\_ISL\_422155|Original|hCoV-19^^Wales|Human|Wales Specialist Virology Centre|Public Health Wales Microbiology Cardiff|Moore|United Kingdom

>Spike|hCoV-19/England/MILK-B56677/2020|2020-11-05|EPI\_ISL\_657453|Original|hCoV-19^^England|Human|Lighthouse Lab in Milton Keynes|Wellcome Sanger Institute for the COVID-19 Genomics UK (COG-UK) Consortium|Davies|United Kingdom

>Spike|hCoV-19/USA/WA-S399/2020|2020-03-28|EPI\_ISL\_434159|Original|hCoV-19^^Washington|Human|Washington State Department of Health|Seattle Flu Study|Bedford|USA

>Spike|hCoV-19/USA/AL-QDX-244/2020|2020-04-28|EPI\_ISL\_498695|Original|hCoV-19^^Alabama|Human|Quest Diagnostics|Quest Diagnostics|Kagan|USA

>Spike|hCoV-19/England/MILK-A6BA65/2020|2020-10-09|EPI\_ISL\_608761|Original|hCoV-19^^England|Human|Lighthouse Lab in Milton Keynes|Wellcome Sanger Institute for the COVID-19 Genomics UK (COG-UK) consortium|Davies|United Kingdom

>Spike|hCoV-19/Wales/PHWC-47E6E9/2020|2020-10-12|EPI\_ISL\_595490|Original|hCoV-19^^Wales|Human|Originating lab|COVID-19 Genomics UK (COG-UK) Consortium|Moore|United Kingdom

>Spike|hCoV-19/Luxembourg/LNS8929027/2020|2020-10-20|EPI\_ISL\_744824|Original|hCoV-19^^Luxembourg|Human|Laboratoire national de sant\u00e9|Laboratoire national de sant\u00e9|Wienecke-Baldacchino|Luxembourg

>Spike|hCoV-19/England/MILK-66CC26/2020|2020-07-03|EPI\_ISL\_558089|Original|hCoV-19^^England|Human|Lighthouse Lab in Milton Keynes|Wellcome Sanger Institute for the COVID-19 Genomics UK (COG-UK) consortium|Davies|United Kingdom

>Spike|hCoV-19/Denmark/DCGC-5318/2020|2020-09-14|EPI\_ISL\_615249|Original|hCoV-19^^Midtjylland|Human|Department of Virus and Microbiological Special Diagnostics|Albertsen lab|Michaelsen|Denmark

>Spike|hCoV-19/England/CAMB-76F71/2020|2020-03-31|EPI\_ISL\_425442|Original|hCoV-19^^England|Human|Department of Pathology|COVID-19 Genomics UK (COG-UK) Consortium|Meredith|United Kingdom

>Spike|hCoV-19/Scotland/QEUH-AAD126/2020|2020-10-21|EPI\_ISL\_652942|Original|hCoV-19^^Scotland|Human|Oxford Viromics|COVID-19 Genomics UK (COG-UK) Consortium|Golubchik|United Kingdom

>Spike|hCoV-19/USA/MI-UM-10036424368/2020|2020-10-13|EPI\_ISL\_610104|Original|hCoV-19^^Michigan|Human|University of Michigan Clinical Microbiology Laboratory|Lauring Lab|Valesano|USA

>Spike|hCoV-19/USA/CA-ALSR-3717/2020|2020-06-05|EPI\_ISL\_636163|Original|hCoV-19^^California|Human|San Diego County Public Health Laboratory|Andersen lab at Scripps Research|Gangavarapu|USA

>Spike|hCoV-19/Spain/AN-IBV-98001780/2020|2020-04-04|EPI\_ISL\_538153|Original|hCoV-19^^Andalucia|Human|Servicio de Microbiolog\u00eda y Parasitolog\u00eda cl\u00ednica. UCEIMP. Hospital Universitario Virgen del Roc\u00edo/IBIS/CSIC/US|SeqCOVID-SPAIN consortium/IBV (CSIC)|Comas|Spain

>Spike|hCoV-19/Denmark/DCGC-11468/2020|2020-11-02|EPI\_ISL\_670934|Original|hCoV-19^^Nordjylland|Human|Department of Virus and Microbiological Special Diagnostics|Albertsen Lab|Michaelsen|Denmark

>Spike|hCoV-19/Lithuania/MR-LUHS-Eilnr450/2020|2020-09-07|EPI\_ISL\_636889|Original|hCoV-19^^Kauno apskritis|Human|Lithuanian University of Health Sciences Hospital|Lithuanian University of Health Sciences|Zemaitis|Lithuania

>Spike|hCoV-19/Brazil/SP-137/2020|2020-04-01|EPI\_ISL\_515543|Original|hCoV-19^^S\u00e3o Paulo|Human|Servi\u00e7o de Vigil\u00e2ncia Sanit\u00e1ria e Epidemiol\u00f3gica|Instituto Adolfo Lutz|Sacchi|Brazil

>Spike|hCoV-19/Denmark/DCGC-13385/2020|2020-11-30|EPI\_ISL\_712767|Original|hCoV-19^^Midtjylland|Human|Department of Virus and Microbiological Special Diagnostics|Albertsen Lab|Michaelsen|Denmark

>Spike|hCoV-19/England/NORT-1B61166/2020|2020-10-15|EPI\_ISL\_637787|Original|hCoV-19^^England|Human|Northumbria University / South Tees Hospitals NHS Foundation Trust / North Cumbria Integrated Care NHS Foundation Trust / North Tees and Hartlepool NHS Foundation Trust / Newcastle Hospitals NHS Foundation Trust|COVID-19 Genomics UK (COG-UK) Consortium|Bashton|United Kingdom

>Spike|hCoV-19/USA/NY-NYCPHL-001235/2020|2020-11-06|EPI\_ISL\_683872|Original|hCoV-19^^New York|Human|DOHMH Corona|New York City Public Health Laboratory|Wang|USA

>Spike|hCoV-19/Netherlands/ZH-EMC-450/2020|2020-08-12|EPI\_ISL\_523788|Original|hCoV-19^^Zuid Holland|Human|Dutch COVID-19 response team|Erasmus Medical Center|Oude Munnink|Netherlands

>Spike|hCoV-19/Netherlands/NoordBrabant\_10039/2020|2020-03-16|EPI\_ISL\_454788|Original|hCoV-19^^Utrecht|Human|Dutch COVID-19 response team|National Institute for Public Health and the Environment (RIVM)|Meijer|Netherlands

>Spike|hCoV-19/England/QEUA-A1EAAD/2020|2020-09-29|EPI\_ISL\_587563|Original|hCoV-19^^England|Human|Lighthouse Lab in Glasgow|Wellcome Sanger Institute for the COVID-19 Genomics UK (COG-UK) consortium|Davies|United Kingdom

>Spike|hCoV-19/Scotland/EDB613/2020|2020-03-31|EPI\_ISL\_433216|Original|hCoV-19^^Scotland|Human|Virology Department|COVID-19 Genomics UK (COG-UK) Consortium|Williams|United Kingdom

>Spike|hCoV-19/England/MILK-9E02BC/2020|2020-09-18|EPI\_ISL\_601314|Original|hCoV-19^^England|Human|Lighthouse Lab in Milton Keynes|Wellcome Sanger Institute for the COVID-19 Genomics UK (COG-UK) consortium|Davies|United Kingdom

>Spike|hCoV-19/Luxembourg/LNS2644869/2020|2020-10-23|EPI\_ISL\_740162|Original|hCoV-19^^Luxembourg|Human|Laboratoire national de sant\u00e9|Laboratoire national de sant\u00e9|Wienecke-Baldacchino|Luxembourg

>Spike|hCoV-19/USA/UT-UPHL-2012124802/2020|2020-12-01|EPI\_ISL\_746975|Original|hCoV-19^^Utah|Human|Utah Public Health Laboratory|Utah Public Health Laboratory|Gallagher|USA

>Spike|hCoV-19/Japan/PG-8539/2020|2020-07-00|EPI\_ISL\_686135|Original|hCoV-19^^Japan|Human|Pathogen Genomics Center|Pathogen Genomics Center|Sekizuka|Japan

>Spike|hCoV-19/England/ALDP-B1BF46/2020|2020-11-01|EPI\_ISL\_645640|Original|hCoV-19^^England|Human|Lighthouse Lab in Alderley Park|Wellcome Sanger Institute for the COVID-19 Genomics UK (COG-UK) Consortium|Davies|United Kingdom

>Spike|hCoV-19/India/OR-ILSCV16498/2020|2020-05-12|EPI\_ISL\_463047|Original|hCoV-19^^Odisha|Human|Institute of Life Sciences|Immunogenomics lab|Raghav|India

>Spike|hCoV-19/England/ALDP-AA1359/2020|2020-10-22|EPI\_ISL\_623968|Original|hCoV-19^^England|Human|Lighthouse Lab in Alderley Park|Wellcome Sanger Institute for the COVID-19 Genomics UK (COG-UK) consortium|Davies|United Kingdom

>Spike|hCoV-19/Denmark/DCGC-15330/2020|2020-11-23|EPI\_ISL\_713766|Original|hCoV-19^^Sjaelland|Human|Department of Virus and Microbiological Special Diagnostics|Albertsen Lab|Michaelsen|Denmark

>Spike|hCoV-19/Wales/PHWC-4871DD/2020|2020-10-13|EPI\_ISL\_639172|Original|hCoV-19^^Wales|Human|Wales Specialist Virology Centre Sequencing lab|COVID-19 Genomics UK (COG-UK) Consortium|Moore|United Kingdom

>Spike|hCoV-19/USA/UT-08427/2020|2020-05-13|EPI\_ISL\_524203|Original|hCoV-19^^Utah|Human|Utah Public Health Laboratory|Utah Public Health Laboratory|Young|USA

>Spike|hCoV-19/USA/DE-DHSS-F981541/2020|2020-08-29|EPI\_ISL\_693743|Original|hCoV-19^^Delaware|Human|Delaware Public Health Laboratory|Delaware Public Health Laboratory|Bajwa|USA

>Spike|hCoV-19/Germany/NW-HHU-77/2020|2020-03-12|EPI\_ISL\_523948|Original|hCoV-19^^North Rhine-Westphalia|Human|Center of Medical Microbiology|Center of Medical Microbiology|Wienemann|Germany

>Spike|hCoV-19/USA/NE-10832/2020|2020-05-04|EPI\_ISL\_475184|Original|hCoV-19^^Nebraska|Human|Nebraska Public Health Laboratory|UNMC COVID-19 Response Team|Pratt|USA

>Spike|hCoV-19/England/MILK-973324/2020|2020-08-19|EPI\_ISL\_575904|Original|hCoV-19^^England|Human|Lighthouse Lab in Milton Keynes|Wellcome Sanger Institute for the COVID-19 Genomics UK (COG-UK) consortium|Davies|United Kingdom

>Spike|hCoV-19/England/CAMC-B53838/2020|2020-11-08|EPI\_ISL\_656821|Original|hCoV-19^^England|Human|Lighthouse Lab in Cambridge|Wellcome Sanger Institute for the COVID-19 Genomics UK (COG-UK) Consortium|Davies|United Kingdom

>Spike|hCoV-19/USA/MI-UM-10036634235/2020|2020-10-26|EPI\_ISL\_650036|Original|hCoV-19^^Michigan|Human|University of Michigan Clinical Microbiology Laboratory|Lauring Lab|Valesano|USA



>Spike|hCoV-19/Thailand/WU11-3/2020|2020-03-16|EPI\_ISL\_450959|Original|hCoV-19^^Thailand|Human|Center of Excellence in Clinical Virology|Center of Excellence in Clinical Virology|Poovorawan|Thailand

>Spike|hCoV-19/England/ALDP-5A44EF/2020|2020-06-13|EPI\_ISL\_558811|Original|hCoV-19^^England|Human|Lighthouse Lab in Alderley Park|Wellcome Sanger Institute for the COVID-19 Genomics UK (COG-UK) consortium|Davies|United Kingdom

>Spike|hCoV-19/Denmark/DCGC-17986/2020|2020-12-14|EPI\_ISL\_749536|Original|hCoV-19^^Hovedstaden|Human|Department of Virus and Microbiological Special Diagnostics|Albertsen Lab|Michaelsen|Denmark

>Spike|hCoV-19/England/ALDP-C8909A/2020|2020-12-17|EPI\_ISL\_762931|Original|hCoV-19^^England|Human|Lighthouse Lab in Alderley Park|Wellcome Sanger Institute for the COVID-19 Genomics UK (COG-UK) Consortium|Davies|United Kingdom

>Spike|hCoV-19/England/CAMC-B983AF/2020|2020-11-15|EPI\_ISL\_673619|Original|hCoV-19^^England|Human|Lighthouse Lab in Cambridge|Wellcome Sanger Institute for the COVID-19 Genomics UK (COG-UK) Consortium|Davies|United Kingdom

>Spike|hCoV-19/England/QEUA-A0AD14/2020|2020-10-03|EPI\_ISL\_599187|Original|hCoV-19^^England|Human|Lighthouse Lab in Glasgow|Wellcome Sanger Institute for the COVID-19 Genomics UK (COG-UK) consortium|Davies|United Kingdom

>Spike|hCoV-19/Australia/VIC14894/2020|2020-08-31|EPI\_ISL\_593049|Original|hCoV-19^^Victoria|Human|Microbiological Diagnostic Unit - Public Health Laboratory (MDU-PHL)|MDU-PHL|Schultz|Australia

>Spike|hCoV-19/Hong Kong/HKU-IHCE0511-001a/2020|2020-01-29|EPI\_ISL\_538524|Original|hCoV-19^^Hong Kong|Human|Department of Microbiology|Department of Microbiology|Chan|China

>Spike|hCoV-19/England/QEUA-A0083B/2020|2020-09-30|EPI\_ISL\_600267|Original|hCoV-19^^England|Human|Lighthouse Lab in Glasgow|Wellcome Sanger Institute for the COVID-19 Genomics UK (COG-UK) consortium|Davies|United Kingdom

>Spike|hCoV-19/USA/FL-BPHL-1042/2020|2020-08-01|EPI\_ISL\_517932|Original|hCoV-19^^Florida|Human|Florida Bureau of Public Health Laboratories|Florida Bureau of Public Health Laboratories|Blanton|USA

>Spike|hCoV-19/England/CAMB-A97DB2/2020|2020-12-13|EPI\_ISL\_741011|Original|hCoV-19^^England|Human|Department of Pathology|COVID-19 Genomics UK (COG-UK) Consortium|Goodfellow|United Kingdom

>Spike|hCoV-19/Japan/PG-4006/2020|2020-07-00|EPI\_ISL\_692247|Original|hCoV-19^^Japan|Human|Pathogen Genomics Center|Pathogen Genomics Center|Sekizuka|Japan

>Spike|hCoV-19/England/NORW-E8587/2020|2020-04-16|EPI\_ISL\_449161|Original|hCoV-19^^England|Human|Quadram Institute Bioscience|COVID-19 Genomics UK (COG-UK) Consortium|Alikhan|United Kingdom

>Spike|hCoV-19/Wales/PHWC-16F0D1/2020|2020-10-05|EPI\_ISL\_585912|Original|hCoV-19^^Wales|Human|Wales Specialist Virology Centre Sequencing lab|COVID-19 Genomics UK (COG-UK) Consortium|Moore|United Kingdom

>Spike|hCoV-19/Japan/PG-6011/2020|2020-07-00|EPI\_ISL\_689124|Original|hCoV-19^^Japan|Human|Pathogen Genomics Center|Pathogen Genomics Center|Sekizuka|Japan

>Spike|hCoV-19/England/GSTT-265D5EB/2020|2020-03-23|EPI\_ISL\_483985|Original|hCoV-19^^England|Human|Centre for Clinical Infection and Diagnostics Research and Genomics Innovation Unit|COVID-19 Genomics UK (COG-UK) Consortium|Awan|United Kingdom

>Spike|hCoV-19/South Africa/KRISP-K002736/2020|2020-08-15|EPI\_ISL\_529734|Original|hCoV-19^^KwaZulu-Natal|Human|NHLS-IALCH|KRISP|de Oliveira|South Africa

>Spike|hCoV-19/England/SHEF-C9D57/2020|2020-08-15|EPI\_ISL\_517560|Original|hCoV-19^^England|Human|Virology Department|COVID-19 Genomics UK (COG-UK) Consortium|de Silva|United Kingdom

>Spike|hCoV-19/USA/TX-HMH-MCoV-14209/2020|2020-10-05|EPI\_ISL\_787494|Original|hCoV-19^^Texas|Human|Houston Methodist Hospital|Houston Methodist Hospital|Long|USA

>Spike|hCoV-19/England/CAMB-1B2C71/2020|2020-05-19|EPI\_ISL\_456716|Original|hCoV-19^^England|Human|Department of Pathology|COVID-19 Genomics UK (COG-UK) Consortium|Meredith|United Kingdom

>Spike|hCoV-19/England/QEUA-A2238D/2020|2020-10-01|EPI\_ISL\_587411|Original|hCoV-19^^England|Human|Lighthouse Lab in Glasgow|Wellcome Sanger Institute for the COVID-19 Genomics UK (COG-UK) consortium|Davies|United Kingdom

>Spike|hCoV-19/Belgium/BD-0407280/2020|2020-04-07|EPI\_ISL\_464074|Original|hCoV-19^^Dour|Human|KU Leuven|KU Leuven|Maes|Belgium

>Spike|hCoV-19/Denmark/DCGC-20180/2020|2020-11-30|EPI\_ISL\_748032|Original|hCoV-19^^Hovedstaden|Human|Department of Virus and Microbiological Special Diagnostics|Albertsen Lab|Michaelsen|Denmark

>Spike|hCoV-19/England/MILK-9C213B/2020|2020-09-11|EPI\_ISL\_566617|Original|hCoV-19^^England|Human|Lighthouse Lab in Milton Keynes|Wellcome Sanger Institute for the COVID-19 Genomics UK (COG-UK) consortium|Davies|United Kingdom

>Spike|hCoV-19/Denmark/DCGC-7956/2020|2020-10-26|EPI\_ISL\_618903|Original|hCoV-19^^Hovedstaden|Human|Department of Virus and Microbiological Special Diagnostics|Albertsen lab|Michaelsen|Denmark

>Spike|hCoV-19/Poland/Sla3/2020|2020-05-05|EPI\_ISL\_451657|Original|hCoV-19^^Slask|Human|State Sanitary Inspectorate|Laboratory of Recombinant Vaccines|Rabalski|Poland

>Spike|hCoV-19/USA/CA-ALSR-3052/2020|2020-08-28|EPI\_ISL\_635816|Original|hCoV-19^^California|Human|San Diego County Public Health Laboratory|Andersen lab at Scripps Research|Gangavarapu|USA

>Spike|hCoV-19/England/SHEF-D3024/2020|2020-04-08|EPI\_ISL\_442516|Original|hCoV-19^^England|Human|Virology Department|COVID-19 Genomics UK (COG-UK) Consortium|de Silva|United Kingdom

>Spike|hCoV-19/England/CAMC-BBDB7F/2020|2020-11-22|EPI\_ISL\_705618|Original|hCoV-19^^England|Human|Virology Department|COVID-19 Genomics UK (COG-UK) Consortium|de Silva|United Kingdom

>Spike|hCoV-19/Denmark/DCGC-12372/2020|2020-11-16|EPI\_ISL\_682553|Original|hCoV-19^^Hovedstaden|Human|Department of Virus and Microbiological Special Diagnostics|Albertsen Lab|Michaelsen|Denmark

>Spike|hCoV-19/France/PAC-IHU-0928/2020|2020-06-05|EPI\_ISL\_568994|Original|hCoV-19^^Provence-Alpes-C\u00f4te-d\u2019Azur|Human|MEPHI|MEPHI|Levasseur|France

>Spike|hCoV-19/South Africa/KRISP-K003370/2020|2020-09-03|EPI\_ISL\_602760|Original|hCoV-19^^KwaZulu-Natal|Human|NHLS-IALCH|KRISP|de Oliveira|South Africa

>Spike|hCoV-19/Latvia/182/2020|2020-09-27|EPI\_ISL\_639679|Original|hCoV-19^^Latvia|Human|Centr\u0101l\u0101 Laboratorija|Latvian Biomedical Research and Study Centre|Zrelovs|Latvia

>Spike|hCoV-19/England/MILK-A9135C/2020|2020-10-16|EPI\_ISL\_638525|Original|hCoV-19^^England|Human|Oxford Viromics|COVID-19 Genomics UK (COG-UK) Consortium|Golubchik|United Kingdom

>Spike|hCoV-19/England/MILK-AB8DCA/2020|2020-10-21|EPI\_ISL\_623646|Original|hCoV-19^^England|Human|Lighthouse Lab in Milton Keynes|Wellcome Sanger Institute for the COVID-19 Genomics UK (COG-UK) consortium|Davies|United Kingdom

>Spike|hCoV-19/England/201080009/2020|2020-03-05|EPI\_ISL\_464422|Original|hCoV-19^^England|Human|Respiratory Virus Unit|Respiratory Virus Unit|Platt|United Kingdom

>Spike|hCoV-19/England/ALDP-A87AEB/2020|2020-10-17|EPI\_ISL\_606274|Original|hCoV-19^^England|Human|Lighthouse Lab in Alderley Park|Wellcome Sanger Institute for the COVID-19 Genomics UK (COG-UK) consortium|Davies|United Kingdom

>Spike|hCoV-19/England/CAMC-A3E4D6/2020|2020-10-05|EPI\_ISL\_609612|Original|hCoV-19^^England|Human|Lighthouse Lab in Cambridge|Wellcome Sanger Institute for the COVID-19 Genomics UK (COG-UK) consortium|Davies|United Kingdom

>Spike|hCoV-19/England/MILK-A7C3C0/2020|2020-10-15|EPI\_ISL\_606491|Original|hCoV-19^^England|Human|Lighthouse Lab in Milton Keynes|Wellcome Sanger Institute for the COVID-19 Genomics UK (COG-UK) consortium|Davies|United Kingdom

>Spike|hCoV-19/England/OXON-B19A9/2020|2020-04-19|EPI\_ISL\_479059|Original|hCoV-19^^England|Human|Oxford Viromics|COVID-19 Genomics UK (COG-UK) Consortium|Golubchik|United Kingdom

>Spike|hCoV-19/England/QEUA-BA16AA/2020|2020-11-18|EPI\_ISL\_719689|Original|hCoV-19^^England|Human|Lighthouse Lab in Glasgow|Wellcome Sanger Institute for the COVID-19 Genomics UK (COG-UK) Consortium|Davies|United Kingdom

>Spike|hCoV-19/Brazil/RJ-0254/2020|2020-04-01|EPI\_ISL\_470622|Original|hCoV-19^^Rio de Janeiro|Human|Laboratorio de Virologia Molecular / UFRJ|Bioinformatics Laboratory / LNCC|Almeida|Brazil

>Spike|hCoV-19/Northern Ireland/NIRE-10345B/2020|2020-04-17|EPI\_ISL\_489312|Original|hCoV-19^^Northern Ireland|Human|Regional Virus Laboratory|Wellcome Sanger Institute for the COVID-19 Genomics UK (COG-UK) consortium|Davies|United Kingdom

>Spike|hCoV-19/USA/WI-UW-1998/2020|2020-09-25|EPI\_ISL\_677406|Original|hCoV-19^^Wisconsin|Human|University of Wisconsin-Madison AIDS Vaccine Research Laboratories|University of Wisconsin-Madison AIDS Vaccine Research Laboratories|Baczenas|USA

>Spike|hCoV-19/England/204490707/2020|2020-10-29|EPI\_ISL\_660756|Original|hCoV-19^^England|Human|Respiratory Virus Unit|COVID-19 Genomics UK (COG-UK) Consortium|Platt|United Kingdom

>Spike|hCoV-19/England/QEUEH-9F5454/2020|2020-09-25|EPI\_ISL\_638678|Original|hCoV-19^^England|Human|Department of Pathology|COVID-19 Genomics UK (COG-UK) Consortium|Goodfellow|United Kingdom

>Spike|hCoV-19/Japan/PG-3798/2020|2020-07-00|EPI\_ISL\_692049|Original|hCoV-19^^Japan|Human|Fukuoka Institute of Health and Environmental Sciences|Pathogen Genomics Center|Sekizuka|Japan

>Spike|hCoV-19/England/MILK-A91BBE/2020|2020-10-19|EPI\_ISL\_704845|Original|hCoV-19^^England|Human|Oxford Viromics|COVID-19 Genomics UK (COG-UK) Consortium|Golubchik|United Kingdom

>Spike|hCoV-19/France/BRE-8936/2020|2020-07-29|EPI\_ISL\_560604|Original|hCoV-19^^Bretagne|Human|Hospital|National Reference Center for Viruses of Respiratory Infections|Enouf|France

>Spike|hCoV-19/USA/VA-DCLS-1561/2020|2020-08-04|EPI\_ISL\_610125|Original|hCoV-19^^Virginia|Human|Virginia DCLS|Virginia DCLS|St. Jacques|USA

>Spike|hCoV-19/Portugal/PT1437/2020|2020-03-26|EPI\_ISL\_511396|Original|hCoV-19^^Portugal|Human|Instituto Nacional de Saude (INSA)|Instituto Nacional de Saude (INSA)|Borges|Portugal

>Spike|hCoV-19/USA/CA-ALSR-1202/2020|2020-04-24|EPI\_ISL\_494434|Original|hCoV-19^^California|Human|San Diego County Public Health Laboratory|Andersen lab at Scripps Research|Gangavarapu|USA

>Spike|hCoV-19/Canada/QC-LSPQ-L00222575/2020|2020-03-15|EPI\_ISL\_535817|Original|hCoV-19^^Quebec|Human|H\u00f4pital Maisonneuve-Rosemont|Laboratoire de sant\u00e9 publique du Qu\u00e9bec|Moreira|Canada

>Spike|hCoV-19/England/MILK-BAB8AA/2020|2020-11-17|EPI\_ISL\_720521|Original|hCoV-19^^England|Human|Lighthouse Lab in Milton Keynes|Wellcome Sanger Institute for the COVID-19 Genomics UK (COG-UK) Consortium|Davies|United Kingdom

>Spike|hCoV-19/USA/MA-MASPHL-00090/2020|2020-04-03|EPI\_ISL\_791576|Original|hCoV-19^^Massachusetts|Human|Massachusetts State Public Health Laboratory|Infectious Disease Program|Park|USA

>Spike|hCoV-19/USA/TX-HMH-MCoV-15142/2020|2020-10-17|EPI\_ISL\_786626|Original|hCoV-19^^Texas|Human|Houston Methodist Hospital|Houston Methodist Hospital|Long|USA

>Spike|hCoV-19/England/QEUEH-AF57F0/2020|2020-10-30|EPI\_ISL\_662908|Original|hCoV-19^^England|Human|Lighthouse Lab in Glasgow|Wellcome Sanger Institute for the COVID-19 Genomics UK (COG-UK) Consortium|Davies|United Kingdom

>Spike|hCoV-19/Denmark/DCGC-13355/2020|2020-11-30|EPI\_ISL\_712746|Original|hCoV-19^^Hovedstaden|Human|Department of Virus and Microbiological Special Diagnostics|Albertsen Lab|Michaelsen|Denmark

>Spike|hCoV-19/USA/WA-S2136/2020|2020-06-08|EPI\_ISL\_497564|Original|hCoV-19^^Washington|Human|Washington State Department of Health|Seattle Flu Study|Lee|USA

>Spike|hCoV-19/England/MILK-ABC29A/2020|2020-10-21|EPI\_ISL\_631218|Original|hCoV-19^^England|Human|Lighthouse Lab in Milton Keynes|Wellcome Sanger Institute for the COVID-19 Genomics UK (COG-UK) consortium|Davies|United Kingdom

>Spike|hCoV-19/USA/DE-DHSS-F1039049/2020|2020-12-17|EPI\_ISL\_766988|Original|hCoV-19^^Delaware|Human|Delaware Public Health Laboratory|Delaware Public Health Laboratory|Bajwa|USA

>Spike|hCoV-19/Scotland/GCVR-1702F5/2020|2020-03-24|EPI\_ISL\_459580|Original|hCoV-19^^Scotland|Human|NHSGGC West of Scotland Specialist Virology Centre / MRC-University of Glasgow Centre for Virus Research|Wellcome Sanger Institute for the COVID-19 Genomics UK (COG-UK) consortium|Davies|United Kingdom

>Spike|hCoV-19/England/MILK-9757BD/2020|2020-08-20|EPI\_ISL\_552678|Original|hCoV-19^^England|Human|Lighthouse Lab in Milton Keynes|Wellcome Sanger Institute for the COVID-19 Genomics UK (COG-UK) consortium|Davies|United Kingdom

>Spike|hCoV-19/USA/TX-HMH-MCoV-9366/2020|2020-07-03|EPI\_ISL\_781079|Original|hCoV-19^^Texas|Human|Houston Methodist Hospital|Houston Methodist Hospital|Long|USA

>Spike|hCoV-19/Australia/VIC5041/2020|2020-07-16|EPI\_ISL\_519845|Original|hCoV-19^^Victoria|Human|Microbiological Diagnostic Unit - Public Health Laboratory (MDU-PHL)|MDU-PHL|Schultz|Australia

>Spike|hCoV-19/England/QEUA-98F05B/2020|2020-08-24|EPI\_ISL\_540360|Original|hCoV-19^^England|Human|Lighthouse Lab in Glasgow|Wellcome Sanger Institute for the COVID-19 Genomics UK (COG-UK) consortium|Davies|United Kingdom

>Spike|hCoV-19/USA/OR-PROV-044/2020|2020-03-20|EPI\_ISL\_482326|Original|hCoV-19^^Oregon|Human|Providence St. Joseph Health Molecular Genomics Laboratory|Providence St. Joseph Health Molecular Genomics Laboratory|Dowdell|USA

>Spike|hCoV-19/England/ALDP-688019/2020|2020-07-02|EPI\_ISL\_551827|Original|hCoV-19^^England|Human|Lighthouse Lab in Alderley Park|Wellcome Sanger Institute for the COVID-19 Genomics UK (COG-UK) consortium|Davies|United Kingdom

>Spike|hCoV-19/England/LIVE-DC46AF/2020|2020-11-10|EPI\_ISL\_705902|Original|hCoV-19^^England|Human|Liverpool Clinical Laboratories|COVID-19 Genomics UK (COG-UK) Consortium|Haldenby|United Kingdom

>Spike|hCoV-19/Scotland/EDB6364/2020|2020-06-06|EPI\_ISL\_478243|Original|hCoV-19^^Scotland|Human|Virology Department|COVID-19 Genomics UK (COG-UK) Consortium|Williams|United Kingdom

>Spike|hCoV-19/USA/WI-GMF-30775/2020|2020-11-02|EPI\_ISL\_661049|Original|hCoV-19^^Wisconsin|Human|Gundersen Molecular Diagnostics Laboratory|Kabara Cancer Research Institute|Kenny|USA

>Spike|hCoV-19/England/LIVE-AB571/2020|2020-06-15|EPI\_ISL\_612437|Original|hCoV-19^^England|Human|Liverpool Clinical Laboratories|COVID-19 Genomics UK (COG-UK) Consortium|Haldenby|United Kingdom

>Spike|hCoV-19/Spain/CT-IBV-97009555/2020|2020-07-20|EPI\_ISL\_671852|Original|hCoV-19^^Catalunya|Human|Servicio de Microbiolog\u00eda|SeqCOVID-SPAIN consortium|IBV (CSIC)|Comas|Spain

>Spike|hCoV-19/Netherlands/NA\_522/2020|2020-03-22|EPI\_ISL\_460695|Original|hCoV-19^^Netherlands|Human|Dutch COVID-19 response team|Erasmus Medical Center|Oude Munnink|Netherlands

>Spike|hCoV-19/South Africa/KRISP-0019/2020|2020-04-02|EPI\_ISL\_467434|Original|hCoV-19^^KwaZulu-Natal|Human|AMPATH-DBN|KRISP|de Oliveira|South Africa

>Spike|hCoV-19/England/MILK-99318E/2020|2020-08-27|EPI\_ISL\_552020|Original|hCoV-19^^England|Human|Lighthouse Lab in Milton Keynes|Wellcome Sanger Institute for the COVID-19 Genomics UK (COG-UK) consortium|Davies|United Kingdom

>Spike|hCoV-19/England/ALDP-A92EB4/2020|2020-10-20|EPI\_ISL\_610989|Original|hCoV-19^^England|Human|Lighthouse Lab in Alderley Park|Wellcome Sanger Institute for the COVID-19 Genomics UK (COG-UK) consortium|Davies|United Kingdom

>Spike|hCoV-19/England/EXET-13DDE4/2020|2020-12-02|EPI\_ISL\_724293|Original|hCoV-19^^England|Human|University of Exeter|COVID-19 Genomics UK (COG-UK) Consortium|Temperton|United Kingdom

>Spike|hCoV-19/England/EKHU-260EF81/2020|2020-03-26|EPI\_ISL\_501624|Original|hCoV-19^^England|Human|Lab Microbiology|Wellcome Sanger Institute for the COVID-19 Genomics UK (COG-UK) consortium|Davies|United Kingdom

>Spike|hCoV-19/England/QEUA-997E92/2020|2020-08-24|EPI\_ISL\_537157|Original|hCoV-19^^England|Human|Lighthouse Lab in Glasgow|Wellcome Sanger Institute for the COVID-19 Genomics UK (COG-UK) consortium|Davies|United Kingdom

>Spike|hCoV-19/USA/NY-Wadsworth-11735-01/2020|2020-03-08|EPI\_ISL\_426290|Original|hCoV-19^^New York|Human|Wadsworth Center|Wadsworth Center|Lasek-Nesselquist|USA

>Spike|hCoV-19/India/MH-ACTREC-042/2020|2020-05-12|EPI\_ISL\_699698|Original|hCoV-19^^Maharashtra|Human|Hematopathology Laboratory|Hematopathology Laboratory|Patkar|India

>Spike|hCoV-19/USA/MI-UM-10036857948/2020|2020-11-09|EPI\_ISL\_728445|Original|hCoV-19^^Michigan|Human|University of Michigan Clinical Microbiology Laboratory|Lauring Lab|Valesano|USA

>Spike|hCoV-19/Spain/VC-IBV-98006465/2020|2020-06-27|EPI\_ISL\_657467|Original|hCoV-19^^Comunitat Valenciana|Human|Servicio de Microbiolog\u00eda. Hospital General Universitario de Castell\u00f3n|SeqCOVID-SPAIN consortium/IBV(CSIC)|Comas|Spain

>Spike|hCoV-19/USA/CO-CDPHE-2010200546/2020|2020-10-19|EPI\_ISL\_677318|Original|hCoV-19^^Colorado|Human|Colorado Department of Public Health and Environment|Colorado Department of Public Health and Environment|Bankers|USA

>Spike|hCoV-19/Russia/SVE-RII-MH3111S/2020|2020-10-03|EPI\_ISL\_733090|Original|hCoV-19^^Sverdlovsk|Human|HELIX LLC|WHO National Influenza Centre Russian Federation|Komissarov|Russia

>Spike|hCoV-19/England/CAMB-7AF22/2020|2020-04-10|EPI\_ISL\_433895|Original|hCoV-19^^England|Human|Department of Pathology|COVID-19 Genomics UK (COG-UK) Consortium|Meredith|United Kingdom

>Spike|hCoV-19/Australia/NSW2634/2020|2020-07-22|EPI\_ISL\_678328|Original|hCoV-19^^New South Wales|Human|Area of Virology|Virology Research Laboratory; Area of Virology|Foster|Australia

>Spike|hCoV-19/USA/WY-CDC-2-3714354/2020|2020-12-05|EPI\_ISL\_751643|Original|hCoV-19^^Wyoming|Human|WY Public Health Laboratory|Genomics and Discovery|Queen|USA

>Spike|hCoV-19/Singapore/323ilmn/2020|2020-03-26|EPI\_ISL\_469100|Original|hCoV-19^^Singapore|Human|National Public Health Laboratory|National Public Health Laboratory|Mak|Singapore

>Spike|hCoV-19/USA/FL-BPHL-1428/2020|2020-09-01|EPI\_ISL\_549210|Original|hCoV-19^^Florida|Human|Florida Bureau of Public Health Laboratories|Florida Bureau of Public Health Laboratories|Blanton|USA

>Spike|hCoV-19/Germany/NW-HHU-399/2020|2020-11-01|EPI\_ISL\_718078|Original|hCoV-19^^North Rhine-Westphalia|Human|ZOTZ KLIMAS MVZ D\u00fcsseldorf-Centrum GbR \u00dcBAG f\u00fcr Labormedizin|Center of Medical Microbiology|Wienemann|Germany

>Spike|hCoV-19/England/NOTT-10DF9C/2020|2020-03-14|EPI\_ISL\_425476|Original|hCoV-19^^England|Human|Queens Medical Centre|COVID-19 Genomics UK (COG-UK) Consortium|Loose|United Kingdom

>Spike|hCoV-19/England/MILK-B02AD8/2020|2020-10-25|EPI\_ISL\_642887|Original|hCoV-19^^England|Human|Lighthouse Lab in Milton Keynes|Wellcome Sanger Institute for the COVID-19 Genomics UK (COG-UK) Consortium|Davies|United Kingdom

>Spike|hCoV-19/USA/ID-UW-6365/2020|2020-04-01|EPI\_ISL\_570105|Original|hCoV-19^^Idaho|Human|UW Virology Lab|UW Virology Lab|Roychoudhury|USA

>Spike|hCoV-19/Denmark/DCGC-21158/2020|2020-12-21|EPI\_ISL\_759581|Original|hCoV-19^^Syddanmark|Human|Department of Virus and Microbiological Special Diagnostics|Albertsen Lab|Michaelsen|Denmark

>Spike|hCoV-19/England/SHEF-D04EF/2020|2020-04-17|EPI\_ISL\_462072|Original|hCoV-19^^England|Human|Virology Department|COVID-19 Genomics UK (COG-UK) Consortium|de Silva|United Kingdom

>Spike|hCoV-19/USA/CA-CZB-15463/2020|2020-12-05|EPI\_ISL\_738808|Original|hCoV-19^^California|Human|Orange County Public Health Lab|Chan-Zuckerberg Biohub|Kamm|USA

>Spike|hCoV-19/Belgium/ULG-10265/2020|2020-07-16|EPI\_ISL\_515072|Original|hCoV-19^^Liege|Human|Department of Clinical Microbiology|GIGA Medical Genomics|Durkin|Belgium

>Spike|hCoV-19/Portugal/PT0480/2020|2020-03-27|EPI\_ISL\_454204|Original|hCoV-19^^Portugal|Human|unknown|Instituto Nacional de Saude (INSA)|Borges|Portugal

>Spike|hCoV-19/USA/FL-BPHL-1859/2020|2020-04-10|EPI\_ISL\_613937|Original|hCoV-19^^Florida|Human|Florida Bureau of Public Health Laboratories|Florida Bureau of Public Health Laboratories|Blanton|USA

>Spike|hCoV-19/England/ALDP-A672CB/2020|2020-10-09|EPI\_ISL\_630512|Original|hCoV-19^^England|Human|Lighthouse Lab in Alderley Park|Wellcome Sanger Institute for the COVID-19 Genomics UK (COG-UK) consortium|Davies|United Kingdom

>Spike|hCoV-19/Scotland/CVR2054/2020|2020-04-09|EPI\_ISL\_453018|Original|hCoV-19^^Scotland|Human|West of Scotland Specialist Virology Centre|COVID-19 Genomics UK (COG-UK) Consortium|Robertson|United Kingdom

>Spike|hCoV-19/Poland/PL\_MCB\_92/2020|2020-05-09|EPI\_ISL\_645091|Original|hCoV-19^^Poland|Human|Human Genome Variation Research Group|Human Genome Variation Research Group||Poland

>Spike|hCoV-19/Denmark/DCGC-3622/2020|2020-08-31|EPI\_ISL\_616390|Original|hCoV-19^^Syddanmark|Human|Department of Virus and Microbiological Special Diagnostics|Albertsen lab|Michaelsen|Denmark

>Spike|hCoV-19/Scotland/QEUH-96F73E/2020|2020-08-19|EPI\_ISL\_540233|Original|hCoV-19^^Scotland|Human|Lighthouse Lab in Glasgow|Wellcome Sanger Institute for the COVID-19 Genomics UK (COG-UK) consortium|Davies|United Kingdom

>Spike|hCoV-19/USA/AZ-TG668409/2020|2020-04-20|EPI\_ISL\_696310|Original|hCoV-19^^Arizona|Human|Sonora Quest Laboratories|TGen North|French|USA

>Spike|hCoV-19/England/CAMC-B0CC41/2020|2020-10-30|EPI\_ISL\_643469|Original|hCoV-19^^England|Human|Lighthouse Lab in Cambridge|Wellcome Sanger Institute for the COVID-19 Genomics UK (COG-UK) Consortium|Davies|United Kingdom

>Spike|hCoV-19/Canada/QC-LSPQ-L00232955/2020|2020-03-22|EPI\_ISL\_536005|Original|hCoV-19^^Quebec|Human|Centre Hospitalier R\u00e9gional de Lanaudi\u00e8re|Laboratoire de sant\u00e9 publique du Qu\u00e9bec|Moreira|Canada

>Spike|hCoV-19/England/OXON-B2C90/2020|2020-04-16|EPI\_ISL\_534803|Original|hCoV-19^^England|Human|Oxford Viromics|COVID-19 Genomics UK (COG-UK) Consortium|Golubchik|United Kingdom

>Spike|hCoV-19/USA/NY-NYUMC889/2020|2020-03-20|EPI\_ISL\_467382|Original|hCoV-19^^New York|Human|NYU Langone Health|Departments of Pathology and Medicine|Maurano|USA

>Spike|hCoV-19/England/ALDP-B47E44/2020|2020-11-07|EPI\_ISL\_649342|Original|hCoV-19^^England|Human|Lighthouse Lab in Alderley Park|Wellcome Sanger Institute for the COVID-19 Genomics UK (COG-UK) Consortium|Davies|United Kingdom

>Spike|hCoV-19/Australia/VIC14035/2020|2020-08-21|EPI\_ISL\_562740|Original|hCoV-19^^Victoria|Human|Microbiological Diagnostic Unit - Public Health Laboratory (MDU-PHL)|MDU-PHL|Schultz|Australia

>Spike|hCoV-19/Scotland/QEUH-BA14A0/2020|2020-11-18|EPI\_ISL\_757206|Original|hCoV-19^^Scotland|Human|Lighthouse Lab in Glasgow|Wellcome Sanger Institute for the COVID-19 Genomics UK (COG-UK) Consortium|Davies|United Kingdom

>Spike|hCoV-19/South Korea/KCDC2596/2020|2020-06-30|EPI\_ISL\_514999|Original|hCoV-19^^South Korea|Human|Division of Viral Diseases|Division of Viral Diseases|Kim|South Korea

>Spike|hCoV-19/England/MILK-9E096C/2020|2020-09-20|EPI\_ISL\_601320|Original|hCoV-19^^England|Human|Lighthouse Lab in Milton Keynes|Wellcome Sanger Institute for the COVID-19 Genomics UK (COG-UK) consortium|Davies|United Kingdom

>Spike|hCoV-19/Switzerland/AG-ETHZ-260172/2020|2020-08-27|EPI\_ISL\_539463|Original|hCoV-19^^Aargau|Human|Viollier AG|Department of Biosystems Science and Engineering|Nadeau|Switzerland

>Spike|hCoV-19/Italy/APU-UniMI-45/2020|2020-03-16|EPI\_ISL\_477193|Original|hCoV-19^^Apulia|Human|Istituto Zooprofilattico Sperimentale Puglia e Basilicata;|Beaconlab (Bioinformatics|Chiara|Italy

>Spike|hCoV-19/England/ALDP-953AF8/2020|2020-06-08|EPI\_ISL\_553797|Original|hCoV-19^^England|Human|Lighthouse Lab in Alderley Park|Wellcome Sanger Institute for the COVID-19 Genomics UK (COG-UK) consortium|Davies|United Kingdom

>Spike|hCoV-19/India/MH-ACTREC-481/2020|2020-08-13|EPI\_ISL\_700129|Original|hCoV-19^^Maharashtra|Human|Hematopathology Laboratory|Hematopathology Laboratory|Patkar|India

>Spike|hCoV-19/Scotland/CVR4102/2020|2020-09-04|EPI\_ISL\_540806|Original|hCoV-19^^Scotland|Human|West of Scotland Specialist Virology Centre|COVID-19 Genomics UK (COG-UK) Consortium|Robertson|United Kingdom

>Spike|hCoV-19/Japan/PG-0376/2020|2020-02-22|EPI\_ISL\_480046|Original|hCoV-19^^Chubu|Human|Nagoya City Public Health Research Institute|Pathogen Genomics Center|Sekizuka|Japan

>Spike|hCoV-19/Northern Ireland/NIRE-FD2E2/2020|2020-05-04|EPI\_ISL\_489338|Original|hCoV-19^^Northern Ireland|Human|Regional Virus Laboratory|Wellcome Sanger Institute for the COVID-19 Genomics UK (COG-UK) consortium|Davies|United Kingdom

>Spike|hCoV-19/USA/IL-NM0107/2020|2020-03-20|EPI\_ISL\_444592|Original|hCoV-19^^Illinois|Human|Northwestern Memorial Hospital|Ozer Lab|Ozer|USA

>Spike|hCoV-19/England/QEUA-AD279F/2020|2020-10-26|EPI\_ISL\_633892|Original|hCoV-19^^England|Human|Lighthouse Lab in Glasgow|Wellcome Sanger Institute for the COVID-19 Genomics UK (COG-UK) consortium|Davies|United Kingdom

>Spike|hCoV-19/England/EXET-13AC26/2020|2020-11-10|EPI\_ISL\_664268|Original|hCoV-19^^England|Human|University of Exeter|COVID-19 Genomics UK (COG-UK) Consortium|Temperton|United Kingdom

>Spike|hCoV-19/Northern Ireland/QEUA-77BC14/2020|2020-07-16|EPI\_ISL\_533097|Original|hCoV-19^^Northern Ireland|Human|Lighthouse Lab in Glasgow|Wellcome Sanger Institute for the COVID-19 Genomics UK (COG-UK) consortium|Davies|United Kingdom

>Spike|hCoV-19/USA/MA-MASPHL-00122/2020|2020-04-03|EPI\_ISL\_791601|Original|hCoV-19^^Massachusetts|Human|Massachusetts State Public Health Laboratory|Infectious Disease Program|Park|USA

>Spike|hCoV-19/Netherlands/ZH-EMC-445/2020|2020-08-12|EPI\_ISL\_523783|Original|hCoV-19^^Zuid Holland|Human|Dutch COVID-19 response team|Erasmus Medical Center|Oude Munnink|Netherlands

>Spike|hCoV-19/Japan/PG-7197/2020|2020-07-00|EPI\_ISL\_688301|Original|hCoV-19^^Japan|Human|Saitama Prefectural Institute of Public Health|Pathogen Genomics Center|Sekizuka|Japan

>Spike|hCoV-19/Denmark/DCGC-22251/2020|2020-12-14|EPI\_ISL\_757833|Original|hCoV-19^^Hovedstaden|Human|Department of Virus and Microbiological Special Diagnostics|Albertsen Lab|Michaelsen|Denmark

>Spike|hCoV-19/USA/TX-DSHS-1784/2020|2020-06-13|EPI\_ISL\_738160|Original|hCoV-19^^Texas|Human|Texas Department of State Health Services|Texas Department of State Health Services|Rahman|USA

>Spike|hCoV-19/USA/ID-UW-7306/2020|2020-04-04|EPI\_ISL\_570187|Original|hCoV-19^^Idaho|Human|UW Virology Lab|UW Virology Lab|Roychoudhury|USA

>Spike|hCoV-19/Austria/CeMM0191/2020|2020-03-13|EPI\_ISL\_438032|Original|hCoV-19^^Styria|Human|Center for Virology|Bergthaler laboratory|Bergthaler|Austria

>Spike|hCoV-19/Luxembourg/LNS8330596/2020|2020-07-14|EPI\_ISL\_744720|Original|hCoV-19^^Luxembourg|Human|Laboratoire national de sant\u00e9|Laboratoire national de sant\u00e9|Wienecke-Baldacchino|Luxembourg

>Spike|hCoV-19/Netherlands/UT-RIVM-10054/2020|2020-03-23|EPI\_ISL\_547515|Original|hCoV-19^^Utrecht|Human|Dutch COVID-19 response team|National Institute for Public Health and the Environment (RIVM)|Meijer|Netherlands

>Spike|hCoV-19/Scotland/CVR5181/2020|2020-10-15|EPI\_ISL\_626973|Original|hCoV-19^^Scotland|Human|West of Scotland Specialist Virology Centre|COVID-19 Genomics UK (COG-UK) Consortium|Robertson|United Kingdom

>Spike|hCoV-19/Australia/VIC15741/2020|2020-08-03|EPI\_ISL\_593435|Original|hCoV-19^^Victoria|Human|Microbiological Diagnostic Unit - Public Health Laboratory (MDU-PHL)|MDU-PHL|Schultz|Australia

>Spike|hCoV-19/Scotland/EDB5401/2020|2020-04-04|EPI\_ISL\_487850|Original|hCoV-19^^Scotland|Human|Virology Department|Wellcome Sanger Institute for the COVID-19 Genomics UK (COG-UK) consortium|Davies|United Kingdom

>Spike|hCoV-19/USA/LA-GBCL-26492500/2020|2020-04-24|EPI\_ISL\_485056|Original|hCoV-19^^Louisiana|Human|River Road Testing Lab|Ginkgo Bioworks Clinical Laboratory|Smith|USA

>Spike|hCoV-19/England/LIVE-DBAE3B/2020|2020-11-14|EPI\_ISL\_664430|Original|hCoV-19^^England|Human|Liverpool Clinical Laboratories|COVID-19 Genomics UK (COG-UK) Consortium|Haldenby|United Kingdom

>Spike|hCoV-19/Australia/VIC1625/2020|2020-05-13|EPI\_ISL\_456532|Original|hCoV-19^^Victoria|Human|Victorian Infectious Diseases Reference Laboratory (VIDRL)|Microbiological Diagnostic Unit Public Health Laboratory and Victorian Infectious Diseases Reference Laboratory|Schultz|Australia

>Spike|hCoV-19/USA/CA-CZB-14119/2020|2020-05-26|EPI\_ISL\_739161|Original|hCoV-19^^California|Human|Alameda County Public Health Lab|Chan-Zuckerberg Biohub|Kamm|USA

>Spike|hCoV-19/Switzerland/ZH-ETHZ-380382/2020|2020-11-23|EPI\_ISL\_721958|Original|hCoV-19^^Zurich|Human|Viollier AG|Department of Biosystems Science and Engineering|Nadeau|Switzerland

>Spike|hCoV-19/India/MH-NIV-157939/2020|2020-08-10|EPI\_ISL\_541708|Original|hCoV-19^^Maharashtra|Human|National Institute of Virology|National Institute of Virology|Potdar|India

>Spike|hCoV-19/Switzerland/UR-ETHZ-120188/2020|2020-04-27|EPI\_ISL\_468263|Original|hCoV-19^^Uri|Human|Viollier AG|Department of Biosystems Science and Engineering|Nadeau|Switzerland

>Spike|hCoV-19/Denmark/DCGC-6090/2020|2020-10-05|EPI\_ISL\_620284|Original|hCoV-19^^Hovedstaden|Human|Department of Virus and Microbiological Special Diagnostics|Albertsen lab|Michaelsen|Denmark

>Spike|hCoV-19/England/ALDP-9C5183/2020|2020-09-10|EPI\_ISL\_567860|Original|hCoV-19^^England|Human|Lighthouse Lab in Alderley Park|Wellcome Sanger Institute for the COVID-19 Genomics UK (COG-UK) consortium|Davies|United Kingdom

>Spike|hCoV-19/England/QEUA-B40F84/2020|2020-11-08|EPI\_ISL\_658468|Original|hCoV-19^^England|Human|Lighthouse Lab in Glasgow|Wellcome Sanger Institute for the COVID-19 Genomics UK (COG-UK) Consortium|Davies|United Kingdom

>Spike|hCoV-19/England/BIRM-603D8/2020|2020-05-25|EPI\_ISL\_473405|Original|hCoV-19^^England|Human|University of Birmingham|COVID-19 Genomics UK (COG-UK) Consortium|Loman|United Kingdom

>Spike|hCoV-19/Australia/VIC16451/2020|2020-08-05|EPI\_ISL\_640954|Original|hCoV-19^^Victoria|Human|Microbiological Diagnostic Unit - Public Health Laboratory (MDU-PHL)|MDU-PHL|Schultz|Australia

>Spike|hCoV-19/England/LOND-1267433/2020|2020-12-08|EPI\_ISL\_741288|Original|hCoV-19^^England|Human|University College London|COVID-19 Genomics UK (COG-UK) Consortium|Roy|United Kingdom

>Spike|hCoV-19/England/QEUA-962BE4/2020|2020-08-11|EPI\_ISL\_531670|Original|hCoV-19^^England|Human|Lighthouse Lab in Glasgow|Wellcome Sanger Institute for the COVID-19 Genomics UK (COG-UK) consortium|Davies|United Kingdom

>Spike|hCoV-19/Japan/PG-8734/2020|2020-08-00|EPI\_ISL\_686330|Original|hCoV-19^^Japan|Human|Pathogen Genomics Center|Pathogen Genomics Center|Sekizuka|Japan

>Spike|hCoV-19/USA/NM-DOH-2020616528/2020|2020-12-12|EPI\_ISL\_751820|Original|hCoV-19^^New Mexico|Human|New Mexico Department of Health Scientific Laboratory|New Mexico Department of Health Scientific Laboratory|Malone|USA

>Spike|hCoV-19/Ireland/D-NVRL-20G44368/2020|2020-03-29|EPI\_ISL\_605100|Original|hCoV-19^^Dublin|Human|National Virus Reference Laboratory|Irish Coronavirus Sequencing Consortium - Helixworks|Chalapati|Ireland

>Spike|hCoV-19/Scotland/CVR3335/2020|2020-05-01|EPI\_ISL\_456781|Original|hCoV-19^^Scotland|Human|West of Scotland Specialist Virology Centre|COVID-19 Genomics UK (COG-UK) Consortium|Robertson|United Kingdom

>Spike|hCoV-19/USA/MI-QDX-600/2020|2020-03-19|EPI\_ISL\_571335|Original|hCoV-19^^Michigan|Human|Quest Diagnostics|Quest Diagnostics|Kagan|USA

>Spike|hCoV-19/Spain/MD-HLP-102-2/2020|2020-05-07|EPI\_ISL\_530029|Original|hCoV-19^^Madrid|Human|Hospital Universitario La Paz|Hospital Universitario La Paz|Viedma|Spain

>Spike|hCoV-19/England/QEUA-9C93B6/2020|2020-09-12|EPI\_ISL\_602041|Original|hCoV-19^^England|Human|Lighthouse Lab in Glasgow|Wellcome Sanger Institute for the COVID-19 Genomics UK (COG-UK) consortium|Davies|United Kingdom

>Spike|hCoV-19/England/BRIS-1264E9/2020|2020-04-10|EPI\_ISL\_458951|Original|hCoV-19^^England|Human|PHE South West Regional Laboratory|Wellcome Sanger Institute for the COVID-19 Genomics UK (COG-UK) consortium|Davies|United Kingdom

>Spike|hCoV-19/England/ALDP-9CCCF4/2020|2020-09-16|EPI\_ISL\_566385|Original|hCoV-19^^England|Human|Lighthouse Lab in Alderley Park|Wellcome Sanger Institute for the COVID-19 Genomics UK (COG-UK) consortium|Davies|United Kingdom

>Spike|hCoV-19/England/BIRM-6AACA/2020|2020-11-11|EPI\_ISL\_651645|Original|hCoV-19^^England|Human|University of Birmingham|COVID-19 Genomics UK (COG-UK) Consortium|Loman|United Kingdom

>Spike|hCoV-19/Italy/LAZ-INMI-9/2020|2020-03-23|EPI\_ISL\_424343|Original|hCoV-19^^Lazio|Human|INMI Lazzaro Spallanzani IRCCS|Laboratory of Virology|Gruber|Italy



>Spike|hCoV-19/England/QEUA-9B8A97/2020|2020-09-07|EPI\_ISL\_549679|Original|hCoV-19^^England|Human|Lighthouse Lab in Glasgow|Wellcome Sanger Institute for the COVID-19 Genomics UK (COG-UK) consortium|Davies|United Kingdom

>Spike|hCoV-19/England/LIVE-9A01A/2020|2020-04-14|EPI\_ISL\_439837|Original|hCoV-19^^England|Human|Liverpool Clinical Laboratories|COVID-19 Genomics UK (COG-UK) Consortium|Haldenby|United Kingdom

>Spike|hCoV-19/Spain/MD-IBV-99012351/2020|2020-11-22|EPI\_ISL\_779998|Original|hCoV-19^^Madrid|Human|Hospital General Universitario Gregorio Mara\u00f1a|SeqCOVID-SPAIN consortium/IBV (CSIC)|Comas|Spain

>Spike|hCoV-19/Belgium/ULG-10340/2020|2020-08-04|EPI\_ISL\_540507|Original|hCoV-19^^Li\u00e8ge|Human|Department of Clinical Microbiology|GIGA Medical Genomics|Durkin|Belgium

>Spike|hCoV-19/Denmark/DCGC-6352/2020|2020-09-21|EPI\_ISL\_622286|Original|hCoV-19^^Hovedstaden|Human|Department of Virus and Microbiological Special Diagnostics|Albertsen lab|Michaelsen|Denmark

>Spike|hCoV-19/USA/TX-DSHS-0396/2020|2020-05-31|EPI\_ISL\_542456|Original|hCoV-19^^Texas|Human|Texas Department of State Health Services|Texas Department of State Health Services|Rahman|USA

>Spike|hCoV-19/USA/NC\_200488/2020|2020-04-00|EPI\_ISL\_458006|Original|hCoV-19^^North Carolina|Human|Dirk Dittmer|Dirk Dittmer|Moorad|USA

>Spike|hCoV-19/England/MILK-93D8FA/2020|2020-06-21|EPI\_ISL\_552948|Original|hCoV-19^^England|Human|Lighthouse Lab in Milton Keynes|Wellcome Sanger Institute for the COVID-19 Genomics UK (COG-UK) consortium|Davies|United Kingdom

>Spike|hCoV-19/Sichuan/SC-WCH2-017/2020|2020-01-28|EPI\_ISL\_451378|Original|hCoV-19^^Sichuan|Human|West China Hospital of Sichuan University|State Key Laboratory of Biotherapy of Sichuan University|Tang|China

>Spike|hCoV-19/Brazil/MA-IEC-162466/2020|2020-04-29|EPI\_ISL\_524791|Original|hCoV-19^^Maranh\u00e3o|Human|\uffeffEvandro Chagas Institute|\uffeffEvandro Chagas Institute|Sousa J\u00fanior|Brazil

>Spike|hCoV-19/USA/NY-PV09336/2020|2020-03-18|EPI\_ISL\_450024|Original|hCoV-19^^New York|Human|MSSS Clinical Microbiology Laboratories|MSSS Pathogen Surveillance Program|van Bakel|USA

>Spike|hCoV-19/Australia/VIC11491/2020|2020-08-29|EPI\_ISL\_563395|Original|hCoV-19^^Victoria|Human|Microbiological Diagnostic Unit - Public Health Laboratory (MDU-PHL)|MDU-PHL|Schultz|Australia

>Spike|hCoV-19/Switzerland/BE-ETHZ-400374/2020|2020-12-09|EPI\_ISL\_728828|Original|hCoV-19^^Bern|Human|Viollier AG|Department of Biosystems Science and Engineering|Nadeau|Switzerland

>Spike|hCoV-19/England/SHEF-10B2CF7/2020|2020-05-12|EPI\_ISL\_537235|Original|hCoV-19^^England|Human|Virology Department|Wellcome Sanger Institute for the COVID-19 Genomics UK (COG-UK) consortium|Davies|United Kingdom

>Spike|hCoV-19/Scotland/QEUA-53D3A2/2020|2020-05-18|EPI\_ISL\_532178|Original|hCoV-19^^Scotland|Human|NHSGGC West of Scotland Specialist Virology Centre / MRC-University of Glasgow Centre for Virus Research|Wellcome Sanger Institute for the COVID-19 Genomics UK (COG-UK) consortium|Davies|United Kingdom

>Spike|hCoV-19/England/SHEF-CBECB/2020|2020-03-30|EPI\_ISL\_432517|Original|hCoV-19^^England|Human|Virology Department|COVID-19 Genomics UK (COG-UK) Consortium|de Silva|United Kingdom

>Spike|hCoV-19/England/NORT-2835F5/2020|2020-00-00|EPI\_ISL\_478499|Original|hCoV-19^^England|Human|Northumbria University / South Tees Hospitals NHS Foundation Trust / North Cumbria Integrated Care NHS Foundation Trust / North Tees and Hartlepool NHS Foundation Trust / Newcastle Hospitals NHS Foundation Trust|COVID-19 Genomics UK (COG-UK) Consortium|Bashton|United Kingdom

>Spike|hCoV-19/Australia/VIC13521/2020|2020-07-30|EPI\_ISL\_603040|Original|hCoV-19^^Victoria|Human|MDU-PHL|MDU-PHL|Seemann|Australia

>Spike|hCoV-19/England/CAMB-7907B/2020|2020-04-03|EPI\_ISL\_441169|Original|hCoV-19^^England|Human|Department of Pathology|Wellcome Sanger Institute for the COVID-19 Genomics UK (COG-UK) consortium|Amato|United Kingdom

>Spike|hCoV-19/Spain/MD-IBV-99009601/2020|2020-10-28|EPI\_ISL\_654350|Original|hCoV-19^^Madrid|Human|Hospital General Universitario Gregorio Mara\u00f1a|SeqCOVID-SPAIN consortium/IBV (CSIC)|Comas|Spain

>Spike|hCoV-19/USA/MA-MASPHL-00420/2020|2020-04-27|EPI\_ISL\_693131|Original|hCoV-19^^Massachusetts|Human|Massachusetts State Public Health Laboratory|Massachusetts State Public Health Laboratory|Lang|USA

>Spike|hCoV-19/England/MILK-5759E8/2020|2020-06-11|EPI\_ISL\_558377|Original|hCoV-19^^England|Human|Lighthouse Lab in Milton Keynes|Wellcome Sanger Institute for the COVID-19 Genomics UK (COG-UK) consortium|Davies|United Kingdom

>Spike|hCoV-19/England/MILK-A05AC7/2020|2020-09-29|EPI\_ISL\_599901|Original|hCoV-19^^England|Human|Lighthouse Lab in Milton Keynes|Wellcome Sanger Institute for the COVID-19 Genomics UK (COG-UK) consortium|Davies|United Kingdom

>Spike|hCoV-19/USA/TX-HMH-3552/2020|2020-06-14|EPI\_ISL\_543014|Original|hCoV-19^^Texas|Human|Houston Methodist Hospital|Houston Methodist Hospital|Long|USA

>Spike|hCoV-19/England/ALDP-B85387/2020|2020-11-15|EPI\_ISL\_675688|Original|hCoV-19^^England|Human|Lighthouse Lab in Alderley Park|Wellcome Sanger Institute for the COVID-19 Genomics UK (COG-UK) Consortium|Davies|United Kingdom

>Spike|hCoV-19/Denmark/DCGC-16289/2020|2020-11-16|EPI\_ISL\_714684|Original|hCoV-19^^Hovedstaden|Human|Department of Virus and Microbiological Special Diagnostics|Albertsen Lab|Michaelsen|Denmark

>Spike|hCoV-19/England/MILK-9D4F5A/2020|2020-09-19|EPI\_ISL\_601552|Original|hCoV-19^^England|Human|Lighthouse Lab in Milton Keynes|Wellcome Sanger Institute for the COVID-19 Genomics UK (COG-UK) consortium|Davies|United Kingdom

>Spike|hCoV-19/England/CAMC-9DFDCE/2020|2020-09-21|EPI\_ISL\_576938|Original|hCoV-19^^England|Human|Oxford Viromics|COVID-19 Genomics UK (COG-UK) Consortium|Golubchik|United Kingdom

>Spike|hCoV-19/England/QEUEH-9F89BC/2020|2020-09-25|EPI\_ISL\_588743|Original|hCoV-19^^England|Human|Lighthouse Lab in Glasgow|Wellcome Sanger Institute for the COVID-19 Genomics UK (COG-UK) consortium|Davies|United Kingdom

>Spike|hCoV-19/USA/LA-EVTL122/2020|2020-05-06|EPI\_ISL\_451283|Original|hCoV-19^^Louisiana|Human|LSUHS Emerging Viral Threat Laboratory|Microbial Genome Sequencing Center|Kamil|USA

>Spike|hCoV-19/England/QEUEH-B6AC9C/2020|2020-11-11|EPI\_ISL\_655217|Original|hCoV-19^^England|Human|Lighthouse Lab in Glasgow|Wellcome Sanger Institute for the COVID-19 Genomics UK (COG-UK) Consortium|Davies|United Kingdom

>Spike|hCoV-19/USA/TX-HMH-MCoV-15432/2020|2020-10-22|EPI\_ISL\_786916|Original|hCoV-19^^Texas|Human|Houston Methodist Hospital|Houston Methodist Hospital|Long|USA

>Spike|hCoV-19/England/ALDP-BBB582/2020|2020-11-20|EPI\_ISL\_702568|Original|hCoV-19^^England|Human|Lighthouse Lab in Alderley Park|Wellcome Sanger Institute for the COVID-19 Genomics UK (COG-UK) Consortium|Davies|United Kingdom

>Spike|hCoV-19/USA/OR-PROV-151/2020|2020-05-04|EPI\_ISL\_482407|Original|hCoV-19^^Oregon|Human|Providence St. Joseph Health Molecular Genomics Laboratory|Providence St. Joseph Health Molecular Genomics Laboratory|Dowdell|USA

>Spike|hCoV-19/England/20100004004/2020|2020-03-01|EPI\_ISL\_464245|Original|hCoV-19^^England|Human|Respiratory Virus Unit|Respiratory Virus Unit|Platt|United Kingdom

>Spike|hCoV-19/England/20119086704/2020|2020-03-14|EPI\_ISL\_465119|Original|hCoV-19^^England|Human|Respiratory Virus Unit|Respiratory Virus Unit|Platt|United Kingdom

>Spike|hCoV-19/United Arab Emirates/0214/2020|2020-05-18|EPI\_ISL\_698400|Original|hCoV-19^^Abu Dhabi|Human|Group 42 (G42) Healthcare|G42 Healthcare|Ogrodzki|United Arab Emirates

>Spike|hCoV-19/Denmark/DCGC-18022/2020|2020-12-14|EPI\_ISL\_749707|Original|hCoV-19^^Hovedstaden|Human|Department of Virus and Microbiological Special Diagnostics|Albertsen Lab|Michaelsen|Denmark

>Spike|hCoV-19/England/BRIS-12A60D/2020|2020-04-29|EPI\_ISL\_458445|Original|hCoV-19^^England|Human|PHE South West Regional Laboratory|Wellcome Sanger Institute for the COVID-19 Genomics UK (COG-UK) consortium|Davies|United Kingdom

>Spike|hCoV-19/Denmark/DCGC-21424/2020|2020-12-21|EPI\_ISL\_757729|Original|hCoV-19^^Hovedstaden|Human|Department of Virus and Microbiological Special Diagnostics|Albertsen Lab|Michaelsen|Denmark

>Spike|hCoV-19/England/CAMC-B9B01E/2020|2020-11-15|EPI\_ISL\_673428|Original|hCoV-19^^England|Human|Lighthouse Lab in Cambridge|Wellcome Sanger Institute for the COVID-19 Genomics UK (COG-UK) Consortium|Davies|United Kingdom

>Spike|hCoV-19/England/ALDP-4982D6/2020|2020-05-25|EPI\_ISL\_559376|Original|hCoV-19^^England|Human|Lighthouse Lab in Alderley Park|Wellcome Sanger Institute for the COVID-19 Genomics UK (COG-UK) consortium|Davies|United Kingdom

>Spike|hCoV-19/England/LOND-1266E54/2020|2020-12-10|EPI\_ISL\_741220|Original|hCoV-19^^England|Human|University College London|COVID-19 Genomics UK (COG-UK) Consortium|Roy|United Kingdom

>Spike|hCoV-19/Japan/PG-0384/2020|2020-03-03|EPI\_ISL\_480053|Original|hCoV-19^^Chubu|Human|Nagoya City Public Health Research Institute|Pathogen Genomics Center|Sekizuka|Japan

>Spike|hCoV-19/Scotland/QEUA-A1EE38/2020|2020-10-01|EPI\_ISL\_598900|Original|hCoV-19^^Scotland|Human|Lighthouse Lab in Glasgow|Wellcome Sanger Institute for the COVID-19 Genomics UK (COG-UK) consortium|Davies|United Kingdom

>Spike|hCoV-19/Japan/PG-8178/2020|2020-08-00|EPI\_ISL\_687277|Original|hCoV-19^^Japan|Human|Pathogen Genomics Center|Pathogen Genomics Center|Sekizuka|Japan

>Spike|hCoV-19/England/GSTT-265D994/2020|2020-03-26|EPI\_ISL\_484042|Original|hCoV-19^^England|Human|Centre for Clinical Infection and Diagnostics Research and Genomics Innovation Unit|COVID-19 Genomics UK (COG-UK) Consortium|Awan|United Kingdom

>Spike|hCoV-19/Luxembourg/LNS8685935/2020|2020-11-03|EPI\_ISL\_744788|Original|hCoV-19^^Luxembourg|Human|Laboratoire national de sant\u00e9|Laboratoire national de sant\u00e9|Wienecke-Baldacchino|Luxembourg

>Spike|hCoV-19/England/ALDP-A66DBC/2020|2020-10-12|EPI\_ISL\_630538|Original|hCoV-19^^England|Human|Lighthouse Lab in Alderley Park|Wellcome Sanger Institute for the COVID-19 Genomics UK (COG-UK) consortium|Davies|United Kingdom

>Spike|hCoV-19/Netherlands/ZH-EMC-459/2020|2020-08-12|EPI\_ISL\_523796|Original|hCoV-19^^Zuid Holland|Human|Dutch COVID-19 response team|Erasmus Medical Center|Oude Munnink|Netherlands

>Spike|hCoV-19/USA/NY-PV09343/2020|2020-03-24|EPI\_ISL\_450031|Original|hCoV-19^^New York|Human|MSHS Clinical Microbiology Laboratories|MSHS Pathogen Surveillance Program|van Bakel|USA

>Spike|hCoV-19/Denmark/ALAB-SSI513/2020|2020-03-24|EPI\_ISL\_429581|Original|hCoV-19^^Denmark|Human|Department of Virus and Microbiological Special Diagnostics|Albertsen lab|Kirkegaard|Denmark

>Spike|hCoV-19/Belgium/ULG-10462/2020|2020-08-31|EPI\_ISL\_581633|Original|hCoV-19^^Li\u00e8ge|Human|Department of Clinical Microbiology|GIGA Medical Genomics|Durkin|Belgium

>Spike|hCoV-19/USA/NY-QDX-1219/2020|2020-03-16|EPI\_ISL\_571997|Original|hCoV-19^^New York|Human|Quest Diagnostics|Quest Diagnostics|Kagan|USA

>Spike|hCoV-19/England/ALDP-AA3EFC/2020|2020-10-22|EPI\_ISL\_625032|Original|hCoV-19^^England|Human|Lighthouse Lab in Alderley Park|Wellcome Sanger Institute for the COVID-19 Genomics UK (COG-UK) consortium|Davies|United Kingdom

>Spike|hCoV-19/Scotland/QEUA-9902CA/2020|2020-08-29|EPI\_ISL\_530361|Original|hCoV-19^^Scotland|Human|NHSGGC West of Scotland Specialist Virology Centre / MRC-University of Glasgow Centre for Virus Research|Wellcome Sanger Institute for the COVID-19 Genomics UK (COG-UK) consortium|Davies|United Kingdom

>Spike|hCoV-19/Germany/BE-ChVir-W1432-4374/2020|2020-06-26|EPI\_ISL\_753964|Original|hCoV-19^^Berlin|Human|Charit\u00e9 Universit\u00e4tsmedizin Berlin|Charit\u00e9 Universit\u00e4tsmedizin Berlin|Muehlemann|Germany

>Spike|hCoV-19/England/MILK-B3E37E/2020|2020-11-02|EPI\_ISL\_706272|Original|hCoV-19^^England|Human|Oxford Viromics|COVID-19 Genomics UK (COG-UK) Consortium|Golubchik|United Kingdom

>Spike|hCoV-19/India/MH-ACTREC-247/2020|2020-07-07|EPI\_ISL\_699900|Original|hCoV-19^^Maharashtra|Human|Hematopathology Laboratory|Hematopathology Laboratory|Patkar|India

>Spike|hCoV-19/England/MILK-975B93/2020|2020-08-21|EPI\_ISL\_552652|Original|hCoV-19^^England|Human|Lighthouse Lab in Milton Keynes|Wellcome Sanger Institute for the COVID-19 Genomics UK (COG-UK) consortium|Davies|United Kingdom

>Spike|hCoV-19/Wales/PHWC-16A962/2020|2020-09-10|EPI\_ISL\_560130|Original|hCoV-19^^Wales|Human|Wales Specialist Virology Centre Sequencing lab|COVID-19 Genomics UK (COG-UK) Consortium|Moore|United Kingdom

>Spike|hCoV-19/Denmark/DCGC-20383/2020|2020-12-21|EPI\_ISL\_758719|Original|hCoV-19^^Hovedstaden|Human|Department of Virus and Microbiological Special Diagnostics|Albertsen Lab|Michaelsen|Denmark

>Spike|hCoV-19/England/QEUA-7F2B36/2020|2020-07-17|EPI\_ISL\_532887|Original|hCoV-19^^England|Human|Lighthouse Lab in Glasgow|Wellcome Sanger Institute for the COVID-19 Genomics UK (COG-UK) consortium|Davies|United Kingdom

>Spike|hCoV-19/USA/MN-GMF-27759/2020|2020-10-26|EPI\_ISL\_660988|Original|hCoV-19^^Minnesota|Human|Gundersen Molecular Diagnostics Laboratory|Kabara Cancer Research Institute|Kenny|USA

>Spike|hCoV-19/Wales/PHWC-4843E9/2020|2020-10-23|EPI\_ISL\_628000|Original|hCoV-19^^Wales|Human|Wales Specialist Virology Centre Sequencing lab|COVID-19 Genomics UK (COG-UK) Consortium|Moore|United Kingdom

>Spike|hCoV-19/Wales/PHWC-32C6B/2020|2020-04-14|EPI\_ISL\_474402|Original|hCoV-19^^Wales|Human|Originating lab|COVID-19 Genomics UK (COG-UK) Consortium|Moore|United Kingdom

>Spike|hCoV-19/USA/MI-UM-10036591651/2020|2020-10-23|EPI\_ISL\_640218|Original|hCoV-19^^Michigan|Human|University of Michigan Clinical Microbiology Laboratory|Lauring Lab|Valesano|USA

>Spike|hCoV-19/Australia/VIC6275/2020|2020-07-25|EPI\_ISL\_518264|Original|hCoV-19^^Victoria|Human|Microbiological Diagnostic Unit - Public Health Laboratory (MDU-PHL)|MDU-PHL|Schultz|Australia

>Spike|hCoV-19/England/MILK-A6BFB1/2020|2020-10-09|EPI\_ISL\_609126|Original|hCoV-19^^England|Human|Lighthouse Lab in Milton Keynes|Wellcome Sanger Institute for the COVID-19 Genomics UK (COG-UK) consortium|Davies|United Kingdom

>Spike|hCoV-19/Australia/VIC13196/2020|2020-08-15|EPI\_ISL\_563638|Original|hCoV-19^^Victoria|Human|Microbiological Diagnostic Unit - Public Health Laboratory (MDU-PHL)|MDU-PHL|Schultz|Australia

>Spike|hCoV-19/Denmark/DCGC-19868/2020|2020-12-07|EPI\_ISL\_747839|Original|hCoV-19^^Hovedstaden|Human|Department of Virus and Microbiological Special Diagnostics|Albertsen Lab|Michaelsen|Denmark

>Spike|hCoV-19/USA/MN-MDH-1305/2020|2020-04-08|EPI\_ISL\_495604|Original|hCoV-19^^Minnesota|Human|Mayo Clinic & Mayo Clinic Laboratories|Minnesota Department of Health|Garfin|USA

>Spike|hCoV-19/USA/CA-ALSR-3166/2020|2020-08-19|EPI\_ISL\_635894|Original|hCoV-19^^California|Human|San Diego County Public Health Laboratory|Andersen lab at Scripps Research|Gangavarapu|USA

>Spike|hCoV-19/Wales/PHWC-4954D3/2020|2020-11-22|EPI\_ISL\_726355|Original|hCoV-19^^Wales|Human|Originating lab|COVID-19 Genomics UK (COG-UK) Consortium|Moore|United Kingdom

>Spike|hCoV-19/Denmark/DCGC-6317/2020|2020-09-14|EPI\_ISL\_615601|Original|hCoV-19^^Hovedstaden|Human|Department of Virus and Microbiological Special Diagnostics|Albertsen lab|Michaelsen|Denmark

>Spike|hCoV-19/USA/CA-CZB-3892/2020|2020-07-21|EPI\_ISL\_548530|Original|hCoV-19^^California|Human|County of Santa Clara Public Health Department|Chan-Zuckerberg Biohub|Bhatt|USA

>Spike|hCoV-19/Spain/CE-ISCIII-2016506/2020|2020-10-14|EPI\_ISL\_691690|Original|hCoV-19^^Ceuta|Human|Hospital Universitario de Ceuta|Instituto de Salud Carlos III|Caballero|Spain

>Spike|hCoV-19/England/MILK-B8D61D/2020|2020-11-13|EPI\_ISL\_673929|Original|hCoV-19^^England|Human|Lighthouse Lab in Milton Keynes|Wellcome Sanger Institute for the COVID-19 Genomics UK (COG-UK) Consortium|Davies|United Kingdom

>Spike|hCoV-19/Wales/PHWC-4968A9/2020|2020-11-20|EPI\_ISL\_726650|Original|hCoV-19^^Wales|Human|Originating lab|COVID-19 Genomics UK (COG-UK) Consortium|Moore|United Kingdom

>Spike|hCoV-19/Japan/PG-1669/2020|2020-04-00|EPI\_ISL\_685275|Original|hCoV-19^^Japan|Human|Pathogen Genomics Center|Pathogen Genomics Center|Sekizuka|Japan

>Spike|hCoV-19/England/NORW-F984E/2020|2020-12-02|EPI\_ISL\_704929|Original|hCoV-19^^England|Human|Quadram Institute Bioscience|COVID-19 Genomics UK (COG-UK) Consortium|Alikhan|United Kingdom

>Spike|hCoV-19/England/QEUEH-A36D97/2020|2020-10-05|EPI\_ISL\_638714|Original|hCoV-19^^England|Human|Wales Specialist Virology Centre Sequencing lab|COVID-19 Genomics UK (COG-UK) Consortium|Moore|United Kingdom

>Spike|hCoV-19/Australia/VIC8344/2020|2020-08-06|EPI\_ISL\_594137|Original|hCoV-19^^Victoria|Human|MDU-PHL|MDU-PHL|Schultz|Australia

>Spike|hCoV-19/USA/OR-OHSU-2157/2020|2020-08-05|EPI\_ISL\_667553|Original|hCoV-19^^Oregon|Human|OHSU Lab Services Molecular Microbiology Lab|Oregon SARS-CoV-2 Genome Sequencing Center|O'Roak|USA

>Spike|hCoV-19/Japan/IC-0337/2020|2020-11-00|EPI\_ISL\_721584|Original|hCoV-19^^Japan|Human|Pathogen Genomics Center|Pathogen Genomics Center|Sekizuka|Japan

>Spike|hCoV-19/Scotland/EDB2697/2020|2020-03-26|EPI\_ISL\_488900|Original|hCoV-19^^Scotland|Human|Virology Department|Wellcome Sanger Institute for the COVID-19 Genomics UK (COG-UK) consortium|Davies|United Kingdom

>Spike|hCoV-19/England/LIVE-A54D4/2020|2020-03-21|EPI\_ISL\_500122|Original|hCoV-19^^England|Human|Liverpool Clinical Laboratories|COVID-19 Genomics UK (COG-UK) Consortium|Haldenby|United Kingdom

>Spike|hCoV-19/USA/WA-UW-31223/2020|2020-10-12|EPI\_ISL\_735464|Original|hCoV-19^^Washington|Human|UW Virology Lab|UW Virology Lab|Roychoudhury|USA

>Spike|hCoV-19/England/20148004704/2020|2020-04-03|EPI\_ISL\_423587|Original|hCoV-19^^England|Human|Respiratory Virus Unit|Respiratory Virus Unit|Platt|United Kingdom

>Spike|hCoV-19/England/ALDP-B5C36B/2020|2020-11-10|EPI\_ISL\_655734|Original|hCoV-19^^England|Human|Lighthouse Lab in Alderley Park|Wellcome Sanger Institute for the COVID-19 Genomics UK (COG-UK) Consortium|Davies|United Kingdom

>Spike|hCoV-19/England/LIVE-A67DA/2020|2020-03-19|EPI\_ISL\_499742|Original|hCoV-19^^England|Human|Liverpool Clinical Laboratories|COVID-19 Genomics UK (COG-UK) Consortium|Haldenby|United Kingdom

>Spike|hCoV-19/England/QEUEH-AD2717/2020|2020-10-26|EPI\_ISL\_629823|Original|hCoV-19^^England|Human|Lighthouse Lab in Glasgow|Wellcome Sanger Institute for the COVID-19 Genomics UK (COG-UK) consortium|Davies|United Kingdom

>Spike|hCoV-19/India/HR-IMT-AE21/2020|2020-05-28|EPI\_ISL\_560318|Original|hCoV-19^^Haryana|Human|Civil Hospital|CSIR-Institute of Microbial Technology|Patil|India

>Spike|hCoV-19/USA/MN-MDH-2142/2020|2020-11-09|EPI\_ISL\_708480|Original|hCoV-19^^Minnesota|Human|Minnesota Department of Health|Minnesota Department of Health|Lorentz|USA

>Spike|hCoV-19/USA/TX-HMH-5036/2020|2020-06-24|EPI\_ISL\_544476|Original|hCoV-19^^Texas|Human|Houston Methodist Hospital|Houston Methodist Hospital|Long|USA

>Spike|hCoV-19/England/QEUEH-9990D6/2020|2020-08-24|EPI\_ISL\_541834|Original|hCoV-19^^England|Human|Lighthouse Lab in Glasgow|Wellcome Sanger Institute for the COVID-19 Genomics UK (COG-UK) consortium|Davies|United Kingdom

>Spike|hCoV-19/India/MH-NCCS-NR-8720/2020|2020-07-01|EPI\_ISL\_721664|Original|hCoV-19^^Maharashtra|Human|National Centre For Cell Science|National Centre For Cell Science|Paul|India

>Spike|hCoV-19/England/CAMB-78962/2020|2020-04-07|EPI\_ISL\_433796|Original|hCoV-19^^England|Human|Department of Pathology|COVID-19 Genomics UK (COG-UK) Consortium|Meredith|United Kingdom

>Spike|hCoV-19/USA/CA-CZB-2464/2020|2020-05-19|EPI\_ISL\_513869|Original|hCoV-19^^California|Human|San Francisco Public Health Laboratory|Chan-Zuckerberg Biohub|Kamm|USA

>Spike|hCoV-19/England/CAMB-75A44/2020|2020-03-29|EPI\_ISL\_438504|Original|hCoV-19^^England|Human|Department of Pathology|Wellcome Sanger Institute for the COVID-19 Genomics UK (COG-UK) consortium|Amato|United Kingdom

>Spike|hCoV-19/USA/MA-MGH-02786/2020|2020-09-23|EPI\_ISL\_765635|Original|hCoV-19^^Massachusetts|Human|Massachusetts General Hospital|Infectious Disease Program|Park|USA

>Spike|hCoV-19/Japan/PG-4815/2020|2020-08-00|EPI\_ISL\_689939|Original|hCoV-19^^Japan|Human|Pathogen Genomics Center|Pathogen Genomics Center|Sekizuka|Japan

>Spike|hCoV-19/Spain/VC-IBV-98004412/2020|2020-04-13|EPI\_ISL\_583918|Original|hCoV-19^^Comunitat\_Valenciana|Human|Servicio de Microbiolog\u00eda. Hospital General Universitario de Castell\u00f3n|SeqCOVID-SPAIN consortium/IBV(CSIC)|Comas|Spain

>Spike|hCoV-19/England/CAMB-1B8349/2020|2020-10-19|EPI\_ISL\_637702|Original|hCoV-19^^England|Human|Department of Pathology|COVID-19 Genomics UK (COG-UK) Consortium|Goodfellow|United Kingdom

>Spike|hCoV-19/England/20130073304/2020|2020-03-20|EPI\_ISL\_423667|Original|hCoV-19^^England|Human|Respiratory Virus Unit|Respiratory Virus Unit|Platt|United Kingdom

>Spike|hCoV-19/Scotland/EDB8342/2020|2020-10-04|EPI\_ISL\_612330|Original|hCoV-19^^Scotland|Human|Virology Department|COVID-19 Genomics UK (COG-UK) Consortium|McHugh|United Kingdom

>Spike|hCoV-19/England/NORW-F8C34/2020|2020-11-27|EPI\_ISL\_725370|Original|hCoV-19^^England|Human|Quadram Institute Bioscience|COVID-19 Genomics UK (COG-UK) Consortium|Alikhan|United Kingdom

>Spike|hCoV-19/Australia/VIC2448/2020|2020-06-26|EPI\_ISL\_522154|Original|hCoV-19^^Victoria|Human|Victorian Infectious Diseases Reference Laboratory (VIDRL)|VIDRL and MDU-PHL|Schultz|Australia

>Spike|hCoV-19/Denmark/DCGC-2789/2020|2020-08-24|EPI\_ISL\_616624|Original|hCoV-19^^Midtjylland|Human|Department of Virus and Microbiological Special Diagnostics|Albertsen lab|Michaelsen|Denmark

>Spike|hCoV-19/Australia/VIC10251/2020|2020-08-14|EPI\_ISL\_562843|Original|hCoV-19^^Victoria|Human|Victorian Infectious Diseases Reference Laboratory (VIDRL)|VIDRL and MDU-PHL|Schultz|Australia

>Spike|hCoV-19/England/ALDP-B85A91/2020|2020-11-14|EPI\_ISL\_675613|Original|hCoV-19^^England|Human|Lighthouse Lab in Alderley Park|Wellcome Sanger Institute for the COVID-19 Genomics UK (COG-UK) Consortium|Davies|United Kingdom

>Spike|hCoV-19/England/ALDP-94E96C/2020|2020-06-20|EPI\_ISL\_555083|Original|hCoV-19^^England|Human|Lighthouse Lab in Alderley Park|Wellcome Sanger Institute for the COVID-19 Genomics UK (COG-UK) consortium|Davies|United Kingdom

>Spike|hCoV-19/England/ALDP-B5C0A0/2020|2020-11-08|EPI\_ISL\_655886|Original|hCoV-19^^England|Human|Lighthouse Lab in Alderley Park|Wellcome Sanger Institute for the COVID-19 Genomics UK (COG-UK) Consortium|Davies|United Kingdom

>Spike|hCoV-19/Brazil/RJ-00445/2020|2020-04-13|EPI\_ISL\_717840|Original|hCoV-19^^Rio de Janeiro|Human|Laboratorio de Virologia Molecular / UFRJ|Bioinformatics Laboratory / LNCC|Almeida|Brazil

>Spike|hCoV-19/England/CAMC-B5499E/2020|2020-11-09|EPI\_ISL\_658203|Original|hCoV-19^^England|Human|Lighthouse Lab in Cambridge|Wellcome Sanger Institute for the COVID-19 Genomics UK (COG-UK) Consortium|Davies|United Kingdom

>Spike|hCoV-19/Wales/PHWC-480C5B/2020|2020-10-19|EPI\_ISL\_612987|Original|hCoV-19^^Wales|Human|Wales Specialist Virology Centre Sequencing lab|COVID-19 Genomics UK (COG-UK) Consortium|Moore|United Kingdom

>Spike|hCoV-19/Belgium/UGent-332/2020|2020-12-11|EPI\_ISL\_745217|Original|hCoV-19^^Ghent|Human|Lab voor klinische biologie|Onderzoeksgroep Virologie|Lambrechts|Belgium

>Spike|hCoV-19/England/CAMC-B37E74/2020|2020-11-05|EPI\_ISL\_658809|Original|hCoV-19^^England|Human|Lighthouse Lab in Cambridge|Wellcome Sanger Institute for the COVID-19 Genomics UK (COG-UK) Consortium|Davies|United Kingdom

>Spike|hCoV-19/Japan/PG-0406/2020|2020-03-30|EPI\_ISL\_480075|Original|hCoV-19^^Kanto|Human|Shizuoka City Institute of Environmental Sciences and Public Health|Pathogen Genomics Center|Sekizuka|Japan

>Spike|hCoV-19/USA/LA-EVTL367/2020|2020-05-29|EPI\_ISL\_578773|Original|hCoV-19^^Louisiana|Human|LSUHS Emerging Viral Threat Laboratory|Microbial Genome Sequencing Center|Kamil|USA

>Spike|hCoV-19/Germany/BY-MVP-0124/2020|2020-03-23|EPI\_ISL\_451941|Original|hCoV-19^^Bavaria|Human|Max von Pettenkofer Institute|Laboratory for Functional Genome Analysis|Graf|Germany

>Spike|hCoV-19/USA/WA-UW-354/2020|2020-03-24|EPI\_ISL\_524442|Original|hCoV-19^^Washington|Human|University of Washington Virology Lab|Laboratory Medicine|Roychoudhury|USA

>Spike|hCoV-19/Australia/NSW949/2020|2020-08-27|EPI\_ISL\_545021|Original|hCoV-19^^New South Wales|Human|Sydney South West Pathology Service (SSWPS) - Royal Prince Alfred Hospital - NSW Health Pathology|NSW Health Pathology - Institute of Clinical Pathology and Medical Research; Westmead Hospital; University of Sydney|Gall|Australia

>Spike|hCoV-19/England/LIVE-A1793/2020|2020-06-22|EPI\_ISL\_490337|Original|hCoV-19^^England|Human|Liverpool Clinical Laboratories|COVID-19 Genomics UK (COG-UK) Consortium|Haldenby|United Kingdom

>Spike|hCoV-19/Belgium/regA-0406856/2020|2020-04-06|EPI\_ISL\_734536|Original|hCoV-19^^P\u00e9crot|Human|UZ Leuven|KU Leuven|Maes|Belgium

>Spike|hCoV-19/Denmark/DCGC-8940/2020|2020-11-02|EPI\_ISL\_626144|Original|hCoV-19^^NA|Human|Department of Virus and Microbiological Special Diagnostics|Albertsen lab|Michaelsen|Denmark

>Spike|hCoV-19/England/QEUA-9AE84F/2020|2020-09-02|EPI\_ISL\_577246|Original|hCoV-19^^England|Human|University of Exeter|COVID-19 Genomics UK (COG-UK) Consortium|Temperton|United Kingdom

>Spike|hCoV-19/United Arab Emirates/0533/2020|2020-05-17|EPI\_ISL\_698695|Original|hCoV-19^^Abu Dhabi|Human|Group 42 (G42) Healthcare|G42 Healthcare|Ogrodzki|United Arab Emirates

>Spike|hCoV-19/Finland/4LS5D11/2020|2020-08-08|EPI\_ISL\_756005|Original|hCoV-19^^Uusimaa|Human|Department of Virology and Immunology|Department of Virology|Smura|Finland

>Spike|hCoV-19/USA/CA-ALSR-0847-IPL/2020|2020-04-29|EPI\_ISL\_483396|Original|hCoV-19^^California|Human|UC San Diego Center for Advanced Laboratory Medicine|Andersen lab at Scripps Research|Gangavarapu|USA

>Spike|hCoV-19/Japan/PG-5454/2020|2020-08-00|EPI\_ISL\_690557|Original|hCoV-19^^Japan|Human|Pathogen Genomics Center|Pathogen Genomics Center|Sekizuka|Japan

>Spike|hCoV-19/DRC/5240/2020|2020-05-03|EPI\_ISL\_496492|Original|hCoV-19^^Kinshasa|Human|Viral Respiratory Lab|Pathogen Sequencing Lab|Lokilo|Democratic Republic of the Congo

>Spike|hCoV-19/England/MILK-B882D2/2020|2020-11-13|EPI\_ISL\_674244|Original|hCoV-19^^England|Human|Lighthouse Lab in Milton Keynes|Wellcome Sanger Institute for the COVID-19 Genomics UK (COG-UK) Consortium|Davies|United Kingdom

>Spike|hCoV-19/Japan/PG-0104/2020|2020-03-09|EPI\_ISL\_479844|Original|hCoV-19^^Hokkaido|Human|Sapporo City Institute of Public Health|Pathogen Genomics Center|Sekizuka|Japan

>Spike|hCoV-19/Belgium/regA-09231023/2020|2020-09-23|EPI\_ISL\_735032|Original|hCoV-19^^Leuven|Human|UZ Leuven|KU Leuven|Maes|Belgium

>Spike|hCoV-19/England/WSFT-25C1AA8/2020|2020-04-19|EPI\_ISL\_488853|Original|hCoV-19^^England|Human|Department of Medical Microbiology|Wellcome Sanger Institute for the COVID-19 Genomics UK (COG-UK) consortium|Davies|United Kingdom

>Spike|hCoV-19/USA/OR-OHSU-2900/2020|2020-09-04|EPI\_ISL\_667400|Original|hCoV-19^^Oregon|Human|OHSU Lab Services Molecular Microbiology Lab|Oregon SARS-CoV-2 Genome Sequencing Center|O'Roak|USA

>Spike|hCoV-19/Denmark/DCGC-16422/2020|2020-11-16|EPI\_ISL\_714114|Original|hCoV-19^^Hovedstaden|Human|Department of Virus and Microbiological Special Diagnostics|Albertsen Lab|Michaelsen|Denmark

>Spike|hCoV-19/Wales/QEUA-998A42/2020|2020-08-24|EPI\_ISL\_540031|Original|hCoV-19^^Wales|Human|Lighthouse Lab in Glasgow|Wellcome Sanger Institute for the COVID-19 Genomics UK (COG-UK) consortium|Davies|United Kingdom

>Spike|hCoV-19/Denmark/DCGC-20291/2020|2020-11-30|EPI\_ISL\_748096|Original|hCoV-19^^Hovedstaden|Human|Department of Virus and Microbiological Special Diagnostics|Albertsen Lab|Michaelsen|Denmark

>Spike|hCoV-19/USA/UT-UPHL-01413/2020|2020-04-01|EPI\_ISL\_560841|Original|hCoV-19^^Utah|Human|Utah Public Health Laboratory|Utah Public Health Laboratory|Young|USA

>Spike|hCoV-19/England/QEUA-B7E9F8/2020|2020-11-14|EPI\_ISL\_668066|Original|hCoV-19^^England|Human|Lighthouse Lab in Glasgow|Wellcome Sanger Institute for the COVID-19 Genomics UK (COG-UK) Consortium|Davies|United Kingdom

>Spike|hCoV-19/South Korea/KCDC2371/2020|2020-05-31|EPI\_ISL\_514774|Original|hCoV-19^^South Korea|Human|Division of Viral Diseases|Division of Viral Diseases|Kim|South Korea

>Spike|hCoV-19/Singapore/1367/2020|2020-06-27|EPI\_ISL\_648719|Original|hCoV-19^^Singapore|Human|Department of Laboratory Medicine|Department of Laboratory Medicine|Chen|Singapore

>Spike|hCoV-19/England/QEUEH-96BC15/2020|2020-08-14|EPI\_ISL\_531346|Original|hCoV-19^^England|Human|Lighthouse Lab in Glasgow|Wellcome Sanger Institute for the COVID-19 Genomics UK (COG-UK) consortium|Davies|United Kingdom

>Spike|hCoV-19/England/BIRM-64134/2020|2020-08-13|EPI\_ISL\_651596|Original|hCoV-19^^England|Human|University of Birmingham|COVID-19 Genomics UK (COG-UK) Consortium|Loman|United Kingdom

>Spike|hCoV-19/USA/CA-ALSR-3406/2020|2020-07-07|EPI\_ISL\_636008|Original|hCoV-19^^California|Human|San Diego County Public Health Laboratory|Andersen lab at Scripps Research|Gangavarapu|USA

>Spike|hCoV-19/England/CAMB-1AD444/2020|2020-04-24|EPI\_ISL\_489400|Original|hCoV-19^^England|Human|Department of Pathology|Wellcome Sanger Institute for the COVID-19 Genomics UK (COG-UK) consortium|Davies|United Kingdom

>Spike|hCoV-19/Wales/PHWC-47FA91/2020|2020-10-12|EPI\_ISL\_612766|Original|hCoV-19^^Wales|Human|Wales Specialist Virology Centre Sequencing lab|COVID-19 Genomics UK (COG-UK) Consortium|Moore|United Kingdom

>Spike|hCoV-19/Denmark/DCGC-21651/2020|2020-12-21|EPI\_ISL\_758287|Original|hCoV-19^^Hovedstaden|Human|Department of Virus and Microbiological Special Diagnostics|Albertsen Lab|Michaelsen|Denmark

>Spike|hCoV-19/USA/NM-DOH-2020616318/2020|2020-12-12|EPI\_ISL\_751813|Original|hCoV-19^^New Mexico|Human|New Mexico Department of Health Scientific Laboratory|New Mexico Department of Health Scientific Laboratory|Malone|USA

>Spike|hCoV-19/Wales/PHWC-496539/2020|2020-11-27|EPI\_ISL\_726596|Original|hCoV-19^^Wales|Human|Originating lab|COVID-19 Genomics UK (COG-UK) Consortium|Moore|United Kingdom

>Spike|hCoV-19/India/TG-CCMB-AC488/2020|2020-08-19|EPI\_ISL\_539661|Original|hCoV-19^^Telangana|Human|CSIR-Centre for Cellular and Molecular Biology|CSIR-Centre for Cellular and Molecular Biology|Mukherjee|India

>Spike|hCoV-19/Japan/PG-3588/2020|2020-07-00|EPI\_ISL\_691842|Original|hCoV-19^^Japan|Human|Pathogen Genomics Center|Pathogen Genomics Center|Sekizuka|Japan

>Spike|hCoV-19/Australia/VIC9597/2020|2020-08-19|EPI\_ISL\_565618|Original|hCoV-19^^Victoria|Human|Microbiological Diagnostic Unit - Public Health Laboratory (MDU-PHL)|MDU-PHL|Schultz|Australia

>Spike|hCoV-19/USA/TX-HMH-MCoV-10120/2020|2020-07-06|EPI\_ISL\_789111|Original|hCoV-19^^Texas|Human|Houston Methodist Hospital|Houston Methodist Hospital|Long|USA

>Spike|hCoV-19/USA/MA-MGH-01338/2020|2020-05-05|EPI\_ISL\_791928|Original|hCoV-19^^Massachusetts|Human|Massachusetts General Hospital|Infectious Disease Program|Park|USA

>Spike|hCoV-19/Denmark/DCGC-10039/2020|2020-11-09|EPI\_ISL\_668498|Original|hCoV-19^^Hovedstaden|Human|Department of Virus and Microbiological Special Diagnostics|Albertsen Lab|Michaelsen|Denmark

>Spike|hCoV-19/USA/CA-ALSR-0976-SAN/2020|2020-03-30|EPI\_ISL\_483435|Original|hCoV-19^^California|Human|UC San Diego Center for Advanced Laboratory Medicine|Andersen lab at Scripps Research|Gangavarapu|USA

>Spike|hCoV-19/USA/TX-DSHS-1899/2020|2020-07-08|EPI\_ISL\_751507|Original|hCoV-19^^Texas|Human|Texas Department of State Health Services|Texas Department of State Health Services|Rahman|USA

>Spike|hCoV-19/Scotland/CVR5311/2020|2020-10-23|EPI\_ISL\_650731|Original|hCoV-19^^Scotland|Human|West of Scotland Specialist Virology Centre|COVID-19 Genomics UK (COG-UK) Consortium|Robertson|United Kingdom

>Spike|hCoV-19/Wales/PHWC-4A3D04/2020|2020-12-12|EPI\_ISL\_764621|Original|hCoV-19^^Wales|Human|Wales Specialist Virology Centre Sequencing lab|COVID-19 Genomics UK (COG-UK) Consortium|Moore|United Kingdom



>Spike|hCoV-19/Hong Kong/HKPU-5052/2020|2020-09-24|EPI\_ISL\_610194|Original|hCoV-19^^Hong Kong|Human|Department of Health Technology and Informatics|Department of Health Technology and Informatics|Leung|China

>Spike|hCoV-19/USA/CA-CZB-10168/2020|2020-05-15|EPI\_ISL\_672242|Original|hCoV-19^^California|Human|The Ashley Laboratory|Chan-Zuckerberg Biohub|Bhatt|USA

>Spike|hCoV-19/Canada/ON\_MU-S312/2020|2020-03-29|EPI\_ISL\_463980|Original|hCoV-19^^Ontario|Human|Toronto Invasive Bacterial Diseases Network|McMaster University|McArthur|Canada

>Spike|hCoV-19/England/ALDP-95AE9B/2020|2020-06-13|EPI\_ISL\_555673|Original|hCoV-19^^England|Human|Lighthouse Lab in Alderley Park|Wellcome Sanger Institute for the COVID-19 Genomics UK (COG-UK) consortium|Davies|United Kingdom

>Spike|hCoV-19/England/ALDP-BBB1E8/2020|2020-11-21|EPI\_ISL\_701756|Original|hCoV-19^^England|Human|Lighthouse Lab in Alderley Park|Wellcome Sanger Institute for the COVID-19 Genomics UK (COG-UK) Consortium|Davies|United Kingdom

>Spike|hCoV-19/Wales/PHWC-48A653/2020|2020-10-29|EPI\_ISL\_652580|Original|hCoV-19^^Wales|Human|Wales Specialist Virology Centre Sequencing lab|COVID-19 Genomics UK (COG-UK) Consortium|Moore|United Kingdom

>Spike|hCoV-19/USA/WI-UW-1818/2020|2020-09-09|EPI\_ISL\_605690|Original|hCoV-19^^Wisconsin|Human|University of Wisconsin-Madison AIDS Vaccine Research Laboratories|University of Wisconsin-Madison AIDS Vaccine Research Laboratories|Baczenas|USA

>Spike|hCoV-19/Italy/UMB-IZSUM-48682-7/2020|2020-10-19|EPI\_ISL\_763138|Original|hCoV-19^^Umbria|Human|Istituto Zooprofilattico Sperimentale dell' Umbria e delle Marche - Togo Rosati|Istituto Superiore di Sanit\u00e0|De Sabato|Italy

>Spike|hCoV-19/England/ALDP-71CBAF/2020|2020-07-01|EPI\_ISL\_557722|Original|hCoV-19^^England|Human|Lighthouse Lab in Alderley Park|Wellcome Sanger Institute for the COVID-19 Genomics UK (COG-UK) consortium|Davies|United Kingdom

>Spike|hCoV-19/Northern Ireland/NIRE-234E43/2020|2020-10-23|EPI\_ISL\_764399|Original|hCoV-19^^Northern Ireland|Human|Regional Virus Laboratory|COVID-19 Genomics UK (COG-UK) Consortium|Fairley|United Kingdom

>Spike|hCoV-19/Spain/NC-IBV-001396/2020|2020-03-18|EPI\_ISL\_452505|Original|hCoV-19^^Navarra|Human|Cl\u00e9nica Universidad de Navarra. Servicio de Enfermedades Infecciosas y Microbiolog\u00eda cl\u00e9nica|SeqCOVID-SPAIN consortium/IBV (CSIC)|Comas|Spain

>Spike|hCoV-19/USA/FL-BPHL-0286/2020|2020-05-15|EPI\_ISL\_480937|Original|hCoV-19^^Florida|Human|Florida Bureau of Public Health Laboratories|Florida Bureau of Public Health Laboratories|Blanton|USA

>Spike|hCoV-19/USA/WA-UW-31265/2020|2020-10-13|EPI\_ISL\_735471|Original|hCoV-19^^Washington|Human|UW Virology Lab|UW Virology Lab|Roychoudhury|USA

>Spike|hCoV-19/Bahrain/340861174\_S24\_L001/2020|2020-10-14|EPI\_ISL\_681304|Original|hCoV-19^^Bahrain|Human|Communicable Disease Laboratory|Communicable Disease Laboratory|Altaif|Bahrain

>Spike|hCoV-19/England/CAMC-B9814B/2020|2020-11-15|EPI\_ISL\_674908|Original|hCoV-19^^England|Human|Lighthouse Lab in Cambridge|Wellcome Sanger Institute for the COVID-19 Genomics UK (COG-UK) Consortium|Davies|United Kingdom

>Spike|hCoV-19/France/PAC-IHU-0673/2020|2020-04-15|EPI\_ISL\_568925|Original|hCoV-19^^Provence-Alpes-C\u00f4te-d\u00e0z|Human|MEPHI|MEPHI|Levasseur|France

>Spike|hCoV-19/Denmark/DCGC-19070/2020|2020-12-07|EPI\_ISL\_748735|Original|hCoV-19^^Syddanmark|Human|Department of Virus and Microbiological Special Diagnostics|Albertsen Lab|Michaelsen|Denmark

>Spike|hCoV-19/USA/MA-MGH-00690/2020|2020-04-06|EPI\_ISL\_460187|Original|hCoV-19^^Massachusetts|Human|Massachusetts General Hospital|Infectious Disease Program|Lemieux|USA

>Spike|hCoV-19/USA/UT-UPHL-03101/2020|2020-05-04|EPI\_ISL\_575251|Original|hCoV-19^^Utah|Human|Utah Public Health Laboratory|Utah Public Health Laboratory|Young|USA

>Spike|hCoV-19/USA/AZ-TG532053/2020|2020-07-01|EPI\_ISL\_695401|Original|hCoV-19^^Arizona|Human|AZ SPHL|TGen North|French|USA

>Spike|hCoV-19/Belgium/ULG-11134/2020|2020-12-18|EPI\_ISL\_737378|Original|hCoV-19^^Li\u00e8ge|Human|Department of Clinical Microbiology|GIGA Medical Genomics|Durkin|Belgium

>Spike|hCoV-19/Scotland/EDB3870/2020|2020-04-30|EPI\_ISL\_439348|Original|hCoV-19^^Scotland|Human|Virology Department|COVID-19 Genomics UK (COG-UK) Consortium|Williams|United Kingdom

>Spike|hCoV-19/USA/UT-UPHL-2009362/2020|2020-05-17|EPI\_ISL\_524956|Original|hCoV-19^^Utah|Human|Utah Public Health Laboratory|Utah Public Health Laboratory|Young|USA

>Spike|hCoV-19/England/ALDP-9CDB23/2020|2020-09-16|EPI\_ISL\_566110|Original|hCoV-19^^England|Human|Lighthouse Lab in Alderley Park|Wellcome Sanger Institute for the COVID-19 Genomics UK (COG-UK) consortium|Davies|United Kingdom

>Spike|hCoV-19/Scotland/CVR2648/2020|2020-04-17|EPI\_ISL\_484629|Original|hCoV-19^^Scotland|Human|West of Scotland Specialist Virology Centre|COVID-19 Genomics UK (COG-UK) Consortium|Robertson|United Kingdom

>Spike|hCoV-19/USA/ID-QDX-2045/2020|2020-03-17|EPI\_ISL\_604329|Original|hCoV-19^^Idaho|Human|Quest Diagnostics|Quest Diagnostics|Kagan|USA

>Spike|hCoV-19/England/QEUEH-B422B6/2020|2020-11-08|EPI\_ISL\_657028|Original|hCoV-19^^England|Human|Lighthouse Lab in Glasgow|Wellcome Sanger Institute for the COVID-19 Genomics UK (COG-UK) Consortium|Davies|United Kingdom

>Spike|hCoV-19/Switzerland/AG-ETHZ-380396/2020|2020-11-23|EPI\_ISL\_721671|Original|hCoV-19^^Aargau|Human|Viollier AG|Department of Biosystems Science and Engineering|Nadeau|Switzerland

>Spike|hCoV-19/USA/NY-Wadsworth-283448-01/2020|2020-12-05|EPI\_ISL\_754444|Original|hCoV-19^^New York|Human|Wadsworth Center|Wadsworth Center|Lasek-Nesselquist|USA

>Spike|hCoV-19/USA/UT-UPHL-2012703708/2020|2020-06-18|EPI\_ISL\_746459|Original|hCoV-19^^Utah|Human|Utah Public Health Laboratory|Utah Public Health Laboratory|Gallagher|USA

>Spike|hCoV-19/England/QEUEH-AF4C6B/2020|2020-10-30|EPI\_ISL\_663101|Original|hCoV-19^^England|Human|Lighthouse Lab in Glasgow|Wellcome Sanger Institute for the COVID-19 Genomics UK (COG-UK) Consortium|Davies|United Kingdom

>Spike|hCoV-19/France/PAC-IHU-1333/2020|2020-08-19|EPI\_ISL\_569120|Original|hCoV-19^^Provence-Alpes-C\u00f4te-d\u2019Azur|Human|MEPHI|MEPHI|Levasseur|France

>Spike|hCoV-19/Portugal/PT2072/2020|2020-11-12|EPI\_ISL\_732286|Original|hCoV-19^^Portugal|Human|Instituto Nacional de Saude (INSA) and Instituto Gulbenkian de Ciencia (IGC)|Instituto Nacional de Saude (INSA) and Instituto Gulbenkian de Ciencia (IGC)|Borges|Portugal

>Spike|hCoV-19/USA/UT-UPHL-201208035/2020|2020-04-03|EPI\_ISL\_672549|Original|hCoV-19^^Utah|Human|Utah Public Health Laboratory|Utah Public Health Laboratory|Young|USA

>Spike|hCoV-19/USA/NY-NYUMC75/2020|2020-03-18|EPI\_ISL\_420591|Original|hCoV-19^^New York|Human|NYU Langone Health|Departments of Pathology and Medicine|Maurano|USA

>Spike|hCoV-19/England/ALDP-94DCA0/2020|2020-06-19|EPI\_ISL\_555178|Original|hCoV-19^^England|Human|Lighthouse Lab in Alderley Park|Wellcome Sanger Institute for the COVID-19 Genomics UK (COG-UK) consortium|Davies|United Kingdom

>Spike|hCoV-19/Denmark/DCGC-21659/2020|2020-12-21|EPI\_ISL\_758292|Original|hCoV-19^^Hovedstaden|Human|Department of Virus and Microbiological Special Diagnostics|Albertsen Lab|Michaelsen|Denmark

>Spike|hCoV-19/USA/CA-CZB-15097/2020|2020-11-20|EPI\_ISL\_738942|Original|hCoV-19^^California|Human|Santa Clara County Public Health Laboratory|Chan-Zuckerberg Biohub|Kamm|USA

>Spike|hCoV-19/USA/UN-UW-686/2020|2020-03-12|EPI\_ISL\_476932|Original|hCoV-19^^USA|Human|UW Virology Lab|UW Virology Lab|Roychoudhury|USA

>Spike|hCoV-19/Portugal/PT1699/2020|2020-11-13|EPI\_ISL\_732166|Original|hCoV-19^^Portugal|Human|Instituto Nacional de Saude (INSA) and Instituto Gulbenkian de Ciencia (IGC)|Instituto Nacional de Saude (INSA) and Instituto Gulbenkian de Ciencia (IGC)|Borges|Portugal

>Spike|hCoV-19/England/QEUEH-884D8D/2020|2020-07-25|EPI\_ISL\_532809|Original|hCoV-19^^England|Human|Lighthouse Lab in Glasgow|Wellcome Sanger Institute for the COVID-19 Genomics UK (COG-UK) consortium|Davies|United Kingdom

>Spike|hCoV-19/England/ALDP-B48F5F/2020|2020-11-07|EPI\_ISL\_649450|Original|hCoV-19^^England|Human|Lighthouse Lab in Alderley Park|Wellcome Sanger Institute for the COVID-19 Genomics UK (COG-UK) Consortium|Davies|United Kingdom

>Spike|hCoV-19/Wales/PHWC-49986A/2020|2020-12-03|EPI\_ISL\_727367|Original|hCoV-19^^Wales|Human|Originating lab|COVID-19 Genomics UK (COG-UK) Consortium|Moore|United Kingdom

>Spike|hCoV-19/England/LIVE-DC676E/2020|2020-11-30|EPI\_ISL\_703409|Original|hCoV-19^^England|Human|Liverpool Clinical Laboratories|COVID-19 Genomics UK (COG-UK) Consortium|Haldenby|United Kingdom

>Spike|hCoV-19/England/ALDP-9BE202/2020|2020-09-09|EPI\_ISL\_568121|Original|hCoV-19^^England|Human|Lighthouse Lab in Alderley Park|Wellcome Sanger Institute for the COVID-19 Genomics UK (COG-UK) consortium|Davies|United Kingdom

>Spike|hCoV-19/USA/WA-UW-5164/2020|2020-04-02|EPI\_ISL\_429652|Original|hCoV-19^^Washington|Human|UW Virology Lab|UW Virology Lab|Roychoudhury|USA

>Spike|hCoV-19/Denmark/DCGC-21418/2020|2020-12-21|EPI\_ISL\_757946|Original|hCoV-19^^Hovedstaden|Human|Department of Virus and Microbiological Special Diagnostics|Albertsen Lab|Michaelsen|Denmark

>Spike|hCoV-19/Denmark/DCGC-8062/2020|2020-10-26|EPI\_ISL\_617186|Original|hCoV-19^^Nordjylland|Human|Department of Virus and Microbiological Special Diagnostics|Albertsen lab|Michaelsen|Denmark

>Spike|hCoV-19/USA/NY-NYCPHL-000168/2020|2020-04-10|EPI\_ISL\_631704|Original|hCoV-19^^New York|Human|Jamaica Hospital Medical Center|New York City Public Health Laboratory|Wang|USA

>Spike|hCoV-19/Bangladesh/BCSIR-NILMRC-204/2020|2020-06-26|EPI\_ISL\_483686|Original|hCoV-19^^Chittagong|Human|National Institute of Laboratory Medicine and Referral Center|Genomic Research Lab|Khan|Bangladesh

>Spike|hCoV-19/England/CAMC-A654C7/2020|2020-10-11|EPI\_ISL\_608411|Original|hCoV-19^^England|Human|Lighthouse Lab in Cambridge|Wellcome Sanger Institute for the COVID-19 Genomics UK (COG-UK) consortium|Davies|United Kingdom

>Spike|hCoV-19/Belgium/UGent-194/2020|2020-10-20|EPI\_ISL\_717609|Original|hCoV-19^^Ghent|Human|Lab voor klinische biologie|Onderzoeksgroep Virologie|Lambrechts|Belgium

>Spike|hCoV-19/Brazil/SP-L22-CD489/2020|2020-04-04|EPI\_ISL\_476385|Original|hCoV-19^^S\u00e3o Paulo|Human|Hospital da Cl\u00ednicas da Faculdade de Medicina da Universidade de S\u00e3o Paulo|Instituto de Medicina Tropical da Univesidade de S\u00e3o Paulo|Faria|Brazil

>Spike|hCoV-19/Denmark/DCGC-22575/2020|2020-12-14|EPI\_ISL\_757649|Original|hCoV-19^^Syddanmark|Human|Department of Virus and Microbiological Special Diagnostics|Albertsen Lab|Michaelsen|Denmark

>Spike|hCoV-19/USA/CA-OHSU-0857/2020|2020-06-27|EPI\_ISL\_525804|Original|hCoV-19^^California|Human|OHSU Lab Services Molecular Microbiology Lab|Oregon SARS-CoV-2 Genome Sequencing Center|O'Roak|USA

>Spike|hCoV-19/England/ALDP-B24B64/2020|2020-11-04|EPI\_ISL\_646961|Original|hCoV-19^^England|Human|Lighthouse Lab in Alderley Park|Wellcome Sanger Institute for the COVID-19 Genomics UK (COG-UK) Consortium|Davies|United Kingdom

>Spike|hCoV-19/Portugal/PT1315/2020|2020-03-17|EPI\_ISL\_511274|Original|hCoV-19^^Portugal|Human|Instituto Nacional de Saude (INSA) and Instituto Gulbenkian de Ciencia (IGC)|Instituto Nacional de Saude (INSA) and Instituto Gulbenkian de Ciencia (IGC)|Borges|Portugal

>Spike|hCoV-19/England/QEUEH-5537D7/2020|2020-05-12|EPI\_ISL\_532281|Original|hCoV-19^^England|Human|Lighthouse Lab in Glasgow|Wellcome Sanger Institute for the COVID-19 Genomics UK (COG-UK) consortium|Davies|United Kingdom

>Spike|hCoV-19/England/ALDP-B1B140/2020|2020-11-01|EPI\_ISL\_645701|Original|hCoV-19^^England|Human|Lighthouse Lab in Alderley Park|Wellcome Sanger Institute for the COVID-19 Genomics UK (COG-UK) Consortium|Davies|United Kingdom

>Spike|hCoV-19/Wales/MILK-9D4C08/2020|2020-09-19|EPI\_ISL\_601750|Original|hCoV-19^^Wales|Human|Lighthouse Lab in Milton Keynes|Wellcome Sanger Institute for the COVID-19 Genomics UK (COG-UK) consortium|Davies|United Kingdom

>Spike|hCoV-19/England/MILK-BB2503/2020|2020-11-18|EPI\_ISL\_720219|Original|hCoV-19^^England|Human|Lighthouse Lab in Milton Keynes|Wellcome Sanger Institute for the COVID-19 Genomics UK (COG-UK) Consortium|Davies|United Kingdom

>Spike|hCoV-19/Germany/HH-hpi-p1925/2020|2020-03-25|EPI\_ISL\_776255|Original|hCoV-19^^Hamburg|Human|University Medical Center Hamburg Eppendorf|Heinrich Pette Institute|Robitaille|Germany

>Spike|hCoV-19/USA/TX-HMH-MCoV-9033/2020|2020-07-02|EPI\_ISL\_780909|Original|hCoV-19^^Texas|Human|Houston Methodist Hospital|Houston Methodist Hospital|Long|USA

>Spike|hCoV-19/England/CAMB-77EFB/2020|2020-03-31|EPI\_ISL\_440826|Original|hCoV-19^^England|Human|Department of Pathology|Wellcome Sanger Institute for the COVID-19 Genomics UK (COG-UK) consortium|Amato|United Kingdom

>Spike|hCoV-19/Denmark/DCGC-16612/2020|2020-11-16|EPI\_ISL\_714869|Original|hCoV-19^^Sjaelland|Human|Department of Virus and Microbiological Special Diagnostics|Albertsen Lab|Michaelsen|Denmark

>Spike|hCoV-19/USA/AZ-TG274750/2020|2020-04-07|EPI\_ISL\_694069|Original|hCoV-19^^Arizona|Human|AZ SPHL|TGen North|French|USA

>Spike|hCoV-19/USA/TX-HMH-6065/2020|2020-07-02|EPI\_ISL\_547207|Original|hCoV-19^^Texas|Human|Houston Methodist Hospital|Houston Methodist Hospital|Long|USA

>Spike|hCoV-19/Denmark/DCGC-6660/2020|2020-10-12|EPI\_ISL\_619563|Original|hCoV-19^^Midtjylland|Human|Department of Virus and Microbiological Special Diagnostics|Albertsen lab|Michaelsen|Denmark

>Spike|hCoV-19/USA/CO-CDPHE-2100015712/2020|2020-11-20|EPI\_ISL\_771314|Original|hCoV-19^^Colorado|Human|Colorado Department of Public Health and Environment|Colorado Department of Public Health and Environment|Bankers|USA

>Spike|hCoV-19/England/MILK-B3957D/2020|2020-11-02|EPI\_ISL\_659026|Original|hCoV-19^^England|Human|Lighthouse Lab in Milton Keynes|Wellcome Sanger Institute for the COVID-19 Genomics UK (COG-UK) Consortium|Davies|United Kingdom

>Spike|hCoV-19/England/205260427/2020|2020-00-00|EPI\_ISL\_766541|Original|hCoV-19^^England|Human|Respiratory Virus Unit|COVID-19 Genomics UK (COG-UK) Consortium|Platt|United Kingdom

>Spike|hCoV-19/South Africa/KRISP-K001365/2020|2020-07-16|EPI\_ISL\_515850|Original|hCoV-19^^KwaZulu-Natal|Human|Medical Disagnostics Services (MDS)|KRISP|de Oliveira|South Africa

>Spike|hCoV-19/Slovakia/UKBA-402/2020|2020-11-22|EPI\_ISL\_718250|Original|hCoV-19^^Bratislava|Human|Institute of Virology|Faculty of Natural Sciences|Vinar|Slovakia

>Spike|hCoV-19/England/MILK-AC917F/2020|2020-10-22|EPI\_ISL\_709917|Original|hCoV-19^^England|Human|Lighthouse Lab in Milton Keynes|Wellcome Sanger Institute for the COVID-19 Genomics UK (COG-UK) Consortium|Davies|United Kingdom

>Spike|hCoV-19/Norway/2955/2020|2020-07-29|EPI\_ISL\_549038|Original|hCoV-19^^Viken|Human|Furst Medical Laboratory|Norwegian Institute of Public Health|Kopperud Riis|Norway

>Spike|hCoV-19/Gibraltar/204462890/2020|2020-10-29|EPI\_ISL\_615055|Original|hCoV-19^^Gibraltar|Human|Microbiology|Respiratory Virus Unit|Platt|Gibraltar

>Spike|hCoV-19/India/GJ-GBRC56a/2020|2020-05-03|EPI\_ISL\_447030|Original|hCoV-19^^Gujarat|Human|B.J. Medical College and Civil hospital|Gujarat Biotechnology Research Centre|Joshi|India

>Spike|hCoV-19/Denmark/DCGC-5139/2020|2020-09-21|EPI\_ISL\_621677|Original|hCoV-19^^Syddanmark|Human|Department of Virus and Microbiological Special Diagnostics|Albertsen lab|Michaelsen|Denmark

>Spike|hCoV-19/Northern Ireland/NIRE-2350D3/2020|2020-10-15|EPI\_ISL\_764410|Original|hCoV-19^^Northern Ireland|Human|Regional Virus Laboratory|COVID-19 Genomics UK (COG-UK) Consortium|Fairley|United Kingdom

>Spike|hCoV-19/Portugal/PT0857/2020|2020-03-27|EPI\_ISL\_511116|Original|hCoV-19^^Portugal|Human|Instituto Nacional de Saude (INSA)|Instituto Nacional de Saude (INSA)|Borges|Portugal

>Spike|hCoV-19/Denmark/DCGC-14629/2020|2020-11-23|EPI\_ISL\_711879|Original|hCoV-19^^Midtjylland|Human|Department of Virus and Microbiological Special Diagnostics|Albertsen Lab|Michaelsen|Denmark

>Spike|hCoV-19/England/QEUH-A4BB0E/2020|2020-10-05|EPI\_ISL\_628509|Original|hCoV-19^^England|Human|Oxford Viromics|COVID-19 Genomics UK (COG-UK) Consortium|Golubchik|United Kingdom

>Spike|hCoV-19/England/ALDP-AA29CF/2020|2020-10-21|EPI\_ISL\_630835|Original|hCoV-19^^England|Human|Lighthouse Lab in Alderley Park|Wellcome Sanger Institute for the COVID-19 Genomics UK (COG-UK) consortium|Davies|United Kingdom

>Spike|hCoV-19/England/20149006204/2020|2020-04-01|EPI\_ISL\_466116|Original|hCoV-19^^England|Human|Respiratory Virus Unit|Respiratory Virus Unit|Platt|United Kingdom

>Spike|hCoV-19/England/CAMC-B0A0ED/2020|2020-10-29|EPI\_ISL\_672999|Original|hCoV-19^^England|Human|Lighthouse Lab in Cambridge|Wellcome Sanger Institute for the COVID-19 Genomics UK (COG-UK) Consortium|Davies|United Kingdom

>Spike|hCoV-19/France/ARA-105054/2020|2020-11-11|EPI\_ISL\_730650|Original|hCoV-19^^Auvergne-Rh\u00f4ne-Alpes|Human|CNR Virus des Infections Respiratoires - France SUD|CNR Virus des Infections Respiratoires - France SUD|Bal|France

>Spike|hCoV-19/England/20189118901/2020|2020-05-01|EPI\_ISL\_465543|Original|hCoV-19^^England|Human|Respiratory Virus Unit|Respiratory Virus Unit|Platt|United Kingdom

>Spike|hCoV-19/England/ALDP-AA4523/2020|2020-10-22|EPI\_ISL\_625083|Original|hCoV-19^^England|Human|Lighthouse Lab in Alderley Park|Wellcome Sanger Institute for the COVID-19 Genomics UK (COG-UK) consortium|Davies|United Kingdom

>Spike|hCoV-19/USA/CT-QDX-1183/2020|2020-03-14|EPI\_ISL\_571926|Original|hCoV-19^^Connecticut|Human|Quest Diagnostics|Quest Diagnostics|Kagan|USA

>Spike|hCoV-19/England/QEUH-BA0201/2020|2020-11-18|EPI\_ISL\_719754|Original|hCoV-19^^England|Human|Lighthouse Lab in Glasgow|Wellcome Sanger Institute for the COVID-19 Genomics UK (COG-UK) Consortium|Davies|United Kingdom

>Spike|hCoV-19/Spain/CT-IBV-97007946/2020|2020-10-05|EPI\_ISL\_654511|Original|hCoV-19^^Catalunya|Human|Servicio de Microbiolog\u00eda|SeqCOVID-SPAIN consortium/IBV (CSIC)|Comas|Spain

>Spike|hCoV-19/Spain/AN-IBV-98001736/2020|2020-04-12|EPI\_ISL\_538141|Original|hCoV-19^^Andalucia|Human|Servicio de Microbiolog\u00eda y Parasitolog\u00eda cl\u00ednica. UCEIMP. Hospital Universitario Virgen del Roc\u00edo/IBIS/CSIC/US|SeqCOVID-SPAIN consortium/IBV (CSIC)|Comas|Spain

>Spike|hCoV-19/Denmark/DCGC-5572/2020|2020-09-28|EPI\_ISL\_620897|Original|hCoV-19^^Hovedstaden|Human|Department of Virus and Microbiological Special Diagnostics|Albertsen lab|Michaelsen|Denmark

>Spike|hCoV-19/Netherlands/GE-EMC-243/2020|2020-00-00|EPI\_ISL\_523222|Original|hCoV-19^^Gelderland|Human|Dutch COVID-19 response team|Erasmus Medical Center|Oude Munnink|Netherlands

>Spike|hCoV-19/Northern Ireland/NIRE-234432/2020|2020-10-18|EPI\_ISL\_680387|Original|hCoV-19^^Northern Ireland|Human|Regional Virus Laboratory|COVID-19 Genomics UK (COG-UK) Consortium|Fairley|United Kingdom

>Spike|hCoV-19/India/TG-CCMB-AB344/2020|2020-08-13|EPI\_ISL\_539718|Original|hCoV-19^^Telangana|Human|CSIR-Centre for Cellular and Molecular Biology|CSIR-Centre for Cellular and Molecular Biology|Mukherjee|India

>Spike|hCoV-19/Japan/PG-0786/2020|2020-04-00|EPI\_ISL\_684396|Original|hCoV-19^^Japan|Human|Pathogen Genomics Center|Pathogen Genomics Center|Sekizuka|Japan

>Spike|hCoV-19/USA/VA-DCLS-2237/2020|2020-11-05|EPI\_ISL\_734217|Original|hCoV-19^^Virginia|Human|Virginia Division of Consolidated Laboratory Services (DCLS)|Virginia Division of Consolidated Laboratory Services (DCLS)|St. Jacques|USA

>Spike|hCoV-19/Bahrain/340860476\_S15/2020|2020-10-14|EPI\_ISL\_632280|Original|hCoV-19^^Bahrain|Human|Communicable Disease Laboratory|Communicable Disease Laboratory|Altaif|Bahrain

>Spike|hCoV-19/USA/TX-DSHS-1941/2020|2020-06-21|EPI\_ISL\_765910|Original|hCoV-19^^Texas|Human|TXDSHS|TXDSHS|Rahman|USA

>Spike|hCoV-19/South Africa/NHLS-UCT-GS-1259/2020|2020-11-05|EPI\_ISL\_700488|Original|hCoV-19^^Western Cape|Human|Conville CDC wc CVC|NHLS/UCT|Iranzadeh|South Africa

>Spike|hCoV-19/England/CAMC-B0704A/2020|2020-10-29|EPI\_ISL\_643712|Original|hCoV-19^^England|Human|Lighthouse Lab in Cambridge|Wellcome Sanger Institute for the COVID-19 Genomics UK (COG-UK) Consortium|Davies|United Kingdom

>Spike|hCoV-19/USA/TX-HMH-MCoV-18071/2020|2020-11-12|EPI\_ISL\_784419|Original|hCoV-19^^Texas|Human|Houston Methodist Hospital|Houston Methodist Hospital|Long|USA

>Spike|hCoV-19/Denmark/DCGC-1622/2020|2020-04-06|EPI\_ISL\_619268|Original|hCoV-19^^Hovedstaden|Human|Department of Virus and Microbiological Special Diagnostics|Albertsen lab|Michaelsen|Denmark

>Spike|hCoV-19/Belgium/reg-0508542/2020|2020-05-08|EPI\_ISL\_734712|Original|hCoV-19^^Peruwelz|Human|UZ Leuven|KU Leuven|Maes|Belgium

>Spike|hCoV-19/France/BRE-5687/2020|2020-04-03|EPI\_ISL\_443292|Original|hCoV-19^^Bretagne|Human|CHRU Pontchaillou - Laboratoire de Virologie|National Reference Center for Viruses of Respiratory Infections|Enouf|France

>Spike|hCoV-19/USA/LA-EVTL071/2020|2020-05-04|EPI\_ISL\_451232|Original|hCoV-19^^Louisiana|Human|LSUHS Emerging Viral Threat Laboratory|Microbial Genome Sequencing Center|Kamil|USA

>Spike|hCoV-19/Japan/PG-5793/2020|2020-08-00|EPI\_ISL\_688912|Original|hCoV-19^^Japan|Human|Fukuoka Institute of Health and Environmental Sciences|Pathogen Genomics Center|Sekizuka|Japan

>Spike|hCoV-19/Germany/BE-ChVir3100/2020|2020-03-24|EPI\_ISL\_729531|Original|hCoV-19^^Berlin|Human|Charit\u00e9 Universit\u00e4tsmedizin Berlin|Charit\u00e9 Universit\u00e4tsmedizin Berlin|Muehlemann|Germany

>Spike|hCoV-19/England/QEUA-B7F818/2020|2020-11-14|EPI\_ISL\_674685|Original|hCoV-19^^England|Human|Lighthouse Lab in Glasgow|Wellcome Sanger Institute for the COVID-19 Genomics UK (COG-UK) Consortium|Davies|United Kingdom

>Spike|hCoV-19/USA/TX-HMH-4074/2020|2020-06-18|EPI\_ISL\_543345|Original|hCoV-19^^Texas|Human|Houston Methodist Hospital|Houston Methodist Hospital|Long|USA

>Spike|hCoV-19/England/ALDP-AA45BA/2020|2020-10-21|EPI\_ISL\_624231|Original|hCoV-19^^England|Human|Lighthouse Lab in Alderley Park|Wellcome Sanger Institute for the COVID-19 Genomics UK (COG-UK) consortium|Davies|United Kingdom

>Spike|hCoV-19/Scotland/EDB7142/2020|2020-08-05|EPI\_ISL\_514550|Original|hCoV-19^^Scotland|Human|Virology Department|COVID-19 Genomics UK (COG-UK) Consortium|Williams|United Kingdom

>Spike|hCoV-19/USA/WI-GMF-13030/2020|2020-07-29|EPI\_ISL\_547651|Original|hCoV-19^^Wisconsin|Human|Gundersen Molecular Diagnostics Laboratory|Kabara Cancer Research Institute|Kenny|USA

>Spike|hCoV-19/England/CAMC-B325FC/2020|2020-11-05|EPI\_ISL\_659175|Original|hCoV-19^^England|Human|Lighthouse Lab in Cambridge|Wellcome Sanger Institute for the COVID-19 Genomics UK (COG-UK) Consortium|Davies|United Kingdom

>Spike|hCoV-19/England/MILK-9C2A12/2020|2020-09-10|EPI\_ISL\_566497|Original|hCoV-19^^England|Human|Lighthouse Lab in Milton Keynes|Wellcome Sanger Institute for the COVID-19 Genomics UK (COG-UK) consortium|Davies|United Kingdom

>Spike|hCoV-19/England/NORW-F3CB1/2020|2020-00-00|EPI\_ISL\_627664|Original|hCoV-19^^England|Human|Quadram Institute Bioscience|COVID-19 Genomics UK (COG-UK) Consortium|Alikhan|United Kingdom

>Spike|hCoV-19/USA/MI-UM-10036461388/2020|2020-10-15|EPI\_ISL\_628808|Original|hCoV-19^^Michigan|Human|University of Michigan Clinical Microbiology Laboratory|Lauring Lab|Valesano|USA

>Spike|hCoV-19/England/LIVE-AA0CC/2020|2020-03-23|EPI\_ISL\_517400|Original|hCoV-19^^England|Human|Liverpool Clinical Laboratories|COVID-19 Genomics UK (COG-UK) Consortium|Haldenby|United Kingdom

>Spike|hCoV-19/Australia/NSW650/2020|2020-07-11|EPI\_ISL\_498769|Original|hCoV-19^^New South Wales|Human|Laverty Pathology|NSW Health Pathology - Institute of Clinical Pathology and Medical Research; Westmead Hospital; University of Sydney|Gall|Australia

>Spike|hCoV-19/Germany/BY-MVP-0270/2020|2020-05-19|EPI\_ISL\_466912|Original|hCoV-19^^Bavaria|Human|Max von Pettenkofer Institute|Laboratory for Functional Genome Analysis|Graf|Germany

>Spike|hCoV-19/England/20169040504/2020|2020-04-18|EPI\_ISL\_465248|Original|hCoV-19^^England|Human|Respiratory Virus Unit|Respiratory Virus Unit|Platt|United Kingdom

>Spike|hCoV-19/USA/CA-CZB-13088/2020|2020-05-08|EPI\_ISL\_672066|Original|hCoV-19^^California|Human|Alameda County Public Health Lab|Chan-Zuckerberg Biohub|Bhatt|USA

>Spike|hCoV-19/Wales/PHWC-16AD75/2020|2020-09-13|EPI\_ISL\_560194|Original|hCoV-19^^Wales|Human|Wales Specialist Virology Centre Sequencing lab|COVID-19 Genomics UK (COG-UK) Consortium|Moore|United Kingdom

>Spike|hCoV-19/England/ALDP-CB51A1/2020|2020-12-18|EPI\_ISL\_761748|Original|hCoV-19^^England|Human|Lighthouse Lab in Alderley Park|Wellcome Sanger Institute for the COVID-19 Genomics UK (COG-UK) Consortium|Davies|United Kingdom

>Spike|hCoV-19/USA/FL-BPHL-1024/2020|2020-07-22|EPI\_ISL\_517914|Original|hCoV-19^^Florida|Human|Florida Bureau of Public Health Laboratories|Florida Bureau of Public Health Laboratories|Blanton|USA

>Spike|hCoV-19/Wales/PHWC-4A1F00/2020|2020-12-14|EPI\_ISL\_743831|Original|hCoV-19^^Wales|Human|Wales Specialist Virology Centre Sequencing lab|COVID-19 Genomics UK (COG-UK) Consortium|Moore|United Kingdom

>Spike|hCoV-19/England/BIRM-5E425/2020|2020-03-24|EPI\_ISL\_444295|Original|hCoV-19^^England|Human|University of Birmingham|COVID-19 Genomics UK (COG-UK) Consortium|Loman|United Kingdom

>Spike|hCoV-19/England/ALDP-9C5D07/2020|2020-09-10|EPI\_ISL\_567630|Original|hCoV-19^^England|Human|Lighthouse Lab in Alderley Park|Wellcome Sanger Institute for the COVID-19 Genomics UK (COG-UK) consortium|Davies|United Kingdom

>Spike|hCoV-19/England/QEUEH-B6C526/2020|2020-11-11|EPI\_ISL\_661622|Original|hCoV-19^^England|Human|Lighthouse Lab in Glasgow|Wellcome Sanger Institute for the COVID-19 Genomics UK (COG-UK) Consortium|Davies|United Kingdom

>Spike|hCoV-19/USA/MA-MASPHL-00352/2020|2020-04-28|EPI\_ISL\_693180|Original|hCoV-19^^Massachusetts|Human|Massachusetts State Public Health Laboratory|Massachusetts State Public Health Laboratory|Lang|USA

>Spike|hCoV-19/Wales/PHWC-16B327/2020|2020-09-15|EPI\_ISL\_560274|Original|hCoV-19^^Wales|Human|Wales Specialist Virology Centre Sequencing lab|COVID-19 Genomics UK (COG-UK) Consortium|Moore|United Kingdom

>Spike|hCoV-19/England/ALDP-94ABF1/2020|2020-06-11|EPI\_ISL\_556507|Original|hCoV-19^^England|Human|Lighthouse Lab in Alderley Park|Wellcome Sanger Institute for the COVID-19 Genomics UK (COG-UK) consortium|Davies|United Kingdom

>Spike|hCoV-19/North Macedonia/9451/2020|2020-08-06|EPI\_ISL\_678248|Original|hCoV-19^^Skopje|Human|Center for public health - Skopje|Research Center for Genetic Engineering and Biotechnology \Georgi D. Efremov\u201d|Dimovski|North Macedonia

>Spike|hCoV-19/England/NOTT-11F50E/2020|2020-11-24|EPI\_ISL\_706433|Original|hCoV-19^^England|Human|Queens Medical Centre|COVID-19 Genomics UK (COG-UK) Consortium|Loose|United Kingdom

>Spike|hCoV-19/USA/MN-MDH-1525/2020|2020-07-14|EPI\_ISL\_527590|Original|hCoV-19^^Minnesota|Human|Minnesota Department of Health|Minnesota Department of Health|Garfin|USA

>Spike|hCoV-19/England/CAMB-735AF/2020|2020-03-20|EPI\_ISL\_440164|Original|hCoV-19^^England|Human|Department of Pathology|Wellcome Sanger Institute for the COVID-19 Genomics UK (COG-UK) consortium|Amato|United Kingdom

>Spike|hCoV-19/Kenya/C5178/2020|2020-05-09|EPI\_ISL\_568753|Original|hCoV-19^^Mombasa|Human|KEMRI-Wellcome Trust Research Programme|KEMRI-CGMR-C Kilifi|KEMRI-Wellcome Trust Research Programme|KEMRI-CGMR-C Kilifi|Githinji|Kenya

>Spike|hCoV-19/England/QEUEH-9DCB4F/2020|2020-09-21|EPI\_ISL\_580924|Original|hCoV-19^^England|Human|Lighthouse Lab in Glasgow|Wellcome Sanger Institute for the COVID-19 Genomics UK (COG-UK) consortium|Davies|United Kingdom

>Spike|hCoV-19/USA/CA-CZB-1707/2020|2020-04-02|EPI\_ISL\_468639|Original|hCoV-19^^California|Human|Contra Costa Public Health Lab|Chan-Zuckerberg Biohub|McGeever|USA

>Spike|hCoV-19/USA/TX-HMH-1742/2020|2020-04-18|EPI\_ISL\_542808|Original|hCoV-19^^Texas|Human|Houston Methodist Hospital|Houston Methodist Hospital|Long|USA

>Spike|hCoV-19/England/CAMC-9B1BE6/2020|2020-09-04|EPI\_ISL\_566631|Original|hCoV-19^^England|Human|Lighthouse Lab in Cambridge|Wellcome Sanger Institute for the COVID-19 Genomics UK (COG-UK) consortium|Davies|United Kingdom

>Spike|hCoV-19/USA/OR-OHSU-3101/2020|2020-09-30|EPI\_ISL\_667482|Original|hCoV-19^^Oregon|Human|OHSU Lab Services Molecular Microbiology Lab|Oregon SARS-CoV-2 Genome Sequencing Center|O'Roak|USA

>Spike|hCoV-19/USA/MI-MDHHS-SC22081/2020|2020-03-19|EPI\_ISL\_594193|Original|hCoV-19^^Michigan|Human|Michigan Department of Health and Human Services|Michigan Department of Health and Human Services|Jacob|USA

>Spike|hCoV-19/USA/CO-CDPHE-2004220752/2020|2020-04-21|EPI\_ISL\_710187|Original|hCoV-19^^Colorado|Human|Colorado Department of Public Health and Environment|Colorado Department of Public Health and Environment|Bankers|USA

>Spike|hCoV-19/USA/CA-CZB-14355/2020|2020-07-15|EPI\_ISL\_739083|Original|hCoV-19^^California|Human|Alameda County Public Health Lab|Chan-Zuckerberg Biohub|Kamm|USA

>Spike|hCoV-19/USA/WI-GMF-16096/2020|2020-08-18|EPI\_ISL\_547717|Original|hCoV-19^^Wisconsin|Human|Gundersen Molecular Diagnostics Laboratory|Kabara Cancer Research Institute|Kenny|USA

>Spike|hCoV-19/USA/NY-Wadsworth-200243-01/2020|2020-06-23|EPI\_ISL\_677076|Original|hCoV-19^^New York|Human|Masonic Medical Research Institute|Wadsworth Center|Lasek-Nesselquist|USA

>Spike|hCoV-19/Wales/PHWC-489A67/2020|2020-10-27|EPI\_ISL\_652444|Original|hCoV-19^^Wales|Human|Wales Specialist Virology Centre Sequencing lab|COVID-19 Genomics UK (COG-UK) Consortium|Moore|United Kingdom

>Spike|hCoV-19/England/NOTT-119AAB/2020|2020-11-04|EPI\_ISL\_627722|Original|hCoV-19^^England|Human|Queens Medical Centre|COVID-19 Genomics UK (COG-UK) Consortium|Loose|United Kingdom

>Spike|hCoV-19/India/MH-ACTREC-267/2020|2020-07-09|EPI\_ISL\_699919|Original|hCoV-19^^Maharashtra|Human|Hematopathology Laboratory|Hematopathology Laboratory|Patkar|India

>Spike|hCoV-19/Brazil/RS-00606/2020|2020-11-24|EPI\_ISL\_770558|Original|hCoV-19^^Rio Grande do Sul|Human|Laborat\u00f3rio de Microbiologia Molecular - Universidade FEEVALE|Bioinformatics Laboratory / LNCC|Almeida|Brazil

>Spike|hCoV-19/England/MILK-970E62/2020|2020-08-18|EPI\_ISL\_553012|Original|hCoV-19^^England|Human|Lighthouse Lab in Milton Keynes|Wellcome Sanger Institute for the COVID-19 Genomics UK (COG-UK) consortium|Davies|United Kingdom

>Spike|hCoV-19/Scotland/CVR3290/2020|2020-05-06|EPI\_ISL\_493852|Original|hCoV-19^^Scotland|Human|West of Scotland Specialist Virology Centre|COVID-19 Genomics UK (COG-UK) Consortium|Robertson|United Kingdom

>Spike|hCoV-19/USA/CA-CHLA-PLM11371375/2020|2020-12-02|EPI\_ISL\_753592|Original|hCoV-19^^California|Human|Clinical virology Laboratory|Center for Personalized Medicine|Dien Bard|USA

>Spike|hCoV-19/England/NORT-2A534E/2020|2020-09-24|EPI\_ISL\_584687|Original|hCoV-19^^England|Human|Northumbria University / South Tees Hospitals NHS Foundation Trust / North Cumbria Integrated Care NHS Foundation Trust / North Tees and Hartlepool NHS Foundation Trust / Newcastle Hospitals NHS Foundation Trust|COVID-19 Genomics UK (COG-UK) Consortium|Bashton|United Kingdom

>Spike|hCoV-19/Australia/NSW1097/2020|2020-09-03|EPI\_ISL\_593764|Original|hCoV-19^^New South Wales|Human|Sydney South West Pathology Service (SSWPS) - Liverpool Hospital - NSW Health Pathology|NSW Health Pathology - Institute of Clinical Pathology and Medical Research; Westmead Hospital; University of Sydney|Gall|Australia

>Spike|hCoV-19/Ireland/WD-NVRL-20IRL80813/2020|2020-04-17|EPI\_ISL\_671932|Original|hCoV-19^^Waterford|Human|National Virus Reference Laboratory|National Virus Reference Laboratory|Gonzalez|Ireland

>Spike|hCoV-19/England/CAMB-1B7E0D/2020|2020-10-13|EPI\_ISL\_637460|Original|hCoV-19^^England|Human|Department of Pathology|COVID-19 Genomics UK (COG-UK) Consortium|Goodfellow|United Kingdom

>Spike|hCoV-19/England/MILK-BABAD1/2020|2020-11-18|EPI\_ISL\_681393|Original|hCoV-19^^England|Human|Lighthouse Lab in Milton Keynes|Wellcome Sanger Institute for the COVID-19 Genomics UK (COG-UK) Consortium|Davies|United Kingdom

>Spike|hCoV-19/England/CAMC-B9A923/2020|2020-11-15|EPI\_ISL\_673431|Original|hCoV-19^^England|Human|Lighthouse Lab in Cambridge|Wellcome Sanger Institute for the COVID-19 Genomics UK (COG-UK) Consortium|Davies|United Kingdom

>Spike|hCoV-19/Denmark/DCGC-4083/2020|2020-09-14|EPI\_ISL\_622039|Original|hCoV-19^^Hovedstaden|Human|Department of Virus and Microbiological Special Diagnostics|Albertsen lab|Michaelsen|Denmark



>Spike|hCoV-19/Denmark/DCGC-8716/2020|2020-10-26|EPI\_ISL\_626028|Original|hCoV-19^^Midtjylland|Human|Department of Virus and Microbiological Special Diagnostics|Albertsen lab|Michaelsen|Denmark

>Spike|hCoV-19/Spain/PV-IBV-000891/2020|2020-03-26|EPI\_ISL\_452672|Original|hCoV-19^^Basque Country|Human|Servicio de Microbiolog\u00eda. Hospital Universitario Donostia. OSI Donostialdea. \u00c1rea de Enfermedades Infecciosas|SeqCOVID-SPAIN consortium/IBV (CSIC)|Comas|Spain

>Spike|hCoV-19/Ireland/D-NVRL-MPA42736/2020|2020-05-01|EPI\_ISL\_671338|Original|hCoV-19^^Dublin|Human|National Virus Reference Laboratory|Irish Coronavirus Sequencing Consortium - Teagasc Moorepark|Walsh|Ireland

>Spike|hCoV-19/Austria/CeMM0254/2020|2020-03-22|EPI\_ISL\_438083|Original|hCoV-19^^Vienna|Human|Center for Virology|Bergthaler laboratory|Bergthaler|Austria

>Spike|hCoV-19/Luxembourg/LNS0194872/2020|2020-10-23|EPI\_ISL\_739735|Original|hCoV-19^^Luxembourg|Human|Laboratoire national de sant\u00e9|Laboratoire national de sant\u00e9|Wienecke-Baldacchino|Luxembourg

>Spike|hCoV-19/Denmark/DCGC-18201/2020|2020-12-14|EPI\_ISL\_749811|Original|hCoV-19^^Hovedstaden|Human|Department of Virus and Microbiological Special Diagnostics|Albertsen Lab|Michaelsen|Denmark

>Spike|hCoV-19/Scotland/EDB4439/2020|2020-05-04|EPI\_ISL\_493901|Original|hCoV-19^^Scotland|Human|Virology Department|COVID-19 Genomics UK (COG-UK) Consortium|Williams|United Kingdom

>Spike|hCoV-19/Peru/LIM-INS-138/2020|2020-03-17|EPI\_ISL\_536533|Original|hCoV-19^^Lima|Human|Instituto Nacional de Salud|Laboratorio de Infecciones Respiratorias Agudas|Lopez|Peru

>Spike|hCoV-19/England/ALDP-95382B/2020|2020-06-13|EPI\_ISL\_553816|Original|hCoV-19^^England|Human|Lighthouse Lab in Alderley Park|Wellcome Sanger Institute for the COVID-19 Genomics UK (COG-UK) consortium|Davies|United Kingdom

>Spike|hCoV-19/USA/UT-04196/2020|2020-05-14|EPI\_ISL\_493056|Original|hCoV-19^^Utah|Human|Utah Public Health Laboratory|Utah Public Health Laboratory|Butz|USA

>Spike|hCoV-19/Australia/VIC4684/2020|2020-07-15|EPI\_ISL\_519072|Original|hCoV-19^^Victoria|Human|Microbiological Diagnostic Unit - Public Health Laboratory (MDU-PHL)|MDU-PHL|Schultz|Australia

>Spike|hCoV-19/Northern Ireland/NIRE-10727B/2020|2020-03-31|EPI\_ISL\_585130|Original|hCoV-19^^Northern Ireland|Human|Regional Virus Laboratory|COVID-19 Genomics UK (COG-UK) Consortium|Fairley|United Kingdom

>Spike|hCoV-19/Portugal/PT0513/2020|2020-03-20|EPI\_ISL\_454237|Original|hCoV-19^^Portugal|Human|unknown|Instituto Nacional de Saude (INSA)|Borges|Portugal

>Spike|hCoV-19/Hong Kong/VM20127935/2020|2020-10-04|EPI\_ISL\_760042|Original|hCoV-19^^Hong Kong|Human|Hong Kong Department of Health|School of Public Health|Chu|China

>Spike|hCoV-19/Scotland/QEUA-B11010/2020|2020-11-03|EPI\_ISL\_649529|Original|hCoV-19^^Scotland|Human|Lighthouse Lab in Glasgow|Wellcome Sanger Institute for the COVID-19 Genomics UK (COG-UK) Consortium|Davies|United Kingdom

>Spike|hCoV-19/USA/TX-HMH-MCoV-10450/2020|2020-07-08|EPI\_ISL\_789483|Original|hCoV-19^^Texas|Human|Houston Methodist Hospital|Houston Methodist Hospital|Long|USA

>Spike|hCoV-19/England/MILK-ABC1D9/2020|2020-10-20|EPI\_ISL\_630973|Original|hCoV-19^^England|Human|Lighthouse Lab in Milton Keynes|Wellcome Sanger Institute for the COVID-19 Genomics UK (COG-UK) consortium|Davies|United Kingdom

>Spike|hCoV-19/USA/MN-MDH-1159/2020|2020-05-04|EPI\_ISL\_476744|Original|hCoV-19^^Minnesota|Human|Minnesota Department of Health|Minnesota Department of Health|Garfin|USA

>Spike|hCoV-19/USA/FL-BPHL-1441/2020|2020-09-08|EPI\_ISL\_549223|Original|hCoV-19^^Florida|Human|Florida Bureau of Public Health Laboratories|Florida Bureau of Public Health Laboratories|Blanton|USA

>Spike|hCoV-19/Belgium/regu-0507537/2020|2020-05-07|EPI\_ISL\_734707|Original|hCoV-19^^Willaupuis|Human|UZ Leuven|KU Leuven|Maes|Belgium

>Spike|hCoV-19/Denmark/DCGC-18539/2020|2020-12-07|EPI\_ISL\_750029|Original|hCoV-19^^Hovedstaden|Human|Department of Virus and Microbiological Special Diagnostics|Albertsen Lab|Michaelsen|Denmark

>Spike|hCoV-19/Nigeria/OS-CV297/2020|2020-08-04|EPI\_ISL\_729976|Original|hCoV-19^^Osun State|Human|Nigeria Centre for Disease Control (NCDC)|African Centre of Excellence for Genomics of Infectious Diseases (ACEGID)|Oluniyi|Nigeria

>Spike|hCoV-19/Japan/PG-7453/2020|2020-07-00|EPI\_ISL\_688555|Original|hCoV-19^^Japan|Human|Pathogen Genomics Center|Pathogen Genomics Center|Sekizuka|Japan

>Spike|hCoV-19/England/LOND-124FB3C/2020|2020-10-01|EPI\_ISL\_665185|Original|hCoV-19^^England|Human|University College London Hospital|COVID-19 Genomics UK (COG-UK) Consortium|Byott|United Kingdom

>Spike|hCoV-19/Switzerland/ZH-ETHZ-380373/2020|2020-11-22|EPI\_ISL\_721954|Original|hCoV-19^^Zurich|Human|Viollier AG|Department of Biosystems Science and Engineering|Nadeau|Switzerland

>Spike|hCoV-19/England/ALDP-70A01E/2020|2020-06-30|EPI\_ISL\_557708|Original|hCoV-19^^England|Human|Lighthouse Lab in Alderley Park|Wellcome Sanger Institute for the COVID-19 Genomics UK (COG-UK) consortium|Davies|United Kingdom

>Spike|hCoV-19/USA/MI-MDHHS-SC20989/2020|2020-05-30|EPI\_ISL\_507776|Original|hCoV-19^^Michigan|Human|Michigan Department of Health and Human Services|Michigan Department of Health and Human Services|Blankenship|USA

>Spike|hCoV-19/Scotland/EDB1566/2020|2020-04-13|EPI\_ISL\_433083|Original|hCoV-19^^Scotland|Human|Virology Department|COVID-19 Genomics UK (COG-UK) Consortium|Williams|United Kingdom

>Spike|hCoV-19/USA/MI-QDX-301/2020|2020-03-21|EPI\_ISL\_571045|Original|hCoV-19^^Michigan|Human|Quest Diagnostics|Quest Diagnostics|Kagan|USA

>Spike|hCoV-19/England/MILK-9F193B/2020|2020-09-25|EPI\_ISL\_589629|Original|hCoV-19^^England|Human|Lighthouse Lab in Milton Keynes|Wellcome Sanger Institute for the COVID-19 Genomics UK (COG-UK) consortium|Davies|United Kingdom

>Spike|hCoV-19/USA/NY-NYCPHL-000978/2020|2020-10-01|EPI\_ISL\_633006|Original|hCoV-19^^New York|Human|DOHMH Jamaica|New York City Public Health Laboratory|Wang|USA

>Spike|hCoV-19/Denmark/DCGC-19703/2020|2020-12-07|EPI\_ISL\_748530|Original|hCoV-19^^Hovedstaden|Human|Department of Virus and Microbiological Special Diagnostics|Albertsen Lab|Michaelsen|Denmark

>Spike|hCoV-19/Switzerland/AG-ETHZ-190082/2020|2020-07-06|EPI\_ISL\_500938|Original|hCoV-19^^Aargau|Human|Viollier AG|Department of Biosystems Science and Engineering|Nadeau|Switzerland

>Spike|hCoV-19/USA/TX-HMH0128/2020|2020-03-21|EPI\_ISL\_434828|Original|hCoV-19^^Texas|Human|Houston Methodist Hospital|Houston Methodist Hospital|Long|USA

>Spike|hCoV-19/England/ALDP-BC742C/2020|2020-11-22|EPI\_ISL\_721291|Original|hCoV-19^^England|Human|Lighthouse Lab in Alderley Park|Wellcome Sanger Institute for the COVID-19 Genomics UK (COG-UK) Consortium|Davies|United Kingdom

>Spike|hCoV-19/Denmark/DCGC-17005/2020|2020-12-14|EPI\_ISL\_750703|Original|hCoV-19^^Sjaelland|Human|Department of Virus and Microbiological Special Diagnostics|Albertsen Lab|Michaelsen|Denmark

>Spike|hCoV-19/Hong Kong/HKU-200723-095/2020|2020-07-09|EPI\_ISL\_497862|Original|hCoV-19^^Hong Kong|Human|Department of Microbiology|Department of Microbiology|Chan|China

>Spike|hCoV-19/England/NORW-E85F0/2020|2020-04-18|EPI\_ISL\_449166|Original|hCoV-19^^England|Human|Quadram Institute Bioscience|COVID-19 Genomics UK (COG-UK) Consortium|Alikhan|United Kingdom

>Spike|hCoV-19/England/MILK-ACEA51/2020|2020-10-22|EPI\_ISL\_629661|Original|hCoV-19^^England|Human|Lighthouse Lab in Milton Keynes|Wellcome Sanger Institute for the COVID-19 Genomics UK (COG-UK) consortium|Davies|United Kingdom

>Spike|hCoV-19/Scotland/QEUEH-96ED88/2020|2020-08-18|EPI\_ISL\_534510|Original|hCoV-19^^Scotland|Human|NHSGGC West of Scotland Specialist Virology Centre / MRC - University of Glasgow Centre for Virus Research|Wellcome Sanger Institute for the COVID-19 Genomics UK (COG-UK) consortium|Davies|United Kingdom

>Spike|hCoV-19/Australia/VIC13739/2020|2020-09-01|EPI\_ISL\_592312|Original|hCoV-19^^Victoria|Human|Microbiological Diagnostic Unit - Public Health Laboratory (MDU-PHL)|MDU-PHL|Schultz|Australia

>Spike|hCoV-19/Netherlands/UT-EMC-104/2020|2020-09-27|EPI\_ISL\_632502|Original|hCoV-19^^Utrecht|Human|Dutch COVID-19 response team|Erasmus Medical Center|Oude Munnink|Netherlands

>Spike|hCoV-19/USA/UT-UPHL-2012715997/2020|2020-10-25|EPI\_ISL\_745502|Original|hCoV-19^^Utah|Human|Ginkgo Bioworks Clinical Laboratory|Utah Public Health Laboratory|Young|USA

>Spike|hCoV-19/Guadeloupe/IPG-7324/2020|2020-03-13|EPI\_ISL\_613424|Original|hCoV-19^^Sainte-Anne|Human|Institut Pasteur de la Guadeloupe|Institut Pasteur de la Guadeloupe|Enouf|Guadeloupe

>Spike|hCoV-19/Spain/VC-FISABIO-570/2020|2020-03-27|EPI\_ISL\_447501|Original|hCoV-19^^Comunitat Valenciana|Human|Servicio de Microbiología. Hospital Clínico Universitario de Valencia|Sequencing and Bioinformatics Service and Molecular Epidemiology Research Group. FISABIO-Public Health|Gonzalez-Candelas|Spain

>Spike|hCoV-19/Scotland/QEUH-A9B63B/2020|2020-10-20|EPI\_ISL\_625357|Original|hCoV-19^^Scotland|Human|Lighthouse Lab in Glasgow|Wellcome Sanger Institute for the COVID-19 Genomics UK (COG-UK) consortium|Davies|United Kingdom

>Spike|hCoV-19/England/CAMB-7F2F7/2020|2020-04-08|EPI\_ISL\_442943|Original|hCoV-19^^England|Human|Department of Pathology|Wellcome Sanger Institute for the COVID-19 Genomics UK (COG-UK) consortium|Amato|United Kingdom

>Spike|hCoV-19/Denmark/DCGC-20364/2020|2020-12-21|EPI\_ISL\_758893|Original|hCoV-19^^Syddanmark|Human|Department of Virus and Microbiological Special Diagnostics|Albertsen Lab|Michaelsen|Denmark

>Spike|hCoV-19/Romania/USAFSAM-S569/2020|2020-11-28|EPI\_ISL\_738343|Original|hCoV-19^^Romania|Human|Landstuhl Regional Medical Center|United States Air Force School of Aerospace Medicine|Fries|Romania

>Spike|hCoV-19/England/EXET-13DC32/2020|2020-12-02|EPI\_ISL\_724281|Original|hCoV-19^^England|Human|University of Exeter|COVID-19 Genomics UK (COG-UK) Consortium|Temperton|United Kingdom

>Spike|hCoV-19/England/NORW-EB86D/2020|2020-05-05|EPI\_ISL\_472322|Original|hCoV-19^^England|Human|Quadram Institute Bioscience|COVID-19 Genomics UK (COG-UK) Consortium|Alikhan|United Kingdom

>Spike|hCoV-19/England/PORT-2CFD13/2020|2020-05-08|EPI\_ISL\_461989|Original|hCoV-19^^England|Human|Centre for Enzyme Innovation|COVID-19 Genomics UK (COG-UK) Consortium|Robson|United Kingdom

>Spike|hCoV-19/Ireland/LK-UHL7/2020|2020-04-01|EPI\_ISL\_681759|Original|hCoV-19^^Limerick|Human|University Hospital Limerick|Irish Coronavirus Sequencing Consortium - Teagasc Moorepark|Walsh|Ireland

>Spike|hCoV-19/Wales/PHWC-48A7D8/2020|2020-11-03|EPI\_ISL\_650787|Original|hCoV-19^^Wales|Human|Wales Specialist Virology Centre Sequencing lab|COVID-19 Genomics UK (COG-UK) Consortium|Moore|United Kingdom

>Spike|hCoV-19/England/ALDP-9326EC/2020|2020-06-20|EPI\_ISL\_551534|Original|hCoV-19^^England|Human|Lighthouse Lab in Alderley Park|Wellcome Sanger Institute for the COVID-19 Genomics UK (COG-UK) consortium|Davies|United Kingdom

>Spike|hCoV-19/Israel/CVL-n-5856/2020|2020-03-15|EPI\_ISL\_474986|Original|hCoV-19^^Shoam|Human|Israel Central Virology laboratory|Israel Central Virology laboratory|Zuckerman|Israel

>Spike|hCoV-19/Scotland/QEUH-9F4419/2020|2020-09-27|EPI\_ISL\_600636|Original|hCoV-19^^Scotland|Human|Lighthouse Lab in Glasgow|Wellcome Sanger Institute for the COVID-19 Genomics UK (COG-UK) consortium|Davies|United Kingdom

>Spike|hCoV-19/England/ALDP-CAE6E8/2020|2020-12-14|EPI\_ISL\_760989|Original|hCoV-19^^England|Human|Lighthouse Lab in Alderley Park|Wellcome Sanger Institute for the COVID-19 Genomics UK (COG-UK) Consortium|Davies|United Kingdom

>Spike|hCoV-19/England/MILK-9F034D/2020|2020-09-24|EPI\_ISL\_580759|Original|hCoV-19^^England|Human|Lighthouse Lab in Milton Keynes|Wellcome Sanger Institute for the COVID-19 Genomics UK (COG-UK) consortium|Davies|United Kingdom

>Spike|hCoV-19/England/20109001804/2020|2020-03-04|EPI\_ISL\_464498|Original|hCoV-19^^England|Human|Respiratory Virus Unit|Respiratory Virus Unit|Platt|United Kingdom

>Spike|hCoV-19/Northern Ireland/NIRE-107114/2020|2020-03-27|EPI\_ISL\_585111|Original|hCoV-19^^Northern Ireland|Human|Regional Virus Laboratory|COVID-19 Genomics UK (COG-UK) Consortium|Fairley|United Kingdom

>Spike|hCoV-19/USA/TX-HMH-MCoV-15594/2020|2020-10-26|EPI\_ISL\_787078|Original|hCoV-19^^Texas|Human|Houston Methodist Hospital|Houston Methodist Hospital|Long|USA

>Spike|hCoV-19/Germany/BY-ChVir-1482/2020|2020-02-07|EPI\_ISL\_450207|Original|hCoV-19^^Bavaria|Human|Department of Virology|Department of Virology|B\u00f6hmer|Germany

>Spike|hCoV-19/England/CAMB-847A5/2020|2020-03-01|EPI\_ISL\_440513|Original|hCoV-19^^England|Human|Department of Pathology|Wellcome Sanger Institute for the COVID-19 Genomics UK (COG-UK) consortium|Amato|United Kingdom

>Spike|hCoV-19/USA/CruiseA-7/2020|2020-02-17|EPI\_ISL\_413612|Original|hCoV-19^^USA|Human|unknown|Pathogen Discovery|Queen|USA

>Spike|hCoV-19/England/QEUIH-BA0702/2020|2020-11-18|EPI\_ISL\_719633|Original|hCoV-19^^England|Human|Lighthouse Lab in Glasgow|Wellcome Sanger Institute for the COVID-19 Genomics UK (COG-UK) Consortium|Davies|United Kingdom

>Spike|hCoV-19/Wales/PHWC-48073C/2020|2020-10-22|EPI\_ISL\_612924|Original|hCoV-19^^Wales|Human|Wales Specialist Virology Centre Sequencing lab|COVID-19 Genomics UK (COG-UK) Consortium|Moore|United Kingdom

>Spike|hCoV-19/England/ALDP-A6F1F3/2020|2020-10-15|EPI\_ISL\_607272|Original|hCoV-19^^England|Human|Lighthouse Lab in Alderley Park|Wellcome Sanger Institute for the COVID-19 Genomics UK (COG-UK) consortium|Davies|United Kingdom

>Spike|hCoV-19/England/QEUIH-A8C4E8/2020|2020-10-18|EPI\_ISL\_643223|Original|hCoV-19^^England|Human|Lighthouse Lab in Glasgow|Wellcome Sanger Institute for the COVID-19 Genomics UK (COG-UK) Consortium|Davies|United Kingdom

>Spike|hCoV-19/England/QEUIH-9F8354/2020|2020-09-27|EPI\_ISL\_588874|Original|hCoV-19^^England|Human|Lighthouse Lab in Glasgow|Wellcome Sanger Institute for the COVID-19 Genomics UK (COG-UK) consortium|Davies|United Kingdom

>Spike|hCoV-19/SaudiArabia/KAUST-JEDDAH1002/2020|2020-06-23|EPI\_ISL\_512876|Original|hCoV-19^^Jeddah|Human|Pathogen Genomics Lab King Abdullah University of Science and Technology(KAUST)|Pathogen Genomics Lab King Abdullah University of Science and Technology(KAUST)|Mohamed Ghazzali|Saudi Arabia

>Spike|hCoV-19/Australia/TAS35/2020|2020-04-11|EPI\_ISL\_522712|Original|hCoV-19^^Tasmania|Human|Royal Hobart Hospital Microbiology Department|MDU-PHL|Schultz|Australia

>Spike|hCoV-19/England/CAMC-941A1B/2020|2020-07-18|EPI\_ISL\_556827|Original|hCoV-19^^England|Human|Lighthouse Lab in Cambridge|Wellcome Sanger Institute for the COVID-19 Genomics UK (COG-UK) consortium|Davies|United Kingdom

>Spike|hCoV-19/Scotland/QEUIH-AE1FB3/2020|2020-10-27|EPI\_ISL\_649655|Original|hCoV-19^^Scotland|Human|Lighthouse Lab in Glasgow|Wellcome Sanger Institute for the COVID-19 Genomics UK (COG-UK) Consortium|Davies|United Kingdom

>Spike|hCoV-19/Luxembourg/LNS4269918/2020|2020-10-22|EPI\_ISL\_740441|Original|hCoV-19^^Luxembourg|Human|Laboratoire national de sant\u00e9|Laboratoire national de sant\u00e9|Wienecke-Baldacchino|Luxembourg

>Spike|hCoV-19/England/QEUIH-B7D962/2020|2020-11-14|EPI\_ISL\_727835|Original|hCoV-19^^England|Human|Oxford Viromics|COVID-19 Genomics UK (COG-UK) Consortium|Golubchik|United Kingdom

>Spike|hCoV-19/England/ALDP-A503A4/2020|2020-10-07|EPI\_ISL\_597754|Original|hCoV-19^^England|Human|Lighthouse Lab in Alderley Park|Wellcome Sanger Institute for the COVID-19 Genomics UK (COG-UK) consortium|Davies|United Kingdom

>Spike|hCoV-19/Switzerland/GE-SNRCI-7821/2020|2020-03-00|EPI\_ISL\_548203|Original|hCoV-19^^Geneve|Human|Laboratoire de Virologie|Swiss National Reference Centre for Influenza|Gon\u00e7alves Cabecinhas|Switzerland

>Spike|hCoV-19/England/NORW-E9DE8/2020|2020-05-03|EPI\_ISL\_448369|Original|hCoV-19^^England|Human|Quadram Institute Bioscience|COVID-19 Genomics UK (COG-UK) Consortium|Alikhan|United Kingdom

>Spike|hCoV-19/USA/CA-CSMC73/2020|2020-03-26|EPI\_ISL\_475688|Original|hCoV-19^^California|Human|Cedars-Sinai Medical Center|Cedars-Sinai Medical Center|Zhang|USA

>Spike|hCoV-19/England/QEUIH-B7CBF4/2020|2020-11-14|EPI\_ISL\_741812|Original|hCoV-19^^England|Human|Oxford Viromics|COVID-19 Genomics UK (COG-UK) Consortium|Golubchik|United Kingdom

>Spike|hCoV-19/England/MILK-A46D76/2020|2020-10-06|EPI\_ISL\_598332|Original|hCoV-19^^England|Human|Lighthouse Lab in Milton Keynes|Wellcome Sanger Institute for the COVID-19 Genomics UK (COG-UK) consortium|Davies|United Kingdom

>Spike|hCoV-19/Scotland/EDB4905/2020|2020-05-13|EPI\_ISL\_493920|Original|hCoV-19^^Scotland|Human|Virology Department|COVID-19 Genomics UK (COG-UK) Consortium|Williams|United Kingdom

>Spike|hCoV-19/Wales/PHWC-49783F/2020|2020-11-22|EPI\_ISL\_726889|Original|hCoV-19^^Wales|Human|Originating lab|COVID-19 Genomics UK (COG-UK) Consortium|Moore|United Kingdom

>Spike|hCoV-19/Japan/Donner3/2020|2020-04-06|EPI\_ISL\_438948|Original|hCoV-19^^Kanto|Human|Keio University School of Medicine|Keio University School of Medicine|Kosaki|Japan

>Spike|hCoV-19/England/QEUEH-960885/2020|2020-08-04|EPI\_ISL\_532006|Original|hCoV-19^^England|Human|Lighthouse Lab in Glasgow|Wellcome Sanger Institute for the COVID-19 Genomics UK (COG-UK) consortium|Davies|United Kingdom

>Spike|hCoV-19/Wales/PHWC-32445/2020|2020-04-10|EPI\_ISL\_446648|Original|hCoV-19^^Wales|Human|Wales Specialist Virology Centre|Public Health Wales Microbiology Cardiff|Moore|United Kingdom

>Spike|hCoV-19/Japan/PG-8452/2020|2020-09-00|EPI\_ISL\_687551|Original|hCoV-19^^Japan|Human|Fukuoka Institute of Health and Environmental Sciences|Pathogen Genomics Center|Sekizuka|Japan

>Spike|hCoV-19/USA/TX-HMH-2944/2020|2020-06-09|EPI\_ISL\_543880|Original|hCoV-19^^Texas|Human|Houston Methodist Hospital|Houston Methodist Hospital|Long|USA

>Spike|hCoV-19/Australia/VIC4727/2020|2020-07-12|EPI\_ISL\_519115|Original|hCoV-19^^Victoria|Human|Microbiological Diagnostic Unit - Public Health Laboratory (MDU-PHL)|MDU-PHL|Schultz|Australia

>Spike|hCoV-19/Scotland/QEUEH-96E1B9/2020|2020-08-20|EPI\_ISL\_534505|Original|hCoV-19^^Scotland|Human|NHSGGC West of Scotland Specialist Virology Centre / MRC-University of Glasgow Centre for Virus Research|Wellcome Sanger Institute for the COVID-19 Genomics UK (COG-UK) consortium|Davies|United Kingdom

>Spike|hCoV-19/England/LIVE-99233/2020|2020-04-07|EPI\_ISL\_439700|Original|hCoV-19^^England|Human|Liverpool Clinical Laboratories|COVID-19 Genomics UK (COG-UK) Consortium|Haldenby|United Kingdom

>Spike|hCoV-19/England/BRIS-12AAB6/2020|2020-04-29|EPI\_ISL\_458363|Original|hCoV-19^^England|Human|PHE South West Regional Laboratory|Wellcome Sanger Institute for the COVID-19 Genomics UK (COG-UK) consortium|Davies|United Kingdom

>Spike|hCoV-19/England/204991204/2020|2020-12-05|EPI\_ISL\_723035|Original|hCoV-19^^England|Human|Respiratory Virus Unit|COVID-19 Genomics UK (COG-UK) Consortium|Platt|United Kingdom

>Spike|hCoV-19/England/QEUEH-9FF126/2020|2020-10-02|EPI\_ISL\_600490|Original|hCoV-19^^England|Human|Lighthouse Lab in Glasgow|Wellcome Sanger Institute for the COVID-19 Genomics UK (COG-UK) consortium|Davies|United Kingdom

>Spike|hCoV-19/England/NORW-F8F68/2020|2020-12-01|EPI\_ISL\_706407|Original|hCoV-19^^England|Human|Quadram Institute Bioscience|COVID-19 Genomics UK (COG-UK) Consortium|Alikhan|United Kingdom

>Spike|hCoV-19/Denmark/DCGC-985/2020|2020-03-09|EPI\_ISL\_614570|Original|hCoV-19^^Sjælland|Human|Department of Virus and Microbiological Special Diagnostics|Albertsen lab|Michaelsen|Denmark

>Spike|hCoV-19/England/SHEF-D0FDF/2020|2020-05-07|EPI\_ISL\_475493|Original|hCoV-19^^England|Human|Virology Department|COVID-19 Genomics UK (COG-UK) Consortium|de Silva|United Kingdom

>Spike|hCoV-19/England/ALDP-A879B1/2020|2020-10-16|EPI\_ISL\_606068|Original|hCoV-19^^England|Human|Lighthouse Lab in Alderley Park|Wellcome Sanger Institute for the COVID-19 Genomics UK (COG-UK) consortium|Davies|United Kingdom

>Spike|hCoV-19/Denmark/DCGC-3093/2020|2020-08-31|EPI\_ISL\_616873|Original|hCoV-19^^Midtjylland|Human|Department of Virus and Microbiological Special Diagnostics|Albertsen lab|Michaelsen|Denmark

>Spike|hCoV-19/USA/NY-NYUMC177/2020|2020-04-01|EPI\_ISL\_427473|Original|hCoV-19^^New York|Human|NYU Langone Health|Departments of Pathology and Medicine|Maurano|USA

>Spike|hCoV-19/England/QEUEH-AE1B28/2020|2020-10-26|EPI\_ISL\_633516|Original|hCoV-19^^England|Human|Lighthouse Lab in Glasgow|Wellcome Sanger Institute for the COVID-19 Genomics UK (COG-UK) consortium|Davies|United Kingdom

>Spike|hCoV-19/Malaysia/UNIMAS-B057/2020|2020-11-02|EPI\_ISL\_718191|Original|hCoV-19^^Sarawak|Human|Borneo Medical Centre|Institute of Health and Community Medicine|Jonathan|Malaysia

>Spike|hCoV-19/England/ALDP-9E69EE/2020|2020-09-24|EPI\_ISL\_580542|Original|hCoV-19^^England|Human|Lighthouse Lab in Alderley Park|Wellcome Sanger Institute for the COVID-19 Genomics UK (COG-UK) consortium|Davies|United Kingdom

>Spike|hCoV-19/USA/WI-UW-1891/2020|2020-09-22|EPI\_ISL\_605760|Original|hCoV-19^^Wisconsin|Human|University of Wisconsin-Madison AIDS Vaccine Research Laboratories|University of Wisconsin-Madison AIDS Vaccine Research Laboratories|Baczenas|USA

>Spike|hCoV-19/England/MILK-BB04AE/2020|2020-11-17|EPI\_ISL\_720238|Original|hCoV-19^^England|Human|Lighthouse Lab in Milton Keynes|Wellcome Sanger Institute for the COVID-19 Genomics UK (COG-UK) Consortium|Davies|United Kingdom

>Spike|hCoV-19/England/ALDP-BB3C94/2020|2020-11-19|EPI\_ISL\_701914|Original|hCoV-19^^England|Human|Lighthouse Lab in Alderley Park|Wellcome Sanger Institute for the COVID-19 Genomics UK (COG-UK) Consortium|Davies|United Kingdom

>Spike|hCoV-19/Northern Ireland/CAMC-9BFDB5/2020|2020-09-09|EPI\_ISL\_573759|Original|hCoV-19^^Northern Ireland|Human|Oxford Viromics|COVID-19 Genomics UK (COG-UK) Consortium|Golubchik|United Kingdom

>Spike|hCoV-19/England/QEUEH-95F36A/2020|2020-08-06|EPI\_ISL\_532445|Original|hCoV-19^^England|Human|Lighthouse Lab in Glasgow|Wellcome Sanger Institute for the COVID-19 Genomics UK (COG-UK) consortium|Davies|United Kingdom

>Spike|hCoV-19/USA/LA-GBCL-26556542/2020|2020-04-15|EPI\_ISL\_485180|Original|hCoV-19^^Louisiana|Human|River Road Testing Lab|Ginkgo Bioworks Clinical Laboratory|Smith|USA

>Spike|hCoV-19/USA/WA-UW-12828/2020|2020-06-29|EPI\_ISL\_570906|Original|hCoV-19^^Washington|Human|UW Virology Lab|UW Virology Lab|Roychoudhury|USA

>Spike|hCoV-19/England/20129034504/2020|2020-03-19|EPI\_ISL\_424026|Original|hCoV-19^^England|Human|Respiratory Virus Unit|Respiratory Virus Unit|Platt|United Kingdom

>Spike|hCoV-19/Wales/PHWC-4950A2/2020|2020-11-25|EPI\_ISL\_726296|Original|hCoV-19^^Wales|Human|Originating lab|COVID-19 Genomics UK (COG-UK) Consortium|Moore|United Kingdom

>Spike|hCoV-19/England/CAMC-B08E30/2020|2020-10-29|EPI\_ISL\_673100|Original|hCoV-19^^England|Human|Lighthouse Lab in Cambridge|Wellcome Sanger Institute for the COVID-19 Genomics UK (COG-UK) Consortium|Davies|United Kingdom

>Spike|hCoV-19/USA/TX-HMH-MCoV-19101/2020|2020-11-23|EPI\_ISL\_783624|Original|hCoV-19^^Texas|Human|Houston Methodist Hospital|Houston Methodist Hospital|Long|USA

>Spike|hCoV-19/Wales/PHWC-16B7FE/2020|2020-09-15|EPI\_ISL\_573905|Original|hCoV-19^^Wales|Human|Wales Specialist Virology Centre Sequencing lab|COVID-19 Genomics UK (COG-UK) Consortium|Moore|United Kingdom

>Spike|hCoV-19/USA/UT-UPHL-2012029219/2020|2020-07-27|EPI\_ISL\_745719|Original|hCoV-19^^Utah|Human|Ginkgo Bioworks Clinical Laboratory|Utah Public Health Laboratory|Young|USA

>Spike|hCoV-19/Russia/PER-RII-MH2818S/2020|2020-09-22|EPI\_ISL\_639964|Original|hCoV-19^^Perm|Human|HELIX LLC|WHO National Influenza Centre Russian Federation|Komissarov|Russia

>Spike|hCoV-19/USA/NY-NYUMC225/2020|2020-03-18|EPI\_ISL\_427520|Original|hCoV-19^^New York|Human|NYU Langone Health|Departments of Pathology and Medicine|Maurano|USA

>Spike|hCoV-19/England/CAMB-82A71/2020|2020-04-23|EPI\_ISL\_438652|Original|hCoV-19^^England|Human|Department of Pathology|COVID-19 Genomics UK (COG-UK) Consortium|Meredith|United Kingdom

>Spike|hCoV-19/Belgium/regal-11301201/2020|2020-11-30|EPI\_ISL\_735237|Original|hCoV-19^^Assenede|Human|UZ Leuven|KU Leuven|Maes|Belgium

>Spike|hCoV-19/England/QEUEH-96057F/2020|2020-08-02|EPI\_ISL\_532013|Original|hCoV-19^^England|Human|Lighthouse Lab in Glasgow|Wellcome Sanger Institute for the COVID-19 Genomics UK (COG-UK) consortium|Davies|United Kingdom

>Spike|hCoV-19/Canada/ON-PHL-20-00032/2020|2020-00-00|EPI\_ISL\_548713|Original|hCoV-19^^Ontario|Human|Public Health Ontario Laboratory|Public Health Ontario Laboratory|Guthrie|Canada

>Spike|hCoV-19/USA/TX-DSHS-1805/2020|2020-06-13|EPI\_ISL\_738158|Original|hCoV-19^^Texas|Human|Texas Department of State Health Services|Texas Department of State Health Services|Rahman|USA

>Spike|hCoV-19/Wales/PHWC-16ED08/2020|2020-10-04|EPI\_ISL\_585853|Original|hCoV-19^^Wales|Human|Wales Specialist Virology Centre Sequencing lab|COVID-19 Genomics UK (COG-UK) Consortium|Moore|United Kingdom

>Spike|hCoV-19/Spain/AR-IBV-005119/2020|2020-04-26|EPI\_ISL\_510385|Original|hCoV-19^^Aragon|Human|Servicio de Microbiolog\u00eda|SeqCOVID-SPAIN consortium/IBV (CSIC) |Comas|Spain

>Spike|hCoV-19/USA/MA-MGH-00036/2020|2020-03-25|EPI\_ISL\_460421|Original|hCoV-19^^Massachusetts|Human|Massachusetts General Hospital|Infectious Disease Program|Lemieux|USA

>Spike|hCoV-19/England/QEUH-B9F01A/2020|2020-11-18|EPI\_ISL\_719929|Original|hCoV-19^^England|Human|Lighthouse Lab in Glasgow|Wellcome Sanger Institute for the COVID-19 Genomics UK (COG-UK) Consortium|Davies|United Kingdom

>Spike|hCoV-19/Denmark/DCGC-21242/2020|2020-12-21|EPI\_ISL\_759083|Original|hCoV-19^^Hovedstaden|Human|Department of Virus and Microbiological Special Diagnostics|Albertsen Lab|Michaelsen|Denmark

>Spike|hCoV-19/Spain/MD-IBV-99008708/2020|2020-10-07|EPI\_ISL\_654286|Original|hCoV-19^^Madrid|Human|Hospital General Universitario Gregorio Mara\u00f1\u00f3n|SeqCOVID-SPAIN consortium/IBV (CSIC) |Comas|Spain

>Spike|hCoV-19/England/204191997/2020|2020-10-11|EPI\_ISL\_603196|Original|hCoV-19^^England|Human|Respiratory Virus Unit|Respiratory Virus Unit|Platt|United Kingdom

>Spike|hCoV-19/Scotland/QEUH-9CF541/2020|2020-09-17|EPI\_ISL\_601990|Original|hCoV-19^^Scotland|Human|Lighthouse Lab in Glasgow|Wellcome Sanger Institute for the COVID-19 Genomics UK (COG-UK) consortium|Davies|United Kingdom

>Spike|hCoV-19/USA/WA-UW-46899/2020|2020-12-12|EPI\_ISL\_756200|Original|hCoV-19^^Washington|Human|UW Virology Lab|UW Virology Lab|Roychoudhury|USA

>Spike|hCoV-19/USA/CA-ALSR-1066-SAN/2020|2020-06-22|EPI\_ISL\_483496|Original|hCoV-19^^California|Human|UC San Diego Center for Advanced Laboratory Medicine|Andersen lab at Scripps Research|Gangavarapu|USA

>Spike|hCoV-19/England/QEUH-C3242B/2020|2020-12-11|EPI\_ISL\_782625|Original|hCoV-19^^England|Human|Lighthouse Lab in Glasgow|Wellcome Sanger Institute for the COVID-19 Genomics UK (COG-UK) Consortium|Davies|United Kingdom

>Spike|hCoV-19/England/MILK-B95ABC/2020|2020-11-13|EPI\_ISL\_674916|Original|hCoV-19^^England|Human|Lighthouse Lab in Milton Keynes|Wellcome Sanger Institute for the COVID-19 Genomics UK (COG-UK) Consortium|Davies|United Kingdom

>Spike|hCoV-19/Denmark/DCGC-9899/2020|2020-11-09|EPI\_ISL\_669262|Original|hCoV-19^^Denmark|Human|Department of Virus and Microbiological Special Diagnostics|Albertsen Lab|Michaelsen|Denmark

>Spike|hCoV-19/USA/TX-HMH-MCoV-15800/2020|2020-07-09|EPI\_ISL\_785484|Original|hCoV-19^^Texas|Human|Houston Methodist Hospital|Houston Methodist Hospital|Long|USA

>Spike|hCoV-19/England/MILK-A7B07F/2020|2020-10-14|EPI\_ISL\_607482|Original|hCoV-19^^England|Human|Lighthouse Lab in Milton Keynes|Wellcome Sanger Institute for the COVID-19 Genomics UK (COG-UK) consortium|Davies|United Kingdom

>Spike|hCoV-19/South Korea/KCDC2520/2020|2020-06-16|EPI\_ISL\_514923|Original|hCoV-19^^South Korea|Human|Division of Viral Diseases|Division of Viral Diseases|Kim|South Korea

>Spike|hCoV-19/England/20110097506/2020|2020-03-08|EPI\_ISL\_417313|Original|hCoV-19^^England|Human|Respiratory Virus Unit|Respiratory Virus Unit|Platt|United Kingdom

>Spike|hCoV-19/England/NORW-EAAB3/2020|2020-05-09|EPI\_ISL\_457353|Original|hCoV-19^^England|Human|Quadram Institute Bioscience|COVID-19 Genomics UK (COG-UK) Consortium|Alikhan|United Kingdom

>Spike|hCoV-19/USA/TX-HMH-6571/2020|2020-06-24|EPI\_ISL\_546094|Original|hCoV-19^^Texas|Human|Houston Methodist Hospital|Houston Methodist Hospital|Long|USA

>Spike|hCoV-19/England/QEUH-B40FC0/2020|2020-11-08|EPI\_ISL\_658450|Original|hCoV-19^^England|Human|Lighthouse Lab in Glasgow|Wellcome Sanger Institute for the COVID-19 Genomics UK (COG-UK) Consortium|Davies|United Kingdom

>Spike|hCoV-19/USA/VA-DCLS-2153/2020|2020-10-27|EPI\_ISL\_734236|Original|hCoV-19^^Virginia|Human|Virginia Division of Consolidated Laboratory Services (DCLS)|Virginia Division of Consolidated Laboratory Services (DCLS)|St. Jacques|USA

>Spike|hCoV-19/South Africa/KRISP-K002314/2020|2020-07-22|EPI\_ISL\_515690|Original|hCoV-19^^KwaZulu-Natal|Human|NHL-IALCH|KRISP|de Oliveira|South Africa

>Spike|hCoV-19/England/CAMC-BC1BE1/2020|2020-11-22|EPI\_ISL\_704868|Original|hCoV-19^^England|Human|Lighthouse Lab in Cambridge|Wellcome Sanger Institute for the COVID-19 Genomics UK (COG-UK) Consortium|Davies|United Kingdom

>Spike|hCoV-19/SaudiArabia/KAUST-MAKKAH802/2020|2020-04-24|EPI\_ISL\_513257|Original|hCoV-19^^Makkah|Human|Pathogen Genomics Lab King Abdullah University of Science and Technology(KAUST)|Pathogen Genomics Lab King Abdullah University of Science and Technology(KAUST)|Mohamed Ghazzali|Saudi Arabia

>Spike|hCoV-19/USA/FL-BPHL-0265/2020|2020-05-04|EPI\_ISL\_480916|Original|hCoV-19^^Florida|Human|Florida Bureau of Public Health Laboratories|Florida Bureau of Public Health Laboratories|Blanton|USA

>Spike|hCoV-19/Sweden/20-14089/2020|2020-04-27|EPI\_ISL\_450827|Original|hCoV-19^^Uppsala|Human|Uppsala Narakut Aleris|The Public Health Agency of Sweden|Svartstr\u00f6m|Sweden

>Spike|hCoV-19/USA/CA-QDX-2637/2020|2020-03-15|EPI\_ISL\_604902|Original|hCoV-19^^California|Human|Quest Diagnostics|Quest Diagnostics|Kagan|USA

>Spike|hCoV-19/Australia/VIC14998/2020|2020-09-05|EPI\_ISL\_592861|Original|hCoV-19^^Victoria|Human|Microbiological Diagnostic Unit - Public Health Laboratory (MDU-PHL)|MDU-PHL|Schultz|Australia

>Spike|hCoV-19/Germany/NW-HHU-04/2020|2020-02-26|EPI\_ISL\_414499|Original|hCoV-19^^North Rhine-Westphalia|Human|Center of Medical Microbiology|Center of Medical Microbiology|Wienemann|Germany

>Spike|hCoV-19/Canada/QC-LSPQ-L00243347/2020|2020-03-30|EPI\_ISL\_536360|Original|hCoV-19^^Quebec|Human|H\u00f4pital Pierre-Boucher|Laboratoire de sant\u00e9 publique du Qu\u00e9bec|Moreira|Canada

>Spike|hCoV-19/USA/TX-DSHS-0254/2020|2020-04-25|EPI\_ISL\_527827|Original|hCoV-19^^Texas|Human|Texas Department of State Health Services|Texas Department of State Health Services|Rahman|USA

>Spike|hCoV-19/Japan/PG-4333/2020|2020-07-00|EPI\_ISL\_692561|Original|hCoV-19^^Japan|Human|Pathogen Genomics Center|Pathogen Genomics Center|Sekizuka|Japan

>Spike|hCoV-19/USA/CA-CZB-15960/2020|2020-12-01|EPI\_ISL\_739166|Original|hCoV-19^^California|Human|Santa Clara County Public Health Laboratory|Chan-Zuckerberg Biohub|Kamm|USA

>Spike|hCoV-19/Scotland/QEUA-9E482F/2020|2020-09-23|EPI\_ISL\_601045|Original|hCoV-19^^Scotland|Human|Lighthouse Lab in Glasgow|Wellcome Sanger Institute for the COVID-19 Genomics UK (COG-UK) consortium|Davies|United Kingdom

>Spike|hCoV-19/Scotland/QEUA-9439C1/2020|2020-07-31|EPI\_ISL\_532594|Original|hCoV-19^^Scotland|Human|NHSGGC West of Scotland Specialist Virology Centre / MRC-University of Glasgow Centre for Virus Research|Wellcome Sanger Institute for the COVID-19 Genomics UK (COG-UK) consortium|Davies|United Kingdom

>Spike|hCoV-19/USA/CA-ALSR-4433/2020|2020-10-22|EPI\_ISL\_649027|Original|hCoV-19^^California|Human|San Diego County Public Health Laboratory|Andersen lab at Scripps Research|Gangavarapu|USA

>Spike|hCoV-19/Scotland/QEUA-A9C412/2020|2020-10-20|EPI\_ISL\_652641|Original|hCoV-19^^Scotland|Human|Queens Medical Centre|COVID-19 Genomics UK (COG-UK) Consortium|Loose|United Kingdom

>Spike|hCoV-19/England/OXON-B378F/2020|2020-03-24|EPI\_ISL\_534886|Original|hCoV-19^^England|Human|Oxford Viromics|COVID-19 Genomics UK (COG-UK) Consortium|Golubchik|United Kingdom

>Spike|hCoV-19/England/ALDP-C3B64A/2020|2020-12-09|EPI\_ISL\_730812|Original|hCoV-19^^England|Human|Lighthouse Lab in Alderley Park|Wellcome Sanger Institute for the COVID-19 Genomics UK (COG-UK) Consortium|Davies|United Kingdom

>Spike|hCoV-19/England/ALDP-CB3E33/2020|2020-12-19|EPI\_ISL\_761315|Original|hCoV-19^^England|Human|Lighthouse Lab in Alderley Park|Wellcome Sanger Institute for the COVID-19 Genomics UK (COG-UK) Consortium|Davies|United Kingdom



>Spike|hCoV-19/Chile/RM-157618/2020|2020-08-21|EPI\_ISL\_746676|Original|hCoV-19^^Region Metropolitana de Santiago|Human|Genetica Molecular and Subdepartamento de Virologia ISP Chile|Instituto de Salud Publica de Chile|Tognarelli|Chile

>Spike|hCoV-19/USA/WI-UW-2330/2020|2020-11-13|EPI\_ISL\_728096|Original|hCoV-19^^Wisconsin|Human|University of Wisconsin-Madison AIDS Vaccine Research Laboratories|University of Wisconsin-Madison AIDS Vaccine Research Laboratories|Baczenas|USA

>Spike|hCoV-19/England/QEUK-AF409C/2020|2020-10-30|EPI\_ISL\_662998|Original|hCoV-19^^England|Human|Lighthouse Lab in Glasgow|Wellcome Sanger Institute for the COVID-19 Genomics UK (COG-UK) Consortium|Davies|United Kingdom

>Spike|hCoV-19/England/LIVE-A03AF/2020|2020-05-25|EPI\_ISL\_472106|Original|hCoV-19^^England|Human|Liverpool Clinical Laboratories|COVID-19 Genomics UK (COG-UK) Consortium|Haldenby|United Kingdom

>Spike|hCoV-19/England/MILK-99187C/2020|2020-08-26|EPI\_ISL\_576997|Original|hCoV-19^^England|Human|Northumbria University / South Tees Hospitals NHS Foundation Trust / North Cumbria Integrated Care NHS Foundation Trust / North Tees and Hartlepool NHS Foundation Trust / Newcastle Hospitals NHS Foundation Trust|COVID-19 Genomics UK (COG-UK) Consortium|Bashton|United Kingdom

>Spike|hCoV-19/USA/WI-GMF-23546/2020|2020-10-01|EPI\_ISL\_660874|Original|hCoV-19^^Wisconsin|Human|Gundersen Clinical Microbiology Laboratory|Kabara Cancer Research Institute|Kenny|USA

>Spike|hCoV-19/Spain/CN-IBV-002594/2020|2020-03-12|EPI\_ISL\_474911|Original|hCoV-19^^Canary Islands|Human|Hospital Universitario de Gran Canaria Dr. Negr\u00ededn|SeqCOVID-SPAIN consortium|IBV(CSIC)|Comas|Spain

>Spike|hCoV-19/Denmark/DCGC-4076/2020|2020-09-14|EPI\_ISL\_622032|Original|hCoV-19^^Hovedstaden|Human|Department of Virus and Microbiological Special Diagnostics|Albertsen lab|Michaelsen|Denmark

>Spike|hCoV-19/USA/MI-MDHHS-SC21520/2020|2020-04-03|EPI\_ISL\_516247|Original|hCoV-19^^Michigan|Human|Michigan Department of Health and Human Services|Michigan Department of Health and Human Services|Blankenship|USA

>Spike|hCoV-19/France/NAQ-SC222/2020|2020-03-28|EPI\_ISL\_649970|Original|hCoV-19^^Nouvelle-Aquitaine|Human|CHU Bordeaux|CNR Virus des Infections Respiratoires - France SUD|Bal|France

>Spike|hCoV-19/Brazil/SP-L5-CAMPI114/2020|2020-04-28|EPI\_ISL\_476412|Original|hCoV-19^^S\u00e3o Paulo|Human|Laborat\u00f3rio de Patologia Cl\u00ednica - UNICAMP|Laborat\u00f3rio de Estudos de V\u00edrus Emergentes - UNICAMP|Sabino|Brazil

>Spike|hCoV-19/USA/MI-MDHHS-SC22193/2020|2020-10-20|EPI\_ISL\_614244|Original|hCoV-19^^Michigan|Human|Michigan Department of Health and Human Services|Michigan Department of Health and Human Services|Jacob|USA

>Spike|hCoV-19/Scotland/EDB5464/2020|2020-04-25|EPI\_ISL\_461742|Original|hCoV-19^^Scotland|Human|Virology Department|COVID-19 Genomics UK (COG-UK) Consortium|Williams|United Kingdom

>Spike|hCoV-19/Japan/NGY-NNH-001/2020|2020-03-13|EPI\_ISL\_568556|Original|hCoV-19^^Aichi|Human|Department of Infectious Diseases and Immunology|Clinical Research Center|Iwatani|Japan

>Spike|hCoV-19/Wales/MILK-9C1E44/2020|2020-09-10|EPI\_ISL\_566489|Original|hCoV-19^^Wales|Human|Lighthouse Lab in Milton Keynes|Wellcome Sanger Institute for the COVID-19 Genomics UK (COG-UK) consortium|Davies|United Kingdom

>Spike|hCoV-19/England/ALDP-AA516A/2020|2020-10-22|EPI\_ISL\_623964|Original|hCoV-19^^England|Human|Lighthouse Lab in Alderley Park|Wellcome Sanger Institute for the COVID-19 Genomics UK (COG-UK) consortium|Davies|United Kingdom

>Spike|hCoV-19/Australia/VIC2230/2020|2020-06-21|EPI\_ISL\_521967|Original|hCoV-19^^Victoria|Human|Victorian Infectious Diseases Reference Laboratory (VIDRL)|VIDRL and MDU-PHL|Schultz|Australia

>Spike|hCoV-19/England/CAMB-1BD47E/2020|2020-12-01|EPI\_ISL\_764305|Original|hCoV-19^^England|Human|Department of Pathology|COVID-19 Genomics UK (COG-UK) Consortium|Goodfellow|United Kingdom

>Spike|hCoV-19/England/MILK-9958D2/2020|2020-08-23|EPI\_ISL\_551643|Original|hCoV-19^^England|Human|Lighthouse Lab in Milton Keynes|Wellcome Sanger Institute for the COVID-19 Genomics UK (COG-UK) consortium|Davies|United Kingdom

>Spike|hCoV-19/England/202561788/2020|2020-06-14|EPI\_ISL\_485609|Original|hCoV-19^^England|Human|Respiratory Virus Unit|Respiratory Virus Unit|Ledesma|United Kingdom

>Spike|hCoV-19/England/MILK-A06361/2020|2020-10-01|EPI\_ISL\_600044|Original|hCoV-19^^England|Human|Lighthouse Lab in Milton Keynes|Wellcome Sanger Institute for the COVID-19 Genomics UK (COG-UK) consortium|Davies|United Kingdom

>Spike|hCoV-19/England/205141235/2020|2020-12-16|EPI\_ISL\_756162|Original|hCoV-19^^England|Human|Respiratory Virus Unit|COVID-19 Genomics UK (COG-UK) Consortium|Miah|United Kingdom

>Spike|hCoV-19/Netherlands/OV-EMC-80/2020|2020-07-10|EPI\_ISL\_523464|Original|hCoV-19^^Overijssel|Human|Dutch COVID-19 response team|Erasmus Medical Center|Oude Munnink|Netherlands

>Spike|hCoV-19/USA/WA-S2679/2020|2020-06-22|EPI\_ISL\_497311|Original|hCoV-19^^Washington|Human|Washington State Department of Health|Seattle Flu Study|Lee|USA

>Spike|hCoV-19/USA/WI-GMF-19490/2020|2020-09-09|EPI\_ISL\_547813|Original|hCoV-19^^Wisconsin|Human|Gundersen Molecular Diagnostics Laboratory|Kabara Cancer Research Institute|Kenny|USA

>Spike|hCoV-19/USA/CA-SEARCH-5344/2020|2020-12-09|EPI\_ISL\_755161|Original|hCoV-19^^California|Human|UCSD EXCITE lab|Andersen lab at Scripps Research|Gangavarapu|USA

>Spike|hCoV-19/Northern Ireland/NIRE-10686B/2020|2020-05-10|EPI\_ISL\_501044|Original|hCoV-19^^Northern Ireland|Human|Regional Virus Laboratory|Wellcome Sanger Institute for the COVID-19 Genomics UK (COG-UK) consortium|Davies|United Kingdom

>Spike|hCoV-19/England/QEUA-B82575/2020|2020-11-14|EPI\_ISL\_661694|Original|hCoV-19^^England|Human|Lighthouse Lab in Glasgow|Wellcome Sanger Institute for the COVID-19 Genomics UK (COG-UK) Consortium|Davies|United Kingdom

>Spike|hCoV-19/England/QEUA-97013C/2020|2020-08-16|EPI\_ISL\_568405|Original|hCoV-19^^England|Human|Lighthouse Lab in Glasgow|Wellcome Sanger Institute for the COVID-19 Genomics UK (COG-UK) consortium|Davies|United Kingdom

>Spike|hCoV-19/England/QEUA-B4184C/2020|2020-11-08|EPI\_ISL\_658661|Original|hCoV-19^^England|Human|Lighthouse Lab in Glasgow|Wellcome Sanger Institute for the COVID-19 Genomics UK (COG-UK) Consortium|Davies|United Kingdom

>Spike|hCoV-19/Egypt/EGY-020/2020|2020-08-14|EPI\_ISL\_526975|Original|hCoV-19^^Egypt|Human|Biological prevention|Biological prevention|Seadawy|Egypt

>Spike|hCoV-19/USA/UT-08392/2020|2020-05-16|EPI\_ISL\_524173|Original|hCoV-19^^Utah|Human|Utah Public Health Laboratory|Utah Public Health Laboratory|Young|USA

>Spike|hCoV-19/Japan/PG-2548/2020|2020-05-00|EPI\_ISL\_690683|Original|hCoV-19^^Japan|Human|Saitama Prefectural Institute of Public Health|Pathogen Genomics Center|Sekizuka|Japan

>Spike|hCoV-19/USA/TX-HMH-MCoV-15871/2020|2020-07-10|EPI\_ISL\_785555|Original|hCoV-19^^Texas|Human|Houston Methodist Hospital|Houston Methodist Hospital|Long|USA

>Spike|hCoV-19/England/CAMC-AAFF84/2020|2020-10-23|EPI\_ISL\_631220|Original|hCoV-19^^England|Human|Lighthouse Lab in Cambridge|Wellcome Sanger Institute for the COVID-19 Genomics UK (COG-UK) consortium|Davies|United Kingdom

>Spike|hCoV-19/France/ARA-23943/2020|2020-04-12|EPI\_ISL\_508930|Original|hCoV-19^^Auvergne-Rhône-Alpes|Human|CNR Virus des Infections Respiratoires - France SUD|CNR Virus des Infections Respiratoires - France SUD|Josset|France

>Spike|hCoV-19/Netherlands/NA\_166/2020|2020-03-21|EPI\_ISL\_422701|Original|hCoV-19^^Netherlands|Human|Dutch COVID-19 response team|Erasmus Medical Center|Oude Munnink|Netherlands

>Spike|hCoV-19/England/LOND-126275D/2020|2020-10-04|EPI\_ISL\_594872|Original|hCoV-19^^England|Human|University College London|COVID-19 Genomics UK (COG-UK) Consortium|Roy|United Kingdom

>Spike|hCoV-19/Wales/PHWC-4A49B4/2020|2020-12-09|EPI\_ISL\_764753|Original|hCoV-19^^Wales|Human|Wales Specialist Virology Centre Sequencing lab|COVID-19 Genomics UK (COG-UK) Consortium|Moore|United Kingdom

>Spike|hCoV-19/USA/VA-DCLS-0351/2020|2020-05-08|EPI\_ISL\_463118|Original|hCoV-19^^Virginia|Human|Virginia DCLS|Virginia DCLS|St. Jacques|USA

>Spike|hCoV-19/Japan/PG-5460/2020|2020-08-00|EPI\_ISL\_690563|Original|hCoV-19^^Japan|Human|Pathogen Genomics Center|Pathogen Genomics Center|Sekizuka|Japan

>Spike|hCoV-19/Scotland/GCVR-170055/2020|2020-03-24|EPI\_ISL\_459658|Original|hCoV-19^^Scotland|Human|NHSGGC West of Scotland Specialist Virology Centre / MRC-University of Glasgow Centre for Virus Research|Wellcome Sanger Institute for the COVID-19 Genomics UK (COG-UK) consortium|Davies|United Kingdom

>Spike|hCoV-19/Wales/CAMC-9C1B6B/2020|2020-09-10|EPI\_ISL\_573869|Original|hCoV-19^^Wales|Human|Oxford Viromics|COVID-19 Genomics UK (COG-UK) Consortium|Golubchik|United Kingdom

>Spike|hCoV-19/Spain/RI-IBV-98002318/2020|2020-03-19|EPI\_ISL\_537838|Original|hCoV-19^^La Rioja|Human|Centro de Investigaci\u00f3n Biom\u00e9dica de La Rioja - Hospital San Pedro Logro\u00f1o|SeqCOVID-SPAIN consortium/IBV (CSIC)|Comas|Spain

>Spike|hCoV-19/Switzerland/BS-UHB-42184365/2020|2020-03-10|EPI\_ISL\_527974|Original|hCoV-19^^Basel-Stadt|Human|University Hospital Basel|University Hospital Basel|Roloff Handschin|Switzerland

>Spike|hCoV-19/Denmark/DCGC-10328/2020|2020-11-02|EPI\_ISL\_669904|Original|hCoV-19^^Nordjylland|Human|Department of Virus and Microbiological Special Diagnostics|Albertsen Lab|Michaelsen|Denmark

>Spike|hCoV-19/England/CAMB-808F1/2020|2020-04-10|EPI\_ISL\_442586|Original|hCoV-19^^England|Human|Department of Pathology|Wellcome Sanger Institute for the COVID-19 Genomics UK (COG-UK) consortium|Amato|United Kingdom

>Spike|hCoV-19/Belgium/RR-030699/2020|2020-03-06|EPI\_ISL\_420355|Original|hCoV-19^^Ronse|Human|KU Leuven|KU Leuven|Maes|Belgium

>Spike|hCoV-19/Austria/CeMM0918/2020|2020-03-16|EPI\_ISL\_583770|Original|hCoV-19^^Austria|Human|Dr. Gernot Walder GmbH|Bergthaler laboratory|Bergthaler|Austria

>Spike|hCoV-19/England/ALDP-C3956D/2020|2020-12-08|EPI\_ISL\_731512|Original|hCoV-19^^England|Human|Lighthouse Lab in Alderley Park|Wellcome Sanger Institute for the COVID-19 Genomics UK (COG-UK) Consortium|Davies|United Kingdom

>Spike|hCoV-19/England/HECH-259A255/2020|2020-05-26|EPI\_ISL\_488867|Original|hCoV-19^^England|Human|Microbiology Department|Wellcome Sanger Institute for the COVID-19 Genomics UK (COG-UK) consortium|Davies|United Kingdom

>Spike|hCoV-19/Wales/PHWC-32CD4/2020|2020-04-07|EPI\_ISL\_446677|Original|hCoV-19^^Wales|Human|Wales Specialist Virology Centre|Public Health Wales Microbiology Cardiff|Moore|United Kingdom

>Spike|hCoV-19/USA/OK-ADDL-04/2020|2020-05-27|EPI\_ISL\_535363|Original|hCoV-19^^Oklahoma|Human|Oklahoma Animal Disease Diagnostic Laboratory|Oklahoma Animal Disease Diagnostic Laboratory|Narayanan|USA

>Spike|hCoV-19/Canada/NS-NML-1218/2020|2020-04-03|EPI\_ISL\_579615|Original|hCoV-19^^Nova Scotia|Human|QEII Health Sciences Centre|National Microbiology Laboratory (NML)|Majer|Canada

>Spike|hCoV-19/Wales/PHWC-2BC83/2020|2020-04-10|EPI\_ISL\_445828|Original|hCoV-19^^Wales|Human|Wales Specialist Virology Centre|Public Health Wales Microbiology Cardiff|Moore|United Kingdom

>Spike|hCoV-19/England/NORT-291D92/2020|2020-05-05|EPI\_ISL\_489131|Original|hCoV-19^^England|Human|NU-OMICS DNA Sequencing research facility|Wellcome Sanger Institute for the COVID-19 Genomics UK (COG-UK) consortium|Davies|United Kingdom

>Spike|hCoV-19/New Zealand/20VR1847/2020|2020-03-28|EPI\_ISL\_456283|Original|hCoV-19^^Southern|Human|Southern Community Labs Dunedin|Institute of Environmental Science and Research (ESR)|de Ligt|New Zealand

>Spike|hCoV-19/England/MILK-956D83/2020|2020-06-10|EPI\_ISL\_554205|Original|hCoV-19^^England|Human|Lighthouse Lab in Milton Keynes|Wellcome Sanger Institute for the COVID-19 Genomics UK (COG-UK) consortium|Davies|United Kingdom

>Spike|hCoV-19/Wales/PHWC-48D061/2020|2020-11-05|EPI\_ISL\_666573|Original|hCoV-19^^Wales|Human|Wales Specialist Virology Centre Sequencing lab|COVID-19 Genomics UK (COG-UK) Consortium|Moore|United Kingdom

>Spike|hCoV-19/England/SHEF-C8AE8/2020|2020-04-05|EPI\_ISL\_432456|Original|hCoV-19^^England|Human|Virology Department|COVID-19 Genomics UK (COG-UK) Consortium|de Silva|United Kingdom

>Spike|hCoV-19/Belgium/regal-12141425/2020|2020-12-14|EPI\_ISL\_738477|Original|hCoV-19^^Arendonk|Human|UZ Leuven|KU Leuven|Maes|Belgium

>Spike|hCoV-19/England/QEUA-B6A968/2020|2020-11-11|EPI\_ISL\_662562|Original|hCoV-19^^England|Human|Lighthouse Lab in Glasgow|Wellcome Sanger Institute for the COVID-19 Genomics UK (COG-UK) Consortium|Davies|United Kingdom

>Spike|hCoV-19/Scotland/QEUA-9CE269/2020|2020-09-16|EPI\_ISL\_601907|Original|hCoV-19^^Scotland|Human|Lighthouse Lab in Glasgow|Wellcome Sanger Institute for the COVID-19 Genomics UK (COG-UK) consortium|Davies|United Kingdom

>Spike|hCoV-19/Germany/HH-hpi-p2432/2020|2020-04-24|EPI\_ISL\_775758|Original|hCoV-19^^Hamburg|Human|University Medical Center Hamburg Eppendorf|Heinrich Pette Institute|Robitaille|Germany

>Spike|hCoV-19/mink/Netherlands/NB-EMC-68-1/2020|2020-11-03|EPI\_ISL\_722448|Original|hCoV-19^^Limburg|Neovison vison|Dutch COVID-19 response team|Erasmus Medical Center|Oude Munnink|Netherlands

>Spike|hCoV-19/Denmark/DCGC-3637/2020|2020-08-31|EPI\_ISL\_615408|Original|hCoV-19^^Hovedstaden|Human|Department of Virus and Microbiological Special Diagnostics|Albertsen lab|Michaelsen|Denmark

>Spike|hCoV-19/England/SHEF-CB520/2020|2020-10-29|EPI\_ISL\_650705|Original|hCoV-19^^England|Human|Virology Department|COVID-19 Genomics UK (COG-UK) Consortium|de Silva|United Kingdom

>Spike|hCoV-19/Netherlands/Diemen\_1363454/2020|2020-02-28|EPI\_ISL\_413570|Original|hCoV-19^^Noord Holland|Human|RIVM|Erasmus Medical Center|Oude Munnink|Netherlands

>Spike|hCoV-19/USA/VA-DCLS-1155/2020|2020-07-23|EPI\_ISL\_522822|Original|hCoV-19^^Virginia|Human|Virginia DCLS|Virginia DCLS|St. Jacques|USA

>Spike|hCoV-19/Northern Ireland/QEUA-960E47/2020|2020-08-04|EPI\_ISL\_532039|Original|hCoV-19^^Northern Ireland|Human|Lighthouse Lab in Glasgow|Wellcome Sanger Institute for the COVID-19 Genomics UK (COG-UK) consortium|Davies|United Kingdom

>Spike|hCoV-19/USA/TX-HMH-MCoV-13780/2020|2020-08-18|EPI\_ISL\_788873|Original|hCoV-19^^Texas|Human|Houston Methodist Hospital|Houston Methodist Hospital|Long|USA

>Spike|hCoV-19/Portugal/PT1354/2020|2020-03-25|EPI\_ISL\_511313|Original|hCoV-19^^Portugal|Human|Instituto Nacional de Saude (INSA) and Instituto Gulbenkian de Ciencia (IGC)|Instituto Nacional de Saude (INSA) and Instituto Gulbenkian de Ciencia (IGC)|Borges|Portugal

>Spike|hCoV-19/Wales/PHWC-4A3C9E/2020|2020-12-12|EPI\_ISL\_764615|Original|hCoV-19^^Wales|Human|Wales Specialist Virology Centre Sequencing lab|COVID-19 Genomics UK (COG-UK) Consortium|Moore|United Kingdom

>Spike|hCoV-19/England/QEUA-A75EB7/2020|2020-10-15|EPI\_ISL\_613310|Original|hCoV-19^^England|Human|Queens Medical Centre|COVID-19 Genomics UK (COG-UK) Consortium|Loose|United Kingdom

>Spike|hCoV-19/England/QEUA-B7C392/2020|2020-11-13|EPI\_ISL\_668249|Original|hCoV-19^^England|Human|Lighthouse Lab in Glasgow|Wellcome Sanger Institute for the COVID-19 Genomics UK (COG-UK) Consortium|Davies|United Kingdom

>Spike|hCoV-19/United Arab Emirates/0221/2020|2020-05-17|EPI\_ISL\_698407|Original|hCoV-19^^Abu Dhabi|Human|Group 42 (G42) Healthcare|G42 Healthcare|Ogrodzki|United Arab Emirates

>Spike|hCoV-19/Wales/PHWC-48406A/2020|2020-10-22|EPI\_ISL\_627960|Original|hCoV-19^^Wales|Human|Wales Specialist Virology Centre Sequencing lab|COVID-19 Genomics UK (COG-UK) Consortium|Moore|United Kingdom

>Spike|hCoV-19/Bangladesh/G-27/2020|2020-03-26|EPI\_ISL\_600554|Original|hCoV-19^^Rangpur|Human|Institute of Epidemiology Disease Control And Research|Institute for Developing Science and Health Initiatives|Cowley|Bangladesh

>Spike|hCoV-19/Sweden/20-08100/2020|2020-03-06|EPI\_ISL\_454471|Original|hCoV-19^^Stockholm|Human|Karolinska Universitetslaboratoriet|The Public Health Agency of Sweden|Svartstr\u00f6m|Sweden

>Spike|hCoV-19/Canada/ON-UHTC\_0151/2020|2020-06-09|EPI\_ISL\_526284|Original|hCoV-19^^Ontario|Human|Unity Health Toronto|Ontario Institute for Cancer Research|de Borja|Canada

>Spike|hCoV-19/England/ALDP-B26036/2020|2020-11-04|EPI\_ISL\_646454|Original|hCoV-19^^England|Human|Lighthouse Lab in Alderley Park|Wellcome Sanger Institute for the COVID-19 Genomics UK (COG-UK) Consortium|Davies|United Kingdom

>Spike|hCoV-19/England/20128031204/2020|2020-03-20|EPI\_ISL\_423949|Original|hCoV-19^^England|Human|Respiratory Virus Unit|Respiratory Virus Unit|Platt|United Kingdom

>Spike|hCoV-19/USA/CA-ALSR-0615-SAN/2020|2020-04-06|EPI\_ISL\_483259|Original|hCoV-19^^California|Human|UC San Diego Center for Advanced Laboratory Medicine|Andersen lab at Scripps Research|Gangavarapu|USA

>Spike|hCoV-19/England/ALDP-9E91D4/2020|2020-09-24|EPI\_ISL\_584192|Original|hCoV-19^^England|Human|Virology Department|COVID-19 Genomics UK (COG-UK) Consortium|de Silva|United Kingdom

>Spike|hCoV-19/Wales/PHWC-499E95/2020|2020-11-24|EPI\_ISL\_727458|Original|hCoV-19^^Wales|Human|Originating lab|COVID-19 Genomics UK (COG-UK) Consortium|Moore|United Kingdom

>Spike|hCoV-19/England/ALDP-9ED4E6/2020|2020-05-05|EPI\_ISL\_589418|Original|hCoV-19^^England|Human|Lighthouse Lab in Alderley Park|Wellcome Sanger Institute for the COVID-19 Genomics UK (COG-UK) consortium|Davies|United Kingdom

>Spike|hCoV-19/Belgium/reg-0722803/2020|2020-07-22|EPI\_ISL\_734816|Original|hCoV-19^^Antwerpen|Human|UZ Leuven|KU Leuven|Maes|Belgium

>Spike|hCoV-19/Denmark/DCGC-9878/2020|2020-11-09|EPI\_ISL\_669248|Original|hCoV-19^^Sjaelland|Human|Department of Virus and Microbiological Special Diagnostics|Albertsen Lab|Michaelsen|Denmark

>Spike|hCoV-19/Luxembourg/LNS9754910/2020|2020-12-21|EPI\_ISL\_770847|Original|hCoV-19^^Luxembourg|Human|Laboratoire national de sant\u00e9|Laboratoire national de sant\u00e9|Wienecke-Baldacchino|Luxembourg

>Spike|hCoV-19/England/20139015804/2020|2020-03-27|EPI\_ISL\_423343|Original|hCoV-19^^England|Human|Respiratory Virus Unit|Respiratory Virus Unit|Platt|United Kingdom

>Spike|hCoV-19/Wales/MILK-9EE922/2020|2020-09-23|EPI\_ISL\_580766|Original|hCoV-19^^Wales|Human|Lighthouse Lab in Milton Keynes|Wellcome Sanger Institute for the COVID-19 Genomics UK (COG-UK) consortium|Davies|United Kingdom

>Spike|hCoV-19/Jordan/SR-044/2020|2020-03-16|EPI\_ISL\_430002|Original|hCoV-19^^Amman|Human|Biolab Diagnostic Laboratories|Andersen lab at Scripps Research|Gangavarapu|Jordan

>Spike|hCoV-19/England/EXET-139270/2020|2020-10-27|EPI\_ISL\_664127|Original|hCoV-19^^England|Human|University of Exeter|COVID-19 Genomics UK (COG-UK) Consortium|Temperton|United Kingdom

>Spike|hCoV-19/Wales/PHWC-15FCB2/2020|2020-05-19|EPI\_ISL\_472844|Original|hCoV-19^^Wales|Human|Wales Specialist Virology Centre Sequencing lab|COVID-19 Genomics UK (COG-UK) Consortium|Moore|United Kingdom

>Spike|hCoV-19/England/LIVE-DCC470/2020|2020-11-25|EPI\_ISL\_724508|Original|hCoV-19^^England|Human|Liverpool Clinical Laboratories|COVID-19 Genomics UK (COG-UK) Consortium|Haldenby|United Kingdom

>Spike|hCoV-19/Japan/IC-0263/2020|2020-10-00|EPI\_ISL\_667692|Original|hCoV-19^^Japan|Human|Pathogen Genomics Center|Pathogen Genomics Center|Sekizuka|Japan

>Spike|hCoV-19/USA/FL-BPHL-0969/2020|2020-07-09|EPI\_ISL\_517859|Original|hCoV-19^^Florida|Human|Florida Bureau of Public Health Laboratories|Florida Bureau of Public Health Laboratories|Blanton|USA

>Spike|hCoV-19/Scotland/QEUH-C33C7D/2020|2020-12-11|EPI\_ISL\_757176|Original|hCoV-19^^Scotland|Human|Lighthouse Lab in Glasgow|Wellcome Sanger Institute for the COVID-19 Genomics UK (COG-UK) Consortium|Davies|United Kingdom

>Spike|hCoV-19/Wales/PHWC-35CE0/2020|2020-04-26|EPI\_ISL\_474556|Original|hCoV-19^^Wales|Human|Originating lab|COVID-19 Genomics UK (COG-UK) Consortium|Moore|United Kingdom

>Spike|hCoV-19/Australia/VIC17929/2020|2020-08-05|EPI\_ISL\_779565|Original|hCoV-19^^Victoria|Human|Microbiological Diagnostic Unit - Public Health Laboratory (MDU-PHL)|MDU-PHL|Beck|Australia

>Spike|hCoV-19/England/QEUH-AE24C2/2020|2020-10-27|EPI\_ISL\_633581|Original|hCoV-19^^England|Human|Lighthouse Lab in Glasgow|Wellcome Sanger Institute for the COVID-19 Genomics UK (COG-UK) consortium|Davies|United Kingdom

>Spike|hCoV-19/England/QEUH-9F6347/2020|2020-09-25|EPI\_ISL\_588918|Original|hCoV-19^^England|Human|Lighthouse Lab in Glasgow|Wellcome Sanger Institute for the COVID-19 Genomics UK (COG-UK) consortium|Davies|United Kingdom

>Spike|hCoV-19/Scotland/CVR2198/2020|2020-04-11|EPI\_ISL\_448158|Original|hCoV-19^^Scotland|Human|West of Scotland Specialist Virology Centre|COVID-19 Genomics UK (COG-UK) Consortium|Robertson|United Kingdom

>Spike|hCoV-19/England/ALDP-9FD744/2020|2020-10-01|EPI\_ISL\_587774|Original|hCoV-19^^England|Human|Lighthouse Lab in Alderley Park|Wellcome Sanger Institute for the COVID-19 Genomics UK (COG-UK) consortium|Davies|United Kingdom

>Spike|hCoV-19/Wales/PHWC-48B76E/2020|2020-11-05|EPI\_ISL\_666278|Original|hCoV-19^^Wales|Human|Wales Specialist Virology Centre Sequencing lab|COVID-19 Genomics UK (COG-UK) Consortium|Moore|United Kingdom

>Spike|hCoV-19/Japan/PG-0143/2020|2020-02-00|EPI\_ISL\_479865|Original|hCoV-19^^Kansai|Human|Wakayama Prefectural Research Center of Environment and Public Health|Pathogen Genomics Center|Sekizuka|Japan

>Spike|hCoV-19/England/ALDP-9BE994/2020|2020-09-09|EPI\_ISL\_567921|Original|hCoV-19^^England|Human|Lighthouse Lab in Alderley Park|Wellcome Sanger Institute for the COVID-19 Genomics UK (COG-UK) consortium|Davies|United Kingdom

>Spike|hCoV-19/Denmark/DCGC-7676/2020|2020-10-19|EPI\_ISL\_618569|Original|hCoV-19^^Hovedstaden|Human|Department of Virus and Microbiological Special Diagnostics|Albertsen lab|Michaelsen|Denmark

>Spike|hCoV-19/Wales/MILK-9C1FE7/2020|2020-09-10|EPI\_ISL\_566572|Original|hCoV-19^^Wales|Human|Lighthouse Lab in Milton Keynes|Wellcome Sanger Institute for the COVID-19 Genomics UK (COG-UK) consortium|Davies|United Kingdom

>Spike|hCoV-19/USA/CA-QDX-1623/2020|2020-03-19|EPI\_ISL\_603905|Original|hCoV-19^^California|Human|Quest Diagnostics|Quest Diagnostics|Kagan|USA

>Spike|hCoV-19/Denmark/DCGC-3466/2020|2020-08-31|EPI\_ISL\_616253|Original|hCoV-19^^Hovedstaden|Human|Department of Virus and Microbiological Special Diagnostics|Albertsen lab|Michaelsen|Denmark

>Spike|hCoV-19/USA/TX-HMH-MCoV-13247/2020|2020-08-24|EPI\_ISL\_788397|Original|hCoV-19^^Texas|Human|Houston Methodist Hospital|Houston Methodist Hospital|Long|USA

>Spike|hCoV-19/England/ALDP-917A78/2020|2020-06-22|EPI\_ISL\_551458|Original|hCoV-19^^England|Human|Lighthouse Lab in Alderley Park|Wellcome Sanger Institute for the COVID-19 Genomics UK (COG-UK) consortium|Davies|United Kingdom

>Spike|hCoV-19/Denmark/DCGC-15001/2020|2020-11-23|EPI\_ISL\_713571|Original|hCoV-19^^Hovedstaden|Human|Department of Virus and Microbiological Special Diagnostics|Albertsen Lab|Michaelsen|Denmark

>Spike|hCoV-19/New Zealand/20CV0493/2020|2020-10-27|EPI\_ISL\_622823|Original|hCoV-19^^Auckland|Human|LabPLUS|Institute of Environmental Science and Research (ESR)|Wang|New Zealand

>Spike|hCoV-19/England/MILK-AB7675/2020|2020-10-20|EPI\_ISL\_623228|Original|hCoV-19^^England|Human|Lighthouse Lab in Milton Keynes|Wellcome Sanger Institute for the COVID-19 Genomics UK (COG-UK) consortium|Davies|United Kingdom

>Spike|hCoV-19/Canada/MB-NML-560/2020|2020-03-26|EPI\_ISL\_582261|Original|hCoV-19^^Manitoba|Human|Cadham Provincial Laboratory|National Microbiology Laboratory (NML)|Majer|Canada

>Spike|hCoV-19/England/CAMC-B54819/2020|2020-11-08|EPI\_ISL\_658371|Original|hCoV-19^^England|Human|Lighthouse Lab in Cambridge|Wellcome Sanger Institute for the COVID-19 Genomics UK (COG-UK) Consortium|Davies|United Kingdom

>Spike|hCoV-19/USA/TX-HMH-4560/2020|2020-06-21|EPI\_ISL\_543718|Original|hCoV-19^^Texas|Human|Houston Methodist Hospital|Houston Methodist Hospital|Long|USA

>Spike|hCoV-19/Spain/CT-IBV-97010113/2020|2020-11-12|EPI\_ISL\_683637|Original|hCoV-19^^Catalunya|Human|Servicio de Microbiolog\u00eda|SeqCOVID-SPAIN consortium|IBV (CSIC)|Comas|Spain

>Spike|hCoV-19/Scotland/QEUEH-9905D0/2020|2020-08-29|EPI\_ISL\_530366|Original|hCoV-19^^Scotland|Human|NHSGGC West of Scotland Specialist Virology Centre / MRC-University of Glasgow Centre for Virus Research|Wellcome Sanger Institute for the COVID-19 Genomics UK (COG-UK) consortium|Davies|United Kingdom

>Spike|hCoV-19/England/BRIS-12F85D/2020|2020-03-26|EPI\_ISL\_488420|Original|hCoV-19^^England|Human|PHE South West Regional Laboratory|Wellcome Sanger Institute for the COVID-19 Genomics UK (COG-UK) consortium|Davies|United Kingdom

>Spike|hCoV-19/England/LEED-2A8D98/2020|2020-04-03|EPI\_ISL\_539018|Original|hCoV-19^^England|Human|Leeds Teaching Hospitals NHS Trust and Public Health

England|Wellcome Sanger Institute for the COVID-19 Genomics UK (COG-UK) consortium|Davies|United Kingdom  
>Spike|hCoV-19/England/MILK-469924/2020|2020-05-24|EPI\_ISL\_559727|Original|hCoV-19^^England|Human|Lighthouse Lab in Milton Keynes|Wellcome Sanger Institute for the COVID-19 Genomics UK (COG-UK) consortium|Davies|United Kingdom  
>Spike|hCoV-19/Japan/PG-1269/2020|2020-00-00|EPI\_ISL\_684879|Original|hCoV-19^^Japan|Human|Pathogen Genomics Center|Pathogen Genomics Center|Sekizuka|Japan  
>Spike|hCoV-19/Wales/PHWC-483784/2020|2020-10-11|EPI\_ISL\_626780|Original|hCoV-19^^Wales|Human|Wales Specialist Virology Centre Sequencing lab|COVID-19 Genomics UK (COG-UK) Consortium|Moore|United Kingdom  
>Spike|hCoV-19/USA/WA-S2625/2020|2020-06-19|EPI\_ISL\_497257|Original|hCoV-19^^Washington|Human|Washington State Department of Health|Seattle Flu Study|Lee|USA  
>Spike|hCoV-19/England/LOND-D5ACA/2020|2020-04-17|EPI\_ISL\_457297|Original|hCoV-19^^England|Human|University College London|COVID-19 Genomics UK (COG-UK) Consortium|Roy|United Kingdom  
>Spike|hCoV-19/Australia/VIC402/2020|2020-03-24|EPI\_ISL\_426705|Original|hCoV-19^^Victoria|Human|Victorian Infectious Diseases Reference Laboratory (VIDRL)|Microbiological Diagnostic Unit Public Health Laboratory and Victorian Infectious Diseases Reference Laboratory|Schultz|Australia  
>Spike|hCoV-19/Sweden/20-52770/2020|2020-08-03|EPI\_ISL\_654948|Original|hCoV-19^^Kronoberg|Human|Klinisk mikrobiologi|The Public Health Agency of Sweden|Svartstr\u00f6m|Sweden  
>Spike|hCoV-19/USA/AZ-TG426533/2020|2020-06-25|EPI\_ISL\_694988|Original|hCoV-19^^Arizona|Human|TGen North|TGen North|French|USA  
>Spike|hCoV-19/USA/MD-MDH-0429/2020|2020-10-14|EPI\_ISL\_666797|Original|hCoV-19^^Maryland|Human|Maryland Public Health Laboratory|Maryland Public Health Laboratory|Keller|USA  
>Spike|hCoV-19/England/CAMB-772D1/2020|2020-03-31|EPI\_ISL\_439420|Original|hCoV-19^^England|Human|Department of Pathology|Wellcome Sanger Institute for the COVID-19 Genomics UK (COG-UK) consortium|Amato|United Kingdom  
>Spike|hCoV-19/Japan/PG-2423/2020|2020-04-00|EPI\_ISL\_686028|Original|hCoV-19^^Japan|Human|Pathogen Genomics Center|Pathogen Genomics Center|Sekizuka|Japan  
>Spike|hCoV-19/Netherlands/ZH-EMC-233/2020|2020-04-17|EPI\_ISL\_523575|Original|hCoV-19^^Zuid Holland|Human|Dutch COVID-19 response team|Erasmus Medical Center|Oude Munnink|Netherlands  
>Spike|hCoV-19/England/ALDP-691235/2020|2020-07-02|EPI\_ISL\_558129|Original|hCoV-19^^England|Human|Lighthouse Lab in Alderley Park|Wellcome Sanger Institute for the COVID-19 Genomics UK (COG-UK) consortium|Davies|United Kingdom  
>Spike|hCoV-19/England/EXET-13952C/2020|2020-00-00|EPI\_ISL\_724254|Original|hCoV-19^^England|Human|University of Exeter|COVID-19 Genomics UK (COG-UK) Consortium|Temperton|United Kingdom  
>Spike|hCoV-19/USA/TX-HMH-6977/2020|2020-06-28|EPI\_ISL\_546402|Original|hCoV-19^^Texas|Human|Houston Methodist Hospital|Houston Methodist Hospital|Long|USA  
>Spike|hCoV-19/England/20199024804/2020|2020-05-09|EPI\_ISL\_465642|Original|hCoV-19^^England|Human|Respiratory Virus Unit|Respiratory Virus Unit|Platt|United Kingdom  
>Spike|hCoV-19/USA/TX-HMH-1993/2020|2020-05-17|EPI\_ISL\_545057|Original|hCoV-19^^Texas|Human|Houston Methodist Hospital|Houston Methodist Hospital|Long|USA  
>Spike|hCoV-19/England/QEUH-A0AF0F/2020|2020-10-01|EPI\_ISL\_599155|Original|hCoV-19^^England|Human|Lighthouse Lab in Glasgow|Wellcome Sanger Institute for the COVID-19 Genomics UK (COG-UK) consortium|Davies|United Kingdom  
>Spike|hCoV-19/USA/LA-EVTL555/2020|2020-08-05|EPI\_ISL\_578959|Original|hCoV-19^^Louisiana|Human|LSUHS Emerging Viral Threat Laboratory|Microbial Genome Sequencing Center|Kamil|USA  
>Spike|hCoV-19/Australia/VIC6974/2020|2020-08-02|EPI\_ISL\_564171|Original|hCoV-19^^Victoria|Human|Microbiological Diagnostic Unit - Public Health Laboratory (MDU-PHL)|MDU-PHL|Schultz|Australia  
>Spike|hCoV-19/England/MILK-9C41B1/2020|2020-09-10|EPI\_ISL\_566977|Original|hCoV-19^^England|Human|Lighthouse Lab in Milton Keynes|Wellcome Sanger Institute for the COVID-19 Genomics UK (COG-UK) consortium|Davies|United Kingdom

>Spike|hCoV-19/England/OXON-AEB12/2020|2020-00-00|EPI\_ISL\_448757|Original|hCoV-19^^England|Human|Oxford Viromics|COVID-19 Genomics UK (COG-UK) Consortium|Golubchik|United Kingdom

>Spike|hCoV-19/Canada/BC\_83163/2020|2020-03-05|EPI\_ISL\_415589|Original|hCoV-19^^British Columbia|Human|BCCDC Public Health Laboratory|BCCDC Public Health Laboratory|Harrigan|Canada

>Spike|hCoV-19/Denmark/DCGC-22468/2020|2020-12-14|EPI\_ISL\_757577|Original|hCoV-19^^Syddanmark|Human|Department of Virus and Microbiological Special Diagnostics|Albertsen Lab|Michaelsen|Denmark

>Spike|hCoV-19/USA/CA-CZB-14700/2020|2020-11-17|EPI\_ISL\_738921|Original|hCoV-19^^California|Human|Orange County Public Health Lab|Chan-Zuckerberg Biohub|Kamm|USA

>Spike|hCoV-19/England/QEUEH-53A554/2020|2020-05-18|EPI\_ISL\_532180|Original|hCoV-19^^England|Human|Lighthouse Lab in Glasgow|Wellcome Sanger Institute for the COVID-19 Genomics UK (COG-UK) consortium|Davies|United Kingdom

>Spike|hCoV-19/USA/CA-CZB-1178/2020|2020-04-30|EPI\_ISL\_454628|Original|hCoV-19^^California|Human|UCSF Clinical Microbiology Laboratory|Chan-Zuckerberg Biohub|Hao|USA

>Spike|hCoV-19/Wales/PHWC-1642E5/2020|2020-05-08|EPI\_ISL\_474157|Original|hCoV-19^^Wales|Human|Originating lab|COVID-19 Genomics UK (COG-UK) Consortium|Moore|United Kingdom

>Spike|hCoV-19/Netherlands/ZH-EMC-286/2020|2020-06-26|EPI\_ISL\_523628|Original|hCoV-19^^Zuid Holland|Human|Dutch COVID-19 response team|Erasmus Medical Center|Oude Munnink|Netherlands

>Spike|hCoV-19/Spain/MD-IBV-005338/2020|2020-03-17|EPI\_ISL\_510216|Original|hCoV-19^^Madrid|Human|Hospital General Universitario Gregorio Mara\u00f1\u00f3n|SeqCOVID-SPAIN consortium/IBV (CSIC)|Comas|Spain

>Spike|hCoV-19/Peru/LIM-INS-095/2020|2020-07-03|EPI\_ISL\_536494|Original|hCoV-19^^Lima|Human|Instituto Nacional de Salud|Laboratorio de Infecciones Respiratorias Agudas|Lopez|Peru

>Spike|hCoV-19/USA/TN-CDC-2-3693573/2020|2020-11-25|EPI\_ISL\_747183|Original|hCoV-19^^Tennessee|Human|Respiratory Viruses Branch|Respiratory Viruses Branch|Queen|USA

>Spike|hCoV-19/England/CAMB-1B5467/2020|2020-07-06|EPI\_ISL\_499968|Original|hCoV-19^^England|Human|Department of Pathology|COVID-19 Genomics UK (COG-UK) Consortium|Meredith|United Kingdom

>Spike|hCoV-19/Australia/VIC1407/2020|2020-04-16|EPI\_ISL\_456424|Original|hCoV-19^^Victoria|Human|Victorian Infectious Diseases Reference Laboratory (VIDRL)|Microbiological Diagnostic Unit Public Health Laboratory and Victorian Infectious Diseases Reference Laboratory|Schultz|Australia

>Spike|hCoV-19/England/QEUEH-AD155A/2020|2020-10-24|EPI\_ISL\_633939|Original|hCoV-19^^England|Human|Lighthouse Lab in Glasgow|Wellcome Sanger Institute for the COVID-19 Genomics UK (COG-UK) consortium|Davies|United Kingdom

>Spike|hCoV-19/Switzerland/Vs-ETHZ-410062/2020|2020-12-17|EPI\_ISL\_737842|Original|hCoV-19^^Valais|Human|Viollier AG|Department of Biosystems Science and Engineering|Nadeau|Switzerland

>Spike|hCoV-19/Wales/PHWC-4A1B0C/2020|2020-12-11|EPI\_ISL\_743777|Original|hCoV-19^^Wales|Human|Wales Specialist Virology Centre Sequencing lab|COVID-19 Genomics UK (COG-UK) Consortium|Moore|United Kingdom

>Spike|hCoV-19/England/ALDP-9BE30F/2020|2020-09-10|EPI\_ISL\_567976|Original|hCoV-19^^England|Human|Lighthouse Lab in Alderley Park|Wellcome Sanger Institute for the COVID-19 Genomics UK (COG-UK) consortium|Davies|United Kingdom

>Spike|hCoV-19/England/QEUEH-A9B70B/2020|2020-10-20|EPI\_ISL\_611345|Original|hCoV-19^^England|Human|Lighthouse Lab in Glasgow|Wellcome Sanger Institute for the COVID-19 Genomics UK (COG-UK) consortium|Davies|United Kingdom

>Spike|hCoV-19/Japan/PG-4986/2020|2020-08-00|EPI\_ISL\_690099|Original|hCoV-19^^Japan|Human|Pathogen Genomics Center|Pathogen Genomics Center|Sekizuka|Japan

>Spike|hCoV-19/USA/TX-DSHS-0994/2020|2020-07-03|EPI\_ISL\_614008|Original|hCoV-19^^Texas|Human|Texas Department of State Health Services|Texas Department of State Health Services|Rahman|USA



>Spike|hCoV-19/Wales/PHWC-488664/2020|2020-10-31|EPI\_ISL\_639418|Original|hCoV-19^^Wales|Human|Wales Specialist Virology Centre Sequencing lab|COVID-19 Genomics UK (COG-UK) Consortium|Moore|United Kingdom

>Spike|hCoV-19/Denmark/DCGC-13712/2020|2020-11-30|EPI\_ISL\_712975|Original|hCoV-19^^Syddanmark|Human|Department of Virus and Microbiological Special Diagnostics|Albertsen Lab|Michaelsen|Denmark

>Spike|hCoV-19/USA/FL-BPHL-0445/2020|2020-03-23|EPI\_ISL\_495351|Original|hCoV-19^^Florida|Human|Florida Bureau of Public Health Laboratories|Florida Bureau of Public Health Laboratories|Blanton|USA

>Spike|hCoV-19/USA/CA-LACPHL-AF00042/2020|2020-12-20|EPI\_ISL\_754122|Original|hCoV-19^^California|Human|UCLA Clinical Micro Lab|Los Angeles County PHL|Hemarajata|USA

>Spike|hCoV-19/England/MILK-A1D7E3/2020|2020-10-03|EPI\_ISL\_595088|Original|hCoV-19^^England|Human|Queens Medical Centre|COVID-19 Genomics UK (COG-UK) Consortium|Loose|United Kingdom

>Spike|hCoV-19/Australia/VIC1046/2020|2020-04-03|EPI\_ISL\_430550|Original|hCoV-19^^Victoria|Human|Victorian Infectious Diseases Reference Laboratory (VIDRL)|Microbiological Diagnostic Unit Public Health Laboratory and Victorian Infectious Diseases Reference Laboratory|Schultz|Australia

>Spike|hCoV-19/USA/NY-Wadsworth-57118-01/2020|2020-04-20|EPI\_ISL\_525686|Original|hCoV-19^^New York|Human|Wadsworth Center|Wadsworth Center|Plitnick|USA

>Spike|hCoV-19/England/ALDP-9E95F6/2020|2020-09-24|EPI\_ISL\_584225|Original|hCoV-19^^England|Human|Virology Department|COVID-19 Genomics UK (COG-UK) Consortium|de Silva|United Kingdom

>Spike|hCoV-19/Netherlands/Gelderland\_13/2020|2020-03-12|EPI\_ISL\_455122|Original|hCoV-19^^Gelderland|Human|Dutch COVID-19 response team|Erasmus Medical Center|Oude Munnink|Netherlands

>Spike|hCoV-19/Jordan/AM-ALSR-4068/2020|2020-10-03|EPI\_ISL\_636428|Original|hCoV-19^^Amman|Human|Biolab Diagnostic Laboratories|Andersen lab at Scripps Research|Gangavarapu|Jordan

>Spike|hCoV-19/England/CAMC-A66129/2020|2020-10-11|EPI\_ISL\_637774|Original|hCoV-19^^England|Human|Department of Pathology|COVID-19 Genomics UK (COG-UK) Consortium|Goodfellow|United Kingdom

>Spike|hCoV-19/England/ALDP-C57C73/2020|2020-12-14|EPI\_ISL\_736047|Original|hCoV-19^^England|Human|Lighthouse Lab in Alderley Park|Wellcome Sanger Institute for the COVID-19 Genomics UK (COG-UK) Consortium|Davies|United Kingdom

>Spike|hCoV-19/England/20138026604/2020|2020-03-26|EPI\_ISL\_423314|Original|hCoV-19^^England|Human|Respiratory Virus Unit|Respiratory Virus Unit|Platt|United Kingdom

>Spike|hCoV-19/England/NORT-2949AA/2020|2020-03-28|EPI\_ISL\_488679|Original|hCoV-19^^England|Human|NU-OMICS DNA Sequencing research facility|Wellcome Sanger Institute for the COVID-19 Genomics UK (COG-UK) consortium|Davies|United Kingdom

>Spike|hCoV-19/France/ARA-SC340/2020|2020-03-12|EPI\_ISL\_641542|Original|hCoV-19^^Auvergne-Rhone-Alpes|Human|CHU de Saint-\u00c9tienne H\u00f4pital Nord|CNR Virus des Infections Respiratoires - France SUD|Bal|France

>Spike|hCoV-19/South Africa/KRISP-K002627/2020|2020-07-31|EPI\_ISL\_535497|Original|hCoV-19^^KwaZulu-Natal|Human|NHLs-IALCH|KRISP|de Oliveira|South Africa

>Spike|hCoV-19/Singapore/1127/2020|2020-10-29|EPI\_ISL\_626639|Original|hCoV-19^^Singapore|Human|National Public Health Laboratory|National Public Health Laboratory|Mak|Singapore

>Spike|hCoV-19/Chile/BI-ISPCH-2-2/2020|2020-03-12|EPI\_ISL\_445333|Original|hCoV-19^^Biobio|Human|LABORATORIO CLINICA UNIVERSITARIA DE CONCEPCION|Instituto de Salud Publica de Chile|Fernandez|Chile

>Spike|hCoV-19/Northern Ireland/NIRE-10100E/2020|2020-04-30|EPI\_ISL\_482152|Original|hCoV-19^^Northern Ireland|Human|Regional Virus Laboratory|Wellcome Sanger Institute for the COVID-19 Genomics UK (COG-UK) consortium|Davies|United Kingdom

>Spike|hCoV-19/England/MILK-8731C1/2020|2020-07-20|EPI\_ISL\_557244|Original|hCoV-19^^England|Human|Lighthouse Lab in Milton Keynes|Wellcome Sanger Institute for the COVID-19 Genomics UK (COG-UK) consortium|Davies|United Kingdom

>Spike|hCoV-19/Japan/PG-2688/2020|2020-03-00|EPI\_ISL\_690820|Original|hCoV-19^^Japan|Human|Kanagawa Prefectural Institute of Public Health|Pathogen Genomics Center|Sekizuka|Japan

>Spike|hCoV-19/Denmark/DCGC-15385/2020|2020-11-23|EPI\_ISL\_713795|Original|hCoV-19^^Hovedstaden|Human|Department of Virus and Microbiological Special Diagnostics|Albertsen Lab|Michaelsen|Denmark

>Spike|hCoV-19/USA/CA-ALSR-4583/2020|2020-07-10|EPI\_ISL\_667020|Original|hCoV-19^^California|Human|San Diego County Public Health Laboratory|Andersen lab at Scripps Research|Gangavarapu|USA

>Spike|hCoV-19/Scotland/QEUH-AD5714/2020|2020-10-26|EPI\_ISL\_649680|Original|hCoV-19^^Scotland|Human|Lighthouse Lab in Glasgow|Wellcome Sanger Institute for the COVID-19 Genomics UK (COG-UK) Consortium|Davies|United Kingdom

>Spike|hCoV-19/USA/MI-MDHHS-SC20027/2020|2020-03-17|EPI\_ISL\_437114|Original|hCoV-19^^Michigan|Human|Michigan Department of Health and Human Services|Michigan Department of Health and Human Services|Blankenship|USA

>Spike|hCoV-19/USA/UT-UPHL-2009049/2020|2020-05-14|EPI\_ISL\_525063|Original|hCoV-19^^Utah|Human|Utah Public Health Laboratory|Utah Public Health Laboratory|Young|USA

>Spike|hCoV-19/England/ALDP-C3A2B0/2020|2020-12-09|EPI\_ISL\_731106|Original|hCoV-19^^England|Human|Lighthouse Lab in Alderley Park|Wellcome Sanger Institute for the COVID-19 Genomics UK (COG-UK) Consortium|Davies|United Kingdom

>Spike|hCoV-19/England/QEUH-AD3E4E/2020|2020-10-26|EPI\_ISL\_629855|Original|hCoV-19^^England|Human|Lighthouse Lab in Glasgow|Wellcome Sanger Institute for the COVID-19 Genomics UK (COG-UK) consortium|Davies|United Kingdom

>Spike|hCoV-19/Russia/OMS-ORINFI-2128S/2020|2020-07-02|EPI\_ISL\_639919|Original|hCoV-19^^Omsk|Human|Omsk Research Institute of Natural Focal Infections|WHO National Influenza Centre Russian Federation|Komissarov|Russia

>Spike|hCoV-19/Canada/ON-SLB3144/2020|2020-04-27|EPI\_ISL\_717739|Original|hCoV-19^^Ontario|Human|Kingston Health Sciences Centre and Queen's University|Ontario Institute for Cancer Research|de Borja|Canada

>Spike|hCoV-19/USA/LA-EVTL911/2020|2020-07-09|EPI\_ISL\_653602|Original|hCoV-19^^Louisiana|Human|LSUHS Emerging Viral Threat Laboratory|Microbial Genome Sequencing Center|Kamil|USA

>Spike|hCoV-19/USA/MDH-6612/2020|2020-03-09|EPI\_ISL\_454426|Original|hCoV-19^^Maryland|Human|Maryland Department of Health Laboratories Administration|Maryland Department of Health Laboratories Administration|Vepachedu|USA

>Spike|hCoV-19/England/CAMB-1B4F67/2020|2020-06-18|EPI\_ISL\_477803|Original|hCoV-19^^England|Human|Department of Pathology|COVID-19 Genomics UK (COG-UK) Consortium|Meredith|United Kingdom

>Spike|hCoV-19/USA/LA-EVTL1104/2020|2020-12-03|EPI\_ISL\_768374|Original|hCoV-19^^Louisiana|Human|LSUHS Emerging Viral Threat Laboratory|Microbial Genome Sequencing Center|Kamil|USA

>Spike|hCoV-19/England/PORT-2D7325/2020|2020-10-19|EPI\_ISL\_626684|Original|hCoV-19^^England|Human|Centre for Enzyme Innovation|COVID-19 Genomics UK (COG-UK) Consortium|Robson|United Kingdom

>Spike|hCoV-19/Netherlands/GE-EMC-348/2020|2020-10-27|EPI\_ISL\_632764|Original|hCoV-19^^Gelderland|Human|Dutch COVID-19 response team|Erasmus Medical Center|Oude Munnink|Netherlands

>Spike|hCoV-19/Iceland/10/2020|2020-03-16|EPI\_ISL\_417536|Original|hCoV-19^^Reykjavik|Human|deCODE genetics|deCODE genetics|J\u00f3nsson|Iceland

>Spike|hCoV-19/Switzerland/BL-UHB-42189773/2020|2020-03-13|EPI\_ISL\_528051|Original|hCoV-19^^Basel-Land|Human|University Hospital Basel|University Hospital Basel|Roloff Handschin|Switzerland

>Spike|hCoV-19/Scotland/CVR5614/2020|2020-11-01|EPI\_ISL\_650752|Original|hCoV-19^^Scotland|Human|West of Scotland Specialist Virology Centre|COVID-19 Genomics UK (COG-UK) Consortium|Robertson|United Kingdom

>Spike|hCoV-19/Italy/CAM-IZSM-118588/2020|2020-08-25|EPI\_ISL\_738125|Original|hCoV-19^^Campania|Human|IZSM-U.O.C. Virologia|Istituto Zooprofilattico Sperimentale del Mezzogiorno|Viscardi|Italy

>Spike|hCoV-19/Denmark/DCGC-21088/2020|2020-12-21|EPI\_ISL\_759546|Original|hCoV-19^^Hovedstaden|Human|Department of Virus and Microbiological Special Diagnostics|Albertsen Lab|Michaelsen|Denmark

>Spike|hCoV-19/England/20129142604/2020|2020-03-12|EPI\_ISL\_424108|Original|hCoV-19^^England|Human|Respiratory Virus Unit|Respiratory Virus Unit|Platt|United Kingdom

>Spike|hCoV-19/USA/CA-CZB-14905/2020|2020-11-25|EPI\_ISL\_739279|Original|hCoV-19^^California|Human|Orange County Public Health Lab|Chan-Zuckerberg Biohub|Kamm|USA

>Spike|hCoV-19/Scotland/QEUH-9AF1CB/2020|2020-09-03|EPI\_ISL\_560033|Original|hCoV-19^^Scotland|Human|Oxford Viromics|COVID-19 Genomics UK (COG-UK) Consortium|Golubchik|United Kingdom

>Spike|hCoV-19/Mali/M002615/2020|2020-04-06|EPI\_ISL\_487447|Original|hCoV-19^^Mopti|Human|CICM-Mali|Bundeswehr Institut of Microbiology|Antwerpen|Mali

>Spike|hCoV-19/Denmark/DCGC-16910/2020|2020-12-14|EPI\_ISL\_750638|Original|hCoV-19^^Hovedstaden|Human|Department of Virus and Microbiological Special Diagnostics|Albertsen Lab|Michaelsen|Denmark

>Spike|hCoV-19/Wales/PHWC-4990F9/2020|2020-12-02|EPI\_ISL\_727257|Original|hCoV-19^^Wales|Human|Originating lab|COVID-19 Genomics UK (COG-UK) Consortium|Moore|United Kingdom

>Spike|hCoV-19/England/ALDP-A66B67/2020|2020-10-12|EPI\_ISL\_630568|Original|hCoV-19^^England|Human|Lighthouse Lab in Alderley Park|Wellcome Sanger Institute for the COVID-19 Genomics UK (COG-UK) consortium|Davies|United Kingdom

>Spike|hCoV-19/Denmark/DCGC-11734/2020|2020-10-26|EPI\_ISL\_670528|Original|hCoV-19^^Midtjylland|Human|Department of Virus and Microbiological Special Diagnostics|Albertsen Lab|Michaelsen|Denmark

>Spike|hCoV-19/USA/TX-HMH-MCoV-11879/2020|2020-09-16|EPI\_ISL\_789898|Original|hCoV-19^^Texas|Human|Houston Methodist Hospital|Houston Methodist Hospital|Long|USA

>Spike|hCoV-19/Australia/QLDID921/2020|2020-03-11|EPI\_ISL\_417033|Original|hCoV-19^^Queensland|Human|Sullivan Nicolaides Pathology|Public Health Virology Laboratory|Warrilow|Australia

>Spike|hCoV-19/USA/CA-QRTP-Donor3/2020|2020-04-01|EPI\_ISL\_490212|Original|hCoV-19^^California|Human|Quest Diagnostics|Q Squared Solutions - QRTP facility|Weigman|USA

>Spike|hCoV-19/India/MH-NIV-206415/2020|2020-09-10|EPI\_ISL\_577666|Original|hCoV-19^^Maharashtra|Human|NIV Influenza|NIV Influenza|Potdar|India

>Spike|hCoV-19/England/MILK-99D0B4/2020|2020-08-30|EPI\_ISL\_549926|Original|hCoV-19^^England|Human|Lighthouse Lab in Milton Keynes|Wellcome Sanger Institute for the COVID-19 Genomics UK (COG-UK) consortium|Davies|United Kingdom

>Spike|hCoV-19/Portugal/PT0615/2020|2020-03-17|EPI\_ISL\_454338|Original|hCoV-19^^Portugal|Human|unknown|Instituto Nacional de Saude (INSA)|Borges|Portugal

>Spike|hCoV-19/Spain/MD-IBV-005324/2020|2020-03-17|EPI\_ISL\_510203|Original|hCoV-19^^Madrid|Human|Hospital General Universitario Gregorio Mara\u00f1a|SeqCOVID-SPAIN consortium|IBV (CSIC)|Comas|Spain

>Spike|hCoV-19/England/GSTT-265E4CF/2020|2020-03-31|EPI\_ISL\_484209|Original|hCoV-19^^England|Human|Centre for Clinical Infection and Diagnostics Research and Genomics Innovation Unit|COVID-19 Genomics UK (COG-UK) Consortium|Awan|United Kingdom

>Spike|hCoV-19/Scotland/QEUH-C543F9/2020|2020-12-12|EPI\_ISL\_757067|Original|hCoV-19^^Scotland|Human|Lighthouse Lab in Glasgow|Wellcome Sanger Institute for the COVID-19 Genomics UK (COG-UK) Consortium|Davies|United Kingdom

>Spike|hCoV-19/Denmark/DCGC-16478/2020|2020-11-16|EPI\_ISL\_714792|Original|hCoV-19^^Hovedstaden|Human|Department of Virus and Microbiological Special Diagnostics|Albertsen Lab|Michaelsen|Denmark

>Spike|hCoV-19/Australia/NSW306/2020|2020-04-01|EPI\_ISL\_451570|Original|hCoV-19^^New South Wales|Human|Pathology West - NSW Health Pathology|NSW Health Pathology - Institute of Clinical Pathology and Medical Research; Westmead Hospital; University of Sydney|Gall|Australia

>Spike|hCoV-19/Australia/VIC8929/2020|2020-07-28|EPI\_ISL\_565285|Original|hCoV-19^^Victoria|Human|Microbiological Diagnostic Unit - Public Health Laboratory (MDU-PHL)|MDU-PHL|Schultz|Australia

>Spike|hCoV-19/England/QEUA-AAAE04/2020|2020-10-21|EPI\_ISL\_652745|Original|hCoV-19^^England|Human|Oxford Viromics|COVID-19 Genomics UK (COG-UK) Consortium|Golubchik|United Kingdom

>Spike|hCoV-19/USA/TX-HMH-4168/2020|2020-06-18|EPI\_ISL\_543407|Original|hCoV-19^^Texas|Human|Houston Methodist Hospital|Houston Methodist Hospital|Long|USA

>Spike|hCoV-19/Denmark/DCGC-10046/2020|2020-11-09|EPI\_ISL\_669359|Original|hCoV-19^^Hovedstaden|Human|Department of Virus and Microbiological Special Diagnostics|Albertsen Lab|Michaelsen|Denmark

>Spike|hCoV-19/USA/CT-Yale-044/2020|2020-03-23|EPI\_ISL\_419512|Original|hCoV-19^^Connecticut|Human|Yale COVID-19 Biorepository|Grubaugh Lab - Yale School of Public Health|Grubaugh|USA

>Spike|hCoV-19/USA/CA-CZB-4714/2020|2020-08-27|EPI\_ISL\_582894|Original|hCoV-19^^California|Human|County of Santa Clara Public Health Department|Chan-Zuckerberg Biohub|Bhatt|USA

>Spike|hCoV-19/England/ALDP-91E0E8/2020|2020-06-23|EPI\_ISL\_553313|Original|hCoV-19^^England|Human|Lighthouse Lab in Alderley Park|Wellcome Sanger Institute for the COVID-19 Genomics UK (COG-UK) consortium|Davies|United Kingdom

>Spike|hCoV-19/England/CAMB-77FF8/2020|2020-04-01|EPI\_ISL\_441264|Original|hCoV-19^^England|Human|Department of Pathology|Wellcome Sanger Institute for the COVID-19 Genomics UK (COG-UK) consortium|Amato|United Kingdom

>Spike|hCoV-19/USA/NY-QDX-2464/2020|2020-03-16|EPI\_ISL\_604806|Original|hCoV-19^^New York|Human|Quest Diagnostics|Quest Diagnostics|Kagan|USA

>Spike|hCoV-19/England/ALDP-A861AB/2020|2020-10-17|EPI\_ISL\_606000|Original|hCoV-19^^England|Human|Lighthouse Lab in Alderley Park|Wellcome Sanger Institute for the COVID-19 Genomics UK (COG-UK) consortium|Davies|United Kingdom

>Spike|hCoV-19/USA/TX-HMH-5130/2020|2020-06-23|EPI\_ISL\_544546|Original|hCoV-19^^Texas|Human|Houston Methodist Hospital|Houston Methodist Hospital|Long|USA

>Spike|hCoV-19/Wales/PHWC-48A83F/2020|2020-11-04|EPI\_ISL\_650549|Original|hCoV-19^^Wales|Human|Wales Specialist Virology Centre Sequencing lab|COVID-19 Genomics UK (COG-UK) Consortium|Moore|United Kingdom

>Spike|hCoV-19/Denmark/DCGC-22635/2020|2020-12-14|EPI\_ISL\_757682|Original|hCoV-19^^Hovedstaden|Human|Department of Virus and Microbiological Special Diagnostics|Albertsen Lab|Michaelsen|Denmark

>Spike|hCoV-19/USA/MA-MASPHL-00270/2020|2020-04-17|EPI\_ISL\_791702|Original|hCoV-19^^Massachusetts|Human|Massachusetts State Public Health Laboratory|Infectious Disease Program|Park|USA

>Spike|hCoV-19/Morocco/FMP-3/2020|2020-11-00|EPI\_ISL\_728272|Original|hCoV-19^^Rabat|Human|Laboratoire Biolife|Laboratoire de Biotechnologie|Ouahgghiri|Morocco

>Spike|hCoV-19/Belgium/regal-12111330/2020|2020-12-11|EPI\_ISL\_738383|Original|hCoV-19^^Mol|Human|UZ Leuven|KU Leuven|Maes|Belgium

>Spike|hCoV-19/England/CAMB-7369D/2020|2020-03-22|EPI\_ISL\_440185|Original|hCoV-19^^England|Human|Department of Pathology|Wellcome Sanger Institute for the COVID-19 Genomics UK (COG-UK) consortium|Amato|United Kingdom

>Spike|hCoV-19/SaudiArabia/KAUST-JEDDAH554/2020|2020-04-21|EPI\_ISL\_512958|Original|hCoV-19^^Jeddah|Human|Pathogen Genomics Lab King Abdullah University of Science and Technology(KAUST)|Pathogen Genomics Lab King Abdullah University of Science and Technology(KAUST)|Mohamed Ghazzali|Saudi Arabia

>Spike|hCoV-19/Wales/PHWC-4A4529/2020|2020-12-16|EPI\_ISL\_764704|Original|hCoV-19^^Wales|Human|Wales Specialist Virology Centre Sequencing lab|COVID-19 Genomics UK (COG-UK) Consortium|Moore|United Kingdom

>Spike|hCoV-19/England/ALDP-90B127/2020|2020-06-22|EPI\_ISL\_556606|Original|hCoV-19^^England|Human|Lighthouse Lab in Alderley Park|Wellcome Sanger Institute for the COVID-19 Genomics UK (COG-UK) consortium|Davies|United Kingdom

>Spike|hCoV-19/USA/TX-HMH-MCoV-10552/2020|2020-07-08|EPI\_ISL\_789531|Original|hCoV-19^^Texas|Human|Houston Methodist Hospital|Houston Methodist Hospital|Long|USA

>Spike|hCoV-19/USA/CA-CZB-1260/2020|2020-05-12|EPI\_ISL\_454680|Original|hCoV-19^^California|Human|County of Santa Clara Public Health Department|Chan-Zuckerberg Biohub|Hao|USA

>Spike|hCoV-19/USA/WI-UW-1423/2020|2020-09-11|EPI\_ISL\_541556|Original|hCoV-19^^Wisconsin|Human|University of Wisconsin-Madison Campus AIDS Vaccine Research

Laboratories|University of Wisconsin-Madison AIDS Vaccine Research  
Laboratories|Baczenas|USA  
>Spike|hCoV-19/England/QEUI-5DCC5F/2020|2020-06-17|EPI\_ISL\_533274|Original|hCoV-19^^England|Human|Lighthouse Lab in Glasgow|Wellcome Sanger Institute for the COVID-19 Genomics UK (COG-UK) consortium|Davies|United Kingdom  
>Spike|hCoV-19/USA/UT-UPHL-2008951/2020|2020-05-15|EPI\_ISL\_525278|Original|hCoV-19^^Utah|Human|Utah Public Health Laboratory|Utah Public Health Laboratory|Young|USA  
>Spike|hCoV-19/Canada/BC\_06944842/2020|2020-04-00|EPI\_ISL\_466808|Original|hCoV-19^^British Columbia|Human|BCCDC Public Health Laboratory|BCCDC Public Health Laboratory|Harrigan|Canada  
>Spike|hCoV-19/USA/HI-H200129/2020|2020-07-05|EPI\_ISL\_752692|Original|hCoV-19^^Hawaii|Human|State Laboratories Division|State Laboratories Division|Sultana|USA  
>Spike|hCoV-19/England/MILK-C61CB2/2020|2020-12-13|EPI\_ISL\_735609|Original|hCoV-19^^England|Human|Lighthouse Lab in Milton Keynes|Wellcome Sanger Institute for the COVID-19 Genomics UK (COG-UK) Consortium|Davies|United Kingdom  
>Spike|hCoV-19/England/BRIS-12849C/2020|2020-04-16|EPI\_ISL\_469664|Original|hCoV-19^^England|Human|PHE South West Regional Laboratory|Wellcome Sanger Institute for the COVID-19 Genomics UK (COG-UK) consortium|Davies|United Kingdom  
>Spike|hCoV-19/England/204390715/2020|2020-10-22|EPI\_ISL\_649874|Original|hCoV-19^^England|Human|Respiratory Virus Unit|COVID-19 Genomics UK (COG-UK) Consortium|Platt|United Kingdom  
>Spike|hCoV-19/Northern Ireland/NIRE-FB518/2020|2020-08-19|EPI\_ISL\_585231|Original|hCoV-19^^Northern Ireland|Human|Regional Virus Laboratory|COVID-19 Genomics UK (COG-UK) Consortium|Fairley|United Kingdom  
>Spike|hCoV-19/United Arab Emirates/1065/2020|2020-06-11|EPI\_ISL\_698140|Original|hCoV-19^^Abu Dhabi|Human|Group 42 (G42) Healthcare|G42 Healthcare|Ogrodzki|United Arab Emirates  
>Spike|hCoV-19/Germany/SH-ChVir8321/2020|2020-07-27|EPI\_ISL\_729578|Original|hCoV-19^^Schleswig-Holstein|Human|A. Krumbholz|Charit\u00e9 Universit\u00e4tsmedizin Berlin|Muehlemann|Germany  
>Spike|hCoV-19/India/MH-NIV-27109/2020|2020-05-11|EPI\_ISL\_479526|Original|hCoV-19^^Maharashtra|Human|NIV Influenza|NIV Influenza|Potdar|India  
>Spike|hCoV-19/USA/TX-HMH-5537/2020|2020-06-25|EPI\_ISL\_544847|Original|hCoV-19^^Texas|Human|Houston Methodist Hospital|Houston Methodist Hospital|Long|USA  
>Spike|hCoV-19/England/ALDP-B831E9/2020|2020-11-14|EPI\_ISL\_675590|Original|hCoV-19^^England|Human|Lighthouse Lab in Alderley Park|Wellcome Sanger Institute for the COVID-19 Genomics UK (COG-UK) Consortium|Davies|United Kingdom  
>Spike|hCoV-19/France/PAC-MEPHI-2375/2020|2020-10-10|EPI\_ISL\_644547|Original|hCoV-19^^Provence-Alpes-Cote-d\u2019Azur|Human|MEPHI|MEPHI|Levasseur|France  
>Spike|hCoV-19/Gibraltar/204421196/2020|2020-10-27|EPI\_ISL\_613657|Original|hCoV-19^^Gibraltar|Human|Microbiology|Respiratory Virus Unit|Platt|Gibraltar  
>Spike|hCoV-19/England/CAMC-B0C485/2020|2020-10-29|EPI\_ISL\_649628|Original|hCoV-19^^England|Human|Lighthouse Lab in Cambridge|Wellcome Sanger Institute for the COVID-19 Genomics UK (COG-UK) Consortium|Davies|United Kingdom  
>Spike|hCoV-19/England/QEUI-9C87CA/2020|2020-09-11|EPI\_ISL\_567167|Original|hCoV-19^^England|Human|Lighthouse Lab in Glasgow|Wellcome Sanger Institute for the COVID-19 Genomics UK (COG-UK) consortium|Davies|United Kingdom  
>Spike|hCoV-19/Denmark/DCGC-1789/2020|2020-07-20|EPI\_ISL\_618220|Original|hCoV-19^^Hovedstaden|Human|Department of Virus and Microbiological Special Diagnostics|Albertsen lab|Michaelsen|Denmark  
>Spike|hCoV-19/England/ALDP-B85A82/2020|2020-11-14|EPI\_ISL\_675670|Original|hCoV-19^^England|Human|Lighthouse Lab in Alderley Park|Wellcome Sanger Institute for the COVID-19 Genomics UK (COG-UK) Consortium|Davies|United Kingdom  
>Spike|hCoV-19/Sweden/20-50150/2020|2020-03-05|EPI\_ISL\_455860|Original|hCoV-19^^Stockholm|Human|Karolinska Universitetslaboratoriet|The Public Health Agency of Sweden|Svartstr\u00f6m|Sweden  
>Spike|hCoV-19/England/CAMB-1AB6E6/2020|2020-04-27|EPI\_ISL\_444327|Original|hCoV-19^^England|Human|Department of Pathology|COVID-19 Genomics UK (COG-UK) Consortium|Meredith|United Kingdom

>Spike|hCoV-19/Wales/PHWC-487DCA/2020|2020-10-28|EPI\_ISL\_639306|Original|hCoV-19^^Wales|Human|Wales Specialist Virology Centre Sequencing lab|COVID-19 Genomics UK (COG-UK) Consortium|Moore|United Kingdom

>Spike|hCoV-19/England/SHEF-CEAB5/2020|2020-08-31|EPI\_ISL\_540759|Original|hCoV-19^^England|Human|Virology Department|COVID-19 Genomics UK (COG-UK) Consortium|de Silva|United Kingdom

>Spike|hCoV-19/Wales/PHWC-49C9FB/2020|2020-11-19|EPI\_ISL\_742630|Original|hCoV-19^^Wales|Human|Wales Specialist Virology Centre Sequencing lab|COVID-19 Genomics UK (COG-UK) Consortium|Moore|United Kingdom

>Spike|hCoV-19/England/LIVE-AA3F0/2020|2020-03-23|EPI\_ISL\_517449|Original|hCoV-19^^England|Human|Liverpool Clinical Laboratories|COVID-19 Genomics UK (COG-UK) Consortium|Haldenby|United Kingdom

>Spike|hCoV-19/England/QEUEH-961E64/2020|2020-07-31|EPI\_ISL\_536980|Original|hCoV-19^^England|Human|Lighthouse Lab in Glasgow|Wellcome Sanger Institute for the COVID-19 Genomics UK (COG-UK) consortium|Davies|United Kingdom

>Spike|hCoV-19/Netherlands/GE-RIVM-20566/2020|2020-12-15|EPI\_ISL\_790650|Original|hCoV-19^^Gelderland|Human|Dutch COVID-19 response team|National Institute for Public Health and the Environment (RIVM)|Meijer|Netherlands

>Spike|hCoV-19/USA/FL-BPHL-0582/2020|2020-03-21|EPI\_ISL\_508786|Original|hCoV-19^^Florida|Human|Florida Bureau of Public Health Laboratories|Florida Bureau of Public Health Laboratories|Blanton|USA

>Spike|hCoV-19/Netherlands/UT-RIVM-20359/2020|2020-12-07|EPI\_ISL\_728579|Original|hCoV-19^^Utrecht|Human|Dutch COVID-19 response team|National Institute for Public Health and the Environment (RIVM)|Meijer|Netherlands

>Spike|hCoV-19/England/QEUEH-CDE351/2020|2020-12-26|EPI\_ISL\_782348|Original|hCoV-19^^England|Human|Lighthouse Lab in Glasgow|Wellcome Sanger Institute for the COVID-19 Genomics UK (COG-UK) Consortium|Davies|United Kingdom

>Spike|hCoV-19/USA/TX-HMH-3595/2020|2020-06-15|EPI\_ISL\_543051|Original|hCoV-19^^Texas|Human|Houston Methodist Hospital|Houston Methodist Hospital|Long|USA

>Spike|hCoV-19/Denmark/DCGC-6331/2020|2020-09-07|EPI\_ISL\_621188|Original|hCoV-19^^Midtjylland|Human|Department of Virus and Microbiological Special Diagnostics|Albertsen lab|Michaelsen|Denmark

>Spike|hCoV-19/Spain/RI-IBV-006014/2020|2020-03-29|EPI\_ISL\_500444|Original|hCoV-19^^La Rioja|Human|Centro de Investigaci\u00f3n Biom\u00e9dica de La Rioja - Hospital San Pedro Logro\u00f1o|SeqCOVID-SPAIN consortium|IBV (CSIC)|Comas|Spain

>Spike|hCoV-19/England/CAMB-7D3F6/2020|2020-04-06|EPI\_ISL\_441632|Original|hCoV-19^^England|Human|Department of Pathology|Wellcome Sanger Institute for the COVID-19 Genomics UK (COG-UK) consortium|Amato|United Kingdom

>Spike|hCoV-19/England/QEUEH-9B7FD5/2020|2020-09-08|EPI\_ISL\_590535|Original|hCoV-19^^England|Human|Lighthouse Lab in Glasgow|Wellcome Sanger Institute for the COVID-19 Genomics UK (COG-UK) consortium|Davies|United Kingdom

>Spike|hCoV-19/India/TG-CCMB-M588/2020|2020-06-10|EPI\_ISL\_495217|Original|hCoV-19^^Telangana|Human|CSIR-Centre for Cellular and Molecular Biology|CSIR-Centre for Cellular and Molecular Biology|Banu|India

>Spike|hCoV-19/Netherlands/ZH-EMC-987/2020|2020-11-09|EPI\_ISL\_722757|Original|hCoV-19^^Zuid Holland|Human|Dutch COVID-19 response team|Erasmus Medical Center|Oude Munnink|Netherlands

>Spike|hCoV-19/England/ALDP-B1D603/2020|2020-11-01|EPI\_ISL\_646113|Original|hCoV-19^^England|Human|Lighthouse Lab in Alderley Park|Wellcome Sanger Institute for the COVID-19 Genomics UK (COG-UK) Consortium|Davies|United Kingdom

>Spike|hCoV-19/Wales/PHWC-4809EB/2020|2020-10-11|EPI\_ISL\_612959|Original|hCoV-19^^Wales|Human|Wales Specialist Virology Centre Sequencing lab|COVID-19 Genomics UK (COG-UK) Consortium|Moore|United Kingdom

>Spike|hCoV-19/New Zealand/20VR2095/2020|2020-04-02|EPI\_ISL\_548123|Original|hCoV-19^^Auckland|Human|Middlemore Hospital|Institute of Environmental Science and Research (ESR)|Wang|New Zealand

>Spike|hCoV-19/Japan/PG-2054/2020|2020-04-00|EPI\_ISL\_685659|Original|hCoV-19^^Japan|Human|Pathogen Genomics Center|Pathogen Genomics Center|Sekizuka|Japan

>Spike|hCoV-19/England/MILK-BA9EB9/2020|2020-11-18|EPI\_ISL\_681648|Original|hCoV-19^^England|Human|Lighthouse Lab in Milton Keynes|Wellcome Sanger Institute for the COVID-19 Genomics UK (COG-UK) Consortium|Davies|United Kingdom

>Spike|hCoV-19/Wales/PHWC-48BDA8/2020|2020-11-03|EPI\_ISL\_666356|Original|hCoV-19^^Wales|Human|Wales Specialist Virology Centre Sequencing lab|COVID-19 Genomics UK (COG-UK) Consortium|Moore|United Kingdom

>Spike|hCoV-19/Hungary/US-60522w/2020|2020-10-02|EPI\_ISL\_677811|Original|hCoV-19^^B\u00e9lcs-Kiskun county|Human|University of Szeged|National Laboratory of Virology|Kemenesi|Hungary

>Spike|hCoV-19/USA/LA-BIE-018/2020|2020-04-07|EPI\_ISL\_468709|Original|hCoV-19^^Louisiana|Human|Ochsner Health|Bioinfoexperts|Cross|USA

>Spike|hCoV-19/Denmark/DCGC-19150/2020|2020-12-07|EPI\_ISL\_748199|Original|hCoV-19^^Sjaelland|Human|Department of Virus and Microbiological Special Diagnostics|Albertsen Lab|Michaelsen|Denmark

>Spike|hCoV-19/USA/TX-HMH-MCoV-9007/2020|2020-07-02|EPI\_ISL\_780891|Original|hCoV-19^^Texas|Human|Houston Methodist Hospital|Houston Methodist Hospital|Long|USA

>Spike|hCoV-19/England/MILK-B55678/2020|2020-11-05|EPI\_ISL\_657381|Original|hCoV-19^^England|Human|Lighthouse Lab in Milton Keynes|Wellcome Sanger Institute for the COVID-19 Genomics UK (COG-UK) Consortium|Davies|United Kingdom

>Spike|hCoV-19/England/ALDP-BB9FA4/2020|2020-11-20|EPI\_ISL\_702017|Original|hCoV-19^^England|Human|Lighthouse Lab in Alderley Park|Wellcome Sanger Institute for the COVID-19 Genomics UK (COG-UK) Consortium|Davies|United Kingdom

>Spike|hCoV-19/England/CAMB-1AEB20/2020|2020-04-28|EPI\_ISL\_524610|Original|hCoV-19^^England|Human|Department of Pathology|Wellcome Sanger Institute for the COVID-19 Genomics UK (COG-UK) consortium|Davies|United Kingdom

>Spike|hCoV-19/Thailand/Bangkok-CONI-0272/2020|2020-03-14|EPI\_ISL\_693350|Original|hCoV-19^^Bangkok|Human|Ramathibodi Hospital|COVID-19 Network Investigations (CONI) Alliance|Batty|Thailand

>Spike|hCoV-19/England/ALDP-94E410/2020|2020-06-17|EPI\_ISL\_555382|Original|hCoV-19^^England|Human|Lighthouse Lab in Alderley Park|Wellcome Sanger Institute for the COVID-19 Genomics UK (COG-UK) consortium|Davies|United Kingdom

>Spike|hCoV-19/USA/TX-HMH-MCoV-18940/2020|2020-11-25|EPI\_ISL\_785236|Original|hCoV-19^^Texas|Human|Houston Methodist Hospital|Houston Methodist Hospital|Long|USA

>Spike|hCoV-19/Denmark/ALAB-HH-183/2020|2020-04-14|EPI\_ISL\_452049|Original|hCoV-19^^Denmark|Human|Department of Clinical Microbiology|Albertsen lab|Kirkegaard|Denmark

>Spike|hCoV-19/Denmark/DCGC-20738/2020|2020-12-21|EPI\_ISL\_759334|Original|hCoV-19^^Nordjylland|Human|Department of Virus and Microbiological Special Diagnostics|Albertsen Lab|Michaelsen|Denmark

>Spike|hCoV-19/USA/ID-UW-4433/2020|2020-03-27|EPI\_ISL\_426073|Original|hCoV-19^^Idaho|Human|UW Virology Lab|UW Virology Lab|Roychoudhury|USA

>Spike|hCoV-19/England/ALDP-B1CCF3/2020|2020-11-01|EPI\_ISL\_645579|Original|hCoV-19^^England|Human|Lighthouse Lab in Alderley Park|Wellcome Sanger Institute for the COVID-19 Genomics UK (COG-UK) Consortium|Davies|United Kingdom

>Spike|hCoV-19/England/CAMC-C82F85/2020|2020-12-17|EPI\_ISL\_762827|Original|hCoV-19^^England|Human|Lighthouse Lab in Cambridge|Wellcome Sanger Institute for the COVID-19 Genomics UK (COG-UK) Consortium|Davies|United Kingdom

>Spike|hCoV-19/Scotland/QEUIH-96B69F/2020|2020-08-17|EPI\_ISL\_531249|Original|hCoV-19^^Scotland|Human|NHSGGC West of Scotland Specialist Virology Centre / MRC-University of Glasgow Centre for Virus Research|Wellcome Sanger Institute for the COVID-19 Genomics UK (COG-UK) consortium|Davies|United Kingdom

>Spike|hCoV-19/Australia/NSW777/2020|2020-07-29|EPI\_ISL\_526119|Original|hCoV-19^^New South Wales|Human|Sydney South West Pathology Service (SSWPS) - Liverpool Hospital - NSW Health Pathology|NSW Health Pathology - Institute of Clinical Pathology and Medical Research; Westmead Hospital; University of Sydney|Gall|Australia

>Spike|hCoV-19/Russia/StPetersburg-RII6846V/2020|2020-04-15|EPI\_ISL\_450245|Vero P1|hCoV-19^^Saint Petersburg|Human|WHO National Influenza Centre Russian Federation|WHO National Influenza Centre Russian Federation|Komissarov|Russia

>Spike|hCoV-19/United Arab Emirates/0012/2020|2020-05-07|EPI\_ISL\_698222|Original|hCoV-19^^Abu Dhabi|Human|Group 42 (G42) Healthcare|G42 Healthcare|Ogrodzki|United Arab Emirates

>Spike|hCoV-19/USA/TX-HMH-3083/2020|2020-06-09|EPI\_ISL\_543984|Original|hCoV-19^^Texas|Human|Houston Methodist Hospital|Houston Methodist Hospital|Long|USA

>Spike|hCoV-19/Netherlands/ZH-EMC-1022/2020|2020-00-00|EPI\_ISL\_722488|Original|hCoV-19^^Zuid Holland|Human|Dutch COVID-19 response team|Erasmus Medical Center|Oude Munnink|Netherlands

>Spike|hCoV-19/England/CAMB-81034/2020|2020-04-20|EPI\_ISL\_438558|Original|hCoV-19^^England|Human|Department of Pathology|COVID-19 Genomics UK (COG-UK) Consortium|Meredith|United Kingdom

>Spike|hCoV-19/Japan/PG-2351/2020|2020-05-00|EPI\_ISL\_685956|Original|hCoV-19^^Japan|Human|Pathogen Genomics Center|Pathogen Genomics Center|Sekizuka|Japan

>Spike|hCoV-19/England/ALDP-CB6AA5/2020|2020-12-19|EPI\_ISL\_761678|Original|hCoV-19^^England|Human|Lighthouse Lab in Alderley Park|Wellcome Sanger Institute for the COVID-19 Genomics UK (COG-UK) Consortium|Davies|United Kingdom

>Spike|hCoV-19/USA/WA-S2392/2020|2020-06-13|EPI\_ISL\_497024|Original|hCoV-19^^Washington|Human|Washington State Department of Health|Seattle Flu Study|Lee|USA

>Spike|hCoV-19/Japan/PG-1394/2020|2020-04-00|EPI\_ISL\_685001|Original|hCoV-19^^Japan|Human|Saitama Prefectural Institute of Public Health|Pathogen Genomics Center|Sekizuka|Japan

>Spike|hCoV-19/USA/CA-CZB-1962/2020|2020-05-06|EPI\_ISL\_486234|Original|hCoV-19^^California|Human|Orange County Public Health Laboratory|Chan-Zuckerberg Biohub|McGeever|USA

>Spike|hCoV-19/Peru/LIM-INS-157/2020|2020-03-19|EPI\_ISL\_536550|Original|hCoV-19^^Lima|Human|Instituto Nacional de Salud|Laboratorio de Infecciones Respiratorias Agudas|Lopez|Peru

>Spike|hCoV-19/Wales/PHWC-48EE1B/2020|2020-11-11|EPI\_ISL\_681010|Original|hCoV-19^^Wales|Human|Wales Specialist Virology Centre Sequencing lab|COVID-19 Genomics UK (COG-UK) Consortium|Moore|United Kingdom

>Spike|hCoV-19/Luxembourg/LNS0320605/2020|2020-10-02|EPI\_ISL\_739756|Original|hCoV-19^^Luxembourg|Human|Laboratoire national de sant\u00e9|Laboratoire national de sant\u00e9|Wienecke-Baldacchino|Luxembourg

>Spike|hCoV-19/Spain/MD-IBV-97010030/2020|2020-03-19|EPI\_ISL\_779716|Original|hCoV-19^^Madrid|Human|IdISSC/Hospital Cl\u00e9nico San Carlos de Madrid\u200b|SeqCOVID-SPAIN consortium/IBV (CSIC)|Comas|Spain

>Spike|hCoV-19/USA/NM-NMDOH-2020329281/2020|2020-09-01|EPI\_ISL\_569662|Original|hCoV-19^^New Mexico|Human|New Mexico Department of Health Scientific Laboratory|New Mexico Department of Health Scientific Laboratory|Johnson|USA

>Spike|hCoV-19/New Zealand/20VR1910/2020|2020-04-02|EPI\_ISL\_456305|Original|hCoV-19^^Southern|Human|Southern Community Labs Dunedin|Institute of Environmental Science and Research (ESR)|de Ligt|New Zealand

>Spike|hCoV-19/Denmark/DCGC-16214/2020|2020-11-16|EPI\_ISL\_714643|Original|hCoV-19^^Midtjylland|Human|Department of Virus and Microbiological Special Diagnostics|Albertsen Lab|Michaelsen|Denmark

>Spike|hCoV-19/France/OCC-SC529/2020|2020-03-11|EPI\_ISL\_644698|Original|hCoV-19^^Occitanie|Human|CHU N\u00eemes|CNR Virus des Infections Respiratoires - France SUD|Bal|France

>Spike|hCoV-19/USA/WI-UW-1711/2020|2020-09-11|EPI\_ISL\_605584|Original|hCoV-19^^Wisconsin|Human|University of Wisconsin-Madison AIDS Vaccine Research Laboratories|University of Wisconsin-Madison AIDS Vaccine Research Laboratories|Baczenas|USA

>Spike|hCoV-19/USA/ME-HETL-J0056/2020|2020-03-16|EPI\_ISL\_513467|Original|hCoV-19^^Maine|Human|Maine HETL|Tewhey Lab|Tewhey|USA

>Spike|hCoV-19/Japan/PG-1048/2020|2020-04-00|EPI\_ISL\_684658|Original|hCoV-19^^Japan|Human|Fukuoka Institute of Health and Environmental Sciences|Pathogen Genomics Center|Sekizuka|Japan

>Spike|hCoV-19/South Africa/KRISP-K003332/2020|2020-09-07|EPI\_ISL\_602725|Original|hCoV-19^^KwaZulu-Natal|Human|NHLS-IALCH|KRISP|de Oliveira|South Africa



>Spike|hCoV-19/USA/TX-HMH0327/2020|2020-03-28|EPI\_ISL\_434939|Original|hCoV-19^^Texas|Human|Houston Methodist Hospital|Houston Methodist Hospital|Long|USA

>Spike|hCoV-19/England/BIRM-61B1B/2020|2020-03-25|EPI\_ISL\_529327|Original|hCoV-19^^England|Human|University of Birmingham|COVID-19 Genomics UK (COG-UK) Consortium|Loman|United Kingdom

>Spike|hCoV-19/USA/WI-UW-2037/2020|2020-09-30|EPI\_ISL\_677443|Original|hCoV-19^^Wisconsin|Human|University of Wisconsin-Madison AIDS Vaccine Research Laboratories|University of Wisconsin-Madison AIDS Vaccine Research Laboratories|Baczenas|USA

>Spike|hCoV-19/England/ALDP-95D029/2020|2020-06-18|EPI\_ISL\_554989|Original|hCoV-19^^England|Human|Lighthouse Lab in Alderley Park|Wellcome Sanger Institute for the COVID-19 Genomics UK (COG-UK) consortium|Davies|United Kingdom

>Spike|hCoV-19/England/LIVE-DB395F/2020|2020-10-22|EPI\_ISL\_650877|Original|hCoV-19^^England|Human|Liverpool Clinical Laboratories|COVID-19 Genomics UK (COG-UK) Consortium|Haldenby|United Kingdom

>Spike|hCoV-19/South Africa/KRISP-0300/2020|2020-06-25|EPI\_ISL\_487288|Original|hCoV-19^^KwaZulu-Natal|Human|NHLs-IALCH|KRISP|de Oliveira|South Africa

>Spike|hCoV-19/England/ALDP-955D57/2020|2020-06-12|EPI\_ISL\_554063|Original|hCoV-19^^England|Human|Lighthouse Lab in Alderley Park|Wellcome Sanger Institute for the COVID-19 Genomics UK (COG-UK) consortium|Davies|United Kingdom

>Spike|hCoV-19/USA/UT-UPHL-2012142512/2020|2020-11-27|EPI\_ISL\_746911|Original|hCoV-19^^Utah|Human|Utah Public Health Laboratory|Utah Public Health Laboratory|Gallagher|USA

>Spike|hCoV-19/England/MILK-9A6B99/2020|2020-09-02|EPI\_ISL\_550072|Original|hCoV-19^^England|Human|Lighthouse Lab in Milton Keynes|Wellcome Sanger Institute for the COVID-19 Genomics UK (COG-UK) consortium|Davies|United Kingdom

>Spike|hCoV-19/Japan/PG-3078/2020|2020-04-00|EPI\_ISL\_691201|Original|hCoV-19^^Japan|Human|Pathogen Genomics Center|Pathogen Genomics Center|Sekizuka|Japan

>Spike|hCoV-19/England/CWAR-24FD989/2020|2020-04-24|EPI\_ISL\_584457|Original|hCoV-19^^England|Human|UHCW / University of Warwick|COVID-19 Genomics UK (COG-UK) Consortium|Stark|United Kingdom

>Spike|hCoV-19/England/QEUEH-BA3268/2020|2020-11-18|EPI\_ISL\_721060|Original|hCoV-19^^England|Human|Lighthouse Lab in Glasgow|Wellcome Sanger Institute for the COVID-19 Genomics UK (COG-UK) Consortium|Davies|United Kingdom

>Spike|hCoV-19/Spain/GA-IBV-002731/2020|2020-04-14|EPI\_ISL\_467281|Original|hCoV-19^^Galicia|Human|Hospital Cl\u00e9nico Universitario de Santiago de Compostela|SeqCOVID-SPAIN consortium|IBV (CSIC)|Comas|Spain

>Spike|hCoV-19/USA/WA-UW-13084/2020|2020-06-30|EPI\_ISL\_570951|Original|hCoV-19^^Washington|Human|UW Virology Lab|UW Virology Lab|Roychoudhury|USA

>Spike|hCoV-19/Italy/LOM-ASST-6/2020|2020-03-02|EPI\_ISL\_486662|Original|hCoV-19^^Lombardy|Human|Microbiology|Microbiology|Comandatore|Italy

>Spike|hCoV-19/USA/OR-PROV-108/2020|2020-04-23|EPI\_ISL\_482376|Original|hCoV-19^^Oregon|Human|Providence St. Joseph Health Molecular Genomics Laboratory|Providence St. Joseph Health Molecular Genomics Laboratory|Dowdell|USA

>Spike|hCoV-19/India/GJ-GBRC289/2020|2020-06-05|EPI\_ISL\_495026|Original|hCoV-19^^Gujarat|Human|GMERS Medical College & Hospital|Gujarat Biotechnology Research Centre|Joshi|India

>Spike|hCoV-19/England/LIVE-A742D/2020|2020-03-28|EPI\_ISL\_517020|Original|hCoV-19^^England|Human|Liverpool Clinical Laboratories|COVID-19 Genomics UK (COG-UK) Consortium|Haldenby|United Kingdom

>Spike|hCoV-19/USA/TX-HMH-MCoV-12292/2020|2020-09-23|EPI\_ISL\_790284|Original|hCoV-19^^Texas|Human|Houston Methodist Hospital|Houston Methodist Hospital|Long|USA

>Spike|hCoV-19/England/CAMB-792A2/2020|2020-04-03|EPI\_ISL\_441106|Original|hCoV-19^^England|Human|Department of Pathology|Wellcome Sanger Institute for the COVID-19 Genomics UK (COG-UK) consortium|Amato|United Kingdom

>Spike|hCoV-19/Denmark/DCGC-2589/2020|2020-08-17|EPI\_ISL\_617825|Original|hCoV-19^^Hovedstaden|Human|Department of Virus and Microbiological Special Diagnostics|Albertsen lab|Michaelsen|Denmark

>Spike|hCoV-19/USA/NY-NYCPHL-001028/2020|2020-09-28|EPI\_ISL\_633044|Original|hCoV-19^^New York|Human|DOHMH Morrisania|New York City Public Health Laboratory|Wang|USA

>Spike|hCoV-19/England/SHEF-C51F5/2020|2020-05-27|EPI\_ISL\_535056|Original|hCoV-19^^England|Human|Virology Department|COVID-19 Genomics UK (COG-UK) Consortium|de Silva|United Kingdom

>Spike|hCoV-19/Denmark/DCGC-22506/2020|2020-12-14|EPI\_ISL\_757600|Original|hCoV-19^^Syddanmark|Human|Department of Virus and Microbiological Special Diagnostics|Albertsen Lab|Michaelsen|Denmark

>Spike|hCoV-19/Portugal/PT2022/2020|2020-11-19|EPI\_ISL\_731928|Original|hCoV-19^^Portugal|Human|Instituto Nacional de Saude (INSA) and Instituto Gulbenkian de Ciencia (IGC)|Instituto Nacional de Saude (INSA) and Instituto Gulbenkian de Ciencia (IGC)|Borges|Portugal

>Spike|hCoV-19/England/MILK-ACFAD8/2020|2020-10-17|EPI\_ISL\_652122|Original|hCoV-19^^England|Human|Oxford Viromics|COVID-19 Genomics UK (COG-UK) Consortium|Golubchik|United Kingdom

>Spike|hCoV-19/Japan/PG-1194/2020|2020-04-00|EPI\_ISL\_684804|Original|hCoV-19^^Japan|Human|Yamagata Prefectural Institute of Public Health|Pathogen Genomics Center|Sekizuka|Japan

>Spike|hCoV-19/Wales/PHWC-4A3047/2020|2020-12-14|EPI\_ISL\_744044|Original|hCoV-19^^Wales|Human|Wales Specialist Virology Centre Sequencing lab|COVID-19 Genomics UK (COG-UK) Consortium|Moore|United Kingdom

>Spike|hCoV-19/USA/UT-UPHL-2012056251/2020|2020-08-14|EPI\_ISL\_746115|Original|hCoV-19^^Utah|Human|Ginkgo Bioworks Clinical Laboratory|Utah Public Health Laboratory|Young|USA

>Spike|hCoV-19/Australia/NSW627/2020|2020-06-24|EPI\_ISL\_490036|Original|hCoV-19^^New South Wales|Human|Pathology West - NSW Health Pathology|NSW Health Pathology - Institute of Clinical Pathology and Medical Research; Westmead Hospital; University of Sydney|Gall|Australia

>Spike|hCoV-19/England/MILK-9AAAC5/2020|2020-09-01|EPI\_ISL\_550876|Original|hCoV-19^^England|Human|Lighthouse Lab in Milton Keynes|Wellcome Sanger Institute for the COVID-19 Genomics UK (COG-UK) consortium|Davies|United Kingdom

>Spike|hCoV-19/USA/MN-MDH-1109/2020|2020-06-03|EPI\_ISL\_470789|Original|hCoV-19^^Minnesota|Human|Minnesota Department of Health|Minnesota Department of Health|Garfin|USA

>Spike|hCoV-19/England/SHEF-10D7825/2020|2020-12-06|EPI\_ISL\_742104|Original|hCoV-19^^England|Human|Virology Department|COVID-19 Genomics UK (COG-UK) Consortium|de Silva|United Kingdom

>Spike|hCoV-19/Denmark/DCGC-18457/2020|2020-12-07|EPI\_ISL\_749396|Original|hCoV-19^^Syddanmark|Human|Department of Virus and Microbiological Special Diagnostics|Albertsen Lab|Michaelsen|Denmark

>Spike|hCoV-19/England/LIVE-9DED1/2020|2020-04-05|EPI\_ISL\_453246|Original|hCoV-19^^England|Human|Liverpool Clinical Laboratories|COVID-19 Genomics UK (COG-UK) Consortium|Haldenby|United Kingdom

>Spike|hCoV-19/Japan/PG-7055/2020|2020-08-00|EPI\_ISL\_688160|Original|hCoV-19^^Japan|Human|Pathogen Genomics Center|Pathogen Genomics Center|Sekizuka|Japan

>Spike|hCoV-19/Switzerland/SH-ETHZ-380221/2020|2020-11-23|EPI\_ISL\_721864|Original|hCoV-19^^Schaffhausen|Human|Viollier AG|Department of Biosystems Science and Engineering|Nadeau|Switzerland

>Spike|hCoV-19/England/ALDP-724A89/2020|2020-07-01|EPI\_ISL\_557638|Original|hCoV-19^^England|Human|Lighthouse Lab in Alderley Park|Wellcome Sanger Institute for the COVID-19 Genomics UK (COG-UK) consortium|Davies|United Kingdom

>Spike|hCoV-19/Norway/3364/2020|2020-09-03|EPI\_ISL\_635104|Original|hCoV-19^^Viken|Human|Unilabs Laboratory Medicine|Norwegian Institute of Public Health|Vollan|Norway

>Spike|hCoV-19/USA/WI-WSLH-200349/2020|2020-04-21|EPI\_ISL\_578521|Original|hCoV-19^^Wisconsin|Human|Wisconsin State Laboratory of Hygiene Communicable Disease Division|Wisconsin State Laboratory of Hygiene Communicable Disease Division|Florek|USA

>Spike|hCoV-19/England/MILK-B8F851/2020|2020-11-13|EPI\_ISL\_674812|Original|hCoV-19^^England|Human|Lighthouse Lab in Milton Keynes|Wellcome Sanger Institute for the COVID-19 Genomics UK (COG-UK) Consortium|Davies|United Kingdom

>Spike|hCoV-19/USA/HI-H200014/2020|2020-04-16|EPI\_ISL\_752610|Original|hCoV-19^^Hawaii|Human|State Laboratories Division|State Laboratories Division|Sultana|USA

>Spike|hCoV-19/USA/MI-MDHHS-SC21212/2020|2020-03-29|EPI\_ISL\_507469|Original|hCoV-19^^Michigan|Human|Michigan Department of Health and Human Services|Michigan Department of Health and Human Services|Blankenship|USA

>Spike|hCoV-19/England/20080000404/2020|2020-02-16|EPI\_ISL\_464177|Original|hCoV-19^^England|Human|Respiratory Virus Unit|Respiratory Virus Unit|Platt|United Kingdom

>Spike|hCoV-19/Saudi Arabia/KAUST-MADINAH451/2020|2020-04-21|EPI\_ISL\_678030|Original|hCoV-19^^Madinah|Human|Pathogen Genomics Lab King Abdullah University of Science and Technology(KAUST)|Pathogen Genomics Lab King Abdullah University of Science and Technology(KAUST)|Mohamed Ghazzali|Saudi Arabia

>Spike|hCoV-19/Northern Ireland/QEUIH-969D6F/2020|2020-08-14|EPI\_ISL\_530857|Original|hCoV-19^^Northern Ireland|Human|Lighthouse Lab in Glasgow|Wellcome Sanger Institute for the COVID-19 Genomics UK (COG-UK) consortium|Davies|United Kingdom

>Spike|hCoV-19/India/MH-GA19/2020|2020-06-17|EPI\_ISL\_508214|Original|hCoV-19^^Maharashtra|Human|Government Medical College|National Institute of Biomedical Genomics|Maitra|India

>Spike|hCoV-19/Switzerland/SO-ETHZ-390228/2020|2020-11-27|EPI\_ISL\_721690|Original|hCoV-19^^Solothurn|Human|Viollier AG|Department of Biosystems Science and Engineering|Nadeau|Switzerland

>Spike|hCoV-19/England/LIVE-DB3069/2020|2020-10-29|EPI\_ISL\_650268|Original|hCoV-19^^England|Human|Liverpool Clinical Laboratories|COVID-19 Genomics UK (COG-UK) Consortium|Haldenby|United Kingdom

>Spike|hCoV-19/England/SHEF-C6AF9/2020|2020-09-14|EPI\_ISL\_559913|Original|hCoV-19^^England|Human|Virology Department|COVID-19 Genomics UK (COG-UK) Consortium|de Silva|United Kingdom

>Spike|hCoV-19/England/ALDP-9B57DF/2020|2020-08-28|EPI\_ISL\_590347|Original|hCoV-19^^England|Human|Lighthouse Lab in Alderley Park|Wellcome Sanger Institute for the COVID-19 Genomics UK (COG-UK) consortium|Davies|United Kingdom

>Spike|hCoV-19/England/LIVE-A8477/2020|2020-03-27|EPI\_ISL\_517166|Original|hCoV-19^^England|Human|Liverpool Clinical Laboratories|COVID-19 Genomics UK (COG-UK) Consortium|Haldenby|United Kingdom

>Spike|hCoV-19/USA/CA-IGI-0139/2020|2020-06-18|EPI\_ISL\_495160|Original|hCoV-19^^California|Human|Innovative Genomics Institute|Innovative Genomics Institute|Shivram|USA

>Spike|hCoV-19/Wales/ALDP-8D984C/2020|2020-06-24|EPI\_ISL\_557126|Original|hCoV-19^^Wales|Human|Lighthouse Lab in Alderley Park|Wellcome Sanger Institute for the COVID-19 Genomics UK (COG-UK) consortium|Davies|United Kingdom

>Spike|hCoV-19/England/NORW-E7694/2020|2020-05-04|EPI\_ISL\_449062|Original|hCoV-19^^England|Human|Quadram Institute Bioscience|COVID-19 Genomics UK (COG-UK) Consortium|Alikhan|United Kingdom

>Spike|hCoV-19/England/CAMC-A3F6C0/2020|2020-10-03|EPI\_ISL\_609642|Original|hCoV-19^^England|Human|Lighthouse Lab in Cambridge|Wellcome Sanger Institute for the COVID-19 Genomics UK (COG-UK) consortium|Davies|United Kingdom

>Spike|hCoV-19/South Africa/KRISP-K004327/2020|2020-10-26|EPI\_ISL\_660203|Original|hCoV-19^^KwaZulu-Natal|Human|NHLS-IALCH|KRISP|de Oliveira|South Africa

>Spike|hCoV-19/India/OR-ILSCV15547/2020|2020-05-11|EPI\_ISL\_463036|Original|hCoV-19^^Odisha|Human|Institute of Life Sciences|Immunogenomics lab|Raghav|India

>Spike|hCoV-19/England/NORW-F74D3/2020|2020-12-02|EPI\_ISL\_704142|Original|hCoV-19^^England|Human|Quadram Institute Bioscience|COVID-19 Genomics UK (COG-UK) Consortium|Alikhan|United Kingdom

>Spike|hCoV-19/Australia/VIC7151/2020|2020-08-06|EPI\_ISL\_562705|Original|hCoV-19^^Victoria|Human|Victorian Infectious Diseases Reference Laboratory (VIDRL)|VIDRL and MDU-PHL|Schultz|Australia

>Spike|hCoV-19/England/ALDP-A51F54/2020|2020-10-07|EPI\_ISL\_598085|Original|hCoV-19^^England|Human|Lighthouse Lab in Alderley Park|Wellcome Sanger Institute for the COVID-19 Genomics UK (COG-UK) consortium|Davies|United Kingdom

>Spike|hCoV-19/Denmark/DCGC-3283/2020|2020-08-31|EPI\_ISL\_616035|Original|hCoV-19^^Hovedstaden|Human|Department of Virus and Microbiological Special Diagnostics|Albertsen lab|Michaelsen|Denmark

>Spike|hCoV-19/Netherlands/NA\_438/2020|2020-04-09|EPI\_ISL\_455240|Original|hCoV-19^^Netherlands|Human|Dutch COVID-19 response team|Erasmus Medical Center|Oude Munnink|Netherlands

>Spike|hCoV-19/USA/TX-HMH-MCoV-15495/2020|2020-10-24|EPI\_ISL\_786979|Original|hCoV-19^^Texas|Human|Houston Methodist Hospital|Houston Methodist Hospital|Long|USA

>Spike|hCoV-19/Switzerland/BL-ETHZ-190016/2020|2020-07-06|EPI\_ISL\_500881|Original|hCoV-19^^Basel-Landschaft|Human|Viollier AG|Department of Biosystems Science and Engineering|Nadeau|Switzerland

>Spike|hCoV-19/Thailand/Bangkok-CONI-0266/2020|2020-03-14|EPI\_ISL\_693345|Original|hCoV-19^^Bangkok|Human|Ramathibodi Hospital|COVID-19 Network Investigations (CONI) Alliance|Batty|Thailand

>Spike|hCoV-19/Guatemala/CDC-1229/2020|2020-03-15|EPI\_ISL\_509710|Original|hCoV-19^^Guatemala|Human|Guatemala Ministry of Public Health|Pathogen Discovery|Queen|Guatemala

>Spike|hCoV-19/England/NOTT-11B784/2020|2020-11-12|EPI\_ISL\_650430|Original|hCoV-19^^England|Human|Queens Medical Centre|COVID-19 Genomics UK (COG-UK) Consortium|Loose|United Kingdom

>Spike|hCoV-19/USA/MN-MDH-2173/2020|2020-11-23|EPI\_ISL\_723124|Original|hCoV-19^^Minnesota|Human|Minnesota Department of Health|Minnesota Department of Health|Lorentz|USA

>Spike|hCoV-19/England/QEUEH-9DD9CC/2020|2020-09-21|EPI\_ISL\_599661|Original|hCoV-19^^England|Human|Lighthouse Lab in Glasgow|Wellcome Sanger Institute for the COVID-19 Genomics UK (COG-UK) consortium|Davies|United Kingdom

>Spike|hCoV-19/England/SHEF-CA169/2020|2020-04-03|EPI\_ISL\_432483|Original|hCoV-19^^England|Human|Virology Department|COVID-19 Genomics UK (COG-UK) Consortium|de Silva|United Kingdom

>Spike|hCoV-19/Denmark/DCGC-6955/2020|2020-10-12|EPI\_ISL\_619801|Original|hCoV-19^^Syddanmark|Human|Department of Virus and Microbiological Special Diagnostics|Albertsen lab|Michaelsen|Denmark

>Spike|hCoV-19/Scotland/QEUEH-AEFEB8/2020|2020-10-30|EPI\_ISL\_676457|Original|hCoV-19^^Scotland|Human|Lighthouse Lab in Glasgow|Wellcome Sanger Institute for the COVID-19 Genomics UK (COG-UK) Consortium|Davies|United Kingdom

>Spike|hCoV-19/Latvia/197/2020|2020-10-12|EPI\_ISL\_639694|Original|hCoV-19^^Latvia|Human|E. Gulbja Laboratorija|Latvian Biomedical Research and Study Centre|Zrelavs|Latvia

>Spike|hCoV-19/United Arab Emirates/0028/2020|2020-05-17|EPI\_ISL\_698237|Original|hCoV-19^^Abu Dhabi|Human|Group 42 (G42) Healthcare|G42 Healthcare|Ogrodzki|United Arab Emirates

>Spike|hCoV-19/Spain/AN-IBV-98001644/2020|2020-04-07|EPI\_ISL\_538122|Original|hCoV-19^^Andalucia|Human|Servicio de Microbiolog\u00eda y Parasitolog\u00eda cl\u00ednica. UCEIMP. Hospital Universitario Virgen del Roc\u00edo/IBIS/CSIC/US|SeqCOVID-SPAIN consortium/IBV (CSIC) |Comas|Spain

>Spike|hCoV-19/Denmark/DCGC-5737/2020|2020-09-28|EPI\_ISL\_621242|Original|hCoV-19^^Hovedstaden|Human|Department of Virus and Microbiological Special Diagnostics|Albertsen lab|Michaelsen|Denmark

>Spike|hCoV-19/Russia/AST-RII-MH4437S/2020|2020-09-17|EPI\_ISL\_733186|Original|hCoV-19^^Astrakhan|Human|Pathogenic Microorganisms Variability Laboratory|WHO National Influenza Centre Russian Federation|Komissarov|Russia

>Spike|hCoV-19/Scotland/EDB1519/2020|2020-04-13|EPI\_ISL\_433069|Original|hCoV-19^^Scotland|Human|Virology Department|COVID-19 Genomics UK (COG-UK) Consortium|Williams|United Kingdom

>Spike|hCoV-19/England/201060045/2020|2020-03-04|EPI\_ISL\_464379|Original|hCoV-19^^England|Human|Respiratory Virus Unit|Respiratory Virus Unit|Platt|United Kingdom

>Spike|hCoV-19/England/CAMB-7C04B/2020|2020-04-13|EPI\_ISL\_433983|Original|hCoV-19^^England|Human|Department of Pathology|COVID-19 Genomics UK (COG-UK) Consortium|Meredith|United Kingdom

>Spike|hCoV-19/Wales/PHWC-4A193F/2020|2020-12-11|EPI\_ISL\_743748|Original|hCoV-19^^Wales|Human|Wales Specialist Virology Centre Sequencing lab|COVID-19 Genomics UK (COG-UK) Consortium|Moore|United Kingdom

>Spike|hCoV-19/England/CAMB-80BF8/2020|2020-04-11|EPI\_ISL\_442914|Original|hCoV-19^^England|Human|Department of Pathology|Wellcome Sanger Institute for the COVID-19 Genomics UK (COG-UK) consortium|Amato|United Kingdom

>Spike|hCoV-19/England/LOND-D421E/2020|2020-04-06|EPI\_ISL\_444103|Original|hCoV-19^^England|Human|University College London|COVID-19 Genomics UK (COG-UK) Consortium|Roy|United Kingdom

>Spike|hCoV-19/USA/TX-DSHS-0890/2020|2020-06-16|EPI\_ISL\_610026|Original|hCoV-19^^Texas|Human|Texas Department of State Health Services|Texas Department of State Health Services|Rahman|USA

>Spike|hCoV-19/England/SHEF-10D7F3F/2020|2020-12-20|EPI\_ISL\_742111|Original|hCoV-19^^England|Human|Virology Department|COVID-19 Genomics UK (COG-UK) Consortium|de Silva|United Kingdom

>Spike|hCoV-19/Canada/ON-UHTC\_0405/2020|2020-11-24|EPI\_ISL\_698084|Original|hCoV-19^^Ontario|Human|Unity Health Toronto|Ontario Institute for Cancer Research|de Borja|Canada

>Spike|hCoV-19/Japan/PG-7838/2020|2020-08-00|EPI\_ISL\_686940|Original|hCoV-19^^Japan|Human|Pathogen Genomics Center|Pathogen Genomics Center|Sekizuka|Japan

>Spike|hCoV-19/Japan/PG-5666/2020|2020-04-00|EPI\_ISL\_688790|Original|hCoV-19^^Japan|Human|Pathogen Genomics Center|Pathogen Genomics Center|Sekizuka|Japan

>Spike|hCoV-19/Spain/PV-IBV-2129/2020|2020-04-12|EPI\_ISL\_468940|Original|hCoV-19^^Basque Country|Human|Servicio de Microbiolog\u00eda. Hospital Universitario Donostia. OSI Donostialdea. \u00c1rea de Enfermedades Infecciosas|SeqCOVID-SPAIN consortium/IBV (CSIC) |Comas|Spain

>Spike|hCoV-19/USA/TX-HMH-MCoV-15911/2020|2020-07-10|EPI\_ISL\_785595|Original|hCoV-19^^Texas|Human|Houston Methodist Hospital|Houston Methodist Hospital|Long|USA

>Spike|hCoV-19/Australia/VIC8051/2020|2020-08-12|EPI\_ISL\_564819|Original|hCoV-19^^Victoria|Human|Microbiological Diagnostic Unit - Public Health Laboratory (MDU-PHL) |MDU-PHL|Schultz|Australia

>Spike|hCoV-19/Denmark/DCGC-11290/2020|2020-11-02|EPI\_ISL\_670816|Original|hCoV-19^^Syddanmark|Human|Department of Virus and Microbiological Special Diagnostics|Albertsen Lab|Michaelsen|Denmark

>Spike|hCoV-19/Portugal/PT0918/2020|2020-03-28|EPI\_ISL\_511175|Original|hCoV-19^^Portugal|Human|Instituto Nacional de Saude (INSA)|Instituto Nacional de Saude (INSA) |Borges|Portugal

>Spike|hCoV-19/England/QEUEH-96DF83/2020|2020-08-18|EPI\_ISL\_530556|Original|hCoV-19^^England|Human|Lighthouse Lab in Glasgow|Wellcome Sanger Institute for the COVID-19 Genomics UK (COG-UK) consortium|Davies|United Kingdom

>Spike|hCoV-19/Wales/PHWC-2BE32/2020|2020-04-09|EPI\_ISL\_445855|Original|hCoV-19^^Wales|Human|Wales Specialist Virology Centre|Public Health Wales Microbiology Cardiff|Moore|United Kingdom

>Spike|hCoV-19/Australia/VIC14078/2020|2020-09-16|EPI\_ISL\_592345|Original|hCoV-19^^Victoria|Human|Microbiological Diagnostic Unit - Public Health Laboratory (MDU-PHL) |MDU-PHL|Schultz|Australia

>Spike|hCoV-19/Bosnia and Herzegovina/ChVir7387/2020|2020-04-11|EPI\_ISL\_462461|Original|hCoV-19^^Maglaj|Human|Clinical Center|Charite Universitatsmedizin Berlin|Muehlemann|Bosnia and Herzegovina

>Spike|hCoV-19/Scotland/CVR3533/2020|2020-05-14|EPI\_ISL\_473671|Original|hCoV-19^^Scotland|Human|West of Scotland Specialist Virology Centre|COVID-19 Genomics UK (COG-UK) Consortium|Robertson|United Kingdom

>Spike|hCoV-19/USA/CA-CZB-3287/2020|2020-07-17|EPI\_ISL\_548307|Original|hCoV-19^^California|Human|County of Santa Clara Public Health Department|Chan-Zuckerberg Biohub|Bhatt|USA

>Spike|hCoV-19/England/ALDP-BBA0FB/2020|2020-11-20|EPI\_ISL\_701956|Original|hCoV-19^^England|Human|Lighthouse Lab in Alderley Park|Wellcome Sanger Institute for the COVID-19 Genomics UK (COG-UK) Consortium|Davies|United Kingdom

>Spike|hCoV-19/India/GJ-GBRC293b/2020|2020-06-15|EPI\_ISL\_495033|Original|hCoV-19^^Gujarat|Human|GMERS Medical College & Hospital|Gujarat Biotechnology Research Centre|Joshi|India

>Spike|hCoV-19/USA/DE-DHSS-F917937/2020|2020-03-25|EPI\_ISL\_576153|Original|hCoV-19^^Delaware|Human|Delaware Public Health Lab|Delaware Public Health Lab|Bajwa|USA

>Spike|hCoV-19/England/ALDP-95CAE0/2020|2020-06-17|EPI\_ISL\_553561|Original|hCoV-19^^England|Human|Lighthouse Lab in Alderley Park|Wellcome Sanger Institute for the COVID-19 Genomics UK (COG-UK) consortium|Davies|United Kingdom

>Spike|hCoV-19/Chile/RM-203933/2020|2020-10-10|EPI\_ISL\_746758|Original|hCoV-19^^Region Metropolitana de Santiago|Human|Genetica Molecular and Subdepartamento de Virologia ISP Chile|Instituto de Salud Publica de Chile|Tognarelli|Chile

>Spike|hCoV-19/Japan/PG-6182/2020|2020-08-00|EPI\_ISL\_689294|Original|hCoV-19^^Japan|Human|Pathogen Genomics Center|Pathogen Genomics Center|Sekizuka|Japan

>Spike|hCoV-19/USA/TX-HMH-MCoV-15413/2020|2020-10-21|EPI\_ISL\_786897|Original|hCoV-19^^Texas|Human|Houston Methodist Hospital|Houston Methodist Hospital|Long|USA

>Spike|hCoV-19/England/MILK-9C2A6D/2020|2020-09-10|EPI\_ISL\_566647|Original|hCoV-19^^England|Human|Lighthouse Lab in Milton Keynes|Wellcome Sanger Institute for the COVID-19 Genomics UK (COG-UK) consortium|Davies|United Kingdom

>Spike|hCoV-19/Wales/PHWC-4920C3/2020|2020-11-17|EPI\_ISL\_706817|Original|hCoV-19^^Wales|Human|Originating lab|COVID-19 Genomics UK (COG-UK) Consortium|Moore|United Kingdom

>Spike|hCoV-19/England/QEUA-9AE250/2020|2020-09-02|EPI\_ISL\_637545|Original|hCoV-19^^England|Human|Department of Pathology|COVID-19 Genomics UK (COG-UK) Consortium|Goodfellow|United Kingdom

>Spike|hCoV-19/England/EXET-13A048/2020|2020-11-07|EPI\_ISL\_664644|Original|hCoV-19^^England|Human|University of Exeter|COVID-19 Genomics UK (COG-UK) Consortium|Temperton|United Kingdom

>Spike|hCoV-19/USA/TX-HMH-MCoV-12028/2020|2020-09-17|EPI\_ISL\_790171|Original|hCoV-19^^Texas|Human|Houston Methodist Hospital|Houston Methodist Hospital|Long|USA

>Spike|hCoV-19/Scotland/QEUA-9BA45B/2020|2020-09-09|EPI\_ISL\_573814|Original|hCoV-19^^Scotland|Human|Oxford Viromics|COVID-19 Genomics UK (COG-UK) Consortium|Golubchik|United Kingdom

>Spike|hCoV-19/Australia/VIC879/2020|2020-04-06|EPI\_ISL\_427134|Original|hCoV-19^^Victoria|Human|Victorian Infectious Diseases Reference Laboratory (VIDRL)|Microbiological Diagnostic Unit Public Health Laboratory and Victorian Infectious Diseases Reference Laboratory|Schultz|Australia

>Spike|hCoV-19/England/CAMB-1AAC8B/2020|2020-04-18|EPI\_ISL\_470224|Original|hCoV-19^^England|Human|Department of Pathology|Wellcome Sanger Institute for the COVID-19 Genomics UK (COG-UK) consortium|Davies|United Kingdom

>Spike|hCoV-19/USA/TX-HMH-MCoV-19276/2020|2020-11-23|EPI\_ISL\_783735|Original|hCoV-19^^Texas|Human|Houston Methodist Hospital|Houston Methodist Hospital|Long|USA

>Spike|hCoV-19/USA/AZ-WL-CVG00112/2020|2020-10-12|EPI\_ISL\_765952|Original|hCoV-19^^Arizona|Human|Worobey Lab|Worobey Lab|Larsen|USA

>Spike|hCoV-19/Israel/n14270/2020|2020-03-17|EPI\_ISL\_483715|Original|hCoV-19^^Kfar Saba|Human|Israel Central Virology laboratory|Israel Central Virology laboratory|Zuckerman|Israel

>Spike|hCoV-19/England/NORT-28D6AD/2020|2020-11-18|EPI\_ISL\_705282|Original|hCoV-19^^England|Human|Northumbria University / South Tees Hospitals NHS Foundation Trust / North Cumbria Integrated Care NHS Foundation Trust / North Tees and Hartlepool NHS Foundation Trust / Newcastle Hospitals NHS Foundation Trust|COVID-19 Genomics UK (COG-UK) Consortium|Bashton|United Kingdom

>Spike|hCoV-19/Canada/BC\_3808524/2020|2020-03-09|EPI\_ISL\_418819|Original|hCoV-19^^British Columbia|Human|BCCDC Public Health Laboratory|BCCDC Public Health Laboratory|Harrigan|Canada

>Spike|hCoV-19/USA/UT-02544/2020|2020-04-24|EPI\_ISL\_487201|Original|hCoV-19^^Utah|Human|Utah Public Health Laboratory|Utah Public Health Laboratory|Butz|USA

>Spike|hCoV-19/USA/AZ-TG395201/2020|2020-06-19|EPI\_ISL\_694720|Original|hCoV-19^^Arizona|Human|TGen North|TGen North|French|USA

>Spike|hCoV-19/Spain/AR-IBV-2408/2020|2020-03-26|EPI\_ISL\_468832|Original|hCoV-19^^Aragon|Human|Servicio de Microbiolog\u00eda|SeqCOVID-SPAIN consortium/IBV (CSIC) |Comas|Spain

>Spike|hCoV-19/England/NOTT-11329A/2020|2020-09-14|EPI\_ISL\_549491|Original|hCoV-19^^England|Human|Queens Medical Centre|COVID-19 Genomics UK (COG-UK) Consortium|Loose|United Kingdom

>Spike|hCoV-19/Switzerland/BE-ETHZ-420168/2020|2020-12-18|EPI\_ISL\_768037|Original|hCoV-19^^Bern|Human|Viollier AG|Department of Biosystems Science and Engineering|Nadeau|Switzerland

>Spike|hCoV-19/England/NORT-2844F7/2020|2020-03-22|EPI\_ISL\_488667|Original|hCoV-19^^England|Human|NU-OMICS DNA Sequencing research facility|Wellcome Sanger Institute for the COVID-19 Genomics UK (COG-UK) consortium|Davies|United Kingdom

>Spike|hCoV-19/Spain/GA-IBV-97006346/2020|2020-07-21|EPI\_ISL\_537380|Original|hCoV-19^^Galicia|Human|Complejo Hospitalario Universitario de Vigo|SeqCOVID-SPAIN consortium/IBV (CSIC) |Comas|Spain

>Spike|hCoV-19/Portugal/PT1573/2020|2020-06-29|EPI\_ISL\_693581|Original|hCoV-19^^Portugal|Human|Instituto Nacional de Saude (INSA)|Instituto Nacional de Saude (INSA) |Borges|Portugal

>Spike|hCoV-19/Scotland/EDB7966/2020|2020-09-28|EPI\_ISL\_585462|Original|hCoV-19^^Scotland|Human|Virology Department|COVID-19 Genomics UK (COG-UK) Consortium|McHugh|United Kingdom

>Spike|hCoV-19/USA/WA-S2378/2020|2020-06-12|EPI\_ISL\_497010|Original|hCoV-19^^Washington|Human|Washington State Department of Health|Seattle Flu Study|Lee|USA

>Spike|hCoV-19/Spain/CL-IBV-97006334/2020|2020-05-13|EPI\_ISL\_537685|Original|hCoV-19^^Castilla y Leon|Human|Universidad de Le\u00f3n|SeqCOVID-SPAIN consortium/IBV (CSIC) |Comas|Spain

>Spike|hCoV-19/USA/MI-UM-10036587103/2020|2020-10-23|EPI\_ISL\_649991|Original|hCoV-19^^Michigan|Human|University of Michigan Clinical Microbiology Laboratory|Lauring Lab|Valesano|USA

>Spike|hCoV-19/Saudi Arabia/KAUST-Madinah270/2020|2020-03-30|EPI\_ISL\_437752|Original|hCoV-19^^Madinah|Human|Pathogen Genomics Lab King Abdullah University of Science and Technology(KAUST)|Pathogen Genomics Lab King Abdullah University of Science and Technology(KAUST)|Mohamed Ghazzali|Saudi Arabia

>Spike|hCoV-19/Denmark/DCGC-1347/2020|2020-05-11|EPI\_ISL\_617942|Original|hCoV-19^^Hovedstaden|Human|Department of Virus and Microbiological Special Diagnostics|Albertsen lab|Michaelsen|Denmark

>Spike|hCoV-19/Scotland/QEUA-A1F8C0/2020|2020-10-01|EPI\_ISL\_599018|Original|hCoV-19^^Scotland|Human|Lighthouse Lab in Glasgow|Wellcome Sanger Institute for the COVID-19 Genomics UK (COG-UK) consortium|Davies|United Kingdom

>Spike|hCoV-19/Australia/VIC104/2020|2020-03-17|EPI\_ISL\_419818|Original|hCoV-19^^Victoria|Human|Victorian Infectious Diseases Reference Laboratory (VIDRL)|Victorian Infectious Diseases Reference Laboratory and Microbiological Diagnostic Unit Public Health Laboratory|Schultz|Australia

>Spike|hCoV-19/Scotland/CVR4905/2020|2020-10-02|EPI\_ISL\_594672|Original|hCoV-19^^Scotland|Human|West of Scotland Specialist Virology Centre|COVID-19 Genomics UK (COG-UK) Consortium|Robertson|United Kingdom

>Spike|hCoV-19/Wales/PHWC-2A4D7/2020|2020-04-06|EPI\_ISL\_445575|Original|hCoV-19^^Wales|Human|Wales Specialist Virology Centre|Public Health Wales Microbiology Cardiff|Moore|United Kingdom

>Spike|hCoV-19/Northern Ireland/NIRE-10931C/2020|2020-10-20|EPI\_ISL\_651410|Original|hCoV-19^^Northern Ireland|Human|Regional Virus Laboratory|COVID-19 Genomics UK (COG-UK) Consortium|Fairley|United Kingdom

>Spike|hCoV-19/England/LOND-1250822/2020|2020-10-27|EPI\_ISL\_664839|Original|hCoV-19^^England|Human|University College London Hospital|COVID-19 Genomics UK (COG-UK) Consortium|Byott|United Kingdom

>Spike|hCoV-19/Turkey/KU-034/2020|2020-05-20|EPI\_ISL\_495444|Original|hCoV-19^^Kars Province|Human|Kafkas University|Kafkas University|Karamese|Turkey

>Spike|hCoV-19/England/NOTT-114F92/2020|2020-10-12|EPI\_ISL\_584783|Original|hCoV-19^^England|Human|Queens Medical Centre|COVID-19 Genomics UK (COG-UK) Consortium|Loose|United Kingdom

>Spike|hCoV-19/England/QEUA-9FAE8E/2020|2020-09-28|EPI\_ISL\_588155|Original|hCoV-19^^England|Human|Lighthouse Lab in Glasgow|Wellcome Sanger Institute for the COVID-19 Genomics UK (COG-UK) consortium|Davies|United Kingdom

>Spike|hCoV-19/South Africa/KRISP-K002568/2020|2020-07-29|EPI\_ISL\_535434|Original|hCoV-19^^KwaZulu-Natal|Human|NHL-SIALCH|KRISP|de Oliveira|South Africa

>Spike|hCoV-19/Northern Ireland/NIRE-1020FE/2020|2020-03-20|EPI\_ISL\_441381|Original|hCoV-19^^Northern Ireland|Human|Regional Virus Laboratory|COVID-19 Genomics UK (COG-UK) Consortium|Fairley|United Kingdom

>Spike|hCoV-19/India/MH-ACTREC-526/2020|2020-08-22|EPI\_ISL\_700172|Original|hCoV-19^^Maharashtra|Human|Hematopathology Laboratory|Hematopathology Laboratory|Patkar|India

>Spike|hCoV-19/France/OCC-SC560/2020|2020-04-20|EPI\_ISL\_660727|Original|hCoV-19^^Occitanie|Human|CHU N\u00eemes|CNR Virus des Infections Respiratoires - France SUD|Bal|France

>Spike|hCoV-19/Scotland/CVR5363/2020|2020-10-22|EPI\_ISL\_650843|Original|hCoV-19^^Scotland|Human|West of Scotland Specialist Virology Centre|COVID-19 Genomics UK (COG-UK) Consortium|Robertson|United Kingdom

>Spike|hCoV-19/Denmark/ALAB-SSI-828/2020|2020-03-30|EPI\_ISL\_444926|Original|hCoV-19^^Denmark|Human|Department of Virus and Microbiological Special Diagnostics|Albertsen lab|Kirkegaard|Denmark

>Spike|hCoV-19/South Korea/KDCA0159/2020|2020-11-16|EPI\_ISL\_747393|Original|hCoV-19^^South Korea|Human|Division of Emerging Infectious Diseases|Division of Emerging Infectious Diseases|Park|South Korea

>Spike|hCoV-19/England/QEUA-BCD7C3/2020|2020-11-26|EPI\_ISL\_704466|Original|hCoV-19^^England|Human|Lighthouse Lab in Glasgow|Wellcome Sanger Institute for the COVID-19 Genomics UK (COG-UK) Consortium|Davies|United Kingdom

>Spike|hCoV-19/DRC/5996/2020|2020-05-08|EPI\_ISL\_496514|Original|hCoV-19^^Kinshasa|Human|Viral Respiratory Lab|Pathogen Sequencing Lab|Lokilo|Democratic Republic of the Congo

>Spike|hCoV-19/England/QEUA-CADA29/2020|2020-12-20|EPI\_ISL\_761014|Original|hCoV-19^^England|Human|Lighthouse Lab in Glasgow|Wellcome Sanger Institute for the COVID-19 Genomics UK (COG-UK) Consortium|Davies|United Kingdom

>Spike|hCoV-19/England/QEUA-B7EBD4/2020|2020-11-14|EPI\_ISL\_661894|Original|hCoV-19^^England|Human|Lighthouse Lab in Glasgow|Wellcome Sanger Institute for the COVID-19 Genomics UK (COG-UK) Consortium|Davies|United Kingdom

>Spike|hCoV-19/England/ALDP-9E69C0/2020|2020-09-24|EPI\_ISL\_580472|Original|hCoV-19^^England|Human|Lighthouse Lab in Alderley Park|Wellcome Sanger Institute for the COVID-19 Genomics UK (COG-UK) consortium|Davies|United Kingdom

>Spike|hCoV-19/USA/WA-S547/2020|2020-03-24|EPI\_ISL\_434307|Original|hCoV-19^^Washington|Human|Washington State Department of Health|Seattle Flu Study|Bedford|USA

>Spike|hCoV-19/Wales/PHWC-483CFE/2020|2020-10-19|EPI\_ISL\_627270|Original|hCoV-19^^Wales|Human|Wales Specialist Virology Centre Sequencing lab|COVID-19 Genomics UK (COG-UK) Consortium|Moore|United Kingdom

>Spike|hCoV-19/Denmark/DCGC-15023/2020|2020-11-23|EPI\_ISL\_713585|Original|hCoV-19^^Midtjylland|Human|Department of Virus and Microbiological Special Diagnostics|Albertsen Lab|Michaelsen|Denmark

>Spike|hCoV-19/Canada/BC\_06768018/2020|2020-04-00|EPI\_ISL\_466803|Original|hCoV-19^^British Columbia|Human|BCCDC Public Health Laboratory|BCCDC Public Health Laboratory|Harrigan|Canada

>Spike|hCoV-19/Denmark/DCGC-17133/2020|2020-12-14|EPI\_ISL\_750775|Original|hCoV-19^^Nordjylland|Human|Department of Virus and Microbiological Special Diagnostics|Albertsen Lab|Michaelsen|Denmark

>Spike|hCoV-19/Singapore/1463/2020|2020-12-10|EPI\_ISL\_728199|Original|hCoV-19^^Singapore|Human|National Public Health Laboratory|National Public Health Laboratory|Mak|Singapore

>Spike|hCoV-19/England/MILK-B05246/2020|2020-10-24|EPI\_ISL\_637381|Original|hCoV-19^^England|Human|Virology Department|COVID-19 Genomics UK (COG-UK) Consortium|de Silva|United Kingdom



>Spike|hCoV-19/England/MILK-BACD7D/2020|2020-11-17|EPI\_ISL\_681472|Original|hCoV-19^^England|Human|Lighthouse Lab in Milton Keynes|Wellcome Sanger Institute for the COVID-19 Genomics UK (COG-UK) Consortium|Davies|United Kingdom

>Spike|hCoV-19/England/MILK-ACCBC9/2020|2020-10-21|EPI\_ISL\_634434|Original|hCoV-19^^England|Human|Lighthouse Lab in Milton Keynes|Wellcome Sanger Institute for the COVID-19 Genomics UK (COG-UK) consortium|Davies|United Kingdom

>Spike|hCoV-19/Thailand/Bangkok-CONI-0144/2020|2020-03-15|EPI\_ISL\_455938|Original|hCoV-19^^Bangkok|Human|Ramathibodi Hospital|COVID-19 Network Investigations (CONI) Alliance|Batty|Thailand

>Spike|hCoV-19/USA/VA-DCLS-0425/2020|2020-04-29|EPI\_ISL\_477641|Original|hCoV-19^^Virginia|Human|Virginia DCLS|Virginia DCLS|St. Jacques|USA

>Spike|hCoV-19/Japan/IC-0585/2020|2020-11-00|EPI\_ISL\_779671|Original|hCoV-19^^Japan|Human|Pathogen Genomics Center|Pathogen Genomics Center|Sekizuka|Japan

>Spike|hCoV-19/Scotland/CVR1534/2020|2020-04-04|EPI\_ISL\_433610|Original|hCoV-19^^Scotland|Human|West of Scotland Specialist Virology Centre|COVID-19 Genomics UK (COG-UK) Consortium|Robertson|United Kingdom

>Spike|hCoV-19/Singapore/896/2020|2020-03-13|EPI\_ISL\_536437|Original|hCoV-19^^Singapore|Human|National Public Health Laboratory|National Public Health Laboratory|Mak|Singapore

>Spike|hCoV-19/England/CAMC-A585E2/2020|2020-10-07|EPI\_ISL\_597094|Original|hCoV-19^^England|Human|Lighthouse Lab in Cambridge|Wellcome Sanger Institute for the COVID-19 Genomics UK (COG-UK) consortium|Davies|United Kingdom

>Spike|hCoV-19/Germany/BW-UT-001/2020|2020-05-13|EPI\_ISL\_485809|Original|hCoV-19^^Baden-W\u00fcrtemberg|Human|Institut f\u00fcr Virologie und Epidemiologie der Viruskrankheiten|NGS Competence Center T\u00fcbingen|Angelov|Germany

>Spike|hCoV-19/Denmark/DCGC-15157/2020|2020-11-23|EPI\_ISL\_713665|Original|hCoV-19^^Midtjylland|Human|Department of Virus and Microbiological Special Diagnostics|Albertsen Lab|Michaelsen|Denmark

>Spike|hCoV-19/Denmark/DCGC-6431/2020|2020-10-12|EPI\_ISL\_620331|Original|hCoV-19^^Hovedstaden|Human|Department of Virus and Microbiological Special Diagnostics|Albertsen lab|Michaelsen|Denmark

>Spike|hCoV-19/USA/TX-DSHS-0637/2020|2020-07-16|EPI\_ISL\_576292|Original|hCoV-19^^Texas|Human|Texas Department of State Health Services|Texas Department of State Health Services|Rahman|USA

>Spike|hCoV-19/Japan/PG-2178/2020|2020-03-00|EPI\_ISL\_685783|Original|hCoV-19^^Japan|Human|Pathogen Genomics Center|Pathogen Genomics Center|Sekizuka|Japan

>Spike|hCoV-19/England/QEUH-A4CBA3/2020|2020-10-05|EPI\_ISL\_596028|Original|hCoV-19^^England|Human|Quadram Institute Bioscience|COVID-19 Genomics UK (COG-UK) Consortium|Alikhan|United Kingdom

>Spike|hCoV-19/Indonesia/JK-LIPI002/2020|2020-08-13|EPI\_ISL\_518820|Original|hCoV-19^^Jakarta|Human|Klinik Apotek Dein|Biosafety Level-3 Laboratory|Lisdiyanti|Indonesia

>Spike|hCoV-19/Canada/ON-S805/2020|2020-04-00|EPI\_ISL\_591234|Original|hCoV-19^^Ontario|Human|Toronto Invasive Bacterial Diseases Network|McMaster University|McArthur|Canada

>Spike|hCoV-19/England/SHEF-D029A/2020|2020-03-19|EPI\_ISL\_432611|Original|hCoV-19^^England|Human|Virology Department|COVID-19 Genomics UK (COG-UK) Consortium|de Silva|United Kingdom

>Spike|hCoV-19/USA/TX-HMH-2447/2020|2020-05-30|EPI\_ISL\_545314|Original|hCoV-19^^Texas|Human|Houston Methodist Hospital|Houston Methodist Hospital|Long|USA

>Spike|hCoV-19/Australia/NSW715/2020|2020-07-28|EPI\_ISL\_513358|Original|hCoV-19^^New South Wales|Human|Pathology West - NSW Health Pathology|NSW Health Pathology - Institute of Clinical Pathology and Medical Research; Westmead Hospital; University of Sydney|Gall|Australia

>Spike|hCoV-19/Australia/VIC3059/2020|2020-00-00|EPI\_ISL\_520766|Original|hCoV-19^^Victoria|Human|Microbiological Diagnostic Unit - Public Health Laboratory (MDU-PHL)|MDU-PHL|Schultz|Australia

>Spike|hCoV-19/Northern Ireland/NIRE-2356D1/2020|2020-11-12|EPI\_ISL\_742130|Original|hCoV-19^^Northern Ireland|Human|Regional Virus Laboratory|COVID-19 Genomics UK (COG-UK) Consortium|Fairley|United Kingdom

>Spike|hCoV-19/Wales/PHWC-16D9D8/2020|2020-09-26|EPI\_ISL\_577476|Original|hCoV-19^^Wales|Human|Wales Specialist Virology Centre Sequencing lab|COVID-19 Genomics UK (COG-UK) Consortium|Moore|United Kingdom

>Spike|hCoV-19/England/BRIS-1258DF/2020|2020-03-29|EPI\_ISL\_443686|Original|hCoV-19^^England|Human|PHE South West Regional Laboratory|Wellcome Sanger Institute for the COVID-19 Genomics UK (COG-UK) consortium|Amato|United Kingdom

>Spike|hCoV-19/Canada/QC-LSPQ-L00230821/2020|2020-03-21|EPI\_ISL\_535935|Original|hCoV-19^^Quebec|Human|Centre Hospitalier R\u00e9gional de Lanaud\u00e9re|Laboratoire de sant\u00e9 publique du Qu\u00e9bec|Moreira|Canada

>Spike|hCoV-19/England/NOTT-110D6F/2020|2020-04-29|EPI\_ISL\_448414|Original|hCoV-19^^England|Human|Queens Medical Centre|COVID-19 Genomics UK (COG-UK) Consortium|Loose|United Kingdom

>Spike|hCoV-19/Denmark/DCGC-19773/2020|2020-12-07|EPI\_ISL\_747778|Original|hCoV-19^^Sjaelland|Human|Department of Virus and Microbiological Special Diagnostics|Albertsen Lab|Michaelsen|Denmark

>Spike|hCoV-19/England/CAMC-B79EC1/2020|2020-11-12|EPI\_ISL\_741060|Original|hCoV-19^^England|Human|Oxford Viromics|COVID-19 Genomics UK (COG-UK) Consortium|Golubchik|United Kingdom

>Spike|hCoV-19/England/LOND-DAOD2/2020|2020-11-08|EPI\_ISL\_665664|Original|hCoV-19^^England|Human|University College London|COVID-19 Genomics UK (COG-UK) Consortium|Roy|United Kingdom

>Spike|hCoV-19/Denmark/DCGC-7289/2020|2020-10-12|EPI\_ISL\_619099|Original|hCoV-19^^Hovedstaden|Human|Department of Virus and Microbiological Special Diagnostics|Albertsen lab|Michaelsen|Denmark

>Spike|hCoV-19/England/ALDP-9FD44D/2020|2020-10-02|EPI\_ISL\_587832|Original|hCoV-19^^England|Human|Lighthouse Lab in Alderley Park|Wellcome Sanger Institute for the COVID-19 Genomics UK (COG-UK) consortium|Davies|United Kingdom

>Spike|hCoV-19/Italy/APU-IZSPB-196PT/2020|2020-08-28|EPI\_ISL\_722900|Original|hCoV-19^^Apulia|Human|I.R.C.C.S. \S. De Bellis\ - Ente Ospedaliero|Istituto Zooprofilattico Sperimentale della Puglia e della Basilicata|Parisi|Italy

>Spike|hCoV-19/Russia/Tver-72601/2020|2020-03-19|EPI\_ISL\_428921|Vero|hCoV-19^^Tver|Human|State Research Center of Virology and Biotechnology VECTOR|State Research Center of Virology and Biotechnology VECTOR|Shvalov|Russia

>Spike|hCoV-19/England/QEUH-964FAA/2020|2020-08-13|EPI\_ISL\_530998|Original|hCoV-19^^England|Human|Lighthouse Lab in Glasgow|Wellcome Sanger Institute for the COVID-19 Genomics UK (COG-UK) consortium|Davies|United Kingdom

>Spike|hCoV-19/England/CAMC-A82F96/2020|2020-10-14|EPI\_ISL\_610719|Original|hCoV-19^^England|Human|Lighthouse Lab in Cambridge|Wellcome Sanger Institute for the COVID-19 Genomics UK (COG-UK) consortium|Davies|United Kingdom

>Spike|hCoV-19/England/LEED-2A9ADC/2020|2020-04-11|EPI\_ISL\_538841|Original|hCoV-19^^England|Human|Leeds Teaching Hospitals NHS Trust and Public Health England|Wellcome Sanger Institute for the COVID-19 Genomics UK (COG-UK) Consortium|Davies|United Kingdom

>Spike|hCoV-19/USA/CA-CHLA-PLM76781771/2020|2020-11-30|EPI\_ISL\_753483|Original|hCoV-19^^California|Human|Clinical virology Laboratory|Center for Personalized Medicine|Dien Bard|USA

>Spike|hCoV-19/Oman/B-7106/2020|2020-05-06|EPI\_ISL\_491145|Original|hCoV-19^^South Batinah|Human|Oman-National Influenza Center|Biotechnology & OMICs Laboratory|Al Mahruqi|Oman

>Spike|hCoV-19/Shanghai/SH0056/2020|2020-02-08|EPI\_ISL\_416364|Original|hCoV-19^^Shanghai|Human|Shanghai Public Health Clinical Center|National Research Center for Translational Medicine (Shanghai)|Zhang|China

>Spike|hCoV-19/USA/TX-DSHS-1114/2020|2020-06-21|EPI\_ISL\_615151|Original|hCoV-19^^Texas|Human|Texas Department of State Health Services|Texas Department of State Health Services|Rahman|USA

>Spike|hCoV-19/England/CAMC-B52D49/2020|2020-11-09|EPI\_ISL\_657618|Original|hCoV-19^^England|Human|Lighthouse Lab in Cambridge|Wellcome Sanger Institute for the COVID-19 Genomics UK (COG-UK) Consortium|Davies|United Kingdom

>Spike|hCoV-19/England/20134087404/2020|2020-03-25|EPI\_ISL\_465815|Original|hCoV-19^^England|Human|Respiratory Virus Unit|Respiratory Virus Unit|Platt|United Kingdom

>Spike|hCoV-19/Japan/PG-4368/2020|2020-07-00|EPI\_ISL\_692595|Original|hCoV-19^^Japan|Human|Pathogen Genomics Center|Pathogen Genomics Center|Sekizuka|Japan

>Spike|hCoV-19/USA/CA-CZB-3746/2020|2020-07-24|EPI\_ISL\_548485|Original|hCoV-19^^California|Human|Orange County Public Health Laboratory|Chan-Zuckerberg Biohub|Bhatt|USA

>Spike|hCoV-19/Finland/2A68SVIIIA/2020|2020-04-02|EPI\_ISL\_481651|Original|hCoV-19^^Uusimaa|Human|Department of Virology and Immunology|Department of Virology|Smura|Finland

>Spike|hCoV-19/England/LCST-24D70AE/2020|2020-06-07|EPI\_ISL\_478361|Original|hCoV-19^^England|Human|University Hospitals Of Leicester NHS Trust and DeepSeq Nottingham|COVID-19 Genomics UK (COG-UK) Consortium|Loose|United Kingdom

>Spike|hCoV-19/Japan/PG-8574/2020|2020-08-00|EPI\_ISL\_686170|Original|hCoV-19^^Japan|Human|Pathogen Genomics Center|Pathogen Genomics Center|Sekizuka|Japan

>Spike|hCoV-19/Japan/PG-0334/2020|2020-03-29|EPI\_ISL\_480008|Original|hCoV-19^^Kanto|Human|Chiba Prefectural Institute of Public Health|Pathogen Genomics Center|Sekizuka|Japan

>Spike|hCoV-19/USA/MI-UM-10036738304/2020|2020-11-02|EPI\_ISL\_682161|Original|hCoV-19^^Michigan|Human|University of Michigan Clinical Microbiology Laboratory|Lauring Lab|Valesano|USA

>Spike|hCoV-19/England/QEUEH-A0BE2F/2020|2020-10-01|EPI\_ISL\_599350|Original|hCoV-19^^England|Human|Lighthouse Lab in Glasgow|Wellcome Sanger Institute for the COVID-19 Genomics UK (COG-UK) consortium|Davies|United Kingdom

>Spike|hCoV-19/England/CAMB-1B1920/2020|2020-05-13|EPI\_ISL\_452982|Original|hCoV-19^^England|Human|Department of Pathology|COVID-19 Genomics UK (COG-UK) Consortium|Meredith|United Kingdom

>Spike|hCoV-19/Malaysia/3321/2020|2020-03-30|EPI\_ISL\_501203|Original|hCoV-19^^Kuala Lumpur|Human|Department of Medical Microbiology|Department of Medical Microbiology|Chan|Malaysia

>Spike|hCoV-19/Netherlands/un-EMC-735/2020|2020-03-14|EPI\_ISL\_523490|Original|hCoV-19^^Netherlands|Human|Dutch COVID-19 response team|Erasmus Medical Center|Oude Munnink|Netherlands

>Spike|hCoV-19/England/MILK-99532C/2020|2020-08-24|EPI\_ISL\_552407|Original|hCoV-19^^England|Human|Lighthouse Lab in Milton Keynes|Wellcome Sanger Institute for the COVID-19 Genomics UK (COG-UK) consortium|Davies|United Kingdom

>Spike|hCoV-19/USA/CA-CZB-13000/2020|2020-10-21|EPI\_ISL\_672297|Original|hCoV-19^^California|Human|Santa Clara County Public Health Laboratory|Chan-Zuckerberg Biohub|Bhatt|USA

>Spike|hCoV-19/Singapore/428/2020|2020-03-20|EPI\_ISL\_475959|Original|hCoV-19^^Singapore|Human|National Public Health Laboratory|National Public Health Laboratory|Mak|Singapore

>Spike|hCoV-19/Canada/QC\_AY3/2020|2020-04-12|EPI\_ISL\_463955|Original|hCoV-19^^Quebec|Human|Laboratoire de microbiologie|Smith Laboratory|Smith|Canada

>Spike|hCoV-19/Belgium/ULG-10591/2020|2020-10-23|EPI\_ISL\_626337|Original|hCoV-19^^Li\u00e8ge|Human|Department of Clinical Microbiology|GIGA Medical Genomics|Durkin|Belgium

>Spike|hCoV-19/England/OXON-B1C28/2020|2020-05-03|EPI\_ISL\_479080|Original|hCoV-19^^England|Human|Oxford Viromics|COVID-19 Genomics UK (COG-UK) Consortium|Golubchik|United Kingdom

>Spike|hCoV-19/Scotland/CVR4717/2020|2020-09-21|EPI\_ISL\_611718|Original|hCoV-19^^Scotland|Human|West of Scotland Specialist Virology Centre|COVID-19 Genomics UK (COG-UK) Consortium|Robertson|United Kingdom

>Spike|hCoV-19/Jordan/AM-ALSR-4063/2020|2020-10-03|EPI\_ISL\_636423|Original|hCoV-19^^Amman|Human|Biolab Diagnostic Laboratories|Andersen lab at Scripps Research|Gangavarapu|Jordan

>Spike|hCoV-19/USA/MI-UM-10036587493/2020|2020-10-23|EPI\_ISL\_649984|Original|hCoV-19^^Michigan|Human|University of Michigan Clinical Microbiology Laboratory|Lauring Lab|Valesano|USA

>Spike|hCoV-19/England/QEUEH-9F98FA/2020|2020-09-25|EPI\_ISL\_589141|Original|hCoV-19^^England|Human|Lighthouse Lab in Glasgow|Wellcome Sanger Institute for the COVID-19 Genomics UK (COG-UK) consortium|Davies|United Kingdom

>Spike|hCoV-19/England/QEUA-B2D284/2020|2020-11-04|EPI\_ISL\_659875|Original|hCoV-19^^England|Human|Lighthouse Lab in Glasgow|Wellcome Sanger Institute for the COVID-19 Genomics UK (COG-UK) Consortium|Davies|United Kingdom

>Spike|hCoV-19/USA/NM-NMDOH-2020330134/2020|2020-09-04|EPI\_ISL\_644604|Original|hCoV-19^^New Mexico|Human|New Mexico Department of Health Scientific Laboratory|New Mexico Department of Health Scientific Laboratory|Johnson|USA

>Spike|hCoV-19/Denmark/DCGC-11516/2020|2020-11-02|EPI\_ISL\_670971|Original|hCoV-19^^Hovedstaden|Human|Department of Virus and Microbiological Special Diagnostics|Albertsen Lab|Michaelsen|Denmark

>Spike|hCoV-19/USA/CA-CZB-14748/2020|2020-10-23|EPI\_ISL\_738879|Original|hCoV-19^^California|Human|Humboldt County Public Health Laboratory|Chan-Zuckerberg Biohub|Kamm|USA

>Spike|hCoV-19/Vietnam/VNHN\_0762/2020|2020-03-13|EPI\_ISL\_435313|Original|hCoV-19^^Hanoi|Human|National Hospital of Tropical Diseases|Oxford University Clinical Research Unit|Nguyen|Vietnam

>Spike|hCoV-19/Japan/PG-3363/2020|2020-04-00|EPI\_ISL\_691478|Original|hCoV-19^^Japan|Human|Pathogen Genomics Center|Pathogen Genomics Center|Sekizuka|Japan

>Spike|hCoV-19/Russia/Krasnodar-63401/2020|2020-03-11|EPI\_ISL\_428867|Vero|hCoV-19^^Krasnodar|Human|State Research Center of Virology and Biotechnology VECTOR|State Research Center of Virology and Biotechnology VECTOR|Shvalov|Russia

>Spike|hCoV-19/England/QEUA-9DE1C3/2020|2020-09-21|EPI\_ISL\_599706|Original|hCoV-19^^England|Human|Lighthouse Lab in Glasgow|Wellcome Sanger Institute for the COVID-19 Genomics UK (COG-UK) consortium|Davies|United Kingdom

>Spike|hCoV-19/Scotland/QEUA-998532/2020|2020-08-24|EPI\_ISL\_539913|Original|hCoV-19^^Scotland|Human|Lighthouse Lab in Glasgow|Wellcome Sanger Institute for the COVID-19 Genomics UK (COG-UK) consortium|Davies|United Kingdom

>Spike|hCoV-19/USA/VA-DCLS-0091/2020|2020-04-02|EPI\_ISL\_429988|Original|hCoV-19^^Virginia|Human|Virginia DCLS|Virginia DCLS|St. Jacques|USA

>Spike|hCoV-19/England/LOND-1262ACD/2020|2020-10-12|EPI\_ISL\_594886|Original|hCoV-19^^England|Human|University College London|COVID-19 Genomics UK (COG-UK) Consortium|Roy|United Kingdom

>Spike|hCoV-19/England/MILK-9AA7A0/2020|2020-08-31|EPI\_ISL\_550857|Original|hCoV-19^^England|Human|Lighthouse Lab in Milton Keynes|Wellcome Sanger Institute for the COVID-19 Genomics UK (COG-UK) consortium|Davies|United Kingdom

>Spike|hCoV-19/Japan/PG-0456/2020|2020-03-00|EPI\_ISL\_684172|Original|hCoV-19^^Japan|Human|Pathogen Genomics Center|Pathogen Genomics Center|Sekizuka|Japan

>Spike|hCoV-19/England/QEUA-AF473D/2020|2020-10-30|EPI\_ISL\_662730|Original|hCoV-19^^England|Human|Lighthouse Lab in Glasgow|Wellcome Sanger Institute for the COVID-19 Genomics UK (COG-UK) Consortium|Davies|United Kingdom

>Spike|hCoV-19/England/MILK-B3DDAE/2020|2020-11-01|EPI\_ISL\_741395|Original|hCoV-19^^England|Human|Oxford Viromics|COVID-19 Genomics UK (COG-UK) Consortium|Golubchik|United Kingdom

>Spike|hCoV-19/England/ALDP-5AB99E/2020|2020-06-08|EPI\_ISL\_558875|Original|hCoV-19^^England|Human|Lighthouse Lab in Alderley Park|Wellcome Sanger Institute for the COVID-19 Genomics UK (COG-UK) consortium|Davies|United Kingdom

>Spike|hCoV-19/USA/CA-CHLA-PLM31438336/2020|2020-11-15|EPI\_ISL\_753388|Original|hCoV-19^^California|Human|Clinical virology Laboratory|Center for Personalized Medicine|Dien Bard|USA

>Spike|hCoV-19/England/ALDP-A5068D/2020|2020-10-07|EPI\_ISL\_597539|Original|hCoV-19^^England|Human|Lighthouse Lab in Alderley Park|Wellcome Sanger Institute for the COVID-19 Genomics UK (COG-UK) consortium|Davies|United Kingdom

>Spike|hCoV-19/Wales/PHWC-491EBB/2020|2020-11-16|EPI\_ISL\_706791|Original|hCoV-19^^Wales|Human|Originating lab|COVID-19 Genomics UK (COG-UK) Consortium|Moore|United Kingdom

>Spike|hCoV-19/Denmark/DCGC-6686/2020|2020-10-12|EPI\_ISL\_619589|Original|hCoV-19^^Midtjylland|Human|Department of Virus and Microbiological Special Diagnostics|Albertsen lab|Michaelsen|Denmark

>Spike|hCoV-19/USA/TX-HMH-MCoV-13855/2020|2020-08-17|EPI\_ISL\_787148|Original|hCoV-19^^Texas|Human|Houston Methodist Hospital|Houston Methodist Hospital|Long|USA

>Spike|hCoV-19/Germany/BE-ChVir-W1651-8237/2020|2020-07-20|EPI\_ISL\_753982|Original|hCoV-19^^Berlin|Human|Charit\u00e9 Universit\u00e4tsmedizin Berlin|Charit\u00e9 Universit\u00e4tsmedizin Berlin|Muehlemann|Germany

>Spike|hCoV-19/USA/CA-QDX-1955/2020|2020-03-16|EPI\_ISL\_604212|Original|hCoV-19^^California|Human|Quest Diagnostics|Quest Diagnostics|Kagan|USA

>Spike|hCoV-19/USA/MI-MDHHS-SC20269/2020|2020-03-26|EPI\_ISL\_447067|Original|hCoV-19^^Michigan|Human|Michigan Department of Health and Human Services|Michigan Department of Health and Human Services|Blankenship|USA

>Spike|hCoV-19/England/MILK-957353/2020|2020-06-12|EPI\_ISL\_553907|Original|hCoV-19^^England|Human|Lighthouse Lab in Milton Keynes|Wellcome Sanger Institute for the COVID-19 Genomics UK (COG-UK) consortium|Davies|United Kingdom

>Spike|hCoV-19/England/QEUEH-AE291E/2020|2020-10-27|EPI\_ISL\_633680|Original|hCoV-19^^England|Human|Lighthouse Lab in Glasgow|Wellcome Sanger Institute for the COVID-19 Genomics UK (COG-UK) consortium|Davies|United Kingdom

>Spike|hCoV-19/England/CAMC-9DF57B/2020|2020-09-21|EPI\_ISL\_638412|Original|hCoV-19^^England|Human|Department of Pathology|COVID-19 Genomics UK (COG-UK) Consortium|Goodfellow|United Kingdom

>Spike|hCoV-19/Netherlands/ZH-EMC-1049/2020|2020-10-25|EPI\_ISL\_722547|Original|hCoV-19^^Zuid Holland|Human|Dutch COVID-19 response team|Erasmus Medical Center|Oude Munnink|Netherlands

>Spike|hCoV-19/England/ALDP-9B5A5E/2020|2020-08-28|EPI\_ISL\_590220|Original|hCoV-19^^England|Human|Lighthouse Lab in Alderley Park|Wellcome Sanger Institute for the COVID-19 Genomics UK (COG-UK) consortium|Davies|United Kingdom

>Spike|hCoV-19/England/MILK-ACC68C/2020|2020-10-21|EPI\_ISL\_634421|Original|hCoV-19^^England|Human|Lighthouse Lab in Milton Keynes|Wellcome Sanger Institute for the COVID-19 Genomics UK (COG-UK) consortium|Davies|United Kingdom

>Spike|hCoV-19/England/CAMB-1B831C/2020|2020-10-19|EPI\_ISL\_637394|Original|hCoV-19^^England|Human|Department of Pathology|COVID-19 Genomics UK (COG-UK) Consortium|Goodfellow|United Kingdom

>Spike|hCoV-19/USA/TX-DSHS-0863/2020|2020-06-16|EPI\_ISL\_593595|Original|hCoV-19^^Texas|Human|Texas Department of State Health Services|Texas Department of State Health Services|Rahman|USA

>Spike|hCoV-19/England/ALDP-A67D7F/2020|2020-10-09|EPI\_ISL\_608896|Original|hCoV-19^^England|Human|Lighthouse Lab in Alderley Park|Wellcome Sanger Institute for the COVID-19 Genomics UK (COG-UK) consortium|Davies|United Kingdom

>Spike|hCoV-19/England/QEUEH-C5BFA3/2020|2020-12-14|EPI\_ISL\_769475|Original|hCoV-19^^England|Human|Lighthouse Lab in Glasgow|Wellcome Sanger Institute for the COVID-19 Genomics UK (COG-UK) Consortium|Davies|United Kingdom

>Spike|hCoV-19/Japan/PG-5692/2020|2020-06-00|EPI\_ISL\_688816|Original|hCoV-19^^Japan|Human|Pathogen Genomics Center|Pathogen Genomics Center|Sekizuka|Japan

>Spike|hCoV-19/Spain/CT-ISCIIE-2013585/2020|2020-06-29|EPI\_ISL\_539541|Original|hCoV-19^^Catalunya|Human|Hospital Cl\u00e9dnic|Instituto de Salud Carlos III|Caballero|Spain

>Spike|hCoV-19/England/ALDP-A2EE71/2020|2020-10-05|EPI\_ISL\_587290|Original|hCoV-19^^England|Human|Lighthouse Lab in Alderley Park|Wellcome Sanger Institute for the COVID-19 Genomics UK (COG-UK) consortium|Davies|United Kingdom

>Spike|hCoV-19/France/ARA-112775/2020|2020-11-26|EPI\_ISL\_745339|Original|hCoV-19^^Auvergne-Rh\u00f4ne-Alpes|Human|CNR Virus des Infections Respiratoires - France SUD|CNR Virus des Infections Respiratoires - France SUD|Bal|France

>Spike|hCoV-19/USA/TX-HMH-MCoV-13458/2020|2020-08-22|EPI\_ISL\_788593|Original|hCoV-19^^Texas|Human|Houston Methodist Hospital|Houston Methodist Hospital|Long|USA

>Spike|hCoV-19/USA/WI-GMF-00466/2020|2020-03-29|EPI\_ISL\_419651|Original|hCoV-19^^Minnesota|Human|Gundersen Molecular Diagnostics Laboratory|Kabara Cancer Research Institute|Kenny|USA

>Spike|hCoV-19/England/HECH-2599CB2/2020|2020-05-05|EPI\_ISL\_482088|Original|hCoV-19^^England|Human|Microbiology Department|Wellcome Sanger Institute for the COVID-19 Genomics UK (COG-UK) consortium|Davies|United Kingdom

>Spike|hCoV-19/Scotland/CVR5071/2020|2020-10-11|EPI\_ISL\_594804|Original|hCoV-19^^Scotland|Human|West of Scotland Specialist Virology Centre|COVID-19 Genomics UK (COG-UK) Consortium|Robertson|United Kingdom

>Spike|hCoV-19/South Africa/NHLS-UCT-GS-2028/2020|2020-09-16|EPI\_ISL\_640121|Original|hCoV-19^^Western Cape|Human|False Bay Hospital wc FBH|NHLS/UCT|Iranzadeh|South Africa

>Spike|hCoV-19/India/TG-CCMB-L040-P1/2020|2020-04-18|EPI\_ISL\_458077|Vero P1|hCoV-19^^Telangana|Human|CSIR-Centre for Cellular and Molecular Biology|CSIR-Centre for Cellular and Molecular Biology|Banu|India

>Spike|hCoV-19/USA/TX-HMH-6632/2020|2020-06-24|EPI\_ISL\_546133|Original|hCoV-19^^Texas|Human|Houston Methodist Hospital|Houston Methodist Hospital|Long|USA

>Spike|hCoV-19/England/ALDP-94F9D4/2020|2020-06-16|EPI\_ISL\_555272|Original|hCoV-19^^England|Human|Lighthouse Lab in Alderley Park|Wellcome Sanger Institute for the COVID-19 Genomics UK (COG-UK) consortium|Davies|United Kingdom

>Spike|hCoV-19/USA/VA-DCLS-1857/2020|2020-09-23|EPI\_ISL\_614081|Original|hCoV-19^^Virginia|Human|Virginia DCLS|Virginia DCLS|St. Jacques|USA

>Spike|hCoV-19/England/MILK-BDB63E/2020|2020-11-26|EPI\_ISL\_709670|Original|hCoV-19^^England|Human|Lighthouse Lab in Milton Keynes|Wellcome Sanger Institute for the COVID-19 Genomics UK (COG-UK) Consortium|Davies|United Kingdom

>Spike|hCoV-19/Scotland/QEUH-B7F441/2020|2020-11-14|EPI\_ISL\_676357|Original|hCoV-19^^Scotland|Human|Lighthouse Lab in Glasgow|Wellcome Sanger Institute for the COVID-19 Genomics UK (COG-UK) Consortium|Davies|United Kingdom

>Spike|hCoV-19/Denmark/DCGC-2309/2020|2020-08-10|EPI\_ISL\_617734|Original|hCoV-19^^Midtjylland|Human|Department of Virus and Microbiological Special Diagnostics|Albertsen lab|Michaelsen|Denmark

>Spike|hCoV-19/South Korea/KDCA0447/2020|2020-11-16|EPI\_ISL\_760231|Original|hCoV-19^^South Korea|Human|Division of Emerging Infectious Diseases|Division of Emerging Infectious Diseases|Park|South Korea

>Spike|hCoV-19/Brazil/RJ-00567/2020|2020-11-04|EPI\_ISL\_717951|Original|hCoV-19^^Rio de Janeiro|Human|Laboratorio de Virologia Molecular / UFRJ|Bioinformatics Laboratory / LNCC|Almeida|Brazil

>Spike|hCoV-19/USA/TX-HMH-MCoV-14811/2020|2020-10-12|EPI\_ISL\_786296|Original|hCoV-19^^Texas|Human|Houston Methodist Hospital|Houston Methodist Hospital|Long|USA

>Spike|hCoV-19/India/MH-ACTREC-315/2020|2020-07-16|EPI\_ISL\_699964|Original|hCoV-19^^Maharashtra|Human|Hematopathology Laboratory|Hematopathology Laboratory|Patkar|India

>Spike|hCoV-19/USA/NY-NYCPHL-000223/2020|2020-03-19|EPI\_ISL\_631753|Original|hCoV-19^^New York|Human|NYC HH Lincoln Medical And Mental Health Center|New York City Public Health Laboratory|Wang|USA

>Spike|hCoV-19/USA/UT-08309/2020|2020-05-21|EPI\_ISL\_524105|Original|hCoV-19^^Utah|Human|Utah Public Health Laboratory|Utah Public Health Laboratory|Young|USA

>Spike|hCoV-19/USA/WI-UW-1445/2020|2020-09-11|EPI\_ISL\_541577|Original|hCoV-19^^Wisconsin|Human|University of Wisconsin-Madison AIDS Vaccine Research Laboratories|University of Wisconsin-Madison AIDS Vaccine Research Laboratories|Baczenas|USA

>Spike|hCoV-19/Uganda/UG135/2020|2020-10-01|EPI\_ISL\_738042|Original|hCoV-19^^Uganda|Human|Uganda Central Public Health Lab and Uganda Virus Research Institute|MRC/UVRI & LSHTM Uganda Research Unit|Cotten|Uganda

>Spike|hCoV-19/Denmark/DCGC-6313/2020|2020-09-07|EPI\_ISL\_615538|Original|hCoV-19^^Sjaelland|Human|Department of Virus and Microbiological Special Diagnostics|Albertsen lab|Michaelsen|Denmark

>Spike|hCoV-19/England/20118148804/2020|2020-03-12|EPI\_ISL\_464978|Original|hCoV-19^^England|Human|Respiratory Virus Unit|Respiratory Virus Unit|Platt|United Kingdom

>Spike|hCoV-19/England/ALDP-C3A56C/2020|2020-12-08|EPI\_ISL\_731381|Original|hCoV-19^^England|Human|Lighthouse Lab in Alderley Park|Wellcome Sanger Institute for the COVID-19 Genomics UK (COG-UK) Consortium|Davies|United Kingdom

>Spike|hCoV-19/USA/OR-OHSU-1873/2020|2020-07-28|EPI\_ISL\_526054|Original|hCoV-19^^Oregon|Human|OHSU Lab Services Molecular Microbiology Lab|Oregon SARS-CoV-2 Genome Sequencing Center|O'Roak|USA

>Spike|hCoV-19/Denmark/DCGC-12474/2020|2020-11-16|EPI\_ISL\_682655|Original|hCoV-19^^Hovedstaden|Human|Department of Virus and Microbiological Special Diagnostics|Albertsen Lab|Michaelsen|Denmark

>Spike|hCoV-19/USA/AZ-TG547362/2020|2020-07-06|EPI\_ISL\_695505|Original|hCoV-19^^Arizona|Human|AZ SPHL|TGen North|French|USA

>Spike|hCoV-19/England/MILK-9C29BB/2020|2020-09-10|EPI\_ISL\_566511|Original|hCoV-19^^England|Human|Lighthouse Lab in Milton Keynes|Wellcome Sanger Institute for the COVID-19 Genomics UK (COG-UK) consortium|Davies|United Kingdom

>Spike|hCoV-19/Denmark/DCGC-13776/2020|2020-11-30|EPI\_ISL\_713017|Original|hCoV-19^^Sjaelland|Human|Department of Virus and Microbiological Special Diagnostics|Albertsen Lab|Michaelsen|Denmark

>Spike|hCoV-19/USA/HI-H200523/2020|2020-11-02|EPI\_ISL\_753057|Original|hCoV-19^^Hawaii|Human|State Laboratories Division|State Laboratories Division|Sultana|USA

>Spike|hCoV-19/Japan/PG-4590/2020|2020-08-00|EPI\_ISL\_689727|Original|hCoV-19^^Japan|Human|Pathogen Genomics Center|Pathogen Genomics Center|Sekizuka|Japan

>Spike|hCoV-19/England/QEUEH-AF5295/2020|2020-10-30|EPI\_ISL\_663156|Original|hCoV-19^^England|Human|Lighthouse Lab in Glasgow|Wellcome Sanger Institute for the COVID-19 Genomics UK (COG-UK) Consortium|Davies|United Kingdom

>Spike|hCoV-19/USA/CA-QDX-34/2020|2020-03-15|EPI\_ISL\_467828|Original|hCoV-19^^California|Human|Quest Diagnostics|Quest Diagnostics|Kagan|USA

>Spike|hCoV-19/USA/OR-OHSU-2211/2020|2020-08-06|EPI\_ISL\_667147|Original|hCoV-19^^Oregon|Human|OHSU Lab Services Molecular Microbiology Lab|Oregon SARS-CoV-2 Genome Sequencing Center|O'Roak|USA

>Spike|hCoV-19/England/ALDP-A6E1D6/2020|2020-10-15|EPI\_ISL\_607678|Original|hCoV-19^^England|Human|Lighthouse Lab in Alderley Park|Wellcome Sanger Institute for the COVID-19 Genomics UK (COG-UK) consortium|Davies|United Kingdom

>Spike|hCoV-19/Japan/PG-5775/2020|2020-08-00|EPI\_ISL\_688894|Original|hCoV-19^^Japan|Human|Pathogen Genomics Center|Pathogen Genomics Center|Sekizuka|Japan

>Spike|hCoV-19/Australia/VIC6653/2020|2020-07-18|EPI\_ISL\_521410|Original|hCoV-19^^Victoria|Human|Victorian Infectious Diseases Reference Laboratory (VIDRL)|VIDRL and MDU-PHL|Schultz|Australia

>Spike|hCoV-19/Belgium/reg-0419536/2020|2020-04-19|EPI\_ISL\_734629|Original|hCoV-19^^Lubbeek|Human|UZ Leuven|KU Leuven|Maes|Belgium

>Spike|hCoV-19/England/MILK-A6ACBB/2020|2020-10-09|EPI\_ISL\_608814|Original|hCoV-19^^England|Human|Lighthouse Lab in Milton Keynes|Wellcome Sanger Institute for the COVID-19 Genomics UK (COG-UK) consortium|Davies|United Kingdom

>Spike|hCoV-19/England/ALDP-B1F926/2020|2020-11-01|EPI\_ISL\_646061|Original|hCoV-19^^England|Human|Lighthouse Lab in Alderley Park|Wellcome Sanger Institute for the COVID-19 Genomics UK (COG-UK) Consortium|Davies|United Kingdom

>Spike|hCoV-19/England/MILK-9707A3/2020|2020-08-17|EPI\_ISL\_553181|Original|hCoV-19^^England|Human|Lighthouse Lab in Milton Keynes|Wellcome Sanger Institute for the COVID-19 Genomics UK (COG-UK) consortium|Davies|United Kingdom

>Spike|hCoV-19/England/ALDP-AA1A09/2020|2020-10-22|EPI\_ISL\_624401|Original|hCoV-19^^England|Human|Lighthouse Lab in Alderley Park|Wellcome Sanger Institute for the COVID-19 Genomics UK (COG-UK) consortium|Davies|United Kingdom

>Spike|hCoV-19/USA/PA-MGSC51-05/2020|2020-03-26|EPI\_ISL\_436499|Original|hCoV-19^^Pennsylvania|Human|UPMC Clinical Laboratory|Microbial Genome Sequencing Center|Cooper|USA

>Spike|hCoV-19/USA/TX-DSHS-0507/2020|2020-06-21|EPI\_ISL\_560950|Original|hCoV-19^^Texas|Human|Texas Department of State Health Services|Texas Department of State Health Services|Rahman|USA

>Spike|hCoV-19/Luxembourg/LNS8512641/2020|2020-07-27|EPI\_ISL\_744751|Original|hCoV-19^^Luxembourg|Human|Laboratoire national de sant\u00e9|Laboratoire national de sant\u00e9|Wienecke-Baldacchino|Luxembourg

>Spike|hCoV-19/Denmark/DCGC-920/2020|2020-03-30|EPI\_ISL\_614885|Original|hCoV-19^^Syddanmark|Human|Department of Virus and Microbiological Special Diagnostics|Albertsen lab|Michaelsen|Denmark

>Spike|hCoV-19/Japan/PG-7716/2020|2020-08-00|EPI\_ISL\_686818|Original|hCoV-19^^Japan|Human|Chiba Prefectural Institute of Public Health|Pathogen Genomics Center|Sekizuka|Japan

>Spike|hCoV-19/India/DL-IGIB11305171/2020|2020-08-00|EPI\_ISL\_751308|Original|hCoV-19^^Delhi|Human|Devki Devi Foundation|CSIR-IGIB/Max|Pandey|India

>Spike|hCoV-19/England/ALDP-B1DB04/2020|2020-11-01|EPI\_ISL\_646132|Original|hCoV-19^^England|Human|Lighthouse Lab in Alderley Park|Wellcome Sanger Institute for the COVID-19 Genomics UK (COG-UK) Consortium|Davies|United Kingdom

>Spike|hCoV-19/USA/WA-S1283/2020|2020-05-12|EPI\_ISL\_495733|Original|hCoV-19^^Washington|Human|Washington State Department of Health|Seattle Flu Study|Lee|USA

>Spike|hCoV-19/USA/CA-CZB-2351/2020|2020-05-13|EPI\_ISL\_513799|Original|hCoV-19^^California|Human|Orange County Public Health Laboratory|Chan-Zuckerberg Biohub|Kamm|USA

>Spike|hCoV-19/Luxembourg/LNS0893820/2020|2020-11-25|EPI\_ISL\_739847|Original|hCoV-19^^Luxembourg|Human|Laboratoire national de sant\u00e9|Laboratoire national de sant\u00e9|Wienecke-Baldacchino|Luxembourg

>Spike|hCoV-19/Australia/VIC4361/2020|2020-07-13|EPI\_ISL\_519657|Original|hCoV-19^^Victoria|Human|Microbiological Diagnostic Unit - Public Health Laboratory (MDU-PHL)|MDU-PHL|Schultz|Australia

>Spike|hCoV-19/Scotland/EDB5667/2020|2020-04-12|EPI\_ISL\_473826|Original|hCoV-19^^Scotland|Human|Virology Department|COVID-19 Genomics UK (COG-UK) Consortium|Williams|United Kingdom

>Spike|hCoV-19/England/ALDP-AA230D/2020|2020-10-22|EPI\_ISL\_624259|Original|hCoV-19^^England|Human|Lighthouse Lab in Alderley Park|Wellcome Sanger Institute for the COVID-19 Genomics UK (COG-UK) consortium|Davies|United Kingdom

>Spike|hCoV-19/Uganda/UG087/2020|2020-08-25|EPI\_ISL\_737998|Original|hCoV-19^^Uganda|Human|Uganda Central Public Health Lab and Uganda Virus Research Institute|MRC/UVRI & LSHTM Uganda\u00a0Research Unit|Cotten|Uganda

>Spike|hCoV-19/USA/OR-OHSU-0785/2020|2020-06-17|EPI\_ISL\_525900|Original|hCoV-19^^Oregon|Human|OHSU Lab Services Molecular Microbiology Lab|Oregon SARS-CoV-2 Genome Sequencing Center|O'Roak|USA

>Spike|hCoV-19/England/NORT-295D70/2020|2020-05-17|EPI\_ISL\_472290|Original|hCoV-19^^England|Human|Northumbria University / South Tees Hospitals NHS Foundation Trust / North Cumbria Integrated Care NHS Foundation Trust / North Tees and Hartlepool NHS Foundation Trust / Newcastle Hospitals NHS Foundation Trust|COVID-19 Genomics UK (COG-UK) Consortium|Bashton|United Kingdom

>Spike|hCoV-19/England/CAMC-A6503C/2020|2020-10-11|EPI\_ISL\_608515|Original|hCoV-19^^England|Human|Lighthouse Lab in Cambridge|Wellcome Sanger Institute for the COVID-19 Genomics UK (COG-UK) consortium|Davies|United Kingdom

>Spike|hCoV-19/England/CAMB-1BC54F/2020|2020-11-26|EPI\_ISL\_723878|Original|hCoV-19^^England|Human|Department of Pathology|COVID-19 Genomics UK (COG-UK) Consortium|Goodfellow|United Kingdom

>Spike|hCoV-19/Vietnam/PIHCM-305/2020|2020-03-18|EPI\_ISL\_654878|Vero E6|hCoV-19^^Ho Chi Minh city|Human|Pasteur Institute in Ho Chi Minh city|Department of Microbiology and Immunology - Pasteur Institute in Ho Chi Minh city|Vu|Viet Nam

>Spike|hCoV-19/England/ALDP-95A9D6/2020|2020-06-13|EPI\_ISL\_554997|Original|hCoV-19^^England|Human|Lighthouse Lab in Alderley Park|Wellcome Sanger Institute for the COVID-19 Genomics UK (COG-UK) consortium|Davies|United Kingdom

>Spike|hCoV-19/Canada/ON-PHL-20-01233/2020|2020-06-00|EPI\_ISL\_548855|Original|hCoV-19^^Ontario|Human|Public Health Ontario Laboratory|Public Health Ontario Laboratory|Guthrie|Canada

>Spike|hCoV-19/Australia/VIC6727/2020|2020-07-25|EPI\_ISL\_564016|Original|hCoV-19^^Victoria|Human|Victorian Infectious Diseases Reference Laboratory (VIDRL)|VIDRL and MDU-PHL|Schultz|Australia

>Spike|hCoV-19/Denmark/DCGC-835/2020|2020-04-20|EPI\_ISL\_614737|Original|hCoV-19^^Hovedstaden|Human|Department of Virus and Microbiological Special Diagnostics|Albertsen lab|Michaelsen|Denmark

>Spike|hCoV-19/England/CAMC-B0839B/2020|2020-10-30|EPI\_ISL\_643427|Original|hCoV-19^^England|Human|Lighthouse Lab in Cambridge|Wellcome Sanger Institute for the COVID-19 Genomics UK (COG-UK) Consortium|Davies|United Kingdom

>Spike|hCoV-19/England/BRIS-12D637/2020|2020-05-06|EPI\_ISL\_481961|Original|hCoV-19^^England|Human|PHE South West Regional Laboratory|Wellcome Sanger Institute for the COVID-19 Genomics UK (COG-UK) consortium|Davies|United Kingdom



>Spike|hCoV-19/Switzerland/VD-ETHZ-280125/2020|2020-09-08|EPI\_ISL\_560502|Original|hCoV-19^^Vaud|Human|Viollier AG|Department of Biosystems Science and Engineering|Nadeau|Switzerland

>Spike|hCoV-19/England/ALDP-6D3932/2020|2020-07-02|EPI\_ISL\_556271|Original|hCoV-19^^England|Human|Lighthouse Lab in Alderley Park|Wellcome Sanger Institute for the COVID-19 Genomics UK (COG-UK) consortium|Davies|United Kingdom

>Spike|hCoV-19/England/20120054704/2020|2020-03-15|EPI\_ISL\_465725|Original|hCoV-19^^England|Human|Respiratory Virus Unit|Respiratory Virus Unit|Platt|United Kingdom

>Spike|hCoV-19/England/204400155/2020|2020-10-25|EPI\_ISL\_653939|Original|hCoV-19^^England|Human|Respiratory Virus Unit|COVID-19 Genomics UK (COG-UK) Consortium|Platt|United Kingdom

>Spike|hCoV-19/Scotland/QEUA-9CEE38/2020|2020-09-17|EPI\_ISL\_601964|Original|hCoV-19^^Scotland|Human|Lighthouse Lab in Glasgow|Wellcome Sanger Institute for the COVID-19 Genomics UK (COG-UK) consortium|Davies|United Kingdom

>Spike|hCoV-19/Japan/PG-5255/2020|2020-07-00|EPI\_ISL\_690358|Original|hCoV-19^^Japan|Human|Pathogen Genomics Center|Pathogen Genomics Center|Sekizuka|Japan

>Spike|hCoV-19/Spain/MD-IBV-005361/2020|2020-03-22|EPI\_ISL\_510237|Original|hCoV-19^^Madrid|Human|Hospital General Universitario Gregorio Mara\u00f1\u00f3n|SeqCOVID-SPAIN consortium/IBV (CSIC)|Comas|Spain

>Spike|hCoV-19/England/QEUA-B433A3/2020|2020-11-07|EPI\_ISL\_657139|Original|hCoV-19^^England|Human|Lighthouse Lab in Glasgow|Wellcome Sanger Institute for the COVID-19 Genomics UK (COG-UK) Consortium|Davies|United Kingdom

>Spike|hCoV-19/England/NORW-F55A5/2020|2020-10-26|EPI\_ISL\_725274|Original|hCoV-19^^England|Human|Quadram Institute Bioscience|COVID-19 Genomics UK (COG-UK) Consortium|Alikhan|United Kingdom

>Spike|hCoV-19/USA/MI-UM-2006S000891/2020|2020-03-25|EPI\_ISL\_484738|Original|hCoV-19^^Michigan|Human|University of Michigan Clinical Microbiology Laboratory|Lauring Lab|Valesano|USA

>Spike|hCoV-19/England/CAMC-B9A0C4/2020|2020-11-15|EPI\_ISL\_673352|Original|hCoV-19^^England|Human|Lighthouse Lab in Cambridge|Wellcome Sanger Institute for the COVID-19 Genomics UK (COG-UK) Consortium|Davies|United Kingdom

>Spike|hCoV-19/Wales/PHWC-160683/2020|2020-04-09|EPI\_ISL\_472961|Original|hCoV-19^^Wales|Human|Wales Specialist Virology Centre Sequencing lab|COVID-19 Genomics UK (COG-UK) Consortium|Moore|United Kingdom

>Spike|hCoV-19/USA/CA-SR0247/2020|2020-03-27|EPI\_ISL\_437563|Original|hCoV-19^^California|Human|Scripps Medical Laboratory|Andersen lab at Scripps Research|Gangavarapu|USA

>Spike|hCoV-19/Switzerland/VD-ETHZ-300420/2020|2020-09-29|EPI\_ISL\_603379|Original|hCoV-19^^Vaud|Human|Viollier AG|Department of Biosystems Science and Engineering|Nadeau|Switzerland

>Spike|hCoV-19/Australia/VIC14681/2020|2020-07-29|EPI\_ISL\_592951|Original|hCoV-19^^Victoria|Human|Microbiological Diagnostic Unit - Public Health Laboratory (MDU-PHL)|MDU-PHL|Schultz|Australia

>Spike|hCoV-19/USA/CA-ALSR-4134/2020|2020-07-06|EPI\_ISL\_648841|Original|hCoV-19^^California|Human|San Diego County Public Health Laboratory|Andersen lab at Scripps Research|Gangavarapu|USA

>Spike|hCoV-19/England/MILK-978073/2020|2020-07-29|EPI\_ISL\_550492|Original|hCoV-19^^England|Human|Lighthouse Lab in Milton Keynes|Wellcome Sanger Institute for the COVID-19 Genomics UK (COG-UK) consortium|Davies|United Kingdom

>Spike|hCoV-19/Scotland/EDB386/2020|2020-03-30|EPI\_ISL\_425991|Original|hCoV-19^^Scotland|Human|Virology Department|COVID-19 Genomics UK (COG-UK) Consortium|Williams|United Kingdom

>Spike|hCoV-19/USA/OR-OHSU-0614/2020|2020-06-13|EPI\_ISL\_525846|Original|hCoV-19^^Oregon|Human|OHSU Lab Services Molecular Microbiology Lab|Ginkgo Bioworks Clinical Laboratory|O'Roak|USA

>Spike|hCoV-19/England/SHEF-10CC52C/2020|2020-12-23|EPI\_ISL\_765169|Original|hCoV-19^^England|Human|Virology Department|COVID-19 Genomics UK (COG-UK) Consortium|de Silva|United Kingdom

>Spike|hCoV-19/USA/LA-EVTL207/2020|2020-08-13|EPI\_ISL\_574341|Original|hCoV-19^^Louisiana|Human|LSUHS Emerging Viral Threat Laboratory|Microbial Genome Sequencing Center|Kamil|USA

>Spike|hCoV-19/England/MILK-B54C1D/2020|2020-11-05|EPI\_ISL\_657761|Original|hCoV-19^^England|Human|Lighthouse Lab in Milton Keynes|Wellcome Sanger Institute for the COVID-19 Genomics UK (COG-UK) Consortium|Davies|United Kingdom

>Spike|hCoV-19/England/NORT-283D0C/2020|2020-04-04|EPI\_ISL\_488456|Original|hCoV-19^^England|Human|NU-OMICS DNA Sequencing research facility|Wellcome Sanger Institute for the COVID-19 Genomics UK (COG-UK) consortium|Davies|United Kingdom

>Spike|hCoV-19/Scotland/CVR2925/2020|2020-04-21|EPI\_ISL\_461592|Original|hCoV-19^^Scotland|Human|West of Scotland Specialist Virology Centre|COVID-19 Genomics UK (COG-UK) Consortium|Robertson|United Kingdom

>Spike|hCoV-19/England/NOTT-10FB87/2020|2020-04-07|EPI\_ISL\_432693|Original|hCoV-19^^England|Human|Queens Medical Centre|COVID-19 Genomics UK (COG-UK) Consortium|Loose|United Kingdom

>Spike|hCoV-19/Scotland/CVR2771/2020|2020-04-20|EPI\_ISL\_448193|Original|hCoV-19^^Scotland|Human|West of Scotland Specialist Virology Centre|COVID-19 Genomics UK (COG-UK) Consortium|Robertson|United Kingdom

>Spike|hCoV-19/England/CAMB-1B9982/2020|2020-11-07|EPI\_ISL\_664955|Original|hCoV-19^^England|Human|Department of Pathology|COVID-19 Genomics UK (COG-UK) Consortium|Goodfellow|United Kingdom

>Spike|hCoV-19/England/CAMC-9C1749/2020|2020-09-10|EPI\_ISL\_573200|Original|hCoV-19^^England|Human|Oxford Viromics|COVID-19 Genomics UK (COG-UK) Consortium|Golubchik|United Kingdom

>Spike|hCoV-19/England/MILK-AC8FEF/2020|2020-10-22|EPI\_ISL\_629695|Original|hCoV-19^^England|Human|Lighthouse Lab in Milton Keynes|Wellcome Sanger Institute for the COVID-19 Genomics UK (COG-UK) consortium|Davies|United Kingdom

>Spike|hCoV-19/England/BRIS-121CE6/2020|2020-03-18|EPI\_ISL\_440251|Original|hCoV-19^^England|Human|PHE South West Regional Laboratory|Wellcome Sanger Institute for the COVID-19 Genomics UK (COG-UK) consortium|Amato|United Kingdom

>Spike|hCoV-19/England/LOND-1251F4A/2020|2020-12-01|EPI\_ISL\_705959|Original|hCoV-19^^England|Human|University College London Hospital|COVID-19 Genomics UK (COG-UK) Consortium|Byott|United Kingdom

>Spike|hCoV-19/India/DL-MaxCov0032-CSIR-IGIB/2020|2020-05-05|EPI\_ISL\_459934|Original|hCoV-19^^Delhi|Human|Devki Devi Foundation|CSIR-IGIB/Max|Pandey|India

>Spike|hCoV-19/Japan/PG-3700/2020|2020-04-00|EPI\_ISL\_691953|Original|hCoV-19^^Japan|Human|Pathogen Genomics Center|Pathogen Genomics Center|Sekizuka|Japan

>Spike|hCoV-19/USA/TX-HMH-6232/2020|2020-07-07|EPI\_ISL\_547329|Original|hCoV-19^^Texas|Human|Houston Methodist Hospital|Houston Methodist Hospital|Long|USA

>Spike|hCoV-19/England/MILK-9949B2/2020|2020-08-24|EPI\_ISL\_552195|Original|hCoV-19^^England|Human|Lighthouse Lab in Milton Keynes|Wellcome Sanger Institute for the COVID-19 Genomics UK (COG-UK) consortium|Davies|United Kingdom

>Spike|hCoV-19/USA/UT-UPHL-2012868180/2020|2020-08-03|EPI\_ISL\_745745|Original|hCoV-19^^Utah|Human|Ginkgo Bioworks Clinical Laboratory|Utah Public Health Laboratory|Young|USA

>Spike|hCoV-19/USA/MA-MASPHL-00217/2020|2020-04-13|EPI\_ISL\_791665|Original|hCoV-19^^Massachusetts|Human|Massachusetts State Public Health Laboratory|Infectious Disease Program|Park|USA

>Spike|hCoV-19/England/LOND-124F2FB/2020|2020-04-22|EPI\_ISL\_665150|Original|hCoV-19^^England|Human|University College London Hospital|COVID-19 Genomics UK (COG-UK) Consortium|Byott|United Kingdom

>Spike|hCoV-19/England/ALDP-A50061/2020|2020-10-07|EPI\_ISL\_597812|Original|hCoV-19^^England|Human|Lighthouse Lab in Alderley Park|Wellcome Sanger Institute for the COVID-19 Genomics UK (COG-UK) consortium|Davies|United Kingdom

>Spike|hCoV-19/England/BRIS-125C2E/2020|2020-03-29|EPI\_ISL\_443858|Original|hCoV-19^^England|Human|PHE South West Regional Laboratory|Wellcome Sanger Institute for the COVID-19 Genomics UK (COG-UK) consortium|Amato|United Kingdom

>Spike|hCoV-19/England/QEUIH-CC3D24/2020|2020-12-21|EPI\_ISL\_760592|Original|hCoV-19^^England|Human|Lighthouse Lab in Glasgow|Wellcome Sanger Institute for the COVID-19 Genomics UK (COG-UK) Consortium|Davies|United Kingdom

>Spike|hCoV-19/USA/IL-NM-1718/2020|2020-07-25|EPI\_ISL\_626545|Original|hCoV-19^^Illinois|Human|Northwestern Memorial Hospital|Ozer Lab|Ozer|USA

>Spike|hCoV-19/USA/CA-CDPH111/2020|2020-09-18|EPI\_ISL\_755051|Original|hCoV-19^^California|Human|California Department of Public Health|California Department of Public Health|Bell|USA

>Spike|hCoV-19/USA/CA-UCLA-98/2020|2020-03-28|EPI\_ISL\_537607|Original|hCoV-19^^California|Human|UCLA Pathology Clinical Microbiology Lab|Kruglyak Lab|Boocock|USA

>Spike|hCoV-19/South Africa/R12713-20/2020|2020-06-16|EPI\_ISL\_504239|Original|hCoV-19^^North West|Human|National Institute for Communicable Diseases of the National Health Laboratory Service|National Institute for Communicable Diseases of the National Health Laboratory Service|Allam|South Africa

>Spike|hCoV-19/England/CAMB-80220/2020|2020-04-08|EPI\_ISL\_524546|Original|hCoV-19^^England|Human|Department of Pathology|Wellcome Sanger Institute for the COVID-19 Genomics UK (COG-UK) consortium|Davies|United Kingdom

>Spike|hCoV-19/England/PORT-2EAB27/2020|2020-00-00|EPI\_ISL\_727773|Original|hCoV-19^^England|Human|Centre for Enzyme Innovation|COVID-19 Genomics UK (COG-UK) Consortium|Robson|United Kingdom

>Spike|hCoV-19/England/CAMC-A8297A/2020|2020-10-12|EPI\_ISL\_610733|Original|hCoV-19^^England|Human|Lighthouse Lab in Cambridge|Wellcome Sanger Institute for the COVID-19 Genomics UK (COG-UK) consortium|Davies|United Kingdom

>Spike|hCoV-19/England/QEUIH-AA0493/2020|2020-10-20|EPI\_ISL\_666000|Original|hCoV-19^^England|Human|Northumbria University / South Tees Hospitals NHS Foundation Trust / North Cumbria Integrated Care NHS Foundation Trust / North Tees and Hartlepool NHS Foundation Trust / Newcastle Hospitals NHS Foundation Trust|COVID-19 Genomics UK (COG-UK) Consortium|Bashton|United Kingdom

>Spike|hCoV-19/England/MILK-A7B956/2020|2020-10-15|EPI\_ISL\_607463|Original|hCoV-19^^England|Human|Lighthouse Lab in Milton Keynes|Wellcome Sanger Institute for the COVID-19 Genomics UK (COG-UK) consortium|Davies|United Kingdom

>Spike|hCoV-19/USA/VA-DCLS-0722/2020|2020-07-06|EPI\_ISL\_526845|Original|hCoV-19^^Virginia|Human|Virginia DCLS|Virginia DCLS|St. Jacques|USA

>Spike|hCoV-19/Australia/VIC8342/2020|2020-08-07|EPI\_ISL\_564954|Original|hCoV-19^^Victoria|Human|Microbiological Diagnostic Unit - Public Health Laboratory (MDU-PHL)|MDU-PHL|Schultz|Australia

>Spike|hCoV-19/USA/WI-UW-1658/2020|2020-09-10|EPI\_ISL\_605532|Original|hCoV-19^^Wisconsin|Human|University of Wisconsin-Madison AIDS Vaccine Research Laboratories|University of Wisconsin-Madison AIDS Vaccine Research Laboratories|Baczenas|USA

>Spike|hCoV-19/England/ALDP-5C746E/2020|2020-06-19|EPI\_ISL\_558603|Original|hCoV-19^^England|Human|Lighthouse Lab in Alderley Park|Wellcome Sanger Institute for the COVID-19 Genomics UK (COG-UK) consortium|Davies|United Kingdom

>Spike|hCoV-19/Norway/2871/2020|2020-07-08|EPI\_ISL\_500790|Original|hCoV-19^^Norway|Human|Furst Medical Laboratory|Norwegian Institute of Public Health|Kopperud Riis|Norway

>Spike|hCoV-19/England/MILK-A06149/2020|2020-10-01|EPI\_ISL\_599970|Original|hCoV-19^^England|Human|Lighthouse Lab in Milton Keynes|Wellcome Sanger Institute for the COVID-19 Genomics UK (COG-UK) consortium|Davies|United Kingdom

>Spike|hCoV-19/England/CAMC-A57E9D/2020|2020-10-09|EPI\_ISL\_597145|Original|hCoV-19^^England|Human|Lighthouse Lab in Cambridge|Wellcome Sanger Institute for the COVID-19 Genomics UK (COG-UK) consortium|Davies|United Kingdom

>Spike|hCoV-19/India/TG-CCMB-AB247/2020|2020-08-14|EPI\_ISL\_539765|Original|hCoV-19^^Telangana|Human|CSIR-Centre for Cellular and Molecular Biology|CSIR-Centre for Cellular and Molecular Biology|Mukherjee|India

>Spike|hCoV-19/USA/TX-HMH-MCoV-16153/2020|2020-10-29|EPI\_ISL\_785837|Original|hCoV-19^^Texas|Human|Houston Methodist Hospital|Houston Methodist Hospital|Long|USA

>Spike|hCoV-19/England/QEUA-C5449C/2020|2020-12-12|EPI\_ISL\_736386|Original|hCoV-19^^England|Human|Lighthouse Lab in Glasgow|Wellcome Sanger Institute for the COVID-19 Genomics UK (COG-UK) Consortium|Davies|United Kingdom

>Spike|hCoV-19/England/ALDP-B5C1E9/2020|2020-11-09|EPI\_ISL\_655763|Original|hCoV-19^^England|Human|Lighthouse Lab in Alderley Park|Wellcome Sanger Institute for the COVID-19 Genomics UK (COG-UK) Consortium|Davies|United Kingdom

>Spike|hCoV-19/England/QEUA-CC2DAD/2020|2020-12-21|EPI\_ISL\_778219|Original|hCoV-19^^England|Human|Lighthouse Lab in Glasgow|Wellcome Sanger Institute for the COVID-19 Genomics UK (COG-UK) Consortium|Davies|United Kingdom

>Spike|hCoV-19/England/LEED-2A916E/2020|2020-04-07|EPI\_ISL\_539180|Original|hCoV-19^^England|Human|Leeds Teaching Hospitals NHS Trust and Public Health England|Wellcome Sanger Institute for the COVID-19 Genomics UK (COG-UK) consortium|Davies|United Kingdom

>Spike|hCoV-19/Denmark/DCGC-5295/2020|2020-09-14|EPI\_ISL\_615226|Original|hCoV-19^^Nordjylland|Human|Department of Virus and Microbiological Special Diagnostics|Albertsen lab|Michaelsen|Denmark

>Spike|hCoV-19/England/MILK-C5057F/2020|2020-12-11|EPI\_ISL\_736683|Original|hCoV-19^^England|Human|Lighthouse Lab in Milton Keynes|Wellcome Sanger Institute for the COVID-19 Genomics UK (COG-UK) Consortium|Davies|United Kingdom

>Spike|hCoV-19/England/MILK-991E6B/2020|2020-08-27|EPI\_ISL\_552128|Original|hCoV-19^^England|Human|Lighthouse Lab in Milton Keynes|Wellcome Sanger Institute for the COVID-19 Genomics UK (COG-UK) consortium|Davies|United Kingdom

>Spike|hCoV-19/USA/HI-H200288/2020|2020-08-06|EPI\_ISL\_752847|Original|hCoV-19^^Hawaii|Human|State Laboratories Division|State Laboratories Division|Sultana|USA

>Spike|hCoV-19/USA/OR-OHSU-0811/2020|2020-06-22|EPI\_ISL\_525906|Original|hCoV-19^^Oregon|Human|OHSU Lab Services Molecular Microbiology Lab|Oregon SARS-CoV-2 Genome Sequencing Center|O'Roak|USA

>Spike|hCoV-19/England/NORW-21FE20/2020|2020-12-11|EPI\_ISL\_725069|Original|hCoV-19^^England|Human|Quadram Institute Bioscience|COVID-19 Genomics UK (COG-UK) Consortium|Alikhan|United Kingdom

>Spike|hCoV-19/England/ALDP-BBA732/2020|2020-11-20|EPI\_ISL\_701707|Original|hCoV-19^^England|Human|Lighthouse Lab in Alderley Park|Wellcome Sanger Institute for the COVID-19 Genomics UK (COG-UK) Consortium|Davies|United Kingdom

>Spike|hCoV-19/Australia/VIC17625/2020|2020-07-28|EPI\_ISL\_663954|Original|hCoV-19^^Victoria|Human|Microbiological Diagnostic Unit - Public Health Laboratory (MDU-PHL)|MDU-PHL|Schultz|Australia

>Spike|hCoV-19/Wales/ALDP-9FDC72/2020|2020-10-02|EPI\_ISL\_600531|Original|hCoV-19^^Wales|Human|Lighthouse Lab in Alderley Park|Wellcome Sanger Institute for the COVID-19 Genomics UK (COG-UK) consortium|Davies|United Kingdom

>Spike|hCoV-19/Australia/VIC9176/2020|2020-08-21|EPI\_ISL\_562708|Original|hCoV-19^^Victoria|Human|Microbiological Diagnostic Unit - Public Health Laboratory (MDU-PHL)|MDU-PHL|Schultz|Australia

>Spike|hCoV-19/England/NOTT-10E001/2020|2020-03-16|EPI\_ISL\_425483|Original|hCoV-19^^England|Human|Queens Medical Centre|COVID-19 Genomics UK (COG-UK) Consortium|Loose|United Kingdom

>Spike|hCoV-19/Scotland/EDB4075/2020|2020-04-16|EPI\_ISL\_456917|Original|hCoV-19^^Scotland|Human|Virology Department|COVID-19 Genomics UK (COG-UK) Consortium|Williams|United Kingdom

>Spike|hCoV-19/Wales/PHWC-294BA/2020|2020-04-01|EPI\_ISL\_432136|Original|hCoV-19^^Wales|Human|Wales Specialist Virology Centre|Public Health Wales Microbiology Cardiff|Moore|United Kingdom

>Spike|hCoV-19/England/CAMB-73A0A/2020|2020-03-31|EPI\_ISL\_425266|Original|hCoV-19^^England|Human|Department of Pathology|COVID-19 Genomics UK (COG-UK) Consortium|Meredith|United Kingdom

>Spike|hCoV-19/USA/MI-MDHHS-SC22183/2020|2020-10-06|EPI\_ISL\_614234|Original|hCoV-19^^Michigan|Human|Michigan Department of Health and Human Services|Michigan Department of Health and Human Services|Jacob|USA

>Spike|hCoV-19/England/EXET-135274/2020|2020-04-04|EPI\_ISL\_457041|Original|hCoV-19^^England|Human|University of Exeter|COVID-19 Genomics UK (COG-UK) Consortium|Temperton|United Kingdom

>Spike|hCoV-19/Australia/VIC5521/2020|2020-07-22|EPI\_ISL\_518355|Original|hCoV-19^^Victoria|Human|Microbiological Diagnostic Unit - Public Health Laboratory (MDU-PHL)|MDU-PHL|Schultz|Australia

>Spike|hCoV-19/Denmark/DCGC-3570/2020|2020-08-31|EPI\_ISL\_616365|Original|hCoV-19^^Hovedstaden|Human|Department of Virus and Microbiological Special Diagnostics|Albertsen lab|Michaelsen|Denmark

>Spike|hCoV-19/Australia/VIC3235/2020|2020-07-05|EPI\_ISL\_520916|Original|hCoV-19^^Victoria|Human|Victorian Infectious Diseases Reference Laboratory (VIDRL)|VIDRL and MDU-PHL|Schultz|Australia

>Spike|hCoV-19/USA/WA-OHSU-0973/2020|2020-07-03|EPI\_ISL\_526101|Original|hCoV-19^^Washington|Human|OHSU Lab Services Molecular Microbiology Lab|Oregon SARS-CoV-2 Genome Sequencing Center|O'Roak|USA

>Spike|hCoV-19/England/QEUEH-BA34EA/2020|2020-11-18|EPI\_ISL\_720993|Original|hCoV-19^^England|Human|Lighthouse Lab in Glasgow|Wellcome Sanger Institute for the COVID-19 Genomics UK (COG-UK) Consortium|Davies|United Kingdom

>Spike|hCoV-19/England/NORT-2A7C7E/2020|2020-10-02|EPI\_ISL\_584712|Original|hCoV-19^^England|Human|Northumbria University / South Tees Hospitals NHS Foundation Trust / North Cumbria Integrated Care NHS Foundation Trust / North Tees and Hartlepool NHS Foundation Trust / Newcastle Hospitals NHS Foundation Trust|COVID-19 Genomics UK (COG-UK) Consortium|Bashton|United Kingdom

>Spike|hCoV-19/England/ALDP-95CBCF/2020|2020-06-17|EPI\_ISL\_553482|Original|hCoV-19^^England|Human|Lighthouse Lab in Alderley Park|Wellcome Sanger Institute for the COVID-19 Genomics UK (COG-UK) consortium|Davies|United Kingdom

>Spike|hCoV-19/Japan/PG-6266/2020|2020-08-00|EPI\_ISL\_689377|Original|hCoV-19^^Japan|Human|Pathogen Genomics Center|Pathogen Genomics Center|Sekizuka|Japan

>Spike|hCoV-19/USA/TX-HMH-MCoV-19850/2020|2020-11-20|EPI\_ISL\_784172|Original|hCoV-19^^Texas|Human|Houston Methodist Hospital|Houston Methodist Hospital|Long|USA

>Spike|hCoV-19/England/LIVE-9A302/2020|2020-04-16|EPI\_ISL\_449332|Original|hCoV-19^^England|Human|Liverpool Clinical Laboratories|COVID-19 Genomics UK (COG-UK) Consortium|Haldenby|United Kingdom

>Spike|hCoV-19/England/CAMC-B33EB4/2020|2020-11-05|EPI\_ISL\_659246|Original|hCoV-19^^England|Human|Lighthouse Lab in Cambridge|Wellcome Sanger Institute for the COVID-19 Genomics UK (COG-UK) Consortium|Davies|United Kingdom

>Spike|hCoV-19/Bangladesh/BCSIR-NILMRC-287/2020|2020-07-14|EPI\_ISL\_504177|Original|hCoV-19^^Rangpur|Human|National Institute of Laboratory Medicine and Referral Center|Genomic Research Lab|Khan|Bangladesh

>Spike|hCoV-19/England/QEUEH-94342A/2020|2020-07-29|EPI\_ISL\_532604|Original|hCoV-19^^England|Human|Lighthouse Lab in Glasgow|Wellcome Sanger Institute for the COVID-19 Genomics UK (COG-UK) consortium|Davies|United Kingdom

>Spike|hCoV-19/England/EXET-1373CA/2020|2020-03-13|EPI\_ISL\_471971|Original|hCoV-19^^England|Human|University of Exeter|COVID-19 Genomics UK (COG-UK) Consortium|Temperton|United Kingdom

>Spike|hCoV-19/England/SHEF-C00B1/2020|2020-03-21|EPI\_ISL\_420276|Original|hCoV-19^^England|Human|Virology Department|Department of Infection|de Silva|United Kingdom

>Spike|hCoV-19/USA/CA-CZB-3696/2020|2020-07-17|EPI\_ISL\_548401|Original|hCoV-19^^California|Human|County of Santa Clara Public Health Department|Chan-Zuckerberg Biohub|Bhatt|USA

>Spike|hCoV-19/England/MILK-AC7A49/2020|2020-10-21|EPI\_ISL\_634313|Original|hCoV-19^^England|Human|Lighthouse Lab in Milton Keynes|Wellcome Sanger Institute for the COVID-19 Genomics UK (COG-UK) consortium|Davies|United Kingdom

>Spike|hCoV-19/England/MILK-A45ADA/2020|2020-10-06|EPI\_ISL\_598530|Original|hCoV-19^^England|Human|Lighthouse Lab in Milton Keynes|Wellcome Sanger Institute for the COVID-19 Genomics UK (COG-UK) consortium|Davies|United Kingdom

>Spike|hCoV-19/England/CAMC-B34AA0/2020|2020-11-05|EPI\_ISL\_659743|Original|hCoV-19^^England|Human|Lighthouse Lab in Cambridge|Wellcome Sanger Institute for the COVID-19 Genomics UK (COG-UK) Consortium|Davies|United Kingdom

>Spike|hCoV-19/England/QEUEH-B1399B/2020|2020-11-02|EPI\_ISL\_641690|Original|hCoV-19^^England|Human|Lighthouse Lab in Glasgow|Wellcome Sanger Institute for the COVID-19 Genomics UK (COG-UK) Consortium|Davies|United Kingdom

>Spike|hCoV-19/England/BRIS-130C11/2020|2020-03-23|EPI\_ISL\_492727|Original|hCoV-19^^England|Human|PHE South West Regional Laboratory|Wellcome Sanger Institute for the COVID-19 Genomics UK (COG-UK) consortium|Davies|United Kingdom

>Spike|hCoV-19/Canada/ON-E33/2020|2020-05-25|EPI\_ISL\_593511|Original|hCoV-19^^Ontario|Human|Eastern Ontario Regional Laboratory Association|McMaster University|McArthur|Canada

>Spike|hCoV-19/DRC/4501/2020|2020-05-30|EPI\_ISL\_513591|Original|hCoV-19^^Kinshasa|Human|Viral Respiratory Lab|Pathogen Sequencing Lab|Lokilo|Democratic Republic of the Congo

>Spike|hCoV-19/England/20138009704/2020|2020-03-22|EPI\_ISL\_423275|Original|hCoV-19^^England|Human|Respiratory Virus Unit|Respiratory Virus Unit|Platt|United Kingdom

>Spike|hCoV-19/USA/WI-UW-1941/2020|2020-09-14|EPI\_ISL\_677350|Original|hCoV-19^^Wisconsin|Human|University of Wisconsin-Madison AIDS Vaccine Research Laboratories|University of Wisconsin-Madison AIDS Vaccine Research Laboratories|Baczenas|USA

>Spike|hCoV-19/Canada/BC\_26509737/2020|2020-03-00|EPI\_ISL\_463235|Original|hCoV-19^^British Columbia|Human|BCCDC Public Health Laboratory|BCCDC Public Health Laboratory|Harrigan|Canada

>Spike|hCoV-19/Switzerland/BLETHZ-340086/2020|2020-10-26|EPI\_ISL\_721773|Original|hCoV-19^^Basel-Landschaft|Human|Viollier AG|Department of Biosystems Science and Engineering|Nadeau|Switzerland

>Spike|hCoV-19/Scotland/QEUH-C5B820/2020|2020-12-14|EPI\_ISL\_757040|Original|hCoV-19^^Scotland|Human|Lighthouse Lab in Glasgow|Wellcome Sanger Institute for the COVID-19 Genomics UK (COG-UK) Consortium|Davies|United Kingdom

>Spike|hCoV-19/England/CAMB-7CC29/2020|2020-04-05|EPI\_ISL\_442313|Original|hCoV-19^^England|Human|Department of Pathology|Wellcome Sanger Institute for the COVID-19 Genomics UK (COG-UK) consortium|Amato|United Kingdom

>Spike|hCoV-19/Iceland/158/2020|2020-03-13|EPI\_ISL\_417805|Original|hCoV-19^^Reykjavik|Human|The National University Hospital of Iceland|deCODE genetics|J\|u00f3nsson|Iceland

>Spike|hCoV-19/Czech Republic/NRL\_3971/2020|2020-03-19|EPI\_ISL\_491092|Original|hCoV-19^^Litovel|Human|The National Institute of Public Health|State Veterinary Institute Prague|Nagy|Czech Republic

>Spike|hCoV-19/Japan/PG-4584/2020|2020-08-00|EPI\_ISL\_689721|Original|hCoV-19^^Japan|Human|Pathogen Genomics Center|Pathogen Genomics Center|Sekizuka|Japan

>Spike|hCoV-19/England/MILK-A471B5/2020|2020-10-06|EPI\_ISL\_598463|Original|hCoV-19^^England|Human|Lighthouse Lab in Milton Keynes|Wellcome Sanger Institute for the COVID-19 Genomics UK (COG-UK) consortium|Davies|United Kingdom

>Spike|hCoV-19/USA/CA-CZB-13718/2020|2020-11-06|EPI\_ISL\_739540|Original|hCoV-19^^California|Human|County of San Luis Obispo Public Health Laboratory|Chan-Zuckerberg Biohub|Kamm|USA

>Spike|hCoV-19/France/NAQ-SC298/2020|2020-05-04|EPI\_ISL\_666718|Original|hCoV-19^^Nouvelle-Aquitaine|Human|CHU de Limoges|CNR Virus des Infections Respiratoires - France SUD|Bal|France

>Spike|hCoV-19/USA/TX-HMH-MCoV-19662/2020|2020-11-29|EPI\_ISL\_784021|Original|hCoV-19^^Texas|Human|Houston Methodist Hospital|Houston Methodist Hospital|Long|USA

>Spike|hCoV-19/Denmark/SSI-04/2020|2020-03-02|EPI\_ISL\_416153|Original|hCoV-19^^Copenhagen|Human|Department of Virus and Microbiological Special diagnostics|ViFU|Rasmussen|Denmark

>Spike|hCoV-19/England/QEUH-A78CF6/2020|2020-10-12|EPI\_ISL\_638776|Original|hCoV-19^^England|Human|Oxford Viromics|COVID-19 Genomics UK (COG-UK) Consortium|Golubchik|United Kingdom

>Spike|hCoV-19/USA/HI-H200351/2020|2020-09-15|EPI\_ISL\_752907|Original|hCoV-19^^Hawaii|Human|State Laboratories Division|State Laboratories Division|Sultana|USA

>Spike|hCoV-19/Portugal/PT1264/2020|2020-03-19|EPI\_ISL\_511225|Original|hCoV-19^^Portugal|Human|Instituto Nacional de Saude (INSA) and Instituto Gulbenkian de Ciencia (IGC)|Instituto Nacional de Saude (INSA) and Instituto Gulbenkian de Ciencia (IGC)|Borges|Portugal

>Spike|hCoV-19/England/ALDP-94D8D9/2020|2020-06-20|EPI\_ISL\_555274|Original|hCoV-19^^England|Human|Lighthouse Lab in Alderley Park|Wellcome Sanger Institute for the COVID-19 Genomics UK (COG-UK) consortium|Davies|United Kingdom

>Spike|hCoV-19/USA/MN-MDH-1826/2020|2020-09-15|EPI\_ISL\_602961|Original|hCoV-19^^Minnesota|Human|Minnesota Department of Health|Minnesota Department of Health|Garfin|USA

>Spike|hCoV-19/Canada/ON-PHL-20-01296/2020|2020-06-00|EPI\_ISL\_548900|Original|hCoV-19^^Ontario|Human|Public Health Ontario Laboratory|Public Health Ontario Laboratory|Guthrie|Canada

>Spike|hCoV-19/England/SHEF-10C66C5/2020|2020-12-18|EPI\_ISL\_764226|Original|hCoV-19^^England|Human|Virology Department|COVID-19 Genomics UK (COG-UK) Consortium|de Silva|United Kingdom

>Spike|hCoV-19/USA/WA-UW-10655/2020|2020-06-09|EPI\_ISL\_570343|Original|hCoV-19^^Washington|Human|UW Virology Lab|UW Virology Lab|Roychoudhury|USA

>Spike|hCoV-19/England/MILK-B54A7D/2020|2020-11-05|EPI\_ISL\_657772|Original|hCoV-19^^England|Human|Lighthouse Lab in Milton Keynes|Wellcome Sanger Institute for the COVID-19 Genomics UK (COG-UK) Consortium|Davies|United Kingdom

>Spike|hCoV-19/USA/NY-Wadsworth-251975-01/2020|2020-10-22|EPI\_ISL\_734397|Original|hCoV-19^^New York|Human|Wadsworth Center|Wadsworth Center|Lasek-Nesselquist|USA

>Spike|hCoV-19/Spain/PV-IBV-001462/2020|2020-03-18|EPI\_ISL\_467179|Original|hCoV-19^^Basque Country|Human|Hospital Universitario Araba. Vitoria-Gasteiz|SeqCOVID-SPAIN consortium/IBV (CSIC) |Comas|Spain

>Spike|hCoV-19/Spain/MD-IBV-99008787/2020|2020-10-20|EPI\_ISL\_654327|Original|hCoV-19^^Madrid|Human|Hospital General Universitario Gregorio Mara\u00f1a|SeqCOVID-SPAIN consortium/IBV (CSIC) |Comas|Spain

>Spike|hCoV-19/USA/NY-NYCPHL-000226/2020|2020-03-23|EPI\_ISL\_631755|Original|hCoV-19^^New York|Human|Richmond University Medical Center|New York City Public Health Laboratory|Wang|USA

>Spike|hCoV-19/Spain/AR-IBV-005134/2020|2020-05-28|EPI\_ISL\_500368|Original|hCoV-19^^Aragon|Human|Servicio de Microbiolog\u00eda|SeqCOVID-SPAIN consortium/IBV (CSIC) |Comas|Spain

>Spike|hCoV-19/Belgium/regal-0414489/2020|2020-04-14|EPI\_ISL\_734572|Original|hCoV-19^^Overijze|Human|UZ Leuven|KU Leuven|Maes|Belgium

>Spike|hCoV-19/England/BRIS-12CA4B/2020|2020-04-17|EPI\_ISL\_481834|Original|hCoV-19^^England|Human|PHE South West Regional Laboratory|Wellcome Sanger Institute for the COVID-19 Genomics UK (COG-UK) consortium|Davies|United Kingdom

>Spike|hCoV-19/England/ALDP-B45954/2020|2020-11-07|EPI\_ISL\_655991|Original|hCoV-19^^England|Human|Lighthouse Lab in Alderley Park|Wellcome Sanger Institute for the COVID-19 Genomics UK (COG-UK) Consortium|Davies|United Kingdom

>Spike|hCoV-19/USA/NY-Wadsworth-292388-01/2020|2020-12-18|EPI\_ISL\_767673|Original|hCoV-19^^New York|Human|BIO-REFERENCE LABORATORIES|Wadsworth Center|Lasek-Nesselquist|USA

>Spike|hCoV-19/Wales/PHWC-497E00/2020|2020-11-30|EPI\_ISL\_726980|Original|hCoV-19^^Wales|Human|Originating lab|COVID-19 Genomics UK (COG-UK) Consortium|Moore|United Kingdom

>Spike|hCoV-19/England/QEUA-5F1920/2020|2020-06-16|EPI\_ISL\_533253|Original|hCoV-19^^England|Human|Lighthouse Lab in Glasgow|Wellcome Sanger Institute for the COVID-19 Genomics UK (COG-UK) consortium|Davies|United Kingdom

>Spike|hCoV-19/USA/LA-BIE-040/2020|2020-04-03|EPI\_ISL\_463288|Original|hCoV-19^^Louisiana|Human|Ochsner Health|Bioinfoexperts|Cross|USA

>Spike|hCoV-19/USA/CA-ALSR-1114-SAN/2020|2020-06-25|EPI\_ISL\_483537|Original|hCoV-19^^California|Human|San Diego County Public Health Laboratory|Andersen lab at Scripps Research|Gangavarapu|USA

>Spike|hCoV-19/USA/CA-QDX-2394/2020|2020-03-17|EPI\_ISL\_604668|Original|hCoV-19^^California|Human|Quest Diagnostics|Quest Diagnostics|Kagan|USA

>Spike|hCoV-19/USA/OH-UW-921/2020|2020-07-12|EPI\_ISL\_509807|Original|hCoV-19^^Ohio|Human|University of Wisconsin-Madison AIDS Vaccine Research Laboratories|University of Wisconsin-Madison AIDS Vaccine Research Laboratories|Baczenas|USA

>Spike|hCoV-19/Brazil/PE-IAM273/2020|2020-04-08|EPI\_ISL\_500476|Original|hCoV-19^^Pernambuco|Human|LACEN/PE|WallauLab|Wallau|Brazil

>Spike|hCoV-19/Belgium/ITM\_C420/2020|2020-04-10|EPI\_ISL\_434383|Original|hCoV-19^^Antwerp|Human|Hospital AZ Rivierenland|Institute of Tropical Medicine|Selhorst|Belgium

>Spike|hCoV-19/Japan/PG-3748/2020|2020-04-00|EPI\_ISL\_692001|Original|hCoV-19^^Japan|Human|Pathogen Genomics Center|Pathogen Genomics Center|Sekizuka|Japan

>Spike|hCoV-19/USA/TX-HMH-MCoV-11692/2020|2020-09-08|EPI\_ISL\_790087|Original|hCoV-19^^Texas|Human|Houston Methodist Hospital|Houston Methodist Hospital|Long|USA

>Spike|hCoV-19/Wales/PHWC-499CB9/2020|2020-12-04|EPI\_ISL\_727428|Original|hCoV-19^^Wales|Human|Originating lab|COVID-19 Genomics UK (COG-UK) Consortium|Moore|United Kingdom

>Spike|hCoV-19/England/LIVE-DB2FB8/2020|2020-11-01|EPI\_ISL\_651271|Original|hCoV-19^^England|Human|Liverpool Clinical Laboratories|COVID-19 Genomics UK (COG-UK) Consortium|Haldenby|United Kingdom

>Spike|hCoV-19/Denmark/DCGC-20745/2020|2020-12-21|EPI\_ISL\_759339|Original|hCoV-19^^Hovedstaden|Human|Department of Virus and Microbiological Special Diagnostics|Albertsen Lab|Michaelsen|Denmark

>Spike|hCoV-19/England/QEUEH-C4C215/2020|2020-12-13|EPI\_ISL\_736685|Original|hCoV-19^^England|Human|Lighthouse Lab in Glasgow|Wellcome Sanger Institute for the COVID-19 Genomics UK (COG-UK) Consortium|Davies|United Kingdom

>Spike|hCoV-19/USA/UT-UPHL-201029634/2020|2020-05-31|EPI\_ISL\_594013|Original|hCoV-19^^Utah|Human|Utah Public Health Laboratory|Utah Public Health Laboratory|Young|USA

>Spike|hCoV-19/USA/TX-HMH-MCoV-18482/2020|2020-11-20|EPI\_ISL\_784830|Original|hCoV-19^^Texas|Human|Houston Methodist Hospital|Houston Methodist Hospital|Long|USA

>Spike|hCoV-19/USA/FL-BPHL-0602/2020|2020-03-20|EPI\_ISL\_508806|Original|hCoV-19^^Florida|Human|Florida Bureau of Public Health Laboratories|Florida Bureau of Public Health Laboratories|Blanton|USA

>Spike|hCoV-19/Scotland/CVR4192/2020|2020-08-30|EPI\_ISL\_540864|Original|hCoV-19^^Scotland|Human|Lighthouse Lab in Glasgow / MRC-University of Glasgow Centre for Virus Research|COVID-19 Genomics UK (COG-UK) Consortium|Robertson|United Kingdom

>Spike|hCoV-19/USA/TX-HMH-1178/2020|2020-04-21|EPI\_ISL\_542567|Original|hCoV-19^^Texas|Human|Houston Methodist Hospital|Houston Methodist Hospital|Long|USA

>Spike|hCoV-19/Belgium/ULG-10001/2020|2020-03-30|EPI\_ISL\_421182|Original|hCoV-19^^Li\u00e8ge|Human|Department of Clinical Microbiology|GIGA Medical Genomics|Durkin|Belgium

>Spike|hCoV-19/England/MILK-99568D/2020|2020-08-23|EPI\_ISL\_551626|Original|hCoV-19^^England|Human|Lighthouse Lab in Milton Keynes|Wellcome Sanger Institute for the COVID-19 Genomics UK (COG-UK) consortium|Davies|United Kingdom

>Spike|hCoV-19/England/20166072904/2020|2020-04-15|EPI\_ISL\_466586|Original|hCoV-19^^England|Human|Respiratory Virus Unit|Respiratory Virus Unit|Platt|United Kingdom

>Spike|hCoV-19/England/NORW-EED4D/2020|2020-11-29|EPI\_ISL\_706356|Original|hCoV-19^^England|Human|Quadram Institute Bioscience|COVID-19 Genomics UK (COG-UK) Consortium|Alikhan|United Kingdom

>Spike|hCoV-19/England/QEUEH-A9D280/2020|2020-10-20|EPI\_ISL\_727775|Original|hCoV-19^^England|Human|Centre for Enzyme Innovation|COVID-19 Genomics UK (COG-UK) Consortium|Robson|United Kingdom

>Spike|hCoV-19/India/TG-CDFD-C1847/2020|2020-06-16|EPI\_ISL\_528573|Original|hCoV-19^^Telangana|Human|National Genomics Core-Center for DNA Fingerprinting and Diagnostics|National Genomics Core-Center for DNA Fingerprinting and Diagnostics (NGC-CDFD)- DBT's PAN-INDIA-1000 Genome consortium|Vashisht|India

>Spike|hCoV-19/USA/WA-S820/2020|2020-04-15|EPI\_ISL\_449990|Original|hCoV-19^^Washington|Human|Washington State Department of Health|Seattle Flu Study|Bedford|USA

>Spike|hCoV-19/USA/TX-HMH-6966/2020|2020-06-28|EPI\_ISL\_546393|Original|hCoV-19^^Texas|Human|Houston Methodist Hospital|Houston Methodist Hospital|Long|USA

>Spike|hCoV-19/England/MILK-9C4069/2020|2020-09-09|EPI\_ISL\_566803|Original|hCoV-19^^England|Human|Lighthouse Lab in Milton Keynes|Wellcome Sanger Institute for the COVID-19 Genomics UK (COG-UK) consortium|Davies|United Kingdom



>Spike|hCoV-19/Wales/PHWC-4991D8/2020|2020-12-02|EPI\_ISL\_727270|Original|hCoV-19^^Wales|Human|Originating lab|COVID-19 Genomics UK (COG-UK) Consortium|Moore|United Kingdom

>Spike|hCoV-19/USA/MD-MDH-0119/2020|2020-05-26|EPI\_ISL\_522852|Original|hCoV-19^^Maryland|Human|Maryland Department of Health|Maryland Department of Health|Keller|USA

>Spike|hCoV-19/Scotland/QEUH-9AD01B/2020|2020-09-05|EPI\_ISL\_560014|Original|hCoV-19^^Scotland|Human|Oxford Viromics|COVID-19 Genomics UK (COG-UK) Consortium|Golubchik|United Kingdom

>Spike|hCoV-19/England/MILK-9D47F8/2020|2020-09-18|EPI\_ISL\_601598|Original|hCoV-19^^England|Human|Lighthouse Lab in Milton Keynes|Wellcome Sanger Institute for the COVID-19 Genomics UK (COG-UK) consortium|Davies|United Kingdom

>Spike|hCoV-19/Israel/CVL-n-6035/2020|2020-03-15|EPI\_ISL\_474974|Original|hCoV-19^^Hukuk|Human|Israel Central Virology laboratory|Israel Central Virology laboratory|Zuckerman|Israel

>Spike|hCoV-19/Wales/PHWC-16E01E/2020|2020-09-28|EPI\_ISL\_585655|Original|hCoV-19^^Wales|Human|Wales Specialist Virology Centre Sequencing lab|COVID-19 Genomics UK (COG-UK) Consortium|Moore|United Kingdom

>Spike|hCoV-19/England/EXET-13DA56/2020|2020-00-00|EPI\_ISL\_724273|Original|hCoV-19^^England|Human|University of Exeter|COVID-19 Genomics UK (COG-UK) Consortium|Temperton|United Kingdom

>Spike|hCoV-19/Germany/HH-hpi-p1461/2020|2020-03-11|EPI\_ISL\_775974|Original|hCoV-19^^Hamburg|Human|University Medical Center Hamburg Eppendorf|Heinrich Pette Institute|Robitaille|Germany

>Spike|hCoV-19/England/MILK-9F1ACF/2020|2020-09-23|EPI\_ISL\_589666|Original|hCoV-19^^England|Human|Lighthouse Lab in Milton Keynes|Wellcome Sanger Institute for the COVID-19 Genomics UK (COG-UK) consortium|Davies|United Kingdom

>Spike|hCoV-19/Brazil/SP-04/2020|2020-03-04|EPI\_ISL\_414017|Original|hCoV-19^^S\u00e3o Paulo|Human|Hospital S\u00e3o Joaquim Beneficencia Portuguesa|Instituto Adolfo Lutz|Sacchi|Brazil

>Spike|hCoV-19/South Korea/KCDC2494/2020|2020-06-15|EPI\_ISL\_514897|Original|hCoV-19^^South Korea|Human|Division of Viral Diseases|Division of Viral Diseases|Kim|South Korea

>Spike|hCoV-19/England/ALDP-A6E279/2020|2020-10-15|EPI\_ISL\_606965|Original|hCoV-19^^England|Human|Lighthouse Lab in Alderley Park|Wellcome Sanger Institute for the COVID-19 Genomics UK (COG-UK) consortium|Davies|United Kingdom

>Spike|hCoV-19/Wales/PHWC-48A8D5/2020|2020-11-03|EPI\_ISL\_650929|Original|hCoV-19^^Wales|Human|Wales Specialist Virology Centre Sequencing lab|COVID-19 Genomics UK (COG-UK) Consortium|Moore|United Kingdom

>Spike|hCoV-19/Finland/17MR11cC6/2020|2020-11-17|EPI\_ISL\_757308|Original|hCoV-19^^Uusimaa|Human|Department of Virology and Immunology|Department of Virology|Smura|Finland

>Spike|hCoV-19/USA/VA-DCLS-1905/2020|2020-10-05|EPI\_ISL\_614092|Original|hCoV-19^^Virginia|Human|Virginia DCLS|Virginia DCLS|St. Jacques|USA

>Spike|hCoV-19/Wales/ALDP-A2D49E/2020|2020-10-05|EPI\_ISL\_598824|Original|hCoV-19^^Wales|Human|Lighthouse Lab in Alderley Park|Wellcome Sanger Institute for the COVID-19 Genomics UK (COG-UK) consortium|Davies|United Kingdom

>Spike|hCoV-19/Wales/PHWC-253C0/2020|2020-03-23|EPI\_ISL\_420987|Original|hCoV-19^^Wales|Human|Wales Specialist Virology Centre|Public Health Wales Microbiology Cardiff|Moore|United Kingdom

>Spike|hCoV-19/USA/ME-HETL-J0246/2020|2020-09-28|EPI\_ISL\_755401|Original|hCoV-19^^Maine|Human|Maine Health and Environmental Testing Laboratory|Tewhey Lab|Tewhey|USA

>Spike|hCoV-19/Switzerland/BL-UHB-42192108/2020|2020-03-16|EPI\_ISL\_528125|Original|hCoV-19^^Basel-Land|Human|University Hospital Basel|University Hospital Basel|Roloff Handschin|Switzerland

>Spike|hCoV-19/Japan/PG-5610/2020|2020-08-00|EPI\_ISL\_688735|Original|hCoV-19^^Japan|Human|Pathogen Genomics Center|Pathogen Genomics Center|Sekizuka|Japan

>Spike|hCoV-19/Denmark/DCGC-10717/2020|2020-11-02|EPI\_ISL\_670159|Original|hCoV-19^^Hovedstaden|Human|Department of Virus and Microbiological Special Diagnostics|Albertsen Lab|Michaelsen|Denmark

>Spike|hCoV-19/Wales/ALDP-AA4981/2020|2020-10-21|EPI\_ISL\_624913|Original|hCoV-19^^Wales|Human|Lighthouse Lab in Alderley Park|Wellcome Sanger Institute for the COVID-19 Genomics UK (COG-UK) consortium|Davies|United Kingdom

>Spike|hCoV-19/England/ALDP-949B2F/2020|2020-06-11|EPI\_ISL\_556331|Original|hCoV-19^^England|Human|Lighthouse Lab in Alderley Park|Wellcome Sanger Institute for the COVID-19 Genomics UK (COG-UK) consortium|Davies|United Kingdom

>Spike|hCoV-19/USA/IL-NM-0451/2020|2020-04-16|EPI\_ISL\_626410|Original|hCoV-19^^Illinois|Human|Northwestern Memorial Hospital|Ozer Lab|Ozer|USA

>Spike|hCoV-19/Wales/PHWC-30ABE/2020|2020-04-09|EPI\_ISL\_446317|Original|hCoV-19^^Wales|Human|Wales Specialist Virology Centre|Public Health Wales Microbiology Cardiff|Moore|United Kingdom

>Spike|hCoV-19/USA/CT-Yale-459/2020|2020-09-12|EPI\_ISL\_729744|Original|hCoV-19^^Connecticut|Human|Connecticut Department of Health|Grubaugh Lab - Yale School of Public Health|Grubaugh|USA

>Spike|hCoV-19/USA/WA-S370/2020|2020-03-28|EPI\_ISL\_434130|Original|hCoV-19^^Washington|Human|Washington State Department of Health|Seattle Flu Study|Bedford|USA

>Spike|hCoV-19/Kenya/C7322/2020|2020-05-16|EPI\_ISL\_568832|Original|hCoV-19^^Kwale|Human|KEMRI-Wellcome Trust Research Programme/KEMRI-CGMR-C Kilifi|KEMRI-Wellcome Trust Research Programme/KEMRI-CGMR-C Kilifi|Githinji|Kenya

>Spike|hCoV-19/Canada/ON-E26/2020|2020-05-23|EPI\_ISL\_593504|Original|hCoV-19^^Ontario|Human|Eastern Ontario Regional Laboratory Association|McMaster University|McArthur|Canada

>Spike|hCoV-19/England/CAMB-1AB376/2020|2020-04-19|EPI\_ISL\_470161|Original|hCoV-19^^England|Human|Department of Pathology|Wellcome Sanger Institute for the COVID-19 Genomics UK (COG-UK) consortium|Davies|United Kingdom

>Spike|hCoV-19/Netherlands/ZH-EMC-601/2020|2020-09-18|EPI\_ISL\_578029|Original|hCoV-19^^Zuid Holland|Human|Dutch COVID-19 response team|Erasmus Medical Center|Oude Munnink|Netherlands

>Spike|hCoV-19/England/MILK-9757DB/2020|2020-08-20|EPI\_ISL\_552698|Original|hCoV-19^^England|Human|Lighthouse Lab in Milton Keynes|Wellcome Sanger Institute for the COVID-19 Genomics UK (COG-UK) consortium|Davies|United Kingdom

>Spike|hCoV-19/Spain/IB-IBV-2586/2020|2020-04-14|EPI\_ISL\_468958|Original|hCoV-19^^Illes Balears|Human|Servicio de Microbiolog\u00eda|SeqCOVID-SPAIN consortium|IBV (CSIC) |Comas|Spain

>Spike|hCoV-19/USA/CT-Yale-017/2020|2020-03-19|EPI\_ISL\_419520|Original|hCoV-19^^Connecticut|Human|Yale Clinical Virology Laboratory|Grubaugh Lab - Yale School of Public Health|Grubaugh|USA

>Spike|hCoV-19/Australia/VIC6646/2020|2020-07-19|EPI\_ISL\_521403|Original|hCoV-19^^Victoria|Human|Victorian Infectious Diseases Reference Laboratory (VIDRL)|VIDRL and MDU-PHL|Schultz|Australia

>Spike|hCoV-19/Wales/PHWC-496724/2020|2020-11-20|EPI\_ISL\_726627|Original|hCoV-19^^Wales|Human|Originating lab|COVID-19 Genomics UK (COG-UK) Consortium|Moore|United Kingdom

>Spike|hCoV-19/Australia/NSW718/2020|2020-07-27|EPI\_ISL\_513361|Original|hCoV-19^^New South Wales|Human|St Vincent's Pathology (SydPath)|NSW Health Pathology - Institute of Clinical Pathology and Medical Research; Westmead Hospital; University of Sydney|Gall|Australia

>Spike|hCoV-19/USA/TX-DSHS-2052/2020|2020-12-03|EPI\_ISL\_766667|Original|hCoV-19^^Texas|Human|Texas Department of State Health Services|Texas Department of State Health Services|Rahman|USA

>Spike|hCoV-19/Japan/PG-2827/2020|2020-04-00|EPI\_ISL\_690954|Original|hCoV-19^^Japan|Human|Pathogen Genomics Center|Pathogen Genomics Center|Sekizuka|Japan

>Spike|hCoV-19/USA/CA-CZB-5851/2020|2020-07-22|EPI\_ISL\_583210|Original|hCoV-19^^California|Human|UCSF Clinical Microbiology Laboratory|Chan-Zuckerberg Biohub|Bhatt|USA

>Spike|hCoV-19/Scotland/CVR2713/2020|2020-04-18|EPI\_ISL\_473534|Original|hCoV-19^^Scotland|Human|West of Scotland Specialist Virology Centre|COVID-19 Genomics UK (COG-UK) Consortium|Robertson|United Kingdom

>Spike|hCoV-19/England/CAMC-AAF68F/2020|2020-10-23|EPI\_ISL\_631118|Original|hCoV-19^^England|Human|Lighthouse Lab in Cambridge|Wellcome Sanger Institute for the COVID-19 Genomics UK (COG-UK) consortium|Davies|United Kingdom

>Spike|hCoV-19/England/SHEF-CA2A2/2020|2020-10-31|EPI\_ISL\_727994|Original|hCoV-19^^England|Human|Virology Department|COVID-19 Genomics UK (COG-UK) Consortium|de Silva|United Kingdom

>Spike|hCoV-19/Singapore/989/2020|2020-03-23|EPI\_ISL\_548997|Original|hCoV-19^^Singapore|Human|National Public Health Laboratory|National Public Health Laboratory|Mak|Singapore

>Spike|hCoV-19/England/CAMC-A66350/2020|2020-10-11|EPI\_ISL\_626772|Original|hCoV-19^^England|Human|University of Exeter|COVID-19 Genomics UK (COG-UK) Consortium|Temperton|United Kingdom

>Spike|hCoV-19/Australia/VIC7105/2020|2020-08-01|EPI\_ISL\_564234|Original|hCoV-19^^Victoria|Human|Victorian Infectious Diseases Reference Laboratory (VIDRL)|VIDRL and MDU-PHL|Schultz|Australia

>Spike|hCoV-19/Wales/PHWC-498212/2020|2020-12-01|EPI\_ISL\_727041|Original|hCoV-19^^Wales|Human|Originating lab|COVID-19 Genomics UK (COG-UK) Consortium|Moore|United Kingdom

>Spike|hCoV-19/Iceland/138/2020|2020-03-12|EPI\_ISL\_417720|Original|hCoV-19^^Reykjavik|Human|The National University Hospital of Iceland|deCODE genetics|J\u00f3nsson|Iceland

>Spike|hCoV-19/Scotland/QEUA-964195/2020|2020-08-12|EPI\_ISL\_534385|Original|hCoV-19^^Scotland|Human|NHSGGC West of Scotland Specialist Virology Centre / MRC-University of Glasgow Centre for Virus Research|Wellcome Sanger Institute for the COVID-19 Genomics UK (COG-UK) consortium|Davies|United Kingdom

>Spike|hCoV-19/England/BIRM-675AE/2020|2020-10-22|EPI\_ISL\_651618|Original|hCoV-19^^England|Human|University of Birmingham|COVID-19 Genomics UK (COG-UK) Consortium|Loman|United Kingdom

>Spike|hCoV-19/England/CAMC-B79F46/2020|2020-11-12|EPI\_ISL\_741066|Original|hCoV-19^^England|Human|Oxford Viromics|COVID-19 Genomics UK (COG-UK) Consortium|Golubchik|United Kingdom

>Spike|hCoV-19/England/QEUA-AAE0A0/2020|2020-10-22|EPI\_ISL\_630871|Original|hCoV-19^^England|Human|Lighthouse Lab in Glasgow|Wellcome Sanger Institute for the COVID-19 Genomics UK (COG-UK) consortium|Davies|United Kingdom

>Spike|hCoV-19/Denmark/DCGC-11309/2020|2020-11-02|EPI\_ISL\_670831|Original|hCoV-19^^Sjælland|Human|Department of Virus and Microbiological Special Diagnostics|Albertsen Lab|Michaelsen|Denmark

>Spike|hCoV-19/England/QEUA-9D1685/2020|2020-09-14|EPI\_ISL\_577295|Original|hCoV-19^^England|Human|University of Exeter|COVID-19 Genomics UK (COG-UK) Consortium|Temperton|United Kingdom

>Spike|hCoV-19/Denmark/DCGC-13224/2020|2020-11-30|EPI\_ISL\_712662|Original|hCoV-19^^Syddanmark|Human|Department of Virus and Microbiological Special Diagnostics|Albertsen Lab|Michaelsen|Denmark

>Spike|hCoV-19/England/MILK-ACFE45/2020|2020-10-22|EPI\_ISL\_651545|Original|hCoV-19^^England|Human|Oxford Viromics|COVID-19 Genomics UK (COG-UK) Consortium|Golubchik|United Kingdom

>Spike|hCoV-19/Wales/PHWC-484C0C/2020|2020-10-17|EPI\_ISL\_627276|Original|hCoV-19^^Wales|Human|Wales Specialist Virology Centre Sequencing lab|COVID-19 Genomics UK (COG-UK) Consortium|Moore|United Kingdom

>Spike|hCoV-19/USA/NY-Wadsworth-292229-01/2020|2020-12-01|EPI\_ISL\_767659|Original|hCoV-19^^New York|Human|MEMORIAL SLOAN KETTERING CANCER CENTER|Wadsworth Center|Lasek-Nesselquist|USA

>Spike|hCoV-19/Australia/NSW320/2020|2020-03-30|EPI\_ISL\_699647|Original|hCoV-19^^New South Wales|Human|Pathology Sydney South West - NSW Health Pathology|NSW Health Pathology - Institute of Clinical Pathology and Medical Research; Westmead Hospital; University of Sydney|Gall|Australia

>Spike|hCoV-19/Australia/NSW1021/2020|2020-03-26|EPI\_ISL\_593666|Original|hCoV-19^^New South Wales|Human|Pathology West - NSW Health Pathology|NSW Health Pathology - Institute of Clinical Pathology and Medical Research; Westmead Hospital; University of Sydney|Gall|Australia

>Spike|hCoV-19/USA/TX-HMH-MCoV-14418/2020|2020-10-07|EPI\_ISL\_787703|Original|hCoV-19^^Texas|Human|Houston Methodist Hospital|Houston Methodist Hospital|Long|USA

>Spike|hCoV-19/Spain/MD-H12-32/2020|2020-03-12|EPI\_ISL\_428695|Original|hCoV-19^^Madrid|Human|Hospital Universitario 12 de Octubre|Hospital Universitario 12 de Octubre|Viedma|Spain

>Spike|hCoV-19/England/ALDP-BB96AF/2020|2020-11-20|EPI\_ISL\_702378|Original|hCoV-19^^England|Human|Lighthouse Lab in Alderley Park|Wellcome Sanger Institute for the COVID-19 Genomics UK (COG-UK) Consortium|Davies|United Kingdom

>Spike|hCoV-19/USA/CA-CDPH212/2020|2020-11-15|EPI\_ISL\_755068|Original|hCoV-19^^California|Human|California Department of Public Health|California Department of Public Health|Bell|USA

>Spike|hCoV-19/Poland/27929/2020|2020-11-00|EPI\_ISL\_732919|Original|hCoV-19^^Poland|Human|genXone SA|genXone SA|Kaszuba|Poland

>Spike|hCoV-19/England/QEUEH-B686FA/2020|2020-11-11|EPI\_ISL\_662028|Original|hCoV-19^^England|Human|Lighthouse Lab in Glasgow|Wellcome Sanger Institute for the COVID-19 Genomics UK (COG-UK) Consortium|Davies|United Kingdom

>Spike|hCoV-19/USA/CA-ALSR-2081/2020|2020-05-26|EPI\_ISL\_635338|Original|hCoV-19^^California|Human|San Diego County Public Health Laboratory|Andersen lab at Scripps Research|Gangavarapu|USA

>Spike|hCoV-19/England/QEUEH-BA2B31/2020|2020-11-18|EPI\_ISL\_672833|Original|hCoV-19^^England|Human|Lighthouse Lab in Glasgow|Wellcome Sanger Institute for the COVID-19 Genomics UK (COG-UK) Consortium|Davies|United Kingdom

>Spike|hCoV-19/England/20144064004/2020|2020-03-30|EPI\_ISL\_423554|Original|hCoV-19^^England|Human|Respiratory Virus Unit|Respiratory Virus Unit|Platt|United Kingdom

>Spike|hCoV-19/USA/WI-UW-2066/2020|2020-10-09|EPI\_ISL\_677471|Original|hCoV-19^^Wisconsin|Human|University of Wisconsin-Madison AIDS Vaccine Research Laboratories|University of Wisconsin-Madison AIDS Vaccine Research Laboratories|Baczenas|USA

>Spike|hCoV-19/USA/CA-ALSR-4380/2020|2020-07-22|EPI\_ISL\_648996|Original|hCoV-19^^California|Human|San Diego County Public Health Laboratory|Andersen lab at Scripps Research|Gangavarapu|USA

>Spike|hCoV-19/France/OCC-SC550/2020|2020-04-03|EPI\_ISL\_660721|Original|hCoV-19^^Occitanie|Human|CHU N\u00eemes|CNR Virus des Infections Respiratoires - France SUD|Bal|France

>Spike|hCoV-19/USA/AZ-TG664298/2020|2020-04-29|EPI\_ISL\_696092|Original|hCoV-19^^Arizona|Human|Sonora Quest Laboratories|TGen North|French|USA

>Spike|hCoV-19/Wales/PHWC-2EBFC/2020|2020-04-06|EPI\_ISL\_446126|Original|hCoV-19^^Wales|Human|Wales Specialist Virology Centre|Public Health Wales Microbiology Cardiff|Moore|United Kingdom

>Spike|hCoV-19/England/ALDP-A94E2B/2020|2020-10-19|EPI\_ISL\_624770|Original|hCoV-19^^England|Human|Lighthouse Lab in Alderley Park|Wellcome Sanger Institute for the COVID-19 Genomics UK (COG-UK) consortium|Davies|United Kingdom

>Spike|hCoV-19/England/ALDP-9CB888/2020|2020-09-16|EPI\_ISL\_575472|Original|hCoV-19^^England|Human|Lighthouse Lab in Alderley Park|Wellcome Sanger Institute for the COVID-19 Genomics UK (COG-UK) consortium|Davies|United Kingdom

>Spike|hCoV-19/USA/LA-GBCL-26791739/2020|2020-04-06|EPI\_ISL\_485356|Original|hCoV-19^^Louisiana|Human|River Road Testing Lab|Ginkgo Bioworks Clinical Laboratory|Smith|USA

>Spike|hCoV-19/Japan/PG-3111/2020|2020-05-00|EPI\_ISL\_691233|Original|hCoV-19^^Japan|Human|Pathogen Genomics Center|Pathogen Genomics Center|Sekizuka|Japan

>Spike|hCoV-19/USA/TX-HMH-6205/2020|2020-07-04|EPI\_ISL\_547310|Original|hCoV-19^^Texas|Human|Houston Methodist Hospital|Houston Methodist Hospital|Long|USA

>Spike|hCoV-19/England/ALDP-AA15AE/2020|2020-10-22|EPI\_ISL\_624275|Original|hCoV-19^^England|Human|Lighthouse Lab in Alderley Park|Wellcome Sanger Institute for the COVID-19 Genomics UK (COG-UK) consortium|Davies|United Kingdom

>Spike|hCoV-19/Sweden/20-24262/2020|2020-04-06|EPI\_ISL\_710580|Original|hCoV-19^^Uppsala|Human|Uppsala klinisk mikrobiologi|The Public Health Agency of Sweden|Svartstr\u00f6m|Sweden

>Spike|hCoV-19/New Zealand/20VR1840/2020|2020-03-28|EPI\_ISL\_579144|Original|hCoV-19^^Southern|Human|Southern Community Labs Dunedin|Institute of Environmental Science and Research (ESR)|Wang|New Zealand

>Spike|hCoV-19/USA/IL-NM-0419/2020|2020-04-13|EPI\_ISL\_626399|Original|hCoV-19^^Illinois|Human|Northwestern Memorial Hospital|Ozer Lab|Ozer|USA

>Spike|hCoV-19/England/ALDP-953B13/2020|2020-06-08|EPI\_ISL\_553748|Original|hCoV-19^^England|Human|Lighthouse Lab in Alderley Park|Wellcome Sanger Institute for the COVID-19 Genomics UK (COG-UK) consortium|Davies|United Kingdom

>Spike|hCoV-19/USA/ID-QDX-1090/2020|2020-03-19|EPI\_ISL\_571831|Original|hCoV-19^^Idaho|Human|Quest Diagnostics|Quest Diagnostics|Kagan|USA

>Spike|hCoV-19/Wales/PHWC-4935F0/2020|2020-11-29|EPI\_ISL\_725914|Original|hCoV-19^^Wales|Human|Originating lab|COVID-19 Genomics UK (COG-UK) Consortium|Moore|United Kingdom

>Spike|hCoV-19/Denmark/DCGC-7557/2020|2020-10-12|EPI\_ISL\_618475|Original|hCoV-19^^Syddanmark|Human|Department of Virus and Microbiological Special Diagnostics|Albertsen lab|Michaelsen|Denmark

>Spike|hCoV-19/Australia/VIC11805/2020|2020-08-16|EPI\_ISL\_640909|Original|hCoV-19^^Victoria|Human|Microbiological Diagnostic Unit - Public Health Laboratory (MDU-PHL)|MDU-PHL|Schultz|Australia

>Spike|hCoV-19/USA/FL-BPHL-1553/2020|2020-09-09|EPI\_ISL\_568651|Original|hCoV-19^^Florida|Human|Florida Bureau of Public Health Laboratories|Florida Bureau of Public Health Laboratories|Blanton|USA

>Spike|hCoV-19/USA/NY-PV08456/2020|2020-03-17|EPI\_ISL\_421405|Original|hCoV-19^^New York|Human|MSSS Clinical Microbiology Laboratories|MSSS Pathogen Surveillance Program|van Bakel|USA

>Spike|hCoV-19/England/20184026804/2020|2020-04-27|EPI\_ISL\_465454|Original|hCoV-19^^England|Human|Respiratory Virus Unit|Respiratory Virus Unit|Platt|United Kingdom

>Spike|hCoV-19/England/SHEF-C3B17/2020|2020-04-18|EPI\_ISL\_462010|Original|hCoV-19^^England|Human|Virology Department|COVID-19 Genomics UK (COG-UK) Consortium|de Silva|United Kingdom

>Spike|hCoV-19/France/IDF-211-80/2020|2020-03-11|EPI\_ISL\_469282|Vero E6|hCoV-19^^\u00cele-de-France|Human|Service de Virologie H\u00f4pital Saint-Louis|Laboratory of Cell Biology of viral infection|Meertens|France

>Spike|hCoV-19/USA/MI-UM-10033871586/2020|2020-04-07|EPI\_ISL\_578145|Original|hCoV-19^^Michigan|Human|University of Michigan Clinical Microbiology Laboratory|Lauring Lab|Valesano|USA

>Spike|hCoV-19/Scotland/CVR5226/2020|2020-10-20|EPI\_ISL\_627398|Original|hCoV-19^^Scotland|Human|West of Scotland Specialist Virology Centre|COVID-19 Genomics UK (COG-UK) Consortium|Robertson|United Kingdom

>Spike|hCoV-19/USA/TX-HMH-7230/2020|2020-06-29|EPI\_ISL\_546614|Original|hCoV-19^^Texas|Human|Houston Methodist Hospital|Houston Methodist Hospital|Long|USA

>Spike|hCoV-19/Denmark/DCGC-1993/2020|2020-07-20|EPI\_ISL\_618290|Original|hCoV-19^^Sjaelland|Human|Department of Virus and Microbiological Special Diagnostics|Albertsen lab|Michaelsen|Denmark

>Spike|hCoV-19/England/BRIS-128362/2020|2020-04-16|EPI\_ISL\_469787|Original|hCoV-19^^England|Human|PHE South West Regional Laboratory|Wellcome Sanger Institute for the COVID-19 Genomics UK (COG-UK) consortium|Davies|United Kingdom

>Spike|hCoV-19/USA/NY-NYCPHL-001268/2020|2020-11-09|EPI\_ISL\_683899|Original|hCoV-19^^New York|Human|DOHMH Corona|New York City Public Health Laboratory|Wang|USA

>Spike|hCoV-19/USA/HI-H200602/2020|2020-10-05|EPI\_ISL\_753128|Original|hCoV-19^^Hawaii|Human|State Laboratories Division|State Laboratories Division|Sultana|USA

>Spike|hCoV-19/Japan/PG-8061/2020|2020-09-00|EPI\_ISL\_687162|Original|hCoV-19^^Japan|Human|Pathogen Genomics Center|Pathogen Genomics Center|Sekizuka|Japan

>Spike|hCoV-19/Portugal/PT0742/2020|2020-03-22|EPI\_ISL\_511001|Original|hCoV-19^^Portugal|Human|Instituto Nacional de Saude (INSA)|Instituto Nacional de Saude (INSA)|Borges|Portugal

>Spike|hCoV-19/South Korea/KCDC2607/2020|2020-07-01|EPI\_ISL\_515010|Original|hCoV-19^^South Korea|Human|Division of Viral Diseases|Division of Viral Diseases|Kim|South Korea

>Spike|hCoV-19/England/ALDP-A2FD55/2020|2020-10-06|EPI\_ISL\_587176|Original|hCoV-19^^England|Human|Lighthouse Lab in Alderley Park|Wellcome Sanger Institute for the COVID-19 Genomics UK (COG-UK) consortium|Davies|United Kingdom

>Spike|hCoV-19/Spain/MD-IBV-99008765/2020|2020-10-20|EPI\_ISL\_654318|Original|hCoV-19^^Madrid|Human|Hospital General Universitario Gregorio Mara\u00f1\u00f3n|SeqCOVID-SPAIN consortium/IBV (CSIC)|Comas|Spain

>Spike|hCoV-19/USA/FL-BPHL-0420/2020|2020-05-15|EPI\_ISL\_489829|Original|hCoV-19^^Florida|Human|Florida Bureau of Public Health Laboratories|Florida Bureau of Public Health Laboratories|Blanton|USA

>Spike|hCoV-19/Australia/VIC265/2020|2020-03-22|EPI\_ISL\_419958|Original|hCoV-19^^Victoria|Human|Victorian Infectious Diseases Reference Laboratory (VIDRL)|Victorian Infectious Diseases Reference Laboratory and Microbiological Diagnostic Unit Public Health Laboratory|Schultz|Australia

>Spike|hCoV-19/Canada/ON-PHL-20-01771/2020|2020-07-00|EPI\_ISL\_636924|Original|hCoV-19^^Ontario|Human|Public Health Ontario Laboratory|Public Health Ontario Laboratory|Guthrie|Canada

>Spike|hCoV-19/France/IDF-2849/2020|2020-03-17|EPI\_ISL\_420047|Original|hCoV-19^^\u00cele-de-France|Human|R\u00e9sidence Villa Caroline|National Reference Center for Viruses of Respiratory Infections|Enouf|France

>Spike|hCoV-19/Scotland/CVR4968/2020|2020-10-06|EPI\_ISL\_594732|Original|hCoV-19^^Scotland|Human|West of Scotland Specialist Virology Centre|COVID-19 Genomics UK (COG-UK) Consortium|Robertson|United Kingdom

>Spike|hCoV-19/Germany/NW-HHU-23/2020|2020-03-16|EPI\_ISL\_417468|Original|hCoV-19^^North Rhine-Westphalia|Human|Center of Medical Microbiology|Center of Medical Microbiology|Wienemann|Germany

>Spike|hCoV-19/USA/GA-CDC-5102/2020|2020-06-29|EPI\_ISL\_566090|Original|hCoV-19^^Georgia|Human|GA Department of Public Health Laboratory|Pathogen Discovery|Queen|USA

>Spike|hCoV-19/England/C200045989/2020|2020-11-11|EPI\_ISL\_664093|Original|hCoV-19^^England|Human|Respiratory Virus Unit|COVID-19 Genomics UK (COG-UK) Consortium|Platt|United Kingdom

>Spike|hCoV-19/USA/PA-MGEL-00703/2020|2020-09-10|EPI\_ISL\_682034|Original|hCoV-19^^Pennsylvania|Human|UPMC Clinical Microbiology Laboratory|Microbial Genomic Epidemiology Laboratory|Griffith|USA

>Spike|hCoV-19/England/ALDP-A2F5D5/2020|2020-10-05|EPI\_ISL\_587296|Original|hCoV-19^^England|Human|Lighthouse Lab in Alderley Park|Wellcome Sanger Institute for the COVID-19 Genomics UK (COG-UK) consortium|Davies|United Kingdom

>Spike|hCoV-19/Germany/BE-ChVir-W2127-8203/2020|2020-10-07|EPI\_ISL\_754192|Original|hCoV-19^^Berlin|Human|Charit\u00e9 Universit\u00e4tsmedizin Berlin|Charit\u00e9 Universit\u00e4tsmedizin Berlin|Muehleemann|Germany

>Spike|hCoV-19/England/ALDP-9D99FD/2020|2020-09-18|EPI\_ISL\_576784|Original|hCoV-19^^England|Human|Oxford Viromics|COVID-19 Genomics UK (COG-UK) Consortium|Golubchik|United Kingdom

>Spike|hCoV-19/Northern Ireland/NIRE-103B74/2020|2020-04-16|EPI\_ISL\_489223|Original|hCoV-19^^Northern Ireland|Human|Regional Virus Laboratory|Wellcome Sanger Institute for the COVID-19 Genomics UK (COG-UK) consortium|Davies|United Kingdom

>Spike|hCoV-19/USA/WA-SFS-S2853/2020|2020-08-31|EPI\_ISL\_575031|Original|hCoV-19^^Washington|Human|Seattle Flu Study|Seattle Flu Study|Lee|USA

>Spike|hCoV-19/England/CAMC-B20737/2020|2020-11-02|EPI\_ISL\_647601|Original|hCoV-19^^England|Human|Lighthouse Lab in Cambridge|Wellcome Sanger Institute for the COVID-19 Genomics UK (COG-UK) Consortium|Davies|United Kingdom

>Spike|hCoV-19/USA/UT-UPHL-2012152848/2020|2020-07-26|EPI\_ISL\_745687|Original|hCoV-19^^Utah|Human|Ginkgo Bioworks Clinical Laboratory|Utah Public Health Laboratory|Young|USA

>Spike|hCoV-19/USA/CA-QDX-117/2020|2020-03-16|EPI\_ISL\_467811|Original|hCoV-19^^California|Human|Quest Diagnostics|Quest Diagnostics|Kagan|USA

>Spike|hCoV-19/England/NORW-EDA56/2020|2020-00-00|EPI\_ISL\_490514|Original|hCoV-19^^England|Human|Quadram Institute Bioscience|COVID-19 Genomics UK (COG-UK) Consortium|Alikhan|United Kingdom

>Spike|hCoV-19/Bangladesh/DNAS\_DRICM\_isl\_18944/2020|2020-06-27|EPI\_ISL\_775009|Original|hCoV-19^^Dhaka|Human|Designated Reference Institute for Chemical Measurements (DRICM)|DNA SOLUTION LTD.|Rabbi|Bangladesh

>Spike|hCoV-19/Japan/PG-7042/2020|2020-08-00|EPI\_ISL\_688147|Original|hCoV-19^^Japan|Human|Pathogen Genomics Center|Pathogen Genomics Center|Sekizuka|Japan

>Spike|hCoV-19/Denmark/DCGC-19365/2020|2020-12-07|EPI\_ISL\_748907|Original|hCoV-19^^Sjaelland|Human|Department of Virus and Microbiological Special Diagnostics|Albertsen Lab|Michaelsen|Denmark

>Spike|hCoV-19/England/BRIS-126CC3/2020|2020-04-10|EPI\_ISL\_458919|Original|hCoV-19^^England|Human|PHE South West Regional Laboratory|Wellcome Sanger Institute for the COVID-19 Genomics UK (COG-UK) consortium|Davies|United Kingdom

>Spike|hCoV-19/England/ALDP-C061DE/2020|2020-12-05|EPI\_ISL\_709514|Original|hCoV-19^^England|Human|Lighthouse Lab in Alderley Park|Wellcome Sanger Institute for the COVID-19 Genomics UK (COG-UK) Consortium|Davies|United Kingdom

>Spike|hCoV-19/Egypt/EGY-S032/2020|2020-08-17|EPI\_ISL\_526987|Original|hCoV-19^^Egypt|Human|Biological prevention|Biological prevention|Seadawy|Egypt

>Spike|hCoV-19/England/20118070804/2020|2020-03-12|EPI\_ISL\_464941|Original|hCoV-19^^England|Human|Respiratory Virus Unit|Respiratory Virus Unit|Platt|United Kingdom

>Spike|hCoV-19/Japan/PG-2217/2020|2020-04-00|EPI\_ISL\_685822|Original|hCoV-19^^Japan|Human|Pathogen Genomics Center|Pathogen Genomics Center|Sekizuka|Japan

>Spike|hCoV-19/Poland/PL\_P26/2020|2020-04-01|EPI\_ISL\_451987|Original|hCoV-19^^Malopolska|Human|1. ViroGenetics - BSL3 Laboratory of Virology|1. ViroGenetics - BSL3 Laboratory of Virology|Pyrz|Poland

>Spike|hCoV-19/Denmark/DCGC-1906/2020|2020-05-18|EPI\_ISL\_622496|Original|hCoV-19^^Hovedstaden|Human|Department of Virus and Microbiological Special Diagnostics|Albertsen lab|Michaelsen|Denmark

>Spike|hCoV-19/USA/UT-UPHL-2009383/2020|2020-05-27|EPI\_ISL\_605148|Original|hCoV-19^^Utah|Human|Utah Public Health Laboratory|Utah Public Health Laboratory|Young|USA

>Spike|hCoV-19/Switzerland/SZ-UZH-1000478990/2020|2020-03-03|EPI\_ISL\_524484|Original|hCoV-19^^Schwyz|Human|Hospital Schwyz|Institute of Medical Virology|Schmutz|Switzerland

>Spike|hCoV-19/England/20182004604/2020|2020-04-24|EPI\_ISL\_465441|Original|hCoV-19^^England|Human|Respiratory Virus Unit|Respiratory Virus Unit|Platt|United Kingdom

>Spike|hCoV-19/Switzerland/BE-ETHZ-321491/2020|2020-10-15|EPI\_ISL\_603703|Original|hCoV-19^^Bern|Human|Viollier AG|Department of Biosystems Science and Engineering|Nadeau|Switzerland

>Spike|hCoV-19/England/20099071404/2020|2020-02-29|EPI\_ISL\_464218|Original|hCoV-19^^England|Human|Respiratory Virus Unit|Respiratory Virus Unit|Platt|United Kingdom

>Spike|hCoV-19/England/ALDP-BBB537/2020|2020-11-20|EPI\_ISL\_702535|Original|hCoV-19^^England|Human|Lighthouse Lab in Alderley Park|Wellcome Sanger Institute for the COVID-19 Genomics UK (COG-UK) Consortium|Davies|United Kingdom

>Spike|hCoV-19/Brazil/SP-226/2020|2020-04-17|EPI\_ISL\_527868|Original|hCoV-19^^S\u00e3o Paulo|Human|Hospital e Maternidade do Braz|Instituto Adolfo Lutz|Sacchi|Brazil

>Spike|hCoV-19/USA/FL-BPHL-0913/2020|2020-06-30|EPI\_ISL\_517803|Original|hCoV-19^^Florida|Human|Florida Bureau of Public Health Laboratories|Florida Bureau of Public Health Laboratories|Blanton|USA

>Spike|hCoV-19/England/MILK-9594E5/2020|2020-06-02|EPI\_ISL\_554319|Original|hCoV-19^^England|Human|Lighthouse Lab in Milton Keynes|Wellcome Sanger Institute for the COVID-19 Genomics UK (COG-UK) consortium|Davies|United Kingdom

>Spike|hCoV-19/Israel/CVL-n3837/2020|2020-03-10|EPI\_ISL\_649068|Original|hCoV-19^^Beer-Sheva|Human|Israel Central Virology laboratory|Israel Central Virology laboratory|Zuckerman|Israel

>Spike|hCoV-19/Wales/PHWC-480F52/2020|2020-10-15|EPI\_ISL\_613017|Original|hCoV-19^^Wales|Human|Wales Specialist Virology Centre Sequencing lab|COVID-19 Genomics UK (COG-UK) Consortium|Moore|United Kingdom

>Spike|hCoV-19/Portugal/PT0962/2020|2020-03-24|EPI\_ISL\_511511|Original|hCoV-19^^Portugal|Human|Instituto Nacional de Saude (INSA)|Instituto Nacional de Saude (INSA)|Borges|Portugal

>Spike|hCoV-19/USA/CA-ALSR-2218/2020|2020-06-25|EPI\_ISL\_635390|Original|hCoV-19^^California|Human|San Diego County Public Health Laboratory|Andersen lab at Scripps Research|Gangavarapu|USA

>Spike|hCoV-19/USA/WA-UW-12760/2020|2020-06-29|EPI\_ISL\_570898|Original|hCoV-19^^Washington|Human|UW Virology Lab|UW Virology Lab|Roychoudhury|USA

>Spike|hCoV-19/USA/MA-MGH-00179/2020|2020-03-26|EPI\_ISL\_460451|Original|hCoV-19^^Massachusetts|Human|Massachusetts General Hospital|Infectious Disease Program|Lemieux|USA

>Spike|hCoV-19/Canada/ON-S201/2020|2020-03-25|EPI\_ISL\_586379|Original|hCoV-19^^Ontario|Human|Toronto Invasive Bacterial Diseases Network|McMaster University|McArthur|Canada

>Spike|hCoV-19/USA/MI-MDHHS-SC21481/2020|2020-07-19|EPI\_ISL\_516208|Original|hCoV-19^^Michigan|Human|Michigan Department of Health and Human Services|Michigan Department of Health and Human Services|Blankenship|USA

>Spike|hCoV-19/England/QEUEH-9F44A0/2020|2020-09-24|EPI\_ISL\_588443|Original|hCoV-19^^England|Human|Lighthouse Lab in Glasgow|Wellcome Sanger Institute for the COVID-19 Genomics UK (COG-UK) consortium|Davies|United Kingdom

>Spike|hCoV-19/Canada/ON-SLB3242/2020|2020-11-24|EPI\_ISL\_717734|Original|hCoV-19^^Ontario|Human|Kingston Health Sciences Centre and Queen's University|Ontario Institute for Cancer Research|de Borja|Canada

>Spike|hCoV-19/Finland/30M75S3/2020|2020-03-30|EPI\_ISL\_481657|Original|hCoV-19^^Uusimaa|Human|Department of Virology and Immunology|Department of Virology|Smura|Finland

>Spike|hCoV-19/England/BRIS-12AB4A/2020|2020-05-01|EPI\_ISL\_458418|Original|hCoV-19^^England|Human|PHE South West Regional Laboratory|Wellcome Sanger Institute for the COVID-19 Genomics UK (COG-UK) consortium|Davies|United Kingdom

>Spike|hCoV-19/USA/CA-QDX-451/2020|2020-03-21|EPI\_ISL\_571173|Original|hCoV-19^^California|Human|Quest Diagnostics|Quest Diagnostics|Kagan|USA

>Spike|hCoV-19/England/204361199/2020|2020-10-22|EPI\_ISL\_637121|Original|hCoV-19^^England|Human|Respiratory Virus Unit|COVID-19 Genomics UK (COG-UK) Consortium|Platt|United Kingdom

>Spike|hCoV-19/Wales/PHWC-289AD/2020|2020-04-02|EPI\_ISL\_445383|Original|hCoV-19^^Wales|Human|Wales Specialist Virology Centre|Public Health Wales Microbiology Cardiff|Moore|United Kingdom

>Spike|hCoV-19/England/ALDP-9CBE1D/2020|2020-09-16|EPI\_ISL\_575467|Original|hCoV-19^^England|Human|Lighthouse Lab in Alderley Park|Wellcome Sanger Institute for the COVID-19 Genomics UK (COG-UK) consortium|Davies|United Kingdom

>Spike|hCoV-19/Denmark/DCGC-13592/2020|2020-11-30|EPI\_ISL\_712896|Original|hCoV-19^^Hovedstaden|Human|Department of Virus and Microbiological Special Diagnostics|Albertsen Lab|Michaelsen|Denmark

>Spike|hCoV-19/Denmark/DCGC-885/2020|2020-05-11|EPI\_ISL\_614801|Original|hCoV-19^^Syddanmark|Human|Department of Virus and Microbiological Special Diagnostics|Albertsen lab|Michaelsen|Denmark

>Spike|hCoV-19/Northern Ireland/NIRE-109473/2020|2020-10-13|EPI\_ISL\_651329|Original|hCoV-19^^Northern Ireland|Human|Regional Virus Laboratory|COVID-19 Genomics UK (COG-UK) Consortium|Fairley|United Kingdom

>Spike|hCoV-19/USA/MI-UM-10036673508/2020|2020-10-28|EPI\_ISL\_650075|Original|hCoV-19^^Michigan|Human|University of Michigan Clinical Microbiology Laboratory|Lauring Lab|Valesano|USA

>Spike|hCoV-19/India/GJ-GBRC-384b/2020|2020-06-22|EPI\_ISL\_524745|Original|hCoV-19^^Gujarat|Human|GMERS Medical College and Hospital|Gujarat Biotechnology Research Centre|Joshi|India



>Spike|hCoV-19/Japan/PG-0282/2020|2020-03-00|EPI\_ISL\_684155|Original|hCoV-19^^Japan|Human|Tokyo Metropolitan Institute of Public Health|Pathogen Genomics Center|Sekizuka|Japan

>Spike|hCoV-19/England/ALDP-B75469/2020|2020-11-12|EPI\_ISL\_740904|Original|hCoV-19^^England|Human|Oxford Viromics|COVID-19 Genomics UK (COG-UK) Consortium|Golubchik|United Kingdom

>Spike|hCoV-19/Germany/HH-hpi-p1978/2020|2020-03-26|EPI\_ISL\_776298|Original|hCoV-19^^Hamburg|Human|University Medical Center Hamburg Eppendorf|Heinrich Pette Institute|Robitaille|Germany

>Spike|hCoV-19/England/ALDP-B756EB/2020|2020-11-12|EPI\_ISL\_662212|Original|hCoV-19^^England|Human|Lighthouse Lab in Alderley Park|Wellcome Sanger Institute for the COVID-19 Genomics UK (COG-UK) Consortium|Davies|United Kingdom

>Spike|hCoV-19/Spain/AN-IBV-001962/2020|2020-03-14|EPI\_ISL\_452419|Original|hCoV-19^^Andalucia|Human|Servicio de Microbiolog\u00eda. HRU de M\u00e9laga. Servicio Andaluz de Salud|SeqCOVID-SPAIN consortium|IBV(CSIC)|Comas|Spain

>Spike|hCoV-19/England/MILK-97637C/2020|2020-08-20|EPI\_ISL\_575947|Original|hCoV-19^^England|Human|Lighthouse Lab in Milton Keynes|Wellcome Sanger Institute for the COVID-19 Genomics UK (COG-UK) consortium|Davies|United Kingdom

>Spike|hCoV-19/Denmark/DCGC-18005/2020|2020-12-14|EPI\_ISL\_749695|Original|hCoV-19^^Hovedstaden|Human|Department of Virus and Microbiological Special Diagnostics|Albertsen Lab|Michaelsen|Denmark

>Spike|hCoV-19/Scotland/QEUA-9CE30C/2020|2020-09-16|EPI\_ISL\_601892|Original|hCoV-19^^Scotland|Human|Lighthouse Lab in Glasgow|Wellcome Sanger Institute for the COVID-19 Genomics UK (COG-UK) consortium|Davies|United Kingdom

>Spike|hCoV-19/USA/TX-HMH-MCoV-18742/2020|2020-11-22|EPI\_ISL\_785083|Original|hCoV-19^^Texas|Human|Houston Methodist Hospital|Houston Methodist Hospital|Long|USA

>Spike|hCoV-19/England/QEUA-96F1A9/2020|2020-08-17|EPI\_ISL\_530545|Original|hCoV-19^^England|Human|Lighthouse Lab in Glasgow|Wellcome Sanger Institute for the COVID-19 Genomics UK (COG-UK) consortium|Davies|United Kingdom

>Spike|hCoV-19/Denmark/DCGC-20975/2020|2020-12-21|EPI\_ISL\_759484|Original|hCoV-19^^Nordjylland|Human|Department of Virus and Microbiological Special Diagnostics|Albertsen Lab|Michaelsen|Denmark

>Spike|hCoV-19/Singapore/1409/2020|2020-05-04|EPI\_ISL\_648743|Original|hCoV-19^^Singapore|Human|Department of Laboratory Medicine|Department of Laboratory Medicine|Chen|Singapore

>Spike|hCoV-19/Finland/FIN-318/2020|2020-03-04|EPI\_ISL\_414644|Original|hCoV-19^^Finland|Human|Department of Virology and Immunology|Department of Virology|Smura|Finland

>Spike|hCoV-19/Kazakhstan/26580/2020|2020-04-26|EPI\_ISL\_454604|Original|hCoV-19^^Nursultan|Human|Laboratory of virology|Laboratory of molecular-genetic research|Abdaliyev|Kazakhstan

>Spike|hCoV-19/England/QEUA-AF0C7E/2020|2020-10-29|EPI\_ISL\_662818|Original|hCoV-19^^England|Human|Lighthouse Lab in Glasgow|Wellcome Sanger Institute for the COVID-19 Genomics UK (COG-UK) Consortium|Davies|United Kingdom

>Spike|hCoV-19/England/CAMC-B37551/2020|2020-11-05|EPI\_ISL\_645491|Original|hCoV-19^^England|Human|Lighthouse Lab in Cambridge|Wellcome Sanger Institute for the COVID-19 Genomics UK (COG-UK) Consortium|Davies|United Kingdom

>Spike|hCoV-19/Cote d'Ivoire/BKE0631/2020|2020-07-17|EPI\_ISL\_614379|Original|hCoV-19^^Yamoussoukro|Human|Molecular diagnostic unit for viral haemorrhagic fevers and emerging viruses|Project group Epidemiology of Highly Pathogenic Microorganisms|Calvignac-Spencer|C\u00f4te d'Ivoire

>Spike|hCoV-19/USA/TX-HMH-3781/2020|2020-06-13|EPI\_ISL\_543186|Original|hCoV-19^^Texas|Human|Houston Methodist Hospital|Houston Methodist Hospital|Long|USA

>Spike|hCoV-19/England/BRIS-18536B6/2020|2020-04-09|EPI\_ISL\_492281|Original|hCoV-19^^England|Human|PHE South West Regional Laboratory|Wellcome Sanger Institute for the COVID-19 Genomics UK (COG-UK) consortium|Davies|United Kingdom

>Spike|hCoV-19/Brazil/RJ-00565/2020|2020-11-03|EPI\_ISL\_717949|Original|hCoV-19^^Rio de Janeiro|Human|Laboratorio de Virologia Molecular / UFRJ|Bioinformatics Laboratory / LNCC|Almeida|Brazil

>Spike|hCoV-19/Australia/VIC2924/2020|2020-07-06|EPI\_ISL\_521755|Original|hCoV-19^^Victoria|Human|Microbiological Diagnostic Unit - Public Health Laboratory (MDU-PHL) |MDU-PHL|Schultz|Australia

>Spike|hCoV-19/England/QEUEH-9FF44B/2020|2020-09-30|EPI\_ISL\_600299|Original|hCoV-19^^England|Human|Lighthouse Lab in Glasgow|Wellcome Sanger Institute for the COVID-19 Genomics UK (COG-UK) consortium|Davies|United Kingdom

>Spike|hCoV-19/Denmark/DCGC-18816/2020|2020-12-07|EPI\_ISL\_748574|Original|hCoV-19^^Hovedstaden|Human|Department of Virus and Microbiological Special Diagnostics|Albertsen Lab|Michaelsen|Denmark

>Spike|hCoV-19/USA/TX-HMH-MCoV-15400/2020|2020-10-21|EPI\_ISL\_786884|Original|hCoV-19^^Texas|Human|Houston Methodist Hospital|Houston Methodist Hospital|Long|USA

>Spike|hCoV-19/England/ALDP-9549BE/2020|2020-06-12|EPI\_ISL\_553397|Original|hCoV-19^^England|Human|Lighthouse Lab in Alderley Park|Wellcome Sanger Institute for the COVID-19 Genomics UK (COG-UK) consortium|Davies|United Kingdom

>Spike|hCoV-19/USA/TX-HMH-MCoV-11994/2020|2020-09-15|EPI\_ISL\_790162|Original|hCoV-19^^Texas|Human|Houston Methodist Hospital|Houston Methodist Hospital|Long|USA

>Spike|hCoV-19/South Africa/KRISP-0097/2020|2020-04-01|EPI\_ISL\_467462|Original|hCoV-19^^KwaZulu-Natal|Human|AMPATH-DBN|KRISP|de Oliveira|South Africa

>Spike|hCoV-19/Canada/NS-NML-156/2020|2020-04-18|EPI\_ISL\_579526|Original|hCoV-19^^Nova Scotia|Human|QEII Health Sciences Centre|National Microbiology Laboratory (NML) |Majer|Canada

>Spike|hCoV-19/England/20142015504/2020|2020-03-29|EPI\_ISL\_423433|Original|hCoV-19^^England|Human|Respiratory Virus Unit|Respiratory Virus Unit|Platt|United Kingdom

>Spike|hCoV-19/England/ALDP-A2F6B4/2020|2020-10-05|EPI\_ISL\_587004|Original|hCoV-19^^England|Human|Lighthouse Lab in Alderley Park|Wellcome Sanger Institute for the COVID-19 Genomics UK (COG-UK) consortium|Davies|United Kingdom

>Spike|hCoV-19/England/QEUEH-B7D3DD/2020|2020-11-14|EPI\_ISL\_741856|Original|hCoV-19^^England|Human|Oxford Viromics|COVID-19 Genomics UK (COG-UK) Consortium|Golubchik|United Kingdom

>Spike|hCoV-19/India/TG-CCMB-L1935/2020|2020-06-04|EPI\_ISL\_495173|Original|hCoV-19^^Telangana|Human|CSIR-Centre for Cellular and Molecular Biology|CSIR-Centre for Cellular and Molecular Biology|Banu|India

>Spike|hCoV-19/England/NORT-1B719E3/2020|2020-11-18|EPI\_ISL\_703010|Original|hCoV-19^^England|Human|Northumbria University / South Tees Hospitals NHS Foundation Trust / North Cumbria Integrated Care NHS Foundation Trust / North Tees and Hartlepool NHS Foundation Trust / Newcastle Hospitals NHS Foundation Trust|COVID-19 Genomics UK (COG-UK) Consortium|Bashton|United Kingdom

>Spike|hCoV-19/Japan/PG-6425/2020|2020-07-00|EPI\_ISL\_689531|Original|hCoV-19^^Japan|Human|Pathogen Genomics Center|Pathogen Genomics Center|Sekizuka|Japan

>Spike|hCoV-19/USA/NY-CDC-2-3714272/2020|2020-10-30|EPI\_ISL\_751548|Original|hCoV-19^^New York|Human|NYSDOH Wadsworth Center|Genomics and Discovery|Queen|USA

>Spike|hCoV-19/South Korea/KCDC2053/2020|2020-02-23|EPI\_ISL\_481373|Original|hCoV-19^^South Korea|Human|Division of Viral Diseases|Division of Viral Diseases|Kim|South Korea

>Spike|hCoV-19/England/QEUEH-A9EB1B/2020|2020-10-19|EPI\_ISL\_721563|Original|hCoV-19^^England|Human|Lighthouse Lab in Glasgow|Wellcome Sanger Institute for the COVID-19 Genomics UK (COG-UK) Consortium|Davies|United Kingdom

>Spike|hCoV-19/England/MILK-B38338/2020|2020-11-01|EPI\_ISL\_658853|Original|hCoV-19^^England|Human|Lighthouse Lab in Milton Keynes|Wellcome Sanger Institute for the COVID-19 Genomics UK (COG-UK) Consortium|Davies|United Kingdom

>Spike|hCoV-19/England/CAMB-7FC08/2020|2020-04-16|EPI\_ISL\_433491|Original|hCoV-19^^England|Human|Department of Pathology|COVID-19 Genomics UK (COG-UK) Consortium|Meredith|United Kingdom

>Spike|hCoV-19/Brazil/RJ-UFRJ-1019/2020|2020-04-15|EPI\_ISL\_492032|Original|hCoV-19^^Rio de Janeiro|Human|Instituto de Biologia do Ex\u00e9rcito|Laborat\u00f3rio Metabolismo Macromolecular FirminoTorres de Castro|Moura-Neto|Brazil

>Spike|hCoV-19/USA/TX-HMH-3438/2020|2020-06-14|EPI\_ISL\_544194|Original|hCoV-19^^Texas|Human|Houston Methodist Hospital|Houston Methodist Hospital|Long|USA

>Spike|hCoV-19/England/NORW-21FEC6/2020|2020-12-11|EPI\_ISL\_725077|Original|hCoV-19^^England|Human|Quadram Institute Bioscience|COVID-19 Genomics UK (COG-UK) Consortium|Alikhan|United Kingdom

>Spike|hCoV-19/USA/UT-UPHL-04313/2020|2020-05-15|EPI\_ISL\_575143|Original|hCoV-19^^Utah|Human|Utah Public Health Laboratory|Utah Public Health Laboratory|Young|USA

>Spike|hCoV-19/Australia/VIC800/2020|2020-04-01|EPI\_ISL\_427074|Original|hCoV-19^^Victoria|Human|Microbiological Diagnostic Unit Public Health Laboratory|Microbiological Diagnostic Unit Public Health Laboratory|Schultz|Australia

>Spike|hCoV-19/England/MILK-A461D4/2020|2020-10-06|EPI\_ISL\_598593|Original|hCoV-19^^England|Human|Lighthouse Lab in Milton Keynes|Wellcome Sanger Institute for the COVID-19 Genomics UK (COG-UK) consortium|Davies|United Kingdom

>Spike|hCoV-19/Scotland/EDB5823/2020|2020-04-27|EPI\_ISL\_487736|Original|hCoV-19^^Scotland|Human|Virology Department|Wellcome Sanger Institute for the COVID-19 Genomics UK (COG-UK) consortium|Davies|United Kingdom

>Spike|hCoV-19/Wales/PHWC-486648/2020|2020-10-29|EPI\_ISL\_639062|Original|hCoV-19^^Wales|Human|Wales Specialist Virology Centre Sequencing lab|COVID-19 Genomics UK (COG-UK) Consortium|Moore|United Kingdom

>Spike|hCoV-19/United Arab Emirates/0761/2020|2020-05-19|EPI\_ISL\_708835|Original|hCoV-19^^Abu Dhabi|Human|Group 42 (G42) Healthcare|G42 Healthcare|Ogrodzki|United Arab Emirates

>Spike|hCoV-19/USA/TX-HMH-4122/2020|2020-06-18|EPI\_ISL\_543388|Original|hCoV-19^^Texas|Human|Houston Methodist Hospital|Houston Methodist Hospital|Long|USA

>Spike|hCoV-19/England/ALDP-91F6F4/2020|2020-06-23|EPI\_ISL\_553279|Original|hCoV-19^^England|Human|Lighthouse Lab in Alderley Park|Wellcome Sanger Institute for the COVID-19 Genomics UK (COG-UK) consortium|Davies|United Kingdom

>Spike|hCoV-19/Switzerland/BE-ETHZ-420312/2020|2020-12-20|EPI\_ISL\_768005|Original|hCoV-19^^Bern|Human|Viollier AG|Department of Biosystems Science and Engineering|Nadeau|Switzerland

>Spike|hCoV-19/USA/UT-UPHL-201117437/2020|2020-05-01|EPI\_ISL\_634907|Original|hCoV-19^^Utah|Human|Utah Public Health Laboratory|Utah Public Health Laboratory|Young|USA

>Spike|hCoV-19/DRC/108/2020|2020-03-19|EPI\_ISL\_417948|Original|hCoV-19^^Kinshasa|Human|Viral Respiratory Lab|Pathogen Sequencing Lab|Pratt|Democratic Republic of the Congo

>Spike|hCoV-19/England/QEUA-B31CF8/2020|2020-11-04|EPI\_ISL\_646331|Original|hCoV-19^^England|Human|Lighthouse Lab in Glasgow|Wellcome Sanger Institute for the COVID-19 Genomics UK (COG-UK) Consortium|Davies|United Kingdom

>Spike|hCoV-19/Switzerland/BS-42395177/2020|2020-08-14|EPI\_ISL\_581955|Original|hCoV-19^^Basel-Stadt|Human|University Hospital Basel|University Hospital Basel|Roloff Handschin|Switzerland

>Spike|hCoV-19/USA/WA-S1859/2020|2020-05-28|EPI\_ISL\_496285|Original|hCoV-19^^Washington|Human|Washington State Department of Health|Seattle Flu Study|Lee|USA

>Spike|hCoV-19/England/CAMC-CB7558/2020|2020-12-18|EPI\_ISL\_777789|Original|hCoV-19^^England|Human|Lighthouse Lab in Cambridge|Wellcome Sanger Institute for the COVID-19 Genomics UK (COG-UK) Consortium|Davies|United Kingdom

>Spike|hCoV-19/Turkey/IST-GLAB-255/2020|2020-05-19|EPI\_ISL\_735320|Original|hCoV-19^^Istanbul|Human|Genomic Laboratory (GLAB) (Conjoint lab of Health Directorate of Istanbul and Istanbul Technical University)|Genomic Laboratory (GLAB)|Karacan|Turkey

>Spike|hCoV-19/USA/TX-HMH-5265/2020|2020-06-24|EPI\_ISL\_544637|Original|hCoV-19^^Texas|Human|Houston Methodist Hospital|Houston Methodist Hospital|Long|USA

>Spike|hCoV-19/England/QEUA-A0B37B/2020|2020-10-01|EPI\_ISL\_599469|Original|hCoV-19^^England|Human|Lighthouse Lab in Glasgow|Wellcome Sanger Institute for the COVID-19 Genomics UK (COG-UK) consortium|Davies|United Kingdom

>Spike|hCoV-19/Portugal/PT1954/2020|2020-11-13|EPI\_ISL\_732181|Original|hCoV-19^^Portugal|Human|Instituto Nacional de Saude (INSA) and Instituto Gulbenkian de Ciencia (IGC)|Instituto Nacional de Saude (INSA) and Instituto Gulbenkian de Ciencia (IGC)|Borges|Portugal

>Spike|hCoV-19/Netherlands/NB-RIVM-10078/2020|2020-00-00|EPI\_ISL\_547487|Original|hCoV-19^^Noord Brabant|Human|Dutch COVID-19 response team|National Institute for Public Health and the Environment (RIVM)|Meijer|Netherlands

>Spike|hCoV-19/Wales/PHWC-28AF5/2020|2020-04-02|EPI\_ISL\_445401|Original|hCoV-19^^Wales|Human|Wales Specialist Virology Centre|Public Health Wales Microbiology Cardiff|Moore|United Kingdom

>Spike|hCoV-19/England/BRIS-126434/2020|2020-04-10|EPI\_ISL\_458990|Original|hCoV-19^^England|Human|PHE South West Regional Laboratory|Wellcome Sanger Institute for the COVID-19 Genomics UK (COG-UK) consortium|Davies|United Kingdom

>Spike|hCoV-19/South Africa/KRISP-0125/2020|2020-05-13|EPI\_ISL\_467477|Original|hCoV-19^^KwaZulu-Natal|Human|Molecular Diagnostics Services (MDS)|KRISP|de Oliveira|South Africa

>Spike|hCoV-19/England/QEUEH-AE251A/2020|2020-10-26|EPI\_ISL\_633552|Original|hCoV-19^^England|Human|Lighthouse Lab in Glasgow|Wellcome Sanger Institute for the COVID-19 Genomics UK (COG-UK) consortium|Davies|United Kingdom

>Spike|hCoV-19/Scotland/QEUEH-9F9405/2020|2020-09-25|EPI\_ISL\_600886|Original|hCoV-19^^Scotland|Human|Lighthouse Lab in Glasgow|Wellcome Sanger Institute for the COVID-19 Genomics UK (COG-UK) consortium|Davies|United Kingdom

>Spike|hCoV-19/England/LOND-DB45D/2020|2020-11-17|EPI\_ISL\_724768|Original|hCoV-19^^England|Human|University College London|COVID-19 Genomics UK (COG-UK) Consortium|Roy|United Kingdom

>Spike|hCoV-19/Scotland/EDB6062/2020|2020-05-09|EPI\_ISL\_478200|Original|hCoV-19^^Scotland|Human|Virology Department|COVID-19 Genomics UK (COG-UK) Consortium|Williams|United Kingdom

>Spike|hCoV-19/Denmark/DCGC-21982/2020|2020-12-14|EPI\_ISL\_758490|Original|hCoV-19^^Midtjylland|Human|Department of Virus and Microbiological Special Diagnostics|Albertsen Lab|Michaelsen|Denmark

>Spike|hCoV-19/USA/AZ-TG366762/2020|2020-06-04|EPI\_ISL\_694509|Original|hCoV-19^^Arizona|Human|AZ SPHL|TGen North|French|USA

>Spike|hCoV-19/USA/UT-03044/2020|2020-05-01|EPI\_ISL\_522315|Original|hCoV-19^^Utah|Human|Utah Public Health Laboratory|Utah Public Health Laboratory|Young|USA

>Spike|hCoV-19/Scotland/CVR6010/2020|2020-11-27|EPI\_ISL\_680454|Original|hCoV-19^^Scotland|Human|West of Scotland Specialist Virology Centre|COVID-19 Genomics UK (COG-UK) Consortium|Robertson|United Kingdom

>Spike|hCoV-19/Gambia/GC19-2985/2020|2020-07-24|EPI\_ISL\_561158|Original|hCoV-19^^Kombo|Human|MRCG at LSHTM Genomics lab|MRCG at LSHTM Genomics lab|Sesay|Gambia

>Spike|hCoV-19/Ireland/LH-NVRL-22901/2020|2020-03-10|EPI\_ISL\_418582|Original|hCoV-19^^Louth|Human|UCD National Virus Reference Laboratory|UCD National Virus Reference Laboratory|Gonzalez|Ireland

>Spike|hCoV-19/Denmark/DCGC-922/2020|2020-03-30|EPI\_ISL\_614534|Original|hCoV-19^^Sjaelland|Human|Department of Virus and Microbiological Special Diagnostics|Albertsen lab|Michaelsen|Denmark

>Spike|hCoV-19/Canada/ON-UHTC\_0385/2020|2020-11-24|EPI\_ISL\_698082|Original|hCoV-19^^Ontario|Human|Unity Health Toronto|Ontario Institute for Cancer Research|de Borja|Canada

>Spike|hCoV-19/England/QEUEH-AF2948/2020|2020-10-30|EPI\_ISL\_662702|Original|hCoV-19^^England|Human|Lighthouse Lab in Glasgow|Wellcome Sanger Institute for the COVID-19 Genomics UK (COG-UK) Consortium|Davies|United Kingdom

>Spike|hCoV-19/USA/VA-DCLS-1626/2020|2020-08-19|EPI\_ISL\_614031|Original|hCoV-19^^Virginia|Human|Virginia DCLS|Virginia DCLS|St. Jacques|USA

>Spike|hCoV-19/USA/TX-DSHS-0884/2020|2020-06-16|EPI\_ISL\_610020|Original|hCoV-19^^Texas|Human|Texas Department of State Health Services|Texas Department of State Health Services|Rahman|USA

>Spike|hCoV-19/Denmark/DCGC-21361/2020|2020-12-21|EPI\_ISL\_758128|Original|hCoV-19^^Hovedstaden|Human|Department of Virus and Microbiological Special Diagnostics|Albertsen Lab|Michaelsen|Denmark

>Spike|hCoV-19/Scotland/EDB2608/2020|2020-04-25|EPI\_ISL\_439241|Original|hCoV-19^^Scotland|Human|Virology Department|COVID-19 Genomics UK (COG-UK) Consortium|Williams|United Kingdom

>Spike|hCoV-19/England/ALDP-B26009/2020|2020-11-04|EPI\_ISL\_646689|Original|hCoV-19^^England|Human|Lighthouse Lab in Alderley Park|Wellcome Sanger Institute for the COVID-19 Genomics UK (COG-UK) Consortium|Davies|United Kingdom

>Spike|hCoV-19/England/LIVE-A12FC/2020|2020-06-03|EPI\_ISL\_499951|Original|hCoV-19^^England|Human|Liverpool Clinical Laboratories|COVID-19 Genomics UK (COG-UK) Consortium|Haldenby|United Kingdom

>Spike|hCoV-19/USA/WA-UW-12355/2020|2020-06-27|EPI\_ISL\_570510|Original|hCoV-19^^Washington|Human|UW Virology Lab|UW Virology Lab|Roychoudhury|USA

>Spike|hCoV-19/Wales/PHWC-4A1FE2/2020|2020-12-14|EPI\_ISL\_743841|Original|hCoV-19^^Wales|Human|Wales Specialist Virology Centre Sequencing lab|COVID-19 Genomics UK (COG-UK) Consortium|Moore|United Kingdom

>Spike|hCoV-19/USA/CA-UCLA-236/2020|2020-06-18|EPI\_ISL\_537542|Original|hCoV-19^^California|Human|UCLA Pathology Clinical Microbiology Lab|Kruglyak Lab|Boocock|USA

>Spike|hCoV-19/South Africa/KRISP-K003704/2020|2020-10-04|EPI\_ISL\_602884|Original|hCoV-19^^KwaZulu-Natal|Human|NHLS-IALCH|KRISP|de Oliveira|South Africa

>Spike|hCoV-19/Wales/PHWC-486781/2020|2020-10-30|EPI\_ISL\_639077|Original|hCoV-19^^Wales|Human|Wales Specialist Virology Centre Sequencing lab|COVID-19 Genomics UK (COG-UK) Consortium|Moore|United Kingdom

>Spike|hCoV-19/Wales/PHWC-493754/2020|2020-11-29|EPI\_ISL\_725935|Original|hCoV-19^^Wales|Human|Originating lab|COVID-19 Genomics UK (COG-UK) Consortium|Moore|United Kingdom

>Spike|hCoV-19/England/CAMB-720CD/2020|2020-03-28|EPI\_ISL\_439918|Original|hCoV-19^^England|Human|Department of Pathology|Wellcome Sanger Institute for the COVID-19 Genomics UK (COG-UK) consortium|Amato|United Kingdom

>Spike|hCoV-19/Wales/ALDP-C3A4E7/2020|2020-12-08|EPI\_ISL\_767173|Original|hCoV-19^^Wales|Human|Lighthouse Lab in Alderley Park|Wellcome Sanger Institute for the COVID-19 Genomics UK (COG-UK) Consortium|Davies|United Kingdom

>Spike|hCoV-19/England/MILK-BABA86/2020|2020-11-18|EPI\_ISL\_720392|Original|hCoV-19^^England|Human|Lighthouse Lab in Milton Keynes|Wellcome Sanger Institute for the COVID-19 Genomics UK (COG-UK) Consortium|Davies|United Kingdom

>Spike|hCoV-19/England/MILK-C51945/2020|2020-12-11|EPI\_ISL\_769649|Original|hCoV-19^^England|Human|Lighthouse Lab in Milton Keynes|Wellcome Sanger Institute for the COVID-19 Genomics UK (COG-UK) Consortium|Davies|United Kingdom

>Spike|hCoV-19/USA/TX-HMH-MCoV-15545/2020|2020-10-26|EPI\_ISL\_787029|Original|hCoV-19^^Texas|Human|Houston Methodist Hospital|Houston Methodist Hospital|Long|USA

>Spike|hCoV-19/USA/WI-WSLH-200241/2020|2020-04-14|EPI\_ISL\_578461|Original|hCoV-19^^Wisconsin|Human|Wisconsin State Laboratory of Hygiene Communicable Disease Division|Wisconsin State Laboratory of Hygiene Communicable Disease Division|Florek|USA

>Spike|hCoV-19/USA/SC-DHEC-0930/2020|2020-06-26|EPI\_ISL\_538421|Original|hCoV-19^^South Carolina|Human|Microbiology Division|Microbiology Division|Flores|USA

>Spike|hCoV-19/England/LIVE-DC4399/2020|2020-11-14|EPI\_ISL\_703952|Original|hCoV-19^^England|Human|Liverpool Clinical Laboratories|COVID-19 Genomics UK (COG-UK) Consortium|Haldenby|United Kingdom

>Spike|hCoV-19/USA/TX-DSHS-0548/2020|2020-05-14|EPI\_ISL\_574452|Original|hCoV-19^^Texas|Human|Texas Department of State Health Services|Texas Department of State Health Services|Rahman|USA

>Spike|hCoV-19/Scotland/QEUEH-C4BC36/2020|2020-12-14|EPI\_ISL\_757118|Original|hCoV-19^^Scotland|Human|Lighthouse Lab in Glasgow|Wellcome Sanger Institute for the COVID-19 Genomics UK (COG-UK) Consortium|Davies|United Kingdom

>Spike|hCoV-19/Australia/VIC13377/2020|2020-07-29|EPI\_ISL\_563702|Original|hCoV-19^^Victoria|Human|Microbiological Diagnostic Unit - Public Health Laboratory (MDU-PHL)|MDU-PHL|Schultz|Australia

>Spike|hCoV-19/India/MH-ACTREC-234/2020|2020-07-04|EPI\_ISL\_699887|Original|hCoV-19^^Maharashtra|Human|Hematopathology Laboratory|Hematopathology Laboratory|Patkar|India

>Spike|hCoV-19/Denmark/DCGC-9293/2020|2020-11-16|EPI\_ISL\_668890|Original|hCoV-19^^Nordjylland|Human|Department of Virus and Microbiological Special Diagnostics|Albertsen Lab|Michaelsen|Denmark

>Spike|hCoV-19/Wales/ALDP-6FA6D4/2020|2020-06-29|EPI\_ISL\_557425|Original|hCoV-19^^Wales|Human|Lighthouse Lab in Alderley Park|Wellcome Sanger Institute for the COVID-19 Genomics UK (COG-UK) consortium|Davies|United Kingdom

>Spike|hCoV-19/USA/WA-UW115/2020|2020-03-11|EPI\_ISL\_416653|Original|hCoV-19^^Washington|Human|UW Virology Lab|UW Virology Lab|Roychoudhury|USA

>Spike|hCoV-19/England/MILK-BAA4E3/2020|2020-11-17|EPI\_ISL\_783085|Original|hCoV-19^^England|Human|Lighthouse Lab in Milton Keynes|Wellcome Sanger Institute for the COVID-19 Genomics UK (COG-UK) Consortium|Davies|United Kingdom

>Spike|hCoV-19/Scotland/QEUEH-9E53F0/2020|2020-09-24|EPI\_ISL\_601083|Original|hCoV-19^^Scotland|Human|Lighthouse Lab in Glasgow|Wellcome Sanger Institute for the COVID-19 Genomics UK (COG-UK) consortium|Davies|United Kingdom

>Spike|hCoV-19/Brazil/MG-0289/2020|2020-04-08|EPI\_ISL\_470594|Original|hCoV-19^^Minas Gerais|Human|Simile|Bioinformatics Laboratory / LNCC|Almeida|Brazil

>Spike|hCoV-19/Australia/VIC9664/2020|2020-08-12|EPI\_ISL\_565642|Original|hCoV-19^^Victoria|Human|Microbiological Diagnostic Unit - Public Health Laboratory (MDU-PHL)|MDU-PHL|Schultz|Australia

>Spike|hCoV-19/England/LIVE-1D2C3F/2020|2020-08-15|EPI\_ISL\_611898|Original|hCoV-19^^England|Human|Liverpool Clinical Laboratories|COVID-19 Genomics UK (COG-UK) Consortium|Haldenby|United Kingdom

>Spike|hCoV-19/USA/CA-ALSR-3862/2020|2020-07-01|EPI\_ISL\_636249|Original|hCoV-19^^California|Human|San Diego County Public Health Laboratory|Andersen lab at Scripps Research|Gangavarapu|USA

>Spike|hCoV-19/England/20168039704/2020|2020-04-13|EPI\_ISL\_528388|Original|hCoV-19^^England|Human|Respiratory Virus Unit|Respiratory Virus Unit|Ledesma|United Kingdom

>Spike|hCoV-19/USA/UT-UPHL-04526/2020|2020-05-22|EPI\_ISL\_575156|Original|hCoV-19^^Utah|Human|Utah Public Health Laboratory|Utah Public Health Laboratory|Young|USA

>Spike|hCoV-19/England/QEUEH-9F34DE/2020|2020-09-24|EPI\_ISL\_588477|Original|hCoV-19^^England|Human|Lighthouse Lab in Glasgow|Wellcome Sanger Institute for the COVID-19 Genomics UK (COG-UK) consortium|Davies|United Kingdom

>Spike|hCoV-19/Wales/PHWC-16BAE6/2020|2020-09-17|EPI\_ISL\_573941|Original|hCoV-19^^Wales|Human|Wales Specialist Virology Centre Sequencing lab|COVID-19 Genomics UK (COG-UK) Consortium|Moore|United Kingdom

>Spike|hCoV-19/Denmark/ALAB-SSI-779/2020|2020-03-19|EPI\_ISL\_444901|Original|hCoV-19^^Denmark|Human|Department of Virus and Microbiological Special Diagnostics|Albertsen lab|Kirkegaard|Denmark

>Spike|hCoV-19/USA/TX-HMH-MCoV-11457/2020|2020-09-09|EPI\_ISL\_790024|Original|hCoV-19^^Texas|Human|Houston Methodist Hospital|Houston Methodist Hospital|Long|USA

>Spike|hCoV-19/England/MILK-BAA46B/2020|2020-11-17|EPI\_ISL\_783365|Original|hCoV-19^^England|Human|Lighthouse Lab in Milton Keynes|Wellcome Sanger Institute for the COVID-19 Genomics UK (COG-UK) Consortium|Davies|United Kingdom

>Spike|hCoV-19/England/MILK-9E0322/2020|2020-09-20|EPI\_ISL\_601363|Original|hCoV-19^^England|Human|Lighthouse Lab in Milton Keynes|Wellcome Sanger Institute for the COVID-19 Genomics UK (COG-UK) consortium|Davies|United Kingdom

>Spike|hCoV-19/Germany/ChVir2012/2020|2020-00-00|EPI\_ISL\_729554|Original|hCoV-19^^Germany|Human|Charit\u00e9 Universit\u00e4tsmedizin Berlin|Charit\u00e9 Universit\u00e4tsmedizin Berlin|Muehlemann|Germany

>Spike|hCoV-19/England/QEUEH-A61EEB/2020|2020-10-12|EPI\_ISL\_706942|Original|hCoV-19^^England|Human|Oxford Viromics|COVID-19 Genomics UK (COG-UK) Consortium|Golubchik|United Kingdom

>Spike|hCoV-19/England/LIVE-DC0E32/2020|2020-11-03|EPI\_ISL\_702953|Original|hCoV-19^^England|Human|Liverpool Clinical Laboratories|COVID-19 Genomics UK (COG-UK) Consortium|Haldenby|United Kingdom

>Spike|hCoV-19/USA/WA-UW-8873/2020|2020-05-09|EPI\_ISL\_570224|Original|hCoV-19^^Washington|Human|UW Virology Lab|UW Virology Lab|Roychoudhury|USA

>Spike|hCoV-19/Scotland/CVR388/2020|2020-03-22|EPI\_ISL\_439070|Original|hCoV-19^^Scotland|Human|West of Scotland Specialist Virology Centre|COVID-19 Genomics UK (COG-UK) Consortium|Robertson|United Kingdom

>Spike|hCoV-19/Denmark/DCGC-12933/2020|2020-12-07|EPI\_ISL\_712472|Original|hCoV-19^^Hovedstaden|Human|Department of Virus and Microbiological Special Diagnostics|Albertsen Lab|Michaelsen|Denmark

>Spike|hCoV-19/Wales/PHWC-485B86/2020|2020-10-26|EPI\_ISL\_628258|Original|hCoV-19^^Wales|Human|Wales Specialist Virology Centre Sequencing lab|COVID-19 Genomics UK (COG-UK) Consortium|Moore|United Kingdom

>Spike|hCoV-19/USA/TX-HMH-1137/2020|2020-04-25|EPI\_ISL\_542546|Original|hCoV-19^^Texas|Human|Houston Methodist Hospital|Houston Methodist Hospital|Long|USA

>Spike|hCoV-19/USA/VA-DCLS-0839/2020|2020-05-06|EPI\_ISL\_516706|Original|hCoV-19^^Virginia|Human|Virginia DCLS|Virginia DCLS|St. Jacques|USA

>Spike|hCoV-19/England/QEUA-C33ADD/2020|2020-12-11|EPI\_ISL\_734110|Original|hCoV-19^^England|Human|Lighthouse Lab in Glasgow|Wellcome Sanger Institute for the COVID-19 Genomics UK (COG-UK) Consortium|Davies|United Kingdom

>Spike|hCoV-19/Japan/PG-1064/2020|2020-04-00|EPI\_ISL\_684674|Original|hCoV-19^^Japan|Human|Fukuoka Institute of Health and Environmental Sciences|Pathogen Genomics Center|Sekizuka|Japan

>Spike|hCoV-19/Wales/PHWC-16567F/2020|2020-06-18|EPI\_ISL\_490711|Original|hCoV-19^^Wales|Human|Wales Specialist Virology Centre Sequencing lab|COVID-19 Genomics UK (COG-UK) Consortium|Moore|United Kingdom

>Spike|hCoV-19/Singapore/1338/2020|2020-06-04|EPI\_ISL\_648687|Original|hCoV-19^^Singapore|Human|Department of Laboratory Medicine|Department of Laboratory Medicine|Chen|Singapore

>Spike|hCoV-19/USA/TX-HMH-MCoV-15758/2020|2020-07-10|EPI\_ISL\_785442|Original|hCoV-19^^Texas|Human|Houston Methodist Hospital|Houston Methodist Hospital|Long|USA

>Spike|hCoV-19/Japan/PG-3571/2020|2020-06-00|EPI\_ISL\_691827|Original|hCoV-19^^Japan|Human|Pathogen Genomics Center|Pathogen Genomics Center|Sekizuka|Japan

>Spike|hCoV-19/England/LOND-D6777/2020|2020-04-23|EPI\_ISL\_482209|Original|hCoV-19^^England|Human|University College London|Wellcome Sanger Institute for the COVID-19 Genomics UK (COG-UK) consortium|Davies|United Kingdom

>Spike|hCoV-19/England/ALDP-94C62B/2020|2020-06-14|EPI\_ISL\_555919|Original|hCoV-19^^England|Human|Lighthouse Lab in Alderley Park|Wellcome Sanger Institute for the COVID-19 Genomics UK (COG-UK) consortium|Davies|United Kingdom

>Spike|hCoV-19/England/BIRM-67ACD/2020|2020-11-01|EPI\_ISL\_650251|Original|hCoV-19^^England|Human|University of Birmingham|COVID-19 Genomics UK (COG-UK) Consortium|Loman|United Kingdom

>Spike|hCoV-19/England/QEUA-B110B6/2020|2020-11-03|EPI\_ISL\_641916|Original|hCoV-19^^England|Human|Lighthouse Lab in Glasgow|Wellcome Sanger Institute for the COVID-19 Genomics UK (COG-UK) Consortium|Davies|United Kingdom

>Spike|hCoV-19/England/LOND-1266CD2/2020|2020-12-10|EPI\_ISL\_741196|Original|hCoV-19^^England|Human|University College London|COVID-19 Genomics UK (COG-UK) Consortium|Roy|United Kingdom

>Spike|hCoV-19/Switzerland/Vs-ETHZ-410514/2020|2020-11-25|EPI\_ISL\_737618|Original|hCoV-19^^Valais|Human|Viollier AG|Department of Biosystems Science and Engineering|Nadeau|Switzerland

>Spike|hCoV-19/USA/TX-HMH-3585/2020|2020-06-15|EPI\_ISL\_543042|Original|hCoV-19^^Texas|Human|Houston Methodist Hospital|Houston Methodist Hospital|Long|USA

>Spike|hCoV-19/England/ALDP-94467E/2020|2020-06-07|EPI\_ISL\_554617|Original|hCoV-19^^England|Human|Lighthouse Lab in Alderley Park|Wellcome Sanger Institute for the COVID-19 Genomics UK (COG-UK) consortium|Davies|United Kingdom

>Spike|hCoV-19/Denmark/DCGC-9841/2020|2020-11-09|EPI\_ISL\_669219|Original|hCoV-19^^Hovedstaden|Human|Department of Virus and Microbiological Special Diagnostics|Albertsen Lab|Michaelsen|Denmark

>Spike|hCoV-19/Portugal/PT1828/2020|2020-11-15|EPI\_ISL\_732050|Original|hCoV-19^^Portugal|Human|Instituto Nacional de Saude (INSA)|Instituto Nacional de Saude (INSA)|Borges|Portugal

>Spike|hCoV-19/Denmark/DCGC-13474/2020|2020-11-30|EPI\_ISL\_712820|Original|hCoV-19^^Sjaelland|Human|Department of Virus and Microbiological Special Diagnostics|Albertsen Lab|Michaelsen|Denmark

>Spike|hCoV-19/Netherlands/NA\_534/2020|2020-00-00|EPI\_ISL\_460707|Original|hCoV-19^^Netherlands|Human|Dutch COVID-19 response team|Erasmus Medical Center|Oude Munnink|Netherlands

>Spike|hCoV-19/USA/VA-DCLS-2005/2020|2020-10-13|EPI\_ISL\_644906|Original|hCoV-19^^Virginia|Human|Virginia DCLS|Virginia DCLS|St. Jacques|USA

>Spike|hCoV-19/England/204221402/2020|2020-00-00|EPI\_ISL\_593796|Original|hCoV-19^^England|Human|Respiratory Virus Unit|Respiratory Virus Unit|Platt|United Kingdom

>Spike|hCoV-19/USA/CA-CZB-13706/2020|2020-11-09|EPI\_ISL\_739122|Original|hCoV-19^^California|Human|Santa Clara County Public Health Laboratory|Chan-Zuckerberg Biohub|Kamm|USA

>Spike|hCoV-19/England/BIRM-64FA3/2020|2020-09-28|EPI\_ISL\_594537|Original|hCoV-19^^England|Human|University of Birmingham|COVID-19 Genomics UK (COG-UK) Consortium|Loman|United Kingdom

>Spike|hCoV-19/USA/WA-UW-4227/2020|2020-03-31|EPI\_ISL\_427250|Original|hCoV-19^^Washington|Human|UW Virology Lab|UW Virology Lab|Roychoudhury|USA

>Spike|hCoV-19/Northern Ireland/QEUIH-9699A7/2020|2020-08-14|EPI\_ISL\_530980|Original|hCoV-19^^Northern Ireland|Human|Lighthouse Lab in Glasgow|Wellcome Sanger Institute for the COVID-19 Genomics UK (COG-UK) consortium|Davies|United Kingdom

>Spike|hCoV-19/USA/NY-NYCPHL-000944/2020|2020-09-25|EPI\_ISL\_632983|Original|hCoV-19^^New York|Human|DOHMH Corona|New York City Public Health Laboratory|Wang|USA

>Spike|hCoV-19/Australia/VIC14836/2020|2020-09-20|EPI\_ISL\_593020|Original|hCoV-19^^Victoria|Human|Microbiological Diagnostic Unit - Public Health Laboratory (MDU-PHL)|MDU-PHL|Schultz|Australia

>Spike|hCoV-19/Wales/PHWC-30BF7/2020|2020-04-10|EPI\_ISL\_446336|Original|hCoV-19^^Wales|Human|Wales Specialist Virology Centre|Public Health Wales Microbiology Cardiff|Moore|United Kingdom

>Spike|hCoV-19/Luxembourg/LNS3515812/2020|2020-10-26|EPI\_ISL\_740324|Original|hCoV-19^^Luxembourg|Human|Laboratoire national de sant\u00e9|Laboratoire national de sant\u00e9|Wienecke-Baldacchino|Luxembourg

>Spike|hCoV-19/England/ALDP-CB446D/2020|2020-12-18|EPI\_ISL\_761707|Original|hCoV-19^^England|Human|Lighthouse Lab in Alderley Park|Wellcome Sanger Institute for the COVID-19 Genomics UK (COG-UK) Consortium|Davies|United Kingdom

>Spike|hCoV-19/USA/HI-H200533/2020|2020-10-24|EPI\_ISL\_753065|Original|hCoV-19^^Hawaii|Human|State Laboratories Division|State Laboratories Division|Sultana|USA

>Spike|hCoV-19/Denmark/DCGC-14535/2020|2020-11-30|EPI\_ISL\_711823|Original|hCoV-19^^Sjaelland|Human|Department of Virus and Microbiological Special Diagnostics|Albertsen Lab|Michaelsen|Denmark

>Spike|hCoV-19/USA/TX-HMH-MCoV-13380/2020|2020-08-23|EPI\_ISL\_788523|Original|hCoV-19^^Texas|Human|Houston Methodist Hospital|Houston Methodist Hospital|Long|USA

>Spike|hCoV-19/USA/TX-HMH-7739/2020|2020-06-30|EPI\_ISL\_545609|Original|hCoV-19^^Texas|Human|Houston Methodist Hospital|Houston Methodist Hospital|Long|USA

>Spike|hCoV-19/England/MILK-ABC133/2020|2020-10-22|EPI\_ISL\_631139|Original|hCoV-19^^England|Human|Lighthouse Lab in Milton Keynes|Wellcome Sanger Institute for the COVID-19 Genomics UK (COG-UK) consortium|Davies|United Kingdom

>Spike|hCoV-19/USA/TX-HMH-3175/2020|2020-06-11|EPI\_ISL\_544050|Original|hCoV-19^^Texas|Human|Houston Methodist Hospital|Houston Methodist Hospital|Long|USA

>Spike|hCoV-19/USA/FL-BPHL-0451/2020|2020-03-24|EPI\_ISL\_495357|Original|hCoV-19^^Florida|Human|Florida Bureau of Public Health Laboratories|Florida Bureau of Public Health Laboratories|Blanton|USA

>Spike|hCoV-19/Wales/PHWC-47FE59/2020|2020-10-07|EPI\_ISL\_612819|Original|hCoV-19^^Wales|Human|Wales Specialist Virology Centre Sequencing lab|COVID-19 Genomics UK (COG-UK) Consortium|Moore|United Kingdom

>Spike|hCoV-19/Japan/PG-6098/2020|2020-08-00|EPI\_ISL\_689210|Original|hCoV-19^^Japan|Human|Pathogen Genomics Center|Pathogen Genomics Center|Sekizuka|Japan

>Spike|hCoV-19/USA/FL-BPHL-2099/2020|2020-07-20|EPI\_ISL\_653252|Original|hCoV-19^^Florida|Human|Florida Bureau of Public Health Laboratories|Florida Bureau of Public Health Laboratories|Blanton|USA



>Spike|hCoV-19/Wales/PHWC-482309/2020|2020-10-21|EPI\_ISL\_613212|Original|hCoV-19^^Wales|Human|Wales Specialist Virology Centre Sequencing lab|COVID-19 Genomics UK (COG-UK) Consortium|Moore|United Kingdom

>Spike|hCoV-19/England/205190021/2020|2020-12-19|EPI\_ISL\_791214|Original|hCoV-19^^England|Human|Respiratory Virus Unit|COVID-19 Genomics UK (COG-UK) Consortium|Platt|United Kingdom

>Spike|hCoV-19/USA/TX-HMH-MCoV-13926/2020|2020-08-16|EPI\_ISL\_787218|Original|hCoV-19^^Texas|Human|Houston Methodist Hospital|Houston Methodist Hospital|Long|USA

>Spike|hCoV-19/Switzerland/VD-ETHZ-330255/2020|2020-10-17|EPI\_ISL\_614959|Original|hCoV-19^^Vaud|Human|Viollier AG|Department of Biosystems Science and Engineering|Nadeau|Switzerland

>Spike|hCoV-19/England/ALDP-C060E0/2020|2020-12-05|EPI\_ISL\_709347|Original|hCoV-19^^England|Human|Lighthouse Lab in Alderley Park|Wellcome Sanger Institute for the COVID-19 Genomics UK (COG-UK) Consortium|Davies|United Kingdom

>Spike|hCoV-19/England/MILK-9A90C4/2020|2020-08-31|EPI\_ISL\_551251|Original|hCoV-19^^England|Human|Lighthouse Lab in Milton Keynes|Wellcome Sanger Institute for the COVID-19 Genomics UK (COG-UK) consortium|Davies|United Kingdom

>Spike|hCoV-19/Wales/PHWC-4A31EA/2020|2020-12-14|EPI\_ISL\_744068|Original|hCoV-19^^Wales|Human|Wales Specialist Virology Centre Sequencing lab|COVID-19 Genomics UK (COG-UK) Consortium|Moore|United Kingdom

>Spike|hCoV-19/Wales/PHWC-34829/2020|2020-04-15|EPI\_ISL\_446981|Original|hCoV-19^^Wales|Human|Wales Specialist Virology Centre|Public Health Wales Microbiology Cardiff|Moore|United Kingdom

>Spike|hCoV-19/South Africa/KRISP-0544/2020|2020-07-13|EPI\_ISL\_498085|Original|hCoV-19^^KwaZulu-Natal|Human|NHLs-IALCH|KRISP|de Oliveira|South Africa

>Spike|hCoV-19/Wales/PHWC-16A610/2020|2020-09-09|EPI\_ISL\_540916|Original|hCoV-19^^Wales|Human|Wales Specialist Virology Centre Sequencing lab|COVID-19 Genomics UK (COG-UK) Consortium|Moore|United Kingdom

>Spike|hCoV-19/Australia/VIC14500/2020|2020-08-09|EPI\_ISL\_592524|Original|hCoV-19^^Victoria|Human|Microbiological Diagnostic Unit - Public Health Laboratory (MDU-PHL)|MDU-PHL|Schultz|Australia

>Spike|hCoV-19/England/ALDP-AC12B0/2020|2020-10-10|EPI\_ISL\_631184|Original|hCoV-19^^England|Human|Lighthouse Lab in Alderley Park|Wellcome Sanger Institute for the COVID-19 Genomics UK (COG-UK) consortium|Davies|United Kingdom

>Spike|hCoV-19/Denmark/DCGC-2101/2020|2020-07-20|EPI\_ISL\_618360|Original|hCoV-19^^Hovedstaden|Human|Department of Virus and Microbiological Special Diagnostics|Albertsen lab|Michaelsen|Denmark

>Spike|hCoV-19/England/CAMC-AEAD38/2020|2020-10-26|EPI\_ISL\_633273|Original|hCoV-19^^England|Human|Lighthouse Lab in Cambridge|Wellcome Sanger Institute for the COVID-19 Genomics UK (COG-UK) consortium|Davies|United Kingdom

>Spike|hCoV-19/Scotland/GCVR-173DC4/2020|2020-04-06|EPI\_ISL\_459102|Original|hCoV-19^^Scotland|Human|NHSGGC West of Scotland Specialist Virology Centre / MRC-University of Glasgow Centre for Virus Research|Wellcome Sanger Institute for the COVID-19 Genomics UK (COG-UK) consortium|Davies|United Kingdom

>Spike|hCoV-19/Wales/PHWC-35A04/2020|2020-04-24|EPI\_ISL\_474512|Original|hCoV-19^^Wales|Human|Originating lab|COVID-19 Genomics UK (COG-UK) Consortium|Moore|United Kingdom

>Spike|hCoV-19/Wales/PHWC-480E64/2020|2020-10-16|EPI\_ISL\_613009|Original|hCoV-19^^Wales|Human|Wales Specialist Virology Centre Sequencing lab|COVID-19 Genomics UK (COG-UK) Consortium|Moore|United Kingdom

>Spike|hCoV-19/England/CAMB-809A3/2020|2020-04-09|EPI\_ISL\_470503|Original|hCoV-19^^England|Human|Department of Pathology|Wellcome Sanger Institute for the COVID-19 Genomics UK (COG-UK) consortium|Davies|United Kingdom

>Spike|hCoV-19/Portugal/PT0212/2020|2020-03-30|EPI\_ISL\_453926|Original|hCoV-19^^Portugal|Human|unknown|Instituto Nacional de Saude (INSA)|Borges|Portugal

>Spike|hCoV-19/USA/CA-QDX-2705/2020|2020-03-17|EPI\_ISL\_605005|Original|hCoV-19^^California|Human|Quest Diagnostics|Quest Diagnostics|Kagan|USA

>Spike|hCoV-19/England/ALDP-5246E1/2020|2020-06-02|EPI\_ISL\_559068|Original|hCoV-19^^England|Human|Lighthouse Lab in Alderley Park|Wellcome Sanger Institute for the COVID-19 Genomics UK (COG-UK) consortium|Davies|United Kingdom

>Spike|hCoV-19/Wales/PHWC-162A76/2020|2020-05-28|EPI\_ISL\_473156|Original|hCoV-19^^Wales|Human|Wales Specialist Virology Centre Sequencing lab|COVID-19 Genomics UK (COG-UK) Consortium|Moore|United Kingdom

>Spike|hCoV-19/Denmark/DCGC-11045/2020|2020-11-02|EPI\_ISL\_670363|Original|hCoV-19^^Nordjylland|Human|Department of Virus and Microbiological Special Diagnostics|Albertsen Lab|Michaelsen|Denmark

>Spike|hCoV-19/England/ALDP-AA127A/2020|2020-10-22|EPI\_ISL\_623988|Original|hCoV-19^^England|Human|Lighthouse Lab in Alderley Park|Wellcome Sanger Institute for the COVID-19 Genomics UK (COG-UK) consortium|Davies|United Kingdom

>Spike|hCoV-19/USA/VA-DCLS-2300/2020|2020-11-04|EPI\_ISL\_734258|Original|hCoV-19^^Virginia|Human|Virginia Division of Consolidated Laboratory Services (DCLS)|Virginia Division of Consolidated Laboratory Services (DCLS)|St. Jacques|USA

>Spike|hCoV-19/Switzerland/BL-ETHZ-110015/2020|2020-04-01|EPI\_ISL\_486455|Original|hCoV-19^^Basel-Landschaft|Human|Viollier AG|Department of Biosystems Science and Engineering|Nadeau|Switzerland

>Spike|hCoV-19/Australia/VIC8460/2020|2020-07-27|EPI\_ISL\_565030|Original|hCoV-19^^Victoria|Human|Microbiological Diagnostic Unit - Public Health Laboratory (MDU-PHL)|MDU-PHL|Schultz|Australia

>Spike|hCoV-19/Northern Ireland/QEUA-95EAB1/2020|2020-08-09|EPI\_ISL\_532320|Original|hCoV-19^^Northern Ireland|Human|Lighthouse Lab in Glasgow|Wellcome Sanger Institute for the COVID-19 Genomics UK (COG-UK) consortium|Davies|United Kingdom

>Spike|hCoV-19/USA/NY-NYCPHL-000534/2020|2020-03-18|EPI\_ISL\_631995|Original|hCoV-19^^New York|Human|Wyckoff Heights Medical Center|New York City Public Health Laboratory|Wang|USA

>Spike|hCoV-19/Scotland/QEUA-9437B8/2020|2020-07-28|EPI\_ISL\_532625|Original|hCoV-19^^Scotland|Human|NHSGGC West of Scotland Specialist Virology Centre / MRC-University of Glasgow Centre for Virus Research|Wellcome Sanger Institute for the COVID-19 Genomics UK (COG-UK) consortium|Davies|United Kingdom

>Spike|hCoV-19/USA/CA-UCLA-36/2020|2020-03-17|EPI\_ISL\_537568|Original|hCoV-19^^California|Human|UCLA Pathology Clinical Microbiology Lab|Kruglyak Lab|Boocock|USA

>Spike|hCoV-19/Scotland/QEUA-A1F67B/2020|2020-10-01|EPI\_ISL\_598943|Original|hCoV-19^^Scotland|Human|Lighthouse Lab in Glasgow|Wellcome Sanger Institute for the COVID-19 Genomics UK (COG-UK) consortium|Davies|United Kingdom

>Spike|hCoV-19/Japan/IC-0453/2020|2020-12-00|EPI\_ISL\_768662|Original|hCoV-19^^Japan|Human|Pathogen Genomics Center|Pathogen Genomics Center|Sekizuka|Japan

>Spike|hCoV-19/England/ALDP-CED191/2020|2020-12-17|EPI\_ISL\_782013|Original|hCoV-19^^England|Human|Lighthouse Lab in Alderley Park|Wellcome Sanger Institute for the COVID-19 Genomics UK (COG-UK) Consortium|Davies|United Kingdom

>Spike|hCoV-19/England/MILK-9E0BC0/2020|2020-09-21|EPI\_ISL\_601349|Original|hCoV-19^^England|Human|Lighthouse Lab in Milton Keynes|Wellcome Sanger Institute for the COVID-19 Genomics UK (COG-UK) consortium|Davies|United Kingdom

>Spike|hCoV-19/Denmark/DCGC-9758/2020|2020-11-09|EPI\_ISL\_669151|Original|hCoV-19^^Midtjylland|Human|Department of Virus and Microbiological Special Diagnostics|Albertsen Lab|Michaelsen|Denmark

>Spike|hCoV-19/Finland/S8AA11/2020|2020-10-10|EPI\_ISL\_737055|Original|hCoV-19^^Uusimaa|Human|Department of Virology and Immunology|Department of Virology|Smura|Finland

>Spike|hCoV-19/Australia/QLD1011/2020|2020-03-22|EPI\_ISL\_530271|Original|hCoV-19^^Queensland|Human|Queensland Health Forensic and Scientific Services|Public Health Virology Laboratory|Nguyen|Australia

>Spike|hCoV-19/England/CAMC-B52A8E/2020|2020-11-09|EPI\_ISL\_657600|Original|hCoV-19^^England|Human|Lighthouse Lab in Cambridge|Wellcome Sanger Institute for the COVID-19 Genomics UK (COG-UK) Consortium|Davies|United Kingdom

>Spike|hCoV-19/England/MILK-BDCAD7/2020|2020-11-27|EPI\_ISL\_709704|Original|hCoV-19^^England|Human|Lighthouse Lab in Milton Keynes|Wellcome Sanger Institute for the COVID-19 Genomics UK (COG-UK) Consortium|Davies|United Kingdom

>Spike|hCoV-19/India/GJ-GBRC9/2020|2020-04-21|EPI\_ISL\_435056|Original|hCoV-19^^Gujarat|Human|Gujarat Biotechnology Research Centre|Gujarat Biotechnology Research Centre|Joshi|India

>Spike|hCoV-19/Germany/BE-ChVir-D1932-8298/2020|2020-10-08|EPI\_ISL\_753874|Original|hCoV-19^^Berlin|Human|Charit\u00e9 Universit\u00e4tsmedizin Berlin|Charit\u00e9 Universit\u00e4tsmedizin Berlin|Muehlemann|Germany

>Spike|hCoV-19/Northern Ireland/QEUIH-94390D/2020|2020-07-11|EPI\_ISL\_532578|Original|hCoV-19^^Northern Ireland|Human|Lighthouse Lab in Glasgow|Wellcome Sanger Institute for the COVID-19 Genomics UK (COG-UK) consortium|Davies|United Kingdom

>Spike|hCoV-19/USA/TX-HMH-6987/2020|2020-06-28|EPI\_ISL\_546411|Original|hCoV-19^^Texas|Human|Houston Methodist Hospital|Houston Methodist Hospital|Long|USA

>Spike|hCoV-19/Wales/PHWC-48B79B/2020|2020-11-05|EPI\_ISL\_666281|Original|hCoV-19^^Wales|Human|Wales Specialist Virology Centre Sequencing lab|COVID-19 Genomics UK (COG-UK) Consortium|Moore|United Kingdom

>Spike|hCoV-19/Spain/MD-HLP-105-4/2020|2020-04-21|EPI\_ISL\_534333|Original|hCoV-19^^Madrid|Human|Hospital Universitario La Paz|Hospital Universitario La Paz|Viedma|Spain

>Spike|hCoV-19/USA/TX-HMH-MCoV-12675/2020|2020-08-31|EPI\_ISL\_790458|Original|hCoV-19^^Texas|Human|Houston Methodist Hospital|Houston Methodist Hospital|Long|USA

>Spike|hCoV-19/Mexico/BCN-ALSR-2457/2020|2020-05-16|EPI\_ISL\_635485|Original|hCoV-19^^Baja California|Human|Centro de Diagn\u00f3stico COVID-19 UABC Tijuana|Andersen lab at Scripps Research|Gangavarapu|Mexico

>Spike|hCoV-19/USA/CA-IGI-0325/2020|2020-07-22|EPI\_ISL\_754866|Original|hCoV-19^^California|Human|Innovative Genomics Institute|Innovative Genomics Institute|Wyman|USA

>Spike|hCoV-19/Wales/MILK-9A9C1B/2020|2020-09-01|EPI\_ISL\_551244|Original|hCoV-19^^Wales|Human|Lighthouse Lab in Milton Keynes|Wellcome Sanger Institute for the COVID-19 Genomics UK (COG-UK) consortium|Davies|United Kingdom

>Spike|hCoV-19/England/CAMB-77B4F/2020|2020-04-01|EPI\_ISL\_439433|Original|hCoV-19^^England|Human|Department of Pathology|Wellcome Sanger Institute for the COVID-19 Genomics UK (COG-UK) consortium|Amato|United Kingdom

>Spike|hCoV-19/USA/WI-WSLH-200738/2020|2020-09-14|EPI\_ISL\_631494|Original|hCoV-19^^Wisconsin|Human|Wisconsin State Laboratory of Hygiene Communicable Disease Division|Wisconsin State Laboratory of Hygiene Communicable Disease Division|Florek|USA

>Spike|hCoV-19/USA/TX-HMH-6112/2020|2020-07-06|EPI\_ISL\_547248|Original|hCoV-19^^Texas|Human|Houston Methodist Hospital|Houston Methodist Hospital|Long|USA

>Spike|hCoV-19/England/NORT-296DCA/2020|2020-04-28|EPI\_ISL\_488161|Original|hCoV-19^^England|Human|NU-OMICS DNA Sequencing research facility|Wellcome Sanger Institute for the COVID-19 Genomics UK (COG-UK) consortium|Davies|United Kingdom

>Spike|hCoV-19/England/ALDP-B2438A/2020|2020-11-04|EPI\_ISL\_646911|Original|hCoV-19^^England|Human|Lighthouse Lab in Alderley Park|Wellcome Sanger Institute for the COVID-19 Genomics UK (COG-UK) Consortium|Davies|United Kingdom

>Spike|hCoV-19/Netherlands/ZuidHolland\_173/2020|2020-04-14|EPI\_ISL\_461345|Original|hCoV-19^^Zuid Holland|Human|Dutch COVID-19 response team|Erasmus Medical Center|Oude Munnink|Netherlands

>Spike|hCoV-19/England/CAMB-1B9C5C/2020|2020-11-09|EPI\_ISL\_664967|Original|hCoV-19^^England|Human|Department of Pathology|COVID-19 Genomics UK (COG-UK) Consortium|Goodfellow|United Kingdom

>Spike|hCoV-19/USA/WA-UW-6179/2020|2020-04-01|EPI\_ISL\_570082|Original|hCoV-19^^Washington|Human|UW Virology Lab|UW Virology Lab|Roychoudhury|USA

>Spike|hCoV-19/Denmark/DCGC-9404/2020|2020-11-16|EPI\_ISL\_668954|Original|hCoV-19^^Midtjylland|Human|Department of Virus and Microbiological Special Diagnostics|Albertsen Lab|Michaelsen|Denmark

>Spike|hCoV-19/Scotland/CVR3053/2020|2020-04-23|EPI\_ISL\_461640|Original|hCoV-19^^Scotland|Human|West of Scotland Specialist Virology Centre|COVID-19 Genomics UK (COG-UK) Consortium|Robertson|United Kingdom

>Spike|hCoV-19/USA/MN-MDH-1881/2020|2020-10-02|EPI\_ISL\_603016|Original|hCoV-19^^Minnesota|Human|Essentia Health-St. Mary's Medical Center|Minnesota Department of Health|Garfin|USA

>Spike|hCoV-19/England/ALDP-4F5D03/2020|2020-06-24|EPI\_ISL\_559186|Original|hCoV-19^^England|Human|Lighthouse Lab in Alderley Park|Wellcome Sanger Institute for the COVID-19 Genomics UK (COG-UK) consortium|Davies|United Kingdom

>Spike|hCoV-19/Belgium/reg-0409563/2020|2020-04-09|EPI\_ISL\_734553|Original|hCoV-19^^Heppen|Human|UZ Leuven|KU Leuven|Maes|Belgium

>Spike|hCoV-19/USA/MA-MGH-03085/2020|2020-08-14|EPI\_ISL\_765703|Original|hCoV-19^^Massachusetts|Human|Massachusetts General Hospital|Infectious Disease Program|Park|USA

>Spike|hCoV-19/USA/MD-MDH-0334/2020|2020-10-14|EPI\_ISL\_648279|Original|hCoV-19^^Maryland|Human|MD PHL|MD PHL|Keller|USA

>Spike|hCoV-19/Wales/QEUA-AE4BE9/2020|2020-10-27|EPI\_ISL\_647910|Original|hCoV-19^^Wales|Human|Lighthouse Lab in Glasgow|Wellcome Sanger Institute for the COVID-19 Genomics UK (COG-UK) Consortium|Davies|United Kingdom

>Spike|hCoV-19/Shenzhen/HKU-SZ-005/2020|2020-01-11|EPI\_ISL\_405839|Original|hCoV-19^^Guangdong|Human|The University of Hong Kong - Shenzhen Hospital|Li Ka Shing Faculty of Medicine|Chan|China

>Spike|hCoV-19/Denmark/DCGC-19494/2020|2020-12-07|EPI\_ISL\_748313|Original|hCoV-19^^Syddanmark|Human|Department of Virus and Microbiological Special Diagnostics|Albertsen Lab|Michaelsen|Denmark

>Spike|hCoV-19/England/QEUA-B8236C/2020|2020-11-14|EPI\_ISL\_661678|Original|hCoV-19^^England|Human|Lighthouse Lab in Glasgow|Wellcome Sanger Institute for the COVID-19 Genomics UK (COG-UK) Consortium|Davies|United Kingdom

>Spike|hCoV-19/USA/CA-CZB-13725/2020|2020-11-09|EPI\_ISL\_739384|Original|hCoV-19^^California|Human|County of San Luis Obispo Public Health Laboratory|Chan-Zuckerberg Biohub|Kamm|USA

>Spike|hCoV-19/England/MILK-9E0A87/2020|2020-09-20|EPI\_ISL\_601442|Original|hCoV-19^^England|Human|Lighthouse Lab in Milton Keynes|Wellcome Sanger Institute for the COVID-19 Genomics UK (COG-UK) consortium|Davies|United Kingdom

>Spike|hCoV-19/Belgium/reg-0409433/2020|2020-04-09|EPI\_ISL\_476942|Original|hCoV-19^^Landen|Human|KU Leuven|KU Leuven|Maes|Belgium

>Spike|hCoV-19/England/NOTT-10ECEF/2020|2020-03-28|EPI\_ISL\_432913|Original|hCoV-19^^England|Human|Queens Medical Centre|COVID-19 Genomics UK (COG-UK) Consortium|Loose|United Kingdom

>Spike|hCoV-19/USA/CA-SR0261/2020|2020-04-28|EPI\_ISL\_437551|Original|hCoV-19^^California|Human|Scripps Medical Laboratory|Andersen lab at Scripps Research|Gangavarapu|USA

>Spike|hCoV-19/England/MILK-AC9A83/2020|2020-10-21|EPI\_ISL\_630270|Original|hCoV-19^^England|Human|Lighthouse Lab in Milton Keynes|Wellcome Sanger Institute for the COVID-19 Genomics UK (COG-UK) consortium|Davies|United Kingdom

>Spike|hCoV-19/USA/TX-HMH-MCoV-15975/2020|2020-07-10|EPI\_ISL\_785659|Original|hCoV-19^^Texas|Human|Houston Methodist Hospital|Houston Methodist Hospital|Long|USA

>Spike|hCoV-19/USA/MI-MDHHS-SC20782/2020|2020-04-22|EPI\_ISL\_471803|Original|hCoV-19^^Michigan|Human|Michigan Department of Health and Human Services|Michigan Department of Health and Human Services|Blankenship|USA

>Spike|hCoV-19/South Africa/NHLS-UCT-GS-2203/2020|2020-08-03|EPI\_ISL\_700594|Original|hCoV-19^^Western Cape|Human|Oudtshoorn Hospital wc OUD|NHLS/UCT|Iranzadeh|South Africa

>Spike|hCoV-19/USA/TX-DSHS-0099/2020|2020-05-28|EPI\_ISL\_522382|Original|hCoV-19^^Texas|Human|Texas Department of State Health Services|Texas Department of State Health Services|Rahman|USA

>Spike|hCoV-19/England/QEUA-533861/2020|2020-05-18|EPI\_ISL\_532273|Original|hCoV-19^^England|Human|Lighthouse Lab in Glasgow|Wellcome Sanger Institute for the COVID-19 Genomics UK (COG-UK) consortium|Davies|United Kingdom

>Spike|hCoV-19/Denmark/DCGC-10415/2020|2020-11-02|EPI\_ISL\_669955|Original|hCoV-19^^Sjaelland|Human|Department of Virus and Microbiological Special Diagnostics|Albertsen Lab|Michaelsen|Denmark

>Spike|hCoV-19/England/NOTT-110DD8/2020|2020-04-29|EPI\_ISL\_448419|Original|hCoV-19^^England|Human|Queens Medical Centre|COVID-19 Genomics UK (COG-UK) Consortium|Loose|United Kingdom

>Spike|hCoV-19/India/DL-NCDC2067-CSIR-IGIB/2020|2020-05-19|EPI\_ISL\_482540|Original|hCoV-19^^Delhi|Human|National Centre for Disease control (NCDC)|NCDC/CSIR-IGIB|Pandey|India

>Spike|hCoV-19/Spain/MD-IBV-99012435/2020|2020-11-28|EPI\_ISL\_780046|Original|hCoV-19^^Madrid|Human|Hospital General Universitario Gregorio Mara\u00f1\u00f3n|SeqCOVID-SPAIN consortium|IBV (CSIC)|Comas|Spain

>Spike|hCoV-19/England/MILK-A18A1C/2020|2020-10-03|EPI\_ISL\_627472|Original|hCoV-19^^England|Human|University College London|COVID-19 Genomics UK (COG-UK) Consortium|Roy|United Kingdom

>Spike|hCoV-19/England/ALDP-A51552/2020|2020-10-07|EPI\_ISL\_598110|Original|hCoV-19^^England|Human|Lighthouse Lab in Alderley Park|Wellcome Sanger Institute for the COVID-19 Genomics UK (COG-UK) consortium|Davies|United Kingdom

>Spike|hCoV-19/Wales/PHWC-48453E/2020|2020-10-25|EPI\_ISL\_628014|Original|hCoV-19^^Wales|Human|Wales Specialist Virology Centre Sequencing lab|COVID-19 Genomics UK (COG-UK) Consortium|Moore|United Kingdom

>Spike|hCoV-19/USA/LA-BIE-087/2020|2020-04-08|EPI\_ISL\_436955|Original|hCoV-19^^Louisiana|Human|Ochsner Health|Bioinfoexperts|Cross|USA

>Spike|hCoV-19/Wales/MILK-9E05E0/2020|2020-09-20|EPI\_ISL\_601415|Original|hCoV-19^^Wales|Human|Lighthouse Lab in Milton Keynes|Wellcome Sanger Institute for the COVID-19 Genomics UK (COG-UK) consortium|Davies|United Kingdom

>Spike|hCoV-19/Australia/VIC6511/2020|2020-07-28|EPI\_ISL\_521285|Original|hCoV-19^^Victoria|Human|Microbiological Diagnostic Unit - Public Health Laboratory (MDU-PHL)|MDU-PHL|Schultz|Australia

>Spike|hCoV-19/Wales/PHWC-24F63/2020|2020-03-22|EPI\_ISL\_420959|Original|hCoV-19^^Wales|Human|Wales Specialist Virology Centre|Public Health Wales Microbiology Cardiff|Moore|United Kingdom

>Spike|hCoV-19/France/ARA-72249/2020|2020-09-14|EPI\_ISL\_693488|Original|hCoV-19^^Auvergne-Rh\u00f4ne-Alpes|Human|CNR Virus des Infections Respiratoires - France SUD|CNR Virus des Infections Respiratoires - France SUD|Bal|France

>Spike|hCoV-19/Wales/PHWC-16F569/2020|2020-10-04|EPI\_ISL\_585984|Original|hCoV-19^^Wales|Human|Wales Specialist Virology Centre Sequencing lab|COVID-19 Genomics UK (COG-UK) Consortium|Moore|United Kingdom

>Spike|hCoV-19/England/ALDP-A2E846/2020|2020-10-05|EPI\_ISL\_587182|Original|hCoV-19^^England|Human|Lighthouse Lab in Alderley Park|Wellcome Sanger Institute for the COVID-19 Genomics UK (COG-UK) consortium|Davies|United Kingdom

>Spike|hCoV-19/Luxembourg/LNS6184906/2020|2020-11-20|EPI\_ISL\_744377|Original|hCoV-19^^Luxembourg|Human|Laboratoire national de sant\u00e9|Laboratoire national de sant\u00e9|Wienecke-Baldacchino|Luxembourg

>Spike|hCoV-19/England/QEUEH-C53EEA/2020|2020-12-11|EPI\_ISL\_736455|Original|hCoV-19^^England|Human|Lighthouse Lab in Glasgow|Wellcome Sanger Institute for the COVID-19 Genomics UK (COG-UK) Consortium|Davies|United Kingdom

>Spike|hCoV-19/Japan/PG-1575/2020|2020-04-00|EPI\_ISL\_685181|Original|hCoV-19^^Japan|Human|Pathogen Genomics Center|Pathogen Genomics Center|Sekizuka|Japan

>Spike|hCoV-19/USA/WI-UW-937/2020|2020-05-05|EPI\_ISL\_509937|Original|hCoV-19^^Wisconsin|Human|University of Wisconsin-Madison AIDS Vaccine Research Laboratories|University of Wisconsin-Madison AIDS Vaccine Research Laboratories|Baczenas|USA

>Spike|hCoV-19/England/QEUEH-9AE205/2020|2020-09-04|EPI\_ISL\_637663|Original|hCoV-19^^England|Human|Department of Pathology|COVID-19 Genomics UK (COG-UK) Consortium|Goodfellow|United Kingdom

>Spike|hCoV-19/USA/MI-MDHHS-SC22328/2020|2020-11-08|EPI\_ISL\_708304|Original|hCoV-19^^Michigan|Human|Michigan Department of Health and Human Services|Michigan Department of Health and Human Services|Jacob|USA

>Spike|hCoV-19/Denmark/DCGC-19960/2020|2020-12-07|EPI\_ISL\_747890|Original|hCoV-19^^Midtjylland|Human|Department of Virus and Microbiological Special Diagnostics|Albertsen Lab|Michaelsen|Denmark

>Spike|hCoV-19/USA/FL-BPHL-03/2020|2020-04-05|EPI\_ISL\_436507|Original|hCoV-19^^Florida|Human|Florida Bureau of Public Health Laboratories|Florida Bureau of Public Health Laboratories|Blanton|USA

>Spike|hCoV-19/Canada/MB-NML-581/2020|2020-03-27|EPI\_ISL\_582272|Original|hCoV-19^^Manitoba|Human|Cadham Provincial Laboratory|National Microbiology Laboratory (NML)|Majer|Canada

>Spike|hCoV-19/Australia/VIC4806/2020|2020-07-15|EPI\_ISL\_519191|Original|hCoV-19^^Victoria|Human|Microbiological Diagnostic Unit - Public Health Laboratory (MDU-PHL)|MDU-PHL|Schultz|Australia

>Spike|hCoV-19/Denmark/DCGC-5774/2020|2020-09-28|EPI\_ISL\_620961|Original|hCoV-19^^Nordjylland|Human|Department of Virus and Microbiological Special Diagnostics|Albertsen lab|Michaelsen|Denmark

>Spike|hCoV-19/Uganda/UG125/2020|2020-09-01|EPI\_ISL\_738032|Original|hCoV-19^^Uganda|Human|Uganda Central Public Health Lab and Uganda Virus Research Institute|MRC/UVRI & LSHTM Uganda Research Unit|Cotten|Uganda

>Spike|hCoV-19/England/QEUEH-B2B884/2020|2020-11-02|EPI\_ISL\_646649|Original|hCoV-19^^England|Human|Lighthouse Lab in Glasgow|Wellcome Sanger Institute for the COVID-19 Genomics UK (COG-UK) Consortium|Davies|United Kingdom

>Spike|hCoV-19/USA/TX-HMH-MCoV-15869/2020|2020-07-10|EPI\_ISL\_785553|Original|hCoV-19^^Texas|Human|Houston Methodist Hospital|Houston Methodist Hospital|Long|USA

>Spike|hCoV-19/England/ALDP-AA3612/2020|2020-10-22|EPI\_ISL\_624970|Original|hCoV-19^^England|Human|Lighthouse Lab in Alderley Park|Wellcome Sanger Institute for the COVID-19 Genomics UK (COG-UK) consortium|Davies|United Kingdom

>Spike|hCoV-19/England/LOND-D5990/2020|2020-04-17|EPI\_ISL\_457284|Original|hCoV-19^^England|Human|University College London|COVID-19 Genomics UK (COG-UK) Consortium|Roy|United Kingdom

>Spike|hCoV-19/USA/NM-DOH-2020316085/2020|2020-08-27|EPI\_ISL\_732719|Original|hCoV-19^^New Mexico|Human|New Mexico Department of Health Scientific Laboratory|New Mexico Department of Health Scientific Laboratory|Johnson|USA

>Spike|hCoV-19/Japan/PG-5739/2020|2020-08-00|EPI\_ISL\_688859|Original|hCoV-19^^Japan|Human|Pathogen Genomics Center|Pathogen Genomics Center|Sekizuka|Japan

>Spike|hCoV-19/England/CAMB-83B04/2020|2020-04-15|EPI\_ISL\_443364|Original|hCoV-19^^England|Human|Department of Pathology|Wellcome Sanger Institute for the COVID-19 Genomics UK (COG-UK) consortium|Amato|United Kingdom

>Spike|hCoV-19/USA/CA-CZB-11165/2020|2020-09-15|EPI\_ISL\_625523|Original|hCoV-19^^California|Human|Alameda County Public Health Lab|Chan-Zuckerberg Biohub|Bhatt|USA

>Spike|hCoV-19/USA/MI-QDX-325/2020|2020-03-22|EPI\_ISL\_571069|Original|hCoV-19^^Michigan|Human|Quest Diagnostics|Quest Diagnostics|Kagan|USA

>Spike|hCoV-19/Wales/PHWC-28257/2020|2020-03-26|EPI\_ISL\_432140|Original|hCoV-19^^Wales|Human|Wales Specialist Virology Centre|Public Health Wales Microbiology Cardiff|Moore|United Kingdom

>Spike|hCoV-19/Denmark/DCGC-21015/2020|2020-12-21|EPI\_ISL\_759502|Original|hCoV-19^^Sjaelland|Human|Department of Virus and Microbiological Special Diagnostics|Albertsen Lab|Michaelsen|Denmark

>Spike|hCoV-19/Canada/ON-E9/2020|2020-04-26|EPI\_ISL\_593489|Original|hCoV-19^^Ontario|Human|Eastern Ontario Regional Laboratory Association|McMaster University|McArthur|Canada

>Spike|hCoV-19/Saudi Arabia/KAUST-Makkah193/2020|2020-04-06|EPI\_ISL\_437708|Original|hCoV-19^^Makkah|Human|Pathogen Genomics Lab King Abdullah University of Science and Technology(KAUST)|Pathogen Genomics Lab King Abdullah University of Science and Technology(KAUST)|Mohamed Ghazzali|Saudi Arabia

>Spike|hCoV-19/Iran/SA-Isf-20/2020|2020-04-11|EPI\_ISL\_591060|Original|hCoV-19^^Iran|Human|Infectious Diseases and Tropical Medicine Research Center|Infectious Diseases and Tropical Medicine Research Center|Haghjooy Javanmard,S.|Iran

>Spike|hCoV-19/Spain/CL-IBV-97006292/2020|2020-04-21|EPI\_ISL\_537662|Original|hCoV-19^^Castilla y Leon|Human|Universidad de Le\u00f3n|SeqCOVID-SPAIN consortium/IBV (CSIC)|Comas|Spain

>Spike|hCoV-19/USA/TX-HMH-3051/2020|2020-04-16|EPI\_ISL\_543957|Original|hCoV-19^^Texas|Human|Houston Methodist Hospital|Houston Methodist Hospital|Long|USA

>Spike|hCoV-19/England/QEUI-9F76D4/2020|2020-09-27|EPI\_ISL\_595694|Original|hCoV-19^^England|Human|Oxford Viromics|COVID-19 Genomics UK (COG-UK) Consortium|Golubchik|United Kingdom

>Spike|hCoV-19/USA/TX-HMH-1041/2020|2020-04-11|EPI\_ISL\_542504|Original|hCoV-19^^Texas|Human|Houston Methodist Hospital|Houston Methodist Hospital|Long|USA

>Spike|hCoV-19/England/NOTT-112C60/2020|2020-04-16|EPI\_ISL\_493603|Original|hCoV-19^^England|Human|Lincolnshire Hospitals and DeepSeq Nottingham|COVID-19 Genomics UK (COG-UK) Consortium|Loose|United Kingdom

>Spike|hCoV-19/Singapore/193/2020|2020-04-20|EPI\_ISL\_462311|Original|hCoV-19^^Singapore|Human|National Public Health Laboratory|National Public Health Laboratory|Mak|Singapore

>Spike|hCoV-19/France/PAC-MEPHI-2155/2020|2020-09-25|EPI\_ISL\_644516|Original|hCoV-19^^Provence-Alpes-Cote-d\u2019Azur|Human|MEPHI|MEPHI|Levasseur|France

>Spike|hCoV-19/Wales/PHWC-34249/2020|2020-04-18|EPI\_ISL\_446890|Original|hCoV-19^^Wales|Human|Wales Specialist Virology Centre|Public Health Wales Microbiology Cardiff|Moore|United Kingdom

>Spike|hCoV-19/England/LOND-D41A8/2020|2020-04-06|EPI\_ISL\_444096|Original|hCoV-19^^England|Human|University College London|COVID-19 Genomics UK (COG-UK) Consortium|Roy|United Kingdom

>Spike|hCoV-19/Japan/PG-1331/2020|2020-04-00|EPI\_ISL\_684939|Original|hCoV-19^^Japan|Human|Saitama Prefectural Institute of Public Health|Pathogen Genomics Center|Sekizuka|Japan

>Spike|hCoV-19/Australia/VIC17847/2020|2020-07-27|EPI\_ISL\_779498|Original|hCoV-19^^Victoria|Human|Microbiological Diagnostic Unit - Public Health Laboratory (MDU-PHL)|MDU-PHL|Beck|Australia

>Spike|hCoV-19/USA/WA-UW-24191/2020|2020-08-14|EPI\_ISL\_570763|Original|hCoV-19^^Washington|Human|UW Virology Lab|UW Virology Lab|Roychoudhury|USA

>Spike|hCoV-19/USA/NY-NYUMC224/2020|2020-03-18|EPI\_ISL\_427519|Original|hCoV-19^^New York|Human|NYU Langone Health|Departments of Pathology and Medicine|Maurano|USA

>Spike|hCoV-19/England/PORT-2F5E4E/2020|2020-10-08|EPI\_ISL\_613303|Original|hCoV-19^^England|Human|Centre for Enzyme Innovation|COVID-19 Genomics UK (COG-UK) Consortium|Robson|United Kingdom

>Spike|hCoV-19/England/ALDP-4AEE24/2020|2020-06-14|EPI\_ISL\_559362|Original|hCoV-19^^England|Human|Lighthouse Lab in Alderley Park|Wellcome Sanger Institute for the COVID-19 Genomics UK (COG-UK) consortium|Davies|United Kingdom

>Spike|hCoV-19/Denmark/DCGC-8326/2020|2020-10-26|EPI\_ISL\_617312|Original|hCoV-19^^Hovedstaden|Human|Department of Virus and Microbiological Special Diagnostics|Albertsen lab|Michaelsen|Denmark

>Spike|hCoV-19/France/OCC-NRC02765/2020|2020-10-19|EPI\_ISL\_640002|Original|hCoV-19^^Occitanie|Human|CNR Virus des Infections Respiratoires - France SUD|CNR Virus des Infections Respiratoires - France SUD|Josset|France

>Spike|hCoV-19/Scotland/QEUI-9B76EF/2020|2020-09-08|EPI\_ISL\_602113|Original|hCoV-19^^Scotland|Human|Lighthouse Lab in Glasgow|Wellcome Sanger Institute for the COVID-19 Genomics UK (COG-UK) consortium|Davies|United Kingdom

>Spike|hCoV-19/England/QEUI-9F509C/2020|2020-09-27|EPI\_ISL\_638653|Original|hCoV-19^^England|Human|Department of Pathology|COVID-19 Genomics UK (COG-UK) Consortium|Goodfellow|United Kingdom

>Spike|hCoV-19/Japan/PG-1726/2020|2020-04-00|EPI\_ISL\_685332|Original|hCoV-19^^Japan|Human|Pathogen Genomics Center|Pathogen Genomics Center|Sekizuka|Japan

>Spike|hCoV-19/Portugal/IGC4476/2020|2020-06-09|EPI\_ISL\_491257|Original|hCoV-19^^Portugal|Human|Instituto Gulbenkian de Ci\u00eancia|Instituto Gulbenkian de Ci\u00eancia|Leite|Portugal

>Spike|hCoV-19/USA/CA-ALSR-4332/2020|2020-10-07|EPI\_ISL\_648977|Original|hCoV-19^^California|Human|San Diego County Public Health Laboratory|Andersen lab at Scripps Research|Gangavarapu|USA

>Spike|hCoV-19/USA/CA-CZB-6740/2020|2020-08-19|EPI\_ISL\_582996|Original|hCoV-19^^California|Human|Orange County Public Health Lab|Chan-Zuckerberg Biohub|Bhatt|USA

>Spike|hCoV-19/Denmark/DCGC-21786/2020|2020-12-21|EPI\_ISL\_757780|Original|hCoV-19^^Hovedstaden|Human|Department of Virus and Microbiological Special Diagnostics|Albertsen Lab|Michaelsen|Denmark

>Spike|hCoV-19/USA/TX-DSHS-1924/2020|2020-06-21|EPI\_ISL\_765908|Original|hCoV-19^^Texas|Human|TXDSHS|TXDSHS|Rahman|USA

>Spike|hCoV-19/England/QEUEH-95E76F/2020|2020-08-06|EPI\_ISL\_532377|Original|hCoV-19^^England|Human|Lighthouse Lab in Glasgow|Wellcome Sanger Institute for the COVID-19 Genomics UK (COG-UK) consortium|Davies|United Kingdom

>Spike|hCoV-19/England/QEUEH-CDF44E/2020|2020-12-26|EPI\_ISL\_782319|Original|hCoV-19^^England|Human|Lighthouse Lab in Glasgow|Wellcome Sanger Institute for the COVID-19 Genomics UK (COG-UK) Consortium|Davies|United Kingdom

>Spike|hCoV-19/Australia/VIC3281/2020|2020-07-08|EPI\_ISL\_520960|Original|hCoV-19^^Victoria|Human|Microbiological Diagnostic Unit - Public Health Laboratory (MDU-PHL)|MDU-PHL|Schultz|Australia

>Spike|hCoV-19/USA/UT-UPHL-03789/2020|2020-04-03|EPI\_ISL\_560920|Original|hCoV-19^^Utah|Human|Utah Public Health Laboratory|Utah Public Health Laboratory|Young|USA

>Spike|hCoV-19/USA/WA-UW155/2020|2020-03-12|EPI\_ISL\_416693|Original|hCoV-19^^Washington|Human|UW Virology Lab|UW Virology Lab|Roychoudhury|USA

>Spike|hCoV-19/England/ALDP-AA12B6/2020|2020-10-22|EPI\_ISL\_624174|Original|hCoV-19^^England|Human|Lighthouse Lab in Alderley Park|Wellcome Sanger Institute for the COVID-19 Genomics UK (COG-UK) consortium|Davies|United Kingdom

>Spike|hCoV-19/USA/MI-UM-10033793415/2020|2020-03-27|EPI\_ISL\_578119|Original|hCoV-19^^Michigan|Human|University of Michigan Clinical Microbiology Laboratory|Lauring Lab|Valesano|USA

>Spike|hCoV-19/India/MP-DRDE 197/2020|2020-04-01|EPI\_ISL\_476846|Original|hCoV-19^^Madhya Pradesh|Human|Defence Research & Development Establishment (DRDE)|Defence Research & Development Establishment (DRDE)|Dash|India

>Spike|hCoV-19/Wales/PHWC-4997A9/2020|2020-12-03|EPI\_ISL\_727355|Original|hCoV-19^^Wales|Human|Originating lab|COVID-19 Genomics UK (COG-UK) Consortium|Moore|United Kingdom

>Spike|hCoV-19/Australia/VPRL006/2020|2020-04-01|EPI\_ISL\_455598|Original|hCoV-19^^South Australia|Human|SA Pathology|VPRL|Leong|Australia

>Spike|hCoV-19/Wales/PHWC-29010/2020|2020-04-03|EPI\_ISL\_445469|Original|hCoV-19^^Wales|Human|Wales Specialist Virology Centre|Public Health Wales Microbiology Cardiff|Moore|United Kingdom

>Spike|hCoV-19/Argentina/PAIS-A0008/2020|2020-03-30|EPI\_ISL\_430800|Original|hCoV-19^^Ciudad Autonoma de Buenos Aires|Human|Laboratorio de Virolog\u00eda del Hospital de Ni\u00f1os Dr. Ricardo Gutierrez|\u00c1rea de Secuenciaci\u00f3n del Laboratorio de Virolog\u00eda del Hospital de Ni\u00f1os Dr. Ricardo Gutierrez|Viegas|Argentina

>Spike|hCoV-19/Spain/AN-IBV-002912/2020|2020-03-19|EPI\_ISL\_474851|Original|hCoV-19^^Andalucia|Human|Hospital Universitario Virgen de las Nieves de Granada-SAS|SeqCOVID-SPAIN consortium|IBV(CSIC)|Comas|Spain

>Spike|hCoV-19/USA/CA-SEARCH-5360/2020|2020-12-14|EPI\_ISL\_755172|Original|hCoV-19^^California|Human|UCSD EXCITE lab|Andersen lab at Scripps Research|Gangavarapu|USA

>Spike|hCoV-19/USA/MN-GMF-19243/2020|2020-09-08|EPI\_ISL\_547800|Original|hCoV-19^^Minnesota|Human|Gundersen Molecular Diagnostics Laboratory|Kabara Cancer Research Institute|Kenny|USA

>Spike|hCoV-19/England/LIVE-A120B/2020|2020-05-17|EPI\_ISL\_499984|Original|hCoV-19^^England|Human|Liverpool Clinical Laboratories|COVID-19 Genomics UK (COG-UK) Consortium|Haldenby|United Kingdom

>Spike|hCoV-19/USA/TX-HMH-MCoV-14560/2020|2020-10-08|EPI\_ISL\_787845|Original|hCoV-19^^Texas|Human|Houston Methodist Hospital|Houston Methodist Hospital|Long|USA

>Spike|hCoV-19/England/QEUEH-96E7D5/2020|2020-08-17|EPI\_ISL\_530585|Original|hCoV-19^^England|Human|Lighthouse Lab in Glasgow|Wellcome Sanger Institute for the COVID-19 Genomics UK (COG-UK) consortium|Davies|United Kingdom

>Spike|hCoV-19/Denmark/DCGC-19949/2020|2020-12-07|EPI\_ISL\_747885|Original|hCoV-19^^Hovedstaden|Human|Department of Virus and Microbiological Special Diagnostics|Albertsen Lab|Michaelsen|Denmark

>Spike|hCoV-19/Australia/VIC3542/2020|2020-06-26|EPI\_ISL\_520291|Original|hCoV-19^^Victoria|Human|Victorian Infectious Diseases Reference Laboratory (VIDRL)|VIDRL and MDU-PHL|Schultz|Australia



>Spike|hCoV-19/USA/LA-EVTL1009/2020|2020-08-23|EPI\_ISL\_653700|Original|hCoV-19^^Louisiana|Human|LSUHS Emerging Viral Threat Laboratory|Microbial Genome Sequencing Center|Kamil|USA

>Spike|hCoV-19/Netherlands/NB-EMC-314/2020|2020-10-06|EPI\_ISL\_632666|Original|hCoV-19^^Noord Brabant|Human|Dutch COVID-19 response team|Erasmus Medical Center|Oude Munnink|Netherlands

>Spike|hCoV-19/England/LIVE-9E25C/2020|2020-04-03|EPI\_ISL\_453280|Original|hCoV-19^^England|Human|Liverpool Clinical Laboratories|COVID-19 Genomics UK (COG-UK) Consortium|Haldenby|United Kingdom

>Spike|hCoV-19/USA/FL-BPHL-1183/2020|2020-08-20|EPI\_ISL\_526669|Original|hCoV-19^^Florida|Human|Florida Bureau of Public Health Laboratories|Florida Bureau of Public Health Laboratories|Blanton|USA

>Spike|hCoV-19/Australia/VIC10260/2020|2020-08-08|EPI\_ISL\_562638|Original|hCoV-19^^Victoria|Human|Microbiological Diagnostic Unit - Public Health Laboratory (MDU-PHL)|MDU-PHL|Schultz|Australia

>Spike|hCoV-19/France/OCC-SC488/2020|2020-03-24|EPI\_ISL\_660686|Original|hCoV-19^^Occitanie|Human|CHU Montpellier|CNR Virus des Infections Respiratoires - France SUD|Bal|France

>Spike|hCoV-19/USA/TX-HMH-1745/2020|2020-05-12|EPI\_ISL\_542810|Original|hCoV-19^^Texas|Human|Houston Methodist Hospital|Houston Methodist Hospital|Long|USA

>Spike|hCoV-19/England/QEUH-9987D2/2020|2020-08-24|EPI\_ISL\_540016|Original|hCoV-19^^England|Human|Lighthouse Lab in Glasgow|Wellcome Sanger Institute for the COVID-19 Genomics UK (COG-UK) consortium|Davies|United Kingdom

>Spike|hCoV-19/Japan/PG-8299/2020|2020-08-00|EPI\_ISL\_687398|Original|hCoV-19^^Japan|Human|Pathogen Genomics Center|Pathogen Genomics Center|Sekizuka|Japan

>Spike|hCoV-19/England/CAMB-78CA5/2020|2020-04-03|EPI\_ISL\_441220|Original|hCoV-19^^England|Human|Department of Pathology|Wellcome Sanger Institute for the COVID-19 Genomics UK (COG-UK) consortium|Amato|United Kingdom

>Spike|hCoV-19/Luxembourg/LNS2287197/2020|2020-11-14|EPI\_ISL\_740093|Original|hCoV-19^^Luxembourg|Human|Laboratoire national de sant\u00e9|Laboratoire national de sant\u00e9|Wienecke-Baldacchino|Luxembourg

>Spike|hCoV-19/USA/WA-S2847/2020|2020-09-18|EPI\_ISL\_574689|Original|hCoV-19^^Washington|Human|Seattle Flu Study|Seattle Flu Study|Lee|USA

>Spike|hCoV-19/Switzerland/BE-ETHZ-300277/2020|2020-10-01|EPI\_ISL\_603309|Original|hCoV-19^^Bern|Human|Viollier AG|Department of Biosystems Science and Engineering|Nadeau|Switzerland

>Spike|hCoV-19/England/CAMC-A588F8/2020|2020-10-08|EPI\_ISL\_596930|Original|hCoV-19^^England|Human|Lighthouse Lab in Cambridge|Wellcome Sanger Institute for the COVID-19 Genomics UK (COG-UK) consortium|Davies|United Kingdom

>Spike|hCoV-19/USA/CA-CZB0707/2020|2020-03-23|EPI\_ISL\_429038|Original|hCoV-19^^California|Human|UCSF Clinical Microbiology Laboratory|Chan-Zuckerberg Biohub|Kamm|USA

>Spike|hCoV-19/USA/CA-ALSR-5111/2020|2020-12-03|EPI\_ISL\_730358|Original|hCoV-19^^California|Human|San Diego County Public Health Laboratory|Andersen lab at Scripps Research|Gangavarapu|USA

>Spike|hCoV-19/Austria/CeMM0422/2020|2020-03-27|EPI\_ISL\_475850|Original|hCoV-19^^Austria|Human|Austrian Agency for Health and Food Safety (AGES)|Bergthaler laboratory|Bergthaler|Austria

>Spike|hCoV-19/USA/TX-HMH-MCoV-9178/2020|2020-07-02|EPI\_ISL\_780556|Original|hCoV-19^^Texas|Human|Houston Methodist Hospital|Houston Methodist Hospital|Long|USA

>Spike|hCoV-19/Australia/NSW88/2020|2020-03-16|EPI\_ISL\_427702|Original|hCoV-19^^New South Wales|Human|Centre for Infectious Diseases and Microbiology Public Health|NSW Health Pathology - Institute of Clinical Pathology and Medical Research; Westmead Hospital; University of Sydney|Gall|Australia

>Spike|hCoV-19/Switzerland/BS-42404943/2020|2020-08-21|EPI\_ISL\_581980|Original|hCoV-19^^Basel-Stadt|Human|University Hospital Basel|University Hospital Basel|Roloff Handschin|Switzerland

>Spike|hCoV-19/Spain/CT-IBV-003150/2020|2020-03-16|EPI\_ISL\_510247|Original|hCoV-19^^Catalunya|Human|Hospital de la Santa Creu i Sant Pau. Servicio de Microbiolog\u00eda|SeqCOVID-SPAIN consortium/IBV (CSIC)|Comas|Spain

>Spike|hCoV-19/England/LOND-124D8DD/2020|2020-00-00|EPI\_ISL\_584622|Original|hCoV-19^^England|Human|University College London Hospital|COVID-19 Genomics UK (COG-UK) Consortium|Byott|United Kingdom

>Spike|hCoV-19/USA/WI-UW-101/2020|2020-03-31|EPI\_ISL\_425158|Original|hCoV-19^^Wisconsin|Human|University of Wisconsin-Madison AIDS Vaccine Research Laboratories|University of Wisconsin-Madison AIDS Vaccine Research Laboratories|Baczenas|USA

>Spike|hCoV-19/England/ALDP-6C993F/2020|2020-07-02|EPI\_ISL\_556149|Original|hCoV-19^^England|Human|Lighthouse Lab in Alderley Park|Wellcome Sanger Institute for the COVID-19 Genomics UK (COG-UK) consortium|Davies|United Kingdom

>Spike|hCoV-19/England/ALDP-9E9D2B/2020|2020-09-24|EPI\_ISL\_580185|Original|hCoV-19^^England|Human|Lighthouse Lab in Alderley Park|Wellcome Sanger Institute for the COVID-19 Genomics UK (COG-UK) consortium|Davies|United Kingdom

>Spike|hCoV-19/England/CAMC-A3F9D6/2020|2020-10-06|EPI\_ISL\_609571|Original|hCoV-19^^England|Human|Lighthouse Lab in Cambridge|Wellcome Sanger Institute for the COVID-19 Genomics UK (COG-UK) consortium|Davies|United Kingdom

>Spike|hCoV-19/England/LIVE-DBD65E/2020|2020-10-27|EPI\_ISL\_664424|Original|hCoV-19^^England|Human|Liverpool Clinical Laboratories|COVID-19 Genomics UK (COG-UK) Consortium|Haldenby|United Kingdom

>Spike|hCoV-19/United Arab Emirates/0969/2020|2020-06-29|EPI\_ISL\_699105|Original|hCoV-19^^Abu Dhabi|Human|Group 42 (G42) Healthcare|G42 Healthcare|Ogrodzki|United Arab Emirates

>Spike|hCoV-19/England/CAMB-1B74ED/2020|2020-10-19|EPI\_ISL\_637725|Original|hCoV-19^^England|Human|Department of Pathology|COVID-19 Genomics UK (COG-UK) Consortium|Goodfellow|United Kingdom

>Spike|hCoV-19/England/QEUE-B7DAF6/2020|2020-11-14|EPI\_ISL\_741896|Original|hCoV-19^^England|Human|Oxford Viromics|COVID-19 Genomics UK (COG-UK) Consortium|Golubchik|United Kingdom

>Spike|hCoV-19/USA/TX-HMH-8030/2020|2020-07-07|EPI\_ISL\_545802|Original|hCoV-19^^Texas|Human|Houston Methodist Hospital|Houston Methodist Hospital|Long|USA

>Spike|hCoV-19/England/QEUE-96212E/2020|2020-08-10|EPI\_ISL\_531737|Original|hCoV-19^^England|Human|Lighthouse Lab in Glasgow|Wellcome Sanger Institute for the COVID-19 Genomics UK (COG-UK) consortium|Davies|United Kingdom

>Spike|hCoV-19/England/CAMB-77505/2020|2020-04-01|EPI\_ISL\_438523|Original|hCoV-19^^England|Human|Department of Pathology|Wellcome Sanger Institute for the COVID-19 Genomics UK (COG-UK) consortium|Amato|United Kingdom

>Spike|hCoV-19/Northern Ireland/NIRE-1086D8/2020|2020-09-09|EPI\_ISL\_585195|Original|hCoV-19^^Northern Ireland|Human|Regional Virus Laboratory|COVID-19 Genomics UK (COG-UK) Consortium|Fairley|United Kingdom

>Spike|hCoV-19/England/MILK-9E2E6B/2020|2020-09-21|EPI\_ISL\_581184|Original|hCoV-19^^England|Human|Lighthouse Lab in Milton Keynes|Wellcome Sanger Institute for the COVID-19 Genomics UK (COG-UK) consortium|Davies|United Kingdom

>Spike|hCoV-19/India/MH-ACTREC-198/2020|2020-06-23|EPI\_ISL\_699852|Original|hCoV-19^^Maharashtra|Human|Hematopathology Laboratory|Hematopathology Laboratory|Patkar|India

>Spike|hCoV-19/Canada/MB-NML-845/2020|2020-03-20|EPI\_ISL\_582334|Original|hCoV-19^^Manitoba|Human|Cadham Provincial Laboratory|National Microbiology Laboratory (NML)|Majer|Canada

>Spike|hCoV-19/Netherlands/ZH-EMC-1183/2020|2020-12-20|EPI\_ISL\_763257|Original|hCoV-19^^Zuid Holland|Human|Dutch COVID-19 response team|Erasmus Medical Center|Oude Munnink|Netherlands

>Spike|hCoV-19/England/MILK-B95E83/2020|2020-11-14|EPI\_ISL\_674987|Original|hCoV-19^^England|Human|Lighthouse Lab in Milton Keynes|Wellcome Sanger Institute for the COVID-19 Genomics UK (COG-UK) Consortium|Davies|United Kingdom

>Spike|hCoV-19/Wales/PHWC-4911FE/2020|2020-11-17|EPI\_ISL\_706625|Original|hCoV-19^^Wales|Human|Originating lab|COVID-19 Genomics UK (COG-UK) Consortium|Moore|United Kingdom

>Spike|hCoV-19/Denmark/DCGC-8262/2020|2020-10-26|EPI\_ISL\_617307|Original|hCoV-19^^Hovedstaden|Human|Department of Virus and Microbiological Special Diagnostics|Albertsen lab|Michaelsen|Denmark

>Spike|hCoV-19/South Africa/KRISP-K003533/2020|2020-09-23|EPI\_ISL\_602851|Original|hCoV-19^^KwaZulu-Natal|Human|NHLs-IALCH|KRISP|de Oliveira|South Africa

>Spike|hCoV-19/South Africa/NHLs-UCT-GS-0015/2020|2020-08-11|EPI\_ISL\_640017|Original|hCoV-19^^Western Cape|Human|Oudtshoorn Hospital wc OUD|NHLs/UCT|Iranzadeh|South Africa

>Spike|hCoV-19/Netherlands/ZH-EMC-853/2020|2020-10-09|EPI\_ISL\_632735|Original|hCoV-19^^Zuid Holland|Human|Dutch COVID-19 response team|Erasmus Medical Center|Oude Munnink|Netherlands

>Spike|hCoV-19/England/CAMC-B3229B/2020|2020-11-05|EPI\_ISL\_659298|Original|hCoV-19^^England|Human|Lighthouse Lab in Cambridge|Wellcome Sanger Institute for the COVID-19 Genomics UK (COG-UK) Consortium|Davies|United Kingdom

>Spike|hCoV-19/USA/TX-HMH-MCoV-16356/2020|2020-11-02|EPI\_ISL\_786040|Original|hCoV-19^^Texas|Human|Houston Methodist Hospital|Houston Methodist Hospital|Long|USA

>Spike|hCoV-19/Switzerland/ZH-ETHZ-410319/2020|2020-12-16|EPI\_ISL\_737512|Original|hCoV-19^^Zurich|Human|Viollier AG|Department of Biosystems Science and Engineering|Nadeau|Switzerland

>Spike|hCoV-19/India/MH-NIV-65282/2020|2020-06-16|EPI\_ISL\_479562|Original|hCoV-19^^Maharashtra|Human|NIV Influenza|NIV Influenza|Potdar|India

>Spike|hCoV-19/England/ALDP-BCA6AB/2020|2020-11-23|EPI\_ISL\_703688|Original|hCoV-19^^England|Human|Lighthouse Lab in Alderley Park|Wellcome Sanger Institute for the COVID-19 Genomics UK (COG-UK) Consortium|Davies|United Kingdom

>Spike|hCoV-19/England/MILK-995ACD/2020|2020-08-25|EPI\_ISL\_551650|Original|hCoV-19^^England|Human|Lighthouse Lab in Milton Keynes|Wellcome Sanger Institute for the COVID-19 Genomics UK (COG-UK) consortium|Davies|United Kingdom

>Spike|hCoV-19/England/MILK-ACE3ED/2020|2020-10-21|EPI\_ISL\_629153|Original|hCoV-19^^England|Human|Lighthouse Lab in Milton Keynes|Wellcome Sanger Institute for the COVID-19 Genomics UK (COG-UK) consortium|Davies|United Kingdom

>Spike|hCoV-19/USA/UT-UPHL-2009650/2020|2020-07-27|EPI\_ISL\_605325|Original|hCoV-19^^Utah|Human|Utah Public Health Laboratory|Utah Public Health Laboratory|Young|USA

>Spike|hCoV-19/USA/UT-UPHL-2012089416/2020|2020-11-27|EPI\_ISL\_746955|Original|hCoV-19^^Utah|Human|Utah Public Health Laboratory|Utah Public Health Laboratory|Gallagher|USA

>Spike|hCoV-19/USA/TX-HMH-6287/2020|2020-07-03|EPI\_ISL\_547366|Original|hCoV-19^^Texas|Human|Houston Methodist Hospital|Houston Methodist Hospital|Long|USA

>Spike|hCoV-19/England/ALDP-B4F85D/2020|2020-08-12|EPI\_ISL\_649356|Original|hCoV-19^^England|Human|Lighthouse Lab in Alderley Park|Wellcome Sanger Institute for the COVID-19 Genomics UK (COG-UK) Consortium|Davies|United Kingdom

>Spike|hCoV-19/England/ALDP-9EDF21/2020|2020-05-08|EPI\_ISL\_589279|Original|hCoV-19^^England|Human|Lighthouse Lab in Alderley Park|Wellcome Sanger Institute for the COVID-19 Genomics UK (COG-UK) consortium|Davies|United Kingdom

>Spike|hCoV-19/USA/CA-IGI-0375/2020|2020-06-26|EPI\_ISL\_576554|Original|hCoV-19^^California|Human|Innovative Genomics Institute|Innovative Genomics Institute|Wyman|USA

>Spike|hCoV-19/England/MILK-A4715B/2020|2020-10-06|EPI\_ISL\_598334|Original|hCoV-19^^England|Human|Lighthouse Lab in Milton Keynes|Wellcome Sanger Institute for the COVID-19 Genomics UK (COG-UK) consortium|Davies|United Kingdom

>Spike|hCoV-19/Japan/PG-4074/2020|2020-07-00|EPI\_ISL\_692315|Original|hCoV-19^^Japan|Human|Sakai City Institute of Public Health|Pathogen Genomics Center|Sekizuka|Japan

>Spike|hCoV-19/England/QEUA-AD2F79/2020|2020-10-25|EPI\_ISL\_629789|Original|hCoV-19^^England|Human|Lighthouse Lab in Glasgow|Wellcome Sanger Institute for the COVID-19 Genomics UK (COG-UK) consortium|Davies|United Kingdom

>Spike|hCoV-19/Denmark/DCGC-11854/2020|2020-10-26|EPI\_ISL\_670546|Original|hCoV-19^^Nordjylland|Human|Department of Virus and Microbiological Special Diagnostics|Albertsen Lab|Michaelsen|Denmark

>Spike|hCoV-19/England/ALDP-B1CC4E/2020|2020-11-02|EPI\_ISL\_664849|Original|hCoV-19^^England|Human|Centre for Enzyme Innovation|COVID-19 Genomics UK (COG-UK) Consortium|Robson|United Kingdom

>Spike|hCoV-19/England/BRIS-122A63/2020|2020-04-03|EPI\_ISL\_440648|Original|hCoV-19^^England|Human|PHE South West Regional Laboratory|Wellcome Sanger Institute for the COVID-19 Genomics UK (COG-UK) consortium|Amato|United Kingdom

>Spike|hCoV-19/USA/IL-UW-350/2020|2020-04-18|EPI\_ISL\_450704|Original|hCoV-19^^Illinois|Human|University of Wisconsin-Madison AIDS Vaccine Research Laboratories|University of Wisconsin-Madison AIDS Vaccine Research Laboratories|Baczenas|USA

>Spike|hCoV-19/Australia/VIC4222/2020|2020-07-18|EPI\_ISL\_519550|Original|hCoV-19^^Victoria|Human|Microbiological Diagnostic Unit - Public Health Laboratory (MDU-PHL)|MDU-PHL|Schultz|Australia

>Spike|hCoV-19/England/QEUH-C32573/2020|2020-12-11|EPI\_ISL\_782636|Original|hCoV-19^^England|Human|Lighthouse Lab in Glasgow|Wellcome Sanger Institute for the COVID-19 Genomics UK (COG-UK) Consortium|Davies|United Kingdom

>Spike|hCoV-19/Singapore/1065/2020|2020-08-17|EPI\_ISL\_583900|original|hCoV-19^^Singapore|Human|Singapore General Hospital|Department of Microbiology|Abdul Rahman|Singapore

>Spike|hCoV-19/USA/WI-WSLH-200215/2020|2020-03-28|EPI\_ISL\_578436|Original|hCoV-19^^Wisconsin|Human|Wisconsin State Laboratory of Hygiene Communicable Disease Division|Wisconsin State Laboratory of Hygiene Communicable Disease Division|Florek|USA

>Spike|hCoV-19/England/20166068404/2020|2020-04-15|EPI\_ISL\_466572|Original|hCoV-19^^England|Human|Respiratory Virus Unit|Respiratory Virus Unit|Platt|United Kingdom

>Spike|hCoV-19/Wales/PHWC-49C17B/2020|2020-12-07|EPI\_ISL\_742516|Original|hCoV-19^^Wales|Human|Wales Specialist Virology Centre Sequencing lab|COVID-19 Genomics UK (COG-UK) Consortium|Moore|United Kingdom

>Spike|hCoV-19/England/MILK-975261/2020|2020-08-21|EPI\_ISL\_552462|Original|hCoV-19^^England|Human|Lighthouse Lab in Milton Keynes|Wellcome Sanger Institute for the COVID-19 Genomics UK (COG-UK) consortium|Davies|United Kingdom

>Spike|hCoV-19/Chile/BI-167039/2020|2020-09-02|EPI\_ISL\_746507|Original|hCoV-19^^Biobio|Human|Genetica Molecular and Subdepartamento de Virologia ISP Chile|Instituto de Salud Publica de Chile|Tognarelli|Chile

>Spike|hCoV-19/Spain/VC-FISABIO-131/2020|2020-03-17|EPI\_ISL\_436226|Original|hCoV-19^^Comunitat Valenciana|Human|Servicio de Microbiolog\u00eda. Consorcio Hospital General Universitario de Valencia|Sequencing and Bioinformatics Service and Molecular Epidemiology Research Group. FISABIO-Public Health|Gonzalez-Candelas|Spain

>Spike|hCoV-19/England/LEED-2AA40A/2020|2020-04-09|EPI\_ISL\_538796|Original|hCoV-19^^England|Human|Leeds Teaching Hospitals NHS Trust and Public Health England|Wellcome Sanger Institute for the COVID-19 Genomics UK (COG-UK) consortium|Davies|United Kingdom

>Spike|hCoV-19/Switzerland/GE-SNRCI-2770/2020|2020-03-00|EPI\_ISL\_548158|Original|hCoV-19^^Geneve|Human|Laboratoire de Virologie|Swiss National Reference Centre for Influenza|Gon\u00e7alves Cabecinhas|Switzerland

>Spike|hCoV-19/United Arab Emirates/0148/2020|2020-05-18|EPI\_ISL\_698335|Original|hCoV-19^^Abu Dhabi|Human|Group 42 (G42) Healthcare|G42 Healthcare|Ogrodzki|United Arab Emirates

>Spike|hCoV-19/England/CAMB-1B6958/2020|2020-10-07|EPI\_ISL\_584318|Original|hCoV-19^^England|Human|Department of Pathology|COVID-19 Genomics UK (COG-UK) Consortium|Goodfellow|United Kingdom

>Spike|hCoV-19/USA/TX-HMH-MCoV-14786/2020|2020-10-13|EPI\_ISL\_786271|Original|hCoV-19^^Texas|Human|Houston Methodist Hospital|Houston Methodist Hospital|Long|USA

>Spike|hCoV-19/USA/CA-QDX-2561/2020|2020-03-16|EPI\_ISL\_604772|Original|hCoV-19^^California|Human|Quest Diagnostics|Quest Diagnostics|Kagan|USA

>Spike|hCoV-19/Canada/BC-BCCDC-7268/2020|2020-11-00|EPI\_ISL\_740649|Original|hCoV-19^^British Columbia|Human|BCCDC Public Health Laboratory|BCCDC Public Health Laboratory|Prystajek|Canada

>Spike|hCoV-19/USA/TX-HMH-MCoV-10069/2020|2020-07-06|EPI\_ISL\_789312|Original|hCoV-19^^Texas|Human|Houston Methodist Hospital|Houston Methodist Hospital|Long|USA

>Spike|hCoV-19/Brazil/SE-6535/2020|2020-03-12|EPI\_ISL\_541375|Original|hCoV-19^^Sergipe|Human|LACEN/SE|Laboratory of Respiratory Viruses and Measles|Silva|Brazil

>Spike|hCoV-19/England/EXET-136264/2020|2020-04-13|EPI\_ISL\_457213|Original|hCoV-19^^England|Human|University of Exeter|COVID-19 Genomics UK (COG-UK) Consortium|Temperton|United Kingdom

>Spike|hCoV-19/England/20189167501/2020|2020-05-01|EPI\_ISL\_465571|Original|hCoV-19^^England|Human|Respiratory Virus Unit|Respiratory Virus Unit|Platt|United Kingdom

>Spike|hCoV-19/Denmark/DCGC-20568/2020|2020-12-21|EPI\_ISL\_759223|Original|hCoV-19^^Nordjylland|Human|Department of Virus and Microbiological Special Diagnostics|Albertsen Lab|Michaelsen|Denmark

>Spike|hCoV-19/England/QEUEH-B41484/2020|2020-11-08|EPI\_ISL\_658510|Original|hCoV-19^^England|Human|Lighthouse Lab in Glasgow|Wellcome Sanger Institute for the COVID-19 Genomics UK (COG-UK) Consortium|Davies|United Kingdom

>Spike|hCoV-19/USA/WA-S250/2020|2020-03-03|EPI\_ISL\_430288|Original|hCoV-19^^Washington|Human|Washington State Department of Health|Seattle Flu Study|Bedford|USA

>Spike|hCoV-19/USA/WA-S539/2020|2020-03-23|EPI\_ISL\_434299|Original|hCoV-19^^Washington|Human|Washington State Department of Health|Seattle Flu Study|Bedford|USA

>Spike|hCoV-19/England/NOTT-10F6D1/2020|2020-04-03|EPI\_ISL\_433038|Original|hCoV-19^^England|Human|Queens Medical Centre|COVID-19 Genomics UK (COG-UK) Consortium|Loose|United Kingdom

>Spike|hCoV-19/Scotland/QEUEH-9B85D2/2020|2020-09-10|EPI\_ISL\_568271|Original|hCoV-19^^Scotland|Human|Lighthouse Lab in Glasgow|Wellcome Sanger Institute for the COVID-19 Genomics UK (COG-UK) consortium|Davies|United Kingdom

>Spike|hCoV-19/India/WB-S17/2020|2020-04-19|EPI\_ISL\_455647|Original|hCoV-19^^West Bengal|Human|ICMR-National Institute of Cholera and Enteric Diseases|National Institute of Biomedical Genomics|Maitra|India

>Spike|hCoV-19/USA/MI-MDHHS-SC21806/2020|2020-07-07|EPI\_ISL\_565849|Original|hCoV-19^^Michigan|Human|Michigan Department of Health and Human Services|Michigan Department of Health and Human Services|Blankenship|USA

>Spike|hCoV-19/Sichuan/SC-PHCC1-032/2020|2020-01-27|EPI\_ISL\_451353|Original|hCoV-19^^Sichuan|Human|West China Hospital of Sichuan University|State Key Laboratory of Biotherapy of Sichuan University|Tang|China

>Spike|hCoV-19/Denmark/DCGC-4389/2020|2020-09-14|EPI\_ISL\_615387|Original|hCoV-19^^Sjaelland|Human|Department of Virus and Microbiological Special Diagnostics|Albertsen lab|Michaelsen|Denmark

>Spike|hCoV-19/Wales/PHWC-4A2C80/2020|2020-12-14|EPI\_ISL\_744000|Original|hCoV-19^^Wales|Human|Wales Specialist Virology Centre Sequencing lab|COVID-19 Genomics UK (COG-UK) Consortium|Moore|United Kingdom

>Spike|hCoV-19/Wales/PHWC-49CFEA/2020|2020-12-09|EPI\_ISL\_742718|Original|hCoV-19^^Wales|Human|Wales Specialist Virology Centre Sequencing lab|COVID-19 Genomics UK (COG-UK) Consortium|Moore|United Kingdom

>Spike|hCoV-19/Wales/PHWC-493EC8/2020|2020-11-10|EPI\_ISL\_726036|Original|hCoV-19^^Wales|Human|Originating lab|COVID-19 Genomics UK (COG-UK) Consortium|Moore|United Kingdom

>Spike|hCoV-19/England/MILK-B87AEA/2020|2020-11-13|EPI\_ISL\_724830|Original|hCoV-19^^England|Human|Oxford Viromics|COVID-19 Genomics UK (COG-UK) Consortium|Golubchik|United Kingdom

>Spike|hCoV-19/England/MILK-9C304C/2020|2020-09-07|EPI\_ISL\_566919|Original|hCoV-19^^England|Human|Lighthouse Lab in Milton Keynes|Wellcome Sanger Institute for the COVID-19 Genomics UK (COG-UK) consortium|Davies|United Kingdom

>Spike|hCoV-19/Denmark/DCGC-4360/2020|2020-09-07|EPI\_ISL\_615562|Original|hCoV-19^^Nordjylland|Human|Department of Virus and Microbiological Special Diagnostics|Albertsen lab|Michaelsen|Denmark

>Spike|hCoV-19/Scotland/CVR5012/2020|2020-10-10|EPI\_ISL\_594751|Original|hCoV-19^^Scotland|Human|West of Scotland Specialist Virology Centre|COVID-19 Genomics UK (COG-UK) Consortium|Robertson|United Kingdom

>Spike|hCoV-19/Japan/IC-0316/2020|2020-11-00|EPI\_ISL\_667745|Original|hCoV-19^^Japan|Human|Pathogen Genomics Center|Pathogen Genomics Center|Sekizuka|Japan

>Spike|hCoV-19/India/MH-NIV-4367/2020|2020-03-22|EPI\_ISL\_452203|Original|hCoV-19^^Maharashtra|Human|NIV Influenza|NIV Influenza|Potdar|India

>Spike|hCoV-19/England/ALDP-A93D10/2020|2020-10-19|EPI\_ISL\_611076|Original|hCoV-19^^England|Human|Lighthouse Lab in Alderley Park|Wellcome Sanger Institute for the COVID-19 Genomics UK (COG-UK) consortium|Davies|United Kingdom

>Spike|hCoV-19/USA/WA-S1903/2020|2020-05-29|EPI\_ISL\_496329|Original|hCoV-19^^Washington|Human|Washington State Department of Health|Seattle Flu Study|Lee|USA

>Spike|hCoV-19/England/ALDP-6BAB59/2020|2020-06-29|EPI\_ISL\_557835|Original|hCoV-19^^England|Human|Lighthouse Lab in Alderley Park|Wellcome Sanger Institute for the COVID-19 Genomics UK (COG-UK) consortium|Davies|United Kingdom

>Spike|hCoV-19/England/CAMC-B77D99/2020|2020-11-12|EPI\_ISL\_668138|Original|hCoV-19^^England|Human|Lighthouse Lab in Cambridge|Wellcome Sanger Institute for the COVID-19 Genomics UK (COG-UK) Consortium|Davies|United Kingdom

>Spike|hCoV-19/USA/UT-UPHL-03099/2020|2020-05-04|EPI\_ISL\_575249|Original|hCoV-19^^Utah|Human|Utah Public Health Laboratory|Utah Public Health Laboratory|Young|USA

>Spike|hCoV-19/England/ALDP-9E5A37/2020|2020-09-24|EPI\_ISL\_589434|Original|hCoV-19^^England|Human|Lighthouse Lab in Alderley Park|Wellcome Sanger Institute for the COVID-19 Genomics UK (COG-UK) consortium|Davies|United Kingdom

>Spike|hCoV-19/USA/TX-HMH-1353/2020|2020-04-21|EPI\_ISL\_542666|Original|hCoV-19^^Texas|Human|Houston Methodist Hospital|Houston Methodist Hospital|Long|USA

>Spike|hCoV-19/USA/CT-UW-6361/2020|2020-04-01|EPI\_ISL\_570104|Original|hCoV-19^^Connecticut|Human|UW Virology Lab|UW Virology Lab|Roychoudhury|USA

>Spike|hCoV-19/England/MILK-B96884/2020|2020-11-14|EPI\_ISL\_676116|Original|hCoV-19^^England|Human|Lighthouse Lab in Milton Keynes|Wellcome Sanger Institute for the COVID-19 Genomics UK (COG-UK) Consortium|Davies|United Kingdom

>Spike|hCoV-19/Netherlands/NH-RIVM-20103/2020|2020-11-07|EPI\_ISL\_723280|Original|hCoV-19^^Noord-Holland|Human|Dutch COVID-19 response team|National Institute for Public Health and the Environment (RIVM)|Meijer|Netherlands

>Spike|hCoV-19/Belgium/ULG-10825/2020|2020-11-13|EPI\_ISL\_661246|Original|hCoV-19^^Li\u00e8ge|Human|Department of Clinical Microbiology|GIGA Medical Genomics|Durkin|Belgium

>Spike|hCoV-19/England/MILK-BEE2BC/2020|2020-11-30|EPI\_ISL\_708862|Original|hCoV-19^^England|Human|Lighthouse Lab in Milton Keynes|Wellcome Sanger Institute for the COVID-19 Genomics UK (COG-UK) Consortium|Davies|United Kingdom

>Spike|hCoV-19/Canada/QC\_AC8/2020|2020-04-08|EPI\_ISL\_444511|Original|hCoV-19^^Quebec|Human|Laboratoire de microbiologie|Smith Laboratory|Smith|Canada

>Spike|hCoV-19/England/NORT-28407B/2020|2020-04-01|EPI\_ISL\_472262|Original|hCoV-19^^England|Human|Northumbria University / South Tees Hospitals NHS Foundation Trust / North Cumbria Integrated Care NHS Foundation Trust / North Tees and Hartlepool NHS Foundation Trust / Newcastle Hospitals NHS Foundation Trust|COVID-19 Genomics UK (COG-UK) Consortium|Bashton|United Kingdom

>Spike|hCoV-19/Spain/VC-FISABIO-138/2020|2020-03-18|EPI\_ISL\_436233|Original|hCoV-19^^Comunitat Valenciana|Human|Servicio de Microbiolog\u00eda. Consorcio Hospital General Universitario de Valencia|Sequencing and Bioinformatics Service and Molecular Epidemiology Research Group. FISABIO-Public Health|Gonzalez-Candelas|Spain

>Spike|hCoV-19/Chile/BI-194034/2020|2020-09-30|EPI\_ISL\_746512|Original|hCoV-19^^Biobio|Human|Genetica Molecular and Subdepartamento de Virologia ISP Chile|Instituto de Salud Publica de Chile|Tognarelli|Chile

>Spike|hCoV-19/Australia/VIC7237/2020|2020-07-23|EPI\_ISL\_564304|Original|hCoV-19^^Victoria|Human|Microbiological Diagnostic Unit - Public Health Laboratory (MDU-PHL)|MDU-PHL|Schultz|Australia

>Spike|hCoV-19/India/MH-NIV-72638/2020|2020-06-20|EPI\_ISL\_541736|Original|hCoV-19^^Maharashtra|Human|National Institute of Virology|National Institute of Virology|Potdar|India

>Spike|hCoV-19/Australia/VIC3330/2020|2020-07-09|EPI\_ISL\_521009|Original|hCoV-19^^Victoria|Human|Microbiological Diagnostic Unit - Public Health Laboratory (MDU-PHL)|MDU-PHL|Schultz|Australia

>Spike|hCoV-19/Japan/PG-5306/2020|2020-08-00|EPI\_ISL\_690409|Original|hCoV-19^^Japan|Human|Pathogen Genomics Center|Pathogen Genomics Center|Sekizuka|Japan

>Spike|hCoV-19/England/CAMC-B7783E/2020|2020-11-12|EPI\_ISL\_668265|Original|hCoV-19^^England|Human|Lighthouse Lab in Cambridge|Wellcome Sanger Institute for the COVID-19 Genomics UK (COG-UK) Consortium|Davies|United Kingdom

>Spike|hCoV-19/England/CAMB-7AA30/2020|2020-04-08|EPI\_ISL\_433829|Original|hCoV-19^^England|Human|Department of Pathology|COVID-19 Genomics UK (COG-UK) Consortium|Meredith|United Kingdom

>Spike|hCoV-19/USA/WA-S1648/2020|2020-05-26|EPI\_ISL\_496074|Original|hCoV-19^^Washington|Human|Washington State Department of Health|Seattle Flu Study|Lee|USA

>Spike|hCoV-19/USA/UN-CDC-7467/2020|2020-04-21|EPI\_ISL\_514072|Original|hCoV-19^^USA|Human|Navy and Marine Corps Public Health Center|Pathogen Discovery|Queen|USA

>Spike|hCoV-19/Japan/PG-2495/2020|2020-04-00|EPI\_ISL\_686100|Original|hCoV-19^^Japan|Human|Saitama Prefectural Institute of Public Health|Pathogen Genomics Center|Sekizuka|Japan

>Spike|hCoV-19/Wales/PHWC-2ED32/2020|2020-04-07|EPI\_ISL\_446145|Original|hCoV-19^^Wales|Human|Wales Specialist Virology Centre|Public Health Wales Microbiology Cardiff|Moore|United Kingdom

>Spike|hCoV-19/England/MILK-AC844A/2020|2020-10-21|EPI\_ISL\_629299|Original|hCoV-19^^England|Human|Lighthouse Lab in Milton Keynes|Wellcome Sanger Institute for the COVID-19 Genomics UK (COG-UK) consortium|Davies|United Kingdom

>Spike|hCoV-19/Russia/StPetersburg-RII5634S/2020|2020-04-14|EPI\_ISL\_430093|Original|hCoV-19^^Saint Petersburg|Human|WHO National Influenza Centre Russian Federation|WHO National Influenza Centre Russian Federation|Komissarov|Russia

>Spike|hCoV-19/USA/ME-HETL-J0024/2020|2020-03-15|EPI\_ISL\_513436|Original|hCoV-19^^Maine|Human|Maine HETL|Tewhey Lab|Tewhey|USA

>Spike|hCoV-19/USA/UT-UPHL-2012274873/2020|2020-08-08|EPI\_ISL\_745810|Original|hCoV-19^^Utah|Human|Ginkgo Bioworks Clinical Laboratory|Utah Public Health Laboratory|Young|USA

>Spike|hCoV-19/England/QEUEH-B7C936/2020|2020-11-14|EPI\_ISL\_741801|Original|hCoV-19^^England|Human|Oxford Viromics|COVID-19 Genomics UK (COG-UK) Consortium|Golubchik|United Kingdom

>Spike|hCoV-19/England/LIVE-A8170/2020|2020-03-26|EPI\_ISL\_517122|Original|hCoV-19^^England|Human|Liverpool Clinical Laboratories|COVID-19 Genomics UK (COG-UK) Consortium|Haldenby|United Kingdom

>Spike|hCoV-19/Denmark/DCGC-7493/2020|2020-10-12|EPI\_ISL\_618917|Original|hCoV-19^^Syddanmark|Human|Department of Virus and Microbiological Special Diagnostics|Albertsen lab|Michaelsen|Denmark

>Spike|hCoV-19/England/ALDP-B1A396/2020|2020-11-01|EPI\_ISL\_646093|Original|hCoV-19^^England|Human|Lighthouse Lab in Alderley Park|Wellcome Sanger Institute for the COVID-19 Genomics UK (COG-UK) Consortium|Davies|United Kingdom

>Spike|hCoV-19/Denmark/DCGC-15323/2020|2020-11-23|EPI\_ISL\_713305|Original|hCoV-19^^Hovedstaden|Human|Department of Virus and Microbiological Special Diagnostics|Albertsen Lab|Michaelsen|Denmark

>Spike|hCoV-19/India/TN-CCMB-C9/2020|2020-04-29|EPI\_ISL\_458038|Original|hCoV-19^^Tamil Nadu|Human|King Institute of Preventive Medicine & Research|CSIR-Centre for Cellular and Molecular Biology|Banu|India

>Spike|hCoV-19/England/QEUEH-A63DBF/2020|2020-10-12|EPI\_ISL\_628673|Original|hCoV-19^^England|Human|Oxford Viromics|COVID-19 Genomics UK (COG-UK) Consortium|Golubchik|United Kingdom

>Spike|hCoV-19/USA/PA-MGEL-00740/2020|2020-09-21|EPI\_ISL\_682042|Original|hCoV-19^^Pennsylvania|Human|UPMC Clinical Microbiology Laboratory|Microbial Genomic Epidemiology Laboratory|Griffith|USA

>Spike|hCoV-19/Wales/PHWC-48E349/2020|2020-11-11|EPI\_ISL\_680844|Original|hCoV-19^^Wales|Human|Wales Specialist Virology Centre Sequencing lab|COVID-19 Genomics UK (COG-UK) Consortium|Moore|United Kingdom

>Spike|hCoV-19/England/ALDP-C3C00F/2020|2020-12-10|EPI\_ISL\_731596|Original|hCoV-19^^England|Human|Lighthouse Lab in Alderley Park|Wellcome Sanger Institute for the COVID-19 Genomics UK (COG-UK) Consortium|Davies|United Kingdom

>Spike|hCoV-19/England/QEUEH-B0F24C/2020|2020-11-02|EPI\_ISL\_642587|Original|hCoV-19^^England|Human|Lighthouse Lab in Glasgow|Wellcome Sanger Institute for the COVID-19 Genomics UK (COG-UK) Consortium|Davies|United Kingdom

>Spike|hCoV-19/England/ALDP-9E6BBB/2020|2020-09-24|EPI\_ISL\_580544|Original|hCoV-19^^England|Human|Lighthouse Lab in Alderley Park|Wellcome Sanger Institute for the COVID-19 Genomics UK (COG-UK) consortium|Davies|United Kingdom

>Spike|hCoV-19/England/ALDP-A6688E/2020|2020-10-12|EPI\_ISL\_630440|Original|hCoV-19^^England|Human|Lighthouse Lab in Alderley Park|Wellcome Sanger Institute for the COVID-19 Genomics UK (COG-UK) consortium|Davies|United Kingdom

>Spike|hCoV-19/England/MILK-BAA10A/2020|2020-11-18|EPI\_ISL\_783194|Original|hCoV-19^^England|Human|Lighthouse Lab in Milton Keynes|Wellcome Sanger Institute for the COVID-19 Genomics UK (COG-UK) Consortium|Davies|United Kingdom

>Spike|hCoV-19/England/ALDP-B46267/2020|2020-11-07|EPI\_ISL\_656282|Original|hCoV-19^^England|Human|Lighthouse Lab in Alderley Park|Wellcome Sanger Institute for the COVID-19 Genomics UK (COG-UK) Consortium|Davies|United Kingdom

>Spike|hCoV-19/Denmark/DCGC-16960/2020|2020-12-14|EPI\_ISL\_750215|Original|hCoV-19^^Sjaelland|Human|Department of Virus and Microbiological Special Diagnostics|Albertsen Lab|Michaelsen|Denmark

>Spike|hCoV-19/Scotland/GCVR-170C42/2020|2020-03-25|EPI\_ISL\_459581|Original|hCoV-19^^Scotland|Human|NHSGGC West of Scotland Specialist Virology Centre / MRC-University of Glasgow Centre for Virus Research|Wellcome Sanger Institute for the COVID-19 Genomics UK (COG-UK) consortium|Davies|United Kingdom

>Spike|hCoV-19/England/ALDP-B25EA6/2020|2020-11-04|EPI\_ISL\_646676|Original|hCoV-19^^England|Human|Lighthouse Lab in Alderley Park|Wellcome Sanger Institute for the COVID-19 Genomics UK (COG-UK) Consortium|Davies|United Kingdom

>Spike|hCoV-19/USA/MN-MDH-1750/2020|2020-04-10|EPI\_ISL\_590755|Original|hCoV-19^^Minnesota|Human|Minnesota Department of Health|Minnesota Department of Health|Lorentz|USA

>Spike|hCoV-19/England/CAMB-1B2673/2020|2020-05-19|EPI\_ISL\_456702|Original|hCoV-19^^England|Human|Department of Pathology|COVID-19 Genomics UK (COG-UK) Consortium|Meredith|United Kingdom

>Spike|hCoV-19/Scotland/QEUA-AAB4E3/2020|2020-10-21|EPI\_ISL\_652796|Original|hCoV-19^^Scotland|Human|Oxford Viromics|COVID-19 Genomics UK (COG-UK) Consortium|Golubchik|United Kingdom

>Spike|hCoV-19/Wales/PHWC-16086F/2020|2020-05-20|EPI\_ISL\_472986|Original|hCoV-19^^Wales|Human|Wales Specialist Virology Centre Sequencing lab|COVID-19 Genomics UK (COG-UK) Consortium|Moore|United Kingdom

>Spike|hCoV-19/England/CAMC-945C6C/2020|2020-07-16|EPI\_ISL\_556668|Original|hCoV-19^^England|Human|Lighthouse Lab in Cambridge|Wellcome Sanger Institute for the COVID-19 Genomics UK (COG-UK) consortium|Davies|United Kingdom

>Spike|hCoV-19/England/MILK-99227D/2020|2020-08-27|EPI\_ISL\_540664|Original|hCoV-19^^England|Human|Queens Medical Centre|COVID-19 Genomics UK (COG-UK) Consortium|Loose|United Kingdom

>Spike|hCoV-19/USA/MI-UM-2006S000934/2020|2020-03-31|EPI\_ISL\_484762|Original|hCoV-19^^Michigan|Human|University of Michigan Clinical Microbiology Laboratory|Lauring Lab|Valesano|USA

>Spike|hCoV-19/USA/TX-HMH-7385/2020|2020-06-29|EPI\_ISL\_546724|Original|hCoV-19^^Texas|Human|Houston Methodist Hospital|Houston Methodist Hospital|Long|USA

>Spike|hCoV-19/Spain/MD-H12-90/2020|2020-04-14|EPI\_ISL\_530017|Original|hCoV-19^^Madrid|Human|Hospital Universitario 12 de Octubre|Hospital Universitario 12 de Octubre|Viedma|Spain

>Spike|hCoV-19/Denmark/DCGC-939/2020|2020-03-09|EPI\_ISL\_614696|Original|hCoV-19^^Sjaelland|Human|Department of Virus and Microbiological Special Diagnostics|Albertsen lab|Michaelsen|Denmark

>Spike|hCoV-19/South Korea/KCDC2376/2020|2020-05-31|EPI\_ISL\_514779|Original|hCoV-19^^South Korea|Human|Division of Viral Diseases|Division of Viral Diseases|Kim|South Korea

>Spike|hCoV-19/Netherlands/ZH-EMC-311/2020|2020-06-06|EPI\_ISL\_523653|Original|hCoV-19^^Zuid Holland|Human|Dutch COVID-19 response team|Erasmus Medical Center|Oude Munnink|Netherlands

>Spike|hCoV-19/England/LIVE-DC8E0D/2020|2020-11-19|EPI\_ISL\_705054|Original|hCoV-19^^England|Human|Liverpool Clinical Laboratories|COVID-19 Genomics UK (COG-UK) Consortium|Haldenby|United Kingdom



>Spike|hCoV-19/Northern Ireland/NIRE-2354D7/2020|2020-11-14|EPI\_ISL\_764437|Original|hCoV-19^^Northern Ireland|Human|Regional Virus Laboratory|COVID-19 Genomics UK (COG-UK) Consortium|Fairley|United Kingdom

>Spike|hCoV-19/Wales/PHWC-34FCA/2020|2020-04-25|EPI\_ISL\_474429|Original|hCoV-19^^Wales|Human|Originating lab|COVID-19 Genomics UK (COG-UK) Consortium|Moore|United Kingdom

>Spike|hCoV-19/England/ALDP-502F48/2020|2020-06-25|EPI\_ISL\_559153|Original|hCoV-19^^England|Human|Lighthouse Lab in Alderley Park|Wellcome Sanger Institute for the COVID-19 Genomics UK (COG-UK) consortium|Davies|United Kingdom

>Spike|hCoV-19/England/ALDP-94B774/2020|2020-06-13|EPI\_ISL\_555785|Original|hCoV-19^^England|Human|Lighthouse Lab in Alderley Park|Wellcome Sanger Institute for the COVID-19 Genomics UK (COG-UK) consortium|Davies|United Kingdom

>Spike|hCoV-19/England/SHEF-C9847/2020|2020-06-11|EPI\_ISL\_484482|Original|hCoV-19^^England|Human|Virology Department|COVID-19 Genomics UK (COG-UK) Consortium|de Silva|United Kingdom

>Spike|hCoV-19/USA/IA-UW-2458/2020|2020-12-22|EPI\_ISL\_759733|Original|hCoV-19^^Iowa|Human|University of Wisconsin-Madison AIDS Vaccine Research Laboratories|University of Wisconsin-Madison AIDS Vaccine Research Laboratories|Moreno|USA

>Spike|hCoV-19/England/MILK-B8D4AA/2020|2020-11-13|EPI\_ISL\_673902|Original|hCoV-19^^England|Human|Lighthouse Lab in Milton Keynes|Wellcome Sanger Institute for the COVID-19 Genomics UK (COG-UK) Consortium|Davies|United Kingdom

>Spike|hCoV-19/England/ALDP-704CF2/2020|2020-06-30|EPI\_ISL\_557669|Original|hCoV-19^^England|Human|Lighthouse Lab in Alderley Park|Wellcome Sanger Institute for the COVID-19 Genomics UK (COG-UK) consortium|Davies|United Kingdom

>Spike|hCoV-19/Australia/VIC17906/2020|2020-08-24|EPI\_ISL\_779549|Original|hCoV-19^^Victoria|Human|Microbiological Diagnostic Unit - Public Health Laboratory (MDU-PHL)|MDU-PHL|Beck|Australia

>Spike|hCoV-19/England/NORT-2A4D05/2020|2020-09-17|EPI\_ISL\_573402|Original|hCoV-19^^England|Human|Northumbria University / South Tees Hospitals NHS Foundation Trust / North Cumbria Integrated Care NHS Foundation Trust / North Tees and Hartlepool NHS Foundation Trust / Newcastle Hospitals NHS Foundation Trust|COVID-19 Genomics UK (COG-UK) Consortium|Bashton|United Kingdom

>Spike|hCoV-19/England/MILK-9AA99B/2020|2020-08-31|EPI\_ISL\_550827|Original|hCoV-19^^England|Human|Lighthouse Lab in Milton Keynes|Wellcome Sanger Institute for the COVID-19 Genomics UK (COG-UK) consortium|Davies|United Kingdom

>Spike|hCoV-19/Denmark/DCGC-18728/2020|2020-12-07|EPI\_ISL\_750148|Original|hCoV-19^^Midtjylland|Human|Department of Virus and Microbiological Special Diagnostics|Albertsen Lab|Michaelsen|Denmark

>Spike|hCoV-19/Wales/PHWC-488AD1/2020|2020-11-02|EPI\_ISL\_639463|Original|hCoV-19^^Wales|Human|Wales Specialist Virology Centre Sequencing lab|COVID-19 Genomics UK (COG-UK) Consortium|Moore|United Kingdom

>Spike|hCoV-19/USA/MN-MDH-1656/2020|2020-04-01|EPI\_ISL\_560743|Original|hCoV-19^^Minnesota|Human|Minnesota Department of Health|Minnesota Department of Health|Garfin|USA

>Spike|hCoV-19/Sweden/20-53609/2020|2020-11-24|EPI\_ISL\_732654|Original|hCoV-19^^Vastra Gotaland|Human|Klinisk mikrobiologi|The Public Health Agency of Sweden|Svartstr\u00f6m|Sweden

>Spike|hCoV-19/England/CAMC-B36868/2020|2020-11-05|EPI\_ISL\_645351|Original|hCoV-19^^England|Human|Lighthouse Lab in Cambridge|Wellcome Sanger Institute for the COVID-19 Genomics UK (COG-UK) Consortium|Davies|United Kingdom

>Spike|hCoV-19/England/CAMC-B98F14/2020|2020-11-15|EPI\_ISL\_673422|Original|hCoV-19^^England|Human|Lighthouse Lab in Cambridge|Wellcome Sanger Institute for the COVID-19 Genomics UK (COG-UK) Consortium|Davies|United Kingdom

>Spike|hCoV-19/England/CAMB-7DD8F/2020|2020-04-07|EPI\_ISL\_442175|Original|hCoV-19^^England|Human|Department of Pathology|Wellcome Sanger Institute for the COVID-19 Genomics UK (COG-UK) consortium|Amato|United Kingdom

>Spike|hCoV-19/England/ALDP-B76E00/2020|2020-11-12|EPI\_ISL\_723816|Original|hCoV-19^^England|Human|Oxford Viromics|COVID-19 Genomics UK (COG-UK) Consortium|Golubchik|United Kingdom

>Spike|hCoV-19/England/QEUA-B7C383/2020|2020-11-13|EPI\_ISL\_668244|Original|hCoV-19^^England|Human|Lighthouse Lab in Glasgow|Wellcome Sanger Institute for the COVID-19 Genomics UK (COG-UK) Consortium|Davies|United Kingdom

>Spike|hCoV-19/USA/MI-QDX-382/2020|2020-03-24|EPI\_ISL\_571124|Original|hCoV-19^^Michigan|Human|Quest Diagnostics|Quest Diagnostics|Kagan|USA

>Spike|hCoV-19/England/ALDP-AA0F83/2020|2020-10-22|EPI\_ISL\_624237|Original|hCoV-19^^England|Human|Lighthouse Lab in Alderley Park|Wellcome Sanger Institute for the COVID-19 Genomics UK (COG-UK) consortium|Davies|United Kingdom

>Spike|hCoV-19/Japan/IC-0193/2020|2020-06-00|EPI\_ISL\_667622|Original|hCoV-19^^Japan|Human|Pathogen Genomics Center|Pathogen Genomics Center|Sekizuka|Japan

>Spike|hCoV-19/England/CAMC-C44DEF/2020|2020-12-10|EPI\_ISL\_718600|Original|hCoV-19^^England|Human|Lighthouse Lab in Cambridge|Wellcome Sanger Institute for the COVID-19 Genomics UK (COG-UK) Consortium|Davies|United Kingdom

>Spike|hCoV-19/USA/MN-MDH-1060/2020|2020-05-14|EPI\_ISL\_462905|Original|hCoV-19^^Minnesota|Human|Minnesota Department of Health|Minnesota Department of Health|Garfin|USA

>Spike|hCoV-19/USA/MN-MDH-2038/2020|2020-11-03|EPI\_ISL\_654719|Original|hCoV-19^^Minnesota|Human|Minnesota Department of Health|Minnesota Department of Health|Lorentz|USA

>Spike|hCoV-19/England/MILK-9C4834/2020|2020-09-07|EPI\_ISL\_549468|Original|hCoV-19^^England|Human|Centre for Enzyme Innovation|COVID-19 Genomics UK (COG-UK) Consortium|Robson|United Kingdom

>Spike|hCoV-19/England/QEUA-54590F/2020|2020-05-14|EPI\_ISL\_533368|Original|hCoV-19^^England|Human|Lighthouse Lab in Glasgow|Wellcome Sanger Institute for the COVID-19 Genomics UK (COG-UK) consortium|Davies|United Kingdom

>Spike|hCoV-19/England/ALDP-CB3932/2020|2020-12-18|EPI\_ISL\_760906|Original|hCoV-19^^England|Human|Lighthouse Lab in Alderley Park|Wellcome Sanger Institute for the COVID-19 Genomics UK (COG-UK) Consortium|Davies|United Kingdom

>Spike|hCoV-19/England/ALDP-A95F27/2020|2020-10-19|EPI\_ISL\_624880|Original|hCoV-19^^England|Human|Lighthouse Lab in Alderley Park|Wellcome Sanger Institute for the COVID-19 Genomics UK (COG-UK) consortium|Davies|United Kingdom

>Spike|hCoV-19/England/ALDP-A2DCB4/2020|2020-10-05|EPI\_ISL\_586696|Original|hCoV-19^^England|Human|Lighthouse Lab in Alderley Park|Wellcome Sanger Institute for the COVID-19 Genomics UK (COG-UK) consortium|Davies|United Kingdom

>Spike|hCoV-19/USA/TX-HMH-1315/2020|2020-04-14|EPI\_ISL\_542647|Original|hCoV-19^^Texas|Human|Houston Methodist Hospital|Houston Methodist Hospital|Long|USA

>Spike|hCoV-19/England/MILK-B3873C/2020|2020-11-01|EPI\_ISL\_658797|Original|hCoV-19^^England|Human|Lighthouse Lab in Milton Keynes|Wellcome Sanger Institute for the COVID-19 Genomics UK (COG-UK) Consortium|Davies|United Kingdom

>Spike|hCoV-19/England/QEUA-96F72F/2020|2020-08-17|EPI\_ISL\_530460|Original|hCoV-19^^England|Human|Lighthouse Lab in Glasgow|Wellcome Sanger Institute for the COVID-19 Genomics UK (COG-UK) consortium|Davies|United Kingdom

>Spike|hCoV-19/England/CAMB-775BA/2020|2020-03-31|EPI\_ISL\_438528|Original|hCoV-19^^England|Human|Department of Pathology|Wellcome Sanger Institute for the COVID-19 Genomics UK (COG-UK) consortium|Amato|United Kingdom

>Spike|hCoV-19/USA/CA-SCCPHD-UC168/2020|2020-03-13|EPI\_ISL\_435647|Original|hCoV-19^^California|Human|Santa Clara County Public Health Department|Chiu Laboratory|Chiu|USA

>Spike|hCoV-19/Netherlands/NH-RIVM-21031/2020|2020-12-23|EPI\_ISL\_791046|Original|hCoV-19^^Noord-Holland|Human|Dutch COVID-19 response team|National Institute for Public Health and the Environment (RIVM)|Meijer|Netherlands

>Spike|hCoV-19/USA/UT-03026/2020|2020-05-01|EPI\_ISL\_522298|Original|hCoV-19^^Utah|Human|Utah Public Health Laboratory|Utah Public Health Laboratory|Young|USA

>Spike|hCoV-19/Russia/MUR-RII-MH2079S/2020|2020-09-25|EPI\_ISL\_602408|Original|hCoV-19^^Murmansk|Human|HELIX LLC|WHO National Influenza Centre Russian Federation|Komissarov|Russia

>Spike|hCoV-19/England/ALDP-B5BEC5/2020|2020-11-09|EPI\_ISL\_655718|Original|hCoV-19^^England|Human|Lighthouse Lab in Alderley Park|Wellcome Sanger Institute for the COVID-19 Genomics UK (COG-UK) Consortium|Davies|United Kingdom

>Spike|hCoV-19/England/ALDP-B1A7F4/2020|2020-11-01|EPI\_ISL\_647705|Original|hCoV-19^^England|Human|Lighthouse Lab in Alderley Park|Wellcome Sanger Institute for the COVID-19 Genomics UK (COG-UK) Consortium|Davies|United Kingdom

>Spike|hCoV-19/USA/UT-UPHL-2012562796/2020|2020-07-18|EPI\_ISL\_745783|Original|hCoV-19^^Utah|Human|Ginkgo Bioworks Clinical Laboratory|Utah Public Health Laboratory|Young|USA

>Spike|hCoV-19/England/QEUH-95FBF9/2020|2020-08-03|EPI\_ISL\_532369|Original|hCoV-19^^England|Human|Lighthouse Lab in Glasgow|Wellcome Sanger Institute for the COVID-19 Genomics UK (COG-UK) consortium|Davies|United Kingdom

>Spike|hCoV-19/Denmark/ALAB-HH-169/2020|2020-04-14|EPI\_ISL\_452039|Original|hCoV-19^^Denmark|Human|Department of Clinical Microbiology|Albertsen lab|Kirkegaard|Denmark

>Spike|hCoV-19/South Africa/KRISP-K000618/2020|2020-07-03|EPI\_ISL\_509270|Original|hCoV-19^^KwaZulu-Natal|Human|NHLS-IALCH|KRISP|de Oliveira|South Africa

>Spike|hCoV-19/England/ALDP-A2F881/2020|2020-10-06|EPI\_ISL\_586999|Original|hCoV-19^^England|Human|Lighthouse Lab in Alderley Park|Wellcome Sanger Institute for the COVID-19 Genomics UK (COG-UK) consortium|Davies|United Kingdom

>Spike|hCoV-19/France/GES-8804/2020|2020-04-16|EPI\_ISL\_560631|Original|hCoV-19^^Grand-Est|Human|Hospital|National Reference Center for Viruses of Respiratory Infections|Enouf|France

>Spike|hCoV-19/Norway/6734/2020|2020-12-06|EPI\_ISL\_775408|Original|hCoV-19^^Vestland|Human|Haukeland University Hospital|Norwegian Institute of Public Health|Vollan|Norway

>Spike|hCoV-19/USA/UT-UPHL-2012590975/2020|2020-08-17|EPI\_ISL\_746285|Original|hCoV-19^^Utah|Human|Ginkgo Bioworks Clinical Laboratory|Utah Public Health Laboratory|Young|USA

>Spike|hCoV-19/USA/CA-QDX-1629/2020|2020-03-18|EPI\_ISL\_603908|Original|hCoV-19^^California|Human|Quest Diagnostics|Quest Diagnostics|Kagan|USA

>Spike|hCoV-19/USA/NY-NYCPHL-001378/2020|2020-11-17|EPI\_ISL\_683988|Original|hCoV-19^^New York|Human|DOHMH PHL|New York City Public Health Laboratory|Wang|USA

>Spike|hCoV-19/England/MILK-ACBE3A/2020|2020-10-21|EPI\_ISL\_629356|Original|hCoV-19^^England|Human|Lighthouse Lab in Milton Keynes|Wellcome Sanger Institute for the COVID-19 Genomics UK (COG-UK) consortium|Davies|United Kingdom

>Spike|hCoV-19/England/PORT-2D009E/2020|2020-05-01|EPI\_ISL\_475251|Original|hCoV-19^^England|Human|Centre for Enzyme Innovation|COVID-19 Genomics UK (COG-UK) Consortium|Robson|United Kingdom

>Spike|hCoV-19/Wales/PHWC-4A333F/2020|2020-12-14|EPI\_ISL\_744089|Original|hCoV-19^^Wales|Human|Wales Specialist Virology Centre Sequencing lab|COVID-19 Genomics UK (COG-UK) Consortium|Moore|United Kingdom

>Spike|hCoV-19/England/BRIS-12F8B7/2020|2020-03-27|EPI\_ISL\_488195|Original|hCoV-19^^England|Human|PHE South West Regional Laboratory|Wellcome Sanger Institute for the COVID-19 Genomics UK (COG-UK) consortium|Davies|United Kingdom

>Spike|hCoV-19/England/ALDP-AC1292/2020|2020-10-10|EPI\_ISL\_631165|Original|hCoV-19^^England|Human|Lighthouse Lab in Alderley Park|Wellcome Sanger Institute for the COVID-19 Genomics UK (COG-UK) consortium|Davies|United Kingdom

>Spike|hCoV-19/Denmark/DCGC-1367/2020|2020-03-30|EPI\_ISL\_622224|Original|hCoV-19^^Sjaelland|Human|Department of Virus and Microbiological Special Diagnostics|Albertsen lab|Michaelsen|Denmark

>Spike|hCoV-19/Wales/PHWC-492EE7/2020|2020-11-28|EPI\_ISL\_725805|Original|hCoV-19^^Wales|Human|Originating lab|COVID-19 Genomics UK (COG-UK) Consortium|Moore|United Kingdom

>Spike|hCoV-19/Japan/PG-0816/2020|2020-04-00|EPI\_ISL\_684426|Original|hCoV-19^^Japan|Human|Fukuoka Institute of Health and Environmental Sciences|Pathogen Genomics Center|Sekizuka|Japan

>Spike|hCoV-19/Spain/MD-IBV-99012334/2020|2020-11-20|EPI\_ISL\_779987|Original|hCoV-19^^Madrid|Human|Hospital General Universitario Gregorio Marañón|SeqCOVID-SPAIN consortium/IBV (CSIC)|Comas|Spain

>Spike|hCoV-19/Sweden/20-08130/2020|2020-03-10|EPI\_ISL\_469073|Original|hCoV-19^^Halland|Human|Halmstad klinisk mikrobiologi|The Public Health Agency of Sweden|Svartstr\u00f6m|Sweden

>Spike|hCoV-19/Portugal/PT1205/2020|2020-03-30|EPI\_ISL\_511748|Original|hCoV-19^^Portugal|Human|Instituto Nacional de Saude (INSA)|Instituto Nacional de Saude (INSA)|Borges|Portugal

>Spike|hCoV-19/USA/DC-HP00026/2020|2020-03-14|EPI\_ISL\_438223|Original|hCoV-19^^District of Columbia|Human|Johns Hopkins Hospital Department of Pathology|Johns Hopkins Hospital Department of Pathology|Ramakrishnan|USA

>Spike|hCoV-19/USA/VA-DCLS-0297/2020|2020-04-30|EPI\_ISL\_463100|Original|hCoV-19^^Virginia|Human|Virginia DCLS|Virginia DCLS|St. Jacques|USA

>Spike|hCoV-19/USA/WA-S915/2020|2020-04-27|EPI\_ISL\_463405|Original|hCoV-19^^Washington|Human|Washington State Department of Health|Seattle Flu Study|Bedford|USA

>Spike|hCoV-19/England/210100365/2021|2021-01-04|EPI\_ISL\_791248|Original|hCoV-19^^England|Human|Respiratory Virus Unit|COVID-19 Genomics UK (COG-UK) Consortium|Platt|United Kingdom

>Spike|hCoV-19/USA/TX-HMH-MCoV-17970/2020|2020-11-16|EPI\_ISL\_786118|Original|hCoV-19^^Texas|Human|Houston Methodist Hospital|Houston Methodist Hospital|Long|USA

>Spike|hCoV-19/England/LIVE-DB9DE4/2020|2020-11-05|EPI\_ISL\_664621|Original|hCoV-19^^England|Human|Liverpool Clinical Laboratories|COVID-19 Genomics UK (COG-UK) Consortium|Haldenby|United Kingdom

>Spike|hCoV-19/USA/CA-CZB-4075/2020|2020-08-05|EPI\_ISL\_548667|Original|hCoV-19^^California|Human|Orange County Public Health Laboratory|Chan-Zuckerberg Biohub|Bhatt|USA

>Spike|hCoV-19/England/MILK-ABC0FA/2020|2020-10-22|EPI\_ISL\_631238|Original|hCoV-19^^England|Human|Lighthouse Lab in Milton Keynes|Wellcome Sanger Institute for the COVID-19 Genomics UK (COG-UK) consortium|Davies|United Kingdom

>Spike|hCoV-19/England/QEUA-ALDDD2/2020|2020-09-29|EPI\_ISL\_587424|Original|hCoV-19^^England|Human|Lighthouse Lab in Glasgow|Wellcome Sanger Institute for the COVID-19 Genomics UK (COG-UK) consortium|Davies|United Kingdom

>Spike|hCoV-19/Japan/PG-7595/2020|2020-07-00|EPI\_ISL\_686697|Original|hCoV-19^^Japan|Human|Chiba Prefectural Institute of Public Health|Pathogen Genomics Center|Sekizuka|Japan

>Spike|hCoV-19/England/CAMB-1B8983/2020|2020-10-30|EPI\_ISL\_651002|Original|hCoV-19^^England|Human|Department of Pathology|COVID-19 Genomics UK (COG-UK) Consortium|Goodfellow|United Kingdom

>Spike|hCoV-19/England/BRIS-1257C3/2020|2020-03-29|EPI\_ISL\_443970|Original|hCoV-19^^England|Human|PHE South West Regional Laboratory|Wellcome Sanger Institute for the COVID-19 Genomics UK (COG-UK) consortium|Amato|United Kingdom

>Spike|hCoV-19/England/LIVE-A7645/2020|2020-03-28|EPI\_ISL\_517050|Original|hCoV-19^^England|Human|Liverpool Clinical Laboratories|COVID-19 Genomics UK (COG-UK) Consortium|Haldenby|United Kingdom

>Spike|hCoV-19/India/GJ-GBRC306a/2020|2020-06-15|EPI\_ISL\_495056|Original|hCoV-19^^Gujarat|Human|GMERS Medical College & Hospital|Gujarat Biotechnology Research Centre|Joshi|India

>Spike|hCoV-19/England/ALDP-8D4173/2020|2020-06-24|EPI\_ISL\_557010|Original|hCoV-19^^England|Human|Lighthouse Lab in Alderley Park|Wellcome Sanger Institute for the COVID-19 Genomics UK (COG-UK) consortium|Davies|United Kingdom

>Spike|hCoV-19/England/QEUA-9D1C92/2020|2020-09-14|EPI\_ISL\_573685|Original|hCoV-19^^England|Human|University College London|COVID-19 Genomics UK (COG-UK) Consortium|Roy|United Kingdom

>Spike|hCoV-19/USA/MI-MDHHS-SC20199/2020|2020-03-19|EPI\_ISL\_447170|Original|hCoV-19^^Michigan|Human|Michigan Department of Health and Human Services|Michigan Department of Health and Human Services|Blankenship|USA

>Spike|hCoV-19/England/QEUA-9637A3/2020|2020-08-10|EPI\_ISL\_531729|Original|hCoV-19^^England|Human|Lighthouse Lab in Glasgow|Wellcome Sanger Institute for the COVID-19 Genomics UK (COG-UK) consortium|Davies|United Kingdom

>Spike|hCoV-19/Switzerland/BL-ETHZ-420569/2020|2020-12-22|EPI\_ISL\_768066|Original|hCoV-19^^Basel-Landschaft|Human|Viollier AG|Department of Biosystems Science and Engineering|Nadeau|Switzerland

>Spike|hCoV-19/Italy/LOM-IZSGC-TE38845/2020|2020-05-10|EPI\_ISL\_528949|Original|hCoV-19^^Lombardy|Human|Agenzia di Tutela della Salute di Bergamo|Istituto Zooprofilattico Sperimentale dell'Abruzzo e Molise \G.Caporale\|Lorusso|Italy

>Spike|hCoV-19/USA/VA-DCLS-0791/2020|2020-07-07|EPI\_ISL\_526896|Original|hCoV-19^^Virginia|Human|Virginia DCLS|Virginia DCLS|St. Jacques|USA

>Spike|hCoV-19/France/BRE-BR9061/2020|2020-08-31|EPI\_ISL\_613550|Original|hCoV-19^^Bretagne|Human|CHRU Pontchaillou - Laboratoire de Virologie\n2|National Reference Center for Viruses of Respiratory Infections|Enouf|France

>Spike|hCoV-19/USA/MN-MDH-1331/2020|2020-06-03|EPI\_ISL\_496917|Original|hCoV-19^^Minnesota|Human|Minnesota Department of Health|Minnesota Department of Health|Garfin|USA

>Spike|hCoV-19/India/DL-5504375-CSIR-IGIB/2020|2020-08-06|EPI\_ISL\_636787|Original|hCoV-19^^Delhi|Human|National Centre for Disease control (NCDC)|NCDC/CSIR-IGIB|Faruq|India

>Spike|hCoV-19/USA/ME-HETL-J0184/2020|2020-09-16|EPI\_ISL\_755362|Original|hCoV-19^^Maine|Human|Maine Health and Environmental Testing Laboratory|Tewhey Lab|Tewhey|USA

>Spike|hCoV-19/Scotland/CVR4375/2020|2020-09-16|EPI\_ISL\_572639|Original|hCoV-19^^Scotland|Human|West of Scotland Specialist Virology Centre|COVID-19 Genomics UK (COG-UK) Consortium|Robertson|United Kingdom

>Spike|hCoV-19/Wales/PHWC-499D7A/2020|2020-11-24|EPI\_ISL\_727440|Original|hCoV-19^^Wales|Human|Originating lab|COVID-19 Genomics UK (COG-UK) Consortium|Moore|United Kingdom

>Spike|hCoV-19/England/QEUH-B6B994/2020|2020-11-11|EPI\_ISL\_655208|Original|hCoV-19^^England|Human|Lighthouse Lab in Glasgow|Wellcome Sanger Institute for the COVID-19 Genomics UK (COG-UK) Consortium|Davies|United Kingdom

>Spike|hCoV-19/Belgium/reg-10191127/2020|2020-10-19|EPI\_ISL\_735158|Original|hCoV-19^^Puurs|Human|UZ Leuven|KU Leuven|Maes|Belgium

>Spike|hCoV-19/England/MILK-9763F4/2020|2020-08-20|EPI\_ISL\_575877|Original|hCoV-19^^England|Human|Lighthouse Lab in Milton Keynes|Wellcome Sanger Institute for the COVID-19 Genomics UK (COG-UK) consortium|Davies|United Kingdom

>Spike|hCoV-19/Japan/PG-5377/2020|2020-08-00|EPI\_ISL\_690480|Original|hCoV-19^^Japan|Human|Fukuoka Institute of Health and Environmental Sciences|Pathogen Genomics Center|Sekizuka|Japan

>Spike|hCoV-19/Australia/VIC738/2020|2020-03-30|EPI\_ISL\_427017|Original|hCoV-19^^Victoria|Human|Victorian Infectious Diseases Reference Laboratory (VIDRL)|Microbiological Diagnostic Unit Public Health Laboratory and Victorian Infectious Diseases Reference Laboratory|Schultz|Australia

>Spike|hCoV-19/Australia/VIC3401/2020|2020-07-11|EPI\_ISL\_521080|Original|hCoV-19^^Victoria|Human|Microbiological Diagnostic Unit - Public Health Laboratory (MDU-PHL)|MDU-PHL|Schultz|Australia

>Spike|hCoV-19/USA/TX-HMH-MCoV-19084/2020|2020-11-25|EPI\_ISL\_783616|Original|hCoV-19^^Texas|Human|Houston Methodist Hospital|Houston Methodist Hospital|Long|USA

>Spike|hCoV-19/Russia/MOS-RII-MH2807S/2020|2020-09-27|EPI\_ISL\_639956|Original|hCoV-19^^Moscow|Human|HELIX LLC|WHO National Influenza Centre Russian Federation|Komissarov|Russia

>Spike|hCoV-19/USA/WA-S1053/2020|2020-05-01|EPI\_ISL\_463543|Original|hCoV-19^^Washington|Human|Washington State Department of Health|Seattle Flu Study|Bedford|USA

>Spike|hCoV-19/USA/NY-Wadsworth-12767-01/2020|2020-03-10|EPI\_ISL\_525594|Original|hCoV-19^^New York|Human|Wadsworth Center|Wadsworth Center|Plitnick|USA

>Spike|hCoV-19/England/CAMC-A41EF0/2020|2020-10-05|EPI\_ISL\_609337|Original|hCoV-19^^England|Human|Lighthouse Lab in Cambridge|Wellcome Sanger Institute for the COVID-19 Genomics UK (COG-UK) consortium|Davies|United Kingdom

>Spike|hCoV-19/England/QEUA-A1DC02/2020|2020-09-29|EPI\_ISL\_587387|Original|hCoV-19^^England|Human|Lighthouse Lab in Glasgow|Wellcome Sanger Institute for the COVID-19 Genomics UK (COG-UK) consortium|Davies|United Kingdom

>Spike|hCoV-19/USA/UT-UPHL-2012618844/2020|2020-11-23|EPI\_ISL\_746974|Original|hCoV-19^^Utah|Human|Utah Public Health Laboratory|Utah Public Health Laboratory|Gallagher|USA

>Spike|hCoV-19/England/MILK-A45FBD/2020|2020-10-06|EPI\_ISL\_598610|Original|hCoV-19^^England|Human|Lighthouse Lab in Milton Keynes|Wellcome Sanger Institute for the COVID-19 Genomics UK (COG-UK) consortium|Davies|United Kingdom

>Spike|hCoV-19/France/PAC-IHU-0087/2020|2020-03-20|EPI\_ISL\_569302|Original|hCoV-19^^Provence-Alpes-C\u00f4te-d\u00e0z|Human|MEPHI|MEPHI|Levasseur|France

>Spike|hCoV-19/Gambia/3676/2020|2020-07-30|EPI\_ISL\_560996|Original|hCoV-19^^Kombo|Human|MRCG at LSHTM Genomics lab|MRCG at LSHTM Genomics lab|Sesay|Gambia

>Spike|hCoV-19/Pakistan/JRCGR-KHI20/2020|2020-07-02|EPI\_ISL\_779276|Original|hCoV-19^^Karachi|Human|Jamil-ur-Rahman Center for Genome Research|Jamil-ur-Rahman Center for Genome Research|Shakeel|Pakistan

>Spike|hCoV-19/England/MILK-9937D7/2020|2020-08-27|EPI\_ISL\_551941|Original|hCoV-19^^England|Human|Lighthouse Lab in Milton Keynes|Wellcome Sanger Institute for the COVID-19 Genomics UK (COG-UK) consortium|Davies|United Kingdom

>Spike|hCoV-19/Wales/PHWC-48F30C/2020|2020-11-08|EPI\_ISL\_681075|Original|hCoV-19^^Wales|Human|Wales Specialist Virology Centre Sequencing lab|COVID-19 Genomics UK (COG-UK) Consortium|Moore|United Kingdom

>Spike|hCoV-19/USA/FL-BPHL-0078/2020|2020-04-29|EPI\_ISL\_445021|Original|hCoV-19^^Florida|Human|Florida Bureau of Public Health Laboratories|Florida Bureau of Public Health Laboratories|Blanton|USA

>Spike|hCoV-19/England/BIRM-67F55/2020|2020-11-05|EPI\_ISL\_650218|Original|hCoV-19^^England|Human|University of Birmingham|COVID-19 Genomics UK (COG-UK) Consortium|Loman|United Kingdom

>Spike|hCoV-19/England/QEUA-A8C8BF/2020|2020-10-16|EPI\_ISL\_643159|Original|hCoV-19^^England|Human|Lighthouse Lab in Glasgow|Wellcome Sanger Institute for the COVID-19 Genomics UK (COG-UK) Consortium|Davies|United Kingdom

>Spike|hCoV-19/Denmark/ALAB-SSI-1245/2020|2020-03-11|EPI\_ISL\_444824|Original|hCoV-19^^Denmark|Human|Department of Virus and Microbiological Special Diagnostics|Albertsen lab|Kirkegaard|Denmark

>Spike|hCoV-19/England/LIVE-DB9DB7/2020|2020-11-06|EPI\_ISL\_664634|Original|hCoV-19^^England|Human|Liverpool Clinical Laboratories|COVID-19 Genomics UK (COG-UK) Consortium|Haldenby|United Kingdom

>Spike|hCoV-19/England/QEUA-9DC24A/2020|2020-09-21|EPI\_ISL\_601246|Original|hCoV-19^^England|Human|Lighthouse Lab in Glasgow|Wellcome Sanger Institute for the COVID-19 Genomics UK (COG-UK) consortium|Davies|United Kingdom

>Spike|hCoV-19/Japan/PG-1251/2020|2020-00-00|EPI\_ISL\_684861|Original|hCoV-19^^Japan|Human|Pathogen Genomics Center|Pathogen Genomics Center|Sekizuka|Japan

>Spike|hCoV-19/Japan/PG-3219/2020|2020-04-00|EPI\_ISL\_691337|Original|hCoV-19^^Japan|Human|Pathogen Genomics Center|Pathogen Genomics Center|Sekizuka|Japan

>Spike|hCoV-19/Wales/ALDP-AA24BF/2020|2020-10-22|EPI\_ISL\_634785|Original|hCoV-19^^Wales|Human|Lighthouse Lab in Alderley Park|Wellcome Sanger Institute for the COVID-19 Genomics UK (COG-UK) consortium|Davies|United Kingdom

>Spike|hCoV-19/USA/MI-MDHHS-SC22459/2020|2020-11-02|EPI\_ISL\_708557|Original|hCoV-19^^Michigan|Human|Michigan Department of Health and Human Services|Michigan Department of Health and Human Services|Jacob|USA

>Spike|hCoV-19/Spain/RI-IBV-98002314/2020|2020-03-11|EPI\_ISL\_537835|Original|hCoV-19^^La Rioja|Human|Centro de Investigaci\u00f3n Biom\u00e9dica de La Rioja - Hospital San Pedro Logro\u00f1o|SeqCOVID-SPAIN consortium|IBV (CSIC)|Comas|Spain

>Spike|hCoV-19/England/QEUA-A9FA1D/2020|2020-10-20|EPI\_ISL\_665987|Original|hCoV-19^^England|Human|Northumbria University / South Tees Hospitals NHS Foundation Trust / North Cumbria Integrated Care NHS Foundation Trust / North Tees and Hartlepool NHS Foundation Trust / Newcastle Hospitals NHS Foundation Trust|COVID-19 Genomics UK (COG-UK) Consortium|Bashton|United Kingdom

>Spike|hCoV-19/Portugal/PT1996/2020|2020-11-14|EPI\_ISL\_732217|Original|hCoV-19^^Portugal|Human|Instituto Nacional de Saude (INSA) and Instituto Gulbenkian de

Ciencia (IGC)|Instituto Nacional de Saude (INSA) and Instituto Gulbenkian de Ciencia (IGC)|Borges|Portugal  
>Spike|hCoV-19/Scotland/CVR5768/2020|2020-11-12|EPI\_ISL\_705638|Original|hCoV-19^^Scotland|Human|West of Scotland Specialist Virology Centre|COVID-19 Genomics UK (COG-UK) Consortium|Robertson|United Kingdom  
>Spike|hCoV-19/England/SHEF-10D0EDF/2020|2020-12-03|EPI\_ISL\_727941|Original|hCoV-19^^England|Human|Virology Department|COVID-19 Genomics UK (COG-UK) Consortium|de Silva|United Kingdom  
>Spike|hCoV-19/England/BRIS-12A1EE/2020|2020-04-16|EPI\_ISL\_458509|Original|hCoV-19^^England|Human|PHE South West Regional Laboratory|Wellcome Sanger Institute for the COVID-19 Genomics UK (COG-UK) consortium|Davies|United Kingdom  
>Spike|hCoV-19/USA/WI-UW-985/2020|2020-07-19|EPI\_ISL\_509981|Original|hCoV-19^^Wisconsin|Human|University of Wisconsin-Madison AIDS Vaccine Research Laboratories|University of Wisconsin-Madison AIDS Vaccine Research Laboratories|Baczenas|USA  
>Spike|hCoV-19/Netherlands/ZH-EMC-1002/2020|2020-10-14|EPI\_ISL\_722503|Original|hCoV-19^^Zuid Holland|Human|Dutch COVID-19 response team|Erasmus Medical Center|Oude Munnink|Netherlands  
>Spike|hCoV-19/England/ALDP-BB4FB8/2020|2020-11-20|EPI\_ISL\_701926|Original|hCoV-19^^England|Human|Lighthouse Lab in Alderley Park|Wellcome Sanger Institute for the COVID-19 Genomics UK (COG-UK) Consortium|Davies|United Kingdom  
>Spike|hCoV-19/USA/WA-S2868/2020|2020-09-21|EPI\_ISL\_596399|Original|hCoV-19^^Washington|Human|Seattle Flu Study|Seattle Flu Study|Lee|USA  
>Spike|hCoV-19/England/CAMC-B98D47/2020|2020-11-15|EPI\_ISL\_673684|Original|hCoV-19^^England|Human|Lighthouse Lab in Cambridge|Wellcome Sanger Institute for the COVID-19 Genomics UK (COG-UK) Consortium|Davies|United Kingdom  
>Spike|hCoV-19/England/ALDP-A939A3/2020|2020-10-20|EPI\_ISL\_611057|Original|hCoV-19^^England|Human|Lighthouse Lab in Alderley Park|Wellcome Sanger Institute for the COVID-19 Genomics UK (COG-UK) consortium|Davies|United Kingdom  
>Spike|hCoV-19/Turkey/IST-GLAB-341/2020|2020-06-24|EPI\_ISL\_735356|Original|hCoV-19^^Istanbul|Human|Genomic Laboratory (GLAB) (Conjoint lab of Health Directorate of Istanbul and Istanbul Technical University)|Genomic Laboratory (GLAB)|Karacan|Turkey  
>Spike|hCoV-19/England/OXON-AE796/2020|2020-00-00|EPI\_ISL\_448718|Original|hCoV-19^^England|Human|Oxford Viromics|COVID-19 Genomics UK (COG-UK) Consortium|Golubchik|United Kingdom  
>Spike|hCoV-19/Brazil/SP-L38-CD1011/2020|2020-05-10|EPI\_ISL\_722006|Original|hCoV-19^^S\u00e3o Paulo|Human|Hospital das Cl\u00ednicas Universidade de S\u00e3o Paulo Medical School|Laborat\u00f3rio de Parasitologia M\u00e9dica - Instituto de Medicina Tropical - Universidade de S\u00e3o Paulo|de Jesus|Brazil  
>Spike|hCoV-19/USA/WI-UW-1982/2020|2020-09-29|EPI\_ISL\_677390|Original|hCoV-19^^Wisconsin|Human|University of Wisconsin-Madison AIDS Vaccine Research Laboratories|University of Wisconsin-Madison AIDS Vaccine Research Laboratories|Baczenas|USA  
>Spike|hCoV-19/England/LIVE-9FCF3/2020|2020-06-02|EPI\_ISL\_472058|Original|hCoV-19^^England|Human|Liverpool Clinical Laboratories|COVID-19 Genomics UK (COG-UK) Consortium|Haldenby|United Kingdom  
>Spike|hCoV-19/Australia/VIC549/2020|2020-03-23|EPI\_ISL\_426812|Original|hCoV-19^^Victoria|Human|Victorian Infectious Diseases Reference Laboratory (VIDRL)|Microbiological Diagnostic Unit Public Health Laboratory and Victorian Infectious Diseases Reference Laboratory|Schultz|Australia  
>Spike|hCoV-19/Denmark/DCGC-10679/2020|2020-11-02|EPI\_ISL\_670131|Original|hCoV-19^^Sjaelland|Human|Department of Virus and Microbiological Special Diagnostics|Albertsen Lab|Michaelsen|Denmark  
>Spike|hCoV-19/France/PAC-SC451/2020|2020-04-02|EPI\_ISL\_644713|Original|hCoV-19^^Provence-Alpes-Cote d'Azur|Human|Unit\u00e9 des Virus \u00c9mergents|CNR Virus des Infections Respiratoires - France SUD|Bal|France  
>Spike|hCoV-19/Chile/MA-UMAG-Catg-7/2020|2020-09-03|EPI\_ISL\_625675|Original|hCoV-19^^Magallanes|Human|Laboratory of Molecular Medicine|Centro Asistencial Docente y de Investigacion|Navarrete|Chile

>Spike|hCoV-19/USA/WA\_0429/2020|2020-03-19|EPI\_ISL\_426440|Original|hCoV-19^^Washington|Human|WA State Department of Health|Pathogen Discovery|Queen|USA

>Spike|hCoV-19/England/QEUEH-B2DEDB/2020|2020-11-04|EPI\_ISL\_659962|Original|hCoV-19^^England|Human|Lighthouse Lab in Glasgow|Wellcome Sanger Institute for the COVID-19 Genomics UK (COG-UK) Consortium|Davies|United Kingdom

>Spike|hCoV-19/USA/MN-CDC-6215/2020|2020-05-15|EPI\_ISL\_527676|Original|hCoV-19^^Minnesota|Human|MN PHL Division|Pathogen Discovery|Queen|USA

>Spike|hCoV-19/England/QEUEH-96F121/2020|2020-08-17|EPI\_ISL\_530526|Original|hCoV-19^^England|Human|Lighthouse Lab in Glasgow|Wellcome Sanger Institute for the COVID-19 Genomics UK (COG-UK) consortium|Davies|United Kingdom

>Spike|hCoV-19/USA/CA-CZB-2534/2020|2020-05-08|EPI\_ISL\_513903|Original|hCoV-19^^California|Human|UCSF Clinical Microbiology Laboratory|Chan-Zuckerberg Biohub|Kamm|USA

>Spike|hCoV-19/Switzerland/BS-ETHZ-380231/2020|2020-11-21|EPI\_ISL\_721801|Original|hCoV-19^^Basel-Stadt|Human|Viollier AG|Department of Biosystems Science and Engineering|Nadeau|Switzerland

>Spike|hCoV-19/Singapore/594/2020|2020-03-27|EPI\_ISL\_483617|Original|hCoV-19^^Singapore|Human|National Public Health Laboratory|National Public Health Laboratory|Mak|Singapore

>Spike|hCoV-19/England/QEUEH-B3FAE1/2020|2020-11-08|EPI\_ISL\_658531|Original|hCoV-19^^England|Human|Lighthouse Lab in Glasgow|Wellcome Sanger Institute for the COVID-19 Genomics UK (COG-UK) Consortium|Davies|United Kingdom

>Spike|hCoV-19/Wales/PHWC-25551/2020|2020-03-23|EPI\_ISL\_421004|Original|hCoV-19^^Wales|Human|Wales Specialist Virology Centre|Public Health Wales Microbiology Cardiff|Moore|United Kingdom

>Spike|hCoV-19/USA/TX-HMH-MCoV-8620/2020|2020-07-01|EPI\_ISL\_780548|Original|hCoV-19^^Texas|Human|Houston Methodist Hospital|Houston Methodist Hospital|Long|USA

>Spike|hCoV-19/Wales/PHWC-488A68/2020|2020-11-02|EPI\_ISL\_639457|Original|hCoV-19^^Wales|Human|Wales Specialist Virology Centre Sequencing lab|COVID-19 Genomics UK (COG-UK) Consortium|Moore|United Kingdom

>Spike|hCoV-19/USA/MI-UM-10036346883/2020|2020-10-08|EPI\_ISL\_610056|Original|hCoV-19^^Michigan|Human|University of Michigan Clinical Microbiology Laboratory|Lauring Lab|Valesano|USA

>Spike|hCoV-19/USA/NM-DOH-2020642451/2020|2020-12-27|EPI\_ISL\_767069|Original|hCoV-19^^New Mexico|Human|New Mexico Department of Health Scientific Laboratory|New Mexico Department of Health Scientific Laboratory|Malone|USA

>Spike|hCoV-19/England/CAMC-C45F9D/2020|2020-12-10|EPI\_ISL\_718424|Original|hCoV-19^^England|Human|Lighthouse Lab in Cambridge|Wellcome Sanger Institute for the COVID-19 Genomics UK (COG-UK) Consortium|Davies|United Kingdom

>Spike|hCoV-19/Spain/PV-IBV-004198/2020|2020-04-03|EPI\_ISL\_510483|Original|hCoV-19^^Basque Country|Human|Servicio de Microbiolog\u00eda. Hospital Universitario Donostia. OSI Donostialdea. \u00clrea de Enfermedades Infecciosas|SeqCOVID-SPAIN consortium/IBV (CSIC)|Comas|Spain

>Spike|hCoV-19/Denmark/DCGC-3901/2020|2020-09-07|EPI\_ISL\_615621|Original|hCoV-19^^Syddanmark|Human|Department of Virus and Microbiological Special Diagnostics|Albertsen lab|Michaelsen|Denmark

>Spike|hCoV-19/Japan/PG-3854/2020|2020-07-00|EPI\_ISL\_692105|Original|hCoV-19^^Japan|Human|Pathogen Genomics Center|Pathogen Genomics Center|Sekizuka|Japan

>Spike|hCoV-19/England/ALDP-B62F9B/2020|2020-11-08|EPI\_ISL\_655364|Original|hCoV-19^^England|Human|Lighthouse Lab in Alderley Park|Wellcome Sanger Institute for the COVID-19 Genomics UK (COG-UK) Consortium|Davies|United Kingdom

>Spike|hCoV-19/Australia/NSW2253/2020|2020-03-22|EPI\_ISL\_500692|Original|hCoV-19^^New South Wales|Human|Area of Virology|Area of Virology|Bull|Australia

>Spike|hCoV-19/England/ALDP-B4864B/2020|2020-11-06|EPI\_ISL\_649443|Original|hCoV-19^^England|Human|Lighthouse Lab in Alderley Park|Wellcome Sanger Institute for the COVID-19 Genomics UK (COG-UK) Consortium|Davies|United Kingdom

>Spike|hCoV-19/Australia/VIC1008/2020|2020-03-31|EPI\_ISL\_430473|Original|hCoV-19^^Victoria|Human|Victorian Infectious Diseases Reference Laboratory (VIDRL)|Microbiological Diagnostic Unit Public Health Laboratory and Victorian Infectious Diseases Reference Laboratory|Schultz|Australia



>Spike|hCoV-19/Wales/PHWC-4964D2/2020|2020-11-27|EPI\_ISL\_726590|Original|hCoV-19^^Wales|Human|Originating lab|COVID-19 Genomics UK (COG-UK) Consortium|Moore|United Kingdom

>Spike|hCoV-19/Scotland/QEUH-9DACC6/2020|2020-09-22|EPI\_ISL\_601124|Original|hCoV-19^^Scotland|Human|Lighthouse Lab in Glasgow|Wellcome Sanger Institute for the COVID-19 Genomics UK (COG-UK) consortium|Davies|United Kingdom

>Spike|hCoV-19/USA/WI-UW-902/2020|2020-07-12|EPI\_ISL\_509903|Original|hCoV-19^^Wisconsin|Human|University of Wisconsin-Madison AIDS Vaccine Research Laboratories|University of Wisconsin-Madison AIDS Vaccine Research Laboratories|Baczenas|USA

>Spike|hCoV-19/Switzerland/VD-ETHZ-350205/2020|2020-10-30|EPI\_ISL\_693853|Original|hCoV-19^^Vaud|Human|Viollier AG|Department of Biosystems Science and Engineering|Nadeau|Switzerland

>Spike|hCoV-19/USA/MA-MGH-03253/2020|2020-10-16|EPI\_ISL\_765760|Original|hCoV-19^^Massachusetts|Human|Massachusetts General Hospital|Infectious Disease Program|Park|USA

>Spike|hCoV-19/England/BRIS-126926/2020|2020-04-07|EPI\_ISL\_459032|Original|hCoV-19^^England|Human|PHE South West Regional Laboratory|Wellcome Sanger Institute for the COVID-19 Genomics UK (COG-UK) consortium|Davies|United Kingdom

>Spike|hCoV-19/Canada/ON-S2018/2020|2020-12-17|EPI\_ISL\_755804|Original|hCoV-19^^Ontario|Human|Toronto Invasive Bacterial Diseases Network|McMaster University|McArthur|Canada

>Spike|hCoV-19/Japan/PG-0644/2020|2020-04-00|EPI\_ISL\_684254|Original|hCoV-19^^Japan|Human|Gunma Prefectural Institute of Public Health and Environmental Sciences|Pathogen Genomics Center|Sekizuka|Japan

>Spike|hCoV-19/Wales/PHWC-481F06/2020|2020-10-15|EPI\_ISL\_613184|Original|hCoV-19^^Wales|Human|Wales Specialist Virology Centre Sequencing lab|COVID-19 Genomics UK (COG-UK) Consortium|Moore|United Kingdom

>Spike|hCoV-19/England/ALDP-B47284/2020|2020-11-07|EPI\_ISL\_656289|Original|hCoV-19^^England|Human|Lighthouse Lab in Alderley Park|Wellcome Sanger Institute for the COVID-19 Genomics UK (COG-UK) Consortium|Davies|United Kingdom

>Spike|hCoV-19/England/ALDP-A927F5/2020|2020-10-19|EPI\_ISL\_611068|Original|hCoV-19^^England|Human|Lighthouse Lab in Alderley Park|Wellcome Sanger Institute for the COVID-19 Genomics UK (COG-UK) consortium|Davies|United Kingdom

>Spike|hCoV-19/England/MILK-B052DD/2020|2020-10-24|EPI\_ISL\_650374|Original|hCoV-19^^England|Human|Virology Department|COVID-19 Genomics UK (COG-UK) Consortium|de Silva|United Kingdom

>Spike|hCoV-19/England/20196219804/2020|2020-05-05|EPI\_ISL\_465632|Original|hCoV-19^^England|Human|Respiratory Virus Unit|Respiratory Virus Unit|Platt|United Kingdom

>Spike|hCoV-19/Denmark/DCGC-20453/2020|2020-12-21|EPI\_ISL\_759160|Original|hCoV-19^^Hovedstaden|Human|Department of Virus and Microbiological Special Diagnostics|Albertsen Lab|Michaelsen|Denmark

>Spike|hCoV-19/Japan/PG-7162/2020|2020-09-00|EPI\_ISL\_688267|Original|hCoV-19^^Japan|Human|Pathogen Genomics Center|Pathogen Genomics Center|Sekizuka|Japan

>Spike|hCoV-19/USA/WY-WPHL-20150064/2020|2020-11-24|EPI\_ISL\_770064|Original|hCoV-19^^Wyoming|Human|Wyoming Public Health Laboratory|Wyoming Public Health Laboratory|Hull|USA

>Spike|hCoV-19/Spain/AN-IBV-002915/2020|2020-03-19|EPI\_ISL\_474870|Original|hCoV-19^^Andalucia|Human|Hospital Universitario Virgen de las Nieves de Granada-SAS|SeqCOVID-SPAIN consortium|IBV(CSIC)|Comas|Spain

>Spike|hCoV-19/Canada/BC\_20425011/2020|2020-03-00|EPI\_ISL\_462773|Original|hCoV-19^^British Columbia|Human|BCCDC Public Health Laboratory|BCCDC Public Health Laboratory|Harrigan|Canada

>Spike|hCoV-19/England/SHEF-C9962/2020|2020-05-24|EPI\_ISL\_475423|Original|hCoV-19^^England|Human|Virology Department|COVID-19 Genomics UK (COG-UK) Consortium|de Silva|United Kingdom

>Spike|hCoV-19/Singapore/18/2020|2020-03-01|EPI\_ISL\_418999|Original|hCoV-19^^Singapore|Human|National Public Health Laboratory|National Public Health Laboratory|Mak|Singapore

>Spike|hCoV-19/Belgium/ULG-10197/2020|2020-05-27|EPI\_ISL\_471432|Original|hCoV-19^^Liege|Human|Department of Clinical Microbiology|GIGA Medical Genomics|Durkin|Belgium

>Spike|hCoV-19/USA/WA-S2638/2020|2020-06-20|EPI\_ISL\_497270|Original|hCoV-19^^Washington|Human|Washington State Department of Health|Seattle Flu Study|Lee|USA

>Spike|hCoV-19/Germany/BW-UKT-a031/2020|2020-03-16|EPI\_ISL\_723085|Original|hCoV-19^^Baden-Wuerttemberg|Human|Institute of Medical Genetics and Applied Genomics|Institute of Medical Genetics and Applied Genomics|Gross|Germany

>Spike|hCoV-19/USA/TX-HMH-MCoV-16003/2020|2020-07-09|EPI\_ISL\_785687|Original|hCoV-19^^Texas|Human|Houston Methodist Hospital|Houston Methodist Hospital|Long|USA

>Spike|hCoV-19/Scotland/EDB2106/2020|2020-04-20|EPI\_ISL\_439155|Original|hCoV-19^^Scotland|Human|Virology Department|COVID-19 Genomics UK (COG-UK) Consortium|Williams|United Kingdom

>Spike|hCoV-19/Australia/VIC10254/2020|2020-08-14|EPI\_ISL\_562845|Original|hCoV-19^^Victoria|Human|Victorian Infectious Diseases Reference Laboratory (VIDRL)|VIDRL and MDU-PHL|Schultz|Australia

>Spike|hCoV-19/Wales/PHWC-49785D/2020|2020-11-22|EPI\_ISL\_726891|Original|hCoV-19^^Wales|Human|Originating lab|COVID-19 Genomics UK (COG-UK) Consortium|Moore|United Kingdom

>Spike|hCoV-19/Wales/PHWC-2B12A/2020|2020-04-07|EPI\_ISL\_432174|Original|hCoV-19^^Wales|Human|Wales Specialist Virology Centre|Public Health Wales Microbiology Cardiff|Moore|United Kingdom

>Spike|hCoV-19/USA/MA-MGH-00627/2020|2020-03-28|EPI\_ISL\_460129|Original|hCoV-19^^Massachusetts|Human|Massachusetts General Hospital|Infectious Disease Program|Lemieux|USA

>Spike|hCoV-19/USA/AZ-QDX-2118/2020|2020-03-18|EPI\_ISL\_604387|Original|hCoV-19^^Arizona|Human|Quest Diagnostics|Quest Diagnostics|Kagan|USA

>Spike|hCoV-19/South Africa/R10197/2020|2020-05-22|EPI\_ISL\_490262|Original|hCoV-19^^Western Cape|Human|National Institute for Communicable Diseases of the National Health Laboratory Service|National Institute for Communicable Diseases of the National Health Laboratory Service|Allam|South Africa

>Spike|hCoV-19/England/NORT-1B71093/2020|2020-11-15|EPI\_ISL\_706301|Original|hCoV-19^^England|Human|Northumbria University / South Tees Hospitals NHS Foundation Trust / North Cumbria Integrated Care NHS Foundation Trust / North Tees and Hartlepool NHS Foundation Trust / Newcastle Hospitals NHS Foundation Trust|COVID-19 Genomics UK (COG-UK) Consortium|Bashton|United Kingdom

>Spike|hCoV-19/USA/TX-HMH-3641/2020|2020-06-12|EPI\_ISL\_543089|Original|hCoV-19^^Texas|Human|Houston Methodist Hospital|Houston Methodist Hospital|Long|USA

>Spike|hCoV-19/USA/TX-HMH-MCoV-19554/2020|2020-11-30|EPI\_ISL\_783926|Original|hCoV-19^^Texas|Human|Houston Methodist Hospital|Houston Methodist Hospital|Long|USA

>Spike|hCoV-19/England/ALDP-A6F82B/2020|2020-10-14|EPI\_ISL\_607137|Original|hCoV-19^^England|Human|Lighthouse Lab in Alderley Park|Wellcome Sanger Institute for the COVID-19 Genomics UK (COG-UK) consortium|Davies|United Kingdom

>Spike|hCoV-19/USA/TX-HMH-1100/2020|2020-04-25|EPI\_ISL\_542530|Original|hCoV-19^^Texas|Human|Houston Methodist Hospital|Houston Methodist Hospital|Long|USA

>Spike|hCoV-19/Sweden/20-52480/2020|2020-08-03|EPI\_ISL\_539886|Original|hCoV-19^^Halland|Human|Barnakuten|The Public Health Agency of Sweden|Svartstr\u00f6m|Sweden

>Spike|hCoV-19/USA/WI-UW-613/2020|2020-06-22|EPI\_ISL\_484988|Original|hCoV-19^^Wisconsin|Human|University of Wisconsin-Madison AIDS Vaccine Research Laboratories|University of Wisconsin-Madison AIDS Vaccine Research Laboratories|Baczenas|USA

>Spike|hCoV-19/England/MILK-A05D46/2020|2020-09-30|EPI\_ISL\_600076|Original|hCoV-19^^England|Human|Lighthouse Lab in Milton Keynes|Wellcome Sanger Institute for the COVID-19 Genomics UK (COG-UK) consortium|Davies|United Kingdom

>Spike|hCoV-19/England/NORT-29F71E/2020|2020-04-29|EPI\_ISL\_488051|Original|hCoV-19^^England|Human|NU-OMICS DNA Sequencing research facility|Wellcome Sanger Institute for the COVID-19 Genomics UK (COG-UK) consortium|Davies|United Kingdom

>Spike|hCoV-19/England/QEUA-9C984E/2020|2020-09-10|EPI\_ISL\_567407|Original|hCoV-19^^England|Human|Lighthouse Lab in Glasgow|Wellcome Sanger Institute for the COVID-19 Genomics UK (COG-UK) consortium|Davies|United Kingdom

>Spike|hCoV-19/Italy/CAM-INMI-32798-45/2020|2020-03-28|EPI\_ISL\_493332|Vero|hCoV-19^^Campania|Human|Istituto Zooprofilattico Sperimentale del Mezzogiorno|INMI Lazzaro Spallanzani IRCCS|Gruber|Italy

>Spike|hCoV-19/England/ALDP-952CF3/2020|2020-06-11|EPI\_ISL\_554039|Original|hCoV-19^^England|Human|Lighthouse Lab in Alderley Park|Wellcome Sanger Institute for the COVID-19 Genomics UK (COG-UK) consortium|Davies|United Kingdom

>Spike|hCoV-19/United Arab Emirates/0606/2020|2020-05-15|EPI\_ISL\_698198|Original|hCoV-19^^Abu Dhabi|Human|Group 42 (G42) Healthcare|G42 Healthcare|Ogrodzki|United Arab Emirates

>Spike|hCoV-19/Japan/PG-1700/2020|2020-04-00|EPI\_ISL\_685306|Original|hCoV-19^^Japan|Human|Niigata Prefectural Institute of Public Health and Environmental Sciences|Pathogen Genomics Center|Sekizuka|Japan

>Spike|hCoV-19/USA/MN-MDH-1342/2020|2020-03-26|EPI\_ISL\_496928|Original|hCoV-19^^Minnesota|Human|Minnesota Department of Health|Minnesota Department of Health|Garfin|USA

>Spike|hCoV-19/England/20146018404/2020|2020-04-02|EPI\_ISL\_423581|Original|hCoV-19^^England|Human|Respiratory Virus Unit|Respiratory Virus Unit|Platt|United Kingdom

>Spike|hCoV-19/England/LIVE-A91D9/2020|2020-03-25|EPI\_ISL\_517274|Original|hCoV-19^^England|Human|Liverpool Clinical Laboratories|COVID-19 Genomics UK (COG-UK) Consortium|Haldenby|United Kingdom

>Spike|hCoV-19/USA/WA-UW-27010/2020|2020-08-28|EPI\_ISL\_776692|Original|hCoV-19^^Washington|Human|UW Virology Lab|UW Virology Lab|Roychoudhury|USA

>Spike|hCoV-19/England/MILK-BAABA2/2020|2020-11-18|EPI\_ISL\_681612|Original|hCoV-19^^England|Human|Lighthouse Lab in Milton Keynes|Wellcome Sanger Institute for the COVID-19 Genomics UK (COG-UK) Consortium|Davies|United Kingdom

>Spike|hCoV-19/USA/OH-ODH-SC35345 /2020|2020-04-24|EPI\_ISL\_780424|Original|hCoV-19^^Ohio|Human|Ohio Department of Health Laboratory|Ohio Department of Health Laboratory|Holmes|USA

>Spike|hCoV-19/England/QEUA-9F34B0/2020|2020-09-24|EPI\_ISL\_588483|Original|hCoV-19^^England|Human|Lighthouse Lab in Glasgow|Wellcome Sanger Institute for the COVID-19 Genomics UK (COG-UK) consortium|Davies|United Kingdom

>Spike|hCoV-19/England/NORT-28B2D8/2020|2020-04-18|EPI\_ISL\_472269|Original|hCoV-19^^England|Human|Northumbria University / South Tees Hospitals NHS Foundation Trust / North Cumbria Integrated Care NHS Foundation Trust / North Tees and Hartlepool NHS Foundation Trust / Newcastle Hospitals NHS Foundation Trust|COVID-19 Genomics UK (COG-UK) Consortium|Bashton|United Kingdom

>Spike|hCoV-19/England/MILK-ACDAF8/2020|2020-10-21|EPI\_ISL\_630340|Original|hCoV-19^^England|Human|Lighthouse Lab in Milton Keynes|Wellcome Sanger Institute for the COVID-19 Genomics UK (COG-UK) consortium|Davies|United Kingdom

>Spike|hCoV-19/England/MILK-99CF5E/2020|2020-08-30|EPI\_ISL\_549810|Original|hCoV-19^^England|Human|Lighthouse Lab in Milton Keynes|Wellcome Sanger Institute for the COVID-19 Genomics UK (COG-UK) consortium|Davies|United Kingdom

>Spike|hCoV-19/England/QEUA-B80A96/2020|2020-11-14|EPI\_ISL\_661748|Original|hCoV-19^^England|Human|Lighthouse Lab in Glasgow|Wellcome Sanger Institute for the COVID-19 Genomics UK (COG-UK) Consortium|Davies|United Kingdom

>Spike|hCoV-19/Wales/PHWC-2F1BD/2020|2020-04-06|EPI\_ISL\_446213|Original|hCoV-19^^Wales|Human|Wales Specialist Virology Centre|Public Health Wales Microbiology Cardiff|Moore|United Kingdom

>Spike|hCoV-19/Indonesia/JI-ITDua-6033NTv/2020|2020-04-30|EPI\_ISL\_759964|Vero P1|hCoV-19^^East Java|Human|Mitra Keluarga Hospital Waru|Institute of Tropical Disease|Lusida|Indonesia

>Spike|hCoV-19/Wales/MILK-B0639D/2020|2020-10-24|EPI\_ISL\_647820|Original|hCoV-19^^Wales|Human|Lighthouse Lab in Milton Keynes|Wellcome Sanger Institute for the COVID-19 Genomics UK (COG-UK) Consortium|Davies|United Kingdom

>Spike|hCoV-19/England/ALDP-9CB1D8/2020|2020-09-16|EPI\_ISL\_575747|Original|hCoV-19^^England|Human|Lighthouse Lab in Alderley Park|Wellcome Sanger Institute for the COVID-19 Genomics UK (COG-UK) consortium|Davies|United Kingdom

>Spike|hCoV-19/Spain/MD-IBV-004931/2020|2020-04-07|EPI\_ISL\_481072|Original|hCoV-19^^Madrid|Human|Hospital General Universitario Gregorio Mara\u00f1\u00f3n|SeqCOVID-SPAIN consortium/IBV (CSIC)|Comas|Spain

>Spike|hCoV-19/USA/WI-UW-1690/2020|2020-09-11|EPI\_ISL\_605563|Original|hCoV-19^^Wisconsin|Human|University of Wisconsin-Madison AIDS Vaccine Research Laboratories|University of Wisconsin-Madison AIDS Vaccine Research Laboratories|Baczenas|USA

>Spike|hCoV-19/England/LIVE-9FF27/2020|2020-06-01|EPI\_ISL\_472072|Original|hCoV-19^^England|Human|Liverpool Clinical Laboratories|COVID-19 Genomics UK (COG-UK) Consortium|Haldenby|United Kingdom

>Spike|hCoV-19/England/CAMC-B0C625/2020|2020-10-30|EPI\_ISL\_643525|Original|hCoV-19^^England|Human|Lighthouse Lab in Cambridge|Wellcome Sanger Institute for the COVID-19 Genomics UK (COG-UK) Consortium|Davies|United Kingdom

>Spike|hCoV-19/USA/TX-DSHS-0114/2020|2020-06-11|EPI\_ISL\_522943|Original|hCoV-19^^Texas|Human|Texas Department of State Health Services|Texas Department of State Health Services|Rahman|USA

>Spike|hCoV-19/USA/UT-UPHL-201116188/2020|2020-04-11|EPI\_ISL\_628962|Original|hCoV-19^^Utah|Human|Utah Public Health Laboratory|Utah Public Health Laboratory|Young|USA

>Spike|hCoV-19/Netherlands/NH-RIVM-20217/2020|2020-12-04|EPI\_ISL\_723370|Original|hCoV-19^^Noord-Holland|Human|Dutch COVID-19 response team|National Institute for Public Health and the Environment (RIVM)|Meijer|Netherlands

>Spike|hCoV-19/England/MILK-B897B4/2020|2020-11-13|EPI\_ISL\_675753|Original|hCoV-19^^England|Human|Lighthouse Lab in Milton Keynes|Wellcome Sanger Institute for the COVID-19 Genomics UK (COG-UK) Consortium|Davies|United Kingdom

>Spike|hCoV-19/England/EXET-135BE2/2020|2020-04-04|EPI\_ISL\_457145|Original|hCoV-19^^England|Human|University of Exeter|COVID-19 Genomics UK (COG-UK) Consortium|Temperton|United Kingdom

>Spike|hCoV-19/India/MH-ACTREC-283/2020|2020-07-11|EPI\_ISL\_699935|Original|hCoV-19^^Maharashtra|Human|Hematopathology Laboratory|Hematopathology Laboratory|Patkar|India

>Spike|hCoV-19/Oman/205038041/2020|2020-05-21|EPI\_ISL\_491992|Original|hCoV-19^^Muscat|Human|Oman-NIC|Department of\u00a0Microbiology\u00a0and Immunology-SQUH|AL Zadjali|Oman

>Spike|hCoV-19/USA/MI-MDHHS-SC21606/2020|2020-03-28|EPI\_ISL\_516333|Original|hCoV-19^^Michigan|Human|Michigan Department of Health and Human Services|Michigan Department of Health and Human Services|Blankenship|USA

>Spike|hCoV-19/Denmark/DCGC-8054/2020|2020-10-26|EPI\_ISL\_617180|Original|hCoV-19^^Hovedstaden|Human|Department of Virus and Microbiological Special Diagnostics|Albertsen lab|Michaelsen|Denmark

>Spike|hCoV-19/Germany/HH-hpi-pl654/2020|2020-03-17|EPI\_ISL\_775639|Original|hCoV-19^^Hamburg|Human|University Medical Center Hamburg Eppendorf|Heinrich Pette Institute|Robitaille|Germany

>Spike|hCoV-19/Indonesia/JB-TFRIC19-R42550/2020|2020-07-11|EPI\_ISL\_511878|Original|hCoV-19^^West Java|Human|Santosa Hospital Bandung Kopo|Laboratorium Kesehatan Provinsi Jawa Barat; Molecular Genetics Laboratory-Faculty of Medicine-Universitas Padjadjaran; School of Life Sciences and Technology & School of Pharmacy-Institut Teknologi Bandung|Tan|Indonesia

>Spike|hCoV-19/Denmark/DCGC-2061/2020|2020-07-13|EPI\_ISL\_618303|Original|hCoV-19^^Nordjylland|Human|Department of Virus and Microbiological Special Diagnostics|Albertsen lab|Michaelsen|Denmark

>Spike|hCoV-19/South Africa/KRISP-K002402/2020|2020-07-30|EPI\_ISL\_515766|Original|hCoV-19^^KwaZulu-Natal|Human|NHLS-IALCH|KRISP|de Oliveira|South Africa

>Spike|hCoV-19/England/204581975/2020|2020-11-05|EPI\_ISL\_686548|Original|hCoV-19^^England|Human|Respiratory Virus Unit|COVID-19 Genomics UK (COG-UK) Consortium|Platt|United Kingdom

>Spike|hCoV-19/Japan/PG-7347/2020|2020-08-00|EPI\_ISL\_687614|Original|hCoV-19^^Japan|Human|Pathogen Genomics Center|Pathogen Genomics Center|Sekizuka|Japan

>Spike|hCoV-19/England/NOTT-1118F4/2020|2020-05-28|EPI\_ISL\_461939|Original|hCoV-19^^England|Human|Queens Medical Centre|COVID-19 Genomics UK (COG-UK) Consortium|Loose|United Kingdom

>Spike|hCoV-19/England/EXET-138EF5/2020|2020-00-00|EPI\_ISL\_665047|Original|hCoV-19^^England|Human|University of Exeter|COVID-19 Genomics UK (COG-UK) Consortium|Temperton|United Kingdom

>Spike|hCoV-19/England/NOTT-10E748/2020|2020-03-24|EPI\_ISL\_425587|Original|hCoV-19^^England|Human|Queens Medical Centre|COVID-19 Genomics UK (COG-UK) Consortium|Loose|United Kingdom

>Spike|hCoV-19/England/ALDP-9C5E6E/2020|2020-09-10|EPI\_ISL\_567541|Original|hCoV-19^^England|Human|Lighthouse Lab in Alderley Park|Wellcome Sanger Institute for the COVID-19 Genomics UK (COG-UK) consortium|Davies|United Kingdom

>Spike|hCoV-19/USA/NY-PV09312/2020|2020-03-21|EPI\_ISL\_450004|Original|hCoV-19^^New York|Human|MSHS Clinical Microbiology Laboratories|MSHS Pathogen Surveillance Program|van Bakel|USA

>Spike|hCoV-19/Portugal/IGC00010/2020|2020-03-18|EPI\_ISL\_419387|Original|hCoV-19^^Lisbon|Human|Hospital Prof. Doutor Fernando Fonseca|Instituto Gulbenkian de Ci\u00eancia|Leite|Portugal

>Spike|hCoV-19/Spain/MD-IBV-99012418/2020|2020-11-17|EPI\_ISL\_780067|Original|hCoV-19^^Madrid|Human|Hospital General Universitario Gregorio Mara\u00f1a|SeqCOVID-SPAIN consortium/IBV (CSIC) |Comas|Spain

>Spike|hCoV-19/England/20139042904/2020|2020-03-28|EPI\_ISL\_420677|Original|hCoV-19^^England|Human|Respiratory Virus Unit|Respiratory Virus Unit|Platt|United Kingdom

>Spike|hCoV-19/South Africa/KRISP-0386/2020|2020-07-01|EPI\_ISL\_487329|Original|hCoV-19^^KwaZulu-Natal|Human|Molecular Diagnostics Services (MDS) |KRISP|de Oliveira|South Africa

>Spike|hCoV-19/USA/MA-MGH-00263/2020|2020-04-06|EPI\_ISL\_460332|Original|hCoV-19^^Massachusetts|Human|Massachusetts General Hospital|Infectious Disease Program|Lemieux|USA

>Spike|hCoV-19/Spain/CT-IBV-97007981/2020|2020-10-05|EPI\_ISL\_654528|Original|hCoV-19^^Catalunya|Human|Servicio de Microbiolog\u00eda|SeqCOVID-SPAIN consortium/IBV (CSIC) |Comas|Spain

>Spike|hCoV-19/Belgium/LPDC-0323115/2020|2020-03-23|EPI\_ISL\_420372|Original|hCoV-19^^Vorst|Human|KU Leuven|KU Leuven|Maes|Belgium

>Spike|hCoV-19/Denmark/ALAB-SSI-651/2020|2020-03-28|EPI\_ISL\_437022|Original|hCoV-19^^Denmark|Human|Department of Virus and Microbiological Special Diagnostics|Albertsen lab|Kirkegaard|Denmark

>Spike|hCoV-19/England/CAMC-B088AB/2020|2020-10-29|EPI\_ISL\_643678|Original|hCoV-19^^England|Human|Lighthouse Lab in Cambridge|Wellcome Sanger Institute for the COVID-19 Genomics UK (COG-UK) Consortium|Davies|United Kingdom

>Spike|hCoV-19/Switzerland/BE-ETHZ-410240/2020|2020-11-27|EPI\_ISL\_737728|Original|hCoV-19^^Bern|Human|Viollier AG|Department of Biosystems Science and Engineering|Nadeau|Switzerland

>Spike|hCoV-19/Japan/PG-6081/2020|2020-07-00|EPI\_ISL\_689193|Original|hCoV-19^^Japan|Human|Pathogen Genomics Center|Pathogen Genomics Center|Sekizuka|Japan

>Spike|hCoV-19/Denmark/DCGC-14560/2020|2020-11-30|EPI\_ISL\_711840|Original|hCoV-19^^Midtjylland|Human|Department of Virus and Microbiological Special Diagnostics|Albertsen Lab|Michaelsen|Denmark

>Spike|hCoV-19/England/MILK-9C206B/2020|2020-09-10|EPI\_ISL\_566540|Original|hCoV-19^^England|Human|Lighthouse Lab in Milton Keynes|Wellcome Sanger Institute for the COVID-19 Genomics UK (COG-UK) consortium|Davies|United Kingdom

>Spike|hCoV-19/England/MILK-A7A76C/2020|2020-10-15|EPI\_ISL\_606390|Original|hCoV-19^^England|Human|Lighthouse Lab in Milton Keynes|Wellcome Sanger Institute for the COVID-19 Genomics UK (COG-UK) consortium|Davies|United Kingdom

>Spike|hCoV-19/USA/HI-H200463/2020|2020-10-12|EPI\_ISL\_753006|Original|hCoV-19^^Hawaii|Human|State Laboratories Division|State Laboratories Division|Sultana|USA

>Spike|hCoV-19/Scotland/CVR3561/2020|2020-05-16|EPI\_ISL\_473696|Original|hCoV-19^^Scotland|Human|West of Scotland Specialist Virology Centre|COVID-19 Genomics UK (COG-UK) Consortium|Robertson|United Kingdom

>Spike|hCoV-19/USA/TX-HMH-2964/2020|2020-06-08|EPI\_ISL\_543898|Original|hCoV-19^^Texas|Human|Houston Methodist Hospital|Houston Methodist Hospital|Long|USA

>Spike|hCoV-19/Spain/MD-H12-80/2020|2020-04-16|EPI\_ISL\_530009|Original|hCoV-19^^Madrid|Human|Hospital Universitario 12 de Octubre|Hospital Universitario 12 de Octubre|Viedma|Spain

>Spike|hCoV-19/England/NORT-1B72548/2020|2020-11-28|EPI\_ISL\_724886|Original|hCoV-19^^England|Human|Northumbria University / South Tees Hospitals NHS Foundation Trust / North Cumbria Integrated Care NHS Foundation Trust / North Tees and Hartlepool NHS Foundation Trust / Newcastle Hospitals NHS Foundation Trust|COVID-19 Genomics UK (COG-UK) Consortium|Bashton|United Kingdom

>Spike|hCoV-19/England/LIVE-A1C94/2020|2020-06-18|EPI\_ISL\_584616|Original|hCoV-19^^England|Human|Liverpool Clinical Laboratories|COVID-19 Genomics UK (COG-UK) Consortium|Haldenby|United Kingdom

>Spike|hCoV-19/Wales/PHWC-487D06/2020|2020-10-27|EPI\_ISL\_639298|Original|hCoV-19^^Wales|Human|Wales Specialist Virology Centre Sequencing lab|COVID-19 Genomics UK (COG-UK) Consortium|Moore|United Kingdom

>Spike|hCoV-19/Netherlands/Gelderland\_38/2020|2020-04-30|EPI\_ISL\_460938|Original|hCoV-19^^Gelderland|Human|Dutch COVID-19 response team|Erasmus Medical Center|Oude Munnink|Netherlands

>Spike|hCoV-19/USA/TX-DSHS-1706/2020|2020-06-17|EPI\_ISL\_708620|Original|hCoV-19^^Texas|Human|Texas Department of State Health Services|Texas Department of State Health Services|Rahman|USA

>Spike|hCoV-19/England/LOND-12512F6/2020|2020-11-12|EPI\_ISL\_665843|Original|hCoV-19^^England|Human|University College London Hospital|COVID-19 Genomics UK (COG-UK) Consortium|Byott|United Kingdom

>Spike|hCoV-19/England/QEUEH-B65F7A/2020|2020-11-08|EPI\_ISL\_655727|Original|hCoV-19^^England|Human|Lighthouse Lab in Glasgow|Wellcome Sanger Institute for the COVID-19 Genomics UK (COG-UK) Consortium|Davies|United Kingdom

>Spike|hCoV-19/Latvia/040/2020|2020-03-17|EPI\_ISL\_486423|Original|hCoV-19^^Latvia|Human|Latvijas Infektolo\u0123ijas centrs|Latvian Biomedical Research and Study Centre|Zrelavs|Latvia

>Spike|hCoV-19/Australia/VIC806/2020|2020-03-23|EPI\_ISL\_427080|Original|hCoV-19^^Victoria|Human|Victorian Infectious Diseases Reference Laboratory (VIDRL)|Microbiological Diagnostic Unit Public Health Laboratory and Victorian Infectious Diseases Reference Laboratory|Schultz|Australia

>Spike|hCoV-19/Japan/PG-6208/2020|2020-08-00|EPI\_ISL\_689320|Original|hCoV-19^^Japan|Human|Pathogen Genomics Center|Pathogen Genomics Center|Sekizuka|Japan

>Spike|hCoV-19/Denmark/ALAB-HH-125/2020|2020-03-11|EPI\_ISL\_452006|Original|hCoV-19^^Denmark|Human|Department of Clinical Microbiology|Albertsen lab|Kirkegaard|Denmark

>Spike|hCoV-19/England/CAMC-BD4626/2020|2020-11-27|EPI\_ISL\_702058|Original|hCoV-19^^England|Human|Lighthouse Lab in Cambridge|Wellcome Sanger Institute for the COVID-19 Genomics UK (COG-UK) Consortium|Davies|United Kingdom

>Spike|hCoV-19/Spain/AR-IBV-2439/2020|2020-03-27|EPI\_ISL\_468849|Original|hCoV-19^^Aragon|Human|Servicio de Microbiolog\u00eda|SeqCOVID-SPAIN consortium|IBV (CSIC) |Comas|Spain

>Spike|hCoV-19/Japan/PG-7644/2020|2020-08-00|EPI\_ISL\_686746|Original|hCoV-19^^Japan|Human|Chiba Prefectural Institute of Public Health|Pathogen Genomics Center|Sekizuka|Japan

>Spike|hCoV-19/England/QEUEH-C5BFFE/2020|2020-12-14|EPI\_ISL\_769310|Original|hCoV-19^^England|Human|Lighthouse Lab in Glasgow|Wellcome Sanger Institute for the COVID-19 Genomics UK (COG-UK) Consortium|Davies|United Kingdom

>Spike|hCoV-19/Wales/PHWC-163C51/2020|2020-04-30|EPI\_ISL\_474061|Original|hCoV-19^^Wales|Human|Originating lab|COVID-19 Genomics UK (COG-UK) Consortium|Moore|United Kingdom

>Spike|hCoV-19/USA/TX-HMH-MCoV-14285/2020|2020-10-04|EPI\_ISL\_787570|Original|hCoV-19^^Texas|Human|Houston Methodist Hospital|Houston Methodist Hospital|Long|USA

>Spike|hCoV-19/USA/MI-MDHHS-SC22247/2020|2020-10-30|EPI\_ISL\_666913|Original|hCoV-19^^Michigan|Human|Michigan Department of Health and Human Services|Michigan Department of Health and Human Services|Jacob|USA

>Spike|hCoV-19/England/LOND-124D239/2020|2020-03-25|EPI\_ISL\_507070|Original|hCoV-19^^England|Human|University College London Hospital|COVID-19 Genomics UK (COG-UK) Consortium|Byott|United Kingdom

>Spike|hCoV-19/Scotland/CVR4276/2020|2020-09-09|EPI\_ISL\_559949|Original|hCoV-19^^Scotland|Human|Lighthouse Lab in Glasgow / MRC-University of Glasgow Centre for Virus Research|COVID-19 Genomics UK (COG-UK) Consortium|Robertson|United Kingdom

>Spike|hCoV-19/USA/MI-MDHHS-SC21151/2020|2020-03-30|EPI\_ISL\_507927|Original|hCoV-19^^Michigan|Human|Michigan Department of Health and Human Services|Michigan Department of Health and Human Services|Blankenship|USA

>Spike|hCoV-19/USA/AZ-QDX-2165/2020|2020-03-18|EPI\_ISL\_604392|Original|hCoV-19^^Arizona|Human|Quest Diagnostics|Quest Diagnostics|Kagan|USA

>Spike|hCoV-19/Australia/VIC166/2020|2020-03-18|EPI\_ISL\_419863|Original|hCoV-19^^Victoria|Human|Victorian Infectious Diseases Reference Laboratory (VIDRL)|Victorian Infectious Diseases Reference Laboratory and Microbiological Diagnostic Unit Public Health Laboratory|Schultz|Australia

>Spike|hCoV-19/USA/CA-ALSR-2094/2020|2020-05-22|EPI\_ISL\_635345|Original|hCoV-19^^California|Human|San Diego County Public Health Laboratory|Andersen lab at Scripps Research|Gangavarapu|USA

>Spike|hCoV-19/England/CAMC-CB6FB5/2020|2020-12-19|EPI\_ISL\_778100|Original|hCoV-19^^England|Human|Lighthouse Lab in Cambridge|Wellcome Sanger Institute for the COVID-19 Genomics UK (COG-UK) Consortium|Davies|United Kingdom

>Spike|hCoV-19/USA/VA-DCLS-2402/2020|2020-11-16|EPI\_ISL\_734173|Original|hCoV-19^^Virginia|Human|Virginia Division of Consolidated Laboratory Services (DCLS)|Virginia Division of Consolidated Laboratory Services (DCLS)|St. Jacques|USA

>Spike|hCoV-19/Chile/RM-153360/2020|2020-08-17|EPI\_ISL\_746651|Original|hCoV-19^^Region Metropolitana de Santiago|Human|Genética Molecular and Subdepartamento de Virología ISP Chile|Instituto de Salud Pública de Chile|Tognarelli|Chile

>Spike|hCoV-19/New Zealand/20CV0662/2020|2020-12-11|EPI\_ISL\_732964|Original|hCoV-19^^Auckland|Human|LabPLUS|Institute of Environmental Science and Research (ESR)|Wang|New Zealand

>Spike|hCoV-19/England/EXET-139CFA/2020|2020-00-00|EPI\_ISL\_679336|Original|hCoV-19^^England|Human|University of Exeter|COVID-19 Genomics UK (COG-UK) Consortium|Temperton|United Kingdom

>Spike|hCoV-19/England/CAMC-B340EA/2020|2020-11-05|EPI\_ISL\_659449|Original|hCoV-19^^England|Human|Lighthouse Lab in Cambridge|Wellcome Sanger Institute for the COVID-19 Genomics UK (COG-UK) Consortium|Davies|United Kingdom

>Spike|hCoV-19/Wales/PHWC-480D0D/2020|2020-10-22|EPI\_ISL\_612994|Original|hCoV-19^^Wales|Human|Wales Specialist Virology Centre Sequencing lab|COVID-19 Genomics UK (COG-UK) Consortium|Moore|United Kingdom

>Spike|hCoV-19/England/20188018004/2020|2020-04-30|EPI\_ISL\_465494|Original|hCoV-19^^England|Human|Respiratory Virus Unit|Respiratory Virus Unit|Platt|United Kingdom

>Spike|hCoV-19/Australia/VIC12928/2020|2020-07-27|EPI\_ISL\_592111|Original|hCoV-19^^Victoria|Human|Microbiological Diagnostic Unit - Public Health Laboratory (MDU-PHL)|MDU-PHL|Schultz|Australia

>Spike|hCoV-19/USA/NY-WCMP4G04P/2020|2020-03-13|EPI\_ISL\_427538|Original|hCoV-19^^New York|Human|NewYork-Presbyterian & Mason Lab|Mason Lab|Mason|USA

>Spike|hCoV-19/South Korea/KCDC2240/2020|2020-05-09|EPI\_ISL\_510578|Original|hCoV-19^^South Korea|Human|Division of Viral Diseases|Division of Viral Diseases|Kim|South Korea

>Spike|hCoV-19/England/ALDP-B1A4A2/2020|2020-10-31|EPI\_ISL\_647787|Original|hCoV-19^^England|Human|Lighthouse Lab in Alderley Park|Wellcome Sanger Institute for the COVID-19 Genomics UK (COG-UK) Consortium|Davies|United Kingdom

>Spike|hCoV-19/England/ALDP-AA46C6/2020|2020-10-21|EPI\_ISL\_624208|Original|hCoV-19^^England|Human|Lighthouse Lab in Alderley Park|Wellcome Sanger Institute for the COVID-19 Genomics UK (COG-UK) consortium|Davies|United Kingdom

>Spike|hCoV-19/England/QEUA-B81716/2020|2020-11-14|EPI\_ISL\_667912|Original|hCoV-19^^England|Human|Lighthouse Lab in Glasgow|Wellcome Sanger Institute for the COVID-19 Genomics UK (COG-UK) Consortium|Davies|United Kingdom

>Spike|hCoV-19/England/OXON-AD490/2020|2020-00-00|EPI\_ISL\_448581|Original|hCoV-19^^England|Human|Oxford Viromics|COVID-19 Genomics UK (COG-UK) Consortium|Golubchik|United Kingdom

>Spike|hCoV-19/Australia/VIC606/2020|2020-03-27|EPI\_ISL\_426861|Original|hCoV-19^^Victoria|Human|Victorian Infectious Diseases Reference Laboratory (VIDRL)|Microbiological Diagnostic Unit Public Health Laboratory and Victorian Infectious Diseases Reference Laboratory|Schultz|Australia

>Spike|hCoV-19/England/QEUA-96C528/2020|2020-08-13|EPI\_ISL\_530907|Original|hCoV-19^^England|Human|Lighthouse Lab in Glasgow|Wellcome Sanger Institute for the COVID-19 Genomics UK (COG-UK) consortium|Davies|United Kingdom

>Spike|hCoV-19/England/MILK-A068BD/2020|2020-10-01|EPI\_ISL\_599883|Original|hCoV-19^^England|Human|Lighthouse Lab in Milton Keynes|Wellcome Sanger Institute for the COVID-19 Genomics UK (COG-UK) consortium|Davies|United Kingdom

>Spike|hCoV-19/England/ALDP-A6FDC2/2020|2020-10-14|EPI\_ISL\_607028|Original|hCoV-19^^England|Human|Lighthouse Lab in Alderley Park|Wellcome Sanger Institute for the COVID-19 Genomics UK (COG-UK) consortium|Davies|United Kingdom

>Spike|hCoV-19/Japan/PG-6834/2020|2020-08-00|EPI\_ISL\_687942|Original|hCoV-19^^Japan|Human|Pathogen Genomics Center|Pathogen Genomics Center|Sekizuka|Japan

>Spike|hCoV-19/England/MILK-B38BB8/2020|2020-11-01|EPI\_ISL\_659046|Original|hCoV-19^^England|Human|Lighthouse Lab in Milton Keynes|Wellcome Sanger Institute for the COVID-19 Genomics UK (COG-UK) Consortium|Davies|United Kingdom

>Spike|hCoV-19/USA/CA-CZB-1581/2020|2020-03-21|EPI\_ISL\_468511|Original|hCoV-19^^California|Human|San Joaquin County Public Health Lab|Chan-Zuckerberg Biohub|Hao|USA

>Spike|hCoV-19/England/MILK-BB1416/2020|2020-11-18|EPI\_ISL\_720279|Original|hCoV-19^^England|Human|Lighthouse Lab in Milton Keynes|Wellcome Sanger Institute for the COVID-19 Genomics UK (COG-UK) Consortium|Davies|United Kingdom

>Spike|hCoV-19/Jordan/AM-ALSR-5149/2020|2020-10-18|EPI\_ISL\_730388|Original|hCoV-19^^Amman|Human|Biolab Diagnostic Laboratories|Andersen lab at Scripps Research|Gangavarapu|Jordan

>Spike|hCoV-19/England/CAMC-9D2068/2020|2020-09-19|EPI\_ISL\_601730|Original|hCoV-19^^England|Human|Lighthouse Lab in Cambridge|Wellcome Sanger Institute for the COVID-19 Genomics UK (COG-UK) consortium|Davies|United Kingdom

>Spike|hCoV-19/Hangzhou/HZCDC7363/2020|2020-03-25|EPI\_ISL\_482585|Original|hCoV-19^^Zhejiang|Human|Hangzhou Center for Diseases Control and Prevention|Hangzhou Center for Diseases Control and Prevention|Li|China

>Spike|hCoV-19/Wales/PHWC-48E0AC/2020|2020-11-09|EPI\_ISL\_680803|Original|hCoV-19^^Wales|Human|Wales Specialist Virology Centre Sequencing lab|COVID-19 Genomics UK (COG-UK) Consortium|Moore|United Kingdom

>Spike|hCoV-19/USA/CT-QDX-765/2020|2020-03-18|EPI\_ISL\_571514|Original|hCoV-19^^Connecticut|Human|Quest Diagnostics|Quest Diagnostics|Kagan|USA

>Spike|hCoV-19/DRC/11260/2020|2020-05-23|EPI\_ISL\_527558|Original|hCoV-19^^Kongo Central|Human|Viral Respiratory Lab|Pathogen Sequencing Lab|Lokilo|Democratic Republic of the Congo

>Spike|hCoV-19/Scotland/CVR2847/2020|2020-04-21|EPI\_ISL\_473592|Original|hCoV-19^^Scotland|Human|West of Scotland Specialist Virology Centre|COVID-19 Genomics UK (COG-UK) Consortium|Robertson|United Kingdom

>Spike|hCoV-19/Wales/PHWC-4864D5/2020|2020-10-14|EPI\_ISL\_637546|Original|hCoV-19^^Wales|Human|Wales Specialist Virology Centre Sequencing lab|COVID-19 Genomics UK (COG-UK) Consortium|Moore|United Kingdom

>Spike|hCoV-19/USA/MI-UM-10036652302/2020|2020-10-27|EPI\_ISL\_650065|Original|hCoV-19^^Michigan|Human|University of Michigan Clinical Microbiology Laboratory|Lauring Lab|Valesano|USA

>Spike|hCoV-19/USA/MI-UM-10036515004/2020|2020-10-19|EPI\_ISL\_640194|Original|hCoV-19^^Michigan|Human|University of Michigan Clinical Microbiology Laboratory|Lauring Lab|Valesano|USA

>Spike|hCoV-19/England/GSTT-5700/2020|2020-03-22|EPI\_ISL\_560704|Original|hCoV-19^^England|Human|Centre for Clinical Infection and Diagnostics Research and Genomics Innovation Unit|Centre for Clinical Infection and Diagnostics Research and Genomics Innovation Unit|Awan|United Kingdom



>Spike|hCoV-19/England/ALDP-C6B77B/2020|2020-12-14|EPI\_ISL\_778357|Original|hCoV-19^^England|Human|Lighthouse Lab in Alderley Park|Wellcome Sanger Institute for the COVID-19 Genomics UK (COG-UK) Consortium|Davies|United Kingdom

>Spike|hCoV-19/England/ALDP-B1A93A/2020|2020-11-01|EPI\_ISL\_647630|Original|hCoV-19^^England|Human|Lighthouse Lab in Alderley Park|Wellcome Sanger Institute for the COVID-19 Genomics UK (COG-UK) Consortium|Davies|United Kingdom

>Spike|hCoV-19/Denmark/DCGC-4686/2020|2020-09-14|EPI\_ISL\_621918|Original|hCoV-19^^Hovedstaden|Human|Department of Virus and Microbiological Special Diagnostics|Albertsen lab|Michaelsen|Denmark

>Spike|hCoV-19/England/ALDP-B755FD/2020|2020-11-12|EPI\_ISL\_662202|Original|hCoV-19^^England|Human|Lighthouse Lab in Alderley Park|Wellcome Sanger Institute for the COVID-19 Genomics UK (COG-UK) Consortium|Davies|United Kingdom

>Spike|hCoV-19/Wales/PHWC-49010E/2020|2020-11-14|EPI\_ISL\_706446|Original|hCoV-19^^Wales|Human|Originating lab|COVID-19 Genomics UK (COG-UK) Consortium|Moore|United Kingdom

>Spike|hCoV-19/USA/FL-BPHL-1722/2020|2020-10-01|EPI\_ISL\_613790|Original|hCoV-19^^Florida|Human|Florida Bureau of Public Health Laboratories|Florida Bureau of Public Health Laboratories|Blanton|USA

>Spike|hCoV-19/Denmark/DCGC-14357/2020|2020-11-30|EPI\_ISL\_711716|Original|hCoV-19^^Midtjylland|Human|Department of Virus and Microbiological Special Diagnostics|Albertsen Lab|Michaelsen|Denmark

>Spike|hCoV-19/Oman/205036179/2020|2020-05-16|EPI\_ISL\_491976|Original|hCoV-19^^Muscat|Human|Oman-NIC|Department of Microbiology and Immunology-SQUH|ALZadjali|Oman

>Spike|hCoV-19/England/QEUEH-96F279/2020|2020-08-17|EPI\_ISL\_530555|Original|hCoV-19^^England|Human|Lighthouse Lab in Glasgow|Wellcome Sanger Institute for the COVID-19 Genomics UK (COG-UK) consortium|Davies|United Kingdom

>Spike|hCoV-19/Austria/CeMM0949/2020|2020-03-28|EPI\_ISL\_583801|Original|hCoV-19^^Austria|Human|Dr. Gernot Walder GmbH|Bergthaler laboratory|Bergthaler|Austria

>Spike|hCoV-19/England/ALDP-B465AA/2020|2020-11-07|EPI\_ISL\_656278|Original|hCoV-19^^England|Human|Lighthouse Lab in Alderley Park|Wellcome Sanger Institute for the COVID-19 Genomics UK (COG-UK) Consortium|Davies|United Kingdom

>Spike|hCoV-19/England/ALDP-9D9C6D/2020|2020-09-18|EPI\_ISL\_576807|Original|hCoV-19^^England|Human|Oxford Viromics|COVID-19 Genomics UK (COG-UK) Consortium|Golubchik|United Kingdom

>Spike|hCoV-19/England/SHEF-C288A/2020|2020-05-09|EPI\_ISL\_479204|Original|hCoV-19^^England|Human|Virology Department|COVID-19 Genomics UK (COG-UK) Consortium|de Silva|United Kingdom

>Spike|hCoV-19/England/LOND-D659B/2020|2020-04-22|EPI\_ISL\_487595|Original|hCoV-19^^England|Human|University College London|Wellcome Sanger Institute for the COVID-19 Genomics UK (COG-UK) consortium|Davies|United Kingdom

>Spike|hCoV-19/England/MILK-BABA3B/2020|2020-11-18|EPI\_ISL\_720397|Original|hCoV-19^^England|Human|Lighthouse Lab in Milton Keynes|Wellcome Sanger Institute for the COVID-19 Genomics UK (COG-UK) Consortium|Davies|United Kingdom

>Spike|hCoV-19/Portugal/PT1716/2020|2020-08-24|EPI\_ISL\_693643|Original|hCoV-19^^Portugal|Human|Hospital Vila Franca de Xira|Instituto Nacional de Saude (INSA)|Borges|Portugal

>Spike|hCoV-19/Chile/RM-109521/2020|2020-06-24|EPI\_ISL\_746555|Original|hCoV-19^^Region Metropolitana de Santiago|Human|Genetica Molecular and Subdepartamento de Virologia ISP Chile|Instituto de Salud Publica de Chile|Tognarelli|Chile

>Spike|hCoV-19/England/ALDP-A66BC1/2020|2020-10-12|EPI\_ISL\_630609|Original|hCoV-19^^England|Human|Lighthouse Lab in Alderley Park|Wellcome Sanger Institute for the COVID-19 Genomics UK (COG-UK) consortium|Davies|United Kingdom

>Spike|hCoV-19/Japan/PG-6268/2020|2020-08-00|EPI\_ISL\_689379|Original|hCoV-19^^Japan|Human|Pathogen Genomics Center|Pathogen Genomics Center|Sekizuka|Japan

>Spike|hCoV-19/England/BRIS-12BEF5/2020|2020-05-09|EPI\_ISL\_469443|Original|hCoV-19^^England|Human|PHE South West Regional Laboratory|Wellcome Sanger Institute for the COVID-19 Genomics UK (COG-UK) consortium|Davies|United Kingdom

>Spike|hCoV-19/England/GSTT-5186/2020|2020-03-18|EPI\_ISL\_560657|Original|hCoV-19^^England|Human|Centre for Clinical Infection and Diagnostics Research and Genomics

Innovation Unit|Centre for Clinical Infection and Diagnostics Research and Genomics  
Innovation Unit|Awan|United Kingdom  
>Spike|hCoV-19/Australia/VIC11019/2020|2020-07-31|EPI\_ISL\_563202|Original|hCoV-19^^Victoria|Human|Microbiological Diagnostic Unit - Public Health Laboratory (MDU-PHL)|MDU-PHL|Schultz|Australia  
>Spike|hCoV-19/England/ALDP-9BDCAB/2020|2020-09-09|EPI\_ISL\_568090|Original|hCoV-19^^England|Human|Lighthouse Lab in Alderley Park|Wellcome Sanger Institute for the COVID-19 Genomics UK (COG-UK) consortium|Davies|United Kingdom  
>Spike|hCoV-19/England/ALDP-AA2D3C/2020|2020-10-22|EPI\_ISL\_625250|Original|hCoV-19^^England|Human|Lighthouse Lab in Alderley Park|Wellcome Sanger Institute for the COVID-19 Genomics UK (COG-UK) consortium|Davies|United Kingdom  
>Spike|hCoV-19/Australia/VIC12405/2020|2020-07-29|EPI\_ISL\_640622|Original|hCoV-19^^Victoria|Human|Microbiological Diagnostic Unit - Public Health Laboratory (MDU-PHL)|MDU-PHL|Schultz|Australia  
>Spike|hCoV-19/England/QEUEH-AD3E8A/2020|2020-10-26|EPI\_ISL\_629766|Original|hCoV-19^^England|Human|Lighthouse Lab in Glasgow|Wellcome Sanger Institute for the COVID-19 Genomics UK (COG-UK) consortium|Davies|United Kingdom  
>Spike|hCoV-19/England/20124095604/2020|2020-03-18|EPI\_ISL\_465790|Original|hCoV-19^^England|Human|Respiratory Virus Unit|Respiratory Virus Unit|Platt|United Kingdom  
>Spike|hCoV-19/Wales/PHWC-4A4E4C/2020|2020-12-09|EPI\_ISL\_763782|Original|hCoV-19^^Wales|Human|Wales Specialist Virology Centre Sequencing lab|COVID-19 Genomics UK (COG-UK) Consortium|Moore|United Kingdom  
>Spike|hCoV-19/England/ALDP-B5C1F8/2020|2020-11-09|EPI\_ISL\_655871|Original|hCoV-19^^England|Human|Lighthouse Lab in Alderley Park|Wellcome Sanger Institute for the COVID-19 Genomics UK (COG-UK) Consortium|Davies|United Kingdom  
>Spike|hCoV-19/Scotland/CVR5600/2020|2020-11-02|EPI\_ISL\_651860|Original|hCoV-19^^Scotland|Human|West of Scotland Specialist Virology Centre|COVID-19 Genomics UK (COG-UK) Consortium|Robertson|United Kingdom  
>Spike|hCoV-19/USA/TX-HMH-MCoV-9700/2020|2020-07-07|EPI\_ISL\_780230|Original|hCoV-19^^Texas|Human|Houston Methodist Hospital|Houston Methodist Hospital|Long|USA  
>Spike|hCoV-19/England/QEUEH-9F4974/2020|2020-09-25|EPI\_ISL\_588297|Original|hCoV-19^^England|Human|Lighthouse Lab in Glasgow|Wellcome Sanger Institute for the COVID-19 Genomics UK (COG-UK) consortium|Davies|United Kingdom  
>Spike|hCoV-19/South Korea/KCDC2064/2020|2020-02-06|EPI\_ISL\_497965|Vero E6 P1|hCoV-19^^South Korea|Human|Division of Viral Diseases|Division of Viral Diseases|Kim|South Korea  
>Spike|hCoV-19/USA/TX-HMH-2135/2020|2020-05-22|EPI\_ISL\_545138|Original|hCoV-19^^Texas|Human|Houston Methodist Hospital|Houston Methodist Hospital|Long|USA  
>Spike|hCoV-19/Wales/PHWC-4913CB/2020|2020-11-17|EPI\_ISL\_706648|Original|hCoV-19^^Wales|Human|Originating lab|COVID-19 Genomics UK (COG-UK) Consortium|Moore|United Kingdom  
>Spike|hCoV-19/England/CAMC-B3228C/2020|2020-11-05|EPI\_ISL\_659410|Original|hCoV-19^^England|Human|Lighthouse Lab in Cambridge|Wellcome Sanger Institute for the COVID-19 Genomics UK (COG-UK) Consortium|Davies|United Kingdom  
>Spike|hCoV-19/Singapore/325/2020|2020-03-25|EPI\_ISL\_462089|Original|hCoV-19^^Singapore|Human|Singapore General Hospital|Department of Microbiology|Abdul Rahman|Singapore  
>Spike|hCoV-19/Wales/PHWC-49DE19/2020|2020-12-04|EPI\_ISL\_742916|Original|hCoV-19^^Wales|Human|Wales Specialist Virology Centre Sequencing lab|COVID-19 Genomics UK (COG-UK) Consortium|Moore|United Kingdom  
>Spike|hCoV-19/India/MH-ACTREC-502/2020|2020-08-15|EPI\_ISL\_700150|Original|hCoV-19^^Maharashtra|Human|Hematopathology Laboratory|Hematopathology Laboratory|Patkar|India  
>Spike|hCoV-19/England/ALDP-952A35/2020|2020-06-12|EPI\_ISL\_554075|Original|hCoV-19^^England|Human|Lighthouse Lab in Alderley Park|Wellcome Sanger Institute for the COVID-19 Genomics UK (COG-UK) consortium|Davies|United Kingdom  
>Spike|hCoV-19/India/TG-CCMB-OM17/2020|2020-05-17|EPI\_ISL\_495283|Original|hCoV-19^^Telangana|Human|Osmania Medical College|CSIR-Centre for Cellular and Molecular Biology|Banu|India

>Spike|hCoV-19/England/ALDP-9EAB3F/2020|2020-09-24|EPI\_ISL\_580155|Original|hCoV-19^^England|Human|Lighthouse Lab in Alderley Park|Wellcome Sanger Institute for the COVID-19 Genomics UK (COG-UK) consortium|Davies|United Kingdom

>Spike|hCoV-19/England/QEUEH-B0F1E5/2020|2020-11-02|EPI\_ISL\_642493|Original|hCoV-19^^England|Human|Lighthouse Lab in Glasgow|Wellcome Sanger Institute for the COVID-19 Genomics UK (COG-UK) Consortium|Davies|United Kingdom

>Spike|hCoV-19/USA/WI-UW-1102/2020|2020-07-26|EPI\_ISL\_516527|Original|hCoV-19^^Wisconsin|Human|University of Wisconsin-Madison AIDS Vaccine Research Laboratories|University of Wisconsin-Madison AIDS Vaccine Research Laboratories|Baczenas|USA

>Spike|hCoV-19/England/NOTT-11417E/2020|2020-10-04|EPI\_ISL\_577144|Original|hCoV-19^^England|Human|Queens Medical Centre|COVID-19 Genomics UK (COG-UK) Consortium|Loose|United Kingdom

>Spike|hCoV-19/USA/CA-CZB0701/2020|2020-03-23|EPI\_ISL\_429040|Original|hCoV-19^^California|Human|UCSF Clinical Microbiology Laboratory|Chan-Zuckerberg Biohub|Kamm|USA

>Spike|hCoV-19/Gambia/GC192812/2020|2020-07-22|EPI\_ISL\_561148|Original|hCoV-19^^Kombo|Human|MRCG at LSHTM Genomics lab|MRCG at LSHTM Genomics lab|Sesay|Gambia

>Spike|hCoV-19/England/QEUEH-76BE6C/2020|2020-07-16|EPI\_ISL\_533115|Original|hCoV-19^^England|Human|Lighthouse Lab in Glasgow|Wellcome Sanger Institute for the COVID-19 Genomics UK (COG-UK) consortium|Davies|United Kingdom

>Spike|hCoV-19/England/CAMC-B20290/2020|2020-11-02|EPI\_ISL\_647625|Original|hCoV-19^^England|Human|Lighthouse Lab in Cambridge|Wellcome Sanger Institute for the COVID-19 Genomics UK (COG-UK) Consortium|Davies|United Kingdom

>Spike|hCoV-19/Wales/PHWC-496742/2020|2020-11-20|EPI\_ISL\_726629|Original|hCoV-19^^Wales|Human|Originating lab|COVID-19 Genomics UK (COG-UK) Consortium|Moore|United Kingdom

>Spike|hCoV-19/England/ALDP-B5DB71/2020|2020-11-09|EPI\_ISL\_723564|Original|hCoV-19^^England|Human|Northumbria University / South Tees Hospitals NHS Foundation Trust / North Cumbria Integrated Care NHS Foundation Trust / North Tees and Hartlepool NHS Foundation Trust / Newcastle Hospitals NHS Foundation Trust|COVID-19 Genomics UK (COG-UK) Consortium|Bashton|United Kingdom

>Spike|hCoV-19/Denmark/DCGC-12766/2020|2020-11-09|EPI\_ISL\_682947|Original|hCoV-19^^Hovedstaden|Human|Department of Virus and Microbiological Special Diagnostics|Albertsen Lab|Michaelsen|Denmark

>Spike|hCoV-19/England/CAMC-BD146B/2020|2020-11-29|EPI\_ISL\_702147|Original|hCoV-19^^England|Human|Lighthouse Lab in Cambridge|Wellcome Sanger Institute for the COVID-19 Genomics UK (COG-UK) Consortium|Davies|United Kingdom

>Spike|hCoV-19/Wales/PHWC-15D0C7/2020|2020-05-08|EPI\_ISL\_472666|Original|hCoV-19^^Wales|Human|Wales Specialist Virology Centre Sequencing lab|COVID-19 Genomics UK (COG-UK) Consortium|Moore|United Kingdom

>Spike|hCoV-19/Scotland/EDB7824/2020|2020-09-21|EPI\_ISL\_572803|Original|hCoV-19^^Scotland|Human|Virology Department|COVID-19 Genomics UK (COG-UK) Consortium|Williams|United Kingdom

>Spike|hCoV-19/England/ALDP-936FDE/2020|2020-06-21|EPI\_ISL\_551426|Original|hCoV-19^^England|Human|Lighthouse Lab in Alderley Park|Wellcome Sanger Institute for the COVID-19 Genomics UK (COG-UK) consortium|Davies|United Kingdom

>Spike|hCoV-19/USA/TX-HMH-MCoV-15899/2020|2020-07-10|EPI\_ISL\_785583|Original|hCoV-19^^Texas|Human|Houston Methodist Hospital|Houston Methodist Hospital|Long|USA

>Spike|hCoV-19/USA/HI-H200019/2020|2020-04-20|EPI\_ISL\_752613|Original|hCoV-19^^Hawaii|Human|State Laboratories Division|State Laboratories Division|Sultana|USA

>Spike|hCoV-19/Singapore/1262/2020|2020-05-04|EPI\_ISL\_648746|Original|hCoV-19^^Singapore|Human|Department of Laboratory Medicine|Department of Laboratory Medicine|Chen|Singapore

>Spike|hCoV-19/USA/LA-CDC-1267/2020|2020-06-11|EPI\_ISL\_535308|Vero P1|hCoV-19^^Louisiana|Human|LA Office of Public Health Laboratories|Pathogen Discovery|Queen|USA

>Spike|hCoV-19/USA/NY-PV08420/2020|2020-03-19|EPI\_ISL\_421382|Original|hCoV-19^^New York|Human|MSHS Clinical Microbiology Laboratories|MSHS Pathogen Surveillance Program|van Bakel|USA

>Spike|hCoV-19/Denmark/DCGC-19289/2020|2020-12-07|EPI\_ISL\_748329|Original|hCoV-19^^Hovedstaden|Human|Department of Virus and Microbiological Special Diagnostics|Albertsen Lab|Michaelsen|Denmark

>Spike|hCoV-19/Denmark/DCGC-5657/2020|2020-09-28|EPI\_ISL\_619944|Original|hCoV-19^^Sjaelland|Human|Department of Virus and Microbiological Special Diagnostics|Albertsen lab|Michaelsen|Denmark

>Spike|hCoV-19/Wuhan/0125-A191/2020|2020-01-25|EPI\_ISL\_493165|Original|hCoV-19^^Hubei|Human|National Virus Resource Center|Computational Virology Group|Liu|China

>Spike|hCoV-19/USA/WA-UW-12171/2020|2020-06-26|EPI\_ISL\_570500|Original|hCoV-19^^Washington|Human|UW Virology Lab|UW Virology Lab|Roychoudhury|USA

>Spike|hCoV-19/England/ALDP-94C649/2020|2020-06-15|EPI\_ISL\_555865|Original|hCoV-19^^England|Human|Lighthouse Lab in Alderley Park|Wellcome Sanger Institute for the COVID-19 Genomics UK (COG-UK) consortium|Davies|United Kingdom

>Spike|hCoV-19/Lithuania/MR-LUHS-Eilnrj18/2020|2020-11-00|EPI\_ISL\_770538|Original|hCoV-19^^Jonavos apskritis|Human|Private lab|Lithuanian University of Health Sciences|Zemaitis|Lithuania

>Spike|hCoV-19/Israel/CVL-n26166/2020|2020-07-20|EPI\_ISL\_514293|Original|hCoV-19^^Jerusalem District|Human|Israel Central Virology laboratory|Israel Central Virology laboratory|Zuckerman|Israel

>Spike|hCoV-19/Denmark/DCGC-11200/2020|2020-11-02|EPI\_ISL\_670452|Original|hCoV-19^^Hovedstaden|Human|Department of Virus and Microbiological Special Diagnostics|Albertsen Lab|Michaelsen|Denmark

>Spike|hCoV-19/England/QEUA-A9BFB8/2020|2020-10-19|EPI\_ISL\_651071|Original|hCoV-19^^England|Human|Queens Medical Centre|COVID-19 Genomics UK (COG-UK) Consortium|Loose|United Kingdom

>Spike|hCoV-19/USA/WA-S423/2020|2020-03-28|EPI\_ISL\_434183|Original|hCoV-19^^Washington|Human|Washington State Department of Health|Seattle Flu Study|Bedford|USA

>Spike|hCoV-19/England/CAMB-1BA004/2020|2020-11-04|EPI\_ISL\_651574|Original|hCoV-19^^England|Human|Department of Pathology|COVID-19 Genomics UK (COG-UK) Consortium|Goodfellow|United Kingdom

>Spike|hCoV-19/Switzerland/BL-ETHZ-350326/2020|2020-11-03|EPI\_ISL\_728844|Original|hCoV-19^^Basel-Landschaft|Human|Viollier AG|Department of Biosystems Science and Engineering|Nadeau|Switzerland

>Spike|hCoV-19/Spain/AS-IBV-98006594/2020|2020-03-12|EPI\_ISL\_654639|Original|hCoV-19^^Asturias|Human|Servicio de Microbiolog\u00eda|SeqCOVID-SPAIN consortium|IBV (CSIC)|Comas|Spain

>Spike|hCoV-19/England/QEUA-963CB3/2020|2020-08-10|EPI\_ISL\_531541|Original|hCoV-19^^England|Human|Lighthouse Lab in Glasgow|Wellcome Sanger Institute for the COVID-19 Genomics UK (COG-UK) consortium|Davies|United Kingdom

>Spike|hCoV-19/Wales/PHWC-4A484E/2020|2020-12-17|EPI\_ISL\_764738|Original|hCoV-19^^Wales|Human|Wales Specialist Virology Centre Sequencing lab|COVID-19 Genomics UK (COG-UK) Consortium|Moore|United Kingdom

>Spike|hCoV-19/Japan/PG-1197/2020|2020-04-00|EPI\_ISL\_684807|Original|hCoV-19^^Japan|Human|Yamagata Prefectural Institute of Public Health|Pathogen Genomics Center|Sekizuka|Japan

>Spike|hCoV-19/USA/TX-HMH-MCoV-19742/2020|2020-11-19|EPI\_ISL\_784087|Original|hCoV-19^^Texas|Human|Houston Methodist Hospital|Houston Methodist Hospital|Long|USA

>Spike|hCoV-19/Switzerland/BL-ETHZ-410138/2020|2020-12-17|EPI\_ISL\_737439|Original|hCoV-19^^Basel-Landschaft|Human|Viollier AG|Department of Biosystems Science and Engineering|Nadeau|Switzerland

>Spike|hCoV-19/Italy/APU-IZSPB\_286PT/2020|2020-11-02|EPI\_ISL\_653778|Original|hCoV-19^^Apulia|Human|I.R.C.C.S. \S. De Bellis\ - Ente Ospedaliero|Istituto Zooprofilattico Sperimentale della Puglia e della Basilicata|Parisi|Italy

>Spike|hCoV-19/England/MILK-B3CC39/2020|2020-11-01|EPI\_ISL\_679823|Original|hCoV-19^^England|Human|Oxford Viromics|COVID-19 Genomics UK (COG-UK) Consortium|Golubchik|United Kingdom

>Spike|hCoV-19/Scotland/QEUA-9AEAEF/2020|2020-09-03|EPI\_ISL\_573802|Original|hCoV-19^^Scotland|Human|University College London|COVID-19 Genomics UK (COG-UK) Consortium|Roy|United Kingdom

>Spike|hCoV-19/Wales/PHWC-4944A7/2020|2020-11-19|EPI\_ISL\_726122|Original|hCoV-19^^Wales|Human|Originating lab|COVID-19 Genomics UK (COG-UK) Consortium|Moore|United Kingdom

>Spike|hCoV-19/Australia/VIC9020/2020|2020-07-24|EPI\_ISL\_565357|Original|hCoV-19^^Victoria|Human|Microbiological Diagnostic Unit - Public Health Laboratory (MDU-PHL)|MDU-PHL|Schultz|Australia

>Spike|hCoV-19/USA/CO-CDPHE-2007233151/2020|2020-07-22|EPI\_ISL\_771232|Original|hCoV-19^^Colorado|Human|Colorado Department of Public Health and Environment|Colorado Department of Public Health and Environment|Bankers|USA

>Spike|hCoV-19/Lithuania/MR-LUHS-Eilnr248/2020|2020-08-07|EPI\_ISL\_636853|Original|hCoV-19^^Kauno apskritis|Human|Lithuanian University of Health Sciences Hospital|Lithuanian University of Health Sciences|Zemaitis|Lithuania

>Spike|hCoV-19/England/CAMC-A6603B/2020|2020-10-10|EPI\_ISL\_627314|Original|hCoV-19^^England|Human|University of Exeter|COVID-19 Genomics UK (COG-UK) Consortium|Temperton|United Kingdom

>Spike|hCoV-19/USA/TX-HMH-MCoV-18383/2020|2020-11-18|EPI\_ISL\_784731|Original|hCoV-19^^Texas|Human|Houston Methodist Hospital|Houston Methodist Hospital|Long|USA

>Spike|hCoV-19/Norway/5899/2020|2020-11-22|EPI\_ISL\_759980|Original|hCoV-19^^Viken|Human|Medical Microbiology Unit|Norwegian Institute of Public Health|Kopperud Riis|Norway

>Spike|hCoV-19/England/PORT-2E9D6E/2020|2020-00-00|EPI\_ISL\_703015|Original|hCoV-19^^England|Human|Centre for Enzyme Innovation|COVID-19 Genomics UK (COG-UK) Consortium|Robson|United Kingdom

>Spike|hCoV-19/Denmark/DCGC-1491/2020|2020-05-25|EPI\_ISL\_617975|Original|hCoV-19^^Hovedstaden|Human|Department of Virus and Microbiological Special Diagnostics|Albertsen lab|Michaelsen|Denmark

>Spike|hCoV-19/France/OCC-106/2020|2020-10-22|EPI\_ISL\_671952|Original|hCoV-19^^Occitanie|Human|CHU Purpan - Laboratoire de Virologie - Institut F\u00e9deratif de Biologie|CHU Purpan - Laboratoire de Virologie - Institut F\u00e9deratif de Biologie|Latour|France

>Spike|hCoV-19/Japan/PG-8911/2020|2020-09-00|EPI\_ISL\_686457|Original|hCoV-19^^Japan|Human|Pathogen Genomics Center|Pathogen Genomics Center|Sekizuka|Japan

>Spike|hCoV-19/England/MILK-B02CE1/2020|2020-10-24|EPI\_ISL\_642869|Original|hCoV-19^^England|Human|Lighthouse Lab in Milton Keynes|Wellcome Sanger Institute for the COVID-19 Genomics UK (COG-UK) Consortium|Davies|United Kingdom

>Spike|hCoV-19/Germany/NW-HHU-422/2020|2020-11-13|EPI\_ISL\_718096|Original|hCoV-19^^North Rhine-Westphalia|Human|ZOTZ KLIMAS MVZ D\u00fcrseldorf-Centrum GbR \u00dcBAG f\u00fcr Labormedizin|Center of Medical Microbiology|Wienemann|Germany

>Spike|hCoV-19/Singapore/801/2020|2020-07-25|EPI\_ISL\_512837|Original|hCoV-19^^Singapore|Human|National Public Health Laboratory|National Public Health Laboratory|Mak|Singapore

>Spike|hCoV-19/USA/TX-HMH-MCoV-11700/2020|2020-09-08|EPI\_ISL\_790089|Original|hCoV-19^^Texas|Human|Houston Methodist Hospital|Houston Methodist Hospital|Long|USA

>Spike|hCoV-19/England/MILK-BFCBB0/2020|2020-12-02|EPI\_ISL\_720687|Original|hCoV-19^^England|Human|Lighthouse Lab in Milton Keynes|Wellcome Sanger Institute for the COVID-19 Genomics UK (COG-UK) Consortium|Davies|United Kingdom

>Spike|hCoV-19/Netherlands/NA\_563/2020|2020-04-11|EPI\_ISL\_460728|Original|hCoV-19^^Netherlands|Human|Dutch COVID-19 response team|Erasmus Medical Center|Oude Munnink|Netherlands

>Spike|hCoV-19/England/20142060904/2020|2020-03-27|EPI\_ISL\_420768|Original|hCoV-19^^England|Human|Respiratory Virus Unit|Respiratory Virus Unit|Platt|United Kingdom

>Spike|hCoV-19/USA/NY-NYCPHL-000046/2020|2020-03-09|EPI\_ISL\_631540|Original|hCoV-19^^New York|Human|New York Presbyterian Lower Manhattan|New York City Public Health Laboratory|Wang|USA

>Spike|hCoV-19/USA/TX-HMH-MCoV-18939/2020|2020-11-25|EPI\_ISL\_785235|Original|hCoV-19^^Texas|Human|Houston Methodist Hospital|Houston Methodist Hospital|Long|USA

>Spike|hCoV-19/Jordan/AM-ALSR-5000/2020|2020-10-05|EPI\_ISL\_730273|Original|hCoV-19^^Amman|Human|Biolab Diagnostic Laboratories|Andersen lab at Scripps Research|Gangavarapu|Jordan

>Spike|hCoV-19/England/LEED-2A931D/2020|2020-04-07|EPI\_ISL\_539188|Original|hCoV-19^^England|Human|Leeds Teaching Hospitals NHS Trust and Public Health England|Wellcome Sanger Institute for the COVID-19 Genomics UK (COG-UK) consortium|Davies|United Kingdom

>Spike|hCoV-19/Denmark/DCGC-11039/2020|2020-11-02|EPI\_ISL\_670359|Original|hCoV-19^^Hovedstaden|Human|Department of Virus and Microbiological Special Diagnostics|Albertsen Lab|Michaelsen|Denmark

>Spike|hCoV-19/England/SHEF-C3C50/2020|2020-04-24|EPI\_ISL\_457602|Original|hCoV-19^^England|Human|Virology Department|COVID-19 Genomics UK (COG-UK) Consortium|de Silva|United Kingdom

>Spike|hCoV-19/England/MILK-ACD67C/2020|2020-10-21|EPI\_ISL\_634308|Original|hCoV-19^^England|Human|Lighthouse Lab in Milton Keynes|Wellcome Sanger Institute for the COVID-19 Genomics UK (COG-UK) consortium|Davies|United Kingdom

>Spike|hCoV-19/England/ALDP-526E8D/2020|2020-06-02|EPI\_ISL\_559052|Original|hCoV-19^^England|Human|Lighthouse Lab in Alderley Park|Wellcome Sanger Institute for the COVID-19 Genomics UK (COG-UK) consortium|Davies|United Kingdom

>Spike|hCoV-19/Scotland/QEUH-9650F1/2020|2020-08-13|EPI\_ISL\_534402|Original|hCoV-19^^Scotland|Human|NHSGGC West of Scotland Specialist Virology Centre / MRC-University of Glasgow Centre for Virus Research|Wellcome Sanger Institute for the COVID-19 Genomics UK (COG-UK) consortium|Davies|United Kingdom

>Spike|hCoV-19/USA/WA-S1371/2020|2020-05-05|EPI\_ISL\_495821|Original|hCoV-19^^Washington|Human|Washington State Department of Health|Seattle Flu Study|Lee|USA

>Spike|hCoV-19/England/CAMB-1B4EC4/2020|2020-06-16|EPI\_ISL\_477798|Original|hCoV-19^^England|Human|Department of Pathology|COVID-19 Genomics UK (COG-UK) Consortium|Meredith|United Kingdom

>Spike|hCoV-19/England/MILK-B9715B/2020|2020-11-13|EPI\_ISL\_674942|Original|hCoV-19^^England|Human|Lighthouse Lab in Milton Keynes|Wellcome Sanger Institute for the COVID-19 Genomics UK (COG-UK) Consortium|Davies|United Kingdom

>Spike|hCoV-19/England/ALDP-B74127/2020|2020-11-12|EPI\_ISL\_664159|Original|hCoV-19^^England|Human|Quadram Institute Bioscience|COVID-19 Genomics UK (COG-UK) Consortium|Alikhan|United Kingdom

>Spike|hCoV-19/Australia/VIC11043/2020|2020-00-00|EPI\_ISL\_563217|Original|hCoV-19^^Victoria|Human|Microbiological Diagnostic Unit - Public Health Laboratory (MDU-PHL) |MDU-PHL|Schultz|Australia

>Spike|hCoV-19/Denmark/DCGC-13278/2020|2020-11-30|EPI\_ISL\_712700|Original|hCoV-19^^Hovedstaden|Human|Department of Virus and Microbiological Special Diagnostics|Albertsen Lab|Michaelsen|Denmark

>Spike|hCoV-19/USA/AZ-TG491558/2020|2020-06-22|EPI\_ISL\_695171|Original|hCoV-19^^Arizona|Human|AZ SPHL|TGen North|French|USA

>Spike|hCoV-19/England/NOTT-121842/2020|2020-12-22|EPI\_ISL\_764509|Original|hCoV-19^^England|Human|Queens Medical Centre|COVID-19 Genomics UK (COG-UK) Consortium|Loose|United Kingdom

>Spike|hCoV-19/England/CAMB-810AD/2020|2020-04-20|EPI\_ISL\_438564|Original|hCoV-19^^England|Human|Department of Pathology|COVID-19 Genomics UK (COG-UK) Consortium|Meredith|United Kingdom

>Spike|hCoV-19/England/NORW-F6FD3/2020|2020-11-24|EPI\_ISL\_704236|Original|hCoV-19^^England|Human|Quadram Institute Bioscience|COVID-19 Genomics UK (COG-UK) Consortium|Alikhan|United Kingdom

>Spike|hCoV-19/USA/LA-GBCL-26159752/2020|2020-04-11|EPI\_ISL\_485005|Original|hCoV-19^^Louisiana|Human|River Road Testing Lab|Ginkgo Bioworks Clinical Laboratory|Smith|USA

>Spike|hCoV-19/Denmark/DCGC-15456/2020|2020-11-23|EPI\_ISL\_713166|Original|hCoV-19^^Hovedstaden|Human|Department of Virus and Microbiological Special Diagnostics|Albertsen Lab|Michaelsen|Denmark

>Spike|hCoV-19/England/CAMB-1BAD3A/2020|2020-11-12|EPI\_ISL\_664166|Original|hCoV-19^^England|Human|Department of Pathology|COVID-19 Genomics UK (COG-UK) Consortium|Goodfellow|United Kingdom

>Spike|hCoV-19/Russia/StPetersburg-RII4532V/2020|2020-04-03|EPI\_ISL\_427313|Vero P1|hCoV-19^^Saint Petersburg|Human|WHO National Influenza Centre Russian Federation|WHO National Influenza Centre Russian Federation|Komissarov|Russia

>Spike|hCoV-19/Scotland/QEUH-B11DDD/2020|2020-11-02|EPI\_ISL\_649576|Original|hCoV-19^^Scotland|Human|Lighthouse Lab in Glasgow|Wellcome Sanger Institute for the COVID-19 Genomics UK (COG-UK) Consortium|Davies|United Kingdom

>Spike|hCoV-19/England/ALDP-C3A04D/2020|2020-12-09|EPI\_ISL\_730749|Original|hCoV-19^^England|Human|Lighthouse Lab in Alderley Park|Wellcome Sanger Institute for the COVID-19 Genomics UK (COG-UK) Consortium|Davies|United Kingdom

>Spike|hCoV-19/Wales/ALDP-95AB1C/2020|2020-06-11|EPI\_ISL\_554908|Original|hCoV-19^^Wales|Human|Lighthouse Lab in Alderley Park|Wellcome Sanger Institute for the COVID-19 Genomics UK (COG-UK) consortium|Davies|United Kingdom

>Spike|hCoV-19/Brazil/SP-744/2020|2020-07-04|EPI\_ISL\_735404|Original|hCoV-19^^S\u00e3o Paulo|Human|Instituto Adolfo Lutz - Regional de Rio Claro|Instituto Adolfo Lutz|Sacchi|Brazil

>Spike|hCoV-19/USA/FL-BPHL-0681/2020|2020-03-25|EPI\_ISL\_509739|Original|hCoV-19^^Florida|Human|Florida Bureau of Public Health Laboratories|Florida Bureau of Public Health Laboratories|Blanton|USA

>Spike|hCoV-19/USA/LA-EVTL163/2020|2020-05-11|EPI\_ISL\_574298|Original|hCoV-19^^Louisiana|Human|LSUHS Emerging Viral Threat Laboratory|Microbial Genome Sequencing Center|Kamil|USA

>Spike|hCoV-19/Scotland/QEUH-AADC70/2020|2020-10-22|EPI\_ISL\_623930|Original|hCoV-19^^Scotland|Human|Lighthouse Lab in Glasgow|Wellcome Sanger Institute for the COVID-19 Genomics UK (COG-UK) consortium|Davies|United Kingdom

>Spike|hCoV-19/England/20129067504/2020|2020-03-12|EPI\_ISL\_465808|Original|hCoV-19^^England|Human|Respiratory Virus Unit|Respiratory Virus Unit|Platt|United Kingdom

>Spike|hCoV-19/United Arab Emirates/0265/2020|2020-05-17|EPI\_ISL\_698446|Original|hCoV-19^^Abu Dhabi|Human|Group 42 (G42) Healthcare|G42 Healthcare|Ogrodzki|United Arab Emirates

>Spike|hCoV-19/England/CAMB-7AB79/2020|2020-04-07|EPI\_ISL\_433844|Original|hCoV-19^^England|Human|Department of Pathology|COVID-19 Genomics UK (COG-UK) Consortium|Meredith|United Kingdom

>Spike|hCoV-19/England/QEUH-B7C05F/2020|2020-11-14|EPI\_ISL\_668208|Original|hCoV-19^^England|Human|Lighthouse Lab in Glasgow|Wellcome Sanger Institute for the COVID-19 Genomics UK (COG-UK) Consortium|Davies|United Kingdom

>Spike|hCoV-19/England/MILK-B96BB8/2020|2020-11-13|EPI\_ISL\_675096|Original|hCoV-19^^England|Human|Lighthouse Lab in Milton Keynes|Wellcome Sanger Institute for the COVID-19 Genomics UK (COG-UK) Consortium|Davies|United Kingdom

>Spike|hCoV-19/England/MILK-B8618C/2020|2020-11-13|EPI\_ISL\_673881|Original|hCoV-19^^England|Human|Lighthouse Lab in Milton Keynes|Wellcome Sanger Institute for the COVID-19 Genomics UK (COG-UK) Consortium|Davies|United Kingdom

>Spike|hCoV-19/England/QEUH-A78009/2020|2020-10-14|EPI\_ISL\_613351|Original|hCoV-19^^England|Human|Queens Medical Centre|COVID-19 Genomics UK (COG-UK) Consortium|Loose|United Kingdom

>Spike|hCoV-19/Canada/ON-PHL-20-02438/2020|2020-09-00|EPI\_ISL\_671582|Original|hCoV-19^^Ontario|Human|Public Health Ontario Laboratory|Public Health Ontario Laboratory|Guthrie|Canada

>Spike|hCoV-19/Scotland/QEUH-A1F857/2020|2020-10-01|EPI\_ISL\_598946|Original|hCoV-19^^Scotland|Human|Lighthouse Lab in Glasgow|Wellcome Sanger Institute for the COVID-19 Genomics UK (COG-UK) consortium|Davies|United Kingdom

>Spike|hCoV-19/Norway/2784/2020|2020-06-23|EPI\_ISL\_493354|Original|hCoV-19^^Norway|Human|Oslo University Hospital|Norwegian Institute of Public Health|Kopperud Riis|Norway

>Spike|hCoV-19/Wales/PHWC-48841F/2020|2020-11-02|EPI\_ISL\_638059|Original|hCoV-19^^Wales|Human|Wales Specialist Virology Centre Sequencing lab|COVID-19 Genomics UK (COG-UK) Consortium|Moore|United Kingdom

>Spike|hCoV-19/England/CAMC-94BC93/2020|2020-07-15|EPI\_ISL\_556756|Original|hCoV-19^^England|Human|Lighthouse Lab in Cambridge|Wellcome Sanger Institute for the COVID-19 Genomics UK (COG-UK) consortium|Davies|United Kingdom

>Spike|hCoV-19/Scotland/QEUH-9C8742/2020|2020-09-15|EPI\_ISL\_576029|Original|hCoV-19^^Scotland|Human|Lighthouse Lab in Glasgow|Wellcome Sanger Institute for the COVID-19 Genomics UK (COG-UK) consortium|Davies|United Kingdom

>Spike|hCoV-19/USA/IL-QDX-258/2020|2020-04-30|EPI\_ISL\_498723|Original|hCoV-19^^Illinois|Human|Quest Diagnostics|Quest Diagnostics|Kagan|USA

>Spike|hCoV-19/Singapore/1348/2020|2020-06-11|EPI\_ISL\_648697|Original|hCoV-19^^Singapore|Human|Department of Laboratory Medicine|Department of Laboratory Medicine|Chen|Singapore

>Spike|hCoV-19/England/QEUA-B6927D/2020|2020-11-11|EPI\_ISL\_662026|Original|hCoV-19^^England|Human|Lighthouse Lab in Glasgow|Wellcome Sanger Institute for the COVID-19 Genomics UK (COG-UK) Consortium|Davies|United Kingdom

>Spike|hCoV-19/USA/MN-MDH-1366/2020|2020-04-23|EPI\_ISL\_507954|Original|hCoV-19^^Minnesota|Human|Minnesota Department of Health|Minnesota Department of Health|Garfin|USA

>Spike|hCoV-19/England/LIVE-A2E24/2020|2020-05-19|EPI\_ISL\_499890|Original|hCoV-19^^England|Human|Liverpool Clinical Laboratories|COVID-19 Genomics UK (COG-UK) Consortium|Haldenby|United Kingdom

>Spike|hCoV-19/Norway/3026/2020|2020-08-06|EPI\_ISL\_549121|Original|hCoV-19^^Viken|Human|Furst Medical Laboratory|Norwegian Institute of Public Health|Kopperud Riis|Norway

>Spike|hCoV-19/Luxembourg/LNS8124566/2020|2020-03-17|EPI\_ISL\_421756|Original|hCoV-19^^Luxembourg|Human|Laboratoire National de Sante|Laboratoire National de Sante|Wienecke-Baldacchino|Luxembourg

>Spike|hCoV-19/Scotland/CVR2735/2020|2020-04-16|EPI\_ISL\_453074|Original|hCoV-19^^Scotland|Human|West of Scotland Specialist Virology Centre|COVID-19 Genomics UK (COG-UK) Consortium|Robertson|United Kingdom

>Spike|hCoV-19/Hong Kong/HKPU-5135/2020|2020-10-07|EPI\_ISL\_610201|Original|hCoV-19^^Hong Kong|Human|Department of Health Technology and Informatics|Department of Health Technology and Informatics|Leung|China

>Spike|hCoV-19/England/NORT-28C5B0/2020|2020-05-14|EPI\_ISL\_478599|Original|hCoV-19^^England|Human|Northumbria University / South Tees Hospitals NHS Foundation Trust / North Cumbria Integrated Care NHS Foundation Trust / North Tees and Hartlepool NHS Foundation Trust / Newcastle Hospitals NHS Foundation Trust|COVID-19 Genomics UK (COG-UK) Consortium|Bashton|United Kingdom

>Spike|hCoV-19/England/NORT-29F57E/2020|2020-04-30|EPI\_ISL\_488164|Original|hCoV-19^^England|Human|NU-OMICS DNA Sequencing research facility|Wellcome Sanger Institute for the COVID-19 Genomics UK (COG-UK) consortium|Davies|United Kingdom

>Spike|hCoV-19/Scotland/QEUA-AAE680/2020|2020-10-22|EPI\_ISL\_644112|Original|hCoV-19^^Scotland|Human|Lighthouse Lab in Glasgow|Wellcome Sanger Institute for the COVID-19 Genomics UK (COG-UK) Consortium|Davies|United Kingdom

>Spike|hCoV-19/Finland/5LS6B3/2020|2020-10-05|EPI\_ISL\_756065|Original|hCoV-19^^Uusimaa|Human|Department of Virology and Immunology|Department of Virology|Smura|Finland

>Spike|hCoV-19/England/NORT-28D661/2020|2020-11-18|EPI\_ISL\_705364|Original|hCoV-19^^England|Human|Northumbria University / South Tees Hospitals NHS Foundation Trust / North Cumbria Integrated Care NHS Foundation Trust / North Tees and Hartlepool NHS Foundation Trust / Newcastle Hospitals NHS Foundation Trust|COVID-19 Genomics UK (COG-UK) Consortium|Bashton|United Kingdom

>Spike|hCoV-19/France/PAC-MEPHI-1673/2020|2020-09-14|EPI\_ISL\_644417|Original|hCoV-19^^Provence-Alpes-Cote-d\u2019Azur|Human|MEPHI|MEPHI|Levasseur|France

>Spike|hCoV-19/England/ALDP-AA1DC4/2020|2020-10-22|EPI\_ISL\_625074|Original|hCoV-19^^England|Human|Lighthouse Lab in Alderley Park|Wellcome Sanger Institute for the COVID-19 Genomics UK (COG-UK) consortium|Davies|United Kingdom

>Spike|hCoV-19/Sweden/20-22130/2020|2020-08-25|EPI\_ISL\_660379|Original|hCoV-19^^Orebro|Human|Orebro klinisk mikrobiologi|The Public Health Agency of Sweden|Svartstr\u00f6m|Sweden

>Spike|hCoV-19/Denmark/DCGC-2292/2020|2020-08-10|EPI\_ISL\_617716|Original|hCoV-19^^Midtjylland|Human|Department of Virus and Microbiological Special Diagnostics|Albertsen lab|Michaelsen|Denmark

>Spike|hCoV-19/USA/TX-HMH-6991/2020|2020-06-28|EPI\_ISL\_546414|Original|hCoV-19^^Texas|Human|Houston Methodist Hospital|Houston Methodist Hospital|Long|USA



>Spike|hCoV-19/England/NOTT-1212C6/2020|2020-12-15|EPI\_ISL\_741630|Original|hCoV-19^^England|Human|Queens Medical Centre|COVID-19 Genomics UK (COG-UK) Consortium|Loose|United Kingdom

>Spike|hCoV-19/Norway/3621/2020|2020-09-20|EPI\_ISL\_635185|Original|hCoV-19^^Viken|Human|Ostfold Hospital Trust - Kalnes|Norwegian Institute of Public Health|Vollan|Norway

>Spike|hCoV-19/England/204391000/2020|2020-10-24|EPI\_ISL\_649877|Original|hCoV-19^^England|Human|Respiratory Virus Unit|COVID-19 Genomics UK (COG-UK) Consortium|Platt|United Kingdom

>Spike|hCoV-19/Japan/PG-7981/2020|2020-08-00|EPI\_ISL\_687082|Original|hCoV-19^^Japan|Human|Pathogen Genomics Center|Pathogen Genomics Center|Sekizuka|Japan

>Spike|hCoV-19/Wales/PHWC-15C550/2020|2020-04-22|EPI\_ISL\_472504|Original|hCoV-19^^Wales|Human|Wales Specialist Virology Centre Sequencing lab|COVID-19 Genomics UK (COG-UK) Consortium|Moore|United Kingdom

>Spike|hCoV-19/Japan/PG-7096/2020|2020-08-00|EPI\_ISL\_688201|Original|hCoV-19^^Japan|Human|Pathogen Genomics Center|Pathogen Genomics Center|Sekizuka|Japan

>Spike|hCoV-19/USA/MD-MDH-0390/2020|2020-10-27|EPI\_ISL\_660099|Original|hCoV-19^^Maryland|Human|MD PHL|MD PHL|Keller|USA

>Spike|hCoV-19/USA/CA-CZB-1263/2020|2020-05-12|EPI\_ISL\_454683|Original|hCoV-19^^California|Human|County of Santa Clara Public Health Department|Chan-Zuckerberg Biohub|Hao|USA

>Spike|hCoV-19/USA/CA-ALSR-1526/2020|2020-05-13|EPI\_ISL\_494643|Original|hCoV-19^^California|Human|Scripps Medical Laboratory|Andersen lab at Scripps Research|Gangavarapu|USA

>Spike|hCoV-19/England/LIVE-9F6C8/2020|2020-04-18|EPI\_ISL\_472001|Original|hCoV-19^^England|Human|Liverpool Clinical Laboratories|COVID-19 Genomics UK (COG-UK) Consortium|Haldenby|United Kingdom

>Spike|hCoV-19/Japan/IC-0123/2020|2020-08-00|EPI\_ISL\_591464|Original|hCoV-19^^Japan|Human|Pathogen Genomics Center|Pathogen Genomics Center|Sekizuka|Japan

>Spike|hCoV-19/England/CAMC-B77ADE/2020|2020-11-12|EPI\_ISL\_783441|Original|hCoV-19^^England|Human|Lighthouse Lab in Cambridge|Wellcome Sanger Institute for the COVID-19 Genomics UK (COG-UK) Consortium|Davies|United Kingdom

>Spike|hCoV-19/Australia/VIC8930/2020|2020-07-29|EPI\_ISL\_565286|Original|hCoV-19^^Victoria|Human|Microbiological Diagnostic Unit - Public Health Laboratory (MDU-PHL)|MDU-PHL|Schultz|Australia

>Spike|hCoV-19/England/ALDP-A2D470/2020|2020-10-06|EPI\_ISL\_586789|Original|hCoV-19^^England|Human|Lighthouse Lab in Alderley Park|Wellcome Sanger Institute for the COVID-19 Genomics UK (COG-UK) consortium|Davies|United Kingdom

>Spike|hCoV-19/England/QEUEH-BCE2A3/2020|2020-11-26|EPI\_ISL\_704660|Original|hCoV-19^^England|Human|Lighthouse Lab in Glasgow|Wellcome Sanger Institute for the COVID-19 Genomics UK (COG-UK) Consortium|Davies|United Kingdom

>Spike|hCoV-19/USA/OR-OHSU-2695/2020|2020-08-26|EPI\_ISL\_667285|Original|hCoV-19^^Oregon|Human|OHSU Lab Services Molecular Microbiology Lab|Oregon SARS-CoV-2 Genome Sequencing Center|O'Roak|USA

>Spike|hCoV-19/USA/CA-CHLA-PLM97812099/2020|2020-12-01|EPI\_ISL\_753570|Original|hCoV-19^^California|Human|Clinical virology Laboratory|Center for Personalized Medicine|Dien Bard|USA

>Spike|hCoV-19/Australia/VIC9925/2020|2020-08-26|EPI\_ISL\_565783|Original|hCoV-19^^Victoria|Human|Microbiological Diagnostic Unit - Public Health Laboratory (MDU-PHL)|MDU-PHL|Schultz|Australia

>Spike|hCoV-19/USA/NY-QDX-94/2020|2020-03-12|EPI\_ISL\_468586|Original|hCoV-19^^New York|Human|Quest Diagnostics|Quest Diagnostics|Kagan|USA

>Spike|hCoV-19/Wales/PHWC-3555E/2020|2020-04-23|EPI\_ISL\_474444|Original|hCoV-19^^Wales|Human|Originating lab|COVID-19 Genomics UK (COG-UK) Consortium|Moore|United Kingdom

>Spike|hCoV-19/England/CAMC-BD20B1/2020|2020-11-28|EPI\_ISL\_702298|Original|hCoV-19^^England|Human|Lighthouse Lab in Cambridge|Wellcome Sanger Institute for the COVID-19 Genomics UK (COG-UK) Consortium|Davies|United Kingdom

>Spike|hCoV-19/Denmark/DCGC-3268/2020|2020-08-31|EPI\_ISL\_616212|Original|hCoV-19^^Hovedstaden|Human|Department of Virus and Microbiological Special Diagnostics|Albertsen lab|Michaelsen|Denmark

>Spike|hCoV-19/Ireland/LH-NVRL-20ILR08027/2020|2020-11-09|EPI\_ISL\_732416|Original|hCoV-19^^Louth|Human|National Virus Reference Laboratory|National Virus Reference Laboratory|Gonzalez|Ireland

>Spike|hCoV-19/England/MILK-956EBD/2020|2020-06-08|EPI\_ISL\_554251|Original|hCoV-19^^England|Human|Lighthouse Lab in Milton Keynes|Wellcome Sanger Institute for the COVID-19 Genomics UK (COG-UK) consortium|Davies|United Kingdom

>Spike|hCoV-19/USA/WA-S1467/2020|2020-05-08|EPI\_ISL\_495642|Original|hCoV-19^^Washington|Human|Washington State Department of Health|Seattle Flu Study|Lee|USA

>Spike|hCoV-19/USA/CA-CZB-14156/2020|2020-10-17|EPI\_ISL\_739061|Original|hCoV-19^^California|Human|Madera County Department of Public Health|Chan-Zuckerberg Biohub|Kamm|USA

>Spike|hCoV-19/England/LIVE-A5FC4/2020|2020-03-21|EPI\_ISL\_499671|Original|hCoV-19^^England|Human|Liverpool Clinical Laboratories|COVID-19 Genomics UK (COG-UK) Consortium|Haldenby|United Kingdom

>Spike|hCoV-19/England/MILK-9773C6/2020|2020-07-24|EPI\_ISL\_526396|Original|hCoV-19^^England|Human|Queens Medical Centre|COVID-19 Genomics UK (COG-UK) Consortium|Loose|United Kingdom

>Spike|hCoV-19/USA/HI-H200367/2020|2020-09-09|EPI\_ISL\_752923|Original|hCoV-19^^Hawaii|Human|State Laboratories Division|State Laboratories Division|Sultana|USA

>Spike|hCoV-19/England/ALDP-B63DAF/2020|2020-11-08|EPI\_ISL\_655302|Original|hCoV-19^^England|Human|Lighthouse Lab in Alderley Park|Wellcome Sanger Institute for the COVID-19 Genomics UK (COG-UK) Consortium|Davies|United Kingdom

>Spike|hCoV-19/Canada/ON-PHL-20-01240/2020|2020-06-00|EPI\_ISL\_548862|Original|hCoV-19^^Ontario|Human|Public Health Ontario Laboratory|Public Health Ontario Laboratory|Guthrie|Canada

>Spike|hCoV-19/Italy/VEN-UniVR-73/2020|2020-03-19|EPI\_ISL\_751382|Original|hCoV-19^^Veneto|Human|IRCCS Sacro Cuore Don Calabria Hospital|University of Verona|Mori|Italy

>Spike|hCoV-19/USA/UT-UPHL-2009673/2020|2020-07-27|EPI\_ISL\_605348|Original|hCoV-19^^Utah|Human|Utah Public Health Laboratory|Utah Public Health Laboratory|Young|USA

>Spike|hCoV-19/England/MILK-AC7557/2020|2020-10-21|EPI\_ISL\_644054|Original|hCoV-19^^England|Human|Lighthouse Lab in Milton Keynes|Wellcome Sanger Institute for the COVID-19 Genomics UK (COG-UK) Consortium|Davies|United Kingdom

>Spike|hCoV-19/South Africa/KRISP-K002271/2020|2020-07-19|EPI\_ISL\_515653|Original|hCoV-19^^KwaZulu-Natal|Human|NHLs-IALCH|KRISP|de Oliveira|South Africa

>Spike|hCoV-19/Germany/HH-hpi-pl285/2020|2020-03-16|EPI\_ISL\_775803|Original|hCoV-19^^Hamburg|Human|University Medical Center Hamburg Eppendorf|Heinrich Pette Institute|Robitaille|Germany

>Spike|hCoV-19/Denmark/DCGC-13888/2020|2020-11-30|EPI\_ISL\_712292|Original|hCoV-19^^Syddanmark|Human|Department of Virus and Microbiological Special Diagnostics|Albertsen Lab|Michaelsen|Denmark

>Spike|hCoV-19/Wales/PHWC-489D7D/2020|2020-10-28|EPI\_ISL\_651108|Original|hCoV-19^^Wales|Human|Wales Specialist Virology Centre Sequencing lab|COVID-19 Genomics UK (COG-UK) Consortium|Moore|United Kingdom

>Spike|hCoV-19/England/MILK-B05282/2020|2020-10-24|EPI\_ISL\_638549|Original|hCoV-19^^England|Human|Virology Department|COVID-19 Genomics UK (COG-UK) Consortium|de Silva|United Kingdom

>Spike|hCoV-19/England/LIVE-A50EF/2020|2020-03-05|EPI\_ISL\_499885|Original|hCoV-19^^England|Human|Liverpool Clinical Laboratories|COVID-19 Genomics UK (COG-UK) Consortium|Haldenby|United Kingdom

>Spike|hCoV-19/England/MILK-A47980/2020|2020-10-05|EPI\_ISL\_598359|Original|hCoV-19^^England|Human|Lighthouse Lab in Milton Keynes|Wellcome Sanger Institute for the COVID-19 Genomics UK (COG-UK) consortium|Davies|United Kingdom

>Spike|hCoV-19/England/CAMB-73949/2020|2020-03-30|EPI\_ISL\_425257|Original|hCoV-19^^England|Human|Department of Pathology|COVID-19 Genomics UK (COG-UK) Consortium|Meredith|United Kingdom

>Spike|hCoV-19/England/QEUA-C333B4/2020|2020-12-11|EPI\_ISL\_734115|Original|hCoV-19^England|Human|Lighthouse Lab in Glasgow|Wellcome Sanger Institute for the COVID-19 Genomics UK (COG-UK) Consortium|Davies|United Kingdom

>Spike|hCoV-19/England/MILK-9C4737/2020|2020-09-07|EPI\_ISL\_566827|Original|hCoV-19^England|Human|Lighthouse Lab in Milton Keynes|Wellcome Sanger Institute for the COVID-19 Genomics UK (COG-UK) consortium|Davies|United Kingdom

>Spike|hCoV-19/Australia/VIC3247/2020|2020-07-06|EPI\_ISL\_520927|Original|hCoV-19^Victoria|Human|Victorian Infectious Diseases Reference Laboratory (VIDRL)|VIDRL and MDU-PHL|Schultz|Australia

>Spike|hCoV-19/England/ALDP-BC795A/2020|2020-11-22|EPI\_ISL\_721314|Original|hCoV-19^England|Human|Lighthouse Lab in Alderley Park|Wellcome Sanger Institute for the COVID-19 Genomics UK (COG-UK) Consortium|Davies|United Kingdom

>Spike|hCoV-19/England/QEUA-96BE97/2020|2020-08-15|EPI\_ISL\_531260|Original|hCoV-19^England|Human|Lighthouse Lab in Glasgow|Wellcome Sanger Institute for the COVID-19 Genomics UK (COG-UK) consortium|Davies|United Kingdom

>Spike|hCoV-19/England/BRIS-13015E/2020|2020-04-11|EPI\_ISL\_492645|Original|hCoV-19^England|Human|PHE South West Regional Laboratory|Wellcome Sanger Institute for the COVID-19 Genomics UK (COG-UK) consortium|Davies|United Kingdom

>Spike|hCoV-19/Netherlands/Limburg\_7/2020|2020-00-00|EPI\_ISL\_415464|Original|hCoV-19^Limburg|Human|Dutch COVID-19 response team|Erasmus Medical Center|Oude Munnink|Netherlands

>Spike|hCoV-19/USA/WI-UW-1636/2020|2020-09-09|EPI\_ISL\_605510|Original|hCoV-19^Wisconsin|Human|University of Wisconsin-Madison AIDS Vaccine Research Laboratories|University of Wisconsin-Madison AIDS Vaccine Research Laboratories|Baczenas|USA

>Spike|hCoV-19/Saudi Arabia/KAIMRC10/2020|2020-03-15|EPI\_ISL\_507016|unknown|hCoV-19^Saudi Arabia|Human|unknown|Infectious Diseases Research|Submitter|Saudi Arabia

>Spike|hCoV-19/USA/TX-HMH-816/2020|2020-04-10|EPI\_ISL\_545850|Original|hCoV-19^Texas|Human|Houston Methodist Hospital|Houston Methodist Hospital|Long|USA

>Spike|hCoV-19/Mexico/BCN-ALSR-1690/2020|2020-04-28|EPI\_ISL\_496351|Original|hCoV-19^Baja California|Human|Infectolab|Andersen lab at Scripps Research|Gangavarapu|Mexico

>Spike|hCoV-19/India/KA-IB17/2020|2020-06-20|EPI\_ISL\_508295|Original|hCoV-19^Karnataka|Human|Indian Institute of Science|National Institute of Biomedical Genomics|Maitra|India

>Spike|hCoV-19/Poland/PL\_MCB\_56/2020|2020-06-06|EPI\_ISL\_645055|Original|hCoV-19^Poland|Human|Human Genome Variation Research Group|Human Genome Variation Research Group||Poland

>Spike|hCoV-19/Scotland/CVR5247/2020|2020-10-19|EPI\_ISL\_627063|Original|hCoV-19^Scotland|Human|West of Scotland Specialist Virology Centre|COVID-19 Genomics UK (COG-UK) Consortium|Robertson|United Kingdom

>Spike|hCoV-19/Scotland/CVR5312/2020|2020-10-23|EPI\_ISL\_651750|Original|hCoV-19^Scotland|Human|West of Scotland Specialist Virology Centre|COVID-19 Genomics UK (COG-UK) Consortium|Robertson|United Kingdom

>Spike|hCoV-19/England/CAMB-1B726B/2020|2020-10-17|EPI\_ISL\_638311|Original|hCoV-19^England|Human|Department of Pathology|COVID-19 Genomics UK (COG-UK) Consortium|Goodfellow|United Kingdom

>Spike|hCoV-19/England/LIVE-9D958/2020|2020-04-27|EPI\_ISL\_449606|Original|hCoV-19^England|Human|Liverpool Clinical Laboratories|COVID-19 Genomics UK (COG-UK) Consortium|Haldenby|United Kingdom

>Spike|hCoV-19/Denmark/DCGC-16017/2020|2020-11-23|EPI\_ISL\_714537|Original|hCoV-19^Syddanmark|Human|Department of Virus and Microbiological Special Diagnostics|Albertsen Lab|Michaelsen|Denmark

>Spike|hCoV-19/England/QEUA-A21913/2020|2020-10-01|EPI\_ISL\_587376|Original|hCoV-19^England|Human|Lighthouse Lab in Glasgow|Wellcome Sanger Institute for the COVID-19 Genomics UK (COG-UK) consortium|Davies|United Kingdom

>Spike|hCoV-19/Denmark/DCGC-11499/2020|2020-11-02|EPI\_ISL\_670676|Original|hCoV-19^Syddanmark|Human|Department of Virus and Microbiological Special Diagnostics|Albertsen Lab|Michaelsen|Denmark

>Spike|hCoV-19/Brazil/SP-756/2020|2020-07-06|EPI\_ISL\_735411|Original|hCoV-19^^S\u00e3o Paulo|Human|Centro de Vigilancia a Saude de Diadema|Instituto Adolfo Lutz|Sacchi|Brazil

>Spike|hCoV-19/England/204501192/2020|2020-11-02|EPI\_ISL\_660787|Original|hCoV-19^^England|Human|Respiratory Virus Unit|COVID-19 Genomics UK (COG-UK) Consortium|Platt|United Kingdom

>Spike|hCoV-19/USA/HI-H200306/2020|2020-08-12|EPI\_ISL\_752865|Original|hCoV-19^^Hawaii|Human|State Laboratories Division|State Laboratories Division|Sultana|USA

>Spike|hCoV-19/Australia/VIC6043/2020|2020-07-20|EPI\_ISL\_518084|Original|hCoV-19^^Victoria|Human|Victorian Infectious Diseases Reference Laboratory (VIDRL)|VIDRL and MDU-PHL|Schultz|Australia

>Spike|hCoV-19/USA/TX-HMH-6809/2020|2020-06-24|EPI\_ISL\_546259|Original|hCoV-19^^Texas|Human|Houston Methodist Hospital|Houston Methodist Hospital|Long|USA

>Spike|hCoV-19/USA/LA-GBCL-26544571/2020|2020-04-17|EPI\_ISL\_485143|Original|hCoV-19^^Louisiana|Human|River Road Testing Lab|Ginkgo Bioworks Clinical Laboratory|Smith|USA

>Spike|hCoV-19/Luxembourg/LNS5962893/2020|2020-11-23|EPI\_ISL\_744330|Original|hCoV-19^^Luxembourg|Human|Laboratoire national de sant\u00e9|Laboratoire national de sant\u00e9|Wienecke-Baldacchino|Luxembourg

>Spike|hCoV-19/Austria/CeMM0364/2020|2020-04-05|EPI\_ISL\_438127|Vero P3|hCoV-19^^Vienna|Human|Center for Virology|Bergthaler laboratory|Bergthaler|Austria

>Spike|hCoV-19/Wales/PHWC-47F6D9/2020|2020-10-11|EPI\_ISL\_612713|Original|hCoV-19^^Wales|Human|Wales Specialist Virology Centre Sequencing lab|COVID-19 Genomics UK (COG-UK) Consortium|Moore|United Kingdom

>Spike|hCoV-19/England/MILK-9E0498/2020|2020-09-20|EPI\_ISL\_601452|Original|hCoV-19^^England|Human|Lighthouse Lab in Milton Keynes|Wellcome Sanger Institute for the COVID-19 Genomics UK (COG-UK) consortium|Davies|United Kingdom

>Spike|hCoV-19/USA/NY-QDX-2473/2020|2020-03-15|EPI\_ISL\_604810|Original|hCoV-19^^New York|Human|Quest Diagnostics|Quest Diagnostics|Kagan|USA

>Spike|hCoV-19/Japan/PG-1281/2020|2020-03-00|EPI\_ISL\_684890|Original|hCoV-19^^Japan|Human|Saitama Prefectural Institute of Public Health|Pathogen Genomics Center|Sekizuka|Japan

>Spike|hCoV-19/France/PAC-IHU-0304/2020|2020-03-31|EPI\_ISL\_569445|Original|hCoV-19^^Provence-Alpes-C\u00f4te-d\u0201Azur|Human|MEPHI|MEPHI|Levasseur|France

>Spike|hCoV-19/Wuhan/HBCDC-HB-03/2019|2019-12-30|EPI\_ISL\_412899|Original|hCoV-19^^Hubei|Human|Wuhan Jinyintan Hospital|Hubei Provincial Center for Disease Control and Prevention|Fang|China

>Spike|hCoV-19/Sweden/20-24736/2020|2020-11-25|EPI\_ISL\_766643|Original|hCoV-19^^Ostergotland|Human|Vardcentralen Brinken|The Public Health Agency of Sweden|Svartstr\u00f6m|Sweden

>Spike|hCoV-19/USA/FL-BPHL-0446/2020|2020-03-23|EPI\_ISL\_495352|Original|hCoV-19^^Florida|Human|Florida Bureau of Public Health Laboratories|Florida Bureau of Public Health Laboratories|Blanton|USA

>Spike|hCoV-19/England/ALDP-9E9CF1/2020|2020-09-24|EPI\_ISL\_580084|Original|hCoV-19^^England|Human|Lighthouse Lab in Alderley Park|Wellcome Sanger Institute for the COVID-19 Genomics UK (COG-UK) consortium|Davies|United Kingdom

>Spike|hCoV-19/Netherlands/Limburg\_20/2020|2020-05-16|EPI\_ISL\_461008|Original|hCoV-19^^Limburg|Human|Dutch COVID-19 response team|Erasmus Medical Center|Oude Munnink|Netherlands

>Spike|hCoV-19/USA/CA-CZB-1044/2020|2020-03-31|EPI\_ISL\_437044|Original|hCoV-19^^California|Human|County of Santa Clara Public Health|Chan-Zuckerberg Biohub|Hao|USA

>Spike|hCoV-19/Wales/PHWC-16B749/2020|2020-09-17|EPI\_ISL\_573895|Original|hCoV-19^^Wales|Human|Wales Specialist Virology Centre Sequencing lab|COVID-19 Genomics UK (COG-UK) Consortium|Moore|United Kingdom

>Spike|hCoV-19/Canada/QC-LSPQ-L00230676/2020|2020-03-21|EPI\_ISL\_535928|Original|hCoV-19^^Quebec|Human|CSSS Haut-Richelieu/Rouville (H\u00f4pital)|Laboratoire de sant\u00e9 publique du Qu\u00e9bec|Moreira|Canada

>Spike|hCoV-19/England/ALDP-C230B0/2020|2020-12-06|EPI\_ISL\_733850|Original|hCoV-19^^England|Human|Lighthouse Lab in Alderley Park|Wellcome Sanger Institute for the COVID-19 Genomics UK (COG-UK) Consortium|Davies|United Kingdom

>Spike|hCoV-19/Ireland/CN-NVRL-73IRL72730/2020|2020-09-14|EPI\_ISL\_639849|Original|hCoV-19^^Cavan|Human|National Virus Reference Laboratory|National Virus Reference Laboratory|Gonzalez|Ireland

>Spike|hCoV-19/England/CAMB-82464/2020|2020-04-12|EPI\_ISL\_443626|Original|hCoV-19^^England|Human|Department of Pathology|Wellcome Sanger Institute for the COVID-19 Genomics UK (COG-UK) consortium|Amato|United Kingdom

>Spike|hCoV-19/Netherlands/ZH-EMC-871/2020|2020-10-27|EPI\_ISL\_632331|Original|hCoV-19^^Zuid Holland|Human|Dutch COVID-19 response team|Erasmus Medical Center|Oude Munnink|Netherlands

>Spike|hCoV-19/Colombia/NSA-NS-79852/2020|2020-03-14|EPI\_ISL\_653752|Original|hCoV-19^^Norte de Santander|Human|Instituto Nacional de Salud|Instituto Nacional de Salud|Franco-Mu\u00f1oz|Colombia

>Spike|hCoV-19/Wuhan/HB-WHCM2-264/2020|2020-02-13|EPI\_ISL\_454999|Original|hCoV-19^^Hubei|Human|Wuhan Chain Medical Labs (CMLabs)|State Key Laboratory of Biotherapy of Sichuan University|Tang|China

>Spike|hCoV-19/Luxembourg/LNS9798699/2020|2020-11-09|EPI\_ISL\_744987|Original|hCoV-19^^Luxembourg|Human|Laboratoire national de sant\u00e9|Laboratoire national de sant\u00e9|Wienecke-Baldacchino|Luxembourg

>Spike|hCoV-19/England/ALDP-A96418/2020|2020-10-20|EPI\_ISL\_624638|Original|hCoV-19^^England|Human|Lighthouse Lab in Alderley Park|Wellcome Sanger Institute for the COVID-19 Genomics UK (COG-UK) consortium|Davies|United Kingdom

>Spike|hCoV-19/Australia/VIC4852/2020|2020-07-19|EPI\_ISL\_519236|Original|hCoV-19^^Victoria|Human|Microbiological Diagnostic Unit - Public Health Laboratory (MDU-PHL)|MDU-PHL|Schultz|Australia

>Spike|hCoV-19/USA/MI-MDHHS-SC20618/2020|2020-04-30|EPI\_ISL\_462700|Original|hCoV-19^^Michigan|Human|Michigan Department of Health and Human Services|Michigan Department of Health and Human Services|Blankenship|USA

>Spike|hCoV-19/England/ALDP-CC097E/2020|2020-12-20|EPI\_ISL\_778035|Original|hCoV-19^^England|Human|Lighthouse Lab in Alderley Park|Wellcome Sanger Institute for the COVID-19 Genomics UK (COG-UK) Consortium|Davies|United Kingdom

>Spike|hCoV-19/Wales/PHWC-15FE52/2020|2020-05-19|EPI\_ISL\_479286|Original|hCoV-19^^Wales|Human|Wales Specialist Virology Centre Sequencing lab|COVID-19 Genomics UK (COG-UK) Consortium|Moore|United Kingdom

>Spike|hCoV-19/England/ALDP-CEC3E7/2020|2020-12-21|EPI\_ISL\_781505|Original|hCoV-19^^England|Human|Lighthouse Lab in Alderley Park|Wellcome Sanger Institute for the COVID-19 Genomics UK (COG-UK) Consortium|Davies|United Kingdom

>Spike|hCoV-19/USA/WI-UW-57/2020|2020-03-19|EPI\_ISL\_421315|Original|hCoV-19^^Wisconsin|Human|University of Wisconsin-Madison AIDS Vaccine Research Laboratories|University of Wisconsin-Madison AIDS Vaccine Research Laboratories|Baczenas|USA

>Spike|hCoV-19/Wales/ALDP-BBA714/2020|2020-11-20|EPI\_ISL\_710728|Original|hCoV-19^^Wales|Human|Lighthouse Lab in Alderley Park|Wellcome Sanger Institute for the COVID-19 Genomics UK (COG-UK) Consortium|Davies|United Kingdom

>Spike|hCoV-19/USA/WI-UW-1169/2020|2020-08-09|EPI\_ISL\_522925|Original|hCoV-19^^Wisconsin|Human|University of Wisconsin-Madison AIDS Vaccine Research Laboratories|University of Wisconsin-Madison AIDS Vaccine Research Laboratories|Baczenas|USA

>Spike|hCoV-19/Denmark/DCGC-18348/2020|2020-12-07|EPI\_ISL\_749908|Original|hCoV-19^^Sjaelland|Human|Department of Virus and Microbiological Special Diagnostics|Albertsen Lab|Michaelsen|Denmark

>Spike|hCoV-19/England/QEUH-B13A3E/2020|2020-11-02|EPI\_ISL\_641840|Original|hCoV-19^^England|Human|Lighthouse Lab in Glasgow|Wellcome Sanger Institute for the COVID-19 Genomics UK (COG-UK) Consortium|Davies|United Kingdom

>Spike|hCoV-19/Gibraltar/205000702/2020|2020-12-00|EPI\_ISL\_709948|Original|hCoV-19^^Gibraltar|Human|Microbiology|Respiratory Virus Unit|Platt|Gibraltar

>Spike|hCoV-19/England/ALDP-A852A9/2020|2020-10-17|EPI\_ISL\_610347|Original|hCoV-19^^England|Human|Lighthouse Lab in Alderley Park|Wellcome Sanger Institute for the COVID-19 Genomics UK (COG-UK) consortium|Davies|United Kingdom

>Spike|hCoV-19/Slovakia/UKBA-204/2020|2020-04-06|EPI\_ISL\_577736|Original|hCoV-19^^Bratislava|Human|Institute of Virology|Faculty of Natural Sciences|Vinar|Slovakia

>Spike|hCoV-19/Jordan/SEARCH-5435/2020|2020-09-14|EPI\_ISL\_755120|Original|hCoV-19^^Amman|Human|Biolab Diagnostic Laboratories|Andersen lab at Scripps Research|Gangavarapu|Jordan

>Spike|hCoV-19/England/CAMC-B37EA1/2020|2020-11-05|EPI\_ISL\_659079|Original|hCoV-19^^England|Human|Lighthouse Lab in Cambridge|Wellcome Sanger Institute for the COVID-19 Genomics UK (COG-UK) Consortium|Davies|United Kingdom

>Spike|hCoV-19/USA/TX-HMH-MCoV-9820/2020|2020-07-06|EPI\_ISL\_780293|Original|hCoV-19^^Texas|Human|Houston Methodist Hospital|Houston Methodist Hospital|Long|USA

>Spike|hCoV-19/USA/AZ-TG491528/2020|2020-06-19|EPI\_ISL\_695145|Original|hCoV-19^^Arizona|Human|AZ SPHL|TGen North|French|USA

>Spike|hCoV-19/Lithuania/MR-LUHS-Eilnr46/2020|2020-04-08|EPI\_ISL\_541860|Original|hCoV-19^^Marijampoles apskritis|Human|Lithuanian University of Health Sciences Hospital|Lithuanian University of Health Sciences|Zemaitis|Lithuania

>Spike|hCoV-19/DRC/82/2020|2020-03-18|EPI\_ISL\_417946|Original|hCoV-19^^Kinshasa|Human|Viral Respiratory Lab|Pathogen Sequencing Lab|Pratt|Democratic Republic of the Congo

>Spike|hCoV-19/Hong Kong/HKU-902a/2020|2020-01-23|EPI\_ISL\_434563|unknown|hCoV-19^^Hong Kong|Human|unknown|Microbiology|Submitter|China

>Spike|hCoV-19/England/ALDP-B45BE5/2020|2020-11-07|EPI\_ISL\_656335|Original|hCoV-19^^England|Human|Lighthouse Lab in Alderley Park|Wellcome Sanger Institute for the COVID-19 Genomics UK (COG-UK) Consortium|Davies|United Kingdom

>Spike|hCoV-19/North Macedonia/7238/2020|2020-07-10|EPI\_ISL\_677716|Original|hCoV-19^^Shtip|Human|Clinical Hospital - Shtip|Research Center for Genetic Engineering and Biotechnology \Georgi D. Efremov\u201d|Dimovski|North Macedonia

>Spike|hCoV-19/England/SHEF-CBCB2/2020|2020-11-10|EPI\_ISL\_653078|Original|hCoV-19^^England|Human|Virology Department|COVID-19 Genomics UK (COG-UK) Consortium|de Silva|United Kingdom

>Spike|hCoV-19/Wales/PHWC-2F399/2020|2020-04-06|EPI\_ISL\_446241|Original|hCoV-19^^Wales|Human|Wales Specialist Virology Centre|Public Health Wales Microbiology Cardiff|Moore|United Kingdom

>Spike|hCoV-19/USA/NV-NSPHL-A0110/2020|2020-04-18|EPI\_ISL\_514673|Original|hCoV-19^^Nevada|Human|Nevada State Public Health Laboratory|Nevada State Public Health Laboratory|Sevinsky|USA

>Spike|hCoV-19/Denmark/DCGC-11496/2020|2020-11-02|EPI\_ISL\_670958|Original|hCoV-19^^Hovedstaden|Human|Department of Virus and Microbiological Special Diagnostics|Albertsen Lab|Michaelsen|Denmark

>Spike|hCoV-19/England/CAMC-B9848E/2020|2020-11-15|EPI\_ISL\_674949|Original|hCoV-19^^England|Human|Lighthouse Lab in Cambridge|Wellcome Sanger Institute for the COVID-19 Genomics UK (COG-UK) Consortium|Davies|United Kingdom

>Spike|hCoV-19/France/PAC-IHU-0473/2020|2020-04-05|EPI\_ISL\_569537|Original|hCoV-19^^Provence-Alpes-C\u00f4te-d\u2019Azur|Human|MEPHI|MEPHI|Levasseur|France

>Spike|hCoV-19/England/QEUH-CADF39/2020|2020-12-20|EPI\_ISL\_761095|Original|hCoV-19^^England|Human|Lighthouse Lab in Glasgow|Wellcome Sanger Institute for the COVID-19 Genomics UK (COG-UK) Consortium|Davies|United Kingdom

>Spike|hCoV-19/England/LIVE-1DD706/2020|2020-10-02|EPI\_ISL\_611731|Original|hCoV-19^^England|Human|Liverpool Clinical Laboratories|COVID-19 Genomics UK (COG-UK) Consortium|Haldenby|United Kingdom

>Spike|hCoV-19/USA/VA-DCLS-2319/2020|2020-11-17|EPI\_ISL\_734269|Original|hCoV-19^^Virginia|Human|Virginia Division of Consolidated Laboratory Services (DCLS)|Virginia Division of Consolidated Laboratory Services (DCLS)|St. Jacques|USA

>Spike|hCoV-19/Denmark/DCGC-9767/2020|2020-11-09|EPI\_ISL\_669160|Original|hCoV-19^^Midtjylland|Human|Department of Virus and Microbiological Special Diagnostics|Albertsen Lab|Michaelsen|Denmark

>Spike|hCoV-19/Scotland/CVR1969/2020|2020-04-09|EPI\_ISL\_484535|Original|hCoV-19^^Scotland|Human|West of Scotland Specialist Virology Centre|COVID-19 Genomics UK (COG-UK) Consortium|Robertson|United Kingdom

>Spike|hCoV-19/England/SHEF-CC185/2020|2020-03-24|EPI\_ISL\_442408|Original|hCoV-19^^England|Human|Virology Department|COVID-19 Genomics UK (COG-UK) Consortium|de Silva|United Kingdom

>Spike|hCoV-19/Scotland/EDB6417/2020|2020-04-16|EPI\_ISL\_487785|Original|hCoV-19^^Scotland|Human|Virology Department|Wellcome Sanger Institute for the COVID-19 Genomics UK (COG-UK) consortium|Davies|United Kingdom

>Spike|hCoV-19/England/LIVE-1DD584/2020|2020-10-01|EPI\_ISL\_612039|Original|hCoV-19^^England|Human|Liverpool Clinical Laboratories|COVID-19 Genomics UK (COG-UK) Consortium|Haldenby|United Kingdom

>Spike|hCoV-19/Australia/NSW992/2020|2020-07-12|EPI\_ISL\_591503|Original|hCoV-19^^New South Wales|Human|South Eastern Area Laboratory Services (SEALS)|NSW Health Pathology - Institute of Clinical Pathology and Medical Research; Westmead Hospital; University of Sydney|Gall|Australia

>Spike|hCoV-19/Germany/HH-hpi-pl688/2020|2020-03-18|EPI\_ISL\_776098|Original|hCoV-19^^Hamburg|Human|University Medical Center Hamburg Eppendorf|Heinrich Pette Institute|Robitaille|Germany

>Spike|hCoV-19/USA/CA-ALSR-2005/2020|2020-05-12|EPI\_ISL\_635302|Original|hCoV-19^^California|Human|San Diego County Public Health Laboratory|Andersen lab at Scripps Research|Gangavarapu|USA

>Spike|hCoV-19/Wales/PHWC-49451D/2020|2020-11-20|EPI\_ISL\_726129|Original|hCoV-19^^Wales|Human|Originating lab|COVID-19 Genomics UK (COG-UK) Consortium|Moore|United Kingdom

>Spike|hCoV-19/Turkey/IST-GLAB-120/2020|2020-04-30|EPI\_ISL\_735268|Original|hCoV-19^^Istanbul|Human|Genomic Laboratory (GLAB) (Conjoint lab of Health Directorate of Istanbul and Istanbul Technical University)|Genomic Laboratory (GLAB)|Karacan|Turkey

>Spike|hCoV-19/Brazil/BA-L29-CD747/2020|2020-04-14|EPI\_ISL\_722138|Original|hCoV-19^^S\u00e3o Paulo|Human|DB Diagnosticos do Brasil|Laborat\u00f3rio de Parasitologia M\u00e9dica - Instituto de Medicina Tropical - Universidade de S\u00e3o Paulo|de Jesus|Brazil

>Spike|hCoV-19/England/QEUEH-9F5D59/2020|2020-09-27|EPI\_ISL\_588289|Original|hCoV-19^^England|Human|Lighthouse Lab in Glasgow|Wellcome Sanger Institute for the COVID-19 Genomics UK (COG-UK) consortium|Davies|United Kingdom

>Spike|hCoV-19/USA/MI-MDHHS-SC21500/2020|2020-03-31|EPI\_ISL\_516227|Original|hCoV-19^^Michigan|Human|Michigan Department of Health and Human Services|Michigan Department of Health and Human Services|Blankenship|USA

>Spike|hCoV-19/USA/CA-UCLA-87/2020|2020-03-19|EPI\_ISL\_537604|Original|hCoV-19^^California|Human|UCLA Pathology Clinical Microbiology Lab|Kruglyak Lab|Boocock|USA

>Spike|hCoV-19/USA/CA-ALSR-0483-SAN/2020|2020-03-31|EPI\_ISL\_483171|Original|hCoV-19^^California|Human|UC San Diego Center for Advanced Laboratory Medicine|Andersen lab at Scripps Research|Gangavarapu|USA

>Spike|hCoV-19/USA/UT-UPHL-2012377088/2020|2020-08-09|EPI\_ISL\_746313|Original|hCoV-19^^Utah|Human|Ginkgo Bioworks Clinical Laboratory|Utah Public Health Laboratory|Young|USA

>Spike|hCoV-19/Denmark/DCGC-17526/2020|2020-12-14|EPI\_ISL\_751043|Original|hCoV-19^^Midtjylland|Human|Department of Virus and Microbiological Special Diagnostics|Albertsen Lab|Michaelsen|Denmark

>Spike|hCoV-19/USA/TX-HMH-3873/2020|2020-06-16|EPI\_ISL\_543268|Original|hCoV-19^^Texas|Human|Houston Methodist Hospital|Houston Methodist Hospital|Long|USA

>Spike|hCoV-19/France/ARA-104138/2020|2020-11-09|EPI\_ISL\_683347|Original|hCoV-19^^Auvergne-Rh\u00f4ne-Alpes|Human|CNR Virus des Infections Respiratoires - France SUD|CNR Virus des Infections Respiratoires - France SUD|Bal|France

>Spike|hCoV-19/USA/MI-MDHHS-SC20639/2020|2020-04-24|EPI\_ISL\_462721|Original|hCoV-19^^Michigan|Human|Michigan Department of Health and Human Services|Michigan Department of Health and Human Services|Blankenship|USA

>Spike|hCoV-19/Morocco/HMIMV-Rabat1462-04/2020|2020-04-19|EPI\_ISL\_471460|Original|hCoV-19^^Rabat|Human|Centre de Virologie des Maladies

Tropicales|Functional Genomic Platform/Service Analyses Biologique/UATRS/ Centre National Pour la Recherche Scientifique Et Technique (CNRST)|El Fahime|Morocco  
>Spike|hCoV-19/USA/WI-WSLH-200537/2020|2020-05-29|EPI\_ISL\_578674|Original|hCoV-19^^Wisconsin|Human|Wisconsin State Laboratory of Hygiene Communicable Disease Division|Wisconsin State Laboratory of Hygiene Communicable Disease Division|Florek|USA  
>Spike|hCoV-19/England/210100345/2021|2021-01-04|EPI\_ISL\_791230|Original|hCoV-19^^England|Human|Respiratory Virus Unit|COVID-19 Genomics UK (COG-UK) Consortium|Platt|United Kingdom  
>Spike|hCoV-19/England/SHEF-D2984/2020|2020-06-28|EPI\_ISL\_493736|Original|hCoV-19^^England|Human|Virology Department|COVID-19 Genomics UK (COG-UK) Consortium|de Silva|United Kingdom  
>Spike|hCoV-19/USA/CA-CZB-13096/2020|2020-05-12|EPI\_ISL\_672350|Original|hCoV-19^^California|Human|Alameda County Public Health Lab|Chan-Zuckerberg Biohub|Bhatt|USA  
>Spike|hCoV-19/USA/WA-S241/2020|2020-03-04|EPI\_ISL\_430279|Original|hCoV-19^^Washington|Human|Washington State Department of Health|Seattle Flu Study|Bedford|USA  
>Spike|hCoV-19/England/MILK-467962/2020|2020-05-21|EPI\_ISL\_559752|Original|hCoV-19^^England|Human|Lighthouse Lab in Milton Keynes|Wellcome Sanger Institute for the COVID-19 Genomics UK (COG-UK) consortium|Davies|United Kingdom  
>Spike|hCoV-19/USA/MI-MDHHS-SC21758/2020|2020-08-05|EPI\_ISL\_529876|Original|hCoV-19^^Michigan|Human|Michigan Department of Health and Human Services|Michigan Department of Health and Human Services|Blankenship|USA  
>Spike|hCoV-19/Switzerland/BL-ETHZ-110509/2020|2020-04-07|EPI\_ISL\_451915|Original|hCoV-19^^Basel-Landschaft|Human|Viollier AG|Department of Biosystems Science and Engineering|Nadeau|Switzerland  
>Spike|hCoV-19/England/MILK-957A30/2020|2020-06-08|EPI\_ISL\_553993|Original|hCoV-19^^England|Human|Lighthouse Lab in Milton Keynes|Wellcome Sanger Institute for the COVID-19 Genomics UK (COG-UK) consortium|Davies|United Kingdom  
>Spike|hCoV-19/England/CAMC-B51BE6/2020|2020-11-06|EPI\_ISL\_658304|Original|hCoV-19^^England|Human|Lighthouse Lab in Cambridge|Wellcome Sanger Institute for the COVID-19 Genomics UK (COG-UK) Consortium|Davies|United Kingdom  
>Spike|hCoV-19/England/QEUEH-CCDA41/2020|2020-12-24|EPI\_ISL\_782291|Original|hCoV-19^^England|Human|Lighthouse Lab in Glasgow|Wellcome Sanger Institute for the COVID-19 Genomics UK (COG-UK) Consortium|Davies|United Kingdom  
>Spike|hCoV-19/USA/TX-HMH-MCoV-18321/2020|2020-11-17|EPI\_ISL\_784669|Original|hCoV-19^^Texas|Human|Houston Methodist Hospital|Houston Methodist Hospital|Long|USA  
>Spike|hCoV-19/USA/LA-BIE-050/2020|2020-04-04|EPI\_ISL\_463298|Original|hCoV-19^^Louisiana|Human|Ochsner Health|Bioinfoexperts|Cross|USA  
>Spike|hCoV-19/England/ALDP-BCA3FF/2020|2020-11-23|EPI\_ISL\_703448|Original|hCoV-19^^England|Human|Lighthouse Lab in Alderley Park|Wellcome Sanger Institute for the COVID-19 Genomics UK (COG-UK) Consortium|Davies|United Kingdom  
>Spike|hCoV-19/Chile/RM-191185/2020|2020-09-26|EPI\_ISL\_746745|Original|hCoV-19^^Region Metropolitana de Santiago|Human|Genetica Molecular and Subdepartamento de Virologia ISP Chile|Instituto de Salud Publica de Chile|Tognarelli|Chile  
>Spike|hCoV-19/Italy/VEN-UniVR-112/2020|2020-03-28|EPI\_ISL\_751415|Original|hCoV-19^^Veneto|Human|IRCCS Sacro Cuore Don Calabria Hospital|University of Verona|Mori|Italy  
>Spike|hCoV-19/England/QEUEH-A8AA60/2020|2020-10-16|EPI\_ISL\_638869|Original|hCoV-19^^England|Human|Oxford Viromics|COVID-19 Genomics UK (COG-UK) Consortium|Golubchik|United Kingdom  
>Spike|hCoV-19/England/CAMC-B78C22/2020|2020-11-10|EPI\_ISL\_783475|Original|hCoV-19^^England|Human|Lighthouse Lab in Cambridge|Wellcome Sanger Institute for the COVID-19 Genomics UK (COG-UK) Consortium|Davies|United Kingdom  
>Spike|hCoV-19/Australia/TAS01/2020|2020-04-10|EPI\_ISL\_522556|Original|hCoV-19^^Tasmania|Human|Royal Hobart Hospital Microbiology Department|MDU-PHL|Schultz|Australia



>Spike|hCoV-19/England/CAMB-80457/2020|2020-04-10|EPI\_ISL\_470461|Original|hCoV-19^^England|Human|Department of Pathology|Wellcome Sanger Institute for the COVID-19 Genomics UK (COG-UK) consortium|Davies|United Kingdom

>Spike|hCoV-19/Canada/NS-NML-1291/2020|2020-04-08|EPI\_ISL\_579675|Original|hCoV-19^^Nova Scotia|Human|QEII Health Sciences Centre|National Microbiology Laboratory (NML)|Majer|Canada

>Spike|hCoV-19/England/QEIH-9DC945/2020|2020-09-21|EPI\_ISL\_581019|Original|hCoV-19^^England|Human|Lighthouse Lab in Glasgow|Wellcome Sanger Institute for the COVID-19 Genomics UK (COG-UK) consortium|Davies|United Kingdom

>Spike|hCoV-19/England/ALDP-B45D94/2020|2020-11-07|EPI\_ISL\_656266|Original|hCoV-19^^England|Human|Lighthouse Lab in Alderley Park|Wellcome Sanger Institute for the COVID-19 Genomics UK (COG-UK) Consortium|Davies|United Kingdom

>Spike|hCoV-19/Netherlands/Limburg\_41/2020|2020-03-21|EPI\_ISL\_461029|Original|hCoV-19^^Limburg|Human|Dutch COVID-19 response team|Erasmus Medical Center|Oude Munnink|Netherlands

>Spike|hCoV-19/Australia/VIC8712/2020|2020-07-26|EPI\_ISL\_565152|Original|hCoV-19^^Victoria|Human|Victorian Infectious Diseases Reference Laboratory (VIDRL)|VIDRL and MDU-PHL|Schultz|Australia

>Spike|hCoV-19/England/CAMB-1ABB6F/2020|2020-04-19|EPI\_ISL\_470284|Original|hCoV-19^^England|Human|Department of Pathology|Wellcome Sanger Institute for the COVID-19 Genomics UK (COG-UK) consortium|Davies|United Kingdom

>Spike|hCoV-19/Switzerland/BL-ETHZ-170025/2020|2020-06-23|EPI\_ISL\_486537|Original|hCoV-19^^Basel-Landschaft|Human|Viollier AG|Department of Biosystems Science and Engineering|Nadeau|Switzerland

>Spike|hCoV-19/England/20146021404/2020|2020-03-31|EPI\_ISL\_421983|Original|hCoV-19^^England|Human|Respiratory Virus Unit|Respiratory Virus Unit|Platt|United Kingdom

>Spike|hCoV-19/Denmark/DCGC-19402/2020|2020-12-07|EPI\_ISL\_748928|Original|hCoV-19^^Syddanmark|Human|Department of Virus and Microbiological Special Diagnostics|Albertsen Lab|Michaelsen|Denmark

>Spike|hCoV-19/Scotland/CVR1406/2020|2020-04-01|EPI\_ISL\_433571|Original|hCoV-19^^Scotland|Human|West of Scotland Specialist Virology Centre|COVID-19 Genomics UK (COG-UK) Consortium|Robertson|United Kingdom

>Spike|hCoV-19/USA/WI-UW-681/2020|2020-06-28|EPI\_ISL\_491362|Original|hCoV-19^^Wisconsin|Human|University of Wisconsin-Madison AIDS Vaccine Research Laboratories|University of Wisconsin-Madison AIDS Vaccine Research Laboratories|Baczenas|USA

>Spike|hCoV-19/Canada/ON-UHTC\_0384/2020|2020-11-24|EPI\_ISL\_698099|Original|hCoV-19^^Ontario|Human|Unity Health Toronto|Ontario Institute for Cancer Research|de Borja|Canada

>Spike|hCoV-19/Japan/PG-1601/2020|2020-04-00|EPI\_ISL\_685207|Original|hCoV-19^^Japan|Human|Pathogen Genomics Center|Pathogen Genomics Center|Sekizuka|Japan

>Spike|hCoV-19/Denmark/DCGC-1254/2020|2020-06-01|EPI\_ISL\_618019|Original|hCoV-19^^Hovedstaden|Human|Department of Virus and Microbiological Special Diagnostics|Albertsen lab|Michaelsen|Denmark

>Spike|hCoV-19/Japan/PG-5862/2020|2020-08-00|EPI\_ISL\_688979|Original|hCoV-19^^Japan|Human|Pathogen Genomics Center|Pathogen Genomics Center|Sekizuka|Japan

>Spike|hCoV-19/Portugal/PT0395a/2020|2020-04-18|EPI\_ISL\_454114|Original|hCoV-19^^Portugal|Human|unknown|Instituto Nacional de Saude (INSA)|Borges|Portugal

>Spike|hCoV-19/England/SHEF-C6992/2020|2020-10-15|EPI\_ISL\_613370|Original|hCoV-19^^England|Human|Virology Department|COVID-19 Genomics UK (COG-UK) Consortium|de Silva|United Kingdom

>Spike|hCoV-19/USA/NE-11310/2020|2020-05-04|EPI\_ISL\_466676|Original|hCoV-19^^Nebraska|Human|Nebraska Public Health Laboratory|UNMC COVID-19 Response Team|Pratt|USA

>Spike|hCoV-19/USA/LA-EVTL326/2020|2020-05-19|EPI\_ISL\_578732|Original|hCoV-19^^Louisiana|Human|LSUHS Emerging Viral Threat Laboratory|Microbial Genome Sequencing Center|Kamil|USA

>Spike|hCoV-19/Norway/3600/2020|2020-09-19|EPI\_ISL\_590945|original|hCoV-19^^Viken|Human|Medical Microbiology Unit|Norwegian Institute of Public Health|Vollan|Norway

>Spike|hCoV-19/Australia/VIC3957/2020|2020-07-13|EPI\_ISL\_519351|Original|hCoV-19^^Victoria|Human|Microbiological Diagnostic Unit - Public Health Laboratory (MDU-PHL)|MDU-PHL|Schultz|Australia

>Spike|hCoV-19/USA/TX-HMH-MCoV-18472/2020|2020-11-18|EPI\_ISL\_784820|Original|hCoV-19^^Texas|Human|Houston Methodist Hospital|Houston Methodist Hospital|Long|USA

>Spike|hCoV-19/Netherlands/NH-EMC-42/2020|2020-06-07|EPI\_ISL\_523411|Original|hCoV-19^^Noord Holland|Human|Dutch COVID-19 response team|Erasmus Medical Center|Oude Munnink|Netherlands

>Spike|hCoV-19/Scotland/EDB9498/2020|2020-10-24|EPI\_ISL\_650180|Original|hCoV-19^^Scotland|Human|Virology Department|COVID-19 Genomics UK (COG-UK) Consortium|McHugh|United Kingdom

>Spike|hCoV-19/England/ALDP-5C711C/2020|2020-06-19|EPI\_ISL\_558548|Original|hCoV-19^^England|Human|Lighthouse Lab in Alderley Park|Wellcome Sanger Institute for the COVID-19 Genomics UK (COG-UK) consortium|Davies|United Kingdom

>Spike|hCoV-19/Netherlands/NoordBrabant\_6/2020|2020-03-06|EPI\_ISL\_414451|Original|hCoV-19^^Noord Brabant|Human|Dutch COVID-19 response team|Erasmus Medical Center|Oude Munnink|Netherlands

>Spike|hCoV-19/Spain/MD-ISCI-2014664/2020|2020-08-18|EPI\_ISL\_691719|Original|hCoV-19^^Madrid|Human|Hospital Cl\u00e9nico San Carlos|Instituto de Salud Carlos III|Caballero|Spain

>Spike|hCoV-19/Australia/VIC2081/2020|2020-06-19|EPI\_ISL\_521912|Original|hCoV-19^^Victoria|Human|Victorian Infectious Diseases Reference Laboratory (VIDRL)|VIDRL and MDU-PHL|Schultz|Australia

>Spike|hCoV-19/India/MH-NIV-221624/2020|2020-09-21|EPI\_ISL\_577651|Original|hCoV-19^^Maharashtra|Human|NIV Influenza|NIV Influenza|Potdar|India

>Spike|hCoV-19/USA/OR-OHSU-0439/2020|2020-05-27|EPI\_ISL\_509140|Original|hCoV-19^^Oregon|Human|OHSU Lab Services Molecular Microbiology Lab|Oregon SARS-CoV-2 Genome Sequencing Center|O'Roak|USA

>Spike|hCoV-19/USA/WA-S2452/2020|2020-06-16|EPI\_ISL\_497084|Original|hCoV-19^^Washington|Human|Washington State Department of Health|Seattle Flu Study|Lee|USA

>Spike|hCoV-19/England/QEUH-B0DDC5/2020|2020-11-02|EPI\_ISL\_641927|Original|hCoV-19^^England|Human|Lighthouse Lab in Glasgow|Wellcome Sanger Institute for the COVID-19 Genomics UK (COG-UK) Consortium|Davies|United Kingdom

>Spike|hCoV-19/Sweden/20-08156/2020|2020-03-11|EPI\_ISL\_455842|Original|hCoV-19^^Vastra Gotaland|Human|Skovde/Unilabs|The Public Health Agency of Sweden|Svartstr\u00f6m|Sweden

>Spike|hCoV-19/Shanghai/SH0050/2020|2020-02-05|EPI\_ISL\_416358|Original|hCoV-19^^Shanghai|Human|Shanghai Public Health Clinical Center|National Research Center for Translational Medicine (Shanghai)|Zhang|China

>Spike|hCoV-19/England/CAMC-B5411E/2020|2020-11-09|EPI\_ISL\_656698|Original|hCoV-19^^England|Human|Lighthouse Lab in Cambridge|Wellcome Sanger Institute for the COVID-19 Genomics UK (COG-UK) Consortium|Davies|United Kingdom

>Spike|hCoV-19/Mexico/BCN-ALSR-4770/2020|2020-08-24|EPI\_ISL\_730130|Original|hCoV-19^^Baja California|Human|Sharp HealthCare Laboratory|Andersen lab at Scripps Research|Gangavarapu|Mexico

>Spike|hCoV-19/USA/WI-GMF-20576/2020|2020-09-16|EPI\_ISL\_660801|Original|hCoV-19^^Wisconsin|Human|Gundersen Molecular Diagnostics Laboratory|Kabara Cancer Research Institute|Kenny|USA

>Spike|hCoV-19/USA/WA-UW-6170/2020|2020-04-01|EPI\_ISL\_430935|Original|hCoV-19^^Washington|Human|UW Virology Lab|UW Virology Lab|Roychoudhury|USA

>Spike|hCoV-19/England/MILK-A7A298/2020|2020-10-15|EPI\_ISL\_606729|Original|hCoV-19^^England|Human|Lighthouse Lab in Milton Keynes|Wellcome Sanger Institute for the COVID-19 Genomics UK (COG-UK) consortium|Davies|United Kingdom

>Spike|hCoV-19/Scotland/QEUH-9F65AB/2020|2020-09-27|EPI\_ISL\_600669|Original|hCoV-19^^Scotland|Human|Lighthouse Lab in Glasgow|Wellcome Sanger Institute for the COVID-19 Genomics UK (COG-UK) consortium|Davies|United Kingdom

>Spike|hCoV-19/USA/MI-MDHHS-SC22275/2020|2020-11-03|EPI\_ISL\_666941|Original|hCoV-19^^Michigan|Human|Michigan Department of Health and Human Services|Michigan Department of Health and Human Services|Jacob|USA

>Spike|hCoV-19/England/QEUA-A335FC/2020|2020-10-05|EPI\_ISL\_626901|Original|hCoV-19^^England|Human|Virology Department|COVID-19 Genomics UK (COG-UK) Consortium|de Silva|United Kingdom

>Spike|hCoV-19/Denmark/DCGC-22436/2020|2020-12-14|EPI\_ISL\_757413|Original|hCoV-19^^Midtjylland|Human|Department of Virus and Microbiological Special Diagnostics|Albertsen Lab|Michaelsen|Denmark

>Spike|hCoV-19/Netherlands/ZH-RIVM-10127/2020|2020-00-00|EPI\_ISL\_547567|Original|hCoV-19^^Zuid Holland|Human|Dutch COVID-19 response team|National Institute for Public Health and the Environment (RIVM)|Meijer|Netherlands

>Spike|hCoV-19/USA/TX-HMH-MCoV-18444/2020|2020-11-19|EPI\_ISL\_784792|Original|hCoV-19^^Texas|Human|Houston Methodist Hospital|Houston Methodist Hospital|Long|USA

>Spike|hCoV-19/Australia/VIC5515/2020|2020-07-21|EPI\_ISL\_518350|Original|hCoV-19^^Victoria|Human|Microbiological Diagnostic Unit - Public Health Laboratory (MDU-PHL)|MDU-PHL|Schultz|Australia

>Spike|hCoV-19/England/CAMC-BFBCEB/2020|2020-12-04|EPI\_ISL\_709178|Original|hCoV-19^^England|Human|Lighthouse Lab in Cambridge|Wellcome Sanger Institute for the COVID-19 Genomics UK (COG-UK) Consortium|Davies|United Kingdom

>Spike|hCoV-19/India/MH-NIV-39037/2020|2020-05-22|EPI\_ISL\_479659|Original|hCoV-19^^Maharashtra|Human|NIV Influenza|NIV Influenza|Potdar|India

>Spike|hCoV-19/Denmark/DCGC-16771/2020|2020-12-14|EPI\_ISL\_750552|Original|hCoV-19^^Hovedstaden|Human|Department of Virus and Microbiological Special Diagnostics|Albertsen Lab|Michaelsen|Denmark

>Spike|hCoV-19/South Korea/KCDC2259/2020|2020-05-12|EPI\_ISL\_510597|Original|hCoV-19^^South Korea|Human|Division of Viral Diseases|Division of Viral Diseases|Kim|South Korea

>Spike|hCoV-19/Spain/AR-IBV-98008136/2020|2020-10-13|EPI\_ISL\_654429|Original|hCoV-19^^Aragon|Human|Servicio de Microbiolog\u00eda|SeqCOVID-SPAIN consortium|IBV (CSIC)|Comas|Spain

>Spike|hCoV-19/USA/TX-HMH-1968/2020|2020-05-18|EPI\_ISL\_542925|Original|hCoV-19^^Texas|Human|Houston Methodist Hospital|Houston Methodist Hospital|Long|USA

>Spike|hCoV-19/USA/NY-Wadsworth-288191-01/2020|2020-12-15|EPI\_ISL\_767478|Original|hCoV-19^^New York|Human|Wadsworth Center|Wadsworth Center|Lasek-Nesselquist|USA

>Spike|hCoV-19/Wales/PHWC-499D5C/2020|2020-11-24|EPI\_ISL\_727438|Original|hCoV-19^^Wales|Human|Originating lab|COVID-19 Genomics UK (COG-UK) Consortium|Moore|United Kingdom

>Spike|hCoV-19/Switzerland/ZH-ETHZ-190025/2020|2020-07-07|EPI\_ISL\_500889|Original|hCoV-19^^Zurich|Human|Viollier AG|Department of Biosystems Science and Engineering|Nadeau|Switzerland

>Spike|hCoV-19/USA/VA-DCLS-0211/2020|2020-04-04|EPI\_ISL\_437426|Original|hCoV-19^^Virginia|Human|Virginia DCLS|Virginia DCLS|St. Jacques|USA

>Spike|hCoV-19/USA/WA-UW210/2020|2020-03-14|EPI\_ISL\_417359|Original|hCoV-19^^Washington|Human|UW Virology Lab|UW Virology Lab|Roychoudhury|USA

>Spike|hCoV-19/France/ARA-106011/2020|2020-11-12|EPI\_ISL\_732684|Original|hCoV-19^^Auvergne-Rh\u00f4ne-Alpes|Human|CNR Virus des Infections Respiratoires - France SUD|CNR Virus des Infections Respiratoires - France SUD|Bal|France

>Spike|hCoV-19/England/20164076104/2020|2020-04-15|EPI\_ISL\_466478|Original|hCoV-19^^England|Human|Respiratory Virus Unit|Respiratory Virus Unit|Platt|United Kingdom

>Spike|hCoV-19/Scotland/CVR3848/2020|2020-06-03|EPI\_ISL\_493891|Original|hCoV-19^^Scotland|Human|West of Scotland Specialist Virology Centre|COVID-19 Genomics UK (COG-UK) Consortium|Robertson|United Kingdom

>Spike|hCoV-19/Portugal/PT0135/2020|2020-03-26|EPI\_ISL\_453851|Original|hCoV-19^^Portugal|Human|unknown|Instituto Nacional de Saude (INSA)|Borges|Portugal

>Spike|hCoV-19/USA/MA-MGH-01151/2020|2020-04-29|EPI\_ISL\_791892|Original|hCoV-19^^Massachusetts|Human|Massachusetts General Hospital|Infectious Disease Program|Park|USA

>Spike|hCoV-19/USA/LA-EVTL1290/2020|2020-12-11|EPI\_ISL\_778956|Original|hCoV-19^^Louisiana|Human|LSUHS Emerging Viral Threat Laboratory|Microbial Genome Sequencing Center|Kamil|USA

>Spike|hCoV-19/Denmark/DCGC-2974/2020|2020-08-24|EPI\_ISL\_616736|Original|hCoV-19^^Midtjylland|Human|Department of Virus and Microbiological Special Diagnostics|Albertsen lab|Michaelsen|Denmark

>Spike|hCoV-19/USA/CA-ALSR-3480/2020|2020-08-07|EPI\_ISL\_636049|Original|hCoV-19^^California|Human|San Diego County Public Health Laboratory|Andersen lab at Scripps Research|Gangavarapu|USA

>Spike|hCoV-19/USA/TX-HMH-7437/2020|2020-06-30|EPI\_ISL\_546768|Original|hCoV-19^^Texas|Human|Houston Methodist Hospital|Houston Methodist Hospital|Long|USA

>Spike|hCoV-19/Italy/LOM-INMI-BG-11639/2020|2020-02-28|EPI\_ISL\_460080|Original|hCoV-19^^Lombardy|Human|Molecular Virology Unit|Laboratory of Virology|Gruber|Italy

>Spike|hCoV-19/Japan/PG-1606/2020|2020-04-00|EPI\_ISL\_685212|Original|hCoV-19^^Japan|Human|Pathogen Genomics Center|Pathogen Genomics Center|Sekizuka|Japan

>Spike|hCoV-19/USA/NY-NYUMC188/2020|2020-04-01|EPI\_ISL\_427484|Original|hCoV-19^^New York|Human|NYU Langone Health|Departments of Pathology and Medicine|Maurano|USA

>Spike|hCoV-19/Wales/PHWC-4967D9/2020|2020-11-22|EPI\_ISL\_726637|Original|hCoV-19^^Wales|Human|Originating lab|COVID-19 Genomics UK (COG-UK) Consortium|Moore|United Kingdom

>Spike|hCoV-19/Denmark/DCGC-14752/2020|2020-11-23|EPI\_ISL\_711218|Original|hCoV-19^^Nordjylland|Human|Department of Virus and Microbiological Special Diagnostics|Albertsen Lab|Michaelsen|Denmark

>Spike|hCoV-19/Australia/VIC14060/2020|2020-09-16|EPI\_ISL\_563950|Original|hCoV-19^^Victoria|Human|Microbiological Diagnostic Unit - Public Health Laboratory (MDU-PHL)|MDU-PHL|Schultz|Australia

>Spike|hCoV-19/Germany/HH-hpi-p1958/2020|2020-03-25|EPI\_ISL\_776283|Original|hCoV-19^^Hamburg|Human|University Medical Center Hamburg Eppendorf|Heinrich Pette Institute|Robitaille|Germany

>Spike|hCoV-19/USA/TX-CDC-8420/2020|2020-03-07|EPI\_ISL\_594455|original|hCoV-19^^Texas|Human|Texas Department of State Health Services Public Health Laboratory|Pathogen Discovery|Queen|USA

>Spike|hCoV-19/England/MILK-B8C380/2020|2020-11-13|EPI\_ISL\_674205|Original|hCoV-19^^England|Human|Lighthouse Lab in Milton Keynes|Wellcome Sanger Institute for the COVID-19 Genomics UK (COG-UK) Consortium|Davies|United Kingdom

>Spike|hCoV-19/Wales/PHWC-48B2C7/2020|2020-10-31|EPI\_ISL\_666218|Original|hCoV-19^^Wales|Human|Wales Specialist Virology Centre Sequencing lab|COVID-19 Genomics UK (COG-UK) Consortium|Moore|United Kingdom

>Spike|hCoV-19/England/QEUEH-9DE63D/2020|2020-09-21|EPI\_ISL\_599787|Original|hCoV-19^^England|Human|Lighthouse Lab in Glasgow|Wellcome Sanger Institute for the COVID-19 Genomics UK (COG-UK) consortium|Davies|United Kingdom

>Spike|hCoV-19/England/NOTT-11EA2E/2020|2020-11-30|EPI\_ISL\_741611|Original|hCoV-19^^England|Human|Queens Medical Centre|COVID-19 Genomics UK (COG-UK) Consortium|Loose|United Kingdom

>Spike|hCoV-19/France/ARA-0779/2020|2020-03-11|EPI\_ISL\_508945|Original|hCoV-19^^Auvergne-Rh\u00f4ne-Alpes|Human|CNR Virus des Infections Respiratoires - France SUD|CNR Virus des Infections Respiratoires - France SUD|Josset|France

>Spike|hCoV-19/USA/VA-DCLS-1860/2020|2020-09-23|EPI\_ISL\_614082|Original|hCoV-19^^Virginia|Human|Virginia DCLS|Virginia DCLS|St. Jacques|USA

>Spike|hCoV-19/Wales/MILK-9750C1/2020|2020-08-20|EPI\_ISL\_552635|Original|hCoV-19^^Wales|Human|Lighthouse Lab in Milton Keynes|Wellcome Sanger Institute for the COVID-19 Genomics UK (COG-UK) consortium|Davies|United Kingdom

>Spike|hCoV-19/USA/TX-HMH-2802/2020|2020-06-08|EPI\_ISL\_545565|Original|hCoV-19^^Texas|Human|Houston Methodist Hospital|Houston Methodist Hospital|Long|USA

>Spike|hCoV-19/England/SHEF-10B2FC1/2020|2020-05-25|EPI\_ISL\_537247|Original|hCoV-19^^England|Human|Virology Department|Wellcome Sanger Institute for the COVID-19 Genomics UK (COG-UK) consortium|Davies|United Kingdom

>Spike|hCoV-19/England/PORT-2D0D88/2020|2020-03-30|EPI\_ISL\_475281|Original|hCoV-19^^England|Human|Centre for Enzyme Innovation|COVID-19 Genomics UK (COG-UK) Consortium|Robson|United Kingdom

>Spike|hCoV-19/USA/WI-UW-1442/2020|2020-09-13|EPI\_ISL\_541574|Original|hCoV-19^^Wisconsin|Human|University of Wisconsin-Madison AIDS Vaccine Research

Laboratories|University of Wisconsin-Madison AIDS Vaccine Research  
Laboratories|Baczenas|USA  
>Spike|hCoV-19/England/QEUA-A1E375/2020|2020-09-29|EPI\_ISL\_587449|Original|hCoV-19^^England|Human|Lighthouse Lab in Glasgow|Wellcome Sanger Institute for the COVID-19 Genomics UK (COG-UK) consortium|Davies|United Kingdom  
>Spike|hCoV-19/Denmark/DCGC-10704/2020|2020-11-02|EPI\_ISL\_670149|Original|hCoV-19^^Sjaelland|Human|Department of Virus and Microbiological Special Diagnostics|Albertsen Lab|Michaelsen|Denmark  
>Spike|hCoV-19/England/LIVE-9F895/2020|2020-05-31|EPI\_ISL\_472020|Original|hCoV-19^^England|Human|Liverpool Clinical Laboratories|COVID-19 Genomics UK (COG-UK) Consortium|Haldenby|United Kingdom  
>Spike|hCoV-19/Denmark/DCGC-8850/2020|2020-10-26|EPI\_ISL\_626105|Original|hCoV-19^^Midtjylland|Human|Department of Virus and Microbiological Special Diagnostics|Albertsen lab|Michaelsen|Denmark  
>Spike|hCoV-19/USA/MI-MDHHS-SC20894/2020|2020-04-23|EPI\_ISL\_476031|Original|hCoV-19^^Michigan|Human|Michigan Department of Health and Human Services|Michigan Department of Health and Human Services|Blankenship|USA  
>Spike|hCoV-19/England/CAMC-B0B1AD/2020|2020-10-29|EPI\_ISL\_643577|Original|hCoV-19^^England|Human|Lighthouse Lab in Cambridge|Wellcome Sanger Institute for the COVID-19 Genomics UK (COG-UK) Consortium|Davies|United Kingdom  
>Spike|hCoV-19/Brazil/RJ-00568/2020|2020-11-04|EPI\_ISL\_717952|Original|hCoV-19^^Rio de Janeiro|Human|Laboratorio de Virologia Molecular / UFRJ|Bioinformatics Laboratory / LNCC|Almeida|Brazil  
>Spike|hCoV-19/USA/FL-BPHL-2030/2020|2020-03-26|EPI\_ISL\_653183|Original|hCoV-19^^Florida|Human|Florida Bureau of Public Health Laboratories|Florida Bureau of Public Health Laboratories|Blanton|USA  
>Spike|hCoV-19/England/20212015904/2020|2020-05-18|EPI\_ISL\_465675|Original|hCoV-19^^England|Human|Respiratory Virus Unit|Respiratory Virus Unit|Platt|United Kingdom  
>Spike|hCoV-19/England/QEUA-5EF5D6/2020|2020-06-16|EPI\_ISL\_533269|Original|hCoV-19^^England|Human|Lighthouse Lab in Glasgow|Wellcome Sanger Institute for the COVID-19 Genomics UK (COG-UK) consortium|Davies|United Kingdom  
>Spike|hCoV-19/USA/OR-OHSU-2489/2020|2020-08-17|EPI\_ISL\_667226|Original|hCoV-19^^Oregon|Human|OHSU Lab Services Molecular Microbiology Lab|Oregon SARS-CoV-2 Genome Sequencing Center|O'Roak|USA  
>Spike|hCoV-19/England/LOND-12646C7/2020|2020-11-19|EPI\_ISL\_705970|Original|hCoV-19^^England|Human|University College London|COVID-19 Genomics UK (COG-UK) Consortium|Roy|United Kingdom  
>Spike|hCoV-19/England/MILK-CA9911/2020|2020-12-17|EPI\_ISL\_762504|Original|hCoV-19^^England|Human|Lighthouse Lab in Milton Keynes|Wellcome Sanger Institute for the COVID-19 Genomics UK (COG-UK) Consortium|Davies|United Kingdom  
>Spike|hCoV-19/Australia/VIC7232/2020|2020-07-25|EPI\_ISL\_564299|Original|hCoV-19^^Victoria|Human|Microbiological Diagnostic Unit - Public Health Laboratory (MDU-PHL)|MDU-PHL|Schultz|Australia  
>Spike|hCoV-19/England/CAMB-1AB5BC/2020|2020-04-21|EPI\_ISL\_470213|Original|hCoV-19^^England|Human|Department of Pathology|Wellcome Sanger Institute for the COVID-19 Genomics UK (COG-UK) consortium|Davies|United Kingdom  
>Spike|hCoV-19/England/CAMB-81A45/2020|2020-04-10|EPI\_ISL\_442571|Original|hCoV-19^^England|Human|Department of Pathology|Wellcome Sanger Institute for the COVID-19 Genomics UK (COG-UK) consortium|Amato|United Kingdom  
>Spike|hCoV-19/Ireland/MH-NVRL-76IRL26957/2020|2020-10-18|EPI\_ISL\_639842|Original|hCoV-19^^Meath|Human|National Virus Reference Laboratory|National Virus Reference Laboratory|Gonzalez|Ireland  
>Spike|hCoV-19/USA/TX-HMH038/2020|2020-03-06|EPI\_ISL\_434747|Original|hCoV-19^^Texas|Human|Houston Methodist Hospital|Houston Methodist Hospital|Long|USA  
>Spike|hCoV-19/Australia/VIC8093/2020|2020-08-15|EPI\_ISL\_562661|Original|hCoV-19^^Victoria|Human|Microbiological Diagnostic Unit - Public Health Laboratory (MDU-PHL)|MDU-PHL|Schultz|Australia  
>Spike|hCoV-19/Wales/PHWC-4A4671/2020|2020-12-16|EPI\_ISL\_764719|Original|hCoV-19^^Wales|Human|Wales Specialist Virology Centre Sequencing lab|COVID-19 Genomics UK (COG-UK) Consortium|Moore|United Kingdom

>Spike|hCoV-19/Hong Kong/VM20121641/2020|2020-09-13|EPI\_ISL\_730604|Original|hCoV-19^^Hong Kong|Human|Tuen Mun Hospital|Hong Kong Department of Health|Mak|China

>Spike|hCoV-19/India/GJ-GBRC168b/2020|2020-05-27|EPI\_ISL\_461506|Original|hCoV-19^^Gujarat|Human|B.J. Medical College and Civil hospital|Gujarat Biotechnology Research Centre|Joshi|India

>Spike|hCoV-19/Japan/PG-4973/2020|2020-08-00|EPI\_ISL\_690091|Original|hCoV-19^^Japan|Human|Pathogen Genomics Center|Pathogen Genomics Center|Sekizuka|Japan

>Spike|hCoV-19/England/ALDP-9C639B/2020|2020-09-10|EPI\_ISL\_567591|Original|hCoV-19^^England|Human|Lighthouse Lab in Alderley Park|Wellcome Sanger Institute for the COVID-19 Genomics UK (COG-UK) consortium|Davies|United Kingdom

>Spike|hCoV-19/USA/DE-DHSS-F995432/2020|2020-09-22|EPI\_ISL\_693724|Original|hCoV-19^^Delaware|Human|Delaware Public Health Laboratory|Delaware Public Health Laboratory|Bajwa|USA

>Spike|hCoV-19/England/ALDP-9E84AF/2020|2020-09-24|EPI\_ISL\_638249|Original|hCoV-19^^England|Human|Centre for Enzyme Innovation|COVID-19 Genomics UK (COG-UK) Consortium|Robson|United Kingdom

>Spike|hCoV-19/Wales/PHWC-16980C/2020|2020-07-21|EPI\_ISL\_512517|Original|hCoV-19^^Wales|Human|Wales Specialist Virology Centre Sequencing lab|COVID-19 Genomics UK (COG-UK) Consortium|Moore|United Kingdom

>Spike|hCoV-19/USA/UT-UPHL-2012191643/2020|2020-11-30|EPI\_ISL\_746432|Original|hCoV-19^^Utah|Human|Utah Public Health Laboratory|Utah Public Health Laboratory|Gallagher|USA

>Spike|hCoV-19/Wales/PHWC-16B04E/2020|2020-09-16|EPI\_ISL\_560235|Original|hCoV-19^^Wales|Human|Wales Specialist Virology Centre Sequencing lab|COVID-19 Genomics UK (COG-UK) Consortium|Moore|United Kingdom

>Spike|hCoV-19/England/ALDP-BBABBE/2020|2020-11-21|EPI\_ISL\_702463|Original|hCoV-19^^England|Human|Lighthouse Lab in Alderley Park|Wellcome Sanger Institute for the COVID-19 Genomics UK (COG-UK) Consortium|Davies|United Kingdom

>Spike|hCoV-19/Canada/ON-S904/2020|2020-04-12|EPI\_ISL\_586477|Original|hCoV-19^^Ontario|Human|Toronto Invasive Bacterial Diseases Network|McMaster University|McArthur|Canada

>Spike|hCoV-19/USA/DC-HP00138/2020|2020-03-16|EPI\_ISL\_457770|Original|hCoV-19^^District of Columbia|Human|Johns Hopkins Hospital Department of Pathology|Johns Hopkins Hospital Department of Pathology|Ramakrishnan|USA

>Spike|hCoV-19/Canada/MB-NML-1135/2020|2020-07-20|EPI\_ISL\_582466|Original|hCoV-19^^Manitoba|Human|Cadham Provincial Laboratory|National Microbiology Laboratory (NML)|Majer|Canada

>Spike|hCoV-19/USA/UT-UPHL-02829/2020|2020-04-24|EPI\_ISL\_575089|Original|hCoV-19^^Utah|Human|Utah Public Health Laboratory|Utah Public Health Laboratory|Young|USA

>Spike|hCoV-19/USA/CA-CZB-11789/2020|2020-09-22|EPI\_ISL\_625632|Original|hCoV-19^^California|Human|Orange County Public Health Lab|Chan-Zuckerberg Biohub|Bhatt|USA

>Spike|hCoV-19/Ireland/D-NVRL-AIIDM0043v1/2020|2020-05-01|EPI\_ISL\_644251|Original|hCoV-19^^Dublin|Human|CEPHR / Mater Hospital|Irish Coronavirus Sequencing Consortium - National Virus Reference Laboratory|Gonzalez|Ireland

>Spike|hCoV-19/Sweden/20-53027/2020|2020-04-10|EPI\_ISL\_676533|Original|hCoV-19^^unknown|Human|Karolinska Universitetslaboratoriet|The Public Health Agency of Sweden|Svartstr\u00f6m|Sweden

>Spike|hCoV-19/England/QEUH-B7ECFF/2020|2020-11-14|EPI\_ISL\_661663|Original|hCoV-19^^England|Human|Lighthouse Lab in Glasgow|Wellcome Sanger Institute for the COVID-19 Genomics UK (COG-UK) Consortium|Davies|United Kingdom

>Spike|hCoV-19/Russia/SPE-RII-MH953S/2020|2020-09-03|EPI\_ISL\_596363|Original|hCoV-19^^Saint Petersburg|Human|HELIX LCC|WHO National Influenza Centre Russian Federation|Komissarov|Russia

>Spike|hCoV-19/USA/VA\_NIDDL\_3082/2020|2020-04-09|EPI\_ISL\_491942|Original|hCoV-19^^Virginia|Human|Naval Infectious Diseases Diagnostic Laboratory|Naval Medical Research Center Biological Defense Research Directorate|Voegtly|USA

>Spike|hCoV-19/England/BRIS-12A227/2020|2020-04-16|EPI\_ISL\_458316|Original|hCoV-19^^England|Human|PHE South West Regional Laboratory|Wellcome Sanger Institute for the COVID-19 Genomics UK (COG-UK) consortium|Davies|United Kingdom

>Spike|hCoV-19/USA/TX-HMH-896/2020|2020-04-10|EPI\_ISL\_545908|Original|hCoV-19^^Texas|Human|Houston Methodist Hospital|Houston Methodist Hospital|Long|USA

>Spike|hCoV-19/Denmark/DCGC-1903/2020|2020-05-25|EPI\_ISL\_622493|Original|hCoV-19^^Hovedstaden|Human|Department of Virus and Microbiological Special Diagnostics|Albertsen lab|Michaelsen|Denmark

>Spike|hCoV-19/mink/Netherlands/NB-EMC-11-1/2020|2020-06-07|EPI\_ISL\_522993|Original|hCoV-19^^Noord Brabant|Neovison vison|Dutch COVID-19 response team|Erasmus Medical Center|Oude Munnink|Netherlands

>Spike|hCoV-19/United Arab Emirates/0488/2020|2020-05-18|EPI\_ISL\_698656|Original|hCoV-19^^Abu Dhabi|Human|Group 42 (G42) Healthcare|G42 Healthcare|Ogrodzki|United Arab Emirates

>Spike|hCoV-19/Denmark/DCGC-13238/2020|2020-11-30|EPI\_ISL\_712672|Original|hCoV-19^^Syddanmark|Human|Department of Virus and Microbiological Special Diagnostics|Albertsen Lab|Michaelsen|Denmark

>Spike|hCoV-19/Japan/PG-8425/2020|2020-09-00|EPI\_ISL\_687524|Original|hCoV-19^^Japan|Human|Pathogen Genomics Center|Pathogen Genomics Center|Sekizuka|Japan

>Spike|hCoV-19/England/MILK-9735E2/2020|2020-08-20|EPI\_ISL\_575830|Original|hCoV-19^^England|Human|Lighthouse Lab in Milton Keynes|Wellcome Sanger Institute for the COVID-19 Genomics UK (COG-UK) consortium|Davies|United Kingdom

>Spike|hCoV-19/Denmark/DCGC-7556/2020|2020-10-12|EPI\_ISL\_618465|Original|hCoV-19^^Midtjylland|Human|Department of Virus and Microbiological Special Diagnostics|Albertsen lab|Michaelsen|Denmark

>Spike|hCoV-19/England/MILK-482D1A/2020|2020-04-26|EPI\_ISL\_559696|Original|hCoV-19^^England|Human|Lighthouse Lab in Milton Keynes|Wellcome Sanger Institute for the COVID-19 Genomics UK (COG-UK) consortium|Davies|United Kingdom

>Spike|hCoV-19/Nigeria/KN-CV252/2020|2020-04-25|EPI\_ISL\_729937|Original|hCoV-19^^Kano State|Human|Nigeria Centre for Disease Control (NCDC)|African Centre of Excellence for Genomics of Infectious Diseases (ACEGID)|Oluniyi|Nigeria

>Spike|hCoV-19/Denmark/DCGC-11614/2020|2020-11-02|EPI\_ISL\_671024|Original|hCoV-19^^Midtjylland|Human|Department of Virus and Microbiological Special Diagnostics|Albertsen Lab|Michaelsen|Denmark

>Spike|hCoV-19/USA/CA-ALSR-4594/2020|2020-07-10|EPI\_ISL\_667028|Original|hCoV-19^^California|Human|San Diego County Public Health Laboratory|Andersen lab at Scripps Research|Gangavarapu|USA

>Spike|hCoV-19/Netherlands/NB-RIVM-20276/2020|2020-11-27|EPI\_ISL\_723416|Original|hCoV-19^^Noord-Brabant|Human|Dutch COVID-19 response team|National Institute for Public Health and the Environment (RIVM)|Meijer|Netherlands

>Spike|hCoV-19/USA/TX-HMH-MCoV-18909/2020|2020-11-25|EPI\_ISL\_785214|Original|hCoV-19^^Texas|Human|Houston Methodist Hospital|Houston Methodist Hospital|Long|USA

>Spike|hCoV-19/Denmark/DCGC-20705/2020|2020-12-21|EPI\_ISL\_759316|Original|hCoV-19^^Hovedstaden|Human|Department of Virus and Microbiological Special Diagnostics|Albertsen Lab|Michaelsen|Denmark

>Spike|hCoV-19/Chile/RM-157771/2020|2020-08-21|EPI\_ISL\_746681|Original|hCoV-19^^Region Metropolitana de Santiago|Human|Genetica Molecular and Subdepartamento de Virologia ISP Chile|Instituto de Salud Publica de Chile|Tognarelli|Chile

>Spike|hCoV-19/Belgium/ULG-10808/2020|2020-11-17|EPI\_ISL\_661235|Original|hCoV-19^^Li\u00e8ge|Human|Department of Clinical Microbiology|GIGA Medical Genomics|Durkin|Belgium

>Spike|hCoV-19/Japan/PG-8378/2020|2020-07-00|EPI\_ISL\_687477|Original|hCoV-19^^Japan|Human|Pathogen Genomics Center|Pathogen Genomics Center|Sekizuka|Japan

>Spike|hCoV-19/USA/MN-MDH-1440/2020|2020-03-25|EPI\_ISL\_514659|Original|hCoV-19^^Minnesota|Human|Minnesota Department of Health|Minnesota Department of Health|Garfin|USA

>Spike|hCoV-19/England/ALDP-A67F79/2020|2020-10-12|EPI\_ISL\_608674|Original|hCoV-19^^England|Human|Lighthouse Lab in Alderley Park|Wellcome Sanger Institute for the COVID-19 Genomics UK (COG-UK) consortium|Davies|United Kingdom

>Spike|hCoV-19/Wales/PHWC-47ED5D/2020|2020-10-11|EPI\_ISL\_595585|Original|hCoV-19^^Wales|Human|Originating lab|COVID-19 Genomics UK (COG-UK) Consortium|Moore|United Kingdom

>Spike|hCoV-19/Spain/CN-IBV-97006476/2020|2020-03-24|EPI\_ISL\_537693|Original|hCoV-19^^Canary Islands|Human|Hospital Universitario de Gran Canaria Dr. Negr\u00ededn|SeqCOVID-SPAIN consortium/IBV(CSIC)|Comas|Spain

>Spike|hCoV-19/Scotland/QEUH-95E477/2020|2020-08-10|EPI\_ISL\_534423|Original|hCoV-19^^Scotland|Human|NHSGGC West of Scotland Specialist Virology Centre / MRC-University of Glasgow Centre for Virus Research|Wellcome Sanger Institute for the COVID-19 Genomics UK (COG-UK) consortium|Davies|United Kingdom

>Spike|hCoV-19/USA/TX-HMH-6866/2020|2020-06-25|EPI\_ISL\_546301|Original|hCoV-19^^Texas|Human|Houston Methodist Hospital|Houston Methodist Hospital|Long|USA

>Spike|hCoV-19/Portugal/PT0752/2020|2020-03-23|EPI\_ISL\_511011|Original|hCoV-19^^Portugal|Human|Instituto Nacional de Saude (INSA)|Instituto Nacional de Saude (INSA)|Borges|Portugal

>Spike|hCoV-19/USA/WI-UW-893/2020|2020-07-12|EPI\_ISL\_509895|Original|hCoV-19^^Wisconsin|Human|University of Wisconsin-Madison AIDS Vaccine Research Laboratories|University of Wisconsin-Madison AIDS Vaccine Research Laboratories|Baczenas|USA

>Spike|hCoV-19/England/ALDP-9E62B6/2020|2020-09-24|EPI\_ISL\_580281|Original|hCoV-19^^England|Human|Lighthouse Lab in Alderley Park|Wellcome Sanger Institute for the COVID-19 Genomics UK (COG-UK) consortium|Davies|United Kingdom

>Spike|hCoV-19/Denmark/DCGC-16735/2020|2020-07-06|EPI\_ISL\_714364|Original|hCoV-19^^Hovedstaden|Human|Department of Virus and Microbiological Special Diagnostics|Albertsen Lab|Michaelsen|Denmark

>Spike|hCoV-19/England/CAMB-1B65AF/2020|2020-09-29|EPI\_ISL\_584290|Original|hCoV-19^^England|Human|Department of Pathology|COVID-19 Genomics UK (COG-UK) Consortium|Goodfellow|United Kingdom

>Spike|hCoV-19/Wales/ALDP-B1AB25/2020|2020-11-01|EPI\_ISL\_711029|Original|hCoV-19^^Wales|Human|Lighthouse Lab in Alderley Park|Wellcome Sanger Institute for the COVID-19 Genomics UK (COG-UK) Consortium|Davies|United Kingdom

>Spike|hCoV-19/England/BRIS-124EFC/2020|2020-03-26|EPI\_ISL\_443871|Original|hCoV-19^^England|Human|PHE South West Regional Laboratory|Wellcome Sanger Institute for the COVID-19 Genomics UK (COG-UK) consortium|Amato|United Kingdom

>Spike|hCoV-19/Wales/PHWC-29FE6/2020|2020-04-03|EPI\_ISL\_432409|Original|hCoV-19^^Wales|Human|Wales Specialist Virology Centre|Public Health Wales Microbiology Cardiff|Moore|United Kingdom

>Spike|hCoV-19/England/NOTT-1151AA/2020|2020-10-11|EPI\_ISL\_584795|Original|hCoV-19^^England|Human|Queens Medical Centre|COVID-19 Genomics UK (COG-UK) Consortium|Loose|United Kingdom

>Spike|hCoV-19/USA/WA-UW-21969/2020|2020-08-06|EPI\_ISL\_570820|Original|hCoV-19^^Washington|Human|UW Virology Lab|UW Virology Lab|Roychoudhury|USA

>Spike|hCoV-19/England/MILK-BABE20/2020|2020-11-18|EPI\_ISL\_681537|Original|hCoV-19^^England|Human|Lighthouse Lab in Milton Keynes|Wellcome Sanger Institute for the COVID-19 Genomics UK (COG-UK) Consortium|Davies|United Kingdom

>Spike|hCoV-19/England/ALDP-745C31/2020|2020-06-29|EPI\_ISL\_557414|Original|hCoV-19^^England|Human|Lighthouse Lab in Alderley Park|Wellcome Sanger Institute for the COVID-19 Genomics UK (COG-UK) consortium|Davies|United Kingdom

>Spike|hCoV-19/Spain/PV-IBV-000939/2020|2020-03-28|EPI\_ISL\_452633|Original|hCoV-19^^Basque Country|Human|Servicio de Microbiolog\u00eda. Hospital Universitario Donostia. OSI Donostialdea. \u00clrea de Enfermedades Infecciosas|SeqCOVID-SPAIN consortium/IBV(CSIC)|Comas|Spain

>Spike|hCoV-19/Denmark/DCGC-22205/2020|2020-12-14|EPI\_ISL\_758612|Original|hCoV-19^^Hovedstaden|Human|Department of Virus and Microbiological Special Diagnostics|Albertsen Lab|Michaelsen|Denmark

>Spike|hCoV-19/Japan/PG-6409/2020|2020-08-00|EPI\_ISL\_689515|Original|hCoV-19^^Japan|Human|Pathogen Genomics Center|Pathogen Genomics Center|Sekizuka|Japan

>Spike|hCoV-19/Italy/BAS-UniMI-2144/2020|2020-03-23|EPI\_ISL\_477201|Original|hCoV-19^^Basilicata|Human|Istituto Zooprofilattico Sperimentale Puglia e Basilicata|Beaconlab (Bioinformatics)|Chiara|Italy

>Spike|hCoV-19/USA/MI-MDHHS-SC22077/2020|2020-10-05|EPI\_ISL\_583534|Original|hCoV-19^^Michigan|Human|Michigan Department of Health and Human Services|Michigan Department of Health and Human Services|Blankenship|USA



>Spike|hCoV-19/USA/TX-HMH-MCoV-11403/2020|2020-09-04|EPI\_ISL\_790015|Original|hCoV-19^^Texas|Human|Houston Methodist Hospital|Houston Methodist Hospital|Long|USA

>Spike|hCoV-19/Bangladesh/BCSIR-NILMRC-082/2020|2020-06-01|EPI\_ISL\_466649|Original|hCoV-19^^Dhaka|Human|National Institute of Laboratory Medicine and Referral Center|Genomic Research Lab|Khan|Bangladesh

>Spike|hCoV-19/USA/FL-BPHL-0625/2020|2020-04-05|EPI\_ISL\_508829|Original|hCoV-19^^Florida|Human|Florida Bureau of Public Health Laboratories|Florida Bureau of Public Health Laboratories|Blanton|USA

>Spike|hCoV-19/USA/WA-S1014/2020|2020-04-30|EPI\_ISL\_463504|Original|hCoV-19^^Washington|Human|Washington State Department of Health|Seattle Flu Study|Bedford|USA

>Spike|hCoV-19/Germany/SH-ChVir8182/2020|2020-07-11|EPI\_ISL\_729565|Original|hCoV-19^^Schleswig-Holstein|Human|A. Krumbholz|Charit\u00e9 Universit\u00e4tsmedizin Berlin|Muehlemann|Germany

>Spike|hCoV-19/Denmark/DCGC-13514/2020|2020-11-30|EPI\_ISL\_712179|Original|hCoV-19^^Hovedstaden|Human|Department of Virus and Microbiological Special Diagnostics|Albertsen Lab|Michaelsen|Denmark

>Spike|hCoV-19/Denmark/DCGC-7873/2020|2020-10-19|EPI\_ISL\_618837|Original|hCoV-19^^Midtjylland|Human|Department of Virus and Microbiological Special Diagnostics|Albertsen lab|Michaelsen|Denmark

>Spike|hCoV-19/England/ALDP-9E6DF1/2020|2020-09-24|EPI\_ISL\_580464|Original|hCoV-19^^England|Human|Lighthouse Lab in Alderley Park|Wellcome Sanger Institute for the COVID-19 Genomics UK (COG-UK) consortium|Davies|United Kingdom

>Spike|hCoV-19/Japan/PG-7350/2020|2020-08-00|EPI\_ISL\_688452|Original|hCoV-19^^Japan|Human|Pathogen Genomics Center|Pathogen Genomics Center|Sekizuka|Japan

>Spike|hCoV-19/Netherlands/Limburg\_28/2020|2020-04-22|EPI\_ISL\_461016|Original|hCoV-19^^Limburg|Human|Dutch COVID-19 response team|Erasmus Medical Center|Oude Munnink|Netherlands

>Spike|hCoV-19/USA/WI-UW-232/2020|2020-03-27|EPI\_ISL\_428328|Original|hCoV-19^^Wisconsin|Human|University of Wisconsin-Madison AIDS Vaccine Research Laboratories|University of Wisconsin-Madison AIDS Vaccine Research Laboratories|Moreno|USA

>Spike|hCoV-19/USA/NY-Wadsworth-253098-01/2020|2020-10-23|EPI\_ISL\_734305|Original|hCoV-19^^New York|Human|Wadsworth Center|Wadsworth Center|Lasek-Nesselquist|USA

>Spike|hCoV-19/Switzerland/AG-ETHZ-160011/2020|2020-06-18|EPI\_ISL\_486508|Original|hCoV-19^^Aargau|Human|Viollier AG|Department of Biosystems Science and Engineering|Nadeau|Switzerland

>Spike|hCoV-19/USA/UT-08506/2020|2020-05-18|EPI\_ISL\_524271|Original|hCoV-19^^Utah|Human|Utah Public Health Laboratory|Utah Public Health Laboratory|Young|USA

>Spike|hCoV-19/USA/DE-DHSS-F986809/2020|2020-11-18|EPI\_ISL\_767004|Original|hCoV-19^^Delaware|Human|Delaware Public Health Laboratory|Delaware Public Health Laboratory|Bajwa|USA

>Spike|hCoV-19/England/NORW-F1363/2020|2020-10-19|EPI\_ISL\_595226|Original|hCoV-19^^England|Human|Quadram Institute Bioscience|COVID-19 Genomics UK (COG-UK) Consortium|Alikhan|United Kingdom

>Spike|hCoV-19/Denmark/DCGC-16654/2020|2020-11-16|EPI\_ISL\_714895|Original|hCoV-19^^Sjaelland|Human|Department of Virus and Microbiological Special Diagnostics|Albertsen Lab|Michaelsen|Denmark

>Spike|hCoV-19/USA/CA-ALSR-0761-IPL/2020|2020-04-11|EPI\_ISL\_483340|Original|hCoV-19^^California|Human|UC San Diego Center for Advanced Laboratory Medicine|Andersen lab at Scripps Research|Gangavarapu|USA

>Spike|hCoV-19/Mexico/CMX-INMEGEN-21/2020|2020-08-06|EPI\_ISL\_522986|Original|hCoV-19^^Mexico City|Human|Instituto Nacional de Medicina Gen\u00e9tica|Instituto Nacional de Medicina Gen\u00e9tica|Hidalgo|Mexico

>Spike|hCoV-19/Switzerland/VD-ETHZ-250133/2020|2020-08-15|EPI\_ISL\_535639|Original|hCoV-19^^Vaud|Human|Viollier AG|Department of Biosystems Science and Engineering|Nadeau|Switzerland

>Spike|hCoV-19/England/QEUA-A4C192/2020|2020-10-05|EPI\_ISL\_628548|Original|hCoV-19^^England|Human|Oxford Viromics|COVID-19 Genomics UK (COG-UK) Consortium|Golubchik|United Kingdom

>Spike|hCoV-19/Japan/PG-2227/2020|2020-04-00|EPI\_ISL\_685832|Original|hCoV-19^^Japan|Human|Pathogen Genomics Center|Pathogen Genomics Center|Sekizuka|Japan

>Spike|hCoV-19/Israel/CVL-46398/2020|2020-12-15|EPI\_ISL\_745072|Original|hCoV-19^^Tel Aviv|Human|Israel Central Virology laboratory|Israel Central Virology laboratory|Zuckerman|Israel

>Spike|hCoV-19/Hong Kong/VM20008964/2020|2020-04-03|EPI\_ISL\_426412|Original|hCoV-19^^Hong Kong|Human|Pok Oi Hospital|Hong Kong Department of Health|Mak|China

>Spike|hCoV-19/Australia/VIC6235/2020|2020-07-21|EPI\_ISL\_518229|Original|hCoV-19^^Victoria|Human|Victorian Infectious Diseases Reference Laboratory (VIDRL)|VIDRL and MDU-PHL|Schultz|Australia

>Spike|hCoV-19/USA/MN-MDH-1883/2020|2020-10-16|EPI\_ISL\_603018|Original|hCoV-19^^Minnesota|Human|Minnesota Department of Health|Minnesota Department of Health|Garfin|USA

>Spike|hCoV-19/USA/CA-CZB-180/2020|2020-05-08|EPI\_ISL\_583177|Original|hCoV-19^^California|Human|San Bernardino County Public Health Lab|Chan-Zuckerberg Biohub|Bhatt|USA

>Spike|hCoV-19/Luxembourg/LNS6262346/2020|2020-11-15|EPI\_ISL\_744393|Original|hCoV-19^^Luxembourg|Human|Laboratoire national de sant\u00e9|Laboratoire national de sant\u00e9|Wienecke-Baldacchino|Luxembourg

>Spike|hCoV-19/Iceland/522/2020|2020-03-25|EPI\_ISL\_424543|Original|hCoV-19^^Reykjavik|Human|deCODE genetics|deCODE genetics|J\u00f3nsson|Iceland

>Spike|hCoV-19/England/QEUA-96C24F/2020|2020-08-13|EPI\_ISL\_530926|Original|hCoV-19^^England|Human|Lighthouse Lab in Glasgow|Wellcome Sanger Institute for the COVID-19 Genomics UK (COG-UK) consortium|Davies|United Kingdom

>Spike|hCoV-19/USA/CA-CZB-15430/2020|2020-12-02|EPI\_ISL\_738981|Original|hCoV-19^^California|Human|Orange County Public Health Lab|Chan-Zuckerberg Biohub|Kamm|USA

>Spike|hCoV-19/Netherlands/ZH-EMC-1219/2020|2020-12-13|EPI\_ISL\_763348|Original|hCoV-19^^Zuid Holland|Human|Dutch COVID-19 response team|Erasmus Medical Center|Oude Munnink|Netherlands

>Spike|hCoV-19/India/DL-NCDC7560-CSIR-IGIB/2020|2020-05-28|EPI\_ISL\_482644|Original|hCoV-19^^Delhi|Human|National Centre for Disease control (NCDC)|NCDC/CSIR-IGIB|Singh|India

>Spike|hCoV-19/Japan/PG-2430/2020|2020-04-00|EPI\_ISL\_686035|Original|hCoV-19^^Japan|Human|Pathogen Genomics Center|Pathogen Genomics Center|Sekizuka|Japan

>Spike|hCoV-19/Japan/PG-1223/2020|2020-04-00|EPI\_ISL\_684833|Original|hCoV-19^^Japan|Human|Yamagata Prefectural Institute of Public Health|Pathogen Genomics Center|Sekizuka|Japan

>Spike|hCoV-19/USA/CA-IGI-0329/2020|2020-07-17|EPI\_ISL\_754868|Original|hCoV-19^^California|Human|Innovative Genomics Institute|Innovative Genomics Institute|Wyman|USA

>Spike|hCoV-19/England/ALDP-B49097/2020|2020-11-07|EPI\_ISL\_649276|Original|hCoV-19^^England|Human|Lighthouse Lab in Alderley Park|Wellcome Sanger Institute for the COVID-19 Genomics UK (COG-UK) Consortium|Davies|United Kingdom

>Spike|hCoV-19/USA/TX-DSHS-1319/2020|2020-03-31|EPI\_ISL\_654902|Original|hCoV-19^^Texas|Human|Texas Department of State Health Services|Texas Department of State Health Services|Rahman|USA

>Spike|hCoV-19/England/20140069004/2020|2020-03-28|EPI\_ISL\_423402|Original|hCoV-19^^England|Human|Respiratory Virus Unit|Respiratory Virus Unit|Platt|United Kingdom

>Spike|hCoV-19/England/ALDP-9EABE4/2020|2020-09-24|EPI\_ISL\_580027|Original|hCoV-19^^England|Human|Lighthouse Lab in Alderley Park|Wellcome Sanger Institute for the COVID-19 Genomics UK (COG-UK) consortium|Davies|United Kingdom

>Spike|hCoV-19/England/CAMC-A3EA01/2020|2020-10-03|EPI\_ISL\_609733|Original|hCoV-19^^England|Human|Lighthouse Lab in Cambridge|Wellcome Sanger Institute for the COVID-19 Genomics UK (COG-UK) consortium|Davies|United Kingdom

>Spike|hCoV-19/England/QEUA-BA3918/2020|2020-11-18|EPI\_ISL\_721104|Original|hCoV-19^^England|Human|Lighthouse Lab in Glasgow|Wellcome Sanger Institute for the COVID-19 Genomics UK (COG-UK) Consortium|Davies|United Kingdom

>Spike|hCoV-19/England/MILK-99A196/2020|2020-08-30|EPI\_ISL\_550413|Original|hCoV-19^^England|Human|Lighthouse Lab in Milton Keynes|Wellcome Sanger Institute for the COVID-19 Genomics UK (COG-UK) consortium|Davies|United Kingdom

>Spike|hCoV-19/England/SHEF-C5B9D/2020|2020-06-07|EPI\_ISL\_484459|Original|hCoV-19^^England|Human|Virology Department|COVID-19 Genomics UK (COG-UK) Consortium|de Silva|United Kingdom

>Spike|hCoV-19/USA/TX-DSHS-0635/2020|2020-06-26|EPI\_ISL\_576291|Original|hCoV-19^^Texas|Human|Texas Department of State Health Services|Texas Department of State Health Services|Rahman|USA

>Spike|hCoV-19/USA/TX-HMH-MCoV-19249/2020|2020-11-27|EPI\_ISL\_783717|Original|hCoV-19^^Texas|Human|Houston Methodist Hospital|Houston Methodist Hospital|Long|USA

>Spike|hCoV-19/England/ALDP-B1CEB1/2020|2020-11-01|EPI\_ISL\_645740|Original|hCoV-19^^England|Human|Lighthouse Lab in Alderley Park|Wellcome Sanger Institute for the COVID-19 Genomics UK (COG-UK) Consortium|Davies|United Kingdom

>Spike|hCoV-19/USA/MI-MDHHS-SC20368/2020|2020-03-13|EPI\_ISL\_450579|Original|hCoV-19^^Michigan|Human|Michigan Department of Health and Human Services|Michigan Department of Health and Human Services|Blankenship|USA

>Spike|hCoV-19/England/20169020704/2020|2020-04-18|EPI\_ISL\_465209|Original|hCoV-19^^England|Human|Respiratory Virus Unit|Respiratory Virus Unit|Platt|United Kingdom

>Spike|hCoV-19/Denmark/DCGC-6775/2020|2020-10-12|EPI\_ISL\_619471|Original|hCoV-19^^Hovedstaden|Human|Department of Virus and Microbiological Special Diagnostics|Albertsen lab|Michaelsen|Denmark

>Spike|hCoV-19/Australia/VIC108/2020|2020-03-18|EPI\_ISL\_419714|Original|hCoV-19^^Victoria|Human|Microbiological Diagnostic Unit Public Health Laboratory|Microbiological Diagnostic Unit Public Health Laboratory|Schultz|Australia

>Spike|hCoV-19/Scotland/CVR4034/2020|2020-08-30|EPI\_ISL\_535132|Original|hCoV-19^^Scotland|Human|West of Scotland Specialist Virology Centre|COVID-19 Genomics UK (COG-UK) Consortium|Robertson|United Kingdom

>Spike|hCoV-19/Australia/NSW1116/2020|2020-09-15|EPI\_ISL\_593730|Original|hCoV-19^^New South Wales|Human|South Eastern Area Laboratory Services (SEALS)|NSW Health Pathology - Institute of Clinical Pathology and Medical Research; Westmead Hospital; University of Sydney|Gall|Australia

>Spike|hCoV-19/England/LEED-2A8BCB/2020|2020-04-02|EPI\_ISL\_539101|Original|hCoV-19^^England|Human|Leeds Teaching Hospitals NHS Trust and Public Health England|Wellcome Sanger Institute for the COVID-19 Genomics UK (COG-UK) consortium|Davies|United Kingdom

>Spike|hCoV-19/England/ALDP-BB9566/2020|2020-11-20|EPI\_ISL\_702598|Original|hCoV-19^^England|Human|Lighthouse Lab in Alderley Park|Wellcome Sanger Institute for the COVID-19 Genomics UK (COG-UK) Consortium|Davies|United Kingdom

>Spike|hCoV-19/Spain/CB-IBV-98007082/2020|2020-07-03|EPI\_ISL\_582098|Original|hCoV-19^^Cantabria|Human|Hospital Universitario Marqu\u00e9s de Valdecilla - IDIVAL (Santander|SeqCOVID-SPAIN consortium|IBV (CSIC)|Comas|Spain

>Spike|hCoV-19/England/QEUH-BCB437/2020|2020-11-26|EPI\_ISL\_704160|Original|hCoV-19^^England|Human|Lighthouse Lab in Glasgow|Wellcome Sanger Institute for the COVID-19 Genomics UK (COG-UK) Consortium|Davies|United Kingdom

>Spike|hCoV-19/USA/CA-CZB-5682/2020|2020-07-23|EPI\_ISL\_582972|Original|hCoV-19^^California|Human|San Luis Obispo Public Health Department|Chan-Zuckerberg Biohub|Bhatt|USA

>Spike|hCoV-19/Denmark/DCGC-858/2020|2020-05-18|EPI\_ISL\_614811|Original|hCoV-19^^Hovedstaden|Human|Department of Virus and Microbiological Special Diagnostics|Albertsen lab|Michaelsen|Denmark

>Spike|hCoV-19/Spain/AR-IBV-2450/2020|2020-03-28|EPI\_ISL\_468783|Original|hCoV-19^^Aragon|Human|Servicio de Microbiolog\u00eda|SeqCOVID-SPAIN consortium|IBV (CSIC)|Comas|Spain

>Spike|hCoV-19/USA/AZ-TG408128/2020|2020-06-12|EPI\_ISL\_694891|Original|hCoV-19^^Arizona|Human|AZ SPHL|TGen North|French|USA

>Spike|hCoV-19/England/CAMC-B3672F/2020|2020-11-05|EPI\_ISL\_645316|Original|hCoV-19^^England|Human|Lighthouse Lab in Cambridge|Wellcome Sanger Institute for the COVID-19 Genomics UK (COG-UK) Consortium|Davies|United Kingdom

>Spike|hCoV-19/USA/OR-OHSU-4584/2020|2020-11-09|EPI\_ISL\_667538|Original|hCoV-19^^Oregon|Human|OHSU Lab Services Molecular Microbiology Lab|Oregon SARS-CoV-2 Genome Sequencing Center|O'Roak|USA

>Spike|hCoV-19/USA/TX-HMH-3306/2020|2020-06-11|EPI\_ISL\_544118|Original|hCoV-19^^Texas|Human|Houston Methodist Hospital|Houston Methodist Hospital|Long|USA

>Spike|hCoV-19/USA/TX-HMH-MCoV-16020/2020|2020-07-10|EPI\_ISL\_785704|Original|hCoV-19^^Texas|Human|Houston Methodist Hospital|Houston Methodist Hospital|Long|USA

>Spike|hCoV-19/England/20126063104/2020|2020-03-18|EPI\_ISL\_423903|Original|hCoV-19^^England|Human|Respiratory Virus Unit|Respiratory Virus Unit|Platt|United Kingdom

>Spike|hCoV-19/England/NORT-1B61737/2020|2020-10-23|EPI\_ISL\_702525|Original|hCoV-19^^England|Human|Northumbria University / South Tees Hospitals NHS Foundation Trust / North Cumbria Integrated Care NHS Foundation Trust / North Tees and Hartlepool NHS Foundation Trust / Newcastle Hospitals NHS Foundation Trust|COVID-19 Genomics UK (COG-UK) Consortium|Bashton|United Kingdom

>Spike|hCoV-19/Senegal/073/2020|2020-03-10|EPI\_ISL\_418210|Original|hCoV-19^^Diourbel|Human|Institut Pasteur Dakar|Institut Pasteur de Dakar|Dia|Senegal

>Spike|hCoV-19/England/QEUEH-CC5DB9/2020|2020-12-22|EPI\_ISL\_760513|Original|hCoV-19^^England|Human|Lighthouse Lab in Glasgow|Wellcome Sanger Institute for the COVID-19 Genomics UK (COG-UK) Consortium|Davies|United Kingdom

>Spike|hCoV-19/England/MILK-B9522D/2020|2020-11-13|EPI\_ISL\_673738|Original|hCoV-19^^England|Human|Lighthouse Lab in Milton Keynes|Wellcome Sanger Institute for the COVID-19 Genomics UK (COG-UK) Consortium|Davies|United Kingdom

>Spike|hCoV-19/England/ALDP-9EA13D/2020|2020-09-24|EPI\_ISL\_580229|Original|hCoV-19^^England|Human|Lighthouse Lab in Alderley Park|Wellcome Sanger Institute for the COVID-19 Genomics UK (COG-UK) consortium|Davies|United Kingdom

>Spike|hCoV-19/England/CAMB-83788/2020|2020-04-15|EPI\_ISL\_443436|Original|hCoV-19^^England|Human|Department of Pathology|Wellcome Sanger Institute for the COVID-19 Genomics UK (COG-UK) consortium|Amato|United Kingdom

>Spike|hCoV-19/Australia/VIC16551/2020|2020-07-23|EPI\_ISL\_640603|Original|hCoV-19^^Victoria|Human|Microbiological Diagnostic Unit - Public Health Laboratory (MDU-PHL)|MDU-PHL|Schultz|Australia

>Spike|hCoV-19/England/ALDP-4A7016/2020|2020-06-13|EPI\_ISL\_559534|Original|hCoV-19^^England|Human|Lighthouse Lab in Alderley Park|Wellcome Sanger Institute for the COVID-19 Genomics UK (COG-UK) consortium|Davies|United Kingdom

>Spike|hCoV-19/USA/IL-UW-366/2020|2020-04-14|EPI\_ISL\_450720|Original|hCoV-19^^Illinois|Human|University of Wisconsin-Madison AIDS Vaccine Research Laboratories|University of Wisconsin-Madison AIDS Vaccine Research Laboratories|Baczenas|USA

>Spike|hCoV-19/England/CAMC-B3631C/2020|2020-11-05|EPI\_ISL\_645519|Original|hCoV-19^^England|Human|Lighthouse Lab in Cambridge|Wellcome Sanger Institute for the COVID-19 Genomics UK (COG-UK) Consortium|Davies|United Kingdom

>Spike|hCoV-19/England/QEUEH-C6460C/2020|2020-12-14|EPI\_ISL\_778497|Original|hCoV-19^^England|Human|Lighthouse Lab in Glasgow|Wellcome Sanger Institute for the COVID-19 Genomics UK (COG-UK) Consortium|Davies|United Kingdom

>Spike|hCoV-19/Wales/OXON-F40F26/2020|2020-12-15|EPI\_ISL\_764555|Original|hCoV-19^^Wales|Human|Oxford Viromics|COVID-19 Genomics UK (COG-UK) Consortium|Golubchik|United Kingdom

>Spike|hCoV-19/USA/LA-EVTL287/2020|2020-08-26|EPI\_ISL\_574421|Original|hCoV-19^^Louisiana|Human|LSUHS Emerging Viral Threat Laboratory|Microbial Genome Sequencing Center|Kamil|USA

>Spike|hCoV-19/England/ALDP-CBFD76/2020|2020-12-19|EPI\_ISL\_760544|Original|hCoV-19^^England|Human|Lighthouse Lab in Alderley Park|Wellcome Sanger Institute for the COVID-19 Genomics UK (COG-UK) Consortium|Davies|United Kingdom

>Spike|hCoV-19/England/ALDP-52114D/2020|2020-06-02|EPI\_ISL\_559031|Original|hCoV-19^^England|Human|Lighthouse Lab in Alderley Park|Wellcome Sanger Institute for the COVID-19 Genomics UK (COG-UK) consortium|Davies|United Kingdom

>Spike|hCoV-19/USA/CA-CZB-1544/2020|2020-04-28|EPI\_ISL\_468489|Original|hCoV-19^^California|Human|Ventura County Public Health Lab|Chan-Zuckerberg Biohub|Hao|USA

>Spike|hCoV-19/England/QEUA-9E53D2/2020|2020-09-22|EPI\_ISL\_579841|Original|hCoV-19^^England|Human|Lighthouse Lab in Glasgow|Wellcome Sanger Institute for the COVID-19 Genomics UK (COG-UK) consortium|Davies|United Kingdom

>Spike|hCoV-19/Japan/PG-8943/2020|2020-08-00|EPI\_ISL\_686489|Original|hCoV-19^^Japan|Human|Pathogen Genomics Center|Pathogen Genomics Center|Sekizuka|Japan

>Spike|hCoV-19/England/QEUA-9DE65B/2020|2020-09-21|EPI\_ISL\_599614|Original|hCoV-19^^England|Human|Lighthouse Lab in Glasgow|Wellcome Sanger Institute for the COVID-19 Genomics UK (COG-UK) consortium|Davies|United Kingdom

>Spike|hCoV-19/USA/TX-DSHS-0675/2020|2020-07-16|EPI\_ISL\_576328|Original|hCoV-19^^Texas|Human|Texas Department of State Health Services|Texas Department of State Health Services|Rahman|USA

>Spike|hCoV-19/England/ALDP-94AEF8/2020|2020-06-11|EPI\_ISL\_556457|Original|hCoV-19^^England|Human|Lighthouse Lab in Alderley Park|Wellcome Sanger Institute for the COVID-19 Genomics UK (COG-UK) consortium|Davies|United Kingdom

>Spike|hCoV-19/Switzerland/ZH-ETHZ-380381/2020|2020-11-23|EPI\_ISL\_721957|Original|hCoV-19^^Zurich|Human|Viollier AG|Department of Biosystems Science and Engineering|Nadeau|Switzerland

>Spike|hCoV-19/England/MILK-B568DB/2020|2020-11-05|EPI\_ISL\_656957|Original|hCoV-19^^England|Human|Lighthouse Lab in Milton Keynes|Wellcome Sanger Institute for the COVID-19 Genomics UK (COG-UK) Consortium|Davies|United Kingdom

>Spike|hCoV-19/Belgium/ULG-10221/2020|2020-05-14|EPI\_ISL\_498127|Original|hCoV-19^^Li\u00e8ge|Human|Department of Clinical Microbiology|GIGA Medical Genomics|Durkin|Belgium

>Spike|hCoV-19/England/CAMC-A64CA2/2020|2020-10-11|EPI\_ISL\_608939|Original|hCoV-19^^England|Human|Lighthouse Lab in Cambridge|Wellcome Sanger Institute for the COVID-19 Genomics UK (COG-UK) consortium|Davies|United Kingdom

>Spike|hCoV-19/Israel/701002489/2020|2020-03-25|EPI\_ISL\_447295|Original|hCoV-19^^South Coast District|Human|Microbiology Division|Stern Lab|Miller|Israel

>Spike|hCoV-19/India/MH-ACTREC-478/2020|2020-08-11|EPI\_ISL\_700126|Original|hCoV-19^^Maharashtra|Human|Hematopathology Laboratory|Hematopathology Laboratory|Patkar|India

>Spike|hCoV-19/India/UT-AR33/2020|2020-06-02|EPI\_ISL\_508181|Original|hCoV-19^^Uttarakhand|Human|All india institute of Medical Sciences Rishikesh|National Institute of Biomedical Genomics|Maitra|India

>Spike|hCoV-19/England/LOND-1260968/2020|2020-03-17|EPI\_ISL\_516845|Original|hCoV-19^^England|Human|North West London Pathology|Wellcome Sanger Institute for the COVID-19 Genomics UK (COG-UK) consortium|Davies|United Kingdom

>Spike|hCoV-19/England/QEUA-A211A2/2020|2020-10-01|EPI\_ISL\_587382|Original|hCoV-19^^England|Human|Lighthouse Lab in Glasgow|Wellcome Sanger Institute for the COVID-19 Genomics UK (COG-UK) consortium|Davies|United Kingdom

>Spike|hCoV-19/USA/WI-UW-2016/2020|2020-10-08|EPI\_ISL\_677423|Original|hCoV-19^^Wisconsin|Human|University of Wisconsin-Madison AIDS Vaccine Research Laboratories|University of Wisconsin-Madison AIDS Vaccine Research Laboratories|Baczenas|USA

>Spike|hCoV-19/England/NORT-2A5FB3/2020|2020-10-12|EPI\_ISL\_637463|Original|hCoV-19^^England|Human|Northumbria University / South Tees Hospitals NHS Foundation Trust / North Cumbria Integrated Care NHS Foundation Trust / North Tees and Hartlepool NHS Foundation Trust / Newcastle Hospitals NHS Foundation Trust|COVID-19 Genomics UK (COG-UK) Consortium|Bashton|United Kingdom

>Spike|hCoV-19/Australia/VIC948/2020|2020-03-26|EPI\_ISL\_430647|Original|hCoV-19^^Victoria|Human|Microbiological Diagnostic Unit Public Health Laboratory|Microbiological Diagnostic Unit Public Health Laboratory|Schultz|Australia

>Spike|hCoV-19/USA/HI-H200333/2020|2020-08-14|EPI\_ISL\_752891|Original|hCoV-19^^Hawaii|Human|State Laboratories Division|State Laboratories Division|Sultana|USA

>Spike|hCoV-19/Spain/VC-IBV-98003531/2020|2020-03-28|EPI\_ISL\_537963|Original|hCoV-19^^Comunitat Valenciana|Human|Servicio de Microbiolog\u00eda. Hospital General Universitario de Castell\u00f3n|SeqCOVID-SPAIN consortium|IBV(CSIC)|Comas|Spain

>Spike|hCoV-19/Wales/PHWC-485755/2020|2020-10-25|EPI\_ISL\_628214|Original|hCoV-19^^Wales|Human|Wales Specialist Virology Centre Sequencing lab|COVID-19 Genomics UK (COG-UK) Consortium|Moore|United Kingdom

>Spike|hCoV-19/Sweden/20-52028/2020|2020-06-10|EPI\_ISL\_623086|Original|hCoV-19^^Halland|Human|Halmstad klinisk mikrobiologi|The Public Health Agency of Sweden|Svartstr\u00f6m|Sweden

>Spike|hCoV-19/USA/TX-HMH-4481/2020|2020-06-17|EPI\_ISL\_543656|Original|hCoV-19^^Texas|Human|Houston Methodist Hospital|Houston Methodist Hospital|Long|USA

>Spike|hCoV-19/Wales/PHWC-3169B/2020|2020-04-13|EPI\_ISL\_446471|Original|hCoV-19^^Wales|Human|Wales Specialist Virology Centre|Public Health Wales Microbiology Cardiff|Moore|United Kingdom

>Spike|hCoV-19/Japan/PG-2079/2020|2020-04-00|EPI\_ISL\_685684|Original|hCoV-19^^Japan|Human|Tokyo Metropolitan Institute of Public Health|Pathogen Genomics Center|Sekizuka|Japan

>Spike|hCoV-19/Australia/VIC733/2020|2020-03-30|EPI\_ISL\_427012|Original|hCoV-19^^Victoria|Human|Victorian Infectious Diseases Reference Laboratory (VIDRL)|Microbiological Diagnostic Unit Public Health Laboratory and Victorian Infectious Diseases Reference Laboratory|Schultz|Australia

>Spike|hCoV-19/Japan/IC-0203/2020|2020-07-00|EPI\_ISL\_667632|Original|hCoV-19^^Japan|Human|Pathogen Genomics Center|Pathogen Genomics Center|Sekizuka|Japan

>Spike|hCoV-19/Australia/VIC16886/2020|2020-08-06|EPI\_ISL\_663623|Original|hCoV-19^^Victoria|Human|Microbiological Diagnostic Unit - Public Health Laboratory (MDU-PHL)|MDU-PHL|Schultz|Australia

>Spike|hCoV-19/USA/TX-HMH-MCoV-9733/2020|2020-07-06|EPI\_ISL\_780246|Original|hCoV-19^^Texas|Human|Houston Methodist Hospital|Houston Methodist Hospital|Long|USA

>Spike|hCoV-19/Israel/CVL-n1999/2020|2020-03-06|EPI\_ISL\_649092|Original|hCoV-19^^Ramat-Hasharon|Human|Israel Central Virology laboratory|Israel Central Virology laboratory|Zuckerman|Israel

>Spike|hCoV-19/England/MILK-9706B5/2020|2020-08-17|EPI\_ISL\_553142|Original|hCoV-19^^England|Human|Lighthouse Lab in Milton Keynes|Wellcome Sanger Institute for the COVID-19 Genomics UK (COG-UK) consortium|Davies|United Kingdom

>Spike|hCoV-19/England/BRIS-1332D0/2020|2020-05-07|EPI\_ISL\_495115|Original|hCoV-19^^England|Human|PHE South West Regional Laboratory|Wellcome Sanger Institute for the COVID-19 Genomics UK (COG-UK) consortium|Davies|United Kingdom

>Spike|hCoV-19/Japan/DP0724/2020|2020-02-17|EPI\_ISL\_416620|Original|hCoV-19^^Japan|Human|Japanese Quarantine Stations|Pathogen Genomics Center|Sekizuka|Japan

>Spike|hCoV-19/Denmark/DCGC-22277/2020|2020-12-14|EPI\_ISL\_758650|Original|hCoV-19^^Midtjylland|Human|Department of Virus and Microbiological Special Diagnostics|Albertsen Lab|Michaelsen|Denmark

>Spike|hCoV-19/Pakistan/JRCGR-KHI36/2020|2020-08-10|EPI\_ISL\_779273|Original|hCoV-19^^Karachi|Human|Jamil-ur-Rahman Center for Genome Research|Jamil-ur-Rahman Center for Genome Research|Shakeel|Pakistan

>Spike|hCoV-19/USA/TX-HMH-MCoV-13660/2020|2020-08-20|EPI\_ISL\_788761|Original|hCoV-19^^Texas|Human|Houston Methodist Hospital|Houston Methodist Hospital|Long|USA

>Spike|hCoV-19/England/QEUA-54A339/2020|2020-05-13|EPI\_ISL\_533378|Original|hCoV-19^^England|Human|Lighthouse Lab in Glasgow|Wellcome Sanger Institute for the COVID-19 Genomics UK (COG-UK) consortium|Davies|United Kingdom

>Spike|hCoV-19/England/QEUA-AF4CE3/2020|2020-10-30|EPI\_ISL\_663195|Original|hCoV-19^^England|Human|Lighthouse Lab in Glasgow|Wellcome Sanger Institute for the COVID-19 Genomics UK (COG-UK) Consortium|Davies|United Kingdom

>Spike|hCoV-19/USA/TX-HMH-4541/2020|2020-06-21|EPI\_ISL\_543705|Original|hCoV-19^^Texas|Human|Houston Methodist Hospital|Houston Methodist Hospital|Long|USA

>Spike|hCoV-19/England/PORT-2D3550/2020|2020-04-14|EPI\_ISL\_535036|Original|hCoV-19^^England|Human|Centre for Enzyme Innovation|COVID-19 Genomics UK (COG-UK) Consortium|Robson|United Kingdom

>Spike|hCoV-19/England/ALDP-952525/2020|2020-06-09|EPI\_ISL\_555709|Original|hCoV-19^^England|Human|Lighthouse Lab in Alderley Park|Wellcome Sanger Institute for the COVID-19 Genomics UK (COG-UK) consortium|Davies|United Kingdom

>Spike|hCoV-19/Portugal/PT1990/2020|2020-11-13|EPI\_ISL\_732212|Original|hCoV-19^^Portugal|Human|Instituto Nacional de Saude (INSA) and Instituto Gulbenkian de Ciencia (IGC)|Instituto Nacional de Saude (INSA) and Instituto Gulbenkian de Ciencia (IGC)|Borges|Portugal

>Spike|hCoV-19/Wales/PHWC-489A94/2020|2020-10-27|EPI\_ISL\_652447|Original|hCoV-19^^Wales|Human|Wales Specialist Virology Centre Sequencing lab|COVID-19 Genomics UK (COG-UK) Consortium|Moore|United Kingdom

>Spike|hCoV-19/SaudiArabia/KAUST-JEDDAH1058/2020|2020-06-23|EPI\_ISL\_512907|Original|hCoV-19^^Jeddah|Human|Pathogen Genomics Lab King Abdullah University of Science and Technology(KAUST)|Pathogen Genomics Lab King Abdullah University of Science and Technology(KAUST)|Mohamed Ghazzali|Saudi Arabia

>Spike|hCoV-19/Russia/StPetersburg-RII11275S/2020|2020-05-02|EPI\_ISL\_507251|Original|hCoV-19^^Saint Petersburg|Human|WHO National Influenza Centre Russian Federation|WHO National Influenza Centre Russian Federation|Komissarov|Russia

>Spike|hCoV-19/Canada/NS-NML-888/2020|2020-03-19|EPI\_ISL\_579540|Original|hCoV-19^^Nova Scotia|Human|QEII Health Sciences Centre|National Microbiology Laboratory (NML)|Majer|Canada

>Spike|hCoV-19/Switzerland/BE-ETHZ-330515/2020|2020-10-19|EPI\_ISL\_614915|Original|hCoV-19^^Bern|Human|Viollier AG|Department of Biosystems Science and Engineering|Nadeau|Switzerland

>Spike|hCoV-19/England/MILK-A79D3E/2020|2020-10-15|EPI\_ISL\_606607|Original|hCoV-19^^England|Human|Lighthouse Lab in Milton Keynes|Wellcome Sanger Institute for the COVID-19 Genomics UK (COG-UK) consortium|Davies|United Kingdom

>Spike|hCoV-19/Spain/IB-IBV-2514/2020|2020-03-20|EPI\_ISL\_468988|Original|hCoV-19^^Illes Balears|Human|Servicio de Microbiolog\u00eda|SeqCOVID-SPAIN consortium|IBV (CSIC)|Comas|Spain

>Spike|hCoV-19/France/PDL-SC636/2020|2020-04-04|EPI\_ISL\_663275|Original|hCoV-19^^Pays-de-la-Loire|Human|CHU Nantes|CNR Virus des Infections Respiratoires - France SUD|Bal|France

>Spike|hCoV-19/France/ARA-6777/2020|2020-09-04|EPI\_ISL\_692767|Original|hCoV-19^^Auvergne-Rh\u00f4ne-Alpes|Human|CNR Virus des Infections Respiratoires - France SUD|CNR Virus des Infections Respiratoires - France SUD|Bal|France

>Spike|hCoV-19/USA/MN-QDX-1348/2020|2020-03-15|EPI\_ISL\_572137|Original|hCoV-19^^Minnesota|Human|Quest Diagnostics|Quest Diagnostics|Kagan|USA

>Spike|hCoV-19/Switzerland/Vs-ETHZ-270176/2020|2020-08-29|EPI\_ISL\_541509|Original|hCoV-19^^Valais|Human|Viollier AG|Department of Biosystems Science and Engineering|Nadeau|Switzerland

>Spike|hCoV-19/England/MILK-AB7C82/2020|2020-10-21|EPI\_ISL\_623730|Original|hCoV-19^^England|Human|Lighthouse Lab in Milton Keynes|Wellcome Sanger Institute for the COVID-19 Genomics UK (COG-UK) consortium|Davies|United Kingdom

>Spike|hCoV-19/England/QEUIH-B145B4/2020|2020-11-03|EPI\_ISL\_641809|Original|hCoV-19^^England|Human|Lighthouse Lab in Glasgow|Wellcome Sanger Institute for the COVID-19 Genomics UK (COG-UK) Consortium|Davies|United Kingdom

>Spike|hCoV-19/USA/UT-UPHL-2012973122/2020|2020-10-26|EPI\_ISL\_746228|Original|hCoV-19^^Utah|Human|Ginkgo Bioworks Clinical Laboratory|Utah Public Health Laboratory|Young|USA

>Spike|hCoV-19/Scotland/EDB10554/2020|2020-10-18|EPI\_ISL\_703198|Original|hCoV-19^^Scotland|Human|Virology Department|COVID-19 Genomics UK (COG-UK) Consortium|McHugh|United Kingdom

>Spike|hCoV-19/England/204742179/2020|2020-00-00|EPI\_ISL\_649896|Original|hCoV-19^^England|Human|Respiratory Virus Unit|COVID-19 Genomics UK (COG-UK) Consortium|Platt|United Kingdom

>Spike|hCoV-19/USA/WA\_0442/2020|2020-03-19|EPI\_ISL\_426445|Original|hCoV-19^^Washington|Human|WA State Department of Health|Pathogen Discovery|Queen|USA

>Spike|hCoV-19/Australia/NSW156/2020|2020-03-18|EPI\_ISL\_427719|Original|hCoV-19^^New South Wales|Human|ACT Pathology|NSW Health Pathology - Institute of Clinical Pathology and Medical Research; Westmead Hospital; University of Sydney|Gall|Australia

>Spike|hCoV-19/Brazil/SP-360/2020|2020-06-22|EPI\_ISL\_583498|Original|hCoV-19^^S\u00e3o Paulo|Human|Hospital Municipal Dr. Waldemar Tebaldi|Instituto Adolfo Lutz|Sacchi|Brazil

>Spike|hCoV-19/USA/AZ-TG378380/2020|2020-06-16|EPI\_ISL\_694627|Original|hCoV-19^^Arizona|Human|TGen North|TGen North|French|USA

>Spike|hCoV-19/USA/NY-NYCPHL-000566/2020|2020-03-29|EPI\_ISL\_632025|Original|hCoV-19^^New York|Human|Jamaica Hospital Medical Center|New York City Public Health Laboratory|Wang|USA

>Spike|hCoV-19/France/IDF-2536/2020|2020-03-14|EPI\_ISL\_421504|Original|hCoV-19^^\u00cele-de-France|Human|Service de Biologie M\u00e9dicale - BP 125|National Reference Center for Viruses of Respiratory Infections|Enouf|France

>Spike|hCoV-19/England/ALDP-4FA5BB/2020|2020-06-24|EPI\_ISL\_559282|Original|hCoV-19^^England|Human|Lighthouse Lab in Alderley Park|Wellcome Sanger Institute for the COVID-19 Genomics UK (COG-UK) consortium|Davies|United Kingdom

>Spike|hCoV-19/England/LOND-124C3DD/2020|2020-03-26|EPI\_ISL\_492850|Original|hCoV-19^^England|Human|Royal Free Hospital / Health Services Laboratories|Wellcome Sanger Institute for the COVID-19 Genomics UK (COG-UK) consortium|Davies|United Kingdom

>Spike|hCoV-19/Wales/PHWC-49A25C/2020|2020-12-01|EPI\_ISL\_727516|Original|hCoV-19^^Wales|Human|Originating lab|COVID-19 Genomics UK (COG-UK) Consortium|Moore|United Kingdom

>Spike|hCoV-19/Canada/MB-NML-1070/2020|2020-08-04|EPI\_ISL\_582424|Original|hCoV-19^^Manitoba|Human|Cadham Provincial Laboratory|National Microbiology Laboratory (NML)|Majer|Canada

>Spike|hCoV-19/Japan/PG-7302/2020|2020-08-00|EPI\_ISL\_688405|Original|hCoV-19^^Japan|Human|Pathogen Genomics Center|Pathogen Genomics Center|Sekizuka|Japan

>Spike|hCoV-19/England/QEUEH-AD0E14/2020|2020-10-26|EPI\_ISL\_633973|Original|hCoV-19^^England|Human|Lighthouse Lab in Glasgow|Wellcome Sanger Institute for the COVID-19 Genomics UK (COG-UK) consortium|Davies|United Kingdom

>Spike|hCoV-19/USA/MD-MDH-0324/2020|2020-10-20|EPI\_ISL\_633099|Original|hCoV-19^^Maryland|Human|MD PHL|MD PHL|Keller|USA

>Spike|hCoV-19/Wales/PHWC-489E89/2020|2020-11-03|EPI\_ISL\_652501|Original|hCoV-19^^Wales|Human|Wales Specialist Virology Centre Sequencing lab|COVID-19 Genomics UK (COG-UK) Consortium|Moore|United Kingdom

>Spike|hCoV-19/Northern Ireland/NIRE-1025FF/2020|2020-04-17|EPI\_ISL\_469872|Original|hCoV-19^^Northern Ireland|Human|Regional Virus Laboratory|Wellcome Sanger Institute for the COVID-19 Genomics UK (COG-UK) consortium|Davies|United Kingdom

>Spike|hCoV-19/England/NORT-287EE7/2020|2020-11-15|EPI\_ISL\_725004|Original|hCoV-19^^England|Human|Northumbria University / South Tees Hospitals NHS Foundation Trust / North Cumbria Integrated Care NHS Foundation Trust / North Tees and Hartlepool NHS Foundation Trust / Newcastle Hospitals NHS Foundation Trust|COVID-19 Genomics UK (COG-UK) Consortium|Bashton|United Kingdom

>Spike|hCoV-19/Denmark/DCGC-18616/2020|2020-12-07|EPI\_ISL\_750082|Original|hCoV-19^^Midtjylland|Human|Department of Virus and Microbiological Special Diagnostics|Albertsen Lab|Michaelsen|Denmark

>Spike|hCoV-19/England/QEUEH-A7634E/2020|2020-10-12|EPI\_ISL\_613318|Original|hCoV-19^^England|Human|Queens Medical Centre|COVID-19 Genomics UK (COG-UK) Consortium|Loose|United Kingdom

>Spike|hCoV-19/Denmark/DCGC-7880/2020|2020-10-26|EPI\_ISL\_618860|Original|hCoV-19^^Nordjylland|Human|Department of Virus and Microbiological Special Diagnostics|Albertsen lab|Michaelsen|Denmark

>Spike|hCoV-19/Luxembourg/LNS2702537/2020|2020-10-26|EPI\_ISL\_740173|Original|hCoV-19^^Luxembourg|Human|Laboratoire national de sant\u00e9|Laboratoire national de sant\u00e9|Wienecke-Baldacchino|Luxembourg

>Spike|hCoV-19/Wales/PHWC-49E267/2020|2020-12-07|EPI\_ISL\_742975|Original|hCoV-19^^Wales|Human|Wales Specialist Virology Centre Sequencing lab|COVID-19 Genomics UK (COG-UK) Consortium|Moore|United Kingdom

>Spike|hCoV-19/England/LIVE-AA0F9/2020|2020-03-25|EPI\_ISL\_517403|Original|hCoV-19^^England|Human|Liverpool Clinical Laboratories|COVID-19 Genomics UK (COG-UK) Consortium|Haldenby|United Kingdom

>Spike|hCoV-19/England/QEUEH-B9F609/2020|2020-11-18|EPI\_ISL\_720943|Original|hCoV-19^^England|Human|Lighthouse Lab in Glasgow|Wellcome Sanger Institute for the COVID-19 Genomics UK (COG-UK) Consortium|Davies|United Kingdom

>Spike|hCoV-19/Morocco/FMP-56/2020|2020-00-00|EPI\_ISL\_775255|Original|hCoV-19^^Temara|Human|Laboratoire Biolife|Laboratoire de Biotechnologie|Ouahghiri|Morocco



>Spike|hCoV-19/USA/NY-NYUMC551/2020|2020-03-30|EPI\_ISL\_444668|Original|hCoV-19^^New York|Human|NYU Langone Health|Departments of Pathology and Medicine|Maurano|USA

>Spike|hCoV-19/England/MILK-ACDEDE/2020|2020-10-22|EPI\_ISL\_630032|Original|hCoV-19^^England|Human|Lighthouse Lab in Milton Keynes|Wellcome Sanger Institute for the COVID-19 Genomics UK (COG-UK) consortium|Davies|United Kingdom

>Spike|hCoV-19/USA/TX-HMH-MCoV-18399/2020|2020-11-18|EPI\_ISL\_784747|Original|hCoV-19^^Texas|Human|Houston Methodist Hospital|Houston Methodist Hospital|Long|USA

>Spike|hCoV-19/England/CAMB-7C579/2020|2020-04-04|EPI\_ISL\_442290|Original|hCoV-19^^England|Human|Department of Pathology|Wellcome Sanger Institute for the COVID-19 Genomics UK (COG-UK) consortium|Amato|United Kingdom

>Spike|hCoV-19/England/LOND-12F0BA3/2020|2020-11-26|EPI\_ISL\_679609|Original|hCoV-19^^England|Human|University College London|COVID-19 Genomics UK (COG-UK) Consortium|Roy|United Kingdom

>Spike|hCoV-19/USA/WY-UNM-00140/2020|2020-07-01|EPI\_ISL\_614259|Original|hCoV-19^^Wyoming|Human|Wyoming Public Health Laboratory|Center for Global Health|Domman|USA

>Spike|hCoV-19/England/ALDP-A2F7DF/2020|2020-10-05|EPI\_ISL\_587077|Original|hCoV-19^^England|Human|Lighthouse Lab in Alderley Park|Wellcome Sanger Institute for the COVID-19 Genomics UK (COG-UK) consortium|Davies|United Kingdom

>Spike|hCoV-19/Wales/PHWC-2D2BC/2020|2020-04-04|EPI\_ISL\_445966|Original|hCoV-19^^Wales|Human|Wales Specialist Virology Centre|Public Health Wales Microbiology Cardiff|Moore|United Kingdom

>Spike|hCoV-19/USA/MI-MDHHS-SC22213/2020|2020-10-18|EPI\_ISL\_644355|Original|hCoV-19^^Michigan|Human|Michigan Department of Health and Human Services|Michigan Department of Health and Human Services|Jacob|USA

>Spike|hCoV-19/Australia/VIC4676/2020|2020-07-17|EPI\_ISL\_519064|Original|hCoV-19^^Victoria|Human|Microbiological Diagnostic Unit - Public Health Laboratory (MDU-PHL)|MDU-PHL|Schultz|Australia

>Spike|hCoV-19/Switzerland/Vs-ETHZ-410780/2020|2020-12-11|EPI\_ISL\_737641|Original|hCoV-19^^Valais|Human|Viollier AG|Department of Biosystems Science and Engineering|Nadeau|Switzerland

>Spike|hCoV-19/England/QEUH-C6694D/2020|2020-12-15|EPI\_ISL\_778482|Original|hCoV-19^^England|Human|Lighthouse Lab in Glasgow|Wellcome Sanger Institute for the COVID-19 Genomics UK (COG-UK) Consortium|Davies|United Kingdom

>Spike|hCoV-19/Switzerland/BL-ETHZ-420520/2020|2020-12-22|EPI\_ISL\_768076|Original|hCoV-19^^Basel-Landschaft|Human|Viollier AG|Department of Biosystems Science and Engineering|Nadeau|Switzerland

>Spike|hCoV-19/England/ALDP-A2E837/2020|2020-10-05|EPI\_ISL\_586693|Original|hCoV-19^^England|Human|Lighthouse Lab in Alderley Park|Wellcome Sanger Institute for the COVID-19 Genomics UK (COG-UK) consortium|Davies|United Kingdom

>Spike|hCoV-19/England/MILK-BB0453/2020|2020-11-17|EPI\_ISL\_720014|Original|hCoV-19^^England|Human|Lighthouse Lab in Milton Keynes|Wellcome Sanger Institute for the COVID-19 Genomics UK (COG-UK) Consortium|Davies|United Kingdom

>Spike|hCoV-19/USA/TX-HMH-MCoV-10474/2020|2020-07-08|EPI\_ISL\_789270|Original|hCoV-19^^Texas|Human|Houston Methodist Hospital|Houston Methodist Hospital|Long|USA

>Spike|hCoV-19/USA/ME-HETL-J0204/2020|2020-09-21|EPI\_ISL\_755372|Original|hCoV-19^^Maine|Human|Maine Health and Environmental Testing Laboratory|Tewhey Lab|Tewhey|USA

>Spike|hCoV-19/Mexico/BCN-ALSR-2523/2020|2020-06-16|EPI\_ISL\_635527|Original|hCoV-19^^Baja California|Human|Centro de Diagn\u00f3stico COVID-19 UABC Tijuana|Andersen lab at Scripps Research|Gangavarapu|Mexico

>Spike|hCoV-19/England/ALDP-9CBBDA/2020|2020-09-16|EPI\_ISL\_575488|Original|hCoV-19^^England|Human|Lighthouse Lab in Alderley Park|Wellcome Sanger Institute for the COVID-19 Genomics UK (COG-UK) consortium|Davies|United Kingdom

>Spike|hCoV-19/Denmark/DCGC-14209/2020|2020-11-30|EPI\_ISL\_711626|Original|hCoV-19^^Nordjylland|Human|Department of Virus and Microbiological Special Diagnostics|Albertsen Lab|Michaelsen|Denmark

>Spike|hCoV-19/Denmark/DCGC-4407/2020|2020-09-21|EPI\_ISL\_621828|Original|hCoV-19^^Syddanmark|Human|Department of Virus and Microbiological Special Diagnostics|Albertsen lab|Michaelsen|Denmark

>Spike|hCoV-19/England/20128015004/2020|2020-03-18|EPI\_ISL\_423941|Original|hCoV-19^^England|Human|Respiratory Virus Unit|Respiratory Virus Unit|Platt|United Kingdom

>Spike|hCoV-19/Belgium/reg-09181143/2020|2020-09-18|EPI\_ISL\_738227|Original|hCoV-19^^Overijse|Human|UZ Leuven|KU Leuven|Maes|Belgium

>Spike|hCoV-19/USA/IL-NM025/2020|2020-03-15|EPI\_ISL\_444535|Original|hCoV-19^^Illinois|Human|Northwestern Memorial Hospital|Ozer Lab|Ozer|USA

>Spike|hCoV-19/England/QEUEH-B67998/2020|2020-11-11|EPI\_ISL\_661331|Original|hCoV-19^^England|Human|Lighthouse Lab in Glasgow|Wellcome Sanger Institute for the COVID-19 Genomics UK (COG-UK) Consortium|Davies|United Kingdom

>Spike|hCoV-19/USA/LA-EVTL762/2020|2020-07-21|EPI\_ISL\_653453|Original|hCoV-19^^Louisiana|Human|LSUHS Emerging Viral Threat Laboratory|Microbial Genome Sequencing Center|Kamil|USA

>Spike|hCoV-19/Denmark/DCGC-11378/2020|2020-11-02|EPI\_ISL\_670876|Original|hCoV-19^^Sjaelland|Human|Department of Virus and Microbiological Special Diagnostics|Albertsen Lab|Michaelsen|Denmark

>Spike|hCoV-19/England/ALDP-4A931B/2020|2020-06-09|EPI\_ISL\_559472|Original|hCoV-19^^England|Human|Lighthouse Lab in Alderley Park|Wellcome Sanger Institute for the COVID-19 Genomics UK (COG-UK) consortium|Davies|United Kingdom

>Spike|hCoV-19/Scotland/EDB2543/2020|2020-04-24|EPI\_ISL\_439227|Original|hCoV-19^^Scotland|Human|Virology Department|COVID-19 Genomics UK (COG-UK) Consortium|Williams|United Kingdom

>Spike|hCoV-19/Japan/PG-3245/2020|2020-04-00|EPI\_ISL\_690623|Original|hCoV-19^^Japan|Human|Pathogen Genomics Center|Pathogen Genomics Center|Sekizuka|Japan

>Spike|hCoV-19/Brazil/SP-243/2020|2020-05-02|EPI\_ISL\_693196|Original|hCoV-19^^S\u00e3o Paulo|Human|Hospital Santa Clara|Instituto Adolfo Lutz|Sacchi|Brazil

>Spike|hCoV-19/England/PORT-2EA4E0/2020|2020-11-17|EPI\_ISL\_665625|Original|hCoV-19^^England|Human|Centre for Enzyme Innovation|COVID-19 Genomics UK (COG-UK) Consortium|Robson|United Kingdom

>Spike|hCoV-19/Netherlands/NB-EMC-300/2020|2020-10-01|EPI\_ISL\_632535|Original|hCoV-19^^Noord Brabant|Human|Dutch COVID-19 response team|Erasmus Medical Center|Oude Munnink|Netherlands

>Spike|hCoV-19/England/ALDP-95272F/2020|2020-06-09|EPI\_ISL\_553953|Original|hCoV-19^^England|Human|Lighthouse Lab in Alderley Park|Wellcome Sanger Institute for the COVID-19 Genomics UK (COG-UK) consortium|Davies|United Kingdom

>Spike|hCoV-19/Northern Ireland/NIRE-23510D/2020|2020-10-15|EPI\_ISL\_764413|Original|hCoV-19^^Northern Ireland|Human|Regional Virus Laboratory|COVID-19 Genomics UK (COG-UK) Consortium|Fairley|United Kingdom

>Spike|hCoV-19/USA/FL-BPHL-1012/2020|2020-07-16|EPI\_ISL\_517902|Original|hCoV-19^^Florida|Human|Florida Bureau of Public Health Laboratories|Florida Bureau of Public Health Laboratories|Blanton|USA

>Spike|hCoV-19/England/LOND-D565D/2020|2020-04-16|EPI\_ISL\_449709|Original|hCoV-19^^England|Human|University College London|COVID-19 Genomics UK (COG-UK) Consortium|Roy|United Kingdom

>Spike|hCoV-19/England/PORT-2D1376/2020|2020-03-24|EPI\_ISL\_479187|Original|hCoV-19^^England|Human|Centre for Enzyme Innovation|COVID-19 Genomics UK (COG-UK) Consortium|Robson|United Kingdom

>Spike|hCoV-19/Canada/MB-NML-1079/2020|2020-08-03|EPI\_ISL\_582431|Original|hCoV-19^^Manitoba|Human|Cadham Provincial Laboratory|National Microbiology Laboratory (NML)|Majer|Canada

>Spike|hCoV-19/USA/MN-MDH-2053/2020|2020-03-29|EPI\_ISL\_683682|Original|hCoV-19^^Minnesota|Human|M Health Fairview|Minnesota Department of Health|Garfin|USA

>Spike|hCoV-19/Switzerland/BS-UHB-42196976/2020|2020-03-18|EPI\_ISL\_528200|Original|hCoV-19^^Basel-Stadt|Human|University Hospital Basel|University Hospital Basel|Roloff Handschin|Switzerland

>Spike|hCoV-19/England/CAMC-BD45FC/2020|2020-11-27|EPI\_ISL\_702131|Original|hCoV-19^^England|Human|Lighthouse Lab in Cambridge|Wellcome Sanger Institute for the COVID-19 Genomics UK (COG-UK) Consortium|Davies|United Kingdom

>Spike|hCoV-19/England/LOND-124C59B/2020|2020-04-08|EPI\_ISL\_492845|Original|hCoV-19^^England|Human|Royal Free Hospital / Health Services Laboratories|Wellcome Sanger Institute for the COVID-19 Genomics UK (COG-UK) consortium|Davies|United Kingdom

>Spike|hCoV-19/USA/OR-OHSU-2949/2020|2020-08-24|EPI\_ISL\_667429|Original|hCoV-19^^Oregon|Human|OHSU Lab Services Molecular Microbiology Lab|Oregon SARS-CoV-2 Genome Sequencing Center|O'Roak|USA

>Spike|hCoV-19/USA/WA-S910/2020|2020-04-27|EPI\_ISL\_463400|Original|hCoV-19^^Washington|Human|Washington State Department of Health|Seattle Flu Study|Bedford|USA

>Spike|hCoV-19/England/CAMC-B99942/2020|2020-11-15|EPI\_ISL\_673574|Original|hCoV-19^^England|Human|Lighthouse Lab in Cambridge|Wellcome Sanger Institute for the COVID-19 Genomics UK (COG-UK) Consortium|Davies|United Kingdom

>Spike|hCoV-19/USA/UT-03186/2020|2020-04-21|EPI\_ISL\_470741|Original|hCoV-19^^Utah|Human|Utah Public Health Laboratory|Utah Public Health Laboratory|Butz|USA

>Spike|hCoV-19/England/ALDP-9505CD/2020|2020-06-17|EPI\_ISL\_555219|Original|hCoV-19^^England|Human|Lighthouse Lab in Alderley Park|Wellcome Sanger Institute for the COVID-19 Genomics UK (COG-UK) consortium|Davies|United Kingdom

>Spike|hCoV-19/France/ARA-96707/2020|2020-10-29|EPI\_ISL\_732702|Original|hCoV-19^^Auvergne-Rh\u00f4ne-Alpes|Human|CNR Virus des Infections Respiratoires - France SUD|CNR Virus des Infections Respiratoires - France SUD|Bal|France

>Spike|hCoV-19/England/LEED-2A9052/2020|2020-04-03|EPI\_ISL\_539010|Original|hCoV-19^^England|Human|Leeds Teaching Hospitals NHS Trust and Public Health England|Wellcome Sanger Institute for the COVID-19 Genomics UK (COG-UK) consortium|Davies|United Kingdom

>Spike|hCoV-19/Australia/VIC2791/2020|2020-07-01|EPI\_ISL\_563985|Original|hCoV-19^^Victoria|Human|Microbiological Diagnostic Unit - Public Health Laboratory (MDU-PHL)|MDU-PHL|Schultz|Australia

>Spike|hCoV-19/USA/WA-S455/2020|2020-03-31|EPI\_ISL\_434215|Original|hCoV-19^^Washington|Human|Washington State Department of Health|Seattle Flu Study|Bedford|USA

>Spike|hCoV-19/USA/FL-BPHL-0365/2020|2020-04-13|EPI\_ISL\_489774|Original|hCoV-19^^Florida|Human|Florida Bureau of Public Health Laboratories|Florida Bureau of Public Health Laboratories|Blanton|USA

>Spike|hCoV-19/USA/MI-MDHHS-SC21835/2020|2020-04-16|EPI\_ISL\_565878|Original|hCoV-19^^Michigan|Human|Michigan Department of Health and Human Services|Michigan Department of Health and Human Services|Blankenship|USA

>Spike|hCoV-19/USA/OR-OHSU-2353/2020|2020-08-12|EPI\_ISL\_667191|Original|hCoV-19^^Oregon|Human|OHSU Lab Services Molecular Microbiology Lab|Oregon SARS-CoV-2 Genome Sequencing Center|O'Roak|USA

>Spike|hCoV-19/USA/CA-CZB-15483/2020|2020-09-04|EPI\_ISL\_739095|Original|hCoV-19^^California|Human|County of San Luis Obispo Public Health Laboratory|Chan-Zuckerberg Biohub|Kamm|USA

>Spike|hCoV-19/Spain/RI-IBV-98002302/2020|2020-03-08|EPI\_ISL\_537825|Original|hCoV-19^^La Rioja|Human|Centro de Investigaci\u00f3n Biom\u00e9dica de La Rioja - Hospital San Pedro Logro\u00f1o|SeqCOVID-SPAIN consortium/IBV (CSIC)|Comas|Spain

>Spike|hCoV-19/Wales/PHWC-495EE4/2020|2020-11-23|EPI\_ISL\_726502|Original|hCoV-19^^Wales|Human|Originating lab|COVID-19 Genomics UK (COG-UK) Consortium|Moore|United Kingdom

>Spike|hCoV-19/Australia/VIC2895/2020|2020-07-04|EPI\_ISL\_521726|Original|hCoV-19^^Victoria|Human|Microbiological Diagnostic Unit - Public Health Laboratory (MDU-PHL)|MDU-PHL|Schultz|Australia

>Spike|hCoV-19/Spain/PV-IBV-004241/2020|2020-04-05|EPI\_ISL\_500305|Original|hCoV-19^^Basque Country|Human|Servicio de Microbiolog\u00eda. Hospital Universitario Donostia. OSI Donostialdea. \u00c1rea de Enfermedades Infecciosas|SeqCOVID-SPAIN consortium/IBV (CSIC)|Comas|Spain

>Spike|hCoV-19/USA/FL-BPHL-1101/2020|2020-08-03|EPI\_ISL\_526587|Original|hCoV-19^^Florida|Human|Florida Bureau of Public Health Laboratories|Florida Bureau of Public Health Laboratories|Blanton|USA

>Spike|hCoV-19/Australia/VIC8900/2020|2020-07-22|EPI\_ISL\_565272|Original|hCoV-19^^Victoria|Human|Microbiological Diagnostic Unit - Public Health Laboratory (MDU-PHL)|MDU-PHL|Schultz|Australia

>Spike|hCoV-19/Netherlands/NA\_52/2020|2020-03-14|EPI\_ISL\_422813|Original|hCoV-19^^Netherlands|Human|Dutch COVID-19 response team|Erasmus Medical Center|Oude Munnink|Netherlands

>Spike|hCoV-19/mink/Netherlands/NB-EMC-29-1/2020|2020-08-12|EPI\_ISL\_577755|Original|hCoV-19^^Limburg|Neovison vison|Dutch COVID-19 response team|Erasmus Medical Center|Oude Munnink|Netherlands

>Spike|hCoV-19/Denmark/DCGC-8055/2020|2020-10-26|EPI\_ISL\_617185|Original|hCoV-19^^Hovedstaden|Human|Department of Virus and Microbiological Special Diagnostics|Albertsen lab|Michaelsen|Denmark

>Spike|hCoV-19/England/NORW-E8790/2020|2020-04-11|EPI\_ISL\_448232|Original|hCoV-19^^England|Human|Quadram Institute Bioscience|COVID-19 Genomics UK (COG-UK) Consortium|Alikhan|United Kingdom

>Spike|hCoV-19/Scotland/QEUIH-96FE48/2020|2020-08-18|EPI\_ISL\_568427|Original|hCoV-19^^Scotland|Human|Lighthouse Lab in Glasgow|Wellcome Sanger Institute for the COVID-19 Genomics UK (COG-UK) consortium|Davies|United Kingdom

>Spike|hCoV-19/Scotland/QEUIH-A4CA2E/2020|2020-10-05|EPI\_ISL\_628588|Original|hCoV-19^^Scotland|Human|Oxford Viromics|COVID-19 Genomics UK (COG-UK) Consortium|Golubchik|United Kingdom

>Spike|hCoV-19/England/MILK-A23BFD/2020|2020-10-03|EPI\_ISL\_595106|Original|hCoV-19^^England|Human|Centre for Enzyme Innovation|COVID-19 Genomics UK (COG-UK) Consortium|Robson|United Kingdom

>Spike|hCoV-19/Wales/PHWC-164F39/2020|2020-06-03|EPI\_ISL\_479400|Original|hCoV-19^^Wales|Human|Wales Specialist Virology Centre Sequencing lab|COVID-19 Genomics UK (COG-UK) Consortium|Moore|United Kingdom

>Spike|hCoV-19/England/ALDP-94F9B6/2020|2020-06-16|EPI\_ISL\_555226|Original|hCoV-19^^England|Human|Lighthouse Lab in Alderley Park|Wellcome Sanger Institute for the COVID-19 Genomics UK (COG-UK) consortium|Davies|United Kingdom

>Spike|hCoV-19/Spain/MD-IBV-99008554/2020|2020-09-17|EPI\_ISL\_654095|Original|hCoV-19^^Madrid|Human|Hospital General Universitario Gregorio Mara\u00f1a|SeqCOVID-SPAIN consortium|IBV(CSIC)|Comas|Spain

>Spike|hCoV-19/USA/WA-S1239/2020|2020-05-11|EPI\_ISL\_495689|Original|hCoV-19^^Washington|Human|Washington State Department of Health|Seattle Flu Study|Lee|USA

>Spike|hCoV-19/England/QEUIH-B81637/2020|2020-11-14|EPI\_ISL\_667844|Original|hCoV-19^^England|Human|Lighthouse Lab in Glasgow|Wellcome Sanger Institute for the COVID-19 Genomics UK (COG-UK) Consortium|Davies|United Kingdom

>Spike|hCoV-19/USA/UT-UPHL-2009162/2020|2020-05-26|EPI\_ISL\_525150|Original|hCoV-19^^Utah|Human|Utah Public Health Laboratory|Utah Public Health Laboratory|Young|USA

>Spike|hCoV-19/England/EXET-13DD7B/2020|2020-12-03|EPI\_ISL\_724289|Original|hCoV-19^^England|Human|University of Exeter|COVID-19 Genomics UK (COG-UK) Consortium|Temperton|United Kingdom

>Spike|hCoV-19/England/EXET-138499/2020|2020-09-13|EPI\_ISL\_611620|Original|hCoV-19^^England|Human|University of Exeter|COVID-19 Genomics UK (COG-UK) Consortium|Temperton|United Kingdom

>Spike|hCoV-19/England/MILK-C7B20E/2020|2020-12-15|EPI\_ISL\_756944|Original|hCoV-19^^England|Human|Lighthouse Lab in Milton Keynes|Wellcome Sanger Institute for the COVID-19 Genomics UK (COG-UK) Consortium|Davies|United Kingdom

>Spike|hCoV-19/Denmark/DCGC-11424/2020|2020-11-02|EPI\_ISL\_670746|Original|hCoV-19^^Denmark|Human|Department of Virus and Microbiological Special Diagnostics|Albertsen Lab|Michaelsen|Denmark

>Spike|hCoV-19/United Arab Emirates/0791/2020|2020-05-19|EPI\_ISL\_698931|Original|hCoV-19^^Abu Dhabi|Human|Group 42 (G42) Healthcare|G42 Healthcare|Ogrodzki|United Arab Emirates

>Spike|hCoV-19/Australia/VIC16164/2020|2020-08-09|EPI\_ISL\_640822|Original|hCoV-19^^Victoria|Human|Microbiological Diagnostic Unit - Public Health Laboratory (MDU-PHL)|MDU-PHL|Schultz|Australia

>Spike|hCoV-19/tiger/USA/NY-P3/2020|2020-04-04|EPI\_ISL\_566040|Vero P3|hCoV-19^^New York|Panthera tigris jacksoni|Wildlife Conservation Society|Diagnostic Virology Laboratory|Mitchell|USA

>Spike|hCoV-19/England/QEUA-9CFD1C/2020|2020-09-15|EPI\_ISL\_589993|Original|hCoV-19^^England|Human|Lighthouse Lab in Glasgow|Wellcome Sanger Institute for the COVID-19 Genomics UK (COG-UK) consortium|Davies|United Kingdom

>Spike|hCoV-19/England/QEUA-A30FE2/2020|2020-10-05|EPI\_ISL\_595851|Original|hCoV-19^^England|Human|Quadram Institute Bioscience|COVID-19 Genomics UK (COG-UK) Consortium|Alikhan|United Kingdom

>Spike|hCoV-19/England/QEUA-C4B61A/2020|2020-12-12|EPI\_ISL\_769743|Original|hCoV-19^^England|Human|Lighthouse Lab in Glasgow|Wellcome Sanger Institute for the COVID-19 Genomics UK (COG-UK) Consortium|Davies|United Kingdom

>Spike|hCoV-19/Wuhan/HB-WHCM2-279/2020|2020-02-11|EPI\_ISL\_455011|Original|hCoV-19^^Hubei|Human|Wuhan Chain Medical Labs (CMLabs)|State Key Laboratory of Biotherapy of Sichuan University|Tang|China

>Spike|hCoV-19/England/CAMB-7CC65/2020|2020-04-05|EPI\_ISL\_442341|Original|hCoV-19^^England|Human|Department of Pathology|Wellcome Sanger Institute for the COVID-19 Genomics UK (COG-UK) consortium|Amato|United Kingdom

>Spike|hCoV-19/England/ALDP-94C70A/2020|2020-06-15|EPI\_ISL\_555891|Original|hCoV-19^^England|Human|Lighthouse Lab in Alderley Park|Wellcome Sanger Institute for the COVID-19 Genomics UK (COG-UK) consortium|Davies|United Kingdom

>Spike|hCoV-19/England/MILK-9702C0/2020|2020-08-17|EPI\_ISL\_553086|Original|hCoV-19^^England|Human|Lighthouse Lab in Milton Keynes|Wellcome Sanger Institute for the COVID-19 Genomics UK (COG-UK) consortium|Davies|United Kingdom

>Spike|hCoV-19/England/ALDP-9C5086/2020|2020-09-10|EPI\_ISL\_567619|Original|hCoV-19^^England|Human|Lighthouse Lab in Alderley Park|Wellcome Sanger Institute for the COVID-19 Genomics UK (COG-UK) consortium|Davies|United Kingdom

>Spike|hCoV-19/Australia/VIC2676/2020|2020-06-30|EPI\_ISL\_521517|Original|hCoV-19^^Victoria|Human|Victorian Infectious Diseases Reference Laboratory (VIDRL)|VIDRL and MDU-PHL|Schultz|Australia

>Spike|hCoV-19/Japan/PG-1710/2020|2020-04-00|EPI\_ISL\_685316|Original|hCoV-19^^Japan|Human|Pathogen Genomics Center|Pathogen Genomics Center|Sekizuka|Japan

>Spike|hCoV-19/England/MILK-B89E64/2020|2020-11-13|EPI\_ISL\_675558|Original|hCoV-19^^England|Human|Lighthouse Lab in Milton Keynes|Wellcome Sanger Institute for the COVID-19 Genomics UK (COG-UK) Consortium|Davies|United Kingdom

>Spike|hCoV-19/Switzerland/GE-SNRCI-2616/2020|2020-03-00|EPI\_ISL\_548156|Original|hCoV-19^^Geneve|Human|Laboratoire de Virologie|Swiss National Reference Centre for Influenza|Gon\u00e7alves Cabecinhas|Switzerland

>Spike|hCoV-19/England/MILK-ABB3C5/2020|2020-10-21|EPI\_ISL\_623514|Original|hCoV-19^^England|Human|Lighthouse Lab in Milton Keynes|Wellcome Sanger Institute for the COVID-19 Genomics UK (COG-UK) consortium|Davies|United Kingdom

>Spike|hCoV-19/USA/WI-UW-1821/2020|2020-09-09|EPI\_ISL\_605693|Original|hCoV-19^^Wisconsin|Human|University of Wisconsin-Madison AIDS Vaccine Research Laboratories|University of Wisconsin-Madison AIDS Vaccine Research Laboratories|Baczenas|USA

>Spike|hCoV-19/USA/WI-UW-1195/2020|2020-08-08|EPI\_ISL\_527805|Original|hCoV-19^^Wisconsin|Human|University of Wisconsin-Madison AIDS Vaccine Research Laboratories|University of Wisconsin-Madison AIDS Vaccine Research Laboratories|Baczenas|USA

>Spike|hCoV-19/Chile/BI-178219/2020|2020-09-14|EPI\_ISL\_746509|Original|hCoV-19^^Biobio|Human|Genetica Molecular and Subdepartamento de Virologia ISP Chile|Instituto de Salud Publica de Chile|Tognarelli|Chile

>Spike|hCoV-19/Canada/QC-LSPQ-L00222731/2020|2020-03-16|EPI\_ISL\_535818|Original|hCoV-19^^Quebec|Human|H\u00f4pital Pierre-Boucher|Laboratoire de sant\u00e9 publique du Qu\u00e9bec|Moreira|Canada

>Spike|hCoV-19/USA/MN-QDX-1020/2020|2020-03-15|EPI\_ISL\_571746|Original|hCoV-19^^Minnesota|Human|Quest Diagnostics|Quest Diagnostics|Kagan|USA

>Spike|hCoV-19/England/ALDP-9CB967/2020|2020-09-16|EPI\_ISL\_575757|Original|hCoV-19^^England|Human|Lighthouse Lab in Alderley Park|Wellcome Sanger Institute for the COVID-19 Genomics UK (COG-UK) consortium|Davies|United Kingdom

>Spike|hCoV-19/USA/TX-HMH-3562/2020|2020-06-14|EPI\_ISL\_543024|Original|hCoV-19^^Texas|Human|Houston Methodist Hospital|Houston Methodist Hospital|Long|USA

>Spike|hCoV-19/England/MILK-9D4B38/2020|2020-09-19|EPI\_ISL\_601562|Original|hCoV-19^^England|Human|Lighthouse Lab in Milton Keynes|Wellcome Sanger Institute for the COVID-19 Genomics UK (COG-UK) consortium|Davies|United Kingdom

>Spike|hCoV-19/England/QEUEH-A9D98B/2020|2020-10-20|EPI\_ISL\_652663|Original|hCoV-19^^England|Human|Queens Medical Centre|COVID-19 Genomics UK (COG-UK) Consortium|Loose|United Kingdom

>Spike|hCoV-19/Belgium/ULG-10117/2020|2020-04-07|EPI\_ISL\_427365|Original|hCoV-19^^Liege|Human|Department of Clinical Microbiology|GIGA Medical Genomics|Durkin|Belgium

>Spike|hCoV-19/Wales/PHWC-485290/2020|2020-10-23|EPI\_ISL\_628163|Original|hCoV-19^^Wales|Human|Wales Specialist Virology Centre Sequencing lab|COVID-19 Genomics UK (COG-UK) Consortium|Moore|United Kingdom

>Spike|hCoV-19/Japan/PG-7641/2020|2020-08-00|EPI\_ISL\_686743|Original|hCoV-19^^Japan|Human|Chiba Prefectural Institute of Public Health|Pathogen Genomics Center|Sekizuka|Japan

>Spike|hCoV-19/USA/MI-UM-10036454976/2020|2020-10-15|EPI\_ISL\_628834|Original|hCoV-19^^Michigan|Human|University of Michigan Clinical Microbiology Laboratory|Lauring Lab|Valesano|USA

>Spike|hCoV-19/England/NORT-286149/2020|2020-07-09|EPI\_ISL\_573312|Original|hCoV-19^^England|Human|Northumbria University / South Tees Hospitals NHS Foundation Trust / North Cumbria Integrated Care NHS Foundation Trust / North Tees and Hartlepool NHS Foundation Trust / Newcastle Hospitals NHS Foundation Trust|COVID-19 Genomics UK (COG-UK) Consortium|Bashton|United Kingdom

>Spike|hCoV-19/Wales/ALDP-BE91E1/2020|2020-12-03|EPI\_ISL\_710618|Original|hCoV-19^^Wales|Human|Lighthouse Lab in Alderley Park|Wellcome Sanger Institute for the COVID-19 Genomics UK (COG-UK) Consortium|Davies|United Kingdom

>Spike|hCoV-19/Gibraltar/204841744/2020|2020-00-00|EPI\_ISL\_671311|Original|hCoV-19^^Gibraltar|Human|Microbiology|Respiratory Virus Unit|Platt|Gibraltar

>Spike|hCoV-19/England/MILK-B3970E/2020|2020-11-01|EPI\_ISL\_679636|Original|hCoV-19^^England|Human|Oxford Viromics|COVID-19 Genomics UK (COG-UK) Consortium|Golubchik|United Kingdom

>Spike|hCoV-19/USA/TX-DSHS-1440/2020|2020-06-24|EPI\_ISL\_671614|Original|hCoV-19^^Texas|Human|Texas Department of State Health Services|Texas Department of State Health Services|Rahman|USA

>Spike|hCoV-19/Brazil/SP-L7-CD57/2020|2020-03-20|EPI\_ISL\_476430|Original|hCoV-19^^S\u00e3o Paulo|Human|Hospital da Cl\u00ednicas da Faculdade de Medicina da Universidade de S\u00e3o Paulo|Instituto de Medicina Tropical da Univesidade de S\u00e3o Paulo|Sabino|Brazil

>Spike|hCoV-19/USA/CA-ALSR-2726/2020|2020-07-15|EPI\_ISL\_635645|Original|hCoV-19^^California|Human|San Diego County Public Health Laboratory|Andersen lab at Scripps Research|Gangavarapu|USA

>Spike|hCoV-19/England/20156047404/2020|2020-04-09|EPI\_ISL\_466324|Original|hCoV-19^^England|Human|Respiratory Virus Unit|Respiratory Virus Unit|Platt|United Kingdom

>Spike|hCoV-19/Wales/ALDP-C39785/2020|2020-12-07|EPI\_ISL\_767197|Original|hCoV-19^^Wales|Human|Lighthouse Lab in Alderley Park|Wellcome Sanger Institute for the COVID-19 Genomics UK (COG-UK) Consortium|Davies|United Kingdom

>Spike|hCoV-19/England/NORW-ED7F5/2020|2020-00-00|EPI\_ISL\_490497|Original|hCoV-19^^England|Human|Quadram Institute Bioscience|COVID-19 Genomics UK (COG-UK) Consortium|Alikhan|United Kingdom

>Spike|hCoV-19/Scotland/EDB6048/2020|2020-05-08|EPI\_ISL\_473872|Original|hCoV-19^^Scotland|Human|Virology Department|COVID-19 Genomics UK (COG-UK) Consortium|Williams|United Kingdom

>Spike|hCoV-19/England/MILK-ACE329/2020|2020-10-21|EPI\_ISL\_629162|Original|hCoV-19^^England|Human|Lighthouse Lab in Milton Keynes|Wellcome Sanger Institute for the COVID-19 Genomics UK (COG-UK) consortium|Davies|United Kingdom

>Spike|hCoV-19/South Africa/KRISP-K003544/2020|2020-09-25|EPI\_ISL\_602860|Original|hCoV-19^^KwaZulu-Natal|Human|NHLS-IALCH|KRISP|de Oliveira|South Africa

>Spike|hCoV-19/New Zealand/20VR3147/2020|2020-03-21|EPI\_ISL\_579439|Original|hCoV-19^^Canterbury|Human|Canterbury Health Laboratories|Institute of Environmental Science and Research (ESR)|Wang|New Zealand

>Spike|hCoV-19/Australia/VIC11537/2020|2020-08-28|EPI\_ISL\_563406|Original|hCoV-19^^Victoria|Human|Microbiological Diagnostic Unit - Public Health Laboratory (MDU-PHL)|MDU-PHL|Schultz|Australia

>Spike|hCoV-19/England/GSTT-265DB70/2020|2020-03-27|EPI\_ISL\_484072|Original|hCoV-19^^England|Human|Centre for Clinical Infection and Diagnostics Research and Genomics Innovation Unit|COVID-19 Genomics UK (COG-UK) Consortium|Awan|United Kingdom

>Spike|hCoV-19/England/LIVE-DC1C28/2020|2020-11-20|EPI\_ISL\_705241|Original|hCoV-19^^England|Human|Liverpool Clinical Laboratories|COVID-19 Genomics UK (COG-UK) Consortium|Haldenby|United Kingdom

>Spike|hCoV-19/England/BRIS-121A91/2020|2020-03-31|EPI\_ISL\_440158|Original|hCoV-19^^England|Human|PHE South West Regional Laboratory|Wellcome Sanger Institute for the COVID-19 Genomics UK (COG-UK) consortium|Amato|United Kingdom

>Spike|hCoV-19/England/QEUEH-9CE7B5/2020|2020-09-17|EPI\_ISL\_590103|Original|hCoV-19^^England|Human|Lighthouse Lab in Glasgow|Wellcome Sanger Institute for the COVID-19 Genomics UK (COG-UK) consortium|Davies|United Kingdom

>Spike|hCoV-19/England/PORT-2D3C6A/2020|2020-04-21|EPI\_ISL\_499317|Original|hCoV-19^^England|Human|Centre for Enzyme Innovation|COVID-19 Genomics UK (COG-UK) Consortium|Robson|United Kingdom

>Spike|hCoV-19/Spain/MD-IBV-005299/2020|2020-03-15|EPI\_ISL\_510183|Original|hCoV-19^^Madrid|Human|Hospital General Universitario Gregorio Mara\u00f1a|SeqCOVID-SPAIN consortium/IBV (CSIC)|Comas|Spain

>Spike|hCoV-19/England/QEUEH-98F659/2020|2020-08-27|EPI\_ISL\_540032|Original|hCoV-19^^England|Human|Lighthouse Lab in Glasgow|Wellcome Sanger Institute for the COVID-19 Genomics UK (COG-UK) consortium|Davies|United Kingdom

>Spike|hCoV-19/England/ALDP-9D959F/2020|2020-09-18|EPI\_ISL\_576741|Original|hCoV-19^^England|Human|Oxford Viromics|COVID-19 Genomics UK (COG-UK) Consortium|Golubchik|United Kingdom

>Spike|hCoV-19/Denmark/DCGC-13598/2020|2020-11-30|EPI\_ISL\_712900|Original|hCoV-19^^Hovedstaden|Human|Department of Virus and Microbiological Special Diagnostics|Albertsen Lab|Michaelsen|Denmark

>Spike|hCoV-19/USA/LA-EVTL1376/2020|2020-12-11|EPI\_ISL\_779042|Original|hCoV-19^^Louisiana|Human|LSUHS Emerging Viral Threat Laboratory|Microbial Genome Sequencing Center|Kamil|USA

>Spike|hCoV-19/England/ALDP-A84987/2020|2020-10-18|EPI\_ISL\_610569|Original|hCoV-19^^England|Human|Lighthouse Lab in Alderley Park|Wellcome Sanger Institute for the COVID-19 Genomics UK (COG-UK) consortium|Davies|United Kingdom

>Spike|hCoV-19/England/MILK-A7AD79/2020|2020-10-15|EPI\_ISL\_606565|Original|hCoV-19^^England|Human|Lighthouse Lab in Milton Keynes|Wellcome Sanger Institute for the COVID-19 Genomics UK (COG-UK) consortium|Davies|United Kingdom

>Spike|hCoV-19/Belgium/DA-0319106/2020|2020-03-18|EPI\_ISL\_420362|Original|hCoV-19^^Quevy|Human|KU Leuven|KU Leuven|Maes|Belgium

>Spike|hCoV-19/USA/TX-DSHS-1755/2020|2020-06-23|EPI\_ISL\_710403|Original|hCoV-19^^Texas|Human|Texas Department of State Health Services|Texas Department of State Health Services|Rahman|USA

>Spike|hCoV-19/England/CAMC-BBB93B/2020|2020-11-22|EPI\_ISL\_703742|Original|hCoV-19^^England|Human|Department of Pathology|COVID-19 Genomics UK (COG-UK) Consortium|Goodfellow|United Kingdom

>Spike|hCoV-19/England/QEUEH-9981A7/2020|2020-08-26|EPI\_ISL\_537158|Original|hCoV-19^^England|Human|Lighthouse Lab in Glasgow|Wellcome Sanger Institute for the COVID-19 Genomics UK (COG-UK) consortium|Davies|United Kingdom

>Spike|hCoV-19/England/QEUEH-C53E53/2020|2020-12-12|EPI\_ISL\_736464|Original|hCoV-19^^England|Human|Lighthouse Lab in Glasgow|Wellcome Sanger Institute for the COVID-19 Genomics UK (COG-UK) Consortium|Davies|United Kingdom

>Spike|hCoV-19/India/OR-ILSCV27789/2020|2020-05-21|EPI\_ISL\_481124|Original|hCoV-19^^Odisha|Human|Immunogenomics lab|Immunogenomics lab|Raghav|India

>Spike|hCoV-19/USA/WA-S1848/2020|2020-05-27|EPI\_ISL\_496274|Original|hCoV-19^^Washington|Human|Washington State Department of Health|Seattle Flu Study|Lee|USA

>Spike|hCoV-19/England/ALDP-8E388B/2020|2020-06-25|EPI\_ISL\_557082|Original|hCoV-19^^England|Human|Lighthouse Lab in Alderley Park|Wellcome Sanger Institute for the COVID-19 Genomics UK (COG-UK) consortium|Davies|United Kingdom

>Spike|hCoV-19/Denmark/DCGC-20896/2020|2020-12-21|EPI\_ISL\_758781|Original|hCoV-19^^Hovedstaden|Human|Department of Virus and Microbiological Special Diagnostics|Albertsen Lab|Michaelsen|Denmark

>Spike|hCoV-19/Canada/QC-LSPQ-L00237080/2020|2020-03-25|EPI\_ISL\_536159|Original|hCoV-19^^Quebec|Human|Centre hospitalier Anna-Laberge|Laboratoire de sant\u00e9 publique du Qu\u00e9bec|Moreira|Canada

>Spike|hCoV-19/Denmark/DCGC-2194/2020|2020-08-10|EPI\_ISL\_617495|Original|hCoV-19^^Midtjylland|Human|Department of Virus and Microbiological Special Diagnostics|Albertsen lab|Michaelsen|Denmark

>Spike|hCoV-19/USA/MN-QDX-1319/2020|2020-03-14|EPI\_ISL\_572108|Original|hCoV-19^^Minnesota|Human|Quest Diagnostics|Quest Diagnostics|Kagan|USA

>Spike|hCoV-19/England/NORW-ED78C/2020|2020-06-08|EPI\_ISL\_472382|Original|hCoV-19^^England|Human|Quadram Institute Bioscience|COVID-19 Genomics UK (COG-UK) Consortium|Alikhan|United Kingdom

>Spike|hCoV-19/England/ALDP-934802/2020|2020-06-21|EPI\_ISL\_552978|Original|hCoV-19^^England|Human|Lighthouse Lab in Alderley Park|Wellcome Sanger Institute for the COVID-19 Genomics UK (COG-UK) consortium|Davies|United Kingdom

>Spike|hCoV-19/USA/MI-UM-10036541568/2020|2020-10-20|EPI\_ISL\_640160|Original|hCoV-19^^Michigan|Human|University of Michigan Clinical Microbiology Laboratory|Lauring Lab|Valesano|USA

>Spike|hCoV-19/Netherlands/OV-RIVM-20502/2020|2020-11-18|EPI\_ISL\_728717|Original|hCoV-19^^Overijssel|Human|Dutch COVID-19 response team|National Institute for Public Health and the Environment (RIVM)|Meijer|Netherlands

>Spike|hCoV-19/Scotland/EDB9161/2020|2020-11-02|EPI\_ISL\_665552|Original|hCoV-19^^Scotland|Human|Virology Department|COVID-19 Genomics UK (COG-UK) Consortium|McHugh|United Kingdom

>Spike|hCoV-19/USA/IL-NM-1251/2020|2020-06-25|EPI\_ISL\_626511|Original|hCoV-19^^Illinois|Human|Northwestern Memorial Hospital|Ozer Lab|Ozer|USA

>Spike|hCoV-19/USA/NY-Wadsworth-281399-01/2020|2020-10-27|EPI\_ISL\_734466|Original|hCoV-19^^New York|Human|Masonic Medical Research Institute|Wadsworth Center|Lasek-Nesselquist|USA

>Spike|hCoV-19/England/QEUEH-9D0088/2020|2020-09-15|EPI\_ISL\_589868|Original|hCoV-19^^England|Human|Lighthouse Lab in Glasgow|Wellcome Sanger Institute for the COVID-19 Genomics UK (COG-UK) consortium|Davies|United Kingdom

>Spike|hCoV-19/Spain/VC-FISABIO-97/2020|2020-03-17|EPI\_ISL\_425221|Original|hCoV-19^^Comunitat Valenciana|Human|Servicio de Microbiolog\u00eda. Consorcio Hospital General Universitario de Valencia|Sequencing and Bioinformatics Service and Molecular Epidemiology Research Group. FISABIO-Public Health|Gonzalez-Candelas|Spain

>Spike|hCoV-19/USA/NY-NYUMC525/2020|2020-03-30|EPI\_ISL\_444642|Original|hCoV-19^^New York|Human|NYU Langone Health|Departments of Pathology and Medicine|Maurano|USA

>Spike|hCoV-19/Netherlands/Zeeland\_31/2020|2020-04-25|EPI\_ISL\_461270|Original|hCoV-19^^Zeeland|Human|Dutch COVID-19 response team|Erasmus Medical Center|Oude Munnink|Netherlands

>Spike|hCoV-19/Belgium/ITM\_C2184\_2/2020|2020-06-02|EPI\_ISL\_487432|Original|hCoV-19^^Belgium|Human|Queen Astrid Military Hospital|Institute of Tropical Medicine|Selhorst|Belgium

>Spike|hCoV-19/USA/TX-HMH-5376/2020|2020-06-23|EPI\_ISL\_544728|Original|hCoV-19^^Texas|Human|Houston Methodist Hospital|Houston Methodist Hospital|Long|USA

>Spike|hCoV-19/Portugal/PT1543/2020|2020-06-20|EPI\_ISL\_693557|Original|hCoV-19^^Portugal|Human|Instituto Nacional de Saude (INSA)|Instituto Nacional de Saude (INSA)|Borges|Portugal

>Spike|hCoV-19/England/QEUEH-B9E39A/2020|2020-11-17|EPI\_ISL\_720969|Original|hCoV-19^^England|Human|Lighthouse Lab in Glasgow|Wellcome Sanger Institute for the COVID-19 Genomics UK (COG-UK) Consortium|Davies|United Kingdom



>Spike|hCoV-19/USA/MD-HP12027/2020|2020-11-06|EPI\_ISL\_791334|Original|hCoV-19^^Maryland|Human|Johns Hopkins Hospital Department of Pathology|Johns Hopkins Hospital Department of Pathology|Morris|USA

>Spike|hCoV-19/Switzerland/BS-42206244/2020|2020-03-25|EPI\_ISL\_581745|Original|hCoV-19^^Basel-Stadt|Human|University Hospital Basel|University Hospital Basel|Roloff Handschin|Switzerland

>Spike|hCoV-19/USA/CA-ALSR-3795/2020|2020-05-27|EPI\_ISL\_636205|Original|hCoV-19^^California|Human|San Diego County Public Health Laboratory|Andersen lab at Scripps Research|Gangavarapu|USA

>Spike|hCoV-19/USA/WA-S2884/2020|2020-09-24|EPI\_ISL\_596415|Original|hCoV-19^^Washington|Human|Seattle Flu Study|Seattle Flu Study|Lee|USA

>Spike|hCoV-19/USA/TX-HMH-1218/2020|2020-04-21|EPI\_ISL\_542588|Original|hCoV-19^^Texas|Human|Houston Methodist Hospital|Houston Methodist Hospital|Long|USA

>Spike|hCoV-19/England/QEUEH-B9F9B5/2020|2020-11-18|EPI\_ISL\_721082|Original|hCoV-19^^England|Human|Lighthouse Lab in Glasgow|Wellcome Sanger Institute for the COVID-19 Genomics UK (COG-UK) Consortium|Davies|United Kingdom

>Spike|hCoV-19/Australia/VIC13821/2020|2020-09-14|EPI\_ISL\_563841|Original|hCoV-19^^Victoria|Human|Microbiological Diagnostic Unit - Public Health Laboratory (MDU-PHL)|MDU-PHL|Schultz|Australia

>Spike|hCoV-19/England/QEUEH-AD22E9/2020|2020-10-26|EPI\_ISL\_629820|Original|hCoV-19^^England|Human|Lighthouse Lab in Glasgow|Wellcome Sanger Institute for the COVID-19 Genomics UK (COG-UK) consortium|Davies|United Kingdom

>Spike|hCoV-19/USA/TX-DSHS-0663/2020|2020-07-19|EPI\_ISL\_576317|Original|hCoV-19^^Texas|Human|Texas Department of State Health Services|Texas Department of State Health Services|Rahman|USA

>Spike|hCoV-19/England/LIVE-DB7B82/2020|2020-11-02|EPI\_ISL\_651223|Original|hCoV-19^^England|Human|Liverpool Clinical Laboratories|COVID-19 Genomics UK (COG-UK) Consortium|Haldenby|United Kingdom

>Spike|hCoV-19/Chile/AR-ISPCH-12/2020|2020-03-25|EPI\_ISL\_445346|Original|hCoV-19^^La Araucania|Human|HOSPITAL DR.HERNAN HENRIQUEZ ARAVENA|Instituto de Salud Publica de Chile|Fernandez|Chile

>Spike|hCoV-19/USA/WI-UW-555/2020|2020-06-25|EPI\_ISL\_484930|Original|hCoV-19^^Wisconsin|Human|University of Wisconsin-Madison AIDS Vaccine Research Laboratories|University of Wisconsin-Madison AIDS Vaccine Research Laboratories|Baczenas|USA

>Spike|hCoV-19/Japan/PG-5871/2020|2020-08-00|EPI\_ISL\_688986|Original|hCoV-19^^Japan|Human|Pathogen Genomics Center|Pathogen Genomics Center|Sekizuka|Japan

>Spike|hCoV-19/England/ALDP-BC7CBB/2020|2020-11-22|EPI\_ISL\_721362|Original|hCoV-19^^England|Human|Lighthouse Lab in Alderley Park|Wellcome Sanger Institute for the COVID-19 Genomics UK (COG-UK) Consortium|Davies|United Kingdom

>Spike|hCoV-19/Netherlands/GE-EMC-392/2020|2020-09-29|EPI\_ISL\_722838|Original|hCoV-19^^Gelderland|Human|Dutch COVID-19 response team|Erasmus Medical Center|Oude Munnink|Netherlands

>Spike|hCoV-19/Northern Ireland/NIRE-FCA90/2020|2020-04-22|EPI\_ISL\_470060|Original|hCoV-19^^Northern Ireland|Human|Regional Virus Laboratory|Wellcome Sanger Institute for the COVID-19 Genomics UK (COG-UK) consortium|Davies|United Kingdom

>Spike|hCoV-19/USA/TX-HMH-MCoV-14275/2020|2020-10-04|EPI\_ISL\_787560|Original|hCoV-19^^Texas|Human|Houston Methodist Hospital|Houston Methodist Hospital|Long|USA

>Spike|hCoV-19/Australia/WA185/2020|2020-03-25|EPI\_ISL\_596748|Original|hCoV-19^^Western Australia|Human|PathWest Laboratory Medicine WA|PathWest Laboratory Medicine WA Microbial Surveillance Unit|Sikazwe|Australia

>Spike|hCoV-19/England/CAMC-A57C1B/2020|2020-10-08|EPI\_ISL\_597414|Original|hCoV-19^^England|Human|Lighthouse Lab in Cambridge|Wellcome Sanger Institute for the COVID-19 Genomics UK (COG-UK) consortium|Davies|United Kingdom

>Spike|hCoV-19/England/BRIS-123A9F/2020|2020-04-07|EPI\_ISL\_442702|Original|hCoV-19^^England|Human|PHE South West Regional Laboratory|Wellcome Sanger Institute for the COVID-19 Genomics UK (COG-UK) consortium|Amato|United Kingdom

>Spike|hCoV-19/USA/MA-MGH-02788/2020|2020-09-23|EPI\_ISL\_765636|Original|hCoV-19^^Massachusetts|Human|Massachusetts General Hospital|Infectious Disease Program|Park|USA

>Spike|hCoV-19/USA/AZ-TG342042/2020|2020-05-30|EPI\_ISL\_694381|Original|hCoV-19^^Arizona|Human|TGen North|TGen North|French|USA

>Spike|hCoV-19/USA/MD-MDH-0341/2020|2020-10-16|EPI\_ISL\_648283|Original|hCoV-19^^Maryland|Human|MD PHL|MD PHL|Keller|USA

>Spike|hCoV-19/England/CAMB-7A8EB/2020|2020-04-03|EPI\_ISL\_441178|Original|hCoV-19^^England|Human|Department of Pathology|Wellcome Sanger Institute for the COVID-19 Genomics UK (COG-UK) consortium|Amato|United Kingdom

>Spike|hCoV-19/Iran/K1r-114/2020|2020-05-00|EPI\_ISL\_596382|Original|hCoV-19^^Iran|Human|Virology|Virology|Ranjbar|Iran

>Spike|hCoV-19/England/PORT-2E9056/2020|2020-00-00|EPI\_ISL\_763604|Original|hCoV-19^^England|Human|Centre for Enzyme Innovation|COVID-19 Genomics UK (COG-UK) Consortium|Robson|United Kingdom

>Spike|hCoV-19/USA/MA-MASPHL-00437/2020|2020-04-28|EPI\_ISL\_693120|Original|hCoV-19^^Massachusetts|Human|Massachusetts State Public Health Laboratory|Massachusetts State Public Health Laboratory|Lang|USA

>Spike|hCoV-19/England/LIVE-DB500D/2020|2020-10-23|EPI\_ISL\_650655|Original|hCoV-19^^England|Human|Liverpool Clinical Laboratories|COVID-19 Genomics UK (COG-UK) Consortium|Haldenby|United Kingdom

>Spike|hCoV-19/England/MILK-A7C8B2/2020|2020-10-15|EPI\_ISL\_607545|Original|hCoV-19^^England|Human|Lighthouse Lab in Milton Keynes|Wellcome Sanger Institute for the COVID-19 Genomics UK (COG-UK) consortium|Davies|United Kingdom

>Spike|hCoV-19/England/ALDP-AA221F/2020|2020-10-22|EPI\_ISL\_624960|Original|hCoV-19^^England|Human|Lighthouse Lab in Alderley Park|Wellcome Sanger Institute for the COVID-19 Genomics UK (COG-UK) consortium|Davies|United Kingdom

>Spike|hCoV-19/India/TG-CCMB-K496/2020|2020-04-13|EPI\_ISL\_447580|Original|hCoV-19^^Telangana|Human|CSIR-Centre for Cellular and Molecular Biology|CSIR-Centre for Cellular and Molecular Biology|Banu|India

>Spike|hCoV-19/Australia/VIC4104/2020|2020-07-14|EPI\_ISL\_519484|Original|hCoV-19^^Victoria|Human|Microbiological Diagnostic Unit - Public Health Laboratory (MDU-PHL)|MDU-PHL|Schultz|Australia

>Spike|hCoV-19/Denmark/DCGC-9334/2020|2020-11-16|EPI\_ISL\_668913|Original|hCoV-19^^Nordjylland|Human|Department of Virus and Microbiological Special Diagnostics|Albertsen Lab|Michaelsen|Denmark

>Spike|hCoV-19/England/ALDP-A700C5/2020|2020-10-15|EPI\_ISL\_608123|Original|hCoV-19^^England|Human|Lighthouse Lab in Alderley Park|Wellcome Sanger Institute for the COVID-19 Genomics UK (COG-UK) consortium|Davies|United Kingdom

>Spike|hCoV-19/USA/CA-CZB-4084/2020|2020-08-11|EPI\_ISL\_548589|Original|hCoV-19^^California|Human|Orange County Public Health Laboratory|Chan-Zuckerberg Biohub|Bhatt|USA

>Spike|hCoV-19/England/BRIS-12A0E1/2020|2020-04-16|EPI\_ISL\_458512|Original|hCoV-19^^England|Human|PHE South West Regional Laboratory|Wellcome Sanger Institute for the COVID-19 Genomics UK (COG-UK) consortium|Davies|United Kingdom

>Spike|hCoV-19/Japan/PG-5472/2020|2020-08-00|EPI\_ISL\_690575|Original|hCoV-19^^Japan|Human|Pathogen Genomics Center|Pathogen Genomics Center|Sekizuka|Japan

>Spike|hCoV-19/Australia/NSW2519/2020|2020-03-23|EPI\_ISL\_527035|Original|hCoV-19^^New South Wales|Human|Area of Virology|Area of Virology|Yeang|Australia

>Spike|hCoV-19/England/PORT-2D158F/2020|2020-04-20|EPI\_ISL\_484410|Original|hCoV-19^^England|Human|Centre for Enzyme Innovation|COVID-19 Genomics UK (COG-UK) Consortium|Robson|United Kingdom

>Spike|hCoV-19/USA/WI-UW-1878/2020|2020-09-11|EPI\_ISL\_605749|Original|hCoV-19^^Wisconsin|Human|University of Wisconsin-Madison AIDS Vaccine Research Laboratories|University of Wisconsin-Madison AIDS Vaccine Research Laboratories|Baczenas|USA

>Spike|hCoV-19/USA/TX-HMH-MCoV-14929/2020|2020-10-15|EPI\_ISL\_786413|Original|hCoV-19^^Texas|Human|Houston Methodist Hospital|Houston Methodist Hospital|Long|USA

>Spike|hCoV-19/Scotland/EDB6211/2020|2020-05-19|EPI\_ISL\_473915|Original|hCoV-19^^Scotland|Human|Virology Department|COVID-19 Genomics UK (COG-UK) Consortium|Williams|United Kingdom

>Spike|hCoV-19/England/MILK-A7B4CE/2020|2020-10-15|EPI\_ISL\_607618|Original|hCoV-19^^England|Human|Lighthouse Lab in Milton Keynes|Wellcome Sanger Institute for the COVID-19 Genomics UK (COG-UK) consortium|Davies|United Kingdom

>Spike|hCoV-19/Denmark/DCGC-16721/2020|2020-10-19|EPI\_ISL\_714433|Original|hCoV-19^^Hovedstaden|Human|Department of Virus and Microbiological Special Diagnostics|Albertsen Lab|Michaelsen|Denmark

>Spike|hCoV-19/Luxembourg/LNS8708455/2020|2020-12-23|EPI\_ISL\_771041|Original|hCoV-19^^Luxembourg|Human|Laboratoire national de sant\u00e9|Laboratoire national de sant\u00e9|Wienecke-Baldacchino|Luxembourg

>Spike|hCoV-19/England/QEUEH-7858C8/2020|2020-07-15|EPI\_ISL\_533168|Original|hCoV-19^^England|Human|Lighthouse Lab in Glasgow|Wellcome Sanger Institute for the COVID-19 Genomics UK (COG-UK) consortium|Davies|United Kingdom

>Spike|hCoV-19/England/ALDP-952DC3/2020|2020-06-11|EPI\_ISL\_553657|Original|hCoV-19^^England|Human|Lighthouse Lab in Alderley Park|Wellcome Sanger Institute for the COVID-19 Genomics UK (COG-UK) consortium|Davies|United Kingdom

>Spike|hCoV-19/Sweden/20-51771/2020|2020-05-27|EPI\_ISL\_510848|Original|hCoV-19^^Vastra Gotaland|Human|Skovde/Unilabs|The Public Health Agency of Sweden|Svartstr\u00f6m|Sweden

>Spike|hCoV-19/USA/TX-HMH-3115/2020|2020-06-11|EPI\_ISL\_544002|Original|hCoV-19^^Texas|Human|Houston Methodist Hospital|Houston Methodist Hospital|Long|USA

>Spike|hCoV-19/USA/VA-DCLS-0632/2020|2020-04-10|EPI\_ISL\_495305|Original|hCoV-19^^Virginia|Human|Virginia DCLS|Virginia DCLS|St. Jacques|USA

>Spike|hCoV-19/England/LIVE-A48E8/2020|2020-03-10|EPI\_ISL\_500053|Original|hCoV-19^^England|Human|Liverpool Clinical Laboratories|COVID-19 Genomics UK (COG-UK) Consortium|Haldenby|United Kingdom

>Spike|hCoV-19/USA/MI-MDHHS-SC21160/2020|2020-04-03|EPI\_ISL\_507417|Original|hCoV-19^^Michigan|Human|Michigan Department of Health and Human Services|Michigan Department of Health and Human Services|Blankenship|USA

>Spike|hCoV-19/USA/WA-UW-5782/2020|2020-04-07|EPI\_ISL\_570078|Original|hCoV-19^^Washington|Human|UW Virology Lab|UW Virology Lab|Roychoudhury|USA

>Spike|hCoV-19/Scotland/QEUEH-A4B9F5/2020|2020-10-08|EPI\_ISL\_628501|Original|hCoV-19^^Scotland|Human|Oxford Viromics|COVID-19 Genomics UK (COG-UK) Consortium|Golubchik|United Kingdom

>Spike|hCoV-19/USA/TX-HMH-3731/2020|2020-06-16|EPI\_ISL\_543143|Original|hCoV-19^^Texas|Human|Houston Methodist Hospital|Houston Methodist Hospital|Long|USA

>Spike|hCoV-19/England/MILK-9A6953/2020|2020-09-01|EPI\_ISL\_549967|Original|hCoV-19^^England|Human|Lighthouse Lab in Milton Keynes|Wellcome Sanger Institute for the COVID-19 Genomics UK (COG-UK) consortium|Davies|United Kingdom

>Spike|hCoV-19/England/ALDP-66B638/2020|2020-07-03|EPI\_ISL\_558220|Original|hCoV-19^^England|Human|Lighthouse Lab in Alderley Park|Wellcome Sanger Institute for the COVID-19 Genomics UK (COG-UK) consortium|Davies|United Kingdom

>Spike|hCoV-19/England/CAMC-B37FDB/2020|2020-11-05|EPI\_ISL\_659093|Original|hCoV-19^^England|Human|Lighthouse Lab in Cambridge|Wellcome Sanger Institute for the COVID-19 Genomics UK (COG-UK) Consortium|Davies|United Kingdom

>Spike|hCoV-19/England/QEUEH-AADEB6/2020|2020-10-22|EPI\_ISL\_652958|Original|hCoV-19^^England|Human|Oxford Viromics|COVID-19 Genomics UK (COG-UK) Consortium|Golubchik|United Kingdom

>Spike|hCoV-19/USA/CA-QDX-799/2020|2020-03-22|EPI\_ISL\_571492|Original|hCoV-19^^California|Human|Quest Diagnostics|Quest Diagnostics|Kagan|USA

>Spike|hCoV-19/England/QEUEH-9A4278/2020|2020-09-01|EPI\_ISL\_540140|Original|hCoV-19^^England|Human|Lighthouse Lab in Glasgow|Wellcome Sanger Institute for the COVID-19 Genomics UK (COG-UK) consortium|Davies|United Kingdom

>Spike|hCoV-19/Denmark/DCGC-22020/2020|2020-12-14|EPI\_ISL\_758513|Original|hCoV-19^^Sjaelland|Human|Department of Virus and Microbiological Special Diagnostics|Albertsen Lab|Michaelsen|Denmark

>Spike|hCoV-19/England/QEUA-A20D54/2020|2020-10-01|EPI\_ISL\_587624|Original|hCoV-19^^England|Human|Lighthouse Lab in Glasgow|Wellcome Sanger Institute for the COVID-19 Genomics UK (COG-UK) consortium|Davies|United Kingdom

>Spike|hCoV-19/Italy/ABR-IZSGC-TE49480/2020|2020-05-16|EPI\_ISL\_529004|Original|hCoV-19^^Abruzzo|Human|Servizio di igiene epidemiologia e sanit\u00e0 pubblica (SIESP)-Chieti|Istituto Zooprofilattico Sperimentale dell'Abruzzo e Molise \G.Caporale\|Lorusso|Italy

>Spike|hCoV-19/USA/HI-H200640/2020|2020-11-23|EPI\_ISL\_753164|Original|hCoV-19^^Hawaii|Human|State Laboratories Division|State Laboratories Division|Sultana|USA

>Spike|hCoV-19/Japan/PG-2323/2020|2020-05-00|EPI\_ISL\_685928|Original|hCoV-19^^Japan|Human|Pathogen Genomics Center|Pathogen Genomics Center|Sekizuka|Japan

>Spike|hCoV-19/Scotland/CVR4690/2020|2020-09-30|EPI\_ISL\_612312|Original|hCoV-19^^Scotland|Human|West of Scotland Specialist Virology Centre|COVID-19 Genomics UK (COG-UK) Consortium|Robertson|United Kingdom

>Spike|hCoV-19/USA/MI-MDHHS-SC22414/2020|2020-11-18|EPI\_ISL\_708247|Original|hCoV-19^^Michigan|Human|Michigan Department of Health and Human Services|Michigan Department of Health and Human Services|Jacob|USA

>Spike|hCoV-19/Luxembourg/LNS5953507/2020|2020-04-15|EPI\_ISL\_434515|Original|hCoV-19^^Luxembourg|Human|Laboratoire National de Sante|Laboratoire National de Sante|Wienecke-Baldacchino|Luxembourg

>Spike|hCoV-19/Lithuania/MR-LUHS-Eilnr458/2020|2020-09-12|EPI\_ISL\_636893|Original|hCoV-19^^Kauno apskritis|Human|Lithuanian University of Health Sciences Hospital|Lithuanian University of Health Sciences|Zemaitis|Lithuania

>Spike|hCoV-19/Wales/PHWC-24358/2020|2020-03-16|EPI\_ISL\_419400|Original|hCoV-19^^Wales|Human|Wales Specialist Virology Centre|Public Health Wales Microbiology Cardiff|Moore|United Kingdom

>Spike|hCoV-19/England/MILK-B96796/2020|2020-11-14|EPI\_ISL\_676139|Original|hCoV-19^^England|Human|Lighthouse Lab in Milton Keynes|Wellcome Sanger Institute for the COVID-19 Genomics UK (COG-UK) Consortium|Davies|United Kingdom

>Spike|hCoV-19/England/MILK-C782D4/2020|2020-12-15|EPI\_ISL\_756791|Original|hCoV-19^^England|Human|Lighthouse Lab in Milton Keynes|Wellcome Sanger Institute for the COVID-19 Genomics UK (COG-UK) Consortium|Davies|United Kingdom

>Spike|hCoV-19/Netherlands/Hardinxveld\_Giessendam\_1364806/2020|2020-03-02|EPI\_ISL\_413573|Original|hCoV-19^^Hardinxveld Giessendam|Human|Dienst Gezondheid & Jeugd Zuid-Holland Zuid|Erasmus Medical Center|Oude Munnink|Netherlands

>Spike|hCoV-19/England/ALDP-A9625A/2020|2020-10-20|EPI\_ISL\_624833|Original|hCoV-19^^England|Human|Lighthouse Lab in Alderley Park|Wellcome Sanger Institute for the COVID-19 Genomics UK (COG-UK) consortium|Davies|United Kingdom

>Spike|hCoV-19/USA/TX-HMH-2657/2020|2020-06-06|EPI\_ISL\_545455|Original|hCoV-19^^Texas|Human|Houston Methodist Hospital|Houston Methodist Hospital|Long|USA

>Spike|hCoV-19/England/QEUA-B2D54F/2020|2020-11-04|EPI\_ISL\_659897|Original|hCoV-19^^England|Human|Lighthouse Lab in Glasgow|Wellcome Sanger Institute for the COVID-19 Genomics UK (COG-UK) Consortium|Davies|United Kingdom

>Spike|hCoV-19/Spain/MD-IBV-99008644/2020|2020-09-29|EPI\_ISL\_654212|Original|hCoV-19^^Madrid|Human|Hospital General Universitario Gregorio Mara\u00f1a|SeqCOVID-SPAIN consortium|IBV (CSIC)|Comas|Spain

>Spike|hCoV-19/England/ALDP-A68594/2020|2020-10-12|EPI\_ISL\_608390|Original|hCoV-19^^England|Human|Lighthouse Lab in Alderley Park|Wellcome Sanger Institute for the COVID-19 Genomics UK (COG-UK) consortium|Davies|United Kingdom

>Spike|hCoV-19/USA/TX-HMH-MCoV-19525/2020|2020-11-17|EPI\_ISL\_783902|Original|hCoV-19^^Texas|Human|Houston Methodist Hospital|Houston Methodist Hospital|Long|USA

>Spike|hCoV-19/USA/MA-MASPHL-00497/2020|2020-05-02|EPI\_ISL\_693073|Original|hCoV-19^^Massachusetts|Human|Massachusetts State Public Health Laboratory|Massachusetts State Public Health Laboratory|Lang|USA

>Spike|hCoV-19/Germany/BE-ChVir-W2219-4467/2020|2020-11-16|EPI\_ISL\_753833|Original|hCoV-19^^Berlin|Human|Charit\u00e9 Universit\u00e4tsmedizin Berlin|Charit\u00e9 Universit\u00e4tsmedizin Berlin|Muehlemann|Germany

>Spike|hCoV-19/USA/NY-NYCPHL-001258/2020|2020-11-06|EPI\_ISL\_683868|Original|hCoV-19^^New York|Human|DOHMH Fort Greene|New York City Public Health Laboratory|Wang|USA

>Spike|hCoV-19/Northern Ireland/NIRE-10252C/2020|2020-04-17|EPI\_ISL\_469879|Original|hCoV-19^^Northern Ireland|Human|Regional Virus Laboratory|Wellcome Sanger Institute for the COVID-19 Genomics UK (COG-UK) consortium|Davies|United Kingdom

>Spike|hCoV-19/Japan/IC-0048/2020|2020-05-00|EPI\_ISL\_591390|Original|hCoV-19^^Japan|Human|Pathogen Genomics Center|Pathogen Genomics Center|Sekizuka|Japan

>Spike|hCoV-19/Scotland/CVR3191/2020|2020-04-28|EPI\_ISL\_449212|Original|hCoV-19^^Scotland|Human|West of Scotland Specialist Virology Centre|COVID-19 Genomics UK (COG-UK) Consortium|Robertson|United Kingdom

>Spike|hCoV-19/Luxembourg/LNS9752865/2020|2020-11-01|EPI\_ISL\_744978|Original|hCoV-19^^Luxembourg|Human|Laboratoire national de sant\u00e9|Laboratoire national de sant\u00e9|Wienecke-Baldacchino|Luxembourg

>Spike|hCoV-19/USA/TX-HMH-3134/2020|2020-06-10|EPI\_ISL\_544017|Original|hCoV-19^^Texas|Human|Houston Methodist Hospital|Houston Methodist Hospital|Long|USA

>Spike|hCoV-19/Scotland/QEUA-9F90B6/2020|2020-09-27|EPI\_ISL\_600843|Original|hCoV-19^^Scotland|Human|Lighthouse Lab in Glasgow|Wellcome Sanger Institute for the COVID-19 Genomics UK (COG-UK) consortium|Davies|United Kingdom

>Spike|hCoV-19/Northern Ireland/QEUA-96223A/2020|2020-08-10|EPI\_ISL\_531594|Original|hCoV-19^^Northern Ireland|Human|Lighthouse Lab in Glasgow|Wellcome Sanger Institute for the COVID-19 Genomics UK (COG-UK) consortium|Davies|United Kingdom

>Spike|hCoV-19/USA/CA-ALSR-5096/2020|2020-09-21|EPI\_ISL\_730348|Original|hCoV-19^^California|Human|San Diego County Public Health Laboratory|Andersen lab at Scripps Research|Gangavarapu|USA

>Spike|hCoV-19/Japan/PG-0163/2020|2020-03-12|EPI\_ISL\_479873|Original|hCoV-19^^Hokkaido|Human|Sapporo City Institute of Public Health|Pathogen Genomics Center|Sekizuka|Japan

>Spike|hCoV-19/Belgium/reg-09201063/2020|2020-09-20|EPI\_ISL\_735005|Original|hCoV-19^^Leuven|Human|UZ Leuven|KU Leuven|Maes|Belgium

>Spike|hCoV-19/Spain/GA-USC-004/2020|2020-04-29|EPI\_ISL\_468334|Original|hCoV-19^^Galicia|Human|Microbiology Service|Genomes & Disease|Garcia-Souto|Spain

>Spike|hCoV-19/England/204960124/2020|2020-12-02|EPI\_ISL\_723009|Original|hCoV-19^^England|Human|Respiratory Virus Unit|COVID-19 Genomics UK (COG-UK) Consortium|Platt|United Kingdom

>Spike|hCoV-19/England/NOTT-10F54D/2020|2020-04-02|EPI\_ISL\_433017|Original|hCoV-19^^England|Human|Queens Medical Centre|COVID-19 Genomics UK (COG-UK) Consortium|Loose|United Kingdom

>Spike|hCoV-19/England/ALDP-B5CE6A/2020|2020-11-10|EPI\_ISL\_655650|Original|hCoV-19^^England|Human|Lighthouse Lab in Alderley Park|Wellcome Sanger Institute for the COVID-19 Genomics UK (COG-UK) Consortium|Davies|United Kingdom

>Spike|hCoV-19/Wales/PHWC-4817A4/2020|2020-10-17|EPI\_ISL\_613108|Original|hCoV-19^^Wales|Human|Wales Specialist Virology Centre Sequencing lab|COVID-19 Genomics UK (COG-UK) Consortium|Moore|United Kingdom

>Spike|hCoV-19/England/ALDP-AA1AAF/2020|2020-10-22|EPI\_ISL\_624527|Original|hCoV-19^^England|Human|Lighthouse Lab in Alderley Park|Wellcome Sanger Institute for the COVID-19 Genomics UK (COG-UK) consortium|Davies|United Kingdom

>Spike|hCoV-19/England/ALDP-BBB0AF/2020|2020-11-20|EPI\_ISL\_701995|Original|hCoV-19^^England|Human|Lighthouse Lab in Alderley Park|Wellcome Sanger Institute for the COVID-19 Genomics UK (COG-UK) Consortium|Davies|United Kingdom

>Spike|hCoV-19/England/SHEF-CA3EB/2020|2020-04-10|EPI\_ISL\_442360|Original|hCoV-19^^England|Human|Virology Department|COVID-19 Genomics UK (COG-UK) Consortium|de Silva|United Kingdom

>Spike|hCoV-19/Iceland/97/2020|2020-03-10|EPI\_ISL\_417876|Original|hCoV-19^^Reykjavik|Human|The National University Hospital of Iceland|deCODE genetics|J\u00f3nsson|Iceland

>Spike|hCoV-19/England/QEUA-962DB1/2020|2020-08-11|EPI\_ISL\_531674|Original|hCoV-19^^England|Human|Lighthouse Lab in Glasgow|Wellcome Sanger Institute for the COVID-19 Genomics UK (COG-UK) consortium|Davies|United Kingdom

>Spike|hCoV-19/Denmark/DCGC-11455/2020|2020-11-02|EPI\_ISL\_670487|Original|hCoV-19^^Hovedstaden|Human|Department of Virus and Microbiological Special Diagnostics|Albertsen Lab|Michaelsen|Denmark

>Spike|hCoV-19/USA/WA-S396/2020|2020-03-25|EPI\_ISL\_434156|Original|hCoV-19^^Washington|Human|Washington State Department of Health|Seattle Flu Study|Bedford|USA

>Spike|hCoV-19/USA/WA-S293/2020|2020-04-01|EPI\_ISL\_430147|Original|hCoV-19^^Washington|Human|Seattle Flu Study|Seattle Flu Study|Bedford|USA

>Spike|hCoV-19/Wales/PHWC-160173/2020|2020-05-25|EPI\_ISL\_472901|Original|hCoV-19^^Wales|Human|Wales Specialist Virology Centre Sequencing lab|COVID-19 Genomics UK (COG-UK) Consortium|Moore|United Kingdom

>Spike|hCoV-19/Spain/MD-IBV-003696/2020|2020-04-02|EPI\_ISL\_467257|Original|hCoV-19^^Madrid|Human|Hospital General Universitario Gregorio Mara\u00f1a|SeqCOVID-SPAIN consortium/IBV (CSIC)|Comas|Spain

>Spike|hCoV-19/Australia/VIC3129/2020|2020-07-02|EPI\_ISL\_520836|Original|hCoV-19^^Victoria|Human|Victorian Infectious Diseases Reference Laboratory (VIDRL)|VIDRL and MDU-PHL|Schultz|Australia

>Spike|hCoV-19/USA/AZ-TG569469/2020|2020-07-10|EPI\_ISL\_695570|Original|hCoV-19^^Arizona|Human|AZ SPHL|TGen North|French|USA

>Spike|hCoV-19/Denmark/DCGC-10750/2020|2020-11-02|EPI\_ISL\_670182|Original|hCoV-19^^Nordjylland|Human|Department of Virus and Microbiological Special Diagnostics|Albertsen Lab|Michaelsen|Denmark

>Spike|hCoV-19/Ukraine/203100323/2020|2020-05-27|EPI\_ISL\_512603|Original|hCoV-19^^Ukraine|Human|National Laboratory for Influenza/Virology reference laboratory|Respiratory Virus Unit|Platt|Ukraine

>Spike|hCoV-19/Chile/RM-171015/2020|2020-09-07|EPI\_ISL\_746726|Original|hCoV-19^^Region Metropolitana de Santiago|Human|Genetica Molecular and Subdepartamento de Virologia ISP Chile|Instituto de Salud Publica de Chile|Tognarelli|Chile

>Spike|hCoV-19/Denmark/DCGC-14241/2020|2020-11-30|EPI\_ISL\_711436|Original|hCoV-19^^Hovedstaden|Human|Department of Virus and Microbiological Special Diagnostics|Albertsen Lab|Michaelsen|Denmark

>Spike|hCoV-19/England/CAMB-1BBE36/2020|2020-00-00|EPI\_ISL\_679241|Original|hCoV-19^^England|Human|Department of Pathology|COVID-19 Genomics UK (COG-UK) Consortium|Goodfellow|United Kingdom

>Spike|hCoV-19/Sweden/20-08990/2020|2020-09-16|EPI\_ISL\_582772|Original|hCoV-19^^Ostergotland|Human|Klinsisk mikrobiologi Linkoping|The Public Health Agency of Sweden|Svartstr\u00f6m|Sweden

>Spike|hCoV-19/Switzerland/ZH-UZH-1000477916/2020|2020-03-01|EPI\_ISL\_524475|Original|hCoV-19^^Zurich|Human|Division of Infectious Diseases|Institute of Medical Virology|Schmutz|Switzerland

>Spike|hCoV-19/Australia/VIC14202/2020|2020-08-02|EPI\_ISL\_592386|Original|hCoV-19^^Victoria|Human|Microbiological Diagnostic Unit - Public Health Laboratory (MDU-PHL)|MDU-PHL|Schultz|Australia

>Spike|hCoV-19/England/MILK-A696EB/2020|2020-10-07|EPI\_ISL\_665686|Original|hCoV-19^^England|Human|University of Exeter|COVID-19 Genomics UK (COG-UK) Consortium|Temperton|United Kingdom

>Spike|hCoV-19/England/NORW-F60B2/2020|2020-11-07|EPI\_ISL\_650345|Original|hCoV-19^^England|Human|Quadram Institute Bioscience|COVID-19 Genomics UK (COG-UK) Consortium|Alikhan|United Kingdom

>Spike|hCoV-19/England/MILK-B04599/2020|2020-10-24|EPI\_ISL\_651019|Original|hCoV-19^^England|Human|Department of Pathology|COVID-19 Genomics UK (COG-UK) Consortium|Goodfellow|United Kingdom

>Spike|hCoV-19/USA/TX-HMH-MCoV-10924/2020|2020-07-05|EPI\_ISL\_789685|Original|hCoV-19^^Texas|Human|Houston Methodist Hospital|Houston Methodist Hospital|Long|USA

>Spike|hCoV-19/England/BRIS-1853971/2020|2020-04-16|EPI\_ISL\_492409|Original|hCoV-19^^England|Human|PHE South West Regional Laboratory|Wellcome Sanger Institute for the COVID-19 Genomics UK (COG-UK) consortium|Davies|United Kingdom

>Spike|hCoV-19/USA/FL-BPHL-1236/2020|2020-04-19|EPI\_ISL\_541154|Original|hCoV-19^^Florida|Human|Florida Bureau of Public Health Laboratories|Florida Bureau of Public Health Laboratories|Blanton|USA

>Spike|hCoV-19/England/CAMC-B219B8/2020|2020-11-02|EPI\_ISL\_647146|Original|hCoV-19^^England|Human|Lighthouse Lab in Cambridge|Wellcome Sanger Institute for the COVID-19 Genomics UK (COG-UK) Consortium|Davies|United Kingdom

>Spike|hCoV-19/USA/OH-UW-2398/2020|2020-12-05|EPI\_ISL\_754668|Original|hCoV-19^^Ohio|Human|University of Wisconsin-Madison AIDS Vaccine Research Laboratories|University of Wisconsin-Madison AIDS Vaccine Research Laboratories|Moreno|USA

>Spike|hCoV-19/England/MILK-B97267/2020|2020-11-14|EPI\_ISL\_674997|Original|hCoV-19^^England|Human|Lighthouse Lab in Milton Keynes|Wellcome Sanger Institute for the COVID-19 Genomics UK (COG-UK) Consortium|Davies|United Kingdom

>Spike|hCoV-19/England/ALDP-A2DABA/2020|2020-10-06|EPI\_ISL\_586630|Original|hCoV-19^^England|Human|Lighthouse Lab in Alderley Park|Wellcome Sanger Institute for the COVID-19 Genomics UK (COG-UK) consortium|Davies|United Kingdom

>Spike|hCoV-19/Ireland/D-NVRL-AIIDV1366v1s1/2020|2020-11-13|EPI\_ISL\_791300|Original|hCoV-19^^Dublin|Human|National Virus Reference Laboratory|Irish Coronavirus Sequencing Consortium - Teagasc Moorepark|Walsh|Ireland

>Spike|hCoV-19/Thailand/Bangkok-CONI-0316/2020|2020-03-25|EPI\_ISL\_693386|Original|hCoV-19^^Bangkok|Human|Ramathibodi Hospital|COVID-19 Network Investigations (CONI) Alliance|Batty|Thailand

>Spike|hCoV-19/USA/WA-UW-24736/2020|2020-08-16|EPI\_ISL\_570766|Original|hCoV-19^^Washington|Human|UW Virology Lab|UW Virology Lab|Roychoudhury|USA

>Spike|hCoV-19/Japan/PG-5025/2020|2020-08-00|EPI\_ISL\_690136|Original|hCoV-19^^Japan|Human|Pathogen Genomics Center|Pathogen Genomics Center|Sekizuka|Japan

>Spike|hCoV-19/USA/AZ-TG276758/2020|2020-04-16|EPI\_ISL\_694127|Original|hCoV-19^^Arizona|Human|AZ SPHL|TGen North|French|USA

>Spike|hCoV-19/Wales/PHWC-2DEC7/2020|2020-04-08|EPI\_ISL\_474318|Original|hCoV-19^^Wales|Human|Originating lab|COVID-19 Genomics UK (COG-UK) Consortium|Moore|United Kingdom

>Spike|hCoV-19/USA/WA-S2189/2020|2020-06-08|EPI\_ISL\_497617|Original|hCoV-19^^Washington|Human|Washington State Department of Health|Seattle Flu Study|Lee|USA

>Spike|hCoV-19/Norway/4965/2020|2020-10-26|EPI\_ISL\_635081|Original|hCoV-19^^Vestlandet|Human|Haukeland University Hospital|Norwegian Institute of Public Health|Vollan|Norway

>Spike|hCoV-19/Netherlands/ZH-EMC-499/2020|2020-08-25|EPI\_ISL\_577928|Original|hCoV-19^^Zuid Holland|Human|Dutch COVID-19 response team|Erasmus Medical Center|Oude Munnink|Netherlands

>Spike|hCoV-19/Denmark/DCGC-17092/2020|2020-12-14|EPI\_ISL\_750524|Original|hCoV-19^^Hovedstaden|Human|Department of Virus and Microbiological Special Diagnostics|Albertsen Lab|Michaelsen|Denmark

>Spike|hCoV-19/England/SHEF-C034F/2020|2020-03-29|EPI\_ISL\_420205|Original|hCoV-19^^England|Human|Virology Department|Department of Infection|de Silva|United Kingdom

>Spike|hCoV-19/Wales/PHWC-1626AF/2020|2020-05-31|EPI\_ISL\_473104|Original|hCoV-19^^Wales|Human|Wales Specialist Virology Centre Sequencing lab|COVID-19 Genomics UK (COG-UK) Consortium|Moore|United Kingdom

>Spike|hCoV-19/Denmark/DCGC-5460/2020|2020-09-21|EPI\_ISL\_620785|Original|hCoV-19^^Syddanmark|Human|Department of Virus and Microbiological Special Diagnostics|Albertsen lab|Michaelsen|Denmark

>Spike|hCoV-19/England/LIVE-9A50C/2020|2020-03-25|EPI\_ISL\_449341|Original|hCoV-19^^England|Human|Liverpool Clinical Laboratories|COVID-19 Genomics UK (COG-UK) Consortium|Haldenby|United Kingdom

>Spike|hCoV-19/Australia/VIC16169/2020|2020-08-06|EPI\_ISL\_640950|Original|hCoV-19^^Victoria|Human|Microbiological Diagnostic Unit - Public Health Laboratory (MDU-PHL)|MDU-PHL|Schultz|Australia

>Spike|hCoV-19/Switzerland/BL-ETHZ-420526/2020|2020-12-22|EPI\_ISL\_768068|Original|hCoV-19^^Basel-Landschaft|Human|Viollier AG|Department of Biosystems Science and Engineering|Nadeau|Switzerland

>Spike|hCoV-19/USA/CA-CZB-13793/2020|2020-09-24|EPI\_ISL\_739285|Original|hCoV-19^^California|Human|Alameda County Public Health Lab|Chan-Zuckerberg Biohub|Kamm|USA

>Spike|hCoV-19/Japan/PG-3317/2020|2020-04-00|EPI\_ISL\_691432|Original|hCoV-19^^Japan|Human|Pathogen Genomics Center|Pathogen Genomics Center|Sekizuka|Japan

>Spike|hCoV-19/Australia/VIC2457/2020|2020-06-26|EPI\_ISL\_522163|Original|hCoV-19^^Victoria|Human|Victorian Infectious Diseases Reference Laboratory (VIDRL)|VIDRL and MDU-PHL|Schultz|Australia

>Spike|hCoV-19/England/CAMC-A582EB/2020|2020-10-07|EPI\_ISL\_597125|Original|hCoV-19^^England|Human|Lighthouse Lab in Cambridge|Wellcome Sanger Institute for the COVID-19 Genomics UK (COG-UK) consortium|Davies|United Kingdom

>Spike|hCoV-19/England/CAMC-B086DE/2020|2020-10-29|EPI\_ISL\_643800|Original|hCoV-19^^England|Human|Lighthouse Lab in Cambridge|Wellcome Sanger Institute for the COVID-19 Genomics UK (COG-UK) Consortium|Davies|United Kingdom

>Spike|hCoV-19/Portugal/PT0260/2020|2020-04-03|EPI\_ISL\_453974|Original|hCoV-19^^Portugal|Human|unknown|Instituto Nacional de Saude (INSA)|Borges|Portugal

>Spike|hCoV-19/USA/WI-WSLH-200195/2020|2020-03-13|EPI\_ISL\_578419|Original|hCoV-19^^Wisconsin|Human|Wisconsin State Laboratory of Hygiene Communicable Disease Division|Wisconsin State Laboratory of Hygiene Communicable Disease Division|Florek|USA

>Spike|hCoV-19/Wales/MILK-B0248F/2020|2020-10-24|EPI\_ISL\_647811|Original|hCoV-19^^Wales|Human|Lighthouse Lab in Milton Keynes|Wellcome Sanger Institute for the COVID-19 Genomics UK (COG-UK) Consortium|Davies|United Kingdom

>Spike|hCoV-19/USA/TX-HMH-MCoV-12772/2020|2020-08-19|EPI\_ISL\_789864|Original|hCoV-19^^Texas|Human|Houston Methodist Hospital|Houston Methodist Hospital|Long|USA

>Spike|hCoV-19/Japan/PG-3013/2020|2020-04-00|EPI\_ISL\_691137|Original|hCoV-19^^Japan|Human|Pathogen Genomics Center|Pathogen Genomics Center|Sekizuka|Japan

>Spike|hCoV-19/England/MILK-99A63D/2020|2020-08-29|EPI\_ISL\_550344|Original|hCoV-19^^England|Human|Lighthouse Lab in Milton Keynes|Wellcome Sanger Institute for the COVID-19 Genomics UK (COG-UK) consortium|Davies|United Kingdom

>Spike|hCoV-19/Denmark/DCGC-19060/2020|2020-12-07|EPI\_ISL\_748728|Original|hCoV-19^^Midtjylland|Human|Department of Virus and Microbiological Special Diagnostics|Albertsen Lab|Michaelsen|Denmark

>Spike|hCoV-19/USA/CA-QDX-2323/2020|2020-03-16|EPI\_ISL\_604631|Original|hCoV-19^^California|Human|Quest Diagnostics|Quest Diagnostics|Kagan|USA

>Spike|hCoV-19/England/LEED-2AA09D/2020|2020-04-08|EPI\_ISL\_538889|Original|hCoV-19^^England|Human|Leeds Teaching Hospitals NHS Trust and Public Health England|Wellcome Sanger Institute for the COVID-19 Genomics UK (COG-UK) consortium|Davies|United Kingdom

>Spike|hCoV-19/England/CAMB-71C7F/2020|2020-03-31|EPI\_ISL\_439650|Original|hCoV-19^^England|Human|Department of Pathology|Wellcome Sanger Institute for the COVID-19 Genomics UK (COG-UK) consortium|Amato|United Kingdom

>Spike|hCoV-19/England/204191995/2020|2020-10-11|EPI\_ISL\_603195|Original|hCoV-19^^England|Human|Respiratory Virus Unit|Respiratory Virus Unit|Platt|United Kingdom

>Spike|hCoV-19/Netherlands/LI-EMC-157/2020|2020-11-27|EPI\_ISL\_763125|Original|hCoV-19^^Limburg|Human|Dutch COVID-19 response team|Erasmus Medical Center|Oude Munnink|Netherlands

>Spike|hCoV-19/India/MH-NCDC-02315/2020|2020-03-29|EPI\_ISL\_435086|Original|hCoV-19^^Maharashtra|Human|National Centre for Disease control (NCDC)|NCDC/CSIR-IGIB|Faruq|India

>Spike|hCoV-19/USA/CA-QDX-1517/2020|2020-03-17|EPI\_ISL\_603770|Original|hCoV-19^^California|Human|Quest Diagnostics|Quest Diagnostics|Kagan|USA

>Spike|hCoV-19/England/ALDP-95C5B2/2020|2020-06-20|EPI\_ISL\_554960|Original|hCoV-19^^England|Human|Lighthouse Lab in Alderley Park|Wellcome Sanger Institute for the COVID-19 Genomics UK (COG-UK) consortium|Davies|United Kingdom

>Spike|hCoV-19/Denmark/DCGC-13530/2020|2020-11-30|EPI\_ISL\_712858|Original|hCoV-19^^Midtjylland|Human|Department of Virus and Microbiological Special Diagnostics|Albertsen Lab|Michaelsen|Denmark

>Spike|hCoV-19/USA/UT-UPHL-2012972605/2020|2020-08-17|EPI\_ISL\_746012|Original|hCoV-19^^Utah|Human|Ginkgo Bioworks Clinical Laboratory|Utah Public Health Laboratory|Young|USA

>Spike|hCoV-19/England/QEUEH-B0E5DB/2020|2020-11-01|EPI\_ISL\_642169|Original|hCoV-19^^England|Human|Lighthouse Lab in Glasgow|Wellcome Sanger Institute for the COVID-19 Genomics UK (COG-UK) Consortium|Davies|United Kingdom



>Spike|hCoV-19/USA/VA-DCLS-1715/2020|2020-09-03|EPI\_ISL\_614125|Original|hCoV-19^^Virginia|Human|Virginia DCLS|Virginia DCLS|St. Jacques|USA

>Spike|hCoV-19/Wales/PHWC-4A433E/2020|2020-12-16|EPI\_ISL\_764681|Original|hCoV-19^^Wales|Human|Wales Specialist Virology Centre Sequencing lab|COVID-19 Genomics UK (COG-UK) Consortium|Moore|United Kingdom

>Spike|hCoV-19/Canada/ON-PHL-20-02300/2020|2020-09-00|EPI\_ISL\_671557|Original|hCoV-19^^Ontario|Human|Public Health Ontario Laboratory|Public Health Ontario Laboratory|Guthrie|Canada

>Spike|hCoV-19/Northern Ireland/NIRE-FD613/2020|2020-05-01|EPI\_ISL\_489303|Original|hCoV-19^^Northern Ireland|Human|Regional Virus Laboratory|Wellcome Sanger Institute for the COVID-19 Genomics UK (COG-UK) consortium|Davies|United Kingdom

>Spike|hCoV-19/USA/CA-CZB-6984/2020|2020-09-02|EPI\_ISL\_582911|Original|hCoV-19^^California|Human|County of Santa Clara Public Health Department|Chan-Zuckerberg Biohub|Bhatt|USA

>Spike|hCoV-19/Sweden/20-07013/2020|2020-04-07|EPI\_ISL\_434662|Original|hCoV-19^^Vastra Gotaland|Human|Omtanken Grimmered|The Public Health Agency of Sweden|Svartstr\u00f6m|Sweden

>Spike|hCoV-19/Denmark/DCGC-18794/2020|2020-12-07|EPI\_ISL\_748170|Original|hCoV-19^^Hovedstaden|Human|Department of Virus and Microbiological Special Diagnostics|Albertsen Lab|Michaelsen|Denmark

>Spike|hCoV-19/England/ALDP-B7395D/2020|2020-11-12|EPI\_ISL\_664756|Original|hCoV-19^^England|Human|Quadram Institute Bioscience|COVID-19 Genomics UK (COG-UK) Consortium|Alikhan|United Kingdom

>Spike|hCoV-19/Australia/TAS275/2020|2020-04-18|EPI\_ISL\_522704|Original|hCoV-19^^Tasmania|Human|Royal Hobart Hospital Microbiology Department|MDU-PHL|Schultz|Australia

>Spike|hCoV-19/England/MILK-9A530B/2020|2020-09-02|EPI\_ISL\_550026|Original|hCoV-19^^England|Human|Lighthouse Lab in Milton Keynes|Wellcome Sanger Institute for the COVID-19 Genomics UK (COG-UK) consortium|Davies|United Kingdom

>Spike|hCoV-19/France/IDF-10003SN/2020|2020-03-00|EPI\_ISL\_447719|Original|hCoV-19^^France|Human|H\u00f4pital Henri-Mondor Ap-Hp|H\u00f4pital Henri-Mondor Ap-Hp|Rodriguez|France

>Spike|hCoV-19/Vietnam/VNHN\_3916/2020|2020-03-31|EPI\_ISL\_455704|Original|hCoV-19^^Hanoi|Human|National Hospital of Tropical Diseases|Oxford University Clinical Research Unit|Nguyen|Vietnam

>Spike|hCoV-19/USA/TX-HMH-4489/2020|2020-06-19|EPI\_ISL\_543662|Original|hCoV-19^^Texas|Human|Houston Methodist Hospital|Houston Methodist Hospital|Long|USA

>Spike|hCoV-19/Canada/ON-SLB3095/2020|2020-04-17|EPI\_ISL\_717747|Original|hCoV-19^^Ontario|Human|Kingston Health Sciences Centre and Queen's University|Ontario Institute for Cancer Research|de Borja|Canada

>Spike|hCoV-19/England/QEUEH-B9E02A/2020|2020-11-18|EPI\_ISL\_721034|Original|hCoV-19^^England|Human|Lighthouse Lab in Glasgow|Wellcome Sanger Institute for the COVID-19 Genomics UK (COG-UK) Consortium|Davies|United Kingdom

>Spike|hCoV-19/Scotland/QEUEH-95F4FE/2020|2020-08-08|EPI\_ISL\_532515|Original|hCoV-19^^Scotland|Human|NHSGGC West of Scotland Specialist Virology Centre / MRC-University of Glasgow Centre for Virus Research|Wellcome Sanger Institute for the COVID-19 Genomics UK (COG-UK) consortium|Davies|United Kingdom

>Spike|hCoV-19/USA/TX-HMH-MCoV-9778/2020|2020-07-06|EPI\_ISL\_780272|Original|hCoV-19^^Texas|Human|Houston Methodist Hospital|Houston Methodist Hospital|Long|USA

>Spike|hCoV-19/England/CAMC-CB2DFB/2020|2020-12-03|EPI\_ISL\_760922|Original|hCoV-19^^England|Human|Lighthouse Lab in Cambridge|Wellcome Sanger Institute for the COVID-19 Genomics UK (COG-UK) Consortium|Davies|United Kingdom

>Spike|hCoV-19/USA/ME-HETL-J0020/2020|2020-03-15|EPI\_ISL\_513433|Original|hCoV-19^^Maine|Human|Maine HETL|Tewhey Lab|Tewhey|USA

>Spike|hCoV-19/England/ALDP-B737EA/2020|2020-11-12|EPI\_ISL\_664859|Original|hCoV-19^^England|Human|Quadram Institute Bioscience|COVID-19 Genomics UK (COG-UK) Consortium|Alikhan|United Kingdom

>Spike|hCoV-19/England/BRIS-12EE4D/2020|2020-04-21|EPI\_ISL\_488409|Original|hCoV-19^^England|Human|PHE South West Regional Laboratory|Wellcome Sanger Institute for the COVID-19 Genomics UK (COG-UK) Consortium|Davies|United Kingdom

>Spike|hCoV-19/England/ALDP-A4F9C4/2020|2020-10-07|EPI\_ISL\_597611|Original|hCoV-19^^England|Human|Lighthouse Lab in Alderley Park|Wellcome Sanger Institute for the COVID-19 Genomics UK (COG-UK) consortium|Davies|United Kingdom

>Spike|hCoV-19/England/CWAR-24FDF69/2020|2020-06-12|EPI\_ISL\_584550|Original|hCoV-19^^England|Human|UHCW / University of Warwick|COVID-19 Genomics UK (COG-UK) Consortium|Stark|United Kingdom

>Spike|hCoV-19/Ireland/SO-NVRL-73IRL72886/2020|2020-09-14|EPI\_ISL\_639834|Original|hCoV-19^^Sligo|Human|National Virus Reference Laboratory|National Virus Reference Laboratory|Gonzalez|Ireland

>Spike|hCoV-19/Finland/1LS16D10/2020|2020-10-01|EPI\_ISL\_757351|Original|hCoV-19^^Uusimaa|Human|Department of Virology and Immunology|Department of Virology|Smura|Finland

>Spike|hCoV-19/USA/CA-SR0205/2020|2020-03-21|EPI\_ISL\_437581|Original|hCoV-19^^California|Human|Scripps Medical Laboratory|Andersen lab at Scripps Research|Gangavarapu|USA

>Spike|hCoV-19/Wales/PHWC-49D5F6/2020|2020-12-11|EPI\_ISL\_742807|Original|hCoV-19^^Wales|Human|Wales Specialist Virology Centre Sequencing lab|COVID-19 Genomics UK (COG-UK) Consortium|Moore|United Kingdom

>Spike|hCoV-19/Scotland/QEUH-AAB4B6/2020|2020-10-21|EPI\_ISL\_652793|Original|hCoV-19^^Scotland|Human|Oxford Viromics|COVID-19 Genomics UK (COG-UK) Consortium|Golubchik|United Kingdom

>Spike|hCoV-19/France/ARA-73624/2020|2020-09-16|EPI\_ISL\_692753|Original|hCoV-19^^Auvergne-Rh\u00f4ne-Alpes|Human|CNR Virus des Infections Respiratoires - France SUD|CNR Virus des Infections Respiratoires - France SUD|Bal|France

>Spike|hCoV-19/Netherlands/NA\_72/2020|2020-03-10|EPI\_ISL\_422832|Original|hCoV-19^^Netherlands|Human|Dutch COVID-19 response team|Erasmus Medical Center|Oude Munnink|Netherlands

>Spike|hCoV-19/Japan/PG-6319/2020|2020-08-00|EPI\_ISL\_689430|Original|hCoV-19^^Japan|Human|Pathogen Genomics Center|Pathogen Genomics Center|Sekizuka|Japan

>Spike|hCoV-19/Denmark/DCGC-16890/2020|2020-12-14|EPI\_ISL\_750210|Original|hCoV-19^^Midtjylland|Human|Department of Virus and Microbiological Special Diagnostics|Albertsen Lab|Michaelsen|Denmark

>Spike|hCoV-19/Australia/VIC9874/2020|2020-08-07|EPI\_ISL\_565756|Original|hCoV-19^^Victoria|Human|Microbiological Diagnostic Unit - Public Health Laboratory (MDU-PHL)|MDU-PHL|Schultz|Australia

>Spike|hCoV-19/United Arab Emirates/0212/2020|2020-05-18|EPI\_ISL\_698398|Original|hCoV-19^^Abu Dhabi|Human|Group 42 (G42) Healthcare|G42 Healthcare|Ogrodzki|United Arab Emirates

>Spike|hCoV-19/England/QEUH-B10E62/2020|2020-11-02|EPI\_ISL\_642367|Original|hCoV-19^^England|Human|Lighthouse Lab in Glasgow|Wellcome Sanger Institute for the COVID-19 Genomics UK (COG-UK) Consortium|Davies|United Kingdom

>Spike|hCoV-19/England/ALDP-B73647/2020|2020-11-12|EPI\_ISL\_662418|Original|hCoV-19^^England|Human|Lighthouse Lab in Alderley Park|Wellcome Sanger Institute for the COVID-19 Genomics UK (COG-UK) Consortium|Davies|United Kingdom

>Spike|hCoV-19/Ireland/KE-NVRL-72IRL19153/2020|2020-08-13|EPI\_ISL\_528479|Original|hCoV-19^^Kildare|Human|National Virus Reference Laboratory|National Virus Reference Laboratory|Gonzalez|Ireland

>Spike|hCoV-19/USA/WA-S1572/2020|2020-05-26|EPI\_ISL\_495998|Original|hCoV-19^^Washington|Human|Washington State Department of Health|Seattle Flu Study|Lee|USA

>Spike|hCoV-19/Denmark/DCGC-5117/2020|2020-09-21|EPI\_ISL\_621655|Original|hCoV-19^^Syddanmark|Human|Department of Virus and Microbiological Special Diagnostics|Albertsen lab|Michaelsen|Denmark

>Spike|hCoV-19/England/NORW-E8C0A/2020|2020-04-14|EPI\_ISL\_448291|Original|hCoV-19^^England|Human|Quadram Institute Bioscience|COVID-19 Genomics UK (COG-UK) Consortium|Alikhan|United Kingdom

>Spike|hCoV-19/Germany/BW-MVZ-LS-18/2020|2020-04-07|EPI\_ISL\_640236|Original|hCoV-19^^Baden-W\u00fcrtemberg|Human|MVZ Labor\u00e4rzte Singen|MVZ Labor\u00e4rzte Singen|Schmidt|Germany

>Spike|hCoV-19/England/QEUA-A8C433/2020|2020-10-18|EPI\_ISL\_643086|Original|hCoV-19^^England|Human|Lighthouse Lab in Glasgow|Wellcome Sanger Institute for the COVID-19 Genomics UK (COG-UK) Consortium|Davies|United Kingdom

>Spike|hCoV-19/England/LIVE-DCBE91/2020|2020-11-22|EPI\_ISL\_724472|Original|hCoV-19^^England|Human|Liverpool Clinical Laboratories|COVID-19 Genomics UK (COG-UK) Consortium|Haldenby|United Kingdom

>Spike|hCoV-19/England/MILK-C2FEBA/2020|2020-12-07|EPI\_ISL\_782775|Original|hCoV-19^^England|Human|Lighthouse Lab in Milton Keynes|Wellcome Sanger Institute for the COVID-19 Genomics UK (COG-UK) Consortium|Davies|United Kingdom

>Spike|hCoV-19/England/PORT-2D0D00/2020|2020-04-27|EPI\_ISL\_475275|Original|hCoV-19^^England|Human|Centre for Enzyme Innovation|COVID-19 Genomics UK (COG-UK) Consortium|Robson|United Kingdom

>Spike|hCoV-19/Wales/PHWC-164106/2020|2020-05-02|EPI\_ISL\_474129|Original|hCoV-19^^Wales|Human|Originating lab|COVID-19 Genomics UK (COG-UK) Consortium|Moore|United Kingdom

>Spike|hCoV-19/USA/CA-CHLA-PLM77922729/2020|2020-11-30|EPI\_ISL\_753518|Original|hCoV-19^^California|Human|Clinical virology Laboratory|Center for Personalized Medicine|Dien Bard|USA

>Spike|hCoV-19/USA/HI-H200076/2020|2020-06-12|EPI\_ISL\_752644|Original|hCoV-19^^Hawaii|Human|State Laboratories Division|State Laboratories Division|Sultana|USA

>Spike|hCoV-19/England/ALDP-9ED4AA/2020|2020-05-05|EPI\_ISL\_589562|Original|hCoV-19^^England|Human|Lighthouse Lab in Alderley Park|Wellcome Sanger Institute for the COVID-19 Genomics UK (COG-UK) consortium|Davies|United Kingdom

>Spike|hCoV-19/USA/TX-HMH-3150/2020|2020-06-10|EPI\_ISL\_544028|Original|hCoV-19^^Texas|Human|Houston Methodist Hospital|Houston Methodist Hospital|Long|USA

>Spike|hCoV-19/Northern Ireland/NIRE-234C0D/2020|2020-10-16|EPI\_ISL\_763573|Original|hCoV-19^^Northern Ireland|Human|Regional Virus Laboratory|COVID-19 Genomics UK (COG-UK) Consortium|Fairley|United Kingdom

>Spike|hCoV-19/England/CAMC-B22FC4/2020|2020-11-02|EPI\_ISL\_647377|Original|hCoV-19^^England|Human|Lighthouse Lab in Cambridge|Wellcome Sanger Institute for the COVID-19 Genomics UK (COG-UK) Consortium|Davies|United Kingdom

>Spike|hCoV-19/Japan/PG-7029/2020|2020-08-00|EPI\_ISL\_688134|Original|hCoV-19^^Japan|Human|Pathogen Genomics Center|Pathogen Genomics Center|Sekizuka|Japan

>Spike|hCoV-19/England/QEUA-AF72A2/2020|2020-10-29|EPI\_ISL\_662745|Original|hCoV-19^^England|Human|Lighthouse Lab in Glasgow|Wellcome Sanger Institute for the COVID-19 Genomics UK (COG-UK) Consortium|Davies|United Kingdom

>Spike|hCoV-19/USA/CA-CZB-1019/2020|2020-04-10|EPI\_ISL\_436660|Original|hCoV-19^^California|Human|County of Santa Clara Public Health Department|Chan-Zuckerberg Biohub|Hao|USA

>Spike|hCoV-19/England/MILK-ABB969/2020|2020-10-21|EPI\_ISL\_623459|Original|hCoV-19^^England|Human|Lighthouse Lab in Milton Keynes|Wellcome Sanger Institute for the COVID-19 Genomics UK (COG-UK) consortium|Davies|United Kingdom

>Spike|hCoV-19/England/LOND-D9808/2020|2020-04-14|EPI\_ISL\_487637|Original|hCoV-19^^England|Human|University College London|Wellcome Sanger Institute for the COVID-19 Genomics UK (COG-UK) consortium|Davies|United Kingdom

>Spike|hCoV-19/Oman/RESP-20-1189/2020|2020-03-02|EPI\_ISL\_457706|Original|hCoV-19^^Muscat|Human|Oman-NIC|Oman-NIC|Al Mahruqi|Oman

>Spike|hCoV-19/Netherlands/NA\_640/2020|2020-05-03|EPI\_ISL\_461075|Original|hCoV-19^^Netherlands|Human|Dutch COVID-19 response team|Erasmus Medical Center|Oude Munnink|Netherlands

>Spike|hCoV-19/England/MILK-A7CB31/2020|2020-10-15|EPI\_ISL\_606495|Original|hCoV-19^^England|Human|Lighthouse Lab in Milton Keynes|Wellcome Sanger Institute for the COVID-19 Genomics UK (COG-UK) consortium|Davies|United Kingdom

>Spike|hCoV-19/England/CAMB-1B917B/2020|2020-00-00|EPI\_ISL\_704413|Original|hCoV-19^^England|Human|Department of Pathology|COVID-19 Genomics UK (COG-UK) Consortium|Goodfellow|United Kingdom

>Spike|hCoV-19/Wales/PHWC-4A676D/2020|2020-12-17|EPI\_ISL\_765070|Original|hCoV-19^^Wales|Human|Wales Specialist Virology Centre Sequencing lab|COVID-19 Genomics UK (COG-UK) Consortium|Moore|United Kingdom

>Spike|hCoV-19/England/CAMB-7AAF4/2020|2020-04-07|EPI\_ISL\_433839|Original|hCoV-19^^England|Human|Department of Pathology|COVID-19 Genomics UK (COG-UK) Consortium|Meredith|United Kingdom

>Spike|hCoV-19/Australia/NSW1135/2020|2020-04-27|EPI\_ISL\_593746|Original|hCoV-19^^New South Wales|Human|South Eastern Area Laboratory Services (SEALS)|NSW Health Pathology - Institute of Clinical Pathology and Medical Research; Westmead Hospital; University of Sydney|Gall|Australia

>Spike|hCoV-19/England/NORT-28C899/2020|2020-05-16|EPI\_ISL\_478604|Original|hCoV-19^^England|Human|Northumbria University / South Tees Hospitals NHS Foundation Trust / North Cumbria Integrated Care NHS Foundation Trust / North Tees and Hartlepool NHS Foundation Trust / Newcastle Hospitals NHS Foundation Trust|COVID-19 Genomics UK (COG-UK) Consortium|Bashton|United Kingdom

>Spike|hCoV-19/England/BRIS-128CFE/2020|2020-04-14|EPI\_ISL\_458891|Original|hCoV-19^^England|Human|PHE South West Regional Laboratory|Wellcome Sanger Institute for the COVID-19 Genomics UK (COG-UK) consortium|Davies|United Kingdom

>Spike|hCoV-19/England/MILK-846947/2020|2020-07-16|EPI\_ISL\_557292|Original|hCoV-19^^England|Human|Lighthouse Lab in Milton Keynes|Wellcome Sanger Institute for the COVID-19 Genomics UK (COG-UK) consortium|Davies|United Kingdom

>Spike|hCoV-19/England/QEUH-BA29FB/2020|2020-11-18|EPI\_ISL\_672840|Original|hCoV-19^^England|Human|Lighthouse Lab in Glasgow|Wellcome Sanger Institute for the COVID-19 Genomics UK (COG-UK) Consortium|Davies|United Kingdom

>Spike|hCoV-19/Belgium/rega-0803753/2020|2020-08-03|EPI\_ISL\_734897|Original|hCoV-19^^Merksem|Human|UZ Leuven|KU Leuven|Maes|Belgium

>Spike|hCoV-19/Spain/AN-IBV-002901/2020|2020-03-18|EPI\_ISL\_474938|Original|hCoV-19^^Andalucia|Human|Hospital Universitario Virgen de las Nieves de Granada-SAS|SeqCOVID-SPAIN consortium|IBV(CSIC)|Comas|Spain

>Spike|hCoV-19/Panama/331186/2020|2020-03-06|EPI\_ISL\_496681|Original|hCoV-19^^Panama West|Human|Gorgas Memorial Laboratory of Health Studies|Gorgas Memorial Laboratory of Health Studies|Martinez|Panama

>Spike|hCoV-19/Japan/PG-1009/2020|2020-03-00|EPI\_ISL\_684619|Original|hCoV-19^^Japan|Human|Tokyo Metropolitan Institute of Public Health|Pathogen Genomics Center|Sekizuka|Japan

>Spike|hCoV-19/Gambia/NPHL-2909/2020|2020-07-26|EPI\_ISL\_561304|Original|hCoV-19^^Kombo|Human|MRCG at LSHTM Genomics lab|MRCG at LSHTM Genomics lab|Sesay|Gambia

>Spike|hCoV-19/England/MILK-BAABB1/2020|2020-11-18|EPI\_ISL\_681554|Original|hCoV-19^^England|Human|Lighthouse Lab in Milton Keynes|Wellcome Sanger Institute for the COVID-19 Genomics UK (COG-UK) Consortium|Davies|United Kingdom

>Spike|hCoV-19/England/BRIS-125198/2020|2020-03-25|EPI\_ISL\_443812|Original|hCoV-19^^England|Human|PHE South West Regional Laboratory|Wellcome Sanger Institute for the COVID-19 Genomics UK (COG-UK) consortium|Amato|United Kingdom

>Spike|hCoV-19/Wales/PHWC-48F16C/2020|2020-11-07|EPI\_ISL\_681051|Original|hCoV-19^^Wales|Human|Wales Specialist Virology Centre Sequencing lab|COVID-19 Genomics UK (COG-UK) Consortium|Moore|United Kingdom

>Spike|hCoV-19/Australia/SAP367/2020|2020-03-29|EPI\_ISL\_483138|Original|hCoV-19^^South Australia|Human|SA Pathology|SA Pathology|Leong|Australia

>Spike|hCoV-19/South Africa/R10478/2020|2020-06-04|EPI\_ISL\_490279|Original|hCoV-19^^Western Cape|Human|National Institute for Communicable Diseases of the National Health Laboratory Service|National Institute for Communicable Diseases of the National Health Laboratory Service|Allam|South Africa

>Spike|hCoV-19/Australia/VIC13553/2020|2020-08-03|EPI\_ISL\_563750|Original|hCoV-19^^Victoria|Human|Microbiological Diagnostic Unit - Public Health Laboratory (MDU-PHL)|MDU-PHL|Schultz|Australia

>Spike|hCoV-19/USA/TX-HMH-MCoV-14706/2020|2020-10-01|EPI\_ISL\_787991|Original|hCoV-19^^Texas|Human|Houston Methodist Hospital|Houston Methodist Hospital|Long|USA

>Spike|hCoV-19/Japan/PG-8315/2020|2020-08-00|EPI\_ISL\_687414|Original|hCoV-19^^Japan|Human|Pathogen Genomics Center|Pathogen Genomics Center|Sekizuka|Japan

>Spike|hCoV-19/England/ALDP-9CD1B8/2020|2020-09-16|EPI\_ISL\_566118|Original|hCoV-19^^England|Human|Lighthouse Lab in Alderley Park|Wellcome Sanger Institute for the COVID-19 Genomics UK (COG-UK) consortium|Davies|United Kingdom

>Spike|hCoV-19/Russia/PSK-RII-MH6191S/2020|2020-11-13|EPI\_ISL\_733361|Original|hCoV-19^^Pskov|Human|HELIX LLC|WHO National Influenza Centre Russian Federation|Komissarov|Russia

>Spike|hCoV-19/England/MILK-AC85B0/2020|2020-10-21|EPI\_ISL\_629234|Original|hCoV-19^^England|Human|Lighthouse Lab in Milton Keynes|Wellcome Sanger Institute for the COVID-19 Genomics UK (COG-UK) consortium|Davies|United Kingdom

>Spike|hCoV-19/England/QEUEH-AAE820/2020|2020-10-22|EPI\_ISL\_630951|Original|hCoV-19^^England|Human|Lighthouse Lab in Glasgow|Wellcome Sanger Institute for the COVID-19 Genomics UK (COG-UK) consortium|Davies|United Kingdom

>Spike|hCoV-19/England/CAMC-945640/2020|2020-07-15|EPI\_ISL\_556796|Original|hCoV-19^^England|Human|Lighthouse Lab in Cambridge|Wellcome Sanger Institute for the COVID-19 Genomics UK (COG-UK) consortium|Davies|United Kingdom

>Spike|hCoV-19/England/QEUEH-969673/2020|2020-08-14|EPI\_ISL\_581406|Original|hCoV-19^^England|Human|Lighthouse Lab in Glasgow|Wellcome Sanger Institute for the COVID-19 Genomics UK (COG-UK) consortium|Davies|United Kingdom

>Spike|hCoV-19/England/ALDP-C065E1/2020|2020-12-05|EPI\_ISL\_709421|Original|hCoV-19^^England|Human|Lighthouse Lab in Alderley Park|Wellcome Sanger Institute for the COVID-19 Genomics UK (COG-UK) Consortium|Davies|United Kingdom

>Spike|hCoV-19/New Zealand/20CV0567/2020|2020-11-14|EPI\_ISL\_661256|Original|hCoV-19^^Auckland|Human|LabPLUS|Institute of Environmental Science and Research (ESR)|Wang|New Zealand

>Spike|hCoV-19/England/NOTT-11F94E/2020|2020-11-27|EPI\_ISL\_725588|Original|hCoV-19^^England|Human|Lincolnshire Hospitals and DeepSeq Nottingham|COVID-19 Genomics UK (COG-UK) Consortium|Loose|United Kingdom

>Spike|hCoV-19/USA/CA-ALSR-4308/2020|2020-09-29|EPI\_ISL\_648958|Original|hCoV-19^^California|Human|San Diego County Public Health Laboratory|Andersen lab at Scripps Research|Gangavarapu|USA

>Spike|hCoV-19/England/QEUEH-B6693F/2020|2020-11-11|EPI\_ISL\_662306|Original|hCoV-19^^England|Human|Lighthouse Lab in Glasgow|Wellcome Sanger Institute for the COVID-19 Genomics UK (COG-UK) Consortium|Davies|United Kingdom

>Spike|hCoV-19/Denmark/DCGC-2347/2020|2020-08-10|EPI\_ISL\_617685|Original|hCoV-19^^Hovedstaden|Human|Department of Virus and Microbiological Special Diagnostics|Albertsen lab|Michaelsen|Denmark

>Spike|hCoV-19/Gambia/GC19-3301/2020|2020-07-27|EPI\_ISL\_561059|Original|hCoV-19^^Kombo|Human|MRCG at LSHTM Genomics lab|MRCG at LSHTM Genomics lab|Sesay|Gambia

>Spike|hCoV-19/USA/CT-Yale-114/2020|2020-04-10|EPI\_ISL\_431082|Original|hCoV-19^^Connecticut|Human|Yale COVID-19 Biorepository|Grubaugh Lab - Yale School of Public Health|Grubaugh|USA

>Spike|hCoV-19/Denmark/DCGC-1055/2020|2020-03-16|EPI\_ISL\_614686|Original|hCoV-19^^Sjaelland|Human|Department of Virus and Microbiological Special Diagnostics|Albertsen lab|Michaelsen|Denmark

>Spike|hCoV-19/England/20182001304/2020|2020-04-24|EPI\_ISL\_527357|Original|hCoV-19^^England|Human|Respiratory Virus Unit|Respiratory Virus Unit|Ledesma|United Kingdom

>Spike|hCoV-19/USA/VI-CDC-4022/2020|2020-04-17|EPI\_ISL\_454643|Original|hCoV-19^^Virgin Islands|Human|VI-US Virgin Islands Department of Health|Pathogen Discovery|Queen|USA

>Spike|hCoV-19/Peru/ANC-INS-051/2020|2020-04-12|EPI\_ISL\_516685|Original|hCoV-19^^Ancash|Human|Laboratorio de Referencia Nacional de Virus Respiratorio. Centro Nacional de Salud Publica. Instituto Nacional de Salud Peru.|Laboratorio de Referencia Nacional de Biotecnolog\u00eda y Biolog\u00eda Molecular. Centro Nacional de Salud Publica. Instituto Nacional de Salud Peru.|Padilla Rojas|Peru

>Spike|hCoV-19/Ecuador/USFQ-106/2020|2020-05-19|EPI\_ISL\_471271|Original|hCoV-19^^Quito|Human|Hospital Oncol\u00f3gico Solca N\u00facleo de Quito|Institute of Microbiology|Cardenas|Ecuador

>Spike|hCoV-19/Scotland/CVR2542/2020|2020-04-16|EPI\_ISL\_490692|Original|hCoV-19^^Scotland|Human|West of Scotland Specialist Virology Centre|COVID-19 Genomics UK (COG-UK) Consortium|Robertson|United Kingdom

>Spike|hCoV-19/USA/VA\_NIDDL\_2896/2020|2020-04-02|EPI\_ISL\_491921|Original|hCoV-19^^Virginia|Human|Naval Infectious Diseases Diagnostic Laboratory|Naval Medical Research Center Biological Defense Research Directorate|Voegtly|USA

>Spike|hCoV-19/USA/MI-UM-10036802563/2020|2020-11-05|EPI\_ISL\_707842|Original|hCoV-19^^Michigan|Human|University of Michigan Clinical Microbiology Laboratory|Lauring Lab|Valesano|USA

>Spike|hCoV-19/England/LIVE-993C7/2020|2020-04-08|EPI\_ISL\_439716|Original|hCoV-19^^England|Human|Liverpool Clinical Laboratories|COVID-19 Genomics UK (COG-UK) Consortium|Haldenby|United Kingdom

>Spike|hCoV-19/England/QEUEH-B30AB3/2020|2020-11-03|EPI\_ISL\_659946|Original|hCoV-19^^England|Human|Lighthouse Lab in Glasgow|Wellcome Sanger Institute for the COVID-19 Genomics UK (COG-UK) Consortium|Davies|United Kingdom

>Spike|hCoV-19/USA/HI-H200465/2020|2020-10-12|EPI\_ISL\_753008|Original|hCoV-19^^Hawaii|Human|State Laboratories Division|State Laboratories Division|Sultana|USA

>Spike|hCoV-19/USA/TX-DSHS-1571/2020|2020-06-24|EPI\_ISL\_681855|Original|hCoV-19^^Texas|Human|Texas Department of State Health Services|Texas Department of State Health Services|Rahman|USA

>Spike|hCoV-19/England/QEUEH-B10837/2020|2020-11-02|EPI\_ISL\_641895|Original|hCoV-19^^England|Human|Lighthouse Lab in Glasgow|Wellcome Sanger Institute for the COVID-19 Genomics UK (COG-UK) Consortium|Davies|United Kingdom

>Spike|hCoV-19/England/CAMB-7A308/2020|2020-04-02|EPI\_ISL\_441810|Original|hCoV-19^^England|Human|Department of Pathology|Wellcome Sanger Institute for the COVID-19 Genomics UK (COG-UK) consortium|Amato|United Kingdom

>Spike|hCoV-19/Italy/APU-IZSPB\_293PT/2020|2020-11-03|EPI\_ISL\_653787|Original|hCoV-19^^Apulia|Human|I.R.C.C.S. \S. De Bellis\ - Ente Ospedaliero|Istituto Zooprofilattico Sperimentale della Puglia e della Basilicata|Parisi|Italy

>Spike|hCoV-19/England/ALDP-952EEE/2020|2020-06-11|EPI\_ISL\_553668|Original|hCoV-19^^England|Human|Lighthouse Lab in Alderley Park|Wellcome Sanger Institute for the COVID-19 Genomics UK (COG-UK) consortium|Davies|United Kingdom

>Spike|hCoV-19/England/20139043604/2020|2020-03-28|EPI\_ISL\_420679|Original|hCoV-19^^England|Human|Respiratory Virus Unit|Respiratory Virus Unit|Platt|United Kingdom

>Spike|hCoV-19/South Africa/KRISP-K001054/2020|2020-07-18|EPI\_ISL\_509312|Original|hCoV-19^^KwaZulu-Natal|Human|NHLS-IALCH|KRISP|de Oliveira|South Africa

>Spike|hCoV-19/Japan/PG-7016/2020|2020-08-00|EPI\_ISL\_688121|Original|hCoV-19^^Japan|Human|Pathogen Genomics Center|Pathogen Genomics Center|Sekizuka|Japan

>Spike|hCoV-19/England/ALDP-5B9E70/2020|2020-06-15|EPI\_ISL\_558815|Original|hCoV-19^^England|Human|Lighthouse Lab in Alderley Park|Wellcome Sanger Institute for the COVID-19 Genomics UK (COG-UK) consortium|Davies|United Kingdom

>Spike|hCoV-19/Northern Ireland/NIRE-2357DE/2020|2020-11-05|EPI\_ISL\_742145|Original|hCoV-19^^Northern Ireland|Human|Regional Virus Laboratory|COVID-19 Genomics UK (COG-UK) Consortium|Fairley|United Kingdom

>Spike|hCoV-19/Sichuan/SC-PHCC1-035/2020|2020-02-07|EPI\_ISL\_451356|Original|hCoV-19^^Sichuan|Human|West China Hospital of Sichuan University|State Key Laboratory of Biotherapy of Sichuan University|Tang|China

>Spike|hCoV-19/USA/WA-S659/2020|2020-04-21|EPI\_ISL\_438212|Original|hCoV-19^^Washington|Human|Washington State Department of Health|Seattle Flu Study|Bedford|USA

>Spike|hCoV-19/England/ALDP-5CA7F9/2020|2020-06-19|EPI\_ISL\_558447|Original|hCoV-19^^England|Human|Lighthouse Lab in Alderley Park|Wellcome Sanger Institute for the COVID-19 Genomics UK (COG-UK) consortium|Davies|United Kingdom

>Spike|hCoV-19/Denmark/DCGC-10462/2020|2020-11-02|EPI\_ISL\_669990|Original|hCoV-19^^Midtjylland|Human|Department of Virus and Microbiological Special Diagnostics|Albertsen Lab|Michaelsen|Denmark

>Spike|hCoV-19/Belgium/ULG-10430/2020|2020-08-14|EPI\_ISL\_581608|Original|hCoV-19^^Li\u00e8ge|Human|Department of Clinical Microbiology|GIGA Medical Genomics|Durkin|Belgium

>Spike|hCoV-19/England/ALDP-B23F1E/2020|2020-11-04|EPI\_ISL\_646363|Original|hCoV-19^^England|Human|Lighthouse Lab in Alderley Park|Wellcome Sanger Institute for the COVID-19 Genomics UK (COG-UK) Consortium|Davies|United Kingdom

>Spike|hCoV-19/Scotland/CVR1971/2020|2020-04-08|EPI\_ISL\_433665|Original|hCoV-19^^Scotland|Human|West of Scotland Specialist Virology Centre|COVID-19 Genomics UK (COG-UK) Consortium|Robertson|United Kingdom

>Spike|hCoV-19/England/CAMB-79415/2020|2020-04-03|EPI\_ISL\_441147|Original|hCoV-19^^England|Human|Department of Pathology|Wellcome Sanger Institute for the COVID-19 Genomics UK (COG-UK) consortium|Amato|United Kingdom

>Spike|hCoV-19/Russia/OMS-ORINFI-5372S/2020|2020-06-05|EPI\_ISL\_569770|Original|hCoV-19^^Omsk|Human|Omsk Research Institute of Natural Focal Infections|WHO National Influenza Centre Russian Federation|Komissarov|Russia

>Spike|hCoV-19/England/MILK-AB8674/2020|2020-10-21|EPI\_ISL\_623214|Original|hCoV-19^^England|Human|Lighthouse Lab in Milton Keynes|Wellcome Sanger Institute for the COVID-19 Genomics UK (COG-UK) Consortium|Davies|United Kingdom

>Spike|hCoV-19/England/MILK-BAB549/2020|2020-11-18|EPI\_ISL\_681407|Original|hCoV-19^^England|Human|Lighthouse Lab in Milton Keynes|Wellcome Sanger Institute for the COVID-19 Genomics UK (COG-UK) Consortium|Davies|United Kingdom

>Spike|hCoV-19/England/QEUH-9F956C/2020|2020-09-25|EPI\_ISL\_589061|Original|hCoV-19^^England|Human|Lighthouse Lab in Glasgow|Wellcome Sanger Institute for the COVID-19 Genomics UK (COG-UK) consortium|Davies|United Kingdom

>Spike|hCoV-19/USA/MA-MGH-03274/2020|2020-10-22|EPI\_ISL\_765768|Original|hCoV-19^^Massachusetts|Human|Massachusetts General Hospital|Infectious Disease Program|Park|USA

>Spike|hCoV-19/Denmark/DCGC-19520/2020|2020-12-07|EPI\_ISL\_748378|Original|hCoV-19^^Syddanmark|Human|Department of Virus and Microbiological Special Diagnostics|Albertsen Lab|Michaelsen|Denmark

>Spike|hCoV-19/England/BRIS-12ED31/2020|2020-04-22|EPI\_ISL\_488257|Original|hCoV-19^^England|Human|PHE South West Regional Laboratory|Wellcome Sanger Institute for the COVID-19 Genomics UK (COG-UK) consortium|Davies|United Kingdom

>Spike|hCoV-19/Bangladesh/BARJ-CVASU-CTG-517/2020|2020-05-03|EPI\_ISL\_450344|Original|hCoV-19^^Chittagong|Human|Bangladesh Institute of Tropical & Infectious Diseases|Basic and Applied Research on Jute Project|Ahmed|Bangladesh

>Spike|hCoV-19/USA/UT-UPHL-201227657/2020|2020-03-31|EPI\_ISL\_672552|Original|hCoV-19^^Utah|Human|Utah Public Health Laboratory|Utah Public Health Laboratory|Young|USA

>Spike|hCoV-19/USA/HI-H200057/2020|2020-05-28|EPI\_ISL\_752642|Original|hCoV-19^^Hawaii|Human|State Laboratories Division|State Laboratories Division|Sultana|USA

>Spike|hCoV-19/England/CAMC-B78ED1/2020|2020-11-13|EPI\_ISL\_668068|Original|hCoV-19^^England|Human|Lighthouse Lab in Cambridge|Wellcome Sanger Institute for the COVID-19 Genomics UK (COG-UK) Consortium|Davies|United Kingdom

>Spike|hCoV-19/USA/NY-NYCPHL-000558/2020|2020-03-27|EPI\_ISL\_632017|Original|hCoV-19^^New York|Human|Jamaica Hospital Medical Center|New York City Public Health Laboratory|Wang|USA

>Spike|hCoV-19/USA/VI-CDC-4367/2020|2020-04-25|EPI\_ISL\_454650|Original|hCoV-19^^Virgin Islands|Human|VI-US Virgin Islands Department of Health|Pathogen Discovery|Queen|USA

>Spike|hCoV-19/USA/WI-WSLH-200685/2020|2020-09-10|EPI\_ISL\_631442|Original|hCoV-19^^Wisconsin|Human|Wisconsin State Laboratory of Hygiene Communicable Disease Division|Wisconsin State Laboratory of Hygiene Communicable Disease Division|Florek|USA

>Spike|hCoV-19/England/ALDP-950509/2020|2020-06-18|EPI\_ISL\_555283|Original|hCoV-19^^England|Human|Lighthouse Lab in Alderley Park|Wellcome Sanger Institute for the COVID-19 Genomics UK (COG-UK) consortium|Davies|United Kingdom

>Spike|hCoV-19/Wales/PHWC-49A2D4/2020|2020-12-01|EPI\_ISL\_727524|Original|hCoV-19^^Wales|Human|Originating lab|COVID-19 Genomics UK (COG-UK) Consortium|Moore|United Kingdom

>Spike|hCoV-19/England/ALDP-A6835E/2020|2020-10-12|EPI\_ISL\_608858|Original|hCoV-19^^England|Human|Lighthouse Lab in Alderley Park|Wellcome Sanger Institute for the COVID-19 Genomics UK (COG-UK) consortium|Davies|United Kingdom

>Spike|hCoV-19/Canada/QC-LSPQ-L00238518/2020|2020-03-25|EPI\_ISL\_536209|Original|hCoV-19^^Quebec|Human|H\u00f4pital de Hull|Laboratoire de sant\u00e9 publique du Qu\u00e9bec|Moreira|Canada

>Spike|hCoV-19/Morocco/RMPS-03/2020|2020-04-03|EPI\_ISL\_469051|Original|hCoV-19^^Morocco|Human|LNR National Reference Laboratory|Medical Biotechnology Laboratory|Kartti|Morocco

>Spike|hCoV-19/England/ALDP-9CC3C2/2020|2020-09-16|EPI\_ISL\_573104|Original|hCoV-19^^England|Human|Quadram Institute Bioscience|COVID-19 Genomics UK (COG-UK) Consortium|Alikhan|United Kingdom

>Spike|hCoV-19/Denmark/DCGC-20670/2020|2020-12-21|EPI\_ISL\_759288|Original|hCoV-19^^Midtjylland|Human|Department of Virus and Microbiological Special Diagnostics|Albertsen Lab|Michaelsen|Denmark

>Spike|hCoV-19/Israel/2113155/2020|2020-04-15|EPI\_ISL\_447349|Original|hCoV-19^^Jerusalem District|Human|Clinical Virology Unit|Stern Lab|Miller|Israel

>Spike|hCoV-19/USA/TX-HMH-MCoV-18285/2020|2020-11-17|EPI\_ISL\_784633|Original|hCoV-19^^Texas|Human|Houston Methodist Hospital|Houston Methodist Hospital|Long|USA

>Spike|hCoV-19/USA/WI-UW-1608/2020|2020-09-17|EPI\_ISL\_605485|Original|hCoV-19^^Wisconsin|Human|University of Wisconsin-Madison AIDS Vaccine Research Laboratories|University of Wisconsin-Madison AIDS Vaccine Research Laboratories|Baczenas|USA

>Spike|hCoV-19/Wales/PHWC-4A5449/2020|2020-12-15|EPI\_ISL\_764866|Original|hCoV-19^^Wales|Human|Wales Specialist Virology Centre Sequencing lab|COVID-19 Genomics UK (COG-UK) Consortium|Moore|United Kingdom

>Spike|hCoV-19/USA/CA-CZB-10872/2020|2020-08-04|EPI\_ISL\_583112|Original|hCoV-19^^California|Human|Humboldt County Public Health Laboratory|Chan-Zuckerberg Biohub|Bhatt|USA

>Spike|hCoV-19/Australia/VIC17119/2020|2020-08-06|EPI\_ISL\_663742|Original|hCoV-19^^Victoria|Human|Microbiological Diagnostic Unit - Public Health Laboratory (MDU-PHL) |MDU-PHL|Schultz|Australia

>Spike|hCoV-19/England/NOTT-1196F2/2020|2020-11-02|EPI\_ISL\_627713|Original|hCoV-19^^England|Human|Queens Medical Centre|COVID-19 Genomics UK (COG-UK) Consortium|Loose|United Kingdom

>Spike|hCoV-19/Scotland/EDB4756/2020|2020-05-10|EPI\_ISL\_453149|Original|hCoV-19^^Scotland|Human|Virology Department|COVID-19 Genomics UK (COG-UK) Consortium|Williams|United Kingdom

>Spike|hCoV-19/England/QEUEH-9B5274/2020|2020-09-03|EPI\_ISL\_590253|Original|hCoV-19^^England|Human|Lighthouse Lab in Glasgow|Wellcome Sanger Institute for the COVID-19 Genomics UK (COG-UK) consortium|Davies|United Kingdom

>Spike|hCoV-19/England/MILK-A7DA24/2020|2020-10-16|EPI\_ISL\_638461|Original|hCoV-19^^England|Human|Oxford Viromics|COVID-19 Genomics UK (COG-UK) Consortium|Golubchik|United Kingdom

>Spike|hCoV-19/England/BIRM-60CFB/2020|2020-07-12|EPI\_ISL\_529590|Original|hCoV-19^^England|Human|University of Birmingham|COVID-19 Genomics UK (COG-UK) Consortium|Loman|United Kingdom

>Spike|hCoV-19/USA/TX-HMH-MCoV-8082/2020|2020-06-30|EPI\_ISL\_784185|Original|hCoV-19^^Texas|Human|Houston Methodist Hospital|Houston Methodist Hospital|Long|USA

>Spike|hCoV-19/Japan/PG-1297/2020|2020-03-00|EPI\_ISL\_684905|Original|hCoV-19^^Japan|Human|Saitama Prefectural Institute of Public Health|Pathogen Genomics Center|Sekizuka|Japan

>Spike|hCoV-19/Sweden/20-07034/2020|2020-04-06|EPI\_ISL\_434664|Original|hCoV-19^^Vastra Gotaland|Human|Omtanken Grimmered|The Public Health Agency of Sweden|Svartstr\u00f6m|Sweden

>Spike|hCoV-19/Denmark/DCGC-18872/2020|2020-12-07|EPI\_ISL\_748176|Original|hCoV-19^^Sjaelland|Human|Department of Virus and Microbiological Special Diagnostics|Albertsen Lab|Michaelsen|Denmark

>Spike|hCoV-19/Canada/NL\_34/2020|2020-03-15|EPI\_ISL\_429815|Original|hCoV-19^^Newfoundland and Labrador|Human|Public Health Laboratory|National Microbiology Laboratory|Majer|Canada



>Spike|hCoV-19/Germany/NW-HHU-175/2020|2020-03-25|EPI\_ISL\_602497|Original|hCoV-19^^North Rhine-Westphalia|Human|Institute for Virology|Center of Medical Microbiology|Wienemann|Germany

>Spike|hCoV-19/Scotland/EDB020/2020|2020-03-14|EPI\_ISL\_425826|Original|hCoV-19^^Scotland|Human|Virology Department|COVID-19 Genomics UK (COG-UK) Consortium|Williams|United Kingdom

>Spike|hCoV-19/England/204441447/2020|2020-10-25|EPI\_ISL\_637154|Original|hCoV-19^^England|Human|Respiratory Virus Unit|COVID-19 Genomics UK (COG-UK) Consortium|Platt|United Kingdom

>Spike|hCoV-19/England/QEUH-C934A0/2020|2020-12-15|EPI\_ISL\_761998|Original|hCoV-19^^England|Human|Lighthouse Lab in Glasgow|Wellcome Sanger Institute for the COVID-19 Genomics UK (COG-UK) Consortium|Davies|United Kingdom

>Spike|hCoV-19/Scotland/CVR3710/2020|2020-05-26|EPI\_ISL\_473765|Original|hCoV-19^^Scotland|Human|West of Scotland Specialist Virology Centre|COVID-19 Genomics UK (COG-UK) Consortium|Robertson|United Kingdom

>Spike|hCoV-19/USA/FL-BPHL-1621/2020|2020-09-04|EPI\_ISL\_594311|Original|hCoV-19^^Florida|Human|Florida Bureau of Public Health Laboratories|Florida Bureau of Public Health Laboratories|Blanton|USA

>Spike|hCoV-19/England/MILK-ACD3B1/2020|2020-10-21|EPI\_ISL\_634501|Original|hCoV-19^^England|Human|Lighthouse Lab in Milton Keynes|Wellcome Sanger Institute for the COVID-19 Genomics UK (COG-UK) consortium|Davies|United Kingdom

>Spike|hCoV-19/England/QEUH-9A44EB/2020|2020-09-01|EPI\_ISL\_540231|Original|hCoV-19^^England|Human|Lighthouse Lab in Glasgow|Wellcome Sanger Institute for the COVID-19 Genomics UK (COG-UK) consortium|Davies|United Kingdom

>Spike|hCoV-19/England/QEUH-B2C8B0/2020|2020-11-03|EPI\_ISL\_646726|Original|hCoV-19^^England|Human|Lighthouse Lab in Glasgow|Wellcome Sanger Institute for the COVID-19 Genomics UK (COG-UK) Consortium|Davies|United Kingdom

>Spike|hCoV-19/Australia/VIC8952/2020|2020-07-28|EPI\_ISL\_565306|Original|hCoV-19^^Victoria|Human|Microbiological Diagnostic Unit - Public Health Laboratory (MDU-PHL)|MDU-PHL|Schultz|Australia

>Spike|hCoV-19/Scotland/QEUH-B0DA64/2020|2020-11-02|EPI\_ISL\_649518|Original|hCoV-19^^Scotland|Human|Lighthouse Lab in Glasgow|Wellcome Sanger Institute for the COVID-19 Genomics UK (COG-UK) Consortium|Davies|United Kingdom

>Spike|hCoV-19/USA/TX-DSHS-1501/2020|2020-06-22|EPI\_ISL\_683416|Original|hCoV-19^^Texas|Human|Texas Department of State Health Services|Texas Department of State Health Services|Rahman|USA

>Spike|hCoV-19/England/SHEF-CF595/2020|2020-05-18|EPI\_ISL\_462070|Original|hCoV-19^^England|Human|Virology Department|COVID-19 Genomics UK (COG-UK) Consortium|de Silva|United Kingdom

>Spike|hCoV-19/Denmark/DCGC-20032/2020|2020-12-07|EPI\_ISL\_747942|Original|hCoV-19^^Midtjylland|Human|Department of Virus and Microbiological Special Diagnostics|Albertsen Lab|Michaelsen|Denmark

>Spike|hCoV-19/Japan/PG-7278/2020|2020-08-00|EPI\_ISL\_688381|Original|hCoV-19^^Japan|Human|Saitama Prefectural Institute of Public Health|Pathogen Genomics Center|Sekizuka|Japan

>Spike|hCoV-19/Denmark/DCGC-8718/2020|2020-10-26|EPI\_ISL\_625711|Original|hCoV-19^^Hovedstaden|Human|Department of Virus and Microbiological Special Diagnostics|Albertsen lab|Michaelsen|Denmark

>Spike|hCoV-19/England/LIVE-A4F89/2020|2020-02-28|EPI\_ISL\_499843|Original|hCoV-19^^England|Human|Liverpool Clinical Laboratories|COVID-19 Genomics UK (COG-UK) Consortium|Haldenby|United Kingdom

>Spike|hCoV-19/Denmark/DCGC-8059/2020|2020-10-26|EPI\_ISL\_617073|Original|hCoV-19^^Nordjylland|Human|Department of Virus and Microbiological Special Diagnostics|Albertsen lab|Michaelsen|Denmark

>Spike|hCoV-19/England/QEUH-AD3127/2020|2020-10-26|EPI\_ISL\_633812|Original|hCoV-19^^England|Human|Lighthouse Lab in Glasgow|Wellcome Sanger Institute for the COVID-19 Genomics UK (COG-UK) consortium|Davies|United Kingdom

>Spike|hCoV-19/Denmark/DCGC-6735/2020|2020-04-20|EPI\_ISL\_622355|Original|hCoV-19^^Hovedstaden|Human|Department of Virus and Microbiological Special Diagnostics|Albertsen lab|Michaelsen|Denmark

>Spike|hCoV-19/South Africa/KRISP-K002319/2020|2020-07-22|EPI\_ISL\_515695|Original|hCoV-19^^KwaZulu-Natal|Human|NHLS-IALCH|KRISP|de Oliveira|South Africa

>Spike|hCoV-19/USA/MN-CDC-2-3714282/2020|2020-11-18|EPI\_ISL\_751641|Original|hCoV-19^^Minnesota|Human|MN PHL Division|Genomics and Discovery|Queen|USA

>Spike|hCoV-19/South Korea/KCDC2523/2020|2020-06-16|EPI\_ISL\_514926|Original|hCoV-19^^South Korea|Human|Division of Viral Diseases|Division of Viral Diseases|Kim|South Korea

>Spike|hCoV-19/Denmark/ALAB-SSI29/2020|2020-03-03|EPI\_ISL\_429447|Original|hCoV-19^^Denmark|Human|Department of Virus and Microbiological Special Diagnostics|Albertsen lab|Kirkegaard|Denmark

>Spike|hCoV-19/France/BRE-8946/2020|2020-08-06|EPI\_ISL\_560613|Original|hCoV-19^^Bretagne|Human|Hospital|National Reference Center for Viruses of Respiratory Infections|Enouf|France

>Spike|hCoV-19/Northern Ireland/NIRE-109376/2020|2020-10-20|EPI\_ISL\_650898|Original|hCoV-19^^Northern Ireland|Human|Regional Virus Laboratory|COVID-19 Genomics UK (COG-UK) Consortium|Fairley|United Kingdom

>Spike|hCoV-19/England/ALDP-9EA434/2020|2020-09-24|EPI\_ISL\_580057|Original|hCoV-19^^England|Human|Lighthouse Lab in Alderley Park|Wellcome Sanger Institute for the COVID-19 Genomics UK (COG-UK) consortium|Davies|United Kingdom

>Spike|hCoV-19/USA/WA-S942/2020|2020-04-27|EPI\_ISL\_463432|Original|hCoV-19^^Washington|Human|Washington State Department of Health|Seattle Flu Study|Bedford|USA

>Spike|hCoV-19/Wales/PHWC-36B1F/2020|2020-05-01|EPI\_ISL\_474762|Original|hCoV-19^^Wales|Human|Originating lab|COVID-19 Genomics UK (COG-UK) Consortium|Moore|United Kingdom

>Spike|hCoV-19/Canada/BC\_13704688/2020|2020-04-00|EPI\_ISL\_467423|Original|hCoV-19^^British Columbia|Human|BCCDC Public Health Laboratory|BCCDC Public Health Laboratory|Harrigan|Canada

>Spike|hCoV-19/Spain/CM-ISCIII-202018234/2020|2020-03-22|EPI\_ISL\_539527|Original|hCoV-19^^Castilla La Mancha|Human|Consejeria de Sanidad y Asuntos Sociales|Instituto de Salud Carlos III|Caballero|Spain

>Spike|hCoV-19/England/MILK-ACF3A0/2020|2020-10-21|EPI\_ISL\_629539|Original|hCoV-19^^England|Human|Lighthouse Lab in Milton Keynes|Wellcome Sanger Institute for the COVID-19 Genomics UK (COG-UK) consortium|Davies|United Kingdom

>Spike|hCoV-19/England/QEUH-9FB0B4/2020|2020-09-29|EPI\_ISL\_588075|Original|hCoV-19^^England|Human|Lighthouse Lab in Glasgow|Wellcome Sanger Institute for the COVID-19 Genomics UK (COG-UK) Consortium|Davies|United Kingdom

>Spike|hCoV-19/USA/VA-DCLS-1960/2020|2020-10-07|EPI\_ISL\_644883|Original|hCoV-19^^Virginia|Human|Virginia DCLS|Virginia DCLS|St. Jacques|USA

>Spike|hCoV-19/England/ALDP-5C7DCD/2020|2020-06-19|EPI\_ISL\_558441|Original|hCoV-19^^England|Human|Lighthouse Lab in Alderley Park|Wellcome Sanger Institute for the COVID-19 Genomics UK (COG-UK) consortium|Davies|United Kingdom

>Spike|hCoV-19/USA/NY-Wadsworth-200217-01/2020|2020-06-23|EPI\_ISL\_677052|Original|hCoV-19^^New York|Human|Masonic Medical Research Institute|Wadsworth Center|Lasek-Nesselquist|USA

>Spike|hCoV-19/Spain/PV-IBV-004308/2020|2020-06-11|EPI\_ISL\_510423|Original|hCoV-19^^Basque Country|Human|Servicio de Microbiolog\u00eda. Hospital Universitario Donostia. OSI Donostialdea. \u00clrea de Enfermedades Infecciosas|SeqCOVID-SPAIN consortium|IBV (CSIC) |Comas|Spain

>Spike|hCoV-19/USA/MI-MDHHS-SC22605/2020|2020-11-18|EPI\_ISL\_737178|Original|hCoV-19^^Michigan|Human|Michigan Department of Health and Human Services|Michigan Department of Health and Human Services|Blankenship|USA

>Spike|hCoV-19/Romania/ROSV\_3561/2020|2020-04-21|EPI\_ISL\_491070|Original|hCoV-19^^Suceava|Human|Suceava County Emergency Hospital|\Stefan cel Mare\ University Metagenomics Lab|Lobiuc|Romania

>Spike|hCoV-19/Australia/VIC7445/2020|2020-07-23|EPI\_ISL\_564419|Original|hCoV-19^^Victoria|Human|Microbiological Diagnostic Unit - Public Health Laboratory (MDU-PHL) |MDU-PHL|Schultz|Australia

>Spike|hCoV-19/Belgium/ULG-10892/2020|2020-11-14|EPI\_ISL\_678434|Original|hCoV-19^^Li\u00e8ge|Human|Department of Clinical Microbiology|GIGA Medical Genomics|Durkin|Belgium

>Spike|hCoV-19/Germany/HH-hpi-p1977/2020|2020-03-26|EPI\_ISL\_775631|Original|hCoV-19^^Hamburg|Human|University Medical Center Hamburg Eppendorf|Heinrich Pette Institute|Robitaille|Germany

>Spike|hCoV-19/Iceland/511/2020|2020-03-20|EPI\_ISL\_424533|Original|hCoV-19^^Reykjavik|Human|deCODE genetics|deCODE genetics|J\u00f3nsson|Iceland

>Spike|hCoV-19/USA/MA-MGH-01107/2020|2020-05-01|EPI\_ISL\_791875|Original|hCoV-19^^Massachusetts|Human|Massachusetts General Hospital|Infectious Disease Program|Park|USA

>Spike|hCoV-19/Canada/ON-PHL-20-01794/2020|2020-07-00|EPI\_ISL\_636944|Original|hCoV-19^^Ontario|Human|Public Health Ontario Laboratory|Public Health Ontario Laboratory|Guthrie|Canada

>Spike|hCoV-19/England/MILK-B8E791/2020|2020-11-13|EPI\_ISL\_674102|Original|hCoV-19^^England|Human|Lighthouse Lab in Milton Keynes|Wellcome Sanger Institute for the COVID-19 Genomics UK (COG-UK) Consortium|Davies|United Kingdom

>Spike|hCoV-19/USA/MI-MDHHS-SC21238/2020|2020-04-07|EPI\_ISL\_507493|Original|hCoV-19^^Michigan|Human|Michigan Department of Health and Human Services|Michigan Department of Health and Human Services|Blankenship|USA

>Spike|hCoV-19/England/ALDP-B250DD/2020|2020-11-04|EPI\_ISL\_646660|Original|hCoV-19^^England|Human|Lighthouse Lab in Alderley Park|Wellcome Sanger Institute for the COVID-19 Genomics UK (COG-UK) Consortium|Davies|United Kingdom

>Spike|hCoV-19/New Zealand/20CV0487/2020|2020-10-22|EPI\_ISL\_622819|Original|hCoV-19^^Auckland|Human|Middlemore Hospital|Institute of Environmental Science and Research (ESR)|Wang|New Zealand

>Spike|hCoV-19/USA/AZ-TG371443/2020|2020-05-30|EPI\_ISL\_694600|Original|hCoV-19^^Arizona|Human|AZ SPHL|TGen North|French|USA

>Spike|hCoV-19/England/LIVE-A398C/2020|2020-06-10|EPI\_ISL\_490391|Original|hCoV-19^^England|Human|Liverpool Clinical Laboratories|COVID-19 Genomics UK (COG-UK) Consortium|Haldenby|United Kingdom

>Spike|hCoV-19/Denmark/DCGC-19567/2020|2020-12-07|EPI\_ISL\_749031|Original|hCoV-19^^Hovedstaden|Human|Department of Virus and Microbiological Special Diagnostics|Albertsen Lab|Michaelsen|Denmark

>Spike|hCoV-19/England/CAMB-7F190/2020|2020-04-07|EPI\_ISL\_443010|Original|hCoV-19^^England|Human|Department of Pathology|Wellcome Sanger Institute for the COVID-19 Genomics UK (COG-UK) consortium|Amato|United Kingdom

>Spike|hCoV-19/Japan/PG-5211/2020|2020-08-00|EPI\_ISL\_690314|Original|hCoV-19^^Japan|Human|Pathogen Genomics Center|Pathogen Genomics Center|Sekizuka|Japan

>Spike|hCoV-19/USA/UT-06239/2020|2020-04-23|EPI\_ISL\_493121|Original|hCoV-19^^Utah|Human|Utah Public Health Laboratory|Utah Public Health Laboratory|Butz|USA

>Spike|hCoV-19/England/QEUH-B6850C/2020|2020-11-11|EPI\_ISL\_655099|Original|hCoV-19^^England|Human|Lighthouse Lab in Glasgow|Wellcome Sanger Institute for the COVID-19 Genomics UK (COG-UK) Consortium|Davies|United Kingdom

>Spike|hCoV-19/Cote d'Ivoire/BKE0792/2020|2020-08-04|EPI\_ISL\_614385|Original|hCoV-19^^Boauk\u00e9|Human|Molecular diagnostic unit for viral haemorrhagic fevers and emerging viruses|Project group Epidemiology of Highly Pathogenic Microorganisms|Calvignac-Spencer|C\u00f4te d'Ivoire

>Spike|hCoV-19/England/BIRM-6C03F/2020|2020-10-31|EPI\_ISL\_679130|Original|hCoV-19^^England|Human|University of Birmingham|COVID-19 Genomics UK (COG-UK) Consortium|Loman|United Kingdom

>Spike|hCoV-19/Wales/PHWC-25612/2020|2020-03-23|EPI\_ISL\_422296|Original|hCoV-19^^Wales|Human|Wales Specialist Virology Centre|Public Health Wales Microbiology Cardiff|Moore|United Kingdom

>Spike|hCoV-19/Scotland/GCVR-1708E4/2020|2020-03-25|EPI\_ISL\_501633|Original|hCoV-19^^Scotland|Human|NHSGGC West of Scotland Specialist Virology Centre / MRC-University of Glasgow Centre for Virus Research|Wellcome Sanger Institute for the COVID-19 Genomics UK (COG-UK) consortium|Davies|United Kingdom

>Spike|hCoV-19/Canada/ON-S47/2020|2020-03-18|EPI\_ISL\_586412|Original|hCoV-19^^Ontario|Human|Toronto Invasive Bacterial Diseases Network|McMaster University|McArthur|Canada

>Spike|hCoV-19/USA/MI-QDX-58/2020|2020-03-15|EPI\_ISL\_467871|Original|hCoV-19^^Michigan|Human|Quest Diagnostics|Quest Diagnostics|Kagan|USA

>Spike|hCoV-19/England/QEUA-9F9BE2/2020|2020-09-27|EPI\_ISL\_595753|Original|hCoV-19^^England|Human|Oxford Viromics|COVID-19 Genomics UK (COG-UK) Consortium|Golubchik|United Kingdom

>Spike|hCoV-19/Denmark/ALAB-SSI407/2020|2020-03-10|EPI\_ISL\_429501|Original|hCoV-19^^Denmark|Human|Department of Virus and Microbiological Special Diagnostics|Albertsen lab|Kirkegaard|Denmark

>Spike|hCoV-19/England/MILK-A18997/2020|2020-10-03|EPI\_ISL\_612198|Original|hCoV-19^^England|Human|University College London|COVID-19 Genomics UK (COG-UK) Consortium|Roy|United Kingdom

>Spike|hCoV-19/Japan/PG-0083/2020|2020-03-00|EPI\_ISL\_684114|Original|hCoV-19^^Japan|Human|Pathogen Genomics Center|Pathogen Genomics Center|Sekizuka|Japan

>Spike|hCoV-19/India/GJ-GBRC-339/2020|2020-07-09|EPI\_ISL\_512077|Original|hCoV-19^^Gujarat|Human|Dr. RSS Hospital|Gujarat Biotechnology Research Centre|Joshi|India

>Spike|hCoV-19/England/ALDP-A51D87/2020|2020-10-07|EPI\_ISL\_598139|Original|hCoV-19^^England|Human|Lighthouse Lab in Alderley Park|Wellcome Sanger Institute for the COVID-19 Genomics UK (COG-UK) consortium|Davies|United Kingdom

>Spike|hCoV-19/India/GJ-GBRC136b/2020|2020-05-24|EPI\_ISL\_458093|Original|hCoV-19^^Gujarat|Human|B.J. Medical College and Civil hospital|Gujarat Biotechnology Research Centre|Joshi|India

>Spike|hCoV-19/South Korea/KCDC2088/2020|2020-02-22|EPI\_ISL\_497989|Original|hCoV-19^^South Korea|Human|Division of Viral Diseases|Division of Viral Diseases|Kim|South Korea

>Spike|hCoV-19/USA/CA-SCCPHD-UC191/2020|2020-03-19|EPI\_ISL\_435670|Original|hCoV-19^^California|Human|Santa Clara County Public Health Department|Chiu Laboratory|Chiu|USA

>Spike|hCoV-19/USA/FL-BPHL-0973/2020|2020-07-29|EPI\_ISL\_517863|Original|hCoV-19^^Florida|Human|Florida Bureau of Public Health Laboratories|Florida Bureau of Public Health Laboratories|Blanton|USA

>Spike|hCoV-19/England/CAMC-BBFFCC/2020|2020-11-22|EPI\_ISL\_705111|Original|hCoV-19^^England|Human|Lighthouse Lab in Cambridge|Wellcome Sanger Institute for the COVID-19 Genomics UK (COG-UK) Consortium|Davies|United Kingdom

>Spike|hCoV-19/England/OXON-F415E7/2020|2020-12-14|EPI\_ISL\_764572|Original|hCoV-19^^England|Human|Oxford Viromics|COVID-19 Genomics UK (COG-UK) Consortium|Golubchik|United Kingdom

>Spike|hCoV-19/England/QEUA-96F08E/2020|2020-08-16|EPI\_ISL\_530457|Original|hCoV-19^^England|Human|Lighthouse Lab in Glasgow|Wellcome Sanger Institute for the COVID-19 Genomics UK (COG-UK) consortium|Davies|United Kingdom

>Spike|hCoV-19/USA/CA-CZB-11893/2020|2020-09-30|EPI\_ISL\_672111|Original|hCoV-19^^California|Human|Santa Clara County Public Health Laboratory|Chan-Zuckerberg Biohub|Bhatt|USA

>Spike|hCoV-19/Belgium/ULG-10120/2020|2020-04-07|EPI\_ISL\_427368|Original|hCoV-19^^Liege|Human|Department of Clinical Microbiology|GIGA Medical Genomics|Durkin|Belgium

>Spike|hCoV-19/England/LIVE-9C889/2020|2020-03-23|EPI\_ISL\_449588|Original|hCoV-19^^England|Human|Liverpool Clinical Laboratories|COVID-19 Genomics UK (COG-UK) Consortium|Haldenby|United Kingdom

>Spike|hCoV-19/England/CAMB-1B640C/2020|2020-00-00|EPI\_ISL\_576905|Original|hCoV-19^^England|Human|Department of Pathology|COVID-19 Genomics UK (COG-UK) Consortium|Goodfellow|United Kingdom

>Spike|hCoV-19/England/ALDP-B23840/2020|2020-11-04|EPI\_ISL\_646881|Original|hCoV-19^^England|Human|Lighthouse Lab in Alderley Park|Wellcome Sanger Institute for the COVID-19 Genomics UK (COG-UK) Consortium|Davies|United Kingdom

>Spike|hCoV-19/USA/IL-UW-553/2020|2020-06-21|EPI\_ISL\_484928|Original|hCoV-19^^Illinois|Human|University of Wisconsin-Madison AIDS Vaccine Research

Laboratories|University of Wisconsin-Madison AIDS Vaccine Research  
Laboratories|Baczenas|USA  
>Spike|hCoV-19/USA/CA-ALSR-0623-IPL/2020|2020-04-21|EPI\_ISL\_483263|Original|hCoV-19^^California|Human|UC San Diego Center for Advanced Laboratory Medicine|Andersen lab at Scripps Research|Gangavarapu|USA  
>Spike|hCoV-19/USA/NY-Wadsworth-264208-01/2020|2020-11-05|EPI\_ISL\_754519|Original|hCoV-19^^New York|Human|Wadsworth Center|Wadsworth Center|Lasek-Nesselquist|USA  
>Spike|hCoV-19/England/SHEF-C01CD/2020|2020-03-26|EPI\_ISL\_420229|Original|hCoV-19^^England|Human|Virology Department|Department of Infection|de Silva|United Kingdom  
>Spike|hCoV-19/mink/Denmark/KL14-Farm1/2020|2020-06-17|EPI\_ISL\_626351|Original|hCoV-19^^Denmark|Neovison vison|Statens Serum Institute|Statens Serum Institute|Rasmussen|Denmark  
>Spike|hCoV-19/England/CAMC-B98D56/2020|2020-11-15|EPI\_ISL\_673847|Original|hCoV-19^^England|Human|Lighthouse Lab in Cambridge|Wellcome Sanger Institute for the COVID-19 Genomics UK (COG-UK) Consortium|Davies|United Kingdom  
>Spike|hCoV-19/Morocco/FMP-28/2020|2020-12-00|EPI\_ISL\_728359|Original|hCoV-19^^Rabat|Human|Laboratoire Biolife|Laboratoire de Biotechnologie|Ouadghiri|Morocco  
>Spike|hCoV-19/England/ALDP-B27132/2020|2020-11-04|EPI\_ISL\_664240|Original|hCoV-19^^England|Human|Northumbria University / South Tees Hospitals NHS Foundation Trust / North Cumbria Integrated Care NHS Foundation Trust / North Tees and Hartlepool NHS Foundation Trust / Newcastle Hospitals NHS Foundation Trust|COVID-19 Genomics UK (COG-UK) Consortium|Bashton|United Kingdom  
>Spike|hCoV-19/England/PORT-2EE631/2020|2020-11-18|EPI\_ISL\_741718|Original|hCoV-19^^England|Human|Centre for Enzyme Innovation|COVID-19 Genomics UK (COG-UK) Consortium|Robson|United Kingdom  
>Spike|hCoV-19/USA/UT-UPHL-03751/2020|2020-04-03|EPI\_ISL\_575102|Original|hCoV-19^^Utah|Human|Utah Public Health Laboratory|Utah Public Health Laboratory|Young|USA  
>Spike|hCoV-19/South Africa/R12579-20/2020|2020-06-16|EPI\_ISL\_504195|Original|hCoV-19^^North West|Human|National Institute for Communicable Diseases of the National Health Laboratory Service|National Institute for Communicable Diseases of the National Health Laboratory Service|Allam|South Africa  
>Spike|hCoV-19/England/QEUH-9FAC39/2020|2020-09-28|EPI\_ISL\_588126|Original|hCoV-19^^England|Human|Lighthouse Lab in Glasgow|Wellcome Sanger Institute for the COVID-19 Genomics UK (COG-UK) consortium|Davies|United Kingdom  
>Spike|hCoV-19/England/SHEF-C1988/2020|2020-09-07|EPI\_ISL\_540721|Original|hCoV-19^^England|Human|Virology Department|COVID-19 Genomics UK (COG-UK) Consortium|de Silva|United Kingdom  
>Spike|hCoV-19/Belgium/rega-0803740/2020|2020-08-03|EPI\_ISL\_734891|Original|hCoV-19^^Antwerpen|Human|UZ Leuven|KU Leuven|Maes|Belgium  
>Spike|hCoV-19/USA/TX-HMH-3648/2020|2020-06-15|EPI\_ISL\_543094|Original|hCoV-19^^Texas|Human|Houston Methodist Hospital|Houston Methodist Hospital|Long|USA  
>Spike|hCoV-19/USA/TX-HMH-MCoV-8215/2020|2020-07-07|EPI\_ISL\_784270|Original|hCoV-19^^Texas|Human|Houston Methodist Hospital|Houston Methodist Hospital|Long|USA  
>Spike|hCoV-19/England/201080005/2020|2020-03-05|EPI\_ISL\_464420|Original|hCoV-19^^England|Human|Respiratory Virus Unit|Respiratory Virus Unit|Platt|United Kingdom  
>Spike|hCoV-19/Denmark/DCGC-21802/2020|2020-12-21|EPI\_ISL\_758372|Original|hCoV-19^^Sjaelland|Human|Department of Virus and Microbiological Special Diagnostics|Albertsen Lab|Michaelsen|Denmark  
>Spike|hCoV-19/Denmark/DCGC-11837/2020|2020-10-26|EPI\_ISL\_670545|Original|hCoV-19^^Midtjylland|Human|Department of Virus and Microbiological Special Diagnostics|Albertsen Lab|Michaelsen|Denmark  
>Spike|hCoV-19/USA/SC-20-1167-T07/2020|2020-06-24|EPI\_ISL\_516752|Original|hCoV-19^^South Carolina|Human|van Bakel Laboratory|van Bakel Laboratory|van Bakel|USA  
>Spike|hCoV-19/Netherlands/NoordBrabant\_10045/2020|2020-04-07|EPI\_ISL\_454794|Original|hCoV-19^^Utrecht|Human|Dutch COVID-19 response team|National Institute for Public Health and the Environment (RIVM)|Meijer|Netherlands

>Spike|hCoV-19/England/OXON-B0A89/2020|2020-04-17|EPI\_ISL\_478932|Original|hCoV-19^^England|Human|Oxford Viromics|COVID-19 Genomics UK (COG-UK) Consortium|Golubchik|United Kingdom

>Spike|hCoV-19/England/QEUH-B41220/2020|2020-11-08|EPI\_ISL\_658722|Original|hCoV-19^^England|Human|Lighthouse Lab in Glasgow|Wellcome Sanger Institute for the COVID-19 Genomics UK (COG-UK) Consortium|Davies|United Kingdom

>Spike|hCoV-19/England/CAMC-B0B5DE/2020|2020-10-30|EPI\_ISL\_643441|Original|hCoV-19^^England|Human|Lighthouse Lab in Cambridge|Wellcome Sanger Institute for the COVID-19 Genomics UK (COG-UK) Consortium|Davies|United Kingdom

>Spike|hCoV-19/Denmark/DCGC-8706/2020|2020-10-26|EPI\_ISL\_626033|Original|hCoV-19^^Hovedstaden|Human|Department of Virus and Microbiological Special Diagnostics|Albertsen lab|Michaelsen|Denmark

>Spike|hCoV-19/USA/MA-MASPHL-00495/2020|2020-05-03|EPI\_ISL\_693075|Original|hCoV-19^^Massachusetts|Human|Massachusetts State Public Health Laboratory|Massachusetts State Public Health Laboratory|Lang|USA

>Spike|hCoV-19/Denmark/DCGC-17513/2020|2020-12-14|EPI\_ISL\_751033|Original|hCoV-19^^Midtjylland|Human|Department of Virus and Microbiological Special Diagnostics|Albertsen Lab|Michaelsen|Denmark

>Spike|hCoV-19/USA/AK-PHL480/2020|2020-06-12|EPI\_ISL\_560564|Original|hCoV-19^^Alaska|Human|Alaska State Virology Laboratory|Alaska State Virology Laboratory|Chen|USA

>Spike|hCoV-19/France/NAQ-SC206/2020|2020-03-07|EPI\_ISL\_649960|Original|hCoV-19^^Nouvelle-Aquitaine|Human|CHU Bordeaux|CNR Virus des Infections Respiratoires - France SUD|Bal|France

>Spike|hCoV-19/Scotland/CVR164/2020|2020-03-17|EPI\_ISL\_425703|Original|hCoV-19^^Scotland|Human|West of Scotland Specialist Virology Centre|COVID-19 Genomics UK (COG-UK) Consortium|Robertson|United Kingdom

>Spike|hCoV-19/England/20156042904/2020|2020-04-09|EPI\_ISL\_466316|Original|hCoV-19^^England|Human|Respiratory Virus Unit|Respiratory Virus Unit|Platt|United Kingdom

>Spike|hCoV-19/Ireland/RN-NVRL-75IRL84062/2020|2020-10-13|EPI\_ISL\_671929|Original|hCoV-19^^Roscommon|Human|National Virus Reference Laboratory|National Virus Reference Laboratory|Gonzalez|Ireland

>Spike|hCoV-19/Spain/IB-IBV-99011581/2020|2020-12-10|EPI\_ISL\_779861|Original|hCoV-19^^Balear Islands|Human|Servicio de Microbiolog\u00eda|SeqCOVID-SPAIN consortium|IBV (CSIC) |Comas|Spain

>Spike|hCoV-19/USA/VA-DCLS-1265/2020|2020-08-12|EPI\_ISL\_529955|Original|hCoV-19^^Virginia|Human|Virginia DCLS|Virginia DCLS|St. Jacques|USA

>Spike|hCoV-19/Netherlands/Overijssel\_1/2020|2020-03-03|EPI\_ISL\_414434|Original|hCoV-19^^Overijssel|Human|Dutch COVID-19 response team|Erasmus Medical Center|Oude Munnink|Netherlands

>Spike|hCoV-19/USA/NM-DOH-2020313047/2020|2020-08-26|EPI\_ISL\_574261|Original|hCoV-19^^New Mexico|Human|New Mexico Department of Health Scientific Laboratory|New Mexico Department of Health Scientific Laboratory|Johnson|USA

>Spike|hCoV-19/Denmark/DCGC-1772/2020|2020-07-06|EPI\_ISL\_618187|Original|hCoV-19^^Nordjylland|Human|Department of Virus and Microbiological Special Diagnostics|Albertsen lab|Michaelsen|Denmark

>Spike|hCoV-19/Brazil/SP-131/2020|2020-04-04|EPI\_ISL\_471543|Original|hCoV-19^^S\u00e3o Paulo|Human|Centro de Saude I Tacito Leite de Carvalho e Silva|Instituto Adolfo Lutz|Sacchi|Brazil

>Spike|hCoV-19/England/ALDP-B23A4A/2020|2020-11-04|EPI\_ISL\_646803|Original|hCoV-19^^England|Human|Lighthouse Lab in Alderley Park|Wellcome Sanger Institute for the COVID-19 Genomics UK (COG-UK) Consortium|Davies|United Kingdom

>Spike|hCoV-19/Ireland/DL-NVRL-20G49337/2020|2020-04-06|EPI\_ISL\_666696|Original|hCoV-19^^Donegal|Human|National Virus Reference Lab (NVRL)|Irish Coronavirus Sequencing Consortium-Teagasc Grange|McCabe|Ireland

>Spike|hCoV-19/USA/MI-MDHHS-SC22007/2020|2020-08-26|EPI\_ISL\_577569|Original|hCoV-19^^Michigan|Human|Michigan Department of Health and Human Services|Michigan Department of Health and Human Services|Jacob|USA

>Spike|hCoV-19/Scotland/CVR4313/2020|2020-09-16|EPI\_ISL\_572624|Original|hCoV-19^^Scotland|Human|West of Scotland Specialist Virology Centre|COVID-19 Genomics UK (COG-UK) Consortium|Robertson|United Kingdom

>Spike|hCoV-19/Australia/VIC9494/2020|2020-08-16|EPI\_ISL\_565574|Original|hCoV-19^^Victoria|Human|Microbiological Diagnostic Unit - Public Health Laboratory (MDU-PHL)|MDU-PHL|Schultz|Australia

>Spike|hCoV-19/USA/MI-UM-10036757137/2020|2020-11-03|EPI\_ISL\_682185|Original|hCoV-19^^Michigan|Human|University of Michigan Clinical Microbiology Laboratory|Lauring Lab|Valesano|USA

>Spike|hCoV-19/Australia/VIC12905/2020|2020-07-27|EPI\_ISL\_640943|Original|hCoV-19^^Victoria|Human|Microbiological Diagnostic Unit - Public Health Laboratory (MDU-PHL)|MDU-PHL|Schultz|Australia

>Spike|hCoV-19/England/EXET-136CB1/2020|2020-04-20|EPI\_ISL\_471911|Original|hCoV-19^^England|Human|University of Exeter|COVID-19 Genomics UK (COG-UK) Consortium|Temperton|United Kingdom

>Spike|hCoV-19/Denmark/DCGC-1671/2020|2020-03-09|EPI\_ISL\_621825|Original|hCoV-19^^Sjaelland|Human|Department of Virus and Microbiological Special Diagnostics|Albertsen lab|Michaelsen|Denmark

>Spike|hCoV-19/England/CAMB-84C4C/2020|2020-03-12|EPI\_ISL\_440529|Original|hCoV-19^^England|Human|Department of Pathology|Wellcome Sanger Institute for the COVID-19 Genomics UK (COG-UK) consortium|Amato|United Kingdom

>Spike|hCoV-19/USA/TX-DSHS-1736/2020|2020-06-20|EPI\_ISL\_710392|Original|hCoV-19^^Texas|Human|Texas Department of State Health Services|Texas Department of State Health Services|Rahman|USA

>Spike|hCoV-19/Germany/SH-ChVir20047/2020|2020-11-06|EPI\_ISL\_729662|Original|hCoV-19^^Schleswig-Holstein|Human|A. Krumbholz|Charit\u00e9 Universit\u00e4tsmedizin Berlin|Muehlemann|Germany

>Spike|hCoV-19/USA/TX\_GCID\_192000088/2020|2020-03-23|EPI\_ISL\_445081|Original|hCoV-19^^Texas|Human|Baylor College of Medicine|Baylor College of Medicine|Skinner|USA

>Spike|hCoV-19/USA/MI-MDHHS-SC20120/2020|2020-03-13|EPI\_ISL\_436810|Original|hCoV-19^^Michigan|Human|Michigan Department of Health and Human Services|Michigan Department of Health and Human Services|Blankenship|USA

>Spike|hCoV-19/USA/WI-UW-1667/2020|2020-09-16|EPI\_ISL\_605541|Original|hCoV-19^^Wisconsin|Human|University of Wisconsin-Madison AIDS Vaccine Research Laboratories|University of Wisconsin-Madison AIDS Vaccine Research Laboratories|Baczenas|USA

>Spike|hCoV-19/England/NORW-F1169/2020|2020-10-17|EPI\_ISL\_626964|Original|hCoV-19^^England|Human|Quadram Institute Bioscience|COVID-19 Genomics UK (COG-UK) Consortium|Alikhan|United Kingdom

>Spike|hCoV-19/England/ALDP-AA3348/2020|2020-10-22|EPI\_ISL\_624162|Original|hCoV-19^^England|Human|Lighthouse Lab in Alderley Park|Wellcome Sanger Institute for the COVID-19 Genomics UK (COG-UK) consortium|Davies|United Kingdom

>Spike|hCoV-19/England/ALDP-5ADE51/2020|2020-06-17|EPI\_ISL\_558670|Original|hCoV-19^^England|Human|Lighthouse Lab in Alderley Park|Wellcome Sanger Institute for the COVID-19 Genomics UK (COG-UK) consortium|Davies|United Kingdom

>Spike|hCoV-19/New Zealand/20VR2498/2020|2020-00-00|EPI\_ISL\_579253|Original|hCoV-19^^Auckland|Human|LabPLUS|Institute of Environmental Science and Research (ESR)|Wang|New Zealand

>Spike|hCoV-19/Wales/PHWC-47EFA2/2020|2020-10-13|EPI\_ISL\_612611|Original|hCoV-19^^Wales|Human|Wales Specialist Virology Centre Sequencing lab|COVID-19 Genomics UK (COG-UK) Consortium|Moore|United Kingdom

>Spike|hCoV-19/Australia/VIC3297/2020|2020-07-06|EPI\_ISL\_520976|Original|hCoV-19^^Victoria|Human|Microbiological Diagnostic Unit - Public Health Laboratory (MDU-PHL)|MDU-PHL|Schultz|Australia

>Spike|hCoV-19/England/MILK-958167/2020|2020-06-14|EPI\_ISL\_554643|Original|hCoV-19^^England|Human|Lighthouse Lab in Milton Keynes|Wellcome Sanger Institute for the COVID-19 Genomics UK (COG-UK) consortium|Davies|United Kingdom

>Spike|hCoV-19/Japan/PG-4183/2020|2020-07-00|EPI\_ISL\_692422|Original|hCoV-19^^Japan|Human|Pathogen Genomics Center|Pathogen Genomics Center|Sekizuka|Japan

>Spike|hCoV-19/Belgium/MC-030689/2020|2020-03-06|EPI\_ISL\_420345|Original|hCoV-19^^Couvin|Human|KU Leuven|KU Leuven|Maes|Belgium

>Spike|hCoV-19/Denmark/DCGC-8655/2020|2020-10-26|EPI\_ISL\_625967|Original|hCoV-19^^Hovedstaden|Human|Department of Virus and Microbiological Special Diagnostics|Albertsen lab|Michaelsen|Denmark

>Spike|hCoV-19/England/ALDP-95C8D7/2020|2020-06-20|EPI\_ISL\_553354|Original|hCoV-19^^England|Human|Lighthouse Lab in Alderley Park|Wellcome Sanger Institute for the COVID-19 Genomics UK (COG-UK) consortium|Davies|United Kingdom

>Spike|hCoV-19/Scotland/EDB7853/2020|2020-09-20|EPI\_ISL\_572777|Original|hCoV-19^^Scotland|Human|Virology Department|COVID-19 Genomics UK (COG-UK) Consortium|Williams|United Kingdom

>Spike|hCoV-19/USA/WA-UW-45188/2020|2020-12-07|EPI\_ISL\_747231|Original|hCoV-19^^Washington|Human|UW Virology Lab|UW Virology Lab|Roychoudhury|USA

>Spike|hCoV-19/England/MILK-B8EF4E/2020|2020-11-13|EPI\_ISL\_675439|Original|hCoV-19^^England|Human|Lighthouse Lab in Milton Keynes|Wellcome Sanger Institute for the COVID-19 Genomics UK (COG-UK) Consortium|Davies|United Kingdom

>Spike|hCoV-19/Australia/NSW272/2020|2020-04-04|EPI\_ISL\_451537|Original|hCoV-19^^New South Wales|Human|Pathology West - NSW Health Pathology|NSW Health Pathology - Institute of Clinical Pathology and Medical Research; Westmead Hospital; University of Sydney|Gall|Australia

>Spike|hCoV-19/Australia/VIC10611/2020|2020-08-04|EPI\_ISL\_562989|Original|hCoV-19^^Victoria|Human|Microbiological Diagnostic Unit - Public Health Laboratory (MDU-PHL) |MDU-PHL|Schultz|Australia

>Spike|hCoV-19/USA/WA\_5030/2020|2020-02-27|EPI\_ISL\_419555|Original|hCoV-19^^Washington|Human|WA State Department of Health|Pathogen Discovery|Queen|USA

>Spike|hCoV-19/England/QEUA-A89C89/2020|2020-10-16|EPI\_ISL\_638819|Original|hCoV-19^^England|Human|Oxford Viromics|COVID-19 Genomics UK (COG-UK) Consortium|Golubchik|United Kingdom

>Spike|hCoV-19/Iran/SA-Isf-25/2020|2020-06-06|EPI\_ISL\_672578|Original|hCoV-19^^Iran|Human|Infectious Diseases and Tropical Medicine Research Center|Infectious Diseases and Tropical Medicine Research Center|Ahangarzadeh, S.|Iran

>Spike|hCoV-19/England/MILK-A9195A/2020|2020-10-19|EPI\_ISL\_705997|Original|hCoV-19^^England|Human|Oxford Viromics|COVID-19 Genomics UK (COG-UK) Consortium|Golubchik|United Kingdom

>Spike|hCoV-19/Spain/MD-IBV-004919/2020|2020-03-13|EPI\_ISL\_481103|Original|hCoV-19^^Madrid|Human|Hospital General Universitario Gregorio Mara\u00f1a|SeqCOVID-SPAIN consortium|IBV (CSIC) |Comas|Spain

>Spike|hCoV-19/England/BIRM-60921/2020|2020-06-08|EPI\_ISL\_483905|Original|hCoV-19^^England|Human|University of Birmingham|COVID-19 Genomics UK (COG-UK) Consortium|Loman|United Kingdom

>Spike|hCoV-19/Japan/PG-8731/2020|2020-08-00|EPI\_ISL\_686327|Original|hCoV-19^^Japan|Human|Pathogen Genomics Center|Pathogen Genomics Center|Sekizuka|Japan

>Spike|hCoV-19/Portugal/PT0859/2020|2020-03-27|EPI\_ISL\_511118|Original|hCoV-19^^Portugal|Human|Instituto Nacional de Saude (INSA)|Instituto Nacional de Saude (INSA) |Borges|Portugal

>Spike|hCoV-19/Scotland/CVR3285/2020|2020-05-02|EPI\_ISL\_493849|Original|hCoV-19^^Scotland|Human|West of Scotland Specialist Virology Centre|COVID-19 Genomics UK (COG-UK) Consortium|Robertson|United Kingdom

>Spike|hCoV-19/England/CAMC-B99915/2020|2020-11-15|EPI\_ISL\_673699|Original|hCoV-19^^England|Human|Lighthouse Lab in Cambridge|Wellcome Sanger Institute for the COVID-19 Genomics UK (COG-UK) Consortium|Davies|United Kingdom

>Spike|hCoV-19/Wales/PHWC-169EBF/2020|2020-08-30|EPI\_ISL\_529709|Original|hCoV-19^^Wales|Human|Wales Specialist Virology Centre Sequencing lab|COVID-19 Genomics UK (COG-UK) Consortium|Moore|United Kingdom

>Spike|hCoV-19/England/QEUA-B6991E/2020|2020-11-11|EPI\_ISL\_661381|Original|hCoV-19^^England|Human|Lighthouse Lab in Glasgow|Wellcome Sanger Institute for the COVID-19 Genomics UK (COG-UK) Consortium|Davies|United Kingdom

>Spike|hCoV-19/England/LIVE-9B547/2020|2020-04-02|EPI\_ISL\_449459|Original|hCoV-19^^England|Human|Liverpool Clinical Laboratories|COVID-19 Genomics UK (COG-UK) Consortium|Haldenby|United Kingdom



>Spike|hCoV-19/England/OXON-B4821/2020|2020-04-02|EPI\_ISL\_534978|Original|hCoV-19^^England|Human|Oxford Viromics|COVID-19 Genomics UK (COG-UK) Consortium|Golubchik|United Kingdom

>Spike|hCoV-19/England/NORT-293510/2020|2020-06-24|EPI\_ISL\_499568|Original|hCoV-19^^England|Human|Northumbria University / South Tees Hospitals NHS Foundation Trust / North Cumbria Integrated Care NHS Foundation Trust / North Tees and Hartlepool NHS Foundation Trust / Newcastle Hospitals NHS Foundation Trust|COVID-19 Genomics UK (COG-UK) Consortium|Bashton|United Kingdom

>Spike|hCoV-19/USA/AZ-TG382200/2020|2020-06-15|EPI\_ISL\_694682|Original|hCoV-19^^Arizona|Human|TGen North|TGen North|French|USA

>Spike|hCoV-19/Denmark/DCGC-5790/2020|2020-09-28|EPI\_ISL\_620977|Original|hCoV-19^^Sjaelland|Human|Department of Virus and Microbiological Special Diagnostics|Albertsen lab|Michaelsen|Denmark

>Spike|hCoV-19/England/ALDP-B84564/2020|2020-11-14|EPI\_ISL\_675261|Original|hCoV-19^^England|Human|Lighthouse Lab in Alderley Park|Wellcome Sanger Institute for the COVID-19 Genomics UK (COG-UK) Consortium|Davies|United Kingdom

>Spike|hCoV-19/USA/FL-BPHL-2053/2020|2020-06-27|EPI\_ISL\_653206|Original|hCoV-19^^Florida|Human|Florida Bureau of Public Health Laboratories|Florida Bureau of Public Health Laboratories|Blanton|USA

>Spike|hCoV-19/Spain/VC-IBV-98003640/2020|2020-03-13|EPI\_ISL\_538644|Original|hCoV-19^^Comunitat Valenciana|Human|Servicio de Microbiolog\u00eda. Hospital General Universitario de Castell\u00f3n|SeqCOVID-SPAIN consortium/IBV(CSIC)|Comas|Spain

>Spike|hCoV-19/USA/WA-UW-22112/2020|2020-08-04|EPI\_ISL\_570626|Original|hCoV-19^^Washington|Human|UW Virology Lab|UW Virology Lab|Roychoudhury|USA

>Spike|hCoV-19/Scotland/QEUA-A1EA07/2020|2020-10-01|EPI\_ISL\_598851|Original|hCoV-19^^Scotland|Human|Lighthouse Lab in Glasgow|Wellcome Sanger Institute for the COVID-19 Genomics UK (COG-UK) consortium|Davies|United Kingdom

>Spike|hCoV-19/Wales/MILK-A47B4E/2020|2020-10-05|EPI\_ISL\_609279|Original|hCoV-19^^Wales|Human|Lighthouse Lab in Milton Keynes|Wellcome Sanger Institute for the COVID-19 Genomics UK (COG-UK) consortium|Davies|United Kingdom

>Spike|hCoV-19/USA/UT-CDC-9756/2020|2020-04-28|EPI\_ISL\_509693|Original|hCoV-19^^Utah|Human|Utah Public Health Laboratory|Pathogen Discovery|Queen|USA

>Spike|hCoV-19/Portugal/PT1641/2020|2020-11-10|EPI\_ISL\_731950|Original|hCoV-19^^Portugal|Human|Instituto Nacional de Saude (INSA)|Instituto Nacional de Saude (INSA)|Borges|Portugal

>Spike|hCoV-19/Austria/CeMM0565/2020|2020-04-15|EPI\_ISL\_475915|Original|hCoV-19^^Austria|Human|Klinikum Wels-Grieskirchen|Bergthaler laboratory|Bergthaler|Austria

>Spike|hCoV-19/Nigeria/OS-CV300/2020|2020-08-31|EPI\_ISL\_729978|Original|hCoV-19^^Osun State|Human|Nigeria Centre for Disease Control (NCDC)|African Centre of Excellence for Genomics of Infectious Diseases (ACEGID)|Oluniyi|Nigeria

>Spike|hCoV-19/South Africa/NHLS-UCT-GS-1648/2020|2020-08-17|EPI\_ISL\_700493|Original|hCoV-19^^Western Cape|Human|Groote Schuur Hospital w GSH|NHLS/UCT|Iranzadeh|South Africa

>Spike|hCoV-19/Japan/PG-5385/2020|2020-08-00|EPI\_ISL\_690488|Original|hCoV-19^^Japan|Human|Fukuoka Institute of Health and Environmental Sciences|Pathogen Genomics Center|Sekizuka|Japan

>Spike|hCoV-19/England/QEUA-9DD021/2020|2020-09-21|EPI\_ISL\_599619|Original|hCoV-19^^England|Human|Lighthouse Lab in Glasgow|Wellcome Sanger Institute for the COVID-19 Genomics UK (COG-UK) consortium|Davies|United Kingdom

>Spike|hCoV-19/Brazil/PE-IAM109/2020|2020-04-08|EPI\_ISL\_572334|Original|hCoV-19^^Pernambuco|Human|LACEN/PE|WallauLab|Wallau|Brazil

>Spike|hCoV-19/Japan/PG-2029/2020|2020-04-00|EPI\_ISL\_685634|Original|hCoV-19^^Japan|Human|Pathogen Genomics Center|Pathogen Genomics Center|Sekizuka|Japan

>Spike|hCoV-19/England/CAMC-A41F39/2020|2020-10-06|EPI\_ISL\_609382|Original|hCoV-19^^England|Human|Lighthouse Lab in Cambridge|Wellcome Sanger Institute for the COVID-19 Genomics UK (COG-UK) consortium|Davies|United Kingdom

>Spike|hCoV-19/Scotland/QEUA-9B76FE/2020|2020-09-08|EPI\_ISL\_602110|Original|hCoV-19^^Scotland|Human|Lighthouse Lab in Glasgow|Wellcome Sanger Institute for the COVID-19 Genomics UK (COG-UK) consortium|Davies|United Kingdom

>Spike|hCoV-19/USA/AZ-TG664269/2020|2020-04-28|EPI\_ISL\_696070|Original|hCoV-19^^Arizona|Human|Sonora Quest Laboratories|TGen North|French|USA

>Spike|hCoV-19/USA/UT-UPHL-03795/2020|2020-04-04|EPI\_ISL\_560923|Original|hCoV-19^^Utah|Human|Utah Public Health Laboratory|Utah Public Health Laboratory|Young|USA

>Spike|hCoV-19/Canada/BC-BCCDC-7584/2020|2020-11-00|EPI\_ISL\_740733|Original|hCoV-19^^British Columbia|Human|BCCDC Public Health Laboratory|BCCDC Public Health Laboratory|Prystajecky|Canada

>Spike|hCoV-19/USA/CA-CZB-13844/2020|2020-08-17|EPI\_ISL\_738835|Original|hCoV-19^^California|Human|Alameda County Public Health Lab|Chan-Zuckerberg Biohub|Kamm|USA

>Spike|hCoV-19/USA/LA-EVTL827/2020|2020-07-28|EPI\_ISL\_653518|Original|hCoV-19^^Louisiana|Human|LSUHS Emerging Viral Threat Laboratory|Microbial Genome Sequencing Center|Kamil|USA

>Spike|hCoV-19/England/OXON-B3725/2020|2020-04-01|EPI\_ISL\_534883|Original|hCoV-19^^England|Human|Oxford Viromics|COVID-19 Genomics UK (COG-UK) Consortium|Golubchik|United Kingdom

>Spike|hCoV-19/England/QEUH-BCD444/2020|2020-11-26|EPI\_ISL\_704267|Original|hCoV-19^^England|Human|Lighthouse Lab in Glasgow|Wellcome Sanger Institute for the COVID-19 Genomics UK (COG-UK) Consortium|Davies|United Kingdom

>Spike|hCoV-19/England/BRIS-1853522/2020|2020-04-07|EPI\_ISL\_492304|Original|hCoV-19^^England|Human|PHE South West Regional Laboratory|Wellcome Sanger Institute for the COVID-19 Genomics UK (COG-UK) consortium|Davies|United Kingdom

>Spike|hCoV-19/England/QEUH-B7D7D1/2020|2020-11-14|EPI\_ISL\_741880|Original|hCoV-19^^England|Human|Oxford Viromics|COVID-19 Genomics UK (COG-UK) Consortium|Golubchik|United Kingdom

>Spike|hCoV-19/USA/TX-HMH-MCoV-10677/2020|2020-07-09|EPI\_ISL\_789188|Original|hCoV-19^^Texas|Human|Houston Methodist Hospital|Houston Methodist Hospital|Long|USA

>Spike|hCoV-19/USA/TX-HMH-MCoV-19535/2020|2020-11-17|EPI\_ISL\_783911|Original|hCoV-19^^Texas|Human|Houston Methodist Hospital|Houston Methodist Hospital|Long|USA

>Spike|hCoV-19/Ireland/D-NVRL-MPW25565/2020|2020-04-11|EPI\_ISL\_767755|Original|hCoV-19^^Dublin|Human|National Virus Reference Laboratory|Irish Coronavirus Sequencing Consortium - Teagasc Moorepark|Walsh|Ireland

>Spike|hCoV-19/Northern Ireland/NIRE-1082D4/2020|2020-03-31|EPI\_ISL\_585183|Original|hCoV-19^^Northern Ireland|Human|Regional Virus Laboratory|COVID-19 Genomics UK (COG-UK) Consortium|Fairley|United Kingdom

>Spike|hCoV-19/England/NORT-28D2D6/2020|2020-11-16|EPI\_ISL\_706336|Original|hCoV-19^^England|Human|Northumbria University / South Tees Hospitals NHS Foundation Trust / North Cumbria Integrated Care NHS Foundation Trust / North Tees and Hartlepool NHS Foundation Trust / Newcastle Hospitals NHS Foundation Trust|COVID-19 Genomics UK (COG-UK) Consortium|Bashton|United Kingdom

>Spike|hCoV-19/Wales/CAMC-A81D24/2020|2020-10-13|EPI\_ISL\_625296|Original|hCoV-19^^Wales|Human|Lighthouse Lab in Cambridge|Wellcome Sanger Institute for the COVID-19 Genomics UK (COG-UK) consortium|Davies|United Kingdom

>Spike|hCoV-19/Denmark/DCGC-7845/2020|2020-10-19|EPI\_ISL\_618777|Original|hCoV-19^^Hovedstaden|Human|Department of Virus and Microbiological Special Diagnostics|Albertsen lab|Michaelsen|Denmark

>Spike|hCoV-19/England/MILK-BA9B67/2020|2020-11-17|EPI\_ISL\_681578|Original|hCoV-19^^England|Human|Lighthouse Lab in Milton Keynes|Wellcome Sanger Institute for the COVID-19 Genomics UK (COG-UK) Consortium|Davies|United Kingdom

>Spike|hCoV-19/Denmark/DCGC-7940/2020|2020-10-26|EPI\_ISL\_618878|Original|hCoV-19^^Hovedstaden|Human|Department of Virus and Microbiological Special Diagnostics|Albertsen lab|Michaelsen|Denmark

>Spike|hCoV-19/Switzerland/SO-ETHZ-410283/2020|2020-12-15|EPI\_ISL\_737504|Original|hCoV-19^^Solothurn|Human|Viollier AG|Department of Biosystems Science and Engineering|Nadeau|Switzerland

>Spike|hCoV-19/USA/CA-CDPH075/2020|2020-07-20|EPI\_ISL\_754961|Original|hCoV-19^^California|Human|California Department of Public Health|California Department of Public Health|Bell|USA

>Spike|hCoV-19/USA/TX-HMH-MCoV-18502/2020|2020-11-19|EPI\_ISL\_784850|Original|hCoV-19^^Texas|Human|Houston Methodist Hospital|Houston Methodist Hospital|Long|USA

>Spike|hCoV-19/Wales/ALDP-B2492E/2020|2020-11-04|EPI\_ISL\_646816|Original|hCoV-19^^Wales|Human|Lighthouse Lab in Alderley Park|Wellcome Sanger Institute for the COVID-19 Genomics UK (COG-UK) Consortium|Davies|United Kingdom

>Spike|hCoV-19/Scotland/CVR4077/2020|2020-08-31|EPI\_ISL\_535168|Original|hCoV-19^^Scotland|Human|West of Scotland Specialist Virology Centre|COVID-19 Genomics UK (COG-UK) Consortium|Robertson|United Kingdom

>Spike|hCoV-19/England/MILK-9941D8/2020|2020-08-24|EPI\_ISL\_551646|Original|hCoV-19^^England|Human|Lighthouse Lab in Milton Keynes|Wellcome Sanger Institute for the COVID-19 Genomics UK (COG-UK) consortium|Davies|United Kingdom

>Spike|hCoV-19/England/NOTT-112C15/2020|2020-04-30|EPI\_ISL\_493600|Original|hCoV-19^^England|Human|Lincolnshire Hospitals and DeepSeq Nottingham|COVID-19 Genomics UK (COG-UK) Consortium|Loose|United Kingdom

>Spike|hCoV-19/USA/MI-MDHHS-SC20905/2020|2020-04-29|EPI\_ISL\_476041|Original|hCoV-19^^Michigan|Human|Michigan Department of Health and Human Services|Michigan Department of Health and Human Services|Blankenship|USA

>Spike|hCoV-19/England/ALDP-AA185A/2020|2020-10-22|EPI\_ISL\_624973|Original|hCoV-19^^England|Human|Lighthouse Lab in Alderley Park|Wellcome Sanger Institute for the COVID-19 Genomics UK (COG-UK) consortium|Davies|United Kingdom

>Spike|hCoV-19/Wales/PHWC-49D0C8/2020|2020-12-10|EPI\_ISL\_742731|Original|hCoV-19^^Wales|Human|Wales Specialist Virology Centre Sequencing lab|COVID-19 Genomics UK (COG-UK) Consortium|Moore|United Kingdom

>Spike|hCoV-19/Taiwan/TSGH-34/2020|2020-04-01|EPI\_ISL\_447593|Original|hCoV-19^^New Taipei City|Human|TSGH-CP molecular lab|TSGH-CP molecular lab|Shang|Taiwan

>Spike|hCoV-19/England/QEUA-9AF36B/2020|2020-09-01|EPI\_ISL\_559838|Original|hCoV-19^^England|Human|Oxford Viromics|COVID-19 Genomics UK (COG-UK) Consortium|Golubchik|United Kingdom

>Spike|hCoV-19/USA/TX-HMH-MCoV-18707/2020|2020-11-22|EPI\_ISL\_785055|Original|hCoV-19^^Texas|Human|Houston Methodist Hospital|Houston Methodist Hospital|Long|USA

>Spike|hCoV-19/Scotland/CVR1675/2020|2020-04-05|EPI\_ISL\_433649|Original|hCoV-19^^Scotland|Human|West of Scotland Specialist Virology Centre|COVID-19 Genomics UK (COG-UK) Consortium|Robertson|United Kingdom

>Spike|hCoV-19/Denmark/ALAB-SSI-243/2020|2020-03-10|EPI\_ISL\_437658|Original|hCoV-19^^Denmark|Human|Department of Virus and Microbiological Special Diagnostics|Albertsen lab|Kirkegaard|Denmark

>Spike|hCoV-19/England/MILK-B3E1A1/2020|2020-11-01|EPI\_ISL\_706265|Original|hCoV-19^^England|Human|Oxford Viromics|COVID-19 Genomics UK (COG-UK) Consortium|Golubchik|United Kingdom

>Spike|hCoV-19/Wales/PHWC-49F11E/2020|2020-12-01|EPI\_ISL\_743168|Original|hCoV-19^^Wales|Human|Wales Specialist Virology Centre Sequencing lab|COVID-19 Genomics UK (COG-UK) Consortium|Moore|United Kingdom

>Spike|hCoV-19/Brazil/RS-15290/2020|2020-08-15|EPI\_ISL\_729799|Original|hCoV-19^^Rio Grande do Sul|Human|Laboratorio Central de Saude Publica do Estado do Rio Grande do Sul (LACEN-RS)|Laboratory of Respiratory Viruses and Measles|Silva|Brazil

>Spike|hCoV-19/Belgium/ULG-10589/2020|2020-10-23|EPI\_ISL\_626295|Original|hCoV-19^^Liège|Human|Department of Clinical Microbiology|GIGA Medical Genomics|Durkin|Belgium

>Spike|hCoV-19/mink/Netherlands/NB-EMC-17-19/2020|2020-07-02|EPI\_ISL\_523037|Original|hCoV-19^^Noord Brabant|Neovison vison|Dutch COVID-19 response team|Erasmus Medical Center|Oude Munnink|Netherlands

>Spike|hCoV-19/Chile/RM-CMM-0263M/2020|2020-04-28|EPI\_ISL\_629016|Original|hCoV-19^^Region Metropolitana de Santiago|Human|Centro de Biotecnología Vegetal|Center for Mathematical Modeling and Center for Genome Regulation. Santiago|Palma Vera|Chile

>Spike|hCoV-19/England/ALDP-AA54F8/2020|2020-10-22|EPI\_ISL\_625025|Original|hCoV-19^^England|Human|Lighthouse Lab in Alderley Park|Wellcome Sanger Institute for the COVID-19 Genomics UK (COG-UK) consortium|Davies|United Kingdom

>Spike|hCoV-19/Wales/PHWC-16DEAC/2020|2020-09-29|EPI\_ISL\_585635|Original|hCoV-19^^Wales|Human|Wales Specialist Virology Centre Sequencing lab|COVID-19 Genomics UK (COG-UK) Consortium|Moore|United Kingdom

>Spike|hCoV-19/USA/NJ-QDX-1253/2020|2020-03-16|EPI\_ISL\_571980|Original|hCoV-19^^New Jersey|Human|Quest Diagnostics|Quest Diagnostics|Kagan|USA

>Spike|hCoV-19/England/CAMC-AB15AB/2020|2020-10-23|EPI\_ISL\_623832|Original|hCoV-19^^England|Human|Lighthouse Lab in Cambridge|Wellcome Sanger Institute for the COVID-19 Genomics UK (COG-UK) consortium|Davies|United Kingdom

>Spike|hCoV-19/USA/WA-S2615/2020|2020-06-19|EPI\_ISL\_497247|Original|hCoV-19^^Washington|Human|Washington State Department of Health|Seattle Flu Study|Lee|USA

>Spike|hCoV-19/France/ARA-117740/2020|2020-12-09|EPI\_ISL\_745375|Original|hCoV-19^^Auvergne-Rh\u00f4ne-Alpes|Human|CNR Virus des Infections Respiratoires - France SUD|CNR Virus des Infections Respiratoires - France SUD|Bal|France

>Spike|hCoV-19/Australia/VIC3075/2020|2020-07-10|EPI\_ISL\_520782|Original|hCoV-19^^Victoria|Human|Microbiological Diagnostic Unit - Public Health Laboratory (MDU-PHL) |MDU-PHL|Schultz|Australia

>Spike|hCoV-19/Denmark/DCGC-21119/2020|2020-12-21|EPI\_ISL\_758801|Original|hCoV-19^^Hovedstaden|Human|Department of Virus and Microbiological Special Diagnostics|Albertsen Lab|Michaelsen|Denmark

>Spike|hCoV-19/Japan/PG-6139/2020|2020-08-00|EPI\_ISL\_689251|Original|hCoV-19^^Japan|Human|Pathogen Genomics Center|Pathogen Genomics Center|Sekizuka|Japan

>Spike|hCoV-19/Denmark/DCGC-16099/2020|2020-11-16|EPI\_ISL\_714125|Original|hCoV-19^^Sjaelland|Human|Department of Virus and Microbiological Special Diagnostics|Albertsen Lab|Michaelsen|Denmark

>Spike|hCoV-19/Spain/MD-H12-LP20-2327/2020|2020-03-11|EPI\_ISL\_428677|Original|hCoV-19^^Madrid|Human|Hospital Universitario La Paz|Hospital Universitario 12 de Octubre|Viedma|Spain

>Spike|hCoV-19/England/LIVE-DC687A/2020|2020-11-23|EPI\_ISL\_703275|Original|hCoV-19^^England|Human|Liverpool Clinical Laboratories|COVID-19 Genomics UK (COG-UK) Consortium|Haldenby|United Kingdom

>Spike|hCoV-19/USA/MI-MDHHS-SC20836/2020|2020-04-21|EPI\_ISL\_471857|Original|hCoV-19^^Michigan|Human|Michigan Department of Health and Human Services|Michigan Department of Health and Human Services|Blankenship|USA

>Spike|hCoV-19/Canada/BC-BCCDC-6427/2020|2020-10-00|EPI\_ISL\_740580|Original|hCoV-19^^British Columbia|Human|BCCDC Public Health Laboratory|BCCDC Public Health Laboratory|Prystajecky|Canada

>Spike|hCoV-19/USA/VA-DCLS-1354/2020|2020-07-03|EPI\_ISL\_572267|Original|hCoV-19^^Virginia|Human|Virginia DCLS|Virginia DCLS|St. Jacques|USA

>Spike|hCoV-19/Japan/PG-4198/2020|2020-07-00|EPI\_ISL\_692437|Original|hCoV-19^^Japan|Human|Pathogen Genomics Center|Pathogen Genomics Center|Sekizuka|Japan

>Spike|hCoV-19/USA/MN-MDH-1314/2020|2020-03-24|EPI\_ISL\_495613|Original|hCoV-19^^Minnesota|Human|Minnesota Department of Health|Minnesota Department of Health|Garfin|USA

>Spike|hCoV-19/Denmark/DCGC-5980/2020|2020-09-21|EPI\_ISL\_621089|Original|hCoV-19^^Midtjylland|Human|Department of Virus and Microbiological Special Diagnostics|Albertsen lab|Michaelsen|Denmark

>Spike|hCoV-19/USA/MI-QDX-927/2020|2020-03-22|EPI\_ISL\_571632|Original|hCoV-19^^Michigan|Human|Quest Diagnostics|Quest Diagnostics|Kagan|USA

>Spike|hCoV-19/Australia/NSW183/2020|2020-03-22|EPI\_ISL\_427714|Original|hCoV-19^^New South Wales|Human|Centre for Infectious Diseases and Microbiology Public Health|NSW Health Pathology - Institute of Clinical Pathology and Medical Research; Westmead Hospital; University of Sydney|Gall|Australia

>Spike|hCoV-19/USA/AZ-TG654362/2020|2020-04-11|EPI\_ISL\_695999|Original|hCoV-19^^Arizona|Human|Sonora Quest Laboratories|TGen North|French|USA

>Spike|hCoV-19/USA/NM-DOH-2020329356/2020|2020-09-04|EPI\_ISL\_575326|Original|hCoV-19^^New Mexico|Human|Molecular Biology|Molecular Biology|Johnson|USA

>Spike|hCoV-19/England/QEUEH-96ADC8/2020|2020-08-14|EPI\_ISL\_531377|Original|hCoV-19^^England|Human|Lighthouse Lab in Glasgow|Wellcome Sanger Institute for the COVID-19 Genomics UK (COG-UK) consortium|Davies|United Kingdom

>Spike|hCoV-19/England/CAMC-B99229/2020|2020-11-15|EPI\_ISL\_673334|Original|hCoV-19^^England|Human|Lighthouse Lab in Cambridge|Wellcome Sanger Institute for the COVID-19 Genomics UK (COG-UK) Consortium|Davies|United Kingdom

>Spike|hCoV-19/England/QEUA-AAA8CA/2020|2020-10-21|EPI\_ISL\_652717|Original|hCoV-19^^England|Human|Oxford Viromics|COVID-19 Genomics UK (COG-UK) Consortium|Golubchik|United Kingdom

>Spike|hCoV-19/USA/FL-BPHL-0545/2020|2020-03-31|EPI\_ISL\_508748|Original|hCoV-19^^Florida|Human|Florida Bureau of Public Health Laboratories|Florida Bureau of Public Health Laboratories|Blanton|USA

>Spike|hCoV-19/Wales/ALDP-B24F68/2020|2020-11-04|EPI\_ISL\_646738|Original|hCoV-19^^Wales|Human|Lighthouse Lab in Alderley Park|Wellcome Sanger Institute for the COVID-19 Genomics UK (COG-UK) Consortium|Davies|United Kingdom

>Spike|hCoV-19/England/BRIS-12870C/2020|2020-04-15|EPI\_ISL\_458793|Original|hCoV-19^^England|Human|PHE South West Regional Laboratory|Wellcome Sanger Institute for the COVID-19 Genomics UK (COG-UK) consortium|Davies|United Kingdom

>Spike|hCoV-19/England/SHEF-C5580/2020|2020-04-29|EPI\_ISL\_475383|Original|hCoV-19^^England|Human|Virology Department|COVID-19 Genomics UK (COG-UK) Consortium|de Silva|United Kingdom

>Spike|hCoV-19/Wales/PHWC-49CADA/2020|2020-12-04|EPI\_ISL\_742643|Original|hCoV-19^^Wales|Human|Wales Specialist Virology Centre Sequencing lab|COVID-19 Genomics UK (COG-UK) Consortium|Moore|United Kingdom

>Spike|hCoV-19/Wales/PHWC-4882BB/2020|2020-10-28|EPI\_ISL\_639375|Original|hCoV-19^^Wales|Human|Wales Specialist Virology Centre Sequencing lab|COVID-19 Genomics UK (COG-UK) Consortium|Moore|United Kingdom

>Spike|hCoV-19/India/MH-ACTREC-211/2020|2020-06-27|EPI\_ISL\_699865|Original|hCoV-19^^Maharashtra|Human|Hematopathology Laboratory|Hematopathology Laboratory|Patkar|India

>Spike|hCoV-19/USA/WI-WSLH-200299/2020|2020-04-17|EPI\_ISL\_578483|Original|hCoV-19^^Wisconsin|Human|Wisconsin State Laboratory of Hygiene Communicable Disease Division|Wisconsin State Laboratory of Hygiene Communicable Disease Division|Florek|USA

>Spike|hCoV-19/Netherlands/NB-EMC-402/2020|2020-00-00|EPI\_ISL\_722479|Original|hCoV-19^^Noord Brabant|Human|Dutch COVID-19 response team|Erasmus Medical Center|Oude Munnink|Netherlands

>Spike|hCoV-19/England/BRIS-12CE9A/2020|2020-04-24|EPI\_ISL\_481933|Original|hCoV-19^^England|Human|PHE South West Regional Laboratory|Wellcome Sanger Institute for the COVID-19 Genomics UK (COG-UK) consortium|Davies|United Kingdom

>Spike|hCoV-19/Australia/VIC3793/2020|2020-07-12|EPI\_ISL\_520510|Original|hCoV-19^^Victoria|Human|Microbiological Diagnostic Unit - Public Health Laboratory (MDU-PHL)|MDU-PHL|Schultz|Australia

>Spike|hCoV-19/USA/TX-HMH-7137/2020|2020-06-29|EPI\_ISL\_546537|Original|hCoV-19^^Texas|Human|Houston Methodist Hospital|Houston Methodist Hospital|Long|USA

>Spike|hCoV-19/Wales/PHWC-274AD/2020|2020-03-31|EPI\_ISL\_432282|Original|hCoV-19^^Wales|Human|Wales Specialist Virology Centre|Public Health Wales Microbiology Cardiff|Moore|United Kingdom

>Spike|hCoV-19/USA/NV-NSPHL-A0051/2020|2020-03-25|EPI\_ISL\_515333|Original|hCoV-19^^Nevada|Human|Nevada State Public Health Laboratory|Nevada State Public Health Laboratory|Sevinsky|USA

>Spike|hCoV-19/England/ALDP-927CAC/2020|2020-06-22|EPI\_ISL\_552838|Original|hCoV-19^^England|Human|Lighthouse Lab in Alderley Park|Wellcome Sanger Institute for the COVID-19 Genomics UK (COG-UK) consortium|Davies|United Kingdom

>Spike|hCoV-19/Denmark/DCGC-7875/2020|2020-10-26|EPI\_ISL\_618859|Original|hCoV-19^^Nordjylland|Human|Department of Virus and Microbiological Special Diagnostics|Albertsen lab|Michaelsen|Denmark

>Spike|hCoV-19/USA/WA-S2351/2020|2020-06-13|EPI\_ISL\_496983|Original|hCoV-19^^Washington|Human|Washington State Department of Health|Seattle Flu Study|Lee|USA

>Spike|hCoV-19/Denmark/DCGC-18418/2020|2020-12-07|EPI\_ISL\_749234|Original|hCoV-19^^Sjaelland|Human|Department of Virus and Microbiological Special Diagnostics|Albertsen Lab|Michaelsen|Denmark

>Spike|hCoV-19/Australia/VIC12929/2020|2020-07-28|EPI\_ISL\_592112|Original|hCoV-19^^Victoria|Human|Microbiological Diagnostic Unit - Public Health Laboratory (MDU-PHL)|MDU-PHL|Schultz|Australia

>Spike|hCoV-19/Germany/BW-ChVir-1577/2020|2020-02-25|EPI\_ISL\_412912|Original|hCoV-19^^Baden-W\u00fcrtemberg|Human|State Health Office Baden-W\u00fcrtemberg|Charite\u0301 Universita\u0308tsmedizin Berlin|Muehlemann|Germany

>Spike|hCoV-19/Malaysia/2982/2020|2020-03-29|EPI\_ISL\_506998|Original|hCoV-19^^Kuala Lumpur|Human|Department of Medical Microbiology|Department of Medical Microbiology|Chan|Malaysia

>Spike|hCoV-19/England/20139059004/2020|2020-03-28|EPI\_ISL\_420727|Original|hCoV-19^^England|Human|Respiratory Virus Unit|Respiratory Virus Unit|Platt|United Kingdom

>Spike|hCoV-19/Australia/VIC2669/2020|2020-07-02|EPI\_ISL\_521511|Original|hCoV-19^^Victoria|Human|Victorian Infectious Diseases Reference Laboratory (VIDRL)|VIDRL and MDU-PHL|Schultz|Australia

>Spike|hCoV-19/Northern Ireland/NIRE-103F0F/2020|2020-04-08|EPI\_ISL\_482134|Original|hCoV-19^^Northern Ireland|Human|Regional Virus Laboratory|Wellcome Sanger Institute for the COVID-19 Genomics UK (COG-UK) consortium|Davies|United Kingdom

>Spike|hCoV-19/England/201290032/2020|2020-03-21|EPI\_ISL\_423978|Original|hCoV-19^^England|Human|Respiratory Virus Unit|Respiratory Virus Unit|Platt|United Kingdom

>Spike|hCoV-19/Spain/VC-IBV-98004342/2020|2020-03-25|EPI\_ISL\_654478|Original|hCoV-19^^Comunitat\_Valenciana|Human|Servicio de Microbiolog\u00eda. Hospital General Universitario de Castell\u00f3n|SeqCOVID-SPAIN consortium/IBV(CSIC)|Comas|Spain

>Spike|hCoV-19/Wales/PHWC-494BFD/2020|2020-11-22|EPI\_ISL\_726230|Original|hCoV-19^^Wales|Human|Originating lab|COVID-19 Genomics UK (COG-UK) Consortium|Moore|United Kingdom

>Spike|hCoV-19/USA/UT-08619/2020|2020-05-06|EPI\_ISL\_524359|Original|hCoV-19^^Utah|Human|Utah Public Health Laboratory|Utah Public Health Laboratory|Young|USA

>Spike|hCoV-19/England/LOND-D4C01/2020|2020-04-14|EPI\_ISL\_449663|Original|hCoV-19^^England|Human|University College London|COVID-19 Genomics UK (COG-UK) Consortium|Roy|United Kingdom

>Spike|hCoV-19/USA/NY-Wadsworth-261035-01/2020|2020-11-02|EPI\_ISL\_754512|Original|hCoV-19^^New York|Human|Wadsworth Center|Wadsworth Center|Lasek-Nesselquist|USA

>Spike|hCoV-19/Denmark/DCGC-14685/2020|2020-11-23|EPI\_ISL\_711910|Original|hCoV-19^^Sjaelland|Human|Department of Virus and Microbiological Special Diagnostics|Albertsen Lab|Michaelsen|Denmark

>Spike|hCoV-19/Switzerland/GE-ETHZ-360137/2020|2020-11-06|EPI\_ISL\_693916|Original|hCoV-19^^Geneva|Human|Viollier AG|Department of Biosystems Science and Engineering|Nadeau|Switzerland

>Spike|hCoV-19/USA/UT-02538/2020|2020-04-24|EPI\_ISL\_487199|Original|hCoV-19^^Utah|Human|Utah Public Health Laboratory|Utah Public Health Laboratory|Butz|USA

>Spike|hCoV-19/India/TG-CCMB-M135/2020|2020-06-06|EPI\_ISL\_495184|Original|hCoV-19^^Telangana|Human|CSIR-Centre for Cellular and Molecular Biology|CSIR-Centre for Cellular and Molecular Biology|Banu|India

>Spike|hCoV-19/England/MILK-A7B32B/2020|2020-10-14|EPI\_ISL\_607499|Original|hCoV-19^^England|Human|Lighthouse Lab in Milton Keynes|Wellcome Sanger Institute for the COVID-19 Genomics UK (COG-UK) consortium|Davies|United Kingdom

>Spike|hCoV-19/England/20140002604/2020|2020-03-28|EPI\_ISL\_423372|Original|hCoV-19^^England|Human|Respiratory Virus Unit|Respiratory Virus Unit|Platt|United Kingdom

>Spike|hCoV-19/USA/LA-EVTL848/2020|2020-07-28|EPI\_ISL\_653539|Original|hCoV-19^^Louisiana|Human|LSUHS Emerging Viral Threat Laboratory|Microbial Genome Sequencing Center|Kamil|USA

>Spike|hCoV-19/England/CAMC-B9A422/2020|2020-11-15|EPI\_ISL\_673246|Original|hCoV-19^^England|Human|Lighthouse Lab in Cambridge|Wellcome Sanger Institute for the COVID-19 Genomics UK (COG-UK) Consortium|Davies|United Kingdom

>Spike|hCoV-19/USA/NY-NYUMC735/2020|2020-03-25|EPI\_ISL\_451450|Original|hCoV-19^^New York|Human|NYU Langone Health|Departments of Pathology and Medicine|Maurano|USA

>Spike|hCoV-19/Italy/VEN-IZSV-9/2020|2020-03-17|EPI\_ISL\_496482|Original|hCoV-19^^Veneto|Human|Dept. Infectious|1) Dept. Infectious|Mori|Italy

>Spike|hCoV-19/USA/MI-MDHHS-SC20855/2020|2020-05-08|EPI\_ISL\_471876|Original|hCoV-19^^Michigan|Human|Michigan Department of Health and Human Services|Michigan Department of Health and Human Services|Blankenship|USA

>Spike|hCoV-19/Canada/ON-PHL-20-03801/2020|2020-11-00|EPI\_ISL\_775062|Original|hCoV-19^Ontario|Human|Public Health Ontario Laboratory|Public Health Ontario Laboratory|Guthrie|Canada

>Spike|hCoV-19/Germany/NW-HHU-70/2020|2020-03-27|EPI\_ISL\_523941|Original|hCoV-19^North Rhine-Westphalia|Human|Center of Medical Microbiology|Center of Medical Microbiology|Wienemann|Germany

>Spike|hCoV-19/Colombia/VAC-INS-96183/2020|2020-04-01|EPI\_ISL\_456147|Original|hCoV-19^Valle del Cauca|Human|Instituto Nacional de Salud - Unidad de Secuenciación y Análisis Genómico|Instituto Nacional de Salud|Diedrich|Colombia

>Spike|hCoV-19/USA/TX-HMH-MCoV-12087/2020|2020-09-17|EPI\_ISL\_790195|Original|hCoV-19^Texas|Human|Houston Methodist Hospital|Houston Methodist Hospital|Long|USA

>Spike|hCoV-19/England/MILK-A7A508/2020|2020-10-15|EPI\_ISL\_606696|Original|hCoV-19^England|Human|Lighthouse Lab in Milton Keynes|Wellcome Sanger Institute for the COVID-19 Genomics UK (COG-UK) consortium|Davies|United Kingdom

>Spike|hCoV-19/Czech Republic/IAB\_9/2020|2020-03-28|EPI\_ISL\_426886|Original|hCoV-19^Czech Republic|Human|Motol University Hospital|Institute of Applied Biotechnologies a.s.|Broz|Czech Republic

>Spike|hCoV-19/Luxembourg/LNS7903628/2020|2020-10-23|EPI\_ISL\_744650|Original|hCoV-19^Luxembourg|Human|Laboratoire national de santé|Laboratoire national de santé|Wienecke-Baldacchino|Luxembourg

>Spike|hCoV-19/Switzerland/ZH-ETHZ-210034/2020|2020-07-22|EPI\_ISL\_510775|Original|hCoV-19^Zurich|Human|Viollier AG|Department of Biosystems Science and Engineering|Nadeau|Switzerland

>Spike|hCoV-19/Belgium/reg-09171052/2020|2020-09-17|EPI\_ISL\_734974|Original|hCoV-19^Tervuren|Human|UZ Leuven|KU Leuven|Maes|Belgium

>Spike|hCoV-19/Luxembourg/LNS4295690/2020|2020-04-01|EPI\_ISL\_428959|Original|hCoV-19^Luxembourg|Human|Laboratoire National de Santé|Laboratoire National de Santé|Wienecke-Baldacchino|Luxembourg

>Spike|hCoV-19/USA/MD-MDH-0530/2020|2020-12-01|EPI\_ISL\_778907|Original|hCoV-19^Maryland|Human|Maryland Public Health Laboratory|Maryland Public Health Laboratory|Keller|USA

>Spike|hCoV-19/England/MILK-A6BF39/2020|2020-10-09|EPI\_ISL\_609110|Original|hCoV-19^England|Human|Lighthouse Lab in Milton Keynes|Wellcome Sanger Institute for the COVID-19 Genomics UK (COG-UK) consortium|Davies|United Kingdom

>Spike|hCoV-19/England/ALDP-B45DD0/2020|2020-11-07|EPI\_ISL\_656222|Original|hCoV-19^England|Human|Lighthouse Lab in Alderley Park|Wellcome Sanger Institute for the COVID-19 Genomics UK (COG-UK) Consortium|Davies|United Kingdom

>Spike|hCoV-19/England/MILK-9A6759/2020|2020-09-01|EPI\_ISL\_549955|Original|hCoV-19^England|Human|Lighthouse Lab in Milton Keynes|Wellcome Sanger Institute for the COVID-19 Genomics UK (COG-UK) consortium|Davies|United Kingdom

>Spike|hCoV-19/Serbia/KV77-04/2020|2020-04-22|EPI\_ISL\_462438|Original|hCoV-19^Kraljevo|Human|unknown|Laboratory Diagnostic|Vidanovic|Serbia

>Spike|hCoV-19/Scotland/EDB8588/2020|2020-10-21|EPI\_ISL\_651969|Original|hCoV-19^Scotland|Human|Virology Department|COVID-19 Genomics UK (COG-UK) Consortium|McHugh|United Kingdom

>Spike|hCoV-19/USA/TX-HMH-MCoV-9918/2020|2020-07-06|EPI\_ISL\_780339|Original|hCoV-19^Texas|Human|Houston Methodist Hospital|Houston Methodist Hospital|Long|USA

>Spike|hCoV-19/Denmark/DCGC-2570/2020|2020-08-17|EPI\_ISL\_617869|Original|hCoV-19^Syddanmark|Human|Department of Virus and Microbiological Special Diagnostics|Albertsen lab|Michaelsen|Denmark

>Spike|hCoV-19/England/ALDP-A853F1/2020|2020-10-17|EPI\_ISL\_610322|Original|hCoV-19^England|Human|Lighthouse Lab in Alderley Park|Wellcome Sanger Institute for the COVID-19 Genomics UK (COG-UK) consortium|Davies|United Kingdom

>Spike|hCoV-19/USA/MN-QDX-1618/2020|2020-03-16|EPI\_ISL\_603989|Original|hCoV-19^Minnesota|Human|Quest Diagnostics|Quest Diagnostics|Kagan|USA

>Spike|hCoV-19/Northern Ireland/NIRE-2330B7/2020|2020-09-27|EPI\_ISL\_680253|Original|hCoV-19^Northern Ireland|Human|Regional Virus Laboratory|COVID-19 Genomics UK (COG-UK) Consortium|Fairley|United Kingdom

>Spike|hCoV-19/England/ALDP-A2D6B6/2020|2020-10-06|EPI\_ISL\_586744|Original|hCoV-19^^England|Human|Lighthouse Lab in Alderley Park|Wellcome Sanger Institute for the COVID-19 Genomics UK (COG-UK) consortium|Davies|United Kingdom

>Spike|hCoV-19/Georgia/Tb-3118/2020|2020-04-15|EPI\_ISL\_470877|Original|hCoV-19^^Tbilisi|Human|Department for Virology|Department for Virology|Tomashvili|Georgia

>Spike|hCoV-19/Spain/AS-IBV-98006635/2020|2020-04-02|EPI\_ISL\_654676|Original|hCoV-19^^Asturias|Human|Servicio de Microbiolog\u00eda|SeqCOVID-SPAIN consortium/IBV (CSIC) |Comas|Spain

>Spike|hCoV-19/England/NORT-29879D/2020|2020-05-19|EPI\_ISL\_469312|Original|hCoV-19^^England|Human|NU-OMICS DNA Sequencing research facility|Wellcome Sanger Institute for the COVID-19 Genomics UK (COG-UK) consortium|Davies|United Kingdom

>Spike|hCoV-19/Switzerland/ZH-ETHZ-270143/2020|2020-08-28|EPI\_ISL\_541525|Original|hCoV-19^^Zurich|Human|Viollier AG|Department of Biosystems Science and Engineering|Nadeau|Switzerland

>Spike|hCoV-19/USA/VA-DCLS-1971/2020|2020-10-07|EPI\_ISL\_644888|Original|hCoV-19^^Virginia|Human|Virginia DCLS|Virginia DCLS|St. Jacques|USA

>Spike|hCoV-19/USA/WA-UW280/2020|2020-03-13|EPI\_ISL\_418065|Original|hCoV-19^^Washington|Human|UW Virology Lab|UW Virology Lab|Roychoudhury|USA

>Spike|hCoV-19/Netherlands/un-EMC-757/2020|2020-07-02|EPI\_ISL\_523513|Original|hCoV-19^^Netherlands|Human|Dutch COVID-19 response team|Erasmus Medical Center|Oude Munnink|Netherlands

>Spike|hCoV-19/Japan/PG-0476/2020|2020-04-02|EPI\_ISL\_480136|Original|hCoV-19^^HokurikuShinsyu|Human|Fukui Prefectural Institute of Public Health and Environmental Science|Pathogen Genomics Center|Sekizuka|Japan

>Spike|hCoV-19/Australia/VIC12779/2020|2020-08-03|EPI\_ISL\_640899|Original|hCoV-19^^Victoria|Human|Microbiological Diagnostic Unit - Public Health Laboratory (MDU-PHL) |MDU-PHL|Schultz|Australia

>Spike|hCoV-19/USA/NY-PV09315/2020|2020-03-21|EPI\_ISL\_450007|Original|hCoV-19^^New York|Human|MSHS Clinical Microbiology Laboratories|MSHS Pathogen Surveillance Program|van Bakel|USA

>Spike|hCoV-19/USA/MN-MDH-1098/2020|2020-06-03|EPI\_ISL\_470778|Original|hCoV-19^^Minnesota|Human|Minnesota Department of Health|Minnesota Department of Health|Garfin|USA

>Spike|hCoV-19/Denmark/DCGC-21229/2020|2020-12-21|EPI\_ISL\_758820|Original|hCoV-19^^Denmark|Human|Department of Virus and Microbiological Special Diagnostics|Albertsen Lab|Michaelsen|Denmark

>Spike|hCoV-19/USA/NY-NYUMC408/2020|2020-03-30|EPI\_ISL\_435475|Original|hCoV-19^^New York|Human|NYU Langone Health|Departments of Pathology and Medicine|Maurano|USA

>Spike|hCoV-19/Japan/PG-7392/2020|2020-07-00|EPI\_ISL\_688494|Original|hCoV-19^^Japan|Human|Pathogen Genomics Center|Pathogen Genomics Center|Sekizuka|Japan

>Spike|hCoV-19/Spain/IB-IBV-99011583/2020|2020-12-21|EPI\_ISL\_779906|Original|hCoV-19^^Balear Islands|Human|Servicio de Microbiolog\u00eda|SeqCOVID-SPAIN consortium/IBV (CSIC) |Comas|Spain

>Spike|hCoV-19/England/20154083504/2020|2020-04-03|EPI\_ISL\_466271|Original|hCoV-19^^England|Human|Respiratory Virus Unit|Respiratory Virus Unit|Platt|United Kingdom

>Spike|hCoV-19/Netherlands/ZH-EMC-471/2020|2020-08-17|EPI\_ISL\_523807|Original|hCoV-19^^Zuid Holland|Human|Dutch COVID-19 response team|Erasmus Medical Center|Oude Munnink|Netherlands

>Spike|hCoV-19/USA/OR-PROV-174/2020|2020-05-12|EPI\_ISL\_482424|Original|hCoV-19^^Oregon|Human|Providence St. Joseph Health Molecular Genomics Laboratory|Providence St. Joseph Health Molecular Genomics Laboratory|Dowdell|USA

>Spike|hCoV-19/Australia/VIC828/2020|2020-04-03|EPI\_ISL\_427096|Original|hCoV-19^^Victoria|Human|Victorian Infectious Diseases Reference Laboratory (VIDRL) |Microbiological Diagnostic Unit Public Health Laboratory and Victorian Infectious Diseases Reference Laboratory|Schultz|Australia

>Spike|hCoV-19/England/ALDP-B5BCF8/2020|2020-11-09|EPI\_ISL\_655731|Original|hCoV-19^^England|Human|Lighthouse Lab in Alderley Park|Wellcome Sanger Institute for the COVID-19 Genomics UK (COG-UK) Consortium|Davies|United Kingdom



>Spike|hCoV-19/England/MILK-ACA879/2020|2020-10-21|EPI\_ISL\_630343|Original|hCoV-19^^England|Human|Lighthouse Lab in Milton Keynes|Wellcome Sanger Institute for the COVID-19 Genomics UK (COG-UK) consortium|Davies|United Kingdom

>Spike|hCoV-19/USA/CruiseA-4/2020|2020-02-21|EPI\_ISL\_413609|Original|hCoV-19^^USA|Human|unknown|Pathogen Discovery|Queen|USA

>Spike|hCoV-19/USA/CA-CZB-1801/2020|2020-04-16|EPI\_ISL\_486130|Original|hCoV-19^^California|Human|Orange County Public Health Laboratory|Chan-Zuckerberg Biohub|McGeever|USA

>Spike|hCoV-19/USA/NY-WCMP11E05P/2020|2020-03-16|EPI\_ISL\_427593|Original|hCoV-19^^New York|Human|NewYork-Presbyterian & Mason Lab|Mason Lab|Mason|USA

>Spike|hCoV-19/England/LIVE-A9203/2020|2020-03-25|EPI\_ISL\_517277|Original|hCoV-19^^England|Human|Liverpool Clinical Laboratories|COVID-19 Genomics UK (COG-UK) Consortium|Haldenby|United Kingdom

>Spike|hCoV-19/England/QEUEH-B32073/2020|2020-11-04|EPI\_ISL\_646175|Original|hCoV-19^^England|Human|Lighthouse Lab in Glasgow|Wellcome Sanger Institute for the COVID-19 Genomics UK (COG-UK) Consortium|Davies|United Kingdom

>Spike|hCoV-19/Denmark/DCGC-10711/2020|2020-11-02|EPI\_ISL\_669489|Original|hCoV-19^^Hovedstaden|Human|Department of Virus and Microbiological Special Diagnostics|Albertsen Lab|Michaelsen|Denmark

>Spike|hCoV-19/England/20140000404/2020|2020-03-29|EPI\_ISL\_423367|Original|hCoV-19^^England|Human|Respiratory Virus Unit|Respiratory Virus Unit|Platt|United Kingdom

>Spike|hCoV-19/Netherlands/NH-RIVM-20111/2020|2020-11-27|EPI\_ISL\_723288|Original|hCoV-19^^Noord-Holland|Human|Dutch COVID-19 response team|National Institute for Public Health and the Environment (RIVM)|Meijer|Netherlands

>Spike|hCoV-19/Wales/PHWC-163D6D/2020|2020-05-06|EPI\_ISL\_474077|Original|hCoV-19^^Wales|Human|Originating lab|COVID-19 Genomics UK (COG-UK) Consortium|Moore|United Kingdom

>Spike|hCoV-19/Portugal/PT1798/2020|2020-11-09|EPI\_ISL\_732025|Original|hCoV-19^^Portugal|Human|Instituto Nacional de Saude (INSA)|Instituto Nacional de Saude (INSA)|Borges|Portugal

>Spike|hCoV-19/Netherlands/UT-RIVM-10072/2020|2020-00-00|EPI\_ISL\_547523|Original|hCoV-19^^Utrecht|Human|Dutch COVID-19 response team|National Institute for Public Health and the Environment (RIVM)|Meijer|Netherlands

>Spike|hCoV-19/Wales/PHWC-485342/2020|2020-10-25|EPI\_ISL\_628170|Original|hCoV-19^^Wales|Human|Wales Specialist Virology Centre Sequencing lab|COVID-19 Genomics UK (COG-UK) Consortium|Moore|United Kingdom

>Spike|hCoV-19/Denmark/DCGC-8123/2020|2020-10-26|EPI\_ISL\_617078|Original|hCoV-19^^Midtjylland|Human|Department of Virus and Microbiological Special Diagnostics|Albertsen lab|Michaelsen|Denmark

>Spike|hCoV-19/England/MILK-CA511D/2020|2020-12-17|EPI\_ISL\_762491|Original|hCoV-19^^England|Human|Lighthouse Lab in Milton Keynes|Wellcome Sanger Institute for the COVID-19 Genomics UK (COG-UK) Consortium|Davies|United Kingdom

>Spike|hCoV-19/England/ALDP-AA4356/2020|2020-10-22|EPI\_ISL\_624446|Original|hCoV-19^^England|Human|Lighthouse Lab in Alderley Park|Wellcome Sanger Institute for the COVID-19 Genomics UK (COG-UK) consortium|Davies|United Kingdom

>Spike|hCoV-19/England/ALDP-9557C2/2020|2020-06-12|EPI\_ISL\_554367|Original|hCoV-19^^England|Human|Lighthouse Lab in Alderley Park|Wellcome Sanger Institute for the COVID-19 Genomics UK (COG-UK) consortium|Davies|United Kingdom

>Spike|hCoV-19/Wales/PHWC-49002F/2020|2020-11-15|EPI\_ISL\_703918|Original|hCoV-19^^Wales|Human|Originating lab|COVID-19 Genomics UK (COG-UK) Consortium|Moore|United Kingdom

>Spike|hCoV-19/USA/MA-MGH-02780/2020|2020-09-24|EPI\_ISL\_765630|Original|hCoV-19^^Massachusetts|Human|Massachusetts General Hospital|Infectious Disease Program|Park|USA

>Spike|hCoV-19/England/QEUEH-B42456/2020|2020-11-08|EPI\_ISL\_657085|Original|hCoV-19^^England|Human|Lighthouse Lab in Glasgow|Wellcome Sanger Institute for the COVID-19 Genomics UK (COG-UK) Consortium|Davies|United Kingdom

>Spike|hCoV-19/England/EXET-1381DE/2020|2020-10-06|EPI\_ISL\_612388|Original|hCoV-19^^England|Human|University of Exeter|COVID-19 Genomics UK (COG-UK) Consortium|Temperton|United Kingdom

>Spike|hCoV-19/USA/MI-MDHHS-SC20658/2020|2020-04-29|EPI\_ISL\_471682|Original|hCoV-19^^Michigan|Human|Michigan Department of Health and Human Services|Michigan Department of Health and Human Services|Blankenship|USA

>Spike|hCoV-19/USA/TX-HMH-2200/2020|2020-05-23|EPI\_ISL\_545177|Original|hCoV-19^^Texas|Human|Houston Methodist Hospital|Houston Methodist Hospital|Long|USA

>Spike|hCoV-19/Canada/ON-S1232/2020|2020-04-10|EPI\_ISL\_586307|Original|hCoV-19^^Ontario|Human|Toronto Invasive Bacterial Diseases Network|McMaster University|McArthur|Canada

>Spike|hCoV-19/Scotland/CVR183/2020|2020-03-18|EPI\_ISL\_425722|Original|hCoV-19^^Scotland|Human|West of Scotland Specialist Virology Centre|COVID-19 Genomics UK (COG-UK) Consortium|Robertson|United Kingdom

>Spike|hCoV-19/Belgium/reg-10141401/2020|2020-10-14|EPI\_ISL\_738453|Original|hCoV-19^^Bertem|Human|UZ Leuven|KU Leuven|Maes|Belgium

>Spike|hCoV-19/England/NOTT-112459/2020|2020-06-19|EPI\_ISL\_484381|Original|hCoV-19^^England|Human|University Hospitals Of Leicester NHS Trust and DeepSeq Nottingham|COVID-19 Genomics UK (COG-UK) Consortium|Loose|United Kingdom

>Spike|hCoV-19/England/ALDP-A87052/2020|2020-10-17|EPI\_ISL\_606268|Original|hCoV-19^^England|Human|Lighthouse Lab in Alderley Park|Wellcome Sanger Institute for the COVID-19 Genomics UK (COG-UK) consortium|Davies|United Kingdom

>Spike|hCoV-19/Portugal/PT1535/2020|2020-05-25|EPI\_ISL\_693551|Original|hCoV-19^^Portugal|Human|Instituto Nacional de Saude (INSA)|Instituto Nacional de Saude (INSA)|Borges|Portugal

>Spike|hCoV-19/Japan/PG-0991/2020|2020-04-00|EPI\_ISL\_684601|Original|hCoV-19^^Japan|Human|Pathogen Genomics Center|Pathogen Genomics Center|Sekizuka|Japan

>Spike|hCoV-19/USA/VA-DCLS-0795/2020|2020-07-07|EPI\_ISL\_522806|Original|hCoV-19^^Virginia|Human|Virginia DCLS|Virginia DCLS|St. Jacques|USA

>Spike|hCoV-19/USA/WA-QDX-237/2020|2020-04-27|EPI\_ISL\_498746|Original|hCoV-19^^Washington|Human|Quest Diagnostics|Quest Diagnostics|Kagan|USA

>Spike|hCoV-19/England/MILK-ACE8EE/2020|2020-10-22|EPI\_ISL\_629291|Original|hCoV-19^^England|Human|Lighthouse Lab in Milton Keynes|Wellcome Sanger Institute for the COVID-19 Genomics UK (COG-UK) consortium|Davies|United Kingdom

>Spike|hCoV-19/England/PORT-2D4777/2020|2020-10-11|EPI\_ISL\_612068|Original|hCoV-19^^England|Human|Centre for Enzyme Innovation|COVID-19 Genomics UK (COG-UK) Consortium|Robson|United Kingdom

>Spike|hCoV-19/Netherlands/NA\_115/2020|2020-03-10|EPI\_ISL\_422663|Original|hCoV-19^^Netherlands|Human|Dutch COVID-19 response team|Erasmus Medical Center|Oude Munnink|Netherlands

>Spike|hCoV-19/USA/NY-NYUMC468/2020|2020-04-16|EPI\_ISL\_435533|Original|hCoV-19^^New York|Human|NYU Langone Health|Departments of Pathology and Medicine|Maurano|USA

>Spike|hCoV-19/Hong Kong/HKPU-1570/2020|2020-07-14|EPI\_ISL\_610184|Original|hCoV-19^^Hong Kong|Human|Department of Health Technology and Informatics|Department of Health Technology and Informatics|Leung|China

>Spike|hCoV-19/Belgium/Rega-0328193/2020|2020-03-28|EPI\_ISL\_458163|Original|hCoV-19^^Mon|Human|KU Leuven|KU Leuven|Maes|Belgium

>Spike|hCoV-19/Indonesia/JK-EIJK-23/2020|2020-04-11|EPI\_ISL\_568687|Original|hCoV-19^^Jakarta|Human|RSUP Fatmawati|Eijkman Institute for Molecular Biology|Soebandrio|Indonesia

>Spike|hCoV-19/England/QEUH-9FAA5D/2020|2020-09-28|EPI\_ISL\_588138|Original|hCoV-19^^England|Human|Lighthouse Lab in Glasgow|Wellcome Sanger Institute for the COVID-19 Genomics UK (COG-UK) consortium|Davies|United Kingdom

>Spike|hCoV-19/Vietnam/VNHN\_4851/2020|2020-04-09|EPI\_ISL\_455709|Original|hCoV-19^^Hanoi|Human|National Hospital of Tropical Diseases|Oxford University Clinical Research Unit|Nguyen|Vietnam

>Spike|hCoV-19/USA/CO-CDPHE-2011020243/2020|2020-11-01|EPI\_ISL\_771188|Original|hCoV-19^^Colorado|Human|Colorado Department of Public Health and Environment|Colorado Department of Public Health and Environment|Bankers|USA

>Spike|hCoV-19/Scotland/CVR2151/2020|2020-04-10|EPI\_ISL\_484564|Original|hCoV-19^^Scotland|Human|West of Scotland Specialist Virology Centre|COVID-19 Genomics UK (COG-UK) Consortium|Robertson|United Kingdom

>Spike|hCoV-19/Denmark/DCGC-22152/2020|2020-12-14|EPI\_ISL\_758589|Original|hCoV-19^^Midtjylland|Human|Department of Virus and Microbiological Special Diagnostics|Albertsen Lab|Michaelsen|Denmark

>Spike|hCoV-19/USA/ME-HETL-J0327/2020|2020-11-30|EPI\_ISL\_755455|Original|hCoV-19^^Maine|Human|Maine Health and Environmental Testing Laboratory|Tewhey Lab|Tewhey|USA

>Spike|hCoV-19/England/CAMC-A82558/2020|2020-10-12|EPI\_ISL\_610632|Original|hCoV-19^^England|Human|Lighthouse Lab in Cambridge|Wellcome Sanger Institute for the COVID-19 Genomics UK (COG-UK) consortium|Davies|United Kingdom

>Spike|hCoV-19/England/20124009202/2020|2020-03-16|EPI\_ISL\_418695|Original|hCoV-19^^England|Human|Respiratory Virus Unit|Respiratory Virus Unit|Platt|United Kingdom

>Spike|hCoV-19/USA/VA-DCLS-0565/2020|2020-03-18|EPI\_ISL\_485864|Original|hCoV-19^^Virginia|Human|Virginia DCLS|Virginia DCLS|St. Jacques|USA

>Spike|hCoV-19/Scotland/QEUH-A1F5C9/2020|2020-10-01|EPI\_ISL\_599126|Original|hCoV-19^^Scotland|Human|Lighthouse Lab in Glasgow|Wellcome Sanger Institute for the COVID-19 Genomics UK (COG-UK) consortium|Davies|United Kingdom

>Spike|hCoV-19/USA/IL-UW-MAYO2/2020|2020-03-23|EPI\_ISL\_501075|Original|hCoV-19^^Illinois|Human|Mayo Clinic Laboratories|University of Washington Virology Lab|Roychoudhury|USA

>Spike|hCoV-19/England/204300490/2020|2020-10-16|EPI\_ISL\_649812|Original|hCoV-19^^England|Human|Respiratory Virus Unit|COVID-19 Genomics UK (COG-UK) Consortium|Platt|United Kingdom

>Spike|hCoV-19/France/IDF-9113/2020|2020-09-15|EPI\_ISL\_593902|Original|hCoV-19^^\u00cele-de-France|Human|Sentinelles|National Reference Center for Viruses of Respiratory Infections|Enouf|France

>Spike|hCoV-19/USA/NY-NYCPHL-000179/2020|2020-04-15|EPI\_ISL\_631714|Original|hCoV-19^^New York|Human|Flushing Hospital Medical Center|New York City Public Health Laboratory|Wang|USA

>Spike|hCoV-19/England/NORW-221F55/2020|2020-12-20|EPI\_ISL\_764482|Original|hCoV-19^^England|Human|Quadram Institute Bioscience|COVID-19 Genomics UK (COG-UK) Consortium|Alikhan|United Kingdom

>Spike|hCoV-19/Belgium/ULG-10432/2020|2020-08-14|EPI\_ISL\_581610|Original|hCoV-19^^Li\u00e8ge|Human|Department of Clinical Microbiology|GIGA Medical Genomics|Durkin|Belgium

>Spike|hCoV-19/England/CAMC-BBCA91/2020|2020-11-22|EPI\_ISL\_705604|Original|hCoV-19^^England|Human|Quadram Institute Bioscience|COVID-19 Genomics UK (COG-UK) Consortium|Alikhan|United Kingdom

>Spike|hCoV-19/Scotland/GCVR-170B54/2020|2020-03-24|EPI\_ISL\_459669|Original|hCoV-19^^Scotland|Human|NHSGGC West of Scotland Specialist Virology Centre / MRC-University of Glasgow Centre for Virus Research|Wellcome Sanger Institute for the COVID-19 Genomics UK (COG-UK) consortium|Davies|United Kingdom

>Spike|hCoV-19/Luxembourg/LNS7121709/2020|2020-11-22|EPI\_ISL\_744518|Original|hCoV-19^^Luxembourg|Human|Laboratoire national de sant\u00e9|Laboratoire national de sant\u00e9|Wienecke-Baldacchino|Luxembourg

>Spike|hCoV-19/Switzerland/BS-UHB-42201329/2020|2020-03-21|EPI\_ISL\_528291|Original|hCoV-19^^Basel-Stadt|Human|University Hospital Basel|University Hospital Basel|Roloff Handschin|Switzerland

>Spike|hCoV-19/Luxembourg/LNS4613975/2020|2020-10-19|EPI\_ISL\_740509|Original|hCoV-19^^Luxembourg|Human|Laboratoire national de sant\u00e9|Laboratoire national de sant\u00e9|Wienecke-Baldacchino|Luxembourg

>Spike|hCoV-19/England/20126009204/2020|2020-03-18|EPI\_ISL\_423883|Original|hCoV-19^^England|Human|Respiratory Virus Unit|Respiratory Virus Unit|Platt|United Kingdom

>Spike|hCoV-19/England/CAMB-82E75/2020|2020-04-12|EPI\_ISL\_443353|Original|hCoV-19^^England|Human|Department of Pathology|Wellcome Sanger Institute for the COVID-19 Genomics UK (COG-UK) consortium|Amato|United Kingdom

>Spike|hCoV-19/Wales/MILK-9E2AB2/2020|2020-09-20|EPI\_ISL\_581315|Original|hCoV-19^^Wales|Human|Lighthouse Lab in Milton Keynes|Wellcome Sanger Institute for the COVID-19 Genomics UK (COG-UK) consortium|Davies|United Kingdom

>Spike|hCoV-19/USA/FL-BPHL-2074/2020|2020-07-01|EPI\_ISL\_653227|Original|hCoV-19^^Florida|Human|Florida Bureau of Public Health Laboratories|Florida Bureau of Public Health Laboratories|Blanton|USA

>Spike|hCoV-19/England/NOTT-11559F/2020|2020-10-14|EPI\_ISL\_595248|Original|hCoV-19^^England|Human|Queens Medical Centre|COVID-19 Genomics UK (COG-UK) Consortium|Loose|United Kingdom

>Spike|hCoV-19/Wales/PHWC-34610/2020|2020-04-21|EPI\_ISL\_446949|Original|hCoV-19^^Wales|Human|Wales Specialist Virology Centre|Public Health Wales Microbiology Cardiff|Moore|United Kingdom

>Spike|hCoV-19/USA/CT-Yale-150/2020|2020-04-24|EPI\_ISL\_452143|Original|hCoV-19^^Connecticut|Human|Yale COVID-19 Biorepository|Grubaugh Lab - Yale School of Public Health|Grubaugh|USA

>Spike|hCoV-19/England/ALDP-9BEAA0/2020|2020-09-10|EPI\_ISL\_567905|Original|hCoV-19^^England|Human|Lighthouse Lab in Alderley Park|Wellcome Sanger Institute for the COVID-19 Genomics UK (COG-UK) consortium|Davies|United Kingdom

>Spike|hCoV-19/England/MILK-A190FB/2020|2020-09-30|EPI\_ISL\_612483|Original|hCoV-19^^England|Human|Wales Specialist Virology Centre Sequencing lab|COVID-19 Genomics UK (COG-UK) Consortium|Moore|United Kingdom

>Spike|hCoV-19/USA/MN-MDH-1733/2020|2020-09-16|EPI\_ISL\_576242|Original|hCoV-19^^Minnesota|Human|Minnesota Department of Health|Minnesota Department of Health|Garfin|USA

>Spike|hCoV-19/England/LIVE-A59B7/2020|2020-03-19|EPI\_ISL\_499614|Original|hCoV-19^^England|Human|Liverpool Clinical Laboratories|COVID-19 Genomics UK (COG-UK) Consortium|Haldenby|United Kingdom

>Spike|hCoV-19/Spain/VC-FISABIO-273/2020|2020-03-25|EPI\_ISL\_436368|Original|hCoV-19^^Comunitat Valenciana|Human|Servicio de Microbiologia. Hospital Clinico Universitario de Valencia|Sequencing and Bioinformatics Service and Molecular Epidemiology Research Group. FISABIO-Public Health|Gonzalez-Candelas|Spain

>Spike|hCoV-19/England/CAMC-B9A194/2020|2020-11-15|EPI\_ISL\_673605|Original|hCoV-19^^England|Human|Lighthouse Lab in Cambridge|Wellcome Sanger Institute for the COVID-19 Genomics UK (COG-UK) Consortium|Davies|United Kingdom

>Spike|hCoV-19/Scotland/CVR5858/2020|2020-11-16|EPI\_ISL\_665609|Original|hCoV-19^^Scotland|Human|West of Scotland Specialist Virology Centre|COVID-19 Genomics UK (COG-UK) Consortium|Robertson|United Kingdom

>Spike|hCoV-19/England/QEUEH-9DCFE9/2020|2020-09-21|EPI\_ISL\_581048|Original|hCoV-19^^England|Human|Lighthouse Lab in Glasgow|Wellcome Sanger Institute for the COVID-19 Genomics UK (COG-UK) consortium|Davies|United Kingdom

>Spike|hCoV-19/England/ALDP-9E67B7/2020|2020-09-24|EPI\_ISL\_580314|Original|hCoV-19^^England|Human|Lighthouse Lab in Alderley Park|Wellcome Sanger Institute for the COVID-19 Genomics UK (COG-UK) consortium|Davies|United Kingdom

>Spike|hCoV-19/Scotland/QEUEH-9DCB12/2020|2020-09-22|EPI\_ISL\_601127|Original|hCoV-19^^Scotland|Human|Lighthouse Lab in Glasgow|Wellcome Sanger Institute for the COVID-19 Genomics UK (COG-UK) consortium|Davies|United Kingdom

>Spike|hCoV-19/Ecuador/USFQ-126/2020|2020-07-03|EPI\_ISL\_491939|Original|hCoV-19^^Orellana|Human|Institute of Microbiology|Institute of Microbiology|Cardenas|Ecuador

>Spike|hCoV-19/USA/WA-S1846/2020|2020-05-27|EPI\_ISL\_496272|Original|hCoV-19^^Washington|Human|Washington State Department of Health|Seattle Flu Study|Lee|USA

>Spike|hCoV-19/Spain/GA-IBV-002745/2020|2020-04-13|EPI\_ISL\_467265|Original|hCoV-19^^Galicia|Human|Hospital Cl\u00e9nico Universitario de Santiago de Compostela|SeqCOVID-SPAIN consortium|IBV (CSIC)|Comas|Spain

>Spike|hCoV-19/Netherlands/NoordBrabant\_88/2020|2020-00-00|EPI\_ISL\_422882|Original|hCoV-19^^Noord Brabant|Human|Dutch COVID-19 response team|Erasmus Medical Center|Oude Munnink|Netherlands

>Spike|hCoV-19/USA/UT-UPHL-2008788/2020|2020-05-29|EPI\_ISL\_524815|Original|hCoV-19^^Utah|Human|Utah Public Health Laboratory|Utah Public Health Laboratory|Young|USA

>Spike|hCoV-19/Wales/PHWC-271B5/2020|2020-03-31|EPI\_ISL\_432099|Original|hCoV-19^^Wales|Human|Wales Specialist Virology Centre|Public Health Wales Microbiology Cardiff|Moore|United Kingdom

>Spike|hCoV-19/Australia/VIC8110/2020|2020-08-14|EPI\_ISL\_564855|Original|hCoV-19^^Victoria|Human|Microbiological Diagnostic Unit - Public Health Laboratory (MDU-PHL)|MDU-PHL|Schultz|Australia

>Spike|hCoV-19/USA/MI-UM-10036835591/2020|2020-11-07|EPI\_ISL\_728473|Original|hCoV-19^^Michigan|Human|University of Michigan Clinical Microbiology Laboratory|Lauring Lab|Valesano|USA

>Spike|hCoV-19/England/QEUA-B681EA/2020|2020-11-11|EPI\_ISL\_661627|Original|hCoV-19^^England|Human|Lighthouse Lab in Glasgow|Wellcome Sanger Institute for the COVID-19 Genomics UK (COG-UK) Consortium|Davies|United Kingdom

>Spike|hCoV-19/Denmark/DCGC-19530/2020|2020-12-07|EPI\_ISL\_749010|Original|hCoV-19^^Midtjylland|Human|Department of Virus and Microbiological Special Diagnostics|Albertsen Lab|Michaelsen|Denmark

>Spike|hCoV-19/Japan/PG-1583/2020|2020-04-00|EPI\_ISL\_685189|Original|hCoV-19^^Japan|Human|Pathogen Genomics Center|Pathogen Genomics Center|Sekizuka|Japan

>Spike|hCoV-19/USA/WI-WSLH-200379/2020|2020-04-22|EPI\_ISL\_578547|Original|hCoV-19^^Wisconsin|Human|Wisconsin State Laboratory of Hygiene Communicable Disease Division|Wisconsin State Laboratory of Hygiene Communicable Disease Division|Florek|USA

>Spike|hCoV-19/England/QEUA-962A14/2020|2020-08-10|EPI\_ISL\_531679|Original|hCoV-19^^England|Human|Lighthouse Lab in Glasgow|Wellcome Sanger Institute for the COVID-19 Genomics UK (COG-UK) consortium|Davies|United Kingdom

>Spike|hCoV-19/Northern Ireland/QEUA-88AEFD/2020|2020-07-27|EPI\_ISL\_532826|Original|hCoV-19^^Northern Ireland|Human|Lighthouse Lab in Glasgow|Wellcome Sanger Institute for the COVID-19 Genomics UK (COG-UK) consortium|Davies|United Kingdom

>Spike|hCoV-19/Singapore/600/2020|2020-06-28|EPI\_ISL\_490050|Original|hCoV-19^^Singapore|Human|National Public Health Laboratory|National Public Health Laboratory|Mak|Singapore

>Spike|hCoV-19/England/ALDP-94D04A/2020|2020-06-15|EPI\_ISL\_556007|Original|hCoV-19^^England|Human|Lighthouse Lab in Alderley Park|Wellcome Sanger Institute for the COVID-19 Genomics UK (COG-UK) consortium|Davies|United Kingdom

>Spike|hCoV-19/France/ARA-20154/2020|2020-04-05|EPI\_ISL\_508983|Original|hCoV-19^^Auvergne-Rhône-Alpes|Human|CNR Virus des Infections Respiratoires - France SUD|CNR Virus des Infections Respiratoires - France SUD|Josset|France

>Spike|hCoV-19/England/QEUA-A02769/2020|2020-09-29|EPI\_ISL\_584930|Original|hCoV-19^^England|Human|Quadram Institute Bioscience|COVID-19 Genomics UK (COG-UK) Consortium|Alikhan|United Kingdom

>Spike|hCoV-19/Wales/PHWC-15CC97/2020|2020-05-06|EPI\_ISL\_472603|Original|hCoV-19^^Wales|Human|Wales Specialist Virology Centre Sequencing lab|COVID-19 Genomics UK (COG-UK) Consortium|Moore|United Kingdom

>Spike|hCoV-19/England/20109051906/2020|2020-03-06|EPI\_ISL\_417271|Original|hCoV-19^^England|Human|Respiratory Virus Unit|Respiratory Virus Unit|Platt|United Kingdom

>Spike|hCoV-19/USA/WI-UW-1117/2020|2020-07-27|EPI\_ISL\_516542|Original|hCoV-19^^Wisconsin|Human|University of Wisconsin-Madison AIDS Vaccine Research Laboratories|University of Wisconsin-Madison AIDS Vaccine Research Laboratories|Baczenas|USA

>Spike|hCoV-19/England/ALDP-AA571D/2020|2020-10-22|EPI\_ISL\_625093|Original|hCoV-19^^England|Human|Lighthouse Lab in Alderley Park|Wellcome Sanger Institute for the COVID-19 Genomics UK (COG-UK) consortium|Davies|United Kingdom

>Spike|hCoV-19/mink/Netherlands/NB-EMC-23-6/2020|2020-07-14|EPI\_ISL\_523081|Original|hCoV-19^^Noord Brabant|Neovison vison|Dutch COVID-19 response team|Erasmus Medical Center|Oude Munnink|Netherlands

>Spike|hCoV-19/Denmark/DCGC-21921/2020|2020-12-21|EPI\_ISL\_758458|Original|hCoV-19^^Nordjylland|Human|Department of Virus and Microbiological Special Diagnostics|Albertsen Lab|Michaelsen|Denmark

>Spike|hCoV-19/Denmark/DCGC-19458/2020|2020-12-07|EPI\_ISL\_748514|Original|hCoV-19^^Syddanmark|Human|Department of Virus and Microbiological Special Diagnostics|Albertsen Lab|Michaelsen|Denmark

>Spike|hCoV-19/England/CAMB-1AAAEB/2020|2020-04-18|EPI\_ISL\_470257|Original|hCoV-19^^England|Human|Department of Pathology|Wellcome Sanger Institute for the COVID-19 Genomics UK (COG-UK) consortium|Davies|United Kingdom

>Spike|hCoV-19/England/LIVE-DBAF0B/2020|2020-11-14|EPI\_ISL\_664332|Original|hCoV-19^^England|Human|Liverpool Clinical Laboratories|COVID-19 Genomics UK (COG-UK) Consortium|Haldenby|United Kingdom

>Spike|hCoV-19/Luxembourg/LNS4737895/2020|2020-10-23|EPI\_ISL\_740536|Original|hCoV-19^^Luxembourg|Human|Laboratoire national de sant\u00e9|Laboratoire national de sant\u00e9|Wienecke-Baldacchino|Luxembourg

>Spike|hCoV-19/USA/UT-UPHL-01661/2020|2020-04-08|EPI\_ISL\_575070|Original|hCoV-19^^Utah|Human|Utah Public Health Laboratory|Utah Public Health Laboratory|Young|USA

>Spike|hCoV-19/England/QEUEH-9B798C/2020|2020-09-08|EPI\_ISL\_590482|Original|hCoV-19^^England|Human|Lighthouse Lab in Glasgow|Wellcome Sanger Institute for the COVID-19 Genomics UK (COG-UK) consortium|Davies|United Kingdom

>Spike|hCoV-19/Japan/PG-2856/2020|2020-04-00|EPI\_ISL\_690982|Original|hCoV-19^^Japan|Human|Fukuoka Institute of Health and Environmental Sciences|Pathogen Genomics Center|Sekizuka|Japan

>Spike|hCoV-19/England/ALDP-A2E4AC/2020|2020-10-06|EPI\_ISL\_586861|Original|hCoV-19^^England|Human|Lighthouse Lab in Alderley Park|Wellcome Sanger Institute for the COVID-19 Genomics UK (COG-UK) consortium|Davies|United Kingdom

>Spike|hCoV-19/Wales/PHWC-4A2E11/2020|2020-12-14|EPI\_ISL\_744022|Original|hCoV-19^^Wales|Human|Wales Specialist Virology Centre Sequencing lab|COVID-19 Genomics UK (COG-UK) Consortium|Moore|United Kingdom

>Spike|hCoV-19/India/MH-ACTREC-424/2020|2020-07-31|EPI\_ISL\_700073|Original|hCoV-19^^Maharashtra|Human|Hematopathology Laboratory|Hematopathology Laboratory|Patkar|India

>Spike|hCoV-19/USA/MN-QDX-1342/2020|2020-03-15|EPI\_ISL\_572131|Original|hCoV-19^^Minnesota|Human|Quest Diagnostics|Quest Diagnostics|Kagan|USA

>Spike|hCoV-19/India/DL-NCDC6079-CSIR-IGIB/2020|2020-05-25|EPI\_ISL\_482615|Original|hCoV-19^^Delhi|Human|National Centre for Disease control (NCDC)|NCDC/CSIR-IGIB|Singh|India

>Spike|hCoV-19/Norway/4634/2020|2020-10-18|EPI\_ISL\_775315|Original|hCoV-19^^Viken|Human|Ostfold Hospital Trust - Kalnes|Norwegian Institute of Public Health|Vollan|Norway

>Spike|hCoV-19/England/LIVE-A685F/2020|2020-03-15|EPI\_ISL\_499576|Original|hCoV-19^^England|Human|Liverpool Clinical Laboratories|COVID-19 Genomics UK (COG-UK) Consortium|Haldenby|United Kingdom

>Spike|hCoV-19/Saudi Arabia/KAUST-JEDDAH994/2020|2020-06-17|EPI\_ISL\_636965|Original|hCoV-19^^Jeddah|Human|Pathogen Genomics Lab King Abdullah University of Science and Technology(KAUST)|Pathogen Genomics Lab King Abdullah University of Science and Technology(KAUST)|Mohamed Ghazzali|Saudi Arabia

>Spike|hCoV-19/England/ALDP-681B3D/2020|2020-07-05|EPI\_ISL\_551811|Original|hCoV-19^^England|Human|Lighthouse Lab in Alderley Park|Wellcome Sanger Institute for the COVID-19 Genomics UK (COG-UK) consortium|Davies|United Kingdom

>Spike|hCoV-19/Canada/UN-CRCHUM-PreFreeze-10/2020|2020-09-04|EPI\_ISL\_667767|Original|hCoV-19^^Canada|Human|Microbiology|Microbiology|Benoit, P.|Canada

>Spike|hCoV-19/England/NORT-281F62/2020|2020-03-25|EPI\_ISL\_478490|Original|hCoV-19^^England|Human|Northumbria University / South Tees Hospitals NHS Foundation Trust / North Cumbria Integrated Care NHS Foundation Trust / North Tees and Hartlepool NHS Foundation Trust / Newcastle Hospitals NHS Foundation Trust|COVID-19 Genomics UK (COG-UK) Consortium|Bashton|United Kingdom

>Spike|hCoV-19/France/BRE-IPP9983/2020|2020-11-04|EPI\_ISL\_718240|Original|hCoV-19^^Bretagne|Human|Hospital|National Reference Center for Viruses of Respiratory Infections|Enouf|France

>Spike|hCoV-19/USA/NY-Wadsworth-31786-01/2020|2020-03-27|EPI\_ISL\_676779|Original|hCoV-19^^New York|Human|Wadsworth Center|Wadsworth Center|Lasek-Nesselquist|USA

>Spike|hCoV-19/Netherlands/NA\_431/2020|2020-04-06|EPI\_ISL\_455233|Original|hCoV-19^^Netherlands|Human|Dutch COVID-19 response team|Erasmus Medical Center|Oude Munnink|Netherlands

>Spike|hCoV-19/Scotland/CVR4394/2020|2020-09-18|EPI\_ISL\_585268|Original|hCoV-19^^Scotland|Human|West of Scotland Specialist Virology Centre|COVID-19 Genomics UK (COG-UK) Consortium|Robertson|United Kingdom

>Spike|hCoV-19/England/QEUH-BA26B8/2020|2020-11-18|EPI\_ISL\_672768|Original|hCoV-19^^England|Human|Lighthouse Lab in Glasgow|Wellcome Sanger Institute for the COVID-19 Genomics UK (COG-UK) Consortium|Davies|United Kingdom

>Spike|hCoV-19/Denmark/DCGC-1770/2020|2020-07-13|EPI\_ISL\_618199|Original|hCoV-19^^Sjaelland|Human|Department of Virus and Microbiological Special Diagnostics|Albertsen lab|Michaelsen|Denmark

>Spike|hCoV-19/USA/CA-CZB-11644/2020|2020-09-23|EPI\_ISL\_625478|Original|hCoV-19^^California|Human|Santa Clara County Public Health Laboratory|Chan-Zuckerberg Biohub|Bhatt|USA

>Spike|hCoV-19/Japan/PG-1323/2020|2020-04-00|EPI\_ISL\_684931|Original|hCoV-19^^Japan|Human|Saitama Prefectural Institute of Public Health|Pathogen Genomics Center|Sekizuka|Japan

>Spike|hCoV-19/Wales/PHWC-48454D/2020|2020-10-19|EPI\_ISL\_627091|Original|hCoV-19^^Wales|Human|Wales Specialist Virology Centre Sequencing lab|COVID-19 Genomics UK (COG-UK) Consortium|Moore|United Kingdom

>Spike|hCoV-19/Wales/PHWC-4A6660/2020|2020-12-17|EPI\_ISL\_765057|Original|hCoV-19^^Wales|Human|Wales Specialist Virology Centre Sequencing lab|COVID-19 Genomics UK (COG-UK) Consortium|Moore|United Kingdom

>Spike|hCoV-19/England/CAMC-A3E782/2020|2020-10-05|EPI\_ISL\_609631|Original|hCoV-19^^England|Human|Lighthouse Lab in Cambridge|Wellcome Sanger Institute for the COVID-19 Genomics UK (COG-UK) consortium|Davies|United Kingdom

>Spike|hCoV-19/England/QEUH-95FB80/2020|2020-08-04|EPI\_ISL\_532527|Original|hCoV-19^^England|Human|Lighthouse Lab in Glasgow|Wellcome Sanger Institute for the COVID-19 Genomics UK (COG-UK) consortium|Davies|United Kingdom

>Spike|hCoV-19/England/LIVE-A80EC/2020|2020-03-26|EPI\_ISL\_517115|Original|hCoV-19^^England|Human|Liverpool Clinical Laboratories|COVID-19 Genomics UK (COG-UK) Consortium|Haldenby|United Kingdom

>Spike|hCoV-19/England/ALDP-6C8C37/2020|2020-07-01|EPI\_ISL\_556209|Original|hCoV-19^^England|Human|Lighthouse Lab in Alderley Park|Wellcome Sanger Institute for the COVID-19 Genomics UK (COG-UK) consortium|Davies|United Kingdom

>Spike|hCoV-19/Scotland/CVR4287/2020|2020-09-09|EPI\_ISL\_559960|Original|hCoV-19^^Scotland|Human|Lighthouse Lab in Glasgow / MRC-University of Glasgow Centre for Virus Research|COVID-19 Genomics UK (COG-UK) Consortium|Robertson|United Kingdom

>Spike|hCoV-19/Israel/CVL-n896/2020|2020-02-27|EPI\_ISL\_649094|Original|hCoV-19^^Rishon-Letsion|Human|Israel Central Virology laboratory|Israel Central Virology laboratory|Zuckerman|Israel

>Spike|hCoV-19/USA/MD-MDH-0104/2020|2020-05-27|EPI\_ISL\_522839|Original|hCoV-19^^Maryland|Human|Maryland Department of Health|Maryland Department of Health|Keller|USA

>Spike|hCoV-19/England/MILK-A450C9/2020|2020-10-06|EPI\_ISL\_598613|Original|hCoV-19^^England|Human|Lighthouse Lab in Milton Keynes|Wellcome Sanger Institute for the COVID-19 Genomics UK (COG-UK) consortium|Davies|United Kingdom

>Spike|hCoV-19/Australia/NSW660/2020|2020-07-18|EPI\_ISL\_498779|Original|hCoV-19^^New South Wales|Human|Pathology West - NSW Health Pathology|NSW Health Pathology - Institute of Clinical Pathology and Medical Research; Westmead Hospital; University of Sydney|Gall|Australia

>Spike|hCoV-19/Wales/PHWC-4A0EAA/2020|2020-12-12|EPI\_ISL\_743588|Original|hCoV-19^^Wales|Human|Wales Specialist Virology Centre Sequencing lab|COVID-19 Genomics UK (COG-UK) Consortium|Moore|United Kingdom

>Spike|hCoV-19/Spain/PV-IBV-2151/2020|2020-04-12|EPI\_ISL\_468860|Original|hCoV-19^^Basque Country|Human|Servicio de Microbiolog\u00eda. Hospital Universitario

Donostia. OSI Donostialdea. \u00clrea de Enfermedades Infecciosas|SeqCOVID-SPAIN consortium/IBV (CSIC) |Comas|Spain  
>Spike|hCoV-19/Singapore/923/2020|2020-03-24|EPI\_ISL\_538454|Original|hCoV-19^^Singapore|Human|Department of Laboratory Medicine|Department of Laboratory Medicine|Chen|Singapore  
>Spike|hCoV-19/England/20166055904/2020|2020-04-14|EPI\_ISL\_466550|Original|hCoV-19^^England|Human|Respiratory Virus Unit|Respiratory Virus Unit|Platt|United Kingdom  
>Spike|hCoV-19/England/ALDP-BB92AB/2020|2020-11-21|EPI\_ISL\_702391|Original|hCoV-19^^England|Human|Lighthouse Lab in Alderley Park|Wellcome Sanger Institute for the COVID-19 Genomics UK (COG-UK) Consortium|Davies|United Kingdom  
>Spike|hCoV-19/USA/VA-DCLS-1704/2020|2020-09-04|EPI\_ISL\_609983|Original|hCoV-19^^Virginia|Human|Virginia DCLS|Virginia DCLS|St. Jacques|USA  
>Spike|hCoV-19/England/ALDP-95406E/2020|2020-06-12|EPI\_ISL\_553813|Original|hCoV-19^^England|Human|Lighthouse Lab in Alderley Park|Wellcome Sanger Institute for the COVID-19 Genomics UK (COG-UK) consortium|Davies|United Kingdom  
>Spike|hCoV-19/England/BRIS-124AE9/2020|2020-03-26|EPI\_ISL\_443787|Original|hCoV-19^^England|Human|PHE South West Regional Laboratory|Wellcome Sanger Institute for the COVID-19 Genomics UK (COG-UK) consortium|Amato|United Kingdom  
>Spike|hCoV-19/Wales/PHWC-16BF14/2020|2020-09-14|EPI\_ISL\_573989|Original|hCoV-19^^Wales|Human|Wales Specialist Virology Centre Sequencing lab|COVID-19 Genomics UK (COG-UK) Consortium|Moore|United Kingdom  
>Spike|hCoV-19/England/20119076104/2020|2020-03-14|EPI\_ISL\_465105|Original|hCoV-19^^England|Human|Respiratory Virus Unit|Respiratory Virus Unit|Platt|United Kingdom  
>Spike|hCoV-19/England/PORT-2CF3E4/2020|2020-04-28|EPI\_ISL\_453676|Original|hCoV-19^^England|Human|Centre for Enzyme Innovation|COVID-19 Genomics UK (COG-UK) Consortium|Robson|United Kingdom  
>Spike|hCoV-19/Canada/BC\_10603886/2020|2020-04-00|EPI\_ISL\_477118|Original|hCoV-19^^British Columbia|Human|BCCDC Public Health Laboratory|BCCDC Public Health Laboratory|Harrigan|Canada  
>Spike|hCoV-19/Canada/BC-BCCDC-8590/2020|2020-11-00|EPI\_ISL\_740837|Original|hCoV-19^^British Columbia|Human|BCCDC Public Health Laboratory|BCCDC Public Health Laboratory|Prystajecky|Canada  
>Spike|hCoV-19/USA/FL-BPHL-1175/2020|2020-08-19|EPI\_ISL\_526661|Original|hCoV-19^^Florida|Human|Florida Bureau of Public Health Laboratories|Florida Bureau of Public Health Laboratories|Blanton|USA  
>Spike|hCoV-19/Norway/3293/2020|2020-09-05|EPI\_ISL\_590878|original|hCoV-19^^Oslo|Human|Oslo University Hospital|Norwegian Institute of Public Health|Vollan|Norway  
>Spike|hCoV-19/USA/UT-UPHL-2009562/2020|2020-07-19|EPI\_ISL\_605241|Original|hCoV-19^^Utah|Human|Utah Public Health Laboratory|Utah Public Health Laboratory|Young|USA  
>Spike|hCoV-19/Australia/VIC15475/2020|2020-08-04|EPI\_ISL\_593322|Original|hCoV-19^^Victoria|Human|Microbiological Diagnostic Unit - Public Health Laboratory (MDU-PHL) |MDU-PHL|Schultz|Australia  
>Spike|hCoV-19/USA/TX-HMH-MCoV-11823/2020|2020-09-14|EPI\_ISL\_790117|Original|hCoV-19^^Texas|Human|Houston Methodist Hospital|Houston Methodist Hospital|Long|USA  
>Spike|hCoV-19/USA/NY-NYUMC924/2020|2020-03-18|EPI\_ISL\_467417|Original|hCoV-19^^New York|Human|NYU Langone Health|Departments of Pathology and Medicine|Maurano|USA  
>Spike|hCoV-19/England/ALDP-9CDBF6/2020|2020-09-16|EPI\_ISL\_566324|Original|hCoV-19^^England|Human|Lighthouse Lab in Alderley Park|Wellcome Sanger Institute for the COVID-19 Genomics UK (COG-UK) consortium|Davies|United Kingdom  
>Spike|hCoV-19/Japan/PG-8804/2020|2020-08-00|EPI\_ISL\_686391|Original|hCoV-19^^Japan|Human|Pathogen Genomics Center|Pathogen Genomics Center|Sekizuka|Japan  
>Spike|hCoV-19/Canada/ON-S1501/2020|2020-08-30|EPI\_ISL\_755890|Original|hCoV-19^^Ontario|Human|Toronto Invasive Bacterial Diseases Network|McMaster University|McArthur|Canada  
>Spike|hCoV-19/Australia/VIC9900/2020|2020-08-24|EPI\_ISL\_565771|Original|hCoV-19^^Victoria|Human|Microbiological Diagnostic Unit - Public Health Laboratory (MDU-PHL) |MDU-PHL|Schultz|Australia  
>Spike|hCoV-19/Portugal/PT0166/2020|2020-03-28|EPI\_ISL\_453882|Original|hCoV-19^^Portugal|Human|unknown|Instituto Nacional de Saude (INSA)|Borges|Portugal



>Spike|hCoV-19/USA/CA-IGI-0090/2020|2020-06-19|EPI\_ISL\_511844|Original|hCoV-19^^California|Human|Innovative Genomics Institute|Innovative Genomics Institute|Wyman|USA

>Spike|hCoV-19/England/ALDP-B5E2E4/2020|2020-11-08|EPI\_ISL\_723649|Original|hCoV-19^^England|Human|Oxford Viromics|COVID-19 Genomics UK (COG-UK) Consortium|Golubchik|United Kingdom

>Spike|hCoV-19/England/NOTT-1100EE/2020|2020-04-10|EPI\_ISL\_441470|Original|hCoV-19^^England|Human|Queens Medical Centre|COVID-19 Genomics UK (COG-UK) Consortium|Loose|United Kingdom

>Spike|hCoV-19/USA/AZ-TG383704/2020|2020-06-17|EPI\_ISL\_694689|Original|hCoV-19^^Arizona|Human|TGen North|TGen North|French|USA

>Spike|hCoV-19/Scotland/CVR5032/2020|2020-10-08|EPI\_ISL\_594766|Original|hCoV-19^^Scotland|Human|West of Scotland Specialist Virology Centre|COVID-19 Genomics UK (COG-UK) Consortium|Robertson|United Kingdom

>Spike|hCoV-19/Japan/PG-6306/2020|2020-08-00|EPI\_ISL\_689417|Original|hCoV-19^^Japan|Human|Pathogen Genomics Center|Pathogen Genomics Center|Sekizuka|Japan

>Spike|hCoV-19/England/OXON-B47CA/2020|2020-04-25|EPI\_ISL\_534973|Original|hCoV-19^^England|Human|Oxford Viromics|COVID-19 Genomics UK (COG-UK) Consortium|Golubchik|United Kingdom

>Spike|hCoV-19/Gambia/NPHL-2514/2020|2020-07-21|EPI\_ISL\_561265|Original|hCoV-19^^Kombo|Human|MRCG at LSHTM Genomics lab|MRCG at LSHTM Genomics lab|Sesay|Gambia

>Spike|hCoV-19/Slovenia/V0-6934/2020|2020-04-09|EPI\_ISL\_635297|Original|hCoV-19^^Slovenia|Human|Institute of Microbiology and Immunology|Institute of Microbiology and Immunology|Zakotnik|Slovenia

>Spike|hCoV-19/Japan/PG-3469/2020|2020-07-00|EPI\_ISL\_691579|Original|hCoV-19^^Japan|Human|Pathogen Genomics Center|Pathogen Genomics Center|Sekizuka|Japan

>Spike|hCoV-19/England/CAMC-BBEC3/2020|2020-11-21|EPI\_ISL\_705573|Original|hCoV-19^^England|Human|Quadram Institute Bioscience|COVID-19 Genomics UK (COG-UK) Consortium|Alikhan|United Kingdom

>Spike|hCoV-19/England/MILK-BB1AD8/2020|2020-11-18|EPI\_ISL\_720444|Original|hCoV-19^^England|Human|Lighthouse Lab in Milton Keynes|Wellcome Sanger Institute for the COVID-19 Genomics UK (COG-UK) Consortium|Davies|United Kingdom

>Spike|hCoV-19/England/MILK-4C8BD2/2020|2020-06-06|EPI\_ISL\_559171|Original|hCoV-19^^England|Human|Lighthouse Lab in Milton Keynes|Wellcome Sanger Institute for the COVID-19 Genomics UK (COG-UK) consortium|Davies|United Kingdom

>Spike|hCoV-19/France/ARA-26417/2020|2020-04-17|EPI\_ISL\_676562|Original|hCoV-19^^Auvergne-Rh\u00f4ne-Alpes|Human|CNR Virus des Infections Respiratoires - France SUD|CNR Virus des Infections Respiratoires - France SUD|Bal|France

>Spike|hCoV-19/England/QEUEH-A31136/2020|2020-10-05|EPI\_ISL\_595868|Original|hCoV-19^^England|Human|Quadram Institute Bioscience|COVID-19 Genomics UK (COG-UK) Consortium|Alikhan|United Kingdom

>Spike|hCoV-19/England/ALDP-9CDF27/2020|2020-09-16|EPI\_ISL\_566399|Original|hCoV-19^^England|Human|Lighthouse Lab in Alderley Park|Wellcome Sanger Institute for the COVID-19 Genomics UK (COG-UK) consortium|Davies|United Kingdom

>Spike|hCoV-19/USA/MN-MDH-2055/2020|2020-03-27|EPI\_ISL\_683684|Original|hCoV-19^^Minnesota|Human|M Health Fairview|Minnesota Department of Health|Garfin|USA

>Spike|hCoV-19/Denmark/DCGC-3815/2020|2020-08-31|EPI\_ISL\_622722|Original|hCoV-19^^Hovedstaden|Human|Department of Virus and Microbiological Special Diagnostics|Albertsen lab|Michaelsen|Denmark

>Spike|hCoV-19/South Africa/KRISP-0498/2020|2020-07-10|EPI\_ISL\_498067|Original|hCoV-19^^KwaZulu-Natal|Human|NHLS-IALCH|KRISP|de Oliveira|South Africa

>Spike|hCoV-19/England/MILK-958589/2020|2020-06-11|EPI\_ISL\_554814|Original|hCoV-19^^England|Human|Lighthouse Lab in Milton Keynes|Wellcome Sanger Institute for the COVID-19 Genomics UK (COG-UK) consortium|Davies|United Kingdom

>Spike|hCoV-19/USA/WA-S2425/2020|2020-06-15|EPI\_ISL\_497057|Original|hCoV-19^^Washington|Human|Washington State Department of Health|Seattle Flu Study|Lee|USA

>Spike|hCoV-19/England/OXON-F40BC8/2020|2020-12-15|EPI\_ISL\_764546|Original|hCoV-19^^England|Human|Oxford Viromics|COVID-19 Genomics UK (COG-UK) Consortium|Golubchik|United Kingdom

>Spike|hCoV-19/Luxembourg/LNS5474384/2020|2020-11-26|EPI\_ISL\_744239|Original|hCoV-19^^Luxembourg|Human|Laboratoire national de sant\u00e9|Laboratoire national de sant\u00e9|Wienecke-Baldacchino|Luxembourg

>Spike|hCoV-19/USA/CA-CSMC127/2020|2020-04-05|EPI\_ISL\_475604|Original|hCoV-19^^California|Human|Cedars-Sinai Medical Center|Cedars-Sinai Medical Center|Zhang|USA

>Spike|hCoV-19/England/NORT-291F23/2020|2020-05-06|EPI\_ISL\_489079|Original|hCoV-19^^England|Human|NU-OMICS DNA Sequencing research facility|Wellcome Sanger Institute for the COVID-19 Genomics UK (COG-UK) consortium|Davies|United Kingdom

>Spike|hCoV-19/USA/MI-MDHHS-SC22218/2020|2020-10-26|EPI\_ISL\_644353|Original|hCoV-19^^Michigan|Human|Michigan Department of Health and Human Services|Michigan Department of Health and Human Services|Jacob|USA

>Spike|hCoV-19/England/NORW-EEB07/2020|2020-07-04|EPI\_ISL\_493543|Original|hCoV-19^^England|Human|Quadram Institute Bioscience|COVID-19 Genomics UK (COG-UK) Consortium|Alikhan|United Kingdom

>Spike|hCoV-19/England/20126007102/2020|2020-03-18|EPI\_ISL\_418751|Original|hCoV-19^^England|Human|Respiratory Virus Unit|Respiratory Virus Unit|Platt|United Kingdom

>Spike|hCoV-19/Japan/PG-2644/2020|2020-04-00|EPI\_ISL\_690776|Original|hCoV-19^^Japan|Human|Pathogen Genomics Center|Pathogen Genomics Center|Sekizuka|Japan

>Spike|hCoV-19/USA/TX-HMH-4309/2020|2020-06-18|EPI\_ISL\_543518|Original|hCoV-19^^Texas|Human|Houston Methodist Hospital|Houston Methodist Hospital|Long|USA

>Spike|hCoV-19/England/ALDP-AA357F/2020|2020-10-22|EPI\_ISL\_624169|Original|hCoV-19^^England|Human|Lighthouse Lab in Alderley Park|Wellcome Sanger Institute for the COVID-19 Genomics UK (COG-UK) consortium|Davies|United Kingdom

>Spike|hCoV-19/England/ALDP-4AE0D3/2020|2020-06-08|EPI\_ISL\_559527|Original|hCoV-19^^England|Human|Lighthouse Lab in Alderley Park|Wellcome Sanger Institute for the COVID-19 Genomics UK (COG-UK) consortium|Davies|United Kingdom

>Spike|hCoV-19/England/ALDP-AA1720/2020|2020-10-22|EPI\_ISL\_625235|Original|hCoV-19^^England|Human|Lighthouse Lab in Alderley Park|Wellcome Sanger Institute for the COVID-19 Genomics UK (COG-UK) consortium|Davies|United Kingdom

>Spike|hCoV-19/England/CAMC-A578F9/2020|2020-10-09|EPI\_ISL\_597438|Original|hCoV-19^^England|Human|Lighthouse Lab in Cambridge|Wellcome Sanger Institute for the COVID-19 Genomics UK (COG-UK) consortium|Davies|United Kingdom

>Spike|hCoV-19/Norway/3740/2020|2020-09-04|EPI\_ISL\_590996|Original|hCoV-19^^Viken|Human|Ostfold Hospital Trust - Kalnes|Norwegian Institute of Public Health|Vollan|Norway

>Spike|hCoV-19/Wales/PHWC-499E77/2020|2020-11-24|EPI\_ISL\_727456|Original|hCoV-19^^Wales|Human|Originating lab|COVID-19 Genomics UK (COG-UK) Consortium|Moore|United Kingdom

>Spike|hCoV-19/Scotland/QEUA-A4B254/2020|2020-10-08|EPI\_ISL\_637822|Original|hCoV-19^^Scotland|Human|Department of Pathology|COVID-19 Genomics UK (COG-UK) Consortium|Goodfellow|United Kingdom

>Spike|hCoV-19/Sweden/20-50361/2020|2020-03-16|EPI\_ISL\_429163|Original|hCoV-19^^Gavleborgs lan|Human|The Public Health Agency of Sweden|The Public Health Agency of Sweden|Svartstr\u00f6m|Sweden

>Spike|hCoV-19/England/QEUA-B8152B/2020|2020-11-14|EPI\_ISL\_668247|Original|hCoV-19^^England|Human|Lighthouse Lab in Glasgow|Wellcome Sanger Institute for the COVID-19 Genomics UK (COG-UK) Consortium|Davies|United Kingdom

>Spike|hCoV-19/Germany/NW-HHU-D870/2020|2020-06-24|EPI\_ISL\_572397|Original|hCoV-19^^North Rhine-Westphalia|Human|Institute for Virology|Institute for Virology|Walker|Germany

>Spike|hCoV-19/USA/WA-S1630/2020|2020-05-27|EPI\_ISL\_496056|Original|hCoV-19^^Washington|Human|Washington State Department of Health|Seattle Flu Study|Lee|USA

>Spike|hCoV-19/Australia/VIC6022/2020|2020-07-25|EPI\_ISL\_518063|Original|hCoV-19^^Victoria|Human|Microbiological Diagnostic Unit - Public Health Laboratory (MDU-PHL)|MDU-PHL|Schultz|Australia

>Spike|hCoV-19/England/SHEF-10D7290/2020|2020-12-13|EPI\_ISL\_742099|Original|hCoV-19^^England|Human|Virology Department|COVID-19 Genomics UK (COG-UK) Consortium|de Silva|United Kingdom

>Spike|hCoV-19/Singapore/1417/2020|2020-11-11|EPI\_ISL\_654815|Original|hCoV-19^^Singapore|Human|National Public Health Laboratory|National Public Health Laboratory|Mak|Singapore

>Spike|hCoV-19/Singapore/1480/2020|2020-12-21|EPI\_ISL\_754095|Original|hCoV-19^^Singapore|Human|National Public Health Laboratory|National Public Health Laboratory|Mak|Singapore

>Spike|hCoV-19/USA/NY-NYUMC273/2020|2020-04-06|EPI\_ISL\_428787|Original|hCoV-19^^New York|Human|NYU Langone Health|Departments of Pathology and Medicine|Maurano|USA

>Spike|hCoV-19/England/20129174704/2020|2020-03-22|EPI\_ISL\_424151|Original|hCoV-19^^England|Human|Respiratory Virus Unit|Respiratory Virus Unit|Platt|United Kingdom

>Spike|hCoV-19/USA/CA-QDX-1425/2020|2020-03-18|EPI\_ISL\_572077|Original|hCoV-19^^California|Human|Quest Diagnostics|Quest Diagnostics|Kagan|USA

>Spike|hCoV-19/England/CAMC-AEA6F1/2020|2020-10-26|EPI\_ISL\_633284|Original|hCoV-19^^England|Human|Lighthouse Lab in Cambridge|Wellcome Sanger Institute for the COVID-19 Genomics UK (COG-UK) consortium|Davies|United Kingdom

>Spike|hCoV-19/Switzerland/BE-UNIBE-226-3606/2020|2020-04-15|EPI\_ISL\_574860|Original|hCoV-19^^Bern|Human|Institute for Infectious Diseases|Institute for Infectious Diseases|Koch|Switzerland

>Spike|hCoV-19/USA/WA-UW-47055/2020|2020-12-12|EPI\_ISL\_756299|Original|hCoV-19^^Washington|Human|UW Virology Lab|UW Virology Lab|Roychoudhury|USA

>Spike|hCoV-19/Denmark/DCGC-18186/2020|2020-12-14|EPI\_ISL\_749801|Original|hCoV-19^^Hovedstaden|Human|Department of Virus and Microbiological Special Diagnostics|Albertsen Lab|Michaelsen|Denmark

>Spike|hCoV-19/Denmark/DCGC-21757/2020|2020-12-21|EPI\_ISL\_758346|Original|hCoV-19^^Hovedstaden|Human|Department of Virus and Microbiological Special Diagnostics|Albertsen Lab|Michaelsen|Denmark

>Spike|hCoV-19/Spain/MD-IBV-97010085/2020|2020-03-26|EPI\_ISL\_779765|Original|hCoV-19^^Madrid|Human|IdISSC/Hospital Cl\u00e9nico San Carlos de Madrid\u200b|SeqCOVID-SPAIN consortium/IBV (CSIC)|Comas|Spain

>Spike|hCoV-19/USA/CA-CDPH013/2020|2020-03-20|EPI\_ISL\_515906|Original|hCoV-19^^California|Human|California Department of Public Health|California Department of Public Health|Bell|USA

>Spike|hCoV-19/Netherlands/NB-RIVM-20368/2020|2020-12-09|EPI\_ISL\_728588|Original|hCoV-19^^Noord-Brabant|Human|Dutch COVID-19 response team|National Institute for Public Health and the Environment (RIVM)|Meijer|Netherlands

>Spike|hCoV-19/Australia/VIC5555/2020|2020-07-21|EPI\_ISL\_518383|Original|hCoV-19^^Victoria|Human|Microbiological Diagnostic Unit - Public Health Laboratory (MDU-PHL)|MDU-PHL|Schultz|Australia

>Spike|hCoV-19/Australia/VIC2790/2020|2020-07-06|EPI\_ISL\_521624|Original|hCoV-19^^Victoria|Human|Microbiological Diagnostic Unit - Public Health Laboratory (MDU-PHL)|MDU-PHL|Schultz|Australia

>Spike|hCoV-19/USA/NY-Wadsworth-31058-01/2020|2020-03-27|EPI\_ISL\_525635|Original|hCoV-19^^New York|Human|Wadsworth Center|Wadsworth Center|Plitnick|USA

>Spike|hCoV-19/Japan/PG-4136/2020|2020-07-00|EPI\_ISL\_692375|Original|hCoV-19^^Japan|Human|Pathogen Genomics Center|Pathogen Genomics Center|Sekizuka|Japan

>Spike|hCoV-19/Wales/PHWC-4957F8/2020|2020-11-24|EPI\_ISL\_726400|Original|hCoV-19^^Wales|Human|Originating lab|COVID-19 Genomics UK (COG-UK) Consortium|Moore|United Kingdom

>Spike|hCoV-19/Japan/PG-1418/2020|2020-04-00|EPI\_ISL\_685025|Original|hCoV-19^^Japan|Human|Saitama Prefectural Institute of Public Health|Pathogen Genomics Center|Sekizuka|Japan

>Spike|hCoV-19/South Africa/KRISP-K002889/2020|2020-09-04|EPI\_ISL\_602701|Original|hCoV-19^^KwaZulu-Natal|Human|NHLS-IALCH|KRISP|de Oliveira|South Africa

>Spike|hCoV-19/Japan/PG-1914/2020|2020-04-00|EPI\_ISL\_685520|Original|hCoV-19^^Japan|Human|Pathogen Genomics Center|Pathogen Genomics Center|Sekizuka|Japan

>Spike|hCoV-19/England/MILK-BAAA2D/2020|2020-11-17|EPI\_ISL\_681531|Original|hCoV-19^^England|Human|Lighthouse Lab in Milton Keynes|Wellcome Sanger Institute for the COVID-19 Genomics UK (COG-UK) Consortium|Davies|United Kingdom

>Spike|hCoV-19/USA/MO-QDX-676/2020|2020-03-18|EPI\_ISL\_571475|Original|hCoV-19^^Missouri|Human|Quest Diagnostics|Quest Diagnostics|Kagan|USA

>Spike|hCoV-19/England/QEUA-AE1B73/2020|2020-10-26|EPI\_ISL\_633436|Original|hCoV-19^^England|Human|Lighthouse Lab in Glasgow|Wellcome Sanger Institute for the COVID-19 Genomics UK (COG-UK) consortium|Davies|United Kingdom

>Spike|hCoV-19/Spain/AR-IBV-2469/2020|2020-03-27|EPI\_ISL\_468790|Original|hCoV-19^^Aragon|Human|Servicio de Microbiolog\u00eda|SeqCOVID-SPAIN consortium/IBV (CSIC) |Comas|Spain

>Spike|hCoV-19/Germany/SH-ChVir8179/2020|2020-07-01|EPI\_ISL\_729563|Original|hCoV-19^^Schleswig-Holstein|Human|A. Krumbholz|Charit\u00e9 Universit\u00e4tsmedizin Berlin|Muehlemann|Germany

>Spike|hCoV-19/USA/WI-UW-2062/2020|2020-07-16|EPI\_ISL\_677467|Original|hCoV-19^^Wisconsin|Human|University of Wisconsin-Madison AIDS Vaccine Research Laboratories|University of Wisconsin-Madison AIDS Vaccine Research Laboratories|Baczenas|USA

>Spike|hCoV-19/Denmark/DCGC-997/2020|2020-05-11|EPI\_ISL\_614802|Original|hCoV-19^^Syddanmark|Human|Department of Virus and Microbiological Special Diagnostics|Albertsen lab|Michaelsen|Denmark

>Spike|hCoV-19/Japan/DP0200/2020|2020-02-15|EPI\_ISL\_416584|Original|hCoV-19^^Japan|Human|Japanese Quarantine Stations|Pathogen Genomics Center|Sekizuka|Japan

>Spike|hCoV-19/Ireland/LK-NVRL-MPT28673/2020|2020-05-20|EPI\_ISL\_767813|Original|hCoV-19^^Limerick|Human|National Virus Reference Laboratory|Irish Coronavirus Sequencing Consortium - Teagasc Moorepark|Walsh|Ireland

>Spike|hCoV-19/England/NORT-28C170/2020|2020-05-11|EPI\_ISL\_461801|Original|hCoV-19^^England|Human|Northumbria University / South Tees Hospitals NHS Foundation Trust / North Cumbria Integrated Care NHS Foundation Trust / North Tees and Hartlepool NHS Foundation Trust / Newcastle Hospitals NHS Foundation Trust|COVID-19 Genomics UK (COG-UK) Consortium|Bashton|United Kingdom

>Spike|hCoV-19/South Africa/KRISP-K004534-CS1/2020|2020-11-17|EPI\_ISL\_660232|Original|hCoV-19^^KwaZulu-Natal|Human|KRISP|KRISP|de Oliveira|South Africa

>Spike|hCoV-19/England/CAMC-B0A171/2020|2020-10-30|EPI\_ISL\_673173|Original|hCoV-19^^England|Human|Lighthouse Lab in Cambridge|Wellcome Sanger Institute for the COVID-19 Genomics UK (COG-UK) Consortium|Davies|United Kingdom

>Spike|hCoV-19/Switzerland/VD-ETHZ-110008/2020|2020-04-01|EPI\_ISL\_486448|Original|hCoV-19^^Vaud|Human|Viollier AG|Department of Biosystems Science and Engineering|Nadeau|Switzerland

>Spike|hCoV-19/England/MILK-994FA1/2020|2020-08-25|EPI\_ISL\_552402|Original|hCoV-19^^England|Human|Lighthouse Lab in Milton Keynes|Wellcome Sanger Institute for the COVID-19 Genomics UK (COG-UK) consortium|Davies|United Kingdom

>Spike|hCoV-19/England/LIVE-DC6D7B/2020|2020-11-28|EPI\_ISL\_705292|Original|hCoV-19^^England|Human|Liverpool Clinical Laboratories|COVID-19 Genomics UK (COG-UK) Consortium|Haldenby|United Kingdom

>Spike|hCoV-19/France/ARA-SC069/2020|2020-04-17|EPI\_ISL\_666677|Original|hCoV-19^^Auvergne-Rh\u00f4ne-Alpes|Human|Laboratoire du Centre Hospitalier Annecy Genevois|CNR Virus des Infections Respiratoires - France SUD|Bal|France

>Spike|hCoV-19/England/QEUA-9AEFE0/2020|2020-09-03|EPI\_ISL\_573524|Original|hCoV-19^^England|Human|University College London|COVID-19 Genomics UK (COG-UK) Consortium|Roy|United Kingdom

>Spike|hCoV-19/England/QEUA-A9E638/2020|2020-10-20|EPI\_ISL\_680035|Original|hCoV-19^^England|Human|Centre for Enzyme Innovation|COVID-19 Genomics UK (COG-UK) Consortium|Robson|United Kingdom

>Spike|hCoV-19/Australia/NSW08/2020|2020-02-28|EPI\_ISL\_413594|Original|hCoV-19^^New South Wales|Human|Centre for Infectious Diseases and Microbiology Laboratory Services|NSW Health Pathology - Institute of Clinical Pathology and Medical Research; Westmead Hospital; University of Sydney|Rockett|Australia

>Spike|hCoV-19/Bangladesh/BCSIR-NILMRC-306/2020|2020-07-18|EPI\_ISL\_498786|Original|hCoV-19^^Sylhet|Human|National Institute of Laboratory Medicine and Referral Center|Genomic Research Lab|Khan|Bangladesh

>Spike|hCoV-19/Portugal/PT1838/2020|2020-11-09|EPI\_ISL\_732058|Original|hCoV-19^^Portugal|Human|Instituto Nacional de Saude (INSA)|Instituto Nacional de Saude (INSA)|Borges|Portugal

>Spike|hCoV-19/USA/NY-NYCPHL-001521/2020|2020-11-30|EPI\_ISL\_745437|Original|hCoV-19^^New York|Human|DOHMH PHL|New York City Public Health Laboratory|Wang|USA

>Spike|hCoV-19/England/QEUEH-B673A9/2020|2020-11-11|EPI\_ISL\_662083|Original|hCoV-19^^England|Human|Lighthouse Lab in Glasgow|Wellcome Sanger Institute for the COVID-19 Genomics UK (COG-UK) Consortium|Davies|United Kingdom

>Spike|hCoV-19/Denmark/DCGC-11523/2020|2020-11-02|EPI\_ISL\_670974|Original|hCoV-19^^Midtjylland|Human|Department of Virus and Microbiological Special Diagnostics|Albertsen Lab|Michaelsen|Denmark

>Spike|hCoV-19/India/KA-IB2/2020|2020-06-21|EPI\_ISL\_508298|Original|hCoV-19^^Karnataka|Human|Indian Institute of Science|National Institute of Biomedical Genomics|Maitra|India

>Spike|hCoV-19/Japan/PG-2367/2020|2020-05-00|EPI\_ISL\_685972|Original|hCoV-19^^Japan|Human|Tokyo Metropolitan Institute of Public Health|Pathogen Genomics Center|Sekizuka|Japan

>Spike|hCoV-19/England/ALDP-BB51A2/2020|2020-11-20|EPI\_ISL\_701889|Original|hCoV-19^^England|Human|Lighthouse Lab in Alderley Park|Wellcome Sanger Institute for the COVID-19 Genomics UK (COG-UK) Consortium|Davies|United Kingdom

>Spike|hCoV-19/England/SHEF-C237A/2020|2020-03-26|EPI\_ISL\_441926|Original|hCoV-19^^England|Human|Virology Department|COVID-19 Genomics UK (COG-UK) Consortium|de Silva|United Kingdom

>Spike|hCoV-19/mink/Netherlands/NB-EMC-62-5/2020|2020-10-05|EPI\_ISL\_632437|Original|hCoV-19^^Noord Brabant|Neovison vison|Dutch COVID-19 response team|Erasmus Medical Center|Oude Munnink|Netherlands

>Spike|hCoV-19/Belgium/ULG-0191/2020|2020-03-23|EPI\_ISL\_447131|Original|hCoV-19^^Liege|Human|Department of Clinical Microbiology|GIGA Medical Genomics|Durkin|Belgium

>Spike|hCoV-19/England/LIVE-A2BD2/2020|2020-05-18|EPI\_ISL\_499835|Original|hCoV-19^^England|Human|Liverpool Clinical Laboratories|COVID-19 Genomics UK (COG-UK) Consortium|Haldenby|United Kingdom

>Spike|hCoV-19/England/20104009002/2020|2020-03-02|EPI\_ISL\_417233|Original|hCoV-19^^England|Human|Respiratory Virus Unit|Respiratory Virus Unit|Platt|United Kingdom

>Spike|hCoV-19/Wales/ALDP-B48818/2020|2020-11-07|EPI\_ISL\_710897|Original|hCoV-19^^Wales|Human|Lighthouse Lab in Alderley Park|Wellcome Sanger Institute for the COVID-19 Genomics UK (COG-UK) Consortium|Davies|United Kingdom

>Spike|hCoV-19/USA/CA-SEARCH-5506/2020|2020-11-18|EPI\_ISL\_755270|Original|hCoV-19^^California|Human|San Diego County Public Health Laboratory|Andersen lab at Scripps Research|Gangavarapu|USA

>Spike|hCoV-19/USA/CA-ALSR-0781-SAN/2020|2020-04-15|EPI\_ISL\_483353|Original|hCoV-19^^California|Human|UC San Diego Center for Advanced Laboratory Medicine|Andersen lab at Scripps Research|Gangavarapu|USA

>Spike|hCoV-19/England/MILK-9A9FF4/2020|2020-08-31|EPI\_ISL\_550852|Original|hCoV-19^^England|Human|Lighthouse Lab in Milton Keynes|Wellcome Sanger Institute for the COVID-19 Genomics UK (COG-UK) consortium|Davies|United Kingdom

>Spike|hCoV-19/USA/LA-EVTL1373/2020|2020-12-11|EPI\_ISL\_779039|Original|hCoV-19^^Louisiana|Human|LSUHS Emerging Viral Threat Laboratory|Microbial Genome Sequencing Center|Kamil|USA

>Spike|hCoV-19/USA/TX-HMH-MCoV-15960/2020|2020-07-10|EPI\_ISL\_785644|Original|hCoV-19^^Texas|Human|Houston Methodist Hospital|Houston Methodist Hospital|Long|USA

>Spike|hCoV-19/Netherlands/ZH-EMC-756/2020|2020-09-23|EPI\_ISL\_632381|Original|hCoV-19^^Zuid Holland|Human|Dutch COVID-19 response team|Erasmus Medical Center|Oude Munnink|Netherlands

>Spike|hCoV-19/England/CAMB-1B9B40/2020|2020-11-07|EPI\_ISL\_679153|Original|hCoV-19^^England|Human|Department of Pathology|COVID-19 Genomics UK (COG-UK) Consortium|Goodfellow|United Kingdom

>Spike|hCoV-19/Australia/VIC7084/2020|2020-07-31|EPI\_ISL\_564222|Original|hCoV-19^^Victoria|Human|Victorian Infectious Diseases Reference Laboratory (VIDRL)|VIDRL and MDU-PHL|Schultz|Australia

>Spike|hCoV-19/England/EXET-13ABB0/2020|2020-11-09|EPI\_ISL\_665091|Original|hCoV-19^^England|Human|University of Exeter|COVID-19 Genomics UK (COG-UK) Consortium|Temperton|United Kingdom

>Spike|hCoV-19/Australia/VIC17434/2020|2020-08-06|EPI\_ISL\_663886|Original|hCoV-19^^Victoria|Human|Microbiological Diagnostic Unit - Public Health Laboratory (MDU-PHL)|MDU-PHL|Schultz|Australia

>Spike|hCoV-19/Spain/MD-IBV-005340/2020|2020-03-18|EPI\_ISL\_510218|Original|hCoV-19^^Madrid|Human|Hospital General Universitario Gregorio Mara\u00f1\u00f3n|SeqCOVID-SPAIN consortium/IBV (CSIC)|Comas|Spain

>Spike|hCoV-19/USA/FL-BPHL-0863/2020|2020-06-29|EPI\_ISL\_514209|Original|hCoV-19^^Florida|Human|Florida Bureau of Public Health Laboratories|Florida Bureau of Public Health Laboratories|Blanton|USA

>Spike|hCoV-19/USA/WI-WSLH-200324/2020|2020-04-19|EPI\_ISL\_578505|Original|hCoV-19^^Wisconsin|Human|Wisconsin State Laboratory of Hygiene Communicable Disease Division|Wisconsin State Laboratory of Hygiene Communicable Disease Division|Florek|USA

>Spike|hCoV-19/England/QEUEH-96463C/2020|2020-08-11|EPI\_ISL\_536875|Original|hCoV-19^^England|Human|Lighthouse Lab in Glasgow|Wellcome Sanger Institute for the COVID-19 Genomics UK (COG-UK) consortium|Davies|United Kingdom

>Spike|hCoV-19/Australia/VIC11414/2020|2020-08-29|EPI\_ISL\_563363|Original|hCoV-19^^Victoria|Human|Microbiological Diagnostic Unit - Public Health Laboratory (MDU-PHL)|MDU-PHL|Schultz|Australia

>Spike|hCoV-19/Spain/IB-IBV-2527/2020|2020-03-20|EPI\_ISL\_468971|Original|hCoV-19^^Illes Balears|Human|Servicio de Microbiolog\u00eda|SeqCOVID-SPAIN consortium/IBV (CSIC)|Comas|Spain

>Spike|hCoV-19/Luxembourg/LNS7831038/2020|2020-11-05|EPI\_ISL\_744638|Original|hCoV-19^^Luxembourg|Human|Laboratoire national de sant\u00e9|Laboratoire national de sant\u00e9|Wienecke-Baldacchino|Luxembourg

>Spike|hCoV-19/Japan/PG-1182/2020|2020-04-00|EPI\_ISL\_684792|Original|hCoV-19^^Japan|Human|Pathogen Genomics Center|Pathogen Genomics Center|Sekizuka|Japan

>Spike|hCoV-19/Netherlands/NA\_82/2020|2020-03-11|EPI\_ISL\_422842|Original|hCoV-19^^Netherlands|Human|Dutch COVID-19 response team|Erasmus Medical Center|Oude Munnink|Netherlands

>Spike|hCoV-19/Spain/CT-IBV-005644/2020|2020-04-22|EPI\_ISL\_508673|Original|hCoV-19^^Catalunya|Human|Departamento de Microbiolog\u00eda|SeqCOVID-SPAIN consortium/IBV (CSIC)|Comas|Spain

>Spike|hCoV-19/USA/UT-02898/2020|2020-04-30|EPI\_ISL\_498668|Original|hCoV-19^^Utah|Human|Utah Public Health Laboratory|Utah Public Health Laboratory|Butz|USA

>Spike|hCoV-19/England/LIVE-9F886/2020|2020-05-31|EPI\_ISL\_472019|Original|hCoV-19^^England|Human|Liverpool Clinical Laboratories|COVID-19 Genomics UK (COG-UK) Consortium|Haldenby|United Kingdom

>Spike|hCoV-19/Australia/VIC10580/2020|2020-08-03|EPI\_ISL\_562968|Original|hCoV-19^^Victoria|Human|Microbiological Diagnostic Unit - Public Health Laboratory (MDU-PHL)|MDU-PHL|Schultz|Australia

>Spike|hCoV-19/Wales/PHWC-16F4B7/2020|2020-10-03|EPI\_ISL\_585973|Original|hCoV-19^^Wales|Human|Wales Specialist Virology Centre Sequencing lab|COVID-19 Genomics UK (COG-UK) Consortium|Moore|United Kingdom

>Spike|hCoV-19/Luxembourg/LNS3922342/2020|2020-10-25|EPI\_ISL\_740391|Original|hCoV-19^^Luxembourg|Human|Laboratoire national de sant\u00e9|Laboratoire national de sant\u00e9|Wienecke-Baldacchino|Luxembourg

>Spike|hCoV-19/USA/TX-HMH-MCoV-9945/2020|2020-07-06|EPI\_ISL\_780351|Original|hCoV-19^^Texas|Human|Houston Methodist Hospital|Houston Methodist Hospital|Long|USA

>Spike|hCoV-19/England/205260308/2020|2020-12-07|EPI\_ISL\_766513|Original|hCoV-19^^England|Human|Respiratory Virus Unit|COVID-19 Genomics UK (COG-UK) Consortium|Platt|United Kingdom

>Spike|hCoV-19/England/ALDP-B84090/2020|2020-11-14|EPI\_ISL\_674281|Original|hCoV-19^^England|Human|Lighthouse Lab in Alderley Park|Wellcome Sanger Institute for the COVID-19 Genomics UK (COG-UK) Consortium|Davies|United Kingdom

>Spike|hCoV-19/USA/UT-UPHL-2009201/2020|2020-05-11|EPI\_ISL\_525183|Original|hCoV-19^^Utah|Human|Utah Public Health Laboratory|Utah Public Health Laboratory|Young|USA

>Spike|hCoV-19/England/MILK-9D48AA/2020|2020-09-19|EPI\_ISL\_601702|Original|hCoV-19^^England|Human|Lighthouse Lab in Milton Keynes|Wellcome Sanger Institute for the COVID-19 Genomics UK (COG-UK) consortium|Davies|United Kingdom

>Spike|hCoV-19/Wales/PHWC-26541/2020|2020-03-26|EPI\_ISL\_422248|Original|hCoV-19^^Wales|Human|Wales Specialist Virology Centre|Public Health Wales Microbiology Cardiff|Moore|United Kingdom

>Spike|hCoV-19/New Zealand/20VR1114/2020|2020-03-20|EPI\_ISL\_456192|Original|hCoV-19^^Waikato|Human|Waikato Hospital|Institute of Environmental Science and Research (ESR)|de Ligt|New Zealand

>Spike|hCoV-19/England/ALDP-A2EEAE/2020|2020-10-05|EPI\_ISL\_587295|Original|hCoV-19^^England|Human|Lighthouse Lab in Alderley Park|Wellcome Sanger Institute for the COVID-19 Genomics UK (COG-UK) consortium|Davies|United Kingdom

>Spike|hCoV-19/USA/CA-CHLA-PLM87046575/2020|2020-11-12|EPI\_ISL\_753330|Original|hCoV-19^^California|Human|Clinical virology Laboratory|Center for Personalized Medicine|Dien Bard|USA

>Spike|hCoV-19/Thailand/CO63-1044-3/2020|2020-03-23|EPI\_ISL\_450985|Original|hCoV-19^^Thailand|Human|Center of Excellence in Clinical Virology|Center of Excellence in Clinical Virology|Poovorawan|Thailand

>Spike|hCoV-19/England/QEUEH-AE2170/2020|2020-10-26|EPI\_ISL\_633565|Original|hCoV-19^^England|Human|Lighthouse Lab in Glasgow|Wellcome Sanger Institute for the COVID-19 Genomics UK (COG-UK) consortium|Davies|United Kingdom

>Spike|hCoV-19/England/CAMB-1AEEBE/2020|2020-05-10|EPI\_ISL\_452869|Original|hCoV-19^^England|Human|Department of Pathology|COVID-19 Genomics UK (COG-UK) Consortium|Meredith|United Kingdom

>Spike|hCoV-19/England/MILK-B3A7C1/2020|2020-11-02|EPI\_ISL\_706037|Original|hCoV-19^^England|Human|Oxford Viromics|COVID-19 Genomics UK (COG-UK) Consortium|Golubchik|United Kingdom

>Spike|hCoV-19/Scotland/CVR4408/2020|2020-09-19|EPI\_ISL\_585282|Original|hCoV-19^^Scotland|Human|West of Scotland Specialist Virology Centre|COVID-19 Genomics UK (COG-UK) Consortium|Robertson|United Kingdom

>Spike|hCoV-19/England/MILK-B569C9/2020|2020-11-05|EPI\_ISL\_656906|Original|hCoV-19^^England|Human|Lighthouse Lab in Milton Keynes|Wellcome Sanger Institute for the COVID-19 Genomics UK (COG-UK) Consortium|Davies|United Kingdom

>Spike|hCoV-19/USA/MN-MDH-1131/2020|2020-04-25|EPI\_ISL\_476716|Original|hCoV-19^^Minnesota|Human|Minnesota Department of Health|Minnesota Department of Health|Garfin|USA

>Spike|hCoV-19/Japan/PG-8182/2020|2020-08-00|EPI\_ISL\_687281|Original|hCoV-19^^Japan|Human|Pathogen Genomics Center|Pathogen Genomics Center|Sekizuka|Japan

>Spike|hCoV-19/England/LIVE-DC8C30/2020|2020-11-19|EPI\_ISL\_705287|Original|hCoV-19^^England|Human|Liverpool Clinical Laboratories|COVID-19 Genomics UK (COG-UK) Consortium|Haldenby|United Kingdom

>Spike|hCoV-19/USA/MI-UM-10036803164/2020|2020-11-05|EPI\_ISL\_728392|Original|hCoV-19^^Michigan|Human|University of Michigan Clinical Microbiology Laboratory|Lauring Lab|Valesano|USA

>Spike|hCoV-19/Canada/QC-LSPQ-L00227481/2020|2020-03-19|EPI\_ISL\_535863|Original|hCoV-19^^Quebec|Human|H\u00f4pital Pierre-Le Gardeur|Laboratoire de sant\u00e9 publique du Qu\u00e9bec|Moreira|Canada

>Spike|hCoV-19/Wales/PHWC-48BED2/2020|2020-11-01|EPI\_ISL\_666367|Original|hCoV-19^^Wales|Human|Wales Specialist Virology Centre Sequencing lab|COVID-19 Genomics UK (COG-UK) Consortium|Moore|United Kingdom

>Spike|hCoV-19/Brazil/CE-L12-CD213/2020|2020-03-16|EPI\_ISL\_476213|Original|hCoV-19^^Cear\u00e1|Human|DB Diagn\u00f3sticos do Brasil|Instituto de Medicina Tropical da Univesidade de S\u00e3o Paulo|Faria|Brazil

>Spike|hCoV-19/USA/CA-CZB-3836/2020|2020-07-24|EPI\_ISL\_548428|Original|hCoV-19^^California|Human|County of San Luis Obispo Public Health Laboratory|Chan-Zuckerberg Biohub|Bhatt|USA

>Spike|hCoV-19/Russia/StPetersburg-RII8371S/2020|2020-04-22|EPI\_ISL\_450274|Original|hCoV-19^^Saint Petersburg|Human|WHO National Influenza Centre Russian Federation|WHO National Influenza Centre Russian Federation|Komissarov|Russia

>Spike|hCoV-19/England/BRIS-12F714/2020|2020-03-10|EPI\_ISL\_488367|Original|hCoV-19^^England|Human|PHE South West Regional Laboratory|Wellcome Sanger Institute for the COVID-19 Genomics UK (COG-UK) consortium|Davies|United Kingdom

>Spike|hCoV-19/USA/MI-MDHHS-SC22505/2020|2020-11-17|EPI\_ISL\_708208|Original|hCoV-19^^Michigan|Human|Michigan Department of Health and Human Services|Michigan Department of Health and Human Services|Jacob|USA

>Spike|hCoV-19/Wales/PHWC-48D113/2020|2020-11-08|EPI\_ISL\_666582|Original|hCoV-19^^Wales|Human|Wales Specialist Virology Centre Sequencing lab|COVID-19 Genomics UK (COG-UK) Consortium|Moore|United Kingdom

>Spike|hCoV-19/England/ALDP-5A525D/2020|2020-06-15|EPI\_ISL\_558639|Original|hCoV-19^^England|Human|Lighthouse Lab in Alderley Park|Wellcome Sanger Institute for the COVID-19 Genomics UK (COG-UK) consortium|Davies|United Kingdom

>Spike|hCoV-19/Wales/PHWC-47F2D5/2020|2020-10-07|EPI\_ISL\_612658|Original|hCoV-19^^Wales|Human|Wales Specialist Virology Centre Sequencing lab|COVID-19 Genomics UK (COG-UK) Consortium|Moore|United Kingdom

>Spike|hCoV-19/Wales/PHWC-16CE43/2020|2020-09-06|EPI\_ISL\_574175|Original|hCoV-19^^Wales|Human|Wales Specialist Virology Centre Sequencing lab|COVID-19 Genomics UK (COG-UK) Consortium|Moore|United Kingdom

>Spike|hCoV-19/England/QEUEH-96B899/2020|2020-08-14|EPI\_ISL\_531278|Original|hCoV-19^^England|Human|Lighthouse Lab in Glasgow|Wellcome Sanger Institute for the COVID-19 Genomics UK (COG-UK) consortium|Davies|United Kingdom

>Spike|hCoV-19/Australia/VIC9035/2020|2020-07-30|EPI\_ISL\_565365|Original|hCoV-19^^Victoria|Human|Microbiological Diagnostic Unit - Public Health Laboratory (MDU-PHL)|MDU-PHL|Schultz|Australia

>Spike|hCoV-19/Australia/VIC2481/2020|2020-06-28|EPI\_ISL\_522184|Original|hCoV-19^^Victoria|Human|Victorian Infectious Diseases Reference Laboratory (VIDRL)|VIDRL and MDU-PHL|Schultz|Australia

>Spike|hCoV-19/Denmark/DCGC-10530/2020|2020-11-02|EPI\_ISL\_670036|Original|hCoV-19^^Syddanmark|Human|Department of Virus and Microbiological Special Diagnostics|Albertsen Lab|Michaelsen|Denmark

>Spike|hCoV-19/England/MILK-A7A3D1/2020|2020-10-15|EPI\_ISL\_606705|Original|hCoV-19^^England|Human|Lighthouse Lab in Milton Keynes|Wellcome Sanger Institute for the COVID-19 Genomics UK (COG-UK) consortium|Davies|United Kingdom

>Spike|hCoV-19/England/MILK-CA9D42/2020|2020-12-18|EPI\_ISL\_762444|Original|hCoV-19^^England|Human|Lighthouse Lab in Milton Keynes|Wellcome Sanger Institute for the COVID-19 Genomics UK (COG-UK) Consortium|Davies|United Kingdom

>Spike|hCoV-19/England/QEUEH-B31FA4/2020|2020-11-04|EPI\_ISL\_646240|Original|hCoV-19^^England|Human|Lighthouse Lab in Glasgow|Wellcome Sanger Institute for the COVID-19 Genomics UK (COG-UK) Consortium|Davies|United Kingdom

>Spike|hCoV-19/England/ALDP-A69047/2020|2020-10-12|EPI\_ISL\_609083|Original|hCoV-19^^England|Human|Lighthouse Lab in Alderley Park|Wellcome Sanger Institute for the COVID-19 Genomics UK (COG-UK) consortium|Davies|United Kingdom

>Spike|hCoV-19/England/CWAR-24FDA1D/2020|2020-05-02|EPI\_ISL\_584466|Original|hCoV-19^^England|Human|UHCW / University of Warwick|COVID-19 Genomics UK (COG-UK) Consortium|Stark|United Kingdom

>Spike|hCoV-19/USA/TX-HMH-MCoV-14368/2020|2020-10-05|EPI\_ISL\_787653|Original|hCoV-19^^Texas|Human|Houston Methodist Hospital|Houston Methodist Hospital|Long|USA

>Spike|hCoV-19/Switzerland/SG-ETHZ-390429/2020|2020-11-04|EPI\_ISL\_729073|Original|hCoV-19^^St Gallen|Human|Viollier AG|Department of Biosystems Science and Engineering|Nadeau|Switzerland

>Spike|hCoV-19/England/NORW-21F6BF/2020|2020-12-09|EPI\_ISL\_725040|Original|hCoV-19^^England|Human|Quadram Institute Bioscience|COVID-19 Genomics UK (COG-UK) Consortium|Alikhan|United Kingdom



>Spike|hCoV-19/USA/AZ-TG637297/2020|2020-07-27|EPI\_ISL\_695724|Original|hCoV-19^^Arizona|Human|AZ SPHL|TGen North|French|USA

>Spike|hCoV-19/USA/TX-DSHS-1645/2020|2020-06-24|EPI\_ISL\_710086|Original|hCoV-19^^Texas|Human|Texas Department of State Health Services|Texas Department of State Health Services|Rahman|USA

>Spike|hCoV-19/England/NORW-EAE99/2020|2020-04-30|EPI\_ISL\_457388|Original|hCoV-19^^England|Human|Quadram Institute Bioscience|COVID-19 Genomics UK (COG-UK) Consortium|Alikhan|United Kingdom

>Spike|hCoV-19/Japan/IC-0154/2020|2020-08-00|EPI\_ISL\_667583|Original|hCoV-19^^Japan|Human|Pathogen Genomics Center|Pathogen Genomics Center|Sekizuka|Japan

>Spike|hCoV-19/USA/NY-NYCPHL-001342/2020|2020-11-13|EPI\_ISL\_683974|Original|hCoV-19^^New York|Human|DOHMH Central Harlem|New York City Public Health Laboratory|Wang|USA

>Spike|hCoV-19/England/QEUEH-95F7C8/2020|2020-08-05|EPI\_ISL\_532423|Original|hCoV-19^^England|Human|Lighthouse Lab in Glasgow|Wellcome Sanger Institute for the COVID-19 Genomics UK (COG-UK) consortium|Davies|United Kingdom

>Spike|hCoV-19/England/QEUEH-B6878E/2020|2020-11-11|EPI\_ISL\_655052|Original|hCoV-19^^England|Human|Lighthouse Lab in Glasgow|Wellcome Sanger Institute for the COVID-19 Genomics UK (COG-UK) Consortium|Davies|United Kingdom

>Spike|hCoV-19/USA/CA-CZB-3365/2020|2020-07-15|EPI\_ISL\_548323|Original|hCoV-19^^California|Human|Orange County Public Health Laboratory|Chan-Zuckerberg Biohub|Bhatt|USA

>Spike|hCoV-19/England/QEUEH-B106C4/2020|2020-11-02|EPI\_ISL\_641858|Original|hCoV-19^^England|Human|Lighthouse Lab in Glasgow|Wellcome Sanger Institute for the COVID-19 Genomics UK (COG-UK) Consortium|Davies|United Kingdom

>Spike|hCoV-19/Wales/PHWC-15C5AB/2020|2020-03-29|EPI\_ISL\_472509|Original|hCoV-19^^Wales|Human|Wales Specialist Virology Centre Sequencing lab|COVID-19 Genomics UK (COG-UK) Consortium|Moore|United Kingdom

>Spike|hCoV-19/England/ALDP-9552C1/2020|2020-06-12|EPI\_ISL\_553545|Original|hCoV-19^^England|Human|Lighthouse Lab in Alderley Park|Wellcome Sanger Institute for the COVID-19 Genomics UK (COG-UK) consortium|Davies|United Kingdom

>Spike|hCoV-19/Japan/PG-1860/2020|2020-05-00|EPI\_ISL\_685466|Original|hCoV-19^^Japan|Human|Tokyo Metropolitan Institute of Public Health|Pathogen Genomics Center|Sekizuka|Japan

>Spike|hCoV-19/England/QEUEH-A4D832/2020|2020-10-07|EPI\_ISL\_628613|Original|hCoV-19^^England|Human|Oxford Viromics|COVID-19 Genomics UK (COG-UK) Consortium|Golubchik|United Kingdom

>Spike|hCoV-19/England/MILK-9573EA/2020|2020-06-16|EPI\_ISL\_554101|Original|hCoV-19^^England|Human|Lighthouse Lab in Milton Keynes|Wellcome Sanger Institute for the COVID-19 Genomics UK (COG-UK) consortium|Davies|United Kingdom

>Spike|hCoV-19/USA/WA-S491/2020|2020-04-02|EPI\_ISL\_434251|Original|hCoV-19^^Washington|Human|Washington State Department of Health|Seattle Flu Study|Bedford|USA

>Spike|hCoV-19/Denmark/DCGC-5881/2020|2020-09-28|EPI\_ISL\_621068|Original|hCoV-19^^Midtjylland|Human|Department of Virus and Microbiological Special Diagnostics|Albertsen lab|Michaelsen|Denmark

>Spike|hCoV-19/Japan/PG-2181/2020|2020-04-00|EPI\_ISL\_685786|Original|hCoV-19^^Japan|Human|Pathogen Genomics Center|Pathogen Genomics Center|Sekizuka|Japan

>Spike|hCoV-19/England/ALDP-9449A2/2020|2020-06-07|EPI\_ISL\_555758|Original|hCoV-19^^England|Human|Lighthouse Lab in Alderley Park|Wellcome Sanger Institute for the COVID-19 Genomics UK (COG-UK) consortium|Davies|United Kingdom

>Spike|hCoV-19/USA/CA-CZB-12358/2020|2020-10-12|EPI\_ISL\_648429|Original|hCoV-19^^California|Human|Santa Clara County Public Health Laboratory|Chan-Zuckerberg Biohub|Bhatt|USA

>Spike|hCoV-19/England/ALDP-CB4843/2020|2020-12-17|EPI\_ISL\_761815|Original|hCoV-19^^England|Human|Lighthouse Lab in Alderley Park|Wellcome Sanger Institute for the COVID-19 Genomics UK (COG-UK) Consortium|Davies|United Kingdom

>Spike|hCoV-19/Bangladesh/BCSIR-NILMRC-199/2020|2020-06-20|EPI\_ISL\_483643|Original|hCoV-19^^Chittagong|Human|National Institute of Laboratory Medicine and Referral Center|Genomic Research Lab|Khan|Bangladesh

>Spike|hCoV-19/USA/MI-UM-10036312478/2020|2020-10-06|EPI\_ISL\_596595|Original|hCoV-19^^Michigan|Human|University of Michigan Clinical Microbiology Laboratory|Lauring Lab|Valesano|USA

>Spike|hCoV-19/USA/UT-02849/2020|2020-04-29|EPI\_ISL\_513658|Original|hCoV-19^^Utah|Human|Utah Public Health Laboratory|Utah Public Health Laboratory|Butz|USA

>Spike|hCoV-19/Japan/PG-0857/2020|2020-04-00|EPI\_ISL\_684467|Original|hCoV-19^^Japan|Human|Fukuoka Institute of Health and Environmental Sciences|Pathogen Genomics Center|Sekizuka|Japan

>Spike|hCoV-19/Brazil/SP-L2-CAMPI52/2020|2020-04-18|EPI\_ISL\_476340|Original|hCoV-19^^S\u00e3o Paulo|Human|Laborat\u00f3rio de Patologia Cl\u00ednica - UNICAMP|Laborat\u00f3rio de Estudos de V\u00edrus Emergentes - UNICAMP|Faria|Brazil

>Spike|hCoV-19/England/QEUH-AD4EC5/2020|2020-10-26|EPI\_ISL\_633922|Original|hCoV-19^^England|Human|Lighthouse Lab in Glasgow|Wellcome Sanger Institute for the COVID-19 Genomics UK (COG-UK) consortium|Davies|United Kingdom

>Spike|hCoV-19/England/NORW-F56DF/2020|2020-11-02|EPI\_ISL\_665581|Original|hCoV-19^^England|Human|Quadram Institute Bioscience|COVID-19 Genomics UK (COG-UK) Consortium|Alikhan|United Kingdom

>Spike|hCoV-19/South Korea/KCDC2124/2020|2020-03-15|EPI\_ISL\_498025|Original|hCoV-19^^South Korea|Human|Division of Viral Diseases|Division of Viral Diseases|Kim|South Korea

>Spike|hCoV-19/England/QEUH-A338A8/2020|2020-10-05|EPI\_ISL\_626771|Original|hCoV-19^^England|Human|Virology Department|COVID-19 Genomics UK (COG-UK) Consortium|de Silva|United Kingdom

>Spike|hCoV-19/Sweden/20-23685/2020|2020-10-07|EPI\_ISL\_648191|Original|hCoV-19^^Sweden|Human|The Public Health Agency of Sweden|The Public Health Agency of Sweden|Svartstr\u00f6m|Sweden

>Spike|hCoV-19/Scotland/QEUH-96BF2B/2020|2020-08-17|EPI\_ISL\_534683|Original|hCoV-19^^Scotland|Human|NHSGGC West of Scotland Specialist Virology Centre / MRC-University of Glasgow Centre for Virus Research|Wellcome Sanger Institute for the COVID-19 Genomics UK (COG-UK) consortium|Davies|United Kingdom

>Spike|hCoV-19/England/QEUH-B67B56/2020|2020-11-11|EPI\_ISL\_661375|Original|hCoV-19^^England|Human|Lighthouse Lab in Glasgow|Wellcome Sanger Institute for the COVID-19 Genomics UK (COG-UK) Consortium|Davies|United Kingdom

>Spike|hCoV-19/England/NORT-2892CB/2020|2020-03-29|EPI\_ISL\_458600|Original|hCoV-19^^England|Human|NU-OMICS DNA Sequencing research facility|Wellcome Sanger Institute for the COVID-19 Genomics UK (COG-UK) consortium|Davies|United Kingdom

>Spike|hCoV-19/USA/HI-H200037/2020|2020-04-13|EPI\_ISL\_752621|Original|hCoV-19^^Hawaii|Human|State Laboratories Division|State Laboratories Division|Sultana|USA

>Spike|hCoV-19/England/MILK-AC82F5/2020|2020-10-21|EPI\_ISL\_629317|Original|hCoV-19^^England|Human|Lighthouse Lab in Milton Keynes|Wellcome Sanger Institute for the COVID-19 Genomics UK (COG-UK) consortium|Davies|United Kingdom

>Spike|hCoV-19/Bangladesh/DNAS\_DRCIM\_isl\_HH-12/2020|2020-06-30|EPI\_ISL\_774949|Original|hCoV-19^^Dhaka|Human|Designated Reference Institute for Chemical Measurements (DRICM)|DNA SOLUTION LTD.|Rabbi|Bangladesh

>Spike|hCoV-19/Netherlands/NB-EMC-213/2020|2020-06-13|EPI\_ISL\_523336|Original|hCoV-19^^Noord Brabant|Human|Dutch COVID-19 response team|Erasmus Medical Center|Oude Munnink|Netherlands

>Spike|hCoV-19/Scotland/QEUH-9FFF1D/2020|2020-10-02|EPI\_ISL\_600213|Original|hCoV-19^^Scotland|Human|Lighthouse Lab in Glasgow|Wellcome Sanger Institute for the COVID-19 Genomics UK (COG-UK) consortium|Davies|United Kingdom

>Spike|hCoV-19/Austria/CeMM0981/2020|2020-04-06|EPI\_ISL\_583826|Original|hCoV-19^^Austria|Human|Dr. Gernot Walder GmbH|Bergthaler laboratory|Bergthaler|Austria

>Spike|hCoV-19/Hong Kong/HKU-IHCE0511-012b/2020|2020-03-13|EPI\_ISL\_538550|Original|hCoV-19^^Hong Kong|Human|Department of Microbiology|Department of Microbiology|Chan|China

>Spike|hCoV-19/Australia/VIC14162/2020|2020-07-30|EPI\_ISL\_592361|Original|hCoV-19^^Victoria|Human|Microbiological Diagnostic Unit - Public Health Laboratory (MDU-PHL)|MDU-PHL|Schultz|Australia

>Spike|hCoV-19/mink/Denmark/mDK-172/2020|2020-11-04|EPI\_ISL\_683023|Original|hCoV-19^^Denmark|Neovison vison|Department of Virus and Microbiological Special Diagnostics|Albertsen Lab|Michaelsen|Denmark

>Spike|hCoV-19/Japan/PG-5259/2020|2020-08-00|EPI\_ISL\_690362|Original|hCoV-19^^Japan|Human|Pathogen Genomics Center|Pathogen Genomics Center|Sekizuka|Japan

>Spike|hCoV-19/Denmark/DCGC-2963/2020|2020-08-24|EPI\_ISL\_616725|Original|hCoV-19^^Hovedstaden|Human|Department of Virus and Microbiological Special Diagnostics|Albertsen lab|Michaelsen|Denmark

>Spike|hCoV-19/Netherlands/Gelderland\_80/2020|2020-05-19|EPI\_ISL\_460979|Original|hCoV-19^^Gelderland|Human|Dutch COVID-19 response team|Erasmus Medical Center|Oude Munnink|Netherlands

>Spike|hCoV-19/Australia/VIC3146/2020|2020-07-12|EPI\_ISL\_520853|Original|hCoV-19^^Victoria|Human|Microbiological Diagnostic Unit - Public Health Laboratory (MDU-PHL)|MDU-PHL|Schultz|Australia

>Spike|hCoV-19/USA/TX-HMH-6373/2020|2020-07-05|EPI\_ISL\_547427|Original|hCoV-19^^Texas|Human|Houston Methodist Hospital|Houston Methodist Hospital|Long|USA

>Spike|hCoV-19/USA/TX-HMH-MCoV-13874/2020|2020-08-16|EPI\_ISL\_787167|Original|hCoV-19^^Texas|Human|Houston Methodist Hospital|Houston Methodist Hospital|Long|USA

>Spike|hCoV-19/Wales/PHWC-357C1/2020|2020-04-25|EPI\_ISL\_474476|Original|hCoV-19^^Wales|Human|Originating lab|COVID-19 Genomics UK (COG-UK) Consortium|Moore|United Kingdom

>Spike|hCoV-19/USA/MN-QDX-1575/2020|2020-03-17|EPI\_ISL\_603976|Original|hCoV-19^^Minnesota|Human|Quest Diagnostics|Quest Diagnostics|Kagan|USA

>Spike|hCoV-19/England/CAMB-7E8BA/2020|2020-04-08|EPI\_ISL\_443059|Original|hCoV-19^^England|Human|Department of Pathology|Wellcome Sanger Institute for the COVID-19 Genomics UK (COG-UK) consortium|Amato|United Kingdom

>Spike|hCoV-19/Japan/PG-2875/2020|2020-04-00|EPI\_ISL\_691001|Original|hCoV-19^^Japan|Human|Pathogen Genomics Center|Pathogen Genomics Center|Sekizuka|Japan

>Spike|hCoV-19/Spain/MD-IBV-005355/2020|2020-03-19|EPI\_ISL\_510232|Original|hCoV-19^^Madrid|Human|Hospital General Universitario Gregorio Mara\u00f1a|SeqCOVID-SPAIN consortium|IBV (CSIC)|Comas|Spain

>Spike|hCoV-19/USA/TX-DSHS-0048/2020|2020-05-09|EPI\_ISL\_517979|Original|hCoV-19^^Texas|Human|Texas Department of State Health Services|Texas Department of State Health Services|Rahman|USA

>Spike|hCoV-19/England/ALDP-95117D/2020|2020-06-13|EPI\_ISL\_554263|Original|hCoV-19^^England|Human|Lighthouse Lab in Alderley Park|Wellcome Sanger Institute for the COVID-19 Genomics UK (COG-UK) consortium|Davies|United Kingdom

>Spike|hCoV-19/England/ALDP-B5B2E7/2020|2020-11-08|EPI\_ISL\_655635|Original|hCoV-19^^England|Human|Lighthouse Lab in Alderley Park|Wellcome Sanger Institute for the COVID-19 Genomics UK (COG-UK) Consortium|Davies|United Kingdom

>Spike|hCoV-19/England/QEUEH-BA4267/2020|2020-11-18|EPI\_ISL\_721180|Original|hCoV-19^^England|Human|Lighthouse Lab in Glasgow|Wellcome Sanger Institute for the COVID-19 Genomics UK (COG-UK) Consortium|Davies|United Kingdom

>Spike|hCoV-19/Denmark/DCGC-4668/2020|2020-09-14|EPI\_ISL\_621900|Original|hCoV-19^^Hovedstaden|Human|Department of Virus and Microbiological Special Diagnostics|Albertsen lab|Michaelsen|Denmark

>Spike|hCoV-19/Denmark/DCGC-18470/2020|2020-12-07|EPI\_ISL\_749398|Original|hCoV-19^^Syddanmark|Human|Department of Virus and Microbiological Special Diagnostics|Albertsen Lab|Michaelsen|Denmark

>Spike|hCoV-19/England/CAMC-B3387A/2020|2020-11-05|EPI\_ISL\_659303|Original|hCoV-19^^England|Human|Lighthouse Lab in Cambridge|Wellcome Sanger Institute for the COVID-19 Genomics UK (COG-UK) Consortium|Davies|United Kingdom

>Spike|hCoV-19/England/ALDP-A8716E/2020|2020-10-17|EPI\_ISL\_606031|Original|hCoV-19^^England|Human|Lighthouse Lab in Alderley Park|Wellcome Sanger Institute for the COVID-19 Genomics UK (COG-UK) consortium|Davies|United Kingdom

>Spike|hCoV-19/Wales/PHWC-488C08/2020|2020-10-30|EPI\_ISL\_639481|Original|hCoV-19^^Wales|Human|Wales Specialist Virology Centre Sequencing lab|COVID-19 Genomics UK (COG-UK) Consortium|Moore|United Kingdom

>Spike|hCoV-19/Australia/NSW606/2020|2020-06-19|EPI\_ISL\_478718|Original|hCoV-19^^New South Wales|Human|Sydney South West Pathology Service (SSWPS) - Concord Repatriation

General Hospital - NSW Health Pathology|NSW Health Pathology - Institute of Clinical Pathology and Medical Research; Westmead Hospital; University of Sydney|Gall|Australia

>Spike|hCoV-19/Japan/PG-4879/2020|2020-08-00|EPI\_ISL\_690000|Original|hCoV-19^^Japan|Human|Pathogen Genomics Center|Pathogen Genomics Center|Sekizuka|Japan

>Spike|hCoV-19/Denmark/DCGC-14818/2020|2020-11-23|EPI\_ISL\_712006|Original|hCoV-19^^Midtjylland|Human|Department of Virus and Microbiological Special Diagnostics|Albertsen Lab|Michaelsen|Denmark

>Spike|hCoV-19/Australia/NSW2106/2020|2020-04-13|EPI\_ISL\_678298|Original|hCoV-19^^New South Wales|Human|Area of Virology|Virology Research Laboratory; Area of Virology|Foster|Australia

>Spike|hCoV-19/England/20152046204/2020|2020-04-06|EPI\_ISL\_466233|Original|hCoV-19^^England|Human|Respiratory Virus Unit|Respiratory Virus Unit|Platt|United Kingdom

>Spike|hCoV-19/England/CAMC-9D1CFC/2020|2020-09-19|EPI\_ISL\_601728|Original|hCoV-19^^England|Human|Lighthouse Lab in Cambridge|Wellcome Sanger Institute for the COVID-19 Genomics UK (COG-UK) consortium|Davies|United Kingdom

>Spike|hCoV-19/India/MH-NIV-7893/2020|2020-04-07|EPI\_ISL\_454551|Original|hCoV-19^^Maharashtra|Human|NIV Influenza|NIV Influenza|Potdar|India

>Spike|hCoV-19/England/ALDP-B1A475/2020|2020-10-31|EPI\_ISL\_647695|Original|hCoV-19^^England|Human|Lighthouse Lab in Alderley Park|Wellcome Sanger Institute for the COVID-19 Genomics UK (COG-UK) Consortium|Davies|United Kingdom

>Spike|hCoV-19/England/QEUA-9F40CA/2020|2020-08-22|EPI\_ISL\_588539|Original|hCoV-19^^England|Human|Lighthouse Lab in Glasgow|Wellcome Sanger Institute for the COVID-19 Genomics UK (COG-UK) consortium|Davies|United Kingdom

>Spike|hCoV-19/Denmark/DCGC-12337/2020|2020-11-16|EPI\_ISL\_682518|Original|hCoV-19^^Hovedstaden|Human|Department of Virus and Microbiological Special Diagnostics|Albertsen Lab|Michaelsen|Denmark

>Spike|hCoV-19/USA/TX-HMH-MCoV-14801/2020|2020-10-12|EPI\_ISL\_786286|Original|hCoV-19^^Texas|Human|Houston Methodist Hospital|Houston Methodist Hospital|Long|USA

>Spike|hCoV-19/India/MH-NIV-229360/2020|2020-09-29|EPI\_ISL\_577711|Original|hCoV-19^^Maharashtra|Human|NIV Influenza|NIV Influenza|Potdar|India

>Spike|hCoV-19/USA/OR-PROV-110/2020|2020-04-24|EPI\_ISL\_482378|Original|hCoV-19^^Oregon|Human|Providence St. Joseph Health Molecular Genomics Laboratory|Providence St. Joseph Health Molecular Genomics Laboratory|Dowdell|USA

>Spike|hCoV-19/USA/DE-DHSS-F918400/2020|2020-03-30|EPI\_ISL\_593955|Original|hCoV-19^^Delaware|Human|Delaware Public Health Lab|Delaware Public Health Lab|Bajwa|USA

>Spike|hCoV-19/USA/TX-DSHS-0454/2020|2020-06-16|EPI\_ISL\_541988|Original|hCoV-19^^Texas|Human|Texas Department of State Health Services|Texas Department of State Health Services|Rahman|USA

>Spike|hCoV-19/England/QEUA-B6A42B/2020|2020-11-11|EPI\_ISL\_662442|Original|hCoV-19^^England|Human|Lighthouse Lab in Glasgow|Wellcome Sanger Institute for the COVID-19 Genomics UK (COG-UK) Consortium|Davies|United Kingdom

>Spike|hCoV-19/Denmark/ALAB-SSI-604/2020|2020-03-27|EPI\_ISL\_436988|Original|hCoV-19^^Denmark|Human|Department of Virus and Microbiological Special Diagnostics|Albertsen lab|Kirkegaard|Denmark

>Spike|hCoV-19/USA/CT-Yale-608/2020|2020-05-06|EPI\_ISL\_730070|Original|hCoV-19^^Connecticut|Human|Yale Clinical Virology Laboratory|Grubaugh Lab - Yale School of Public Health|Grubaugh|USA

>Spike|hCoV-19/England/MILK-BB20B7/2020|2020-11-18|EPI\_ISL\_720181|Original|hCoV-19^^England|Human|Lighthouse Lab in Milton Keynes|Wellcome Sanger Institute for the COVID-19 Genomics UK (COG-UK) Consortium|Davies|United Kingdom

>Spike|hCoV-19/Denmark/DCGC-6064/2020|2020-10-05|EPI\_ISL\_620258|Original|hCoV-19^^Hovedstaden|Human|Department of Virus and Microbiological Special Diagnostics|Albertsen lab|Michaelsen|Denmark

>Spike|hCoV-19/England/MILK-BB0990/2020|2020-11-17|EPI\_ISL\_720332|Original|hCoV-19^^England|Human|Lighthouse Lab in Milton Keynes|Wellcome Sanger Institute for the COVID-19 Genomics UK (COG-UK) Consortium|Davies|United Kingdom

>Spike|hCoV-19/South Africa/KRISP-K002297/2020|2020-07-20|EPI\_ISL\_515674|Original|hCoV-19^^KwaZulu-Natal|Human|NHLS-IALCH|KRISP|de Oliveira|South Africa

>Spike|hCoV-19/Brazil/RS-L16-CD349/2020|2020-03-30|EPI\_ISL\_476291|Original|hCoV-19^^Rio Grande do Sul|Human|DB Diagn\u00f3sticos do Brasil|Instituto de Medicina Tropical da Universidade de S\u00e3o Paulo|Sabino|Brazil

>Spike|hCoV-19/USA/NY-PV09439/2020|2020-03-07|EPI\_ISL\_450116|Original|hCoV-19^^New York|Human|MSHS Clinical Microbiology Laboratories|MSHS Pathogen Surveillance Program|van Bakel|USA

>Spike|hCoV-19/Denmark/DCGC-866/2020|2020-05-18|EPI\_ISL\_614828|Original|hCoV-19^^Syddanmark|Human|Department of Virus and Microbiological Special Diagnostics|Albertsen lab|Michaelsen|Denmark

>Spike|hCoV-19/Denmark/DCGC-15656/2020|2020-11-23|EPI\_ISL\_713209|Original|hCoV-19^^Syddanmark|Human|Department of Virus and Microbiological Special Diagnostics|Albertsen Lab|Michaelsen|Denmark

>Spike|hCoV-19/Denmark/DCGC-20824/2020|2020-12-21|EPI\_ISL\_759387|Original|hCoV-19^^Hovedstaden|Human|Department of Virus and Microbiological Special Diagnostics|Albertsen Lab|Michaelsen|Denmark

>Spike|hCoV-19/Netherlands/NoordHolland\_9/2020|2020-04-01|EPI\_ISL\_460798|Original|hCoV-19^^Noord Holland|Human|Dutch COVID-19 response team|Erasmus Medical Center|Oude Munnink|Netherlands

>Spike|hCoV-19/USA/MA-MASPHL-00095/2020|2020-04-03|EPI\_ISL\_791580|Original|hCoV-19^^Massachusetts|Human|Massachusetts State Public Health Laboratory|Infectious Disease Program|Park|USA

>Spike|hCoV-19/Denmark/DCGC-2415/2020|2020-08-10|EPI\_ISL\_617597|Original|hCoV-19^^Nordjylland|Human|Department of Virus and Microbiological Special Diagnostics|Albertsen lab|Michaelsen|Denmark

>Spike|hCoV-19/England/MILK-BAC153/2020|2020-11-18|EPI\_ISL\_783098|Original|hCoV-19^^England|Human|Lighthouse Lab in Milton Keynes|Wellcome Sanger Institute for the COVID-19 Genomics UK (COG-UK) Consortium|Davies|United Kingdom

>Spike|hCoV-19/Wales/PHWC-16832A/2020|2020-04-18|EPI\_ISL\_494227|Original|hCoV-19^^Wales|Human|Originating lab|COVID-19 Genomics UK (COG-UK) Consortium|Moore|United Kingdom

>Spike|hCoV-19/Denmark/DCGC-17010/2020|2020-12-14|EPI\_ISL\_750319|Original|hCoV-19^^Midtjylland|Human|Department of Virus and Microbiological Special Diagnostics|Albertsen Lab|Michaelsen|Denmark

>Spike|hCoV-19/Japan/PG-0743/2020|2020-04-00|EPI\_ISL\_684353|Original|hCoV-19^^Japan|Human|Pathogen Genomics Center|Pathogen Genomics Center|Sekizuka|Japan

>Spike|hCoV-19/USA/IL-NM-1689/2020|2020-07-23|EPI\_ISL\_626540|Original|hCoV-19^^Illinois|Human|Northwestern Memorial Hospital|Ozer Lab|Ozer|USA

>Spike|hCoV-19/England/QEUEH-BA1BBA/2020|2020-11-18|EPI\_ISL\_719970|Original|hCoV-19^^England|Human|Lighthouse Lab in Glasgow|Wellcome Sanger Institute for the COVID-19 Genomics UK (COG-UK) Consortium|Davies|United Kingdom

>Spike|hCoV-19/England/CAMB-81016/2020|2020-04-20|EPI\_ISL\_438556|Original|hCoV-19^^England|Human|Department of Pathology|COVID-19 Genomics UK (COG-UK) Consortium|Meredith|United Kingdom

>Spike|hCoV-19/USA/TX-HMH-5862/2020|2020-06-19|EPI\_ISL\_547071|Original|hCoV-19^^Texas|Human|Houston Methodist Hospital|Houston Methodist Hospital|Long|USA

>Spike|hCoV-19/England/ALDP-B1BB42/2020|2020-11-01|EPI\_ISL\_645577|Original|hCoV-19^^England|Human|Lighthouse Lab in Alderley Park|Wellcome Sanger Institute for the COVID-19 Genomics UK (COG-UK) Consortium|Davies|United Kingdom

>Spike|hCoV-19/Spain/VC-IBV-98003461/2020|2020-04-03|EPI\_ISL\_539265|Original|hCoV-19^^Comunitat Valenciana|Human|Hospital Universitario de La Ribera (Alzira|SeqCOVID-SPAIN consortium|IBV (CSIC)|Comas|Spain

>Spike|hCoV-19/England/MILK-A6A538/2020|2020-10-09|EPI\_ISL\_626912|Original|hCoV-19^^England|Human|Virology Department|COVID-19 Genomics UK (COG-UK) Consortium|de Silva|United Kingdom

>Spike|hCoV-19/USA/CA-ALSR-3609/2020|2020-06-24|EPI\_ISL\_636109|Original|hCoV-19^^California|Human|San Diego County Public Health Laboratory|Andersen lab at Scripps Research|Gangavarapu|USA

>Spike|hCoV-19/Denmark/DCGC-2849/2020|2020-08-24|EPI\_ISL\_616676|Original|hCoV-19^^Hovedstaden|Human|Department of Virus and Microbiological Special Diagnostics|Albertsen lab|Michaelsen|Denmark

>Spike|hCoV-19/England/ALDP-9BE31E/2020|2020-09-10|EPI\_ISL\_568088|Original|hCoV-19^^England|Human|Lighthouse Lab in Alderley Park|Wellcome Sanger Institute for the COVID-19 Genomics UK (COG-UK) consortium|Davies|United Kingdom

>Spike|hCoV-19/Australia/VIC9314/2020|2020-08-24|EPI\_ISL\_565502|Original|hCoV-19^^Victoria|Human|Microbiological Diagnostic Unit - Public Health Laboratory (MDU-PHL)|MDU-PHL|Schultz|Australia

>Spike|hCoV-19/England/ALDP-9D828A/2020|2020-09-18|EPI\_ISL\_576643|Original|hCoV-19^^England|Human|Oxford Viromics|COVID-19 Genomics UK (COG-UK) Consortium|Golubchik|United Kingdom

>Spike|hCoV-19/England/MILK-815413/2020|2020-07-16|EPI\_ISL\_557260|Original|hCoV-19^^England|Human|Lighthouse Lab in Milton Keynes|Wellcome Sanger Institute for the COVID-19 Genomics UK (COG-UK) consortium|Davies|United Kingdom

>Spike|hCoV-19/Spain/PV-IBV-003215/2020|2020-03-13|EPI\_ISL\_480970|Original|hCoV-19^^Basque Country|Human|Servicio de Microbiolog\u00eda. Hospital Universitario Donostia. OSI Donostialdea. \u00c1rea de Enfermedades Infecciosas|SeqCOVID-SPAIN consortium|IBV (CSIC)|Comas|Spain

>Spike|hCoV-19/Wales/ALDP-52C063/2020|2020-06-01|EPI\_ISL\_558909|Original|hCoV-19^^Wales|Human|Lighthouse Lab in Alderley Park|Wellcome Sanger Institute for the COVID-19 Genomics UK (COG-UK) consortium|Davies|United Kingdom

>Spike|hCoV-19/USA/TX-HMH-MCoV-18942/2020|2020-11-25|EPI\_ISL\_785238|Original|hCoV-19^^Texas|Human|Houston Methodist Hospital|Houston Methodist Hospital|Long|USA

>Spike|hCoV-19/England/LIVE-9DC40/2020|2020-04-27|EPI\_ISL\_449621|Original|hCoV-19^^England|Human|Liverpool Clinical Laboratories|COVID-19 Genomics UK (COG-UK) Consortium|Haldenby|United Kingdom

>Spike|hCoV-19/Japan/PG-0261/2020|2020-03-00|EPI\_ISL\_479945|Original|hCoV-19^^Kansai|Human|Osaka Institute of Public Health|Pathogen Genomics Center|Sekizuka|Japan

>Spike|hCoV-19/Scotland/CVR5358/2020|2020-10-26|EPI\_ISL\_651777|Original|hCoV-19^^Scotland|Human|West of Scotland Specialist Virology Centre|COVID-19 Genomics UK (COG-UK) Consortium|Robertson|United Kingdom

>Spike|hCoV-19/England/MILK-9C262D/2020|2020-09-10|EPI\_ISL\_566649|Original|hCoV-19^^England|Human|Lighthouse Lab in Milton Keynes|Wellcome Sanger Institute for the COVID-19 Genomics UK (COG-UK) consortium|Davies|United Kingdom

>Spike|hCoV-19/England/QEUH-A618B0/2020|2020-10-11|EPI\_ISL\_628639|Original|hCoV-19^^England|Human|Oxford Viromics|COVID-19 Genomics UK (COG-UK) Consortium|Golubchik|United Kingdom

>Spike|hCoV-19/Malaysia/IMR\_WC80031/2020|2020-05-23|EPI\_ISL\_490090|Original|hCoV-19^^Selangor|Human|Institute for Medical Research|Institute for Medical Research|Suppiah|Malaysia

>Spike|hCoV-19/Wales/PHWC-488D05/2020|2020-11-02|EPI\_ISL\_639494|Original|hCoV-19^^Wales|Human|Wales Specialist Virology Centre Sequencing lab|COVID-19 Genomics UK (COG-UK) Consortium|Moore|United Kingdom

>Spike|hCoV-19/England/LIVE-9EEB2/2020|2020-04-09|EPI\_ISL\_453405|Original|hCoV-19^^England|Human|Liverpool Clinical Laboratories|COVID-19 Genomics UK (COG-UK) Consortium|Haldenby|United Kingdom

>Spike|hCoV-19/USA/WI-GMF-26498/2020|2020-10-18|EPI\_ISL\_660954|Original|hCoV-19^^Wisconsin|Human|Gundersen Molecular Diagnostics Laboratory|Kabara Cancer Research Institute|Kenny|USA

>Spike|hCoV-19/England/BRIS-123006/2020|2020-04-02|EPI\_ISL\_440744|Original|hCoV-19^^England|Human|PHE South West Regional Laboratory|Wellcome Sanger Institute for the COVID-19 Genomics UK (COG-UK) consortium|Amato|United Kingdom

>Spike|hCoV-19/Scotland/EDB1363/2020|2020-04-10|EPI\_ISL\_491529|Original|hCoV-19^^Scotland|Human|Virology Department|Wellcome Sanger Institute for the COVID-19 Genomics UK (COG-UK) consortium|Davies|United Kingdom

>Spike|hCoV-19/England/QEUH-C33E59/2020|2020-12-11|EPI\_ISL\_734074|Original|hCoV-19^^England|Human|Lighthouse Lab in Glasgow|Wellcome Sanger Institute for the COVID-19 Genomics UK (COG-UK) Consortium|Davies|United Kingdom

>Spike|hCoV-19/Norway/3032/2020|2020-08-06|EPI\_ISL\_549055|Original|hCoV-19^^Oslo|Human|Furst Medical Laboratory|Norwegian Institute of Public Health|Kopperud Riis|Norway

>Spike|hCoV-19/England/QEUA-B32116/2020|2020-11-04|EPI\_ISL\_646339|Original|hCoV-19^^England|Human|Lighthouse Lab in Glasgow|Wellcome Sanger Institute for the COVID-19 Genomics UK (COG-UK) Consortium|Davies|United Kingdom

>Spike|hCoV-19/England/NORW-E8A00/2020|2020-00-00|EPI\_ISL\_448263|Original|hCoV-19^^England|Human|Quadram Institute Bioscience|COVID-19 Genomics UK (COG-UK) Consortium|Alikhan|United Kingdom

>Spike|hCoV-19/Denmark/DCGC-17612/2020|2020-12-14|EPI\_ISL\_751103|Original|hCoV-19^^Midtjylland|Human|Department of Virus and Microbiological Special Diagnostics|Albertsen Lab|Michaelsen|Denmark

>Spike|hCoV-19/USA/AZ-TG333630/2020|2020-05-27|EPI\_ISL\_694359|Original|hCoV-19^^Arizona|Human|TGen North|TGen North|French|USA

>Spike|hCoV-19/Denmark/DCGC-13768/2020|2020-11-30|EPI\_ISL\_713012|Original|hCoV-19^^Midtjylland|Human|Department of Virus and Microbiological Special Diagnostics|Albertsen Lab|Michaelsen|Denmark

>Spike|hCoV-19/England/ALDP-B45D0D/2020|2020-11-07|EPI\_ISL\_656275|Original|hCoV-19^^England|Human|Lighthouse Lab in Alderley Park|Wellcome Sanger Institute for the COVID-19 Genomics UK (COG-UK) Consortium|Davies|United Kingdom

>Spike|hCoV-19/Australia/VIC8047/2020|2020-08-12|EPI\_ISL\_564817|Original|hCoV-19^^Victoria|Human|Microbiological Diagnostic Unit - Public Health Laboratory (MDU-PHL)|MDU-PHL|Schultz|Australia

>Spike|hCoV-19/Panama/333242/2020|2020-03-25|EPI\_ISL\_496735|Original|hCoV-19^^Panama Center|Human|Gorgas Memorial Laboratory of Health Studies|Gorgas Memorial Laboratory of Health Studies|Martinez|Panama

>Spike|hCoV-19/England/ALDP-B48775/2020|2020-11-07|EPI\_ISL\_649402|Original|hCoV-19^^England|Human|Lighthouse Lab in Alderley Park|Wellcome Sanger Institute for the COVID-19 Genomics UK (COG-UK) Consortium|Davies|United Kingdom

>Spike|hCoV-19/England/QEUA-B12E8E/2020|2020-11-02|EPI\_ISL\_642690|Original|hCoV-19^^England|Human|Lighthouse Lab in Glasgow|Wellcome Sanger Institute for the COVID-19 Genomics UK (COG-UK) Consortium|Davies|United Kingdom

>Spike|hCoV-19/Australia/VIC5921/2020|2020-07-21|EPI\_ISL\_518700|Original|hCoV-19^^Victoria|Human|Microbiological Diagnostic Unit - Public Health Laboratory (MDU-PHL)|MDU-PHL|Schultz|Australia

>Spike|hCoV-19/England/MILK-9F036B/2020|2020-09-24|EPI\_ISL\_580653|Original|hCoV-19^^England|Human|Lighthouse Lab in Milton Keynes|Wellcome Sanger Institute for the COVID-19 Genomics UK (COG-UK) consortium|Davies|United Kingdom

>Spike|hCoV-19/USA/TX-HMH-MCoV-15340/2020|2020-10-19|EPI\_ISL\_786824|Original|hCoV-19^^Texas|Human|Houston Methodist Hospital|Houston Methodist Hospital|Long|USA

>Spike|hCoV-19/England/ALDP-9241CE/2020|2020-06-23|EPI\_ISL\_552981|Original|hCoV-19^^England|Human|Lighthouse Lab in Alderley Park|Wellcome Sanger Institute for the COVID-19 Genomics UK (COG-UK) consortium|Davies|United Kingdom

>Spike|hCoV-19/England/CAMB-75394/2020|2020-03-14|EPI\_ISL\_440419|Original|hCoV-19^^England|Human|Department of Pathology|Wellcome Sanger Institute for the COVID-19 Genomics UK (COG-UK) consortium|Amato|United Kingdom

>Spike|hCoV-19/Germany/NW-HHU-161/2020|2020-03-14|EPI\_ISL\_602530|Original|hCoV-19^^North Rhine-Westphalia|Human|Institute for Virology|Center of Medical Microbiology|Wienemann|Germany

>Spike|hCoV-19/England/QEUA-BA1042/2020|2020-11-18|EPI\_ISL\_719739|Original|hCoV-19^^England|Human|Lighthouse Lab in Glasgow|Wellcome Sanger Institute for the COVID-19 Genomics UK (COG-UK) Consortium|Davies|United Kingdom

>Spike|hCoV-19/England/CAMB-7FD50/2020|2020-04-20|EPI\_ISL\_444408|Original|hCoV-19^^England|Human|Department of Pathology|COVID-19 Genomics UK (COG-UK) Consortium|Meredith|United Kingdom

>Spike|hCoV-19/England/MILK-B59920/2020|2020-11-06|EPI\_ISL\_679886|Original|hCoV-19^^England|Human|Virology Department|COVID-19 Genomics UK (COG-UK) Consortium|de Silva|United Kingdom

>Spike|hCoV-19/Switzerland/UR-ETHZ-240078/2020|2020-08-10|EPI\_ISL\_523916|Original|hCoV-19^^Uri|Human|Viollier AG|Department of Biosystems Science and Engineering|Nadeau|Switzerland

>Spike|hCoV-19/Belgium/ULG-10987/2020|2020-10-25|EPI\_ISL\_707717|Original|hCoV-19^^Li\u00e8ge|Human|Department of Clinical Microbiology|GIGA Medical Genomics|Durkin|Belgium

>Spike|hCoV-19/Wales/PHWC-25357/2020|2020-03-23|EPI\_ISL\_432188|Original|hCoV-19^^Wales|Human|Wales Specialist Virology Centre|Public Health Wales Microbiology Cardiff|Moore|United Kingdom

>Spike|hCoV-19/England/MILK-9D4D7E/2020|2020-09-19|EPI\_ISL\_601533|Original|hCoV-19^^England|Human|Lighthouse Lab in Milton Keynes|Wellcome Sanger Institute for the COVID-19 Genomics UK (COG-UK) consortium|Davies|United Kingdom

>Spike|hCoV-19/England/SHEF-C3740/2020|2020-04-30|EPI\_ISL\_475369|Original|hCoV-19^^England|Human|Virology Department|COVID-19 Genomics UK (COG-UK) Consortium|de Silva|United Kingdom

>Spike|hCoV-19/Wales/PHWC-494902/2020|2020-11-20|EPI\_ISL\_726187|Original|hCoV-19^^Wales|Human|Originating lab|COVID-19 Genomics UK (COG-UK) Consortium|Moore|United Kingdom

>Spike|hCoV-19/England/BIRM-615A4/2020|2020-04-28|EPI\_ISL\_477780|Original|hCoV-19^^England|Human|University of Birmingham|COVID-19 Genomics UK (COG-UK) Consortium|Loman|United Kingdom

>Spike|hCoV-19/Australia/VIC13252/2020|2020-07-30|EPI\_ISL\_592218|Original|hCoV-19^^Victoria|Human|Microbiological Diagnostic Unit - Public Health Laboratory (MDU-PHL)|MDU-PHL|Schultz|Australia

>Spike|hCoV-19/England/MILK-836B71/2020|2020-07-11|EPI\_ISL\_557195|Original|hCoV-19^^England|Human|Lighthouse Lab in Milton Keynes|Wellcome Sanger Institute for the COVID-19 Genomics UK (COG-UK) consortium|Davies|United Kingdom

>Spike|hCoV-19/England/QEUEH-B11906/2020|2020-11-02|EPI\_ISL\_642423|Original|hCoV-19^^England|Human|Lighthouse Lab in Glasgow|Wellcome Sanger Institute for the COVID-19 Genomics UK (COG-UK) Consortium|Davies|United Kingdom

>Spike|hCoV-19/Switzerland/ZH-ETHZ-110044/2020|2020-04-01|EPI\_ISL\_486477|Original|hCoV-19^^Zurich|Human|Viollier AG|Department of Biosystems Science and Engineering|Nadeau|Switzerland

>Spike|hCoV-19/England/QEUEH-C332D5/2020|2020-12-11|EPI\_ISL\_733931|Original|hCoV-19^^England|Human|Lighthouse Lab in Glasgow|Wellcome Sanger Institute for the COVID-19 Genomics UK (COG-UK) Consortium|Davies|United Kingdom

>Spike|hCoV-19/USA/WA-S1657/2020|2020-05-29|EPI\_ISL\_496083|Original|hCoV-19^^Washington|Human|Washington State Department of Health|Seattle Flu Study|Lee|USA

>Spike|hCoV-19/Scotland/EDB2805/2020|2020-03-30|EPI\_ISL\_488947|Original|hCoV-19^^Scotland|Human|Virology Department|Wellcome Sanger Institute for the COVID-19 Genomics UK (COG-UK) consortium|Davies|United Kingdom

>Spike|hCoV-19/England/MILK-CA6817/2020|2020-12-16|EPI\_ISL\_761583|Original|hCoV-19^^England|Human|Lighthouse Lab in Milton Keynes|Wellcome Sanger Institute for the COVID-19 Genomics UK (COG-UK) Consortium|Davies|United Kingdom

>Spike|hCoV-19/England/ALDP-8FB2BF/2020|2020-06-24|EPI\_ISL\_551388|Original|hCoV-19^^England|Human|Lighthouse Lab in Alderley Park|Wellcome Sanger Institute for the COVID-19 Genomics UK (COG-UK) consortium|Davies|United Kingdom

>Spike|hCoV-19/England/QEUEH-C31741/2020|2020-12-10|EPI\_ISL\_731432|Original|hCoV-19^^England|Human|Lighthouse Lab in Glasgow|Wellcome Sanger Institute for the COVID-19 Genomics UK (COG-UK) Consortium|Davies|United Kingdom

>Spike|hCoV-19/Spain/MD-IBV-99008621/2020|2020-09-14|EPI\_ISL\_654197|Original|hCoV-19^^Madrid|Human|Hospital General Universitario Gregorio Mara\u00f1a|SeqCOVID-SPAIN consortium|IBV (CSIC)|Comas|Spain

>Spike|hCoV-19/England/QEUEH-9A4630/2020|2020-09-01|EPI\_ISL\_540198|Original|hCoV-19^^England|Human|Lighthouse Lab in Glasgow|Wellcome Sanger Institute for the COVID-19 Genomics UK (COG-UK) consortium|Davies|United Kingdom

>Spike|hCoV-19/England/LIVE-9BDB8/2020|2020-04-19|EPI\_ISL\_440918|Original|hCoV-19^^England|Human|Liverpool Clinical Laboratories|COVID-19 Genomics UK (COG-UK) Consortium|Haldenby|United Kingdom

>Spike|hCoV-19/England/ALDP-6D03EC/2020|2020-07-02|EPI\_ISL\_556194|Original|hCoV-19^^England|Human|Lighthouse Lab in Alderley Park|Wellcome Sanger Institute for the COVID-19 Genomics UK (COG-UK) consortium|Davies|United Kingdom



>Spike|hCoV-19/USA/NY-PV09425/2020|2020-03-14|EPI\_ISL\_450103|Original|hCoV-19^^New York|Human|MSHS Clinical Microbiology Laboratories|MSHS Pathogen Surveillance Program|van Bakel|USA

>Spike|hCoV-19/Wales/PHWC-16BB89/2020|2020-09-19|EPI\_ISL\_573949|Original|hCoV-19^^Wales|Human|Wales Specialist Virology Centre Sequencing lab|COVID-19 Genomics UK (COG-UK) Consortium|Moore|United Kingdom

>Spike|hCoV-19/South Africa/KRISP-K002281/2020|2020-07-21|EPI\_ISL\_515661|Original|hCoV-19^^KwaZulu-Natal|Human|NHLS-IALCH|KRISP|de Oliveira|South Africa

>Spike|hCoV-19/England/LIVE-DC1208/2020|2020-11-01|EPI\_ISL\_665140|Original|hCoV-19^^England|Human|Liverpool Clinical Laboratories|COVID-19 Genomics UK (COG-UK) Consortium|Haldenby|United Kingdom

>Spike|hCoV-19/Denmark/DCGC-6002/2020|2020-09-28|EPI\_ISL\_621111|Original|hCoV-19^^Midtjylland|Human|Department of Virus and Microbiological Special Diagnostics|Albertsen lab|Michaelsen|Denmark

>Spike|hCoV-19/England/ALDP-A66C64/2020|2020-10-12|EPI\_ISL\_630559|Original|hCoV-19^^England|Human|Lighthouse Lab in Alderley Park|Wellcome Sanger Institute for the COVID-19 Genomics UK (COG-UK) consortium|Davies|United Kingdom

>Spike|hCoV-19/Canada/MB-NML-878/2020|2020-03-31|EPI\_ISL\_582354|Original|hCoV-19^^Manitoba|Human|Cadham Provincial Laboratory|National Microbiology Laboratory (NML)|Majer|Canada

>Spike|hCoV-19/England/MILK-B39DDF/2020|2020-11-01|EPI\_ISL\_679667|Original|hCoV-19^^England|Human|Oxford Viromics|COVID-19 Genomics UK (COG-UK) Consortium|Golubchik|United Kingdom

>Spike|hCoV-19/Wales/ALDP-B24BBF/2020|2020-11-04|EPI\_ISL\_711010|Original|hCoV-19^^Wales|Human|Lighthouse Lab in Alderley Park|Wellcome Sanger Institute for the COVID-19 Genomics UK (COG-UK) Consortium|Davies|United Kingdom

>Spike|hCoV-19/England/QEUE-9BB038/2020|2020-09-07|EPI\_ISL\_573646|Original|hCoV-19^^England|Human|Oxford Viromics|COVID-19 Genomics UK (COG-UK) Consortium|Golubchik|United Kingdom

>Spike|hCoV-19/USA/NY-Wadsworth-264185-01/2020|2020-11-05|EPI\_ISL\_734422|Original|hCoV-19^^New York|Human|Wadsworth Center|Wadsworth Center|Lasek-Nesselquist|USA

>Spike|hCoV-19/Denmark/DCGC-22338/2020|2020-12-14|EPI\_ISL\_757847|Original|hCoV-19^^Hovedstaden|Human|Department of Virus and Microbiological Special Diagnostics|Albertsen Lab|Michaelsen|Denmark

>Spike|hCoV-19/USA/WA-UW-9819/2020|2020-05-26|EPI\_ISL\_501164|Original|hCoV-19^^Washington|Human|University of Washington Virology Lab|University of Washington Virology Lab|Roychoudhury|USA

>Spike|hCoV-19/England/BRIS-12D0C0/2020|2020-04-25|EPI\_ISL\_481964|Original|hCoV-19^^England|Human|PHE South West Regional Laboratory|Wellcome Sanger Institute for the COVID-19 Genomics UK (COG-UK) consortium|Davies|United Kingdom

>Spike|hCoV-19/England/BRIS-12706C/2020|2020-04-23|EPI\_ISL\_469713|Original|hCoV-19^^England|Human|PHE South West Regional Laboratory|Wellcome Sanger Institute for the COVID-19 Genomics UK (COG-UK) consortium|Davies|United Kingdom

>Spike|hCoV-19/Spain/VC-FISABIO-44/2020|2020-03-12|EPI\_ISL\_420128|Original|hCoV-19^^Comunitat Valenciana|Human|Servicio de Microbiologia. Hospital Clinico Universitario de Valencia|Sequencing and Bioinformatics Service and Molecular Epidemiology Research Group. FISABIO-Public Health|Gonzalez-Candelas|Spain

>Spike|hCoV-19/England/CAMC-94971C/2020|2020-07-22|EPI\_ISL\_556771|Original|hCoV-19^^England|Human|Lighthouse Lab in Cambridge|Wellcome Sanger Institute for the COVID-19 Genomics UK (COG-UK) consortium|Davies|United Kingdom

>Spike|hCoV-19/England/OXON-B32BB/2020|2020-04-22|EPI\_ISL\_534848|Original|hCoV-19^^England|Human|Oxford Viromics|COVID-19 Genomics UK (COG-UK) Consortium|Golubchik|United Kingdom

>Spike|hCoV-19/Canada/BC\_19100589/2020|2020-04-00|EPI\_ISL\_469216|Original|hCoV-19^^British Columbia|Human|BCCDC Public Health Laboratory|BCCDC Public Health Laboratory|Harrigan|Canada

>Spike|hCoV-19/England/QEUA-969C71/2020|2020-08-12|EPI\_ISL\_530859|Original|hCoV-19^^England|Human|Lighthouse Lab in Glasgow|Wellcome Sanger Institute for the COVID-19 Genomics UK (COG-UK) consortium|Davies|United Kingdom

>Spike|hCoV-19/Japan/PG-7558/2020|2020-06-00|EPI\_ISL\_686660|Original|hCoV-19^^Japan|Human|Chiba Prefectural Institute of Public Health|Pathogen Genomics Center|Sekizuka|Japan

>Spike|hCoV-19/USA/TX-HMH-MCoV-10687/2020|2020-07-08|EPI\_ISL\_789589|Original|hCoV-19^^Texas|Human|Houston Methodist Hospital|Houston Methodist Hospital|Long|USA

>Spike|hCoV-19/Australia/NSW311/2020|2020-03-29|EPI\_ISL\_451575|Original|hCoV-19^^New South Wales|Human|Pathology West - NSW Health Pathology|NSW Health Pathology - Institute of Clinical Pathology and Medical Research; Westmead Hospital; University of Sydney|Gall|Australia

>Spike|hCoV-19/Wales/PHWC-32287/2020|2020-04-09|EPI\_ISL\_446625|Original|hCoV-19^^Wales|Human|Wales Specialist Virology Centre|Public Health Wales Microbiology Cardiff|Moore|United Kingdom

>Spike|hCoV-19/England/QEUA-AAACA0/2020|2020-10-21|EPI\_ISL\_652740|Original|hCoV-19^^England|Human|Oxford Viromics|COVID-19 Genomics UK (COG-UK) Consortium|Golubchik|United Kingdom

>Spike|hCoV-19/Colombia/ATL-INS-020202/2020|2020-10-10|EPI\_ISL\_739682|Original|hCoV-19^^Atlantico|Human|Instituto Nacional de Salud|Instituto Nacional de Salud|Franco-Mu\u00f1oz|Colombia

>Spike|hCoV-19/USA/NY-QDX-858/2020|2020-03-16|EPI\_ISL\_571665|Original|hCoV-19^^New York|Human|Quest Diagnostics|Quest Diagnostics|Kagan|USA

>Spike|hCoV-19/Denmark/DCGC-14553/2020|2020-11-30|EPI\_ISL\_711835|Original|hCoV-19^^Hovedstaden|Human|Department of Virus and Microbiological Special Diagnostics|Albertsen Lab|Michaelsen|Denmark

>Spike|hCoV-19/Australia/VIC5089/2020|2020-07-17|EPI\_ISL\_519892|Original|hCoV-19^^Victoria|Human|Microbiological Diagnostic Unit - Public Health Laboratory (MDU-PHL)|MDU-PHL|Schultz|Australia

>Spike|hCoV-19/England/ALDP-9CAF39/2020|2020-09-16|EPI\_ISL\_575674|Original|hCoV-19^^England|Human|Lighthouse Lab in Alderley Park|Wellcome Sanger Institute for the COVID-19 Genomics UK (COG-UK) consortium|Davies|United Kingdom

>Spike|hCoV-19/England/CAMC-A596C0/2020|2020-10-09|EPI\_ISL\_597027|Original|hCoV-19^^England|Human|Lighthouse Lab in Cambridge|Wellcome Sanger Institute for the COVID-19 Genomics UK (COG-UK) consortium|Davies|United Kingdom

>Spike|hCoV-19/Denmark/DCGC-8500/2020|2020-10-26|EPI\_ISL\_625925|Original|hCoV-19^^Syddanmark|Human|Department of Virus and Microbiological Special Diagnostics|Albertsen lab|Michaelsen|Denmark

>Spike|hCoV-19/England/LIVE-A975F/2020|2020-07-08|EPI\_ISL\_526390|Original|hCoV-19^^England|Human|Liverpool Clinical Laboratories|COVID-19 Genomics UK (COG-UK) Consortium|Haldenby|United Kingdom

>Spike|hCoV-19/England/SHEF-CDF8/2020|2020-10-14|EPI\_ISL\_611650|Original|hCoV-19^^England|Human|Virology Department|COVID-19 Genomics UK (COG-UK) Consortium|de Silva|United Kingdom

>Spike|hCoV-19/Denmark/DCGC-22648/2020|2020-12-14|EPI\_ISL\_757687|Original|hCoV-19^^Hovedstaden|Human|Department of Virus and Microbiological Special Diagnostics|Albertsen Lab|Michaelsen|Denmark

>Spike|hCoV-19/Switzerland/BS-ETHZ-100111/2020|2020-03-16|EPI\_ISL\_451695|Original|hCoV-19^^Basel-Stadt|Human|Viollier AG|Department of Biosystems Science and Engineering|Nadeau|Switzerland

>Spike|hCoV-19/Australia/VIC17469/2020|2020-08-19|EPI\_ISL\_663898|Original|hCoV-19^^Victoria|Human|Microbiological Diagnostic Unit - Public Health Laboratory (MDU-PHL)|MDU-PHL|Schultz|Australia

>Spike|hCoV-19/Wales/PHWC-168F62/2020|2020-05-04|EPI\_ISL\_499372|Original|hCoV-19^^Wales|Human|Originating lab|COVID-19 Genomics UK (COG-UK) Consortium|Moore|United Kingdom

>Spike|hCoV-19/Brazil/SP-697/2020|2020-06-30|EPI\_ISL\_693239|Original|hCoV-19^^S\u00e3o Paulo|Human|Secao Centro de Diagnostico Secedi|Instituto Adolfo Lutz|Sacchi|Brazil

>Spike|hCoV-19/Denmark/DCGC-7476/2020|2020-10-12|EPI\_ISL\_619377|Original|hCoV-19^^Midtjylland|Human|Department of Virus and Microbiological Special Diagnostics|Albertsen lab|Michaelsen|Denmark

>Spike|hCoV-19/Netherlands/ZE-EMC-66/2020|2020-00-00|EPI\_ISL\_523565|Original|hCoV-19^^Zeeland|Human|Dutch COVID-19 response team|Erasmus Medical Center|Oude Munnink|Netherlands

>Spike|hCoV-19/France/ARA-62546/2020|2020-08-20|EPI\_ISL\_683375|Original|hCoV-19^^Auvergne-Rh\u00f4ne-Alpes|Human|CNR Virus des Infections Respiratoires - France SUD|CNR Virus des Infections Respiratoires - France SUD|Bal|France

>Spike|hCoV-19/USA/TX-HMH-6599/2020|2020-06-24|EPI\_ISL\_546117|Original|hCoV-19^^Texas|Human|Houston Methodist Hospital|Houston Methodist Hospital|Long|USA

>Spike|hCoV-19/Denmark/DCGC-17277/2020|2020-12-14|EPI\_ISL\_750874|Original|hCoV-19^^Midtjylland|Human|Department of Virus and Microbiological Special Diagnostics|Albertsen Lab|Michaelsen|Denmark

>Spike|hCoV-19/Belgium/ULG-10659/2020|2020-10-26|EPI\_ISL\_636636|Original|hCoV-19^^Li\u00e8ge|Human|Department of Clinical Microbiology|GIGA Medical Genomics|Durkin|Belgium

>Spike|hCoV-19/Denmark/DCGC-21000/2020|2020-12-21|EPI\_ISL\_758856|Original|hCoV-19^^Syddanmark|Human|Department of Virus and Microbiological Special Diagnostics|Albertsen Lab|Michaelsen|Denmark

>Spike|hCoV-19/Japan/PG-6547/2020|2020-08-00|EPI\_ISL\_687661|Original|hCoV-19^^Japan|Human|Pathogen Genomics Center|Pathogen Genomics Center|Sekizuka|Japan

>Spike|hCoV-19/Australia/NSW367/2020|2020-04-14|EPI\_ISL\_451628|Original|hCoV-19^^New South Wales|Human|Pathology West - NSW Health Pathology|NSW Health Pathology - Institute of Clinical Pathology and Medical Research; Westmead Hospital; University of Sydney|Gall|Australia

>Spike|hCoV-19/Australia/VIC4424/2020|2020-07-17|EPI\_ISL\_519720|Original|hCoV-19^^Victoria|Human|Microbiological Diagnostic Unit - Public Health Laboratory (MDU-PHL)|MDU-PHL|Schultz|Australia

>Spike|hCoV-19/USA/CA-ALSR-3139/2020|2020-08-19|EPI\_ISL\_635869|Original|hCoV-19^^California|Human|San Diego County Public Health Laboratory|Andersen lab at Scripps Research|Gangavarapu|USA

>Spike|hCoV-19/Wales/PHWC-49BF63/2020|2020-12-06|EPI\_ISL\_742486|Original|hCoV-19^^Wales|Human|Wales Specialist Virology Centre Sequencing lab|COVID-19 Genomics UK (COG-UK) Consortium|Moore|United Kingdom

>Spike|hCoV-19/USA/TX-HMH-MCoV-9235/2020|2020-07-03|EPI\_ISL\_781013|Original|hCoV-19^^Texas|Human|Houston Methodist Hospital|Houston Methodist Hospital|Long|USA

>Spike|hCoV-19/England/EXET-135A6D/2020|2020-04-09|EPI\_ISL\_457130|Original|hCoV-19^^England|Human|University of Exeter|COVID-19 Genomics UK (COG-UK) Consortium|Temperton|United Kingdom

>Spike|hCoV-19/England/ALDP-A70177/2020|2020-10-15|EPI\_ISL\_608287|Original|hCoV-19^^England|Human|Lighthouse Lab in Alderley Park|Wellcome Sanger Institute for the COVID-19 Genomics UK (COG-UK) consortium|Davies|United Kingdom

>Spike|hCoV-19/Lithuania/MR-LUHS-Eilnr235011/2020|2020-12-17|EPI\_ISL\_770501|Original|hCoV-19^^Kauno apskritis|Human|Lithuanian University of Health Sciences Hospital|Lithuanian University of Health Sciences|Zemaitis|Lithuania

>Spike|hCoV-19/England/QEUH-95F704/2020|2020-08-05|EPI\_ISL\_532428|Original|hCoV-19^^England|Human|Lighthouse Lab in Glasgow|Wellcome Sanger Institute for the COVID-19 Genomics UK (COG-UK) consortium|Davies|United Kingdom

>Spike|hCoV-19/USA/UT-UPHL-2012256510/2020|2020-08-11|EPI\_ISL\_745928|Original|hCoV-19^^Utah|Human|Ginkgo Bioworks Clinical Laboratory|Utah Public Health Laboratory|Young|USA

>Spike|hCoV-19/Belgium/reg-0409560/2020|2020-04-09|EPI\_ISL\_734550|Original|hCoV-19^^Saint-Giles|Human|UZ Leuven|KU Leuven|Maes|Belgium

>Spike|hCoV-19/Wales/PHWC-49D338/2020|2020-12-10|EPI\_ISL\_742766|Original|hCoV-19^^Wales|Human|Wales Specialist Virology Centre Sequencing lab|COVID-19 Genomics UK (COG-UK) Consortium|Moore|United Kingdom

>Spike|hCoV-19/England/ALDP-8E60DB/2020|2020-06-25|EPI\_ISL\_556603|Original|hCoV-19^^England|Human|Lighthouse Lab in Alderley Park|Wellcome Sanger Institute for the COVID-19 Genomics UK (COG-UK) consortium|Davies|United Kingdom

>Spike|hCoV-19/Japan/PG-5359/2020|2020-08-00|EPI\_ISL\_690462|Original|hCoV-19^^Japan|Human|Fukuoka Institute of Health and Environmental Sciences|Pathogen Genomics Center|Sekizuka|Japan

>Spike|hCoV-19/Israel/CVL-n-6142/2020|2020-03-15|EPI\_ISL\_475015|Original|hCoV-19^^Haifa|Human|Israel Central Virology laboratory|Israel Central Virology laboratory|Zuckerman|Israel

>Spike|hCoV-19/England/QEUEH-B3F43E/2020|2020-11-08|EPI\_ISL\_658480|Original|hCoV-19^^England|Human|Lighthouse Lab in Glasgow|Wellcome Sanger Institute for the COVID-19 Genomics UK (COG-UK) Consortium|Davies|United Kingdom

>Spike|hCoV-19/Canada/ON-PHL-20-01249/2020|2020-06-00|EPI\_ISL\_548871|Original|hCoV-19^^Ontario|Human|Public Health Ontario Laboratory|Public Health Ontario Laboratory|Guthrie|Canada

>Spike|hCoV-19/England/QEUEH-9CA31F/2020|2020-09-13|EPI\_ISL\_567282|Original|hCoV-19^^England|Human|Lighthouse Lab in Glasgow|Wellcome Sanger Institute for the COVID-19 Genomics UK (COG-UK) consortium|Davies|United Kingdom

>Spike|hCoV-19/Wales/PHWC-162E4D/2020|2020-05-28|EPI\_ISL\_473208|Original|hCoV-19^^Wales|Human|Wales Specialist Virology Centre Sequencing lab|COVID-19 Genomics UK (COG-UK) Consortium|Moore|United Kingdom

>Spike|hCoV-19/Japan/PG-2650/2020|2020-04-00|EPI\_ISL\_690782|Original|hCoV-19^^Japan|Human|Pathogen Genomics Center|Pathogen Genomics Center|Sekizuka|Japan

>Spike|hCoV-19/England/NORW-E9049/2020|2020-04-24|EPI\_ISL\_453577|Original|hCoV-19^^England|Human|Quadram Institute Bioscience|COVID-19 Genomics UK (COG-UK) Consortium|Alikhan|United Kingdom

>Spike|hCoV-19/England/ALDP-981F7A/2020|2020-08-09|EPI\_ISL\_552741|Original|hCoV-19^^England|Human|Lighthouse Lab in Alderley Park|Wellcome Sanger Institute for the COVID-19 Genomics UK (COG-UK) consortium|Davies|United Kingdom

>Spike|hCoV-19/England/EXET-13547E/2020|2020-04-06|EPI\_ISL\_457063|Original|hCoV-19^^England|Human|University of Exeter|COVID-19 Genomics UK (COG-UK) Consortium|Temperton|United Kingdom

>Spike|hCoV-19/USA/MN-MDH-1363/2020|2020-04-22|EPI\_ISL\_507952|Original|hCoV-19^^Minnesota|Human|Minnesota Department of Health|Minnesota Department of Health|Garfin|USA

>Spike|hCoV-19/England/NORT-283CE1/2020|2020-04-03|EPI\_ISL\_478522|Original|hCoV-19^^England|Human|Northumbria University / South Tees Hospitals NHS Foundation Trust / North Cumbria Integrated Care NHS Foundation Trust / North Tees and Hartlepool NHS Foundation Trust / Newcastle Hospitals NHS Foundation Trust|COVID-19 Genomics UK (COG-UK) Consortium|Bashton|United Kingdom

>Spike|hCoV-19/England/ALDP-9D78D4/2020|2020-09-18|EPI\_ISL\_576597|Original|hCoV-19^^England|Human|Oxford Viromics|COVID-19 Genomics UK (COG-UK) Consortium|Golubchik|United Kingdom

>Spike|hCoV-19/Japan/PG-6770/2020|2020-08-00|EPI\_ISL\_687880|Original|hCoV-19^^Japan|Human|Pathogen Genomics Center|Pathogen Genomics Center|Sekizuka|Japan

>Spike|hCoV-19/United Arab Emirates/1012/2020|2020-06-11|EPI\_ISL\_699144|Original|hCoV-19^^Abu Dhabi|Human|Group 42 (G42) Healthcare|G42 Healthcare|Ogrodzki|United Arab Emirates

>Spike|hCoV-19/Spain/PV-IBV-000856/2020|2020-03-11|EPI\_ISL\_452696|Original|hCoV-19^^Basque Country|Human|Hospital Universitario Araba. Vitoria-Gasteiz,|SeqCOVID-SPAIN consortium/IBV (CSIC)|Comas|Spain

>Spike|hCoV-19/USA/CA-CHLA-PLM04668722/2020|2020-11-30|EPI\_ISL\_753425|Original|hCoV-19^^California|Human|Clinical virology Laboratory|Center for Personalized Medicine|Dien Bard|USA

>Spike|hCoV-19/England/MILK-B8D20A/2020|2020-11-13|EPI\_ISL\_674091|Original|hCoV-19^^England|Human|Lighthouse Lab in Milton Keynes|Wellcome Sanger Institute for the COVID-19 Genomics UK (COG-UK) Consortium|Davies|United Kingdom

>Spike|hCoV-19/Canada/ON-SK-20H-329MM0239/2020|2020-11-24|EPI\_ISL\_791509|Original|hCoV-19^^Ontario|Human|The Hospital for Sick Children|The Hospital for Sick Children|Lau|Canada

>Spike|hCoV-19/South Africa/KRISP-K004290/2020|2020-07-29|EPI\_ISL\_660171|Original|hCoV-19^^KwaZulu-Natal|Human|NHLS-IALCH|KRISP|de Oliveira|South Africa

>Spike|hCoV-19/Mexico/CMX-INdRE-13/2020|2020-03-21|EPI\_ISL\_455437|Original|hCoV-19^^Mexico City|Human|Instituto de Diagnostico y Referencia Epidemiologicos (INDRE)|Instituto de Diagnostico y Referencia Epidemiologicos (INDRE)|Mendieta|Mexico

>Spike|hCoV-19/England/QEUH-963AAA/2020|2020-08-10|EPI\_ISL\_531496|Original|hCoV-19^^England|Human|Lighthouse Lab in Glasgow|Wellcome Sanger Institute for the COVID-19 Genomics UK (COG-UK) consortium|Davies|United Kingdom

>Spike|hCoV-19/Wales/PHWC-47DEE2/2020|2020-10-12|EPI\_ISL\_595378|Original|hCoV-19^^Wales|Human|Originating lab|COVID-19 Genomics UK (COG-UK) Consortium|Moore|United Kingdom

>Spike|hCoV-19/Australia/WA279/2020|2020-03-25|EPI\_ISL\_596822|Original|hCoV-19^^Western Australia|Human|PathWest Laboratory Medicine WA|PathWest Laboratory Medicine WA Microbial Surveillance Unit|Sikazwe|Australia

>Spike|hCoV-19/England/CAMB-1BABE5/2020|2020-11-12|EPI\_ISL\_664785|Original|hCoV-19^^England|Human|Department of Pathology|COVID-19 Genomics UK (COG-UK) Consortium|Goodfellow|United Kingdom

>Spike|hCoV-19/England/CAMC-B51ABC/2020|2020-11-08|EPI\_ISL\_658138|Original|hCoV-19^^England|Human|Lighthouse Lab in Cambridge|Wellcome Sanger Institute for the COVID-19 Genomics UK (COG-UK) Consortium|Davies|United Kingdom

>Spike|hCoV-19/USA/CA-ALSR-1736/2020|2020-05-21|EPI\_ISL\_512159|Original|hCoV-19^^California|Human|San Diego County Public Health Laboratory|Andersen lab at Scripps Research|Gangavarapu|USA

>Spike|hCoV-19/USA/OR-OHSU-1675/2020|2020-07-22|EPI\_ISL\_525999|Original|hCoV-19^^Oregon|Human|OHSU Lab Services Molecular Microbiology Lab|Oregon SARS-CoV-2 Genome Sequencing Center|O'Roak|USA

>Spike|hCoV-19/Australia/VIC8463/2020|2020-07-28|EPI\_ISL\_565033|Original|hCoV-19^^Victoria|Human|Microbiological Diagnostic Unit - Public Health Laboratory (MDU-PHL)|MDU-PHL|Schultz|Australia

>Spike|hCoV-19/Denmark/DCGC-14279/2020|2020-11-30|EPI\_ISL\_711669|Original|hCoV-19^^Syddanmark|Human|Department of Virus and Microbiological Special Diagnostics|Albertsen Lab|Michaelsen|Denmark

>Spike|hCoV-19/Belgium/GGO-0327349/2020|2020-03-27|EPI\_ISL\_462203|Original|hCoV-19^^Brugge|Human|KU Leuven|KU Leuven|Maes|Belgium

>Spike|hCoV-19/India/MH-BJMC-9065/2020|2020-06-04|EPI\_ISL\_728262|Original|hCoV-19^^Maharashtra|Human|B.J. Govt. Medical College|National Centre For Cell Science|Paul|India

>Spike|hCoV-19/France/PAC-MEPHI-0312/2020|2020-03-24|EPI\_ISL\_644404|Original|hCoV-19^^Provence-Alpes-Cote-d\u2019Azur|Human|MEPHI|MEPHI|Levasseur|France

>Spike|hCoV-19/England/ALDP-97F80B/2020|2020-08-05|EPI\_ISL\_526338|Original|hCoV-19^^England|Human|Queens Medical Centre|COVID-19 Genomics UK (COG-UK) Consortium|Loose|United Kingdom

>Spike|hCoV-19/Ireland/CO-NVRL-78IRL73073/2020|2020-11-23|EPI\_ISL\_752562|Original|hCoV-19^^Cork|Human|National Virus Reference Laboratory|National Virus Reference Laboratory|Gonzalez|Ireland

>Spike|hCoV-19/Denmark/DCGC-4887/2020|2020-09-21|EPI\_ISL\_621573|Original|hCoV-19^^Midtjylland|Human|Department of Virus and Microbiological Special Diagnostics|Albertsen lab|Michaelsen|Denmark

>Spike|hCoV-19/England/MILK-9E3170/2020|2020-09-20|EPI\_ISL\_581363|Original|hCoV-19^^England|Human|Lighthouse Lab in Milton Keynes|Wellcome Sanger Institute for the COVID-19 Genomics UK (COG-UK) consortium|Davies|United Kingdom

>Spike|hCoV-19/USA/DE-DHSS-F917785/2020|2020-03-24|EPI\_ISL\_576169|Original|hCoV-19^^Delaware|Human|Delaware Public Health Lab|Delaware Public Health Lab|Bajwa|USA

>Spike|hCoV-19/USA/GA-EHC-083E/2020|2020-03-09|EPI\_ISL\_454690|Original|hCoV-19^^Georgia|Human|Emory Molecular Diagnostics Laboratory|Piantadosi Lab|Piantadosi|USA

>Spike|hCoV-19/England/ALDP-B5BB0A/2020|2020-11-10|EPI\_ISL\_655549|Original|hCoV-19^^England|Human|Lighthouse Lab in Alderley Park|Wellcome Sanger Institute for the COVID-19 Genomics UK (COG-UK) Consortium|Davies|United Kingdom

>Spike|hCoV-19/Wales/PHWC-47E519/2020|2020-10-12|EPI\_ISL\_595466|Original|hCoV-19^^Wales|Human|Originating lab|COVID-19 Genomics UK (COG-UK) Consortium|Moore|United Kingdom

>Spike|hCoV-19/Wales/PHWC-168CF2/2020|2020-04-18|EPI\_ISL\_494355|Original|hCoV-19^^Wales|Human|Originating lab|COVID-19 Genomics UK (COG-UK) Consortium|Moore|United Kingdom

>Spike|hCoV-19/England/ALDP-C3C70A/2020|2020-12-10|EPI\_ISL\_731608|Original|hCoV-19^^England|Human|Lighthouse Lab in Alderley Park|Wellcome Sanger Institute for the COVID-19 Genomics UK (COG-UK) Consortium|Davies|United Kingdom

>Spike|hCoV-19/England/NORW-EFEFE/2020|2020-10-07|EPI\_ISL\_595163|Original|hCoV-19^^England|Human|Quadram Institute Bioscience|COVID-19 Genomics UK (COG-UK) Consortium|Alikhan|United Kingdom

>Spike|hCoV-19/Thailand/Bangkok-CONI-0129/2020|2020-03-12|EPI\_ISL\_455923|Original|hCoV-19^^Bangkok|Human|Ramathibodi Hospital|COVID-19 Network Investigations (CONI) Alliance|Batty|Thailand

>Spike|hCoV-19/USA/NY-PV09067/2020|2020-03-20|EPI\_ISL\_421616|Original|hCoV-19^^New York|Human|MSHS Clinical Microbiology Laboratories|MSHS Pathogen Surveillance Program|van Bakel|USA

>Spike|hCoV-19/England/ALDP-A6E2E2/2020|2020-10-15|EPI\_ISL\_607011|Original|hCoV-19^^England|Human|Lighthouse Lab in Alderley Park|Wellcome Sanger Institute for the COVID-19 Genomics UK (COG-UK) consortium|Davies|United Kingdom

>Spike|hCoV-19/England/CAMC-BC0E9E/2020|2020-11-22|EPI\_ISL\_705097|Original|hCoV-19^^England|Human|Lighthouse Lab in Cambridge|Wellcome Sanger Institute for the COVID-19 Genomics UK (COG-UK) Consortium|Davies|United Kingdom

>Spike|hCoV-19/USA/TX-HMH-3693/2020|2020-06-16|EPI\_ISL\_543112|Original|hCoV-19^^Texas|Human|Houston Methodist Hospital|Houston Methodist Hospital|Long|USA

>Spike|hCoV-19/England/MILK-9A52A4/2020|2020-09-04|EPI\_ISL\_550253|Original|hCoV-19^^England|Human|Lighthouse Lab in Milton Keynes|Wellcome Sanger Institute for the COVID-19 Genomics UK (COG-UK) consortium|Davies|United Kingdom

>Spike|hCoV-19/England/QEUH-B2DF6F/2020|2020-11-04|EPI\_ISL\_659928|Original|hCoV-19^^England|Human|Lighthouse Lab in Glasgow|Wellcome Sanger Institute for the COVID-19 Genomics UK (COG-UK) Consortium|Davies|United Kingdom

>Spike|hCoV-19/Russia/StPetersburg-RII6043S/2020|2020-04-14|EPI\_ISL\_430103|Original|hCoV-19^^Saint Petersburg|Human|WHO National Influenza Centre Russian Federation|WHO National Influenza Centre Russian Federation|Komissarov|Russia

>Spike|hCoV-19/Wales/PHWC-16428B/2020|2020-05-11|EPI\_ISL\_474152|Original|hCoV-19^^Wales|Human|Originating lab|COVID-19 Genomics UK (COG-UK) Consortium|Moore|United Kingdom

>Spike|hCoV-19/Wales/PHWC-487331/2020|2020-10-14|EPI\_ISL\_637327|Original|hCoV-19^^Wales|Human|Wales Specialist Virology Centre Sequencing lab|COVID-19 Genomics UK (COG-UK) Consortium|Moore|United Kingdom

>Spike|hCoV-19/Canada/QC-LSPQ-L00237747/2020|2020-03-25|EPI\_ISL\_536194|Original|hCoV-19^^Quebec|Human|H\u00f4pital Charles-LeMoyn\u00e9|Laboratoire de sant\u00e9 publique du Qu\u00e9bec|Moreira|Canada

>Spike|hCoV-19/Netherlands/NB-EMC-205/2020|2020-00-00|EPI\_ISL\_523328|Original|hCoV-19^^Noord Brabant|Human|Dutch COVID-19 response team|Erasmus Medical Center|Oude Munnink|Netherlands

>Spike|hCoV-19/Japan/PG-1614/2020|2020-03-00|EPI\_ISL\_685220|Original|hCoV-19^^Japan|Human|Tokyo Metropolitan Institute of Public Health|Pathogen Genomics Center|Sekizuka|Japan

>Spike|hCoV-19/USA/TX-HMH-7564/2020|2020-06-25|EPI\_ISL\_546855|Original|hCoV-19^^Texas|Human|Houston Methodist Hospital|Houston Methodist Hospital|Long|USA

>Spike|hCoV-19/Australia/VIC6665/2020|2020-07-20|EPI\_ISL\_521421|Original|hCoV-19^^Victoria|Human|Victorian Infectious Diseases Reference Laboratory (VIDRL)|VIDRL and MDU-PHL|Schultz|Australia

>Spike|hCoV-19/New Zealand/20CV0194/2020|2020-08-29|EPI\_ISL\_548060|Original|hCoV-19^^Auckland|Human|North Shore Hospital|Institute of Environmental Science and Research (ESR)|Wang|New Zealand

>Spike|hCoV-19/France/ARA-12877/2020|2020-03-23|EPI\_ISL\_420617|Original|hCoV-19^^Auvergne-Rh\u00f4ne-Alpes|Human|Centre Hospitalier Saint Joseph Saint Luc|CNR Virus des Infections Respiratoires - France SUD|Josset|France

>Spike|hCoV-19/Netherlands/ZH-EMC-1023/2020|2020-11-24|EPI\_ISL\_722311|Original|hCoV-19^^Zuid Holland|Human|Dutch COVID-19 response team|Erasmus Medical Center|Oude Munnink|Netherlands

>Spike|hCoV-19/Switzerland/BE-ETHZ-160017/2020|2020-06-15|EPI\_ISL\_486510|Original|hCoV-19^^Bern|Human|Viollier AG|Department of Biosystems Science and Engineering|Nadeau|Switzerland

>Spike|hCoV-19/England/MILK-AC7C07/2020|2020-10-22|EPI\_ISL\_634277|Original|hCoV-19^^England|Human|Lighthouse Lab in Milton Keynes|Wellcome Sanger Institute for the COVID-19 Genomics UK (COG-UK) consortium|Davies|United Kingdom

>Spike|hCoV-19/Australia/VIC6638/2020|2020-07-19|EPI\_ISL\_521397|Original|hCoV-19^^Victoria|Human|Victorian Infectious Diseases Reference Laboratory (VIDRL)|VIDRL and MDU-PHL|Schultz|Australia

>Spike|hCoV-19/England/ALDP-5B18D4/2020|2020-06-17|EPI\_ISL\_558627|Original|hCoV-19^^England|Human|Lighthouse Lab in Alderley Park|Wellcome Sanger Institute for the COVID-19 Genomics UK (COG-UK) consortium|Davies|United Kingdom

>Spike|hCoV-19/England/ALDP-95ADCB/2020|2020-06-15|EPI\_ISL\_555548|Original|hCoV-19^^England|Human|Lighthouse Lab in Alderley Park|Wellcome Sanger Institute for the COVID-19 Genomics UK (COG-UK) consortium|Davies|United Kingdom

>Spike|hCoV-19/Spain/AR-IBV-2434/2020|2020-03-24|EPI\_ISL\_468829|Original|hCoV-19^^Aragon|Human|Servicio de Microbiolog\u00eda|SeqCOVID-SPAIN consortium|IBV (CSIC)|Comas|Spain

>Spike|hCoV-19/England/QEUEH-A21069/2020|2020-10-01|EPI\_ISL\_587595|Original|hCoV-19^^England|Human|Lighthouse Lab in Glasgow|Wellcome Sanger Institute for the COVID-19 Genomics UK (COG-UK) consortium|Davies|United Kingdom

>Spike|hCoV-19/Austria/CeMM0242/2020|2020-03-20|EPI\_ISL\_438072|Original|hCoV-19^^Vienna|Human|Center for Virology|Bergthaler laboratory|Bergthaler|Austria

>Spike|hCoV-19/USA/WI-WSLH-200587/2020|2020-06-08|EPI\_ISL\_631389|Original|hCoV-19^^Wisconsin|Human|Wisconsin State Laboratory of Hygiene Communicable Disease Division|Wisconsin State Laboratory of Hygiene Communicable Disease Division|Florek|USA

>Spike|hCoV-19/England/CAMB-1BB4F8/2020|2020-11-17|EPI\_ISL\_664470|Original|hCoV-19^^England|Human|Department of Pathology|COVID-19 Genomics UK (COG-UK) Consortium|Goodfellow|United Kingdom

>Spike|hCoV-19/USA/WA-S1164/2020|2020-05-06|EPI\_ISL\_463654|Original|hCoV-19^^Washington|Human|Washington State Department of Health|Seattle Flu Study|Bedford|USA

>Spike|hCoV-19/England/ALDP-BB99C4/2020|2020-11-20|EPI\_ISL\_703084|Original|hCoV-19^^England|Human|Lighthouse Lab in Alderley Park|Wellcome Sanger Institute for the COVID-19 Genomics UK (COG-UK) Consortium|Davies|United Kingdom

>Spike|hCoV-19/Belgium/regal-10121446/2020|2020-10-12|EPI\_ISL\_738498|Original|hCoV-19^^Tervuren|Human|UZ Leuven|KU Leuven|Maes|Belgium

>Spike|hCoV-19/Spain/CT-IBV-99009887/2020|2020-08-06|EPI\_ISL\_660284|Original|hCoV-19^^Catalunya|Human|Servicio de Microbiolog\u00eda|SeqCOVID-SPAIN consortium|IBV (CSIC)|Comas|Spain

>Spike|hCoV-19/Denmark/DCGC-11065/2020|2020-11-02|EPI\_ISL\_670375|Original|hCoV-19^^Sjaelland|Human|Department of Virus and Microbiological Special Diagnostics|Albertsen Lab|Michaelsen|Denmark

>Spike|hCoV-19/England/204500446/2020|2020-10-30|EPI\_ISL\_660781|Original|hCoV-19^^England|Human|Respiratory Virus Unit|COVID-19 Genomics UK (COG-UK) Consortium|Platt|United Kingdom

>Spike|hCoV-19/England/LIVE-DC7FB0/2020|2020-11-16|EPI\_ISL\_703364|Original|hCoV-19^^England|Human|Liverpool Clinical Laboratories|COVID-19 Genomics UK (COG-UK) Consortium|Haldenby|United Kingdom

>Spike|hCoV-19/England/MILK-C2F694/2020|2020-12-07|EPI\_ISL\_782952|Original|hCoV-19^^England|Human|Lighthouse Lab in Milton Keynes|Wellcome Sanger Institute for the COVID-19 Genomics UK (COG-UK) Consortium|Davies|United Kingdom

>Spike|hCoV-19/Denmark/DCGC-8202/2020|2020-10-26|EPI\_ISL\_616958|Original|hCoV-19^^Hovedstaden|Human|Department of Virus and Microbiological Special Diagnostics|Albertsen lab|Michaelsen|Denmark

>Spike|hCoV-19/Chile/BI-ISPCH-3-2/2020|2020-03-25|EPI\_ISL\_445336|Original|hCoV-19^^Biobio|Human|HOSPITAL LAS HIGUERAS DE TALCAHUANO|Instituto de Salud Publica de Chile|Fernandez|Chile

>Spike|hCoV-19/Wales/PHWC-3639F/2020|2020-04-29|EPI\_ISL\_474659|Original|hCoV-19^^Wales|Human|Originating lab|COVID-19 Genomics UK (COG-UK) Consortium|Moore|United Kingdom

>Spike|hCoV-19/Bangladesh/BCSIR-NILMRC-076/2020|2020-06-01|EPI\_ISL\_466644|Original|hCoV-19^^Dhaka|Human|National Institute of Laboratory Medicine and Referral Center|Genomic Research Lab|Khan|Bangladesh

>Spike|hCoV-19/Denmark/DCGC-13446/2020|2020-11-30|EPI\_ISL\_712174|Original|hCoV-19^^Sjaelland|Human|Department of Virus and Microbiological Special Diagnostics|Albertsen Lab|Michaelsen|Denmark

>Spike|hCoV-19/England/LOND-12509D4/2020|2020-10-30|EPI\_ISL\_664228|Original|hCoV-19^^England|Human|University College London Hospital|COVID-19 Genomics UK (COG-UK) Consortium|Byott|United Kingdom

>Spike|hCoV-19/France/PAC-MEPHI-2401/2020|2020-10-13|EPI\_ISL\_644557|Original|hCoV-19^^Provence-Alpes-Cote-d\u2019Azur|Human|MEPHI|MEPHI|Levasseur|France

>Spike|hCoV-19/South Africa/KRISP-K004542/2020|2020-10-22|EPI\_ISL\_660239|Original|hCoV-19^^KwaZulu-Natal|Human|NHLS-IALCH|KRISP|de Oliveira|South Africa

>Spike|hCoV-19/Switzerland/BL-42205226/2020|2020-03-24|EPI\_ISL\_581735|Original|hCoV-19^^Basel-Land|Human|University Hospital Basel|University Hospital Basel|Roloff Handschin|Switzerland

>Spike|hCoV-19/Australia/VIC2171/2020|2020-06-23|EPI\_ISL\_521920|Original|hCoV-19^^Victoria|Human|Victorian Infectious Diseases Reference Laboratory (VIDRL)|VIDRL and MDU-PHL|Schultz|Australia

>Spike|hCoV-19/Australia/VIC3860/2020|2020-07-13|EPI\_ISL\_520573|Original|hCoV-19^^Victoria|Human|Microbiological Diagnostic Unit - Public Health Laboratory (MDU-PHL)|MDU-PHL|Schultz|Australia

>Spike|hCoV-19/England/205260872/2020|2020-12-20|EPI\_ISL\_754329|Original|hCoV-19^^England|Human|Respiratory Virus Unit|COVID-19 Genomics UK (COG-UK) Consortium|Platt|United Kingdom

>Spike|hCoV-19/England/CAMB-7864D/2020|2020-04-05|EPI\_ISL\_433758|Original|hCoV-19^^England|Human|Department of Pathology|COVID-19 Genomics UK (COG-UK) Consortium|Meredith|United Kingdom

>Spike|hCoV-19/Wales/PHWC-48D6F6/2020|2020-11-16|EPI\_ISL\_680666|Original|hCoV-19^^Wales|Human|Wales Specialist Virology Centre Sequencing lab|COVID-19 Genomics UK (COG-UK) Consortium|Moore|United Kingdom

>Spike|hCoV-19/USA/ME-HETL-J0036/2020|2020-03-16|EPI\_ISL\_513448|Original|hCoV-19^^Maine|Human|Maine HETL|Tewhey Lab|Tewhey|USA

>Spike|hCoV-19/Scotland/CVR4902/2020|2020-10-06|EPI\_ISL\_594669|Original|hCoV-19^^Scotland|Human|West of Scotland Specialist Virology Centre|COVID-19 Genomics UK (COG-UK) Consortium|Robertson|United Kingdom

>Spike|hCoV-19/England/QEUA-ALDE93/2020|2020-10-01|EPI\_ISL\_587528|Original|hCoV-19^^England|Human|Lighthouse Lab in Glasgow|Wellcome Sanger Institute for the COVID-19 Genomics UK (COG-UK) consortium|Davies|United Kingdom

>Spike|hCoV-19/USA/UT-UPHL-2012285603/2020|2020-08-17|EPI\_ISL\_745481|Original|hCoV-19^^Utah|Human|Ginkgo Bioworks Clinical Laboratory|Utah Public Health Laboratory|Young|USA

>Spike|hCoV-19/England/CAMB-779CD/2020|2020-03-31|EPI\_ISL\_439393|Original|hCoV-19^^England|Human|Department of Pathology|Wellcome Sanger Institute for the COVID-19 Genomics UK (COG-UK) consortium|Amato|United Kingdom

>Spike|hCoV-19/SaudiArabia/KAUST-MADINAH609/2020|2020-05-06|EPI\_ISL\_513172|Original|hCoV-19^^Madinah|Human|Pathogen Genomics Lab King Abdullah University of Science and Technology(KAUST)|Pathogen Genomics Lab King Abdullah University of Science and Technology(KAUST)|Mohamed Ghazzali|Saudi Arabia

>Spike|hCoV-19/USA/MI-MDHHS-SC20430/2020|2020-03-19|EPI\_ISL\_452304|Original|hCoV-19^^Michigan|Human|Michigan Department of Health and Human Services|Michigan Department of Health and Human Services|Blankenship|USA



>Spike|hCoV-19/Wales/PHWC-487F79/2020|2020-10-29|EPI\_ISL\_639329|Original|hCoV-19^^Wales|Human|Wales Specialist Virology Centre Sequencing lab|COVID-19 Genomics UK (COG-UK) Consortium|Moore|United Kingdom

>Spike|hCoV-19/England/MILK-A7AC21/2020|2020-10-16|EPI\_ISL\_606724|Original|hCoV-19^^England|Human|Lighthouse Lab in Milton Keynes|Wellcome Sanger Institute for the COVID-19 Genomics UK (COG-UK) consortium|Davies|United Kingdom

>Spike|hCoV-19/USA/CA-CZB-14022/2020|2020-07-10|EPI\_ISL\_739243|Original|hCoV-19^^California|Human|Alameda County Public Health Lab|Chan-Zuckerberg Biohub|Kamm|USA

>Spike|hCoV-19/Finland/17A62S12/2020|2020-04-17|EPI\_ISL\_481580|Original|hCoV-19^^Uusimaa|Human|Department of Virology and Immunology|Department of Virology|Smura|Finland

>Spike|hCoV-19/Lithuania/MR-LUHS-Eilnr174/2020|2020-07-21|EPI\_ISL\_636840|Original|hCoV-19^^Taurages apskritis|Human|Lithuanian University of Health Sciences Hospital|Lithuanian University of Health Sciences|Zemaitis|Lithuania

>Spike|hCoV-19/England/ALDP-A2F56C/2020|2020-10-06|EPI\_ISL\_586944|Original|hCoV-19^^England|Human|Lighthouse Lab in Alderley Park|Wellcome Sanger Institute for the COVID-19 Genomics UK (COG-UK) consortium|Davies|United Kingdom

>Spike|hCoV-19/USA/NY-WCMP10D09P/2020|2020-03-15|EPI\_ISL\_427567|Original|hCoV-19^^New York|Human|NewYork-Presbyterian & Mason Lab|Mason Lab|Mason|USA

>Spike|hCoV-19/England/ALDP-9E8357/2020|2020-09-24|EPI\_ISL\_637413|Original|hCoV-19^^England|Human|Department of Pathology|COVID-19 Genomics UK (COG-UK) Consortium|Goodfellow|United Kingdom

>Spike|hCoV-19/USA/CA-ALSR-0667-IPL/2020|2020-05-01|EPI\_ISL\_483289|Original|hCoV-19^^California|Human|UC San Diego Center for Advanced Laboratory Medicine|Andersen lab at Scripps Research|Gangavarapu|USA

>Spike|hCoV-19/Denmark/DCGC-20354/2020|2020-09-28|EPI\_ISL\_748134|Original|hCoV-19^^Syddanmark|Human|Department of Virus and Microbiological Special Diagnostics|Albertsen Lab|Michaelsen|Denmark

>Spike|hCoV-19/England/MILK-9A67B3/2020|2020-08-31|EPI\_ISL\_550062|Original|hCoV-19^^England|Human|Lighthouse Lab in Milton Keynes|Wellcome Sanger Institute for the COVID-19 Genomics UK (COG-UK) consortium|Davies|United Kingdom

>Spike|hCoV-19/England/GSTT-265D8A6/2020|2020-03-25|EPI\_ISL\_484028|Original|hCoV-19^^England|Human|Centre for Clinical Infection and Diagnostics Research and Genomics Innovation Unit|COVID-19 Genomics UK (COG-UK) Consortium|Awan|United Kingdom

>Spike|hCoV-19/Denmark/DCGC-9557/2020|2020-11-09|EPI\_ISL\_668721|Original|hCoV-19^^Hovedstaden|Human|Department of Virus and Microbiological Special Diagnostics|Albertsen Lab|Michaelsen|Denmark

>Spike|hCoV-19/Australia/VIC12821/2020|2020-08-02|EPI\_ISL\_640996|Original|hCoV-19^^Victoria|Human|Microbiological Diagnostic Unit - Public Health Laboratory (MDU-PHL)|MDU-PHL|Schultz|Australia

>Spike|hCoV-19/USA/TX-HMH-MCoV-19163/2020|2020-11-23|EPI\_ISL\_783663|Original|hCoV-19^^Texas|Human|Houston Methodist Hospital|Houston Methodist Hospital|Long|USA

>Spike|hCoV-19/USA/FL-BPHL-0896/2020|2020-04-10|EPI\_ISL\_517786|Original|hCoV-19^^Florida|Human|Florida Bureau of Public Health Laboratories|Florida Bureau of Public Health Laboratories|Blanton|USA

>Spike|hCoV-19/Australia/VIC5701/2020|2020-07-20|EPI\_ISL\_518505|Original|hCoV-19^^Victoria|Human|Microbiological Diagnostic Unit - Public Health Laboratory (MDU-PHL)|MDU-PHL|Schultz|Australia

>Spike|hCoV-19/Wales/ALDP-4AC2C0/2020|2020-06-14|EPI\_ISL\_559619|Original|hCoV-19^^Wales|Human|Lighthouse Lab in Alderley Park|Wellcome Sanger Institute for the COVID-19 Genomics UK (COG-UK) consortium|Davies|United Kingdom

>Spike|hCoV-19/Serbia/Kraljevo-00040707/2020|2020-07-06|EPI\_ISL\_644568|Original|hCoV-19^^Kraljevo|Human|Veterinary Specialized Institute \Kraljevo\|Veterinary Specialized Institute \Kraljevo\|Vidanovic|Serbia

>Spike|hCoV-19/England/CAMC-B09EC6/2020|2020-10-31|EPI\_ISL\_673147|Original|hCoV-19^^England|Human|Lighthouse Lab in Cambridge|Wellcome Sanger Institute for the COVID-19 Genomics UK (COG-UK) Consortium|Davies|United Kingdom

>Spike|hCoV-19/England/SHEF-10C614C/2020|2020-12-12|EPI\_ISL\_727867|Original|hCoV-19^^England|Human|Virology Department|COVID-19 Genomics UK (COG-UK) Consortium|de Silva|United Kingdom

>Spike|hCoV-19/England/MILK-99CB1E/2020|2020-08-31|EPI\_ISL\_550567|Original|hCoV-19^^England|Human|Lighthouse Lab in Milton Keynes|Wellcome Sanger Institute for the COVID-19 Genomics UK (COG-UK) consortium|Davies|United Kingdom

>Spike|hCoV-19/USA/NM-UNM-00599/2020|2020-06-03|EPI\_ISL\_560354|Original|hCoV-19^^New Mexico|Human|TriCore Reference Laboratories|Center for Global Health|Domman|USA

>Spike|hCoV-19/England/MILK-BDC688/2020|2020-11-27|EPI\_ISL\_709790|Original|hCoV-19^^England|Human|Lighthouse Lab in Milton Keynes|Wellcome Sanger Institute for the COVID-19 Genomics UK (COG-UK) Consortium|Davies|United Kingdom

>Spike|hCoV-19/England/NOTT-1183B0/2020|2020-10-27|EPI\_ISL\_612599|Original|hCoV-19^^England|Human|Queens Medical Centre|COVID-19 Genomics UK (COG-UK) Consortium|Loose|United Kingdom

>Spike|hCoV-19/Denmark/DCGC-900/2020|2020-05-18|EPI\_ISL\_614464|Original|hCoV-19^^Denmark|Human|Department of Virus and Microbiological Special Diagnostics|Albertsen lab|Michaelsen|Denmark

>Spike|hCoV-19/England/BRIS-12A53D/2020|2020-04-30|EPI\_ISL\_458492|Original|hCoV-19^^England|Human|PHE South West Regional Laboratory|Wellcome Sanger Institute for the COVID-19 Genomics UK (COG-UK) consortium|Davies|United Kingdom

>Spike|hCoV-19/Scotland/CVR5346/2020|2020-10-26|EPI\_ISL\_651769|Original|hCoV-19^^Scotland|Human|West of Scotland Specialist Virology Centre|COVID-19 Genomics UK (COG-UK) Consortium|Robertson|United Kingdom

>Spike|hCoV-19/Wales/PHWC-48BCF6/2020|2020-11-04|EPI\_ISL\_666346|Original|hCoV-19^^Wales|Human|Wales Specialist Virology Centre Sequencing lab|COVID-19 Genomics UK (COG-UK) Consortium|Moore|United Kingdom

>Spike|hCoV-19/England/QEUA-B3193D/2020|2020-11-04|EPI\_ISL\_646439|Original|hCoV-19^^England|Human|Lighthouse Lab in Glasgow|Wellcome Sanger Institute for the COVID-19 Genomics UK (COG-UK) Consortium|Davies|United Kingdom

>Spike|hCoV-19/Australia/VIC3899/2020|2020-07-13|EPI\_ISL\_520611|Original|hCoV-19^^Victoria|Human|Microbiological Diagnostic Unit - Public Health Laboratory (MDU-PHL)|MDU-PHL|Schultz|Australia

>Spike|hCoV-19/England/NORT-28BCDA/2020|2020-05-08|EPI\_ISL\_457314|Original|hCoV-19^^England|Human|Northumbria University / South Tees Hospitals NHS Foundation Trust / North Cumbria Integrated Care NHS Foundation Trust / North Tees and Hartlepool NHS Foundation Trust / Newcastle Hospitals NHS Foundation Trust|COVID-19 Genomics UK (COG-UK) Consortium|Bashton|United Kingdom

>Spike|hCoV-19/England/MILK-9EE9C8/2020|2020-09-23|EPI\_ISL\_580804|Original|hCoV-19^^England|Human|Lighthouse Lab in Milton Keynes|Wellcome Sanger Institute for the COVID-19 Genomics UK (COG-UK) consortium|Davies|United Kingdom

>Spike|hCoV-19/England/LOND-1250558/2020|2020-10-20|EPI\_ISL\_665216|Original|hCoV-19^^England|Human|University College London Hospital|COVID-19 Genomics UK (COG-UK) Consortium|Byott|United Kingdom

>Spike|hCoV-19/England/CAMC-B7BE83/2020|2020-11-13|EPI\_ISL\_724060|Original|hCoV-19^^England|Human|Oxford Viromics|COVID-19 Genomics UK (COG-UK) Consortium|Golubchik|United Kingdom

>Spike|hCoV-19/England/ALDP-924AF0/2020|2020-06-23|EPI\_ISL\_551566|Original|hCoV-19^^England|Human|Lighthouse Lab in Alderley Park|Wellcome Sanger Institute for the COVID-19 Genomics UK (COG-UK) consortium|Davies|United Kingdom

>Spike|hCoV-19/USA/HI-H200194/2020|2020-08-10|EPI\_ISL\_752753|Original|hCoV-19^^Hawaii|Human|State Laboratories Division|State Laboratories Division|Sultana|USA

>Spike|hCoV-19/USA/WA-OHSU-1831/2020|2020-07-27|EPI\_ISL\_526109|Original|hCoV-19^^Washington|Human|OHSU Lab Services Molecular Microbiology Lab|Oregon SARS-CoV-2 Genome Sequencing Center|O'Roak|USA

>Spike|hCoV-19/Japan/PG-5101/2020|2020-08-00|EPI\_ISL\_690210|Original|hCoV-19^^Japan|Human|Gunma Prefectural Institute of Public Health and Environmental Sciences|Pathogen Genomics Center|Sekizuka|Japan

>Spike|hCoV-19/Japan/PG-2341/2020|2020-05-00|EPI\_ISL\_685946|Original|hCoV-19^^Japan|Human|Pathogen Genomics Center|Pathogen Genomics Center|Sekizuka|Japan

>Spike|hCoV-19/England/QEUA-B669C6/2020|2020-11-11|EPI\_ISL\_654998|Original|hCoV-19^^England|Human|Lighthouse Lab in Glasgow|Wellcome Sanger Institute for the COVID-19 Genomics UK (COG-UK) Consortium|Davies|United Kingdom

>Spike|hCoV-19/England/BRIS-123D1E/2020|2020-04-07|EPI\_ISL\_492820|Original|hCoV-19^^England|Human|PHE South West Regional Laboratory|Wellcome Sanger Institute for the COVID-19 Genomics UK (COG-UK) consortium|Davies|United Kingdom

>Spike|hCoV-19/England/CAMC-B51F80/2020|2020-11-08|EPI\_ISL\_658041|Original|hCoV-19^^England|Human|Lighthouse Lab in Cambridge|Wellcome Sanger Institute for the COVID-19 Genomics UK (COG-UK) Consortium|Davies|United Kingdom

>Spike|hCoV-19/England/20189019804/2020|2020-05-01|EPI\_ISL\_465525|Original|hCoV-19^^England|Human|Respiratory Virus Unit|Respiratory Virus Unit|Platt|United Kingdom

>Spike|hCoV-19/USA/TX-HMH-MCoV-19671/2020|2020-11-23|EPI\_ISL\_784029|Original|hCoV-19^^Texas|Human|Houston Methodist Hospital|Houston Methodist Hospital|Long|USA

>Spike|hCoV-19/Austria/CeMM0149/2020|2020-03-03|EPI\_ISL\_437997|Original|hCoV-19^^Vienna|Human|Center for Virology|Bergthaler laboratory|Bergthaler|Austria

>Spike|hCoV-19/England/QEUH-99035E/2020|2020-08-25|EPI\_ISL\_539922|Original|hCoV-19^^England|Human|Lighthouse Lab in Glasgow|Wellcome Sanger Institute for the COVID-19 Genomics UK (COG-UK) consortium|Davies|United Kingdom

>Spike|hCoV-19/England/MILK-B86034/2020|2020-11-13|EPI\_ISL\_673943|Original|hCoV-19^^England|Human|Lighthouse Lab in Milton Keynes|Wellcome Sanger Institute for the COVID-19 Genomics UK (COG-UK) Consortium|Davies|United Kingdom

>Spike|hCoV-19/England/ALDP-95090D/2020|2020-06-14|EPI\_ISL\_554498|Original|hCoV-19^^England|Human|Lighthouse Lab in Alderley Park|Wellcome Sanger Institute for the COVID-19 Genomics UK (COG-UK) consortium|Davies|United Kingdom

>Spike|hCoV-19/Wales/PHWC-2BDEA/2020|2020-04-10|EPI\_ISL\_445850|Original|hCoV-19^^Wales|Human|Wales Specialist Virology Centre|Public Health Wales Microbiology Cardiff|Moore|United Kingdom

>Spike|hCoV-19/Australia/NSW97/2020|2020-03-22|EPI\_ISL\_427769|Original|hCoV-19^^New South Wales|Human|Centre for Infectious Diseases and Microbiology Public Health|NSW Health Pathology - Institute of Clinical Pathology and Medical Research; Westmead Hospital; University of Sydney|Gall|Australia

>Spike|hCoV-19/United Arab Emirates/0174/2020|2020-05-18|EPI\_ISL\_698361|Original|hCoV-19^^Abu Dhabi|Human|Group 42 (G42) Healthcare|G42 Healthcare|Ogrodzki|United Arab Emirates

>Spike|hCoV-19/Japan/PG-4689/2020|2020-08-00|EPI\_ISL\_689826|Original|hCoV-19^^Japan|Human|Pathogen Genomics Center|Pathogen Genomics Center|Sekizuka|Japan

>Spike|hCoV-19/England/NORW-221DE2/2020|2020-12-19|EPI\_ISL\_764476|Original|hCoV-19^^England|Human|Quadram Institute Bioscience|COVID-19 Genomics UK (COG-UK) Consortium|Alikhan|United Kingdom

>Spike|hCoV-19/Denmark/DCGC-20510/2020|2020-12-21|EPI\_ISL\_759197|Original|hCoV-19^^Hovedstaden|Human|Department of Virus and Microbiological Special Diagnostics|Albertsen Lab|Michaelsen|Denmark

>Spike|hCoV-19/USA/HI-H200526/2020|2020-11-02|EPI\_ISL\_753059|Original|hCoV-19^^Hawaii|Human|State Laboratories Division|State Laboratories Division|Sultana|USA

>Spike|hCoV-19/Denmark/DCGC-2668/2020|2020-08-17|EPI\_ISL\_617888|Original|hCoV-19^^Hovedstaden|Human|Department of Virus and Microbiological Special Diagnostics|Albertsen lab|Michaelsen|Denmark

>Spike|hCoV-19/DRC/4551/2020|2020-04-30|EPI\_ISL\_513599|Original|hCoV-19^^Kinshasa|Human|Viral Respiratory Lab|Pathogen Sequencing Lab|Lokilo|Democratic Republic of the Congo

>Spike|hCoV-19/USA/MI-MDHHS-SC22658/2020|2020-11-13|EPI\_ISL\_737272|Original|hCoV-19^^Michigan|Human|Michigan Department of Health and Human Services|Michigan Department of Health and Human Services|Blankenship|USA

>Spike|hCoV-19/USA/DE-DHSS-F987027/2020|2020-11-29|EPI\_ISL\_766975|Original|hCoV-19^^Delaware|Human|Delaware Public Health Laboratory|Delaware Public Health Laboratory|Bajwa|USA

>Spike|hCoV-19/Canada/QC-LSPQ-L00236074/2020|2020-03-24|EPI\_ISL\_536116|Original|hCoV-19^^Quebec|Human|H\u00f4tel-Dieu de Sorel|Laboratoire de sant\u00e9 publique du Qu\u00e9bec|Moreira|Canada

>Spike|hCoV-19/Denmark/DCGC-17090/2020|2020-12-14|EPI\_ISL\_750751|Original|hCoV-19^^Midtjylland|Human|Department of Virus and Microbiological Special Diagnostics|Albertsen Lab|Michaelsen|Denmark

>Spike|hCoV-19/USA/MI-MDHHS-SC20491/2020|2020-04-01|EPI\_ISL\_460030|Original|hCoV-19^^Michigan|Human|Michigan Department of Health and Human Services|Michigan Department of Health and Human Services|Blankenship|USA

>Spike|hCoV-19/England/ALDP-B846E9/2020|2020-11-15|EPI\_ISL\_675209|Original|hCoV-19^^England|Human|Lighthouse Lab in Alderley Park|Wellcome Sanger Institute for the COVID-19 Genomics UK (COG-UK) Consortium|Davies|United Kingdom

>Spike|hCoV-19/Denmark/DCGC-10698/2020|2020-11-02|EPI\_ISL\_670144|Original|hCoV-19^^Midtjylland|Human|Department of Virus and Microbiological Special Diagnostics|Albertsen Lab|Michaelsen|Denmark

>Spike|hCoV-19/Scotland/EDB7812/2020|2020-09-21|EPI\_ISL\_572442|Original|hCoV-19^^Scotland|Human|Virology Department|COVID-19 Genomics UK (COG-UK) Consortium|Williams|United Kingdom

>Spike|hCoV-19/South Africa/KRISP-K001351/2020|2020-07-01|EPI\_ISL\_515836|Original|hCoV-19^^KwaZulu-Natal|Human|Medical Disagnostics Services (MDS)|KRISP|de Oliveira|South Africa

>Spike|hCoV-19/Netherlands/LI-EMC-106/2020|2020-10-30|EPI\_ISL\_722576|Original|hCoV-19^^Limburg|Human|Dutch COVID-19 response team|Erasmus Medical Center|Oude Munnink|Netherlands

>Spike|hCoV-19/Scotland/CVR1631/2020|2020-04-05|EPI\_ISL\_433634|Original|hCoV-19^^Scotland|Human|West of Scotland Specialist Virology Centre|COVID-19 Genomics UK (COG-UK) Consortium|Robertson|United Kingdom

>Spike|hCoV-19/USA/MA-MGH-03347/2020|2020-11-05|EPI\_ISL\_765797|Original|hCoV-19^^Massachusetts|Human|Massachusetts General Hospital|Infectious Disease Program|Park|USA

>Spike|hCoV-19/Denmark/DCGC-21633/2020|2020-12-21|EPI\_ISL\_758276|Original|hCoV-19^^Hovedstaden|Human|Department of Virus and Microbiological Special Diagnostics|Albertsen Lab|Michaelsen|Denmark

>Spike|hCoV-19/England/ALDP-B1B535/2020|2020-11-01|EPI\_ISL\_645767|Original|hCoV-19^^England|Human|Lighthouse Lab in Alderley Park|Wellcome Sanger Institute for the COVID-19 Genomics UK (COG-UK) Consortium|Davies|United Kingdom

>Spike|hCoV-19/Canada/ON-PHL-20-03774/2020|2020-11-00|EPI\_ISL\_775083|Original|hCoV-19^^Ontario|Human|Public Health Ontario Laboratory|Public Health Ontario Laboratory|Guthrie|Canada

>Spike|hCoV-19/Ireland/LD-NVRL-20G48734/2020|2020-04-03|EPI\_ISL\_708522|Original|hCoV-19^^Longford|Human|National Virus Reference Laboratory|Irish Coronavirus Sequencing Consortium - Teagasc Oakpark|Della Bartola|Ireland

>Spike|hCoV-19/England/ALDP-94F7BC/2020|2020-06-16|EPI\_ISL\_555779|Original|hCoV-19^^England|Human|Lighthouse Lab in Alderley Park|Wellcome Sanger Institute for the COVID-19 Genomics UK (COG-UK) consortium|Davies|United Kingdom

>Spike|hCoV-19/Netherlands/GE-RIVM-20543/2020|2020-11-24|EPI\_ISL\_728758|Original|hCoV-19^^Gelderland|Human|Dutch COVID-19 response team|National Institute for Public Health and the Environment (RIVM)|Meijer|Netherlands

>Spike|hCoV-19/Denmark/DCGC-20243/2020|2020-11-30|EPI\_ISL\_748067|Original|hCoV-19^^Syddanmark|Human|Department of Virus and Microbiological Special Diagnostics|Albertsen Lab|Michaelsen|Denmark

>Spike|hCoV-19/England/ALDP-A6FCA7/2020|2020-10-15|EPI\_ISL\_606978|Original|hCoV-19^^England|Human|Lighthouse Lab in Alderley Park|Wellcome Sanger Institute for the COVID-19 Genomics UK (COG-UK) consortium|Davies|United Kingdom

>Spike|hCoV-19/USA/WA-UW-4682/2020|2020-04-06|EPI\_ISL\_486097|Original|hCoV-19^^Washington|Human|UW Virology Lab|UW Virology Lab|Roychoudhury|USA

>Spike|hCoV-19/USA/UT-03867/2020|2020-04-05|EPI\_ISL\_470724|Original|hCoV-19^^Utah|Human|Utah Public Health Laboratory|Utah Public Health Laboratory|Butz|USA

>Spike|hCoV-19/England/CAMC-B37E29/2020|2020-11-05|EPI\_ISL\_658916|Original|hCoV-19^^England|Human|Lighthouse Lab in Cambridge|Wellcome Sanger Institute for the COVID-19 Genomics UK (COG-UK) Consortium|Davies|United Kingdom

>Spike|hCoV-19/USA/FL-BPHL-1116/2020|2020-08-07|EPI\_ISL\_526602|Original|hCoV-19^^Florida|Human|Florida Bureau of Public Health Laboratories|Florida Bureau of Public Health Laboratories|Blanton|USA

>Spike|hCoV-19/England/BRIS-1222D4/2020|2020-03-23|EPI\_ISL\_440051|Original|hCoV-19^^England|Human|PHE South West Regional Laboratory|Wellcome Sanger Institute for the COVID-19 Genomics UK (COG-UK) consortium|Amato|United Kingdom

>Spike|hCoV-19/England/QEUEH-9F8257/2020|2020-09-27|EPI\_ISL\_588833|Original|hCoV-19^^England|Human|Lighthouse Lab in Glasgow|Wellcome Sanger Institute for the COVID-19 Genomics UK (COG-UK) consortium|Davies|United Kingdom

>Spike|hCoV-19/England/ALDP-94EF4C/2020|2020-06-17|EPI\_ISL\_556137|Original|hCoV-19^^England|Human|Lighthouse Lab in Alderley Park|Wellcome Sanger Institute for the COVID-19 Genomics UK (COG-UK) consortium|Davies|United Kingdom

>Spike|hCoV-19/USA/WA-S2345/2020|2020-06-12|EPI\_ISL\_496977|Original|hCoV-19^^Washington|Human|Washington State Department of Health|Seattle Flu Study|Lee|USA

>Spike|hCoV-19/USA/MN-QDX-1760/2020|2020-03-17|EPI\_ISL\_604085|Original|hCoV-19^^Minnesota|Human|Quest Diagnostics|Quest Diagnostics|Kagan|USA

>Spike|hCoV-19/England/MILK-BAC86D/2020|2020-11-18|EPI\_ISL\_720384|Original|hCoV-19^^England|Human|Lighthouse Lab in Milton Keynes|Wellcome Sanger Institute for the COVID-19 Genomics UK (COG-UK) Consortium|Davies|United Kingdom

>Spike|hCoV-19/England/QEUEH-79EEF7/2020|2020-07-15|EPI\_ISL\_533040|Original|hCoV-19^^England|Human|Lighthouse Lab in Glasgow|Wellcome Sanger Institute for the COVID-19 Genomics UK (COG-UK) consortium|Davies|United Kingdom

>Spike|hCoV-19/Chile/RM-108734/2020|2020-06-23|EPI\_ISL\_746546|Original|hCoV-19^^Region Metropolitana de Santiago|Human|Genetica Molecular and Subdepartamento de Virologia ISP Chile|Instituto de Salud Publica de Chile|Tognarelli|Chile

>Spike|hCoV-19/Switzerland/AG-ETHZ-120009/2020|2020-04-17|EPI\_ISL\_468209|Original|hCoV-19^^Aargau|Human|Viollier AG|Department of Biosystems Science and Engineering|Nadeau|Switzerland

>Spike|hCoV-19/USA/TX-HMH-6892/2020|2020-06-25|EPI\_ISL\_546326|Original|hCoV-19^^Texas|Human|Houston Methodist Hospital|Houston Methodist Hospital|Long|USA

>Spike|hCoV-19/Portugal/PT0777a/2020|2020-03-20|EPI\_ISL\_511036|Original|hCoV-19^^Portugal|Human|Instituto Nacional de Saude (INSA)|Instituto Nacional de Saude (INSA)|Borges|Portugal

>Spike|hCoV-19/Denmark/DCGC-19993/2020|2020-12-07|EPI\_ISL\_747915|Original|hCoV-19^^Hovedstaden|Human|Department of Virus and Microbiological Special Diagnostics|Albertsen Lab|Michaelsen|Denmark

>Spike|hCoV-19/England/ALDP-9CAADE/2020|2020-09-16|EPI\_ISL\_575718|Original|hCoV-19^^England|Human|Lighthouse Lab in Alderley Park|Wellcome Sanger Institute for the COVID-19 Genomics UK (COG-UK) consortium|Davies|United Kingdom

>Spike|hCoV-19/England/ALDP-9FD7DB/2020|2020-10-01|EPI\_ISL\_587950|Original|hCoV-19^^England|Human|Lighthouse Lab in Alderley Park|Wellcome Sanger Institute for the COVID-19 Genomics UK (COG-UK) consortium|Davies|United Kingdom

>Spike|hCoV-19/USA/MI-MDHHS-SC21570/2020|2020-03-21|EPI\_ISL\_516297|Original|hCoV-19^^Michigan|Human|Michigan Department of Health and Human Services|Michigan Department of Health and Human Services|Blankenship|USA

>Spike|hCoV-19/Scotland/EDB3652/2020|2020-04-27|EPI\_ISL\_439304|Original|hCoV-19^^Scotland|Human|Virology Department|COVID-19 Genomics UK (COG-UK) Consortium|Williams|United Kingdom

>Spike|hCoV-19/Austria/CeMM0224/2020|2020-03-17|EPI\_ISL\_438058|Original|hCoV-19^^Vienna|Human|Center for Virology|Bergthaler laboratory|Bergthaler|Austria

>Spike|hCoV-19/Scotland/CVR3876/2020|2020-05-30|EPI\_ISL\_484665|Original|hCoV-19^^Scotland|Human|West of Scotland Specialist Virology Centre|COVID-19 Genomics UK (COG-UK) Consortium|Robertson|United Kingdom

>Spike|hCoV-19/India/MH-AFCO-8223/2020|2020-06-17|EPI\_ISL\_722188|Original|hCoV-19^^Maharashtra|Human|Armed Forces Medical College|National Centre For Cell Science|Paul|India

>Spike|hCoV-19/USA/UT-UPHL-201119439/2020|2020-05-01|EPI\_ISL\_634904|Original|hCoV-19^^Utah|Human|Utah Public Health Laboratory|Utah Public Health Laboratory|Young|USA

>Spike|hCoV-19/United Arab Emirates/0562/2020|2020-05-19|EPI\_ISL\_698722|Original|hCoV-19^^Abu Dhabi|Human|Group 42 (G42) Healthcare|G42 Healthcare|Ogrodzki|United Arab Emirates

>Spike|hCoV-19/Scotland/CVR261/2020|2020-03-20|EPI\_ISL\_433277|Original|hCoV-19^^Scotland|Human|West of Scotland Specialist Virology Centre|COVID-19 Genomics UK (COG-UK) Consortium|Robertson|United Kingdom

>Spike|hCoV-19/Wales/PHWC-16949F/2020|2020-06-25|EPI\_ISL\_499446|Original|hCoV-19^^Wales|Human|Wales Specialist Virology Centre Sequencing lab|COVID-19 Genomics UK (COG-UK) Consortium|Moore|United Kingdom

>Spike|hCoV-19/Netherlands/ZH-EMC-1154/2020|2020-12-19|EPI\_ISL\_763229|Original|hCoV-19^^Zuid Holland|Human|Dutch COVID-19 response team|Erasmus Medical Center|Oude Munnink|Netherlands

>Spike|hCoV-19/India/UT-AR7/2020|2020-05-30|EPI\_ISL\_508204|Original|hCoV-19^^Uttarakhand|Human|All india institute of Medical Sciences Rishikesh|National Institute of Biomedical Genomics|Maitra|India

>Spike|hCoV-19/Australia/VIC16935/2020|2020-00-00|EPI\_ISL\_663646|Original|hCoV-19^^Victoria|Human|Microbiological Diagnostic Unit - Public Health Laboratory (MDU-PHL) |MDU-PHL|Schultz|Australia

>Spike|hCoV-19/South Africa/R12710-20/2020|2020-06-16|EPI\_ISL\_504237|Original|hCoV-19^^North West|Human|National Institute for Communicable Diseases of the National Health Laboratory Service|National Institute for Communicable Diseases of the National Health Laboratory Service|Allam|South Africa

>Spike|hCoV-19/USA/CA-QDX-1579/2020|2020-03-18|EPI\_ISL\_603893|Original|hCoV-19^^California|Human|Quest Diagnostics|Quest Diagnostics|Kagan|USA

>Spike|hCoV-19/England/MILK-BAFCB9/2020|2020-11-17|EPI\_ISL\_720339|Original|hCoV-19^^England|Human|Lighthouse Lab in Milton Keynes|Wellcome Sanger Institute for the COVID-19 Genomics UK (COG-UK) Consortium|Davies|United Kingdom

>Spike|hCoV-19/England/ALDP-AA1580/2020|2020-10-22|EPI\_ISL\_624242|Original|hCoV-19^^England|Human|Lighthouse Lab in Alderley Park|Wellcome Sanger Institute for the COVID-19 Genomics UK (COG-UK) consortium|Davies|United Kingdom

>Spike|hCoV-19/USA/TX-HMH-5056/2020|2020-06-24|EPI\_ISL\_544492|Original|hCoV-19^^Texas|Human|Houston Methodist Hospital|Houston Methodist Hospital|Long|USA

>Spike|hCoV-19/USA/VA-DCLS-1138/2020|2020-04-25|EPI\_ISL\_529928|Original|hCoV-19^^Virginia|Human|Virginia Division of Consolidated Laboratory Services|Virginia Division of Consolidated Laboratory Services|St. Jacques|USA

>Spike|hCoV-19/England/ALDP-9E66D8/2020|2020-09-25|EPI\_ISL\_580443|Original|hCoV-19^^England|Human|Lighthouse Lab in Alderley Park|Wellcome Sanger Institute for the COVID-19 Genomics UK (COG-UK) consortium|Davies|United Kingdom

>Spike|hCoV-19/England/LIVE-DB3BFF/2020|2020-10-20|EPI\_ISL\_650198|Original|hCoV-19^^England|Human|Liverpool Clinical Laboratories|COVID-19 Genomics UK (COG-UK) Consortium|Haldenby|United Kingdom

>Spike|hCoV-19/USA/CA-CZB-7204/2020|2020-08-04|EPI\_ISL\_582940|Original|hCoV-19^^California|Human|County of Santa Clara Public Health Department|Chan-Zuckerberg Biohub|Bhatt|USA

>Spike|hCoV-19/USA/CT-UW328/2020|2020-03-14|EPI\_ISL\_418895|Original|hCoV-19^^Connecticut|Human|UW Virology Lab|UW Virology Lab|Roychoudhury|USA

>Spike|hCoV-19/USA/TX-HMH-MCoV-14076/2020|2020-08-14|EPI\_ISL\_787362|Original|hCoV-19^^Texas|Human|Houston Methodist Hospital|Houston Methodist Hospital|Long|USA

>Spike|hCoV-19/Australia/VIC15231/2020|2020-08-02|EPI\_ISL\_593207|Original|hCoV-19^^Victoria|Human|Microbiological Diagnostic Unit - Public Health Laboratory (MDU-PHL) |MDU-PHL|Schultz|Australia

>Spike|hCoV-19/USA/CA-CZB-14366/2020|2020-07-09|EPI\_ISL\_739600|Original|hCoV-19^^California|Human|Alameda County Public Health Lab|Chan-Zuckerberg Biohub|Kamm|USA

>Spike|hCoV-19/Spain/GA-IBV-004045/2020|2020-03-17|EPI\_ISL\_510284|Original|hCoV-19^^Galicia|Human|Hospital Cl\u00e9nico Universitario de Santiago de Compostela|SeqCOVID-SPAIN consortium/IBV (CSIC)|Comas|Spain

>Spike|hCoV-19/England/MILK-9AB46C/2020|2020-08-31|EPI\_ISL\_551198|Original|hCoV-19^^England|Human|Lighthouse Lab in Milton Keynes|Wellcome Sanger Institute for the COVID-19 Genomics UK (COG-UK) consortium|Davies|United Kingdom

>Spike|hCoV-19/Wales/PHWC-47D8F3/2020|2020-10-06|EPI\_ISL\_586208|Original|hCoV-19^^Wales|Human|Wales Specialist Virology Centre Sequencing lab|COVID-19 Genomics UK (COG-UK) Consortium|Moore|United Kingdom

>Spike|hCoV-19/England/ALDP-8FCA7A/2020|2020-06-24|EPI\_ISL\_557065|Original|hCoV-19^^England|Human|Lighthouse Lab in Alderley Park|Wellcome Sanger Institute for the COVID-19 Genomics UK (COG-UK) consortium|Davies|United Kingdom

>Spike|hCoV-19/USA/CA-CZB-2140/2020|2020-05-21|EPI\_ISL\_486362|Original|hCoV-19^^California|Human|UCSF Clinical Microbiology Laboratory|Chan-Zuckerberg Biohub|McGeever|USA

>Spike|hCoV-19/USA/WA-S2757/2020|2020-07-28|EPI\_ISL\_525747|Original|hCoV-19^^Washington|Human|Seattle Flu Study|Seattle Flu Study|Lee|USA

>Spike|hCoV-19/Canada/BC\_08419582/2020|2020-04-00|EPI\_ISL\_466832|Original|hCoV-19^^British Columbia|Human|BCCDC Public Health Laboratory|BCCDC Public Health Laboratory|Harrigan|Canada

>Spike|hCoV-19/England/LIVE-9FADB/2020|2020-06-06|EPI\_ISL\_472038|Original|hCoV-19^^England|Human|Liverpool Clinical Laboratories|COVID-19 Genomics UK (COG-UK) Consortium|Haldenby|United Kingdom

>Spike|hCoV-19/Denmark/DCGC-4323/2020|2020-08-31|EPI\_ISL\_615523|Original|hCoV-19^^Syddanmark|Human|Department of Virus and Microbiological Special Diagnostics|Albertsen lab|Michaelsen|Denmark

>Spike|hCoV-19/England/MILK-AB81DD/2020|2020-10-21|EPI\_ISL\_623250|Original|hCoV-19^^England|Human|Lighthouse Lab in Milton Keynes|Wellcome Sanger Institute for the COVID-19 Genomics UK (COG-UK) consortium|Davies|United Kingdom

>Spike|hCoV-19/Netherlands/NB-RIVM-20718/2020|2020-12-14|EPI\_ISL\_790784|Original|hCoV-19^^Noord-Brabant|Human|Dutch COVID-19 response team|National Institute for Public Health and the Environment (RIVM)|Meijer|Netherlands

>Spike|hCoV-19/England/ALDP-A87BBB/2020|2020-10-17|EPI\_ISL\_606087|Original|hCoV-19^^England|Human|Lighthouse Lab in Alderley Park|Wellcome Sanger Institute for the COVID-19 Genomics UK (COG-UK) consortium|Davies|United Kingdom

>Spike|hCoV-19/Australia/VIC11563/2020|2020-08-27|EPI\_ISL\_562646|Original|hCoV-19^^Victoria|Human|Victorian Infectious Diseases Reference Laboratory (VIDRL)|VIDRL and MDU-PHL|Schultz|Australia

>Spike|hCoV-19/England/20139044104/2020|2020-03-29|EPI\_ISL\_420680|Original|hCoV-19^^England|Human|Respiratory Virus Unit|Respiratory Virus Unit|Platt|United Kingdom

>Spike|hCoV-19/Singapore/1190/2020|2020-04-14|EPI\_ISL\_648118|Original|hCoV-19^^Singapore|Human|Department of Laboratory Medicine|Department of Laboratory Medicine|Chen|Singapore

>Spike|hCoV-19/USA/CA-CZB-11550/2020|2020-07-12|EPI\_ISL\_625548|Original|hCoV-19^^California|Human|County of San Luis Obispo Public Health Laboratory|Chan-Zuckerberg Biohub|Bhatt|USA

>Spike|hCoV-19/USA/WI-UW-509/2020|2020-06-08|EPI\_ISL\_484884|Original|hCoV-19^^Wisconsin|Human|University of Wisconsin-Madison AIDS Vaccine Research Laboratories|University of Wisconsin-Madison AIDS Vaccine Research Laboratories|Baczenas|USA

>Spike|hCoV-19/Wales/PHWC-2DF6A/2020|2020-04-10|EPI\_ISL\_446042|Original|hCoV-19^^Wales|Human|Wales Specialist Virology Centre|Public Health Wales Microbiology Cardiff|Moore|United Kingdom

>Spike|hCoV-19/Australia/VIC16293/2020|2020-08-21|EPI\_ISL\_641266|Original|hCoV-19^^Victoria|Human|Microbiological Diagnostic Unit - Public Health Laboratory (MDU-PHL)|MDU-PHL|Schultz|Australia

>Spike|hCoV-19/Scotland/CVR5900/2020|2020-11-17|EPI\_ISL\_705658|Original|hCoV-19^^Scotland|Human|West of Scotland Specialist Virology Centre|COVID-19 Genomics UK (COG-UK) Consortium|Robertson|United Kingdom

>Spike|hCoV-19/England/NORT-29AB17/2020|2020-05-21|EPI\_ISL\_492467|Original|hCoV-19^^England|Human|NU-OMICS DNA Sequencing research facility|Wellcome Sanger Institute for the COVID-19 Genomics UK (COG-UK) Consortium|Davies|United Kingdom

>Spike|hCoV-19/England/ALDP-B62845/2020|2020-11-09|EPI\_ISL\_656433|Original|hCoV-19^^England|Human|Lighthouse Lab in Alderley Park|Wellcome Sanger Institute for the COVID-19 Genomics UK (COG-UK) Consortium|Davies|United Kingdom

>Spike|hCoV-19/England/20142131104/2020|2020-03-30|EPI\_ISL\_465962|Original|hCoV-19^^England|Human|Respiratory Virus Unit|Respiratory Virus Unit|Platt|United Kingdom

>Spike|hCoV-19/Wales/PHWC-4898D6/2020|2020-10-27|EPI\_ISL\_652422|Original|hCoV-19^^Wales|Human|Wales Specialist Virology Centre Sequencing lab|COVID-19 Genomics UK (COG-UK) Consortium|Moore|United Kingdom

>Spike|hCoV-19/England/CAMB-1AADA6/2020|2020-04-19|EPI\_ISL\_470234|Original|hCoV-19^^England|Human|Department of Pathology|Wellcome Sanger Institute for the COVID-19 Genomics UK (COG-UK) consortium|Davies|United Kingdom

>Spike|hCoV-19/USA/CA-CZB-1068/2020|2020-04-21|EPI\_ISL\_437068|Original|hCoV-19^^California|Human|County of Santa Clara Public Health|Chan-Zuckerberg Biohub|Hao|USA

>Spike|hCoV-19/England/ALDP-CB5DE9/2020|2020-12-18|EPI\_ISL\_761821|Original|hCoV-19^^England|Human|Lighthouse Lab in Alderley Park|Wellcome Sanger Institute for the COVID-19 Genomics UK (COG-UK) Consortium|Davies|United Kingdom

>Spike|hCoV-19/Wuhan/HB-WH1-127/2020|2020-03-02|EPI\_ISL\_454908|Original|hCoV-19^^Hubei|Human|Wuhan Chain Medical Labs (CMLabs)|State Key Laboratory of Biotherapy of Sichuan University|Tang|China

>Spike|hCoV-19/Wales/PHWC-49A605/2020|2020-12-02|EPI\_ISL\_727573|Original|hCoV-19^^Wales|Human|Originating lab|COVID-19 Genomics UK (COG-UK) Consortium|Moore|United Kingdom

>Spike|hCoV-19/England/QEUEH-548043/2020|2020-05-14|EPI\_ISL\_533416|Original|hCoV-19^^England|Human|Lighthouse Lab in Glasgow|Wellcome Sanger Institute for the COVID-19 Genomics UK (COG-UK) consortium|Davies|United Kingdom

>Spike|hCoV-19/Switzerland/VD-ETHZ-220066/2020|2020-07-25|EPI\_ISL\_512035|Original|hCoV-19^^Vaud|Human|Viollier AG|Department of Biosystems Science and Engineering|Nadeau|Switzerland

>Spike|hCoV-19/England/SHEF-10D75A6/2020|2020-12-04|EPI\_ISL\_742101|Original|hCoV-19^^England|Human|Virology Department|COVID-19 Genomics UK (COG-UK) Consortium|de Silva|United Kingdom

>Spike|hCoV-19/Wales/CAMC-A80E04/2020|2020-10-14|EPI\_ISL\_625310|Original|hCoV-19^^Wales|Human|Lighthouse Lab in Cambridge|Wellcome Sanger Institute for the COVID-19 Genomics UK (COG-UK) consortium|Davies|United Kingdom

>Spike|hCoV-19/Denmark/DCGC-17804/2020|2020-12-14|EPI\_ISL\_749576|Original|hCoV-19^^Sjaelland|Human|Department of Virus and Microbiological Special Diagnostics|Albertsen Lab|Michaelsen|Denmark

>Spike|hCoV-19/Denmark/DCGC-2173/2020|2020-08-10|EPI\_ISL\_617472|Original|hCoV-19^^Midtjylland|Human|Department of Virus and Microbiological Special Diagnostics|Albertsen lab|Michaelsen|Denmark

>Spike|hCoV-19/Netherlands/ZH-EMC-265/2020|2020-04-16|EPI\_ISL\_523607|Original|hCoV-19^^Zuid Holland|Human|Dutch COVID-19 response team|Erasmus Medical Center|Oude Munnink|Netherlands

>Spike|hCoV-19/Russia/MOW-RII-MH2001S/2020|2020-06-15|EPI\_ISL\_596344|Original|hCoV-19^^Moscow|Human|Pathogenic Microorganisms Variability Laboratory|WHO National Influenza Centre Russian Federation|Komissarov|Russia

>Spike|hCoV-19/Ireland/D-NVRL-AIIDV0072v1/2020|2020-04-10|EPI\_ISL\_644276|Original|hCoV-19^^Dublin|Human|CEPHR / Vincent's Hospital|Irish Coronavirus Sequencing Consortium - National Virus Reference Laboratory|Gonzalez|Ireland

>Spike|hCoV-19/Scotland/EDB3079/2020|2020-04-04|EPI\_ISL\_489029|Original|hCoV-19^^Scotland|Human|Virology Department|Wellcome Sanger Institute for the COVID-19 Genomics UK (COG-UK) consortium|Davies|United Kingdom

>Spike|hCoV-19/India/TG-CCMB-O2-P4M/2020|2020-04-15|EPI\_ISL\_471645|Vero P4|hCoV-19^^Telangana|Human|CSIR-Centre for Cellular and Molecular Biology|CSIR-Centre for Cellular and Molecular Biology|Banu|India

>Spike|hCoV-19/USA/WI-WSLH-200231/2020|2020-04-12|EPI\_ISL\_578451|Original|hCoV-19^^Wisconsin|Human|Wisconsin State Laboratory of Hygiene Communicable Disease Division|Wisconsin State Laboratory of Hygiene Communicable Disease Division|Florek|USA

>Spike|hCoV-19/Northern Ireland/NIRE-107590/2020|2020-03-29|EPI\_ISL\_585170|Original|hCoV-19^^Northern Ireland|Human|Regional Virus Laboratory|COVID-19 Genomics UK (COG-UK) Consortium|Fairley|United Kingdom



>Spike|hCoV-19/New Zealand/20VR2020/2020|2020-00-00|EPI\_ISL\_579208|Original|hCoV-19^^Combined Wellington|Human|Wellington SCL (WN)|Institute of Environmental Science and Research (ESR)|Wang|New Zealand

>Spike|hCoV-19/USA/NY-NYUMC566/2020|2020-03-30|EPI\_ISL\_444683|Original|hCoV-19^^New York|Human|NYU Langone Health|Departments of Pathology and Medicine|Maurano|USA

>Spike|hCoV-19/USA/ME-HETL-J0125/2020|2020-09-06|EPI\_ISL\_755324|Original|hCoV-19^^Maine|Human|Maine Health and Environmental Testing Laboratory|Tewhey Lab|Tewhey|USA

>Spike|hCoV-19/Wales/PHWC-16DD90/2020|2020-09-27|EPI\_ISL\_577532|Original|hCoV-19^^Wales|Human|Wales Specialist Virology Centre Sequencing lab|COVID-19 Genomics UK (COG-UK) Consortium|Moore|United Kingdom

>Spike|hCoV-19/England/SHEF-10D554E/2020|2020-12-17|EPI\_ISL\_742074|Original|hCoV-19^^England|Human|Virology Department|COVID-19 Genomics UK (COG-UK) Consortium|de Silva|United Kingdom

>Spike|hCoV-19/USA/FL-BPHL-1542/2020|2020-08-28|EPI\_ISL\_568640|Original|hCoV-19^^Florida|Human|Florida Bureau of Public Health Laboratories|Florida Bureau of Public Health Laboratories|Blanton|USA

>Spike|hCoV-19/USA/WA-UW-10036/2020|2020-05-29|EPI\_ISL\_461454|Original|hCoV-19^^Washington|Human|UW Virology Lab|UW Virology Lab|Roychoudhury|USA

>Spike|hCoV-19/Switzerland/VD-42205435/2020|2020-03-24|EPI\_ISL\_581784|Original|hCoV-19^^Vaud|Human|University Hospital Basel|University Hospital Basel|Roloff Handschin|Switzerland

>Spike|hCoV-19/Wales/PHWC-49C560/2020|2020-12-11|EPI\_ISL\_742571|Original|hCoV-19^^Wales|Human|Wales Specialist Virology Centre Sequencing lab|COVID-19 Genomics UK (COG-UK) Consortium|Moore|United Kingdom

>Spike|hCoV-19/England/ALDP-9B6686/2020|2020-08-28|EPI\_ISL\_573026|Original|hCoV-19^^England|Human|Oxford Viromics|COVID-19 Genomics UK (COG-UK) Consortium|Golubchik|United Kingdom

>Spike|hCoV-19/Denmark/DCGC-6398/2020|2020-09-28|EPI\_ISL\_622324|Original|hCoV-19^^Nordjylland|Human|Department of Virus and Microbiological Special Diagnostics|Albertsen lab|Michaelsen|Denmark

>Spike|hCoV-19/Denmark/DCGC-11615/2020|2020-11-02|EPI\_ISL\_671025|Original|hCoV-19^^Syddanmark|Human|Department of Virus and Microbiological Special Diagnostics|Albertsen Lab|Michaelsen|Denmark

>Spike|hCoV-19/USA/IA-GMF-32907/2020|2020-11-10|EPI\_ISL\_661169|Original|hCoV-19^^Iowa|Human|Gundersen Molecular Diagnostics Laboratory|Kabara Cancer Research Institute|Kenny|USA

>Spike|hCoV-19/USA/VA-DCLS-2012/2020|2020-10-14|EPI\_ISL\_677165|Original|hCoV-19^^Virginia|Human|Virginia Division of Consolidated Laboratory Services|Virginia Division of Consolidated Laboratory Services|St. Jacques|USA

>Spike|hCoV-19/Denmark/DCGC-6939/2020|2020-10-12|EPI\_ISL\_619785|Original|hCoV-19^^Sjaelland|Human|Department of Virus and Microbiological Special Diagnostics|Albertsen lab|Michaelsen|Denmark

>Spike|hCoV-19/England/ALDP-AA3A43/2020|2020-10-22|EPI\_ISL\_624264|Original|hCoV-19^^England|Human|Lighthouse Lab in Alderley Park|Wellcome Sanger Institute for the COVID-19 Genomics UK (COG-UK) consortium|Davies|United Kingdom

>Spike|hCoV-19/Wales/ALDP-AA5443/2020|2020-10-21|EPI\_ISL\_625138|Original|hCoV-19^^Wales|Human|Lighthouse Lab in Alderley Park|Wellcome Sanger Institute for the COVID-19 Genomics UK (COG-UK) consortium|Davies|United Kingdom

>Spike|hCoV-19/USA/UT-02760/2020|2020-04-29|EPI\_ISL\_522276|Original|hCoV-19^^Utah|Human|Utah Public Health Laboratory|Utah Public Health Laboratory|Young|USA

>Spike|hCoV-19/USA/UT-UPHL-04840/2020|2020-05-22|EPI\_ISL\_575166|Original|hCoV-19^^Utah|Human|Utah Public Health Laboratory|Utah Public Health Laboratory|Young|USA

>Spike|hCoV-19/USA/IA-GMF-09911/2020|2020-07-08|EPI\_ISL\_547604|Original|hCoV-19^^Iowa|Human|Gundersen Molecular Diagnostics Laboratory|Kabara Cancer Research Institute|Kenny|USA

>Spike|hCoV-19/England/QEUH-89873D/2020|2020-07-27|EPI\_ISL\_532682|Original|hCoV-19^^England|Human|Lighthouse Lab in Glasgow|Wellcome Sanger Institute for the COVID-19 Genomics UK (COG-UK) consortium|Davies|United Kingdom

>Spike|hCoV-19/Netherlands/GR-RIVM-20418/2020|2020-11-29|EPI\_ISL\_728638|Original|hCoV-19^Groningen|Human|Dutch COVID-19 response team|National Institute for Public Health and the Environment (RIVM)|Meijer|Netherlands

>Spike|hCoV-19/USA/MI-QDX-739/2020|2020-03-21|EPI\_ISL\_571472|Original|hCoV-19^Michigan|Human|Quest Diagnostics|Quest Diagnostics|Kagan|USA

>Spike|hCoV-19/Luxembourg/LNS2446787/2020|2020-03-21|EPI\_ISL\_740125|Original|hCoV-19^Luxembourg|Human|Laboratoire national de sant\u00e9|Laboratoire national de sant\u00e9|Wienecke-Baldacchino|Luxembourg

>Spike|hCoV-19/India/MH-ACTREC-519/2020|2020-08-21|EPI\_ISL\_700165|Original|hCoV-19^Maharashtra|Human|Hematopathology Laboratory|Hematopathology Laboratory|Patkar|India

>Spike|hCoV-19/USA/TX-HMH-4030/2020|2020-06-16|EPI\_ISL\_543310|Original|hCoV-19^Texas|Human|Houston Methodist Hospital|Houston Methodist Hospital|Long|USA

>Spike|hCoV-19/USA/WI-UW-2395/2020|2020-12-15|EPI\_ISL\_754620|Original|hCoV-19^Wisconsin|Human|University of Wisconsin-Madison AIDS Vaccine Research Laboratories|University of Wisconsin-Madison AIDS Vaccine Research Laboratories|Moreno|USA

>Spike|hCoV-19/England/QEUH-B9E42E/2020|2020-11-18|EPI\_ISL\_720915|Original|hCoV-19^England|Human|Lighthouse Lab in Glasgow|Wellcome Sanger Institute for the COVID-19 Genomics UK (COG-UK) Consortium|Davies|United Kingdom

>Spike|hCoV-19/Scotland/GCVR-171519/2020|2020-03-28|EPI\_ISL\_489591|Original|hCoV-19^Scotland|Human|NHSGGC West of Scotland Specialist Virology Centre / MRC-University of Glasgow Centre for Virus Research|Wellcome Sanger Institute for the COVID-19 Genomics UK (COG-UK) consortium|Davies|United Kingdom

>Spike|hCoV-19/Wales/PHWC-162E7A/2020|2020-05-19|EPI\_ISL\_473211|Original|hCoV-19^Wales|Human|Wales Specialist Virology Centre Sequencing lab|COVID-19 Genomics UK (COG-UK) Consortium|Moore|United Kingdom

>Spike|hCoV-19/Denmark/DCGC-22207/2020|2020-12-14|EPI\_ISL\_758613|Original|hCoV-19^Hovedstaden|Human|Department of Virus and Microbiological Special Diagnostics|Albertsen Lab|Michaelsen|Denmark

>Spike|hCoV-19/England/CAMC-C71C0A/2020|2020-12-16|EPI\_ISL\_768977|Original|hCoV-19^England|Human|Lighthouse Lab in Cambridge|Wellcome Sanger Institute for the COVID-19 Genomics UK (COG-UK) Consortium|Davies|United Kingdom

>Spike|hCoV-19/Singapore/33/2020|2020-03-11|EPI\_ISL\_420110|Vero P1|hCoV-19^Singapore|Human|National Centre for Infectious Diseases|Programme in Emerging Infectious Diseases|Smith|Singapore

>Spike|hCoV-19/Denmark/DCGC-17163/2020|2020-12-14|EPI\_ISL\_750334|Original|hCoV-19^Midtjylland|Human|Department of Virus and Microbiological Special Diagnostics|Albertsen Lab|Michaelsen|Denmark

>Spike|hCoV-19/South Africa/R12656-20/2020|2020-06-16|EPI\_ISL\_504211|Original|hCoV-19^North West|Human|National Institute for Communicable Diseases of the National Health Laboratory Service|National Institute for Communicable Diseases of the National Health Laboratory Service|Allam|South Africa

>Spike|hCoV-19/England/CAMC-A646D1/2020|2020-10-10|EPI\_ISL\_609091|Original|hCoV-19^England|Human|Lighthouse Lab in Cambridge|Wellcome Sanger Institute for the COVID-19 Genomics UK (COG-UK) consortium|Davies|United Kingdom

>Spike|hCoV-19/Spain/AR-IBV-97005107/2020|2020-04-27|EPI\_ISL\_779735|Original|hCoV-19^Aragon|Human|Servicio de Microbiolog\u00eda|SeqCOVID-SPAIN consortium|IBV (CSIC)|Comas|Spain

>Spike|hCoV-19/USA/HI-H200661/2020|2020-12-01|EPI\_ISL\_753184|Original|hCoV-19^Hawaii|Human|State Laboratories Division|State Laboratories Division|Sultana|USA

>Spike|hCoV-19/USA/TX-HMH-MCoV-11961/2020|2020-09-18|EPI\_ISL\_790147|Original|hCoV-19^Texas|Human|Houston Methodist Hospital|Houston Methodist Hospital|Long|USA

>Spike|hCoV-19/Japan/PG-0500/2020|2020-04-03|EPI\_ISL\_480159|Original|hCoV-19^HokurikuShinsyu|Human|Fukui Prefectural Institute of Public Health and Environmental Science|Pathogen Genomics Center|Sekizuka|Japan

>Spike|hCoV-19/Denmark/DCGC-6426/2020|2020-10-12|EPI\_ISL\_620326|Original|hCoV-19^Midtjylland|Human|Department of Virus and Microbiological Special Diagnostics|Albertsen lab|Michaelsen|Denmark

>Spike|hCoV-19/Japan/PG-8986/2020|2020-09-00|EPI\_ISL\_686524|Original|hCoV-19^^Japan|Human|Sakai City Institute of Public Health|Pathogen Genomics Center|Sekizuka|Japan

>Spike|hCoV-19/Austria/CeMM0934/2020|2020-03-26|EPI\_ISL\_583786|Original|hCoV-19^^Austria|Human|Dr. Gernot Walder GmbH|Bergthaler laboratory|Bergthaler|Austria

>Spike|hCoV-19/England/ALDP-CB3FF4/2020|2020-12-19|EPI\_ISL\_761150|Original|hCoV-19^^England|Human|Lighthouse Lab in Alderley Park|Wellcome Sanger Institute for the COVID-19 Genomics UK (COG-UK) Consortium|Davies|United Kingdom

>Spike|hCoV-19/England/204390681/2020|2020-10-23|EPI\_ISL\_649868|Original|hCoV-19^^England|Human|Respiratory Virus Unit|COVID-19 Genomics UK (COG-UK) Consortium|Platt|United Kingdom

>Spike|hCoV-19/USA/CA-CDC-4714/2020|2020-06-05|EPI\_ISL\_535690|Original|hCoV-19^^California|Human|CDPH|Pathogen Discovery|Queen|USA

>Spike|hCoV-19/Wales/PHWC-32D1D/2020|2020-04-07|EPI\_ISL\_446681|Original|hCoV-19^^Wales|Human|Wales Specialist Virology Centre|Public Health Wales Microbiology Cardiff|Moore|United Kingdom

>Spike|hCoV-19/France/NAQ-SC585/2020|2020-05-13|EPI\_ISL\_663236|Original|hCoV-19^^Nouvelle-Aquitaine|Human|CHU Poitiers|CNR Virus des Infections Respiratoires - France SUD|Bal|France

>Spike|hCoV-19/Gambia/NPHL-2712/2020|2020-08-03|EPI\_ISL\_561288|Original|hCoV-19^^Kombo|Human|MRCG at LSHTM Genomics lab|MRCG at LSHTM Genomics lab|Sesay|Gambia

>Spike|hCoV-19/Belgium/reg-0411448/2020|2020-04-11|EPI\_ISL\_476958|Original|hCoV-19^^Tienen|Human|KU Leuven|KU Leuven|Maes|Belgium

>Spike|hCoV-19/USA/CA-CZB-13481/2020|2020-10-23|EPI\_ISL\_672026|Original|hCoV-19^^California|Human|Madera County Department of Public Health|Chan-Zuckerberg Biohub|Bhatt|USA

>Spike|hCoV-19/England/QEUA-96BDA9/2020|2020-08-14|EPI\_ISL\_531339|Original|hCoV-19^^England|Human|Lighthouse Lab in Glasgow|Wellcome Sanger Institute for the COVID-19 Genomics UK (COG-UK) consortium|Davies|United Kingdom

>Spike|hCoV-19/USA/MI-MDHHS-SC22369/2020|2020-11-12|EPI\_ISL\_708349|Original|hCoV-19^^Michigan|Human|Michigan Department of Health and Human Services|Michigan Department of Health and Human Services|Jacob|USA

>Spike|hCoV-19/USA/MI-UM-10036824591/2020|2020-11-06|EPI\_ISL\_728436|Original|hCoV-19^^Michigan|Human|University of Michigan Clinical Microbiology Laboratory|Lauring Lab|Valesano|USA

>Spike|hCoV-19/Wales/PHWC-492BB3/2020|2020-11-26|EPI\_ISL\_725759|Original|hCoV-19^^Wales|Human|Originating lab|COVID-19 Genomics UK (COG-UK) Consortium|Moore|United Kingdom

>Spike|hCoV-19/England/CAMC-B7A033/2020|2020-11-12|EPI\_ISL\_741077|Original|hCoV-19^^England|Human|Oxford Viromics|COVID-19 Genomics UK (COG-UK) Consortium|Golubchik|United Kingdom

>Spike|hCoV-19/Japan/PG-0865/2020|2020-00-00|EPI\_ISL\_684475|Original|hCoV-19^^Japan|Human|Fukuoka Institute of Health and Environmental Sciences|Pathogen Genomics Center|Sekizuka|Japan

>Spike|hCoV-19/England/QEUA-53EB9A/2020|2020-05-18|EPI\_ISL\_532269|Original|hCoV-19^^England|Human|Lighthouse Lab in Glasgow|Wellcome Sanger Institute for the COVID-19 Genomics UK (COG-UK) consortium|Davies|United Kingdom

>Spike|hCoV-19/Northern Ireland/NIRE-2356A4/2020|2020-11-09|EPI\_ISL\_742127|Original|hCoV-19^^Northern Ireland|Human|Regional Virus Laboratory|COVID-19 Genomics UK (COG-UK) Consortium|Fairley|United Kingdom

>Spike|hCoV-19/USA/TX-HMH-7568/2020|2020-06-25|EPI\_ISL\_546859|Original|hCoV-19^^Texas|Human|Houston Methodist Hospital|Houston Methodist Hospital|Long|USA

>Spike|hCoV-19/England/LOND-12635BC/2020|2020-11-04|EPI\_ISL\_679451|Original|hCoV-19^^England|Human|University College London|COVID-19 Genomics UK (COG-UK) Consortium|Roy|United Kingdom

>Spike|hCoV-19/Australia/VIC12864/2020|2020-07-25|EPI\_ISL\_592093|Original|hCoV-19^^Victoria|Human|Microbiological Diagnostic Unit - Public Health Laboratory (MDU-PHL)|MDU-PHL|Schultz|Australia

>Spike|hCoV-19/USA/WY-WYPHL010/2020|2020-03-16|EPI\_ISL\_421547|Original|hCoV-19^^Wyoming|Human|Wyoming Public Health Laboratory|Center for Global Health|Domman|USA

>Spike|hCoV-19/Denmark/DCGC-19356/2020|2020-12-07|EPI\_ISL\_748903|Original|hCoV-19^^Syddanmark|Human|Department of Virus and Microbiological Special Diagnostics|Albertsen Lab|Michaelsen|Denmark

>Spike|hCoV-19/Denmark/DCGC-21571/2020|2020-12-21|EPI\_ISL\_758118|Original|hCoV-19^^Sjaelland|Human|Department of Virus and Microbiological Special Diagnostics|Albertsen Lab|Michaelsen|Denmark

>Spike|hCoV-19/England/QEUAH-AAC488/2020|2020-10-21|EPI\_ISL\_652856|Original|hCoV-19^^England|Human|Oxford Viromics|COVID-19 Genomics UK (COG-UK) Consortium|Golubchik|United Kingdom

>Spike|hCoV-19/USA/TX-HMH-MCoV-13745/2020|2020-08-18|EPI\_ISL\_788838|Original|hCoV-19^^Texas|Human|Houston Methodist Hospital|Houston Methodist Hospital|Long|USA

>Spike|hCoV-19/Australia/VIC16836/2020|2020-08-16|EPI\_ISL\_663595|Original|hCoV-19^^Victoria|Human|Microbiological Diagnostic Unit - Public Health Laboratory (MDU-PHL) |MDU-PHL|Schultz|Australia

>Spike|hCoV-19/Japan/PG-4354/2020|2020-07-00|EPI\_ISL\_692582|Original|hCoV-19^^Japan|Human|Pathogen Genomics Center|Pathogen Genomics Center|Sekizuka|Japan

>Spike|hCoV-19/Sweden/20-08532/2020|2020-03-27|EPI\_ISL\_710584|Original|hCoV-19^^Vastra Gotaland|Human|Skovde/Unilabs|The Public Health Agency of Sweden|Svartstr\u00f6m|Sweden

>Spike|hCoV-19/England/CAMC-AEAFAB/2020|2020-10-25|EPI\_ISL\_633121|Original|hCoV-19^^England|Human|Lighthouse Lab in Cambridge|Wellcome Sanger Institute for the COVID-19 Genomics UK (COG-UK) consortium|Davies|United Kingdom

>Spike|hCoV-19/India/OR-RMRC166/2020|2020-05-07|EPI\_ISL\_455766|Original|hCoV-19^^Odisha|Human|REGIONAL VRDL, ICMR-RMRC BBSR|Immunogenomics lab|Raghav|India

>Spike|hCoV-19/England/ALDP-B63677/2020|2020-11-09|EPI\_ISL\_656553|Original|hCoV-19^^England|Human|Lighthouse Lab in Alderley Park|Wellcome Sanger Institute for the COVID-19 Genomics UK (COG-UK) Consortium|Davies|United Kingdom

>Spike|hCoV-19/USA/TX-DSHS-1109/2020|2020-06-15|EPI\_ISL\_615146|Original|hCoV-19^^Texas|Human|Texas Department of State Health Services|Texas Department of State Health Services|Rahman|USA

>Spike|hCoV-19/England/MILK-A475F5/2020|2020-10-06|EPI\_ISL\_598346|Original|hCoV-19^^England|Human|Lighthouse Lab in Milton Keynes|Wellcome Sanger Institute for the COVID-19 Genomics UK (COG-UK) consortium|Davies|United Kingdom

>Spike|hCoV-19/England/CAMC-990D7E/2020|2020-08-27|EPI\_ISL\_551912|Original|hCoV-19^^England|Human|Lighthouse Lab in Cambridge|Wellcome Sanger Institute for the COVID-19 Genomics UK (COG-UK) consortium|Davies|United Kingdom

>Spike|hCoV-19/England/CAMB-73888/2020|2020-03-30|EPI\_ISL\_425248|Original|hCoV-19^^England|Human|Department of Pathology|COVID-19 Genomics UK (COG-UK) Consortium|Meredith|United Kingdom

>Spike|hCoV-19/Wales/PHWC-4A0C73/2020|2020-12-12|EPI\_ISL\_743565|Original|hCoV-19^^Wales|Human|Wales Specialist Virology Centre Sequencing lab|COVID-19 Genomics UK (COG-UK) Consortium|Moore|United Kingdom

>Spike|hCoV-19/England/CAMC-B99502/2020|2020-11-15|EPI\_ISL\_673281|Original|hCoV-19^^England|Human|Lighthouse Lab in Cambridge|Wellcome Sanger Institute for the COVID-19 Genomics UK (COG-UK) Consortium|Davies|United Kingdom

>Spike|hCoV-19/Scotland/EDB3846/2020|2020-05-01|EPI\_ISL\_439337|Original|hCoV-19^^Scotland|Human|Virology Department|COVID-19 Genomics UK (COG-UK) Consortium|Williams|United Kingdom

>Spike|hCoV-19/Denmark/DCGC-2209/2020|2020-08-10|EPI\_ISL\_617512|Original|hCoV-19^^Midtjylland|Human|Department of Virus and Microbiological Special Diagnostics|Albertsen lab|Michaelsen|Denmark

>Spike|hCoV-19/England/ALDP-A68804/2020|2020-10-12|EPI\_ISL\_608365|Original|hCoV-19^^England|Human|Lighthouse Lab in Alderley Park|Wellcome Sanger Institute for the COVID-19 Genomics UK (COG-UK) consortium|Davies|United Kingdom

>Spike|hCoV-19/United Arab Emirates/1016/2020|2020-06-11|EPI\_ISL\_699148|Original|hCoV-19^^Abu Dhabi|Human|Group 42 (G42) Healthcare|G42 Healthcare|Ogrodzki|United Arab Emirates

>Spike|hCoV-19/England/SHEF-C234D/2020|2020-10-07|EPI\_ISL\_611800|Original|hCoV-19^^England|Human|Virology Department|COVID-19 Genomics UK (COG-UK) Consortium|de Silva|United Kingdom

>Spike|hCoV-19/Wales/PHWC-480EOA/2020|2020-10-17|EPI\_ISL\_613006|Original|hCoV-19^^Wales|Human|Wales Specialist Virology Centre Sequencing lab|COVID-19 Genomics UK (COG-UK) Consortium|Moore|United Kingdom

>Spike|hCoV-19/Thailand/Samut Sakorn\_692/2020|2020-12-21|EPI\_ISL\_768530|Original|hCoV-19^^Samut Sakorn|Human|Regional Medical Sciences Center 5 Samut Songkhram|National Institute of Health|Phuygun|Thailand

>Spike|hCoV-19/Jordan/AM-ALSR-4973/2020|2020-10-05|EPI\_ISL\_730246|Original|hCoV-19^^Amman|Human|Biolab Diagnostic Laboratories|Andersen lab at Scripps Research|Gangavarapu|Jordan

>Spike|hCoV-19/USA/TX-HMH-7958/2020|2020-07-01|EPI\_ISL\_545740|Original|hCoV-19^^Texas|Human|Houston Methodist Hospital|Houston Methodist Hospital|Long|USA

>Spike|hCoV-19/Denmark/DCGC-7598/2020|2020-10-12|EPI\_ISL\_618471|Original|hCoV-19^^Hovedstaden|Human|Department of Virus and Microbiological Special Diagnostics|Albertsen lab|Michaelsen|Denmark

>Spike|hCoV-19/England/ALDP-94A159/2020|2020-06-11|EPI\_ISL\_556401|Original|hCoV-19^^England|Human|Lighthouse Lab in Alderley Park|Wellcome Sanger Institute for the COVID-19 Genomics UK (COG-UK) consortium|Davies|United Kingdom

>Spike|hCoV-19/Japan/PG-6248/2020|2020-08-00|EPI\_ISL\_689359|Original|hCoV-19^^Japan|Human|Pathogen Genomics Center|Pathogen Genomics Center|Sekizuka|Japan

>Spike|hCoV-19/France/OCC-77/2020|2020-09-02|EPI\_ISL\_603217|Original|hCoV-19^^Occitanie|Human|CHU Purpan - Laboratoire de Virologie - Institut F\u00e9d\u00e9ratif de Biologie|CHU Purpan - Laboratoire de Virologie - Institut F\u00e9d\u00e9ratif de Biologie|Latour|France

>Spike|hCoV-19/England/ALDP-A66903/2020|2020-10-12|EPI\_ISL\_630629|Original|hCoV-19^^England|Human|Lighthouse Lab in Alderley Park|Wellcome Sanger Institute for the COVID-19 Genomics UK (COG-UK) consortium|Davies|United Kingdom

>Spike|hCoV-19/USA/WI-WSLH-200342/2020|2020-04-20|EPI\_ISL\_578517|Original|hCoV-19^^Wisconsin|Human|Wisconsin State Laboratory of Hygiene Communicable Disease Division|Wisconsin State Laboratory of Hygiene Communicable Disease Division|Florek|USA

>Spike|hCoV-19/Denmark/DCGC-9002/2020|2020-10-26|EPI\_ISL\_626193|Original|hCoV-19^^Sjælland|Human|Department of Virus and Microbiological Special Diagnostics|Albertsen lab|Michaelsen|Denmark

>Spike|hCoV-19/USA/NY-NYCPHL-000968/2020|2020-08-25|EPI\_ISL\_632999|Original|hCoV-19^^New York|Human|DOHMH Jamaica|New York City Public Health Laboratory|Wang|USA

>Spike|hCoV-19/USA/MN-MDH-1990/2020|2020-10-22|EPI\_ISL\_634864|Original|hCoV-19^^Minnesota|Human|HealthPartners Central Lab|Minnesota Department of Health|Lorentz|USA

>Spike|hCoV-19/Denmark/DCGC-3034/2020|2020-08-24|EPI\_ISL\_616812|Original|hCoV-19^^Syddanmark|Human|Department of Virus and Microbiological Special Diagnostics|Albertsen lab|Michaelsen|Denmark

>Spike|hCoV-19/Hong Kong/VM20123763/2020|2020-09-19|EPI\_ISL\_730610|Original|hCoV-19^^Hong Kong|Human|Tuen Mun Hospital|Hong Kong Department of Health|Mak|China

>Spike|hCoV-19/Denmark/DCGC-13108/2020|2020-11-30|EPI\_ISL\_712586|Original|hCoV-19^^Syddanmark|Human|Department of Virus and Microbiological Special Diagnostics|Albertsen Lab|Michaelsen|Denmark

>Spike|hCoV-19/Canada/ON-S1766/2020|2020-11-08|EPI\_ISL\_755767|Original|hCoV-19^^Ontario|Human|Toronto Invasive Bacterial Diseases Network|McMaster University|McArthur|Canada

>Spike|hCoV-19/USA/MA-MGH-03361/2020|2020-11-07|EPI\_ISL\_765803|Original|hCoV-19^^Massachusetts|Human|Massachusetts General Hospital|Infectious Disease Program|Park|USA

>Spike|hCoV-19/Scotland/CVR964/2020|2020-03-28|EPI\_ISL\_439139|Original|hCoV-19^^Scotland|Human|West of Scotland Specialist Virology Centre|COVID-19 Genomics UK (COG-UK) Consortium|Robertson|United Kingdom

>Spike|hCoV-19/Ireland/LH-NVRL-73IRL41490/2020|2020-09-09|EPI\_ISL\_639856|Original|hCoV-19^^Louth|Human|National Virus Reference Laboratory|National Virus Reference Laboratory|Gonzalez|Ireland

>Spike|hCoV-19/England/NOTT-111900/2020|2020-05-28|EPI\_ISL\_461940|Original|hCoV-19^^England|Human|Queens Medical Centre|COVID-19 Genomics UK (COG-UK) Consortium|Loose|United Kingdom

>Spike|hCoV-19/England/CAMB-1ABAEA/2020|2020-04-20|EPI\_ISL\_470207|Original|hCoV-19^^England|Human|Department of Pathology|Wellcome Sanger Institute for the COVID-19 Genomics UK (COG-UK) consortium|Davies|United Kingdom

>Spike|hCoV-19/England/QEUEH-96DF38/2020|2020-08-17|EPI\_ISL\_530628|Original|hCoV-19^^England|Human|Lighthouse Lab in Glasgow|Wellcome Sanger Institute for the COVID-19 Genomics UK (COG-UK) consortium|Davies|United Kingdom

>Spike|hCoV-19/USA/UT-QDX-1842/2020|2020-03-15|EPI\_ISL\_604158|Original|hCoV-19^^Utah|Human|Quest Diagnostics|Quest Diagnostics|Kagan|USA

>Spike|hCoV-19/USA/WI-UW-2121/2020|2020-10-07|EPI\_ISL\_677526|Original|hCoV-19^^Wisconsin|Human|University of Wisconsin-Madison AIDS Vaccine Research Laboratories|University of Wisconsin-Madison AIDS Vaccine Research Laboratories|Baczenas|USA

>Spike|hCoV-19/England/ALDP-C49A4D/2020|2020-12-12|EPI\_ISL\_718715|Original|hCoV-19^^England|Human|Lighthouse Lab in Alderley Park|Wellcome Sanger Institute for the COVID-19 Genomics UK (COG-UK) Consortium|Davies|United Kingdom

>Spike|hCoV-19/France/PAC-IHU-1569/2020|2020-09-02|EPI\_ISL\_569202|Original|hCoV-19^^Provence-Alpes-C\u00f4te-d\u2019Azur|Human|MEPHI|MEPHI|Levasseur|France

>Spike|hCoV-19/England/QEUEH-C347A8/2020|2020-12-11|EPI\_ISL\_734059|Original|hCoV-19^^England|Human|Lighthouse Lab in Glasgow|Wellcome Sanger Institute for the COVID-19 Genomics UK (COG-UK) Consortium|Davies|United Kingdom

>Spike|hCoV-19/USA/CA-CZB-14600/2020|2020-10-17|EPI\_ISL\_739633|Original|hCoV-19^^California|Human|UCSF Clinical Microbiology Laboratory|Chan-Zuckerberg Biohub|Kamm|USA

>Spike|hCoV-19/England/ALDP-BB56FE/2020|2020-11-20|EPI\_ISL\_703173|Original|hCoV-19^^England|Human|Lighthouse Lab in Alderley Park|Wellcome Sanger Institute for the COVID-19 Genomics UK (COG-UK) Consortium|Davies|United Kingdom

>Spike|hCoV-19/England/ALDP-B74682/2020|2020-11-12|EPI\_ISL\_662140|Original|hCoV-19^^England|Human|Lighthouse Lab in Alderley Park|Wellcome Sanger Institute for the COVID-19 Genomics UK (COG-UK) Consortium|Davies|United Kingdom

>Spike|hCoV-19/England/ALDP-A8493C/2020|2020-10-18|EPI\_ISL\_610582|Original|hCoV-19^^England|Human|Lighthouse Lab in Alderley Park|Wellcome Sanger Institute for the COVID-19 Genomics UK (COG-UK) consortium|Davies|United Kingdom

>Spike|hCoV-19/Denmark/DCGC-12980/2020|2020-12-07|EPI\_ISL\_712504|Original|hCoV-19^^Hovedstaden|Human|Department of Virus and Microbiological Special Diagnostics|Albertsen Lab|Michaelsen|Denmark

>Spike|hCoV-19/England/ALDP-AA3F08/2020|2020-10-22|EPI\_ISL\_625041|Original|hCoV-19^^England|Human|Lighthouse Lab in Alderley Park|Wellcome Sanger Institute for the COVID-19 Genomics UK (COG-UK) consortium|Davies|United Kingdom

>Spike|hCoV-19/USA/AZ-TG319953/2020|2020-05-20|EPI\_ISL\_694016|Original|hCoV-19^^Arizona|Human|TGen North|TGen North|French|USA

>Spike|hCoV-19/England/CAMB-76D4A/2020|2020-04-02|EPI\_ISL\_439403|Original|hCoV-19^^England|Human|Department of Pathology|Wellcome Sanger Institute for the COVID-19 Genomics UK (COG-UK) consortium|Amato|United Kingdom

>Spike|hCoV-19/Scotland/CVR2753/2020|2020-04-18|EPI\_ISL\_448191|Original|hCoV-19^^Scotland|Human|West of Scotland Specialist Virology Centre|COVID-19 Genomics UK (COG-UK) Consortium|Robertson|United Kingdom

>Spike|hCoV-19/South Korea/KCDC2490/2020|2020-06-12|EPI\_ISL\_514893|Original|hCoV-19^^South Korea|Human|Division of Viral Diseases|Division of Viral Diseases|Kim|South Korea

>Spike|hCoV-19/USA/NM-NMDOH-2020242033/2020|2020-07-22|EPI\_ISL\_510882|Original|hCoV-19^^New Mexico|Human|New Mexico Department of Health Scientific Laboratory|New Mexico Department of Health Scientific Laboratory|Johnson|USA

>Spike|hCoV-19/Northern Ireland/NIRE-FBF56/2020|2020-04-10|EPI\_ISL\_459381|Original|hCoV-19^^Northern Ireland|Human|Regional Virus

Laboratory|Wellcome Sanger Institute for the COVID-19 Genomics UK (COG-UK) consortium|Davies|United Kingdom  
>Spike|hCoV-19/Ireland/OY-NVRL-72IRL00335/2020|2020-08-05|EPI\_ISL\_525416|Original|hCoV-19^^Offaly|Human|National Virus Reference Laboratory|National Virus Reference Laboratory|Gonzalez|Ireland  
>Spike|hCoV-19/USA/TX-HMH-2472/2020|2020-05-29|EPI\_ISL\_545329|Original|hCoV-19^^Texas|Human|Houston Methodist Hospital|Houston Methodist Hospital|Long|USA  
>Spike|hCoV-19/England/QEUA-A210E1/2020|2020-09-29|EPI\_ISL\_587700|Original|hCoV-19^^England|Human|Lighthouse Lab in Glasgow|Wellcome Sanger Institute for the COVID-19 Genomics UK (COG-UK) consortium|Davies|United Kingdom  
>Spike|hCoV-19/England/ALDP-B84379/2020|2020-11-14|EPI\_ISL\_674211|Original|hCoV-19^^England|Human|Lighthouse Lab in Alderley Park|Wellcome Sanger Institute for the COVID-19 Genomics UK (COG-UK) Consortium|Davies|United Kingdom  
>Spike|hCoV-19/Nigeria/OY636-CV192/2020|2020-06-17|EPI\_ISL\_527915|Original|hCoV-19^^Oyo|Human|Nigeria Centre for Disease Control (NCDC)|African Centre of Excellence for Genomics of Infectious Diseases (ACEGID)|Oluniyi|Nigeria  
>Spike|hCoV-19/India/DL-NCDC2020-CSIR-IGIB/2020|2020-05-18|EPI\_ISL\_482527|Original|hCoV-19^^Delhi|Human|National Centre for Disease control (NCDC)|NCDC/CSIR-IGIB|Pandey|India  
>Spike|hCoV-19/Switzerland/ZH-ETHZ-240064/2020|2020-08-13|EPI\_ISL\_523904|Original|hCoV-19^^Zurich|Human|Viollier AG|Department of Biosystems Science and Engineering|Nadeau|Switzerland  
>Spike|hCoV-19/England/QEUA-AE233E/2020|2020-10-27|EPI\_ISL\_633615|Original|hCoV-19^^England|Human|Lighthouse Lab in Glasgow|Wellcome Sanger Institute for the COVID-19 Genomics UK (COG-UK) consortium|Davies|United Kingdom  
>Spike|hCoV-19/USA/WI-UW-951/2020|2020-05-13|EPI\_ISL\_509950|Original|hCoV-19^^Wisconsin|Human|University of Wisconsin-Madison AIDS Vaccine Research Laboratories|University of Wisconsin-Madison AIDS Vaccine Research Laboratories|Baczenas|USA  
>Spike|hCoV-19/Wales/PHWC-489038/2020|2020-10-27|EPI\_ISL\_637604|Original|hCoV-19^^Wales|Human|Wales Specialist Virology Centre Sequencing lab|COVID-19 Genomics UK (COG-UK) Consortium|Moore|United Kingdom  
>Spike|hCoV-19/Iceland/181/2020|2020-03-16|EPI\_ISL\_417814|Original|hCoV-19^^Reykjavik|Human|The National University Hospital of Iceland|deCODE genetics|J\u00f3nsson|Iceland  
>Spike|hCoV-19/USA/AZ-TG547375/2020|2020-07-07|EPI\_ISL\_695512|Original|hCoV-19^^Arizona|Human|AZ SPHL|TGen North|French|USA  
>Spike|hCoV-19/Portugal/PT1913/2020|2020-11-13|EPI\_ISL\_732126|Original|hCoV-19^^Portugal|Human|Instituto Nacional de Saude (INSA) and Instituto Gulbenkian de Ciencia (IGC)|Instituto Nacional de Saude (INSA) and Instituto Gulbenkian de Ciencia (IGC)|Borges|Portugal  
>Spike|hCoV-19/Australia/VIC5933/2020|2020-07-21|EPI\_ISL\_518712|Original|hCoV-19^^Victoria|Human|Microbiological Diagnostic Unit - Public Health Laboratory (MDU-PHL)|MDU-PHL|Schultz|Australia  
>Spike|hCoV-19/England/MILK-BA9BA3/2020|2020-11-17|EPI\_ISL\_681641|Original|hCoV-19^^England|Human|Lighthouse Lab in Milton Keynes|Wellcome Sanger Institute for the COVID-19 Genomics UK (COG-UK) Consortium|Davies|United Kingdom  
>Spike|hCoV-19/Australia/VIC3372/2020|2020-07-06|EPI\_ISL\_521051|Original|hCoV-19^^Victoria|Human|Microbiological Diagnostic Unit - Public Health Laboratory (MDU-PHL)|MDU-PHL|Schultz|Australia  
>Spike|hCoV-19/Jordan/AM-ALSR-5006/2020|2020-10-11|EPI\_ISL\_730279|Original|hCoV-19^^Amman|Human|Biolab Diagnostic Laboratories|Andersen lab at Scripps Research|Gangavarapu|Jordan  
>Spike|hCoV-19/England/QEUA-A1EFF9/2020|2020-09-29|EPI\_ISL\_587356|Original|hCoV-19^^England|Human|Lighthouse Lab in Glasgow|Wellcome Sanger Institute for the COVID-19 Genomics UK (COG-UK) consortium|Davies|United Kingdom  
>Spike|hCoV-19/USA/LA-EVTL707/2020|2020-07-14|EPI\_ISL\_653399|Original|hCoV-19^^Louisiana|Human|LSUHS Emerging Viral Threat Laboratory|Microbial Genome Sequencing Center|Kamil|USA

>Spike|hCoV-19/SaudiArabia/KAUST-MAKKAH762/2020|2020-04-18|EPI\_ISL\_513236|Original|hCoV-19^^Makkah|Human|Pathogen Genomics Lab King Abdullah University of Science and Technology(KAUST)|Pathogen Genomics Lab King Abdullah University of Science and Technology(KAUST)|Mohamed Ghazzali|Saudi Arabia

>Spike|hCoV-19/South Africa/KRISP-K003403/2020|2020-09-11|EPI\_ISL\_602791|Original|hCoV-19^^KwaZulu-Natal|Human|NHLS-IALCH|KRISP|de Oliveira|South Africa

>Spike|hCoV-19/USA/CO-CDPHE-2100004497/2020|2020-11-19|EPI\_ISL\_771285|Original|hCoV-19^^Colorado|Human|Colorado Department of Public Health and Environment|Colorado Department of Public Health and Environment|Bankers|USA

>Spike|hCoV-19/USA/MI-MDHHS-SC22289/2020|2020-11-04|EPI\_ISL\_666955|Original|hCoV-19^^Michigan|Human|Michigan Department of Health and Human Services|Michigan Department of Health and Human Services|Jacob|USA

>Spike|hCoV-19/England/BRIS-1232B5/2020|2020-04-05|EPI\_ISL\_442754|Original|hCoV-19^^England|Human|PHE South West Regional Laboratory|Wellcome Sanger Institute for the COVID-19 Genomics UK (COG-UK) consortium|Amato|United Kingdom

>Spike|hCoV-19/England/MILK-B8C03E/2020|2020-11-11|EPI\_ISL\_709886|Original|hCoV-19^^England|Human|Lighthouse Lab in Milton Keynes|Wellcome Sanger Institute for the COVID-19 Genomics UK (COG-UK) Consortium|Davies|United Kingdom

>Spike|hCoV-19/Scotland/QEUH-C4BC27/2020|2020-12-14|EPI\_ISL\_757102|Original|hCoV-19^^Scotland|Human|Lighthouse Lab in Glasgow|Wellcome Sanger Institute for the COVID-19 Genomics UK (COG-UK) Consortium|Davies|United Kingdom

>Spike|hCoV-19/India/MH-AFCO-15230/2020|2020-07-25|EPI\_ISL\_721631|Original|hCoV-19^^Maharashtra|Human|Armed Forces Medical College|National Centre For Cell Science|Paul|India

>Spike|hCoV-19/Denmark/DCGC-3608/2020|2020-09-07|EPI\_ISL\_616374|Original|hCoV-19^^Hovedstaden|Human|Department of Virus and Microbiological Special Diagnostics|Albertsen lab|Michaelsen|Denmark

>Spike|hCoV-19/Wales/PHWC-481179/2020|2020-10-15|EPI\_ISL\_613039|Original|hCoV-19^^Wales|Human|Wales Specialist Virology Centre Sequencing lab|COVID-19 Genomics UK (COG-UK) Consortium|Moore|United Kingdom

>Spike|hCoV-19/Brazil/SP-L9-CD124/2020|2020-03-23|EPI\_ISL\_476473|Original|hCoV-19^^S\u00e3o Paulo|Human|Hospital da Cl\u00ednicas da Faculdade de Medicina da Universidade de S\u00e3o Paulo|Instituto de Medicina Tropical da Univesidade de S\u00e3o Paulo|Faria|Brazil

>Spike|hCoV-19/Switzerland/BL-ETHZ-410961/2020|2020-11-27|EPI\_ISL\_737680|Original|hCoV-19^^Basel-Landschaft|Human|Viollier AG|Department of Biosystems Science and Engineering|Nadeau|Switzerland

>Spike|hCoV-19/England/MILK-A4707C/2020|2020-10-06|EPI\_ISL\_598379|Original|hCoV-19^^England|Human|Lighthouse Lab in Milton Keynes|Wellcome Sanger Institute for the COVID-19 Genomics UK (COG-UK) consortium|Davies|United Kingdom

>Spike|hCoV-19/Ireland/MH-NVRL-20G44535/2020|2020-03-30|EPI\_ISL\_605088|Original|hCoV-19^^Meath|Human|National Virus Reference Laboratory|Irish Coronavirus Sequencing Consortium - Helixworks|Chalapati|Ireland

>Spike|hCoV-19/USA/WI-UW-18/2020|2020-03-17|EPI\_ISL\_417515|Original|hCoV-19^^Wisconsin|Human|University of Wisconsin-Madison AIDS Vaccine Research Laboratories|University of Wisconsin-Madison AIDS Vaccine Research Laboratories|Braun|USA

>Spike|hCoV-19/USA/TX-HMH-2606/2020|2020-06-07|EPI\_ISL\_545422|Original|hCoV-19^^Texas|Human|Houston Methodist Hospital|Houston Methodist Hospital|Long|USA

>Spike|hCoV-19/Northern Ireland/QEUH-96AAA3/2020|2020-08-17|EPI\_ISL\_531418|Original|hCoV-19^^Northern Ireland|Human|Lighthouse Lab in Glasgow|Wellcome Sanger Institute for the COVID-19 Genomics UK (COG-UK) consortium|Davies|United Kingdom

>Spike|hCoV-19/England/ALDP-94E0B2/2020|2020-06-16|EPI\_ISL\_555336|Original|hCoV-19^^England|Human|Lighthouse Lab in Alderley Park|Wellcome Sanger Institute for the COVID-19 Genomics UK (COG-UK) consortium|Davies|United Kingdom

>Spike|hCoV-19/Netherlands/NH-EMC-36/2020|2020-05-26|EPI\_ISL\_523405|Original|hCoV-19^^Noord Holland|Human|Dutch COVID-19 response team|Erasmus Medical Center|Oude Munnink|Netherlands



>Spike|hCoV-19/USA/WA-UW332/2020|2020-03-16|EPI\_ISL\_418899|Original|hCoV-19^^Washington|Human|UW Virology Lab|UW Virology Lab|Roychoudhury|USA

>Spike|hCoV-19/England/LOND-12F098B/2020|2020-11-20|EPI\_ISL\_679595|Original|hCoV-19^^England|Human|University College London|COVID-19 Genomics UK (COG-UK) Consortium|Roy|United Kingdom

>Spike|hCoV-19/Denmark/DCGC-3206/2020|2020-08-31|EPI\_ISL\_616029|Original|hCoV-19^^Syddanmark|Human|Department of Virus and Microbiological Special Diagnostics|Albertsen lab|Michaelsen|Denmark

>Spike|hCoV-19/England/PORT-2F62AB/2020|2020-11-28|EPI\_ISL\_741756|Original|hCoV-19^^England|Human|Centre for Enzyme Innovation|COVID-19 Genomics UK (COG-UK) Consortium|Robson|United Kingdom

>Spike|hCoV-19/USA/CA-CZB-2811/2020|2020-07-06|EPI\_ISL\_648542|Original|hCoV-19^^California|Human|Santa Clara County Public Health Laboratory|Chan-Zuckerberg Biohub|Bhatt|USA

>Spike|hCoV-19/England/QEUEH-9C7AD1/2020|2020-09-10|EPI\_ISL\_567151|Original|hCoV-19^^England|Human|Lighthouse Lab in Glasgow|Wellcome Sanger Institute for the COVID-19 Genomics UK (COG-UK) consortium|Davies|United Kingdom

>Spike|hCoV-19/Denmark/DCGC-5994/2020|2020-09-28|EPI\_ISL\_621103|Original|hCoV-19^^Midtjylland|Human|Department of Virus and Microbiological Special Diagnostics|Albertsen lab|Michaelsen|Denmark

>Spike|hCoV-19/USA/CA-ALSR-3197/2020|2020-06-02|EPI\_ISL\_635909|Original|hCoV-19^^California|Human|San Diego County Public Health Laboratory|Andersen lab at Scripps Research|Gangavarapu|USA

>Spike|hCoV-19/Scotland/EDB5673/2020|2020-04-12|EPI\_ISL\_473831|Original|hCoV-19^^Scotland|Human|Virology Department|COVID-19 Genomics UK (COG-UK) Consortium|Williams|United Kingdom

>Spike|hCoV-19/USA/WI-UW-1501/2020|2020-09-14|EPI\_ISL\_541628|Original|hCoV-19^^Wisconsin|Human|University of Wisconsin-Madison AIDS Vaccine Research Laboratories|University of Wisconsin-Madison AIDS Vaccine Research Laboratories|Baczenas|USA

>Spike|hCoV-19/Ireland/CE-UHL121/2020|2020-04-07|EPI\_ISL\_681707|Original|hCoV-19^^Clare|Human|University Hospital Limerick|Irish Coronavirus Sequencing Consortium - Teagasc Moorepark|Walsh|Ireland

>Spike|hCoV-19/Gibraltar/205121253/2020|2020-00-00|EPI\_ISL\_766373|Original|hCoV-19^^Gibraltar|Human|Microbiology|Respiratory Virus Unit|Platt|Gibraltar

>Spike|hCoV-19/Japan/PG-4588/2020|2020-08-00|EPI\_ISL\_689725|Original|hCoV-19^^Japan|Human|Pathogen Genomics Center|Pathogen Genomics Center|Sekizuka|Japan

>Spike|hCoV-19/Switzerland/BS-UHB-42200112/2020|2020-03-20|EPI\_ISL\_528269|Original|hCoV-19^^Basel-Stadt|Human|University Hospital Basel|University Hospital Basel|Roloff Handschin|Switzerland

>Spike|hCoV-19/USA/UT-019/2020|2020-03-13|EPI\_ISL\_418962|Original|hCoV-19^^Utah|Human|Utah Public Health Laboratory|Utah Public Health Laboratory|Young|USA

>Spike|hCoV-19/USA/CA-CZB-13945/2020|2020-06-22|EPI\_ISL\_739544|Original|hCoV-19^^California|Human|Alameda County Public Health Lab|Chan-Zuckerberg Biohub|Kamm|USA

>Spike|hCoV-19/South Korea/KCDC2107/2020|2020-03-10|EPI\_ISL\_498008|Original|hCoV-19^^South Korea|Human|Division of Viral Diseases|Division of Viral Diseases|Kim|South Korea

>Spike|hCoV-19/England/CAMC-AAFD3F/2020|2020-10-21|EPI\_ISL\_623411|Original|hCoV-19^^England|Human|Lighthouse Lab in Cambridge|Wellcome Sanger Institute for the COVID-19 Genomics UK (COG-UK) consortium|Davies|United Kingdom

>Spike|hCoV-19/England/QEUEH-9F4015/2020|2020-09-24|EPI\_ISL\_588676|Original|hCoV-19^^England|Human|Lighthouse Lab in Glasgow|Wellcome Sanger Institute for the COVID-19 Genomics UK (COG-UK) consortium|Davies|United Kingdom

>Spike|hCoV-19/England/WSFT-25C16E0/2020|2020-04-20|EPI\_ISL\_495087|Original|hCoV-19^^England|Human|Department of Medical Microbiology|Wellcome Sanger Institute for the COVID-19 Genomics UK (COG-UK) consortium|Davies|United Kingdom

>Spike|hCoV-19/Canada/NS-NML-1273/2020|2020-04-07|EPI\_ISL\_579661|Original|hCoV-19^^Nova Scotia|Human|QEII Health Sciences Centre|National Microbiology Laboratory (NML)|Majer|Canada

>Spike|hCoV-19/Russia/OMS-ORINFI-8583S/2020|2020-07-22|EPI\_ISL\_569790|Original|hCoV-19^^Omsk|Human|Omsk Research Institute of Natural Focal Infections|WHO National Influenza Centre Russian Federation|Komissarov|Russia

>Spike|hCoV-19/England/ALDP-A936E8/2020|2020-10-20|EPI\_ISL\_611093|Original|hCoV-19^^England|Human|Lighthouse Lab in Alderley Park|Wellcome Sanger Institute for the COVID-19 Genomics UK (COG-UK) Consortium|Davies|United Kingdom

>Spike|hCoV-19/England/BRIS-12AD80/2020|2020-05-01|EPI\_ISL\_458328|Original|hCoV-19^^England|Human|PHE South West Regional Laboratory|Wellcome Sanger Institute for the COVID-19 Genomics UK (COG-UK) consortium|Davies|United Kingdom

>Spike|hCoV-19/USA/AZ-TG654299/2020|2020-04-11|EPI\_ISL\_695955|Original|hCoV-19^^Arizona|Human|Sonora Quest Laboratories|TGen North|French|USA

>Spike|hCoV-19/Scotland/QEUH-AD1BFE/2020|2020-10-26|EPI\_ISL\_643999|Original|hCoV-19^^Scotland|Human|Lighthouse Lab in Glasgow|Wellcome Sanger Institute for the COVID-19 Genomics UK (COG-UK) Consortium|Davies|United Kingdom

>Spike|hCoV-19/USA/UT-QDX-1971/2020|2020-03-13|EPI\_ISL\_604292|Original|hCoV-19^^Utah|Human|Quest Diagnostics|Quest Diagnostics|Kagan|USA

>Spike|hCoV-19/England/QEUH-9F748F/2020|2020-09-25|EPI\_ISL\_589092|Original|hCoV-19^^England|Human|Lighthouse Lab in Glasgow|Wellcome Sanger Institute for the COVID-19 Genomics UK (COG-UK) consortium|Davies|United Kingdom

>Spike|hCoV-19/Wales/ALDP-68A28A/2020|2020-07-02|EPI\_ISL\_557996|Original|hCoV-19^^Wales|Human|Lighthouse Lab in Alderley Park|Wellcome Sanger Institute for the COVID-19 Genomics UK (COG-UK) consortium|Davies|United Kingdom

>Spike|hCoV-19/England/LIVE-DCC0D6/2020|2020-11-23|EPI\_ISL\_724487|Original|hCoV-19^^England|Human|Liverpool Clinical Laboratories|COVID-19 Genomics UK (COG-UK) Consortium|Haldenby|United Kingdom

>Spike|hCoV-19/England/204691902/2020|2020-11-14|EPI\_ISL\_693447|Original|hCoV-19^^England|Human|Respiratory Virus Unit|COVID-19 Genomics UK (COG-UK) Consortium|Platt|United Kingdom

>Spike|hCoV-19/England/ALDP-7215D6/2020|2020-06-28|EPI\_ISL\_557579|Original|hCoV-19^^England|Human|Lighthouse Lab in Alderley Park|Wellcome Sanger Institute for the COVID-19 Genomics UK (COG-UK) consortium|Davies|United Kingdom

>Spike|hCoV-19/England/ALDP-A2D07C/2020|2020-10-06|EPI\_ISL\_586714|Original|hCoV-19^^England|Human|Lighthouse Lab in Alderley Park|Wellcome Sanger Institute for the COVID-19 Genomics UK (COG-UK) consortium|Davies|United Kingdom

>Spike|hCoV-19/Japan/PG-5599/2020|2020-08-00|EPI\_ISL\_688724|Original|hCoV-19^^Japan|Human|Pathogen Genomics Center|Pathogen Genomics Center|Sekizuka|Japan

>Spike|hCoV-19/Wales/PHWC-4A4741/2020|2020-12-16|EPI\_ISL\_764727|Original|hCoV-19^^Wales|Human|Wales Specialist Virology Centre Sequencing lab|COVID-19 Genomics UK (COG-UK) Consortium|Moore|United Kingdom

>Spike|hCoV-19/England/CAMC-C3FBFC/2020|2020-12-10|EPI\_ISL\_719286|Original|hCoV-19^^England|Human|Lighthouse Lab in Cambridge|Wellcome Sanger Institute for the COVID-19 Genomics UK (COG-UK) Consortium|Davies|United Kingdom

>Spike|hCoV-19/England/QEUH-C01391/2020|2020-12-04|EPI\_ISL\_720776|Original|hCoV-19^^England|Human|Lighthouse Lab in Glasgow|Wellcome Sanger Institute for the COVID-19 Genomics UK (COG-UK) Consortium|Davies|United Kingdom

>Spike|hCoV-19/England/BRIS-12E84F/2020|2020-04-23|EPI\_ISL\_488441|Original|hCoV-19^^England|Human|PHE South West Regional Laboratory|Wellcome Sanger Institute for the COVID-19 Genomics UK (COG-UK) consortium|Davies|United Kingdom

>Spike|hCoV-19/Wales/PHWC-48745C/2020|2020-10-29|EPI\_ISL\_639196|Original|hCoV-19^^Wales|Human|Wales Specialist Virology Centre Sequencing lab|COVID-19 Genomics UK (COG-UK) Consortium|Moore|United Kingdom

>Spike|hCoV-19/England/ALDP-94BB87/2020|2020-06-11|EPI\_ISL\_555775|Original|hCoV-19^^England|Human|Lighthouse Lab in Alderley Park|Wellcome Sanger Institute for the COVID-19 Genomics UK (COG-UK) consortium|Davies|United Kingdom

>Spike|hCoV-19/Brazil/SP-321/2020|2020-05-02|EPI\_ISL\_534316|Original|hCoV-19^^S\u00e3o Paulo|Human|OS Mun Santana Lauro Ribas Braga|Instituto Adolfo Lutz|Sacchi|Brazil

>Spike|hCoV-19/Portugal/PT1178/2020|2020-03-24|EPI\_ISL\_511724|Original|hCoV-19^^Portugal|Human|Instituto Nacional de Saude (INSA)|Instituto Nacional de Saude (INSA)|Borges|Portugal

>Spike|hCoV-19/Australia/WA74/2020|2020-07-07|EPI\_ISL\_512727|Original|hCoV-19^^Western Australia|Human|PathWest Laboratory Medicine WA|PathWest Laboratory Medicine WA Microbial Surveillance Unit|Sikazwe|Australia

>Spike|hCoV-19/Wales/ALDP-C39E17/2020|2020-12-08|EPI\_ISL\_767221|Original|hCoV-19^^Wales|Human|Lighthouse Lab in Alderley Park|Wellcome Sanger Institute for the COVID-19 Genomics UK (COG-UK) Consortium|Davies|United Kingdom

>Spike|hCoV-19/South Africa/KRISP-K003347/2020|2020-09-04|EPI\_ISL\_602739|Original|hCoV-19^^KwaZulu-Natal|Human|NHLS-IALCH|KRISP|de Oliveira|South Africa

>Spike|hCoV-19/Russia/NGR-RII-MH6321S/2020|2020-11-12|EPI\_ISL\_733381|Original|hCoV-19^^Novgorod|Human|HELIX LLC|WHO National Influenza Centre Russian Federation|Komissarov|Russia

>Spike|hCoV-19/England/NORT-2819EC/2020|2020-03-22|EPI\_ISL\_472172|Original|hCoV-19^^England|Human|Northumbria University / South Tees Hospitals NHS Foundation Trust / North Cumbria Integrated Care NHS Foundation Trust / North Tees and Hartlepool NHS Foundation Trust / Newcastle Hospitals NHS Foundation Trust|COVID-19 Genomics UK (COG-UK) Consortium|Bashton|United Kingdom

>Spike|hCoV-19/Australia/VIC137/2020|2020-03-22|EPI\_ISL\_419830|Original|hCoV-19^^Victoria|Human|Microbiological Diagnostic Unit Public Health Laboratory|Microbiological Diagnostic Unit Public Health Laboratory|Schultz|Australia

>Spike|hCoV-19/Northern Ireland/NIRE-2341B3/2020|2020-10-14|EPI\_ISL\_680350|Original|hCoV-19^^Northern Ireland|Human|Regional Virus Laboratory|COVID-19 Genomics UK (COG-UK) Consortium|Fairley|United Kingdom

>Spike|hCoV-19/India/TG-CCMB-L1893/2020|2020-06-03|EPI\_ISL\_495169|Original|hCoV-19^^Telangana|Human|CSIR-Centre for Cellular and Molecular Biology|CSIR-Centre for Cellular and Molecular Biology|Banu|India

>Spike|hCoV-19/USA/CA-CZB-2509/2020|2020-05-18|EPI\_ISL\_513894|Original|hCoV-19^^California|Human|UCSF Clinical Microbiology Laboratory|Chan-Zuckerberg Biohub|Kamm|USA

>Spike|hCoV-19/Canada/ON-S1298/2020|2020-05-18|EPI\_ISL\_586342|Original|hCoV-19^^Ontario|Human|Toronto Invasive Bacterial Diseases Network|McMaster University|McArthur|Canada

>Spike|hCoV-19/England/ALDP-B1AF0B/2020|2020-11-01|EPI\_ISL\_645937|Original|hCoV-19^^England|Human|Lighthouse Lab in Alderley Park|Wellcome Sanger Institute for the COVID-19 Genomics UK (COG-UK) Consortium|Davies|United Kingdom

>Spike|hCoV-19/Switzerland/ZH-ETHZ-101190/2020|2020-03-31|EPI\_ISL\_451852|Original|hCoV-19^^Zurich|Human|Viollier AG|Department of Biosystems Science and Engineering|Nadeau|Switzerland

>Spike|hCoV-19/Scotland/EDB5389/2020|2020-04-02|EPI\_ISL\_461736|Original|hCoV-19^^Scotland|Human|Virology Department|COVID-19 Genomics UK (COG-UK) Consortium|Williams|United Kingdom

>Spike|hCoV-19/France/PAC-MEPHI-2417/2020|2020-10-14|EPI\_ISL\_644564|Original|hCoV-19^^Provence-Alpes-Cote-d\u2019Azur|Human|MEPHI|MEPHI|Levasseur|France

>Spike|hCoV-19/USA/IA-GMF-32590/2020|2020-11-09|EPI\_ISL\_661156|Original|hCoV-19^^Iowa|Human|Gundersen Molecular Diagnostics Laboratory|Kabara Cancer Research Institute|Kenny|USA

>Spike|hCoV-19/Wales/PHWC-485C47/2020|2020-10-26|EPI\_ISL\_628268|Original|hCoV-19^^Wales|Human|Wales Specialist Virology Centre Sequencing lab|COVID-19 Genomics UK (COG-UK) Consortium|Moore|United Kingdom

>Spike|hCoV-19/USA/FL-BPHL-0613/2020|2020-04-03|EPI\_ISL\_508817|Original|hCoV-19^^Florida|Human|Florida Bureau of Public Health Laboratories|Florida Bureau of Public Health Laboratories|Blanton|USA

>Spike|hCoV-19/Norway/5797/2020|2020-11-10|EPI\_ISL\_708178|Original|hCoV-19^^Vestland|Human|Foerde Hospital|Norwegian Institute of Public Health|Kopperud Riis|Norway

>Spike|hCoV-19/England/LEED-2A9DE2/2020|2020-03-24|EPI\_ISL\_538773|Original|hCoV-19^^England|Human|Leeds Teaching Hospitals NHS Trust and Public Health England|Wellcome Sanger Institute for the COVID-19 Genomics UK (COG-UK) consortium|Davies|United Kingdom

>Spike|hCoV-19/England/ALDP-94E0A3/2020|2020-06-16|EPI\_ISL\_555323|Original|hCoV-19^^England|Human|Lighthouse Lab in Alderley Park|Wellcome Sanger Institute for the COVID-19 Genomics UK (COG-UK) consortium|Davies|United Kingdom

>Spike|hCoV-19/Spain/MD-IBV-99008606/2020|2020-06-11|EPI\_ISL\_654190|Original|hCoV-19^^Madrid|Human|Hospital General Universitario Gregorio Mara\u00f1a|SeqCOVID-SPAIN consortium/IBV (CSIC)|Comas|Spain

>Spike|hCoV-19/USA/CA-CZB-1769/2020|2020-03-27|EPI\_ISL\_476786|Original|hCoV-19^^California|Human|Stanford clinical virology lab|Chan-Zuckerberg Biohub|Kamm|USA

>Spike|hCoV-19/USA/NY-NYUMC808/2020|2020-03-27|EPI\_ISL\_456044|Original|hCoV-19^^New York|Human|NYU Langone Health|Departments of Pathology and Medicine|Maurano|USA

>Spike|hCoV-19/England/CAMB-7A274/2020|2020-04-02|EPI\_ISL\_441314|Original|hCoV-19^^England|Human|Department of Pathology|Wellcome Sanger Institute for the COVID-19 Genomics UK (COG-UK) consortium|Amato|United Kingdom

>Spike|hCoV-19/Scotland/EDB1339/2020|2020-04-10|EPI\_ISL\_433436|Original|hCoV-19^^Scotland|Human|Virology Department|COVID-19 Genomics UK (COG-UK) Consortium|Williams|United Kingdom

>Spike|hCoV-19/United Arab Emirates/0681/2020|2020-05-15|EPI\_ISL\_698834|Original|hCoV-19^^Abu Dhabi|Human|Group 42 (G42) Healthcare|G42 Healthcare|Ogrodzki|United Arab Emirates

>Spike|hCoV-19/Japan/PG-2040/2020|2020-05-00|EPI\_ISL\_685645|Original|hCoV-19^^Japan|Human|Pathogen Genomics Center|Pathogen Genomics Center|Sekizuka|Japan

>Spike|hCoV-19/USA/TX-DSHS-0286/2020|2020-06-13|EPI\_ISL\_527853|Original|hCoV-19^^Texas|Human|Texas Department of State Health Services|Texas Department of State Health Services|Rahman|USA

>Spike|hCoV-19/England/20128009404/2020|2020-03-19|EPI\_ISL\_423928|Original|hCoV-19^^England|Human|Respiratory Virus Unit|Respiratory Virus Unit|Platt|United Kingdom

>Spike|hCoV-19/India/MH-NCCS-NR2359/2020|2020-05-22|EPI\_ISL\_496581|Original|hCoV-19^^Maharashtra|Human|National Centre For Cell Science|National Centre For Cell Science|Paul|India

>Spike|hCoV-19/USA/AZ-TG392965/2020|2020-06-18|EPI\_ISL\_694708|Original|hCoV-19^^Arizona|Human|TGen North|TGen North|French|USA

>Spike|hCoV-19/Australia/VIC3229/2020|2020-06-29|EPI\_ISL\_520912|Original|hCoV-19^^Victoria|Human|Victorian Infectious Diseases Reference Laboratory (VIDRL)|VIDRL and MDU-PHL|Schultz|Australia

>Spike|hCoV-19/Denmark/DCGC-22343/2020|2020-12-14|EPI\_ISL\_758691|Original|hCoV-19^^Midtjylland|Human|Department of Virus and Microbiological Special Diagnostics|Albertsen Lab|Michaelsen|Denmark

>Spike|hCoV-19/Denmark/DCGC-9398/2020|2020-11-16|EPI\_ISL\_668950|Original|hCoV-19^^Midtjylland|Human|Department of Virus and Microbiological Special Diagnostics|Albertsen Lab|Michaelsen|Denmark

>Spike|hCoV-19/Wales/PHWC-49D2C2/2020|2020-12-10|EPI\_ISL\_742761|Original|hCoV-19^^Wales|Human|Wales Specialist Virology Centre Sequencing lab|COVID-19 Genomics UK (COG-UK) Consortium|Moore|United Kingdom

>Spike|hCoV-19/Costa Rica/INC-0049/2020|2020-03-20|EPI\_ISL\_512655|Original|hCoV-19^^San Jose|Human|Hospital De Ni\u00f1os Dr. Carlos Saenz Herrera [San Jose/San Jose]|Inciensa|Brenes Porras|Costa Rica

>Spike|hCoV-19/Wales/PHWC-491A4E/2020|2020-11-09|EPI\_ISL\_706730|Original|hCoV-19^^Wales|Human|Originating lab|COVID-19 Genomics UK (COG-UK) Consortium|Moore|United Kingdom

>Spike|hCoV-19/England/ALDP-9BE378/2020|2020-09-10|EPI\_ISL\_568155|Original|hCoV-19^^England|Human|Lighthouse Lab in Alderley Park|Wellcome Sanger Institute for the COVID-19 Genomics UK (COG-UK) consortium|Davies|United Kingdom

>Spike|hCoV-19/USA/MI-UM-10036195123/2020|2020-09-29|EPI\_ISL\_590739|Original|hCoV-19^^Michigan|Human|University of Michigan Clinical Microbiology Laboratory|Lauring Lab|Valesano|USA

>Spike|hCoV-19/England/QEUH-A0B250/2020|2020-10-01|EPI\_ISL\_599142|Original|hCoV-19^^England|Human|Lighthouse Lab in Glasgow|Wellcome Sanger Institute for the COVID-19 Genomics UK (COG-UK) consortium|Davies|United Kingdom

>Spike|hCoV-19/USA/MI-UM-10036852618/2020|2020-11-09|EPI\_ISL\_728495|Original|hCoV-19^^Michigan|Human|University of Michigan Clinical Microbiology Laboratory|Lauring Lab|Valesano|USA

>Spike|hCoV-19/Japan/PG-0010/2020|2020-02-18|EPI\_ISL\_479797|Original|hCoV-19^^Kanto|Human|Sagamihara City Public Health Research Institute|Pathogen Genomics Center|Sekizuka|Japan

>Spike|hCoV-19/Denmark/DCGC-20366/2020|2020-12-21|EPI\_ISL\_759107|Original|hCoV-19^^Hovedstaden|Human|Department of Virus and Microbiological Special Diagnostics|Albertsen Lab|Michaelsen|Denmark

>Spike|hCoV-19/England/SHEF-CD430/2020|2020-04-05|EPI\_ISL\_432545|Original|hCoV-19^^England|Human|Virology Department|COVID-19 Genomics UK (COG-UK) Consortium|de Silva|United Kingdom

>Spike|hCoV-19/Japan/PG-0193/2020|2020-03-16|EPI\_ISL\_479898|Original|hCoV-19^^Kanto|Human|Gunma Prefectural Institute of Public Health and Environmental Sciences|Pathogen Genomics Center|Sekizuka|Japan

>Spike|hCoV-19/Wales/PHWC-16B4E8/2020|2020-09-16|EPI\_ISL\_560297|Original|hCoV-19^^Wales|Human|Wales Specialist Virology Centre Sequencing lab|COVID-19 Genomics UK (COG-UK) Consortium|Moore|United Kingdom

>Spike|hCoV-19/England/ALDP-9E6FCE/2020|2020-09-24|EPI\_ISL\_580528|Original|hCoV-19^^England|Human|Lighthouse Lab in Alderley Park|Wellcome Sanger Institute for the COVID-19 Genomics UK (COG-UK) consortium|Davies|United Kingdom

>Spike|hCoV-19/Scotland/QEUH-B65CDD/2020|2020-11-10|EPI\_ISL\_676374|Original|hCoV-19^^Scotland|Human|Lighthouse Lab in Glasgow|Wellcome Sanger Institute for the COVID-19 Genomics UK (COG-UK) Consortium|Davies|United Kingdom

>Spike|hCoV-19/USA/WA-S2284/2020|2020-06-10|EPI\_ISL\_497712|Original|hCoV-19^^Washington|Human|Washington State Department of Health|Seattle Flu Study|Lee|USA

>Spike|hCoV-19/England/CAMB-839CE/2020|2020-04-15|EPI\_ISL\_443337|Original|hCoV-19^^England|Human|Department of Pathology|Wellcome Sanger Institute for the COVID-19 Genomics UK (COG-UK) consortium|Amato|United Kingdom

>Spike|hCoV-19/South Africa/NHLS-UCT-GP-5223/2020|2020-04-29|EPI\_ISL\_640102|Original|hCoV-19^^Western Cape|Human|Vanguard CHC wc VGC|NHLS/UCT|Iranzadeh|South Africa

>Spike|hCoV-19/England/ALDP-A92C23/2020|2020-10-19|EPI\_ISL\_610959|Original|hCoV-19^^England|Human|Lighthouse Lab in Alderley Park|Wellcome Sanger Institute for the COVID-19 Genomics UK (COG-UK) consortium|Davies|United Kingdom

>Spike|hCoV-19/Singapore/1192/2020|2020-04-14|EPI\_ISL\_648120|Original|hCoV-19^^Singapore|Human|Department of Laboratory Medicine|Department of Laboratory Medicine|Chen|Singapore

>Spike|hCoV-19/Denmark/DCGC-16535/2020|2020-11-16|EPI\_ISL\_714822|Original|hCoV-19^^Nordjylland|Human|Department of Virus and Microbiological Special Diagnostics|Albertsen Lab|Michaelsen|Denmark

>Spike|hCoV-19/USA/MN-MDH-1508/2020|2020-04-26|EPI\_ISL\_527573|Original|hCoV-19^^Minnesota|Human|Minnesota Department of Health|Minnesota Department of Health|Garfin|USA

>Spike|hCoV-19/env/Qingdao/IVDC-011-10/2020|2020-10-07|EPI\_ISL\_591280|Vero C2|hCoV-19^^Shandong|Environment|National Institute for Viral Disease Control and Prevention|National Institute for Viral Disease Control and Prevention|Chen|China

>Spike|hCoV-19/Wales/PHWC-49F785/2020|2020-12-08|EPI\_ISL\_743265|Original|hCoV-19^^Wales|Human|Wales Specialist Virology Centre Sequencing lab|COVID-19 Genomics UK (COG-UK) Consortium|Moore|United Kingdom

>Spike|hCoV-19/Singapore/990/2020|2020-03-15|EPI\_ISL\_548998|Original|hCoV-19^^Singapore|Human|National Public Health Laboratory|National Public Health Laboratory|Mak|Singapore

>Spike|hCoV-19/Denmark/DCGC-13691/2020|2020-11-30|EPI\_ISL\_712962|Original|hCoV-19^^Syddanmark|Human|Department of Virus and Microbiological Special Diagnostics|Albertsen Lab|Michaelsen|Denmark

>Spike|hCoV-19/USA/MI-UM-2006S001056/2020|2020-04-01|EPI\_ISL\_484801|Original|hCoV-19^^Michigan|Human|University of Michigan Clinical Microbiology Laboratory|Lauring Lab|Valesano|USA

>Spike|hCoV-19/Japan/PG-7867/2020|2020-07-00|EPI\_ISL\_686968|Original|hCoV-19^^Japan|Human|Pathogen Genomics Center|Pathogen Genomics Center|Sekizuka|Japan

>Spike|hCoV-19/England/MILK-B8EB3B/2020|2020-11-13|EPI\_ISL\_674720|Original|hCoV-19^^England|Human|Lighthouse Lab in Milton Keynes|Wellcome Sanger Institute for the COVID-19 Genomics UK (COG-UK) Consortium|Davies|United Kingdom

>Spike|hCoV-19/Scotland/CVR1334/2020|2020-03-31|EPI\_ISL\_433544|Original|hCoV-19^^Scotland|Human|West of Scotland Specialist Virology Centre|COVID-19 Genomics UK (COG-UK) Consortium|Robertson|United Kingdom

>Spike|hCoV-19/England/QEUA-AAC1FA/2020|2020-10-21|EPI\_ISL\_652848|Original|hCoV-19^^England|Human|Oxford Viromics|COVID-19 Genomics UK (COG-UK) Consortium|Golubchik|United Kingdom

>Spike|hCoV-19/Switzerland/BL-UHB-42174724-2/2020|2020-03-03|EPI\_ISL\_527921|Original|hCoV-19^^Basel-Land|Human|University Hospital Basel|University Hospital Basel|Roloff Handschin|Switzerland

>Spike|hCoV-19/Denmark/DCGC-16283/2020|2020-11-16|EPI\_ISL\_714470|Original|hCoV-19^^Syddanmark|Human|Department of Virus and Microbiological Special Diagnostics|Albertsen Lab|Michaelsen|Denmark

>Spike|hCoV-19/Spain/AN-IBV-001959/2020|2020-03-14|EPI\_ISL\_452422|Original|hCoV-19^^Andalucia|Human|Servicio de Microbiolog\u00eda. HRU de M\u00e9llaga. Servicio Andaluz de Salud|SeqCOVID-SPAIN consortium|IBV(CSIC)|Comas|Spain

>Spike|hCoV-19/France/PAC-IHU-1407/2020|2020-08-10|EPI\_ISL\_569154|Original|hCoV-19^^Provence-Alpes-C\u00f4te-d\u2019Azur|Human|MEPHI|MEPHI|Levasseur|France

>Spike|hCoV-19/England/ALDP-9E74CE/2020|2020-09-24|EPI\_ISL\_594475|Original|hCoV-19^^England|Human|Oxford Viromics|COVID-19 Genomics UK (COG-UK) Consortium|Golubchik|United Kingdom

>Spike|hCoV-19/Burkina Faso/2939/2020|2020-09-21|EPI\_ISL\_660520|Original|hCoV-19^^Bobo Dioulasso|Human|Laboratoire de Microbiologie CH\u00f9 Sourou Sanou|Centre Muraz|Ouedraogo|Burkina Faso

>Spike|hCoV-19/Wales/PHWC-49F257/2020|2020-12-05|EPI\_ISL\_743185|Original|hCoV-19^^Wales|Human|Wales Specialist Virology Centre Sequencing lab|COVID-19 Genomics UK (COG-UK) Consortium|Moore|United Kingdom

>Spike|hCoV-19/Japan/PG-8766/2020|2020-09-00|EPI\_ISL\_686362|Original|hCoV-19^^Japan|Human|Pathogen Genomics Center|Pathogen Genomics Center|Sekizuka|Japan

>Spike|hCoV-19/Scotland/QEUA-C54432/2020|2020-12-12|EPI\_ISL\_757065|Original|hCoV-19^^Scotland|Human|Lighthouse Lab in Glasgow|Wellcome Sanger Institute for the COVID-19 Genomics UK (COG-UK) Consortium|Davies|United Kingdom

>Spike|hCoV-19/Denmark/DCGC-16474/2020|2020-11-16|EPI\_ISL\_714790|Original|hCoV-19^^Nordjylland|Human|Department of Virus and Microbiological Special Diagnostics|Albertsen Lab|Michaelsen|Denmark

>Spike|hCoV-19/England/QEUA-B67EE4/2020|2020-11-11|EPI\_ISL\_661379|Original|hCoV-19^^England|Human|Lighthouse Lab in Glasgow|Wellcome Sanger Institute for the COVID-19 Genomics UK (COG-UK) Consortium|Davies|United Kingdom

>Spike|hCoV-19/Australia/WA116/2020|2020-03-28|EPI\_ISL\_596679|Original|hCoV-19^^Western Australia|Human|PathWest Laboratory Medicine WA|PathWest Laboratory Medicine WA Microbial Surveillance Unit|Sikazwe|Australia

>Spike|hCoV-19/England/CAMC-B77E5A/2020|2020-11-12|EPI\_ISL\_783440|Original|hCoV-19^^England|Human|Lighthouse Lab in Cambridge|Wellcome Sanger Institute for the COVID-19 Genomics UK (COG-UK) Consortium|Davies|United Kingdom

>Spike|hCoV-19/England/QEUA-9DA72F/2020|2020-09-22|EPI\_ISL\_601446|Original|hCoV-19^^England|Human|Lighthouse Lab in Glasgow|Wellcome Sanger Institute for the COVID-19 Genomics UK (COG-UK) consortium|Davies|United Kingdom

>Spike|hCoV-19/USA/CA-CZB-13381/2020|2020-05-12|EPI\_ISL\_672038|Original|hCoV-19^^California|Human|Alameda County Public Health Lab|Chan-Zuckerberg Biohub|Bhatt|USA

>Spike|hCoV-19/England/QEUA-AD2498/2020|2020-10-24|EPI\_ISL\_634185|Original|hCoV-19^^England|Human|Lighthouse Lab in Glasgow|Wellcome Sanger Institute for the COVID-19 Genomics UK (COG-UK) consortium|Davies|United Kingdom

>Spike|hCoV-19/England/EXET-13ABCF/2020|2020-11-06|EPI\_ISL\_664287|Original|hCoV-19^^England|Human|University of Exeter|COVID-19 Genomics UK (COG-UK) Consortium|Temperton|United Kingdom

>Spike|hCoV-19/England/CAMC-B079A9/2020|2020-10-30|EPI\_ISL\_643759|Original|hCoV-19^^England|Human|Lighthouse Lab in Cambridge|Wellcome Sanger Institute for the COVID-19 Genomics UK (COG-UK) Consortium|Davies|United Kingdom

>Spike|hCoV-19/South Africa/N00060/2020|2020-08-12|EPI\_ISL\_623066|Original|hCoV-19^^Eastern Cape|Human|National Health Laboratory Service|National Institute for Communicable Diseases of the National Health Laboratory Service|Allam|South Africa

>Spike|hCoV-19/England/CAMC-B20FA8/2020|2020-11-01|EPI\_ISL\_647748|Original|hCoV-19^^England|Human|Lighthouse Lab in Cambridge|Wellcome Sanger Institute for the COVID-19 Genomics UK (COG-UK) Consortium|Davies|United Kingdom

>Spike|hCoV-19/SaudiArabia/KAUST-MADINAH938/2020|2020-05-26|EPI\_ISL\_513202|Original|hCoV-19^^Madinah|Human|Pathogen Genomics Lab King Abdullah University of Science and Technology(KAUST)|Pathogen Genomics Lab King Abdullah University of Science and Technology(KAUST)|Mohamed Ghazzali|Saudi Arabia

>Spike|hCoV-19/Australia/VIC15823/2020|2020-08-09|EPI\_ISL\_593467|Original|hCoV-19^^Victoria|Human|Microbiological Diagnostic Unit - Public Health Laboratory (MDU-PHL)|MDU-PHL|Schultz|Australia

>Spike|hCoV-19/England/CAMC-9D1D44/2020|2020-09-19|EPI\_ISL\_601515|Original|hCoV-19^^England|Human|Lighthouse Lab in Cambridge|Wellcome Sanger Institute for the COVID-19 Genomics UK (COG-UK) consortium|Davies|United Kingdom

>Spike|hCoV-19/USA/WA-S853/2020|2020-04-24|EPI\_ISL\_463343|Original|hCoV-19^^Washington|Human|Washington State Department of Health|Seattle Flu Study|Bedford|USA

>Spike|hCoV-19/USA/UT-UPHL-05569/2020|2020-06-02|EPI\_ISL\_575225|Original|hCoV-19^^Utah|Human|Utah Public Health Laboratory|Utah Public Health Laboratory|Young|USA

>Spike|hCoV-19/Scotland/EDB8382/2020|2020-10-14|EPI\_ISL\_612351|Original|hCoV-19^^Scotland|Human|Virology Department|COVID-19 Genomics UK (COG-UK) Consortium|McHugh|United Kingdom

>Spike|hCoV-19/USA/CA-CZB-10848/2020|2020-07-27|EPI\_ISL\_583093|Original|hCoV-19^^California|Human|Humboldt County Public Health Laboratory|Chan-Zuckerberg Biohub|Bhatt|USA

>Spike|hCoV-19/England/ALDP-A2FF04/2020|2020-10-06|EPI\_ISL\_587082|Original|hCoV-19^^England|Human|Lighthouse Lab in Alderley Park|Wellcome Sanger Institute for the COVID-19 Genomics UK (COG-UK) consortium|Davies|United Kingdom

>Spike|hCoV-19/USA/CA-CZB-2367/2020|2020-05-15|EPI\_ISL\_513808|Original|hCoV-19^^California|Human|Orange County Public Health Laboratory|Chan-Zuckerberg Biohub|Kamm|USA

>Spike|hCoV-19/Germany/HH-hpi-p1657/2020|2020-03-18|EPI\_ISL\_775718|Original|hCoV-19^^Hamburg|Human|University Medical Center Hamburg Eppendorf|Heinrich Pette Institute|Robitaille|Germany

>Spike|hCoV-19/USA/TX-HMH-MCoV-13088/2020|2020-08-27|EPI\_ISL\_788239|Original|hCoV-19^^Texas|Human|Houston Methodist Hospital|Houston Methodist Hospital|Long|USA

>Spike|hCoV-19/Scotland/QEUH-9CEF9F/2020|2020-09-17|EPI\_ISL\_601947|Original|hCoV-19^^Scotland|Human|Lighthouse Lab in Glasgow|Wellcome Sanger Institute for the COVID-19 Genomics UK (COG-UK) consortium|Davies|United Kingdom

>Spike|hCoV-19/England/CAMB-1AB5CB/2020|2020-04-27|EPI\_ISL\_444325|Original|hCoV-19^^England|Human|Department of Pathology|COVID-19 Genomics UK (COG-UK) Consortium|Meredith|United Kingdom

>Spike|hCoV-19/USA/ME-HETL-J0227/2020|2020-09-25|EPI\_ISL\_755387|Original|hCoV-19^^Maine|Human|Maine Health and Environmental Testing Laboratory|Tewhey Lab|Tewhey|USA

>Spike|hCoV-19/England/QEUH-A9EBEE/2020|2020-10-19|EPI\_ISL\_721558|Original|hCoV-19^^England|Human|Lighthouse Lab in Glasgow|Wellcome Sanger Institute for the COVID-19 Genomics UK (COG-UK) Consortium|Davies|United Kingdom

>Spike|hCoV-19/England/NORW-E90D0/2020|2020-04-28|EPI\_ISL\_461818|Original|hCoV-19^^England|Human|Quadram Institute Bioscience|COVID-19 Genomics UK (COG-UK) Consortium|Alikhan|United Kingdom

>Spike|hCoV-19/Gambia/GC19-3839/2020|2020-07-27|EPI\_ISL\_561098|Original|hCoV-19^^Kombo|Human|MRCG at LSHTM Genomics lab|MRCG at LSHTM Genomics lab|Sesay|Gambia

>Spike|hCoV-19/England/MILK-A193A7/2020|2020-10-03|EPI\_ISL\_612509|Original|hCoV-19^^England|Human|Wales Specialist Virology Centre Sequencing lab|COVID-19 Genomics UK (COG-UK) Consortium|Moore|United Kingdom

>Spike|hCoV-19/Australia/VIC14358/2020|2020-07-29|EPI\_ISL\_592466|Original|hCoV-19^^Victoria|Human|Microbiological Diagnostic Unit - Public Health Laboratory (MDU-PHL)|MDU-PHL|Schultz|Australia

>Spike|hCoV-19/Denmark/DCGC-6709/2020|2020-04-20|EPI\_ISL\_622387|Original|hCoV-19^^Hovedstaden|Human|Department of Virus and Microbiological Special Diagnostics|Albertsen lab|Michaelsen|Denmark

>Spike|hCoV-19/England/ALDP-C3B02E/2020|2020-12-09|EPI\_ISL\_731846|Original|hCoV-19^^England|Human|Lighthouse Lab in Alderley Park|Wellcome Sanger Institute for the COVID-19 Genomics UK (COG-UK) Consortium|Davies|United Kingdom

>Spike|hCoV-19/Belgium/RYR-030649/2020|2020-03-06|EPI\_ISL\_420315|Original|hCoV-19^^Yernee-fraineux|Human|KU Leuven|KU Leuven|Maes|Belgium

>Spike|hCoV-19/USA/NJ-QDX-1223/2020|2020-03-16|EPI\_ISL\_571978|Original|hCoV-19^^New Jersey|Human|Quest Diagnostics|Quest Diagnostics|Kagan|USA

>Spike|hCoV-19/England/LIVE-1D706B/2020|2020-09-23|EPI\_ISL\_584591|Original|hCoV-19^^England|Human|Liverpool Clinical Laboratories|COVID-19 Genomics UK (COG-UK) Consortium|Haldenby|United Kingdom

>Spike|hCoV-19/Switzerland/SZ-ETHZ-100095/2020|2020-03-13|EPI\_ISL\_451687|Original|hCoV-19^^Schwyz|Human|Viollier AG|Department of Biosystems Science and Engineering|Nadeau|Switzerland

>Spike|hCoV-19/USA/FL-QDX-913/2020|2020-03-22|EPI\_ISL\_571597|Original|hCoV-19^^Florida|Human|Quest Diagnostics|Quest Diagnostics|Kagan|USA

>Spike|hCoV-19/Colombia/CAL-INS-79489/2020|2020-03-12|EPI\_ISL\_456123|Original|hCoV-19^^Caldas|Human|Instituto Nacional de Salud - Unidad de Secuenciación y Análisis Genómico|Instituto Nacional de Salud|Díaz|Colombia

>Spike|hCoV-19/Wales/PHWC-48E5BC/2020|2020-11-12|EPI\_ISL\_680880|Original|hCoV-19^^Wales|Human|Wales Specialist Virology Centre Sequencing lab|COVID-19 Genomics UK (COG-UK) Consortium|Moore|United Kingdom

>Spike|hCoV-19/USA/UT-UPHL-2008847/2020|2020-06-01|EPI\_ISL\_524864|Original|hCoV-19^^Utah|Human|Utah Public Health Laboratory|Utah Public Health Laboratory|Young|USA

>Spike|hCoV-19/USA/OR-OHSU-1895/2020|2020-07-28|EPI\_ISL\_526062|Original|hCoV-19^^Oregon|Human|OHSU Lab Services Molecular Microbiology Lab|Oregon SARS-CoV-2 Genome Sequencing Center|O'Roak|USA

>Spike|hCoV-19/England/ALDP-AA3506/2020|2020-10-22|EPI\_ISL\_624061|Original|hCoV-19^^England|Human|Lighthouse Lab in Alderley Park|Wellcome Sanger Institute for the COVID-19 Genomics UK (COG-UK) consortium|Davies|United Kingdom

>Spike|hCoV-19/England/NOTT-10EBB5/2020|2020-03-27|EPI\_ISL\_432902|Original|hCoV-19^^England|Human|Queens Medical Centre|COVID-19 Genomics UK (COG-UK) Consortium|Loose|United Kingdom

>Spike|hCoV-19/Russia/StPetersburg-RII6053S/2020|2020-04-15|EPI\_ISL\_430104|Original|hCoV-19^^Saint Petersburg|Human|WHO National Influenza Centre Russian Federation|WHO National Influenza Centre Russian Federation|Komissarov|Russia

>Spike|hCoV-19/England/BRIS-123507/2020|2020-04-05|EPI\_ISL\_442626|Original|hCoV-19^^England|Human|PHE South West Regional Laboratory|Wellcome Sanger Institute for the COVID-19 Genomics UK (COG-UK) consortium|Amato|United Kingdom

>Spike|hCoV-19/England/201360214/2020|2020-03-25|EPI\_ISL\_423245|Original|hCoV-19^^England|Human|Respiratory Virus Unit|Respiratory Virus Unit|Platt|United Kingdom

>Spike|hCoV-19/USA/FL-BPHL-0859/2020|2020-06-29|EPI\_ISL\_514205|Original|hCoV-19^^Florida|Human|Florida Bureau of Public Health Laboratories|Florida Bureau of Public Health Laboratories|Blanton|USA

>Spike|hCoV-19/USA/MA-JLL-435722S/2020|2020-05-06|EPI\_ISL\_648268|Original|hCoV-19^^Massachusetts|Human|Brigham and Women's Hospital|Jonathan Li laboratory|Choudhary|USA

>Spike|hCoV-19/Ireland/D-NVRL-20IRL76962/2020|2020-11-05|EPI\_ISL\_732402|Original|hCoV-19^^Dublin|Human|National Virus Reference Laboratory|National Virus Reference Laboratory|Gonzalez|Ireland



>Spike|hCoV-19/USA/CA-CZB-1648/2020|2020-04-18|EPI\_ISL\_468592|Original|hCoV-19^^California|Human|Orange County Public Health Lab|Chan-Zuckerberg Biohub|McGeever|USA

>Spike|hCoV-19/England/SHEF-10CCE21/2020|2020-12-06|EPI\_ISL\_741996|Original|hCoV-19^^England|Human|Virology Department|COVID-19 Genomics UK (COG-UK) Consortium|de Silva|United Kingdom

>Spike|hCoV-19/Denmark/DCGC-3444/2020|2020-08-31|EPI\_ISL\_616206|Original|hCoV-19^^Hovedstaden|Human|Department of Virus and Microbiological Special Diagnostics|Albertsen lab|Michaelsen|Denmark

>Spike|hCoV-19/England/QEUA-95FAB0/2020|2020-08-03|EPI\_ISL\_532487|Original|hCoV-19^^England|Human|Lighthouse Lab in Glasgow|Wellcome Sanger Institute for the COVID-19 Genomics UK (COG-UK) consortium|Davies|United Kingdom

>Spike|hCoV-19/England/BRIS-13121E/2020|2020-05-20|EPI\_ISL\_467711|Original|hCoV-19^^England|Human|PHE South West Regional Laboratory|Wellcome Sanger Institute for the COVID-19 Genomics UK (COG-UK) consortium|Davies|United Kingdom

>Spike|hCoV-19/Wales/PHWC-30BBB/2020|2020-04-10|EPI\_ISL\_446332|Original|hCoV-19^^Wales|Human|Wales Specialist Virology Centre|Public Health Wales Microbiology Cardiff|Moore|United Kingdom

>Spike|hCoV-19/England/MILK-B8C05C/2020|2020-11-13|EPI\_ISL\_674468|Original|hCoV-19^^England|Human|Lighthouse Lab in Milton Keynes|Wellcome Sanger Institute for the COVID-19 Genomics UK (COG-UK) Consortium|Davies|United Kingdom

>Spike|hCoV-19/Northern Ireland/NIRE-106FDF/2020|2020-03-27|EPI\_ISL\_585095|Original|hCoV-19^^Northern Ireland|Human|Regional Virus Laboratory|COVID-19 Genomics UK (COG-UK) Consortium|Fairley|United Kingdom

>Spike|hCoV-19/Japan/PG-3717/2020|2020-04-00|EPI\_ISL\_691970|Original|hCoV-19^^Japan|Human|Pathogen Genomics Center|Pathogen Genomics Center|Sekizuka|Japan

>Spike|hCoV-19/England/MILK-B55DCE/2020|2020-11-06|EPI\_ISL\_658324|Original|hCoV-19^^England|Human|Lighthouse Lab in Milton Keynes|Wellcome Sanger Institute for the COVID-19 Genomics UK (COG-UK) Consortium|Davies|United Kingdom

>Spike|hCoV-19/England/201790215/2020|2020-04-24|EPI\_ISL\_500952|Original|hCoV-19^^England|Human|Respiratory Virus Unit|Respiratory Virus Unit|Platt|United Kingdom

>Spike|hCoV-19/England/QEUA-B67655/2020|2020-11-11|EPI\_ISL\_661534|Original|hCoV-19^^England|Human|Lighthouse Lab in Glasgow|Wellcome Sanger Institute for the COVID-19 Genomics UK (COG-UK) Consortium|Davies|United Kingdom

>Spike|hCoV-19/England/ALDP-B74066/2020|2020-11-12|EPI\_ISL\_662281|Original|hCoV-19^^England|Human|Lighthouse Lab in Alderley Park|Wellcome Sanger Institute for the COVID-19 Genomics UK (COG-UK) Consortium|Davies|United Kingdom

>Spike|hCoV-19/Netherlands/NB-EMC-289/2020|2020-08-24|EPI\_ISL\_577838|Original|hCoV-19^^Noord Brabant|Human|Dutch COVID-19 response team|Erasmus Medical Center|Oude Munnink|Netherlands

>Spike|hCoV-19/South Africa/NHLS-UCT-GS-0657/2020|2020-10-22|EPI\_ISL\_700538|Original|hCoV-19^^Western Cape|Human|Conville CDC wc CVC|NHLS/UCT|Iranzadeh|South Africa

>Spike|hCoV-19/Portugal/PT1963/2020|2020-11-23|EPI\_ISL\_731900|Original|hCoV-19^^Portugal|Human|Instituto Nacional de Saude (INSA) and Instituto Gulbenkian de Ciencia (IGC)|Instituto Nacional de Saude (INSA) and Instituto Gulbenkian de Ciencia (IGC)|Borges|Portugal

>Spike|hCoV-19/Wales/PHWC-48B85C/2020|2020-11-05|EPI\_ISL\_666290|Original|hCoV-19^^Wales|Human|Wales Specialist Virology Centre Sequencing lab|COVID-19 Genomics UK (COG-UK) Consortium|Moore|United Kingdom

>Spike|hCoV-19/England/SHEF-10C93BC/2020|2020-12-22|EPI\_ISL\_764216|Original|hCoV-19^^England|Human|Virology Department|COVID-19 Genomics UK (COG-UK) Consortium|de Silva|United Kingdom

>Spike|hCoV-19/England/QEUA-A0025B/2020|2020-09-29|EPI\_ISL\_600452|Original|hCoV-19^^England|Human|Lighthouse Lab in Glasgow|Wellcome Sanger Institute for the COVID-19 Genomics UK (COG-UK) consortium|Davies|United Kingdom

>Spike|hCoV-19/England/20149054304/2020|2020-04-04|EPI\_ISL\_466215|Original|hCoV-19^^England|Human|Respiratory Virus Unit|Respiratory Virus Unit|Platt|United Kingdom

>Spike|hCoV-19/England/MILK-9A88DC/2020|2020-09-01|EPI\_ISL\_549430|Original|hCoV-19^^England|Human|Oxford Viromics|COVID-19 Genomics UK (COG-UK) Consortium|Golubchik|United Kingdom

>Spike|hCoV-19/England/ALDP-CEC129/2020|2020-12-19|EPI\_ISL\_781457|Original|hCoV-19^^England|Human|Lighthouse Lab in Alderley Park|Wellcome Sanger Institute for the COVID-19 Genomics UK (COG-UK) Consortium|Davies|United Kingdom

>Spike|hCoV-19/Australia/WA219/2020|2020-03-28|EPI\_ISL\_596782|Original|hCoV-19^^Western Australia|Human|PathWest Laboratory Medicine WA|PathWest Laboratory Medicine WA Microbial Surveillance Unit|Sikazwe|Australia

>Spike|hCoV-19/Costa Rica/INC-0038/2020|2020-03-16|EPI\_ISL\_491449|Original|hCoV-19^^Alajuela|Human|Area de Salud Alajuela Sur|Inciensa|Brenes Porras|Costa Rica

>Spike|hCoV-19/England/QEUEH-C31EC4/2020|2020-12-11|EPI\_ISL\_731259|Original|hCoV-19^^England|Human|Lighthouse Lab in Glasgow|Wellcome Sanger Institute for the COVID-19 Genomics UK (COG-UK) Consortium|Davies|United Kingdom

>Spike|hCoV-19/USA/WV-CDC-2-3714290/2020|2020-12-01|EPI\_ISL\_751566|Original|hCoV-19^^West Virginia|Human|WVDHHR - Office of Laboratory Services|Genomics and Discovery|Queen|USA

>Spike|hCoV-19/England/ALDP-A92D4E/2020|2020-10-19|EPI\_ISL\_611149|Original|hCoV-19^^England|Human|Lighthouse Lab in Alderley Park|Wellcome Sanger Institute for the COVID-19 Genomics UK (COG-UK) consortium|Davies|United Kingdom

>Spike|hCoV-19/England/ALDP-A506F6/2020|2020-10-07|EPI\_ISL\_597831|Original|hCoV-19^^England|Human|Lighthouse Lab in Alderley Park|Wellcome Sanger Institute for the COVID-19 Genomics UK (COG-UK) consortium|Davies|United Kingdom

>Spike|hCoV-19/Wales/PHWC-4A2C08/2020|2020-12-13|EPI\_ISL\_743994|Original|hCoV-19^^Wales|Human|Wales Specialist Virology Centre Sequencing lab|COVID-19 Genomics UK (COG-UK) Consortium|Moore|United Kingdom

>Spike|hCoV-19/USA/CA-CZB-12291/2020|2020-10-07|EPI\_ISL\_648386|Original|hCoV-19^^California|Human|Santa Clara County Public Health Laboratory|Chan-Zuckerberg Biohub|Bhatt|USA

>Spike|hCoV-19/Wales/PHWC-2D44D/2020|2020-04-04|EPI\_ISL\_445986|Original|hCoV-19^^Wales|Human|Wales Specialist Virology Centre|Public Health Wales Microbiology Cardiff|Moore|United Kingdom

>Spike|hCoV-19/USA/CA-CDPH216/2020|2020-11-15|EPI\_ISL\_755072|Original|hCoV-19^^California|Human|California Department of Public Health|California Department of Public Health|Bell|USA

>Spike|hCoV-19/England/BRIS-12CC18/2020|2020-04-19|EPI\_ISL\_481957|Original|hCoV-19^^England|Human|PHE South West Regional Laboratory|Wellcome Sanger Institute for the COVID-19 Genomics UK (COG-UK) consortium|Davies|United Kingdom

>Spike|hCoV-19/England/BRIS-12FF67/2020|2020-04-10|EPI\_ISL\_492519|Original|hCoV-19^^England|Human|PHE South West Regional Laboratory|Wellcome Sanger Institute for the COVID-19 Genomics UK (COG-UK) consortium|Davies|United Kingdom

>Spike|hCoV-19/Japan/PG-5367/2020|2020-08-00|EPI\_ISL\_690470|Original|hCoV-19^^Japan|Human|Fukuoka Institute of Health and Environmental Sciences|Pathogen Genomics Center|Sekizuka|Japan

>Spike|hCoV-19/USA/CA-IGI-0741/2020|2020-07-30|EPI\_ISL\_677884|Original|hCoV-19^^California|Human|Innovative Genomics Institute|Innovative Genomics Institute|Wyman|USA

>Spike|hCoV-19/Finland/30M77S3/2020|2020-03-30|EPI\_ISL\_481658|Original|hCoV-19^^Uusimaa|Human|Department of Virology and Immunology|Department of Virology|Smura|Finland

>Spike|hCoV-19/Wales/PHWC-16E4A9/2020|2020-09-29|EPI\_ISL\_585723|Original|hCoV-19^^Wales|Human|Wales Specialist Virology Centre Sequencing lab|COVID-19 Genomics UK (COG-UK) Consortium|Moore|United Kingdom

>Spike|hCoV-19/Singapore/1072/2020|2020-10-05|EPI\_ISL\_596462|Original|hCoV-19^^Singapore|Human|National Public Health Laboratory|National Public Health Laboratory|Mak|Singapore

>Spike|hCoV-19/USA/CA-CDPH284/2020|2020-11-14|EPI\_ISL\_754924|Original|hCoV-19^^California|Human|California Department of Public Health|California Department of Public Health|Bell|USA

>Spike|hCoV-19/Australia/VIC11700/2020|2020-07-22|EPI\_ISL\_563464|Original|hCoV-19^^Victoria|Human|Microbiological Diagnostic Unit - Public Health Laboratory (MDU-PHL)|MDU-PHL|Schultz|Australia

>Spike|hCoV-19/England/LOND-1267327/2020|2020-12-07|EPI\_ISL\_741272|Original|hCoV-19^^England|Human|University College London|COVID-19 Genomics UK (COG-UK) Consortium|Roy|United Kingdom

>Spike|hCoV-19/England/QEUA-B6C5BD/2020|2020-11-11|EPI\_ISL\_661467|Original|hCoV-19^^England|Human|Lighthouse Lab in Glasgow|Wellcome Sanger Institute for the COVID-19 Genomics UK (COG-UK) Consortium|Davies|United Kingdom

>Spike|hCoV-19/Denmark/ALAB-SSI375/2020|2020-03-22|EPI\_ISL\_429480|Original|hCoV-19^^Denmark|Human|Department of Virus and Microbiological Special Diagnostics|Albertsen lab|Kirkegaard|Denmark

>Spike|hCoV-19/France/BRE-5355/2020|2020-03-24|EPI\_ISL\_443271|Original|hCoV-19^^Bretagne|Human|CHU - H\u00f4pital Cavale Blanche - Labo. de Virologie|National Reference Center for Viruses of Respiratory Infections|Enouf|France

>Spike|hCoV-19/England/CAMC-B51ADA/2020|2020-11-06|EPI\_ISL\_658197|Original|hCoV-19^^England|Human|Lighthouse Lab in Cambridge|Wellcome Sanger Institute for the COVID-19 Genomics UK (COG-UK) Consortium|Davies|United Kingdom

>Spike|hCoV-19/Israel/990333193/2020|2020-03-26|EPI\_ISL\_447260|Original|hCoV-19^^South Coast District|Human|Microbiology laboratory|Stern Lab|Miller|Israel

>Spike|hCoV-19/England/ALDP-B48DFB/2020|2020-11-07|EPI\_ISL\_649387|Original|hCoV-19^^England|Human|Lighthouse Lab in Alderley Park|Wellcome Sanger Institute for the COVID-19 Genomics UK (COG-UK) Consortium|Davies|United Kingdom

>Spike|hCoV-19/Scotland/EDB1112/2020|2020-04-06|EPI\_ISL\_433402|Original|hCoV-19^^Scotland|Human|Virology Department|COVID-19 Genomics UK (COG-UK) Consortium|Williams|United Kingdom

>Spike|hCoV-19/USA/AZ-TG664227/2020|2020-04-28|EPI\_ISL\_696035|Original|hCoV-19^^Arizona|Human|Sonora Quest Laboratories|TGen North|French|USA

>Spike|hCoV-19/Sweden/20-53768/2020|2020-12-14|EPI\_ISL\_766711|Original|hCoV-19^^Dalarna|Human|Klinisk mikrobiologi|The Public Health Agency of Sweden|Svartstr\u00f6m|Sweden

>Spike|hCoV-19/Wales/PHWC-480CB5/2020|2020-10-18|EPI\_ISL\_611711|Original|hCoV-19^^Wales|Human|Wales Specialist Virology Centre Sequencing lab|COVID-19 Genomics UK (COG-UK) Consortium|Moore|United Kingdom

>Spike|hCoV-19/South Africa/L00168/2020|2020-07-27|EPI\_ISL\_623073|Original|hCoV-19^^Gauteng|Human|Lancet Laboratories|National Institute for Communicable Diseases of the National Health Laboratory Service|Allam|South Africa

>Spike|hCoV-19/Scotland/QEUA-997BC8/2020|2020-08-28|EPI\_ISL\_559993|Original|hCoV-19^^Scotland|Human|Oxford Viromics|COVID-19 Genomics UK (COG-UK) Consortium|Golubchik|United Kingdom

>Spike|hCoV-19/Japan/PG-6783/2020|2020-08-00|EPI\_ISL\_687892|Original|hCoV-19^^Japan|Human|Pathogen Genomics Center|Pathogen Genomics Center|Sekizuka|Japan

>Spike|hCoV-19/England/ALDP-AA1B06/2020|2020-10-22|EPI\_ISL\_624437|Original|hCoV-19^^England|Human|Lighthouse Lab in Alderley Park|Wellcome Sanger Institute for the COVID-19 Genomics UK (COG-UK) consortium|Davies|United Kingdom

>Spike|hCoV-19/USA/MA-MASPHL-00465/2020|2020-04-30|EPI\_ISL\_693098|Original|hCoV-19^^Massachusetts|Human|Massachusetts State Public Health Laboratory|Massachusetts State Public Health Laboratory|Lang|USA

>Spike|hCoV-19/Wales/PHWC-48F3B1/2020|2020-11-09|EPI\_ISL\_681085|Original|hCoV-19^^Wales|Human|Wales Specialist Virology Centre Sequencing lab|COVID-19 Genomics UK (COG-UK) Consortium|Moore|United Kingdom

>Spike|hCoV-19/Japan/PG-7619/2020|2020-08-00|EPI\_ISL\_686721|Original|hCoV-19^^Japan|Human|Chiba Prefectural Institute of Public Health|Pathogen Genomics Center|Sekizuka|Japan

>Spike|hCoV-19/South Africa/R13506-20/2020|2020-07-10|EPI\_ISL\_622925|Original|hCoV-19^^North West|Human|National Institute for Communicable Diseases of the National Health Laboratory Service|National Institute for Communicable Diseases of the National Health Laboratory Service|Allam|South Africa

>Spike|hCoV-19/Bangladesh/BCSIR-NILMRC-096/2020|2020-05-23|EPI\_ISL\_469298|Original|hCoV-19^^Rangpur|Human|National Institute of Laboratory Medicine and Referral Center|Genomic Research Lab|Khan|Bangladesh

>Spike|hCoV-19/Scotland/QEUH-9CA2C7/2020|2020-09-13|EPI\_ISL\_576080|Original|hCoV-19^^Scotland|Human|Lighthouse Lab in Glasgow|Wellcome Sanger Institute for the COVID-19 Genomics UK (COG-UK) consortium|Davies|United Kingdom

>Spike|hCoV-19/Denmark/DCGC-16983/2020|2020-12-14|EPI\_ISL\_750687|Original|hCoV-19^^Midtjylland|Human|Department of Virus and Microbiological Special Diagnostics|Albertsen Lab|Michaelsen|Denmark

>Spike|hCoV-19/South Africa/LR00138/2020|2020-07-20|EPI\_ISL\_514369|Original|hCoV-19^^Gauteng|Human|National Institute for Communicable Diseases of the National Health Laboratory Service|National Institute for Communicable Diseases of the National Health Laboratory Service|Allam|South Africa

>Spike|hCoV-19/England/LOND-1264D4A/2020|2020-11-23|EPI\_ISL\_724562|Original|hCoV-19^^England|Human|University College London|COVID-19 Genomics UK (COG-UK) Consortium|Roy|United Kingdom

>Spike|hCoV-19/Saudi Arabia/KAIMRC64/2020|2020-04-03|EPI\_ISL\_507028|unknown|hCoV-19^^Saudi Arabia|Human|unknown|Infectious Diseases Research|Submitter|Saudi Arabia

>Spike|hCoV-19/England/QEUH-B43710/2020|2020-11-08|EPI\_ISL\_657076|Original|hCoV-19^^England|Human|Lighthouse Lab in Glasgow|Wellcome Sanger Institute for the COVID-19 Genomics UK (COG-UK) Consortium|Davies|United Kingdom

>Spike|hCoV-19/Netherlands/OV-RIVM-21004/2020|2020-12-26|EPI\_ISL\_791021|Original|hCoV-19^^Overijssel|Human|Dutch COVID-19 response team|National Institute for Public Health and the Environment (RIVM)|Meijer|Netherlands

>Spike|hCoV-19/Wales/PHWC-497653/2020|2020-11-30|EPI\_ISL\_726861|Original|hCoV-19^^Wales|Human|Originating lab|COVID-19 Genomics UK (COG-UK) Consortium|Moore|United Kingdom

>Spike|hCoV-19/USA/AZ-TG392628/2020|2020-06-19|EPI\_ISL\_694703|Original|hCoV-19^^Arizona|Human|TGen North|TGen North|French|USA

>Spike|hCoV-19/USA/TX-HMH-MCoV-8842/2020|2020-07-01|EPI\_ISL\_780789|Original|hCoV-19^^Texas|Human|Houston Methodist Hospital|Houston Methodist Hospital|Long|USA

>Spike|hCoV-19/Canada/BC-BCCDC-8356/2020|2020-11-00|EPI\_ISL\_740749|Original|hCoV-19^^British Columbia|Human|BCCDC Public Health Laboratory|BCCDC Public Health Laboratory|Prystajecky|Canada

>Spike|hCoV-19/Scotland/QEUH-9F66F3/2020|2020-09-27|EPI\_ISL\_600663|Original|hCoV-19^^Scotland|Human|Lighthouse Lab in Glasgow|Wellcome Sanger Institute for the COVID-19 Genomics UK (COG-UK) consortium|Davies|United Kingdom

>Spike|hCoV-19/USA/VA-DCLS-2449/2020|2020-11-20|EPI\_ISL\_734196|Original|hCoV-19^^Virginia|Human|Virginia Division of Consolidated Laboratory Services (DCLS)|Virginia Division of Consolidated Laboratory Services (DCLS)|St. Jacques|USA

>Spike|hCoV-19/England/ALDP-A6D5CC/2020|2020-10-14|EPI\_ISL\_607227|Original|hCoV-19^^England|Human|Lighthouse Lab in Alderley Park|Wellcome Sanger Institute for the COVID-19 Genomics UK (COG-UK) consortium|Davies|United Kingdom

>Spike|hCoV-19/USA/MI-MDHHS-SC22115/2020|2020-09-29|EPI\_ISL\_614166|Original|hCoV-19^^Michigan|Human|Michigan Department of Health and Human Services|Michigan Department of Health and Human Services|Jacob|USA

>Spike|hCoV-19/Iran/SA-Isf-14/2020|2020-05-10|EPI\_ISL\_582005|Original|hCoV-19^^Iran|Human|Infectious Diseases and Tropical Medicine Research Center|Infectious Diseases and Tropical Medicine Research Center|Haghjooy Javanmard,S.|Iran

>Spike|hCoV-19/USA/WI-UW-603/2020|2020-06-25|EPI\_ISL\_484978|Original|hCoV-19^^Wisconsin|Human|University of Wisconsin-Madison AIDS Vaccine Research Laboratories|University of Wisconsin-Madison AIDS Vaccine Research Laboratories|Baczenas|USA

>Spike|hCoV-19/Wales/PHWC-16DBF0/2020|2020-09-21|EPI\_ISL\_577506|Original|hCoV-19^^Wales|Human|Wales Specialist Virology Centre Sequencing lab|COVID-19 Genomics UK (COG-UK) Consortium|Moore|United Kingdom

>Spike|hCoV-19/Peru/AMZ-UPCH-0256/2020|2020-08-29|EPI\_ISL\_729902|Original|hCoV-19^^Amazonas|Human|Instituto de Medicina Tropical|Laboratorio de Gen\u00f3mica Microbiana|Tsukayama|Peru

>Spike|hCoV-19/USA/NY-Wadsworth-292769-01/2020|2020-12-26|EPI\_ISL\_769942|Original|hCoV-19^^New York|Human|Albany Medical Center Hospital Clinical Laboratories|Wadsworth Center|Lasek-Nesselquist|USA

>Spike|hCoV-19/England/QEUEH-9A473D/2020|2020-09-01|EPI\_ISL\_568371|Original|hCoV-19^^England|Human|Lighthouse Lab in Glasgow|Wellcome Sanger Institute for the COVID-19 Genomics UK (COG-UK) consortium|Davies|United Kingdom

>Spike|hCoV-19/England/ALDP-A706C3/2020|2020-10-15|EPI\_ISL\_607722|Original|hCoV-19^^England|Human|Lighthouse Lab in Alderley Park|Wellcome Sanger Institute for the COVID-19 Genomics UK (COG-UK) consortium|Davies|United Kingdom

>Spike|hCoV-19/Scotland/EDB1814/2020|2020-04-16|EPI\_ISL\_433138|Original|hCoV-19^^Scotland|Human|Virology Department|COVID-19 Genomics UK (COG-UK) Consortium|Williams|United Kingdom

>Spike|hCoV-19/England/CAMC-B99186/2020|2020-11-15|EPI\_ISL\_673817|Original|hCoV-19^^England|Human|Lighthouse Lab in Cambridge|Wellcome Sanger Institute for the COVID-19 Genomics UK (COG-UK) Consortium|Davies|United Kingdom

>Spike|hCoV-19/USA/IL-NM061/2020|2020-03-18|EPI\_ISL\_444557|Original|hCoV-19^^Illinois|Human|Northwestern Memorial Hospital|Ozer Lab|Ozer|USA

>Spike|hCoV-19/USA/VA-DCLS-2329/2020|2020-10-27|EPI\_ISL\_734276|Original|hCoV-19^^Virginia|Human|Virginia Division of Consolidated Laboratory Services (DCLS)|Virginia Division of Consolidated Laboratory Services (DCLS)|St. Jacques|USA

>Spike|hCoV-19/England/QEUEH-C32BCC/2020|2020-12-11|EPI\_ISL\_782585|Original|hCoV-19^^England|Human|Lighthouse Lab in Glasgow|Wellcome Sanger Institute for the COVID-19 Genomics UK (COG-UK) Consortium|Davies|United Kingdom

>Spike|hCoV-19/USA/MN-MDH-2175/2020|2020-11-21|EPI\_ISL\_723126|Original|hCoV-19^^Minnesota|Human|Minnesota Department of Health|Minnesota Department of Health|Lorentz|USA

>Spike|hCoV-19/Denmark/DCGC-16780/2020|2020-12-14|EPI\_ISL\_750558|Original|hCoV-19^^Hovedstaden|Human|Department of Virus and Microbiological Special Diagnostics|Albertsen Lab|Michaelsen|Denmark

>Spike|hCoV-19/England/PORT-2F61BD/2020|2020-12-12|EPI\_ISL\_741748|Original|hCoV-19^^England|Human|Centre for Enzyme Innovation|COVID-19 Genomics UK (COG-UK) Consortium|Robson|United Kingdom

>Spike|hCoV-19/Belgium/ULG-10024/2020|2020-03-30|EPI\_ISL\_421198|Original|hCoV-19^^Li\u00e8ge|Human|Department of Clinical Microbiology|GIGA Medical Genomics|Durkin|Belgium

>Spike|hCoV-19/Wales/PHWC-27FCA/2020|2020-03-25|EPI\_ISL\_431983|Original|hCoV-19^^Wales|Human|Wales Specialist Virology Centre|Public Health Wales Microbiology Cardiff|Moore|United Kingdom

>Spike|hCoV-19/Belgium/ULG-10324/2020|2020-07-29|EPI\_ISL\_540491|Original|hCoV-19^^Li\u00e8ge|Human|Department of Clinical Microbiology|GIGA Medical Genomics|Durkin|Belgium

>Spike|hCoV-19/Switzerland/BE-ETHZ-100806/2020|2020-03-25|EPI\_ISL\_451756|Original|hCoV-19^^Bern|Human|Viollier AG|Department of Biosystems Science and Engineering|Nadeau|Switzerland

>Spike|hCoV-19/England/NOTT-11F762/2020|2020-11-26|EPI\_ISL\_725563|Original|hCoV-19^^England|Human|Lincolnshire Hospitals and DeepSeq Nottingham|COVID-19 Genomics UK (COG-UK) Consortium|Loose|United Kingdom

>Spike|hCoV-19/France/PAC-IHU-0560/2020|2020-04-08|EPI\_ISL\_569595|Original|hCoV-19^^Provence-Alpes-C\u00f4te-d\u0192Azur|Human|MEPHI|MEPHI|Levasseur|France

>Spike|hCoV-19/USA/LA-EVTL092/2020|2020-05-06|EPI\_ISL\_451253|Original|hCoV-19^^Louisiana|Human|LSUHS Emerging Viral Threat Laboratory|Microbial Genome Sequencing Center|Kamil|USA

>Spike|hCoV-19/Germany/SH-ChVir4733/2020|2020-04-08|EPI\_ISL\_729550|Original|hCoV-19^^Schleswig-Holstein|Human|A. Krumbholz|Charit\u00e9 Universit\u00e4tsmedizin Berlin|Muehlemann|Germany

>Spike|hCoV-19/India/UT-50438-CSIR-IGIB/2020|2020-07-26|EPI\_ISL\_636748|Original|hCoV-19^^Uttarakhand|Human|National Centre for Disease control (NCDC)|NCDC/CSIR-IGIB|Faruq|India

>Spike|hCoV-19/England/MILK-ACDC7A/2020|2020-10-22|EPI\_ISL\_630050|Original|hCoV-19^^England|Human|Lighthouse Lab in Milton Keynes|Wellcome Sanger Institute for the COVID-19 Genomics UK (COG-UK) consortium|Davies|United Kingdom

>Spike|hCoV-19/USA/MA-MGH-00269/2020|2020-04-01|EPI\_ISL\_460164|Original|hCoV-19^^Massachusetts|Human|Massachusetts General Hospital|Infectious Disease Program|Lemieux|USA

>Spike|hCoV-19/England/MILK-B86447/2020|2020-11-13|EPI\_ISL\_674001|Original|hCoV-19^^England|Human|Lighthouse Lab in Milton Keynes|Wellcome Sanger Institute for the COVID-19 Genomics UK (COG-UK) Consortium|Davies|United Kingdom

>Spike|hCoV-19/USA/WA-UW-21673/2020|2020-08-03|EPI\_ISL\_570815|Original|hCoV-19^^Washington|Human|UW Virology Lab|UW Virology Lab|Roychoudhury|USA

>Spike|hCoV-19/England/MILK-9C3AA8/2020|2020-09-11|EPI\_ISL\_566819|Original|hCoV-19^^England|Human|Lighthouse Lab in Milton Keynes|Wellcome Sanger Institute for the COVID-19 Genomics UK (COG-UK) consortium|Davies|United Kingdom

>Spike|hCoV-19/Scotland/QEUA-A4B88F/2020|2020-10-08|EPI\_ISL\_628486|Original|hCoV-19^^Scotland|Human|Oxford Viromics|COVID-19 Genomics UK (COG-UK) Consortium|Golubchik|United Kingdom

>Spike|hCoV-19/Peru/LIM-UPCH-0133/2020|2020-08-27|EPI\_ISL\_568529|Original|hCoV-19^^Lima|Human|Laboratorio de Referencia Nacional de Virus Respiratorios|Laboratorio de Gen\u00f3mica Microbiana|Tsukayama|Peru

>Spike|hCoV-19/Denmark/DCGC-5236/2020|2020-09-14|EPI\_ISL\_615167|Original|hCoV-19^^Nordjylland|Human|Department of Virus and Microbiological Special Diagnostics|Albertsen lab|Michaelsen|Denmark

>Spike|hCoV-19/England/MILK-A47BF3/2020|2020-10-05|EPI\_ISL\_598367|Original|hCoV-19^^England|Human|Lighthouse Lab in Milton Keynes|Wellcome Sanger Institute for the COVID-19 Genomics UK (COG-UK) consortium|Davies|United Kingdom

>Spike|hCoV-19/England/QEUA-96A706/2020|2020-08-12|EPI\_ISL\_531555|Original|hCoV-19^^England|Human|Lighthouse Lab in Glasgow|Wellcome Sanger Institute for the COVID-19 Genomics UK (COG-UK) consortium|Davies|United Kingdom

>Spike|hCoV-19/England/QEUA-9C979C/2020|2020-09-10|EPI\_ISL\_567519|Original|hCoV-19^^England|Human|Lighthouse Lab in Glasgow|Wellcome Sanger Institute for the COVID-19 Genomics UK (COG-UK) consortium|Davies|United Kingdom

>Spike|hCoV-19/England/ALDP-A2D4E9/2020|2020-10-06|EPI\_ISL\_586810|Original|hCoV-19^^England|Human|Lighthouse Lab in Alderley Park|Wellcome Sanger Institute for the COVID-19 Genomics UK (COG-UK) consortium|Davies|United Kingdom

>Spike|hCoV-19/England/LIVE-DB3D35/2020|2020-10-20|EPI\_ISL\_650933|Original|hCoV-19^^England|Human|Liverpool Clinical Laboratories|COVID-19 Genomics UK (COG-UK) Consortium|Haldenby|United Kingdom

>Spike|hCoV-19/England/QEUA-A0BF77/2020|2020-10-03|EPI\_ISL\_599288|Original|hCoV-19^^England|Human|Lighthouse Lab in Glasgow|Wellcome Sanger Institute for the COVID-19 Genomics UK (COG-UK) consortium|Davies|United Kingdom

>Spike|hCoV-19/Wales/PHWC-2E048/2020|2020-04-10|EPI\_ISL\_446050|Original|hCoV-19^^Wales|Human|Wales Specialist Virology Centre|Public Health Wales Microbiology Cardiff|Moore|United Kingdom

>Spike|hCoV-19/USA/FL-BPHL-2116/2020|2020-03-11|EPI\_ISL\_653269|Original|hCoV-19^^Florida|Human|Florida Bureau of Public Health Laboratories|Florida Bureau of Public Health Laboratories|Blanton|USA

>Spike|hCoV-19/England/ALDP-A94CB8/2020|2020-10-19|EPI\_ISL\_624606|Original|hCoV-19^^England|Human|Lighthouse Lab in Alderley Park|Wellcome Sanger Institute for the COVID-19 Genomics UK (COG-UK) consortium|Davies|United Kingdom

>Spike|hCoV-19/USA/MI-MDHHS-SC20869/2020|2020-04-29|EPI\_ISL\_471890|Original|hCoV-19^^Michigan|Human|Michigan Department of Health and Human Services|Michigan Department of Health and Human Services|Blankenship|USA

>Spike|hCoV-19/England/OXON-B25C2/2020|2020-04-10|EPI\_ISL\_479158|Original|hCoV-19^^England|Human|Oxford Viromics|COVID-19 Genomics UK (COG-UK) Consortium|Golubchik|United Kingdom

>Spike|hCoV-19/England/MILK-BDC327/2020|2020-11-26|EPI\_ISL\_709679|Original|hCoV-19^^England|Human|Lighthouse Lab in Milton Keynes|Wellcome Sanger Institute for the COVID-19 Genomics UK (COG-UK) Consortium|Davies|United Kingdom

>Spike|hCoV-19/USA/CA-ALSR-3092/2020|2020-08-20|EPI\_ISL\_635844|Original|hCoV-19^^California|Human|San Diego County Public Health Laboratory|Andersen lab at Scripps Research|Gangavarapu|USA

>Spike|hCoV-19/Thailand/SI200383-NT/2020|2020-01-23|EPI\_ISL\_437622|unknown|hCoV-19^^Thailand|Human|unknown|Faculty of Medicine|Submitter|Thailand

>Spike|hCoV-19/England/NORW-E829F/2020|2020-04-08|EPI\_ISL\_449133|Original|hCoV-19^^England|Human|Quadram Institute Bioscience|COVID-19 Genomics UK (COG-UK) Consortium|Alikhan|United Kingdom

>Spike|hCoV-19/Germany/NW-HHU-13/2020|2020-03-11|EPI\_ISL\_417458|Original|hCoV-19^^North Rhine-Westphalia|Human|Center of Medical Microbiology|Center of Medical Microbiology|Wienemann|Germany

>Spike|hCoV-19/England/NORW-EB320/2020|2020-05-02|EPI\_ISL\_457418|Original|hCoV-19^^England|Human|Quadram Institute Bioscience|COVID-19 Genomics UK (COG-UK) Consortium|Alikhan|United Kingdom

>Spike|hCoV-19/Canada/BC\_22451513/2020|2020-03-00|EPI\_ISL\_462831|Original|hCoV-19^^British Columbia|Human|BCCDC Public Health Laboratory|BCCDC Public Health Laboratory|Harrigan|Canada

>Spike|hCoV-19/England/QEUA-AD246B/2020|2020-10-25|EPI\_ISL\_634112|Original|hCoV-19^^England|Human|Lighthouse Lab in Glasgow|Wellcome Sanger Institute for the COVID-19 Genomics UK (COG-UK) consortium|Davies|United Kingdom

>Spike|hCoV-19/Denmark/DCGC-10696/2020|2020-11-02|EPI\_ISL\_670143|Original|hCoV-19^^Sjaelland|Human|Department of Virus and Microbiological Special Diagnostics|Albertsen Lab|Michaelsen|Denmark

>Spike|hCoV-19/Australia/VIC8811/2020|2020-08-02|EPI\_ISL\_565210|Original|hCoV-19^^Victoria|Human|Victorian Infectious Diseases Reference Laboratory (VIDRL)|VIDRL and MDU-PHL|Schultz|Australia

>Spike|hCoV-19/Scotland/QEUA-96C29A/2020|2020-08-15|EPI\_ISL\_530906|Original|hCoV-19^^Scotland|Human|NHSGGC West of Scotland Specialist Virology Centre / MRC-University of Glasgow Centre for Virus Research|Wellcome Sanger Institute for the COVID-19 Genomics UK (COG-UK) consortium|Davies|United Kingdom

>Spike|hCoV-19/England/NORT-1B7227E/2020|2020-11-25|EPI\_ISL\_724863|Original|hCoV-19^^England|Human|Northumbria University / South Tees Hospitals NHS Foundation Trust / North Cumbria Integrated Care NHS Foundation Trust / North Tees and Hartlepool NHS Foundation Trust / Newcastle Hospitals NHS Foundation Trust|COVID-19 Genomics UK (COG-UK) Consortium|Bashton|United Kingdom

>Spike|hCoV-19/Netherlands/GR-RIVM-20248/2020|2020-11-23|EPI\_ISL\_723395|Original|hCoV-19^^Groningen|Human|Dutch COVID-19 response team|National Institute for Public Health and the Environment (RIVM)|Meijer|Netherlands

>Spike|hCoV-19/Japan/PG-2892/2020|2020-03-00|EPI\_ISL\_691018|Original|hCoV-19^^Japan|Human|Pathogen Genomics Center|Pathogen Genomics Center|Sekizuka|Japan

>Spike|hCoV-19/England/QEUA-B2D5F4/2020|2020-11-04|EPI\_ISL\_659910|Original|hCoV-19^^England|Human|Lighthouse Lab in Glasgow|Wellcome Sanger Institute for the COVID-19 Genomics UK (COG-UK) Consortium|Davies|United Kingdom

>Spike|hCoV-19/USA/TX-HMH-MCoV-19504/2020|2020-11-30|EPI\_ISL\_783885|Original|hCoV-19^^Texas|Human|Houston Methodist Hospital|Houston Methodist Hospital|Long|USA

>Spike|hCoV-19/USA/TX-DSHS-0019/2020|2020-05-07|EPI\_ISL\_517960|Original|hCoV-19^^Texas|Human|Texas Department of State Health Services|Texas Department of State Health Services|Rahman|USA

>Spike|hCoV-19/Wales/PHWC-2BE50/2020|2020-04-10|EPI\_ISL\_445857|Original|hCoV-19^^Wales|Human|Wales Specialist Virology Centre|Public Health Wales Microbiology Cardiff|Moore|United Kingdom

>Spike|hCoV-19/England/ALDP-9EA197/2020|2020-09-24|EPI\_ISL\_579965|Original|hCoV-19^^England|Human|Lighthouse Lab in Alderley Park|Wellcome Sanger Institute for the COVID-19 Genomics UK (COG-UK) consortium|Davies|United Kingdom

>Spike|hCoV-19/England/20126002304/2020|2020-03-18|EPI\_ISL\_423870|Original|hCoV-19^^England|Human|Respiratory Virus Unit|Respiratory Virus Unit|Platt|United Kingdom

>Spike|hCoV-19/Spain/VC-FISABIO-231/2020|2020-03-26|EPI\_ISL\_436326|Original|hCoV-19^^Comunitat Valenciana|Human|Servicio de Microbiología. Hospital Clínico Universitario de Valencia|Sequencing and Bioinformatics Service and Molecular Epidemiology Research Group. FISABIO-Public Health|Gonzalez-Candelas|Spain

>Spike|hCoV-19/France/PAC-MEPHI-2049/2020|2020-08-29|EPI\_ISL\_644481|Original|hCoV-19^^Provence-Alpes-Cote-d\u2019Azur|Human|MEPHI|MEPHI|Levasseur|France

>Spike|hCoV-19/England/MILK-9E1093/2020|2020-09-20|EPI\_ISL\_580950|Original|hCoV-19^^England|Human|Lighthouse Lab in Milton Keynes|Wellcome Sanger Institute for the COVID-19 Genomics UK (COG-UK) consortium|Davies|United Kingdom

>Spike|hCoV-19/France/NAQ-SC296/2020|2020-05-05|EPI\_ISL\_666717|Original|hCoV-19^^Nouvelle-Aquitaine|Human|CHU de Limoges|CNR Virus des Infections Respiratoires - France SUD|Bal|France

>Spike|hCoV-19/USA/TX-HMH-MCoV-10143/2020|2020-07-06|EPI\_ISL\_789341|Original|hCoV-19^^Texas|Human|Houston Methodist Hospital|Houston Methodist Hospital|Long|USA

>Spike|hCoV-19/Wales/PHWC-48FC7A/2020|2020-11-11|EPI\_ISL\_681209|Original|hCoV-19^^Wales|Human|Wales Specialist Virology Centre Sequencing lab|COVID-19 Genomics UK (COG-UK) Consortium|Moore|United Kingdom

>Spike|hCoV-19/England/ALDP-A515BC/2020|2020-10-07|EPI\_ISL\_598169|Original|hCoV-19^^England|Human|Lighthouse Lab in Alderley Park|Wellcome Sanger Institute for the COVID-19 Genomics UK (COG-UK) consortium|Davies|United Kingdom

>Spike|hCoV-19/USA/UT-UPHL-2012266977/2020|2020-10-02|EPI\_ISL\_746102|Original|hCoV-19^^Utah|Human|Ginkgo Bioworks Clinical Laboratory|Utah Public Health Laboratory|Young|USA

>Spike|hCoV-19/Luxembourg/LNS9402077/2020|2020-11-10|EPI\_ISL\_744904|Original|hCoV-19^^Luxembourg|Human|Laboratoire national de sant\u00e9|Laboratoire national de sant\u00e9|Wienecke-Baldacchino|Luxembourg

>Spike|hCoV-19/Netherlands/NB-RIVM-20399/2020|2020-12-09|EPI\_ISL\_728619|Original|hCoV-19^^Noord-Brabant|Human|Dutch COVID-19 response team|National Institute for Public Health and the Environment (RIVM)|Meijer|Netherlands

>Spike|hCoV-19/England/CAMB-7BD18/2020|2020-04-05|EPI\_ISL\_442107|Original|hCoV-19^^England|Human|Department of Pathology|Wellcome Sanger Institute for the COVID-19 Genomics UK (COG-UK) consortium|Amato|United Kingdom

>Spike|hCoV-19/England/LIVE-A92E5/2020|2020-03-25|EPI\_ISL\_517291|Original|hCoV-19^^England|Human|Liverpool Clinical Laboratories|COVID-19 Genomics UK (COG-UK) Consortium|Haldenby|United Kingdom

>Spike|hCoV-19/England/NOTT-10E10E/2020|2020-03-14|EPI\_ISL\_425499|Original|hCoV-19^^England|Human|Queens Medical Centre|COVID-19 Genomics UK (COG-UK) Consortium|Loose|United Kingdom

>Spike|hCoV-19/England/ALDP-A943A4/2020|2020-10-19|EPI\_ISL\_611283|Original|hCoV-19^^England|Human|Lighthouse Lab in Alderley Park|Wellcome Sanger Institute for the COVID-19 Genomics UK (COG-UK) consortium|Davies|United Kingdom

>Spike|hCoV-19/Russia/MOS-CRIE-13681164/2020|2020-11-09|EPI\_ISL\_745249|Original|hCoV-19^^Moscow|Human|Molecular diagnostic laboratory of Federal Budget Institution of Science \Central Research Institute of Epidemiology\ of The Federal Service on Customers' Rights Protection and Human Well-being Surveillance|Group of Genomics and Postgenomic Technologies of Central Research Institute of Epidemiology

>y|Korneenko|Russia

>Spike|hCoV-19/England/EXET-138E7D/2020|2020-10-30|EPI\_ISL\_664205|Original|hCoV-19^^England|Human|University of Exeter|COVID-19 Genomics UK (COG-UK) Consortium|Temperton|United Kingdom

>Spike|hCoV-19/USA/WA-S571/2020|2020-03-30|EPI\_ISL\_434331|Original|hCoV-19^^Washington|Human|Washington State Department of Health|Seattle Flu Study|Bedford|USA

>Spike|hCoV-19/Northern Ireland/LIVE-1DDC25/2020|2020-10-10|EPI\_ISL\_611786|Original|hCoV-19^^Northern Ireland|Human|Liverpool Clinical Laboratories|COVID-19 Genomics UK (COG-UK) Consortium|Haldenby|United Kingdom

>Spike|hCoV-19/England/CAMC-C403A5/2020|2020-12-10|EPI\_ISL\_718592|Original|hCoV-19^^England|Human|Lighthouse Lab in Cambridge|Wellcome Sanger Institute for the COVID-19 Genomics UK (COG-UK) Consortium|Davies|United Kingdom

>Spike|hCoV-19/Denmark/DCGC-12266/2020|2020-11-16|EPI\_ISL\_682447|Original|hCoV-19^^Hovedstaden|Human|Department of Virus and Microbiological Special Diagnostics|Albertsen Lab|Michaelsen|Denmark



>Spike|hCoV-19/England/QEUH-B814B5/2020|2020-11-14|EPI\_ISL\_668236|Original|hCoV-19^^England|Human|Lighthouse Lab in Glasgow|Wellcome Sanger Institute for the COVID-19 Genomics UK (COG-UK) Consortium|Davies|United Kingdom

>Spike|hCoV-19/USA/MI-MDHHS-SC22310/2020|2020-11-09|EPI\_ISL\_708286|Original|hCoV-19^^Michigan|Human|Michigan Department of Health and Human Services|Michigan Department of Health and Human Services|Jacob|USA

>Spike|hCoV-19/England/MILK-99A266/2020|2020-08-30|EPI\_ISL\_550390|Original|hCoV-19^^England|Human|Lighthouse Lab in Milton Keynes|Wellcome Sanger Institute for the COVID-19 Genomics UK (COG-UK) consortium|Davies|United Kingdom

>Spike|hCoV-19/England/QEUH-B10E53/2020|2020-11-02|EPI\_ISL\_642262|Original|hCoV-19^^England|Human|Lighthouse Lab in Glasgow|Wellcome Sanger Institute for the COVID-19 Genomics UK (COG-UK) Consortium|Davies|United Kingdom

>Spike|hCoV-19/Switzerland/BL-UHB-42190921/2020|2020-03-13|EPI\_ISL\_528079|Original|hCoV-19^^Basel-Land|Human|University Hospital Basel|University Hospital Basel|Roloff Handschin|Switzerland

>Spike|hCoV-19/New Zealand/20VR2101/2020|2020-04-01|EPI\_ISL\_579229|Original|hCoV-19^^Counties Manukau|Human|Middlemore Hospital|Institute of Environmental Science and Research (ESR)|Wang|New Zealand

>Spike|hCoV-19/England/ALDP-AA5030/2020|2020-10-21|EPI\_ISL\_630912|Original|hCoV-19^^England|Human|Lighthouse Lab in Alderley Park|Wellcome Sanger Institute for the COVID-19 Genomics UK (COG-UK) consortium|Davies|United Kingdom

>Spike|hCoV-19/United Arab Emirates/0566/2020|2020-05-15|EPI\_ISL\_698725|Original|hCoV-19^^Abu Dhabi|Human|Group 42 (G42) Healthcare|G42 Healthcare|Ogrodzki|United Arab Emirates

>Spike|hCoV-19/Northern Ireland/NIRE-107457/2020|2020-03-31|EPI\_ISL\_585151|Original|hCoV-19^^Northern Ireland|Human|Regional Virus Laboratory|COVID-19 Genomics UK (COG-UK) Consortium|Fairley|United Kingdom

>Spike|hCoV-19/England/MILK-9E2988/2020|2020-09-20|EPI\_ISL\_581140|Original|hCoV-19^^England|Human|Lighthouse Lab in Milton Keynes|Wellcome Sanger Institute for the COVID-19 Genomics UK (COG-UK) consortium|Davies|United Kingdom

>Spike|hCoV-19/USA/LA-EVTL1235/2020|2020-12-17|EPI\_ISL\_768504|Original|hCoV-19^^Louisiana|Human|LSUHS Emerging Viral Threat Laboratory|Microbial Genome Sequencing Center|Kamil|USA

>Spike|hCoV-19/USA/WA17-UW13/2020|2020-03-05|EPI\_ISL\_413652|Original|hCoV-19^^Washington|Human|UW Virology Lab|UW Virology Lab|Roychoudhury|USA

>Spike|hCoV-19/England/MILK-99E262/2020|2020-08-29|EPI\_ISL\_568364|Original|hCoV-19^^England|Human|Lighthouse Lab in Milton Keynes|Wellcome Sanger Institute for the COVID-19 Genomics UK (COG-UK) consortium|Davies|United Kingdom

>Spike|hCoV-19/Denmark/DCGC-20740/2020|2020-12-21|EPI\_ISL\_759336|Original|hCoV-19^^Syddanmark|Human|Department of Virus and Microbiological Special Diagnostics|Albertsen Lab|Michaelsen|Denmark

>Spike|hCoV-19/England/LIVE-99752/2020|2020-04-09|EPI\_ISL\_439755|Original|hCoV-19^^England|Human|Liverpool Clinical Laboratories|COVID-19 Genomics UK (COG-UK) Consortium|Haldenby|United Kingdom

>Spike|hCoV-19/England/MILK-B045C6/2020|2020-10-24|EPI\_ISL\_650391|Original|hCoV-19^^England|Human|Department of Pathology|COVID-19 Genomics UK (COG-UK) Consortium|Goodfellow|United Kingdom

>Spike|hCoV-19/England/CAMB-76CB6/2020|2020-03-30|EPI\_ISL\_438409|Original|hCoV-19^^England|Human|Department of Pathology|Wellcome Sanger Institute for the COVID-19 Genomics UK (COG-UK) consortium|Amato|United Kingdom

>Spike|hCoV-19/Israel/CVL-45532/2020|2020-12-07|EPI\_ISL\_745047|Original|hCoV-19^^Central|Human|Israel Central Virology laboratory|Israel Central Virology laboratory|Zuckerman|Israel

>Spike|hCoV-19/England/ALDP-AA268C/2020|2020-10-22|EPI\_ISL\_630841|Original|hCoV-19^^England|Human|Lighthouse Lab in Alderley Park|Wellcome Sanger Institute for the COVID-19 Genomics UK (COG-UK) consortium|Davies|United Kingdom

>Spike|hCoV-19/USA/WI-UW-1591/2020|2020-09-18|EPI\_ISL\_605468|Original|hCoV-19^^Wisconsin|Human|University of Wisconsin-Madison AIDS Vaccine Research Laboratories|University of Wisconsin-Madison AIDS Vaccine Research Laboratories|Baczenas|USA

>Spike|hCoV-19/Wales/PHWC-160708/2020|2020-05-24|EPI\_ISL\_472968|Original|hCoV-19^^Wales|Human|Wales Specialist Virology Centre Sequencing lab|COVID-19 Genomics UK (COG-UK) Consortium|Moore|United Kingdom

>Spike|hCoV-19/England/CAMB-83102/2020|2020-04-14|EPI\_ISL\_443550|Original|hCoV-19^^England|Human|Department of Pathology|Wellcome Sanger Institute for the COVID-19 Genomics UK (COG-UK) consortium|Amato|United Kingdom

>Spike|hCoV-19/Germany/BY-MVP-0207/2020|2020-04-20|EPI\_ISL\_466888|Original|hCoV-19^^Bavaria|Human|Max von Pettenkofer Institute|Laboratory for Functional Genome Analysis|Graf|Germany

>Spike|hCoV-19/Japan/PG-3394/2020|2020-04-00|EPI\_ISL\_691508|Original|hCoV-19^^Japan|Human|Pathogen Genomics Center|Pathogen Genomics Center|Sekizuka|Japan

>Spike|hCoV-19/England/BRIS-12CA0F/2020|2020-05-15|EPI\_ISL\_469504|Original|hCoV-19^^England|Human|PHE South West Regional Laboratory|Wellcome Sanger Institute for the COVID-19 Genomics UK (COG-UK) consortium|Davies|United Kingdom

>Spike|hCoV-19/USA/LA-GBCL-26684470/2020|2020-04-10|EPI\_ISL\_485288|Original|hCoV-19^^Louisiana|Human|River Road Testing Lab|Ginkgo Bioworks Clinical Laboratory|Smith|USA

>Spike|hCoV-19/Denmark/DCGC-21385/2020|2020-12-21|EPI\_ISL\_758139|Original|hCoV-19^^Midtjylland|Human|Department of Virus and Microbiological Special Diagnostics|Albertsen Lab|Michaelsen|Denmark

>Spike|hCoV-19/Denmark/DCGC-5028/2020|2020-09-14|EPI\_ISL\_622753|Original|hCoV-19^^Hovedstaden|Human|Department of Virus and Microbiological Special Diagnostics|Albertsen lab|Michaelsen|Denmark

>Spike|hCoV-19/Switzerland/SH-ETHZ-380309/2020|2020-11-24|EPI\_ISL\_721866|Original|hCoV-19^^Schaffhausen|Human|Viollier AG|Department of Biosystems Science and Engineering|Nadeau|Switzerland

>Spike|hCoV-19/England/NORW-EE35A/2020|2020-00-00|EPI\_ISL\_490531|Original|hCoV-19^^England|Human|Quadram Institute Bioscience|COVID-19 Genomics UK (COG-UK) Consortium|Alikhan|United Kingdom

>Spike|hCoV-19/Scotland/EDB399/2020|2020-03-30|EPI\_ISL\_425998|Original|hCoV-19^^Scotland|Human|Virology Department|COVID-19 Genomics UK (COG-UK) Consortium|Williams|United Kingdom

>Spike|hCoV-19/Scotland/QEUH-A33644/2020|2020-10-07|EPI\_ISL\_628398|Original|hCoV-19^^Scotland|Human|Virology Department|COVID-19 Genomics UK (COG-UK) Consortium|de Silva|United Kingdom

>Spike|hCoV-19/England/CAMC-B0AEA7/2020|2020-10-29|EPI\_ISL\_643635|Original|hCoV-19^^England|Human|Lighthouse Lab in Cambridge|Wellcome Sanger Institute for the COVID-19 Genomics UK (COG-UK) Consortium|Davies|United Kingdom

>Spike|hCoV-19/Australia/VPRL009/2020|2020-04-01|EPI\_ISL\_455601|Original|hCoV-19^^South Australia|Human|SA Pathology|VPRL|Leong|Australia

>Spike|hCoV-19/England/PORT-2D7185/2020|2020-10-22|EPI\_ISL\_628325|Original|hCoV-19^^England|Human|Centre for Enzyme Innovation|COVID-19 Genomics UK (COG-UK) Consortium|Robson|United Kingdom

>Spike|hCoV-19/England/SHEF-10CEC25/2020|2020-12-13|EPI\_ISL\_727926|Original|hCoV-19^^England|Human|Virology Department|COVID-19 Genomics UK (COG-UK) Consortium|de Silva|United Kingdom

>Spike|hCoV-19/Wales/PHWC-496B82/2020|2020-11-23|EPI\_ISL\_726695|Original|hCoV-19^^Wales|Human|Originating lab|COVID-19 Genomics UK (COG-UK) Consortium|Moore|United Kingdom

>Spike|hCoV-19/England/LIVE-A4E13/2020|2020-03-14|EPI\_ISL\_500092|Original|hCoV-19^^England|Human|Liverpool Clinical Laboratories|COVID-19 Genomics UK (COG-UK) Consortium|Haldenby|United Kingdom

>Spike|hCoV-19/Scotland/CVR1030/2020|2020-03-30|EPI\_ISL\_438754|Original|hCoV-19^^Scotland|Human|West of Scotland Specialist Virology Centre|COVID-19 Genomics UK (COG-UK) Consortium|Robertson|United Kingdom

>Spike|hCoV-19/USA/TX-HMH-5643/2020|2020-06-25|EPI\_ISL\_544929|Original|hCoV-19^^Texas|Human|Houston Methodist Hospital|Houston Methodist Hospital|Long|USA

>Spike|hCoV-19/England/MILK-C006C6/2020|2020-12-02|EPI\_ISL\_720768|Original|hCoV-19^^England|Human|Lighthouse Lab in Milton Keynes|Wellcome Sanger Institute for the COVID-19 Genomics UK (COG-UK) Consortium|Davies|United Kingdom

>Spike|hCoV-19/Denmark/DCGC-19000/2020|2020-12-07|EPI\_ISL\_748690|Original|hCoV-19^^Hovedstaden|Human|Department of Virus and Microbiological Special Diagnostics|Albertsen Lab|Michaelsen|Denmark

>Spike|hCoV-19/USA/OR-OHSU-2431/2020|2020-08-14|EPI\_ISL\_667206|Original|hCoV-19^^Oregon|Human|OHSU Lab Services Molecular Microbiology Lab|Oregon SARS-CoV-2 Genome Sequencing Center|O'Roak|USA

>Spike|hCoV-19/Denmark/DCGC-10713/2020|2020-11-02|EPI\_ISL\_670156|Original|hCoV-19^^Hovedstaden|Human|Department of Virus and Microbiological Special Diagnostics|Albertsen Lab|Michaelsen|Denmark

>Spike|hCoV-19/England/QEUEH-AD3BA1/2020|2020-10-26|EPI\_ISL\_634107|Original|hCoV-19^^England|Human|Lighthouse Lab in Glasgow|Wellcome Sanger Institute for the COVID-19 Genomics UK (COG-UK) consortium|Davies|United Kingdom

>Spike|hCoV-19/Northern Ireland/CAMC-990E6C/2020|2020-08-28|EPI\_ISL\_551875|Original|hCoV-19^^Northern Ireland|Human|Lighthouse Lab in Cambridge|Wellcome Sanger Institute for the COVID-19 Genomics UK (COG-UK) consortium|Davies|United Kingdom

>Spike|hCoV-19/Iceland/556/2020|2020-03-27|EPI\_ISL\_424576|Original|hCoV-19^^Reykjavik|Human|The National University Hospital of Iceland|deCODE genetics|J\u00f3nsson|Iceland

>Spike|hCoV-19/Denmark/DCGC-18449/2020|2020-12-07|EPI\_ISL\_749974|Original|hCoV-19^^Midtjylland|Human|Department of Virus and Microbiological Special Diagnostics|Albertsen Lab|Michaelsen|Denmark

>Spike|hCoV-19/Germany/HH-hpi-p2424/2020|2020-04-26|EPI\_ISL\_776493|Original|hCoV-19^^Hamburg|Human|University Medical Center Hamburg Eppendorf|Heinrich Pette Institute|Robitaille|Germany

>Spike|hCoV-19/England/QEUEH-9B47C1/2020|2020-09-02|EPI\_ISL\_590254|Original|hCoV-19^^England|Human|Lighthouse Lab in Glasgow|Wellcome Sanger Institute for the COVID-19 Genomics UK (COG-UK) consortium|Davies|United Kingdom

>Spike|hCoV-19/USA/IL-NM-0540/2020|2020-04-29|EPI\_ISL\_626448|Original|hCoV-19^^Illinois|Human|Northwestern Memorial Hospital|Ozer Lab|Ozer|USA

>Spike|hCoV-19/England/QEUEH-9ACBC0/2020|2020-09-05|EPI\_ISL\_559800|Original|hCoV-19^^England|Human|Oxford Viromics|COVID-19 Genomics UK (COG-UK) Consortium|Golubchik|United Kingdom

>Spike|hCoV-19/England/MILK-B047C0/2020|2020-10-24|EPI\_ISL\_651027|Original|hCoV-19^^England|Human|Department of Pathology|COVID-19 Genomics UK (COG-UK) Consortium|Goodfellow|United Kingdom

>Spike|hCoV-19/USA/MN-MDH-372/2020|2020-04-05|EPI\_ISL\_437365|Original|hCoV-19^^Minnesota|Human|Minnesota Department of Health|Minnesota Department of Health|Garfin|USA

>Spike|hCoV-19/England/QEUEH-A790EA/2020|2020-10-11|EPI\_ISL\_638786|Original|hCoV-19^^England|Human|Oxford Viromics|COVID-19 Genomics UK (COG-UK) Consortium|Golubchik|United Kingdom

>Spike|hCoV-19/England/CAMB-1B80AC/2020|2020-10-24|EPI\_ISL\_637505|Original|hCoV-19^^England|Human|Department of Pathology|COVID-19 Genomics UK (COG-UK) Consortium|Goodfellow|United Kingdom

>Spike|hCoV-19/Belgium/ULG-10687/2020|2020-10-26|EPI\_ISL\_636659|Original|hCoV-19^^Li\u00e8ge|Human|Department of Clinical Microbiology|GIGA Medical Genomics|Durkin|Belgium

>Spike|hCoV-19/Japan/PG-3187/2020|2020-04-00|EPI\_ISL\_691307|Original|hCoV-19^^Japan|Human|Pathogen Genomics Center|Pathogen Genomics Center|Sekizuka|Japan

>Spike|hCoV-19/Malaysia/UNIMAS-15772/2020|2020-11-13|EPI\_ISL\_718193|Original|hCoV-19^^Sarawak|Human|Ministry of Health Hospitals|Institute of Health and Community Medicine|Jonathan|Malaysia

>Spike|hCoV-19/Scotland/EDB326/2020|2020-03-28|EPI\_ISL\_425972|Original|hCoV-19^^Scotland|Human|Virology Department|COVID-19 Genomics UK (COG-UK) Consortium|Williams|United Kingdom

>Spike|hCoV-19/England/CAMC-B7AD5A/2020|2020-11-13|EPI\_ISL\_723960|Original|hCoV-19^^England|Human|Oxford Viromics|COVID-19 Genomics UK (COG-UK) Consortium|Golubchik|United Kingdom

>Spike|hCoV-19/England/QEUA-B8219F/2020|2020-11-14|EPI\_ISL\_668332|Original|hCoV-19^^England|Human|Lighthouse Lab in Glasgow|Wellcome Sanger Institute for the COVID-19 Genomics UK (COG-UK) Consortium|Davies|United Kingdom

>Spike|hCoV-19/England/QEUA-BA41C4/2020|2020-11-18|EPI\_ISL\_721166|Original|hCoV-19^^England|Human|Lighthouse Lab in Glasgow|Wellcome Sanger Institute for the COVID-19 Genomics UK (COG-UK) Consortium|Davies|United Kingdom

>Spike|hCoV-19/Belgium/UGent-215/2020|2020-10-23|EPI\_ISL\_717615|Original|hCoV-19^^Ghent|Human|Lab voor klinische biologie|Onderzoeksgroep Virologie|Lambrechts|Belgium

>Spike|hCoV-19/Bangladesh/G-149/2020|2020-06-08|EPI\_ISL\_600492|Original|hCoV-19^^Chittagong|Human|Institute of Epidemiology Disease Control And Research|Institute for Developing Science and Health Initiatives|Cowley|Bangladesh

>Spike|hCoV-19/England/MILK-97488E/2020|2020-08-21|EPI\_ISL\_575914|Original|hCoV-19^^England|Human|Lighthouse Lab in Milton Keynes|Wellcome Sanger Institute for the COVID-19 Genomics UK (COG-UK) consortium|Davies|United Kingdom

>Spike|hCoV-19/Switzerland/TI-ETHZ-321378/2020|2020-10-13|EPI\_ISL\_603622|Original|hCoV-19^^Ticino|Human|Viollier AG|Department of Biosystems Science and Engineering|Nadeau|Switzerland

>Spike|hCoV-19/USA/CA-QDX-1872/2020|2020-03-15|EPI\_ISL\_604186|Original|hCoV-19^^California|Human|Quest Diagnostics|Quest Diagnostics|Kagan|USA

>Spike|hCoV-19/Spain/RI-IBV-99005920/2020|2020-03-30|EPI\_ISL\_537457|Original|hCoV-19^^La Rioja|Human|Centro de Investigaci\u00f3n Biom\u00e9dica de La Rioja - Hospital San Pedro Logro\u00f1o|SeqCOVID-SPAIN consortium/IBV (CSIC)|Comas|Spain

>Spike|hCoV-19/Belgium/regal-0427611/2020|2020-04-27|EPI\_ISL\_734662|Original|hCoV-19^^Herzele|Human|UZ Leuven|KU Leuven|Maes|Belgium

>Spike|hCoV-19/USA/FL-BPHL-0227/2020|2020-04-21|EPI\_ISL\_480878|Original|hCoV-19^^Florida|Human|Florida Bureau of Public Health Laboratories|Florida Bureau of Public Health Laboratories|Blanton|USA

>Spike|hCoV-19/England/20189158801/2020|2020-05-02|EPI\_ISL\_465560|Original|hCoV-19^^England|Human|Respiratory Virus Unit|Respiratory Virus Unit|Platt|United Kingdom

>Spike|hCoV-19/USA/MI-UM-10036396766/2020|2020-10-12|EPI\_ISL\_610066|Original|hCoV-19^^Michigan|Human|University of Michigan Clinical Microbiology Laboratory|Lauring Lab|Valesano|USA

>Spike|hCoV-19/England/MILK-B876F5/2020|2020-11-13|EPI\_ISL\_724793|Original|hCoV-19^^England|Human|Oxford Viromics|COVID-19 Genomics UK (COG-UK) Consortium|Golubchik|United Kingdom

>Spike|hCoV-19/USA/TX-HMH-MCoV-15646/2020|2020-07-09|EPI\_ISL\_785330|Original|hCoV-19^^Texas|Human|Houston Methodist Hospital|Houston Methodist Hospital|Long|USA

>Spike|hCoV-19/England/ALDP-B857E5/2020|2020-11-14|EPI\_ISL\_675414|Original|hCoV-19^^England|Human|Lighthouse Lab in Alderley Park|Wellcome Sanger Institute for the COVID-19 Genomics UK (COG-UK) Consortium|Davies|United Kingdom

>Spike|hCoV-19/England/LOND-12F1A5A/2020|2020-12-18|EPI\_ISL\_763397|Original|hCoV-19^^England|Human|University College London|COVID-19 Genomics UK (COG-UK) Consortium|Roy|United Kingdom

>Spike|hCoV-19/England/ALDP-9DA0D9/2020|2020-09-18|EPI\_ISL\_576844|Original|hCoV-19^^England|Human|Oxford Viromics|COVID-19 Genomics UK (COG-UK) Consortium|Golubchik|United Kingdom

>Spike|hCoV-19/Australia/VIC13082/2020|2020-07-29|EPI\_ISL\_563617|Original|hCoV-19^^Victoria|Human|Microbiological Diagnostic Unit - Public Health Laboratory (MDU-PHL)|MDU-PHL|Schultz|Australia

>Spike|hCoV-19/England/CAMC-BC06C3/2020|2020-11-23|EPI\_ISL\_705050|Original|hCoV-19^^England|Human|Lighthouse Lab in Cambridge|Wellcome Sanger Institute for the COVID-19 Genomics UK (COG-UK) Consortium|Davies|United Kingdom

>Spike|hCoV-19/England/SHEF-10CD716/2020|2020-12-03|EPI\_ISL\_742002|Original|hCoV-19^^England|Human|Virology Department|COVID-19 Genomics UK (COG-UK) Consortium|de Silva|United Kingdom

>Spike|hCoV-19/Japan/PG-1703/2020|2020-04-00|EPI\_ISL\_685309|Original|hCoV-19^^Japan|Human|Niigata Prefectural Institute of Public Health and Environmental Sciences|Pathogen Genomics Center|Sekizuka|Japan

>Spike|hCoV-19/Scotland/EDB2846/2020|2020-03-31|EPI\_ISL\_488909|Original|hCoV-19^^Scotland|Human|Virology Department|Wellcome Sanger Institute for the COVID-19 Genomics UK (COG-UK) consortium|Davies|United Kingdom

>Spike|hCoV-19/USA/TX-HMH-5598/2020|2020-06-22|EPI\_ISL\_544890|Original|hCoV-19^^Texas|Human|Houston Methodist Hospital|Houston Methodist Hospital|Long|USA

>Spike|hCoV-19/England/QEUEH-9DDBB7/2020|2020-09-21|EPI\_ISL\_599621|Original|hCoV-19^^England|Human|Lighthouse Lab in Glasgow|Wellcome Sanger Institute for the COVID-19 Genomics UK (COG-UK) consortium|Davies|United Kingdom

>Spike|hCoV-19/Wales/PHWC-498B17/2020|2020-12-04|EPI\_ISL\_727175|Original|hCoV-19^^Wales|Human|Originating lab|COVID-19 Genomics UK (COG-UK) Consortium|Moore|United Kingdom

>Spike|hCoV-19/England/QEUEH-7A508E/2020|2020-07-08|EPI\_ISL\_533010|Original|hCoV-19^^England|Human|Lighthouse Lab in Glasgow|Wellcome Sanger Institute for the COVID-19 Genomics UK (COG-UK) consortium|Davies|United Kingdom

>Spike|hCoV-19/Netherlands/OV-RIVM-20099/2020|2020-11-11|EPI\_ISL\_723164|Original|hCoV-19^^Overijssel|Human|Dutch COVID-19 response team|National Institute for Public Health and the Environment (RIVM)|Meijer|Netherlands

>Spike|hCoV-19/Russia/SVE-RII-MH197S/2020|2020-07-16|EPI\_ISL\_560311|Original|hCoV-19^^Sverdlovsk|Human|UMMC-Health|WHO National Influenza Centre Russian Federation|Komissarov|Russia

>Spike|hCoV-19/England/CAMB-8481B/2020|2020-03-03|EPI\_ISL\_440504|Original|hCoV-19^^England|Human|Department of Pathology|Wellcome Sanger Institute for the COVID-19 Genomics UK (COG-UK) consortium|Amato|United Kingdom

>Spike|hCoV-19/England/CAMB-7B96F/2020|2020-04-04|EPI\_ISL\_441658|Original|hCoV-19^^England|Human|Department of Pathology|Wellcome Sanger Institute for the COVID-19 Genomics UK (COG-UK) consortium|Amato|United Kingdom

>Spike|hCoV-19/Denmark/DCGC-6718/2020|2020-04-27|EPI\_ISL\_622352|Original|hCoV-19^^Hovedstaden|Human|Department of Virus and Microbiological Special Diagnostics|Albertsen lab|Michaelsen|Denmark

>Spike|hCoV-19/Australia/VIC15965/2020|2020-07-30|EPI\_ISL\_641038|Original|hCoV-19^^Victoria|Human|Microbiological Diagnostic Unit - Public Health Laboratory (MDU-PHL)|MDU-PHL|Schultz|Australia

>Spike|hCoV-19/Russia/SPE-RII-35397S/2020|2020-09-28|EPI\_ISL\_596247|Original|hCoV-19^^Saint Petersburg|Human|WHO National Influenza Centre Russian Federation|WHO National Influenza Centre Russian Federation|Komissarov|Russia

>Spike|hCoV-19/England/QEUEH-B6789B/2020|2020-11-10|EPI\_ISL\_655832|Original|hCoV-19^^England|Human|Lighthouse Lab in Glasgow|Wellcome Sanger Institute for the COVID-19 Genomics UK (COG-UK) Consortium|Davies|United Kingdom

>Spike|hCoV-19/Denmark/DCGC-13005/2020|2020-12-07|EPI\_ISL\_712253|Original|hCoV-19^^Midtjylland|Human|Department of Virus and Microbiological Special Diagnostics|Albertsen Lab|Michaelsen|Denmark

>Spike|hCoV-19/USA/WA-S805/2020|2020-04-15|EPI\_ISL\_449975|Original|hCoV-19^^Washington|Human|Washington State Department of Health|Seattle Flu Study|Bedford|USA

>Spike|hCoV-19/Belgium/ULG-10270/2020|2020-07-20|EPI\_ISL\_515077|Original|hCoV-19^^Liege|Human|Department of Clinical Microbiology|GIGA Medical Genomics|Durkin|Belgium

>Spike|hCoV-19/Bangladesh/BCSIR-NILMRC-006/2020|2020-05-21|EPI\_ISL\_455458|Original|hCoV-19^^Dhaka|Human|National Institute of Laboratory Medicine and Referral Center|Genomic Research Lab|Mohammad Mahmud|Bangladesh

>Spike|hCoV-19/England/ALDP-49CB04/2020|2020-06-11|EPI\_ISL\_559501|Original|hCoV-19^^England|Human|Lighthouse Lab in Alderley Park|Wellcome Sanger Institute for the COVID-19 Genomics UK (COG-UK) consortium|Davies|United Kingdom

>Spike|hCoV-19/USA/WA-NH8/2020|2020-03-13|EPI\_ISL\_418777|Original|hCoV-19^^Washington|Human|WA State Department of Health|Pathogen Discovery|Queen|USA

>Spike|hCoV-19/France/PAC-IHU-0833/2020|2020-05-19|EPI\_ISL\_568984|Original|hCoV-19^^Provence-Alpes-C\u00f4te-d\u2019Azur|Human|MEPHI|MEPHI|Levasseur|France

>Spike|hCoV-19/India/UT-59267-CSIR-IGIB/2020|2020-08-02|EPI\_ISL\_636805|Original|hCoV-19^^Uttarakhand|Human|National Centre for Disease control (NCDC)|NCDC/CSIR-IGIB|Faruq|India

>Spike|hCoV-19/England/CAMC-C44D85/2020|2020-12-10|EPI\_ISL\_718625|Original|hCoV-19^^England|Human|Lighthouse Lab in Cambridge|Wellcome Sanger Institute for the COVID-19 Genomics UK (COG-UK) Consortium|Davies|United Kingdom

>Spike|hCoV-19/USA/TX-HMH-MCoV-13100/2020|2020-08-27|EPI\_ISL\_788251|Original|hCoV-19^^Texas|Human|Houston Methodist Hospital|Houston Methodist Hospital|Long|USA

>Spike|hCoV-19/Netherlands/UT-EMC-228/2020|2020-12-11|EPI\_ISL\_722460|Original|hCoV-19^^Utrecht|Human|Dutch COVID-19 response team|Erasmus Medical Center|Oude Munnink|Netherlands

>Spike|hCoV-19/Denmark/DCGC-22026/2020|2020-12-14|EPI\_ISL\_757809|Original|hCoV-19^^Hovedstaden|Human|Department of Virus and Microbiological Special Diagnostics|Albertsen Lab|Michaelsen|Denmark

>Spike|hCoV-19/Luxembourg/LNS0059319/2020|2020-10-25|EPI\_ISL\_739703|Original|hCoV-19^^Luxembourg|Human|Laboratoire national de sant\u00e9|Laboratoire national de sant\u00e9|Wienecke-Baldacchino|Luxembourg

>Spike|hCoV-19/USA/CA-CZB-10785/2020|2020-06-22|EPI\_ISL\_583046|Original|hCoV-19^^California|Human|Humboldt County Public Health Laboratory|Chan-Zuckerberg Biohub|Bhatt|USA

>Spike|hCoV-19/USA/CA-ALSR-5027/2020|2020-11-12|EPI\_ISL\_730298|Original|hCoV-19^^California|Human|San Diego County Public Health Laboratory|Andersen lab at Scripps Research|Gangavarapu|USA

>Spike|hCoV-19/Wales/PHWC-31419/2020|2020-04-13|EPI\_ISL\_446444|Original|hCoV-19^^Wales|Human|Wales Specialist Virology Centre|Public Health Wales Microbiology Cardiff|Moore|United Kingdom

>Spike|hCoV-19/Wales/ALDP-C399E9/2020|2020-12-07|EPI\_ISL\_767188|Original|hCoV-19^^Wales|Human|Lighthouse Lab in Alderley Park|Wellcome Sanger Institute for the COVID-19 Genomics UK (COG-UK) Consortium|Davies|United Kingdom

>Spike|hCoV-19/Scotland/CVR2184/2020|2020-04-11|EPI\_ISL\_484568|Original|hCoV-19^^Scotland|Human|West of Scotland Specialist Virology Centre|COVID-19 Genomics UK (COG-UK) Consortium|Robertson|United Kingdom

>Spike|hCoV-19/England/QEUEH-9648FA/2020|2020-08-11|EPI\_ISL\_531141|Original|hCoV-19^^England|Human|Lighthouse Lab in Glasgow|Wellcome Sanger Institute for the COVID-19 Genomics UK (COG-UK) consortium|Davies|United Kingdom

>Spike|hCoV-19/England/LOND-D3561/2020|2020-03-27|EPI\_ISL\_440956|Original|hCoV-19^^England|Human|University College London|COVID-19 Genomics UK (COG-UK) Consortium|Roy|United Kingdom

>Spike|hCoV-19/Denmark/DCGC-16690/2020|2020-11-09|EPI\_ISL\_714919|Original|hCoV-19^^Hovedstaden|Human|Department of Virus and Microbiological Special Diagnostics|Albertsen Lab|Michaelsen|Denmark

>Spike|hCoV-19/Australia/VIC9634/2020|2020-08-21|EPI\_ISL\_562745|Original|hCoV-19^^Victoria|Human|Microbiological Diagnostic Unit - Public Health Laboratory (MDU-PHL)|MDU-PHL|Schultz|Australia

>Spike|hCoV-19/Wales/PHWC-16634A/2020|2020-06-15|EPI\_ISL\_490867|Original|hCoV-19^^Wales|Human|Wales Specialist Virology Centre Sequencing lab|COVID-19 Genomics UK (COG-UK) Consortium|Moore|United Kingdom

>Spike|hCoV-19/England/MILK-9AA193/2020|2020-09-01|EPI\_ISL\_550836|Original|hCoV-19^^England|Human|Lighthouse Lab in Milton Keynes|Wellcome Sanger Institute for the COVID-19 Genomics UK (COG-UK) consortium|Davies|United Kingdom

>Spike|hCoV-19/Denmark/DCGC-18745/2020|2020-12-07|EPI\_ISL\_750159|Original|hCoV-19^^Midtjylland|Human|Department of Virus and Microbiological Special Diagnostics|Albertsen Lab|Michaelsen|Denmark

>Spike|hCoV-19/England/CAMB-80F74/2020|2020-04-15|EPI\_ISL\_444453|Original|hCoV-19^^England|Human|Department of Pathology|COVID-19 Genomics UK (COG-UK) Consortium|Meredith|United Kingdom

>Spike|hCoV-19/Scotland/QEUEH-9B84D5/2020|2020-09-10|EPI\_ISL\_568275|Original|hCoV-19^^Scotland|Human|Lighthouse Lab in Glasgow|Wellcome Sanger Institute for the COVID-19 Genomics UK (COG-UK) consortium|Davies|United Kingdom

>Spike|hCoV-19/USA/TX-HMH-5121/2020|2020-06-23|EPI\_ISL\_544539|Original|hCoV-19^^Texas|Human|Houston Methodist Hospital|Houston Methodist Hospital|Long|USA

>Spike|hCoV-19/Japan/PG-7942/2020|2020-05-00|EPI\_ISL\_687043|Original|hCoV-19^^Japan|Human|Kanagawa Prefectural Institute of Public Health|Pathogen Genomics Center|Sekizuka|Japan

>Spike|hCoV-19/USA/AZ-TG375921/2020|2020-06-15|EPI\_ISL\_694607|Original|hCoV-19^^Arizona|Human|TGen North|TGen North|French|USA

>Spike|hCoV-19/England/ALDP-9BE41B/2020|2020-09-10|EPI\_ISL\_568195|Original|hCoV-19^^England|Human|Lighthouse Lab in Alderley Park|Wellcome Sanger Institute for the COVID-19 Genomics UK (COG-UK) consortium|Davies|United Kingdom

>Spike|hCoV-19/England/QEUK-9DE62E/2020|2020-09-21|EPI\_ISL\_599487|Original|hCoV-19^^England|Human|Lighthouse Lab in Glasgow|Wellcome Sanger Institute for the COVID-19 Genomics UK (COG-UK) consortium|Davies|United Kingdom

>Spike|hCoV-19/England/20149006704/2020|2020-03-30|EPI\_ISL\_466120|Original|hCoV-19^^England|Human|Respiratory Virus Unit|Respiratory Virus Unit|Platt|United Kingdom

>Spike|hCoV-19/USA/MI-UM-10036110847/2020|2020-09-24|EPI\_ISL\_583405|Original|hCoV-19^^Michigan|Human|University of Michigan Clinical Microbiology Laboratory|Lauring Lab|Valesano|USA

>Spike|hCoV-19/England/MILK-AB86ED/2020|2020-10-21|EPI\_ISL\_623215|Original|hCoV-19^^England|Human|Lighthouse Lab in Milton Keynes|Wellcome Sanger Institute for the COVID-19 Genomics UK (COG-UK) consortium|Davies|United Kingdom

>Spike|hCoV-19/Wales/PHWC-16095D/2020|2020-05-18|EPI\_ISL\_472997|Original|hCoV-19^^Wales|Human|Wales Specialist Virology Centre Sequencing lab|COVID-19 Genomics UK (COG-UK) Consortium|Moore|United Kingdom

>Spike|hCoV-19/England/MILK-AC9160/2020|2020-10-21|EPI\_ISL\_709921|Original|hCoV-19^^England|Human|Lighthouse Lab in Milton Keynes|Wellcome Sanger Institute for the COVID-19 Genomics UK (COG-UK) Consortium|Davies|United Kingdom

>Spike|hCoV-19/Scotland/QEUK-9CF365/2020|2020-09-17|EPI\_ISL\_601869|Original|hCoV-19^^Scotland|Human|Lighthouse Lab in Glasgow|Wellcome Sanger Institute for the COVID-19 Genomics UK (COG-UK) consortium|Davies|United Kingdom

>Spike|hCoV-19/Spain/AN-IBV-006080/2020|2020-03-12|EPI\_ISL\_510424|Original|hCoV-19^^Andalucia|Human|Hospital Universitario Virgen de las Nieves de Granada-SAS|SeqCOVID-SPAIN consortium|IBV(CSIC)|Comas|Spain

>Spike|hCoV-19/USA/NY-NYCPHL-000974/2020|2020-09-30|EPI\_ISL\_633004|Original|hCoV-19^^New York|Human|DOHMH Jamaica|New York City Public Health Laboratory|Wang|USA

>Spike|hCoV-19/Denmark/DCGC-2703/2020|2020-08-17|EPI\_ISL\_616436|Original|hCoV-19^^Midtjylland|Human|Department of Virus and Microbiological Special Diagnostics|Albertsen lab|Michaelsen|Denmark

>Spike|hCoV-19/Belgium/regal-10081256/2020|2020-10-08|EPI\_ISL\_735093|Original|hCoV-19^^Wilsele|Human|UZ Leuven|KU Leuven|Maes|Belgium

>Spike|hCoV-19/England/ALDP-C48E15/2020|2020-12-12|EPI\_ISL\_736726|Original|hCoV-19^^England|Human|Lighthouse Lab in Alderley Park|Wellcome Sanger Institute for the COVID-19 Genomics UK (COG-UK) Consortium|Davies|United Kingdom

>Spike|hCoV-19/USA/LA-GBCL-26684455/2020|2020-04-11|EPI\_ISL\_485277|Original|hCoV-19^^Louisiana|Human|River Road Testing Lab|Ginkgo Bioworks Clinical Laboratory|Smith|USA

>Spike|hCoV-19/USA/WA-UW284/2020|2020-03-14|EPI\_ISL\_418069|Original|hCoV-19^^Washington|Human|UW Virology Lab|UW Virology Lab|Roychoudhury|USA

>Spike|hCoV-19/England/MILK-B061B1/2020|2020-10-24|EPI\_ISL\_642979|Original|hCoV-19^^England|Human|Lighthouse Lab in Milton Keynes|Wellcome Sanger Institute for the COVID-19 Genomics UK (COG-UK) Consortium|Davies|United Kingdom

>Spike|hCoV-19/Canada/BC\_19785113/2020|2020-03-00|EPI\_ISL\_462769|Original|hCoV-19^^British Columbia|Human|BCCDC Public Health Laboratory|BCCDC Public Health Laboratory|Harrigan|Canada

>Spike|hCoV-19/England/204421080/2020|2020-10-27|EPI\_ISL\_653967|Original|hCoV-19^^England|Human|Respiratory Virus Unit|COVID-19 Genomics UK (COG-UK) Consortium|Platt|United Kingdom

>Spike|hCoV-19/USA/TX-HMH-867/2020|2020-04-05|EPI\_ISL\_545884|Original|hCoV-19^^Texas|Human|Houston Methodist Hospital|Houston Methodist Hospital|Long|USA

>Spike|hCoV-19/India/KA-nimh-1400/2020|2020-04-14|EPI\_ISL\_515935|Original|hCoV-19^^Karnataka|Human|DH|Department of Neurovirology|Pattabiraman|India

>Spike|hCoV-19/Denmark/DCGC-18774/2020|2020-12-07|EPI\_ISL\_748284|Original|hCoV-19^^Midtjylland|Human|Department of Virus and Microbiological Special Diagnostics|Albertsen Lab|Michaelsen|Denmark

>Spike|hCoV-19/USA/WA-UW-6331/2020|2020-04-01|EPI\_ISL\_430968|Original|hCoV-19^^Washington|Human|UW Virology Lab|UW Virology Lab|Roychoudhury|USA

>Spike|hCoV-19/England/LEED-2AA5AD/2020|2020-03-31|EPI\_ISL\_538820|Original|hCoV-19^^England|Human|Leeds Teaching Hospitals NHS Trust and Public Health England|Wellcome Sanger Institute for the COVID-19 Genomics UK (COG-UK) consortium|Davies|United Kingdom

>Spike|hCoV-19/USA/OR-OHSU-2803/2020|2020-08-31|EPI\_ISL\_667317|Original|hCoV-19^^Oregon|Human|OHSU Lab Services Molecular Microbiology Lab|Oregon SARS-CoV-2 Genome Sequencing Center|O'Roak|USA

>Spike|hCoV-19/Spain/AN-IBV-002918/2020|2020-03-19|EPI\_ISL\_474939|Original|hCoV-19^^Andalucia|Human|Hospital Universitario Virgen de las Nieves de Granada-SAS|SeqCOVID-SPAIN consortium/IBV(CSIC)|Comas|Spain

>Spike|hCoV-19/England/EXET-139D33/2020|2020-00-00|EPI\_ISL\_679339|Original|hCoV-19^^England|Human|University of Exeter|COVID-19 Genomics UK (COG-UK) Consortium|Temperton|United Kingdom

>Spike|hCoV-19/Russia/SPE-RII-15054S/2020|2020-05-13|EPI\_ISL\_524008|Original|hCoV-19^^Saint Petersburg|Human|WHO National Influenza Centre Russian Federation|WHO National Influenza Centre Russian Federation|Komissarov|Russia

>Spike|hCoV-19/USA/TX\_2039/2020|2020-02-29|EPI\_ISL\_420796|Original|hCoV-19^^Texas|Human|Texas DSHS Lab Services|Pathogen Discovery|Queen|USA

>Spike|hCoV-19/England/ALDP-B5B311/2020|2020-11-08|EPI\_ISL\_655290|Original|hCoV-19^^England|Human|Lighthouse Lab in Alderley Park|Wellcome Sanger Institute for the COVID-19 Genomics UK (COG-UK) Consortium|Davies|United Kingdom

>Spike|hCoV-19/England/QEUE-AE2BAF/2020|2020-10-27|EPI\_ISL\_633452|Original|hCoV-19^^England|Human|Lighthouse Lab in Glasgow|Wellcome Sanger Institute for the COVID-19 Genomics UK (COG-UK) consortium|Davies|United Kingdom

>Spike|hCoV-19/USA/MI-MDHHS-SC20238/2020|2020-03-22|EPI\_ISL\_447208|Original|hCoV-19^^Michigan|Human|Michigan Department of Health and Human Services|Michigan Department of Health and Human Services|Blankenship|USA

>Spike|hCoV-19/England/ALDP-950B34/2020|2020-06-14|EPI\_ISL\_554526|Original|hCoV-19^^England|Human|Lighthouse Lab in Alderley Park|Wellcome Sanger Institute for the COVID-19 Genomics UK (COG-UK) consortium|Davies|United Kingdom

>Spike|hCoV-19/Scotland/CVR2185/2020|2020-04-11|EPI\_ISL\_477869|Original|hCoV-19^^Scotland|Human|West of Scotland Specialist Virology Centre|COVID-19 Genomics UK (COG-UK) Consortium|Robertson|United Kingdom

>Spike|hCoV-19/USA/NY-NYUMC335/2020|2020-04-08|EPI\_ISL\_430362|Original|hCoV-19^^New York|Human|NYU Langone Health|Departments of Pathology and Medicine|Maurano|USA

>Spike|hCoV-19/South Africa/KRISP-K002311/2020|2020-07-22|EPI\_ISL\_515687|Original|hCoV-19^^KwaZulu-Natal|Human|NHLS-IALCH|KRISP|de Oliveira|South Africa

>Spike|hCoV-19/USA/TX-DSHS-0654/2020|2020-07-19|EPI\_ISL\_576308|Original|hCoV-19^^Texas|Human|Texas Department of State Health Services|Texas Department of State Health Services|Rahman|USA

>Spike|hCoV-19/Australia/VIC12799/2020|2020-07-29|EPI\_ISL\_640594|Original|hCoV-19^^Victoria|Human|Microbiological Diagnostic Unit - Public Health Laboratory (MDU-PHL)|MDU-PHL|Schultz|Australia

>Spike|hCoV-19/Wales/PHWC-490B88/2020|2020-11-15|EPI\_ISL\_706543|Original|hCoV-19^^Wales|Human|Originating lab|COVID-19 Genomics UK (COG-UK) Consortium|Moore|United Kingdom

>Spike|hCoV-19/England/PORT-2F5D50/2020|2020-04-14|EPI\_ISL\_512426|Original|hCoV-19^^England|Human|Centre for Enzyme Innovation|COVID-19 Genomics UK (COG-UK) Consortium|Robson|United Kingdom

>Spike|hCoV-19/Gibraltar/204421235/2020|2020-10-27|EPI\_ISL\_613695|Original|hCoV-19^^Gibraltar|Human|Microbiology|Respiratory Virus Unit|Platt|Gibraltar

>Spike|hCoV-19/USA/CA-CZB-13660/2020|2020-11-04|EPI\_ISL\_738717|Original|hCoV-19^^California|Human|Santa Clara County Public Health Laboratory|Chan-Zuckerberg Biohub|Kamm|USA



>Spike|hCoV-19/Wales/PHWC-4A4468/2020|2020-12-17|EPI\_ISL\_764695|Original|hCoV-19^^Wales|Human|Wales Specialist Virology Centre Sequencing lab|COVID-19 Genomics UK (COG-UK) Consortium|Moore|United Kingdom

>Spike|hCoV-19/England/QEUEH-A8C10F/2020|2020-10-17|EPI\_ISL\_643221|Original|hCoV-19^^England|Human|Lighthouse Lab in Glasgow|Wellcome Sanger Institute for the COVID-19 Genomics UK (COG-UK) Consortium|Davies|United Kingdom

>Spike|hCoV-19/USA/WA-UW-22496/2020|2020-08-04|EPI\_ISL\_603261|Original|hCoV-19^^Washington|Human|UW Virology Lab|UW Virology Lab|Roychoudhury|USA

>Spike|hCoV-19/England/SHEF-10CF608/2020|2020-12-14|EPI\_ISL\_742017|Original|hCoV-19^^England|Human|Virology Department|COVID-19 Genomics UK (COG-UK) Consortium|de Silva|United Kingdom

>Spike|hCoV-19/England/NORT-287315/2020|2020-10-19|EPI\_ISL\_650785|Original|hCoV-19^^England|Human|Northumbria University / South Tees Hospitals NHS Foundation Trust / North Cumbria Integrated Care NHS Foundation Trust / North Tees and Hartlepool NHS Foundation Trust / Newcastle Hospitals NHS Foundation Trust|COVID-19 Genomics UK (COG-UK) Consortium|Bashton|United Kingdom

>Spike|hCoV-19/Wales/PHWC-4974B3/2020|2020-11-28|EPI\_ISL\_726836|Original|hCoV-19^^Wales|Human|Originating lab|COVID-19 Genomics UK (COG-UK) Consortium|Moore|United Kingdom

>Spike|hCoV-19/England/ALDP-9CCDA6/2020|2020-09-16|EPI\_ISL\_566119|Original|hCoV-19^^England|Human|Lighthouse Lab in Alderley Park|Wellcome Sanger Institute for the COVID-19 Genomics UK (COG-UK) consortium|Davies|United Kingdom

>Spike|hCoV-19/England/QEUEH-C32106/2020|2020-12-11|EPI\_ISL\_782632|Original|hCoV-19^^England|Human|Lighthouse Lab in Glasgow|Wellcome Sanger Institute for the COVID-19 Genomics UK (COG-UK) Consortium|Davies|United Kingdom

>Spike|hCoV-19/England/QEUEH-96DFB0/2020|2020-08-17|EPI\_ISL\_530450|Original|hCoV-19^^England|Human|Lighthouse Lab in Glasgow|Wellcome Sanger Institute for the COVID-19 Genomics UK (COG-UK) consortium|Davies|United Kingdom

>Spike|hCoV-19/England/MILK-9AAF7B/2020|2020-08-31|EPI\_ISL\_551033|Original|hCoV-19^^England|Human|Lighthouse Lab in Milton Keynes|Wellcome Sanger Institute for the COVID-19 Genomics UK (COG-UK) consortium|Davies|United Kingdom

>Spike|hCoV-19/mink/Netherlands/NB-EMC-56-6/2020|2020-09-23|EPI\_ISL\_632453|Original|hCoV-19^^Noord Brabant|Neovison vison|Dutch COVID-19 response team|Erasmus Medical Center|Oude Munnink|Netherlands

>Spike|hCoV-19/Australia/VIC3292/2020|2020-07-07|EPI\_ISL\_520971|Original|hCoV-19^^Victoria|Human|Microbiological Diagnostic Unit - Public Health Laboratory (MDU-PHL)|MDU-PHL|Schultz|Australia

>Spike|hCoV-19/England/QEUEH-96B2C8/2020|2020-08-14|EPI\_ISL\_531236|Original|hCoV-19^^England|Human|Lighthouse Lab in Glasgow|Wellcome Sanger Institute for the COVID-19 Genomics UK (COG-UK) consortium|Davies|United Kingdom

>Spike|hCoV-19/Netherlands/NA\_374/2020|2020-04-08|EPI\_ISL\_455177|Original|hCoV-19^^Netherlands|Human|Dutch COVID-19 response team|Erasmus Medical Center|Oude Munnink|Netherlands

>Spike|hCoV-19/England/ALDP-9EAC69/2020|2020-09-24|EPI\_ISL\_580261|Original|hCoV-19^^England|Human|Lighthouse Lab in Alderley Park|Wellcome Sanger Institute for the COVID-19 Genomics UK (COG-UK) consortium|Davies|United Kingdom

>Spike|hCoV-19/England/CAMB-7BB3C/2020|2020-04-04|EPI\_ISL\_442227|Original|hCoV-19^^England|Human|Department of Pathology|Wellcome Sanger Institute for the COVID-19 Genomics UK (COG-UK) consortium|Amato|United Kingdom

>Spike|hCoV-19/France/PAC-IHU-1065/2020|2020-08-05|EPI\_ISL\_569045|Original|hCoV-19^^Provence-Alpes-C\u00f4te-d\u0201Azur|Human|MEPHI|MEPHI|Levasseur|France

>Spike|hCoV-19/Japan/PG-0246/2020|2020-03-18|EPI\_ISL\_479934|Original|hCoV-19^^Kanto|Human|Saitama Prefectural Institute of Public Health|Pathogen Genomics Center|Sekizuka|Japan

>Spike|hCoV-19/England/LOND-1250190/2020|2020-10-14|EPI\_ISL\_665199|Original|hCoV-19^^England|Human|University College London Hospital|COVID-19 Genomics UK (COG-UK) Consortium|Byott|United Kingdom

>Spike|hCoV-19/England/ALDP-5D4DAF/2020|2020-06-19|EPI\_ISL\_558597|Original|hCoV-19^^England|Human|Lighthouse Lab in Alderley Park|Wellcome Sanger Institute for the COVID-19 Genomics UK (COG-UK) consortium|Davies|United Kingdom

>Spike|hCoV-19/Switzerland/ZH-ETHZ-380364/2020|2020-11-22|EPI\_ISL\_721948|Original|hCoV-19^^Zurich|Human|Viollier AG|Department of Biosystems Science and Engineering|Nadeau|Switzerland

>Spike|hCoV-19/Switzerland/BL-ETHZ-120200/2020|2020-04-28|EPI\_ISL\_468273|Original|hCoV-19^^Basel-Landschaft|Human|Viollier AG|Department of Biosystems Science and Engineering|Nadeau|Switzerland

>Spike|hCoV-19/USA/MN-MDH-1173/2020|2020-05-21|EPI\_ISL\_476758|Original|hCoV-19^^Minnesota|Human|Minnesota Department of Health|Minnesota Department of Health|Garfin|USA

>Spike|hCoV-19/England/CAMC-B52268/2020|2020-11-08|EPI\_ISL\_656948|Original|hCoV-19^^England|Human|Lighthouse Lab in Cambridge|Wellcome Sanger Institute for the COVID-19 Genomics UK (COG-UK) Consortium|Davies|United Kingdom

>Spike|hCoV-19/USA/MI-UM-10036741863/2020|2020-11-02|EPI\_ISL\_682182|Original|hCoV-19^^Michigan|Human|University of Michigan Clinical Microbiology Laboratory|Lauring Lab|Valesano|USA

>Spike|hCoV-19/Scotland/EDB1457/2020|2020-04-11|EPI\_ISL\_433455|Original|hCoV-19^^Scotland|Human|Virology Department|COVID-19 Genomics UK (COG-UK) Consortium|Williams|United Kingdom

>Spike|hCoV-19/Germany/BY-ChVir-W1050-5794/2020|2020-03-27|EPI\_ISL\_754024|Original|hCoV-19^^Bavaria|Human|Charit\u00e9 Universit\u00e4tsmedizin Berlin|Charit\u00e9 Universit\u00e4tsmedizin Berlin|Muehlemann|Germany

>Spike|hCoV-19/Japan/PG-3822/2020|2020-07-00|EPI\_ISL\_692073|Original|hCoV-19^^Japan|Human|Pathogen Genomics Center|Pathogen Genomics Center|Sekizuka|Japan

>Spike|hCoV-19/Japan/PG-1717/2020|2020-04-00|EPI\_ISL\_685323|Original|hCoV-19^^Japan|Human|Pathogen Genomics Center|Pathogen Genomics Center|Sekizuka|Japan

>Spike|hCoV-19/Finland/15LS4BF5/2020|2020-10-15|EPI\_ISL\_756175|Original|hCoV-19^^Uusimaa|Human|Department of Virology and Immunology|Department of Virology|Smura|Finland

>Spike|hCoV-19/Northern Ireland/QEUI-96CE78/2020|2020-08-21|EPI\_ISL\_530732|Original|hCoV-19^^Northern Ireland|Human|Lighthouse Lab in Glasgow|Wellcome Sanger Institute for the COVID-19 Genomics UK (COG-UK) consortium|Davies|United Kingdom

>Spike|hCoV-19/Denmark/DCGC-17410/2020|2020-12-14|EPI\_ISL\_750962|Original|hCoV-19^^Midtjylland|Human|Department of Virus and Microbiological Special Diagnostics|Albertsen Lab|Michaelsen|Denmark

>Spike|hCoV-19/England/20144022404/2020|2020-03-26|EPI\_ISL\_423519|Original|hCoV-19^^England|Human|Respiratory Virus Unit|Respiratory Virus Unit|Platt|United Kingdom

>Spike|hCoV-19/Scotland/QEUI-A63687/2020|2020-10-12|EPI\_ISL\_596130|Original|hCoV-19^^Scotland|Human|Quadram Institute Bioscience|COVID-19 Genomics UK (COG-UK) Consortium|Alikhan|United Kingdom

>Spike|hCoV-19/Denmark/DCGC-14346/2020|2020-11-30|EPI\_ISL\_711394|Original|hCoV-19^^Sjælland|Human|Department of Virus and Microbiological Special Diagnostics|Albertsen Lab|Michaelsen|Denmark

>Spike|hCoV-19/India/MH-ACTREC-202/2020|2020-06-25|EPI\_ISL\_699856|Original|hCoV-19^^Maharashtra|Human|Hematopathology Laboratory|Hematopathology Laboratory|Patkar|India

>Spike|hCoV-19/USA/TX-HMH-MCoV-14627/2020|2020-10-11|EPI\_ISL\_787912|Original|hCoV-19^^Texas|Human|Houston Methodist Hospital|Houston Methodist Hospital|Long|USA

>Spike|hCoV-19/Australia/VIC7681/2020|2020-07-23|EPI\_ISL\_564572|Original|hCoV-19^^Victoria|Human|Microbiological Diagnostic Unit - Public Health Laboratory (MDU-PHL)|MDU-PHL|Schultz|Australia

>Spike|hCoV-19/England/BRIS-12F8F3/2020|2020-03-29|EPI\_ISL\_488394|Original|hCoV-19^^England|Human|PHE South West Regional Laboratory|Wellcome Sanger Institute for the COVID-19 Genomics UK (COG-UK) consortium|Davies|United Kingdom

>Spike|hCoV-19/Denmark/DCGC-5498/2020|2020-09-21|EPI\_ISL\_620823|Original|hCoV-19^^Syddanmark|Human|Department of Virus and Microbiological Special Diagnostics|Albertsen lab|Michaelsen|Denmark

>Spike|hCoV-19/England/BIRM-61F2E/2020|2020-03-27|EPI\_ISL\_529358|Original|hCoV-19^^England|Human|University of Birmingham|COVID-19 Genomics UK (COG-UK) Consortium|Loman|United Kingdom

>Spike|hCoV-19/England/ALDP-A2E13C/2020|2020-10-06|EPI\_ISL\_586624|Original|hCoV-19^^England|Human|Lighthouse Lab in Alderley Park|Wellcome Sanger Institute for the COVID-19 Genomics UK (COG-UK) consortium|Davies|United Kingdom

>Spike|hCoV-19/USA/ME-HETL-J0414/2020|2020-12-18|EPI\_ISL\_755520|Original|hCoV-19^^Maine|Human|Maine Health and Environmental Testing Laboratory|Tewhey Lab|Tewhey|USA

>Spike|hCoV-19/England/QEUA-B9FCBC/2020|2020-11-18|EPI\_ISL\_720949|Original|hCoV-19^^England|Human|Lighthouse Lab in Glasgow|Wellcome Sanger Institute for the COVID-19 Genomics UK (COG-UK) Consortium|Davies|United Kingdom

>Spike|hCoV-19/Germany/BW-UKT-062/2020|2020-04-20|EPI\_ISL\_581485|Original|hCoV-19^^Baden-W\u00fcrtemberg|Human|Medizinische Klinik Innere Medizin I|NGS Competence Center T\u00fcbingen|Angelov|Germany

>Spike|hCoV-19/Netherlands/NH-RIVM-20014/2020|2020-11-20|EPI\_ISL\_723213|Original|hCoV-19^^Noord-Holland|Human|Dutch COVID-19 response team|National Institute for Public Health and the Environment (RIVM)|Meijer|Netherlands

>Spike|hCoV-19/Denmark/DCGC-6539/2020|2020-10-05|EPI\_ISL\_619439|Original|hCoV-19^^Sjaelland|Human|Department of Virus and Microbiological Special Diagnostics|Albertsen lab|Michaelsen|Denmark

>Spike|hCoV-19/Denmark/DCGC-11556/2020|2020-11-02|EPI\_ISL\_670992|Original|hCoV-19^^Hovedstaden|Human|Department of Virus and Microbiological Special Diagnostics|Albertsen Lab|Michaelsen|Denmark

>Spike|hCoV-19/England/NORT-1B7A16A/2020|2020-11-24|EPI\_ISL\_724958|Original|hCoV-19^^England|Human|Northumbria University / South Tees Hospitals NHS Foundation Trust / North Cumbria Integrated Care NHS Foundation Trust / North Tees and Hartlepool NHS Foundation Trust / Newcastle Hospitals NHS Foundation Trust|COVID-19 Genomics UK (COG-UK) Consortium|Bashton|United Kingdom

>Spike|hCoV-19/Scotland/QEUA-96512B/2020|2020-08-13|EPI\_ISL\_534375|Original|hCoV-19^^Scotland|Human|NHSGGC West of Scotland Specialist Virology Centre / MRC-University of Glasgow Centre for Virus Research|Wellcome Sanger Institute for the COVID-19 Genomics UK (COG-UK) consortium|Davies|United Kingdom

>Spike|hCoV-19/England/CAMC-BBCD89/2020|2020-11-18|EPI\_ISL\_724201|Original|hCoV-19^^England|Human|Quadram Institute Bioscience|COVID-19 Genomics UK (COG-UK) Consortium|Alikhan|United Kingdom

>Spike|hCoV-19/Japan/PG-5471/2020|2020-07-00|EPI\_ISL\_690574|Original|hCoV-19^^Japan|Human|Pathogen Genomics Center|Pathogen Genomics Center|Sekizuka|Japan

>Spike|hCoV-19/England/CAMB-7B404/2020|2020-04-12|EPI\_ISL\_433954|Original|hCoV-19^^England|Human|Department of Pathology|COVID-19 Genomics UK (COG-UK) Consortium|Meredith|United Kingdom

>Spike|hCoV-19/USA/AZ-TG274698/2020|2020-04-06|EPI\_ISL\_694060|Original|hCoV-19^^Arizona|Human|AZ SPHL|TGen North|French|USA

>Spike|hCoV-19/Denmark/DCGC-16598/2020|2020-11-16|EPI\_ISL\_714860|Original|hCoV-19^^Hovedstaden|Human|Department of Virus and Microbiological Special Diagnostics|Albertsen Lab|Michaelsen|Denmark

>Spike|hCoV-19/USA/VA-DCLS-0259/2020|2020-04-22|EPI\_ISL\_452832|Original|hCoV-19^^Virginia|Human|Virginia DCLS|Virginia DCLS|St. Jacques|USA

>Spike|hCoV-19/Wales/PHWC-2DEF4/2020|2020-04-09|EPI\_ISL\_446038|Original|hCoV-19^^Wales|Human|Wales Specialist Virology Centre|Public Health Wales Microbiology Cardiff|Moore|United Kingdom

>Spike|hCoV-19/India/TG-CCMB-K600B/2020|2020-04-14|EPI\_ISL\_447581|Original|hCoV-19^^Telangana|Human|CSIR-Centre for Cellular and Molecular Biology|CSIR-Centre for Cellular and Molecular Biology|Banu|India

>Spike|hCoV-19/Wales/PHWC-49D031/2020|2020-12-10|EPI\_ISL\_742723|Original|hCoV-19^^Wales|Human|Wales Specialist Virology Centre Sequencing lab|COVID-19 Genomics UK (COG-UK) Consortium|Moore|United Kingdom

>Spike|hCoV-19/England/SHEF-10B2D8B/2020|2020-05-16|EPI\_ISL\_537225|Original|hCoV-19^^England|Human|Virology Department|Wellcome Sanger Institute for the COVID-19 Genomics UK (COG-UK) consortium|Davies|United Kingdom

>Spike|hCoV-19/Australia/VIC6451/2020|2020-07-23|EPI\_ISL\_521229|Original|hCoV-19^^Victoria|Human|Microbiological Diagnostic Unit - Public Health Laboratory (MDU-PHL)|MDU-PHL|Schultz|Australia

>Spike|hCoV-19/England/ALDP-B5E26C/2020|2020-11-09|EPI\_ISL\_723645|Original|hCoV-19^^England|Human|Oxford Viromics|COVID-19 Genomics UK (COG-UK) Consortium|Golubchik|United Kingdom

>Spike|hCoV-19/Scotland/CVR4314/2020|2020-09-15|EPI\_ISL\_573771|Original|hCoV-19^^Scotland|Human|West of Scotland Specialist Virology Centre|COVID-19 Genomics UK (COG-UK) Consortium|Robertson|United Kingdom

>Spike|hCoV-19/Scotland/QEUH-A4B9E6/2020|2020-10-08|EPI\_ISL\_628500|Original|hCoV-19^^Scotland|Human|Oxford Viromics|COVID-19 Genomics UK (COG-UK) Consortium|Golubchik|United Kingdom

>Spike|hCoV-19/USA/AZ-TG480043/2020|2020-07-07|EPI\_ISL\_695061|Original|hCoV-19^^Arizona|Human|TGen North|TGen North|French|USA

>Spike|hCoV-19/England/20132004804/2020|2020-03-23|EPI\_ISL\_423717|Original|hCoV-19^^England|Human|Respiratory Virus Unit|Respiratory Virus Unit|Platt|United Kingdom

>Spike|hCoV-19/England/CAMB-1B96F4/2020|2020-11-04|EPI\_ISL\_664573|Original|hCoV-19^^England|Human|Department of Pathology|COVID-19 Genomics UK (COG-UK) Consortium|Goodfellow|United Kingdom

>Spike|hCoV-19/Australia/VIC14945/2020|2020-09-22|EPI\_ISL\_593073|Original|hCoV-19^^Victoria|Human|Microbiological Diagnostic Unit - Public Health Laboratory (MDU-PHL)|MDU-PHL|Schultz|Australia

>Spike|hCoV-19/USA/MI-MDHHS-SC21159/2020|2020-04-03|EPI\_ISL\_507416|Original|hCoV-19^^Michigan|Human|Michigan Department of Health and Human Services|Michigan Department of Health and Human Services|Blankenship|USA

>Spike|hCoV-19/Spain/PV-IBV-000678/2020|2020-03-03|EPI\_ISL\_452780|Original|hCoV-19^^Basque Country|Human|Hospital Universitario Araba. Vitoria-Gasteiz,|SeqCOVID-SPAIN consortium|IBV (CSIC)|Comas|Spain

>Spike|hCoV-19/Japan/PG-3465/2020|2020-07-00|EPI\_ISL\_691575|Original|hCoV-19^^Japan|Human|Pathogen Genomics Center|Pathogen Genomics Center|Sekizuka|Japan

>Spike|hCoV-19/Australia/VIC11342/2020|2020-08-24|EPI\_ISL\_563338|Original|hCoV-19^^Victoria|Human|Microbiological Diagnostic Unit - Public Health Laboratory (MDU-PHL)|MDU-PHL|Schultz|Australia

>Spike|hCoV-19/Canada/BC-BCCDC-7305/2020|2020-00-00|EPI\_ISL\_740672|Original|hCoV-19^^British Columbia|Human|BCCDC Public Health Laboratory|BCCDC Public Health Laboratory|Prystajecky|Canada

>Spike|hCoV-19/USA/TX-DSHS-0833/2020|2020-06-07|EPI\_ISL\_593576|Original|hCoV-19^^Texas|Human|Texas Department of State Health Services|Texas Department of State Health Services|Rahman|USA

>Spike|hCoV-19/Denmark/DCGC-2990/2020|2020-08-24|EPI\_ISL\_616754|Original|hCoV-19^^Midtjylland|Human|Department of Virus and Microbiological Special Diagnostics|Albertsen lab|Michaelsen|Denmark

>Spike|hCoV-19/England/HECH-259A316/2020|2020-06-03|EPI\_ISL\_488870|Original|hCoV-19^^England|Human|Microbiology Department|Wellcome Sanger Institute for the COVID-19 Genomics UK (COG-UK) consortium|Davies|United Kingdom

>Spike|hCoV-19/Vietnam/CM296/2020|2020-03-06|EPI\_ISL\_416431|Vero|hCoV-19^^Hanoi|Human|National Influenza Center|National Influenza Center|Ung|Vietnam

>Spike|hCoV-19/England/QEUH-AD247A/2020|2020-10-26|EPI\_ISL\_634227|Original|hCoV-19^^England|Human|Lighthouse Lab in Glasgow|Wellcome Sanger Institute for the COVID-19 Genomics UK (COG-UK) consortium|Davies|United Kingdom

>Spike|hCoV-19/England/NOTT-10F422/2020|2020-04-02|EPI\_ISL\_433003|Original|hCoV-19^^England|Human|Queens Medical Centre|COVID-19 Genomics UK (COG-UK) Consortium|Loose|United Kingdom

>Spike|hCoV-19/Singapore/197/2020|2020-04-22|EPI\_ISL\_462315|Original|hCoV-19^^Singapore|Human|National Public Health Laboratory|National Public Health Laboratory|Mak|Singapore

>Spike|hCoV-19/Chile/RM-126528/2020|2020-07-17|EPI\_ISL\_746594|Original|hCoV-19^^Region Metropolitana de Santiago|Human|Genética Molecular and Subdepartamento de Virología ISP Chile|Instituto de Salud Pública de Chile|Tognarelli|Chile

>Spike|hCoV-19/Denmark/DCGC-9673/2020|2020-11-09|EPI\_ISL\_669102|Original|hCoV-19^^Sjaelland|Human|Department of Virus and Microbiological Special Diagnostics|Albertsen Lab|Michaelsen|Denmark

>Spike|hCoV-19/Scotland/CVR2083/2020|2020-04-10|EPI\_ISL\_484557|Original|hCoV-19^^Scotland|Human|West of Scotland Specialist Virology Centre|COVID-19 Genomics UK (COG-UK) Consortium|Robertson|United Kingdom

>Spike|hCoV-19/United Arab Emirates/1040/2020|2020-06-11|EPI\_ISL\_698115|Original|hCoV-19^^Abu Dhabi|Human|Group 42 (G42) Healthcare|G42 Healthcare|Ogrodzki|United Arab Emirates

>Spike|hCoV-19/Australia/VIC12981/2020|2020-07-28|EPI\_ISL\_592134|Original|hCoV-19^^Victoria|Human|Microbiological Diagnostic Unit - Public Health Laboratory (MDU-PHL)|MDU-PHL|Schultz|Australia

>Spike|hCoV-19/Australia/VIC15371/2020|2020-08-01|EPI\_ISL\_593268|Original|hCoV-19^^Victoria|Human|Microbiological Diagnostic Unit - Public Health Laboratory (MDU-PHL)|MDU-PHL|Schultz|Australia

>Spike|hCoV-19/Australia/NSW1255/2020|2020-12-18|EPI\_ISL\_740886|Original|hCoV-19^^New South Wales|Human|Pathology North - Royal North Shore Hospital - NSW Health Pathology|NSW Health Pathology - Institute of Clinical Pathology and Medical Research; Westmead Hospital; University of Sydney|Gall|Australia

>Spike|hCoV-19/Japan/PG-8168/2020|2020-07-00|EPI\_ISL\_687267|Original|hCoV-19^^Japan|Human|Pathogen Genomics Center|Pathogen Genomics Center|Sekizuka|Japan

>Spike|hCoV-19/USA/TX-HMH-6461/2020|2020-06-27|EPI\_ISL\_546014|Original|hCoV-19^^Texas|Human|Houston Methodist Hospital|Houston Methodist Hospital|Long|USA

>Spike|hCoV-19/USA/CO-CSU-D3171/2020|2020-04-02|EPI\_ISL\_527477|Original|hCoV-19^^Colorado|Human|Colorado State University - Ebel Lab|Colorado State University - Ebel Lab|Cline|USA

>Spike|hCoV-19/England/MILK-BAC5B1/2020|2020-11-18|EPI\_ISL\_720653|Original|hCoV-19^^England|Human|Lighthouse Lab in Milton Keynes|Wellcome Sanger Institute for the COVID-19 Genomics UK (COG-UK) Consortium|Davies|United Kingdom

>Spike|hCoV-19/USA/NV-NSPHL-A0028/2020|2020-03-19|EPI\_ISL\_515315|Original|hCoV-19^^Nevada|Human|Nevada State Public Health Laboratory|Nevada State Public Health Laboratory|Sevinsky|USA

>Spike|hCoV-19/USA/TX-HMH-4089/2020|2020-06-17|EPI\_ISL\_543359|Original|hCoV-19^^Texas|Human|Houston Methodist Hospital|Houston Methodist Hospital|Long|USA

>Spike|hCoV-19/Russia/SPE-RII-18966V/2020|2020-06-01|EPI\_ISL\_524022|Vero P1|hCoV-19^^Saint Petersburg|Human|WHO National Influenza Centre Russian Federation|WHO National Influenza Centre Russian Federation|Komissarov|Russia

>Spike|hCoV-19/Germany/NW-MPP-19/2020|2020-05-25|EPI\_ISL\_487407|Original|hCoV-19^^North Rhine-Westphalia|Human|Labor Knei\u00dfler GmbH & Co. KG|Heinrich Pette Institute|G\u00f6ttingen|Germany

>Spike|hCoV-19/England/QEUEH-9DDECD/2020|2020-09-21|EPI\_ISL\_599543|Original|hCoV-19^^England|Human|Lighthouse Lab in Glasgow|Wellcome Sanger Institute for the COVID-19 Genomics UK (COG-UK) consortium|Davies|United Kingdom

>Spike|hCoV-19/USA/MI-UM-10036453787/2020|2020-10-15|EPI\_ISL\_628814|Original|hCoV-19^^Michigan|Human|University of Michigan Clinical Microbiology Laboratory|Lauring Lab|Valesano|USA

>Spike|hCoV-19/England/ALDP-9B605B/2020|2020-08-28|EPI\_ISL\_572984|Original|hCoV-19^^England|Human|Oxford Viromics|COVID-19 Genomics UK (COG-UK) Consortium|Golubchik|United Kingdom

>Spike|hCoV-19/England/NORW-EC5B0/2020|2020-05-10|EPI\_ISL\_457536|Original|hCoV-19^^England|Human|Quadram Institute Bioscience|COVID-19 Genomics UK (COG-UK) Consortium|Alikhan|United Kingdom

>Spike|hCoV-19/USA/MA-MGH-00069/2020|2020-03-25|EPI\_ISL\_460119|Original|hCoV-19^^Massachusetts|Human|Massachusetts General Hospital|Infectious Disease Program|Lemieux|USA

>Spike|hCoV-19/Denmark/DCGC-17490/2020|2020-12-14|EPI\_ISL\_751021|Original|hCoV-19^^Nordjylland|Human|Department of Virus and Microbiological Special Diagnostics|Albertsen Lab|Michaelsen|Denmark

>Spike|hCoV-19/USA/WI-GMF-08878/2020|2020-07-02|EPI\_ISL\_489937|Original|hCoV-19^^Wisconsin|Human|Gundersen Molecular Diagnostics Laboratory|Kabara Cancer Research Institute|Kenny|USA

>Spike|hCoV-19/USA/CA-CZB-10830/2020|2020-07-17|EPI\_ISL\_583079|Original|hCoV-19^^California|Human|Humboldt County Public Health Laboratory|Chan-Zuckerberg Biohub|Bhatt|USA

>Spike|hCoV-19/USA/CA-CZB-1538/2020|2020-04-20|EPI\_ISL\_468483|Original|hCoV-19^^California|Human|Ventura County Public Health Lab|Chan-Zuckerberg Biohub|Hao|USA

>Spike|hCoV-19/Belgium/UGent-62/2020|2020-04-05|EPI\_ISL\_451173|Original|hCoV-19^^Ghent|Human|Lab voor klinische biologie|Onderzoeksgroep Virologie|Lambrechts|Belgium

>Spike|hCoV-19/Finland/26SS9F9/2020|2020-09-26|EPI\_ISL\_759954|Original|hCoV-19^^Uusimaa|Human|Department of Virology and Immunology|Department of Virology|Smura|Finland

>Spike|hCoV-19/Germany/HH-hpi-p2485/2020|2020-06-16|EPI\_ISL\_776542|Original|hCoV-19^^Hamburg|Human|University Medical Center Hamburg Eppendorf|Heinrich Pette Institute|Robitaille|Germany

>Spike|hCoV-19/Luxembourg/LNS5339140/2020|2020-10-31|EPI\_ISL\_744220|Original|hCoV-19^^Luxembourg|Human|Laboratoire national de sant\u00e9|Laboratoire national de sant\u00e9|Wienecke-Baldacchino|Luxembourg

>Spike|hCoV-19/Luxembourg/LNS0469996/2020|2020-10-19|EPI\_ISL\_739781|Original|hCoV-19^^Luxembourg|Human|Laboratoire national de sant\u00e9|Laboratoire national de sant\u00e9|Wienecke-Baldacchino|Luxembourg

>Spike|hCoV-19/Switzerland/BL-ETHZ-420056/2020|2020-12-18|EPI\_ISL\_768069|Original|hCoV-19^^Basel-Landschaft|Human|Viollier AG|Department of Biosystems Science and Engineering|Nadeau|Switzerland

>Spike|hCoV-19/USA/CT-UW159/2020|2020-03-13|EPI\_ISL\_416697|Original|hCoV-19^^Connecticut|Human|UW Virology Lab|UW Virology Lab|Roychoudhury|USA

>Spike|hCoV-19/England/ALDP-A2F186/2020|2020-10-05|EPI\_ISL\_586983|Original|hCoV-19^^England|Human|Lighthouse Lab in Alderley Park|Wellcome Sanger Institute for the COVID-19 Genomics UK (COG-UK) consortium|Davies|United Kingdom

>Spike|hCoV-19/USA/CA-CHLA-PLM61223149/2020|2020-11-07|EPI\_ISL\_753290|Original|hCoV-19^^California|Human|Clinical virology Laboratory|Center for Personalized Medicine|Dien Bard|USA

>Spike|hCoV-19/Scotland/QEUH-B9FC9E/2020|2020-11-18|EPI\_ISL\_757281|Original|hCoV-19^^Scotland|Human|Lighthouse Lab in Glasgow|Wellcome Sanger Institute for the COVID-19 Genomics UK (COG-UK) Consortium|Davies|United Kingdom

>Spike|hCoV-19/England/MILK-BAB4D3/2020|2020-11-18|EPI\_ISL\_681622|Original|hCoV-19^^England|Human|Lighthouse Lab in Milton Keynes|Wellcome Sanger Institute for the COVID-19 Genomics UK (COG-UK) Consortium|Davies|United Kingdom

>Spike|hCoV-19/England/ALDP-5CE8D4/2020|2020-06-19|EPI\_ISL\_558582|Original|hCoV-19^^England|Human|Lighthouse Lab in Alderley Park|Wellcome Sanger Institute for the COVID-19 Genomics UK (COG-UK) consortium|Davies|United Kingdom

>Spike|hCoV-19/England/QEUH-AF3D69/2020|2020-10-30|EPI\_ISL\_663071|Original|hCoV-19^^England|Human|Lighthouse Lab in Glasgow|Wellcome Sanger Institute for the COVID-19 Genomics UK (COG-UK) Consortium|Davies|United Kingdom

>Spike|hCoV-19/USA/WI-UW-1913/2020|2020-10-26|EPI\_ISL\_677322|Original|hCoV-19^^Wisconsin|Human|University of Wisconsin-Madison AIDS Vaccine Research Laboratories|University of Wisconsin-Madison AIDS Vaccine Research Laboratories|Baczenas|USA

>Spike|hCoV-19/Wales/CVR4748/2020|2020-09-20|EPI\_ISL\_626825|Original|hCoV-19^^Wales|Human|West of Scotland Specialist Virology Centre|COVID-19 Genomics UK (COG-UK) Consortium|Robertson|United Kingdom

>Spike|hCoV-19/USA/TX-DSHS-0820/2020|2020-06-03|EPI\_ISL\_593563|Original|hCoV-19^^Texas|Human|Texas Department of State Health Services|Texas Department of State Health Services|Rahman|USA

>Spike|hCoV-19/England/ALDP-AA4F34/2020|2020-10-22|EPI\_ISL\_630829|Original|hCoV-19^^England|Human|Lighthouse Lab in Alderley Park|Wellcome Sanger Institute for the COVID-19 Genomics UK (COG-UK) consortium|Davies|United Kingdom

>Spike|hCoV-19/Wales/PHWC-483010/2020|2020-10-13|EPI\_ISL\_627293|Original|hCoV-19^^Wales|Human|Wales Specialist Virology Centre Sequencing lab|COVID-19 Genomics UK (COG-UK) Consortium|Moore|United Kingdom

>Spike|hCoV-19/England/ALDP-C3C8F8/2020|2020-12-10|EPI\_ISL\_730943|Original|hCoV-19^^England|Human|Lighthouse Lab in Alderley Park|Wellcome Sanger Institute for the COVID-19 Genomics UK (COG-UK) Consortium|Davies|United Kingdom

>Spike|hCoV-19/England/QEUEH-BA17C5/2020|2020-11-18|EPI\_ISL\_719847|Original|hCoV-19^^England|Human|Lighthouse Lab in Glasgow|Wellcome Sanger Institute for the COVID-19 Genomics UK (COG-UK) Consortium|Davies|United Kingdom

>Spike|hCoV-19/England/MILK-A917AB/2020|2020-10-19|EPI\_ISL\_705985|Original|hCoV-19^^England|Human|Oxford Viromics|COVID-19 Genomics UK (COG-UK) Consortium|Golubchik|United Kingdom

>Spike|hCoV-19/Slovakia/SK-BMC1/2020|2020-03-06|EPI\_ISL\_417877|Vero E6 P1|hCoV-19^^Kostoliste|Human|Institute of Virology|Institute of Virology|Klempa|Slovakia

>Spike|hCoV-19/Wales/PHWC-492861/2020|2020-11-30|EPI\_ISL\_725710|Original|hCoV-19^^Wales|Human|Originating lab|COVID-19 Genomics UK (COG-UK) Consortium|Moore|United Kingdom

>Spike|hCoV-19/England/MILK-A060B5/2020|2020-10-01|EPI\_ISL\_599842|Original|hCoV-19^^England|Human|Lighthouse Lab in Milton Keynes|Wellcome Sanger Institute for the COVID-19 Genomics UK (COG-UK) consortium|Davies|United Kingdom

>Spike|hCoV-19/England/QEUEH-C7FF21/2020|2020-12-16|EPI\_ISL\_757032|Original|hCoV-19^^England|Human|Lighthouse Lab in Glasgow|Wellcome Sanger Institute for the COVID-19 Genomics UK (COG-UK) Consortium|Davies|United Kingdom

>Spike|hCoV-19/England/205120470/2020|2020-12-10|EPI\_ISL\_766305|Original|hCoV-19^^England|Human|Respiratory Virus Unit|COVID-19 Genomics UK (COG-UK) Consortium|Platt|United Kingdom

>Spike|hCoV-19/Scotland/EDB510/2020|2020-03-31|EPI\_ISL\_491605|Original|hCoV-19^^Scotland|Human|Virology Department|Wellcome Sanger Institute for the COVID-19 Genomics UK (COG-UK) consortium|Davies|United Kingdom

>Spike|hCoV-19/England/QEUEH-9B5380/2020|2020-09-03|EPI\_ISL\_590433|Original|hCoV-19^^England|Human|Lighthouse Lab in Glasgow|Wellcome Sanger Institute for the COVID-19 Genomics UK (COG-UK) consortium|Davies|United Kingdom

>Spike|hCoV-19/England/20104003204/2020|2020-03-02|EPI\_ISL\_464306|Original|hCoV-19^^England|Human|Respiratory Virus Unit|Respiratory Virus Unit|Platt|United Kingdom

>Spike|hCoV-19/England/CAMB-7576B/2020|2020-03-13|EPI\_ISL\_440468|Original|hCoV-19^^England|Human|Department of Pathology|Wellcome Sanger Institute for the COVID-19 Genomics UK (COG-UK) consortium|Amato|United Kingdom

>Spike|hCoV-19/USA/MA-MGH-00592/2020|2020-03-28|EPI\_ISL\_460317|Original|hCoV-19^^Massachusetts|Human|Massachusetts General Hospital|Infectious Disease Program|Lemieux|USA

>Spike|hCoV-19/England/CAMB-7DE40/2020|2020-04-07|EPI\_ISL\_442081|Original|hCoV-19^^England|Human|Department of Pathology|Wellcome Sanger Institute for the COVID-19 Genomics UK (COG-UK) consortium|Amato|United Kingdom

>Spike|hCoV-19/England/QEUEH-AE2213/2020|2020-10-27|EPI\_ISL\_633596|Original|hCoV-19^^England|Human|Lighthouse Lab in Glasgow|Wellcome Sanger Institute for the COVID-19 Genomics UK (COG-UK) consortium|Davies|United Kingdom

>Spike|hCoV-19/Japan/PG-2806/2020|2020-04-00|EPI\_ISL\_690933|Original|hCoV-19^^Japan|Human|Pathogen Genomics Center|Pathogen Genomics Center|Sekizuka|Japan

>Spike|hCoV-19/Australia/VIC15627/2020|2020-08-04|EPI\_ISL\_593386|Original|hCoV-19^^Victoria|Human|Microbiological Diagnostic Unit - Public Health Laboratory (MDU-PHL)|MDU-PHL|Schultz|Australia

>Spike|hCoV-19/England/204490005/2020|2020-10-30|EPI\_ISL\_654008|Original|hCoV-19^^England|Human|Respiratory Virus Unit|COVID-19 Genomics UK (COG-UK) Consortium|Platt|United Kingdom

>Spike|hCoV-19/Scotland/CVR2761/2020|2020-04-20|EPI\_ISL\_473553|Original|hCoV-19^^Scotland|Human|West of Scotland Specialist Virology Centre|COVID-19 Genomics UK (COG-UK) Consortium|Robertson|United Kingdom

>Spike|hCoV-19/USA/MI-UM-10036531598/2020|2020-10-20|EPI\_ISL\_640155|Original|hCoV-19^^Michigan|Human|University of Michigan Clinical Microbiology Laboratory|Lauring Lab|Valesano|USA

>Spike|hCoV-19/Denmark/DCGC-8144/2020|2020-10-26|EPI\_ISL\_617245|Original|hCoV-19^^Hovedstaden|Human|Department of Virus and Microbiological Special Diagnostics|Albertsen lab|Michaelsen|Denmark

>Spike|hCoV-19/England/MILK-B3CA99/2020|2020-11-01|EPI\_ISL\_706182|Original|hCoV-19^^England|Human|Oxford Viromics|COVID-19 Genomics UK (COG-UK) Consortium|Golubchik|United Kingdom

>Spike|hCoV-19/England/CAMC-BC07DF/2020|2020-11-22|EPI\_ISL\_704984|Original|hCoV-19^^England|Human|Lighthouse Lab in Cambridge|Wellcome Sanger Institute for the COVID-19 Genomics UK (COG-UK) Consortium|Davies|United Kingdom

>Spike|hCoV-19/England/LIVE-1D2B05/2020|2020-03-29|EPI\_ISL\_612108|Original|hCoV-19^^England|Human|Liverpool Clinical Laboratories|COVID-19 Genomics UK (COG-UK) Consortium|Haldenby|United Kingdom

>Spike|hCoV-19/England/QEUH-8A8EEA/2020|2020-07-25|EPI\_ISL\_532798|Original|hCoV-19^^England|Human|Lighthouse Lab in Glasgow|Wellcome Sanger Institute for the COVID-19 Genomics UK (COG-UK) consortium|Davies|United Kingdom

>Spike|hCoV-19/Sweden/20-53165/2020|2020-10-19|EPI\_ISL\_648177|Original|hCoV-19^^Sweden|Human|The Public Health Agency of Sweden|The Public Health Agency of Sweden|Svartstr\u00f6m|Sweden

>Spike|hCoV-19/Denmark/DCGC-17206/2020|2020-12-14|EPI\_ISL\_750824|Original|hCoV-19^^Sjaelland|Human|Department of Virus and Microbiological Special Diagnostics|Albertsen Lab|Michaelsen|Denmark

>Spike|hCoV-19/Ireland/LK-NVRL-73IRL26070/2020|2020-09-06|EPI\_ISL\_578313|Original|hCoV-19^^Limerick|Human|National Virus Reference Laboratory|National Virus Reference Laboratory|Gonzalez|Ireland

>Spike|hCoV-19/England/QEUH-A00859/2020|2020-10-02|EPI\_ISL\_600410|Original|hCoV-19^^England|Human|Lighthouse Lab in Glasgow|Wellcome Sanger Institute for the COVID-19 Genomics UK (COG-UK) consortium|Davies|United Kingdom

>Spike|hCoV-19/USA/WI-GMF-19468/2020|2020-09-09|EPI\_ISL\_547811|Original|hCoV-19^^Wisconsin|Human|Gundersen Molecular Diagnostics Laboratory|Kabara Cancer Research Institute|Kenny|USA

>Spike|hCoV-19/England/ALDP-B5E32D/2020|2020-11-08|EPI\_ISL\_723650|Original|hCoV-19^^England|Human|Oxford Viromics|COVID-19 Genomics UK (COG-UK) Consortium|Golubchik|United Kingdom

>Spike|hCoV-19/England/EXET-135D37/2020|2020-04-06|EPI\_ISL\_457160|Original|hCoV-19^^England|Human|University of Exeter|COVID-19 Genomics UK (COG-UK) Consortium|Temperton|United Kingdom

>Spike|hCoV-19/Denmark/DCGC-12218/2020|2020-11-16|EPI\_ISL\_682399|Original|hCoV-19^^Syddanmark|Human|Department of Virus and Microbiological Special Diagnostics|Albertsen Lab|Michaelsen|Denmark

>Spike|hCoV-19/England/ALDP-AA4013/2020|2020-10-22|EPI\_ISL\_630894|Original|hCoV-19^^England|Human|Lighthouse Lab in Alderley Park|Wellcome Sanger Institute for the COVID-19 Genomics UK (COG-UK) consortium|Davies|United Kingdom

>Spike|hCoV-19/England/CAMB-1B2F78/2020|2020-05-19|EPI\_ISL\_456739|Original|hCoV-19^^England|Human|Department of Pathology|COVID-19 Genomics UK (COG-UK) Consortium|Meredith|United Kingdom

>Spike|hCoV-19/USA/TX-HMH095/2020|2020-03-19|EPI\_ISL\_434800|Original|hCoV-19^^Texas|Human|Houston Methodist Hospital|Houston Methodist Hospital|Long|USA

>Spike|hCoV-19/USA/LA-EVTL515/2020|2020-08-02|EPI\_ISL\_578919|Original|hCoV-19^^Louisiana|Human|LSUHS Emerging Viral Threat Laboratory|Microbial Genome Sequencing Center|Kamil|USA

>Spike|hCoV-19/Canada/ON-PHL-20-03778/2020|2020-11-00|EPI\_ISL\_778853|Original|hCoV-19^^Ontario|Human|Public Health Ontario Laboratory|Public Health Ontario Laboratory|Guthrie|Canada

>Spike|hCoV-19/Scotland/QEUH-A78625/2020|2020-10-14|EPI\_ISL\_638979|Original|hCoV-19^^Scotland|Human|Oxford Viromics|COVID-19 Genomics UK (COG-UK) Consortium|Golubchik|United Kingdom

>Spike|hCoV-19/USA/NY-NYCPHL-001542/2020|2020-12-02|EPI\_ISL\_745458|Original|hCoV-19^^New York|Human|DOHMH Corona|New York City Public Health Laboratory|Wang|USA

>Spike|hCoV-19/USA/TX-HMH-MCoV-16193/2020|2020-10-28|EPI\_ISL\_785877|Original|hCoV-19^^Texas|Human|Houston Methodist Hospital|Houston Methodist Hospital|Long|USA



>Spike|hCoV-19/Australia/VIC15031/2020|2020-07-29|EPI\_ISL\_593114|Original|hCoV-19^^Victoria|Human|Microbiological Diagnostic Unit - Public Health Laboratory (MDU-PHL)|MDU-PHL|Schultz|Australia

>Spike|hCoV-19/England/QEUEH-9DD2EF/2020|2020-09-21|EPI\_ISL\_581109|Original|hCoV-19^^England|Human|Lighthouse Lab in Glasgow|Wellcome Sanger Institute for the COVID-19 Genomics UK (COG-UK) consortium|Davies|United Kingdom

>Spike|hCoV-19/England/ALDP-9E79FC/2020|2020-09-24|EPI\_ISL\_580255|Original|hCoV-19^^England|Human|Lighthouse Lab in Alderley Park|Wellcome Sanger Institute for the COVID-19 Genomics UK (COG-UK) consortium|Davies|United Kingdom

>Spike|hCoV-19/England/QEUEH-96FDC3/2020|2020-08-18|EPI\_ISL\_540295|Original|hCoV-19^^England|Human|Lighthouse Lab in Glasgow|Wellcome Sanger Institute for the COVID-19 Genomics UK (COG-UK) consortium|Davies|United Kingdom

>Spike|hCoV-19/England/CAMB-1B7D88/2020|2020-10-13|EPI\_ISL\_638373|Original|hCoV-19^^England|Human|Department of Pathology|COVID-19 Genomics UK (COG-UK) Consortium|Goodfellow|United Kingdom

>Spike|hCoV-19/England/MILK-A45B40/2020|2020-10-06|EPI\_ISL\_598563|Original|hCoV-19^^England|Human|Lighthouse Lab in Milton Keynes|Wellcome Sanger Institute for the COVID-19 Genomics UK (COG-UK) consortium|Davies|United Kingdom

>Spike|hCoV-19/England/CAMB-72458/2020|2020-03-24|EPI\_ISL\_439940|Original|hCoV-19^^England|Human|Department of Pathology|Wellcome Sanger Institute for the COVID-19 Genomics UK (COG-UK) consortium|Amato|United Kingdom

>Spike|hCoV-19/USA/TX-HMH-MCoV-12960/2020|2020-08-28|EPI\_ISL\_788112|Original|hCoV-19^^Texas|Human|Houston Methodist Hospital|Houston Methodist Hospital|Long|USA

>Spike|hCoV-19/England/CAMC-B78CF5/2020|2020-11-12|EPI\_ISL\_783380|Original|hCoV-19^^England|Human|Lighthouse Lab in Cambridge|Wellcome Sanger Institute for the COVID-19 Genomics UK (COG-UK) Consortium|Davies|United Kingdom

>Spike|hCoV-19/USA/AZ-TG664254/2020|2020-04-28|EPI\_ISL\_696056|Original|hCoV-19^^Arizona|Human|Sonora Quest Laboratories|TGen North|French|USA

>Spike|hCoV-19/England/QEUEH-882059/2020|2020-07-24|EPI\_ISL\_532657|Original|hCoV-19^^England|Human|Lighthouse Lab in Glasgow|Wellcome Sanger Institute for the COVID-19 Genomics UK (COG-UK) consortium|Davies|United Kingdom

>Spike|hCoV-19/Australia/VIC9433/2020|2020-08-18|EPI\_ISL\_565547|Original|hCoV-19^^Victoria|Human|Microbiological Diagnostic Unit - Public Health Laboratory (MDU-PHL)|MDU-PHL|Schultz|Australia

>Spike|hCoV-19/Japan/PG-6973/2020|2020-07-00|EPI\_ISL\_688078|Original|hCoV-19^^Japan|Human|Pathogen Genomics Center|Pathogen Genomics Center|Sekizuka|Japan

>Spike|hCoV-19/Australia/WA310/2020|2020-03-09|EPI\_ISL\_596853|Original|hCoV-19^^Western Australia|Human|PathWest Laboratory Medicine WA|PathWest Laboratory Medicine WA Microbial Surveillance Unit|Sikazwe|Australia

>Spike|hCoV-19/Canada/ON-PHL-20-02297/2020|2020-09-00|EPI\_ISL\_671548|Original|hCoV-19^^Ontario|Human|Public Health Ontario Laboratory|Public Health Ontario Laboratory|Guthrie|Canada

>Spike|hCoV-19/Northern Ireland/NIRE-234EF8/2020|2020-10-24|EPI\_ISL\_763482|Original|hCoV-19^^Northern Ireland|Human|Regional Virus Laboratory|COVID-19 Genomics UK (COG-UK) Consortium|Fairley|United Kingdom

>Spike|hCoV-19/England/NOTT-11D0A5/2020|2020-11-20|EPI\_ISL\_665415|Original|hCoV-19^^England|Human|Queens Medical Centre|COVID-19 Genomics UK (COG-UK) Consortium|Loose|United Kingdom

>Spike|hCoV-19/Northern Ireland/NIRE-FB642/2020|2020-08-30|EPI\_ISL\_585245|Original|hCoV-19^^Northern Ireland|Human|Regional Virus Laboratory|COVID-19 Genomics UK (COG-UK) Consortium|Fairley|United Kingdom

>Spike|hCoV-19/Netherlands/ZH-EMC-839/2020|2020-10-14|EPI\_ISL\_632705|Original|hCoV-19^^Zuid Holland|Human|Dutch COVID-19 response team|Erasmus Medical Center|Oude Munnink|Netherlands

>Spike|hCoV-19/USA/MI-MDHHS-SC22136/2020|2020-10-12|EPI\_ISL\_614187|Original|hCoV-19^^Michigan|Human|Michigan Department of Health and Human Services|Michigan Department of Health and Human Services|Jacob|USA

>Spike|hCoV-19/England/LOND-DA773/2020|2020-11-16|EPI\_ISL\_724663|Original|hCoV-19^^England|Human|University College London|COVID-19 Genomics UK (COG-UK) Consortium|Roy|United Kingdom

>Spike|hCoV-19/England/CAMC-C98C67/2020|2020-12-17|EPI\_ISL\_761981|Original|hCoV-19^^England|Human|Lighthouse Lab in Cambridge|Wellcome Sanger Institute for the COVID-19 Genomics UK (COG-UK) Consortium|Davies|United Kingdom

>Spike|hCoV-19/Denmark/DCGC-18067/2020|2020-12-14|EPI\_ISL\_749736|Original|hCoV-19^^Sjaelland|Human|Department of Virus and Microbiological Special Diagnostics|Albertsen Lab|Michaelsen|Denmark

>Spike|hCoV-19/England/CAMB-1B9199/2020|2020-00-00|EPI\_ISL\_704419|Original|hCoV-19^^England|Human|Department of Pathology|COVID-19 Genomics UK (COG-UK) Consortium|Goodfellow|United Kingdom

>Spike|hCoV-19/Denmark/DCGC-2034/2020|2020-07-27|EPI\_ISL\_618254|Original|hCoV-19^^Hovedstaden|Human|Department of Virus and Microbiological Special Diagnostics|Albertsen lab|Michaelsen|Denmark

>Spike|hCoV-19/England/ALDP-B75FE0/2020|2020-11-12|EPI\_ISL\_723722|Original|hCoV-19^^England|Human|Oxford Viromics|COVID-19 Genomics UK (COG-UK) Consortium|Golubchik|United Kingdom

>Spike|hCoV-19/England/ALDP-A67C45/2020|2020-10-12|EPI\_ISL\_630509|Original|hCoV-19^^England|Human|Lighthouse Lab in Alderley Park|Wellcome Sanger Institute for the COVID-19 Genomics UK (COG-UK) consortium|Davies|United Kingdom

>Spike|hCoV-19/England/QEUEH-9D2D16/2020|2020-09-18|EPI\_ISL\_577302|Original|hCoV-19^^England|Human|Centre for Enzyme Innovation|COVID-19 Genomics UK (COG-UK) Consortium|Robson|United Kingdom

>Spike|hCoV-19/Wales/PHWC-49CAE9/2020|2020-12-04|EPI\_ISL\_742644|Original|hCoV-19^^Wales|Human|Wales Specialist Virology Centre Sequencing lab|COVID-19 Genomics UK (COG-UK) Consortium|Moore|United Kingdom

>Spike|hCoV-19/USA/WA-S338/2020|2020-04-02|EPI\_ISL\_434098|Original|hCoV-19^^Washington|Human|Washington State Department of Health|Seattle Flu Study|Bedford|USA

>Spike|hCoV-19/England/MILK-9AB675/2020|2020-08-31|EPI\_ISL\_549453|Original|hCoV-19^^England|Human|Oxford Viromics|COVID-19 Genomics UK (COG-UK) Consortium|Golubchik|United Kingdom

>Spike|hCoV-19/Japan/FHU-CS24-0227/2020|2020-02-27|EPI\_ISL\_728206|Original|hCoV-19^^Aichi|Human|Fujita Health University Okazaki Medical Center|Fujita health University|Suzuki|Japan

>Spike|hCoV-19/Italy/PIE-SLL-MS59/2020|2020-03-31|EPI\_ISL\_569875|Original|hCoV-19^^Piedmont|Human|Amedeo di savoia|Crosetto lab|Harbers|Italy

>Spike|hCoV-19/Wales/PHWC-262C2/2020|2020-03-26|EPI\_ISL\_422227|Original|hCoV-19^^Wales|Human|Wales Specialist Virology Centre|Public Health Wales Microbiology Cardiff|Moore|United Kingdom

>Spike|hCoV-19/England/PORT-2D1859/2020|2020-04-12|EPI\_ISL\_484425|Original|hCoV-19^^England|Human|Centre for Enzyme Innovation|COVID-19 Genomics UK (COG-UK) Consortium|Robson|United Kingdom

>Spike|hCoV-19/Japan/PG-4925/2020|2020-07-00|EPI\_ISL\_690045|Original|hCoV-19^^Japan|Human|Pathogen Genomics Center|Pathogen Genomics Center|Sekizuka|Japan

>Spike|hCoV-19/Scotland/QEUEH-B7C0F5/2020|2020-11-14|EPI\_ISL\_710845|Original|hCoV-19^^Scotland|Human|Lighthouse Lab in Glasgow|Wellcome Sanger Institute for the COVID-19 Genomics UK (COG-UK) Consortium|Davies|United Kingdom

>Spike|hCoV-19/USA/TX-HMH-6678/2020|2020-06-24|EPI\_ISL\_546166|Original|hCoV-19^^Texas|Human|Houston Methodist Hospital|Houston Methodist Hospital|Long|USA

>Spike|hCoV-19/England/ALDP-B8476E/2020|2020-11-14|EPI\_ISL\_675252|Original|hCoV-19^^England|Human|Lighthouse Lab in Alderley Park|Wellcome Sanger Institute for the COVID-19 Genomics UK (COG-UK) Consortium|Davies|United Kingdom

>Spike|hCoV-19/USA/MI-MDHHS-SC21610/2020|2020-03-28|EPI\_ISL\_516337|Original|hCoV-19^^Michigan|Human|Michigan Department of Health and Human Services|Michigan Department of Health and Human Services|Blankenship|USA

>Spike|hCoV-19/Wales/PHWC-48204E/2020|2020-10-20|EPI\_ISL\_613195|Original|hCoV-19^^Wales|Human|Wales Specialist Virology Centre Sequencing lab|COVID-19 Genomics UK (COG-UK) Consortium|Moore|United Kingdom

>Spike|hCoV-19/Denmark/DCGC-15596/2020|2020-11-23|EPI\_ISL\_713915|Original|hCoV-19^^Nordjylland|Human|Department of Virus and Microbiological Special Diagnostics|Albertsen Lab|Michaelsen|Denmark

>Spike|hCoV-19/England/QEUEH-CC595B/2020|2020-12-22|EPI\_ISL\_760481|Original|hCoV-19^^England|Human|Lighthouse Lab in Glasgow|Wellcome Sanger Institute for the COVID-19 Genomics UK (COG-UK) Consortium|Davies|United Kingdom

>Spike|hCoV-19/USA/MA-MGH-01111/2020|2020-05-01|EPI\_ISL\_791879|Original|hCoV-19^^Massachusetts|Human|Massachusetts General Hospital|Infectious Disease Program|Park|USA

>Spike|hCoV-19/England/CAMB-1B6C04/2020|2020-10-11|EPI\_ISL\_612274|Original|hCoV-19^^England|Human|Department of Pathology|COVID-19 Genomics UK (COG-UK) Consortium|Goodfellow|United Kingdom

>Spike|hCoV-19/Australia/VIC1293/2020|2020-04-09|EPI\_ISL\_563609|Original|hCoV-19^^Victoria|Human|Victorian Infectious Diseases Reference Laboratory (VIDRL)|VIDRL and MDU-PHL|Schultz|Australia

>Spike|hCoV-19/England/BRIS-126D2A/2020|2020-04-08|EPI\_ISL\_459023|Original|hCoV-19^^England|Human|PHE South West Regional Laboratory|Wellcome Sanger Institute for the COVID-19 Genomics UK (COG-UK) consortium|Davies|United Kingdom

>Spike|hCoV-19/England/NOTT-10F0B5/2020|2020-03-30|EPI\_ISL\_432961|Original|hCoV-19^^England|Human|Queens Medical Centre|COVID-19 Genomics UK (COG-UK) Consortium|Loose|United Kingdom

>Spike|hCoV-19/Luxembourg/LNS7936669/2020|2020-11-19|EPI\_ISL\_744657|Original|hCoV-19^^Luxembourg|Human|Laboratoire national de sant\u00e9|Laboratoire national de sant\u00e9|Wienecke-Baldacchino|Luxembourg

>Spike|hCoV-19/USA/UT-UPHL-2008775/2020|2020-05-20|EPI\_ISL\_524807|Original|hCoV-19^^Utah|Human|Utah Public Health Laboratory|Utah Public Health Laboratory|Young|USA

>Spike|hCoV-19/England/ALDP-B5B3E4/2020|2020-11-08|EPI\_ISL\_655590|Original|hCoV-19^^England|Human|Lighthouse Lab in Alderley Park|Wellcome Sanger Institute for the COVID-19 Genomics UK (COG-UK) Consortium|Davies|United Kingdom

>Spike|hCoV-19/England/204791406/2020|2020-11-21|EPI\_ISL\_678765|Original|hCoV-19^^England|Human|Respiratory Virus Unit|COVID-19 Genomics UK (COG-UK) Consortium|Platt|United Kingdom

>Spike|hCoV-19/USA/WI-UW-1344/2020|2020-09-09|EPI\_ISL\_536715|Original|hCoV-19^^Wisconsin|Human|University of Wisconsin-Madison AIDS Vaccine Research Laboratories|University of Wisconsin-Madison AIDS Vaccine Research Laboratories|Baczenas|USA

>Spike|hCoV-19/USA/TX-HMH-4014/2020|2020-06-16|EPI\_ISL\_543296|Original|hCoV-19^^Texas|Human|Houston Methodist Hospital|Houston Methodist Hospital|Long|USA

>Spike|hCoV-19/Scotland/QEUEH-9F859A/2020|2020-09-27|EPI\_ISL\_600863|Original|hCoV-19^^Scotland|Human|Lighthouse Lab in Glasgow|Wellcome Sanger Institute for the COVID-19 Genomics UK (COG-UK) consortium|Davies|United Kingdom

>Spike|hCoV-19/Scotland/QEUEH-9B4CD1/2020|2020-09-07|EPI\_ISL\_602065|Original|hCoV-19^^Scotland|Human|Lighthouse Lab in Glasgow|Wellcome Sanger Institute for the COVID-19 Genomics UK (COG-UK) consortium|Davies|United Kingdom

>Spike|hCoV-19/Denmark/DCGC-18833/2020|2020-12-07|EPI\_ISL\_748584|Original|hCoV-19^^Nordjylland|Human|Department of Virus and Microbiological Special Diagnostics|Albertsen Lab|Michaelsen|Denmark

>Spike|hCoV-19/Belgium/ULG-10970/2020|2020-09-08|EPI\_ISL\_707747|Original|hCoV-19^^Li\u00e8ge|Human|Department of Clinical Microbiology|GIGA Medical Genomics|Durkin|Belgium

>Spike|hCoV-19/Japan/PG-4172/2020|2020-07-00|EPI\_ISL\_692411|Original|hCoV-19^^Japan|Human|Pathogen Genomics Center|Pathogen Genomics Center|Sekizuka|Japan

>Spike|hCoV-19/England/QEUEH-CC3173/2020|2020-12-21|EPI\_ISL\_760322|Original|hCoV-19^^England|Human|Lighthouse Lab in Glasgow|Wellcome Sanger Institute for the COVID-19 Genomics UK (COG-UK) Consortium|Davies|United Kingdom

>Spike|hCoV-19/Scotland/CVR2147/2020|2020-04-10|EPI\_ISL\_484563|Original|hCoV-19^^Scotland|Human|West of Scotland Specialist Virology Centre|COVID-19 Genomics UK (COG-UK) Consortium|Robertson|United Kingdom

>Spike|hCoV-19/Wales/PHWC-2730A/2020|2020-03-30|EPI\_ISL\_432290|Original|hCoV-19^^Wales|Human|Wales Specialist Virology Centre|Public Health Wales Microbiology Cardiff|Moore|United Kingdom

>Spike|hCoV-19/Scotland/CVR2234/2020|2020-04-12|EPI\_ISL\_477877|Original|hCoV-19^^Scotland|Human|West of Scotland Specialist Virology Centre|COVID-19 Genomics UK (COG-UK) Consortium|Robertson|United Kingdom

>Spike|hCoV-19/India/MH-ACTREC-122/2020|2020-05-25|EPI\_ISL\_699778|Original|hCoV-19^^Maharashtra|Human|Hematopathology Laboratory|Hematopathology Laboratory|Patkar|India

>Spike|hCoV-19/Gibraltar/204421172/2020|2020-10-27|EPI\_ISL\_613636|Original|hCoV-19^^Gibraltar|Human|Microbiology|Respiratory Virus Unit|Platt|Gibraltar

>Spike|hCoV-19/USA/CA-ALSR-5022/2020|2020-11-14|EPI\_ISL\_730293|Original|hCoV-19^^California|Human|San Diego County Public Health Laboratory|Andersen lab at Scripps Research|Gangavarapu|USA

>Spike|hCoV-19/USA/UT-QDX-2672/2020|2020-03-14|EPI\_ISL\_604989|Original|hCoV-19^^Utah|Human|Quest Diagnostics|Quest Diagnostics|Kagan|USA

>Spike|hCoV-19/USA/TX-HMH-6470/2020|2020-06-27|EPI\_ISL\_546020|Original|hCoV-19^^Texas|Human|Houston Methodist Hospital|Houston Methodist Hospital|Long|USA

>Spike|hCoV-19/England/CAMB-1B495A/2020|2020-06-04|EPI\_ISL\_473489|Original|hCoV-19^^England|Human|Department of Pathology|COVID-19 Genomics UK (COG-UK) Consortium|Meredith|United Kingdom

>Spike|hCoV-19/England/205141215/2020|2020-12-16|EPI\_ISL\_756154|Original|hCoV-19^^England|Human|Respiratory Virus Unit|COVID-19 Genomics UK (COG-UK) Consortium|Miah|United Kingdom

>Spike|hCoV-19/England/ALDP-94E058/2020|2020-06-17|EPI\_ISL\_555361|Original|hCoV-19^^England|Human|Lighthouse Lab in Alderley Park|Wellcome Sanger Institute for the COVID-19 Genomics UK (COG-UK) consortium|Davies|United Kingdom

>Spike|hCoV-19/England/QEUEH-AOC082/2020|2020-10-01|EPI\_ISL\_599392|Original|hCoV-19^^England|Human|Lighthouse Lab in Glasgow|Wellcome Sanger Institute for the COVID-19 Genomics UK (COG-UK) consortium|Davies|United Kingdom

>Spike|hCoV-19/Denmark/DCGC-20826/2020|2020-12-21|EPI\_ISL\_758961|Original|hCoV-19^^Hovedstaden|Human|Department of Virus and Microbiological Special Diagnostics|Albertsen Lab|Michaelsen|Denmark

>Spike|hCoV-19/USA/NY-Wadsworth-16555-01/2020|2020-03-14|EPI\_ISL\_676741|Original|hCoV-19^^New York|Human|Wadsworth Center|Wadsworth Center|Lasek-Nesselquist|USA

>Spike|hCoV-19/England/NORT-289C27/2020|2020-04-04|EPI\_ISL\_453513|Original|hCoV-19^^England|Human|Northumbria University / South Tees Hospitals NHS Foundation Trust / North Cumbria Integrated Care NHS Foundation Trust / North Tees and Hartlepool NHS Foundation Trust / Newcastle Hospitals NHS Foundation Trust|COVID-19 Genomics UK (COG-UK) Consortium|Bashton|United Kingdom

>Spike|hCoV-19/England/MILK-9AB5B4/2020|2020-08-31|EPI\_ISL\_549446|Original|hCoV-19^^England|Human|Oxford Viromics|COVID-19 Genomics UK (COG-UK) Consortium|Golubchik|United Kingdom

>Spike|hCoV-19/Australia/WA112/2020|2020-07-15|EPI\_ISL\_512765|Original|hCoV-19^^Western Australia|Human|PathWest Laboratory Medicine WA|PathWest Laboratory Medicine WA Microbial Surveillance Unit|Sikazwe|Australia

>Spike|hCoV-19/England/QEUEH-9DD20D/2020|2020-09-21|EPI\_ISL\_599577|Original|hCoV-19^^England|Human|Lighthouse Lab in Glasgow|Wellcome Sanger Institute for the COVID-19 Genomics UK (COG-UK) consortium|Davies|United Kingdom

>Spike|hCoV-19/Wales/PHWC-488206/2020|2020-10-29|EPI\_ISL\_639367|Original|hCoV-19^^Wales|Human|Wales Specialist Virology Centre Sequencing lab|COVID-19 Genomics UK (COG-UK) Consortium|Moore|United Kingdom

>Spike|hCoV-19/England/CAMC-94A739/2020|2020-07-19|EPI\_ISL\_556734|Original|hCoV-19^^England|Human|Lighthouse Lab in Cambridge|Wellcome Sanger Institute for the COVID-19 Genomics UK (COG-UK) consortium|Davies|United Kingdom

>Spike|hCoV-19/England/QEUEH-9D3207/2020|2020-09-20|EPI\_ISL\_577317|Original|hCoV-19^^England|Human|Centre for Enzyme Innovation|COVID-19 Genomics UK (COG-UK) Consortium|Robson|United Kingdom

>Spike|hCoV-19/England/SHEF-C72C3/2020|2020-08-30|EPI\_ISL\_540738|Original|hCoV-19^^England|Human|Virology Department|COVID-19 Genomics UK (COG-UK) Consortium|de Silva|United Kingdom

>Spike|hCoV-19/England/ALDP-A87A54/2020|2020-10-17|EPI\_ISL\_605935|Original|hCoV-19^^England|Human|Lighthouse Lab in Alderley Park|Wellcome Sanger Institute for the COVID-19 Genomics UK (COG-UK) consortium|Davies|United Kingdom

>Spike|hCoV-19/Switzerland/ZH-ETHZ-280073/2020|2020-09-07|EPI\_ISL\_560542|Original|hCoV-19^^Zurich|Human|Viollier AG|Department of Biosystems Science and Engineering|Nadeau|Switzerland

>Spike|hCoV-19/USA/WI-WSLH-200310/2020|2020-04-20|EPI\_ISL\_578491|Original|hCoV-19^^Wisconsin|Human|Wisconsin State Laboratory of Hygiene Communicable Disease Division|Wisconsin State Laboratory of Hygiene Communicable Disease Division|Florek|USA

>Spike|hCoV-19/USA/CT-UW-3094/2020|2020-03-27|EPI\_ISL\_485930|Original|hCoV-19^^Connecticut|Human|UW Virology Lab|UW Virology Lab|Roychoudhury|USA

>Spike|hCoV-19/Scotland/GCVR-171E2D/2020|2020-03-29|EPI\_ISL\_524513|Original|hCoV-19^^Scotland|Human|NHSGGC West of Scotland Specialist Virology Centre / MRC-University of Glasgow Centre for Virus Research|Wellcome Sanger Institute for the COVID-19 Genomics UK (COG-UK) consortium|Davies|United Kingdom

>Spike|hCoV-19/Scotland/QEUH-A4B6D0/2020|2020-10-08|EPI\_ISL\_628472|Original|hCoV-19^^Scotland|Human|Oxford Viromics|COVID-19 Genomics UK (COG-UK) Consortium|Golubchik|United Kingdom

>Spike|hCoV-19/England/ALDP-A93DF2/2020|2020-10-19|EPI\_ISL\_611182|Original|hCoV-19^^England|Human|Lighthouse Lab in Alderley Park|Wellcome Sanger Institute for the COVID-19 Genomics UK (COG-UK) consortium|Davies|United Kingdom

>Spike|hCoV-19/England/NORT-284406/2020|2020-03-20|EPI\_ISL\_478546|Original|hCoV-19^^England|Human|Northumbria University / South Tees Hospitals NHS Foundation Trust / North Cumbria Integrated Care NHS Foundation Trust / North Tees and Hartlepool NHS Foundation Trust / Newcastle Hospitals NHS Foundation Trust|COVID-19 Genomics UK (COG-UK) Consortium|Bashton|United Kingdom

>Spike|hCoV-19/England/BRIS-185380B/2020|2020-04-13|EPI\_ISL\_492337|Original|hCoV-19^^England|Human|PHE South West Regional Laboratory|Wellcome Sanger Institute for the COVID-19 Genomics UK (COG-UK) consortium|Davies|United Kingdom

>Spike|hCoV-19/USA/MA-MGH-00669/2020|2020-04-04|EPI\_ISL\_460190|Original|hCoV-19^^Massachusetts|Human|Massachusetts General Hospital|Infectious Disease Program|Lemieux|USA

>Spike|hCoV-19/England/ALDP-CB679F/2020|2020-12-16|EPI\_ISL\_761323|Original|hCoV-19^^England|Human|Lighthouse Lab in Alderley Park|Wellcome Sanger Institute for the COVID-19 Genomics UK (COG-UK) Consortium|Davies|United Kingdom

>Spike|hCoV-19/England/ALDP-A2F739/2020|2020-10-05|EPI\_ISL\_587301|Original|hCoV-19^^England|Human|Lighthouse Lab in Alderley Park|Wellcome Sanger Institute for the COVID-19 Genomics UK (COG-UK) consortium|Davies|United Kingdom

>Spike|hCoV-19/France/PAC-IHU-0507/2020|2020-04-06|EPI\_ISL\_569561|Original|hCoV-19^^Provence-Alpes-C\u00f4te-d\u2019Azur|Human|MEPHI|MEPHI|Levasseur|France

>Spike|hCoV-19/Scotland/EDB2874/2020|2020-03-31|EPI\_ISL\_488902|Original|hCoV-19^^Scotland|Human|Virology Department|Wellcome Sanger Institute for the COVID-19 Genomics UK (COG-UK) consortium|Davies|United Kingdom

>Spike|hCoV-19/USA/UT-UPHL-2012829129/2020|2020-08-06|EPI\_ISL\_746018|Original|hCoV-19^^Utah|Human|Ginkgo Bioworks Clinical Laboratory|Utah Public Health Laboratory|Young|USA

>Spike|hCoV-19/England/BIRM-652D6/2020|2020-09-29|EPI\_ISL\_594545|Original|hCoV-19^^England|Human|University of Birmingham|COVID-19 Genomics UK (COG-UK) Consortium|Loman|United Kingdom

>Spike|hCoV-19/USA/CA-CZB-3679/2020|2020-07-09|EPI\_ISL\_548447|Original|hCoV-19^^California|Human|University of California|Chan-Zuckerberg Biohub|Bhatt|USA

>Spike|hCoV-19/England/MILK-ACC5E9/2020|2020-10-21|EPI\_ISL\_634355|Original|hCoV-19^^England|Human|Lighthouse Lab in Milton Keynes|Wellcome Sanger Institute for the COVID-19 Genomics UK (COG-UK) consortium|Davies|United Kingdom

>Spike|hCoV-19/England/MILK-AC8592/2020|2020-10-21|EPI\_ISL\_629378|Original|hCoV-19^^England|Human|Lighthouse Lab in Milton Keynes|Wellcome Sanger Institute for the COVID-19 Genomics UK (COG-UK) consortium|Davies|United Kingdom

>Spike|hCoV-19/England/ALDP-9E6D2E/2020|2020-09-24|EPI\_ISL\_580616|Original|hCoV-19^^England|Human|Lighthouse Lab in Alderley Park|Wellcome Sanger Institute for the COVID-19 Genomics UK (COG-UK) consortium|Davies|United Kingdom

>Spike|hCoV-19/Guadeloupe/IPG-7339/2020|2020-03-22|EPI\_ISL\_613438|Original|hCoV-19^^Le Moule|Human|Institut Pasteur de la Guadeloupe|Institut Pasteur de la Guadeloupe|Enouf|Guadeloupe

>Spike|hCoV-19/Northern Ireland/QEUI-963239/2020|2020-08-11|EPI\_ISL\_531641|Original|hCoV-19^^Northern Ireland|Human|Lighthouse Lab in Glasgow|Wellcome Sanger Institute for the COVID-19 Genomics UK (COG-UK) consortium|Davies|United Kingdom

>Spike|hCoV-19/South Korea/KCDC2721/2020|2020-07-11|EPI\_ISL\_522500|Original|hCoV-19^^South Korea|Human|Division of Viral Diseases|Division of Viral Diseases|Kim|South Korea

>Spike|hCoV-19/England/CAMB-7F673/2020|2020-04-08|EPI\_ISL\_470437|Original|hCoV-19^^England|Human|Department of Pathology|Wellcome Sanger Institute for the COVID-19 Genomics UK (COG-UK) consortium|Davies|United Kingdom

>Spike|hCoV-19/USA/TX-HMH-MCoV-13844/2020|2020-08-17|EPI\_ISL\_787137|Original|hCoV-19^^Texas|Human|Houston Methodist Hospital|Houston Methodist Hospital|Long|USA

>Spike|hCoV-19/Denmark/DCGC-19344/2020|2020-12-07|EPI\_ISL\_748374|Original|hCoV-19^^Syddanmark|Human|Department of Virus and Microbiological Special Diagnostics|Albertsen Lab|Michaelsen|Denmark

>Spike|hCoV-19/USA/OR-PROV-132/2020|2020-05-01|EPI\_ISL\_482395|Original|hCoV-19^^Oregon|Human|Providence St. Joseph Health Molecular Genomics Laboratory|Providence St. Joseph Health Molecular Genomics Laboratory|Dowdell|USA

>Spike|hCoV-19/Taiwan/CGMH-CGU-31/2020|2020-07-31|EPI\_ISL\_660543|Vero E6|hCoV-19^^Taoyuan|Human|Laboratory Medicine|Department of Laboratory Medicine|Yi Chun|Taiwan

>Spike|hCoV-19/England/CAMC-A57DAF/2020|2020-10-09|EPI\_ISL\_597043|Original|hCoV-19^^England|Human|Lighthouse Lab in Cambridge|Wellcome Sanger Institute for the COVID-19 Genomics UK (COG-UK) consortium|Davies|United Kingdom

>Spike|hCoV-19/Spain/AN-IBV-001935/2020|2020-03-12|EPI\_ISL\_452441|Original|hCoV-19^^Andalucia|Human|Servicio de Microbiolog\u00eda. HRU de M\u00ella. Servicio Andaluz de Salud|SeqCOVID-SPAIN consortium|IBV(CSIC)|Comas|Spain

>Spike|hCoV-19/Australia/VIC13990/2020|2020-07-23|EPI\_ISL\_563913|Original|hCoV-19^^Victoria|Human|Microbiological Diagnostic Unit - Public Health Laboratory (MDU-PHL)|MDU-PHL|Schultz|Australia

>Spike|hCoV-19/England/LIVE-9D642/2020|2020-04-10|EPI\_ISL\_453218|Original|hCoV-19^^England|Human|Liverpool Clinical Laboratories|COVID-19 Genomics UK (COG-UK) Consortium|Haldenby|United Kingdom

>Spike|hCoV-19/Wales/PHWC-166ADC/2020|2020-06-22|EPI\_ISL\_494079|Original|hCoV-19^^Wales|Human|Originating lab|COVID-19 Genomics UK (COG-UK) Consortium|Moore|United Kingdom

>Spike|hCoV-19/Japan/PG-2780/2020|2020-06-00|EPI\_ISL\_690907|Original|hCoV-19^^Japan|Human|Tokyo Metropolitan Institute of Public Health|Pathogen Genomics Center|Sekizuka|Japan

>Spike|hCoV-19/England/MILK-B56AB7/2020|2020-11-05|EPI\_ISL\_656887|Original|hCoV-19^^England|Human|Lighthouse Lab in Milton Keynes|Wellcome Sanger Institute for the COVID-19 Genomics UK (COG-UK) Consortium|Davies|United Kingdom

>Spike|hCoV-19/Japan/PG-7078/2020|2020-08-00|EPI\_ISL\_688183|Original|hCoV-19^^Japan|Human|Pathogen Genomics Center|Pathogen Genomics Center|Sekizuka|Japan

>Spike|hCoV-19/Denmark/DCGC-16568/2020|2020-11-16|EPI\_ISL\_714841|Original|hCoV-19^^Hovedstaden|Human|Department of Virus and Microbiological Special Diagnostics|Albertsen Lab|Michaelsen|Denmark

>Spike|hCoV-19/England/PORT-2D18B3/2020|2020-04-12|EPI\_ISL\_484430|Original|hCoV-19^^England|Human|Centre for Enzyme Innovation|COVID-19 Genomics UK (COG-UK) Consortium|Robson|United Kingdom

>Spike|hCoV-19/Finland/23LS6C11/2020|2020-10-23|EPI\_ISL\_759781|Original|hCoV-19^^Uusimaa|Human|Department of Virology and Immunology|Department of Virology|Smura|Finland

>Spike|hCoV-19/Germany/HH-hpi-p1546/2020|2020-03-15|EPI\_ISL\_775927|Original|hCoV-19^^Hamburg|Human|University Medical Center Hamburg Eppendorf|Heinrich Pette Institute|Robitaille|Germany

>Spike|hCoV-19/France/PAC-MEPHI-2018/2020|2020-08-28|EPI\_ISL\_644475|Original|hCoV-19^^Provence-Alpes-Cote-d\u2019Azur|Human|MEPHI|MEPHI|Levasseur|France

>Spike|hCoV-19/England/QEUA-B13E14/2020|2020-11-02|EPI\_ISL\_641738|Original|hCoV-19^^England|Human|Lighthouse Lab in Glasgow|Wellcome Sanger Institute for the COVID-19 Genomics UK (COG-UK) Consortium|Davies|United Kingdom

>Spike|hCoV-19/USA/TX-HMH-MCoV-9361/2020|2020-07-03|EPI\_ISL\_781077|Original|hCoV-19^^Texas|Human|Houston Methodist Hospital|Houston Methodist Hospital|Long|USA

>Spike|hCoV-19/USA/WA-UW-351/2020|2020-03-24|EPI\_ISL\_524440|Original|hCoV-19^^Washington|Human|University of Washington Virology Lab|Laboratory Medicine|Roychoudhury|USA

>Spike|hCoV-19/Denmark/DCGC-8094/2020|2020-10-26|EPI\_ISL\_617191|Original|hCoV-19^^Sjaelland|Human|Department of Virus and Microbiological Special Diagnostics|Albertsen lab|Michaelsen|Denmark

>Spike|hCoV-19/England/NORW-E8709/2020|2020-04-18|EPI\_ISL\_448226|Original|hCoV-19^^England|Human|Quadram Institute Bioscience|COVID-19 Genomics UK (COG-UK) Consortium|Alikhan|United Kingdom

>Spike|hCoV-19/Netherlands/Gelderland\_95/2020|2020-05-21|EPI\_ISL\_460994|Original|hCoV-19^^Gelderland|Human|Dutch COVID-19 response team|Erasmus Medical Center|Oude Munnink|Netherlands

>Spike|hCoV-19/Latvia/226/2020|2020-09-13|EPI\_ISL\_770060|Original|hCoV-19^^Latvia|Human|Latvijas Infektolo\u0123ijas centrs|Latvian Biomedical Research and Study Centre|Zrelavs|Latvia

>Spike|hCoV-19/England/MILK-975225/2020|2020-08-21|EPI\_ISL\_552676|Original|hCoV-19^^England|Human|Lighthouse Lab in Milton Keynes|Wellcome Sanger Institute for the COVID-19 Genomics UK (COG-UK) consortium|Davies|United Kingdom

>Spike|hCoV-19/England/QEUA-BCBB8D/2020|2020-11-27|EPI\_ISL\_704385|Original|hCoV-19^^England|Human|Lighthouse Lab in Glasgow|Wellcome Sanger Institute for the COVID-19 Genomics UK (COG-UK) Consortium|Davies|United Kingdom

>Spike|hCoV-19/England/ALDP-A2EC77/2020|2020-10-05|EPI\_ISL\_587130|Original|hCoV-19^^England|Human|Lighthouse Lab in Alderley Park|Wellcome Sanger Institute for the COVID-19 Genomics UK (COG-UK) consortium|Davies|United Kingdom

>Spike|hCoV-19/Iceland/493/2020|2020-03-20|EPI\_ISL\_424515|Original|hCoV-19^^Reykjavik|Human|The National University Hospital of Iceland|deCODE genetics|J\u00f3nsson|Iceland

>Spike|hCoV-19/USA/UT-UPHL-2012732813/2020|2020-10-26|EPI\_ISL\_746229|Original|hCoV-19^^Utah|Human|Ginkgo Bioworks Clinical Laboratory|Utah Public Health Laboratory|Young|USA

>Spike|hCoV-19/England/QEUA-B0EDA6/2020|2020-11-02|EPI\_ISL\_642657|Original|hCoV-19^^England|Human|Lighthouse Lab in Glasgow|Wellcome Sanger Institute for the COVID-19 Genomics UK (COG-UK) Consortium|Davies|United Kingdom

>Spike|hCoV-19/Singapore/1312/2020|2020-05-18|EPI\_ISL\_648799|Original|hCoV-19^^Singapore|Human|Department of Laboratory Medicine|Department of Laboratory Medicine|Chen|Singapore

>Spike|hCoV-19/Australia/NSW331/2020|2020-03-25|EPI\_ISL\_451593|Original|hCoV-19^^New South Wales|Human|ACT pathology|NSW Health Pathology - Institute of Clinical Pathology and Medical Research; Westmead Hospital; University of Sydney|Gall|Australia

>Spike|hCoV-19/England/204441526/2020|2020-10-19|EPI\_ISL\_622882|Original|hCoV-19^^England|Human|Respiratory Virus Unit|Respiratory Virus Unit|Platt|United Kingdom

>Spike|hCoV-19/Mexico/COA-INDRE-36/2020|2020-06-13|EPI\_ISL\_516618|Original|hCoV-19^^Coahuila|Human|Instituto de Diagnostico y Referencia Epidemiologicos (INDRE)|Instituto de Diagnostico y Referencia Epidemiologicos (INDRE)|Rodriguez|Mexico

>Spike|hCoV-19/England/ALDP-9FD0EF/2020|2020-10-02|EPI\_ISL\_588053|Original|hCoV-19^^England|Human|Lighthouse Lab in Alderley Park|Wellcome Sanger Institute for the COVID-19 Genomics UK (COG-UK) consortium|Davies|United Kingdom

>Spike|hCoV-19/Japan/PG-3932/2020|2020-07-00|EPI\_ISL\_692183|Original|hCoV-19^^Japan|Human|Pathogen Genomics Center|Pathogen Genomics Center|Sekizuka|Japan

>Spike|hCoV-19/Spain/AR-ISCI-201587/2020|2020-03-05|EPI\_ISL\_539501|Original|hCoV-19^^Aragon|Human|Hospital Cl\u00e9nico Universitario Lozano Blesa|Instituto de Salud Carlos III|Caballero|Spain

>Spike|hCoV-19/England/ALDP-B469EA/2020|2020-11-07|EPI\_ISL\_656152|Original|hCoV-19^^England|Human|Lighthouse Lab in Alderley Park|Wellcome Sanger Institute for the COVID-19 Genomics UK (COG-UK) Consortium|Davies|United Kingdom

>Spike|hCoV-19/England/NORT-29ED1D/2020|2020-05-10|EPI\_ISL\_488139|Original|hCoV-19^^England|Human|NU-OMICS DNA Sequencing research facility|Wellcome Sanger Institute for the COVID-19 Genomics UK (COG-UK) consortium|Davies|United Kingdom

>Spike|hCoV-19/Denmark/DCGC-12817/2020|2020-10-26|EPI\_ISL\_682998|Original|hCoV-19^^Midtjylland|Human|Department of Virus and Microbiological Special Diagnostics|Albertsen Lab|Michaelsen|Denmark

>Spike|hCoV-19/Netherlands/un-EMC-775/2020|2020-00-00|EPI\_ISL\_577871|Original|hCoV-19^^Netherlands|Human|Dutch COVID-19 response team|Erasmus Medical Center|Oude Munnink|Netherlands

>Spike|hCoV-19/Luxembourg/LNS7131184/2020|2020-11-09|EPI\_ISL\_744520|Original|hCoV-19^^Luxembourg|Human|Laboratoire national de sant\u00e9|Laboratoire national de sant\u00e9|Wienecke-Baldacchino|Luxembourg

>Spike|hCoV-19/USA/TX-HMH-MCoV-19285/2020|2020-11-27|EPI\_ISL\_783741|Original|hCoV-19^^Texas|Human|Houston Methodist Hospital|Houston Methodist Hospital|Long|USA

>Spike|hCoV-19/England/20144067504/2020|2020-03-20|EPI\_ISL\_421957|Original|hCoV-19^^England|Human|Respiratory Virus Unit|Respiratory Virus Unit|Platt|United Kingdom

>Spike|hCoV-19/Spain/PV-IBV-005147/2020|2020-06-19|EPI\_ISL\_509637|Original|hCoV-19^^Basque Country|Human|Servicio de Microbiolog\u00eda. Hospital Universitario Donostia. OSI Donostialdea. \u00c9rea de Enfermedades Infecciosas|SeqCOVID-SPAIN consortium/IBV (CSIC)|Comas|Spain

>Spike|hCoV-19/Brazil/MA-L17-CD364/2020|2020-03-31|EPI\_ISL\_476310|Original|hCoV-19^^Maranh\u00e3o|Human|DB Diagn\u00f3sticos do Brasil|Instituto de Medicina Tropical da Universidade de S\u00e3o Paulo|Faria|Brazil

>Spike|hCoV-19/England/NORT-282954/2020|2020-03-26|EPI\_ISL\_488481|Original|hCoV-19^^England|Human|NU-OMICS DNA Sequencing research facility|Wellcome Sanger Institute for the COVID-19 Genomics UK (COG-UK) consortium|Davies|United Kingdom

>Spike|hCoV-19/USA/NY-Wadsworth-247244-01/2020|2020-10-16|EPI\_ISL\_734353|Original|hCoV-19^^New York|Human|Wadsworth Center|Wadsworth Center|Lasek-Nesselquist|USA

>Spike|hCoV-19/England/ALDP-A50E49/2020|2020-10-07|EPI\_ISL\_597699|Original|hCoV-19^^England|Human|Lighthouse Lab in Alderley Park|Wellcome Sanger Institute for the COVID-19 Genomics UK (COG-UK) consortium|Davies|United Kingdom

>Spike|hCoV-19/Wales/PHWC-16E209/2020|2020-09-29|EPI\_ISL\_585684|Original|hCoV-19^^Wales|Human|Wales Specialist Virology Centre Sequencing lab|COVID-19 Genomics UK (COG-UK) Consortium|Moore|United Kingdom

>Spike|hCoV-19/England/MILK-A7B4BF/2020|2020-10-15|EPI\_ISL\_607302|Original|hCoV-19^^England|Human|Lighthouse Lab in Milton Keynes|Wellcome Sanger Institute for the COVID-19 Genomics UK (COG-UK) consortium|Davies|United Kingdom

>Spike|hCoV-19/France/ARA-68071/2020|2020-09-04|EPI\_ISL\_683393|Original|hCoV-19^^Auvergne-Rh\u00f4ne-Alpes|Human|CNR Virus des Infections Respiratoires - France SUD|CNR Virus des Infections Respiratoires - France SUD|Bal|France

>Spike|hCoV-19/Belgium/reg-0426606/2020|2020-04-26|EPI\_ISL\_734656|Original|hCoV-19^^Koersel|Human|UZ Leuven|KU Leuven|Maes|Belgium

>Spike|hCoV-19/Jordan/SEARCH-5427/2020|2020-09-06|EPI\_ISL\_755235|Original|hCoV-19^^Amman|Human|Biolab Diagnostic Laboratories|Andersen lab at Scripps Research|Gangavarapu|Jordan

>Spike|hCoV-19/Scotland/CVR3492/2020|2020-04-19|EPI\_ISL\_456880|Original|hCoV-19^^Scotland|Human|West of Scotland Specialist Virology Centre|COVID-19 Genomics UK (COG-UK) Consortium|Robertson|United Kingdom

>Spike|hCoV-19/England/QEUH-8AD665/2020|2020-07-22|EPI\_ISL\_532821|Original|hCoV-19^^England|Human|Lighthouse Lab in Glasgow|Wellcome Sanger Institute for the COVID-19 Genomics UK (COG-UK) consortium|Davies|United Kingdom



>Spike|hCoV-19/Scotland/QEUH-A33653/2020|2020-10-07|EPI\_ISL\_627298|Original|hCoV-19^^Scotland|Human|Virology Department|COVID-19 Genomics UK (COG-UK) Consortium|de Silva|United Kingdom

>Spike|hCoV-19/USA/NV-NSPHL-A0151/2020|2020-05-14|EPI\_ISL\_515415|Original|hCoV-19^^Nevada|Human|Nevada State Public Health Laboratory|Nevada State Public Health Laboratory|Sevinsky|USA

>Spike|hCoV-19/USA/MN46-MDH46/2020|2020-03-13|EPI\_ISL\_417493|Original|hCoV-19^^Minnesota|Human|Minnesota Department of Health|Minnesota Department of Health|Wang|USA

>Spike|hCoV-19/USA/NY-NYCPHL-000565/2020|2020-03-29|EPI\_ISL\_632024|Original|hCoV-19^^New York|Human|Flushing Hospital Medical Center|New York City Public Health Laboratory|Wang|USA

>Spike|hCoV-19/India/TG-CCMB-OM23/2020|2020-09-20|EPI\_ISL\_644717|Original|hCoV-19^^Telangana|Human|Osmania Medical College|CSIR-Centre for Cellular and Molecular Biology|Mukherjee|India

>Spike|hCoV-19/USA/WI-WSLH-200087/2020|2020-03-16|EPI\_ISL\_471251|Original|hCoV-19^^Wisconsin|Human|Wisconsin State Laboratory of Hygiene Communicable Disease Division|Wisconsin State Laboratory of Hygiene Communicable Disease Division|Florek|USA

>Spike|hCoV-19/England/NORT-283DA2/2020|2020-04-04|EPI\_ISL\_488761|Original|hCoV-19^^England|Human|NU-OMICS DNA Sequencing research facility|Wellcome Sanger Institute for the COVID-19 Genomics UK (COG-UK) consortium|Davies|United Kingdom

>Spike|hCoV-19/England/MILK-61AB75/2020|2020-07-06|EPI\_ISL\_557956|Original|hCoV-19^^England|Human|Lighthouse Lab in Milton Keynes|Wellcome Sanger Institute for the COVID-19 Genomics UK (COG-UK) consortium|Davies|United Kingdom

>Spike|hCoV-19/USA/WA-S1460/2020|2020-05-22|EPI\_ISL\_495910|Original|hCoV-19^^Washington|Human|Washington State Department of Health|Seattle Flu Study|Lee|USA

>Spike|hCoV-19/Greece/35/2020|2020-03-29|EPI\_ISL\_434459|Original|hCoV-19^^Athens|Human|Laboratory of Microbiology|Laboratory of Biology|Karakasiliotis|Greece

>Spike|hCoV-19/England/ALDP-A6F8C1/2020|2020-10-14|EPI\_ISL\_607251|Original|hCoV-19^^England|Human|Lighthouse Lab in Alderley Park|Wellcome Sanger Institute for the COVID-19 Genomics UK (COG-UK) consortium|Davies|United Kingdom

>Spike|hCoV-19/USA/CA-ALSR-4336/2020|2020-10-06|EPI\_ISL\_648978|Original|hCoV-19^^California|Human|San Diego County Public Health Laboratory|Andersen lab at Scripps Research|Gangavarapu|USA

>Spike|hCoV-19/USA/TX-DSHS-1997/2020|2020-06-21|EPI\_ISL\_766758|Original|hCoV-19^^Texas|Human|Texas Department of State Health Services|Texas Department of State Health Services|Rahman|USA

>Spike|hCoV-19/Wales/PHWC-48BC23/2020|2020-11-04|EPI\_ISL\_666337|Original|hCoV-19^^Wales|Human|Wales Specialist Virology Centre Sequencing lab|COVID-19 Genomics UK (COG-UK) Consortium|Moore|United Kingdom

>Spike|hCoV-19/Denmark/DCGC-11684/2020|2020-10-26|EPI\_ISL\_671067|Original|hCoV-19^^Midtjylland|Human|Department of Virus and Microbiological Special Diagnostics|Albertsen Lab|Michaelsen|Denmark

>Spike|hCoV-19/Portugal/PT1705/2020|2020-08-24|EPI\_ISL\_693634|Original|hCoV-19^^Portugal|Human|Hospital Vila Franca de Xira|Instituto Nacional de Saude (INSA)|Borges|Portugal

>Spike|hCoV-19/USA/MI-QDX-1132/2020|2020-03-20|EPI\_ISL\_571862|Original|hCoV-19^^Michigan|Human|Quest Diagnostics|Quest Diagnostics|Kagan|USA

>Spike|hCoV-19/USA/FL-BPHL-0955/2020|2020-07-07|EPI\_ISL\_517845|Original|hCoV-19^^Florida|Human|Florida Bureau of Public Health Laboratories|Florida Bureau of Public Health Laboratories|Blanton|USA

>Spike|hCoV-19/USA/TX-HMH-MCoV-14823/2020|2020-10-12|EPI\_ISL\_786307|Original|hCoV-19^^Texas|Human|Houston Methodist Hospital|Houston Methodist Hospital|Long|USA

>Spike|hCoV-19/England/MILK-B55C49/2020|2020-11-05|EPI\_ISL\_658283|Original|hCoV-19^^England|Human|Lighthouse Lab in Milton Keynes|Wellcome Sanger Institute for the COVID-19 Genomics UK (COG-UK) Consortium|Davies|United Kingdom

>Spike|hCoV-19/Denmark/DCGC-19739/2020|2020-12-07|EPI\_ISL\_749144|Original|hCoV-19^^Hovedstaden|Human|Department of Virus and Microbiological Special Diagnostics|Albertsen Lab|Michaelsen|Denmark

>Spike|hCoV-19/England/QEUIH-9F8345/2020|2020-09-27|EPI\_ISL\_588758|Original|hCoV-19^^England|Human|Lighthouse Lab in Glasgow|Wellcome Sanger Institute for the COVID-19 Genomics UK (COG-UK) consortium|Davies|United Kingdom

>Spike|hCoV-19/USA/HI-H200160/2020|2020-07-24|EPI\_ISL\_752722|Original|hCoV-19^^Hawaii|Human|State Laboratories Division|State Laboratories Division|Sultana|USA

>Spike|hCoV-19/England/ALDP-93A769/2020|2020-06-21|EPI\_ISL\_551517|Original|hCoV-19^^England|Human|Lighthouse Lab in Alderley Park|Wellcome Sanger Institute for the COVID-19 Genomics UK (COG-UK) consortium|Davies|United Kingdom

>Spike|hCoV-19/USA/UT-0159/2020|2020-03-14|EPI\_ISL\_420805|Original|hCoV-19^^Utah|Human|Utah Public Health Laboratory|Utah Public Health Laboratory|Young|USA

>Spike|hCoV-19/Spain/AN-IBV-98001786/2020|2020-04-04|EPI\_ISL\_538156|Original|hCoV-19^^Andalucia|Human|Servicio de Microbiolog\u00eda y Parasitolog\u00eda cl\u00ednica. UCEIMP. Hospital Universitario Virgen del Roc\u00edo/IBIS/CSIC/US|SeqCOVID-SPAIN consortium/IBV (CSIC) |Comas|Spain

>Spike|hCoV-19/France/BRE-BR9065/2020|2020-09-04|EPI\_ISL\_613554|Original|hCoV-19^^Bretagne|Human|CHRU Pontchaillou - Laboratoire de Virologie\n2|National Reference Center for Viruses of Respiratory Infections|Enouf|France

>Spike|hCoV-19/England/BIRM-5EEAF/2020|2020-00-00|EPI\_ISL\_456661|Original|hCoV-19^^England|Human|University of Birmingham|COVID-19 Genomics UK (COG-UK) Consortium|Loman|United Kingdom

>Spike|hCoV-19/USA/AZ-TG547346/2020|2020-07-06|EPI\_ISL\_695494|Original|hCoV-19^^Arizona|Human|AZ SPHL|TGen North|French|USA

>Spike|hCoV-19/England/CAMC-A82145/2020|2020-10-13|EPI\_ISL\_610759|Original|hCoV-19^^England|Human|Lighthouse Lab in Cambridge|Wellcome Sanger Institute for the COVID-19 Genomics UK (COG-UK) consortium|Davies|United Kingdom

>Spike|hCoV-19/Denmark/DCGC-10579/2020|2020-11-02|EPI\_ISL\_670066|Original|hCoV-19^^Syddanmark|Human|Department of Virus and Microbiological Special Diagnostics|Albertsen Lab|Michaelsen|Denmark

>Spike|hCoV-19/England/MILK-85BE22/2020|2020-07-17|EPI\_ISL\_557457|Original|hCoV-19^^England|Human|Lighthouse Lab in Milton Keynes|Wellcome Sanger Institute for the COVID-19 Genomics UK (COG-UK) consortium|Davies|United Kingdom

>Spike|hCoV-19/Scotland/CVR2236/2020|2020-04-12|EPI\_ISL\_453029|Original|hCoV-19^^Scotland|Human|West of Scotland Specialist Virology Centre|COVID-19 Genomics UK (COG-UK) Consortium|Robertson|United Kingdom

>Spike|hCoV-19/Australia/VIC16883/2020|2020-08-06|EPI\_ISL\_663622|Original|hCoV-19^^Victoria|Human|Microbiological Diagnostic Unit - Public Health Laboratory (MDU-PHL) |MDU-PHL|Schultz|Australia

>Spike|hCoV-19/England/ALDP-9D7607/2020|2020-09-18|EPI\_ISL\_576571|Original|hCoV-19^^England|Human|Oxford Viromics|COVID-19 Genomics UK (COG-UK) Consortium|Golubchik|United Kingdom

>Spike|hCoV-19/Wales/PHWC-16BA5F/2020|2020-09-22|EPI\_ISL\_573933|Original|hCoV-19^^Wales|Human|Wales Specialist Virology Centre Sequencing lab|COVID-19 Genomics UK (COG-UK) Consortium|Moore|United Kingdom

>Spike|hCoV-19/Denmark/DCGC-11090/2020|2020-11-02|EPI\_ISL\_670386|Original|hCoV-19^^Hovedstaden|Human|Department of Virus and Microbiological Special Diagnostics|Albertsen Lab|Michaelsen|Denmark

>Spike|hCoV-19/England/CAMC-A3FA88/2020|2020-10-07|EPI\_ISL\_609636|Original|hCoV-19^^England|Human|Lighthouse Lab in Cambridge|Wellcome Sanger Institute for the COVID-19 Genomics UK (COG-UK) consortium|Davies|United Kingdom

>Spike|hCoV-19/India/MH-ACTREC-091/2020|2020-05-22|EPI\_ISL\_699747|Original|hCoV-19^^Maharashtra|Human|Hematopathology Laboratory|Hematopathology Laboratory|Patkar|India

>Spike|hCoV-19/Scotland/EDB5799/2020|2020-04-27|EPI\_ISL\_473859|Original|hCoV-19^^Scotland|Human|Virology Department|COVID-19 Genomics UK (COG-UK) Consortium|Williams|United Kingdom

>Spike|hCoV-19/USA/NY-Wadsworth-11789-01/2020|2020-03-08|EPI\_ISL\_525590|Original|hCoV-19^^New York|Human|Wadsworth Center|Wadsworth Center|Plitnick|USA

>Spike|hCoV-19/England/QEUA-AE28C6/2020|2020-10-27|EPI\_ISL\_633473|Original|hCoV-19^^England|Human|Lighthouse Lab in Glasgow|Wellcome Sanger Institute for the COVID-19 Genomics UK (COG-UK) consortium|Davies|United Kingdom

>Spike|hCoV-19/Denmark/ALAB-SSI-751/2020|2020-03-19|EPI\_ISL\_444888|Original|hCoV-19^^Denmark|Human|Department of Virus and Microbiological Special Diagnostics|Albertsen lab|Kirkegaard|Denmark

>Spike|hCoV-19/Scotland/QEUA-A0ADD8/2020|2020-10-03|EPI\_ISL\_599256|Original|hCoV-19^^Scotland|Human|Lighthouse Lab in Glasgow|Wellcome Sanger Institute for the COVID-19 Genomics UK (COG-UK) consortium|Davies|United Kingdom

>Spike|hCoV-19/Wuhan/HB-WH5-238/2020|2020-03-18|EPI\_ISL\_454979|Original|hCoV-19^^Hubei|Human|Wuhan Chain Medical Labs (CMLabs)|State Key Laboratory of Biotherapy of Sichuan University|Tang|China

>Spike|hCoV-19/England/EXET-136361/2020|2020-04-12|EPI\_ISL\_457223|Original|hCoV-19^^England|Human|University of Exeter|COVID-19 Genomics UK (COG-UK) Consortium|Temperton|United Kingdom

>Spike|hCoV-19/France/PAC-IHU-0261/2020|2020-03-31|EPI\_ISL\_569418|Original|hCoV-19^^Provence-Alpes-C\u00f4te-d\u00a0Azur|Human|MEPHI|MEPHI|Levasseur|France

>Spike|hCoV-19/England/MILK-A7B80E/2020|2020-10-15|EPI\_ISL\_607317|Original|hCoV-19^^England|Human|Lighthouse Lab in Milton Keynes|Wellcome Sanger Institute for the COVID-19 Genomics UK (COG-UK) consortium|Davies|United Kingdom

>Spike|hCoV-19/Wales/PHWC-47D2D7/2020|2020-10-07|EPI\_ISL\_586124|Original|hCoV-19^^Wales|Human|Wales Specialist Virology Centre Sequencing lab|COVID-19 Genomics UK (COG-UK) Consortium|Moore|United Kingdom

>Spike|hCoV-19/Scotland/QEUA-B69617/2020|2020-11-11|EPI\_ISL\_676380|Original|hCoV-19^^Scotland|Human|Lighthouse Lab in Glasgow|Wellcome Sanger Institute for the COVID-19 Genomics UK (COG-UK) Consortium|Davies|United Kingdom

>Spike|hCoV-19/England/ALDP-AA5267/2020|2020-10-22|EPI\_ISL\_623896|Original|hCoV-19^^England|Human|Lighthouse Lab in Alderley Park|Wellcome Sanger Institute for the COVID-19 Genomics UK (COG-UK) consortium|Davies|United Kingdom

>Spike|hCoV-19/England/MILK-A7C481/2020|2020-10-15|EPI\_ISL\_607612|Original|hCoV-19^^England|Human|Lighthouse Lab in Milton Keynes|Wellcome Sanger Institute for the COVID-19 Genomics UK (COG-UK) consortium|Davies|United Kingdom

>Spike|hCoV-19/Spain/CT-IBV-97007965/2020|2020-09-15|EPI\_ISL\_654513|Original|hCoV-19^^Catalunya|Human|Servicio de Microbiolog\u00eda|SeqCOVID-SPAIN consortium|IBV (CSIC)|Comas|Spain

>Spike|hCoV-19/England/ALDP-9FD86F/2020|2020-10-02|EPI\_ISL\_587872|Original|hCoV-19^^England|Human|Lighthouse Lab in Alderley Park|Wellcome Sanger Institute for the COVID-19 Genomics UK (COG-UK) consortium|Davies|United Kingdom

>Spike|hCoV-19/England/QEUA-B2F6B3/2020|2020-11-04|EPI\_ISL\_659973|Original|hCoV-19^^England|Human|Lighthouse Lab in Glasgow|Wellcome Sanger Institute for the COVID-19 Genomics UK (COG-UK) Consortium|Davies|United Kingdom

>Spike|hCoV-19/USA/MN-CDC-6186/2020|2020-04-21|EPI\_ISL\_527667|Original|hCoV-19^^Minnesota|Human|MN PHL Division|Pathogen Discovery|Queen|USA

>Spike|hCoV-19/Australia/SAP482/2020|2020-08-05|EPI\_ISL\_513912|Original|hCoV-19^^South Australia|Human|SA Pathology|SA Pathology|Leong|Australia

>Spike|hCoV-19/England/MILK-9A8CC1/2020|2020-09-02|EPI\_ISL\_550208|Original|hCoV-19^^England|Human|Lighthouse Lab in Milton Keynes|Wellcome Sanger Institute for the COVID-19 Genomics UK (COG-UK) consortium|Davies|United Kingdom

>Spike|hCoV-19/USA/MI-UM-10036795528/2020|2020-11-05|EPI\_ISL\_707877|Original|hCoV-19^^Michigan|Human|University of Michigan Clinical Microbiology Laboratory|Lauring Lab|Valesano|USA

>Spike|hCoV-19/England/MILK-9AB165/2020|2020-08-31|EPI\_ISL\_551154|Original|hCoV-19^^England|Human|Lighthouse Lab in Milton Keynes|Wellcome Sanger Institute for the COVID-19 Genomics UK (COG-UK) consortium|Davies|United Kingdom

>Spike|hCoV-19/USA/WA-S2471/2020|2020-06-16|EPI\_ISL\_497103|Original|hCoV-19^^Washington|Human|Washington State Department of Health|Seattle Flu Study|Lee|USA

>Spike|hCoV-19/Spain/CL-IBV-97006146/2020|2020-04-01|EPI\_ISL\_537293|Original|hCoV-19^^Castilla y Leon|Human|Universidad de Le\u00f3n|SeqCOVID-SPAIN consortium/IBV (CSIC) |Comas|Spain

>Spike|hCoV-19/France/ARA-SC161/2020|2020-04-08|EPI\_ISL\_634826|Original|hCoV-19^^Auvergne-Rhone-Alpes|Human|Laboratoire de virologie|CNR Virus des Infections Respiratoires - France SUD|Bal|France

>Spike|hCoV-19/England/ALDP-C064E4/2020|2020-12-06|EPI\_ISL\_709547|Original|hCoV-19^^England|Human|Lighthouse Lab in Alderley Park|Wellcome Sanger Institute for the COVID-19 Genomics UK (COG-UK) Consortium|Davies|United Kingdom

>Spike|hCoV-19/France/HDF-1989/2020|2020-03-04|EPI\_ISL\_414636|Original|hCoV-19^^Hauts-de-France|Human|Centre Hospitalier Compi\u00e8gne Laboratoire de Biologie|National Reference Center for Viruses of Respiratory Infections|Enouf|France

>Spike|hCoV-19/Denmark/DCGC-17150/2020|2020-12-14|EPI\_ISL\_750788|Original|hCoV-19^^Midtjylland|Human|Department of Virus and Microbiological Special Diagnostics|Albertsen Lab|Michaelsen|Denmark

>Spike|hCoV-19/France/ARA-7096/2020|2020-09-11|EPI\_ISL\_693492|Original|hCoV-19^^Auvergne-Rh\u00f4ne-Alpes|Human|CNR Virus des Infections Respiratoires - France SUD|CNR Virus des Infections Respiratoires - France SUD|Bal|France

>Spike|hCoV-19/Japan/PG-8473/2020|2020-07-00|EPI\_ISL\_687572|Original|hCoV-19^^Japan|Human|Pathogen Genomics Center|Pathogen Genomics Center|Sekizuka|Japan

>Spike|hCoV-19/Scotland/GCVR-1705A1/2020|2020-03-25|EPI\_ISL\_459519|Original|hCoV-19^^Scotland|Human|NHSGGC West of Scotland Specialist Virology Centre / MRC-University of Glasgow Centre for Virus Research|Wellcome Sanger Institute for the COVID-19 Genomics UK (COG-UK) consortium|Davies|United Kingdom

>Spike|hCoV-19/Wales/PHWC-48B0AF/2020|2020-11-06|EPI\_ISL\_666191|Original|hCoV-19^^Wales|Human|Wales Specialist Virology Centre Sequencing lab|COVID-19 Genomics UK (COG-UK) Consortium|Moore|United Kingdom

>Spike|hCoV-19/Canada/QC-LSPQ-L00237309/2020|2020-03-25|EPI\_ISL\_536172|Original|hCoV-19^^Quebec|Human|CSSS Haut-Richelieu/Rouville (H\u00f4pital)|Laboratoire de sant\u00e9 publique du Qu\u00e9bec|Moreira|Canada

>Spike|hCoV-19/Brazil/RJ-INCA-C32/2020|2020-04-16|EPI\_ISL\_513540|Original|hCoV-19^^Rio de Janeiro|Human|Programa de Oncovirologia|Programa de Oncovirologia|Ramos Goes|Brazil

>Spike|hCoV-19/Wales/QEUH-532DAF/2020|2020-05-18|EPI\_ISL\_532163|Original|hCoV-19^^Wales|Human|Lighthouse Lab in Glasgow|Wellcome Sanger Institute for the COVID-19 Genomics UK (COG-UK) consortium|Davies|United Kingdom

>Spike|hCoV-19/USA/OR-OHSU-1985/2020|2020-07-30|EPI\_ISL\_526083|Original|hCoV-19^^Oregon|Human|OHSU Lab Services Molecular Microbiology Lab|Oregon SARS-CoV-2 Genome Sequencing Center|O'Roak|USA

>Spike|hCoV-19/Wales/MILK-995007/2020|2020-08-25|EPI\_ISL\_552359|Original|hCoV-19^^Wales|Human|Lighthouse Lab in Milton Keynes|Wellcome Sanger Institute for the COVID-19 Genomics UK (COG-UK) consortium|Davies|United Kingdom

>Spike|hCoV-19/England/CAMC-A65DF9/2020|2020-10-11|EPI\_ISL\_638447|Original|hCoV-19^^England|Human|Department of Pathology|COVID-19 Genomics UK (COG-UK) Consortium|Goodfellow|United Kingdom

>Spike|hCoV-19/USA/CA-CZB-2070/2020|2020-05-04|EPI\_ISL\_486313|Original|hCoV-19^^California|Human|San Joaquin County Public Health Lab|Chan-Zuckerberg Biohub|McGeever|USA

>Spike|hCoV-19/USA/CO-CDPHE-2008180122/2020|2020-08-17|EPI\_ISL\_710270|Original|hCoV-19^^Colorado|Human|Colorado Department of Public Health and Environment|Colorado Department of Public Health and Environment|Bankers|USA

>Spike|hCoV-19/Denmark/DCGC-2082/2020|2020-07-27|EPI\_ISL\_618338|Original|hCoV-19^^Nordjylland|Human|Department of Virus and Microbiological Special Diagnostics|Albertsen lab|Michaelsen|Denmark

>Spike|hCoV-19/Belgium/ULG-10863/2020|2020-11-13|EPI\_ISL\_678407|Original|hCoV-19^^Li\u00e8ge|Human|Department of Clinical Microbiology|GIGA Medical Genomics|Durkin|Belgium

>Spike|hCoV-19/England/ALDP-BB8DE7/2020|2020-11-20|EPI\_ISL\_703131|Original|hCoV-19^^England|Human|Lighthouse Lab in Alderley Park|Wellcome Sanger Institute for the COVID-19 Genomics UK (COG-UK) Consortium|Davies|United Kingdom

>Spike|hCoV-19/Canada/UN-CRCHUM-PostFreeze-10/2020|2020-09-04|EPI\_ISL\_667775|Original|hCoV-19^^Canada|Human|Microbiology|Microbiology|Benoit, P.|Canada

>Spike|hCoV-19/France/ARA-SC117/2020|2020-04-12|EPI\_ISL\_700381|Original|hCoV-19^^Auvergne-Rh\u00f4ne-Alpes|Human|Centre hospitalier M\u00e9tropole Savoie|CNR Virus des Infections Respiratoires - France SUD|Bal|France

>Spike|hCoV-19/England/ALDP-5D9D40/2020|2020-06-20|EPI\_ISL\_558472|Original|hCoV-19^^England|Human|Lighthouse Lab in Alderley Park|Wellcome Sanger Institute for the COVID-19 Genomics UK (COG-UK) consortium|Davies|United Kingdom

>Spike|hCoV-19/Australia/QLD1103/2020|2020-03-22|EPI\_ISL\_593620|Original|hCoV-19^^Australia|Human|unknown|Public Health Virology Laboratory|Nguyen|Australia

>Spike|hCoV-19/England/NOTT-111636/2020|2020-05-19|EPI\_ISL\_461902|Original|hCoV-19^^England|Human|Queens Medical Centre|COVID-19 Genomics UK (COG-UK) Consortium|Loose|United Kingdom

>Spike|hCoV-19/England/ALDP-BBAD4F/2020|2020-11-20|EPI\_ISL\_702488|Original|hCoV-19^^England|Human|Lighthouse Lab in Alderley Park|Wellcome Sanger Institute for the COVID-19 Genomics UK (COG-UK) Consortium|Davies|United Kingdom

>Spike|hCoV-19/Portugal/PT1983/2020|2020-11-12|EPI\_ISL\_732206|Original|hCoV-19^^Portugal|Human|Instituto Nacional de Saude (INSA) and Instituto Gulbenkian de Ciencia (IGC)|Instituto Nacional de Saude (INSA) and Instituto Gulbenkian de Ciencia (IGC)|Borges|Portugal

>Spike|hCoV-19/Denmark/DCGC-15084/2020|2020-11-23|EPI\_ISL\_713625|Original|hCoV-19^^Midtjylland|Human|Department of Virus and Microbiological Special Diagnostics|Albertsen Lab|Michaelsen|Denmark

>Spike|hCoV-19/England/QEUEH-AF53DE/2020|2020-10-30|EPI\_ISL\_663181|Original|hCoV-19^^England|Human|Lighthouse Lab in Glasgow|Wellcome Sanger Institute for the COVID-19 Genomics UK (COG-UK) Consortium|Davies|United Kingdom

>Spike|hCoV-19/South Africa/NHLS-UCT-GS-0620/2020|2020-10-22|EPI\_ISL\_700564|Original|hCoV-19^^Western Cape|Human|D'Almeida Clinic w DAL|NHLS/UCT|Iranzadeh|South Africa

>Spike|hCoV-19/Wales/PHWC-49F925/2020|2020-12-09|EPI\_ISL\_743291|Original|hCoV-19^^Wales|Human|Wales Specialist Virology Centre Sequencing lab|COVID-19 Genomics UK (COG-UK) Consortium|Moore|United Kingdom

>Spike|hCoV-19/Wales/PHWC-4A2EB7/2020|2020-12-14|EPI\_ISL\_744030|Original|hCoV-19^^Wales|Human|Wales Specialist Virology Centre Sequencing lab|COVID-19 Genomics UK (COG-UK) Consortium|Moore|United Kingdom

>Spike|hCoV-19/England/QEUEH-B6C438/2020|2020-11-11|EPI\_ISL\_655144|Original|hCoV-19^^England|Human|Lighthouse Lab in Glasgow|Wellcome Sanger Institute for the COVID-19 Genomics UK (COG-UK) Consortium|Davies|United Kingdom

>Spike|hCoV-19/Denmark/DCGC-20120/2020|2020-12-07|EPI\_ISL\_747536|Original|hCoV-19^^Hovedstaden|Human|Department of Virus and Microbiological Special Diagnostics|Albertsen Lab|Michaelsen|Denmark

>Spike|hCoV-19/Japan/PG-4394/2020|2020-07-00|EPI\_ISL\_692620|Original|hCoV-19^^Japan|Human|Pathogen Genomics Center|Pathogen Genomics Center|Sekizuka|Japan

>Spike|hCoV-19/Wales/PHWC-4A09F4/2020|2020-12-10|EPI\_ISL\_743527|Original|hCoV-19^^Wales|Human|Wales Specialist Virology Centre Sequencing lab|COVID-19 Genomics UK (COG-UK) Consortium|Moore|United Kingdom

>Spike|hCoV-19/England/NORT-291169/2020|2020-04-26|EPI\_ISL\_453539|Original|hCoV-19^^England|Human|Northumbria University / South Tees Hospitals NHS Foundation Trust / North Cumbria Integrated Care NHS Foundation Trust / North Tees and Hartlepool NHS Foundation Trust / Newcastle Hospitals NHS Foundation Trust|COVID-19 Genomics UK (COG-UK) Consortium|Bashton|United Kingdom

>Spike|hCoV-19/England/QEUEH-B2B927/2020|2020-11-02|EPI\_ISL\_646700|Original|hCoV-19^^England|Human|Lighthouse Lab in Glasgow|Wellcome Sanger Institute for the COVID-19 Genomics UK (COG-UK) Consortium|Davies|United Kingdom

>Spike|hCoV-19/France/PAC-IHU-0108/2020|2020-03-23|EPI\_ISL\_569313|Original|hCoV-19^^Provence-Alpes-C\u00f4te-d\u00e0z|Human|MEPHI|MEPHI|Levasseur|France

>Spike|hCoV-19/USA/MN-MDH-1056/2020|2020-05-14|EPI\_ISL\_462901|Original|hCoV-19^^Minnesota|Human|Minnesota Department of Health|Minnesota Department of Health|Garfin|USA

>Spike|hCoV-19/England/GSTT-5580/2020|2020-03-21|EPI\_ISL\_560688|Original|hCoV-19^^England|Human|Centre for Clinical Infection and Diagnostics Research and Genomics Innovation Unit|Centre for Clinical Infection and Diagnostics Research and Genomics Innovation Unit|Awan|United Kingdom

>Spike|hCoV-19/South Africa/NHLS-UCT-GS-0016/2020|2020-08-11|EPI\_ISL\_640018|Original|hCoV-19^^Western Cape|Human|Heidelberg Clinic wc HBC|NHLS/UCT|Iranzadeh|South Africa

>Spike|hCoV-19/Denmark/DCGC-18874/2020|2020-12-07|EPI\_ISL\_748150|Original|hCoV-19^^Hovedstaden|Human|Department of Virus and Microbiological Special Diagnostics|Albertsen Lab|Michaelsen|Denmark

>Spike|hCoV-19/Scotland/QEUH-A36C30/2020|2020-10-06|EPI\_ISL\_706925|Original|hCoV-19^^Scotland|Human|Oxford Viromics|COVID-19 Genomics UK (COG-UK) Consortium|Golubchik|United Kingdom

>Spike|hCoV-19/Scotland/EDB7146/2020|2020-08-05|EPI\_ISL\_514552|Original|hCoV-19^^Scotland|Human|Virology Department|COVID-19 Genomics UK (COG-UK) Consortium|Williams|United Kingdom

>Spike|hCoV-19/India/MH-BJMC-965/2020|2020-04-12|EPI\_ISL\_496554|Original|hCoV-19^^Maharashtra|Human|B.J. Govt. Medical College|National Centre For Cell Science|Paul|India

>Spike|hCoV-19/England/QEUH-9F45CB/2020|2020-09-25|EPI\_ISL\_588410|Original|hCoV-19^^England|Human|Lighthouse Lab in Glasgow|Wellcome Sanger Institute for the COVID-19 Genomics UK (COG-UK) consortium|Davies|United Kingdom

>Spike|hCoV-19/Denmark/DCGC-11103/2020|2020-11-02|EPI\_ISL\_670393|Original|hCoV-19^^Hovedstaden|Human|Department of Virus and Microbiological Special Diagnostics|Albertsen Lab|Michaelsen|Denmark

>Spike|hCoV-19/USA/NM-UNM-00659/2020|2020-07-01|EPI\_ISL\_560330|Original|hCoV-19^^New Mexico|Human|TriCore Reference Laboratories|Center for Global Health|Domman|USA

>Spike|hCoV-19/Denmark/DCGC-13560/2020|2020-11-30|EPI\_ISL\_712878|Original|hCoV-19^^Hovedstaden|Human|Department of Virus and Microbiological Special Diagnostics|Albertsen Lab|Michaelsen|Denmark

>Spike|hCoV-19/South Africa/KRISP-K005317/2020|2020-11-14|EPI\_ISL\_678609|Original|hCoV-19^^KwaZulu-Natal|Human|NHLS-IALCH|KRISP|de Oliveira|South Africa

>Spike|hCoV-19/Canada/ON-PHL-20-02440/2020|2020-09-00|EPI\_ISL\_671577|Original|hCoV-19^^Ontario|Human|Public Health Ontario Laboratory|Public Health Ontario Laboratory|Guthrie|Canada

>Spike|hCoV-19/Canada/QC-AI8/2020|2020-04-00|EPI\_ISL\_435346|Original|hCoV-19^^Quebec|Human|Laboratoire de microbiologie|Smith Laboratory|Smith|Canada

>Spike|hCoV-19/England/20126012702/2020|2020-03-17|EPI\_ISL\_418756|Original|hCoV-19^^England|Human|Respiratory Virus Unit|Respiratory Virus Unit|Platt|United Kingdom

>Spike|hCoV-19/Finland/15A602/2020|2020-04-15|EPI\_ISL\_481559|Original|hCoV-19^^Uusimaa|Human|Department of Virology and Immunology|Department of Virology|Smura|Finland

>Spike|hCoV-19/England/ALDP-B5C8D5/2020|2020-11-08|EPI\_ISL\_655813|Original|hCoV-19^^England|Human|Lighthouse Lab in Alderley Park|Wellcome Sanger Institute for the COVID-19 Genomics UK (COG-UK) Consortium|Davies|United Kingdom

>Spike|hCoV-19/Canada/QC-LSPQ-L00214546/2020|2020-03-11|EPI\_ISL\_535729|Original|hCoV-19^^Quebec|Human|CHUM - Microbiologie - H\u00f4pital Saint-Luc|Laboratoire de sant\u00e9 publique du Qu\u00e9bec|Moreira|Canada

>Spike|hCoV-19/Finland/8LS18H1/2020|2020-10-08|EPI\_ISL\_755979|Original|hCoV-19^^Uusimaa|Human|Department of Virology and Immunology|Department of Virology|Smura|Finland

>Spike|hCoV-19/England/LIVE-A03DC/2020|2020-05-25|EPI\_ISL\_472109|Original|hCoV-19^^England|Human|Liverpool Clinical Laboratories|COVID-19 Genomics UK (COG-UK) Consortium|Haldenby|United Kingdom

>Spike|hCoV-19/Denmark/DCGC-10573/2020|2020-11-02|EPI\_ISL\_670060|Original|hCoV-19^^Syddanmark|Human|Department of Virus and Microbiological Special Diagnostics|Albertsen Lab|Michaelsen|Denmark

>Spike|hCoV-19/USA/UT-UPHL-2012333679/2020|2020-12-03|EPI\_ISL\_747020|Original|hCoV-19^^Utah|Human|Utah Public Health Laboratory|Utah Public Health Laboratory|Gallagher|USA

>Spike|hCoV-19/England/ALDP-94C96E/2020|2020-06-16|EPI\_ISL\_555952|Original|hCoV-19^^England|Human|Lighthouse Lab in Alderley Park|Wellcome Sanger Institute for the COVID-19 Genomics UK (COG-UK) consortium|Davies|United Kingdom

>Spike|hCoV-19/England/ALDP-A2F7A2/2020|2020-10-05|EPI\_ISL\_587065|Original|hCoV-19^^England|Human|Lighthouse Lab in Alderley Park|Wellcome Sanger Institute for the COVID-19 Genomics UK (COG-UK) consortium|Davies|United Kingdom

>Spike|hCoV-19/Belgium/HC-030760/2020|2020-03-07|EPI\_ISL\_420451|Original|hCoV-19^^Mons|Human|KU Leuven|KU Leuven|Maes|Belgium

>Spike|hCoV-19/Shanghai/SH0009/2020|2020-01-29|EPI\_ISL\_416322|Original|hCoV-19^^Shanghai|Human|Shanghai Public Health Clinical Center|National Research Center for Translational Medicine (Shanghai)|Zhang|China

>Spike|hCoV-19/Saudi Arabia/KAUST-Makkah178/2020|2020-04-06|EPI\_ISL\_437701|Original|hCoV-19^^Makkah|Human|Pathogen Genomics Lab King Abdullah University of Science and Technology(KAUST)|Pathogen Genomics Lab King Abdullah University of Science and Technology(KAUST)|Mohamed Ghazzali|Saudi Arabia

>Spike|hCoV-19/Scotland/CVR89/2020|2020-03-12|EPI\_ISL\_425813|Original|hCoV-19^^Scotland|Human|West of Scotland Specialist Virology Centre|COVID-19 Genomics UK (COG-UK) Consortium|Robertson|United Kingdom

>Spike|hCoV-19/England/QEUEH-B1400E/2020|2020-10-30|EPI\_ISL\_641652|Original|hCoV-19^^England|Human|Lighthouse Lab in Glasgow|Wellcome Sanger Institute for the COVID-19 Genomics UK (COG-UK) Consortium|Davies|United Kingdom

>Spike|hCoV-19/England/CAMC-9EC1FF/2020|2020-09-24|EPI\_ISL\_580421|Original|hCoV-19^^England|Human|Lighthouse Lab in Cambridge|Wellcome Sanger Institute for the COVID-19 Genomics UK (COG-UK) consortium|Davies|United Kingdom

>Spike|hCoV-19/Wales/PHWC-49C68B/2020|2020-11-18|EPI\_ISL\_742588|Original|hCoV-19^^Wales|Human|Wales Specialist Virology Centre Sequencing lab|COVID-19 Genomics UK (COG-UK) Consortium|Moore|United Kingdom

>Spike|hCoV-19/USA/MI-QDX-392/2020|2020-03-23|EPI\_ISL\_571133|Original|hCoV-19^^Michigan|Human|Quest Diagnostics|Quest Diagnostics|Kagan|USA

>Spike|hCoV-19/Australia/VIC25/2020|2020-03-10|EPI\_ISL\_419744|Original|hCoV-19^^Victoria|Human|Victorian Infectious Diseases Reference Laboratory (VIDRL)|Victorian Infectious Diseases Reference Laboratory and Microbiological Diagnostic Unit Public Health Laboratory|Schultz|Australia

>Spike|hCoV-19/USA/WA-UW-28263/2020|2020-09-16|EPI\_ISL\_717774|Original|hCoV-19^^Washington|Human|UW Virology Lab|UW Virology Lab|Roychoudhury|USA

>Spike|hCoV-19/England/QEUEH-CB0F51/2020|2020-12-08|EPI\_ISL\_761047|Original|hCoV-19^^England|Human|Lighthouse Lab in Glasgow|Wellcome Sanger Institute for the COVID-19 Genomics UK (COG-UK) Consortium|Davies|United Kingdom

>Spike|hCoV-19/India/MH-BJMC-1675/2020|2020-04-18|EPI\_ISL\_496547|Original|hCoV-19^^Maharashtra|Human|B.J. Govt. Medical College|National Centre For Cell Science|Paul|India

>Spike|hCoV-19/Scotland/QEUEH-A63669/2020|2020-10-13|EPI\_ISL\_596128|Original|hCoV-19^^Scotland|Human|Quadram Institute Bioscience|COVID-19 Genomics UK (COG-UK) Consortium|Alikhan|United Kingdom

>Spike|hCoV-19/England/CAMC-AB2188/2020|2020-10-23|EPI\_ISL\_623584|Original|hCoV-19^^England|Human|Lighthouse Lab in Cambridge|Wellcome Sanger Institute for the COVID-19 Genomics UK (COG-UK) consortium|Davies|United Kingdom

>Spike|hCoV-19/Japan/PG-1322/2020|2020-04-00|EPI\_ISL\_684930|Original|hCoV-19^^Japan|Human|Saitama Prefectural Institute of Public Health|Pathogen Genomics Center|Sekizuka|Japan

>Spike|hCoV-19/USA/IL-QDX-687/2020|2020-03-18|EPI\_ISL\_571436|Original|hCoV-19^^Illinois|Human|Quest Diagnostics|Quest Diagnostics|Kagan|USA

>Spike|hCoV-19/USA/TX-HMH-647/2020|2020-04-10|EPI\_ISL\_546019|Original|hCoV-19^^Texas|Human|Houston Methodist Hospital|Houston Methodist Hospital|Long|USA

>Spike|hCoV-19/USA/TX-HMH-6258/2020|2020-07-04|EPI\_ISL\_547345|Original|hCoV-19^^Texas|Human|Houston Methodist Hospital|Houston Methodist Hospital|Long|USA

>Spike|hCoV-19/England/LIVE-A5498/2020|2020-03-20|EPI\_ISL\_500119|Original|hCoV-19^^England|Human|Liverpool Clinical Laboratories|COVID-19 Genomics UK (COG-UK) Consortium|Haldenby|United Kingdom

>Spike|hCoV-19/England/ALDP-C3DED7/2020|2020-12-10|EPI\_ISL\_730712|Original|hCoV-19^^England|Human|Lighthouse Lab in Alderley Park|Wellcome Sanger Institute for the COVID-19 Genomics UK (COG-UK) Consortium|Davies|United Kingdom

>Spike|hCoV-19/USA/UT-04130/2020|2020-05-13|EPI\_ISL\_487252|Original|hCoV-19^^Utah|Human|Utah Public Health Laboratory|Utah Public Health Laboratory|Butz|USA

>Spike|hCoV-19/England/CAMC-B9A02E/2020|2020-11-15|EPI\_ISL\_673488|Original|hCoV-19^^England|Human|Lighthouse Lab in Cambridge|Wellcome Sanger Institute for the COVID-19 Genomics UK (COG-UK) Consortium|Davies|United Kingdom

>Spike|hCoV-19/Australia/VIC16785/2020|2020-08-10|EPI\_ISL\_663579|Original|hCoV-19^^Victoria|Human|Microbiological Diagnostic Unit - Public Health Laboratory (MDU-PHL)|MDU-PHL|Schultz|Australia

>Spike|hCoV-19/England/LOND-12673AF/2020|2020-12-08|EPI\_ISL\_741280|Original|hCoV-19^^England|Human|University College London|COVID-19 Genomics UK (COG-UK) Consortium|Roy|United Kingdom

>Spike|hCoV-19/Wales/MILK-9950E9/2020|2020-08-24|EPI\_ISL\_552441|Original|hCoV-19^^Wales|Human|Lighthouse Lab in Milton Keynes|Wellcome Sanger Institute for the COVID-19 Genomics UK (COG-UK) consortium|Davies|United Kingdom

>Spike|hCoV-19/Wales/PHWC-4937BE/2020|2020-11-29|EPI\_ISL\_725941|Original|hCoV-19^^Wales|Human|Originating lab|COVID-19 Genomics UK (COG-UK) Consortium|Moore|United Kingdom

>Spike|hCoV-19/Netherlands/NA\_680/2020|2020-03-13|EPI\_ISL\_461115|Original|hCoV-19^^Netherlands|Human|Dutch COVID-19 response team|Erasmus Medical Center|Oude Munnink|Netherlands

>Spike|hCoV-19/USA/OH-ODH-SC35277/2020|2020-04-24|EPI\_ISL\_780419|Original|hCoV-19^^Ohio|Human|Ohio Department of Health Laboratory|Ohio Department of Health Laboratory|Holmes|USA

>Spike|hCoV-19/Australia/VIC11004/2020|2020-08-01|EPI\_ISL\_563193|Original|hCoV-19^^Victoria|Human|Microbiological Diagnostic Unit - Public Health Laboratory (MDU-PHL)|MDU-PHL|Schultz|Australia

>Spike|hCoV-19/Scotland/CVR5474/2020|2020-10-30|EPI\_ISL\_651811|Original|hCoV-19^^Scotland|Human|West of Scotland Specialist Virology Centre|COVID-19 Genomics UK (COG-UK) Consortium|Robertson|United Kingdom

>Spike|hCoV-19/England/ALDP-9B5A21/2020|2020-08-28|EPI\_ISL\_590388|Original|hCoV-19^^England|Human|Lighthouse Lab in Alderley Park|Wellcome Sanger Institute for the COVID-19 Genomics UK (COG-UK) consortium|Davies|United Kingdom

>Spike|hCoV-19/England/MILK-B89EBF/2020|2020-11-13|EPI\_ISL\_675695|Original|hCoV-19^^England|Human|Lighthouse Lab in Milton Keynes|Wellcome Sanger Institute for the COVID-19 Genomics UK (COG-UK) Consortium|Davies|United Kingdom

>Spike|hCoV-19/USA/MA-MASPHL-00054/2020|2020-04-03|EPI\_ISL\_791554|Original|hCoV-19^^Massachusetts|Human|Massachusetts State Public Health Laboratory|Infectious Disease Program|Park|USA

>Spike|hCoV-19/England/OXON-B1068/2020|2020-00-00|EPI\_ISL\_478990|Original|hCoV-19^^England|Human|Oxford Viromics|COVID-19 Genomics UK (COG-UK) Consortium|Golubchik|United Kingdom

>Spike|hCoV-19/England/ALDP-9ED47D/2020|2020-05-09|EPI\_ISL\_589402|Original|hCoV-19^^England|Human|Lighthouse Lab in Alderley Park|Wellcome Sanger Institute for the COVID-19 Genomics UK (COG-UK) consortium|Davies|United Kingdom

>Spike|hCoV-19/England/ALDP-AA523A/2020|2020-10-22|EPI\_ISL\_623885|Original|hCoV-19^^England|Human|Lighthouse Lab in Alderley Park|Wellcome Sanger Institute for the COVID-19 Genomics UK (COG-UK) consortium|Davies|United Kingdom

>Spike|hCoV-19/USA/MN-MDH-1320/2020|2020-03-24|EPI\_ISL\_495619|Original|hCoV-19^^Minnesota|Human|Minnesota Department of Health|Minnesota Department of Health|Garfin|USA

>Spike|hCoV-19/Switzerland/BS-42227559/2020|2020-04-10|EPI\_ISL\_581693|Original|hCoV-19^^Basel-Stadt|Human|University Hospital Basel|University Hospital Basel|Roloff Handschin|Switzerland



>Spike|hCoV-19/India/GJ-GBRC-368b/2020|2020-06-18|EPI\_ISL\_524724|Original|hCoV-19^^Gujarat|Human|B.J. Medical College and Civil hospital|Gujarat Biotechnology Research Centre|Joshi|India

>Spike|hCoV-19/England/MILK-B0455D/2020|2020-10-23|EPI\_ISL\_651348|Original|hCoV-19^^England|Human|Department of Pathology|COVID-19 Genomics UK (COG-UK) Consortium|Goodfellow|United Kingdom

>Spike|hCoV-19/England/ALDP-B5B724/2020|2020-11-09|EPI\_ISL\_655359|Original|hCoV-19^^England|Human|Lighthouse Lab in Alderley Park|Wellcome Sanger Institute for the COVID-19 Genomics UK (COG-UK) Consortium|Davies|United Kingdom

>Spike|hCoV-19/USA/NM-UNM-00295/2020|2020-05-14|EPI\_ISL\_508068|Original|hCoV-19^^New Mexico|Human|New Mexico Department of Health Scientific Laboratory Division|Center for Global Health|Domman|USA

>Spike|hCoV-19/Scotland/QEUH-A9EA78/2020|2020-10-20|EPI\_ISL\_625372|Original|hCoV-19^^Scotland|Human|Lighthouse Lab in Glasgow|Wellcome Sanger Institute for the COVID-19 Genomics UK (COG-UK) consortium|Davies|United Kingdom

>Spike|hCoV-19/USA/CA-CZB-13386/2020|2020-08-31|EPI\_ISL\_672062|Original|hCoV-19^^California|Human|Alameda County Public Health Lab|Chan-Zuckerberg Biohub|Bhatt|USA

>Spike|hCoV-19/England/NORT-2814AF/2020|2020-03-16|EPI\_ISL\_488767|Original|hCoV-19^^England|Human|NU-OMICS DNA Sequencing research facility|Wellcome Sanger Institute for the COVID-19 Genomics UK (COG-UK) consortium|Davies|United Kingdom

>Spike|hCoV-19/USA/UT-UPHL-2012598636/2020|2020-07-27|EPI\_ISL\_745527|Original|hCoV-19^^Utah|Human|Ginkgo Bioworks Clinical Laboratory|Utah Public Health Laboratory|Young|USA

>Spike|hCoV-19/Germany/HH-hpi-p1740/2020|2020-03-12|EPI\_ISL\_776119|Original|hCoV-19^^Hamburg|Human|University Medical Center Hamburg Eppendorf|Heinrich Pette Institute|Robitaille|Germany

>Spike|hCoV-19/Wales/PHWC-481A50/2020|2020-10-14|EPI\_ISL\_611902|Original|hCoV-19^^Wales|Human|Wales Specialist Virology Centre Sequencing lab|COVID-19 Genomics UK (COG-UK) Consortium|Moore|United Kingdom

>Spike|hCoV-19/England/ALDP-6B9FB8/2020|2020-06-29|EPI\_ISL\_557950|Original|hCoV-19^^England|Human|Lighthouse Lab in Alderley Park|Wellcome Sanger Institute for the COVID-19 Genomics UK (COG-UK) consortium|Davies|United Kingdom

>Spike|hCoV-19/England/CAMC-B79A72/2020|2020-11-10|EPI\_ISL\_741033|Original|hCoV-19^^England|Human|Oxford Viromics|COVID-19 Genomics UK (COG-UK) Consortium|Golubchik|United Kingdom

>Spike|hCoV-19/Japan/PG-2942/2020|2020-04-00|EPI\_ISL\_691068|Original|hCoV-19^^Japan|Human|Pathogen Genomics Center|Pathogen Genomics Center|Sekizuka|Japan

>Spike|hCoV-19/England/NORT-281F71/2020|2020-03-25|EPI\_ISL\_478491|Original|hCoV-19^^England|Human|Northumbria University / South Tees Hospitals NHS Foundation Trust / North Cumbria Integrated Care NHS Foundation Trust / North Tees and Hartlepool NHS Foundation Trust / Newcastle Hospitals NHS Foundation Trust|COVID-19 Genomics UK (COG-UK) Consortium|Bashton|United Kingdom

>Spike|hCoV-19/England/CAMC-B346AC/2020|2020-11-05|EPI\_ISL\_659532|Original|hCoV-19^^England|Human|Lighthouse Lab in Cambridge|Wellcome Sanger Institute for the COVID-19 Genomics UK (COG-UK) Consortium|Davies|United Kingdom

>Spike|hCoV-19/Canada/ON-UHTC\_0052/2020|2020-04-02|EPI\_ISL\_464056|unknown|hCoV-19^^Ontario|Human|Unity Health Toronto|Ontario Institute for Cancer Research|de Borja|Canada

>Spike|hCoV-19/England/ALDP-B5B496/2020|2020-11-09|EPI\_ISL\_655501|Original|hCoV-19^^England|Human|Lighthouse Lab in Alderley Park|Wellcome Sanger Institute for the COVID-19 Genomics UK (COG-UK) Consortium|Davies|United Kingdom

>Spike|hCoV-19/England/ALDP-A94B7F/2020|2020-10-20|EPI\_ISL\_624676|Original|hCoV-19^^England|Human|Lighthouse Lab in Alderley Park|Wellcome Sanger Institute for the COVID-19 Genomics UK (COG-UK) consortium|Davies|United Kingdom

>Spike|hCoV-19/USA/TX-HMH-MCoV-13961/2020|2020-08-16|EPI\_ISL\_787253|Original|hCoV-19^^Texas|Human|Houston Methodist Hospital|Houston Methodist Hospital|Long|USA

>Spike|hCoV-19/USA/MI-UM-10036579570/2020|2020-10-22|EPI\_ISL\_640158|Original|hCoV-19^^Michigan|Human|University of Michigan Clinical Microbiology Laboratory|Lauring Lab|Valesano|USA

>Spike|hCoV-19/England/QEUH-96A86D/2020|2020-08-13|EPI\_ISL\_531525|Original|hCoV-19^^England|Human|Lighthouse Lab in Glasgow|Wellcome Sanger Institute for the COVID-19 Genomics UK (COG-UK) consortium|Davies|United Kingdom

>Spike|hCoV-19/Finland/1LS6C1/2020|2020-10-01|EPI\_ISL\_757362|Original|hCoV-19^^Uusimaa|Human|Department of Virology and Immunology|Department of Virology|Smura|Finland

>Spike|hCoV-19/Wales/ALDP-AA5012/2020|2020-10-21|EPI\_ISL\_634787|Original|hCoV-19^^Wales|Human|Lighthouse Lab in Alderley Park|Wellcome Sanger Institute for the COVID-19 Genomics UK (COG-UK) consortium|Davies|United Kingdom

>Spike|hCoV-19/Australia/VIC17415/2020|2020-00-00|EPI\_ISL\_663878|Original|hCoV-19^^Victoria|Human|Microbiological Diagnostic Unit - Public Health Laboratory (MDU-PHL)|MDU-PHL|Schultz|Australia

>Spike|hCoV-19/Spain/PV-IBV-001522/2020|2020-03-17|EPI\_ISL\_467106|Original|hCoV-19^^Basque Country|Human|Hospital Universitario Araba. Vitoria-Gasteiz|SeqCOVID-SPAIN consortium/IBV (CSIC)|Comas|Spain

>Spike|hCoV-19/Netherlands/un-EMC-781/2020|2020-06-03|EPI\_ISL\_577877|Original|hCoV-19^^Netherlands|Human|Dutch COVID-19 response team|Erasmus Medical Center|Oude Munnink|Netherlands

>Spike|hCoV-19/England/ALDP-9CD376/2020|2020-09-16|EPI\_ISL\_566330|Original|hCoV-19^^England|Human|Lighthouse Lab in Alderley Park|Wellcome Sanger Institute for the COVID-19 Genomics UK (COG-UK) consortium|Davies|United Kingdom

>Spike|hCoV-19/Switzerland/BS-UHB-42203381/2020|2020-03-23|EPI\_ISL\_528354|Original|hCoV-19^^Basel-Stadt|Human|University Hospital Basel|University Hospital Basel|Roloff Handschin|Switzerland

>Spike|hCoV-19/USA/VA-DCLS-2089/2020|2020-10-21|EPI\_ISL\_677189|Original|hCoV-19^^Virginia|Human|Virginia Division of Consolidated Laboratory Services|Virginia Division of Consolidated Laboratory Services|St. Jacques|USA

>Spike|hCoV-19/USA/TX-HMH-MCoV-18952/2020|2020-11-25|EPI\_ISL\_785244|Original|hCoV-19^^Texas|Human|Houston Methodist Hospital|Houston Methodist Hospital|Long|USA

>Spike|hCoV-19/Japan/PG-6935/2020|2020-09-00|EPI\_ISL\_688041|Original|hCoV-19^^Japan|Human|Pathogen Genomics Center|Pathogen Genomics Center|Sekizuka|Japan

>Spike|hCoV-19/South Korea/KCDC2281/2020|2020-05-19|EPI\_ISL\_510618|Original|hCoV-19^^South Korea|Human|Division of Viral Diseases|Division of Viral Diseases|Kim|South Korea

>Spike|hCoV-19/India/GJ-GBRC359/2020|2020-06-25|EPI\_ISL\_514609|Original|hCoV-19^^Gujarat|Human|B.J. Medical College and Civil hospital|Gujarat Biotechnology Research Centre|Joshi|India

>Spike|hCoV-19/England/CAMC-AEADDE/2020|2020-10-26|EPI\_ISL\_633238|Original|hCoV-19^^England|Human|Lighthouse Lab in Cambridge|Wellcome Sanger Institute for the COVID-19 Genomics UK (COG-UK) consortium|Davies|United Kingdom

>Spike|hCoV-19/Israel/130710217/2020|2020-04-16|EPI\_ISL\_447462|Original|hCoV-19^^Tel Aviv District|Human|Clinical Microbiology Laboratory|Stern Lab|Miller|Israel

>Spike|hCoV-19/USA/CA-ALSR-3737/2020|2020-06-04|EPI\_ISL\_636175|Original|hCoV-19^^California|Human|San Diego County Public Health Laboratory|Andersen lab at Scripps Research|Gangavarapu|USA

>Spike|hCoV-19/Denmark/ALAB-HH24/2020|2020-03-11|EPI\_ISL\_429282|Original|hCoV-19^^Denmark|Human|Department of Clinical Microbiology|Albertsen lab|Kirkegaard|Denmark

>Spike|hCoV-19/Australia/VIC5333/2020|2020-07-18|EPI\_ISL\_520096|Original|hCoV-19^^Victoria|Human|Microbiological Diagnostic Unit - Public Health Laboratory (MDU-PHL)|MDU-PHL|Schultz|Australia

>Spike|hCoV-19/USA/WA-S2424/2020|2020-06-15|EPI\_ISL\_497056|Original|hCoV-19^^Washington|Human|Washington State Department of Health|Seattle Flu Study|Lee|USA

>Spike|hCoV-19/England/ALDP-A70881/2020|2020-10-14|EPI\_ISL\_608321|Original|hCoV-19^^England|Human|Lighthouse Lab in Alderley Park|Wellcome Sanger Institute for the COVID-19 Genomics UK (COG-UK) consortium|Davies|United Kingdom

>Spike|hCoV-19/Wales/PHWC-35D1A/2020|2020-04-27|EPI\_ISL\_474559|Original|hCoV-19^^Wales|Human|Originating lab|COVID-19 Genomics UK (COG-UK) Consortium|Moore|United Kingdom

>Spike|hCoV-19/Australia/NSW46/2020|2020-03-10|EPI\_ISL\_427658|Original|hCoV-19^^New South Wales|Human|Centre for Infectious Diseases and Microbiology Public Health|NSW Health Pathology - Institute of Clinical Pathology and Medical Research; Westmead Hospital; University of Sydney|Gall|Australia

>Spike|hCoV-19/Scotland/EDB5487/2020|2020-04-26|EPI\_ISL\_461758|Original|hCoV-19^^Scotland|Human|Virology Department|COVID-19 Genomics UK (COG-UK) Consortium|Williams|United Kingdom

>Spike|hCoV-19/Israel/CVL-n2888/2020|2020-03-08|EPI\_ISL\_649080|Original|hCoV-19^^Modiin|Human|Israel Central Virology laboratory|Israel Central Virology laboratory|Zuckerman|Israel

>Spike|hCoV-19/USA/PA-MGEL-00255/2020|2020-05-19|EPI\_ISL\_681988|Original|hCoV-19^^Pennsylvania|Human|UPMC Clinical Microbiology Laboratory|Microbial Genomic Epidemiology Laboratory|Griffith|USA

>Spike|hCoV-19/Denmark/DCGC-2683/2020|2020-08-17|EPI\_ISL\_617904|Original|hCoV-19^^Midtjylland|Human|Department of Virus and Microbiological Special Diagnostics|Albertsen lab|Michaelsen|Denmark

>Spike|hCoV-19/Japan/PG-3070/2020|2020-04-00|EPI\_ISL\_691193|Original|hCoV-19^^Japan|Human|Pathogen Genomics Center|Pathogen Genomics Center|Sekizuka|Japan

>Spike|hCoV-19/England/BRIS-1854767/2020|2020-04-27|EPI\_ISL\_495107|Original|hCoV-19^^England|Human|PHE South West Regional Laboratory|Wellcome Sanger Institute for the COVID-19 Genomics UK (COG-UK) consortium|Davies|United Kingdom

>Spike|hCoV-19/USA/CA-ALSR-2183/2020|2020-06-04|EPI\_ISL\_635378|Original|hCoV-19^^California|Human|San Diego County Public Health Laboratory|Andersen lab at Scripps Research|Gangavarapu|USA

>Spike|hCoV-19/Denmark/DCGC-4629/2020|2020-09-21|EPI\_ISL\_621298|Original|hCoV-19^^Sjaelland|Human|Department of Virus and Microbiological Special Diagnostics|Albertsen lab|Michaelsen|Denmark

>Spike|hCoV-19/England/QEUEH-B9FE3E/2020|2020-11-18|EPI\_ISL\_720944|Original|hCoV-19^^England|Human|Lighthouse Lab in Glasgow|Wellcome Sanger Institute for the COVID-19 Genomics UK (COG-UK) Consortium|Davies|United Kingdom

>Spike|hCoV-19/England/ALDP-93138C/2020|2020-06-21|EPI\_ISL\_552806|Original|hCoV-19^^England|Human|Lighthouse Lab in Alderley Park|Wellcome Sanger Institute for the COVID-19 Genomics UK (COG-UK) consortium|Davies|United Kingdom

>Spike|hCoV-19/Denmark/ALAB-HH-248/2020|2020-04-25|EPI\_ISL\_452086|Original|hCoV-19^^Denmark|Human|Department of Clinical Microbiology|Albertsen lab|Kirkegaard|Denmark

>Spike|hCoV-19/Denmark/DCGC-13017/2020|2020-11-30|EPI\_ISL\_712129|Original|hCoV-19^^Hovedstaden|Human|Department of Virus and Microbiological Special Diagnostics|Albertsen Lab|Michaelsen|Denmark

>Spike|hCoV-19/Wales/ALDP-A2D513/2020|2020-10-06|EPI\_ISL\_586926|Original|hCoV-19^^Wales|Human|Lighthouse Lab in Alderley Park|Wellcome Sanger Institute for the COVID-19 Genomics UK (COG-UK) consortium|Davies|United Kingdom

>Spike|hCoV-19/England/LIVE-1DDE6B/2020|2020-10-10|EPI\_ISL\_612043|Original|hCoV-19^^England|Human|Liverpool Clinical Laboratories|COVID-19 Genomics UK (COG-UK) Consortium|Haldenby|United Kingdom

>Spike|hCoV-19/England/QEUEH-A5E7B9/2020|2020-10-12|EPI\_ISL\_597261|Original|hCoV-19^^England|Human|Lighthouse Lab in Glasgow|Wellcome Sanger Institute for the COVID-19 Genomics UK (COG-UK) consortium|Davies|United Kingdom

>Spike|hCoV-19/England/ALDP-B76DE5/2020|2020-11-12|EPI\_ISL\_723814|Original|hCoV-19^^England|Human|Oxford Viromics|COVID-19 Genomics UK (COG-UK) Consortium|Golubchik|United Kingdom

>Spike|hCoV-19/Ireland/LS-NVRL-75IRL79332/2020|2020-10-13|EPI\_ISL\_671923|Original|hCoV-19^^Laois|Human|National Virus Reference Laboratory|National Virus Reference Laboratory|Gonzalez|Ireland

>Spike|hCoV-19/USA/TX-HMH-MCoV-12809/2020|2020-08-19|EPI\_ISL\_790540|Original|hCoV-19^^Texas|Human|Houston Methodist Hospital|Houston Methodist Hospital|Long|USA

>Spike|hCoV-19/Scotland/QEUEH-9DAA9F/2020|2020-09-22|EPI\_ISL\_575384|Original|hCoV-19^^Scotland|Human|Lighthouse Lab in Glasgow|Wellcome Sanger Institute for the COVID-19 Genomics UK (COG-UK) consortium|Davies|United Kingdom

>Spike|hCoV-19/France/PAC-IHU-0017/2020|2020-03-07|EPI\_ISL\_569246|Original|hCoV-19^^Provence-Alpes-C\u00f4te-d\u02019Azur|Human|MEPHI|MEPHI|Levasseur|France

>Spike|hCoV-19/Wales/MILK-B0539E/2020|2020-10-24|EPI\_ISL\_650659|Original|hCoV-19^^Wales|Human|Virology Department|COVID-19 Genomics UK (COG-UK) Consortium|de Silva|United Kingdom

>Spike|hCoV-19/USA/MN-MDH-1772/2020|2020-04-12|EPI\_ISL\_590776|Original|hCoV-19^^Minnesota|Human|Minnesota Department of Health|Minnesota Department of Health|Lorentz|USA

>Spike|hCoV-19/England/SHEF-C772E/2020|2020-08-10|EPI\_ISL\_517557|Original|hCoV-19^^England|Human|Virology Department|COVID-19 Genomics UK (COG-UK) Consortium|de Silva|United Kingdom

>Spike|hCoV-19/England/205260433/2020|2020-00-00|EPI\_ISL\_766545|Original|hCoV-19^^England|Human|Respiratory Virus Unit|COVID-19 Genomics UK (COG-UK) Consortium|Platt|United Kingdom

>Spike|hCoV-19/Australia/QLD1109/2020|2020-03-26|EPI\_ISL\_593626|Original|hCoV-19^^Australia|Human|unknown|Public Health Virology Laboratory|Nguyen|Australia

>Spike|hCoV-19/England/ALDP-B632A0/2020|2020-11-08|EPI\_ISL\_656444|Original|hCoV-19^^England|Human|Lighthouse Lab in Alderley Park|Wellcome Sanger Institute for the COVID-19 Genomics UK (COG-UK) Consortium|Davies|United Kingdom

>Spike|hCoV-19/England/LOND-D5AE8/2020|2020-04-18|EPI\_ISL\_457298|Original|hCoV-19^^England|Human|University College London|COVID-19 Genomics UK (COG-UK) Consortium|Roy|United Kingdom

>Spike|hCoV-19/Luxembourg/LNS1947589/2020|2020-09-25|EPI\_ISL\_740027|Original|hCoV-19^^Luxembourg|Human|Laboratoire national de sant\u00e9|Laboratoire national de sant\u00e9|Wienecke-Baldacchino|Luxembourg

>Spike|hCoV-19/Portugal/PT0312/2020|2020-03-14|EPI\_ISL\_454028|Original|hCoV-19^^Portugal|Human|unknown|Instituto Nacional de Saude (INSA)|Borges|Portugal

>Spike|hCoV-19/England/QEUH-A5E801/2020|2020-10-11|EPI\_ISL\_597332|Original|hCoV-19^^England|Human|Lighthouse Lab in Glasgow|Wellcome Sanger Institute for the COVID-19 Genomics UK (COG-UK) consortium|Davies|United Kingdom

>Spike|hCoV-19/England/CAMB-77FE9/2020|2020-04-01|EPI\_ISL\_441229|Original|hCoV-19^^England|Human|Department of Pathology|Wellcome Sanger Institute for the COVID-19 Genomics UK (COG-UK) consortium|Amato|United Kingdom

>Spike|hCoV-19/USA/WA-UW-22449/2020|2020-08-05|EPI\_ISL\_570691|Original|hCoV-19^^Washington|Human|UW Virology Lab|UW Virology Lab|Roychoudhury|USA

>Spike|hCoV-19/USA/WI-WSLH-200705/2020|2020-06-26|EPI\_ISL\_631462|Original|hCoV-19^^Wisconsin|Human|Wisconsin State Laboratory of Hygiene Communicable Disease Division|Wisconsin State Laboratory of Hygiene Communicable Disease Division|Florek|USA

>Spike|hCoV-19/USA/NY-Wadsworth-84608-01/2020|2020-05-07|EPI\_ISL\_676683|Original|hCoV-19^^New York|Human|Wadsworth Center|Wadsworth Center|Lasek-Nesselquist|USA

>Spike|hCoV-19/England/NORW-F6586/2020|2020-12-03|EPI\_ISL\_704921|Original|hCoV-19^^England|Human|Quadram Institute Bioscience|COVID-19 Genomics UK (COG-UK) Consortium|Alikhan|United Kingdom

>Spike|hCoV-19/Wales/PHWC-49692E/2020|2020-11-22|EPI\_ISL\_726658|Original|hCoV-19^^Wales|Human|Originating lab|COVID-19 Genomics UK (COG-UK) Consortium|Moore|United Kingdom

>Spike|hCoV-19/USA/CA-CZB-11514/2020|2020-08-02|EPI\_ISL\_625582|Original|hCoV-19^^California|Human|NaN|Chan-Zuckerberg Biohub|Bhatt|USA

>Spike|hCoV-19/Spain/CE-ISCI-2016519/2020|2020-10-14|EPI\_ISL\_691698|Original|hCoV-19^^Ceuta|Human|Hospital Universitario de Ceuta|Instituto de Salud Carlos III|Caballero|Spain

>Spike|hCoV-19/USA/WA-UW-22256/2020|2020-08-03|EPI\_ISL\_570571|Original|hCoV-19^^Washington|Human|UW Virology Lab|UW Virology Lab|Roychoudhury|USA

>Spike|hCoV-19/England/204221496/2020|2020-00-00|EPI\_ISL\_593994|Original|hCoV-19^^England|Human|Respiratory Virus Unit|Respiratory Virus Unit|Platt|United Kingdom

>Spike|hCoV-19/England/NOTT-11CB0F/2020|2020-11-17|EPI\_ISL\_665622|Original|hCoV-19^^England|Human|Queens Medical Centre|COVID-19 Genomics UK (COG-UK) Consortium|Loose|United Kingdom

>Spike|hCoV-19/USA/VA-DCLS-1492/2020|2020-07-28|EPI\_ISL\_581566|Original|hCoV-19^^Virginia|Human|Virginia DCLS|Virginia DCLS|St. Jacques|USA

>Spike|hCoV-19/France/PAC-SC436/2020|2020-04-23|EPI\_ISL\_644704|Original|hCoV-19^^Provence-Alpes-Cote d'Azur|Human|Unit\00e9 des Virus \00c9mergents|CNR Virus des Infections Respiratoires - France SUD|Bal|France

>Spike|hCoV-19/England/ALDP-AA2FCD/2020|2020-10-22|EPI\_ISL\_630831|Original|hCoV-19^^England|Human|Lighthouse Lab in Alderley Park|Wellcome Sanger Institute for the COVID-19 Genomics UK (COG-UK) consortium|Davies|United Kingdom

>Spike|hCoV-19/Germany/HH-hpi-p2304/2020|2020-03-12|EPI\_ISL\_776436|Original|hCoV-19^^Hamburg|Human|University Medical Center Hamburg Eppendorf|Heinrich Pette Institute|Robitaille|Germany

>Spike|hCoV-19/Denmark/DCGC-19171/2020|2020-12-07|EPI\_ISL\_748367|Original|hCoV-19^^Syddanmark|Human|Department of Virus and Microbiological Special Diagnostics|Albertsen Lab|Michaelsen|Denmark

>Spike|hCoV-19/USA/TX-HMH-MCoV-13831/2020|2020-08-17|EPI\_ISL\_787124|Original|hCoV-19^^Texas|Human|Houston Methodist Hospital|Houston Methodist Hospital|Long|USA

>Spike|hCoV-19/Denmark/DCGC-14950/2020|2020-11-23|EPI\_ISL\_713541|Original|hCoV-19^^Hovedstaden|Human|Department of Virus and Microbiological Special Diagnostics|Albertsen Lab|Michaelsen|Denmark

>Spike|hCoV-19/Wales/PHWC-484729/2020|2020-10-17|EPI\_ISL\_628037|Original|hCoV-19^^Wales|Human|Wales Specialist Virology Centre Sequencing lab|COVID-19 Genomics UK (COG-UK) Consortium|Moore|United Kingdom

>Spike|hCoV-19/USA/WI-UW-1549/2020|2020-09-15|EPI\_ISL\_605427|Original|hCoV-19^^Wisconsin|Human|University of Wisconsin-Madison AIDS Vaccine Research Laboratories|University of Wisconsin-Madison AIDS Vaccine Research Laboratories|Baczenas|USA

>Spike|hCoV-19/England/ALDP-5A2D6E/2020|2020-06-14|EPI\_ISL\_558819|Original|hCoV-19^^England|Human|Lighthouse Lab in Alderley Park|Wellcome Sanger Institute for the COVID-19 Genomics UK (COG-UK) consortium|Davies|United Kingdom

>Spike|hCoV-19/South Africa/KRISP-0144/2020|2020-05-30|EPI\_ISL\_467494|Original|hCoV-19^^KwaZulu-Natal|Human|Molecular Diagnostics Services (MDS)|KRISP|de Oliveira|South Africa

>Spike|hCoV-19/USA/TX-HMH089/2020|2020-03-19|EPI\_ISL\_434795|Original|hCoV-19^^Texas|Human|Houston Methodist Hospital|Houston Methodist Hospital|Long|USA

>Spike|hCoV-19/England/QEUEH-9F9D0A/2020|2020-09-26|EPI\_ISL\_595759|Original|hCoV-19^^England|Human|Oxford Viromics|COVID-19 Genomics UK (COG-UK) Consortium|Golubchik|United Kingdom

>Spike|hCoV-19/England/MILK-ABC3F1/2020|2020-10-21|EPI\_ISL\_631158|Original|hCoV-19^^England|Human|Lighthouse Lab in Milton Keynes|Wellcome Sanger Institute for the COVID-19 Genomics UK (COG-UK) consortium|Davies|United Kingdom

>Spike|hCoV-19/England/SHEF-10D3D84/2020|2020-12-20|EPI\_ISL\_765192|Original|hCoV-19^^England|Human|Virology Department|COVID-19 Genomics UK (COG-UK) Consortium|de Silva|United Kingdom

>Spike|hCoV-19/USA/TX-HMH-786/2020|2020-04-08|EPI\_ISL\_545668|Original|hCoV-19^^Texas|Human|Houston Methodist Hospital|Houston Methodist Hospital|Long|USA

>Spike|hCoV-19/USA/MI-MDHHS-SC22599/2020|2020-11-09|EPI\_ISL\_737172|Original|hCoV-19^^Michigan|Human|Michigan Department of Health and Human Services|Michigan Department of Health and Human Services|Blankenship|USA

>Spike|hCoV-19/Japan/PG-7393/2020|2020-07-00|EPI\_ISL\_688495|Original|hCoV-19^^Japan|Human|Pathogen Genomics Center|Pathogen Genomics Center|Sekizuka|Japan

>Spike|hCoV-19/USA/MI-MDHHS-SC20993/2020|2020-06-05|EPI\_ISL\_507779|Original|hCoV-19^^Michigan|Human|Michigan Department of Health and Human Services|Michigan Department of Health and Human Services|Blankenship|USA

>Spike|hCoV-19/Denmark/DCGC-2496/2020|2020-08-10|EPI\_ISL\_617767|Original|hCoV-19^^Midtjylland|Human|Department of Virus and Microbiological Special Diagnostics|Albertsen lab|Michaelsen|Denmark

>Spike|hCoV-19/Australia/VIC4461/2020|2020-07-15|EPI\_ISL\_519757|Original|hCoV-19^^Victoria|Human|Microbiological Diagnostic Unit - Public Health Laboratory (MDU-PHL)|MDU-PHL|Schultz|Australia

>Spike|hCoV-19/Spain/VC-IBV-98006471/2020|2020-07-06|EPI\_ISL\_538671|Original|hCoV-19^^Comunitat Valenciana|Human|Servicio de Microbiolog\u00eda. Hospital General Universitario de Castell\u00f3n|SeqCOVID-SPAIN consortium/IBV(CSIC)|Comas|Spain

>Spike|hCoV-19/England/QEUEH-B6C650/2020|2020-11-11|EPI\_ISL\_661551|Original|hCoV-19^^England|Human|Lighthouse Lab in Glasgow|Wellcome Sanger Institute for the COVID-19 Genomics UK (COG-UK) Consortium|Davies|United Kingdom

>Spike|hCoV-19/England/MILK-95D8B8/2020|2020-06-21|EPI\_ISL\_556091|Original|hCoV-19^^England|Human|Lighthouse Lab in Milton Keynes|Wellcome Sanger Institute for the COVID-19 Genomics UK (COG-UK) consortium|Davies|United Kingdom

>Spike|hCoV-19/Portugal/PT0945/2020|2020-04-10|EPI\_ISL\_511495|Original|hCoV-19^^Portugal|Human|Instituto Nacional de Saude (INSA)|Instituto Nacional de Saude (INSA) and Instituto Gulbenkian de Ciencia (IGC)|Borges|Portugal

>Spike|hCoV-19/England/ALDP-B1A976/2020|2020-11-01|EPI\_ISL\_647536|Original|hCoV-19^^England|Human|Lighthouse Lab in Alderley Park|Wellcome Sanger Institute for the COVID-19 Genomics UK (COG-UK) Consortium|Davies|United Kingdom

>Spike|hCoV-19/England/CAMC-945BD8/2020|2020-07-15|EPI\_ISL\_556674|Original|hCoV-19^^England|Human|Lighthouse Lab in Cambridge|Wellcome Sanger Institute for the COVID-19 Genomics UK (COG-UK) consortium|Davies|United Kingdom

>Spike|hCoV-19/Scotland/EDB4823/2020|2020-04-03|EPI\_ISL\_453156|Original|hCoV-19^^Scotland|Human|Virology Department|COVID-19 Genomics UK (COG-UK) Consortium|Williams|United Kingdom

>Spike|hCoV-19/England/MILK-BAB400/2020|2020-11-18|EPI\_ISL\_783188|Original|hCoV-19^^England|Human|Lighthouse Lab in Milton Keynes|Wellcome Sanger Institute for the COVID-19 Genomics UK (COG-UK) Consortium|Davies|United Kingdom

>Spike|hCoV-19/USA/AZ-TG648716/2020|2020-04-13|EPI\_ISL\_695904|Original|hCoV-19^^Arizona|Human|Sonora Quest Laboratories|TGen North|French|USA

>Spike|hCoV-19/Australia/VIC11505/2020|2020-09-01|EPI\_ISL\_563401|Original|hCoV-19^^Victoria|Human|Microbiological Diagnostic Unit - Public Health Laboratory (MDU-PHL)|MDU-PHL|Schultz|Australia

>Spike|hCoV-19/England/CAMC-C9938F/2020|2020-12-18|EPI\_ISL\_777564|Original|hCoV-19^^England|Human|Lighthouse Lab in Cambridge|Wellcome Sanger Institute for the COVID-19 Genomics UK (COG-UK) Consortium|Davies|United Kingdom

>Spike|hCoV-19/USA/CO-CSU-D1862/2020|2020-04-02|EPI\_ISL\_527450|Original|hCoV-19^^Colorado|Human|Colorado State University - Ebel Lab|Colorado State University - Ebel Lab|Cline|USA

>Spike|hCoV-19/Norway/5620/2020|2020-11-10|EPI\_ISL\_708129|Original|hCoV-19^^Viken|Human|Furst Medical Laboratory|Norwegian Institute of Public Health|Kopperud Riis|Norway

>Spike|hCoV-19/England/QEUEH-C31477/2020|2020-12-10|EPI\_ISL\_730785|Original|hCoV-19^^England|Human|Lighthouse Lab in Glasgow|Wellcome Sanger Institute for the COVID-19 Genomics UK (COG-UK) Consortium|Davies|United Kingdom

>Spike|hCoV-19/England/20169013804/2020|2020-04-16|EPI\_ISL\_465193|Original|hCoV-19^^England|Human|Respiratory Virus Unit|Respiratory Virus Unit|Platt|United Kingdom

>Spike|hCoV-19/Australia/VIC10813/2020|2020-07-30|EPI\_ISL\_563104|Original|hCoV-19^^Victoria|Human|Microbiological Diagnostic Unit - Public Health Laboratory (MDU-PHL)|MDU-PHL|Schultz|Australia

>Spike|hCoV-19/USA/NY-NYCPHL-001425/2020|2020-11-20|EPI\_ISL\_683754|Original|hCoV-19^^New York|Human|DOHMH Morrisania|New York City Public Health Laboratory|Wang|USA

>Spike|hCoV-19/Spain/IB-IBV-99011591/2020|2020-12-10|EPI\_ISL\_779854|Original|hCoV-19^^Balear Islands|Human|Servicio de Microbiolog\u00eda|SeqCOVID-SPAIN consortium/IBV(CSIC)|Comas|Spain

>Spike|hCoV-19/Wales/PHWC-26462/2020|2020-03-28|EPI\_ISL\_422372|Original|hCoV-19^^Wales|Human|Wales Specialist Virology Centre|Public Health Wales Microbiology Cardiff|Moore|United Kingdom

>Spike|hCoV-19/Wales/PHWC-16ECCF/2020|2020-10-05|EPI\_ISL\_585849|Original|hCoV-19^^Wales|Human|Wales Specialist Virology Centre Sequencing lab|COVID-19 Genomics UK (COG-UK) Consortium|Moore|United Kingdom

>Spike|hCoV-19/England/ALDP-A6E6F5/2020|2020-10-15|EPI\_ISL\_607120|Original|hCoV-19^^England|Human|Lighthouse Lab in Alderley Park|Wellcome Sanger Institute for the COVID-19 Genomics UK (COG-UK) consortium|Davies|United Kingdom

>Spike|hCoV-19/Switzerland/BS-42220870/2020|2020-04-05|EPI\_ISL\_581858|Original|hCoV-19^^Basel-Stadt|Human|University Hospital Basel|University Hospital Basel|Roloff Handschin|Switzerland

>Spike|hCoV-19/England/ALDP-6D4351/2020|2020-07-02|EPI\_ISL\_556222|Original|hCoV-19^^England|Human|Lighthouse Lab in Alderley Park|Wellcome Sanger Institute for the COVID-19 Genomics UK (COG-UK) consortium|Davies|United Kingdom

>Spike|hCoV-19/England/MILK-BB1BC6/2020|2020-11-18|EPI\_ISL\_720091|Original|hCoV-19^^England|Human|Lighthouse Lab in Milton Keynes|Wellcome Sanger Institute for the COVID-19 Genomics UK (COG-UK) Consortium|Davies|United Kingdom

>Spike|hCoV-19/England/MILK-A797C7/2020|2020-10-15|EPI\_ISL\_606779|Original|hCoV-19^^England|Human|Lighthouse Lab in Milton Keynes|Wellcome Sanger Institute for the COVID-19 Genomics UK (COG-UK) consortium|Davies|United Kingdom

>Spike|hCoV-19/Wales/PHWC-165624/2020|2020-06-27|EPI\_ISL\_484690|Original|hCoV-19^^Wales|Human|Originating lab|COVID-19 Genomics UK (COG-UK) Consortium|Moore|United Kingdom

>Spike|hCoV-19/Netherlands/ZH-EMC-1187/2020|2020-12-20|EPI\_ISL\_763261|Original|hCoV-19^^Zuid Holland|Human|Dutch COVID-19 response team|Erasmus Medical Center|Oude Munnink|Netherlands

>Spike|hCoV-19/England/OXON-B07BF/2020|2020-04-20|EPI\_ISL\_478907|Original|hCoV-19^^England|Human|Oxford Viromics|COVID-19 Genomics UK (COG-UK) Consortium|Golubchik|United Kingdom

>Spike|hCoV-19/USA/UT-UPHL-03106/2020|2020-05-05|EPI\_ISL\_575255|Original|hCoV-19^^Utah|Human|Utah Public Health Laboratory|Utah Public Health Laboratory|Young|USA

>Spike|hCoV-19/Scotland/QEUIH-B0EFDD/2020|2020-11-02|EPI\_ISL\_649507|Original|hCoV-19^^Scotland|Human|Lighthouse Lab in Glasgow|Wellcome Sanger Institute for the COVID-19 Genomics UK (COG-UK) Consortium|Davies|United Kingdom

>Spike|hCoV-19/USA/MI-QDX-510/2020|2020-03-22|EPI\_ISL\_571244|Original|hCoV-19^^Michigan|Human|Quest Diagnostics|Quest Diagnostics|Kagan|USA

>Spike|hCoV-19/Austria/CeMM0165/2020|2020-03-06|EPI\_ISL\_438010|Original|hCoV-19^^Vienna|Human|Center for Virology|Bergthaler laboratory|Bergthaler|Austria

>Spike|hCoV-19/England/ALDP-9CCEC1/2020|2020-09-16|EPI\_ISL\_566114|Original|hCoV-19^^England|Human|Lighthouse Lab in Alderley Park|Wellcome Sanger Institute for the COVID-19 Genomics UK (COG-UK) consortium|Davies|United Kingdom

>Spike|hCoV-19/Denmark/DCGC-7012/2020|2020-10-12|EPI\_ISL\_619859|Original|hCoV-19^^Sjaelland|Human|Department of Virus and Microbiological Special Diagnostics|Albertsen lab|Michaelsen|Denmark

>Spike|hCoV-19/England/20109001704/2020|2020-03-04|EPI\_ISL\_464497|Original|hCoV-19^^England|Human|Respiratory Virus Unit|Respiratory Virus Unit|Platt|United Kingdom

>Spike|hCoV-19/USA/WA-S1909/2020|2020-05-28|EPI\_ISL\_496335|Original|hCoV-19^^Washington|Human|Washington State Department of Health|Seattle Flu Study|Lee|USA

>Spike|hCoV-19/USA/FL-BPHL-0979/2020|2020-07-29|EPI\_ISL\_517869|Original|hCoV-19^^Florida|Human|Florida Bureau of Public Health Laboratories|Florida Bureau of Public Health Laboratories|Blanton|USA

>Spike|hCoV-19/Ireland/D-NVRL-20G41361/2020|2020-03-26|EPI\_ISL\_605071|Original|hCoV-19^^Dublin|Human|National Virus Reference Laboratory|Irish Coronavirus Sequencing Consortium - Helixworks|Chalapati|Ireland

>Spike|hCoV-19/England/EXET-136DAF/2020|2020-04-07|EPI\_ISL\_471924|Original|hCoV-19^^England|Human|University of Exeter|COVID-19 Genomics UK (COG-UK) Consortium|Temperton|United Kingdom

>Spike|hCoV-19/Wales/PHWC-485E23/2020|2020-10-19|EPI\_ISL\_628284|Original|hCoV-19^^Wales|Human|Wales Specialist Virology Centre Sequencing lab|COVID-19 Genomics UK (COG-UK) Consortium|Moore|United Kingdom

>Spike|hCoV-19/Wales/PHWC-48A69F/2020|2020-11-04|EPI\_ISL\_652584|Original|hCoV-19^^Wales|Human|Wales Specialist Virology Centre Sequencing lab|COVID-19 Genomics UK (COG-UK) Consortium|Moore|United Kingdom

>Spike|hCoV-19/Canada/QC-LSPQ-L00243036/2020|2020-03-30|EPI\_ISL\_536345|Original|hCoV-19^^Quebec|Human|CSSS Haut-Richelieu/Rouville (H\u00f4pital)|Laboratoire de sant\u00e9 publique du Qu\u00e9bec|Moreira|Canada

>Spike|hCoV-19/USA/TX-HMH-MCoV-19789/2020|2020-11-29|EPI\_ISL\_784127|Original|hCoV-19^^Texas|Human|Houston Methodist Hospital|Houston Methodist Hospital|Long|USA

>Spike|hCoV-19/South Korea/KDCA0122/2020|2020-10-04|EPI\_ISL\_747357|Original|hCoV-19^^South Korea|Human|Division of Emerging Infectious Diseases|Division of Emerging Infectious Diseases|Park|South Korea

>Spike|hCoV-19/Denmark/DCGC-18273/2020|2020-12-14|EPI\_ISL\_749373|Original|hCoV-19^^Midtjylland|Human|Department of Virus and Microbiological Special Diagnostics|Albertsen Lab|Michaelsen|Denmark

>Spike|hCoV-19/USA/WI-WSLH-200483/2020|2020-05-19|EPI\_ISL\_578624|Original|hCoV-19^^Wisconsin|Human|Wisconsin State Laboratory of Hygiene Communicable Disease Division|Wisconsin State Laboratory of Hygiene Communicable Disease Division|Florek|USA

>Spike|hCoV-19/USA/TX-HMH-MCoV-18588/2020|2020-11-19|EPI\_ISL\_784936|Original|hCoV-19^^Texas|Human|Houston Methodist Hospital|Houston Methodist Hospital|Long|USA

>Spike|hCoV-19/Netherlands/UT-EMC-120/2020|2020-10-05|EPI\_ISL\_632645|Original|hCoV-19^^Utrecht|Human|Dutch COVID-19 response team|Erasmus Medical Center|Oude Munnink|Netherlands

>Spike|hCoV-19/USA/AZ-TG266871/2020|2020-03-10|EPI\_ISL\_694047|Original|hCoV-19^^Arizona|Human|TGen North|TGen North|French|USA

>Spike|hCoV-19/Wales/MILK-A47E09/2020|2020-10-05|EPI\_ISL\_609259|Original|hCoV-19^^Wales|Human|Lighthouse Lab in Milton Keynes|Wellcome Sanger Institute for the COVID-19 Genomics UK (COG-UK) consortium|Davies|United Kingdom

>Spike|hCoV-19/Japan/PG-8207/2020|2020-08-00|EPI\_ISL\_687306|Original|hCoV-19^^Japan|Human|Pathogen Genomics Center|Pathogen Genomics Center|Sekizuka|Japan

>Spike|hCoV-19/USA/MI-UM-10036661877/2020|2020-10-28|EPI\_ISL\_650096|Original|hCoV-19^^Michigan|Human|University of Michigan Clinical Microbiology Laboratory|Lauring Lab|Valesano|USA

>Spike|hCoV-19/Spain/IB-IBV-99011593/2020|2020-12-14|EPI\_ISL\_779912|Original|hCoV-19^^Balear Islands|Human|Servicio de Microbiolog\u00eda|SeqCOVID-SPAIN consortium|IBV (CSIC) |Comas|Spain

>Spike|hCoV-19/Austria/CeMM0101/2020|2020-03-20|EPI\_ISL\_437962|Original|hCoV-19^^Innsbruck|Human|Universitaetsklinik f\u00fcr Innere Medizin II Innsbruck|Bergthaler laboratory|Bergthaler|Austria

>Spike|hCoV-19/England/OXON-B2119/2020|2020-04-14|EPI\_ISL\_479117|Original|hCoV-19^^England|Human|Oxford Viromics|COVID-19 Genomics UK (COG-UK) Consortium|Golubchik|United Kingdom

>Spike|hCoV-19/USA/WA-UW-10403/2020|2020-06-05|EPI\_ISL\_570303|Original|hCoV-19^^Washington|Human|UW Virology Lab|UW Virology Lab|Roychoudhury|USA

>Spike|hCoV-19/England/MILK-B5987E/2020|2020-11-06|EPI\_ISL\_679878|Original|hCoV-19^^England|Human|Virology Department|COVID-19 Genomics UK (COG-UK) Consortium|de Silva|United Kingdom

>Spike|hCoV-19/USA/CA-CZB-12777/2020|2020-10-14|EPI\_ISL\_648440|Original|hCoV-19^^California|Human|Santa Clara County Public Health Laboratory|Chan-Zuckerberg Biohub|Bhatt|USA

>Spike|hCoV-19/USA/TX-DSHS-0401/2020|2020-06-01|EPI\_ISL\_542461|Original|hCoV-19^^Texas|Human|Texas Department of State Health Services|Texas Department of State Health Services|Rahman|USA

>Spike|hCoV-19/Australia/NSW953/2020|2020-09-09|EPI\_ISL\_545025|Original|hCoV-19^^New South Wales|Human|Sydney South West Pathology Service (SSWPS) - Liverpool Hospital - NSW Health Pathology|NSW Health Pathology - Institute of Clinical Pathology and Medical Research; Westmead Hospital; University of Sydney|Gall|Australia

>Spike|hCoV-19/Japan/PG-7160/2020|2020-09-00|EPI\_ISL\_688265|Original|hCoV-19^^Japan|Human|Pathogen Genomics Center|Pathogen Genomics Center|Sekizuka|Japan

>Spike|hCoV-19/Russia/OMS-ORINFI-5363S/2020|2020-06-05|EPI\_ISL\_569769|Original|hCoV-19^^Omsk|Human|Omsk Research Institute of Natural Focal Infections|WHO National Influenza Centre Russian Federation|Komissarov|Russia

>Spike|hCoV-19/Australia/VIC10443/2020|2020-09-04|EPI\_ISL\_562914|Original|hCoV-19^^Victoria|Human|Microbiological Diagnostic Unit - Public Health Laboratory (MDU-PHL) |MDU-PHL|Schultz|Australia

>Spike|hCoV-19/Spain/M-20224207/2020|2020-07-06|EPI\_ISL\_776871|Original|hCoV-19^^Madrid|Human|Hospital General Universitario Gregorio Mara\u00f1\u00f3n|Hospital General Universitario Gregorio Mara\u00f1\u00f3n|Garc\u00eda de Viedma|Spain



>Spike|hCoV-19/United Arab Emirates/0529/2020|2020-05-17|EPI\_ISL\_698691|Original|hCoV-19^^Abu Dhabi|Human|Group 42 (G42) Healthcare|G42 Healthcare|Ogrodzki|United Arab Emirates

>Spike|hCoV-19/England/QEUH-B3F7F9/2020|2020-11-08|EPI\_ISL\_658651|Original|hCoV-19^^England|Human|Lighthouse Lab in Glasgow|Wellcome Sanger Institute for the COVID-19 Genomics UK (COG-UK) Consortium|Davies|United Kingdom

>Spike|hCoV-19/South Korea/KDCA0413/2020|2020-11-04|EPI\_ISL\_760197|Original|hCoV-19^^South Korea|Human|Division of Emerging Infectious Diseases|Division of Emerging Infectious Diseases|Park|South Korea

>Spike|hCoV-19/England/CAMC-B788E2/2020|2020-11-11|EPI\_ISL\_783425|Original|hCoV-19^^England|Human|Lighthouse Lab in Cambridge|Wellcome Sanger Institute for the COVID-19 Genomics UK (COG-UK) Consortium|Davies|United Kingdom

>Spike|hCoV-19/Denmark/DCGC-18975/2020|2020-12-07|EPI\_ISL\_748677|Original|hCoV-19^^Hovedstaden|Human|Department of Virus and Microbiological Special Diagnostics|Albertsen Lab|Michaelsen|Denmark

>Spike|hCoV-19/Canada/ON-E78/2020|2020-05-29|EPI\_ISL\_593551|Original|hCoV-19^^Ontario|Human|Eastern Ontario Regional Laboratory Association|McMaster University|McArthur|Canada

>Spike|hCoV-19/Switzerland/BE-ETHZ-260026/2020|2020-08-22|EPI\_ISL\_539360|Original|hCoV-19^^Bern|Human|Viollier AG|Department of Biosystems Science and Engineering|Nadeau|Switzerland

>Spike|hCoV-19/England/ALDP-9DA121/2020|2020-09-18|EPI\_ISL\_576849|Original|hCoV-19^^England|Human|Oxford Viromics|COVID-19 Genomics UK (COG-UK) Consortium|Golubchik|United Kingdom

>Spike|hCoV-19/England/20129109504/2020|2020-03-12|EPI\_ISL\_424094|Original|hCoV-19^^England|Human|Respiratory Virus Unit|Respiratory Virus Unit|Platt|United Kingdom

>Spike|hCoV-19/England/CAMC-9910DE/2020|2020-08-25|EPI\_ISL\_551892|Original|hCoV-19^^England|Human|Lighthouse Lab in Cambridge|Wellcome Sanger Institute for the COVID-19 Genomics UK (COG-UK) consortium|Davies|United Kingdom

>Spike|hCoV-19/Canada/NS-NML-1230/2020|2020-04-04|EPI\_ISL\_579625|Original|hCoV-19^^Nova Scotia|Human|QEII Health Sciences Centre|National Microbiology Laboratory (NML)|Majer|Canada

>Spike|hCoV-19/India/TG-CCMB-AB578/2020|2020-08-16|EPI\_ISL\_539665|Original|hCoV-19^^Telangana|Human|CSIR-Centre for Cellular and Molecular Biology|CSIR-Centre for Cellular and Molecular Biology|Mukherjee|India

>Spike|hCoV-19/England/CAMB-79882/2020|2020-04-01|EPI\_ISL\_441809|Original|hCoV-19^^England|Human|Department of Pathology|Wellcome Sanger Institute for the COVID-19 Genomics UK (COG-UK) consortium|Amato|United Kingdom

>Spike|hCoV-19/England/MILK-99CCEE/2020|2020-08-30|EPI\_ISL\_549941|Original|hCoV-19^^England|Human|Lighthouse Lab in Milton Keynes|Wellcome Sanger Institute for the COVID-19 Genomics UK (COG-UK) consortium|Davies|United Kingdom

>Spike|hCoV-19/Denmark/DCGC-19330/2020|2020-12-07|EPI\_ISL\_748372|Original|hCoV-19^^Syddanmark|Human|Department of Virus and Microbiological Special Diagnostics|Albertsen Lab|Michaelsen|Denmark

>Spike|hCoV-19/Portugal/PT0879/2020|2020-03-28|EPI\_ISL\_511138|Original|hCoV-19^^Portugal|Human|Instituto Nacional de Saude (INSA)|Instituto Nacional de Saude (INSA)|Borges|Portugal

>Spike|hCoV-19/USA/LA-GBCL-26544557/2020|2020-04-18|EPI\_ISL\_485132|Original|hCoV-19^^Louisiana|Human|River Road Testing Lab|Ginkgo Bioworks Clinical Laboratory|Smith|USA

>Spike|hCoV-19/Bahrain/250182774/2020|2020-11-16|EPI\_ISL\_682316|Original|hCoV-19^^Bahrain|Human|Communicable Disease Laboratory|Communicable Disease Laboratory|Altaif|Bahrain

>Spike|hCoV-19/Russia/MOW-RII-MH2061S/2020|2020-09-25|EPI\_ISL\_602396|Original|hCoV-19^^Moscow|Human|HELIX LLC|WHO National Influenza Centre Russian Federation|Komissarov|Russia

>Spike|hCoV-19/USA/UT-UPHL-2009152/2020|2020-05-31|EPI\_ISL\_525142|Original|hCoV-19^^Utah|Human|Utah Public Health Laboratory|Utah Public Health Laboratory|Young|USA

>Spike|hCoV-19/England/MILK-A46981/2020|2020-10-06|EPI\_ISL\_598423|Original|hCoV-19^^England|Human|Lighthouse Lab in Milton Keynes|Wellcome Sanger Institute for the COVID-19 Genomics UK (COG-UK) consortium|Davies|United Kingdom

>Spike|hCoV-19/USA/MN-GMF-19171/2020|2020-09-08|EPI\_ISL\_547791|Original|hCoV-19^^Minnesota|Human|Gundersen Molecular Diagnostics Laboratory|Kabara Cancer Research Institute|Kenny|USA

>Spike|hCoV-19/England/MILK-C52A23/2020|2020-12-11|EPI\_ISL\_736286|Original|hCoV-19^^England|Human|Lighthouse Lab in Milton Keynes|Wellcome Sanger Institute for the COVID-19 Genomics UK (COG-UK) Consortium|Davies|United Kingdom

>Spike|hCoV-19/USA/TX-HMH-MCoV-8463/2020|2020-07-01|EPI\_ISL\_780575|Original|hCoV-19^^Texas|Human|Houston Methodist Hospital|Houston Methodist Hospital|Long|USA

>Spike|hCoV-19/England/MILK-9927F6/2020|2020-08-27|EPI\_ISL\_552028|Original|hCoV-19^^England|Human|Lighthouse Lab in Milton Keynes|Wellcome Sanger Institute for the COVID-19 Genomics UK (COG-UK) consortium|Davies|United Kingdom

>Spike|hCoV-19/Scotland/EDB8376/2020|2020-10-14|EPI\_ISL\_612187|Original|hCoV-19^^Scotland|Human|Virology Department|COVID-19 Genomics UK (COG-UK) Consortium|McHugh|United Kingdom

>Spike|hCoV-19/India/TG-CCMB-M175/2020|2020-06-06|EPI\_ISL\_495190|Original|hCoV-19^^Telangana|Human|CSIR-Centre for Cellular and Molecular Biology|CSIR-Centre for Cellular and Molecular Biology|Banu|India

>Spike|hCoV-19/USA/TX-HMH-4740/2020|2020-06-22|EPI\_ISL\_544297|Original|hCoV-19^^Texas|Human|Houston Methodist Hospital|Houston Methodist Hospital|Long|USA

>Spike|hCoV-19/USA/NM-UNM-00085/2020|2020-04-01|EPI\_ISL\_467632|Original|hCoV-19^^New Mexico|Human|New Mexico Department of Health Scientific Laboratory Division|Center for Global Health|Domman|USA

>Spike|hCoV-19/Scotland/QEUH-C33E95/2020|2020-12-11|EPI\_ISL\_757153|Original|hCoV-19^^Scotland|Human|Lighthouse Lab in Glasgow|Wellcome Sanger Institute for the COVID-19 Genomics UK (COG-UK) Consortium|Davies|United Kingdom

>Spike|hCoV-19/India/MH-ACTREC-606/2020|2020-09-09|EPI\_ISL\_700243|Original|hCoV-19^^Maharashtra|Human|Hematopathology Laboratory|Hematopathology Laboratory|Patkar|India

>Spike|hCoV-19/Japan/PG-8658/2020|2020-09-00|EPI\_ISL\_686254|Original|hCoV-19^^Japan|Human|Pathogen Genomics Center|Pathogen Genomics Center|Sekizuka|Japan

>Spike|hCoV-19/Scotland/QEUH-A9DF98/2020|2020-10-20|EPI\_ISL\_652671|Original|hCoV-19^^Scotland|Human|Queens Medical Centre|COVID-19 Genomics UK (COG-UK) Consortium|Loose|United Kingdom

>Spike|hCoV-19/USA/WI-UW-791/2020|2020-07-03|EPI\_ISL\_495495|Original|hCoV-19^^Wisconsin|Human|University of Wisconsin-Madison AIDS Vaccine Research Laboratories|University of Wisconsin-Madison AIDS Vaccine Research Laboratories|Baczenas|USA

>Spike|hCoV-19/England/MILK-9D4A77/2020|2020-09-19|EPI\_ISL\_601570|Original|hCoV-19^^England|Human|Lighthouse Lab in Milton Keynes|Wellcome Sanger Institute for the COVID-19 Genomics UK (COG-UK) consortium|Davies|United Kingdom

>Spike|hCoV-19/Australia/NSW799/2020|2020-08-06|EPI\_ISL\_526141|Original|hCoV-19^^New South Wales|Human|Pathology West - NSW Health Pathology|NSW Health Pathology - Institute of Clinical Pathology and Medical Research; Westmead Hospital; University of Sydney|Gall|Australia

>Spike|hCoV-19/Denmark/DCGC-12559/2020|2020-11-16|EPI\_ISL\_682740|Original|hCoV-19^^Hovedstaden|Human|Department of Virus and Microbiological Special Diagnostics|Albertsen Lab|Michaelsen|Denmark

>Spike|hCoV-19/England/ALDP-AA1B51/2020|2020-10-22|EPI\_ISL\_644098|Original|hCoV-19^^England|Human|Lighthouse Lab in Alderley Park|Wellcome Sanger Institute for the COVID-19 Genomics UK (COG-UK) Consortium|Davies|United Kingdom

>Spike|hCoV-19/Australia/VIC7725/2020|2020-08-05|EPI\_ISL\_564608|Original|hCoV-19^^Victoria|Human|Microbiological Diagnostic Unit - Public Health Laboratory (MDU-PHL) |MDU-PHL|Schultz|Australia

>Spike|hCoV-19/USA/AZ-TG396392/2020|2020-06-12|EPI\_ISL\_694843|Original|hCoV-19^^Arizona|Human|AZ SPHL|TGen North|French|USA

>Spike|hCoV-19/USA/TX-HMH-MCoV-15450/2020|2020-10-24|EPI\_ISL\_786934|Original|hCoV-19^^Texas|Human|Houston Methodist Hospital|Houston Methodist Hospital|Long|USA

>Spike|hCoV-19/USA/CA-CZB-14578/2020|2020-11-17|EPI\_ISL\_739453|Original|hCoV-19^^California|Human|Santa Clara County Public Health Laboratory|Chan-Zuckerberg Biohub|Kamm|USA

>Spike|hCoV-19/Denmark/DCGC-18180/2020|2020-12-14|EPI\_ISL\_749798|Original|hCoV-19^^Midtjylland|Human|Department of Virus and Microbiological Special Diagnostics|Albertsen Lab|Michaelsen|Denmark

>Spike|hCoV-19/Denmark/DCGC-6898/2020|2020-10-12|EPI\_ISL\_619743|Original|hCoV-19^^Hovedstaden|Human|Department of Virus and Microbiological Special Diagnostics|Albertsen lab|Michaelsen|Denmark

>Spike|hCoV-19/England/SHEF-CDA2F/2020|2020-04-01|EPI\_ISL\_457659|Original|hCoV-19^^England|Human|Virology Department|COVID-19 Genomics UK (COG-UK) Consortium|de Silva|United Kingdom

>Spike|hCoV-19/Vietnam/VNHN\_4864/2020|2020-04-10|EPI\_ISL\_455708|Original|hCoV-19^^Hanoi|Human|National Hospital of Tropical Diseases|Oxford University Clinical Research Unit|Nguyen|Vietnam

>Spike|hCoV-19/England/OXON-AD7D3/2020|2020-00-00|EPI\_ISL\_448596|Original|hCoV-19^^England|Human|Oxford Viromics|COVID-19 Genomics UK (COG-UK) Consortium|Golubchik|United Kingdom

>Spike|hCoV-19/England/QEUH-CABE2F/2020|2020-12-20|EPI\_ISL\_761078|Original|hCoV-19^^England|Human|Lighthouse Lab in Glasgow|Wellcome Sanger Institute for the COVID-19 Genomics UK (COG-UK) Consortium|Davies|United Kingdom

>Spike|hCoV-19/England/LCST-24D69E0/2020|2020-06-02|EPI\_ISL\_478318|Original|hCoV-19^^England|Human|University Hospitals Of Leicester NHS Trust and DeepSeq Nottingham|COVID-19 Genomics UK (COG-UK) Consortium|Loose|United Kingdom

>Spike|hCoV-19/Northern Ireland/QEUH-96CA92/2020|2020-08-21|EPI\_ISL\_530715|Original|hCoV-19^^Northern Ireland|Human|Lighthouse Lab in Glasgow|Wellcome Sanger Institute for the COVID-19 Genomics UK (COG-UK) consortium|Davies|United Kingdom

>Spike|hCoV-19/USA/AZ-TG494611/2020|2020-07-13|EPI\_ISL\_695248|Original|hCoV-19^^Arizona|Human|TGen North|TGen North|French|USA

>Spike|hCoV-19/Wales/PHWC-165AEC/2020|2020-04-14|EPI\_ISL\_490765|Original|hCoV-19^^Wales|Human|Wales Specialist Virology Centre Sequencing lab|COVID-19 Genomics UK (COG-UK) Consortium|Moore|United Kingdom

>Spike|hCoV-19/Belgium/regal-11301203/2020|2020-11-30|EPI\_ISL\_735238|Original|hCoV-19^^Assenede|Human|UZ Leuven|KU Leuven|Maes|Belgium

>Spike|hCoV-19/Iceland/119/2020|2020-03-17|EPI\_ISL\_417544|Original|hCoV-19^^Reykjavik|Human|deCODE genetics|deCODE genetics|J\u00f3nsson|Iceland

>Spike|hCoV-19/Northern Ireland/QEUH-95F995/2020|2020-08-06|EPI\_ISL\_532519|Original|hCoV-19^^Northern Ireland|Human|Lighthouse Lab in Glasgow|Wellcome Sanger Institute for the COVID-19 Genomics UK (COG-UK) consortium|Davies|United Kingdom

>Spike|hCoV-19/USA/MI-MDHHS-SC21154/2020|2020-03-24|EPI\_ISL\_507930|Original|hCoV-19^^Michigan|Human|Michigan Department of Health and Human Services|Michigan Department of Health and Human Services|Blankenship|USA

>Spike|hCoV-19/USA/CT-UW-3118/2020|2020-03-27|EPI\_ISL\_485936|Original|hCoV-19^^Connecticut|Human|UW Virology Lab|UW Virology Lab|Roychoudhury|USA

>Spike|hCoV-19/Canada/ON-PHL-20-02415/2020|2020-09-00|EPI\_ISL\_671606|Original|hCoV-19^^Ontario|Human|Public Health Ontario Laboratory|Public Health Ontario Laboratory|Guthrie|Canada

>Spike|hCoV-19/England/ALDP-95663D/2020|2020-06-08|EPI\_ISL\_553890|Original|hCoV-19^^England|Human|Lighthouse Lab in Alderley Park|Wellcome Sanger Institute for the COVID-19 Genomics UK (COG-UK) consortium|Davies|United Kingdom

>Spike|hCoV-19/USA/TX-HMH-MCoV-14650/2020|2020-10-10|EPI\_ISL\_787935|Original|hCoV-19^^Texas|Human|Houston Methodist Hospital|Houston Methodist Hospital|Long|USA

>Spike|hCoV-19/Australia/VIC12150/2020|2020-08-10|EPI\_ISL\_641147|Original|hCoV-19^^Victoria|Human|Microbiological Diagnostic Unit - Public Health Laboratory (MDU-PHL)|MDU-PHL|Schultz|Australia

>Spike|hCoV-19/England/MILK-B05914/2020|2020-10-24|EPI\_ISL\_652206|Original|hCoV-19^^England|Human|Queens Medical Centre|COVID-19 Genomics UK (COG-UK) Consortium|Loose|United Kingdom

>Spike|hCoV-19/USA/TX-HMH-MCoV-15265/2020|2020-10-21|EPI\_ISL\_786749|Original|hCoV-19^^Texas|Human|Houston Methodist Hospital|Houston Methodist Hospital|Long|USA

>Spike|hCoV-19/Canada/BC\_26693628/2020|2020-03-00|EPI\_ISL\_463254|Original|hCoV-19^^British Columbia|Human|BCCDC Public Health Laboratory|BCCDC Public Health Laboratory|Harrigan|Canada

>Spike|hCoV-19/England/ALDP-9DA3A3/2020|2020-09-18|EPI\_ISL\_576868|Original|hCoV-19^^England|Human|Oxford Viromics|COVID-19 Genomics UK (COG-UK) Consortium|Golubchik|United Kingdom

>Spike|hCoV-19/Denmark/DCGC-13632/2020|2020-11-30|EPI\_ISL\_712926|Original|hCoV-19^^Sjaelland|Human|Department of Virus and Microbiological Special Diagnostics|Albertsen Lab|Michaelsen|Denmark

>Spike|hCoV-19/Sweden/20-53538/2020|2020-10-02|EPI\_ISL\_766613|Original|hCoV-19^^Jonkoping|Human|Klinisk mikrobiologi|The Public Health Agency of Sweden|Svartstr\u00f6m|Sweden

>Spike|hCoV-19/England/QEUA-897A35/2020|2020-07-27|EPI\_ISL\_532736|Original|hCoV-19^^England|Human|Lighthouse Lab in Glasgow|Wellcome Sanger Institute for the COVID-19 Genomics UK (COG-UK) consortium|Davies|United Kingdom

>Spike|hCoV-19/USA/TX-HMH-1747/2020|2020-05-12|EPI\_ISL\_542812|Original|hCoV-19^^Texas|Human|Houston Methodist Hospital|Houston Methodist Hospital|Long|USA

>Spike|hCoV-19/Scotland/QEUA-9F849D/2020|2020-09-27|EPI\_ISL\_600851|Original|hCoV-19^^Scotland|Human|Lighthouse Lab in Glasgow|Wellcome Sanger Institute for the COVID-19 Genomics UK (COG-UK) consortium|Davies|United Kingdom

>Spike|hCoV-19/Wales/PHWC-49BEB1/2020|2020-12-06|EPI\_ISL\_742478|Original|hCoV-19^^Wales|Human|Wales Specialist Virology Centre Sequencing lab|COVID-19 Genomics UK (COG-UK) Consortium|Moore|United Kingdom

>Spike|hCoV-19/USA/UT-UPHL-201103917/2020|2020-04-05|EPI\_ISL\_623171|Original|hCoV-19^^Utah|Human|Utah Public Health Laboratory|Utah Public Health Laboratory|Young|USA

>Spike|hCoV-19/USA/TX-HMH-MCoV-18197/2020|2020-11-15|EPI\_ISL\_784545|Original|hCoV-19^^Texas|Human|Houston Methodist Hospital|Houston Methodist Hospital|Long|USA

>Spike|hCoV-19/England/ALDP-BB952A/2020|2020-11-20|EPI\_ISL\_702485|Original|hCoV-19^^England|Human|Lighthouse Lab in Alderley Park|Wellcome Sanger Institute for the COVID-19 Genomics UK (COG-UK) Consortium|Davies|United Kingdom

>Spike|hCoV-19/Wales/CAMC-9D6E1F/2020|2020-09-20|EPI\_ISL\_585621|Original|hCoV-19^^Wales|Human|Virology Department|COVID-19 Genomics UK (COG-UK) Consortium|de Silva|United Kingdom

>Spike|hCoV-19/England/20154001704/2020|2020-04-06|EPI\_ISL\_466244|Original|hCoV-19^^England|Human|Respiratory Virus Unit|Respiratory Virus Unit|Platt|United Kingdom

>Spike|hCoV-19/Wales/PHWC-16B5E5/2020|2020-09-19|EPI\_ISL\_573878|Original|hCoV-19^^Wales|Human|Wales Specialist Virology Centre Sequencing lab|COVID-19 Genomics UK (COG-UK) Consortium|Moore|United Kingdom

>Spike|hCoV-19/USA/UT-UPHL-2012728359/2020|2020-09-10|EPI\_ISL\_745664|Original|hCoV-19^^Utah|Human|Ginkgo Bioworks Clinical Laboratory|Utah Public Health Laboratory|Young|USA

>Spike|hCoV-19/Australia/VIC12762/2020|2020-07-26|EPI\_ISL\_592074|Original|hCoV-19^^Victoria|Human|Microbiological Diagnostic Unit - Public Health Laboratory (MDU-PHL)|MDU-PHL|Schultz|Australia

>Spike|hCoV-19/England/CAMB-82FAF/2020|2020-04-10|EPI\_ISL\_443373|Original|hCoV-19^^England|Human|Department of Pathology|Wellcome Sanger Institute for the COVID-19 Genomics UK (COG-UK) consortium|Amato|United Kingdom

>Spike|hCoV-19/England/QEUA-A4CEE6/2020|2020-10-05|EPI\_ISL\_596065|Original|hCoV-19^^England|Human|Quadram Institute Bioscience|COVID-19 Genomics UK (COG-UK) Consortium|Alikhan|United Kingdom

>Spike|hCoV-19/USA/MA-MASPHL-00832/2020|2020-10-08|EPI\_ISL\_692871|Original|hCoV-19^^Massachusetts|Human|Massachusetts State Public Health Laboratory|Massachusetts State Public Health Laboratory|Lang|USA

>Spike|hCoV-19/England/ALDP-B49158/2020|2020-11-07|EPI\_ISL\_649238|Original|hCoV-19^^England|Human|Lighthouse Lab in Alderley Park|Wellcome Sanger Institute for the COVID-19 Genomics UK (COG-UK) Consortium|Davies|United Kingdom

>Spike|hCoV-19/USA/WA-S2621/2020|2020-06-19|EPI\_ISL\_497253|Original|hCoV-19^^Washington|Human|Washington State Department of Health|Seattle Flu Study|Lee|USA

>Spike|hCoV-19/England/BRIS-12B36F/2020|2020-05-03|EPI\_ISL\_487547|Original|hCoV-19^^England|Human|PHE South West Regional Laboratory|Wellcome Sanger Institute for the COVID-19 Genomics UK (COG-UK) consortium|Davies|United Kingdom

>Spike|hCoV-19/Australia/WA117/2020|2020-04-07|EPI\_ISL\_596680|Original|hCoV-19^^Western Australia|Human|PathWest Laboratory Medicine WA|PathWest Laboratory Medicine WA Microbial Surveillance Unit|Sikazwe|Australia

>Spike|hCoV-19/England/ALDP-BB5333/2020|2020-11-20|EPI\_ISL\_702765|Original|hCoV-19^^England|Human|Lighthouse Lab in Alderley Park|Wellcome Sanger Institute for the COVID-19 Genomics UK (COG-UK) Consortium|Davies|United Kingdom

>Spike|hCoV-19/USA/TX-HMH-MCoV-15860/2020|2020-07-10|EPI\_ISL\_785544|Original|hCoV-19^^Texas|Human|Houston Methodist Hospital|Houston Methodist Hospital|Long|USA

>Spike|hCoV-19/Scotland/EDB3598/2020|2020-04-27|EPI\_ISL\_439296|Original|hCoV-19^^Scotland|Human|Virology Department|COVID-19 Genomics UK (COG-UK) Consortium|Williams|United Kingdom

>Spike|hCoV-19/Wales/PHWC-47E28B/2020|2020-09-26|EPI\_ISL\_595430|Original|hCoV-19^^Wales|Human|Originating lab|COVID-19 Genomics UK (COG-UK) Consortium|Moore|United Kingdom

>Spike|hCoV-19/Switzerland/BS-UHB-42193780/2020|2020-03-16|EPI\_ISL\_528151|Original|hCoV-19^^Basel-Stadt|Human|University Hospital Basel|University Hospital Basel|Roloff Handschin|Switzerland

>Spike|hCoV-19/Slovenia/5677/2020|2020-03-18|EPI\_ISL\_635220|Original|hCoV-19^^Slovenia|Human|Institute of Microbiology and Immunology|Institute of Microbiology and Immunology|Zakotnik|Slovenia

>Spike|hCoV-19/England/CAMC-B7A22E/2020|2020-11-12|EPI\_ISL\_741090|Original|hCoV-19^^England|Human|Oxford Viromics|COVID-19 Genomics UK (COG-UK) Consortium|Golubchik|United Kingdom

>Spike|hCoV-19/Belgium/ULG-10187/2020|2020-05-11|EPI\_ISL\_455975|Original|hCoV-19^^Li\u00e8ge|Human|Department of Clinical Microbiology|GIGA Medical Genomics|Durkin|Belgium

>Spike|hCoV-19/Denmark/DCGC-1745/2020|2020-03-09|EPI\_ISL\_619983|Original|hCoV-19^^Nordjylland|Human|Department of Virus and Microbiological Special Diagnostics|Albertsen lab|Michaelsen|Denmark

>Spike|hCoV-19/USA/TX-HMH-MCoV-8955/2020|2020-07-02|EPI\_ISL\_780855|Original|hCoV-19^^Texas|Human|Houston Methodist Hospital|Houston Methodist Hospital|Long|USA

>Spike|hCoV-19/England/MILK-C7822F/2020|2020-12-15|EPI\_ISL\_756899|Original|hCoV-19^^England|Human|Lighthouse Lab in Milton Keynes|Wellcome Sanger Institute for the COVID-19 Genomics UK (COG-UK) Consortium|Davies|United Kingdom

>Spike|hCoV-19/Australia/NSW1264/2020|2020-12-14|EPI\_ISL\_740895|Original|hCoV-19^^New South Wales|Human|Sydney South West Pathology Service (SSWPS) - Royal Prince Alfred Hospital - NSW Health Pathology|NSW Health Pathology - Institute of Clinical Pathology and Medical Research; Westmead Hospital; University of Sydney|Gall|Australia

>Spike|hCoV-19/USA/AZ-TG498743/2020|2020-07-14|EPI\_ISL\_695269|Original|hCoV-19^^Arizona|Human|TGen North|TGen North|French|USA

>Spike|hCoV-19/England/204290338/2020|2020-10-16|EPI\_ISL\_613611|Original|hCoV-19^^England|Human|Respiratory Virus Unit|Respiratory Virus Unit|Platt|United Kingdom

>Spike|hCoV-19/USA/WI-GMF-32244/2020|2020-11-08|EPI\_ISL\_661133|Original|hCoV-19^^Wisconsin|Human|Gundersen Molecular Diagnostics Laboratory|Kabara Cancer Research Institute|Kenny|USA

>Spike|hCoV-19/USA/WA-S2902/2020|2020-10-03|EPI\_ISL\_596433|Original|hCoV-19^^Washington|Human|Seattle Flu Study|Seattle Flu Study|Lee|USA

>Spike|hCoV-19/Wales/PHWC-4A6563/2020|2020-12-17|EPI\_ISL\_765048|Original|hCoV-19^^Wales|Human|Wales Specialist Virology Centre Sequencing lab|COVID-19 Genomics UK (COG-UK) Consortium|Moore|United Kingdom

>Spike|hCoV-19/England/ALDP-BBB42B/2020|2020-11-21|EPI\_ISL\_701766|Original|hCoV-19^^England|Human|Lighthouse Lab in Alderley Park|Wellcome Sanger Institute for the COVID-19 Genomics UK (COG-UK) Consortium|Davies|United Kingdom

>Spike|hCoV-19/Denmark/DCGC-2041/2020|2020-07-27|EPI\_ISL\_618266|Original|hCoV-19^^Syddanmark|Human|Department of Virus and Microbiological Special Diagnostics|Albertsen lab|Michaelsen|Denmark

>Spike|hCoV-19/Bangladesh/DNAS-isl-95/2020|2020-05-24|EPI\_ISL\_605912|Original|hCoV-19^^Bangladesh|Human|NGS Lab|NGS Lab|Rabbi|Bangladesh

>Spike|hCoV-19/England/QEUH-B0EA18/2020|2020-11-02|EPI\_ISL\_641943|Original|hCoV-19^^England|Human|Lighthouse Lab in Glasgow|Wellcome Sanger Institute for the COVID-19 Genomics UK (COG-UK) Consortium|Davies|United Kingdom

>Spike|hCoV-19/Gibraltar/204841755/2020|2020-00-00|EPI\_ISL\_671322|Original|hCoV-19^^Gibraltar|Human|Microbiology|Respiratory Virus Unit|Platt|Gibraltar

>Spike|hCoV-19/Wales/PHWC-2F2D8/2020|2020-04-06|EPI\_ISL\_446230|Original|hCoV-19^^Wales|Human|Wales Specialist Virology Centre|Public Health Wales Microbiology Cardiff|Moore|United Kingdom

>Spike|hCoV-19/Spain/EX-IBV-005007/2020|2020-03-13|EPI\_ISL\_510316|Original|hCoV-19^^Extremadura|Human|Hospital San Pedro de Alc\u00e9ntara (C\u00e9lceres)|SeqCOVID-SPAIN consortium/IBV (CSIC)|Comas|Spain

>Spike|hCoV-19/England/MILK-A6BFA2/2020|2020-10-09|EPI\_ISL\_609076|Original|hCoV-19^^England|Human|Lighthouse Lab in Milton Keynes|Wellcome Sanger Institute for the COVID-19 Genomics UK (COG-UK) consortium|Davies|United Kingdom

>Spike|hCoV-19/Canada/QC-LSPQ-L00214050/2020|2020-03-10|EPI\_ISL\_535724|Original|hCoV-19^^Quebec|Human|Centre de SSS La Pommeraie|Laboratoire de sant\u00e9 publique du Qu\u00e9bec|Moreira|Canada

>Spike|hCoV-19/USA/UT-UPHL-2008924/2020|2020-05-26|EPI\_ISL\_525030|Original|hCoV-19^^Utah|Human|Utah Public Health Laboratory|Utah Public Health Laboratory|Young|USA

>Spike|hCoV-19/England/CWAR-24FDBDE/2020|2020-05-03|EPI\_ISL\_584493|Original|hCoV-19^^England|Human|UHCW / University of Warwick|COVID-19 Genomics UK (COG-UK) Consortium|Stark|United Kingdom

>Spike|hCoV-19/Hong Kong/VM20032469/2020|2020-07-08|EPI\_ISL\_523827|Original|hCoV-19^^Hong Kong|Human|Queen Mary Hospital|Hong Kong Department of Health|Mak|China

>Spike|hCoV-19/USA/WA-S1304/2020|2020-05-14|EPI\_ISL\_495754|Original|hCoV-19^^Washington|Human|Washington State Department of Health|Seattle Flu Study|Lee|USA

>Spike|hCoV-19/USA/MN-MDH-2197/2020|2020-11-29|EPI\_ISL\_723148|Original|hCoV-19^^Minnesota|Human|Vault Health|Minnesota Department of Health|Lorentz|USA

>Spike|hCoV-19/Denmark/DCGC-10229/2020|2020-11-09|EPI\_ISL\_669846|Original|hCoV-19^^Nordjylland|Human|Department of Virus and Microbiological Special Diagnostics|Albertsen Lab|Michaelsen|Denmark

>Spike|hCoV-19/USA/AZ-TG403612/2020|2020-06-23|EPI\_ISL\_694862|Original|hCoV-19^^Arizona|Human|TGen North|TGen North|French|USA

>Spike|hCoV-19/England/QEUH-9A413F/2020|2020-09-01|EPI\_ISL\_540147|Original|hCoV-19^^England|Human|Lighthouse Lab in Glasgow|Wellcome Sanger Institute for the COVID-19 Genomics UK (COG-UK) consortium|Davies|United Kingdom

>Spike|hCoV-19/Luxembourg/LNS9060494/2020|2020-11-23|EPI\_ISL\_744839|Original|hCoV-19^^Luxembourg|Human|Laboratoire national de sant\u00e9|Laboratoire national de sant\u00e9|Wienecke-Baldacchino|Luxembourg

>Spike|hCoV-19/England/OXON-B2BB1/2020|2020-04-06|EPI\_ISL\_534798|Original|hCoV-19^^England|Human|Oxford Viromics|COVID-19 Genomics UK (COG-UK) Consortium|Golubchik|United Kingdom

>Spike|hCoV-19/England/QEUH-A0C556/2020|2020-10-01|EPI\_ISL\_584987|Original|hCoV-19^^England|Human|Quadram Institute Bioscience|COVID-19 Genomics UK (COG-UK) Consortium|Alikhan|United Kingdom

>Spike|hCoV-19/Netherlands/OV-RIVM-20509/2020|2020-11-16|EPI\_ISL\_728724|Original|hCoV-19^^Overijssel|Human|Dutch COVID-19 response team|National Institute for Public Health and the Environment (RIVM)|Meijer|Netherlands

>Spike|hCoV-19/USA/CA-SEARCH-5544/2020|2020-11-30|EPI\_ISL\_755285|Original|hCoV-19^^California|Human|San Diego County Public Health Laboratory|Andersen lab at Scripps Research|Gangavarapu|USA

>Spike|hCoV-19/England/SHEF-C8FBC/2020|2020-04-27|EPI\_ISL\_475415|Original|hCoV-19^^England|Human|Virology Department|COVID-19 Genomics UK (COG-UK) Consortium|de Silva|United Kingdom

>Spike|hCoV-19/USA/TX-DSHS-0803/2020|2020-06-02|EPI\_ISL\_590867|Original|hCoV-19^^Texas|Human|Texas Department of State Health Services|Texas Department of State Health Services|Rahman|USA

>Spike|hCoV-19/Australia/NSW1342/2020|2020-12-29|EPI\_ISL\_767908|Original|hCoV-19^^New South Wales|Human|Sydney South West Pathology Service (SSWPS) - Royal Prince Alfred Hospital - NSW Health Pathology|NSW Health Pathology - Institute of Clinical Pathology and Medical Research; Westmead Hospital; University of Sydney|Gall|Australia

>Spike|hCoV-19/USA/CA-QDX-2097/2020|2020-03-18|EPI\_ISL\_604407|Original|hCoV-19^^California|Human|Quest Diagnostics|Quest Diagnostics|Kagan|USA

>Spike|hCoV-19/Switzerland/ZH-ETHZ-420114/2020|2020-12-18|EPI\_ISL\_768261|Original|hCoV-19^^Zurich|Human|Viollier AG|Department of Biosystems Science and Engineering|Nadeau|Switzerland

>Spike|hCoV-19/England/MILK-B55872/2020|2020-11-05|EPI\_ISL\_657706|Original|hCoV-19^^England|Human|Lighthouse Lab in Milton Keynes|Wellcome Sanger Institute for the COVID-19 Genomics UK (COG-UK) Consortium|Davies|United Kingdom

>Spike|hCoV-19/England/LIVE-99A0E/2020|2020-04-13|EPI\_ISL\_439786|Original|hCoV-19^^England|Human|Liverpool Clinical Laboratories|COVID-19 Genomics UK (COG-UK) Consortium|Haldenby|United Kingdom

>Spike|hCoV-19/Scotland/QEUH-96D7E5/2020|2020-08-20|EPI\_ISL\_534583|Original|hCoV-19^^Scotland|Human|NHSGGC West of Scotland Specialist Virology Centre / MRC-University of Glasgow Centre for Virus Research|Wellcome Sanger Institute for the COVID-19 Genomics UK (COG-UK) consortium|Davies|United Kingdom

>Spike|hCoV-19/France/ARA-SC135/2020|2020-05-07|EPI\_ISL\_700399|Original|hCoV-19^^Auvergne-Rh\u00f4ne-Alpes|Human|Centre hospitalier M\u00e9tropole Savoie|CNR Virus des Infections Respiratoires - France SUD|Bal|France

>Spike|hCoV-19/USA/NC-CDC-2-3693565/2020|2020-11-10|EPI\_ISL\_747178|Original|hCoV-19^^North Carolina|Human|Respiratory Viruses Branch|Respiratory Viruses Branch|Queen|USA

>Spike|hCoV-19/USA/WI-GMF-19502/2020|2020-09-09|EPI\_ISL\_547817|Original|hCoV-19^^Wisconsin|Human|Gundersen Molecular Diagnostics Laboratory|Kabara Cancer Research Institute|Kenny|USA

>Spike|hCoV-19/Northern Ireland/NIRE-106F75/2020|2020-05-27|EPI\_ISL\_501040|Original|hCoV-19^^Northern Ireland|Human|Regional Virus Laboratory|Wellcome Sanger Institute for the COVID-19 Genomics UK (COG-UK) consortium|Davies|United Kingdom

>Spike|hCoV-19/Spain/AS-IBV-98006613/2020|2020-03-13|EPI\_ISL\_654656|Original|hCoV-19^^Asturias|Human|Servicio de Microbiolog\u00eda|SeqCOVID-SPAIN consortium|IBV (CSIC) |Comas|Spain

>Spike|hCoV-19/Scotland/CVR3346/2020|2020-05-06|EPI\_ISL\_456782|Original|hCoV-19^^Scotland|Human|West of Scotland Specialist Virology Centre|COVID-19 Genomics UK (COG-UK) Consortium|Robertson|United Kingdom

>Spike|hCoV-19/England/LOND-D8450/2020|2020-04-17|EPI\_ISL\_492753|Original|hCoV-19^^England|Human|University College London|Wellcome Sanger Institute for the COVID-19 Genomics UK (COG-UK) consortium|Davies|United Kingdom

>Spike|hCoV-19/Japan/PG-3456/2020|2020-07-00|EPI\_ISL\_691566|Original|hCoV-19^^Japan|Human|Pathogen Genomics Center|Pathogen Genomics Center|Sekizuka|Japan

>Spike|hCoV-19/USA/CA-CZB-12991/2020|2020-10-21|EPI\_ISL\_672069|Original|hCoV-19^^California|Human|Santa Clara County Public Health Laboratory|Chan-Zuckerberg Biohub|Bhatt|USA

>Spike|hCoV-19/Ireland/D-NVRL-20ILR10850/2020|2020-11-24|EPI\_ISL\_732446|Original|hCoV-19^^Dublin|Human|National Virus Reference Laboratory|National Virus Reference Laboratory|Gonzalez|Ireland

>Spike|hCoV-19/England/MILK-9A52D1/2020|2020-09-04|EPI\_ISL\_550210|Original|hCoV-19^^England|Human|Lighthouse Lab in Milton Keynes|Wellcome Sanger Institute for the COVID-19 Genomics UK (COG-UK) consortium|Davies|United Kingdom

>Spike|hCoV-19/USA/AZ-TG654361/2020|2020-04-13|EPI\_ISL\_695998|Original|hCoV-19^^Arizona|Human|Sonora Quest Laboratories|TGen North|French|USA

>Spike|hCoV-19/USA/TX-HMH-MCoV-13236/2020|2020-08-25|EPI\_ISL\_788386|Original|hCoV-19^^Texas|Human|Houston Methodist Hospital|Houston Methodist Hospital|Long|USA

>Spike|hCoV-19/Denmark/DCGC-11791/2020|2020-10-26|EPI\_ISL\_671139|Original|hCoV-19^^Nordjylland|Human|Department of Virus and Microbiological Special Diagnostics|Albertsen Lab|Michaelsen|Denmark

>Spike|hCoV-19/Wales/PHWC-31F90/2020|2020-04-14|EPI\_ISL\_446593|Original|hCoV-19^^Wales|Human|Wales Specialist Virology Centre|Public Health Wales Microbiology Cardiff|Moore|United Kingdom

>Spike|hCoV-19/USA/TX-HMH-5087/2020|2020-06-24|EPI\_ISL\_544515|Original|hCoV-19^^Texas|Human|Houston Methodist Hospital|Houston Methodist Hospital|Long|USA

>Spike|hCoV-19/England/ALDP-71C51A/2020|2020-07-02|EPI\_ISL\_557654|Original|hCoV-19^^England|Human|Lighthouse Lab in Alderley Park|Wellcome Sanger Institute for the COVID-19 Genomics UK (COG-UK) consortium|Davies|United Kingdom

>Spike|hCoV-19/USA/TX-HMH-MCoV-19702/2020|2020-11-20|EPI\_ISL\_784055|Original|hCoV-19^^Texas|Human|Houston Methodist Hospital|Houston Methodist Hospital|Long|USA

>Spike|hCoV-19/Wales/PHWC-4A33C6/2020|2020-12-14|EPI\_ISL\_744095|Original|hCoV-19^^Wales|Human|Wales Specialist Virology Centre Sequencing lab|COVID-19 Genomics UK (COG-UK) Consortium|Moore|United Kingdom

>Spike|hCoV-19/England/ALDP-A52366/2020|2020-10-07|EPI\_ISL\_598112|Original|hCoV-19^^England|Human|Lighthouse Lab in Alderley Park|Wellcome Sanger Institute for the COVID-19 Genomics UK (COG-UK) consortium|Davies|United Kingdom

>Spike|hCoV-19/USA/TX-HMH-8046/2020|2020-07-01|EPI\_ISL\_545815|Original|hCoV-19^^Texas|Human|Houston Methodist Hospital|Houston Methodist Hospital|Long|USA

>Spike|hCoV-19/USA/AZ-TG395945/2020|2020-06-08|EPI\_ISL\_694778|Original|hCoV-19^^Arizona|Human|AZ SPHL|TGen North|French|USA

>Spike|hCoV-19/Lithuania/MR-LUHS-Eilnr409/2020|2020-08-31|EPI\_ISL\_636881|Original|hCoV-19^^Kauno apskritis|Human|Lithuanian University of Health Sciences Hospital|Lithuanian University of Health Sciences|Zemaitis|Lithuania

>Spike|hCoV-19/Denmark/DCGC-19793/2020|2020-12-07|EPI\_ISL\_747593|Original|hCoV-19^^Hovedstaden|Human|Department of Virus and Microbiological Special Diagnostics|Albertsen Lab|Michaelsen|Denmark

>Spike|hCoV-19/England/QEUH-AF6953/2020|2020-10-30|EPI\_ISL\_662921|Original|hCoV-19^^England|Human|Lighthouse Lab in Glasgow|Wellcome Sanger Institute for the COVID-19 Genomics UK (COG-UK) Consortium|Davies|United Kingdom

>Spike|hCoV-19/England/BRIS-1236E6/2020|2020-04-06|EPI\_ISL\_442731|Original|hCoV-19^^England|Human|PHE South West Regional Laboratory|Wellcome Sanger Institute for the COVID-19 Genomics UK (COG-UK) consortium|Amato|United Kingdom

>Spike|hCoV-19/England/BRIS-122025/2020|2020-03-20|EPI\_ISL\_440038|Original|hCoV-19^^England|Human|PHE South West Regional Laboratory|Wellcome Sanger Institute for the COVID-19 Genomics UK (COG-UK) consortium|Amato|United Kingdom

>Spike|hCoV-19/England/BRIS-129826/2020|2020-03-31|EPI\_ISL\_458801|Original|hCoV-19^^England|Human|PHE South West Regional Laboratory|Wellcome Sanger Institute for the COVID-19 Genomics UK (COG-UK) consortium|Davies|United Kingdom

>Spike|hCoV-19/Denmark/DCGC-18535/2020|2020-12-07|EPI\_ISL\_750026|Original|hCoV-19^^Syddanmark|Human|Department of Virus and Microbiological Special Diagnostics|Albertsen Lab|Michaelsen|Denmark

>Spike|hCoV-19/England/MILK-846C02/2020|2020-07-16|EPI\_ISL\_557202|Original|hCoV-19^^England|Human|Lighthouse Lab in Milton Keynes|Wellcome Sanger Institute for the COVID-19 Genomics UK (COG-UK) consortium|Davies|United Kingdom

>Spike|hCoV-19/South Korea/KCDC2515/2020|2020-06-17|EPI\_ISL\_514918|Original|hCoV-19^^South Korea|Human|Division of Viral Diseases|Division of Viral Diseases|Kim|South Korea

>Spike|hCoV-19/USA/IL-UW-1621/2020|2020-09-28|EPI\_ISL\_681321|Original|hCoV-19^^Illinois|Human|Pathology and Laboratory Medicine|Pathology and Laboratory Medicine|Moreno|USA

>Spike|hCoV-19/Germany/BY-ChVir-W1173-5738/2020|2020-03-30|EPI\_ISL\_754037|Original|hCoV-19^^Bavaria|Human|Charit\u00e9 Universit\u00e4tsmedizin Berlin|Charit\u00e9 Universit\u00e4tsmedizin Berlin|Muehlemann|Germany

>Spike|hCoV-19/Spain/NC-IBV-001381/2020|2020-03-14|EPI\_ISL\_452520|Original|hCoV-19^^Navarra|Human|Cl\u00e9nica Universidad de Navarra. Servicio de Enfermedades Infecciosas y Microbiolog\u00eda cl\u00e9nica|SeqCOVID-SPAIN consortium/IBV (CSIC) |Comas|Spain

>Spike|hCoV-19/Hong Kong/VM20035537/2020|2020-07-11|EPI\_ISL\_523832|Original|hCoV-19^^Hong Kong|Human|Tuen Mun Hospital|Hong Kong Department of Health|Mak|China



>Spike|hCoV-19/Canada/ON-PHL-20-03603/2020|2020-11-00|EPI\_ISL\_775111|Original|hCoV-19^^Ontario|Human|Public Health Ontario Laboratory|Public Health Ontario Laboratory|Guthrie|Canada

>Spike|hCoV-19/England/CAMC-B35122/2020|2020-11-05|EPI\_ISL\_659737|Original|hCoV-19^^England|Human|Lighthouse Lab in Cambridge|Wellcome Sanger Institute for the COVID-19 Genomics UK (COG-UK) Consortium|Davies|United Kingdom

>Spike|hCoV-19/England/ALDP-BB9E5C/2020|2020-11-20|EPI\_ISL\_701773|Original|hCoV-19^^England|Human|Lighthouse Lab in Alderley Park|Wellcome Sanger Institute for the COVID-19 Genomics UK (COG-UK) Consortium|Davies|United Kingdom

>Spike|hCoV-19/England/PORT-2F6074/2020|2020-12-10|EPI\_ISL\_741733|Original|hCoV-19^^England|Human|Centre for Enzyme Innovation|COVID-19 Genomics UK (COG-UK) Consortium|Robson|United Kingdom

>Spike|hCoV-19/England/MILK-9F0F2B/2020|2020-09-25|EPI\_ISL\_589754|Original|hCoV-19^^England|Human|Lighthouse Lab in Milton Keynes|Wellcome Sanger Institute for the COVID-19 Genomics UK (COG-UK) consortium|Davies|United Kingdom

>Spike|hCoV-19/USA/VA-DCLS-1249/2020|2020-07-30|EPI\_ISL\_529941|Original|hCoV-19^^Virginia|Human|Virginia DCLS|Virginia DCLS|St. Jacques|USA

>Spike|hCoV-19/England/QEUH-96166C/2020|2020-08-04|EPI\_ISL\_537085|Original|hCoV-19^^England|Human|Lighthouse Lab in Glasgow|Wellcome Sanger Institute for the COVID-19 Genomics UK (COG-UK) consortium|Davies|United Kingdom

>Spike|hCoV-19/USA/MA-MASPHL-00123/2020|2020-04-03|EPI\_ISL\_791602|Original|hCoV-19^^Massachusetts|Human|Massachusetts State Public Health Laboratory|Infectious Disease Program|Park|USA

>Spike|hCoV-19/France/PAC-MEPHI-2153/2020|2020-09-30|EPI\_ISL\_644514|Original|hCoV-19^^Provence-Alpes-Cote-d\u2019Azur|Human|MEPHI|MEPHI|Levasseur|France

>Spike|hCoV-19/Brazil/RJ-1901/2020|2020-04-09|EPI\_ISL\_456089|Original|hCoV-19^^Rio de Janeiro|Human|Laboratory of Respiratory Viruses and Measles|Laboratory of Respiratory Viruses and Measles|Silva|Brazil

>Spike|hCoV-19/Denmark/DCGC-20827/2020|2020-12-21|EPI\_ISL\_758953|Original|hCoV-19^^Nordjylland|Human|Department of Virus and Microbiological Special Diagnostics|Albertsen Lab|Michaelsen|Denmark

>Spike|hCoV-19/USA/FL-BPHL-2188/2020|2020-08-22|EPI\_ISL\_653341|Original|hCoV-19^^Florida|Human|Florida Bureau of Public Health Laboratories|Florida Bureau of Public Health Laboratories|Blanton|USA

>Spike|hCoV-19/Netherlands/Utrecht\_45/2020|2020-04-14|EPI\_ISL\_461243|Original|hCoV-19^^Utrecht|Human|Dutch COVID-19 response team|Erasmus Medical Center|Oude Munnink|Netherlands

>Spike|hCoV-19/Canada/ON-PHL-20-00051/2020|2020-00-00|EPI\_ISL\_548728|Original|hCoV-19^^Ontario|Human|Public Health Ontario Laboratory|Public Health Ontario Laboratory|Guthrie|Canada

>Spike|hCoV-19/Wales/PHWC-47ECAB/2020|2020-09-24|EPI\_ISL\_595576|Original|hCoV-19^^Wales|Human|Originating lab|COVID-19 Genomics UK (COG-UK) Consortium|Moore|United Kingdom

>Spike|hCoV-19/England/NORT-293FF4/2020|2020-07-23|EPI\_ISL\_573334|Original|hCoV-19^^England|Human|Northumbria University / South Tees Hospitals NHS Foundation Trust / North Cumbria Integrated Care NHS Foundation Trust / North Tees and Hartlepool NHS Foundation Trust / Newcastle Hospitals NHS Foundation Trust|COVID-19 Genomics UK (COG-UK) Consortium|Bashton|United Kingdom

>Spike|hCoV-19/Australia/VIC5920/2020|2020-07-21|EPI\_ISL\_518699|Original|hCoV-19^^Victoria|Human|Microbiological Diagnostic Unit - Public Health Laboratory (MDU-PHL)|MDU-PHL|Schultz|Australia

>Spike|hCoV-19/USA/CA-ALSR-1682/2020|2020-03-25|EPI\_ISL\_494740|Original|hCoV-19^^California|Human|San Diego County Public Health Laboratory|Andersen lab at Scripps Research|Gangavarapu|USA

>Spike|hCoV-19/Netherlands/FL-EMC-45/2020|2020-12-11|EPI\_ISL\_722459|Original|hCoV-19^^Flevoland|Human|Dutch COVID-19 response team|Erasmus Medical Center|Oude Munnink|Netherlands

>Spike|hCoV-19/France/PAC-IHU-0145/2020|2020-03-21|EPI\_ISL\_569334|Original|hCoV-19^^Provence-Alpes-C\u00f4te-d\u2019Azur|Human|MEPHI|MEPHI|Levasseur|France

>Spike|hCoV-19/England/ALDP-B5B557/2020|2020-11-08|EPI\_ISL\_655466|Original|hCoV-19^^England|Human|Lighthouse Lab in Alderley Park|Wellcome Sanger Institute for the COVID-19 Genomics UK (COG-UK) Consortium|Davies|United Kingdom

>Spike|hCoV-19/England/NORT-1B71224/2020|2020-11-14|EPI\_ISL\_703540|Original|hCoV-19^^England|Human|Northumbria University / South Tees Hospitals NHS Foundation Trust / North Cumbria Integrated Care NHS Foundation Trust / North Tees and Hartlepool NHS Foundation Trust / Newcastle Hospitals NHS Foundation Trust|COVID-19 Genomics UK (COG-UK) Consortium|Bashton|United Kingdom

>Spike|hCoV-19/Switzerland/BE-UNIBE-202-6410/2020|2020-03-27|EPI\_ISL\_574840|Original|hCoV-19^^Bern|Human|Institute for Infectious Diseases|Institute for Infectious Diseases|Koch|Switzerland

>Spike|hCoV-19/USA/WA-UW-13081/2020|2020-06-30|EPI\_ISL\_570851|Original|hCoV-19^^Washington|Human|UW Virology Lab|UW Virology Lab|Roychoudhury|USA

>Spike|hCoV-19/Denmark/DCGC-16917/2020|2020-12-14|EPI\_ISL\_750641|Original|hCoV-19^^Nordjylland|Human|Department of Virus and Microbiological Special Diagnostics|Albertsen Lab|Michaelsen|Denmark

>Spike|hCoV-19/Saudi Arabia/KAUST-MAKKAH118/2020|2020-03-24|EPI\_ISL\_678076|Original|hCoV-19^^Makkah|Human|Pathogen Genomics Lab King Abdullah University of Science and Technology(KAUST)|Pathogen Genomics Lab King Abdullah University of Science and Technology(KAUST)|Mohamed Ghazzali|Saudi Arabia

>Spike|hCoV-19/Denmark/DCGC-11383/2020|2020-11-02|EPI\_ISL\_670551|Original|hCoV-19^^Hovedstaden|Human|Department of Virus and Microbiological Special Diagnostics|Albertsen Lab|Michaelsen|Denmark

>Spike|hCoV-19/England/PORT-2D33DE/2020|2020-04-11|EPI\_ISL\_529671|Original|hCoV-19^^England|Human|Centre for Enzyme Innovation|COVID-19 Genomics UK (COG-UK) Consortium|Robson|United Kingdom

>Spike|hCoV-19/Japan/PG-3604/2020|2020-07-00|EPI\_ISL\_691858|Original|hCoV-19^^Japan|Human|Pathogen Genomics Center|Pathogen Genomics Center|Sekizuka|Japan

>Spike|hCoV-19/Scotland/CVR5673/2020|2020-11-09|EPI\_ISL\_651898|Original|hCoV-19^^Scotland|Human|West of Scotland Specialist Virology Centre|COVID-19 Genomics UK (COG-UK) Consortium|Robertson|United Kingdom

>Spike|hCoV-19/England/NORW-E7324/2020|2020-04-08|EPI\_ISL\_449024|Original|hCoV-19^^England|Human|Quadram Institute Bioscience|COVID-19 Genomics UK (COG-UK) Consortium|Alikhan|United Kingdom

>Spike|hCoV-19/Wales/PHWC-48F0D8/2020|2020-11-06|EPI\_ISL\_681043|Original|hCoV-19^^Wales|Human|Wales Specialist Virology Centre Sequencing lab|COVID-19 Genomics UK (COG-UK) Consortium|Moore|United Kingdom

>Spike|hCoV-19/England/MILK-99E3BA/2020|2020-08-31|EPI\_ISL\_550524|Original|hCoV-19^^England|Human|Lighthouse Lab in Milton Keynes|Wellcome Sanger Institute for the COVID-19 Genomics UK (COG-UK) consortium|Davies|United Kingdom

>Spike|hCoV-19/England/ALDP-9CD1C7/2020|2020-09-16|EPI\_ISL\_566257|Original|hCoV-19^^England|Human|Lighthouse Lab in Alderley Park|Wellcome Sanger Institute for the COVID-19 Genomics UK (COG-UK) consortium|Davies|United Kingdom

>Spike|hCoV-19/USA/TX-HMH-MCoV-18133/2020|2020-11-17|EPI\_ISL\_784481|Original|hCoV-19^^Texas|Human|Houston Methodist Hospital|Houston Methodist Hospital|Long|USA

>Spike|hCoV-19/Germany/HH-hpi-p2015/2020|2020-03-21|EPI\_ISL\_776323|Original|hCoV-19^^Hamburg|Human|University Medical Center Hamburg Eppendorf|Heinrich Pette Institute|Robitaille|Germany

>Spike|hCoV-19/England/LEED-2A9395/2020|2020-04-07|EPI\_ISL\_539165|Original|hCoV-19^^England|Human|Leeds Teaching Hospitals NHS Trust and Public Health England|Wellcome Sanger Institute for the COVID-19 Genomics UK (COG-UK) consortium|Davies|United Kingdom

>Spike|hCoV-19/USA/FL-BPHL-0654/2020|2020-04-07|EPI\_ISL\_508858|Original|hCoV-19^^Florida|Human|Florida Bureau of Public Health Laboratories|Florida Bureau of Public Health Laboratories|Blanton|USA

>Spike|hCoV-19/Netherlands/NA\_615/2020|2020-03-16|EPI\_ISL\_460778|Original|hCoV-19^^Netherlands|Human|Dutch COVID-19 response team|Erasmus Medical Center|Oude Munnink|Netherlands

>Spike|hCoV-19/Wales/PHWC-33CC4/2020|2020-04-18|EPI\_ISL\_446810|Original|hCoV-19^^Wales|Human|Wales Specialist Virology Centre|Public Health Wales Microbiology Cardiff|Moore|United Kingdom

>Spike|hCoV-19/England/SHEF-C15B1/2020|2020-03-20|EPI\_ISL\_432725|Original|hCoV-19^^England|Human|Virology Department|COVID-19 Genomics UK (COG-UK) Consortium|de Silva|United Kingdom

>Spike|hCoV-19/England/SHEF-10CDCDB/2020|2020-12-17|EPI\_ISL\_742004|Original|hCoV-19^^England|Human|Virology Department|COVID-19 Genomics UK (COG-UK) Consortium|de Silva|United Kingdom

>Spike|hCoV-19/England/LOND-1260E4B/2020|2020-04-04|EPI\_ISL\_524643|Original|hCoV-19^^England|Human|North West London Pathology|Wellcome Sanger Institute for the COVID-19 Genomics UK (COG-UK) consortium|Davies|United Kingdom

>Spike|hCoV-19/Denmark/DCGC-1508/2020|2020-06-15|EPI\_ISL\_618111|Original|hCoV-19^^Hovedstaden|Human|Department of Virus and Microbiological Special Diagnostics|Albertsen lab|Michaelsen|Denmark

>Spike|hCoV-19/India/GJ-GBRC-424a/2020|2020-07-14|EPI\_ISL\_586555|Original|hCoV-19^^Gujarat|Human|CCC, Veraval|Gujarat Biotechnology Research Centre|Joshi|India

>Spike|hCoV-19/Canada/QC\_AQ1/2020|2020-04-02|EPI\_ISL\_463927|Original|hCoV-19^^Quebec|Human|Laboratoire de microbiologie|Smith Laboratory|Smith|Canada

>Spike|hCoV-19/USA/CA-IGI-0602/2020|2020-08-01|EPI\_ISL\_677842|Original|hCoV-19^^California|Human|Innovative Genomics Institute|Innovative Genomics Institute|Wyman|USA

>Spike|hCoV-19/Spain/AR-IBV-98008166/2020|2020-10-14|EPI\_ISL\_654467|Original|hCoV-19^^Aragon|Human|Servicio de Microbiolog\u00eda|SeqCOVID-SPAIN consortium|IBV (CSIC)|Comas|Spain

>Spike|hCoV-19/USA/TX-HMH-504/2020|2020-04-01|EPI\_ISL\_544479|Original|hCoV-19^^Texas|Human|Houston Methodist Hospital|Houston Methodist Hospital|Long|USA

>Spike|hCoV-19/England/CAMB-7AF31/2020|2020-04-10|EPI\_ISL\_433896|Original|hCoV-19^^England|Human|Department of Pathology|COVID-19 Genomics UK (COG-UK) Consortium|Meredith|United Kingdom

>Spike|hCoV-19/USA/TX-HMH-MCoV-11263/2020|2020-09-03|EPI\_ISL\_789753|Original|hCoV-19^^Texas|Human|Houston Methodist Hospital|Houston Methodist Hospital|Long|USA

>Spike|hCoV-19/England/QEUEH-96F8A4/2020|2020-08-15|EPI\_ISL\_530443|Original|hCoV-19^^England|Human|Lighthouse Lab in Glasgow|Wellcome Sanger Institute for the COVID-19 Genomics UK (COG-UK) consortium|Davies|United Kingdom

>Spike|hCoV-19/England/MILK-9F29C1/2020|2020-09-25|EPI\_ISL\_589133|Original|hCoV-19^^England|Human|Lighthouse Lab in Milton Keynes|Wellcome Sanger Institute for the COVID-19 Genomics UK (COG-UK) consortium|Davies|United Kingdom

>Spike|hCoV-19/Switzerland/BL-ETHZ-410181/2020|2020-12-12|EPI\_ISL\_737667|Original|hCoV-19^^Basel-Landschaft|Human|Viollier AG|Department of Biosystems Science and Engineering|Nadeau|Switzerland

>Spike|hCoV-19/England/CAMC-B087EA/2020|2020-10-29|EPI\_ISL\_643838|Original|hCoV-19^^England|Human|Lighthouse Lab in Cambridge|Wellcome Sanger Institute for the COVID-19 Genomics UK (COG-UK) Consortium|Davies|United Kingdom

>Spike|hCoV-19/Scotland/EDB8724/2020|2020-10-25|EPI\_ISL\_650796|Original|hCoV-19^^Scotland|Human|Virology Department|COVID-19 Genomics UK (COG-UK) Consortium|McHugh|United Kingdom

>Spike|hCoV-19/Scotland/EDB3879/2020|2020-04-30|EPI\_ISL\_439352|Original|hCoV-19^^Scotland|Human|Virology Department|COVID-19 Genomics UK (COG-UK) Consortium|Williams|United Kingdom

>Spike|hCoV-19/Norway/CS-06/2020|2020-04-27|EPI\_ISL\_665255|Original|hCoV-19^^Viken|Human|Dept. of Microbiology and Infection Control|Dept. of Microbiology and Infection Control|Hesselberg L\u00f8vestad|Norway

>Spike|hCoV-19/USA/CA-CZB-9651/2020|2020-04-27|EPI\_ISL\_672105|Original|hCoV-19^^California|Human|The Ashley Laboratory|Chan-Zuckerberg Biohub|Bhatt|USA

>Spike|hCoV-19/England/CAMC-B98363/2020|2020-11-15|EPI\_ISL\_675117|Original|hCoV-19^^England|Human|Lighthouse Lab in Cambridge|Wellcome Sanger Institute for the COVID-19 Genomics UK (COG-UK) Consortium|Davies|United Kingdom

>Spike|hCoV-19/USA/CA-CZB-3899/2020|2020-07-24|EPI\_ISL\_548519|Original|hCoV-19^^California|Human|County of San Luis Obispo Public Health Laboratory|Chan-Zuckerberg Biohub|Bhatt|USA

>Spike|hCoV-19/Germany/NW-HHU-217/2020|2020-04-22|EPI\_ISL\_626216|Original|hCoV-19^^North Rhine-Westphalia|Human|Institute for Virology|Center of Medical Microbiology|Wienemann|Germany

>Spike|hCoV-19/England/MILK-A47DA2/2020|2020-10-05|EPI\_ISL\_598428|Original|hCoV-19^^England|Human|Lighthouse Lab in Milton Keynes|Wellcome Sanger Institute for the COVID-19 Genomics UK (COG-UK) consortium|Davies|United Kingdom

>Spike|hCoV-19/England/CAMC-B0C85C/2020|2020-10-31|EPI\_ISL\_643361|Original|hCoV-19^^England|Human|Lighthouse Lab in Cambridge|Wellcome Sanger Institute for the COVID-19 Genomics UK (COG-UK) Consortium|Davies|United Kingdom

>Spike|hCoV-19/USA/CA-ALSR-0722-SAN/2020|2020-05-04|EPI\_ISL\_483324|Original|hCoV-19^^California|Human|UC San Diego Center for Advanced Laboratory Medicine|Andersen lab at Scripps Research|Gangavarapu|USA

>Spike|hCoV-19/Wales/MILK-9E186E/2020|2020-09-19|EPI\_ISL\_577411|Original|hCoV-19^^Wales|Human|Oxford Viromics|COVID-19 Genomics UK (COG-UK) Consortium|Golubchik|United Kingdom

>Spike|hCoV-19/England/ALDP-8FD87F/2020|2020-06-24|EPI\_ISL\_551476|Original|hCoV-19^^England|Human|Lighthouse Lab in Alderley Park|Wellcome Sanger Institute for the COVID-19 Genomics UK (COG-UK) consortium|Davies|United Kingdom

>Spike|hCoV-19/USA/UT-UPHL-2012362745/2020|2020-10-26|EPI\_ISL\_745513|Original|hCoV-19^^Utah|Human|Ginkgo Bioworks Clinical Laboratory|Utah Public Health Laboratory|Young|USA

>Spike|hCoV-19/England/204742484/2020|2020-11-17|EPI\_ISL\_683544|Original|hCoV-19^^England|Human|Respiratory Virus Unit|COVID-19 Genomics UK (COG-UK) Consortium|Platt|United Kingdom

>Spike|hCoV-19/England/NORT-2961EC/2020|2020-05-19|EPI\_ISL\_484265|Original|hCoV-19^^England|Human|Northumbria University / South Tees Hospitals NHS Foundation Trust / North Cumbria Integrated Care NHS Foundation Trust / North Tees and Hartlepool NHS Foundation Trust / Newcastle Hospitals NHS Foundation Trust|COVID-19 Genomics UK (COG-UK) Consortium|Bashton|United Kingdom

>Spike|hCoV-19/USA/CA-CZB-10873/2020|2020-08-06|EPI\_ISL\_583113|Original|hCoV-19^^California|Human|Humboldt County Public Health Laboratory|Chan-Zuckerberg Biohub|Bhatt|USA

>Spike|hCoV-19/USA/WA-S66/2020|2020-03-06|EPI\_ISL\_417119|Original|hCoV-19^^Washington|Human|Washington State Department of Health|Seattle Flu Study|Bedford|USA

>Spike|hCoV-19/England/LIVE-A17B1/2020|2020-06-19|EPI\_ISL\_490338|Original|hCoV-19^^England|Human|Liverpool Clinical Laboratories|COVID-19 Genomics UK (COG-UK) Consortium|Haldenby|United Kingdom

>Spike|hCoV-19/USA/WI-GMF-19599/2020|2020-09-10|EPI\_ISL\_547828|Original|hCoV-19^^Wisconsin|Human|Gundersen Molecular Diagnostics Laboratory|Kabara Cancer Research Institute|Kenny|USA

>Spike|hCoV-19/Bangladesh/DNAS\_DRICM\_isl\_S-02/2020|2020-06-28|EPI\_ISL\_774996|Original|hCoV-19^^Dhaka|Human|Designated Reference Institute for Chemical Measurements (DRICM)|DNA SOLUTION LTD.|Rabbi|Bangladesh

>Spike|hCoV-19/Denmark/DCGC-17016/2020|2020-12-14|EPI\_ISL\_750712|Original|hCoV-19^^Midtjylland|Human|Department of Virus and Microbiological Special Diagnostics|Albertsen Lab|Michaelsen|Denmark

>Spike|hCoV-19/USA/MN-MDH-1938/2020|2020-09-23|EPI\_ISL\_613488|Original|hCoV-19^^Minnesota|Human|Public Health Laboratory - Infectious Disease Lab|Minnesota Department of Health|Lorentz|USA

>Spike|hCoV-19/SaudiArabia/KAUST-JEDDAH490/2020|2020-04-08|EPI\_ISL\_512934|Original|hCoV-19^^Jeddah|Human|Pathogen Genomics Lab King Abdullah University of Science and Technology(KAUST)|Pathogen Genomics Lab King Abdullah University of Science and Technology(KAUST)|Mohamed Ghazzali|Saudi Arabia

>Spike|hCoV-19/India/MH-ACTREC-397/2020|2020-07-29|EPI\_ISL\_700046|Original|hCoV-19^^Maharashtra|Human|Hematopathology Laboratory|Hematopathology Laboratory|Patkar|India

>Spike|hCoV-19/England/ALDP-A2D610/2020|2020-10-05|EPI\_ISL\_586854|Original|hCoV-19^^England|Human|Lighthouse Lab in Alderley Park|Wellcome Sanger Institute for the COVID-19 Genomics UK (COG-UK) consortium|Davies|United Kingdom

>Spike|hCoV-19/England/MILK-9E042F/2020|2020-09-20|EPI\_ISL\_601270|Original|hCoV-19^^England|Human|Lighthouse Lab in Milton Keynes|Wellcome Sanger Institute for the COVID-19 Genomics UK (COG-UK) consortium|Davies|United Kingdom

>Spike|hCoV-19/England/MILK-BAC26F/2020|2020-11-18|EPI\_ISL\_783276|Original|hCoV-19^^England|Human|Lighthouse Lab in Milton Keynes|Wellcome Sanger Institute for the COVID-19 Genomics UK (COG-UK) Consortium|Davies|United Kingdom

>Spike|hCoV-19/USA/TX-DSHS-0070/2020|2020-05-09|EPI\_ISL\_522355|Original|hCoV-19^^Texas|Human|Texas Department of State Health Services|Texas Department of State Health Services|Rahman|USA

>Spike|hCoV-19/USA/MA-MGH-00617/2020|2020-03-28|EPI\_ISL\_460393|Original|hCoV-19^^Massachusetts|Human|Massachusetts General Hospital|Infectious Disease Program|Lemieux|USA

>Spike|hCoV-19/Serbia/KV52-12-05/2020|2020-05-11|EPI\_ISL\_514426|Original|hCoV-19^^Serbia|Human|Laboratory Diagnostic|Laboratory Diagnostic|Submitter|Serbia

>Spike|hCoV-19/Scotland/EDB1622/2020|2020-04-13|EPI\_ISL\_433092|Original|hCoV-19^^Scotland|Human|Virology Department|COVID-19 Genomics UK (COG-UK) Consortium|Williams|United Kingdom

>Spike|hCoV-19/Wales/MILK-9D4637/2020|2020-09-18|EPI\_ISL\_601775|Original|hCoV-19^^Wales|Human|Lighthouse Lab in Milton Keynes|Wellcome Sanger Institute for the COVID-19 Genomics UK (COG-UK) consortium|Davies|United Kingdom

>Spike|hCoV-19/England/CAMB-7BFF4/2020|2020-04-13|EPI\_ISL\_433978|Original|hCoV-19^^England|Human|Department of Pathology|COVID-19 Genomics UK (COG-UK) Consortium|Meredith|United Kingdom

>Spike|hCoV-19/India/MH-NIV-187756/2020|2020-08-31|EPI\_ISL\_541721|Original|hCoV-19^^Maharashtra|Human|National Institute of Virology|National Institute of Virology|Potdar|India

>Spike|hCoV-19/Australia/VIC13867/2020|2020-08-24|EPI\_ISL\_563858|Original|hCoV-19^^Victoria|Human|Microbiological Diagnostic Unit - Public Health Laboratory (MDU-PHL)|MDU-PHL|Schultz|Australia

>Spike|hCoV-19/Australia/VIC816/2020|2020-04-03|EPI\_ISL\_427089|Original|hCoV-19^^Victoria|Human|Victorian Infectious Diseases Reference Laboratory (VIDRL)|Microbiological Diagnostic Unit Public Health Laboratory and Victorian Infectious Diseases Reference Laboratory|Schultz|Australia

>Spike|hCoV-19/USA/TX-HMH-1222/2020|2020-04-16|EPI\_ISL\_542591|Original|hCoV-19^^Texas|Human|Houston Methodist Hospital|Houston Methodist Hospital|Long|USA

>Spike|hCoV-19/England/NORT-2929BB/2020|2020-05-22|EPI\_ISL\_472275|Original|hCoV-19^^England|Human|Northumbria University / South Tees Hospitals NHS Foundation Trust / North Cumbria Integrated Care NHS Foundation Trust / North Tees and Hartlepool NHS Foundation Trust / Newcastle Hospitals NHS Foundation Trust|COVID-19 Genomics UK (COG-UK) Consortium|Bashton|United Kingdom

>Spike|hCoV-19/England/MILK-87C1C8/2020|2020-07-18|EPI\_ISL\_557228|Original|hCoV-19^^England|Human|Lighthouse Lab in Milton Keynes|Wellcome Sanger Institute for the COVID-19 Genomics UK (COG-UK) consortium|Davies|United Kingdom

>Spike|hCoV-19/England/MILK-A6A4C2/2020|2020-10-09|EPI\_ISL\_627509|Original|hCoV-19^^England|Human|Virology Department|COVID-19 Genomics UK (COG-UK) Consortium|de Silva|United Kingdom

>Spike|hCoV-19/England/CAMB-743D1/2020|2020-03-20|EPI\_ISL\_425285|Original|hCoV-19^^England|Human|Department of Pathology|COVID-19 Genomics UK (COG-UK) Consortium|Meredith|United Kingdom

>Spike|hCoV-19/Spain/AR-IBV-2387/2020|2020-03-17|EPI\_ISL\_468840|Original|hCoV-19^^Aragon|Human|Servicio de Microbiolog\u00eda|SeqCOVID-SPAIN consortium|IBV (CSIC)|Comas|Spain

>Spike|hCoV-19/England/NORT-1B79A24/2020|2020-11-27|EPI\_ISL\_741444|Original|hCoV-19^^England|Human|Northumbria University / South Tees Hospitals NHS Foundation Trust / North Cumbria Integrated Care NHS Foundation Trust / North Tees and Hartlepool NHS Foundation Trust / Newcastle Hospitals NHS Foundation Trust|COVID-19 Genomics UK (COG-UK) Consortium|Bashton|United Kingdom

>Spike|hCoV-19/England/ALDP-B5C2E6/2020|2020-11-10|EPI\_ISL\_655821|Original|hCoV-19^^England|Human|Lighthouse Lab in Alderley Park|Wellcome Sanger Institute for the COVID-19 Genomics UK (COG-UK) Consortium|Davies|United Kingdom

>Spike|hCoV-19/England/MILK-642D32/2020|2020-07-04|EPI\_ISL\_556294|Original|hCoV-19^^England|Human|Lighthouse Lab in Milton Keynes|Wellcome Sanger Institute for the COVID-19 Genomics UK (COG-UK) consortium|Davies|United Kingdom

>Spike|hCoV-19/Denmark/DCGC-18020/2020|2020-12-14|EPI\_ISL\_749163|Original|hCoV-19^^Hovedstaden|Human|Department of Virus and Microbiological Special Diagnostics|Albertsen Lab|Michaelsen|Denmark

>Spike|hCoV-19/Uruguay/UY-NYUMC852/2020|2020-03-17|EPI\_ISL\_457948|Original|hCoV-19^^Montevideo|Human|Laboratorio de Biología Molecular Asociaci\u00f3n Espa\u00f1ola Primera en Salud|Departments of Pathology and Medicine|Maurano|Uruguay

>Spike|hCoV-19/Australia/VIC15038/2020|2020-07-29|EPI\_ISL\_593119|Original|hCoV-19^^Victoria|Human|Microbiological Diagnostic Unit - Public Health Laboratory (MDU-PHL)|MDU-PHL|Schultz|Australia

>Spike|hCoV-19/England/MILK-A6C16F/2020|2020-10-08|EPI\_ISL\_609049|Original|hCoV-19^^England|Human|Lighthouse Lab in Milton Keynes|Wellcome Sanger Institute for the COVID-19 Genomics UK (COG-UK) consortium|Davies|United Kingdom

>Spike|hCoV-19/USA/TX-HMH-2183/2020|2020-05-20|EPI\_ISL\_545168|Original|hCoV-19^^Texas|Human|Houston Methodist Hospital|Houston Methodist Hospital|Long|USA

>Spike|hCoV-19/Japan/PG-6730/2020|2020-08-00|EPI\_ISL\_687841|Original|hCoV-19^^Japan|Human|Pathogen Genomics Center|Pathogen Genomics Center|Sekizuka|Japan

>Spike|hCoV-19/India/UT-AR64/2020|2020-06-09|EPI\_ISL\_511922|Original|hCoV-19^^Uttarakhand|Human|All india institute of Medical Sciences Rishikesh|National Institute of Biomedical Genomics -\u00a0DBT's PAN-INDIA 1000 SARS--CoV-2 RNA Genome Sequencing Consortium|Maitra|India

>Spike|hCoV-19/England/20128033202/2020|2020-03-18|EPI\_ISL\_420470|Original|hCoV-19^^England|Human|Respiratory Virus Unit|Respiratory Virus Unit|Platt|United Kingdom

>Spike|hCoV-19/Scotland/CVR3733/2020|2020-05-09|EPI\_ISL\_473771|Original|hCoV-19^^Scotland|Human|West of Scotland Specialist Virology Centre|COVID-19 Genomics UK (COG-UK) Consortium|Robertson|United Kingdom

>Spike|hCoV-19/Wales/ALDP-BE8E81/2020|2020-12-03|EPI\_ISL\_710614|Original|hCoV-19^^Wales|Human|Lighthouse Lab in Alderley Park|Wellcome Sanger Institute for the COVID-19 Genomics UK (COG-UK) Consortium|Davies|United Kingdom

>Spike|hCoV-19/England/QEUEH-BA13C1/2020|2020-11-18|EPI\_ISL\_672847|Original|hCoV-19^^England|Human|Lighthouse Lab in Glasgow|Wellcome Sanger Institute for the COVID-19 Genomics UK (COG-UK) Consortium|Davies|United Kingdom

>Spike|hCoV-19/Wales/PHWC-292FC/2020|2020-04-03|EPI\_ISL\_445507|Original|hCoV-19^^Wales|Human|Wales Specialist Virology Centre|Public Health Wales Microbiology Cardiff|Moore|United Kingdom

>Spike|hCoV-19/Hangzhou/HZCDC0090L/2020|2020-01-21|EPI\_ISL\_421229|Original|hCoV-19^^Hangzhou|Human|Hangzhou Center for Diseases Control and Prevention|Hangzhou Center for Diseases Control and Prevention|Li|China

>Spike|hCoV-19/France/PAC-IHU-0122/2020|2020-03-24|EPI\_ISL\_569321|Original|hCoV-19^^Provence-Alpes-C\u00f4te-d\u2019Azur|Human|MEPHI|MEPHI|Levasseur|France

>Spike|hCoV-19/USA/TX-HMH-MCoV-11633/2020|2020-09-08|EPI\_ISL\_790071|Original|hCoV-19^^Texas|Human|Houston Methodist Hospital|Houston Methodist Hospital|Long|USA

>Spike|hCoV-19/Netherlands/NA\_411/2020|2020-03-21|EPI\_ISL\_455213|Original|hCoV-19^^Netherlands|Human|Dutch COVID-19 response team|Erasmus Medical Center|Oude Munnink|Netherlands

>Spike|hCoV-19/Poland/PL\_P47/2020|2020-04-17|EPI\_ISL\_492072|Original|hCoV-19^^Mazowieckie|Human|1. ViroGenetics - BSL3 Laboratory of Virology|1. ViroGenetics - BSL3 Laboratory of Virology|Pyrz|Poland

>Spike|hCoV-19/Denmark/DCGC-22291/2020|2020-12-14|EPI\_ISL\_758093|Original|hCoV-19^^Hovedstaden|Human|Department of Virus and Microbiological Special Diagnostics|Albertsen Lab|Michaelsen|Denmark

>Spike|hCoV-19/Thailand/Bangkok-CONI-0231/2020|2020-03-27|EPI\_ISL\_512872|Original|hCoV-19^^Bangkok|Human|Ramathibodi Hospital|COVID-19 Network Investigations (CONI) Alliance|Batty|Thailand

>Spike|hCoV-19/USA/UN-CDC-7419/2020|2020-04-20|EPI\_ISL\_514065|Original|hCoV-19^USA|Human|Navy and Marine Corps Public Health Center|Pathogen Discovery|Queen|USA

>Spike|hCoV-19/USA/CA-ALSR-3273/2020|2020-09-16|EPI\_ISL\_635946|Original|hCoV-19^California|Human|San Diego County Public Health Laboratory|Andersen lab at Scripps Research|Gangavarapu|USA

>Spike|hCoV-19/India/OR-ILSCV19144/2020|2020-05-14|EPI\_ISL\_463065|Original|hCoV-19^Odisha|Human|Institute of Life Sciences|Immunogenomics lab|Raghav|India

>Spike|hCoV-19/England/MILK-9D4AC2/2020|2020-09-19|EPI\_ISL\_601633|Original|hCoV-19^England|Human|Lighthouse Lab in Milton Keynes|Wellcome Sanger Institute for the COVID-19 Genomics UK (COG-UK) consortium|Davies|United Kingdom

>Spike|hCoV-19/England/ALDP-A50C03/2020|2020-10-07|EPI\_ISL\_597750|Original|hCoV-19^England|Human|Lighthouse Lab in Alderley Park|Wellcome Sanger Institute for the COVID-19 Genomics UK (COG-UK) consortium|Davies|United Kingdom

>Spike|hCoV-19/England/OXON-AD6B8/2020|2020-00-00|EPI\_ISL\_448588|Original|hCoV-19^England|Human|Oxford Viromics|COVID-19 Genomics UK (COG-UK) Consortium|Golubchik|United Kingdom

>Spike|hCoV-19/Wales/PHWC-31525/2020|2020-04-12|EPI\_ISL\_446457|Original|hCoV-19^Wales|Human|Wales Specialist Virology Centre|Public Health Wales Microbiology Cardiff|Moore|United Kingdom

>Spike|hCoV-19/England/CAMB-1AB6B9/2020|2020-04-21|EPI\_ISL\_470324|Original|hCoV-19^England|Human|Department of Pathology|Wellcome Sanger Institute for the COVID-19 Genomics UK (COG-UK) consortium|Davies|United Kingdom

>Spike|hCoV-19/USA/SC-DHEC-0533/2020|2020-06-04|EPI\_ISL\_529081|Original|hCoV-19^South Carolina|Human|Microbiology Division|Microbiology Division|Flores,H.|USA

>Spike|hCoV-19/England/CAMC-B353C2/2020|2020-11-05|EPI\_ISL\_659513|Original|hCoV-19^England|Human|Lighthouse Lab in Cambridge|Wellcome Sanger Institute for the COVID-19 Genomics UK (COG-UK) Consortium|Davies|United Kingdom

>Spike|hCoV-19/England/QEUEH-B124F5/2020|2020-11-02|EPI\_ISL\_642670|Original|hCoV-19^England|Human|Lighthouse Lab in Glasgow|Wellcome Sanger Institute for the COVID-19 Genomics UK (COG-UK) Consortium|Davies|United Kingdom

>Spike|hCoV-19/England/NOTT-10FDEB/2020|2020-04-09|EPI\_ISL\_441445|Original|hCoV-19^England|Human|Queens Medical Centre|COVID-19 Genomics UK (COG-UK) Consortium|Loose|United Kingdom

>Spike|hCoV-19/England/ALDP-AA37B5/2020|2020-10-22|EPI\_ISL\_624958|Original|hCoV-19^England|Human|Lighthouse Lab in Alderley Park|Wellcome Sanger Institute for the COVID-19 Genomics UK (COG-UK) consortium|Davies|United Kingdom

>Spike|hCoV-19/Scotland/GCVR-1710CD/2020|2020-03-27|EPI\_ISL\_459596|Original|hCoV-19^Scotland|Human|NHSGGC West of Scotland Specialist Virology Centre / MRC-University of Glasgow Centre for Virus Research|Wellcome Sanger Institute for the COVID-19 Genomics UK (COG-UK) consortium|Davies|United Kingdom

>Spike|hCoV-19/England/MILK-A46DC1/2020|2020-10-06|EPI\_ISL\_598265|Original|hCoV-19^England|Human|Lighthouse Lab in Milton Keynes|Wellcome Sanger Institute for the COVID-19 Genomics UK (COG-UK) consortium|Davies|United Kingdom

>Spike|hCoV-19/Germany/BE-ChVir-W1416-4346/2020|2020-06-22|EPI\_ISL\_753958|Original|hCoV-19^Berlin|Human|Charit\u00e9 Universit\u00e4tsmedizin Berlin|Charit\u00e9 Universit\u00e4tsmedizin Berlin|Muehlemann|Germany

>Spike|hCoV-19/Northern Ireland/NIRE-233169/2020|2020-09-26|EPI\_ISL\_680259|Original|hCoV-19^Northern Ireland|Human|Regional Virus Laboratory|COVID-19 Genomics UK (COG-UK) Consortium|Fairley|United Kingdom

>Spike|hCoV-19/USA/TX-HMH-MCoV-9903/2020|2020-07-06|EPI\_ISL\_780333|Original|hCoV-19^Texas|Human|Houston Methodist Hospital|Houston Methodist Hospital|Long|USA

>Spike|hCoV-19/England/PORT-2D1886/2020|2020-04-11|EPI\_ISL\_484428|Original|hCoV-19^England|Human|Centre for Enzyme Innovation|COVID-19 Genomics UK (COG-UK) Consortium|Robson|United Kingdom

>Spike|hCoV-19/England/OXON-B4D40/2020|2020-04-01|EPI\_ISL\_535010|Original|hCoV-19^England|Human|Oxford Viromics|COVID-19 Genomics UK (COG-UK) Consortium|Golubchik|United Kingdom

>Spike|hCoV-19/USA/TX-HMH-1878/2020|2020-05-09|EPI\_ISL\_542890|Original|hCoV-19^Texas|Human|Houston Methodist Hospital|Houston Methodist Hospital|Long|USA

>Spike|hCoV-19/England/MILK-BAF958/2020|2020-11-17|EPI\_ISL\_783263|Original|hCoV-19^^England|Human|Lighthouse Lab in Milton Keynes|Wellcome Sanger Institute for the COVID-19 Genomics UK (COG-UK) Consortium|Davies|United Kingdom

>Spike|hCoV-19/Japan/PG-7021/2020|2020-08-00|EPI\_ISL\_688126|Original|hCoV-19^^Japan|Human|Pathogen Genomics Center|Pathogen Genomics Center|Sekizuka|Japan

>Spike|hCoV-19/England/QEUA-B3FCEB/2020|2020-11-08|EPI\_ISL\_658512|Original|hCoV-19^^England|Human|Lighthouse Lab in Glasgow|Wellcome Sanger Institute for the COVID-19 Genomics UK (COG-UK) Consortium|Davies|United Kingdom

>Spike|hCoV-19/England/QEUA-C3287A/2020|2020-12-10|EPI\_ISL\_782487|Original|hCoV-19^^England|Human|Lighthouse Lab in Glasgow|Wellcome Sanger Institute for the COVID-19 Genomics UK (COG-UK) Consortium|Davies|United Kingdom

>Spike|hCoV-19/Belgium/reg-09231005/2020|2020-09-23|EPI\_ISL\_735028|Original|hCoV-19^^Steenokkerzeel|Human|UZ Leuven|KU Leuven|Maes|Belgium

>Spike|hCoV-19/England/MILK-BB066C/2020|2020-11-17|EPI\_ISL\_720294|Original|hCoV-19^^England|Human|Lighthouse Lab in Milton Keynes|Wellcome Sanger Institute for the COVID-19 Genomics UK (COG-UK) Consortium|Davies|United Kingdom

>Spike|hCoV-19/Turkey/IST-GLAB-168/2020|2020-05-03|EPI\_ISL\_480261|Original|hCoV-19^^Istanbul|Human|Genomic Laboratory (GLAB) (Conjoint lab of Health Directorate of Istanbul and Istanbul Technical University)|Genomic Laboratory (GLAB)|Karacan|Turkey

>Spike|hCoV-19/England/QEUA-A0B6AF/2020|2020-10-03|EPI\_ISL\_599481|Original|hCoV-19^^England|Human|Lighthouse Lab in Glasgow|Wellcome Sanger Institute for the COVID-19 Genomics UK (COG-UK) consortium|Davies|United Kingdom

>Spike|hCoV-19/England/ALDP-94E832/2020|2020-06-17|EPI\_ISL\_555472|Original|hCoV-19^^England|Human|Lighthouse Lab in Alderley Park|Wellcome Sanger Institute for the COVID-19 Genomics UK (COG-UK) consortium|Davies|United Kingdom

>Spike|hCoV-19/England/QEUA-A5E379/2020|2020-10-12|EPI\_ISL\_597509|Original|hCoV-19^^England|Human|Lighthouse Lab in Glasgow|Wellcome Sanger Institute for the COVID-19 Genomics UK (COG-UK) consortium|Davies|United Kingdom

>Spike|hCoV-19/USA/NY-NYUMC130/2020|2020-04-01|EPI\_ISL\_424937|Original|hCoV-19^^New York|Human|NYU Langone Health|Departments of Pathology and Medicine|Maurano|USA

>Spike|hCoV-19/USA/AZ-TG381250/2020|2020-06-15|EPI\_ISL\_694656|Original|hCoV-19^^Arizona|Human|TGen North|TGen North|French|USA

>Spike|hCoV-19/England/QEUA-96398F/2020|2020-08-11|EPI\_ISL\_536840|Original|hCoV-19^^England|Human|Lighthouse Lab in Glasgow|Wellcome Sanger Institute for the COVID-19 Genomics UK (COG-UK) consortium|Davies|United Kingdom

>Spike|hCoV-19/USA/NY-PV08435/2020|2020-03-18|EPI\_ISL\_421390|Original|hCoV-19^^New York|Human|MSHS Clinical Microbiology Laboratories|MSHS Pathogen Surveillance Program|van Bakel|USA

>Spike|hCoV-19/England/SHEF-C27E7/2020|2020-06-12|EPI\_ISL\_479203|Original|hCoV-19^^England|Human|Virology Department|COVID-19 Genomics UK (COG-UK) Consortium|de Silva|United Kingdom

>Spike|hCoV-19/USA/PA\_2887/2020|2020-03-08|EPI\_ISL\_426434|Original|hCoV-19^^Pennsylvania|Human|PA Department of Health|Pathogen Discovery|Queen|USA

>Spike|hCoV-19/USA/WI-WSLH-200360/2020|2020-04-21|EPI\_ISL\_578530|Original|hCoV-19^^Wisconsin|Human|Wisconsin State Laboratory of Hygiene Communicable Disease Division|Wisconsin State Laboratory of Hygiene Communicable Disease Division|Florek|USA

>Spike|hCoV-19/Wuhan/0126-C47/2020|2020-01-26|EPI\_ISL\_493177|Original|hCoV-19^^Hubei|Human|National Virus Resource Center|Computational Virology Group|Liu|China

>Spike|hCoV-19/England/CAMB-73D2F/2020|2020-04-01|EPI\_ISL\_433688|Original|hCoV-19^^England|Human|Department of Pathology|COVID-19 Genomics UK (COG-UK) Consortium|Meredith|United Kingdom

>Spike|hCoV-19/England/ALDP-A6F90A/2020|2020-10-15|EPI\_ISL\_607092|Original|hCoV-19^^England|Human|Lighthouse Lab in Alderley Park|Wellcome Sanger Institute for the COVID-19 Genomics UK (COG-UK) consortium|Davies|United Kingdom

>Spike|hCoV-19/Spain/MD-IBV-99009668/2020|2020-10-22|EPI\_ISL\_654393|Original|hCoV-19^^Madrid|Human|Hospital General Universitario Gregorio Marañón|SeqCOVID-SPAIN consortium/IBV (CSIC)|Comas|Spain



>Spike|hCoV-19/Japan/PG-7187/2020|2020-07-00|EPI\_ISL\_688291|Original|hCoV-19^^Japan|Human|Saitama Prefectural Institute of Public Health|Pathogen Genomics Center|Sekizuka|Japan

>Spike|hCoV-19/USA/WA-S692/2020|2020-04-08|EPI\_ISL\_449862|Original|hCoV-19^^Washington|Human|Washington State Department of Health|Seattle Flu Study|Bedford|USA

>Spike|hCoV-19/France/PAC-MEPHI-2061/2020|2020-09-21|EPI\_ISL\_644487|Original|hCoV-19^^Provence-Alpes-Cote-d\u2019Azur|Human|MEPHI|MEPHI|Levasseur|France

>Spike|hCoV-19/England/CAMC-C26141/2020|2020-12-08|EPI\_ISL\_733868|Original|hCoV-19^^England|Human|Lighthouse Lab in Cambridge|Wellcome Sanger Institute for the COVID-19 Genomics UK (COG-UK) Consortium|Davies|United Kingdom

>Spike|hCoV-19/England/CAMC-CB7549/2020|2020-12-18|EPI\_ISL\_777839|Original|hCoV-19^^England|Human|Lighthouse Lab in Cambridge|Wellcome Sanger Institute for the COVID-19 Genomics UK (COG-UK) Consortium|Davies|United Kingdom

>Spike|hCoV-19/England/QEUH-990163/2020|2020-08-26|EPI\_ISL\_539923|Original|hCoV-19^^England|Human|Lighthouse Lab in Glasgow|Wellcome Sanger Institute for the COVID-19 Genomics UK (COG-UK) consortium|Davies|United Kingdom

>Spike|hCoV-19/England/QEUH-AF3D1E/2020|2020-10-30|EPI\_ISL\_663159|Original|hCoV-19^^England|Human|Lighthouse Lab in Glasgow|Wellcome Sanger Institute for the COVID-19 Genomics UK (COG-UK) Consortium|Davies|United Kingdom

>Spike|hCoV-19/England/BRIS-12C5A4/2020|2020-05-06|EPI\_ISL\_469517|Original|hCoV-19^^England|Human|PHE South West Regional Laboratory|Wellcome Sanger Institute for the COVID-19 Genomics UK (COG-UK) consortium|Davies|United Kingdom

>Spike|hCoV-19/England/QEUH-54D749/2020|2020-05-12|EPI\_ISL\_533402|Original|hCoV-19^^England|Human|Lighthouse Lab in Glasgow|Wellcome Sanger Institute for the COVID-19 Genomics UK (COG-UK) consortium|Davies|United Kingdom

>Spike|hCoV-19/USA/CO-CDPHE-2005080071/2020|2020-05-07|EPI\_ISL\_710148|Original|hCoV-19^^Colorado|Human|Colorado Department of Public Health and Environment|Colorado Department of Public Health and Environment|Bankers|USA

>Spike|hCoV-19/USA/TX-HMH-6702/2020|2020-06-24|EPI\_ISL\_546181|Original|hCoV-19^^Texas|Human|Houston Methodist Hospital|Houston Methodist Hospital|Long|USA

>Spike|hCoV-19/Australia/NSW906/2020|2020-08-28|EPI\_ISL\_544987|Original|hCoV-19^^New South Wales|Human|Histopath|NSW Health Pathology - Institute of Clinical Pathology and Medical Research; Westmead Hospital; University of Sydney|Gall|Australia

>Spike|hCoV-19/Australia/VIC12592/2020|2020-07-29|EPI\_ISL\_641272|Original|hCoV-19^^Victoria|Human|Microbiological Diagnostic Unit - Public Health Laboratory (MDU-PHL)|MDU-PHL|Schultz|Australia

>Spike|hCoV-19/England/ALDP-A96023/2020|2020-10-20|EPI\_ISL\_624600|Original|hCoV-19^^England|Human|Lighthouse Lab in Alderley Park|Wellcome Sanger Institute for the COVID-19 Genomics UK (COG-UK) consortium|Davies|United Kingdom

>Spike|hCoV-19/USA/UT-03869/2020|2020-04-05|EPI\_ISL\_470725|Original|hCoV-19^^Utah|Human|Utah Public Health Laboratory|Utah Public Health Laboratory|Butz|USA

>Spike|hCoV-19/USA/TX-HMH-7897/2020|2020-06-30|EPI\_ISL\_545689|Original|hCoV-19^^Texas|Human|Houston Methodist Hospital|Houston Methodist Hospital|Long|USA

>Spike|hCoV-19/France/NAQ-SC279/2020|2020-03-30|EPI\_ISL\_645183|Original|hCoV-19^^Nouvelle-Aquitaine|Human|CHU de Limoges|CNR Virus des Infections Respiratoires - France SUD|Bal|France

>Spike|hCoV-19/Japan/PG-1537/2020|2020-04-00|EPI\_ISL\_685143|Original|hCoV-19^^Japan|Human|Pathogen Genomics Center|Pathogen Genomics Center|Sekizuka|Japan

>Spike|hCoV-19/USA/OR-PROV-096/2020|2020-04-21|EPI\_ISL\_482367|Original|hCoV-19^^Oregon|Human|Providence St. Joseph Health Molecular Genomics Laboratory|Providence St. Joseph Health Molecular Genomics Laboratory|Dowdell|USA

>Spike|hCoV-19/Denmark/DCGC-3494/2020|2020-08-31|EPI\_ISL\_616282|Original|hCoV-19^^Syddanmark|Human|Department of Virus and Microbiological Special Diagnostics|Albertsen lab|Michaelsen|Denmark

>Spike|hCoV-19/England/QEUH-9AF495/2020|2020-09-01|EPI\_ISL\_559844|Original|hCoV-19^^England|Human|Oxford Viromics|COVID-19 Genomics UK (COG-UK) Consortium|Golubchik|United Kingdom

>Spike|hCoV-19/England/NOTT-10EAE5/2020|2020-03-30|EPI\_ISL\_425639|Original|hCoV-19^^England|Human|Queens Medical Centre|COVID-19 Genomics UK (COG-UK) Consortium|Loose|United Kingdom

>Spike|hCoV-19/England/ALDP-B84045/2020|2020-11-14|EPI\_ISL\_674451|Original|hCoV-19^^England|Human|Lighthouse Lab in Alderley Park|Wellcome Sanger Institute for the COVID-19 Genomics UK (COG-UK) Consortium|Davies|United Kingdom

>Spike|hCoV-19/USA/WA-UW-13003/2020|2020-06-29|EPI\_ISL\_570940|Original|hCoV-19^^Washington|Human|UW Virology Lab|UW Virology Lab|Roychoudhury|USA

>Spike|hCoV-19/Belgium/reg-09181051/2020|2020-09-18|EPI\_ISL\_734994|Original|hCoV-19^^Boortmeerbeek|Human|UZ Leuven|KU Leuven|Maes|Belgium

>Spike|hCoV-19/Turkey/HSGM-1497/2020|2020-03-19|EPI\_ISL\_437321|Vero P1|hCoV-19^^Istanbul|Human|Ministry of Health Turkey|Ministry of Health Turkey|Bayrakdar|Turkey

>Spike|hCoV-19/USA/WI-UW-2520/2020|2020-12-30|EPI\_ISL\_779351|Original|hCoV-19^^Wisconsin|Human|University of Wisconsin-Madison AIDS Vaccine Research Laboratories|University of Wisconsin-Madison AIDS Vaccine Research Laboratories|Moreno|USA

>Spike|hCoV-19/Bahrain/340862225\_S35/2020|2020-10-14|EPI\_ISL\_632903|Original|hCoV-19^^Bahrain|Human|Communicable Disease Laboratory|Communicable Disease Laboratory|Altaif|Bahrain

>Spike|hCoV-19/Wales/PHWC-28B10/2020|2020-04-02|EPI\_ISL\_445403|Original|hCoV-19^^Wales|Human|Wales Specialist Virology Centre|Public Health Wales Microbiology Cardiff|Moore|United Kingdom

>Spike|hCoV-19/USA/LA-EVTL558/2020|2020-08-05|EPI\_ISL\_578962|Original|hCoV-19^^Louisiana|Human|LSUHS Emerging Viral Threat Laboratory|Microbial Genome Sequencing Center|Kamil|USA

>Spike|hCoV-19/Luxembourg/LNS0895040/2020|2020-07-13|EPI\_ISL\_739848|Original|hCoV-19^^Luxembourg|Human|Laboratoire national de sant\u00e9|Laboratoire national de sant\u00e9|Wienecke-Baldacchino|Luxembourg

>Spike|hCoV-19/Wales/PHWC-4A62A8/2020|2020-12-16|EPI\_ISL\_765020|Original|hCoV-19^^Wales|Human|Wales Specialist Virology Centre Sequencing lab|COVID-19 Genomics UK (COG-UK) Consortium|Moore|United Kingdom

>Spike|hCoV-19/USA/VA-DCLS-2251/2020|2020-11-03|EPI\_ISL\_723498|Original|hCoV-19^^Virginia|Human|Virginia Division of Consolidated Laboratory Services (DCLS)|Virginia Division of Consolidated Laboratory Services (DCLS)|St. Jacques|USA

>Spike|hCoV-19/France/OCC-SC511/2020|2020-04-24|EPI\_ISL\_660702|Original|hCoV-19^^Occitanie|Human|CHU Montpellier|CNR Virus des Infections Respiratoires - France SUD|Bal|France

>Spike|hCoV-19/United Arab Emirates/0734/2020|2020-05-15|EPI\_ISL\_698884|Original|hCoV-19^^Abu Dhabi|Human|Group 42 (G42) Healthcare|G42 Healthcare|Ogrodzki|United Arab Emirates

>Spike|hCoV-19/Japan/IC-0330/2020|2020-11-00|EPI\_ISL\_721574|Original|hCoV-19^^Japan|Human|Pathogen Genomics Center|Pathogen Genomics Center|Sekizuka|Japan

>Spike|hCoV-19/Australia/VIC11208/2020|2020-09-07|EPI\_ISL\_562701|Original|hCoV-19^^Victoria|Human|Microbiological Diagnostic Unit - Public Health Laboratory (MDU-PHL)|MDU-PHL|Schultz|Australia

>Spike|hCoV-19/England/MILK-A45876/2020|2020-10-06|EPI\_ISL\_598664|Original|hCoV-19^^England|Human|Lighthouse Lab in Milton Keynes|Wellcome Sanger Institute for the COVID-19 Genomics UK (COG-UK) consortium|Davies|United Kingdom

>Spike|hCoV-19/Scotland/CVR3980/2020|2020-08-28|EPI\_ISL\_540777|Original|hCoV-19^^Scotland|Human|West of Scotland Specialist Virology Centre|COVID-19 Genomics UK (COG-UK) Consortium|Robertson|United Kingdom

>Spike|hCoV-19/Australia/WA496/2020|2020-11-24|EPI\_ISL\_708790|Original|hCoV-19^^Western Australia|Human|PathWest Laboratory Medicine WA|PathWest Laboratory Medicine WA Microbial Surveillance Unit|Sikazwe|Australia

>Spike|hCoV-19/Wales/PHWC-48307A/2020|2020-10-08|EPI\_ISL\_627306|Original|hCoV-19^^Wales|Human|Wales Specialist Virology Centre Sequencing lab|COVID-19 Genomics UK (COG-UK) Consortium|Moore|United Kingdom

>Spike|hCoV-19/England/QEUA-A9FDF6/2020|2020-10-20|EPI\_ISL\_611475|Original|hCoV-19^^England|Human|Lighthouse Lab in Glasgow|Wellcome Sanger Institute for the COVID-19 Genomics UK (COG-UK) consortium|Davies|United Kingdom

>Spike|hCoV-19/Finland/17A63S4/2020|2020-04-17|EPI\_ISL\_481581|Original|hCoV-19^^Uusimaa|Human|Department of Virology and Immunology|Department of Virology|Smura|Finland

>Spike|hCoV-19/USA/CA-ALSR-0479-SAN/2020|2020-04-10|EPI\_ISL\_483168|Original|hCoV-19^^California|Human|UC San Diego Center for Advanced Laboratory Medicine|Andersen lab at Scripps Research|Gangavarapu|USA

>Spike|hCoV-19/USA/NY-Wadsworth-269590-01/2020|2020-11-10|EPI\_ISL\_734428|Original|hCoV-19^^New York|Human|Wadsworth Center|Wadsworth Center|Lasèk-Nesselquist|USA

>Spike|hCoV-19/South Korea/KDCA0227/2020|2020-10-14|EPI\_ISL\_759992|Original|hCoV-19^^South Korea|Human|Division of Emerging Infectious Diseases|Division of Emerging Infectious Diseases|Park|South Korea

>Spike|hCoV-19/Denmark/DCGC-16858/2020|2020-12-14|EPI\_ISL\_750306|Original|hCoV-19^^Syddanmark|Human|Department of Virus and Microbiological Special Diagnostics|Albertsen Lab|Michaelsen|Denmark

>Spike|hCoV-19/USA/CA-LAC-USC10/2020-06-02|2020-06-02|EPI\_ISL\_569673|Original|hCoV-19^^California|Human|Lee Lab|Lee Lab|Lee|USA

>Spike|hCoV-19/England/ALDP-A66AC4/2020|2020-10-12|EPI\_ISL\_630553|Original|hCoV-19^^England|Human|Lighthouse Lab in Alderley Park|Wellcome Sanger Institute for the COVID-19 Genomics UK (COG-UK) consortium|Davies|United Kingdom

>Spike|hCoV-19/Scotland/CVR2518/2020|2020-04-15|EPI\_ISL\_453059|Original|hCoV-19^^Scotland|Human|West of Scotland Specialist Virology Centre|COVID-19 Genomics UK (COG-UK) Consortium|Robertson|United Kingdom

>Spike|hCoV-19/Jordan/AM-ALSR-4053/2020|2020-10-03|EPI\_ISL\_636413|Original|hCoV-19^^Amman|Human|Biolab Diagnostic Laboratories|Andersen lab at Scripps Research|Gangavarapu|Jordan

>Spike|hCoV-19/USA/IL-UW-383/2020|2020-05-22|EPI\_ISL\_480365|Original|hCoV-19^^Illinois|Human|University of Wisconsin-Madison AIDS Vaccine Research Laboratories|University of Wisconsin-Madison AIDS Vaccine Research Laboratories|Baczenas|USA

>Spike|hCoV-19/USA/PA-MGSC48-05/2020|2020-03-26|EPI\_ISL\_436496|Original|hCoV-19^^Pennsylvania|Human|UPMC Clinical Laboratory|Microbial Genome Sequencing Center|Cooper|USA

>Spike|hCoV-19/England/CAMC-BC0809/2020|2020-11-22|EPI\_ISL\_705147|Original|hCoV-19^^England|Human|Lighthouse Lab in Cambridge|Wellcome Sanger Institute for the COVID-19 Genomics UK (COG-UK) Consortium|Davies|United Kingdom

>Spike|hCoV-19/Denmark/DCGC-21843/2020|2020-12-21|EPI\_ISL\_758399|Original|hCoV-19^^Hovedstaden|Human|Department of Virus and Microbiological Special Diagnostics|Albertsen Lab|Michaelsen|Denmark

>Spike|hCoV-19/Scotland/QEUA-9F52C3/2020|2020-09-27|EPI\_ISL\_638923|Original|hCoV-19^^Scotland|Human|Department of Pathology|COVID-19 Genomics UK (COG-UK) Consortium|Goodfellow|United Kingdom

>Spike|hCoV-19/Thailand/Bangkok-CONI-0262/2020|2020-03-14|EPI\_ISL\_693341|Original|hCoV-19^^Bangkok|Human|Ramathibodi Hospital|COVID-19 Network Investigations (CONI) Alliance|Batty|Thailand

>Spike|hCoV-19/USA/CA-ALSR-0579-SAN/2020|2020-05-13|EPI\_ISL\_483235|Original|hCoV-19^^California|Human|UC San Diego Center for Advanced Laboratory Medicine|Andersen lab at Scripps Research|Gangavarapu|USA

>Spike|hCoV-19/USA/ME-HETL-J0114/2020|2020-09-02|EPI\_ISL\_755316|Original|hCoV-19^^Maine|Human|Maine Health and Environmental Testing Laboratory|Tewhey Lab|Tewhey|USA

>Spike|hCoV-19/Germany/NW-HHU-355/2020|2020-09-10|EPI\_ISL\_666642|Original|hCoV-19^^North Rhine-Westphalia|Human|ZOTZ KLIMAS MVZ D\u00f0fcsseldorf-Centrum GbR \u00dcBAG f\u00f0r Labormedizin|Center of Medical Microbiology|Wienemann|Germany

>Spike|hCoV-19/Canada/QC-LSPQ-L00226159/2020|2020-03-17|EPI\_ISL\_535843|Original|hCoV-19^^Quebec|Human|Centre Hospitalier R\u00e9gional de Lanaud\u00e8re|Laboratoire de sant\u00e9 publique du Qu\u00e9bec|Moreira|Canada

>Spike|hCoV-19/Netherlands/NoordBrabant\_128/2020|2020-03-28|EPI\_ISL\_461163|Original|hCoV-19^^Noord Brabant|Human|Dutch COVID-19 response team|Erasmus Medical Center|Oude Munnink|Netherlands

>Spike|hCoV-19/England/QEUA-9B8AD3/2020|2020-09-07|EPI\_ISL\_549754|Original|hCoV-19^^England|Human|Lighthouse Lab in Glasgow|Wellcome Sanger Institute for the COVID-19 Genomics UK (COG-UK) consortium|Davies|United Kingdom

>Spike|hCoV-19/England/QEUA-B9E549/2020|2020-11-18|EPI\_ISL\_719660|Original|hCoV-19^^England|Human|Lighthouse Lab in Glasgow|Wellcome Sanger Institute for the COVID-19 Genomics UK (COG-UK) Consortium|Davies|United Kingdom

>Spike|hCoV-19/England/MILK-A7D1B6/2020|2020-10-13|EPI\_ISL\_606478|Original|hCoV-19^^England|Human|Lighthouse Lab in Milton Keynes|Wellcome Sanger Institute for the COVID-19 Genomics UK (COG-UK) consortium|Davies|United Kingdom

>Spike|hCoV-19/Switzerland/VD-ETHZ-100371/2020|2020-03-19|EPI\_ISL\_575012|Original|hCoV-19^^Vaud|Human|Viollier AG|Department of Biosystems Science and Engineering|Nadeau|Switzerland

>Spike|hCoV-19/Denmark/DCGC-21976/2020|2020-12-14|EPI\_ISL\_758487|Original|hCoV-19^^Hovedstaden|Human|Department of Virus and Microbiological Special Diagnostics|Albertsen Lab|Michaelsen|Denmark

>Spike|hCoV-19/Japan/PG-3240/2020|2020-04-00|EPI\_ISL\_691356|Original|hCoV-19^^Japan|Human|Pathogen Genomics Center|Pathogen Genomics Center|Sekizuka|Japan

>Spike|hCoV-19/Scotland/CAMC-A573DA/2020|2020-10-09|EPI\_ISL\_609205|Original|hCoV-19^^Scotland|Human|Lighthouse Lab in Cambridge|Wellcome Sanger Institute for the COVID-19 Genomics UK (COG-UK) consortium|Davies|United Kingdom

>Spike|hCoV-19/Switzerland/ZH-ETHZ-331077/2020|2020-10-20|EPI\_ISL\_614971|Original|hCoV-19^^Zurich|Human|Viollier AG|Department of Biosystems Science and Engineering|Nadeau|Switzerland

>Spike|hCoV-19/England/CAMB-7C9C8/2020|2020-04-05|EPI\_ISL\_442052|Original|hCoV-19^^England|Human|Department of Pathology|Wellcome Sanger Institute for the COVID-19 Genomics UK (COG-UK) consortium|Amato|United Kingdom

>Spike|hCoV-19/England/QEUA-B80E7C/2020|2020-11-14|EPI\_ISL\_668083|Original|hCoV-19^^England|Human|Lighthouse Lab in Glasgow|Wellcome Sanger Institute for the COVID-19 Genomics UK (COG-UK) Consortium|Davies|United Kingdom

>Spike|hCoV-19/USA/WA-UW179/2020|2020-03-15|EPI\_ISL\_416717|Original|hCoV-19^^Washington|Human|UW Virology Lab|UW Virology Lab|Roychoudhury|USA

>Spike|hCoV-19/England/QEUA-96A074/2020|2020-08-10|EPI\_ISL\_530915|Original|hCoV-19^^England|Human|Lighthouse Lab in Glasgow|Wellcome Sanger Institute for the COVID-19 Genomics UK (COG-UK) consortium|Davies|United Kingdom

>Spike|hCoV-19/Denmark/DCGC-9435/2020|2020-11-09|EPI\_ISL\_668969|Original|hCoV-19^^Syddanmark|Human|Department of Virus and Microbiological Special Diagnostics|Albertsen Lab|Michaelsen|Denmark

>Spike|hCoV-19/England/MILK-B88418/2020|2020-11-13|EPI\_ISL\_674444|Original|hCoV-19^^England|Human|Lighthouse Lab in Milton Keynes|Wellcome Sanger Institute for the COVID-19 Genomics UK (COG-UK) Consortium|Davies|United Kingdom

>Spike|hCoV-19/England/MILK-B5502F/2020|2020-11-03|EPI\_ISL\_657861|Original|hCoV-19^^England|Human|Lighthouse Lab in Milton Keynes|Wellcome Sanger Institute for the COVID-19 Genomics UK (COG-UK) Consortium|Davies|United Kingdom

>Spike|hCoV-19/USA/NY-NYCPHL-001233/2020|2020-11-05|EPI\_ISL\_683941|Original|hCoV-19^^New York|Human|DOHMH Chelsea|New York City Public Health Laboratory|Wang|USA

>Spike|hCoV-19/South Africa/KRISP-K001337/2020|2020-07-19|EPI\_ISL\_515822|Original|hCoV-19^^KwaZulu-Natal|Human|Medical Disagnostics Services (MDS)|KRISP|de Oliveira|South Africa

>Spike|hCoV-19/Belgium/ULG-10938/2020|2020-11-24|EPI\_ISL\_678477|Original|hCoV-19^^Li\u00e8ge|Human|Department of Clinical Microbiology|GIGA Medical Genomics|Durkin|Belgium

>Spike|hCoV-19/USA/AK-PHL1418/2020|2020-07-17|EPI\_ISL\_528494|Original|hCoV-19^^Alaska|Human|Alaska State Virology Laboratory|Alaska State Virology Laboratory|Drown|USA

>Spike|hCoV-19/England/LCST-24D6D4E/2020|2020-06-10|EPI\_ISL\_484232|Original|hCoV-19^^England|Human|University Hospitals Of Leicester NHS Trust and DeepSeq Nottingham|COVID-19 Genomics UK (COG-UK) Consortium|Loose|United Kingdom

>Spike|hCoV-19/England/NOTT-11078F/2020|2020-04-20|EPI\_ISL\_441855|Original|hCoV-19^^England|Human|Queens Medical Centre|COVID-19 Genomics UK (COG-UK) Consortium|Loose|United Kingdom

>Spike|hCoV-19/England/CAMC-BBC378/2020|2020-11-18|EPI\_ISL\_724127|Original|hCoV-19^^England|Human|Quadram Institute Bioscience|COVID-19 Genomics UK (COG-UK) Consortium|Alikhan|United Kingdom

>Spike|hCoV-19/Spain/PV-IBV-2167/2020|2020-04-12|EPI\_ISL\_468951|Original|hCoV-19^^Basque Country|Human|Servicio de Microbiolog\u00eda. Hospital Universitario Donostia. OSI Donostialdea. \u00c1rea de Enfermedades Infecciosas|SeqCOVID-SPAIN consortium/IBV (CSIC) |Comas|Spain

>Spike|hCoV-19/England/CAMC-C85AFA/2020|2020-12-17|EPI\_ISL\_756605|Original|hCoV-19^^England|Human|Lighthouse Lab in Cambridge|Wellcome Sanger Institute for the COVID-19 Genomics UK (COG-UK) Consortium|Davies|United Kingdom

>Spike|hCoV-19/England/20149021804/2020|2020-04-03|EPI\_ISL\_466164|Original|hCoV-19^^England|Human|Respiratory Virus Unit|Respiratory Virus Unit|Platt|United Kingdom

>Spike|hCoV-19/Turkey/KOC-IST-B316/2020|2020-03-29|EPI\_ISL\_613462|Original|hCoV-19^^Turkey|Human|Microbiology|Microbiology|Nurtop|Turkey

>Spike|hCoV-19/Scotland/QEUA-9F4CC6/2020|2020-09-27|EPI\_ISL\_600723|Original|hCoV-19^^Scotland|Human|Lighthouse Lab in Glasgow|Wellcome Sanger Institute for the COVID-19 Genomics UK (COG-UK) consortium|Davies|United Kingdom

>Spike|hCoV-19/USA/NV-NSPHL-A0006/2020|2020-03-12|EPI\_ISL\_515295|Original|hCoV-19^^Nevada|Human|Nevada State Public Health Laboratory|Nevada State Public Health Laboratory|Sevinsky|USA

>Spike|hCoV-19/Wales/PHWC-16D7A1/2020|2020-09-25|EPI\_ISL\_577446|Original|hCoV-19^^Wales|Human|Wales Specialist Virology Centre Sequencing lab|COVID-19 Genomics UK (COG-UK) Consortium|Moore|United Kingdom

>Spike|hCoV-19/England/QEUA-BA08C3/2020|2020-11-18|EPI\_ISL\_719726|Original|hCoV-19^^England|Human|Lighthouse Lab in Glasgow|Wellcome Sanger Institute for the COVID-19 Genomics UK (COG-UK) Consortium|Davies|United Kingdom

>Spike|hCoV-19/Austria/CeMM0127/2020|2020-03-11|EPI\_ISL\_437983|Original|hCoV-19^^Ischgl|Human|Institut f\u00fcr Virologie am Department f\u00fcr Hygiene|Bergthaler laboratory|Bergthaler|Austria

>Spike|hCoV-19/USA/WI-UW-1095/2020|2020-08-02|EPI\_ISL\_516520|Original|hCoV-19^^Wisconsin|Human|University of Wisconsin-Madison AIDS Vaccine Research Laboratories|University of Wisconsin-Madison AIDS Vaccine Research Laboratories|Baczenas|USA

>Spike|hCoV-19/Canada/QC-LSPQ-L00229929/2020|2020-03-19|EPI\_ISL\_535905|Original|hCoV-19^^Quebec|Human|H\u00f4pital de Chicoutimi|Laboratoire de sant\u00e9 publique du Qu\u00e9bec|Moreira|Canada

>Spike|hCoV-19/England/CAMB-1AB473/2020|2020-04-19|EPI\_ISL\_470288|Original|hCoV-19^^England|Human|Department of Pathology|Wellcome Sanger Institute for the COVID-19 Genomics UK (COG-UK) consortium|Davies|United Kingdom

>Spike|hCoV-19/USA/MA-MGH-00828/2020|2020-04-13|EPI\_ISL\_791784|Original|hCoV-19^^Massachusetts|Human|Massachusetts General Hospital|Infectious Disease Program|Park|USA

>Spike|hCoV-19/USA/AZ-TG392982/2020|2020-06-18|EPI\_ISL\_694710|Original|hCoV-19^^Arizona|Human|TGen North|TGen North|French|USA

>Spike|hCoV-19/England/NORT-284A13/2020|2020-03-25|EPI\_ISL\_488657|Original|hCoV-19^^England|Human|NU-OMICS DNA Sequencing research facility|Wellcome Sanger Institute for the COVID-19 Genomics UK (COG-UK) consortium|Davies|United Kingdom

>Spike|hCoV-19/USA/NC\_6999/2020|2020-03-06|EPI\_ISL\_424871|Original|hCoV-19^^North Carolina|Human|NC State Laboratory of Public Health|Pathogen Discovery|Queen|USA

>Spike|hCoV-19/England/CAMC-B22137/2020|2020-11-02|EPI\_ISL\_645992|Original|hCoV-19^^England|Human|Lighthouse Lab in Cambridge|Wellcome Sanger Institute for the COVID-19 Genomics UK (COG-UK) Consortium|Davies|United Kingdom

>Spike|hCoV-19/England/CAMB-724FE/2020|2020-03-21|EPI\_ISL\_439600|Original|hCoV-19^^England|Human|Department of Pathology|Wellcome Sanger Institute for the COVID-19 Genomics UK (COG-UK) consortium|Amato|United Kingdom

>Spike|hCoV-19/England/QEUA-9F960F/2020|2020-09-25|EPI\_ISL\_589164|Original|hCoV-19^^England|Human|Lighthouse Lab in Glasgow|Wellcome Sanger Institute for the COVID-19 Genomics UK (COG-UK) consortium|Davies|United Kingdom

>Spike|hCoV-19/USA/MI-UM-10036760166/2020|2020-11-03|EPI\_ISL\_682219|Original|hCoV-19^^Michigan|Human|University of Michigan Clinical Microbiology Laboratory|Lauring Lab|Valesano|USA

>Spike|hCoV-19/Wales/PHWC-4A2558/2020|2020-12-15|EPI\_ISL\_743905|Original|hCoV-19^^Wales|Human|Wales Specialist Virology Centre Sequencing lab|COVID-19 Genomics UK (COG-UK) Consortium|Moore|United Kingdom

>Spike|hCoV-19/England/MILK-5637C5/2020|2020-06-10|EPI\_ISL\_558309|Original|hCoV-19^^England|Human|Lighthouse Lab in Milton Keynes|Wellcome Sanger Institute for the COVID-19 Genomics UK (COG-UK) consortium|Davies|United Kingdom

>Spike|hCoV-19/England/BRIS-12AF4E/2020|2020-04-30|EPI\_ISL\_458486|Original|hCoV-19^^England|Human|PHE South West Regional Laboratory|Wellcome Sanger Institute for the COVID-19 Genomics UK (COG-UK) consortium|Davies|United Kingdom

>Spike|hCoV-19/Wales/PHWC-27285/2020|2020-03-31|EPI\_ISL\_432277|Original|hCoV-19^^Wales|Human|Wales Specialist Virology Centre|Public Health Wales Microbiology Cardiff|Moore|United Kingdom

>Spike|hCoV-19/Hungary/US-60568w/2020|2020-09-29|EPI\_ISL\_677815|Original|hCoV-19^^B\u00e9k\u00e9s county|Human|University of Szeged|National Laboratory of Virology|Kemenesi|Hungary

>Spike|hCoV-19/England/ALDP-95B02B/2020|2020-06-14|EPI\_ISL\_555683|Original|hCoV-19^^England|Human|Lighthouse Lab in Alderley Park|Wellcome Sanger Institute for the COVID-19 Genomics UK (COG-UK) consortium|Davies|United Kingdom

>Spike|hCoV-19/England/CAMC-B08155/2020|2020-10-29|EPI\_ISL\_643760|Original|hCoV-19^^England|Human|Lighthouse Lab in Cambridge|Wellcome Sanger Institute for the COVID-19 Genomics UK (COG-UK) Consortium|Davies|United Kingdom

>Spike|hCoV-19/Australia/VIC1658/2020|2020-05-12|EPI\_ISL\_456559|Original|hCoV-19^^Victoria|Human|Victorian Infectious Diseases Reference Laboratory (VIDRL)|Microbiological Diagnostic Unit Public Health Laboratory and Victorian Infectious Diseases Reference Laboratory|Schultz|Australia

>Spike|hCoV-19/Bangladesh/BCSIR-NILMRC\_391/2020|2020-07-31|EPI\_ISL\_603225|Original|hCoV-19^^Dhaka|Human|National Institute of Laboratory Medicine and Referral Center|Genomic Research Lab|Khan|Bangladesh

>Spike|hCoV-19/New Zealand/20CV0224/2020|2020-08-30|EPI\_ISL\_548118|Original|hCoV-19^^Canterbury|Human|Canterbury Health Laboratories|Institute of Environmental Science and Research (ESR)|Wang|New Zealand

>Spike|hCoV-19/England/ALDP-932813/2020|2020-06-20|EPI\_ISL\_551397|Original|hCoV-19^^England|Human|Lighthouse Lab in Alderley Park|Wellcome Sanger Institute for the COVID-19 Genomics UK (COG-UK) consortium|Davies|United Kingdom

>Spike|hCoV-19/Denmark/DCGC-20731/2020|2020-12-21|EPI\_ISL\_759330|Original|hCoV-19^^Hovedstaden|Human|Department of Virus and Microbiological Special Diagnostics|Albertsen Lab|Michaelsen|Denmark

>Spike|hCoV-19/Denmark/DCGC-3345/2020|2020-08-31|EPI\_ISL\_616099|Original|hCoV-19^^Hovedstaden|Human|Department of Virus and Microbiological Special Diagnostics|Albertsen lab|Michaelsen|Denmark

>Spike|hCoV-19/Japan/PG-1345/2020|2020-04-00|EPI\_ISL\_684953|Original|hCoV-19^^Japan|Human|Saitama Prefectural Institute of Public Health|Pathogen Genomics Center|Sekizuka|Japan

>Spike|hCoV-19/USA/TX-HMH-5754/2020|2020-06-24|EPI\_ISL\_546990|Original|hCoV-19^^Texas|Human|Houston Methodist Hospital|Houston Methodist Hospital|Long|USA

>Spike|hCoV-19/England/QEUA-A36966/2020|2020-10-06|EPI\_ISL\_638684|Original|hCoV-19^^England|Human|Wales Specialist Virology Centre Sequencing lab|COVID-19 Genomics UK (COG-UK) Consortium|Moore|United Kingdom

>Spike|hCoV-19/England/BRIS-130437/2020|2020-04-11|EPI\_ISL\_492535|Original|hCoV-19^^England|Human|PHE South West Regional Laboratory|Wellcome Sanger Institute for the COVID-19 Genomics UK (COG-UK) consortium|Davies|United Kingdom

>Spike|hCoV-19/Scotland/EDB11336/2020|2020-12-26|EPI\_ISL\_764369|Original|hCoV-19^^Scotland|Human|Virology Department|COVID-19 Genomics UK (COG-UK) Consortium|McHugh|United Kingdom

>Spike|hCoV-19/Luxembourg/LNS4044086/2020|2020-10-29|EPI\_ISL\_740407|Original|hCoV-19^^Luxembourg|Human|Laboratoire national de sant\u00e9|Laboratoire national de sant\u00e9|Wienecke-Baldacchino|Luxembourg

>Spike|hCoV-19/England/CAMC-A3F1FC/2020|2020-10-04|EPI\_ISL\_609653|Original|hCoV-19^^England|Human|Lighthouse Lab in Cambridge|Wellcome Sanger Institute for the COVID-19 Genomics UK (COG-UK) consortium|Davies|United Kingdom

>Spike|hCoV-19/Australia/NSW1051/2020|2020-07-08|EPI\_ISL\_593703|Original|hCoV-19^^New South Wales|Human|South Eastern Area Laboratory Services (SEALS)|NSW Health Pathology - Institute of Clinical Pathology and Medical Research; Westmead Hospital; University of Sydney|Gall|Australia

>Spike|hCoV-19/Colombia/NAR-GUR-0627/2020|2020-03-29|EPI\_ISL\_447749|Original|hCoV-19^^Narino|Human|Grupo de Investigaciones Microbiol\u00f3gicas-UR (GIMUR)|Grupo de Investigaciones Microbiol\u00f3gicas-UR (GIMUR)|Ram\u00e9drez|Colombia

>Spike|hCoV-19/England/QEUH-9B4916/2020|2020-09-03|EPI\_ISL\_590356|Original|hCoV-19^^England|Human|Lighthouse Lab in Glasgow|Wellcome Sanger Institute for the COVID-19 Genomics UK (COG-UK) consortium|Davies|United Kingdom

>Spike|hCoV-19/USA/TX-DSHS-0926/2020|2020-06-15|EPI\_ISL\_602224|Original|hCoV-19^^Texas|Human|Texas Department of State Health Services|Texas Department of State Health Services|Rahman|USA

>Spike|hCoV-19/England/MILK-9706E2/2020|2020-08-17|EPI\_ISL\_553126|Original|hCoV-19^^England|Human|Lighthouse Lab in Milton Keynes|Wellcome Sanger Institute for the COVID-19 Genomics UK (COG-UK) consortium|Davies|United Kingdom

>Spike|hCoV-19/USA/NY-NYCPHL-001448/2020|2020-11-24|EPI\_ISL\_683812|Original|hCoV-19^^New York|Human|DOHMH Corona|New York City Public Health Laboratory|Wang|USA

>Spike|hCoV-19/England/NORW-E701E/2020|2020-04-21|EPI\_ISL\_453549|Original|hCoV-19^^England|Human|Quadram Institute Bioscience|COVID-19 Genomics UK (COG-UK) Consortium|Alikhan|United Kingdom

>Spike|hCoV-19/Scotland/QEUH-A1F435/2020|2020-10-01|EPI\_ISL\_587503|Original|hCoV-19^^Scotland|Human|Lighthouse Lab in Glasgow|Wellcome Sanger Institute for the COVID-19 Genomics UK (COG-UK) consortium|Davies|United Kingdom

>Spike|hCoV-19/USA/NM-NMDOH-2020326697/2020|2020-09-02|EPI\_ISL\_632845|Original|hCoV-19^^New Mexico|Human|New Mexico Department of Health Scientific Laboratory|New Mexico Department of Health Scientific Laboratory|Johnson|USA

>Spike|hCoV-19/Netherlands/NH-RIVM-20090/2020|2020-11-23|EPI\_ISL\_723268|Original|hCoV-19^^Noord-Holland|Human|Dutch COVID-19 response team|National Institute for Public Health and the Environment (RIVM)|Meijer|Netherlands

>Spike|hCoV-19/Japan/PG-5894/2020|2020-08-00|EPI\_ISL\_689009|Original|hCoV-19^^Japan|Human|Pathogen Genomics Center|Pathogen Genomics Center|Sekizuka|Japan

>Spike|hCoV-19/USA/TX-HMH-MCoV-18830/2020|2020-11-25|EPI\_ISL\_785150|Original|hCoV-19^^Texas|Human|Houston Methodist Hospital|Houston Methodist Hospital|Long|USA

>Spike|hCoV-19/Wales/ALDP-BBA468/2020|2020-11-20|EPI\_ISL\_702371|Original|hCoV-19^^Wales|Human|Lighthouse Lab in Alderley Park|Wellcome Sanger Institute for the COVID-19 Genomics UK (COG-UK) Consortium|Davies|United Kingdom

>Spike|hCoV-19/Luxembourg/LNS3257811/2020|2020-04-09|EPI\_ISL\_429773|Original|hCoV-19^^Luxembourg|Human|Laboratoire National de Sante|Laboratoire National de Sante|Wienecke-Baldacchino|Luxembourg

>Spike|hCoV-19/Scotland/EDB5340/2020|2020-05-22|EPI\_ISL\_493959|Original|hCoV-19^^Scotland|Human|Virology Department|COVID-19 Genomics UK (COG-UK) Consortium|Williams|United Kingdom

>Spike|hCoV-19/USA/TX-HMH-MCoV-15771/2020|2020-07-09|EPI\_ISL\_785455|Original|hCoV-19^^Texas|Human|Houston Methodist Hospital|Houston Methodist Hospital|Long|USA

>Spike|hCoV-19/England/QEUH-75F0B0/2020|2020-07-14|EPI\_ISL\_532995|Original|hCoV-19^^England|Human|Lighthouse Lab in Glasgow|Wellcome Sanger Institute for the COVID-19 Genomics UK (COG-UK) consortium|Davies|United Kingdom

>Spike|hCoV-19/Switzerland/AG-ETHZ-270037/2020|2020-09-01|EPI\_ISL\_541401|Original|hCoV-19^^Aargau|Human|Viollier AG|Department of Biosystems Science and Engineering|Nadeau|Switzerland

>Spike|hCoV-19/India/GJ-GBRC141b/2020|2020-05-24|EPI\_ISL\_458101|Original|hCoV-19^^Gujarat|Human|B.J. Medical College and Civil hospital|Gujarat Biotechnology Research Centre|Joshi|India

>Spike|hCoV-19/England/ALDP-B490E2/2020|2020-11-07|EPI\_ISL\_649329|Original|hCoV-19^^England|Human|Lighthouse Lab in Alderley Park|Wellcome Sanger Institute for the COVID-19 Genomics UK (COG-UK) Consortium|Davies|United Kingdom

>Spike|hCoV-19/England/MILK-957924/2020|2020-06-11|EPI\_ISL\_554058|Original|hCoV-19^^England|Human|Lighthouse Lab in Milton Keynes|Wellcome Sanger Institute for the COVID-19 Genomics UK (COG-UK) consortium|Davies|United Kingdom

>Spike|hCoV-19/Australia/VIC13050/2020|2020-07-25|EPI\_ISL\_592165|Original|hCoV-19^^Victoria|Human|Victorian Infectious Diseases Reference Laboratory (VIDRL)|VIDRL and MDU-PHL|Schultz|Australia

>Spike|hCoV-19/USA/MN-QDX-1688/2020|2020-03-16|EPI\_ISL\_604006|Original|hCoV-19^^Minnesota|Human|Quest Diagnostics|Quest Diagnostics|Kagan|USA

>Spike|hCoV-19/Canada/ON-PHL-20-01248/2020|2020-06-00|EPI\_ISL\_548870|Original|hCoV-19^^Ontario|Human|Public Health Ontario Laboratory|Public Health Ontario Laboratory|Guthrie|Canada

>Spike|hCoV-19/France/BFC-5012/2020|2020-04-02|EPI\_ISL\_443262|Original|hCoV-19^^Bourgogne-Franche-Comt\u00e9|Human|CHU de Dijon - Laboratoire de Virologie|National Reference Center for Viruses of Respiratory Infections|Enouf|France

>Spike|hCoV-19/USA/TX-HMH-1144/2020|2020-04-19|EPI\_ISL\_542551|Original|hCoV-19^^Texas|Human|Houston Methodist Hospital|Houston Methodist Hospital|Long|USA

>Spike|hCoV-19/Switzerland/BS-42200886/2020|2020-03-20|EPI\_ISL\_581721|Original|hCoV-19^^Basel-Stadt|Human|University Hospital Basel|University Hospital Basel|Roloff Handschin|Switzerland

>Spike|hCoV-19/Spain/AN-IBV-001155/2020|2020-03-25|EPI\_ISL\_452577|Original|hCoV-19^^Andalucia|Human|Servicio de Microbiolog\u00eda y Parasitolog\u00eda cl\u00ednica. UCEIMP. Hospital Universitario Virgen del Roc\u00edo/IBIS/CSIC/US.|SeqCOVID-SPAIN consortium/IBV (CSIC)|Comas|Spain

>Spike|hCoV-19/England/CAMB-72151/2020|2020-03-28|EPI\_ISL\_439930|Original|hCoV-19^^England|Human|Department of Pathology|Wellcome Sanger Institute for the COVID-19 Genomics UK (COG-UK) consortium|Amato|United Kingdom

>Spike|hCoV-19/Denmark/DCGC-6875/2020|2020-10-12|EPI\_ISL\_619720|Original|hCoV-19^^Syddanmark|Human|Department of Virus and Microbiological Special Diagnostics|Albertsen lab|Michaelsen|Denmark

>Spike|hCoV-19/England/CAMC-C2D4C9/2020|2020-12-07|EPI\_ISL\_733911|Original|hCoV-19^^England|Human|Lighthouse Lab in Cambridge|Wellcome Sanger Institute for the COVID-19 Genomics UK (COG-UK) Consortium|Davies|United Kingdom

>Spike|hCoV-19/England/MILK-9C362C/2020|2020-09-10|EPI\_ISL\_566787|Original|hCoV-19^^England|Human|Lighthouse Lab in Milton Keynes|Wellcome Sanger Institute for the COVID-19 Genomics UK (COG-UK) consortium|Davies|United Kingdom

>Spike|hCoV-19/USA/NY-NYCPHL-000085/2020|2020-03-19|EPI\_ISL\_631578|Original|hCoV-19^^New York|Human|Jamaica Hospital Medical Center|New York City Public Health Laboratory|Wang|USA

>Spike|hCoV-19/Luxembourg/LNS5146889/2020|2020-11-01|EPI\_ISL\_744191|Original|hCoV-19^^Luxembourg|Human|Laboratoire national de sant\u00e9|Laboratoire national de sant\u00e9|Wienecke-Baldacchino|Luxembourg

>Spike|hCoV-19/Denmark/DCGC-19254/2020|2020-12-07|EPI\_ISL\_748848|Original|hCoV-19^^Hovedstaden|Human|Department of Virus and Microbiological Special Diagnostics|Albertsen Lab|Michaelsen|Denmark

>Spike|hCoV-19/USA/TX-HMH-2329/2020|2020-05-30|EPI\_ISL\_545248|Original|hCoV-19^^Texas|Human|Houston Methodist Hospital|Houston Methodist Hospital|Long|USA

>Spike|hCoV-19/Denmark/DCGC-4951/2020|2020-09-21|EPI\_ISL\_621489|Original|hCoV-19^^Midtjylland|Human|Department of Virus and Microbiological Special Diagnostics|Albertsen lab|Michaelsen|Denmark

>Spike|hCoV-19/Japan/PG-3347/2020|2020-04-00|EPI\_ISL\_691462|Original|hCoV-19^^Japan|Human|Pathogen Genomics Center|Pathogen Genomics Center|Sekizuka|Japan

>Spike|hCoV-19/Wales/PHWC-484DDC/2020|2020-10-19|EPI\_ISL\_628112|Original|hCoV-19^^Wales|Human|Wales Specialist Virology Centre Sequencing lab|COVID-19 Genomics UK (COG-UK) Consortium|Moore|United Kingdom



>Spike|hCoV-19/England/NORW-F04BC/2020|2020-10-07|EPI\_ISL\_584731|Original|hCoV-19^^England|Human|Quadram Institute Bioscience|COVID-19 Genomics UK (COG-UK) Consortium|Alikhan|United Kingdom

>Spike|hCoV-19/Australia/VIC5891/2020|2020-07-21|EPI\_ISL\_518673|Original|hCoV-19^^Victoria|Human|Microbiological Diagnostic Unit - Public Health Laboratory (MDU-PHL)|MDU-PHL|Schultz|Australia

>Spike|hCoV-19/England/MILK-AB8DF7/2020|2020-10-21|EPI\_ISL\_623685|Original|hCoV-19^^England|Human|Lighthouse Lab in Milton Keynes|Wellcome Sanger Institute for the COVID-19 Genomics UK (COG-UK) consortium|Davies|United Kingdom

>Spike|hCoV-19/India/MH-ACTREC-576/2020|2020-09-02|EPI\_ISL\_700220|Original|hCoV-19^^Maharashtra|Human|Hematopathology Laboratory|Hematopathology Laboratory|Patkar|India

>Spike|hCoV-19/England/QEUA-A33969/2020|2020-10-05|EPI\_ISL\_628417|Original|hCoV-19^^England|Human|Oxford Viromics|COVID-19 Genomics UK (COG-UK) Consortium|Golubchik|United Kingdom

>Spike|hCoV-19/Singapore/759/2020|2020-03-14|EPI\_ISL\_507004|Original|hCoV-19^^Singapore|Human|Department of Laboratory Medicine|Department of Laboratory Medicine|Chen|Singapore

>Spike|hCoV-19/England/NOTT-1203E2/2020|2020-12-08|EPI\_ISL\_725612|Original|hCoV-19^^England|Human|Queens Medical Centre|COVID-19 Genomics UK (COG-UK) Consortium|Loose|United Kingdom

>Spike|hCoV-19/Puerto Rico/CDC-S10/2020|2020-03-24|EPI\_ISL\_434550|Original|hCoV-19^^Puerto Rico|Human|Puerto Rico Department of Health|Centers for Disease Control and Prevention|Santiago|USA

>Spike|hCoV-19/Jordan/AM-ALSR-4079/2020|2020-10-03|EPI\_ISL\_636439|Original|hCoV-19^^Amman|Human|Biolab Diagnostic Laboratories|Andersen lab at Scripps Research|Gangavarapu|Jordan

>Spike|hCoV-19/Denmark/DCGC-17203/2020|2020-12-14|EPI\_ISL\_750391|Original|hCoV-19^^Midtjylland|Human|Department of Virus and Microbiological Special Diagnostics|Albertsen Lab|Michaelsen|Denmark

>Spike|hCoV-19/England/ALDP-A6E84A/2020|2020-10-15|EPI\_ISL\_607801|Original|hCoV-19^^England|Human|Lighthouse Lab in Alderley Park|Wellcome Sanger Institute for the COVID-19 Genomics UK (COG-UK) consortium|Davies|United Kingdom

>Spike|hCoV-19/Japan/PG-6095/2020|2020-08-00|EPI\_ISL\_689207|Original|hCoV-19^^Japan|Human|Pathogen Genomics Center|Pathogen Genomics Center|Sekizuka|Japan

>Spike|hCoV-19/Japan/PG-1273/2020|2020-03-00|EPI\_ISL\_684882|Original|hCoV-19^^Japan|Human|Saitama Prefectural Institute of Public Health|Pathogen Genomics Center|Sekizuka|Japan

>Spike|hCoV-19/Australia/VIC6679/2020|2020-07-20|EPI\_ISL\_521435|Original|hCoV-19^^Victoria|Human|Victorian Infectious Diseases Reference Laboratory (VIDRL)|VIDRL and MDU-PHL|Schultz|Australia

>Spike|hCoV-19/England/QEUA-89A601/2020|2020-07-27|EPI\_ISL\_532774|Original|hCoV-19^^England|Human|Lighthouse Lab in Glasgow|Wellcome Sanger Institute for the COVID-19 Genomics UK (COG-UK) consortium|Davies|United Kingdom

>Spike|hCoV-19/USA/TX-HMH-7546/2020|2020-06-25|EPI\_ISL\_546841|Original|hCoV-19^^Texas|Human|Houston Methodist Hospital|Houston Methodist Hospital|Long|USA

>Spike|hCoV-19/USA/WI-UW-432/2020|2020-06-17|EPI\_ISL\_484807|Original|hCoV-19^^Wisconsin|Human|University of Wisconsin-Madison AIDS Vaccine Research Laboratories|University of Wisconsin-Madison AIDS Vaccine Research Laboratories|Baczenas|USA

>Spike|hCoV-19/England/MILK-AC7751/2020|2020-10-17|EPI\_ISL\_630272|Original|hCoV-19^^England|Human|Lighthouse Lab in Milton Keynes|Wellcome Sanger Institute for the COVID-19 Genomics UK (COG-UK) consortium|Davies|United Kingdom

>Spike|hCoV-19/England/ALDP-5D1461/2020|2020-06-19|EPI\_ISL\_558480|Original|hCoV-19^^England|Human|Lighthouse Lab in Alderley Park|Wellcome Sanger Institute for the COVID-19 Genomics UK (COG-UK) consortium|Davies|United Kingdom

>Spike|hCoV-19/Japan/PG-0063/2020|2020-03-01|EPI\_ISL\_479823|Original|hCoV-19^^Chushikoku|Human|Kochi Prefectural Institute of Public Health|Pathogen Genomics Center|Sekizuka|Japan

>Spike|hCoV-19/Belgium/ULG-10386/2020|2020-08-07|EPI\_ISL\_540553|Original|hCoV-19^^Li\u00e8ge|Human|Department of Clinical Microbiology|GIGA Medical Genomics|Durkin|Belgium

>Spike|hCoV-19/Wales/PHWC-492A89/2020|2020-11-24|EPI\_ISL\_725741|Original|hCoV-19^^Wales|Human|Originating lab|COVID-19 Genomics UK (COG-UK) Consortium|Moore|United Kingdom

>Spike|hCoV-19/USA/OR-OHSU-0273/2020|2020-04-14|EPI\_ISL\_509088|Original|hCoV-19^^Oregon|Human|OHSU Lab Services Molecular Microbiology Lab|Oregon SARS-CoV-2 Genome Sequencing Center|O'Roak|USA

>Spike|hCoV-19/Australia/VIC13332/2020|2020-07-28|EPI\_ISL\_563679|Original|hCoV-19^^Victoria|Human|Microbiological Diagnostic Unit - Public Health Laboratory (MDU-PHL)|MDU-PHL|Schultz|Australia

>Spike|hCoV-19/England/GSTT-265D369/2020|2020-03-17|EPI\_ISL\_483946|Original|hCoV-19^^England|Human|Centre for Clinical Infection and Diagnostics Research and Genomics Innovation Unit|COVID-19 Genomics UK (COG-UK) Consortium|Awan|United Kingdom

>Spike|hCoV-19/England/CAMC-B9A316/2020|2020-11-15|EPI\_ISL\_673667|Original|hCoV-19^^England|Human|Lighthouse Lab in Cambridge|Wellcome Sanger Institute for the COVID-19 Genomics UK (COG-UK) Consortium|Davies|United Kingdom

>Spike|hCoV-19/Australia/VIC4793/2020|2020-07-18|EPI\_ISL\_519179|Original|hCoV-19^^Victoria|Human|Microbiological Diagnostic Unit - Public Health Laboratory (MDU-PHL)|MDU-PHL|Schultz|Australia

>Spike|hCoV-19/England/NORT-293792/2020|2020-07-02|EPI\_ISL\_499596|Original|hCoV-19^^England|Human|Northumbria University / South Tees Hospitals NHS Foundation Trust / North Cumbria Integrated Care NHS Foundation Trust / North Tees and Hartlepool NHS Foundation Trust / Newcastle Hospitals NHS Foundation Trust|COVID-19 Genomics UK (COG-UK) Consortium|Bashton|United Kingdom

>Spike|hCoV-19/USA/MI-QDX-636/2020|2020-03-17|EPI\_ISL\_571361|Original|hCoV-19^^Michigan|Human|Quest Diagnostics|Quest Diagnostics|Kagan|USA

>Spike|hCoV-19/England/CAMB-74614/2020|2020-03-22|EPI\_ISL\_425316|Original|hCoV-19^^England|Human|Department of Pathology|COVID-19 Genomics UK (COG-UK) Consortium|Meredith|United Kingdom

>Spike|hCoV-19/Turkey/IST-GLAB-241/2020|2020-05-16|EPI\_ISL\_735308|Original|hCoV-19^^Istanbul|Human|Genomic Laboratory (GLAB) (Conjoint lab of Health Directorate of Istanbul and Istanbul Technical University)|Genomic Laboratory (GLAB)|Karacan|Turkey

>Spike|hCoV-19/England/OXON-AFD0C/2020|2020-04-09|EPI\_ISL\_478822|Original|hCoV-19^^England|Human|Oxford Viromics|COVID-19 Genomics UK (COG-UK) Consortium|Golubchik|United Kingdom

>Spike|hCoV-19/England/QEUEH-C310FB/2020|2020-12-11|EPI\_ISL\_731319|Original|hCoV-19^^England|Human|Lighthouse Lab in Glasgow|Wellcome Sanger Institute for the COVID-19 Genomics UK (COG-UK) Consortium|Davies|United Kingdom

>Spike|hCoV-19/England/LIVE-DC60BE/2020|2020-11-26|EPI\_ISL\_705083|Original|hCoV-19^^England|Human|Liverpool Clinical Laboratories|COVID-19 Genomics UK (COG-UK) Consortium|Haldenby|United Kingdom

>Spike|hCoV-19/Australia/QLD1151/2020|2020-03-30|EPI\_ISL\_639754|Original|hCoV-19^^Australia|Human|unknown|Public Health Virology Laboratory|Nguyen|Australia

>Spike|hCoV-19/Iran/SA-Isf-34/2020|2020-05-19|EPI\_ISL\_672586|Original|hCoV-19^^Iran|Human|Infectious Diseases and Tropical Medicine Research Center|Infectious Diseases and Tropical Medicine Research Center|Haghjooy Javanmard,S.|Iran

>Spike|hCoV-19/USA/PA-MGEL102/2020|2020-04-01|EPI\_ISL\_454381|Original|hCoV-19^^Pennsylvania|Human|UPMC Clinical Microbiology Laboratory|Microbial Genome Sequencing Center|Mustapha|USA

>Spike|hCoV-19/England/QEUEH-C53E26/2020|2020-12-12|EPI\_ISL\_736258|Original|hCoV-19^^England|Human|Lighthouse Lab in Glasgow|Wellcome Sanger Institute for the COVID-19 Genomics UK (COG-UK) Consortium|Davies|United Kingdom

>Spike|hCoV-19/Northern Ireland/QEUEH-77BCE7/2020|2020-07-16|EPI\_ISL\_533190|Original|hCoV-19^^Northern Ireland|Human|Lighthouse Lab in Glasgow|Wellcome Sanger Institute for the COVID-19 Genomics UK (COG-UK) consortium|Davies|United Kingdom

>Spike|hCoV-19/Netherlands/ZH-EMC-660/2020|2020-09-28|EPI\_ISL\_632323|Original|hCoV-19^^Zuid Holland|Human|Dutch COVID-19 response team|Erasmus Medical Center|Oude Munnink|Netherlands

>Spike|hCoV-19/England/MILK-B55010/2020|2020-11-04|EPI\_ISL\_657751|Original|hCoV-19^^England|Human|Lighthouse Lab in Milton Keynes|Wellcome Sanger Institute for the COVID-19 Genomics UK (COG-UK) Consortium|Davies|United Kingdom

>Spike|hCoV-19/India/JK-NCDC-02370/2020|2020-03-29|EPI\_ISL\_435107|Original|hCoV-19^^Jammu and Kashmir|Human|National Centre for Disease control (NCDC)|NCDC/CSIR-IGIB|Faruq|India

>Spike|hCoV-19/Japan/PG-3254/2020|2020-06-00|EPI\_ISL\_691369|Original|hCoV-19^^Japan|Human|Saitama Prefectural Institute of Public Health|Pathogen Genomics Center|Sekizuka|Japan

>Spike|hCoV-19/England/ALDP-B23A1D/2020|2020-11-04|EPI\_ISL\_646913|Original|hCoV-19^^England|Human|Lighthouse Lab in Alderley Park|Wellcome Sanger Institute for the COVID-19 Genomics UK (COG-UK) Consortium|Davies|United Kingdom

>Spike|hCoV-19/England/CAMB-1AEBD5/2020|2020-05-04|EPI\_ISL\_448058|Original|hCoV-19^^England|Human|Department of Pathology|COVID-19 Genomics UK (COG-UK) Consortium|Meredith|United Kingdom

>Spike|hCoV-19/England/MILK-C7B365/2020|2020-12-15|EPI\_ISL\_756873|Original|hCoV-19^^England|Human|Lighthouse Lab in Milton Keynes|Wellcome Sanger Institute for the COVID-19 Genomics UK (COG-UK) Consortium|Davies|United Kingdom

>Spike|hCoV-19/Denmark/DCGC-18588/2020|2020-12-07|EPI\_ISL\_750064|Original|hCoV-19^^Nordjylland|Human|Department of Virus and Microbiological Special Diagnostics|Albertsen Lab|Michaelsen|Denmark

>Spike|hCoV-19/England/CAMC-B33D11/2020|2020-11-05|EPI\_ISL\_659270|Original|hCoV-19^^England|Human|Lighthouse Lab in Cambridge|Wellcome Sanger Institute for the COVID-19 Genomics UK (COG-UK) Consortium|Davies|United Kingdom

>Spike|hCoV-19/Italy/VEN-UniVR-17/2020|2020-04-20|EPI\_ISL\_751338|Original|hCoV-19^^Veneto|Human|IRCCS Sacro Cuore Don Calabria Hospital|University of Verona|Mori|Italy

>Spike|hCoV-19/Wales/PHWC-493596/2020|2020-11-29|EPI\_ISL\_725908|Original|hCoV-19^^Wales|Human|Originating lab|COVID-19 Genomics UK (COG-UK) Consortium|Moore|United Kingdom

>Spike|hCoV-19/Denmark/DCGC-6890/2020|2020-10-12|EPI\_ISL\_619735|Original|hCoV-19^^Midtjylland|Human|Department of Virus and Microbiological Special Diagnostics|Albertsen lab|Michaelsen|Denmark

>Spike|hCoV-19/Switzerland/ZH-ETHZ-410093/2020|2020-12-17|EPI\_ISL\_737915|Original|hCoV-19^^Zurich|Human|Viollier AG|Department of Biosystems Science and Engineering|Nadeau|Switzerland

>Spike|hCoV-19/England/MILK-ACD858/2020|2020-10-21|EPI\_ISL\_630334|Original|hCoV-19^^England|Human|Lighthouse Lab in Milton Keynes|Wellcome Sanger Institute for the COVID-19 Genomics UK (COG-UK) consortium|Davies|United Kingdom

>Spike|hCoV-19/USA/NY-WCMP12D08P/2020|2020-03-16|EPI\_ISL\_427604|Original|hCoV-19^^New York|Human|NewYork-Presbyterian & Mason Lab|Mason Lab|Mason|USA

>Spike|hCoV-19/USA/CA-CSMC47/2020|2020-04-09|EPI\_ISL\_475659|Original|hCoV-19^^California|Human|Cedars-Sinai Medical Center|Cedars-Sinai Medical Center|Zhang|USA

>Spike|hCoV-19/USA/UT-012/2020|2020-03-12|EPI\_ISL\_417960|Original|hCoV-19^^Utah|Human|Utah Public Health Laboratory|Utah Public Health Laboratory|Young|USA

>Spike|hCoV-19/Japan/PG-2373/2020|2020-05-00|EPI\_ISL\_685978|Original|hCoV-19^^Japan|Human|Tokyo Metropolitan Institute of Public Health|Pathogen Genomics Center|Sekizuka|Japan

>Spike|hCoV-19/USA/MA-MGH-02816/2020|2020-09-19|EPI\_ISL\_765647|Original|hCoV-19^^Massachusetts|Human|Massachusetts General Hospital|Infectious Disease Program|Park|USA

>Spike|hCoV-19/USA/MI-MDHHS-SC20111/2020|2020-03-24|EPI\_ISL\_436846|Original|hCoV-19^^Michigan|Human|Michigan Department of Health and Human Services|Michigan Department of Health and Human Services|Blankenship|USA

>Spike|hCoV-19/England/CAMB-1BADFE/2020|2020-11-11|EPI\_ISL\_664174|Original|hCoV-19^^England|Human|Department of Pathology|COVID-19 Genomics UK (COG-UK) Consortium|Goodfellow|United Kingdom

>Spike|hCoV-19/USA/TX-HMH-MCoV-14226/2020|2020-10-04|EPI\_ISL\_787511|Original|hCoV-19^^Texas|Human|Houston Methodist Hospital|Houston Methodist Hospital|Long|USA

>Spike|hCoV-19/England/QEUH-CADC6F/2020|2020-12-20|EPI\_ISL\_761353|Original|hCoV-19^^England|Human|Lighthouse Lab in Glasgow|Wellcome Sanger Institute for the COVID-19 Genomics UK (COG-UK) Consortium|Davies|United Kingdom

>Spike|hCoV-19/Wales/PHWC-47EDA8/2020|2020-10-12|EPI\_ISL\_595589|Original|hCoV-19^^Wales|Human|Originating lab|COVID-19 Genomics UK (COG-UK) Consortium|Moore|United Kingdom

>Spike|hCoV-19/England/QEUH-C348C3/2020|2020-12-11|EPI\_ISL\_734112|Original|hCoV-19^^England|Human|Lighthouse Lab in Glasgow|Wellcome Sanger Institute for the COVID-19 Genomics UK (COG-UK) Consortium|Davies|United Kingdom

>Spike|hCoV-19/Wales/PHWC-284AC/2020|2020-03-29|EPI\_ISL\_432100|Original|hCoV-19^^Wales|Human|Wales Specialist Virology Centre|Public Health Wales Microbiology Cardiff|Moore|United Kingdom

>Spike|hCoV-19/England/ALDP-A2E4CA/2020|2020-10-06|EPI\_ISL\_586675|Original|hCoV-19^^England|Human|Lighthouse Lab in Alderley Park|Wellcome Sanger Institute for the COVID-19 Genomics UK (COG-UK) consortium|Davies|United Kingdom

>Spike|hCoV-19/Canada/ON-UHTC-0361/2020|2020-09-30|EPI\_ISL\_671670|Original|hCoV-19^^Ontario|Human|Unity Health Toronto|Ontario Institute for Cancer Research|de Borja|Canada

>Spike|hCoV-19/USA/TX-HMH-MCoV-18821/2020|2020-11-24|EPI\_ISL\_785145|Original|hCoV-19^^Texas|Human|Houston Methodist Hospital|Houston Methodist Hospital|Long|USA

>Spike|hCoV-19/England/MILK-B89C4C/2020|2020-11-13|EPI\_ISL\_675661|Original|hCoV-19^^England|Human|Lighthouse Lab in Milton Keynes|Wellcome Sanger Institute for the COVID-19 Genomics UK (COG-UK) Consortium|Davies|United Kingdom

>Spike|hCoV-19/Scotland/QEUH-B9E655/2020|2020-11-18|EPI\_ISL\_757198|Original|hCoV-19^^Scotland|Human|Lighthouse Lab in Glasgow|Wellcome Sanger Institute for the COVID-19 Genomics UK (COG-UK) Consortium|Davies|United Kingdom

>Spike|hCoV-19/England/QEUH-B3F39B/2020|2020-11-08|EPI\_ISL\_658494|Original|hCoV-19^^England|Human|Lighthouse Lab in Glasgow|Wellcome Sanger Institute for the COVID-19 Genomics UK (COG-UK) Consortium|Davies|United Kingdom

>Spike|hCoV-19/Luxembourg/LNS1039229/2020|2020-10-19|EPI\_ISL\_739877|Original|hCoV-19^^Luxembourg|Human|Laboratoire national de sant\u00e9|Laboratoire national de sant\u00e9|Wienecke-Baldacchino|Luxembourg

>Spike|hCoV-19/England/ALDP-AA1210/2020|2020-10-22|EPI\_ISL\_623922|Original|hCoV-19^^England|Human|Lighthouse Lab in Alderley Park|Wellcome Sanger Institute for the COVID-19 Genomics UK (COG-UK) consortium|Davies|United Kingdom

>Spike|hCoV-19/England/QEUH-CC25B4/2020|2020-12-19|EPI\_ISL\_778281|Original|hCoV-19^^England|Human|Lighthouse Lab in Glasgow|Wellcome Sanger Institute for the COVID-19 Genomics UK (COG-UK) Consortium|Davies|United Kingdom

>Spike|hCoV-19/England/OXON-B1657/2020|2020-00-00|EPI\_ISL\_479032|Original|hCoV-19^^England|Human|Oxford Viromics|COVID-19 Genomics UK (COG-UK) Consortium|Golubchik|United Kingdom

>Spike|hCoV-19/England/ALDP-95549E/2020|2020-06-12|EPI\_ISL\_554548|Original|hCoV-19^^England|Human|Lighthouse Lab in Alderley Park|Wellcome Sanger Institute for the COVID-19 Genomics UK (COG-UK) consortium|Davies|United Kingdom

>Spike|hCoV-19/Netherlands/NA\_305/2020|2020-04-01|EPI\_ISL\_422614|Original|hCoV-19^^Netherlands|Human|Dutch COVID-19 response team|Erasmus Medical Center|Oude Munnink|Netherlands

>Spike|hCoV-19/Denmark/DCGC-8403/2020|2020-10-26|EPI\_ISL\_617352|Original|hCoV-19^^Sjaelland|Human|Department of Virus and Microbiological Special Diagnostics|Albertsen lab|Michaelsen|Denmark

>Spike|hCoV-19/Denmark/DCGC-4811/2020|2020-09-21|EPI\_ISL\_621421|Original|hCoV-19^^Sjaelland|Human|Department of Virus and Microbiological Special Diagnostics|Albertsen lab|Michaelsen|Denmark

>Spike|hCoV-19/South Africa/KRISP-0169/2020|2020-05-31|EPI\_ISL\_467519|Original|hCoV-19^^KwaZulu-Natal|Human|NHLs-IALCH|KRISP|de Oliveira|South Africa

>Spike|hCoV-19/Northern Ireland/NIRE-108948/2020|2020-09-10|EPI\_ISL\_585220|Original|hCoV-19^^Northern Ireland|Human|Regional Virus Laboratory|COVID-19 Genomics UK (COG-UK) Consortium|Fairley|United Kingdom

>Spike|hCoV-19/England/20238073704/2020|2020-06-04|EPI\_ISL\_471515|Original|hCoV-19^^England|Human|Respiratory Virus Unit|Respiratory Virus Unit|Platt|United Kingdom

>Spike|hCoV-19/England/QEUEH-9F7944/2020|2020-09-27|EPI\_ISL\_589213|Original|hCoV-19^^England|Human|Lighthouse Lab in Glasgow|Wellcome Sanger Institute for the COVID-19 Genomics UK (COG-UK) consortium|Davies|United Kingdom

>Spike|hCoV-19/England/LIVE-A2677/2020|2020-05-20|EPI\_ISL\_512343|Original|hCoV-19^^England|Human|Liverpool Clinical Laboratories|COVID-19 Genomics UK (COG-UK) Consortium|Haldenby|United Kingdom

>Spike|hCoV-19/Australia/VIC258/2020|2020-03-21|EPI\_ISL\_419951|Original|hCoV-19^^Victoria|Human|Victorian Infectious Diseases Reference Laboratory (VIDRL)|Victorian Infectious Diseases Reference Laboratory and Microbiological Diagnostic Unit Public Health Laboratory|Schultz|Australia

>Spike|hCoV-19/Wales/PHWC-49A83C/2020|2020-12-02|EPI\_ISL\_727605|Original|hCoV-19^^Wales|Human|Originating lab|COVID-19 Genomics UK (COG-UK) Consortium|Moore|United Kingdom

>Spike|hCoV-19/Malaysia/UNIMAS-15712/2020|2020-10-30|EPI\_ISL\_718208|Original|hCoV-19^^Sarawak|Human|Ministry of Health Hospitals|Institute of Health and Community Medicine|Jonathan|Malaysia

>Spike|hCoV-19/Wales/PHWC-4919D8/2020|2020-11-09|EPI\_ISL\_706723|Original|hCoV-19^^Wales|Human|Originating lab|COVID-19 Genomics UK (COG-UK) Consortium|Moore|United Kingdom

>Spike|hCoV-19/Australia/VIC6504/2020|2020-07-26|EPI\_ISL\_521278|Original|hCoV-19^^Victoria|Human|Microbiological Diagnostic Unit - Public Health Laboratory (MDU-PHL)|MDU-PHL|Schultz|Australia

>Spike|hCoV-19/England/CAMC-A82C35/2020|2020-10-12|EPI\_ISL\_610645|Original|hCoV-19^^England|Human|Lighthouse Lab in Cambridge|Wellcome Sanger Institute for the COVID-19 Genomics UK (COG-UK) consortium|Davies|United Kingdom

>Spike|hCoV-19/England/ALDP-B2445A/2020|2020-11-04|EPI\_ISL\_646906|Original|hCoV-19^^England|Human|Lighthouse Lab in Alderley Park|Wellcome Sanger Institute for the COVID-19 Genomics UK (COG-UK) Consortium|Davies|United Kingdom

>Spike|hCoV-19/England/ALDP-A2DD93/2020|2020-10-05|EPI\_ISL\_586829|Original|hCoV-19^^England|Human|Lighthouse Lab in Alderley Park|Wellcome Sanger Institute for the COVID-19 Genomics UK (COG-UK) consortium|Davies|United Kingdom

>Spike|hCoV-19/England/MILK-B031D2/2020|2020-10-21|EPI\_ISL\_642917|Original|hCoV-19^^England|Human|Lighthouse Lab in Milton Keynes|Wellcome Sanger Institute for the COVID-19 Genomics UK (COG-UK) Consortium|Davies|United Kingdom

>Spike|hCoV-19/USA/TX-HMH-MCoV-12947/2020|2020-08-18|EPI\_ISL\_788099|Original|hCoV-19^^Texas|Human|Houston Methodist Hospital|Houston Methodist Hospital|Long|USA

>Spike|hCoV-19/England/OXON-AF434/2020|2020-04-14|EPI\_ISL\_478738|Original|hCoV-19^^England|Human|Oxford Viromics|COVID-19 Genomics UK (COG-UK) Consortium|Golubchik|United Kingdom

>Spike|hCoV-19/England/20109060106/2020|2020-03-07|EPI\_ISL\_417284|Original|hCoV-19^^England|Human|Respiratory Virus Unit|Respiratory Virus Unit|Platt|United Kingdom

>Spike|hCoV-19/England/NOTT-115A54/2020|2020-10-16|EPI\_ISL\_595282|Original|hCoV-19^^England|Human|Queens Medical Centre|COVID-19 Genomics UK (COG-UK) Consortium|Loose|United Kingdom

>Spike|hCoV-19/Mexico/BCN-ALSR-2480/2020|2020-05-26|EPI\_ISL\_635492|Original|hCoV-19^^Baja California|Human|Centro de Diagn\u00f3stico COVID-19 UABC Tijuana|Andersen lab at Scripps Research|Gangavarapu|Mexico

>Spike|hCoV-19/England/MILK-BDCAA/2020|2020-11-27|EPI\_ISL\_709640|Original|hCoV-19^^England|Human|Lighthouse Lab in Milton Keynes|Wellcome Sanger Institute for the COVID-19 Genomics UK (COG-UK) Consortium|Davies|United Kingdom

>Spike|hCoV-19/USA/TX-DSHS-0381/2020|2020-06-23|EPI\_ISL\_538317|Original|hCoV-19^^Texas|Human|Texas Department of State Health Services|Texas Department of State Health Services|Rahman|USA

>Spike|hCoV-19/USA/MN-MDH-1726/2020|2020-09-16|EPI\_ISL\_576235|Original|hCoV-19^^Minnesota|Human|Minnesota Department of Health|Minnesota Department of Health|Garfin|USA

>Spike|hCoV-19/Denmark/DCGC-10397/2020|2020-11-02|EPI\_ISL\_669942|Original|hCoV-19^^Hovedstaden|Human|Department of Virus and Microbiological Special Diagnostics|Albertsen Lab|Michaelsen|Denmark

>Spike|hCoV-19/England/ALDP-703534/2020|2020-06-30|EPI\_ISL\_557616|Original|hCoV-19^^England|Human|Lighthouse Lab in Alderley Park|Wellcome Sanger Institute for the COVID-19 Genomics UK (COG-UK) consortium|Davies|United Kingdom

>Spike|hCoV-19/USA/UT-UPHL-02822/2020|2020-04-25|EPI\_ISL\_575085|Original|hCoV-19^^Utah|Human|Utah Public Health Laboratory|Utah Public Health Laboratory|Young|USA

>Spike|hCoV-19/USA/MI-QDX-350/2020|2020-03-23|EPI\_ISL\_571094|Original|hCoV-19^^Michigan|Human|Quest Diagnostics|Quest Diagnostics|Kagan|USA

>Spike|hCoV-19/Japan/PG-1288/2020|2020-03-00|EPI\_ISL\_684897|Original|hCoV-19^^Japan|Human|Saitama Prefectural Institute of Public Health|Pathogen Genomics Center|Sekizuka|Japan

>Spike|hCoV-19/England/ALDP-9CB554/2020|2020-09-16|EPI\_ISL\_575580|Original|hCoV-19^^England|Human|Lighthouse Lab in Alderley Park|Wellcome Sanger Institute for the COVID-19 Genomics UK (COG-UK) consortium|Davies|United Kingdom

>Spike|hCoV-19/Spain/MD-IBV-003713/2020|2020-04-03|EPI\_ISL\_467212|Original|hCoV-19^^Madrid|Human|Hospital General Universitario Gregorio Mara\u00f1a|SeqCOVID-SPAIN consortium/IBV (CSIC)|Comas|Spain

>Spike|hCoV-19/England/MILK-9C734F/2020|2020-09-12|EPI\_ISL\_573298|Original|hCoV-19^^England|Human|Northumbria University / South Tees Hospitals NHS Foundation Trust / North Cumbria Integrated Care NHS Foundation Trust / North Tees and Hartlepool NHS Foundation Trust / Newcastle Hospitals NHS Foundation Trust|COVID-19 Genomics UK (COG-UK) Consortium|Bashton|United Kingdom

>Spike|hCoV-19/USA/OR-OHSU-2737/2020|2020-08-27|EPI\_ISL\_667297|Original|hCoV-19^^Oregon|Human|OHSU Lab Services Molecular Microbiology Lab|Oregon SARS-CoV-2 Genome Sequencing Center|O'Roak|USA

>Spike|hCoV-19/England/MILK-99C4F5/2020|2020-08-30|EPI\_ISL\_550757|Original|hCoV-19^^England|Human|Lighthouse Lab in Milton Keynes|Wellcome Sanger Institute for the COVID-19 Genomics UK (COG-UK) consortium|Davies|United Kingdom

>Spike|hCoV-19/Australia/VIC11431/2020|2020-08-20|EPI\_ISL\_563369|Original|hCoV-19^^Victoria|Human|Microbiological Diagnostic Unit - Public Health Laboratory (MDU-PHL)|MDU-PHL|Schultz|Australia

>Spike|hCoV-19/England/NOTT-11027F/2020|2020-04-11|EPI\_ISL\_441490|Original|hCoV-19^^England|Human|Queens Medical Centre|COVID-19 Genomics UK (COG-UK) Consortium|Loose|United Kingdom

>Spike|hCoV-19/Australia/NSW536/2020|2020-03-25|EPI\_ISL\_455075|Original|hCoV-19^^New South Wales|Human|South Eastern Area Laboratory Services|NSW Health Pathology - Institute of Clinical Pathology and Medical Research; Westmead Hospital; University of Sydney|Gall|Australia

>Spike|hCoV-19/Australia/TAS104/2020|2020-03-20|EPI\_ISL\_522570|Original|hCoV-19^^Tasmania|Human|Royal Hobart Hospital Microbiology Department|MDU-PHL|Schultz|Australia

>Spike|hCoV-19/England/LIVE-DCB532/2020|2020-11-24|EPI\_ISL\_724408|Original|hCoV-19^^England|Human|Liverpool Clinical Laboratories|COVID-19 Genomics UK (COG-UK) Consortium|Haldenby|United Kingdom

>Spike|hCoV-19/England/BRIS-1271C3/2020|2020-04-24|EPI\_ISL\_469707|Original|hCoV-19^^England|Human|PHE South West Regional Laboratory|Wellcome Sanger Institute for the COVID-19 Genomics UK (COG-UK) consortium|Davies|United Kingdom

>Spike|hCoV-19/Denmark/DCGC-17921/2020|2020-12-14|EPI\_ISL\_749197|Original|hCoV-19^^Hovedstaden|Human|Department of Virus and Microbiological Special Diagnostics|Albertsen Lab|Michaelsen|Denmark

>Spike|hCoV-19/Denmark/DCGC-8251/2020|2020-10-26|EPI\_ISL\_617093|Original|hCoV-19^^Hovedstaden|Human|Department of Virus and Microbiological Special Diagnostics|Albertsen lab|Michaelsen|Denmark

>Spike|hCoV-19/USA/VA-DCLS-0130/2020|2020-04-14|EPI\_ISL\_437769|Original|hCoV-19^^Virginia|Human|Virginia DCLS|Virginia DCLS|St. Jacques|USA

>Spike|hCoV-19/England/MILK-A17FF0/2020|2020-09-30|EPI\_ISL\_595010|Original|hCoV-19^^England|Human|Northumbria University / South Tees Hospitals NHS Foundation Trust / North Cumbria Integrated Care NHS Foundation Trust / North Tees and Hartlepool NHS Foundation Trust / Newcastle Hospitals NHS Foundation Trust|COVID-19 Genomics UK (COG-UK) Consortium|Bashton|United Kingdom

>Spike|hCoV-19/USA/WA-S1440/2020|2020-05-21|EPI\_ISL\_495890|Original|hCoV-19^^Washington|Human|Washington State Department of Health|Seattle Flu Study|Lee|USA

>Spike|hCoV-19/England/ALDP-954E46/2020|2020-06-13|EPI\_ISL\_553428|Original|hCoV-19^^England|Human|Lighthouse Lab in Alderley Park|Wellcome Sanger Institute for the COVID-19 Genomics UK (COG-UK) consortium|Davies|United Kingdom

>Spike|hCoV-19/England/ALDP-CB4719/2020|2020-12-19|EPI\_ISL\_760979|Original|hCoV-19^^England|Human|Lighthouse Lab in Alderley Park|Wellcome Sanger Institute for the COVID-19 Genomics UK (COG-UK) Consortium|Davies|United Kingdom

>Spike|hCoV-19/England/MILK-A79CF5/2020|2020-10-15|EPI\_ISL\_606834|Original|hCoV-19^^England|Human|Lighthouse Lab in Milton Keynes|Wellcome Sanger Institute for the COVID-19 Genomics UK (COG-UK) consortium|Davies|United Kingdom

>Spike|hCoV-19/Wales/PHWC-48BC7E/2020|2020-11-04|EPI\_ISL\_665451|Original|hCoV-19^^Wales|Human|Wales Specialist Virology Centre Sequencing lab|COVID-19 Genomics UK (COG-UK) Consortium|Moore|United Kingdom

>Spike|hCoV-19/Netherlands/ZH-RIVM-20394/2020|2020-12-11|EPI\_ISL\_728614|Original|hCoV-19^^Zuid-holland|Human|Dutch COVID-19 response team|National Institute for Public Health and the Environment (RIVM)|Meijer|Netherlands

>Spike|hCoV-19/Japan/Donner94/2020|2020-08-25|EPI\_ISL\_644998|Original|hCoV-19^^Kanto|Human|Department of Infectious Diseases|Center for Medical Genetics|Kosaki|Japan

>Spike|hCoV-19/Switzerland/ZH-ETHZ-300261/2020|2020-10-01|EPI\_ISL\_603293|Original|hCoV-19^^Zurich|Human|Viollier AG|Department of Biosystems Science and Engineering|Nadeau|Switzerland

>Spike|hCoV-19/Japan/PG-0354/2020|2020-03-31|EPI\_ISL\_480026|Original|hCoV-19^^Kanto|Human|Ibaraki Prefectural Institute of Public Health|Pathogen Genomics Center|Sekizuka|Japan

>Spike|hCoV-19/England/CAMC-9EC159/2020|2020-09-24|EPI\_ISL\_580449|Original|hCoV-19^^England|Human|Lighthouse Lab in Cambridge|Wellcome Sanger Institute for the COVID-19 Genomics UK (COG-UK) consortium|Davies|United Kingdom

>Spike|hCoV-19/USA/CA-CZB-10070/2020|2020-06-21|EPI\_ISL\_672204|Original|hCoV-19^^California|Human|The Ashley Laboratory|Chan-Zuckerberg Biohub|Bhatt|USA

>Spike|hCoV-19/Hong Kong/HKU-904a/2020|2020-01-30|EPI\_ISL\_450412|unknown|hCoV-19^^Hong Kong|Human|unknown|Microbiology|Submitter|China

>Spike|hCoV-19/England/CAMC-A3EBA4/2020|2020-10-05|EPI\_ISL\_609658|Original|hCoV-19^^England|Human|Lighthouse Lab in Cambridge|Wellcome Sanger Institute for the COVID-19 Genomics UK (COG-UK) consortium|Davies|United Kingdom

>Spike|hCoV-19/England/NORT-292CD0/2020|2020-05-18|EPI\_ISL\_472281|Original|hCoV-19^^England|Human|Northumbria University / South Tees Hospitals NHS Foundation Trust / North Cumbria Integrated Care NHS Foundation Trust / North Tees and Hartlepool NHS Foundation Trust / Newcastle Hospitals NHS Foundation Trust|COVID-19 Genomics UK (COG-UK) Consortium|Bashton|United Kingdom

>Spike|hCoV-19/Japan/PG-5354/2020|2020-08-00|EPI\_ISL\_690457|Original|hCoV-19^^Japan|Human|Fukuoka Institute of Health and Environmental Sciences|Pathogen Genomics Center|Sekizuka|Japan

>Spike|hCoV-19/Denmark/DCGC-18891/2020|2020-12-07|EPI\_ISL\_748493|Original|hCoV-19^^Hovedstaden|Human|Department of Virus and Microbiological Special Diagnostics|Albertsen Lab|Michaelsen|Denmark

>Spike|hCoV-19/Denmark/DCGC-16752/2020|2020-12-14|EPI\_ISL\_750540|Original|hCoV-19^^Hovedstaden|Human|Department of Virus and Microbiological Special Diagnostics|Albertsen Lab|Michaelsen|Denmark

>Spike|hCoV-19/USA/TX-HMH-4515/2020|2020-06-19|EPI\_ISL\_543684|Original|hCoV-19^^Texas|Human|Houston Methodist Hospital|Houston Methodist Hospital|Long|USA

>Spike|hCoV-19/Scotland/EDB1697/2020|2020-04-15|EPI\_ISL\_433120|Original|hCoV-19^^Scotland|Human|Virology Department|COVID-19 Genomics UK (COG-UK) Consortium|Williams|United Kingdom

>Spike|hCoV-19/England/QEUH-94379A/2020|2020-07-27|EPI\_ISL\_532613|Original|hCoV-19^^England|Human|Lighthouse Lab in Glasgow|Wellcome Sanger Institute for the COVID-19 Genomics UK (COG-UK) consortium|Davies|United Kingdom

>Spike|hCoV-19/England/QEUH-9AE2BA/2020|2020-09-02|EPI\_ISL\_638632|Original|hCoV-19^^England|Human|Department of Pathology|COVID-19 Genomics UK (COG-UK) Consortium|Goodfellow|United Kingdom

>Spike|hCoV-19/England/20186036004/2020|2020-04-28|EPI\_ISL\_465469|Original|hCoV-19^^England|Human|Respiratory Virus Unit|Respiratory Virus Unit|Platt|United Kingdom

>Spike|hCoV-19/England/CAMB-1B428C/2020|2020-06-01|EPI\_ISL\_473465|Original|hCoV-19^^England|Human|Department of Pathology|COVID-19 Genomics UK (COG-UK) Consortium|Meredith|United Kingdom

>Spike|hCoV-19/France/PAC-IHU-0466/2020|2020-04-05|EPI\_ISL\_569530|Original|hCoV-19^^Provence-Alpes-C\u00f4te-d\u00a0Azur|Human|MEPHI|MEPHI|Levasseur|France

>Spike|hCoV-19/USA/TX-HMH-MCoV-9598/2020|2020-07-04|EPI\_ISL\_780174|Original|hCoV-19^^Texas|Human|Houston Methodist Hospital|Houston Methodist Hospital|Long|USA

>Spike|hCoV-19/USA/CA-SCCPHD-UC159/2020|2020-03-12|EPI\_ISL\_435638|Original|hCoV-19^^California|Human|Santa Clara County Public Health Department|Chiu Laboratory|Chiu|USA

>Spike|hCoV-19/USA/MA-QDX-1457/2020|2020-03-12|EPI\_ISL\_603824|Original|hCoV-19^^Massachusetts|Human|Quest Diagnostics|Quest Diagnostics|Kagan|USA

>Spike|hCoV-19/England/QEUH-BA207E/2020|2020-11-18|EPI\_ISL\_719971|Original|hCoV-19^^England|Human|Lighthouse Lab in Glasgow|Wellcome Sanger Institute for the COVID-19 Genomics UK (COG-UK) Consortium|Davies|United Kingdom

>Spike|hCoV-19/England/20124086804/2020|2020-03-18|EPI\_ISL\_465789|Original|hCoV-19^^England|Human|Respiratory Virus Unit|Respiratory Virus Unit|Platt|United Kingdom

>Spike|hCoV-19/England/QEUH-A786CB/2020|2020-10-13|EPI\_ISL\_638761|Original|hCoV-19^^England|Human|Oxford Viromics|COVID-19 Genomics UK (COG-UK) Consortium|Golubchik|United Kingdom

>Spike|hCoV-19/England/ALDP-C3CB1D/2020|2020-12-10|EPI\_ISL\_731575|Original|hCoV-19^^England|Human|Lighthouse Lab in Alderley Park|Wellcome Sanger Institute for the COVID-19 Genomics UK (COG-UK) Consortium|Davies|United Kingdom

>Spike|hCoV-19/Sweden/20-50294/2020|2020-03-11|EPI\_ISL\_454902|Original|hCoV-19^^Stockholm|Human|Karolinska Universitetslaboratoriet|The Public Health Agency of Sweden|Svartstr\u00f6m|Sweden

>Spike|hCoV-19/USA/CA-CZB-11273/2020|2020-09-11|EPI\_ISL\_739557|Original|hCoV-19^^California|Human|Napa-Solano-Yolo- Marin County (NSYM) Public Health Laboratories|Chan-Zuckerberg Biohub|Kamm|USA

>Spike|hCoV-19/Japan/PG-2100/2020|2020-04-00|EPI\_ISL\_685705|Original|hCoV-19^^Japan|Human|Pathogen Genomics Center|Pathogen Genomics Center|Sekizuka|Japan

>Spike|hCoV-19/Luxembourg/LNS4104090/2020|2020-12-02|EPI\_ISL\_771030|Original|hCoV-19^^Luxembourg|Human|Laboratoire national de sant\u00e9|Laboratoire national de sant\u00e9|Wienecke-Baldacchino|Luxembourg

>Spike|hCoV-19/England/ALDP-9E890A/2020|2020-09-24|EPI\_ISL\_638264|Original|hCoV-19^^England|Human|Department of Pathology|COVID-19 Genomics UK (COG-UK) Consortium|Goodfellow|United Kingdom

>Spike|hCoV-19/USA/MI-MDHHS-SC21991/2020|2020-09-26|EPI\_ISL\_576214|Original|hCoV-19^^Michigan|Human|Michigan Department of Health and Human Services|Michigan Department of Health and Human Services|Blankenship|USA

>Spike|hCoV-19/USA/NY-NYUMC399/2020|2020-04-13|EPI\_ISL\_430426|Original|hCoV-19^^New York|Human|NYU Langone Health|Departments of Pathology and Medicine|Maurano|USA

>Spike|hCoV-19/England/MILK-A7DE64/2020|2020-10-15|EPI\_ISL\_638481|Original|hCoV-19^^England|Human|Oxford Viromics|COVID-19 Genomics UK (COG-UK) Consortium|Golubchik|United Kingdom

>Spike|hCoV-19/Romania/ROSV\_569/2020|2020-04-05|EPI\_ISL\_491085|Original|hCoV-19^^Suceava|Human|Suceava County Emergency Hospital|\Stefan cel Mare\ University Metagenomics Lab|Lobiuc|Romania



>Spike|hCoV-19/Austria/CeMM0972/2020|2020-04-01|EPI\_ISL\_583818|Original|hCoV-19^^Austria|Human|Dr. Gernot Walder GmbH|Bergthaler laboratory|Bergthaler|Austria

>Spike|hCoV-19/USA/TX-HMH-5959/2020|2020-06-30|EPI\_ISL\_547123|Original|hCoV-19^^Texas|Human|Houston Methodist Hospital|Houston Methodist Hospital|Long|USA

>Spike|hCoV-19/USA/NM-DOH-2020617070/2020|2020-12-12|EPI\_ISL\_751840|Original|hCoV-19^^New Mexico|Human|New Mexico Department of Health Scientific Laboratory|New Mexico Department of Health Scientific Laboratory|Malone|USA

>Spike|hCoV-19/Luxembourg/LNS5897398/2020|2020-10-22|EPI\_ISL\_744316|Original|hCoV-19^^Luxembourg|Human|Laboratoire national de sant\u00e9|Laboratoire national de sant\u00e9|Wienecke-Baldacchino|Luxembourg

>Spike|hCoV-19/Japan/PG-8754/2020|2020-09-00|EPI\_ISL\_686350|Original|hCoV-19^^Japan|Human|Pathogen Genomics Center|Pathogen Genomics Center|Sekizuka|Japan

>Spike|hCoV-19/England/QEUEH-9F5DD1/2020|2020-09-27|EPI\_ISL\_588360|Original|hCoV-19^^England|Human|Lighthouse Lab in Glasgow|Wellcome Sanger Institute for the COVID-19 Genomics UK (COG-UK) consortium|Davies|United Kingdom

>Spike|hCoV-19/Bangladesh/CHRF-0088/2020|2020-09-26|EPI\_ISL\_700347|Original|hCoV-19^^Bangladesh|Human|Child Health Research Foundation|Child Health Research Foundation|Saha|Bangladesh

>Spike|hCoV-19/Canada/BC\_25384316/2020|2020-03-00|EPI\_ISL\_463222|Original|hCoV-19^^British Columbia|Human|BCCDC Public Health Laboratory|BCCDC Public Health Laboratory|Harrigan|Canada

>Spike|hCoV-19/USA/WA-S372/2020|2020-03-26|EPI\_ISL\_434132|Original|hCoV-19^^Washington|Human|Washington State Department of Health|Seattle Flu Study|Bedford|USA

>Spike|hCoV-19/USA/MN-MDH-117/2020|2020-03-20|EPI\_ISL\_427273|Original|hCoV-19^^Minnesota|Human|Minnesota Department of Health|Minnesota Department of Health|Wang|USA

>Spike|hCoV-19/USA/TX-HMH-534/2020|2020-04-06|EPI\_ISL\_544696|Original|hCoV-19^^Texas|Human|Houston Methodist Hospital|Houston Methodist Hospital|Long|USA

>Spike|hCoV-19/England/NOTT-10EDCE/2020|2020-03-28|EPI\_ISL\_432925|Original|hCoV-19^^England|Human|Queens Medical Centre|COVID-19 Genomics UK (COG-UK) Consortium|Loose|United Kingdom

>Spike|hCoV-19/USA/AZ-TG381052/2020|2020-06-15|EPI\_ISL\_694648|Original|hCoV-19^^Arizona|Human|TGen North|TGen North|French|USA

>Spike|hCoV-19/Belgium/regal-0915946/2020|2020-09-15|EPI\_ISL\_734937|Original|hCoV-19^^Steenokkerzeel|Human|UZ Leuven|KU Leuven|Maes|Belgium

>Spike|hCoV-19/USA/MI-QDX-628/2020|2020-03-19|EPI\_ISL\_571355|Original|hCoV-19^^Michigan|Human|Quest Diagnostics|Quest Diagnostics|Kagan|USA

>Spike|hCoV-19/Denmark/DCGC-9420/2020|2020-11-09|EPI\_ISL\_668962|Original|hCoV-19^^Midtjylland|Human|Department of Virus and Microbiological Special Diagnostics|Albertsen Lab|Michaelsen|Denmark

>Spike|hCoV-19/England/QEUEH-C93938/2020|2020-12-19|EPI\_ISL\_777290|Original|hCoV-19^^England|Human|Lighthouse Lab in Glasgow|Wellcome Sanger Institute for the COVID-19 Genomics UK (COG-UK) Consortium|Davies|United Kingdom

>Spike|hCoV-19/England/ALDP-94E067/2020|2020-06-17|EPI\_ISL\_555486|Original|hCoV-19^^England|Human|Lighthouse Lab in Alderley Park|Wellcome Sanger Institute for the COVID-19 Genomics UK (COG-UK) consortium|Davies|United Kingdom

>Spike|hCoV-19/Denmark/DCGC-20887/2020|2020-12-21|EPI\_ISL\_759430|Original|hCoV-19^^Midtjylland|Human|Department of Virus and Microbiological Special Diagnostics|Albertsen Lab|Michaelsen|Denmark

>Spike|hCoV-19/Germany/BE-ChVir-D2033-5902/2020|2020-10-06|EPI\_ISL\_753911|Original|hCoV-19^^Berlin|Human|Charit\u00e9 Universit\u00e4tsmedizin Berlin|Charit\u00e9 Universit\u00e4tsmedizin Berlin|Muehlemann|Germany

>Spike|hCoV-19/Japan/PG-3704/2020|2020-04-00|EPI\_ISL\_691957|Original|hCoV-19^^Japan|Human|Pathogen Genomics Center|Pathogen Genomics Center|Sekizuka|Japan

>Spike|hCoV-19/India/GJ-GBRC291/2020|2020-06-15|EPI\_ISL\_495029|Original|hCoV-19^^Gujarat|Human|GMERS Medical College & Hospital|Gujarat Biotechnology Research Centre|Joshi|India

>Spike|hCoV-19/USA/TX-HMH-MCoV-13207/2020|2020-08-26|EPI\_ISL\_788358|Original|hCoV-19^^Texas|Human|Houston Methodist Hospital|Houston Methodist Hospital|Long|USA

>Spike|hCoV-19/Australia/NSWID930/2020|2020-03-26|EPI\_ISL\_421636|Original|hCoV-19^^New South Wales|Human|Pathology North|Public Health Virology Laboratory|Warrilow|Australia

>Spike|hCoV-19/Wales/PHWC-48994C/2020|2020-10-26|EPI\_ISL\_652428|Original|hCoV-19^^Wales|Human|Wales Specialist Virology Centre Sequencing lab|COVID-19 Genomics UK (COG-UK) Consortium|Moore|United Kingdom

>Spike|hCoV-19/United Arab Emirates/0351/2020|2020-05-15|EPI\_ISL\_698526|Original|hCoV-19^^Abu Dhabi|Human|Group 42 (G42) Healthcare|G42 Healthcare|Ogrodzki|United Arab Emirates

>Spike|hCoV-19/USA/NY-Wadsworth-250055-01/2020|2020-10-20|EPI\_ISL\_734380|Original|hCoV-19^^New York|Human|Wadsworth Center|Wadsworth Center|Lasek-Nesselquist|USA

>Spike|hCoV-19/England/SHEF-D0B26/2020|2020-05-13|EPI\_ISL\_493731|Original|hCoV-19^^England|Human|Virology Department|COVID-19 Genomics UK (COG-UK) Consortium|de Silva|United Kingdom

>Spike|hCoV-19/Spain/VC-IBV-98003618/2020|2020-03-17|EPI\_ISL\_538633|Original|hCoV-19^^Comunitat Valenciana|Human|Servicio de Microbiolog\u00eda. Hospital General Universitario de Castell\u00f3n|SeqCOVID-SPAIN consortium/IBV(CSIC)|Comas|Spain

>Spike|hCoV-19/Russia/KHM-RII-MH9266S/2020|2020-10-10|EPI\_ISL\_733424|Original|hCoV-19^^Khanty-Mansi|Human|HELIX LLC|WHO National Influenza Centre Russian Federation|Komissarov|Russia

>Spike|hCoV-19/USA/TX-HMH-5639/2020|2020-06-23|EPI\_ISL\_544924|Original|hCoV-19^^Texas|Human|Houston Methodist Hospital|Houston Methodist Hospital|Long|USA

>Spike|hCoV-19/France/PAC-IHU-0460/2020|2020-04-05|EPI\_ISL\_569525|Original|hCoV-19^^Provence-Alpes-C\u00f4te-d\u00e0z|Human|MEPHI|MEPHI|Levasseur|France

>Spike|hCoV-19/Chile/RM-ISPCH-24/2020|2020-03-14|EPI\_ISL\_445303|Original|hCoV-19^^Region Metropolitana de Santiago|Human|CTRO.DE SALUD FAMILIAR DR. RAUL YAZIGI|Instituto de Salud Publica de Chile|Fernandez|Chile

>Spike|hCoV-19/Norway/6054/2020|2020-11-27|EPI\_ISL\_775462|Original|hCoV-19^^Oslo|Human|Norwegian Institute of Public Health|Norwegian Institute of Public Health|Vollan|Norway

>Spike|hCoV-19/USA/TX-HMH-MCoV-11707/2020|2020-09-08|EPI\_ISL\_790090|Original|hCoV-19^^Texas|Human|Houston Methodist Hospital|Houston Methodist Hospital|Long|USA

>Spike|hCoV-19/Australia/NSW1324/2020|2020-12-19|EPI\_ISL\_767890|Original|hCoV-19^^New South Wales|Human|South Eastern Area Laboratory Services (SEALS)|NSW Health Pathology - Institute of Clinical Pathology and Medical Research; Westmead Hospital; University of Sydney|Gall|Australia

>Spike|hCoV-19/Japan/PG-0268/2020|2020-03-00|EPI\_ISL\_479951|Original|hCoV-19^^Kansai|Human|Osaka Institute of Public Health|Pathogen Genomics Center|Sekizuka|Japan

>Spike|hCoV-19/England/CAMB-72009/2020|2020-03-28|EPI\_ISL\_439911|Original|hCoV-19^^England|Human|Department of Pathology|Wellcome Sanger Institute for the COVID-19 Genomics UK (COG-UK) consortium|Amato|United Kingdom

>Spike|hCoV-19/Denmark/DCGC-2887/2020|2020-08-24|EPI\_ISL\_616582|Original|hCoV-19^^Hovedstaden|Human|Department of Virus and Microbiological Special Diagnostics|Albertsen lab|Michaelsen|Denmark

>Spike|hCoV-19/Wales/PHWC-35B4D/2020|2020-04-27|EPI\_ISL\_474531|Original|hCoV-19^^Wales|Human|Originating lab|COVID-19 Genomics UK (COG-UK) Consortium|Moore|United Kingdom

>Spike|hCoV-19/Canada/BC-BCCDC-7599/2020|2020-11-00|EPI\_ISL\_740744|Original|hCoV-19^^British Columbia|Human|BCCDC Public Health Laboratory|BCCDC Public Health Laboratory|Prystajecky|Canada

>Spike|hCoV-19/Wales/PHWC-16343B/2020|2020-05-06|EPI\_ISL\_473295|Original|hCoV-19^^Wales|Human|Wales Specialist Virology Centre Sequencing lab|COVID-19 Genomics UK (COG-UK) Consortium|Moore|United Kingdom

>Spike|hCoV-19/England/LIVE-DC4B73/2020|2020-11-11|EPI\_ISL\_705449|Original|hCoV-19^^England|Human|Liverpool Clinical Laboratories|COVID-19 Genomics UK (COG-UK) Consortium|Haldenby|United Kingdom

>Spike|hCoV-19/USA/WA-S314/2020|2020-04-03|EPI\_ISL\_434074|Original|hCoV-19^^Washington|Human|Washington State Department of Health|Seattle Flu Study|Bedford|USA

>Spike|hCoV-19/England/ALDP-B8384E/2020|2020-11-14|EPI\_ISL\_675350|Original|hCoV-19^^England|Human|Lighthouse Lab in Alderley Park|Wellcome Sanger Institute for the COVID-19 Genomics UK (COG-UK) Consortium|Davies|United Kingdom

>Spike|hCoV-19/Germany/BY-MVP-0085/2020|2020-04-01|EPI\_ISL\_437279|Original|hCoV-19^^Bavaria|Human|Max von Pettenkofer Institute|Laboratory for Functional Genome Analysis|Graf|Germany

>Spike|hCoV-19/Germany/NW-UBI-48/2020|2020-03-12|EPI\_ISL\_631301|Original|hCoV-19^^North Rhine-Westphalia|Human|MVZ DIAMEDIS Diagnostische Medizin Sennestadt GmbH|Bielefeld University|Brandt|Germany

>Spike|hCoV-19/USA/ME-HETL-J0447/2020|2020-12-17|EPI\_ISL\_755545|Original|hCoV-19^^Maine|Human|Maine Health and Environmental Testing Laboratory|Tewhey Lab|Tewhey|USA

>Spike|hCoV-19/Wales/PHWC-1657F4/2020|2020-06-07|EPI\_ISL\_490727|Original|hCoV-19^^Wales|Human|Wales Specialist Virology Centre Sequencing lab|COVID-19 Genomics UK (COG-UK) Consortium|Moore|United Kingdom

>Spike|hCoV-19/Scotland/CVR2450/2020|2020-04-14|EPI\_ISL\_438910|Original|hCoV-19^^Scotland|Human|West of Scotland Specialist Virology Centre|COVID-19 Genomics UK (COG-UK) Consortium|Robertson|United Kingdom

>Spike|hCoV-19/England/LOND-124D451/2020|2020-04-28|EPI\_ISL\_507098|Original|hCoV-19^^England|Human|University College London Hospital|COVID-19 Genomics UK (COG-UK) Consortium|Byott|United Kingdom

>Spike|hCoV-19/USA/TX-HMH-MCoV-14692/2020|2020-10-01|EPI\_ISL\_787977|Original|hCoV-19^^Texas|Human|Houston Methodist Hospital|Houston Methodist Hospital|Long|USA

>Spike|hCoV-19/Scotland/QEUA-9CF68A/2020|2020-09-17|EPI\_ISL\_601960|Original|hCoV-19^^Scotland|Human|Lighthouse Lab in Glasgow|Wellcome Sanger Institute for the COVID-19 Genomics UK (COG-UK) consortium|Davies|United Kingdom

>Spike|hCoV-19/Denmark/DCGC-1795/2020|2020-07-13|EPI\_ISL\_618205|Original|hCoV-19^^Hovedstaden|Human|Department of Virus and Microbiological Special Diagnostics|Albertsen lab|Michaelsen|Denmark

>Spike|hCoV-19/England/ALDP-C3CD71/2020|2020-12-10|EPI\_ISL\_731861|Original|hCoV-19^^England|Human|Lighthouse Lab in Alderley Park|Wellcome Sanger Institute for the COVID-19 Genomics UK (COG-UK) Consortium|Davies|United Kingdom

>Spike|hCoV-19/England/PORT-2F6162/2020|2020-11-10|EPI\_ISL\_741745|Original|hCoV-19^^England|Human|Centre for Enzyme Innovation|COVID-19 Genomics UK (COG-UK) Consortium|Robson|United Kingdom

>Spike|hCoV-19/South Africa/NHLS-UCT-GS-1246/2020|2020-07-29|EPI\_ISL\_640076|Original|hCoV-19^^Western Cape|Human|Knysna Hospital wcn KNY|NHLS/UCT|Iranzadeh|South Africa

>Spike|hCoV-19/USA/IL-NM-0436/2020|2020-04-11|EPI\_ISL\_626407|Original|hCoV-19^^Illinois|Human|Northwestern Memorial Hospital|Ozer Lab|Ozer|USA

>Spike|hCoV-19/England/QEUA-B40713/2020|2020-11-08|EPI\_ISL\_657195|Original|hCoV-19^^England|Human|Lighthouse Lab in Glasgow|Wellcome Sanger Institute for the COVID-19 Genomics UK (COG-UK) Consortium|Davies|United Kingdom

>Spike|hCoV-19/USA/WI-WSLH-200426/2020|2020-04-24|EPI\_ISL\_578586|Original|hCoV-19^^Wisconsin|Human|Wisconsin State Laboratory of Hygiene Communicable Disease Division|Wisconsin State Laboratory of Hygiene Communicable Disease Division|Florek|USA

>Spike|hCoV-19/USA/NY-Wadsworth-126337-01/2020|2020-06-01|EPI\_ISL\_676959|Original|hCoV-19^^New York|Human|Wadsworth Center|Wadsworth Center|Lasek-Nesselquist|USA

>Spike|hCoV-19/Denmark/DCGC-1158/2020|2020-03-16|EPI\_ISL\_614660|Original|hCoV-19^^Hovedstaden|Human|Department of Virus and Microbiological Special Diagnostics|Albertsen lab|Michaelsen|Denmark

>Spike|hCoV-19/England/QEUA-9B8BFE/2020|2020-09-07|EPI\_ISL\_549551|Original|hCoV-19^^England|Human|Lighthouse Lab in Glasgow|Wellcome Sanger Institute for the COVID-19 Genomics UK (COG-UK) consortium|Davies|United Kingdom

>Spike|hCoV-19/Netherlands/OV-RIVM-20158/2020|2020-11-17|EPI\_ISL\_723325|Original|hCoV-19^^Overijssel|Human|Dutch COVID-19 response team|National Institute for Public Health and the Environment (RIVM)|Meijer|Netherlands

>Spike|hCoV-19/Wales/PHWC-4804BD/2020|2020-10-22|EPI\_ISL\_612892|Original|hCoV-19^^Wales|Human|Wales Specialist Virology Centre Sequencing lab|COVID-19 Genomics UK (COG-UK) Consortium|Moore|United Kingdom

>Spike|hCoV-19/USA/WI-WSLH-200527/2020|2020-05-27|EPI\_ISL\_578666|Original|hCoV-19^^Wisconsin|Human|Wisconsin State Laboratory of Hygiene Communicable Disease Division|Wisconsin State Laboratory of Hygiene Communicable Disease Division|Florek|USA

>Spike|hCoV-19/Denmark/DCGC-18456/2020|2020-12-07|EPI\_ISL\_749331|Original|hCoV-19^^Nordjylland|Human|Department of Virus and Microbiological Special Diagnostics|Albertsen Lab|Michaelsen|Denmark

>Spike|hCoV-19/USA/LA-EVTL216/2020|2020-08-15|EPI\_ISL\_574350|Original|hCoV-19^^Louisiana|Human|LSUHS Emerging Viral Threat Laboratory|Microbial Genome Sequencing Center|Kamil|USA

>Spike|hCoV-19/England/CAMB-81456/2020|2020-04-10|EPI\_ISL\_442549|Original|hCoV-19^^England|Human|Department of Pathology|Wellcome Sanger Institute for the COVID-19 Genomics UK (COG-UK) consortium|Amato|United Kingdom

>Spike|hCoV-19/Russia/OMS-ORINFI-6957S/2020|2020-07-17|EPI\_ISL\_569824|Original|hCoV-19^^Omsk|Human|Omsk Research Institute of Natural Focal Infections|WHO National Influenza Centre Russian Federation|Komissarov|Russia

>Spike|hCoV-19/Switzerland/SZ-ETHZ-230044/2020|2020-08-03|EPI\_ISL\_516583|Original|hCoV-19^^Schwyz|Human|Viollier AG|Department of Biosystems Science and Engineering|Nadeau|Switzerland

>Spike|hCoV-19/Canada/BC\_23279341/2020|2020-04-00|EPI\_ISL\_477037|Original|hCoV-19^^British Columbia|Human|BCCDC Public Health Laboratory|BCCDC Public Health Laboratory|Harrigan|Canada

>Spike|hCoV-19/Brazil/RJ-00309/2020|2020-04-20|EPI\_ISL\_623112|Original|hCoV-19^^Rio de Janeiro|Human|Laboratorio de Virologia Molecular / UFRJ|Bioinformatics Laboratory / LNCC|Almeida|Brazil

>Spike|hCoV-19/Germany/NW-HHU-162/2020|2020-03-14|EPI\_ISL\_602531|Original|hCoV-19^^North Rhine-Westphalia|Human|Institute for Virology|Center of Medical Microbiology|Wienemann|Germany

>Spike|hCoV-19/England/204760136/2020|2020-11-18|EPI\_ISL\_678734|Original|hCoV-19^^England|Human|Respiratory Virus Unit|COVID-19 Genomics UK (COG-UK) Consortium|Platt|United Kingdom

>Spike|hCoV-19/Luxembourg/LNS9419524/2020|2020-11-10|EPI\_ISL\_744909|Original|hCoV-19^^Luxembourg|Human|Laboratoire national de santé|Laboratoire national de santé|Wienecke-Baldacchino|Luxembourg

>Spike|hCoV-19/South Korea/KDCA0012/2020|2020-09-04|EPI\_ISL\_747253|Original|hCoV-19^^South Korea|Human|Division of Emerging Infectious Diseases|Division of Emerging Infectious Diseases|Park|South Korea

>Spike|hCoV-19/USA/WI-UW-1373/2020|2020-09-06|EPI\_ISL\_536744|Original|hCoV-19^^Wisconsin|Human|University of Wisconsin-Madison AIDS Vaccine Research Laboratories|University of Wisconsin-Madison AIDS Vaccine Research Laboratories|Baczenas|USA

>Spike|hCoV-19/Switzerland/BE-ETHZ-200035/2020|2020-07-15|EPI\_ISL\_510723|Original|hCoV-19^^Bern|Human|Viollier AG|Department of Biosystems Science and Engineering|Nadeau|Switzerland

>Spike|hCoV-19/USA/MI-QDX-611/2020|2020-03-18|EPI\_ISL\_571340|Original|hCoV-19^^Michigan|Human|Quest Diagnostics|Quest Diagnostics|Kagan|USA

>Spike|hCoV-19/England/ALDP-944465/2020|2020-06-07|EPI\_ISL\_554772|Original|hCoV-19^^England|Human|Lighthouse Lab in Alderley Park|Wellcome Sanger Institute for the COVID-19 Genomics UK (COG-UK) consortium|Davies|United Kingdom

>Spike|hCoV-19/Wales/PHWC-47F75E/2020|2020-10-08|EPI\_ISL\_612720|Original|hCoV-19^^Wales|Human|Wales Specialist Virology Centre Sequencing lab|COVID-19 Genomics UK (COG-UK) Consortium|Moore|United Kingdom

>Spike|hCoV-19/England/MILK-99D12A/2020|2020-08-30|EPI\_ISL\_549903|Original|hCoV-19^^England|Human|Lighthouse Lab in Milton Keynes|Wellcome Sanger Institute for the COVID-19 Genomics UK (COG-UK) consortium|Davies|United Kingdom

>Spike|hCoV-19/USA/TX-HMH-MCoV-12149/2020|2020-09-21|EPI\_ISL\_790223|Original|hCoV-19^^Texas|Human|Houston Methodist Hospital|Houston Methodist Hospital|Long|USA

>Spike|hCoV-19/Australia/NSW194/2020|2020-03-22|EPI\_ISL\_427763|Original|hCoV-19^^New South Wales|Human|Centre for Infectious Diseases and Microbiology Public Health|NSW Health Pathology - Institute of Clinical Pathology and Medical Research; Westmead Hospital; University of Sydney|Gall|Australia

>Spike|hCoV-19/Denmark/DCGC-4752/2020|2020-09-14|EPI\_ISL\_622191|Original|hCoV-19^^Syddanmark|Human|Department of Virus and Microbiological Special Diagnostics|Albertsen lab|Michaelsen|Denmark

>Spike|hCoV-19/Belgium/UGent-151/2020|2020-07-26|EPI\_ISL\_634877|Original|hCoV-19^^Ghent|Human|Lab voor klinische biologie|Onderzoeksgroep Virologie|Lambrechts|Belgium

>Spike|hCoV-19/USA/NE-11317/2020|2020-05-04|EPI\_ISL\_475204|Original|hCoV-19^^Nebraska|Human|Nebraska Public Health Laboratory|UNMC COVID-19 Response Team|Pratt|USA

>Spike|hCoV-19/Australia/VIC14696/2020|2020-08-07|EPI\_ISL\_592670|Original|hCoV-19^^Victoria|Human|Microbiological Diagnostic Unit - Public Health Laboratory (MDU-PHL) |MDU-PHL|Schultz|Australia

>Spike|hCoV-19/United Arab Emirates/0869/2020|2020-05-19|EPI\_ISL\_699008|Original|hCoV-19^^Abu Dhabi|Human|Group 42 (G42) Healthcare|G42 Healthcare|Ogrodzki|United Arab Emirates

>Spike|hCoV-19/Germany/BW-MVZ-LS-29/2020|2020-04-14|EPI\_ISL\_640247|Original|hCoV-19^^Baden-W\u00fcrtemberg|Human|MVZ Labor\u00e4rzte Singen|MVZ Labor\u00e4rzte Singen|Schmidt|Germany

>Spike|hCoV-19/England/MILK-ABBF76/2020|2020-10-20|EPI\_ISL\_631130|Original|hCoV-19^^England|Human|Lighthouse Lab in Milton Keynes|Wellcome Sanger Institute for the COVID-19 Genomics UK (COG-UK) consortium|Davies|United Kingdom

>Spike|hCoV-19/Wales/ALDP-AA2FEB/2020|2020-10-22|EPI\_ISL\_634778|Original|hCoV-19^^Wales|Human|Lighthouse Lab in Alderley Park|Wellcome Sanger Institute for the COVID-19 Genomics UK (COG-UK) consortium|Davies|United Kingdom

>Spike|hCoV-19/Wales/PHWC-488646/2020|2020-10-28|EPI\_ISL\_639417|Original|hCoV-19^^Wales|Human|Wales Specialist Virology Centre Sequencing lab|COVID-19 Genomics UK (COG-UK) Consortium|Moore|United Kingdom

>Spike|hCoV-19/Switzerland/BE-ETHZ-220034/2020|2020-07-28|EPI\_ISL\_512015|Original|hCoV-19^^Bern|Human|Viollier AG|Department of Biosystems Science and Engineering|Nadeau|Switzerland

>Spike|hCoV-19/Belgium/ULG-10651/2020|2020-10-26|EPI\_ISL\_636629|Original|hCoV-19^^Li\u00e8ge|Human|Department of Clinical Microbiology|GIGA Medical Genomics|Durkin|Belgium

>Spike|hCoV-19/England/EXET-13A084/2020|2020-11-08|EPI\_ISL\_664674|Original|hCoV-19^^England|Human|University of Exeter|COVID-19 Genomics UK (COG-UK) Consortium|Temperton|United Kingdom

>Spike|hCoV-19/USA/TX-HMH-MCoV-13919/2020|2020-08-15|EPI\_ISL\_787211|Original|hCoV-19^^Texas|Human|Houston Methodist Hospital|Houston Methodist Hospital|Long|USA

>Spike|hCoV-19/Spain/NC-IBV-001414/2020|2020-03-21|EPI\_ISL\_452487|Original|hCoV-19^^Navarra|Human|Cl\u00ednica Universidad de Navarra. Servicio de Enfermedades Infecciosas y Microbiolog\u00eda cl\u00ednica|SeqCOVID-SPAIN consortium|IBV (CSIC) |Comas|Spain

>Spike|hCoV-19/Scotland/CVR5933/2020|2020-11-21|EPI\_ISL\_705678|Original|hCoV-19^^Scotland|Human|West of Scotland Specialist Virology Centre|COVID-19 Genomics UK (COG-UK) Consortium|Robertson|United Kingdom

>Spike|hCoV-19/England/QEUEH-9F319B/2020|2020-09-24|EPI\_ISL\_588512|Original|hCoV-19^^England|Human|Lighthouse Lab in Glasgow|Wellcome Sanger Institute for the COVID-19 Genomics UK (COG-UK) consortium|Davies|United Kingdom

>Spike|hCoV-19/USA/TX-HMH-4593/2020|2020-06-21|EPI\_ISL\_543740|Original|hCoV-19^^Texas|Human|Houston Methodist Hospital|Houston Methodist Hospital|Long|USA

>Spike|hCoV-19/Japan/PG-2187/2020|2020-04-00|EPI\_ISL\_685792|Original|hCoV-19^^Japan|Human|Pathogen Genomics Center|Pathogen Genomics Center|Sekizuka|Japan

>Spike|hCoV-19/Wales/MILK-9D4CF9/2020|2020-09-19|EPI\_ISL\_601703|Original|hCoV-19^^Wales|Human|Lighthouse Lab in Milton Keynes|Wellcome Sanger Institute for the COVID-19 Genomics UK (COG-UK) consortium|Davies|United Kingdom

>Spike|hCoV-19/USA/TX-HMH-MCoV-8338/2020|2020-07-07|EPI\_ISL\_784341|Original|hCoV-19^^Texas|Human|Houston Methodist Hospital|Houston Methodist Hospital|Long|USA

>Spike|hCoV-19/England/ALDP-A523B1/2020|2020-10-07|EPI\_ISL\_598206|Original|hCoV-19^^England|Human|Lighthouse Lab in Alderley Park|Wellcome Sanger Institute for the COVID-19 Genomics UK (COG-UK) consortium|Davies|United Kingdom

>Spike|hCoV-19/USA/TX-DSHS-0205/2020|2020-03-19|EPI\_ISL\_525767|Original|hCoV-19^^Texas|Human|Texas Department of State Health Services|Texas Department of State Health Services|Rahman|USA

>Spike|hCoV-19/England/CAMC-94AA5E/2020|2020-07-26|EPI\_ISL\_555843|Original|hCoV-19^^England|Human|Lighthouse Lab in Cambridge|Wellcome Sanger Institute for the COVID-19 Genomics UK (COG-UK) consortium|Davies|United Kingdom

>Spike|hCoV-19/Canada/BC-BCCDC-7527/2020|2020-11-00|EPI\_ISL\_740695|Original|hCoV-19^^British Columbia|Human|BCCDC Public Health Laboratory|BCCDC Public Health Laboratory|Prystajecky|Canada

>Spike|hCoV-19/Japan/PG-3482/2020|2020-07-00|EPI\_ISL\_691592|Original|hCoV-19^^Japan|Human|Pathogen Genomics Center|Pathogen Genomics Center|Sekizuka|Japan

>Spike|hCoV-19/USA/WA-S643/2020|2020-04-17|EPI\_ISL\_438196|Original|hCoV-19^^Washington|Human|Washington State Department of Health|Seattle Flu Study|Bedford|USA

>Spike|hCoV-19/England/LIVE-AA79A/2020|2020-03-24|EPI\_ISL\_517500|Original|hCoV-19^^England|Human|Liverpool Clinical Laboratories|COVID-19 Genomics UK (COG-UK) Consortium|Haldenby|United Kingdom

>Spike|hCoV-19/England/ALDP-A5040B/2020|2020-10-07|EPI\_ISL\_597733|Original|hCoV-19^^England|Human|Lighthouse Lab in Alderley Park|Wellcome Sanger Institute for the COVID-19 Genomics UK (COG-UK) consortium|Davies|United Kingdom

>Spike|hCoV-19/England/CAMB-1ABC8A/2020|2020-04-20|EPI\_ISL\_470347|Original|hCoV-19^^England|Human|Department of Pathology|Wellcome Sanger Institute for the COVID-19 Genomics UK (COG-UK) consortium|Davies|United Kingdom

>Spike|hCoV-19/Wales/PHWC-483E61/2020|2020-10-24|EPI\_ISL\_627938|Original|hCoV-19^^Wales|Human|Wales Specialist Virology Centre Sequencing lab|COVID-19 Genomics UK (COG-UK) Consortium|Moore|United Kingdom

>Spike|hCoV-19/USA/NY-Wadsworth-223805-01/2020|2020-09-21|EPI\_ISL\_765511|Original|hCoV-19^^New York|Human|Wadsworth Center|Wadsworth Center|Lasek-Nesselquist|USA

>Spike|hCoV-19/Japan/PG-2760/2020|2020-04-00|EPI\_ISL\_690892|Original|hCoV-19^^Japan|Human|Pathogen Genomics Center|Pathogen Genomics Center|Sekizuka|Japan

>Spike|hCoV-19/Australia/VIC1158/2020|2020-04-09|EPI\_ISL\_430602|Original|hCoV-19^^Victoria|Human|Victorian Infectious Diseases Reference Laboratory (VIDRL)|Microbiological Diagnostic Unit Public Health Laboratory and Victorian Infectious Diseases Reference Laboratory|Schultz|Australia

>Spike|hCoV-19/England/MILK-ACDA25/2020|2020-10-21|EPI\_ISL\_630062|Original|hCoV-19^^England|Human|Lighthouse Lab in Milton Keynes|Wellcome Sanger Institute for the COVID-19 Genomics UK (COG-UK) consortium|Davies|United Kingdom

>Spike|hCoV-19/England/ALDP-A95C3F/2020|2020-10-20|EPI\_ISL\_624868|Original|hCoV-19^^England|Human|Lighthouse Lab in Alderley Park|Wellcome Sanger Institute for the COVID-19 Genomics UK (COG-UK) consortium|Davies|United Kingdom

>Spike|hCoV-19/Japan/PG-6406/2020|2020-08-00|EPI\_ISL\_689512|Original|hCoV-19^^Japan|Human|Pathogen Genomics Center|Pathogen Genomics Center|Sekizuka|Japan

>Spike|hCoV-19/England/CAMC-B9961E/2020|2020-11-15|EPI\_ISL\_673292|Original|hCoV-19^^England|Human|Lighthouse Lab in Cambridge|Wellcome Sanger Institute for the COVID-19 Genomics UK (COG-UK) Consortium|Davies|United Kingdom

>Spike|hCoV-19/Finland/4LS11C5/2020|2020-08-08|EPI\_ISL\_755995|Original|hCoV-19^^Uusimaa|Human|Department of Virology and Immunology|Department of Virology|Smura|Finland

>Spike|hCoV-19/England/ALDP-A6EA17/2020|2020-10-15|EPI\_ISL\_607148|Original|hCoV-19^^England|Human|Lighthouse Lab in Alderley Park|Wellcome Sanger Institute for the COVID-19 Genomics UK (COG-UK) consortium|Davies|United Kingdom

>Spike|hCoV-19/England/LOND-1264C4D/2020|2020-11-23|EPI\_ISL\_724550|Original|hCoV-19^^England|Human|University College London|COVID-19 Genomics UK (COG-UK) Consortium|Roy|United Kingdom

>Spike|hCoV-19/Russia/StPetersburg-RII7557S/2020|2020-04-21|EPI\_ISL\_450260|Original|hCoV-19^^Saint Petersburg|Human|WHO National Influenza Centre Russian Federation|WHO National Influenza Centre Russian Federation|Komissarov|Russia

>Spike|hCoV-19/Denmark/DCGC-14156/2020|2020-11-30|EPI\_ISL\_711596|Original|hCoV-19^^Midtjylland|Human|Department of Virus and Microbiological Special Diagnostics|Albertsen Lab|Michaelsen|Denmark

>Spike|hCoV-19/Chile/RM-158209/2020|2020-08-22|EPI\_ISL\_746686|Original|hCoV-19^^Region Metropolitana de Santiago|Human|Genetica Molecular and Subdepartamento de Virologia ISP Chile|Instituto de Salud Publica de Chile|Tognarelli|Chile

>Spike|hCoV-19/Denmark/DCGC-20700/2020|2020-12-21|EPI\_ISL\_759311|Original|hCoV-19^^Sjaelland|Human|Department of Virus and Microbiological Special Diagnostics|Albertsen Lab|Michaelsen|Denmark

>Spike|hCoV-19/USA/NY-PV08468/2020|2020-03-18|EPI\_ISL\_421412|Original|hCoV-19^^New York|Human|MSHS Clinical Microbiology Laboratories|MSHS Pathogen Surveillance Program|van Bakel|USA

>Spike|hCoV-19/England/MILK-9932A9/2020|2020-08-27|EPI\_ISL\_552106|Original|hCoV-19^^England|Human|Lighthouse Lab in Milton Keynes|Wellcome Sanger Institute for the COVID-19 Genomics UK (COG-UK) Consortium|Davies|United Kingdom

>Spike|hCoV-19/Wales/PHWC-48919F/2020|2020-11-02|EPI\_ISL\_639544|Original|hCoV-19^^Wales|Human|Wales Specialist Virology Centre Sequencing lab|COVID-19 Genomics UK (COG-UK) Consortium|Moore|United Kingdom

>Spike|hCoV-19/Australia/VIC2743/2020|2020-07-05|EPI\_ISL\_521578|Original|hCoV-19^^Victoria|Human|Microbiological Diagnostic Unit - Public Health Laboratory (MDU-PHL) |MDU-PHL|Schultz|Australia

>Spike|hCoV-19/Netherlands/OV-RIVM-20468/2020|2020-11-15|EPI\_ISL\_728683|Original|hCoV-19^^Overijssel|Human|Dutch COVID-19 response team|National Institute for Public Health and the Environment (RIVM)|Meijer|Netherlands

>Spike|hCoV-19/Iceland/335/2020|2020-03-13|EPI\_ISL\_417664|Original|hCoV-19^^Reykjavik|Human|deCODE genetics|deCODE genetics|J\u00f3nsson|Iceland

>Spike|hCoV-19/USA/NM-DOH-2020314875/2020|2020-08-26|EPI\_ISL\_574281|Original|hCoV-19^^New Mexico|Human|New Mexico Department of Health Scientific Laboratory|New Mexico Department of Health Scientific Laboratory|Johnson|USA

>Spike|hCoV-19/Denmark/DCGC-21211/2020|2020-12-21|EPI\_ISL\_759614|Original|hCoV-19^^Hovedstaden|Human|Department of Virus and Microbiological Special Diagnostics|Albertsen Lab|Michaelsen|Denmark

>Spike|hCoV-19/USA/OR-PROV-223/2020|2020-03-27|EPI\_ISL\_482458|Original|hCoV-19^^Oregon|Human|Providence St. Joseph Health Molecular Genomics Laboratory|Providence St. Joseph Health Molecular Genomics Laboratory|Dowdell|USA

>Spike|hCoV-19/USA/MI-UM-10036823317/2020|2020-11-06|EPI\_ISL\_728386|Original|hCoV-19^^Michigan|Human|University of Michigan Clinical Microbiology Laboratory|Lauring Lab|Valesano|USA

>Spike|hCoV-19/Luxembourg/LNS3342997/2020|2020-12-29|EPI\_ISL\_771149|Original|hCoV-19^^Luxembourg|Human|Laboratoire national de sant\u00e9|Laboratoire national de sant\u00e9|Wienecke-Baldacchino|Luxembourg

>Spike|hCoV-19/England/ALDP-B8490E/2020|2020-11-14|EPI\_ISL\_675823|Original|hCoV-19^^England|Human|Lighthouse Lab in Alderley Park|Wellcome Sanger Institute for the COVID-19 Genomics UK (COG-UK) Consortium|Davies|United Kingdom

>Spike|hCoV-19/England/NOTT-111997/2020|2020-05-31|EPI\_ISL\_461946|Original|hCoV-19^^England|Human|Queens Medical Centre|COVID-19 Genomics UK (COG-UK) Consortium|Loose|United Kingdom

>Spike|hCoV-19/USA/CA-CHLA-PLM43812599/2020|2020-12-04|EPI\_ISL\_753621|Original|hCoV-19^^California|Human|Clinical virology Laboratory|Center for Personalized Medicine|Dien Bard|USA

>Spike|hCoV-19/Australia/SAP392/2020|2020-03-20|EPI\_ISL\_492157|Original|hCoV-19^^South Australia|Human|SA Pathology|SA Pathology|Leong|Australia

>Spike|hCoV-19/Wales/PHWC-4A3241/2020|2020-12-14|EPI\_ISL\_744074|Original|hCoV-19^^Wales|Human|Wales Specialist Virology Centre Sequencing lab|COVID-19 Genomics UK (COG-UK) Consortium|Moore|United Kingdom

>Spike|hCoV-19/England/MILK-9A8B2E/2020|2020-08-31|EPI\_ISL\_550111|Original|hCoV-19^^England|Human|Lighthouse Lab in Milton Keynes|Wellcome Sanger Institute for the COVID-19 Genomics UK (COG-UK) consortium|Davies|United Kingdom

>Spike|hCoV-19/England/MILK-CA68BD/2020|2020-12-16|EPI\_ISL\_761446|Original|hCoV-19^^England|Human|Lighthouse Lab in Milton Keynes|Wellcome Sanger Institute for the COVID-19 Genomics UK (COG-UK) Consortium|Davies|United Kingdom

>Spike|hCoV-19/England/ALDP-A50D79/2020|2020-10-07|EPI\_ISL\_597595|Original|hCoV-19^^England|Human|Lighthouse Lab in Alderley Park|Wellcome Sanger Institute for the COVID-19 Genomics UK (COG-UK) consortium|Davies|United Kingdom

>Spike|hCoV-19/England/QEUEH-AD36DD/2020|2020-10-26|EPI\_ISL\_634135|Original|hCoV-19^^England|Human|Lighthouse Lab in Glasgow|Wellcome Sanger Institute for the COVID-19 Genomics UK (COG-UK) consortium|Davies|United Kingdom

>Spike|hCoV-19/South Africa/KRISP-K001331/2020|2020-07-19|EPI\_ISL\_515816|Original|hCoV-19^^KwaZulu-Natal|Human|Medical Disagnostics Services (MDS)|KRISP|de Oliveira|South Africa

>Spike|hCoV-19/England/BRIS-12FB72/2020|2020-04-04|EPI\_ISL\_488288|Original|hCoV-19^^England|Human|PHE South West Regional Laboratory|Wellcome Sanger Institute for the COVID-19 Genomics UK (COG-UK) consortium|Davies|United Kingdom

>Spike|hCoV-19/England/ALDP-A527F1/2020|2020-10-07|EPI\_ISL\_598213|Original|hCoV-19^^England|Human|Lighthouse Lab in Alderley Park|Wellcome Sanger Institute for the COVID-19 Genomics UK (COG-UK) consortium|Davies|United Kingdom

>Spike|hCoV-19/USA/AZ-CDC-2-3693553/2020|2020-11-03|EPI\_ISL\_747124|Original|hCoV-19^^Arizona|Human|Respiratory Viruses Branch|Respiratory Viruses Branch|Queen|USA

>Spike|hCoV-19/SaudiArabia/KAUST-JEDDAH759/2020|2020-04-01|EPI\_ISL\_513001|Original|hCoV-19^^Jeddah|Human|Pathogen Genomics Lab King Abdullah University of Science and Technology(KAUST)|Pathogen Genomics Lab King Abdullah University of Science and Technology(KAUST)|Mohamed Ghazzali|Saudi Arabia

>Spike|hCoV-19/England/MILK-BAA42F/2020|2020-11-17|EPI\_ISL\_783148|Original|hCoV-19^^England|Human|Lighthouse Lab in Milton Keynes|Wellcome Sanger Institute for the COVID-19 Genomics UK (COG-UK) Consortium|Davies|United Kingdom

>Spike|hCoV-19/USA/WA-UW-45061/2020|2020-12-08|EPI\_ISL\_747199|Original|hCoV-19^^Washington|Human|UW Virology Lab|UW Virology Lab|Roychoudhury|USA

>Spike|hCoV-19/USA/TX-HMH-MCoV-12125/2020|2020-09-20|EPI\_ISL\_790209|Original|hCoV-19^^Texas|Human|Houston Methodist Hospital|Houston Methodist Hospital|Long|USA

>Spike|hCoV-19/Switzerland/BE-ETHZ-350190/2020|2020-11-04|EPI\_ISL\_693839|Original|hCoV-19^^Bern|Human|Viollier AG|Department of Biosystems Science and Engineering|Nadeau|Switzerland

>Spike|hCoV-19/England/LIVE-DCB68A/2020|2020-11-24|EPI\_ISL\_724416|Original|hCoV-19^^England|Human|Liverpool Clinical Laboratories|COVID-19 Genomics UK (COG-UK) Consortium|Haldenby|United Kingdom

>Spike|hCoV-19/Spain/VC-IBV-98003118/2020|2020-03-16|EPI\_ISL\_538054|Original|hCoV-19^^Comunitat Valenciana|Human|Hospital Universitari i Polit\u00e8cnic La Fe de Val\u00e8ncia|SeqCOVID-SPAIN consortium/IBV(CSIC)|Comas|Spain

>Spike|hCoV-19/USA/WI-UW-1970/2020|2020-09-18|EPI\_ISL\_677378|Original|hCoV-19^^Wisconsin|Human|University of Wisconsin-Madison AIDS Vaccine Research Laboratories|University of Wisconsin-Madison AIDS Vaccine Research Laboratories|Baczenas|USA

>Spike|hCoV-19/USA/ME-HETL-J0358/2020|2020-11-24|EPI\_ISL\_755481|Original|hCoV-19^^Maine|Human|Maine Health and Environmental Testing Laboratory|Tewhey Lab|Tewhey|USA



>Spike|hCoV-19/England/ALDP-95474B/2020|2020-06-09|EPI\_ISL\_555404|Original|hCoV-19^^England|Human|Lighthouse Lab in Alderley Park|Wellcome Sanger Institute for the COVID-19 Genomics UK (COG-UK) consortium|Davies|United Kingdom

>Spike|hCoV-19/England/MILK-BB2785/2020|2020-11-18|EPI\_ISL\_720102|Original|hCoV-19^^England|Human|Lighthouse Lab in Milton Keynes|Wellcome Sanger Institute for the COVID-19 Genomics UK (COG-UK) Consortium|Davies|United Kingdom

>Spike|hCoV-19/England/QEUA-9643BD/2020|2020-08-11|EPI\_ISL\_536861|Original|hCoV-19^^England|Human|Lighthouse Lab in Glasgow|Wellcome Sanger Institute for the COVID-19 Genomics UK (COG-UK) consortium|Davies|United Kingdom

>Spike|hCoV-19/Denmark/DCGC-5795/2020|2020-09-28|EPI\_ISL\_620982|Original|hCoV-19^^Syddanmark|Human|Department of Virus and Microbiological Special Diagnostics|Albertsen lab|Michaelsen|Denmark

>Spike|hCoV-19/Bangladesh/DNAS\_DRCIM\_isl\_Sik-bip 2/2020|2020-06-30|EPI\_ISL\_774948|Original|hCoV-19^^Dhaka|Human|Designated Reference Institute for Chemical Measurements (DRICM)|DNA SOLUTION LTD.|Rabbi|Bangladesh

>Spike|hCoV-19/England/MILK-B5A673/2020|2020-11-06|EPI\_ISL\_658061|Original|hCoV-19^^England|Human|Lighthouse Lab in Milton Keynes|Wellcome Sanger Institute for the COVID-19 Genomics UK (COG-UK) Consortium|Davies|United Kingdom

>Spike|hCoV-19/England/MILK-ACCC5D/2020|2020-10-22|EPI\_ISL\_630279|Original|hCoV-19^^England|Human|Lighthouse Lab in Milton Keynes|Wellcome Sanger Institute for the COVID-19 Genomics UK (COG-UK) consortium|Davies|United Kingdom

>Spike|hCoV-19/England/SHEF-D2AFA/2020|2020-04-21|EPI\_ISL\_453773|Original|hCoV-19^^England|Human|Virology Department|COVID-19 Genomics UK (COG-UK) Consortium|de Silva|United Kingdom

>Spike|hCoV-19/England/SHEF-C096B/2020|2020-04-27|EPI\_ISL\_475342|Original|hCoV-19^^England|Human|Virology Department|COVID-19 Genomics UK (COG-UK) Consortium|de Silva|United Kingdom

>Spike|hCoV-19/Scotland/CVR2709/2020|2020-04-18|EPI\_ISL\_484650|Original|hCoV-19^^Scotland|Human|West of Scotland Specialist Virology Centre|COVID-19 Genomics UK (COG-UK) Consortium|Robertson|United Kingdom

>Spike|hCoV-19/USA/WA-UW-11703/2020|2020-06-16|EPI\_ISL\_570460|Original|hCoV-19^^Washington|Human|UW Virology Lab|UW Virology Lab|Roychoudhury|USA

>Spike|hCoV-19/England/MILK-A1D83B/2020|2020-10-03|EPI\_ISL\_595092|Original|hCoV-19^^England|Human|Queens Medical Centre|COVID-19 Genomics UK (COG-UK) Consortium|Loose|United Kingdom

>Spike|hCoV-19/Denmark/DCGC-21185/2020|2020-12-21|EPI\_ISL\_759601|Original|hCoV-19^^Syddanmark|Human|Department of Virus and Microbiological Special Diagnostics|Albertsen Lab|Michaelsen|Denmark

>Spike|hCoV-19/USA/WA-UW-10247/2020|2020-06-01|EPI\_ISL\_570285|Original|hCoV-19^^Washington|Human|UW Virology Lab|UW Virology Lab|Roychoudhury|USA

>Spike|hCoV-19/Denmark/DCGC-6367/2020|2020-10-05|EPI\_ISL\_622337|Original|hCoV-19^^Hovedstaden|Human|Department of Virus and Microbiological Special Diagnostics|Albertsen lab|Michaelsen|Denmark

>Spike|hCoV-19/Australia/VIC3919/2020|2020-07-10|EPI\_ISL\_520631|Original|hCoV-19^^Victoria|Human|Microbiological Diagnostic Unit - Public Health Laboratory (MDU-PHL)|MDU-PHL|Schultz|Australia

>Spike|hCoV-19/Scotland/EDB5164/2020|2020-05-19|EPI\_ISL\_456982|Original|hCoV-19^^Scotland|Human|Virology Department|COVID-19 Genomics UK (COG-UK) Consortium|Williams|United Kingdom

>Spike|hCoV-19/Scotland/QEUA-A0C310/2020|2020-10-03|EPI\_ISL\_599341|Original|hCoV-19^^Scotland|Human|Lighthouse Lab in Glasgow|Wellcome Sanger Institute for the COVID-19 Genomics UK (COG-UK) consortium|Davies|United Kingdom

>Spike|hCoV-19/South Korea/KCDC2165/2020|2020-03-09|EPI\_ISL\_506959|Original|hCoV-19^^South Korea|Human|Division of Viral Diseases|Division of Viral Diseases|Kim|South Korea

>Spike|hCoV-19/USA/VA-DCLS-1599/2020|2020-08-14|EPI\_ISL\_610150|Original|hCoV-19^^Virginia|Human|Virginia DCLS|Virginia DCLS|St. Jacques|USA

>Spike|hCoV-19/DRC/10902/2020|2020-05-23|EPI\_ISL\_527490|Original|hCoV-19^^Kinshasa|Human|Viral Respiratory Lab|Pathogen Sequencing Lab|Lokilo|Democratic Republic of the Congo

>Spike|hCoV-19/Australia/VIC9512/2020|2020-08-19|EPI\_ISL\_565581|Original|hCoV-19^^Victoria|Human|Microbiological Diagnostic Unit - Public Health Laboratory (MDU-PHL)|MDU-PHL|Schultz|Australia

>Spike|hCoV-19/England/GSTT-265D76D/2020|2020-03-24|EPI\_ISL\_484008|Original|hCoV-19^^England|Human|Centre for Clinical Infection and Diagnostics Research and Genomics Innovation Unit|COVID-19 Genomics UK (COG-UK) Consortium|Awan|United Kingdom

>Spike|hCoV-19/India/MH-NIV-28815/2020|2020-05-13|EPI\_ISL\_479529|Original|hCoV-19^^Maharashtra|Human|NIV Influenza|NIV Influenza|Potdar|India

>Spike|hCoV-19/England/ALDP-925840/2020|2020-06-23|EPI\_ISL\_552844|Original|hCoV-19^^England|Human|Lighthouse Lab in Alderley Park|Wellcome Sanger Institute for the COVID-19 Genomics UK (COG-UK) consortium|Davies|United Kingdom

>Spike|hCoV-19/Wales/PHWC-16BCB3/2020|2020-09-14|EPI\_ISL\_573962|Original|hCoV-19^^Wales|Human|Wales Specialist Virology Centre Sequencing lab|COVID-19 Genomics UK (COG-UK) Consortium|Moore|United Kingdom

>Spike|hCoV-19/England/QEUEH-96499D/2020|2020-08-13|EPI\_ISL\_531124|Original|hCoV-19^^England|Human|Lighthouse Lab in Glasgow|Wellcome Sanger Institute for the COVID-19 Genomics UK (COG-UK) consortium|Davies|United Kingdom

>Spike|hCoV-19/USA/UT-CDC-2-3693661/2020|2020-11-05|EPI\_ISL\_747077|Original|hCoV-19^^Utah|Human|Respiratory Viruses Branch|Respiratory Viruses Branch|Queen|USA

>Spike|hCoV-19/Wales/PHWC-495910/2020|2020-11-24|EPI\_ISL\_726414|Original|hCoV-19^^Wales|Human|Originating lab|COVID-19 Genomics UK (COG-UK) Consortium|Moore|United Kingdom

>Spike|hCoV-19/England/204890403/2020|2020-11-28|EPI\_ISL\_754336|Original|hCoV-19^^England|Human|Respiratory Virus Unit|COVID-19 Genomics UK (COG-UK) Consortium|Platt|United Kingdom

>Spike|hCoV-19/England/CAMC-BBDCC7/2020|2020-11-20|EPI\_ISL\_703026|Original|hCoV-19^^England|Human|Virology Department|COVID-19 Genomics UK (COG-UK) Consortium|de Silva|United Kingdom

>Spike|hCoV-19/Iceland/393/2020|2020-03-19|EPI\_ISL\_424417|Original|hCoV-19^^Reykjavik|Human|The National University Hospital of Iceland|deCODE genetics|J\u00f3nsson|Iceland

>Spike|hCoV-19/England/QEUEH-BCBB23/2020|2020-11-27|EPI\_ISL\_704287|Original|hCoV-19^^England|Human|Lighthouse Lab in Glasgow|Wellcome Sanger Institute for the COVID-19 Genomics UK (COG-UK) Consortium|Davies|United Kingdom

>Spike|hCoV-19/Finland/8LS19AD6/2020|2020-10-08|EPI\_ISL\_755980|Original|hCoV-19^^Uusimaa|Human|Department of Virology and Immunology|Department of Virology|Smura|Finland

>Spike|hCoV-19/Denmark/DCGC-18248/2020|2020-12-14|EPI\_ISL\_749842|Original|hCoV-19^^Syddanmark|Human|Department of Virus and Microbiological Special Diagnostics|Albertsen Lab|Michaelsen|Denmark

>Spike|hCoV-19/India/MH-GA37/2020|2020-06-20|EPI\_ISL\_508231|Original|hCoV-19^^Maharashtra|Human|Government Medical College|National Institute of Biomedical Genomics|Maitra|India

>Spike|hCoV-19/England/SHEF-CDDAE/2020|2020-09-09|EPI\_ISL\_540756|Original|hCoV-19^^England|Human|Virology Department|COVID-19 Genomics UK (COG-UK) Consortium|de Silva|United Kingdom

>Spike|hCoV-19/Portugal/PT1617/2020|2020-07-08|EPI\_ISL\_693538|Original|hCoV-19^^Portugal|Human|Instituto Nacional de Saude (INSA)|Instituto Nacional de Saude (INSA)|Borges|Portugal

>Spike|hCoV-19/England/EXET-139E9A/2020|2020-00-00|EPI\_ISL\_679349|Original|hCoV-19^^England|Human|University of Exeter|COVID-19 Genomics UK (COG-UK) Consortium|Temperton|United Kingdom

>Spike|hCoV-19/England/ALDP-B24DB9/2020|2020-11-04|EPI\_ISL\_646744|Original|hCoV-19^^England|Human|Lighthouse Lab in Alderley Park|Wellcome Sanger Institute for the COVID-19 Genomics UK (COG-UK) Consortium|Davies|United Kingdom

>Spike|hCoV-19/England/QEUEH-B3F6FC/2020|2020-11-08|EPI\_ISL\_658580|Original|hCoV-19^^England|Human|Lighthouse Lab in Glasgow|Wellcome Sanger Institute for the COVID-19 Genomics UK (COG-UK) Consortium|Davies|United Kingdom

>Spike|hCoV-19/Scotland/EDB10180/2020|2020-11-23|EPI\_ISL\_680493|Original|hCoV-19^^Scotland|Human|Virology Department|COVID-19 Genomics UK (COG-UK) Consortium|McHugh|United Kingdom

>Spike|hCoV-19/England/BRIS-12F77E/2020|2020-03-11|EPI\_ISL\_488434|Original|hCoV-19^^England|Human|PHE South West Regional Laboratory|Wellcome Sanger Institute for the COVID-19 Genomics UK (COG-UK) consortium|Davies|United Kingdom

>Spike|hCoV-19/Australia/QLD1218/2020|2020-03-22|EPI\_ISL\_639809|Original|hCoV-19^^Australia|Human|unknown|Public Health Virology Laboratory|Nguyen|Australia

>Spike|hCoV-19/France/ARA-24023/2020|2020-04-11|EPI\_ISL\_508931|Original|hCoV-19^^Auvergne-Rh\u00f4ne-Alpes|Human|L'H\u00f4pital Nord-Ouest Tarare-Grandris|CNR Virus des Infections Respiratoires - France SUD|Josset|France

>Spike|hCoV-19/Australia/VIC3079/2020|2020-07-10|EPI\_ISL\_520786|Original|hCoV-19^^Victoria|Human|Microbiological Diagnostic Unit - Public Health Laboratory (MDU-PHL)|MDU-PHL|Schultz|Australia

>Spike|hCoV-19/England/ALDP-A961D5/2020|2020-10-19|EPI\_ISL\_624678|Original|hCoV-19^^England|Human|Lighthouse Lab in Alderley Park|Wellcome Sanger Institute for the COVID-19 Genomics UK (COG-UK) consortium|Davies|United Kingdom

>Spike|hCoV-19/Guinea/CERFIG-1337/2020|2020-06-09|EPI\_ISL\_788934|Original|hCoV-19^^Conakry|Human|Centre de Recherche et de Formation en Infectiologie Guin\u00e9e|TransVIHMI|Keita|Guinea

>Spike|hCoV-19/England/CAMB-82701/2020|2020-04-14|EPI\_ISL\_443586|Original|hCoV-19^^England|Human|Department of Pathology|Wellcome Sanger Institute for the COVID-19 Genomics UK (COG-UK) consortium|Amato|United Kingdom

>Spike|hCoV-19/Mexico/BCN-INDRE-50/2020|2020-06-30|EPI\_ISL\_516610|Original|hCoV-19^^Baja California|Human|Instituto de Diagnostico y Referencia Epidemiologicos (INDRE)|Instituto de Diagnostico y Referencia Epidemiologicos (INDRE)|Rodriguez|Mexico

>Spike|hCoV-19/England/MILK-9C4A10/2020|2020-09-10|EPI\_ISL\_573262|Original|hCoV-19^^England|Human|Centre for Enzyme Innovation|COVID-19 Genomics UK (COG-UK) Consortium|Robson|United Kingdom

>Spike|hCoV-19/England/ALDP-B83653/2020|2020-11-15|EPI\_ISL\_675270|Original|hCoV-19^^England|Human|Lighthouse Lab in Alderley Park|Wellcome Sanger Institute for the COVID-19 Genomics UK (COG-UK) Consortium|Davies|United Kingdom

>Spike|hCoV-19/England/ALDP-94A4F6/2020|2020-06-11|EPI\_ISL\_556355|Original|hCoV-19^^England|Human|Lighthouse Lab in Alderley Park|Wellcome Sanger Institute for the COVID-19 Genomics UK (COG-UK) consortium|Davies|United Kingdom

>Spike|hCoV-19/Spain/MD-IBV-99009607/2020|2020-10-05|EPI\_ISL\_654356|Original|hCoV-19^^Madrid|Human|Hospital General Universitario Gregorio Mara\u00f1a|SeqCOVID-SPAIN consortium/IBV (CSIC)|Comas|Spain

>Spike|hCoV-19/USA/TX-HMH-MCoV-16222/2020|2020-10-31|EPI\_ISL\_785906|Original|hCoV-19^^Texas|Human|Houston Methodist Hospital|Houston Methodist Hospital|Long|USA

>Spike|hCoV-19/Wales/MILK-9E1172/2020|2020-09-20|EPI\_ISL\_581078|Original|hCoV-19^^Wales|Human|Lighthouse Lab in Milton Keynes|Wellcome Sanger Institute for the COVID-19 Genomics UK (COG-UK) consortium|Davies|United Kingdom

>Spike|hCoV-19/England/BRIS-1854336/2020|2020-04-28|EPI\_ISL\_492253|Original|hCoV-19^^England|Human|PHE South West Regional Laboratory|Wellcome Sanger Institute for the COVID-19 Genomics UK (COG-UK) consortium|Davies|United Kingdom

>Spike|hCoV-19/England/BRIS-1267A4/2020|2020-04-08|EPI\_ISL\_459001|Original|hCoV-19^^England|Human|PHE South West Regional Laboratory|Wellcome Sanger Institute for the COVID-19 Genomics UK (COG-UK) consortium|Davies|United Kingdom

>Spike|hCoV-19/USA/FL-BPHL-2244/2020|2020-09-04|EPI\_ISL\_666866|Original|hCoV-19^^Florida|Human|Florida Bureau of Public Health Laboratories|Florida Bureau of Public Health Laboratories|Blanton|USA

>Spike|hCoV-19/England/ALDP-B487FD/2020|2020-11-07|EPI\_ISL\_649470|Original|hCoV-19^^England|Human|Lighthouse Lab in Alderley Park|Wellcome Sanger Institute for the COVID-19 Genomics UK (COG-UK) Consortium|Davies|United Kingdom

>Spike|hCoV-19/England/MILK-970451/2020|2020-08-17|EPI\_ISL\_581398|Original|hCoV-19^^England|Human|Lighthouse Lab in Milton Keynes|Wellcome Sanger Institute for the COVID-19 Genomics UK (COG-UK) consortium|Davies|United Kingdom

>Spike|hCoV-19/USA/WI-UW-1366/2020|2020-09-07|EPI\_ISL\_536737|Original|hCoV-19^^Wisconsin|Human|University of Wisconsin-Madison AIDS Vaccine Research Laboratories|University of Wisconsin-Madison AIDS Vaccine Research Laboratories|Baczenas|USA

>Spike|hCoV-19/India/GJ-GBRC325/2020|2020-06-18|EPI\_ISL\_512059|Original|hCoV-19^^Gujarat|Human|B.J. Medical College and Civil hospital|Gujarat Biotechnology Research Centre|Joshi|India

>Spike|hCoV-19/Denmark/DCGC-21410/2020|2020-12-21|EPI\_ISL\_758152|Original|hCoV-19^^Hovedstaden|Human|Department of Virus and Microbiological Special Diagnostics|Albertsen Lab|Michaelsen|Denmark

>Spike|hCoV-19/England/205120471/2020|2020-12-11|EPI\_ISL\_766306|Original|hCoV-19^^England|Human|Respiratory Virus Unit|COVID-19 Genomics UK (COG-UK) Consortium|Platt|United Kingdom

>Spike|hCoV-19/Germany/NI-UMCG-PE-S4/2020|2020-00-00|EPI\_ISL\_517611|Original|hCoV-19^^Lower Saxony|Human|Institute of Medical Microbiology|Institute of Human Genetics|Zibat|Germany

>Spike|hCoV-19/Wales/PHWC-160DF7/2020|2020-05-26|EPI\_ISL\_473055|Original|hCoV-19^^Wales|Human|Wales Specialist Virology Centre Sequencing lab|COVID-19 Genomics UK (COG-UK) Consortium|Moore|United Kingdom

>Spike|hCoV-19/England/NORW-E94D4/2020|2020-04-22|EPI\_ISL\_453599|Original|hCoV-19^^England|Human|Quadram Institute Bioscience|COVID-19 Genomics UK (COG-UK) Consortium|Alikhan|United Kingdom

>Spike|hCoV-19/South Korea/KCDC2265/2020|2020-05-11|EPI\_ISL\_510603|Original|hCoV-19^^South Korea|Human|Division of Viral Diseases|Division of Viral Diseases|Kim|South Korea

>Spike|hCoV-19/Wales/PHWC-2A61D/2020|2020-04-06|EPI\_ISL\_445595|Original|hCoV-19^^Wales|Human|Wales Specialist Virology Centre|Public Health Wales Microbiology Cardiff|Moore|United Kingdom

>Spike|hCoV-19/Belgium/reg-0720809/2020|2020-07-20|EPI\_ISL\_734802|Original|hCoV-19^^Herzele|Human|UZ Leuven|KU Leuven|Maes|Belgium

>Spike|hCoV-19/England/CAMC-A3E579/2020|2020-10-06|EPI\_ISL\_609563|Original|hCoV-19^^England|Human|Lighthouse Lab in Cambridge|Wellcome Sanger Institute for the COVID-19 Genomics UK (COG-UK) consortium|Davies|United Kingdom

>Spike|hCoV-19/Netherlands/NA\_357/2020|2020-04-07|EPI\_ISL\_455161|Original|hCoV-19^^Netherlands|Human|Dutch COVID-19 response team|Erasmus Medical Center|Oude Munnink|Netherlands

>Spike|hCoV-19/USA/NY-QDX-2735/2020|2020-03-15|EPI\_ISL\_605055|Original|hCoV-19^^New York|Human|Quest Diagnostics|Quest Diagnostics|Kagan|USA

>Spike|hCoV-19/USA/TX-DSHS-1758/2020|2020-06-21|EPI\_ISL\_710383|Original|hCoV-19^^Texas|Human|Texas Department of State Health Services|Texas Department of State Health Services|Rahman|USA

>Spike|hCoV-19/Australia/VIC9739/2020|2020-08-05|EPI\_ISL\_565685|Original|hCoV-19^^Victoria|Human|Microbiological Diagnostic Unit - Public Health Laboratory (MDU-PHL)|MDU-PHL|Schultz|Australia

>Spike|hCoV-19/Denmark/DCGC-11072/2020|2020-11-02|EPI\_ISL\_669759|Original|hCoV-19^^Hovedstaden|Human|Department of Virus and Microbiological Special Diagnostics|Albertsen Lab|Michaelsen|Denmark

>Spike|hCoV-19/India/MH-ACTREC-639/2020|2020-09-13|EPI\_ISL\_700272|Original|hCoV-19^^Maharashtra|Human|Hematopathology Laboratory|Hematopathology Laboratory|Patkar|India

>Spike|hCoV-19/Netherlands/LI-EMC-150/2020|2020-11-23|EPI\_ISL\_763118|Original|hCoV-19^^Limburg|Human|Dutch COVID-19 response team|Erasmus Medical Center|Oude Munnink|Netherlands

>Spike|hCoV-19/Japan/PG-4332/2020|2020-07-00|EPI\_ISL\_692560|Original|hCoV-19^^Japan|Human|Pathogen Genomics Center|Pathogen Genomics Center|Sekizuka|Japan

>Spike|hCoV-19/USA/MA-MGH-00491/2020|2020-03-27|EPI\_ISL\_460247|Original|hCoV-19^^Massachusetts|Human|Massachusetts General Hospital|Infectious Disease Program|Lemieux|USA

>Spike|hCoV-19/Wales/PHWC-287EF/2020|2020-04-01|EPI\_ISL\_431940|Original|hCoV-19^^Wales|Human|Wales Specialist Virology Centre|Public Health Wales Microbiology Cardiff|Moore|United Kingdom

>Spike|hCoV-19/USA/TX-HMH-MCoV-18058/2020|2020-11-13|EPI\_ISL\_784406|Original|hCoV-19^^Texas|Human|Houston Methodist Hospital|Houston Methodist Hospital|Long|USA

>Spike|hCoV-19/Canada/BC\_7493713/2020|2020-03-12|EPI\_ISL\_418844|Original|hCoV-19^^British Columbia|Human|BCCDC Public Health Laboratory|BCCDC Public Health Laboratory|Harrigan|Canada

>Spike|hCoV-19/England/CAMC-B9A97E/2020|2020-11-15|EPI\_ISL\_673486|Original|hCoV-19^^England|Human|Lighthouse Lab in Cambridge|Wellcome Sanger Institute for the COVID-19 Genomics UK (COG-UK) Consortium|Davies|United Kingdom

>Spike|hCoV-19/USA/AZ-TG405413/2020|2020-06-22|EPI\_ISL\_694872|Original|hCoV-19^^Arizona|Human|TGen North|TGen North|French|USA

>Spike|hCoV-19/Denmark/DCGC-15866/2020|2020-11-23|EPI\_ISL\_714072|Original|hCoV-19^^Syddanmark|Human|Department of Virus and Microbiological Special Diagnostics|Albertsen Lab|Michaelsen|Denmark

>Spike|hCoV-19/Netherlands/NH-RIVM-20766/2020|2020-12-23|EPI\_ISL\_790909|Original|hCoV-19^^Noord-Holland|Human|Dutch COVID-19 response team|National Institute for Public Health and the Environment (RIVM)|Meijer|Netherlands

>Spike|hCoV-19/USA/CA-CHLA-PLM94026245/2020|2020-11-09|EPI\_ISL\_753293|Original|hCoV-19^^California|Human|Clinical virology Laboratory|Center for Personalized Medicine|Dien Bard|USA

>Spike|hCoV-19/Netherlands/UT-EMC-133/2020|2020-10-14|EPI\_ISL\_632727|Original|hCoV-19^^Utrecht|Human|Dutch COVID-19 response team|Erasmus Medical Center|Oude Munnink|Netherlands

>Spike|hCoV-19/USA/MA-MASPHL-00740/2020|2020-09-24|EPI\_ISL\_692932|Original|hCoV-19^^Massachusetts|Human|Massachusetts State Public Health Laboratory|Massachusetts State Public Health Laboratory|Lang|USA

>Spike|hCoV-19/USA/MI-QDX-690/2020|2020-03-17|EPI\_ISL\_571438|Original|hCoV-19^^Michigan|Human|Quest Diagnostics|Quest Diagnostics|Kagan|USA

>Spike|hCoV-19/Australia/VIC10060/2020|2020-08-21|EPI\_ISL\_562779|Original|hCoV-19^^Victoria|Human|Microbiological Diagnostic Unit - Public Health Laboratory (MDU-PHL)|MDU-PHL|Schultz|Australia

>Spike|hCoV-19/USA/WA-S2678/2020|2020-06-22|EPI\_ISL\_497310|Original|hCoV-19^^Washington|Human|Washington State Department of Health|Seattle Flu Study|Lee|USA

>Spike|hCoV-19/USA/VA-DCLS-1253/2020|2020-08-06|EPI\_ISL\_529944|Original|hCoV-19^^Virginia|Human|Virginia DCLS|Virginia DCLS|St. Jacques|USA

>Spike|hCoV-19/USA/MA-MASPHL-00130/2020|2020-04-03|EPI\_ISL\_791607|Original|hCoV-19^^Massachusetts|Human|Massachusetts State Public Health Laboratory|Infectious Disease Program|Park|USA

>Spike|hCoV-19/France/PAC-MEPHI-2147/2020|2020-09-24|EPI\_ISL\_644511|Original|hCoV-19^^Provence-Alpes-Cote-d\u2019Azur|Human|MEPHI|MEPHI|Levasseur|France

>Spike|hCoV-19/Spain/AN-IBV-001088/2020|2020-03-26|EPI\_ISL\_452598|Original|hCoV-19^^Andalucia|Human|Servicio de Microbiolog\u00eda y Parasitolog\u00eda cl\u00ednica. UCEIMP. Hospital Universitario Virgen del Roc\u00edo/IBIS/CSIC/US.|SeqCOVID-SPAIN consortium/IBV (CSIC)|Comas|Spain

>Spike|hCoV-19/Wales/PHWC-48D016/2020|2020-11-04|EPI\_ISL\_666567|Original|hCoV-19^^Wales|Human|Wales Specialist Virology Centre Sequencing lab|COVID-19 Genomics UK (COG-UK) Consortium|Moore|United Kingdom

>Spike|hCoV-19/Bangladesh/DNAS-CPH-isl-461/2020|2020-04-29|EPI\_ISL\_605902|Original|hCoV-19^^Bangladesh|Human|NGS Lab|NGS Lab|Rabbi|Bangladesh

>Spike|hCoV-19/Congo/UKT-015/2020|2020-06-25|EPI\_ISL\_581493|Original|hCoV-19^^Brazzaville|Human|Fondation Congolaise pour la recherche medicale (FCRM)|NGS Competence Center T\u00fcbingen|Angelov|Republic of Congo

>Spike|hCoV-19/Netherlands/NH-RIVM-20006/2020|2020-11-21|EPI\_ISL\_723205|Original|hCoV-19^^Noord-Holland|Human|Dutch COVID-19 response team|National Institute for Public Health and the Environment (RIVM)|Meijer|Netherlands

>Spike|hCoV-19/Morocco/FMP-52/2020|2020-12-00|EPI\_ISL\_775249|Original|hCoV-19^^Rabat|Human|Laboratoire Biolife|Laboratoire de Biotechnologie|Ouahgiri|Morocco

>Spike|hCoV-19/England/CAMC-CB8E5C/2020|2020-12-18|EPI\_ISL\_778126|Original|hCoV-19^^England|Human|Lighthouse Lab in Cambridge|Wellcome Sanger Institute for the COVID-19 Genomics UK (COG-UK) Consortium|Davies|United Kingdom

>Spike|hCoV-19/Wales/PHWC-2811E/2020|2020-03-26|EPI\_ISL\_432147|Original|hCoV-19^^Wales|Human|Wales Specialist Virology Centre|Public Health Wales Microbiology Cardiff|Moore|United Kingdom

>Spike|hCoV-19/USA/TX-HMH0357/2020|2020-03-29|EPI\_ISL\_434950|Original|hCoV-19^^Texas|Human|Houston Methodist Hospital|Houston Methodist Hospital|Long|USA

>Spike|hCoV-19/USA/CA-CHLA-PLM59996756/2020|2020-11-28|EPI\_ISL\_753530|Original|hCoV-19^^California|Human|Clinical virology Laboratory|Center for Personalized Medicine|Dien Bard|USA

>Spike|hCoV-19/Luxembourg/LNS5755279/2020|2020-11-29|EPI\_ISL\_770915|Original|hCoV-19^^Luxembourg|Human|Laboratoire national de sant\u00e9|Laboratoire national de sant\u00e9|Wienecke-Baldacchino|Luxembourg

>Spike|hCoV-19/England/204590623/2020|2020-11-06|EPI\_ISL\_700631|Original|hCoV-19^^England|Human|Respiratory Virus Unit|COVID-19 Genomics UK (COG-UK) Consortium|Platt|United Kingdom

>Spike|hCoV-19/Singapore/1385/2020|2020-07-21|EPI\_ISL\_648739|Original|hCoV-19^^Singapore|Human|Department of Laboratory Medicine|Department of Laboratory Medicine|Chen|Singapore

>Spike|hCoV-19/England/QEUEH-9F3465/2020|2020-09-24|EPI\_ISL\_588616|Original|hCoV-19^^England|Human|Lighthouse Lab in Glasgow|Wellcome Sanger Institute for the COVID-19 Genomics UK (COG-UK) consortium|Davies|United Kingdom

>Spike|hCoV-19/England/20136008004/2020|2020-03-26|EPI\_ISL\_423211|Original|hCoV-19^^England|Human|Respiratory Virus Unit|Respiratory Virus Unit|Platt|United Kingdom

>Spike|hCoV-19/USA/WI-CDC-6238/2020|2020-03-26|EPI\_ISL\_576187|Original|hCoV-19^^Wisconsin|Human|WI State Laboratory of Hygiene|Pathogen Discovery|Queen|USA

>Spike|hCoV-19/Australia/VIC6527/2020|2020-07-24|EPI\_ISL\_521297|Original|hCoV-19^^Victoria|Human|Microbiological Diagnostic Unit - Public Health Laboratory (MDU-PHL)|MDU-PHL|Schultz|Australia

>Spike|hCoV-19/England/QEUEH-B2CECD/2020|2020-11-04|EPI\_ISL\_660064|Original|hCoV-19^^England|Human|Lighthouse Lab in Glasgow|Wellcome Sanger Institute for the COVID-19 Genomics UK (COG-UK) Consortium|Davies|United Kingdom

>Spike|hCoV-19/India/GJ-GBRC130/2020|2020-05-02|EPI\_ISL\_455027|Original|hCoV-19^^Gujarat|Human|Government Medical College|Gujarat Biotechnology Research Centre|Joshi|India

>Spike|hCoV-19/England/CAMC-B37F71/2020|2020-11-05|EPI\_ISL\_659091|Original|hCoV-19^^England|Human|Lighthouse Lab in Cambridge|Wellcome Sanger Institute for the COVID-19 Genomics UK (COG-UK) Consortium|Davies|United Kingdom

>Spike|hCoV-19/USA/TX-HMH-MCoV-16229/2020|2020-10-30|EPI\_ISL\_785913|Original|hCoV-19^^Texas|Human|Houston Methodist Hospital|Houston Methodist Hospital|Long|USA

>Spike|hCoV-19/Denmark/DCGC-14665/2020|2020-11-23|EPI\_ISL\_711199|Original|hCoV-19^^Syddanmark|Human|Department of Virus and Microbiological Special Diagnostics|Albertsen Lab|Michaelsen|Denmark

>Spike|hCoV-19/USA/UT-UPHL-201130046/2020|2020-04-04|EPI\_ISL\_623174|Original|hCoV-19^^Utah|Human|Utah Public Health Laboratory|Utah Public Health Laboratory|Young|USA

>Spike|hCoV-19/Wales/PHWC-48B77D/2020|2020-11-05|EPI\_ISL\_666279|Original|hCoV-19^^Wales|Human|Wales Specialist Virology Centre Sequencing lab|COVID-19 Genomics UK (COG-UK) Consortium|Moore|United Kingdom

>Spike|hCoV-19/Spain/CE-ISCIIII-2016517/2020|2020-10-14|EPI\_ISL\_691696|Original|hCoV-19^^Ceuta|Human|Hospital Universitario de Ceuta|Instituto de Salud Carlos III|Caballero|Spain

>Spike|hCoV-19/England/QEUEH-A9F4B5/2020|2020-10-20|EPI\_ISL\_611313|Original|hCoV-19^^England|Human|Lighthouse Lab in Glasgow|Wellcome Sanger Institute for the COVID-19 Genomics UK (COG-UK) consortium|Davies|United Kingdom

>Spike|hCoV-19/England/HECH-259A194/2020|2020-05-14|EPI\_ISL\_488873|Original|hCoV-19^^England|Human|Microbiology Department|Wellcome Sanger Institute for the COVID-19 Genomics UK (COG-UK) consortium|Davies|United Kingdom

>Spike|hCoV-19/England/CAMC-B52356/2020|2020-11-08|EPI\_ISL\_656818|Original|hCoV-19^^England|Human|Lighthouse Lab in Cambridge|Wellcome Sanger Institute for the COVID-19 Genomics UK (COG-UK) Consortium|Davies|United Kingdom

>Spike|hCoV-19/England/QEUA-AE3133/2020|2020-10-27|EPI\_ISL\_633580|Original|hCoV-19^^England|Human|Lighthouse Lab in Glasgow|Wellcome Sanger Institute for the COVID-19 Genomics UK (COG-UK) consortium|Davies|United Kingdom

>Spike|hCoV-19/England/QEUA-A0C653/2020|2020-09-30|EPI\_ISL\_584997|Original|hCoV-19^^England|Human|Quadram Institute Bioscience|COVID-19 Genomics UK (COG-UK) Consortium|Alikhan|United Kingdom

>Spike|hCoV-19/Australia/NSW876/2020|2020-07-20|EPI\_ISL\_544957|Original|hCoV-19^^New South Wales|Human|Laverty Pathology|NSW Health Pathology - Institute of Clinical Pathology and Medical Research; Westmead Hospital; University of Sydney|Gall|Australia

>Spike|hCoV-19/Singapore/782/2020|2020-06-18|EPI\_ISL\_509392|Original|hCoV-19^^Singapore|Human|Singapore General Hospital|Department of Microbiology|Abdul Rahman|Singapore

>Spike|hCoV-19/USA/TX-HMH-MCoV-13956/2020|2020-08-15|EPI\_ISL\_787248|Original|hCoV-19^^Texas|Human|Houston Methodist Hospital|Houston Methodist Hospital|Long|USA

>Spike|hCoV-19/Switzerland/BE-ETHZ-330423/2020|2020-10-18|EPI\_ISL\_614909|Original|hCoV-19^^Bern|Human|Viollier AG|Department of Biosystems Science and Engineering|Nadeau|Switzerland

>Spike|hCoV-19/Saudi Arabia/KAUST-MADINAH1123/2020|2020-06-11|EPI\_ISL\_677983|Original|hCoV-19^^Madinah|Human|Pathogen Genomics Lab King Abdullah University of Science and Technology(KAUST)|Pathogen Genomics Lab King Abdullah University of Science and Technology(KAUST)|Mohamed Ghazzali|Saudi Arabia

>Spike|hCoV-19/Scotland/EDB6213/2020|2020-05-19|EPI\_ISL\_473917|Original|hCoV-19^^Scotland|Human|Virology Department|COVID-19 Genomics UK (COG-UK) Consortium|Williams|United Kingdom

>Spike|hCoV-19/England/CAMC-B095D0/2020|2020-10-29|EPI\_ISL\_673078|Original|hCoV-19^^England|Human|Lighthouse Lab in Cambridge|Wellcome Sanger Institute for the COVID-19 Genomics UK (COG-UK) Consortium|Davies|United Kingdom

>Spike|hCoV-19/Wales/PHWC-49ABBB/2020|2020-12-03|EPI\_ISL\_727657|Original|hCoV-19^^Wales|Human|Originating lab|COVID-19 Genomics UK (COG-UK) Consortium|Moore|United Kingdom

>Spike|hCoV-19/Denmark/DCGC-1137/2020|2020-03-16|EPI\_ISL\_614606|Original|hCoV-19^^Hovedstaden|Human|Department of Virus and Microbiological Special Diagnostics|Albertsen lab|Michaelsen|Denmark

>Spike|hCoV-19/England/QEUA-AD0A5C/2020|2020-10-26|EPI\_ISL\_633881|Original|hCoV-19^^England|Human|Lighthouse Lab in Glasgow|Wellcome Sanger Institute for the COVID-19 Genomics UK (COG-UK) consortium|Davies|United Kingdom

>Spike|hCoV-19/England/ALDP-9CDE84/2020|2020-09-16|EPI\_ISL\_566278|Original|hCoV-19^^England|Human|Lighthouse Lab in Alderley Park|Wellcome Sanger Institute for the COVID-19 Genomics UK (COG-UK) consortium|Davies|United Kingdom

>Spike|hCoV-19/England/CAMB-7A4C9/2020|2020-04-02|EPI\_ISL\_440590|Original|hCoV-19^^England|Human|Department of Pathology|Wellcome Sanger Institute for the COVID-19 Genomics UK (COG-UK) consortium|Amato|United Kingdom

>Spike|hCoV-19/England/QEUA-9F5C10/2020|2020-09-25|EPI\_ISL\_588418|Original|hCoV-19^^England|Human|Lighthouse Lab in Glasgow|Wellcome Sanger Institute for the COVID-19 Genomics UK (COG-UK) consortium|Davies|United Kingdom

>Spike|hCoV-19/England/ALDP-B1C525/2020|2020-11-01|EPI\_ISL\_645658|Original|hCoV-19^^England|Human|Lighthouse Lab in Alderley Park|Wellcome Sanger Institute for the COVID-19 Genomics UK (COG-UK) Consortium|Davies|United Kingdom

>Spike|hCoV-19/Australia/VIC4339/2020|2020-07-13|EPI\_ISL\_519635|Original|hCoV-19^^Victoria|Human|Microbiological Diagnostic Unit - Public Health Laboratory (MDU-PHL)|MDU-PHL|Schultz|Australia

>Spike|hCoV-19/USA/UT-UPHL-2009081/2020|2020-05-11|EPI\_ISL\_525088|Original|hCoV-19^^Utah|Human|Utah Public Health Laboratory|Utah Public Health Laboratory|Young|USA

>Spike|hCoV-19/England/CAMB-7ED60/2020|2020-04-06|EPI\_ISL\_442893|Original|hCoV-19^^England|Human|Department of Pathology|Wellcome Sanger Institute for the COVID-19 Genomics UK (COG-UK) consortium|Amato|United Kingdom

>Spike|hCoV-19/Japan/PG-5009/2020|2020-08-00|EPI\_ISL\_690121|Original|hCoV-19^^Japan|Human|Pathogen Genomics Center|Pathogen Genomics Center|Sekizuka|Japan

>Spike|hCoV-19/England/QEUH-B6642F/2020|2020-11-11|EPI\_ISL\_661433|Original|hCoV-19^^England|Human|Lighthouse Lab in Glasgow|Wellcome Sanger Institute for the COVID-19 Genomics UK (COG-UK) Consortium|Davies|United Kingdom

>Spike|hCoV-19/USA/NY-NYUMC449/2020|2020-04-20|EPI\_ISL\_435516|Original|hCoV-19^^New York|Human|NYU Langone Health|Departments of Pathology and Medicine|Maurano|USA

>Spike|hCoV-19/Scotland/CVR4398/2020|2020-09-17|EPI\_ISL\_585272|Original|hCoV-19^^Scotland|Human|West of Scotland Specialist Virology Centre|COVID-19 Genomics UK (COG-UK) Consortium|Robertson|United Kingdom

>Spike|hCoV-19/USA/LA-EVTL659/2020|2020-07-11|EPI\_ISL\_653351|Original|hCoV-19^^Louisiana|Human|LSUHS Emerging Viral Threat Laboratory|Microbial Genome Sequencing Center|Kamil|USA

>Spike|hCoV-19/Iceland/232/2020|2020-03-17|EPI\_ISL\_417560|Original|hCoV-19^^Reykjavik|Human|The National University Hospital of Iceland|deCODE genetics|J\u00f3nsson|Iceland

>Spike|hCoV-19/England/MILK-BACD31/2020|2020-11-17|EPI\_ISL\_681569|Original|hCoV-19^^England|Human|Lighthouse Lab in Milton Keynes|Wellcome Sanger Institute for the COVID-19 Genomics UK (COG-UK) Consortium|Davies|United Kingdom

>Spike|hCoV-19/Australia/WA94/2020|2020-04-02|EPI\_ISL\_512747|Original|hCoV-19^^Western Australia|Human|PathWest Laboratory Medicine WA|PathWest Laboratory Medicine WA Microbial Surveillance Unit|Sikazwe|Australia

>Spike|hCoV-19/Germany/NW-MPP-22/2020|2020-06-05|EPI\_ISL\_487411|Original|hCoV-19^^North Rhine-Westphalia|Human|Labor Knei\u00dfler GmbH & Co. KG|Heinrich Pette Institute|G\u00f6tther|Germany

>Spike|hCoV-19/USA/NY-NYUMC104/2020|2020-03-18|EPI\_ISL\_421716|Original|hCoV-19^^New York|Human|NYU Langone Health|Departments of Pathology and Medicine|Maurano|USA

>Spike|hCoV-19/Luxembourg/LNS5462232/2020|2020-11-15|EPI\_ISL\_744236|Original|hCoV-19^^Luxembourg|Human|Laboratoire national de sant\u00e9|Laboratoire national de sant\u00e9|Wienecke-Baldacchino|Luxembourg

>Spike|hCoV-19/England/ALDP-953A70/2020|2020-06-08|EPI\_ISL\_553809|Original|hCoV-19^^England|Human|Lighthouse Lab in Alderley Park|Wellcome Sanger Institute for the COVID-19 Genomics UK (COG-UK) consortium|Davies|United Kingdom

>Spike|hCoV-19/USA/MA-MGH-02750/2020|2020-09-25|EPI\_ISL\_765615|Original|hCoV-19^^Massachusetts|Human|Massachusetts General Hospital|Infectious Disease Program|Park|USA

>Spike|hCoV-19/Denmark/DCGC-7021/2020|2020-10-12|EPI\_ISL\_619868|Original|hCoV-19^^Hovedstaden|Human|Department of Virus and Microbiological Special Diagnostics|Albertsen lab|Michaelsen|Denmark

>Spike|hCoV-19/USA/TX-HMH-3550/2020|2020-06-10|EPI\_ISL\_543012|Original|hCoV-19^^Texas|Human|Houston Methodist Hospital|Houston Methodist Hospital|Long|USA

>Spike|hCoV-19/India/TG-CCMB-AA222/2020|2020-08-10|EPI\_ISL\_539712|Original|hCoV-19^^Telangana|Human|CSIR-Centre for Cellular and Molecular Biology|CSIR-Centre for Cellular and Molecular Biology|Mukherjee|India

>Spike|hCoV-19/Spain/VC-IBV-98004470/2020|2020-03-24|EPI\_ISL\_583938|Original|hCoV-19^^Comunitat Valenciana|Human|Servicio de Microbiolog\u00eda. Hospital General Universitario de Castell\u00f3n|SeqCOVID-SPAIN consortium|IBV(CSIC)|Comas|Spain

>Spike|hCoV-19/USA/TX-HMH-MCoV-10724/2020|2020-07-09|EPI\_ISL\_789199|Original|hCoV-19^^Texas|Human|Houston Methodist Hospital|Houston Methodist Hospital|Long|USA

>Spike|hCoV-19/Australia/VIC2471/2020|2020-06-28|EPI\_ISL\_522174|Original|hCoV-19^^Victoria|Human|Victorian Infectious Diseases Reference Laboratory (VIDRL)|VIDRL and MDU-PHL|Schultz|Australia

>Spike|hCoV-19/England/ALDP-BC651B/2020|2020-11-20|EPI\_ISL\_721341|Original|hCoV-19^^England|Human|Lighthouse Lab in Alderley Park|Wellcome Sanger Institute for the COVID-19 Genomics UK (COG-UK) Consortium|Davies|United Kingdom

>Spike|hCoV-19/Denmark/DCGC-2770/2020|2020-08-24|EPI\_ISL\_616604|Original|hCoV-19^^Hovedstaden|Human|Department of Virus and Microbiological Special Diagnostics|Albertsen lab|Michaelsen|Denmark



>Spike|hCoV-19/Canada/QC-LSPQ-L00235295/2020|2020-03-24|EPI\_ISL\_536094|Original|hCoV-19^^Quebec|Human|H\u00f4pital Charles-LeMoine|Laboratoire de sant\u00e9 publique du Qu\u00e9bec|Moreira|Canada

>Spike|hCoV-19/Gibraltar/204641759/2020|2020-00-00|EPI\_ISL\_637227|Original|hCoV-19^^Gibraltar|Human|Microbiology|Respiratory Virus Unit|Platt|Gibraltar

>Spike|hCoV-19/England/ALDP-95AC64/2020|2020-06-12|EPI\_ISL\_554948|Original|hCoV-19^^England|Human|Lighthouse Lab in Alderley Park|Wellcome Sanger Institute for the COVID-19 Genomics UK (COG-UK) consortium|Davies|United Kingdom

>Spike|hCoV-19/Denmark/ALAB-SSI358/2020|2020-03-24|EPI\_ISL\_429469|Original|hCoV-19^^Denmark|Human|Department of Virus and Microbiological Special Diagnostics|Albertsen lab|Kirkegaard|Denmark

>Spike|hCoV-19/Denmark/DCGC-18549/2020|2020-12-07|EPI\_ISL\_750036|Original|hCoV-19^^Hovedstaden|Human|Department of Virus and Microbiological Special Diagnostics|Albertsen Lab|Michaelsen|Denmark

>Spike|hCoV-19/Japan/PG-5396/2020|2020-08-00|EPI\_ISL\_690499|Original|hCoV-19^^Japan|Human|Fukuoka Institute of Health and Environmental Sciences|Pathogen Genomics Center|Sekizuka|Japan

>Spike|hCoV-19/England/QEUEH-BCE917/2020|2020-11-26|EPI\_ISL\_704493|Original|hCoV-19^^England|Human|Lighthouse Lab in Glasgow|Wellcome Sanger Institute for the COVID-19 Genomics UK (COG-UK) Consortium|Davies|United Kingdom

>Spike|hCoV-19/England/QEUEH-A208EA/2020|2020-10-01|EPI\_ISL\_587626|Original|hCoV-19^^England|Human|Lighthouse Lab in Glasgow|Wellcome Sanger Institute for the COVID-19 Genomics UK (COG-UK) consortium|Davies|United Kingdom

>Spike|hCoV-19/Switzerland/VD-ETHZ-321549/2020|2020-10-15|EPI\_ISL\_603758|Original|hCoV-19^^Vaud|Human|Viollier AG|Department of Biosystems Science and Engineering|Nadeau|Switzerland

>Spike|hCoV-19/Japan/PG-4347/2020|2020-07-00|EPI\_ISL\_692575|Original|hCoV-19^^Japan|Human|Pathogen Genomics Center|Pathogen Genomics Center|Sekizuka|Japan

>Spike|hCoV-19/USA/CA-CZB-2197/2020|2020-05-27|EPI\_ISL\_513746|Original|hCoV-19^^California|Human|Orange County Public Health Lab|Chan-Zuckerberg Biohub|Kamm|USA

>Spike|hCoV-19/Denmark/DCGC-6102/2020|2020-10-05|EPI\_ISL\_620297|Original|hCoV-19^^Hovedstaden|Human|Department of Virus and Microbiological Special Diagnostics|Albertsen lab|Michaelsen|Denmark

>Spike|hCoV-19/USA/WI-WSLH-200745/2020|2020-06-29|EPI\_ISL\_631500|Original|hCoV-19^^Wisconsin|Human|Wisconsin State Laboratory of Hygiene Communicable Disease Division|Wisconsin State Laboratory of Hygiene Communicable Disease Division|Florek|USA

>Spike|hCoV-19/Australia/VIC4493/2020|2020-07-15|EPI\_ISL\_518904|Original|hCoV-19^^Victoria|Human|Microbiological Diagnostic Unit - Public Health Laboratory (MDU-PHL)|MDU-PHL|Schultz|Australia

>Spike|hCoV-19/Denmark/DCGC-19230/2020|2020-12-07|EPI\_ISL\_748830|Original|hCoV-19^^Hovedstaden|Human|Department of Virus and Microbiological Special Diagnostics|Albertsen Lab|Michaelsen|Denmark

>Spike|hCoV-19/England/QEUEH-A8BDDF/2020|2020-10-15|EPI\_ISL\_643222|Original|hCoV-19^^England|Human|Lighthouse Lab in Glasgow|Wellcome Sanger Institute for the COVID-19 Genomics UK (COG-UK) Consortium|Davies|United Kingdom

>Spike|hCoV-19/United Arab Emirates/0733/2020|2020-05-15|EPI\_ISL\_698181|Original|hCoV-19^^Abu Dhabi|Human|Group 42 (G42) Healthcare|G42 Healthcare|Ogrodzki|United Arab Emirates

>Spike|hCoV-19/USA/TX-HMH-MCoV-14113/2020|2020-10-03|EPI\_ISL\_787399|Original|hCoV-19^^Texas|Human|Houston Methodist Hospital|Houston Methodist Hospital|Long|USA

>Spike|hCoV-19/Wales/PHWC-166FCE/2020|2020-06-13|EPI\_ISL\_494137|Original|hCoV-19^^Wales|Human|Originating lab|COVID-19 Genomics UK (COG-UK) Consortium|Moore|United Kingdom

>Spike|hCoV-19/England/MILK-B97504/2020|2020-11-15|EPI\_ISL\_675054|Original|hCoV-19^^England|Human|Lighthouse Lab in Milton Keynes|Wellcome Sanger Institute for the COVID-19 Genomics UK (COG-UK) Consortium|Davies|United Kingdom

>Spike|hCoV-19/England/QEUEH-C34474/2020|2020-12-11|EPI\_ISL\_733969|Original|hCoV-19^^England|Human|Lighthouse Lab in Glasgow|Wellcome Sanger Institute for the COVID-19 Genomics UK (COG-UK) Consortium|Davies|United Kingdom

>Spike|hCoV-19/Japan/PG-0936/2020|2020-04-00|EPI\_ISL\_684546|Original|hCoV-19^^Japan|Human|Pathogen Genomics Center|Pathogen Genomics Center|Sekizuka|Japan

>Spike|hCoV-19/USA/CA-CZB-13125/2020|2020-10-26|EPI\_ISL\_672410|Original|hCoV-19^^California|Human|Madera County Department of Public Health|Chan-Zuckerberg Biohub|Bhatt|USA

>Spike|hCoV-19/England/CAMB-74359/2020|2020-00-00|EPI\_ISL\_425280|Original|hCoV-19^^England|Human|Department of Pathology|COVID-19 Genomics UK (COG-UK) Consortium|Meredith|United Kingdom

>Spike|hCoV-19/Israel/CVL-n-6102/2020|2020-03-15|EPI\_ISL\_474987|Original|hCoV-19^^Yavne|Human|Israel Central Virology laboratory|Israel Central Virology laboratory|Zuckerman|Israel

>Spike|hCoV-19/USA/WI-UW-33/2020|2020-03-23|EPI\_ISL\_421291|Original|hCoV-19^^Wisconsin|Human|University of Wisconsin-Madison AIDS Vaccine Research Laboratories|University of Wisconsin-Madison AIDS Vaccine Research Laboratories|Baczenas|USA

>Spike|hCoV-19/USA/TX-DSHS-1492/2020|2020-06-22|EPI\_ISL\_683407|Original|hCoV-19^^Texas|Human|Texas Department of State Health Services|Texas Department of State Health Services|Rahman|USA

>Spike|hCoV-19/England/SHEF-CCEE8/2020|2020-04-18|EPI\_ISL\_462061|Original|hCoV-19^^England|Human|Virology Department|COVID-19 Genomics UK (COG-UK) Consortium|de Silva|United Kingdom

>Spike|hCoV-19/England/ALDP-952D3C/2020|2020-06-11|EPI\_ISL\_581404|Original|hCoV-19^^England|Human|Lighthouse Lab in Alderley Park|Wellcome Sanger Institute for the COVID-19 Genomics UK (COG-UK) consortium|Davies|United Kingdom

>Spike|hCoV-19/England/HECH-259A47D/2020|2020-06-30|EPI\_ISL\_529661|Original|hCoV-19^^England|Human|University of Birmingham|COVID-19 Genomics UK (COG-UK) Consortium|Loman|United Kingdom

>Spike|hCoV-19/Australia/VIC5102/2020|2020-07-19|EPI\_ISL\_519905|Original|hCoV-19^^Victoria|Human|Microbiological Diagnostic Unit - Public Health Laboratory (MDU-PHL)|MDU-PHL|Schultz|Australia

>Spike|hCoV-19/England/ALDP-B5CF49/2020|2020-11-09|EPI\_ISL\_655796|Original|hCoV-19^^England|Human|Lighthouse Lab in Alderley Park|Wellcome Sanger Institute for the COVID-19 Genomics UK (COG-UK) Consortium|Davies|United Kingdom

>Spike|hCoV-19/South Africa/KRISP-K004559/2020|2020-10-21|EPI\_ISL\_660255|Original|hCoV-19^^KwaZulu-Natal|Human|NHLS-IALCH|KRISP|de Oliveira|South Africa

>Spike|hCoV-19/India/MH-ACTREC-109/2020|2020-05-24|EPI\_ISL\_699765|Original|hCoV-19^^Maharashtra|Human|Hematopathology Laboratory|Hematopathology Laboratory|Patkar|India

>Spike|hCoV-19/England/CAMC-B09F3C/2020|2020-10-30|EPI\_ISL\_673114|Original|hCoV-19^^England|Human|Lighthouse Lab in Cambridge|Wellcome Sanger Institute for the COVID-19 Genomics UK (COG-UK) Consortium|Davies|United Kingdom

>Spike|hCoV-19/Switzerland/BE-ETHZ-100118/2020|2020-03-16|EPI\_ISL\_451702|Original|hCoV-19^^Bern|Human|Viollier AG|Department of Biosystems Science and Engineering|Nadeau|Switzerland

>Spike|hCoV-19/Scotland/QEUH-9E4555/2020|2020-09-23|EPI\_ISL\_600985|Original|hCoV-19^^Scotland|Human|Lighthouse Lab in Glasgow|Wellcome Sanger Institute for the COVID-19 Genomics UK (COG-UK) consortium|Davies|United Kingdom

>Spike|hCoV-19/England/ALDP-9877A9/2020|2020-08-08|EPI\_ISL\_529581|Original|hCoV-19^^England|Human|Quadram Institute Bioscience|COVID-19 Genomics UK (COG-UK) Consortium|Alikhan|United Kingdom

>Spike|hCoV-19/Switzerland/BE-ETHZ-260179/2020|2020-08-27|EPI\_ISL\_539470|Original|hCoV-19^^Bern|Human|Viollier AG|Department of Biosystems Science and Engineering|Nadeau|Switzerland

>Spike|hCoV-19/New Zealand/20VR3138/2020|2020-03-20|EPI\_ISL\_579430|Original|hCoV-19^^Canterbury|Human|Canterbury Health Laboratories|Institute of Environmental Science and Research (ESR)|Wang|New Zealand

>Spike|hCoV-19/USA/MI-MDHHS-SC21102/2020|2020-03-27|EPI\_ISL\_507878|Original|hCoV-19^^Michigan|Human|Michigan Department of Health and Human Services|Michigan Department of Health and Human Services|Blankenship|USA

>Spike|hCoV-19/England/SHEF-10C6285/2020|2020-12-07|EPI\_ISL\_741940|Original|hCoV-19^^England|Human|Virology Department|COVID-19 Genomics UK (COG-UK) Consortium|de Silva|United Kingdom

>Spike|hCoV-19/England/ALDP-BB555B/2020|2020-11-21|EPI\_ISL\_703106|Original|hCoV-19^^England|Human|Lighthouse Lab in Alderley Park|Wellcome Sanger Institute for the COVID-19 Genomics UK (COG-UK) Consortium|Davies|United Kingdom

>Spike|hCoV-19/Spain/AN-IBV-002908/2020|2020-03-18|EPI\_ISL\_474869|Original|hCoV-19^^Andalucia|Human|Hospital Universitario Virgen de las Nieves de Granada-SAS|SeqCOVID-SPAIN consortium/IBV(CSIC)|Comas|Spain

>Spike|hCoV-19/England/QEUH-A89C01/2020|2020-10-16|EPI\_ISL\_638175|Original|hCoV-19^^England|Human|Oxford Viromics|COVID-19 Genomics UK (COG-UK) Consortium|Golubchik|United Kingdom

>Spike|hCoV-19/Saudi Arabia/KAUST-MAKKAH167/2020|2020-04-06|EPI\_ISL\_678135|Original|hCoV-19^^Makkah|Human|Pathogen Genomics Lab King Abdullah University of Science and Technology(KAUST)|Pathogen Genomics Lab King Abdullah University of Science and Technology(KAUST)|Mohamed Ghazzali|Saudi Arabia

>Spike|hCoV-19/USA/WI-UW-2149/2020|2020-10-14|EPI\_ISL\_677553|Original|hCoV-19^^Wisconsin|Human|University of Wisconsin-Madison AIDS Vaccine Research Laboratories|University of Wisconsin-Madison AIDS Vaccine Research Laboratories|Baczenas|USA

>Spike|hCoV-19/USA/WA-S946/2020|2020-04-27|EPI\_ISL\_463436|Original|hCoV-19^^Washington|Human|Washington State Department of Health|Seattle Flu Study|Bedford|USA

>Spike|hCoV-19/Australia/VIC15457/2020|2020-08-01|EPI\_ISL\_593312|Original|hCoV-19^^Victoria|Human|Microbiological Diagnostic Unit - Public Health Laboratory (MDU-PHL)|MDU-PHL|Schultz|Australia

>Spike|hCoV-19/USA/MN-MDH-1097/2020|2020-06-03|EPI\_ISL\_470777|Original|hCoV-19^^Minnesota|Human|Minnesota Department of Health|Minnesota Department of Health|Garfin|USA

>Spike|hCoV-19/England/PORT-2D5530/2020|2020-12-20|EPI\_ISL\_765121|Original|hCoV-19^^England|Human|Centre for Enzyme Innovation|COVID-19 Genomics UK (COG-UK) Consortium|Robson|United Kingdom

>Spike|hCoV-19/England/ALDP-A84F94/2020|2020-10-18|EPI\_ISL\_610575|Original|hCoV-19^^England|Human|Lighthouse Lab in Alderley Park|Wellcome Sanger Institute for the COVID-19 Genomics UK (COG-UK) consortium|Davies|United Kingdom

>Spike|hCoV-19/England/20119049904/2020|2020-03-14|EPI\_ISL\_465073|Original|hCoV-19^^England|Human|Respiratory Virus Unit|Respiratory Virus Unit|Platt|United Kingdom

>Spike|hCoV-19/England/CAMC-B20BFF/2020|2020-11-02|EPI\_ISL\_647665|Original|hCoV-19^^England|Human|Lighthouse Lab in Cambridge|Wellcome Sanger Institute for the COVID-19 Genomics UK (COG-UK) Consortium|Davies|United Kingdom

>Spike|hCoV-19/Spain/VC-FISABIO-277/2020|2020-03-16|EPI\_ISL\_436372|Original|hCoV-19^^Comunitat Valenciana|Human|Servicio de Microbiologia. Hospital Universitario Doctor Peset|Sequencing and Bioinformatics Service and Molecular Epidemiology Research Group. FISABIO-Public Health|Gonzalez-Candelas|Spain

>Spike|hCoV-19/England/ALDP-9501D8/2020|2020-06-15|EPI\_ISL\_555292|Original|hCoV-19^^England|Human|Lighthouse Lab in Alderley Park|Wellcome Sanger Institute for the COVID-19 Genomics UK (COG-UK) consortium|Davies|United Kingdom

>Spike|hCoV-19/Canada/ON-S840/2020|2020-04-00|EPI\_ISL\_591243|Original|hCoV-19^^Ontario|Human|Toronto Invasive Bacterial Diseases Network|McMaster University|McArthur|Canada

>Spike|hCoV-19/Denmark/ALAB-SSI411/2020|2020-03-10|EPI\_ISL\_429505|Original|hCoV-19^^Denmark|Human|Department of Virus and Microbiological Special Diagnostics|Albertsen lab|Kirkegaard|Denmark

>Spike|hCoV-19/England/SHEF-D085C/2020|2020-05-10|EPI\_ISL\_475487|Original|hCoV-19^^England|Human|Virology Department|COVID-19 Genomics UK (COG-UK) Consortium|de Silva|United Kingdom

>Spike|hCoV-19/USA/TX-HMH-MCoV-10081/2020|2020-07-06|EPI\_ISL\_789315|Original|hCoV-19^^Texas|Human|Houston Methodist Hospital|Houston Methodist Hospital|Long|USA

>Spike|hCoV-19/England/CAMC-BD20DF/2020|2020-11-27|EPI\_ISL\_702107|Original|hCoV-19^^England|Human|Lighthouse Lab in Cambridge|Wellcome Sanger Institute for the COVID-19 Genomics UK (COG-UK) Consortium|Davies|United Kingdom

>Spike|hCoV-19/Brazil/RS-00689/2020|2020-11-27|EPI\_ISL\_770625|Original|hCoV-19^^Rio Grande do Sul|Human|Laborat\u00f3rio de Microbiologia Molecular - Universidade FEEVALE|Bioinformatics Laboratory / LNCC|Almeida|Brazil

>Spike|hCoV-19/USA/NY-Wadsworth-290757-01/2020|2020-12-20|EPI\_ISL\_767575|Original|hCoV-19^^New York|Human|URMC LABS|Wadsworth Center|Lasek-Nesselquist|USA

>Spike|hCoV-19/Belgium/ULG-7500/2020|2020-03-16|EPI\_ISL\_418632|Original|hCoV-19^^Li\u00e8ge|Human|Department of Clinical Microbiology|GIGA Medical Genomics|Durkin|Belgium

>Spike|hCoV-19/England/CAMC-B222F8/2020|2020-11-01|EPI\_ISL\_645886|Original|hCoV-19^^England|Human|Lighthouse Lab in Cambridge|Wellcome Sanger Institute for the COVID-19 Genomics UK (COG-UK) Consortium|Davies|United Kingdom

>Spike|hCoV-19/USA/LA-GBCL-26544551/2020|2020-04-18|EPI\_ISL\_485129|Original|hCoV-19^^Louisiana|Human|River Road Testing Lab|Ginkgo Bioworks Clinical Laboratory|Smith|USA

>Spike|hCoV-19/England/MILK-9A95F2/2020|2020-09-01|EPI\_ISL\_551163|Original|hCoV-19^^England|Human|Lighthouse Lab in Milton Keynes|Wellcome Sanger Institute for the COVID-19 Genomics UK (COG-UK) consortium|Davies|United Kingdom

>Spike|hCoV-19/England/MILK-957441/2020|2020-06-13|EPI\_ISL\_553965|Original|hCoV-19^^England|Human|Lighthouse Lab in Milton Keynes|Wellcome Sanger Institute for the COVID-19 Genomics UK (COG-UK) consortium|Davies|United Kingdom

>Spike|hCoV-19/Germany/HH-hpi-p2307/2020|2020-03-12|EPI\_ISL\_776438|Original|hCoV-19^^Hamburg|Human|University Medical Center Hamburg Eppendorf|Heinrich Pette Institute|Robitaille|Germany

>Spike|hCoV-19/USA/WA-S1842/2020|2020-05-27|EPI\_ISL\_496268|Original|hCoV-19^^Washington|Human|Washington State Department of Health|Seattle Flu Study|Lee|USA

>Spike|hCoV-19/England/ALDP-9FD9B7/2020|2020-10-02|EPI\_ISL\_587845|Original|hCoV-19^^England|Human|Lighthouse Lab in Alderley Park|Wellcome Sanger Institute for the COVID-19 Genomics UK (COG-UK) consortium|Davies|United Kingdom

>Spike|hCoV-19/England/NORW-E8BB2/2020|2020-04-13|EPI\_ISL\_448286|Original|hCoV-19^^England|Human|Quadram Institute Bioscience|COVID-19 Genomics UK (COG-UK) Consortium|Alikhan|United Kingdom

>Spike|hCoV-19/SaudiArabia/KAUST-MADINAH354/2020|2020-04-23|EPI\_ISL\_513134|Original|hCoV-19^^Madinah|Human|Pathogen Genomics Lab King Abdullah University of Science and Technology(KAUST)|Pathogen Genomics Lab King Abdullah University of Science and Technology(KAUST)|Mohamed Ghazzali|Saudi Arabia

>Spike|hCoV-19/USA/CA-ALSR-1970/2020|2020-06-26|EPI\_ISL\_512268|Original|hCoV-19^^California|Human|San Diego County Public Health Laboratory|Andersen lab at Scripps Research|Gangavarapu|USA

>Spike|hCoV-19/USA/NY-NYUMC891/2020|2020-05-10|EPI\_ISL\_467384|Original|hCoV-19^^New York|Human|NYU Langone Health|Departments of Pathology and Medicine|Maurano|USA

>Spike|hCoV-19/Scotland/EDB971/2020|2020-04-06|EPI\_ISL\_432892|Original|hCoV-19^^Scotland|Human|Virology Department|COVID-19 Genomics UK (COG-UK) Consortium|Williams|United Kingdom

>Spike|hCoV-19/Japan/PG-6456/2020|2020-08-00|EPI\_ISL\_689561|Original|hCoV-19^^Japan|Human|Pathogen Genomics Center|Pathogen Genomics Center|Sekizuka|Japan

>Spike|hCoV-19/Switzerland/AG-ETHZ-140086/2020|2020-04-20|EPI\_ISL\_476129|Original|hCoV-19^^Aargau|Human|Viollier AG|Department of Biosystems Science and Engineering|Nadeau|Switzerland

>Spike|hCoV-19/England/LOND-D6874/2020|2020-04-21|EPI\_ISL\_482193|Original|hCoV-19^^England|Human|University College London|Wellcome Sanger Institute for the COVID-19 Genomics UK (COG-UK) consortium|Davies|United Kingdom

>Spike|hCoV-19/USA/WI-UW-609/2020|2020-06-24|EPI\_ISL\_484984|Original|hCoV-19^^Wisconsin|Human|University of Wisconsin-Madison AIDS Vaccine Research Laboratories|University of Wisconsin-Madison AIDS Vaccine Research Laboratories|Baczenas|USA

>Spike|hCoV-19/Northern Ireland/NIRE-FB78B/2020|2020-03-28|EPI\_ISL\_448977|Original|hCoV-19^^Northern Ireland|Human|Regional Virus Laboratory|COVID-19 Genomics UK (COG-UK) Consortium|Fairley|United Kingdom

>Spike|hCoV-19/USA/WA-S1647/2020|2020-05-27|EPI\_ISL\_496073|Original|hCoV-19^^Washington|Human|Washington State Department of Health|Seattle Flu Study|Lee|USA

>Spike|hCoV-19/England/ALDP-B481B3/2020|2020-11-07|EPI\_ISL\_649344|Original|hCoV-19^^England|Human|Lighthouse Lab in Alderley Park|Wellcome Sanger Institute for the COVID-19 Genomics UK (COG-UK) Consortium|Davies|United Kingdom

>Spike|hCoV-19/England/CAMC-AEAB4D/2020|2020-10-26|EPI\_ISL\_633141|Original|hCoV-19^^England|Human|Lighthouse Lab in Cambridge|Wellcome Sanger Institute for the COVID-19 Genomics UK (COG-UK) consortium|Davies|United Kingdom

>Spike|hCoV-19/England/ALDP-5D271C/2020|2020-06-19|EPI\_ISL\_558503|Original|hCoV-19^^England|Human|Lighthouse Lab in Alderley Park|Wellcome Sanger Institute for the COVID-19 Genomics UK (COG-UK) consortium|Davies|United Kingdom

>Spike|hCoV-19/USA/TX-HMH-MCoV-15084/2020|2020-10-18|EPI\_ISL\_786568|Original|hCoV-19^^Texas|Human|Houston Methodist Hospital|Houston Methodist Hospital|Long|USA

>Spike|hCoV-19/Wales/PHWC-31A62/2020|2020-04-11|EPI\_ISL\_474325|Original|hCoV-19^^Wales|Human|Originating lab|COVID-19 Genomics UK (COG-UK) Consortium|Moore|United Kingdom

>Spike|hCoV-19/Vietnam/VNHN\_3629/2020|2020-03-30|EPI\_ISL\_455706|Original|hCoV-19^^Hanoi|Human|National Hospital of Tropical Diseases|Oxford University Clinical Research Unit|Nguyen|Vietnam

>Spike|hCoV-19/England/CAMB-7F646/2020|2020-04-09|EPI\_ISL\_470389|Original|hCoV-19^^England|Human|Department of Pathology|Wellcome Sanger Institute for the COVID-19 Genomics UK (COG-UK) consortium|Davies|United Kingdom

>Spike|hCoV-19/India/TN-NCDC-02309/2020|2020-03-29|EPI\_ISL\_435084|Original|hCoV-19^^Tamil Nadu|Human|National Centre for Disease control (NCDC)|NCDC/CSIR-IGIB|Faruq|India

>Spike|hCoV-19/Portugal/PT1133/2020|2020-03-27|EPI\_ISL\_511680|Original|hCoV-19^^Portugal|Human|Instituto Nacional de Saude (INSA)|Instituto Nacional de Saude (INSA)|Borges|Portugal

>Spike|hCoV-19/Denmark/DCGC-11655/2020|2020-10-26|EPI\_ISL\_671050|Original|hCoV-19^^Midtjylland|Human|Department of Virus and Microbiological Special Diagnostics|Albertsen Lab|Michaelsen|Denmark

>Spike|hCoV-19/Japan/PG-7458/2020|2020-07-00|EPI\_ISL\_688560|Original|hCoV-19^^Japan|Human|Pathogen Genomics Center|Pathogen Genomics Center|Sekizuka|Japan

>Spike|hCoV-19/Wales/PHWC-4A4C9D/2020|2020-12-09|EPI\_ISL\_763422|Original|hCoV-19^^Wales|Human|Wales Specialist Virology Centre Sequencing lab|COVID-19 Genomics UK (COG-UK) Consortium|Moore|United Kingdom

>Spike|hCoV-19/Canada/ON-PHL-20-02329/2020|2020-09-00|EPI\_ISL\_671555|Original|hCoV-19^^Ontario|Human|Public Health Ontario Laboratory|Public Health Ontario Laboratory|Guthrie|Canada

>Spike|hCoV-19/USA/TX-HMH-MCoV-14284/2020|2020-10-03|EPI\_ISL\_787569|Original|hCoV-19^^Texas|Human|Houston Methodist Hospital|Houston Methodist Hospital|Long|USA

>Spike|hCoV-19/Russia/NGR-RII-MH6306S/2020|2020-11-12|EPI\_ISL\_733376|Original|hCoV-19^^Novgorod|Human|HELIX LLC|WHO National Influenza Centre Russian Federation|Komissarov|Russia

>Spike|hCoV-19/USA/TX-HMH-MCoV-14846/2020|2020-10-13|EPI\_ISL\_786330|Original|hCoV-19^^Texas|Human|Houston Methodist Hospital|Houston Methodist Hospital|Long|USA

>Spike|hCoV-19/England/ALDP-AA1CD6/2020|2020-10-22|EPI\_ISL\_624449|Original|hCoV-19^^England|Human|Lighthouse Lab in Alderley Park|Wellcome Sanger Institute for the COVID-19 Genomics UK (COG-UK) consortium|Davies|United Kingdom

>Spike|hCoV-19/England/QEUEH-97015A/2020|2020-08-17|EPI\_ISL\_540288|Original|hCoV-19^^England|Human|Lighthouse Lab in Glasgow|Wellcome Sanger Institute for the COVID-19 Genomics UK (COG-UK) consortium|Davies|United Kingdom

>Spike|hCoV-19/Denmark/DCGC-20040/2020|2020-12-07|EPI\_ISL\_747946|Original|hCoV-19^^Syddanmark|Human|Department of Virus and Microbiological Special Diagnostics|Albertsen Lab|Michaelsen|Denmark

>Spike|hCoV-19/USA/CA-CZB-2455/2020|2020-05-21|EPI\_ISL\_513863|Original|hCoV-19^^California|Human|San Francisco Public Health Laboratory|Chan-Zuckerberg Biohub|Kamm|USA

>Spike|hCoV-19/USA/WA-S1424/2020|2020-05-19|EPI\_ISL\_495874|Original|hCoV-19^^Washington|Human|Washington State Department of Health|Seattle Flu Study|Lee|USA

>Spike|hCoV-19/England/MILK-D0B730/2020|2020-12-21|EPI\_ISL\_781191|Original|hCoV-19^^England|Human|Lighthouse Lab in Milton Keynes|Wellcome Sanger Institute for the COVID-19 Genomics UK (COG-UK) Consortium|Davies|United Kingdom

>Spike|hCoV-19/India/GJ-GBRC-363/2020|2020-06-18|EPI\_ISL\_524715|Original|hCoV-19^^Gujarat|Human|B.J. Medical College and Civil hospital|Gujarat Biotechnology Research Centre|Joshi|India

>Spike|hCoV-19/England/MILK-9937F5/2020|2020-08-27|EPI\_ISL\_552026|Original|hCoV-19^^England|Human|Lighthouse Lab in Milton Keynes|Wellcome Sanger Institute for the COVID-19 Genomics UK (COG-UK) consortium|Davies|United Kingdom

>Spike|hCoV-19/Luxembourg/LNS9594129/2020|2020-10-28|EPI\_ISL\_744945|Original|hCoV-19^^Luxembourg|Human|Laboratoire national de sant\u00e9|Laboratoire national de sant\u00e9|Wienecke-Baldacchino|Luxembourg

>Spike|hCoV-19/England/MILK-C78289/2020|2020-12-15|EPI\_ISL\_756958|Original|hCoV-19^^England|Human|Lighthouse Lab in Milton Keynes|Wellcome Sanger Institute for the COVID-19 Genomics UK (COG-UK) Consortium|Davies|United Kingdom

>Spike|hCoV-19/USA/MN-MDH-1857/2020|2020-10-08|EPI\_ISL\_602992|Original|hCoV-19^^Minnesota|Human|Minnesota Department of Health|Minnesota Department of Health|Garfin|USA

>Spike|hCoV-19/New Zealand/20CV0139/2020|2020-08-20|EPI\_ISL\_548019|Original|hCoV-19^^Auckland|Human|North Shore Hospital|Institute of Environmental Science and Research (ESR)|Wang|New Zealand

>Spike|hCoV-19/England/EKHU-260F1D5/2020|2020-05-17|EPI\_ISL\_501622|Original|hCoV-19^^England|Human|Lab Microbiology|Wellcome Sanger Institute for the COVID-19 Genomics UK (COG-UK) consortium|Davies|United Kingdom

>Spike|hCoV-19/England/QEUEH-961110/2020|2020-08-04|EPI\_ISL\_531946|Original|hCoV-19^^England|Human|Lighthouse Lab in Glasgow|Wellcome Sanger Institute for the COVID-19 Genomics UK (COG-UK) consortium|Davies|United Kingdom

>Spike|hCoV-19/Jordan/AM-ALSR-5135/2020|2020-10-17|EPI\_ISL\_730375|Original|hCoV-19^^Amman|Human|Biolab Diagnostic Laboratories|Andersen lab at Scripps Research|Gangavarapu|Jordan

>Spike|hCoV-19/France/ARA-SC024/2020|2020-03-21|EPI\_ISL\_629090|Original|hCoV-19^^Auvergne-Rh\u00f4ne-Alpes|Human|Laboratoire du Centre Hospitalier Annecy Genevois|CNR Virus des Infections Respiratoires - France SUD|Bal|France

>Spike|hCoV-19/England/MILK-B8D370/2020|2020-11-13|EPI\_ISL\_673905|Original|hCoV-19^^England|Human|Lighthouse Lab in Milton Keynes|Wellcome Sanger Institute for the COVID-19 Genomics UK (COG-UK) Consortium|Davies|United Kingdom

>Spike|hCoV-19/England/QEUEH-CCC9FA/2020|2020-12-23|EPI\_ISL\_782272|Original|hCoV-19^^England|Human|Lighthouse Lab in Glasgow|Wellcome Sanger Institute for the COVID-19 Genomics UK (COG-UK) Consortium|Davies|United Kingdom

>Spike|hCoV-19/Netherlands/ZH-EMC-312/2020|2020-05-23|EPI\_ISL\_523654|Original|hCoV-19^^Zuid Holland|Human|Dutch COVID-19 response team|Erasmus Medical Center|Oude Munnink|Netherlands

>Spike|hCoV-19/Japan/PG-8713/2020|2020-08-00|EPI\_ISL\_686309|Original|hCoV-19^^Japan|Human|Pathogen Genomics Center|Pathogen Genomics Center|Sekizuka|Japan

>Spike|hCoV-19/England/MILK-A23FD3/2020|2020-10-04|EPI\_ISL\_651099|Original|hCoV-19^^England|Human|Centre for Enzyme Innovation|COVID-19 Genomics UK (COG-UK) Consortium|Robson|United Kingdom

>Spike|hCoV-19/Japan/PG-2248/2020|2020-04-00|EPI\_ISL\_685853|Original|hCoV-19^^Japan|Human|Pathogen Genomics Center|Pathogen Genomics Center|Sekizuka|Japan

>Spike|hCoV-19/Poland/79327/2020|2020-11-00|EPI\_ISL\_732893|Original|hCoV-19^^Poland|Human|genXone SA|genXone SA|Kaszuba|Poland

>Spike|hCoV-19/USA/CA-ALSR-4708/2020|2020-10-09|EPI\_ISL\_730095|Original|hCoV-19^^California|Human|San Diego County Public Health Laboratory|Andersen lab at Scripps Research|Gangavarapu|USA

>Spike|hCoV-19/England/QEUA-89EBA4/2020|2020-07-25|EPI\_ISL\_532816|Original|hCoV-19^^England|Human|Lighthouse Lab in Glasgow|Wellcome Sanger Institute for the COVID-19 Genomics UK (COG-UK) consortium|Davies|United Kingdom

>Spike|hCoV-19/England/EXET-13E994/2020|2020-12-13|EPI\_ISL\_764135|Original|hCoV-19^^England|Human|University of Exeter|COVID-19 Genomics UK (COG-UK) Consortium|Temperton|United Kingdom

>Spike|hCoV-19/USA/MI-UM-2006S000940/2020|2020-03-26|EPI\_ISL\_484765|Original|hCoV-19^^Michigan|Human|University of Michigan Clinical Microbiology Laboratory|Lauring Lab|Valesano|USA

>Spike|hCoV-19/USA/NV-NSPHL-A0160/2020|2020-05-15|EPI\_ISL\_515422|Original|hCoV-19^^Nevada|Human|Nevada State Public Health Laboratory|Nevada State Public Health Laboratory|Sevinsky|USA

>Spike|hCoV-19/South Korea/KDCA0338/2020|2020-07-11|EPI\_ISL\_760124|Original|hCoV-19^^South Korea|Human|Division of Emerging Infectious Diseases|Division of Emerging Infectious Diseases|Park|South Korea

>Spike|hCoV-19/England/QEUA-BA3435/2020|2020-11-18|EPI\_ISL\_672904|Original|hCoV-19^^England|Human|Lighthouse Lab in Glasgow|Wellcome Sanger Institute for the COVID-19 Genomics UK (COG-UK) Consortium|Davies|United Kingdom

>Spike|hCoV-19/Denmark/DCGC-20952/2020|2020-12-21|EPI\_ISL\_759469|Original|hCoV-19^^Sjaelland|Human|Department of Virus and Microbiological Special Diagnostics|Albertsen Lab|Michaelsen|Denmark

>Spike|hCoV-19/Scotland/CVR5004/2020|2020-10-10|EPI\_ISL\_594743|Original|hCoV-19^^Scotland|Human|West of Scotland Specialist Virology Centre|COVID-19 Genomics UK (COG-UK) Consortium|Robertson|United Kingdom

>Spike|hCoV-19/Australia/VIC2874/2020|2020-07-03|EPI\_ISL\_521705|Original|hCoV-19^^Victoria|Human|Microbiological Diagnostic Unit - Public Health Laboratory (MDU-PHL)|MDU-PHL|Schultz|Australia

>Spike|hCoV-19/Scotland/CVR3313/2020|2020-05-04|EPI\_ISL\_493867|Original|hCoV-19^^Scotland|Human|West of Scotland Specialist Virology Centre|COVID-19 Genomics UK (COG-UK) Consortium|Robertson|United Kingdom

>Spike|hCoV-19/USA/CO-CDPHE-2009170012/2020|2020-09-16|EPI\_ISL\_710252|Original|hCoV-19^^Colorado|Human|Colorado Department of Public Health and Environment|Colorado Department of Public Health and Environment|Bankers|USA

>Spike|hCoV-19/England/CAMC-B51C4D/2020|2020-11-09|EPI\_ISL\_657833|Original|hCoV-19^^England|Human|Lighthouse Lab in Cambridge|Wellcome Sanger Institute for the COVID-19 Genomics UK (COG-UK) Consortium|Davies|United Kingdom

>Spike|hCoV-19/USA/FL-BPHL-1744/2020|2020-10-02|EPI\_ISL\_613862|Original|hCoV-19^^Florida|Human|Florida Bureau of Public Health Laboratories|Florida Bureau of Public Health Laboratories|Blanton|USA

>Spike|hCoV-19/England/ALDP-B631EF/2020|2020-11-08|EPI\_ISL\_656460|Original|hCoV-19^^England|Human|Lighthouse Lab in Alderley Park|Wellcome Sanger Institute for the COVID-19 Genomics UK (COG-UK) Consortium|Davies|United Kingdom

>Spike|hCoV-19/New Zealand/20CV0283/2020|2020-03-26|EPI\_ISL\_579073|Original|hCoV-19^^Canterbury|Human|Canterbury Health Laboratories|Institute of Environmental Science and Research (ESR)|Wang|New Zealand

>Spike|hCoV-19/England/ALDP-9E8ABC/2020|2020-09-24|EPI\_ISL\_638280|Original|hCoV-19^^England|Human|Centre for Enzyme Innovation|COVID-19 Genomics UK (COG-UK) Consortium|Robson|United Kingdom

>Spike|hCoV-19/England/PORT-2D59CB/2020|2020-12-18|EPI\_ISL\_765134|Original|hCoV-19^^England|Human|Centre for Enzyme Innovation|COVID-19 Genomics UK (COG-UK) Consortium|Robson|United Kingdom

>Spike|hCoV-19/England/MILK-654007/2020|2020-07-04|EPI\_ISL\_558155|Original|hCoV-19^^England|Human|Lighthouse Lab in Milton Keynes|Wellcome Sanger Institute for the COVID-19 Genomics UK (COG-UK) consortium|Davies|United Kingdom

>Spike|hCoV-19/Denmark/DCGC-8197/2020|2020-10-26|EPI\_ISL\_617279|Original|hCoV-19^^Hovedstaden|Human|Department of Virus and Microbiological Special Diagnostics|Albertsen lab|Michaelsen|Denmark

>Spike|hCoV-19/England/QEUA-B435F8/2020|2020-11-08|EPI\_ISL\_657239|Original|hCoV-19^^England|Human|Lighthouse Lab in Glasgow|Wellcome Sanger Institute for the COVID-19 Genomics UK (COG-UK) Consortium|Davies|United Kingdom

>Spike|hCoV-19/England/BRIS-122D88/2020|2020-04-02|EPI\_ISL\_440806|Original|hCoV-19^^England|Human|PHE South West Regional Laboratory|Wellcome Sanger Institute for the COVID-19 Genomics UK (COG-UK) consortium|Amato|United Kingdom

>Spike|hCoV-19/England/OXON-AF452/2020|2020-04-13|EPI\_ISL\_478740|Original|hCoV-19^^England|Human|Oxford Viromics|COVID-19 Genomics UK (COG-UK) Consortium|Golubchik|United Kingdom

>Spike|hCoV-19/Wales/PHWC-49D5D8/2020|2020-12-11|EPI\_ISL\_742805|Original|hCoV-19^^Wales|Human|Wales Specialist Virology Centre Sequencing lab|COVID-19 Genomics UK (COG-UK) Consortium|Moore|United Kingdom

>Spike|hCoV-19/England/LIVE-A5155/2020|2020-03-07|EPI\_ISL\_500109|Original|hCoV-19^^England|Human|Liverpool Clinical Laboratories|COVID-19 Genomics UK (COG-UK) Consortium|Haldenby|United Kingdom

>Spike|hCoV-19/England/QEUEH-9C95A1/2020|2020-09-10|EPI\_ISL\_567497|Original|hCoV-19^^England|Human|Lighthouse Lab in Glasgow|Wellcome Sanger Institute for the COVID-19 Genomics UK (COG-UK) consortium|Davies|United Kingdom

>Spike|hCoV-19/England/ALDP-BBA5DE/2020|2020-11-22|EPI\_ISL\_702565|Original|hCoV-19^^England|Human|Lighthouse Lab in Alderley Park|Wellcome Sanger Institute for the COVID-19 Genomics UK (COG-UK) Consortium|Davies|United Kingdom

>Spike|hCoV-19/England/QEUEH-9DE266/2020|2020-09-21|EPI\_ISL\_599603|Original|hCoV-19^^England|Human|Lighthouse Lab in Glasgow|Wellcome Sanger Institute for the COVID-19 Genomics UK (COG-UK) consortium|Davies|United Kingdom

>Spike|hCoV-19/Wales/PHWC-49388E/2020|2020-11-29|EPI\_ISL\_725951|Original|hCoV-19^^Wales|Human|Originating lab|COVID-19 Genomics UK (COG-UK) Consortium|Moore|United Kingdom

>Spike|hCoV-19/Spain/VC-FISABIO-120/2020|2020-03-13|EPI\_ISL\_436215|Original|hCoV-19^^Comunitat Valenciana|Human|Servicio de Microbiolog\u00eda. Consorcio Hospital General Universitario de Valencia|Sequencing and Bioinformatics Service and Molecular Epidemiology Research Group. FISABIO-Public Health|Gonzalez-Candelas|Spain

>Spike|hCoV-19/England/ALDP-A67683/2020|2020-10-12|EPI\_ISL\_630588|Original|hCoV-19^^England|Human|Lighthouse Lab in Alderley Park|Wellcome Sanger Institute for the COVID-19 Genomics UK (COG-UK) consortium|Davies|United Kingdom

>Spike|hCoV-19/Australia/VIC4235/2020|2020-07-15|EPI\_ISL\_519563|Original|hCoV-19^^Victoria|Human|Microbiological Diagnostic Unit - Public Health Laboratory (MDU-PHL)|MDU-PHL|Schultz|Australia

>Spike|hCoV-19/USA/UT-08282/2020|2020-05-19|EPI\_ISL\_524082|Original|hCoV-19^^Utah|Human|Utah Public Health Laboratory|Utah Public Health Laboratory|Young|USA

>Spike|hCoV-19/England/CAMB-842A4/2020|2020-04-16|EPI\_ISL\_443476|Original|hCoV-19^^England|Human|Department of Pathology|Wellcome Sanger Institute for the COVID-19 Genomics UK (COG-UK) consortium|Amato|United Kingdom

>Spike|hCoV-19/USA/ID-UW-6470/2020|2020-04-02|EPI\_ISL\_570122|Original|hCoV-19^^Idaho|Human|UW Virology Lab|UW Virology Lab|Roychoudhury|USA

>Spike|hCoV-19/USA/UT-UPHL-2009375/2020|2020-05-17|EPI\_ISL\_524968|Original|hCoV-19^^Utah|Human|Utah Public Health Laboratory|Utah Public Health Laboratory|Young|USA

>Spike|hCoV-19/USA/CA-CHLA-PLM90547620/2020|2020-11-30|EPI\_ISL\_753468|Original|hCoV-19^^California|Human|Clinical virology Laboratory|Center for Personalized Medicine|Dien Bard|USA

>Spike|hCoV-19/Ireland/KE-NVRL-71IRL94983/2020|2020-07-30|EPI\_ISL\_525363|Original|hCoV-19^^Kildare|Human|National Virus Reference Laboratory|National Virus Reference Laboratory|Gonzalez|Ireland

>Spike|hCoV-19/Japan/PG-4397/2020|2020-07-00|EPI\_ISL\_692623|Original|hCoV-19^^Japan|Human|Pathogen Genomics Center|Pathogen Genomics Center|Sekizuka|Japan

>Spike|hCoV-19/Wales/PHWC-169365/2020|2020-06-13|EPI\_ISL\_499434|Original|hCoV-19^^Wales|Human|Wales Specialist Virology Centre Sequencing lab|COVID-19 Genomics UK (COG-UK) Consortium|Moore|United Kingdom

>Spike|hCoV-19/USA/HI-H200230/2020|2020-08-11|EPI\_ISL\_752789|Original|hCoV-19^^Hawaii|Human|State Laboratories Division|State Laboratories Division|Sultana|USA

>Spike|hCoV-19/England/MILK-C7BA33/2020|2020-12-15|EPI\_ISL\_756798|Original|hCoV-19^^England|Human|Lighthouse Lab in Milton Keynes|Wellcome Sanger Institute for the COVID-19 Genomics UK (COG-UK) Consortium|Davies|United Kingdom



>Spike|hCoV-19/Scotland/QEUH-B132CD/2020|2020-11-03|EPI\_ISL\_649580|Original|hCoV-19^^Scotland|Human|Lighthouse Lab in Glasgow|Wellcome Sanger Institute for the COVID-19 Genomics UK (COG-UK) Consortium|Davies|United Kingdom

>Spike|hCoV-19/England/BRIS-12DA2C/2020|2020-05-07|EPI\_ISL\_481908|Original|hCoV-19^^England|Human|PHE South West Regional Laboratory|Wellcome Sanger Institute for the COVID-19 Genomics UK (COG-UK) consortium|Davies|United Kingdom

>Spike|hCoV-19/Australia/VIC2846/2020|2020-07-04|EPI\_ISL\_521677|Original|hCoV-19^^Victoria|Human|Microbiological Diagnostic Unit - Public Health Laboratory (MDU-PHL)|MDU-PHL|Schultz|Australia

>Spike|hCoV-19/England/CAMC-991618/2020|2020-08-26|EPI\_ISL\_551953|Original|hCoV-19^^England|Human|Lighthouse Lab in Cambridge|Wellcome Sanger Institute for the COVID-19 Genomics UK (COG-UK) consortium|Davies|United Kingdom

>Spike|hCoV-19/Japan/PG-5930/2020|2020-08-00|EPI\_ISL\_689045|Original|hCoV-19^^Japan|Human|Pathogen Genomics Center|Pathogen Genomics Center|Sekizuka|Japan

>Spike|hCoV-19/England/NORW-F3E15/2020|2020-00-00|EPI\_ISL\_627665|Original|hCoV-19^^England|Human|Quadram Institute Bioscience|COVID-19 Genomics UK (COG-UK) Consortium|Alikhan|United Kingdom

>Spike|hCoV-19/England/QEUH-9B55F3/2020|2020-09-02|EPI\_ISL\_590325|Original|hCoV-19^^England|Human|Lighthouse Lab in Glasgow|Wellcome Sanger Institute for the COVID-19 Genomics UK (COG-UK) consortium|Davies|United Kingdom

>Spike|hCoV-19/Japan/PG-3073/2020|2020-04-00|EPI\_ISL\_691196|Original|hCoV-19^^Japan|Human|Pathogen Genomics Center|Pathogen Genomics Center|Sekizuka|Japan

>Spike|hCoV-19/USA/LA-EVTL1059/2020|2020-11-27|EPI\_ISL\_768329|Original|hCoV-19^^Louisiana|Human|LSUHS Emerging Viral Threat Laboratory|Microbial Genome Sequencing Center|Kamil|USA

>Spike|hCoV-19/Northern Ireland/NIRE-FF505/2020|2020-04-25|EPI\_ISL\_469870|Original|hCoV-19^^Northern Ireland|Human|Regional Virus Laboratory|Wellcome Sanger Institute for the COVID-19 Genomics UK (COG-UK) consortium|Davies|United Kingdom

>Spike|hCoV-19/Spain/AN-IBV-001104/2020|2020-03-29|EPI\_ISL\_452586|Original|hCoV-19^^Andalucia|Human|Servicio de Microbiolog\u00eda y Parasitolog\u00eda cl\u00ednica. UCEIMP. Hospital Universitario Virgen del Roc\u00edo/IBIS/CSIC/US.|SeqCOVID-SPAIN consortium/IBV (CSIC)|Comas|Spain

>Spike|hCoV-19/England/CAMB-1B0E6E/2020|2020-05-12|EPI\_ISL\_452969|Original|hCoV-19^^England|Human|Department of Pathology|COVID-19 Genomics UK (COG-UK) Consortium|Meredith|United Kingdom

>Spike|hCoV-19/Denmark/DCGC-4940/2020|2020-09-21|EPI\_ISL\_621478|Original|hCoV-19^^Hovedstaden|Human|Department of Virus and Microbiological Special Diagnostics|Albertsen lab|Michaelsen|Denmark

>Spike|hCoV-19/England/CAMC-A412F4/2020|2020-10-07|EPI\_ISL\_609325|Original|hCoV-19^^England|Human|Lighthouse Lab in Cambridge|Wellcome Sanger Institute for the COVID-19 Genomics UK (COG-UK) consortium|Davies|United Kingdom

>Spike|hCoV-19/England/MILK-A4716A/2020|2020-10-06|EPI\_ISL\_598254|Original|hCoV-19^^England|Human|Lighthouse Lab in Milton Keynes|Wellcome Sanger Institute for the COVID-19 Genomics UK (COG-UK) consortium|Davies|United Kingdom

>Spike|hCoV-19/Japan/PG-6814/2020|2020-05-00|EPI\_ISL\_687923|Original|hCoV-19^^Japan|Human|Pathogen Genomics Center|Pathogen Genomics Center|Sekizuka|Japan

>Spike|hCoV-19/Denmark/DCGC-16127/2020|2020-11-16|EPI\_ISL\_714262|Original|hCoV-19^^Syddanmark|Human|Department of Virus and Microbiological Special Diagnostics|Albertsen Lab|Michaelsen|Denmark

>Spike|hCoV-19/Wales/PHWC-49F15A/2020|2020-12-02|EPI\_ISL\_743172|Original|hCoV-19^^Wales|Human|Wales Specialist Virology Centre Sequencing lab|COVID-19 Genomics UK (COG-UK) Consortium|Moore|United Kingdom

>Spike|hCoV-19/Denmark/ALAB-SSI-133/2020|2020-03-08|EPI\_ISL\_437642|Original|hCoV-19^^Denmark|Human|Department of Virus and Microbiological Special Diagnostics|Albertsen lab|Kirkegaard|Denmark

>Spike|hCoV-19/USA/TX-HMH-MCoV-11359/2020|2020-09-05|EPI\_ISL\_789996|Original|hCoV-19^^Texas|Human|Houston Methodist Hospital|Houston Methodist Hospital|Long|USA

>Spike|hCoV-19/Guangzhou/GZMU0042/2020|2020-02-25|EPI\_ISL\_414688|Original|hCoV-19^^Guangdong|Human|State Key Laboratory of Respiratory Disease|The First Affiliated Hospital of Guangzhou Medical University & BGI-Shenzhen|Ji|China

>Spike|hCoV-19/England/ALDP-954BA9/2020|2020-06-13|EPI\_ISL\_553503|Original|hCoV-19^^England|Human|Lighthouse Lab in Alderley Park|Wellcome Sanger Institute for the COVID-19 Genomics UK (COG-UK) consortium|Davies|United Kingdom

>Spike|hCoV-19/England/204961122/2020|2020-12-03|EPI\_ISL\_700687|Original|hCoV-19^^England|Human|Respiratory Virus Unit|COVID-19 Genomics UK (COG-UK) Consortium|Platt|United Kingdom

>Spike|hCoV-19/France/PDL-SC616/2020|2020-03-30|EPI\_ISL\_663262|Original|hCoV-19^^Pays-de-la-Loire|Human|CHU Nantes|CNR Virus des Infections Respiratoires - France SUD|Bal|France

>Spike|hCoV-19/Canada/ON-UHTC\_0055/2020|2020-04-02|EPI\_ISL\_464046|unknown|hCoV-19^^Ontario|Human|Unity Health Toronto|Ontario Institute for Cancer Research|de Borja|Canada

>Spike|hCoV-19/Czech Republic/NRL-7322-3/2020|2020-06-21|EPI\_ISL\_584076|Original|hCoV-19^^Northern Bohemia Region|Human|The National Institute of Public Health|State Veterinary Institute Prague|Nagy|Czech Republic

>Spike|hCoV-19/Japan/PG-1263/2020|2020-00-00|EPI\_ISL\_684873|Original|hCoV-19^^Japan|Human|Pathogen Genomics Center|Pathogen Genomics Center|Sekizuka|Japan

>Spike|hCoV-19/France/IDF-10029DT/2020|2020-03-00|EPI\_ISL\_447669|Original|hCoV-19^^France|Human|H\u00f4pital Henri-Mondor Ap-Hp|H\u00f4pital Henri-Mondor Ap-Hp|Rodriguez|France

>Spike|hCoV-19/USA/CA-CZB-1423/2020|2020-03-20|EPI\_ISL\_468395|Original|hCoV-19^^California|Human|County of San Luis Obispo Public Health Laboratory|Chan-Zuckerberg Biohub|Hao|USA

>Spike|hCoV-19/Spain/RI-IBV-98002304/2020|2020-03-09|EPI\_ISL\_537827|Original|hCoV-19^^La Rioja|Human|Centro de Investigaci\u00f3n Biom\u00e9dica de La Rioja - Hospital San Pedro Logro\u00f1o|SeqCOVID-SPAIN consortium/IBV (CSIC)|Comas|Spain

>Spike|hCoV-19/Croatia/361\_Pula/2020|2020-03-09|EPI\_ISL\_454595|Original|hCoV-19^^Pula|Human|University Hospital for Infectious Diseases \Dr. Fran Mihaljevi\u0107\|University of Zagreb|Ivancic Jelecki|Croatia

>Spike|hCoV-19/England/QEUEH-99880C/2020|2020-08-24|EPI\_ISL\_539945|Original|hCoV-19^^England|Human|Lighthouse Lab in Glasgow|Wellcome Sanger Institute for the COVID-19 Genomics UK (COG-UK) consortium|Davies|United Kingdom

>Spike|hCoV-19/England/ALDP-A84F1C/2020|2020-10-18|EPI\_ISL\_610541|Original|hCoV-19^^England|Human|Lighthouse Lab in Alderley Park|Wellcome Sanger Institute for the COVID-19 Genomics UK (COG-UK) consortium|Davies|United Kingdom

>Spike|hCoV-19/England/ALDP-9445CC/2020|2020-06-07|EPI\_ISL\_554810|Original|hCoV-19^^England|Human|Lighthouse Lab in Alderley Park|Wellcome Sanger Institute for the COVID-19 Genomics UK (COG-UK) consortium|Davies|United Kingdom

>Spike|hCoV-19/England/BRIS-12F9E1/2020|2020-04-03|EPI\_ISL\_488192|Original|hCoV-19^^England|Human|PHE South West Regional Laboratory|Wellcome Sanger Institute for the COVID-19 Genomics UK (COG-UK) consortium|Davies|United Kingdom

>Spike|hCoV-19/England/MILK-9AA5F1/2020|2020-08-31|EPI\_ISL\_550801|Original|hCoV-19^^England|Human|Lighthouse Lab in Milton Keynes|Wellcome Sanger Institute for the COVID-19 Genomics UK (COG-UK) consortium|Davies|United Kingdom

>Spike|hCoV-19/England/CAMC-B21CEC/2020|2020-11-01|EPI\_ISL\_647354|Original|hCoV-19^^England|Human|Lighthouse Lab in Cambridge|Wellcome Sanger Institute for the COVID-19 Genomics UK (COG-UK) Consortium|Davies|United Kingdom

>Spike|hCoV-19/USA/WI-WSLH-200083/2020|2020-04-13|EPI\_ISL\_471247|Original|hCoV-19^^Wisconsin|Human|Wisconsin State Laboratory of Hygiene Communicable Disease Division|Wisconsin State Laboratory of Hygiene Communicable Disease Division|Florek|USA

>Spike|hCoV-19/Norway/1526/2020|2020-03-02|EPI\_ISL\_417485|Original|hCoV-19^^Oslo|Human|University Hospital of Northern Norway|Norwegian Institute of Public Health|Hungnes|Norway

>Spike|hCoV-19/Finland/13LS12AH5/2020|2020-10-13|EPI\_ISL\_737215|Original|hCoV-19^^Uusimaa|Human|Department of Virology and Immunology|Department of Virology|Smura|Finland

>Spike|hCoV-19/England/QEUA-9B9C45/2020|2020-09-07|EPI\_ISL\_549581|Original|hCoV-19^^England|Human|Lighthouse Lab in Glasgow|Wellcome Sanger Institute for the COVID-19 Genomics UK (COG-UK) consortium|Davies|United Kingdom

>Spike|hCoV-19/Spain/MD-HLP-104-1/2020|2020-04-24|EPI\_ISL\_530031|Original|hCoV-19^^Madrid|Human|Hospital Universitario La Paz|Hospital Universitario La Paz|Viedma|Spain

>Spike|hCoV-19/Scotland/CVR5746/2020|2020-11-08|EPI\_ISL\_651952|Original|hCoV-19^^Scotland|Human|West of Scotland Specialist Virology Centre|COVID-19 Genomics UK (COG-UK) Consortium|Robertson|United Kingdom

>Spike|hCoV-19/Australia/VIC7553/2020|2020-07-24|EPI\_ISL\_564494|Original|hCoV-19^^Victoria|Human|Microbiological Diagnostic Unit - Public Health Laboratory (MDU-PHL)|MDU-PHL|Schultz|Australia

>Spike|hCoV-19/England/ALDP-B46CA5/2020|2020-11-06|EPI\_ISL\_656219|Original|hCoV-19^^England|Human|Lighthouse Lab in Alderley Park|Wellcome Sanger Institute for the COVID-19 Genomics UK (COG-UK) Consortium|Davies|United Kingdom

>Spike|hCoV-19/Australia/VIC2969/2020|2020-07-07|EPI\_ISL\_521799|Original|hCoV-19^^Victoria|Human|Microbiological Diagnostic Unit - Public Health Laboratory (MDU-PHL)|MDU-PHL|Schultz|Australia

>Spike|hCoV-19/England/ALDP-A2E952/2020|2020-10-05|EPI\_ISL\_587060|Original|hCoV-19^^England|Human|Lighthouse Lab in Alderley Park|Wellcome Sanger Institute for the COVID-19 Genomics UK (COG-UK) consortium|Davies|United Kingdom

>Spike|hCoV-19/USA/CA-CDPH025/2020|2020-05-19|EPI\_ISL\_515917|Original|hCoV-19^^California|Human|California Department of Public Health|California Department of Public Health|Bell|USA

>Spike|hCoV-19/Portugal/PT0006b/2020|2020-03-08|EPI\_ISL\_417991|Original|hCoV-19^^Portugal|Human|CHULC - H Curry Cabral|Instituto Nacional de Saude (INSA)|Borges|Portugal

>Spike|hCoV-19/England/CAMC-A65412/2020|2020-10-11|EPI\_ISL\_608689|Original|hCoV-19^^England|Human|Lighthouse Lab in Cambridge|Wellcome Sanger Institute for the COVID-19 Genomics UK (COG-UK) consortium|Davies|United Kingdom

>Spike|hCoV-19/Scotland/EDB594/2020|2020-04-01|EPI\_ISL\_433210|Original|hCoV-19^^Scotland|Human|Virology Department|COVID-19 Genomics UK (COG-UK) Consortium|Williams|United Kingdom

>Spike|hCoV-19/England/QEUA-9B803B/2020|2020-09-04|EPI\_ISL\_590635|Original|hCoV-19^^England|Human|Lighthouse Lab in Glasgow|Wellcome Sanger Institute for the COVID-19 Genomics UK (COG-UK) consortium|Davies|United Kingdom

>Spike|hCoV-19/Denmark/DCGC-10578/2020|2020-11-02|EPI\_ISL\_670065|Original|hCoV-19^^Hovedstaden|Human|Department of Virus and Microbiological Special Diagnostics|Albertsen Lab|Michaelsen|Denmark

>Spike|hCoV-19/England/LIVE-9C0FA/2020|2020-03-31|EPI\_ISL\_449510|Original|hCoV-19^^England|Human|Liverpool Clinical Laboratories|COVID-19 Genomics UK (COG-UK) Consortium|Haldenby|United Kingdom

>Spike|hCoV-19/India/MH-ACTREC-476/2020|2020-08-11|EPI\_ISL\_700124|Original|hCoV-19^^Maharashtra|Human|Hematopathology Laboratory|Hematopathology Laboratory|Patkar|India

>Spike|hCoV-19/USA/TX-HMH-MCoV-11561/2020|2020-09-12|EPI\_ISL\_790055|Original|hCoV-19^^Texas|Human|Houston Methodist Hospital|Houston Methodist Hospital|Long|USA

>Spike|hCoV-19/Japan/PG-0319/2020|2020-03-27|EPI\_ISL\_479994|Original|hCoV-19^^Kyusyu|Human|Kumamoto City Public Health Research Institute|Pathogen Genomics Center|Sekizuka|Japan

>Spike|hCoV-19/USA/NY-NYCPHL-000512/2020|2020-03-23|EPI\_ISL\_631973|Original|hCoV-19^^New York|Human|Jamaica Hospital Medical Center|New York City Public Health Laboratory|Wang|USA

>Spike|hCoV-19/Scotland/CVR96/2020|2020-03-14|EPI\_ISL\_425816|Original|hCoV-19^^Scotland|Human|West of Scotland Specialist Virology Centre|COVID-19 Genomics UK (COG-UK) Consortium|Robertson|United Kingdom

>Spike|hCoV-19/USA/DE-DHSS-F998315/2020|2020-09-01|EPI\_ISL\_708403|Original|hCoV-19^^Delaware|Human|Delaware Public Health Lab|Delaware Public Health Lab|Bajwa|USA

>Spike|hCoV-19/Denmark/DCGC-2913/2020|2020-08-17|EPI\_ISL\_616547|Original|hCoV-19^^Syddanmark|Human|Department of Virus and Microbiological Special Diagnostics|Albertsen lab|Michaelsen|Denmark

>Spike|hCoV-19/England/CAMC-B20A2F/2020|2020-11-02|EPI\_ISL\_647717|Original|hCoV-19^^England|Human|Lighthouse Lab in Cambridge|Wellcome Sanger Institute for the COVID-19 Genomics UK (COG-UK) Consortium|Davies|United Kingdom

>Spike|hCoV-19/Luxembourg/LNS1096019/2020|2020-10-30|EPI\_ISL\_739886|Original|hCoV-19^^Luxembourg|Human|Laboratoire national de sant\u00e9|Laboratoire national de sant\u00e9|Wienecke-Baldacchino|Luxembourg

>Spike|hCoV-19/USA/MA-JLL-147N/2020|2020-00-00|EPI\_ISL\_632294|Original|hCoV-19^^Massachusetts|Human|Brigham and Women's Hospital|Jonathan Li laboratory|Choudhary|USA

>Spike|hCoV-19/Denmark/DCGC-13579/2020|2020-11-30|EPI\_ISL\_712184|Original|hCoV-19^^Sjaelland|Human|Department of Virus and Microbiological Special Diagnostics|Albertsen Lab|Michaelsen|Denmark

>Spike|hCoV-19/Belgium/rega-0506645/2020|2020-05-06|EPI\_ISL\_734706|Original|hCoV-19^^Linter|Human|UZ Leuven|KU Leuven|Maes|Belgium

>Spike|hCoV-19/Luxembourg/LNS8911052/2020|2020-09-14|EPI\_ISL\_744822|Original|hCoV-19^^Luxembourg|Human|Laboratoire national de sant\u00e9|Laboratoire national de sant\u00e9|Wienecke-Baldacchino|Luxembourg

>Spike|hCoV-19/USA/TX-HMH-4299/2020|2020-06-18|EPI\_ISL\_543509|Original|hCoV-19^^Texas|Human|Houston Methodist Hospital|Houston Methodist Hospital|Long|USA

>Spike|hCoV-19/USA/UT-UPHL-2012985745/2020|2020-08-08|EPI\_ISL\_745471|Original|hCoV-19^^Utah|Human|Ginkgo Bioworks Clinical Laboratory|Utah Public Health Laboratory|Young|USA

>Spike|hCoV-19/England/ALDP-C3D60C/2020|2020-12-10|EPI\_ISL\_730818|Original|hCoV-19^^England|Human|Lighthouse Lab in Alderley Park|Wellcome Sanger Institute for the COVID-19 Genomics UK (COG-UK) Consortium|Davies|United Kingdom

>Spike|hCoV-19/England/CAMC-B52A06/2020|2020-11-09|EPI\_ISL\_657506|Original|hCoV-19^^England|Human|Lighthouse Lab in Cambridge|Wellcome Sanger Institute for the COVID-19 Genomics UK (COG-UK) Consortium|Davies|United Kingdom

>Spike|hCoV-19/USA/CA-CZB-9571/2020|2020-05-08|EPI\_ISL\_672134|Original|hCoV-19^^California|Human|The Ashley Laboratory|Chan-Zuckerberg Biohub|Bhatt|USA

>Spike|hCoV-19/England/LIVE-DBD3C0/2020|2020-10-28|EPI\_ISL\_664138|Original|hCoV-19^^England|Human|Liverpool Clinical Laboratories|COVID-19 Genomics UK (COG-UK) Consortium|Haldenby|United Kingdom

>Spike|hCoV-19/England/QEUEH-B2D266/2020|2020-11-04|EPI\_ISL\_659836|Original|hCoV-19^^England|Human|Lighthouse Lab in Glasgow|Wellcome Sanger Institute for the COVID-19 Genomics UK (COG-UK) Consortium|Davies|United Kingdom

>Spike|hCoV-19/England/MILK-BB1B4E/2020|2020-11-18|EPI\_ISL\_720506|Original|hCoV-19^^England|Human|Lighthouse Lab in Milton Keynes|Wellcome Sanger Institute for the COVID-19 Genomics UK (COG-UK) Consortium|Davies|United Kingdom

>Spike|hCoV-19/USA/TX-HMH-MCoV-14820/2020|2020-10-12|EPI\_ISL\_786304|Original|hCoV-19^^Texas|Human|Houston Methodist Hospital|Houston Methodist Hospital|Long|USA

>Spike|hCoV-19/England/QEUEH-9FFDC8/2020|2020-09-30|EPI\_ISL\_600313|Original|hCoV-19^^England|Human|Lighthouse Lab in Glasgow|Wellcome Sanger Institute for the COVID-19 Genomics UK (COG-UK) consortium|Davies|United Kingdom

>Spike|hCoV-19/India/MH-NIV-11857/2020|2020-04-19|EPI\_ISL\_479495|Original|hCoV-19^^Maharashtra|Human|NIV Influenza|NIV Influenza|Potdar|India

>Spike|hCoV-19/USA/CA-CZB-14159/2020|2020-10-24|EPI\_ISL\_738666|Original|hCoV-19^^California|Human|Madera County Department of Public Health|Chan-Zuckerberg Biohub|Kamm|USA

>Spike|hCoV-19/England/CAMB-7AA21/2020|2020-04-03|EPI\_ISL\_441239|Original|hCoV-19^^England|Human|Department of Pathology|Wellcome Sanger Institute for the COVID-19 Genomics UK (COG-UK) consortium|Amato|United Kingdom

>Spike|hCoV-19/Denmark/DCGC-14510/2020|2020-11-30|EPI\_ISL\_711267|Original|hCoV-19^^Hovedstaden|Human|Department of Virus and Microbiological Special Diagnostics|Albertsen Lab|Michaelsen|Denmark

>Spike|hCoV-19/Northern Ireland/NIRE-103FA5/2020|2020-04-08|EPI\_ISL\_482049|Original|hCoV-19^^Northern Ireland|Human|Regional Virus

Laboratory|Wellcome Sanger Institute for the COVID-19 Genomics UK (COG-UK) consortium|Davies|United Kingdom  
>Spike|hCoV-19/England/CAMB-84D94/2020|2020-03-11|EPI\_ISL\_440460|Original|hCoV-19^^England|Human|Department of Pathology|Wellcome Sanger Institute for the COVID-19 Genomics UK (COG-UK) consortium|Amato|United Kingdom  
>Spike|hCoV-19/Gambia/GC19-2653/2020|2020-07-21|EPI\_ISL\_561129|Original|hCoV-19^^Kombo|Human|MRCG at LSHTM Genomics lab|MRCG at LSHTM Genomics lab|Sesay|Gambia  
>Spike|hCoV-19/Switzerland/BS-42227717/2020|2020-04-11|EPI\_ISL\_581696|Original|hCoV-19^^Basel-Stadt|Human|University Hospital Basel|University Hospital Basel|Roloff Handschin|Switzerland  
>Spike|hCoV-19/USA/FL-BPHL-0751/2020|2020-06-23|EPI\_ISL\_512557|Original|hCoV-19^^Florida|Human|Florida Bureau of Public Health Laboratories|Florida Bureau of Public Health Laboratories|Blanton|USA  
>Spike|hCoV-19/USA/WA-S1463/2020|2020-05-21|EPI\_ISL\_495913|Original|hCoV-19^^Washington|Human|Washington State Department of Health|Seattle Flu Study|Lee|USA  
>Spike|hCoV-19/USA/WA-S1823/2020|2020-06-03|EPI\_ISL\_496249|Original|hCoV-19^^Washington|Human|Washington State Department of Health|Seattle Flu Study|Lee|USA  
>Spike|hCoV-19/USA/LA-GBCL-26544521/2020|2020-04-20|EPI\_ISL\_485108|Original|hCoV-19^^Louisiana|Human|River Road Testing Lab|Ginkgo Bioworks Clinical Laboratory|Smith|USA  
>Spike|hCoV-19/England/CAMB-793AF/2020|2020-04-02|EPI\_ISL\_441833|Original|hCoV-19^^England|Human|Department of Pathology|Wellcome Sanger Institute for the COVID-19 Genomics UK (COG-UK) consortium|Amato|United Kingdom  
>Spike|hCoV-19/Netherlands/Gelderland\_155/2020|2020-05-22|EPI\_ISL\_460915|Original|hCoV-19^^Gelderland|Human|Dutch COVID-19 response team|Erasmus Medical Center|Oude Munnink|Netherlands  
>Spike|hCoV-19/England/QEUEH-9CA4FE/2020|2020-09-13|EPI\_ISL\_567389|Original|hCoV-19^^England|Human|Lighthouse Lab in Glasgow|Wellcome Sanger Institute for the COVID-19 Genomics UK (COG-UK) consortium|Davies|United Kingdom  
>Spike|hCoV-19/England/MILK-9C6F6A/2020|2020-09-08|EPI\_ISL\_573269|Original|hCoV-19^^England|Human|Northumbria University / South Tees Hospitals NHS Foundation Trust / North Cumbria Integrated Care NHS Foundation Trust / North Tees and Hartlepool NHS Foundation Trust / Newcastle Hospitals NHS Foundation Trust|COVID-19 Genomics UK (COG-UK) Consortium|Bashton|United Kingdom  
>Spike|hCoV-19/England/MILK-A45B5F/2020|2020-10-06|EPI\_ISL\_598744|Original|hCoV-19^^England|Human|Lighthouse Lab in Milton Keynes|Wellcome Sanger Institute for the COVID-19 Genomics UK (COG-UK) consortium|Davies|United Kingdom  
>Spike|hCoV-19/USA/UT-UPHL-2009227/2020|2020-05-14|EPI\_ISL\_525225|Original|hCoV-19^^Utah|Human|Utah Public Health Laboratory|Utah Public Health Laboratory|Young|USA  
>Spike|hCoV-19/USA/TX-HMH-MCoV-8278/2020|2020-07-07|EPI\_ISL\_784306|Original|hCoV-19^^Texas|Human|Houston Methodist Hospital|Houston Methodist Hospital|Long|USA  
>Spike|hCoV-19/Japan/PG-1523/2020|2020-04-00|EPI\_ISL\_685130|Original|hCoV-19^^Japan|Human|Saitama Prefectural Institute of Public Health|Pathogen Genomics Center|Sekizuka|Japan  
>Spike|hCoV-19/South Africa/R10836/2020|2020-06-18|EPI\_ISL\_490309|Original|hCoV-19^^Gauteng|Human|National Institute for Communicable Diseases of the National Health Laboratory Service|National Institute for Communicable Diseases of the National Health Laboratory Service|Allam|South Africa  
>Spike|hCoV-19/England/QEUEH-9B7C47/2020|2020-09-04|EPI\_ISL\_590486|Original|hCoV-19^^England|Human|Lighthouse Lab in Glasgow|Wellcome Sanger Institute for the COVID-19 Genomics UK (COG-UK) consortium|Davies|United Kingdom  
>Spike|hCoV-19/France/ARA-SC321/2020|2020-03-23|EPI\_ISL\_660327|Original|hCoV-19^^Auvergne-Rh\u00f4ne-Alpes|Human|CHU de Saint-\u00c9tienne H\u00f4pital Nord|CNR Virus des Infections Respiratoires - France SUD|Bal|France  
>Spike|hCoV-19/England/CAMB-72160/2020|2020-03-28|EPI\_ISL\_439887|Original|hCoV-19^^England|Human|Department of Pathology|Wellcome Sanger Institute for the COVID-19 Genomics UK (COG-UK) consortium|Amato|United Kingdom  
>Spike|hCoV-19/England/ALDP-5CDC9D/2020|2020-06-19|EPI\_ISL\_558464|Original|hCoV-19^^England|Human|Lighthouse Lab in Alderley Park|Wellcome Sanger Institute for the COVID-19 Genomics UK (COG-UK) consortium|Davies|United Kingdom

>Spike|hCoV-19/Switzerland/AG-ETHZ-190057/2020|2020-07-09|EPI\_ISL\_500918|Original|hCoV-19^^Aargau|Human|Viollier AG|Department of Biosystems Science and Engineering|Nadeau|Switzerland

>Spike|hCoV-19/Luxembourg/LNS2011060/2020|2020-11-12|EPI\_ISL\_740037|Original|hCoV-19^^Luxembourg|Human|Laboratoire national de sant\u00e9|Laboratoire national de sant\u00e9|Wienecke-Baldacchino|Luxembourg

>Spike|hCoV-19/Norway/5239/2020|2020-11-01|EPI\_ISL\_708055|Original|hCoV-19^^Agder|Human|Hospital of Southern Norway - Kristiansand|Norwegian Institute of Public Health|Kopperud Riis|Norway

>Spike|hCoV-19/Switzerland/BE-ETHZ-330517/2020|2020-10-19|EPI\_ISL\_614917|Original|hCoV-19^^Bern|Human|Viollier AG|Department of Biosystems Science and Engineering|Nadeau|Switzerland

>Spike|hCoV-19/England/NOTT-121729/2020|2020-12-20|EPI\_ISL\_741651|Original|hCoV-19^^England|Human|Queens Medical Centre|COVID-19 Genomics UK (COG-UK) Consortium|Loose|United Kingdom

>Spike|hCoV-19/Spain/PV-IBV-98008395/2020|2020-10-17|EPI\_ISL\_654587|Original|hCoV-19^^Basque Country|Human|Servicio de Microbiolog\u00eda. Hospital Universitario Donostia. OSI Donostialdea. \u00c1rea de Enfermedades Infecciosas|SeqCOVID-SPAIN consortium/IBV (CSIC) |Comas|Spain

>Spike|hCoV-19/India/WB-IICB-005/2020|2020-08-12|EPI\_ISL\_569863|Original|hCoV-19^^West Bengal|Human|CSIR-Indian Institute of Chemical Biology|CSIR-Indian Institute of Chemical Biology|Bhowmik|India

>Spike|hCoV-19/Finland/1LS23E5/2020|2020-10-01|EPI\_ISL\_757358|Original|hCoV-19^^Uusimaa|Human|Department of Virology and Immunology|Department of Virology|Smura|Finland

>Spike|hCoV-19/Luxembourg/LNS1856024/2020|2020-11-01|EPI\_ISL\_740008|Original|hCoV-19^^Luxembourg|Human|Laboratoire national de sant\u00e9|Laboratoire national de sant\u00e9|Wienecke-Baldacchino|Luxembourg

>Spike|hCoV-19/Scotland/QEUH-B7F2ED/2020|2020-11-14|EPI\_ISL\_710853|Original|hCoV-19^^Scotland|Human|Lighthouse Lab in Glasgow|Wellcome Sanger Institute for the COVID-19 Genomics UK (COG-UK) Consortium|Davies|United Kingdom

>Spike|hCoV-19/Pakistan/UN-UVAS-Lahore-IV/2020|2020-05-11|EPI\_ISL\_548945|Original|hCoV-19^^Pakistan|Human|Institute of Microbiology|Institute of Microbiology|Yaqub, T.|Pakistan

>Spike|hCoV-19/England/ALDP-95C655/2020|2020-06-20|EPI\_ISL\_554887|Original|hCoV-19^^England|Human|Lighthouse Lab in Alderley Park|Wellcome Sanger Institute for the COVID-19 Genomics UK (COG-UK) consortium|Davies|United Kingdom

>Spike|hCoV-19/Spain/VC-IBV-98006455/2020|2020-06-27|EPI\_ISL\_538661|Original|hCoV-19^^Comunitat Valenciana|Human|Servicio de Microbiolog\u00eda. Hospital General Universitario de Castell\u00f3n|SeqCOVID-SPAIN consortium/IBV (CSIC) |Comas|Spain

>Spike|hCoV-19/Australia/VIC425/2020|2020-03-25|EPI\_ISL\_426725|Original|hCoV-19^^Victoria|Human|Victorian Infectious Diseases Reference Laboratory (VIDRL)|Microbiological Diagnostic Unit Public Health Laboratory and Victorian Infectious Diseases Reference Laboratory|Schultz|Australia

>Spike|hCoV-19/England/NOTT-113591/2020|2020-09-20|EPI\_ISL\_549516|Original|hCoV-19^^England|Human|Queens Medical Centre|COVID-19 Genomics UK (COG-UK) Consortium|Loose|United Kingdom

>Spike|hCoV-19/England/MILK-A7C4FA/2020|2020-10-15|EPI\_ISL\_607566|Original|hCoV-19^^England|Human|Lighthouse Lab in Milton Keynes|Wellcome Sanger Institute for the COVID-19 Genomics UK (COG-UK) consortium|Davies|United Kingdom

>Spike|hCoV-19/USA/NE-006-17/2020|2020-09-26|EPI\_ISL\_732825|Original|hCoV-19^^Nebraska|Human|Nebraska Public Health Laboratory|UNMC COVID-19 Response Team|Pratt|USA

>Spike|hCoV-19/USA/TX-HMH-MCoV-13897/2020|2020-08-16|EPI\_ISL\_787189|Original|hCoV-19^^Texas|Human|Houston Methodist Hospital|Houston Methodist Hospital|Long|USA

>Spike|hCoV-19/USA/NY-NYUMC69/2020|2020-03-18|EPI\_ISL\_420585|Original|hCoV-19^^New York|Human|NYU Langone Health|Departments of Pathology and Medicine|Maurano|USA

>Spike|hCoV-19/England/CAMB-80466/2020|2020-04-09|EPI\_ISL\_470434|Original|hCoV-19^^England|Human|Department of Pathology|Wellcome Sanger Institute for the COVID-19 Genomics UK (COG-UK) consortium|Davies|United Kingdom

>Spike|hCoV-19/Germany/SH-ChVir20815/2020|2020-12-01|EPI\_ISL\_729714|Original|hCoV-19^^Schleswig-Holstein|Human|A. Krumbholz|Charit\u00e9 Universit\u00e4tsmedizin Berlin|Muehlemann|Germany

>Spike|hCoV-19/USA/MD-HP00058/2020|2020-03-19|EPI\_ISL\_457800|Original|hCoV-19^^Maryland|Human|Johns Hopkins Hospital Department of Pathology|Johns Hopkins Hospital Department of Pathology|Ramakrishnan|USA

>Spike|hCoV-19/Germany/HH-hpi-p2409/2020|2020-04-25|EPI\_ISL\_775696|Original|hCoV-19^^Hamburg|Human|University Medical Center Hamburg Eppendorf|Heinrich Pette Institute|Robitaille|Germany

>Spike|hCoV-19/Belgium/reg-0916975/2020|2020-09-16|EPI\_ISL\_734965|Original|hCoV-19^^Steenokkerzeel|Human|UZ Leuven|KU Leuven|Maes|Belgium

>Spike|hCoV-19/Bangladesh/DNAS\_DRCIM\_isl\_SM-12/2020|2020-07-02|EPI\_ISL\_774925|Original|hCoV-19^^Dhaka|Human|Designated Reference Institute for Chemical Measurements (DRICM)|DNA SOLUTION LTD.|Rabbi|Bangladesh

>Spike|hCoV-19/Singapore/1366/2020|2020-06-25|EPI\_ISL\_648718|Original|hCoV-19^^Singapore|Human|Department of Laboratory Medicine|Department of Laboratory Medicine|Chen|Singapore

>Spike|hCoV-19/England/ALDP-9442F2/2020|2020-06-07|EPI\_ISL\_554735|Original|hCoV-19^^England|Human|Lighthouse Lab in Alderley Park|Wellcome Sanger Institute for the COVID-19 Genomics UK (COG-UK) consortium|Davies|United Kingdom

>Spike|hCoV-19/England/QEUEH-9DAAAE/2020|2020-09-21|EPI\_ISL\_601426|Original|hCoV-19^^England|Human|Lighthouse Lab in Glasgow|Wellcome Sanger Institute for the COVID-19 Genomics UK (COG-UK) consortium|Davies|United Kingdom

>Spike|hCoV-19/Wales/PHWC-323DF/2020|2020-04-08|EPI\_ISL\_446642|Original|hCoV-19^^Wales|Human|Wales Specialist Virology Centre|Public Health Wales Microbiology Cardiff|Moore|United Kingdom

>Spike|hCoV-19/England/CAMB-1B3B64/2020|2020-05-26|EPI\_ISL\_461579|Original|hCoV-19^^England|Human|Department of Pathology|COVID-19 Genomics UK (COG-UK) Consortium|Meredith|United Kingdom

>Spike|hCoV-19/England/QEUEH-B0F965/2020|2020-11-02|EPI\_ISL\_642033|Original|hCoV-19^^England|Human|Lighthouse Lab in Glasgow|Wellcome Sanger Institute for the COVID-19 Genomics UK (COG-UK) Consortium|Davies|United Kingdom

>Spike|hCoV-19/Netherlands/NA\_255/2020|2020-03-30|EPI\_ISL\_422789|Original|hCoV-19^^Netherlands|Human|Dutch COVID-19 response team|Erasmus Medical Center|Oude Munnink|Netherlands

>Spike|hCoV-19/Australia/VIC9131/2020|2020-08-07|EPI\_ISL\_565402|Original|hCoV-19^^Victoria|Human|Victorian Infectious Diseases Reference Laboratory (VIDRL)|VIDRL and MDU-PHL|Schultz|Australia

>Spike|hCoV-19/England/CAMC-B33986/2020|2020-11-05|EPI\_ISL\_659350|Original|hCoV-19^^England|Human|Lighthouse Lab in Cambridge|Wellcome Sanger Institute for the COVID-19 Genomics UK (COG-UK) Consortium|Davies|United Kingdom

>Spike|hCoV-19/England/NOTT-10F589/2020|2020-04-03|EPI\_ISL\_433021|Original|hCoV-19^^England|Human|Queens Medical Centre|COVID-19 Genomics UK (COG-UK) Consortium|Loose|United Kingdom

>Spike|hCoV-19/England/ALDP-9E80E7/2020|2020-09-24|EPI\_ISL\_638236|Original|hCoV-19^^England|Human|Department of Pathology|COVID-19 Genomics UK (COG-UK) Consortium|Goodfellow|United Kingdom

>Spike|hCoV-19/Wales/PHWC-4A160B/2020|2020-12-10|EPI\_ISL\_743700|Original|hCoV-19^^Wales|Human|Wales Specialist Virology Centre Sequencing lab|COVID-19 Genomics UK (COG-UK) Consortium|Moore|United Kingdom

>Spike|hCoV-19/England/PORT-2CFD9B/2020|2020-05-06|EPI\_ISL\_461996|Original|hCoV-19^^England|Human|Centre for Enzyme Innovation|COVID-19 Genomics UK (COG-UK) Consortium|Robson|United Kingdom

>Spike|hCoV-19/Japan/PG-2626/2020|2020-04-00|EPI\_ISL\_690758|Original|hCoV-19^^Japan|Human|Pathogen Genomics Center|Pathogen Genomics Center|Sekizuka|Japan

>Spike|hCoV-19/USA/CA-QDX-2335/2020|2020-03-17|EPI\_ISL\_604638|Original|hCoV-19^^California|Human|Quest Diagnostics|Quest Diagnostics|Kagan|USA

>Spike|hCoV-19/Denmark/DCGC-2397/2020|2020-08-10|EPI\_ISL\_617579|Original|hCoV-19^^Midtjylland|Human|Department of Virus and Microbiological Special Diagnostics|Albertsen lab|Michaelsen|Denmark

>Spike|hCoV-19/England/QEUA-CAA5EF/2020|2020-12-20|EPI\_ISL\_760996|Original|hCoV-19^^England|Human|Lighthouse Lab in Glasgow|Wellcome Sanger Institute for the COVID-19 Genomics UK (COG-UK) Consortium|Davies|United Kingdom

>Spike|hCoV-19/Scotland/QEUA-C331E7/2020|2020-12-11|EPI\_ISL\_757156|Original|hCoV-19^^Scotland|Human|Lighthouse Lab in Glasgow|Wellcome Sanger Institute for the COVID-19 Genomics UK (COG-UK) Consortium|Davies|United Kingdom

>Spike|hCoV-19/England/QEUA-B13096/2020|2020-11-02|EPI\_ISL\_642280|Original|hCoV-19^^England|Human|Lighthouse Lab in Glasgow|Wellcome Sanger Institute for the COVID-19 Genomics UK (COG-UK) Consortium|Davies|United Kingdom

>Spike|hCoV-19/Denmark/DCGC-1323/2020|2020-06-08|EPI\_ISL\_617996|Original|hCoV-19^^Hovedstaden|Human|Department of Virus and Microbiological Special Diagnostics|Albertsen lab|Michaelsen|Denmark

>Spike|hCoV-19/Sweden/20-22323/2020|2020-04-10|EPI\_ISL\_660413|Original|hCoV-19^^Ostergotland|Human|Klinsisk mikrobiologi Linkoping|The Public Health Agency of Sweden|Svartstr\u00f6m|Sweden

>Spike|hCoV-19/England/CAMB-7D5E1/2020|2020-04-07|EPI\_ISL\_442205|Original|hCoV-19^^England|Human|Department of Pathology|Wellcome Sanger Institute for the COVID-19 Genomics UK (COG-UK) consortium|Amato|United Kingdom

>Spike|hCoV-19/Russia/KC-RII-MH2749S/2020|2020-09-19|EPI\_ISL\_602425|Original|hCoV-19^^Karachay-Cherkess|Human|HELIX LLC|WHO National Influenza Centre Russian Federation|Komissarov|Russia

>Spike|hCoV-19/England/ALDP-A84BFA/2020|2020-10-16|EPI\_ISL\_610438|Original|hCoV-19^^England|Human|Lighthouse Lab in Alderley Park|Wellcome Sanger Institute for the COVID-19 Genomics UK (COG-UK) consortium|Davies|United Kingdom

>Spike|hCoV-19/England/MILK-A7A90C/2020|2020-10-15|EPI\_ISL\_606434|Original|hCoV-19^^England|Human|Lighthouse Lab in Milton Keynes|Wellcome Sanger Institute for the COVID-19 Genomics UK (COG-UK) consortium|Davies|United Kingdom

>Spike|hCoV-19/Scotland/EDB9930/2020|2020-11-16|EPI\_ISL\_680549|Original|hCoV-19^^Scotland|Human|Virology Department|COVID-19 Genomics UK (COG-UK) Consortium|McHugh|United Kingdom

>Spike|hCoV-19/Belgium/ULG-10299/2020|2020-07-25|EPI\_ISL\_540466|Original|hCoV-19^^Anvers|Human|University of Li\u00e8ge COVID-19 testing center|GIGA Medical Genomics|Durkin|Belgium

>Spike|hCoV-19/Gibraltar/204421228/2020|2020-10-27|EPI\_ISL\_613688|Original|hCoV-19^^Gibraltar|Human|Microbiology|Respiratory Virus Unit|Platt|Gibraltar

>Spike|hCoV-19/England/ALDP-9C4D9F/2020|2020-09-10|EPI\_ISL\_567852|Original|hCoV-19^^England|Human|Lighthouse Lab in Alderley Park|Wellcome Sanger Institute for the COVID-19 Genomics UK (COG-UK) consortium|Davies|United Kingdom

>Spike|hCoV-19/Denmark/ALAB-HH-135/2020|2020-03-11|EPI\_ISL\_452014|Original|hCoV-19^^Denmark|Human|Department of Clinical Microbiology|Albertsen lab|Kirkegaard|Denmark

>Spike|hCoV-19/Scotland/EDB8707/2020|2020-10-23|EPI\_ISL\_651221|Original|hCoV-19^^Scotland|Human|Virology Department|COVID-19 Genomics UK (COG-UK) Consortium|McHugh|United Kingdom

>Spike|hCoV-19/Saudi Arabia/KAUST-Makkah13/2020|2020-03-23|EPI\_ISL\_437466|Original|hCoV-19^^Makkah|Human|Pathogen Genomics Lab King Abdullah University of Science and Technology(KAUST)|Pathogen Genomics Lab King Abdullah University of Science and Technology(KAUST)|Mohamed Ghazzali|Saudi Arabia

>Spike|hCoV-19/England/MILK-AB7420/2020|2020-10-20|EPI\_ISL\_623503|Original|hCoV-19^^England|Human|Lighthouse Lab in Milton Keynes|Wellcome Sanger Institute for the COVID-19 Genomics UK (COG-UK) consortium|Davies|United Kingdom

>Spike|hCoV-19/New Zealand/20VR3208/2020|2020-04-01|EPI\_ISL\_579493|Original|hCoV-19^^Canterbury|Human|Canterbury Health Laboratories|Institute of Environmental Science and Research (ESR)|Wang|New Zealand

>Spike|hCoV-19/USA/TX-DSHS-1639/2020|2020-06-24|EPI\_ISL\_710057|Original|hCoV-19^^Texas|Human|Texas Department of State Health Services|Texas Department of State Health Services|Rahman|USA

>Spike|hCoV-19/USA/WA-UW302/2020|2020-03-16|EPI\_ISL\_418870|Original|hCoV-19^^Washington|Human|UW Virology Lab|UW Virology Lab|Roychoudhury|USA



>Spike|hCoV-19/Turkey/DEN-PAU03/2020|2020-07-29|EPI\_ISL\_708184|Original|hCoV-19^^Denizli|Human|Pamukkale University Hospital|Pamukkale University Department of Medical Genetics|Tokgun|Turkey

>Spike|hCoV-19/USA/WA-UW-31224/2020|2020-10-12|EPI\_ISL\_735465|Original|hCoV-19^^Washington|Human|UW Virology Lab|UW Virology Lab|Roychoudhury|USA

>Spike|hCoV-19/USA/NMDOH-2020189541/2020|2020-07-07|EPI\_ISL\_542032|Original|hCoV-19^^New Mexico|Human|New Mexico Department of Health Scientific Laboratory|New Mexico Department of Health Scientific Laboratory|Johnson|USA

>Spike|hCoV-19/England/NORT-29C85A/2020|2020-04-23|EPI\_ISL\_488056|Original|hCoV-19^^England|Human|NU-OMICS DNA Sequencing research facility|Wellcome Sanger Institute for the COVID-19 Genomics UK (COG-UK) consortium|Davies|United Kingdom

>Spike|hCoV-19/Germany/NW-HHU-176/2020|2020-03-26|EPI\_ISL\_602498|Orginal|hCoV-19^^North Rhine-Westphalia|Human|Institute for Virology|Center of Medical Microbiology|Wienemann|Germany

>Spike|hCoV-19/USA/MN-MDH-1619/2020|2020-04-20|EPI\_ISL\_530215|Original|hCoV-19^^Minnesota|Human|Minnesota Department of Health|Minnesota Department of Health|Garfin|USA

>Spike|hCoV-19/USA/MI-QDX-366/2020|2020-03-23|EPI\_ISL\_571109|Original|hCoV-19^^Michigan|Human|Quest Diagnostics|Quest Diagnostics|Kagan|USA

>Spike|hCoV-19/England/QEUEH-AD25A4/2020|2020-10-24|EPI\_ISL\_629790|Original|hCoV-19^^England|Human|Lighthouse Lab in Glasgow|Wellcome Sanger Institute for the COVID-19 Genomics UK (COG-UK) consortium|Davies|United Kingdom

>Spike|hCoV-19/Switzerland/BS-42219995/2020|2020-04-04|EPI\_ISL\_581848|Original|hCoV-19^^Basel-Stadt|Human|University Hospital Basel|University Hospital Basel|Roloff Handschin|Switzerland

>Spike|hCoV-19/England/ALDP-A6F269/2020|2020-10-15|EPI\_ISL\_607130|Original|hCoV-19^^England|Human|Lighthouse Lab in Alderley Park|Wellcome Sanger Institute for the COVID-19 Genomics UK (COG-UK) consortium|Davies|United Kingdom

>Spike|hCoV-19/USA/IL-NM-1370/2020|2020-04-01|EPI\_ISL\_626513|Original|hCoV-19^^Illinois|Human|Northwestern Memorial Hospital|Ozer Lab|Ozer|USA

>Spike|hCoV-19/Wales/PHWC-48CEE0/2020|2020-11-06|EPI\_ISL\_666553|Original|hCoV-19^^Wales|Human|Wales Specialist Virology Centre Sequencing lab|COVID-19 Genomics UK (COG-UK) Consortium|Moore|United Kingdom

>Spike|hCoV-19/England/QEUEH-9FF4F0/2020|2020-09-29|EPI\_ISL\_600391|Original|hCoV-19^^England|Human|Lighthouse Lab in Glasgow|Wellcome Sanger Institute for the COVID-19 Genomics UK (COG-UK) consortium|Davies|United Kingdom

>Spike|hCoV-19/USA/TX-HMH-MCoV-15199/2020|2020-10-21|EPI\_ISL\_786683|Original|hCoV-19^^Texas|Human|Houston Methodist Hospital|Houston Methodist Hospital|Long|USA

>Spike|hCoV-19/USA/LA-EVTL904/2020|2020-07-09|EPI\_ISL\_653595|Original|hCoV-19^^Louisiana|Human|LSUHS Emerging Viral Threat Laboratory|Microbial Genome Sequencing Center|Kamil|USA

>Spike|hCoV-19/Wales/PHWC-49105B/2020|2020-10-14|EPI\_ISL\_706603|Original|hCoV-19^^Wales|Human|Originating lab|COVID-19 Genomics UK (COG-UK) Consortium|Moore|United Kingdom

>Spike|hCoV-19/Denmark/DCGC-2937/2020|2020-08-24|EPI\_ISL\_616698|Original|hCoV-19^^Sjaelland|Human|Department of Virus and Microbiological Special Diagnostics|Albertsen lab|Michaelsen|Denmark

>Spike|hCoV-19/Wales/PHWC-48D386/2020|2020-10-06|EPI\_ISL\_680614|Original|hCoV-19^^Wales|Human|Wales Specialist Virology Centre Sequencing lab|COVID-19 Genomics UK (COG-UK) Consortium|Moore|United Kingdom

>Spike|hCoV-19/Denmark/DCGC-13152/2020|2020-11-30|EPI\_ISL\_712618|Original|hCoV-19^^Hovedstaden|Human|Department of Virus and Microbiological Special Diagnostics|Albertsen Lab|Michaelsen|Denmark

>Spike|hCoV-19/South Africa/KRISP-K002870/2020|2020-09-04|EPI\_ISL\_602683|Original|hCoV-19^^KwaZulu-Natal|Human|NHLS-IALCH|KRISP|de Oliveira|South Africa

>Spike|hCoV-19/Netherlands/NoordBrabant\_99/2020|2020-03-19|EPI\_ISL\_422893|Original|hCoV-19^^Noord Brabant|Human|Dutch COVID-19 response team|Erasmus Medical Center|Oude Munnink|Netherlands

>Spike|hCoV-19/England/ALDP-A707C0/2020|2020-10-15|EPI\_ISL\_608248|Original|hCoV-19^^England|Human|Lighthouse Lab in Alderley Park|Wellcome Sanger Institute for the COVID-19 Genomics UK (COG-UK) consortium|Davies|United Kingdom

>Spike|hCoV-19/Canada/ON-S208/2020|2020-03-25|EPI\_ISL\_755816|Original|hCoV-19^^Ontario|Human|Toronto Invasive Bacterial Diseases Network|McMaster University|McArthur|Canada

>Spike|hCoV-19/Spain/GA-IBV-004035/2020|2020-03-10|EPI\_ISL\_510274|Original|hCoV-19^^Galicia|Human|Hospital Cl\u00e9nico Universitario de Santiago de Compostela|SeqCOVID-SPAIN consortium/IBV (CSIC)|Comas|Spain

>Spike|hCoV-19/England/CAMC-CB7831/2020|2020-12-18|EPI\_ISL\_777860|Original|hCoV-19^^England|Human|Lighthouse Lab in Cambridge|Wellcome Sanger Institute for the COVID-19 Genomics UK (COG-UK) Consortium|Davies|United Kingdom

>Spike|hCoV-19/Japan/PG-4634/2020|2020-07-00|EPI\_ISL\_689771|Original|hCoV-19^^Japan|Human|Fukuoka Institute of Health and Environmental Sciences|Pathogen Genomics Center|Sekizuka|Japan

>Spike|hCoV-19/England/ALDP-B5CB09/2020|2020-11-08|EPI\_ISL\_655673|Original|hCoV-19^^England|Human|Lighthouse Lab in Alderley Park|Wellcome Sanger Institute for the COVID-19 Genomics UK (COG-UK) Consortium|Davies|United Kingdom

>Spike|hCoV-19/USA/TX-HMH-MCoV-19721/2020|2020-11-29|EPI\_ISL\_784071|Original|hCoV-19^^Texas|Human|Houston Methodist Hospital|Houston Methodist Hospital|Long|USA

>Spike|hCoV-19/England/20139037504/2020|2020-03-27|EPI\_ISL\_420670|Original|hCoV-19^^England|Human|Respiratory Virus Unit|Respiratory Virus Unit|Platt|United Kingdom

>Spike|hCoV-19/Scotland/QEUH-9F84E8/2020|2020-09-27|EPI\_ISL\_600860|Original|hCoV-19^^Scotland|Human|Lighthouse Lab in Glasgow|Wellcome Sanger Institute for the COVID-19 Genomics UK (COG-UK) consortium|Davies|United Kingdom

>Spike|hCoV-19/Australia/VIC4874/2020|2020-07-13|EPI\_ISL\_519257|Original|hCoV-19^^Victoria|Human|Victorian Infectious Diseases Reference Laboratory (VIDRL)|VIDRL and MDU-PHL|Schultz|Australia

>Spike|hCoV-19/Denmark/DCGC-4976/2020|2020-09-21|EPI\_ISL\_621514|Original|hCoV-19^^Hovedstaden|Human|Department of Virus and Microbiological Special Diagnostics|Albertsen lab|Michaelsen|Denmark

>Spike|hCoV-19/England/LOND-12648B2/2020|2020-11-19|EPI\_ISL\_705310|Original|hCoV-19^^England|Human|University College London|COVID-19 Genomics UK (COG-UK) Consortium|Roy|United Kingdom

>Spike|hCoV-19/Peru/LIM-UPCH-0094/2020|2020-06-17|EPI\_ISL\_540972|Original|hCoV-19^^Lima|Human|Laboratorio de Referencia Nacional de Virus Respiratorios|Laboratorio de Gen\u00f3mica Microbiana|Tsukayama|Peru

>Spike|hCoV-19/USA/TX-HMH-3824/2020|2020-06-13|EPI\_ISL\_543228|Original|hCoV-19^^Texas|Human|Houston Methodist Hospital|Houston Methodist Hospital|Long|USA

>Spike|hCoV-19/France/PAC-IHU-0424/2020|2020-04-02|EPI\_ISL\_569499|Original|hCoV-19^^Provence-Alpes-C\u00f4te-d\u00e0z|Human|MEPHI|MEPHI|Levasseur|France

>Spike|hCoV-19/England/MILK-B54D38/2020|2020-11-05|EPI\_ISL\_657722|Original|hCoV-19^^England|Human|Lighthouse Lab in Milton Keynes|Wellcome Sanger Institute for the COVID-19 Genomics UK (COG-UK) Consortium|Davies|United Kingdom

>Spike|hCoV-19/Austria/CeMM0114/2020|2020-03-18|EPI\_ISL\_437972|Original|hCoV-19^^St. Anton|Human|Universitaetsklinik f\u00fcr Innere Medizin II Innsbruck|Bergthaler laboratory|Bergthaler|Austria

>Spike|hCoV-19/Spain/PV-IBV-98008409/2020|2020-10-19|EPI\_ISL\_654592|Original|hCoV-19^^Basque Country|Human|Servicio de Microbiolog\u00eda. Hospital Universitario Donostia. OSI Donostialdea. \u00c1rea de Enfermedades Infecciosas|SeqCOVID-SPAIN consortium/IBV (CSIC)|Comas|Spain

>Spike|hCoV-19/Luxembourg/LNS4661846/2020|2020-11-08|EPI\_ISL\_740518|Original|hCoV-19^^Luxembourg|Human|Laboratoire national de sant\u00e9|Laboratoire national de sant\u00e9|Wienecke-Baldacchino|Luxembourg

>Spike|hCoV-19/England/ALDP-C58A4B/2020|2020-12-13|EPI\_ISL\_735971|Original|hCoV-19^^England|Human|Lighthouse Lab in Alderley Park|Wellcome Sanger Institute for the COVID-19 Genomics UK (COG-UK) Consortium|Davies|United Kingdom

>Spike|hCoV-19/Ireland/LH-NVRL-73IRL72673/2020|2020-09-14|EPI\_ISL\_639828|Original|hCoV-19^^Louth|Human|National Virus Reference Laboratory|National Virus Reference Laboratory|Gonzalez|Ireland

>Spike|hCoV-19/Denmark/DCGC-3160/2020|2020-08-31|EPI\_ISL\_615981|Original|hCoV-19^^Hovedstaden|Human|Department of Virus and Microbiological Special Diagnostics|Albertsen lab|Michaelsen|Denmark

>Spike|hCoV-19/USA/WA-S49/2020|2020-03-04|EPI\_ISL\_417102|Original|hCoV-19^^Washington|Human|Washington State Department of Health|Seattle Flu Study|Bedford|USA

>Spike|hCoV-19/USA/CA-CZB-10867/2020|2020-08-04|EPI\_ISL\_583108|Original|hCoV-19^^California|Human|Humboldt County Public Health Laboratory|Chan-Zuckerberg Biohub|Bhatt|USA

>Spike|hCoV-19/England/SHEF-CD421/2020|2020-04-24|EPI\_ISL\_490626|Original|hCoV-19^^England|Human|Virology Department|COVID-19 Genomics UK (COG-UK) Consortium|de Silva|United Kingdom

>Spike|hCoV-19/Italy/VEN-IZSve-20RS2160-29/2020|2020-11-26|EPI\_ISL\_747459|Original|hCoV-19^^Veneto|Human|Ospedale San Bonifacio|Istituto Zooprofilattico Sperimentale delle Venezie|Quaranta|Italy

>Spike|hCoV-19/England/LIVE-1D20E8/2020|2020-05-12|EPI\_ISL\_573243|Original|hCoV-19^^England|Human|Liverpool Clinical Laboratories|COVID-19 Genomics UK (COG-UK) Consortium|Haldenby|United Kingdom

>Spike|hCoV-19/England/QEUEH-A0AAC2/2020|2020-10-01|EPI\_ISL\_599432|Original|hCoV-19^^England|Human|Lighthouse Lab in Glasgow|Wellcome Sanger Institute for the COVID-19 Genomics UK (COG-UK) consortium|Davies|United Kingdom

>Spike|hCoV-19/Belgium/reg-0406285/2020|2020-04-06|EPI\_ISL\_464079|Original|hCoV-19^^Soignies|Human|KU Leuven|KU Leuven|Maes|Belgium

>Spike|hCoV-19/Denmark/DCGC-10100/2020|2020-11-09|EPI\_ISL\_669393|Original|hCoV-19^^Hovedstaden|Human|Department of Virus and Microbiological Special Diagnostics|Albertsen Lab|Michaelsen|Denmark

>Spike|hCoV-19/Netherlands/ZuidHolland\_162/2020|2020-05-14|EPI\_ISL\_461334|Original|hCoV-19^^Zuid Holland|Human|Dutch COVID-19 response team|Erasmus Medical Center|Oude Munnink|Netherlands

>Spike|hCoV-19/Switzerland/AG-ETHZ-100125/2020|2020-03-16|EPI\_ISL\_451709|Original|hCoV-19^^Aargau|Human|Viollier AG|Department of Biosystems Science and Engineering|Nadeau|Switzerland

>Spike|hCoV-19/Jordan/AM-ALSR-5012/2020|2020-10-10|EPI\_ISL\_730285|Original|hCoV-19^^Amman|Human|Biolab Diagnostic Laboratories|Andersen lab at Scripps Research|Gangavarapu|Jordan

>Spike|hCoV-19/Scotland/QEUEH-9FB44F/2020|2020-09-29|EPI\_ISL\_600561|Original|hCoV-19^^Scotland|Human|Lighthouse Lab in Glasgow|Wellcome Sanger Institute for the COVID-19 Genomics UK (COG-UK) consortium|Davies|United Kingdom

>Spike|hCoV-19/England/ALDP-B1A92B/2020|2020-11-01|EPI\_ISL\_647780|Original|hCoV-19^^England|Human|Lighthouse Lab in Alderley Park|Wellcome Sanger Institute for the COVID-19 Genomics UK (COG-UK) Consortium|Davies|United Kingdom

>Spike|hCoV-19/Denmark/DCGC-1021/2020|2020-04-06|EPI\_ISL\_614481|Original|hCoV-19^^Hovedstaden|Human|Department of Virus and Microbiological Special Diagnostics|Albertsen lab|Michaelsen|Denmark

>Spike|hCoV-19/Netherlands/ZH-EMC-1190/2020|2020-12-20|EPI\_ISL\_763264|Original|hCoV-19^^Zuid Holland|Human|Dutch COVID-19 response team|Erasmus Medical Center|Oude Munnink|Netherlands

>Spike|hCoV-19/England/QEUEH-9DD09A/2020|2020-09-21|EPI\_ISL\_599561|Original|hCoV-19^^England|Human|Lighthouse Lab in Glasgow|Wellcome Sanger Institute for the COVID-19 Genomics UK (COG-UK) consortium|Davies|United Kingdom

>Spike|hCoV-19/USA/WA-UW-2100/2020|2020-03-25|EPI\_ISL\_426086|Original|hCoV-19^^Washington|Human|UW Virology Lab|UW Virology Lab|Roychoudhury|USA

>Spike|hCoV-19/Japan/DP0544/2020|2020-02-17|EPI\_ISL\_416608|Original|hCoV-19^^Japan|Human|Japanese Quarantine Stations|Pathogen Genomics Center|Sekizuka|Japan

>Spike|hCoV-19/Netherlands/Zeeland\_29/2020|2020-04-24|EPI\_ISL\_461267|Original|hCoV-19^^Zeeland|Human|Dutch COVID-19 response team|Erasmus Medical Center|Oude Munnink|Netherlands

>Spike|hCoV-19/Denmark/DCGC-2029/2020|2020-07-27|EPI\_ISL\_618257|Original|hCoV-19^^Syddanmark|Human|Department of Virus and Microbiological Special Diagnostics|Albertsen lab|Michaelsen|Denmark

>Spike|hCoV-19/Denmark/DCGC-3620/2020|2020-08-31|EPI\_ISL\_616388|Original|hCoV-19^^Syddanmark|Human|Department of Virus and Microbiological Special Diagnostics|Albertsen lab|Michaelsen|Denmark

>Spike|hCoV-19/USA/FL-BPHL-1204/2020|2020-07-22|EPI\_ISL\_541177|Original|hCoV-19^^Florida|Human|Florida Bureau of Public Health Laboratories|Florida Bureau of Public Health Laboratories|Blanton|USA

>Spike|hCoV-19/England/NOTT-112529/2020|2020-06-26|EPI\_ISL\_484390|Original|hCoV-19^^England|Human|Queens Medical Centre|COVID-19 Genomics UK (COG-UK) Consortium|Loose|United Kingdom

>Spike|hCoV-19/England/ALDP-95C549/2020|2020-06-17|EPI\_ISL\_555097|Original|hCoV-19^^England|Human|Lighthouse Lab in Alderley Park|Wellcome Sanger Institute for the COVID-19 Genomics UK (COG-UK) consortium|Davies|United Kingdom

>Spike|hCoV-19/USA/NY-NYUMC110/2020|2020-03-18|EPI\_ISL\_421722|Original|hCoV-19^^New York|Human|NYU Langone Health|Departments of Pathology and Medicine|Maurano|USA

>Spike|hCoV-19/Japan/NGY-NNH-021/2020|2020-08-15|EPI\_ISL\_568576|Original|hCoV-19^^Aichi|Human|Department of Infectious Diseases and Immunology|Clinical Research Center|Iwatani|Japan

>Spike|hCoV-19/England/QEUEH-B10D1A/2020|2020-11-02|EPI\_ISL\_642228|Original|hCoV-19^^England|Human|Lighthouse Lab in Glasgow|Wellcome Sanger Institute for the COVID-19 Genomics UK (COG-UK) Consortium|Davies|United Kingdom

>Spike|hCoV-19/Denmark/DCGC-19511/2020|2020-12-07|EPI\_ISL\_748231|Original|hCoV-19^^Midtjylland|Human|Department of Virus and Microbiological Special Diagnostics|Albertsen Lab|Michaelsen|Denmark

>Spike|hCoV-19/England/QEUEH-9B8FC5/2020|2020-09-08|EPI\_ISL\_549802|Original|hCoV-19^^England|Human|Lighthouse Lab in Glasgow|Wellcome Sanger Institute for the COVID-19 Genomics UK (COG-UK) consortium|Davies|United Kingdom

>Spike|hCoV-19/Wales/MILK-9EEA98/2020|2020-09-24|EPI\_ISL\_580753|Original|hCoV-19^^Wales|Human|Lighthouse Lab in Milton Keynes|Wellcome Sanger Institute for the COVID-19 Genomics UK (COG-UK) consortium|Davies|United Kingdom

>Spike|hCoV-19/England/ALDP-B63CEE/2020|2020-11-08|EPI\_ISL\_656670|Original|hCoV-19^^England|Human|Lighthouse Lab in Alderley Park|Wellcome Sanger Institute for the COVID-19 Genomics UK (COG-UK) Consortium|Davies|United Kingdom

>Spike|hCoV-19/England/CAMC-A5757A/2020|2020-10-09|EPI\_ISL\_597403|Original|hCoV-19^^England|Human|Lighthouse Lab in Cambridge|Wellcome Sanger Institute for the COVID-19 Genomics UK (COG-UK) consortium|Davies|United Kingdom

>Spike|hCoV-19/Scotland/CVR3996/2020|2020-08-15|EPI\_ISL\_540793|Original|hCoV-19^^Scotland|Human|West of Scotland Specialist Virology Centre|COVID-19 Genomics UK (COG-UK) Consortium|Robertson|United Kingdom

>Spike|hCoV-19/England/ALDP-CB4B4A/2020|2020-12-18|EPI\_ISL\_761335|Original|hCoV-19^^England|Human|Lighthouse Lab in Alderley Park|Wellcome Sanger Institute for the COVID-19 Genomics UK (COG-UK) Consortium|Davies|United Kingdom

>Spike|hCoV-19/England/CAMB-1AE4CB/2020|2020-04-28|EPI\_ISL\_459476|Original|hCoV-19^^England|Human|Department of Pathology|Wellcome Sanger Institute for the COVID-19 Genomics UK (COG-UK) consortium|Davies|United Kingdom

>Spike|hCoV-19/Scotland/CVR2644/2020|2020-04-17|EPI\_ISL\_484628|Original|hCoV-19^^Scotland|Human|West of Scotland Specialist Virology Centre|COVID-19 Genomics UK (COG-UK) Consortium|Robertson|United Kingdom

>Spike|hCoV-19/Russia/PSK-RII-MH6287S/2020|2020-11-12|EPI\_ISL\_733368|Original|hCoV-19^^Pskov|Human|HELIX LLC|WHO National Influenza Centre Russian Federation|Komissarov|Russia

>Spike|hCoV-19/Netherlands/NB-EMC-363/2020|2020-11-04|EPI\_ISL\_722720|Original|hCoV-19^^Noord Brabant|Human|Dutch COVID-19 response team|Erasmus Medical Center|Oude Munnink|Netherlands

>Spike|hCoV-19/Scotland/QEUEH-9E55BE/2020|2020-09-24|EPI\_ISL\_600933|Original|hCoV-19^^Scotland|Human|Lighthouse Lab in Glasgow|Wellcome Sanger Institute for the COVID-19 Genomics UK (COG-UK) consortium|Davies|United Kingdom

>Spike|hCoV-19/England/LIVE-DB7F68/2020|2020-11-01|EPI\_ISL\_651234|Original|hCoV-19^^England|Human|Liverpool Clinical Laboratories|COVID-19 Genomics UK (COG-UK) Consortium|Haldenby|United Kingdom

>Spike|hCoV-19/Belgium/regal-10191265/2020|2020-10-19|EPI\_ISL\_735175|Original|hCoV-19^^Sint-Pieter-Woluwe|Human|UZ Leuven|KU Leuven|Maes|Belgium

>Spike|hCoV-19/Denmark/DCGC-16046/2020|2020-11-23|EPI\_ISL\_714556|Original|hCoV-19^^Syddanmark|Human|Department of Virus and Microbiological Special Diagnostics|Albertsen Lab|Michaelsen|Denmark

>Spike|hCoV-19/USA/CA-CZB-15282/2020|2020-11-29|EPI\_ISL\_739146|Original|hCoV-19^^California|Human|Santa Clara County Public Health Laboratory|Chan-Zuckerberg Biohub|Kamm|USA

>Spike|hCoV-19/England/MILK-B8C4C9/2020|2020-11-13|EPI\_ISL\_674303|Original|hCoV-19^^England|Human|Lighthouse Lab in Milton Keynes|Wellcome Sanger Institute for the COVID-19 Genomics UK (COG-UK) Consortium|Davies|United Kingdom

>Spike|hCoV-19/England/ALDP-94A863/2020|2020-06-12|EPI\_ISL\_556428|Original|hCoV-19^^England|Human|Lighthouse Lab in Alderley Park|Wellcome Sanger Institute for the COVID-19 Genomics UK (COG-UK) Consortium|Davies|United Kingdom

>Spike|hCoV-19/USA/MI-UM-10035956808/2020|2020-09-15|EPI\_ISL\_583351|Original|hCoV-19^^Michigan|Human|University of Michigan Clinical Microbiology Laboratory|Lauring Lab|Valesano|USA

>Spike|hCoV-19/England/MILK-AB844D/2020|2020-10-21|EPI\_ISL\_623541|Original|hCoV-19^^England|Human|Lighthouse Lab in Milton Keynes|Wellcome Sanger Institute for the COVID-19 Genomics UK (COG-UK) consortium|Davies|United Kingdom

>Spike|hCoV-19/SaudiArabia/KAUST-JEDDAH1026/2020|2020-06-17|EPI\_ISL\_512896|Original|hCoV-19^^Jeddah|Human|Pathogen Genomics Lab King Abdullah University of Science and Technology(KAUST)|Pathogen Genomics Lab King Abdullah University of Science and Technology(KAUST)|Mohamed Ghazzali|Saudi Arabia

>Spike|hCoV-19/USA/NY-NYCPHL-000693/2020|2020-03-15|EPI\_ISL\_632109|Original|hCoV-19^^New York|Human|Jamaica Hospital Medical Center|New York City Public Health Laboratory|Wang|USA

>Spike|hCoV-19/England/ALDP-9BE958/2020|2020-09-09|EPI\_ISL\_568099|Original|hCoV-19^^England|Human|Lighthouse Lab in Alderley Park|Wellcome Sanger Institute for the COVID-19 Genomics UK (COG-UK) consortium|Davies|United Kingdom

>Spike|hCoV-19/USA/LA-EVTL478/2020|2020-06-23|EPI\_ISL\_578882|Original|hCoV-19^^Louisiana|Human|LSUHS Emerging Viral Threat Laboratory|Microbial Genome Sequencing Center|Kamil|USA

>Spike|hCoV-19/England/BIRM-67B60/2020|2020-11-03|EPI\_ISL\_651486|Original|hCoV-19^^England|Human|University of Birmingham|COVID-19 Genomics UK (COG-UK) Consortium|Loman|United Kingdom

>Spike|hCoV-19/England/CAMC-BC048D/2020|2020-11-22|EPI\_ISL\_704710|Original|hCoV-19^^England|Human|Lighthouse Lab in Cambridge|Wellcome Sanger Institute for the COVID-19 Genomics UK (COG-UK) Consortium|Davies|United Kingdom

>Spike|hCoV-19/England/SHEF-CF02B/2020|2020-10-09|EPI\_ISL\_611829|Original|hCoV-19^^England|Human|Virology Department|COVID-19 Genomics UK (COG-UK) Consortium|de Silva|United Kingdom

>Spike|hCoV-19/England/ALDP-C23593/2020|2020-12-06|EPI\_ISL\_783034|Original|hCoV-19^^England|Human|Lighthouse Lab in Alderley Park|Wellcome Sanger Institute for the COVID-19 Genomics UK (COG-UK) Consortium|Davies|United Kingdom

>Spike|hCoV-19/England/20168002804/2020|2020-04-16|EPI\_ISL\_466594|Original|hCoV-19^^England|Human|Respiratory Virus Unit|Respiratory Virus Unit|Platt|United Kingdom

>Spike|hCoV-19/USA/TX-HMH-MCoV-14687/2020|2020-10-12|EPI\_ISL\_787972|Original|hCoV-19^^Texas|Human|Houston Methodist Hospital|Houston Methodist Hospital|Long|USA

>Spike|hCoV-19/Italy/LAZ-INMI-56/2020|2020-06-04|EPI\_ISL\_603163|Original|hCoV-19^^Lazio|Human|INMI Lazzaro Spallanzani IRCCS|INMI Lazzaro Spallanzani IRCCS|Gruber|Italy

>Spike|hCoV-19/USA/FL-BPHL-0996/2020|2020-07-10|EPI\_ISL\_517886|Original|hCoV-19^^Florida|Human|Florida Bureau of Public Health Laboratories|Florida Bureau of Public Health Laboratories|Blanton|USA

>Spike|hCoV-19/Ireland/D-NVRL-MPJ65056/2020|2020-05-03|EPI\_ISL\_671344|Original|hCoV-19^^Dublin|Human|National Virus Reference Laboratory|Irish Coronavirus Sequencing Consortium - Teagasc Moorepark|Walsh|Ireland

>Spike|hCoV-19/England/CAMC-CB8F2C/2020|2020-12-18|EPI\_ISL\_778150|Original|hCoV-19^^England|Human|Lighthouse Lab in Cambridge|Wellcome Sanger Institute for the COVID-19 Genomics UK (COG-UK) Consortium|Davies|United Kingdom

>Spike|hCoV-19/USA/OR-OHSU-2843/2020|2020-09-02|EPI\_ISL\_667348|Original|hCoV-19^^Oregon|Human|OHSU Lab Services Molecular Microbiology Lab|Oregon SARS-CoV-2 Genome Sequencing Center|O'Roak|USA

>Spike|hCoV-19/Luxembourg/LNS6172039/2020|2020-12-01|EPI\_ISL\_770898|Original|hCoV-19^^Luxembourg|Human|Laboratoire national de sant\u00e9|Laboratoire national de sant\u00e9|Wienecke-Baldacchino|Luxembourg

>Spike|hCoV-19/USA/FL-QDX-1707/2020|2020-03-17|EPI\_ISL\_604022|Original|hCoV-19^^Florida|Human|Quest Diagnostics|Quest Diagnostics|Kagan|USA

>Spike|hCoV-19/USA/NY-WCMP10D11P/2020|2020-03-15|EPI\_ISL\_427568|Original|hCoV-19^^New York|Human|NewYork-Presbyterian & Mason Lab|Mason Lab|Mason|USA

>Spike|hCoV-19/Australia/VIC12091/2020|2020-08-11|EPI\_ISL\_640999|Original|hCoV-19^^Victoria|Human|Microbiological Diagnostic Unit - Public Health Laboratory (MDU-PHL)|MDU-PHL|Schultz|Australia

>Spike|hCoV-19/England/QEUEH-9F9757/2020|2020-09-25|EPI\_ISL\_589222|Original|hCoV-19^^England|Human|Lighthouse Lab in Glasgow|Wellcome Sanger Institute for the COVID-19 Genomics UK (COG-UK) consortium|Davies|United Kingdom

>Spike|hCoV-19/Japan/PG-5031/2020|2020-07-00|EPI\_ISL\_690142|Original|hCoV-19^^Japan|Human|Pathogen Genomics Center|Pathogen Genomics Center|Sekizuka|Japan

>Spike|hCoV-19/Russia/CRIE162398/2020|2020-03-31|EPI\_ISL\_486821|Original|hCoV-19^^Moscow|Human|Molecular diagnostic laboratory of Federal Budget Institution of Science \Central Research Institute of Epidemiology\ of The Federal Service on Customers' Rights Protection and Human Well-being Surveillance|Group of Genomics and Postgenomic Technologies of Central Research Institute of Epidemiology|Spera>nskaya|Russia

>Spike|hCoV-19/India/MH-NIV-16936/2020|2020-04-28|EPI\_ISL\_479506|Original|hCoV-19^^Maharashtra|Human|NIV Influenza|NIV Influenza|Potdar|India

>Spike|hCoV-19/Japan/PG-6605/2020|2020-08-00|EPI\_ISL\_687717|Original|hCoV-19^^Japan|Human|Niigata Prefectural Institute of Public Health and Environmental Sciences|Pathogen Genomics Center|Sekizuka|Japan

>Spike|hCoV-19/USA/MI-MDHHS-SC21424/2020|2020-03-23|EPI\_ISL\_507678|Original|hCoV-19^^Michigan|Human|Michigan Department of Health and Human Services|Michigan Department of Health and Human Services|Blankenship|USA

>Spike|hCoV-19/USA/TX-HMH-1187/2020|2020-04-24|EPI\_ISL\_542575|Original|hCoV-19^^Texas|Human|Houston Methodist Hospital|Houston Methodist Hospital|Long|USA

>Spike|hCoV-19/Poland/77073/2020|2020-11-00|EPI\_ISL\_732867|Original|hCoV-19^^Poland|Human|genXone SA|genXone SA|Kaszuba|Poland

>Spike|hCoV-19/England/SHEF-10B3045/2020|2020-05-30|EPI\_ISL\_537245|Original|hCoV-19^^England|Human|Virology Department|Wellcome Sanger Institute for the COVID-19 Genomics UK (COG-UK) consortium|Davies|United Kingdom

>Spike|hCoV-19/England/CAMB-1B95E8/2020|2020-11-04|EPI\_ISL\_664941|Original|hCoV-19^^England|Human|Department of Pathology|COVID-19 Genomics UK (COG-UK) Consortium|Goodfellow|United Kingdom

>Spike|hCoV-19/Wales/PHWC-49AA36/2020|2020-12-03|EPI\_ISL\_727634|Original|hCoV-19^^Wales|Human|Originating lab|COVID-19 Genomics UK (COG-UK) Consortium|Moore|United Kingdom

>Spike|hCoV-19/USA/TX-HMH-6425/2020|2020-07-04|EPI\_ISL\_545988|Original|hCoV-19^^Texas|Human|Houston Methodist Hospital|Houston Methodist Hospital|Long|USA

>Spike|hCoV-19/England/CAMB-1BB689/2020|2020-11-20|EPI\_ISL\_665017|Original|hCoV-19^^England|Human|Department of Pathology|COVID-19 Genomics UK (COG-UK) Consortium|Goodfellow|United Kingdom

>Spike|hCoV-19/Scotland/CVR5880/2020|2020-11-17|EPI\_ISL\_705642|Original|hCoV-19^^Scotland|Human|West of Scotland Specialist Virology Centre|COVID-19 Genomics UK (COG-UK) Consortium|Robertson|United Kingdom

>Spike|hCoV-19/USA/TX-HMH-MCoV-18029/2020|2020-11-16|EPI\_ISL\_786177|Original|hCoV-19^^Texas|Human|Houston Methodist Hospital|Houston Methodist Hospital|Long|USA

>Spike|hCoV-19/USA/MI-MDHHS-SC20654/2020|2020-04-27|EPI\_ISL\_462736|Original|hCoV-19^^Michigan|Human|Michigan Department of Health and Human Services|Michigan Department of Health and Human Services|Blankenship|USA

>Spike|hCoV-19/Denmark/DCGC-20245/2020|2020-11-30|EPI\_ISL\_748068|Original|hCoV-19^^Hovedstaden|Human|Department of Virus and Microbiological Special Diagnostics|Albertsen Lab|Michaelsen|Denmark

>Spike|hCoV-19/USA/WA-UW-22217/2020|2020-08-01|EPI\_ISL\_570641|Original|hCoV-19^^Washington|Human|UW Virology Lab|UW Virology Lab|Roychoudhury|USA

>Spike|hCoV-19/Japan/PG-0506/2020|2020-04-07|EPI\_ISL\_480165|Original|hCoV-19^^HokurikuShinsyu|Human|Fukui Prefectural Institute of Public Health and Environmental Science|Pathogen Genomics Center|Sekizuka|Japan

>Spike|hCoV-19/Denmark/DCGC-7423/2020|2020-10-12|EPI\_ISL\_619352|Original|hCoV-19^^Syddanmark|Human|Department of Virus and Microbiological Special Diagnostics|Albertsen lab|Michaelsen|Denmark

>Spike|hCoV-19/Denmark/DCGC-16482/2020|2020-11-16|EPI\_ISL\_714157|Original|hCoV-19^^Hovedstaden|Human|Department of Virus and Microbiological Special Diagnostics|Albertsen Lab|Michaelsen|Denmark

>Spike|hCoV-19/USA/TX-HMH-MCoV-10164/2020|2020-07-07|EPI\_ISL\_789349|Original|hCoV-19^^Texas|Human|Houston Methodist Hospital|Houston Methodist Hospital|Long|USA

>Spike|hCoV-19/England/ALDP-B46FCA/2020|2020-11-07|EPI\_ISL\_656191|Original|hCoV-19^^England|Human|Lighthouse Lab in Alderley Park|Wellcome Sanger Institute for the COVID-19 Genomics UK (COG-UK) Consortium|Davies|United Kingdom

>Spike|hCoV-19/USA/WI-UW-1370/2020|2020-09-05|EPI\_ISL\_536741|Original|hCoV-19^^Wisconsin|Human|University of Wisconsin-Madison AIDS Vaccine Research Laboratories|University of Wisconsin-Madison AIDS Vaccine Research Laboratories|Baczenas|USA

>Spike|hCoV-19/England/QEUH-9CEC4D/2020|2020-09-17|EPI\_ISL\_590143|Original|hCoV-19^^England|Human|Lighthouse Lab in Glasgow|Wellcome Sanger Institute for the COVID-19 Genomics UK (COG-UK) consortium|Davies|United Kingdom

>Spike|hCoV-19/Russia/StPetersburg-RII8317V/2020|2020-04-21|EPI\_ISL\_507293|Vero P1|hCoV-19^^Saint Petersburg|Human|WHO National Influenza Centre Russian Federation|WHO National Influenza Centre Russian Federation|Komissarov|Russia

>Spike|hCoV-19/England/201120459/2020|2020-03-10|EPI\_ISL\_464676|Original|hCoV-19^^England|Human|Respiratory Virus Unit|Respiratory Virus Unit|Platt|United Kingdom

>Spike|hCoV-19/Scotland/EDB373/2020|2020-03-30|EPI\_ISL\_425985|Original|hCoV-19^^Scotland|Human|Virology Department|COVID-19 Genomics UK (COG-UK) Consortium|Williams|United Kingdom

>Spike|hCoV-19/England/ALDP-9BDA1A/2020|2020-09-09|EPI\_ISL\_567943|Original|hCoV-19^^England|Human|Lighthouse Lab in Alderley Park|Wellcome Sanger Institute for the COVID-19 Genomics UK (COG-UK) consortium|Davies|United Kingdom

>Spike|hCoV-19/England/CAMC-B77BBD/2020|2020-11-12|EPI\_ISL\_661951|Original|hCoV-19^^England|Human|Lighthouse Lab in Cambridge|Wellcome Sanger Institute for the COVID-19 Genomics UK (COG-UK) Consortium|Davies|United Kingdom

>Spike|hCoV-19/England/NOTT-10F950/2020|2020-04-05|EPI\_ISL\_433063|Original|hCoV-19^^England|Human|Queens Medical Centre|COVID-19 Genomics UK (COG-UK) Consortium|Loose|United Kingdom

>Spike|hCoV-19/Scotland/QEUH-A01375/2020|2020-10-02|EPI\_ISL\_595804|Original|hCoV-19^^Scotland|Human|Virology Department|COVID-19 Genomics UK (COG-UK) Consortium|de Silva|United Kingdom

>Spike|hCoV-19/Scotland/QEUH-9DC408/2020|2020-09-22|EPI\_ISL\_601161|Original|hCoV-19^^Scotland|Human|Lighthouse Lab in Glasgow|Wellcome Sanger Institute for the COVID-19 Genomics UK (COG-UK) consortium|Davies|United Kingdom

>Spike|hCoV-19/England/WSFT-25C1598/2020|2020-04-23|EPI\_ISL\_495084|Original|hCoV-19^^England|Human|Department of Medical Microbiology|Wellcome Sanger Institute for the COVID-19 Genomics UK (COG-UK) consortium|Davies|United Kingdom

>Spike|hCoV-19/USA/TX-HMH-961/2020|2020-04-07|EPI\_ISL\_545935|Original|hCoV-19^^Texas|Human|Houston Methodist Hospital|Houston Methodist Hospital|Long|USA

>Spike|hCoV-19/Wales/PHWC-492C1A/2020|2020-11-27|EPI\_ISL\_725765|Original|hCoV-19^^Wales|Human|Originating lab|COVID-19 Genomics UK (COG-UK) Consortium|Moore|United Kingdom

>Spike|hCoV-19/USA/TX-HMH-MCoV-14188/2020|2020-10-01|EPI\_ISL\_787473|Original|hCoV-19^^Texas|Human|Houston Methodist Hospital|Houston Methodist Hospital|Long|USA

>Spike|hCoV-19/England/NORW-F546C/2020|2020-11-19|EPI\_ISL\_725260|Original|hCoV-19^^England|Human|Quadram Institute Bioscience|COVID-19 Genomics UK (COG-UK) Consortium|Alikhan|United Kingdom

>Spike|hCoV-19/Portugal/PT1568/2020|2020-06-28|EPI\_ISL\_765220|Original|hCoV-19^^Portugal|Human|Instituto Nacional de Saude (INSA)|Instituto Nacional de Saude (INSA)|Borges|Portugal

>Spike|hCoV-19/Japan/PG-8420/2020|2020-08-00|EPI\_ISL\_687519|Original|hCoV-19^^Japan|Human|Pathogen Genomics Center|Pathogen Genomics Center|Sekizuka|Japan

>Spike|hCoV-19/Gibraltar/203260482/2020|2020-08-03|EPI\_ISL\_547436|Original|hCoV-19^^Gibraltar|Human|Microbiology|Respiratory Virus Unit|Platt|Gibraltar

>Spike|hCoV-19/USA/MN-MDH-1715/2020|2020-08-25|EPI\_ISL\_560802|Original|hCoV-19^^Minnesota|Human|M Health Fairview|Minnesota Department of Health|Garfin|USA

>Spike|hCoV-19/England/CAMB-79E62/2020|2020-04-02|EPI\_ISL\_440606|Original|hCoV-19^^England|Human|Department of Pathology|Wellcome Sanger Institute for the COVID-19 Genomics UK (COG-UK) consortium|Amato|United Kingdom

>Spike|hCoV-19/USA/MA-MASPHL-00100/2020|2020-04-03|EPI\_ISL\_791584|Original|hCoV-19^^Massachusetts|Human|Massachusetts State Public Health Laboratory|Infectious Disease Program|Park|USA

>Spike|hCoV-19/Wales/ALDP-C3CC92/2020|2020-12-10|EPI\_ISL\_767237|Original|hCoV-19^^Wales|Human|Lighthouse Lab in Alderley Park|Wellcome Sanger Institute for the COVID-19 Genomics UK (COG-UK) Consortium|Davies|United Kingdom

>Spike|hCoV-19/USA/ME-HETL-J0463/2020|2020-12-15|EPI\_ISL\_755555|Original|hCoV-19^^Maine|Human|Maine Health and Environmental Testing Laboratory|Tewhey Lab|Tewhey|USA

>Spike|hCoV-19/England/QEUEH-B664B6/2020|2020-11-11|EPI\_ISL\_662515|Original|hCoV-19^^England|Human|Lighthouse Lab in Glasgow|Wellcome Sanger Institute for the COVID-19 Genomics UK (COG-UK) Consortium|Davies|United Kingdom

>Spike|hCoV-19/Italy/LAZ-INMI-69/2020|2020-06-06|EPI\_ISL\_603176|Original|hCoV-19^^Lazio|Human|INMI Lazzaro Spallanzani IRCCS|INMI Lazzaro Spallanzani IRCCS|Gruber|Italy

>Spike|hCoV-19/USA/CA-LAC-USC5/2020-05-06|2020-05-06|EPI\_ISL\_569668|Original|hCoV-19^^California|Human|Lee Lab|Lee Lab|Lee|USA

>Spike|hCoV-19/USA/MI-MDHHS-SC22175/2020|2020-10-20|EPI\_ISL\_614226|Original|hCoV-19^^Michigan|Human|Michigan Department of Health and Human Services|Michigan Department of Health and Human Services|Jacob|USA

>Spike|hCoV-19/England/ALDP-B1C0E8/2020|2020-11-01|EPI\_ISL\_645921|Original|hCoV-19^^England|Human|Lighthouse Lab in Alderley Park|Wellcome Sanger Institute for the COVID-19 Genomics UK (COG-UK) Consortium|Davies|United Kingdom

>Spike|hCoV-19/USA/AZ-TG640903/2020|2020-04-13|EPI\_ISL\_695810|Original|hCoV-19^^Arizona|Human|Sonora Quest Laboratories|TGen North|French|USA

>Spike|hCoV-19/Japan/PG-0747/2020|2020-04-00|EPI\_ISL\_684357|Original|hCoV-19^^Japan|Human|Pathogen Genomics Center|Pathogen Genomics Center|Sekizuka|Japan

>Spike|hCoV-19/Wales/PHWC-329EC/2020|2020-04-14|EPI\_ISL\_474379|Original|hCoV-19^^Wales|Human|Originating lab|COVID-19 Genomics UK (COG-UK) Consortium|Moore|United Kingdom

>Spike|hCoV-19/USA/CA-CZB-1773/2020|2020-04-02|EPI\_ISL\_476790|Original|hCoV-19^^California|Human|Stanford clinical virology lab|Chan-Zuckerberg Biohub|Kamm|USA

>Spike|hCoV-19/England/ALDP-B480E3/2020|2020-11-07|EPI\_ISL\_649318|Original|hCoV-19^^England|Human|Lighthouse Lab in Alderley Park|Wellcome Sanger Institute for the COVID-19 Genomics UK (COG-UK) Consortium|Davies|United Kingdom

>Spike|hCoV-19/England/MILK-A06747/2020|2020-10-01|EPI\_ISL\_600026|Original|hCoV-19^^England|Human|Lighthouse Lab in Milton Keynes|Wellcome Sanger Institute for the COVID-19 Genomics UK (COG-UK) consortium|Davies|United Kingdom

>Spike|hCoV-19/England/LIVE-A9986/2020|2020-03-23|EPI\_ISL\_517299|Original|hCoV-19^^England|Human|Liverpool Clinical Laboratories|COVID-19 Genomics UK (COG-UK) Consortium|Haldenby|United Kingdom



>Spike|hCoV-19/USA/FL-BPHL-0597/2020|2020-03-24|EPI\_ISL\_508801|Original|hCoV-19^^Florida|Human|Florida Bureau of Public Health Laboratories|Florida Bureau of Public Health Laboratories|Blanton|USA

>Spike|hCoV-19/England/CAMB-1B4143/2020|2020-05-26|EPI\_ISL\_473460|Original|hCoV-19^^England|Human|Department of Pathology|COVID-19 Genomics UK (COG-UK) Consortium|Meredith|United Kingdom

>Spike|hCoV-19/France/ARA-75541/2020|2020-09-20|EPI\_ISL\_732693|Original|hCoV-19^^Auvergne-Rh\u00f4ne-Alpes|Human|CNR Virus des Infections Respiratoires - France SUD|CNR Virus des Infections Respiratoires - France SUD|Bal|France

>Spike|hCoV-19/England/ALDP-9863F1/2020|2020-08-05|EPI\_ISL\_529575|Original|hCoV-19^^England|Human|Quadram Institute Bioscience|COVID-19 Genomics UK (COG-UK) Consortium|Alikhan|United Kingdom

>Spike|hCoV-19/India/UT-AR1/2020|2020-06-01|EPI\_ISL\_508156|Original|hCoV-19^^Uttarakhand|Human|All india institute of Medical Sciences Rishikesh|National Institute of Biomedical Genomics|Maitra|India

>Spike|hCoV-19/England/QEUEH-B105A9/2020|2020-11-02|EPI\_ISL\_642432|Original|hCoV-19^^England|Human|Lighthouse Lab in Glasgow|Wellcome Sanger Institute for the COVID-19 Genomics UK (COG-UK) Consortium|Davies|United Kingdom

>Spike|hCoV-19/England/CAMB-7B941/2020|2020-04-04|EPI\_ISL\_441607|Original|hCoV-19^^England|Human|Department of Pathology|Wellcome Sanger Institute for the COVID-19 Genomics UK (COG-UK) consortium|Amato|United Kingdom

>Spike|hCoV-19/Denmark/DCGC-19296/2020|2020-12-07|EPI\_ISL\_748496|Original|hCoV-19^^Hovedstaden|Human|Department of Virus and Microbiological Special Diagnostics|Albertsen Lab|Michaelsen|Denmark

>Spike|hCoV-19/Brazil/PE-IAM215/2020|2020-04-06|EPI\_ISL\_500471|Original|hCoV-19^^Pernambuco|Human|LACEN/PE|WallauLab|Wallau|Brazil

>Spike|hCoV-19/Spain/AR-IBV-98010657/2020|2020-11-12|EPI\_ISL\_722267|Original|hCoV-19^^Aragon|Human|Servicio de Microbiolog\u00eda|SeqCOVID-SPAIN consortium/IBV (CSIC) |Comas|Spain

>Spike|hCoV-19/Australia/NSW2940/2020|2020-10-16|EPI\_ISL\_678372|Original|hCoV-19^^New South Wales|Human|Area of Virology|Virology Research Laboratory; Area of Virology|Foster|Australia

>Spike|hCoV-19/USA/FL-BPHL-1491/2020|2020-08-10|EPI\_ISL\_568589|Original|hCoV-19^^Florida|Human|Florida Bureau of Public Health Laboratories|Florida Bureau of Public Health Laboratories|Blanton|USA

>Spike|hCoV-19/England/CAMB-80FCF/2020|2020-04-14|EPI\_ISL\_438552|Original|hCoV-19^^England|Human|Department of Pathology|COVID-19 Genomics UK (COG-UK) Consortium|Meredith|United Kingdom

>Spike|hCoV-19/England/QEUEH-BA1C11/2020|2020-11-18|EPI\_ISL\_719974|Original|hCoV-19^^England|Human|Lighthouse Lab in Glasgow|Wellcome Sanger Institute for the COVID-19 Genomics UK (COG-UK) Consortium|Davies|United Kingdom

>Spike|hCoV-19/USA/WI-WSLH-200292/2020|2020-04-18|EPI\_ISL\_578478|Original|hCoV-19^^Wisconsin|Human|Wisconsin State Laboratory of Hygiene Communicable Disease Division|Wisconsin State Laboratory of Hygiene Communicable Disease Division|Florek|USA

>Spike|hCoV-19/England/MILK-A7992B/2020|2020-10-14|EPI\_ISL\_606783|Original|hCoV-19^^England|Human|Lighthouse Lab in Milton Keynes|Wellcome Sanger Institute for the COVID-19 Genomics UK (COG-UK) consortium|Davies|United Kingdom

>Spike|hCoV-19/USA/CA-CHLA-PLM30324031/2020|2020-11-30|EPI\_ISL\_753415|Original|hCoV-19^^California|Human|Clinical virology Laboratory|Center for Personalized Medicine|Dien Bard|USA

>Spike|hCoV-19/USA/MI-QDX-468/2020|2020-03-23|EPI\_ISL\_571203|Original|hCoV-19^^Michigan|Human|Quest Diagnostics|Quest Diagnostics|Kagan|USA

>Spike|hCoV-19/England/QEUEH-AE4C40/2020|2020-10-27|EPI\_ISL\_633240|Original|hCoV-19^^England|Human|Lighthouse Lab in Glasgow|Wellcome Sanger Institute for the COVID-19 Genomics UK (COG-UK) consortium|Davies|United Kingdom

>Spike|hCoV-19/England/QEUEH-AF5E55/2020|2020-10-30|EPI\_ISL\_662947|Original|hCoV-19^^England|Human|Lighthouse Lab in Glasgow|Wellcome Sanger Institute for the COVID-19 Genomics UK (COG-UK) Consortium|Davies|United Kingdom

>Spike|hCoV-19/England/SHEF-C4C5F/2020|2020-03-23|EPI\_ISL\_475378|Original|hCoV-19^^England|Human|Virology Department|COVID-19 Genomics UK (COG-UK) Consortium|de Silva|United Kingdom

>Spike|hCoV-19/Wales/PHWC-26EFB/2020|2020-03-30|EPI\_ISL\_422068|Original|hCoV-19^^Wales|Human|Wales Specialist Virology Centre|Public Health Wales Microbiology Cardiff|Moore|United Kingdom

>Spike|hCoV-19/England/CAMB-7D9A9/2020|2020-04-06|EPI\_ISL\_441754|Original|hCoV-19^^England|Human|Department of Pathology|Wellcome Sanger Institute for the COVID-19 Genomics UK (COG-UK) consortium|Amato|United Kingdom

>Spike|hCoV-19/England/ALDP-9BEC7/2020|2020-09-10|EPI\_ISL\_567956|Original|hCoV-19^^England|Human|Lighthouse Lab in Alderley Park|Wellcome Sanger Institute for the COVID-19 Genomics UK (COG-UK) consortium|Davies|United Kingdom

>Spike|hCoV-19/USA/VA-DCLS-1788/2020|2020-09-16|EPI\_ISL\_644873|Original|hCoV-19^^Virginia|Human|Virginia DCLS|Virginia DCLS|St. Jacques|USA

>Spike|hCoV-19/Australia/VIC3045/2020|2020-07-05|EPI\_ISL\_520758|Original|hCoV-19^^Victoria|Human|Victorian Infectious Diseases Reference Laboratory (VIDRL)|VIDRL and MDU-PHL|Schultz|Australia

>Spike|hCoV-19/England/CAMB-1BA0E6/2020|2020-11-03|EPI\_ISL\_650993|Original|hCoV-19^^England|Human|Department of Pathology|COVID-19 Genomics UK (COG-UK) Consortium|Goodfellow|United Kingdom

>Spike|hCoV-19/England/MILK-99E0E0/2020|2020-08-31|EPI\_ISL\_550773|Original|hCoV-19^^England|Human|Lighthouse Lab in Milton Keynes|Wellcome Sanger Institute for the COVID-19 Genomics UK (COG-UK) consortium|Davies|United Kingdom

>Spike|hCoV-19/England/ALDP-C3CF7B/2020|2020-12-10|EPI\_ISL\_730923|Original|hCoV-19^^England|Human|Lighthouse Lab in Alderley Park|Wellcome Sanger Institute for the COVID-19 Genomics UK (COG-UK) Consortium|Davies|United Kingdom

>Spike|hCoV-19/Kenya/C7380/2020|2020-05-17|EPI\_ISL\_568835|Original|hCoV-19^^Mombasa|Human|KEMRI-Wellcome Trust Research Programme/KEMRI-CGMR-C Kilifi|KEMRI-Wellcome Trust Research Programme/KEMRI-CGMR-C Kilifi|Githinji|Kenya

>Spike|hCoV-19/USA/CA-PC101P/2020|2020-03-11|EPI\_ISL\_414648|Original|hCoV-19^^California|Human|Andersen Lab|Andersen Lab|Gangavarapu|USA

>Spike|hCoV-19/England/MILK-A45F80/2020|2020-10-06|EPI\_ISL\_598791|Original|hCoV-19^^England|Human|Lighthouse Lab in Milton Keynes|Wellcome Sanger Institute for the COVID-19 Genomics UK (COG-UK) consortium|Davies|United Kingdom

>Spike|hCoV-19/USA/WY-WPHL-20148596/2020|2020-11-23|EPI\_ISL\_770089|Original|hCoV-19^^Wyoming|Human|Wyoming Public Health Laboratory|Wyoming Public Health Laboratory|Hull|USA

>Spike|hCoV-19/Australia/VIC17705/2020|2020-08-23|EPI\_ISL\_664003|Original|hCoV-19^^Victoria|Human|Microbiological Diagnostic Unit - Public Health Laboratory (MDU-PHL)|MDU-PHL|Schultz|Australia

>Spike|hCoV-19/Switzerland/BE-ETHZ-250085/2020|2020-08-19|EPI\_ISL\_535604|Original|hCoV-19^^Bern|Human|Viollier AG|Department of Biosystems Science and Engineering|Nadeau|Switzerland

>Spike|hCoV-19/England/LIVE-DC2C18/2020|2020-11-25|EPI\_ISL\_703818|Original|hCoV-19^^England|Human|Liverpool Clinical Laboratories|COVID-19 Genomics UK (COG-UK) Consortium|Haldenby|United Kingdom

>Spike|hCoV-19/Canada/ON-S736/2020|2020-04-09|EPI\_ISL\_591157|Original|hCoV-19^^Ontario|Human|Toronto Invasive Bacterial Diseases Network|McMaster University|McArthur|Canada

>Spike|hCoV-19/USA/WA-S87/2020|2020-03-01|EPI\_ISL\_417140|Original|hCoV-19^^Washington|Human|Washington State Department of Health|Seattle Flu Study|Bedford|USA

>Spike|hCoV-19/England/ALDP-A51E48/2020|2020-10-07|EPI\_ISL\_598229|Original|hCoV-19^^England|Human|Lighthouse Lab in Alderley Park|Wellcome Sanger Institute for the COVID-19 Genomics UK (COG-UK) consortium|Davies|United Kingdom

>Spike|hCoV-19/Scotland/CVR4641/2020|2020-09-26|EPI\_ISL\_612288|Original|hCoV-19^^Scotland|Human|West of Scotland Specialist Virology Centre|COVID-19 Genomics UK (COG-UK) Consortium|Robertson|United Kingdom

>Spike|hCoV-19/USA/UT-QDX-1906/2020|2020-03-14|EPI\_ISL\_604284|Original|hCoV-19^^Utah|Human|Quest Diagnostics|Quest Diagnostics|Kagan|USA

>Spike|hCoV-19/Wales/PHWC-2AE33/2020|2020-04-07|EPI\_ISL\_432077|Original|hCoV-19^^Wales|Human|Wales Specialist Virology Centre|Public Health Wales Microbiology Cardiff|Moore|United Kingdom

>Spike|hCoV-19/Wales/PHWC-49D9DC/2020|2020-12-07|EPI\_ISL\_742859|Original|hCoV-19^^Wales|Human|Wales Specialist Virology Centre Sequencing lab|COVID-19 Genomics UK (COG-UK) Consortium|Moore|United Kingdom

>Spike|hCoV-19/Wales/PHWC-49201E/2020|2020-11-16|EPI\_ISL\_706808|Original|hCoV-19^^Wales|Human|Originating lab|COVID-19 Genomics UK (COG-UK) Consortium|Moore|United Kingdom

>Spike|hCoV-19/Wales/PHWC-16526C/2020|2020-05-28|EPI\_ISL\_479440|Original|hCoV-19^^Wales|Human|Wales Specialist Virology Centre Sequencing lab|COVID-19 Genomics UK (COG-UK) Consortium|Moore|United Kingdom

>Spike|hCoV-19/England/QEUEH-9CA2D6/2020|2020-09-13|EPI\_ISL\_567504|Original|hCoV-19^^England|Human|Lighthouse Lab in Glasgow|Wellcome Sanger Institute for the COVID-19 Genomics UK (COG-UK) consortium|Davies|United Kingdom

>Spike|hCoV-19/England/ALDP-67E09E/2020|2020-07-03|EPI\_ISL\_551772|Original|hCoV-19^^England|Human|Lighthouse Lab in Alderley Park|Wellcome Sanger Institute for the COVID-19 Genomics UK (COG-UK) consortium|Davies|United Kingdom

>Spike|hCoV-19/USA/TX-DSHS-0333/2020|2020-06-13|EPI\_ISL\_534300|Original|hCoV-19^^Texas|Human|Texas Department of State Health Services|Texas Department of State Health Services|Rahman|USA

>Spike|hCoV-19/Denmark/DCGC-11234/2020|2020-11-02|EPI\_ISL\_670784|Original|hCoV-19^^Hovedstaden|Human|Department of Virus and Microbiological Special Diagnostics|Albertsen Lab|Michaelsen|Denmark

>Spike|hCoV-19/South Africa/KRISP-K002707/2020|2020-07-30|EPI\_ISL\_535566|Original|hCoV-19^^KwaZulu-Natal|Human|NHLs-IALCH|KRISP|de Oliveira|South Africa

>Spike|hCoV-19/England/ALDP-95024E/2020|2020-06-15|EPI\_ISL\_555259|Original|hCoV-19^^England|Human|Lighthouse Lab in Alderley Park|Wellcome Sanger Institute for the COVID-19 Genomics UK (COG-UK) Consortium|Davies|United Kingdom

>Spike|hCoV-19/England/LIVE-DC37AD/2020|2020-11-20|EPI\_ISL\_702826|Original|hCoV-19^^England|Human|Liverpool Clinical Laboratories|COVID-19 Genomics UK (COG-UK) Consortium|Haldenby|United Kingdom

>Spike|hCoV-19/England/ALDP-A2E3EB/2020|2020-10-06|EPI\_ISL\_586832|Original|hCoV-19^^England|Human|Lighthouse Lab in Alderley Park|Wellcome Sanger Institute for the COVID-19 Genomics UK (COG-UK) consortium|Davies|United Kingdom

>Spike|hCoV-19/Australia/VIC15573/2020|2020-07-30|EPI\_ISL\_593364|Original|hCoV-19^^Victoria|Human|Microbiological Diagnostic Unit - Public Health Laboratory (MDU-PHL) |MDU-PHL|Schultz|Australia

>Spike|hCoV-19/Denmark/DCGC-3387/2020|2020-08-31|EPI\_ISL\_616146|Original|hCoV-19^^Hovedstaden|Human|Department of Virus and Microbiological Special Diagnostics|Albertsen lab|Michaelsen|Denmark

>Spike|hCoV-19/Spain/MD-H12-29/2020|2020-03-12|EPI\_ISL\_428692|Original|hCoV-19^^Madrid|Human|Hospital Universitario 12 de Octubre|Hospital Universitario 12 de Octubre|Viedma|Spain

>Spike|hCoV-19/England/ALDP-BBB1BB/2020|2020-11-21|EPI\_ISL\_701679|Original|hCoV-19^^England|Human|Lighthouse Lab in Alderley Park|Wellcome Sanger Institute for the COVID-19 Genomics UK (COG-UK) Consortium|Davies|United Kingdom

>Spike|hCoV-19/Spain/IB-IBV-99010760/2020|2020-06-01|EPI\_ISL\_691662|Original|hCoV-19^^Balear Islands|Human|Servicio de Microbiolog\u00eda|SeqCOVID-SPAIN consortium/IBV (CSIC) |Comas|Spain

>Spike|hCoV-19/England/ALDP-9FD6DE/2020|2020-10-01|EPI\_ISL\_587781|Original|hCoV-19^^England|Human|Lighthouse Lab in Alderley Park|Wellcome Sanger Institute for the COVID-19 Genomics UK (COG-UK) consortium|Davies|United Kingdom

>Spike|hCoV-19/Sweden/20-50600/2020|2020-04-02|EPI\_ISL\_475149|Original|hCoV-19^^Stockholm|Human|Karolinska Universitetslaboratoriet|The Public Health Agency of Sweden|Svartstr\u00f6m|Sweden

>Spike|hCoV-19/USA/NY-NYCPHL-001070/2020|2020-10-15|EPI\_ISL\_633071|Original|hCoV-19^^New York|Human|DOHMH PHL|New York City Public Health Laboratory|Wang|USA

>Spike|hCoV-19/USA/MA-MGH-00876/2020|2020-04-14|EPI\_ISL\_791807|Original|hCoV-19^^Massachusetts|Human|Massachusetts General Hospital|Infectious Disease Program|Park|USA

>Spike|hCoV-19/USA/NY-NYCPHL-001157/2020|2020-10-27|EPI\_ISL\_671738|Original|hCoV-19^^New York|Human|DOHMH Fort Greene|New York City Public Health Laboratory|Wang|USA

>Spike|hCoV-19/England/LIVE-DC2E30/2020|2020-11-25|EPI\_ISL\_703170|Original|hCoV-19^^England|Human|Liverpool Clinical Laboratories|COVID-19 Genomics UK (COG-UK) Consortium|Haldenby|United Kingdom

>Spike|hCoV-19/France/PAC-IHU-1568/2020|2020-09-01|EPI\_ISL\_569201|Original|hCoV-19^^Provence-Alpes-C\u00f4te-d\u2019Azur|Human|MEPHI|MEPHI|Levasseur|France

>Spike|hCoV-19/Denmark/DCGC-17132/2020|2020-12-14|EPI\_ISL\_750774|Original|hCoV-19^^Midtjylland|Human|Department of Virus and Microbiological Special Diagnostics|Albertsen Lab|Michaelsen|Denmark

>Spike|hCoV-19/Switzerland/Vs-ETHZ-100360/2020|2020-03-19|EPI\_ISL\_574975|Original|hCoV-19^^Valais|Human|Viollier AG|Department of Biosystems Science and Engineering|Nadeau|Switzerland

>Spike|hCoV-19/England/MILK-CB2C76/2020|2020-12-04|EPI\_ISL\_760810|Original|hCoV-19^^England|Human|Lighthouse Lab in Milton Keynes|Wellcome Sanger Institute for the COVID-19 Genomics UK (COG-UK) Consortium|Davies|United Kingdom

>Spike|hCoV-19/England/OXON-B4180/2020|2020-03-29|EPI\_ISL\_534935|Original|hCoV-19^^England|Human|Oxford Viromics|COVID-19 Genomics UK (COG-UK) Consortium|Golubchik|United Kingdom

>Spike|hCoV-19/USA/TX-HMH-MCoV-13547/2020|2020-08-21|EPI\_ISL\_788667|Original|hCoV-19^^Texas|Human|Houston Methodist Hospital|Houston Methodist Hospital|Long|USA

>Spike|hCoV-19/Australia/VIC8085/2020|2020-08-13|EPI\_ISL\_564839|Original|hCoV-19^^Victoria|Human|Microbiological Diagnostic Unit - Public Health Laboratory (MDU-PHL)|MDU-PHL|Schultz|Australia

>Spike|hCoV-19/England/MILK-BB255E/2020|2020-11-18|EPI\_ISL\_720107|Original|hCoV-19^^England|Human|Lighthouse Lab in Milton Keynes|Wellcome Sanger Institute for the COVID-19 Genomics UK (COG-UK) Consortium|Davies|United Kingdom

>Spike|hCoV-19/Italy/BAS-IZSPB-336PT/2020|2020-10-28|EPI\_ISL\_722901|Original|hCoV-19^^Basilicata|Human|Istituto Zooprofilattico Sperimentale della Puglia e della Basilicata|Istituto Zooprofilattico Sperimentale della Puglia e della Basilicata|Parisi|Italy

>Spike|hCoV-19/Sweden/20-22122/2020|2020-07-04|EPI\_ISL\_582791|Original|hCoV-19^^Orebro|Human|Orebro klinisk mikrobiologi|The Public Health Agency of Sweden|Svartstr\u00f6m|Sweden

>Spike|hCoV-19/USA/TX-HMH-1490/2020|2020-04-30|EPI\_ISL\_542751|Original|hCoV-19^^Texas|Human|Houston Methodist Hospital|Houston Methodist Hospital|Long|USA

>Spike|hCoV-19/Scotland/QEUH-A9EDCA/2020|2020-10-20|EPI\_ISL\_625320|Original|hCoV-19^^Scotland|Human|Lighthouse Lab in Glasgow|Wellcome Sanger Institute for the COVID-19 Genomics UK (COG-UK) consortium|Davies|United Kingdom

>Spike|hCoV-19/USA/NE-11460/2020|2020-05-05|EPI\_ISL\_475214|Original|hCoV-19^^Nebraska|Human|Nebraska Public Health Laboratory|UNMC COVID-19 Response Team|Pratt|USA

>Spike|hCoV-19/South Africa/LR00014/2020|2020-07-02|EPI\_ISL\_515144|Original|hCoV-19^^Gauteng|Human|National Institute for Communicable Diseases of the National Health Laboratory Service|National Institute for Communicable Diseases of the National Health Laboratory Service|Allam|South Africa

>Spike|hCoV-19/Canada/NS-NML-1259/2020|2020-04-06|EPI\_ISL\_579648|Original|hCoV-19^^Nova Scotia|Human|QEII Health Sciences Centre|National Microbiology Laboratory (NML)|Majer|Canada

>Spike|hCoV-19/England/LIVE-DB9E87/2020|2020-11-11|EPI\_ISL\_664539|Original|hCoV-19^^England|Human|Liverpool Clinical Laboratories|COVID-19 Genomics UK (COG-UK) Consortium|Haldenby|United Kingdom

>Spike|hCoV-19/Japan/PG-0676/2020|2020-04-00|EPI\_ISL\_684286|Original|hCoV-19^^Japan|Human|Gunma Prefectural Institute of Public Health and Environmental Sciences|Pathogen Genomics Center|Sekizuka|Japan

>Spike|hCoV-19/England/CAMC-9D741C/2020|2020-09-20|EPI\_ISL\_584369|Original|hCoV-19^^England|Human|Virology Department|COVID-19 Genomics UK (COG-UK) Consortium|de Silva|United Kingdom

>Spike|hCoV-19/England/QEUA-9906EC/2020|2020-08-26|EPI\_ISL\_530393|Original|hCoV-19^^England|Human|Lighthouse Lab in Glasgow|Wellcome Sanger Institute for the COVID-19 Genomics UK (COG-UK) consortium|Davies|United Kingdom

>Spike|hCoV-19/Israel/2047364/2020|2020-03-28|EPI\_ISL\_447393|Original|hCoV-19^^North District|Human|Clinical Microbiology Laboratory|Stern Lab|Miller|Israel

>Spike|hCoV-19/Switzerland/BE-ETHZ-210073/2020|2020-07-22|EPI\_ISL\_510803|Original|hCoV-19^^Bern|Human|Viollier AG|Department of Biosystems Science and Engineering|Nadeau|Switzerland

>Spike|hCoV-19/USA/FL-BPHL-0167/2020|2020-04-03|EPI\_ISL\_480818|Original|hCoV-19^^Florida|Human|Florida Bureau of Public Health Laboratories|Florida Bureau of Public Health Laboratories|Blanton|USA

>Spike|hCoV-19/DRC/16191/2020|2020-06-03|EPI\_ISL\_591086|Original|hCoV-19^^Kinshasa|Human|Viral Respiratory Lab|Pathogen Sequencing Lab|Lokilo|Democratic Republic of the Congo

>Spike|hCoV-19/USA/TX-DSHS-0572/2020|2020-06-18|EPI\_ISL\_574474|Original|hCoV-19^^Texas|Human|Texas Department of State Health Services|Texas Department of State Health Services|Rahman|USA

>Spike|hCoV-19/England/ALDP-B464CB/2020|2020-11-07|EPI\_ISL\_656308|Original|hCoV-19^^England|Human|Lighthouse Lab in Alderley Park|Wellcome Sanger Institute for the COVID-19 Genomics UK (COG-UK) Consortium|Davies|United Kingdom

>Spike|hCoV-19/Australia/VIC11049/2020|2020-08-01|EPI\_ISL\_563221|Original|hCoV-19^^Victoria|Human|Microbiological Diagnostic Unit - Public Health Laboratory (MDU-PHL)|MDU-PHL|Schultz|Australia

>Spike|hCoV-19/Australia/VIC10389/2020|2020-08-20|EPI\_ISL\_562897|Original|hCoV-19^^Victoria|Human|Microbiological Diagnostic Unit - Public Health Laboratory (MDU-PHL)|MDU-PHL|Schultz|Australia

>Spike|hCoV-19/England/CAMB-75604/2020|2020-03-16|EPI\_ISL\_425413|Original|hCoV-19^^England|Human|Department of Pathology|COVID-19 Genomics UK (COG-UK) Consortium|Meredith|United Kingdom

>Spike|hCoV-19/Netherlands/FR-RIVM-20928/2020|2020-12-14|EPI\_ISL\_790955|Original|hCoV-19^^Friesland|Human|Dutch COVID-19 response team|National Institute for Public Health and the Environment (RIVM)|Meijer|Netherlands

>Spike|hCoV-19/England/GSTT-5347/2020|2020-03-19|EPI\_ISL\_560674|Original|hCoV-19^^England|Human|Centre for Clinical Infection and Diagnostics Research and Genomics Innovation Unit|Centre for Clinical Infection and Diagnostics Research and Genomics Innovation Unit|Awan|United Kingdom

>Spike|hCoV-19/Japan/PG-6669/2020|2020-07-00|EPI\_ISL\_687780|Original|hCoV-19^^Japan|Human|Pathogen Genomics Center|Pathogen Genomics Center|Sekizuka|Japan

>Spike|hCoV-19/England/QEUA-B807AE/2020|2020-11-14|EPI\_ISL\_661828|Original|hCoV-19^^England|Human|Lighthouse Lab in Glasgow|Wellcome Sanger Institute for the COVID-19 Genomics UK (COG-UK) Consortium|Davies|United Kingdom

>Spike|hCoV-19/England/LOND-1286D60/2020|2020-04-08|EPI\_ISL\_541752|Original|hCoV-19^^England|Human|Barts Health NHS Trust|Wellcome Sanger Institute for the COVID-19 Genomics UK (COG-UK) consortium|Davies|United Kingdom

>Spike|hCoV-19/Spain/AR-IBV-98010619/2020|2020-11-10|EPI\_ISL\_722258|Original|hCoV-19^^Aragon|Human|Servicio de Microbiolog\u00eda|SeqCOVID-SPAIN consortium|IBV (CSIC)|Comas|Spain

>Spike|hCoV-19/Ireland/MN-NVRL-20IRL51408/2020|2020-09-30|EPI\_ISL\_639906|Original|hCoV-19^^Monaghan|Human|National Virus Reference Laboratory|National Virus Reference Laboratory|Gonzalez|Ireland

>Spike|hCoV-19/Colombia/MAG-GVI-93457/2020|2020-04-01|EPI\_ISL\_447778|Original|hCoV-19^^Magdalena|Human|Instituto Nacional de Salud|Grupo de Investigaciones Microbiol\u00f3gicas-UR (GIMUR)|Ram\u00e9drez|Colombia

>Spike|hCoV-19/Turkey/KOC-IST-B91/2020|2020-04-08|EPI\_ISL\_478670|Original|hCoV-19^^Turkey|Human|unknown|Microbiology|Submitter|Turkey

>Spike|hCoV-19/France/PAC-IHU-0179/2020|2020-03-26|EPI\_ISL\_569352|Original|hCoV-19^^Provence-Alpes-C\u00f4te-d\u2019Azur|Human|MEPHI|MEPHI|Levasseur|France

>Spike|hCoV-19/Canada/ON-PHL-20-00236/2020|2020-03-00|EPI\_ISL\_548771|Original|hCoV-19^^Ontario|Human|Public Health Ontario Laboratory|Public Health Ontario Laboratory|Guthrie|Canada

>Spike|hCoV-19/England/QEUEH-C92FCE/2020|2020-12-17|EPI\_ISL\_762145|Original|hCoV-19^^England|Human|Lighthouse Lab in Glasgow|Wellcome Sanger Institute for the COVID-19 Genomics UK (COG-UK) Consortium|Davies|United Kingdom

>Spike|hCoV-19/England/ALDP-BCA483/2020|2020-11-23|EPI\_ISL\_703526|Original|hCoV-19^^England|Human|Lighthouse Lab in Alderley Park|Wellcome Sanger Institute for the COVID-19 Genomics UK (COG-UK) Consortium|Davies|United Kingdom

>Spike|hCoV-19/USA/CO-CDPHE-2006272103/2020|2020-06-25|EPI\_ISL\_677293|Original|hCoV-19^^Colorado|Human|Colorado Department of Public Health and Environment|Colorado Department of Public Health and Environment|Bankers|USA

>Spike|hCoV-19/Wales/PHWC-499044/2020|2020-12-01|EPI\_ISL\_727248|Original|hCoV-19^^Wales|Human|Originating lab|COVID-19 Genomics UK (COG-UK) Consortium|Moore|United Kingdom

>Spike|hCoV-19/England/CAMB-7A326/2020|2020-04-02|EPI\_ISL\_441060|Original|hCoV-19^^England|Human|Department of Pathology|Wellcome Sanger Institute for the COVID-19 Genomics UK (COG-UK) consortium|Amato|United Kingdom

>Spike|hCoV-19/England/QEUEH-B69E6A/2020|2020-11-11|EPI\_ISL\_655105|Original|hCoV-19^^England|Human|Lighthouse Lab in Glasgow|Wellcome Sanger Institute for the COVID-19 Genomics UK (COG-UK) Consortium|Davies|United Kingdom

>Spike|hCoV-19/USA/CO-CDPHE-2010280196/2020|2020-10-26|EPI\_ISL\_710362|Original|hCoV-19^^Colorado|Human|Colorado Department of Public Health and Environment|Colorado Department of Public Health and Environment|Bankers|USA

>Spike|hCoV-19/England/CAMC-B33713/2020|2020-11-05|EPI\_ISL\_659136|Original|hCoV-19^^England|Human|Lighthouse Lab in Cambridge|Wellcome Sanger Institute for the COVID-19 Genomics UK (COG-UK) Consortium|Davies|United Kingdom

>Spike|hCoV-19/England/MILK-971599/2020|2020-08-18|EPI\_ISL\_553117|Original|hCoV-19^^England|Human|Lighthouse Lab in Milton Keynes|Wellcome Sanger Institute for the COVID-19 Genomics UK (COG-UK) consortium|Davies|United Kingdom

>Spike|hCoV-19/Germany/SH-ChVir20782/2020|2020-11-28|EPI\_ISL\_729692|Original|hCoV-19^^Schleswig-Holstein|Human|A. Krumbholz|Charit\u00e9 Universit\u00e4tsmedizin Berlin|Muehlemann|Germany

>Spike|hCoV-19/USA/MI-MDHHS-SC20691/2020|2020-05-20|EPI\_ISL\_471715|Original|hCoV-19^^Michigan|Human|Michigan Department of Health and Human Services|Michigan Department of Health and Human Services|Blankenship|USA

>Spike|hCoV-19/Japan/PG-4679/2020|2020-08-00|EPI\_ISL\_689816|Original|hCoV-19^^Japan|Human|Fukuoka Institute of Health and Environmental Sciences|Pathogen Genomics Center|Sekizuka|Japan

>Spike|hCoV-19/Bosnia and Herzegovina/ChVir7347/2020|2020-03-20|EPI\_ISL\_462454|Original|hCoV-19^^Gorazde|Human|Clinical Center|Charite Universitatsmedizin Berlin|Muehlemann|Bosnia and Herzegovina

>Spike|hCoV-19/England/QEUEH-B40528/2020|2020-11-08|EPI\_ISL\_657112|Original|hCoV-19^^England|Human|Lighthouse Lab in Glasgow|Wellcome Sanger Institute for the COVID-19 Genomics UK (COG-UK) Consortium|Davies|United Kingdom

>Spike|hCoV-19/USA/CA-IGI-0423/2020|2020-07-16|EPI\_ISL\_756324|Original|hCoV-19^^California|Human|Innovative Genomics Institute|Innovative Genomics Institute|Wyman|USA

>Spike|hCoV-19/England/EXET-1360D3/2020|2020-04-16|EPI\_ISL\_457197|Original|hCoV-19^^England|Human|University of Exeter|COVID-19 Genomics UK (COG-UK) Consortium|Temperton|United Kingdom

>Spike|hCoV-19/USA/MI-UM-2006S000856/2020|2020-03-31|EPI\_ISL\_484713|Original|hCoV-19^^Michigan|Human|University of Michigan Clinical Microbiology Laboratory|Lauring Lab|Valesano|USA

>Spike|hCoV-19/England/ALDP-94415F/2020|2020-06-07|EPI\_ISL\_554847|Original|hCoV-19^^England|Human|Lighthouse Lab in Alderley Park|Wellcome Sanger Institute for the COVID-19 Genomics UK (COG-UK) consortium|Davies|United Kingdom

>Spike|hCoV-19/England/ALDP-B7578E/2020|2020-11-12|EPI\_ISL\_740922|Original|hCoV-19^^England|Human|Oxford Viromics|COVID-19 Genomics UK (COG-UK) Consortium|Golubchik|United Kingdom

>Spike|hCoV-19/Wales/ALDP-B47D47/2020|2020-11-07|EPI\_ISL\_710893|Original|hCoV-19^^Wales|Human|Lighthouse Lab in Alderley Park|Wellcome Sanger Institute for the COVID-19 Genomics UK (COG-UK) Consortium|Davies|United Kingdom

>Spike|hCoV-19/South Korea/KCDC2133/2020|2020-03-20|EPI\_ISL\_498034|Original|hCoV-19^^South Korea|Human|Division of Viral Diseases|Division of Viral Diseases|Kim|South Korea

>Spike|hCoV-19/England/MILK-A7B7F2/2020|2020-10-15|EPI\_ISL\_607343|Original|hCoV-19^^England|Human|Lighthouse Lab in Milton Keynes|Wellcome Sanger Institute for the COVID-19 Genomics UK (COG-UK) consortium|Davies|United Kingdom

>Spike|hCoV-19/Hungary/UD-90462/2020|2020-10-04|EPI\_ISL\_671470|Original|hCoV-19^^Borsod-Aba\u00faj-Zempl\u00e9n county|Human|University of Debrecen|National Laboratory of Virology|Kemenesi|Hungary

>Spike|hCoV-19/England/ALDP-95D135/2020|2020-06-18|EPI\_ISL\_553609|Original|hCoV-19^^England|Human|Lighthouse Lab in Alderley Park|Wellcome Sanger Institute for the COVID-19 Genomics UK (COG-UK) consortium|Davies|United Kingdom

>Spike|hCoV-19/USA/NJ-QDX-1209/2020|2020-03-17|EPI\_ISL\_571970|Original|hCoV-19^^New Jersey|Human|Quest Diagnostics|Quest Diagnostics|Kagan|USA

>Spike|hCoV-19/England/ALDP-AA1A81/2020|2020-10-22|EPI\_ISL\_624389|Original|hCoV-19^^England|Human|Lighthouse Lab in Alderley Park|Wellcome Sanger Institute for the COVID-19 Genomics UK (COG-UK) consortium|Davies|United Kingdom

>Spike|hCoV-19/USA/AR-CDC-2-3713966/2020|2020-09-02|EPI\_ISL\_751760|Original|hCoV-19^^Arkansas|Human|AR Dept. of Health-Public Health Lab|Genomics and Discovery|Queen|USA

>Spike|hCoV-19/Switzerland/VS-ETHZ-410248/2020|2020-11-27|EPI\_ISL\_737848|Original|hCoV-19^^Valais|Human|Viollier AG|Department of Biosystems Science and Engineering|Nadeau|Switzerland

>Spike|hCoV-19/USA/CO-UW-MAYO33/2020|2020-03-18|EPI\_ISL\_500508|Original|hCoV-19^^Colorado|Human|Mayo Clinic Laboratories|University of Washington Virology Lab|Roychoudhury|USA

>Spike|hCoV-19/England/CAMC-B231DC/2020|2020-11-03|EPI\_ISL\_665028|Original|hCoV-19^^England|Human|Virology Department|COVID-19 Genomics UK (COG-UK) Consortium|de Silva|United Kingdom

>Spike|hCoV-19/England/LIVE-AB9EE/2020|2020-06-16|EPI\_ISL\_612447|Original|hCoV-19^^England|Human|Liverpool Clinical Laboratories|COVID-19 Genomics UK (COG-UK) Consortium|Haldenby|United Kingdom

>Spike|hCoV-19/England/ALDP-9FD4D4/2020|2020-10-01|EPI\_ISL\_587794|Original|hCoV-19^^England|Human|Lighthouse Lab in Alderley Park|Wellcome Sanger Institute for the COVID-19 Genomics UK (COG-UK) consortium|Davies|United Kingdom

>Spike|hCoV-19/South Africa/KRISP-0550/2020|2020-07-15|EPI\_ISL\_498089|Original|hCoV-19^^KwaZulu-Natal|Human|NHLS-IALCH|KRISP|de Oliveira|South Africa

>Spike|hCoV-19/USA/MN-MDH-1496/2020|2020-03-21|EPI\_ISL\_518889|Original|hCoV-19^^Minnesota|Human|Mayo Clinic & Mayo Clinic Laboratories|Minnesota Department of Health|Garfin|USA

>Spike|hCoV-19/USA/MD-MDH-0391/2020|2020-10-27|EPI\_ISL\_660085|Original|hCoV-19^^Maryland|Human|MD PHL|MD PHL|Keller|USA

>Spike|hCoV-19/England/MILK-6EECA4/2020|2020-06-30|EPI\_ISL\_557545|Original|hCoV-19^^England|Human|Lighthouse Lab in Milton Keynes|Wellcome Sanger Institute for the COVID-19 Genomics UK (COG-UK) consortium|Davies|United Kingdom

>Spike|hCoV-19/Scotland/QEUEH-A9B5E3/2020|2020-10-20|EPI\_ISL\_625388|Original|hCoV-19^^Scotland|Human|Lighthouse Lab in Glasgow|Wellcome Sanger Institute for the COVID-19 Genomics UK (COG-UK) consortium|Davies|United Kingdom

>Spike|hCoV-19/England/ALDP-B74D14/2020|2020-11-12|EPI\_ISL\_662169|Original|hCoV-19^^England|Human|Lighthouse Lab in Alderley Park|Wellcome Sanger Institute for the COVID-19 Genomics UK (COG-UK) Consortium|Davies|United Kingdom

>Spike|hCoV-19/USA/CA-CZB-1598/2020|2020-03-29|EPI\_ISL\_468527|Original|hCoV-19^^California|Human|San Joaquin County Public Health Lab|Chan-Zuckerberg Biohub|Hao|USA

>Spike|hCoV-19/England/CAMC-A58139/2020|2020-10-09|EPI\_ISL\_597080|Original|hCoV-19^^England|Human|Lighthouse Lab in Cambridge|Wellcome Sanger Institute for the COVID-19 Genomics UK (COG-UK) consortium|Davies|United Kingdom

>Spike|hCoV-19/Gibraltar/204462828/2020|2020-10-29|EPI\_ISL\_615003|Original|hCoV-19^^Gibraltar|Human|Microbiology|Respiratory Virus Unit|Platt|Gibraltar

>Spike|hCoV-19/Denmark/DCGC-2534/2020|2020-08-17|EPI\_ISL\_617805|Original|hCoV-19^^Syddanmark|Human|Department of Virus and Microbiological Special Diagnostics|Albertsen lab|Michaelsen|Denmark

>Spike|hCoV-19/England/QEUEH-B14271/2020|2020-11-02|EPI\_ISL\_641849|Original|hCoV-19^^England|Human|Lighthouse Lab in Glasgow|Wellcome Sanger Institute for the COVID-19 Genomics UK (COG-UK) Consortium|Davies|United Kingdom

>Spike|hCoV-19/Russia/SVE-RII-MH1716S/2020|2020-09-17|EPI\_ISL\_602353|Original|hCoV-19^^Sverdlovsk|Human|HELIX LLC|WHO National Influenza Centre Russian Federation|Komissarov|Russia

>Spike|hCoV-19/Japan/PG-5827/2020|2020-08-00|EPI\_ISL\_688944|Original|hCoV-19^^Japan|Human|Fukuoka Institute of Health and Environmental Sciences|Pathogen Genomics Center|Sekizuka|Japan

>Spike|hCoV-19/USA/WI-UW-1318/2020|2020-08-28|EPI\_ISL\_536690|Original|hCoV-19^^Wisconsin|Human|University of Wisconsin-Madison AIDS Vaccine Research Laboratories|University of Wisconsin-Madison AIDS Vaccine Research Laboratories|Baczenas|USA

>Spike|hCoV-19/England/ALDP-A67850/2020|2020-10-09|EPI\_ISL\_630682|Original|hCoV-19^^England|Human|Lighthouse Lab in Alderley Park|Wellcome Sanger Institute for the COVID-19 Genomics UK (COG-UK) consortium|Davies|United Kingdom

>Spike|hCoV-19/England/QEUEH-AE526B/2020|2020-10-26|EPI\_ISL\_633137|Original|hCoV-19^^England|Human|Lighthouse Lab in Glasgow|Wellcome Sanger Institute for the COVID-19 Genomics UK (COG-UK) consortium|Davies|United Kingdom

>Spike|hCoV-19/Wales/PHWC-485B3B/2020|2020-10-25|EPI\_ISL\_628254|Original|hCoV-19^^Wales|Human|Wales Specialist Virology Centre Sequencing lab|COVID-19 Genomics UK (COG-UK) Consortium|Moore|United Kingdom

>Spike|hCoV-19/England/QEUEH-AF4885/2020|2020-10-30|EPI\_ISL\_663086|Original|hCoV-19^^England|Human|Lighthouse Lab in Glasgow|Wellcome Sanger Institute for the COVID-19 Genomics UK (COG-UK) Consortium|Davies|United Kingdom

>Spike|hCoV-19/Italy/APU-IZSPB-190PT/2020|2020-08-28|EPI\_ISL\_649938|Original|hCoV-19^^Apulia|Human|I.R.C.C.S. \S. De Bellis\ - Ente Ospedaliero|Istituto Zooprofilattico Sperimentale della Puglia e della Basilicata|Parisi|Italy

>Spike|hCoV-19/Denmark/DCGC-1637/2020|2020-04-06|EPI\_ISL\_619163|Original|hCoV-19^^Hovedstaden|Human|Department of Virus and Microbiological Special Diagnostics|Albertsen lab|Michaelsen|Denmark

>Spike|hCoV-19/Jordan/AM-ALSR-5169/2020|2020-10-16|EPI\_ISL\_730408|Original|hCoV-19^^Amman|Human|Biolab Diagnostic Laboratories|Andersen lab at Scripps Research|Gangavarapu|Jordan

>Spike|hCoV-19/Shanghai/SH0058/2020|2020-01-30|EPI\_ISL\_416365|Original|hCoV-19^^Shanghai|Human|Shanghai Public Health Clinical Center|National Research Center for Translational Medicine (Shanghai)|Zhang|China

>Spike|hCoV-19/USA/TX-HMH-MCoV-8127/2020|2020-06-30|EPI\_ISL\_784217|Original|hCoV-19^^Texas|Human|Houston Methodist Hospital|Houston Methodist Hospital|Long|USA

>Spike|hCoV-19/Japan/PG-8695/2020|2020-08-00|EPI\_ISL\_686291|Original|hCoV-19^^Japan|Human|Pathogen Genomics Center|Pathogen Genomics Center|Sekizuka|Japan

>Spike|hCoV-19/Wales/PHWC-16EB3B/2020|2020-10-02|EPI\_ISL\_585824|Original|hCoV-19^^Wales|Human|Wales Specialist Virology Centre Sequencing lab|COVID-19 Genomics UK (COG-UK) Consortium|Moore|United Kingdom

>Spike|hCoV-19/Denmark/DCGC-16247/2020|2020-11-16|EPI\_ISL\_714663|Original|hCoV-19^^Midtjylland|Human|Department of Virus and Microbiological Special Diagnostics|Albertsen Lab|Michaelsen|Denmark

>Spike|hCoV-19/USA/ID-UNM-IBL311/2020|2020-03-28|EPI\_ISL\_632861|Original|hCoV-19^^Idaho|Human|Idaho Bureau of Laboratories|Center for Global Health|Domman|USA

>Spike|hCoV-19/England/CAMB-7C55B/2020|2020-04-06|EPI\_ISL\_441570|Original|hCoV-19^^England|Human|Department of Pathology|Wellcome Sanger Institute for the COVID-19 Genomics UK (COG-UK) consortium|Amato|United Kingdom



>Spike|hCoV-19/Australia/VIC2497/2020|2020-06-30|EPI\_ISL\_522195|Original|hCoV-19^^Victoria|Human|Microbiological Diagnostic Unit - Public Health Laboratory (MDU-PHL)|MDU-PHL|Schultz|Australia

>Spike|hCoV-19/Denmark/DCGC-7818/2020|2020-10-19|EPI\_ISL\_618787|Original|hCoV-19^^Hovedstaden|Human|Department of Virus and Microbiological Special Diagnostics|Albertsen lab|Michaelsen|Denmark

>Spike|hCoV-19/USA/CA-CZB-9784/2020|2020-05-18|EPI\_ISL\_672176|Original|hCoV-19^^California|Human|The Ashley Laboratory|Chan-Zuckerberg Biohub|Bhatt|USA

>Spike|hCoV-19/Wales/PHWC-164C23/2020|2020-05-23|EPI\_ISL\_479361|Original|hCoV-19^^Wales|Human|Wales Specialist Virology Centre Sequencing lab|COVID-19 Genomics UK (COG-UK) Consortium|Moore|United Kingdom

>Spike|hCoV-19/Wales/PHWC-16CD82/2020|2020-06-07|EPI\_ISL\_574164|Original|hCoV-19^^Wales|Human|Wales Specialist Virology Centre Sequencing lab|COVID-19 Genomics UK (COG-UK) Consortium|Moore|United Kingdom

>Spike|hCoV-19/South Korea/KDCA0236/2020|2020-10-06|EPI\_ISL\_760001|Original|hCoV-19^^South Korea|Human|Division of Emerging Infectious Diseases|Division of Emerging Infectious Diseases|Park|South Korea

>Spike|hCoV-19/USA/MA-MASPHL-00475/2020|2020-05-01|EPI\_ISL\_693090|Original|hCoV-19^^Massachusetts|Human|Massachusetts State Public Health Laboratory|Massachusetts State Public Health Laboratory|Lang|USA

>Spike|hCoV-19/Japan/PG-3643/2020|2020-04-00|EPI\_ISL\_691896|Original|hCoV-19^^Japan|Human|Pathogen Genomics Center|Pathogen Genomics Center|Sekizuka|Japan

>Spike|hCoV-19/Denmark/DCGC-20015/2020|2020-12-07|EPI\_ISL\_747930|Original|hCoV-19^^Syddanmark|Human|Department of Virus and Microbiological Special Diagnostics|Albertsen Lab|Michaelsen|Denmark

>Spike|hCoV-19/England/LIVE-DC8061/2020|2020-11-19|EPI\_ISL\_705176|Original|hCoV-19^^England|Human|Liverpool Clinical Laboratories|COVID-19 Genomics UK (COG-UK) Consortium|Haldenby|United Kingdom

>Spike|hCoV-19/England/OXON-AD005/2020|2020-04-07|EPI\_ISL\_448553|Original|hCoV-19^^England|Human|Oxford Viromics|COVID-19 Genomics UK (COG-UK) Consortium|Golubchik|United Kingdom

>Spike|hCoV-19/Switzerland/VD-ETHZ-390324/2020|2020-11-29|EPI\_ISL\_721917|Original|hCoV-19^^Vaud|Human|Viollier AG|Department of Biosystems Science and Engineering|Nadeau|Switzerland

>Spike|hCoV-19/USA/UT-08582/2020|2020-05-26|EPI\_ISL\_524335|Original|hCoV-19^^Utah|Human|Utah Public Health Laboratory|Utah Public Health Laboratory|Young|USA

>Spike|hCoV-19/Wales/PHWC-4908DC/2020|2020-11-14|EPI\_ISL\_706523|Original|hCoV-19^^Wales|Human|Originating lab|COVID-19 Genomics UK (COG-UK) Consortium|Moore|United Kingdom

>Spike|hCoV-19/England/QEUEH-9F71A6/2020|2020-09-27|EPI\_ISL\_595667|Original|hCoV-19^^England|Human|Oxford Viromics|COVID-19 Genomics UK (COG-UK) Consortium|Golubchik|United Kingdom

>Spike|hCoV-19/Norway/4852/2020|2020-10-27|EPI\_ISL\_635077|Original|hCoV-19^^Oslo|Human|Norwegian Institute of Public Health|Norwegian Institute of Public Health|Vollan|Norway

>Spike|hCoV-19/Spain/AR-IBV-98008054/2020|2020-09-30|EPI\_ISL\_654414|Original|hCoV-19^^Aragon|Human|Servicio de Microbiolog\u00eda|SeqCOVID-SPAIN consortium|IBV (CSIC)|Comas|Spain

>Spike|hCoV-19/Japan/PG-3543/2020|2020-06-00|EPI\_ISL\_691799|Original|hCoV-19^^Japan|Human|Pathogen Genomics Center|Pathogen Genomics Center|Sekizuka|Japan

>Spike|hCoV-19/USA/TX-HMH-MCoV-18911/2020|2020-11-24|EPI\_ISL\_785216|Original|hCoV-19^^Texas|Human|Houston Methodist Hospital|Houston Methodist Hospital|Long|USA

>Spike|hCoV-19/Hong Kong/VB20024950-2/2020|2020-01-30|EPI\_ISL\_412029|Original|hCoV-19^^Hong Kong|Human|Hong Kong Department of Health|The University of Hong Kong|Chu|China

>Spike|hCoV-19/England/ALDP-526421/2020|2020-06-02|EPI\_ISL\_558927|Original|hCoV-19^^England|Human|Lighthouse Lab in Alderley Park|Wellcome Sanger Institute for the COVID-19 Genomics UK (COG-UK) consortium|Davies|United Kingdom

>Spike|hCoV-19/England/204201049/2020|2020-10-09|EPI\_ISL\_603201|Original|hCoV-19^^England|Human|Respiratory Virus Unit|Respiratory Virus Unit|Platt|United Kingdom

>Spike|hCoV-19/England/EXET-13A36D/2020|2020-11-04|EPI\_ISL\_664650|Original|hCoV-19^^England|Human|University of Exeter|COVID-19 Genomics UK (COG-UK) Consortium|Temperton|United Kingdom

>Spike|hCoV-19/England/ALDP-95A87F/2020|2020-06-09|EPI\_ISL\_553390|Original|hCoV-19^^England|Human|Lighthouse Lab in Alderley Park|Wellcome Sanger Institute for the COVID-19 Genomics UK (COG-UK) consortium|Davies|United Kingdom

>Spike|hCoV-19/Northern Ireland/NIRE-103831/2020|2020-04-15|EPI\_ISL\_489205|Original|hCoV-19^^Northern Ireland|Human|Regional Virus Laboratory|Wellcome Sanger Institute for the COVID-19 Genomics UK (COG-UK) consortium|Davies|United Kingdom

>Spike|hCoV-19/England/ALDP-BC7714/2020|2020-11-22|EPI\_ISL\_721437|Original|hCoV-19^^England|Human|Lighthouse Lab in Alderley Park|Wellcome Sanger Institute for the COVID-19 Genomics UK (COG-UK) Consortium|Davies|United Kingdom

>Spike|hCoV-19/India/UP-NBRI-N49-TEI217/2020|2020-05-26|EPI\_ISL\_516977|Original|hCoV-19^^Uttar Pradesh|Human|King Georges Medical University|CSIR-National Botanical Research Institute|Bag|India

>Spike|hCoV-19/Jordan/AM-ALSR-3944/2020|2020-09-30|EPI\_ISL\_636308|Original|hCoV-19^^Amman|Human|Biolab Diagnostic Laboratories|Andersen lab at Scripps Research|Gangavarapu|Jordan

>Spike|hCoV-19/England/20144016604/2020|2020-03-30|EPI\_ISL\_421937|Original|hCoV-19^^England|Human|Respiratory Virus Unit|Respiratory Virus Unit|Platt|United Kingdom

>Spike|hCoV-19/England/ALDP-A50DD3/2020|2020-10-07|EPI\_ISL\_597644|Original|hCoV-19^^England|Human|Lighthouse Lab in Alderley Park|Wellcome Sanger Institute for the COVID-19 Genomics UK (COG-UK) consortium|Davies|United Kingdom

>Spike|hCoV-19/USA/MA-MGH-03570/2020|2020-12-01|EPI\_ISL\_765889|Original|hCoV-19^^Massachusetts|Human|Massachusetts General Hospital|Infectious Disease Program|Park|USA

>Spike|hCoV-19/England/QEUEH-9F35F9/2020|2020-09-24|EPI\_ISL\_588536|Original|hCoV-19^^England|Human|Lighthouse Lab in Glasgow|Wellcome Sanger Institute for the COVID-19 Genomics UK (COG-UK) consortium|Davies|United Kingdom

>Spike|hCoV-19/England/MILK-B3CC0C/2020|2020-11-01|EPI\_ISL\_679821|Original|hCoV-19^^England|Human|Oxford Viromics|COVID-19 Genomics UK (COG-UK) Consortium|Golubchik|United Kingdom

>Spike|hCoV-19/Greece/148/2020|2020-03-09|EPI\_ISL\_434484|Original|hCoV-19^^Athens|Human|Laboratory of Microbiology|Laboratory of Biology|Karakasiliotis|Greece

>Spike|hCoV-19/Denmark/DCGC-17644/2020|2020-12-14|EPI\_ISL\_751119|Original|hCoV-19^^Nordjylland|Human|Department of Virus and Microbiological Special Diagnostics|Albertsen Lab|Michaelsen|Denmark

>Spike|hCoV-19/USA/TX-HMH-5248/2020|2020-06-23|EPI\_ISL\_544625|Original|hCoV-19^^Texas|Human|Houston Methodist Hospital|Houston Methodist Hospital|Long|USA

>Spike|hCoV-19/Australia/VIC6479/2020|2020-07-23|EPI\_ISL\_521257|Original|hCoV-19^^Victoria|Human|Microbiological Diagnostic Unit - Public Health Laboratory (MDU-PHL)|MDU-PHL|Schultz|Australia

>Spike|hCoV-19/Denmark/DCGC-19005/2020|2020-12-07|EPI\_ISL\_748693|Original|hCoV-19^^Syddanmark|Human|Department of Virus and Microbiological Special Diagnostics|Albertsen Lab|Michaelsen|Denmark

>Spike|hCoV-19/France/PAC-IHU-1626/2020|2020-09-10|EPI\_ISL\_569235|Original|hCoV-19^^Provence-Alpes-C\u00f4te-d\u2019Azur|Human|MEPHI|MEPHI|Levasseur|France

>Spike|hCoV-19/Ireland/D-SVUH-R6408/2020|2020-04-03|EPI\_ISL\_596645|Original|hCoV-19^^Dublin|Human|St.Vincent's University Hospital|St.Vincent's University Hospital|Gonzalez|Ireland

>Spike|hCoV-19/England/ALDP-94ECFA/2020|2020-06-20|EPI\_ISL\_556380|Original|hCoV-19^^England|Human|Lighthouse Lab in Alderley Park|Wellcome Sanger Institute for the COVID-19 Genomics UK (COG-UK) consortium|Davies|United Kingdom

>Spike|hCoV-19/Denmark/DCGC-19640/2020|2020-12-07|EPI\_ISL\_749077|Original|hCoV-19^^Nordjylland|Human|Department of Virus and Microbiological Special Diagnostics|Albertsen Lab|Michaelsen|Denmark

>Spike|hCoV-19/Germany/BW-MVZ-LS-46/2020|2020-04-09|EPI\_ISL\_640263|Original|hCoV-19^^Baden-W\u00fcrtemberg|Human|MVZ Labor\u00e4rzte Singen|MVZ Labor\u00e4rzte Singen|Schmidt|Germany

>Spike|hCoV-19/Wales/PHWC-4A2172/2020|2020-12-14|EPI\_ISL\_743853|Original|hCoV-19^^Wales|Human|Wales Specialist Virology Centre Sequencing lab|COVID-19 Genomics UK (COG-UK) Consortium|Moore|United Kingdom

>Spike|hCoV-19/Australia/VIC13227/2020|2020-08-15|EPI\_ISL\_563643|Original|hCoV-19^^Victoria|Human|Microbiological Diagnostic Unit - Public Health Laboratory (MDU-PHL)|MDU-PHL|Schultz|Australia

>Spike|hCoV-19/USA/HI-H200510/2020|2020-08-13|EPI\_ISL\_753048|Original|hCoV-19^^Hawaii|Human|State Laboratories Division|State Laboratories Division|Sultana|USA

>Spike|hCoV-19/Switzerland/BE-ETHZ-350108/2020|2020-11-02|EPI\_ISL\_693808|Original|hCoV-19^^Bern|Human|Viollier AG|Department of Biosystems Science and Engineering|Nadeau|Switzerland

>Spike|hCoV-19/USA/OH-CDC-2-3714358/2020|2020-11-18|EPI\_ISL\_751741|Original|hCoV-19^^Ohio|Human|OH Department of Health Laboratory|Genomics and Discovery|Queen|USA

>Spike|hCoV-19/England/LIVE-9A1EA/2020|2020-04-17|EPI\_ISL\_439859|Original|hCoV-19^^England|Human|Liverpool Clinical Laboratories|COVID-19 Genomics UK (COG-UK) Consortium|Haldenby|United Kingdom

>Spike|hCoV-19/England/ALDP-B75557/2020|2020-11-12|EPI\_ISL\_662215|Original|hCoV-19^^England|Human|Lighthouse Lab in Alderley Park|Wellcome Sanger Institute for the COVID-19 Genomics UK (COG-UK) Consortium|Davies|United Kingdom

>Spike|hCoV-19/Brazil/RS-6243/2020|2020-06-02|EPI\_ISL\_729847|Original|hCoV-19^^Rio Grande do Sul|Human|Laboratorio Central de Saude Publica do Estado do Rio Grande do Sul (LACEN-RS)|Laboratory of Respiratory Viruses and Measles|Silva|Brazil

>Spike|hCoV-19/USA/WA-CDC-8376/2020|2020-03-03|EPI\_ISL\_594449|original|hCoV-19^^Washington|Human|Washington State Public Health Laboratories|Pathogen Discovery|Queen|USA

>Spike|hCoV-19/Scotland/CVR2186/2020|2020-04-11|EPI\_ISL\_493782|Original|hCoV-19^^Scotland|Human|West of Scotland Specialist Virology Centre|COVID-19 Genomics UK (COG-UK) Consortium|Robertson|United Kingdom

>Spike|hCoV-19/England/ALDP-94F37C/2020|2020-06-20|EPI\_ISL\_556060|Original|hCoV-19^^England|Human|Lighthouse Lab in Alderley Park|Wellcome Sanger Institute for the COVID-19 Genomics UK (COG-UK) consortium|Davies|United Kingdom

>Spike|hCoV-19/USA/CA-SR0235/2020|2020-04-20|EPI\_ISL\_437569|Original|hCoV-19^^California|Human|Scripps Medical Laboratory|Andersen lab at Scripps Research|Gangavarapu|USA

>Spike|hCoV-19/Australia/VIC12323/2020|2020-08-11|EPI\_ISL\_591958|Original|hCoV-19^^Victoria|Human|Victorian Infectious Diseases Reference Laboratory (VIDRL)|VIDRL and MDU-PHL|Schultz|Australia

>Spike|hCoV-19/USA/CA-CZB-13375/2020|2020-05-13|EPI\_ISL\_672452|Original|hCoV-19^^California|Human|Alameda County Public Health Lab|Chan-Zuckerberg Biohub|Bhatt|USA

>Spike|hCoV-19/Spain/VC-IBV-98004490/2020|2020-03-24|EPI\_ISL\_583945|Original|hCoV-19^^Comunitat Valenciana|Human|Servicio de Microbiolog\u00eda. Hospital General Universitario de Castell\u00f3n|SeqCOVID-SPAIN consortium|IBV(CSIC)|Comas|Spain

>Spike|hCoV-19/Canada/NB-232/2020|2020-03-25|EPI\_ISL\_479645|Original|hCoV-19^^New Brunswick|Human|Dr. Georges-L.-Dumont University Hospital Centre|National Microbiology Laboratory|Majer|Canada

>Spike|hCoV-19/Denmark/DCGC-19986/2020|2020-12-07|EPI\_ISL\_747911|Original|hCoV-19^^Sjaelland|Human|Department of Virus and Microbiological Special Diagnostics|Albertsen Lab|Michaelsen|Denmark

>Spike|hCoV-19/Belgium/ULG-10727/2020|2020-09-15|EPI\_ISL\_641569|Original|hCoV-19^^Li\u00e8ge|Human|Department of Clinical Microbiology|GIGA Medical Genomics|Durkin|Belgium

>Spike|hCoV-19/USA/WI-UW-1664/2020|2020-09-17|EPI\_ISL\_605538|Original|hCoV-19^^Wisconsin|Human|University of Wisconsin-Madison AIDS Vaccine Research Laboratories|University of Wisconsin-Madison AIDS Vaccine Research Laboratories|Baczenas|USA

>Spike|hCoV-19/USA/CA-ALSR-4872/2020|2020-11-03|EPI\_ISL\_730191|Original|hCoV-19^^California|Human|San Diego County Public Health Laboratory|Andersen lab at Scripps Research|Gangavarapu|USA

>Spike|hCoV-19/Japan/PG-6926/2020|2020-09-00|EPI\_ISL\_688032|Original|hCoV-19^^Japan|Human|Pathogen Genomics Center|Pathogen Genomics Center|Sekizuka|Japan

>Spike|hCoV-19/USA/FL-BPHL-1564/2020|2020-09-10|EPI\_ISL\_568662|Original|hCoV-19^^Florida|Human|Florida Bureau of Public Health Laboratories|Florida Bureau of Public Health Laboratories|Blanton|USA

>Spike|hCoV-19/USA/OR-OHSU-1437/2020|2020-07-16|EPI\_ISL\_509201|Original|hCoV-19^^Oregon|Human|OHSU Lab Services Molecular Microbiology Lab|Oregon SARS-CoV-2 Genome Sequencing Center|O'Roak|USA

>Spike|hCoV-19/England/CAMB-1B78F0/2020|2020-10-20|EPI\_ISL\_638339|Original|hCoV-19^^England|Human|Department of Pathology|COVID-19 Genomics UK (COG-UK) Consortium|Goodfellow|United Kingdom

>Spike|hCoV-19/Wales/PHWC-4A6396/2020|2020-12-16|EPI\_ISL\_765030|Original|hCoV-19^^Wales|Human|Wales Specialist Virology Centre Sequencing lab|COVID-19 Genomics UK (COG-UK) Consortium|Moore|United Kingdom

>Spike|hCoV-19/USA/TX-HMH-4460/2020|2020-06-16|EPI\_ISL\_543637|Original|hCoV-19^^Texas|Human|Houston Methodist Hospital|Houston Methodist Hospital|Long|USA

>Spike|hCoV-19/England/ALDP-C4846E/2020|2020-12-12|EPI\_ISL\_736634|Original|hCoV-19^^England|Human|Lighthouse Lab in Alderley Park|Wellcome Sanger Institute for the COVID-19 Genomics UK (COG-UK) Consortium|Davies|United Kingdom

>Spike|hCoV-19/Scotland/QEUA-C014DA/2020|2020-12-05|EPI\_ISL\_757257|Original|hCoV-19^^Scotland|Human|Lighthouse Lab in Glasgow|Wellcome Sanger Institute for the COVID-19 Genomics UK (COG-UK) Consortium|Davies|United Kingdom

>Spike|hCoV-19/Germany/NW-HHU-420/2020|2020-11-11|EPI\_ISL\_718094|Original|hCoV-19^^North Rhine-Westphalia|Human|ZOTZ KLIMAS MVZ D\u00f0fcsseldorf-Centrum GbR \u00dcBAG f\u00f0r Labormedizin|Center of Medical Microbiology|Wienemann|Germany

>Spike|hCoV-19/South Africa/KRISP-0212/2020|2020-06-11|EPI\_ISL\_482721|Original|hCoV-19^^KwaZulu-Natal|Human|Molecular Diagnostics Services (MDS)|KRISP|de Oliveira|South Africa

>Spike|hCoV-19/Australia/VIC6534/2020|2020-07-24|EPI\_ISL\_521304|Original|hCoV-19^^Victoria|Human|Microbiological Diagnostic Unit - Public Health Laboratory (MDU-PHL)|MDU-PHL|Schultz|Australia

>Spike|hCoV-19/Switzerland/AG-ETHZ-310404/2020|2020-10-08|EPI\_ISL\_603478|Original|hCoV-19^^Aargau|Human|Viollier AG|Department of Biosystems Science and Engineering|Nadeau|Switzerland

>Spike|hCoV-19/England/QEUA-A1EB6E/2020|2020-09-29|EPI\_ISL\_587506|Original|hCoV-19^^England|Human|Lighthouse Lab in Glasgow|Wellcome Sanger Institute for the COVID-19 Genomics UK (COG-UK) consortium|Davies|United Kingdom

>Spike|hCoV-19/England/205180777/2020|2020-12-16|EPI\_ISL\_766465|Original|hCoV-19^^England|Human|Respiratory Virus Unit|COVID-19 Genomics UK (COG-UK) Consortium|Platt|United Kingdom

>Spike|hCoV-19/England/NOTT-11BEBE/2020|2020-11-14|EPI\_ISL\_652390|Original|hCoV-19^^England|Human|Queens Medical Centre|COVID-19 Genomics UK (COG-UK) Consortium|Loose|United Kingdom

>Spike|hCoV-19/Wales/PHWC-4959E3/2020|2020-11-24|EPI\_ISL\_726425|Original|hCoV-19^^Wales|Human|Originating lab|COVID-19 Genomics UK (COG-UK) Consortium|Moore|United Kingdom

>Spike|hCoV-19/Switzerland/BS-ETHZ-380346/2020|2020-11-21|EPI\_ISL\_721684|Original|hCoV-19^^Basel-Stadt|Human|Viollier AG|Department of Biosystems Science and Engineering|Nadeau|Switzerland

>Spike|hCoV-19/Denmark/DCGC-1493/2020|2020-05-25|EPI\_ISL\_617977|Original|hCoV-19^^Hovedstaden|Human|Department of Virus and Microbiological Special Diagnostics|Albertsen lab|Michaelsen|Denmark

>Spike|hCoV-19/England/BRIS-12523B/2020|2020-03-26|EPI\_ISL\_443852|Original|hCoV-19^^England|Human|PHE South West Regional Laboratory|Wellcome Sanger Institute for the COVID-19 Genomics UK (COG-UK) consortium|Amato|United Kingdom

>Spike|hCoV-19/England/SHEF-D32E2/2020|2020-04-07|EPI\_ISL\_507178|Original|hCoV-19^^England|Human|Virology Department|COVID-19 Genomics UK (COG-UK) Consortium|de Silva|United Kingdom

>Spike|hCoV-19/USA/WI-UW-2657/2020|2020-12-31|EPI\_ISL\_791171|Original|hCoV-19^^Wisconsin|Human|University of Wisconsin-Madison AIDS Vaccine Research Laboratories|University of Wisconsin-Madison AIDS Vaccine Research Laboratories|Moreno|USA

>Spike|hCoV-19/Australia/VIC4768/2020|2020-07-17|EPI\_ISL\_519156|Original|hCoV-19^^Victoria|Human|Microbiological Diagnostic Unit - Public Health Laboratory (MDU-PHL)|MDU-PHL|Schultz|Australia

>Spike|hCoV-19/Bosnia and Herzegovina/ChVir7354/2020|2020-03-22|EPI\_ISL\_462460|Original|hCoV-19^^Gorazde|Human|Clinical Center|Charite Universitatsmedizin Berlin|Muehlemann|Bosnia and Herzegovina

>Spike|hCoV-19/Singapore/1267/2020|2020-05-05|EPI\_ISL\_648751|Original|hCoV-19^^Singapore|Human|Department of Laboratory Medicine|Department of Laboratory Medicine|Chen|Singapore

>Spike|hCoV-19/England/204961148/2020|2020-12-03|EPI\_ISL\_700659|Original|hCoV-19^^England|Human|Respiratory Virus Unit|COVID-19 Genomics UK (COG-UK) Consortium|Platt|United Kingdom

>Spike|hCoV-19/England/LIVE-A01C3/2020|2020-06-03|EPI\_ISL\_472094|Original|hCoV-19^^England|Human|Liverpool Clinical Laboratories|COVID-19 Genomics UK (COG-UK) Consortium|Haldenby|United Kingdom

>Spike|hCoV-19/England/SHEF-C317F/2020|2020-06-14|EPI\_ISL\_479206|Original|hCoV-19^^England|Human|Virology Department|COVID-19 Genomics UK (COG-UK) Consortium|de Silva|United Kingdom

>Spike|hCoV-19/Israel/ISR\_NH\_GD1\_0714/2020|2020-07-14|EPI\_ISL\_594159|Original|hCoV-19^^Israel|Human|Israel Institute for Biological Research|Israel Institute for Biological Research|Zaide|Israel

>Spike|hCoV-19/England/LOND-D420F/2020|2020-04-06|EPI\_ISL\_444102|Original|hCoV-19^^England|Human|University College London|COVID-19 Genomics UK (COG-UK) Consortium|Roy|United Kingdom

>Spike|hCoV-19/England/LIVE-A9E4B/2020|2020-03-24|EPI\_ISL\_517369|Original|hCoV-19^^England|Human|Liverpool Clinical Laboratories|COVID-19 Genomics UK (COG-UK) Consortium|Haldenby|United Kingdom

>Spike|hCoV-19/England/MILK-95DA67/2020|2020-06-23|EPI\_ISL\_556075|Original|hCoV-19^^England|Human|Lighthouse Lab in Milton Keynes|Wellcome Sanger Institute for the COVID-19 Genomics UK (COG-UK) consortium|Davies|United Kingdom

>Spike|hCoV-19/England/ALDP-95CD41/2020|2020-06-16|EPI\_ISL\_554873|Original|hCoV-19^^England|Human|Lighthouse Lab in Alderley Park|Wellcome Sanger Institute for the COVID-19 Genomics UK (COG-UK) consortium|Davies|United Kingdom

>Spike|hCoV-19/Australia/ACT0038/2020|2020-03-23|EPI\_ISL\_498505|Original|hCoV-19^^Australian Capital Territory|Human|ACT Pathology|Schwessinger Lab|Hall|Australia

>Spike|hCoV-19/England/CAMB-75060/2020|2020-03-15|EPI\_ISL\_440416|Original|hCoV-19^^England|Human|Department of Pathology|Wellcome Sanger Institute for the COVID-19 Genomics UK (COG-UK) consortium|Amato|United Kingdom

>Spike|hCoV-19/Denmark/DCGC-9658/2020|2020-11-09|EPI\_ISL\_669092|Original|hCoV-19^^Hovedstaden|Human|Department of Virus and Microbiological Special Diagnostics|Albertsen Lab|Michaelsen|Denmark

>Spike|hCoV-19/England/CAMB-1B5F66/2020|2020-09-15|EPI\_ISL\_573142|Original|hCoV-19^^England|Human|Department of Pathology|COVID-19 Genomics UK (COG-UK) Consortium|Goodfellow|United Kingdom

>Spike|hCoV-19/Switzerland/SO-ETHZ-380239/2020|2020-11-21|EPI\_ISL\_721870|Original|hCoV-19^^Solothurn|Human|Viollier AG|Department of Biosystems Science and Engineering|Nadeau|Switzerland

>Spike|hCoV-19/Luxembourg/LNS7339710/2020|2020-10-21|EPI\_ISL\_744555|Original|hCoV-19^^Luxembourg|Human|Laboratoire national de sant\u00e9|Laboratoire national de sant\u00e9|Wienecke-Baldacchino|Luxembourg

>Spike|hCoV-19/USA/UT-03041/2020|2020-05-01|EPI\_ISL\_522312|Original|hCoV-19^^Utah|Human|Utah Public Health Laboratory|Utah Public Health Laboratory|Young|USA

>Spike|hCoV-19/England/MILK-A18EE3/2020|2020-10-01|EPI\_ISL\_612473|Original|hCoV-19^^England|Human|Wales Specialist Virology Centre Sequencing lab|COVID-19 Genomics UK (COG-UK) Consortium|Moore|United Kingdom

>Spike|hCoV-19/Wales/PHWC-495707/2020|2020-11-23|EPI\_ISL\_726386|Original|hCoV-19^^Wales|Human|Originating lab|COVID-19 Genomics UK (COG-UK) Consortium|Moore|United Kingdom

>Spike|hCoV-19/USA/TX-HMH-MCoV-14440/2020|2020-10-07|EPI\_ISL\_787725|Original|hCoV-19^^Texas|Human|Houston Methodist Hospital|Houston Methodist Hospital|Long|USA

>Spike|hCoV-19/USA/WA-S514/2020|2020-03-29|EPI\_ISL\_434274|Original|hCoV-19^^Washington|Human|Washington State Department of Health|Seattle Flu Study|Bedford|USA

>Spike|hCoV-19/USA/MN-MDH-1247/2020|2020-04-21|EPI\_ISL\_482968|Original|hCoV-19^^Minnesota|Human|Mayo Clinic & Mayo Clinic Laboratories|Minnesota Department of Health|Garfin|USA

>Spike|hCoV-19/Luxembourg/LNS2033603/2020|2020-10-31|EPI\_ISL\_740041|Original|hCoV-19^^Luxembourg|Human|Laboratoire national de sant\u00e9|Laboratoire national de sant\u00e9|Wienecke-Baldacchino|Luxembourg

>Spike|hCoV-19/Spain/RI-IBV-99010924/2020|2020-03-26|EPI\_ISL\_732763|Original|hCoV-19^^La\_Rioja|Human|Centro de Investigaci\u00f3n Biom\u00e9dica de La Rioja - Hospital San Pedro Logro\u00f1o|SeqCOVID-SPAIN consortium/IBV (CSIC)|Comas|Spain

>Spike|hCoV-19/Italy/MAR-UnivPM-78955-2/2020|2020-03-04|EPI\_ISL\_516088|Original|hCoV-19^^Marche|Human|Biomedical Sciences and Public Health|Biomedical Sciences and Public Health|Bagnarelli|Italy

>Spike|hCoV-19/USA/TX-HMH-4279/2020|2020-06-18|EPI\_ISL\_543491|Original|hCoV-19^^Texas|Human|Houston Methodist Hospital|Houston Methodist Hospital|Long|USA

>Spike|hCoV-19/England/ALDP-B5D32E/2020|2020-11-09|EPI\_ISL\_678888|Original|hCoV-19^^England|Human|Department of Pathology|COVID-19 Genomics UK (COG-UK) Consortium|Goodfellow|United Kingdom

>Spike|hCoV-19/Peru/ICA-INS-055/2020|2020-04-10|EPI\_ISL\_517531|Original|hCoV-19^^Ica|Human|Laboratorio de Referencia Nacional de Virus Respiratorio. Centro Nacional de Salud Publica. Instituto Nacional de Salud Peru.|Laboratorio de Referencia Nacional de Biotecnolog\u00eda y Biolog\u00eda Molecular. Centro Nacional de Salud Publica. Instituto Nacional de Salud Peru.|Padilla Rojas|Peru

>Spike|hCoV-19/England/LIVE-9B34D/2020|2020-03-26|EPI\_ISL\_449435|Original|hCoV-19^^England|Human|Liverpool Clinical Laboratories|COVID-19 Genomics UK (COG-UK) Consortium|Haldenby|United Kingdom

>Spike|hCoV-19/USA/MN-QDX-1354/2020|2020-03-14|EPI\_ISL\_572143|Original|hCoV-19^^Minnesota|Human|Quest Diagnostics|Quest Diagnostics|Kagan|USA

>Spike|hCoV-19/Iceland/540/2020|2020-03-27|EPI\_ISL\_424560|Original|hCoV-19^^Reykjavik|Human|deCODE genetics|deCODE genetics|J\u00f3nsson|Iceland

>Spike|hCoV-19/Denmark/DCGC-1669/2020|2020-05-18|EPI\_ISL\_622418|Original|hCoV-19^^Hovedstaden|Human|Department of Virus and Microbiological Special Diagnostics|Albertsen lab|Michaelsen|Denmark

>Spike|hCoV-19/USA/TX-HMH-2015/2020|2020-05-13|EPI\_ISL\_545069|Original|hCoV-19^^Texas|Human|Houston Methodist Hospital|Houston Methodist Hospital|Long|USA

>Spike|hCoV-19/SaudiArabia/KAUST-JEDDAH871/2020|2020-05-24|EPI\_ISL\_513025|Original|hCoV-19^^Jeddah|Human|Pathogen Genomics Lab King Abdullah University of Science and Technology(KAUST)|Pathogen Genomics Lab King Abdullah University of Science and Technology(KAUST)|Mohamed Ghazzali|Saudi Arabia

>Spike|hCoV-19/USA/WA-S1605/2020|2020-05-26|EPI\_ISL\_496031|Original|hCoV-19^^Washington|Human|Washington State Department of Health|Seattle Flu Study|Lee|USA

>Spike|hCoV-19/England/CAMC-A41C50/2020|2020-10-05|EPI\_ISL\_609346|Original|hCoV-19^^England|Human|Lighthouse Lab in Cambridge|Wellcome Sanger Institute for the COVID-19 Genomics UK (COG-UK) consortium|Davies|United Kingdom

>Spike|hCoV-19/England/QEUH-AE5298/2020|2020-10-27|EPI\_ISL\_633406|Original|hCoV-19^^England|Human|Lighthouse Lab in Glasgow|Wellcome Sanger Institute for the COVID-19 Genomics UK (COG-UK) consortium|Davies|United Kingdom

>Spike|hCoV-19/Japan/PG-5853/2020|2020-08-00|EPI\_ISL\_688970|Original|hCoV-19^^Japan|Human|Pathogen Genomics Center|Pathogen Genomics Center|Sekizuka|Japan

>Spike|hCoV-19/Russia/OMS-ORINFI-9916S/2020|2020-05-21|EPI\_ISL\_639927|Original|hCoV-19^^Omsk|Human|Omsk Research Institute of Natural Focal Infections|WHO National Influenza Centre Russian Federation|Komissarov|Russia

>Spike|hCoV-19/Scotland/QEUH-9698C8/2020|2020-08-14|EPI\_ISL\_531100|Original|hCoV-19^^Scotland|Human|NHSGGC West of Scotland Specialist Virology Centre / MRC-University of Glasgow Centre for Virus Research|Wellcome Sanger Institute for the COVID-19 Genomics UK (COG-UK) consortium|Davies|United Kingdom

>Spike|hCoV-19/India/OR-ILSCV15552/2020|2020-05-11|EPI\_ISL\_463037|Original|hCoV-19^^Odisha|Human|Institute of Life Sciences|Immunogenomics lab|Raghav|India

>Spike|hCoV-19/USA/TX-HMH-5048/2020|2020-06-22|EPI\_ISL\_544483|Original|hCoV-19^^Texas|Human|Houston Methodist Hospital|Houston Methodist Hospital|Long|USA

>Spike|hCoV-19/Wales/PHWC-16EA5C/2020|2020-10-03|EPI\_ISL\_585810|Original|hCoV-19^^Wales|Human|Wales Specialist Virology Centre Sequencing lab|COVID-19 Genomics UK (COG-UK) Consortium|Moore|United Kingdom

>Spike|hCoV-19/USA/UT-UPHL-2012766698/2020|2020-08-10|EPI\_ISL\_745855|Original|hCoV-19^^Utah|Human|Ginkgo Bioworks Clinical Laboratory|Utah Public Health Laboratory|Young|USA

>Spike|hCoV-19/England/NOTT-11BD46/2020|2020-11-13|EPI\_ISL\_652385|Original|hCoV-19^^England|Human|Queens Medical Centre|COVID-19 Genomics UK (COG-UK) Consortium|Loose|United Kingdom

>Spike|hCoV-19/Scotland/EDB888/2020|2020-04-04|EPI\_ISL\_433266|Original|hCoV-19^^Scotland|Human|Virology Department|COVID-19 Genomics UK (COG-UK) Consortium|Williams|United Kingdom

>Spike|hCoV-19/England/MILK-B0256E/2020|2020-10-24|EPI\_ISL\_642771|Original|hCoV-19^^England|Human|Lighthouse Lab in Milton Keynes|Wellcome Sanger Institute for the COVID-19 Genomics UK (COG-UK) Consortium|Davies|United Kingdom

>Spike|hCoV-19/England/ALDP-B5E6CA/2020|2020-11-09|EPI\_ISL\_655421|Original|hCoV-19^^England|Human|Lighthouse Lab in Alderley Park|Wellcome Sanger Institute for the COVID-19 Genomics UK (COG-UK) Consortium|Davies|United Kingdom

>Spike|hCoV-19/Denmark/DCGC-19933/2020|2020-12-07|EPI\_ISL\_747556|Original|hCoV-19^^Hovedstaden|Human|Department of Virus and Microbiological Special Diagnostics|Albertsen Lab|Michaelsen|Denmark

>Spike|hCoV-19/England/MILK-A4670F/2020|2020-10-06|EPI\_ISL\_598661|Original|hCoV-19^^England|Human|Lighthouse Lab in Milton Keynes|Wellcome Sanger Institute for the COVID-19 Genomics UK (COG-UK) consortium|Davies|United Kingdom

>Spike|hCoV-19/DRC/1249/2020|2020-04-06|EPI\_ISL\_429259|Original|hCoV-19^^Kinshasa|Human|Viral Respiratory Lab|Pathogen Sequencing Lab|Amuri|Democratic Republic of the Congo

>Spike|hCoV-19/England/LIVE-AA509/2020|2020-06-17|EPI\_ISL\_517462|Original|hCoV-19^^England|Human|Liverpool Clinical Laboratories|COVID-19 Genomics UK (COG-UK) Consortium|Haldenby|United Kingdom

>Spike|hCoV-19/Spain/MD-HLP-R51/2020|2020-04-20|EPI\_ISL\_530101|Original|hCoV-19^^Madrid|Human|Hospital Universitario Ram\u00f3n y Cajal|Hospital Universitario La Paz|Viedma|Spain

>Spike|hCoV-19/Russia/MUR-RII-MH6034S/2020|2020-11-11|EPI\_ISL\_733334|Original|hCoV-19^^Murmansk|Human|HELIX LLC|WHO National Influenza Centre Russian Federation|Komissarov|Russia

>Spike|hCoV-19/England/ALDP-BC86AD/2020|2020-11-23|EPI\_ISL\_721329|Original|hCoV-19^^England|Human|Lighthouse Lab in Alderley Park|Wellcome Sanger Institute for the COVID-19 Genomics UK (COG-UK) Consortium|Davies|United Kingdom

>Spike|hCoV-19/USA/CA-CZB-9625/2020|2020-05-06|EPI\_ISL\_672142|Original|hCoV-19^^California|Human|The Ashley Laboratory|Chan-Zuckerberg Biohub|Bhatt|USA

>Spike|hCoV-19/USA/UT-UPHL-201123552/2020|2020-04-29|EPI\_ISL\_634915|Original|hCoV-19^^Utah|Human|Utah Public Health Laboratory|Utah Public Health Laboratory|Young|USA

>Spike|hCoV-19/England/ALDP-9CBDD4/2020|2020-09-16|EPI\_ISL\_575709|Original|hCoV-19^^England|Human|Lighthouse Lab in Alderley Park|Wellcome Sanger Institute for the COVID-19 Genomics UK (COG-UK) consortium|Davies|United Kingdom

>Spike|hCoV-19/USA/FL-BPHL-1499/2020|2020-07-23|EPI\_ISL\_568597|Original|hCoV-19^^Florida|Human|Florida Bureau of Public Health Laboratories|Florida Bureau of Public Health Laboratories|Blanton|USA

>Spike|hCoV-19/England/QEUA-B2DF14/2020|2020-11-04|EPI\_ISL\_659840|Original|hCoV-19^England|Human|Lighthouse Lab in Glasgow|Wellcome Sanger Institute for the COVID-19 Genomics UK (COG-UK) Consortium|Davies|United Kingdom

>Spike|hCoV-19/England/MILK-9782F5/2020|2020-07-30|EPI\_ISL\_526408|Original|hCoV-19^England|Human|Queens Medical Centre|COVID-19 Genomics UK (COG-UK) Consortium|Loose|United Kingdom

>Spike|hCoV-19/USA/CA-SR0401/2020|2020-04-14|EPI\_ISL\_458273|Original|hCoV-19^California|Human|Scripps Medical Laboratory|Andersen lab at Scripps Research|Gangavarapu|USA

>Spike|hCoV-19/Australia/VIC16175/2020|2020-08-06|EPI\_ISL\_640325|Original|hCoV-19^Victoria|Human|Microbiological Diagnostic Unit - Public Health Laboratory (MDU-PHL)|MDU-PHL|Schultz|Australia

>Spike|hCoV-19/England/MILK-57024C/2020|2020-06-11|EPI\_ISL\_558319|Original|hCoV-19^England|Human|Lighthouse Lab in Milton Keynes|Wellcome Sanger Institute for the COVID-19 Genomics UK (COG-UK) consortium|Davies|United Kingdom

>Spike|hCoV-19/Poland/PL\_MCB\_69/2020|2020-05-10|EPI\_ISL\_645068|Original|hCoV-19^Poland|Human|Human Genome Variation Research Group|Human Genome Variation Research Group||Poland

>Spike|hCoV-19/New Zealand/20CV0075/2020|2020-08-14|EPI\_ISL\_547981|Original|hCoV-19^Combined Auckland|Human|Canterbury Health Laboratories|Institute of Environmental Science and Research (ESR)|Wang|New Zealand

>Spike|hCoV-19/Scotland/CVR5602/2020|2020-11-02|EPI\_ISL\_651862|Original|hCoV-19^Scotland|Human|West of Scotland Specialist Virology Centre|COVID-19 Genomics UK (COG-UK) Consortium|Robertson|United Kingdom

>Spike|hCoV-19/England/QEUA-B9EBB0/2020|2020-11-18|EPI\_ISL\_719665|Original|hCoV-19^England|Human|Lighthouse Lab in Glasgow|Wellcome Sanger Institute for the COVID-19 Genomics UK (COG-UK) Consortium|Davies|United Kingdom

>Spike|hCoV-19/Belgium/reg-10181089/2020|2020-10-18|EPI\_ISL\_735129|Original|hCoV-19^Tervuren|Human|UZ Leuven|KU Leuven|Maes|Belgium

>Spike|hCoV-19/Colombia/CES-INS-87973/2020|2020-03-23|EPI\_ISL\_498153|Original|hCoV-19^Cesar|Human|Instituto Nacional de Salud|Instituto Nacional de Salud|Franco-Mu\u00f1oz|Colombia

>Spike|hCoV-19/England/20186075104/2020|2020-04-30|EPI\_ISL\_465472|Original|hCoV-19^England|Human|Respiratory Virus Unit|Respiratory Virus Unit|Platt|United Kingdom

>Spike|hCoV-19/USA/NM-DOH-2020308002/2020|2020-08-24|EPI\_ISL\_602169|Original|hCoV-19^New Mexico|Human|New Mexico Department of Health Scientific Laboratory|New Mexico Department of Health Scientific Laboratory|Johnson|USA

>Spike|hCoV-19/USA/CA-ALSR-0570-IPL/2020|2020-05-13|EPI\_ISL\_483230|Original|hCoV-19^California|Human|UC San Diego Center for Advanced Laboratory Medicine|Andersen lab at Scripps Research|Gangavarapu|USA

>Spike|hCoV-19/Wales/PHWC-16DBE1/2020|2020-09-26|EPI\_ISL\_577505|Original|hCoV-19^Wales|Human|Wales Specialist Virology Centre Sequencing lab|COVID-19 Genomics UK (COG-UK) Consortium|Moore|United Kingdom

>Spike|hCoV-19/Denmark/DCGC-15384/2020|2020-11-23|EPI\_ISL\_713794|Original|hCoV-19^Sjaelland|Human|Department of Virus and Microbiological Special Diagnostics|Albertsen Lab|Michaelsen|Denmark

>Spike|hCoV-19/Wales/PHWC-15D4AD/2020|2020-04-19|EPI\_ISL\_473144|Original|hCoV-19^Wales|Human|Wales Specialist Virology Centre Sequencing lab|COVID-19 Genomics UK (COG-UK) Consortium|Moore|United Kingdom

>Spike|hCoV-19/USA/TX-HMH-MCoV-8602/2020|2020-07-01|EPI\_ISL\_780455|Original|hCoV-19^Texas|Human|Houston Methodist Hospital|Houston Methodist Hospital|Long|USA

>Spike|hCoV-19/Brazil/SP-299/2020|2020-04-24|EPI\_ISL\_527864|Original|hCoV-19^S\u00e3o Paulo|Human|Hospital e Pronto Socorro Comunit\u00e1rio Vila Iolanda|Instituto Adolfo Lutz|Sacchi|Brazil

>Spike|hCoV-19/England/CAMC-C71B2B/2020|2020-12-16|EPI\_ISL\_769094|Original|hCoV-19^England|Human|Lighthouse Lab in Cambridge|Wellcome Sanger Institute for the COVID-19 Genomics UK (COG-UK) Consortium|Davies|United Kingdom

>Spike|hCoV-19/England/ALDP-B480F2/2020|2020-11-07|EPI\_ISL\_649384|Original|hCoV-19^England|Human|Lighthouse Lab in Alderley Park|Wellcome Sanger Institute for the COVID-19 Genomics UK (COG-UK) Consortium|Davies|United Kingdom



>Spike|hCoV-19/USA/FL-BPHL-0130/2020|2020-04-10|EPI\_ISL\_450864|Original|hCoV-19^^Florida|Human|Florida Bureau of Public Health Laboratories|Florida Bureau of Public Health Laboratories|Blanton|USA

>Spike|hCoV-19/USA/TX-HMH-2350/2020|2020-05-25|EPI\_ISL\_545258|Original|hCoV-19^^Texas|Human|Houston Methodist Hospital|Houston Methodist Hospital|Long|USA

>Spike|hCoV-19/England/QEUA-AE2583/2020|2020-10-27|EPI\_ISL\_633484|Original|hCoV-19^^England|Human|Lighthouse Lab in Glasgow|Wellcome Sanger Institute for the COVID-19 Genomics UK (COG-UK) consortium|Davies|United Kingdom

>Spike|hCoV-19/Australia/VIC2412/2020|2020-06-20|EPI\_ISL\_522123|Original|hCoV-19^^Victoria|Human|Victorian Infectious Diseases Reference Laboratory (VIDRL)|VIDRL and MDU-PHL|Schultz|Australia

>Spike|hCoV-19/Denmark/DCGC-22478/2020|2020-12-14|EPI\_ISL\_757425|Original|hCoV-19^^Hovedstaden|Human|Department of Virus and Microbiological Special Diagnostics|Albertsen Lab|Michaelsen|Denmark

>Spike|hCoV-19/USA/MI-MDHHS-SC21256/2020|2020-04-02|EPI\_ISL\_507511|Original|hCoV-19^^Michigan|Human|Michigan Department of Health and Human Services|Michigan Department of Health and Human Services|Blankenship|USA

>Spike|hCoV-19/Denmark/DCGC-2827/2020|2020-08-24|EPI\_ISL\_616653|Original|hCoV-19^^Hovedstaden|Human|Department of Virus and Microbiological Special Diagnostics|Albertsen lab|Michaelsen|Denmark

>Spike|hCoV-19/Hong Kong/VB20050000/2020|2020-03-17|EPI\_ISL\_476803|Original|hCoV-19^^Hong Kong|Human|Hong Kong Department of Health|School of Public Health|Chu|China

>Spike|hCoV-19/England/BRIS-18542A2/2020|2020-04-28|EPI\_ISL\_492342|Original|hCoV-19^^England|Human|PHE South West Regional Laboratory|Wellcome Sanger Institute for the COVID-19 Genomics UK (COG-UK) consortium|Davies|United Kingdom

>Spike|hCoV-19/USA/NY-WCMP12C04P/2020|2020-03-16|EPI\_ISL\_427601|Original|hCoV-19^^New York|Human|NewYork-Presbyterian & Mason Lab|Mason Lab|Mason|USA

>Spike|hCoV-19/England/ALDP-9D77F5/2020|2020-09-18|EPI\_ISL\_576586|Original|hCoV-19^^England|Human|Oxford Viromics|COVID-19 Genomics UK (COG-UK) Consortium|Golubchik|United Kingdom

>Spike|hCoV-19/Sweden/20-50217/2020|2020-03-07|EPI\_ISL\_455874|Original|hCoV-19^^Stockholm|Human|Karolinska Universitetslaboratoriet|The Public Health Agency of Sweden|Svartstr\u00f6m|Sweden

>Spike|hCoV-19/England/QEUA-A8BB5D/2020|2020-10-19|EPI\_ISL\_643117|Original|hCoV-19^^England|Human|Lighthouse Lab in Glasgow|Wellcome Sanger Institute for the COVID-19 Genomics UK (COG-UK) Consortium|Davies|United Kingdom

>Spike|hCoV-19/England/LIVE-A83E3/2020|2020-03-27|EPI\_ISL\_517158|Original|hCoV-19^^England|Human|Liverpool Clinical Laboratories|COVID-19 Genomics UK (COG-UK) Consortium|Haldenby|United Kingdom

>Spike|hCoV-19/England/ALDP-9E608F/2020|2020-09-24|EPI\_ISL\_580288|Original|hCoV-19^^England|Human|Lighthouse Lab in Alderley Park|Wellcome Sanger Institute for the COVID-19 Genomics UK (COG-UK) consortium|Davies|United Kingdom

>Spike|hCoV-19/England/ALDP-B85721/2020|2020-11-14|EPI\_ISL\_675361|Original|hCoV-19^^England|Human|Lighthouse Lab in Alderley Park|Wellcome Sanger Institute for the COVID-19 Genomics UK (COG-UK) Consortium|Davies|United Kingdom

>Spike|hCoV-19/England/ALDP-A957E3/2020|2020-10-20|EPI\_ISL\_624866|Original|hCoV-19^^England|Human|Lighthouse Lab in Alderley Park|Wellcome Sanger Institute for the COVID-19 Genomics UK (COG-UK) consortium|Davies|United Kingdom

>Spike|hCoV-19/USA/TX-HMH-6202/2020|2020-07-04|EPI\_ISL\_547309|Original|hCoV-19^^Texas|Human|Houston Methodist Hospital|Houston Methodist Hospital|Long|USA

>Spike|hCoV-19/USA/TX-HMH-5546/2020|2020-06-25|EPI\_ISL\_544853|Original|hCoV-19^^Texas|Human|Houston Methodist Hospital|Houston Methodist Hospital|Long|USA

>Spike|hCoV-19/USA/NY-NYUMC476/2020|2020-04-21|EPI\_ISL\_435541|Original|hCoV-19^^New York|Human|NYU Langone Health|Departments of Pathology and Medicine|Maurano|USA

>Spike|hCoV-19/United Arab Emirates/1080/2020|2020-06-12|EPI\_ISL\_698154|Original|hCoV-19^^Abu Dhabi|Human|Group 42 (G42) Healthcare|G42 Healthcare|Ogrodzki|United Arab Emirates

>Spike|hCoV-19/England/MILK-B3B98E/2020|2020-11-02|EPI\_ISL\_706090|Original|hCoV-19^^England|Human|Oxford Viromics|COVID-19 Genomics UK (COG-UK) Consortium|Golubchik|United Kingdom

>Spike|hCoV-19/Denmark/DCGC-21775/2020|2020-12-21|EPI\_ISL\_757778|Original|hCoV-19^^Hovedstaden|Human|Department of Virus and Microbiological Special Diagnostics|Albertsen Lab|Michaelsen|Denmark

>Spike|hCoV-19/USA/VA-CDC-2-3714292/2020|2020-11-09|EPI\_ISL\_751685|Original|hCoV-19^^Virginia|Human|VA-Division of Consolidated Laboratory Services|Genomics and Discovery|Queen|USA

>Spike|hCoV-19/Australia/VIC784/2020|2020-03-30|EPI\_ISL\_427059|Original|hCoV-19^^Victoria|Human|Microbiological Diagnostic Unit Public Health Laboratory|Microbiological Diagnostic Unit Public Health Laboratory|Schultz|Australia

>Spike|hCoV-19/USA/CA-IGI-0242/2020|2020-07-14|EPI\_ISL\_569946|Original|hCoV-19^^California|Human|Innovative Genomics Institute|Innovative Genomics Institute|Wyman|USA

>Spike|hCoV-19/Japan/PG-8491/2020|2020-06-00|EPI\_ISL\_687590|Original|hCoV-19^^Japan|Human|Pathogen Genomics Center|Pathogen Genomics Center|Sekizuka|Japan

>Spike|hCoV-19/Slovenia/V0-15921/2020|2020-04-24|EPI\_ISL\_635272|Original|hCoV-19^^Slovenia|Human|Institute of Microbiology and Immunology|Institute of Microbiology and Immunology|Zakotnik|Slovenia

>Spike|hCoV-19/England/MILK-97596C/2020|2020-08-20|EPI\_ISL\_552603|Original|hCoV-19^^England|Human|Lighthouse Lab in Milton Keynes|Wellcome Sanger Institute for the COVID-19 Genomics UK (COG-UK) consortium|Davies|United Kingdom

>Spike|hCoV-19/Denmark/DCGC-13959/2020|2020-11-30|EPI\_ISL\_711476|Original|hCoV-19^^Midtjylland|Human|Department of Virus and Microbiological Special Diagnostics|Albertsen Lab|Michaelsen|Denmark

>Spike|hCoV-19/Netherlands/OV-RIVM-20144/2020|2020-11-28|EPI\_ISL\_723314|Original|hCoV-19^^Overijssel|Human|Dutch COVID-19 response team|National Institute for Public Health and the Environment (RIVM)|Meijer|Netherlands

>Spike|hCoV-19/England/QEUH-9AE663/2020|2020-09-05|EPI\_ISL\_577231|Original|hCoV-19^^England|Human|University of Exeter|COVID-19 Genomics UK (COG-UK) Consortium|Temperton|United Kingdom

>Spike|hCoV-19/Jordan/IR-ALSR-2578/2020|2020-06-25|EPI\_ISL\_635777|Original|hCoV-19^^Irbid|Human|Biolab Diagnostic Laboratories|Andersen lab at Scripps Research|Gangavarapu|Jordan

>Spike|hCoV-19/Australia/NSW2956/2020|2020-10-20|EPI\_ISL\_707895|Original|hCoV-19^^New South Wales|Human|Area of Virology|Virology Research Laboratory; Area of Virology|Foster|Australia

>Spike|hCoV-19/USA/WA-UW-4677/2020|2020-04-05|EPI\_ISL\_429630|Original|hCoV-19^^Washington|Human|UW Virology Lab|UW Virology Lab|Roychoudhury|USA

>Spike|hCoV-19/Hangzhou/HZ91/2020|2020-01-21|EPI\_ISL\_418507|Original|hCoV-19^^Zhejiang|Human|Hangzhou Center for Disease Control and Prevention|Inspection Center of Hangzhou Center for Disease Control and Prevention|Renton|China

>Spike|hCoV-19/USA/TX-HMH-6978/2020|2020-06-28|EPI\_ISL\_546403|Original|hCoV-19^^Texas|Human|Houston Methodist Hospital|Houston Methodist Hospital|Long|USA

>Spike|hCoV-19/Ireland/WH-NVRL-20G48616/2020|2020-04-04|EPI\_ISL\_708519|Original|hCoV-19^^Westmeath|Human|National Virus Reference Laboratory|Irish Coronavirus Sequencing Consortium - Teagasc Oakpark|Della Bartola|Ireland

>Spike|hCoV-19/England/CAMB-7775A/2020|2020-03-30|EPI\_ISL\_439421|Original|hCoV-19^^England|Human|Department of Pathology|Wellcome Sanger Institute for the COVID-19 Genomics UK (COG-UK) consortium|Amato|United Kingdom

>Spike|hCoV-19/England/ALDP-B24566/2020|2020-11-03|EPI\_ISL\_646903|Original|hCoV-19^^England|Human|Lighthouse Lab in Alderley Park|Wellcome Sanger Institute for the COVID-19 Genomics UK (COG-UK) Consortium|Davies|United Kingdom

>Spike|hCoV-19/Iceland/582/2020|2020-03-27|EPI\_ISL\_424602|Original|hCoV-19^^Reykjavik|Human|The National University Hospital of Iceland|deCODE genetics|J\u00f3nsson|Iceland

>Spike|hCoV-19/USA/CA-CHLA-PLM74675338/2020|2020-11-19|EPI\_ISL\_753382|Original|hCoV-19^^California|Human|Clinical virology Laboratory|Center for Personalized Medicine|Dien Bard|USA

>Spike|hCoV-19/England/ALDP-B1B1AA/2020|2020-11-02|EPI\_ISL\_646054|Original|hCoV-19^^England|Human|Lighthouse Lab in Alderley Park|Wellcome Sanger Institute for the COVID-19 Genomics UK (COG-UK) Consortium|Davies|United Kingdom

>Spike|hCoV-19/England/QEUEH-8928F4/2020|2020-07-27|EPI\_ISL\_532764|Original|hCoV-19^^England|Human|Lighthouse Lab in Glasgow|Wellcome Sanger Institute for the COVID-19 Genomics UK (COG-UK) consortium|Davies|United Kingdom

>Spike|hCoV-19/Denmark/DCGC-16543/2020|2020-11-16|EPI\_ISL\_714163|Original|hCoV-19^^Sjaelland|Human|Department of Virus and Microbiological Special Diagnostics|Albertsen Lab|Michaelsen|Denmark

>Spike|hCoV-19/USA/SC-DHEC-0656/2020|2020-06-19|EPI\_ISL\_529102|Original|hCoV-19^^South Carolina|Human|Microbiology Division|Microbiology Division|Flores,H.|USA

>Spike|hCoV-19/England/QEUEH-9B7C1A/2020|2020-09-04|EPI\_ISL\_590472|Original|hCoV-19^^England|Human|Lighthouse Lab in Glasgow|Wellcome Sanger Institute for the COVID-19 Genomics UK (COG-UK) consortium|Davies|United Kingdom

>Spike|hCoV-19/Denmark/DCGC-6493/2020|2020-10-05|EPI\_ISL\_620393|Original|hCoV-19^^Hovedstaden|Human|Department of Virus and Microbiological Special Diagnostics|Albertsen lab|Michaelsen|Denmark

>Spike|hCoV-19/USA/WA-S1774/2020|2020-06-01|EPI\_ISL\_496200|Original|hCoV-19^^Washington|Human|Washington State Department of Health|Seattle Flu Study|Lee|USA

>Spike|hCoV-19/USA/TX-HMH-888/2020|2020-04-16|EPI\_ISL\_545901|Original|hCoV-19^^Texas|Human|Houston Methodist Hospital|Houston Methodist Hospital|Long|USA

>Spike|hCoV-19/USA/NY-Wadsworth-81624-01/2020|2020-05-06|EPI\_ISL\_677666|Original|hCoV-19^^New York|Human|Wadsworth Center|Wadsworth Center|Lasek-Nesselquist|USA

>Spike|hCoV-19/England/ALDP-AA0BF8/2020|2020-10-22|EPI\_ISL\_624988|Original|hCoV-19^^England|Human|Lighthouse Lab in Alderley Park|Wellcome Sanger Institute for the COVID-19 Genomics UK (COG-UK) consortium|Davies|United Kingdom

>Spike|hCoV-19/Japan/PG-7569/2020|2020-07-00|EPI\_ISL\_686671|Original|hCoV-19^^Japan|Human|Chiba Prefectural Institute of Public Health|Pathogen Genomics Center|Sekizuka|Japan

>Spike|hCoV-19/England/CAMB-1AA878/2020|2020-04-17|EPI\_ISL\_470147|Original|hCoV-19^^England|Human|Department of Pathology|Wellcome Sanger Institute for the COVID-19 Genomics UK (COG-UK) consortium|Davies|United Kingdom

>Spike|hCoV-19/England/CAMC-B37D4A/2020|2020-11-05|EPI\_ISL\_658764|Original|hCoV-19^^England|Human|Lighthouse Lab in Cambridge|Wellcome Sanger Institute for the COVID-19 Genomics UK (COG-UK) Consortium|Davies|United Kingdom

>Spike|hCoV-19/Chile/RM-130072/2020|2020-07-21|EPI\_ISL\_746620|Original|hCoV-19^^Region Metropolitana de Santiago|Human|Genetica Molecular and Subdepartamento de Virologia ISP Chile|Instituto de Salud Publica de Chile|Tognarelli|Chile

>Spike|hCoV-19/USA/NY-NYUMC506/2020|2020-03-30|EPI\_ISL\_444623|Original|hCoV-19^^New York|Human|NYU Langone Health|Departments of Pathology and Medicine|Maurano|USA

>Spike|hCoV-19/Spain/PV-IBV-2137/2020|2020-04-12|EPI\_ISL\_468885|Original|hCoV-19^^Basque Country|Human|Servicio de Microbiolog\u00eda. Hospital Universitario Donostia. OSI Donostialdea. \u00clrea de Enfermedades Infecciosas|SeqCOVID-SPAIN consortium|IBV (CSIC) |Comas|Spain

>Spike|hCoV-19/Spain/CM-IBV-003765/2020|2020-04-03|EPI\_ISL\_474947|Original|hCoV-19^^Castilla La Mancha|Human|Complejo Hospitalario Universitario de Albacete|SeqCOVID-SPAIN consortium|IBV (CSIC) |Comas|Spain

>Spike|hCoV-19/USA/TX-HMH-MCoV-10744/2020|2020-07-08|EPI\_ISL\_789166|Original|hCoV-19^^Texas|Human|Houston Methodist Hospital|Houston Methodist Hospital|Long|USA

>Spike|hCoV-19/England/CAMC-B778C5/2020|2020-11-11|EPI\_ISL\_661791|Original|hCoV-19^^England|Human|Lighthouse Lab in Cambridge|Wellcome Sanger Institute for the COVID-19 Genomics UK (COG-UK) Consortium|Davies|United Kingdom

>Spike|hCoV-19/USA/CA-ALSR-1831/2020|2020-05-19|EPI\_ISL\_512200|Original|hCoV-19^^California|Human|San Diego County Public Health Laboratory|Andersen lab at Scripps Research|Gangavarapu|USA

>Spike|hCoV-19/Germany/BE-ChVir-D1930-8296/2020|2020-10-10|EPI\_ISL\_753873|Original|hCoV-19^^Berlin|Human|Charit\u00e9 Universit\u00e4tsmedizin Berlin|Charit\u00e9 Universit\u00e4tsmedizin Berlin|Muehlemann|Germany

>Spike|hCoV-19/Luxembourg/LNS0394050/2020|2020-11-14|EPI\_ISL\_739768|Original|hCoV-19^^Luxembourg|Human|Laboratoire national de sant\u00e9|Laboratoire national de sant\u00e9|Wienecke-Baldacchino|Luxembourg

>Spike|hCoV-19/USA/TX-HMH-MCoV-15016/2020|2020-10-15|EPI\_ISL\_786500|Original|hCoV-19^^Texas|Human|Houston Methodist Hospital|Houston Methodist Hospital|Long|USA

>Spike|hCoV-19/Gibraltar/204421195/2020|2020-10-27|EPI\_ISL\_613656|Original|hCoV-19^^Gibraltar|Human|Microbiology|Respiratory Virus Unit|Platt|Gibraltar

>Spike|hCoV-19/England/CAMC-A3EA7A/2020|2020-10-05|EPI\_ISL\_609669|Original|hCoV-19^^England|Human|Lighthouse Lab in Cambridge|Wellcome Sanger Institute for the COVID-19 Genomics UK (COG-UK) consortium|Davies|United Kingdom

>Spike|hCoV-19/England/SHEF-CCEBB/2020|2020-05-16|EPI\_ISL\_484503|Original|hCoV-19^^England|Human|Virology Department|COVID-19 Genomics UK (COG-UK) Consortium|de Silva|United Kingdom

>Spike|hCoV-19/England/CAMB-A98610/2020|2020-12-25|EPI\_ISL\_764353|Original|hCoV-19^^England|Human|Department of Pathology|COVID-19 Genomics UK (COG-UK) Consortium|Goodfellow|United Kingdom

>Spike|hCoV-19/England/BIRM-67E58/2020|2020-10-30|EPI\_ISL\_650849|Original|hCoV-19^^England|Human|University of Birmingham|COVID-19 Genomics UK (COG-UK) Consortium|Loman|United Kingdom

>Spike|hCoV-19/Norway/4013/2020|2020-09-21|EPI\_ISL\_590966|Original|hCoV-19^^Rogaland|Human|Dept. of Medical Microbiology|Norwegian Institute of Public Health|Vollan|Norway

>Spike|hCoV-19/USA/MI-MDHHS-SC20562/2020|2020-04-29|EPI\_ISL\_462644|Original|hCoV-19^^Michigan|Human|Michigan Department of Health and Human Services|Michigan Department of Health and Human Services|Blankenship|USA

>Spike|hCoV-19/Denmark/DCGC-18524/2020|2020-12-07|EPI\_ISL\_749246|Original|hCoV-19^^Hovedstaden|Human|Department of Virus and Microbiological Special Diagnostics|Albertsen Lab|Michaelsen|Denmark

>Spike|hCoV-19/Wales/PHWC-47CFB3/2020|2020-09-27|EPI\_ISL\_586080|Original|hCoV-19^^Wales|Human|Wales Specialist Virology Centre Sequencing lab|COVID-19 Genomics UK (COG-UK) Consortium|Moore|United Kingdom

>Spike|hCoV-19/Wales/LIVE-DC9C6C/2020|2020-12-05|EPI\_ISL\_705235|Original|hCoV-19^^Wales|Human|Liverpool Clinical Laboratories|COVID-19 Genomics UK (COG-UK) Consortium|Haldenby|United Kingdom

>Spike|hCoV-19/Portugal/PT1391/2020|2020-03-27|EPI\_ISL\_511350|Original|hCoV-19^^Portugal|Human|Instituto Nacional de Saude (INSA)|Instituto Nacional de Saude (INSA)|Borges|Portugal

>Spike|hCoV-19/Denmark/DCGC-13496/2020|2020-11-30|EPI\_ISL\_712832|Original|hCoV-19^^Midtjylland|Human|Department of Virus and Microbiological Special Diagnostics|Albertsen Lab|Michaelsen|Denmark

>Spike|hCoV-19/England/CAMB-1BAB21/2020|2020-11-13|EPI\_ISL\_664781|Original|hCoV-19^^England|Human|Department of Pathology|COVID-19 Genomics UK (COG-UK) Consortium|Goodfellow|United Kingdom

>Spike|hCoV-19/Wales/PHWC-496EF2/2020|2020-11-25|EPI\_ISL\_726747|Original|hCoV-19^^Wales|Human|Originating lab|COVID-19 Genomics UK (COG-UK) Consortium|Moore|United Kingdom

>Spike|hCoV-19/Scotland/QEUH-9E4F0C/2020|2020-09-24|EPI\_ISL\_600945|Original|hCoV-19^^Scotland|Human|Lighthouse Lab in Glasgow|Wellcome Sanger Institute for the COVID-19 Genomics UK (COG-UK) consortium|Davies|United Kingdom

>Spike|hCoV-19/Canada/ON-PHL-20-03639/2020|2020-11-00|EPI\_ISL\_775143|Original|hCoV-19^^Ontario|Human|Public Health Ontario Laboratory|Public Health Ontario Laboratory|Guthrie|Canada

>Spike|hCoV-19/England/CAMC-AEB159/2020|2020-10-24|EPI\_ISL\_633194|Original|hCoV-19^^England|Human|Lighthouse Lab in Cambridge|Wellcome Sanger Institute for the COVID-19 Genomics UK (COG-UK) consortium|Davies|United Kingdom

>Spike|hCoV-19/USA/TX-HMH-4939/2020|2020-06-21|EPI\_ISL\_544414|Original|hCoV-19^^Texas|Human|Houston Methodist Hospital|Houston Methodist Hospital|Long|USA

>Spike|hCoV-19/England/QEUH-AF4919/2020|2020-10-30|EPI\_ISL\_663025|Original|hCoV-19^^England|Human|Lighthouse Lab in Glasgow|Wellcome Sanger Institute for the COVID-19 Genomics UK (COG-UK) Consortium|Davies|United Kingdom

>Spike|hCoV-19/Denmark/DCGC-11047/2020|2020-11-02|EPI\_ISL\_670364|Original|hCoV-19^^Hovedstaden|Human|Department of Virus and Microbiological Special Diagnostics|Albertsen Lab|Michaelsen|Denmark

>Spike|hCoV-19/USA/HI-H200598/2020|2020-10-05|EPI\_ISL\_753124|Original|hCoV-19^^Hawaii|Human|State Laboratories Division|State Laboratories Division|Sultana|USA

>Spike|hCoV-19/Japan/PG-1981/2020|2020-04-00|EPI\_ISL\_685587|Original|hCoV-19^^Japan|Human|Pathogen Genomics Center|Pathogen Genomics Center|Sekizuka|Japan

>Spike|hCoV-19/England/CAMB-1ACEDE/2020|2020-04-24|EPI\_ISL\_489531|Original|hCoV-19^^England|Human|Department of Pathology|Wellcome Sanger Institute for the COVID-19 Genomics UK (COG-UK) consortium|Davies|United Kingdom

>Spike|hCoV-19/Pakistan/JRCGR-KHI17/2020|2020-07-02|EPI\_ISL\_779290|Original|hCoV-19^^Karachi|Human|Jamil-ur-Rahman Center for Genome Research|Jamil-ur-Rahman Center for Genome Research|Shakeel|Pakistan

>Spike|hCoV-19/USA/MN-MDH-1426/2020|2020-03-25|EPI\_ISL\_514645|Original|hCoV-19^^Minnesota|Human|Avera McKennan Laboratory|Minnesota Department of Health|Garfin|USA

>Spike|hCoV-19/Australia/VIC3250/2020|2020-07-09|EPI\_ISL\_520930|Original|hCoV-19^^Victoria|Human|Microbiological Diagnostic Unit - Public Health Laboratory (MDU-PHL)|MDU-PHL|Schultz|Australia

>Spike|hCoV-19/Japan/PG-2129/2020|2020-04-00|EPI\_ISL\_685734|Original|hCoV-19^^Japan|Human|Pathogen Genomics Center|Pathogen Genomics Center|Sekizuka|Japan

>Spike|hCoV-19/England/NOTT-1145DC/2020|2020-10-05|EPI\_ISL\_577179|Original|hCoV-19^^England|Human|Queens Medical Centre|COVID-19 Genomics UK (COG-UK) Consortium|Loose|United Kingdom

>Spike|hCoV-19/Scotland/MILK-A6A9A5/2020|2020-10-09|EPI\_ISL\_627127|Original|hCoV-19^^Scotland|Human|Liverpool Clinical Laboratories|COVID-19 Genomics UK (COG-UK) Consortium|Haldenby|United Kingdom

>Spike|hCoV-19/England/CAMC-B0AF77/2020|2020-10-29|EPI\_ISL\_643609|Original|hCoV-19^^England|Human|Lighthouse Lab in Cambridge|Wellcome Sanger Institute for the COVID-19 Genomics UK (COG-UK) Consortium|Davies|United Kingdom

>Spike|hCoV-19/Hungary/UD-9953/2020|2020-04-22|EPI\_ISL\_477013|Original|hCoV-19^^Szabolcs-Szatm\u00e9l\u00e9r-Bereg County|Human|University of Debrecen|National Laboratory of Virology|Kemenesi|Hungary

>Spike|hCoV-19/Belgium/reg-0417517/2020|2020-04-17|EPI\_ISL\_734609|Original|hCoV-19^^Tervuren|Human|UZ Leuven|KU Leuven|Maes|Belgium

>Spike|hCoV-19/Norway/6697/2020|2020-11-13|EPI\_ISL\_775515|Original|hCoV-19^^Oslo|Human|Norwegian Institute of Public Health|Norwegian Institute of Public Health|Vollan|Norway

>Spike|hCoV-19/Scotland/CVR3237/2020|2020-04-26|EPI\_ISL\_449247|Original|hCoV-19^^Scotland|Human|West of Scotland Specialist Virology Centre|COVID-19 Genomics UK (COG-UK) Consortium|Robertson|United Kingdom

>Spike|hCoV-19/England/ALDP-A944CF/2020|2020-10-20|EPI\_ISL\_624692|Original|hCoV-19^^England|Human|Lighthouse Lab in Alderley Park|Wellcome Sanger Institute for the COVID-19 Genomics UK (COG-UK) consortium|Davies|United Kingdom

>Spike|hCoV-19/USA/CA-SR0256/2020|2020-03-26|EPI\_ISL\_437556|Original|hCoV-19^^California|Human|Scripps Medical Laboratory|Andersen lab at Scripps Research|Gangavarapu|USA

>Spike|hCoV-19/England/OXON-AFA14/2020|2020-04-15|EPI\_ISL\_478795|Original|hCoV-19^^England|Human|Oxford Viromics|COVID-19 Genomics UK (COG-UK) Consortium|Golubchik|United Kingdom

>Spike|hCoV-19/Australia/VIC5438/2020|2020-07-15|EPI\_ISL\_520189|Original|hCoV-19^^Victoria|Human|Victorian Infectious Diseases Reference Laboratory (VIDRL)|VIDRL and MDU-PHL|Schultz|Australia

>Spike|hCoV-19/USA/LA-EVTL726/2020|2020-07-16|EPI\_ISL\_653418|Original|hCoV-19^^Louisiana|Human|LSUHS Emerging Viral Threat Laboratory|Microbial Genome Sequencing Center|Kamil|USA

>Spike|hCoV-19/Netherlands/NB-EMC-216/2020|2020-06-12|EPI\_ISL\_523339|Original|hCoV-19^^Noord Brabant|Human|Dutch COVID-19 response team|Erasmus Medical Center|Oude Munnink|Netherlands

>Spike|hCoV-19/England/ALDP-9FD498/2020|2020-10-01|EPI\_ISL\_587838|Original|hCoV-19^^England|Human|Lighthouse Lab in Alderley Park|Wellcome Sanger Institute for the COVID-19 Genomics UK (COG-UK) consortium|Davies|United Kingdom

>Spike|hCoV-19/England/MILK-99D737/2020|2020-08-31|EPI\_ISL\_549927|Original|hCoV-19^^England|Human|Lighthouse Lab in Milton Keynes|Wellcome Sanger Institute for the COVID-19 Genomics UK (COG-UK) consortium|Davies|United Kingdom

>Spike|hCoV-19/Wuhan/0125-A167/2020|2020-01-25|EPI\_ISL\_493158|Original|hCoV-19^^Hubei|Human|National Virus Resource Center|Computational Virology Group|Liu|China

>Spike|hCoV-19/Scotland/EDB3380/2020|2020-04-09|EPI\_ISL\_487952|Original|hCoV-19^^Scotland|Human|Virology Department|Wellcome Sanger Institute for the COVID-19 Genomics UK (COG-UK) consortium|Davies|United Kingdom

>Spike|hCoV-19/England/MILK-BB0356/2020|2020-11-17|EPI\_ISL\_720409|Original|hCoV-19^^England|Human|Lighthouse Lab in Milton Keynes|Wellcome Sanger Institute for the COVID-19 Genomics UK (COG-UK) Consortium|Davies|United Kingdom

>Spike|hCoV-19/Australia/VIC11902/2020|2020-08-04|EPI\_ISL\_591889|Original|hCoV-19^^Victoria|Human|Victorian Infectious Diseases Reference Laboratory (VIDRL)|VIDRL and MDU-PHL|Schultz|Australia

>Spike|hCoV-19/Netherlands/UT-EMC-177/2020|2020-10-27|EPI\_ISL\_722558|Original|hCoV-19^^Utrecht|Human|Dutch COVID-19 response team|Erasmus Medical Center|Oude Munnink|Netherlands

>Spike|hCoV-19/England/ALDP-6CFA54/2020|2020-07-03|EPI\_ISL\_556302|Original|hCoV-19^^England|Human|Lighthouse Lab in Alderley Park|Wellcome Sanger Institute for the COVID-19 Genomics UK (COG-UK) consortium|Davies|United Kingdom

>Spike|hCoV-19/USA/TX-HMH-MCoV-14515/2020|2020-10-08|EPI\_ISL\_787800|Original|hCoV-19^^Texas|Human|Houston Methodist Hospital|Houston Methodist Hospital|Long|USA

>Spike|hCoV-19/Spain/MD-IBV-99008728/2020|2020-10-16|EPI\_ISL\_654301|Original|hCoV-19^^Madrid|Human|Hospital General Universitario Gregorio Mara\u00f1a|SeqCOVID-SPAIN consortium/IBV (CSIC)|Comas|Spain

>Spike|hCoV-19/USA/FL-BPHL-2258/2020|2020-11-19|EPI\_ISL\_763341|Original|hCoV-19^^Florida|Human|Florida Bureau of Public Health Laboratories|Florida Bureau of Public Health Laboratories|Blanton|USA

>Spike|hCoV-19/Singapore/1457/2020|2020-12-11|EPI\_ISL\_728193|Original|hCoV-19^^Singapore|Human|National Public Health Laboratory|National Public Health Laboratory|Mak|Singapore

>Spike|hCoV-19/USA/CA-ALSR-1084-SAN/2020|2020-06-23|EPI\_ISL\_483511|Original|hCoV-19^^California|Human|UC San Diego Center for Advanced Laboratory Medicine|Andersen lab at Scripps Research|Gangavarapu|USA

>Spike|hCoV-19/Scotland/QEUEH-96112F/2020|2020-08-03|EPI\_ISL\_532129|Original|hCoV-19^^Scotland|Human|NHSGGC West of Scotland Specialist Virology Centre / MRC-University of Glasgow Centre for Virus Research|Wellcome Sanger Institute for the COVID-19 Genomics UK (COG-UK) consortium|Davies|United Kingdom

>Spike|hCoV-19/USA/UT-UPHL-2008952/2020|2020-05-15|EPI\_ISL\_525279|Original|hCoV-19^^Utah|Human|Utah Public Health Laboratory|Utah Public Health Laboratory|Young|USA

>Spike|hCoV-19/England/QEUEH-B6795C/2020|2020-11-11|EPI\_ISL\_661522|Original|hCoV-19^^England|Human|Lighthouse Lab in Glasgow|Wellcome Sanger Institute for the COVID-19 Genomics UK (COG-UK) Consortium|Davies|United Kingdom

>Spike|hCoV-19/USA/NY-Wadsworth-99603-01/2020|2020-05-14|EPI\_ISL\_676672|Original|hCoV-19^^New York|Human|Wadsworth Center|Wadsworth Center|Lasek-Nesselquist|USA

>Spike|hCoV-19/Denmark/DCGC-14023/2020|2020-11-30|EPI\_ISL\_711286|Original|hCoV-19^^Syddanmark|Human|Department of Virus and Microbiological Special Diagnostics|Albertsen Lab|Michaelsen|Denmark

>Spike|hCoV-19/England/ALDP-C3A9F7/2020|2020-12-08|EPI\_ISL\_736758|Original|hCoV-19^^England|Human|Lighthouse Lab in Alderley Park|Wellcome Sanger Institute for the COVID-19 Genomics UK (COG-UK) Consortium|Davies|United Kingdom

>Spike|hCoV-19/England/LOND-D5031/2020|2020-04-14|EPI\_ISL\_444195|Original|hCoV-19^^England|Human|University College London|COVID-19 Genomics UK (COG-UK) Consortium|Roy|United Kingdom

>Spike|hCoV-19/England/MILK-6A6103/2020|2020-07-02|EPI\_ISL\_551746|Original|hCoV-19^^England|Human|Lighthouse Lab in Milton Keynes|Wellcome Sanger Institute for the COVID-19 Genomics UK (COG-UK) consortium|Davies|United Kingdom

>Spike|hCoV-19/Denmark/DCGC-7417/2020|2020-10-12|EPI\_ISL\_619360|Original|hCoV-19^^Nordjylland|Human|Department of Virus and Microbiological Special Diagnostics|Albertsen lab|Michaelsen|Denmark

>Spike|hCoV-19/Japan/PG-2847/2020|2020-05-00|EPI\_ISL\_690974|Original|hCoV-19^^Japan|Human|Pathogen Genomics Center|Pathogen Genomics Center|Sekizuka|Japan

>Spike|hCoV-19/England/ALDP-9D94DE/2020|2020-09-18|EPI\_ISL\_576733|Original|hCoV-19^^England|Human|Oxford Viromics|COVID-19 Genomics UK (COG-UK) Consortium|Golubchik|United Kingdom

>Spike|hCoV-19/Scotland/CVR1361/2020|2020-04-01|EPI\_ISL\_433554|Original|hCoV-19^^Scotland|Human|West of Scotland Specialist Virology Centre|COVID-19 Genomics UK (COG-UK) Consortium|Robertson|United Kingdom

>Spike|hCoV-19/Bangladesh/DNAS\_DRICM\_isl\_R-28/2020|2020-06-28|EPI\_ISL\_775003|Original|hCoV-19^^Dhaka|Human|Designated Reference Institute for Chemical Measurements (DRICM)|DNA SOLUTION LTD.|Rabbi|Bangladesh

>Spike|hCoV-19/England/QEUEH-B413E1/2020|2020-11-08|EPI\_ISL\_658579|Original|hCoV-19^^England|Human|Lighthouse Lab in Glasgow|Wellcome Sanger Institute for the COVID-19 Genomics UK (COG-UK) Consortium|Davies|United Kingdom

>Spike|hCoV-19/Austria/CeMM0870/2020|2020-04-29|EPI\_ISL\_583735|Original|hCoV-19^^Austria|Human|Dr. Gernot Walder GmbH|Bergthaler laboratory|Bergthaler|Austria

>Spike|hCoV-19/USA/TX-HMH-MCoV-14733/2020|2020-10-12|EPI\_ISL\_786218|Original|hCoV-19^^Texas|Human|Houston Methodist Hospital|Houston Methodist Hospital|Long|USA

>Spike|hCoV-19/Ireland/D-NVRL-20G35142/2020|2020-03-20|EPI\_ISL\_605142|Original|hCoV-19^^Dublin|Human|National Virus Reference Laboratory|Irish Coronavirus Sequencing Consortium - Helixworks|Chalapati|Ireland

>Spike|hCoV-19/England/CAMB-7F6DD/2020|2020-04-08|EPI\_ISL\_470444|Original|hCoV-19^^England|Human|Department of Pathology|Wellcome Sanger Institute for the COVID-19 Genomics UK (COG-UK) consortium|Davies|United Kingdom

>Spike|hCoV-19/England/MILK-A22CBF/2020|2020-10-03|EPI\_ISL\_611948|Original|hCoV-19^^England|Human|Northumbria University / South Tees Hospitals NHS Foundation Trust / North Cumbria Integrated Care NHS Foundation Trust / North Tees and Hartlepool NHS Foundation Trust / Newcastle Hospitals NHS Foundation Trust|COVID-19 Genomics UK (COG-UK) Consortium|Bashton|United Kingdom

>Spike|hCoV-19/England/CAMC-9D7458/2020|2020-09-17|EPI\_ISL\_584371|Original|hCoV-19^^England|Human|Virology Department|COVID-19 Genomics UK (COG-UK) Consortium|de Silva|United Kingdom

>Spike|hCoV-19/England/QEUEH-9F490B/2020|2020-09-25|EPI\_ISL\_588342|Original|hCoV-19^^England|Human|Lighthouse Lab in Glasgow|Wellcome Sanger Institute for the COVID-19 Genomics UK (COG-UK) consortium|Davies|United Kingdom

>Spike|hCoV-19/USA/LA-GBCL-26544575/2020|2020-04-17|EPI\_ISL\_485147|Original|hCoV-19^^Louisiana|Human|River Road Testing Lab|Ginkgo Bioworks Clinical Laboratory|Smith|USA

>Spike|hCoV-19/USA/MA-MGH-03145/2020|2020-09-06|EPI\_ISL\_765717|Original|hCoV-19^^Massachusetts|Human|Massachusetts General Hospital|Infectious Disease Program|Park|USA

>Spike|hCoV-19/Denmark/DCGC-2945/2020|2020-08-24|EPI\_ISL\_616706|Original|hCoV-19^^Midtjylland|Human|Department of Virus and Microbiological Special Diagnostics|Albertsen lab|Michaelsen|Denmark

>Spike|hCoV-19/Denmark/DCGC-16460/2020|2020-11-16|EPI\_ISL\_714780|Original|hCoV-19^^Midtjylland|Human|Department of Virus and Microbiological Special Diagnostics|Albertsen Lab|Michaelsen|Denmark

>Spike|hCoV-19/Brazil/RJ-INCA-C181/2020|2020-04-30|EPI\_ISL\_513519|Original|hCoV-19^^Rio de Janeiro|Human|Programa de Oncovirologia|Programa de Oncovirologia|Ramos Goes|Brazil

>Spike|hCoV-19/Japan/PG-1116/2020|2020-04-00|EPI\_ISL\_684726|Original|hCoV-19^^Japan|Human|Fukuoka Institute of Health and Environmental Sciences|Pathogen Genomics Center|Sekizuka|Japan

>Spike|hCoV-19/Belgium/ULG-10423/2020|2020-08-14|EPI\_ISL\_581584|Original|hCoV-19^^Li\u00e8ge|Human|Department of Clinical Microbiology|GIGA Medical Genomics|Durkin|Belgium

>Spike|hCoV-19/USA/MI-UM-10036166894/2020|2020-09-28|EPI\_ISL\_590729|Original|hCoV-19^^Michigan|Human|University of Michigan Clinical Microbiology Laboratory|Lauring Lab|Valesano|USA

>Spike|hCoV-19/Spain/AS-IBV-98006622/2020|2020-03-21|EPI\_ISL\_654617|Original|hCoV-19^^Asturias|Human|Servicio de Microbiolog\u00eda|SeqCOVID-SPAIN consortium/IBV (CSIC) |Comas|Spain

>Spike|hCoV-19/Wales/PHWC-49EE18/2020|2020-12-09|EPI\_ISL\_743128|Original|hCoV-19^^Wales|Human|Wales Specialist Virology Centre Sequencing lab|COVID-19 Genomics UK (COG-UK) Consortium|Moore|United Kingdom

>Spike|hCoV-19/USA/PA-MGEL128/2020|2020-00-00|EPI\_ISL\_454397|Original|hCoV-19^^Pennsylvania|Human|UPMC Clinical Microbiology Laboratory|Microbial Genome Sequencing Center|Mustapha|USA

>Spike|hCoV-19/England/LIVE-A1924/2020|2020-06-08|EPI\_ISL\_490346|Original|hCoV-19^^England|Human|Liverpool Clinical Laboratories|COVID-19 Genomics UK (COG-UK) Consortium|Haldenby|United Kingdom

>Spike|hCoV-19/Denmark/DCGC-15316/2020|2020-11-23|EPI\_ISL\_713099|Original|hCoV-19^^Hovedstaden|Human|Department of Virus and Microbiological Special Diagnostics|Albertsen Lab|Michaelsen|Denmark

>Spike|hCoV-19/Scotland/EDB4721/2020|2020-04-28|EPI\_ISL\_453136|Original|hCoV-19^^Scotland|Human|Virology Department|COVID-19 Genomics UK (COG-UK) Consortium|Williams|United Kingdom

>Spike|hCoV-19/Scotland/QEUH-B68BBF/2020|2020-11-11|EPI\_ISL\_676364|Original|hCoV-19^^Scotland|Human|Lighthouse Lab in Glasgow|Wellcome Sanger Institute for the COVID-19 Genomics UK (COG-UK) Consortium|Davies|United Kingdom

>Spike|hCoV-19/USA/WA-S2274/2020|2020-06-09|EPI\_ISL\_497702|Original|hCoV-19^^Washington|Human|Washington State Department of Health|Seattle Flu Study|Lee|USA

>Spike|hCoV-19/England/EXET-1393F5/2020|2020-00-00|EPI\_ISL\_724253|Original|hCoV-19^^England|Human|University of Exeter|COVID-19 Genomics UK (COG-UK) Consortium|Temperton|United Kingdom

>Spike|hCoV-19/Australia/VIC7988/2020|2020-08-11|EPI\_ISL\_564793|Original|hCoV-19^^Victoria|Human|Microbiological Diagnostic Unit - Public Health Laboratory (MDU-PHL) |MDU-PHL|Schultz|Australia

>Spike|hCoV-19/USA/NY-PV09383/2020|2020-03-19|EPI\_ISL\_450066|Original|hCoV-19^^New York|Human|MSSS Clinical Microbiology Laboratories|MSSS Pathogen Surveillance Program|van Bakel|USA

>Spike|hCoV-19/Switzerland/GR-ETHZ-410115/2020|2020-12-16|EPI\_ISL\_737417|Original|hCoV-19^^Graub\u00fcnden|Human|Viollier AG|Department of Biosystems Science and Engineering|Nadeau|Switzerland

>Spike|hCoV-19/England/CAMC-991232/2020|2020-08-26|EPI\_ISL\_551909|Original|hCoV-19^^England|Human|Lighthouse Lab in Cambridge|Wellcome Sanger Institute for the COVID-19 Genomics UK (COG-UK) consortium|Davies|United Kingdom

>Spike|hCoV-19/England/BRIS-12704E/2020|2020-04-23|EPI\_ISL\_469725|Original|hCoV-19^^England|Human|PHE South West Regional Laboratory|Wellcome Sanger Institute for the COVID-19 Genomics UK (COG-UK) consortium|Davies|United Kingdom

>Spike|hCoV-19/England/LOND-D62D0/2020|2020-04-21|EPI\_ISL\_482208|Original|hCoV-19^^England|Human|University College London|Wellcome Sanger Institute for the COVID-19 Genomics UK (COG-UK) consortium|Davies|United Kingdom

>Spike|hCoV-19/Brazil/RJ-00432/2020|2020-10-30|EPI\_ISL\_717831|Original|hCoV-19^^Rio de Janeiro|Human|Laboratorio de Virologia Molecular / UFRJ|Bioinformatics Laboratory / LNCC|Almeida|Brazil

>Spike|hCoV-19/USA/TX-HMH-MCoV-19579/2020|2020-11-29|EPI\_ISL\_783951|Original|hCoV-19^^Texas|Human|Houston Methodist Hospital|Houston Methodist Hospital|Long|USA

>Spike|hCoV-19/England/LOND-1266CE1/2020|2020-12-10|EPI\_ISL\_741197|Original|hCoV-19^^England|Human|University College London|COVID-19 Genomics UK (COG-UK) Consortium|Roy|United Kingdom

>Spike|hCoV-19/Netherlands/NH-RIVM-20057/2020|2020-11-15|EPI\_ISL\_723241|Original|hCoV-19^^Noord-Holland|Human|Dutch COVID-19 response team|National Institute for Public Health and the Environment (RIVM)|Meijer|Netherlands



>Spike|hCoV-19/England/ALDP-BB9812/2020|2020-11-20|EPI\_ISL\_702662|Original|hCoV-19^^England|Human|Lighthouse Lab in Alderley Park|Wellcome Sanger Institute for the COVID-19 Genomics UK (COG-UK) Consortium|Davies|United Kingdom

>Spike|hCoV-19/England/CAMB-8230D/2020|2020-04-14|EPI\_ISL\_443491|Original|hCoV-19^^England|Human|Department of Pathology|Wellcome Sanger Institute for the COVID-19 Genomics UK (COG-UK) consortium|Amato|United Kingdom

>Spike|hCoV-19/Switzerland/BE-ETHZ-270048/2020|2020-09-01|EPI\_ISL\_541417|Original|hCoV-19^^Bern|Human|Viollier AG|Department of Biosystems Science and Engineering|Nadeau|Switzerland

>Spike|hCoV-19/Wales/PHWC-499062/2020|2020-12-01|EPI\_ISL\_727250|Original|hCoV-19^^Wales|Human|Originating lab|COVID-19 Genomics UK (COG-UK) Consortium|Moore|United Kingdom

>Spike|hCoV-19/England/MILK-9A8942/2020|2020-09-01|EPI\_ISL\_549435|Original|hCoV-19^^England|Human|Oxford Viromics|COVID-19 Genomics UK (COG-UK) Consortium|Golubchik|United Kingdom

>Spike|hCoV-19/England/NORW-EC8E4/2020|2020-05-17|EPI\_ISL\_457571|Original|hCoV-19^^England|Human|Quadram Institute Bioscience|COVID-19 Genomics UK (COG-UK) Consortium|Alikhan|United Kingdom

>Spike|hCoV-19/England/NORW-F7D8D/2020|2020-11-13|EPI\_ISL\_651409|Original|hCoV-19^^England|Human|Quadram Institute Bioscience|COVID-19 Genomics UK (COG-UK) Consortium|Alikhan|United Kingdom

>Spike|hCoV-19/England/CAMB-1BB12E/2020|2020-11-10|EPI\_ISL\_664820|Original|hCoV-19^^England|Human|Department of Pathology|COVID-19 Genomics UK (COG-UK) Consortium|Goodfellow|United Kingdom

>Spike|hCoV-19/England/QEUEH-AADD9B/2020|2020-10-21|EPI\_ISL\_721548|Original|hCoV-19^^England|Human|Lighthouse Lab in Glasgow|Wellcome Sanger Institute for the COVID-19 Genomics UK (COG-UK) Consortium|Davies|United Kingdom

>Spike|hCoV-19/England/ALDP-B82B37/2020|2020-11-14|EPI\_ISL\_675582|Original|hCoV-19^^England|Human|Lighthouse Lab in Alderley Park|Wellcome Sanger Institute for the COVID-19 Genomics UK (COG-UK) Consortium|Davies|United Kingdom

>Spike|hCoV-19/Switzerland/BS-42204906/2020|2020-03-24|EPI\_ISL\_581737|Original|hCoV-19^^Basel-Stadt|Human|University Hospital Basel|University Hospital Basel|Roloff Handschin|Switzerland

>Spike|hCoV-19/South Africa/KRISP-K002277/2020|2020-07-18|EPI\_ISL\_515657|Original|hCoV-19^^KwaZulu-Natal|Human|NHLS-IALCH|KRISP|de Oliveira|South Africa

>Spike|hCoV-19/Wales/PHWC-16D3F8/2020|2020-09-25|EPI\_ISL\_574234|Original|hCoV-19^^Wales|Human|Wales Specialist Virology Centre Sequencing lab|COVID-19 Genomics UK (COG-UK) Consortium|Moore|United Kingdom

>Spike|hCoV-19/England/ALDP-9B66D1/2020|2020-08-28|EPI\_ISL\_573028|Original|hCoV-19^^England|Human|Oxford Viromics|COVID-19 Genomics UK (COG-UK) Consortium|Golubchik|United Kingdom

>Spike|hCoV-19/USA/CA-ALSR-3377/2020|2020-05-30|EPI\_ISL\_635990|Original|hCoV-19^^California|Human|San Diego County Public Health Laboratory|Andersen lab at Scripps Research|Gangavarapu|USA

>Spike|hCoV-19/England/EXET-136FF4/2020|2020-04-20|EPI\_ISL\_471944|Original|hCoV-19^^England|Human|University of Exeter|COVID-19 Genomics UK (COG-UK) Consortium|Temperton|United Kingdom

>Spike|hCoV-19/England/QEUEH-AF5BA9/2020|2020-10-30|EPI\_ISL\_663036|Original|hCoV-19^^England|Human|Lighthouse Lab in Glasgow|Wellcome Sanger Institute for the COVID-19 Genomics UK (COG-UK) Consortium|Davies|United Kingdom

>Spike|hCoV-19/Netherlands/GE-EMC-372/2020|2020-11-08|EPI\_ISL\_722745|Original|hCoV-19^^Gelderland|Human|Dutch COVID-19 response team|Erasmus Medical Center|Oude Munnink|Netherlands

>Spike|hCoV-19/Brazil/SP-762/2020|2020-06-25|EPI\_ISL\_735415|Original|hCoV-19^^S\u00e3o Paulo|Human|Unidade de Pronto Atendimento de Agenor de Campos|Instituto Adolfo Lutz|Sacchi|Brazil

>Spike|hCoV-19/England/QEUEH-AD1A5B/2020|2020-10-26|EPI\_ISL\_634623|Original|hCoV-19^^England|Human|Lighthouse Lab in Glasgow|Wellcome Sanger Institute for the COVID-19 Genomics UK (COG-UK) consortium|Davies|United Kingdom

>Spike|hCoV-19/Scotland/EDB3286/2020|2020-04-07|EPI\_ISL\_488971|Original|hCoV-19^^Scotland|Human|Virology Department|Wellcome Sanger Institute for the COVID-19 Genomics UK (COG-UK) consortium|Davies|United Kingdom

>Spike|hCoV-19/Denmark/DCGC-16978/2020|2020-12-14|EPI\_ISL\_750682|Original|hCoV-19^^Sjaelland|Human|Department of Virus and Microbiological Special Diagnostics|Albertsen Lab|Michaelsen|Denmark

>Spike|hCoV-19/England/ALDP-C58A1E/2020|2020-12-13|EPI\_ISL\_736040|Original|hCoV-19^^England|Human|Lighthouse Lab in Alderley Park|Wellcome Sanger Institute for the COVID-19 Genomics UK (COG-UK) Consortium|Davies|United Kingdom

>Spike|hCoV-19/USA/TX-DSHS-1617/2020|2020-10-07|EPI\_ISL\_700733|Original|hCoV-19^^Texas|Human|Texas Department of State Health Services|Texas Department of State Health Services|Rahman|USA

>Spike|hCoV-19/Wales/ALDP-9CC9FD/2020|2020-09-16|EPI\_ISL\_572591|Original|hCoV-19^^Wales|Human|Quadram Institute Bioscience|COVID-19 Genomics UK (COG-UK) Consortium|Alikhan|United Kingdom

>Spike|hCoV-19/Wales/QEUEH-A8BAD8/2020|2020-10-16|EPI\_ISL\_647857|Original|hCoV-19^^Wales|Human|Lighthouse Lab in Glasgow|Wellcome Sanger Institute for the COVID-19 Genomics UK (COG-UK) Consortium|Davies|United Kingdom

>Spike|hCoV-19/England/20130036404/2020|2020-03-23|EPI\_ISL\_423616|Original|hCoV-19^^England|Human|Respiratory Virus Unit|Respiratory Virus Unit|Platt|United Kingdom

>Spike|hCoV-19/India/KA-nimh-0351/2020|2020-04-10|EPI\_ISL\_428484|Original|hCoV-19^^Karnataka|Human|District Surveillance Unit|Department of Neurovirology|Pattabiraman|India

>Spike|hCoV-19/Burkina Faso/2832/2020|2020-09-17|EPI\_ISL\_660463|Original|hCoV-19^^Hound\u00e9|Human|Laboratoire de Microbiologie CHU Sourou Sanou|Centre Muraz|Ouedraogo|Burkina Faso

>Spike|hCoV-19/Scotland/GCVR-173D6A/2020|2020-04-06|EPI\_ISL\_459116|Original|hCoV-19^^Scotland|Human|NHSGGC West of Scotland Specialist Virology Centre / MRC-University of Glasgow Centre for Virus Research|Wellcome Sanger Institute for the COVID-19 Genomics UK (COG-UK) consortium|Davies|United Kingdom

>Spike|hCoV-19/USA/TX-HMH-822/2020|2020-04-07|EPI\_ISL\_545854|Original|hCoV-19^^Texas|Human|Houston Methodist Hospital|Houston Methodist Hospital|Long|USA

>Spike|hCoV-19/England/CAMB-7558F/2020|2020-03-13|EPI\_ISL\_440399|Original|hCoV-19^^England|Human|Department of Pathology|Wellcome Sanger Institute for the COVID-19 Genomics UK (COG-UK) consortium|Amato|United Kingdom

>Spike|hCoV-19/Canada/ON-S1565/2020|2020-09-02|EPI\_ISL\_755920|Original|hCoV-19^^Ontario|Human|Toronto Invasive Bacterial Diseases Network|McMaster University|McArthur|Canada

>Spike|hCoV-19/USA/NY-NYCPHL-001153/2020|2020-10-27|EPI\_ISL\_671735|Original|hCoV-19^^New York|Human|DOHMH Jamaica|New York City Public Health Laboratory|Wang|USA

>Spike|hCoV-19/Peru/LIM-INS-003/2020|2020-03-06|EPI\_ISL\_489836|Original|hCoV-19^^Lima|Human|Laboratorio de Referencia Nacional de Virus Respiratorio. Instituto Nacional de Salud Per\u00fa|Laboratorio de Referencia Nacional de Biotecnolog\u00eda y Biolog\u00eda Molecular. Instituto Nacional de Salud Per\u00fa|Padilla Rojas|Peru

>Spike|hCoV-19/USA/TX-HMH-MCoV-9232/2020|2020-07-03|EPI\_ISL\_781011|Original|hCoV-19^^Texas|Human|Houston Methodist Hospital|Houston Methodist Hospital|Long|USA

>Spike|hCoV-19/England/QEUEH-AD15A5/2020|2020-10-23|EPI\_ISL\_633699|Original|hCoV-19^^England|Human|Lighthouse Lab in Glasgow|Wellcome Sanger Institute for the COVID-19 Genomics UK (COG-UK) consortium|Davies|United Kingdom

>Spike|hCoV-19/USA/NY-NYUMC676/2020|2020-03-29|EPI\_ISL\_450393|Original|hCoV-19^^New York|Human|NYU Langone Health|Departments of Pathology and Medicine|Maurano|USA

>Spike|hCoV-19/Wales/PHWC-47E591/2020|2020-09-27|EPI\_ISL\_595471|Original|hCoV-19^^Wales|Human|Originating lab|COVID-19 Genomics UK (COG-UK) Consortium|Moore|United Kingdom

>Spike|hCoV-19/Switzerland/BL-UHB-42191742/2020|2020-03-15|EPI\_ISL\_528110|Original|hCoV-19^^Basel-Land|Human|University Hospital Basel|University Hospital Basel|Roloff Handschin|Switzerland

>Spike|hCoV-19/England/BRIS-122957/2020|2020-04-02|EPI\_ISL\_440767|Original|hCoV-19^^England|Human|PHE South West Regional Laboratory|Wellcome Sanger Institute for the COVID-19 Genomics UK (COG-UK) consortium|Amato|United Kingdom

>Spike|hCoV-19/Canada/BC-BCCDC-7518/2020|2020-11-00|EPI\_ISL\_740688|Original|hCoV-19^^British Columbia|Human|BCCDC Public Health Laboratory|BCCDC Public Health Laboratory|Prystajek|Canada

>Spike|hCoV-19/USA/ME-HETL-J0294/2020|2020-11-30|EPI\_ISL\_755434|Original|hCoV-19^^Maine|Human|Maine Health and Environmental Testing Laboratory|Tewhey Lab|Tewhey|USA

>Spike|hCoV-19/Australia/VIC6960/2020|2020-07-20|EPI\_ISL\_564163|Original|hCoV-19^^Victoria|Human|Microbiological Diagnostic Unit - Public Health Laboratory (MDU-PHL) |MDU-PHL|Schultz|Australia

>Spike|hCoV-19/Scotland/CVR951/2020|2020-03-28|EPI\_ISL\_439137|Original|hCoV-19^^Scotland|Human|West of Scotland Specialist Virology Centre|COVID-19 Genomics UK (COG-UK) Consortium|Robertson|United Kingdom

>Spike|hCoV-19/USA/TX-DSHS-0364/2020|2020-06-13|EPI\_ISL\_538301|Original|hCoV-19^^Texas|Human|Texas Department of State Health Services|Texas Department of State Health Services|Rahman|USA

>Spike|hCoV-19/Australia/VIC862/2020|2020-04-05|EPI\_ISL\_427119|Original|hCoV-19^^Victoria|Human|Victorian Infectious Diseases Reference Laboratory (VIDRL) |Microbiological Diagnostic Unit Public Health Laboratory and Victorian Infectious Diseases Reference Laboratory|Schultz|Australia

>Spike|hCoV-19/USA/CA-CZB-12931/2020|2020-06-03|EPI\_ISL\_672360|Original|hCoV-19^^California|Human|Orange County Public Health Lab|Chan-Zuckerberg Biohub|Bhatt|USA

>Spike|hCoV-19/England/ALDP-B25F49/2020|2020-11-04|EPI\_ISL\_646542|Original|hCoV-19^^England|Human|Lighthouse Lab in Alderley Park|Wellcome Sanger Institute for the COVID-19 Genomics UK (COG-UK) Consortium|Davies|United Kingdom

>Spike|hCoV-19/England/QEUA-A60BC7/2020|2020-10-12|EPI\_ISL\_665967|Original|hCoV-19^^England|Human|Northumbria University / South Tees Hospitals NHS Foundation Trust / North Cumbria Integrated Care NHS Foundation Trust / North Tees and Hartlepool NHS Foundation Trust / Newcastle Hospitals NHS Foundation Trust|COVID-19 Genomics UK (COG-UK) Consortium|Bashton|United Kingdom

>Spike|hCoV-19/Japan/PG-4564/2020|2020-07-00|EPI\_ISL\_689701|Original|hCoV-19^^Japan|Human|Pathogen Genomics Center|Pathogen Genomics Center|Sekizuka|Japan

>Spike|hCoV-19/Ecuador/USFQ-096/2020|2020-06-17|EPI\_ISL\_477015|Original|hCoV-19^^Quito|Human|Institute of Microbiology|Institute of Microbiology|Cardenas|Ecuador

>Spike|hCoV-19/Japan/PG-0057/2020|2020-03-08|EPI\_ISL\_479820|Original|hCoV-19^^Hokkaido|Human|Hokkaido Institute of Public Health|Pathogen Genomics Center|Sekizuka|Japan

>Spike|hCoV-19/England/ALDP-AA2015/2020|2020-10-22|EPI\_ISL\_624391|Original|hCoV-19^^England|Human|Lighthouse Lab in Alderley Park|Wellcome Sanger Institute for the COVID-19 Genomics UK (COG-UK) consortium|Davies|United Kingdom

>Spike|hCoV-19/USA/WA-S1471/2020|2020-05-07|EPI\_ISL\_495646|Original|hCoV-19^^Washington|Human|Washington State Department of Health|Seattle Flu Study|Lee|USA

>Spike|hCoV-19/Denmark/DCGC-6480/2020|2020-10-05|EPI\_ISL\_620380|Original|hCoV-19^^Syddanmark|Human|Department of Virus and Microbiological Special Diagnostics|Albertsen lab|Michaelsen|Denmark

>Spike|hCoV-19/England/MILK-BEED8E/2020|2020-11-30|EPI\_ISL\_708958|Original|hCoV-19^^England|Human|Lighthouse Lab in Milton Keynes|Wellcome Sanger Institute for the COVID-19 Genomics UK (COG-UK) Consortium|Davies|United Kingdom

>Spike|hCoV-19/USA/MI-UM-10036686533/2020|2020-10-29|EPI\_ISL\_682096|Original|hCoV-19^^Michigan|Human|University of Michigan Clinical Microbiology Laboratory|Lauring Lab|Valesano|USA

>Spike|hCoV-19/USA/FL-BPHL-0164/2020|2020-04-02|EPI\_ISL\_480815|Original|hCoV-19^^Florida|Human|Florida Bureau of Public Health Laboratories|Florida Bureau of Public Health Laboratories|Blanton|USA

>Spike|hCoV-19/USA/TX-HMH-MCoV-12880/2020|2020-08-19|EPI\_ISL\_788032|Original|hCoV-19^^Texas|Human|Houston Methodist Hospital|Houston Methodist Hospital|Long|USA

>Spike|hCoV-19/Netherlands/UT-EMC-165/2020|2020-11-01|EPI\_ISL\_722603|Original|hCoV-19^^Utrecht|Human|Dutch COVID-19 response team|Erasmus Medical Center|Oude Munnink|Netherlands

>Spike|hCoV-19/USA/WA-UW-2572/2020|2020-03-28|EPI\_ISL\_486002|Original|hCoV-19^^Washington|Human|UW Virology Lab|UW Virology Lab|Roychoudhury|USA

>Spike|hCoV-19/Scotland/EDB4648/2020|2020-05-08|EPI\_ISL\_478176|Original|hCoV-19^^Scotland|Human|Virology Department|COVID-19 Genomics UK (COG-UK) Consortium|Williams|United Kingdom

>Spike|hCoV-19/Wales/PHWC-487CFA/2020|2020-10-28|EPI\_ISL\_637330|Original|hCoV-19^^Wales|Human|Wales Specialist Virology Centre Sequencing lab|COVID-19 Genomics UK (COG-UK) Consortium|Moore|United Kingdom

>Spike|hCoV-19/Netherlands/NH-RIVM-20626/2020|2020-12-19|EPI\_ISL\_790704|Original|hCoV-19^^Noord-Holland|Human|Dutch COVID-19 response team|National Institute for Public Health and the Environment (RIVM)|Meijer|Netherlands

>Spike|hCoV-19/Wales/PHWC-491E60/2020|2020-11-16|EPI\_ISL\_706788|Original|hCoV-19^^Wales|Human|Originating lab|COVID-19 Genomics UK (COG-UK) Consortium|Moore|United Kingdom

>Spike|hCoV-19/USA/CA-CZB-15292/2020|2020-11-20|EPI\_ISL\_738933|Original|hCoV-19^^California|Human|Santa Clara County Public Health Laboratory|Chan-Zuckerberg Biohub|Kamm|USA

>Spike|hCoV-19/Canada/ON-E57/2020|2020-05-31|EPI\_ISL\_593531|Original|hCoV-19^^Ontario|Human|Eastern Ontario Regional Laboratory Association|McMaster University|McArthur|Canada

>Spike|hCoV-19/Egypt/EGY-042/2020|2020-08-22|EPI\_ISL\_526998|Original|hCoV-19^^Egypt|Human|Biological prevention|Biological prevention|Seadawy|Egypt

>Spike|hCoV-19/Wales/CAMC-9B2259/2020|2020-09-04|EPI\_ISL\_566537|Original|hCoV-19^^Wales|Human|Lighthouse Lab in Cambridge|Wellcome Sanger Institute for the COVID-19 Genomics UK (COG-UK) consortium|Davies|United Kingdom

>Spike|hCoV-19/England/GSTT-265D35A/2020|2020-03-17|EPI\_ISL\_483945|Original|hCoV-19^^England|Human|Centre for Clinical Infection and Diagnostics Research and Genomics Innovation Unit|COVID-19 Genomics UK (COG-UK) Consortium|Awan|United Kingdom

>Spike|hCoV-19/France/ARA-SC197/2020|2020-04-27|EPI\_ISL\_700370|Original|hCoV-19^^Auvergne-Rhône-Alpes|Human|Laboratoire de virologie|CNR Virus des Infections Respiratoires - France SUD|Bal|France

>Spike|hCoV-19/Germany/NW-HHU-89/2020|2020-08-17|EPI\_ISL\_539605|Original|hCoV-19^^North Rhine-Westphalia|Human|ZOTZ KLIMAS MVZ D\u00fcsseldorf-Centrum GbR \u00dcBAG f\u00fcr Labormedizin|Center of Medical Microbiology|Wienemann|Germany

>Spike|hCoV-19/USA/WA-UW-27033/2020|2020-09-06|EPI\_ISL\_570788|Original|hCoV-19^^Washington|Human|UW Virology Lab|UW Virology Lab|Roychoudhury|USA

>Spike|hCoV-19/Wales/MILK-9A6908/2020|2020-09-01|EPI\_ISL\_602145|Original|hCoV-19^^Wales|Human|Lighthouse Lab in Milton Keynes|Wellcome Sanger Institute for the COVID-19 Genomics UK (COG-UK) consortium|Davies|United Kingdom

>Spike|hCoV-19/USA/VA-DCLS-0187/2020|2020-04-14|EPI\_ISL\_437403|Original|hCoV-19^^Virginia|Human|Virginia DCLS|Virginia DCLS|St. Jacques|USA

>Spike|hCoV-19/USA/AZ-TG507252/2020|2020-07-16|EPI\_ISL\_695295|Original|hCoV-19^^Arizona|Human|TGen North|TGen North|French|USA

>Spike|hCoV-19/Northern Ireland/NIRE-1016FD/2020|2020-04-28|EPI\_ISL\_482140|Original|hCoV-19^^Northern Ireland|Human|Regional Virus Laboratory|Wellcome Sanger Institute for the COVID-19 Genomics UK (COG-UK) consortium|Davies|United Kingdom

>Spike|hCoV-19/USA/TX-HMH-1916/2020|2020-04-17|EPI\_ISL\_542900|Original|hCoV-19^^Texas|Human|Houston Methodist Hospital|Houston Methodist Hospital|Long|USA

>Spike|hCoV-19/Northern Ireland/NIRE-FF471/2020|2020-04-22|EPI\_ISL\_469882|Original|hCoV-19^^Northern Ireland|Human|Regional Virus Laboratory|Wellcome Sanger Institute for the COVID-19 Genomics UK (COG-UK) consortium|Davies|United Kingdom

>Spike|hCoV-19/Denmark/DCGC-8589/2020|2020-10-26|EPI\_ISL\_625874|Original|hCoV-19^^Syddanmark|Human|Department of Virus and Microbiological Special Diagnostics|Albertsen lab|Michaelsen|Denmark

>Spike|hCoV-19/England/ALDP-AA40E6/2020|2020-10-22|EPI\_ISL\_623989|Original|hCoV-19^^England|Human|Lighthouse Lab in Alderley Park|Wellcome Sanger Institute for the COVID-19 Genomics UK (COG-UK) consortium|Davies|United Kingdom

>Spike|hCoV-19/USA/CA-ALSR-1225/2020|2020-04-09|EPI\_ISL\_494449|Original|hCoV-19^^California|Human|San Diego County Public Health Laboratory|Andersen lab at Scripps Research|Gangavarapu|USA

>Spike|hCoV-19/Singapore/998/2020|2020-03-20|EPI\_ISL\_574479|Original|hCoV-19^^Singapore|Human|Programme in Emerging Infectious Diseases|National Public Health Laboratory|Mak|Singapore

>Spike|hCoV-19/England/MILK-B8E807/2020|2020-11-13|EPI\_ISL\_674596|Original|hCoV-19^^England|Human|Lighthouse Lab in Milton Keynes|Wellcome Sanger Institute for the COVID-19 Genomics UK (COG-UK) Consortium|Davies|United Kingdom

>Spike|hCoV-19/USA/WA-S748/2020|2020-04-13|EPI\_ISL\_449918|Original|hCoV-19^^Washington|Human|Washington State Department of Health|Seattle Flu Study|Bedford|USA

>Spike|hCoV-19/England/MILK-978AC0/2020|2020-08-01|EPI\_ISL\_526424|Original|hCoV-19^^England|Human|Queens Medical Centre|COVID-19 Genomics UK (COG-UK) Consortium|Loose|United Kingdom

>Spike|hCoV-19/Japan/PG-6772/2020|2020-08-00|EPI\_ISL\_687882|Original|hCoV-19^^Japan|Human|Pathogen Genomics Center|Pathogen Genomics Center|Sekizuka|Japan

>Spike|hCoV-19/Northern Ireland/NIRE-1090F7/2020|2020-10-20|EPI\_ISL\_652314|Original|hCoV-19^^Northern Ireland|Human|Regional Virus Laboratory|COVID-19 Genomics UK (COG-UK) Consortium|Fairley|United Kingdom

>Spike|hCoV-19/Australia/VIC5546/2020|2020-07-20|EPI\_ISL\_518375|Original|hCoV-19^^Victoria|Human|Microbiological Diagnostic Unit - Public Health Laboratory (MDU-PHL)|MDU-PHL|Schultz|Australia

>Spike|hCoV-19/Australia/VIC978/2020|2020-03-29|EPI\_ISL\_430542|Original|hCoV-19^^Victoria|Human|Victorian Infectious Diseases Reference Laboratory (VIDRL)|Microbiological Diagnostic Unit Public Health Laboratory and Victorian Infectious Diseases Reference Laboratory|Schultz|Australia

>Spike|hCoV-19/Denmark/DCGC-22585/2020|2020-12-14|EPI\_ISL\_757436|Original|hCoV-19^^Hovedstaden|Human|Department of Virus and Microbiological Special Diagnostics|Albertsen Lab|Michaelsen|Denmark

>Spike|hCoV-19/England/CAMB-1B24D3/2020|2020-00-00|EPI\_ISL\_456685|Original|hCoV-19^^England|Human|Department of Pathology|COVID-19 Genomics UK (COG-UK) Consortium|Meredith|United Kingdom

>Spike|hCoV-19/New Zealand/20VR2026/2020|2020-00-00|EPI\_ISL\_579213|Original|hCoV-19^^Combined Wellington|Human|Wellington SCL (WN)|Institute of Environmental Science and Research (ESR)|Wang|New Zealand

>Spike|hCoV-19/England/QEUEH-BA2AAD/2020|2020-11-18|EPI\_ISL\_672839|Original|hCoV-19^^England|Human|Lighthouse Lab in Glasgow|Wellcome Sanger Institute for the COVID-19 Genomics UK (COG-UK) Consortium|Davies|United Kingdom

>Spike|hCoV-19/Scotland/CVR5820/2020|2020-11-13|EPI\_ISL\_666033|Original|hCoV-19^^Scotland|Human|West of Scotland Specialist Virology Centre|COVID-19 Genomics UK (COG-UK) Consortium|Robertson|United Kingdom

>Spike|hCoV-19/USA/TX-HMH-MCoV-15772/2020|2020-07-09|EPI\_ISL\_785456|Original|hCoV-19^^Texas|Human|Houston Methodist Hospital|Houston Methodist Hospital|Long|USA

>Spike|hCoV-19/USA/MD-MDH-0056/2020|2020-05-26|EPI\_ISL\_509460|Original|hCoV-19^^Maryland|Human|Maryland Department of Health|Maryland Department of Health|Keller|USA

>Spike|hCoV-19/USA/NY-NYCPHL-000816/2020|2020-03-30|EPI\_ISL\_632193|Original|hCoV-19^^New York|Human|NYC HH Lincoln Medical And Mental Health Center|New York City Public Health Laboratory|Wang|USA

>Spike|hCoV-19/Japan/IC-0391/2020|2020-12-00|EPI\_ISL\_736902|Original|hCoV-19^^Japan|Human|Pathogen Genomics Center|Pathogen Genomics Center|Sekizuka|Japan

>Spike|hCoV-19/Canada/MB-NML-1010/2020|2020-07-29|EPI\_ISL\_582377|Original|hCoV-19^^Manitoba|Human|Cadham Provincial Laboratory|National Microbiology Laboratory (NML)|Majer|Canada

>Spike|hCoV-19/Australia/VIC4706/2020|2020-07-16|EPI\_ISL\_519094|Original|hCoV-19^^Victoria|Human|Microbiological Diagnostic Unit - Public Health Laboratory (MDU-PHL)|MDU-PHL|Schultz|Australia

>Spike|hCoV-19/Japan/PG-0755/2020|2020-04-00|EPI\_ISL\_684365|Original|hCoV-19^^Japan|Human|Pathogen Genomics Center|Pathogen Genomics Center|Sekizuka|Japan

>Spike|hCoV-19/England/ALDP-CBF505/2020|2020-12-18|EPI\_ISL\_760344|Original|hCoV-19^^England|Human|Lighthouse Lab in Alderley Park|Wellcome Sanger Institute for the COVID-19 Genomics UK (COG-UK) Consortium|Davies|United Kingdom

>Spike|hCoV-19/Denmark/DCGC-2283/2020|2020-08-10|EPI\_ISL\_617641|Original|hCoV-19^^Nordjylland|Human|Department of Virus and Microbiological Special Diagnostics|Albertsen lab|Michaelsen|Denmark

>Spike|hCoV-19/England/MILK-976664/2020|2020-08-20|EPI\_ISL\_575897|Original|hCoV-19^^England|Human|Lighthouse Lab in Milton Keynes|Wellcome Sanger Institute for the COVID-19 Genomics UK (COG-UK) consortium|Davies|United Kingdom

>Spike|hCoV-19/England/MILK-BDB8B0/2020|2020-11-26|EPI\_ISL\_709705|Original|hCoV-19^^England|Human|Lighthouse Lab in Milton Keynes|Wellcome Sanger Institute for the COVID-19 Genomics UK (COG-UK) Consortium|Davies|United Kingdom

>Spike|hCoV-19/USA/UT-08664/2020|2020-05-08|EPI\_ISL\_524390|Original|hCoV-19^^Utah|Human|Utah Public Health Laboratory|Utah Public Health Laboratory|Young|USA

>Spike|hCoV-19/Denmark/DCGC-13347/2020|2020-11-30|EPI\_ISL\_712163|Original|hCoV-19^^Hovedstaden|Human|Department of Virus and Microbiological Special Diagnostics|Albertsen Lab|Michaelsen|Denmark

>Spike|hCoV-19/England/ALDP-9CADE4/2020|2020-09-16|EPI\_ISL\_575478|Original|hCoV-19^^England|Human|Lighthouse Lab in Alderley Park|Wellcome Sanger Institute for the COVID-19 Genomics UK (COG-UK) consortium|Davies|United Kingdom

>Spike|hCoV-19/Netherlands/NA\_293/2020|2020-04-01|EPI\_ISL\_422602|Original|hCoV-19^^Netherlands|Human|Dutch COVID-19 response team|Erasmus Medical Center|Oude Munnink|Netherlands

>Spike|hCoV-19/Wales/PHWC-16BC3B/2020|2020-09-19|EPI\_ISL\_573955|Original|hCoV-19^^Wales|Human|Wales Specialist Virology Centre Sequencing lab|COVID-19 Genomics UK (COG-UK) Consortium|Moore|United Kingdom

>Spike|hCoV-19/England/CAMC-C82477/2020|2020-12-16|EPI\_ISL\_762792|Original|hCoV-19^^England|Human|Lighthouse Lab in Cambridge|Wellcome Sanger Institute for the COVID-19 Genomics UK (COG-UK) Consortium|Davies|United Kingdom

>Spike|hCoV-19/USA/WI-UW-2038/2020|2020-09-29|EPI\_ISL\_677444|Original|hCoV-19^^Wisconsin|Human|University of Wisconsin-Madison AIDS Vaccine Research Laboratories|University of Wisconsin-Madison AIDS Vaccine Research Laboratories|Baczenas|USA

>Spike|hCoV-19/USA/LA-EVTL322/2020|2020-05-18|EPI\_ISL\_578728|Original|hCoV-19^^Louisiana|Human|LSUHS Emerging Viral Threat Laboratory|Microbial Genome Sequencing Center|Kamil|USA

>Spike|hCoV-19/USA/WY-WPHL-20168086/2020|2020-12-18|EPI\_ISL\_766783|Original|hCoV-19^^Wyoming|Human|Wyoming Public Health Laboratory|Wyoming Public Health Laboratory|Hull|USA

>Spike|hCoV-19/Bangladesh/DNAS\_DRCIM\_CPH\_isl\_426\_BGD/2020|2020-04-29|EPI\_ISL\_774891|Original|hCoV-19^^Dhaka|Human|Designated Reference Institute for Chemical Measurements (DRICM)|DNA SOLUTION LTD.|Rabbi|Bangladesh

>Spike|hCoV-19/Wales/PHWC-4A5C14/2020|2020-12-13|EPI\_ISL\_764960|Original|hCoV-19^^Wales|Human|Wales Specialist Virology Centre Sequencing lab|COVID-19 Genomics UK (COG-UK) Consortium|Moore|United Kingdom

>Spike|hCoV-19/England/201080077/2020|2020-03-04|EPI\_ISL\_464460|Original|hCoV-19^^England|Human|Respiratory Virus Unit|Respiratory Virus Unit|Platt|United Kingdom

>Spike|hCoV-19/USA/WA-S1448/2020|2020-05-21|EPI\_ISL\_495898|Original|hCoV-19^^Washington|Human|Washington State Department of Health|Seattle Flu Study|Lee|USA

>Spike|hCoV-19/USA/AZ-TG670140/2020|2020-05-02|EPI\_ISL\_696347|Original|hCoV-19^^Arizona|Human|Sonora Quest Laboratories|TGen North|French|USA

>Spike|hCoV-19/USA/UT-04133/2020|2020-05-13|EPI\_ISL\_493032|Original|hCoV-19^^Utah|Human|Utah Public Health Laboratory|Utah Public Health Laboratory|Butz|USA

>Spike|hCoV-19/Scotland/QEUH-AF22F2/2020|2020-10-30|EPI\_ISL\_676445|Original|hCoV-19^^Scotland|Human|Lighthouse Lab in Glasgow|Wellcome Sanger Institute for the COVID-19 Genomics UK (COG-UK) Consortium|Davies|United Kingdom

>Spike|hCoV-19/Scotland/QEUH-A007F2/2020|2020-10-02|EPI\_ISL\_600376|Original|hCoV-19^^Scotland|Human|Lighthouse Lab in Glasgow|Wellcome Sanger Institute for the COVID-19 Genomics UK (COG-UK) consortium|Davies|United Kingdom

>Spike|hCoV-19/England/ALDP-9EDBA5/2020|2020-05-06|EPI\_ISL\_589462|Original|hCoV-19^^England|Human|Lighthouse Lab in Alderley Park|Wellcome Sanger Institute for the COVID-19 Genomics UK (COG-UK) consortium|Davies|United Kingdom

>Spike|hCoV-19/Netherlands/GE-EMC-274/2020|2020-06-06|EPI\_ISL\_523253|Original|hCoV-19^^Gelderland|Human|Dutch COVID-19 response team|Erasmus Medical Center|Oude Munnink|Netherlands

>Spike|hCoV-19/Netherlands/ZuidHolland\_122/2020|2020-04-21|EPI\_ISL\_461295|Original|hCoV-19^^Zuid Holland|Human|Dutch COVID-19 response team|Erasmus Medical Center|Oude Munnink|Netherlands

>Spike|hCoV-19/Italy/APU-IZSPB-181PT/2020|2020-08-28|EPI\_ISL\_722860|Original|hCoV-19^^Apulia|Human|I.R.C.C.S. \S. De Bellis\ - Ente Ospedaliero|Istituto Zooprofilattico Sperimentale della Puglia e della Basilicata|Parisi|Italy

>Spike|hCoV-19/England/ALDP-90222D/2020|2020-06-24|EPI\_ISL\_551571|Original|hCoV-19^^England|Human|Lighthouse Lab in Alderley Park|Wellcome Sanger Institute for the COVID-19 Genomics UK (COG-UK) consortium|Davies|United Kingdom

>Spike|hCoV-19/England/CAMC-BC0432/2020|2020-11-22|EPI\_ISL\_704708|Original|hCoV-19^^England|Human|Lighthouse Lab in Cambridge|Wellcome Sanger Institute for the COVID-19 Genomics UK (COG-UK) Consortium|Davies|United Kingdom

>Spike|hCoV-19/England/ALDP-AA22C4/2020|2020-10-22|EPI\_ISL\_625241|Original|hCoV-19^^England|Human|Lighthouse Lab in Alderley Park|Wellcome Sanger Institute for the COVID-19 Genomics UK (COG-UK) consortium|Davies|United Kingdom

>Spike|hCoV-19/USA/LA-EVTL881/2020|2020-07-06|EPI\_ISL\_653572|Original|hCoV-19^^Louisiana|Human|LSUHS Emerging Viral Threat Laboratory|Microbial Genome Sequencing Center|Kamil|USA

>Spike|hCoV-19/USA/MN-MDH-1894/2020|2020-10-24|EPI\_ISL\_613532|Original|hCoV-19^^Minnesota|Human|Public Health Laboratory - Infectious Disease Lab|Minnesota Department of Health|Lorentz|USA

>Spike|hCoV-19/Hong Kong/HKPU-0291/2020|2020-03-22|EPI\_ISL\_610167|Original|hCoV-19^^Hong Kong|Human|Department of Health Technology and Informatics|Department of Health Technology and Informatics|Leung|China

>Spike|hCoV-19/England/NOTT-11531D/2020|2020-10-12|EPI\_ISL\_584802|Original|hCoV-19^^England|Human|Queens Medical Centre|COVID-19 Genomics UK (COG-UK) Consortium|Loose|United Kingdom

>Spike|hCoV-19/Wales/PHWC-48934E/2020|2020-11-02|EPI\_ISL\_639566|Original|hCoV-19^^Wales|Human|Wales Specialist Virology Centre Sequencing lab|COVID-19 Genomics UK (COG-UK) Consortium|Moore|United Kingdom

>Spike|hCoV-19/Switzerland/BL-UHB-42202153/2020|2020-03-22|EPI\_ISL\_528321|Original|hCoV-19^^Basel-Land|Human|University Hospital Basel|University Hospital Basel|Roloff Handschin|Switzerland

>Spike|hCoV-19/USA/CA-ALSR-1279/2020|2020-04-30|EPI\_ISL\_494476|Original|hCoV-19^^California|Human|San Diego County Public Health Laboratory|Andersen lab at Scripps Research|Gangavarapu|USA

>Spike|hCoV-19/Canada/ON-UHTC-0261/2020|2020-06-16|EPI\_ISL\_570001|Original|hCoV-19^^Ontario|Human|Unity Health Toronto|Ontario Institute for Cancer Research|de Borja|Canada

>Spike|hCoV-19/England/MILK-AC95DD/2020|2020-10-21|EPI\_ISL\_629321|Original|hCoV-19^^England|Human|Lighthouse Lab in Milton Keynes|Wellcome Sanger Institute for the COVID-19 Genomics UK (COG-UK) consortium|Davies|United Kingdom

>Spike|hCoV-19/Wales/PHWC-321F3/2020|2020-04-14|EPI\_ISL\_446618|Original|hCoV-19^^Wales|Human|Wales Specialist Virology Centre|Public Health Wales Microbiology Cardiff|Moore|United Kingdom

>Spike|hCoV-19/England/QEUH-A4C921/2020|2020-10-05|EPI\_ISL\_628578|Original|hCoV-19^^England|Human|Oxford Viromics|COVID-19 Genomics UK (COG-UK) Consortium|Golubchik|United Kingdom

>Spike|hCoV-19/USA/MN-MDH-1549/2020|2020-08-03|EPI\_ISL\_527614|Original|hCoV-19^^Minnesota|Human|Minnesota Department of Health|Minnesota Department of Health|Garfin|USA

>Spike|hCoV-19/USA/WA-UW-11293/2020|2020-06-21|EPI\_ISL\_501096|Original|hCoV-19^^Washington|Human|University of Washington Virology Lab|University of Washington Virology Lab|Roychoudhury|USA

>Spike|hCoV-19/England/CAMC-B0AA94/2020|2020-10-29|EPI\_ISL\_643630|Original|hCoV-19^^England|Human|Lighthouse Lab in Cambridge|Wellcome Sanger Institute for the COVID-19 Genomics UK (COG-UK) Consortium|Davies|United Kingdom

>Spike|hCoV-19/England/NOTT-1140F9/2020|2020-10-03|EPI\_ISL\_577140|Original|hCoV-19^^England|Human|Queens Medical Centre|COVID-19 Genomics UK (COG-UK) Consortium|Loose|United Kingdom

>Spike|hCoV-19/USA/CA-CZB-1330/2020|2020-04-02|EPI\_ISL\_468358|Original|hCoV-19^^California|Human|Alameda County Public Health Lab|Chan-Zuckerberg Biohub|Hao|USA

>Spike|hCoV-19/Denmark/DCGC-18004/2020|2020-12-14|EPI\_ISL\_749694|Original|hCoV-19^^Syddanmark|Human|Department of Virus and Microbiological Special Diagnostics|Albertsen Lab|Michaelsen|Denmark

>Spike|hCoV-19/Switzerland/ZH-ETHZ-767plus/2020|2020-04-14|EPI\_ISL\_483675|Original|hCoV-19^^Zurich|Human|University Hospital Zurich|Department of Biosystems Science and Engineering|Nadeau|Switzerland

>Spike|hCoV-19/England/CAMB-1B618D/2020|2020-09-18|EPI\_ISL\_573151|Original|hCoV-19^^England|Human|Department of Pathology|COVID-19 Genomics UK (COG-UK) Consortium|Goodfellow|United Kingdom

>Spike|hCoV-19/England/MILK-C51927/2020|2020-12-11|EPI\_ISL\_778643|Original|hCoV-19^^England|Human|Lighthouse Lab in Milton Keynes|Wellcome Sanger Institute for the COVID-19 Genomics UK (COG-UK) Consortium|Davies|United Kingdom

>Spike|hCoV-19/England/QEUH-A64431/2020|2020-10-12|EPI\_ISL\_628698|Original|hCoV-19^^England|Human|Oxford Viromics|COVID-19 Genomics UK (COG-UK) Consortium|Golubchik|United Kingdom

>Spike|hCoV-19/Australia/VIC7853/2020|2020-07-29|EPI\_ISL\_564704|Original|hCoV-19^^Victoria|Human|Microbiological Diagnostic Unit - Public Health Laboratory (MDU-PHL)|MDU-PHL|Schultz|Australia

>Spike|hCoV-19/England/NOTT-113A92/2020|2020-09-26|EPI\_ISL\_573454|Original|hCoV-19^^England|Human|Queens Medical Centre|COVID-19 Genomics UK (COG-UK) Consortium|Loose|United Kingdom

>Spike|hCoV-19/Scotland/QEUH-A0ADF6/2020|2020-10-03|EPI\_ISL\_599225|Original|hCoV-19^^Scotland|Human|Lighthouse Lab in Glasgow|Wellcome Sanger Institute for the COVID-19 Genomics UK (COG-UK) consortium|Davies|United Kingdom

>Spike|hCoV-19/England/LOND-124C391/2020|2020-04-12|EPI\_ISL\_492837|Original|hCoV-19^^England|Human|Royal Free Hospital / Health Services Laboratories|Wellcome Sanger Institute for the COVID-19 Genomics UK (COG-UK) consortium|Davies|United Kingdom

>Spike|hCoV-19/USA/UT-UPHL-2012947909/2020|2020-08-18|EPI\_ISL\_746112|Original|hCoV-19^^Utah|Human|Ginkgo Bioworks Clinical Laboratory|Utah Public Health Laboratory|Young|USA

>Spike|hCoV-19/England/MILK-B02391/2020|2020-10-23|EPI\_ISL\_642983|Original|hCoV-19^^England|Human|Lighthouse Lab in Milton Keynes|Wellcome Sanger Institute for the COVID-19 Genomics UK (COG-UK) Consortium|Davies|United Kingdom

>Spike|hCoV-19/Denmark/ALAB-SSI458/2020|2020-03-25|EPI\_ISL\_429541|Original|hCoV-19^^Denmark|Human|Department of Virus and Microbiological Special Diagnostics|Albertsen lab|Kirkegaard|Denmark

>Spike|hCoV-19/Spain/RI-IBV-99005862/2020|2020-03-03|EPI\_ISL\_537405|Original|hCoV-19^^La Rioja|Human|Centro de Investigaci\u00f3n Biom\u00e9dica de La Rioja - Hospital San Pedro Logro\u00f1o|SeqCOVID-SPAIN consortium/IBV (CSIC)|Comas|Spain

>Spike|hCoV-19/USA/MI-UM-10036416305/2020|2020-10-13|EPI\_ISL\_610089|Original|hCoV-19^^Michigan|Human|University of Michigan Clinical Microbiology Laboratory|Lauring Lab|Valesano|USA

>Spike|hCoV-19/USA/FL-BPHL-0831/2020|2020-06-19|EPI\_ISL\_514177|Original|hCoV-19^^Florida|Human|Florida Bureau of Public Health Laboratories|Florida Bureau of Public Health Laboratories|Blanton|USA

>Spike|hCoV-19/Australia/VIC12081/2020|2020-09-10|EPI\_ISL\_563518|Original|hCoV-19^^Victoria|Human|Microbiological Diagnostic Unit - Public Health Laboratory (MDU-PHL)|MDU-PHL|Schultz|Australia

>Spike|hCoV-19/England/ALDP-4F50DD/2020|2020-06-24|EPI\_ISL\_559258|Original|hCoV-19^^England|Human|Lighthouse Lab in Alderley Park|Wellcome Sanger Institute for the COVID-19 Genomics UK (COG-UK) consortium|Davies|United Kingdom



>Spike|hCoV-19/Japan/PG-8954/2020|2020-09-00|EPI\_ISL\_686500|Original|hCoV-19^^Japan|Human|Pathogen Genomics Center|Pathogen Genomics Center|Sekizuka|Japan

>Spike|hCoV-19/Ireland/D-NVRL-71IRL15701/2020|2020-07-09|EPI\_ISL\_500592|Original|hCoV-19^^Dublin|Human|National Virus Reference Laboratory|National Virus Reference Laboratory|Gonzalez|Ireland

>Spike|hCoV-19/England/ALDP-AA3A52/2020|2020-10-22|EPI\_ISL\_624313|Original|hCoV-19^^England|Human|Lighthouse Lab in Alderley Park|Wellcome Sanger Institute for the COVID-19 Genomics UK (COG-UK) consortium|Davies|United Kingdom

>Spike|hCoV-19/Taiwan/CGMH-CGU-36/2020|2020-09-17|EPI\_ISL\_667809|Original|hCoV-19^^Taoyuan|Human|Laboratory Medicine|Department of Laboratory Medicine|Yi Chun|Taiwan

>Spike|hCoV-19/Gibraltar/204462856/2020|2020-10-29|EPI\_ISL\_615024|Original|hCoV-19^^Gibraltar|Human|Microbiology|Respiratory Virus Unit|Platt|Gibraltar

>Spike|hCoV-19/Thailand/Bangkok\_323/2020|2020-01-29|EPI\_ISL\_447916|Vero P2|hCoV-19^^Bangkok|Human|n/a|National Institute of Health. Department of medical Sciences|Okada|Thailand

>Spike|hCoV-19/Germany/HH-hpi-pl624/2020|2020-03-17|EPI\_ISL\_775671|Original|hCoV-19^^Hamburg|Human|University Medical Center Hamburg Eppendorf|Heinrich Pette Institute|Robitaille|Germany

>Spike|hCoV-19/Japan/PG-6845/2020|2020-09-00|EPI\_ISL\_687953|Original|hCoV-19^^Japan|Human|Pathogen Genomics Center|Pathogen Genomics Center|Sekizuka|Japan

>Spike|hCoV-19/England/ALDP-C3BFD6/2020|2020-12-10|EPI\_ISL\_731620|Original|hCoV-19^^England|Human|Lighthouse Lab in Alderley Park|Wellcome Sanger Institute for the COVID-19 Genomics UK (COG-UK) Consortium|Davies|United Kingdom

>Spike|hCoV-19/USA/TX-HMH-MCoV-18318/2020|2020-11-17|EPI\_ISL\_784666|Original|hCoV-19^^Texas|Human|Houston Methodist Hospital|Houston Methodist Hospital|Long|USA

>Spike|hCoV-19/Wales/PHWC-28BD4/2020|2020-04-04|EPI\_ISL\_445415|Original|hCoV-19^^Wales|Human|Wales Specialist Virology Centre|Public Health Wales Microbiology Cardiff|Moore|United Kingdom

>Spike|hCoV-19/USA/TX-HMH-4270/2020|2020-06-18|EPI\_ISL\_543482|Original|hCoV-19^^Texas|Human|Houston Methodist Hospital|Houston Methodist Hospital|Long|USA

>Spike|hCoV-19/USA/WI-GMF-26180/2020|2020-10-16|EPI\_ISL\_660948|Original|hCoV-19^^Wisconsin|Human|Gundersen Molecular Diagnostics Laboratory|Kabara Cancer Research Institute|Kenny|USA

>Spike|hCoV-19/Northern Ireland/NIRE-10235F/2020|2020-03-22|EPI\_ISL\_441404|Original|hCoV-19^^Northern Ireland|Human|Regional Virus Laboratory|COVID-19 Genomics UK (COG-UK) Consortium|Fairley|United Kingdom

>Spike|hCoV-19/England/ALDP-9E7E2A/2020|2020-09-24|EPI\_ISL\_638131|Original|hCoV-19^^England|Human|Department of Pathology|COVID-19 Genomics UK (COG-UK) Consortium|Goodfellow|United Kingdom

>Spike|hCoV-19/Denmark/DCGC-6815/2020|2020-10-12|EPI\_ISL\_619512|Original|hCoV-19^^Midtjylland|Human|Department of Virus and Microbiological Special Diagnostics|Albertsen lab|Michaelsen|Denmark

>Spike|hCoV-19/Denmark/DCGC-19010/2020|2020-12-07|EPI\_ISL\_748695|Original|hCoV-19^^Hovedstaden|Human|Department of Virus and Microbiological Special Diagnostics|Albertsen Lab|Michaelsen|Denmark

>Spike|hCoV-19/USA/LA-EVTL876/2020|2020-07-06|EPI\_ISL\_653567|Original|hCoV-19^^Louisiana|Human|LSUHS Emerging Viral Threat Laboratory|Microbial Genome Sequencing Center|Kamil|USA

>Spike|hCoV-19/Scotland/QEUH-9F67C3/2020|2020-09-27|EPI\_ISL\_600666|Original|hCoV-19^^Scotland|Human|Lighthouse Lab in Glasgow|Wellcome Sanger Institute for the COVID-19 Genomics UK (COG-UK) consortium|Davies|United Kingdom

>Spike|hCoV-19/England/QEUH-B9F7CA/2020|2020-11-18|EPI\_ISL\_720999|Original|hCoV-19^^England|Human|Lighthouse Lab in Glasgow|Wellcome Sanger Institute for the COVID-19 Genomics UK (COG-UK) Consortium|Davies|United Kingdom

>Spike|hCoV-19/Canada/ON-S162-KN/2020|2020-03-24|EPI\_ISL\_770828|Original|hCoV-19^^Ontario|Human|Toronto Invasive Bacterial Diseases Network|McMaster University|McArthur|Canada

>Spike|hCoV-19/Italy/BAS-IZSPB-341PT/2020|2020-10-28|EPI\_ISL\_722875|Original|hCoV-19^^Basilicata|Human|Istituto Zooprofilattico Sperimentale della Puglia e della

Basilicata|Istituto Zooprofilattico Sperimentale della Puglia e della Basilicata|Parisi|Italy  
>Spike|hCoV-19/USA/TX-HMH-6897/2020|2020-06-25|EPI\_ISL\_546331|Original|hCoV-19^^Texas|Human|Houston Methodist Hospital|Houston Methodist Hospital|Long|USA  
>Spike|hCoV-19/Spain/MD-H12-49/2020|2020-03-27|EPI\_ISL\_529982|Original|hCoV-19^^Madrid|Human|Hospital Universitario 12 de Octubre|Hospital Universitario 12 de Octubre|Viedma|Spain  
>Spike|hCoV-19/Jordan/AM-ALSR-4989/2020|2020-10-10|EPI\_ISL\_730262|Original|hCoV-19^^Amman|Human|Biolab Diagnostic Laboratories|Andersen lab at Scripps Research|Gangavarapu|Jordan  
>Spike|hCoV-19/South Africa/N00054/2020|2020-08-11|EPI\_ISL\_623049|Original|hCoV-19^^Eastern Cape|Human|National Health Laboratory Service|National Institute for Communicable Diseases of the National Health Laboratory Service|Allam|South Africa  
>Spike|hCoV-19/Canada/MB-NML-1191/2020|2020-07-20|EPI\_ISL\_582505|Original|hCoV-19^^Manitoba|Human|Cadham Provincial Laboratory|National Microbiology Laboratory (NML)|Majer|Canada  
>Spike|hCoV-19/USA/TX-HMH-2356/2020|2020-05-27|EPI\_ISL\_545261|Original|hCoV-19^^Texas|Human|Houston Methodist Hospital|Houston Methodist Hospital|Long|USA  
>Spike|hCoV-19/Denmark/DCGC-18581/2020|2020-12-07|EPI\_ISL\_750058|Original|hCoV-19^^Hovedstaden|Human|Department of Virus and Microbiological Special Diagnostics|Albertsen Lab|Michaelsen|Denmark  
>Spike|hCoV-19/Thailand/Bangkok-CONI-0263/2020|2020-03-14|EPI\_ISL\_693342|Original|hCoV-19^^Bangkok|Human|Ramathibodi Hospital|COVID-19 Network Investigations (CONI) Alliance|Batty|Thailand  
>Spike|hCoV-19/USA/WA-S2328/2020|2020-06-10|EPI\_ISL\_496960|Original|hCoV-19^^Washington|Human|Washington State Department of Health|Seattle Flu Study|Lee|USA  
>Spike|hCoV-19/USA/TX-HMH-MCoV-8998/2020|2020-07-02|EPI\_ISL\_780883|Original|hCoV-19^^Texas|Human|Houston Methodist Hospital|Houston Methodist Hospital|Long|USA  
>Spike|hCoV-19/Wales/PHWC-480B30/2020|2020-10-10|EPI\_ISL\_612974|Original|hCoV-19^^Wales|Human|Wales Specialist Virology Centre Sequencing lab|COVID-19 Genomics UK (COG-UK) Consortium|Moore|United Kingdom  
>Spike|hCoV-19/England/CAMB-72C6F/2020|2020-03-22|EPI\_ISL\_440046|Original|hCoV-19^^England|Human|Department of Pathology|Wellcome Sanger Institute for the COVID-19 Genomics UK (COG-UK) consortium|Amato|United Kingdom  
>Spike|hCoV-19/England/CAMC-B372C3/2020|2020-11-05|EPI\_ISL\_645333|Original|hCoV-19^^England|Human|Lighthouse Lab in Cambridge|Wellcome Sanger Institute for the COVID-19 Genomics UK (COG-UK) Consortium|Davies|United Kingdom  
>Spike|hCoV-19/Scotland/CVR5467/2020|2020-10-28|EPI\_ISL\_650865|Original|hCoV-19^^Scotland|Human|West of Scotland Specialist Virology Centre|COVID-19 Genomics UK (COG-UK) Consortium|Robertson|United Kingdom  
>Spike|hCoV-19/USA/WA-UW315/2020|2020-03-13|EPI\_ISL\_418882|Original|hCoV-19^^Washington|Human|UW Virology Lab|UW Virology Lab|Roychoudhury|USA  
>Spike|hCoV-19/England/ALDP-A51349/2020|2020-10-08|EPI\_ISL\_598082|Original|hCoV-19^^England|Human|Lighthouse Lab in Alderley Park|Wellcome Sanger Institute for the COVID-19 Genomics UK (COG-UK) consortium|Davies|United Kingdom  
>Spike|hCoV-19/Netherlands/FR-RIVM-20389/2020|2020-12-08|EPI\_ISL\_728609|Original|hCoV-19^^Friesland|Human|Dutch COVID-19 response team|National Institute for Public Health and the Environment (RIVM)|Meijer|Netherlands  
>Spike|hCoV-19/USA/MI-MDHHS-SC20586/2020|2020-04-29|EPI\_ISL\_462668|Original|hCoV-19^^Michigan|Human|Michigan Department of Health and Human Services|Michigan Department of Health and Human Services|Blankenship|USA  
>Spike|hCoV-19/Japan/PG-3091/2020|2020-04-00|EPI\_ISL\_691213|Original|hCoV-19^^Japan|Human|Pathogen Genomics Center|Pathogen Genomics Center|Sekizuka|Japan  
>Spike|hCoV-19/Denmark/DCGC-5351/2020|2020-09-14|EPI\_ISL\_615282|Original|hCoV-19^^Hovedstaden|Human|Department of Virus and Microbiological Special Diagnostics|Albertsen lab|Michaelsen|Denmark  
>Spike|hCoV-19/Bahrain/340864186/2020|2020-10-14|EPI\_ISL\_632259|Original|hCoV-19^^Bahrain|Human|Communicable Disease Laboratory|Communicable Disease Laboratory|Altaif|Bahrain

>Spike|hCoV-19/England/CAMB-80660/2020|2020-04-10|EPI\_ISL\_470370|Original|hCoV-19^^England|Human|Department of Pathology|Wellcome Sanger Institute for the COVID-19 Genomics UK (COG-UK) consortium|Davies|United Kingdom

>Spike|hCoV-19/England/LIVE-DC19A9/2020|2020-11-20|EPI\_ISL\_705813|Original|hCoV-19^^England|Human|Liverpool Clinical Laboratories|COVID-19 Genomics UK (COG-UK) Consortium|Haldenby|United Kingdom

>Spike|hCoV-19/USA/TX-HMH-MCoV-9531/2020|2020-07-03|EPI\_ISL\_781168|Original|hCoV-19^^Texas|Human|Houston Methodist Hospital|Houston Methodist Hospital|Long|USA

>Spike|hCoV-19/Italy/LOM-UniMI05/2020|2020-02-24|EPI\_ISL\_779704|Original|hCoV-19^^Lombardy|Human|Laboratory of Infectious Diseases|Laboratory of Infectious Diseases|Lai|Italy

>Spike|hCoV-19/England/QEUH-BA2A25/2020|2020-11-18|EPI\_ISL\_672813|Original|hCoV-19^^England|Human|Lighthouse Lab in Glasgow|Wellcome Sanger Institute for the COVID-19 Genomics UK (COG-UK) Consortium|Davies|United Kingdom

>Spike|hCoV-19/England/ALDP-B84670/2020|2020-11-15|EPI\_ISL\_675358|Original|hCoV-19^^England|Human|Lighthouse Lab in Alderley Park|Wellcome Sanger Institute for the COVID-19 Genomics UK (COG-UK) Consortium|Davies|United Kingdom

>Spike|hCoV-19/England/MILK-AB7657/2020|2020-10-20|EPI\_ISL\_623314|Original|hCoV-19^^England|Human|Lighthouse Lab in Milton Keynes|Wellcome Sanger Institute for the COVID-19 Genomics UK (COG-UK) consortium|Davies|United Kingdom

>Spike|hCoV-19/Bangladesh/DNAS\_DRCIM\_CPH\_isl\_506\_BGD/2020|2020-04-29|EPI\_ISL\_774884|Original|hCoV-19^^Dhaka|Human|Designated Reference Institute for Chemical Measurements (DRICM)|DNA SOLUTION LTD.|Rabbi|Bangladesh

>Spike|hCoV-19/Australia/NSW338/2020|2020-04-05|EPI\_ISL\_451600|Original|hCoV-19^^New South Wales|Human|Pathology North Hunter- NSW Health Pathology|NSW Health Pathology - Institute of Clinical Pathology and Medical Research; Westmead Hospital; University of Sydney|Gall|Australia

>Spike|hCoV-19/Japan/PG-5416/2020|2020-08-00|EPI\_ISL\_690519|Original|hCoV-19^^Japan|Human|Fukuoka Institute of Health and Environmental Sciences|Pathogen Genomics Center|Sekizuka|Japan

>Spike|hCoV-19/Germany/HH-hpi-p1888/2020|2020-03-24|EPI\_ISL\_776231|Original|hCoV-19^^Hamburg|Human|University Medical Center Hamburg Eppendorf|Heinrich Pette Institute|Robitaille|Germany

>Spike|hCoV-19/England/ALDP-9534BE/2020|2020-06-08|EPI\_ISL\_554427|Original|hCoV-19^^England|Human|Lighthouse Lab in Alderley Park|Wellcome Sanger Institute for the COVID-19 Genomics UK (COG-UK) consortium|Davies|United Kingdom

>Spike|hCoV-19/USA/WA-S977/2020|2020-05-01|EPI\_ISL\_463467|Original|hCoV-19^^Washington|Human|Washington State Department of Health|Seattle Flu Study|Bedford|USA

>Spike|hCoV-19/Australia/VIC6140/2020|2020-07-22|EPI\_ISL\_518151|Original|hCoV-19^^Victoria|Human|Victorian Infectious Diseases Reference Laboratory (VIDRL)|VIDRL and MDU-PHL|Schultz|Australia

>Spike|hCoV-19/Scotland/QEUH-9B4A6E/2020|2020-09-07|EPI\_ISL\_602081|Original|hCoV-19^^Scotland|Human|Lighthouse Lab in Glasgow|Wellcome Sanger Institute for the COVID-19 Genomics UK (COG-UK) consortium|Davies|United Kingdom

>Spike|hCoV-19/Wales/PHWC-16AB3F/2020|2020-09-10|EPI\_ISL\_560158|Original|hCoV-19^^Wales|Human|Wales Specialist Virology Centre Sequencing lab|COVID-19 Genomics UK (COG-UK) Consortium|Moore|United Kingdom

>Spike|hCoV-19/England/CAMC-B3621F/2020|2020-11-05|EPI\_ISL\_645485|Original|hCoV-19^^England|Human|Lighthouse Lab in Cambridge|Wellcome Sanger Institute for the COVID-19 Genomics UK (COG-UK) Consortium|Davies|United Kingdom

>Spike|hCoV-19/USA/NY-QDX-2445/2020|2020-03-16|EPI\_ISL\_604799|Original|hCoV-19^^New York|Human|Quest Diagnostics|Quest Diagnostics|Kagan|USA

>Spike|hCoV-19/England/NOTT-10F291/2020|2020-04-01|EPI\_ISL\_432985|Original|hCoV-19^^England|Human|Queens Medical Centre|COVID-19 Genomics UK (COG-UK) Consortium|Loose|United Kingdom

>Spike|hCoV-19/Scotland/EDB2275/2020|2020-04-21|EPI\_ISL\_491520|Original|hCoV-19^^Scotland|Human|Virology Department|Wellcome Sanger Institute for the COVID-19 Genomics UK (COG-UK) consortium|Davies|United Kingdom

>Spike|hCoV-19/Scotland/CVR4943/2020|2020-10-05|EPI\_ISL\_594707|Original|hCoV-19^^Scotland|Human|West of Scotland Specialist Virology Centre|COVID-19 Genomics UK (COG-UK) Consortium|Robertson|United Kingdom

>Spike|hCoV-19/Senegal/370/2020|2020-03-18|EPI\_ISL\_420072|Original|hCoV-19^^Thies|Human|Institut Pasteur Dakar|Institut Pasteur de Dakar|Dia|Senegal

>Spike|hCoV-19/England/QEUI-B7E5B8/2020|2020-11-14|EPI\_ISL\_668095|Original|hCoV-19^^England|Human|Lighthouse Lab in Glasgow|Wellcome Sanger Institute for the COVID-19 Genomics UK (COG-UK) Consortium|Davies|United Kingdom

>Spike|hCoV-19/England/QEUI-A1F4DB/2020|2020-10-01|EPI\_ISL\_587446|Original|hCoV-19^^England|Human|Lighthouse Lab in Glasgow|Wellcome Sanger Institute for the COVID-19 Genomics UK (COG-UK) consortium|Davies|United Kingdom

>Spike|hCoV-19/England/MILK-97170C/2020|2020-08-18|EPI\_ISL\_553063|Original|hCoV-19^^England|Human|Lighthouse Lab in Milton Keynes|Wellcome Sanger Institute for the COVID-19 Genomics UK (COG-UK) consortium|Davies|United Kingdom

>Spike|hCoV-19/England/BRIS-1219A3/2020|2020-03-15|EPI\_ISL\_440248|Original|hCoV-19^^England|Human|PHE South West Regional Laboratory|Wellcome Sanger Institute for the COVID-19 Genomics UK (COG-UK) consortium|Amato|United Kingdom

>Spike|hCoV-19/Russia/SVE-RII-MH1733S/2020|2020-09-16|EPI\_ISL\_602361|Original|hCoV-19^^Sverdlovsk|Human|HELIIX LLC|WHO National Influenza Centre Russian Federation|Komissarov|Russia

>Spike|hCoV-19/USA/VA-DCLS-0456/2020|2020-05-05|EPI\_ISL\_477667|Original|hCoV-19^^Virginia|Human|Virginia DCLS|Virginia DCLS|St. Jacques|USA

>Spike|hCoV-19/England/CAMB-796A6/2020|2020-04-03|EPI\_ISL\_441843|Original|hCoV-19^^England|Human|Department of Pathology|Wellcome Sanger Institute for the COVID-19 Genomics UK (COG-UK) consortium|Amato|United Kingdom

>Spike|hCoV-19/England/CAMB-80949/2020|2020-04-10|EPI\_ISL\_443045|Original|hCoV-19^^England|Human|Department of Pathology|Wellcome Sanger Institute for the COVID-19 Genomics UK (COG-UK) consortium|Amato|United Kingdom

>Spike|hCoV-19/Denmark/DCGC-19883/2020|2020-12-07|EPI\_ISL\_747851|Original|hCoV-19^^Midtjylland|Human|Department of Virus and Microbiological Special Diagnostics|Albertsen Lab|Michaelsen|Denmark

>Spike|hCoV-19/England/MILK-9F2879/2020|2020-09-18|EPI\_ISL\_589021|Original|hCoV-19^^England|Human|Lighthouse Lab in Milton Keynes|Wellcome Sanger Institute for the COVID-19 Genomics UK (COG-UK) consortium|Davies|United Kingdom

>Spike|hCoV-19/Ireland/MH-NVRL-72IRL21078/2020|2020-08-13|EPI\_ISL\_528482|Original|hCoV-19^^Meath|Human|National Virus Reference Laboratory|National Virus Reference Laboratory|Gonzalez|Ireland

>Spike|hCoV-19/England/MILK-B8F96D/2020|2020-11-13|EPI\_ISL\_674800|Original|hCoV-19^^England|Human|Lighthouse Lab in Milton Keynes|Wellcome Sanger Institute for the COVID-19 Genomics UK (COG-UK) Consortium|Davies|United Kingdom

>Spike|hCoV-19/Australia/VIC4073/2020|2020-07-12|EPI\_ISL\_519455|Original|hCoV-19^^Victoria|Human|Microbiological Diagnostic Unit - Public Health Laboratory (MDU-PHL)|MDU-PHL|Schultz|Australia

>Spike|hCoV-19/USA/NY-PV08441/2020|2020-03-18|EPI\_ISL\_421393|Original|hCoV-19^^New York|Human|MHS Clinical Microbiology Laboratories|MHS Pathogen Surveillance Program|van Bakel|USA

>Spike|hCoV-19/England/NORT-289067/2020|2020-03-26|EPI\_ISL\_458623|Original|hCoV-19^^England|Human|NU-OMICS DNA Sequencing research facility|Wellcome Sanger Institute for the COVID-19 Genomics UK (COG-UK) consortium|Davies|United Kingdom

>Spike|hCoV-19/Canada/ON-UHTC-0240/2020|2020-06-08|EPI\_ISL\_570014|Original|hCoV-19^^Ontario|Human|Unity Health Toronto|Ontario Institute for Cancer Research|de Borja|Canada

>Spike|hCoV-19/England/CAMC-BBC3B4/2020|2020-11-21|EPI\_ISL\_724131|Original|hCoV-19^^England|Human|Quadram Institute Bioscience|COVID-19 Genomics UK (COG-UK) Consortium|Alikhan|United Kingdom

>Spike|hCoV-19/Germany/BY-MVP-0237/2020|2020-04-28|EPI\_ISL\_466898|Original|hCoV-19^^Bavaria|Human|Max von Pettenkofer Institute|Laboratory for Functional Genome Analysis|Graf|Germany

>Spike|hCoV-19/Wales/PHWC-16675D/2020|2020-06-18|EPI\_ISL\_494035|Original|hCoV-19^^Wales|Human|Originating lab|COVID-19 Genomics UK (COG-UK) Consortium|Moore|United Kingdom

>Spike|hCoV-19/England/SHEF-C8110/2020|2020-11-21|EPI\_ISL\_680150|Original|hCoV-19^^England|Human|Virology Department|COVID-19 Genomics UK (COG-UK) Consortium|de Silva|United Kingdom

>Spike|hCoV-19/Wales/PHWC-488691/2020|2020-10-28|EPI\_ISL\_639420|Original|hCoV-19^^Wales|Human|Wales Specialist Virology Centre Sequencing lab|COVID-19 Genomics UK (COG-UK) Consortium|Moore|United Kingdom

>Spike|hCoV-19/England/NOTT-1138B6/2020|2020-09-15|EPI\_ISL\_573441|Original|hCoV-19^^England|Human|Lincolnshire Hospitals and DeepSeq Nottingham|COVID-19 Genomics UK (COG-UK) Consortium|Loose|United Kingdom

>Spike|hCoV-19/USA/NY-Wadsworth-290047-01/2020|2020-12-22|EPI\_ISL\_767524|Original|hCoV-19^^New York|Human|Wadsworth Center|Wadsworth Center|Lasek-Nesselquist|USA

>Spike|hCoV-19/South Africa/KRISP-K001089/2020|2020-07-13|EPI\_ISL\_509341|Original|hCoV-19^^KwaZulu-Natal|Human|NHLS-IALCH|KRISP|de Oliveira|South Africa

>Spike|hCoV-19/Denmark/DCGC-3056/2020|2020-08-31|EPI\_ISL\_616836|Original|hCoV-19^^Midtjylland|Human|Department of Virus and Microbiological Special Diagnostics|Albertsen lab|Michaelsen|Denmark

>Spike|hCoV-19/USA/MI-UM-10036633232/2020|2020-10-26|EPI\_ISL\_650061|Original|hCoV-19^^Michigan|Human|University of Michigan Clinical Microbiology Laboratory|Lauring Lab|Valesano|USA

>Spike|hCoV-19/Ireland/D-NVRL-20G35446/2020|2020-03-20|EPI\_ISL\_605798|Original|hCoV-19^^Dublin|Human|National Virus Reference Laboratory|Irish Coronavirus Sequencing Consortium - Helixworks|Chalapati|Ireland

>Spike|hCoV-19/Australia/VIC12390/2020|2020-07-31|EPI\_ISL\_640495|Original|hCoV-19^^Victoria|Human|Microbiological Diagnostic Unit - Public Health Laboratory (MDU-PHL)|MDU-PHL|Schultz|Australia

>Spike|hCoV-19/England/ALDP-A706A5/2020|2020-10-15|EPI\_ISL\_607674|Original|hCoV-19^^England|Human|Lighthouse Lab in Alderley Park|Wellcome Sanger Institute for the COVID-19 Genomics UK (COG-UK) consortium|Davies|United Kingdom

>Spike|hCoV-19/Northern Ireland/QEUA-95E9D2/2020|2020-08-09|EPI\_ISL\_532397|Original|hCoV-19^^Northern Ireland|Human|Lighthouse Lab in Glasgow|Wellcome Sanger Institute for the COVID-19 Genomics UK (COG-UK) consortium|Davies|United Kingdom

>Spike|hCoV-19/Ireland/MN-NVRL-20IRL50633/2020|2020-09-29|EPI\_ISL\_639900|Original|hCoV-19^^Monaghan|Human|National Virus Reference Laboratory|National Virus Reference Laboratory|Gonzalez|Ireland

>Spike|hCoV-19/Luxembourg/LNS6493220/2020|2020-11-27|EPI\_ISL\_744421|Original|hCoV-19^^Luxembourg|Human|Laboratoire national de sant\u00e9|Laboratoire national de sant\u00e9|Wienecke-Baldacchino|Luxembourg

>Spike|hCoV-19/USA/CA-CZB-15190/2020|2020-11-23|EPI\_ISL\_739180|Original|hCoV-19^^California|Human|Santa Clara County Public Health Laboratory|Chan-Zuckerberg Biohub|Kamm|USA

>Spike|hCoV-19/France/OCC-SC548/2020|2020-04-03|EPI\_ISL\_660720|Original|hCoV-19^^Occitanie|Human|CHU N\u00eemes|CNR Virus des Infections Respiratoires - France SUD|Bal|France

>Spike|hCoV-19/USA/NY-NYCPHL-000821/2020|2020-04-08|EPI\_ISL\_632198|Original|hCoV-19^^New York|Human|Jamaica Hospital Medical Center|New York City Public Health Laboratory|Wang|USA

>Spike|hCoV-19/USA/CA-ALSR-2083/2020|2020-05-22|EPI\_ISL\_635339|Original|hCoV-19^^California|Human|San Diego County Public Health Laboratory|Andersen lab at Scripps Research|Gangavarapu|USA

>Spike|hCoV-19/Spain/PV-IBV-000953/2020|2020-03-28|EPI\_ISL\_452622|Original|hCoV-19^^Basque Country|Human|Servicio de Microbiolog\u00eda. Hospital Universitario Donostia. OSI Donostialdea. \u00c1rea de Enfermedades Infecciosas|SeqCOVID-SPAIN consortium/IBV (CSIC)|Comas|Spain

>Spike|hCoV-19/Denmark/DCGC-22186/2020|2020-12-14|EPI\_ISL\_758603|Original|hCoV-19^^Midtjylland|Human|Department of Virus and Microbiological Special Diagnostics|Albertsen Lab|Michaelsen|Denmark

>Spike|hCoV-19/USA/CA-IGI-0124/2020|2020-05-21|EPI\_ISL\_495146|Original|hCoV-19^^California|Human|Innovative Genomics Institute|Innovative Genomics Institute|Shivram|USA

>Spike|hCoV-19/Germany/SH-ChVir20784/2020|2020-11-28|EPI\_ISL\_729694|Original|hCoV-19^^Schleswig-Holstein|Human|A. Krumbholz|Charit\u00e9 Universit\u00e4tsmedizin Berlin|Muehlemann|Germany

>Spike|hCoV-19/England/20186084004/2020|2020-04-28|EPI\_ISL\_465708|Original|hCoV-19^^England|Human|Respiratory Virus Unit|Respiratory Virus Unit|Platt|United Kingdom

>Spike|hCoV-19/England/CAMC-B2237D/2020|2020-11-03|EPI\_ISL\_645918|Original|hCoV-19^^England|Human|Lighthouse Lab in Cambridge|Wellcome Sanger Institute for the COVID-19 Genomics UK (COG-UK) Consortium|Davies|United Kingdom

>Spike|hCoV-19/USA/TX-HMH-MCoV-15525/2020|2020-10-23|EPI\_ISL\_787009|Original|hCoV-19^^Texas|Human|Houston Methodist Hospital|Houston Methodist Hospital|Long|USA

>Spike|hCoV-19/Spain/RI-IBV-99005844/2020|2020-03-12|EPI\_ISL\_537387|Original|hCoV-19^^La Rioja|Human|Centro de Investigaci\u00f3n Biom\u00e9dica de La Rioja - Hospital San Pedro Logro\u00f1o|SeqCOVID-SPAIN consortium/IBV (CSIC)|Comas|Spain

>Spike|hCoV-19/Scotland/CVR2812/2020|2020-04-21|EPI\_ISL\_438984|Original|hCoV-19^^Scotland|Human|West of Scotland Specialist Virology Centre|COVID-19 Genomics UK (COG-UK) Consortium|Robertson|United Kingdom

>Spike|hCoV-19/England/CAMC-B7BC3E/2020|2020-11-10|EPI\_ISL\_724043|Original|hCoV-19^^England|Human|Oxford Viromics|COVID-19 Genomics UK (COG-UK) Consortium|Golubchik|United Kingdom

>Spike|hCoV-19/USA/TX-HMH-7233/2020|2020-06-29|EPI\_ISL\_546615|Original|hCoV-19^^Texas|Human|Houston Methodist Hospital|Houston Methodist Hospital|Long|USA

>Spike|hCoV-19/Belgium/reg-0616695/2020|2020-06-16|EPI\_ISL\_734757|Original|hCoV-19^^Kortenberg|Human|UZ Leuven|KU Leuven|Maes|Belgium

>Spike|hCoV-19/England/CAMC-BD46CC/2020|2020-11-27|EPI\_ISL\_702024|Original|hCoV-19^^England|Human|Lighthouse Lab in Cambridge|Wellcome Sanger Institute for the COVID-19 Genomics UK (COG-UK) Consortium|Davies|United Kingdom

>Spike|hCoV-19/England/CAMC-BBFECF/2020|2020-11-20|EPI\_ISL\_704833|Original|hCoV-19^^England|Human|Lighthouse Lab in Cambridge|Wellcome Sanger Institute for the COVID-19 Genomics UK (COG-UK) Consortium|Davies|United Kingdom

>Spike|hCoV-19/England/QEUA-AF077D/2020|2020-10-29|EPI\_ISL\_662671|Original|hCoV-19^^England|Human|Lighthouse Lab in Glasgow|Wellcome Sanger Institute for the COVID-19 Genomics UK (COG-UK) Consortium|Davies|United Kingdom

>Spike|hCoV-19/USA/FL-BPHL-1552/2020|2020-09-09|EPI\_ISL\_568650|Original|hCoV-19^^Florida|Human|Florida Bureau of Public Health Laboratories|Florida Bureau of Public Health Laboratories|Blanton|USA

>Spike|hCoV-19/Wales/PHWC-490A21/2020|2020-11-14|EPI\_ISL\_706530|Original|hCoV-19^^Wales|Human|Originating lab|COVID-19 Genomics UK (COG-UK) Consortium|Moore|United Kingdom

>Spike|hCoV-19/Switzerland/SZ-ETHZ-390410/2020|2020-12-03|EPI\_ISL\_721904|Original|hCoV-19^^Schwyz|Human|Viollier AG|Department of Biosystems Science and Engineering|Nadeau|Switzerland

>Spike|hCoV-19/England/QEUA-A4D1FB/2020|2020-10-05|EPI\_ISL\_627079|Original|hCoV-19^^England|Human|Oxford Viromics|COVID-19 Genomics UK (COG-UK) Consortium|Golubchik|United Kingdom

>Spike|hCoV-19/Denmark/DCGC-836/2020|2020-04-20|EPI\_ISL\_614447|Original|hCoV-19^^Hovedstaden|Human|Department of Virus and Microbiological Special Diagnostics|Albertsen lab|Michaelsen|Denmark

>Spike|hCoV-19/England/ALDP-BB5254/2020|2020-11-21|EPI\_ISL\_701791|Original|hCoV-19^^England|Human|Lighthouse Lab in Alderley Park|Wellcome Sanger Institute for the COVID-19 Genomics UK (COG-UK) Consortium|Davies|United Kingdom

>Spike|hCoV-19/USA/LA-EVTL162/2020|2020-05-11|EPI\_ISL\_574297|Original|hCoV-19^^Louisiana|Human|LSUHS Emerging Viral Threat Laboratory|Microbial Genome Sequencing Center|Kamil|USA

>Spike|hCoV-19/Spain/VC-FISABIO-156/2020|2020-03-19|EPI\_ISL\_436251|Original|hCoV-19^^Comunitat Valenciana|Human|Servicio de Microbiología. Hospital Universitario Doctor Peset|Sequencing and Bioinformatics Service and Molecular Epidemiology Research Group. FISABIO-Public Health|Gonzalez-Candelas|Spain

>Spike|hCoV-19/Japan/PG-2530/2020|2020-05-00|EPI\_ISL\_690665|Original|hCoV-19^^Japan|Human|Saitama Prefectural Institute of Public Health|Pathogen Genomics Center|Sekizuka|Japan

>Spike|hCoV-19/USA/WA-UW-3611/2020|2020-03-25|EPI\_ISL\_570035|Original|hCoV-19^^Washington|Human|UW Virology Lab|UW Virology Lab|Roychoudhury|USA

>Spike|hCoV-19/USA/MI-UM-10036825916/2020|2020-11-06|EPI\_ISL\_728426|Original|hCoV-19^^Michigan|Human|University of Michigan Clinical Microbiology Laboratory|Lauring Lab|Valesano|USA

>Spike|hCoV-19/England/QEUEH-BF0B34/2020|2020-12-05|EPI\_ISL\_709005|Original|hCoV-19^^England|Human|Lighthouse Lab in Glasgow|Wellcome Sanger Institute for the COVID-19 Genomics UK (COG-UK) Consortium|Davies|United Kingdom

>Spike|hCoV-19/England/CAMB-1B5616/2020|2020-07-07|EPI\_ISL\_499971|Original|hCoV-19^^England|Human|Department of Pathology|COVID-19 Genomics UK (COG-UK) Consortium|Meredith|United Kingdom

>Spike|hCoV-19/England/QEUEH-CC5B55/2020|2020-12-22|EPI\_ISL\_760444|Original|hCoV-19^^England|Human|Lighthouse Lab in Glasgow|Wellcome Sanger Institute for the COVID-19 Genomics UK (COG-UK) Consortium|Davies|United Kingdom

>Spike|hCoV-19/England/ALDP-CB5271/2020|2020-12-19|EPI\_ISL\_761718|Original|hCoV-19^^England|Human|Lighthouse Lab in Alderley Park|Wellcome Sanger Institute for the COVID-19 Genomics UK (COG-UK) Consortium|Davies|United Kingdom

>Spike|hCoV-19/USA/MI-UM-10036284170/2020|2020-10-05|EPI\_ISL\_596597|Original|hCoV-19^^Michigan|Human|University of Michigan Clinical Microbiology Laboratory|Lauring Lab|Valesano|USA

>Spike|hCoV-19/USA/WI-UW-1475/2020|2020-09-10|EPI\_ISL\_541607|Original|hCoV-19^^Wisconsin|Human|University of Wisconsin-Madison AIDS Vaccine Research Laboratories|University of Wisconsin-Madison AIDS Vaccine Research Laboratories|Baczenas|USA

>Spike|hCoV-19/USA/WI-UW-1092/2020|2020-07-27|EPI\_ISL\_516517|Original|hCoV-19^^Wisconsin|Human|University of Wisconsin-Madison AIDS Vaccine Research Laboratories|University of Wisconsin-Madison AIDS Vaccine Research Laboratories|Baczenas|USA

>Spike|hCoV-19/USA/MA-MGH-03368/2020|2020-11-09|EPI\_ISL\_765806|Original|hCoV-19^^Massachusetts|Human|Massachusetts General Hospital|Infectious Disease Program|Park|USA

>Spike|hCoV-19/USA/CA-ALSR-4194/2020|2020-06-19|EPI\_ISL\_648879|Original|hCoV-19^^California|Human|San Diego County Public Health Laboratory|Andersen lab at Scripps Research|Gangavarapu|USA

>Spike|hCoV-19/Wuhan/HB-WH4-202/2020|2020-03-17|EPI\_ISL\_455388|Original|hCoV-19^^Hubei|Human|Wuhan Chain Medical Labs (CMLabs)|State Key Laboratory of Biotherapy of Sichuan University|Tang|China

>Spike|hCoV-19/United Arab Emirates/0809/2020|2020-05-19|EPI\_ISL\_698948|Original|hCoV-19^^Abu Dhabi|Human|Group 42 (G42) Healthcare|G42 Healthcare|Ogrodzki|United Arab Emirates

>Spike|hCoV-19/England/MILK-A7B9FC/2020|2020-10-15|EPI\_ISL\_607350|Original|hCoV-19^^England|Human|Lighthouse Lab in Milton Keynes|Wellcome Sanger Institute for the COVID-19 Genomics UK (COG-UK) consortium|Davies|United Kingdom

>Spike|hCoV-19/England/CAMB-7C98C/2020|2020-04-04|EPI\_ISL\_442065|Original|hCoV-19^^England|Human|Department of Pathology|Wellcome Sanger Institute for the COVID-19 Genomics UK (COG-UK) consortium|Amato|United Kingdom

>Spike|hCoV-19/India/MH-NIV-11677/2020|2020-04-19|EPI\_ISL\_452194|Original|hCoV-19^^Maharashtra|Human|NIV Influenza|NIV Influenza|Potdar|India

>Spike|hCoV-19/USA/FL-BPHL-0797/2020|2020-03-21|EPI\_ISL\_514143|Original|hCoV-19^^Florida|Human|Florida Bureau of Public Health Laboratories|Florida Bureau of Public Health Laboratories|Blanton|USA

>Spike|hCoV-19/USA/TX-DSHS-0640/2020|2020-07-16|EPI\_ISL\_576295|Original|hCoV-19^^Texas|Human|Texas Department of State Health Services|Texas Department of State Health Services|Rahman|USA

>Spike|hCoV-19/England/ALDP-B84D7B/2020|2020-11-14|EPI\_ISL\_675820|Original|hCoV-19^^England|Human|Lighthouse Lab in Alderley Park|Wellcome Sanger Institute for the COVID-19 Genomics UK (COG-UK) Consortium|Davies|United Kingdom

>Spike|hCoV-19/England/CWAR-24FDE99/2020|2020-06-07|EPI\_ISL\_584537|Original|hCoV-19^^England|Human|UHCW / University of Warwick|COVID-19 Genomics UK (COG-UK) Consortium|Stark|United Kingdom

>Spike|hCoV-19/Colombia/ANT-INS-02/2020|2020-06-04|EPI\_ISL\_653748|Original|hCoV-19^^Antioquia|Human|Instituto Nacional de Salud|Instituto Nacional de Salud|Franco-Mu\u00f1oz|Colombia

>Spike|hCoV-19/England/MILK-9F17E6/2020|2020-09-25|EPI\_ISL\_589658|Original|hCoV-19^^England|Human|Lighthouse Lab in Milton Keynes|Wellcome Sanger Institute for the COVID-19 Genomics UK (COG-UK) consortium|Davies|United Kingdom

>Spike|hCoV-19/Iceland/526/2020|2020-03-00|EPI\_ISL\_424547|Original|hCoV-19^^Reykjavik|Human|deCODE genetics|deCODE genetics|J\u00f3nsson|Iceland

>Spike|hCoV-19/USA/UT-UPHL-2008945/2020|2020-05-13|EPI\_ISL\_525274|Original|hCoV-19^^Utah|Human|Utah Public Health Laboratory|Utah Public Health Laboratory|Young|USA

>Spike|hCoV-19/Wales/PHWC-4A0350/2020|2020-12-11|EPI\_ISL\_743433|Original|hCoV-19^^Wales|Human|Wales Specialist Virology Centre Sequencing lab|COVID-19 Genomics UK (COG-UK) Consortium|Moore|United Kingdom

>Spike|hCoV-19/England/BRIS-1230F7/2020|2020-04-05|EPI\_ISL\_442680|Original|hCoV-19^^England|Human|PHE South West Regional Laboratory|Wellcome Sanger Institute for the COVID-19 Genomics UK (COG-UK) consortium|Amato|United Kingdom

>Spike|hCoV-19/England/QEUEH-AF48D0/2020|2020-10-30|EPI\_ISL\_662890|Original|hCoV-19^^England|Human|Lighthouse Lab in Glasgow|Wellcome Sanger Institute for the COVID-19 Genomics UK (COG-UK) Consortium|Davies|United Kingdom

>Spike|hCoV-19/Canada/BC-BCCDC-8406/2020|2020-10-00|EPI\_ISL\_740778|Original|hCoV-19^^British Columbia|Human|BCCDC Public Health Laboratory|BCCDC Public Health Laboratory|Prystajecky|Canada

>Spike|hCoV-19/USA/TX-HMH-MCoV-14234/2020|2020-10-05|EPI\_ISL\_787519|Original|hCoV-19^^Texas|Human|Houston Methodist Hospital|Houston Methodist Hospital|Long|USA

>Spike|hCoV-19/England/ALDP-4AA81B/2020|2020-06-13|EPI\_ISL\_559572|Original|hCoV-19^^England|Human|Lighthouse Lab in Alderley Park|Wellcome Sanger Institute for the COVID-19 Genomics UK (COG-UK) consortium|Davies|United Kingdom

>Spike|hCoV-19/England/ALDP-AA458D/2020|2020-10-22|EPI\_ISL\_625260|Original|hCoV-19^^England|Human|Lighthouse Lab in Alderley Park|Wellcome Sanger Institute for the COVID-19 Genomics UK (COG-UK) consortium|Davies|United Kingdom

>Spike|hCoV-19/Australia/VIC4204/2020|2020-07-16|EPI\_ISL\_519532|Original|hCoV-19^^Victoria|Human|Microbiological Diagnostic Unit - Public Health Laboratory (MDU-PHL)|MDU-PHL|Schultz|Australia

>Spike|hCoV-19/England/CAMB-7E1CE/2020|2020-04-17|EPI\_ISL\_434048|Original|hCoV-19^^England|Human|Department of Pathology|COVID-19 Genomics UK (COG-UK) Consortium|Meredith|United Kingdom

>Spike|hCoV-19/England/NOTT-121856/2020|2020-12-22|EPI\_ISL\_764513|Original|hCoV-19^^England|Human|Queens Medical Centre|COVID-19 Genomics UK (COG-UK) Consortium|Loose|United Kingdom

>Spike|hCoV-19/England/QEUEH-B6C799/2020|2020-11-10|EPI\_ISL\_655841|Original|hCoV-19^^England|Human|Lighthouse Lab in Glasgow|Wellcome Sanger Institute for the COVID-19 Genomics UK (COG-UK) Consortium|Davies|United Kingdom

>Spike|hCoV-19/England/ALDP-9EACD2/2020|2020-09-24|EPI\_ISL\_580238|Original|hCoV-19^^England|Human|Lighthouse Lab in Alderley Park|Wellcome Sanger Institute for the COVID-19 Genomics UK (COG-UK) consortium|Davies|United Kingdom

>Spike|hCoV-19/Wales/PHWC-2CA1F/2020|2020-04-01|EPI\_ISL\_445935|Original|hCoV-19^^Wales|Human|Wales Specialist Virology Centre|Public Health Wales Microbiology Cardiff|Moore|United Kingdom

>Spike|hCoV-19/Northern Ireland/NIRE-10822F/2020|2020-04-01|EPI\_ISL\_585175|Original|hCoV-19^^Northern Ireland|Human|Regional Virus Laboratory|COVID-19 Genomics UK (COG-UK) Consortium|Fairley|United Kingdom



>Spike|hCoV-19/USA/AZ-TG271894/2020|2020-03-26|EPI\_ISL\_426550|Original|hCoV-19^^Arizona|Human|AZ SPHL|TGen North|Lemmer|USA

>Spike|hCoV-19/England/20126103404/2020|2020-03-18|EPI\_ISL\_423912|Original|hCoV-19^^England|Human|Respiratory Virus Unit|Respiratory Virus Unit|Platt|United Kingdom

>Spike|hCoV-19/Spain/AR-IBV-98008073/2020|2020-09-30|EPI\_ISL\_654412|Original|hCoV-19^^Aragon|Human|Servicio de Microbiolog\u00eda|SeqCOVID-SPAIN consortium|IBV (CSIC) |Comas|Spain

>Spike|hCoV-19/England/QEUEH-B6A5FB/2020|2020-11-11|EPI\_ISL\_662361|Original|hCoV-19^^England|Human|Lighthouse Lab in Glasgow|Wellcome Sanger Institute for the COVID-19 Genomics UK (COG-UK) Consortium|Davies|United Kingdom

>Spike|hCoV-19/Scotland/EDB1269/2020|2020-04-09|EPI\_ISL\_705795|Original|hCoV-19^^Scotland|Human|Virology Department|COVID-19 Genomics UK (COG-UK) Consortium|McHugh|United Kingdom

>Spike|hCoV-19/USA/CA-CZB-11915/2020|2020-10-05|EPI\_ISL\_672290|Original|hCoV-19^^California|Human|Santa Clara County Public Health Laboratory|Chan-Zuckerberg Biohub|Bhatt|USA

>Spike|hCoV-19/Australia/VIC4550/2020|2020-07-14|EPI\_ISL\_518961|Original|hCoV-19^^Victoria|Human|Microbiological Diagnostic Unit - Public Health Laboratory (MDU-PHL) |MDU-PHL|Schultz|Australia

>Spike|hCoV-19/Denmark/DCGC-17443/2020|2020-12-14|EPI\_ISL\_750986|Original|hCoV-19^^Hovedstaden|Human|Department of Virus and Microbiological Special Diagnostics|Albertsen Lab|Michaelsen|Denmark

>Spike|hCoV-19/England/ALDP-A6EFAF/2020|2020-10-15|EPI\_ISL\_607216|Original|hCoV-19^^England|Human|Lighthouse Lab in Alderley Park|Wellcome Sanger Institute for the COVID-19 Genomics UK (COG-UK) consortium|Davies|United Kingdom

>Spike|hCoV-19/USA/OR-OHSU-4152/2020|2020-11-02|EPI\_ISL\_667529|Original|hCoV-19^^Oregon|Human|OHSU Lab Services Molecular Microbiology Lab|Oregon SARS-CoV-2 Genome Sequencing Center|O'Roak|USA

>Spike|hCoV-19/USA/WA-UW-10028/2020|2020-05-29|EPI\_ISL\_461451|Original|hCoV-19^^Washington|Human|UW Virology Lab|UW Virology Lab|Roychoudhury|USA

>Spike|hCoV-19/England/EXET-13F0DA/2020|2020-12-15|EPI\_ISL\_763452|Original|hCoV-19^^England|Human|University of Exeter|COVID-19 Genomics UK (COG-UK) Consortium|Temperton|United Kingdom

>Spike|hCoV-19/USA/NY-Wadsworth-32421-01/2020|2020-03-29|EPI\_ISL\_676784|Original|hCoV-19^^New York|Human|Wadsworth Center|Wadsworth Center|Lasek-Nesselquist|USA

>Spike|hCoV-19/Japan/PG-8581/2020|2020-08-00|EPI\_ISL\_686177|Original|hCoV-19^^Japan|Human|Pathogen Genomics Center|Pathogen Genomics Center|Sekizuka|Japan

>Spike|hCoV-19/England/ALDP-A6C34B/2020|2020-10-15|EPI\_ISL\_608028|Original|hCoV-19^^England|Human|Lighthouse Lab in Alderley Park|Wellcome Sanger Institute for the COVID-19 Genomics UK (COG-UK) consortium|Davies|United Kingdom

>Spike|hCoV-19/USA/LA-EVTL302/2020|2020-05-12|EPI\_ISL\_578709|Original|hCoV-19^^Louisiana|Human|LSUHS Emerging Viral Threat Laboratory|Microbial Genome Sequencing Center|Kamil|USA

>Spike|hCoV-19/USA/CA-ALSR-4343/2020|2020-07-22|EPI\_ISL\_648982|Original|hCoV-19^^California|Human|San Diego County Public Health Laboratory|Andersen lab at Scripps Research|Gangavarapu|USA

>Spike|hCoV-19/Denmark/DCGC-4819/2020|2020-09-21|EPI\_ISL\_621429|Original|hCoV-19^^Nordjylland|Human|Department of Virus and Microbiological Special Diagnostics|Albertsen lab|Michaelsen|Denmark

>Spike|hCoV-19/England/BRIS-12AFD5/2020|2020-04-20|EPI\_ISL\_469821|Original|hCoV-19^^England|Human|PHE South West Regional Laboratory|Wellcome Sanger Institute for the COVID-19 Genomics UK (COG-UK) consortium|Davies|United Kingdom

>Spike|hCoV-19/USA/OR-OHSU-2015/2020|2020-07-31|EPI\_ISL\_667091|Original|hCoV-19^^Oregon|Human|OHSU Lab Services Molecular Microbiology Lab|Oregon SARS-CoV-2 Genome Sequencing Center|O'Roak|USA

>Spike|hCoV-19/Tunisia/COV0425/2020|2020-03-27|EPI\_ISL\_463005|Original|hCoV-19^^Tunisia|Human|unknown|Clinical virology|Submitter|Tunisia

>Spike|hCoV-19/England/MILK-976725/2020|2020-08-16|EPI\_ISL\_575889|Original|hCoV-19^^England|Human|Lighthouse Lab in Milton Keynes|Wellcome Sanger Institute for the COVID-19 Genomics UK (COG-UK) consortium|Davies|United Kingdom

>Spike|hCoV-19/USA/TX-QDX-220/2020|2020-04-10|EPI\_ISL\_498739|Original|hCoV-19^^Texas|Human|Quest Diagnostics|Quest Diagnostics|Kagan|USA

>Spike|hCoV-19/Northern Ireland/NIRE-1053C5/2020|2020-03-29|EPI\_ISL\_472148|Original|hCoV-19^^Northern Ireland|Human|Regional Virus Laboratory|COVID-19 Genomics UK (COG-UK) Consortium|Fairley|United Kingdom

>Spike|hCoV-19/Scotland/CVR5640/2020|2020-10-27|EPI\_ISL\_651402|Original|hCoV-19^^Scotland|Human|West of Scotland Specialist Virology Centre|COVID-19 Genomics UK (COG-UK) Consortium|Robertson|United Kingdom

>Spike|hCoV-19/England/NOTT-115113/2020|2020-10-13|EPI\_ISL\_584791|Original|hCoV-19^^England|Human|Queens Medical Centre|COVID-19 Genomics UK (COG-UK) Consortium|Loose|United Kingdom

>Spike|hCoV-19/England/QEUEH-BCD963/2020|2020-11-26|EPI\_ISL\_704527|Original|hCoV-19^^England|Human|Lighthouse Lab in Glasgow|Wellcome Sanger Institute for the COVID-19 Genomics UK (COG-UK) Consortium|Davies|United Kingdom

>Spike|hCoV-19/Spain/NC-IBV-001417/2020|2020-03-22|EPI\_ISL\_452484|Original|hCoV-19^^Navarra|Human|Cl\u00ednica Universidad de Navarra. Servicio de Enfermedades Infecciosas y Microbiolog\u00eda cl\u00ednica|SeqCOVID-SPAIN consortium/IBV (CSIC) |Comas|Spain

>Spike|hCoV-19/USA/CT-Yale-221/2020|2020-03-31|EPI\_ISL\_463156|Original|hCoV-19^^Connecticut|Human|Yale Clinical Virology Laboratory|Grubaugh Lab - Yale School of Public Health|Grubaugh|USA

>Spike|hCoV-19/USA/NY-Wadsworth-194569-01/2020|2020-08-07|EPI\_ISL\_677033|Original|hCoV-19^^New York|Human|Wadsworth Center|Wadsworth Center|Lasek-Nesselquist|USA

>Spike|hCoV-19/USA/WA-S486/2020|2020-04-01|EPI\_ISL\_434246|Original|hCoV-19^^Washington|Human|Washington State Department of Health|Seattle Flu Study|Bedford|USA

>Spike|hCoV-19/England/ALDP-9E830C/2020|2020-09-24|EPI\_ISL\_637576|Original|hCoV-19^^England|Human|Department of Pathology|COVID-19 Genomics UK (COG-UK) Consortium|Goodfellow|United Kingdom

>Spike|hCoV-19/Australia/VIC15615/2020|2020-08-06|EPI\_ISL\_593377|Original|hCoV-19^^Victoria|Human|Microbiological Diagnostic Unit - Public Health Laboratory (MDU-PHL) |MDU-PHL|Schultz|Australia

>Spike|hCoV-19/England/MILK-BFF90E/2020|2020-12-02|EPI\_ISL\_720843|Original|hCoV-19^^England|Human|Lighthouse Lab in Milton Keynes|Wellcome Sanger Institute for the COVID-19 Genomics UK (COG-UK) Consortium|Davies|United Kingdom

>Spike|hCoV-19/England/BRIS-1239A1/2020|2020-04-07|EPI\_ISL\_442695|Original|hCoV-19^^England|Human|PHE South West Regional Laboratory|Wellcome Sanger Institute for the COVID-19 Genomics UK (COG-UK) consortium|Amato|United Kingdom

>Spike|hCoV-19/USA/TX-HMH-MCoV-9954/2020|2020-07-06|EPI\_ISL\_780353|Original|hCoV-19^^Texas|Human|Houston Methodist Hospital|Houston Methodist Hospital|Long|USA

>Spike|hCoV-19/New Zealand/20VR1825/2020|2020-03-27|EPI\_ISL\_456270|Original|hCoV-19^^Southern|Human|Southern Community Labs Dunedin|Institute of Environmental Science and Research (ESR)|de Ligt|New Zealand

>Spike|hCoV-19/Australia/VIC266/2020|2020-03-22|EPI\_ISL\_419959|Original|hCoV-19^^Victoria|Human|Victorian Infectious Diseases Reference Laboratory (VIDRL) |Victorian Infectious Diseases Reference Laboratory and Microbiological Diagnostic Unit Public Health Laboratory|Schultz|Australia

>Spike|hCoV-19/Germany/HH-hpi-p1806/2020|2020-03-19|EPI\_ISL\_775650|Original|hCoV-19^^Hamburg|Human|University Medical Center Hamburg Eppendorf|Heinrich Pette Institute|Robitaille|Germany

>Spike|hCoV-19/Wales/PHWC-48F973/2020|2020-11-10|EPI\_ISL\_681165|Original|hCoV-19^^Wales|Human|Wales Specialist Virology Centre Sequencing lab|COVID-19 Genomics UK (COG-UK) Consortium|Moore|United Kingdom

>Spike|hCoV-19/Slovakia/UKBA-208/2020|2020-05-06|EPI\_ISL\_577739|Original|hCoV-19^^Pezinok|Human|Institute of Virology|Faculty of Natural Sciences|Vinar|Slovakia

>Spike|hCoV-19/USA/TX-HMH-MCoV-16265/2020|2020-10-30|EPI\_ISL\_785949|Original|hCoV-19^^Texas|Human|Houston Methodist Hospital|Houston Methodist Hospital|Long|USA

>Spike|hCoV-19/Italy/APU-IZSPB-149APT/2020|2020-00-00|EPI\_ISL\_722912|Original|hCoV-19^^Apulia|Human|Dipartimento di Scienze Biomediche e Oncologia Umana - Azienda Ospedaliero Universitaria Consorziale Policlinico|Istituto Zooprofilattico Sperimentale della Puglia e della Basilicata|Parisi|Italy

>Spike|hCoV-19/Gibraltar/204841725/2020|2020-00-00|EPI\_ISL\_671293|Original|hCoV-19^^Gibraltar|Human|Microbiology|Respiratory Virus Unit|Platt|Gibraltar

>Spike|hCoV-19/USA/NY-QDX-2366/2020|2020-03-17|EPI\_ISL\_604710|Original|hCoV-19^^New York|Human|Quest Diagnostics|Quest Diagnostics|Kagan|USA

>Spike|hCoV-19/England/OXON-B049A/2020|2020-04-20|EPI\_ISL\_478882|Original|hCoV-19^^England|Human|Oxford Viromics|COVID-19 Genomics UK (COG-UK) Consortium|Golubchik|United Kingdom

>Spike|hCoV-19/South Korea/KCDC2131/2020|2020-03-17|EPI\_ISL\_498032|Original|hCoV-19^^South Korea|Human|Division of Viral Diseases|Division of Viral Diseases|Kim|South Korea

>Spike|hCoV-19/England/C200028994/2020|2020-10-08|EPI\_ISL\_636697|Original|hCoV-19^^England|Human|Respiratory Virus Unit|Respiratory Virus Unit|Platt|United Kingdom

>Spike|hCoV-19/USA/FL-BPHL-1380/2020|2020-07-21|EPI\_ISL\_541317|Original|hCoV-19^^Florida|Human|Florida Bureau of Public Health Laboratories|Florida Bureau of Public Health Laboratories|Blanton|USA

>Spike|hCoV-19/Wales/PHWC-27689/2020|2020-03-31|EPI\_ISL\_432306|Original|hCoV-19^^Wales|Human|Wales Specialist Virology Centre|Public Health Wales Microbiology Cardiff|Moore|United Kingdom

>Spike|hCoV-19/USA/UT-UPHL-2012756486/2020|2020-07-26|EPI\_ISL\_745686|Original|hCoV-19^^Utah|Human|Ginkgo Bioworks Clinical Laboratory|Utah Public Health Laboratory|Young|USA

>Spike|hCoV-19/USA/AR-CDC-4178/2020|2020-07-08|EPI\_ISL\_509670|Original|hCoV-19^^Arkansas|Human|AR Dept. of Health-Public Health Lab|Pathogen Discovery|Queen|USA

>Spike|hCoV-19/England/QEUH-9618A2/2020|2020-08-05|EPI\_ISL\_537121|Original|hCoV-19^^England|Human|Lighthouse Lab in Glasgow|Wellcome Sanger Institute for the COVID-19 Genomics UK (COG-UK) consortium|Davies|United Kingdom

>Spike|hCoV-19/England/ALDP-CB5BC1/2020|2020-12-18|EPI\_ISL\_761802|Original|hCoV-19^^England|Human|Lighthouse Lab in Alderley Park|Wellcome Sanger Institute for the COVID-19 Genomics UK (COG-UK) Consortium|Davies|United Kingdom

>Spike|hCoV-19/England/QEUH-AA02E4/2020|2020-10-20|EPI\_ISL\_611376|Original|hCoV-19^^England|Human|Lighthouse Lab in Glasgow|Wellcome Sanger Institute for the COVID-19 Genomics UK (COG-UK) consortium|Davies|United Kingdom

>Spike|hCoV-19/USA/UT-025/2020|2020-03-11|EPI\_ISL\_418967|Original|hCoV-19^^Utah|Human|Utah Public Health Laboratory|Utah Public Health Laboratory|Young|USA

>Spike|hCoV-19/Denmark/DCGC-4685/2020|2020-09-14|EPI\_ISL\_621917|Original|hCoV-19^^Hovedstaden|Human|Department of Virus and Microbiological Special Diagnostics|Albertsen lab|Michaelsen|Denmark

>Spike|hCoV-19/USA/CA-CZB-1074/2020|2020-04-21|EPI\_ISL\_437074|Original|hCoV-19^^California|Human|County of Santa Clara Public Health|Chan-Zuckerberg Biohub|Hao|USA

>Spike|hCoV-19/England/ALDP-BC73D4/2020|2020-11-22|EPI\_ISL\_721197|Original|hCoV-19^^England|Human|Lighthouse Lab in Alderley Park|Wellcome Sanger Institute for the COVID-19 Genomics UK (COG-UK) Consortium|Davies|United Kingdom

>Spike|hCoV-19/USA/TX-HMH-MCoV-19353/2020|2020-11-27|EPI\_ISL\_783784|Original|hCoV-19^^Texas|Human|Houston Methodist Hospital|Houston Methodist Hospital|Long|USA

>Spike|hCoV-19/England/SHEF-C3CD8/2020|2020-09-29|EPI\_ISL\_585019|Original|hCoV-19^^England|Human|Virology Department|COVID-19 Genomics UK (COG-UK) Consortium|de Silva|United Kingdom

>Spike|hCoV-19/England/204720406/2020|2020-11-15|EPI\_ISL\_645136|Original|hCoV-19^^England|Human|Respiratory Virus Unit|COVID-19 Genomics UK (COG-UK) Consortium|Platt|United Kingdom

>Spike|hCoV-19/England/QEUH-B1257A/2020|2020-11-02|EPI\_ISL\_642692|Original|hCoV-19^^England|Human|Lighthouse Lab in Glasgow|Wellcome Sanger Institute for the COVID-19 Genomics UK (COG-UK) Consortium|Davies|United Kingdom

>Spike|hCoV-19/England/NOTT-10EE61/2020|2020-03-28|EPI\_ISL\_432933|Original|hCoV-19^^England|Human|Queens Medical Centre|COVID-19 Genomics UK (COG-UK) Consortium|Loose|United Kingdom

>Spike|hCoV-19/mink/Denmark/mDK-29/2020|2020-10-16|EPI\_ISL\_641422|unknown|hCoV-19^^Denmark|Neovison vison|Department of Virus and Microbiological Special Diagnostics|Albertsen lab|Michaelsen|Denmark

>Spike|hCoV-19/England/204221337/2020|2020-10-13|EPI\_ISL\_622847|Original|hCoV-19^^England|Human|Respiratory Virus Unit|Respiratory Virus Unit|Platt|United Kingdom

>Spike|hCoV-19/England/20138008904/2020|2020-03-20|EPI\_ISL\_423274|Original|hCoV-19^^England|Human|Respiratory Virus Unit|Respiratory Virus Unit|Platt|United Kingdom

>Spike|hCoV-19/Wales/PHWC-24E2A/2020|2020-03-00|EPI\_ISL\_432064|Original|hCoV-19^^Wales|Human|Wales Specialist Virology Centre|Public Health Wales Microbiology Cardiff|Moore|United Kingdom

>Spike|hCoV-19/England/ALDP-A9607E/2020|2020-10-20|EPI\_ISL\_624907|Original|hCoV-19^^England|Human|Lighthouse Lab in Alderley Park|Wellcome Sanger Institute for the COVID-19 Genomics UK (COG-UK) consortium|Davies|United Kingdom

>Spike|hCoV-19/England/ALDP-9BD9A4/2020|2020-09-09|EPI\_ISL\_568171|Original|hCoV-19^^England|Human|Lighthouse Lab in Alderley Park|Wellcome Sanger Institute for the COVID-19 Genomics UK (COG-UK) consortium|Davies|United Kingdom

>Spike|hCoV-19/Senegal/640/2020|2020-03-20|EPI\_ISL\_420079|Original|hCoV-19^^Thies|Human|Institut Pasteur Dakar|Institut Pasteur de Dakar|Dia|Senegal

>Spike|hCoV-19/England/ALDP-B7436D/2020|2020-11-12|EPI\_ISL\_662150|Original|hCoV-19^^England|Human|Lighthouse Lab in Alderley Park|Wellcome Sanger Institute for the COVID-19 Genomics UK (COG-UK) Consortium|Davies|United Kingdom

>Spike|hCoV-19/England/CAMC-B0AF3B/2020|2020-10-30|EPI\_ISL\_643573|Original|hCoV-19^^England|Human|Lighthouse Lab in Cambridge|Wellcome Sanger Institute for the COVID-19 Genomics UK (COG-UK) Consortium|Davies|United Kingdom

>Spike|hCoV-19/Scotland/QEUA-5F8CB7/2020|2020-06-25|EPI\_ISL\_533252|Original|hCoV-19^^Scotland|Human|NHSGGC West of Scotland Specialist Virology Centre / MRC-University of Glasgow Centre for Virus Research|Wellcome Sanger Institute for the COVID-19 Genomics UK (COG-UK) consortium|Davies|United Kingdom

>Spike|hCoV-19/England/MILK-9C4087/2020|2020-09-09|EPI\_ISL\_566944|Original|hCoV-19^^England|Human|Lighthouse Lab in Milton Keynes|Wellcome Sanger Institute for the COVID-19 Genomics UK (COG-UK) consortium|Davies|United Kingdom

>Spike|hCoV-19/England/QEUA-9F4288/2020|2020-09-25|EPI\_ISL\_600783|Original|hCoV-19^^England|Human|Lighthouse Lab in Glasgow|Wellcome Sanger Institute for the COVID-19 Genomics UK (COG-UK) consortium|Davies|United Kingdom

>Spike|hCoV-19/USA/CA-ALSR-1113-SAN/2020|2020-06-23|EPI\_ISL\_483536|Original|hCoV-19^^California|Human|San Diego County Public Health Laboratory|Andersen lab at Scripps Research|Gangavarapu|USA

>Spike|hCoV-19/England/MILK-C2FDDB/2020|2020-12-07|EPI\_ISL\_782785|Original|hCoV-19^^England|Human|Lighthouse Lab in Milton Keynes|Wellcome Sanger Institute for the COVID-19 Genomics UK (COG-UK) Consortium|Davies|United Kingdom

>Spike|hCoV-19/England/EXET-1358CD/2020|2020-04-15|EPI\_ISL\_457113|Original|hCoV-19^^England|Human|University of Exeter|COVID-19 Genomics UK (COG-UK) Consortium|Temperton|United Kingdom

>Spike|hCoV-19/USA/WA-S100/2020|2020-02-29|EPI\_ISL\_417153|Original|hCoV-19^^Washington|Human|Washington State Department of Health|Seattle Flu Study|Bedford|USA

>Spike|hCoV-19/England/MILK-AC79F1/2020|2020-10-21|EPI\_ISL\_634419|Original|hCoV-19^^England|Human|Lighthouse Lab in Milton Keynes|Wellcome Sanger Institute for the COVID-19 Genomics UK (COG-UK) consortium|Davies|United Kingdom

>Spike|hCoV-19/Austria/CeMM0305/2020|2020-03-29|EPI\_ISL\_475780|Original|hCoV-19^^Vienna|Human|Center for Virology|Bergthaler laboratory|Bergthaler|Austria

>Spike|hCoV-19/Brazil/SP-316/2020|2020-04-02|EPI\_ISL\_534313|Original|hCoV-19^^S\u00e3o Paulo|Human|Hospital da Sta Casa de Sto Amaro|Instituto Adolfo Lutz|Sacchi|Brazil

>Spike|hCoV-19/USA/CA-CZB-12319/2020|2020-10-08|EPI\_ISL\_648401|Original|hCoV-19^^California|Human|Santa Clara County Public Health Laboratory|Chan-Zuckerberg Biohub|Bhatt|USA

>Spike|hCoV-19/England/MILK-9F08D5/2020|2020-09-24|EPI\_ISL\_589672|Original|hCoV-19^^England|Human|Lighthouse Lab in Milton Keynes|Wellcome Sanger Institute for the COVID-19 Genomics UK (COG-UK) consortium|Davies|United Kingdom

>Spike|hCoV-19/England/QEUA-AD29B7/2020|2020-10-26|EPI\_ISL\_629988|Original|hCoV-19^^England|Human|Lighthouse Lab in Glasgow|Wellcome Sanger Institute for the COVID-19 Genomics UK (COG-UK) consortium|Davies|United Kingdom

>Spike|hCoV-19/USA/CT-Yale-237/2020|2020-04-01|EPI\_ISL\_463169|Original|hCoV-19^^Connecticut|Human|Yale Clinical Virology Laboratory|Grubaugh Lab - Yale School of Public Health|Grubaugh|USA

>Spike|hCoV-19/Belgium/ULG-10486/2020|2020-09-23|EPI\_ISL\_581650|Original|hCoV-19^^Li\u00e8ge|Human|Department of Clinical Microbiology|GIGA Medical Genomics|Durkin|Belgium

>Spike|hCoV-19/Wales/PHWC-29AF4/2020|2020-04-02|EPI\_ISL\_474239|Original|hCoV-19^^Wales|Human|Originating lab|COVID-19 Genomics UK (COG-UK) Consortium|Moore|United Kingdom

>Spike|hCoV-19/USA/TX-HMH-6145/2020|2020-07-04|EPI\_ISL\_547268|Original|hCoV-19^^Texas|Human|Houston Methodist Hospital|Houston Methodist Hospital|Long|USA

>Spike|hCoV-19/Denmark/DCGC-14825/2020|2020-11-23|EPI\_ISL\_712011|Original|hCoV-19^^Midtjylland|Human|Department of Virus and Microbiological Special Diagnostics|Albertsen Lab|Michaelsen|Denmark

>Spike|hCoV-19/Netherlands/UT-EMC-69/2020|2020-08-09|EPI\_ISL\_523546|Original|hCoV-19^^Utrecht|Human|Dutch COVID-19 response team|Erasmus Medical Center|Oude Munnink|Netherlands

>Spike|hCoV-19/USA/FL-BPHL-0823/2020|2020-06-12|EPI\_ISL\_514169|Original|hCoV-19^^Florida|Human|Florida Bureau of Public Health Laboratories|Florida Bureau of Public Health Laboratories|Blanton|USA

>Spike|hCoV-19/Australia/VIC12519/2020|2020-07-27|EPI\_ISL\_592014|Original|hCoV-19^^Victoria|Human|Microbiological Diagnostic Unit - Public Health Laboratory (MDU-PHL)|MDU-PHL|Schultz|Australia

>Spike|hCoV-19/USA/MA-MASPHL-00600/2020|2020-05-08|EPI\_ISL\_693014|Original|hCoV-19^^Massachusetts|Human|Massachusetts State Public Health Laboratory|Massachusetts State Public Health Laboratory|Lang|USA

>Spike|hCoV-19/USA/UN-UW-7428/2020|2020-04-14|EPI\_ISL\_576509|Original|hCoV-19^^USA|Human|UW Virology Lab|UW Virology Lab|Roychoudhury|USA

>Spike|hCoV-19/England/LEED-2A984B/2020|2020-04-16|EPI\_ISL\_538879|Original|hCoV-19^^England|Human|Leeds Teaching Hospitals NHS Trust and Public Health England|Wellcome Sanger Institute for the COVID-19 Genomics UK (COG-UK) consortium|Davies|United Kingdom

>Spike|hCoV-19/USA/VA-DCLS-0736/2020|2020-06-17|EPI\_ISL\_526857|Original|hCoV-19^^Virginia|Human|Virginia DCLS|Virginia DCLS|St. Jacques|USA

>Spike|hCoV-19/USA/AZ-TG280801/2020|2020-04-18|EPI\_ISL\_694155|Original|hCoV-19^^Arizona|Human|AZ SPHL|TGen North|French|USA

>Spike|hCoV-19/Norway/2806/2020|2020-06-26|EPI\_ISL\_493371|Original|hCoV-19^^Norway|Human|Furst Medical Laboratory|Norwegian Institute of Public Health|Kopperud Riis|Norway

>Spike|hCoV-19/England/201780590/2020|2020-04-22|EPI\_ISL\_526758|Original|hCoV-19^^England|Human|Respiratory Virus Unit|Respiratory Virus Unit|Miah|United Kingdom

>Spike|hCoV-19/Japan/PG-5033/2020|2020-07-00|EPI\_ISL\_690144|Original|hCoV-19^^Japan|Human|Pathogen Genomics Center|Pathogen Genomics Center|Sekizuka|Japan

>Spike|hCoV-19/Wales/PHWC-15E0B7/2020|2020-05-13|EPI\_ISL\_472792|Original|hCoV-19^^Wales|Human|Wales Specialist Virology Centre Sequencing lab|COVID-19 Genomics UK (COG-UK) Consortium|Moore|United Kingdom

>Spike|hCoV-19/USA/UT-UPHL-2012437468/2020|2020-08-03|EPI\_ISL\_745757|Original|hCoV-19^^Utah|Human|Ginkgo Bioworks Clinical Laboratory|Utah Public Health Laboratory|Young|USA

>Spike|hCoV-19/England/LCST-24D7080/2020|2020-06-06|EPI\_ISL\_478359|Original|hCoV-19^^England|Human|University Hospitals Of Leicester NHS Trust and DeepSeq Nottingham|COVID-19 Genomics UK (COG-UK) Consortium|Loose|United Kingdom

>Spike|hCoV-19/Gibraltar/204421210/2020|2020-10-27|EPI\_ISL\_613671|Original|hCoV-19^^Gibraltar|Human|Microbiology|Respiratory Virus Unit|Platt|Gibraltar

>Spike|hCoV-19/England/QEUA-9E4BDB/2020|2020-09-22|EPI\_ISL\_579838|Original|hCoV-19^^England|Human|Lighthouse Lab in Glasgow|Wellcome Sanger Institute for the COVID-19 Genomics UK (COG-UK) consortium|Davies|United Kingdom

>Spike|hCoV-19/Australia/VIC3362/2020|2020-07-06|EPI\_ISL\_521041|Original|hCoV-19^^Victoria|Human|Microbiological Diagnostic Unit - Public Health Laboratory (MDU-PHL) |MDU-PHL|Schultz|Australia

>Spike|hCoV-19/Australia/VIC12688/2020|2020-07-27|EPI\_ISL\_640922|Original|hCoV-19^^Victoria|Human|Microbiological Diagnostic Unit - Public Health Laboratory (MDU-PHL) |MDU-PHL|Schultz|Australia

>Spike|hCoV-19/England/NORW-E6E8E/2020|2020-04-18|EPI\_ISL\_448985|Original|hCoV-19^^England|Human|Quadram Institute Bioscience|COVID-19 Genomics UK (COG-UK) Consortium|Alikhan|United Kingdom

>Spike|hCoV-19/England/LIVE-DB30B4/2020|2020-10-30|EPI\_ISL\_651265|Original|hCoV-19^^England|Human|Liverpool Clinical Laboratories|COVID-19 Genomics UK (COG-UK) Consortium|Haldenby|United Kingdom

>Spike|hCoV-19/Chile/LI-ISPCH-9/2020|2020-03-23|EPI\_ISL\_445300|Original|hCoV-19^^O'Higgins|Human|HOSPITAL DE RANCAGUA|Instituto de Salud Publica de Chile|Fernandez|Chile

>Spike|hCoV-19/Wales/MILK-A069E7/2020|2020-10-01|EPI\_ISL\_600088|Original|hCoV-19^^Wales|Human|Lighthouse Lab in Milton Keynes|Wellcome Sanger Institute for the COVID-19 Genomics UK (COG-UK) consortium|Davies|United Kingdom

>Spike|hCoV-19/England/LIVE-9A45A/2020|2020-03-28|EPI\_ISL\_449333|Original|hCoV-19^^England|Human|Liverpool Clinical Laboratories|COVID-19 Genomics UK (COG-UK) Consortium|Haldenby|United Kingdom

>Spike|hCoV-19/England/LIVE-A8F67/2020|2020-03-26|EPI\_ISL\_517237|Original|hCoV-19^^England|Human|Liverpool Clinical Laboratories|COVID-19 Genomics UK (COG-UK) Consortium|Haldenby|United Kingdom

>Spike|hCoV-19/USA/CA-LACPHL-AE00033/2020|2020-05-05|EPI\_ISL\_708725|Original|hCoV-19^^California|Human|Los Angeles County Public Health Laboratory|Los Angeles County Public Health Laboratory|Hemarajata|USA

>Spike|hCoV-19/Australia/VIC15756/2020|2020-08-04|EPI\_ISL\_593443|Original|hCoV-19^^Victoria|Human|Microbiological Diagnostic Unit - Public Health Laboratory (MDU-PHL) |MDU-PHL|Schultz|Australia

>Spike|hCoV-19/Scotland/GCVR-173D3D/2020|2020-04-07|EPI\_ISL\_459122|Original|hCoV-19^^Scotland|Human|NHSGGC West of Scotland Specialist Virology Centre / MRC-University of Glasgow Centre for Virus Research|Wellcome Sanger Institute for the COVID-19 Genomics UK (COG-UK) consortium|Davies|United Kingdom

>Spike|hCoV-19/England/QEUA-96F4CE/2020|2020-08-17|EPI\_ISL\_530409|Original|hCoV-19^^England|Human|Lighthouse Lab in Glasgow|Wellcome Sanger Institute for the COVID-19 Genomics UK (COG-UK) consortium|Davies|United Kingdom

>Spike|hCoV-19/France/CVL-9469/2020|2020-10-19|EPI\_ISL\_614288|Original|hCoV-19^^Centre-Val de Loire|Human|General practitioner|National Reference Center for Viruses of Respiratory Infections|Enouf|France

>Spike|hCoV-19/Wales/QEUA-B13658/2020|2020-11-01|EPI\_ISL\_647863|Original|hCoV-19^^Wales|Human|Lighthouse Lab in Glasgow|Wellcome Sanger Institute for the COVID-19 Genomics UK (COG-UK) Consortium|Davies|United Kingdom

>Spike|hCoV-19/Poland/PL\_MCB\_66/2020|2020-06-06|EPI\_ISL\_645065|Original|hCoV-19^^Poland|Human|Human Genome Variation Research Group|Human Genome Variation Research Group||Poland

>Spike|hCoV-19/England/20130050804/2020|2020-03-21|EPI\_ISL\_423622|Original|hCoV-19^^England|Human|Respiratory Virus Unit|Respiratory Virus Unit|Platt|United Kingdom

>Spike|hCoV-19/USA/WA-S1172/2020|2020-04-29|EPI\_ISL\_463662|Original|hCoV-19^^Washington|Human|Washington State Department of Health|Seattle Flu Study|Bedford|USA

>Spike|hCoV-19/England/LIVE-A1D73/2020|2020-06-15|EPI\_ISL\_490367|Original|hCoV-19^^England|Human|Liverpool Clinical Laboratories|COVID-19 Genomics UK (COG-UK) Consortium|Haldenby|United Kingdom

>Spike|hCoV-19/Luxembourg/LNS8742871/2020|2020-04-13|EPI\_ISL\_434489|Original|hCoV-19^^Luxembourg|Human|Laboratoire National de Sante|Laboratoire National de Sante|Wienecke-Baldacchino|Luxembourg

>Spike|hCoV-19/England/ALDP-BB9496/2020|2020-11-20|EPI\_ISL\_703149|Original|hCoV-19^^England|Human|Lighthouse Lab in Alderley Park|Wellcome Sanger Institute for the COVID-19 Genomics UK (COG-UK) Consortium|Davies|United Kingdom

>Spike|hCoV-19/Switzerland/ZH-ETHZ-110505/2020|2020-04-07|EPI\_ISL\_451911|Original|hCoV-19^^Zurich|Human|Viollier AG|Department of Biosystems Science and Engineering|Nadeau|Switzerland

>Spike|hCoV-19/USA/NY-NYCPHL-000208/2020|2020-04-19|EPI\_ISL\_631741|Original|hCoV-19^^New York|Human|Jamaica Hospital Medical Center|New York City Public Health Laboratory|Wang|USA

>Spike|hCoV-19/Scotland/CAMC-990AC2/2020|2020-08-26|EPI\_ISL\_568461|Original|hCoV-19^^Scotland|Human|Lighthouse Lab in Cambridge|Wellcome Sanger Institute for the COVID-19 Genomics UK (COG-UK) consortium|Davies|United Kingdom

>Spike|hCoV-19/USA/CA-ALSR-1096-SAN/2020|2020-06-18|EPI\_ISL\_483523|Original|hCoV-19^^California|Human|UC San Diego Center for Advanced Laboratory Medicine|Andersen lab at Scripps Research|Gangavarapu|USA

>Spike|hCoV-19/England/OXON-AFC4B/2020|2020-04-08|EPI\_ISL\_478815|Original|hCoV-19^^England|Human|Oxford Viromics|COVID-19 Genomics UK (COG-UK) Consortium|Golubchik|United Kingdom

>Spike|hCoV-19/USA/NY-MSK-6F/2020|2020-05-19|EPI\_ISL\_583449|Original|hCoV-19^^New York|Human|Memorial Sloan Kettering Cancer Center|van Bakel Laboratory|van Bakel|USA

>Spike|hCoV-19/Switzerland/ZH-ETHZ-210051/2020|2020-07-19|EPI\_ISL\_510788|Original|hCoV-19^^Zurich|Human|Viollier AG|Department of Biosystems Science and Engineering|Nadeau|Switzerland

>Spike|hCoV-19/USA/MI-UM-2006S000981/2020|2020-03-29|EPI\_ISL\_484782|Original|hCoV-19^^Michigan|Human|University of Michigan Clinical Microbiology Laboratory|Lauring Lab|Valesano|USA

>Spike|hCoV-19/South Africa/NHLS-UCT-GS-3468/2020|2020-10-01|EPI\_ISL\_640133|Original|hCoV-19^^Western Cape|Human|Groote Schuur Hospital wv GSH|NHLS/UCT|Iranzadeh|South Africa

>Spike|hCoV-19/USA/NM-NMDOH-2020242040/2020|2020-07-22|EPI\_ISL\_510887|Original|hCoV-19^^New Mexico|Human|New Mexico Department of Health Scientific Laboratory|New Mexico Department of Health Scientific Laboratory|Johnson|USA

>Spike|hCoV-19/USA/WA-S2594/2020|2020-06-18|EPI\_ISL\_497226|Original|hCoV-19^^Washington|Human|Washington State Department of Health|Seattle Flu Study|Lee|USA

>Spike|hCoV-19/DRC/11583/2020|2020-05-25|EPI\_ISL\_527542|Original|hCoV-19^^Kinshasa|Human|Viral Respiratory Lab|Pathogen Sequencing Lab|Lokilo|Democratic Republic of the Congo

>Spike|hCoV-19/England/20190038701/2020|2020-04-28|EPI\_ISL\_465584|Original|hCoV-19^^England|Human|Respiratory Virus Unit|Respiratory Virus Unit|Platt|United Kingdom

>Spike|hCoV-19/United Arab Emirates/L2185/2020|2020-03-12|EPI\_ISL\_435130|Original|hCoV-19^^United Arab Emirates|Human|Mohammed Bin Rashid University of Medicine and Health Sciences|Al Jalila Genomics Center|Ramaswamy|United Arab Emirates

>Spike|hCoV-19/Wales/PHWC-2C1FC/2020|2020-04-04|EPI\_ISL\_474291|Original|hCoV-19^^Wales|Human|Originating lab|COVID-19 Genomics UK (COG-UK) Consortium|Moore|United Kingdom

>Spike|hCoV-19/Wales/PHWC-4A196C/2020|2020-12-11|EPI\_ISL\_743751|Original|hCoV-19^^Wales|Human|Wales Specialist Virology Centre Sequencing lab|COVID-19 Genomics UK (COG-UK) Consortium|Moore|United Kingdom

>Spike|hCoV-19/Canada/ON-S854/2020|2020-04-11|EPI\_ISL\_586459|Original|hCoV-19^^Ontario|Human|Toronto Invasive Bacterial Diseases Network|McMaster University|McArthur|Canada

>Spike|hCoV-19/England/QEUA-A335ED/2020|2020-10-05|EPI\_ISL\_628396|Original|hCoV-19^^England|Human|Virology Department|COVID-19 Genomics UK (COG-UK) Consortium|de Silva|United Kingdom

>Spike|hCoV-19/USA/FL-BPHL-0471/2020|2020-04-02|EPI\_ISL\_495377|Original|hCoV-19^^Florida|Human|Florida Bureau of Public Health Laboratories|Florida Bureau of Public Health Laboratories|Blanton|USA

>Spike|hCoV-19/Japan/PG-7858/2020|2020-07-00|EPI\_ISL\_686959|Original|hCoV-19^^Japan|Human|Pathogen Genomics Center|Pathogen Genomics Center|Sekizuka|Japan

>Spike|hCoV-19/Denmark/DCGC-18670/2020|2020-12-07|EPI\_ISL\_750115|Original|hCoV-19^^Midtjylland|Human|Department of Virus and Microbiological Special Diagnostics|Albertsen Lab|Michaelsen|Denmark

>Spike|hCoV-19/England/204600401/2020|2020-11-06|EPI\_ISL\_700641|Original|hCoV-19^^England|Human|Respiratory Virus Unit|COVID-19 Genomics UK (COG-UK) Consortium|Platt|United Kingdom

>Spike|hCoV-19/Scotland/CVR5713/2020|2020-11-09|EPI\_ISL\_651929|Original|hCoV-19^^Scotland|Human|West of Scotland Specialist Virology Centre|COVID-19 Genomics UK (COG-UK) Consortium|Robertson|United Kingdom

>Spike|hCoV-19/England/MILK-BAA28F/2020|2020-11-17|EPI\_ISL\_783174|Original|hCoV-19^^England|Human|Lighthouse Lab in Milton Keynes|Wellcome Sanger Institute for the COVID-19 Genomics UK (COG-UK) Consortium|Davies|United Kingdom

>Spike|hCoV-19/Kenya/C1172/2020|2020-04-19|EPI\_ISL\_457851|Original|hCoV-19^^Kenya|Human|KEMRI-CGMR-C|KEMRI-Wellcome Trust Research Programme/KEMRI-CGMR-C Kilifi|Githinji|Kenya

>Spike|hCoV-19/England/BRIS-12A98C/2020|2020-04-29|EPI\_ISL\_458338|Original|hCoV-19^^England|Human|PHE South West Regional Laboratory|Wellcome Sanger Institute for the COVID-19 Genomics UK (COG-UK) consortium|Davies|United Kingdom

>Spike|hCoV-19/England/LOND-D6FAC/2020|2020-04-03|EPI\_ISL\_478447|Original|hCoV-19^^England|Human|University College London|COVID-19 Genomics UK (COG-UK) Consortium|Roy|United Kingdom

>Spike|hCoV-19/England/BRIS-185307C/2020|2020-04-18|EPI\_ISL\_492236|Original|hCoV-19^^England|Human|PHE South West Regional Laboratory|Wellcome Sanger Institute for the COVID-19 Genomics UK (COG-UK) consortium|Davies|United Kingdom

>Spike|hCoV-19/USA/TX-HMH-934/2020|2020-04-15|EPI\_ISL\_545926|Original|hCoV-19^^Texas|Human|Houston Methodist Hospital|Houston Methodist Hospital|Long|USA

>Spike|hCoV-19/USA/TX-HMH-5956/2020|2020-06-19|EPI\_ISL\_547120|Original|hCoV-19^^Texas|Human|Houston Methodist Hospital|Houston Methodist Hospital|Long|USA

>Spike|hCoV-19/South Korea/KDCA0075/2020|2020-09-29|EPI\_ISL\_747316|Original|hCoV-19^^South Korea|Human|Division of Emerging Infectious Diseases|Division of Emerging Infectious Diseases|Park|South Korea

>Spike|hCoV-19/Turkey/IST-GLAB-242/2020|2020-05-16|EPI\_ISL\_735434|Original|hCoV-19^^Istanbul|Human|Genomic Laboratory (GLAB) (Conjoint lab of Health Directorate of Istanbul and Istanbul Technical University)|Genomic Laboratory (GLAB)|Karacan|Turkey

>Spike|hCoV-19/England/CAMB-7A292/2020|2020-04-01|EPI\_ISL\_441304|Original|hCoV-19^^England|Human|Department of Pathology|Wellcome Sanger Institute for the COVID-19 Genomics UK (COG-UK) consortium|Amato|United Kingdom

>Spike|hCoV-19/England/LIVE-9DD10/2020|2020-04-30|EPI\_ISL\_449623|Original|hCoV-19^^England|Human|Liverpool Clinical Laboratories|COVID-19 Genomics UK (COG-UK) Consortium|Haldenby|United Kingdom

>Spike|hCoV-19/England/ALDP-B1B070/2020|2020-11-01|EPI\_ISL\_645695|Original|hCoV-19^^England|Human|Lighthouse Lab in Alderley Park|Wellcome Sanger Institute for the COVID-19 Genomics UK (COG-UK) Consortium|Davies|United Kingdom

>Spike|hCoV-19/England/20128014404/2020|2020-03-19|EPI\_ISL\_423938|Original|hCoV-19^^England|Human|Respiratory Virus Unit|Respiratory Virus Unit|Platt|United Kingdom

>Spike|hCoV-19/USA/UT-CDC-9782/2020|2020-05-06|EPI\_ISL\_509709|Original|hCoV-19^^Utah|Human|Utah Public Health Laboratory|Pathogen Discovery|Queen|USA

>Spike|hCoV-19/USA/NY-Wadsworth-292793-01/2020|2020-12-23|EPI\_ISL\_769959|Original|hCoV-19^^New York|Human|Albany Medical Center Hospital Clinical Laboratories|Wadsworth Center|Lasek-Nesselquist|USA

>Spike|hCoV-19/England/MILK-559C3C/2020|2020-06-10|EPI\_ISL\_558301|Original|hCoV-19^^England|Human|Lighthouse Lab in Milton Keynes|Wellcome Sanger Institute for the COVID-19 Genomics UK (COG-UK) consortium|Davies|United Kingdom

>Spike|hCoV-19/Wales/QEUH-AE2F94/2020|2020-10-28|EPI\_ISL\_647876|Original|hCoV-19^^Wales|Human|Lighthouse Lab in Glasgow|Wellcome Sanger Institute for the COVID-19 Genomics UK (COG-UK) Consortium|Davies|United Kingdom

>Spike|hCoV-19/Ireland/D-NVRL-MPB62435/2020|2020-04-11|EPI\_ISL\_767789|Original|hCoV-19^^Dublin|Human|National Virus Reference Laboratory|Irish Coronavirus Sequencing Consortium - Teagasc Moorepark|Walsh|Ireland



>Spike|hCoV-19/India/MH-ACTREC-573/2020|2020-08-31|EPI\_ISL\_700217|Original|hCoV-19^^Maharashtra|Human|Hematopathology Laboratory|Hematopathology Laboratory|Patkar|India

>Spike|hCoV-19/England/QEUEH-B2F5C5/2020|2020-11-04|EPI\_ISL\_659858|Original|hCoV-19^^England|Human|Lighthouse Lab in Glasgow|Wellcome Sanger Institute for the COVID-19 Genomics UK (COG-UK) Consortium|Davies|United Kingdom

>Spike|hCoV-19/Spain/AR-IBV-005080/2020|2020-04-22|EPI\_ISL\_510363|Original|hCoV-19^^Aragon|Human|Servicio de Microbiolog\u00eda|SeqCOVID-SPAIN consortium/IBV (CSIC) |Comas|Spain

>Spike|hCoV-19/Netherlands/NB-RIVM-20579/2020|2020-12-12|EPI\_ISL\_790663|Original|hCoV-19^^Noord-Brabant|Human|Dutch COVID-19 response team|National Institute for Public Health and the Environment (RIVM) |Meijer|Netherlands

>Spike|hCoV-19/England/ALDP-5CA97B/2020|2020-06-19|EPI\_ISL\_558604|Original|hCoV-19^^England|Human|Lighthouse Lab in Alderley Park|Wellcome Sanger Institute for the COVID-19 Genomics UK (COG-UK) consortium|Davies|United Kingdom

>Spike|hCoV-19/Wales/PHWC-4883B8/2020|2020-10-30|EPI\_ISL\_639388|Original|hCoV-19^^Wales|Human|Wales Specialist Virology Centre Sequencing lab|COVID-19 Genomics UK (COG-UK) Consortium|Moore|United Kingdom

>Spike|hCoV-19/Finland/10A21S14/2020|2020-04-10|EPI\_ISL\_481521|Original|hCoV-19^^Uusimaa|Human|Department of Virology and Immunology|Department of Virology|Smura|Finland

>Spike|hCoV-19/Japan/PG-1044/2020|2020-04-00|EPI\_ISL\_684654|Original|hCoV-19^^Japan|Human|Fukuoka Institute of Health and Environmental Sciences|Pathogen Genomics Center|Sekizuka|Japan

>Spike|hCoV-19/England/QEUEH-C32EE1/2020|2020-12-11|EPI\_ISL\_734130|Original|hCoV-19^^England|Human|Lighthouse Lab in Glasgow|Wellcome Sanger Institute for the COVID-19 Genomics UK (COG-UK) Consortium|Davies|United Kingdom

>Spike|hCoV-19/USA/AK-PHL142/2020|2020-03-23|EPI\_ISL\_476899|Original|hCoV-19^^Alaska|Human|Alaska State Virology Laboratory|Alaska State Virology Laboratory|Chen|USA

>Spike|hCoV-19/Netherlands/NH-RIVM-20081/2020|2020-11-13|EPI\_ISL\_723260|Original|hCoV-19^^Noord-Holland|Human|Dutch COVID-19 response team|National Institute for Public Health and the Environment (RIVM) |Meijer|Netherlands

>Spike|hCoV-19/England/CAMC-9491A5/2020|2020-07-15|EPI\_ISL\_556766|Original|hCoV-19^^England|Human|Lighthouse Lab in Cambridge|Wellcome Sanger Institute for the COVID-19 Genomics UK (COG-UK) consortium|Davies|United Kingdom

>Spike|hCoV-19/England/QEUEH-B2B31A/2020|2020-11-03|EPI\_ISL\_646778|Original|hCoV-19^^England|Human|Lighthouse Lab in Glasgow|Wellcome Sanger Institute for the COVID-19 Genomics UK (COG-UK) Consortium|Davies|United Kingdom

>Spike|hCoV-19/USA/MI-MDHHS-SC21496/2020|2020-07-30|EPI\_ISL\_516223|Original|hCoV-19^^Michigan|Human|Michigan Department of Health and Human Services|Michigan Department of Health and Human Services|Blankenship|USA

>Spike|hCoV-19/England/CAMC-BD235E/2020|2020-11-27|EPI\_ISL\_702346|Original|hCoV-19^^England|Human|Lighthouse Lab in Cambridge|Wellcome Sanger Institute for the COVID-19 Genomics UK (COG-UK) Consortium|Davies|United Kingdom

>Spike|hCoV-19/Australia/VIC3837/2020|2020-07-10|EPI\_ISL\_520550|Original|hCoV-19^^Victoria|Human|Microbiological Diagnostic Unit - Public Health Laboratory (MDU-PHL) |MDU-PHL|Schultz|Australia

>Spike|hCoV-19/USA/WA-S1443/2020|2020-05-21|EPI\_ISL\_495893|Original|hCoV-19^^Washington|Human|Washington State Department of Health|Seattle Flu Study|Lee|USA

>Spike|hCoV-19/Sweden/20-50100/2020|2020-03-03|EPI\_ISL\_455853|Original|hCoV-19^^Stockholm|Human|Karolinska Universitetslaboratoriet|The Public Health Agency of Sweden|Svartstr\u00f6m|Sweden

>Spike|hCoV-19/Scotland/GCVR-16FC91/2020|2020-03-21|EPI\_ISL\_632247|Original|hCoV-19^^Scotland|Human|NHSGGC West of Scotland Specialist Virology Centre|MRC-University of Glasgow Centre for Virus Research|Robertson|United Kingdom

>Spike|hCoV-19/England/ALDP-CC08EA/2020|2020-12-19|EPI\_ISL\_760370|Original|hCoV-19^^England|Human|Lighthouse Lab in Alderley Park|Wellcome Sanger Institute for the COVID-19 Genomics UK (COG-UK) Consortium|Davies|United Kingdom

>Spike|hCoV-19/USA/WY-WPHL-20168166/2020|2020-12-18|EPI\_ISL\_766788|Original|hCoV-19^^Wyoming|Human|Wyoming Public Health Laboratory|Wyoming Public Health Laboratory|Hull|USA

>Spike|hCoV-19/USA/LA-EVTL316/2020|2020-05-15|EPI\_ISL\_578723|Original|hCoV-19^^Louisiana|Human|LSUHS Emerging Viral Threat Laboratory|Microbial Genome Sequencing Center|Kamil|USA

>Spike|hCoV-19/USA/NY-Wadsworth-192897-01/2020|2020-07-08|EPI\_ISL\_676713|Original|hCoV-19^^New York|Human|Masonic Medical Research Institute|Wadsworth Center|Lasek-Nesselquist|USA

>Spike|hCoV-19/England/MILK-B05E06/2020|2020-10-23|EPI\_ISL\_642866|Original|hCoV-19^^England|Human|Lighthouse Lab in Milton Keynes|Wellcome Sanger Institute for the COVID-19 Genomics UK (COG-UK) Consortium|Davies|United Kingdom

>Spike|hCoV-19/Denmark/DCGC-17329/2020|2020-12-14|EPI\_ISL\_750911|Original|hCoV-19^^Hovedstaden|Human|Department of Virus and Microbiological Special Diagnostics|Albertsen Lab|Michaelsen|Denmark

>Spike|hCoV-19/USA/TX-HMH-MCoV-8991/2020|2020-07-02|EPI\_ISL\_780877|Original|hCoV-19^^Texas|Human|Houston Methodist Hospital|Houston Methodist Hospital|Long|USA

>Spike|hCoV-19/Senegal/64771/2020|2020-06-13|EPI\_ISL\_482874|Original|hCoV-19^^Dakar|Human|Institut Pasteur Dakar|Institut Pasteur de Dakar|Dia|Senegal

>Spike|hCoV-19/England/ALDP-954541/2020|2020-06-09|EPI\_ISL\_555364|Original|hCoV-19^^England|Human|Lighthouse Lab in Alderley Park|Wellcome Sanger Institute for the COVID-19 Genomics UK (COG-UK) consortium|Davies|United Kingdom

>Spike|hCoV-19/Denmark/DCGC-6117/2020|2020-09-21|EPI\_ISL\_621151|Original|hCoV-19^^Midtjylland|Human|Department of Virus and Microbiological Special Diagnostics|Albertsen lab|Michaelsen|Denmark

>Spike|hCoV-19/Australia/VIC17546/2020|2020-08-24|EPI\_ISL\_663917|Original|hCoV-19^^Victoria|Human|Microbiological Diagnostic Unit - Public Health Laboratory (MDU-PHL)|MDU-PHL|Schultz|Australia

>Spike|hCoV-19/England/ALDP-944BAC/2020|2020-06-07|EPI\_ISL\_555661|Original|hCoV-19^^England|Human|Lighthouse Lab in Alderley Park|Wellcome Sanger Institute for the COVID-19 Genomics UK (COG-UK) consortium|Davies|United Kingdom

>Spike|hCoV-19/England/CAMC-B0754B/2020|2020-10-30|EPI\_ISL\_643782|Original|hCoV-19^^England|Human|Lighthouse Lab in Cambridge|Wellcome Sanger Institute for the COVID-19 Genomics UK (COG-UK) Consortium|Davies|United Kingdom

>Spike|hCoV-19/Italy/BAS-UniMI-2627/2020|2020-03-20|EPI\_ISL\_477198|Original|hCoV-19^^Basilicata|Human|Istituto Zooprofilattico Sperimentale Puglia e Basilicata|Beaconlab (Bioinformatics|Chiara|Italy

>Spike|hCoV-19/England/QEUA-B9EBA1/2020|2020-11-18|EPI\_ISL\_719697|Original|hCoV-19^^England|Human|Lighthouse Lab in Glasgow|Wellcome Sanger Institute for the COVID-19 Genomics UK (COG-UK) Consortium|Davies|United Kingdom

>Spike|hCoV-19/Australia/VIC3790/2020|2020-07-11|EPI\_ISL\_520507|Original|hCoV-19^^Victoria|Human|Microbiological Diagnostic Unit - Public Health Laboratory (MDU-PHL)|MDU-PHL|Schultz|Australia

>Spike|hCoV-19/USA/MI-MDHHS-SC21157/2020|2020-03-28|EPI\_ISL\_507933|Original|hCoV-19^^Michigan|Human|Michigan Department of Health and Human Services|Michigan Department of Health and Human Services|Blankenship|USA

>Spike|hCoV-19/Australia/VIC7656/2020|2020-08-11|EPI\_ISL\_564556|Original|hCoV-19^^Victoria|Human|Victorian Infectious Diseases Reference Laboratory (VIDRL)|VIDRL and MDU-PHL|Schultz|Australia

>Spike|hCoV-19/England/QEUA-B0FB9C/2020|2020-11-02|EPI\_ISL\_641961|Original|hCoV-19^^England|Human|Lighthouse Lab in Glasgow|Wellcome Sanger Institute for the COVID-19 Genomics UK (COG-UK) Consortium|Davies|United Kingdom

>Spike|hCoV-19/USA/TX-DSHS-1183/2020|2020-06-16|EPI\_ISL\_631645|Original|hCoV-19^^Texas|Human|Texas Department of State Health Services|Texas Department of State Health Services|Rahman|USA

>Spike|hCoV-19/England/CAMB-1ABEDF/2020|2020-00-00|EPI\_ISL\_444343|Original|hCoV-19^^England|Human|Department of Pathology|COVID-19 Genomics UK (COG-UK) Consortium|Meredith|United Kingdom

>Spike|hCoV-19/Japan/Donner6/2020|2020-04-06|EPI\_ISL\_438951|Original|hCoV-19^^Kanto|Human|Keio University School of Medicine|Keio University School of Medicine|Kosaki|Japan

>Spike|hCoV-19/Netherlands/NH-RIVM-20053/2020|2020-11-05|EPI\_ISL\_723237|Original|hCoV-19^^Noord-Holland|Human|Dutch COVID-19 response team|National Institute for Public Health and the Environment (RIVM)|Meijer|Netherlands

>Spike|hCoV-19/USA/NY-NYUMC529/2020|2020-03-29|EPI\_ISL\_444646|Original|hCoV-19^^New York|Human|NYU Langone Health|Departments of Pathology and Medicine|Maurano|USA

>Spike|hCoV-19/Wales/PHWC-16326E/2020|2020-05-27|EPI\_ISL\_473269|Original|hCoV-19^^Wales|Human|Wales Specialist Virology Centre Sequencing lab|COVID-19 Genomics UK (COG-UK) Consortium|Moore|United Kingdom

>Spike|hCoV-19/Denmark/DCGC-762/2020|2020-03-09|EPI\_ISL\_614772|Original|hCoV-19^^Syddanmark|Human|Department of Virus and Microbiological Special Diagnostics|Albertsen lab|Michaelsen|Denmark

>Spike|hCoV-19/Wales/PHWC-163D4F/2020|2020-05-06|EPI\_ISL\_474075|Original|hCoV-19^^Wales|Human|Originating lab|COVID-19 Genomics UK (COG-UK) Consortium|Moore|United Kingdom

>Spike|hCoV-19/Denmark/DCGC-5885/2020|2020-10-05|EPI\_ISL\_620150|Original|hCoV-19^^Hovedstaden|Human|Department of Virus and Microbiological Special Diagnostics|Albertsen lab|Michaelsen|Denmark

>Spike|hCoV-19/England/BRIS-12DFD2/2020|2020-04-20|EPI\_ISL\_481999|Original|hCoV-19^^England|Human|PHE South West Regional Laboratory|Wellcome Sanger Institute for the COVID-19 Genomics UK (COG-UK) consortium|Davies|United Kingdom

>Spike|hCoV-19/Australia/NSW212/2020|2020-03-21|EPI\_ISL\_427671|Original|hCoV-19^^New South Wales|Human|Centre for Infectious Diseases and Microbiology Public Health|NSW Health Pathology - Institute of Clinical Pathology and Medical Research; Westmead Hospital; University of Sydney|Gall|Australia

>Spike|hCoV-19/Poland/PL\_MCB\_28/2020|2020-05-12|EPI\_ISL\_645027|Original|hCoV-19^^Poland|Human|Human Genome Variation Research Group|Human Genome Variation Research Group||Poland

>Spike|hCoV-19/India/TG-CDFD-C3625/2020|2020-06-20|EPI\_ISL\_528598|Original|hCoV-19^^Telangana|Human|National Genomics Core-Center for DNA Fingerprinting and Diagnostics|National Genomics Core-Center for DNA Fingerprinting and Diagnostics (NGC-CDFD)- DBT's PAN-INDIA-1000 Genome consortium|Vashisht|India

>Spike|hCoV-19/Scotland/GCVR-173DA6/2020|2020-04-06|EPI\_ISL\_459160|Original|hCoV-19^^Scotland|Human|NHSGGC West of Scotland Specialist Virology Centre / MRC-University of Glasgow Centre for Virus Research|Wellcome Sanger Institute for the COVID-19 Genomics UK (COG-UK) consortium|Davies|United Kingdom

>Spike|hCoV-19/England/CAMB-75C20/2020|2020-03-28|EPI\_ISL\_438503|Original|hCoV-19^^England|Human|Department of Pathology|Wellcome Sanger Institute for the COVID-19 Genomics UK (COG-UK) consortium|Amato|United Kingdom

>Spike|hCoV-19/England/QEUH-BCE531/2020|2020-11-26|EPI\_ISL\_704251|Original|hCoV-19^^England|Human|Lighthouse Lab in Glasgow|Wellcome Sanger Institute for the COVID-19 Genomics UK (COG-UK) Consortium|Davies|United Kingdom

>Spike|hCoV-19/Japan/PG-1997/2020|2020-04-00|EPI\_ISL\_685602|Original|hCoV-19^^Japan|Human|Pathogen Genomics Center|Pathogen Genomics Center|Sekizuka|Japan

>Spike|hCoV-19/England/CAMB-71B09/2020|2020-03-31|EPI\_ISL\_439950|Original|hCoV-19^^England|Human|Department of Pathology|Wellcome Sanger Institute for the COVID-19 Genomics UK (COG-UK) consortium|Amato|United Kingdom

>Spike|hCoV-19/Japan/PG-4784/2020|2020-08-00|EPI\_ISL\_689631|Original|hCoV-19^^Japan|Human|Pathogen Genomics Center|Pathogen Genomics Center|Sekizuka|Japan

>Spike|hCoV-19/England/QEUH-B827D9/2020|2020-11-14|EPI\_ISL\_661846|Original|hCoV-19^^England|Human|Lighthouse Lab in Glasgow|Wellcome Sanger Institute for the COVID-19 Genomics UK (COG-UK) Consortium|Davies|United Kingdom

>Spike|hCoV-19/England/MILK-A699F1/2020|2020-10-08|EPI\_ISL\_665857|Original|hCoV-19^^England|Human|University of Exeter|COVID-19 Genomics UK (COG-UK) Consortium|Temperton|United Kingdom

>Spike|hCoV-19/Belgium/regA-0409683/2020|2020-04-09|EPI\_ISL\_738209|Original|hCoV-19^^Brussel|Human|UZ Leuven|KU Leuven|Maes|Belgium

>Spike|hCoV-19/England/CAMC-B3244A/2020|2020-11-05|EPI\_ISL\_659205|Original|hCoV-19^^England|Human|Lighthouse Lab in Cambridge|Wellcome Sanger Institute for the COVID-19 Genomics UK (COG-UK) Consortium|Davies|United Kingdom

>Spike|hCoV-19/England/LEED-2AA419/2020|2020-03-30|EPI\_ISL\_538789|Original|hCoV-19^^England|Human|Leeds Teaching Hospitals NHS Trust and Public Health England|Wellcome Sanger Institute for the COVID-19 Genomics UK (COG-UK) consortium|Davies|United Kingdom

>Spike|hCoV-19/New Zealand/20VR3210/2020|2020-04-01|EPI\_ISL\_579495|Original|hCoV-19^^Canterbury|Human|Canterbury Health Laboratories|Institute of Environmental Science and Research (ESR)|Wang|New Zealand

>Spike|hCoV-19/Canada/ON-PHL-20-02301/2020|2020-09-00|EPI\_ISL\_671558|Original|hCoV-19^^Ontario|Human|Public Health Ontario Laboratory|Public Health Ontario Laboratory|Guthrie|Canada

>Spike|hCoV-19/England/MILK-B8F94F/2020|2020-11-13|EPI\_ISL\_674615|Original|hCoV-19^^England|Human|Lighthouse Lab in Milton Keynes|Wellcome Sanger Institute for the COVID-19 Genomics UK (COG-UK) Consortium|Davies|United Kingdom

>Spike|hCoV-19/Canada/NS-NML-1231/2020|2020-04-04|EPI\_ISL\_579626|Original|hCoV-19^^Nova Scotia|Human|QEII Health Sciences Centre|National Microbiology Laboratory (NML)|Majer|Canada

>Spike|hCoV-19/Iceland/40/2020|2020-03-04|EPI\_ISL\_417846|Original|hCoV-19^^Reykjavik|Human|The National University Hospital of Iceland|deCODE genetics|J\u00f3nsson|Iceland

>Spike|hCoV-19/Netherlands/UT-EMC-157/2020|2020-10-30|EPI\_ISL\_722580|Original|hCoV-19^^Utrecht|Human|Dutch COVID-19 response team|Erasmus Medical Center|Oude Munnink|Netherlands

>Spike|hCoV-19/Bermuda/204990923/2020|2020-11-10|EPI\_ISL\_780393|Original|hCoV-19^^Bermuda|Human|Bermuda Government Molecular Diagnostics Laboratory (MDL)|Respiratory Virus Unit|Platt|Bermuda

>Spike|hCoV-19/Italy/ABR-IZSGC-TE6222/2020|2020-03-23|EPI\_ISL\_420583|Original|hCoV-19^^Abruzzo|Human|Ospedale Civile Giuseppe Mazzini|Istituto Zooprofilattico Sperimentale dell'Abruzzo e Molise \G.Caporale\|Lorusso|Italy

>Spike|hCoV-19/England/ALDP-5AF226/2020|2020-06-17|EPI\_ISL\_558700|Original|hCoV-19^^England|Human|Lighthouse Lab in Alderley Park|Wellcome Sanger Institute for the COVID-19 Genomics UK (COG-UK) consortium|Davies|United Kingdom

>Spike|hCoV-19/Japan/PG-6371/2020|2020-08-00|EPI\_ISL\_689482|Original|hCoV-19^^Japan|Human|Fukuoka Institute of Health and Environmental Sciences|Pathogen Genomics Center|Sekizuka|Japan

>Spike|hCoV-19/Scotland/EDB2445/2020|2020-04-22|EPI\_ISL\_439209|Original|hCoV-19^^Scotland|Human|Virology Department|COVID-19 Genomics UK (COG-UK) Consortium|Williams|United Kingdom

>Spike|hCoV-19/Scotland/GCVR-17018F/2020|2020-03-24|EPI\_ISL\_459536|Original|hCoV-19^^Scotland|Human|NHSGGC West of Scotland Specialist Virology Centre / MRC-University of Glasgow Centre for Virus Research|Wellcome Sanger Institute for the COVID-19 Genomics UK (COG-UK) consortium|Davies|United Kingdom

>Spike|hCoV-19/England/LIVE-A9B35/2020|2020-03-24|EPI\_ISL\_517326|Original|hCoV-19^^England|Human|Liverpool Clinical Laboratories|COVID-19 Genomics UK (COG-UK) Consortium|Haldenby|United Kingdom

>Spike|hCoV-19/USA/TX-HMH-3148/2020|2020-06-10|EPI\_ISL\_544027|Original|hCoV-19^^Texas|Human|Houston Methodist Hospital|Houston Methodist Hospital|Long|USA

>Spike|hCoV-19/Wales/PHWC-16CC2B/2020|2020-09-25|EPI\_ISL\_572754|Original|hCoV-19^^Wales|Human|Wales Specialist Virology Centre Sequencing lab|COVID-19 Genomics UK (COG-UK) Consortium|Moore|United Kingdom

>Spike|hCoV-19/USA/DE-DHSS-F917889/2020|2020-03-25|EPI\_ISL\_583246|Original|hCoV-19^^Delaware|Human|Delaware Public Health Lab|Delaware Public Health Lab|Bajwa|USA

>Spike|hCoV-19/Scotland/CVR2781/2020|2020-04-20|EPI\_ISL\_473562|Original|hCoV-19^^Scotland|Human|West of Scotland Specialist Virology Centre|COVID-19 Genomics UK (COG-UK) Consortium|Robertson|United Kingdom

>Spike|hCoV-19/USA/MI-MDHHS-SC21780/2020|2020-08-13|EPI\_ISL\_529898|Original|hCoV-19^^Michigan|Human|Michigan Department of Health and Human Services|Michigan Department of Health and Human Services|Blankenship|USA

>Spike|hCoV-19/USA/NY-NYUMC35/2020|2020-03-18|EPI\_ISL\_419696|Original|hCoV-19^^New York|Human|NYU Langone Health|Departments of Pathology and Medicine|Maurano|USA

>Spike|hCoV-19/England/QEUEH-B822E7/2020|2020-11-14|EPI\_ISL\_661915|Original|hCoV-19^^England|Human|Lighthouse Lab in Glasgow|Wellcome Sanger Institute for the COVID-19 Genomics UK (COG-UK) Consortium|Davies|United Kingdom

>Spike|hCoV-19/Scotland/EDB404/2020|2020-03-31|EPI\_ISL\_491689|Original|hCoV-19^^Scotland|Human|Virology Department|Wellcome Sanger Institute for the COVID-19 Genomics UK (COG-UK) consortium|Davies|United Kingdom

>Spike|hCoV-19/Netherlands/UT-EMC-123/2020|2020-10-14|EPI\_ISL\_632343|Original|hCoV-19^^Utrecht|Human|Dutch COVID-19 response team|Erasmus Medical Center|Oude Munnink|Netherlands

>Spike|hCoV-19/Spain/IB-IBV-99011592/2020|2020-12-13|EPI\_ISL\_779911|Original|hCoV-19^^Balear Islands|Human|Servicio de Microbiolog\u00eda|SeqCOVID-SPAIN consortium/IBV (CSIC) |Comas|Spain

>Spike|hCoV-19/Denmark/DCGC-2500/2020|2020-08-10|EPI\_ISL\_617771|Original|hCoV-19^^Hovedstaden|Human|Department of Virus and Microbiological Special Diagnostics|Albertsen lab|Michaelsen|Denmark

>Spike|hCoV-19/USA/MI-MDHHS-SC22591/2020|2020-11-19|EPI\_ISL\_737164|Original|hCoV-19^^Michigan|Human|Michigan Department of Health and Human Services|Michigan Department of Health and Human Services|Blankenship|USA

>Spike|hCoV-19/England/ALDP-C581CE/2020|2020-12-13|EPI\_ISL\_735962|Original|hCoV-19^^England|Human|Lighthouse Lab in Alderley Park|Wellcome Sanger Institute for the COVID-19 Genomics UK (COG-UK) Consortium|Davies|United Kingdom

>Spike|hCoV-19/Switzerland/Vs-ETHZ-321479/2020|2020-10-15|EPI\_ISL\_603691|Original|hCoV-19^^Valais|Human|Viollier AG|Department of Biosystems Science and Engineering|Nadeau|Switzerland

>Spike|hCoV-19/Bangladesh/BCSIR-NILMRC-138/2020|2020-06-18|EPI\_ISL\_480424|Original|hCoV-19^^Dhaka|Human|National Institute of Laboratory Medicine and Referral Center|Bangladesh Council of Scientific and Industrial Research|Khan|Bangladesh

>Spike|hCoV-19/Denmark/DCGC-20398/2020|2020-12-21|EPI\_ISL\_758837|Original|hCoV-19^^Sjaelland|Human|Department of Virus and Microbiological Special Diagnostics|Albertsen Lab|Michaelsen|Denmark

>Spike|hCoV-19/England/QEUEH-A63FAA/2020|2020-10-12|EPI\_ISL\_628679|Original|hCoV-19^^England|Human|Oxford Viromics|COVID-19 Genomics UK (COG-UK) Consortium|Golubchik|United Kingdom

>Spike|hCoV-19/England/GSTT-265DF74/2020|2020-03-29|EPI\_ISL\_484130|Original|hCoV-19^^England|Human|Centre for Clinical Infection and Diagnostics Research and Genomics Innovation Unit|COVID-19 Genomics UK (COG-UK) Consortium|Awan|United Kingdom

>Spike|hCoV-19/England/BRIS-130D69/2020|2020-03-23|EPI\_ISL\_501572|Original|hCoV-19^^England|Human|PHE South West Regional Laboratory|Wellcome Sanger Institute for the COVID-19 Genomics UK (COG-UK) consortium|Davies|United Kingdom

>Spike|hCoV-19/USA/TX-HMH-MCoV-15882/2020|2020-07-10|EPI\_ISL\_785566|Original|hCoV-19^^Texas|Human|Houston Methodist Hospital|Houston Methodist Hospital|Long|USA

>Spike|hCoV-19/USA/AK-PHL689/2020|2020-06-29|EPI\_ISL\_586256|Original|hCoV-19^^Alaska|Human|Alaska State Virology Laboratory|Alaska State Virology Laboratory|Chen|USA

>Spike|hCoV-19/England/ALDP-B1B5AE/2020|2020-11-01|EPI\_ISL\_645823|Original|hCoV-19^^England|Human|Lighthouse Lab in Alderley Park|Wellcome Sanger Institute for the COVID-19 Genomics UK (COG-UK) Consortium|Davies|United Kingdom

>Spike|hCoV-19/England/QEUEH-9F64F9/2020|2020-09-24|EPI\_ISL\_588389|Original|hCoV-19^^England|Human|Lighthouse Lab in Glasgow|Wellcome Sanger Institute for the COVID-19 Genomics UK (COG-UK) consortium|Davies|United Kingdom

>Spike|hCoV-19/Denmark/DCGC-14691/2020|2020-11-23|EPI\_ISL\_711912|Original|hCoV-19^^Hovedstaden|Human|Department of Virus and Microbiological Special Diagnostics|Albertsen Lab|Michaelsen|Denmark

>Spike|hCoV-19/USA/TX-HMH-5809/2020|2020-06-30|EPI\_ISL\_547031|Original|hCoV-19^^Texas|Human|Houston Methodist Hospital|Houston Methodist Hospital|Long|USA

>Spike|hCoV-19/England/MILK-CA7254/2020|2020-12-18|EPI\_ISL\_761636|Original|hCoV-19^^England|Human|Lighthouse Lab in Milton Keynes|Wellcome Sanger Institute for the COVID-19 Genomics UK (COG-UK) Consortium|Davies|United Kingdom

>Spike|hCoV-19/Spain/MD-IBV-004914/2020|2020-03-11|EPI\_ISL\_481066|Original|hCoV-19^^Madrid|Human|Hospital General Universitario Gregorio Mara\u00f1\u00f3n|SeqCOVID-SPAIN consortium/IBV (CSIC)|Comas|Spain

>Spike|hCoV-19/England/ALDP-C48598/2020|2020-12-12|EPI\_ISL\_736526|Original|hCoV-19^^England|Human|Lighthouse Lab in Alderley Park|Wellcome Sanger Institute for the COVID-19 Genomics UK (COG-UK) Consortium|Davies|United Kingdom

>Spike|hCoV-19/England/QEUEH-9FA46E/2020|2020-09-28|EPI\_ISL\_588272|Original|hCoV-19^^England|Human|Lighthouse Lab in Glasgow|Wellcome Sanger Institute for the COVID-19 Genomics UK (COG-UK) consortium|Davies|United Kingdom

>Spike|hCoV-19/USA/AZ-TG491468/2020|2020-06-18|EPI\_ISL\_695103|Original|hCoV-19^^Arizona|Human|AZ SPHL|TGen North|French|USA

>Spike|hCoV-19/Scotland/QEUEH-9CF67B/2020|2020-09-17|EPI\_ISL\_601989|Original|hCoV-19^^Scotland|Human|Lighthouse Lab in Glasgow|Wellcome Sanger Institute for the COVID-19 Genomics UK (COG-UK) consortium|Davies|United Kingdom

>Spike|hCoV-19/Germany/HH-hpi-pl591/2020|2020-03-16|EPI\_ISL\_776063|Original|hCoV-19^^Hamburg|Human|University Medical Center Hamburg Eppendorf|Heinrich Pette Institute|Robitaille|Germany

>Spike|hCoV-19/Australia/VIC3261/2020|2020-07-13|EPI\_ISL\_520940|Original|hCoV-19^^Victoria|Human|Microbiological Diagnostic Unit - Public Health Laboratory (MDU-PHL)|MDU-PHL|Schultz|Australia

>Spike|hCoV-19/Germany/BY-MVP-0099/2020|2020-04-05|EPI\_ISL\_437290|Original|hCoV-19^^Bavaria|Human|Max von Pettenkofer Institute|Laboratory for Functional Genome Analysis|Graf|Germany

>Spike|hCoV-19/South Africa/KRISP-K002163/2020|2020-07-22|EPI\_ISL\_515569|Original|hCoV-19^^KwaZulu-Natal|Human|NHLs-IALCH|KRISP|de Oliveira|South Africa

>Spike|hCoV-19/Denmark/DCGC-1282/2020|2020-03-16|EPI\_ISL\_620145|Original|hCoV-19^^Hovedstaden|Human|Department of Virus and Microbiological Special Diagnostics|Albertsen lab|Michaelsen|Denmark

>Spike|hCoV-19/United Arab Emirates/0613/2020|2020-05-15|EPI\_ISL\_698769|Original|hCoV-19^^Abu Dhabi|Human|Group 42 (G42) Healthcare|G42 Healthcare|Ogrodzki|United Arab Emirates

>Spike|hCoV-19/Scotland/CVR4560/2020|2020-09-22|EPI\_ISL\_585418|Original|hCoV-19^^Scotland|Human|Lighthouse Lab in Glasgow / MRC-University of Glasgow Centre for Virus Research|COVID-19 Genomics UK (COG-UK) Consortium|Robertson|United Kingdom

>Spike|hCoV-19/Denmark/DCGC-18501/2020|2020-12-07|EPI\_ISL\_750004|Original|hCoV-19^^Hovedstaden|Human|Department of Virus and Microbiological Special Diagnostics|Albertsen Lab|Michaelsen|Denmark

>Spike|hCoV-19/Wales/PHWC-1627CA/2020|2020-05-17|EPI\_ISL\_473121|Original|hCoV-19^^Wales|Human|Wales Specialist Virology Centre Sequencing lab|COVID-19 Genomics UK (COG-UK) Consortium|Moore|United Kingdom

>Spike|hCoV-19/England/QEUEH-A20334/2020|2020-10-01|EPI\_ISL\_587614|Original|hCoV-19^^England|Human|Lighthouse Lab in Glasgow|Wellcome Sanger Institute for the COVID-19 Genomics UK (COG-UK) consortium|Davies|United Kingdom

>Spike|hCoV-19/England/CAMB-1B7E58/2020|2020-10-14|EPI\_ISL\_638376|Original|hCoV-19^^England|Human|Department of Pathology|COVID-19 Genomics UK (COG-UK) Consortium|Goodfellow|United Kingdom

>Spike|hCoV-19/USA/MN-MDH-1610/2020|2020-04-28|EPI\_ISL\_530206|Original|hCoV-19^^Minnesota|Human|Minnesota Department of Health|Minnesota Department of Health|Garfin|USA

>Spike|hCoV-19/Australia/NSW1313/2020|2020-12-21|EPI\_ISL\_767879|Original|hCoV-19^^New South Wales|Human|Laverty Pathology|NSW Health Pathology - Institute of Clinical Pathology and Medical Research; Westmead Hospital; University of Sydney|Gall|Australia

>Spike|hCoV-19/USA/TX-HMH-1083/2020|2020-04-23|EPI\_ISL\_542524|Original|hCoV-19^^Texas|Human|Houston Methodist Hospital|Houston Methodist Hospital|Long|USA

>Spike|hCoV-19/England/20156044904/2020|2020-04-08|EPI\_ISL\_466320|Original|hCoV-19^^England|Human|Respiratory Virus Unit|Respiratory Virus Unit|Platt|United Kingdom

>Spike|hCoV-19/USA/CA-ALSR-3808/2020|2020-05-27|EPI\_ISL\_636214|Original|hCoV-19^^California|Human|San Diego County Public Health Laboratory|Andersen lab at Scripps Research|Gangavarapu|USA

>Spike|hCoV-19/Denmark/DCGC-18063/2020|2020-12-14|EPI\_ISL\_749733|Original|hCoV-19^^Hovedstaden|Human|Department of Virus and Microbiological Special Diagnostics|Albertsen Lab|Michaelsen|Denmark

>Spike|hCoV-19/Bangladesh/G-66/2020|2020-04-07|EPI\_ISL\_600567|Original|hCoV-19^^Dhaka|Human|Institute of Epidemiology Disease Control And Research|Institute for Developing Science and Health Initiatives|Cowley|Bangladesh

>Spike|hCoV-19/Scotland/QEUH-9E5378/2020|2020-09-24|EPI\_ISL\_600988|Original|hCoV-19^^Scotland|Human|Lighthouse Lab in Glasgow|Wellcome Sanger Institute for the COVID-19 Genomics UK (COG-UK) consortium|Davies|United Kingdom

>Spike|hCoV-19/Denmark/DCGC-16664/2020|2020-11-16|EPI\_ISL\_714902|Original|hCoV-19^^Midtjylland|Human|Department of Virus and Microbiological Special Diagnostics|Albertsen Lab|Michaelsen|Denmark

>Spike|hCoV-19/Denmark/DCGC-10153/2020|2020-11-09|EPI\_ISL\_669423|Original|hCoV-19^^Midtjylland|Human|Department of Virus and Microbiological Special Diagnostics|Albertsen Lab|Michaelsen|Denmark

>Spike|hCoV-19/Thailand/SamutSakhon-CONI-0342/2020|2020-12-19|EPI\_ISL\_733536|Original|hCoV-19^^Samut Sakhon|Human|Institute for Urban Disease Control and Prevention|COVID-19 Network Investigations (CONI) Alliance|Batty|Thailand

>Spike|hCoV-19/USA/TX-HMH-MCoV-8962/2020|2020-07-02|EPI\_ISL\_780862|Original|hCoV-19^^Texas|Human|Houston Methodist Hospital|Houston Methodist Hospital|Long|USA

>Spike|hCoV-19/England/QEUH-B6829C/2020|2020-11-11|EPI\_ISL\_661401|Original|hCoV-19^^England|Human|Lighthouse Lab in Glasgow|Wellcome Sanger Institute for the COVID-19 Genomics UK (COG-UK) Consortium|Davies|United Kingdom

>Spike|hCoV-19/Brazil/SP-L26-CD566/2020|2020-04-22|EPI\_ISL\_672740|Original|hCoV-19^^S\u00e3o Paulo|Human|Hospital das Cl\u00ednicas da Faculdade de Medicina da Universidade de S\u00e3o Paulo (HC-FMUSP)|Laborat\u00f3rio de Parasitologia M\u00e9dica - Instituto de Medicina Tropical - Universidade de S\u00e3o Paulo|de Jesus|Brazil

>Spike|hCoV-19/England/NORT-28952C/2020|2020-03-30|EPI\_ISL\_453503|Original|hCoV-19^^England|Human|Northumbria University / South Tees Hospitals NHS Foundation Trust / North Cumbria Integrated Care NHS Foundation Trust / North Tees and Hartlepool NHS Foundation Trust / Newcastle Hospitals NHS Foundation Trust|COVID-19 Genomics UK (COG-UK) Consortium|Bashton|United Kingdom

>Spike|hCoV-19/Wales/PHWC-49CAAD/2020|2020-12-04|EPI\_ISL\_742641|Original|hCoV-19^^Wales|Human|Wales Specialist Virology Centre Sequencing lab|COVID-19 Genomics UK (COG-UK) Consortium|Moore|United Kingdom

>Spike|hCoV-19/Switzerland/GE-HUG-1736/2020|2020-03-21|EPI\_ISL\_429203|Original|hCoV-19^^Geneve|Human|University Hospitals of Geneva Laboratory of Virology|University Hospitals of Geneva Laboratory of Virology|Cordey|Switzerland

>Spike|hCoV-19/USA/CA-ALSR-4825/2020|2020-10-28|EPI\_ISL\_730163|Original|hCoV-19^^California|Human|San Diego County Public Health Laboratory|Andersen lab at Scripps Research|Gangavarapu|USA

>Spike|hCoV-19/England/NOTT-111F2C/2020|2020-05-04|EPI\_ISL\_472425|Original|hCoV-19^^England|Human|Queens Medical Centre|COVID-19 Genomics UK (COG-UK) Consortium|Loose|United Kingdom

>Spike|hCoV-19/Scotland/CVR3839/2020|2020-04-03|EPI\_ISL\_473779|Original|hCoV-19^^Scotland|Human|West of Scotland Specialist Virology Centre|COVID-19 Genomics UK (COG-UK) Consortium|Robertson|United Kingdom

>Spike|hCoV-19/Luxembourg/LNS0121983/2020|2020-10-30|EPI\_ISL\_739718|Original|hCoV-19^^Luxembourg|Human|Laboratoire national de sant\u00e9|Laboratoire national de sant\u00e9|Wienecke-Baldacchino|Luxembourg

>Spike|hCoV-19/USA/TX-DSHS-1188/2020|2020-06-27|EPI\_ISL\_631650|Original|hCoV-19^^Texas|Human|Texas Department of State Health Services|Texas Department of State Health Services|Rahman|USA

>Spike|hCoV-19/England/BIRM-61410/2020|2020-04-29|EPI\_ISL\_477768|Original|hCoV-19^^England|Human|University of Birmingham|COVID-19 Genomics UK (COG-UK) Consortium|Loman|United Kingdom

>Spike|hCoV-19/USA/AK-PHL844/2020|2020-07-04|EPI\_ISL\_528530|Original|hCoV-19^^Alaska|Human|Alaska State Virology Laboratory|Alaska State Virology Laboratory|Drown|USA

>Spike|hCoV-19/England/CAMB-83FBD/2020|2020-04-22|EPI\_ISL\_438718|Original|hCoV-19^^England|Human|Department of Pathology|COVID-19 Genomics UK (COG-UK) Consortium|Meredith|United Kingdom

>Spike|hCoV-19/USA/LA-GBCL-26684458/2020|2020-04-04|EPI\_ISL\_485279|Original|hCoV-19^^Louisiana|Human|River Road Testing Lab|Ginkgo Bioworks Clinical Laboratory|Smith|USA

>Spike|hCoV-19/England/CAMC-C985C6/2020|2020-12-18|EPI\_ISL\_777434|Original|hCoV-19^^England|Human|Lighthouse Lab in Cambridge|Wellcome Sanger Institute for the COVID-19 Genomics UK (COG-UK) Consortium|Davies|United Kingdom

>Spike|hCoV-19/Switzerland/VD-ETHZ-300423/2020|2020-09-29|EPI\_ISL\_603381|Original|hCoV-19^^Vaud|Human|Viollier AG|Department of Biosystems Science and Engineering|Nadeau|Switzerland

>Spike|hCoV-19/Israel/2099251/2020|2020-04-02|EPI\_ISL\_447355|Original|hCoV-19^^Jerusalem District|Human|Clinical Virology Unit|Stern Lab|Miller|Israel

>Spike|hCoV-19/USA/LA-EVTL169/2020|2020-05-11|EPI\_ISL\_574304|Original|hCoV-19^^Louisiana|Human|LSUHS Emerging Viral Threat Laboratory|Microbial Genome Sequencing Center|Kamil|USA

>Spike|hCoV-19/Scotland/CVR2105/2020|2020-04-10|EPI\_ISL\_493770|Original|hCoV-19^^Scotland|Human|West of Scotland Specialist Virology Centre|COVID-19 Genomics UK (COG-UK) Consortium|Robertson|United Kingdom

>Spike|hCoV-19/England/QEUA-990260/2020|2020-08-29|EPI\_ISL\_530355|Original|hCoV-19^^England|Human|Lighthouse Lab in Glasgow|Wellcome Sanger Institute for the COVID-19 Genomics UK (COG-UK) consortium|Davies|United Kingdom

>Spike|hCoV-19/Scotland/EDB5918/2020|2020-04-30|EPI\_ISL\_487690|Original|hCoV-19^^Scotland|Human|Virology Department|Wellcome Sanger Institute for the COVID-19 Genomics UK (COG-UK) consortium|Davies|United Kingdom

>Spike|hCoV-19/USA/CA-ALSR-2850/2020|2020-07-23|EPI\_ISL\_635712|Original|hCoV-19^^California|Human|San Diego County Public Health Laboratory|Andersen lab at Scripps Research|Gangavarapu|USA

>Spike|hCoV-19/Wales/PHWC-48C2B7/2020|2020-11-05|EPI\_ISL\_666413|Original|hCoV-19^^Wales|Human|Wales Specialist Virology Centre Sequencing lab|COVID-19 Genomics UK (COG-UK) Consortium|Moore|United Kingdom

>Spike|hCoV-19/England/ALDP-C3C870/2020|2020-12-10|EPI\_ISL\_731669|Original|hCoV-19^^England|Human|Lighthouse Lab in Alderley Park|Wellcome Sanger Institute for the COVID-19 Genomics UK (COG-UK) Consortium|Davies|United Kingdom

>Spike|hCoV-19/USA/LA-GBCL-26492436/2020|2020-04-28|EPI\_ISL\_485873|Original|hCoV-19^^Louisiana|Human|River Road Testing Lab|Ginkgo Bioworks Clinical Laboratory|Smith|USA

>Spike|hCoV-19/England/QEUA-9F55BB/2020|2020-09-25|EPI\_ISL\_588699|Original|hCoV-19^^England|Human|Lighthouse Lab in Glasgow|Wellcome Sanger Institute for the COVID-19 Genomics UK (COG-UK) consortium|Davies|United Kingdom

>Spike|hCoV-19/USA/WI-GMF-24330/2020|2020-10-06|EPI\_ISL\_660901|Original|hCoV-19^^Wisconsin|Human|Gundersen Molecular Diagnostics Laboratory|Kabara Cancer Research Institute|Kenny|USA

>Spike|hCoV-19/England/ALDP-9BDD5D/2020|2020-09-09|EPI\_ISL\_568126|Original|hCoV-19^^England|Human|Lighthouse Lab in Alderley Park|Wellcome Sanger Institute for the COVID-19 Genomics UK (COG-UK) consortium|Davies|United Kingdom

>Spike|hCoV-19/England/BRIS-12280F/2020|2020-04-04|EPI\_ISL\_440711|Original|hCoV-19^^England|Human|PHE South West Regional Laboratory|Wellcome Sanger Institute for the COVID-19 Genomics UK (COG-UK) consortium|Amato|United Kingdom

>Spike|hCoV-19/England/20149042504/2020|2020-04-02|EPI\_ISL\_466193|Original|hCoV-19^^England|Human|Respiratory Virus Unit|Respiratory Virus Unit|Platt|United Kingdom



>Spike|hCoV-19/England/NORT-28C705/2020|2020-05-15|EPI\_ISL\_469310|Original|hCoV-19^^England|Human|NU-OMICS DNA Sequencing research facility|Wellcome Sanger Institute for the COVID-19 Genomics UK (COG-UK) consortium|Davies|United Kingdom

>Spike|hCoV-19/Australia/VIC10402/2020|2020-08-12|EPI\_ISL\_562902|Original|hCoV-19^^Victoria|Human|Microbiological Diagnostic Unit - Public Health Laboratory (MDU-PHL)|MDU-PHL|Schultz|Australia

>Spike|hCoV-19/Wales/PHWC-16038C/2020|2020-05-20|EPI\_ISL\_472924|Original|hCoV-19^^Wales|Human|Wales Specialist Virology Centre Sequencing lab|COVID-19 Genomics UK (COG-UK) Consortium|Moore|United Kingdom

>Spike|hCoV-19/USA/WA-S125/2020|2020-03-13|EPI\_ISL\_430162|Original|hCoV-19^^Washington|Human|Washington State Department of Health|Seattle Flu Study|Bedford|USA

>Spike|hCoV-19/Turkey/IST-GLAB-179/2020|2020-05-04|EPI\_ISL\_480269|Original|hCoV-19^^Istanbul|Human|Genomic Laboratory (GLAB) (Conjoint lab of Health Directorate of Istanbul and Istanbul Technical University)|Genomic Laboratory (GLAB)|Karacan|Turkey

>Spike|hCoV-19/Bermuda/204990916/2020|2020-10-31|EPI\_ISL\_780386|Original|hCoV-19^^Bermuda|Human|Bermuda Government Molecular Diagnostics Laboratory (MDL)|Respiratory Virus Unit|Platt|Bermuda

>Spike|hCoV-19/Austria/CeMM0903/2020|2020-03-31|EPI\_ISL\_583756|Original|hCoV-19^^Austria|Human|Dr. Gernot Walder GmbH|Bergthaler laboratory|Bergthaler|Austria

>Spike|hCoV-19/USA/MD-MDH-0125/2020|2020-05-29|EPI\_ISL\_529167|Original|hCoV-19^^Maryland|Human|Maryland Department of Health Laboratory|Maryland Department of Health Laboratory|Keller|USA

>Spike|hCoV-19/Denmark/DCGC-10841/2020|2020-11-02|EPI\_ISL\_670247|Original|hCoV-19^^Hovedstaden|Human|Department of Virus and Microbiological Special Diagnostics|Albertsen Lab|Michaelsen|Denmark

>Spike|hCoV-19/USA/MI-MDHHS-SC20853/2020|2020-04-29|EPI\_ISL\_471874|Original|hCoV-19^^Michigan|Human|Michigan Department of Health and Human Services|Michigan Department of Health and Human Services|Blankenship|USA

>Spike|hCoV-19/England/QEUEH-997DC2/2020|2020-08-24|EPI\_ISL\_537149|Original|hCoV-19^^England|Human|Lighthouse Lab in Glasgow|Wellcome Sanger Institute for the COVID-19 Genomics UK (COG-UK) consortium|Davies|United Kingdom

>Spike|hCoV-19/Japan/PG-2139/2020|2020-05-00|EPI\_ISL\_685744|Original|hCoV-19^^Japan|Human|Pathogen Genomics Center|Pathogen Genomics Center|Sekizuka|Japan

>Spike|hCoV-19/England/20108125106/2020|2020-03-04|EPI\_ISL\_417259|Original|hCoV-19^^England|Human|Respiratory Virus Unit|Respiratory Virus Unit|Platt|United Kingdom

>Spike|hCoV-19/USA/UT-UPHL-201009153/2020|2020-04-18|EPI\_ISL\_594103|Original|hCoV-19^^Utah|Human|Utah Public Health Laboratory|Utah Public Health Laboratory|Young|USA

>Spike|hCoV-19/USA/MI-UM-10035685254/2020|2020-08-27|EPI\_ISL\_583253|Original|hCoV-19^^Michigan|Human|University of Michigan Clinical Microbiology Laboratory|Lauring Lab|Valesano|USA

>Spike|hCoV-19/England/QEUEH-8AF5DF/2020|2020-07-24|EPI\_ISL\_532701|Original|hCoV-19^^England|Human|Lighthouse Lab in Glasgow|Wellcome Sanger Institute for the COVID-19 Genomics UK (COG-UK) consortium|Davies|United Kingdom

>Spike|hCoV-19/England/LIVE-A4A2E/2020|2020-03-11|EPI\_ISL\_500063|Original|hCoV-19^^England|Human|Liverpool Clinical Laboratories|COVID-19 Genomics UK (COG-UK) Consortium|Haldenby|United Kingdom

>Spike|hCoV-19/Denmark/DCGC-20266/2020|2020-11-30|EPI\_ISL\_748084|Original|hCoV-19^^Sjaelland|Human|Department of Virus and Microbiological Special Diagnostics|Albertsen Lab|Michaelsen|Denmark

>Spike|hCoV-19/Denmark/ALAB-SSI412A/2020|2020-03-23|EPI\_ISL\_429508|Original|hCoV-19^^Denmark|Human|Department of Virus and Microbiological Special Diagnostics|Albertsen lab|Kirkegaard|Denmark

>Spike|hCoV-19/England/ALDP-AA1DA6/2020|2020-10-22|EPI\_ISL\_625084|Original|hCoV-19^^England|Human|Lighthouse Lab in Alderley Park|Wellcome Sanger Institute for the COVID-19 Genomics UK (COG-UK) consortium|Davies|United Kingdom

>Spike|hCoV-19/Northern Ireland/NIRE-2347FD/2020|2020-10-06|EPI\_ISL\_680436|Original|hCoV-19^^Northern Ireland|Human|Regional Virus Laboratory|COVID-19 Genomics UK (COG-UK) Consortium|Fairley|United Kingdom

>Spike|hCoV-19/Brazil/PR-5617/2020|2020-03-17|EPI\_ISL\_541340|Original|hCoV-19^^Paran\u00e1|Human|LACEN/PR|Laboratory of Respiratory Viruses and Measles|Silva|Brazil

>Spike|hCoV-19/USA/TX-HMH-2515/2020|2020-06-04|EPI\_ISL\_545351|Original|hCoV-19^^Texas|Human|Houston Methodist Hospital|Houston Methodist Hospital|Long|USA

>Spike|hCoV-19/USA/WA-UW-5776/2020|2020-04-07|EPI\_ISL\_570077|Original|hCoV-19^^Washington|Human|UW Virology Lab|UW Virology Lab|Roychoudhury|USA

>Spike|hCoV-19/England/CAMB-836A9/2020|2020-04-14|EPI\_ISL\_443523|Original|hCoV-19^^England|Human|Department of Pathology|Wellcome Sanger Institute for the COVID-19 Genomics UK (COG-UK) consortium|Amato|United Kingdom

>Spike|hCoV-19/England/NORT-281348/2020|2020-03-12|EPI\_ISL\_488771|Original|hCoV-19^^England|Human|NU-OMICS DNA Sequencing research facility|Wellcome Sanger Institute for the COVID-19 Genomics UK (COG-UK) consortium|Davies|United Kingdom

>Spike|hCoV-19/Australia/VIC10599/2020|2020-08-03|EPI\_ISL\_562980|Original|hCoV-19^^Victoria|Human|Microbiological Diagnostic Unit - Public Health Laboratory (MDU-PHL)|MDU-PHL|Schultz|Australia

>Spike|hCoV-19/Denmark/DCGC-4765/2020|2020-09-21|EPI\_ISL\_621375|Original|hCoV-19^^Nordjylland|Human|Department of Virus and Microbiological Special Diagnostics|Albertsen lab|Michaelsen|Denmark

>Spike|hCoV-19/Chile/RM-72821/2020|2020-05-23|EPI\_ISL\_746781|Original|hCoV-19^^Region Metropolitana de Santiago|Human|Genetica Molecular and Subdepartamento de Virologia ISP Chile|Instituto de Salud Publica de Chile|Tognarelli|Chile

>Spike|hCoV-19/Japan/PG-2269/2020|2020-04-00|EPI\_ISL\_685874|Original|hCoV-19^^Japan|Human|Pathogen Genomics Center|Pathogen Genomics Center|Sekizuka|Japan

>Spike|hCoV-19/USA/SC-DHEC-1142/2020|2020-07-10|EPI\_ISL\_574563|Original|hCoV-19^^South Carolina|Human|Microbiology Division|Microbiology Division|Flores|USA

>Spike|hCoV-19/USA/FL-BPHL-1999/2020|2020-05-15|EPI\_ISL\_653152|Original|hCoV-19^^Florida|Human|Florida Bureau of Public Health Laboratories|Florida Bureau of Public Health Laboratories|Blanton|USA

>Spike|hCoV-19/USA/CA-QDX-1633/2020|2020-03-18|EPI\_ISL\_603909|Original|hCoV-19^^California|Human|Quest Diagnostics|Quest Diagnostics|Kagan|USA

>Spike|hCoV-19/England/NORT-291CD1/2020|2020-05-11|EPI\_ISL\_489128|Original|hCoV-19^^England|Human|NU-OMICS DNA Sequencing research facility|Wellcome Sanger Institute for the COVID-19 Genomics UK (COG-UK) consortium|Davies|United Kingdom

>Spike|hCoV-19/England/20194136904/2020|2020-05-05|EPI\_ISL\_465619|Original|hCoV-19^^England|Human|Respiratory Virus Unit|Respiratory Virus Unit|Platt|United Kingdom

>Spike|hCoV-19/India/KA-IB44/2020|2020-06-15|EPI\_ISL\_508323|Original|hCoV-19^^Karnataka|Human|Indian Institute of Science|National Institute of Biomedical Genomics|Maitra|India

>Spike|hCoV-19/Denmark/DCGC-18410/2020|2020-12-07|EPI\_ISL\_749950|Original|hCoV-19^^Midtjylland|Human|Department of Virus and Microbiological Special Diagnostics|Albertsen Lab|Michaelsen|Denmark

>Spike|hCoV-19/USA/OR-CDC-2-3693568/2020|2020-11-17|EPI\_ISL\_747165|Original|hCoV-19^^Oregon|Human|Respiratory Viruses Branch|Respiratory Viruses Branch|Queen|USA

>Spike|hCoV-19/England/MILK-57A154/2020|2020-06-11|EPI\_ISL\_558292|Original|hCoV-19^^England|Human|Lighthouse Lab in Milton Keynes|Wellcome Sanger Institute for the COVID-19 Genomics UK (COG-UK) consortium|Davies|United Kingdom

>Spike|hCoV-19/USA/NY-NYCPHL-001382/2020|2020-11-17|EPI\_ISL\_683934|Original|hCoV-19^^New York|Human|DOHMH Corona|New York City Public Health Laboratory|Wang|USA

>Spike|hCoV-19/Thailand/Nonthaburi\_3478/2020|2020-03-20|EPI\_ISL\_455592|Vero P1|hCoV-19^^Nonthaburi|Human|National Institute of Health. Department of medical Sciences|National Institute of Health. Department of medical Sciences|Phuygun|Thailand

>Spike|hCoV-19/Australia/QLD1050/2020|2020-09-06|EPI\_ISL\_576137|Original|hCoV-19^^Australia|Human|unknown|Public Health Virology Laboratory|Nguyen|Australia

>Spike|hCoV-19/Japan/PG-5724/2020|2020-07-00|EPI\_ISL\_688846|Original|hCoV-19^^Japan|Human|Pathogen Genomics Center|Pathogen Genomics Center|Sekizuka|Japan

>Spike|hCoV-19/Denmark/DCGC-6353/2020|2020-09-21|EPI\_ISL\_622298|Original|hCoV-19^^Hovedstaden|Human|Department of Virus and Microbiological Special Diagnostics|Albertsen lab|Michaelsen|Denmark

>Spike|hCoV-19/USA/LA-EVTL650/2020|2020-08-06|EPI\_ISL\_579054|Original|hCoV-19^^Louisiana|Human|LSUHS Emerging Viral Threat Laboratory|Microbial Genome Sequencing Center|Kamil|USA

>Spike|hCoV-19/England/ALDP-9BED3E/2020|2020-09-09|EPI\_ISL\_567990|Original|hCoV-19^^England|Human|Lighthouse Lab in Alderley Park|Wellcome Sanger Institute for the COVID-19 Genomics UK (COG-UK) consortium|Davies|United Kingdom

>Spike|hCoV-19/Australia/VIC2239/2020|2020-06-24|EPI\_ISL\_563981|Original|hCoV-19^^Victoria|Human|Microbiological Diagnostic Unit - Public Health Laboratory (MDU-PHL)|MDU-PHL|Schultz|Australia

>Spike|hCoV-19/USA/CA-CZB-1420/2020|2020-03-17|EPI\_ISL\_468393|Original|hCoV-19^^California|Human|County of San Luis Obispo Public Health Laboratory|Chan-Zuckerberg Biohub|Hao|USA

>Spike|hCoV-19/USA/NM-NMDOH-2020324382/2020|2020-09-02|EPI\_ISL\_632830|Original|hCoV-19^^New Mexico|Human|New Mexico Department of Health Scientific Laboratory|New Mexico Department of Health Scientific Laboratory|Johnson|USA

>Spike|hCoV-19/England/QEUH-9B8174/2020|2020-09-04|EPI\_ISL\_590626|Original|hCoV-19^^England|Human|Lighthouse Lab in Glasgow|Wellcome Sanger Institute for the COVID-19 Genomics UK (COG-UK) consortium|Davies|United Kingdom

>Spike|hCoV-19/Canada/ON-E16/2020|2020-05-09|EPI\_ISL\_593496|Original|hCoV-19^^Ontario|Human|Eastern Ontario Regional Laboratory Association|McMaster University|McArthur|Canada

>Spike|hCoV-19/England/NOTT-11328B/2020|2020-09-13|EPI\_ISL\_540717|Original|hCoV-19^^England|Human|Queens Medical Centre|COVID-19 Genomics UK (COG-UK) Consortium|Loose|United Kingdom

>Spike|hCoV-19/Australia/VIC2840/2020|2020-07-02|EPI\_ISL\_521671|Original|hCoV-19^^Victoria|Human|Microbiological Diagnostic Unit - Public Health Laboratory (MDU-PHL)|MDU-PHL|Schultz|Australia

>Spike|hCoV-19/Wales/PHWC-48F21E/2020|2020-11-07|EPI\_ISL\_681061|Original|hCoV-19^^Wales|Human|Wales Specialist Virology Centre Sequencing lab|COVID-19 Genomics UK (COG-UK) Consortium|Moore|United Kingdom

>Spike|hCoV-19/USA/NY-Wadsworth-41904-01/2020|2020-04-08|EPI\_ISL\_525660|Original|hCoV-19^^New York|Human|Wadsworth Center|Wadsworth Center|Plitnick|USA

>Spike|hCoV-19/Denmark/DCGC-21366/2020|2020-12-21|EPI\_ISL\_757722|Original|hCoV-19^^Sjaelland|Human|Department of Virus and Microbiological Special Diagnostics|Albertsen Lab|Michaelsen|Denmark

>Spike|hCoV-19/USA/NY-NYCPHL-000499/2020|2020-04-07|EPI\_ISL\_631960|Original|hCoV-19^^New York|Human|Flushing Hospital Medical Center|New York City Public Health Laboratory|Wang|USA

>Spike|hCoV-19/USA/CA-LACPHL-AD00003/2020|2020-04-17|EPI\_ISL\_707693|Original|hCoV-19^^California|Human|Los Angeles County Public Health Laboratory|Los Angeles County Public Health Laboratory|Hemarajata|USA

>Spike|hCoV-19/Denmark/DCGC-7910/2020|2020-10-26|EPI\_ISL\_618864|Original|hCoV-19^^Sjaelland|Human|Department of Virus and Microbiological Special Diagnostics|Albertsen lab|Michaelsen|Denmark

>Spike|hCoV-19/Luxembourg/LNS4978035/2020|2020-10-25|EPI\_ISL\_744166|Original|hCoV-19^^Luxembourg|Human|Laboratoire national de sant\u00e9|Laboratoire national de sant\u00e9|Wienecke-Baldacchino|Luxembourg

>Spike|hCoV-19/England/ALDP-B47EEA/2020|2020-11-07|EPI\_ISL\_649363|Original|hCoV-19^^England|Human|Lighthouse Lab in Alderley Park|Wellcome Sanger Institute for the COVID-19 Genomics UK (COG-UK) Consortium|Davies|United Kingdom

>Spike|hCoV-19/England/ALDP-BB59B9/2020|2020-11-20|EPI\_ISL\_702931|Original|hCoV-19^^England|Human|Lighthouse Lab in Alderley Park|Wellcome Sanger Institute for the COVID-19 Genomics UK (COG-UK) Consortium|Davies|United Kingdom

>Spike|hCoV-19/England/ALDP-A2DB8A/2020|2020-10-05|EPI\_ISL\_586925|Original|hCoV-19^^England|Human|Lighthouse Lab in Alderley Park|Wellcome Sanger Institute for the COVID-19 Genomics UK (COG-UK) consortium|Davies|United Kingdom

>Spike|hCoV-19/Chile/RM-ISPCH-72/2020|2020-03-22|EPI\_ISL\_445368|Original|hCoV-19^^Region Metropolitana de Santiago|Human|HOSPITAL DEL PROFESOR|Instituto de Salud Publica de Chile|Fernandez|Chile

>Spike|hCoV-19/Denmark/DCGC-13701/2020|2020-11-30|EPI\_ISL\_712197|Original|hCoV-19^^Hovedstaden|Human|Department of Virus and Microbiological Special Diagnostics|Albertsen Lab|Michaelsen|Denmark

>Spike|hCoV-19/England/QEUA-9CA546/2020|2020-09-10|EPI\_ISL\_567491|Original|hCoV-19^^England|Human|Lighthouse Lab in Glasgow|Wellcome Sanger Institute for the COVID-19 Genomics UK (COG-UK) consortium|Davies|United Kingdom

>Spike|hCoV-19/USA/MN-MDH-1171/2020|2020-05-18|EPI\_ISL\_476756|Original|hCoV-19^^Minnesota|Human|Minnesota Department of Health|Minnesota Department of Health|Garfin|USA

>Spike|hCoV-19/England/SHEF-10D0A08/2020|2020-12-01|EPI\_ISL\_742026|Original|hCoV-19^^England|Human|Virology Department|COVID-19 Genomics UK (COG-UK) Consortium|de Silva|United Kingdom

>Spike|hCoV-19/Northern Ireland/NIRE-235291/2020|2020-10-16|EPI\_ISL\_763405|Original|hCoV-19^^Northern Ireland|Human|Regional Virus Laboratory|COVID-19 Genomics UK (COG-UK) Consortium|Fairley|United Kingdom

>Spike|hCoV-19/USA/UT-03027/2020|2020-05-01|EPI\_ISL\_522299|Original|hCoV-19^^Utah|Human|Utah Public Health Laboratory|Utah Public Health Laboratory|Young|USA

>Spike|hCoV-19/Scotland/CVR617/2020|2020-03-25|EPI\_ISL\_439090|Original|hCoV-19^^Scotland|Human|West of Scotland Specialist Virology Centre|COVID-19 Genomics UK (COG-UK) Consortium|Robertson|United Kingdom

>Spike|hCoV-19/England/QEUA-961954/2020|2020-08-01|EPI\_ISL\_537025|Original|hCoV-19^^England|Human|Lighthouse Lab in Glasgow|Wellcome Sanger Institute for the COVID-19 Genomics UK (COG-UK) consortium|Davies|United Kingdom

>Spike|hCoV-19/England/NOTT-120C41/2020|2020-12-12|EPI\_ISL\_725658|Original|hCoV-19^^England|Human|Queens Medical Centre|COVID-19 Genomics UK (COG-UK) Consortium|Loose|United Kingdom

>Spike|hCoV-19/Japan/PG-5168/2020|2020-08-00|EPI\_ISL\_690271|Original|hCoV-19^^Japan|Human|Pathogen Genomics Center|Pathogen Genomics Center|Sekizuka|Japan

>Spike|hCoV-19/Italy/VEN-IZSve-37-4/2020|2020-04-06|EPI\_ISL\_636473|Original|hCoV-19^^Veneto|Human|ULSS6 Piove di Sacco|Istituto Zooprofilattico Sperimentale delle Venezie|Quaranta|Italy

>Spike|hCoV-19/Australia/VIC3877/2020|2020-07-13|EPI\_ISL\_520590|Original|hCoV-19^^Victoria|Human|Microbiological Diagnostic Unit - Public Health Laboratory (MDU-PHL)|MDU-PHL|Schultz|Australia

>Spike|hCoV-19/USA/CA-CZB-13110/2020|2020-10-27|EPI\_ISL\_672422|Original|hCoV-19^^California|Human|Madera County Department of Public Health|Chan-Zuckerberg Biohub|Bhatt|USA

>Spike|hCoV-19/USA/TX-HMH-MCoV-14833/2020|2020-10-13|EPI\_ISL\_786317|Original|hCoV-19^^Texas|Human|Houston Methodist Hospital|Houston Methodist Hospital|Long|USA

>Spike|hCoV-19/Denmark/DCGC-17587/2020|2020-12-14|EPI\_ISL\_751087|Original|hCoV-19^^Midtjylland|Human|Department of Virus and Microbiological Special Diagnostics|Albertsen Lab|Michaelsen|Denmark

>Spike|hCoV-19/Japan/PG-3313/2020|2020-04-00|EPI\_ISL\_691428|Original|hCoV-19^^Japan|Human|Pathogen Genomics Center|Pathogen Genomics Center|Sekizuka|Japan

>Spike|hCoV-19/England/OXON-B0FF3/2020|2020-04-12|EPI\_ISL\_478986|Original|hCoV-19^^England|Human|Oxford Viromics|COVID-19 Genomics UK (COG-UK) Consortium|Golubchik|United Kingdom

>Spike|hCoV-19/Italy/VEN-IZSve-20RS2163-6/2020|2020-11-23|EPI\_ISL\_747475|Original|hCoV-19^^Veneto|Human|ULSS9 Distretto di Bussolengo|Istituto Zooprofilattico Sperimentale delle Venezie|Quaranta|Italy

>Spike|hCoV-19/England/20129023104/2020|2020-03-19|EPI\_ISL\_424015|Original|hCoV-19^^England|Human|Respiratory Virus Unit|Respiratory Virus Unit|Platt|United Kingdom

>Spike|hCoV-19/France/PDL-SC630/2020|2020-04-02|EPI\_ISL\_663271|Original|hCoV-19^^Pays-de-la-Loire|Human|CHU Nantes|CNR Virus des Infections Respiratoires - France SUD|Bal|France

>Spike|hCoV-19/USA/NY-Wadsworth-97827-01/2020|2020-05-13|EPI\_ISL\_676927|Original|hCoV-19^^New York|Human|Wadsworth Center|Wadsworth Center|Lasek-Nesselquist|USA

>Spike|hCoV-19/Netherlands/ZuidHolland\_145/2020|2020-04-19|EPI\_ISL\_461318|Original|hCoV-19^^Zuid Holland|Human|Dutch COVID-19 response team|Erasmus Medical Center|Oude Munnink|Netherlands

>Spike|hCoV-19/England/QEUH-AD202B/2020|2020-10-26|EPI\_ISL\_634161|Original|hCoV-19^^England|Human|Lighthouse Lab in Glasgow|Wellcome Sanger Institute for the COVID-19 Genomics UK (COG-UK) consortium|Davies|United Kingdom

>Spike|hCoV-19/Wales/PHWC-49F07B/2020|2020-11-26|EPI\_ISL\_743161|Original|hCoV-19^^Wales|Human|Wales Specialist Virology Centre Sequencing lab|COVID-19 Genomics UK (COG-UK) Consortium|Moore|United Kingdom

>Spike|hCoV-19/USA/CA-QDX-111/2020|2020-03-13|EPI\_ISL\_468563|Original|hCoV-19^^California|Human|Quest Diagnostics|Quest Diagnostics|Kagan|USA

>Spike|hCoV-19/Denmark/DCGC-1954/2020|2020-07-20|EPI\_ISL\_618328|Original|hCoV-19^^Hovedstaden|Human|Department of Virus and Microbiological Special Diagnostics|Albertsen lab|Michaelsen|Denmark

>Spike|hCoV-19/USA/TX-HMH-MCoV-9863/2020|2020-07-06|EPI\_ISL\_780311|Original|hCoV-19^^Texas|Human|Houston Methodist Hospital|Houston Methodist Hospital|Long|USA

>Spike|hCoV-19/Wales/PHWC-16F235/2020|2020-10-04|EPI\_ISL\_585933|Original|hCoV-19^^Wales|Human|Wales Specialist Virology Centre Sequencing lab|COVID-19 Genomics UK (COG-UK) Consortium|Moore|United Kingdom

>Spike|hCoV-19/India/WB-S46/2020|2020-05-03|EPI\_ISL\_455667|Original|hCoV-19^^West Bengal|Human|ICMR-National Institute of Cholera and Enteric Diseases|National Institute of Biomedical Genomics|Maitra|India

>Spike|hCoV-19/England/20144051704/2020|2020-03-31|EPI\_ISL\_421952|Original|hCoV-19^^England|Human|Respiratory Virus Unit|Respiratory Virus Unit|Platt|United Kingdom

>Spike|hCoV-19/Scotland/EDB212/2020|2020-03-26|EPI\_ISL\_425943|Original|hCoV-19^^Scotland|Human|Virology Department|COVID-19 Genomics UK (COG-UK) Consortium|Williams|United Kingdom

>Spike|hCoV-19/USA/CA-CZB-14350/2020|2020-07-16|EPI\_ISL\_739084|Original|hCoV-19^^California|Human|Alameda County Public Health Lab|Chan-Zuckerberg Biohub|Kamm|USA

>Spike|hCoV-19/England/EXET-135960/2020|2020-04-22|EPI\_ISL\_478277|Original|hCoV-19^^England|Human|University of Exeter|COVID-19 Genomics UK (COG-UK) Consortium|Temperton|United Kingdom

>Spike|hCoV-19/Australia/VIC6106/2020|2020-07-13|EPI\_ISL\_518127|Original|hCoV-19^^Victoria|Human|Victorian Infectious Diseases Reference Laboratory (VIDRL)|VIDRL and MDU-PHL|Schultz|Australia

>Spike|hCoV-19/USA/AZ-TG666107/2020|2020-03-26|EPI\_ISL\_696197|Original|hCoV-19^^Arizona|Human|Sonora Quest Laboratories|TGen North|French|USA

>Spike|hCoV-19/England/CAMB-840AA/2020|2020-04-26|EPI\_ISL\_438732|Original|hCoV-19^^England|Human|Department of Pathology|COVID-19 Genomics UK (COG-UK) Consortium|Meredith|United Kingdom

>Spike|hCoV-19/England/CAMC-BC1774/2020|2020-11-22|EPI\_ISL\_704060|Original|hCoV-19^^England|Human|Department of Pathology|COVID-19 Genomics UK (COG-UK) Consortium|Goodfellow|United Kingdom

>Spike|hCoV-19/Wales/MILK-9C2247/2020|2020-09-11|EPI\_ISL\_566636|Original|hCoV-19^^Wales|Human|Lighthouse Lab in Milton Keynes|Wellcome Sanger Institute for the COVID-19 Genomics UK (COG-UK) consortium|Davies|United Kingdom

>Spike|hCoV-19/France/OCC-SC508/2020|2020-04-22|EPI\_ISL\_660699|Original|hCoV-19^^Occitanie|Human|CHU Montpellier|CNR Virus des Infections Respiratoires - France SUD|Bal|France

>Spike|hCoV-19/Wales/PHWC-16D668/2020|2020-09-25|EPI\_ISL\_577426|Original|hCoV-19^^Wales|Human|Wales Specialist Virology Centre Sequencing lab|COVID-19 Genomics UK (COG-UK) Consortium|Moore|United Kingdom

>Spike|hCoV-19/USA/NY-Wadsworth-46903-01/2020|2020-04-14|EPI\_ISL\_676695|Original|hCoV-19^^New York|Human|Wadsworth Center|Wadsworth Center|Lasek-Nesselquist|USA

>Spike|hCoV-19/South Africa/KRISP-0502/2020|2020-07-11|EPI\_ISL\_498070|Original|hCoV-19^^KwaZulu-Natal|Human|NHLs-IALCH|KRISP|de Oliveira|South Africa

>Spike|hCoV-19/Wales/PHWC-4800E6/2020|2020-10-08|EPI\_ISL\_612851|Original|hCoV-19^^Wales|Human|Wales Specialist Virology Centre Sequencing lab|COVID-19 Genomics UK (COG-UK) Consortium|Moore|United Kingdom

>Spike|hCoV-19/USA/TX-HMH-MCoV-10810/2020|2020-07-05|EPI\_ISL\_789637|Original|hCoV-19^^Texas|Human|Houston Methodist Hospital|Houston Methodist Hospital|Long|USA

>Spike|hCoV-19/Japan/PG-0822/2020|2020-04-00|EPI\_ISL\_684432|Original|hCoV-19^^Japan|Human|Fukuoka Institute of Health and Environmental Sciences|Pathogen Genomics Center|Sekizuka|Japan

>Spike|hCoV-19/France/BRE-IPP9954/2020|2020-09-20|EPI\_ISL\_693762|Original|hCoV-19^^Bretagne|Human|Hospital|National Reference Center for Viruses of Respiratory Infections|Enouf|France

>Spike|hCoV-19/England/ALDP-BB3DEC/2020|2020-11-20|EPI\_ISL\_701695|Original|hCoV-19^^England|Human|Lighthouse Lab in Alderley Park|Wellcome Sanger Institute for the COVID-19 Genomics UK (COG-UK) Consortium|Davies|United Kingdom

>Spike|hCoV-19/Canada/ON-S738/2020|2020-04-09|EPI\_ISL\_586431|Original|hCoV-19^^Ontario|Human|Toronto Invasive Bacterial Diseases Network|McMaster University|McArthur|Canada

>Spike|hCoV-19/England/CAMB-815CC/2020|2020-04-11|EPI\_ISL\_443033|Original|hCoV-19^^England|Human|Department of Pathology|Wellcome Sanger Institute for the COVID-19 Genomics UK (COG-UK) consortium|Amato|United Kingdom

>Spike|hCoV-19/Indonesia/JK-NIHRD-MI52885/2020|2020-08-20|EPI\_ISL\_538505|Original|hCoV-19^^Jakarta|Human|National Institute of Health Research and Development|National Institute of Health Research and Development|Setiawati|Indonesia

>Spike|hCoV-19/England/MILK-4BEC72/2020|2020-06-04|EPI\_ISL\_559166|Original|hCoV-19^^England|Human|Lighthouse Lab in Milton Keynes|Wellcome Sanger Institute for the COVID-19 Genomics UK (COG-UK) consortium|Davies|United Kingdom

>Spike|hCoV-19/Netherlands/ZH-EMC-325/2020|2020-06-24|EPI\_ISL\_523666|Original|hCoV-19^^Zuid Holland|Human|Dutch COVID-19 response team|Erasmus Medical Center|Oude Munnink|Netherlands

>Spike|hCoV-19/England/CAMB-7318D/2020|2020-03-22|EPI\_ISL\_440283|Original|hCoV-19^^England|Human|Department of Pathology|Wellcome Sanger Institute for the COVID-19 Genomics UK (COG-UK) consortium|Amato|United Kingdom

>Spike|hCoV-19/Wales/PHWC-24EA2/2020|2020-03-22|EPI\_ISL\_420953|Original|hCoV-19^^Wales|Human|Wales Specialist Virology Centre|Public Health Wales Microbiology Cardiff|Moore|United Kingdom

>Spike|hCoV-19/Scotland/EDB2597/2020|2020-04-24|EPI\_ISL\_439236|Original|hCoV-19^^Scotland|Human|Virology Department|COVID-19 Genomics UK (COG-UK) Consortium|Williams|United Kingdom

>Spike|hCoV-19/Singapore/1369/2020|2020-06-29|EPI\_ISL\_648721|Original|hCoV-19^^Singapore|Human|Department of Laboratory Medicine|Department of Laboratory Medicine|Chen|Singapore

>Spike|hCoV-19/Denmark/DCGC-9971/2020|2020-11-09|EPI\_ISL\_669302|Original|hCoV-19^^Hovedstaden|Human|Department of Virus and Microbiological Special Diagnostics|Albertsen Lab|Michaelsen|Denmark

>Spike|hCoV-19/Mexico/BCN-ALSR-4924/2020|2020-08-20|EPI\_ISL\_730214|Original|hCoV-19^^Baja California|Human|Genomica Lab Molecular|Andersen lab at Scripps Research|Gangavarapu|Mexico

>Spike|hCoV-19/England/QEUH-9DDCA5/2020|2020-09-21|EPI\_ISL\_599610|Original|hCoV-19^^England|Human|Lighthouse Lab in Glasgow|Wellcome Sanger Institute for the COVID-19 Genomics UK (COG-UK) consortium|Davies|United Kingdom

>Spike|hCoV-19/Wales/PHWC-494B0C/2020|2020-11-21|EPI\_ISL\_726218|Original|hCoV-19^^Wales|Human|Originating lab|COVID-19 Genomics UK (COG-UK) Consortium|Moore|United Kingdom

>Spike|hCoV-19/England/CAMB-84945/2020|2020-03-07|EPI\_ISL\_440535|Original|hCoV-19^^England|Human|Department of Pathology|Wellcome Sanger Institute for the COVID-19 Genomics UK (COG-UK) consortium|Amato|United Kingdom

>Spike|hCoV-19/England/QEUH-9B84E4/2020|2020-09-10|EPI\_ISL\_549721|Original|hCoV-19^^England|Human|Lighthouse Lab in Glasgow|Wellcome Sanger Institute for the COVID-19 Genomics UK (COG-UK) consortium|Davies|United Kingdom

>Spike|hCoV-19/England/SHEF-10D13DF/2020|2020-12-20|EPI\_ISL\_742033|Original|hCoV-19^^England|Human|Virology Department|COVID-19 Genomics UK (COG-UK) Consortium|de Silva|United Kingdom

>Spike|hCoV-19/England/CAMB-1AD7F0/2020|2020-05-04|EPI\_ISL\_448012|Original|hCoV-19^^England|Human|Department of Pathology|COVID-19 Genomics UK (COG-UK) Consortium|Meredith|United Kingdom

>Spike|hCoV-19/Japan/PG-1732/2020|2020-04-00|EPI\_ISL\_685338|Original|hCoV-19^^Japan|Human|Pathogen Genomics Center|Pathogen Genomics Center|Sekizuka|Japan

>Spike|hCoV-19/USA/FL-BPHL-1509/2020|2020-07-24|EPI\_ISL\_568607|Original|hCoV-19^^Florida|Human|Florida Bureau of Public Health Laboratories|Florida Bureau of Public Health Laboratories|Blanton|USA

>Spike|hCoV-19/England/BRIS-124B13/2020|2020-03-26|EPI\_ISL\_444021|Original|hCoV-19^^England|Human|PHE South West Regional Laboratory|Wellcome Sanger Institute for the COVID-19 Genomics UK (COG-UK) consortium|Amato|United Kingdom

>Spike|hCoV-19/South Korea/BA-ACH\_2718/2020|2020-02-29|EPI\_ISL\_420800|Original|hCoV-19^^South Korea|Human|Brian D. Allgood Army Community Hospital|Pathogen Discovery|Queen|South Korea

>Spike|hCoV-19/USA/TX-DSHS-1505/2020|2020-06-22|EPI\_ISL\_683420|Original|hCoV-19^^Texas|Human|Texas Department of State Health Services|Texas Department of State Health Services|Rahman|USA

>Spike|hCoV-19/USA/CA-CDPH237/2020|2020-11-15|EPI\_ISL\_755083|Original|hCoV-19^^California|Human|California Department of Public Health|California Department of Public Health|Bell|USA

>Spike|hCoV-19/England/CAMC-BFB3F5/2020|2020-12-04|EPI\_ISL\_709101|Original|hCoV-19^^England|Human|Lighthouse Lab in Cambridge|Wellcome Sanger Institute for the COVID-19 Genomics UK (COG-UK) Consortium|Davies|United Kingdom

>Spike|hCoV-19/USA/FL-BPHL-0950/2020|2020-07-07|EPI\_ISL\_517840|Original|hCoV-19^^Florida|Human|Florida Bureau of Public Health Laboratories|Florida Bureau of Public Health Laboratories|Blanton|USA

>Spike|hCoV-19/USA/TX-HMH-3516/2020|2020-06-15|EPI\_ISL\_544216|Original|hCoV-19^^Texas|Human|Houston Methodist Hospital|Houston Methodist Hospital|Long|USA

>Spike|hCoV-19/Australia/VIC9642/2020|2020-08-21|EPI\_ISL\_565635|Original|hCoV-19^^Victoria|Human|Microbiological Diagnostic Unit - Public Health Laboratory (MDU-PHL) |MDU-PHL|Schultz|Australia

>Spike|hCoV-19/Scotland/EDB4561/2020|2020-05-06|EPI\_ISL\_493906|Original|hCoV-19^^Scotland|Human|Virology Department|COVID-19 Genomics UK (COG-UK) Consortium|Williams|United Kingdom

>Spike|hCoV-19/Canada/QC-LSPQ-L00218534/2020|2020-03-14|EPI\_ISL\_535784|Original|hCoV-19^^Quebec|Human|CHUL-LABO MULTI / MICRO|Laboratoire de sant\u00e9 publique du Qu\u00e9bec|Moreira|Canada

>Spike|hCoV-19/England/MILK-B8F61B/2020|2020-11-13|EPI\_ISL\_674577|Original|hCoV-19^^England|Human|Lighthouse Lab in Milton Keynes|Wellcome Sanger Institute for the COVID-19 Genomics UK (COG-UK) Consortium|Davies|United Kingdom

>Spike|hCoV-19/England/LIVE-DC7EE0/2020|2020-11-16|EPI\_ISL\_703577|Original|hCoV-19^^England|Human|Liverpool Clinical Laboratories|COVID-19 Genomics UK (COG-UK) Consortium|Haldenby|United Kingdom

>Spike|hCoV-19/Belgium/regal-10191301/2020|2020-10-19|EPI\_ISL\_735204|Original|hCoV-19^^Kortenberg|Human|UZ Leuven|KU Leuven|Maes|Belgium

>Spike|hCoV-19/Wales/ALDP-C3A6B4/2020|2020-12-09|EPI\_ISL\_767259|Original|hCoV-19^^Wales|Human|Lighthouse Lab in Alderley Park|Wellcome Sanger Institute for the COVID-19 Genomics UK (COG-UK) Consortium|Davies|United Kingdom

>Spike|hCoV-19/England/QEUEH-B10B5C/2020|2020-11-02|EPI\_ISL\_642701|Original|hCoV-19^^England|Human|Lighthouse Lab in Glasgow|Wellcome Sanger Institute for the COVID-19 Genomics UK (COG-UK) Consortium|Davies|United Kingdom

>Spike|hCoV-19/Germany/SH-ChVir3053/2020|2020-03-20|EPI\_ISL\_729523|Original|hCoV-19^^Schleswig-Holstein|Human|A. Krumbholz|Charit\u00e9 Universit\u00e4tsmedizin Berlin|Muehlemann|Germany

>Spike|hCoV-19/England/MILK-B8F4B7/2020|2020-11-13|EPI\_ISL\_674697|Original|hCoV-19^^England|Human|Lighthouse Lab in Milton Keynes|Wellcome Sanger Institute for the COVID-19 Genomics UK (COG-UK) Consortium|Davies|United Kingdom

>Spike|hCoV-19/Spain/AN-IBV-004112/2020|2020-05-24|EPI\_ISL\_510056|Original|hCoV-19^^Andalucia|Human|Servicio de Microbiolog\u00eda. HRU de M\u00e9llaga. Servicio Andaluz de Salud|SeqCOVID-SPAIN consortium/IBV(CSIC)|Comas|Spain

>Spike|hCoV-19/England/BRIS-13025B/2020|2020-04-11|EPI\_ISL\_492555|Original|hCoV-19^^England|Human|PHE South West Regional Laboratory|Wellcome Sanger Institute for the COVID-19 Genomics UK (COG-UK) consortium|Davies|United Kingdom

>Spike|hCoV-19/Japan/PG-8884/2020|2020-08-00|EPI\_ISL\_686430|Original|hCoV-19^^Japan|Human|Pathogen Genomics Center|Pathogen Genomics Center|Sekizuka|Japan

>Spike|hCoV-19/USA/MI-QDX-389/2020|2020-03-23|EPI\_ISL\_571130|Original|hCoV-19^^Michigan|Human|Quest Diagnostics|Quest Diagnostics|Kagan|USA

>Spike|hCoV-19/Russia/PRI-RII-MH892S/2020|2020-08-02|EPI\_ISL\_733019|Original|hCoV-19^^Primorsky|Human|WHO National Influenza Centre Russian Federation|WHO National Influenza Centre Russian Federation|Komissarov|Russia

>Spike|hCoV-19/Iceland/103/2020|2020-03-10|EPI\_ISL\_417698|Original|hCoV-19^^Reykjavik|Human|The National University Hospital of Iceland|deCODE genetics|J\u00f3nsson|Iceland

>Spike|hCoV-19/USA/UT-QDX-2117/2020|2020-03-11|EPI\_ISL\_604493|Original|hCoV-19^^Utah|Human|Quest Diagnostics|Quest Diagnostics|Kagan|USA

>Spike|hCoV-19/England/20104013904/2020|2020-03-02|EPI\_ISL\_464329|Original|hCoV-19^^England|Human|Respiratory Virus Unit|Respiratory Virus Unit|Platt|United Kingdom

>Spike|hCoV-19/Brazil/RS-15286/2020|2020-08-14|EPI\_ISL\_729803|Original|hCoV-19^^Rio Grande do Sul|Human|Laboratorio Central de Saude Publica do Estado do Rio Grande do Sul (LACEN-RS)|Laboratory of Respiratory Viruses and Measles|Silva|Brazil

>Spike|hCoV-19/Wales/ALDP-B1CA08/2020|2020-11-01|EPI\_ISL\_723522|Original|hCoV-19^^Wales|Human|Centre for Enzyme Innovation|COVID-19 Genomics UK (COG-UK) Consortium|Robson|United Kingdom

>Spike|hCoV-19/England/ALDP-C3AEE9/2020|2020-12-09|EPI\_ISL\_730663|Original|hCoV-19^^England|Human|Lighthouse Lab in Alderley Park|Wellcome Sanger Institute for the COVID-19 Genomics UK (COG-UK) Consortium|Davies|United Kingdom

>Spike|hCoV-19/England/ALDP-AA4EFB/2020|2020-10-22|EPI\_ISL\_630709|Original|hCoV-19^^England|Human|Lighthouse Lab in Alderley Park|Wellcome Sanger Institute for the COVID-19 Genomics UK (COG-UK) consortium|Davies|United Kingdom

>Spike|hCoV-19/England/EXET-13F3E0/2020|2020-12-16|EPI\_ISL\_763387|Original|hCoV-19^^England|Human|University of Exeter|COVID-19 Genomics UK (COG-UK) Consortium|Temperton|United Kingdom

>Spike|hCoV-19/England/CAMB-1AA359/2020|2020-04-16|EPI\_ISL\_443517|Original|hCoV-19^^England|Human|Department of Pathology|Wellcome Sanger Institute for the COVID-19 Genomics UK (COG-UK) consortium|Amato|United Kingdom

>Spike|hCoV-19/Guadeloupe/IPG-7323/2020|2020-03-15|EPI\_ISL\_613423|Original|hCoV-19^^Saint-Fran\u00e7ois|Human|Institut Pasteur de la Guadeloupe|Institut Pasteur de la Guadeloupe|Enouf|Guadeloupe

>Spike|hCoV-19/USA/LA-EVTL772/2020|2020-07-21|EPI\_ISL\_653463|Original|hCoV-19^^Louisiana|Human|LSUHS Emerging Viral Threat Laboratory|Microbial Genome Sequencing Center|Kamil|USA

>Spike|hCoV-19/Denmark/DCGC-22367/2020|2020-12-14|EPI\_ISL\_757518|Original|hCoV-19^^Hovedstaden|Human|Department of Virus and Microbiological Special Diagnostics|Albertsen Lab|Michaelsen|Denmark

>Spike|hCoV-19/USA/CT-Yale-043/2020|2020-03-19|EPI\_ISL\_420098|Original|hCoV-19^^Connecticut|Human|Yale Clinical Virology Laboratory|Grubaugh Lab - Yale School of Public Health|Grubaugh|USA

>Spike|hCoV-19/England/20129105304/2020|2020-03-13|EPI\_ISL\_424089|Original|hCoV-19^^England|Human|Respiratory Virus Unit|Respiratory Virus Unit|Platt|United Kingdom

>Spike|hCoV-19/England/SHEF-CB97F/2020|2020-10-16|EPI\_ISL\_611920|Original|hCoV-19^^England|Human|Virology Department|COVID-19 Genomics UK (COG-UK) Consortium|de Silva|United Kingdom

>Spike|hCoV-19/Russia/SVE-RII-MH1634S/2020|2020-09-11|EPI\_ISL\_596304|Original|hCoV-19^^Sverdlovsk|Human|HELIX LCC|WHO National Influenza Centre Russian Federation|Komissarov|Russia

>Spike|hCoV-19/Denmark/DCGC-7053/2020|2020-10-12|EPI\_ISL\_619902|Original|hCoV-19^^Hovedstaden|Human|Department of Virus and Microbiological Special Diagnostics|Albertsen lab|Michaelsen|Denmark



>Spike|hCoV-19/England/QEUA-BC4BB1/2020|2020-11-25|EPI\_ISL\_703857|Original|hCoV-19^^England|Human|Lighthouse Lab in Glasgow|Wellcome Sanger Institute for the COVID-19 Genomics UK (COG-UK) Consortium|Davies|United Kingdom

>Spike|hCoV-19/England/MILK-BAFC13/2020|2020-11-17|EPI\_ISL\_720472|Original|hCoV-19^^England|Human|Lighthouse Lab in Milton Keynes|Wellcome Sanger Institute for the COVID-19 Genomics UK (COG-UK) Consortium|Davies|United Kingdom

>Spike|hCoV-19/England/QEUA-A8C14B/2020|2020-10-16|EPI\_ISL\_643097|Original|hCoV-19^^England|Human|Lighthouse Lab in Glasgow|Wellcome Sanger Institute for the COVID-19 Genomics UK (COG-UK) Consortium|Davies|United Kingdom

>Spike|hCoV-19/England/CAMB-7DD9E/2020|2020-04-07|EPI\_ISL\_470491|Original|hCoV-19^^England|Human|Department of Pathology|Wellcome Sanger Institute for the COVID-19 Genomics UK (COG-UK) consortium|Davies|United Kingdom

>Spike|hCoV-19/England/QEUA-95ECD9/2020|2020-08-06|EPI\_ISL\_532457|Original|hCoV-19^^England|Human|Lighthouse Lab in Glasgow|Wellcome Sanger Institute for the COVID-19 Genomics UK (COG-UK) consortium|Davies|United Kingdom

>Spike|hCoV-19/Scotland/EDB6708/2020|2020-05-05|EPI\_ISL\_507194|Original|hCoV-19^^Scotland|Human|Virology Department|COVID-19 Genomics UK (COG-UK) Consortium|Williams|United Kingdom

>Spike|hCoV-19/England/MILK-A23C36/2020|2020-10-03|EPI\_ISL\_595109|Original|hCoV-19^^England|Human|Centre for Enzyme Innovation|COVID-19 Genomics UK (COG-UK) Consortium|Robson|United Kingdom

>Spike|hCoV-19/USA/UT-UPHL-201105786/2020|2020-05-13|EPI\_ISL\_628968|Original|hCoV-19^^Utah|Human|Utah Public Health Laboratory|Utah Public Health Laboratory|Young|USA

>Spike|hCoV-19/England/QEUA-9DBD59/2020|2020-09-21|EPI\_ISL\_601483|Original|hCoV-19^^England|Human|Lighthouse Lab in Glasgow|Wellcome Sanger Institute for the COVID-19 Genomics UK (COG-UK) consortium|Davies|United Kingdom

>Spike|hCoV-19/USA/CO-CDPHE-2100021102/2020|2020-11-21|EPI\_ISL\_771327|Original|hCoV-19^^Colorado|Human|Colorado Department of Public Health and Environment|Colorado Department of Public Health and Environment|Bankers|USA

>Spike|hCoV-19/Wales/PHWC-2B209/2020|2020-04-08|EPI\_ISL\_432038|Original|hCoV-19^^Wales|Human|Wales Specialist Virology Centre|Public Health Wales Microbiology Cardiff|Moore|United Kingdom

>Spike|hCoV-19/England/MILK-BAB673/2020|2020-11-18|EPI\_ISL\_783260|Original|hCoV-19^^England|Human|Lighthouse Lab in Milton Keynes|Wellcome Sanger Institute for the COVID-19 Genomics UK (COG-UK) Consortium|Davies|United Kingdom

>Spike|hCoV-19/England/ALDP-A95F36/2020|2020-10-19|EPI\_ISL\_624654|Original|hCoV-19^^England|Human|Lighthouse Lab in Alderley Park|Wellcome Sanger Institute for the COVID-19 Genomics UK (COG-UK) consortium|Davies|United Kingdom

>Spike|hCoV-19/Japan/PG-3197/2020|2020-04-00|EPI\_ISL\_691317|Original|hCoV-19^^Japan|Human|Pathogen Genomics Center|Pathogen Genomics Center|Sekizuka|Japan

>Spike|hCoV-19/Malaysia/UNIMAS-15762/2020|2020-11-10|EPI\_ISL\_718183|Original|hCoV-19^^Sarawak|Human|Ministry of Health Hospitals|Institute of Health and Community Medicine|Jonathan|Malaysia

>Spike|hCoV-19/England/CAMC-B09743/2020|2020-10-29|EPI\_ISL\_673041|Original|hCoV-19^^England|Human|Lighthouse Lab in Cambridge|Wellcome Sanger Institute for the COVID-19 Genomics UK (COG-UK) Consortium|Davies|United Kingdom

>Spike|hCoV-19/Portugal/PT2018/2020|2020-11-18|EPI\_ISL\_732237|Original|hCoV-19^^Portugal|Human|Instituto Nacional de Saude (INSA) and Instituto Gulbenkian de Ciencia (IGC)|Instituto Nacional de Saude (INSA) and Instituto Gulbenkian de Ciencia (IGC)|Borges|Portugal

>Spike|hCoV-19/USA/ME-HETL-J0009/2020|2020-03-14|EPI\_ISL\_513422|Original|hCoV-19^^Maine|Human|Maine HETL|Tewhey Lab|Tewhey|USA

>Spike|hCoV-19/USA/WI-UW-2439/2020|2020-12-15|EPI\_ISL\_754646|Original|hCoV-19^^Wisconsin|Human|University of Wisconsin-Madison AIDS Vaccine Research Laboratories|University of Wisconsin-Madison AIDS Vaccine Research Laboratories|Moreno|USA

>Spike|hCoV-19/Wales/PHWC-49E540/2020|2020-12-07|EPI\_ISL\_743013|Original|hCoV-19^^Wales|Human|Wales Specialist Virology Centre Sequencing lab|COVID-19 Genomics UK (COG-UK) Consortium|Moore|United Kingdom

>Spike|hCoV-19/England/LIVE-A826E/2020|2020-03-26|EPI\_ISL\_517136|Original|hCoV-19^^England|Human|Liverpool Clinical Laboratories|COVID-19 Genomics UK (COG-UK) Consortium|Haldenby|United Kingdom

>Spike|hCoV-19/USA/CA-CZB-1445/2020|2020-03-30|EPI\_ISL\_468411|Original|hCoV-19^^California|Human|County of San Luis Obispo Public Health Laboratory|Chan-Zuckerberg Biohub|Hao|USA

>Spike|hCoV-19/Colombia/HUI-GVI-97875/2020|2020-04-04|EPI\_ISL\_447807|Original|hCoV-19^^Huila|Human|Instituto Nacional de Salud|Grupo de Investigaciones Microbiol\u00f3gicas-UR (GIMUR)|Ram\u00e9drez|Colombia

>Spike|hCoV-19/Denmark/DCGC-2866/2020|2020-08-17|EPI\_ISL\_616560|Original|hCoV-19^^Hovedstaden|Human|Department of Virus and Microbiological Special Diagnostics|Albertsen lab|Michaelsen|Denmark

>Spike|hCoV-19/England/QEUEH-B7EA13/2020|2020-11-14|EPI\_ISL\_667918|Original|hCoV-19^^England|Human|Lighthouse Lab in Glasgow|Wellcome Sanger Institute for the COVID-19 Genomics UK (COG-UK) Consortium|Davies|United Kingdom

>Spike|hCoV-19/England/ALDP-5D58DA/2020|2020-06-21|EPI\_ISL\_558510|Original|hCoV-19^^England|Human|Lighthouse Lab in Alderley Park|Wellcome Sanger Institute for the COVID-19 Genomics UK (COG-UK) consortium|Davies|United Kingdom

>Spike|hCoV-19/England/QEUEH-AE4B34/2020|2020-10-27|EPI\_ISL\_633152|Original|hCoV-19^^England|Human|Lighthouse Lab in Glasgow|Wellcome Sanger Institute for the COVID-19 Genomics UK (COG-UK) consortium|Davies|United Kingdom

>Spike|hCoV-19/Germany/NW-HHU-206/2020|2020-04-09|EPI\_ISL\_602480|Original|hCoV-19^^North Rhine-Westphalia|Human|Institute for Virology|Center of Medical Microbiology|Wienemann|Germany

>Spike|hCoV-19/South Korea/KCDC2234/2020|2020-05-08|EPI\_ISL\_510572|Original|hCoV-19^^South Korea|Human|Division of Viral Diseases|Division of Viral Diseases|Kim|South Korea

>Spike|hCoV-19/England/ALDP-A2DE90/2020|2020-10-05|EPI\_ISL\_586911|Original|hCoV-19^^England|Human|Lighthouse Lab in Alderley Park|Wellcome Sanger Institute for the COVID-19 Genomics UK (COG-UK) consortium|Davies|United Kingdom

>Spike|hCoV-19/Wales/PHWC-361D1/2020|2020-04-28|EPI\_ISL\_474633|Original|hCoV-19^^Wales|Human|Originating lab|COVID-19 Genomics UK (COG-UK) Consortium|Moore|United Kingdom

>Spike|hCoV-19/Northern Ireland/QEUEH-96B94B/2020|2020-08-16|EPI\_ISL\_531454|Original|hCoV-19^^Northern Ireland|Human|Lighthouse Lab in Glasgow|Wellcome Sanger Institute for the COVID-19 Genomics UK (COG-UK) consortium|Davies|United Kingdom

>Spike|hCoV-19/USA/CA-ALSR-0617-SAN/2020|2020-04-06|EPI\_ISL\_483261|Original|hCoV-19^^California|Human|UC San Diego Center for Advanced Laboratory Medicine|Andersen lab at Scripps Research|Gangavarapu|USA

>Spike|hCoV-19/England/CAMC-BD15B3/2020|2020-11-27|EPI\_ISL\_702052|Original|hCoV-19^^England|Human|Lighthouse Lab in Cambridge|Wellcome Sanger Institute for the COVID-19 Genomics UK (COG-UK) Consortium|Davies|United Kingdom

>Spike|hCoV-19/USA/TX-HMH-5584/2020|2020-06-23|EPI\_ISL\_544880|Original|hCoV-19^^Texas|Human|Houston Methodist Hospital|Houston Methodist Hospital|Long|USA

>Spike|hCoV-19/England/ALDP-B24162/2020|2020-11-04|EPI\_ISL\_646169|Original|hCoV-19^^England|Human|Lighthouse Lab in Alderley Park|Wellcome Sanger Institute for the COVID-19 Genomics UK (COG-UK) Consortium|Davies|United Kingdom

>Spike|hCoV-19/Scotland/EDB3188/2020|2020-04-06|EPI\_ISL\_488919|Original|hCoV-19^^Scotland|Human|Virology Department|Wellcome Sanger Institute for the COVID-19 Genomics UK (COG-UK) consortium|Davies|United Kingdom

>Spike|hCoV-19/England/CAMB-72DD5/2020|2020-03-23|EPI\_ISL\_440011|Original|hCoV-19^^England|Human|Department of Pathology|Wellcome Sanger Institute for the COVID-19 Genomics UK (COG-UK) consortium|Amato|United Kingdom

>Spike|hCoV-19/England/LOND-124C6F2/2020|2020-00-00|EPI\_ISL\_490425|Original|hCoV-19^^England|Human|University College London Hospital|COVID-19 Genomics UK (COG-UK) Consortium|Byott|United Kingdom

>Spike|hCoV-19/England/CAMB-7AE07/2020|2020-04-09|EPI\_ISL\_433880|Original|hCoV-19^^England|Human|Department of Pathology|COVID-19 Genomics UK (COG-UK) Consortium|Meredith|United Kingdom

>Spike|hCoV-19/Japan/PG-7293/2020|2020-08-00|EPI\_ISL\_688396|Original|hCoV-19^^Japan|Human|Saitama Prefectural Institute of Public Health|Pathogen Genomics Center|Sekizuka|Japan

>Spike|hCoV-19/Equatorial Guinea/13205/2020|2020-06-01|EPI\_ISL\_648356|Original|hCoV-19^^Bioko Norte|Human|Laboratorio de Investigaciones de Baney|University Hospital Basel|Hosch|Equatorial Guinea

>Spike|hCoV-19/England/ALDP-9C5305/2020|2020-09-10|EPI\_ISL\_567745|Original|hCoV-19^^England|Human|Lighthouse Lab in Alderley Park|Wellcome Sanger Institute for the COVID-19 Genomics UK (COG-UK) consortium|Davies|United Kingdom

>Spike|hCoV-19/USA/CA-CZB-14697/2020|2020-11-17|EPI\_ISL\_739350|Original|hCoV-19^^California|Human|Orange County Public Health Lab|Chan-Zuckerberg Biohub|Kamm|USA

>Spike|hCoV-19/India/TG-NGC-CDFD-29/2020|2020-05-30|EPI\_ISL\_466867|Original|hCoV-19^^Telangana|Human|National Genomics Core-Center for DNA Fingerprinting and Diagnostics|National Genomics Core-Center for DNA Fingerprinting and Diagnostics (NGC-CDFD)- DBT's PAN-INDIA-1000 Genome consortium|Vashisht|India

>Spike|hCoV-19/USA/NY-NYCPHL-000869/2020|2020-03-25|EPI\_ISL\_632942|Original|hCoV-19^^New York|Human|Richmond University Medical Center|New York City Public Health Laboratory|Wang|USA

>Spike|hCoV-19/England/BIRM-5F7B2/2020|2020-05-11|EPI\_ISL\_473331|Original|hCoV-19^^England|Human|University of Birmingham|COVID-19 Genomics UK (COG-UK) Consortium|Loman|United Kingdom

>Spike|hCoV-19/DRC/214/2020|2020-03-21|EPI\_ISL\_420030|Original|hCoV-19^^Kinshasa|Human|Viral Respiratory Lab|Pathogen Sequencing Lab|Pratt|Democratic Republic of the Congo

>Spike|hCoV-19/USA/TX-HMH-2752/2020|2020-06-05|EPI\_ISL\_545528|Original|hCoV-19^^Texas|Human|Houston Methodist Hospital|Houston Methodist Hospital|Long|USA

>Spike|hCoV-19/Hungary/US-568w/2020|2020-03-29|EPI\_ISL\_477625|Original|hCoV-19^^B\u00e9cs-Kiskun County|Human|University of Szeged|National Laboratory of Virology|Kemenesi|Hungary

>Spike|hCoV-19/England/CAMC-AB1453/2020|2020-10-23|EPI\_ISL\_623700|Original|hCoV-19^^England|Human|Lighthouse Lab in Cambridge|Wellcome Sanger Institute for the COVID-19 Genomics UK (COG-UK) consortium|Davies|United Kingdom

>Spike|hCoV-19/India/OR-ILSCV35456/2020|2020-06-10|EPI\_ISL\_481196|Original|hCoV-19^^Odisha|Human|Immunogenomics lab|Immunogenomics lab|Raghav|India

>Spike|hCoV-19/England/MILK-B8876A/2020|2020-11-13|EPI\_ISL\_674410|Original|hCoV-19^^England|Human|Lighthouse Lab in Milton Keynes|Wellcome Sanger Institute for the COVID-19 Genomics UK (COG-UK) Consortium|Davies|United Kingdom

>Spike|hCoV-19/England/CAMC-B22058/2020|2020-11-02|EPI\_ISL\_645828|Original|hCoV-19^^England|Human|Lighthouse Lab in Cambridge|Wellcome Sanger Institute for the COVID-19 Genomics UK (COG-UK) Consortium|Davies|United Kingdom

>Spike|hCoV-19/England/ALDP-CF1367/2020|2020-12-17|EPI\_ISL\_781993|Original|hCoV-19^^England|Human|Lighthouse Lab in Alderley Park|Wellcome Sanger Institute for the COVID-19 Genomics UK (COG-UK) Consortium|Davies|United Kingdom

>Spike|hCoV-19/Singapore/912/2020|2020-08-28|EPI\_ISL\_536453|Original|hCoV-19^^Singapore|Human|National Public Health Laboratory|National Public Health Laboratory|Mak|Singapore

>Spike|hCoV-19/England/205261890/2020|2020-12-06|EPI\_ISL\_766567|Original|hCoV-19^^England|Human|Respiratory Virus Unit|COVID-19 Genomics UK (COG-UK) Consortium|Platt|United Kingdom

>Spike|hCoV-19/England/SHEF-10D5DA0/2020|2020-12-14|EPI\_ISL\_727974|Original|hCoV-19^^England|Human|Virology Department|COVID-19 Genomics UK (COG-UK) Consortium|de Silva|United Kingdom

>Spike|hCoV-19/England/NOTT-1117E8/2020|2020-05-21|EPI\_ISL\_461926|Original|hCoV-19^^England|Human|Queens Medical Centre|COVID-19 Genomics UK (COG-UK) Consortium|Loose|United Kingdom

>Spike|hCoV-19/USA/CA-CZB-13025/2020|2020-05-11|EPI\_ISL\_672308|Original|hCoV-19^^California|Human|Alameda County Public Health Lab|Chan-Zuckerberg Biohub|Bhatt|USA

>Spike|hCoV-19/Scotland/EDB2262/2020|2020-04-21|EPI\_ISL\_491682|Original|hCoV-19^^Scotland|Human|Virology Department|Wellcome Sanger Institute for the COVID-19 Genomics UK (COG-UK) consortium|Davies|United Kingdom

>Spike|hCoV-19/Scotland/EDB348/2020|2020-03-29|EPI\_ISL\_425977|Original|hCoV-19^^Scotland|Human|Virology Department|COVID-19 Genomics UK (COG-UK) Consortium|Williams|United Kingdom

>Spike|hCoV-19/England/ALDP-AA0A82/2020|2020-10-22|EPI\_ISL\_625018|Original|hCoV-19^^England|Human|Lighthouse Lab in Alderley Park|Wellcome Sanger Institute for the COVID-19 Genomics UK (COG-UK) consortium|Davies|United Kingdom

>Spike|hCoV-19/England/ALDP-B1BA45/2020|2020-11-01|EPI\_ISL\_645727|Original|hCoV-19^^England|Human|Lighthouse Lab in Alderley Park|Wellcome Sanger Institute for the COVID-19 Genomics UK (COG-UK) Consortium|Davies|United Kingdom

>Spike|hCoV-19/England/CAMB-83ECF/2020|2020-04-26|EPI\_ISL\_438706|Original|hCoV-19^^England|Human|Department of Pathology|COVID-19 Genomics UK (COG-UK) Consortium|Meredith|United Kingdom

>Spike|hCoV-19/USA/MN-MDH-1084/2020|2020-06-03|EPI\_ISL\_470764|Original|hCoV-19^^Minnesota|Human|Minnesota Department of Health|Minnesota Department of Health|Garfin|USA

>Spike|hCoV-19/England/QEUEH-B6C034/2020|2020-11-11|EPI\_ISL\_654965|Original|hCoV-19^^England|Human|Lighthouse Lab in Glasgow|Wellcome Sanger Institute for the COVID-19 Genomics UK (COG-UK) Consortium|Davies|United Kingdom

>Spike|hCoV-19/USA/WI-UW-2136/2020|2020-10-14|EPI\_ISL\_677540|Original|hCoV-19^^Wisconsin|Human|University of Wisconsin-Madison AIDS Vaccine Research Laboratories|University of Wisconsin-Madison AIDS Vaccine Research Laboratories|Baczenas|USA

>Spike|hCoV-19/South Korea/KCDC2143/2020|2020-03-22|EPI\_ISL\_498044|Original|hCoV-19^^South Korea|Human|Division of Viral Diseases|Division of Viral Diseases|Kim|South Korea

>Spike|hCoV-19/England/QEUEH-AF0A29/2020|2020-10-29|EPI\_ISL\_662741|Original|hCoV-19^^England|Human|Lighthouse Lab in Glasgow|Wellcome Sanger Institute for the COVID-19 Genomics UK (COG-UK) Consortium|Davies|United Kingdom

>Spike|hCoV-19/England/ALDP-CEC36F/2020|2020-12-21|EPI\_ISL\_781324|Original|hCoV-19^^England|Human|Lighthouse Lab in Alderley Park|Wellcome Sanger Institute for the COVID-19 Genomics UK (COG-UK) Consortium|Davies|United Kingdom

>Spike|hCoV-19/USA/TX-HMH-MCoV-12067/2020|2020-09-19|EPI\_ISL\_790189|Original|hCoV-19^^Texas|Human|Houston Methodist Hospital|Houston Methodist Hospital|Long|USA

>Spike|hCoV-19/Brazil/RJ-2377/2020|2020-04-20|EPI\_ISL\_541361|Original|hCoV-19^^Rio de Janeiro|Human|Laboratory of Respiratory Viruses and Measles|Laboratory of Respiratory Viruses and Measles|Silva|Brazil

>Spike|hCoV-19/Iceland/197/2020|2020-03-16|EPI\_ISL\_417742|Original|hCoV-19^^Reykjavik|Human|The National University Hospital of Iceland|deCODE genetics|J\u00f3nsson|Iceland

>Spike|hCoV-19/Oman/205028718/2020|2020-04-12|EPI\_ISL\_457702|Original|hCoV-19^^Muscat|Human|Oman-NIC|Microbiology laboratory- Sultan Qaboos University Hospital|AL Zadjali|Oman

>Spike|hCoV-19/Switzerland/VD-ETHZ-321384/2020|2020-10-13|EPI\_ISL\_603627|Original|hCoV-19^^Vaud|Human|Viollier AG|Department of Biosystems Science and Engineering|Nadeau|Switzerland

>Spike|hCoV-19/USA/TX-HMH-MCoV-15946/2020|2020-07-10|EPI\_ISL\_785630|Original|hCoV-19^^Texas|Human|Houston Methodist Hospital|Houston Methodist Hospital|Long|USA

>Spike|hCoV-19/England/CAMC-B20EAB/2020|2020-11-02|EPI\_ISL\_647676|Original|hCoV-19^^England|Human|Lighthouse Lab in Cambridge|Wellcome Sanger Institute for the COVID-19 Genomics UK (COG-UK) Consortium|Davies|United Kingdom

>Spike|hCoV-19/England/MILK-B8D64A/2020|2020-11-13|EPI\_ISL\_673903|Original|hCoV-19^^England|Human|Lighthouse Lab in Milton Keynes|Wellcome Sanger Institute for the COVID-19 Genomics UK (COG-UK) Consortium|Davies|United Kingdom

>Spike|hCoV-19/Canada/ON-S357/2020|2020-03-30|EPI\_ISL\_586405|Original|hCoV-19^^Ontario|Human|Toronto Invasive Bacterial Diseases Network|McMaster University|McArthur|Canada

>Spike|hCoV-19/USA/WI-WSLH-200168/2020|2020-03-31|EPI\_ISL\_578394|Original|hCoV-19^^Wisconsin|Human|Wisconsin State Laboratory of Hygiene Communicable Disease Division|Wisconsin State Laboratory of Hygiene Communicable Disease Division|Florek|USA

>Spike|hCoV-19/England/QEUA-961286/2020|2020-08-02|EPI\_ISL\_531940|Original|hCoV-19^^England|Human|Lighthouse Lab in Glasgow|Wellcome Sanger Institute for the COVID-19 Genomics UK (COG-UK) consortium|Davies|United Kingdom

>Spike|hCoV-19/England/ALDP-9FCA3D/2020|2020-10-01|EPI\_ISL\_587856|Original|hCoV-19^^England|Human|Lighthouse Lab in Alderley Park|Wellcome Sanger Institute for the COVID-19 Genomics UK (COG-UK) consortium|Davies|United Kingdom

>Spike|hCoV-19/USA/TX-HMH-MCoV-14780/2020|2020-10-13|EPI\_ISL\_786265|Original|hCoV-19^^Texas|Human|Houston Methodist Hospital|Houston Methodist Hospital|Long|USA

>Spike|hCoV-19/Netherlands/ZH-EMC-646/2020|2020-09-27|EPI\_ISL\_578074|Original|hCoV-19^^Zuid Holland|Human|Dutch COVID-19 response team|Erasmus Medical Center|Oude Munnink|Netherlands

>Spike|hCoV-19/Denmark/DCGC-11344/2020|2020-11-02|EPI\_ISL\_670853|Original|hCoV-19^^Hovedstaden|Human|Department of Virus and Microbiological Special Diagnostics|Albertsen Lab|Michaelsen|Denmark

>Spike|hCoV-19/Scotland/QEUA-9F3FCE/2020|2020-09-24|EPI\_ISL\_600777|Original|hCoV-19^^Scotland|Human|Lighthouse Lab in Glasgow|Wellcome Sanger Institute for the COVID-19 Genomics UK (COG-UK) consortium|Davies|United Kingdom

>Spike|hCoV-19/Wales/PHWC-26CE2/2020|2020-03-29|EPI\_ISL\_422161|Original|hCoV-19^^Wales|Human|Wales Specialist Virology Centre|Public Health Wales Microbiology Cardiff|Moore|United Kingdom

>Spike|hCoV-19/Spain/AR-IBV-98008141/2020|2020-10-13|EPI\_ISL\_654464|Original|hCoV-19^^Aragon|Human|Servicio de Microbiolog\u00eda|SeqCOVID-SPAIN consortium/IBV (CSIC)|Comas|Spain

>Spike|hCoV-19/Netherlands/NA\_687/2020|2020-04-07|EPI\_ISL\_461122|Original|hCoV-19^^Netherlands|Human|Dutch COVID-19 response team|Erasmus Medical Center|Oude Munnink|Netherlands

>Spike|hCoV-19/England/QEUA-B11E52/2020|2020-11-02|EPI\_ISL\_642468|Original|hCoV-19^^England|Human|Lighthouse Lab in Glasgow|Wellcome Sanger Institute for the COVID-19 Genomics UK (COG-UK) Consortium|Davies|United Kingdom

>Spike|hCoV-19/Canada/QC-LSPQ-L00243328/2020|2020-03-30|EPI\_ISL\_536358|Original|hCoV-19^^Quebec|Human|H\u00f4pital du Suro\u00eet|Laboratoire de sant\u00e9 publique du Qu\u00e9bec|Moreira|Canada

>Spike|hCoV-19/England/QEUA-95E3C5/2020|2020-08-10|EPI\_ISL\_537004|Original|hCoV-19^^England|Human|Lighthouse Lab in Glasgow|Wellcome Sanger Institute for the COVID-19 Genomics UK (COG-UK) consortium|Davies|United Kingdom

>Spike|hCoV-19/Wales/PHWC-48081B/2020|2020-10-22|EPI\_ISL\_612936|Original|hCoV-19^^Wales|Human|Wales Specialist Virology Centre Sequencing lab|COVID-19 Genomics UK (COG-UK) Consortium|Moore|United Kingdom

>Spike|hCoV-19/USA/CA-CZB-14149/2020|2020-10-17|EPI\_ISL\_738707|Original|hCoV-19^^California|Human|Madera County Department of Public Health|Chan-Zuckerberg Biohub|Kamm|USA

>Spike|hCoV-19/Scotland/QEUA-A1F5F6/2020|2020-10-01|EPI\_ISL\_598997|Original|hCoV-19^^Scotland|Human|Lighthouse Lab in Glasgow|Wellcome Sanger Institute for the COVID-19 Genomics UK (COG-UK) consortium|Davies|United Kingdom

>Spike|hCoV-19/Japan/PG-7754/2020|2020-04-00|EPI\_ISL\_686856|Original|hCoV-19^^Japan|Human|Pathogen Genomics Center|Pathogen Genomics Center|Sekizuka|Japan

>Spike|hCoV-19/South Korea/KDCA0277/2020|2020-10-24|EPI\_ISL\_760071|Original|hCoV-19^^South Korea|Human|Division of Emerging Infectious Diseases|Division of Emerging Infectious Diseases|Park|South Korea

>Spike|hCoV-19/England/QEUA-C7C249/2020|2020-12-16|EPI\_ISL\_756702|Original|hCoV-19^^England|Human|Lighthouse Lab in Glasgow|Wellcome Sanger Institute for the COVID-19 Genomics UK (COG-UK) Consortium|Davies|United Kingdom

>Spike|hCoV-19/United Arab Emirates/0621/2020|2020-05-15|EPI\_ISL\_698777|Original|hCoV-19^^Abu Dhabi|Human|Group 42 (G42) Healthcare|G42 Healthcare|Ogrodzki|United Arab Emirates

>Spike|hCoV-19/France/NAQ-SC282/2020|2020-03-31|EPI\_ISL\_644675|Original|hCoV-19^^Nouvelle-Aquitaine|Human|CHU de Limoges|CNR Virus des Infections Respiratoires - France SUD|Bal|France

>Spike|hCoV-19/Wales/PHWC-15C426/2020|2020-03-27|EPI\_ISL\_472486|Original|hCoV-19^^Wales|Human|Wales Specialist Virology Centre Sequencing lab|COVID-19 Genomics UK (COG-UK) Consortium|Moore|United Kingdom

>Spike|hCoV-19/Scotland/CVR65/2020|2020-03-06|EPI\_ISL\_425796|Original|hCoV-19^^Scotland|Human|West of Scotland Specialist Virology Centre|COVID-19 Genomics UK (COG-UK) Consortium|Robertson|United Kingdom

>Spike|hCoV-19/Scotland/CVR5885/2020|2020-11-16|EPI\_ISL\_703911|Original|hCoV-19^^Scotland|Human|West of Scotland Specialist Virology Centre|COVID-19 Genomics UK (COG-UK) Consortium|Robertson|United Kingdom

>Spike|hCoV-19/USA/CA-CSMC18/2020|2020-03-25|EPI\_ISL\_475627|Original|hCoV-19^^California|Human|Cedars-Sinai Medical Center|Cedars-Sinai Medical Center|Zhang|USA

>Spike|hCoV-19/USA/NY-PV09178/2020|2020-03-19|EPI\_ISL\_422537|Original|hCoV-19^^New York|Human|MSHS Clinical Microbiology Laboratories|MSHS Pathogen Surveillance Program|van Bakel|USA

>Spike|hCoV-19/England/EXET-1380FF/2020|2020-10-04|EPI\_ISL\_612381|Original|hCoV-19^^England|Human|University of Exeter|COVID-19 Genomics UK (COG-UK) Consortium|Temperton|United Kingdom

>Spike|hCoV-19/Germany/HH-hpi-pl651/2020|2020-03-17|EPI\_ISL\_775775|Original|hCoV-19^^Hamburg|Human|University Medical Center Hamburg Eppendorf|Heinrich Pette Institute|Robitaille|Germany

>Spike|hCoV-19/England/CAMC-B08CEB/2020|2020-10-30|EPI\_ISL\_643886|Original|hCoV-19^^England|Human|Lighthouse Lab in Cambridge|Wellcome Sanger Institute for the COVID-19 Genomics UK (COG-UK) Consortium|Davies|United Kingdom

>Spike|hCoV-19/USA/WA-UW-1315/2020|2020-03-16|EPI\_ISL\_422965|Original|hCoV-19^^Washington|Human|UW Virology Lab|UW Virology Lab|Roychoudhury|USA

>Spike|hCoV-19/Portugal/PT1872/2020|2020-11-11|EPI\_ISL\_732091|Original|hCoV-19^^Portugal|Human|Instituto Nacional de Saude (INSA)|Instituto Nacional de Saude (INSA)|Borges|Portugal

>Spike|hCoV-19/Wales/PHWC-48D3D1/2020|2020-10-25|EPI\_ISL\_680619|Original|hCoV-19^^Wales|Human|Wales Specialist Virology Centre Sequencing lab|COVID-19 Genomics UK (COG-UK) Consortium|Moore|United Kingdom

>Spike|hCoV-19/USA/CO-QDX-2368/2020|2020-03-18|EPI\_ISL\_604688|Original|hCoV-19^^Colorado|Human|Quest Diagnostics|Quest Diagnostics|Kagan|USA

>Spike|hCoV-19/Wales/PHWC-48E80E/2020|2020-11-13|EPI\_ISL\_680916|Original|hCoV-19^^Wales|Human|Wales Specialist Virology Centre Sequencing lab|COVID-19 Genomics UK (COG-UK) Consortium|Moore|United Kingdom

>Spike|hCoV-19/England/CAMC-941A66/2020|2020-07-23|EPI\_ISL\_556835|Original|hCoV-19^^England|Human|Lighthouse Lab in Cambridge|Wellcome Sanger Institute for the COVID-19 Genomics UK (COG-UK) consortium|Davies|United Kingdom

>Spike|hCoV-19/England/ALDP-9CDB50/2020|2020-09-16|EPI\_ISL\_566254|Original|hCoV-19^^England|Human|Lighthouse Lab in Alderley Park|Wellcome Sanger Institute for the COVID-19 Genomics UK (COG-UK) consortium|Davies|United Kingdom

>Spike|hCoV-19/Scotland/CVR5391/2020|2020-09-22|EPI\_ISL\_651794|Original|hCoV-19^^Scotland|Human|Lighthouse Lab in Glasgow / MRC-University of Glasgow Centre for Virus Research|COVID-19 Genomics UK (COG-UK) Consortium|Robertson|United Kingdom

>Spike|hCoV-19/England/QEUH-B7D56E/2020|2020-11-14|EPI\_ISL\_727827|Original|hCoV-19^^England|Human|Oxford Viromics|COVID-19 Genomics UK (COG-UK) Consortium|Golubchik|United Kingdom

>Spike|hCoV-19/Japan/PG-6646/2020|2020-07-00|EPI\_ISL\_687758|Original|hCoV-19^^Japan|Human|Pathogen Genomics Center|Pathogen Genomics Center|Sekizuka|Japan

>Spike|hCoV-19/England/EXET-13A88C/2020|2020-11-07|EPI\_ISL\_664257|Original|hCoV-19^^England|Human|University of Exeter|COVID-19 Genomics UK (COG-UK) Consortium|Temperton|United Kingdom

>Spike|hCoV-19/USA/TX-HMH-6458/2020|2020-06-27|EPI\_ISL\_546011|Original|hCoV-19^^Texas|Human|Houston Methodist Hospital|Houston Methodist Hospital|Long|USA

>Spike|hCoV-19/USA/NY-NYUMC223/2020|2020-03-18|EPI\_ISL\_427518|Original|hCoV-19^^New York|Human|NYU Langone Health|Departments of Pathology and Medicine|Maurano|USA

>Spike|hCoV-19/Denmark/DCGC-18644/2020|2020-12-07|EPI\_ISL\_750098|Original|hCoV-19^^Hovedstaden|Human|Department of Virus and Microbiological Special Diagnostics|Albertsen Lab|Michaelsen|Denmark

>Spike|hCoV-19/Denmark/DCGC-9680/2020|2020-11-09|EPI\_ISL\_669107|Original|hCoV-19^^Hovedstaden|Human|Department of Virus and Microbiological Special Diagnostics|Albertsen Lab|Michaelsen|Denmark

>Spike|hCoV-19/England/EXET-13E888/2020|2020-00-00|EPI\_ISL\_724342|Original|hCoV-19^^England|Human|University of Exeter|COVID-19 Genomics UK (COG-UK) Consortium|Temperton|United Kingdom

>Spike|hCoV-19/England/MILK-99D913/2020|2020-08-30|EPI\_ISL\_550518|Original|hCoV-19^^England|Human|Lighthouse Lab in Milton Keynes|Wellcome Sanger Institute for the COVID-19 Genomics UK (COG-UK) consortium|Davies|United Kingdom

>Spike|hCoV-19/Wales/PHWC-48CF92/2020|2020-11-07|EPI\_ISL\_666561|Original|hCoV-19^^Wales|Human|Wales Specialist Virology Centre Sequencing lab|COVID-19 Genomics UK (COG-UK) Consortium|Moore|United Kingdom

>Spike|hCoV-19/France/OCC-52/2020|2020-07-10|EPI\_ISL\_593867|Original|hCoV-19^^Occitanie|Human|CHU Purpan - Laboratoire de Virologie - Institut F\u00e9deratif de Biologie|CHU Purpan - Laboratoire de Virologie - Institut F\u00e9deratif de Biologie|Latour|France

>Spike|hCoV-19/Sweden/20-09862/2020|2020-11-04|EPI\_ISL\_676490|Original|hCoV-19^^Skane|Human|Klinisk mikrobiologi|The Public Health Agency of Sweden|Svartstr\u00f6m|Sweden

>Spike|hCoV-19/Australia/VIC3820/2020|2020-07-11|EPI\_ISL\_520533|Original|hCoV-19^^Victoria|Human|Microbiological Diagnostic Unit - Public Health Laboratory (MDU-PHL)|MDU-PHL|Schultz|Australia

>Spike|hCoV-19/England/NORW-EE651/2020|2020-00-00|EPI\_ISL\_549477|Original|hCoV-19^^England|Human|Quadram Institute Bioscience|COVID-19 Genomics UK (COG-UK) Consortium|Alikhan|United Kingdom

>Spike|hCoV-19/Chile/RM-157134/2020|2020-08-21|EPI\_ISL\_746671|Original|hCoV-19^^Region Metropolitana de Santiago|Human|Genetica Molecular and Subdepartamento de Virologia ISP Chile|Instituto de Salud Publica de Chile|Tognarelli|Chile

>Spike|hCoV-19/Switzerland/GE-HUG-3655/2020|2020-04-07|EPI\_ISL\_429222|Original|hCoV-19^^Geneve|Human|University Hospitals of Geneva Laboratory of Virology|University Hospitals of Geneva Laboratory of Virology|Cordey|Switzerland

>Spike|hCoV-19/South Korea/KCDC2267/2020|2020-05-14|EPI\_ISL\_510605|Original|hCoV-19^^South Korea|Human|Division of Viral Diseases|Division of Viral Diseases|Kim|South Korea

>Spike|hCoV-19/USA/MI-MDHHS-SC21300/2020|2020-04-10|EPI\_ISL\_507555|Original|hCoV-19^^Michigan|Human|Michigan Department of Health and Human Services|Michigan Department of Health and Human Services|Blankenship|USA

>Spike|hCoV-19/England/CAMC-A3E6D0/2020|2020-10-03|EPI\_ISL\_609565|Original|hCoV-19^^England|Human|Lighthouse Lab in Cambridge|Wellcome Sanger Institute for the COVID-19 Genomics UK (COG-UK) consortium|Davies|United Kingdom

>Spike|hCoV-19/United Arab Emirates/0590/2020|2020-05-19|EPI\_ISL\_698748|Original|hCoV-19^^Abu Dhabi|Human|Group 42 (G42) Healthcare|G42 Healthcare|Ogrodzki|United Arab Emirates

>Spike|hCoV-19/Australia/VIC5833/2020|2020-07-20|EPI\_ISL\_518627|Original|hCoV-19^^Victoria|Human|Microbiological Diagnostic Unit - Public Health Laboratory (MDU-PHL)|MDU-PHL|Schultz|Australia

>Spike|hCoV-19/England/20139064404/2020|2020-03-28|EPI\_ISL\_423351|Original|hCoV-19^^England|Human|Respiratory Virus Unit|Respiratory Virus Unit|Platt|United Kingdom

>Spike|hCoV-19/Australia/VIC5229/2020|2020-07-20|EPI\_ISL\_519994|Original|hCoV-19^^Victoria|Human|Microbiological Diagnostic Unit - Public Health Laboratory (MDU-PHL)|MDU-PHL|Schultz|Australia

>Spike|hCoV-19/Belgium/Rega-0329238/2020|2020-03-29|EPI\_ISL\_458208|Original|hCoV-19^^Elsene|Human|KU Leuven|KU Leuven|Maes|Belgium

>Spike|hCoV-19/Northern Ireland/QEUH-96206D/2020|2020-08-10|EPI\_ISL\_531723|Original|hCoV-19^^Northern Ireland|Human|Lighthouse Lab in

Glasgow|Wellcome Sanger Institute for the COVID-19 Genomics UK (COG-UK) consortium|Davies|United Kingdom  
>Spike|hCoV-19/Japan/PG-4144/2020|2020-07-00|EPI\_ISL\_692383|Original|hCoV-19^^Japan|Human|Pathogen Genomics Center|Pathogen Genomics Center|Sekizuka|Japan  
>Spike|hCoV-19/USA/AZ-TG268917/2020|2020-03-14|EPI\_ISL\_426519|Original|hCoV-19^^Arizona|Human|AZ SPHL|TGen North|Lemmer|USA  
>Spike|hCoV-19/USA/CA-CZB-3776/2020|2020-06-04|EPI\_ISL\_548476|Original|hCoV-19^^California|Human|Ventura County Public Health Lab|Chan-Zuckerberg Biohub|Bhatt|USA  
>Spike|hCoV-19/Italy/ABR-IZSGC-TE99753/2020|2020-07-20|EPI\_ISL\_529015|Original|hCoV-19^^Abruzzo|Human|Ospedale \Ss. Annunziata\|Istituto Zooprofilattico Sperimentale dell'Abruzzo e Molise \G.Caporale\|Lorusso|Italy  
>Spike|hCoV-19/Wales/PHWC-162636/2020|2020-05-22|EPI\_ISL\_473100|Original|hCoV-19^^Wales|Human|Wales Specialist Virology Centre Sequencing lab|COVID-19 Genomics UK (COG-UK) Consortium|Moore|United Kingdom  
>Spike|hCoV-19/Belgium/regal-10191109/2020|2020-10-19|EPI\_ISL\_735152|Original|hCoV-19^^Bost|Human|UZ Leuven|KU Leuven|Maes|Belgium  
>Spike|hCoV-19/Switzerland/VD-ETHZ-100846/2020|2020-03-25|EPI\_ISL\_451793|Original|hCoV-19^^Vaud|Human|Viollier AG|Department of Biosystems Science and Engineering|Nadeau|Switzerland  
>Spike|hCoV-19/USA/TX-DSHS-1864/2020|2020-06-24|EPI\_ISL\_745299|Original|hCoV-19^^Texas|Human|Texas Department of State Health Services|Texas Department of State Health Services|Rahman|USA  
>Spike|hCoV-19/USA/CA-CZB-15401/2020|2020-11-29|EPI\_ISL\_739464|Original|hCoV-19^^California|Human|Orange County Public Health Lab|Chan-Zuckerberg Biohub|Kamm|USA  
>Spike|hCoV-19/South Korea/KDCA0140/2020|2020-09-18|EPI\_ISL\_747375|Original|hCoV-19^^South Korea|Human|Division of Emerging Infectious Diseases|Division of Emerging Infectious Diseases|Park|South Korea  
>Spike|hCoV-19/England/BRIS-1853F9D/2020|2020-04-27|EPI\_ISL\_492255|Original|hCoV-19^^England|Human|PHE South West Regional Laboratory|Wellcome Sanger Institute for the COVID-19 Genomics UK (COG-UK) consortium|Davies|United Kingdom  
>Spike|hCoV-19/England/MILK-BB0ACA/2020|2020-11-18|EPI\_ISL\_720458|Original|hCoV-19^^England|Human|Lighthouse Lab in Milton Keynes|Wellcome Sanger Institute for the COVID-19 Genomics UK (COG-UK) Consortium|Davies|United Kingdom  
>Spike|hCoV-19/Brazil/SP-359/2020|2020-06-17|EPI\_ISL\_583497|Original|hCoV-19^^S\u00e3o Paulo|Human|Complexo Hospitalar Ouro Verde de Campinas|Instituto Adolfo Lutz|Sacchi|Brazil  
>Spike|hCoV-19/USA/UT-UPHL-2008796/2020|2020-05-22|EPI\_ISL\_524823|Original|hCoV-19^^Utah|Human|Utah Public Health Laboratory|Utah Public Health Laboratory|Young|USA  
>Spike|hCoV-19/England/MILK-BAB048/2020|2020-11-18|EPI\_ISL\_681494|Original|hCoV-19^^England|Human|Lighthouse Lab in Milton Keynes|Wellcome Sanger Institute for the COVID-19 Genomics UK (COG-UK) Consortium|Davies|United Kingdom  
>Spike|hCoV-19/England/ALDP-4A92C3/2020|2020-06-09|EPI\_ISL\_559468|Original|hCoV-19^^England|Human|Lighthouse Lab in Alderley Park|Wellcome Sanger Institute for the COVID-19 Genomics UK (COG-UK) consortium|Davies|United Kingdom  
>Spike|hCoV-19/Japan/PG-1879/2020|2020-05-00|EPI\_ISL\_685485|Original|hCoV-19^^Japan|Human|Tokyo Metropolitan Institute of Public Health|Pathogen Genomics Center|Sekizuka|Japan  
>Spike|hCoV-19/USA/VA-DCLS-0642/2020|2020-04-11|EPI\_ISL\_495314|Original|hCoV-19^^Virginia|Human|Virginia DCLS|Virginia DCLS|St. Jacques|USA  
>Spike|hCoV-19/Scotland/EDB11320/2020|2020-12-24|EPI\_ISL\_763548|Original|hCoV-19^^Scotland|Human|Virology Department|COVID-19 Genomics UK (COG-UK) Consortium|McHugh|United Kingdom  
>Spike|hCoV-19/USA/IL-UW-478/2020|2020-06-07|EPI\_ISL\_484853|Original|hCoV-19^^Illinois|Human|University of Wisconsin-Madison AIDS Vaccine Research Laboratories|University of Wisconsin-Madison AIDS Vaccine Research Laboratories|Baczenas|USA  
>Spike|hCoV-19/England/NOTT-11D48B/2020|2020-11-22|EPI\_ISL\_665930|Original|hCoV-19^^England|Human|Queens Medical Centre|COVID-19 Genomics UK (COG-UK) Consortium|Loose|United Kingdom



>Spike|hCoV-19/England/QEUA-B113EA/2020|2020-11-02|EPI\_ISL\_642504|Original|hCoV-19^^England|Human|Lighthouse Lab in Glasgow|Wellcome Sanger Institute for the COVID-19 Genomics UK (COG-UK) Consortium|Davies|United Kingdom

>Spike|hCoV-19/Brazil/RS-6197/2020|2020-05-13|EPI\_ISL\_729829|Original|hCoV-19^^Rio Grande do Sul|Human|Laboratorio Central de Saude Publica do Estado do Rio Grande do Sul (LACEN-RS)|Laboratory of Respiratory Viruses and Measles|Silva|Brazil

>Spike|hCoV-19/England/MILK-A46D58/2020|2020-10-06|EPI\_ISL\_598414|Original|hCoV-19^^England|Human|Lighthouse Lab in Milton Keynes|Wellcome Sanger Institute for the COVID-19 Genomics UK (COG-UK) consortium|Davies|United Kingdom

>Spike|hCoV-19/England/CAMB-1B5F39/2020|2020-09-15|EPI\_ISL\_573139|Original|hCoV-19^^England|Human|Department of Pathology|COVID-19 Genomics UK (COG-UK) Consortium|Goodfellow|United Kingdom

>Spike|hCoV-19/Russia/VOR-RII-MH3416S/2020|2020-10-07|EPI\_ISL\_733141|Original|hCoV-19^^Voronezh|Human|HELIX LLC|WHO National Influenza Centre Russian Federation|Komissarov|Russia

>Spike|hCoV-19/USA/AR-CDC-4194/2020|2020-07-09|EPI\_ISL\_509684|Original|hCoV-19^^Arkansas|Human|AR Dept. of Health-Public Health Lab|Pathogen Discovery|Queen|USA

>Spike|hCoV-19/Peru/LIM-UPCH-0202/2020|2020-10-15|EPI\_ISL\_729894|Original|hCoV-19^^Lima|Human|Laboratorio de Referencia Nacional de Virus Respiratorios|Laboratorio de Gen\u00f3mica Microbiana|Tsukayama|Peru

>Spike|hCoV-19/Denmark/DCGC-17913/2020|2020-12-14|EPI\_ISL\_749641|Original|hCoV-19^^Sjaelland|Human|Department of Virus and Microbiological Special Diagnostics|Albertsen Lab|Michaelsen|Denmark

>Spike|hCoV-19/England/ALDP-9ECE25/2020|2020-05-05|EPI\_ISL\_589301|Original|hCoV-19^^England|Human|Lighthouse Lab in Alderley Park|Wellcome Sanger Institute for the COVID-19 Genomics UK (COG-UK) consortium|Davies|United Kingdom

>Spike|hCoV-19/Wales/QEUA-B812CA/2020|2020-11-14|EPI\_ISL\_710861|Original|hCoV-19^^Wales|Human|Lighthouse Lab in Glasgow|Wellcome Sanger Institute for the COVID-19 Genomics UK (COG-UK) Consortium|Davies|United Kingdom

>Spike|hCoV-19/USA/WA-UW-22149/2020|2020-08-06|EPI\_ISL\_570631|Original|hCoV-19^^Washington|Human|UW Virology Lab|UW Virology Lab|Roychoudhury|USA

>Spike|hCoV-19/England/ALDP-B5BA1C/2020|2020-11-08|EPI\_ISL\_655509|Original|hCoV-19^^England|Human|Lighthouse Lab in Alderley Park|Wellcome Sanger Institute for the COVID-19 Genomics UK (COG-UK) Consortium|Davies|United Kingdom

>Spike|hCoV-19/Spain/MD-H12-R11/2020|2020-03-06|EPI\_ISL\_530094|Original|hCoV-19^^Madrid|Human|Hospital Universitario Ram\u00f3n y Cajal|Hospital Universitario 12 de Octubre|Viedma|Spain

>Spike|hCoV-19/Poland/PL\_P11/2020|2020-04-02|EPI\_ISL\_451972|Original|hCoV-19^^Malopolska|Human|1. ViroGenetics - BSL3 Laboratory of Virology|1. ViroGenetics - BSL3 Laboratory of Virology|Pyrz|Poland

>Spike|hCoV-19/USA/CT-Yale-318/2020|2020-03-31|EPI\_ISL\_476546|Original|hCoV-19^^Connecticut|Human|Yale Clinical Virology Laboratory|Grubaugh Lab - Yale School of Public Health|Grubaugh|USA

>Spike|hCoV-19/USA/MD-MDH-0353/2020|2020-10-20|EPI\_ISL\_648292|Original|hCoV-19^^Maryland|Human|MD PHL|MD PHL|Keller|USA

>Spike|hCoV-19/Denmark/DCGC-15629/2020|2020-11-23|EPI\_ISL\_713931|Original|hCoV-19^^Midtjylland|Human|Department of Virus and Microbiological Special Diagnostics|Albertsen Lab|Michaelsen|Denmark

>Spike|hCoV-19/England/ALDP-693682/2020|2020-07-02|EPI\_ISL\_551818|Original|hCoV-19^^England|Human|Lighthouse Lab in Alderley Park|Wellcome Sanger Institute for the COVID-19 Genomics UK (COG-UK) consortium|Davies|United Kingdom

>Spike|hCoV-19/USA/TX-HMH-MCoV-15556/2020|2020-10-26|EPI\_ISL\_787040|Original|hCoV-19^^Texas|Human|Houston Methodist Hospital|Houston Methodist Hospital|Long|USA

>Spike|hCoV-19/USA/MN-QDX-977/2020|2020-03-14|EPI\_ISL\_571776|Original|hCoV-19^^Minnesota|Human|Quest Diagnostics|Quest Diagnostics|Kagan|USA

>Spike|hCoV-19/Scotland/QEUA-C148C9/2020|2020-12-06|EPI\_ISL\_710695|Original|hCoV-19^^Scotland|Human|Lighthouse Lab in Glasgow|Wellcome Sanger Institute for the COVID-19 Genomics UK (COG-UK) Consortium|Davies|United Kingdom

>Spike|hCoV-19/England/QEUA-BC4850/2020|2020-11-25|EPI\_ISL\_703331|Original|hCoV-19^^England|Human|Lighthouse Lab in Glasgow|Wellcome Sanger Institute for the COVID-19 Genomics UK (COG-UK) Consortium|Davies|United Kingdom

>Spike|hCoV-19/England/CAMB-1ACEED/2020|2020-04-23|EPI\_ISL\_489390|Original|hCoV-19^^England|Human|Department of Pathology|Wellcome Sanger Institute for the COVID-19 Genomics UK (COG-UK) consortium|Davies|United Kingdom

>Spike|hCoV-19/USA/WI-UW-1305/2020|2020-08-31|EPI\_ISL\_536677|Original|hCoV-19^^Wisconsin|Human|University of Wisconsin-Madison AIDS Vaccine Research Laboratories|University of Wisconsin-Madison AIDS Vaccine Research Laboratories|Baczenas|USA

>Spike|hCoV-19/USA/WI-UW-540/2020|2020-06-22|EPI\_ISL\_484915|Original|hCoV-19^^Wisconsin|Human|University of Wisconsin-Madison AIDS Vaccine Research Laboratories|University of Wisconsin-Madison AIDS Vaccine Research Laboratories|Baczenas|USA

>Spike|hCoV-19/South Korea/KDCA0125/2020|2020-10-04|EPI\_ISL\_747360|Original|hCoV-19^^South Korea|Human|Division of Emerging Infectious Diseases|Division of Emerging Infectious Diseases|Park|South Korea

>Spike|hCoV-19/Wales/PHWC-496C16/2020|2020-11-26|EPI\_ISL\_726703|Original|hCoV-19^^Wales|Human|Originating lab|COVID-19 Genomics UK (COG-UK) Consortium|Moore|United Kingdom

>Spike|hCoV-19/England/ALDP-A67A1E/2020|2020-10-12|EPI\_ISL\_630665|Original|hCoV-19^^England|Human|Lighthouse Lab in Alderley Park|Wellcome Sanger Institute for the COVID-19 Genomics UK (COG-UK) consortium|Davies|United Kingdom

>Spike|hCoV-19/Japan/PG-8600/2020|2020-08-00|EPI\_ISL\_686196|Original|hCoV-19^^Japan|Human|Pathogen Genomics Center|Pathogen Genomics Center|Sekizuka|Japan

>Spike|hCoV-19/Denmark/DCGC-10228/2020|2020-11-09|EPI\_ISL\_669845|Original|hCoV-19^^Nordjylland|Human|Department of Virus and Microbiological Special Diagnostics|Albertsen Lab|Michaelsen|Denmark

>Spike|hCoV-19/England/MILK-B8BFF6/2020|2020-11-12|EPI\_ISL\_674331|Original|hCoV-19^^England|Human|Lighthouse Lab in Milton Keynes|Wellcome Sanger Institute for the COVID-19 Genomics UK (COG-UK) Consortium|Davies|United Kingdom

>Spike|hCoV-19/Brazil/SP-L15-CD263/2020|2020-03-29|EPI\_ISL\_476258|Original|hCoV-19^^S\u00e3o Paulo|Human|Hospital da Cl\u00ednicas da Faculdade de Medicina da Universidade de S\u00e3o Paulo|Instituto de Medicina Tropical da Univesidade de S\u00e3o Paulo|Sabino|Brazil

>Spike|hCoV-19/England/BIRM-654C1/2020|2020-10-06|EPI\_ISL\_594561|Original|hCoV-19^^England|Human|University of Birmingham|COVID-19 Genomics UK (COG-UK) Consortium|Loman|United Kingdom

>Spike|hCoV-19/USA/MA-MASPHL-00142/2020|2020-04-03|EPI\_ISL\_791614|Original|hCoV-19^^Massachusetts|Human|Massachusetts State Public Health Laboratory|Infectious Disease Program|Park|USA

>Spike|hCoV-19/Australia/ACT0018/2020|2020-03-21|EPI\_ISL\_498485|Original|hCoV-19^^Australian Capital Territory|Human|ACT Pathology|Schwessinger Lab|Hall|Australia

>Spike|hCoV-19/England/PORT-2CFA3A/2020|2020-05-15|EPI\_ISL\_493617|Original|hCoV-19^^England|Human|Centre for Enzyme Innovation|COVID-19 Genomics UK (COG-UK) Consortium|Robson|United Kingdom

>Spike|hCoV-19/Australia/VIC1387/2020|2020-04-14|EPI\_ISL\_561935|Original|hCoV-19^^Victoria|Human|Victorian Infectious Diseases Reference Laboratory (VIDRL)|VIDRL and MDU-PHL|Schultz|Australia

>Spike|hCoV-19/Costa Rica/INC-0155/2020|2020-09-30|EPI\_ISL\_769992|Original|hCoV-19^^Alajuela|Human|Hospital Metropolitano|Inciensa|Soto-Garita|Costa Rica

>Spike|hCoV-19/England/QEUA-9B9207/2020|2020-09-07|EPI\_ISL\_549782|Original|hCoV-19^^England|Human|Lighthouse Lab in Glasgow|Wellcome Sanger Institute for the COVID-19 Genomics UK (COG-UK) consortium|Davies|United Kingdom

>Spike|hCoV-19/Netherlands/ZH-RIVM-20442/2020|2020-12-15|EPI\_ISL\_728661|Original|hCoV-19^^Zuid-holland|Human|Dutch COVID-19 response team|National Institute for Public Health and the Environment (RIVM)|Meijer|Netherlands

>Spike|hCoV-19/England/QEUA-B2937/2020|2020-11-18|EPI\_ISL\_672774|Original|hCoV-19^^England|Human|Lighthouse Lab in Glasgow|Wellcome Sanger Institute for the COVID-19 Genomics UK (COG-UK) Consortium|Davies|United Kingdom

>Spike|hCoV-19/England/ALDP-B4FB09/2020|2020-10-08|EPI\_ISL\_649368|Original|hCoV-19^^England|Human|Lighthouse Lab in Alderley Park|Wellcome Sanger Institute for the COVID-19 Genomics UK (COG-UK) Consortium|Davies|United Kingdom

>Spike|hCoV-19/USA/MS-CDC-6585/2020|2020-08-22|EPI\_ISL\_648034|Original|hCoV-19^^Mississippi|Human|MS Public Health Laboratory|Pathogen Discovery|Queen|USA

>Spike|hCoV-19/Italy/CAM-INTPas-4/2020|2020-00-00|EPI\_ISL\_494756|Original|hCoV-19^^Campania|Human|INT Fondazione Pascale|INT Fondazione Pascale|Rachiglio|Italy

>Spike|hCoV-19/Portugal/PT1561/2020|2020-06-27|EPI\_ISL\_693572|Original|hCoV-19^^Portugal|Human|Instituto Nacional de Saude (INSA)|Instituto Nacional de Saude (INSA)|Borges|Portugal

>Spike|hCoV-19/USA/MN-MDH-2032/2020|2020-11-03|EPI\_ISL\_654713|Original|hCoV-19^^Minnesota|Human|Minnesota Department of Health|Minnesota Department of Health|Lorentz|USA

>Spike|hCoV-19/Wales/PHWC-164E1E/2020|2020-05-18|EPI\_ISL\_479386|Original|hCoV-19^^Wales|Human|Wales Specialist Virology Centre Sequencing lab|COVID-19 Genomics UK (COG-UK) Consortium|Moore|United Kingdom

>Spike|hCoV-19/England/20129176304/2020|2020-03-21|EPI\_ISL\_424158|Original|hCoV-19^^England|Human|Respiratory Virus Unit|Respiratory Virus Unit|Platt|United Kingdom

>Spike|hCoV-19/England/202822186/2020|2020-06-14|EPI\_ISL\_490242|Original|hCoV-19^^England|Human|Respiratory Virus Unit|Respiratory Virus Unit|Platt|United Kingdom

>Spike|hCoV-19/USA/WA-UW-12163/2020|2020-06-26|EPI\_ISL\_570497|Original|hCoV-19^^Washington|Human|UW Virology Lab|UW Virology Lab|Roychoudhury|USA

>Spike|hCoV-19/England/NOTT-116DA5/2020|2020-10-21|EPI\_ISL\_627668|Original|hCoV-19^^England|Human|Queens Medical Centre|COVID-19 Genomics UK (COG-UK) Consortium|Loose|United Kingdom

>Spike|hCoV-19/Australia/VIC399/2020|2020-03-24|EPI\_ISL\_426702|Original|hCoV-19^^Victoria|Human|Victorian Infectious Diseases Reference Laboratory (VIDRL)|Microbiological Diagnostic Unit Public Health Laboratory and Victorian Infectious Diseases Reference Laboratory|Schultz|Australia

>Spike|hCoV-19/England/MILK-BDB8CF/2020|2020-11-26|EPI\_ISL\_709614|Original|hCoV-19^^England|Human|Lighthouse Lab in Milton Keynes|Wellcome Sanger Institute for the COVID-19 Genomics UK (COG-UK) Consortium|Davies|United Kingdom

>Spike|hCoV-19/USA/CA-CZB-13045/2020|2020-05-15|EPI\_ISL\_672322|Original|hCoV-19^^California|Human|Alameda County Public Health Lab|Chan-Zuckerberg Biohub|Bhatt|USA

>Spike|hCoV-19/USA/WA-UW-10485/2020|2020-06-08|EPI\_ISL\_570321|Original|hCoV-19^^Washington|Human|UW Virology Lab|UW Virology Lab|Roychoudhury|USA

>Spike|hCoV-19/England/NOTT-110AD1/2020|2020-04-30|EPI\_ISL\_441896|Original|hCoV-19^^England|Human|Queens Medical Centre|COVID-19 Genomics UK (COG-UK) Consortium|Loose|United Kingdom

>Spike|hCoV-19/Wales/PHWC-49AB51/2020|2020-12-03|EPI\_ISL\_727651|Original|hCoV-19^^Wales|Human|Originating lab|COVID-19 Genomics UK (COG-UK) Consortium|Moore|United Kingdom

>Spike|hCoV-19/USA/TX-HMH-MCoV-18694/2020|2020-11-22|EPI\_ISL\_785042|Original|hCoV-19^^Texas|Human|Houston Methodist Hospital|Houston Methodist Hospital|Long|USA

>Spike|hCoV-19/England/ALDP-A85564/2020|2020-10-17|EPI\_ISL\_610314|Original|hCoV-19^^England|Human|Lighthouse Lab in Alderley Park|Wellcome Sanger Institute for the COVID-19 Genomics UK (COG-UK) consortium|Davies|United Kingdom

>Spike|hCoV-19/France/OCC-147/2020|2020-11-12|EPI\_ISL\_751467|Original|hCoV-19^^Occitanie|Human|CHU Purpan - Laboratoire de Virologie - Institut F\u00e9d\u00e9ratif de Biologie|CHU Purpan - Laboratoire de Virologie - Institut F\u00e9d\u00e9ratif de Biologie|Latour|France

>Spike|hCoV-19/USA/TX-HMH-2719/2020|2020-06-06|EPI\_ISL\_545502|Original|hCoV-19^^Texas|Human|Houston Methodist Hospital|Houston Methodist Hospital|Long|USA

>Spike|hCoV-19/England/MILK-9C3246/2020|2020-09-10|EPI\_ISL\_566927|Original|hCoV-19^^England|Human|Lighthouse Lab in Milton Keynes|Wellcome Sanger Institute for the COVID-19 Genomics UK (COG-UK) consortium|Davies|United Kingdom

>Spike|hCoV-19/USA/NY-NYCPHL-000907/2020|2020-03-19|EPI\_ISL\_632968|Original|hCoV-19^^New York|Human|Flushing Hospital Medical Center|New York City Public Health Laboratory|Wang|USA

>Spike|hCoV-19/Denmark/DCGC-20917/2020|2020-12-21|EPI\_ISL\_759445|Original|hCoV-19^^Hovedstaden|Human|Department of Virus and Microbiological Special Diagnostics|Albertsen Lab|Michaelsen|Denmark

>Spike|hCoV-19/England/QEUEH-9CA5EC/2020|2020-09-10|EPI\_ISL\_567391|Original|hCoV-19^^England|Human|Lighthouse Lab in Glasgow|Wellcome Sanger Institute for the COVID-19 Genomics UK (COG-UK) consortium|Davies|United Kingdom

>Spike|hCoV-19/Spain/PV-IBV-000750/2020|2020-03-08|EPI\_ISL\_452738|Original|hCoV-19^^Basque Country|Human|Hospital Universitario Araba. Vitoria-Gasteiz,|SeqCOVID-SPAIN consortium|IBV (CSIC)|Comas|Spain

>Spike|hCoV-19/England/QEUEH-964696/2020|2020-08-11|EPI\_ISL\_536896|Original|hCoV-19^^England|Human|Lighthouse Lab in Glasgow|Wellcome Sanger Institute for the COVID-19 Genomics UK (COG-UK) consortium|Davies|United Kingdom

>Spike|hCoV-19/England/ALDP-B829E2/2020|2020-11-14|EPI\_ISL\_675263|Original|hCoV-19^^England|Human|Lighthouse Lab in Alderley Park|Wellcome Sanger Institute for the COVID-19 Genomics UK (COG-UK) Consortium|Davies|United Kingdom

>Spike|hCoV-19/USA/WY-WYPHL004/2020|2020-03-14|EPI\_ISL\_421346|Original|hCoV-19^^Wyoming|Human|Wyoming Public Health Laboratory|Center for Global Health|Domman|USA

>Spike|hCoV-19/England/CAMC-AEA749/2020|2020-10-26|EPI\_ISL\_633363|Original|hCoV-19^^England|Human|Lighthouse Lab in Cambridge|Wellcome Sanger Institute for the COVID-19 Genomics UK (COG-UK) consortium|Davies|United Kingdom

>Spike|hCoV-19/England/QEUEH-C16074/2020|2020-12-06|EPI\_ISL\_709549|Original|hCoV-19^^England|Human|Lighthouse Lab in Glasgow|Wellcome Sanger Institute for the COVID-19 Genomics UK (COG-UK) Consortium|Davies|United Kingdom

>Spike|hCoV-19/England/203580247/2020|2020-08-27|EPI\_ISL\_566070|Original|hCoV-19^^England|Human|Respiratory Virus Unit|Respiratory Virus Unit|Platt|United Kingdom

>Spike|hCoV-19/Denmark/DCGC-15008/2020|2020-11-23|EPI\_ISL\_713576|Original|hCoV-19^^Midtjylland|Human|Department of Virus and Microbiological Special Diagnostics|Albertsen Lab|Michaelsen|Denmark

>Spike|hCoV-19/Russia/AST-RII-MH4485S/2020|2020-08-26|EPI\_ISL\_733209|Original|hCoV-19^^Astrakhan|Human|Pathogenic Microorganisms Variability Laboratory|WHO National Influenza Centre Russian Federation|Komissarov|Russia

>Spike|hCoV-19/USA/CA-CHLA-PLM54586330/2020|2020-11-30|EPI\_ISL\_753536|Original|hCoV-19^^California|Human|Clinical virology Laboratory|Center for Personalized Medicine|Dien Bard|USA

>Spike|hCoV-19/Australia/VIC3120/2020|2020-07-06|EPI\_ISL\_520827|Original|hCoV-19^^Victoria|Human|Victorian Infectious Diseases Reference Laboratory (VIDRL)|VIDRL and MDU-PHL|Schultz|Australia

>Spike|hCoV-19/England/MILK-9581D0/2020|2020-06-14|EPI\_ISL\_554712|Original|hCoV-19^^England|Human|Lighthouse Lab in Milton Keynes|Wellcome Sanger Institute for the COVID-19 Genomics UK (COG-UK) consortium|Davies|United Kingdom

>Spike|hCoV-19/USA/NY-Wadsworth-152368-01/2020|2020-06-24|EPI\_ISL\_676984|Original|hCoV-19^^New York|Human|Wadsworth Center|Wadsworth Center|Lasek-Nesselquist|USA

>Spike|hCoV-19/England/QEUEH-962B7B/2020|2020-08-10|EPI\_ISL\_531665|Original|hCoV-19^^England|Human|Lighthouse Lab in Glasgow|Wellcome Sanger Institute for the COVID-19 Genomics UK (COG-UK) consortium|Davies|United Kingdom

>Spike|hCoV-19/England/MILK-A06756/2020|2020-10-01|EPI\_ISL\_599852|Original|hCoV-19^^England|Human|Lighthouse Lab in Milton Keynes|Wellcome Sanger Institute for the COVID-19 Genomics UK (COG-UK) consortium|Davies|United Kingdom

>Spike|hCoV-19/England/LOND-D5611/2020|2020-04-14|EPI\_ISL\_449706|Original|hCoV-19^^England|Human|University College London|COVID-19 Genomics UK (COG-UK) Consortium|Roy|United Kingdom

>Spike|hCoV-19/Netherlands/FL-EMC-42/2020|2020-10-29|EPI\_ISL\_722344|Original|hCoV-19^^Flevoland|Human|Dutch COVID-19 response team|Erasmus Medical Center|Oude Munnink|Netherlands

>Spike|hCoV-19/Japan/PG-4606/2020|2020-08-00|EPI\_ISL\_689743|Original|hCoV-19^^Japan|Human|Pathogen Genomics Center|Pathogen Genomics Center|Sekizuka|Japan

>Spike|hCoV-19/USA/UT-UPHL-201131371/2020|2020-04-03|EPI\_ISL\_623172|Original|hCoV-19^^Utah|Human|Utah Public Health Laboratory|Utah Public Health Laboratory|Young|USA

>Spike|hCoV-19/England/NOTT-10F45F/2020|2020-04-02|EPI\_ISL\_433006|Original|hCoV-19^^England|Human|Queens Medical Centre|COVID-19 Genomics UK (COG-UK) Consortium|Loose|United Kingdom

>Spike|hCoV-19/England/MILK-ACE0E6/2020|2020-10-22|EPI\_ISL\_630233|Original|hCoV-19^^England|Human|Lighthouse Lab in Milton Keynes|Wellcome Sanger Institute for the COVID-19 Genomics UK (COG-UK) consortium|Davies|United Kingdom

>Spike|hCoV-19/Australia/NSW673/2020|2020-04-09|EPI\_ISL\_513316|Original|hCoV-19^^New South Wales|Human|South Eastern Area Laboratory Services (SEALS)|NSW Health Pathology - Institute of Clinical Pathology and Medical Research; Westmead Hospital; University of Sydney|Gall|Australia

>Spike|hCoV-19/USA/IL-UW-665/2020|2020-06-27|EPI\_ISL\_491310|Original|hCoV-19^^Illinois|Human|University of Wisconsin-Madison AIDS Vaccine Research Laboratories|University of Wisconsin-Madison AIDS Vaccine Research Laboratories|Baczenas|USA

>Spike|hCoV-19/Japan/PG-3280/2020|2020-03-00|EPI\_ISL\_691395|Original|hCoV-19^^Japan|Human|Pathogen Genomics Center|Pathogen Genomics Center|Sekizuka|Japan

>Spike|hCoV-19/Scotland/CVR1062/2020|2020-03-29|EPI\_ISL\_433503|Original|hCoV-19^^Scotland|Human|West of Scotland Specialist Virology Centre|COVID-19 Genomics UK (COG-UK) Consortium|Robertson|United Kingdom

>Spike|hCoV-19/Scotland/EDB7750/2020|2020-09-10|EPI\_ISL\_540888|Original|hCoV-19^^Scotland|Human|Virology Department|COVID-19 Genomics UK (COG-UK) Consortium|Williams|United Kingdom

>Spike|hCoV-19/USA/TX-HMH-5734/2020|2020-06-30|EPI\_ISL\_546975|Original|hCoV-19^^Texas|Human|Houston Methodist Hospital|Houston Methodist Hospital|Long|USA

>Spike|hCoV-19/USA/HI-H200251/2020|2020-08-18|EPI\_ISL\_752810|Original|hCoV-19^^Hawaii|Human|State Laboratories Division|State Laboratories Division|Sultana|USA

>Spike|hCoV-19/England/CAMB-1BC6B5/2020|2020-11-30|EPI\_ISL\_723887|Original|hCoV-19^^England|Human|Department of Pathology|COVID-19 Genomics UK (COG-UK) Consortium|Goodfellow|United Kingdom

>Spike|hCoV-19/Italy/ABR-IZSGC-TE8387/2020|2020-03-30|EPI\_ISL\_529026|Original|hCoV-19^^Abruzzo|Human|Ospedale \Giuseppe Mazzini\ -Teramo|Istitituto Zooprofilattico Sperimentale dell'Abruzzo e Molise \G.Caporale\|Lorusso|Italy

>Spike|hCoV-19/England/20128094804/2020|2020-03-20|EPI\_ISL\_423968|Original|hCoV-19^^England|Human|Respiratory Virus Unit|Respiratory Virus Unit|Platt|United Kingdom

>Spike|hCoV-19/England/QEUEH-9B8B2B/2020|2020-09-07|EPI\_ISL\_549719|Original|hCoV-19^^England|Human|Lighthouse Lab in Glasgow|Wellcome Sanger Institute for the COVID-19 Genomics UK (COG-UK) consortium|Davies|United Kingdom

>Spike|hCoV-19/Wales/LIVE-1DE152/2020|2020-10-09|EPI\_ISL\_611765|Original|hCoV-19^^Wales|Human|Liverpool Clinical Laboratories|COVID-19 Genomics UK (COG-UK) Consortium|Haldenby|United Kingdom

>Spike|hCoV-19/England/MILK-AC734E/2020|2020-10-22|EPI\_ISL\_630346|Original|hCoV-19^^England|Human|Lighthouse Lab in Milton Keynes|Wellcome Sanger Institute for the COVID-19 Genomics UK (COG-UK) consortium|Davies|United Kingdom

>Spike|hCoV-19/Wales/PHWC-275AA/2020|2020-03-31|EPI\_ISL\_431975|Original|hCoV-19^^Wales|Human|Wales Specialist Virology Centre|Public Health Wales Microbiology Cardiff|Moore|United Kingdom

>Spike|hCoV-19/England/ALDP-70704E/2020|2020-06-30|EPI\_ISL\_557737|Original|hCoV-19^^England|Human|Lighthouse Lab in Alderley Park|Wellcome Sanger Institute for the COVID-19 Genomics UK (COG-UK) consortium|Davies|United Kingdom

>Spike|hCoV-19/England/CAMB-1B7B9D/2020|2020-10-26|EPI\_ISL\_638364|Original|hCoV-19^^England|Human|Department of Pathology|COVID-19 Genomics UK (COG-UK) Consortium|Goodfellow|United Kingdom

>Spike|hCoV-19/USA/TX-HMH-MCoV-14398/2020|2020-10-07|EPI\_ISL\_787683|Original|hCoV-19^^Texas|Human|Houston Methodist Hospital|Houston Methodist Hospital|Long|USA

>Spike|hCoV-19/England/ALDP-A7048D/2020|2020-10-15|EPI\_ISL\_607866|Original|hCoV-19^^England|Human|Lighthouse Lab in Alderley Park|Wellcome Sanger Institute for the COVID-19 Genomics UK (COG-UK) consortium|Davies|United Kingdom

>Spike|hCoV-19/Wales/PHWC-48539D/2020|2020-10-21|EPI\_ISL\_628175|Original|hCoV-19^^Wales|Human|Wales Specialist Virology Centre Sequencing lab|COVID-19 Genomics UK (COG-UK) Consortium|Moore|United Kingdom

>Spike|hCoV-19/USA/CA-CZB-14059/2020|2020-06-27|EPI\_ISL\_738804|Original|hCoV-19^^California|Human|Alameda County Public Health Lab|Chan-Zuckerberg Biohub|Kamm|USA

>Spike|hCoV-19/USA/ME-HETL-J0075/2020|2020-03-19|EPI\_ISL\_513486|Original|hCoV-19^^Maine|Human|Maine HETL|Tewhey Lab|Tewhey|USA

>Spike|hCoV-19/England/QEUEH-C3184E/2020|2020-12-09|EPI\_ISL\_731290|Original|hCoV-19^^England|Human|Lighthouse Lab in Glasgow|Wellcome Sanger Institute for the COVID-19 Genomics UK (COG-UK) Consortium|Davies|United Kingdom

>Spike|hCoV-19/Turkey/IST-GLAB-145/2020|2020-04-21|EPI\_ISL\_735281|Original|hCoV-19^^Istanbul|Human|Genomic Laboratory (GLAB) (Conjoint lab of Health Directorate of Istanbul and Istanbul Technical University)|Genomic Laboratory (GLAB)|Karacan|Turkey

>Spike|hCoV-19/Denmark/DCGC-21058/2020|2020-12-21|EPI\_ISL\_759530|Original|hCoV-19^^Hovedstaden|Human|Department of Virus and Microbiological Special Diagnostics|Albertsen Lab|Michaelsen|Denmark

>Spike|hCoV-19/Lithuania/KL-LUHS-Eilnr58/2020|2020-04-09|EPI\_ISL\_603120|Original|hCoV-19^^Klaipėdos apskritis|Human|Lithuanian University of Health Sciences Hospital|Lithuanian University of Health Sciences|Zemaitis|Lithuania

>Spike|hCoV-19/Finland/1CD5/2020|2020-12-01|EPI\_ISL\_732598|Original|hCoV-19^^Uusimaa|Human|Department of Virology and Immunology|Department of Virology|Smura|Finland

>Spike|hCoV-19/USA/MN-MDH-2116/2020|2020-10-30|EPI\_ISL\_683745|Original|hCoV-19^^Minnesota|Human|Minnesota Department of Health|Minnesota Department of Health|Garfin|USA

>Spike|hCoV-19/England/ALDP-A851BB/2020|2020-10-17|EPI\_ISL\_610484|Original|hCoV-19^^England|Human|Lighthouse Lab in Alderley Park|Wellcome Sanger Institute for the COVID-19 Genomics UK (COG-UK) consortium|Davies|United Kingdom

>Spike|hCoV-19/England/QEUEH-9DE54F/2020|2020-09-21|EPI\_ISL\_599695|Original|hCoV-19^^England|Human|Lighthouse Lab in Glasgow|Wellcome Sanger Institute for the COVID-19 Genomics UK (COG-UK) consortium|Davies|United Kingdom

>Spike|hCoV-19/France/PAC-NRC2908/2020|2020-12-07|EPI\_ISL\_779845|Original|hCoV-19^^Provence-Alpes-C\u00f4te d'Azur|Human|CNR Virus des Infections Respiratoires - France SUD|CNR Virus des Infections Respiratoires - France SUD|Bal|France

>Spike|hCoV-19/Scotland/EDB022/2020|2020-03-12|EPI\_ISL\_425828|Original|hCoV-19^^Scotland|Human|Virology Department|COVID-19 Genomics UK (COG-UK) Consortium|Williams|United Kingdom

>Spike|hCoV-19/USA/WA-S1653/2020|2020-05-29|EPI\_ISL\_496079|Original|hCoV-19^^Washington|Human|Washington State Department of Health|Seattle Flu Study|Lee|USA

>Spike|hCoV-19/England/LOND-12609B3/2020|2020-04-05|EPI\_ISL\_516879|Original|hCoV-19^^England|Human|North West London Pathology|Wellcome Sanger Institute for the COVID-19 Genomics UK (COG-UK) consortium|Davies|United Kingdom

>Spike|hCoV-19/England/MILK-B02416/2020|2020-10-23|EPI\_ISL\_642836|Original|hCoV-19^^England|Human|Lighthouse Lab in Milton Keynes|Wellcome Sanger Institute for the COVID-19 Genomics UK (COG-UK) Consortium|Davies|United Kingdom

>Spike|hCoV-19/Denmark/DCGC-18314/2020|2020-12-07|EPI\_ISL\_749224|Original|hCoV-19^^Midtjylland|Human|Department of Virus and Microbiological Special Diagnostics|Albertsen Lab|Michaelsen|Denmark

>Spike|hCoV-19/England/ALDP-A5116D/2020|2020-10-07|EPI\_ISL\_597916|Original|hCoV-19^^England|Human|Lighthouse Lab in Alderley Park|Wellcome Sanger Institute for the COVID-19 Genomics UK (COG-UK) consortium|Davies|United Kingdom

>Spike|hCoV-19/USA/WA-S722/2020|2020-04-12|EPI\_ISL\_449892|Original|hCoV-19^^Washington|Human|Washington State Department of Health|Seattle Flu Study|Bedford|USA

>Spike|hCoV-19/England/ALDP-A70238/2020|2020-10-15|EPI\_ISL\_607988|Original|hCoV-19^^England|Human|Lighthouse Lab in Alderley Park|Wellcome Sanger Institute for the COVID-19 Genomics UK (COG-UK) consortium|Davies|United Kingdom

>Spike|hCoV-19/England/LIVE-1DDA0D/2020|2020-09-25|EPI\_ISL\_611984|Original|hCoV-19^^England|Human|Liverpool Clinical Laboratories|COVID-19 Genomics UK (COG-UK) Consortium|Haldenby|United Kingdom

>Spike|hCoV-19/England/CAMC-CF4AD8/2020|2020-12-21|EPI\_ISL\_781570|Original|hCoV-19^^England|Human|Lighthouse Lab in Cambridge|Wellcome Sanger Institute for the COVID-19 Genomics UK (COG-UK) Consortium|Davies|United Kingdom

>Spike|hCoV-19/Denmark/DCGC-12007/2020|2020-06-15|EPI\_ISL\_671254|Original|hCoV-19^^Nordjylland|Human|Department of Virus and Microbiological Special Diagnostics|Albertsen Lab|Michaelsen|Denmark

>Spike|hCoV-19/Wales/ALDP-BC88A7/2020|2020-11-22|EPI\_ISL\_767332|Original|hCoV-19^^Wales|Human|Lighthouse Lab in Alderley Park|Wellcome Sanger Institute for the COVID-19 Genomics UK (COG-UK) Consortium|Davies|United Kingdom

>Spike|hCoV-19/Switzerland/BE-ETHZ-190066/2020|2020-07-09|EPI\_ISL\_500926|Original|hCoV-19^^Bern|Human|Viollier AG|Department of Biosystems Science and Engineering|Nadeau|Switzerland

>Spike|hCoV-19/Denmark/DCGC-14897/2020|2020-11-23|EPI\_ISL\_712054|Original|hCoV-19^^Sjaelland|Human|Department of Virus and Microbiological Special Diagnostics|Albertsen Lab|Michaelsen|Denmark

>Spike|hCoV-19/Australia/NSW896/2020|2020-08-27|EPI\_ISL\_544977|Original|hCoV-19^^New South Wales|Human|St Vincent's Pathology (SydPath)|NSW Health Pathology - Institute of Clinical Pathology and Medical Research; Westmead Hospital; University of Sydney|Gall|Australia

>Spike|hCoV-19/England/QEUA-B69AB1/2020|2020-11-11|EPI\_ISL\_661540|Original|hCoV-19^^England|Human|Lighthouse Lab in Glasgow|Wellcome Sanger Institute for the COVID-19 Genomics UK (COG-UK) Consortium|Davies|United Kingdom

>Spike|hCoV-19/Scotland/EDB8308/2020|2020-10-13|EPI\_ISL\_594846|Original|hCoV-19^^Scotland|Human|Virology Department|COVID-19 Genomics UK (COG-UK) Consortium|McHugh|United Kingdom

>Spike|hCoV-19/USA/TX-HMH-4591/2020|2020-06-19|EPI\_ISL\_543739|Original|hCoV-19^^Texas|Human|Houston Methodist Hospital|Houston Methodist Hospital|Long|USA

>Spike|hCoV-19/England/CAMB-1B286E/2020|2020-05-14|EPI\_ISL\_469908|Original|hCoV-19^^England|Human|Department of Pathology|Wellcome Sanger Institute for the COVID-19 Genomics UK (COG-UK) consortium|Davies|United Kingdom

>Spike|hCoV-19/USA/TX-HMH-5213/2020|2020-06-20|EPI\_ISL\_544598|Original|hCoV-19^^Texas|Human|Houston Methodist Hospital|Houston Methodist Hospital|Long|USA

>Spike|hCoV-19/England/ALDP-A508C3/2020|2020-10-07|EPI\_ISL\_597619|Original|hCoV-19^^England|Human|Lighthouse Lab in Alderley Park|Wellcome Sanger Institute for the COVID-19 Genomics UK (COG-UK) consortium|Davies|United Kingdom

>Spike|hCoV-19/England/QEUA-B7C12F/2020|2020-11-13|EPI\_ISL\_668386|Original|hCoV-19^^England|Human|Lighthouse Lab in Glasgow|Wellcome Sanger Institute for the COVID-19 Genomics UK (COG-UK) Consortium|Davies|United Kingdom

>Spike|hCoV-19/England/20144021204/2020|2020-03-28|EPI\_ISL\_465986|Original|hCoV-19^^England|Human|Respiratory Virus Unit|Respiratory Virus Unit|Platt|United Kingdom

>Spike|hCoV-19/England/QEUA-B10767/2020|2020-11-02|EPI\_ISL\_641787|Original|hCoV-19^^England|Human|Lighthouse Lab in Glasgow|Wellcome Sanger Institute for the COVID-19 Genomics UK (COG-UK) Consortium|Davies|United Kingdom

>Spike|hCoV-19/USA/FL-BPHL-0845/2020|2020-06-22|EPI\_ISL\_514191|Original|hCoV-19^^Florida|Human|Florida Bureau of Public Health Laboratories|Florida Bureau of Public Health Laboratories|Blanton|USA

>Spike|hCoV-19/Australia/VIC17898/2020|2020-08-20|EPI\_ISL\_779544|Original|hCoV-19^^Victoria|Human|Microbiological Diagnostic Unit - Public Health Laboratory (MDU-PHL)|MDU-PHL|Beck|Australia

>Spike|hCoV-19/USA/MN-MDH-1863/2020|2020-10-12|EPI\_ISL\_602998|Original|hCoV-19^^Minnesota|Human|Minnesota Department of Health|Minnesota Department of Health|Garfin|USA

>Spike|hCoV-19/England/SHEF-D1BAD/2020|2020-05-06|EPI\_ISL\_475498|Original|hCoV-19^^England|Human|Virology Department|COVID-19 Genomics UK (COG-UK) Consortium|de Silva|United Kingdom

>Spike|hCoV-19/France/BRE-IPP10841/2020|2020-11-20|EPI\_ISL\_754154|Original|hCoV-19^^Bretagne|Human|Laboratoire de Microbiologie|National Reference Center for Viruses of Respiratory Infections|Enouf|France

>Spike|hCoV-19/USA/FL-BPHL-0220/2020|2020-04-19|EPI\_ISL\_480871|Original|hCoV-19^^Florida|Human|Florida Bureau of Public Health Laboratories|Florida Bureau of Public Health Laboratories|Blanton|USA

>Spike|hCoV-19/USA/WA-UW-45099/2020|2020-12-08|EPI\_ISL\_747215|Original|hCoV-19^^Washington|Human|UW Virology Lab|UW Virology Lab|Roychoudhury|USA

>Spike|hCoV-19/Denmark/DCGC-7330/2020|2020-10-12|EPI\_ISL\_619311|Original|hCoV-19^^Syddanmark|Human|Department of Virus and Microbiological Special Diagnostics|Albertsen lab|Michaelsen|Denmark

>Spike|hCoV-19/England/ALDP-C3965B/2020|2020-12-09|EPI\_ISL\_731526|Original|hCoV-19^^England|Human|Lighthouse Lab in Alderley Park|Wellcome Sanger Institute for the COVID-19 Genomics UK (COG-UK) Consortium|Davies|United Kingdom

>Spike|hCoV-19/England/QEUEH-C7F844/2020|2020-12-16|EPI\_ISL\_762928|Original|hCoV-19^^England|Human|Lighthouse Lab in Glasgow|Wellcome Sanger Institute for the COVID-19 Genomics UK (COG-UK) Consortium|Davies|United Kingdom

>Spike|hCoV-19/Japan/TKYT30095/2020|2020-08-00|EPI\_ISL\_649140|Original|hCoV-19^^Japan|Human|Tokyo Metropolitan Institute of Public Health|Tokyo Metropolitan Institute of Public Health|Ryota|Japan

>Spike|hCoV-19/England/ALDP-A6E16D/2020|2020-10-15|EPI\_ISL\_607935|Original|hCoV-19^^England|Human|Lighthouse Lab in Alderley Park|Wellcome Sanger Institute for the COVID-19 Genomics UK (COG-UK) consortium|Davies|United Kingdom

>Spike|hCoV-19/England/CAMC-A65843/2020|2020-10-11|EPI\_ISL\_637651|Original|hCoV-19^^England|Human|Department of Pathology|COVID-19 Genomics UK (COG-UK) Consortium|Goodfellow|United Kingdom

>Spike|hCoV-19/Ireland/D-NVRL-MPZ75781/2020|2020-04-13|EPI\_ISL\_767771|Original|hCoV-19^^Dublin|Human|National Virus Reference Laboratory|Irish Coronavirus Sequencing Consortium - Teagasc Moorepark|Walsh|Ireland

>Spike|hCoV-19/England/PORT-2E97AC/2020|2020-00-00|EPI\_ISL\_727731|Original|hCoV-19^^England|Human|Centre for Enzyme Innovation|COVID-19 Genomics UK (COG-UK) Consortium|Robson|United Kingdom

>Spike|hCoV-19/USA/CA-QDX-2075/2020|2020-03-14|EPI\_ISL\_604394|Original|hCoV-19^^California|Human|Quest Diagnostics|Quest Diagnostics|Kagan|USA

>Spike|hCoV-19/England/LOND-D6A41/2020|2020-04-22|EPI\_ISL\_461763|Original|hCoV-19^^England|Human|University College London|COVID-19 Genomics UK (COG-UK) Consortium|Roy|United Kingdom

>Spike|hCoV-19/Denmark/DCGC-9258/2020|2020-11-16|EPI\_ISL\_668877|Original|hCoV-19^^Nordjylland|Human|Department of Virus and Microbiological Special Diagnostics|Albertsen Lab|Michaelsen|Denmark

>Spike|hCoV-19/England/ALDP-BB9C43/2020|2020-11-21|EPI\_ISL\_702606|Original|hCoV-19^^England|Human|Lighthouse Lab in Alderley Park|Wellcome Sanger Institute for the COVID-19 Genomics UK (COG-UK) Consortium|Davies|United Kingdom

>Spike|hCoV-19/DRC/3846/2020|2020-04-25|EPI\_ISL\_471397|Original|hCoV-19^^Kinshasa|Human|Viral Respiratory Lab|Pathogen Sequencing Lab|Lusamaki|Democratic Republic of the Congo

>Spike|hCoV-19/England/QEUEH-BA2EB0/2020|2020-11-18|EPI\_ISL\_672848|Original|hCoV-19^^England|Human|Lighthouse Lab in Glasgow|Wellcome Sanger Institute for the COVID-19 Genomics UK (COG-UK) Consortium|Davies|United Kingdom

>Spike|hCoV-19/England/CAMC-BBBA74/2020|2020-11-21|EPI\_ISL\_724084|Original|hCoV-19^^England|Human|Northumbria University / South Tees Hospitals NHS Foundation Trust / North Cumbria Integrated Care NHS Foundation Trust / North Tees and Hartlepool NHS Foundation Trust / Newcastle Hospitals NHS Foundation Trust|COVID-19 Genomics UK (COG-UK) Consortium|Bashton|United Kingdom

>Spike|hCoV-19/Wales/PHWC-167F72/2020|2020-05-22|EPI\_ISL\_494180|Original|hCoV-19^^Wales|Human|Originating lab|COVID-19 Genomics UK (COG-UK) Consortium|Moore|United Kingdom



>Spike|hCoV-19/England/QEUEH-9DB023/2020|2020-09-21|EPI\_ISL\_601339|Original|hCoV-19^^England|Human|Lighthouse Lab in Glasgow|Wellcome Sanger Institute for the COVID-19 Genomics UK (COG-UK) consortium|Davies|United Kingdom

>Spike|hCoV-19/Australia/VIC9940/2020|2020-07-22|EPI\_ISL\_562759|Original|hCoV-19^^Victoria|Human|Microbiological Diagnostic Unit - Public Health Laboratory (MDU-PHL)|MDU-PHL|Schultz|Australia

>Spike|hCoV-19/USA/AZ-TG495423/2020|2020-07-12|EPI\_ISL\_695259|Original|hCoV-19^^Arizona|Human|TGen North|TGen North|French|USA

>Spike|hCoV-19/Scotland/QEUEH-1FEEC/2020|2020-10-01|EPI\_ISL\_598933|Original|hCoV-19^^Scotland|Human|Lighthouse Lab in Glasgow|Wellcome Sanger Institute for the COVID-19 Genomics UK (COG-UK) consortium|Davies|United Kingdom

>Spike|hCoV-19/Belgium/UGent-106/2020|2020-03-18|EPI\_ISL\_475066|Original|hCoV-19^^Ghent|Human|Lab voor klinische biologie|Onderzoeksgroep Virologie|Lambrechts|Belgium

>Spike|hCoV-19/USA/WA-S2207/2020|2020-06-08|EPI\_ISL\_497635|Original|hCoV-19^^Washington|Human|Washington State Department of Health|Seattle Flu Study|Lee|USA

>Spike|hCoV-19/USA/OR-PROV-186/2020|2020-05-14|EPI\_ISL\_482434|Original|hCoV-19^^Oregon|Human|Providence St. Joseph Health Molecular Genomics Laboratory|Providence St. Joseph Health Molecular Genomics Laboratory|Dowdell|USA

>Spike|hCoV-19/England/ALDP-950879/2020|2020-06-14|EPI\_ISL\_554592|Original|hCoV-19^^England|Human|Lighthouse Lab in Alderley Park|Wellcome Sanger Institute for the COVID-19 Genomics UK (COG-UK) consortium|Davies|United Kingdom

>Spike|hCoV-19/England/SHEF-CB809/2020|2020-04-14|EPI\_ISL\_457648|Original|hCoV-19^^England|Human|Virology Department|COVID-19 Genomics UK (COG-UK) Consortium|de Silva|United Kingdom

>Spike|hCoV-19/South Africa/NHLS-UCT-GP-5031/2020|2020-04-16|EPI\_ISL\_640098|Original|hCoV-19^^Western Cape|Human|Vanguard CHC wc VGC|NHLS/UCT|Iranzadeh|South Africa

>Spike|hCoV-19/England/QEUEH-9F53FD/2020|2020-09-25|EPI\_ISL\_638674|Original|hCoV-19^^England|Human|Department of Pathology|COVID-19 Genomics UK (COG-UK) Consortium|Goodfellow|United Kingdom

>Spike|hCoV-19/England/QEUEH-9B3D84/2020|2020-09-03|EPI\_ISL\_573549|Original|hCoV-19^^England|Human|Virology Department|COVID-19 Genomics UK (COG-UK) Consortium|de Silva|United Kingdom

>Spike|hCoV-19/USA/NY-WCMP11A03P/2020|2020-03-16|EPI\_ISL\_427583|Original|hCoV-19^^New York|Human|NewYork-Presbyterian & Mason Lab|Mason Lab|Mason|USA

>Spike|hCoV-19/USA/NC\_200312/2020|2020-03-00|EPI\_ISL\_454817|Original|hCoV-19^^North Carolina|Human|Dirk Dittmer|Dirk Dittmer|Moorad|USA

>Spike|hCoV-19/USA/UT-UPHL-201000094/2020|2020-07-06|EPI\_ISL\_594057|Original|hCoV-19^^Utah|Human|Utah Public Health Laboratory|Utah Public Health Laboratory|Young|USA

>Spike|hCoV-19/France/PAC-IHU-0532/2020|2020-04-07|EPI\_ISL\_569576|Original|hCoV-19^^Provence-Alpes-C\u00f4te-d\u2019Azur|Human|MEPHI|MEPHI|Levasseur|France

>Spike|hCoV-19/USA/CA-CZB-14757/2020|2020-11-03|EPI\_ISL\_739442|Original|hCoV-19^^California|Human|Humboldt County Public Health Laboratory|Chan-Zuckerberg Biohub|Kamm|USA

>Spike|hCoV-19/USA/TX-DSHS-1144/2020|2020-06-17|EPI\_ISL\_634948|Original|hCoV-19^^Texas|Human|Texas Department of State Health Services|Texas Department of State Health Services|Rahman|USA

>Spike|hCoV-19/Wales/PHWC-32EDE/2020|2020-04-12|EPI\_ISL\_446705|Original|hCoV-19^^Wales|Human|Wales Specialist Virology Centre|Public Health Wales Microbiology Cardiff|Moore|United Kingdom

>Spike|hCoV-19/England/CAMB-1ADE82/2020|2020-04-26|EPI\_ISL\_459477|Original|hCoV-19^^England|Human|Department of Pathology|Wellcome Sanger Institute for the COVID-19 Genomics UK (COG-UK) consortium|Davies|United Kingdom

>Spike|hCoV-19/England/ALDP-C3D29F/2020|2020-12-10|EPI\_ISL\_731780|Original|hCoV-19^^England|Human|Lighthouse Lab in Alderley Park|Wellcome Sanger Institute for the COVID-19 Genomics UK (COG-UK) Consortium|Davies|United Kingdom

>Spike|hCoV-19/England/NORW-E7931/2020|2020-05-05|EPI\_ISL\_449083|Original|hCoV-19^^England|Human|Quadram Institute Bioscience|COVID-19 Genomics UK (COG-UK) Consortium|Alikhan|United Kingdom

>Spike|hCoV-19/Scotland/QEUEH-9E41E8/2020|2020-09-23|EPI\_ISL\_601064|Original|hCoV-19^^Scotland|Human|Lighthouse Lab in Glasgow|Wellcome Sanger Institute for the COVID-19 Genomics UK (COG-UK) consortium|Davies|United Kingdom

>Spike|hCoV-19/England/ALDP-9E8ACB/2020|2020-09-24|EPI\_ISL\_637717|Original|hCoV-19^^England|Human|Centre for Enzyme Innovation|COVID-19 Genomics UK (COG-UK) Consortium|Robson|United Kingdom

>Spike|hCoV-19/USA/LA-GBCL-26513006/2020|2020-04-23|EPI\_ISL\_485070|Original|hCoV-19^^Louisiana|Human|River Road Testing Lab|Ginkgo Bioworks Clinical Laboratory|Smith|USA

>Spike|hCoV-19/England/CAMB-771C5/2020|2020-04-01|EPI\_ISL\_438511|Original|hCoV-19^^England|Human|Department of Pathology|Wellcome Sanger Institute for the COVID-19 Genomics UK (COG-UK) consortium|Amato|United Kingdom

>Spike|hCoV-19/Scotland/QEUEH-C3367F/2020|2020-12-11|EPI\_ISL\_757142|Original|hCoV-19^^Scotland|Human|Lighthouse Lab in Glasgow|Wellcome Sanger Institute for the COVID-19 Genomics UK (COG-UK) Consortium|Davies|United Kingdom

>Spike|hCoV-19/Denmark/DCGC-5253/2020|2020-09-14|EPI\_ISL\_615184|Original|hCoV-19^^Sjaelland|Human|Department of Virus and Microbiological Special Diagnostics|Albertsen lab|Michaelsen|Denmark

>Spike|hCoV-19/USA/FL-BPHL-0426/2020|2020-03-21|EPI\_ISL\_495332|Original|hCoV-19^^Florida|Human|Florida Bureau of Public Health Laboratories|Florida Bureau of Public Health Laboratories|Blanton|USA

>Spike|hCoV-19/USA/TX-HMH082/2020|2020-03-19|EPI\_ISL\_434791|Original|hCoV-19^^Texas|Human|Houston Methodist Hospital|Houston Methodist Hospital|Long|USA

>Spike|hCoV-19/Belgium/reg-09231004/2020|2020-09-23|EPI\_ISL\_735027|Original|hCoV-19^^Bekkevoort|Human|UZ Leuven|KU Leuven|Maes|Belgium

>Spike|hCoV-19/Germany/NW-HHU-73/2020|2020-03-30|EPI\_ISL\_523944|Original|hCoV-19^^North Rhine-Westphalia|Human|Center of Medical Microbiology|Center of Medical Microbiology|Wienemann|Germany

>Spike|hCoV-19/Bahrain/250182770\_S11\_L001/2020|2020-11-21|EPI\_ISL\_678262|Original|hCoV-19^^Bahrain|Human|Communicable Disease Laboratory|Communicable Disease Laboratory|Altaif|Bahrain

>Spike|hCoV-19/England/ALDP-B46BA8/2020|2020-11-07|EPI\_ISL\_656227|Original|hCoV-19^^England|Human|Lighthouse Lab in Alderley Park|Wellcome Sanger Institute for the COVID-19 Genomics UK (COG-UK) Consortium|Davies|United Kingdom

>Spike|hCoV-19/Wales/MILK-B064F4/2020|2020-10-24|EPI\_ISL\_652236|Original|hCoV-19^^Wales|Human|Quadram Institute Bioscience|COVID-19 Genomics UK (COG-UK) Consortium|Alikhan|United Kingdom

>Spike|hCoV-19/Wales/QEUEH-AD3400/2020|2020-10-26|EPI\_ISL\_647960|Original|hCoV-19^^Wales|Human|Lighthouse Lab in Glasgow|Wellcome Sanger Institute for the COVID-19 Genomics UK (COG-UK) Consortium|Davies|United Kingdom

>Spike|hCoV-19/Australia/VIC11751/2020|2020-07-24|EPI\_ISL\_591843|Original|hCoV-19^^Victoria|Human|Microbiological Diagnostic Unit - Public Health Laboratory (MDU-PHL)|MDU-PHL|Schultz|Australia

>Spike|hCoV-19/Australia/VIC6267/2020|2020-07-26|EPI\_ISL\_518257|Original|hCoV-19^^Victoria|Human|Microbiological Diagnostic Unit - Public Health Laboratory (MDU-PHL)|MDU-PHL|Schultz|Australia

>Spike|hCoV-19/England/QEUEH-AABD42/2020|2020-10-21|EPI\_ISL\_651086|Original|hCoV-19^^England|Human|Oxford Viromics|COVID-19 Genomics UK (COG-UK) Consortium|Golubchik|United Kingdom

>Spike|hCoV-19/Switzerland/BE-ETHZ-350191/2020|2020-11-04|EPI\_ISL\_693840|Original|hCoV-19^^Bern|Human|Viollier AG|Department of Biosystems Science and Engineering|Nadeau|Switzerland

>Spike|hCoV-19/England/ALDP-5B514E/2020|2020-06-19|EPI\_ISL\_558712|Original|hCoV-19^^England|Human|Lighthouse Lab in Alderley Park|Wellcome Sanger Institute for the COVID-19 Genomics UK (COG-UK) consortium|Davies|United Kingdom

>Spike|hCoV-19/New Zealand/20VR2671/2020|2020-00-00|EPI\_ISL\_579331|Original|hCoV-19^^Auckland|Human|LabPLUS|Institute of Environmental Science and Research (ESR)|Wang|New Zealand

>Spike|hCoV-19/England/CAMB-1AC4CD/2020|2020-04-22|EPI\_ISL\_489415|Original|hCoV-19^^England|Human|Department of Pathology|Wellcome Sanger Institute for the COVID-19 Genomics UK (COG-UK) consortium|Davies|United Kingdom

>Spike|hCoV-19/Australia/VIC8096/2020|2020-08-16|EPI\_ISL\_564845|Original|hCoV-19^^Victoria|Human|Microbiological Diagnostic Unit - Public Health Laboratory (MDU-PHL)|MDU-PHL|Schultz|Australia

>Spike|hCoV-19/England/20138020604/2020|2020-03-25|EPI\_ISL\_423299|Original|hCoV-19^^England|Human|Respiratory Virus Unit|Respiratory Virus Unit|Platt|United Kingdom

>Spike|hCoV-19/USA/DE-DHSS-F1037845/2020|2020-12-02|EPI\_ISL\_766991|Original|hCoV-19^^Delaware|Human|Delaware Public Health Laboratory|Delaware Public Health Laboratory|Bajwa|USA

>Spike|hCoV-19/USA/TX-HMH-MCoV-15890/2020|2020-07-10|EPI\_ISL\_785574|Original|hCoV-19^^Texas|Human|Houston Methodist Hospital|Houston Methodist Hospital|Long|USA

>Spike|hCoV-19/cat/France/Env-Ba/2020|2020-05-14|EPI\_ISL\_483063|Original|hCoV-19^^France|Felis catus|unknown|Virology|Submitter|France

>Spike|hCoV-19/England/BRIS-1282CF/2020|2020-04-16|EPI\_ISL\_469612|Original|hCoV-19^^England|Human|PHE South West Regional Laboratory|Wellcome Sanger Institute for the COVID-19 Genomics UK (COG-UK) consortium|Davies|United Kingdom

>Spike|hCoV-19/Denmark/DCGC-15601/2020|2020-11-23|EPI\_ISL\_713917|Original|hCoV-19^^Sjaelland|Human|Department of Virus and Microbiological Special Diagnostics|Albertsen Lab|Michaelsen|Denmark

>Spike|hCoV-19/England/LIVE-1D2AEA/2020|2020-03-29|EPI\_ISL\_611991|Original|hCoV-19^^England|Human|Liverpool Clinical Laboratories|COVID-19 Genomics UK (COG-UK) Consortium|Haldenby|United Kingdom

>Spike|hCoV-19/England/QEUEH-B0F701/2020|2020-11-02|EPI\_ISL\_641820|Original|hCoV-19^^England|Human|Lighthouse Lab in Glasgow|Wellcome Sanger Institute for the COVID-19 Genomics UK (COG-UK) Consortium|Davies|United Kingdom

>Spike|hCoV-19/USA/WA-S2551/2020|2020-06-16|EPI\_ISL\_497183|Original|hCoV-19^^Washington|Human|Washington State Department of Health|Seattle Flu Study|Lee|USA

>Spike|hCoV-19/Spain/MD-IBV-99009640/2020|2020-10-27|EPI\_ISL\_654376|Original|hCoV-19^^Madrid|Human|Hospital General Universitario Gregorio Marañón|SeqCOVID-SPAIN consortium/IBV (CSIC)|Comas|Spain

>Spike|hCoV-19/England/20194157001/2020|2020-05-05|EPI\_ISL\_465621|Original|hCoV-19^^England|Human|Respiratory Virus Unit|Respiratory Virus Unit|Platt|United Kingdom

>Spike|hCoV-19/Australia/VIC2985/2020|2020-07-07|EPI\_ISL\_521815|Original|hCoV-19^^Victoria|Human|Microbiological Diagnostic Unit - Public Health Laboratory (MDU-PHL)|MDU-PHL|Schultz|Australia

>Spike|hCoV-19/USA/TX-HMH-7048/2020|2020-06-28|EPI\_ISL\_546461|Original|hCoV-19^^Texas|Human|Houston Methodist Hospital|Houston Methodist Hospital|Long|USA

>Spike|hCoV-19/USA/TX-DSHS-1461/2020|2020-06-22|EPI\_ISL\_676605|Original|hCoV-19^^Texas|Human|Texas Department of State Health Services|Texas Department of State Health Services|Rahman|USA

>Spike|hCoV-19/England/QEUEH-B43376/2020|2020-11-08|EPI\_ISL\_657226|Original|hCoV-19^^England|Human|Lighthouse Lab in Glasgow|Wellcome Sanger Institute for the COVID-19 Genomics UK (COG-UK) Consortium|Davies|United Kingdom

>Spike|hCoV-19/Wales/PHWC-15D276/2020|2020-05-06|EPI\_ISL\_472691|Original|hCoV-19^^Wales|Human|Wales Specialist Virology Centre Sequencing lab|COVID-19 Genomics UK (COG-UK) Consortium|Moore|United Kingdom

>Spike|hCoV-19/Scotland/QEUEH-A1E0D8/2020|2020-10-01|EPI\_ISL\_598860|Original|hCoV-19^^Scotland|Human|Lighthouse Lab in Glasgow|Wellcome Sanger Institute for the COVID-19 Genomics UK (COG-UK) consortium|Davies|United Kingdom

>Spike|hCoV-19/Denmark/DCGC-16587/2020|2020-11-16|EPI\_ISL\_714856|Original|hCoV-19^^Syddanmark|Human|Department of Virus and Microbiological Special Diagnostics|Albertsen Lab|Michaelsen|Denmark

>Spike|hCoV-19/Canada/QC-LSPQ-L00241782/2020|2020-03-28|EPI\_ISL\_536290|Original|hCoV-19^^Quebec|Human|H\u00f4pital Charles-LeMoine|Laboratoire de sant\u00e9 publique du Qu\u00e9bec|Moreira|Canada

>Spike|hCoV-19/Switzerland/ZH-ETHZ-400333/2020|2020-12-08|EPI\_ISL\_729167|Original|hCoV-19^^Zurich|Human|Viollier AG|Department of Biosystems Science and Engineering|Nadeau|Switzerland

>Spike|hCoV-19/England/LIVE-A6109/2020|2020-03-21|EPI\_ISL\_499686|Original|hCoV-19^^England|Human|Liverpool Clinical Laboratories|COVID-19 Genomics UK (COG-UK) Consortium|Haldenby|United Kingdom

>Spike|hCoV-19/Wales/PHWC-36A8B/2020|2020-04-30|EPI\_ISL\_474753|Original|hCoV-19^^Wales|Human|Originating lab|COVID-19 Genomics UK (COG-UK) Consortium|Moore|United Kingdom

>Spike|hCoV-19/Japan/PG-3204/2020|2020-04-00|EPI\_ISL\_691324|Original|hCoV-19^^Japan|Human|Pathogen Genomics Center|Pathogen Genomics Center|Sekizuka|Japan

>Spike|hCoV-19/USA/UT-UPHL-201109255/2020|2020-04-23|EPI\_ISL\_634899|Original|hCoV-19^^Utah|Human|Utah Public Health Laboratory|Utah Public Health Laboratory|Young|USA

>Spike|hCoV-19/USA/TX-HMH-5283/2020|2020-06-19|EPI\_ISL\_544652|Original|hCoV-19^^Texas|Human|Houston Methodist Hospital|Houston Methodist Hospital|Long|USA

>Spike|hCoV-19/Australia/VIC325/2020|2020-03-24|EPI\_ISL\_420016|Original|hCoV-19^^Victoria|Human|Microbiological Diagnostic Unit Public Health Laboratory|Microbiological Diagnostic Unit Public Health Laboratory|Schultz|Australia

>Spike|hCoV-19/DRC/2813/2020|2020-04-16|EPI\_ISL\_437346|Original|hCoV-19^^Kinshasa|Human|Viral Respiratory Lab|Pathogen Sequencing Lab|Muyembe|Democratic Republic of the Congo

>Spike|hCoV-19/USA/TX-HMH-MCoV-18269/2020|2020-11-15|EPI\_ISL\_784617|Original|hCoV-19^^Texas|Human|Houston Methodist Hospital|Houston Methodist Hospital|Long|USA

>Spike|hCoV-19/Brazil/SP-240/2020|2020-05-01|EPI\_ISL\_524468|Original|hCoV-19^^S\u00e3o Paulo|Human|Hospital Municipal Vereador Jose Storopolli|Instituto Adolfo Lutz|Sacchi|Brazil

>Spike|hCoV-19/Denmark/DCGC-16159/2020|2020-11-16|EPI\_ISL\_714263|Original|hCoV-19^^Syddanmark|Human|Department of Virus and Microbiological Special Diagnostics|Albertsen Lab|Michaelsen|Denmark

>Spike|hCoV-19/USA/CO-QDX-107/2020|2020-03-13|EPI\_ISL\_468571|Original|hCoV-19^^Colorado|Human|Quest Diagnostics|Quest Diagnostics|Kagan|USA

>Spike|hCoV-19/Spain/PV-IBV-004242/2020|2020-04-05|EPI\_ISL\_500306|Original|hCoV-19^^Basque Country|Human|Servicio de Microbiolog\u00eda. Hospital Universitario Donostia. OSI Donostialdea. \u00c1rea de Enfermedades Infecciosas|SeqCOVID-SPAIN consortium|IBV (CSIC)|Comas|Spain

>Spike|hCoV-19/Wales/PHWC-482D92/2020|2020-10-21|EPI\_ISL\_627737|Original|hCoV-19^^Wales|Human|Wales Specialist Virology Centre Sequencing lab|COVID-19 Genomics UK (COG-UK) Consortium|Moore|United Kingdom

>Spike|hCoV-19/England/ALDP-9C588E/2020|2020-09-11|EPI\_ISL\_567698|Original|hCoV-19^^England|Human|Lighthouse Lab in Alderley Park|Wellcome Sanger Institute for the COVID-19 Genomics UK (COG-UK) consortium|Davies|United Kingdom

>Spike|hCoV-19/Denmark/DCGC-11159/2020|2020-11-02|EPI\_ISL\_670427|Original|hCoV-19^^Syddanmark|Human|Department of Virus and Microbiological Special Diagnostics|Albertsen Lab|Michaelsen|Denmark

>Spike|hCoV-19/England/20134010002/2020|2020-03-23|EPI\_ISL\_420513|Original|hCoV-19^^England|Human|Respiratory Virus Unit|Respiratory Virus Unit|Platt|United Kingdom

>Spike|hCoV-19/England/SHEF-D00DC/2020|2020-09-27|EPI\_ISL\_585076|Original|hCoV-19^^England|Human|Virology Department|COVID-19 Genomics UK (COG-UK) Consortium|de Silva|United Kingdom

>Spike|hCoV-19/USA/TX-HMH-MCoV-14758/2020|2020-10-12|EPI\_ISL\_786243|Original|hCoV-19^^Texas|Human|Houston Methodist Hospital|Houston Methodist Hospital|Long|USA

>Spike|hCoV-19/England/204391040/2020|2020-10-23|EPI\_ISL\_649880|Original|hCoV-19^^England|Human|Respiratory Virus Unit|COVID-19 Genomics UK (COG-UK) Consortium|Platt|United Kingdom

>Spike|hCoV-19/Netherlands/GE-RIVM-10303/2020|2020-00-00|EPI\_ISL\_636527|Original|hCoV-19^^Gelderland|Human|Dutch COVID-19 response team|National Institute for Public Health and the Environment (RIVM)|Meijer|Netherlands

>Spike|hCoV-19/England/MILK-AC9081/2020|2020-10-22|EPI\_ISL\_629655|Original|hCoV-19^^England|Human|Lighthouse Lab in Milton Keynes|Wellcome Sanger Institute for the COVID-19 Genomics UK (COG-UK) consortium|Davies|United Kingdom

>Spike|hCoV-19/Scotland/QEUH-9F4543/2020|2020-09-27|EPI\_ISL\_600751|Original|hCoV-19^^Scotland|Human|Lighthouse Lab in Glasgow|Wellcome Sanger Institute for the COVID-19 Genomics UK (COG-UK) consortium|Davies|United Kingdom

>Spike|hCoV-19/England/20118041904/2020|2020-03-12|EPI\_ISL\_464910|Original|hCoV-19^^England|Human|Respiratory Virus Unit|Respiratory Virus Unit|Platt|United Kingdom

>Spike|hCoV-19/England/BRIS-126DFD/2020|2020-04-08|EPI\_ISL\_458948|Original|hCoV-19^^England|Human|PHE South West Regional Laboratory|Wellcome Sanger Institute for the COVID-19 Genomics UK (COG-UK) consortium|Davies|United Kingdom

>Spike|hCoV-19/USA/CA-ALSR-2436/2020|2020-07-06|EPI\_ISL\_635477|Original|hCoV-19^^California|Human|San Diego County Public Health Laboratory|Andersen lab at Scripps Research|Gangavarapu|USA

>Spike|hCoV-19/USA/MN-MDH-1468/2020|2020-03-26|EPI\_ISL\_518862|Original|hCoV-19^^Minnesota|Human|Mayo Clinic & Mayo Clinic Laboratories|Minnesota Department of Health|Garfin|USA

>Spike|hCoV-19/England/ALDP-9CC66F/2020|2020-09-16|EPI\_ISL\_573120|Original|hCoV-19^^England|Human|Quadram Institute Bioscience|COVID-19 Genomics UK (COG-UK) Consortium|Alikhan|United Kingdom

>Spike|hCoV-19/Belgium/reg-09221020/2020|2020-09-22|EPI\_ISL\_735018|Original|hCoV-19^^Tervuren|Human|UZ Leuven|KU Leuven|Maes|Belgium

>Spike|hCoV-19/USA/TX-HMH-MCoV-13444/2020|2020-08-23|EPI\_ISL\_788579|Original|hCoV-19^^Texas|Human|Houston Methodist Hospital|Houston Methodist Hospital|Long|USA

>Spike|hCoV-19/England/MILK-97639A/2020|2020-08-20|EPI\_ISL\_575937|Original|hCoV-19^^England|Human|Lighthouse Lab in Milton Keynes|Wellcome Sanger Institute for the COVID-19 Genomics UK (COG-UK) consortium|Davies|United Kingdom

>Spike|hCoV-19/USA/CA-ALSR-3172/2020|2020-06-03|EPI\_ISL\_635898|Original|hCoV-19^^California|Human|San Diego County Public Health Laboratory|Andersen lab at Scripps Research|Gangavarapu|USA

>Spike|hCoV-19/USA/CA-QDX-73/2020|2020-03-16|EPI\_ISL\_467840|Original|hCoV-19^^California|Human|Quest Diagnostics|Quest Diagnostics|Kagan|USA

>Spike|hCoV-19/Switzerland/SZ-ETHZ-321351/2020|2020-10-13|EPI\_ISL\_603601|Original|hCoV-19^^Schwyz|Human|Viollier AG|Department of Biosystems Science and Engineering|Nadeau|Switzerland

>Spike|hCoV-19/Netherlands/Friesland\_37/2020|2020-04-13|EPI\_ISL\_460852|Original|hCoV-19^^Friesland|Human|Dutch COVID-19 response team|Erasmus Medical Center|Oude Munnink|Netherlands

>Spike|hCoV-19/Belgium/ULG-11099/2020|2020-12-16|EPI\_ISL\_737347|Original|hCoV-19^^Liège|Human|Department of Clinical Microbiology|GIGA Medical Genomics|Durkin|Belgium

>Spike|hCoV-19/Australia/VIC1800/2020|2020-05-05|EPI\_ISL\_480607|Original|hCoV-19^^Victoria|Human|Victorian Infectious Diseases Reference Laboratory (VIDRL)|VIDRL and MDU-PHL|Schultz|Australia

>Spike|hCoV-19/Denmark/DCGC-21382/2020|2020-12-21|EPI\_ISL\_757897|Original|hCoV-19^^Hovedstaden|Human|Department of Virus and Microbiological Special Diagnostics|Albertsen Lab|Michaelsen|Denmark

>Spike|hCoV-19/Hungary/US-35090w/2020|2020-09-03|EPI\_ISL\_677768|Original|hCoV-19^^Csongrád county|Human|University of Szeged|National Laboratory of Virology|Kemenesi|Hungary

>Spike|hCoV-19/USA/WA-S1404/2020|2020-05-19|EPI\_ISL\_495854|Original|hCoV-19^^Washington|Human|Washington State Department of Health|Seattle Flu Study|Lee|USA

>Spike|hCoV-19/Denmark/DCGC-20080/2020|2020-12-07|EPI\_ISL\_747669|Original|hCoV-19^^Syddanmark|Human|Department of Virus and Microbiological Special Diagnostics|Albertsen Lab|Michaelsen|Denmark

>Spike|hCoV-19/England/QEUH-B4182E/2020|2020-11-08|EPI\_ISL\_658471|Original|hCoV-19^^England|Human|Lighthouse Lab in Glasgow|Wellcome Sanger Institute for the COVID-19 Genomics UK (COG-UK) Consortium|Davies|United Kingdom

>Spike|hCoV-19/Australia/VIC7271/2020|2020-07-23|EPI\_ISL\_564323|Original|hCoV-19^^Victoria|Human|Victorian Infectious Diseases Reference Laboratory (VIDRL)|VIDRL and MDU-PHL|Schultz|Australia

>Spike|hCoV-19/Scotland/EDB3358/2020|2020-04-09|EPI\_ISL\_487746|Original|hCoV-19^^Scotland|Human|Virology Department|Wellcome Sanger Institute for the COVID-19 Genomics UK (COG-UK) consortium|Davies|United Kingdom

>Spike|hCoV-19/Denmark/DCGC-21930/2020|2020-12-21|EPI\_ISL\_757798|Original|hCoV-19^^Hovedstaden|Human|Department of Virus and Microbiological Special Diagnostics|Albertsen Lab|Michaelsen|Denmark

>Spike|hCoV-19/Japan/PG-5390/2020|2020-08-00|EPI\_ISL\_690493|Original|hCoV-19^^Japan|Human|Fukuoka Institute of Health and Environmental Sciences|Pathogen Genomics Center|Sekizuka|Japan

>Spike|hCoV-19/England/ALDP-A960AB/2020|2020-10-19|EPI\_ISL\_624789|Original|hCoV-19^^England|Human|Lighthouse Lab in Alderley Park|Wellcome Sanger Institute for the COVID-19 Genomics UK (COG-UK) consortium|Davies|United Kingdom

>Spike|hCoV-19/England/LOND-12607AA/2020|2020-04-05|EPI\_ISL\_524666|Original|hCoV-19^^England|Human|North West London Pathology|Wellcome Sanger Institute for the COVID-19 Genomics UK (COG-UK) consortium|Davies|United Kingdom

>Spike|hCoV-19/England/MILK-97153F/2020|2020-08-18|EPI\_ISL\_553209|Original|hCoV-19^^England|Human|Lighthouse Lab in Milton Keynes|Wellcome Sanger Institute for the COVID-19 Genomics UK (COG-UK) consortium|Davies|United Kingdom

>Spike|hCoV-19/SaudiArabia/KAUST-MAKKAH781/2020|2020-04-24|EPI\_ISL\_513249|Original|hCoV-19^^Makkah|Human|Pathogen Genomics Lab King Abdullah University of Science and Technology(KAUST)|Pathogen Genomics Lab King Abdullah University of Science and Technology(KAUST)|Mohamed Ghazzali|Saudi Arabia

>Spike|hCoV-19/England/QEUA-A0B8A9/2020|2020-10-03|EPI\_ISL\_599307|Original|hCoV-19^^England|Human|Lighthouse Lab in Glasgow|Wellcome Sanger Institute for the COVID-19 Genomics UK (COG-UK) consortium|Davies|United Kingdom

>Spike|hCoV-19/Wales/PHWC-33EA0/2020|2020-04-15|EPI\_ISL\_446835|Original|hCoV-19^^Wales|Human|Wales Specialist Virology Centre|Public Health Wales Microbiology Cardiff|Moore|United Kingdom

>Spike|hCoV-19/England/CAMC-B5220E/2020|2020-11-08|EPI\_ISL\_656941|Original|hCoV-19^^England|Human|Lighthouse Lab in Cambridge|Wellcome Sanger Institute for the COVID-19 Genomics UK (COG-UK) Consortium|Davies|United Kingdom

>Spike|hCoV-19/England/OXON-B2B57/2020|2020-03-14|EPI\_ISL\_534797|Original|hCoV-19^^England|Human|Oxford Viromics|COVID-19 Genomics UK (COG-UK) Consortium|Golubchik|United Kingdom

>Spike|hCoV-19/England/CAMB-1B0E5F/2020|2020-05-12|EPI\_ISL\_452968|Original|hCoV-19^^England|Human|Department of Pathology|COVID-19 Genomics UK (COG-UK) Consortium|Meredith|United Kingdom

>Spike|hCoV-19/Norway/5537/2020|2020-11-03|EPI\_ISL\_708112|Original|hCoV-19^^Viken|Human|Ostfold Hospital Trust - Kalnes|Norwegian Institute of Public Health|Kopperud Riis|Norway

>Spike|hCoV-19/Wales/MILK-9E0A69/2020|2020-09-20|EPI\_ISL\_601306|Original|hCoV-19^^Wales|Human|Lighthouse Lab in Milton Keynes|Wellcome Sanger Institute for the COVID-19 Genomics UK (COG-UK) consortium|Davies|United Kingdom

>Spike|hCoV-19/Denmark/DCGC-2918/2020|2020-08-17|EPI\_ISL\_616553|Original|hCoV-19^^Syddanmark|Human|Department of Virus and Microbiological Special Diagnostics|Albertsen lab|Michaelsen|Denmark

>Spike|hCoV-19/New Zealand/20CV0354/2020|2020-09-18|EPI\_ISL\_579100|Original|hCoV-19^^Counties Manukau|Human|Middlemore Hospital|Institute of Environmental Science and Research (ESR)|Wang|New Zealand

>Spike|hCoV-19/Japan/PG-2087/2020|2020-04-00|EPI\_ISL\_685692|Original|hCoV-19^^Japan|Human|Tokyo Metropolitan Institute of Public Health|Pathogen Genomics Center|Sekizuka|Japan

>Spike|hCoV-19/Denmark/DCGC-4664/2020|2020-09-14|EPI\_ISL\_621896|Original|hCoV-19^^Hovedstaden|Human|Department of Virus and Microbiological Special Diagnostics|Albertsen lab|Michaelsen|Denmark

>Spike|hCoV-19/England/NORT-287F7B/2020|2020-11-16|EPI\_ISL\_725007|Original|hCoV-19^^England|Human|Northumbria University / South Tees Hospitals NHS Foundation Trust / North Cumbria Integrated Care NHS Foundation Trust / North Tees and Hartlepool NHS Foundation Trust / Newcastle Hospitals NHS Foundation Trust|COVID-19 Genomics UK (COG-UK) Consortium|Bashton|United Kingdom

>Spike|hCoV-19/Mexico/NLE-UANL-022/2020|2020-11-19|EPI\_ISL\_779185|Original|hCoV-19^^Nuevo Leon|Human|Laboratorio Estatal de Salud P\u00fablica de Nuevo Le\u00f3n|Laboratorio de Infectolog\u00eda Molecular|Gal\u00e9n|Mexico

>Spike|hCoV-19/India/MH-GA82/2020|2020-06-18|EPI\_ISL\_508277|Original|hCoV-19^^Maharashtra|Human|Government Medical College|National Institute of Biomedical Genomics|Maitra|India

>Spike|hCoV-19/England/QEUA-9B4EEA/2020|2020-09-07|EPI\_ISL\_590324|Original|hCoV-19^^England|Human|Lighthouse Lab in Glasgow|Wellcome Sanger Institute for the COVID-19 Genomics UK (COG-UK) consortium|Davies|United Kingdom

>Spike|hCoV-19/USA/CO-CDPHE-201162142/2020|2020-11-16|EPI\_ISL\_771247|Original|hCoV-19^^Colorado|Human|Colorado Department of Public Health and Environment|Colorado Department of Public Health and Environment|Bankers|USA

>Spike|hCoV-19/Wales/PHWC-4A5722/2020|2020-12-16|EPI\_ISL\_764911|Original|hCoV-19^^Wales|Human|Wales Specialist Virology Centre Sequencing lab|COVID-19 Genomics UK (COG-UK) Consortium|Moore|United Kingdom

>Spike|hCoV-19/England/NORT-295B2B/2020|2020-04-03|EPI\_ISL\_488698|Original|hCoV-19^^England|Human|NU-OMICS DNA Sequencing research facility|Wellcome Sanger Institute for the COVID-19 Genomics UK (COG-UK) consortium|Davies|United Kingdom

>Spike|hCoV-19/USA/TX-HMH-MCoV-13680/2020|2020-08-17|EPI\_ISL\_788777|Original|hCoV-19^^Texas|Human|Houston Methodist Hospital|Houston Methodist Hospital|Long|USA

>Spike|hCoV-19/England/LIVE-A0521/2020|2020-05-25|EPI\_ISL\_472118|Original|hCoV-19^^England|Human|Liverpool Clinical Laboratories|COVID-19 Genomics UK (COG-UK) Consortium|Haldenby|United Kingdom

>Spike|hCoV-19/USA/LA-EVTL452/2020|2020-06-20|EPI\_ISL\_578856|Original|hCoV-19^^Louisiana|Human|LSUHS Emerging Viral Threat Laboratory|Microbial Genome Sequencing Center|Kamil|USA

>Spike|hCoV-19/England/QEUA-A9F50D/2020|2020-10-20|EPI\_ISL\_611412|Original|hCoV-19^^England|Human|Lighthouse Lab in Glasgow|Wellcome Sanger Institute for the COVID-19 Genomics UK (COG-UK) consortium|Davies|United Kingdom

>Spike|hCoV-19/England/MILK-A91996/2020|2020-10-19|EPI\_ISL\_705498|Original|hCoV-19^^England|Human|Oxford Viromics|COVID-19 Genomics UK (COG-UK) Consortium|Golubchik|United Kingdom

>Spike|hCoV-19/Australia/VIC656/2020|2020-03-28|EPI\_ISL\_426952|Original|hCoV-19^^Victoria|Human|Victorian Infectious Diseases Reference Laboratory (VIDRL)|Microbiological Diagnostic Unit Public Health Laboratory and Victorian Infectious Diseases Reference Laboratory|Schultz|Australia

>Spike|hCoV-19/USA/CA-CZB-14750/2020|2020-10-23|EPI\_ISL\_739225|Original|hCoV-19^^California|Human|Humboldt County Public Health Laboratory|Chan-Zuckerberg Biohub|Kamm|USA

>Spike|hCoV-19/England/CAMC-9EC951/2020|2020-09-22|EPI\_ISL\_594630|Original|hCoV-19^^England|Human|Oxford Viromics|COVID-19 Genomics UK (COG-UK) Consortium|Golubchik|United Kingdom

>Spike|hCoV-19/Russia/AST-RII-MH4490S/2020|2020-08-06|EPI\_ISL\_733210|Original|hCoV-19^^Astrakhan|Human|Pathogenic Microorganisms Variability Laboratory|WHO National Influenza Centre Russian Federation|Komissarov|Russia

>Spike|hCoV-19/Portugal/PT1447/2020|2020-03-27|EPI\_ISL\_511406|Original|hCoV-19^^Portugal|Human|Instituto Nacional de Saude (INSA)|Instituto Nacional de Saude (INSA)|Borges|Portugal

>Spike|hCoV-19/Japan/PG-8466/2020|2020-08-00|EPI\_ISL\_687565|Original|hCoV-19^^Japan|Human|Pathogen Genomics Center|Pathogen Genomics Center|Sekizuka|Japan

>Spike|hCoV-19/England/ALDP-9565E5/2020|2020-06-08|EPI\_ISL\_553945|Original|hCoV-19^^England|Human|Lighthouse Lab in Alderley Park|Wellcome Sanger Institute for the COVID-19 Genomics UK (COG-UK) consortium|Davies|United Kingdom

>Spike|hCoV-19/Wales/PHWC-48B661/2020|2020-11-02|EPI\_ISL\_666266|Original|hCoV-19^^Wales|Human|Wales Specialist Virology Centre Sequencing lab|COVID-19 Genomics UK (COG-UK) Consortium|Moore|United Kingdom

>Spike|hCoV-19/Scotland/CVR5941/2020|2020-11-22|EPI\_ISL\_705683|Original|hCoV-19^^Scotland|Human|West of Scotland Specialist Virology Centre|COVID-19 Genomics UK (COG-UK) Consortium|Robertson|United Kingdom

>Spike|hCoV-19/Australia/VIC6374/2020|2020-07-23|EPI\_ISL\_521168|Original|hCoV-19^^Victoria|Human|Microbiological Diagnostic Unit - Public Health Laboratory (MDU-PHL)|MDU-PHL|Schultz|Australia

>Spike|hCoV-19/Wales/PHWC-49BD5A/2020|2020-12-06|EPI\_ISL\_742462|Original|hCoV-19^^Wales|Human|Wales Specialist Virology Centre Sequencing lab|COVID-19 Genomics UK (COG-UK) Consortium|Moore|United Kingdom

>Spike|hCoV-19/England/ALDP-BB4E51/2020|2020-11-20|EPI\_ISL\_702422|Original|hCoV-19^^England|Human|Lighthouse Lab in Alderley Park|Wellcome Sanger Institute for the COVID-19 Genomics UK (COG-UK) Consortium|Davies|United Kingdom

>Spike|hCoV-19/USA/CA-ALSR-5083/2020|2020-12-01|EPI\_ISL\_730340|Original|hCoV-19^^California|Human|San Diego County Public Health Laboratory|Andersen lab at Scripps Research|Gangavarapu|USA

>Spike|hCoV-19/USA/MA-MGH-03483/2020|2020-11-20|EPI\_ISL\_765856|Original|hCoV-19^^Massachusetts|Human|Massachusetts General Hospital|Infectious Disease Program|Park|USA

>Spike|hCoV-19/England/20189156801/2020|2020-05-02|EPI\_ISL\_465556|Original|hCoV-19^^England|Human|Respiratory Virus Unit|Respiratory Virus Unit|Platt|United Kingdom

>Spike|hCoV-19/Wales/PHWC-15CCC4/2020|2020-05-07|EPI\_ISL\_472606|Original|hCoV-19^^Wales|Human|Wales Specialist Virology Centre Sequencing lab|COVID-19 Genomics UK (COG-UK) Consortium|Moore|United Kingdom

>Spike|hCoV-19/England/NOTT-1158E1/2020|2020-10-15|EPI\_ISL\_595272|Original|hCoV-19^^England|Human|Queens Medical Centre|COVID-19 Genomics UK (COG-UK) Consortium|Loose|United Kingdom

>Spike|hCoV-19/Wales/MILK-9936CB/2020|2020-08-26|EPI\_ISL\_552013|Original|hCoV-19^^Wales|Human|Lighthouse Lab in Milton Keynes|Wellcome Sanger Institute for the COVID-19 Genomics UK (COG-UK) consortium|Davies|United Kingdom

>Spike|hCoV-19/England/LOND-DAE41/2020|2020-11-07|EPI\_ISL\_724718|Original|hCoV-19^^England|Human|University College London|COVID-19 Genomics UK (COG-UK) Consortium|Roy|United Kingdom

>Spike|hCoV-19/USA/WA-QDX-813/2020|2020-03-21|EPI\_ISL\_571561|Original|hCoV-19^^Washington|Human|Quest Diagnostics|Quest Diagnostics|Kagan|USA

>Spike|hCoV-19/Wales/PHWC-36A12/2020|2020-05-01|EPI\_ISL\_474746|Original|hCoV-19^^Wales|Human|Originating lab|COVID-19 Genomics UK (COG-UK) Consortium|Moore|United Kingdom

>Spike|hCoV-19/England/20142053004/2020|2020-03-27|EPI\_ISL\_423456|Original|hCoV-19^^England|Human|Respiratory Virus Unit|Respiratory Virus Unit|Platt|United Kingdom

>Spike|hCoV-19/Denmark/DCGC-12394/2020|2020-11-16|EPI\_ISL\_682575|Original|hCoV-19^^Hovedstaden|Human|Department of Virus and Microbiological Special Diagnostics|Albertsen Lab|Michaelsen|Denmark

>Spike|hCoV-19/Germany/HH-hpi-p1901/2020|2020-03-24|EPI\_ISL\_776240|Original|hCoV-19^^Hamburg|Human|University Medical Center Hamburg Eppendorf|Heinrich Pette Institute|Robitaille|Germany

>Spike|hCoV-19/Australia/NSW1341/2020|2020-12-28|EPI\_ISL\_767907|Original|hCoV-19^^New South Wales|Human|Sydney South West Pathology Service (SSWPS) - Royal Prince Alfred Hospital - NSW Health Pathology|NSW Health Pathology - Institute of Clinical Pathology and Medical Research; Westmead Hospital; University of Sydney|Gall|Australia

>Spike|hCoV-19/England/CAMC-AB1EBF/2020|2020-10-23|EPI\_ISL\_623733|Original|hCoV-19^^England|Human|Lighthouse Lab in Cambridge|Wellcome Sanger Institute for the COVID-19 Genomics UK (COG-UK) consortium|Davies|United Kingdom

>Spike|hCoV-19/England/BRIS-12580C/2020|2020-03-29|EPI\_ISL\_443963|Original|hCoV-19^^England|Human|PHE South West Regional Laboratory|Wellcome Sanger Institute for the COVID-19 Genomics UK (COG-UK) consortium|Amato|United Kingdom

>Spike|hCoV-19/England/ALDP-9CAA38/2020|2020-09-16|EPI\_ISL\_575690|Original|hCoV-19^^England|Human|Lighthouse Lab in Alderley Park|Wellcome Sanger Institute for the COVID-19 Genomics UK (COG-UK) consortium|Davies|United Kingdom

>Spike|hCoV-19/USA/CA-CZB-1126/2020|2020-03-31|EPI\_ISL\_445174|Original|hCoV-19^^California|Human|UCSF Clinical Microbiology Laboratory|Chan-Zuckerberg Biohub|Kamm|USA



>Spike|hCoV-19/Northern Ireland/NIRE-FCDF1/2020|2020-04-27|EPI\_ISL\_489187|Original|hCoV-19^^Northern Ireland|Human|Regional Virus Laboratory|Wellcome Sanger Institute for the COVID-19 Genomics UK (COG-UK) consortium|Davies|United Kingdom

>Spike|hCoV-19/England/ALDP-BB9DAA/2020|2020-11-20|EPI\_ISL\_703126|Original|hCoV-19^^England|Human|Lighthouse Lab in Alderley Park|Wellcome Sanger Institute for the COVID-19 Genomics UK (COG-UK) Consortium|Davies|United Kingdom

>Spike|hCoV-19/Australia/VIC3197/2020|2020-07-05|EPI\_ISL\_520883|Original|hCoV-19^^Victoria|Human|Victorian Infectious Diseases Reference Laboratory (VIDRL)|VIDRL and MDU-PHL|Schultz|Australia

>Spike|hCoV-19/Nigeria/NCDC-11d/2020|2020-12-22|EPI\_ISL\_766051|Original|hCoV-19^^Federal Capital Territory|Human|Nigeria Centre For Disease Control,|National reference Laboratory|Ndodo|Nigeria

>Spike|hCoV-19/USA/LA-EVTL1329/2020|2020-12-11|EPI\_ISL\_778995|Original|hCoV-19^^Louisiana|Human|LSUHS Emerging Viral Threat Laboratory|Microbial Genome Sequencing Center|Kamil|USA

>Spike|hCoV-19/Denmark/DCGC-17036/2020|2020-12-14|EPI\_ISL\_750722|Original|hCoV-19^^Midtjylland|Human|Department of Virus and Microbiological Special Diagnostics|Albertsen Lab|Michaelsen|Denmark

>Spike|hCoV-19/USA/UT-08398/2020|2020-05-20|EPI\_ISL\_524178|Original|hCoV-19^^Utah|Human|Utah Public Health Laboratory|Utah Public Health Laboratory|Young|USA

>Spike|hCoV-19/England/CAMB-1ACEB0/2020|2020-04-23|EPI\_ISL\_489482|Original|hCoV-19^^England|Human|Department of Pathology|Wellcome Sanger Institute for the COVID-19 Genomics UK (COG-UK) consortium|Davies|United Kingdom

>Spike|hCoV-19/Spain/AN-IBV-001094/2020|2020-03-27|EPI\_ISL\_452592|Original|hCoV-19^^Andalucia|Human|Servicio de Microbiolog\u00eda y Parasitolog\u00eda cl\u00ednica. UCEIMP. Hospital Universitario Virgen del Roc\u00edo/IBIS/CSIC/US.|SeqCOVID-SPAIN consortium/IBV (CSIC)|Comas|Spain

>Spike|hCoV-19/Australia/VIC21/2020|2020-03-09|EPI\_ISL\_419740|Original|hCoV-19^^Victoria|Human|Victorian Infectious Diseases Reference Laboratory (VIDRL)|Victorian Infectious Diseases Reference Laboratory and Microbiological Diagnostic Unit Public Health Laboratory|Schultz|Australia

>Spike|hCoV-19/Northern Ireland/NIRE-1028F6/2020|2020-04-18|EPI\_ISL\_469864|Original|hCoV-19^^Northern Ireland|Human|Regional Virus Laboratory|Wellcome Sanger Institute for the COVID-19 Genomics UK (COG-UK) consortium|Davies|United Kingdom

>Spike|hCoV-19/USA/NY-NYUMC314/2020|2020-03-30|EPI\_ISL\_430341|Original|hCoV-19^^New York|Human|NYU Langone Health|Departments of Pathology and Medicine|Maurano|USA

>Spike|hCoV-19/England/20139067304/2020|2020-03-28|EPI\_ISL\_465857|Original|hCoV-19^^England|Human|Respiratory Virus Unit|Respiratory Virus Unit|Platt|United Kingdom

>Spike|hCoV-19/England/QEUH-AE50AD/2020|2020-10-26|EPI\_ISL\_633174|Original|hCoV-19^^England|Human|Lighthouse Lab in Glasgow|Wellcome Sanger Institute for the COVID-19 Genomics UK (COG-UK) consortium|Davies|United Kingdom

>Spike|hCoV-19/USA/WI-GMF-32178/2020|2020-11-08|EPI\_ISL\_661129|Original|hCoV-19^^Wisconsin|Human|Gundersen Molecular Diagnostics Laboratory|Kabara Cancer Research Institute|Kenny|USA

>Spike|hCoV-19/USA/CA-ALSR-3323/2020|2020-09-22|EPI\_ISL\_635963|Original|hCoV-19^^California|Human|San Diego County Public Health Laboratory|Andersen lab at Scripps Research|Gangavarapu|USA

>Spike|hCoV-19/Australia/VIC339/2020|2020-03-20|EPI\_ISL\_426648|Original|hCoV-19^^Victoria|Human|Victorian Infectious Diseases Reference Laboratory (VIDRL)|Microbiological Diagnostic Unit Public Health Laboratory and Victorian Infectious Diseases Reference Laboratory|Schultz|Australia

>Spike|hCoV-19/England/QEUH-9B799B/2020|2020-09-08|EPI\_ISL\_590634|Original|hCoV-19^^England|Human|Lighthouse Lab in Glasgow|Wellcome Sanger Institute for the COVID-19 Genomics UK (COG-UK) consortium|Davies|United Kingdom

>Spike|hCoV-19/Japan/PG-4412/2020|2020-07-00|EPI\_ISL\_692637|Original|hCoV-19^^Japan|Human|Pathogen Genomics Center|Pathogen Genomics Center|Sekizuka|Japan

>Spike|hCoV-19/Wales/PHWC-33B5E/2020|2020-04-21|EPI\_ISL\_446792|Original|hCoV-19^^Wales|Human|Wales Specialist Virology Centre|Public Health Wales Microbiology Cardiff|Moore|United Kingdom

>Spike|hCoV-19/England/ALDP-A689A7/2020|2020-10-12|EPI\_ISL\_630521|Original|hCoV-19^^England|Human|Lighthouse Lab in Alderley Park|Wellcome Sanger Institute for the COVID-19 Genomics UK (COG-UK) consortium|Davies|United Kingdom

>Spike|hCoV-19/Iceland/420/2020|2020-03-19|EPI\_ISL\_424444|Original|hCoV-19^^Reykjavik|Human|The National University Hospital of Iceland|deCODE genetics|J\u00f3nsson|Iceland

>Spike|hCoV-19/England/MILK-C6F786/2020|2020-12-13|EPI\_ISL\_778429|Original|hCoV-19^^England|Human|Lighthouse Lab in Milton Keynes|Wellcome Sanger Institute for the COVID-19 Genomics UK (COG-UK) Consortium|Davies|United Kingdom

>Spike|hCoV-19/Wales/PHWC-48F2E1/2020|2020-11-09|EPI\_ISL\_681073|Original|hCoV-19^^Wales|Human|Wales Specialist Virology Centre Sequencing lab|COVID-19 Genomics UK (COG-UK) Consortium|Moore|United Kingdom

>Spike|hCoV-19/USA/CA-CDPH067/2020|2020-04-13|EPI\_ISL\_755039|Original|hCoV-19^^California|Human|California Department of Public Health|California Department of Public Health|Bell|USA

>Spike|hCoV-19/Switzerland/BE-ETHZ-110478/2020|2020-04-07|EPI\_ISL\_451890|Original|hCoV-19^^Bern|Human|Viollier AG|Department of Biosystems Science and Engineering|Nadeau|Switzerland

>Spike|hCoV-19/Scotland/EDB3942/2020|2020-04-30|EPI\_ISL\_439667|Original|hCoV-19^^Scotland|Human|Virology Department|COVID-19 Genomics UK (COG-UK) Consortium|Williams|United Kingdom

>Spike|hCoV-19/England/ALDP-A6E77A/2020|2020-10-15|EPI\_ISL\_607859|Original|hCoV-19^^England|Human|Lighthouse Lab in Alderley Park|Wellcome Sanger Institute for the COVID-19 Genomics UK (COG-UK) consortium|Davies|United Kingdom

>Spike|hCoV-19/USA/AZ-TG268909/2020|2020-03-13|EPI\_ISL\_426515|Original|hCoV-19^^Arizona|Human|AZ SPHL|TGen North|Lemmer|USA

>Spike|hCoV-19/USA/UT-QDX-1463/2020|2020-03-13|EPI\_ISL\_603848|Original|hCoV-19^^Utah|Human|Quest Diagnostics|Quest Diagnostics|Kagan|USA

>Spike|hCoV-19/Denmark/DCGC-9888/2020|2020-11-09|EPI\_ISL\_669256|Original|hCoV-19^^Hovedstaden|Human|Department of Virus and Microbiological Special Diagnostics|Albertsen Lab|Michaelsen|Denmark

>Spike|hCoV-19/Russia/PSK-RII-MH6083S/2020|2020-11-14|EPI\_ISL\_733343|Original|hCoV-19^^Pskov|Human|HELIX LLC|WHO National Influenza Centre Russian Federation|Komissarov|Russia

>Spike|hCoV-19/England/ALDP-BB2B7A/2020|2020-11-20|EPI\_ISL\_702691|Original|hCoV-19^^England|Human|Lighthouse Lab in Alderley Park|Wellcome Sanger Institute for the COVID-19 Genomics UK (COG-UK) Consortium|Davies|United Kingdom

>Spike|hCoV-19/Scotland/EDB7882/2020|2020-09-23|EPI\_ISL\_585435|Original|hCoV-19^^Scotland|Human|Virology Department|COVID-19 Genomics UK (COG-UK) Consortium|McHugh|United Kingdom

>Spike|hCoV-19/Wales/PHWC-4916C2/2020|2020-11-04|EPI\_ISL\_706680|Original|hCoV-19^^Wales|Human|Originating lab|COVID-19 Genomics UK (COG-UK) Consortium|Moore|United Kingdom

>Spike|hCoV-19/England/ALDP-AA08A6/2020|2020-10-21|EPI\_ISL\_625225|Original|hCoV-19^^England|Human|Lighthouse Lab in Alderley Park|Wellcome Sanger Institute for the COVID-19 Genomics UK (COG-UK) consortium|Davies|United Kingdom

>Spike|hCoV-19/USA/MI-UM-10033792025/2020|2020-03-27|EPI\_ISL\_578114|Original|hCoV-19^^Michigan|Human|University of Michigan Clinical Microbiology Laboratory|Lauring Lab|Valesano|USA

>Spike|hCoV-19/India/MH-ACTREC-553/2020|2020-08-28|EPI\_ISL\_700198|Original|hCoV-19^^Maharashtra|Human|Hematopathology Laboratory|Hematopathology Laboratory|Patkar|India

>Spike|hCoV-19/Wales/PHWC-33D94/2020|2020-04-15|EPI\_ISL\_446820|Original|hCoV-19^^Wales|Human|Wales Specialist Virology Centre|Public Health Wales Microbiology Cardiff|Moore|United Kingdom

>Spike|hCoV-19/Japan/PG-1382/2020|2020-04-00|EPI\_ISL\_684989|Original|hCoV-19^^Japan|Human|Saitama Prefectural Institute of Public Health|Pathogen Genomics Center|Sekizuka|Japan

>Spike|hCoV-19/Wales/PHWC-47CE7A/2020|2020-10-09|EPI\_ISL\_586060|Original|hCoV-19^^Wales|Human|Wales Specialist Virology Centre Sequencing lab|COVID-19 Genomics UK (COG-UK) Consortium|Moore|United Kingdom

>Spike|hCoV-19/USA/CA-ALSR-0593-SAN/2020|2020-04-15|EPI\_ISL\_483247|Original|hCoV-19^^California|Human|UC San Diego Center for Advanced Laboratory Medicine|Andersen lab at Scripps Research|Gangavarapu|USA

>Spike|hCoV-19/Australia/VIC3951/2020|2020-07-13|EPI\_ISL\_520662|Original|hCoV-19^^Victoria|Human|Microbiological Diagnostic Unit - Public Health Laboratory (MDU-PHL)|MDU-PHL|Schultz|Australia

>Spike|hCoV-19/USA/MI-MDHHS-SC22010/2020|2020-09-01|EPI\_ISL\_577572|Original|hCoV-19^^Michigan|Human|Michigan Department of Health and Human Services|Michigan Department of Health and Human Services|Jacob|USA

>Spike|hCoV-19/USA/UT-UPHL-2012698910/2020|2020-08-04|EPI\_ISL\_746025|Original|hCoV-19^^Utah|Human|Ginkgo Bioworks Clinical Laboratory|Utah Public Health Laboratory|Young|USA

>Spike|hCoV-19/England/CAMC-AAF6E9/2020|2020-10-22|EPI\_ISL\_631025|Original|hCoV-19^^England|Human|Lighthouse Lab in Cambridge|Wellcome Sanger Institute for the COVID-19 Genomics UK (COG-UK) consortium|Davies|United Kingdom

>Spike|hCoV-19/India/GJ-GBRC-430a/2020|2020-07-15|EPI\_ISL\_586565|Original|hCoV-19^^Gujarat|Human|GMERS GMERS Medical College and Hospital|Gujarat Biotechnology Research Centre|Joshi|India

>Spike|hCoV-19/England/QEUEH-B7C4CC/2020|2020-11-14|EPI\_ISL\_741781|Original|hCoV-19^^England|Human|Oxford Viromics|COVID-19 Genomics UK (COG-UK) Consortium|Golubchik|United Kingdom

>Spike|hCoV-19/Chile/MA-164318/2020|2020-08-30|EPI\_ISL\_746520|Original|hCoV-19^^Region Metropolitana de Santiago|Human|Genetica Molecular and Subdepartamento de Virologia ISP Chile|Instituto de Salud Publica de Chile|Tognarelli|Chile

>Spike|hCoV-19/USA/LA-EVTL1110/2020|2020-12-04|EPI\_ISL\_768380|Original|hCoV-19^^Louisiana|Human|LSUHS Emerging Viral Threat Laboratory|Microbial Genome Sequencing Center|Kamil|USA

>Spike|hCoV-19/India/MH-NIV-153805/2020|2020-08-07|EPI\_ISL\_541704|Original|hCoV-19^^Maharashtra|Human|National Institute of Virology|National Institute of Virology|Potdar|India

>Spike|hCoV-19/England/QEUEH-A328E5/2020|2020-10-06|EPI\_ISL\_628365|Original|hCoV-19^^England|Human|Oxford Viromics|COVID-19 Genomics UK (COG-UK) Consortium|Golubchik|United Kingdom

>Spike|hCoV-19/Japan/NGY-NNH-051/2020|2020-09-25|EPI\_ISL\_637017|Original|hCoV-19^^Aichi|Human|Department of Infectious Diseases and Immunology|Clinical Research Center|Iwatani|Japan

>Spike|hCoV-19/England/QEUEH-9FAD45/2020|2020-09-28|EPI\_ISL\_588070|Original|hCoV-19^^England|Human|Lighthouse Lab in Glasgow|Wellcome Sanger Institute for the COVID-19 Genomics UK (COG-UK) consortium|Davies|United Kingdom

>Spike|hCoV-19/USA/FL-BPHL-0478/2020|2020-04-29|EPI\_ISL\_495384|Original|hCoV-19^^Florida|Human|Florida Bureau of Public Health Laboratories|Florida Bureau of Public Health Laboratories|Blanton|USA

>Spike|hCoV-19/England/ALDP-B460A9/2020|2020-11-07|EPI\_ISL\_656171|Original|hCoV-19^^England|Human|Lighthouse Lab in Alderley Park|Wellcome Sanger Institute for the COVID-19 Genomics UK (COG-UK) Consortium|Davies|United Kingdom

>Spike|hCoV-19/England/MILK-BAB5FE/2020|2020-11-18|EPI\_ISL\_681404|Original|hCoV-19^^England|Human|Lighthouse Lab in Milton Keynes|Wellcome Sanger Institute for the COVID-19 Genomics UK (COG-UK) Consortium|Davies|United Kingdom

>Spike|hCoV-19/England/201090512/2020|2020-03-06|EPI\_ISL\_464576|Original|hCoV-19^^England|Human|Respiratory Virus Unit|Respiratory Virus Unit|Platt|United Kingdom

>Spike|hCoV-19/Wales/PHWC-16F10B/2020|2020-10-06|EPI\_ISL\_585915|Original|hCoV-19^^Wales|Human|Wales Specialist Virology Centre Sequencing lab|COVID-19 Genomics UK (COG-UK) Consortium|Moore|United Kingdom

>Spike|hCoV-19/England/LIVE-A7724/2020|2020-03-27|EPI\_ISL\_517062|Original|hCoV-19^^England|Human|Liverpool Clinical Laboratories|COVID-19 Genomics UK (COG-UK) Consortium|Haldenby|United Kingdom

>Spike|hCoV-19/Singapore/900/2020|2020-02-05|EPI\_ISL\_536441|Original|hCoV-19^^Singapore|Human|National Public Health Laboratory|National Public Health Laboratory|Mak|Singapore

>Spike|hCoV-19/England/QEUA-9F7D39/2020|2020-09-27|EPI\_ISL\_589071|Original|hCoV-19^^England|Human|Lighthouse Lab in Glasgow|Wellcome Sanger Institute for the COVID-19 Genomics UK (COG-UK) consortium|Davies|United Kingdom

>Spike|hCoV-19/England/QEUA-CDE412/2020|2020-12-26|EPI\_ISL\_782266|Original|hCoV-19^^England|Human|Lighthouse Lab in Glasgow|Wellcome Sanger Institute for the COVID-19 Genomics UK (COG-UK) Consortium|Davies|United Kingdom

>Spike|hCoV-19/Wales/MILK-B06421/2020|2020-10-24|EPI\_ISL\_651588|Original|hCoV-19^^Wales|Human|Quadram Institute Bioscience|COVID-19 Genomics UK (COG-UK) Consortium|Alikhan|United Kingdom

>Spike|hCoV-19/England/QEUA-A89D1D/2020|2020-10-16|EPI\_ISL\_638823|Original|hCoV-19^^England|Human|Oxford Viromics|COVID-19 Genomics UK (COG-UK) Consortium|Golubchik|United Kingdom

>Spike|hCoV-19/Japan/PG-2969/2020|2020-04-00|EPI\_ISL\_690614|Original|hCoV-19^^Japan|Human|Pathogen Genomics Center|Pathogen Genomics Center|Sekizuka|Japan

>Spike|hCoV-19/USA/LA-EVTL773/2020|2020-07-21|EPI\_ISL\_653464|Original|hCoV-19^^Louisiana|Human|LSUHS Emerging Viral Threat Laboratory|Microbial Genome Sequencing Center|Kamil|USA

>Spike|hCoV-19/USA/MD-HP12106/2021|2021-01-05|EPI\_ISL\_791422|Original|hCoV-19^^Maryland|Human|Johns Hopkins Hospital Department of Pathology|Johns Hopkins Hospital Department of Pathology|Morris|USA

>Spike|hCoV-19/USA/WI-UW-1550/2020|2020-09-15|EPI\_ISL\_605428|Original|hCoV-19^^Wisconsin|Human|University of Wisconsin-Madison AIDS Vaccine Research Laboratories|University of Wisconsin-Madison AIDS Vaccine Research Laboratories|Baczenas|USA

>Spike|hCoV-19/England/QEUA-BEB440/2020|2020-12-03|EPI\_ISL\_708922|Original|hCoV-19^^England|Human|Lighthouse Lab in Glasgow|Wellcome Sanger Institute for the COVID-19 Genomics UK (COG-UK) Consortium|Davies|United Kingdom

>Spike|hCoV-19/USA/VA-DCLS-1809/2020|2020-09-16|EPI\_ISL\_614060|Original|hCoV-19^^Virginia|Human|Virginia DCLS|Virginia DCLS|St. Jacques|USA

>Spike|hCoV-19/Spain/RI-IBV-99010960/2020|2020-11-11|EPI\_ISL\_732788|Original|hCoV-19^^La\_Rioja|Human|Centro de Investigaci\u00f3n Biom\u00e9dica de La Rioja - Hospital San Pedro Logro\u00f1o|SeqCOVID-SPAIN consortium|IBV (CSIC)|Comas|Spain

>Spike|hCoV-19/USA/FL-BPHL-0433/2020|2020-03-19|EPI\_ISL\_495339|Original|hCoV-19^^Florida|Human|Florida Bureau of Public Health Laboratories|Florida Bureau of Public Health Laboratories|Blanton|USA

>Spike|hCoV-19/Denmark/DCGC-14393/2020|2020-11-30|EPI\_ISL\_711247|Original|hCoV-19^^Midtjylland|Human|Department of Virus and Microbiological Special Diagnostics|Albertsen Lab|Michaelsen|Denmark

>Spike|hCoV-19/England/MILK-A7D5AB/2020|2020-10-13|EPI\_ISL\_606578|Original|hCoV-19^^England|Human|Lighthouse Lab in Milton Keynes|Wellcome Sanger Institute for the COVID-19 Genomics UK (COG-UK) consortium|Davies|United Kingdom

>Spike|hCoV-19/England/QEUA-998444/2020|2020-08-24|EPI\_ISL\_539970|Original|hCoV-19^^England|Human|Lighthouse Lab in Glasgow|Wellcome Sanger Institute for the COVID-19 Genomics UK (COG-UK) consortium|Davies|United Kingdom

>Spike|hCoV-19/Norway/3808/2020|2020-08-10|EPI\_ISL\_635146|Original|hCoV-19^^Rogaland|Human|Dept. of Medical Microbiology|Norwegian Institute of Public Health|Vollan|Norway

>Spike|hCoV-19/England/QEUA-9DD7D1/2020|2020-09-21|EPI\_ISL\_599765|Original|hCoV-19^^England|Human|Lighthouse Lab in Glasgow|Wellcome Sanger Institute for the COVID-19 Genomics UK (COG-UK) consortium|Davies|United Kingdom

>Spike|hCoV-19/England/MILK-975207/2020|2020-08-21|EPI\_ISL\_552537|Original|hCoV-19^^England|Human|Lighthouse Lab in Milton Keynes|Wellcome Sanger Institute for the COVID-19 Genomics UK (COG-UK) consortium|Davies|United Kingdom

>Spike|hCoV-19/USA/DE-DHSS-F995183/2020|2020-09-21|EPI\_ISL\_693744|Original|hCoV-19^^Delaware|Human|Delaware Public Health Laboratory|Delaware Public Health Laboratory|Bajwa|USA

>Spike|hCoV-19/USA/MD-CDC-2-3713997/2020|2020-11-21|EPI\_ISL\_751702|Original|hCoV-19^^Maryland|Human|MD DOH Laboratories Administration|Genomics and Discovery|Queen|USA

>Spike|hCoV-19/England/QEUEH-95E36B/2020|2020-08-08|EPI\_ISL\_537145|Original|hCoV-19^^England|Human|Lighthouse Lab in Glasgow|Wellcome Sanger Institute for the COVID-19 Genomics UK (COG-UK) consortium|Davies|United Kingdom

>Spike|hCoV-19/England/NORW-F0A50/2020|2020-10-08|EPI\_ISL\_584748|Original|hCoV-19^^England|Human|Quadram Institute Bioscience|COVID-19 Genomics UK (COG-UK) Consortium|Alikhan|United Kingdom

>Spike|hCoV-19/Denmark/DCGC-5710/2020|2020-09-28|EPI\_ISL\_621215|Original|hCoV-19^^Hovedstaden|Human|Department of Virus and Microbiological Special Diagnostics|Albertsen lab|Michaelsen|Denmark

>Spike|hCoV-19/India/TG-CDFD-C2529/2020|2020-06-18|EPI\_ISL\_528581|Original|hCoV-19^^Telangana|Human|National Genomics Core-Center for DNA Fingerprinting and Diagnostics|National Genomics Core-Center for DNA Fingerprinting and Diagnostics (NGC-CDFD)- DBT's PAN-INDIA-1000 Genome consortium|Vashisht|India

>Spike|hCoV-19/USA/WA-S2434/2020|2020-06-14|EPI\_ISL\_497066|Original|hCoV-19^^Washington|Human|Washington State Department of Health|Seattle Flu Study|Lee|USA

>Spike|hCoV-19/Denmark/DCGC-3954/2020|2020-09-14|EPI\_ISL\_615865|Original|hCoV-19^^Hovedstaden|Human|Department of Virus and Microbiological Special Diagnostics|Albertsen lab|Michaelsen|Denmark

>Spike|hCoV-19/England/LOND-DA096/2020|2020-11-07|EPI\_ISL\_665741|Original|hCoV-19^^England|Human|University College London|COVID-19 Genomics UK (COG-UK) Consortium|Roy|United Kingdom

>Spike|hCoV-19/Denmark/DCGC-984/2020|2020-03-09|EPI\_ISL\_614436|Original|hCoV-19^^Nordjylland|Human|Department of Virus and Microbiological Special Diagnostics|Albertsen lab|Michaelsen|Denmark

>Spike|hCoV-19/Belgium/reg-0411672/2020|2020-04-11|EPI\_ISL\_738210|Original|hCoV-19^^Horruer|Human|UZ Leuven|KU Leuven|Maes|Belgium

>Spike|hCoV-19/Sweden/20-50179/2020|2020-03-08|EPI\_ISL\_429152|Original|hCoV-19^^Orebro lan|Human|Klinisk mikrobiologi Orebro|The Public Health Agency of Sweden|Svartstr\u00f6m|Sweden

>Spike|hCoV-19/England/LIVE-9EA45/2020|2020-04-11|EPI\_ISL\_453357|Original|hCoV-19^^England|Human|Liverpool Clinical Laboratories|COVID-19 Genomics UK (COG-UK) Consortium|Haldenby|United Kingdom

>Spike|hCoV-19/USA/CT-UW-5104/2020|2020-04-05|EPI\_ISL\_461435|Original|hCoV-19^^Connecticut|Human|UW Virology Lab|UW Virology Lab|Roychoudhury|USA

>Spike|hCoV-19/Wales/MILK-9920FB/2020|2020-08-27|EPI\_ISL\_540896|Original|hCoV-19^^Wales|Human|Queens Medical Centre|COVID-19 Genomics UK (COG-UK) Consortium|Loose|United Kingdom

>Spike|hCoV-19/Northern Ireland/NIRE-109552/2020|2020-10-13|EPI\_ISL\_650888|Original|hCoV-19^^Northern Ireland|Human|Regional Virus Laboratory|COVID-19 Genomics UK (COG-UK) Consortium|Fairley|United Kingdom

>Spike|hCoV-19/England/MILK-ACE541/2020|2020-10-21|EPI\_ISL\_644082|Original|hCoV-19^^England|Human|Lighthouse Lab in Milton Keynes|Wellcome Sanger Institute for the COVID-19 Genomics UK (COG-UK) Consortium|Davies|United Kingdom

>Spike|hCoV-19/England/CAMB-1ADB12/2020|2020-05-01|EPI\_ISL\_448034|Original|hCoV-19^^England|Human|Department of Pathology|COVID-19 Genomics UK (COG-UK) Consortium|Meredith|United Kingdom

>Spike|hCoV-19/USA/CA-QDX-2685/2020|2020-03-17|EPI\_ISL\_604995|Original|hCoV-19^^California|Human|Quest Diagnostics|Quest Diagnostics|Kagan|USA

>Spike|hCoV-19/USA/TX-HMH-MCoV-8098/2020|2020-06-30|EPI\_ISL\_784195|Original|hCoV-19^^Texas|Human|Houston Methodist Hospital|Houston Methodist Hospital|Long|USA

>Spike|hCoV-19/Luxembourg/LNS4905512/2020|2020-10-23|EPI\_ISL\_744155|Original|hCoV-19^^Luxembourg|Human|Laboratoire national de sant\u00e9|Laboratoire national de sant\u00e9|Wienecke-Baldacchino|Luxembourg

>Spike|hCoV-19/Spain/CT-IBV-004160/2020|2020-03-28|EPI\_ISL\_510070|Original|hCoV-19^^Catalunya|Human|Instituto de Investigaciones Biomédicas de Barcelona (CSIC)|SeqCOVID-SPAIN consortium/IBV(CSIC)|Comas|Spain

>Spike|hCoV-19/Scotland/QEUH-BA1419/2020|2020-11-18|EPI\_ISL\_757214|Original|hCoV-19^^Scotland|Human|Lighthouse Lab in Glasgow|Wellcome Sanger Institute for the COVID-19 Genomics UK (COG-UK) Consortium|Davies|United Kingdom

>Spike|hCoV-19/USA/NM-DOH-2020308494/2020|2020-08-24|EPI\_ISL\_602182|Original|hCoV-19^^New Mexico|Human|New Mexico Department of Health Scientific Laboratory|New Mexico Department of Health Scientific Laboratory|Johnson|USA

>Spike|hCoV-19/India/GJ-GBRC158/2020|2020-05-27|EPI\_ISL\_461488|Original|hCoV-19^^Gujarat|Human|B.J. Medical College and Civil hospital|Gujarat Biotechnology Research Centre|Joshi|India

>Spike|hCoV-19/England/ALDP-B236CE/2020|2020-11-04|EPI\_ISL\_646839|Original|hCoV-19^^England|Human|Lighthouse Lab in Alderley Park|Wellcome Sanger Institute for the COVID-19 Genomics UK (COG-UK) Consortium|Davies|United Kingdom

>Spike|hCoV-19/USA/TX-HMH-MCoV-11650/2020|2020-09-08|EPI\_ISL\_790075|Original|hCoV-19^^Texas|Human|Houston Methodist Hospital|Houston Methodist Hospital|Long|USA

>Spike|hCoV-19/Denmark/ALAB-SSI-868/2020|2020-03-30|EPI\_ISL\_444950|Original|hCoV-19^^Denmark|Human|Department of Virus and Microbiological Special Diagnostics|Albertsen lab|Kirkegaard|Denmark

>Spike|hCoV-19/Scotland/EDB9014/2020|2020-11-01|EPI\_ISL\_652033|Original|hCoV-19^^Scotland|Human|Virology Department|COVID-19 Genomics UK (COG-UK) Consortium|McHugh|United Kingdom

>Spike|hCoV-19/England/ALDP-B5C91E/2020|2020-11-08|EPI\_ISL\_655797|Original|hCoV-19^^England|Human|Lighthouse Lab in Alderley Park|Wellcome Sanger Institute for the COVID-19 Genomics UK (COG-UK) Consortium|Davies|United Kingdom

>Spike|hCoV-19/Scotland/CVR5379/2020|2020-10-06|EPI\_ISL\_651786|Original|hCoV-19^^Scotland|Human|West of Scotland Specialist Virology Centre|COVID-19 Genomics UK (COG-UK) Consortium|Robertson|United Kingdom

>Spike|hCoV-19/USA/MI-MDHHS-SC21371/2020|2020-03-23|EPI\_ISL\_507625|Original|hCoV-19^^Michigan|Human|Michigan Department of Health and Human Services|Michigan Department of Health and Human Services|Blankenship|USA

>Spike|hCoV-19/Denmark/DCGC-2873/2020|2020-08-24|EPI\_ISL\_616567|Original|hCoV-19^^Syddanmark|Human|Department of Virus and Microbiological Special Diagnostics|Albertsen lab|Michaelsen|Denmark

>Spike|hCoV-19/England/CAMC-AEA758/2020|2020-10-26|EPI\_ISL\_633155|Original|hCoV-19^^England|Human|Lighthouse Lab in Cambridge|Wellcome Sanger Institute for the COVID-19 Genomics UK (COG-UK) consortium|Davies|United Kingdom

>Spike|hCoV-19/USA/NY-NYCPHL-000832/2020|2020-03-25|EPI\_ISL\_632209|Original|hCoV-19^^New York|Human|Jamaica Hospital Medical Center|New York City Public Health Laboratory|Wang|USA

>Spike|hCoV-19/Henan/HN01/2020|2020-02-24|EPI\_ISL\_605929|Vero|hCoV-19^^Henan|Human|Department of Infectious Disease Prevention and Control|Department of Infectious Disease Prevention and Control|Li,X.|China

>Spike|hCoV-19/England/CAMC-C3FD23/2020|2020-12-10|EPI\_ISL\_718337|Original|hCoV-19^^England|Human|Lighthouse Lab in Cambridge|Wellcome Sanger Institute for the COVID-19 Genomics UK (COG-UK) Consortium|Davies|United Kingdom

>Spike|hCoV-19/Poland/PL\_MCB\_84/2020|2020-05-10|EPI\_ISL\_645083|Original|hCoV-19^^Poland|Human|Human Genome Variation Research Group|Human Genome Variation Research Group|Poland

>Spike|hCoV-19/England/ALDP-C3B668/2020|2020-12-09|EPI\_ISL\_730885|Original|hCoV-19^^England|Human|Lighthouse Lab in Alderley Park|Wellcome Sanger Institute for the COVID-19 Genomics UK (COG-UK) Consortium|Davies|United Kingdom

>Spike|hCoV-19/England/MILK-B867F3/2020|2020-11-13|EPI\_ISL\_674054|Original|hCoV-19^^England|Human|Lighthouse Lab in Milton Keynes|Wellcome Sanger Institute for the COVID-19 Genomics UK (COG-UK) Consortium|Davies|United Kingdom

>Spike|hCoV-19/Russia/StPetersburg-RII4983S/2020|2020-04-10|EPI\_ISL\_430080|Original|hCoV-19^^Saint Petersburg|Human|WHO National Influenza Centre Russian Federation|WHO National Influenza Centre Russian Federation|Komissarov|Russia

>Spike|hCoV-19/Belgium/ULG-10755/2020|2020-09-20|EPI\_ISL\_641597|Original|hCoV-19^^Li\u00e8ge|Human|Department of Clinical Microbiology|GIGA Medical Genomics|Durkin|Belgium

>Spike|hCoV-19/USA/OR-OHSU-0151/2020|2020-05-06|EPI\_ISL\_468113|Original|hCoV-19^^Oregon|Human|OHSU Lab Services Molecular Microbiology Lab|Oregon SARS-CoV-2 Genome Sequencing Center|O'Roak|USA

>Spike|hCoV-19/USA/WI-UW-2382/2020|2020-10-29|EPI\_ISL\_728147|Original|hCoV-19^^Wisconsin|Human|University of Wisconsin-Madison AIDS Vaccine Research Laboratories|University of Wisconsin-Madison AIDS Vaccine Research Laboratories|Baczenas|USA

>Spike|hCoV-19/England/QEUA-9F38F0/2020|2020-09-26|EPI\_ISL\_600770|Original|hCoV-19^^England|Human|Lighthouse Lab in Glasgow|Wellcome Sanger Institute for the COVID-19 Genomics UK (COG-UK) consortium|Davies|United Kingdom

>Spike|hCoV-19/England/BRIS-123CE4/2020|2020-04-07|EPI\_ISL\_492768|Original|hCoV-19^^England|Human|PHE South West Regional Laboratory|Wellcome Sanger Institute for the COVID-19 Genomics UK (COG-UK) consortium|Davies|United Kingdom

>Spike|hCoV-19/England/QEUA-A8A189/2020|2020-10-16|EPI\_ISL\_638836|Original|hCoV-19^^England|Human|Oxford Viromics|COVID-19 Genomics UK (COG-UK) Consortium|Golubchik|United Kingdom

>Spike|hCoV-19/Netherlands/ZuidHolland\_224/2020|2020-05-12|EPI\_ISL\_461396|Original|hCoV-19^^Zuid Holland|Human|Dutch COVID-19 response team|Erasmus Medical Center|Oude Munnink|Netherlands

>Spike|hCoV-19/Spain/PV-IBV-2098/2020|2020-04-11|EPI\_ISL\_468902|Original|hCoV-19^^Basque Country|Human|Servicio de Microbiolog\u00eda. Hospital Universitario Donostia. OSI Donostialdea. \u00c1rea de Enfermedades Infecciosas|SeqCOVID-SPAIN consortium|IBV (CSIC)|Comas|Spain

>Spike|hCoV-19/USA/CA-ALSR-1145/2020|2020-04-08|EPI\_ISL\_494390|Original|hCoV-19^^California|Human|San Diego County Public Health Laboratory|Andersen lab at Scripps Research|Gangavarapu|USA

>Spike|hCoV-19/Denmark/DCGC-3247/2020|2020-08-31|EPI\_ISL\_615923|Original|hCoV-19^^Hovedstaden|Human|Department of Virus and Microbiological Special Diagnostics|Albertsen lab|Michaelsen|Denmark

>Spike|hCoV-19/Austria/CeMM0996/2020|2020-04-13|EPI\_ISL\_583840|Original|hCoV-19^^Austria|Human|Dr. Gernot Walder GmbH|Bergthaler laboratory|Bergthaler|Austria

>Spike|hCoV-19/Hong Kong/HKU-IHCE0511-009b/2020|2020-03-12|EPI\_ISL\_538536|Original|hCoV-19^^Hong Kong|Human|Department of Microbiology|Department of Microbiology|Chan|China

>Spike|hCoV-19/Ireland/WX-NVRL-AIIDV0434v1/2020|2020-05-15|EPI\_ISL\_644224|Original|hCoV-19^^Wexford|Human|CEPHR / Vincent's Hospital|Irish Coronavirus Sequencing Consortium - National Virus Reference Laboratory|Gonzalez|Ireland

>Spike|hCoV-19/Scotland/EDB8592/2020|2020-10-21|EPI\_ISL\_651972|Original|hCoV-19^^Scotland|Human|Virology Department|COVID-19 Genomics UK (COG-UK) Consortium|McHugh|United Kingdom

>Spike|hCoV-19/Switzerland/BE-ETHZ-410250/2020|2020-11-27|EPI\_ISL\_737730|Original|hCoV-19^^Bern|Human|Viollier AG|Department of Biosystems Science and Engineering|Nadeau|Switzerland

>Spike|hCoV-19/USA/AR-CDC-7905/2020|2020-07-15|EPI\_ISL\_535659|Original|hCoV-19^^Arkansas|Human|AR Dept. of Health-Public Health Lab|Pathogen Discovery|Queen|USA

>Spike|hCoV-19/England/MILK-CA9D15/2020|2020-12-18|EPI\_ISL\_762329|Original|hCoV-19^^England|Human|Lighthouse Lab in Milton Keynes|Wellcome Sanger Institute for the COVID-19 Genomics UK (COG-UK) Consortium|Davies|United Kingdom

>Spike|hCoV-19/USA/TX-HMH-MCoV-13422/2020|2020-08-24|EPI\_ISL\_788558|Original|hCoV-19^^Texas|Human|Houston Methodist Hospital|Houston Methodist Hospital|Long|USA

>Spike|hCoV-19/France/GES-3372/2020|2020-03-20|EPI\_ISL\_428348|Original|hCoV-19^^Grand-Est|Human|Maison de Sant\u00e9 du Val d'Ormois|National Reference Center for Viruses of Respiratory Infections|Enouf|France

>Spike|hCoV-19/Switzerland/BS-ETHZ-321374/2020|2020-10-13|EPI\_ISL\_603620|Original|hCoV-19^^Basel-Stadt|Human|Viollier AG|Department of Biosystems Science and Engineering|Nadeau|Switzerland

>Spike|hCoV-19/Iceland/152/2020|2020-03-13|EPI\_ISL\_417745|Original|hCoV-19^^Reykjavik|Human|The National University Hospital of Iceland|deCODE genetics|J\u00f3nsson|Iceland

>Spike|hCoV-19/England/MILK-69DA31/2020|2020-07-02|EPI\_ISL\_551792|Original|hCoV-19^^England|Human|Lighthouse Lab in Milton Keynes|Wellcome Sanger Institute for the COVID-19 Genomics UK (COG-UK) consortium|Davies|United Kingdom

>Spike|hCoV-19/Spain/AN-IBV-001926/2020|2020-03-11|EPI\_ISL\_452448|Original|hCoV-19^^Andalucia|Human|Servicio de Microbiolog\u00eda. HRU de M\u00e9llaga. Servicio Andaluz de Salud|SeqCOVID-SPAIN consortium|IBV(CSIC)|Comas|Spain

>Spike|hCoV-19/Australia/VIC7932/2020|2020-08-06|EPI\_ISL\_564754|Original|hCoV-19^^Victoria|Human|Microbiological Diagnostic Unit - Public Health Laboratory (MDU-PHL)|MDU-PHL|Schultz|Australia

>Spike|hCoV-19/USA/TX-HMH-MCoV-18034/2020|2020-11-16|EPI\_ISL\_786182|Original|hCoV-19^^Texas|Human|Houston Methodist Hospital|Houston Methodist Hospital|Long|USA

>Spike|hCoV-19/Sweden/20-51947/2020|2020-06-05|EPI\_ISL\_510861|Original|hCoV-19^^Stockholm|Human|Karolinska Universitetslaboratoriet|The Public Health Agency of Sweden|Svartstr\u00f6m|Sweden

>Spike|hCoV-19/England/MILK-B3BE70/2020|2020-11-02|EPI\_ISL\_706102|Original|hCoV-19^^England|Human|Oxford Viromics|COVID-19 Genomics UK (COG-UK) Consortium|Golubchik|United Kingdom

>Spike|hCoV-19/Japan/PG-7800/2020|2020-07-00|EPI\_ISL\_686902|Original|hCoV-19^^Japan|Human|Pathogen Genomics Center|Pathogen Genomics Center|Sekizuka|Japan

>Spike|hCoV-19/Scotland/QEUA-9B4F05/2020|2020-09-07|EPI\_ISL\_602079|Original|hCoV-19^^Scotland|Human|Lighthouse Lab in Glasgow|Wellcome Sanger Institute for the COVID-19 Genomics UK (COG-UK) consortium|Davies|United Kingdom

>Spike|hCoV-19/England/20106004803/2020|2020-03-03|EPI\_ISL\_417240|Original|hCoV-19^^England|Human|Respiratory Virus Unit|Respiratory Virus Unit|Platt|United Kingdom

>Spike|hCoV-19/DRC/11616/2020|2020-05-25|EPI\_ISL\_527519|Original|hCoV-19^^Kinshasa|Human|Viral Respiratory Lab|Pathogen Sequencing Lab|Lokilo|Democratic Republic of the Congo

>Spike|hCoV-19/Spain/MD-IBV-99008542/2020|2020-09-21|EPI\_ISL\_654088|Original|hCoV-19^^Madrid|Human|Hospital General Universitario Gregorio Mara\u00f1\u00f3n|SeqCOVID-SPAIN consortium|IBV(CSIC)|Comas|Spain

>Spike|hCoV-19/England/ALDP-9CBC22/2020|2020-09-16|EPI\_ISL\_575544|Original|hCoV-19^^England|Human|Lighthouse Lab in Alderley Park|Wellcome Sanger Institute for the COVID-19 Genomics UK (COG-UK) consortium|Davies|United Kingdom

>Spike|hCoV-19/England/QEUA-C5461E/2020|2020-12-12|EPI\_ISL\_736234|Original|hCoV-19^^England|Human|Lighthouse Lab in Glasgow|Wellcome Sanger Institute for the COVID-19 Genomics UK (COG-UK) Consortium|Davies|United Kingdom

>Spike|hCoV-19/England/ALDP-B45BC7/2020|2020-11-07|EPI\_ISL\_656284|Original|hCoV-19^^England|Human|Lighthouse Lab in Alderley Park|Wellcome Sanger Institute for the COVID-19 Genomics UK (COG-UK) Consortium|Davies|United Kingdom

>Spike|hCoV-19/England/MILK-A7A4B0/2020|2020-10-16|EPI\_ISL\_606630|Original|hCoV-19^^England|Human|Lighthouse Lab in Milton Keynes|Wellcome Sanger Institute for the COVID-19 Genomics UK (COG-UK) consortium|Davies|United Kingdom

>Spike|hCoV-19/USA/WA-S2070/2020|2020-06-05|EPI\_ISL\_497498|Original|hCoV-19^^Washington|Human|Washington State Department of Health|Seattle Flu Study|Lee|USA

>Spike|hCoV-19/England/QEUA-AD4A1C/2020|2020-10-26|EPI\_ISL\_634152|Original|hCoV-19^^England|Human|Lighthouse Lab in Glasgow|Wellcome Sanger Institute for the COVID-19 Genomics UK (COG-UK) consortium|Davies|United Kingdom

>Spike|hCoV-19/USA/NY-NYUMC348/2020|2020-04-08|EPI\_ISL\_430375|Original|hCoV-19^^New York|Human|NYU Langone Health|Departments of Pathology and Medicine|Maurano|USA

>Spike|hCoV-19/England/QEUA-C32564/2020|2020-12-11|EPI\_ISL\_782578|Original|hCoV-19^^England|Human|Lighthouse Lab in Glasgow|Wellcome Sanger Institute for the COVID-19 Genomics UK (COG-UK) Consortium|Davies|United Kingdom

>Spike|hCoV-19/USA/DE-DHSS-F995530/2020|2020-09-02|EPI\_ISL\_708436|Original|hCoV-19^^Delaware|Human|Delaware Public Health Lab|Delaware Public Health Lab|Bajwa|USA

>Spike|hCoV-19/Wales/PHWC-4A66F7/2020|2020-12-17|EPI\_ISL\_765066|Original|hCoV-19^^Wales|Human|Wales Specialist Virology Centre Sequencing lab|COVID-19 Genomics UK (COG-UK) Consortium|Moore|United Kingdom



>Spike|hCoV-19/South Korea/KCDC2222/2020|2020-05-07|EPI\_ISL\_510560|Original|hCoV-19^^South Korea|Human|Division of Viral Diseases|Division of Viral Diseases|Kim|South Korea

>Spike|hCoV-19/Denmark/DCGC-22149/2020|2020-12-14|EPI\_ISL\_758587|Original|hCoV-19^^Midtjylland|Human|Department of Virus and Microbiological Special Diagnostics|Albertsen Lab|Michaelsen|Denmark

>Spike|hCoV-19/England/ALDP-B76F58/2020|2020-11-12|EPI\_ISL\_723831|Original|hCoV-19^^England|Human|Oxford Viromics|COVID-19 Genomics UK (COG-UK) Consortium|Golubchik|United Kingdom

>Spike|hCoV-19/England/ALDP-BBA88A/2020|2020-11-20|EPI\_ISL\_701748|Original|hCoV-19^^England|Human|Lighthouse Lab in Alderley Park|Wellcome Sanger Institute for the COVID-19 Genomics UK (COG-UK) Consortium|Davies|United Kingdom

>Spike|hCoV-19/USA/WI-UW-2006/2020|2020-09-10|EPI\_ISL\_677414|Original|hCoV-19^^Wisconsin|Human|University of Wisconsin-Madison AIDS Vaccine Research Laboratories|University of Wisconsin-Madison AIDS Vaccine Research Laboratories|Baczenas|USA

>Spike|hCoV-19/England/CAMB-7DDCB/2020|2020-04-07|EPI\_ISL\_442152|Original|hCoV-19^^England|Human|Department of Pathology|Wellcome Sanger Institute for the COVID-19 Genomics UK (COG-UK) consortium|Amato|United Kingdom

>Spike|hCoV-19/Denmark/DCGC-3323/2020|2020-08-31|EPI\_ISL\_616077|Original|hCoV-19^^Hovedstaden|Human|Department of Virus and Microbiological Special Diagnostics|Albertsen lab|Michaelsen|Denmark

>Spike|hCoV-19/South Africa/KRISP-K002464/2020|2020-07-14|EPI\_ISL\_518047|Original|hCoV-19^^KwaZulu-Natal|Human|NHLs-IALCH|KRISP|de Oliveira|South Africa

>Spike|hCoV-19/Brazil/RJ-0263/2020|2020-04-13|EPI\_ISL\_470630|Original|hCoV-19^^Rio de Janeiro|Human|Laboratorio de Virologia Molecular / UFRJ|Bioinformatics Laboratory / LNCC|Almeida|Brazil

>Spike|hCoV-19/Denmark/ALAB-SSI-860/2020|2020-03-27|EPI\_ISL\_444945|Original|hCoV-19^^Denmark|Human|Department of Virus and Microbiological Special Diagnostics|Albertsen lab|Kirkegaard|Denmark

>Spike|hCoV-19/USA/NM-DOH-2020309735/2020|2020-08-24|EPI\_ISL\_602197|Original|hCoV-19^^New Mexico|Human|New Mexico Department of Health Scientific Laboratory|New Mexico Department of Health Scientific Laboratory|Johnson|USA

>Spike|hCoV-19/Scotland/QEUH-B9E5B2/2020|2020-11-18|EPI\_ISL\_757201|Original|hCoV-19^^Scotland|Human|Lighthouse Lab in Glasgow|Wellcome Sanger Institute for the COVID-19 Genomics UK (COG-UK) Consortium|Davies|United Kingdom

>Spike|hCoV-19/USA/UN-CDC-7480/2020|2020-04-22|EPI\_ISL\_514074|Original|hCoV-19^^USA|Human|Navy and Marine Corps Public Health Center|Pathogen Discovery|Queen|USA

>Spike|hCoV-19/Japan/PG-3134/2020|2020-06-00|EPI\_ISL\_691256|Original|hCoV-19^^Japan|Human|Pathogen Genomics Center|Pathogen Genomics Center|Sekizuka|Japan

>Spike|hCoV-19/USA/LA-GBCL-26791713/2020|2020-04-09|EPI\_ISL\_485333|Original|hCoV-19^^Louisiana|Human|River Road Testing Lab|Ginkgo Bioworks Clinical Laboratory|Smith|USA

>Spike|hCoV-19/USA/TX-HMH-MCoV-15502/2020|2020-10-23|EPI\_ISL\_786986|Original|hCoV-19^^Texas|Human|Houston Methodist Hospital|Houston Methodist Hospital|Long|USA

>Spike|hCoV-19/USA/NY-Wadsworth-290385-01/2020|2020-12-14|EPI\_ISL\_765563|Original|hCoV-19^^New York|Human|MONTEFIORE MEDICAL CENTER LABORATORIES|Wadsworth Center|Lasek-Nesselquist|USA

>Spike|hCoV-19/England/LIVE-DB4DBC/2020|2020-10-22|EPI\_ISL\_651296|Original|hCoV-19^^England|Human|Liverpool Clinical Laboratories|COVID-19 Genomics UK (COG-UK) Consortium|Haldenby|United Kingdom

>Spike|hCoV-19/Belgium/ULG-10740/2020|2020-09-19|EPI\_ISL\_641582|Original|hCoV-19^^Li\u00e8ge|Human|Department of Clinical Microbiology|GIGA Medical Genomics|Durkin|Belgium

>Spike|hCoV-19/England/MILK-A45005/2020|2020-10-06|EPI\_ISL\_598622|Original|hCoV-19^^England|Human|Lighthouse Lab in Milton Keynes|Wellcome Sanger Institute for the COVID-19 Genomics UK (COG-UK) consortium|Davies|United Kingdom

>Spike|hCoV-19/USA/NY-Wadsworth-46445-01/2020|2020-04-14|EPI\_ISL\_676847|Original|hCoV-19^^New York|Human|Wadsworth Center|Wadsworth Center|Lasek-Nesselquist|USA

>Spike|hCoV-19/Czech Republic/2122/2020|2020-03-19|EPI\_ISL\_425229|Original|hCoV-19^^Prague|Human|Laboratory of Molecular Genetics|Laboratory of Molecular Genetics|Kramna|Czech Republic

>Spike|hCoV-19/USA/LA-EVTL473/2020|2020-06-23|EPI\_ISL\_578877|Original|hCoV-19^^Louisiana|Human|LSUHS Emerging Viral Threat Laboratory|Microbial Genome Sequencing Center|Kamil|USA

>Spike|hCoV-19/Beijing/DT-travelES01/2020|2020-03-16|EPI\_ISL\_452343|Original|hCoV-19^^Beijing|Human|Laboratory of Infectious Diseases Center of Beijing Ditan Hospital|Laboratory of Infectious Diseases Center of Beijing Ditan Hospital|Yang|China

>Spike|hCoV-19/Spain/MD-IBV-97010073/2020|2020-03-18|EPI\_ISL\_779741|Original|hCoV-19^^Madrid|Human|IdISSC/Hospital Cl\u00e9dnico San Carlos de Madrid\u200b|SeqCOVID-SPAIN consortium/IBV (CSIC)|Comas|Spain

>Spike|hCoV-19/Spain/MD-IBV-99007098/2020|2020-04-24|EPI\_ISL\_541882|Original|hCoV-19^^Madrid|Human|Hospital General Universitario Gregorio Mara\u00f1\u00f3n|SeqCOVID-SPAIN consortium/IBV (CSIC)|Comas|Spain

>Spike|hCoV-19/England/QEUA-B6AA92/2020|2020-11-11|EPI\_ISL\_662548|Original|hCoV-19^^England|Human|Lighthouse Lab in Glasgow|Wellcome Sanger Institute for the COVID-19 Genomics UK (COG-UK) Consortium|Davies|United Kingdom

>Spike|hCoV-19/England/LIVE-A49D6/2020|2020-03-13|EPI\_ISL\_499846|Original|hCoV-19^^England|Human|Liverpool Clinical Laboratories|COVID-19 Genomics UK (COG-UK) Consortium|Haldenby|United Kingdom

>Spike|hCoV-19/South Korea/KCDC2098/2020|2020-03-04|EPI\_ISL\_497999|Original|hCoV-19^^South Korea|Human|Division of Viral Diseases|Division of Viral Diseases|Kim|South Korea

>Spike|hCoV-19/USA/FL-BPHL-0983/2020|2020-05-29|EPI\_ISL\_517873|Original|hCoV-19^^Florida|Human|Florida Bureau of Public Health Laboratories|Florida Bureau of Public Health Laboratories|Blanton|USA

>Spike|hCoV-19/Scotland/QEUA-96E8A5/2020|2020-08-19|EPI\_ISL\_534456|Original|hCoV-19^^Scotland|Human|NHSGGC West of Scotland Specialist Virology Centre / MRC-University of Glasgow Centre for Virus Research|Wellcome Sanger Institute for the COVID-19 Genomics UK (COG-UK) consortium|Davies|United Kingdom

>Spike|hCoV-19/England/MILK-ACF1A6/2020|2020-10-22|EPI\_ISL\_629727|Original|hCoV-19^^England|Human|Lighthouse Lab in Milton Keynes|Wellcome Sanger Institute for the COVID-19 Genomics UK (COG-UK) Consortium|Davies|United Kingdom

>Spike|hCoV-19/England/CAMB-1B64DF/2020|2020-09-21|EPI\_ISL\_576915|Original|hCoV-19^^England|Human|Department of Pathology|COVID-19 Genomics UK (COG-UK) Consortium|Goodfellow|United Kingdom

>Spike|hCoV-19/USA/WA-S2148/2020|2020-06-08|EPI\_ISL\_497576|Original|hCoV-19^^Washington|Human|Washington State Department of Health|Seattle Flu Study|Lee|USA

>Spike|hCoV-19/England/CAMB-74483/2020|2020-03-20|EPI\_ISL\_425294|Original|hCoV-19^^England|Human|Department of Pathology|COVID-19 Genomics UK (COG-UK) Consortium|Meredith|United Kingdom

>Spike|hCoV-19/Luxembourg/LNS8325961/2020|2020-10-26|EPI\_ISL\_744718|Original|hCoV-19^^Luxembourg|Human|Laboratoire national de sant\u00e9|Laboratoire national de sant\u00e9|Wienecke-Baldacchino|Luxembourg

>Spike|hCoV-19/England/MILK-B5A822/2020|2020-11-06|EPI\_ISL\_658155|Original|hCoV-19^^England|Human|Lighthouse Lab in Milton Keynes|Wellcome Sanger Institute for the COVID-19 Genomics UK (COG-UK) Consortium|Davies|United Kingdom

>Spike|hCoV-19/USA/CA-CZB-15314/2020|2020-11-25|EPI\_ISL\_738700|Original|hCoV-19^^California|Human|Santa Clara County Public Health Laboratory|Chan-Zuckerberg Biohub|Kamm|USA

>Spike|hCoV-19/England/LIVE-9E8F0/2020|2020-04-12|EPI\_ISL\_453342|Original|hCoV-19^^England|Human|Liverpool Clinical Laboratories|COVID-19 Genomics UK (COG-UK) Consortium|Haldenby|United Kingdom

>Spike|hCoV-19/USA/TX-CDC-2-3714374/2020|2020-12-04|EPI\_ISL\_751644|Original|hCoV-19^^Texas|Human|TX DSHS|Genomics and Discovery|Queen|USA

>Spike|hCoV-19/Wales/PHWC-486332/2020|2020-10-27|EPI\_ISL\_639033|Original|hCoV-19^^Wales|Human|Wales Specialist Virology Centre Sequencing lab|COVID-19 Genomics UK (COG-UK) Consortium|Moore|United Kingdom

>Spike|hCoV-19/Japan/PG-0942/2020|2020-04-00|EPI\_ISL\_684552|Original|hCoV-19^^Japan|Human|Pathogen Genomics Center|Pathogen Genomics Center|Sekizuka|Japan

>Spike|hCoV-19/USA/NY-Wadsworth-280797-01/2020|2020-11-30|EPI\_ISL\_754509|Original|hCoV-19^^New York|Human|Wadsworth Center|Wadsworth Center|Lasek-Nesselquist|USA

>Spike|hCoV-19/Denmark/DCGC-11657/2020|2020-10-26|EPI\_ISL\_671051|Original|hCoV-19^^Hovedstaden|Human|Department of Virus and Microbiological Special Diagnostics|Albertsen Lab|Michaelsen|Denmark

>Spike|hCoV-19/USA/WA-UW-1702/2020|2020-03-21|EPI\_ISL\_424228|Original|hCoV-19^^Washington|Human|UW Virology Lab|UW Virology Lab|Roychoudhury|USA

>Spike|hCoV-19/Wales/PHWC-47EEF0/2020|2020-09-27|EPI\_ISL\_595610|Original|hCoV-19^^Wales|Human|Originating lab|COVID-19 Genomics UK (COG-UK) Consortium|Moore|United Kingdom

>Spike|hCoV-19/USA/CA-QDX-1520/2020|2020-03-17|EPI\_ISL\_603773|Original|hCoV-19^^California|Human|Quest Diagnostics|Quest Diagnostics|Kagan|USA

>Spike|hCoV-19/USA/IL-UW-532/2020|2020-06-23|EPI\_ISL\_484907|Original|hCoV-19^^Illinois|Human|University of Wisconsin-Madison AIDS Vaccine Research Laboratories|University of Wisconsin-Madison AIDS Vaccine Research Laboratories|Baczenas|USA

>Spike|hCoV-19/USA/TX-DSHS-1642/2020|2020-06-24|EPI\_ISL\_710062|Original|hCoV-19^^Texas|Human|Texas Department of State Health Services|Texas Department of State Health Services|Rahman|USA

>Spike|hCoV-19/England/QEUEH-C8027F/2020|2020-12-16|EPI\_ISL\_756835|Original|hCoV-19^^England|Human|Lighthouse Lab in Glasgow|Wellcome Sanger Institute for the COVID-19 Genomics UK (COG-UK) Consortium|Davies|United Kingdom

>Spike|hCoV-19/England/ALDP-A67C09/2020|2020-10-12|EPI\_ISL\_630677|Original|hCoV-19^^England|Human|Lighthouse Lab in Alderley Park|Wellcome Sanger Institute for the COVID-19 Genomics UK (COG-UK) consortium|Davies|United Kingdom

>Spike|hCoV-19/England/QEUEH-9CF6B7/2020|2020-09-17|EPI\_ISL\_590067|Original|hCoV-19^^England|Human|Lighthouse Lab in Glasgow|Wellcome Sanger Institute for the COVID-19 Genomics UK (COG-UK) consortium|Davies|United Kingdom

>Spike|hCoV-19/Colombia/NAR-GVI-97417/2020|2020-04-04|EPI\_ISL\_447798|Original|hCoV-19^^Narino|Human|Instituto Nacional de Salud|Grupo de Investigaciones Microbiol\u00f3gicas-UR (GIMUR)|Ram\u00e9drez|Colombia

>Spike|hCoV-19/England/ALDP-B83F3A/2020|2020-11-14|EPI\_ISL\_674323|Original|hCoV-19^^England|Human|Lighthouse Lab in Alderley Park|Wellcome Sanger Institute for the COVID-19 Genomics UK (COG-UK) Consortium|Davies|United Kingdom

>Spike|hCoV-19/Portugal/PT0263/2020|2020-04-04|EPI\_ISL\_453977|Original|hCoV-19^^Portugal|Human|unknown|Instituto Nacional de Saude (INSA)|Borges|Portugal

>Spike|hCoV-19/USA/UT-02437/2020|2020-04-21|EPI\_ISL\_470552|Original|hCoV-19^^Utah|Human|Utah Public Health Laboratory|Utah Public Health Laboratory|Young|USA

>Spike|hCoV-19/Netherlands/ZH-EMC-399/2020|2020-07-23|EPI\_ISL\_523739|Original|hCoV-19^^Zuid Holland|Human|Dutch COVID-19 response team|Erasmus Medical Center|Oude Munnink|Netherlands

>Spike|hCoV-19/Denmark/DCGC-20094/2020|2020-12-07|EPI\_ISL\_747978|Original|hCoV-19^^Midtjylland|Human|Department of Virus and Microbiological Special Diagnostics|Albertsen Lab|Michaelsen|Denmark

>Spike|hCoV-19/England/QEUEH-964BC4/2020|2020-08-11|EPI\_ISL\_531221|Original|hCoV-19^^England|Human|Lighthouse Lab in Glasgow|Wellcome Sanger Institute for the COVID-19 Genomics UK (COG-UK) consortium|Davies|United Kingdom

>Spike|hCoV-19/England/BRIS-130A80/2020|2020-04-14|EPI\_ISL\_492604|Original|hCoV-19^^England|Human|PHE South West Regional Laboratory|Wellcome Sanger Institute for the COVID-19 Genomics UK (COG-UK) consortium|Davies|United Kingdom

>Spike|hCoV-19/England/NORW-F85A2/2020|2020-12-12|EPI\_ISL\_725344|Original|hCoV-19^^England|Human|Quadram Institute Bioscience|COVID-19 Genomics UK (COG-UK) Consortium|Alikhan|United Kingdom

>Spike|hCoV-19/Belgium/ULG-11111/2020|2020-12-17|EPI\_ISL\_737359|Original|hCoV-19^^Li\u00e8ge|Human|Department of Clinical Microbiology|GIGA Medical Genomics|Durkin|Belgium

>Spike|hCoV-19/Scotland/QEUH-B110A7/2020|2020-11-03|EPI\_ISL\_649522|Original|hCoV-19^^Scotland|Human|Lighthouse Lab in Glasgow|Wellcome Sanger Institute for the COVID-19 Genomics UK (COG-UK) Consortium|Davies|United Kingdom

>Spike|hCoV-19/England/CAMC-B78958/2020|2020-11-12|EPI\_ISL\_668101|Original|hCoV-19^^England|Human|Lighthouse Lab in Cambridge|Wellcome Sanger Institute for the COVID-19 Genomics UK (COG-UK) Consortium|Davies|United Kingdom

>Spike|hCoV-19/USA/WA-S2121/2020|2020-06-08|EPI\_ISL\_497549|Original|hCoV-19^^Washington|Human|Washington State Department of Health|Seattle Flu Study|Lee|USA

>Spike|hCoV-19/England/ALDP-4AA981/2020|2020-06-13|EPI\_ISL\_559581|Original|hCoV-19^^England|Human|Lighthouse Lab in Alderley Park|Wellcome Sanger Institute for the COVID-19 Genomics UK (COG-UK) consortium|Davies|United Kingdom

>Spike|hCoV-19/Spain/CL-IBV-97006215/2020|2020-04-13|EPI\_ISL\_537361|Original|hCoV-19^^Castilla y Leon|Human|Universidad de Le\u00f3n|SeqCOVID-SPAIN consortium/IBV (CSIC) |Comas|Spain

>Spike|hCoV-19/England/MILK-B95ACB/2020|2020-11-13|EPI\_ISL\_674994|Original|hCoV-19^^England|Human|Lighthouse Lab in Milton Keynes|Wellcome Sanger Institute for the COVID-19 Genomics UK (COG-UK) Consortium|Davies|United Kingdom

>Spike|hCoV-19/Spain/VC-FISABIO-92/2020|2020-03-16|EPI\_ISL\_425216|Original|hCoV-19^^Comunitat Valenciana|Human|Servicio de Microbiolog\u00eda. Consorcio Hospital General Universitario de Valencia|Sequencing and Bioinformatics Service and Molecular Epidemiology Research Group. FISABIO-Public Health|Gonzalez-Candelas|Spain

>Spike|hCoV-19/Wales/PHWC-16CFAA/2020|2020-09-12|EPI\_ISL\_574191|Original|hCoV-19^^Wales|Human|Wales Specialist Virology Centre Sequencing lab|COVID-19 Genomics UK (COG-UK) Consortium|Moore|United Kingdom

>Spike|hCoV-19/England/NORW-EC592/2020|2020-05-10|EPI\_ISL\_457534|Original|hCoV-19^^England|Human|Quadram Institute Bioscience|COVID-19 Genomics UK (COG-UK) Consortium|Alikhan|United Kingdom

>Spike|hCoV-19/Australia/VIC2837/2020|2020-07-04|EPI\_ISL\_521668|Original|hCoV-19^^Victoria|Human|Microbiological Diagnostic Unit - Public Health Laboratory (MDU-PHL) |MDU-PHL|Schultz|Australia

>Spike|hCoV-19/Peru/LIM-INS-143/2020|2020-03-16|EPI\_ISL\_536538|Original|hCoV-19^^Lima|Human|Instituto Nacional de Salud|Laboratorio de Infecciones Respiratorias Agudas|Lopez|Peru

>Spike|hCoV-19/Latvia/157/2020|2020-09-20|EPI\_ISL\_639654|Original|hCoV-19^^Latvia|Human|Centr\u0101l\u0101 Laboratorija|Latvian Biomedical Research and Study Centre|Zrelavs|Latvia

>Spike|hCoV-19/England/MILK-517B00/2020|2020-06-11|EPI\_ISL\_559084|Original|hCoV-19^^England|Human|Lighthouse Lab in Milton Keynes|Wellcome Sanger Institute for the COVID-19 Genomics UK (COG-UK) consortium|Davies|United Kingdom

>Spike|hCoV-19/Denmark/DCGC-6128/2020|2020-09-21|EPI\_ISL\_621162|Original|hCoV-19^^Midtjylland|Human|Department of Virus and Microbiological Special Diagnostics|Albertsen lab|Michaelsen|Denmark

>Spike|hCoV-19/Wales/PHWC-3172F/2020|2020-04-12|EPI\_ISL\_446479|Original|hCoV-19^^Wales|Human|Wales Specialist Virology Centre|Public Health Wales Microbiology Cardiff|Moore|United Kingdom

>Spike|hCoV-19/France/ARA-09686/2020|2020-03-16|EPI\_ISL\_418417|Original|hCoV-19^^Auvergne-Rh\u00f4ne-Alpes|Human|Centre Hospitalier de Valence|CNR Virus des Infections Respiratoires - France SUD|Josset|France

>Spike|hCoV-19/Scotland/CVR2080/2020|2020-04-10|EPI\_ISL\_484555|Original|hCoV-19^^Scotland|Human|West of Scotland Specialist Virology Centre|COVID-19 Genomics UK (COG-UK) Consortium|Robertson|United Kingdom

>Spike|hCoV-19/Australia/VIC7832/2020|2020-07-29|EPI\_ISL\_564685|Original|hCoV-19^^Victoria|Human|Microbiological Diagnostic Unit - Public Health Laboratory (MDU-PHL) |MDU-PHL|Schultz|Australia

>Spike|hCoV-19/Scotland/EDB7840/2020|2020-09-22|EPI\_ISL\_572689|Original|hCoV-19^^Scotland|Human|Virology Department|COVID-19 Genomics UK (COG-UK) Consortium|Williams|United Kingdom

>Spike|hCoV-19/France/ARA93996/2020|2020-10-25|EPI\_ISL\_640004|Original|hCoV-19^^Auvergne-Rhone-Alpes|Human|CNR Virus des Infections Respiratoires - France SUD|CNR Virus des Infections Respiratoires - France SUD|Josset|France

>Spike|hCoV-19/Japan/IC-0044/2020|2020-05-00|EPI\_ISL\_591386|Original|hCoV-19^^Japan|Human|Pathogen Genomics Center|Pathogen Genomics Center|Sekizuka|Japan

>Spike|hCoV-19/England/CAMB-776A8/2020|2020-03-31|EPI\_ISL\_439531|Original|hCoV-19^^England|Human|Department of Pathology|Wellcome Sanger Institute for the COVID-19 Genomics UK (COG-UK) consortium|Amato|United Kingdom

>Spike|hCoV-19/Wales/PHWC-1689A0/2020|2020-04-20|EPI\_ISL\_494312|Original|hCoV-19^^Wales|Human|Originating lab|COVID-19 Genomics UK (COG-UK) Consortium|Moore|United Kingdom

>Spike|hCoV-19/Scotland/CVR2970/2020|2020-04-22|EPI\_ISL\_448210|Original|hCoV-19^^Scotland|Human|West of Scotland Specialist Virology Centre|COVID-19 Genomics UK (COG-UK) Consortium|Robertson|United Kingdom

>Spike|hCoV-19/USA/AZ-TG648738/2020|2020-04-10|EPI\_ISL\_695921|Original|hCoV-19^^Arizona|Human|Sonora Quest Laboratories|TGen North|French|USA

>Spike|hCoV-19/Japan/PG-7150/2020|2020-09-00|EPI\_ISL\_688255|Original|hCoV-19^^Japan|Human|Pathogen Genomics Center|Pathogen Genomics Center|Sekizuka|Japan

>Spike|hCoV-19/Wales/PHWC-47E1D9/2020|2020-10-09|EPI\_ISL\_595421|Original|hCoV-19^^Wales|Human|Originating lab|COVID-19 Genomics UK (COG-UK) Consortium|Moore|United Kingdom

>Spike|hCoV-19/USA/NY-PV08125/2020|2020-03-13|EPI\_ISL\_421354|Original|hCoV-19^^New York|Human|MSSS Clinical Microbiology Laboratories|MSSS Pathogen Surveillance Program|van Bakel|USA

>Spike|hCoV-19/USA/UT-03021/2020|2020-05-01|EPI\_ISL\_509563|Original|hCoV-19^^Utah|Human|Utah Public Health Laboratory|Utah Public Health Laboratory|Butz|USA

>Spike|hCoV-19/Japan/PG-7879/2020|2020-07-00|EPI\_ISL\_686980|Original|hCoV-19^^Japan|Human|Pathogen Genomics Center|Pathogen Genomics Center|Sekizuka|Japan

>Spike|hCoV-19/Spain/AR-ISCI-201673/2020|2020-03-07|EPI\_ISL\_539508|Original|hCoV-19^^Aragon|Human|Hospital Universitario Miguel Servet|Instituto de Salud Carlos III|Caballero|Spain

>Spike|hCoV-19/England/QE-9B466A/2020|2020-09-04|EPI\_ISL\_590189|Original|hCoV-19^^England|Human|Lighthouse Lab in Glasgow|Wellcome Sanger Institute for the COVID-19 Genomics UK (COG-UK) consortium|Davies|United Kingdom

>Spike|hCoV-19/USA/WA-S181/2020|2020-03-19|EPI\_ISL\_430219|Original|hCoV-19^^Washington|Human|Washington State Department of Health|Seattle Flu Study|Bedford|USA

>Spike|hCoV-19/England/EXET-1392DA/2020|2020-10-25|EPI\_ISL\_665060|Original|hCoV-19^^England|Human|University of Exeter|COVID-19 Genomics UK (COG-UK) Consortium|Temperton|United Kingdom

>Spike|hCoV-19/England/QE-7E600/2020|2020-11-14|EPI\_ISL\_667866|Original|hCoV-19^^England|Human|Lighthouse Lab in Glasgow|Wellcome Sanger Institute for the COVID-19 Genomics UK (COG-UK) Consortium|Davies|United Kingdom

>Spike|hCoV-19/USA/NY-QDX-1175/2020|2020-03-13|EPI\_ISL\_571985|Original|hCoV-19^^New York|Human|Quest Diagnostics|Quest Diagnostics|Kagan|USA

>Spike|hCoV-19/Australia/QLD1217/2020|2020-03-22|EPI\_ISL\_639808|Original|hCoV-19^^Australia|Human|unknown|Public Health Virology Laboratory|Nguyen|Australia

>Spike|hCoV-19/South Africa/KRISP-K002375/2020|2020-07-21|EPI\_ISL\_515741|Original|hCoV-19^^KwaZulu-Natal|Human|NHL-IALCH|KRISP|de Oliveira|South Africa

>Spike|hCoV-19/USA/CA-CZB-12819/2020|2020-09-30|EPI\_ISL\_648470|Original|hCoV-19^^California|Human|Santa Clara County Public Health Laboratory|Chan-Zuckerberg Biohub|Bhatt|USA

>Spike|hCoV-19/England/MILK-BB271C/2020|2020-11-18|EPI\_ISL\_720207|Original|hCoV-19^^England|Human|Lighthouse Lab in Milton Keynes|Wellcome Sanger Institute for the COVID-19 Genomics UK (COG-UK) Consortium|Davies|United Kingdom

>Spike|hCoV-19/USA/LA-QDX-1192/2020|2020-03-16|EPI\_ISL\_571938|Original|hCoV-19^^Louisiana|Human|Quest Diagnostics|Quest Diagnostics|Kagan|USA

>Spike|hCoV-19/Canada/QC-LSPQ-L00232004/2020|2020-03-21|EPI\_ISL\_535969|Original|hCoV-19^^Quebec|Human|H\u00f4pital Sainte-Croix|Laboratoire de sant\u00e9 publique du Qu\u00e9bec|Moreira|Canada

>Spike|hCoV-19/Wales/PHWC-4A1850/2020|2020-12-10|EPI\_ISL\_743735|Original|hCoV-19^^Wales|Human|Wales Specialist Virology Centre Sequencing lab|COVID-19 Genomics UK (COG-UK) Consortium|Moore|United Kingdom

>Spike|hCoV-19/England/CAMB-76894/2020|2020-03-29|EPI\_ISL\_438286|Original|hCoV-19^^England|Human|Department of Pathology|Wellcome Sanger Institute for the COVID-19 Genomics UK (COG-UK) consortium|Amato|United Kingdom

>Spike|hCoV-19/England/SHEF-CDFE4/2020|2020-05-25|EPI\_ISL\_535083|Original|hCoV-19^^England|Human|Virology Department|COVID-19 Genomics UK (COG-UK) Consortium|de Silva|United Kingdom

>Spike|hCoV-19/England/QEUEH-AF517A/2020|2020-10-30|EPI\_ISL\_663120|Original|hCoV-19^^England|Human|Lighthouse Lab in Glasgow|Wellcome Sanger Institute for the COVID-19 Genomics UK (COG-UK) Consortium|Davies|United Kingdom

>Spike|hCoV-19/USA/CO-CDPHE-2004230149/2020|2020-04-21|EPI\_ISL\_710131|Original|hCoV-19^^Colorado|Human|Colorado Department of Public Health and Environment|Colorado Department of Public Health and Environment|Bankers|USA

>Spike|hCoV-19/Wales/PHWC-2E97A/2020|2020-04-07|EPI\_ISL\_446092|Original|hCoV-19^^Wales|Human|Wales Specialist Virology Centre|Public Health Wales Microbiology Cardiff|Moore|United Kingdom

>Spike|hCoV-19/England/QEUEH-8A7D1B/2020|2020-07-24|EPI\_ISL\_532727|Original|hCoV-19^^England|Human|Lighthouse Lab in Glasgow|Wellcome Sanger Institute for the COVID-19 Genomics UK (COG-UK) consortium|Davies|United Kingdom

>Spike|hCoV-19/Australia/VIC12494/2020|2020-00-00|EPI\_ISL\_640800|Original|hCoV-19^^Victoria|Human|Microbiological Diagnostic Unit - Public Health Laboratory (MDU-PHL)|MDU-PHL|Schultz|Australia

>Spike|hCoV-19/England/20136096804/2020|2020-03-23|EPI\_ISL\_420650|Original|hCoV-19^^England|Human|Respiratory Virus Unit|Respiratory Virus Unit|Platt|United Kingdom

>Spike|hCoV-19/England/C200047063/2020|2020-11-13|EPI\_ISL\_666768|Original|hCoV-19^^England|Human|Respiratory Virus Unit|COVID-19 Genomics UK (COG-UK) Consortium|Platt|United Kingdom

>Spike|hCoV-19/England/20149005304/2020|2020-04-01|EPI\_ISL\_466108|Original|hCoV-19^^England|Human|Respiratory Virus Unit|Respiratory Virus Unit|Platt|United Kingdom

>Spike|hCoV-19/USA/NM-DOH-2020328767/2020|2020-09-01|EPI\_ISL\_575323|Original|hCoV-19^^New Mexico|Human|Molecular Biology|Molecular Biology|Johnson|USA

>Spike|hCoV-19/England/CAMC-B09910/2020|2020-10-29|EPI\_ISL\_672987|Original|hCoV-19^^England|Human|Lighthouse Lab in Cambridge|Wellcome Sanger Institute for the COVID-19 Genomics UK (COG-UK) Consortium|Davies|United Kingdom

>Spike|hCoV-19/England/NORT-288F2F/2020|2020-03-24|EPI\_ISL\_458659|Original|hCoV-19^^England|Human|NU-OMICS DNA Sequencing research facility|Wellcome Sanger Institute for the COVID-19 Genomics UK (COG-UK) consortium|Davies|United Kingdom

>Spike|hCoV-19/England/ALDP-B273E1/2020|2020-11-04|EPI\_ISL\_664564|Original|hCoV-19^^England|Human|Northumbria University / South Tees Hospitals NHS Foundation Trust / North Cumbria Integrated Care NHS Foundation Trust / North Tees and Hartlepool NHS Foundation Trust / Newcastle Hospitals NHS Foundation Trust|COVID-19 Genomics UK (COG-UK) Consortium|Bashton|United Kingdom

>Spike|hCoV-19/Australia/NSW493/2020|2020-04-23|EPI\_ISL\_455033|Original|hCoV-19^^New South Wales|Human|Pathology West - NSW Health Pathology|NSW Health Pathology - Institute of Clinical Pathology and Medical Research; Westmead Hospital; University of Sydney|Gall|Australia

>Spike|hCoV-19/USA/UN-UW-7000/2020|2020-03-12|EPI\_ISL\_576496|Original|hCoV-19^^USA|Human|UW Virology Lab|UW Virology Lab|Roychoudhury|USA

>Spike|hCoV-19/USA/IL-UW-2222/2020|2020-09-28|EPI\_ISL\_677625|Original|hCoV-19^^Illinois|Human|University of Wisconsin-Madison AIDS Vaccine Research Laboratories|University of Wisconsin-Madison AIDS Vaccine Research Laboratories|Baczenas|USA

>Spike|hCoV-19/USA/LA-GBCL-26544504/2020|2020-04-27|EPI\_ISL\_485102|Original|hCoV-19^^Louisiana|Human|River Road Testing Lab|Ginkgo Bioworks Clinical Laboratory|Smith|USA

>Spike|hCoV-19/USA/NY-NYCPHL-000272/2020|2020-03-17|EPI\_ISL\_631798|Original|hCoV-19^^New York|Human|Jamaica Hospital Medical Center|New York City Public Health Laboratory|Wang|USA

>Spike|hCoV-19/Switzerland/GR-ETHZ-101170/2020|2020-03-31|EPI\_ISL\_451833|Original|hCoV-19^^Graubunden|Human|Viollier AG|Department of Biosystems Science and Engineering|Nadeau|Switzerland

>Spike|hCoV-19/USA/FL-BPHL-0096/2020|2020-04-27|EPI\_ISL\_445039|Original|hCoV-19^^Florida|Human|Florida Bureau of Public Health Laboratories|Florida Bureau of Public Health Laboratories|Blanton|USA

>Spike|hCoV-19/England/CAMB-7E401/2020|2020-04-07|EPI\_ISL\_524530|Original|hCoV-19^^England|Human|Department of Pathology|Wellcome Sanger Institute for the COVID-19 Genomics UK (COG-UK) consortium|Davies|United Kingdom

>Spike|hCoV-19/USA/MA-MASPHL-00500/2020|2020-05-03|EPI\_ISL\_693070|Original|hCoV-19^^Massachusetts|Human|Massachusetts State Public Health Laboratory|Massachusetts State Public Health Laboratory|Lang|USA

>Spike|hCoV-19/USA/CA-CDPH145/2020|2020-09-26|EPI\_ISL\_755027|Original|hCoV-19^^California|Human|California Department of Public Health|California Department of Public Health|Bell|USA

>Spike|hCoV-19/USA/MN-MDH-2033/2020|2020-11-03|EPI\_ISL\_654714|Original|hCoV-19^^Minnesota|Human|Minnesota Department of Health|Minnesota Department of Health|Lorentz|USA

>Spike|hCoV-19/England/ALDP-A2E0C6/2020|2020-10-06|EPI\_ISL\_586626|Original|hCoV-19^^England|Human|Lighthouse Lab in Alderley Park|Wellcome Sanger Institute for the COVID-19 Genomics UK (COG-UK) consortium|Davies|United Kingdom

>Spike|hCoV-19/Wales/PHWC-28318/2020|2020-03-27|EPI\_ISL\_432153|Original|hCoV-19^^Wales|Human|Wales Specialist Virology Centre|Public Health Wales Microbiology Cardiff|Moore|United Kingdom

>Spike|hCoV-19/England/ALDP-BB99A6/2020|2020-11-20|EPI\_ISL\_702632|Original|hCoV-19^^England|Human|Lighthouse Lab in Alderley Park|Wellcome Sanger Institute for the COVID-19 Genomics UK (COG-UK) Consortium|Davies|United Kingdom

>Spike|hCoV-19/Netherlands/UT-RIVM-20012/2020|2020-11-22|EPI\_ISL\_723211|Original|hCoV-19^^Utrecht|Human|Dutch COVID-19 response team|National Institute for Public Health and the Environment (RIVM)|Meijer|Netherlands

>Spike|hCoV-19/USA/CA-ALSR-0854-NBG/2020|2020-05-14|EPI\_ISL\_483401|Original|hCoV-19^^Louisiana|Human|UC San Diego Center for Advanced Laboratory Medicine|Andersen lab at Scripps Research|Gangavarapu|USA

>Spike|hCoV-19/Scotland/QEUEH-544654/2020|2020-05-14|EPI\_ISL\_533365|Original|hCoV-19^^Scotland|Human|NHSGGC West of Scotland Specialist Virology Centre / MRC - University of Glasgow Centre for Virus Research|Wellcome Sanger Institute for the COVID-19 Genomics UK (COG-UK) consortium|Davies|United Kingdom

>Spike|hCoV-19/Japan/PG-4403/2020|2020-07-00|EPI\_ISL\_692629|Original|hCoV-19^^Japan|Human|Pathogen Genomics Center|Pathogen Genomics Center|Sekizuka|Japan

>Spike|hCoV-19/USA/CA-ALSR-4800/2020|2020-05-02|EPI\_ISL\_730150|Original|hCoV-19^^California|Human|Scripps Medical Laboratory|Andersen lab at Scripps Research|Gangavarapu|USA

>Spike|hCoV-19/Russia/MOS-CRIE-13386480/2020|2020-11-06|EPI\_ISL\_745236|Original|hCoV-19^^Moscow|Human|Molecular diagnostic laboratory of Federal Budget Institution of Science \Central Research Institute of Epidemiology\ of The Federal Service on Customers' Rights Protection and Human Well-being Surveillance|Group of Genomics and Postgenomic Technologies of Central Research Institute of Epidemiology

>y|Korneenko|Russia

>Spike|hCoV-19/Australia/NSW1260/2020|2020-12-17|EPI\_ISL\_740891|Original|hCoV-19^^New South Wales|Human|Pathology North - Hunter - NSW Health Pathology|NSW Health Pathology - Institute of Clinical Pathology and Medical Research; Westmead Hospital; University of Sydney|Gall|Australia

>Spike|hCoV-19/England/20168038004/2020|2020-04-13|EPI\_ISL\_466616|Original|hCoV-19^^England|Human|Respiratory Virus Unit|Respiratory Virus Unit|Platt|United Kingdom

>Spike|hCoV-19/Wales/PHWC-48C123/2020|2020-11-03|EPI\_ISL\_666396|Original|hCoV-19^^Wales|Human|Wales Specialist Virology Centre Sequencing lab|COVID-19 Genomics UK (COG-UK) Consortium|Moore|United Kingdom

>Spike|hCoV-19/Wales/PHWC-26356/2020|2020-03-26|EPI\_ISL\_422342|Original|hCoV-19^^Wales|Human|Wales Specialist Virology Centre|Public Health Wales Microbiology Cardiff|Moore|United Kingdom

>Spike|hCoV-19/Canada/QC-LSPQ-L00229384/2020|2020-03-20|EPI\_ISL\_535892|Original|hCoV-19^^Quebec|Human|H\u00f4pital Pierre-Le Gardeur|Laboratoire de sant\u00e9 publique du Qu\u00e9bec|Moreira|Canada

>Spike|hCoV-19/Chile/MA-CADIUMAG-23/2020|2020-06-20|EPI\_ISL\_681688|Original|hCoV-19^^Magallanes|Human|Molecular Medicine Laboratory|Centro Asistencial Docente y de Investigacion|Navarrete|Chile

>Spike|hCoV-19/Australia/VIC12078/2020|2020-07-27|EPI\_ISL\_640514|Original|hCoV-19^^Victoria|Human|Microbiological Diagnostic Unit - Public Health Laboratory (MDU-PHL)|MDU-PHL|Schultz|Australia

>Spike|hCoV-19/Australia/VIC1609/2020|2020-05-12|EPI\_ISL\_456520|Original|hCoV-19^^Victoria|Human|Victorian Infectious Diseases Reference Laboratory (VIDRL)|Microbiological Diagnostic Unit Public Health Laboratory and Victorian Infectious Diseases Reference Laboratory|Schultz|Australia

>Spike|hCoV-19/Denmark/DCGC-1111/2020|2020-03-09|EPI\_ISL\_614409|Original|hCoV-19^^Syddanmark|Human|Department of Virus and Microbiological Special Diagnostics|Albertsen lab|Michaelsen|Denmark

>Spike|hCoV-19/Northern Ireland/QEUIH-7A4C03/2020|2020-07-14|EPI\_ISL\_533038|Original|hCoV-19^^Northern Ireland|Human|Lighthouse Lab in Glasgow|Wellcome Sanger Institute for the COVID-19 Genomics UK (COG-UK) consortium|Davies|United Kingdom

>Spike|hCoV-19/England/MILK-A45AAD/2020|2020-10-06|EPI\_ISL\_598555|Original|hCoV-19^^England|Human|Lighthouse Lab in Milton Keynes|Wellcome Sanger Institute for the COVID-19 Genomics UK (COG-UK) consortium|Davies|United Kingdom

>Spike|hCoV-19/USA/LA-EVTL123/2020|2020-05-06|EPI\_ISL\_451284|Original|hCoV-19^^Louisiana|Human|LSUHS Emerging Viral Threat Laboratory|Microbial Genome Sequencing Center|Kamil|USA

>Spike|hCoV-19/Canada/ON-PHL-20-01162/2020|2020-06-00|EPI\_ISL\_548784|Original|hCoV-19^^Ontario|Human|Public Health Ontario Laboratory|Public Health Ontario Laboratory|Guthrie|Canada

>Spike|hCoV-19/Wales/PHWC-24394/2020|2020-03-16|EPI\_ISL\_419403|Original|hCoV-19^^Wales|Human|Wales Specialist Virology Centre|Public Health Wales Microbiology Cardiff|Moore|United Kingdom

>Spike|hCoV-19/South Africa/Tygerberg\_328\_CC2/2020|2020-10-09|EPI\_ISL\_660136|Original|hCoV-19^^Western Cape|Human|Lancet|National Health Laboratory Service (NHLS)|de Oliveira|South Africa

>Spike|hCoV-19/Japan/PG-2997/2020|2020-04-00|EPI\_ISL\_691121|Original|hCoV-19^^Japan|Human|Pathogen Genomics Center|Pathogen Genomics Center|Sekizuka|Japan

>Spike|hCoV-19/USA/LA-GBCL-26492474/2020|2020-04-25|EPI\_ISL\_485044|Original|hCoV-19^^Louisiana|Human|River Road Testing Lab|Ginkgo Bioworks Clinical Laboratory|Smith|USA

>Spike|hCoV-19/England/BRIS-125CB5/2020|2020-03-30|EPI\_ISL\_443893|Original|hCoV-19^^England|Human|PHE South West Regional Laboratory|Wellcome Sanger Institute for the COVID-19 Genomics UK (COG-UK) consortium|Amato|United Kingdom

>Spike|hCoV-19/India/GJ-GBRC261a/2020|2020-06-11|EPI\_ISL\_483853|Original|hCoV-19^^Gujarat|Human|Department of Microbiology|Gujarat Biotechnology Research Centre|Joshi|India

>Spike|hCoV-19/USA/TX-HMH-MCoV-12373/2020|2020-09-26|EPI\_ISL\_790317|Original|hCoV-19^^Texas|Human|Houston Methodist Hospital|Houston Methodist Hospital|Long|USA

>Spike|hCoV-19/Wales/MILK-B02BA8/2020|2020-10-24|EPI\_ISL\_647807|Original|hCoV-19^^Wales|Human|Lighthouse Lab in Milton Keynes|Wellcome Sanger Institute for the COVID-19 Genomics UK (COG-UK) Consortium|Davies|United Kingdom

>Spike|hCoV-19/England/CAMC-B07D25/2020|2020-10-29|EPI\_ISL\_643816|Original|hCoV-19^^England|Human|Lighthouse Lab in Cambridge|Wellcome Sanger Institute for the COVID-19 Genomics UK (COG-UK) Consortium|Davies|United Kingdom

>Spike|hCoV-19/USA/AK-PHL070/2020|2020-03-28|EPI\_ISL\_437515|Original|hCoV-19^^Alaska|Human|Alaska State Virology Laboratory|Alaska State Virology Laboratory|Chen|USA



>Spike|hCoV-19/England/MILK-B8E069/2020|2020-11-13|EPI\_ISL\_674760|Original|hCoV-19^^England|Human|Lighthouse Lab in Milton Keynes|Wellcome Sanger Institute for the COVID-19 Genomics UK (COG-UK) Consortium|Davies|United Kingdom

>Spike|hCoV-19/England/QEUIH-87D4CE/2020|2020-07-25|EPI\_ISL\_532732|Original|hCoV-19^^England|Human|Lighthouse Lab in Glasgow|Wellcome Sanger Institute for the COVID-19 Genomics UK (COG-UK) consortium|Davies|United Kingdom

>Spike|hCoV-19/England/MILK-AC94A3/2020|2020-10-21|EPI\_ISL\_630234|Original|hCoV-19^^England|Human|Lighthouse Lab in Milton Keynes|Wellcome Sanger Institute for the COVID-19 Genomics UK (COG-UK) consortium|Davies|United Kingdom

>Spike|hCoV-19/USA/NY-Wadsworth-285049-01/2020|2020-12-07|EPI\_ISL\_754470|Original|hCoV-19^^New York|Human|Wadsworth Center|Wadsworth Center|Lasèk-Nesselquist|USA

>Spike|hCoV-19/Belgium/regal-09221015/2020|2020-09-22|EPI\_ISL\_735013|Original|hCoV-19^^Holsbeek|Human|UZ Leuven|KU Leuven|Maes|Belgium

>Spike|hCoV-19/Bangladesh/BCSIR-NILMRC-374/2020|2020-07-31|EPI\_ISL\_514250|Original|hCoV-19^^Dhaka|Human|National Institute of Laboratory Medicine and Referral Center|Genomic Research Lab|Khan|Bangladesh

>Spike|hCoV-19/USA/TX-HMH-5992/2020|2020-06-30|EPI\_ISL\_547151|Original|hCoV-19^^Texas|Human|Houston Methodist Hospital|Houston Methodist Hospital|Long|USA

>Spike|hCoV-19/USA/MI-QDX-901/2020|2020-03-19|EPI\_ISL\_571622|Original|hCoV-19^^Michigan|Human|Quest Diagnostics|Quest Diagnostics|Kagan|USA

>Spike|hCoV-19/USA/AZ-TG654347/2020|2020-04-13|EPI\_ISL\_695989|Original|hCoV-19^^Arizona|Human|Sonora Quest Laboratories|TGen North|French|USA

>Spike|hCoV-19/England/ALDP-AA3C01/2020|2020-10-22|EPI\_ISL\_624531|Original|hCoV-19^^England|Human|Lighthouse Lab in Alderley Park|Wellcome Sanger Institute for the COVID-19 Genomics UK (COG-UK) consortium|Davies|United Kingdom

>Spike|hCoV-19/Canada/NS-NML-1199/2020|2020-04-02|EPI\_ISL\_579600|Original|hCoV-19^^Nova Scotia|Human|QEII Health Sciences Centre|National Microbiology Laboratory (NML)|Majer|Canada

>Spike|hCoV-19/Finland/24ES18AE9/2020|2020-08-24|EPI\_ISL\_759810|Original|hCoV-19^^Uusimaa|Human|Department of Virology and Immunology|Department of Virology|Smura|Finland

>Spike|hCoV-19/England/NOTT-10F02E/2020|2020-03-30|EPI\_ISL\_432957|Original|hCoV-19^^England|Human|Queens Medical Centre|COVID-19 Genomics UK (COG-UK) Consortium|Loose|United Kingdom

>Spike|hCoV-19/England/CAMB-1ACF71/2020|2020-04-23|EPI\_ISL\_489421|Original|hCoV-19^^England|Human|Department of Pathology|Wellcome Sanger Institute for the COVID-19 Genomics UK (COG-UK) consortium|Davies|United Kingdom

>Spike|hCoV-19/Wales/PHWC-27AC9/2020|2020-03-30|EPI\_ISL\_432000|Original|hCoV-19^^Wales|Human|Wales Specialist Virology Centre|Public Health Wales Microbiology Cardiff|Moore|United Kingdom

>Spike|hCoV-19/USA/MI-MDHHS-SC20915/2020|2020-05-26|EPI\_ISL\_476051|Original|hCoV-19^^Michigan|Human|Michigan Department of Health and Human Services|Michigan Department of Health and Human Services|Blankenship|USA

>Spike|hCoV-19/India/TG-CCMB-L007/2020|2020-04-16|EPI\_ISL\_447583|Original|hCoV-19^^Telangana|Human|CSIR-Centre for Cellular and Molecular Biology|CSIR-Centre for Cellular and Molecular Biology|Banu|India

>Spike|hCoV-19/Wales/PHWC-491D09/2020|2020-11-12|EPI\_ISL\_706770|Original|hCoV-19^^Wales|Human|Originating lab|COVID-19 Genomics UK (COG-UK) Consortium|Moore|United Kingdom

>Spike|hCoV-19/England/QEUIH-9AEA3A/2020|2020-09-05|EPI\_ISL\_577267|Original|hCoV-19^^England|Human|University of Exeter|COVID-19 Genomics UK (COG-UK) Consortium|Temperton|United Kingdom

>Spike|hCoV-19/Scotland/QEUIH-96DDB6/2020|2020-08-21|EPI\_ISL\_534592|Original|hCoV-19^^Scotland|Human|NHSGGC West of Scotland Specialist Virology Centre / MRC-University of Glasgow Centre for Virus Research|Wellcome Sanger Institute for the COVID-19 Genomics UK (COG-UK) consortium|Davies|United Kingdom

>Spike|hCoV-19/USA/NY-NYCPHL-000195/2020|2020-04-15|EPI\_ISL\_631730|Original|hCoV-19^^New York|Human|Jamaica Hospital Medical Center|New York City Public Health Laboratory|Wang|USA

>Spike|hCoV-19/mink/Netherlands/NB-EMC-32-6/2020|2020-08-15|EPI\_ISL\_577762|Original|hCoV-19^^Limburg|Neovison vison|Dutch COVID-19 response team|Erasmus Medical Center|Oude Munnink|Netherlands

>Spike|hCoV-19/Denmark/DCGC-22265/2020|2020-12-14|EPI\_ISL\_757972|Original|hCoV-19^^Syddanmark|Human|Department of Virus and Microbiological Special Diagnostics|Albertsen Lab|Michaelsen|Denmark

>Spike|hCoV-19/USA/CT-Yale-475/2020|2020-09-19|EPI\_ISL\_729789|Original|hCoV-19^^Connecticut|Human|Connecticut Department of Health|Grubaugh Lab - Yale School of Public Health|Grubaugh|USA

>Spike|hCoV-19/England/MILK-995061/2020|2020-08-26|EPI\_ISL\_552350|Original|hCoV-19^^England|Human|Lighthouse Lab in Milton Keynes|Wellcome Sanger Institute for the COVID-19 Genomics UK (COG-UK) consortium|Davies|United Kingdom

>Spike|hCoV-19/Denmark/DCGC-15613/2020|2020-11-23|EPI\_ISL\_713923|Original|hCoV-19^^Nordjylland|Human|Department of Virus and Microbiological Special Diagnostics|Albertsen Lab|Michaelsen|Denmark

>Spike|hCoV-19/England/MILK-9735D3/2020|2020-08-20|EPI\_ISL\_575981|Original|hCoV-19^^England|Human|Lighthouse Lab in Milton Keynes|Wellcome Sanger Institute for the COVID-19 Genomics UK (COG-UK) consortium|Davies|United Kingdom

>Spike|hCoV-19/Netherlands/UT-EMC-146/2020|2020-00-00|EPI\_ISL\_632365|Original|hCoV-19^^Utrecht|Human|Dutch COVID-19 response team|Erasmus Medical Center|Oude Munnink|Netherlands

>Spike|hCoV-19/Wales/CAMC-BC00C5/2020|2020-11-20|EPI\_ISL\_710824|Original|hCoV-19^^Wales|Human|Lighthouse Lab in Cambridge|Wellcome Sanger Institute for the COVID-19 Genomics UK (COG-UK) Consortium|Davies|United Kingdom

>Spike|hCoV-19/Wales/PHWC-1653D2/2020|2020-04-30|EPI\_ISL\_479460|Original|hCoV-19^^Wales|Human|Wales Specialist Virology Centre Sequencing lab|COVID-19 Genomics UK (COG-UK) Consortium|Moore|United Kingdom

>Spike|hCoV-19/England/ALDP-9CAC23/2020|2020-09-16|EPI\_ISL\_575539|Original|hCoV-19^^England|Human|Lighthouse Lab in Alderley Park|Wellcome Sanger Institute for the COVID-19 Genomics UK (COG-UK) consortium|Davies|United Kingdom

>Spike|hCoV-19/USA/WI-WSLH-200516/2020|2020-05-21|EPI\_ISL\_578656|Original|hCoV-19^^Wisconsin|Human|Wisconsin State Laboratory of Hygiene Communicable Disease Division|Wisconsin State Laboratory of Hygiene Communicable Disease Division|Florek|USA

>Spike|hCoV-19/Denmark/DCGC-14379/2020|2020-11-30|EPI\_ISL\_711292|Original|hCoV-19^^Syddanmark|Human|Department of Virus and Microbiological Special Diagnostics|Albertsen Lab|Michaelsen|Denmark

>Spike|hCoV-19/USA/UT-UPHL-2009538/2020|2020-07-18|EPI\_ISL\_605218|Original|hCoV-19^^Utah|Human|Utah Public Health Laboratory|Utah Public Health Laboratory|Young|USA

>Spike|hCoV-19/England/QEUEH-C159B6/2020|2020-12-05|EPI\_ISL\_709341|Original|hCoV-19^^England|Human|Lighthouse Lab in Glasgow|Wellcome Sanger Institute for the COVID-19 Genomics UK (COG-UK) Consortium|Davies|United Kingdom

>Spike|hCoV-19/Germany/HH-hpi-pl432/2020|2020-03-09|EPI\_ISL\_775953|Original|hCoV-19^^Hamburg|Human|University Medical Center Hamburg Eppendorf|Heinrich Pette Institute|Robitaille|Germany

>Spike|hCoV-19/Greece/52\_37266/2020|2020-04-01|EPI\_ISL\_437910|Original|hCoV-19^^Athens|Human|Laboratory of Microbiology|Laboratory of Biology|Karakasiliotis|Greece

>Spike|hCoV-19/Wales/PHWC-483872/2020|2020-10-23|EPI\_ISL\_627864|Original|hCoV-19^^Wales|Human|Wales Specialist Virology Centre Sequencing lab|COVID-19 Genomics UK (COG-UK) Consortium|Moore|United Kingdom

>Spike|hCoV-19/Canada/QC\_AG8/2020|2020-04-14|EPI\_ISL\_476503|Original|hCoV-19^^Quebec|Human|Laboratoire de microbiologie|Smith Laboratory|Smith|Canada

>Spike|hCoV-19/USA/TX-HMH-MCoV-19378/2020|2020-11-29|EPI\_ISL\_783805|Original|hCoV-19^^Texas|Human|Houston Methodist Hospital|Houston Methodist Hospital|Long|USA

>Spike|hCoV-19/England/ALDP-A929FF/2020|2020-10-19|EPI\_ISL\_611018|Original|hCoV-19^^England|Human|Lighthouse Lab in Alderley Park|Wellcome Sanger Institute for the COVID-19 Genomics UK (COG-UK) consortium|Davies|United Kingdom

>Spike|hCoV-19/USA/NY-NYCPHL-001145/2020|2020-10-23|EPI\_ISL\_671727|Original|hCoV-19^^New York|Human|DOHMH Morrisania|New York City Public Health Laboratory|Wang|USA

>Spike|hCoV-19/England/ALDP-94AC1C/2020|2020-06-11|EPI\_ISL\_556316|Original|hCoV-19^^England|Human|Lighthouse Lab in Alderley Park|Wellcome Sanger Institute for the COVID-19 Genomics UK (COG-UK) consortium|Davies|United Kingdom

>Spike|hCoV-19/Wales/PHWC-28D92/2020|2020-04-03|EPI\_ISL\_445438|Original|hCoV-19^^Wales|Human|Wales Specialist Virology Centre|Public Health Wales Microbiology Cardiff|Moore|United Kingdom

>Spike|hCoV-19/England/CAMC-BBC7F4/2020|2020-11-20|EPI\_ISL\_705597|Original|hCoV-19^^England|Human|Quadram Institute Bioscience|COVID-19 Genomics UK (COG-UK) Consortium|Alikhan|United Kingdom

>Spike|hCoV-19/USA/WA-UW-6244/2020|2020-04-02|EPI\_ISL\_570091|Original|hCoV-19^^Washington|Human|UW Virology Lab|UW Virology Lab|Roychoudhury|USA

>Spike|hCoV-19/Denmark/DCGC-11930/2020|2020-10-19|EPI\_ISL\_671222|Original|hCoV-19^^Hovedstaden|Human|Department of Virus and Microbiological Special Diagnostics|Albertsen Lab|Michaelsen|Denmark

>Spike|hCoV-19/England/SHEF-BFD45/2020|2020-03-09|EPI\_ISL\_416739|Original|hCoV-19^^England|Human|Virology Department|Department of Infection|de Silva|United Kingdom

>Spike|hCoV-19/Ukraine/203100364/2020|2020-05-15|EPI\_ISL\_512642|Original|hCoV-19^^Ukraine|Human|National Laboratory for Influenza/Virology reference laboratory|Respiratory Virus Unit|Platt|Ukraine

>Spike|hCoV-19/England/BRIS-12BA5B/2020|2020-05-18|EPI\_ISL\_469374|Original|hCoV-19^^England|Human|PHE South West Regional Laboratory|Wellcome Sanger Institute for the COVID-19 Genomics UK (COG-UK) consortium|Davies|United Kingdom

>Spike|hCoV-19/India/DL-NCDC7668-CSIR-IGIB/2020|2020-05-28|EPI\_ISL\_482659|Original|hCoV-19^^Delhi|Human|National Centre for Disease control (NCDC)|NCDC/CSIR-IGIB|Singh|India

>Spike|hCoV-19/Portugal/PT1820/2020|2020-11-15|EPI\_ISL\_765215|Original|hCoV-19^^Portugal|Human|Instituto Nacional de Saude (INSA)|Instituto Nacional de Saude (INSA)|Borges|Portugal

>Spike|hCoV-19/England/QEUH-C9390B/2020|2020-12-17|EPI\_ISL\_777208|Original|hCoV-19^^England|Human|Lighthouse Lab in Glasgow|Wellcome Sanger Institute for the COVID-19 Genomics UK (COG-UK) Consortium|Davies|United Kingdom

>Spike|hCoV-19/USA/TX-HMH-4175/2020|2020-06-18|EPI\_ISL\_543412|Original|hCoV-19^^Texas|Human|Houston Methodist Hospital|Houston Methodist Hospital|Long|USA

>Spike|hCoV-19/USA/CA-LACPHL-AF00013/2020|2020-12-15|EPI\_ISL\_737248|Original|hCoV-19^^California|Human|Los Angeles County PHL|Los Angeles County PHL|Hemarajata|USA

>Spike|hCoV-19/England/QEUH-CAD810/2020|2020-12-20|EPI\_ISL\_761204|Original|hCoV-19^^England|Human|Lighthouse Lab in Glasgow|Wellcome Sanger Institute for the COVID-19 Genomics UK (COG-UK) Consortium|Davies|United Kingdom

>Spike|hCoV-19/Scotland/QEUH-A4C253/2020|2020-10-07|EPI\_ISL\_628555|Original|hCoV-19^^Scotland|Human|Oxford Viromics|COVID-19 Genomics UK (COG-UK) Consortium|Golubchik|United Kingdom

>Spike|hCoV-19/England/QEUH-BC3781/2020|2020-11-25|EPI\_ISL\_703838|Original|hCoV-19^^England|Human|Lighthouse Lab in Glasgow|Wellcome Sanger Institute for the COVID-19 Genomics UK (COG-UK) Consortium|Davies|United Kingdom

>Spike|hCoV-19/USA/OR-OHSU-0308/2020|2020-05-09|EPI\_ISL\_509099|Original|hCoV-19^^Oregon|Human|OHSU Lab Services Molecular Microbiology Lab|Oregon SARS-CoV-2 Genome Sequencing Center|O'Roak|USA

>Spike|hCoV-19/USA/FL-BPHL-1597/2020|2020-06-05|EPI\_ISL\_594287|Original|hCoV-19^^Florida|Human|Florida Bureau of Public Health Laboratories|Florida Bureau of Public Health Laboratories|Blanton|USA

>Spike|hCoV-19/USA/AZ-TG668364/2020|2020-05-13|EPI\_ISL\_696284|Original|hCoV-19^^Arizona|Human|Sonora Quest Laboratories|TGen North|French|USA

>Spike|hCoV-19/England/QEUH-A01C4D/2020|2020-09-30|EPI\_ISL\_595831|Original|hCoV-19^^England|Human|Virology Department|COVID-19 Genomics UK (COG-UK) Consortium|de Silva|United Kingdom

>Spike|hCoV-19/Australia/NSW532/2020|2020-05-08|EPI\_ISL\_455071|Original|hCoV-19^^New South Wales|Human|Pathology Sydney South West - NSW Health Pathology|NSW Health Pathology - Institute of Clinical Pathology and Medical Research; Westmead Hospital; University of Sydney|Gall|Australia

>Spike|hCoV-19/Japan/PG-0689/2020|2020-04-00|EPI\_ISL\_684299|Original|hCoV-19^^Japan|Human|Pathogen Genomics Center|Pathogen Genomics Center|Sekizuka|Japan

>Spike|hCoV-19/Japan/PG-4054/2020|2020-07-00|EPI\_ISL\_692295|Original|hCoV-19^^Japan|Human|Sakai City Institute of Public Health|Pathogen Genomics Center|Sekizuka|Japan

>Spike|hCoV-19/USA/VA-DCLS-0086/2020|2020-03-30|EPI\_ISL\_429983|Original|hCoV-19^^Virginia|Human|Virginia DCLS|Virginia DCLS|St. Jacques|USA

>Spike|hCoV-19/USA/CA-CZB-1047/2020|2020-04-03|EPI\_ISL\_437047|Original|hCoV-19^^California|Human|County of Santa Clara Public Health|Chan-Zuckerberg Biohub|Hao|USA

>Spike|hCoV-19/USA/WI-UW-239/2020|2020-03-27|EPI\_ISL\_428335|Original|hCoV-19^^Wisconsin|Human|University of Wisconsin-Madison AIDS Vaccine Research Laboratories|University of Wisconsin-Madison AIDS Vaccine Research Laboratories|Moreno|USA

>Spike|hCoV-19/Australia/WA251/2020|2020-08-21|EPI\_ISL\_594167|Original|hCoV-19^^Western Australia|Human|PathWest Laboratory Medicine WA|PathWest Laboratory Medicine WA Microbial Surveillance Unit|Sikazwe|Australia

>Spike|hCoV-19/England/ALDP-9D94ED/2020|2020-09-18|EPI\_ISL\_576734|Original|hCoV-19^^England|Human|Oxford Viromics|COVID-19 Genomics UK (COG-UK) Consortium|Golubchik|United Kingdom

>Spike|hCoV-19/Denmark/DCGC-14781/2020|2020-11-23|EPI\_ISL\_711976|Original|hCoV-19^^Hovedstaden|Human|Department of Virus and Microbiological Special Diagnostics|Albertsen Lab|Michaelsen|Denmark

>Spike|hCoV-19/New Zealand/20VR2931/2020|2020-04-25|EPI\_ISL\_456392|Original|hCoV-19^^Auckland|Human|LabPLUS|Institute of Environmental Science and Research (ESR)|de Ligt|New Zealand

>Spike|hCoV-19/Australia/SAP122/2020|2020-03-20|EPI\_ISL\_451133|Original|hCoV-19^^South Australia|Human|SA Pathology|SA Pathology|Leong|Australia

>Spike|hCoV-19/Scotland/QEUH-A8B2D0/2020|2020-10-16|EPI\_ISL\_649560|Original|hCoV-19^^Scotland|Human|Lighthouse Lab in Glasgow|Wellcome Sanger Institute for the COVID-19 Genomics UK (COG-UK) Consortium|Davies|United Kingdom

>Spike|hCoV-19/USA/HI-H200210/2020|2020-08-13|EPI\_ISL\_752769|Original|hCoV-19^^Hawaii|Human|State Laboratories Division|State Laboratories Division|Sultana|USA

>Spike|hCoV-19/Hong Kong/VM20003442/2020|2020-03-14|EPI\_ISL\_476802|Original|hCoV-19^^Hong Kong|Human|Hong Kong Department of Health|School of Public Health|Chu|China

>Spike|hCoV-19/Brazil/RJ-1574/2020|2020-04-02|EPI\_ISL\_467345|Original|hCoV-19^^Rio de Janeiro|Human|Laboratory of Respiratory Viruses and Measles|Laboratory of Respiratory Viruses and Measles|Silva|Brazil

>Spike|hCoV-19/USA/UT-0507/2020|2020-04-02|EPI\_ISL\_430055|Original|hCoV-19^^Utah|Human|Utah Public Health Laboratory|Utah Public Health Laboratory|Young|USA

>Spike|hCoV-19/Thailand/Bangkok-16110/2020|2020-11-00|EPI\_ISL\_708819|Vero P1|hCoV-19^^Bangkok|Human|Urban Institute for Disease Prevention and Control|National Institute of Health|Phuygun|Thailand

>Spike|hCoV-19/Northern Ireland/NIRE-108E2B/2020|2020-10-11|EPI\_ISL\_627565|Original|hCoV-19^^Northern Ireland|Human|Regional Virus Laboratory|COVID-19 Genomics UK (COG-UK) Consortium|Fairley|United Kingdom

>Spike|hCoV-19/Wales/PHWC-340D6/2020|2020-04-19|EPI\_ISL\_446869|Original|hCoV-19^^Wales|Human|Wales Specialist Virology Centre|Public Health Wales Microbiology Cardiff|Moore|United Kingdom

>Spike|hCoV-19/United Arab Emirates/0646/2020|2020-05-15|EPI\_ISL\_698802|Original|hCoV-19^^Abu Dhabi|Human|Group 42 (G42) Healthcare|G42 Healthcare|Ogrodzki|United Arab Emirates

>Spike|hCoV-19/Scotland/EDB4367/2020|2020-04-24|EPI\_ISL\_449300|Original|hCoV-19^^Scotland|Human|Virology Department|COVID-19 Genomics UK (COG-UK) Consortium|Williams|United Kingdom

>Spike|hCoV-19/USA/WA-S2326/2020|2020-06-11|EPI\_ISL\_496958|Original|hCoV-19^^Washington|Human|Washington State Department of Health|Seattle Flu Study|Lee|USA

>Spike|hCoV-19/England/CAMC-B5180D/2020|2020-11-08|EPI\_ISL\_658128|Original|hCoV-19^^England|Human|Lighthouse Lab in Cambridge|Wellcome Sanger Institute for the COVID-19 Genomics UK (COG-UK) Consortium|Davies|United Kingdom

>Spike|hCoV-19/USA/CA-CZB-11677/2020|2020-08-16|EPI\_ISL\_625489|Original|hCoV-19^^California|Human|Santa Clara County Public Health Laboratory|Chan-Zuckerberg Biohub|Bhatt|USA

>Spike|hCoV-19/Denmark/DCGC-13487/2020|2020-11-30|EPI\_ISL\_712826|Original|hCoV-19^^Hovedstaden|Human|Department of Virus and Microbiological Special Diagnostics|Albertsen Lab|Michaelsen|Denmark

>Spike|hCoV-19/England/QEUA-BA1F36/2020|2020-11-18|EPI\_ISL\_672799|Original|hCoV-19^^England|Human|Lighthouse Lab in Glasgow|Wellcome Sanger Institute for the COVID-19 Genomics UK (COG-UK) Consortium|Davies|United Kingdom

>Spike|hCoV-19/England/CAMB-75E48/2020|2020-03-29|EPI\_ISL\_438397|Original|hCoV-19^^England|Human|Department of Pathology|Wellcome Sanger Institute for the COVID-19 Genomics UK (COG-UK) consortium|Amato|United Kingdom

>Spike|hCoV-19/Denmark/DCGC-22089/2020|2020-12-14|EPI\_ISL\_758547|Original|hCoV-19^^Hovedstaden|Human|Department of Virus and Microbiological Special Diagnostics|Albertsen Lab|Michaelsen|Denmark

>Spike|hCoV-19/USA/TX-HMH-MCoV-18097/2020|2020-11-13|EPI\_ISL\_784445|Original|hCoV-19^^Texas|Human|Houston Methodist Hospital|Houston Methodist Hospital|Long|USA

>Spike|hCoV-19/Wales/PHWC-27B7B/2020|2020-04-01|EPI\_ISL\_431903|Original|hCoV-19^^Wales|Human|Wales Specialist Virology Centre|Public Health Wales Microbiology Cardiff|Moore|United Kingdom

>Spike|hCoV-19/France/PAC-IHU-0958/2020|2020-07-13|EPI\_ISL\_569010|Original|hCoV-19^^Provence-Alpes-C\u00f4te-d\u2019Azur|Human|MEPHI|MEPHI|Levasseur|France

>Spike|hCoV-19/England/QEUA-B7EF50/2020|2020-11-14|EPI\_ISL\_661837|Original|hCoV-19^^England|Human|Lighthouse Lab in Glasgow|Wellcome Sanger Institute for the COVID-19 Genomics UK (COG-UK) Consortium|Davies|United Kingdom

>Spike|hCoV-19/England/204221390/2020|2020-00-00|EPI\_ISL\_593790|Original|hCoV-19^^England|Human|Respiratory Virus Unit|Respiratory Virus Unit|Platt|United Kingdom

>Spike|hCoV-19/Japan/PG-4294/2020|2020-07-00|EPI\_ISL\_692523|Original|hCoV-19^^Japan|Human|Pathogen Genomics Center|Pathogen Genomics Center|Sekizuka|Japan

>Spike|hCoV-19/England/205041756/2020|2020-00-00|EPI\_ISL\_710525|Original|hCoV-19^^England|Human|Respiratory Virus Unit|COVID-19 Genomics UK (COG-UK) Consortium|Platt|United Kingdom

>Spike|hCoV-19/Spain/AR-IBV-98010589/2020|2020-11-06|EPI\_ISL\_722247|Original|hCoV-19^^Aragon|Human|Servicio de Microbiolog\u00eda|SeqCOVID-SPAIN consortium/IBV (CSIC) |Comas|Spain

>Spike|hCoV-19/Germany/BE-ChVir-W1679-4309/2020|2020-08-01|EPI\_ISL\_753768|Original|hCoV-19^^Berlin|Human|Charit\u00e9 Universit\u00e4tsmedizin Berlin|Charit\u00e9 Universit\u00e4tsmedizin Berlin|Muehlemann|Germany

>Spike|hCoV-19/Denmark/DCGC-15260/2020|2020-11-23|EPI\_ISL\_713728|Original|hCoV-19^^Hovedstaden|Human|Department of Virus and Microbiological Special Diagnostics|Albertsen Lab|Michaelsen|Denmark

>Spike|hCoV-19/England/ALDP-669D44/2020|2020-07-03|EPI\_ISL\_555610|Original|hCoV-19^^England|Human|Lighthouse Lab in Alderley Park|Wellcome Sanger Institute for the COVID-19 Genomics UK (COG-UK) consortium|Davies|United Kingdom

>Spike|hCoV-19/England/QEUA-CC2314/2020|2020-12-21|EPI\_ISL\_760356|Original|hCoV-19^^England|Human|Lighthouse Lab in Glasgow|Wellcome Sanger Institute for the COVID-19 Genomics UK (COG-UK) Consortium|Davies|United Kingdom

>Spike|hCoV-19/England/QEUA-CC2C19/2020|2020-12-21|EPI\_ISL\_760653|Original|hCoV-19^^England|Human|Lighthouse Lab in Glasgow|Wellcome Sanger Institute for the COVID-19 Genomics UK (COG-UK) Consortium|Davies|United Kingdom

>Spike|hCoV-19/Australia/VIC16826/2020|2020-08-12|EPI\_ISL\_663589|Original|hCoV-19^^Victoria|Human|Microbiological Diagnostic Unit - Public Health Laboratory (MDU-PHL) |MDU-PHL|Schultz|Australia

>Spike|hCoV-19/Netherlands/NA\_301/2020|2020-04-01|EPI\_ISL\_422610|Original|hCoV-19^^Netherlands|Human|Dutch COVID-19 response team|Erasmus Medical Center|Oude Munnink|Netherlands

>Spike|hCoV-19/England/QEUA-A76C07/2020|2020-10-12|EPI\_ISL\_613347|Original|hCoV-19^^England|Human|Queens Medical Centre|COVID-19 Genomics UK (COG-UK) Consortium|Loose|United Kingdom

>Spike|hCoV-19/England/CAMC-B51A61/2020|2020-11-06|EPI\_ISL\_658195|Original|hCoV-19^^England|Human|Lighthouse Lab in Cambridge|Wellcome Sanger Institute for the COVID-19 Genomics UK (COG-UK) Consortium|Davies|United Kingdom

>Spike|hCoV-19/Sweden/20-23683/2020|2020-10-06|EPI\_ISL\_661280|Original|hCoV-19^^Skane|Human|Klinisk mikrobiologi|The Public Health Agency of Sweden|Svartstr\u00f6m|Sweden

>Spike|hCoV-19/England/LIVE-DB7BDD/2020|2020-10-28|EPI\_ISL\_650257|Original|hCoV-19^^England|Human|Liverpool Clinical Laboratories|COVID-19 Genomics UK (COG-UK) Consortium|Haldenby|United Kingdom

>Spike|hCoV-19/Wales/PHWC-168102/2020|2020-04-19|EPI\_ISL\_494203|Original|hCoV-19^^Wales|Human|Originating lab|COVID-19 Genomics UK (COG-UK) Consortium|Moore|United Kingdom

>Spike|hCoV-19/USA/NY-Wadsworth-258600-01/2020|2020-10-30|EPI\_ISL\_734413|Original|hCoV-19^^New York|Human|Wadsworth Center|Wadsworth Center|Lasek-Nesselquist|USA

>Spike|hCoV-19/Portugal/PT0157/2020|2020-03-27|EPI\_ISL\_453873|Original|hCoV-19^^Portugal|Human|unknown|Instituto Nacional de Saude (INSA)|Borges|Portugal

>Spike|hCoV-19/India/TG-CCMB-J288/2020|2020-04-01|EPI\_ISL\_450329|Original|hCoV-19^^Telangana|Human|CSIR-Centre for Cellular and Molecular Biology|CSIR-Centre for Cellular and Molecular Biology|Banu|India

>Spike|hCoV-19/Wales/CAMC-AEAF32/2020|2020-10-26|EPI\_ISL\_647916|Original|hCoV-19^^Wales|Human|Lighthouse Lab in Cambridge|Wellcome Sanger Institute for the COVID-19 Genomics UK (COG-UK) Consortium|Davies|United Kingdom

>Spike|hCoV-19/England/QEUA-A01ACB/2020|2020-10-01|EPI\_ISL\_595824|Original|hCoV-19^^England|Human|Virology Department|COVID-19 Genomics UK (COG-UK) Consortium|de Silva|United Kingdom

>Spike|hCoV-19/USA/NY-QDX-91/2020|2020-03-12|EPI\_ISL\_468585|Original|hCoV-19^^New York|Human|Quest Diagnostics|Quest Diagnostics|Kagan|USA

>Spike|hCoV-19/USA/NY-QDX-851/2020|2020-03-16|EPI\_ISL\_571660|Original|hCoV-19^^New York|Human|Quest Diagnostics|Quest Diagnostics|Kagan|USA

>Spike|hCoV-19/England/ALDP-9B59E8/2020|2020-08-28|EPI\_ISL\_590283|Original|hCoV-19^^England|Human|Lighthouse Lab in Alderley Park|Wellcome Sanger Institute for the COVID-19 Genomics UK (COG-UK) consortium|Davies|United Kingdom

>Spike|hCoV-19/Switzerland/BE-ETHZ-340157/2020|2020-10-28|EPI\_ISL\_721754|Original|hCoV-19^^Bern|Human|Viollier AG|Department of Biosystems Science and Engineering|Nadeau|Switzerland

>Spike|hCoV-19/USA/FL-BPHL-1602/2020|2020-07-05|EPI\_ISL\_594292|Original|hCoV-19^^Florida|Human|Florida Bureau of Public Health Laboratories|Florida Bureau of Public Health Laboratories|Blanton|USA

>Spike|hCoV-19/USA/AZ-TG382194/2020|2020-06-15|EPI\_ISL\_694678|Original|hCoV-19^^Arizona|Human|TGen North|TGen North|French|USA

>Spike|hCoV-19/England/NOTT-1101EB/2020|2020-04-10|EPI\_ISL\_441481|Original|hCoV-19^^England|Human|Queens Medical Centre|COVID-19 Genomics UK (COG-UK) Consortium|Loose|United Kingdom

>Spike|hCoV-19/Luxembourg/LNS4288043/2020|2020-11-30|EPI\_ISL\_770956|Original|hCoV-19^^Luxembourg|Human|Laboratoire national de sant\u00e9|Laboratoire national de sant\u00e9|Wienecke-Baldacchino|Luxembourg

>Spike|hCoV-19/Denmark/DCGC-14939/2020|2020-11-23|EPI\_ISL\_713533|Original|hCoV-19^^Hovedstaden|Human|Department of Virus and Microbiological Special Diagnostics|Albertsen Lab|Michaelsen|Denmark

>Spike|hCoV-19/England/MILK-ACDC6B/2020|2020-10-22|EPI\_ISL\_630196|Original|hCoV-19^^England|Human|Lighthouse Lab in Milton Keynes|Wellcome Sanger Institute for the COVID-19 Genomics UK (COG-UK) consortium|Davies|United Kingdom

>Spike|hCoV-19/USA/TX-DSHS-2036/2020|2020-11-04|EPI\_ISL\_766655|Original|hCoV-19^^Texas|Human|Texas Department of State Health Services|Texas Department of State Health Services|Rahman|USA

>Spike|hCoV-19/England/CAMC-B33977/2020|2020-11-05|EPI\_ISL\_659332|Original|hCoV-19^^England|Human|Lighthouse Lab in Cambridge|Wellcome Sanger Institute for the COVID-19 Genomics UK (COG-UK) Consortium|Davies|United Kingdom

>Spike|hCoV-19/USA/MI-UM-10036690391/2020|2020-10-29|EPI\_ISL\_682091|Original|hCoV-19^^Michigan|Human|University of Michigan Clinical Microbiology Laboratory|Lauring Lab|Valesano|USA

>Spike|hCoV-19/England/NORT-281B40/2020|2020-03-23|EPI\_ISL\_488830|Original|hCoV-19^^England|Human|NU-OMICS DNA Sequencing research facility|Wellcome Sanger Institute for the COVID-19 Genomics UK (COG-UK) consortium|Davies|United Kingdom

>Spike|hCoV-19/England/MILK-AB745D/2020|2020-10-21|EPI\_ISL\_623432|Original|hCoV-19^^England|Human|Lighthouse Lab in Milton Keynes|Wellcome Sanger Institute for the COVID-19 Genomics UK (COG-UK) consortium|Davies|United Kingdom

>Spike|hCoV-19/England/ALDP-B1C455/2020|2020-11-01|EPI\_ISL\_646040|Original|hCoV-19^^England|Human|Lighthouse Lab in Alderley Park|Wellcome Sanger Institute for the COVID-19 Genomics UK (COG-UK) Consortium|Davies|United Kingdom

>Spike|hCoV-19/England/SHEF-CEA2E/2020|2020-10-11|EPI\_ISL\_611655|Original|hCoV-19^^England|Human|Virology Department|COVID-19 Genomics UK (COG-UK) Consortium|de Silva|United Kingdom

>Spike|hCoV-19/Belgium/DBD-03024/2020|2020-03-02|EPI\_ISL\_416471|Original|hCoV-19^^Kessel-Lo|Human|KU Leuven|KU Leuven|Maes|Belgium

>Spike|hCoV-19/England/20124094506/2020|2020-03-18|EPI\_ISL\_423858|Original|hCoV-19^^England|Human|Respiratory Virus Unit|Respiratory Virus Unit|Platt|United Kingdom

>Spike|hCoV-19/USA/VA-DCLS-1171/2020|2020-07-18|EPI\_ISL\_525198|Original|hCoV-19^^Virginia|Human|Virginia DCLS|Virginia DCLS|St. Jacques|USA

>Spike|hCoV-19/Jordan/AM-ALSR-3973/2020|2020-10-02|EPI\_ISL\_636336|Original|hCoV-19^^Amman|Human|Biolab Diagnostic Laboratories|Andersen lab at Scripps Research|Gangavarapu|Jordan

>Spike|hCoV-19/USA/WA-S2282/2020|2020-06-10|EPI\_ISL\_497710|Original|hCoV-19^^Washington|Human|Washington State Department of Health|Seattle Flu Study|Lee|USA

>Spike|hCoV-19/England/QEUEH-B6994B/2020|2020-11-11|EPI\_ISL\_661523|Original|hCoV-19^^England|Human|Lighthouse Lab in Glasgow|Wellcome Sanger Institute for the COVID-19 Genomics UK (COG-UK) Consortium|Davies|United Kingdom

>Spike|hCoV-19/Denmark/DCGC-20203/2020|2020-11-30|EPI\_ISL\_748048|Original|hCoV-19^^Syddanmark|Human|Department of Virus and Microbiological Special Diagnostics|Albertsen Lab|Michaelsen|Denmark

>Spike|hCoV-19/England/SHEF-CC783/2020|2020-05-10|EPI\_ISL\_475446|Original|hCoV-19^^England|Human|Virology Department|COVID-19 Genomics UK (COG-UK) Consortium|de Silva|United Kingdom

>Spike|hCoV-19/USA/NY-PV09393/2020|2020-03-19|EPI\_ISL\_450074|Original|hCoV-19^^New York|Human|MSHS Clinical Microbiology Laboratories|MSHS Pathogen Surveillance Program|van Bakel|USA

>Spike|hCoV-19/Canada/QC\_AM2/2020|2020-04-13|EPI\_ISL\_515213|Original|hCoV-19^^Quebec|Human|Laboratoire de microbiologie|Smith Laboratory|Smith|Canada

>Spike|hCoV-19/Israel/CVL-116-ngs/2020|2020-12-27|EPI\_ISL\_776816|Original|hCoV-19^^Israel|Human|Israel Central Virology laboratory|Israel Central Virology laboratory|Zuckerman|Israel

>Spike|hCoV-19/England/QEUEH-9B8B76/2020|2020-09-07|EPI\_ISL\_549574|Original|hCoV-19^^England|Human|Lighthouse Lab in Glasgow|Wellcome Sanger Institute for the COVID-19 Genomics UK (COG-UK) consortium|Davies|United Kingdom

>Spike|hCoV-19/Wales/PHWC-48AE97/2020|2020-11-06|EPI\_ISL\_666167|Original|hCoV-19^^Wales|Human|Wales Specialist Virology Centre Sequencing lab|COVID-19 Genomics UK (COG-UK) Consortium|Moore|United Kingdom

>Spike|hCoV-19/England/MILK-B55E61/2020|2020-11-05|EPI\_ISL\_658333|Original|hCoV-19^^England|Human|Lighthouse Lab in Milton Keynes|Wellcome Sanger Institute for the COVID-19 Genomics UK (COG-UK) Consortium|Davies|United Kingdom

>Spike|hCoV-19/USA/MI-MDHHS-SC21028/2020|2020-04-01|EPI\_ISL\_507804|Original|hCoV-19^^Michigan|Human|Michigan Department of Health and Human Services|Michigan Department of Health and Human Services|Blankenship|USA

>Spike|hCoV-19/Germany/HH-hpi-pl692/2020|2020-03-15|EPI\_ISL\_775649|Original|hCoV-19^^Hamburg|Human|University Medical Center Hamburg Eppendorf|Heinrich Pette Institute|Robitaille|Germany

>Spike|hCoV-19/England/EXET-135B2E/2020|2020-04-09|EPI\_ISL\_457135|Original|hCoV-19^^England|Human|University of Exeter|COVID-19 Genomics UK (COG-UK) Consortium|Temperton|United Kingdom

>Spike|hCoV-19/England/NORW-F004F/2020|2020-10-10|EPI\_ISL\_595173|Original|hCoV-19^^England|Human|Quadram Institute Bioscience|COVID-19 Genomics UK (COG-UK) Consortium|Alikhan|United Kingdom

>Spike|hCoV-19/England/CAMB-78179/2020|2020-04-02|EPI\_ISL\_441139|Original|hCoV-19^^England|Human|Department of Pathology|Wellcome Sanger Institute for the COVID-19 Genomics UK (COG-UK) consortium|Amato|United Kingdom

>Spike|hCoV-19/Scotland/QEUH-98F264/2020|2020-08-27|EPI\_ISL\_568452|Original|hCoV-19^^Scotland|Human|Lighthouse Lab in Glasgow|Wellcome Sanger Institute for the COVID-19 Genomics UK (COG-UK) consortium|Davies|United Kingdom

>Spike|hCoV-19/England/QEUH-A78018/2020|2020-10-14|EPI\_ISL\_613352|Original|hCoV-19^^England|Human|Queens Medical Centre|COVID-19 Genomics UK (COG-UK) Consortium|Loose|United Kingdom

>Spike|hCoV-19/USA/FL-BPHL-2159/2020|2020-04-24|EPI\_ISL\_653312|Original|hCoV-19^^Florida|Human|Florida Bureau of Public Health Laboratories|Florida Bureau of Public Health Laboratories|Blanton|USA

>Spike|hCoV-19/Italy/VEN-UniVR-86/2020|2020-03-23|EPI\_ISL\_751394|Original|hCoV-19^^Veneto|Human|IRCCS Sacro Cuore Don Calabria Hospital|University of Verona|Mori|Italy

>Spike|hCoV-19/Australia/VIC3981/2020|2020-07-15|EPI\_ISL\_519373|Original|hCoV-19^^Victoria|Human|Microbiological Diagnostic Unit - Public Health Laboratory (MDU-PHL) |MDU-PHL|Schultz|Australia

>Spike|hCoV-19/Scotland/MILK-A6B7C8/2020|2020-10-08|EPI\_ISL\_625421|Original|hCoV-19^^Scotland|Human|Lighthouse Lab in Milton Keynes|Wellcome Sanger Institute for the COVID-19 Genomics UK (COG-UK) consortium|Davies|United Kingdom

>Spike|hCoV-19/USA/TX-HMH-6502/2020|2020-06-27|EPI\_ISL\_546041|Original|hCoV-19^^Texas|Human|Houston Methodist Hospital|Houston Methodist Hospital|Long|USA

>Spike|hCoV-19/USA/WA-UW-6526/2020|2020-04-05|EPI\_ISL\_437856|Original|hCoV-19^^Washington|Human|UW Virology Lab|UW Virology Lab|Roychoudhury|USA

>Spike|hCoV-19/Scotland/EDB4957/2020|2020-05-14|EPI\_ISL\_473807|Original|hCoV-19^^Scotland|Human|Virology Department|COVID-19 Genomics UK (COG-UK) Consortium|Williams|United Kingdom

>Spike|hCoV-19/Bahrain/340859839\_S13/2020|2020-10-14|EPI\_ISL\_632274|Original|hCoV-19^^Bahrain|Human|Communicable Disease Laboratory|Communicable Disease Laboratory|Altaif|Bahrain

>Spike|hCoV-19/mink/Netherlands/NB-EMC-65-10/2020|2020-10-14|EPI\_ISL\_632491|Original|hCoV-19^^Noord Brabant|Neovison vison|Dutch COVID-19 response team|Erasmus Medical Center|Oude Munnink|Netherlands

>Spike|hCoV-19/England/LIVE-A5173/2020|2020-03-05|EPI\_ISL\_499893|Original|hCoV-19^^England|Human|Liverpool Clinical Laboratories|COVID-19 Genomics UK (COG-UK) Consortium|Haldenby|United Kingdom

>Spike|hCoV-19/Denmark/DCGC-17109/2020|2020-12-14|EPI\_ISL\_750328|Original|hCoV-19^^Midtjylland|Human|Department of Virus and Microbiological Special Diagnostics|Albertsen Lab|Michaelsen|Denmark

>Spike|hCoV-19/Luxembourg/LNS0406231/2020|2020-10-22|EPI\_ISL\_739769|Original|hCoV-19^^Luxembourg|Human|Laboratoire national de sant\u00e9|Laboratoire national de sant\u00e9|Wienecke-Baldacchino|Luxembourg

>Spike|hCoV-19/Wales/PHWC-4914C8/2020|2020-10-14|EPI\_ISL\_706661|Original|hCoV-19^^Wales|Human|Originating lab|COVID-19 Genomics UK (COG-UK) Consortium|Moore|United Kingdom

>Spike|hCoV-19/Spain/CL-IBV-97006190/2020|2020-04-13|EPI\_ISL\_537336|Original|hCoV-19^^Castilla y Leon|Human|Universidad de Le\u00f3n|SeqCOVID-SPAIN consortium|IBV (CSIC) |Comas|Spain

>Spike|hCoV-19/England/ALDP-CB2687/2020|2020-12-03|EPI\_ISL\_760949|Original|hCoV-19^^England|Human|Lighthouse Lab in Alderley Park|Wellcome Sanger Institute for the COVID-19 Genomics UK (COG-UK) Consortium|Davies|United Kingdom



>Spike|hCoV-19/England/MILK-A7B22E/2020|2020-10-15|EPI\_ISL\_607457|Original|hCoV-19^^England|Human|Lighthouse Lab in Milton Keynes|Wellcome Sanger Institute for the COVID-19 Genomics UK (COG-UK) consortium|Davies|United Kingdom

>Spike|hCoV-19/Sweden/20-08356/2020|2020-03-24|EPI\_ISL\_476140|Original|hCoV-19^^Vastmanland|Human|Klinisk Mikrobiologi|The Public Health Agency of Sweden|Svartstr\u00f6m|Sweden

>Spike|hCoV-19/Austria/CeMM0508/2020|2020-03-28|EPI\_ISL\_583594|Original|hCoV-19^^Linz|Human|Institute for Medical and Chemical Laboratory Diagnostics|Bergthaler laboratory|Bergthaler|Austria

>Spike|hCoV-19/Netherlands/NA\_332/2020|2020-04-03|EPI\_ISL\_455137|Original|hCoV-19^^Netherlands|Human|Dutch COVID-19 response team|Erasmus Medical Center|Oude Munnink|Netherlands

>Spike|hCoV-19/North Macedonia/8881/2020|2020-07-30|EPI\_ISL\_677721|Original|hCoV-19^^Shtip|Human|Clinical Hospital - Shtip|Research Center for Genetic Engineering and Biotechnology \Georgi D. Efremov\u201d|Dimovski|North Macedonia

>Spike|hCoV-19/England/NOTT-118AAC/2020|2020-10-29|EPI\_ISL\_627690|Original|hCoV-19^^England|Human|Queens Medical Centre|COVID-19 Genomics UK (COG-UK) Consortium|Loose|United Kingdom

>Spike|hCoV-19/Spain/AN-IBV-002003/2020|2020-03-14|EPI\_ISL\_452396|Original|hCoV-19^^Andalucia|Human|Servicio de Microbiolog\u00eda. HRU de M\u00ella. Servicio Andaluz de Salud|SeqCOVID-SPAIN consortium|IBV(CSIC)|Comas|Spain

>Spike|hCoV-19/Belgium/reg-10151183/2020|2020-10-15|EPI\_ISL\_735102|Original|hCoV-19^^Hoeilaart|Human|UZ Leuven|KU Leuven|Maes|Belgium

>Spike|hCoV-19/Brazil/PE-IAM961/2020|2020-05-02|EPI\_ISL\_572366|Original|hCoV-19^^Pernambuco|Human|LACEN/PE|WallauLab|Wallau|Brazil

>Spike|hCoV-19/Italy/BAS-UniMI-2956/2020|2020-03-27|EPI\_ISL\_525573|Original|hCoV-19^^Basilicata|Human|Istituto Zooprofilattico Sperimentale Puglia e Basilicata; Dipartimento di Bioscienze|Beaconlab (Bioinformatics)|Chiara|Italy

>Spike|hCoV-19/England/CAMB-83D68/2020|2020-04-23|EPI\_ISL\_438687|Original|hCoV-19^^England|Human|Department of Pathology|COVID-19 Genomics UK (COG-UK) Consortium|Meredith|United Kingdom

>Spike|hCoV-19/India/HR-THSTI-BAL-47/2020|2020-04-07|EPI\_ISL\_454861|Original|hCoV-19^^Haryana|Human|Translational Health Science and Technology Institute -ESIC medical college and hospital|THSTI Bioassay laboratory|Medigeshi|India

>Spike|hCoV-19/Australia/VIC8435/2020|2020-07-28|EPI\_ISL\_565009|Original|hCoV-19^^Victoria|Human|Microbiological Diagnostic Unit - Public Health Laboratory (MDU-PHL)|MDU-PHL|Schultz|Australia

>Spike|hCoV-19/England/QEUEH-95DF86/2020|2020-08-07|EPI\_ISL\_537054|Original|hCoV-19^^England|Human|Lighthouse Lab in Glasgow|Wellcome Sanger Institute for the COVID-19 Genomics UK (COG-UK) consortium|Davies|United Kingdom

>Spike|hCoV-19/USA/MN-MDH-2180/2020|2020-11-27|EPI\_ISL\_723131|Original|hCoV-19^^Minnesota|Human|Minnesota Department of Health|Minnesota Department of Health|Lorentz|USA

>Spike|hCoV-19/England/ALDP-94AF04/2020|2020-06-11|EPI\_ISL\_556437|Original|hCoV-19^^England|Human|Lighthouse Lab in Alderley Park|Wellcome Sanger Institute for the COVID-19 Genomics UK (COG-UK) consortium|Davies|United Kingdom

>Spike|hCoV-19/Germany/HH-hpi-p1332/2020|2020-03-24|EPI\_ISL\_775897|Original|hCoV-19^^Hamburg|Human|University Medical Center Hamburg Eppendorf|Heinrich Pette Institute|Robitaille|Germany

>Spike|hCoV-19/France/ARA-95401/2020|2020-10-27|EPI\_ISL\_732699|Original|hCoV-19^^Auvergne-Rh\u00f4ne-Alpes|Human|CNR Virus des Infections Respiratoires - France SUD|CNR Virus des Infections Respiratoires - France SUD|Bal|France

>Spike|hCoV-19/England/ALDP-94E207/2020|2020-06-17|EPI\_ISL\_555567|Original|hCoV-19^^England|Human|Lighthouse Lab in Alderley Park|Wellcome Sanger Institute for the COVID-19 Genomics UK (COG-UK) consortium|Davies|United Kingdom

>Spike|hCoV-19/England/QEUEH-9F871C/2020|2020-09-27|EPI\_ISL\_588739|Original|hCoV-19^^England|Human|Lighthouse Lab in Glasgow|Wellcome Sanger Institute for the COVID-19 Genomics UK (COG-UK) consortium|Davies|United Kingdom

>Spike|hCoV-19/Latvia/184/2020|2020-10-07|EPI\_ISL\_639681|Original|hCoV-19^^Latvia|Human|E. Gulbja Laboratorija|Latvian Biomedical Research and Study Centre|Zrelavs|Latvia

>Spike|hCoV-19/USA/MI-MDHHS-SC22406/2020|2020-11-18|EPI\_ISL\_708239|Original|hCoV-19^^Michigan|Human|Michigan Department of Health and Human Services|Michigan Department of Health and Human Services|Jacob|USA

>Spike|hCoV-19/England/QEUA-A003EF/2020|2020-10-02|EPI\_ISL\_600371|Original|hCoV-19^^England|Human|Lighthouse Lab in Glasgow|Wellcome Sanger Institute for the COVID-19 Genomics UK (COG-UK) consortium|Davies|United Kingdom

>Spike|hCoV-19/England/SHEF-CD11B/2020|2020-10-06|EPI\_ISL\_596212|Original|hCoV-19^^England|Human|Virology Department|COVID-19 Genomics UK (COG-UK) Consortium|de Silva|United Kingdom

>Spike|hCoV-19/Netherlands/Friesland\_2/2020|2020-04-01|EPI\_ISL\_422567|Original|hCoV-19^^Friesland|Human|Dutch COVID-19 response team|Erasmus Medical Center|Oude Munnink|Netherlands

>Spike|hCoV-19/USA/LA-GBCL-26492462/2020|2020-04-28|EPI\_ISL\_485039|Original|hCoV-19^^Louisiana|Human|River Road Testing Lab|Ginkgo Bioworks Clinical Laboratory|Smith|USA

>Spike|hCoV-19/Canada/NB-231/2020|2020-03-24|EPI\_ISL\_479644|Original|hCoV-19^^New Brunswick|Human|Dr. Georges-L.-Dumont University Hospital Centre|National Microbiology Laboratory|Majer|Canada

>Spike|hCoV-19/USA/CA-CZB-1507/2020|2020-04-01|EPI\_ISL\_468454|Original|hCoV-19^^California|Human|Humboldt County Public Health Laboratory|Chan-Zuckerberg Biohub|Hao|USA

>Spike|hCoV-19/England/CAMB-1AFB10/2020|2020-05-03|EPI\_ISL\_459186|Original|hCoV-19^^England|Human|Department of Pathology|Wellcome Sanger Institute for the COVID-19 Genomics UK (COG-UK) consortium|Davies|United Kingdom

>Spike|hCoV-19/USA/WI-UW-765/2020|2020-07-05|EPI\_ISL\_495470|Original|hCoV-19^^Wisconsin|Human|University of Wisconsin-Madison AIDS Vaccine Research Laboratories|University of Wisconsin-Madison AIDS Vaccine Research Laboratories|Baczenas|USA

>Spike|hCoV-19/England/OXON-B334F/2020|2020-03-24|EPI\_ISL\_534853|Original|hCoV-19^^England|Human|Oxford Viromics|COVID-19 Genomics UK (COG-UK) Consortium|Golubchik|United Kingdom

>Spike|hCoV-19/Switzerland/BE-UNIBE-173-2392/2020|2020-03-19|EPI\_ISL\_574813|Original|hCoV-19^^Bern|Human|Institute for Infectious Diseases|Institute for Infectious Diseases|Koch|Switzerland

>Spike|hCoV-19/Wales/PHWC-16002B/2020|2020-04-18|EPI\_ISL\_472884|Original|hCoV-19^^Wales|Human|Wales Specialist Virology Centre Sequencing lab|COVID-19 Genomics UK (COG-UK) Consortium|Moore|United Kingdom

>Spike|hCoV-19/England/MILK-9EF851/2020|2020-09-23|EPI\_ISL\_594949|Original|hCoV-19^^England|Human|Queens Medical Centre|COVID-19 Genomics UK (COG-UK) Consortium|Loose|United Kingdom

>Spike|hCoV-19/Germany/SH-ChVir3219/2020|2020-03-23|EPI\_ISL\_729547|Original|hCoV-19^^Schleswig-Holstein|Human|A. Krumbholz|Charit\u00e9 Universit\u00e4tsmedizin Berlin|Muehlemann|Germany

>Spike|hCoV-19/USA/TX-HMH-5758/2020|2020-06-23|EPI\_ISL\_546994|Original|hCoV-19^^Texas|Human|Houston Methodist Hospital|Houston Methodist Hospital|Long|USA

>Spike|hCoV-19/USA/WA-S1951/2020|2020-06-02|EPI\_ISL\_497379|Original|hCoV-19^^Washington|Human|Washington State Department of Health|Seattle Flu Study|Lee|USA

>Spike|hCoV-19/Finland/9CH11/2020|2020-12-03|EPI\_ISL\_732624|Original|hCoV-19^^Uusimaa|Human|Department of Virology and Immunology|Department of Virology|Smura|Finland

>Spike|hCoV-19/Wales/PHWC-32982/2020|2020-04-15|EPI\_ISL\_474373|Original|hCoV-19^^Wales|Human|Originating lab|COVID-19 Genomics UK (COG-UK) Consortium|Moore|United Kingdom

>Spike|hCoV-19/Ireland/WW-NVRL-MPY84026/2020|2020-03-20|EPI\_ISL\_767837|Original|hCoV-19^^Wicklow|Human|National Virus Reference Laboratory|Irish Coronavirus Sequencing Consortium - Teagasc Moorepark|Walsh|Ireland

>Spike|hCoV-19/Scotland/EDB2288/2020|2020-04-21|EPI\_ISL\_491532|Original|hCoV-19^^Scotland|Human|Virology Department|Wellcome Sanger Institute for the COVID-19 Genomics UK (COG-UK) consortium|Davies|United Kingdom

>Spike|hCoV-19/Denmark/DCGC-17069/2020|2020-12-14|EPI\_ISL\_750741|Original|hCoV-19^^Syddanmark|Human|Department of Virus and Microbiological Special Diagnostics|Albertsen Lab|Michaelsen|Denmark

>Spike|hCoV-19/England/PORT-2D4A14/2020|2020-10-17|EPI\_ISL\_611537|Original|hCoV-19^^England|Human|Centre for Enzyme Innovation|COVID-19 Genomics UK (COG-UK) Consortium|Robson|United Kingdom

>Spike|hCoV-19/England/ALDP-92D022/2020|2020-06-20|EPI\_ISL\_551498|Original|hCoV-19^^England|Human|Lighthouse Lab in Alderley Park|Wellcome Sanger Institute for the COVID-19 Genomics UK (COG-UK) consortium|Davies|United Kingdom

>Spike|hCoV-19/England/CAMB-1B3214/2020|2020-05-22|EPI\_ISL\_456753|Original|hCoV-19^^England|Human|Department of Pathology|COVID-19 Genomics UK (COG-UK) Consortium|Meredith|United Kingdom

>Spike|hCoV-19/England/QEUH-96FF18/2020|2020-08-18|EPI\_ISL\_540330|Original|hCoV-19^^England|Human|Lighthouse Lab in Glasgow|Wellcome Sanger Institute for the COVID-19 Genomics UK (COG-UK) consortium|Davies|United Kingdom

>Spike|hCoV-19/USA/CA-IGI-0083/2020|2020-06-10|EPI\_ISL\_511837|Original|hCoV-19^^California|Human|Innovative Genomics Institute|Innovative Genomics Institute|Wyman|USA

>Spike|hCoV-19/USA/UT-UPHL-2012239501/2020|2020-08-10|EPI\_ISL\_745912|Original|hCoV-19^^Utah|Human|Ginkgo Bioworks Clinical Laboratory|Utah Public Health Laboratory|Young|USA

>Spike|hCoV-19/Japan/PG-6846/2020|2020-09-00|EPI\_ISL\_687954|Original|hCoV-19^^Japan|Human|Pathogen Genomics Center|Pathogen Genomics Center|Sekizuka|Japan

>Spike|hCoV-19/USA/FL-BPHL-0784/2020|2020-04-07|EPI\_ISL\_512588|Original|hCoV-19^^Florida|Human|Florida Bureau of Public Health Laboratories|Florida Bureau of Public Health Laboratories|Blanton|USA

>Spike|hCoV-19/England/MILK-A18E4D/2020|2020-10-01|EPI\_ISL\_612467|Original|hCoV-19^^England|Human|Wales Specialist Virology Centre Sequencing lab|COVID-19 Genomics UK (COG-UK) Consortium|Moore|United Kingdom

>Spike|hCoV-19/England/CAMB-1AB859/2020|2020-04-20|EPI\_ISL\_470231|Original|hCoV-19^^England|Human|Department of Pathology|Wellcome Sanger Institute for the COVID-19 Genomics UK (COG-UK) consortium|Davies|United Kingdom

>Spike|hCoV-19/Canada/BC-BCCDC-6392/2020|2020-10-00|EPI\_ISL\_740550|Original|hCoV-19^^British Columbia|Human|BCCDC Public Health Laboratory|BCCDC Public Health Laboratory|Prystajecky|Canada

>Spike|hCoV-19/England/ALDP-B5C7BA/2020|2020-11-08|EPI\_ISL\_655686|Original|hCoV-19^^England|Human|Lighthouse Lab in Alderley Park|Wellcome Sanger Institute for the COVID-19 Genomics UK (COG-UK) Consortium|Davies|United Kingdom

>Spike|hCoV-19/Spain/CT-IBV-004175/2020|2020-03-31|EPI\_ISL\_510464|Original|hCoV-19^^Catalunya|Human|Instituto de Investigaciones Biom\u00e9dicas de Barcelona (CSIC)|SeqCOVID-SPAIN consortium|IBV(CSIC)|Comas|Spain

>Spike|hCoV-19/USA/IL-GMF-18664/2020|2020-09-03|EPI\_ISL\_547774|Original|hCoV-19^^Illinois|Human|Gundersen Molecular Diagnostics Laboratory|Kabara Cancer Research Institute|Kenny|USA

>Spike|hCoV-19/Switzerland/ZH-ETHZ-331459/2020|2020-10-21|EPI\_ISL\_614975|Original|hCoV-19^^Zurich|Human|Viollier AG|Department of Biosystems Science and Engineering|Nadeau|Switzerland

>Spike|hCoV-19/England/MILK-B39391/2020|2020-11-01|EPI\_ISL\_658906|Original|hCoV-19^^England|Human|Lighthouse Lab in Milton Keynes|Wellcome Sanger Institute for the COVID-19 Genomics UK (COG-UK) Consortium|Davies|United Kingdom

>Spike|hCoV-19/Scotland/QEUH-9B73E8/2020|2020-09-09|EPI\_ISL\_602093|Original|hCoV-19^^Scotland|Human|Lighthouse Lab in Glasgow|Wellcome Sanger Institute for the COVID-19 Genomics UK (COG-UK) consortium|Davies|United Kingdom

>Spike|hCoV-19/England/SHEF-C9F51/2020|2020-04-14|EPI\_ISL\_448872|Original|hCoV-19^^England|Human|Virology Department|COVID-19 Genomics UK (COG-UK) Consortium|de Silva|United Kingdom

>Spike|hCoV-19/England/ALDP-B5B4A5/2020|2020-11-09|EPI\_ISL\_655383|Original|hCoV-19^^England|Human|Lighthouse Lab in Alderley Park|Wellcome Sanger Institute for the COVID-19 Genomics UK (COG-UK) Consortium|Davies|United Kingdom

>Spike|hCoV-19/India/MH-ACTREC-366/2020|2020-07-24|EPI\_ISL\_700015|Original|hCoV-19^^Maharashtra|Human|Hematopathology Laboratory|Hematopathology Laboratory|Patkar|India

>Spike|hCoV-19/Australia/VIC3039/2020|2020-07-03|EPI\_ISL\_520752|Original|hCoV-19^^Victoria|Human|Victorian Infectious Diseases Reference Laboratory (VIDRL)|VIDRL and MDU-PHL|Schultz|Australia

>Spike|hCoV-19/England/MILK-A7B18B/2020|2020-10-15|EPI\_ISL\_607363|Original|hCoV-19^^England|Human|Lighthouse Lab in Milton Keynes|Wellcome Sanger Institute for the COVID-19 Genomics UK (COG-UK) consortium|Davies|United Kingdom

>Spike|hCoV-19/England/NOTT-110DE7/2020|2020-04-29|EPI\_ISL\_448420|Original|hCoV-19^^England|Human|Queens Medical Centre|COVID-19 Genomics UK (COG-UK) Consortium|Loose|United Kingdom

>Spike|hCoV-19/England/MILK-974833/2020|2020-08-21|EPI\_ISL\_575941|Original|hCoV-19^^England|Human|Lighthouse Lab in Milton Keynes|Wellcome Sanger Institute for the COVID-19 Genomics UK (COG-UK) consortium|Davies|United Kingdom

>Spike|hCoV-19/Denmark/DCGC-2527/2020|2020-08-10|EPI\_ISL\_617797|Original|hCoV-19^^Hovedstaden|Human|Department of Virus and Microbiological Special Diagnostics|Albertsen lab|Michaelsen|Denmark

>Spike|hCoV-19/England/CAMC-9BFE58/2020|2020-09-09|EPI\_ISL\_573156|Original|hCoV-19^^England|Human|Oxford Viromics|COVID-19 Genomics UK (COG-UK) Consortium|Golubchik|United Kingdom

>Spike|hCoV-19/Netherlands/Limburg\_33/2020|2020-04-22|EPI\_ISL\_461021|Original|hCoV-19^^Limburg|Human|Dutch COVID-19 response team|Erasmus Medical Center|Oude Munnink|Netherlands

>Spike|hCoV-19/USA/CA-QDX-48/2020|2020-03-15|EPI\_ISL\_467836|Original|hCoV-19^^California|Human|Quest Diagnostics|Quest Diagnostics|Kagan|USA

>Spike|hCoV-19/England/ALDP-A85CC9/2020|2020-10-17|EPI\_ISL\_610536|Original|hCoV-19^^England|Human|Lighthouse Lab in Alderley Park|Wellcome Sanger Institute for the COVID-19 Genomics UK (COG-UK) consortium|Davies|United Kingdom

>Spike|hCoV-19/Netherlands/NB-RIVM-10299/2020|2020-10-21|EPI\_ISL\_636551|Original|hCoV-19^^NoordBrabant|Human|Dutch COVID-19 response team|National Institute for Public Health and the Environment (RIVM)|Meijer|Netherlands

>Spike|hCoV-19/USA/MI-UM-10036821152/2020|2020-11-06|EPI\_ISL\_728415|Original|hCoV-19^^Michigan|Human|University of Michigan Clinical Microbiology Laboratory|Lauring Lab|Valesano|USA

>Spike|hCoV-19/Japan/PG-4699/2020|2020-08-00|EPI\_ISL\_689836|Original|hCoV-19^^Japan|Human|Pathogen Genomics Center|Pathogen Genomics Center|Sekizuka|Japan

>Spike|hCoV-19/England/QEUEH-9FF575/2020|2020-10-02|EPI\_ISL\_600222|Original|hCoV-19^^England|Human|Lighthouse Lab in Glasgow|Wellcome Sanger Institute for the COVID-19 Genomics UK (COG-UK) consortium|Davies|United Kingdom

>Spike|hCoV-19/Japan/PG-8407/2020|2020-08-00|EPI\_ISL\_687506|Original|hCoV-19^^Japan|Human|Pathogen Genomics Center|Pathogen Genomics Center|Sekizuka|Japan

>Spike|hCoV-19/England/MILK-99E54B/2020|2020-08-31|EPI\_ISL\_550779|Original|hCoV-19^^England|Human|Lighthouse Lab in Milton Keynes|Wellcome Sanger Institute for the COVID-19 Genomics UK (COG-UK) consortium|Davies|United Kingdom

>Spike|hCoV-19/Netherlands/NB-EMC-184/2020|2020-05-07|EPI\_ISL\_523307|Original|hCoV-19^^Noord Brabant|Human|Dutch COVID-19 response team|Erasmus Medical Center|Oude Munnink|Netherlands

>Spike|hCoV-19/England/ALDP-C8916A/2020|2020-12-17|EPI\_ISL\_762974|Original|hCoV-19^^England|Human|Lighthouse Lab in Alderley Park|Wellcome Sanger Institute for the COVID-19 Genomics UK (COG-UK) Consortium|Davies|United Kingdom

>Spike|hCoV-19/Wales/PHWC-160A5A/2020|2020-05-19|EPI\_ISL\_472891|Original|hCoV-19^^Wales|Human|Wales Specialist Virology Centre Sequencing lab|COVID-19 Genomics UK (COG-UK) Consortium|Moore|United Kingdom

>Spike|hCoV-19/England/QEUA-C3125F/2020|2020-12-09|EPI\_ISL\_731264|Original|hCoV-19^^England|Human|Lighthouse Lab in Glasgow|Wellcome Sanger Institute for the COVID-19 Genomics UK (COG-UK) Consortium|Davies|United Kingdom

>Spike|hCoV-19/Belgium/ULG-10143/2020|2020-04-07|EPI\_ISL\_427387|Original|hCoV-19^^Liege|Human|Department of Clinical Microbiology|GIGA Medical Genomics|Durkin|Belgium

>Spike|hCoV-19/USA/CA-ALSR-1023-SAN/2020|2020-04-20|EPI\_ISL\_483469|Original|hCoV-19^^California|Human|UC San Diego Center for Advanced Laboratory Medicine|Andersen lab at Scripps Research|Gangavarapu|USA

>Spike|hCoV-19/USA/WI-UW-760/2020|2020-07-07|EPI\_ISL\_495465|Original|hCoV-19^^Wisconsin|Human|University of Wisconsin-Madison AIDS Vaccine Research Laboratories|University of Wisconsin-Madison AIDS Vaccine Research Laboratories|Baczenas|USA

>Spike|hCoV-19/USA/VA-DCLS-0134/2020|2020-04-15|EPI\_ISL\_437773|Original|hCoV-19^^Virginia|Human|Virginia DCLS|Virginia DCLS|St. Jacques|USA

>Spike|hCoV-19/England/CAMB-1B1146/2020|2020-05-05|EPI\_ISL\_459193|Original|hCoV-19^^England|Human|Department of Pathology|Wellcome Sanger Institute for the COVID-19 Genomics UK (COG-UK) consortium|Davies|United Kingdom

>Spike|hCoV-19/USA/VA-DCLS-1245/2020|2020-07-30|EPI\_ISL\_529938|Original|hCoV-19^^Virginia|Human|Virginia DCLS|Virginia DCLS|St. Jacques|USA

>Spike|hCoV-19/USA/TX-HMH-5045/2020|2020-06-24|EPI\_ISL\_544482|Original|hCoV-19^^Texas|Human|Houston Methodist Hospital|Houston Methodist Hospital|Long|USA

>Spike|hCoV-19/Wales/PHWC-48A4D1/2020|2020-11-04|EPI\_ISL\_652561|Original|hCoV-19^^Wales|Human|Wales Specialist Virology Centre Sequencing lab|COVID-19 Genomics UK (COG-UK) Consortium|Moore|United Kingdom

>Spike|hCoV-19/Japan/PG-8119/2020|2020-08-00|EPI\_ISL\_687218|Original|hCoV-19^^Japan|Human|Pathogen Genomics Center|Pathogen Genomics Center|Sekizuka|Japan

>Spike|hCoV-19/England/MILK-9A8D46/2020|2020-09-01|EPI\_ISL\_550067|Original|hCoV-19^^England|Human|Lighthouse Lab in Milton Keynes|Wellcome Sanger Institute for the COVID-19 Genomics UK (COG-UK) consortium|Davies|United Kingdom

>Spike|hCoV-19/Finland/S12BE11/2020|2020-09-22|EPI\_ISL\_732631|Original|hCoV-19^^Uusimaa|Human|Department of Virology and Immunology|Department of Virology|Smura|Finland

>Spike|hCoV-19/England/MILK-9C33F8/2020|2020-09-10|EPI\_ISL\_566714|Original|hCoV-19^^England|Human|Lighthouse Lab in Milton Keynes|Wellcome Sanger Institute for the COVID-19 Genomics UK (COG-UK) consortium|Davies|United Kingdom

>Spike|hCoV-19/Netherlands/NA\_620/2020|2020-03-26|EPI\_ISL\_460783|Original|hCoV-19^^Netherlands|Human|Dutch COVID-19 response team|Erasmus Medical Center|Oude Munnink|Netherlands

>Spike|hCoV-19/England/QEUA-B0DBBC/2020|2020-11-02|EPI\_ISL\_642195|Original|hCoV-19^^England|Human|Lighthouse Lab in Glasgow|Wellcome Sanger Institute for the COVID-19 Genomics UK (COG-UK) Consortium|Davies|United Kingdom

>Spike|hCoV-19/England/CAMC-B9A46E/2020|2020-11-11|EPI\_ISL\_673447|Original|hCoV-19^^England|Human|Lighthouse Lab in Cambridge|Wellcome Sanger Institute for the COVID-19 Genomics UK (COG-UK) Consortium|Davies|United Kingdom

>Spike|hCoV-19/England/LOND-12F08D9/2020|2020-11-19|EPI\_ISL\_679589|Original|hCoV-19^^England|Human|University College London|COVID-19 Genomics UK (COG-UK) Consortium|Roy|United Kingdom

>Spike|hCoV-19/USA/LA-EVTL381/2020|2020-06-01|EPI\_ISL\_578787|Original|hCoV-19^^Louisiana|Human|LSUHS Emerging Viral Threat Laboratory|Microbial Genome Sequencing Center|Kamil|USA

>Spike|hCoV-19/England/MILK-B56194/2020|2020-11-06|EPI\_ISL\_658117|Original|hCoV-19^^England|Human|Lighthouse Lab in Milton Keynes|Wellcome Sanger Institute for the COVID-19 Genomics UK (COG-UK) Consortium|Davies|United Kingdom

>Spike|hCoV-19/Canada/BC\_6404889/2020|2020-03-12|EPI\_ISL\_418838|Original|hCoV-19^^British Columbia|Human|BCCDC Public Health Laboratory|BCCDC Public Health Laboratory|Harrigan|Canada

>Spike|hCoV-19/England/CAMC-B53267/2020|2020-11-08|EPI\_ISL\_657394|Original|hCoV-19^^England|Human|Lighthouse Lab in Cambridge|Wellcome Sanger Institute for the COVID-19 Genomics UK (COG-UK) Consortium|Davies|United Kingdom

>Spike|hCoV-19/Denmark/DCGC-21231/2020|2020-12-21|EPI\_ISL\_759624|Original|hCoV-19^^Hovedstaden|Human|Department of Virus and Microbiological Special Diagnostics|Albertsen Lab|Michaelsen|Denmark

>Spike|hCoV-19/Switzerland/Vs-ETHZ-380207/2020|2020-11-24|EPI\_ISL\_721922|Original|hCoV-19^^Valais|Human|Viollier AG|Department of Biosystems Science and Engineering|Nadeau|Switzerland

>Spike|hCoV-19/USA/LA-EVTL989/2020|2020-08-18|EPI\_ISL\_653680|Original|hCoV-19^^Louisiana|Human|LSUHS Emerging Viral Threat Laboratory|Microbial Genome Sequencing Center|Kamil|USA

>Spike|hCoV-19/England/QEUH-BC3A5B/2020|2020-11-25|EPI\_ISL\_703954|Original|hCoV-19^^England|Human|Lighthouse Lab in Glasgow|Wellcome Sanger Institute for the COVID-19 Genomics UK (COG-UK) Consortium|Davies|United Kingdom

>Spike|hCoV-19/England/ALDP-6C09ED/2020|2020-07-02|EPI\_ISL\_557871|Original|hCoV-19^^England|Human|Lighthouse Lab in Alderley Park|Wellcome Sanger Institute for the COVID-19 Genomics UK (COG-UK) consortium|Davies|United Kingdom

>Spike|hCoV-19/USA/WA-S2399/2020|2020-06-13|EPI\_ISL\_497031|Original|hCoV-19^^Washington|Human|Washington State Department of Health|Seattle Flu Study|Lee|USA

>Spike|hCoV-19/USA/IN-QDX-963/2020|2020-03-17|EPI\_ISL\_571719|Original|hCoV-19^^Indiana|Human|Quest Diagnostics|Quest Diagnostics|Kagan|USA

>Spike|hCoV-19/Austria/CeMM0212/2020|2020-03-16|EPI\_ISL\_438048|Original|hCoV-19^^Vienna|Human|Center for Virology|Bergthaler laboratory|Bergthaler|Austria

>Spike|hCoV-19/Belgium/ULG-11073/2020|2020-12-15|EPI\_ISL\_737324|Original|hCoV-19^^Li\u00e8ge|Human|Department of Clinical Microbiology|GIGA Medical Genomics|Durkin|Belgium

>Spike|hCoV-19/USA/SC-20-1963-T07/2020|2020-07-22|EPI\_ISL\_516782|Original|hCoV-19^^South Carolina|Human|van Bakel Laboratory|van Bakel Laboratory|van Bakel|USA

>Spike|hCoV-19/USA/UT-UPHL-2012879343/2020|2020-06-19|EPI\_ISL\_746405|Original|hCoV-19^^Utah|Human|Utah Public Health Laboratory|Utah Public Health Laboratory|Gallagher|USA

>Spike|hCoV-19/Wales/PHWC-493262/2020|2020-11-29|EPI\_ISL\_725860|Original|hCoV-19^^Wales|Human|Originating lab|COVID-19 Genomics UK (COG-UK) Consortium|Moore|United Kingdom

>Spike|hCoV-19/England/NOTT-110F0F/2020|2020-04-17|EPI\_ISL\_448435|Original|hCoV-19^^England|Human|Queens Medical Centre|COVID-19 Genomics UK (COG-UK) Consortium|Loose|United Kingdom

>Spike|hCoV-19/Australia/VIC14079/2020|2020-08-23|EPI\_ISL\_563958|Original|hCoV-19^^Victoria|Human|Microbiological Diagnostic Unit - Public Health Laboratory (MDU-PHL)|MDU-PHL|Schultz|Australia

>Spike|hCoV-19/England/CAMB-72DB7/2020|2020-03-22|EPI\_ISL\_440112|Original|hCoV-19^^England|Human|Department of Pathology|Wellcome Sanger Institute for the COVID-19 Genomics UK (COG-UK) consortium|Amato|United Kingdom

>Spike|hCoV-19/USA/VA-DCLS-1634/2020|2020-08-20|EPI\_ISL\_614037|Original|hCoV-19^^Virginia|Human|Virginia DCLS|Virginia DCLS|St. Jacques|USA

>Spike|hCoV-19/Denmark/DCGC-20644/2020|2020-12-21|EPI\_ISL\_759272|Original|hCoV-19^^Hovedstaden|Human|Department of Virus and Microbiological Special Diagnostics|Albertsen Lab|Michaelsen|Denmark

>Spike|hCoV-19/England/SHEF-C8E73/2020|2020-11-12|EPI\_ISL\_680157|Original|hCoV-19^^England|Human|Virology Department|COVID-19 Genomics UK (COG-UK) Consortium|de Silva|United Kingdom

>Spike|hCoV-19/England/BRIS-123F18/2020|2020-04-08|EPI\_ISL\_492825|Original|hCoV-19^^England|Human|PHE South West Regional Laboratory|Wellcome Sanger Institute for the COVID-19 Genomics UK (COG-UK) consortium|Davies|United Kingdom

>Spike|hCoV-19/Luxembourg/LNS9407672/2020|2020-11-14|EPI\_ISL\_744906|Original|hCoV-19^^Luxembourg|Human|Laboratoire national de sant\u00e9|Laboratoire national de sant\u00e9|Wienecke-Baldacchino|Luxembourg

>Spike|hCoV-19/Brazil/SP-590/2020|2020-07-05|EPI\_ISL\_693216|Original|hCoV-19^^S\u00e3o Paulo|Human|Unidade de Vigil\u00e2ncia Epidemiol\u00f3gica de Araras|Instituto Adolfo Lutz|Sacchi|Brazil

>Spike|hCoV-19/England/204590460/2020|2020-11-06|EPI\_ISL\_683502|Original|hCoV-19^^England|Human|Respiratory Virus Unit|COVID-19 Genomics UK (COG-UK) Consortium|Platt|United Kingdom

>Spike|hCoV-19/Italy/BAS-IZSPB-387PT/2020|2020-10-20|EPI\_ISL\_722921|Original|hCoV-19^^Basilicata|Human|Istituto Zooprofilattico Sperimentale della Puglia e della Basilicata|Istituto Zooprofilattico Sperimentale della Puglia e della Basilicata|Parisi|Italy

>Spike|hCoV-19/Switzerland/SG-ETHZ-420663/2020|2020-12-24|EPI\_ISL\_768145|Original|hCoV-19^^St Gallen|Human|Viollier AG|Department of Biosystems Science and Engineering|Nadeau|Switzerland

>Spike|hCoV-19/USA/UT-QDX-2321/2020|2020-03-15|EPI\_ISL\_604723|Original|hCoV-19^^Utah|Human|Quest Diagnostics|Quest Diagnostics|Kagan|USA

>Spike|hCoV-19/England/GSTT-265D4DF/2020|2020-03-19|EPI\_ISL\_483968|Original|hCoV-19^^England|Human|Centre for Clinical Infection and Diagnostics Research and Genomics Innovation Unit|COVID-19 Genomics UK (COG-UK) Consortium|Awan|United Kingdom

>Spike|hCoV-19/USA/TX-HMH-MCoV-19506/2020|2020-12-01|EPI\_ISL\_783887|Original|hCoV-19^^Texas|Human|Houston Methodist Hospital|Houston Methodist Hospital|Long|USA

>Spike|hCoV-19/England/QEUEH-BA21A8/2020|2020-11-18|EPI\_ISL\_719838|Original|hCoV-19^^England|Human|Lighthouse Lab in Glasgow|Wellcome Sanger Institute for the COVID-19 Genomics UK (COG-UK) Consortium|Davies|United Kingdom

>Spike|hCoV-19/USA/TX-HMH-4867/2020|2020-06-20|EPI\_ISL\_544389|Original|hCoV-19^^Texas|Human|Houston Methodist Hospital|Houston Methodist Hospital|Long|USA

>Spike|hCoV-19/England/BRIS-12E8F4/2020|2020-04-23|EPI\_ISL\_488210|Original|hCoV-19^^England|Human|PHE South West Regional Laboratory|Wellcome Sanger Institute for the COVID-19 Genomics UK (COG-UK) consortium|Davies|United Kingdom

>Spike|hCoV-19/England/ALDP-9498CE/2020|2020-06-12|EPI\_ISL\_556394|Original|hCoV-19^^England|Human|Lighthouse Lab in Alderley Park|Wellcome Sanger Institute for the COVID-19 Genomics UK (COG-UK) consortium|Davies|United Kingdom

>Spike|hCoV-19/Scotland/CVR1613/2020|2020-04-05|EPI\_ISL\_433631|Original|hCoV-19^^Scotland|Human|West of Scotland Specialist Virology Centre|COVID-19 Genomics UK (COG-UK) Consortium|Robertson|United Kingdom

>Spike|hCoV-19/Ireland/LH-NVRL-20ILR08017/2020|2020-11-09|EPI\_ISL\_732482|Original|hCoV-19^^Louth|Human|National Virus Reference Laboratory|National Virus Reference Laboratory|Gonzalez|Ireland

>Spike|hCoV-19/England/QEUEH-B6654A/2020|2020-11-11|EPI\_ISL\_662459|Original|hCoV-19^^England|Human|Lighthouse Lab in Glasgow|Wellcome Sanger Institute for the COVID-19 Genomics UK (COG-UK) Consortium|Davies|United Kingdom

>Spike|hCoV-19/USA/MI-MDHHS-SC22093/2020|2020-04-03|EPI\_ISL\_594205|Original|hCoV-19^^Michigan|Human|Michigan Department of Health and Human Services|Michigan Department of Health and Human Services|Jacob|USA

>Spike|hCoV-19/England/QEUEH-B7DCF0/2020|2020-11-14|EPI\_ISL\_741916|Original|hCoV-19^^England|Human|Oxford Viromics|COVID-19 Genomics UK (COG-UK) Consortium|Golubchik|United Kingdom

>Spike|hCoV-19/England/MILK-ABB94B/2020|2020-10-21|EPI\_ISL\_623240|Original|hCoV-19^^England|Human|Lighthouse Lab in Milton Keynes|Wellcome Sanger Institute for the COVID-19 Genomics UK (COG-UK) consortium|Davies|United Kingdom

>Spike|hCoV-19/England/QEUEH-AF5541/2020|2020-10-30|EPI\_ISL\_663200|Original|hCoV-19^^England|Human|Lighthouse Lab in Glasgow|Wellcome Sanger Institute for the COVID-19 Genomics UK (COG-UK) Consortium|Davies|United Kingdom

>Spike|hCoV-19/Switzerland/BL-ETHZ-350423/2020|2020-11-04|EPI\_ISL\_728852|Original|hCoV-19^^Basel-Landschaft|Human|Viollier AG|Department of Biosystems Science and Engineering|Nadeau|Switzerland

>Spike|hCoV-19/USA/TX-HMH-4278/2020|2020-06-18|EPI\_ISL\_543490|Original|hCoV-19^^Texas|Human|Houston Methodist Hospital|Houston Methodist Hospital|Long|USA

>Spike|hCoV-19/England/CAMB-1B9E56/2020|2020-11-03|EPI\_ISL\_651562|Original|hCoV-19^^England|Human|Department of Pathology|COVID-19 Genomics UK (COG-UK) Consortium|Goodfellow|United Kingdom

>Spike|hCoV-19/USA/TX-HMH-MCoV-18326/2020|2020-11-17|EPI\_ISL\_784674|Original|hCoV-19^^Texas|Human|Houston Methodist Hospital|Houston Methodist Hospital|Long|USA

>Spike|hCoV-19/Switzerland/SG-ETHZ-100215/2020|2020-03-18|EPI\_ISL\_574955|Original|hCoV-19^^St Gallen|Human|Viollier AG|Department of Biosystems Science and Engineering|Nadeau|Switzerland

>Spike|hCoV-19/Wales/PHWC-264AE/2020|2020-03-26|EPI\_ISL\_422199|Original|hCoV-19^^Wales|Human|Wales Specialist Virology Centre|Public Health Wales Microbiology Cardiff|Moore|United Kingdom

>Spike|hCoV-19/Denmark/DCGC-18992/2020|2020-12-07|EPI\_ISL\_748687|Original|hCoV-19^^Syddanmark|Human|Department of Virus and Microbiological Special Diagnostics|Albertsen Lab|Michaelsen|Denmark

>Spike|hCoV-19/Australia/VIC6465/2020|2020-07-23|EPI\_ISL\_521243|Original|hCoV-19^^Victoria|Human|Microbiological Diagnostic Unit - Public Health Laboratory (MDU-PHL)|MDU-PHL|Schultz|Australia

>Spike|hCoV-19/Belgium/UGent-142/2020|2020-05-06|EPI\_ISL\_481233|Original|hCoV-19^^Ghent|Human|Lab voor klinische biologie|Onderzoeksgroep Virologie|Lambrechts|Belgium

>Spike|hCoV-19/Canada/NS-NML-199/2020|2020-04-24|EPI\_ISL\_579535|Original|hCoV-19^^Nova Scotia|Human|QEII Health Sciences Centre|National Microbiology Laboratory (NML)|Majer|Canada

>Spike|hCoV-19/England/MILK-ACFD57/2020|2020-10-22|EPI\_ISL\_652137|Original|hCoV-19^^England|Human|Oxford Viromics|COVID-19 Genomics UK (COG-UK) Consortium|Golubchik|United Kingdom

>Spike|hCoV-19/England/NORT-288F10/2020|2020-03-24|EPI\_ISL\_458579|Original|hCoV-19^^England|Human|NU-OMICS DNA Sequencing research facility|Wellcome Sanger Institute for the COVID-19 Genomics UK (COG-UK) consortium|Davies|United Kingdom

>Spike|hCoV-19/Iceland/360/2020|2020-03-19|EPI\_ISL\_424384|Original|hCoV-19^^Reykjavik|Human|The National University Hospital of Iceland|deCODE genetics|J\u00f3nsson|Iceland

>Spike|hCoV-19/England/ALDP-AA4277/2020|2020-10-22|EPI\_ISL\_624301|Original|hCoV-19^^England|Human|Lighthouse Lab in Alderley Park|Wellcome Sanger Institute for the COVID-19 Genomics UK (COG-UK) consortium|Davies|United Kingdom

>Spike|hCoV-19/USA/LA-EVTL626/2020|2020-07-02|EPI\_ISL\_579030|Original|hCoV-19^^Louisiana|Human|LSUHS Emerging Viral Threat Laboratory|Microbial Genome Sequencing Center|Kamil|USA

>Spike|hCoV-19/USA/NY-Wadsworth-192868-01/2020|2020-06-21|EPI\_ISL\_677000|Original|hCoV-19^^New York|Human|Masonic Medical Research Institute|Wadsworth Center|Lasek-Nesselquist|USA

>Spike|hCoV-19/USA/OR-OHSU-1665/2020|2020-07-22|EPI\_ISL\_525997|Original|hCoV-19^^Oregon|Human|OHSU Lab Services Molecular Microbiology Lab|Oregon SARS-CoV-2 Genome Sequencing Center|O'Roak|USA

>Spike|hCoV-19/England/QEUI-B80AA5/2020|2020-11-14|EPI\_ISL\_661829|Original|hCoV-19^^England|Human|Lighthouse Lab in Glasgow|Wellcome Sanger Institute for the COVID-19 Genomics UK (COG-UK) Consortium|Davies|United Kingdom

>Spike|hCoV-19/England/QEUI-9F7276/2020|2020-09-27|EPI\_ISL\_595673|Original|hCoV-19^^England|Human|Oxford Viromics|COVID-19 Genomics UK (COG-UK) Consortium|Golubchik|United Kingdom

>Spike|hCoV-19/USA/NY-NYCPHL-000538/2020|2020-03-18|EPI\_ISL\_631998|Original|hCoV-19^^New York|Human|Richmond University Medical Center|New York City Public Health Laboratory|Wang|USA

>Spike|hCoV-19/England/BHRT-24B3F23/2020|2020-08-03|EPI\_ISL\_541753|Original|hCoV-19^^England|Human|Microbiology Department|Wellcome Sanger Institute for the COVID-19 Genomics UK (COG-UK) consortium|Davies|United Kingdom

>Spike|hCoV-19/Singapore/512/2020|2020-05-23|EPI\_ISL\_479590|Original|hCoV-19^^Singapore|Human|National Public Health Laboratory|National Public Health Laboratory|Mak|Singapore

>Spike|hCoV-19/England/ALDP-A681EB/2020|2020-10-12|EPI\_ISL\_608662|Original|hCoV-19^^England|Human|Lighthouse Lab in Alderley Park|Wellcome Sanger Institute for the COVID-19 Genomics UK (COG-UK) consortium|Davies|United Kingdom

>Spike|hCoV-19/Panama/329752/2020|2020-03-14|EPI\_ISL\_496649|Original|hCoV-19^^Panama Center|Human|Gorgas Memorial Laboratory of Health Studies|Gorgas Memorial Laboratory of Health Studies|Martinez|Panama



>Spike|hCoV-19/England/ALDP-94DE8C/2020|2020-06-17|EPI\_ISL\_555553|Original|hCoV-19^^England|Human|Lighthouse Lab in Alderley Park|Wellcome Sanger Institute for the COVID-19 Genomics UK (COG-UK) consortium|Davies|United Kingdom

>Spike|hCoV-19/Mexico/CMX-INdRE\_15/2020|2020-03-11|EPI\_ISL\_455439|Original|hCoV-19^^Mexico City|Human|Instituto de Diagnostico y Referencia Epidemiologicos (INDRE)|Instituto de Diagnostico y Referencia Epidemiologicos (INDRE)|Mendieta|Mexico

>Spike|hCoV-19/Equatorial Guinea/37030/2020|2020-07-14|EPI\_ISL\_648327|Original|hCoV-19^^Bioko Norte|Human|Laboratorio de Investigaciones de Baney|University Hospital Basel|Hosch|Equatorial Guinea

>Spike|hCoV-19/Australia/VIC7695/2020|2020-08-02|EPI\_ISL\_564584|Original|hCoV-19^^Victoria|Human|Microbiological Diagnostic Unit - Public Health Laboratory (MDU-PHL)|MDU-PHL|Schultz|Australia

>Spike|hCoV-19/Brazil/RJ-00501/2020|2020-11-04|EPI\_ISL\_717895|Original|hCoV-19^^Rio de Janeiro|Human|Laboratorio de Virologia Molecular / UFRJ|Bioinformatics Laboratory / LNCC|Almeida|Brazil

>Spike|hCoV-19/Scotland/QEUEH-9E4D20/2020|2020-09-24|EPI\_ISL\_601019|Original|hCoV-19^^Scotland|Human|Lighthouse Lab in Glasgow|Wellcome Sanger Institute for the COVID-19 Genomics UK (COG-UK) consortium|Davies|United Kingdom

>Spike|hCoV-19/England/QEUEH-9FF51B/2020|2020-09-30|EPI\_ISL\_600345|Original|hCoV-19^^England|Human|Lighthouse Lab in Glasgow|Wellcome Sanger Institute for the COVID-19 Genomics UK (COG-UK) consortium|Davies|United Kingdom

>Spike|hCoV-19/USA/TX-HMH-MCoV-8110/2020|2020-06-30|EPI\_ISL\_784203|Original|hCoV-19^^Texas|Human|Houston Methodist Hospital|Houston Methodist Hospital|Long|USA

>Spike|hCoV-19/USA/CO-CDPHE-2010280209/2020|2020-10-26|EPI\_ISL\_710363|Original|hCoV-19^^Colorado|Human|Colorado Department of Public Health and Environment|Colorado Department of Public Health and Environment|Bankers|USA

>Spike|hCoV-19/South Africa/R12646-20/2020|2020-06-16|EPI\_ISL\_504206|Original|hCoV-19^^North West|Human|National Institute for Communicable Diseases of the National Health Laboratory Service|National Institute for Communicable Diseases of the National Health Laboratory Service|Allam|South Africa

>Spike|hCoV-19/Australia/VIC3855/2020|2020-07-12|EPI\_ISL\_520568|Original|hCoV-19^^Victoria|Human|Microbiological Diagnostic Unit - Public Health Laboratory (MDU-PHL)|MDU-PHL|Schultz|Australia

>Spike|hCoV-19/England/CAMB-7CEBA/2020|2020-04-06|EPI\_ISL\_441564|Original|hCoV-19^^England|Human|Department of Pathology|Wellcome Sanger Institute for the COVID-19 Genomics UK (COG-UK) consortium|Amato|United Kingdom

>Spike|hCoV-19/USA/TX-HMH-5397/2020|2020-06-24|EPI\_ISL\_544743|Original|hCoV-19^^Texas|Human|Houston Methodist Hospital|Houston Methodist Hospital|Long|USA

>Spike|hCoV-19/England/QEUEH-9CA670/2020|2020-09-10|EPI\_ISL\_567469|Original|hCoV-19^^England|Human|Lighthouse Lab in Glasgow|Wellcome Sanger Institute for the COVID-19 Genomics UK (COG-UK) consortium|Davies|United Kingdom

>Spike|hCoV-19/Denmark/DCGC-15519/2020|2020-11-23|EPI\_ISL\_713233|Original|hCoV-19^^Hovedstaden|Human|Department of Virus and Microbiological Special Diagnostics|Albertsen Lab|Michaelsen|Denmark

>Spike|hCoV-19/USA/CO-CSU-D1057-2/2020|2020-04-15|EPI\_ISL\_527429|Original|hCoV-19^^Colorado|Human|Colorado State University - Ebel Lab|Colorado State University - Ebel Lab|Cline|USA

>Spike|hCoV-19/England/MILK-A060D3/2020|2020-10-01|EPI\_ISL\_600018|Original|hCoV-19^^England|Human|Lighthouse Lab in Milton Keynes|Wellcome Sanger Institute for the COVID-19 Genomics UK (COG-UK) consortium|Davies|United Kingdom

>Spike|hCoV-19/Japan/PG-5833/2020|2020-08-00|EPI\_ISL\_688950|Original|hCoV-19^^Japan|Human|Fukuoka Institute of Health and Environmental Sciences|Pathogen Genomics Center|Sekizuka|Japan

>Spike|hCoV-19/USA/UT-UPHL-2009680/2020|2020-07-26|EPI\_ISL\_605355|Original|hCoV-19^^Utah|Human|Utah Public Health Laboratory|Utah Public Health Laboratory|Young|USA

>Spike|hCoV-19/USA/NY-WCMP5H03P/2020|2020-03-13|EPI\_ISL\_427543|Original|hCoV-19^^New York|Human|NewYork-Presbyterian & Mason Lab|Mason Lab|Mason|USA

>Spike|hCoV-19/England/ALDP-9CD17C/2020|2020-09-16|EPI\_ISL\_566230|Original|hCoV-19^^England|Human|Lighthouse Lab in Alderley Park|Wellcome Sanger Institute for the COVID-19 Genomics UK (COG-UK) consortium|Davies|United Kingdom

>Spike|hCoV-19/USA/TX-HMH-MCoV-12755/2020|2020-08-29|EPI\_ISL\_790506|Original|hCoV-19^^Texas|Human|Houston Methodist Hospital|Houston Methodist Hospital|Long|USA

>Spike|hCoV-19/India/OR-ILSCV12752/2020|2020-05-09|EPI\_ISL\_463017|Original|hCoV-19^^Odisha|Human|Institute of Life Sciences|Immunogenomics lab|Raghav|India

>Spike|hCoV-19/Wales/PHWC-28C95/2020|2020-04-02|EPI\_ISL\_445426|Original|hCoV-19^^Wales|Human|Wales Specialist Virology Centre|Public Health Wales Microbiology Cardiff|Moore|United Kingdom

>Spike|hCoV-19/Turkey/HSGM-674/2020|2020-03-26|EPI\_ISL\_437304|Vero P1|hCoV-19^^Nevsehir|Human|Ministry of Health Turkey|Ministry of Health Turkey|Bayrakdar|Turkey

>Spike|hCoV-19/England/QEUEH-AD1FE3/2020|2020-10-26|EPI\_ISL\_634131|Original|hCoV-19^^England|Human|Lighthouse Lab in Glasgow|Wellcome Sanger Institute for the COVID-19 Genomics UK (COG-UK) consortium|Davies|United Kingdom

>Spike|hCoV-19/Gambia/NPHL-1248/2020|2020-07-01|EPI\_ISL\_561222|Original|hCoV-19^^Kombo|Human|MRCG at LSHTM Genomics lab|MRCG at LSHTM Genomics lab|Sesay|Gambia

>Spike|hCoV-19/Belgium/ULG-10905/2020|2020-11-14|EPI\_ISL\_678447|Original|hCoV-19^^Li\u00e8ge|Human|Department of Clinical Microbiology|GIGA Medical Genomics|Durkin|Belgium

>Spike|hCoV-19/Denmark/DCGC-10911/2020|2020-11-02|EPI\_ISL\_670280|Original|hCoV-19^^Nordjylland|Human|Department of Virus and Microbiological Special Diagnostics|Albertsen Lab|Michaelsen|Denmark

>Spike|hCoV-19/England/20134019402/2020|2020-03-23|EPI\_ISL\_423104|Original|hCoV-19^^England|Human|Respiratory Virus Unit|Respiratory Virus Unit|Platt|United Kingdom

>Spike|hCoV-19/Wales/PHWC-2574C/2020|2020-03-24|EPI\_ISL\_422258|Original|hCoV-19^^Wales|Human|Wales Specialist Virology Centre|Public Health Wales Microbiology Cardiff|Moore|United Kingdom

>Spike|hCoV-19/Denmark/DCGC-2052/2020|2020-04-06|EPI\_ISL\_618972|Original|hCoV-19^^Hovedstaden|Human|Department of Virus and Microbiological Special Diagnostics|Albertsen lab|Michaelsen|Denmark

>Spike|hCoV-19/India/UP-NBRI-N13-TCR323/2020|2020-04-02|EPI\_ISL\_516942|Original|hCoV-19^^Uttar Pradesh|Human|King Georges Medical University|CSIR-National Botanical Research Institute|Bag|India

>Spike|hCoV-19/England/MILK-A8F05A/2020|2020-10-16|EPI\_ISL\_652116|Original|hCoV-19^^England|Human|Northumbria University / South Tees Hospitals NHS Foundation Trust / North Cumbria Integrated Care NHS Foundation Trust / North Tees and Hartlepool NHS Foundation Trust / Newcastle Hospitals NHS Foundation Trust|COVID-19 Genomics UK (COG-UK) Consortium|Bashton|United Kingdom

>Spike|hCoV-19/England/QEUEH-BC454A/2020|2020-11-25|EPI\_ISL\_703291|Original|hCoV-19^^England|Human|Lighthouse Lab in Glasgow|Wellcome Sanger Institute for the COVID-19 Genomics UK (COG-UK) Consortium|Davies|United Kingdom

>Spike|hCoV-19/Malaysia/MGI-MAEPS67/2020|2020-06-04|EPI\_ISL\_528744|Original|hCoV-19^^Selangor|Human|Malaysia Genome Institute|Malaysia Genome Institute|Mat Isa|Malaysia

>Spike|hCoV-19/USA/LA-EVTL1363/2020|2020-12-11|EPI\_ISL\_779029|Original|hCoV-19^^Louisiana|Human|LSUHS Emerging Viral Threat Laboratory|Microbial Genome Sequencing Center|Kamil|USA

>Spike|hCoV-19/USA/UT-08507/2020|2020-05-18|EPI\_ISL\_524272|Original|hCoV-19^^Utah|Human|Utah Public Health Laboratory|Utah Public Health Laboratory|Young|USA

>Spike|hCoV-19/USA/CA-ALSR-5050/2020|2020-11-12|EPI\_ISL\_730317|Original|hCoV-19^^California|Human|San Diego County Public Health Laboratory|Andersen lab at Scripps Research|Gangavarapu|USA

>Spike|hCoV-19/USA/WA-S1519/2020|2020-05-22|EPI\_ISL\_495945|Original|hCoV-19^^Washington|Human|Washington State Department of Health|Seattle Flu Study|Lee|USA

>Spike|hCoV-19/Japan/PG-5264/2020|2020-07-00|EPI\_ISL\_690367|Original|hCoV-19^^Japan|Human|Pathogen Genomics Center|Pathogen Genomics Center|Sekizuka|Japan

>Spike|hCoV-19/Australia/NSW1187/2020|2020-10-30|EPI\_ISL\_667788|Original|hCoV-19^^New South Wales|Human|South Eastern Area Laboratory Services (SEALS)|NSW Health Pathology - Institute of Clinical Pathology and Medical Research; Westmead Hospital; University of Sydney|Gall|Australia

>Spike|hCoV-19/England/204200491/2020|2020-10-09|EPI\_ISL\_609882|Original|hCoV-19^^England|Human|Respiratory Virus Unit|Respiratory Virus Unit|Platt|United Kingdom

>Spike|hCoV-19/Wales/PHWC-481C2D/2020|2020-10-18|EPI\_ISL\_613157|Original|hCoV-19^^Wales|Human|Wales Specialist Virology Centre Sequencing lab|COVID-19 Genomics UK (COG-UK) Consortium|Moore|United Kingdom

>Spike|hCoV-19/Scotland/EDB7857/2020|2020-09-21|EPI\_ISL\_572834|Original|hCoV-19^^Scotland|Human|Virology Department|COVID-19 Genomics UK (COG-UK) Consortium|Williams|United Kingdom

>Spike|hCoV-19/Singapore/1286/2020|2020-05-09|EPI\_ISL\_648771|Original|hCoV-19^^Singapore|Human|Department of Laboratory Medicine|Department of Laboratory Medicine|Chen|Singapore

>Spike|hCoV-19/Egypt/EGY-S039/2020|2020-08-17|EPI\_ISL\_526994|Original|hCoV-19^^Egypt|Human|Biological prevention|Biological prevention|Seadawy|Egypt

>Spike|hCoV-19/Wales/PHWC-16425E/2020|2020-05-08|EPI\_ISL\_474149|Original|hCoV-19^^Wales|Human|Originating lab|COVID-19 Genomics UK (COG-UK) Consortium|Moore|United Kingdom

>Spike|hCoV-19/USA/TX-HMH-5412/2020|2020-06-25|EPI\_ISL\_544756|Original|hCoV-19^^Texas|Human|Houston Methodist Hospital|Houston Methodist Hospital|Long|USA

>Spike|hCoV-19/Switzerland/SZ-ETHZ-310384/2020|2020-10-08|EPI\_ISL\_603458|Original|hCoV-19^^Schwyz|Human|Viollier AG|Department of Biosystems Science and Engineering|Nadeau|Switzerland

>Spike|hCoV-19/Netherlands/NA\_392/2020|2020-04-07|EPI\_ISL\_455194|Original|hCoV-19^^Netherlands|Human|Dutch COVID-19 response team|Erasmus Medical Center|Oude Munnink|Netherlands

>Spike|hCoV-19/England/CAMB-78601/2020|2020-04-05|EPI\_ISL\_433756|Original|hCoV-19^^England|Human|Department of Pathology|COVID-19 Genomics UK (COG-UK) Consortium|Meredith|United Kingdom

>Spike|hCoV-19/Netherlands/ZH-EMC-534/2020|2020-00-00|EPI\_ISL\_577962|Original|hCoV-19^^Zuid Holland|Human|Dutch COVID-19 response team|Erasmus Medical Center|Oude Munnink|Netherlands

>Spike|hCoV-19/England/QEUH-C57AF1/2020|2020-12-12|EPI\_ISL\_736311|Original|hCoV-19^^England|Human|Lighthouse Lab in Glasgow|Wellcome Sanger Institute for the COVID-19 Genomics UK (COG-UK) Consortium|Davies|United Kingdom

>Spike|hCoV-19/USA/CA-CZB-14131/2020|2020-05-27|EPI\_ISL\_739192|Original|hCoV-19^^California|Human|Alameda County Public Health Lab|Chan-Zuckerberg Biohub|Kamm|USA

>Spike|hCoV-19/Australia/VIC9533/2020|2020-08-15|EPI\_ISL\_565590|Original|hCoV-19^^Victoria|Human|Microbiological Diagnostic Unit - Public Health Laboratory (MDU-PHL)|MDU-PHL|Schultz|Australia

>Spike|hCoV-19/Wales/PHWC-4A00FF/2020|2020-12-03|EPI\_ISL\_743397|Original|hCoV-19^^Wales|Human|Wales Specialist Virology Centre Sequencing lab|COVID-19 Genomics UK (COG-UK) Consortium|Moore|United Kingdom

>Spike|hCoV-19/Singapore/832/2020|2020-03-24|EPI\_ISL\_516804|Original|hCoV-19^^Singapore|Human|Department of Laboratory Medicine, \nTan Tock Seng Hospital|Department of Laboratory Medicine, \nTan Tock Seng Hospital|Chen|Singapore

>Spike|hCoV-19/England/ALDP-C3DDCB/2020|2020-12-10|EPI\_ISL\_730754|Original|hCoV-19^^England|Human|Lighthouse Lab in Alderley Park|Wellcome Sanger Institute for the COVID-19 Genomics UK (COG-UK) Consortium|Davies|United Kingdom

>Spike|hCoV-19/USA/FL-BPHL-1305/2020|2020-06-23|EPI\_ISL\_541243|Original|hCoV-19^^Florida|Human|Florida Bureau of Public Health Laboratories|Florida Bureau of Public Health Laboratories|Blanton|USA

>Spike|hCoV-19/England/LIVE-9E7F3/2020|2020-04-25|EPI\_ISL\_453334|Original|hCoV-19^^England|Human|Liverpool Clinical Laboratories|COVID-19 Genomics UK (COG-UK) Consortium|Haldenby|United Kingdom

>Spike|hCoV-19/USA/FL-BPHL-1544/2020|2020-08-28|EPI\_ISL\_568642|Original|hCoV-19^^Florida|Human|Florida Bureau of Public Health Laboratories|Florida Bureau of Public Health Laboratories|Blanton|USA

>Spike|hCoV-19/USA/TX-HMH-MCoV-11168/2020|2020-09-03|EPI\_ISL\_789721|Original|hCoV-19^^Texas|Human|Houston Methodist Hospital|Houston Methodist Hospital|Long|USA

>Spike|hCoV-19/USA/VA-DCLS-0384/2020|2020-04-16|EPI\_ISL\_467944|Original|hCoV-19^^Virginia|Human|Virginia DCLS|Virginia DCLS|St. Jacques|USA

>Spike|hCoV-19/Scotland/QEUA-965334/2020|2020-08-14|EPI\_ISL\_531188|Original|hCoV-19^^Scotland|Human|NHS GGC West of Scotland Specialist Virology Centre / MRC-University of Glasgow Centre for Virus Research|Wellcome Sanger Institute for the COVID-19 Genomics UK (COG-UK) consortium|Davies|United Kingdom

>Spike|hCoV-19/Denmark/DCGC-6322/2020|2020-09-14|EPI\_ISL\_615806|Original|hCoV-19^^Hovedstaden|Human|Department of Virus and Microbiological Special Diagnostics|Albertsen lab|Michaelsen|Denmark

>Spike|hCoV-19/England/QEUA-A000D9/2020|2020-10-02|EPI\_ISL\_600350|Original|hCoV-19^^England|Human|Lighthouse Lab in Glasgow|Wellcome Sanger Institute for the COVID-19 Genomics UK (COG-UK) consortium|Davies|United Kingdom

>Spike|hCoV-19/USA/LA-QDX-2056/2020|2020-03-16|EPI\_ISL\_604341|Original|hCoV-19^^Louisiana|Human|Quest Diagnostics|Quest Diagnostics|Kagan|USA

>Spike|hCoV-19/Australia/VIC7702/2020|2020-08-01|EPI\_ISL\_564591|Original|hCoV-19^^Victoria|Human|Microbiological Diagnostic Unit - Public Health Laboratory (MDU-PHL)|MDU-PHL|Schultz|Australia

>Spike|hCoV-19/Japan/PG-5112/2020|2020-08-00|EPI\_ISL\_690221|Original|hCoV-19^^Japan|Human|Gunma Prefectural Institute of Public Health and Environmental Sciences|Pathogen Genomics Center|Sekizuka|Japan

>Spike|hCoV-19/England/ALDP-B1B5EA/2020|2020-11-01|EPI\_ISL\_645558|Original|hCoV-19^^England|Human|Lighthouse Lab in Alderley Park|Wellcome Sanger Institute for the COVID-19 Genomics UK (COG-UK) Consortium|Davies|United Kingdom

>Spike|hCoV-19/France/ARA-SC405/2020|2020-04-20|EPI\_ISL\_641549|Original|hCoV-19^^Auvergne-Rhone-Alpes|Human|CHU Clermont-Ferrand|CNR Virus des Infections Respiratoires - France SUD|Bal|France

>Spike|hCoV-19/Spain/RI-IBV-99005852/2020|2020-03-24|EPI\_ISL\_537395|Original|hCoV-19^^La Rioja|Human|Centro de Investigaci\u00f3n Biom\u00e9dica de La Rioja - Hospital San Pedro Logro\u00f1o|SeqCOVID-SPAIN consortium/IBV (CSIC)|Comas|Spain

>Spike|hCoV-19/England/CAMB-841B6/2020|2020-04-16|EPI\_ISL\_443420|Original|hCoV-19^^England|Human|Department of Pathology|Wellcome Sanger Institute for the COVID-19 Genomics UK (COG-UK) consortium|Amato|United Kingdom

>Spike|hCoV-19/England/ALDP-B73DD9/2020|2020-11-12|EPI\_ISL\_664891|Original|hCoV-19^^England|Human|Quadram Institute Bioscience|COVID-19 Genomics UK (COG-UK) Consortium|Alikhan|United Kingdom

>Spike|hCoV-19/England/QEUA-9646F0/2020|2020-08-11|EPI\_ISL\_536923|Original|hCoV-19^^England|Human|Lighthouse Lab in Glasgow|Wellcome Sanger Institute for the COVID-19 Genomics UK (COG-UK) consortium|Davies|United Kingdom

>Spike|hCoV-19/England/205060152/2020|2020-12-09|EPI\_ISL\_723043|Original|hCoV-19^^England|Human|Respiratory Virus Unit|COVID-19 Genomics UK (COG-UK) Consortium|Platt|United Kingdom

>Spike|hCoV-19/England/MILK-B8E55B/2020|2020-11-13|EPI\_ISL\_673972|Original|hCoV-19^^England|Human|Lighthouse Lab in Milton Keynes|Wellcome Sanger Institute for the COVID-19 Genomics UK (COG-UK) Consortium|Davies|United Kingdom

>Spike|hCoV-19/USA/UT-UPHL-2012408644/2020|2020-07-26|EPI\_ISL\_745681|Original|hCoV-19^^Utah|Human|Ginkgo Bioworks Clinical Laboratory|Utah Public Health Laboratory|Young|USA

>Spike|hCoV-19/England/CAMB-80AFB/2020|2020-04-20|EPI\_ISL\_444432|Original|hCoV-19^^England|Human|Department of Pathology|COVID-19 Genomics UK (COG-UK) Consortium|Meredith|United Kingdom

>Spike|hCoV-19/England/CAMB-1B0077/2020|2020-05-04|EPI\_ISL\_448104|Original|hCoV-19^^England|Human|Department of Pathology|COVID-19 Genomics UK (COG-UK) Consortium|Meredith|United Kingdom

>Spike|hCoV-19/Sweden/20-50310/2020|2020-03-09|EPI\_ISL\_510817|Original|hCoV-19^^Ostergotland|Human|Orebro klinisk mikrobiologi|The Public Health Agency of Sweden|Svartstr\u00f6m|Sweden

>Spike|hCoV-19/New Zealand/20CV0454/2020|2020-10-19|EPI\_ISL\_622770|Original|hCoV-19^^Canterbury|Human|Canterbury Health Laboratories|Institute of Environmental Science and Research (ESR)|Wang|New Zealand

>Spike|hCoV-19/England/CAMC-B22164/2020|2020-11-03|EPI\_ISL\_647302|Original|hCoV-19^^England|Human|Lighthouse Lab in Cambridge|Wellcome Sanger Institute for the COVID-19 Genomics UK (COG-UK) Consortium|Davies|United Kingdom

>Spike|hCoV-19/England/QEUA-AAC43D/2020|2020-10-21|EPI\_ISL\_652854|Original|hCoV-19^^England|Human|Oxford Viromics|COVID-19 Genomics UK (COG-UK) Consortium|Golubchik|United Kingdom

>Spike|hCoV-19/Singapore/1279/2020|2020-05-07|EPI\_ISL\_648764|Original|hCoV-19^^Singapore|Human|Department of Laboratory Medicine|Department of Laboratory Medicine|Chen|Singapore

>Spike|hCoV-19/USA/CA-LACPHL-AF00008/2020|2020-11-30|EPI\_ISL\_737243|Original|hCoV-19^^California|Human|Los Angeles County PHL|Los Angeles County PHL|Hemarajata|USA

>Spike|hCoV-19/Luxembourg/LNS6504106/2020|2020-12-01|EPI\_ISL\_770948|Original|hCoV-19^^Luxembourg|Human|Laboratoire national de sant\u00e9|Laboratoire national de sant\u00e9|Wienecke-Baldacchino|Luxembourg

>Spike|hCoV-19/Northern Ireland/NIRE-101FA7/2020|2020-03-23|EPI\_ISL\_453482|Original|hCoV-19^^Northern Ireland|Human|Regional Virus Laboratory|COVID-19 Genomics UK (COG-UK) Consortium|Fairley|United Kingdom

>Spike|hCoV-19/USA/NY-NYUMC381/2020|2020-04-09|EPI\_ISL\_430408|Original|hCoV-19^^New York|Human|NYU Langone Health|Departments of Pathology and Medicine|Maurano|USA

>Spike|hCoV-19/USA/WA-UW-12384/2020|2020-06-27|EPI\_ISL\_570522|Original|hCoV-19^^Washington|Human|UW Virology Lab|UW Virology Lab|Roychoudhury|USA

>Spike|hCoV-19/England/QEUA-CC5D40/2020|2020-12-22|EPI\_ISL\_760456|Original|hCoV-19^^England|Human|Lighthouse Lab in Glasgow|Wellcome Sanger Institute for the COVID-19 Genomics UK (COG-UK) Consortium|Davies|United Kingdom

>Spike|hCoV-19/Japan/PG-3726/2020|2020-04-00|EPI\_ISL\_691979|Original|hCoV-19^^Japan|Human|Pathogen Genomics Center|Pathogen Genomics Center|Sekizuka|Japan

>Spike|hCoV-19/England/NORW-E89C7/2020|2020-04-11|EPI\_ISL\_448259|Original|hCoV-19^^England|Human|Quadram Institute Bioscience|COVID-19 Genomics UK (COG-UK) Consortium|Alikhan|United Kingdom

>Spike|hCoV-19/Iceland/535/2020|2020-03-29|EPI\_ISL\_424555|Original|hCoV-19^^Reykjavik|Human|The National University Hospital of Iceland|deCODE genetics|J\u00f3nsson|Iceland

>Spike|hCoV-19/Australia/VIC17099/2020|2020-08-09|EPI\_ISL\_663731|Original|hCoV-19^^Victoria|Human|Microbiological Diagnostic Unit - Public Health Laboratory (MDU-PHL)|MDU-PHL|Schultz|Australia

>Spike|hCoV-19/USA/OR-OHSU-2487/2020|2020-08-17|EPI\_ISL\_667225|Original|hCoV-19^^Oregon|Human|OHSU Lab Services Molecular Microbiology Lab|Oregon SARS-CoV-2 Genome Sequencing Center|O'Roak|USA

>Spike|hCoV-19/England/CAMB-1B9D95/2020|2020-10-31|EPI\_ISL\_651556|Original|hCoV-19^^England|Human|Department of Pathology|COVID-19 Genomics UK (COG-UK) Consortium|Goodfellow|United Kingdom

>Spike|hCoV-19/USA/WI-UW-2530/2020|2020-12-29|EPI\_ISL\_779361|Original|hCoV-19^^Wisconsin|Human|University of Wisconsin-Madison AIDS Vaccine Research Laboratories|University of Wisconsin-Madison AIDS Vaccine Research Laboratories|Moreno|USA

>Spike|hCoV-19/England/LIVE-DC40B0/2020|2020-11-08|EPI\_ISL\_703284|Original|hCoV-19^^England|Human|Liverpool Clinical Laboratories|COVID-19 Genomics UK (COG-UK) Consortium|Haldenby|United Kingdom

>Spike|hCoV-19/England/CAMC-947F70/2020|2020-07-20|EPI\_ISL\_556917|Original|hCoV-19^^England|Human|Lighthouse Lab in Cambridge|Wellcome Sanger Institute for the COVID-19 Genomics UK (COG-UK) consortium|Davies|United Kingdom

>Spike|hCoV-19/England/ALDP-C488EA/2020|2020-12-12|EPI\_ISL\_736747|Original|hCoV-19^^England|Human|Lighthouse Lab in Alderley Park|Wellcome Sanger Institute for the COVID-19 Genomics UK (COG-UK) Consortium|Davies|United Kingdom

>Spike|hCoV-19/Spain/RI-IBV-99010911/2020|2020-11-13|EPI\_ISL\_732756|Original|hCoV-19^^La Rioja|Human|Centro de Investigaci\u00f3n Biom\u00e9dica de La Rioja - Hospital San Pedro Logro\u00f1o|SeqCOVID-SPAIN consortium/IBV (CSIC)|Comas|Spain

>Spike|hCoV-19/England/CAMB-7682B/2020|2020-03-30|EPI\_ISL\_438272|Original|hCoV-19^^England|Human|Department of Pathology|Wellcome Sanger Institute for the COVID-19 Genomics UK (COG-UK) consortium|Amato|United Kingdom

>Spike|hCoV-19/England/NORT-296BA2/2020|2020-04-28|EPI\_ISL\_488146|Original|hCoV-19^^England|Human|NU-OMICS DNA Sequencing research facility|Wellcome Sanger Institute for the COVID-19 Genomics UK (COG-UK) consortium|Davies|United Kingdom

>Spike|hCoV-19/Wales/PHWC-480505/2020|2020-10-17|EPI\_ISL\_612896|Original|hCoV-19^^Wales|Human|Wales Specialist Virology Centre Sequencing lab|COVID-19 Genomics UK (COG-UK) Consortium|Moore|United Kingdom

>Spike|hCoV-19/Scotland/QEUH-BCCBD7/2020|2020-11-26|EPI\_ISL\_710810|Original|hCoV-19^^Scotland|Human|Lighthouse Lab in Glasgow|Wellcome Sanger Institute for the COVID-19 Genomics UK (COG-UK) Consortium|Davies|United Kingdom

>Spike|hCoV-19/England/CAMC-B07AD3/2020|2020-10-29|EPI\_ISL\_643391|Original|hCoV-19^^England|Human|Lighthouse Lab in Cambridge|Wellcome Sanger Institute for the COVID-19 Genomics UK (COG-UK) Consortium|Davies|United Kingdom

>Spike|hCoV-19/England/ALDP-B6220B/2020|2020-11-08|EPI\_ISL\_656428|Original|hCoV-19^^England|Human|Lighthouse Lab in Alderley Park|Wellcome Sanger Institute for the COVID-19 Genomics UK (COG-UK) Consortium|Davies|United Kingdom

>Spike|hCoV-19/England/CAMB-1BB65C/2020|2020-11-20|EPI\_ISL\_665016|Original|hCoV-19^^England|Human|Department of Pathology|COVID-19 Genomics UK (COG-UK) Consortium|Goodfellow|United Kingdom

>Spike|hCoV-19/England/SHEF-CE147/2020|2020-05-05|EPI\_ISL\_493720|Original|hCoV-19^^England|Human|Virology Department|COVID-19 Genomics UK (COG-UK) Consortium|de Silva|United Kingdom

>Spike|hCoV-19/England/CAMB-1B14D4/2020|2020-05-06|EPI\_ISL\_458572|Original|hCoV-19^^England|Human|Department of Pathology|Wellcome Sanger Institute for the COVID-19 Genomics UK (COG-UK) consortium|Davies|United Kingdom

>Spike|hCoV-19/USA/FL-BPHL-2027/2020|2020-03-25|EPI\_ISL\_653180|Original|hCoV-19^^Florida|Human|Florida Bureau of Public Health Laboratories|Florida Bureau of Public Health Laboratories|Blanton|USA

>Spike|hCoV-19/Scotland/CVR3084/2020|2020-04-24|EPI\_ISL\_461667|Original|hCoV-19^^Scotland|Human|West of Scotland Specialist Virology Centre|COVID-19 Genomics UK (COG-UK) Consortium|Robertson|United Kingdom

>Spike|hCoV-19/Scotland/CAMC-94907B/2020|2020-07-20|EPI\_ISL\_568473|Original|hCoV-19^^Scotland|Human|Lighthouse Lab in Cambridge|Wellcome Sanger Institute for the COVID-19 Genomics UK (COG-UK) consortium|Davies|United Kingdom

>Spike|hCoV-19/England/QEUH-A8B4E9/2020|2020-10-16|EPI\_ISL\_643071|Original|hCoV-19^^England|Human|Lighthouse Lab in Glasgow|Wellcome Sanger Institute for the COVID-19 Genomics UK (COG-UK) Consortium|Davies|United Kingdom

>Spike|hCoV-19/England/CAMC-9C1A22/2020|2020-09-10|EPI\_ISL\_573215|Original|hCoV-19^^England|Human|Oxford Viromics|COVID-19 Genomics UK (COG-UK) Consortium|Golubchik|United Kingdom

>Spike|hCoV-19/USA/UT-03366/2020|2020-04-23|EPI\_ISL\_498652|Original|hCoV-19^^Utah|Human|Utah Public Health Laboratory|Utah Public Health Laboratory|Butz|USA

>Spike|hCoV-19/USA/TX-HMH-MCoV-14187/2020|2020-10-01|EPI\_ISL\_787472|Original|hCoV-19^^Texas|Human|Houston Methodist Hospital|Houston Methodist Hospital|Long|USA

>Spike|hCoV-19/Netherlands/NoordBrabant\_42/2020|2020-03-10|EPI\_ISL\_415500|Original|hCoV-19^^Noord Brabant|Human|Dutch COVID-19 response team|Erasmus Medical Center|Oude Munnink|Netherlands

>Spike|hCoV-19/Australia/VIC8032/2020|2020-08-11|EPI\_ISL\_564812|Original|hCoV-19^^Victoria|Human|Microbiological Diagnostic Unit - Public Health Laboratory (MDU-PHL)|MDU-PHL|Schultz|Australia

>Spike|hCoV-19/England/ALDP-B48265/2020|2020-11-07|EPI\_ISL\_649407|Original|hCoV-19^^England|Human|Lighthouse Lab in Alderley Park|Wellcome Sanger Institute for the COVID-19 Genomics UK (COG-UK) Consortium|Davies|United Kingdom

>Spike|hCoV-19/England/QEUH-B123AD/2020|2020-11-02|EPI\_ISL\_642695|Original|hCoV-19^^England|Human|Lighthouse Lab in Glasgow|Wellcome Sanger Institute for the COVID-19 Genomics UK (COG-UK) Consortium|Davies|United Kingdom

>Spike|hCoV-19/USA/MI-QDX-1649/2020|2020-03-17|EPI\_ISL\_603966|Original|hCoV-19^^Michigan|Human|Quest Diagnostics|Quest Diagnostics|Kagan|USA

>Spike|hCoV-19/USA/CO-CDPHE-2009164004/2020|2020-09-16|EPI\_ISL\_677653|Original|hCoV-19^^Colorado|Human|Colorado Department of Public Health and Environment|Colorado Department of Public Health and Environment|Bankers|USA

>Spike|hCoV-19/USA/TX-HMH-3706/2020|2020-06-15|EPI\_ISL\_543123|Original|hCoV-19^^Texas|Human|Houston Methodist Hospital|Houston Methodist Hospital|Long|USA

>Spike|hCoV-19/England/QEUEH-B2DFC9/2020|2020-11-04|EPI\_ISL\_659919|Original|hCoV-19^^England|Human|Lighthouse Lab in Glasgow|Wellcome Sanger Institute for the COVID-19 Genomics UK (COG-UK) Consortium|Davies|United Kingdom

>Spike|hCoV-19/England/LIVE-996BF/2020|2020-04-08|EPI\_ISL\_439749|Original|hCoV-19^^England|Human|Liverpool Clinical Laboratories|COVID-19 Genomics UK (COG-UK) Consortium|Haldenby|United Kingdom

>Spike|hCoV-19/Malaysia/IMR-WI203/2020|2020-09-29|EPI\_ISL\_718285|Vero|hCoV-19^^Malaysia|Human|Institute for Medical Research|Institute for Medical Research|Suppiah|Malaysia

>Spike|hCoV-19/Canada/QC-LSPQ-L00239332/2020|2020-03-26|EPI\_ISL\_536245|Original|hCoV-19^^Quebec|Human|H\u00f4pital Pierre-Boucher|Laboratoire de sant\u00e9 publique du Qu\u00e9bec|Moreira|Canada

>Spike|hCoV-19/Belgium/regal-10061196/2020|2020-10-06|EPI\_ISL\_735070|Original|hCoV-19^^Overijse|Human|UZ Leuven|KU Leuven|Maes|Belgium

>Spike|hCoV-19/England/CAMC-9D1EC9/2020|2020-09-17|EPI\_ISL\_601785|Original|hCoV-19^^England|Human|Lighthouse Lab in Cambridge|Wellcome Sanger Institute for the COVID-19 Genomics UK (COG-UK) consortium|Davies|United Kingdom

>Spike|hCoV-19/Denmark/DCGC-21869/2020|2020-12-21|EPI\_ISL\_758420|Original|hCoV-19^^Hovedstaden|Human|Department of Virus and Microbiological Special Diagnostics|Albertsen Lab|Michaelsen|Denmark

>Spike|hCoV-19/England/LIVE-A5A5A/2020|2020-03-17|EPI\_ISL\_499653|Original|hCoV-19^^England|Human|Liverpool Clinical Laboratories|COVID-19 Genomics UK (COG-UK) Consortium|Haldenby|United Kingdom

>Spike|hCoV-19/England/201120477/2020|2020-03-09|EPI\_ISL\_464677|Original|hCoV-19^^England|Human|Respiratory Virus Unit|Respiratory Virus Unit|Platt|United Kingdom

>Spike|hCoV-19/Denmark/DCGC-22102/2020|2020-12-14|EPI\_ISL\_758125|Original|hCoV-19^^Hovedstaden|Human|Department of Virus and Microbiological Special Diagnostics|Albertsen Lab|Michaelsen|Denmark

>Spike|hCoV-19/Finland/25SS22G3/2020|2020-09-25|EPI\_ISL\_759920|Original|hCoV-19^^Uusimaa|Human|Department of Virology and Immunology|Department of Virology|Smura|Finland

>Spike|hCoV-19/Canada/ON-S1837/2020|2020-11-24|EPI\_ISL\_729301|Original|hCoV-19^^Ontario|Human|Toronto Invasive Bacterial Diseases Network|McMaster University|McArthur|Canada

>Spike|hCoV-19/Belgium/ULG-10734/2020|2020-09-18|EPI\_ISL\_641576|Original|hCoV-19^^Li\u00e8ge|Human|Department of Clinical Microbiology|GIGA Medical Genomics|Durkin|Belgium

>Spike|hCoV-19/Switzerland/VD-ETHZ-270175/2020|2020-08-29|EPI\_ISL\_541499|Original|hCoV-19^^Vaud|Human|Viollier AG|Department of Biosystems Science and Engineering|Nadeau|Switzerland

>Spike|hCoV-19/England/ALDP-B1B966/2020|2020-11-01|EPI\_ISL\_645567|Original|hCoV-19^^England|Human|Lighthouse Lab in Alderley Park|Wellcome Sanger Institute for the COVID-19 Genomics UK (COG-UK) Consortium|Davies|United Kingdom

>Spike|hCoV-19/England/BRIS-129088/2020|2020-04-18|EPI\_ISL\_458873|Original|hCoV-19^^England|Human|PHE South West Regional Laboratory|Wellcome Sanger Institute for the COVID-19 Genomics UK (COG-UK) consortium|Davies|United Kingdom

>Spike|hCoV-19/India/PB-IMT-P151/2020|2020-05-05|EPI\_ISL\_539490|Original|hCoV-19^^Punjab|Human|Civil Hospital|CSIR-Institute of Microbial Technology|Patil|India

>Spike|hCoV-19/Israel/CVL-n17112/2020|2020-06-01|EPI\_ISL\_516886|Original|hCoV-19^^Tel Aviv|Human|Israel Central Virology laboratory|Israel Central Virology laboratory|Zuckerman|Israel

>Spike|hCoV-19/USA/MN-MDH-1154/2020|2020-05-04|EPI\_ISL\_476739|Original|hCoV-19^^Minnesota|Human|Minnesota Department of Health|Minnesota Department of Health|Garfin|USA

>Spike|hCoV-19/USA/CA-CZB-13986/2020|2020-06-16|EPI\_ISL\_738749|Original|hCoV-19^^California|Human|Alameda County Public Health Lab|Chan-Zuckerberg Biohub|Kamm|USA

>Spike|hCoV-19/England/MILK-A46277/2020|2020-10-04|EPI\_ISL\_598536|Original|hCoV-19^^England|Human|Lighthouse Lab in Milton Keynes|Wellcome Sanger Institute for the COVID-19 Genomics UK (COG-UK) consortium|Davies|United Kingdom

>Spike|hCoV-19/India/GJ-GBRC-400b/2020|2020-06-25|EPI\_ISL\_586518|Original|hCoV-19^^Gujarat|Human|B.J. Medical College and Civil hospital|Gujarat Biotechnology Research Centre|Joshi|India

>Spike|hCoV-19/Australia/VIC1640/2020|2020-05-09|EPI\_ISL\_456543|Original|hCoV-19^^Victoria|Human|Victorian Infectious Diseases Reference Laboratory (VIDRL)|Microbiological Diagnostic Unit Public Health Laboratory and Victorian Infectious Diseases Reference Laboratory|Schultz|Australia

>Spike|hCoV-19/USA/VA-DCLS-1145/2020|2020-04-25|EPI\_ISL\_529933|Original|hCoV-19^^Virginia|Human|Virginia Division of Consolidated Laboratory Services|Virginia Division of Consolidated Laboratory Services|St. Jacques|USA

>Spike|hCoV-19/Denmark/DCGC-6054/2020|2020-10-05|EPI\_ISL\_620248|Original|hCoV-19^^Midtjylland|Human|Department of Virus and Microbiological Special Diagnostics|Albertsen lab|Michaelsen|Denmark

>Spike|hCoV-19/England/20129015102/2020|2020-03-19|EPI\_ISL\_423997|Original|hCoV-19^^England|Human|Respiratory Virus Unit|Respiratory Virus Unit|Platt|United Kingdom

>Spike|hCoV-19/USA/CA-ALSR-0662-IPL/2020|2020-04-30|EPI\_ISL\_483287|Original|hCoV-19^^California|Human|UC San Diego Center for Advanced Laboratory Medicine|Andersen lab at Scripps Research|Gangavarapu|USA

>Spike|hCoV-19/England/ALDP-6DC09E/2020|2020-06-30|EPI\_ISL\_556191|Original|hCoV-19^^England|Human|Lighthouse Lab in Alderley Park|Wellcome Sanger Institute for the COVID-19 Genomics UK (COG-UK) consortium|Davies|United Kingdom

>Spike|hCoV-19/USA/FL-BPHL-2180/2020|2020-08-19|EPI\_ISL\_653333|Original|hCoV-19^^Florida|Human|Florida Bureau of Public Health Laboratories|Florida Bureau of Public Health Laboratories|Blanton|USA

>Spike|hCoV-19/Singapore/1141/2020|2020-04-15|EPI\_ISL\_648050|Original|hCoV-19^^Singapore|Human|Department of Laboratory Medicine|Department of Laboratory Medicine|Chen|Singapore

>Spike|hCoV-19/England/MILK-A7BA53/2020|2020-10-15|EPI\_ISL\_607293|Original|hCoV-19^^England|Human|Lighthouse Lab in Milton Keynes|Wellcome Sanger Institute for the COVID-19 Genomics UK (COG-UK) consortium|Davies|United Kingdom

>Spike|hCoV-19/England/BRIS-133CF0/2020|2020-08-20|EPI\_ISL\_529339|Original|hCoV-19^^England|Human|University of Birmingham|COVID-19 Genomics UK (COG-UK) Consortium|Loman|United Kingdom

>Spike|hCoV-19/France/PAC-IHU-0214/2020|2020-03-28|EPI\_ISL\_569379|Original|hCoV-19^^Provence-Alpes-C\u00f4te-d\u2019Azur|Human|MEPHI|MEPHI|Levasseur|France

>Spike|hCoV-19/Denmark/DCGC-21133/2020|2020-12-21|EPI\_ISL\_759572|Original|hCoV-19^^Hovedstaden|Human|Department of Virus and Microbiological Special Diagnostics|Albertsen Lab|Michaelsen|Denmark

>Spike|hCoV-19/Jordan/IR-ALSR-5198/2020|2020-10-06|EPI\_ISL\_730436|Original|hCoV-19^^Irbid|Human|Biolab Diagnostic Laboratories|Andersen lab at Scripps Research|Gangavarapu|Jordan

>Spike|hCoV-19/Japan/PG-3559/2020|2020-06-00|EPI\_ISL\_691815|Original|hCoV-19^^Japan|Human|Pathogen Genomics Center|Pathogen Genomics Center|Sekizuka|Japan

>Spike|hCoV-19/Japan/PG-0733/2020|2020-04-00|EPI\_ISL\_684343|Original|hCoV-19^^Japan|Human|Pathogen Genomics Center|Pathogen Genomics Center|Sekizuka|Japan

>Spike|hCoV-19/Denmark/DCGC-1881/2020|2020-04-27|EPI\_ISL\_622541|Original|hCoV-19^^Hovedstaden|Human|Department of Virus and Microbiological Special Diagnostics|Albertsen lab|Michaelsen|Denmark

>Spike|hCoV-19/England/BIRM-60639/2020|2020-05-29|EPI\_ISL\_477738|Original|hCoV-19^^England|Human|University of Birmingham|COVID-19 Genomics UK (COG-UK) Consortium|Loman|United Kingdom

>Spike|hCoV-19/USA/WA-S2455/2020|2020-06-16|EPI\_ISL\_497087|Original|hCoV-19^^Washington|Human|Washington State Department of Health|Seattle Flu Study|Lee|USA

>Spike|hCoV-19/Japan/PG-2878/2020|2020-04-00|EPI\_ISL\_691004|Original|hCoV-19^^Japan|Human|Pathogen Genomics Center|Pathogen Genomics Center|Sekizuka|Japan

>Spike|hCoV-19/England/QEUH-9634F7/2020|2020-08-10|EPI\_ISL\_531614|Original|hCoV-19^^England|Human|Lighthouse Lab in Glasgow|Wellcome Sanger Institute for the COVID-19 Genomics UK (COG-UK) consortium|Davies|United Kingdom

>Spike|hCoV-19/USA/NY-QDX-843/2020|2020-03-16|EPI\_ISL\_571654|Original|hCoV-19^^New York|Human|Quest Diagnostics|Quest Diagnostics|Kagan|USA



>Spike|hCoV-19/England/ALDP-9CBD01/2020|2020-09-16|EPI\_ISL\_575645|Original|hCoV-19^^England|Human|Lighthouse Lab in Alderley Park|Wellcome Sanger Institute for the COVID-19 Genomics UK (COG-UK) consortium|Davies|United Kingdom

>Spike|hCoV-19/India/TG-CCMB-AA972/2020|2020-08-13|EPI\_ISL\_539636|Original|hCoV-19^^Telangana|Human|CSIR-Centre for Cellular and Molecular Biology|CSIR-Centre for Cellular and Molecular Biology|Mukherjee|India

>Spike|hCoV-19/USA/WI-UW-953/2020|2020-05-19|EPI\_ISL\_509952|Original|hCoV-19^^Wisconsin|Human|University of Wisconsin-Madison AIDS Vaccine Research Laboratories|University of Wisconsin-Madison AIDS Vaccine Research Laboratories|Baczenas|USA

>Spike|hCoV-19/Austria/CeMM0278/2020|2020-03-25|EPI\_ISL\_438105|Original|hCoV-19^^Vienna|Human|Center for Virology|Bergthaler laboratory|Bergthaler|Austria

>Spike|hCoV-19/Netherlands/LI-RIVM-20240/2020|2020-12-02|EPI\_ISL\_723389|Original|hCoV-19^^Limburg|Human|Dutch COVID-19 response team|National Institute for Public Health and the Environment (RIVM)|Meijer|Netherlands

>Spike|hCoV-19/England/MILK-9E04A7/2020|2020-09-20|EPI\_ISL\_601470|Original|hCoV-19^^England|Human|Lighthouse Lab in Milton Keynes|Wellcome Sanger Institute for the COVID-19 Genomics UK (COG-UK) consortium|Davies|United Kingdom

>Spike|hCoV-19/England/CAMC-A5855B/2020|2020-10-08|EPI\_ISL\_596940|Original|hCoV-19^^England|Human|Lighthouse Lab in Cambridge|Wellcome Sanger Institute for the COVID-19 Genomics UK (COG-UK) consortium|Davies|United Kingdom

>Spike|hCoV-19/New Zealand/20CV0175/2020|2020-08-26|EPI\_ISL\_548044|Original|hCoV-19^^Auckland|Human|North Shore Hospital|Institute of Environmental Science and Research (ESR)|Wang|New Zealand

>Spike|hCoV-19/England/CAMC-B21903/2020|2020-11-01|EPI\_ISL\_647328|Original|hCoV-19^^England|Human|Lighthouse Lab in Cambridge|Wellcome Sanger Institute for the COVID-19 Genomics UK (COG-UK) Consortium|Davies|United Kingdom

>Spike|hCoV-19/United Arab Emirates/0831/2020|2020-05-19|EPI\_ISL\_698970|Original|hCoV-19^^Abu Dhabi|Human|Group 42 (G42) Healthcare|G42 Healthcare|Ogrodzki|United Arab Emirates

>Spike|hCoV-19/Japan/PG-5762/2020|2020-08-00|EPI\_ISL\_688881|Original|hCoV-19^^Japan|Human|Pathogen Genomics Center|Pathogen Genomics Center|Sekizuka|Japan

>Spike|hCoV-19/England/MILK-A69BEC/2020|2020-10-09|EPI\_ISL\_608801|Original|hCoV-19^^England|Human|Lighthouse Lab in Milton Keynes|Wellcome Sanger Institute for the COVID-19 Genomics UK (COG-UK) consortium|Davies|United Kingdom

>Spike|hCoV-19/England/LIVE-A9F48/2020|2020-03-23|EPI\_ISL\_517376|Original|hCoV-19^^England|Human|Liverpool Clinical Laboratories|COVID-19 Genomics UK (COG-UK) Consortium|Haldenby|United Kingdom

>Spike|hCoV-19/USA/WI-UW-1384/2020|2020-09-05|EPI\_ISL\_536755|Original|hCoV-19^^Wisconsin|Human|University of Wisconsin-Madison AIDS Vaccine Research Laboratories|University of Wisconsin-Madison AIDS Vaccine Research Laboratories|Baczenas|USA

>Spike|hCoV-19/USA/TX-HMH-3208/2020|2020-06-12|EPI\_ISL\_544077|Original|hCoV-19^^Texas|Human|Houston Methodist Hospital|Houston Methodist Hospital|Long|USA

>Spike|hCoV-19/USA/WA-UW-3868/2020|2020-03-25|EPI\_ISL\_427197|Original|hCoV-19^^Washington|Human|UW Virology Lab|UW Virology Lab|Roychoudhury|USA

>Spike|hCoV-19/Switzerland/BL-UHB-42167842/2020|2020-02-26|EPI\_ISL\_527917|Original|hCoV-19^^Basel-Land|Human|University Hospital Basel|University Hospital Basel|Roloff Handschin|Switzerland

>Spike|hCoV-19/Canada/QC-LSPQ-L00239407/2020|2020-03-24|EPI\_ISL\_536250|Original|hCoV-19^^Quebec|Human|H\u00f4pital du Centre-de-la-Mauricie|Laboratoire de sant\u00e9 publique du Qu\u00e9bec|Moreira|Canada

>Spike|hCoV-19/USA/AZ-TG670264/2020|2020-04-30|EPI\_ISL\_696440|Original|hCoV-19^^Arizona|Human|Sonora Quest Laboratories|TGen North|French|USA

>Spike|hCoV-19/USA/AZ-TG366765/2020|2020-06-04|EPI\_ISL\_694511|Original|hCoV-19^^Arizona|Human|AZ SPHL|TGen North|French|USA

>Spike|hCoV-19/England/MILK-9F1AED/2020|2020-09-23|EPI\_ISL\_589660|Original|hCoV-19^^England|Human|Lighthouse Lab in Milton Keynes|Wellcome Sanger Institute for the COVID-19 Genomics UK (COG-UK) consortium|Davies|United Kingdom

>Spike|hCoV-19/Denmark/DCGC-1120/2020|2020-03-09|EPI\_ISL\_614591|Original|hCoV-19^^Syddanmark|Human|Department of Virus and Microbiological Special Diagnostics|Albertsen lab|Michaelsen|Denmark

>Spike|hCoV-19/England/QEUA-C03E61/2020|2020-12-03|EPI\_ISL\_720761|Original|hCoV-19^^England|Human|Lighthouse Lab in Glasgow|Wellcome Sanger Institute for the COVID-19 Genomics UK (COG-UK) Consortium|Davies|United Kingdom

>Spike|hCoV-19/USA/WA-S2589/2020|2020-06-18|EPI\_ISL\_497221|Original|hCoV-19^^Washington|Human|Washington State Department of Health|Seattle Flu Study|Lee|USA

>Spike|hCoV-19/England/ALDP-B4671D/2020|2020-11-07|EPI\_ISL\_656138|Original|hCoV-19^^England|Human|Lighthouse Lab in Alderley Park|Wellcome Sanger Institute for the COVID-19 Genomics UK (COG-UK) Consortium|Davies|United Kingdom

>Spike|hCoV-19/USA/TX-HMH-MCoV-18617/2020|2020-11-20|EPI\_ISL\_784965|Original|hCoV-19^^Texas|Human|Houston Methodist Hospital|Houston Methodist Hospital|Long|USA

>Spike|hCoV-19/England/OXON-AEC97/2020|2020-04-08|EPI\_ISL\_448776|Original|hCoV-19^^England|Human|Oxford Viromics|COVID-19 Genomics UK (COG-UK) Consortium|Golubchik|United Kingdom

>Spike|hCoV-19/USA/ME-HETL-J0259/2020|2020-09-29|EPI\_ISL\_755407|Original|hCoV-19^^Maine|Human|Maine Health and Environmental Testing Laboratory|Tewhey Lab|Tewhey|USA

>Spike|hCoV-19/Chile/RM-191226/2020|2020-09-26|EPI\_ISL\_746746|Original|hCoV-19^^Region Metropolitana de Santiago|Human|Genetica Molecular and Subdepartamento de Virologia ISP Chile|Instituto de Salud Publica de Chile|Tognarelli|Chile

>Spike|hCoV-19/England/MILK-993C9C/2020|2020-08-27|EPI\_ISL\_552326|Original|hCoV-19^^England|Human|Lighthouse Lab in Milton Keynes|Wellcome Sanger Institute for the COVID-19 Genomics UK (COG-UK) consortium|Davies|United Kingdom

>Spike|hCoV-19/Australia/VIC7506/2020|2020-00-00|EPI\_ISL\_564455|Original|hCoV-19^^Victoria|Human|Microbiological Diagnostic Unit - Public Health Laboratory (MDU-PHL)|MDU-PHL|Schultz|Australia

>Spike|hCoV-19/England/ALDP-BB547C/2020|2020-11-20|EPI\_ISL\_701948|Original|hCoV-19^^England|Human|Lighthouse Lab in Alderley Park|Wellcome Sanger Institute for the COVID-19 Genomics UK (COG-UK) Consortium|Davies|United Kingdom

>Spike|hCoV-19/Portugal/PT0386/2020|2020-03-20|EPI\_ISL\_454102|Original|hCoV-19^^Portugal|Human|unknown|Instituto Nacional de Saude (INSA)|Borges|Portugal

>Spike|hCoV-19/USA/WA-UW-8330/2020|2020-04-27|EPI\_ISL\_570203|Original|hCoV-19^^Washington|Human|UW Virology Lab|UW Virology Lab|Roychoudhury|USA

>Spike|hCoV-19/USA/TX-HMH-MCoV-16101/2020|2020-10-27|EPI\_ISL\_785785|Original|hCoV-19^^Texas|Human|Houston Methodist Hospital|Houston Methodist Hospital|Long|USA

>Spike|hCoV-19/Peru/LIM-UPCH-0141/2020|2020-08-27|EPI\_ISL\_568535|Original|hCoV-19^^Lima|Human|Laboratorio de Referencia Nacional de Virus Respiratorios|Laboratorio de Gen\u00f3mica Microbiana|Tsukayama|Peru

>Spike|hCoV-19/Denmark/DCGC-8793/2020|2020-10-26|EPI\_ISL\_626040|Original|hCoV-19^^Syddanmark|Human|Department of Virus and Microbiological Special Diagnostics|Albertsen lab|Michaelsen|Denmark

>Spike|hCoV-19/USA/MI-UM-10036515220/2020|2020-10-19|EPI\_ISL\_628875|Original|hCoV-19^^Michigan|Human|University of Michigan Clinical Microbiology Laboratory|Lauring Lab|Valesano|USA

>Spike|hCoV-19/England/LIVE-9C7C8/2020|2020-04-01|EPI\_ISL\_449579|Original|hCoV-19^^England|Human|Liverpool Clinical Laboratories|COVID-19 Genomics UK (COG-UK) Consortium|Haldenby|United Kingdom

>Spike|hCoV-19/Japan/PG-3337/2020|2020-04-00|EPI\_ISL\_691452|Original|hCoV-19^^Japan|Human|Pathogen Genomics Center|Pathogen Genomics Center|Sekizuka|Japan

>Spike|hCoV-19/England/QEUA-96A988/2020|2020-08-17|EPI\_ISL\_531242|Original|hCoV-19^^England|Human|Lighthouse Lab in Glasgow|Wellcome Sanger Institute for the COVID-19 Genomics UK (COG-UK) consortium|Davies|United Kingdom

>Spike|hCoV-19/Wales/PHWC-1639D2/2020|2020-05-07|EPI\_ISL\_474025|Original|hCoV-19^^Wales|Human|Originating lab|COVID-19 Genomics UK (COG-UK) Consortium|Moore|United Kingdom

>Spike|hCoV-19/England/ALDP-9CB5AF/2020|2020-09-16|EPI\_ISL\_575716|Original|hCoV-19^^England|Human|Lighthouse Lab in Alderley Park|Wellcome Sanger Institute for the COVID-19 Genomics UK (COG-UK) consortium|Davies|United Kingdom

>Spike|hCoV-19/England/CAMC-9B1B8C/2020|2020-09-03|EPI\_ISL\_566457|Original|hCoV-19^^England|Human|Lighthouse Lab in Cambridge|Wellcome Sanger Institute for the COVID-19 Genomics UK (COG-UK) consortium|Davies|United Kingdom

>Spike|hCoV-19/Scotland/QEUA-9E4090/2020|2020-09-24|EPI\_ISL\_601026|Original|hCoV-19^^Scotland|Human|Lighthouse Lab in Glasgow|Wellcome Sanger Institute for the COVID-19 Genomics UK (COG-UK) consortium|Davies|United Kingdom

>Spike|hCoV-19/USA/TX-HMH-MCoV-12486/2020|2020-09-28|EPI\_ISL\_790361|Original|hCoV-19^^Texas|Human|Houston Methodist Hospital|Houston Methodist Hospital|Long|USA

>Spike|hCoV-19/England/QEUA-B7F9BB/2020|2020-11-14|EPI\_ISL\_668282|Original|hCoV-19^^England|Human|Lighthouse Lab in Glasgow|Wellcome Sanger Institute for the COVID-19 Genomics UK (COG-UK) Consortium|Davies|United Kingdom

>Spike|hCoV-19/India/GJ-GBRC347b/2020|2020-06-18|EPI\_ISL\_514590|Original|hCoV-19^^Gujarat|Human|B.J. Medical College and Civil hospital|Gujarat Biotechnology Research Centre|Joshi|India

>Spike|hCoV-19/Denmark/DCGC-8552/2020|2020-10-26|EPI\_ISL\_625847|Original|hCoV-19^^Hovedstaden|Human|Department of Virus and Microbiological Special Diagnostics|Albertsen lab|Michaelsen|Denmark

>Spike|hCoV-19/England/QEUA-A2055C/2020|2020-10-01|EPI\_ISL\_587651|Original|hCoV-19^^England|Human|Lighthouse Lab in Glasgow|Wellcome Sanger Institute for the COVID-19 Genomics UK (COG-UK) consortium|Davies|United Kingdom

>Spike|hCoV-19/USA/UT-UPHL-2008937/2020|2020-05-27|EPI\_ISL\_525042|Original|hCoV-19^^Utah|Human|Utah Public Health Laboratory|Utah Public Health Laboratory|Young|USA

>Spike|hCoV-19/India/MH-ACTREC-134/2020|2020-05-28|EPI\_ISL\_699790|Original|hCoV-19^^Maharashtra|Human|Hematopathology Laboratory|Hematopathology Laboratory|Patkar|India

>Spike|hCoV-19/North Macedonia/ChVir7912/2020|2020-06-25|EPI\_ISL\_492082|Original|hCoV-19^^North Macedonia|Human|Institute for Public Health of the Republic of North Macedonia|Charite Universitatsmedizin Berlin|Muehlemann|North Macedonia

>Spike|hCoV-19/England/QEUA-A1EE0B/2020|2020-10-01|EPI\_ISL\_587354|Original|hCoV-19^^England|Human|Lighthouse Lab in Glasgow|Wellcome Sanger Institute for the COVID-19 Genomics UK (COG-UK) consortium|Davies|United Kingdom

>Spike|hCoV-19/Denmark/DCGC-11968/2020|2020-09-14|EPI\_ISL\_670654|Original|hCoV-19^^Nordjylland|Human|Department of Virus and Microbiological Special Diagnostics|Albertsen Lab|Michaelsen|Denmark

>Spike|hCoV-19/USA/TX-DSHS-1972/2020|2020-06-14|EPI\_ISL\_766732|Original|hCoV-19^^Texas|Human|Texas Department of State Health Services|Texas Department of State Health Services|Rahman|USA

>Spike|hCoV-19/Netherlands/UT-EMC-216/2020|2020-12-10|EPI\_ISL\_722763|Original|hCoV-19^^Utrecht|Human|Dutch COVID-19 response team|Erasmus Medical Center|Oude Munnink|Netherlands

>Spike|hCoV-19/Scotland/CVR1932/2020|2020-04-08|EPI\_ISL\_484525|Original|hCoV-19^^Scotland|Human|West of Scotland Specialist Virology Centre|COVID-19 Genomics UK (COG-UK) Consortium|Robertson|United Kingdom

>Spike|hCoV-19/England/BRIS-13075C/2020|2020-04-12|EPI\_ISL\_492529|Original|hCoV-19^^England|Human|PHE South West Regional Laboratory|Wellcome Sanger Institute for the COVID-19 Genomics UK (COG-UK) consortium|Davies|United Kingdom

>Spike|hCoV-19/England/EXET-13E5FA/2020|2020-00-00|EPI\_ISL\_724335|Original|hCoV-19^^England|Human|University of Exeter|COVID-19 Genomics UK (COG-UK) Consortium|Temperton|United Kingdom

>Spike|hCoV-19/Scotland/EDB5438/2020|2020-04-11|EPI\_ISL\_473820|Original|hCoV-19^^Scotland|Human|Virology Department|COVID-19 Genomics UK (COG-UK) Consortium|Williams|United Kingdom

>Spike|hCoV-19/USA/TX-HMH-MCoV-8923/2020|2020-07-02|EPI\_ISL\_780834|Original|hCoV-19^^Texas|Human|Houston Methodist Hospital|Houston Methodist Hospital|Long|USA

>Spike|hCoV-19/Norway/3585/2020|2020-07-31|EPI\_ISL\_590940|Original|hCoV-19^^Norway|Human|University Hospital of Northern Norway|Norwegian Institute of Public Health|Vollan|Norway

>Spike|hCoV-19/Netherlands/Utrecht\_39/2020|2020-04-28|EPI\_ISL\_461237|Original|hCoV-19^^Utrecht|Human|Dutch COVID-19 response team|Erasmus Medical Center|Oude Munnink|Netherlands

>Spike|hCoV-19/England/NORT-281B04/2020|2020-03-23|EPI\_ISL\_472176|Original|hCoV-19^^England|Human|Northumbria University / South Tees Hospitals NHS Foundation Trust / North Cumbria Integrated Care NHS Foundation Trust / North Tees and Hartlepool NHS Foundation Trust / Newcastle Hospitals NHS Foundation Trust|COVID-19 Genomics UK (COG-UK) Consortium|Bashton|United Kingdom

>Spike|hCoV-19/Netherlands/Gelderland\_120/2020|2020-05-22|EPI\_ISL\_460881|Original|hCoV-19^^Gelderland|Human|Dutch COVID-19 response team|Erasmus Medical Center|Oude Munnink|Netherlands

>Spike|hCoV-19/England/MILK-9C32CE/2020|2020-09-10|EPI\_ISL\_566816|Original|hCoV-19^^England|Human|Lighthouse Lab in Milton Keynes|Wellcome Sanger Institute for the COVID-19 Genomics UK (COG-UK) consortium|Davies|United Kingdom

>Spike|hCoV-19/England/OXON-B0CB0/2020|2020-04-17|EPI\_ISL\_478952|Original|hCoV-19^^England|Human|Oxford Viromics|COVID-19 Genomics UK (COG-UK) Consortium|Golubchik|United Kingdom

>Spike|hCoV-19/England/CAMB-1B873E/2020|2020-10-27|EPI\_ISL\_650265|Original|hCoV-19^^England|Human|Department of Pathology|COVID-19 Genomics UK (COG-UK) Consortium|Goodfellow|United Kingdom

>Spike|hCoV-19/Denmark/DCGC-17538/2020|2020-12-14|EPI\_ISL\_751053|Original|hCoV-19^^Hovedstaden|Human|Department of Virus and Microbiological Special Diagnostics|Albertsen Lab|Michaelsen|Denmark

>Spike|hCoV-19/England/MILK-9781E9/2020|2020-07-29|EPI\_ISL\_526404|Original|hCoV-19^^England|Human|Queens Medical Centre|COVID-19 Genomics UK (COG-UK) Consortium|Loose|United Kingdom

>Spike|hCoV-19/England/NOTT-1205DD/2020|2020-12-08|EPI\_ISL\_725631|Original|hCoV-19^^England|Human|Queens Medical Centre|COVID-19 Genomics UK (COG-UK) Consortium|Loose|United Kingdom

>Spike|hCoV-19/Denmark/DCGC-9518/2020|2020-11-09|EPI\_ISL\_668474|Original|hCoV-19^^Hovedstaden|Human|Department of Virus and Microbiological Special Diagnostics|Albertsen Lab|Michaelsen|Denmark

>Spike|hCoV-19/USA/WA-UW-1295/2020|2020-03-18|EPI\_ISL\_422990|Original|hCoV-19^^Washington|Human|UW Virology Lab|UW Virology Lab|Roychoudhury|USA

>Spike|hCoV-19/USA/AZ-TG547254/2020|2020-07-03|EPI\_ISL\_695450|Original|hCoV-19^^Arizona|Human|AZ SPHL|TGen North|French|USA

>Spike|hCoV-19/Germany/HH-hpi-p1544/2020|2020-03-15|EPI\_ISL\_776035|Original|hCoV-19^^Hamburg|Human|University Medical Center Hamburg Eppendorf|Heinrich Pette Institute|Robitaille|Germany

>Spike|hCoV-19/India/MH-AFCO-9304/2020|2020-06-23|EPI\_ISL\_722195|Original|hCoV-19^^Maharashtra|Human|Armed Forces Medical College|National Centre For Cell Science|Paul|India

>Spike|hCoV-19/Denmark/DCGC-19113/2020|2020-12-07|EPI\_ISL\_748764|Original|hCoV-19^^Hovedstaden|Human|Department of Virus and Microbiological Special Diagnostics|Albertsen Lab|Michaelsen|Denmark

>Spike|hCoV-19/USA/VA-DCLS-2454/2020|2020-11-18|EPI\_ISL\_734199|Original|hCoV-19^^Virginia|Human|Virginia Division of Consolidated Laboratory Services (DCLS)|Virginia Division of Consolidated Laboratory Services (DCLS)|St. Jacques|USA

>Spike|hCoV-19/Northern Ireland/NIRE-FC9C0/2020|2020-04-21|EPI\_ISL\_470027|Original|hCoV-19^^Northern Ireland|Human|Regional Virus Laboratory|Wellcome Sanger Institute for the COVID-19 Genomics UK (COG-UK) consortium|Davies|United Kingdom

>Spike|hCoV-19/England/ALDP-9E5CAA/2020|2020-09-24|EPI\_ISL\_589298|Original|hCoV-19^^England|Human|Lighthouse Lab in Alderley Park|Wellcome Sanger Institute for the COVID-19 Genomics UK (COG-UK) consortium|Davies|United Kingdom

>Spike|hCoV-19/USA/TX-HMH-MCoV-9574/2020|2020-07-05|EPI\_ISL\_780163|Original|hCoV-19^^Texas|Human|Houston Methodist Hospital|Houston Methodist Hospital|Long|USA

>Spike|hCoV-19/New Zealand/20CV0063/2020|2020-06-19|EPI\_ISL\_548104|Original|hCoV-19^^Combined Auckland|Human|LabTests|Institute of Environmental Science and Research (ESR)|Wang|New Zealand

>Spike|hCoV-19/England/ALDP-984C43/2020|2020-08-01|EPI\_ISL\_529567|Original|hCoV-19^^England|Human|Quadram Institute Bioscience|COVID-19 Genomics UK (COG-UK) Consortium|Alikhan|United Kingdom

>Spike|hCoV-19/England/ALDP-A6F8A3/2020|2020-10-15|EPI\_ISL\_607228|Original|hCoV-19^^England|Human|Lighthouse Lab in Alderley Park|Wellcome Sanger Institute for the COVID-19 Genomics UK (COG-UK) consortium|Davies|United Kingdom

>Spike|hCoV-19/England/CAMB-1AE0F4/2020|2020-04-26|EPI\_ISL\_524608|Original|hCoV-19^^England|Human|Department of Pathology|Wellcome Sanger Institute for the COVID-19 Genomics UK (COG-UK) consortium|Davies|United Kingdom

>Spike|hCoV-19/England/QEUEH-9AEF77/2020|2020-09-03|EPI\_ISL\_573518|Original|hCoV-19^^England|Human|University College London|COVID-19 Genomics UK (COG-UK) Consortium|Roy|United Kingdom

>Spike|hCoV-19/Scotland/QEUEH-95F1D9/2020|2020-08-09|EPI\_ISL\_532301|Original|hCoV-19^^Scotland|Human|NHSGGC West of Scotland Specialist Virology Centre / MRC-University of Glasgow Centre for Virus Research|Wellcome Sanger Institute for the COVID-19 Genomics UK (COG-UK) consortium|Davies|United Kingdom

>Spike|hCoV-19/USA/WI-UW-158/2020|2020-03-15|EPI\_ISL\_428254|Original|hCoV-19^^Wisconsin|Human|University of Wisconsin-Madison AIDS Vaccine Research Laboratories|University of Wisconsin-Madison AIDS Vaccine Research Laboratories|Moreno|USA

>Spike|hCoV-19/USA/MI-MDHHS-SC21214/2020|2020-04-01|EPI\_ISL\_507471|Original|hCoV-19^^Michigan|Human|Michigan Department of Health and Human Services|Michigan Department of Health and Human Services|Blankenship|USA

>Spike|hCoV-19/Denmark/DCGC-13201/2020|2020-11-30|EPI\_ISL\_712648|Original|hCoV-19^^Hovedstaden|Human|Department of Virus and Microbiological Special Diagnostics|Albertsen Lab|Michaelsen|Denmark

>Spike|hCoV-19/Scotland/QEUEH-7C6290/2020|2020-07-23|EPI\_ISL\_532858|Original|hCoV-19^^Scotland|Human|NHSGGC West of Scotland Specialist Virology Centre / MRC-University of Glasgow Centre for Virus Research|Wellcome Sanger Institute for the COVID-19 Genomics UK (COG-UK) consortium|Davies|United Kingdom

>Spike|hCoV-19/Italy/LOM-INMI-13221/2020|2020-03-01|EPI\_ISL\_460085|Original|hCoV-19^^Lombardy|Human|Molecular Virology Unit|Laboratory of Virology|Gruber|Italy

>Spike|hCoV-19/Wales/PHWC-4A55DD/2020|2020-12-16|EPI\_ISL\_764891|Original|hCoV-19^^Wales|Human|Wales Specialist Virology Centre Sequencing lab|COVID-19 Genomics UK (COG-UK) Consortium|Moore|United Kingdom

>Spike|hCoV-19/Sweden/20-22736/2020|2020-05-06|EPI\_ISL\_615086|Original|hCoV-19^^Stockholm|Human|Karolinska Universitetslaboratoriet|The Public Health Agency of Sweden|Svartstr\u00f6m|Sweden

>Spike|hCoV-19/England/QEUEH-B2E265/2020|2020-11-03|EPI\_ISL\_646387|Original|hCoV-19^^England|Human|Lighthouse Lab in Glasgow|Wellcome Sanger Institute for the COVID-19 Genomics UK (COG-UK) Consortium|Davies|United Kingdom

>Spike|hCoV-19/Australia/NSW138/2020|2020-03-23|EPI\_ISL\_427761|Original|hCoV-19^^New South Wales|Human|Centre for Infectious Diseases and Microbiology Public Health|NSW Health Pathology - Institute of Clinical Pathology and Medical Research; Westmead Hospital; University of Sydney|Gall|Australia

>Spike|hCoV-19/Australia/VIC14825/2020|2020-09-26|EPI\_ISL\_593014|Original|hCoV-19^^Victoria|Human|Microbiological Diagnostic Unit - Public Health Laboratory (MDU-PHL)|MDU-PHL|Schultz|Australia

>Spike|hCoV-19/England/LOND-12513B7/2020|2020-11-14|EPI\_ISL\_665648|Original|hCoV-19^^England|Human|University College London Hospital|COVID-19 Genomics UK (COG-UK) Consortium|Byott|United Kingdom

>Spike|hCoV-19/Wales/PHWC-27425/2020|2020-03-30|EPI\_ISL\_432338|Original|hCoV-19^^Wales|Human|Wales Specialist Virology Centre|Public Health Wales Microbiology Cardiff|Moore|United Kingdom

>Spike|hCoV-19/England/ALDP-9B5A03/2020|2020-08-28|EPI\_ISL\_590441|Original|hCoV-19^^England|Human|Lighthouse Lab in Alderley Park|Wellcome Sanger Institute for the COVID-19 Genomics UK (COG-UK) consortium|Davies|United Kingdom

>Spike|hCoV-19/England/MILK-9747DC/2020|2020-08-16|EPI\_ISL\_575959|Original|hCoV-19^^England|Human|Lighthouse Lab in Milton Keynes|Wellcome Sanger Institute for the COVID-19 Genomics UK (COG-UK) consortium|Davies|United Kingdom

>Spike|hCoV-19/Wales/PHWC-49BA44/2020|2020-12-06|EPI\_ISL\_742419|Original|hCoV-19^^Wales|Human|Wales Specialist Virology Centre Sequencing lab|COVID-19 Genomics UK (COG-UK) Consortium|Moore|United Kingdom

>Spike|hCoV-19/Wuhan/HB-WH1-138/2020|2020-02-24|EPI\_ISL\_454915|Original|hCoV-19^^Hubei|Human|Wuhan Chain Medical Labs (CMLabs)|State Key Laboratory of Biotherapy of Sichuan University|Tang|China

>Spike|hCoV-19/England/PORT-2D76A4/2020|2020-11-08|EPI\_ISL\_650981|Original|hCoV-19^^England|Human|Centre for Enzyme Innovation|COVID-19 Genomics UK (COG-UK) Consortium|Robson|United Kingdom

>Spike|hCoV-19/USA/MN-MDH-1111/2020|2020-05-03|EPI\_ISL\_470791|Original|hCoV-19^^Minnesota|Human|M Health Fairview|Minnesota Department of Health|Garfin|USA

>Spike|hCoV-19/England/CAMC-B3343A/2020|2020-11-05|EPI\_ISL\_659315|Original|hCoV-19^^England|Human|Lighthouse Lab in Cambridge|Wellcome Sanger Institute for the COVID-19 Genomics UK (COG-UK) Consortium|Davies|United Kingdom

>Spike|hCoV-19/USA/TX-HMH-7571/2020|2020-06-25|EPI\_ISL\_546862|Original|hCoV-19^^Texas|Human|Houston Methodist Hospital|Houston Methodist Hospital|Long|USA

>Spike|hCoV-19/Wales/PHWC-48FC4D/2020|2020-11-11|EPI\_ISL\_681206|Original|hCoV-19^^Wales|Human|Wales Specialist Virology Centre Sequencing lab|COVID-19 Genomics UK (COG-UK) Consortium|Moore|United Kingdom

>Spike|hCoV-19/England/NOTT-10FA8A/2020|2020-04-06|EPI\_ISL\_432680|Original|hCoV-19^^England|Human|Queens Medical Centre|COVID-19 Genomics UK (COG-UK) Consortium|Loose|United Kingdom

>Spike|hCoV-19/USA/WA-UW-22258/2020|2020-08-03|EPI\_ISL\_570646|Original|hCoV-19^^Washington|Human|UW Virology Lab|UW Virology Lab|Roychoudhury|USA

>Spike|hCoV-19/Australia/VIC12018/2020|2020-09-12|EPI\_ISL\_563507|Original|hCoV-19^^Victoria|Human|Microbiological Diagnostic Unit - Public Health Laboratory (MDU-PHL)|MDU-PHL|Schultz|Australia

>Spike|hCoV-19/England/CAMB-1B3B82/2020|2020-05-27|EPI\_ISL\_461581|Original|hCoV-19^^England|Human|Department of Pathology|COVID-19 Genomics UK (COG-UK) Consortium|Meredith|United Kingdom

>Spike|hCoV-19/Australia/VIC15530/2020|2020-08-07|EPI\_ISL\_593349|Original|hCoV-19^^Victoria|Human|Microbiological Diagnostic Unit - Public Health Laboratory (MDU-PHL)|MDU-PHL|Schultz|Australia

>Spike|hCoV-19/Scotland/CVR4481/2020|2020-09-20|EPI\_ISL\_585345|Original|hCoV-19^^Scotland|Human|Lighthouse Lab in Glasgow / MRC-University of Glasgow Centre for Virus Research|COVID-19 Genomics UK (COG-UK) Consortium|Robertson|United Kingdom

>Spike|hCoV-19/Germany/HH-hpi-pl442/2020|2020-03-10|EPI\_ISL\_775961|Original|hCoV-19^^Hamburg|Human|University Medical Center Hamburg Eppendorf|Heinrich Pette Institute|Robitaille|Germany

>Spike|hCoV-19/USA/TX-HMH-MCoV-8489/2020|2020-07-01|EPI\_ISL\_780588|Original|hCoV-19^^Texas|Human|Houston Methodist Hospital|Houston Methodist Hospital|Long|USA

>Spike|hCoV-19/USA/NY-QDX-142/2020|2020-03-16|EPI\_ISL\_467893|Original|hCoV-19^^New York|Human|Quest Diagnostics|Quest Diagnostics|Kagan|USA

>Spike|hCoV-19/Scotland/CVR5883/2020|2020-11-16|EPI\_ISL\_705645|Original|hCoV-19^^Scotland|Human|West of Scotland Specialist Virology Centre|COVID-19 Genomics UK (COG-UK) Consortium|Robertson|United Kingdom

>Spike|hCoV-19/England/SHEF-C8D1C/2020|2020-05-21|EPI\_ISL\_484476|Original|hCoV-19^^England|Human|Virology Department|COVID-19 Genomics UK (COG-UK) Consortium|de Silva|United Kingdom

>Spike|hCoV-19/Denmark/DCGC-2307/2020|2020-08-10|EPI\_ISL\_617732|Original|hCoV-19^^Midtjylland|Human|Department of Virus and Microbiological Special Diagnostics|Albertsen lab|Michaelsen|Denmark

>Spike|hCoV-19/USA/TX-HMH-MCoV-12716/2020|2020-08-30|EPI\_ISL\_790479|Original|hCoV-19^^Texas|Human|Houston Methodist Hospital|Houston Methodist Hospital|Long|USA

>Spike|hCoV-19/Scotland/EDB3992/2020|2020-04-13|EPI\_ISL\_453103|Original|hCoV-19^^Scotland|Human|Virology Department|COVID-19 Genomics UK (COG-UK) Consortium|Williams|United Kingdom

>Spike|hCoV-19/England/204381150/2020|2020-10-22|EPI\_ISL\_649853|Original|hCoV-19^^England|Human|Respiratory Virus Unit|COVID-19 Genomics UK (COG-UK) Consortium|Platt|United Kingdom

>Spike|hCoV-19/England/ALDP-B83C8E/2020|2020-11-14|EPI\_ISL\_675201|Original|hCoV-19^^England|Human|Lighthouse Lab in Alderley Park|Wellcome Sanger Institute for the COVID-19 Genomics UK (COG-UK) Consortium|Davies|United Kingdom

>Spike|hCoV-19/Spain/AS-IBV-98006640/2020|2020-04-08|EPI\_ISL\_654622|Original|hCoV-19^^Asturias|Human|Servicio de Microbiolog\u00eda|SeqCOVID-SPAIN consortium/IBV (CSIC) |Comas|Spain

>Spike|hCoV-19/USA/CA-ALSR-1574/2020|2020-04-01|EPI\_ISL\_494667|Original|hCoV-19^^California|Human|Scripps Medical Laboratory|Andersen lab at Scripps Research|Gangavarapu|USA

>Spike|hCoV-19/England/OXON-AEBB8/2020|2020-00-00|EPI\_ISL\_448765|Original|hCoV-19^^England|Human|Oxford Viromics|COVID-19 Genomics UK (COG-UK) Consortium|Golubchik|United Kingdom

>Spike|hCoV-19/England/PORT-2D0DB5/2020|2020-03-30|EPI\_ISL\_475284|Original|hCoV-19^^England|Human|Centre for Enzyme Innovation|COVID-19 Genomics UK (COG-UK) Consortium|Robson|United Kingdom

>Spike|hCoV-19/England/CAMB-7CD80/2020|2020-04-06|EPI\_ISL\_442255|Original|hCoV-19^^England|Human|Department of Pathology|Wellcome Sanger Institute for the COVID-19 Genomics UK (COG-UK) consortium|Amato|United Kingdom

>Spike|hCoV-19/USA/TX-HMH-MCoV-16147/2020|2020-10-28|EPI\_ISL\_785831|Original|hCoV-19^^Texas|Human|Houston Methodist Hospital|Houston Methodist Hospital|Long|USA

>Spike|hCoV-19/USA/CA-CZB-2039/2020|2020-05-15|EPI\_ISL\_486284|Original|hCoV-19^^California|Human|Humboldt County Public Health Laboratory|Chan-Zuckerberg Biohub|McGeever|USA

>Spike|hCoV-19/Wales/PHWC-2F3C6/2020|2020-04-06|EPI\_ISL\_446244|Original|hCoV-19^^Wales|Human|Wales Specialist Virology Centre|Public Health Wales Microbiology Cardiff|Moore|United Kingdom

>Spike|hCoV-19/England/ALDP-CB661A/2020|2020-12-18|EPI\_ISL\_761675|Original|hCoV-19^^England|Human|Lighthouse Lab in Alderley Park|Wellcome Sanger Institute for the COVID-19 Genomics UK (COG-UK) Consortium|Davies|United Kingdom

>Spike|hCoV-19/England/MILK-BABA68/2020|2020-11-18|EPI\_ISL\_720569|Original|hCoV-19^^England|Human|Lighthouse Lab in Milton Keynes|Wellcome Sanger Institute for the COVID-19 Genomics UK (COG-UK) Consortium|Davies|United Kingdom

>Spike|hCoV-19/Scotland/EDB1402/2020|2020-04-11|EPI\_ISL\_487832|Original|hCoV-19^^Scotland|Human|Virology Department|Wellcome Sanger Institute for the COVID-19 Genomics UK (COG-UK) consortium|Davies|United Kingdom

>Spike|hCoV-19/USA/HI-H200591/2020|2020-11-21|EPI\_ISL\_753117|Original|hCoV-19^^Hawaii|Human|State Laboratories Division|State Laboratories Division|Sultana|USA

>Spike|hCoV-19/Japan/PG-3028/2020|2020-04-00|EPI\_ISL\_691151|Original|hCoV-19^^Japan|Human|Pathogen Genomics Center|Pathogen Genomics Center|Sekizuka|Japan

>Spike|hCoV-19/England/LOND-1264FDB/2020|2020-11-24|EPI\_ISL\_724578|Original|hCoV-19^^England|Human|University College London|COVID-19 Genomics UK (COG-UK) Consortium|Roy|United Kingdom

>Spike|hCoV-19/Spain/AR-IBV-005079/2020|2020-04-22|EPI\_ISL\_510362|Original|hCoV-19^^Aragon|Human|Servicio de Microbiolog\u00eda|SeqCOVID-SPAIN consortium/IBV (CSIC) |Comas|Spain

>Spike|hCoV-19/USA/NM-UNM-00639/2020|2020-05-08|EPI\_ISL\_560349|Original|hCoV-19^^New Mexico|Human|TriCore Reference Laboratories|Center for Global Health|Domman|USA

>Spike|hCoV-19/England/20128014506/2020|2020-03-19|EPI\_ISL\_423939|Original|hCoV-19^^England|Human|Respiratory Virus Unit|Respiratory Virus Unit|Platt|United Kingdom

>Spike|hCoV-19/Singapore/444/2020|2020-04-15|EPI\_ISL\_475975|Original|hCoV-19^^Singapore|Human|National Public Health Laboratory|National Public Health Laboratory|Mak|Singapore

>Spike|hCoV-19/Denmark/DCGC-7228/2020|2020-10-12|EPI\_ISL\_619213|Original|hCoV-19^^Midtjylland|Human|Department of Virus and Microbiological Special Diagnostics|Albertsen lab|Michaelsen|Denmark

>Spike|hCoV-19/Spain/PV-IBV-003250/2020|2020-03-16|EPI\_ISL\_480973|Original|hCoV-19^^Basque Country|Human|Servicio de Microbiolog\u00eda. Hospital Universitario Donostia. OSI Donostialdea. \u00c1rea de Enfermedades Infecciosas|SeqCOVID-SPAIN consortium/IBV (CSIC) |Comas|Spain

>Spike|hCoV-19/USA/MD-HP00030/2020|2020-03-20|EPI\_ISL\_434686|Original|hCoV-19^^Maryland|Human|Johns Hopkins Hospital Department of Pathology|Johns Hopkins Hospital Department of Pathology|Mehoke|USA

>Spike|hCoV-19/Scotland/EDB1183/2020|2020-04-08|EPI\_ISL\_433427|Original|hCoV-19^^Scotland|Human|Virology Department|COVID-19 Genomics UK (COG-UK) Consortium|Williams|United Kingdom

>Spike|hCoV-19/USA/VA-DCLS-1939/2020|2020-09-30|EPI\_ISL\_644927|Original|hCoV-19^^Virginia|Human|Virginia DCLS|Virginia DCLS|St. Jacques|USA

>Spike|hCoV-19/USA/WA-UW-31625/2020|2020-10-21|EPI\_ISL\_735488|Original|hCoV-19^^Washington|Human|UW Virology Lab|UW Virology Lab|Roychoudhury|USA

>Spike|hCoV-19/Sweden/20-51753/2020|2020-05-27|EPI\_ISL\_475527|Original|hCoV-19^^Uppsala|Human|Uppsala Narakut Aleris|The Public Health Agency of Sweden|Svartstr\u00f6m|Sweden

>Spike|hCoV-19/Wales/PHWC-4A41F8/2020|2020-12-16|EPI\_ISL\_764665|Original|hCoV-19^^Wales|Human|Wales Specialist Virology Centre Sequencing lab|COVID-19 Genomics UK (COG-UK) Consortium|Moore|United Kingdom

>Spike|hCoV-19/Switzerland/ZH-ETHZ-300259/2020|2020-10-01|EPI\_ISL\_603291|Original|hCoV-19^^Zurich|Human|Viollier AG|Department of Biosystems Science and Engineering|Nadeau|Switzerland

>Spike|hCoV-19/Netherlands/Utrecht\_8/2020|2020-03-03|EPI\_ISL\_414441|Original|hCoV-19^^Utrecht|Human|Dutch COVID-19 response team|Erasmus Medical Center|Oude Munnink|Netherlands

>Spike|hCoV-19/England/MILK-A22A4C/2020|2020-10-03|EPI\_ISL\_612539|Original|hCoV-19^^England|Human|Northumbria University / South Tees Hospitals NHS Foundation Trust / North Cumbria Integrated Care NHS Foundation Trust / North Tees and Hartlepool NHS Foundation Trust / Newcastle Hospitals NHS Foundation Trust|COVID-19 Genomics UK (COG-UK) Consortium|Bashton|United Kingdom

>Spike|hCoV-19/England/201380850/2020|2020-03-27|EPI\_ISL\_465839|Original|hCoV-19^^England|Human|Respiratory Virus Unit|Respiratory Virus Unit|Platt|United Kingdom

>Spike|hCoV-19/England/ALDP-C8B61E/2020|2020-12-17|EPI\_ISL\_756402|Original|hCoV-19^^England|Human|Lighthouse Lab in Alderley Park|Wellcome Sanger Institute for the COVID-19 Genomics UK (COG-UK) Consortium|Davies|United Kingdom

>Spike|hCoV-19/Singapore/82/2020|2020-04-14|EPI\_ISL\_435687|Original|hCoV-19^^Singapore|Human|National Public Health Laboratory|National Public Health Laboratory|Mak|Singapore

>Spike|hCoV-19/USA/CA-ALSR-1917/2020|2020-04-24|EPI\_ISL\_512233|Original|hCoV-19^^California|Human|San Diego County Public Health Laboratory|Andersen lab at Scripps Research|Gangavarapu|USA

>Spike|hCoV-19/England/205180794/2020|2020-12-16|EPI\_ISL\_766469|Original|hCoV-19^^England|Human|Respiratory Virus Unit|COVID-19 Genomics UK (COG-UK) Consortium|Platt|United Kingdom

>Spike|hCoV-19/Denmark/DCGC-1788/2020|2020-07-13|EPI\_ISL\_618212|Original|hCoV-19^^Hovedstaden|Human|Department of Virus and Microbiological Special Diagnostics|Albertsen lab|Michaelsen|Denmark

>Spike|hCoV-19/England/ALDP-A50B15/2020|2020-10-07|EPI\_ISL\_597814|Original|hCoV-19^^England|Human|Lighthouse Lab in Alderley Park|Wellcome Sanger Institute for the COVID-19 Genomics UK (COG-UK) consortium|Davies|United Kingdom

>Spike|hCoV-19/England/QEUA-AF0DD5/2020|2020-10-29|EPI\_ISL\_666006|Original|hCoV-19^^England|Human|Northumbria University / South Tees Hospitals NHS Foundation Trust / North Cumbria Integrated Care NHS Foundation Trust / North Tees and Hartlepool NHS Foundation Trust / Newcastle Hospitals NHS Foundation Trust|COVID-19 Genomics UK (COG-UK) Consortium|Bashton|United Kingdom

>Spike|hCoV-19/England/NOTT-112A93/2020|2020-04-23|EPI\_ISL\_493580|Original|hCoV-19^^England|Human|Lincolnshire Hospitals and DeepSeq Nottingham|COVID-19 Genomics UK (COG-UK) Consortium|Loose|United Kingdom

>Spike|hCoV-19/Brazil/SP-L10-CD142/2020|2020-03-14|EPI\_ISL\_476172|Original|hCoV-19^^S\u00e3o Paulo|Human|DB Diagn\u00f3sticos do Brasil|Instituto de Medicina Tropical da Universidade de S\u00e3o Paulo|Sabino|Brazil

>Spike|hCoV-19/USA/TX-HMH-1384/2020|2020-04-21|EPI\_ISL\_542687|Original|hCoV-19^^Texas|Human|Houston Methodist Hospital|Houston Methodist Hospital|Long|USA



>Spike|hCoV-19/England/ALDP-B62D91/2020|2020-11-08|EPI\_ISL\_655438|Original|hCoV-19^^England|Human|Lighthouse Lab in Alderley Park|Wellcome Sanger Institute for the COVID-19 Genomics UK (COG-UK) Consortium|Davies|United Kingdom

>Spike|hCoV-19/England/LEED-2A8C7D/2020|2020-04-01|EPI\_ISL\_539068|Original|hCoV-19^^England|Human|Leeds Teaching Hospitals NHS Trust and Public Health England|Wellcome Sanger Institute for the COVID-19 Genomics UK (COG-UK) consortium|Davies|United Kingdom

>Spike|hCoV-19/Scotland/CVR2574/2020|2020-04-16|EPI\_ISL\_477977|Original|hCoV-19^^Scotland|Human|West of Scotland Specialist Virology Centre|COVID-19 Genomics UK (COG-UK) Consortium|Robertson|United Kingdom

>Spike|hCoV-19/USA/UT-UPHL-2012165565/2020|2020-10-22|EPI\_ISL\_745610|Original|hCoV-19^^Utah|Human|Ginkgo Bioworks Clinical Laboratory|Utah Public Health Laboratory|Young|USA

>Spike|hCoV-19/USA/CA-CZB-12340/2020|2020-10-11|EPI\_ISL\_648415|Original|hCoV-19^^California|Human|Santa Clara County Public Health Laboratory|Chan-Zuckerberg Biohub|Bhatt|USA

>Spike|hCoV-19/Spain/CT-IBV-97010136/2020|2020-11-02|EPI\_ISL\_683647|Original|hCoV-19^^Catalunya|Human|Servicio de Microbiolog\u00eda|SeqCOVID-SPAIN consortium|IBV (CSIC) |Comas|Spain

>Spike|hCoV-19/England/QEUEH-B407B9/2020|2020-11-08|EPI\_ISL\_657262|Original|hCoV-19^^England|Human|Lighthouse Lab in Glasgow|Wellcome Sanger Institute for the COVID-19 Genomics UK (COG-UK) Consortium|Davies|United Kingdom

>Spike|hCoV-19/Wales/PHWC-166C4F/2020|2020-06-13|EPI\_ISL\_494097|Original|hCoV-19^^Wales|Human|Originating lab|COVID-19 Genomics UK (COG-UK) Consortium|Moore|United Kingdom

>Spike|hCoV-19/Netherlands/ZH-RIVM-20827/2020|2020-12-24|EPI\_ISL\_790883|Original|hCoV-19^^Zuid-holland|Human|Dutch COVID-19 response team|National Institute for Public Health and the Environment (RIVM)|Meijer|Netherlands

>Spike|hCoV-19/Australia/VIC5344/2020|2020-07-18|EPI\_ISL\_520107|Original|hCoV-19^^Victoria|Human|Microbiological Diagnostic Unit - Public Health Laboratory (MDU-PHL)|MDU-PHL|Schultz|Australia

>Spike|hCoV-19/Scotland/QEUEH-A0B548/2020|2020-10-03|EPI\_ISL\_599477|Original|hCoV-19^^Scotland|Human|Lighthouse Lab in Glasgow|Wellcome Sanger Institute for the COVID-19 Genomics UK (COG-UK) consortium|Davies|United Kingdom

>Spike|hCoV-19/USA/CT-Yale-295/2020|2020-03-28|EPI\_ISL\_476524|Original|hCoV-19^^New York|Human|Yale Clinical Virology Laboratory|Grubaugh Lab - Yale School of Public Health|Grubaugh|USA

>Spike|hCoV-19/France/ARA-9584/2020|2020-03-16|EPI\_ISL\_509003|Original|hCoV-19^^Auvergne-Rh\u00f4ne-Alpes|Human|GH Les Portes du Sud|CNR Virus des Infections Respiratoires - France SUD|Josset|France

>Spike|hCoV-19/USA/TX-HMH-MCoV-12175/2020|2020-09-21|EPI\_ISL\_790234|Original|hCoV-19^^Texas|Human|Houston Methodist Hospital|Houston Methodist Hospital|Long|USA

>Spike|hCoV-19/England/CAMC-B988CE/2020|2020-11-15|EPI\_ISL\_673651|Original|hCoV-19^^England|Human|Lighthouse Lab in Cambridge|Wellcome Sanger Institute for the COVID-19 Genomics UK (COG-UK) Consortium|Davies|United Kingdom

>Spike|hCoV-19/England/ALDP-C3B316/2020|2020-12-09|EPI\_ISL\_731697|Original|hCoV-19^^England|Human|Lighthouse Lab in Alderley Park|Wellcome Sanger Institute for the COVID-19 Genomics UK (COG-UK) Consortium|Davies|United Kingdom

>Spike|hCoV-19/USA/NY-NYUMC397/2020|2020-04-13|EPI\_ISL\_430424|Original|hCoV-19^^New York|Human|NYU Langone Health|Departments of Pathology and Medicine|Maurano|USA

>Spike|hCoV-19/India/TG-CCMB-R394/2020|2020-08-09|EPI\_ISL\_539630|Original|hCoV-19^^Telangana|Human|CSIR-Centre for Cellular and Molecular Biology|CSIR-Centre for Cellular and Molecular Biology|Mukherjee|India

>Spike|hCoV-19/Japan/PG-2203/2020|2020-04-00|EPI\_ISL\_685808|Original|hCoV-19^^Japan|Human|Pathogen Genomics Center|Pathogen Genomics Center|Sekizuka|Japan

>Spike|hCoV-19/Wales/PHWC-492CED/2020|2020-11-27|EPI\_ISL\_725777|Original|hCoV-19^^Wales|Human|Originating lab|COVID-19 Genomics UK (COG-UK) Consortium|Moore|United Kingdom

>Spike|hCoV-19/England/QEUA-BCCB5F/2020|2020-11-25|EPI\_ISL\_704354|Original|hCoV-19^^England|Human|Lighthouse Lab in Glasgow|Wellcome Sanger Institute for the COVID-19 Genomics UK (COG-UK) Consortium|Davies|United Kingdom

>Spike|hCoV-19/USA/TX-HMH-MCoV-18749/2020|2020-11-21|EPI\_ISL\_785088|Original|hCoV-19^^Texas|Human|Houston Methodist Hospital|Houston Methodist Hospital|Long|USA

>Spike|hCoV-19/Scotland/QEUA-C542ED/2020|2020-12-12|EPI\_ISL\_757055|Original|hCoV-19^^Scotland|Human|Lighthouse Lab in Glasgow|Wellcome Sanger Institute for the COVID-19 Genomics UK (COG-UK) Consortium|Davies|United Kingdom

>Spike|hCoV-19/Spain/MD-IBV-99007166/2020|2020-08-23|EPI\_ISL\_541936|Original|hCoV-19^^Madrid|Human|Hospital General Universitario Gregorio Marañón|SeqCOVID-SPAIN consortium/IBV (CSIC)|Comas|Spain

>Spike|hCoV-19/Ireland/D-SVUH-R5947/2020|2020-03-30|EPI\_ISL\_596649|Original|hCoV-19^^Dublin|Human|St.Vincent's University Hospital|St.Vincent's University Hospital|Gonzalez|Ireland

>Spike|hCoV-19/England/MILK-B965D8/2020|2020-11-13|EPI\_ISL\_676019|Original|hCoV-19^^England|Human|Lighthouse Lab in Milton Keynes|Wellcome Sanger Institute for the COVID-19 Genomics UK (COG-UK) Consortium|Davies|United Kingdom

>Spike|hCoV-19/England/QEUA-AADCA/2020|2020-10-22|EPI\_ISL\_624044|Original|hCoV-19^^England|Human|Lighthouse Lab in Glasgow|Wellcome Sanger Institute for the COVID-19 Genomics UK (COG-UK) consortium|Davies|United Kingdom

>Spike|hCoV-19/England/CAMC-B98F05/2020|2020-11-15|EPI\_ISL\_673354|Original|hCoV-19^^England|Human|Lighthouse Lab in Cambridge|Wellcome Sanger Institute for the COVID-19 Genomics UK (COG-UK) Consortium|Davies|United Kingdom

>Spike|hCoV-19/Australia/VIC3143/2020|2020-07-12|EPI\_ISL\_520850|Original|hCoV-19^^Victoria|Human|Microbiological Diagnostic Unit - Public Health Laboratory (MDU-PHL)|MDU-PHL|Schultz|Australia

>Spike|hCoV-19/USA/FL-BPHL-0470/2020|2020-04-02|EPI\_ISL\_495376|Original|hCoV-19^^Florida|Human|Florida Bureau of Public Health Laboratories|Florida Bureau of Public Health Laboratories|Blanton|USA

>Spike|hCoV-19/England/ALDP-B46A8D/2020|2020-11-07|EPI\_ISL\_656183|Original|hCoV-19^^England|Human|Lighthouse Lab in Alderley Park|Wellcome Sanger Institute for the COVID-19 Genomics UK (COG-UK) Consortium|Davies|United Kingdom

>Spike|hCoV-19/England/ALDP-B24654/2020|2020-11-04|EPI\_ISL\_646998|Original|hCoV-19^^England|Human|Lighthouse Lab in Alderley Park|Wellcome Sanger Institute for the COVID-19 Genomics UK (COG-UK) Consortium|Davies|United Kingdom

>Spike|hCoV-19/England/ALDP-8FEFF1/2020|2020-06-24|EPI\_ISL\_556986|Original|hCoV-19^^England|Human|Lighthouse Lab in Alderley Park|Wellcome Sanger Institute for the COVID-19 Genomics UK (COG-UK) consortium|Davies|United Kingdom

>Spike|hCoV-19/Shandong/LY007-2/2020|2020-01-25|EPI\_ISL\_414940|Original|hCoV-19^^Shandong|Human|Shandong Provincial Center for Disease Control and Prevention|Beijing Institute of Microbiology and Epidemiology|Ma|China

>Spike|hCoV-19/USA/TX-HMH-MCoV-15684/2020|2020-07-09|EPI\_ISL\_785368|Original|hCoV-19^^Texas|Human|Houston Methodist Hospital|Houston Methodist Hospital|Long|USA

>Spike|hCoV-19/USA/TX-HMH-2445/2020|2020-06-01|EPI\_ISL\_545312|Original|hCoV-19^^Texas|Human|Houston Methodist Hospital|Houston Methodist Hospital|Long|USA

>Spike|hCoV-19/England/LOND-12517F7/2020|2020-11-20|EPI\_ISL\_679440|Original|hCoV-19^^England|Human|University College London Hospital|COVID-19 Genomics UK (COG-UK) Consortium|Byott|United Kingdom

>Spike|hCoV-19/USA/MI-UM-10036633059/2020|2020-10-26|EPI\_ISL\_650041|Original|hCoV-19^^Michigan|Human|University of Michigan Clinical Microbiology Laboratory|Lauring Lab|Valesano|USA

>Spike|hCoV-19/England/LOND-D4472/2020|2020-04-08|EPI\_ISL\_444124|Original|hCoV-19^^England|Human|University College London|COVID-19 Genomics UK (COG-UK) Consortium|Roy|United Kingdom

>Spike|hCoV-19/England/MILK-B38CB5/2020|2020-11-01|EPI\_ISL\_658989|Original|hCoV-19^^England|Human|Lighthouse Lab in Milton Keynes|Wellcome Sanger Institute for the COVID-19 Genomics UK (COG-UK) Consortium|Davies|United Kingdom

>Spike|hCoV-19/USA/CA-ALSR-2332/2020|2020-07-07|EPI\_ISL\_635433|Original|hCoV-19^^California|Human|San Diego County Public Health Laboratory|Andersen lab at Scripps Research|Gangavarapu|USA

>Spike|hCoV-19/England/ALDP-CB5156/2020|2020-12-18|EPI\_ISL\_761816|Original|hCoV-19^^England|Human|Lighthouse Lab in Alderley Park|Wellcome Sanger Institute for the COVID-19 Genomics UK (COG-UK) Consortium|Davies|United Kingdom

>Spike|hCoV-19/Norway/4059/2020|2020-09-30|EPI\_ISL\_635136|Original|hCoV-19^^Tr\u00f8ndelag|Human|Department of Medical Microbiology|Norwegian Institute of Public Health|Vollan|Norway

>Spike|hCoV-19/Denmark/DCGC-3249/2020|2020-08-31|EPI\_ISL\_615946|Original|hCoV-19^^Hovedstaden|Human|Department of Virus and Microbiological Special Diagnostics|Albertsen lab|Michaelsen|Denmark

>Spike|hCoV-19/USA/NY-QDX-96/2020|2020-03-13|EPI\_ISL\_468588|Original|hCoV-19^^New York|Human|Quest Diagnostics|Quest Diagnostics|Kagan|USA

>Spike|hCoV-19/USA/MI-MDHHS-SC20683/2020|2020-05-12|EPI\_ISL\_471707|Original|hCoV-19^^Michigan|Human|Michigan Department of Health and Human Services|Michigan Department of Health and Human Services|Blankenship|USA

>Spike|hCoV-19/Canada/MB-NML-626/2020|2020-03-23|EPI\_ISL\_582293|Original|hCoV-19^^Manitoba|Human|Cadham Provincial Laboratory|National Microbiology Laboratory (NML)|Majer|Canada

>Spike|hCoV-19/USA/FL-BPHL-1055/2020|2020-06-03|EPI\_ISL\_517945|Original|hCoV-19^^Florida|Human|Florida Bureau of Public Health Laboratories|Florida Bureau of Public Health Laboratories|Blanton|USA

>Spike|hCoV-19/USA/MA\_2652/2020|2020-03-06|EPI\_ISL\_424914|Original|hCoV-19^^Massachusetts|Human|MA State Public Health Laboratory|Pathogen Discovery|Queen|USA

>Spike|hCoV-19/USA/TX-HMH-741/2020|2020-04-09|EPI\_ISL\_546747|Original|hCoV-19^^Texas|Human|Houston Methodist Hospital|Houston Methodist Hospital|Long|USA

>Spike|hCoV-19/England/NORW-EBB46/2020|2020-05-05|EPI\_ISL\_457480|Original|hCoV-19^^England|Human|Quadram Institute Bioscience|COVID-19 Genomics UK (COG-UK) Consortium|Alikhan|United Kingdom

>Spike|hCoV-19/Denmark/DCGC-4747/2020|2020-09-14|EPI\_ISL\_622186|Original|hCoV-19^^Syddanmark|Human|Department of Virus and Microbiological Special Diagnostics|Albertsen lab|Michaelsen|Denmark

>Spike|hCoV-19/Wales/PHWC-484817/2020|2020-10-23|EPI\_ISL\_628048|Original|hCoV-19^^Wales|Human|Wales Specialist Virology Centre Sequencing lab|COVID-19 Genomics UK (COG-UK) Consortium|Moore|United Kingdom

>Spike|hCoV-19/England/CAMC-B327AB/2020|2020-11-05|EPI\_ISL\_659567|Original|hCoV-19^^England|Human|Lighthouse Lab in Cambridge|Wellcome Sanger Institute for the COVID-19 Genomics UK (COG-UK) Consortium|Davies|United Kingdom

>Spike|hCoV-19/Australia/VIC8850/2020|2020-07-23|EPI\_ISL\_565235|Original|hCoV-19^^Victoria|Human|Microbiological Diagnostic Unit - Public Health Laboratory (MDU-PHL)|MDU-PHL|Schultz|Australia

>Spike|hCoV-19/USA/MI-UM-10036206650/2020|2020-09-30|EPI\_ISL\_590736|Original|hCoV-19^^Michigan|Human|University of Michigan Clinical Microbiology Laboratory|Lauring Lab|Valesano|USA

>Spike|hCoV-19/England/NORW-EE78B/2020|2020-00-00|EPI\_ISL\_529246|Original|hCoV-19^^England|Human|Quadram Institute Bioscience|COVID-19 Genomics UK (COG-UK) Consortium|Alikhan|United Kingdom

>Spike|hCoV-19/Denmark/DCGC-1183/2020|2020-03-16|EPI\_ISL\_614648|Original|hCoV-19^^Sjaelland|Human|Department of Virus and Microbiological Special Diagnostics|Albertsen lab|Michaelsen|Denmark

>Spike|hCoV-19/Germany/HH-hpi-p2059/2020|2020-03-21|EPI\_ISL\_775644|Original|hCoV-19^^Hamburg|Human|University Medical Center Hamburg Eppendorf|Heinrich Pette Institute|Robitaille|Germany

>Spike|hCoV-19/Scotland/CVR2466/2020|2020-04-14|EPI\_ISL\_493803|Original|hCoV-19^^Scotland|Human|West of Scotland Specialist Virology Centre|COVID-19 Genomics UK (COG-UK) Consortium|Robertson|United Kingdom

>Spike|hCoV-19/England/CAMB-7331E/2020|2020-03-23|EPI\_ISL\_440268|Original|hCoV-19^^England|Human|Department of Pathology|Wellcome Sanger Institute for the COVID-19 Genomics UK (COG-UK) consortium|Amato|United Kingdom

>Spike|hCoV-19/India/MH-ACTREC-296/2020|2020-07-14|EPI\_ISL\_699948|Original|hCoV-19^^Maharashtra|Human|Hematopathology Laboratory|Hematopathology Laboratory|Patkar|India

>Spike|hCoV-19/England/ALDP-A6743E/2020|2020-10-12|EPI\_ISL\_630423|Original|hCoV-19^^England|Human|Lighthouse Lab in Alderley Park|Wellcome Sanger Institute for the COVID-19 Genomics UK (COG-UK) consortium|Davies|United Kingdom

>Spike|hCoV-19/USA/CT-Yale-204/2020|2020-03-30|EPI\_ISL\_463142|Original|hCoV-19^^Connecticut|Human|Yale Clinical Virology Laboratory|Grubaugh Lab - Yale School of Public Health|Grubaugh|USA

>Spike|hCoV-19/USA/WA-S205/2020|2020-03-20|EPI\_ISL\_430243|Original|hCoV-19^^Washington|Human|Washington State Department of Health|Seattle Flu Study|Bedford|USA

>Spike|hCoV-19/Scotland/GCVR-172220/2020|2020-03-30|EPI\_ISL\_469966|Original|hCoV-19^^Scotland|Human|NHSGGC West of Scotland Specialist Virology Centre / MRC-University of Glasgow Centre for Virus Research|Wellcome Sanger Institute for the COVID-19 Genomics UK (COG-UK) consortium|Davies|United Kingdom

>Spike|hCoV-19/Scotland/EDB6099/2020|2020-05-12|EPI\_ISL\_478221|Original|hCoV-19^^Scotland|Human|Virology Department|COVID-19 Genomics UK (COG-UK) Consortium|Williams|United Kingdom

>Spike|hCoV-19/USA/IL-QDX-284/2020|2020-03-19|EPI\_ISL\_571035|Original|hCoV-19^^Illinois|Human|Quest Diagnostics|Quest Diagnostics|Kagan|USA

>Spike|hCoV-19/USA/CA-CHLA-PLM67203110/2020|2020-12-04|EPI\_ISL\_753623|Original|hCoV-19^^California|Human|Clinical virology Laboratory|Center for Personalized Medicine|Dien Bard|USA

>Spike|hCoV-19/England/CAMC-A576B3/2020|2020-10-08|EPI\_ISL\_597372|Original|hCoV-19^^England|Human|Lighthouse Lab in Cambridge|Wellcome Sanger Institute for the COVID-19 Genomics UK (COG-UK) consortium|Davies|United Kingdom

>Spike|hCoV-19/India/AP-CCMB-BB567/2020|2020-12-25|EPI\_ISL\_745199|Original|hCoV-19^^Andhra Pradesh|Human|Rangaraya Medical College|CSIR-Centre for Cellular and Molecular Biology|Banu|India

>Spike|hCoV-19/Denmark/DCGC-4112/2020|2020-09-14|EPI\_ISL\_622068|Original|hCoV-19^^Midtjylland|Human|Department of Virus and Microbiological Special Diagnostics|Albertsen lab|Michaelsen|Denmark

>Spike|hCoV-19/USA/WY-WYPHL-00055/2020|2020-03-24|EPI\_ISL\_462947|Original|hCoV-19^^Wyoming|Human|Wyoming Public Health Laboratory|Center for Global Health|Domman|USA

>Spike|hCoV-19/Japan/IC-0090/2020|2020-07-00|EPI\_ISL\_591539|Original|hCoV-19^^Japan|Human|Pathogen Genomics Center|Pathogen Genomics Center|Sekizuka|Japan

>Spike|hCoV-19/England/LEED-2AA437/2020|2020-03-30|EPI\_ISL\_538852|Original|hCoV-19^^England|Human|Leeds Teaching Hospitals NHS Trust and Public Health England|Wellcome Sanger Institute for the COVID-19 Genomics UK (COG-UK) consortium|Davies|United Kingdom

>Spike|hCoV-19/Japan/PG-7787/2020|2020-07-00|EPI\_ISL\_686889|Original|hCoV-19^^Japan|Human|Pathogen Genomics Center|Pathogen Genomics Center|Sekizuka|Japan

>Spike|hCoV-19/England/ALDP-B2437B/2020|2020-11-04|EPI\_ISL\_646849|Original|hCoV-19^^England|Human|Lighthouse Lab in Alderley Park|Wellcome Sanger Institute for the COVID-19 Genomics UK (COG-UK) Consortium|Davies|United Kingdom

>Spike|hCoV-19/Switzerland/BL-ETHZ-260079/2020|2020-08-25|EPI\_ISL\_539401|Original|hCoV-19^^Basel-Landschaft|Human|Viollier AG|Department of Biosystems Science and Engineering|Nadeau|Switzerland

>Spike|hCoV-19/USA/TX-HMH-MCoV-16325/2020|2020-11-01|EPI\_ISL\_786009|Original|hCoV-19^^Texas|Human|Houston Methodist Hospital|Houston Methodist Hospital|Long|USA

>Spike|hCoV-19/Australia/VIC11400/2020|2020-08-28|EPI\_ISL\_562722|Original|hCoV-19^^Victoria|Human|Microbiological Diagnostic Unit - Public Health Laboratory (MDU-PHL)|MDU-PHL|Schultz|Australia

>Spike|hCoV-19/England/SHEF-D2720/2020|2020-04-15|EPI\_ISL\_448913|Original|hCoV-19^^England|Human|Virology Department|COVID-19 Genomics UK (COG-UK) Consortium|de Silva|United Kingdom

>Spike|hCoV-19/Wales/PHWC-4A36BE/2020|2020-12-15|EPI\_ISL\_744125|Original|hCoV-19^^Wales|Human|Wales Specialist Virology Centre Sequencing lab|COVID-19 Genomics UK (COG-UK) Consortium|Moore|United Kingdom

>Spike|hCoV-19/USA/TX-HMH-MCoV-19124/2020|2020-11-24|EPI\_ISL\_783641|Original|hCoV-19^^Texas|Human|Houston Methodist Hospital|Houston Methodist Hospital|Long|USA

>Spike|hCoV-19/Germany/BB-ChVir-D932-5620/2020|2020-03-14|EPI\_ISL\_753770|Original|hCoV-19^^Brandenburg|Human|Charit\u00e9 Universit\u00e4tsmedizin Berlin|Charit\u00e9 Universit\u00e4tsmedizin Berlin|Muehlemann|Germany

>Spike|hCoV-19/USA/OR-OHSU-1886/2020|2020-07-28|EPI\_ISL\_667085|Original|hCoV-19^^Oregon|Human|OHSU Lab Services Molecular Microbiology Lab|Oregon SARS-CoV-2 Genome Sequencing Center|O'Roak|USA

>Spike|hCoV-19/Luxembourg/LNS4210904/2020|2020-11-10|EPI\_ISL\_740431|Original|hCoV-19^^Luxembourg|Human|Laboratoire national de sant\u00e9|Laboratoire national de sant\u00e9|Wienecke-Baldacchino|Luxembourg

>Spike|hCoV-19/England/204591853/2020|2020-00-00|EPI\_ISL\_637189|Original|hCoV-19^^England|Human|Respiratory Virus Unit|COVID-19 Genomics UK (COG-UK) Consortium|Platt|United Kingdom

>Spike|hCoV-19/England/ALDP-C39E9F/2020|2020-12-09|EPI\_ISL\_730747|Original|hCoV-19^^England|Human|Lighthouse Lab in Alderley Park|Wellcome Sanger Institute for the COVID-19 Genomics UK (COG-UK) Consortium|Davies|United Kingdom

>Spike|hCoV-19/Germany/NW-HHU-473/2020|2020-12-11|EPI\_ISL\_770707|Original|hCoV-19^^North Rhine-Westphalia|Human|ZOTZ KLIMAS MVZ D\u00fcrreseldorf-Centrum GbR \u00dcbAG f\u00fcr Labormedizin|Center of Medical Microbiology|Wienemann|Germany

>Spike|hCoV-19/England/MILK-9936E9/2020|2020-08-27|EPI\_ISL\_552111|Original|hCoV-19^^England|Human|Lighthouse Lab in Milton Keynes|Wellcome Sanger Institute for the COVID-19 Genomics UK (COG-UK) consortium|Davies|United Kingdom

>Spike|hCoV-19/Thailand/Chonburi-SQ-TS0001/2020|2020-07-24|EPI\_ISL\_708801|Vero 1|hCoV-19^^Chonburi|Human|Regional medical sciences center 6 chonburi|National Institute of Health|Phuygun|Thailand

>Spike|hCoV-19/Japan/PG-6893/2020|2020-08-00|EPI\_ISL\_688001|Original|hCoV-19^^Japan|Human|Pathogen Genomics Center|Pathogen Genomics Center|Sekizuka|Japan

>Spike|hCoV-19/England/MILK-B95F9F/2020|2020-11-13|EPI\_ISL\_676175|Original|hCoV-19^^England|Human|Lighthouse Lab in Milton Keynes|Wellcome Sanger Institute for the COVID-19 Genomics UK (COG-UK) Consortium|Davies|United Kingdom

>Spike|hCoV-19/Belgium/ULG-10771/2020|2020-10-31|EPI\_ISL\_644617|Original|hCoV-19^^Li\u00e8ge|Human|Department of Clinical Microbiology|GIGA Medical Genomics|Durkin|Belgium

>Spike|hCoV-19/USA/CA-ALSR-2201/2020|2020-06-23|EPI\_ISL\_635385|Original|hCoV-19^^California|Human|San Diego County Public Health Laboratory|Andersen lab at Scripps Research|Gangavarapu|USA

>Spike|hCoV-19/USA/MI-MDHHS-SC22689/2020|2020-11-23|EPI\_ISL\_737303|Original|hCoV-19^^Michigan|Human|Michigan Department of Health and Human Services|Michigan Department of Health and Human Services|Blankenship|USA

>Spike|hCoV-19/Netherlands/ZH-EMC-659/2020|2020-09-28|EPI\_ISL\_632421|Original|hCoV-19^^Zuid Holland|Human|Dutch COVID-19 response team|Erasmus Medical Center|Oude Munnink|Netherlands

>Spike|hCoV-19/USA/WI-UW-831/2020|2020-05-14|EPI\_ISL\_509838|Original|hCoV-19^^Wisconsin|Human|University of Wisconsin-Madison AIDS Vaccine Research Laboratories|University of Wisconsin-Madison AIDS Vaccine Research Laboratories|Baczenas|USA

>Spike|hCoV-19/Scotland/QEUH-9968FF/2020|2020-08-29|EPI\_ISL\_559989|Original|hCoV-19^^Scotland|Human|Oxford Viromics|COVID-19 Genomics UK (COG-UK) Consortium|Golubchik|United Kingdom

>Spike|hCoV-19/England/MILK-9C1E08/2020|2020-09-11|EPI\_ISL\_566595|Original|hCoV-19^^England|Human|Lighthouse Lab in Milton Keynes|Wellcome Sanger Institute for the COVID-19 Genomics UK (COG-UK) consortium|Davies|United Kingdom

>Spike|hCoV-19/Australia/VIC9801/2020|2020-07-25|EPI\_ISL\_565725|Original|hCoV-19^^Victoria|Human|Microbiological Diagnostic Unit - Public Health Laboratory (MDU-PHL)|MDU-PHL|Schultz|Australia

>Spike|hCoV-19/USA/WA-UW-350/2020|2020-03-24|EPI\_ISL\_524439|Original|hCoV-19^^Washington|Human|University of Washington Virology Lab|Laboratory Medicine|Roychoudhury|USA

>Spike|hCoV-19/England/MILK-ABB2B9/2020|2020-10-21|EPI\_ISL\_623272|Original|hCoV-19^^England|Human|Lighthouse Lab in Milton Keynes|Wellcome Sanger Institute for the COVID-19 Genomics UK (COG-UK) consortium|Davies|United Kingdom

>Spike|hCoV-19/USA/TX-HMH-MCoV-8621/2020|2020-07-01|EPI\_ISL\_780657|Original|hCoV-19^^Texas|Human|Houston Methodist Hospital|Houston Methodist Hospital|Long|USA

>Spike|hCoV-19/USA/WA-S641/2020|2020-04-18|EPI\_ISL\_438194|Original|hCoV-19^^Washington|Human|Washington State Department of Health|Seattle Flu Study|Bedford|USA

>Spike|hCoV-19/USA/TX-HMH-MCoV-18298/2020|2020-11-17|EPI\_ISL\_784646|Original|hCoV-19^^Texas|Human|Houston Methodist Hospital|Houston Methodist Hospital|Long|USA

>Spike|hCoV-19/Scotland/QEUEH-9604AF/2020|2020-08-05|EPI\_ISL\_532130|Original|hCoV-19^^Scotland|Human|NHSGGC West of Scotland Specialist Virology Centre / MRC-University of Glasgow Centre for Virus Research|Wellcome Sanger Institute for the COVID-19 Genomics UK (COG-UK) consortium|Davies|United Kingdom

>Spike|hCoV-19/England/ALDP-9E880D/2020|2020-09-24|EPI\_ISL\_637577|Original|hCoV-19^^England|Human|Department of Pathology|COVID-19 Genomics UK (COG-UK) Consortium|Goodfellow|United Kingdom

>Spike|hCoV-19/USA/FL-BPHL-2106/2020|2020-03-07|EPI\_ISL\_653259|Original|hCoV-19^^Florida|Human|Florida Bureau of Public Health Laboratories|Florida Bureau of Public Health Laboratories|Blanton|USA

>Spike|hCoV-19/England/NORW-F6049/2020|2020-11-06|EPI\_ISL\_650903|Original|hCoV-19^^England|Human|Quadram Institute Bioscience|COVID-19 Genomics UK (COG-UK) Consortium|Alikhan|United Kingdom

>Spike|hCoV-19/Wales/PHWC-482433/2020|2020-10-20|EPI\_ISL\_613219|Original|hCoV-19^^Wales|Human|Wales Specialist Virology Centre Sequencing lab|COVID-19 Genomics UK (COG-UK) Consortium|Moore|United Kingdom

>Spike|hCoV-19/USA/FL-BPHL-0317/2020|2020-06-02|EPI\_ISL\_489726|Original|hCoV-19^^Florida|Human|Florida Bureau of Public Health Laboratories|Florida Bureau of Public Health Laboratories|Blanton|USA

>Spike|hCoV-19/USA/DC-HP00145/2020|2020-03-26|EPI\_ISL\_457775|Original|hCoV-19^^District of Columbia|Human|Johns Hopkins Hospital Department of Pathology|Johns Hopkins Hospital Department of Pathology|Ramakrishnan|USA

>Spike|hCoV-19/Denmark/DCGC-14371/2020|2020-11-30|EPI\_ISL\_711727|Original|hCoV-19^^Hovedstaden|Human|Department of Virus and Microbiological Special Diagnostics|Albertsen Lab|Michaelsen|Denmark

>Spike|hCoV-19/France/IDF-10074LD/2020|2020-03-00|EPI\_ISL\_447684|Original|hCoV-19^^France|Human|H\u00f4pital Henri-Mondor Ap-Hp|H\u00f4pital Henri-Mondor Ap-Hp|Rodriguez|France

>Spike|hCoV-19/USA/CA-QDX-185/2020|2020-04-28|EPI\_ISL\_494505|Original|hCoV-19^^California|Human|Quest Diagnostics|Quest Diagnostics|Kagan|USA

>Spike|hCoV-19/USA/TX-DSHS-0989/2020|2020-06-16|EPI\_ISL\_614005|Original|hCoV-19^^Texas|Human|Texas Department of State Health Services|Texas Department of State Health Services|Rahman|USA

>Spike|hCoV-19/England/LOND-D5884/2020|2020-04-17|EPI\_ISL\_457270|Original|hCoV-19^^England|Human|University College London|COVID-19 Genomics UK (COG-UK) Consortium|Roy|United Kingdom

>Spike|hCoV-19/Switzerland/BL-ETHZ-300323/2020|2020-09-26|EPI\_ISL\_603355|Original|hCoV-19^^Basel-Landschaft|Human|Viollier AG|Department of Biosystems Science and Engineering|Nadeau|Switzerland

>Spike|hCoV-19/England/LIVE-9E016/2020|2020-04-03|EPI\_ISL\_453261|Original|hCoV-19^^England|Human|Liverpool Clinical Laboratories|COVID-19 Genomics UK (COG-UK) Consortium|Haldenby|United Kingdom

>Spike|hCoV-19/England/C200043744/2020|2020-11-06|EPI\_ISL\_666727|Original|hCoV-19^^England|Human|Respiratory Virus Unit|COVID-19 Genomics UK (COG-UK) Consortium|Platt|United Kingdom

>Spike|hCoV-19/Australia/VIC5439/2020|2020-07-15|EPI\_ISL\_520190|Original|hCoV-19^^Victoria|Human|Victorian Infectious Diseases Reference Laboratory (VIDRL)|VIDRL and MDU-PHL|Schultz|Australia

>Spike|hCoV-19/USA/NY-NYCPHL-000604/2020|2020-03-11|EPI\_ISL\_632062|Original|hCoV-19^^New York|Human|NYC Department Of Health And Mental Hygiene|New York City Public Health Laboratory|Wang|USA

>Spike|hCoV-19/USA/MD-HP12137/2020|2020-12-26|EPI\_ISL\_791447|Original|hCoV-19^^Maryland|Human|Johns Hopkins Hospital Department of Pathology|Johns Hopkins Hospital Department of Pathology|Morris|USA

>Spike|hCoV-19/Northern Ireland/NIRE-23555C/2020|2020-10-26|EPI\_ISL\_764441|Original|hCoV-19^^Northern Ireland|Human|Regional Virus Laboratory|COVID-19 Genomics UK (COG-UK) Consortium|Fairley|United Kingdom

>Spike|hCoV-19/England/LIVE-DCB3ED/2020|2020-11-27|EPI\_ISL\_724401|Original|hCoV-19^^England|Human|Liverpool Clinical Laboratories|COVID-19 Genomics UK (COG-UK) Consortium|Haldenby|United Kingdom

>Spike|hCoV-19/England/LIVE-998C8/2020|2020-04-09|EPI\_ISL\_439770|Original|hCoV-19^^England|Human|Liverpool Clinical Laboratories|COVID-19 Genomics UK (COG-UK) Consortium|Haldenby|United Kingdom

>Spike|hCoV-19/Sweden/20-53325/2020|2020-10-26|EPI\_ISL\_676536|Original|hCoV-19^^Gavleborg|Human|Laboratoriemedicin|The Public Health Agency of Sweden|Svartstr\u00f6m|Sweden

>Spike|hCoV-19/USA/VA-DCLS-1594/2020|2020-08-14|EPI\_ISL\_610147|Original|hCoV-19^^Virginia|Human|Virginia DCLS|Virginia DCLS|St. Jacques|USA

>Spike|hCoV-19/Thailand/Bangkok-Sha06/2020|2020-10-09|EPI\_ISL\_708814|Original|hCoV-19^^Bangkok|Human|World Medical Hospital|National Institute of Health|Phuygun|Thailand

>Spike|hCoV-19/Australia/VIC3914/2020|2020-07-13|EPI\_ISL\_520626|Original|hCoV-19^^Victoria|Human|Microbiological Diagnostic Unit - Public Health Laboratory (MDU-PHL)|MDU-PHL|Schultz|Australia

>Spike|hCoV-19/England/GSTT-5253/2020|2020-03-19|EPI\_ISL\_560666|Original|hCoV-19^^England|Human|Centre for Clinical Infection and Diagnostics Research and Genomics Innovation Unit|Centre for Clinical Infection and Diagnostics Research and Genomics Innovation Unit|Awan|United Kingdom

>Spike|hCoV-19/England/ALDP-95AC46/2020|2020-06-12|EPI\_ISL\_554913|Original|hCoV-19^^England|Human|Lighthouse Lab in Alderley Park|Wellcome Sanger Institute for the COVID-19 Genomics UK (COG-UK) consortium|Davies|United Kingdom

>Spike|hCoV-19/Luxembourg/LNS6975113/2020|2020-11-10|EPI\_ISL\_744488|Original|hCoV-19^^Luxembourg|Human|Laboratoire national de sant\u00e9|Laboratoire national de sant\u00e9|Wienecke-Baldacchino|Luxembourg

>Spike|hCoV-19/Germany/BW-UKT-a089/2020|2020-04-14|EPI\_ISL\_723116|Original|hCoV-19^^Baden-Wuerttemberg|Human|Institute of Medical Genetics and Applied Genomics|Institute of Medical Genetics and Applied Genomics|Gross|Germany

>Spike|hCoV-19/England/NORT-2829EB/2020|2020-03-26|EPI\_ISL\_488594|Original|hCoV-19^^England|Human|NU-OMICS DNA Sequencing research facility|Wellcome Sanger Institute for the COVID-19 Genomics UK (COG-UK) consortium|Davies|United Kingdom

>Spike|hCoV-19/USA/ID-QDX-1081/2020|2020-03-19|EPI\_ISL\_571824|Original|hCoV-19^^Idaho|Human|Quest Diagnostics|Quest Diagnostics|Kagan|USA

>Spike|hCoV-19/England/CAMC-B7A516/2020|2020-11-12|EPI\_ISL\_741120|Original|hCoV-19^^England|Human|Oxford Viromics|COVID-19 Genomics UK (COG-UK) Consortium|Golubchik|United Kingdom

>Spike|hCoV-19/Denmark/DCGC-20023/2020|2020-12-07|EPI\_ISL\_747937|Original|hCoV-19^^Hovedstaden|Human|Department of Virus and Microbiological Special Diagnostics|Albertsen Lab|Michaelsen|Denmark

>Spike|hCoV-19/England/ALDP-A2E916/2020|2020-10-05|EPI\_ISL\_587098|Original|hCoV-19^^England|Human|Lighthouse Lab in Alderley Park|Wellcome Sanger Institute for the COVID-19 Genomics UK (COG-UK) consortium|Davies|United Kingdom

>Spike|hCoV-19/England/QEUEH-BF0B43/2020|2020-12-05|EPI\_ISL\_709142|Original|hCoV-19^^England|Human|Lighthouse Lab in Glasgow|Wellcome Sanger Institute for the COVID-19 Genomics UK (COG-UK) Consortium|Davies|United Kingdom

>Spike|hCoV-19/Denmark/DCGC-19672/2020|2020-12-07|EPI\_ISL\_749102|Original|hCoV-19^^Sjaelland|Human|Department of Virus and Microbiological Special Diagnostics|Albertsen Lab|Michaelsen|Denmark

>Spike|hCoV-19/England/ALDP-B5C5CF/2020|2020-11-10|EPI\_ISL\_655840|Original|hCoV-19^^England|Human|Lighthouse Lab in Alderley Park|Wellcome Sanger Institute for the COVID-19 Genomics UK (COG-UK) Consortium|Davies|United Kingdom

>Spike|hCoV-19/England/CAMB-1AE610/2020|2020-04-27|EPI\_ISL\_459419|Original|hCoV-19^^England|Human|Department of Pathology|Wellcome Sanger Institute for the COVID-19 Genomics UK (COG-UK) consortium|Davies|United Kingdom

>Spike|hCoV-19/Wales/PHWC-164C9C/2020|2020-05-18|EPI\_ISL\_479366|Original|hCoV-19^^Wales|Human|Wales Specialist Virology Centre Sequencing lab|COVID-19 Genomics UK (COG-UK) Consortium|Moore|United Kingdom

>Spike|hCoV-19/England/BRIS-122F55/2020|2020-04-01|EPI\_ISL\_440696|Original|hCoV-19^^England|Human|PHE South West Regional Laboratory|Wellcome Sanger Institute for the COVID-19 Genomics UK (COG-UK) consortium|Amato|United Kingdom

>Spike|hCoV-19/England/QEUEH-54D7D0/2020|2020-05-12|EPI\_ISL\_533382|Original|hCoV-19^^England|Human|Lighthouse Lab in Glasgow|Wellcome Sanger Institute for the COVID-19 Genomics UK (COG-UK) consortium|Davies|United Kingdom

>Spike|hCoV-19/Australia/WA167/2020|2020-03-26|EPI\_ISL\_596730|Original|hCoV-19^^Western Australia|Human|PathWest Laboratory Medicine WA|PathWest Laboratory Medicine WA Microbial Surveillance Unit|Sikazwe|Australia

>Spike|hCoV-19/Denmark/DCGC-4601/2020|2020-09-21|EPI\_ISL\_621270|Original|hCoV-19^^Nordjylland|Human|Department of Virus and Microbiological Special Diagnostics|Albertsen lab|Michaelsen|Denmark

>Spike|hCoV-19/Brazil/SP-L1-CAMPI16/2020|2020-04-08|EPI\_ISL\_476158|Original|hCoV-19^^S\u00e3o Paulo|Human|Laborat\u00f3rio de Patologia Cl\u00ednica - UNICAMP|Laborat\u00f3rio de Estudos de V\u00edrus Emergentes - UNICAMP|Faria|Brazil

>Spike|hCoV-19/USA/NY-QDX-1259/2020|2020-03-16|EPI\_ISL\_572023|Original|hCoV-19^^New York|Human|Quest Diagnostics|Quest Diagnostics|Kagan|USA

>Spike|hCoV-19/USA/CA-CZB-3289/2020|2020-07-17|EPI\_ISL\_548266|Original|hCoV-19^^California|Human|County of Santa Clara Public Health Department|Chan-Zuckerberg Biohub|Bhatt|USA

>Spike|hCoV-19/England/BRIS-124D68/2020|2020-03-26|EPI\_ISL\_443874|Original|hCoV-19^^England|Human|PHE South West Regional Laboratory|Wellcome Sanger Institute for the COVID-19 Genomics UK (COG-UK) consortium|Amato|United Kingdom

>Spike|hCoV-19/Beijing/DT-travelIRI01/2020|2020-03-12|EPI\_ISL\_452333|Original|hCoV-19^^Beijing|Human|Laboratory of Infectious Diseases Center of Beijing Ditan Hospital|Laboratory of Infectious Diseases Center of Beijing Ditan Hospital|Yang|China

>Spike|hCoV-19/England/ALDP-8D728C/2020|2020-06-24|EPI\_ISL\_557114|Original|hCoV-19^^England|Human|Lighthouse Lab in Alderley Park|Wellcome Sanger Institute for the COVID-19 Genomics UK (COG-UK) consortium|Davies|United Kingdom

>Spike|hCoV-19/USA/TX-HMH-MCoV-13072/2020|2020-08-29|EPI\_ISL\_788223|Original|hCoV-19^^Texas|Human|Houston Methodist Hospital|Houston Methodist Hospital|Long|USA

>Spike|hCoV-19/Northern Ireland/NIRE-FA77D/2020|2020-03-30|EPI\_ISL\_441697|Original|hCoV-19^^Northern Ireland|Human|Regional Virus Laboratory|Wellcome Sanger Institute for the COVID-19 Genomics UK (COG-UK) consortium|Amato|United Kingdom

>Spike|hCoV-19/England/ALDP-B77063/2020|2020-11-12|EPI\_ISL\_723841|Original|hCoV-19^^England|Human|Oxford Viromics|COVID-19 Genomics UK (COG-UK) Consortium|Golubchik|United Kingdom

>Spike|hCoV-19/Wales/PHWC-3281C/2020|2020-04-15|EPI\_ISL\_474354|Original|hCoV-19^^Wales|Human|Originating lab|COVID-19 Genomics UK (COG-UK) Consortium|Moore|United Kingdom

>Spike|hCoV-19/England/ALDP-AA1F73/2020|2020-10-22|EPI\_ISL\_624260|Original|hCoV-19^^England|Human|Lighthouse Lab in Alderley Park|Wellcome Sanger Institute for the COVID-19 Genomics UK (COG-UK) consortium|Davies|United Kingdom

>Spike|hCoV-19/Scotland/EDB9322/2020|2020-11-06|EPI\_ISL\_652056|Original|hCoV-19^^Scotland|Human|Virology Department|COVID-19 Genomics UK (COG-UK) Consortium|McHugh|United Kingdom



>Spike|hCoV-19/Wales/PHWC-4A4CBB/2020|2020-12-09|EPI\_ISL\_764780|Original|hCoV-19^^Wales|Human|Wales Specialist Virology Centre Sequencing lab|COVID-19 Genomics UK (COG-UK) Consortium|Moore|United Kingdom

>Spike|hCoV-19/Spain/MD-IBV-99008490/2020|2020-09-10|EPI\_ISL\_654064|Original|hCoV-19^^Madrid|Human|Hospital General Universitario Gregorio Mara\u00f1\u00f3n|SeqCOVID-SPAIN consortium/IBV (CSIC)|Comas|Spain

>Spike|hCoV-19/Denmark/DCGC-3242/2020|2020-08-24|EPI\_ISL\_616822|Original|hCoV-19^^Hovedstaden|Human|Department of Virus and Microbiological Special Diagnostics|Albertsen lab|Michaelsen|Denmark

>Spike|hCoV-19/Brazil/SP-L22-CD479/2020|2020-04-03|EPI\_ISL\_476377|Original|hCoV-19^^S\u00e3o Paulo|Human|Hospital da Cl\u00ednicas da Faculdade de Medicina da Universidade de S\u00e3o Paulo|Instituto de Medicina Tropical da Univesidade de S\u00e3o Paulo|Sabino|Brazil

>Spike|hCoV-19/USA/CA-QDX-38/2020|2020-03-15|EPI\_ISL\_467830|Original|hCoV-19^^California|Human|Quest Diagnostics|Quest Diagnostics|Kagan|USA

>Spike|hCoV-19/Denmark/DCGC-2521/2020|2020-08-17|EPI\_ISL\_617791|Original|hCoV-19^^Nordjylland|Human|Department of Virus and Microbiological Special Diagnostics|Albertsen lab|Michaelsen|Denmark

>Spike|hCoV-19/Wales/PHWC-498449/2020|2020-12-01|EPI\_ISL\_727075|Original|hCoV-19^^Wales|Human|Originating lab|COVID-19 Genomics UK (COG-UK) Consortium|Moore|United Kingdom

>Spike|hCoV-19/England/MILK-97544D/2020|2020-08-21|EPI\_ISL\_552573|Original|hCoV-19^^England|Human|Lighthouse Lab in Milton Keynes|Wellcome Sanger Institute for the COVID-19 Genomics UK (COG-UK) consortium|Davies|United Kingdom

>Spike|hCoV-19/England/CAMB-7C0B4/2020|2020-04-14|EPI\_ISL\_433990|Original|hCoV-19^^England|Human|Department of Pathology|COVID-19 Genomics UK (COG-UK) Consortium|Meredith|United Kingdom

>Spike|hCoV-19/Spain/MD-IBV-99009654/2020|2020-10-28|EPI\_ISL\_654384|Original|hCoV-19^^Madrid|Human|Hospital General Universitario Gregorio Mara\u00f1\u00f3n|SeqCOVID-SPAIN consortium/IBV (CSIC)|Comas|Spain

>Spike|hCoV-19/Egypt/CUNCI-HGC5I003/2020|2020-06-02|EPI\_ISL\_479711|Original|hCoV-19^^Egypt|Human|Egyptian National Cancer Institute (ENCI)|Egyptian National Cancer Institute (ENCI)|Zekri|Egypt

>Spike|hCoV-19/England/NORW-2219FD/2020|2020-12-18|EPI\_ISL\_764460|Original|hCoV-19^^England|Human|Quadram Institute Bioscience|COVID-19 Genomics UK (COG-UK) Consortium|Alikhan|United Kingdom

>Spike|hCoV-19/USA/WA-S2046/2020|2020-06-05|EPI\_ISL\_497474|Original|hCoV-19^^Washington|Human|Washington State Department of Health|Seattle Flu Study|Lee|USA

>Spike|hCoV-19/England/ALDP-AA4E55/2020|2020-10-21|EPI\_ISL\_630845|Original|hCoV-19^^England|Human|Lighthouse Lab in Alderley Park|Wellcome Sanger Institute for the COVID-19 Genomics UK (COG-UK) consortium|Davies|United Kingdom

>Spike|hCoV-19/England/CAMB-816C9/2020|2020-04-12|EPI\_ISL\_442608|Original|hCoV-19^^England|Human|Department of Pathology|Wellcome Sanger Institute for the COVID-19 Genomics UK (COG-UK) consortium|Amato|United Kingdom

>Spike|hCoV-19/Scotland/CAMC-945B8D/2020|2020-07-16|EPI\_ISL\_556682|Original|hCoV-19^^Scotland|Human|Lighthouse Lab in Cambridge|Wellcome Sanger Institute for the COVID-19 Genomics UK (COG-UK) consortium|Davies|United Kingdom

>Spike|hCoV-19/USA/NY-NYUMC631/2020|2020-04-02|EPI\_ISL\_444748|Original|hCoV-19^^New York|Human|NYU Langone Health|Departments of Pathology and Medicine|Maurano|USA

>Spike|hCoV-19/England/MILK-BA9A79/2020|2020-11-17|EPI\_ISL\_681440|Original|hCoV-19^^England|Human|Lighthouse Lab in Milton Keynes|Wellcome Sanger Institute for the COVID-19 Genomics UK (COG-UK) Consortium|Davies|United Kingdom

>Spike|hCoV-19/USA/LA-BIE-048/2020|2020-04-06|EPI\_ISL\_463296|Original|hCoV-19^^Louisiana|Human|Ochsner Health|Bioinfoexperts|Cross|USA

>Spike|hCoV-19/USA/TX-HMH-MCoV-9994/2020|2020-07-06|EPI\_ISL\_780373|Original|hCoV-19^^Texas|Human|Houston Methodist Hospital|Houston Methodist Hospital|Long|USA

>Spike|hCoV-19/England/QEUH-A9F1EB/2020|2020-10-19|EPI\_ISL\_651074|Original|hCoV-19^^England|Human|University of Exeter|COVID-19 Genomics UK (COG-UK) Consortium|Temperton|United Kingdom

>Spike|hCoV-19/Wales/PHWC-4963A8/2020|2020-11-18|EPI\_ISL\_726571|Original|hCoV-19^^Wales|Human|Originating lab|COVID-19 Genomics UK (COG-UK) Consortium|Moore|United Kingdom

>Spike|hCoV-19/USA/TX-HMH-4624/2020|2020-06-22|EPI\_ISL\_543763|Original|hCoV-19^^Texas|Human|Houston Methodist Hospital|Houston Methodist Hospital|Long|USA

>Spike|hCoV-19/Finland/8May38S18/2020|2020-05-08|EPI\_ISL\_481725|Original|hCoV-19^^Uusimaa|Human|Department of Virology and Immunology|Department of Virology|Smura|Finland

>Spike|hCoV-19/England/MILK-A7A896/2020|2020-10-15|EPI\_ISL\_606581|Original|hCoV-19^^England|Human|Lighthouse Lab in Milton Keynes|Wellcome Sanger Institute for the COVID-19 Genomics UK (COG-UK) consortium|Davies|United Kingdom

>Spike|hCoV-19/Portugal/PT2060/2020|2020-11-10|EPI\_ISL\_732274|Original|hCoV-19^^Portugal|Human|Instituto Nacional de Saude (INSA) and Instituto Gulbenkian de Ciencia (IGC)|Instituto Nacional de Saude (INSA) and Instituto Gulbenkian de Ciencia (IGC)|Borges|Portugal

>Spike|hCoV-19/Japan/PG-8955/2020|2020-09-00|EPI\_ISL\_686501|Original|hCoV-19^^Japan|Human|Pathogen Genomics Center|Pathogen Genomics Center|Sekizuka|Japan

>Spike|hCoV-19/England/EXET-13DB44/2020|2020-12-01|EPI\_ISL\_724278|Original|hCoV-19^^England|Human|University of Exeter|COVID-19 Genomics UK (COG-UK) Consortium|Temperton|United Kingdom

>Spike|hCoV-19/Denmark/DCGC-2725/2020|2020-08-17|EPI\_ISL\_616470|Original|hCoV-19^^Midtjylland|Human|Department of Virus and Microbiological Special Diagnostics|Albertsen lab|Michaelsen|Denmark

>Spike|hCoV-19/USA/WI-UW-1859/2020|2020-09-17|EPI\_ISL\_605731|Original|hCoV-19^^Wisconsin|Human|University of Wisconsin-Madison AIDS Vaccine Research Laboratories|University of Wisconsin-Madison AIDS Vaccine Research Laboratories|Baczenas|USA

>Spike|hCoV-19/Scotland/EDB156/2020|2020-03-23|EPI\_ISL\_425921|Original|hCoV-19^^Scotland|Human|Virology Department|COVID-19 Genomics UK (COG-UK) Consortium|Williams|United Kingdom

>Spike|hCoV-19/DRC/10533/2020|2020-05-20|EPI\_ISL\_527548|Original|hCoV-19^^Sud Kivu|Human|Viral Respiratory Lab|Pathogen Sequencing Lab|Lokilo|Democratic Republic of the Congo

>Spike|hCoV-19/Wales/MILK-9C21D1/2020|2020-09-11|EPI\_ISL\_566654|Original|hCoV-19^^Wales|Human|Lighthouse Lab in Milton Keynes|Wellcome Sanger Institute for the COVID-19 Genomics UK (COG-UK) consortium|Davies|United Kingdom

>Spike|hCoV-19/England/CAMC-949679/2020|2020-07-20|EPI\_ISL\_556930|Original|hCoV-19^^England|Human|Lighthouse Lab in Cambridge|Wellcome Sanger Institute for the COVID-19 Genomics UK (COG-UK) consortium|Davies|United Kingdom

>Spike|hCoV-19/USA/TX-HMH-MCoV-9172/2020|2020-07-02|EPI\_ISL\_780979|Original|hCoV-19^^Texas|Human|Houston Methodist Hospital|Houston Methodist Hospital|Long|USA

>Spike|hCoV-19/England/ALDP-B23C62/2020|2020-11-04|EPI\_ISL\_646277|Original|hCoV-19^^England|Human|Lighthouse Lab in Alderley Park|Wellcome Sanger Institute for the COVID-19 Genomics UK (COG-UK) Consortium|Davies|United Kingdom

>Spike|hCoV-19/USA/FL-BPHL-1656/2020|2020-07-04|EPI\_ISL\_594345|Original|hCoV-19^^Florida|Human|Florida Bureau of Public Health Laboratories|Florida Bureau of Public Health Laboratories|Blanton|USA

>Spike|hCoV-19/USA/TX-DSHS-0928/2020|2020-06-15|EPI\_ISL\_602226|Original|hCoV-19^^Texas|Human|Texas Department of State Health Services|Texas Department of State Health Services|Rahman|USA

>Spike|hCoV-19/England/CAMB-79794/2020|2020-04-01|EPI\_ISL\_441053|Original|hCoV-19^^England|Human|Department of Pathology|Wellcome Sanger Institute for the COVID-19 Genomics UK (COG-UK) consortium|Amato|United Kingdom

>Spike|hCoV-19/England/CAMB-7D2BD/2020|2020-04-04|EPI\_ISL\_441556|Original|hCoV-19^^England|Human|Department of Pathology|Wellcome Sanger Institute for the COVID-19 Genomics UK (COG-UK) consortium|Amato|United Kingdom

>Spike|hCoV-19/USA/NY-Wadsworth-41091-01/2020|2020-04-07|EPI\_ISL\_676816|Original|hCoV-19^^New York|Human|Wadsworth Center|Wadsworth Center|Lasek-Nesselquist|USA

>Spike|hCoV-19/England/MILK-B02A41/2020|2020-10-24|EPI\_ISL\_642763|Original|hCoV-19^^England|Human|Lighthouse Lab in Milton Keynes|Wellcome Sanger Institute for the COVID-19 Genomics UK (COG-UK) Consortium|Davies|United Kingdom

>Spike|hCoV-19/England/20129163104/2020|2020-03-21|EPI\_ISL\_424124|Original|hCoV-19^^England|Human|Respiratory Virus Unit|Respiratory Virus Unit|Platt|United Kingdom

>Spike|hCoV-19/USA/TX-HMH-MCoV-15784/2020|2020-07-09|EPI\_ISL\_785468|Original|hCoV-19^^Texas|Human|Houston Methodist Hospital|Houston Methodist Hospital|Long|USA

>Spike|hCoV-19/USA/UT-0888/2020|2020-04-06|EPI\_ISL\_435389|Original|hCoV-19^^Utah|Human|Utah Public Health Laboratory|Utah Public Health Laboratory|Young|USA

>Spike|hCoV-19/USA/WA-UW-19700/2020|2020-08-01|EPI\_ISL\_570804|Original|hCoV-19^^Washington|Human|UW Virology Lab|UW Virology Lab|Roychoudhury|USA

>Spike|hCoV-19/USA/UT-UPHL-2009001/2020|2020-05-11|EPI\_ISL\_525312|Original|hCoV-19^^Utah|Human|Utah Public Health Laboratory|Utah Public Health Laboratory|Young|USA

>Spike|hCoV-19/England/ALDP-A7010E/2020|2020-10-15|EPI\_ISL\_608008|Original|hCoV-19^^England|Human|Lighthouse Lab in Alderley Park|Wellcome Sanger Institute for the COVID-19 Genomics UK (COG-UK) consortium|Davies|United Kingdom

>Spike|hCoV-19/Singapore/1139/2020|2020-04-15|EPI\_ISL\_648048|Original|hCoV-19^^Singapore|Human|Department of Laboratory Medicine|Department of Laboratory Medicine|Chen|Singapore

>Spike|hCoV-19/England/CAMB-81FBF/2020|2020-04-21|EPI\_ISL\_438603|Original|hCoV-19^^England|Human|Department of Pathology|COVID-19 Genomics UK (COG-UK) Consortium|Meredith|United Kingdom

>Spike|hCoV-19/England/CAMC-A57D63/2020|2020-10-09|EPI\_ISL\_597215|Original|hCoV-19^^England|Human|Lighthouse Lab in Cambridge|Wellcome Sanger Institute for the COVID-19 Genomics UK (COG-UK) consortium|Davies|United Kingdom

>Spike|hCoV-19/England/MILK-994B34/2020|2020-08-25|EPI\_ISL\_552198|Original|hCoV-19^^England|Human|Lighthouse Lab in Milton Keynes|Wellcome Sanger Institute for the COVID-19 Genomics UK (COG-UK) consortium|Davies|United Kingdom

>Spike|hCoV-19/Scotland/QEUH-B10F32/2020|2020-11-02|EPI\_ISL\_649611|Original|hCoV-19^^Scotland|Human|Lighthouse Lab in Glasgow|Wellcome Sanger Institute for the COVID-19 Genomics UK (COG-UK) Consortium|Davies|United Kingdom

>Spike|hCoV-19/England/BRIS-128308/2020|2020-04-16|EPI\_ISL\_469801|Original|hCoV-19^^England|Human|PHE South West Regional Laboratory|Wellcome Sanger Institute for the COVID-19 Genomics UK (COG-UK) consortium|Davies|United Kingdom

>Spike|hCoV-19/Australia/VIC2049/2020|2020-06-13|EPI\_ISL\_521909|Original|hCoV-19^^Victoria|Human|Microbiological Diagnostic Unit - Public Health Laboratory (MDU-PHL)|MDU-PHL|Schultz|Australia

>Spike|hCoV-19/USA/NY-NYCPHL-000443/2020|2020-03-31|EPI\_ISL\_631917|Original|hCoV-19^^New York|Human|St Barnabas Hospital|New York City Public Health Laboratory|Wang|USA

>Spike|hCoV-19/England/NORT-284293/2020|2020-03-18|EPI\_ISL\_488508|Original|hCoV-19^^England|Human|NU-OMICS DNA Sequencing research facility|Wellcome Sanger Institute for the COVID-19 Genomics UK (COG-UK) consortium|Davies|United Kingdom

>Spike|hCoV-19/Iran/NIV-P1-Q100/2020|2020-03-10|EPI\_ISL\_637100|Vero CCL81 P1|hCoV-19^^Iran|Human|Indian Council of Medical Research-National Institute of Virology,\u00a0Microbial Containment Complex|Indian Council of Medical Research-National Institute of Virology,\u00a0Microbial Containment Complex|Yadav|Iran

>Spike|hCoV-19/India/GJ-GBRC204b/2020|2020-06-07|EPI\_ISL\_475029|Original|hCoV-19^^Gujarat|Human|Banas Medical College and Research Institute|Gujarat Biotechnology Research Centre|Joshi|India

>Spike|hCoV-19/England/LIVE-DCB2B3/2020|2020-11-24|EPI\_ISL\_724396|Original|hCoV-19^^England|Human|Liverpool Clinical Laboratories|COVID-19 Genomics UK (COG-UK) Consortium|Haldenby|United Kingdom

>Spike|hCoV-19/USA/TX-HMH-MCoV-15101/2020|2020-10-16|EPI\_ISL\_786585|Original|hCoV-19^^Texas|Human|Houston Methodist Hospital|Houston Methodist Hospital|Long|USA

>Spike|hCoV-19/USA/WI-UW-1045/2020|2020-07-29|EPI\_ISL\_516471|Original|hCoV-19^^Wisconsin|Human|University of Wisconsin-Madison AIDS Vaccine Research Laboratories|University of Wisconsin-Madison AIDS Vaccine Research Laboratories|Baczenas|USA

>Spike|hCoV-19/Denmark/DCGC-1832/2020|2020-07-13|EPI\_ISL\_622604|Original|hCoV-19^^Hovedstaden|Human|Department of Virus and Microbiological Special Diagnostics|Albertsen lab|Michaelsen|Denmark

>Spike|hCoV-19/USA/WA-S2342/2020|2020-06-12|EPI\_ISL\_496974|Original|hCoV-19^^Washington|Human|Washington State Department of Health|Seattle Flu Study|Lee|USA

>Spike|hCoV-19/Australia/VIC3895/2020|2020-07-12|EPI\_ISL\_520607|Original|hCoV-19^^Victoria|Human|Microbiological Diagnostic Unit - Public Health Laboratory (MDU-PHL)|MDU-PHL|Schultz|Australia

>Spike|hCoV-19/USA/UT-UPHL-2012618881/2020|2020-08-04|EPI\_ISL\_746040|Original|hCoV-19^^Utah|Human|Ginkgo Bioworks Clinical Laboratory|Utah Public Health Laboratory|Young|USA

>Spike|hCoV-19/England/LOND-126413F/2020|2020-11-14|EPI\_ISL\_679527|Original|hCoV-19^^England|Human|University College London|COVID-19 Genomics UK (COG-UK) Consortium|Roy|United Kingdom

>Spike|hCoV-19/Scotland/EDB3656/2020|2020-04-28|EPI\_ISL\_439307|Original|hCoV-19^^Scotland|Human|Virology Department|COVID-19 Genomics UK (COG-UK) Consortium|Williams|United Kingdom

>Spike|hCoV-19/England/CAMC-B52DD0/2020|2020-11-09|EPI\_ISL\_657562|Original|hCoV-19^^England|Human|Lighthouse Lab in Cambridge|Wellcome Sanger Institute for the COVID-19 Genomics UK (COG-UK) Consortium|Davies|United Kingdom

>Spike|hCoV-19/USA/TX-HMH-2704/2020|2020-06-04|EPI\_ISL\_545490|Original|hCoV-19^^Texas|Human|Houston Methodist Hospital|Houston Methodist Hospital|Long|USA

>Spike|hCoV-19/USA/SC-DHEC-0883/2020|2020-06-26|EPI\_ISL\_538434|Original|hCoV-19^^South Carolina|Human|Microbiology Division|Microbiology Division|Flores|USA

>Spike|hCoV-19/England/MILK-80A675/2020|2020-07-15|EPI\_ISL\_557188|Original|hCoV-19^^England|Human|Lighthouse Lab in Milton Keynes|Wellcome Sanger Institute for the COVID-19 Genomics UK (COG-UK) consortium|Davies|United Kingdom

>Spike|hCoV-19/United Arab Emirates/0947/2020|2020-06-27|EPI\_ISL\_699083|Original|hCoV-19^^Abu Dhabi|Human|Group 42 (G42) Healthcare|G42 Healthcare|Ogrodzki|United Arab Emirates

>Spike|hCoV-19/Japan/PG-6839/2020|2020-09-00|EPI\_ISL\_687947|Original|hCoV-19^^Japan|Human|Pathogen Genomics Center|Pathogen Genomics Center|Sekizuka|Japan

>Spike|hCoV-19/India/TG-CCMB-AA770/2020|2020-08-13|EPI\_ISL\_539693|Original|hCoV-19^^Telangana|Human|CSIR-Centre for Cellular and Molecular Biology|CSIR-Centre for Cellular and Molecular Biology|Mukherjee|India

>Spike|hCoV-19/Wales/PHWC-48F885/2020|2020-11-10|EPI\_ISL\_681150|Original|hCoV-19^^Wales|Human|Wales Specialist Virology Centre Sequencing lab|COVID-19 Genomics UK (COG-UK) Consortium|Moore|United Kingdom

>Spike|hCoV-19/Brazil/SP-L39-CD1033/2020|2020-05-12|EPI\_ISL\_722070|Original|hCoV-19^^S\u00e3o Paulo|Human|Hospital das Cl\u00ednicas Universidade de S\u00e3o Paulo Medical School|Laborat\u00f3rio de Parasitologia M\u00e9dica - Instituto de Medicina Tropical - Universidade de S\u00e3o Paulo|de Jesus|Brazil

>Spike|hCoV-19/Denmark/DCGC-3009/2020|2020-08-24|EPI\_ISL\_616785|Original|hCoV-19^^Syddanmark|Human|Department of Virus and Microbiological Special Diagnostics|Albertsen lab|Michaelsen|Denmark

>Spike|hCoV-19/Japan/PG-1108/2020|2020-03-00|EPI\_ISL\_684718|Original|hCoV-19^^Japan|Human|Pathogen Genomics Center|Pathogen Genomics Center|Sekizuka|Japan

>Spike|hCoV-19/France/PAC-IHU-1610/2020|2020-09-04|EPI\_ISL\_569227|Original|hCoV-19^^Provence-Alpes-C\u00f4te-d\u2019Azur|Human|MEPHI|MEPHI|Levasseur|France

>Spike|hCoV-19/USA/WA-UW-5177/2020|2020-04-01|EPI\_ISL\_430868|Original|hCoV-19^^Washington|Human|UW Virology Lab|UW Virology Lab|Roychoudhury|USA

>Spike|hCoV-19/Japan/PG-5700/2020|2020-07-00|EPI\_ISL\_688824|Original|hCoV-19^^Japan|Human|Pathogen Genomics Center|Pathogen Genomics Center|Sekizuka|Japan

>Spike|hCoV-19/Wales/PHWC-49D884/2020|2020-11-26|EPI\_ISL\_742840|Original|hCoV-19^^Wales|Human|Wales Specialist Virology Centre Sequencing lab|COVID-19 Genomics UK (COG-UK) Consortium|Moore|United Kingdom

>Spike|hCoV-19/USA/WA-S224/2020|2020-03-19|EPI\_ISL\_430262|Original|hCoV-19^^Washington|Human|Washington State Department of Health|Seattle Flu Study|Bedford|USA

>Spike|hCoV-19/England/QEUA-AD1F7A/2020|2020-10-26|EPI\_ISL\_629982|Original|hCoV-19^^England|Human|Lighthouse Lab in Glasgow|Wellcome Sanger Institute for the COVID-19 Genomics UK (COG-UK) consortium|Davies|United Kingdom

>Spike|hCoV-19/England/NORW-F1A31/2020|2020-11-12|EPI\_ISL\_725131|Original|hCoV-19^^England|Human|Quadram Institute Bioscience|COVID-19 Genomics UK (COG-UK) Consortium|Alikhan|United Kingdom

>Spike|hCoV-19/USA/NY-QDX-24/2020|2020-03-15|EPI\_ISL\_467898|Original|hCoV-19^^New York|Human|Quest Diagnostics|Quest Diagnostics|Kagan|USA

>Spike|hCoV-19/Germany/HH-hpi-p1887/2020|2020-03-24|EPI\_ISL\_776230|Original|hCoV-19^^Hamburg|Human|University Medical Center Hamburg Eppendorf|Heinrich Pette Institute|Robitaille|Germany

>Spike|hCoV-19/USA/AL-CDC-2-3714566/2020|2020-11-04|EPI\_ISL\_751753|Original|hCoV-19^^Alabama|Human|AL Dept. of Public Health Bureau of Clinical Laboratories|Genomics and Discovery|Queen|USA

>Spike|hCoV-19/Finland/23LS1E6/2020|2020-10-23|EPI\_ISL\_759771|Original|hCoV-19^^Uusimaa|Human|Department of Virology and Immunology|Department of Virology|Smura|Finland

>Spike|hCoV-19/England/ALDP-C3DDE9/2020|2020-12-10|EPI\_ISL\_731569|Original|hCoV-19^^England|Human|Lighthouse Lab in Alderley Park|Wellcome Sanger Institute for the COVID-19 Genomics UK (COG-UK) Consortium|Davies|United Kingdom

>Spike|hCoV-19/Bangladesh/BCSIR-NILMRC-232/2020|2020-07-06|EPI\_ISL\_487375|Original|hCoV-19^^Barisal|Human|National Institute of Laboratory Medicine and Referral Center|Genomic Research Lab|Khan|Bangladesh

>Spike|hCoV-19/USA/WI-UW-10/2020|2020-03-21|EPI\_ISL\_417204|Original|hCoV-19^^Wisconsin|Human|University of Wisconsin-Madison AIDS Vaccine Research Laboratories|University of Wisconsin-Madison AIDS Vaccine Research Laboratories|Braun|USA

>Spike|hCoV-19/Denmark/DCGC-2165/2020|2020-08-10|EPI\_ISL\_617464|Original|hCoV-19^^Nordjylland|Human|Department of Virus and Microbiological Special Diagnostics|Albertsen lab|Michaelsen|Denmark

>Spike|hCoV-19/Belgium/ULG-11036/2020|2020-11-30|EPI\_ISL\_722927|Original|hCoV-19^^Liege|Human|Department of Clinical Microbiology|GIGA Medical Genomics|Durkin|Belgium

>Spike|hCoV-19/Australia/VIC11395/2020|2020-08-21|EPI\_ISL\_563354|Original|hCoV-19^^Victoria|Human|Microbiological Diagnostic Unit - Public Health Laboratory (MDU-PHL)|MDU-PHL|Schultz|Australia

>Spike|hCoV-19/England/NORT-29885E/2020|2020-04-19|EPI\_ISL\_493470|Original|hCoV-19^^England|Human|Northumbria University / South Tees Hospitals NHS Foundation Trust / North Cumbria Integrated Care NHS Foundation Trust / North Tees and Hartlepool NHS Foundation Trust / Newcastle Hospitals NHS Foundation Trust|COVID-19 Genomics UK (COG-UK) Consortium|Bashton|United Kingdom

>Spike|hCoV-19/England/MILK-A7BAAE/2020|2020-10-15|EPI\_ISL\_607595|Original|hCoV-19^^England|Human|Lighthouse Lab in Milton Keynes|Wellcome Sanger Institute for the COVID-19 Genomics UK (COG-UK) consortium|Davies|United Kingdom

>Spike|hCoV-19/USA/MI-MDHHS-SC20702/2020|2020-04-27|EPI\_ISL\_471726|Original|hCoV-19^^Michigan|Human|Michigan Department of Health and Human Services|Michigan Department of Health and Human Services|Blankenship|USA

>Spike|hCoV-19/Denmark/DCGC-19622/2020|2020-12-07|EPI\_ISL\_749065|Original|hCoV-19^^Hovedstaden|Human|Department of Virus and Microbiological Special Diagnostics|Albertsen Lab|Michaelsen|Denmark

>Spike|hCoV-19/Austria/CeMM0954/2020|2020-03-29|EPI\_ISL\_583804|Original|hCoV-19^^Austria|Human|Dr. Gernot Walder GmbH|Bergthaler laboratory|Bergthaler|Austria

>Spike|hCoV-19/USA/TX-HMH-6816/2020|2020-06-25|EPI\_ISL\_546263|Original|hCoV-19^^Texas|Human|Houston Methodist Hospital|Houston Methodist Hospital|Long|USA

>Spike|hCoV-19/India/DL-IGIB11304767/2020|2020-07-00|EPI\_ISL\_751305|Original|hCoV-19^^Delhi|Human|Devki Devi Foundation|CSIR-IGIB|Max|Pandey|India

>Spike|hCoV-19/USA/UT-QDX-2649/2020|2020-03-13|EPI\_ISL\_604979|Original|hCoV-19^^Utah|Human|Quest Diagnostics|Quest Diagnostics|Kagan|USA

>Spike|hCoV-19/Japan/PG-4541/2020|2020-07-00|EPI\_ISL\_689679|Original|hCoV-19^^Japan|Human|Pathogen Genomics Center|Pathogen Genomics Center|Sekizuka|Japan

>Spike|hCoV-19/England/CAMC-B20B4A/2020|2020-11-02|EPI\_ISL\_647766|Original|hCoV-19^^England|Human|Lighthouse Lab in Cambridge|Wellcome Sanger Institute for the COVID-19 Genomics UK (COG-UK) Consortium|Davies|United Kingdom

>Spike|hCoV-19/United Arab Emirates/0021/2020|2020-05-07|EPI\_ISL\_698231|Original|hCoV-19^^Abu Dhabi|Human|Group 42 (G42) Healthcare|G42 Healthcare|Ogrodzki|United Arab Emirates

>Spike|hCoV-19/Russia/StPetersburg-RII7520S/2020|2020-04-20|EPI\_ISL\_450256|Original|hCoV-19^^Saint Petersburg|Human|WHO National Influenza Centre Russian Federation|WHO National Influenza Centre Russian Federation|Komissarov|Russia

>Spike|hCoV-19/Scotland/EDB4928/2020|2020-05-11|EPI\_ISL\_473799|Original|hCoV-19^^Scotland|Human|Virology Department|COVID-19 Genomics UK (COG-UK) Consortium|Williams|United Kingdom

>Spike|hCoV-19/USA/MS-USAFSAM-S021/2020|2020-03-19|EPI\_ISL\_512795|Original|hCoV-19^^Mississippi|Human|Public Health|Public Health|Fries|USA

>Spike|hCoV-19/England/CAMC-A573CB/2020|2020-10-08|EPI\_ISL\_597458|Original|hCoV-19^^England|Human|Lighthouse Lab in Cambridge|Wellcome Sanger Institute for the COVID-19 Genomics UK (COG-UK) consortium|Davies|United Kingdom

>Spike|hCoV-19/USA/NY-NYCPHL-001538/2020|2020-12-01|EPI\_ISL\_745400|Original|hCoV-19^^New York|Human|DOHMH Central Harlem|New York City Public Health Laboratory|Wang|USA

>Spike|hCoV-19/England/MILK-B3A22A/2020|2020-11-01|EPI\_ISL\_658749|Original|hCoV-19^^England|Human|Lighthouse Lab in Milton Keynes|Wellcome Sanger Institute for the COVID-19 Genomics UK (COG-UK) Consortium|Davies|United Kingdom

>Spike|hCoV-19/Wales/PHWC-4A0AC4/2020|2020-12-10|EPI\_ISL\_743540|Original|hCoV-19^^Wales|Human|Wales Specialist Virology Centre Sequencing lab|COVID-19 Genomics UK (COG-UK) Consortium|Moore|United Kingdom

>Spike|hCoV-19/Switzerland/BE-ETHZ-100055/2020|2020-03-12|EPI\_ISL\_466977|Original|hCoV-19^^Bern|Human|Viollier AG|Department of Biosystems Science and Engineering|Nadeau|Switzerland

>Spike|hCoV-19/USA/LA-EVTL427/2020|2020-06-12|EPI\_ISL\_578833|Original|hCoV-19^^Louisiana|Human|LSUHS Emerging Viral Threat Laboratory|Microbial Genome Sequencing Center|Kamil|USA

>Spike|hCoV-19/USA/TX-HMH-4691/2020|2020-06-19|EPI\_ISL\_544261|Original|hCoV-19^^Texas|Human|Houston Methodist Hospital|Houston Methodist Hospital|Long|USA

>Spike|hCoV-19/USA/TX-DSHS-0935/2020|2020-06-15|EPI\_ISL\_602233|Original|hCoV-19^^Texas|Human|Texas Department of State Health Services|Texas Department of State Health Services|Rahman|USA

>Spike|hCoV-19/Switzerland/BS-42210895/2020|2020-03-28|EPI\_ISL\_581806|Original|hCoV-19^^Basel-Stadt|Human|University Hospital Basel|University Hospital Basel|Roloff Handschin|Switzerland

>Spike|hCoV-19/England/ALDP-94D314/2020|2020-06-16|EPI\_ISL\_556499|Original|hCoV-19^^England|Human|Lighthouse Lab in Alderley Park|Wellcome Sanger Institute for the COVID-19 Genomics UK (COG-UK) consortium|Davies|United Kingdom

>Spike|hCoV-19/England/MILK-A228F7/2020|2020-10-03|EPI\_ISL\_612527|Original|hCoV-19^^England|Human|Northumbria University / South Tees Hospitals NHS Foundation Trust / North Cumbria Integrated Care NHS Foundation Trust / North Tees and Hartlepool NHS Foundation Trust / Newcastle Hospitals NHS Foundation Trust|COVID-19 Genomics UK (COG-UK) Consortium|Bashton|United Kingdom

>Spike|hCoV-19/England/ALDP-AA175D/2020|2020-10-22|EPI\_ISL\_625108|Original|hCoV-19^^England|Human|Lighthouse Lab in Alderley Park|Wellcome Sanger Institute for the COVID-19 Genomics UK (COG-UK) consortium|Davies|United Kingdom

>Spike|hCoV-19/England/ALDP-A688F5/2020|2020-10-09|EPI\_ISL\_608518|Original|hCoV-19^^England|Human|Lighthouse Lab in Alderley Park|Wellcome Sanger Institute for the COVID-19 Genomics UK (COG-UK) consortium|Davies|United Kingdom

>Spike|hCoV-19/England/MILK-A79E1D/2020|2020-10-15|EPI\_ISL\_606828|Original|hCoV-19^^England|Human|Lighthouse Lab in Milton Keynes|Wellcome Sanger Institute for the COVID-19 Genomics UK (COG-UK) consortium|Davies|United Kingdom

>Spike|hCoV-19/England/QEUI-B2DB4D/2020|2020-11-03|EPI\_ISL\_646868|Original|hCoV-19^^England|Human|Lighthouse Lab in Glasgow|Wellcome Sanger Institute for the COVID-19 Genomics UK (COG-UK) Consortium|Davies|United Kingdom

>Spike|hCoV-19/England/CAMC-A57D09/2020|2020-10-08|EPI\_ISL\_597200|Original|hCoV-19^^England|Human|Lighthouse Lab in Cambridge|Wellcome Sanger Institute for the COVID-19 Genomics UK (COG-UK) consortium|Davies|United Kingdom

>Spike|hCoV-19/South Africa/KRISP-K003520/2020|2020-09-25|EPI\_ISL\_602839|Original|hCoV-19^^KwaZulu-Natal|Human|NHLS-IALCH|KRISP|de Oliveira|South Africa

>Spike|hCoV-19/Denmark/DCGC-13192/2020|2020-11-30|EPI\_ISL\_712148|Original|hCoV-19^^Hovedstaden|Human|Department of Virus and Microbiological Special Diagnostics|Albertsen Lab|Michaelsen|Denmark

>Spike|hCoV-19/Denmark/DCGC-6017/2020|2020-09-21|EPI\_ISL\_621126|Original|hCoV-19^^Midtjylland|Human|Department of Virus and Microbiological Special Diagnostics|Albertsen lab|Michaelsen|Denmark

>Spike|hCoV-19/England/QEUI-9C82BA/2020|2020-09-11|EPI\_ISL\_567174|Original|hCoV-19^^England|Human|Lighthouse Lab in Glasgow|Wellcome Sanger Institute for the COVID-19 Genomics UK (COG-UK) consortium|Davies|United Kingdom

>Spike|hCoV-19/Spain/MD-ISCIII-2014937/2020|2020-08-26|EPI\_ISL\_691728|Original|hCoV-19^^Madrid|Human|Hospital Cl\u00e9nico San Carlos|Instituto de Salud Carlos III|Caballero|Spain

>Spike|hCoV-19/England/MILK-B9714C/2020|2020-11-13|EPI\_ISL\_675086|Original|hCoV-19^^England|Human|Lighthouse Lab in Milton Keynes|Wellcome Sanger Institute for the COVID-19 Genomics UK (COG-UK) Consortium|Davies|United Kingdom

>Spike|hCoV-19/England/SHEF-D2FFB/2020|2020-05-04|EPI\_ISL\_475506|Original|hCoV-19^^England|Human|Virology Department|COVID-19 Genomics UK (COG-UK) Consortium|de Silva|United Kingdom

>Spike|hCoV-19/Denmark/DCGC-20314/2020|2020-11-23|EPI\_ISL\_748108|Original|hCoV-19^^Hovedstaden|Human|Department of Virus and Microbiological Special Diagnostics|Albertsen Lab|Michaelsen|Denmark

>Spike|hCoV-19/USA/CA-ALSR-1630/2020|2020-04-24|EPI\_ISL\_494700|Original|hCoV-19^^California|Human|Scripps Medical Laboratory|Andersen lab at Scripps Research|Gangavarapu|USA

>Spike|hCoV-19/England/CAMC-B0A89A/2020|2020-10-29|EPI\_ISL\_643415|Original|hCoV-19^^England|Human|Lighthouse Lab in Cambridge|Wellcome Sanger Institute for the COVID-19 Genomics UK (COG-UK) Consortium|Davies|United Kingdom

>Spike|hCoV-19/England/ALDP-B74312/2020|2020-11-12|EPI\_ISL\_662036|Original|hCoV-19^^England|Human|Lighthouse Lab in Alderley Park|Wellcome Sanger Institute for the COVID-19 Genomics UK (COG-UK) Consortium|Davies|United Kingdom

>Spike|hCoV-19/Australia/NSW846/2020|2020-08-06|EPI\_ISL\_526188|Original|hCoV-19^^New South Wales|Human|St Vincent's Pathology (SydPath)|NSW Health Pathology - Institute of Clinical Pathology and Medical Research; Westmead Hospital; University of Sydney|Gall|Australia

>Spike|hCoV-19/Denmark/DCGC-13428/2020|2020-11-30|EPI\_ISL\_712792|Original|hCoV-19^^Sjælland|Human|Department of Virus and Microbiological Special Diagnostics|Albertsen Lab|Michaelsen|Denmark

>Spike|hCoV-19/Denmark/DCGC-2033/2020|2020-07-27|EPI\_ISL\_618233|Original|hCoV-19^^Nordjylland|Human|Department of Virus and Microbiological Special Diagnostics|Albertsen lab|Michaelsen|Denmark

>Spike|hCoV-19/Wales/PHWC-489733/2020|2020-11-01|EPI\_ISL\_639610|Original|hCoV-19^^Wales|Human|Wales Specialist Virology Centre Sequencing lab|COVID-19 Genomics UK (COG-UK) Consortium|Moore|United Kingdom

>Spike|hCoV-19/England/QEUI-9D19AA/2020|2020-09-16|EPI\_ISL\_573671|Original|hCoV-19^^England|Human|University College London|COVID-19 Genomics UK (COG-UK) Consortium|Roy|United Kingdom

>Spike|hCoV-19/USA/VA-DCLS-1684/2020|2020-09-08|EPI\_ISL\_609974|Original|hCoV-19^^Virginia|Human|Virginia DCLS|Virginia DCLS|St. Jacques|USA

>Spike|hCoV-19/India/MH-ACTREC-149/2020|2020-05-31|EPI\_ISL\_699805|Original|hCoV-19^^Maharashtra|Human|Hematopathology Laboratory|Hematopathology Laboratory|Patkar|India

>Spike|hCoV-19/England/ALDP-A4FE4D/2020|2020-10-07|EPI\_ISL\_597835|Original|hCoV-19^^England|Human|Lighthouse Lab in Alderley Park|Wellcome Sanger Institute for the COVID-19 Genomics UK (COG-UK) consortium|Davies|United Kingdom

>Spike|hCoV-19/Japan/PG-7238/2020|2020-08-00|EPI\_ISL\_688342|Original|hCoV-19^^Japan|Human|Saitama Prefectural Institute of Public Health|Pathogen Genomics Center|Sekizuka|Japan

>Spike|hCoV-19/England/ALDP-9EAB11/2020|2020-09-24|EPI\_ISL\_580232|Original|hCoV-19^^England|Human|Lighthouse Lab in Alderley Park|Wellcome Sanger Institute for the COVID-19 Genomics UK (COG-UK) consortium|Davies|United Kingdom

>Spike|hCoV-19/England/MILK-99D403/2020|2020-08-31|EPI\_ISL\_549866|Original|hCoV-19^^England|Human|Lighthouse Lab in Milton Keynes|Wellcome Sanger Institute for the COVID-19 Genomics UK (COG-UK) consortium|Davies|United Kingdom

>Spike|hCoV-19/France/PAC-IHU-0697/2020|2020-04-14|EPI\_ISL\_568940|Original|hCoV-19^^Provence-Alpes-C\u00f4te-d\u2019Azur|Human|MEPHI|MEPHI|Levasseur|France

>Spike|hCoV-19/Denmark/DCGC-2426/2020|2020-08-10|EPI\_ISL\_617508|Original|hCoV-19^^Hovedstaden|Human|Department of Virus and Microbiological Special Diagnostics|Albertsen lab|Michaelsen|Denmark

>Spike|hCoV-19/Germany/HH-hpi-pl493/2020|2020-03-12|EPI\_ISL\_776001|Original|hCoV-19^^Hamburg|Human|University Medical Center Hamburg Eppendorf|Heinrich Pette Institute|Robitaille|Germany

>Spike|hCoV-19/Scotland/CVR2759/2020|2020-04-20|EPI\_ISL\_478031|Original|hCoV-19^^Scotland|Human|West of Scotland Specialist Virology Centre|COVID-19 Genomics UK (COG-UK) Consortium|Robertson|United Kingdom

>Spike|hCoV-19/France/PAC-IHU-0445/2020|2020-04-04|EPI\_ISL\_569513|Original|hCoV-19^^Provence-Alpes-C\u00f4te-d\u2019Azur|Human|MEPHI|MEPHI|Levasseur|France

>Spike|hCoV-19/England/ALDP-A94395/2020|2020-10-19|EPI\_ISL\_611210|Original|hCoV-19^^England|Human|Lighthouse Lab in Alderley Park|Wellcome Sanger Institute for the COVID-19 Genomics UK (COG-UK) consortium|Davies|United Kingdom

>Spike|hCoV-19/USA/TX-HMH-MCoV-15456/2020|2020-10-23|EPI\_ISL\_786940|Original|hCoV-19^^Texas|Human|Houston Methodist Hospital|Houston Methodist Hospital|Long|USA

>Spike|hCoV-19/USA/OR-OHSU-4032/2020|2020-10-28|EPI\_ISL\_667523|Original|hCoV-19^^Oregon|Human|OHSU Lab Services Molecular Microbiology Lab|Oregon SARS-CoV-2 Genome Sequencing Center|O'Roak|USA

>Spike|hCoV-19/Luxembourg/LNS8755341/2020|2020-12-29|EPI\_ISL\_771140|Original|hCoV-19^^Luxembourg|Human|Laboratoire national de sant\u00e9|Laboratoire national de sant\u00e9|Wienecke-Baldacchino|Luxembourg

>Spike|hCoV-19/Denmark/DCGC-20165/2020|2020-11-30|EPI\_ISL\_747633|Original|hCoV-19^^Syddanmark|Human|Department of Virus and Microbiological Special Diagnostics|Albertsen Lab|Michaelsen|Denmark

>Spike|hCoV-19/Spain/AN-IBV-001211/2020|2020-03-24|EPI\_ISL\_452560|Original|hCoV-19^^Andalucia|Human|Servicio de Microbiolog\u00eda y Parasitolog\u00eda cl\u00ednica. UCEIMP. Hospital Universitario Virgen del Roc\u00edo/IBIS/CSIC/US.|SeqCOVID-SPAIN consortium/IBV (CSIC)|Comas|Spain

>Spike|hCoV-19/USA/WI-GMF-03156/2020|2020-05-12|EPI\_ISL\_455572|Original|hCoV-19^^Wisconsin|Human|Gundersen Molecular Diagnostics Laboratory|Kabara Cancer Research Institute|Kenny|USA

>Spike|hCoV-19/Australia/NSW1189/2020|2020-10-30|EPI\_ISL\_667790|Original|hCoV-19^^New South Wales|Human|South Eastern Area Laboratory Services (SEALS)|NSW Health Pathology - Institute of Clinical Pathology and Medical Research; Westmead Hospital; University of Sydney|Gall|Australia

>Spike|hCoV-19/USA/TX-HMH-5907/2020|2020-06-30|EPI\_ISL\_547100|Original|hCoV-19^^Texas|Human|Houston Methodist Hospital|Houston Methodist Hospital|Long|USA

>Spike|hCoV-19/USA/NY-QDX-867/2020|2020-03-16|EPI\_ISL\_571673|Original|hCoV-19^^New York|Human|Quest Diagnostics|Quest Diagnostics|Kagan|USA

>Spike|hCoV-19/England/MILK-A46D3A/2020|2020-10-06|EPI\_ISL\_598457|Original|hCoV-19^^England|Human|Lighthouse Lab in Milton Keynes|Wellcome Sanger Institute for the COVID-19 Genomics UK (COG-UK) consortium|Davies|United Kingdom

>Spike|hCoV-19/Denmark/DCGC-6615/2020|2020-10-12|EPI\_ISL\_619664|Original|hCoV-19^^Midtjylland|Human|Department of Virus and Microbiological Special Diagnostics|Albertsen lab|Michaelsen|Denmark



>Spike|hCoV-19/Denmark/DCGC-11855/2020|2020-10-26|EPI\_ISL\_671179|Original|hCoV-19^^Syddanmark|Human|Department of Virus and Microbiological Special Diagnostics|Albertsen Lab|Michaelsen|Denmark

>Spike|hCoV-19/Spain/AN-IBV-001946/2020|2020-03-13|EPI\_ISL\_452433|Original|hCoV-19^^Andalucia|Human|Servicio de Microbiolog\u00eda. HRU de M\u00e9llaga. Servicio Andaluz de Salud|SeqCOVID-SPAIN consortium/IBV(CSIC)|Comas|Spain

>Spike|hCoV-19/USA/TX-DSHS-2055/2020|2020-12-03|EPI\_ISL\_766646|Original|hCoV-19^^Texas|Human|Texas Department of State Health Services|Texas Department of State Health Services|Rahman|USA

>Spike|hCoV-19/England/ALDP-91F64F/2020|2020-06-23|EPI\_ISL\_553300|Original|hCoV-19^^England|Human|Lighthouse Lab in Alderley Park|Wellcome Sanger Institute for the COVID-19 Genomics UK (COG-UK) consortium|Davies|United Kingdom

>Spike|hCoV-19/England/ALDP-A518A4/2020|2020-10-07|EPI\_ISL\_598152|Original|hCoV-19^^England|Human|Lighthouse Lab in Alderley Park|Wellcome Sanger Institute for the COVID-19 Genomics UK (COG-UK) consortium|Davies|United Kingdom

>Spike|hCoV-19/Wales/ALDP-AA2543/2020|2020-10-22|EPI\_ISL\_634771|Original|hCoV-19^^Wales|Human|Lighthouse Lab in Alderley Park|Wellcome Sanger Institute for the COVID-19 Genomics UK (COG-UK) consortium|Davies|United Kingdom

>Spike|hCoV-19/England/MILK-A45FAE/2020|2020-10-06|EPI\_ISL\_598805|Original|hCoV-19^^England|Human|Lighthouse Lab in Milton Keynes|Wellcome Sanger Institute for the COVID-19 Genomics UK (COG-UK) consortium|Davies|United Kingdom

>Spike|hCoV-19/Portugal/PT1250/2020|2020-03-16|EPI\_ISL\_511211|Original|hCoV-19^^Portugal|Human|Instituto Nacional de Saude (INSA) and Instituto Gulbenkian de Ciencia (IGC)|Instituto Nacional de Saude (INSA) and Instituto Gulbenkian de Ciencia (IGC)|Borges|Portugal

>Spike|hCoV-19/Canada/QC\_AE7/2020|2020-04-05|EPI\_ISL\_515200|Original|hCoV-19^^Quebec|Human|Laboratoire de microbiologie|Smith Laboratory|Smith|Canada

>Spike|hCoV-19/Australia/VIC4440/2020|2020-07-16|EPI\_ISL\_519736|Original|hCoV-19^^Victoria|Human|Microbiological Diagnostic Unit - Public Health Laboratory (MDU-PHL)|MDU-PHL|Schultz|Australia

>Spike|hCoV-19/USA/WA-S2275/2020|2020-06-09|EPI\_ISL\_497703|Original|hCoV-19^^Washington|Human|Washington State Department of Health|Seattle Flu Study|Lee|USA

>Spike|hCoV-19/Northern Ireland/NIRE-232EBE/2020|2020-09-25|EPI\_ISL\_680233|Original|hCoV-19^^Northern Ireland|Human|Regional Virus Laboratory|COVID-19 Genomics UK (COG-UK) Consortium|Fairley|United Kingdom

>Spike|hCoV-19/Norway/2997/2020|2020-08-04|EPI\_ISL\_549062|Original|hCoV-19^^Viken|Human|Furst Medical Laboratory|Norwegian Institute of Public Health|Kopperud Riis|Norway

>Spike|hCoV-19/Spain/MD-IBV-99008755/2020|2020-10-20|EPI\_ISL\_654313|Original|hCoV-19^^Madrid|Human|Hospital General Universitario Gregorio Mara\u00f1a|SeqCOVID-SPAIN consortium/IBV(CSIC)|Comas|Spain

>Spike|hCoV-19/England/QEUH-BCBCD5/2020|2020-11-26|EPI\_ISL\_703883|Original|hCoV-19^^England|Human|Lighthouse Lab in Glasgow|Wellcome Sanger Institute for the COVID-19 Genomics UK (COG-UK) Consortium|Davies|United Kingdom

>Spike|hCoV-19/England/P2/2020|2020-00-00|EPI\_ISL\_479786|unknown|hCoV-19^^England|Human|Breuer Lab|Breuer Lab|Pang|United Kingdom

>Spike|hCoV-19/England/NOTT-11F42F/2020|2020-11-24|EPI\_ISL\_705094|Original|hCoV-19^^England|Human|Queens Medical Centre|COVID-19 Genomics UK (COG-UK) Consortium|Loose|United Kingdom

>Spike|hCoV-19/Scotland/EDB8663/2020|2020-10-24|EPI\_ISL\_650302|Original|hCoV-19^^Scotland|Human|Virology Department|COVID-19 Genomics UK (COG-UK) Consortium|McHugh|United Kingdom

>Spike|hCoV-19/Scotland/CVR3508/2020|2020-05-08|EPI\_ISL\_473648|Original|hCoV-19^^Scotland|Human|West of Scotland Specialist Virology Centre|COVID-19 Genomics UK (COG-UK) Consortium|Robertson|United Kingdom

>Spike|hCoV-19/Wales/PHWC-15C5F6/2020|2020-05-07|EPI\_ISL\_472514|Original|hCoV-19^^Wales|Human|Wales Specialist Virology Centre Sequencing lab|COVID-19 Genomics UK (COG-UK) Consortium|Moore|United Kingdom

>Spike|hCoV-19/England/QEUA-9B414B/2020|2020-09-07|EPI\_ISL\_559879|Original|hCoV-19^^England|Human|Oxford Viromics|COVID-19 Genomics UK (COG-UK) Consortium|Golubchik|United Kingdom

>Spike|hCoV-19/Denmark/DCGC-14964/2020|2020-11-23|EPI\_ISL\_713098|Original|hCoV-19^^Hovedstaden|Human|Department of Virus and Microbiological Special Diagnostics|Albertsen Lab|Michaelsen|Denmark

>Spike|hCoV-19/USA/CT-Yale-567/2020|2020-06-25|EPI\_ISL\_730052|Original|hCoV-19^^Connecticut|Human|Yale COVID-19 Biorepository|Grubaugh Lab - Yale School of Public Health|Grubaugh|USA

>Spike|hCoV-19/Denmark/DCGC-7733/2020|2020-10-19|EPI\_ISL\_618665|Original|hCoV-19^^Midtjylland|Human|Department of Virus and Microbiological Special Diagnostics|Albertsen lab|Michaelsen|Denmark

>Spike|hCoV-19/Italy/VEN-UniVR-134/2020|2020-04-02|EPI\_ISL\_751431|Original|hCoV-19^^Veneto|Human|IRCCS Sacro Cuore Don Calabria Hospital|University of Verona|Mori|Italy

>Spike|hCoV-19/Costa Rica/INC-0149/2020|2020-09-19|EPI\_ISL\_770012|Original|hCoV-19^^San Jose|Human|Area De Salud Coronado|Inciensa|Soto-Garita|Costa Rica

>Spike|hCoV-19/England/QEUA-C33FA1/2020|2020-12-11|EPI\_ISL\_734043|Original|hCoV-19^^England|Human|Lighthouse Lab in Glasgow|Wellcome Sanger Institute for the COVID-19 Genomics UK (COG-UK) Consortium|Davies|United Kingdom

>Spike|hCoV-19/England/NORW-EB37B/2020|2020-05-01|EPI\_ISL\_457423|Original|hCoV-19^^England|Human|Quadram Institute Bioscience|COVID-19 Genomics UK (COG-UK) Consortium|Alikhan|United Kingdom

>Spike|hCoV-19/England/CAMC-B07AB5/2020|2020-10-29|EPI\_ISL\_643546|Original|hCoV-19^^England|Human|Lighthouse Lab in Cambridge|Wellcome Sanger Institute for the COVID-19 Genomics UK (COG-UK) Consortium|Davies|United Kingdom

>Spike|hCoV-19/Denmark/DCGC-1747/2020|2020-03-09|EPI\_ISL\_620132|Original|hCoV-19^^Midtjylland|Human|Department of Virus and Microbiological Special Diagnostics|Albertsen lab|Michaelsen|Denmark

>Spike|hCoV-19/England/CAMC-A57862/2020|2020-10-07|EPI\_ISL\_597472|Original|hCoV-19^^England|Human|Lighthouse Lab in Cambridge|Wellcome Sanger Institute for the COVID-19 Genomics UK (COG-UK) consortium|Davies|United Kingdom

>Spike|hCoV-19/Scotland/QEUA-9C9D12/2020|2020-09-14|EPI\_ISL\_576091|Original|hCoV-19^^Scotland|Human|Lighthouse Lab in Glasgow|Wellcome Sanger Institute for the COVID-19 Genomics UK (COG-UK) consortium|Davies|United Kingdom

>Spike|hCoV-19/Scotland/QEUA-95E310/2020|2020-08-10|EPI\_ISL\_534438|Original|hCoV-19^^Scotland|Human|NHSGGC West of Scotland Specialist Virology Centre / MRC-University of Glasgow Centre for Virus Research|Wellcome Sanger Institute for the COVID-19 Genomics UK (COG-UK) consortium|Davies|United Kingdom

>Spike|hCoV-19/Canada/QC-LSPQ-L00217559/2020|2020-03-12|EPI\_ISL\_535764|Original|hCoV-19^^Quebec|Human|CUSM-Site Glen-LAB Microbiologie|Laboratoire de sant   publique du Qu  bec|Moreira|Canada

>Spike|hCoV-19/England/QEUA-BC4B39/2020|2020-11-25|EPI\_ISL\_703978|Original|hCoV-19^^England|Human|Lighthouse Lab in Glasgow|Wellcome Sanger Institute for the COVID-19 Genomics UK (COG-UK) Consortium|Davies|United Kingdom

>Spike|hCoV-19/USA/FL-BPHL-1417/2020|2020-08-06|EPI\_ISL\_549199|Original|hCoV-19^^Florida|Human|Florida Bureau of Public Health Laboratories|Florida Bureau of Public Health Laboratories|Blanton|USA

>Spike|hCoV-19/Scotland/QEUA-96EC9A/2020|2020-08-19|EPI\_ISL\_530429|Original|hCoV-19^^Scotland|Human|NHSGGC West of Scotland Specialist Virology Centre / MRC-University of Glasgow Centre for Virus Research|Wellcome Sanger Institute for the COVID-19 Genomics UK (COG-UK) consortium|Davies|United Kingdom

>Spike|hCoV-19/England/NOTT-1203B5/2020|2020-12-08|EPI\_ISL\_725610|Original|hCoV-19^^England|Human|Queens Medical Centre|COVID-19 Genomics UK (COG-UK) Consortium|Loose|United Kingdom

>Spike|hCoV-19/England/ALDP-9D78A7/2020|2020-09-18|EPI\_ISL\_576594|Original|hCoV-19^^England|Human|Oxford Viromics|COVID-19 Genomics UK (COG-UK) Consortium|Golubchik|United Kingdom

>Spike|hCoV-19/England/MILK-C53934/2020|2020-12-12|EPI\_ISL\_769663|Original|hCoV-19^^England|Human|Lighthouse Lab in Milton Keynes|Wellcome Sanger Institute for the COVID-19 Genomics UK (COG-UK) Consortium|Davies|United Kingdom

>Spike|hCoV-19/USA/MI-MDHHS-SC22497/2020|2020-11-17|EPI\_ISL\_708200|Original|hCoV-19^^Michigan|Human|Michigan Department of Health and Human Services|Michigan Department of Health and Human Services|Jacob|USA

>Spike|hCoV-19/England/QEUH-AD38D7/2020|2020-10-26|EPI\_ISL\_633776|Original|hCoV-19^^England|Human|Lighthouse Lab in Glasgow|Wellcome Sanger Institute for the COVID-19 Genomics UK (COG-UK) consortium|Davies|United Kingdom

>Spike|hCoV-19/Finland/25LS13D5/2020|2020-10-25|EPI\_ISL\_759907|Original|hCoV-19^^Uusimaa|Human|Department of Virology and Immunology|Department of Virology|Smura|Finland

>Spike|hCoV-19/Australia/VIC5795/2020|2020-00-00|EPI\_ISL\_518591|Original|hCoV-19^^Victoria|Human|Microbiological Diagnostic Unit - Public Health Laboratory (MDU-PHL)|MDU-PHL|Schultz|Australia

>Spike|hCoV-19/Wales/PHWC-3183B/2020|2020-04-10|EPI\_ISL\_446495|Original|hCoV-19^^Wales|Human|Wales Specialist Virology Centre|Public Health Wales Microbiology Cardiff|Moore|United Kingdom

>Spike|hCoV-19/England/CAMC-B21341/2020|2020-11-03|EPI\_ISL\_647249|Original|hCoV-19^^England|Human|Lighthouse Lab in Cambridge|Wellcome Sanger Institute for the COVID-19 Genomics UK (COG-UK) Consortium|Davies|United Kingdom

>Spike|hCoV-19/Denmark/DCGC-7937/2020|2020-10-26|EPI\_ISL\_618891|Original|hCoV-19^^Midtjylland|Human|Department of Virus and Microbiological Special Diagnostics|Albertsen lab|Michaelsen|Denmark

>Spike|hCoV-19/England/NORW-F02EF/2020|2020-10-16|EPI\_ISL\_627576|Original|hCoV-19^^England|Human|Quadram Institute Bioscience|COVID-19 Genomics UK (COG-UK) Consortium|Alikhan|United Kingdom

>Spike|hCoV-19/Wales/PHWC-49E2FE/2020|2020-12-07|EPI\_ISL\_742984|Original|hCoV-19^^Wales|Human|Wales Specialist Virology Centre Sequencing lab|COVID-19 Genomics UK (COG-UK) Consortium|Moore|United Kingdom

>Spike|hCoV-19/England/ALDP-B490C4/2020|2020-11-07|EPI\_ISL\_649396|Original|hCoV-19^^England|Human|Lighthouse Lab in Alderley Park|Wellcome Sanger Institute for the COVID-19 Genomics UK (COG-UK) Consortium|Davies|United Kingdom

>Spike|hCoV-19/England/LIVE-9ED5B/2020|2020-04-04|EPI\_ISL\_453391|Original|hCoV-19^^England|Human|Liverpool Clinical Laboratories|COVID-19 Genomics UK (COG-UK) Consortium|Haldenby|United Kingdom

>Spike|hCoV-19/Norway/2506/2020|2020-04-06|EPI\_ISL\_493351|Original|hCoV-19^^Norway|Human|Oslo University Hospital|Norwegian Institute of Public Health|Kopperud Riis|Norway

>Spike|hCoV-19/England/ALDP-A6CF92/2020|2020-10-14|EPI\_ISL\_608037|Original|hCoV-19^^England|Human|Lighthouse Lab in Alderley Park|Wellcome Sanger Institute for the COVID-19 Genomics UK (COG-UK) consortium|Davies|United Kingdom

>Spike|hCoV-19/Denmark/DCGC-13577/2020|2020-11-30|EPI\_ISL\_712888|Original|hCoV-19^^Midtjylland|Human|Department of Virus and Microbiological Special Diagnostics|Albertsen Lab|Michaelsen|Denmark

>Spike|hCoV-19/South Africa/NHLS-UCT-GS-0057/2020|2020-03-24|EPI\_ISL\_640055|Original|hCoV-19^^Western Cape|Human|Groote Schuur Hospital w GSH|NHLS/UCT|Iranzadeh|South Africa

>Spike|hCoV-19/Denmark/DCGC-3196/2020|2020-08-31|EPI\_ISL\_616019|Original|hCoV-19^^Hovedstaden|Human|Department of Virus and Microbiological Special Diagnostics|Albertsen lab|Michaelsen|Denmark

>Spike|hCoV-19/England/ALDP-BB3F7D/2020|2020-11-19|EPI\_ISL\_701726|Original|hCoV-19^^England|Human|Lighthouse Lab in Alderley Park|Wellcome Sanger Institute for the COVID-19 Genomics UK (COG-UK) Consortium|Davies|United Kingdom

>Spike|hCoV-19/Australia/VIC2190/2020|2020-00-00|EPI\_ISL\_521936|Original|hCoV-19^^Victoria|Human|Microbiological Diagnostic Unit - Public Health Laboratory (MDU-PHL)|MDU-PHL|Schultz|Australia

>Spike|hCoV-19/Germany/HH-hpi-p2080/2020|2020-03-20|EPI\_ISL\_776349|Original|hCoV-19^^Hamburg|Human|University Medical Center Hamburg Eppendorf|Heinrich Pette Institute|Robitaille|Germany

>Spike|hCoV-19/Denmark/DCGC-12924/2020|2020-12-07|EPI\_ISL\_712467|Original|hCoV-19^^Midtjylland|Human|Department of Virus and Microbiological Special Diagnostics|Albertsen Lab|Michaelsen|Denmark

>Spike|hCoV-19/England/MILK-B8C960/2020|2020-11-13|EPI\_ISL\_675979|Original|hCoV-19^^England|Human|Lighthouse Lab in Milton Keynes|Wellcome Sanger Institute for the COVID-19 Genomics UK (COG-UK) Consortium|Davies|United Kingdom

>Spike|hCoV-19/Australia/VIC13648/2020|2020-08-03|EPI\_ISL\_563795|Original|hCoV-19^^Victoria|Human|Microbiological Diagnostic Unit - Public Health Laboratory (MDU-PHL)|MDU-PHL|Schultz|Australia

>Spike|hCoV-19/USA/TX-HMH-MCoV-9473/2020|2020-07-03|EPI\_ISL\_781143|Original|hCoV-19^^Texas|Human|Houston Methodist Hospital|Houston Methodist Hospital|Long|USA

>Spike|hCoV-19/Luxembourg/LNS7991123/2020|2020-03-17|EPI\_ISL\_421753|Original|hCoV-19^^Luxembourg|Human|Laboratoire National de Sante|Laboratoire National de Sante|Wienecke-Baldacchino|Luxembourg

>Spike|hCoV-19/Scotland/CVR2690/2020|2020-04-17|EPI\_ISL\_453071|Original|hCoV-19^^Scotland|Human|West of Scotland Specialist Virology Centre|COVID-19 Genomics UK (COG-UK) Consortium|Robertson|United Kingdom

>Spike|hCoV-19/Switzerland/VD-ETHZ-280207/2020|2020-09-09|EPI\_ISL\_560525|Original|hCoV-19^^Vaud|Human|Viollier AG|Department of Biosystems Science and Engineering|Nadeau|Switzerland

>Spike|hCoV-19/Russia/SVE-RII-MH1613S/2020|2020-09-07|EPI\_ISL\_596296|Original|hCoV-19^^Sverdlovsk|Human|HELIX LCC|WHO National Influenza Centre Russian Federation|Komissarov|Russia

>Spike|hCoV-19/Japan/PG-1431/2020|2020-04-00|EPI\_ISL\_685038|Original|hCoV-19^^Japan|Human|Saitama Prefectural Institute of Public Health|Pathogen Genomics Center|Sekizuka|Japan

>Spike|hCoV-19/England/BRIS-122ED0/2020|2020-04-03|EPI\_ISL\_440635|Original|hCoV-19^^England|Human|PHE South West Regional Laboratory|Wellcome Sanger Institute for the COVID-19 Genomics UK (COG-UK) consortium|Amato|United Kingdom

>Spike|hCoV-19/USA/AZ-TG395965/2020|2020-06-09|EPI\_ISL\_694790|Original|hCoV-19^^Arizona|Human|AZ SPHL|TGen North|French|USA

>Spike|hCoV-19/Wales/PHWC-49446B/2020|2020-11-19|EPI\_ISL\_726118|Original|hCoV-19^^Wales|Human|Originating lab|COVID-19 Genomics UK (COG-UK) Consortium|Moore|United Kingdom

>Spike|hCoV-19/England/CAMB-8322D/2020|2020-04-14|EPI\_ISL\_443485|Original|hCoV-19^^England|Human|Department of Pathology|Wellcome Sanger Institute for the COVID-19 Genomics UK (COG-UK) consortium|Amato|United Kingdom

>Spike|hCoV-19/USA/CA-ALSR-0989-SAN/2020|2020-03-30|EPI\_ISL\_483445|Original|hCoV-19^^California|Human|UC San Diego Center for Advanced Laboratory Medicine|Andersen lab at Scripps Research|Gangavarapu|USA

>Spike|hCoV-19/Singapore/697/2020|2020-07-10|EPI\_ISL\_498595|Original|hCoV-19^^Singapore|Human|National Public Health Laboratory|National Public Health Laboratory|Mak|Singapore

>Spike|hCoV-19/Denmark/DCGC-9496/2020|2020-11-09|EPI\_ISL\_669002|Original|hCoV-19^^Hovedstaden|Human|Department of Virus and Microbiological Special Diagnostics|Albertsen Lab|Michaelsen|Denmark

>Spike|hCoV-19/Spain/RI-IBV-98002376/2020|2020-03-31|EPI\_ISL\_537869|Original|hCoV-19^^La Rioja|Human|Centro de Investigaci\u00f3n Biom\u00e9dica de La Rioja - Hospital San Pedro Logro\u00f1o|SeqCOVID-SPAIN consortium|IBV (CSIC)|Comas|Spain

>Spike|hCoV-19/England/CAMC-B1FC78/2020|2020-11-02|EPI\_ISL\_647542|Original|hCoV-19^^England|Human|Lighthouse Lab in Cambridge|Wellcome Sanger Institute for the COVID-19 Genomics UK (COG-UK) Consortium|Davies|United Kingdom

>Spike|hCoV-19/England/CAMC-BBC132/2020|2020-11-21|EPI\_ISL\_705584|Original|hCoV-19^^England|Human|Quadram Institute Bioscience|COVID-19 Genomics UK (COG-UK) Consortium|Alikhan|United Kingdom

>Spike|hCoV-19/England/CAMB-1B9FF9/2020|2020-11-06|EPI\_ISL\_650612|Original|hCoV-19^^England|Human|Department of Pathology|COVID-19 Genomics UK (COG-UK) Consortium|Goodfellow|United Kingdom

>Spike|hCoV-19/USA/CA-CZB-1266/2020|2020-04-12|EPI\_ISL\_454686|Original|hCoV-19^^California|Human|County of Santa Clara Public Health Department|Chan-Zuckerberg Biohub|Hao|USA

>Spike|hCoV-19/England/SHEF-10B2CBB/2020|2020-05-11|EPI\_ISL\_537263|Original|hCoV-19^^England|Human|Virology Department|Wellcome Sanger Institute for the COVID-19 Genomics UK (COG-UK) consortium|Davies|United Kingdom

>Spike|hCoV-19/Italy/VEN-UniVR-124/2020|2020-03-30|EPI\_ISL\_751424|Original|hCoV-19^^Veneto|Human|IRCCS Sacro Cuore Don Calabria Hospital|University of Verona|Mori|Italy

>Spike|hCoV-19/India/MH-ACTREC-291/2020|2020-07-14|EPI\_ISL\_699943|Original|hCoV-19^^Maharashtra|Human|Hematopathology Laboratory|Hematopathology Laboratory|Patkar|India

>Spike|hCoV-19/USA/TX-HMH-MCoV-18653/2020|2020-11-20|EPI\_ISL\_785001|Original|hCoV-19^^Texas|Human|Houston Methodist Hospital|Houston Methodist Hospital|Long|USA

>Spike|hCoV-19/England/NORT-293AE4/2020|2020-07-13|EPI\_ISL\_512354|Original|hCoV-19^^England|Human|Northumbria University / South Tees Hospitals NHS Foundation Trust / North Cumbria Integrated Care NHS Foundation Trust / North Tees and Hartlepool NHS Foundation Trust / Newcastle Hospitals NHS Foundation Trust|COVID-19 Genomics UK (COG-UK) Consortium|Bashton|United Kingdom

>Spike|hCoV-19/USA/WA-UW-4763/2020|2020-03-27|EPI\_ISL\_429622|Original|hCoV-19^^Washington|Human|UW Virology Lab|UW Virology Lab|Roychoudhury|USA

>Spike|hCoV-19/Denmark/ALAB-HH-115/2020|2020-03-09|EPI\_ISL\_451999|Original|hCoV-19^^Denmark|Human|Department of Clinical Microbiology|Albertsen lab|Kirkegaard|Denmark

>Spike|hCoV-19/Japan/PG-8770/2020|2020-09-00|EPI\_ISL\_686366|Original|hCoV-19^^Japan|Human|Pathogen Genomics Center|Pathogen Genomics Center|Sekizuka|Japan

>Spike|hCoV-19/England/CAMB-761C6/2020|2020-03-29|EPI\_ISL\_438432|Original|hCoV-19^^England|Human|Department of Pathology|Wellcome Sanger Institute for the COVID-19 Genomics UK (COG-UK) consortium|Amato|United Kingdom

>Spike|hCoV-19/Denmark/DCGC-1461/2020|2020-03-30|EPI\_ISL\_622488|Original|hCoV-19^^Hovedstaden|Human|Department of Virus and Microbiological Special Diagnostics|Albertsen lab|Michaelsen|Denmark

>Spike|hCoV-19/United Arab Emirates/0161/2020|2020-05-18|EPI\_ISL\_698348|Original|hCoV-19^^Abu Dhabi|Human|Group 42 (G42) Healthcare|G42 Healthcare|Ogrodzki|United Arab Emirates

>Spike|hCoV-19/Denmark/DCGC-16167/2020|2020-11-16|EPI\_ISL\_714291|Original|hCoV-19^^Syddanmark|Human|Department of Virus and Microbiological Special Diagnostics|Albertsen Lab|Michaelsen|Denmark

>Spike|hCoV-19/England/QEUEH-C30DE6/2020|2020-12-11|EPI\_ISL\_730910|Original|hCoV-19^^England|Human|Lighthouse Lab in Glasgow|Wellcome Sanger Institute for the COVID-19 Genomics UK (COG-UK) Consortium|Davies|United Kingdom

>Spike|hCoV-19/England/QEUEH-AE5140/2020|2020-10-27|EPI\_ISL\_633320|Original|hCoV-19^^England|Human|Lighthouse Lab in Glasgow|Wellcome Sanger Institute for the COVID-19 Genomics UK (COG-UK) consortium|Davies|United Kingdom

>Spike|hCoV-19/India/MH-ACTREC-442/2020|2020-08-05|EPI\_ISL\_700091|Original|hCoV-19^^Maharashtra|Human|Hematopathology Laboratory|Hematopathology Laboratory|Patkar|India

>Spike|hCoV-19/England/LIVE-DC099B/2020|2020-11-04|EPI\_ISL\_702897|Original|hCoV-19^^England|Human|Liverpool Clinical Laboratories|COVID-19 Genomics UK (COG-UK) Consortium|Haldenby|United Kingdom

>Spike|hCoV-19/England/QEUEH-B69B63/2020|2020-11-11|EPI\_ISL\_661598|Original|hCoV-19^^England|Human|Lighthouse Lab in Glasgow|Wellcome Sanger Institute for the COVID-19 Genomics UK (COG-UK) Consortium|Davies|United Kingdom

>Spike|hCoV-19/USA/FL-BPHL-0436/2020|2020-03-23|EPI\_ISL\_495342|Original|hCoV-19^^Florida|Human|Florida Bureau of Public Health Laboratories|Florida Bureau of Public Health Laboratories|Blanton|USA

>Spike|hCoV-19/Denmark/DCGC-7509/2020|2020-10-12|EPI\_ISL\_619374|Original|hCoV-19^^Sjaelland|Human|Department of Virus and Microbiological Special Diagnostics|Albertsen lab|Michaelsen|Denmark

>Spike|hCoV-19/USA/UN-UW382/2020|2020-03-16|EPI\_ISL\_418947|Original|hCoV-19^USA|Human|UW Virology Lab|UW Virology Lab|Roychoudhury|USA

>Spike|hCoV-19/Austria/CeMM0355/2020|2020-04-07|EPI\_ISL\_475812|Original|hCoV-19^Vienna|Human|Center for Virology|Bergthaler laboratory|Bergthaler|Austria

>Spike|hCoV-19/Georgia/Tb-390/2020|2020-03-08|EPI\_ISL\_416477|Original|hCoV-19^Tbilisi|Human|R. G. Lugar Center for Public Health Research|R. G. Lugar Center for Public Health Research|Murtskhvaladze|Georgia

>Spike|hCoV-19/England/LIVE-9A26F/2020|2020-04-18|EPI\_ISL\_439861|Original|hCoV-19^England|Human|Liverpool Clinical Laboratories|COVID-19 Genomics UK (COG-UK) Consortium|Haldenby|United Kingdom

>Spike|hCoV-19/England/ALDP-9BE79A/2020|2020-09-09|EPI\_ISL\_567965|Original|hCoV-19^England|Human|Lighthouse Lab in Alderley Park|Wellcome Sanger Institute for the COVID-19 Genomics UK (COG-UK) consortium|Davies|United Kingdom

>Spike|hCoV-19/Wales/PHWC-49BB7E/2020|2020-12-06|EPI\_ISL\_742438|Original|hCoV-19^Wales|Human|Wales Specialist Virology Centre Sequencing lab|COVID-19 Genomics UK (COG-UK) Consortium|Moore|United Kingdom

>Spike|hCoV-19/USA/DE-DHSS-F918144/2020|2020-03-27|EPI\_ISL\_576222|Original|hCoV-19^Delaware|Human|Delaware Public Health Lab|Delaware Public Health Lab|Bajwa|USA

>Spike|hCoV-19/Spain/AN-IBV-001874/2020|2020-03-06|EPI\_ISL\_452471|Original|hCoV-19^Andalucia|Human|Hospital Universitario Puerta del Mar de C\u00e1diz - INIBICA|SeqCOVID-SPAIN consortium|IBV (CSIC)|Comas|Spain

>Spike|hCoV-19/USA/LA-EVTL1407/2020|2020-12-11|EPI\_ISL\_779073|Original|hCoV-19^Louisiana|Human|LSUHS Emerging Viral Threat Laboratory|Microbial Genome Sequencing Center|Kamil|USA

>Spike|hCoV-19/Brazil/RJ-00363/2020|2020-04-20|EPI\_ISL\_623166|Original|hCoV-19^Rio de Janeiro|Human|Laboratorio de Virologia Molecular / UFRJ|Bioinformatics Laboratory / LNCC|Almeida|Brazil

>Spike|hCoV-19/USA/CA-CZB-3922/2020|2020-07-25|EPI\_ISL\_548524|Original|hCoV-19^California|Human|Contra Costa Public Health Lab|Chan-Zuckerberg Biohub|Bhatt|USA

>Spike|hCoV-19/Spain/CT-IBV-97007952/2020|2020-10-05|EPI\_ISL\_654509|Original|hCoV-19^Catalunya|Human|Servicio de Microbiolog\u00eda|SeqCOVID-SPAIN consortium|IBV (CSIC)|Comas|Spain

>Spike|hCoV-19/USA/WI-UW-1359/2020|2020-09-08|EPI\_ISL\_536730|Original|hCoV-19^Wisconsin|Human|University of Wisconsin-Madison AIDS Vaccine Research Laboratories|University of Wisconsin-Madison AIDS Vaccine Research Laboratories|Baczenas|USA

>Spike|hCoV-19/Denmark/ALAB-SSI432/2020|2020-03-24|EPI\_ISL\_429528|Original|hCoV-19^Denmark|Human|Department of Virus and Microbiological Special Diagnostics|Albertsen lab|Kirkegaard|Denmark

>Spike|hCoV-19/Denmark/DCGC-16100/2020|2020-11-16|EPI\_ISL\_714126|Original|hCoV-19^Syddanmark|Human|Department of Virus and Microbiological Special Diagnostics|Albertsen Lab|Michaelsen|Denmark

>Spike|hCoV-19/USA/AZ-TG664495/2020|2020-05-01|EPI\_ISL\_696120|Original|hCoV-19^Arizona|Human|Sonora Quest Laboratories|TGen North|French|USA

>Spike|hCoV-19/England/EXET-13A43D/2020|2020-11-07|EPI\_ISL\_664682|Original|hCoV-19^England|Human|University of Exeter|COVID-19 Genomics UK (COG-UK) Consortium|Temperton|United Kingdom

>Spike|hCoV-19/England/QEUE-9CA661/2020|2020-09-09|EPI\_ISL\_567338|Original|hCoV-19^England|Human|Lighthouse Lab in Glasgow|Wellcome Sanger Institute for the COVID-19 Genomics UK (COG-UK) consortium|Davies|United Kingdom

>Spike|hCoV-19/England/QEUE-A21694/2020|2020-10-01|EPI\_ISL\_587487|Original|hCoV-19^England|Human|Lighthouse Lab in Glasgow|Wellcome Sanger Institute for the COVID-19 Genomics UK (COG-UK) consortium|Davies|United Kingdom

>Spike|hCoV-19/England/CAMC-A65E7E/2020|2020-10-11|EPI\_ISL\_637366|Original|hCoV-19^England|Human|Department of Pathology|COVID-19 Genomics UK (COG-UK) Consortium|Goodfellow|United Kingdom

>Spike|hCoV-19/USA/TX-HMH-MCoV-14116/2020|2020-10-01|EPI\_ISL\_787402|Original|hCoV-19^Texas|Human|Houston Methodist Hospital|Houston Methodist Hospital|Long|USA

>Spike|hCoV-19/Wales/PHWC-4928BC/2020|2020-11-27|EPI\_ISL\_725714|Original|hCoV-19^^Wales|Human|Originating lab|COVID-19 Genomics UK (COG-UK) Consortium|Moore|United Kingdom

>Spike|hCoV-19/England/LOND-D6D1B/2020|2020-04-01|EPI\_ISL\_478425|Original|hCoV-19^^England|Human|University College London|COVID-19 Genomics UK (COG-UK) Consortium|Roy|United Kingdom

>Spike|hCoV-19/Canada/NS-NML-1216/2020|2020-04-03|EPI\_ISL\_579613|Original|hCoV-19^^Nova Scotia|Human|QEII Health Sciences Centre|National Microbiology Laboratory (NML)|Majer|Canada

>Spike|hCoV-19/Australia/VIC16353/2020|2020-08-05|EPI\_ISL\_641150|Original|hCoV-19^^Victoria|Human|Microbiological Diagnostic Unit - Public Health Laboratory (MDU-PHL)|MDU-PHL|Schultz|Australia

>Spike|hCoV-19/Kenya/NIC\_187/2020|2020-03-20|EPI\_ISL\_457833|Original|hCoV-19^^Kenya|Human|National Public Health Laboratory|KEMRI-Wellcome Trust Research Programme|KEMRI-CGMR-C Kilifi|Githinji|Kenya

>Spike|hCoV-19/Sweden/20-05819/2020|2020-03-16|EPI\_ISL\_452229|Original|hCoV-19^^Vastra Gotaland|Human|Narhalsan Backa vardcentral|The Public Health Agency of Sweden|Svartstr\u00f6m|Sweden

>Spike|hCoV-19/Wales/PHWC-48A33E/2020|2020-11-04|EPI\_ISL\_650340|Original|hCoV-19^^Wales|Human|Wales Specialist Virology Centre Sequencing lab|COVID-19 Genomics UK (COG-UK) Consortium|Moore|United Kingdom

>Spike|hCoV-19/USA/MI-MDHHS-SC20298/2020|2020-03-27|EPI\_ISL\_447095|Original|hCoV-19^^Michigan|Human|Michigan Department of Health and Human Services|Michigan Department of Health and Human Services|Blankenship|USA

>Spike|hCoV-19/Germany/HH-hpi-pl640/2020|2020-03-17|EPI\_ISL\_775618|Original|hCoV-19^^Hamburg|Human|University Medical Center Hamburg Eppendorf|Heinrich Pette Institute|Robitaille|Germany

>Spike|hCoV-19/England/204321417/2020|2020-10-20|EPI\_ISL\_649825|Original|hCoV-19^^England|Human|Respiratory Virus Unit|COVID-19 Genomics UK (COG-UK) Consortium|Platt|United Kingdom

>Spike|hCoV-19/Netherlands/UT-RIVM-10384/2020|2020-10-08|EPI\_ISL\_636582|Original|hCoV-19^^Utrecht|Human|Dutch COVID-19 response team|National Institute for Public Health and the Environment (RIVM)|Meijer|Netherlands

>Spike|hCoV-19/Australia/VIC5401/2020|2020-07-19|EPI\_ISL\_520164|Original|hCoV-19^^Victoria|Human|Microbiological Diagnostic Unit - Public Health Laboratory (MDU-PHL)|MDU-PHL|Schultz|Australia

>Spike|hCoV-19/Finland/7LS4AH2/2020|2020-10-07|EPI\_ISL\_756037|Original|hCoV-19^^Uusimaa|Human|Department of Virology and Immunology|Department of Virology|Smura|Finland

>Spike|hCoV-19/England/MILK-B38848/2020|2020-11-01|EPI\_ISL\_658968|Original|hCoV-19^^England|Human|Lighthouse Lab in Milton Keynes|Wellcome Sanger Institute for the COVID-19 Genomics UK (COG-UK) Consortium|Davies|United Kingdom

>Spike|hCoV-19/Japan/TK-YE614327/2020|2020-05-00|EPI\_ISL\_486903|Original|hCoV-19^^Tokyo|Human|Tokyo Metropolitan Institute of Public Health|Tokyo Metropolitan Institute of Public Health|Nagashima|Japan

>Spike|hCoV-19/USA/CA-ALSR-4229/2020|2020-08-17|EPI\_ISL\_648899|Original|hCoV-19^^California|Human|San Diego County Public Health Laboratory|Andersen lab at Scripps Research|Gangavarapu|USA

>Spike|hCoV-19/Japan/PG-4259/2020|2020-07-00|EPI\_ISL\_692489|Original|hCoV-19^^Japan|Human|Fukuoka Institute of Health and Environmental Sciences|Pathogen Genomics Center|Sekizuka|Japan

>Spike|hCoV-19/England/QEUIH-B80FC4/2020|2020-11-14|EPI\_ISL\_667860|Original|hCoV-19^^England|Human|Lighthouse Lab in Glasgow|Wellcome Sanger Institute for the COVID-19 Genomics UK (COG-UK) Consortium|Davies|United Kingdom

>Spike|hCoV-19/England/BRIS-122F82/2020|2020-04-01|EPI\_ISL\_440662|Original|hCoV-19^^England|Human|PHE South West Regional Laboratory|Wellcome Sanger Institute for the COVID-19 Genomics UK (COG-UK) consortium|Amato|United Kingdom

>Spike|hCoV-19/USA/VA-DCLS-0603/2020|2020-03-28|EPI\_ISL\_526820|Original|hCoV-19^^Virginia|Human|Virginia DCLS|Virginia DCLS|St. Jacques|USA

>Spike|hCoV-19/USA/TX-HMH-5365/2020|2020-06-25|EPI\_ISL\_544719|Original|hCoV-19^^Texas|Human|Houston Methodist Hospital|Houston Methodist Hospital|Long|USA

>Spike|hCoV-19/England/ALDP-4A776C/2020|2020-06-08|EPI\_ISL\_559587|Original|hCoV-19^^England|Human|Lighthouse Lab in Alderley Park|Wellcome Sanger Institute for the COVID-19 Genomics UK (COG-UK) consortium|Davies|United Kingdom

>Spike|hCoV-19/Australia/NSW767/2020|2020-07-31|EPI\_ISL\_513409|Original|hCoV-19^^New South Wales|Human|Sydney South West Pathology Service (SSWPS) - Liverpool Hospital - NSW Health Pathology|NSW Health Pathology - Institute of Clinical Pathology and Medical Research; Westmead Hospital; University of Sydney|Gall|Australia

>Spike|hCoV-19/Australia/WA102/2020|2020-03-25|EPI\_ISL\_512755|Original|hCoV-19^^Western Australia|Human|PathWest Laboratory Medicine WA|PathWest Laboratory Medicine WA Microbial Surveillance Unit|Sikazwe|Australia

>Spike|hCoV-19/Lithuania/KU-LUHS-Eilnr102/2020|2020-04-20|EPI\_ISL\_603112|Original|hCoV-19^^Kauno apskritis|Human|Lithuanian University of Health Sciences Hospital|Lithuanian University of Health Sciences|Zemaitis|Lithuania

>Spike|hCoV-19/Scotland/CVR2181/2020|2020-04-11|EPI\_ISL\_453026|Original|hCoV-19^^Scotland|Human|West of Scotland Specialist Virology Centre|COVID-19 Genomics UK (COG-UK) Consortium|Robertson|United Kingdom

>Spike|hCoV-19/England/QEUEH-B2EE25/2020|2020-11-03|EPI\_ISL\_659887|Original|hCoV-19^^England|Human|Lighthouse Lab in Glasgow|Wellcome Sanger Institute for the COVID-19 Genomics UK (COG-UK) Consortium|Davies|United Kingdom

>Spike|hCoV-19/Scotland/QEUEH-AD5477/2020|2020-10-26|EPI\_ISL\_649679|Original|hCoV-19^^Scotland|Human|Lighthouse Lab in Glasgow|Wellcome Sanger Institute for the COVID-19 Genomics UK (COG-UK) Consortium|Davies|United Kingdom

>Spike|hCoV-19/England/NORT-28355F/2020|2020-03-29|EPI\_ISL\_488560|Original|hCoV-19^^England|Human|NU-OMICS DNA Sequencing research facility|Wellcome Sanger Institute for the COVID-19 Genomics UK (COG-UK) consortium|Davies|United Kingdom

>Spike|hCoV-19/England/20156033504/2020|2020-04-08|EPI\_ISL\_466300|Original|hCoV-19^^England|Human|Respiratory Virus Unit|Respiratory Virus Unit|Platt|United Kingdom

>Spike|hCoV-19/Luxembourg/LNS2687447/2020|2020-10-28|EPI\_ISL\_740168|Original|hCoV-19^^Luxembourg|Human|Laboratoire national de sant\u00e9|Laboratoire national de sant\u00e9|Wienecke-Baldacchino|Luxembourg

>Spike|hCoV-19/England/SHEF-10D62A0/2020|2020-12-19|EPI\_ISL\_742084|Original|hCoV-19^^England|Human|Virology Department|COVID-19 Genomics UK (COG-UK) Consortium|de Silva|United Kingdom

>Spike|hCoV-19/Australia/VIC12675/2020|2020-08-01|EPI\_ISL\_640955|Original|hCoV-19^^Victoria|Human|Microbiological Diagnostic Unit - Public Health Laboratory (MDU-PHL)|MDU-PHL|Schultz|Australia

>Spike|hCoV-19/England/ALDP-9CB7B8/2020|2020-09-16|EPI\_ISL\_575493|Original|hCoV-19^^England|Human|Lighthouse Lab in Alderley Park|Wellcome Sanger Institute for the COVID-19 Genomics UK (COG-UK) consortium|Davies|United Kingdom

>Spike|hCoV-19/India/MH-ACTREC-550/2020|2020-08-28|EPI\_ISL\_700195|Original|hCoV-19^^Maharashtra|Human|Hematopathology Laboratory|Hematopathology Laboratory|Patkar|India

>Spike|hCoV-19/England/ALDP-A9478A/2020|2020-10-19|EPI\_ISL\_624791|Original|hCoV-19^^England|Human|Lighthouse Lab in Alderley Park|Wellcome Sanger Institute for the COVID-19 Genomics UK (COG-UK) consortium|Davies|United Kingdom

>Spike|hCoV-19/England/CAMC-BD1BC0/2020|2020-11-27|EPI\_ISL\_702079|Original|hCoV-19^^England|Human|Lighthouse Lab in Cambridge|Wellcome Sanger Institute for the COVID-19 Genomics UK (COG-UK) Consortium|Davies|United Kingdom

>Spike|hCoV-19/USA/TX-HMH-MCoV-18053/2020|2020-11-16|EPI\_ISL\_784401|Original|hCoV-19^^Texas|Human|Houston Methodist Hospital|Houston Methodist Hospital|Long|USA

>Spike|hCoV-19/England/QEUEH-9B7A6B/2020|2020-09-03|EPI\_ISL\_590564|Original|hCoV-19^^England|Human|Lighthouse Lab in Glasgow|Wellcome Sanger Institute for the COVID-19 Genomics UK (COG-UK) consortium|Davies|United Kingdom

>Spike|hCoV-19/USA/VA-DCLS-2166/2020|2020-11-06|EPI\_ISL\_677195|Original|hCoV-19^^Virginia|Human|Virginia Division of Consolidated Laboratory Services|Virginia Division of Consolidated Laboratory Services|St. Jacques|USA



>Spike|hCoV-19/England/CAMC-9EC2A1/2020|2020-09-23|EPI\_ISL\_580495|Original|hCoV-19^^England|Human|Lighthouse Lab in Cambridge|Wellcome Sanger Institute for the COVID-19 Genomics UK (COG-UK) consortium|Davies|United Kingdom

>Spike|hCoV-19/England/LOND-D3C02/2020|2020-04-04|EPI\_ISL\_449641|Original|hCoV-19^^England|Human|University College London|COVID-19 Genomics UK (COG-UK) Consortium|Roy|United Kingdom

>Spike|hCoV-19/England/BRIS-12208F/2020|2020-03-21|EPI\_ISL\_439965|Original|hCoV-19^^England|Human|PHE South West Regional Laboratory|Wellcome Sanger Institute for the COVID-19 Genomics UK (COG-UK) consortium|Amato|United Kingdom

>Spike|hCoV-19/England/ALDP-5D8691/2020|2020-06-19|EPI\_ISL\_558586|Original|hCoV-19^^England|Human|Lighthouse Lab in Alderley Park|Wellcome Sanger Institute for the COVID-19 Genomics UK (COG-UK) consortium|Davies|United Kingdom

>Spike|hCoV-19/USA/TX-HMH-805/2020|2020-04-08|EPI\_ISL\_545817|Original|hCoV-19^^Texas|Human|Houston Methodist Hospital|Houston Methodist Hospital|Long|USA

>Spike|hCoV-19/USA/TX-DSHS-1749/2020|2020-06-13|EPI\_ISL\_710384|Original|hCoV-19^^Texas|Human|Texas Department of State Health Services|Texas Department of State Health Services|Rahman|USA

>Spike|hCoV-19/United Arab Emirates/0975/2020|2020-06-29|EPI\_ISL\_699110|Original|hCoV-19^^Abu Dhabi|Human|Group 42 (G42) Healthcare|G42 Healthcare|Ogrodzki|United Arab Emirates

>Spike|hCoV-19/England/BRIS-1301A9/2020|2020-04-11|EPI\_ISL\_492602|Original|hCoV-19^^England|Human|PHE South West Regional Laboratory|Wellcome Sanger Institute for the COVID-19 Genomics UK (COG-UK) consortium|Davies|United Kingdom

>Spike|hCoV-19/England/ALDP-663032/2020|2020-07-03|EPI\_ISL\_555509|Original|hCoV-19^^England|Human|Lighthouse Lab in Alderley Park|Wellcome Sanger Institute for the COVID-19 Genomics UK (COG-UK) consortium|Davies|United Kingdom

>Spike|hCoV-19/England/OXON-B36EC/2020|2020-04-04|EPI\_ISL\_534880|Original|hCoV-19^^England|Human|Oxford Viromics|COVID-19 Genomics UK (COG-UK) Consortium|Golubchik|United Kingdom

>Spike|hCoV-19/South Africa/L00160/2020|2020-07-26|EPI\_ISL\_622963|Original|hCoV-19^^Gauteng|Human|Lancet Laboratories|National Institute for Communicable Diseases of the National Health Laboratory Service|Allam|South Africa

>Spike|hCoV-19/England/QEUA-A0BFC2/2020|2020-10-03|EPI\_ISL\_599401|Original|hCoV-19^^England|Human|Lighthouse Lab in Glasgow|Wellcome Sanger Institute for the COVID-19 Genomics UK (COG-UK) consortium|Davies|United Kingdom

>Spike|hCoV-19/Spain/MD-HLP-83/2020|2020-05-21|EPI\_ISL\_530080|Original|hCoV-19^^Madrid|Human|Hospital Universitario La Paz|Hospital Universitario La Paz|Viedma|Spain

>Spike|hCoV-19/England/MILK-ABC2C7/2020|2020-10-21|EPI\_ISL\_631233|Original|hCoV-19^^England|Human|Lighthouse Lab in Milton Keynes|Wellcome Sanger Institute for the COVID-19 Genomics UK (COG-UK) consortium|Davies|United Kingdom

>Spike|hCoV-19/Japan/PG-2555/2020|2020-06-00|EPI\_ISL\_690690|Original|hCoV-19^^Japan|Human|Pathogen Genomics Center|Pathogen Genomics Center|Sekizuka|Japan

>Spike|hCoV-19/England/LIVE-9FBAB/2020|2020-06-05|EPI\_ISL\_472046|Original|hCoV-19^^England|Human|Liverpool Clinical Laboratories|COVID-19 Genomics UK (COG-UK) Consortium|Haldenby|United Kingdom

>Spike|hCoV-19/Denmark/DCGC-4733/2020|2020-09-21|EPI\_ISL\_622172|Original|hCoV-19^^Nordjylland|Human|Department of Virus and Microbiological Special Diagnostics|Albertsen lab|Michaelsen|Denmark

>Spike|hCoV-19/Northern Ireland/NIRE-2331B4/2020|2020-09-27|EPI\_ISL\_680264|Original|hCoV-19^^Northern Ireland|Human|Regional Virus Laboratory|COVID-19 Genomics UK (COG-UK) Consortium|Fairley|United Kingdom

>Spike|hCoV-19/England/CAMC-BD3A2B/2020|2020-11-28|EPI\_ISL\_702262|Original|hCoV-19^^England|Human|Lighthouse Lab in Cambridge|Wellcome Sanger Institute for the COVID-19 Genomics UK (COG-UK) Consortium|Davies|United Kingdom

>Spike|hCoV-19/Denmark/DCGC-2081/2020|2020-07-27|EPI\_ISL\_618337|Original|hCoV-19^^Nordjylland|Human|Department of Virus and Microbiological Special Diagnostics|Albertsen lab|Michaelsen|Denmark

>Spike|hCoV-19/USA/VA-DCLS-0545/2020|2020-03-13|EPI\_ISL\_485846|Original|hCoV-19^^Virginia|Human|Virginia DCLS|Virginia DCLS|St. Jacques|USA

>Spike|hCoV-19/England/QEUI-B12F30/2020|2020-11-02|EPI\_ISL\_641812|Original|hCoV-19^^England|Human|Lighthouse Lab in Glasgow|Wellcome Sanger Institute for the COVID-19 Genomics UK (COG-UK) Consortium|Davies|United Kingdom

>Spike|hCoV-19/England/BRIS-12EC9E/2020|2020-04-22|EPI\_ISL\_488426|Original|hCoV-19^^England|Human|PHE South West Regional Laboratory|Wellcome Sanger Institute for the COVID-19 Genomics UK (COG-UK) consortium|Davies|United Kingdom

>Spike|hCoV-19/Scotland/QEUI-B6944A/2020|2020-11-11|EPI\_ISL\_676332|Original|hCoV-19^^Scotland|Human|Lighthouse Lab in Glasgow|Wellcome Sanger Institute for the COVID-19 Genomics UK (COG-UK) Consortium|Davies|United Kingdom

>Spike|hCoV-19/USA/WA-UW-10479/2020|2020-06-08|EPI\_ISL\_570320|Original|hCoV-19^^Washington|Human|UW Virology Lab|UW Virology Lab|Roychoudhury|USA

>Spike|hCoV-19/Scotland/EDB2242/2020|2020-04-21|EPI\_ISL\_439174|Original|hCoV-19^^Scotland|Human|Virology Department|COVID-19 Genomics UK (COG-UK) Consortium|Williams|United Kingdom

>Spike|hCoV-19/Scotland/EDB6587/2020|2020-05-14|EPI\_ISL\_478268|Original|hCoV-19^^Scotland|Human|Virology Department|COVID-19 Genomics UK (COG-UK) Consortium|Williams|United Kingdom

>Spike|hCoV-19/USA/CA-CZB-11182/2020|2020-09-15|EPI\_ISL\_625536|Original|hCoV-19^^California|Human|Alameda County Public Health Lab|Chan-Zuckerberg Biohub|Bhatt|USA

>Spike|hCoV-19/England/MILK-9C25C6/2020|2020-09-10|EPI\_ISL\_566629|Original|hCoV-19^^England|Human|Lighthouse Lab in Milton Keynes|Wellcome Sanger Institute for the COVID-19 Genomics UK (COG-UK) consortium|Davies|United Kingdom

>Spike|hCoV-19/England/LIVE-DC0AB6/2020|2020-11-04|EPI\_ISL\_705323|Original|hCoV-19^^England|Human|Liverpool Clinical Laboratories|COVID-19 Genomics UK (COG-UK) Consortium|Haldenby|United Kingdom

>Spike|hCoV-19/USA/WA-UW267/2020|2020-03-16|EPI\_ISL\_418052|Original|hCoV-19^^Washington|Human|UW Virology Lab|UW Virology Lab|Roychoudhury|USA

>Spike|hCoV-19/Switzerland/ZH-ETHZ-190039/2020|2020-07-08|EPI\_ISL\_500901|Original|hCoV-19^^Zurich|Human|Viollier AG|Department of Biosystems Science and Engineering|Nadeau|Switzerland

>Spike|hCoV-19/England/QEUI-9DAF09/2020|2020-09-22|EPI\_ISL\_580981|Original|hCoV-19^^England|Human|Lighthouse Lab in Glasgow|Wellcome Sanger Institute for the COVID-19 Genomics UK (COG-UK) consortium|Davies|United Kingdom

>Spike|hCoV-19/England/NOTT-11379B/2020|2020-09-22|EPI\_ISL\_573428|Original|hCoV-19^^England|Human|Queens Medical Centre|COVID-19 Genomics UK (COG-UK) Consortium|Loose|United Kingdom

>Spike|hCoV-19/USA/CA-UCLA-130/2020|2020-04-09|EPI\_ISL\_537479|Original|hCoV-19^^California|Human|UCLA Pathology Clinical Microbiology Lab|Kruglyak Lab|Boocock|USA

>Spike|hCoV-19/England/CAMB-1BD766/2020|2020-12-08|EPI\_ISL\_740979|Original|hCoV-19^^England|Human|Department of Pathology|COVID-19 Genomics UK (COG-UK) Consortium|Goodfellow|United Kingdom

>Spike|hCoV-19/Australia/VIC14625/2020|2020-07-27|EPI\_ISL\_592921|Original|hCoV-19^^Victoria|Human|Microbiological Diagnostic Unit - Public Health Laboratory (MDU-PHL)|MDU-PHL|Schultz|Australia

>Spike|hCoV-19/USA/TX-HMH-MCoV-19687/2020|2020-11-28|EPI\_ISL\_784042|Original|hCoV-19^^Texas|Human|Houston Methodist Hospital|Houston Methodist Hospital|Long|USA

>Spike|hCoV-19/South Africa/KRISP-K001074/2020|2020-07-14|EPI\_ISL\_509328|Original|hCoV-19^^KwaZulu-Natal|Human|NHLS-IALCH|KRISP|de Oliveira|South Africa

>Spike|hCoV-19/USA/MI-UM-10035692136/2020|2020-08-28|EPI\_ISL\_583266|Original|hCoV-19^^Michigan|Human|University of Michigan Clinical Microbiology Laboratory|Lauring Lab|Valesano|USA

>Spike|hCoV-19/USA/CA-LACPHL-AA00035/2020|2020-11-20|EPI\_ISL\_710427|Original|hCoV-19^^California|Human|Los Angeles County PHL|Los Angeles County PHL|Hemarajata|USA

>Spike|hCoV-19/England/ALDP-952DF0/2020|2020-06-11|EPI\_ISL\_553652|Original|hCoV-19^^England|Human|Lighthouse Lab in Alderley Park|Wellcome Sanger Institute for the COVID-19 Genomics UK (COG-UK) consortium|Davies|United Kingdom

>Spike|hCoV-19/USA/LA-EVTL1400/2020|2020-12-11|EPI\_ISL\_779066|Original|hCoV-19^^Louisiana|Human|LSUHS Emerging Viral Threat Laboratory|Microbial Genome Sequencing Center|Kamil|USA

>Spike|hCoV-19/England/ALDP-BB94A5/2020|2020-11-20|EPI\_ISL\_703183|Original|hCoV-19^^England|Human|Lighthouse Lab in Alderley Park|Wellcome Sanger Institute for the COVID-19 Genomics UK (COG-UK) Consortium|Davies|United Kingdom

>Spike|hCoV-19/England/LOND-D6D75/2020|2020-04-01|EPI\_ISL\_478430|Original|hCoV-19^^England|Human|University College London|COVID-19 Genomics UK (COG-UK) Consortium|Roy|United Kingdom

>Spike|hCoV-19/England/ALDP-9C4E8D/2020|2020-09-10|EPI\_ISL\_567628|Original|hCoV-19^^England|Human|Lighthouse Lab in Alderley Park|Wellcome Sanger Institute for the COVID-19 Genomics UK (COG-UK) consortium|Davies|United Kingdom

>Spike|hCoV-19/Denmark/DCGC-2931/2020|2020-08-24|EPI\_ISL\_616750|Original|hCoV-19^^Syddanmark|Human|Department of Virus and Microbiological Special Diagnostics|Albertsen lab|Michaelsen|Denmark

>Spike|hCoV-19/Luxembourg/LNS6836311/2020|2020-11-30|EPI\_ISL\_770912|Original|hCoV-19^^Luxembourg|Human|Laboratoire national de sant\u00e9|Laboratoire national de sant\u00e9|Wienecke-Baldacchino|Luxembourg

>Spike|hCoV-19/USA/OR-OHSU-1803/2020|2020-07-27|EPI\_ISL\_526031|Original|hCoV-19^^Oregon|Human|OHSU Lab Services Molecular Microbiology Lab|Oregon SARS-CoV-2 Genome Sequencing Center|O'Roak|USA

>Spike|hCoV-19/Denmark/DCGC-22379/2020|2020-12-14|EPI\_ISL\_757526|Original|hCoV-19^^Midtjylland|Human|Department of Virus and Microbiological Special Diagnostics|Albertsen Lab|Michaelsen|Denmark

>Spike|hCoV-19/England/CAMC-B09C80/2020|2020-10-29|EPI\_ISL\_673191|Original|hCoV-19^^England|Human|Lighthouse Lab in Cambridge|Wellcome Sanger Institute for the COVID-19 Genomics UK (COG-UK) Consortium|Davies|United Kingdom

>Spike|hCoV-19/England/QEUH-962CB4/2020|2020-08-11|EPI\_ISL\_531838|Original|hCoV-19^^England|Human|Lighthouse Lab in Glasgow|Wellcome Sanger Institute for the COVID-19 Genomics UK (COG-UK) consortium|Davies|United Kingdom

>Spike|hCoV-19/Switzerland/VD-ETHZ-100839/2020|2020-03-25|EPI\_ISL\_451787|Original|hCoV-19^^Vaud|Human|Viollier AG|Department of Biosystems Science and Engineering|Nadeau|Switzerland

>Spike|hCoV-19/England/ALDP-AA3BB9/2020|2020-10-22|EPI\_ISL\_624281|Original|hCoV-19^^England|Human|Lighthouse Lab in Alderley Park|Wellcome Sanger Institute for the COVID-19 Genomics UK (COG-UK) consortium|Davies|United Kingdom

>Spike|hCoV-19/Wales/PHWC-16BF7E/2020|2020-09-14|EPI\_ISL\_573994|Original|hCoV-19^^Wales|Human|Wales Specialist Virology Centre Sequencing lab|COVID-19 Genomics UK (COG-UK) Consortium|Moore|United Kingdom

>Spike|hCoV-19/USA/MI-MDHHS-SC21947/2020|2020-03-25|EPI\_ISL\_565998|Original|hCoV-19^^Michigan|Human|Michigan Department of Health and Human Services|Michigan Department of Health and Human Services|Blankenship|USA

>Spike|hCoV-19/USA/CA-ALSR-4675/2020|2020-11-10|EPI\_ISL\_667071|Original|hCoV-19^^California|Human|San Diego County Public Health Laboratory|Andersen lab at Scripps Research|Gangavarapu|USA

>Spike|hCoV-19/France/ARA-10194/2020|2020-03-17|EPI\_ISL\_525537|Original|hCoV-19^^Auvergne-Rh\u00f4ne-Alpes|Human|CNR Virus des Infections Respiratoires - France SUD|CNR Virus des Infections Respiratoires - France SUD|Josset|France

>Spike|hCoV-19/England/SHEF-C7B22/2020|2020-11-27|EPI\_ISL\_706997|Original|hCoV-19^^England|Human|Virology Department|COVID-19 Genomics UK (COG-UK) Consortium|de Silva|United Kingdom

>Spike|hCoV-19/England/201140778/2020|2020-03-09|EPI\_ISL\_464741|Original|hCoV-19^^England|Human|Respiratory Virus Unit|Respiratory Virus Unit|Platt|United Kingdom

>Spike|hCoV-19/Northern Ireland/NIRE-FBC6E/2020|2020-04-10|EPI\_ISL\_470044|Original|hCoV-19^^Northern Ireland|Human|Regional Virus Laboratory|Wellcome Sanger Institute for the COVID-19 Genomics UK (COG-UK) consortium|Davies|United Kingdom

>Spike|hCoV-19/England/ALDP-A6DFA0/2020|2020-10-14|EPI\_ISL\_607841|Original|hCoV-19^^England|Human|Lighthouse Lab in Alderley Park|Wellcome Sanger Institute for the COVID-19 Genomics UK (COG-UK) consortium|Davies|United Kingdom

>Spike|hCoV-19/England/ALDP-9EA962/2020|2020-09-24|EPI\_ISL\_580265|Original|hCoV-19^^England|Human|Lighthouse Lab in Alderley Park|Wellcome Sanger Institute for the COVID-19 Genomics UK (COG-UK) consortium|Davies|United Kingdom

>Spike|hCoV-19/USA/HI-H200637/2020|2020-11-23|EPI\_ISL\_753161|Original|hCoV-19^^Hawaii|Human|State Laboratories Division|State Laboratories Division|Sultana|USA

>Spike|hCoV-19/England/MILK-974684/2020|2020-08-16|EPI\_ISL\_575766|Original|hCoV-19^^England|Human|Lighthouse Lab in Milton Keynes|Wellcome Sanger Institute for the COVID-19 Genomics UK (COG-UK) consortium|Davies|United Kingdom

>Spike|hCoV-19/Costa Rica/INC-0127/2020|2020-08-06|EPI\_ISL\_682266|Original|hCoV-19^^San Jose|Human|HOSPITAL SAN JUAN DE DIOS|Inciensa|Soto-Garita|Costa Rica

>Spike|hCoV-19/England/QEUH-9BAB83/2020|2020-09-07|EPI\_ISL\_573626|Original|hCoV-19^^England|Human|Oxford Viromics|COVID-19 Genomics UK (COG-UK) Consortium|Golubchik|United Kingdom

>Spike|hCoV-19/England/CAMB-1AC041/2020|2020-04-29|EPI\_ISL\_444363|Original|hCoV-19^^England|Human|Department of Pathology|COVID-19 Genomics UK (COG-UK) Consortium|Meredith|United Kingdom

>Spike|hCoV-19/England/BRIS-12558D/2020|2020-03-28|EPI\_ISL\_443828|Original|hCoV-19^^England|Human|PHE South West Regional Laboratory|Wellcome Sanger Institute for the COVID-19 Genomics UK (COG-UK) consortium|Amato|United Kingdom

>Spike|hCoV-19/Wales/PHWC-48D4B0/2020|2020-11-01|EPI\_ISL\_680632|Original|hCoV-19^^Wales|Human|Wales Specialist Virology Centre Sequencing lab|COVID-19 Genomics UK (COG-UK) Consortium|Moore|United Kingdom

>Spike|hCoV-19/USA/WI-GMF-23209/2020|2020-09-29|EPI\_ISL\_660867|Original|hCoV-19^^Wisconsin|Human|Gundersen Molecular Diagnostics Laboratory|Kabara Cancer Research Institute|Kenny|USA

>Spike|hCoV-19/USA/TX-HMH-MCoV-18401/2020|2020-11-18|EPI\_ISL\_784749|Original|hCoV-19^^Texas|Human|Houston Methodist Hospital|Houston Methodist Hospital|Long|USA

>Spike|hCoV-19/Canada/ON-PHL-20-01208/2020|2020-06-00|EPI\_ISL\_548830|Original|hCoV-19^^Ontario|Human|Public Health Ontario Laboratory|Public Health Ontario Laboratory|Guthrie|Canada

>Spike|hCoV-19/England/MILK-BB1B11/2020|2020-11-18|EPI\_ISL\_720642|Original|hCoV-19^^England|Human|Lighthouse Lab in Milton Keynes|Wellcome Sanger Institute for the COVID-19 Genomics UK (COG-UK) Consortium|Davies|United Kingdom

>Spike|hCoV-19/England/203690360/2020|2020-09-05|EPI\_ISL\_534727|Original|hCoV-19^^England|Human|Respiratory Virus Unit|Respiratory Virus Unit|Platt|United Kingdom

>Spike|hCoV-19/USA/NY-NYCPHL-000854/2020|2020-03-25|EPI\_ISL\_632230|Original|hCoV-19^^New York|Human|Richmond University Medical Center|New York City Public Health Laboratory|Wang|USA

>Spike|hCoV-19/India/OR-ILSCV17741/2020|2020-05-13|EPI\_ISL\_463058|Original|hCoV-19^^Odisha|Human|Institute of Life Sciences|Immunogenomics lab|Raghav|India

>Spike|hCoV-19/Australia/QLD969/2020|2020-04-08|EPI\_ISL\_530233|Original|hCoV-19^^Queensland|Human|Queensland Health Forensic and Scientific Services|Public Health Virology Laboratory|Nguyen|Australia

>Spike|hCoV-19/Mexico/NLE-UANL-026/2020|2020-11-17|EPI\_ISL\_779188|Original|hCoV-19^^Nuevo Leon|Human|Laboratorio Estatal de Salud P\u00fablica de Nuevo Le\u00f3n|Laboratorio de Infectolog\u00eda Molecular|Gal\u00e9n|Mexico

>Spike|hCoV-19/England/SHEF-D10BD/2020|2020-10-19|EPI\_ISL\_637897|Original|hCoV-19^^England|Human|Virology Department|COVID-19 Genomics UK (COG-UK) Consortium|de Silva|United Kingdom

>Spike|hCoV-19/England/QEUH-A767CA/2020|2020-10-12|EPI\_ISL\_613329|Original|hCoV-19^^England|Human|Queens Medical Centre|COVID-19 Genomics UK (COG-UK) Consortium|Loose|United Kingdom

>Spike|hCoV-19/England/ALDP-9E9B30/2020|2020-09-24|EPI\_ISL\_580107|Original|hCoV-19^^England|Human|Lighthouse Lab in Alderley Park|Wellcome Sanger Institute for the COVID-19 Genomics UK (COG-UK) consortium|Davies|United Kingdom

>Spike|hCoV-19/USA/WA-S1072/2020|2020-04-30|EPI\_ISL\_463562|Original|hCoV-19^^Washington|Human|Washington State Department of Health|Seattle Flu Study|Bedford|USA

>Spike|hCoV-19/Wales/PHWC-487B57/2020|2020-10-29|EPI\_ISL\_637447|Original|hCoV-19^^Wales|Human|Wales Specialist Virology Centre Sequencing lab|COVID-19 Genomics UK (COG-UK) Consortium|Moore|United Kingdom

>Spike|hCoV-19/England/QEUH-BC3AC4/2020|2020-11-25|EPI\_ISL\_704113|Original|hCoV-19^^England|Human|Lighthouse Lab in Glasgow|Wellcome Sanger Institute for the COVID-19 Genomics UK (COG-UK) Consortium|Davies|United Kingdom

>Spike|hCoV-19/Northern Ireland/NIRE-FB6CA/2020|2020-03-28|EPI\_ISL\_448965|Original|hCoV-19^^Northern Ireland|Human|Regional Virus Laboratory|COVID-19 Genomics UK (COG-UK) Consortium|Fairley|United Kingdom

>Spike|hCoV-19/India/OR-ILSCV19192/2020|2020-05-14|EPI\_ISL\_463067|Original|hCoV-19^^Odisha|Human|Institute of Life Sciences|Immunogenomics lab|Raghav|India

>Spike|hCoV-19/England/QEUH-9F47E3/2020|2020-09-27|EPI\_ISL\_588420|Original|hCoV-19^^England|Human|Lighthouse Lab in Glasgow|Wellcome Sanger Institute for the COVID-19 Genomics UK (COG-UK) consortium|Davies|United Kingdom

>Spike|hCoV-19/England/ALDP-B5BF59/2020|2020-11-09|EPI\_ISL\_655791|Original|hCoV-19^^England|Human|Lighthouse Lab in Alderley Park|Wellcome Sanger Institute for the COVID-19 Genomics UK (COG-UK) Consortium|Davies|United Kingdom

>Spike|hCoV-19/England/QEUH-98F97E/2020|2020-08-26|EPI\_ISL\_539898|Original|hCoV-19^^England|Human|Lighthouse Lab in Glasgow|Wellcome Sanger Institute for the COVID-19 Genomics UK (COG-UK) consortium|Davies|United Kingdom

>Spike|hCoV-19/Australia/NSW1307/2020|2020-12-18|EPI\_ISL\_767873|Original|hCoV-19^^New South Wales|Human|Histopath|NSW Health Pathology - Institute of Clinical Pathology and Medical Research; Westmead Hospital; University of Sydney|Gall|Australia

>Spike|hCoV-19/Netherlands/NB-EMC-394/2020|2020-00-00|EPI\_ISL\_722471|Original|hCoV-19^^Noord Brabant|Human|Dutch COVID-19 response team|Erasmus Medical Center|Oude Munnink|Netherlands

>Spike|hCoV-19/Denmark/DCGC-15484/2020|2020-11-23|EPI\_ISL\_713849|Original|hCoV-19^^Hovedstaden|Human|Department of Virus and Microbiological Special Diagnostics|Albertsen Lab|Michaelsen|Denmark

>Spike|hCoV-19/Iceland/439/2020|2020-03-20|EPI\_ISL\_424463|Original|hCoV-19^^Reykjavik|Human|The National University Hospital of Iceland|deCODE genetics|J\u00f3nsson|Iceland

>Spike|hCoV-19/USA/VA-DCLS-2407/2020|2020-11-20|EPI\_ISL\_734178|Original|hCoV-19^^Virginia|Human|Virginia Division of Consolidated Laboratory Services (DCLS)|Virginia Division of Consolidated Laboratory Services (DCLS)|St. Jacques|USA

>Spike|hCoV-19/USA/NY-NYUMC542/2020|2020-03-30|EPI\_ISL\_444659|Original|hCoV-19^^New York|Human|NYU Langone Health|Departments of Pathology and Medicine|Maurano|USA

>Spike|hCoV-19/England/CAMC-BBBB17/2020|2020-11-21|EPI\_ISL\_724089|Original|hCoV-19^^England|Human|Northumbria University / South Tees Hospitals NHS Foundation Trust / North Cumbria Integrated Care NHS Foundation Trust / North Tees and Hartlepool NHS Foundation Trust / Newcastle Hospitals NHS Foundation Trust|COVID-19 Genomics UK (COG-UK) Consortium|Bashton|United Kingdom

>Spike|hCoV-19/Germany/BY-MVP-0028/2020|2020-04-13|EPI\_ISL\_437227|Original|hCoV-19^^Bavaria|Human|Max von Pettenkofer Institute|Laboratory for Functional Genome Analysis|Graf|Germany

>Spike|hCoV-19/England/NOTT-11042E/2020|2020-04-17|EPI\_ISL\_441514|Original|hCoV-19^^England|Human|Queens Medical Centre|COVID-19 Genomics UK (COG-UK) Consortium|Loose|United Kingdom

>Spike|hCoV-19/USA/CA-CZB-10121/2020|2020-06-10|EPI\_ISL\_672112|Original|hCoV-19^^California|Human|The Ashley Laboratory|Chan-Zuckerberg Biohub|Bhatt|USA

>Spike|hCoV-19/USA/WI-UW-38/2020|2020-03-25|EPI\_ISL\_421296|Original|hCoV-19^^Wisconsin|Human|University of Wisconsin-Madison AIDS Vaccine Research Laboratories|University of Wisconsin-Madison AIDS Vaccine Research Laboratories|Baczenas|USA

>Spike|hCoV-19/USA/CA-CSMC23/2020|2020-03-25|EPI\_ISL\_475633|Original|hCoV-19^^California|Human|Cedars-Sinai Medical Center|Cedars-Sinai Medical Center|Zhang|USA

>Spike|hCoV-19/Portugal/PT0486/2020|2020-03-30|EPI\_ISL\_454210|Original|hCoV-19^^Portugal|Human|unknown|Instituto Nacional de Sa\u00fade (INSA)|Borges|Portugal

>Spike|hCoV-19/England/QEUA-A9D666/2020|2020-10-20|EPI\_ISL\_727781|Original|hCoV-19^^England|Human|Centre for Enzyme Innovation|COVID-19 Genomics UK (COG-UK) Consortium|Robson|United Kingdom

>Spike|hCoV-19/Netherlands/ZH-EMC-375/2020|2020-08-02|EPI\_ISL\_523715|Original|hCoV-19^^Zuid Holland|Human|Dutch COVID-19 response team|Erasmus Medical Center|Oude Munnink|Netherlands

>Spike|hCoV-19/Equatorial Guinea/13736/2020|2020-06-02|EPI\_ISL\_648357|Original|hCoV-19^^Bioko Norte|Human|Laboratorio de Investigaciones de Baney|University Hospital Basel|Hosch|Equatorial Guinea

>Spike|hCoV-19/Ireland/D-NVRL-20Z06800/2020|2020-04-19|EPI\_ISL\_681903|Original|hCoV-19^^Dublin|Human|National Virus Reference Laboratory|Irish Coronavirus Sequencing Consortium - Teagasc Moorepark|Walsh|Ireland

>Spike|hCoV-19/Singapore/522/2020|2020-04-15|EPI\_ISL\_479600|Original|hCoV-19^^Singapore|Human|National Public Health Laboratory|National Public Health Laboratory|Mak|Singapore

>Spike|hCoV-19/USA/CA-LACPHL-AE00017/2020|2020-07-03|EPI\_ISL\_707914|Original|hCoV-19^^California|Human|Los Angeles County Public Health Laboratory|Los Angeles County Public Health Laboratory|Hemarajata|USA

>Spike|hCoV-19/USA/CA-ALSR-1203/2020|2020-04-24|EPI\_ISL\_494435|Original|hCoV-19^^California|Human|San Diego County Public Health Laboratory|Andersen lab at Scripps Research|Gangavarapu|USA

>Spike|hCoV-19/USA/VA-DCLS-2515/2020|2020-11-19|EPI\_ISL\_734225|Original|hCoV-19^^Virginia|Human|Virginia Division of Consolidated Laboratory Services (DCLS)|Virginia Division of Consolidated Laboratory Services (DCLS)|St. Jacques|USA

>Spike|hCoV-19/England/QEUA-9DD610/2020|2020-09-21|EPI\_ISL\_599630|Original|hCoV-19^^England|Human|Lighthouse Lab in Glasgow|Wellcome Sanger Institute for the COVID-19 Genomics UK (COG-UK) consortium|Davies|United Kingdom

>Spike|hCoV-19/Spain/VC-IBV-98004325/2020|2020-03-24|EPI\_ISL\_654470|Original|hCoV-19^^Comunitat\_Valenciana|Human|Servicio de Microbiolog\u00eda. Hospital General Universitario de Castell\u00f3n|SeqCOVID-SPAIN consortium|IBV(CSIC)|Comas|Spain

>Spike|hCoV-19/Scotland/QEUA-98F598/2020|2020-08-27|EPI\_ISL\_568322|Original|hCoV-19^^Scotland|Human|Lighthouse Lab in Glasgow|Wellcome Sanger Institute for the COVID-19 Genomics UK (COG-UK) consortium|Davies|United Kingdom

>Spike|hCoV-19/Brazil/SP-L15-CD273/2020|2020-03-30|EPI\_ISL\_476266|Original|hCoV-19^^S\u00e3o Paulo|Human|Hospital da Cl\u00ednicas da Faculdade de Medicina da Universidade de S\u00e3o Paulo|Instituto de Medicina Tropical da Univesidade de S\u00e3o Paulo|Faria|Brazil

>Spike|hCoV-19/England/QEUA-9B3CB4/2020|2020-09-04|EPI\_ISL\_573544|Original|hCoV-19^^England|Human|Virology Department|COVID-19 Genomics UK (COG-UK) Consortium|de Silva|United Kingdom

>Spike|hCoV-19/Denmark/ALAB-SSI300/2020|2020-03-10|EPI\_ISL\_429451|Original|hCoV-19^^Denmark|Human|Department of Virus and Microbiological Special Diagnostics|Albertsen lab|Kirkegaard|Denmark

>Spike|hCoV-19/USA/CA-SCCPHD-UC114/2020|2020-03-03|EPI\_ISL\_435593|Original|hCoV-19^^California|Human|Santa Clara County Public Health Department|Chiu Laboratory|Chiu|USA

>Spike|hCoV-19/Netherlands/NB-RIVM-20879/2020|2020-12-23|EPI\_ISL\_790924|Original|hCoV-19^^Noord-Brabant|Human|Dutch COVID-19 response team|National Institute for Public Health and the Environment (RIVM)|Meijer|Netherlands

>Spike|hCoV-19/Hong Kong/VM20001387/2020|2020-01-25|EPI\_ISL\_408998|Original|hCoV-19^^Hong Kong|Human|Ruttonjee Hospital|Hong Kong Department of Health|Mak|China

>Spike|hCoV-19/England/ALDP-CBE551/2020|2020-12-19|EPI\_ISL\_760680|Original|hCoV-19^^England|Human|Lighthouse Lab in Alderley Park|Wellcome Sanger Institute for the COVID-19 Genomics UK (COG-UK) Consortium|Davies|United Kingdom

>Spike|hCoV-19/England/MILK-B56932/2020|2020-11-06|EPI\_ISL\_656973|Original|hCoV-19^^England|Human|Lighthouse Lab in Milton Keynes|Wellcome Sanger Institute for the COVID-19 Genomics UK (COG-UK) Consortium|Davies|United Kingdom

>Spike|hCoV-19/England/201620509/2020|2020-04-09|EPI\_ISL\_466421|Original|hCoV-19^^England|Human|Respiratory Virus Unit|Respiratory Virus Unit|Platt|United Kingdom

>Spike|hCoV-19/England/ALDP-950FED/2020|2020-06-12|EPI\_ISL\_554229|Original|hCoV-19^^England|Human|Lighthouse Lab in Alderley Park|Wellcome Sanger Institute for the COVID-19 Genomics UK (COG-UK) consortium|Davies|United Kingdom

>Spike|hCoV-19/USA/WA-S2501/2020|2020-06-17|EPI\_ISL\_497133|Original|hCoV-19^^Washington|Human|Washington State Department of Health|Seattle Flu Study|Lee|USA

>Spike|hCoV-19/USA/UT-UPHL-01659/2020|2020-04-08|EPI\_ISL\_560859|Original|hCoV-19^^Utah|Human|Utah Public Health Laboratory|Utah Public Health Laboratory|Young|USA

>Spike|hCoV-19/Denmark/DCGC-1052/2020|2020-03-16|EPI\_ISL\_614683|Original|hCoV-19^^Nordjylland|Human|Department of Virus and Microbiological Special Diagnostics|Albertsen lab|Michaelsen|Denmark

>Spike|hCoV-19/Japan/PG-2772/2020|2020-06-00|EPI\_ISL\_690612|Original|hCoV-19^^Japan|Human|Tokyo Metropolitan Institute of Public Health|Pathogen Genomics Center|Sekizuka|Japan

>Spike|hCoV-19/Panama/337884/2020|2020-04-08|EPI\_ISL\_496865|Original|hCoV-19^^Panama West|Human|Gorgas Memorial Laboratory of Health Studies|Gorgas Memorial Laboratory of Health Studies|Martinez|Panama

>Spike|hCoV-19/England/QEUA-A025AB/2020|2020-09-29|EPI\_ISL\_584912|Original|hCoV-19^^England|Human|Quadram Institute Bioscience|COVID-19 Genomics UK (COG-UK) Consortium|Alikhan|United Kingdom

>Spike|hCoV-19/Italy/APU-IZSPB\_291PT/2020|2020-10-30|EPI\_ISL\_653782|Original|hCoV-19^^Apulia|Human|I.R.C.C.S. \S. De Bellis\ - Ente Ospedaliero|Istituto Zooprofilattico Sperimentale della Puglia e della Basilicata|Parisi|Italy

>Spike|hCoV-19/Scotland/QEUA-9DD786/2020|2020-09-21|EPI\_ISL\_599763|Original|hCoV-19^^Scotland|Human|Lighthouse Lab in Glasgow|Wellcome Sanger Institute for the COVID-19 Genomics UK (COG-UK) consortium|Davies|United Kingdom

>Spike|hCoV-19/England/CAMC-9475E7/2020|2020-07-20|EPI\_ISL\_556520|Original|hCoV-19^^England|Human|Lighthouse Lab in Cambridge|Wellcome Sanger Institute for the COVID-19 Genomics UK (COG-UK) consortium|Davies|United Kingdom

>Spike|hCoV-19/England/NORT-293404/2020|2020-06-18|EPI\_ISL\_499609|Original|hCoV-19^^England|Human|Northumbria University / South Tees Hospitals NHS Foundation Trust / North Cumbria Integrated Care NHS Foundation Trust / North Tees and Hartlepool NHS Foundation Trust / Newcastle Hospitals NHS Foundation Trust|COVID-19 Genomics UK (COG-UK) Consortium|Bashton|United Kingdom

>Spike|hCoV-19/England/MILK-ABC17F/2020|2020-10-22|EPI\_ISL\_631151|Original|hCoV-19^^England|Human|Lighthouse Lab in Milton Keynes|Wellcome Sanger Institute for the COVID-19 Genomics UK (COG-UK) consortium|Davies|United Kingdom

>Spike|hCoV-19/England/MILK-BB12EF/2020|2020-11-17|EPI\_ISL\_720296|Original|hCoV-19^^England|Human|Lighthouse Lab in Milton Keynes|Wellcome Sanger Institute for the COVID-19 Genomics UK (COG-UK) Consortium|Davies|United Kingdom

>Spike|hCoV-19/England/20134078404/2020|2020-03-24|EPI\_ISL\_423174|Original|hCoV-19^^England|Human|Respiratory Virus Unit|Respiratory Virus Unit|Platt|United Kingdom

>Spike|hCoV-19/England/201060142/2020|2020-03-04|EPI\_ISL\_464395|Original|hCoV-19^^England|Human|Respiratory Virus Unit|Respiratory Virus Unit|Platt|United Kingdom

>Spike|hCoV-19/Australia/VIC2988/2020|2020-07-07|EPI\_ISL\_521818|Original|hCoV-19^^Victoria|Human|Microbiological Diagnostic Unit - Public Health Laboratory (MDU-PHL)|MDU-PHL|Schultz|Australia

>Spike|hCoV-19/Norway/5387/2020|2020-10-28|EPI\_ISL\_708073|Original|hCoV-19^^Vestland|Human|Foerde Hospital|Norwegian Institute of Public Health|Kopperud Riis|Norway

>Spike|hCoV-19/USA/FL-BPHL-0476/2020|2020-04-03|EPI\_ISL\_495382|Original|hCoV-19^^Florida|Human|Florida Bureau of Public Health Laboratories|Florida Bureau of Public Health Laboratories|Blanton|USA

>Spike|hCoV-19/Australia/WA407-2/2020|2020-05-25|EPI\_ISL\_672619|Original|hCoV-19^^Western Australia|Human|PathWest Laboratory Medicine WA|PathWest Laboratory Medicine WA Microbial Surveillance Unit|Sikazwe|Australia

>Spike|hCoV-19/England/BHRT-24B3BC5/2020|2020-06-15|EPI\_ISL\_528789|Original|hCoV-19^^England|Human|Microbiology Department|Wellcome Sanger Institute for the COVID-19 Genomics UK (COG-UK) consortium|Davies|United Kingdom

>Spike|hCoV-19/Japan/PG-2441/2020|2020-04-00|EPI\_ISL\_686046|Original|hCoV-19^^Japan|Human|Pathogen Genomics Center|Pathogen Genomics Center|Sekizuka|Japan

>Spike|hCoV-19/Belgium/regA-0411472/2020|2020-04-11|EPI\_ISL\_476982|Original|hCoV-19^^Heusden-Zolder|Human|KU Leuven|KU Leuven|Maes|Belgium

>Spike|hCoV-19/USA/MI-UM-10035884804/2020|2020-09-10|EPI\_ISL\_583401|Original|hCoV-19^^Michigan|Human|University of Michigan Clinical Microbiology Laboratory|Lauring Lab|Valesano|USA

>Spike|hCoV-19/England/ALDP-BC76F9/2020|2020-11-22|EPI\_ISL\_721297|Original|hCoV-19^^England|Human|Lighthouse Lab in Alderley Park|Wellcome Sanger Institute for the COVID-19 Genomics UK (COG-UK) Consortium|Davies|United Kingdom

>Spike|hCoV-19/USA/MN-MDH-75/2020|2020-03-16|EPI\_ISL\_460064|Original|hCoV-19^^Minnesota|Human|Minnesota Department of Health|Minnesota Department of Health|Garfin|USA

>Spike|hCoV-19/South Africa/KRISP-K002810/2020|2020-08-24|EPI\_ISL\_602632|Original|hCoV-19^^KwaZulu-Natal|Human|NHLS-IALCH|KRISP|de Oliveira|South Africa

>Spike|hCoV-19/England/QEUA-A1EE47/2020|2020-10-01|EPI\_ISL\_587410|Original|hCoV-19^^England|Human|Lighthouse Lab in Glasgow|Wellcome Sanger Institute for the COVID-19 Genomics UK (COG-UK) consortium|Davies|United Kingdom

>Spike|hCoV-19/Denmark/DCGC-16812/2020|2020-12-14|EPI\_ISL\_750200|Original|hCoV-19^^Sjaelland|Human|Department of Virus and Microbiological Special Diagnostics|Albertsen Lab|Michaelsen|Denmark

>Spike|hCoV-19/Romania/ROSV\_4271/2020|2020-04-23|EPI\_ISL\_491073|Original|hCoV-19^^Suceava|Human|Suceava County Emergency Hospital|\Stefan cel Mare\ University Metagenomics Lab|Lobiuc|Romania

>Spike|hCoV-19/Wales/PHWC-35819/2020|2020-04-25|EPI\_ISL\_474481|Original|hCoV-19^^Wales|Human|Originating lab|COVID-19 Genomics UK (COG-UK) Consortium|Moore|United Kingdom

>Spike|hCoV-19/England/NORW-E8578/2020|2020-04-17|EPI\_ISL\_449160|Original|hCoV-19^^England|Human|Quadram Institute Bioscience|COVID-19 Genomics UK (COG-UK) Consortium|Alikhan|United Kingdom

>Spike|hCoV-19/Russia/SPE-RII-MH1529S/2020|2020-09-13|EPI\_ISL\_602337|Original|hCoV-19^^Saint Petersburg|Human|HELIX LLC|WHO National Influenza Centre Russian Federation|Komissarov|Russia

>Spike|hCoV-19/Japan/PG-7174/2020|2020-07-00|EPI\_ISL\_688279|Original|hCoV-19^^Japan|Human|Pathogen Genomics Center|Pathogen Genomics Center|Sekizuka|Japan

>Spike|hCoV-19/England/QEUA-B672BB/2020|2020-11-11|EPI\_ISL\_662408|Original|hCoV-19^^England|Human|Lighthouse Lab in Glasgow|Wellcome Sanger Institute for the COVID-19 Genomics UK (COG-UK) Consortium|Davies|United Kingdom

>Spike|hCoV-19/Denmark/DCGC-1392/2020|2020-03-23|EPI\_ISL\_622448|Original|hCoV-19^^Hovedstaden|Human|Department of Virus and Microbiological Special Diagnostics|Albertsen lab|Michaelsen|Denmark

>Spike|hCoV-19/England/CAMB-7A6E1/2020|2020-04-03|EPI\_ISL\_441142|Original|hCoV-19^^England|Human|Department of Pathology|Wellcome Sanger Institute for the COVID-19 Genomics UK (COG-UK) consortium|Amato|United Kingdom

>Spike|hCoV-19/England/204191512/2020|2020-10-09|EPI\_ISL\_603190|Original|hCoV-19^^England|Human|Respiratory Virus Unit|Respiratory Virus Unit|Platt|United Kingdom

>Spike|hCoV-19/England/QEUA-9F7B5D/2020|2020-09-27|EPI\_ISL\_589131|Original|hCoV-19^^England|Human|Lighthouse Lab in Glasgow|Wellcome Sanger Institute for the COVID-19 Genomics UK (COG-UK) consortium|Davies|United Kingdom

>Spike|hCoV-19/USA/WI-UW-25/2020|2020-03-23|EPI\_ISL\_421283|Original|hCoV-19^^Wisconsin|Human|University of Wisconsin-Madison AIDS Vaccine Research Laboratories|University of Wisconsin-Madison AIDS Vaccine Research Laboratories|Baczenas|USA

>Spike|hCoV-19/Wales/PHWC-49933C/2020|2020-12-03|EPI\_ISL\_727291|Original|hCoV-19^^Wales|Human|Originating lab|COVID-19 Genomics UK (COG-UK) Consortium|Moore|United Kingdom

>Spike|hCoV-19/England/ALDP-935C6F/2020|2020-06-21|EPI\_ISL\_552797|Original|hCoV-19^^England|Human|Lighthouse Lab in Alderley Park|Wellcome Sanger Institute for the COVID-19 Genomics UK (COG-UK) consortium|Davies|United Kingdom

>Spike|hCoV-19/England/20180032504/2020|2020-04-27|EPI\_ISL\_465437|Original|hCoV-19^^England|Human|Respiratory Virus Unit|Respiratory Virus Unit|Platt|United Kingdom



>Spike|hCoV-19/Belgium/regA-0516552/2020|2020-05-16|EPI\_ISL\_734735|Original|hCoV-19^^Waterloo|Human|UZ Leuven|KU Leuven|Maes|Belgium

>Spike|hCoV-19/England/QEUH-9F5A34/2020|2020-09-25|EPI\_ISL\_588867|Original|hCoV-19^^England|Human|Lighthouse Lab in Glasgow|Wellcome Sanger Institute for the COVID-19 Genomics UK (COG-UK) consortium|Davies|United Kingdom

>Spike|hCoV-19/England/ALDP-B2436C/2020|2020-11-04|EPI\_ISL\_646897|Original|hCoV-19^^England|Human|Lighthouse Lab in Alderley Park|Wellcome Sanger Institute for the COVID-19 Genomics UK (COG-UK) Consortium|Davies|United Kingdom

>Spike|hCoV-19/England/SHEF-C5034/2020|2020-05-18|EPI\_ISL\_493681|Original|hCoV-19^^England|Human|Virology Department|COVID-19 Genomics UK (COG-UK) Consortium|de Silva|United Kingdom

>Spike|hCoV-19/England/NOTT-11B089/2020|2020-11-09|EPI\_ISL\_637800|Original|hCoV-19^^England|Human|Queens Medical Centre|COVID-19 Genomics UK (COG-UK) Consortium|Loose|United Kingdom

>Spike|hCoV-19/Japan/PG-0944/2020|2020-04-00|EPI\_ISL\_684554|Original|hCoV-19^^Japan|Human|Pathogen Genomics Center|Pathogen Genomics Center|Sekizuka|Japan

>Spike|hCoV-19/Scotland/EDB110/2020|2020-03-22|EPI\_ISL\_425898|Original|hCoV-19^^Scotland|Human|Virology Department|COVID-19 Genomics UK (COG-UK) Consortium|Williams|United Kingdom

>Spike|hCoV-19/USA/CA-ALSR-1184/2020|2020-04-01|EPI\_ISL\_494420|Original|hCoV-19^^California|Human|San Diego County Public Health Laboratory|Andersen lab at Scripps Research|Gangavarapu|USA

>Spike|hCoV-19/Wales/PHWC-4A669D/2020|2020-12-17|EPI\_ISL\_765060|Original|hCoV-19^^Wales|Human|Wales Specialist Virology Centre Sequencing lab|COVID-19 Genomics UK (COG-UK) Consortium|Moore|United Kingdom

>Spike|hCoV-19/USA/WA-UW-1870/2020|2020-03-23|EPI\_ISL\_424293|Original|hCoV-19^^Washington|Human|UW Virology Lab|UW Virology Lab|Roychoudhury|USA

>Spike|hCoV-19/Wales/MILK-9EE9E6/2020|2020-09-23|EPI\_ISL\_589769|Original|hCoV-19^^Wales|Human|Lighthouse Lab in Milton Keynes|Wellcome Sanger Institute for the COVID-19 Genomics UK (COG-UK) consortium|Davies|United Kingdom

>Spike|hCoV-19/India/OR-ILSCV19358/2020|2020-05-14|EPI\_ISL\_463072|Original|hCoV-19^^Odisha|Human|Institute of Life Sciences|Immunogenomics lab|Raghav|India

>Spike|hCoV-19/England/CAMC-C44839/2020|2020-12-10|EPI\_ISL\_719398|Original|hCoV-19^^England|Human|Lighthouse Lab in Cambridge|Wellcome Sanger Institute for the COVID-19 Genomics UK (COG-UK) Consortium|Davies|United Kingdom

>Spike|hCoV-19/USA/TX-HMH-MCoV-8083/2020|2020-06-29|EPI\_ISL\_784186|Original|hCoV-19^^Texas|Human|Houston Methodist Hospital|Houston Methodist Hospital|Long|USA

>Spike|hCoV-19/South Korea/KCDC2595/2020|2020-06-30|EPI\_ISL\_514998|Original|hCoV-19^^South Korea|Human|Division of Viral Diseases|Division of Viral Diseases|Kim|South Korea

>Spike|hCoV-19/England/QEUH-A5E528/2020|2020-10-12|EPI\_ISL\_597242|Original|hCoV-19^^England|Human|Lighthouse Lab in Glasgow|Wellcome Sanger Institute for the COVID-19 Genomics UK (COG-UK) consortium|Davies|United Kingdom

>Spike|hCoV-19/Wales/PHWC-4971F8/2020|2020-11-26|EPI\_ISL\_726795|Original|hCoV-19^^Wales|Human|Originating lab|COVID-19 Genomics UK (COG-UK) Consortium|Moore|United Kingdom

>Spike|hCoV-19/England/MILK-AB7781/2020|2020-10-21|EPI\_ISL\_623357|Original|hCoV-19^^England|Human|Lighthouse Lab in Milton Keynes|Wellcome Sanger Institute for the COVID-19 Genomics UK (COG-UK) consortium|Davies|United Kingdom

>Spike|hCoV-19/England/NOTT-110330/2020|2020-04-12|EPI\_ISL\_441501|Original|hCoV-19^^England|Human|Queens Medical Centre|COVID-19 Genomics UK (COG-UK) Consortium|Loose|United Kingdom

>Spike|hCoV-19/England/CAMC-B1FE90/2020|2020-11-01|EPI\_ISL\_647479|Original|hCoV-19^^England|Human|Lighthouse Lab in Cambridge|Wellcome Sanger Institute for the COVID-19 Genomics UK (COG-UK) Consortium|Davies|United Kingdom

>Spike|hCoV-19/England/MILK-AC8301/2020|2020-10-21|EPI\_ISL\_630016|Original|hCoV-19^^England|Human|Lighthouse Lab in Milton Keynes|Wellcome Sanger Institute for the COVID-19 Genomics UK (COG-UK) consortium|Davies|United Kingdom

>Spike|hCoV-19/USA/WA-S902/2020|2020-04-22|EPI\_ISL\_463392|Original|hCoV-19^^Washington|Human|Washington State Department of Health|Seattle Flu Study|Bedford|USA

>Spike|hCoV-19/England/204460556/2020|2020-10-28|EPI\_ISL\_653976|Original|hCoV-19^^England|Human|Respiratory Virus Unit|COVID-19 Genomics UK (COG-UK) Consortium|Platt|United Kingdom

>Spike|hCoV-19/Spain/MD-IBV-97010082/2020|2020-03-26|EPI\_ISL\_779747|Original|hCoV-19^^Madrid|Human|IdISSC/Hospital Cl\u00ednico San Carlos de Madrid\u200b|SeqCOVID-SPAIN consortium/IBV (CSIC)|Comas|Spain

>Spike|hCoV-19/Denmark/DCGC-9586/2020|2020-11-09|EPI\_ISL\_668480|Original|hCoV-19^^Hovedstaden|Human|Department of Virus and Microbiological Special Diagnostics|Albertsen Lab|Michaelsen|Denmark

>Spike|hCoV-19/England/CAMB-74007/2020|2020-03-18|EPI\_ISL\_440358|Original|hCoV-19^^England|Human|Department of Pathology|Wellcome Sanger Institute for the COVID-19 Genomics UK (COG-UK) consortium|Amato|United Kingdom

>Spike|hCoV-19/Scotland/QEUA-95EA2A/2020|2020-08-09|EPI\_ISL\_532510|Original|hCoV-19^^Scotland|Human|NHSGGC West of Scotland Specialist Virology Centre / MRC-University of Glasgow Centre for Virus Research|Wellcome Sanger Institute for the COVID-19 Genomics UK (COG-UK) consortium|Davies|United Kingdom

>Spike|hCoV-19/England/205161451/2020|2020-12-16|EPI\_ISL\_766435|Original|hCoV-19^^England|Human|Respiratory Virus Unit|COVID-19 Genomics UK (COG-UK) Consortium|Platt|United Kingdom

>Spike|hCoV-19/Netherlands/ZH-EMC-915/2020|2020-11-04|EPI\_ISL\_722464|Original|hCoV-19^^Zuid Holland|Human|Dutch COVID-19 response team|Erasmus Medical Center|Oude Munnink|Netherlands

>Spike|hCoV-19/USA/TX-HMH-6082/2020|2020-06-22|EPI\_ISL\_547220|Original|hCoV-19^^Texas|Human|Houston Methodist Hospital|Houston Methodist Hospital|Long|USA

>Spike|hCoV-19/England/CAMC-B9956C/2020|2020-11-15|EPI\_ISL\_673550|Original|hCoV-19^^England|Human|Lighthouse Lab in Cambridge|Wellcome Sanger Institute for the COVID-19 Genomics UK (COG-UK) Consortium|Davies|United Kingdom

>Spike|hCoV-19/England/ALDP-A523DF/2020|2020-10-07|EPI\_ISL\_598192|Original|hCoV-19^^England|Human|Lighthouse Lab in Alderley Park|Wellcome Sanger Institute for the COVID-19 Genomics UK (COG-UK) consortium|Davies|United Kingdom

>Spike|hCoV-19/South Africa/KRISP-K003757/2020|2020-09-28|EPI\_ISL\_602928|Original|hCoV-19^^KwaZulu-Natal|Human|NHLS-IALCH|KRISP|de Oliveira|South Africa

>Spike|hCoV-19/Scotland/EDB4338/2020|2020-04-24|EPI\_ISL\_449295|Original|hCoV-19^^Scotland|Human|Virology Department|COVID-19 Genomics UK (COG-UK) Consortium|Williams|United Kingdom

>Spike|hCoV-19/Italy/SIC-IZSBM194-48/2020|2020-06-00|EPI\_ISL\_582847|Original|hCoV-19^^Sicily|Human|Laboratorio di Riferimento Regionale della Sicilia Occidentale per l'Emergenza COVID-19|Istituto Zooprofilattico Sperimentale della Sicilia|Reale|Italy

>Spike|hCoV-19/USA/WA-S649/2020|2020-04-19|EPI\_ISL\_438202|Original|hCoV-19^^Washington|Human|Washington State Department of Health|Seattle Flu Study|Bedford|USA

>Spike|hCoV-19/Australia/QLD1086/2020|2020-03-27|EPI\_ISL\_593605|Original|hCoV-19^^Australia|Human|unknown|Public Health Virology Laboratory|Nguyen|Australia

>Spike|hCoV-19/USA/WA-S182/2020|2020-03-20|EPI\_ISL\_430220|Original|hCoV-19^^Washington|Human|Washington State Department of Health|Seattle Flu Study|Bedford|USA

>Spike|hCoV-19/Hungary/US-539w/2020|2020-03-29|EPI\_ISL\_477624|Original|hCoV-19^^B\u00e9lcs-Kiskun County|Human|University of Szeged|National Laboratory of Virology|Kemenesi|Hungary

>Spike|hCoV-19/USA/CA-CZB-3615/2020|2020-07-29|EPI\_ISL\_548343|Original|hCoV-19^^California|Human|County of Santa Clara Public Health Department|Chan-Zuckerberg Biohub|Bhatt|USA

>Spike|hCoV-19/England/CAMC-B51199/2020|2020-11-08|EPI\_ISL\_657834|Original|hCoV-19^^England|Human|Lighthouse Lab in Cambridge|Wellcome Sanger Institute for the COVID-19 Genomics UK (COG-UK) Consortium|Davies|United Kingdom

>Spike|hCoV-19/England/MILK-ACD630/2020|2020-10-21|EPI\_ISL\_634451|Original|hCoV-19^^England|Human|Lighthouse Lab in Milton Keynes|Wellcome Sanger Institute for the COVID-19 Genomics UK (COG-UK) consortium|Davies|United Kingdom

>Spike|hCoV-19/England/20109045604/2020|2020-03-06|EPI\_ISL\_464565|Original|hCoV-19^^England|Human|Respiratory Virus Unit|Respiratory Virus Unit|Platt|United Kingdom

>Spike|hCoV-19/England/ALDP-BB398E/2020|2020-11-19|EPI\_ISL\_703114|Original|hCoV-19^^England|Human|Lighthouse Lab in Alderley Park|Wellcome Sanger Institute for the COVID-19 Genomics UK (COG-UK) Consortium|Davies|United Kingdom

>Spike|hCoV-19/South Africa/KRISP-K001393/2020|2020-07-16|EPI\_ISL\_515877|Original|hCoV-19^^KwaZulu-Natal|Human|Medical Disagnostics Services (MDS)|KRISP|de Oliveira|South Africa

>Spike|hCoV-19/Spain/PV-IBV-000815/2020|2020-03-10|EPI\_ISL\_452713|Original|hCoV-19^^Basque Country|Human|Hospital Universitario Araba. Vitoria-Gasteiz,|SeqCOVID-SPAIN consortium|IBV (CSIC)|Comas|Spain

>Spike|hCoV-19/Australia/SAP473/2020|2020-07-28|EPI\_ISL\_508606|Original|hCoV-19^^South Australia|Human|SA Pathology|SA Pathology|Leong|Australia

>Spike|hCoV-19/Czech Republic/ChVir1630/2020|2020-02-29|EPI\_ISL\_416742|Original|hCoV-19^^Prague|Human|NRL for Influenza|Charite Universitaetsmedizin Berlin|Muehlemann|Czech Republic

>Spike|hCoV-19/England/205240594/2020|2020-12-23|EPI\_ISL\_766063|Original|hCoV-19^^England|Human|Respiratory Virus Unit|COVID-19 Genomics UK (COG-UK) Consortium|Platt|United Kingdom

>Spike|hCoV-19/USA/WI-UW-1609/2020|2020-09-17|EPI\_ISL\_605486|Original|hCoV-19^^Wisconsin|Human|University of Wisconsin-Madison AIDS Vaccine Research Laboratories|University of Wisconsin-Madison AIDS Vaccine Research Laboratories|Baczenas|USA

>Spike|hCoV-19/Denmark/DCGC-17014/2020|2020-12-14|EPI\_ISL\_750710|Original|hCoV-19^^Midtjylland|Human|Department of Virus and Microbiological Special Diagnostics|Albertsen Lab|Michaelsen|Denmark

>Spike|hCoV-19/Norway/5375/2020|2020-10-10|EPI\_ISL\_775322|Original|hCoV-19^^Viken|Human|Ostfold Hospital Trust - Kalnes|Norwegian Institute of Public Health|Vollan|Norway

>Spike|hCoV-19/England/ALDP-917A5A/2020|2020-06-22|EPI\_ISL\_551474|Original|hCoV-19^^England|Human|Lighthouse Lab in Alderley Park|Wellcome Sanger Institute for the COVID-19 Genomics UK (COG-UK) consortium|Davies|United Kingdom

>Spike|hCoV-19/USA/NY-SURV0988/2020|2020-03-18|EPI\_ISL\_436080|Original|hCoV-19^^New York|Human|NYC Department of Health and Mental Hygiene|Pathogen Discovery|Queen|USA

>Spike|hCoV-19/England/ALDP-B47D74/2020|2020-11-07|EPI\_ISL\_649448|Original|hCoV-19^^England|Human|Lighthouse Lab in Alderley Park|Wellcome Sanger Institute for the COVID-19 Genomics UK (COG-UK) Consortium|Davies|United Kingdom

>Spike|hCoV-19/England/204760987/2020|2020-11-18|EPI\_ISL\_683546|Original|hCoV-19^^England|Human|Respiratory Virus Unit|COVID-19 Genomics UK (COG-UK) Consortium|Platt|United Kingdom

>Spike|hCoV-19/England/MILK-B9617A/2020|2020-11-14|EPI\_ISL\_676045|Original|hCoV-19^^England|Human|Lighthouse Lab in Milton Keynes|Wellcome Sanger Institute for the COVID-19 Genomics UK (COG-UK) Consortium|Davies|United Kingdom

>Spike|hCoV-19/England/ALDP-6C1B6E/2020|2020-07-01|EPI\_ISL\_557966|Original|hCoV-19^^England|Human|Lighthouse Lab in Alderley Park|Wellcome Sanger Institute for the COVID-19 Genomics UK (COG-UK) consortium|Davies|United Kingdom

>Spike|hCoV-19/Denmark/DCGC-19826/2020|2020-12-07|EPI\_ISL\_747812|Original|hCoV-19^^Midtjylland|Human|Department of Virus and Microbiological Special Diagnostics|Albertsen Lab|Michaelsen|Denmark

>Spike|hCoV-19/Denmark/DCGC-13846/2020|2020-11-30|EPI\_ISL\_713058|Original|hCoV-19^^Hovedstaden|Human|Department of Virus and Microbiological Special Diagnostics|Albertsen Lab|Michaelsen|Denmark

>Spike|hCoV-19/England/ALDP-9C53C9/2020|2020-09-10|EPI\_ISL\_567602|Original|hCoV-19^^England|Human|Lighthouse Lab in Alderley Park|Wellcome Sanger Institute for the COVID-19 Genomics UK (COG-UK) consortium|Davies|United Kingdom

>Spike|hCoV-19/England/CAMC-B081CE/2020|2020-10-29|EPI\_ISL\_643969|Original|hCoV-19^^England|Human|Lighthouse Lab in Cambridge|Wellcome Sanger Institute for the COVID-19 Genomics UK (COG-UK) Consortium|Davies|United Kingdom

>Spike|hCoV-19/USA/UT-UPHL-201229235/2020|2020-03-30|EPI\_ISL\_672551|Original|hCoV-19^^Utah|Human|Utah Public Health Laboratory|Utah Public Health Laboratory|Young|USA

>Spike|hCoV-19/Norway/Trondheim-S5/2020|2020-03-25|EPI\_ISL\_450347|Vero|hCoV-19^^Trondheim|Human|St.Olavs hospital/NTNU|Institute of Genomics Core Facility|Ianevski|Norway

>Spike|hCoV-19/England/QEUA-AF5532/2020|2020-10-30|EPI\_ISL\_663119|Original|hCoV-19^^England|Human|Lighthouse Lab in Glasgow|Wellcome Sanger Institute for the COVID-19 Genomics UK (COG-UK) Consortium|Davies|United Kingdom

>Spike|hCoV-19/Austria/CeMM0896/2020|2020-03-20|EPI\_ISL\_583749|Original|hCoV-19^^Austria|Human|Dr. Gernot Walder GmbH|Bergthaler laboratory|Bergthaler|Austria

>Spike|hCoV-19/England/QEUA-A006F5/2020|2020-09-30|EPI\_ISL\_600496|Original|hCoV-19^^England|Human|Lighthouse Lab in Glasgow|Wellcome Sanger Institute for the COVID-19 Genomics UK (COG-UK) consortium|Davies|United Kingdom

>Spike|hCoV-19/England/ALDP-953050/2020|2020-06-11|EPI\_ISL\_553678|Original|hCoV-19^^England|Human|Lighthouse Lab in Alderley Park|Wellcome Sanger Institute for the COVID-19 Genomics UK (COG-UK) consortium|Davies|United Kingdom

>Spike|hCoV-19/Australia/VIC16079/2020|2020-08-02|EPI\_ISL\_640839|Original|hCoV-19^^Victoria|Human|Microbiological Diagnostic Unit - Public Health Laboratory (MDU-PHL) |MDU-PHL|Schultz|Australia

>Spike|hCoV-19/USA/NY-Wadsworth-290746-01/2020|2020-12-21|EPI\_ISL\_767567|Original|hCoV-19^^New York|Human|URMC LABS|Wadsworth Center|Lasek-Nesselquist|USA

>Spike|hCoV-19/USA/TX-HMH-2540/2020|2020-06-01|EPI\_ISL\_545371|Original|hCoV-19^^Texas|Human|Houston Methodist Hospital|Houston Methodist Hospital|Long|USA

>Spike|hCoV-19/USA/CA-ALSR-0725-IPL/2020|2020-05-04|EPI\_ISL\_483326|Original|hCoV-19^^California|Human|UC San Diego Center for Advanced Laboratory Medicine|Andersen lab at Scripps Research|Gangavarapu|USA

>Spike|hCoV-19/USA/VA-DCLS-0005/2020|2020-03-16|EPI\_ISL\_419256|Original|hCoV-19^^Virginia|Human|Virginia DCLS|Virginia DCLS|St. Jacques|USA

>Spike|hCoV-19/Myanmar/MMC\_137/2020|2020-04-22|EPI\_ISL\_512844|Original|hCoV-19^^Yangon|Human|Department of Medical Research|DMR\_Myanmar|Nyunt|Myanmar

>Spike|hCoV-19/USA/VA-DCLS-0705/2020|2020-04-24|EPI\_ISL\_500859|Original|hCoV-19^^Virginia|Human|Virginia DCLS|Virginia DCLS|St. Jacques|USA

>Spike|hCoV-19/India/MH-ACTREC-488/2020|2020-08-13|EPI\_ISL\_700136|Original|hCoV-19^^Maharashtra|Human|Hematopathology Laboratory|Hematopathology Laboratory|Patkar|India

>Spike|hCoV-19/Japan/PG-1785/2020|2020-05-00|EPI\_ISL\_685391|Original|hCoV-19^^Japan|Human|Pathogen Genomics Center|Pathogen Genomics Center|Sekizuka|Japan

>Spike|hCoV-19/England/QEUA-9DBD86/2020|2020-09-21|EPI\_ISL\_601300|Original|hCoV-19^^England|Human|Lighthouse Lab in Glasgow|Wellcome Sanger Institute for the COVID-19 Genomics UK (COG-UK) consortium|Davies|United Kingdom

>Spike|hCoV-19/Austria/CeMM0750/2020|2020-03-31|EPI\_ISL\_583686|Original|hCoV-19^^Austria|Human|Austrian Agency for Health and Food Safety (AGES)|Bergthaler laboratory|Bergthaler|Austria

>Spike|hCoV-19/England/ALDP-950D01/2020|2020-06-14|EPI\_ISL\_554516|Original|hCoV-19^^England|Human|Lighthouse Lab in Alderley Park|Wellcome Sanger Institute for the COVID-19 Genomics UK (COG-UK) consortium|Davies|United Kingdom

>Spike|hCoV-19/Australia/VIC718/2020|2020-03-27|EPI\_ISL\_427002|Original|hCoV-19^^Victoria|Human|Victorian Infectious Diseases Reference Laboratory (VIDRL) |Microbiological Diagnostic Unit Public Health Laboratory and Victorian Infectious Diseases Reference Laboratory|Schultz|Australia

>Spike|hCoV-19/England/201390359/2020|2020-03-27|EPI\_ISL\_465844|Original|hCoV-19^^England|Human|Respiratory Virus Unit|Respiratory Virus Unit|Platt|United Kingdom

>Spike|hCoV-19/Denmark/DCGC-16818/2020|2020-12-14|EPI\_ISL\_750582|Original|hCoV-19^^Sjaelland|Human|Department of Virus and Microbiological Special Diagnostics|Albertsen Lab|Michaelsen|Denmark

>Spike|hCoV-19/Shanghai/SH0026/2020|2020-02-02|EPI\_ISL\_416335|Original|hCoV-19^^Shanghai|Human|Shanghai Public Health Clinical Center|National Research Center for Translational Medicine (Shanghai)|Zhang|China

>Spike|hCoV-19/USA/FL-BPHL-0091/2020|2020-04-27|EPI\_ISL\_445034|Original|hCoV-19^^Florida|Human|Florida Bureau of Public Health Laboratories|Florida Bureau of Public Health Laboratories|Blanton|USA

>Spike|hCoV-19/Guangdong/20SF602/2020|2020-01-25|EPI\_ISL\_428464|Original|hCoV-19^^Guangdong|Human|Guangdong Provincial Center for Diseases Control and Prevention;Guangdong Provincial Institute of Public Health|School of Public Health|Gu|China

>Spike|hCoV-19/England/ALDP-8E25EF/2020|2020-06-25|EPI\_ISL\_557143|Original|hCoV-19^^England|Human|Lighthouse Lab in Alderley Park|Wellcome Sanger Institute for the COVID-19 Genomics UK (COG-UK) consortium|Davies|United Kingdom

>Spike|hCoV-19/England/CAMC-B22C45/2020|2020-11-02|EPI\_ISL\_647458|Original|hCoV-19^^England|Human|Lighthouse Lab in Cambridge|Wellcome Sanger Institute for the COVID-19 Genomics UK (COG-UK) Consortium|Davies|United Kingdom

>Spike|hCoV-19/USA/AZ-TG547335/2020|2020-07-06|EPI\_ISL\_695485|Original|hCoV-19^^Arizona|Human|AZ SPHL|TGen North|French|USA

>Spike|hCoV-19/England/LIVE-AA123/2020|2020-03-23|EPI\_ISL\_517406|Original|hCoV-19^^England|Human|Liverpool Clinical Laboratories|COVID-19 Genomics UK (COG-UK) Consortium|Haldenby|United Kingdom

>Spike|hCoV-19/England/OXON-B2EC7/2020|2020-04-22|EPI\_ISL\_534823|Original|hCoV-19^^England|Human|Oxford Viromics|COVID-19 Genomics UK (COG-UK) Consortium|Golubchik|United Kingdom

>Spike|hCoV-19/England/ALDP-90C6CD/2020|2020-06-22|EPI\_ISL\_551506|Original|hCoV-19^^England|Human|Lighthouse Lab in Alderley Park|Wellcome Sanger Institute for the COVID-19 Genomics UK (COG-UK) consortium|Davies|United Kingdom

>Spike|hCoV-19/Japan/PG-8326/2020|2020-08-00|EPI\_ISL\_687425|Original|hCoV-19^^Japan|Human|Pathogen Genomics Center|Pathogen Genomics Center|Sekizuka|Japan

>Spike|hCoV-19/England/QEUEH-B7E916/2020|2020-11-14|EPI\_ISL\_668119|Original|hCoV-19^^England|Human|Lighthouse Lab in Glasgow|Wellcome Sanger Institute for the COVID-19 Genomics UK (COG-UK) Consortium|Davies|United Kingdom

>Spike|hCoV-19/Wales/PHWC-485227/2020|2020-10-26|EPI\_ISL\_628159|Original|hCoV-19^^Wales|Human|Wales Specialist Virology Centre Sequencing lab|COVID-19 Genomics UK (COG-UK) Consortium|Moore|United Kingdom

>Spike|hCoV-19/England/CAMC-B3617C/2020|2020-11-05|EPI\_ISL\_645509|Original|hCoV-19^^England|Human|Lighthouse Lab in Cambridge|Wellcome Sanger Institute for the COVID-19 Genomics UK (COG-UK) Consortium|Davies|United Kingdom

>Spike|hCoV-19/England/201161468/2020|2020-03-11|EPI\_ISL\_464845|Original|hCoV-19^^England|Human|Respiratory Virus Unit|Respiratory Virus Unit|Platt|United Kingdom

>Spike|hCoV-19/Israel/130710414/2020|2020-04-17|EPI\_ISL\_447460|Original|hCoV-19^^Tel Aviv District|Human|Clinical Microbiology Laboratory|Stern Lab|Miller|Israel

>Spike|hCoV-19/England/QEUEH-B6C6BA/2020|2020-11-10|EPI\_ISL\_655817|Original|hCoV-19^^England|Human|Lighthouse Lab in Glasgow|Wellcome Sanger Institute for the COVID-19 Genomics UK (COG-UK) Consortium|Davies|United Kingdom

>Spike|hCoV-19/Wales/PHWC-2F37B/2020|2020-04-06|EPI\_ISL\_446239|Original|hCoV-19^^Wales|Human|Wales Specialist Virology Centre|Public Health Wales Microbiology Cardiff|Moore|United Kingdom

>Spike|hCoV-19/Austria/CeMM0557/2020|2020-03-16|EPI\_ISL\_475908|Original|hCoV-19^^Austria|Human|Zentralinstitut f\u00fcr medizinische und chemische Labordiagnostik|Bergthaler laboratory|Bergthaler|Austria

>Spike|hCoV-19/England/QEUEH-B2CA9C/2020|2020-11-02|EPI\_ISL\_646459|Original|hCoV-19^^England|Human|Lighthouse Lab in Glasgow|Wellcome Sanger Institute for the COVID-19 Genomics UK (COG-UK) Consortium|Davies|United Kingdom

>Spike|hCoV-19/India/MH-NIV-176352/2020|2020-08-24|EPI\_ISL\_541717|Original|hCoV-19^^Maharashtra|Human|National Institute of Virology|National Institute of Virology|Potdar|India

>Spike|hCoV-19/USA/VA-DCLS-2230/2020|2020-11-03|EPI\_ISL\_734211|Original|hCoV-19^^Virginia|Human|Virginia Division of Consolidated Laboratory Services (DCLS)|Virginia Division of Consolidated Laboratory Services (DCLS)|St. Jacques|USA

>Spike|hCoV-19/USA/CA-ALSR-1158/2020|2020-04-28|EPI\_ISL\_494401|Original|hCoV-19^^California|Human|San Diego County Public Health Laboratory|Andersen lab at Scripps Research|Gangavarapu|USA

>Spike|hCoV-19/Netherlands/LI-EMC-133/2020|2020-11-21|EPI\_ISL\_763101|Original|hCoV-19^^Limburg|Human|Dutch COVID-19 response team|Erasmus Medical Center|Oude Munnink|Netherlands

>Spike|hCoV-19/Scotland/EDB3064/2020|2020-04-04|EPI\_ISL\_487740|Original|hCoV-19^^Scotland|Human|Virology Department|Wellcome Sanger Institute for the COVID-19 Genomics UK (COG-UK) consortium|Davies|United Kingdom

>Spike|hCoV-19/England/QEUIH-9E37F6/2020|2020-09-24|EPI\_ISL\_584875|Original|hCoV-19^^England|Human|Northumbria University / South Tees Hospitals NHS Foundation Trust / North Cumbria Integrated Care NHS Foundation Trust / North Tees and Hartlepool NHS Foundation Trust / Newcastle Hospitals NHS Foundation Trust|COVID-19 Genomics UK (COG-UK) Consortium|Bashton|United Kingdom

>Spike|hCoV-19/Denmark/DCGC-3836/2020|2020-08-17|EPI\_ISL\_622672|Original|hCoV-19^^Hovedstaden|Human|Department of Virus and Microbiological Special Diagnostics|Albertsen lab|Michaelsen|Denmark

>Spike|hCoV-19/USA/FL-BPHL-1017/2020|2020-07-17|EPI\_ISL\_517907|Original|hCoV-19^^Florida|Human|Florida Bureau of Public Health Laboratories|Florida Bureau of Public Health Laboratories|Blanton|USA

>Spike|hCoV-19/England/QEUIH-A1F004/2020|2020-09-29|EPI\_ISL\_587499|Original|hCoV-19^^England|Human|Lighthouse Lab in Glasgow|Wellcome Sanger Institute for the COVID-19 Genomics UK (COG-UK) consortium|Davies|United Kingdom

>Spike|hCoV-19/Belgium/reg-0423600/2020|2020-04-23|EPI\_ISL\_734647|Original|hCoV-19^^Kessel-Lo|Human|UZ Leuven|KU Leuven|Maes|Belgium

>Spike|hCoV-19/England/QEUIH-9F8D1A/2020|2020-09-27|EPI\_ISL\_588915|Original|hCoV-19^^England|Human|Lighthouse Lab in Glasgow|Wellcome Sanger Institute for the COVID-19 Genomics UK (COG-UK) consortium|Davies|United Kingdom

>Spike|hCoV-19/England/LOND-124C49E/2020|2020-04-12|EPI\_ISL\_492840|Original|hCoV-19^^England|Human|Royal Free Hospital / Health Services Laboratories|Wellcome Sanger Institute for the COVID-19 Genomics UK (COG-UK) consortium|Davies|United Kingdom

>Spike|hCoV-19/England/CAMC-A6547C/2020|2020-10-11|EPI\_ISL\_608495|Original|hCoV-19^^England|Human|Lighthouse Lab in Cambridge|Wellcome Sanger Institute for the COVID-19 Genomics UK (COG-UK) consortium|Davies|United Kingdom

>Spike|hCoV-19/Wales/PHWC-169C4C/2020|2020-08-16|EPI\_ISL\_517608|Original|hCoV-19^^Wales|Human|Wales Specialist Virology Centre Sequencing lab|COVID-19 Genomics UK (COG-UK) Consortium|Moore|United Kingdom

>Spike|hCoV-19/Sweden/20-22291/2020|2020-03-23|EPI\_ISL\_660388|Original|hCoV-19^^Ostergotland|Human|Klinsisk mikrobiologi Linkoping|The Public Health Agency of Sweden|Svartstr\u00f6m|Sweden

>Spike|hCoV-19/USA/TX-HMH-4556/2020|2020-06-22|EPI\_ISL\_543715|Original|hCoV-19^^Texas|Human|Houston Methodist Hospital|Houston Methodist Hospital|Long|USA

>Spike|hCoV-19/England/QEUIH-A32690/2020|2020-10-05|EPI\_ISL\_628357|Original|hCoV-19^^England|Human|Oxford Viromics|COVID-19 Genomics UK (COG-UK) Consortium|Golubchik|United Kingdom

>Spike|hCoV-19/Poland/Slas8/2020|2020-05-05|EPI\_ISL\_451662|Original|hCoV-19^^Slask|Human|State Sanitary Inspectorate|Laboratory of Recombinant Vaccines|Rabalski|Poland

>Spike|hCoV-19/SaudiArabia/KAUST-JEDDAH332/2020|2020-04-15|EPI\_ISL\_512917|Original|hCoV-19^^Jeddah|Human|Pathogen Genomics Lab King Abdullah University of Science and Technology(KAUST)|Pathogen Genomics Lab King Abdullah University of Science and Technology(KAUST)|Mohamed Ghazzali|Saudi Arabia

>Spike|hCoV-19/Northern Ireland/NIRE-FBFDE/2020|2020-04-10|EPI\_ISL\_459345|Original|hCoV-19^^Northern Ireland|Human|Regional Virus Laboratory|Wellcome Sanger Institute for the COVID-19 Genomics UK (COG-UK) consortium|Davies|United Kingdom

>Spike|hCoV-19/England/MILK-BA9FF2/2020|2020-11-17|EPI\_ISL\_783255|Original|hCoV-19^^England|Human|Lighthouse Lab in Milton Keynes|Wellcome Sanger Institute for the COVID-19 Genomics UK (COG-UK) Consortium|Davies|United Kingdom

>Spike|hCoV-19/USA/AZ-TG666093/2020|2020-05-01|EPI\_ISL\_696183|Original|hCoV-19^^Arizona|Human|Sonora Quest Laboratories|TGen North|French|USA

>Spike|hCoV-19/Australia/VIC9296/2020|2020-08-18|EPI\_ISL\_565492|Original|hCoV-19^^Victoria|Human|Microbiological Diagnostic Unit - Public Health Laboratory (MDU-PHL)|MDU-PHL|Schultz|Australia

>Spike|hCoV-19/Netherlands/NA\_55/2020|2020-03-15|EPI\_ISL\_422816|Original|hCoV-19^^Netherlands|Human|Dutch COVID-19 response team|Erasmus Medical Center|Oude Munnink|Netherlands

>Spike|hCoV-19/France/PAC-IHU-0014/2020|2020-03-07|EPI\_ISL\_569244|Original|hCoV-19^^Provence-Alpes-C\u00f4te-d\u00a9Azur|Human|MEPHI|MEPHI|Levasseur|France

>Spike|hCoV-19/Denmark/DCGC-16429/2020|2020-11-16|EPI\_ISL\_714760|Original|hCoV-19^^Midtjylland|Human|Department of Virus and Microbiological Special Diagnostics|Albertsen Lab|Michaelsen|Denmark

>Spike|hCoV-19/Bangladesh/CHRF-0004/2020|2020-04-17|EPI\_ISL\_468072|Original|hCoV-19^^Dhaka|Human|Child Health Research Foundation|Child Health Research Foundation|Saha|Bangladesh

>Spike|hCoV-19/Spain/RI-IBV-99010981/2020|2020-03-25|EPI\_ISL\_732808|Original|hCoV-19^^La\_Rioja|Human|Centro de Investigaci\u00f3n Biom\u00e9dica de La Rioja - Hospital San Pedro Logro\u00f1o|SeqCOVID-SPAIN consortium/IBV (CSIC)|Comas|Spain

>Spike|hCoV-19/Colombia/ANT-INS-103236/2020|2020-10-20|EPI\_ISL\_739675|Original|hCoV-19^^Antioquia|Human|Instituto Nacional de Salud|Instituto Nacional de Salud|Franco-Mu\u00f1oz|Colombia

>Spike|hCoV-19/USA/UT-UPHL-201012311/2020|2020-06-22|EPI\_ISL\_594260|Original|hCoV-19^^Utah|Human|Utah Public Health Laboratory|Utah Public Health Laboratory|Young|USA

>Spike|hCoV-19/Spain/VC-IBV-98004421/2020|2020-04-13|EPI\_ISL\_583921|Original|hCoV-19^^Comunitat\_Valenciana|Human|Servicio de Microbiolog\u00eda. Hospital General Universitario de Castell\u00f3n|SeqCOVID-SPAIN consortium/IBV (CSIC)|Comas|Spain

>Spike|hCoV-19/Japan/PG-4764/2020|2020-08-00|EPI\_ISL\_689900|Original|hCoV-19^^Japan|Human|Pathogen Genomics Center|Pathogen Genomics Center|Sekizuka|Japan

>Spike|hCoV-19/England/QEUEH-B807CC/2020|2020-11-14|EPI\_ISL\_661777|Original|hCoV-19^^England|Human|Lighthouse Lab in Glasgow|Wellcome Sanger Institute for the COVID-19 Genomics UK (COG-UK) Consortium|Davies|United Kingdom

>Spike|hCoV-19/England/ALDP-95C752/2020|2020-06-16|EPI\_ISL\_555007|Original|hCoV-19^^England|Human|Lighthouse Lab in Alderley Park|Wellcome Sanger Institute for the COVID-19 Genomics UK (COG-UK) consortium|Davies|United Kingdom

>Spike|hCoV-19/United Arab Emirates/0584/2020|2020-05-16|EPI\_ISL\_698742|Original|hCoV-19^^Abu Dhabi|Human|Group 42 (G42) Healthcare|G42 Healthcare|Ogrodzki|United Arab Emirates

>Spike|hCoV-19/England/CAMC-A654A9/2020|2020-10-11|EPI\_ISL\_608633|Original|hCoV-19^^England|Human|Lighthouse Lab in Cambridge|Wellcome Sanger Institute for the COVID-19 Genomics UK (COG-UK) consortium|Davies|United Kingdom

>Spike|hCoV-19/England/ALDP-CB68F6/2020|2020-12-17|EPI\_ISL\_761318|Original|hCoV-19^^England|Human|Lighthouse Lab in Alderley Park|Wellcome Sanger Institute for the COVID-19 Genomics UK (COG-UK) Consortium|Davies|United Kingdom

>Spike|hCoV-19/England/LOND-12601BB/2020|2020-03-13|EPI\_ISL\_524675|Original|hCoV-19^^England|Human|North West London Pathology|Wellcome Sanger Institute for the COVID-19 Genomics UK (COG-UK) consortium|Davies|United Kingdom

>Spike|hCoV-19/Wales/PHWC-47CED4/2020|2020-10-09|EPI\_ISL\_586066|Original|hCoV-19^^Wales|Human|Wales Specialist Virology Centre Sequencing lab|COVID-19 Genomics UK (COG-UK) Consortium|Moore|United Kingdom

>Spike|hCoV-19/Wales/PHWC-15D9CC/2020|2020-05-14|EPI\_ISL\_472753|Original|hCoV-19^^Wales|Human|Wales Specialist Virology Centre Sequencing lab|COVID-19 Genomics UK (COG-UK) Consortium|Moore|United Kingdom

>Spike|hCoV-19/Portugal/PT1701/2020|2020-08-24|EPI\_ISL\_693630|Original|hCoV-19^^Portugal|Human|Hospital Vila Franca de Xira|Instituto Nacional de Saude (INSA)|Borges|Portugal

>Spike|hCoV-19/Scotland/EDB5512/2020|2020-04-20|EPI\_ISL\_487755|Original|hCoV-19^^Scotland|Human|Virology Department|Wellcome Sanger Institute for the COVID-19 Genomics UK (COG-UK) consortium|Davies|United Kingdom

>Spike|hCoV-19/Taiwan/TSGH-12/2020|2020-03-18|EPI\_ISL\_428229|Original|hCoV-19^^Taipei|Human|TSGH-CP molecular lab|TSGH-CP molecular lab|Shang|Taiwan

>Spike|hCoV-19/Thailand/Bangkok-0039/2020|2020-03-28|EPI\_ISL\_429175|Original|hCoV-19^^Bangkok|Human|Ramathibodi Hospital|COVID-19 Network Investigations (CONI) Alliance|Batty|Thailand

>Spike|hCoV-19/Serbia/Novi Sad-215042606/2020|2020-06-25|EPI\_ISL\_661192|Original|hCoV-19^^Novi Sad|Human|Scientific Veterinary Institute Novi Sad|Veterinary Specialized Institute \Kraljevo\|Vidanovic|Serbia

>Spike|hCoV-19/Japan/PG-2076/2020|2020-04-00|EPI\_ISL\_685681|Original|hCoV-19^^Japan|Human|Tokyo Metropolitan Institute of Public Health|Pathogen Genomics Center|Sekizuka|Japan

>Spike|hCoV-19/USA/TX-HMH-MCoV-12835/2020|2020-08-19|EPI\_ISL\_790557|Original|hCoV-19^^Texas|Human|Houston Methodist Hospital|Houston Methodist Hospital|Long|USA

>Spike|hCoV-19/Denmark/DCGC-16843/2020|2020-12-14|EPI\_ISL\_750597|Original|hCoV-19^^Midtjylland|Human|Department of Virus and Microbiological Special Diagnostics|Albertsen Lab|Michaelsen|Denmark

>Spike|hCoV-19/England/ALDP-5D61ED/2020|2020-06-19|EPI\_ISL\_558530|Original|hCoV-19^^England|Human|Lighthouse Lab in Alderley Park|Wellcome Sanger Institute for the COVID-19 Genomics UK (COG-UK) consortium|Davies|United Kingdom

>Spike|hCoV-19/England/ALDP-BCA8D2/2020|2020-11-23|EPI\_ISL\_703696|Original|hCoV-19^^England|Human|Lighthouse Lab in Alderley Park|Wellcome Sanger Institute for the COVID-19 Genomics UK (COG-UK) Consortium|Davies|United Kingdom

>Spike|hCoV-19/England/QEUEH-969B92/2020|2020-08-12|EPI\_ISL\_531171|Original|hCoV-19^^England|Human|Lighthouse Lab in Glasgow|Wellcome Sanger Institute for the COVID-19 Genomics UK (COG-UK) consortium|Davies|United Kingdom

>Spike|hCoV-19/England/MILK-B59BDF/2020|2020-11-06|EPI\_ISL\_679916|Original|hCoV-19^^England|Human|Virology Department|COVID-19 Genomics UK (COG-UK) Consortium|de Silva|United Kingdom

>Spike|hCoV-19/England/QEUEH-C33B61/2020|2020-12-11|EPI\_ISL\_734159|Original|hCoV-19^^England|Human|Lighthouse Lab in Glasgow|Wellcome Sanger Institute for the COVID-19 Genomics UK (COG-UK) Consortium|Davies|United Kingdom

>Spike|hCoV-19/Netherlands/NA\_6/2020|2020-03-10|EPI\_ISL\_415495|Original|hCoV-19^^Netherlands|Human|Dutch COVID-19 response team|Erasmus Medical Center|Oude Munnink|Netherlands

>Spike|hCoV-19/Australia/NSW760/2020|2020-08-03|EPI\_ISL\_513402|Original|hCoV-19^^New South Wales|Human|4Cyte Pathology|NSW Health Pathology - Institute of Clinical Pathology and Medical Research; Westmead Hospital; University of Sydney|Gall|Australia

>Spike|hCoV-19/Japan/PG-1955/2020|2020-04-00|EPI\_ISL\_685561|Original|hCoV-19^^Japan|Human|Pathogen Genomics Center|Pathogen Genomics Center|Sekizuka|Japan

>Spike|hCoV-19/USA/NM-NMDOH-2020324072/2020|2020-09-02|EPI\_ISL\_632824|Original|hCoV-19^^New Mexico|Human|New Mexico Department of Health Scientific Laboratory|New Mexico Department of Health Scientific Laboratory|Johnson|USA

>Spike|hCoV-19/England/QEUEH-96BE3D/2020|2020-08-14|EPI\_ISL\_531291|Original|hCoV-19^^England|Human|Lighthouse Lab in Glasgow|Wellcome Sanger Institute for the COVID-19 Genomics UK (COG-UK) consortium|Davies|United Kingdom

>Spike|hCoV-19/Wales/PHWC-164F2A/2020|2020-05-18|EPI\_ISL\_479399|Original|hCoV-19^^Wales|Human|Wales Specialist Virology Centre Sequencing lab|COVID-19 Genomics UK (COG-UK) Consortium|Moore|United Kingdom

>Spike|hCoV-19/England/ALDP-B73A96/2020|2020-11-12|EPI\_ISL\_664868|Original|hCoV-19^^England|Human|Quadram Institute Bioscience|COVID-19 Genomics UK (COG-UK) Consortium|Alikhan|United Kingdom

>Spike|hCoV-19/SaudiArabia/KAUST-MADINAH1100/2020|2020-06-13|EPI\_ISL\_513107|Original|hCoV-19^^Madinah|Human|Pathogen Genomics Lab King Abdullah University of Science and Technology(KAUST)|Pathogen Genomics Lab King Abdullah University of Science and Technology(KAUST)|Mohamed Ghazzali|Saudi Arabia

>Spike|hCoV-19/India/WB-IK8/2020|2020-04-05|EPI\_ISL\_511901|Original|hCoV-19^^West Bengal|Human|Institute of Post Graduate Medical Education & Research|National Institute of Biomedical Genomics -\u00a0DBT's PAN-INDIA 1000 SARS--CoV-2 RNA Genome Sequencing Consortium|Maitra|India



>Spike|hCoV-19/Australia/VIC3826/2020|2020-07-10|EPI\_ISL\_520539|Original|hCoV-19^^Victoria|Human|Microbiological Diagnostic Unit - Public Health Laboratory (MDU-PHL)|MDU-PHL|Schultz|Australia

>Spike|hCoV-19/Japan/PG-5942/2020|2020-00-00|EPI\_ISL\_689057|Original|hCoV-19^^Japan|Human|Gunma Prefectural Institute of Public Health and Environmental Sciences|Pathogen Genomics Center|Sekizuka|Japan

>Spike|hCoV-19/Denmark/DCGC-8464/2020|2020-10-26|EPI\_ISL\_617913|Original|hCoV-19^^Syddanmark|Human|Department of Virus and Microbiological Special Diagnostics|Albertsen lab|Michaelsen|Denmark

>Spike|hCoV-19/England/CAMB-77E37/2020|2020-04-03|EPI\_ISL\_440835|Original|hCoV-19^^England|Human|Department of Pathology|Wellcome Sanger Institute for the COVID-19 Genomics UK (COG-UK) consortium|Amato|United Kingdom

>Spike|hCoV-19/England/MILK-9A6786/2020|2020-09-01|EPI\_ISL\_550144|Original|hCoV-19^^England|Human|Lighthouse Lab in Milton Keynes|Wellcome Sanger Institute for the COVID-19 Genomics UK (COG-UK) consortium|Davies|United Kingdom

>Spike|hCoV-19/Japan/P5-2/2020|2020-03-13|EPI\_ISL\_419310|Original|hCoV-19^^Chiba|Human|Chiba Prefectural Institute of Public Health|Pathogen Genomics Center|Sekizuka|Japan

>Spike|hCoV-19/England/CAMC-A6602C/2020|2020-10-10|EPI\_ISL\_626798|Original|hCoV-19^^England|Human|University of Exeter|COVID-19 Genomics UK (COG-UK) Consortium|Temperton|United Kingdom

>Spike|hCoV-19/Luxembourg/LNS1963903/2020|2020-07-03|EPI\_ISL\_740030|Original|hCoV-19^^Luxembourg|Human|Laboratoire national de sant\u00e9|Laboratoire national de sant\u00e9|Wienecke-Baldacchino|Luxembourg

>Spike|hCoV-19/USA/TX-HMH-3801/2020|2020-06-14|EPI\_ISL\_543205|Original|hCoV-19^^Texas|Human|Houston Methodist Hospital|Houston Methodist Hospital|Long|USA

>Spike|hCoV-19/USA/WA-S176/2020|2020-03-19|EPI\_ISL\_430214|Original|hCoV-19^^Washington|Human|Washington State Department of Health|Seattle Flu Study|Bedford|USA

>Spike|hCoV-19/England/CAMB-71C42/2020|2020-03-31|EPI\_ISL\_439880|Original|hCoV-19^^England|Human|Department of Pathology|Wellcome Sanger Institute for the COVID-19 Genomics UK (COG-UK) consortium|Amato|United Kingdom

>Spike|hCoV-19/England/QEUEH-CAD7D7/2020|2020-12-20|EPI\_ISL\_761116|Original|hCoV-19^^England|Human|Lighthouse Lab in Glasgow|Wellcome Sanger Institute for the COVID-19 Genomics UK (COG-UK) Consortium|Davies|United Kingdom

>Spike|hCoV-19/USA/MI-MDHHS-SC20963/2020|2020-03-26|EPI\_ISL\_507751|Original|hCoV-19^^Michigan|Human|Michigan Department of Health and Human Services|Michigan Department of Health and Human Services|Blankenship|USA

>Spike|hCoV-19/England/MILK-B38DB2/2020|2020-11-01|EPI\_ISL\_709904|Original|hCoV-19^^England|Human|Lighthouse Lab in Milton Keynes|Wellcome Sanger Institute for the COVID-19 Genomics UK (COG-UK) Consortium|Davies|United Kingdom

>Spike|hCoV-19/Denmark/DCGC-6667/2020|2020-10-12|EPI\_ISL\_619570|Original|hCoV-19^^Hovedstaden|Human|Department of Virus and Microbiological Special Diagnostics|Albertsen lab|Michaelsen|Denmark

>Spike|hCoV-19/Wales/PHWC-4A532E/2020|2020-12-15|EPI\_ISL\_764851|Original|hCoV-19^^Wales|Human|Wales Specialist Virology Centre Sequencing lab|COVID-19 Genomics UK (COG-UK) Consortium|Moore|United Kingdom

>Spike|hCoV-19/England/LIVE-9B3E3/2020|2020-04-03|EPI\_ISL\_449444|Original|hCoV-19^^England|Human|Liverpool Clinical Laboratories|COVID-19 Genomics UK (COG-UK) Consortium|Haldenby|United Kingdom

>Spike|hCoV-19/Thailand/Bangkok\_2972/2020|2020-03-17|EPI\_ISL\_455586|Vero P1|hCoV-19^^Bangkok|Human|Siriraj hospital|National Institute of Health. Department of medical Sciences|Phuygun|Thailand

>Spike|hCoV-19/USA/CA-CHLA-PLM32250719/2020|2020-12-01|EPI\_ISL\_753594|Original|hCoV-19^^California|Human|Clinical virology Laboratory|Center for Personalized Medicine|Dien Bard|USA

>Spike|hCoV-19/Papua New Guinea/13/2020|2020-10-06|EPI\_ISL\_693483|Original|hCoV-19^^Papua New Guinea|Human|Central Public Health Laboratory|National Public Health Laboratory|Mak|Papua New Guinea

>Spike|hCoV-19/England/QEUA-B66FE2/2020|2020-11-11|EPI\_ISL\_661321|Original|hCoV-19^^England|Human|Lighthouse Lab in Glasgow|Wellcome Sanger Institute for the COVID-19 Genomics UK (COG-UK) Consortium|Davies|United Kingdom

>Spike|hCoV-19/Portugal/PT1441/2020|2020-03-24|EPI\_ISL\_511400|Original|hCoV-19^^Portugal|Human|Instituto Nacional de Saude (INSA)|Instituto Nacional de Saude (INSA)|Borges|Portugal

>Spike|hCoV-19/England/MILK-ACEC1F/2020|2020-10-21|EPI\_ISL\_629343|Original|hCoV-19^^England|Human|Lighthouse Lab in Milton Keynes|Wellcome Sanger Institute for the COVID-19 Genomics UK (COG-UK) consortium|Davies|United Kingdom

>Spike|hCoV-19/England/QEUA-AE2987/2020|2020-10-27|EPI\_ISL\_633679|Original|hCoV-19^^England|Human|Lighthouse Lab in Glasgow|Wellcome Sanger Institute for the COVID-19 Genomics UK (COG-UK) consortium|Davies|United Kingdom

>Spike|hCoV-19/France/PDL-SC628/2020|2020-04-01|EPI\_ISL\_649179|Original|hCoV-19^^Pays-de-la-Loire|Human|CHU Nantes|CNR Virus des Infections Respiratoires - France SUD|Bal|France

>Spike|hCoV-19/Denmark/DCGC-16716/2020|2020-10-19|EPI\_ISL\_714428|Original|hCoV-19^^Hovedstaden|Human|Department of Virus and Microbiological Special Diagnostics|Albertsen Lab|Michaelsen|Denmark

>Spike|hCoV-19/USA/CA-CZB-12965/2020|2020-07-27|EPI\_ISL\_672380|Original|hCoV-19^^California|Human|San Francisco Public Health Laboratory|Chan-Zuckerberg Biohub|Bhatt|USA

>Spike|hCoV-19/Netherlands/Limburg\_56/2020|2020-04-23|EPI\_ISL\_461044|Original|hCoV-19^^Limburg|Human|Dutch COVID-19 response team|Erasmus Medical Center|Oude Munnink|Netherlands

>Spike|hCoV-19/Wales/PHWC-48B607/2020|2020-11-05|EPI\_ISL\_666260|Original|hCoV-19^^Wales|Human|Wales Specialist Virology Centre Sequencing lab|COVID-19 Genomics UK (COG-UK) Consortium|Moore|United Kingdom

>Spike|hCoV-19/Denmark/DCGC-1351/2020|2020-06-08|EPI\_ISL\_618074|Original|hCoV-19^^Nordjylland|Human|Department of Virus and Microbiological Special Diagnostics|Albertsen lab|Michaelsen|Denmark

>Spike|hCoV-19/Singapore/603/2020|2020-06-29|EPI\_ISL\_490053|Original|hCoV-19^^Singapore|Human|National Public Health Laboratory|National Public Health Laboratory|Mak|Singapore

>Spike|hCoV-19/England/MILK-A18C8F/2020|2020-10-03|EPI\_ISL\_627479|Original|hCoV-19^^England|Human|University College London|COVID-19 Genomics UK (COG-UK) Consortium|Roy|United Kingdom

>Spike|hCoV-19/Spain/MD-IBV-003687/2020|2020-04-02|EPI\_ISL\_467186|Original|hCoV-19^^Madrid|Human|Hospital General Universitario Gregorio Mara\u00f1a|SeqCOVID-SPAIN consortium/IBV (CSIC)|Comas|Spain

>Spike|hCoV-19/Belgium/JK-0305110/2020|2020-03-05|EPI\_ISL\_420367|Original|hCoV-19^^Knokke-Heist|Human|KU Leuven|KU Leuven|Maes|Belgium

>Spike|hCoV-19/USA/TX-HMH-1776/2020|2020-05-14|EPI\_ISL\_542831|Original|hCoV-19^^Texas|Human|Houston Methodist Hospital|Houston Methodist Hospital|Long|USA

>Spike|hCoV-19/England/SHEF-C17BB/2020|2020-11-24|EPI\_ISL\_680118|Original|hCoV-19^^England|Human|Virology Department|COVID-19 Genomics UK (COG-UK) Consortium|de Silva|United Kingdom

>Spike|hCoV-19/Netherlands/ZH-EMC-990/2020|2020-11-16|EPI\_ISL\_722661|Original|hCoV-19^^Zuid Holland|Human|Dutch COVID-19 response team|Erasmus Medical Center|Oude Munnink|Netherlands

>Spike|hCoV-19/Australia/VIC7940/2020|2020-08-11|EPI\_ISL\_564759|Original|hCoV-19^^Victoria|Human|Microbiological Diagnostic Unit - Public Health Laboratory (MDU-PHL)|MDU-PHL|Schultz|Australia

>Spike|hCoV-19/USA/NM-UNM-00298/2020|2020-05-13|EPI\_ISL\_508055|Original|hCoV-19^^New Mexico|Human|New Mexico Department of Health Scientific Laboratory Division|Center for Global Health|Domman|USA

>Spike|hCoV-19/England/BRIS-1239DE/2020|2020-04-07|EPI\_ISL\_442654|Original|hCoV-19^^England|Human|PHE South West Regional Laboratory|Wellcome Sanger Institute for the COVID-19 Genomics UK (COG-UK) consortium|Amato|United Kingdom

>Spike|hCoV-19/Wales/PHWC-4942BC/2020|2020-11-17|EPI\_ISL\_726095|Original|hCoV-19^^Wales|Human|Originating lab|COVID-19 Genomics UK (COG-UK) Consortium|Moore|United Kingdom

>Spike|hCoV-19/England/BRIS-124612/2020|2020-04-09|EPI\_ISL\_492765|Original|hCoV-19^^England|Human|PHE South West Regional Laboratory|Wellcome Sanger Institute for the COVID-19 Genomics UK (COG-UK) consortium|Davies|United Kingdom

>Spike|hCoV-19/Scotland/EDB2440/2020|2020-04-23|EPI\_ISL\_439208|Original|hCoV-19^^Scotland|Human|Virology Department|COVID-19 Genomics UK (COG-UK) Consortium|Williams|United Kingdom

>Spike|hCoV-19/England/BIRM-6011A/2020|2020-00-00|EPI\_ISL\_493439|Original|hCoV-19^^England|Human|University of Birmingham|COVID-19 Genomics UK (COG-UK) Consortium|Loman|United Kingdom

>Spike|hCoV-19/USA/TX-HMH-MCoV-13840/2020|2020-08-17|EPI\_ISL\_787133|Original|hCoV-19^^Texas|Human|Houston Methodist Hospital|Houston Methodist Hospital|Long|USA

>Spike|hCoV-19/Finland/24SS6bD7/2020|2020-09-24|EPI\_ISL\_759837|Original|hCoV-19^^Uusimaa|Human|Department of Virology and Immunology|Department of Virology|Smura|Finland

>Spike|hCoV-19/England/ALDP-94F60A/2020|2020-06-18|EPI\_ISL\_555881|Original|hCoV-19^^England|Human|Lighthouse Lab in Alderley Park|Wellcome Sanger Institute for the COVID-19 Genomics UK (COG-UK) consortium|Davies|United Kingdom

>Spike|hCoV-19/Belgium/ULG-10886/2020|2020-11-13|EPI\_ISL\_678429|Original|hCoV-19^^Li\u00e8ge|Human|Department of Clinical Microbiology|GIGA Medical Genomics|Durkin|Belgium

>Spike|hCoV-19/Finland/13M60/2020|2020-03-13|EPI\_ISL\_418393|Original|hCoV-19^^Finland|Human|Department of Virology and Immunology|Department of Virology|Smura|Finland

>Spike|hCoV-19/Latvia/109/2020|2020-08-03|EPI\_ISL\_515196|Original|hCoV-19^^Latvia|Human|Centr\u0101l\u0101 laboratorija|Latvian Biomedical Research and Study Centre|Zrelovs|Latvia

>Spike|hCoV-19/USA/CA-ALSR-2840/2020|2020-07-23|EPI\_ISL\_635706|Original|hCoV-19^^California|Human|San Diego County Public Health Laboratory|Andersen lab at Scripps Research|Gangavarapu|USA

>Spike|hCoV-19/USA/FL-BPHL-029/2020|2020-04-15|EPI\_ISL\_436533|Original|hCoV-19^^Florida|Human|Florida Bureau of Public Health Laboratories|Florida Bureau of Public Health Laboratories|Blanton|USA

>Spike|hCoV-19/India/DL-NCDC7101-CSIR-IGIB/2020|2020-05-27|EPI\_ISL\_482629|Original|hCoV-19^^Delhi|Human|National Centre for Disease control (NCDC)|NCDC/CSIR-IGIB|Singh|India

>Spike|hCoV-19/Faroe Islands/HFS-46/2020|2020-03-16|EPI\_ISL\_526947|Original|hCoV-19^^Faroe Islands|Human|Faroese National Reference Laboratory for Fish and Animal Diseases|Faroese National Reference Laboratory for Fish and Animal Diseases|Dahl|Faroe Islands

>Spike|hCoV-19/Hungary/UD-7729/2020|2020-04-12|EPI\_ISL\_476076|Original|hCoV-19^^Borsod-Aba\u00faj-Zempl\u00e9n County|Human|University of Debrecen|National Laboratory of Virology|Kemenesi|Hungary

>Spike|hCoV-19/England/LEED-2AA789/2020|2020-04-08|EPI\_ISL\_538969|Original|hCoV-19^^England|Human|Leeds Teaching Hospitals NHS Trust and Public Health England|Wellcome Sanger Institute for the COVID-19 Genomics UK (COG-UK) consortium|Davies|United Kingdom

>Spike|hCoV-19/England/ALDP-95CE20/2020|2020-06-16|EPI\_ISL\_554880|Original|hCoV-19^^England|Human|Lighthouse Lab in Alderley Park|Wellcome Sanger Institute for the COVID-19 Genomics UK (COG-UK) consortium|Davies|United Kingdom

>Spike|hCoV-19/England/CAMB-83C98/2020|2020-04-15|EPI\_ISL\_443350|Original|hCoV-19^^England|Human|Department of Pathology|Wellcome Sanger Institute for the COVID-19 Genomics UK (COG-UK) consortium|Amato|United Kingdom

>Spike|hCoV-19/England/QEUH-9F8363/2020|2020-09-27|EPI\_ISL\_588982|Original|hCoV-19^^England|Human|Lighthouse Lab in Glasgow|Wellcome Sanger Institute for the COVID-19 Genomics UK (COG-UK) consortium|Davies|United Kingdom

>Spike|hCoV-19/England/MILK-991E3E/2020|2020-08-27|EPI\_ISL\_552097|Original|hCoV-19^^England|Human|Lighthouse Lab in Milton Keynes|Wellcome Sanger Institute for the COVID-19 Genomics UK (COG-UK) consortium|Davies|United Kingdom

>Spike|hCoV-19/USA/CA-CZB-11126/2020|2020-05-30|EPI\_ISL\_625517|Original|hCoV-19^^California|Human|Alameda County Public Health Lab|Chan-Zuckerberg Biohub|Bhatt|USA

>Spike|hCoV-19/USA/NY-NYUMC82/2020|2020-03-18|EPI\_ISL\_421583|Original|hCoV-19^^New York|Human|NYU Langone Health|Departments of Pathology and Medicine|Maurano|USA

>Spike|hCoV-19/Indonesia/JK-EIJK46/2020|2020-06-05|EPI\_ISL\_574615|Original|hCoV-19^^Jakarta|Human|RS Harapan Bunda|Eijkman Institute for Molecular Biology|Soebandrio|Indonesia

>Spike|hCoV-19/Wales/PHWC-4833EA/2020|2020-10-22|EPI\_ISL\_627814|Original|hCoV-19^^Wales|Human|Wales Specialist Virology Centre Sequencing lab|COVID-19 Genomics UK (COG-UK) Consortium|Moore|United Kingdom

>Spike|hCoV-19/USA/FL-BPHL-1767/2020|2020-10-05|EPI\_ISL\_613761|Original|hCoV-19^^Florida|Human|Florida Bureau of Public Health Laboratories|Florida Bureau of Public Health Laboratories|Blanton|USA

>Spike|hCoV-19/Wales/PHWC-498591/2020|2020-12-01|EPI\_ISL\_727094|Original|hCoV-19^^Wales|Human|Originating lab|COVID-19 Genomics UK (COG-UK) Consortium|Moore|United Kingdom

>Spike|hCoV-19/United Arab Emirates/0398/2020|2020-05-19|EPI\_ISL\_698573|Original|hCoV-19^^Abu Dhabi|Human|Group 42 (G42) Healthcare|G42 Healthcare|Ogrodzki|United Arab Emirates

>Spike|hCoV-19/England/OXON-B20FE/2020|2020-00-00|EPI\_ISL\_479115|Original|hCoV-19^^England|Human|Oxford Viromics|COVID-19 Genomics UK (COG-UK) Consortium|Golubchik|United Kingdom

>Spike|hCoV-19/England/MILK-B049F7/2020|2020-10-24|EPI\_ISL\_650591|Original|hCoV-19^^England|Human|Department of Pathology|COVID-19 Genomics UK (COG-UK) Consortium|Goodfellow|United Kingdom

>Spike|hCoV-19/Brazil/SP-L4-CAMPI58/2020|2020-04-18|EPI\_ISL\_476396|Original|hCoV-19^^S\u00e3o Paulo|Human|Laborat\u00f3rio de Patologia Cl\u00ednica - UNICAMP|Laborat\u00f3rio de Estudos de V\u00edrus Emergentes - UNICAMP|Sabino|Brazil

>Spike|hCoV-19/South Africa/KRISP-K002411/2020|2020-07-29|EPI\_ISL\_515773|Original|hCoV-19^^KwaZulu-Natal|Human|NHL-S-IALCH|KRISP|de Oliveira|South Africa

>Spike|hCoV-19/Netherlands/ZH-EMC-1203/2020|2020-11-23|EPI\_ISL\_763276|Original|hCoV-19^^Zuid Holland|Human|Dutch COVID-19 response team|Erasmus Medical Center|Oude Munnink|Netherlands

>Spike|hCoV-19/Wales/PHWC-49CBAA/2020|2020-12-07|EPI\_ISL\_742655|Original|hCoV-19^^Wales|Human|Wales Specialist Virology Centre Sequencing lab|COVID-19 Genomics UK (COG-UK) Consortium|Moore|United Kingdom

>Spike|hCoV-19/USA/WI-UW-2404/2020|2020-12-04|EPI\_ISL\_754659|Original|hCoV-19^^Wisconsin|Human|University of Wisconsin-Madison AIDS Vaccine Research Laboratories|University of Wisconsin-Madison AIDS Vaccine Research Laboratories|Moreno|USA

>Spike|hCoV-19/Wales/PHWC-1655FA/2020|2020-06-27|EPI\_ISL\_484687|Original|hCoV-19^^Wales|Human|Originating lab|COVID-19 Genomics UK (COG-UK) Consortium|Moore|United Kingdom

>Spike|hCoV-19/Japan/PG-4861/2020|2020-08-00|EPI\_ISL\_689982|Original|hCoV-19^^Japan|Human|Pathogen Genomics Center|Pathogen Genomics Center|Sekizuka|Japan

>Spike|hCoV-19/USA/MI-MDHHS-SC21548/2020|2020-03-19|EPI\_ISL\_516275|Original|hCoV-19^^Michigan|Human|Michigan Department of Health and Human Services|Michigan Department of Health and Human Services|Blankenship|USA

>Spike|hCoV-19/Wales/PHWC-49B534/2020|2020-11-15|EPI\_ISL\_742350|Original|hCoV-19^^Wales|Human|Wales Specialist Virology Centre Sequencing lab|COVID-19 Genomics UK (COG-UK) Consortium|Moore|United Kingdom

>Spike|hCoV-19/Denmark/DCGC-6116/2020|2020-09-28|EPI\_ISL\_621150|Original|hCoV-19^^Midtjylland|Human|Department of Virus and Microbiological Special Diagnostics|Albertsen lab|Michaelsen|Denmark

>Spike|hCoV-19/USA/NY-NYCPHL-000834/2020|2020-03-26|EPI\_ISL\_632211|Original|hCoV-19^^New York|Human|Flushing Hospital Medical Center|New York City Public Health Laboratory|Wang|USA

>Spike|hCoV-19/England/QEUA-B816DD/2020|2020-11-14|EPI\_ISL\_667907|Original|hCoV-19^^England|Human|Lighthouse Lab in Glasgow|Wellcome Sanger Institute for the COVID-19 Genomics UK (COG-UK) Consortium|Davies|United Kingdom

>Spike|hCoV-19/Ireland/D-NVRL-73IRL27757/2020|2020-09-16|EPI\_ISL\_578270|Original|hCoV-19^^Dublin|Human|National Virus Reference Laboratory|National Virus Reference Laboratory|Gonzalez|Ireland

>Spike|hCoV-19/France/ARA-10192/2020|2020-03-17|EPI\_ISL\_418425|Original|hCoV-19^^Auvergne-Rh\u00f4ne-Alpes|Human|Institut des Agents Infectieux (IAI)|CNR Virus des Infections Respiratoires - France SUD|Josset|France

>Spike|hCoV-19/New Zealand/20VR3137/2020|2020-03-20|EPI\_ISL\_579429|Original|hCoV-19^^Canterbury|Human|Canterbury Health Laboratories|Institute of Environmental Science and Research (ESR)|Wang|New Zealand

>Spike|hCoV-19/Bangladesh/JUST-GC15.09/2020|2020-05-06|EPI\_ISL\_475570|Original|hCoV-19^^Khulna|Human|Genome Center|Genome Center|Alam|Bangladesh

>Spike|hCoV-19/England/C200032612/2020|2020-10-15|EPI\_ISL\_636705|Original|hCoV-19^^England|Human|Respiratory Virus Unit|Respiratory Virus Unit|Platt|United Kingdom

>Spike|hCoV-19/Singapore/111/2020|2020-03-18|EPI\_ISL\_443203|Original|hCoV-19^^Singapore|Human|National Public Health Laboratory|National Public Health Laboratory|Mak|Singapore

>Spike|hCoV-19/Canada/ON-PHL-20-01189/2020|2020-06-00|EPI\_ISL\_548811|Original|hCoV-19^^Ontario|Human|Public Health Ontario Laboratory|Public Health Ontario Laboratory|Guthrie|Canada

>Spike|hCoV-19/England/QEUA-96C85C/2020|2020-08-21|EPI\_ISL\_530717|Original|hCoV-19^^England|Human|Lighthouse Lab in Glasgow|Wellcome Sanger Institute for the COVID-19 Genomics UK (COG-UK) consortium|Davies|United Kingdom

>Spike|hCoV-19/England/LOND-1266D1B/2020|2020-12-10|EPI\_ISL\_741200|Original|hCoV-19^^England|Human|University College London|COVID-19 Genomics UK (COG-UK) Consortium|Roy|United Kingdom

>Spike|hCoV-19/USA/UT-01837/2020|2020-04-13|EPI\_ISL\_470680|Original|hCoV-19^^Utah|Human|Utah Public Health Laboratory|Utah Public Health Laboratory|Young|USA

>Spike|hCoV-19/Wales/PHWC-49FD65/2020|2020-12-09|EPI\_ISL\_743351|Original|hCoV-19^^Wales|Human|Wales Specialist Virology Centre Sequencing lab|COVID-19 Genomics UK (COG-UK) Consortium|Moore|United Kingdom

>Spike|hCoV-19/Portugal/PT1430/2020|2020-03-16|EPI\_ISL\_511389|Original|hCoV-19^^Portugal|Human|Instituto Nacional de Saude (INSA)|Instituto Nacional de Saude (INSA)|Borges|Portugal

>Spike|hCoV-19/Wales/PHWC-33D85/2020|2020-04-15|EPI\_ISL\_446819|Original|hCoV-19^^Wales|Human|Wales Specialist Virology Centre|Public Health Wales Microbiology Cardiff|Moore|United Kingdom

>Spike|hCoV-19/England/LOND-D4CC5/2020|2020-04-15|EPI\_ISL\_449675|Original|hCoV-19^^England|Human|University College London|COVID-19 Genomics UK (COG-UK) Consortium|Roy|United Kingdom

>Spike|hCoV-19/Uganda/UG041/2020|2020-05-07|EPI\_ISL\_737961|Original|hCoV-19^^Uganda|Human|Uganda Central Public Health Lab and Uganda Virus Research Institute|MRC/UVRI & LSHTM Uganda\u00a0Research Unit|Cotten|Uganda

>Spike|hCoV-19/Canada/ON-S1937/2020|2020-11-24|EPI\_ISL\_755658|Original|hCoV-19^^Ontario|Human|Toronto Invasive Bacterial Diseases Network|McMaster University|McArthur|Canada

>Spike|hCoV-19/USA/CA-CZB-2212/2020|2020-05-28|EPI\_ISL\_513760|Original|hCoV-19^^California|Human|Orange County Public Health Lab|Chan-Zuckerberg Biohub|Kamm|USA

>Spike|hCoV-19/USA/VA-DCLS-1289/2020|2020-08-14|EPI\_ISL\_572303|Original|hCoV-19^^Virginia|Human|Virginia DCLS|Virginia DCLS|St. Jacques|USA

>Spike|hCoV-19/Wales/PHWC-1628B8/2020|2020-05-29|EPI\_ISL\_473135|Original|hCoV-19^^Wales|Human|Wales Specialist Virology Centre Sequencing lab|COVID-19 Genomics UK (COG-UK) Consortium|Moore|United Kingdom

>Spike|hCoV-19/England/20130071704/2020|2020-03-22|EPI\_ISL\_423661|Original|hCoV-19^^England|Human|Respiratory Virus Unit|Respiratory Virus Unit|Platt|United Kingdom

>Spike|hCoV-19/USA/MI-MDHHS-SC22430/2020|2020-11-18|EPI\_ISL\_708263|Original|hCoV-19^^Michigan|Human|Michigan Department of Health and Human Services|Michigan Department of Health and Human Services|Jacob|USA

>Spike|hCoV-19/USA/TX-HMH-MCoV-16182/2020|2020-10-28|EPI\_ISL\_785866|Original|hCoV-19^^Texas|Human|Houston Methodist Hospital|Houston Methodist Hospital|Long|USA

>Spike|hCoV-19/England/QEUEH-9E45CE/2020|2020-09-21|EPI\_ISL\_579774|Original|hCoV-19^^England|Human|Lighthouse Lab in Glasgow|Wellcome Sanger Institute for the COVID-19 Genomics UK (COG-UK) consortium|Davies|United Kingdom

>Spike|hCoV-19/USA/CA-LAC-USC22/2020-06-11|2020-06-11|EPI\_ISL\_569685|Original|hCoV-19^^California|Human|Lee Lab|Lee Lab|Lee|USA

>Spike|hCoV-19/India/TG-CDFD-C3630/2020|2020-06-20|EPI\_ISL\_528599|Original|hCoV-19^^Telangana|Human|National Genomics Core-Center for DNA Fingerprinting and Diagnostics|National Genomics Core-Center for DNA Fingerprinting and Diagnostics (NGC-CDFD) - DBT's PAN-INDIA-1000 Genome consortium|Vashisht|India

>Spike|hCoV-19/Denmark/DCGC-18334/2020|2020-12-07|EPI\_ISL\_749895|Original|hCoV-19^^Midtjylland|Human|Department of Virus and Microbiological Special Diagnostics|Albertsen Lab|Michaelsen|Denmark

>Spike|hCoV-19/England/NORT-284345/2020|2020-03-19|EPI\_ISL\_478542|Original|hCoV-19^^England|Human|Northumbria University / South Tees Hospitals NHS Foundation Trust / North Cumbria Integrated Care NHS Foundation Trust / North Tees and Hartlepool NHS Foundation Trust / Newcastle Hospitals NHS Foundation Trust|COVID-19 Genomics UK (COG-UK) Consortium|Bashton|United Kingdom

>Spike|hCoV-19/USA/MI-MDHHS-SC22240/2020|2020-10-22|EPI\_ISL\_666906|Original|hCoV-19^^Michigan|Human|Michigan Department of Health and Human Services|Michigan Department of Health and Human Services|Jacob|USA

>Spike|hCoV-19/South Africa/L00189/2020|2020-07-28|EPI\_ISL\_622957|Original|hCoV-19^^Gauteng|Human|Lancet Laboratories|National Institute for Communicable Diseases of the National Health Laboratory Service|Allam|South Africa

>Spike|hCoV-19/England/CAMB-1AE14C/2020|2020-04-28|EPI\_ISL\_459464|Original|hCoV-19^^England|Human|Department of Pathology|Wellcome Sanger Institute for the COVID-19 Genomics UK (COG-UK) consortium|Davies|United Kingdom

>Spike|hCoV-19/Panama/329230/2020|2020-03-05|EPI\_ISL\_496627|Original|hCoV-19^^Panama Center|Human|Gorgas Memorial Laboratory of Health Studies|Gorgas Memorial Laboratory of Health Studies|Martinez|Panama

>Spike|hCoV-19/England/CAMC-B20AB6/2020|2020-11-01|EPI\_ISL\_647534|Original|hCoV-19^^England|Human|Lighthouse Lab in Cambridge|Wellcome Sanger Institute for the COVID-19 Genomics UK (COG-UK) Consortium|Davies|United Kingdom

>Spike|hCoV-19/USA/TX-HMH-MCoV-19473/2020|2020-11-30|EPI\_ISL\_783860|Original|hCoV-19^^Texas|Human|Houston Methodist Hospital|Houston Methodist Hospital|Long|USA

>Spike|hCoV-19/USA/TX-HMH-2854/2020|2020-06-07|EPI\_ISL\_543825|Original|hCoV-19^^Texas|Human|Houston Methodist Hospital|Houston Methodist Hospital|Long|USA

>Spike|hCoV-19/United Arab Emirates/0197/2020|2020-05-17|EPI\_ISL\_698383|Original|hCoV-19^^Abu Dhabi|Human|Group 42 (G42) Healthcare|G42 Healthcare|Ogrodzki|United Arab Emirates

>Spike|hCoV-19/Wales/PHWC-496153/2020|2020-11-20|EPI\_ISL\_726538|Original|hCoV-19^^Wales|Human|Originating lab|COVID-19 Genomics UK (COG-UK) Consortium|Moore|United Kingdom

>Spike|hCoV-19/Australia/VIC2983/2020|2020-07-07|EPI\_ISL\_521813|Original|hCoV-19^^Victoria|Human|Microbiological Diagnostic Unit - Public Health Laboratory (MDU-PHL) |MDU-PHL|Schultz|Australia

>Spike|hCoV-19/USA/UT-UPHL-01421/2020|2020-04-01|EPI\_ISL\_575059|Original|hCoV-19^^Utah|Human|Utah Public Health Laboratory|Utah Public Health Laboratory|Young|USA

>Spike|hCoV-19/England/OXON-B1EE6/2020|2020-05-01|EPI\_ISL\_479100|Original|hCoV-19^^England|Human|Oxford Viromics|COVID-19 Genomics UK (COG-UK) Consortium|Golubchik|United Kingdom

>Spike|hCoV-19/Bangladesh/250/2020|2020-04-10|EPI\_ISL\_600435|Original|hCoV-19^^Barishal|Human|Institute of Epidemiology Disease Control And Research|Institute for Developing Science and Health Initiatives|Cowley|Bangladesh

>Spike|hCoV-19/England/CAMC-B51E65/2020|2020-11-06|EPI\_ISL\_657725|Original|hCoV-19^^England|Human|Lighthouse Lab in Cambridge|Wellcome Sanger Institute for the COVID-19 Genomics UK (COG-UK) Consortium|Davies|United Kingdom

>Spike|hCoV-19/Switzerland/SO-ETHZ-390342/2020|2020-11-30|EPI\_ISL\_721896|Original|hCoV-19^^Solothurn|Human|Viollier AG|Department of Biosystems Science and Engineering|Nadeau|Switzerland

>Spike|hCoV-19/USA/MA-MASPHL-00886/2020|2020-10-11|EPI\_ISL\_692847|Original|hCoV-19^^Massachusetts|Human|Massachusetts State Public Health Laboratory|Massachusetts State Public Health Laboratory|Lang|USA

>Spike|hCoV-19/England/ALDP-9ECF8C/2020|2020-05-05|EPI\_ISL\_589321|Original|hCoV-19^^England|Human|Lighthouse Lab in Alderley Park|Wellcome Sanger Institute for the COVID-19 Genomics UK (COG-UK) consortium|Davies|United Kingdom

>Spike|hCoV-19/Serbia/Novi Sad-023010904/2020|2020-04-08|EPI\_ISL\_676603|Original|hCoV-19^^Novi Sad|Human|Scientific Veterinary Institute Novi Sad|Veterinary Specialized Institute \Kraljevo\|Vidanovic|Serbia

>Spike|hCoV-19/England/NORT-297163/2020|2020-04-23|EPI\_ISL\_488117|Original|hCoV-19^^England|Human|NU-OMICS DNA Sequencing research facility|Wellcome Sanger Institute for the COVID-19 Genomics UK (COG-UK) consortium|Davies|United Kingdom

>Spike|hCoV-19/England/QEUEH-9FF8A9/2020|2020-09-30|EPI\_ISL\_600130|Original|hCoV-19^^England|Human|Lighthouse Lab in Glasgow|Wellcome Sanger Institute for the COVID-19 Genomics UK (COG-UK) consortium|Davies|United Kingdom

>Spike|hCoV-19/England/SHEF-CB238/2020|2020-04-28|EPI\_ISL\_475436|Original|hCoV-19^^England|Human|Virology Department|COVID-19 Genomics UK (COG-UK) Consortium|de Silva|United Kingdom

>Spike|hCoV-19/England/QEUEH-C16047/2020|2020-12-06|EPI\_ISL\_709324|Original|hCoV-19^^England|Human|Lighthouse Lab in Glasgow|Wellcome Sanger Institute for the COVID-19 Genomics UK (COG-UK) Consortium|Davies|United Kingdom

>Spike|hCoV-19/England/MILK-B029BD/2020|2020-10-24|EPI\_ISL\_642976|Original|hCoV-19^^England|Human|Lighthouse Lab in Milton Keynes|Wellcome Sanger Institute for the COVID-19 Genomics UK (COG-UK) Consortium|Davies|United Kingdom

>Spike|hCoV-19/England/ALDP-A86F65/2020|2020-10-17|EPI\_ISL\_606070|Original|hCoV-19^^England|Human|Lighthouse Lab in Alderley Park|Wellcome Sanger Institute for the COVID-19 Genomics UK (COG-UK) consortium|Davies|United Kingdom

>Spike|hCoV-19/England/QEUEH-A9B756/2020|2020-10-20|EPI\_ISL\_611320|Original|hCoV-19^^England|Human|Lighthouse Lab in Glasgow|Wellcome Sanger Institute for the COVID-19 Genomics UK (COG-UK) consortium|Davies|United Kingdom

>Spike|hCoV-19/Scotland/QEUEH-9B45B8/2020|2020-09-04|EPI\_ISL\_602061|Original|hCoV-19^^Scotland|Human|Lighthouse Lab in Glasgow|Wellcome Sanger Institute for the COVID-19 Genomics UK (COG-UK) consortium|Davies|United Kingdom

>Spike|hCoV-19/Singapore/629/2020|2020-06-26|EPI\_ISL\_490079|Original|hCoV-19^^Singapore|Human|National Public Health Laboratory|National Public Health Laboratory|Mak|Singapore

>Spike|hCoV-19/England/ALDP-9D9641/2020|2020-09-18|EPI\_ISL\_576751|Original|hCoV-19^^England|Human|Oxford Viromics|COVID-19 Genomics UK (COG-UK) Consortium|Golubchik|United Kingdom

>Spike|hCoV-19/Denmark/DCGC-974/2020|2020-03-09|EPI\_ISL\_614568|Original|hCoV-19^^Sjaelland|Human|Department of Virus and Microbiological Special Diagnostics|Albertsen lab|Michaelsen|Denmark

>Spike|hCoV-19/Brazil/RS-2544/2020|2020-03-19|EPI\_ISL\_729809|Original|hCoV-19^^Rio Grande do Sul|Human|Laboratorio Central de Saude Publica do Estado do Rio Grande do Sul (LACEN-RS)|Laboratory of Respiratory Viruses and Measles|Silva|Brazil

>Spike|hCoV-19/India/UN-1652/2020|2020-03-12|EPI\_ISL\_424363|Original|hCoV-19^^India|Human|National Influenza Center|Indian Council of Medical Research-National Institute of Virology|Yadav|India

>Spike|hCoV-19/England/ALDP-721196/2020|2020-07-01|EPI\_ISL\_557677|Original|hCoV-19^^England|Human|Lighthouse Lab in Alderley Park|Wellcome Sanger Institute for the COVID-19 Genomics UK (COG-UK) consortium|Davies|United Kingdom

>Spike|hCoV-19/USA/WA-UW-1481/2020|2020-03-18|EPI\_ISL\_477687|Original|hCoV-19^^Washington|Human|UW Virology Lab|UW Virology Lab|Roychoudhury|USA

>Spike|hCoV-19/England/CAMC-A645E3/2020|2020-10-11|EPI\_ISL\_609113|Original|hCoV-19^^England|Human|Lighthouse Lab in Cambridge|Wellcome Sanger Institute for the COVID-19 Genomics UK (COG-UK) consortium|Davies|United Kingdom

>Spike|hCoV-19/England/MILK-C2FB86/2020|2020-12-07|EPI\_ISL\_733739|Original|hCoV-19^^England|Human|Lighthouse Lab in Milton Keynes|Wellcome Sanger Institute for the COVID-19 Genomics UK (COG-UK) Consortium|Davies|United Kingdom

>Spike|hCoV-19/Denmark/DCGC-21662/2020|2020-12-21|EPI\_ISL\_758294|Original|hCoV-19^^Hovedstaden|Human|Department of Virus and Microbiological Special Diagnostics|Albertsen Lab|Michaelsen|Denmark

>Spike|hCoV-19/England/BRIS-1853328/2020|2020-04-02|EPI\_ISL\_492275|Original|hCoV-19^^England|Human|PHE South West Regional Laboratory|Wellcome Sanger Institute for the COVID-19 Genomics UK (COG-UK) consortium|Davies|United Kingdom

>Spike|hCoV-19/Northern Ireland/NIRE-235352/2020|2020-10-19|EPI\_ISL\_764429|Original|hCoV-19^^Northern Ireland|Human|Regional Virus Laboratory|COVID-19 Genomics UK (COG-UK) Consortium|Fairley|United Kingdom

>Spike|hCoV-19/England/CAMB-75FFA/2020|2020-03-28|EPI\_ISL\_438444|Original|hCoV-19^^England|Human|Department of Pathology|Wellcome Sanger Institute for the COVID-19 Genomics UK (COG-UK) consortium|Amato|United Kingdom

>Spike|hCoV-19/England/CAMB-803E1/2020|2020-04-09|EPI\_ISL\_470426|Original|hCoV-19^^England|Human|Department of Pathology|Wellcome Sanger Institute for the COVID-19 Genomics UK (COG-UK) consortium|Davies|United Kingdom

>Spike|hCoV-19/Thailand/Bangkok-0067/2020|2020-03-29|EPI\_ISL\_447009|Original|hCoV-19^^Bangkok|Human|Ramathibodi Hospital|COVID-19 Network Investigations (CONI) Alliance|Batty|Thailand

>Spike|hCoV-19/Germany/HH-hpi-p1756/2020|2020-03-19|EPI\_ISL\_776131|Original|hCoV-19^^Hamburg|Human|University Medical Center Hamburg Eppendorf|Heinrich Pette Institute|Robitaille|Germany

>Spike|hCoV-19/Canada/ON-E73/2020|2020-04-03|EPI\_ISL\_593546|Original|hCoV-19^^Ontario|Human|Eastern Ontario Regional Laboratory Association|McMaster University|McArthur|Canada

>Spike|hCoV-19/Australia/VIC5979/2020|2020-07-20|EPI\_ISL\_518754|Original|hCoV-19^^Victoria|Human|Microbiological Diagnostic Unit - Public Health Laboratory (MDU-PHL)|MDU-PHL|Schultz|Australia

>Spike|hCoV-19/Austria/CeMM0589/2020|2020-03-27|EPI\_ISL\_583604|Original|hCoV-19^^Innsbruck|Human|Institut f\u00fcr Virologie am Department f\u00fcr Hygiene|Bergthaler laboratory|Bergthaler|Austria

>Spike|hCoV-19/Switzerland/ZH-ETHZ-120164/2020|2020-04-25|EPI\_ISL\_468243|Original|hCoV-19^^Zurich|Human|Viollier AG|Department of Biosystems Science and Engineering|Nadeau|Switzerland

>Spike|hCoV-19/United Arab Emirates/0716/2020|2020-05-19|EPI\_ISL\_698867|Original|hCoV-19^^Abu Dhabi|Human|Group 42 (G42) Healthcare|G42 Healthcare|Ogrodzki|United Arab Emirates

>Spike|hCoV-19/England/MILK-A6A36B/2020|2020-10-09|EPI\_ISL\_627500|Original|hCoV-19^^England|Human|Virology Department|COVID-19 Genomics UK (COG-UK) Consortium|de Silva|United Kingdom

>Spike|hCoV-19/Denmark/DCGC-15840/2020|2020-11-23|EPI\_ISL\_714054|Original|hCoV-19^^Nordjylland|Human|Department of Virus and Microbiological Special Diagnostics|Albertsen Lab|Michaelsen|Denmark

>Spike|hCoV-19/England/MILK-B3B14A/2020|2020-11-01|EPI\_ISL\_706049|Original|hCoV-19^^England|Human|Oxford Viromics|COVID-19 Genomics UK (COG-UK) Consortium|Golubchik|United Kingdom

>Spike|hCoV-19/USA/AZ-TG532077/2020|2020-07-01|EPI\_ISL\_695407|Original|hCoV-19^^Arizona|Human|AZ SPHL|TGen North|French|USA

>Spike|hCoV-19/England/QEUH-B81B29/2020|2020-11-14|EPI\_ISL\_668126|Original|hCoV-19^^England|Human|Lighthouse Lab in Glasgow|Wellcome Sanger Institute for the COVID-19 Genomics UK (COG-UK) Consortium|Davies|United Kingdom

>Spike|hCoV-19/Australia/WA479/2020|2020-04-02|EPI\_ISL\_708773|Original|hCoV-19^^Western Australia|Human|PathWest Laboratory Medicine WA|PathWest Laboratory Medicine WA Microbial Surveillance Unit|Sikazwe|Australia



>Spike|hCoV-19/USA/MI-MDHHS-SC20171/2020|2020-03-19|EPI\_ISL\_436827|Original|hCoV-19^^Michigan|Human|Michigan Department of Health and Human Services|Michigan Department of Health and Human Services|Blankenship|USA

>Spike|hCoV-19/Denmark/DCGC-5713/2020|2020-09-28|EPI\_ISL\_621218|Original|hCoV-19^^Hovedstaden|Human|Department of Virus and Microbiological Special Diagnostics|Albertsen lab|Michaelsen|Denmark

>Spike|hCoV-19/USA/TX-HMH-MCoV-19435/2020|2020-11-30|EPI\_ISL\_783561|Original|hCoV-19^^Texas|Human|Houston Methodist Hospital|Houston Methodist Hospital|Long|USA

>Spike|hCoV-19/England/ALDP-A87C7C/2020|2020-10-17|EPI\_ISL\_605999|Original|hCoV-19^^England|Human|Lighthouse Lab in Alderley Park|Wellcome Sanger Institute for the COVID-19 Genomics UK (COG-UK) consortium|Davies|United Kingdom

>Spike|hCoV-19/USA/LA-ALSR-0067-NBG/2020|2020-03-25|EPI\_ISL\_434524|Original|hCoV-19^^Louisiana|Human|Robert Garry lab|Andersen lab at Scripps Research|Gangavarapu|USA

>Spike|hCoV-19/England/NORW-E797D/2020|2020-05-05|EPI\_ISL\_449085|Original|hCoV-19^^England|Human|Quadram Institute Bioscience|COVID-19 Genomics UK (COG-UK) Consortium|Alikhan|United Kingdom

>Spike|hCoV-19/England/CAMC-B22CDC/2020|2020-11-02|EPI\_ISL\_647162|Original|hCoV-19^^England|Human|Lighthouse Lab in Cambridge|Wellcome Sanger Institute for the COVID-19 Genomics UK (COG-UK) Consortium|Davies|United Kingdom

>Spike|hCoV-19/USA/WI-UW-404/2020|2020-03-19|EPI\_ISL\_480386|Original|hCoV-19^^Wisconsin|Human|University of Wisconsin-Madison AIDS Vaccine Research Laboratories|University of Wisconsin-Madison AIDS Vaccine Research Laboratories|Baczenas|USA

>Spike|hCoV-19/Denmark/DCGC-17472/2020|2020-12-14|EPI\_ISL\_751004|Original|hCoV-19^^Midtjylland|Human|Department of Virus and Microbiological Special Diagnostics|Albertsen Lab|Michaelsen|Denmark

>Spike|hCoV-19/England/QEUEH-9BA95C/2020|2020-09-07|EPI\_ISL\_573612|Original|hCoV-19^^England|Human|Oxford Viromics|COVID-19 Genomics UK (COG-UK) Consortium|Golubchik|United Kingdom

>Spike|hCoV-19/England/CAMC-B07CCE/2020|2020-10-29|EPI\_ISL\_643899|Original|hCoV-19^^England|Human|Lighthouse Lab in Cambridge|Wellcome Sanger Institute for the COVID-19 Genomics UK (COG-UK) Consortium|Davies|United Kingdom

>Spike|hCoV-19/England/QEUEH-A00121/2020|2020-10-02|EPI\_ISL\_600383|Original|hCoV-19^^England|Human|Lighthouse Lab in Glasgow|Wellcome Sanger Institute for the COVID-19 Genomics UK (COG-UK) consortium|Davies|United Kingdom

>Spike|hCoV-19/USA/NY-NYUMC535/2020|2020-03-30|EPI\_ISL\_444652|Original|hCoV-19^^New York|Human|NYU Langone Health|Departments of Pathology and Medicine|Maurano|USA

>Spike|hCoV-19/Wales/PHWC-48D30E/2020|2020-11-11|EPI\_ISL\_680606|Original|hCoV-19^^Wales|Human|Wales Specialist Virology Centre Sequencing lab|COVID-19 Genomics UK (COG-UK) Consortium|Moore|United Kingdom

>Spike|hCoV-19/USA/ME-HETL-J0015/2020|2020-03-15|EPI\_ISL\_513428|Original|hCoV-19^^Maine|Human|Maine HETL|Tewhey Lab|Tewhey|USA

>Spike|hCoV-19/Denmark/DCGC-16667/2020|2020-11-16|EPI\_ISL\_714903|Original|hCoV-19^^Midtjylland|Human|Department of Virus and Microbiological Special Diagnostics|Albertsen Lab|Michaelsen|Denmark

>Spike|hCoV-19/England/QEUEH-96D071/2020|2020-08-21|EPI\_ISL\_530702|Original|hCoV-19^^England|Human|Lighthouse Lab in Glasgow|Wellcome Sanger Institute for the COVID-19 Genomics UK (COG-UK) consortium|Davies|United Kingdom

>Spike|hCoV-19/Netherlands/ZH-EMC-831/2020|2020-10-17|EPI\_ISL\_632701|Original|hCoV-19^^Zuid Holland|Human|Dutch COVID-19 response team|Erasmus Medical Center|Oude Munnink|Netherlands

>Spike|hCoV-19/USA/TX-HMH-7134/2020|2020-06-29|EPI\_ISL\_546534|Original|hCoV-19^^Texas|Human|Houston Methodist Hospital|Houston Methodist Hospital|Long|USA

>Spike|hCoV-19/Scotland/QEUEH-AE1F86/2020|2020-10-27|EPI\_ISL\_649658|Original|hCoV-19^^Scotland|Human|Lighthouse Lab in Glasgow|Wellcome Sanger Institute for the COVID-19 Genomics UK (COG-UK) Consortium|Davies|United Kingdom

>Spike|hCoV-19/USA/NY-NYCPHL-001410/2020|2020-11-18|EPI\_ISL\_683756|Original|hCoV-19^^New York|Human|DOHMH Central Harlem|New York City Public Health Laboratory|Wang|USA

>Spike|hCoV-19/Germany/NW-HHU-14/2020|2020-03-11|EPI\_ISL\_417459|Original|hCoV-19^^North Rhine-Westphalia|Human|Center of Medical Microbiology|Center of Medical Microbiology|Wienemann|Germany

>Spike|hCoV-19/USA/CA-CZB-4094/2020|2020-08-14|EPI\_ISL\_548601|Original|hCoV-19^^California|Human|Orange County Public Health Laboratory|Chan-Zuckerberg Biohub|Bhatt|USA

>Spike|hCoV-19/Wales/PHWC-28B2F/2020|2020-04-03|EPI\_ISL\_445404|Original|hCoV-19^^Wales|Human|Wales Specialist Virology Centre|Public Health Wales Microbiology Cardiff|Moore|United Kingdom

>Spike|hCoV-19/Spain/GA-IBV-004059/2020|2020-03-18|EPI\_ISL\_510297|Original|hCoV-19^^Galicia|Human|Hospital Cl\u00e9nico Universitario de Santiago de Compostela|SeqCOVID-SPAIN consortium|IBV (CSIC)|Comas|Spain

>Spike|hCoV-19/New Zealand/20VR1763/2020|2020-03-25|EPI\_ISL\_456240|Original|hCoV-19^^Southern|Human|Southern Community Labs Dunedin|Institute of Environmental Science and Research (ESR)|de Ligt|New Zealand

>Spike|hCoV-19/USA/WA-UW-23445/2020|2020-08-10|EPI\_ISL\_576455|Original|hCoV-19^^Washington|Human|UW Virology Lab|UW Virology Lab|Roychoudhury|USA

>Spike|hCoV-19/Australia/VIC12811/2020|2020-08-01|EPI\_ISL\_641195|Original|hCoV-19^^Victoria|Human|Microbiological Diagnostic Unit - Public Health Laboratory (MDU-PHL)|MDU-PHL|Schultz|Australia

>Spike|hCoV-19/England/EXET-13D2F4/2020|2020-11-30|EPI\_ISL\_724268|Original|hCoV-19^^England|Human|University of Exeter|COVID-19 Genomics UK (COG-UK) Consortium|Temperton|United Kingdom

>Spike|hCoV-19/USA/AZ-TG602452/2020|2020-07-15|EPI\_ISL\_695650|Original|hCoV-19^^Arizona|Human|AZ SPHL|TGen North|French|USA

>Spike|hCoV-19/England/CAMC-A3F2DB/2020|2020-10-05|EPI\_ISL\_609712|Original|hCoV-19^^England|Human|Lighthouse Lab in Cambridge|Wellcome Sanger Institute for the COVID-19 Genomics UK (COG-UK) consortium|Davies|United Kingdom

>Spike|hCoV-19/England/ALDP-5C70D3/2020|2020-06-19|EPI\_ISL\_558410|Original|hCoV-19^^England|Human|Lighthouse Lab in Alderley Park|Wellcome Sanger Institute for the COVID-19 Genomics UK (COG-UK) consortium|Davies|United Kingdom

>Spike|hCoV-19/USA/VA-DCLS-1900/2020|2020-10-05|EPI\_ISL\_614089|Original|hCoV-19^^Virginia|Human|Virginia DCLS|Virginia DCLS|St. Jacques|USA

>Spike|hCoV-19/Scotland/QEUA-9F8E44/2020|2020-09-27|EPI\_ISL\_600883|Original|hCoV-19^^Scotland|Human|Lighthouse Lab in Glasgow|Wellcome Sanger Institute for the COVID-19 Genomics UK (COG-UK) consortium|Davies|United Kingdom

>Spike|hCoV-19/England/ALDP-920E70/2020|2020-06-23|EPI\_ISL\_552931|Original|hCoV-19^^England|Human|Lighthouse Lab in Alderley Park|Wellcome Sanger Institute for the COVID-19 Genomics UK (COG-UK) consortium|Davies|United Kingdom

>Spike|hCoV-19/England/QEUA-96F051/2020|2020-08-17|EPI\_ISL\_530608|Original|hCoV-19^^England|Human|Lighthouse Lab in Glasgow|Wellcome Sanger Institute for the COVID-19 Genomics UK (COG-UK) consortium|Davies|United Kingdom

>Spike|hCoV-19/England/QEUA-AE1CDA/2020|2020-10-26|EPI\_ISL\_633557|Original|hCoV-19^^England|Human|Lighthouse Lab in Glasgow|Wellcome Sanger Institute for the COVID-19 Genomics UK (COG-UK) consortium|Davies|United Kingdom

>Spike|hCoV-19/Denmark/ALAB-SSI-1393/2020|2020-04-05|EPI\_ISL\_444857|Original|hCoV-19^^Denmark|Human|Department of Virus and Microbiological Special Diagnostics|Albertsen lab|Kirkegaard|Denmark

>Spike|hCoV-19/France/NAQ-SC295/2020|2020-05-05|EPI\_ISL\_666716|Original|hCoV-19^^Nouvelle-Aquitaine|Human|CHU de Limoges|CNR Virus des Infections Respiratoires - France SUD|Bal|France

>Spike|hCoV-19/England/QEUA-AAC646/2020|2020-10-21|EPI\_ISL\_652863|Original|hCoV-19^^England|Human|Oxford Viromics|COVID-19 Genomics UK (COG-UK) Consortium|Golubchik|United Kingdom

>Spike|hCoV-19/Hungary/UD-57989/2020|2020-09-02|EPI\_ISL\_671446|Original|hCoV-19^^Borsod-Aba\u00faj-Zempl\u00e9n county|Human|University of Debrecen|National Laboratory of Virology|Kemenesi|Hungary

>Spike|hCoV-19/Denmark/DCGC-20642/2020|2020-12-21|EPI\_ISL\_759271|Original|hCoV-19^^Nordjylland|Human|Department of Virus and Microbiological Special Diagnostics|Albertsen Lab|Michaelsen|Denmark

>Spike|hCoV-19/Jordan/SEARCH-5446/2020|2020-09-13|EPI\_ISL\_755242|Original|hCoV-19^^Amman|Human|Biolab Diagnostic Laboratories|Andersen lab at Scripps Research|Gangavarapu|Jordan

>Spike|hCoV-19/India/GJ-GBRC-390b/2020|2020-07-06|EPI\_ISL\_524755|Original|hCoV-19^^Gujarat|Human|GMERS Medical College and Hospital|Gujarat Biotechnology Research Centre|Joshi|India

>Spike|hCoV-19/Australia/VIC9219/2020|2020-08-20|EPI\_ISL\_565449|Original|hCoV-19^^Victoria|Human|Microbiological Diagnostic Unit - Public Health Laboratory (MDU-PHL)|MDU-PHL|Schultz|Australia

>Spike|hCoV-19/Australia/NSW611/2020|2020-04-08|EPI\_ISL\_490020|Original|hCoV-19^^New South Wales|Human|Sydney South West Pathology Service (SSWPS) - Liverpool Hospital - NSW Health Pathology|NSW Health Pathology - Institute of Clinical Pathology and Medical Research; Westmead Hospital; University of Sydney|Gall|Australia

>Spike|hCoV-19/England/QEUH-BA05F9/2020|2020-11-18|EPI\_ISL\_719734|Original|hCoV-19^^England|Human|Lighthouse Lab in Glasgow|Wellcome Sanger Institute for the COVID-19 Genomics UK (COG-UK) Consortium|Davies|United Kingdom

>Spike|hCoV-19/England/QEUH-AD0B0E/2020|2020-10-26|EPI\_ISL\_633905|Original|hCoV-19^^England|Human|Lighthouse Lab in Glasgow|Wellcome Sanger Institute for the COVID-19 Genomics UK (COG-UK) consortium|Davies|United Kingdom

>Spike|hCoV-19/Wales/PHWC-4953C7/2020|2020-11-21|EPI\_ISL\_726339|Original|hCoV-19^^Wales|Human|Originating lab|COVID-19 Genomics UK (COG-UK) Consortium|Moore|United Kingdom

>Spike|hCoV-19/England/ALDP-C3BD54/2020|2020-12-10|EPI\_ISL\_731069|Original|hCoV-19^^England|Human|Lighthouse Lab in Alderley Park|Wellcome Sanger Institute for the COVID-19 Genomics UK (COG-UK) Consortium|Davies|United Kingdom

>Spike|hCoV-19/England/CAMC-946F17/2020|2020-07-21|EPI\_ISL\_556572|Original|hCoV-19^^England|Human|Lighthouse Lab in Cambridge|Wellcome Sanger Institute for the COVID-19 Genomics UK (COG-UK) consortium|Davies|United Kingdom

>Spike|hCoV-19/England/NOTT-114220/2020|2020-10-04|EPI\_ISL\_577151|Original|hCoV-19^^England|Human|Queens Medical Centre|COVID-19 Genomics UK (COG-UK) Consortium|Loose|United Kingdom

>Spike|hCoV-19/England/SHEF-C2ED3/2020|2020-10-02|EPI\_ISL\_585016|Original|hCoV-19^^England|Human|Virology Department|COVID-19 Genomics UK (COG-UK) Consortium|de Silva|United Kingdom

>Spike|hCoV-19/Wales/PHWC-16BFF6/2020|2020-09-14|EPI\_ISL\_574001|Original|hCoV-19^^Wales|Human|Wales Specialist Virology Centre Sequencing lab|COVID-19 Genomics UK (COG-UK) Consortium|Moore|United Kingdom

>Spike|hCoV-19/Spain/MD-HLP-46/2020|2020-04-12|EPI\_ISL\_530050|Original|hCoV-19^^Madrid|Human|Hospital Universitario La Paz|Hospital Universitario La Paz|Viedma|Spain

>Spike|hCoV-19/England/LEED-2A83D2/2020|2020-03-29|EPI\_ISL\_538998|Original|hCoV-19^^England|Human|Leeds Teaching Hospitals NHS Trust and Public Health England|Wellcome Sanger Institute for the COVID-19 Genomics UK (COG-UK) consortium|Davies|United Kingdom

>Spike|hCoV-19/USA/TX-HMH-MCoV-15242/2020|2020-10-19|EPI\_ISL\_786726|Original|hCoV-19^^Texas|Human|Houston Methodist Hospital|Houston Methodist Hospital|Long|USA

>Spike|hCoV-19/USA/WI-WSLH-200061/2020|2020-04-13|EPI\_ISL\_471226|Original|hCoV-19^^Wisconsin|Human|Wisconsin State Laboratory of Hygiene Communicable Disease Division|Wisconsin State Laboratory of Hygiene Communicable Disease Division|Florek|USA

>Spike|hCoV-19/England/ALDP-910B7C/2020|2020-06-22|EPI\_ISL\_551385|Original|hCoV-19^^England|Human|Lighthouse Lab in Alderley Park|Wellcome Sanger Institute for the COVID-19 Genomics UK (COG-UK) consortium|Davies|United Kingdom

>Spike|hCoV-19/USA/MN-MDH-1146/2020|2020-04-28|EPI\_ISL\_476731|Original|hCoV-19^^Minnesota|Human|Minnesota Department of Health|Minnesota Department of Health|Garfin|USA

>Spike|hCoV-19/Netherlands/NA\_156/2020|2020-03-21|EPI\_ISL\_422691|Original|hCoV-19^^Netherlands|Human|Dutch COVID-19 response team|Erasmus Medical Center|Oude Munnink|Netherlands

>Spike|hCoV-19/Denmark/DCGC-12620/2020|2020-11-16|EPI\_ISL\_682801|Original|hCoV-19^^Syddanmark|Human|Department of Virus and Microbiological Special Diagnostics|Albertsen Lab|Michaelsen|Denmark

>Spike|hCoV-19/England/MILK-83CA8D/2020|2020-07-14|EPI\_ISL\_557278|Original|hCoV-19^^England|Human|Lighthouse Lab in Milton Keynes|Wellcome Sanger Institute for the COVID-19 Genomics UK (COG-UK) consortium|Davies|United Kingdom

>Spike|hCoV-19/Wales/PHWC-4A4E3D/2020|2020-12-09|EPI\_ISL\_763462|Original|hCoV-19^^Wales|Human|Wales Specialist Virology Centre Sequencing lab|COVID-19 Genomics UK (COG-UK) Consortium|Moore|United Kingdom

>Spike|hCoV-19/Australia/VIC8336/2020|2020-08-12|EPI\_ISL\_564949|Original|hCoV-19^^Victoria|Human|Microbiological Diagnostic Unit - Public Health Laboratory (MDU-PHL)|MDU-PHL|Schultz|Australia

>Spike|hCoV-19/England/CAMC-B1FDDF/2020|2020-11-01|EPI\_ISL\_647483|Original|hCoV-19^^England|Human|Lighthouse Lab in Cambridge|Wellcome Sanger Institute for the COVID-19 Genomics UK (COG-UK) Consortium|Davies|United Kingdom

>Spike|hCoV-19/USA/WA-UW-01/2020|2020-03-00|EPI\_ISL\_424189|Original|hCoV-19^^Washington|Human|UW Virology Lab|UW Virology Lab|Roychoudhury|USA

>Spike|hCoV-19/England/ALDP-AA1B7F/2020|2020-10-22|EPI\_ISL\_630906|Original|hCoV-19^^England|Human|Lighthouse Lab in Alderley Park|Wellcome Sanger Institute for the COVID-19 Genomics UK (COG-UK) consortium|Davies|United Kingdom

>Spike|hCoV-19/England/SHEF-C7F26/2020|2020-05-13|EPI\_ISL\_462034|Original|hCoV-19^^England|Human|Virology Department|COVID-19 Genomics UK (COG-UK) Consortium|de Silva|United Kingdom

>Spike|hCoV-19/England/CAMB-1ACC4D/2020|2020-04-22|EPI\_ISL\_489519|Original|hCoV-19^^England|Human|Department of Pathology|Wellcome Sanger Institute for the COVID-19 Genomics UK (COG-UK) consortium|Davies|United Kingdom

>Spike|hCoV-19/England/MILK-9A9659/2020|2020-09-02|EPI\_ISL\_551065|Original|hCoV-19^^England|Human|Lighthouse Lab in Milton Keynes|Wellcome Sanger Institute for the COVID-19 Genomics UK (COG-UK) consortium|Davies|United Kingdom

>Spike|hCoV-19/USA/CA-SR0398/2020|2020-04-29|EPI\_ISL\_458271|Original|hCoV-19^^California|Human|Scripps Medical Laboratory|Andersen lab at Scripps Research|Gangavarapu|USA

>Spike|hCoV-19/Denmark/DCGC-13850/2020|2020-11-30|EPI\_ISL\_712210|Original|hCoV-19^^Syddanmark|Human|Department of Virus and Microbiological Special Diagnostics|Albertsen Lab|Michaelsen|Denmark

>Spike|hCoV-19/USA/TX-HMH-6900/2020|2020-06-27|EPI\_ISL\_546335|Original|hCoV-19^^Texas|Human|Houston Methodist Hospital|Houston Methodist Hospital|Long|USA

>Spike|hCoV-19/England/CAMB-817E4/2020|2020-04-11|EPI\_ISL\_443112|Original|hCoV-19^^England|Human|Department of Pathology|Wellcome Sanger Institute for the COVID-19 Genomics UK (COG-UK) consortium|Amato|United Kingdom

>Spike|hCoV-19/England/SHEF-C8031/2020|2020-10-05|EPI\_ISL\_596204|Original|hCoV-19^^England|Human|Virology Department|COVID-19 Genomics UK (COG-UK) Consortium|de Silva|United Kingdom

>Spike|hCoV-19/Japan/PG-4851/2020|2020-07-00|EPI\_ISL\_689973|Original|hCoV-19^^Japan|Human|Pathogen Genomics Center|Pathogen Genomics Center|Sekizuka|Japan

>Spike|hCoV-19/England/NORW-E9EF4/2020|2020-05-02|EPI\_ISL\_448380|Original|hCoV-19^^England|Human|Quadram Institute Bioscience|COVID-19 Genomics UK (COG-UK) Consortium|Alikhan|United Kingdom

>Spike|hCoV-19/Portugal/PT0518/2020|2020-03-21|EPI\_ISL\_454242|Original|hCoV-19^^Portugal|Human|unknown|Instituto Nacional de Saude (INSA)|Borges|Portugal

>Spike|hCoV-19/Ireland/D-NVRL-AIIDV0361v2/2020|2020-05-01|EPI\_ISL\_644336|Original|hCoV-19^^Dublin|Human|CEPHR / Vincent's Hospital|Irish Coronavirus Sequencing Consortium - National Virus Reference Laboratory|Gonzalez|Ireland

>Spike|hCoV-19/USA/MI-MDHHS-SC21512/2020|2020-04-01|EPI\_ISL\_516239|Original|hCoV-19^^Michigan|Human|Michigan Department of Health and Human Services|Michigan Department of Health and Human Services|Blankenship|USA

>Spike|hCoV-19/Wales/PHWC-48EDC3/2020|2020-11-10|EPI\_ISL\_681006|Original|hCoV-19^^Wales|Human|Wales Specialist Virology Centre Sequencing lab|COVID-19 Genomics UK (COG-UK) Consortium|Moore|United Kingdom

>Spike|hCoV-19/United Arab Emirates/0098/2020|2020-05-19|EPI\_ISL\_698289|Original|hCoV-19^Abu Dhabi|Human|Group 42 (G42) Healthcare|G42 Healthcare|Ogrodzki|United Arab Emirates

>Spike|hCoV-19/Wales/PHWC-2A352/2020|2020-04-06|EPI\_ISL\_445557|Original|hCoV-19^Wales|Human|Wales Specialist Virology Centre|Public Health Wales Microbiology Cardiff|Moore|United Kingdom

>Spike|hCoV-19/Denmark/DCGC-6550/2020|2020-10-05|EPI\_ISL\_619450|Original|hCoV-19^Midtjylland|Human|Department of Virus and Microbiological Special Diagnostics|Albertsen lab|Michaelsen|Denmark

>Spike|hCoV-19/USA/WI-GMF-01591/2020|2020-04-23|EPI\_ISL\_435399|Original|hCoV-19^Iowa|Human|Gundersen Molecular Diagnostics Laboratory|Kabara Cancer Research Institute|Kenny|USA

>Spike|hCoV-19/USA/HI-H200730/2020|2020-12-09|EPI\_ISL\_753251|Original|hCoV-19^Hawaii|Human|State Laboratories Division|State Laboratories Division|Sultana|USA

>Spike|hCoV-19/Saudi Arabia/KAUST-Madinah50/2020|2020-03-26|EPI\_ISL\_437490|Original|hCoV-19^Madinah|Human|Pathogen Genomics Lab King Abdullah University of Science and Technology(KAUST)|Pathogen Genomics Lab King Abdullah University of Science and Technology(KAUST)|Mohamed Ghazzali|Saudi Arabia

>Spike|hCoV-19/England/LEED-2A9EB2/2020|2020-03-24|EPI\_ISL\_538779|Original|hCoV-19^England|Human|Leeds Teaching Hospitals NHS Trust and Public Health England|Wellcome Sanger Institute for the COVID-19 Genomics UK (COG-UK) consortium|Davies|United Kingdom

>Spike|hCoV-19/USA/TX-HMH-MCoV-11438/2020|2020-09-05|EPI\_ISL\_790021|Original|hCoV-19^Texas|Human|Houston Methodist Hospital|Houston Methodist Hospital|Long|USA

>Spike|hCoV-19/Denmark/DCGC-3284/2020|2020-08-31|EPI\_ISL\_616036|Original|hCoV-19^Sjaelland|Human|Department of Virus and Microbiological Special Diagnostics|Albertsen lab|Michaelsen|Denmark

>Spike|hCoV-19/Vietnam/PIHCM-323/2020|2020-03-17|EPI\_ISL\_654870|Vero E6|hCoV-19^Ho Chi Minh city|Human|Pasteur Institute in Ho Chi Minh city|Department of Microbiology and Immunology - Pasteur Institute in Ho Chi Minh city|Vu|Viet Nam

>Spike|hCoV-19/Germany/HH-hpi-p2126/2020|2020-03-22|EPI\_ISL\_776366|Original|hCoV-19^Hamburg|Human|University Medical Center Hamburg Eppendorf|Heinrich Pette Institute|Robitaille|Germany

>Spike|hCoV-19/England/NORW-EB0CF/2020|2020-05-04|EPI\_ISL\_472298|Original|hCoV-19^England|Human|Quadram Institute Bioscience|COVID-19 Genomics UK (COG-UK) Consortium|Alikhan|United Kingdom

>Spike|hCoV-19/South Africa/KRISP-K004324/2020|2020-10-25|EPI\_ISL\_660200|Original|hCoV-19^KwaZulu-Natal|Human|NHLS-IALCH|KRISP|de Oliveira|South Africa

>Spike|hCoV-19/USA/LA-QDX-167/2020|2020-04-10|EPI\_ISL\_494521|Original|hCoV-19^Louisiana|Human|Quest Diagnostics|Quest Diagnostics|Kagan|USA

>Spike|hCoV-19/Wales/PHWC-16AEBE/2020|2020-09-10|EPI\_ISL\_560214|Original|hCoV-19^Wales|Human|Wales Specialist Virology Centre Sequencing lab|COVID-19 Genomics UK (COG-UK) Consortium|Moore|United Kingdom

>Spike|hCoV-19/USA/MI-MDHHS-SC22608/2020|2020-11-30|EPI\_ISL\_737181|Original|hCoV-19^Michigan|Human|Michigan Department of Health and Human Services|Michigan Department of Health and Human Services|Blankenship|USA

>Spike|hCoV-19/Switzerland/UR-ETHZ-321459/2020|2020-10-14|EPI\_ISL\_603674|Original|hCoV-19^Uri|Human|Viollier AG|Department of Biosystems Science and Engineering|Nadeau|Switzerland

>Spike|hCoV-19/England/LIVE-DC7FFC/2020|2020-11-16|EPI\_ISL\_704950|Original|hCoV-19^England|Human|Liverpool Clinical Laboratories|COVID-19 Genomics UK (COG-UK) Consortium|Haldenby|United Kingdom

>Spike|hCoV-19/Denmark/ALAB-SSI464/2020|2020-03-25|EPI\_ISL\_429545|Original|hCoV-19^Denmark|Human|Department of Virus and Microbiological Special Diagnostics|Albertsen lab|Kirkegaard|Denmark

>Spike|hCoV-19/USA/CA-ALSR-0810-SAN/2020|2020-03-30|EPI\_ISL\_483374|Original|hCoV-19^California|Human|UC San Diego Center for Advanced Laboratory Medicine|Andersen lab at Scripps Research|Gangavarapu|USA

>Spike|hCoV-19/USA/TX-HMH-MCoV-10179/2020|2020-07-06|EPI\_ISL\_789355|Original|hCoV-19^^Texas|Human|Houston Methodist Hospital|Houston Methodist Hospital|Long|USA

>Spike|hCoV-19/Denmark/DCGC-8323/2020|2020-10-26|EPI\_ISL\_617291|Original|hCoV-19^^Hovedstaden|Human|Department of Virus and Microbiological Special Diagnostics|Albertsen lab|Michaelsen|Denmark

>Spike|hCoV-19/Malaysia/UNIMAS-B040/2020|2020-10-25|EPI\_ISL\_718178|Original|hCoV-19^^Sarawak|Human|Borneo Medical Centre|Institute of Health and Community Medicine|Jonathan|Malaysia

>Spike|hCoV-19/England/CAMC-B36482/2020|2020-11-05|EPI\_ISL\_645429|Original|hCoV-19^^England|Human|Lighthouse Lab in Cambridge|Wellcome Sanger Institute for the COVID-19 Genomics UK (COG-UK) Consortium|Davies|United Kingdom

>Spike|hCoV-19/USA/NE-11507/2020|2020-05-05|EPI\_ISL\_475222|Original|hCoV-19^^Nebraska|Human|Nebraska Public Health Laboratory|UNMC COVID-19 Response Team|Pratt|USA

>Spike|hCoV-19/USA/MI-MDHHS-SC21958/2020|2020-08-25|EPI\_ISL\_566009|Original|hCoV-19^^Michigan|Human|Michigan Department of Health and Human Services|Michigan Department of Health and Human Services|Blankenship|USA

>Spike|hCoV-19/England/ALDP-9EE2EB/2020|2020-05-03|EPI\_ISL\_589535|Original|hCoV-19^^England|Human|Lighthouse Lab in Alderley Park|Wellcome Sanger Institute for the COVID-19 Genomics UK (COG-UK) consortium|Davies|United Kingdom

>Spike|hCoV-19/England/LIVE-1D1c8B/2020|2020-05-13|EPI\_ISL\_572451|Original|hCoV-19^^England|Human|Liverpool Clinical Laboratories|COVID-19 Genomics UK (COG-UK) Consortium|Haldenby|United Kingdom

>Spike|hCoV-19/England/ALDP-A51B32/2020|2020-10-07|EPI\_ISL\_598220|Original|hCoV-19^^England|Human|Lighthouse Lab in Alderley Park|Wellcome Sanger Institute for the COVID-19 Genomics UK (COG-UK) consortium|Davies|United Kingdom

>Spike|hCoV-19/USA/CA-IGI-0080/2020|2020-06-11|EPI\_ISL\_511834|Original|hCoV-19^^California|Human|Innovative Genomics Institute|Innovative Genomics Institute|Wyman|USA

>Spike|hCoV-19/Denmark/DCGC-17629/2020|2020-12-14|EPI\_ISL\_750247|Original|hCoV-19^^Hovedstaden|Human|Department of Virus and Microbiological Special Diagnostics|Albertsen Lab|Michaelsen|Denmark

>Spike|hCoV-19/Hong Kong/VM20116099/2020|2020-08-30|EPI\_ISL\_730578|Original|hCoV-19^^Hong Kong|Human|Home Quarantine Taskforce|Hong Kong Department of Health|Mak|China

>Spike|hCoV-19/Wales/PHWC-16AAAB/2020|2020-09-10|EPI\_ISL\_560149|Original|hCoV-19^^Wales|Human|Wales Specialist Virology Centre Sequencing lab|COVID-19 Genomics UK (COG-UK) Consortium|Moore|United Kingdom

>Spike|hCoV-19/USA/LA-EVTL566/2020|2020-06-30|EPI\_ISL\_578970|Original|hCoV-19^^Louisiana|Human|LSUHS Emerging Viral Threat Laboratory|Microbial Genome Sequencing Center|Kamil|USA

>Spike|hCoV-19/USA/WI-UW-2511/2020|2020-12-29|EPI\_ISL\_779343|Original|hCoV-19^^Wisconsin|Human|University of Wisconsin-Madison AIDS Vaccine Research Laboratories|University of Wisconsin-Madison AIDS Vaccine Research Laboratories|Moreno|USA

>Spike|hCoV-19/England/QEUI-B816CE/2020|2020-11-14|EPI\_ISL\_668084|Original|hCoV-19^^England|Human|Lighthouse Lab in Glasgow|Wellcome Sanger Institute for the COVID-19 Genomics UK (COG-UK) Consortium|Davies|United Kingdom

>Spike|hCoV-19/Canada/NS-NML-152/2020|2020-04-18|EPI\_ISL\_579523|Original|hCoV-19^^Nova Scotia|Human|QEII Health Sciences Centre|National Microbiology Laboratory (NML)|Majer|Canada

>Spike|hCoV-19/England/ALDP-C39B01/2020|2020-12-08|EPI\_ISL\_730698|Original|hCoV-19^^England|Human|Lighthouse Lab in Alderley Park|Wellcome Sanger Institute for the COVID-19 Genomics UK (COG-UK) Consortium|Davies|United Kingdom

>Spike|hCoV-19/USA/WI-UW-2108/2020|2020-10-05|EPI\_ISL\_677513|Original|hCoV-19^^Wisconsin|Human|University of Wisconsin-Madison AIDS Vaccine Research Laboratories|University of Wisconsin-Madison AIDS Vaccine Research Laboratories|Baczenas|USA

>Spike|hCoV-19/Scotland/EDB8043/2020|2020-10-01|EPI\_ISL\_594819|Original|hCoV-19^^Scotland|Human|Virology Department|COVID-19 Genomics UK (COG-UK) Consortium|McHugh|United Kingdom

>Spike|hCoV-19/USA/CA-ALSR-3102/2020|2020-07-14|EPI\_ISL\_635850|Original|hCoV-19^^California|Human|San Diego County Public Health Laboratory|Andersen lab at Scripps Research|Gangavarapu|USA

>Spike|hCoV-19/England/CAMC-B07138/2020|2020-10-29|EPI\_ISL\_643689|Original|hCoV-19^^England|Human|Lighthouse Lab in Cambridge|Wellcome Sanger Institute for the COVID-19 Genomics UK (COG-UK) Consortium|Davies|United Kingdom

>Spike|hCoV-19/mink/Netherlands/NB-EMC-20-34/2020|2020-07-09|EPI\_ISL\_523059|Original|hCoV-19^^Limburg|Neovison vison|Dutch COVID-19 response team|Erasmus Medical Center|Oude Munnink|Netherlands

>Spike|hCoV-19/Spain/RI-IBV-98002340/2020|2020-03-28|EPI\_ISL\_537853|Original|hCoV-19^^La Rioja|Human|Centro de Investigaci\u00f3n Biom\u00e9dica de La Rioja - Hospital San Pedro Logro\u00f1o|SeqCOVID-SPAIN consortium/IBV (CSIC)|Comas|Spain

>Spike|hCoV-19/Wales/PHWC-16250C/2020|2020-06-06|EPI\_ISL\_473082|Original|hCoV-19^^Wales|Human|Wales Specialist Virology Centre Sequencing lab|COVID-19 Genomics UK (COG-UK) Consortium|Moore|United Kingdom

>Spike|hCoV-19/Iceland/368/2020|2020-03-19|EPI\_ISL\_424392|Original|hCoV-19^^Reykjavik|Human|The National University Hospital of Iceland|deCODE genetics|J\u00f3nsson|Iceland

>Spike|hCoV-19/USA/TX-HMH-MCoV-8136/2020|2020-06-29|EPI\_ISL\_783590|Original|hCoV-19^^Texas|Human|Houston Methodist Hospital|Houston Methodist Hospital|Long|USA

>Spike|hCoV-19/Switzerland/BE-ETHZ-270178/2020|2020-08-29|EPI\_ISL\_541439|Original|hCoV-19^^Bern|Human|Viollier AG|Department of Biosystems Science and Engineering|Nadeau|Switzerland

>Spike|hCoV-19/England/QEUH-969C08/2020|2020-08-12|EPI\_ISL\_530841|Original|hCoV-19^^England|Human|Lighthouse Lab in Glasgow|Wellcome Sanger Institute for the COVID-19 Genomics UK (COG-UK) consortium|Davies|United Kingdom

>Spike|hCoV-19/England/CAMB-7DA6A/2020|2020-04-06|EPI\_ISL\_441553|Original|hCoV-19^^England|Human|Department of Pathology|Wellcome Sanger Institute for the COVID-19 Genomics UK (COG-UK) consortium|Amato|United Kingdom

>Spike|hCoV-19/England/MILK-B0604B/2020|2020-10-24|EPI\_ISL\_642766|Original|hCoV-19^^England|Human|Lighthouse Lab in Milton Keynes|Wellcome Sanger Institute for the COVID-19 Genomics UK (COG-UK) Consortium|Davies|United Kingdom

>Spike|hCoV-19/England/QEUH-9B7694/2020|2020-09-08|EPI\_ISL\_590654|Original|hCoV-19^^England|Human|Lighthouse Lab in Glasgow|Wellcome Sanger Institute for the COVID-19 Genomics UK (COG-UK) consortium|Davies|United Kingdom

>Spike|hCoV-19/SaudiArabia/KAUST-MADINAH452/2020|2020-04-21|EPI\_ISL\_513161|Original|hCoV-19^^Madinah|Human|Pathogen Genomics Lab King Abdullah University of Science and Technology(KAUST)|Pathogen Genomics Lab King Abdullah University of Science and Technology(KAUST)|Mohamed Ghazzali|Saudi Arabia

>Spike|hCoV-19/USA/TX-HMH-MCoV-18851/2020|2020-11-25|EPI\_ISL\_785168|Original|hCoV-19^^Texas|Human|Houston Methodist Hospital|Houston Methodist Hospital|Long|USA

>Spike|hCoV-19/USA/TX-HMH-MCoV-8151/2020|2020-06-30|EPI\_ISL\_784234|Original|hCoV-19^^Texas|Human|Houston Methodist Hospital|Houston Methodist Hospital|Long|USA

>Spike|hCoV-19/Scotland/EDB5961/2020|2020-05-03|EPI\_ISL\_487881|Original|hCoV-19^^Scotland|Human|Virology Department|Wellcome Sanger Institute for the COVID-19 Genomics UK (COG-UK) consortium|Davies|United Kingdom

>Spike|hCoV-19/England/QEUH-B14596/2020|2020-11-03|EPI\_ISL\_641636|Original|hCoV-19^^England|Human|Lighthouse Lab in Glasgow|Wellcome Sanger Institute for the COVID-19 Genomics UK (COG-UK) Consortium|Davies|United Kingdom

>Spike|hCoV-19/USA/UT-UPHL-2009688/2020|2020-07-27|EPI\_ISL\_605362|Original|hCoV-19^^Utah|Human|Utah Public Health Laboratory|Utah Public Health Laboratory|Young|USA

>Spike|hCoV-19/USA/TX-HMH-4054/2020|2020-06-18|EPI\_ISL\_543330|Original|hCoV-19^^Texas|Human|Houston Methodist Hospital|Houston Methodist Hospital|Long|USA

>Spike|hCoV-19/England/CAMC-CF9B58/2020|2020-12-18|EPI\_ISL\_781299|Original|hCoV-19^^England|Human|Lighthouse Lab in Cambridge|Wellcome Sanger Institute for the COVID-19 Genomics UK (COG-UK) Consortium|Davies|United Kingdom

>Spike|hCoV-19/USA/MI-UM-10036704187/2020|2020-10-30|EPI\_ISL\_682143|Original|hCoV-19^^Michigan|Human|University of Michigan Clinical Microbiology Laboratory|Lauring Lab|Valesano|USA

>Spike|hCoV-19/USA/WA-S2339/2020|2020-06-10|EPI\_ISL\_496971|Original|hCoV-19^^Washington|Human|Washington State Department of Health|Seattle Flu Study|Lee|USA

>Spike|hCoV-19/Australia/VIC4533/2020|2020-07-16|EPI\_ISL\_518944|Original|hCoV-19^^Victoria|Human|Microbiological Diagnostic Unit - Public Health Laboratory (MDU-PHL) |MDU-PHL|Schultz|Australia

>Spike|hCoV-19/USA/TX-HMH-MCoV-15096/2020|2020-10-18|EPI\_ISL\_786580|Original|hCoV-19^^Texas|Human|Houston Methodist Hospital|Houston Methodist Hospital|Long|USA

>Spike|hCoV-19/Chile/NB-202522/2020|2020-10-09|EPI\_ISL\_746540|Original|hCoV-19^^\u00duble|Human|Genetica Molecular and Subdepartamento de Virologia ISP Chile|Instituto de Salud Publica de Chile|Tognarelli|Chile

>Spike|hCoV-19/Scotland/QEUH-9FB193/2020|2020-09-29|EPI\_ISL\_600597|Original|hCoV-19^^Scotland|Human|Lighthouse Lab in Glasgow|Wellcome Sanger Institute for the COVID-19 Genomics UK (COG-UK) consortium|Davies|United Kingdom

>Spike|hCoV-19/Scotland/EDB9412/2020|2020-10-31|EPI\_ISL\_680517|Original|hCoV-19^^Scotland|Human|Virology Department|COVID-19 Genomics UK (COG-UK) Consortium|McHugh|United Kingdom

>Spike|hCoV-19/Denmark/DCGC-21244/2020|2020-12-21|EPI\_ISL\_759632|Original|hCoV-19^^Nordjylland|Human|Department of Virus and Microbiological Special Diagnostics|Albertsen Lab|Michaelsen|Denmark

>Spike|hCoV-19/Canada/ON-S96/2020|2020-03-21|EPI\_ISL\_586505|Original|hCoV-19^^Ontario|Human|Toronto Invasive Bacterial Diseases Network|McMaster University|McArthur|Canada

>Spike|hCoV-19/England/QEUH-BA09C0/2020|2020-11-18|EPI\_ISL\_719672|Original|hCoV-19^^England|Human|Lighthouse Lab in Glasgow|Wellcome Sanger Institute for the COVID-19 Genomics UK (COG-UK) Consortium|Davies|United Kingdom

>Spike|hCoV-19/South Africa/R10569/2020|2020-06-10|EPI\_ISL\_490286|Original|hCoV-19^^Gauteng|Human|National Institute for Communicable Diseases of the National Health Laboratory Service|National Institute for Communicable Diseases of the National Health Laboratory Service|Allam|South Africa

>Spike|hCoV-19/Wales/QEUH-AE23A7/2020|2020-10-27|EPI\_ISL\_647879|Original|hCoV-19^^Wales|Human|Lighthouse Lab in Glasgow|Wellcome Sanger Institute for the COVID-19 Genomics UK (COG-UK) Consortium|Davies|United Kingdom

>Spike|hCoV-19/England/MILK-A69A1C/2020|2020-10-09|EPI\_ISL\_665700|Original|hCoV-19^^England|Human|University of Exeter|COVID-19 Genomics UK (COG-UK) Consortium|Temperton|United Kingdom

>Spike|hCoV-19/Ecuador/HGSQ-USFQ-007/2020|2020-03-30|EPI\_ISL\_422564|Original|hCoV-19^^Pichincha|Human|Institute of Microbiology Universidad San Francisco de Quito|Institute of Microbiology Universidad San Francisco de Quito|Cardenas|Ecuador

>Spike|hCoV-19/Hong Kong/HKU-907b/2020|2020-01-29|EPI\_ISL\_434568|unknown|hCoV-19^^Hong Kong|Human|unknown|Microbiology|Submitter|China

>Spike|hCoV-19/Germany/SH-ChVir9636/2020|2020-10-16|EPI\_ISL\_729619|Original|hCoV-19^^Schleswig-Holstein|Human|A. Krumbholz|Charit\u00e9 Universit\u00e4tsmedizin Berlin|Muehlemann|Germany

>Spike|hCoV-19/England/ALDP-521AF7/2020|2020-06-02|EPI\_ISL\_581444|Original|hCoV-19^^England|Human|Lighthouse Lab in Alderley Park|Wellcome Sanger Institute for the COVID-19 Genomics UK (COG-UK) consortium|Davies|United Kingdom

>Spike|hCoV-19/England/MILK-957FB9/2020|2020-06-11|EPI\_ISL\_554638|Original|hCoV-19^^England|Human|Lighthouse Lab in Milton Keynes|Wellcome Sanger Institute for the COVID-19 Genomics UK (COG-UK) consortium|Davies|United Kingdom

>Spike|hCoV-19/Wales/PHWC-3077B/2020|2020-04-08|EPI\_ISL\_446275|Original|hCoV-19^^Wales|Human|Wales Specialist Virology Centre|Public Health Wales Microbiology Cardiff|Moore|United Kingdom

>Spike|hCoV-19/England/CAMB-809C1/2020|2020-04-10|EPI\_ISL\_470506|Original|hCoV-19^^England|Human|Department of Pathology|Wellcome Sanger Institute for the COVID-19 Genomics UK (COG-UK) consortium|Davies|United Kingdom

>Spike|hCoV-19/USA/HI-H200600/2020|2020-10-05|EPI\_ISL\_753126|Original|hCoV-19^^Hawaii|Human|State Laboratories Division|State Laboratories Division|Sultana|USA



>Spike|hCoV-19/Denmark/DCGC-2215/2020|2020-08-10|EPI\_ISL\_617518|Original|hCoV-19^^Midtjylland|Human|Department of Virus and Microbiological Special Diagnostics|Albertsen lab|Michaelsen|Denmark

>Spike|hCoV-19/England/ALDP-C58638/2020|2020-12-14|EPI\_ISL\_736051|Original|hCoV-19^^England|Human|Lighthouse Lab in Alderley Park|Wellcome Sanger Institute for the COVID-19 Genomics UK (COG-UK) Consortium|Davies|United Kingdom

>Spike|hCoV-19/England/MILK-BAB4C4/2020|2020-11-18|EPI\_ISL\_681371|Original|hCoV-19^^England|Human|Lighthouse Lab in Milton Keynes|Wellcome Sanger Institute for the COVID-19 Genomics UK (COG-UK) Consortium|Davies|United Kingdom

>Spike|hCoV-19/England/LIVE-A87BA/2020|2020-03-26|EPI\_ISL\_517212|Original|hCoV-19^^England|Human|Liverpool Clinical Laboratories|COVID-19 Genomics UK (COG-UK) Consortium|Haldenby|United Kingdom

>Spike|hCoV-19/USA/NY-QDX-2651/2020|2020-03-15|EPI\_ISL\_604956|Original|hCoV-19^^New York|Human|Quest Diagnostics|Quest Diagnostics|Kagan|USA

>Spike|hCoV-19/Australia/VIC10095/2020|2020-08-14|EPI\_ISL\_562791|Original|hCoV-19^^Victoria|Human|Victorian Infectious Diseases Reference Laboratory (VIDRL)|VIDRL and MDU-PHL|Schultz|Australia

>Spike|hCoV-19/Switzerland/ZH-ETHZ-240007/2020|2020-08-07|EPI\_ISL\_523862|Original|hCoV-19^^Zurich|Human|Viollier AG|Department of Biosystems Science and Engineering|Nadeau|Switzerland

>Spike|hCoV-19/USA/NY-Wadsworth-286242-01/2020|2020-12-10|EPI\_ISL\_754562|Original|hCoV-19^^New York|Human|Wadsworth Center|Wadsworth Center|Lasek-Nesselquist|USA

>Spike|hCoV-19/Chile/MA-CADIUMAG-8/2020|2020-04-03|EPI\_ISL\_681674|Original|hCoV-19^^Magallanes|Human|Molecular Medicine Laboratory|Centro Asistencial Docente y de Investigacion|Navarrete|Chile

>Spike|hCoV-19/Nigeria/ED01-CV155/2020|2020-02-21|EPI\_ISL\_527873|Original|hCoV-19^^Edo|Human|Nigeria Centre for Disease Control (NCDC)|African Centre of Excellence for Genomics of Infectious Diseases (ACEGID)|Oluniyi|Nigeria

>Spike|hCoV-19/USA/NY-NYCPHL-000529/2020|2020-04-03|EPI\_ISL\_631990|Original|hCoV-19^^New York|Human|St Barnabas Hospital|New York City Public Health Laboratory|Wang|USA

>Spike|hCoV-19/Wales/PHWC-48D25C/2020|2020-11-13|EPI\_ISL\_680595|Original|hCoV-19^^Wales|Human|Wales Specialist Virology Centre Sequencing lab|COVID-19 Genomics UK (COG-UK) Consortium|Moore|United Kingdom

>Spike|hCoV-19/USA/CA-CZB-3891/2020|2020-07-21|EPI\_ISL\_548498|Original|hCoV-19^^California|Human|County of Santa Clara Public Health Department|Chan-Zuckerberg Biohub|Bhatt|USA

>Spike|hCoV-19/England/MILK-ACBC9A/2020|2020-10-20|EPI\_ISL\_629114|Original|hCoV-19^^England|Human|Lighthouse Lab in Milton Keynes|Wellcome Sanger Institute for the COVID-19 Genomics UK (COG-UK) consortium|Davies|United Kingdom

>Spike|hCoV-19/Australia/VIC10969/2020|2020-09-07|EPI\_ISL\_563175|Original|hCoV-19^^Victoria|Human|Microbiological Diagnostic Unit - Public Health Laboratory (MDU-PHL)|MDU-PHL|Schultz|Australia

>Spike|hCoV-19/England/ALDP-A2D461/2020|2020-10-06|EPI\_ISL\_586587|Original|hCoV-19^^England|Human|Lighthouse Lab in Alderley Park|Wellcome Sanger Institute for the COVID-19 Genomics UK (COG-UK) consortium|Davies|United Kingdom

>Spike|hCoV-19/USA/WA-S1916/2020|2020-06-02|EPI\_ISL\_497345|Original|hCoV-19^^Washington|Human|Washington State Department of Health|Seattle Flu Study|Lee|USA

>Spike|hCoV-19/Netherlands/ZH-EMC-1132/2020|2020-12-18|EPI\_ISL\_763210|Original|hCoV-19^^Zuid Holland|Human|Dutch COVID-19 response team|Erasmus Medical Center|Oude Munnink|Netherlands

>Spike|hCoV-19/Australia/WA234/2020|2020-04-01|EPI\_ISL\_596796|Original|hCoV-19^^Western Australia|Human|PathWest Laboratory Medicine WA|PathWest Laboratory Medicine WA Microbial Surveillance Unit|Sikazwe|Australia

>Spike|hCoV-19/Denmark/DCGC-13412/2020|2020-11-30|EPI\_ISL\_712782|Original|hCoV-19^^Syddanmark|Human|Department of Virus and Microbiological Special Diagnostics|Albertsen Lab|Michaelsen|Denmark

>Spike|hCoV-19/USA/WY-WPHL-20171884/2020|2020-12-29|EPI\_ISL\_770454|Original|hCoV-19^^Wyoming|Human|Wyoming Public Health Laboratory|Wyoming Public Health Laboratory|Hull|USA

>Spike|hCoV-19/Wales/PHWC-15C24A/2020|2020-04-21|EPI\_ISL\_472457|Original|hCoV-19^^Wales|Human|Wales Specialist Virology Centre Sequencing lab|COVID-19 Genomics UK (COG-UK) Consortium|Moore|United Kingdom

>Spike|hCoV-19/USA/WA-S959/2020|2020-05-01|EPI\_ISL\_463449|Original|hCoV-19^^Washington|Human|Washington State Department of Health|Seattle Flu Study|Bedford|USA

>Spike|hCoV-19/Switzerland/VS-ETHZ-330426/2020|2020-10-18|EPI\_ISL\_614949|Original|hCoV-19^^Valais|Human|Viollier AG|Department of Biosystems Science and Engineering|Nadeau|Switzerland

>Spike|hCoV-19/France/ARA-18272/2020|2020-04-02|EPI\_ISL\_508964|Original|hCoV-19^^Auvergne-Rhône-Alpes|Human|CNR Virus des Infections Respiratoires - France SUD|CNR Virus des Infections Respiratoires - France SUD|Josset|France

>Spike|hCoV-19/USA/UT-UPHL-2012649796/2020|2020-08-13|EPI\_ISL\_746194|Original|hCoV-19^^Utah|Human|Ginkgo Bioworks Clinical Laboratory|Utah Public Health Laboratory|Young|USA

>Spike|hCoV-19/Scotland/CVR4498/2020|2020-09-21|EPI\_ISL\_585361|Original|hCoV-19^^Scotland|Human|Lighthouse Lab in Glasgow / MRC-University of Glasgow Centre for Virus Research|COVID-19 Genomics UK (COG-UK) Consortium|Robertson|United Kingdom

>Spike|hCoV-19/Denmark/DCGC-16801/2020|2020-12-14|EPI\_ISL\_750198|Original|hCoV-19^^Hovedstaden|Human|Department of Virus and Microbiological Special Diagnostics|Albertsen Lab|Michaelsen|Denmark

>Spike|hCoV-19/England/CWAR-24FDEA8/2020|2020-06-07|EPI\_ISL\_584538|Original|hCoV-19^^England|Human|UHCW / University of Warwick|COVID-19 Genomics UK (COG-UK) Consortium|Stark|United Kingdom

>Spike|hCoV-19/USA/WA-UW-11040/2020|2020-06-16|EPI\_ISL\_570367|Original|hCoV-19^^Washington|Human|UW Virology Lab|UW Virology Lab|Roychoudhury|USA

>Spike|hCoV-19/USA/MI-MDHHS-SC22552/2020|2020-11-23|EPI\_ISL\_737103|Original|hCoV-19^^Michigan|Human|Michigan Department of Health and Human Services|Michigan Department of Health and Human Services|Blankenship|USA

>Spike|hCoV-19/Wales/PHWC-168C10/2020|2020-05-21|EPI\_ISL\_494346|Original|hCoV-19^^Wales|Human|Originating lab|COVID-19 Genomics UK (COG-UK) Consortium|Moore|United Kingdom

>Spike|hCoV-19/England/CAMC-BD1AB4/2020|2020-11-27|EPI\_ISL\_702225|Original|hCoV-19^^England|Human|Lighthouse Lab in Cambridge|Wellcome Sanger Institute for the COVID-19 Genomics UK (COG-UK) Consortium|Davies|United Kingdom

>Spike|hCoV-19/Scotland/QEUA-A02927/2020|2020-09-29|EPI\_ISL\_585584|Original|hCoV-19^^Scotland|Human|Quadram Institute Bioscience|COVID-19 Genomics UK (COG-UK) Consortium|Alikhan|United Kingdom

>Spike|hCoV-19/England/QEUA-5EC357/2020|2020-06-16|EPI\_ISL\_533277|Original|hCoV-19^^England|Human|Lighthouse Lab in Glasgow|Wellcome Sanger Institute for the COVID-19 Genomics UK (COG-UK) consortium|Davies|United Kingdom

>Spike|hCoV-19/Denmark/DCGC-1177/2020|2020-03-16|EPI\_ISL\_614646|Original|hCoV-19^^Hovedstaden|Human|Department of Virus and Microbiological Special Diagnostics|Albertsen lab|Michaelsen|Denmark

>Spike|hCoV-19/England/CAMC-BBBFB1/2020|2020-11-21|EPI\_ISL\_705581|Original|hCoV-19^^England|Human|Quadram Institute Bioscience|COVID-19 Genomics UK (COG-UK) Consortium|Alikhan|United Kingdom

>Spike|hCoV-19/England/QEUA-A2198C/2020|2020-10-01|EPI\_ISL\_587468|Original|hCoV-19^^England|Human|Lighthouse Lab in Glasgow|Wellcome Sanger Institute for the COVID-19 Genomics UK (COG-UK) consortium|Davies|United Kingdom

>Spike|hCoV-19/England/CAMB-1ACD59/2020|2020-04-22|EPI\_ISL\_489460|Original|hCoV-19^^England|Human|Department of Pathology|Wellcome Sanger Institute for the COVID-19 Genomics UK (COG-UK) consortium|Davies|United Kingdom

>Spike|hCoV-19/England/MILK-9E04B6/2020|2020-09-20|EPI\_ISL\_601447|Original|hCoV-19^^England|Human|Lighthouse Lab in Milton Keynes|Wellcome Sanger Institute for the COVID-19 Genomics UK (COG-UK) consortium|Davies|United Kingdom

>Spike|hCoV-19/Scotland/QEUH-54EC3A/2020|2020-05-12|EPI\_ISL\_532196|Original|hCoV-19^^Scotland|Human|NHSGGC West of Scotland Specialist Virology Centre / MRC-University of Glasgow Centre for Virus Research|Wellcome Sanger Institute for the COVID-19 Genomics UK (COG-UK) consortium|Davies|United Kingdom

>Spike|hCoV-19/Scotland/QEUH-A9B5D4/2020|2020-10-20|EPI\_ISL\_625329|Original|hCoV-19^^Scotland|Human|Lighthouse Lab in Glasgow|Wellcome Sanger Institute for the COVID-19 Genomics UK (COG-UK) consortium|Davies|United Kingdom

>Spike|hCoV-19/Belgium/regA-0803765/2020|2020-08-03|EPI\_ISL\_734904|Original|hCoV-19^^Deurne|Human|UZ Leuven|KU Leuven|Maes|Belgium

>Spike|hCoV-19/Wales/PHWC-291B3/2020|2020-04-03|EPI\_ISL\_445493|Original|hCoV-19^^Wales|Human|Wales Specialist Virology Centre|Public Health Wales Microbiology Cardiff|Moore|United Kingdom

>Spike|hCoV-19/Luxembourg/LNS7719161/2020|2020-10-23|EPI\_ISL\_744620|Original|hCoV-19^^Luxembourg|Human|Laboratoire national de sant\u00e9|Laboratoire national de sant\u00e9|Wienecke-Baldacchino|Luxembourg

>Spike|hCoV-19/lion/USA/NY-2-041520/2020|2020-04-04|EPI\_ISL\_566036|Original|hCoV-19^^New York|Panthera leo|Wildlife Conservation Society|Diagnostic Virology Laboratory|Mitchell|USA

>Spike|hCoV-19/USA/TX-HMH-7411/2020|2020-06-30|EPI\_ISL\_546749|Original|hCoV-19^^Texas|Human|Houston Methodist Hospital|Houston Methodist Hospital|Long|USA

>Spike|hCoV-19/England/BRIS-13125A/2020|2020-05-23|EPI\_ISL\_467705|Original|hCoV-19^^England|Human|PHE South West Regional Laboratory|Wellcome Sanger Institute for the COVID-19 Genomics UK (COG-UK) consortium|Davies|United Kingdom

>Spike|hCoV-19/USA/CA-SEARCH-5376/2020|2020-12-17|EPI\_ISL\_755188|Original|hCoV-19^^California|Human|UCSD EXCITE lab|Andersen lab at Scripps Research|Gangavarapu|USA

>Spike|hCoV-19/England/BRIS-12F116/2020|2020-04-13|EPI\_ISL\_488239|Original|hCoV-19^^England|Human|PHE South West Regional Laboratory|Wellcome Sanger Institute for the COVID-19 Genomics UK (COG-UK) consortium|Davies|United Kingdom

>Spike|hCoV-19/USA/TX-HMH-915/2020|2020-04-16|EPI\_ISL\_545916|Original|hCoV-19^^Texas|Human|Houston Methodist Hospital|Houston Methodist Hospital|Long|USA

>Spike|hCoV-19/USA/HI-H200544/2020|2020-11-05|EPI\_ISL\_753075|Original|hCoV-19^^Hawaii|Human|State Laboratories Division|State Laboratories Division|Sultana|USA

>Spike|hCoV-19/India/OR-ILSCV31185/2020|2020-05-24|EPI\_ISL\_481147|Original|hCoV-19^^Odisha|Human|Immunogenomics lab|Immunogenomics lab|Raghav|India

>Spike|hCoV-19/Denmark/DCGC-12191/2020|2020-11-16|EPI\_ISL\_682372|Original|hCoV-19^^Hovedstaden|Human|Department of Virus and Microbiological Special Diagnostics|Albertsen Lab|Michaelsen|Denmark

>Spike|hCoV-19/England/ALDP-CB4421/2020|2020-12-18|EPI\_ISL\_761818|Original|hCoV-19^^England|Human|Lighthouse Lab in Alderley Park|Wellcome Sanger Institute for the COVID-19 Genomics UK (COG-UK) Consortium|Davies|United Kingdom

>Spike|hCoV-19/England/MILK-A7ADB5/2020|2020-10-15|EPI\_ISL\_606506|Original|hCoV-19^^England|Human|Lighthouse Lab in Milton Keynes|Wellcome Sanger Institute for the COVID-19 Genomics UK (COG-UK) consortium|Davies|United Kingdom

>Spike|hCoV-19/Germany/BY-ChVir1981/2020|2020-03-06|EPI\_ISL\_729495|Original|hCoV-19^^Bavaria|Human|Charit\u00e9 Universit\u00e4tsmedizin Berlin|Charit\u00e9 Universit\u00e4tsmedizin Berlin|Muehlemann|Germany

>Spike|hCoV-19/Sichuan/SC-YA-087/2020|2020-01-30|EPI\_ISL\_451396|Original|hCoV-19^^Sichuan|Human|West China Hospital of Sichuan University|State Key Laboratory of Biotherapy of Sichuan University|Tang|China

>Spike|hCoV-19/USA/MI-UM-2006S001055/2020|2020-04-06|EPI\_ISL\_484800|Original|hCoV-19^^Michigan|Human|University of Michigan Clinical Microbiology Laboratory|Lauring Lab|Valesano|USA

>Spike|hCoV-19/England/ALDP-A2D504/2020|2020-10-06|EPI\_ISL\_586886|Original|hCoV-19^^England|Human|Lighthouse Lab in Alderley Park|Wellcome Sanger Institute for the COVID-19 Genomics UK (COG-UK) consortium|Davies|United Kingdom

>Spike|hCoV-19/England/CAMC-A58AC5/2020|2020-10-09|EPI\_ISL\_596977|Original|hCoV-19^^England|Human|Lighthouse Lab in Cambridge|Wellcome Sanger Institute for the COVID-19 Genomics UK (COG-UK) consortium|Davies|United Kingdom

>Spike|hCoV-19/New Zealand/20CV0235/2020|2020-09-05|EPI\_ISL\_548073|Original|hCoV-19^^Auckland|Human|LabPLUS|Institute of Environmental Science and Research (ESR)|Wang|New Zealand

>Spike|hCoV-19/USA/TX-HMH-MCoV-19641/2020|2020-11-28|EPI\_ISL\_784005|Original|hCoV-19^^Texas|Human|Houston Methodist Hospital|Houston Methodist Hospital|Long|USA

>Spike|hCoV-19/England/ALDP-AA3FAE/2020|2020-10-22|EPI\_ISL\_630770|Original|hCoV-19^^England|Human|Lighthouse Lab in Alderley Park|Wellcome Sanger Institute for the COVID-19 Genomics UK (COG-UK) consortium|Davies|United Kingdom

>Spike|hCoV-19/England/QEUEH-B69A1B/2020|2020-11-11|EPI\_ISL\_661466|Original|hCoV-19^^England|Human|Lighthouse Lab in Glasgow|Wellcome Sanger Institute for the COVID-19 Genomics UK (COG-UK) Consortium|Davies|United Kingdom

>Spike|hCoV-19/Denmark/DCGC-3187/2020|2020-08-31|EPI\_ISL\_616009|Original|hCoV-19^^Sjaelland|Human|Department of Virus and Microbiological Special Diagnostics|Albertsen lab|Michaelsen|Denmark

>Spike|hCoV-19/USA/NY-PV09457/2020|2020-03-19|EPI\_ISL\_450131|Original|hCoV-19^^New York|Human|MSHS Clinical Microbiology Laboratories|MSHS Pathogen Surveillance Program|van Bakel|USA

>Spike|hCoV-19/England/MILK-B86368/2020|2020-11-13|EPI\_ISL\_673894|Original|hCoV-19^^England|Human|Lighthouse Lab in Milton Keynes|Wellcome Sanger Institute for the COVID-19 Genomics UK (COG-UK) Consortium|Davies|United Kingdom

>Spike|hCoV-19/England/ALDP-A2D5E6/2020|2020-10-05|EPI\_ISL\_586592|Original|hCoV-19^^England|Human|Lighthouse Lab in Alderley Park|Wellcome Sanger Institute for the COVID-19 Genomics UK (COG-UK) consortium|Davies|United Kingdom

>Spike|hCoV-19/Portugal/PT1095/2020|2020-03-16|EPI\_ISL\_511642|Original|hCoV-19^^Portugal|Human|Instituto Nacional de Saude (INSA)|Instituto Nacional de Saude (INSA)|Borges|Portugal

>Spike|hCoV-19/England/PORT-2D1ABD/2020|2020-04-02|EPI\_ISL\_493644|Original|hCoV-19^^England|Human|Centre for Enzyme Innovation|COVID-19 Genomics UK (COG-UK) Consortium|Robson|United Kingdom

>Spike|hCoV-19/USA/WA-S2227/2020|2020-06-09|EPI\_ISL\_497655|Original|hCoV-19^^Washington|Human|Washington State Department of Health|Seattle Flu Study|Lee|USA

>Spike|hCoV-19/England/MILK-B9709A/2020|2020-11-13|EPI\_ISL\_675083|Original|hCoV-19^^England|Human|Lighthouse Lab in Milton Keynes|Wellcome Sanger Institute for the COVID-19 Genomics UK (COG-UK) Consortium|Davies|United Kingdom

>Spike|hCoV-19/England/ALDP-9CC1F5/2020|2020-09-16|EPI\_ISL\_573091|Original|hCoV-19^^England|Human|Quadram Institute Bioscience|COVID-19 Genomics UK (COG-UK) Consortium|Alikhan|United Kingdom

>Spike|hCoV-19/Bahrain/340513774\_S1\_L001/2020|2020-08-17|EPI\_ISL\_632262|Original|hCoV-19^^Bahrain|Human|Communicable Disease Laboratory|Communicable Disease Laboratory|Altaif|Bahrain

>Spike|hCoV-19/England/CAMB-802A8/2020|2020-04-09|EPI\_ISL\_524564|Original|hCoV-19^^England|Human|Department of Pathology|Wellcome Sanger Institute for the COVID-19 Genomics UK (COG-UK) consortium|Davies|United Kingdom

>Spike|hCoV-19/USA/CA-QRTP-Donor2/2020|2020-04-01|EPI\_ISL\_490211|Original|hCoV-19^^California|Human|Quest Diagnostics|Q Squared Solutions - QRTP facility|Weigman|USA

>Spike|hCoV-19/Japan/PG-0764/2020|2020-03-00|EPI\_ISL\_684374|Original|hCoV-19^^Japan|Human|Pathogen Genomics Center|Pathogen Genomics Center|Sekizuka|Japan

>Spike|hCoV-19/USA/TX-HMH-MCoV-11113/2020|2020-09-01|EPI\_ISL\_789171|Original|hCoV-19^^Texas|Human|Houston Methodist Hospital|Houston Methodist Hospital|Long|USA

>Spike|hCoV-19/USA/ID-UNM-IBL023/2020|2020-03-13|EPI\_ISL\_632868|Original|hCoV-19^^Idaho|Human|Idaho Bureau of Laboratories|Center for Global Health|Domman|USA

>Spike|hCoV-19/England/LEED-2A9975/2020|2020-04-27|EPI\_ISL\_538849|Original|hCoV-19^^England|Human|Leeds Teaching Hospitals NHS Trust and Public Health England|Wellcome Sanger Institute for the COVID-19 Genomics UK (COG-UK) consortium|Davies|United Kingdom

>Spike|hCoV-19/England/CAMB-1BB1B5/2020|2020-11-11|EPI\_ISL\_664824|Original|hCoV-19^^England|Human|Department of Pathology|COVID-19 Genomics UK (COG-UK) Consortium|Goodfellow|United Kingdom

>Spike|hCoV-19/Wales/PHWC-4990AE/2020|2020-12-02|EPI\_ISL\_727254|Original|hCoV-19^^Wales|Human|Originating lab|COVID-19 Genomics UK (COG-UK) Consortium|Moore|United Kingdom

>Spike|hCoV-19/USA/UT-UPHL-05585/2020|2020-06-01|EPI\_ISL\_575231|Original|hCoV-19^^Utah|Human|Utah Public Health Laboratory|Utah Public Health Laboratory|Young|USA

>Spike|hCoV-19/Spain/PV-IBV-000871/2020|2020-03-25|EPI\_ISL\_452685|Original|hCoV-19^^Basque Country|Human|Servicio de Microbiolog\u00eda. Hospital Universitario Donostia. OSI Donostialdea. \u00clrea de Enfermedades Infecciosas|SeqCOVID-SPAIN consortium/IBV (CSIC) |Comas|Spain

>Spike|hCoV-19/England/ALDP-9CD68C/2020|2020-09-16|EPI\_ISL\_566170|Original|hCoV-19^^England|Human|Lighthouse Lab in Alderley Park|Wellcome Sanger Institute for the COVID-19 Genomics UK (COG-UK) consortium|Davies|United Kingdom

>Spike|hCoV-19/England/ALDP-AA4D85/2020|2020-10-21|EPI\_ISL\_630939|Original|hCoV-19^^England|Human|Lighthouse Lab in Alderley Park|Wellcome Sanger Institute for the COVID-19 Genomics UK (COG-UK) consortium|Davies|United Kingdom

>Spike|hCoV-19/Japan/PG-8078/2020|2020-08-00|EPI\_ISL\_687179|Original|hCoV-19^^Japan|Human|Pathogen Genomics Center|Pathogen Genomics Center|Sekizuka|Japan

>Spike|hCoV-19/USA/FL-BPHL-1407/2020|2020-05-27|EPI\_ISL\_549189|Original|hCoV-19^^Florida|Human|Florida Bureau of Public Health Laboratories|Florida Bureau of Public Health Laboratories|Blanton|USA

>Spike|hCoV-19/England/QEUA-AD160C/2020|2020-10-25|EPI\_ISL\_633766|Original|hCoV-19^^England|Human|Lighthouse Lab in Glasgow|Wellcome Sanger Institute for the COVID-19 Genomics UK (COG-UK) consortium|Davies|United Kingdom

>Spike|hCoV-19/USA/MI-MDHHS-SC22507/2020|2020-11-16|EPI\_ISL\_708210|Original|hCoV-19^^Michigan|Human|Michigan Department of Health and Human Services|Michigan Department of Health and Human Services|Jacob|USA

>Spike|hCoV-19/England/NOTT-11128D/2020|2020-04-23|EPI\_ISL\_453639|Original|hCoV-19^^England|Human|Queens Medical Centre|COVID-19 Genomics UK (COG-UK) Consortium|Loose|United Kingdom

>Spike|hCoV-19/Denmark/DCGC-4642/2020|2020-09-14|EPI\_ISL\_621874|Original|hCoV-19^^Sjaelland|Human|Department of Virus and Microbiological Special Diagnostics|Albertsen lab|Michaelsen|Denmark

>Spike|hCoV-19/England/CAMB-1B288C/2020|2020-05-13|EPI\_ISL\_469893|Original|hCoV-19^^England|Human|Department of Pathology|Wellcome Sanger Institute for the COVID-19 Genomics UK (COG-UK) consortium|Davies|United Kingdom

>Spike|hCoV-19/England/CAMC-AEA6D3/2020|2020-10-26|EPI\_ISL\_633183|Original|hCoV-19^^England|Human|Lighthouse Lab in Cambridge|Wellcome Sanger Institute for the COVID-19 Genomics UK (COG-UK) consortium|Davies|United Kingdom

>Spike|hCoV-19/England/ALDP-A50D2E/2020|2020-10-07|EPI\_ISL\_597782|Original|hCoV-19^^England|Human|Lighthouse Lab in Alderley Park|Wellcome Sanger Institute for the COVID-19 Genomics UK (COG-UK) consortium|Davies|United Kingdom

>Spike|hCoV-19/Gibraltar/204641713/2020|2020-00-00|EPI\_ISL\_637192|Original|hCoV-19^^Gibraltar|Human|Microbiology|Respiratory Virus Unit|Platt|Gibraltar

>Spike|hCoV-19/USA/FL-BPHL-1487/2020|2020-06-30|EPI\_ISL\_549269|Original|hCoV-19^^Florida|Human|Florida Bureau of Public Health Laboratories|Florida Bureau of Public Health Laboratories|Blanton|USA

>Spike|hCoV-19/Australia/VIC3916/2020|2020-07-13|EPI\_ISL\_520628|Original|hCoV-19^^Victoria|Human|Microbiological Diagnostic Unit - Public Health Laboratory (MDU-PHL) |MDU-PHL|Schultz|Australia

>Spike|hCoV-19/Sweden/20-53765/2020|2020-12-20|EPI\_ISL\_766710|Original|hCoV-19^^Ostergotland|Human|Klinisk mikrobiologi|The Public Health Agency of Sweden|Svartstr\u00f6m|Sweden

>Spike|hCoV-19/Japan/PG-3772/2020|2020-04-00|EPI\_ISL\_692025|Original|hCoV-19^^Japan|Human|Pathogen Genomics Center|Pathogen Genomics Center|Sekizuka|Japan

>Spike|hCoV-19/Spain/MD-IBV-99007139/2020|2020-08-04|EPI\_ISL\_541912|Original|hCoV-19^^Madrid|Human|Hospital General Universitario Gregorio Mara\u00f1a|SeqCOVID-SPAIN consortium/IBV (CSIC) |Comas|Spain

>Spike|hCoV-19/England/MILK-AC7BFB/2020|2020-10-22|EPI\_ISL\_634494|Original|hCoV-19^^England|Human|Lighthouse Lab in Milton Keynes|Wellcome Sanger Institute for the COVID-19 Genomics UK (COG-UK) consortium|Davies|United Kingdom

>Spike|hCoV-19/Denmark/DCGC-14540/2020|2020-11-30|EPI\_ISL\_711826|Original|hCoV-19^^Hovedstaden|Human|Department of Virus and Microbiological Special Diagnostics|Albertsen Lab|Michaelsen|Denmark

>Spike|hCoV-19/USA/FL-BPHL-1080/2020|2020-05-16|EPI\_ISL\_526566|Original|hCoV-19^^Florida|Human|Florida Bureau of Public Health Laboratories|Florida Bureau of Public Health Laboratories|Blanton|USA

>Spike|hCoV-19/England/BRIS-1268FC/2020|2020-04-09|EPI\_ISL\_459041|Original|hCoV-19^^England|Human|PHE South West Regional Laboratory|Wellcome Sanger Institute for the COVID-19 Genomics UK (COG-UK) consortium|Davies|United Kingdom

>Spike|hCoV-19/Poland/PL\_MCB\_107/2020|2020-05-12|EPI\_ISL\_645106|Original|hCoV-19^^Poland|Human|Human Genome Variation Research Group|Human Genome Variation Research Group||Poland

>Spike|hCoV-19/USA/OR-OHSU-1897/2020|2020-07-28|EPI\_ISL\_526063|Original|hCoV-19^^Oregon|Human|OHSU Lab Services Molecular Microbiology Lab|Oregon SARS-CoV-2 Genome Sequencing Center|O'Roak|USA

>Spike|hCoV-19/England/204881282/2020|2020-11-00|EPI\_ISL\_678808|Original|hCoV-19^^England|Human|Respiratory Virus Unit|COVID-19 Genomics UK (COG-UK) Consortium|Platt|United Kingdom

>Spike|hCoV-19/England/NOTT-10EBF1/2020|2020-03-27|EPI\_ISL\_432903|Original|hCoV-19^^England|Human|Queens Medical Centre|COVID-19 Genomics UK (COG-UK) Consortium|Loose|United Kingdom

>Spike|hCoV-19/England/NORT-2844BB/2020|2020-03-21|EPI\_ISL\_488729|Original|hCoV-19^^England|Human|NU-OMICS DNA Sequencing research facility|Wellcome Sanger Institute for the COVID-19 Genomics UK (COG-UK) consortium|Davies|United Kingdom

>Spike|hCoV-19/USA/TX-DSHS-1685/2020|2020-05-14|EPI\_ISL\_708646|Original|hCoV-19^^Texas|Human|Texas Department of State Health Services|Texas Department of State Health Services|Rahman|USA

>Spike|hCoV-19/USA/WA-S354/2020|2020-03-25|EPI\_ISL\_434114|Original|hCoV-19^^Washington|Human|Washington State Department of Health|Seattle Flu Study|Bedford|USA

>Spike|hCoV-19/USA/LA-SR0215/2020|2020-04-03|EPI\_ISL\_437541|Original|hCoV-19^^Louisiana|Human|Robert Garry lab|Andersen lab at Scripps Research|Gangavarapu|USA

>Spike|hCoV-19/Wuhan/HB-WH2-156/2020|2020-02-28|EPI\_ISL\_454924|Original|hCoV-19^^Hubei|Human|Wuhan Chain Medical Labs (CMLabs)|State Key Laboratory of Biotherapy of Sichuan University|Tang|China

>Spike|hCoV-19/England/CAMB-78EEB/2020|2020-04-02|EPI\_ISL\_441272|Original|hCoV-19^^England|Human|Department of Pathology|Wellcome Sanger Institute for the COVID-19 Genomics UK (COG-UK) consortium|Amato|United Kingdom

>Spike|hCoV-19/England/LIVE-A9D11/2020|2020-03-23|EPI\_ISL\_517354|Original|hCoV-19^^England|Human|Liverpool Clinical Laboratories|COVID-19 Genomics UK (COG-UK) Consortium|Haldenby|United Kingdom

>Spike|hCoV-19/USA/TX-HMH-MCoV-12871/2020|2020-08-18|EPI\_ISL\_788023|Original|hCoV-19^^Texas|Human|Houston Methodist Hospital|Houston Methodist Hospital|Long|USA

>Spike|hCoV-19/Belgium/MTR-03021/2020|2020-03-02|EPI\_ISL\_416467|Original|hCoV-19^^Holsbeek|Human|KU Leuven|KU Leuven|Maes|Belgium

>Spike|hCoV-19/Australia/VIC1360/2020|2020-04-07|EPI\_ISL\_456427|Original|hCoV-19^^Victoria|Human|Victorian Infectious Diseases Reference Laboratory (VIDRL)|Microbiological Diagnostic Unit Public Health Laboratory and Victorian Infectious Diseases Reference Laboratory|Schultz|Australia

>Spike|hCoV-19/USA/UT-UPHL-2012312153/2020|2020-06-19|EPI\_ISL\_746439|Original|hCoV-19^^Utah|Human|Utah Public Health Laboratory|Utah Public Health Laboratory|Gallagher|USA

>Spike|hCoV-19/Switzerland/SZ-ETHZ-170001/2020|2020-06-27|EPI\_ISL\_486516|Original|hCoV-19^^Schwyz|Human|Viollier AG|Department of Biosystems Science and Engineering|Nadeau|Switzerland

>Spike|hCoV-19/Luxembourg/LNS6796846/2020|2020-12-01|EPI\_ISL\_771016|Original|hCoV-19^^Luxembourg|Human|Laboratoire national de sant\u00e9|Laboratoire national de sant\u00e9|Wienecke-Baldacchino|Luxembourg

>Spike|hCoV-19/Australia/VIC17314/2020|2020-07-28|EPI\_ISL\_663836|Original|hCoV-19^^Victoria|Human|Microbiological Diagnostic Unit - Public Health Laboratory (MDU-PHL)|MDU-PHL|Schultz|Australia

>Spike|hCoV-19/Russia/OMS-ORINFI-47S/2020|2020-05-14|EPI\_ISL\_569817|Original|hCoV-19^^Omsk|Human|Omsk Research Institute of Natural Focal Infections|WHO National Influenza Centre Russian Federation|Komissarov|Russia

>Spike|hCoV-19/USA/WA-S220/2020|2020-03-20|EPI\_ISL\_430258|Original|hCoV-19^^Washington|Human|Washington State Department of Health|Seattle Flu Study|Bedford|USA

>Spike|hCoV-19/Sweden/20-53092/2020|2020-07-11|EPI\_ISL\_648134|Original|hCoV-19^^Sweden|Human|The Public Health Agency of Sweden|The Public Health Agency of Sweden|Svartstr\u00f6m|Sweden

>Spike|hCoV-19/Australia/VIC12183/2020|2020-07-26|EPI\_ISL\_563536|Original|hCoV-19^^Victoria|Human|Microbiological Diagnostic Unit - Public Health Laboratory (MDU-PHL)|MDU-PHL|Schultz|Australia

>Spike|hCoV-19/England/QEUH-B4076E/2020|2020-11-08|EPI\_ISL\_657246|Original|hCoV-19^^England|Human|Lighthouse Lab in Glasgow|Wellcome Sanger Institute for the COVID-19 Genomics UK (COG-UK) Consortium|Davies|United Kingdom

>Spike|hCoV-19/England/ALDP-CED489/2020|2020-12-17|EPI\_ISL\_782150|Original|hCoV-19^^England|Human|Lighthouse Lab in Alderley Park|Wellcome Sanger Institute for the COVID-19 Genomics UK (COG-UK) Consortium|Davies|United Kingdom

>Spike|hCoV-19/England/CAMC-A80DCB/2020|2020-10-14|EPI\_ISL\_610642|Original|hCoV-19^^England|Human|Lighthouse Lab in Cambridge|Wellcome Sanger Institute for the COVID-19 Genomics UK (COG-UK) consortium|Davies|United Kingdom

>Spike|hCoV-19/USA/TX-HMH0144/2020|2020-03-22|EPI\_ISL\_434843|Original|hCoV-19^^Texas|Human|Houston Methodist Hospital|Houston Methodist Hospital|Long|USA

>Spike|hCoV-19/England/BRIS-12C3C8/2020|2020-05-11|EPI\_ISL\_469377|Original|hCoV-19^^England|Human|PHE South West Regional Laboratory|Wellcome Sanger Institute for the COVID-19 Genomics UK (COG-UK) consortium|Davies|United Kingdom

>Spike|hCoV-19/Denmark/DCGC-9386/2020|2020-11-16|EPI\_ISL\_668944|Original|hCoV-19^^Sjælland|Human|Department of Virus and Microbiological Special Diagnostics|Albertsen Lab|Michaelsen|Denmark

>Spike|hCoV-19/England/MILK-ACD24B/2020|2020-10-22|EPI\_ISL\_634429|Original|hCoV-19^^England|Human|Lighthouse Lab in Milton Keynes|Wellcome Sanger Institute for the COVID-19 Genomics UK (COG-UK) consortium|Davies|United Kingdom

>Spike|hCoV-19/England/MILK-AB9039/2020|2020-10-21|EPI\_ISL\_623779|Original|hCoV-19^^England|Human|Lighthouse Lab in Milton Keynes|Wellcome Sanger Institute for the COVID-19 Genomics UK (COG-UK) consortium|Davies|United Kingdom

>Spike|hCoV-19/England/NP7/2020|2020-00-00|EPI\_ISL\_479783|unknown|hCoV-19^^England|Human|Breuer Lab|Breuer Lab|Pang|United Kingdom

>Spike|hCoV-19/Russia/MOS-CRIE-13455107/2020|2020-11-07|EPI\_ISL\_717966|Original|hCoV-19^^Moscow|Human|Molecular diagnostic laboratory of Federal Budget Institution of Science \Central Research Institute of Epidemiology\ of The Federal Service on Customers' Rights Protection and Human Well-being Surveillance|Group of Genomics and Postgenomic Technologies of Central Research Institute of Epidemiology

>y|Korneenko|Russia

>Spike|hCoV-19/Switzerland/BL-ETHZ-280190/2020|2020-09-10|EPI\_ISL\_560466|Original|hCoV-19^^Basel-Landschaft|Human|Viollier AG|Department of Biosystems Science and Engineering|Nadeau|Switzerland

>Spike|hCoV-19/USA/PA-MGEL119/2020|2020-00-00|EPI\_ISL\_454393|Original|hCoV-19^^Pennsylvania|Human|UPMC Clinical Microbiology Laboratory|Microbial Genome Sequencing Center|Mustapha|USA

>Spike|hCoV-19/USA/TX-HMH-3612/2020|2020-06-15|EPI\_ISL\_543066|Original|hCoV-19^^Texas|Human|Houston Methodist Hospital|Houston Methodist Hospital|Long|USA

>Spike|hCoV-19/USA/TX-DSHS-0545/2020|2020-05-14|EPI\_ISL\_574449|Original|hCoV-19^^Texas|Human|Texas Department of State Health Services|Texas Department of State Health Services|Rahman|USA

>Spike|hCoV-19/Denmark/DCGC-10640/2020|2020-11-02|EPI\_ISL\_669738|Original|hCoV-19^^Hovedstaden|Human|Department of Virus and Microbiological Special Diagnostics|Albertsen Lab|Michaelsen|Denmark

>Spike|hCoV-19/England/QEUEH-9E53B4/2020|2020-09-22|EPI\_ISL\_601025|Original|hCoV-19^^England|Human|Lighthouse Lab in Glasgow|Wellcome Sanger Institute for the COVID-19 Genomics UK (COG-UK) consortium|Davies|United Kingdom

>Spike|hCoV-19/England/ALDP-94CA7A/2020|2020-06-15|EPI\_ISL\_555980|Original|hCoV-19^^England|Human|Lighthouse Lab in Alderley Park|Wellcome Sanger Institute for the COVID-19 Genomics UK (COG-UK) consortium|Davies|United Kingdom

>Spike|hCoV-19/USA/TX-HMH-MCoV-16150/2020|2020-10-26|EPI\_ISL\_785834|Original|hCoV-19^^Texas|Human|Houston Methodist Hospital|Houston Methodist Hospital|Long|USA

>Spike|hCoV-19/Wales/PHWC-49497B/2020|2020-11-21|EPI\_ISL\_726194|Original|hCoV-19^^Wales|Human|Originating lab|COVID-19 Genomics UK (COG-UK) Consortium|Moore|United Kingdom

>Spike|hCoV-19/Northern Ireland/NIRE-FAC05/2020|2020-04-06|EPI\_ISL\_470037|Original|hCoV-19^^Northern Ireland|Human|Regional Virus Laboratory|Wellcome Sanger Institute for the COVID-19 Genomics UK (COG-UK) consortium|Davies|United Kingdom

>Spike|hCoV-19/USA/VA-DCLS-2188/2020|2020-11-12|EPI\_ISL\_677213|Original|hCoV-19^^Virginia|Human|Virginia Division of Consolidated Laboratory Services|Virginia Division of Consolidated Laboratory Services|St. Jacques|USA

>Spike|hCoV-19/England/QEUEH-A1DE75/2020|2020-10-01|EPI\_ISL\_587357|Original|hCoV-19^^England|Human|Lighthouse Lab in Glasgow|Wellcome Sanger Institute for the COVID-19 Genomics UK (COG-UK) consortium|Davies|United Kingdom

>Spike|hCoV-19/USA/MT-BHDH-074/2020|2020-04-15|EPI\_ISL\_437433|Original|hCoV-19^^Montana|Human|Bozeman Health Deaconess Hospital|Wiedenheft lab|Nemudryi|USA

>Spike|hCoV-19/England/QEUEH-9AE36C/2020|2020-09-02|EPI\_ISL\_638635|Original|hCoV-19^^England|Human|Department of Pathology|COVID-19 Genomics UK (COG-UK) Consortium|Goodfellow|United Kingdom

>Spike|hCoV-19/England/CAMC-B36798/2020|2020-11-05|EPI\_ISL\_645394|Original|hCoV-19^^England|Human|Lighthouse Lab in Cambridge|Wellcome Sanger Institute for the COVID-19 Genomics UK (COG-UK) Consortium|Davies|United Kingdom

>Spike|hCoV-19/England/ALDP-B85484/2020|2020-11-15|EPI\_ISL\_674343|Original|hCoV-19^^England|Human|Lighthouse Lab in Alderley Park|Wellcome Sanger Institute for the COVID-19 Genomics UK (COG-UK) Consortium|Davies|United Kingdom

>Spike|hCoV-19/England/QEUEH-AD0C0B/2020|2020-10-26|EPI\_ISL\_633848|Original|hCoV-19^^England|Human|Lighthouse Lab in Glasgow|Wellcome Sanger Institute for the COVID-19 Genomics UK (COG-UK) consortium|Davies|United Kingdom

>Spike|hCoV-19/England/BRIS-12FE2E/2020|2020-04-10|EPI\_ISL\_492584|Original|hCoV-19^^England|Human|PHE South West Regional Laboratory|Wellcome Sanger Institute for the COVID-19 Genomics UK (COG-UK) consortium|Davies|United Kingdom

>Spike|hCoV-19/USA/TX-HMH-MCoV-13306/2020|2020-08-24|EPI\_ISL\_788454|Original|hCoV-19^^Texas|Human|Houston Methodist Hospital|Houston Methodist Hospital|Long|USA

>Spike|hCoV-19/Gambia/3741/2020|2020-07-30|EPI\_ISL\_561010|Original|hCoV-19^^Kombo|Human|MRCG at LSHTM Genomics lab|MRCG at LSHTM Genomics lab|Sesay|Gambia

>Spike|hCoV-19/Brazil/PE-IAM221/2020|2020-04-08|EPI\_ISL\_500473|Original|hCoV-19^^Pernambuco|Human|LACEN/PE|WallauLab|Wallau|Brazil

>Spike|hCoV-19/Brazil/SC-L17-CD322/2020|2020-03-26|EPI\_ISL\_476297|Original|hCoV-19^^Santa Catarina|Human|DB Diagn\u00f3sticos do Brasil|Instituto de Medicina Tropical da Universidade de S\u00e3o Paulo|Sabino|Brazil

>Spike|hCoV-19/England/ALDP-C59190/2020|2020-12-13|EPI\_ISL\_735862|Original|hCoV-19^^England|Human|Lighthouse Lab in Alderley Park|Wellcome Sanger Institute for the COVID-19 Genomics UK (COG-UK) Consortium|Davies|United Kingdom

>Spike|hCoV-19/England/MILK-9F1889/2020|2020-09-25|EPI\_ISL\_589730|Original|hCoV-19^^England|Human|Lighthouse Lab in Milton Keynes|Wellcome Sanger Institute for the COVID-19 Genomics UK (COG-UK) consortium|Davies|United Kingdom

>Spike|hCoV-19/England/ALDP-C3BB69/2020|2020-12-10|EPI\_ISL\_731873|Original|hCoV-19^^England|Human|Lighthouse Lab in Alderley Park|Wellcome Sanger Institute for the COVID-19 Genomics UK (COG-UK) Consortium|Davies|United Kingdom

>Spike|hCoV-19/England/PORT-2D2F17/2020|2020-04-07|EPI\_ISL\_493665|Original|hCoV-19^^England|Human|Centre for Enzyme Innovation|COVID-19 Genomics UK (COG-UK) Consortium|Robson|United Kingdom



>Spike|hCoV-19/Belgium/regA-10191280/2020|2020-10-19|EPI\_ISL\_735188|Original|hCoV-19^^Rotselaar|Human|UZ Leuven|KU Leuven|Maes|Belgium

>Spike|hCoV-19/USA/IA-GMF-32395/2020|2020-11-09|EPI\_ISL\_661142|Original|hCoV-19^^Iowa|Human|Gundersen Molecular Diagnostics Laboratory|Kabara Cancer Research Institute|Kenny|USA

>Spike|hCoV-19/England/CAMC-94B6D1/2020|2020-07-25|EPI\_ISL\_556482|Original|hCoV-19^^England|Human|Lighthouse Lab in Cambridge|Wellcome Sanger Institute for the COVID-19 Genomics UK (COG-UK) consortium|Davies|United Kingdom

>Spike|hCoV-19/USA/UT-UPHL-2012036707/2020|2020-11-29|EPI\_ISL\_746919|Original|hCoV-19^^Utah|Human|Utah Public Health Laboratory|Utah Public Health Laboratory|Gallagher|USA

>Spike|hCoV-19/Denmark/DCGC-13222/2020|2020-11-30|EPI\_ISL\_712153|Original|hCoV-19^^Hovedstaden|Human|Department of Virus and Microbiological Special Diagnostics|Albertsen Lab|Michaelsen|Denmark

>Spike|hCoV-19/Japan/PG-6981/2020|2020-07-00|EPI\_ISL\_688086|Original|hCoV-19^^Japan|Human|Pathogen Genomics Center|Pathogen Genomics Center|Sekizuka|Japan

>Spike|hCoV-19/Netherlands/UT-RIVM-20393/2020|2020-12-07|EPI\_ISL\_728613|Original|hCoV-19^^Utrecht|Human|Dutch COVID-19 response team|National Institute for Public Health and the Environment (RIVM)|Meijer|Netherlands

>Spike|hCoV-19/USA/NY-NYUMC498/2020|2020-04-03|EPI\_ISL\_444615|Original|hCoV-19^^New York|Human|NYU Langone Health|Departments of Pathology and Medicine|Maurano|USA

>Spike|hCoV-19/Denmark/DCGC-13999/2020|2020-11-30|EPI\_ISL\_711506|Original|hCoV-19^^Syddanmark|Human|Department of Virus and Microbiological Special Diagnostics|Albertsen Lab|Michaelsen|Denmark

>Spike|hCoV-19/Australia/WA80/2020|2020-07-13|EPI\_ISL\_512733|Original|hCoV-19^^Western Australia|Human|PathWest Laboratory Medicine WA|PathWest Laboratory Medicine WA Microbial Surveillance Unit|Sikazwe|Australia

>Spike|hCoV-19/USA/FL-BPHL-1001/2020|2020-07-10|EPI\_ISL\_517891|Original|hCoV-19^^Florida|Human|Florida Bureau of Public Health Laboratories|Florida Bureau of Public Health Laboratories|Blanton|USA

>Spike|hCoV-19/USA/TX-HMH-6970/2020|2020-06-28|EPI\_ISL\_546396|Original|hCoV-19^^Texas|Human|Houston Methodist Hospital|Houston Methodist Hospital|Long|USA

>Spike|hCoV-19/USA/NY-Wadsworth-269613-01/2020|2020-11-10|EPI\_ISL\_734431|Original|hCoV-19^^New York|Human|Wadsworth Center|Wadsworth Center|Lasek-Nesselquist|USA

>Spike|hCoV-19/England/NORW-E961A/2020|2020-04-22|EPI\_ISL\_448323|Original|hCoV-19^^England|Human|Quadram Institute Bioscience|COVID-19 Genomics UK (COG-UK) Consortium|Alikhan|United Kingdom

>Spike|hCoV-19/England/MILK-A4766B/2020|2020-10-05|EPI\_ISL\_598378|Original|hCoV-19^^England|Human|Lighthouse Lab in Milton Keynes|Wellcome Sanger Institute for the COVID-19 Genomics UK (COG-UK) consortium|Davies|United Kingdom

>Spike|hCoV-19/England/LOND-DB4B7/2020|2020-11-13|EPI\_ISL\_724773|Original|hCoV-19^^England|Human|University College London|COVID-19 Genomics UK (COG-UK) Consortium|Roy|United Kingdom

>Spike|hCoV-19/Wales/PHWC-4A47F6/2020|2020-12-17|EPI\_ISL\_764733|Original|hCoV-19^^Wales|Human|Wales Specialist Virology Centre Sequencing lab|COVID-19 Genomics UK (COG-UK) Consortium|Moore|United Kingdom

>Spike|hCoV-19/England/SHEF-CEC37/2020|2020-04-27|EPI\_ISL\_475471|Original|hCoV-19^^England|Human|Virology Department|COVID-19 Genomics UK (COG-UK) Consortium|de Silva|United Kingdom

>Spike|hCoV-19/England/ALDP-CEC4A8/2020|2020-12-21|EPI\_ISL\_782171|Original|hCoV-19^^England|Human|Lighthouse Lab in Alderley Park|Wellcome Sanger Institute for the COVID-19 Genomics UK (COG-UK) Consortium|Davies|United Kingdom

>Spike|hCoV-19/South Africa/NHLS-UCT-GS-0951/2020|2020-10-15|EPI\_ISL\_700518|Original|hCoV-19^^Western Cape|Human|Plettenberg Bay Clinic wC PLC|NHLS/UCT|Iranzadeh|South Africa

>Spike|hCoV-19/Italy/APU-IZSPB\_280PT/2020|2020-11-02|EPI\_ISL\_653773|Original|hCoV-19^^Apulia|Human|I.R.C.C.S. \S. De Bellis\ - Ente Ospedaliero|Istituto Zooprofilattico Sperimentale della Puglia e della Basilicata|Parisi|Italy

>Spike|hCoV-19/Australia/VIC874/2020|2020-04-05|EPI\_ISL\_427129|Original|hCoV-19^^Victoria|Human|Victorian Infectious Diseases Reference Laboratory (VIDRL)|Microbiological Diagnostic Unit Public Health Laboratory and Victorian Infectious Diseases Reference Laboratory|Schultz|Australia

>Spike|hCoV-19/Germany/NW-HHU-532/2020|2020-12-15|EPI\_ISL\_779942|Original|hCoV-19^^North Rhine-Westphalia|Human|Center of Medical Microbiology|Center of Medical Microbiology|Wienemann|Germany

>Spike|hCoV-19/Wales/PHWC-163574/2020|2020-04-24|EPI\_ISL\_473963|Original|hCoV-19^^Wales|Human|Originating lab|COVID-19 Genomics UK (COG-UK) Consortium|Moore|United Kingdom

>Spike|hCoV-19/USA/UT-03484/2020|2020-04-03|EPI\_ISL\_450546|Original|hCoV-19^^Utah|Human|Utah Public Health Laboratory|Utah Public Health Laboratory|Young|USA

>Spike|hCoV-19/USA/TX-HMH-MCoV-14454/2020|2020-10-07|EPI\_ISL\_787739|Original|hCoV-19^^Texas|Human|Houston Methodist Hospital|Houston Methodist Hospital|Long|USA

>Spike|hCoV-19/Hong Kong/VM20002907/2020|2020-02-25|EPI\_ISL\_414517|Original|hCoV-19^^Hong Kong|Human|Hong Kong Department of Health|School of Public Health|Chu|China

>Spike|hCoV-19/USA/IL-NM-0467/2020|2020-04-21|EPI\_ISL\_626415|Original|hCoV-19^^Illinois|Human|Northwestern Memorial Hospital|Ozer Lab|Ozer|USA

>Spike|hCoV-19/England/BRIS-12A1A2/2020|2020-04-16|EPI\_ISL\_458381|Original|hCoV-19^^England|Human|PHE South West Regional Laboratory|Wellcome Sanger Institute for the COVID-19 Genomics UK (COG-UK) consortium|Davies|United Kingdom

>Spike|hCoV-19/Spain/GA-IBV-004050/2020|2020-03-18|EPI\_ISL\_510289|Original|hCoV-19^^Galicia|Human|Hospital Cl\u00e9nico Universitario de Santiago de Compostela|SeqCOVID-SPAIN consortium|IBV(CSIC)|Comas|Spain

>Spike|hCoV-19/Australia/NSW2146/2020|2020-03-14|EPI\_ISL\_509503|Original|hCoV-19^^New South Wales|Human|Area of Virology|Area of Virology|Yeang|Australia

>Spike|hCoV-19/Wales/PHWC-47E34C/2020|2020-09-29|EPI\_ISL\_595441|Original|hCoV-19^^Wales|Human|Originating lab|COVID-19 Genomics UK (COG-UK) Consortium|Moore|United Kingdom

>Spike|hCoV-19/Italy/LOM-UniMI03/2020|2020-02-24|EPI\_ISL\_417447|Vero E6 P1|hCoV-19^^Lombardy|Human|Laboratory of Infectious Diseases|Laboratory of Infectious Diseases|Zehender|Italy

>Spike|hCoV-19/England/OXON-AEC88/2020|2020-04-07|EPI\_ISL\_448775|Original|hCoV-19^^England|Human|Oxford Viromics|COVID-19 Genomics UK (COG-UK) Consortium|Golubchik|United Kingdom

>Spike|hCoV-19/England/CAMC-9C1794/2020|2020-09-10|EPI\_ISL\_573203|Original|hCoV-19^^England|Human|Oxford Viromics|COVID-19 Genomics UK (COG-UK) Consortium|Golubchik|United Kingdom

>Spike|hCoV-19/England/CAMB-1BBCF0/2020|2020-00-00|EPI\_ISL\_679222|Original|hCoV-19^^England|Human|Department of Pathology|COVID-19 Genomics UK (COG-UK) Consortium|Goodfellow|United Kingdom

>Spike|hCoV-19/Luxembourg/LNS5779400/2020|2020-11-30|EPI\_ISL\_770961|Original|hCoV-19^^Luxembourg|Human|Laboratoire national de sant\u00e9|Laboratoire national de sant\u00e9|Wienecke-Baldacchino|Luxembourg

>Spike|hCoV-19/USA/MI-QDX-625/2020|2020-03-19|EPI\_ISL\_571352|Original|hCoV-19^^Michigan|Human|Quest Diagnostics|Quest Diagnostics|Kagan|USA

>Spike|hCoV-19/Scotland/GCVR-17117F/2020|2020-03-27|EPI\_ISL\_459565|Original|hCoV-19^^Scotland|Human|NHSGGC West of Scotland Specialist Virology Centre / MRC-University of Glasgow Centre for Virus Research|Wellcome Sanger Institute for the COVID-19 Genomics UK (COG-UK) consortium|Davies|United Kingdom

>Spike|hCoV-19/USA/MD-MDH-0440/2020|2020-11-10|EPI\_ISL\_666807|Original|hCoV-19^^Maryland|Human|Maryland Public Health Laboratory|Maryland Public Health Laboratory|Keller|USA

>Spike|hCoV-19/England/CAMB-76366/2020|2020-03-30|EPI\_ISL\_438403|Original|hCoV-19^^England|Human|Department of Pathology|Wellcome Sanger Institute for the COVID-19 Genomics UK (COG-UK) consortium|Amato|United Kingdom

>Spike|hCoV-19/Oman/205035037/2020|2020-05-10|EPI\_ISL\_491968|Original|hCoV-19^^Muscat|Human|Oman-NIC|Department of\u00a0Microbiology\u00a0and Immunology-SQUH|AL Zadjali|Oman

>Spike|hCoV-19/Switzerland/BE-ETHZ-380306/2020|2020-11-24|EPI\_ISL\_721763|Original|hCoV-19^^Bern|Human|Viollier AG|Department of Biosystems Science and Engineering|Nadeau|Switzerland

>Spike|hCoV-19/England/MILK-C52926/2020|2020-12-11|EPI\_ISL\_736433|Original|hCoV-19^^England|Human|Lighthouse Lab in Milton Keynes|Wellcome Sanger Institute for the COVID-19 Genomics UK (COG-UK) Consortium|Davies|United Kingdom

>Spike|hCoV-19/England/ALDP-B26072/2020|2020-11-04|EPI\_ISL\_646572|Original|hCoV-19^^England|Human|Lighthouse Lab in Alderley Park|Wellcome Sanger Institute for the COVID-19 Genomics UK (COG-UK) Consortium|Davies|United Kingdom

>Spike|hCoV-19/USA/OR-OHSU-2221/2020|2020-08-07|EPI\_ISL\_667151|Original|hCoV-19^^Oregon|Human|OHSU Lab Services Molecular Microbiology Lab|Oregon SARS-CoV-2 Genome Sequencing Center|O'Roak|USA

>Spike|hCoV-19/Belgium/ULG-10393/2020|2020-08-10|EPI\_ISL\_540560|Original|hCoV-19^^Li\u00e8ge|Human|Department of Clinical Microbiology|GIGA Medical Genomics|Durkin|Belgium

>Spike|hCoV-19/Canada/ON-S1638/2020|2020-09-15|EPI\_ISL\_755759|Original|hCoV-19^^Ontario|Human|Toronto Invasive Bacterial Diseases Network|McMaster University|McArthur|Canada

>Spike|hCoV-19/Canada/QC-LSPQ-L00230020/2020|2020-03-21|EPI\_ISL\_535909|Original|hCoV-19^^Quebec|Human|H\u00f4pital Pierre-Boucher|Laboratoire de sant\u00e9 publique du Qu\u00e9bec|Moreira|Canada

>Spike|hCoV-19/England/ALDP-BBB3C4/2020|2020-11-21|EPI\_ISL\_702449|Original|hCoV-19^^England|Human|Lighthouse Lab in Alderley Park|Wellcome Sanger Institute for the COVID-19 Genomics UK (COG-UK) Consortium|Davies|United Kingdom

>Spike|hCoV-19/Canada/ON-S256/2020|2020-03-27|EPI\_ISL\_591208|Original|hCoV-19^^Ontario|Human|Toronto Invasive Bacterial Diseases Network|McMaster University|McArthur|Canada

>Spike|hCoV-19/England/BRIS-126B8A/2020|2020-04-10|EPI\_ISL\_458936|Original|hCoV-19^^England|Human|PHE South West Regional Laboratory|Wellcome Sanger Institute for the COVID-19 Genomics UK (COG-UK) consortium|Davies|United Kingdom

>Spike|hCoV-19/Portugal/PT0094/2020|2020-03-24|EPI\_ISL\_421497|Original|hCoV-19^^Portugal|Human|Instituto Nacional de Saude (INSA)|Instituto Nacional de Saude (INSA)|Borges|Portugal

>Spike|hCoV-19/England/LOND-DA4D6/2020|2020-11-04|EPI\_ISL\_724635|Original|hCoV-19^^England|Human|University College London|COVID-19 Genomics UK (COG-UK) Consortium|Roy|United Kingdom

>Spike|hCoV-19/England/QEUEH-B819C5/2020|2020-11-14|EPI\_ISL\_667940|Original|hCoV-19^^England|Human|Lighthouse Lab in Glasgow|Wellcome Sanger Institute for the COVID-19 Genomics UK (COG-UK) Consortium|Davies|United Kingdom

>Spike|hCoV-19/England/MILK-A2294F/2020|2020-10-03|EPI\_ISL\_612529|Original|hCoV-19^^England|Human|Northumbria University / South Tees Hospitals NHS Foundation Trust / North Cumbria Integrated Care NHS Foundation Trust / North Tees and Hartlepool NHS Foundation Trust / Newcastle Hospitals NHS Foundation Trust|COVID-19 Genomics UK (COG-UK) Consortium|Bashton|United Kingdom

>Spike|hCoV-19/Wales/PHWC-2865B/2020|2020-03-31|EPI\_ISL\_431989|Original|hCoV-19^^Wales|Human|Wales Specialist Virology Centre|Public Health Wales Microbiology Cardiff|Moore|United Kingdom

>Spike|hCoV-19/Japan/PG-7494/2020|2020-08-00|EPI\_ISL\_688596|Original|hCoV-19^^Japan|Human|Tokyo Metropolitan Institute of Public Health|Pathogen Genomics Center|Sekizuka|Japan

>Spike|hCoV-19/England/MILK-994C8C/2020|2020-08-25|EPI\_ISL\_552263|Original|hCoV-19^^England|Human|Lighthouse Lab in Milton Keynes|Wellcome Sanger Institute for the COVID-19 Genomics UK (COG-UK) consortium|Davies|United Kingdom

>Spike|hCoV-19/USA/MA-MASPHL-00610/2020|2020-05-11|EPI\_ISL\_693010|Original|hCoV-19^^Massachusetts|Human|Massachusetts State Public Health Laboratory|Massachusetts State Public Health Laboratory|Lang|USA

>Spike|hCoV-19/Wales/PHWC-49270A/2020|2020-11-28|EPI\_ISL\_725689|Original|hCoV-19^^Wales|Human|Originating lab|COVID-19 Genomics UK (COG-UK) Consortium|Moore|United Kingdom

>Spike|hCoV-19/Scotland/EDB5390/2020|2020-04-02|EPI\_ISL\_461737|Original|hCoV-19^^Scotland|Human|Virology Department|COVID-19 Genomics UK (COG-UK) Consortium|Williams|United Kingdom

>Spike|hCoV-19/USA/CA-ALSR-1013-SAN/2020|2020-04-17|EPI\_ISL\_483461|Original|hCoV-19^^California|Human|UC San Diego Center for Advanced Laboratory Medicine|Andersen lab at Scripps Research|Gangavarapu|USA

>Spike|hCoV-19/USA/MI-UM-10036490275/2020|2020-10-16|EPI\_ISL\_628863|Original|hCoV-19^^Michigan|Human|University of Michigan Clinical Microbiology Laboratory|Lauring Lab|Valesano|USA

>Spike|hCoV-19/England/NOTT-112B45/2020|2020-04-25|EPI\_ISL\_493590|Original|hCoV-19^^England|Human|Lincolnshire Hospitals and DeepSeq Nottingham|COVID-19 Genomics UK (COG-UK) Consortium|Loose|United Kingdom

>Spike|hCoV-19/England/ALDP-9EDC0C/2020|2020-05-09|EPI\_ISL\_580706|Original|hCoV-19^^England|Human|Lighthouse Lab in Alderley Park|Wellcome Sanger Institute for the COVID-19 Genomics UK (COG-UK) consortium|Davies|United Kingdom

>Spike|hCoV-19/England/MILK-6F65EA/2020|2020-06-30|EPI\_ISL\_557496|Original|hCoV-19^^England|Human|Lighthouse Lab in Milton Keynes|Wellcome Sanger Institute for the COVID-19 Genomics UK (COG-UK) consortium|Davies|United Kingdom

>Spike|hCoV-19/Russia/StPetersburg-RII4723S/2020|2020-04-07|EPI\_ISL\_427332|Original|hCoV-19^^Saint Petersburg|Human|WHO National Influenza Centre Russian Federation|WHO National Influenza Centre Russian Federation|Komissarov|Russia

>Spike|hCoV-19/USA/MN-MDH-1193/2020|2020-05-05|EPI\_ISL\_477283|Original|hCoV-19^^Minnesota|Human|M Health Fairview|Minnesota Department of Health|Garfin|USA

>Spike|hCoV-19/Wales/PHWC-249A1/2020|2020-03-19|EPI\_ISL\_419463|Original|hCoV-19^^Wales|Human|Wales Specialist Virology Centre|Public Health Wales Microbiology Cardiff|Moore|United Kingdom

>Spike|hCoV-19/Wales/PHWC-1687E2/2020|2020-04-20|EPI\_ISL\_494289|Original|hCoV-19^^Wales|Human|Originating lab|COVID-19 Genomics UK (COG-UK) Consortium|Moore|United Kingdom

>Spike|hCoV-19/Iceland/464/2020|2020-03-20|EPI\_ISL\_424487|Original|hCoV-19^^Reykjavik|Human|The National University Hospital of Iceland|deCODE genetics|J\|u00f3nsson|Iceland

>Spike|hCoV-19/India/GJ-GBRC250a/2020|2020-06-12|EPI\_ISL\_483833|Original|hCoV-19^^Gujarat|Human|Pandit Deendayal Upadhyay Government Medical College|Gujarat Biotechnology Research Centre|Joshi|India

>Spike|hCoV-19/USA/CA-CZB-2177/2020|2020-05-24|EPI\_ISL\_513727|Original|hCoV-19^^California|Human|Orange County Public Health Lab|Chan-Zuckerberg Biohub|Kamm|USA

>Spike|hCoV-19/Hong Kong/VM20040257/2020|2020-07-14|EPI\_ISL\_523843|Original|hCoV-19^^Hong Kong|Human|Queen Elizabeth Hospital|Hong Kong Department of Health|Mak|China

>Spike|hCoV-19/Denmark/DCGC-929/2020|2020-03-30|EPI\_ISL\_614886|Original|hCoV-19^^Syddanmark|Human|Department of Virus and Microbiological Special Diagnostics|Albertsen lab|Michaelsen|Denmark

>Spike|hCoV-19/Denmark/DCGC-7212/2020|2020-10-12|EPI\_ISL\_619203|Original|hCoV-19^^Hovedstaden|Human|Department of Virus and Microbiological Special Diagnostics|Albertsen lab|Michaelsen|Denmark

>Spike|hCoV-19/England/204540974/2020|2020-11-04|EPI\_ISL\_678660|Original|hCoV-19^^England|Human|Respiratory Virus Unit|COVID-19 Genomics UK (COG-UK) Consortium|Platt|United Kingdom

>Spike|hCoV-19/Japan/PG-3758/2020|2020-04-00|EPI\_ISL\_692011|Original|hCoV-19^^Japan|Human|Pathogen Genomics Center|Pathogen Genomics Center|Sekizuka|Japan

>Spike|hCoV-19/USA/TX-HMH-MCoV-9578/2020|2020-07-04|EPI\_ISL\_780166|Original|hCoV-19^^Texas|Human|Houston Methodist Hospital|Houston Methodist Hospital|Long|USA

>Spike|hCoV-19/France/PAC-IHU-0456/2020|2020-04-04|EPI\_ISL\_569522|Original|hCoV-19^^Provence-Alpes-C\|u00f4te-d\|u2019Azur|Human|MEPHI|MEPHI|Levasseur|France

>Spike|hCoV-19/USA/TX-HMH-MCoV-15487/2020|2020-10-22|EPI\_ISL\_786971|Original|hCoV-19^^Texas|Human|Houston Methodist Hospital|Houston Methodist Hospital|Long|USA

>Spike|hCoV-19/SaudiArabia/KAUST-JEDDAH1024/2020|2020-06-23|EPI\_ISL\_512894|Original|hCoV-19^^Jeddah|Human|Pathogen Genomics Lab King Abdullah

University of Science and Technology(KAUST)|Pathogen Genomics Lab King Abdullah  
University of Science and Technology(KAUST)|Mohamed Ghazzali|Saudi Arabia  
>Spike|hCoV-19/England/QEUEH-B6C78A/2020|2020-11-10|EPI\_ISL\_655929|Original|hCoV-  
19^^England|Human|Lighthouse Lab in Glasgow|Wellcome Sanger Institute for the COVID-  
19 Genomics UK (COG-UK) Consortium|Davies|United Kingdom  
>Spike|hCoV-19/Spain/MD-IBV-99007154/2020|2020-08-14|EPI\_ISL\_541926|Original|hCoV-  
19^^Madrid|Human|Hospital General Universitario Gregorio Mara\u00f1a|SeqCOVID-  
SPAIN consortium/IBV (CSIC)|Comas|Spain  
>Spike|hCoV-19/Netherlands/NoordBrabant\_46/2020|2020-03-  
11|EPI\_ISL\_415503|Original|hCoV-19^^Noord Brabant|Human|Dutch COVID-19 response  
team|Erasmus Medical Center|Oude Munnink|Netherlands  
>Spike|hCoV-19/USA/CA-CHLA-PLM92463629/2020|2020-11-30|EPI\_ISL\_753551|Original|hCoV-  
19^^California|Human|Clinical virology Laboratory|Center for Personalized  
Medicine|Dien Bard|USA  
>Spike|hCoV-19/Canada/BC-BCCDC-6465/2020|2020-10-00|EPI\_ISL\_740610|Original|hCoV-  
19^^British Columbia|Human|BCCDC Public Health Laboratory|BCCDC Public Health  
Laboratory|Prystajek|Canada  
>Spike|hCoV-19/France/PAC-IHU-0078/2020|2020-03-20|EPI\_ISL\_569294|Original|hCoV-  
19^^Provence-Alpes-C\u00f4te-d\u00e0z|Human|MEPHI|MEPHI|Levasseur|France  
>Spike|hCoV-19/England/NOTT-10E5D5/2020|2020-03-22|EPI\_ISL\_425568|Original|hCoV-  
19^^England|Human|Queens Medical Centre|COVID-19 Genomics UK (COG-UK)  
Consortium|Loose|United Kingdom  
>Spike|hCoV-19/USA/TX-HMH-MCoV-19665/2020|2020-11-16|EPI\_ISL\_784024|Original|hCoV-  
19^^Texas|Human|Houston Methodist Hospital|Houston Methodist Hospital|Long|USA  
>Spike|hCoV-19/USA/CA-CZB-192/2020|2020-08-26|EPI\_ISL\_583200|Original|hCoV-  
19^^California|Human|UCSF Clinical Microbiology Laboratory|Chan-Zuckerberg  
Biohub|Bhatt|USA  
>Spike|hCoV-19/Belgium/ULG-10408/2020|2020-08-24|EPI\_ISL\_540575|Original|hCoV-  
19^^Li\u00e8ge|Human|Department of Clinical Microbiology|GIGA Medical  
Genomics|Durkin|Belgium  
>Spike|hCoV-19/England/QEUEH-9F7883/2020|2020-09-27|EPI\_ISL\_595709|Original|hCoV-  
19^^England|Human|Oxford Viromics|COVID-19 Genomics UK (COG-UK)  
Consortium|Golubchik|United Kingdom  
>Spike|hCoV-19/England/QEUEH-9B4C1D/2020|2020-09-03|EPI\_ISL\_590444|Original|hCoV-  
19^^England|Human|Lighthouse Lab in Glasgow|Wellcome Sanger Institute for the COVID-  
19 Genomics UK (COG-UK) consortium|Davies|United Kingdom  
>Spike|hCoV-19/England/MILK-977CCB/2020|2020-07-27|EPI\_ISL\_550484|Original|hCoV-  
19^^England|Human|Lighthouse Lab in Milton Keynes|Wellcome Sanger Institute for the  
COVID-19 Genomics UK (COG-UK) consortium|Davies|United Kingdom  
>Spike|hCoV-19/England/BRIS-12EFFF/2020|2020-04-22|EPI\_ISL\_488440|Original|hCoV-  
19^^England|Human|PHE South West Regional Laboratory|Wellcome Sanger Institute for  
the COVID-19 Genomics UK (COG-UK) consortium|Davies|United Kingdom  
>Spike|hCoV-19/England/CWAR-24FDD7E/2020|2020-05-05|EPI\_ISL\_584519|Original|hCoV-  
19^^England|Human|UHCW / University of Warwick|COVID-19 Genomics UK (COG-UK)  
Consortium|Stark|United Kingdom  
>Spike|hCoV-19/Japan/PG-6532/2020|2020-08-00|EPI\_ISL\_687646|Original|hCoV-  
19^^Japan|Human|Pathogen Genomics Center|Pathogen Genomics Center|Sekizuka|Japan  
>Spike|hCoV-19/Australia/VIC9966/2020|2020-07-23|EPI\_ISL\_565810|Original|hCoV-  
19^^Victoria|Human|Microbiological Diagnostic Unit - Public Health Laboratory (MDU-  
PHL)|MDU-PHL|Schultz|Australia  
>Spike|hCoV-19/USA/MI-MDHHS-SC20939/2020|2020-03-14|EPI\_ISL\_507729|Original|hCoV-  
19^^Michigan|Human|Michigan Department of Health and Human Services|Michigan  
Department of Health and Human Services|Blankenship|USA  
>Spike|hCoV-19/Australia/VIC492/2020|2020-03-23|EPI\_ISL\_426765|Original|hCoV-  
19^^Victoria|Human|Victorian Infectious Diseases Reference Laboratory  
(VIDRL)|Microbiological Diagnostic Unit Public Health Laboratory and Victorian  
Infectious Diseases Reference Laboratory|Schultz|Australia  
>Spike|hCoV-19/Malaysia/IMR\_WC81523/2020|2020-05-23|EPI\_ISL\_490096|Original|hCoV-  
19^^Malaysia|Human|Institute for Medical Research|Institute for Medical  
Research|Suppiah|Malaysia

>Spike|hCoV-19/England/MILK-BA9D43/2020|2020-11-17|EPI\_ISL\_783238|Original|hCoV-19^^England|Human|Lighthouse Lab in Milton Keynes|Wellcome Sanger Institute for the COVID-19 Genomics UK (COG-UK) Consortium|Davies|United Kingdom

>Spike|hCoV-19/Brazil/SE-6594/2020|2020-04-29|EPI\_ISL\_541391|Original|hCoV-19^^Sergipe|Human|LACEN/SE|Laboratory of Respiratory Viruses and Measles|Silva|Brazil

>Spike|hCoV-19/Scotland/CVR2415/2020|2020-04-14|EPI\_ISL\_448185|Original|hCoV-19^^Scotland|Human|West of Scotland Specialist Virology Centre|COVID-19 Genomics UK (COG-UK) Consortium|Robertson|United Kingdom

>Spike|hCoV-19/Northern Ireland/NIRE-FBF65/2020|2020-04-11|EPI\_ISL\_459328|Original|hCoV-19^^Northern Ireland|Human|Regional Virus Laboratory|Wellcome Sanger Institute for the COVID-19 Genomics UK (COG-UK) consortium|Davies|United Kingdom

>Spike|hCoV-19/Finland/7LS9A9/2020|2020-10-07|EPI\_ISL\_756044|Original|hCoV-19^^Uusimaa|Human|Department of Virology and Immunology|Department of Virology|Smura|Finland

>Spike|hCoV-19/England/ALDP-94FDE7/2020|2020-06-15|EPI\_ISL\_555271|Original|hCoV-19^^England|Human|Lighthouse Lab in Alderley Park|Wellcome Sanger Institute for the COVID-19 Genomics UK (COG-UK) consortium|Davies|United Kingdom

>Spike|hCoV-19/Wales/PHWC-4A517F/2020|2020-12-14|EPI\_ISL\_764829|Original|hCoV-19^^Wales|Human|Wales Specialist Virology Centre Sequencing lab|COVID-19 Genomics UK (COG-UK) Consortium|Moore|United Kingdom

>Spike|hCoV-19/England/ALDP-9BC7E7/2020|2020-09-09|EPI\_ISL\_568175|Original|hCoV-19^^England|Human|Lighthouse Lab in Alderley Park|Wellcome Sanger Institute for the COVID-19 Genomics UK (COG-UK) consortium|Davies|United Kingdom

>Spike|hCoV-19/Spain/CM-IBV-003750/2020|2020-04-01|EPI\_ISL\_474837|Original|hCoV-19^^Castilla La Mancha|Human|Complejo Hospitalario Universitario de Albacete|SeqCOVID-SPAIN consortium|IBV(CSIC)|Comas|Spain

>Spike|hCoV-19/India/MH-NIV-229912/2020|2020-09-28|EPI\_ISL\_577702|Original|hCoV-19^^Maharashtra|Human|NIV Influenza|NIV Influenza|Potdar|India

>Spike|hCoV-19/USA/MA-MASPHL-00403/2020|2020-04-26|EPI\_ISL\_693143|Original|hCoV-19^^Massachusetts|Human|Massachusetts State Public Health Laboratory|Massachusetts State Public Health Laboratory|Lang|USA

>Spike|hCoV-19/Denmark/DCGC-1662/2020|2020-05-11|EPI\_ISL\_622411|Original|hCoV-19^^Hovedstaden|Human|Department of Virus and Microbiological Special Diagnostics|Albertsen lab|Michaelsen|Denmark

>Spike|hCoV-19/USA/NY-NYUMC63/2020|2020-03-18|EPI\_ISL\_420578|Original|hCoV-19^^New York|Human|NYU Langone Health|Departments of Pathology and Medicine|Maurano|USA

>Spike|hCoV-19/England/MILK-ACE6E4/2020|2020-10-21|EPI\_ISL\_629683|Original|hCoV-19^^England|Human|Lighthouse Lab in Milton Keynes|Wellcome Sanger Institute for the COVID-19 Genomics UK (COG-UK) consortium|Davies|United Kingdom

>Spike|hCoV-19/Wales/PHWC-48C554/2020|2020-11-07|EPI\_ISL\_666440|Original|hCoV-19^^Wales|Human|Wales Specialist Virology Centre Sequencing lab|COVID-19 Genomics UK (COG-UK) Consortium|Moore|United Kingdom

>Spike|hCoV-19/England/BRIS-12368C/2020|2020-04-06|EPI\_ISL\_442691|Original|hCoV-19^^England|Human|PHE South West Regional Laboratory|Wellcome Sanger Institute for the COVID-19 Genomics UK (COG-UK) consortium|Amato|United Kingdom

>Spike|hCoV-19/USA/WA-UW-182/2020|2020-03-08|EPI\_ISL\_570973|Original|hCoV-19^^Washington|Human|UW Virology Lab|UW Virology Lab|Roychoudhury|USA

>Spike|hCoV-19/USA/CA-CZB-15329/2020|2020-11-25|EPI\_ISL\_738994|Original|hCoV-19^^California|Human|Santa Clara County Public Health Laboratory|Chan-Zuckerberg Biohub|Kamm|USA

>Spike|hCoV-19/USA/WA-ISB1/2020|2020-07-00|EPI\_ISL\_593596|Original|hCoV-19^^Washington|Human|Swedish Medical Center|Institute for Systems Biology|Roach|USA

>Spike|hCoV-19/France/IDF-2768/2020|2020-03-17|EPI\_ISL\_420042|Original|hCoV-19^^\u00cele-de-France|Human|Service de Biologie clinique|National Reference Center for Viruses of Respiratory Infections|Enouf|France

>Spike|hCoV-19/England/CAMC-B0B0A0/2020|2020-10-29|EPI\_ISL\_643548|Original|hCoV-19^^England|Human|Lighthouse Lab in Cambridge|Wellcome Sanger Institute for the COVID-19 Genomics UK (COG-UK) Consortium|Davies|United Kingdom

>Spike|hCoV-19/USA/LA-EVTL547/2020|2020-08-05|EPI\_ISL\_578951|Original|hCoV-19^^Louisiana|Human|LSUHS Emerging Viral Threat Laboratory|Microbial Genome Sequencing Center|Kamil|USA

>Spike|hCoV-19/USA/AZ-TG666150/2020|2020-04-30|EPI\_ISL\_696231|Original|hCoV-19^^Arizona|Human|Sonora Quest Laboratories|TGen North|French|USA

>Spike|hCoV-19/England/CAMB-1B8051/2020|2020-10-16|EPI\_ISL\_637692|Original|hCoV-19^^England|Human|Department of Pathology|COVID-19 Genomics UK (COG-UK) Consortium|Goodfellow|United Kingdom

>Spike|hCoV-19/Scotland/EDB10552/2020|2020-10-08|EPI\_ISL\_703782|Original|hCoV-19^^Scotland|Human|Virology Department|COVID-19 Genomics UK (COG-UK) Consortium|McHugh|United Kingdom

>Spike|hCoV-19/Australia/VIC6402/2020|2020-07-23|EPI\_ISL\_521194|Original|hCoV-19^^Victoria|Human|Microbiological Diagnostic Unit - Public Health Laboratory (MDU-PHL)|MDU-PHL|Schultz|Australia

>Spike|hCoV-19/England/ALDP-9FCD16/2020|2020-10-01|EPI\_ISL\_587796|Original|hCoV-19^^England|Human|Lighthouse Lab in Alderley Park|Wellcome Sanger Institute for the COVID-19 Genomics UK (COG-UK) consortium|Davies|United Kingdom

>Spike|hCoV-19/Scotland/QEUH-969A2C/2020|2020-08-12|EPI\_ISL\_531065|Original|hCoV-19^^Scotland|Human|NHSGGC West of Scotland Specialist Virology Centre / MRC-University of Glasgow Centre for Virus Research|Wellcome Sanger Institute for the COVID-19 Genomics UK (COG-UK) consortium|Davies|United Kingdom

>Spike|hCoV-19/Scotland/GCVR-17233C/2020|2020-03-29|EPI\_ISL\_469976|Original|hCoV-19^^Scotland|Human|NHSGGC West of Scotland Specialist Virology Centre / MRC-University of Glasgow Centre for Virus Research|Wellcome Sanger Institute for the COVID-19 Genomics UK (COG-UK) consortium|Davies|United Kingdom

>Spike|hCoV-19/England/ALDP-9D99B1/2020|2020-09-18|EPI\_ISL\_576781|Original|hCoV-19^^England|Human|Oxford Viromics|COVID-19 Genomics UK (COG-UK) Consortium|Golubchik|United Kingdom

>Spike|hCoV-19/Switzerland/LU-ETHZ-410312/2020|2020-12-15|EPI\_ISL\_737418|Original|hCoV-19^^Lucerne|Human|Viollier AG|Department of Biosystems Science and Engineering|Nadeau|Switzerland

>Spike|hCoV-19/USA/FL-BPHL-0806/2020|2020-05-18|EPI\_ISL\_514152|Original|hCoV-19^^Florida|Human|Florida Bureau of Public Health Laboratories|Florida Bureau of Public Health Laboratories|Blanton|USA

>Spike|hCoV-19/England/MILK-A18EB6/2020|2020-10-01|EPI\_ISL\_627483|Original|hCoV-19^^England|Human|Wales Specialist Virology Centre Sequencing lab|COVID-19 Genomics UK (COG-UK) Consortium|Moore|United Kingdom

>Spike|hCoV-19/England/QEUH-B66647/2020|2020-11-11|EPI\_ISL\_661583|Original|hCoV-19^^England|Human|Lighthouse Lab in Glasgow|Wellcome Sanger Institute for the COVID-19 Genomics UK (COG-UK) Consortium|Davies|United Kingdom

>Spike|hCoV-19/USA/MI-UM-10036648902/2020|2020-10-27|EPI\_ISL\_650051|Original|hCoV-19^^Michigan|Human|University of Michigan Clinical Microbiology Laboratory|Lauring Lab|Valesano|USA

>Spike|hCoV-19/Denmark/DCGC-7621/2020|2020-10-19|EPI\_ISL\_618536|Original|hCoV-19^^Midtjylland|Human|Department of Virus and Microbiological Special Diagnostics|Albertsen lab|Michaelsen|Denmark

>Spike|hCoV-19/Australia/VIC8757/2020|2020-07-28|EPI\_ISL\_565178|Original|hCoV-19^^Victoria|Human|Victorian Infectious Diseases Reference Laboratory (VIDRL)|VIDRL and MDU-PHL|Schultz|Australia

>Spike|hCoV-19/Wales/PHWC-490371/2020|2020-10-28|EPI\_ISL\_706472|Original|hCoV-19^^Wales|Human|Originating lab|COVID-19 Genomics UK (COG-UK) Consortium|Moore|United Kingdom

>Spike|hCoV-19/Canada/QC-LSPQ-L00230536/2020|2020-03-21|EPI\_ISL\_535923|Original|hCoV-19^^Quebec|Human|H\u00f4pital Charles-LeMoine|Laboratoire de sant\u00e9 publique du Qu\u00e9bec|Moreira|Canada

>Spike|hCoV-19/Norway/4055/2020|2020-09-30|EPI\_ISL\_635126|Original|hCoV-19^^Tr\u00f8ndelag|Human|Department of Medical Microbiology|Norwegian Institute of Public Health|Vollan|Norway

>Spike|hCoV-19/mink/Netherlands/NB-EMC-36-4/2020|2020-08-20|EPI\_ISL\_577780|Original|hCoV-19^^Noord Brabant|Neovison vison|Dutch COVID-19 response team|Erasmus Medical Center|Oude Munnink|Netherlands

>Spike|hCoV-19/Wales/PHWC-492BA4/2020|2020-11-26|EPI\_ISL\_725758|Original|hCoV-19^^Wales|Human|Originating lab|COVID-19 Genomics UK (COG-UK) Consortium|Moore|United Kingdom

>Spike|hCoV-19/England/ALDP-A6FEFC/2020|2020-10-15|EPI\_ISL\_608222|Original|hCoV-19^^England|Human|Lighthouse Lab in Alderley Park|Wellcome Sanger Institute for the COVID-19 Genomics UK (COG-UK) consortium|Davies|United Kingdom

>Spike|hCoV-19/England/ALDP-95CAC2/2020|2020-06-21|EPI\_ISL\_555113|Original|hCoV-19^^England|Human|Lighthouse Lab in Alderley Park|Wellcome Sanger Institute for the COVID-19 Genomics UK (COG-UK) consortium|Davies|United Kingdom

>Spike|hCoV-19/Cote d'Ivoire/BKE0430/2020|2020-07-03|EPI\_ISL\_681836|Original|hCoV-19^^Boauk\u00e9|Human|Molecular diagnostic unit for viral haemorrhagic fevers and emerging viruses|Project group Epidemiology of Highly Pathogenic Microorganisms|Schubert|C\u00f4te d'Ivoire

>Spike|hCoV-19/Germany/HH-hpi-p2381/2020|2020-06-06|EPI\_ISL\_776459|Original|hCoV-19^^Hamburg|Human|University Medical Center Hamburg Eppendorf|Heinrich Pette Institute|Robitaille|Germany

>Spike|hCoV-19/USA/CA-IGI-0428/2020|2020-07-14|EPI\_ISL\_756326|Original|hCoV-19^^California|Human|Innovative Genomics Institute|Innovative Genomics Institute|Wyman|USA

>Spike|hCoV-19/Australia/VIC5444/2020|2020-07-15|EPI\_ISL\_520195|Original|hCoV-19^^Victoria|Human|Victorian Infectious Diseases Reference Laboratory (VIDRL)|VIDRL and MDU-PHL|Schultz|Australia

>Spike|hCoV-19/Netherlands/Gelderland\_56/2020|2020-05-18|EPI\_ISL\_460955|Original|hCoV-19^^Gelderland|Human|Dutch COVID-19 response team|Erasmus Medical Center|Oude Munnink|Netherlands

>Spike|hCoV-19/Zimbabwe/ZW-9100/2020|2020-06-01|EPI\_ISL\_644754|Original|hCoV-19^^Zimbabwe|Human|National Microbiology Reference Laboratory|Quadram Institute Bioscience|Alikhan|Zimbabwe

>Spike|hCoV-19/England/OXON-B053D/2020|2020-04-20|EPI\_ISL\_478886|Original|hCoV-19^^England|Human|Oxford Viromics|COVID-19 Genomics UK (COG-UK) Consortium|Golubchik|United Kingdom

>Spike|hCoV-19/Sweden/20-22111/2020|2020-06-01|EPI\_ISL\_582786|Original|hCoV-19^^Orebro|Human|Orebro klinisk mikrobiologi|The Public Health Agency of Sweden|Svartstr\u00f6m|Sweden

>Spike|hCoV-19/USA/CA-ALSR-1239/2020|2020-05-05|EPI\_ISL\_494453|Original|hCoV-19^^California|Human|San Diego County Public Health Laboratory|Andersen lab at Scripps Research|Gangavarapu|USA

>Spike|hCoV-19/Chile/RM-109602/2020|2020-06-24|EPI\_ISL\_746561|Original|hCoV-19^^Region Metropolitana de Santiago|Human|Genetica Molecular and Subdepartamento de Virologia ISP Chile|Instituto de Salud Publica de Chile|Tognarelli|Chile

>Spike|hCoV-19/England/NORT-293079/2020|2020-06-07|EPI\_ISL\_490442|Original|hCoV-19^^England|Human|Northumbria University / South Tees Hospitals NHS Foundation Trust / North Cumbria Integrated Care NHS Foundation Trust / North Tees and Hartlepool NHS Foundation Trust / Newcastle Hospitals NHS Foundation Trust|COVID-19 Genomics UK (COG-UK) Consortium|Bashton|United Kingdom

>Spike|hCoV-19/Wales/PHWC-48646C/2020|2020-10-14|EPI\_ISL\_639046|Original|hCoV-19^^Wales|Human|Wales Specialist Virology Centre Sequencing lab|COVID-19 Genomics UK (COG-UK) Consortium|Moore|United Kingdom

>Spike|hCoV-19/Scotland/EDB10645/2020|2020-12-01|EPI\_ISL\_705791|Original|hCoV-19^^Scotland|Human|Virology Department|COVID-19 Genomics UK (COG-UK) Consortium|McHugh|United Kingdom

>Spike|hCoV-19/Wales/PHWC-4808B1/2020|2020-10-06|EPI\_ISL\_612944|Original|hCoV-19^^Wales|Human|Wales Specialist Virology Centre Sequencing lab|COVID-19 Genomics UK (COG-UK) Consortium|Moore|United Kingdom

>Spike|hCoV-19/Scotland/QEUH-9E4F1B/2020|2020-09-24|EPI\_ISL\_600959|Original|hCoV-19^^Scotland|Human|Lighthouse Lab in Glasgow|Wellcome Sanger Institute for the COVID-19 Genomics UK (COG-UK) consortium|Davies|United Kingdom



>Spike|hCoV-19/Israel/13077558/2020|2020-04-03|EPI\_ISL\_447432|Original|hCoV-19^^Tel Aviv District|Human|Clinical Microbiology Laboratory|Stern Lab|Miller|Israel

>Spike|hCoV-19/England/NORW-EFFBF/2020|2020-09-21|EPI\_ISL\_584728|Original|hCoV-19^^England|Human|Quadram Institute Bioscience|COVID-19 Genomics UK (COG-UK) Consortium|Alikhan|United Kingdom

>Spike|hCoV-19/Vietnam/VNHN\_0300/2020|2020-03-09|EPI\_ISL\_435310|Original|hCoV-19^^Vietnam|Human|National Hospital of Tropical Diseases|Oxford University Clinical Research Unit|Nguyen|Vietnam

>Spike|hCoV-19/USA/MI-MDHHS-SC21263/2020|2020-04-06|EPI\_ISL\_507518|Original|hCoV-19^^Michigan|Human|Michigan Department of Health and Human Services|Michigan Department of Health and Human Services|Blankenship|USA

>Spike|hCoV-19/England/MILK-C7B63F/2020|2020-12-15|EPI\_ISL\_756770|Original|hCoV-19^^England|Human|Lighthouse Lab in Milton Keynes|Wellcome Sanger Institute for the COVID-19 Genomics UK (COG-UK) Consortium|Davies|United Kingdom

>Spike|hCoV-19/Netherlands/GE-EMC-297/2020|2020-08-07|EPI\_ISL\_523276|Original|hCoV-19^^Gelderland|Human|Dutch COVID-19 response team|Erasmus Medical Center|Oude Munnink|Netherlands

>Spike|hCoV-19/Netherlands/LI-EMC-93/2020|2020-00-00|EPI\_ISL\_632431|Original|hCoV-19^^Limburg|Human|Dutch COVID-19 response team|Erasmus Medical Center|Oude Munnink|Netherlands

>Spike|hCoV-19/South Korea/KCDC2597/2020|2020-06-30|EPI\_ISL\_515000|Original|hCoV-19^^South Korea|Human|Division of Viral Diseases|Division of Viral Diseases|Kim|South Korea

>Spike|hCoV-19/England/NORT-292C58/2020|2020-05-18|EPI\_ISL\_489095|Original|hCoV-19^^England|Human|NU-OMICS DNA Sequencing research facility|Wellcome Sanger Institute for the COVID-19 Genomics UK (COG-UK) consortium|Davies|United Kingdom

>Spike|hCoV-19/India/KA-nimh-14722/2020|2020-05-10|EPI\_ISL\_515957|Original|hCoV-19^^Karnataka|Human|DH|Department of Neurovirology|Pattabiraman|India

>Spike|hCoV-19/England/NORT-1B71664/2020|2020-11-16|EPI\_ISL\_703034|Original|hCoV-19^^England|Human|Northumbria University / South Tees Hospitals NHS Foundation Trust / North Cumbria Integrated Care NHS Foundation Trust / North Tees and Hartlepool NHS Foundation Trust / Newcastle Hospitals NHS Foundation Trust|COVID-19 Genomics UK (COG-UK) Consortium|Bashton|United Kingdom

>Spike|hCoV-19/USA/NY-Wadsworth-30673-01/2020|2020-03-25|EPI\_ISL\_525633|Original|hCoV-19^^New York|Human|Wadsworth Center|Wadsworth Center|Plitnick|USA

>Spike|hCoV-19/India/MH-GA28/2020|2020-06-17|EPI\_ISL\_508223|Original|hCoV-19^^Maharashtra|Human|Government Medical College|National Institute of Biomedical Genomics|Maitra|India

>Spike|hCoV-19/South Korea/KCDC2713/2020|2020-07-12|EPI\_ISL\_522492|Original|hCoV-19^^South Korea|Human|Center for Laboratory Control of Infectious Diseases|Center for Laboratory Control of Infectious Diseases|Kim|South Korea

>Spike|hCoV-19/Japan/PG-4453/2020|2020-07-00|EPI\_ISL\_692676|Original|hCoV-19^^Japan|Human|Sakai City Institute of Public Health|Pathogen Genomics Center|Sekizuka|Japan

>Spike|hCoV-19/England/ALDP-954B21/2020|2020-06-13|EPI\_ISL\_553405|Original|hCoV-19^^England|Human|Lighthouse Lab in Alderley Park|Wellcome Sanger Institute for the COVID-19 Genomics UK (COG-UK) consortium|Davies|United Kingdom

>Spike|hCoV-19/Wales/PHWC-2A3BC/2020|2020-04-05|EPI\_ISL\_445563|Original|hCoV-19^^Wales|Human|Wales Specialist Virology Centre|Public Health Wales Microbiology Cardiff|Moore|United Kingdom

>Spike|hCoV-19/USA/WY-WYPHL-00065/2020|2020-03-26|EPI\_ISL\_462957|Original|hCoV-19^^Wyoming|Human|Wyoming Public Health Laboratory|Center for Global Health|Domman|USA

>Spike|hCoV-19/USA/LA-EVTL105/2020|2020-05-07|EPI\_ISL\_451266|Original|hCoV-19^^Louisiana|Human|LSUHS Emerging Viral Threat Laboratory|Microbial Genome Sequencing Center|Kamil|USA

>Spike|hCoV-19/Wales/PHWC-32797/2020|2020-04-15|EPI\_ISL\_474351|Original|hCoV-19^^Wales|Human|Originating lab|COVID-19 Genomics UK (COG-UK) Consortium|Moore|United Kingdom

>Spike|hCoV-19/Tunisia/COV0010-12/2020|2020-03-18|EPI\_ISL\_463001|Original|hCoV-19^^Tunisia|Human|unknown|Clinical virology|Submitter|Tunisia

>Spike|hCoV-19/Denmark/DCGC-2628/2020|2020-08-17|EPI\_ISL\_616507|Original|hCoV-19^^Midtjylland|Human|Department of Virus and Microbiological Special Diagnostics|Albertsen lab|Michaelsen|Denmark

>Spike|hCoV-19/Wales/PHWC-485B59/2020|2020-10-22|EPI\_ISL\_628256|Original|hCoV-19^^Wales|Human|Wales Specialist Virology Centre Sequencing lab|COVID-19 Genomics UK (COG-UK) Consortium|Moore|United Kingdom

>Spike|hCoV-19/Canada/ON-UHTC\_0120/2020|2020-05-18|EPI\_ISL\_526266|Original|hCoV-19^^Ontario|Human|Unity Health Toronto|Ontario Institute for Cancer Research|de Borja|Canada

>Spike|hCoV-19/Denmark/DCGC-1085/2020|2020-05-11|EPI\_ISL\_614510|Original|hCoV-19^^Hovedstaden|Human|Department of Virus and Microbiological Special Diagnostics|Albertsen lab|Michaelsen|Denmark

>Spike|hCoV-19/Bangladesh/GRMDRC-2/2020|2020-12-05|EPI\_ISL\_775019|Original|hCoV-19^^Dhaka|Human|Gonoshasthya-RNA Molecular Research Center|Gonoshasthya-RNA Molecular Research Center|Adnan|Bangladesh

>Spike|hCoV-19/Switzerland/SG-ETHZ-390386/2020|2020-12-01|EPI\_ISL\_721853|Original|hCoV-19^^St Gallen|Human|Viollier AG|Department of Biosystems Science and Engineering|Nadeau|Switzerland

>Spike|hCoV-19/England/ALDP-CB5138/2020|2020-12-17|EPI\_ISL\_761813|Original|hCoV-19^^England|Human|Lighthouse Lab in Alderley Park|Wellcome Sanger Institute for the COVID-19 Genomics UK (COG-UK) Consortium|Davies|United Kingdom

>Spike|hCoV-19/USA/TX-HMH-MCoV-10863/2020|2020-07-05|EPI\_ISL\_789664|Original|hCoV-19^^Texas|Human|Houston Methodist Hospital|Houston Methodist Hospital|Long|USA

>Spike|hCoV-19/USA/OH-CDC-2-3714258/2020|2020-11-09|EPI\_ISL\_751777|Original|hCoV-19^^Ohio|Human|OH Department of Health Laboratory|Genomics and Discovery|Queen|USA

>Spike|hCoV-19/England/LOND-D43FD/2020|2020-04-08|EPI\_ISL\_444121|Original|hCoV-19^^England|Human|University College London|COVID-19 Genomics UK (COG-UK) Consortium|Roy|United Kingdom

>Spike|hCoV-19/France/ARA-121875/2020|2020-12-18|EPI\_ISL\_745392|Original|hCoV-19^^Auvergne-Rh\u00f4ne-Alpes|Human|CNR Virus des Infections Respiratoires - France SUD|CNR Virus des Infections Respiratoires - France SUD|Bal|France

>Spike|hCoV-19/Japan/PG-7861/2020|2020-07-00|EPI\_ISL\_686962|Original|hCoV-19^^Japan|Human|Pathogen Genomics Center|Pathogen Genomics Center|Sekizuka|Japan

>Spike|hCoV-19/USA/TX-HMH-7403/2020|2020-06-29|EPI\_ISL\_546742|Original|hCoV-19^^Texas|Human|Houston Methodist Hospital|Houston Methodist Hospital|Long|USA

>Spike|hCoV-19/USA/NV-NSPHL-A0187/2020|2020-05-20|EPI\_ISL\_515443|Original|hCoV-19^^Nevada|Human|Nevada State Public Health Laboratory|Nevada State Public Health Laboratory|Sevinsky|USA

>Spike|hCoV-19/England/204690077/2020|2020-11-13|EPI\_ISL\_683520|Original|hCoV-19^^England|Human|Respiratory Virus Unit|COVID-19 Genomics UK (COG-UK) Consortium|Platt|United Kingdom

>Spike|hCoV-19/Australia/VIC14881/2020|2020-08-16|EPI\_ISL\_592662|Original|hCoV-19^^Victoria|Human|Microbiological Diagnostic Unit - Public Health Laboratory (MDU-PHL)|MDU-PHL|Schultz|Australia

>Spike|hCoV-19/England/ALDP-A6D7A8/2020|2020-10-15|EPI\_ISL\_608237|Original|hCoV-19^^England|Human|Lighthouse Lab in Alderley Park|Wellcome Sanger Institute for the COVID-19 Genomics UK (COG-UK) consortium|Davies|United Kingdom

>Spike|hCoV-19/Canada/ON-S111/2020|2020-03-22|EPI\_ISL\_586287|Original|hCoV-19^^Ontario|Human|Toronto Invasive Bacterial Diseases Network|McMaster University|McArthur|Canada

>Spike|hCoV-19/England/GSTT-265E438/2020|2020-03-30|EPI\_ISL\_484201|Original|hCoV-19^^England|Human|Centre for Clinical Infection and Diagnostics Research and Genomics Innovation Unit|COVID-19 Genomics UK (COG-UK) Consortium|Awan|United Kingdom

>Spike|hCoV-19/Japan/PG-5261/2020|2020-08-00|EPI\_ISL\_690364|Original|hCoV-19^^Japan|Human|Pathogen Genomics Center|Pathogen Genomics Center|Sekizuka|Japan

>Spike|hCoV-19/Denmark/DCGC-3455/2020|2020-08-31|EPI\_ISL\_616219|Original|hCoV-19^^Hovedstaden|Human|Department of Virus and Microbiological Special Diagnostics|Albertsen lab|Michaelsen|Denmark

>Spike|hCoV-19/England/QEUIH-CDF3C9/2020|2020-12-26|EPI\_ISL\_782213|Original|hCoV-19^^England|Human|Lighthouse Lab in Glasgow|Wellcome Sanger Institute for the COVID-19 Genomics UK (COG-UK) Consortium|Davies|United Kingdom

>Spike|hCoV-19/England/NORT-1B6BFF9/2020|2020-10-01|EPI\_ISL\_611952|Original|hCoV-19^^England|Human|Northumbria University / South Tees Hospitals NHS Foundation Trust / North Cumbria Integrated Care NHS Foundation Trust / North Tees and Hartlepool NHS Foundation Trust / Newcastle Hospitals NHS Foundation Trust|COVID-19 Genomics UK (COG-UK) Consortium|Bashton|United Kingdom

>Spike|hCoV-19/Switzerland/ZH-UZH-IMV129/2020|2020-12-21|EPI\_ISL\_751192|Original|hCoV-19^^Zurich|Human|Limmattal Hospital|Institute of Medical Virology|Schmutz|Switzerland

>Spike|hCoV-19/Norway/3033/2020|2020-08-05|EPI\_ISL\_549079|Original|hCoV-19^^Oslo|Human|Furst Medical Laboratory|Norwegian Institute of Public Health|Kopperud Riis|Norway

>Spike|hCoV-19/USA/CA-CZB-1601/2020|2020-04-02|EPI\_ISL\_468530|Original|hCoV-19^^California|Human|San Joaquin County Public Health Lab|Chan-Zuckerberg Biohub|Hao|USA

>Spike|hCoV-19/England/LIVE-A73F3/2020|2020-03-28|EPI\_ISL\_517017|Original|hCoV-19^^England|Human|Liverpool Clinical Laboratories|COVID-19 Genomics UK (COG-UK) Consortium|Haldenby|United Kingdom

>Spike|hCoV-19/USA/MA-MASPHL-00364/2020|2020-05-22|EPI\_ISL\_693169|Original|hCoV-19^^Massachusetts|Human|Massachusetts State Public Health Laboratory|Massachusetts State Public Health Laboratory|Lang|USA

>Spike|hCoV-19/Japan/PG-1559/2020|2020-04-00|EPI\_ISL\_685165|Original|hCoV-19^^Japan|Human|Pathogen Genomics Center|Pathogen Genomics Center|Sekizuka|Japan

>Spike|hCoV-19/England/BIRM-5F99E/2020|2020-05-16|EPI\_ISL\_473356|Original|hCoV-19^^England|Human|University of Birmingham|COVID-19 Genomics UK (COG-UK) Consortium|Loman|United Kingdom

>Spike|hCoV-19/England/ALDP-B85466/2020|2020-11-15|EPI\_ISL\_674172|Original|hCoV-19^^England|Human|Lighthouse Lab in Alderley Park|Wellcome Sanger Institute for the COVID-19 Genomics UK (COG-UK) Consortium|Davies|United Kingdom

>Spike|hCoV-19/Wales/PHWC-32E38/2020|2020-04-14|EPI\_ISL\_446695|Original|hCoV-19^^Wales|Human|Wales Specialist Virology Centre|Public Health Wales Microbiology Cardiff|Moore|United Kingdom

>Spike|hCoV-19/USA/PA-CDC-88398/2020|2020-03-16|EPI\_ISL\_576171|Original|hCoV-19^^Pennsylvania|Human|PA Department of Health|Pathogen Discovery|Queen|USA

>Spike|hCoV-19/England/ALDP-C48835/2020|2020-12-13|EPI\_ISL\_736751|Original|hCoV-19^^England|Human|Lighthouse Lab in Alderley Park|Wellcome Sanger Institute for the COVID-19 Genomics UK (COG-UK) Consortium|Davies|United Kingdom

>Spike|hCoV-19/England/ALDP-9E58E2/2020|2020-09-24|EPI\_ISL\_589359|Original|hCoV-19^^England|Human|Lighthouse Lab in Alderley Park|Wellcome Sanger Institute for the COVID-19 Genomics UK (COG-UK) consortium|Davies|United Kingdom

>Spike|hCoV-19/Norway/2499/2020|2020-04-28|EPI\_ISL\_481211|Original|hCoV-19^^Norway|Human|Ostfold Hospital Trust - Kalnes|Norwegian Institute of Public Health|Kopperud Riis|Norway

>Spike|hCoV-19/Australia/QLD1292/2020|2020-03-23|EPI\_ISL\_693289|Original|hCoV-19^^Australia|Human|unknown|Public Health Virology Laboratory|Nguyen|Australia

>Spike|hCoV-19/England/ALDP-68C938/2020|2020-07-02|EPI\_ISL\_558134|Original|hCoV-19^^England|Human|Lighthouse Lab in Alderley Park|Wellcome Sanger Institute for the COVID-19 Genomics UK (COG-UK) consortium|Davies|United Kingdom

>Spike|hCoV-19/Wales/PHWC-482293/2020|2020-10-21|EPI\_ISL\_613209|Original|hCoV-19^^Wales|Human|Wales Specialist Virology Centre Sequencing lab|COVID-19 Genomics UK (COG-UK) Consortium|Moore|United Kingdom

>Spike|hCoV-19/USA/WA-S2290/2020|2020-06-09|EPI\_ISL\_497718|Original|hCoV-19^^Washington|Human|Washington State Department of Health|Seattle Flu Study|Lee|USA

>Spike|hCoV-19/USA/MI-MDHHS-SC21449/2020|2020-04-08|EPI\_ISL\_507703|Original|hCoV-19^^Michigan|Human|Michigan Department of Health and Human Services|Michigan Department of Health and Human Services|Blankenship|USA

>Spike|hCoV-19/England/NOTT-11191F/2020|2020-05-28|EPI\_ISL\_461941|Original|hCoV-19^^England|Human|Queens Medical Centre|COVID-19 Genomics UK (COG-UK) Consortium|Loose|United Kingdom

>Spike|hCoV-19/Australia/VIC5661/2020|2020-07-17|EPI\_ISL\_518471|Original|hCoV-19^^Victoria|Human|Victorian Infectious Diseases Reference Laboratory (VIDRL)|VIDRL and MDU-PHL|Schultz|Australia

>Spike|hCoV-19/USA/WI-UW-1828/2020|2020-09-11|EPI\_ISL\_605700|Original|hCoV-19^^Wisconsin|Human|University of Wisconsin-Madison AIDS Vaccine Research Laboratories|University of Wisconsin-Madison AIDS Vaccine Research Laboratories|Baczenas|USA

>Spike|hCoV-19/Australia/NSW851/2020|2020-08-12|EPI\_ISL\_526193|Original|hCoV-19^^New South Wales|Human|Sydney South West Pathology Service (SSWPS) - Liverpool Hospital - NSW Health Pathology|NSW Health Pathology - Institute of Clinical Pathology and Medical Research; Westmead Hospital; University of Sydney|Gall|Australia

>Spike|hCoV-19/USA/TX-HMH-MCoV-18357/2020|2020-11-18|EPI\_ISL\_784705|Original|hCoV-19^^Texas|Human|Houston Methodist Hospital|Houston Methodist Hospital|Long|USA

>Spike|hCoV-19/England/ALDP-9ED96F/2020|2020-05-05|EPI\_ISL\_580791|Original|hCoV-19^^England|Human|Lighthouse Lab in Alderley Park|Wellcome Sanger Institute for the COVID-19 Genomics UK (COG-UK) consortium|Davies|United Kingdom

>Spike|hCoV-19/Wales/PHWC-483A8B/2020|2020-10-23|EPI\_ISL\_626996|Original|hCoV-19^^Wales|Human|Wales Specialist Virology Centre Sequencing lab|COVID-19 Genomics UK (COG-UK) Consortium|Moore|United Kingdom

>Spike|hCoV-19/USA/UT-UPHL-2009017/2020|2020-05-11|EPI\_ISL\_525323|Original|hCoV-19^^Utah|Human|Utah Public Health Laboratory|Utah Public Health Laboratory|Young|USA

>Spike|hCoV-19/Saudi Arabia/KAUST-MADINAH1366/2020|2020-06-04|EPI\_ISL\_678012|Original|hCoV-19^^Madinah|Human|Pathogen Genomics Lab King Abdullah University of Science and Technology(KAUST)|Pathogen Genomics Lab King Abdullah University of Science and Technology(KAUST)|Mohamed Ghazzali|Saudi Arabia

>Spike|hCoV-19/Iceland/386/2020|2020-03-19|EPI\_ISL\_424410|Original|hCoV-19^^Reykjavik|Human|The National University Hospital of Iceland|deCODE genetics|J\u00f3nsson|Iceland

>Spike|hCoV-19/England/ALDP-B83B72/2020|2020-11-14|EPI\_ISL\_675678|Original|hCoV-19^^England|Human|Lighthouse Lab in Alderley Park|Wellcome Sanger Institute for the COVID-19 Genomics UK (COG-UK) Consortium|Davies|United Kingdom

>Spike|hCoV-19/USA/TX-HMH-MCoV-9665/2020|2020-07-04|EPI\_ISL\_780211|Original|hCoV-19^^Texas|Human|Houston Methodist Hospital|Houston Methodist Hospital|Long|USA

>Spike|hCoV-19/Netherlands/NA\_380/2020|2020-00-00|EPI\_ISL\_455182|Original|hCoV-19^^Netherlands|Human|Dutch COVID-19 response team|Erasmus Medical Center|Oude Munnink|Netherlands

>Spike|hCoV-19/Netherlands/ZH-EMC-546/2020|2020-09-16|EPI\_ISL\_577974|Original|hCoV-19^^Zuid Holland|Human|Dutch COVID-19 response team|Erasmus Medical Center|Oude Munnink|Netherlands

>Spike|hCoV-19/India/MH-BJMC-8675/2020|2020-06-02|EPI\_ISL\_728329|Original|hCoV-19^^Maharashtra|Human|B.J. Govt. Medical College|National Centre For Cell Science|Paul|India

>Spike|hCoV-19/England/20134002904/2020|2020-03-18|EPI\_ISL\_423054|Original|hCoV-19^^England|Human|Respiratory Virus Unit|Respiratory Virus Unit|Platt|United Kingdom

>Spike|hCoV-19/England/MILK-9578BE/2020|2020-06-09|EPI\_ISL\_554054|Original|hCoV-19^^England|Human|Lighthouse Lab in Milton Keynes|Wellcome Sanger Institute for the COVID-19 Genomics UK (COG-UK) consortium|Davies|United Kingdom

>Spike|hCoV-19/England/ALDP-952103/2020|2020-06-09|EPI\_ISL\_551319|Original|hCoV-19^^England|Human|Lighthouse Lab in Alderley Park|Wellcome Sanger Institute for the COVID-19 Genomics UK (COG-UK) consortium|Davies|United Kingdom

>Spike|hCoV-19/USA/MI-QDX-733/2020|2020-03-22|EPI\_ISL\_571466|Original|hCoV-19^^Michigan|Human|Quest Diagnostics|Quest Diagnostics|Kagan|USA

>Spike|hCoV-19/England/CAMB-821F4/2020|2020-04-21|EPI\_ISL\_438632|Original|hCoV-19^^England|Human|Department of Pathology|COVID-19 Genomics UK (COG-UK) Consortium|Meredith|United Kingdom

>Spike|hCoV-19/Sweden/20-50053/2020|2020-03-02|EPI\_ISL\_454869|Original|hCoV-19^^Stockholm|Human|Karolinska Universitetslaboratoriet|The Public Health Agency of Sweden|Svartstr\u00f6m|Sweden

>Spike|hCoV-19/Finland/15LS7AF9/2020|2020-10-15|EPI\_ISL\_756180|Original|hCoV-19^^Uusimaa|Human|Department of Virology and Immunology|Department of Virology|Smura|Finland

>Spike|hCoV-19/England/CAMC-B21B58/2020|2020-11-01|EPI\_ISL\_647247|Original|hCoV-19^^England|Human|Lighthouse Lab in Cambridge|Wellcome Sanger Institute for the COVID-19 Genomics UK (COG-UK) Consortium|Davies|United Kingdom

>Spike|hCoV-19/USA/MO-WUSTL\_C/2020|2020-08-14|EPI\_ISL\_610157|Original|hCoV-19^^Missouri|Human|Washington University in St. Louis|Washington University in St. Louis|Tahan|USA

>Spike|hCoV-19/England/CAMC-A664C6/2020|2020-10-11|EPI\_ISL\_637489|Original|hCoV-19^^England|Human|Department of Pathology|COVID-19 Genomics UK (COG-UK) Consortium|Goodfellow|United Kingdom

>Spike|hCoV-19/USA/WI-UW-583/2020|2020-06-22|EPI\_ISL\_484958|Original|hCoV-19^^Wisconsin|Human|University of Wisconsin-Madison AIDS Vaccine Research Laboratories|University of Wisconsin-Madison AIDS Vaccine Research Laboratories|Baczenas|USA

>Spike|hCoV-19/Denmark/DCGC-21192/2020|2020-12-21|EPI\_ISL\_759606|Original|hCoV-19^^Hovedstaden|Human|Department of Virus and Microbiological Special Diagnostics|Albertsen Lab|Michaelsen|Denmark

>Spike|hCoV-19/England/MILK-ABBE1F/2020|2020-10-22|EPI\_ISL\_631071|Original|hCoV-19^^England|Human|Lighthouse Lab in Milton Keynes|Wellcome Sanger Institute for the COVID-19 Genomics UK (COG-UK) consortium|Davies|United Kingdom

>Spike|hCoV-19/Australia/VIC2256/2020|2020-06-23|EPI\_ISL\_521985|Original|hCoV-19^^Victoria|Human|Victorian Infectious Diseases Reference Laboratory (VIDRL)|VIDRL and MDU-PHL|Schultz|Australia

>Spike|hCoV-19/USA/CT-CDC-2-3714065/2020|2020-11-12|EPI\_ISL\_751624|Original|hCoV-19^^Connecticut|Human|CT-Dr. Katherine A. Kelley State Public Health Lab|Genomics and Discovery|Queen|USA

>Spike|hCoV-19/Denmark/DCGC-16004/2020|2020-11-23|EPI\_ISL\_714529|Original|hCoV-19^^Hovedstaden|Human|Department of Virus and Microbiological Special Diagnostics|Albertsen Lab|Michaelsen|Denmark

>Spike|hCoV-19/England/QEUEH-B2D600/2020|2020-11-04|EPI\_ISL\_659863|Original|hCoV-19^^England|Human|Lighthouse Lab in Glasgow|Wellcome Sanger Institute for the COVID-19 Genomics UK (COG-UK) Consortium|Davies|United Kingdom

>Spike|hCoV-19/England/QEUEH-BCB9A1/2020|2020-11-27|EPI\_ISL\_703976|Original|hCoV-19^^England|Human|Lighthouse Lab in Glasgow|Wellcome Sanger Institute for the COVID-19 Genomics UK (COG-UK) Consortium|Davies|United Kingdom

>Spike|hCoV-19/Finland/25LS13H1/2020|2020-10-25|EPI\_ISL\_759909|Original|hCoV-19^^Uusimaa|Human|Department of Virology and Immunology|Department of Virology|Smura|Finland

>Spike|hCoV-19/Spain/MD-HLP-R2-15/2020|2020-03-03|EPI\_ISL\_417979|Original|hCoV-19^^Madrid|Human|Hospital Universitario Ram\u00f3n y Cajal|Hospital Universitario La Paz|Viedma|Spain

>Spike|hCoV-19/USA/CA-ALSR-2188/2020|2020-06-24|EPI\_ISL\_635380|Original|hCoV-19^^California|Human|San Diego County Public Health Laboratory|Andersen lab at Scripps Research|Gangavarapu|USA

>Spike|hCoV-19/Wales/PHWC-2480E/2020|2020-03-17|EPI\_ISL\_419449|Original|hCoV-19^^Wales|Human|Wales Specialist Virology Centre|Public Health Wales Microbiology Cardiff|Moore|United Kingdom

>Spike|hCoV-19/USA/TX-HMH-7226/2020|2020-06-29|EPI\_ISL\_546611|Original|hCoV-19^^Texas|Human|Houston Methodist Hospital|Houston Methodist Hospital|Long|USA

>Spike|hCoV-19/Denmark/DCGC-11512/2020|2020-11-02|EPI\_ISL\_670967|Original|hCoV-19^^Sjælland|Human|Department of Virus and Microbiological Special Diagnostics|Albertsen Lab|Michaelsen|Denmark

>Spike|hCoV-19/Scotland/QEUEH-9FB48B/2020|2020-09-29|EPI\_ISL\_600614|Original|hCoV-19^^Scotland|Human|Lighthouse Lab in Glasgow|Wellcome Sanger Institute for the COVID-19 Genomics UK (COG-UK) consortium|Davies|United Kingdom

>Spike|hCoV-19/USA/MD-MDH-0497/2020|2020-12-23|EPI\_ISL\_778878|Original|hCoV-19^^Maryland|Human|Maryland Public Health Laboratory|Maryland Public Health Laboratory|Keller|USA

>Spike|hCoV-19/Switzerland/BE-ETHZ-110481/2020|2020-04-07|EPI\_ISL\_451893|Original|hCoV-19^^Bern|Human|Viollier AG|Department of Biosystems Science and Engineering|Nadeau|Switzerland

>Spike|hCoV-19/USA/CA-CDPH244/2020|2020-11-15|EPI\_ISL\_755087|Original|hCoV-19^^California|Human|California Department of Public Health|California Department of Public Health|Bell|USA

>Spike|hCoV-19/Netherlands/NA\_364/2020|2020-04-08|EPI\_ISL\_455168|Original|hCoV-19^^Netherlands|Human|Dutch COVID-19 response team|Erasmus Medical Center|Oude Munnink|Netherlands

>Spike|hCoV-19/England/QEUEH-B31FE0/2020|2020-11-04|EPI\_ISL\_646449|Original|hCoV-19^^England|Human|Lighthouse Lab in Glasgow|Wellcome Sanger Institute for the COVID-19 Genomics UK (COG-UK) Consortium|Davies|United Kingdom

>Spike|hCoV-19/USA/TX-HMH-MCoV-16069/2020|2020-10-27|EPI\_ISL\_785753|Original|hCoV-19^^Texas|Human|Houston Methodist Hospital|Houston Methodist Hospital|Long|USA

>Spike|hCoV-19/Australia/VIC11005/2020|2020-07-30|EPI\_ISL\_563194|Original|hCoV-19^^Victoria|Human|Microbiological Diagnostic Unit - Public Health Laboratory (MDU-PHL)|MDU-PHL|Schultz|Australia

>Spike|hCoV-19/Australia/VIC4398/2020|2020-07-14|EPI\_ISL\_519694|Original|hCoV-19^^Victoria|Human|Microbiological Diagnostic Unit - Public Health Laboratory (MDU-PHL)|MDU-PHL|Schultz|Australia

>Spike|hCoV-19/Chile/MA-194109-B/2020|2020-09-27|EPI\_ISL\_746523|Original|hCoV-19^^Magallanes|Human|Genetica Molecular and Subdepartamento de Virologia ISP Chile|Instituto de Salud Publica de Chile|Tognarelli|Chile

>Spike|hCoV-19/Gambia/GC19-3794/2020|2020-07-27|EPI\_ISL\_561078|Original|hCoV-19^^Kombo|Human|MRCG at LSHTM Genomics lab|MRCG at LSHTM Genomics lab|Sesay|Gambia

>Spike|hCoV-19/England/QEUEH-9F7CD2/2020|2020-09-27|EPI\_ISL\_588856|Original|hCoV-19^^England|Human|Lighthouse Lab in Glasgow|Wellcome Sanger Institute for the COVID-19 Genomics UK (COG-UK) consortium|Davies|United Kingdom

>Spike|hCoV-19/Sweden/20-50139/2020|2020-03-04|EPI\_ISL\_454883|Original|hCoV-19^^Stockholm|Human|Karolinska Universitetslaboratoriet|The Public Health Agency of Sweden|Svartstr\u00f6m|Sweden

>Spike|hCoV-19/England/ALDP-C48CEE/2020|2020-12-12|EPI\_ISL\_736655|Original|hCoV-19^^England|Human|Lighthouse Lab in Alderley Park|Wellcome Sanger Institute for the COVID-19 Genomics UK (COG-UK) Consortium|Davies|United Kingdom

>Spike|hCoV-19/Japan/PG-0379/2020|2020-02-26|EPI\_ISL\_480049|Original|hCoV-19^^Chubu|Human|Nagoya City Public Health Research Institute|Pathogen Genomics Center|Sekizuka|Japan

>Spike|hCoV-19/England/CAMB-73369/2020|2020-03-22|EPI\_ISL\_440089|Original|hCoV-19^^England|Human|Department of Pathology|Wellcome Sanger Institute for the COVID-19 Genomics UK (COG-UK) consortium|Amato|United Kingdom

>Spike|hCoV-19/Japan/PG-8535/2020|2020-07-00|EPI\_ISL\_686131|Original|hCoV-19^^Japan|Human|Pathogen Genomics Center|Pathogen Genomics Center|Sekizuka|Japan

>Spike|hCoV-19/New Zealand/20VR3076/2020|2020-00-00|EPI\_ISL\_579413|Original|hCoV-19^^Canterbury|Human|Canterbury Health Laboratories|Institute of Environmental Science and Research (ESR)|Wang|New Zealand

>Spike|hCoV-19/England/CAMC-B33036/2020|2020-11-05|EPI\_ISL\_659283|Original|hCoV-19^^England|Human|Lighthouse Lab in Cambridge|Wellcome Sanger Institute for the COVID-19 Genomics UK (COG-UK) Consortium|Davies|United Kingdom

>Spike|hCoV-19/Northern Ireland/NIRE-101763/2020|2020-04-29|EPI\_ISL\_469867|Original|hCoV-19^^Northern Ireland|Human|Regional Virus Laboratory|Wellcome Sanger Institute for the COVID-19 Genomics UK (COG-UK) consortium|Davies|United Kingdom

>Spike|hCoV-19/USA/TX-HMH-MCoV-12828/2020|2020-08-19|EPI\_ISL\_790552|Original|hCoV-19^^Texas|Human|Houston Methodist Hospital|Houston Methodist Hospital|Long|USA

>Spike|hCoV-19/USA/WI-UW-1731/2020|2020-09-08|EPI\_ISL\_605604|Original|hCoV-19^^Wisconsin|Human|University of Wisconsin-Madison AIDS Vaccine Research

Laboratories|University of Wisconsin-Madison AIDS Vaccine Research  
Laboratories|Baczenas|USA  
>Spike|hCoV-19/England/SHEF-CFB48/2020|2020-03-24|EPI\_ISL\_442460|Original|hCoV-19^^England|Human|Virology Department|COVID-19 Genomics UK (COG-UK) Consortium|de Silva|United Kingdom  
>Spike|hCoV-19/Scotland/GCVR-16FE04/2020|2020-03-22|EPI\_ISL\_489632|Original|hCoV-19^^Scotland|Human|NHSGGC West of Scotland Specialist Virology Centre / MRC-University of Glasgow Centre for Virus Research|Wellcome Sanger Institute for the COVID-19 Genomics UK (COG-UK) consortium|Davies|United Kingdom  
>Spike|hCoV-19/Shanghai/SH0012/2020|2020-02-02|EPI\_ISL\_416325|Original|hCoV-19^^Shanghai|Human|Shanghai Public Health Clinical Center|National Research Center for Translational Medicine (Shanghai)|Zhang|China  
>Spike|hCoV-19/England/CAMB-74140/2020|2020-03-20|EPI\_ISL\_440369|Original|hCoV-19^^England|Human|Department of Pathology|Wellcome Sanger Institute for the COVID-19 Genomics UK (COG-UK) consortium|Amato|United Kingdom  
>Spike|hCoV-19/Australia/VIC12420/2020|2020-07-28|EPI\_ISL\_591984|Original|hCoV-19^^Victoria|Human|Microbiological Diagnostic Unit - Public Health Laboratory (MDU-PHL)|MDU-PHL|Schultz|Australia  
>Spike|hCoV-19/Australia/VIC9624/2020|2020-08-12|EPI\_ISL\_565631|Original|hCoV-19^^Victoria|Human|Microbiological Diagnostic Unit - Public Health Laboratory (MDU-PHL)|MDU-PHL|Schultz|Australia  
>Spike|hCoV-19/England/QEUA-B9F8F4/2020|2020-11-18|EPI\_ISL\_720956|Original|hCoV-19^^England|Human|Lighthouse Lab in Glasgow|Wellcome Sanger Institute for the COVID-19 Genomics UK (COG-UK) Consortium|Davies|United Kingdom  
>Spike|hCoV-19/Russia/SPE-RII-19652V/2020|2020-06-03|EPI\_ISL\_524028|Vero P1|hCoV-19^^Saint Petersburg|Human|WHO National Influenza Centre Russian Federation|WHO National Influenza Centre Russian Federation|Komissarov|Russia  
>Spike|hCoV-19/USA/AZ-TG579666/2020|2020-08-05|EPI\_ISL\_695626|Original|hCoV-19^^Arizona|Human|TGen North|TGen North|French|USA  
>Spike|hCoV-19/England/204660311/2020|2020-11-11|EPI\_ISL\_686567|Original|hCoV-19^^England|Human|Respiratory Virus Unit|COVID-19 Genomics UK (COG-UK) Consortium|Platt|United Kingdom  
>Spike|hCoV-19/England/QEUA-969AE0/2020|2020-08-12|EPI\_ISL\_531027|Original|hCoV-19^^England|Human|Lighthouse Lab in Glasgow|Wellcome Sanger Institute for the COVID-19 Genomics UK (COG-UK) consortium|Davies|United Kingdom  
>Spike|hCoV-19/Wales/MILK-9D3A87/2020|2020-09-16|EPI\_ISL\_601746|Original|hCoV-19^^Wales|Human|Lighthouse Lab in Milton Keynes|Wellcome Sanger Institute for the COVID-19 Genomics UK (COG-UK) consortium|Davies|United Kingdom  
>Spike|hCoV-19/England/CAMB-1AA957/2020|2020-04-18|EPI\_ISL\_470251|Original|hCoV-19^^England|Human|Department of Pathology|Wellcome Sanger Institute for the COVID-19 Genomics UK (COG-UK) consortium|Davies|United Kingdom  
>Spike|hCoV-19/Japan/PG-4257/2020|2020-07-00|EPI\_ISL\_692487|Original|hCoV-19^^Japan|Human|Fukuoka Institute of Health and Environmental Sciences|Pathogen Genomics Center|Sekizuka|Japan  
>Spike|hCoV-19/England/201420066/2020|2020-03-31|EPI\_ISL\_465907|Original|hCoV-19^^England|Human|Respiratory Virus Unit|Respiratory Virus Unit|Platt|United Kingdom  
>Spike|hCoV-19/Northern Ireland/QEUA-95EC24/2020|2020-08-08|EPI\_ISL\_532297|Original|hCoV-19^^Northern Ireland|Human|Lighthouse Lab in Glasgow|Wellcome Sanger Institute for the COVID-19 Genomics UK (COG-UK) consortium|Davies|United Kingdom  
>Spike|hCoV-19/USA/NY-NYCPHL-001001/2020|2020-10-01|EPI\_ISL\_633024|Original|hCoV-19^^New York|Human|DOHMH Morrisania|New York City Public Health Laboratory|Wang|USA  
>Spike|hCoV-19/Northern Ireland/NIRE-FB9EF/2020|2020-04-11|EPI\_ISL\_459355|Original|hCoV-19^^Northern Ireland|Human|Regional Virus Laboratory|Wellcome Sanger Institute for the COVID-19 Genomics UK (COG-UK) consortium|Davies|United Kingdom  
>Spike|hCoV-19/England/ALDP-5AA7A4/2020|2020-06-15|EPI\_ISL\_558889|Original|hCoV-19^^England|Human|Lighthouse Lab in Alderley Park|Wellcome Sanger Institute for the COVID-19 Genomics UK (COG-UK) consortium|Davies|United Kingdom

>Spike|hCoV-19/USA/AZ-TG442879/2020|2020-06-25|EPI\_ISL\_694995|Original|hCoV-19^^Arizona|Human|TGen North|TGen North|French|USA

>Spike|hCoV-19/USA/TX-HMH-MCoV-18253/2020|2020-11-17|EPI\_ISL\_784601|Original|hCoV-19^^Texas|Human|Houston Methodist Hospital|Houston Methodist Hospital|Long|USA

>Spike|hCoV-19/Denmark/DCGC-12021/2020|2020-03-09|EPI\_ISL\_671268|Original|hCoV-19^^Hovedstaden|Human|Department of Virus and Microbiological Special Diagnostics|Albertsen Lab|Michaelsen|Denmark

>Spike|hCoV-19/England/ALDP-B837BA/2020|2020-11-14|EPI\_ISL\_675279|Original|hCoV-19^^England|Human|Lighthouse Lab in Alderley Park|Wellcome Sanger Institute for the COVID-19 Genomics UK (COG-UK) Consortium|Davies|United Kingdom

>Spike|hCoV-19/England/QEUEH-B4167F/2020|2020-11-08|EPI\_ISL\_658669|Original|hCoV-19^^England|Human|Lighthouse Lab in Glasgow|Wellcome Sanger Institute for the COVID-19 Genomics UK (COG-UK) Consortium|Davies|United Kingdom

>Spike|hCoV-19/Scotland/EDB690/2020|2020-04-03|EPI\_ISL\_491552|Original|hCoV-19^^Scotland|Human|Virology Department|Wellcome Sanger Institute for the COVID-19 Genomics UK (COG-UK) consortium|Davies|United Kingdom

>Spike|hCoV-19/Thailand/Nonthaburi\_2982/2020|2020-03-18|EPI\_ISL\_455583|Vero P1|hCoV-19^^Nonthaburi|Human|Central Chest Institute of Thailand|National Institute of Health. Department of medical Sciences|Phuygun|Thailand

>Spike|hCoV-19/England/CAMB-1AD16B/2020|2020-04-30|EPI\_ISL\_447971|Original|hCoV-19^^England|Human|Department of Pathology|COVID-19 Genomics UK (COG-UK) Consortium|Meredith|United Kingdom

>Spike|hCoV-19/Denmark/DCGC-19839/2020|2020-12-07|EPI\_ISL\_747823|Original|hCoV-19^^Hovedstaden|Human|Department of Virus and Microbiological Special Diagnostics|Albertsen Lab|Michaelsen|Denmark

>Spike|hCoV-19/England/QEUEH-B6833F/2020|2020-11-11|EPI\_ISL\_661621|Original|hCoV-19^^England|Human|Lighthouse Lab in Glasgow|Wellcome Sanger Institute for the COVID-19 Genomics UK (COG-UK) Consortium|Davies|United Kingdom

>Spike|hCoV-19/England/NORT-2921C2/2020|2020-05-07|EPI\_ISL\_489139|Original|hCoV-19^^England|Human|NU-OMICS DNA Sequencing research facility|Wellcome Sanger Institute for the COVID-19 Genomics UK (COG-UK) consortium|Davies|United Kingdom

>Spike|hCoV-19/Denmark/DCGC-15725/2020|2020-11-23|EPI\_ISL\_713983|Original|hCoV-19^^Syddanmark|Human|Department of Virus and Microbiological Special Diagnostics|Albertsen Lab|Michaelsen|Denmark

>Spike|hCoV-19/England/ALDP-9FC7CD/2020|2020-10-01|EPI\_ISL\_587866|Original|hCoV-19^^England|Human|Lighthouse Lab in Alderley Park|Wellcome Sanger Institute for the COVID-19 Genomics UK (COG-UK) consortium|Davies|United Kingdom

>Spike|hCoV-19/Thailand/Bangkok-0085/2020|2020-04-03|EPI\_ISL\_447026|Original|hCoV-19^^Bangkok|Human|Ramathibodi Hospital|COVID-19 Network Investigations (CONI) Alliance|Batty|Thailand

>Spike|hCoV-19/England/QEUEH-9C9495/2020|2020-09-10|EPI\_ISL\_567336|Original|hCoV-19^^England|Human|Lighthouse Lab in Glasgow|Wellcome Sanger Institute for the COVID-19 Genomics UK (COG-UK) consortium|Davies|United Kingdom

>Spike|hCoV-19/England/ALDP-B5CFD0/2020|2020-11-09|EPI\_ISL\_678841|Original|hCoV-19^^England|Human|Department of Pathology|COVID-19 Genomics UK (COG-UK) Consortium|Goodfellow|United Kingdom

>Spike|hCoV-19/Spain/VC-IBV-98003063/2020|2020-03-13|EPI\_ISL\_538004|Original|hCoV-19^^Comunitat Valenciana|Human|Hospital Universitari i Polit\u00e8nic La Fe de Val\u00e8ncia|SeqCOVID-SPAIN consortium/IBV(CSIC)|Comas|Spain

>Spike|hCoV-19/Denmark/DCGC-13964/2020|2020-11-30|EPI\_ISL\_711480|Original|hCoV-19^^Hovedstaden|Human|Department of Virus and Microbiological Special Diagnostics|Albertsen Lab|Michaelsen|Denmark

>Spike|hCoV-19/England/ALDP-9E6EC1/2020|2020-09-24|EPI\_ISL\_580628|Original|hCoV-19^^England|Human|Lighthouse Lab in Alderley Park|Wellcome Sanger Institute for the COVID-19 Genomics UK (COG-UK) consortium|Davies|United Kingdom

>Spike|hCoV-19/Netherlands/Gelderland\_157/2020|2020-05-22|EPI\_ISL\_460917|Original|hCoV-19^^Gelderland|Human|Dutch COVID-19 response team|Erasmus Medical Center|Oude Munnink|Netherlands



>Spike|hCoV-19/Zimbabwe/ZW-9949/2020|2020-06-01|EPI\_ISL\_644819|Original|hCoV-19^^Zimbabwe|Human|National Microbiology Reference Laboratory|Quadram Institute Bioscience|Alikhan|Zimbabwe

>Spike|hCoV-19/Belgium/ULG-10082/2020|2020-04-04|EPI\_ISL\_424649|Original|hCoV-19^^Li\u00e8ge|Human|Department of Clinical Microbiology|GIGA Medical Genomics|Durkin|Belgium

>Spike|hCoV-19/USA/CA-CZB-1013/2020|2020-04-07|EPI\_ISL\_436654|Original|hCoV-19^^California|Human|County of Santa Clara Public Health Department|Chan-Zuckerberg Biohub|Hao|USA

>Spike|hCoV-19/England/BIRM-5FFAB/2020|2020-00-00|EPI\_ISL\_461544|Original|hCoV-19^^England|Human|University of Birmingham|COVID-19 Genomics UK (COG-UK) Consortium|Loman|United Kingdom

>Spike|hCoV-19/England/CAMB-1B054B/2020|2020-05-11|EPI\_ISL\_452890|Original|hCoV-19^^England|Human|Department of Pathology|COVID-19 Genomics UK (COG-UK) Consortium|Meredith|United Kingdom

>Spike|hCoV-19/Denmark/DCGC-953/2020|2020-03-09|EPI\_ISL\_614547|Original|hCoV-19^^Sjaelland|Human|Department of Virus and Microbiological Special Diagnostics|Albertsen lab|Michaelsen|Denmark

>Spike|hCoV-19/Kazakhstan/22001/2020|2020-04-23|EPI\_ISL\_454582|Original|hCoV-19^^Nur-Sultan|Human|Laboratory of virology|Laboratory of molecular-genetic research|Abdaliyev|Kazakhstan

>Spike|hCoV-19/Sweden/20-22301/2020|2020-04-01|EPI\_ISL\_660398|Original|hCoV-19^^Ostergotland|Human|Klinsisk mikrobiologi Linkoping|The Public Health Agency of Sweden|Svartstr\u00f6m|Sweden

>Spike|hCoV-19/USA/CA-ALSR-5088/2020|2020-07-01|EPI\_ISL\_730343|Original|hCoV-19^^California|Human|San Diego County Public Health Laboratory|Andersen lab at Scripps Research|Gangavarapu|USA

>Spike|hCoV-19/England/CAMC-B354ED/2020|2020-11-05|EPI\_ISL\_659668|Original|hCoV-19^^England|Human|Lighthouse Lab in Cambridge|Wellcome Sanger Institute for the COVID-19 Genomics UK (COG-UK) Consortium|Davies|United Kingdom

>Spike|hCoV-19/Australia/VIC17591/2020|2020-07-17|EPI\_ISL\_663939|Original|hCoV-19^^Victoria|Human|Microbiological Diagnostic Unit - Public Health Laboratory (MDU-PHL)|MDU-PHL|Schultz|Australia

>Spike|hCoV-19/England/ALDP-A500DA/2020|2020-10-07|EPI\_ISL\_597763|Original|hCoV-19^^England|Human|Lighthouse Lab in Alderley Park|Wellcome Sanger Institute for the COVID-19 Genomics UK (COG-UK) consortium|Davies|United Kingdom

>Spike|hCoV-19/England/ALDP-952F63/2020|2020-06-11|EPI\_ISL\_554513|Original|hCoV-19^^England|Human|Lighthouse Lab in Alderley Park|Wellcome Sanger Institute for the COVID-19 Genomics UK (COG-UK) consortium|Davies|United Kingdom

>Spike|hCoV-19/England/CAMC-A3FB76/2020|2020-10-05|EPI\_ISL\_609622|Original|hCoV-19^^England|Human|Lighthouse Lab in Cambridge|Wellcome Sanger Institute for the COVID-19 Genomics UK (COG-UK) consortium|Davies|United Kingdom

>Spike|hCoV-19/Japan/PG-1788/2020|2020-05-00|EPI\_ISL\_685394|Original|hCoV-19^^Japan|Human|Pathogen Genomics Center|Pathogen Genomics Center|Sekizuka|Japan

>Spike|hCoV-19/England/NORW-F0F06/2020|2020-10-17|EPI\_ISL\_627587|Original|hCoV-19^^England|Human|Quadram Institute Bioscience|COVID-19 Genomics UK (COG-UK) Consortium|Alikhan|United Kingdom

>Spike|hCoV-19/Spain/AN-IBV-004081/2020|2020-04-14|EPI\_ISL\_510047|Original|hCoV-19^^Andalucia|Human|Servicio de Microbiolog\u00eda. HRU de M\u00e9llaga. Servicio Andaluz de Salud|SeqCOVID-SPAIN consortium|IBV(CSIC)|Comas|Spain

>Spike|hCoV-19/Wales/PHWC-33AD9/2020|2020-04-20|EPI\_ISL\_446784|Original|hCoV-19^^Wales|Human|Wales Specialist Virology Centre|Public Health Wales Microbiology Cardiff|Moore|United Kingdom

>Spike|hCoV-19/England/CAMC-CB3158/2020|2020-12-03|EPI\_ISL\_760903|Original|hCoV-19^^England|Human|Lighthouse Lab in Cambridge|Wellcome Sanger Institute for the COVID-19 Genomics UK (COG-UK) Consortium|Davies|United Kingdom

>Spike|hCoV-19/Norway/1955/2020|2020-03-11|EPI\_ISL\_420146|Original|hCoV-19^^Norway|Human|Furst Medical Laboratory|Norwegian Institute of Public Health|Hungnes|Norway

>Spike|hCoV-19/Australia/VIC2844/2020|2020-07-03|EPI\_ISL\_521675|Original|hCoV-19^^Victoria|Human|Microbiological Diagnostic Unit - Public Health Laboratory (MDU-PHL)|MDU-PHL|Schultz|Australia

>Spike|hCoV-19/Brazil/RJ-00474/2020|2020-09-03|EPI\_ISL\_717869|Original|hCoV-19^^Rio de Janeiro|Human|Laboratorio de Virologia Molecular / UFRJ|Bioinformatics Laboratory / LNCC|Almeida|Brazil

>Spike|hCoV-19/England/BRIS-1333EC/2020|2020-05-20|EPI\_ISL\_495100|Original|hCoV-19^^England|Human|PHE South West Regional Laboratory|Wellcome Sanger Institute for the COVID-19 Genomics UK (COG-UK) consortium|Davies|United Kingdom

>Spike|hCoV-19/Wales/PHWC-49E601/2020|2020-12-07|EPI\_ISL\_743023|Original|hCoV-19^^Wales|Human|Wales Specialist Virology Centre Sequencing lab|COVID-19 Genomics UK (COG-UK) Consortium|Moore|United Kingdom

>Spike|hCoV-19/USA/MA-MASPHL-00489/2020|2020-05-02|EPI\_ISL\_693078|Original|hCoV-19^^Massachusetts|Human|Massachusetts State Public Health Laboratory|Massachusetts State Public Health Laboratory|Lang|USA

>Spike|hCoV-19/England/QEUEH-AD07CE/2020|2020-10-24|EPI\_ISL\_633787|Original|hCoV-19^^England|Human|Lighthouse Lab in Glasgow|Wellcome Sanger Institute for the COVID-19 Genomics UK (COG-UK) consortium|Davies|United Kingdom

>Spike|hCoV-19/England/QEUEH-95EFEF/2020|2020-08-06|EPI\_ISL\_532534|Original|hCoV-19^^England|Human|Lighthouse Lab in Glasgow|Wellcome Sanger Institute for the COVID-19 Genomics UK (COG-UK) consortium|Davies|United Kingdom

>Spike|hCoV-19/New Zealand/20VR2086/2020|2020-04-11|EPI\_ISL\_456370|Original|hCoV-19^^Canterbury|Human|Canterbury Health Laboratories|Institute of Environmental Science and Research (ESR)|de Ligt|New Zealand

>Spike|hCoV-19/Denmark/DCGC-18194/2020|2020-12-14|EPI\_ISL\_749807|Original|hCoV-19^^Sjaelland|Human|Department of Virus and Microbiological Special Diagnostics|Albertsen Lab|Michaelsen|Denmark

>Spike|hCoV-19/Wales/PHWC-16EE32/2020|2020-10-05|EPI\_ISL\_585871|Original|hCoV-19^^Wales|Human|Wales Specialist Virology Centre Sequencing lab|COVID-19 Genomics UK (COG-UK) Consortium|Moore|United Kingdom

>Spike|hCoV-19/Japan/PG-8099/2020|2020-08-00|EPI\_ISL\_687198|Original|hCoV-19^^Japan|Human|Pathogen Genomics Center|Pathogen Genomics Center|Sekizuka|Japan

>Spike|hCoV-19/Luxembourg/LNS5706571/2020|2020-10-23|EPI\_ISL\_744282|Original|hCoV-19^^Luxembourg|Human|Laboratoire national de sant\u00e9|Laboratoire national de sant\u00e9|Wienecke-Baldacchino|Luxembourg

>Spike|hCoV-19/England/ALDP-BB92C9/2020|2020-11-21|EPI\_ISL\_702382|Original|hCoV-19^^England|Human|Lighthouse Lab in Alderley Park|Wellcome Sanger Institute for the COVID-19 Genomics UK (COG-UK) Consortium|Davies|United Kingdom

>Spike|hCoV-19/Netherlands/NH-RIVM-21028/2020|2020-12-12|EPI\_ISL\_791043|Original|hCoV-19^^Noord-Holland|Human|Dutch COVID-19 response team|National Institute for Public Health and the Environment (RIVM)|Meijer|Netherlands

>Spike|hCoV-19/England/MILK-BAC812/2020|2020-11-18|EPI\_ISL\_720511|Original|hCoV-19^^England|Human|Lighthouse Lab in Milton Keynes|Wellcome Sanger Institute for the COVID-19 Genomics UK (COG-UK) Consortium|Davies|United Kingdom

>Spike|hCoV-19/England/QEUEH-C93E39/2020|2020-12-18|EPI\_ISL\_777601|Original|hCoV-19^^England|Human|Lighthouse Lab in Glasgow|Wellcome Sanger Institute for the COVID-19 Genomics UK (COG-UK) Consortium|Davies|United Kingdom

>Spike|hCoV-19/Netherlands/ZH-EMC-384/2020|2020-08-02|EPI\_ISL\_523724|Original|hCoV-19^^Zuid Holland|Human|Dutch COVID-19 response team|Erasmus Medical Center|Oude Munnink|Netherlands

>Spike|hCoV-19/England/QEUEH-96F060/2020|2020-08-17|EPI\_ISL\_530465|Original|hCoV-19^^England|Human|Lighthouse Lab in Glasgow|Wellcome Sanger Institute for the COVID-19 Genomics UK (COG-UK) consortium|Davies|United Kingdom

>Spike|hCoV-19/France/PAC-IHU-0660/2020|2020-03-16|EPI\_ISL\_568919|Original|hCoV-19^^Provence-Alpes-C\u00f4te-d\u00e0z|Human|MEPHI|MEPHI|Levasseur|France

>Spike|hCoV-19/Panama/328721/2020|2020-03-09|EPI\_ISL\_496608|Original|hCoV-19^^Panama Center|Human|Gorgas Memorial Laboratory of Health Studies|Gorgas Memorial Laboratory of Health Studies|Martinez|Panama

>Spike|hCoV-19/Norway/3725/2020|2020-09-07|EPI\_ISL\_590990|Original|hCoV-19^^Viken|Human|Ostfold Hospital Trust - Kalnes|Norwegian Institute of Public Health|Vollan|Norway

>Spike|hCoV-19/Thailand/Bangkok-0026/2020|2020-03-13|EPI\_ISL\_429165|Original|hCoV-19^^Bangkok|Human|Ramathibodi Hospital|COVID-19 Network Investigations (CONI) Alliance|Batty|Thailand

>Spike|hCoV-19/Japan/DP0058/2020|2020-02-15|EPI\_ISL\_416568|Original|hCoV-19^^Japan|Human|Japanese Quarantine Stations|Pathogen Genomics Center|Sekizuka|Japan

>Spike|hCoV-19/Chile/RM-72851/2020|2020-05-20|EPI\_ISL\_746785|Original|hCoV-19^^Region Metropolitana de Santiago|Human|Genetica Molecular and Subdepartamento de Virologia ISP Chile|Instituto de Salud Publica de Chile|Tognarelli|Chile

>Spike|hCoV-19/England/MILK-9C3DCD/2020|2020-09-09|EPI\_ISL\_566995|Original|hCoV-19^^England|Human|Lighthouse Lab in Milton Keynes|Wellcome Sanger Institute for the COVID-19 Genomics UK (COG-UK) consortium|Davies|United Kingdom

>Spike|hCoV-19/USA/NY-QDX-1898/2020|2020-03-15|EPI\_ISL\_604246|Original|hCoV-19^^New York|Human|Quest Diagnostics|Quest Diagnostics|Kagan|USA

>Spike|hCoV-19/USA/WI-WSLH-200388/2020|2020-04-23|EPI\_ISL\_578554|Original|hCoV-19^^Wisconsin|Human|Wisconsin State Laboratory of Hygiene Communicable Disease Division|Wisconsin State Laboratory of Hygiene Communicable Disease Division|Florek|USA

>Spike|hCoV-19/India/GJ-GBRC58/2020|2020-05-03|EPI\_ISL\_447033|Original|hCoV-19^^Gujarat|Human|B.J. Medical College and Civil hospital|Gujarat Biotechnology Research Centre|Joshi|India

>Spike|hCoV-19/Wales/PHWC-49B0AC/2020|2020-12-07|EPI\_ISL\_742291|Original|hCoV-19^^Wales|Human|Wales Specialist Virology Centre Sequencing lab|COVID-19 Genomics UK (COG-UK) Consortium|Moore|United Kingdom

>Spike|hCoV-19/USA/MA-MGH-03445/2020|2020-11-14|EPI\_ISL\_765840|Original|hCoV-19^^Massachusetts|Human|Massachusetts General Hospital|Infectious Disease Program|Park|USA

>Spike|hCoV-19/England/LOND-D6504/2020|2020-04-22|EPI\_ISL\_487616|Original|hCoV-19^^England|Human|University College London|Wellcome Sanger Institute for the COVID-19 Genomics UK (COG-UK) consortium|Davies|United Kingdom

>Spike|hCoV-19/England/NOTT-10F49B/2020|2020-04-02|EPI\_ISL\_433009|Original|hCoV-19^^England|Human|Queens Medical Centre|COVID-19 Genomics UK (COG-UK) Consortium|Loose|United Kingdom

>Spike|hCoV-19/Belgium/FM-030592/2020|2020-03-05|EPI\_ISL\_420348|Original|hCoV-19^^Havre|Human|KU Leuven|KU Leuven|Maes|Belgium

>Spike|hCoV-19/England/CAMC-A65290/2020|2020-10-11|EPI\_ISL\_637977|Original|hCoV-19^^England|Human|Department of Pathology|COVID-19 Genomics UK (COG-UK) Consortium|Goodfellow|United Kingdom

>Spike|hCoV-19/England/QEUEH-9F9D28/2020|2020-09-27|EPI\_ISL\_595761|Original|hCoV-19^^England|Human|Oxford Viromics|COVID-19 Genomics UK (COG-UK) Consortium|Golubchik|United Kingdom

>Spike|hCoV-19/Brazil/PR-5621/2020|2020-03-19|EPI\_ISL\_541344|Original|hCoV-19^^Paran\u00e1|Human|LACEN/PR|Laboratory of Respiratory Viruses and Measles|Silva|Brazil

>Spike|hCoV-19/England/NOTT-11377D/2020|2020-09-22|EPI\_ISL\_573426|Original|hCoV-19^^England|Human|Queens Medical Centre|COVID-19 Genomics UK (COG-UK) Consortium|Loose|United Kingdom

>Spike|hCoV-19/Finland/3LS10AF3/2020|2020-10-03|EPI\_ISL\_756091|Original|hCoV-19^^Uusimaa|Human|Department of Virology and Immunology|Department of Virology|Smura|Finland

>Spike|hCoV-19/Denmark/DCGC-17297/2020|2020-12-14|EPI\_ISL\_750886|Original|hCoV-19^^Midtjylland|Human|Department of Virus and Microbiological Special Diagnostics|Albertsen Lab|Michaelsen|Denmark

>Spike|hCoV-19/England/MILK-BAFA82/2020|2020-11-17|EPI\_ISL\_783250|Original|hCoV-19^^England|Human|Lighthouse Lab in Milton Keynes|Wellcome Sanger Institute for the COVID-19 Genomics UK (COG-UK) Consortium|Davies|United Kingdom

>Spike|hCoV-19/Russia/StPetersburg-RII11188S/2020|2020-05-02|EPI\_ISL\_507244|Original|hCoV-19^^Saint Petersburg|Human|WHO National Influenza

Centre Russian Federation|WHO National Influenza Centre Russian Federation|Komissarov|Russia  
>Spike|hCoV-19/Denmark/DCGC-6470/2020|2020-10-12|EPI\_ISL\_620370|Original|hCoV-19^^Syddanmark|Human|Department of Virus and Microbiological Special Diagnostics|Albertsen lab|Michaelsen|Denmark  
>Spike|hCoV-19/England/CAMB-81B60/2020|2020-04-13|EPI\_ISL\_442526|Original|hCoV-19^^England|Human|Department of Pathology|Wellcome Sanger Institute for the COVID-19 Genomics UK (COG-UK) consortium|Amato|United Kingdom  
>Spike|hCoV-19/Denmark/DCGC-3632/2020|2020-08-31|EPI\_ISL\_616403|Original|hCoV-19^^Hovedstaden|Human|Department of Virus and Microbiological Special Diagnostics|Albertsen lab|Michaelsen|Denmark  
>Spike|hCoV-19/Luxembourg/LNS9652104/2020|2020-03-12|EPI\_ISL\_419605|Original|hCoV-19^^Luxembourg|Human|Laboratoire National de Sant\u00e9|Laboratoire National de Sant\u00e9|Wienecke-Baldacchino|Luxembourg  
>Spike|hCoV-19/England/QEUB-9F558E/2020|2020-09-25|EPI\_ISL\_588542|Original|hCoV-19^^England|Human|Lighthouse Lab in Glasgow|Wellcome Sanger Institute for the COVID-19 Genomics UK (COG-UK) consortium|Davies|United Kingdom  
>Spike|hCoV-19/England/CAMB-798CE/2020|2020-04-01|EPI\_ISL\_441796|Original|hCoV-19^^England|Human|Department of Pathology|Wellcome Sanger Institute for the COVID-19 Genomics UK (COG-UK) consortium|Amato|United Kingdom  
>Spike|hCoV-19/SaudiArabia/KAUST-JEDDAH911/2020|2020-04-06|EPI\_ISL\_513044|Original|hCoV-19^^Jeddah|Human|Pathogen Genomics Lab King Abdullah University of Science and Technology(KAUST)|Pathogen Genomics Lab King Abdullah University of Science and Technology(KAUST)|Mohamed Ghazzali|Saudi Arabia  
>Spike|hCoV-19/South Africa/KRISP-K001368/2020|2020-07-15|EPI\_ISL\_515853|Original|hCoV-19^^KwaZulu-Natal|Human|Medical Disagnostics Services (MDS)|KRISP|de Oliveira|South Africa  
>Spike|hCoV-19/USA/AZ-TG668341/2020|2020-05-13|EPI\_ISL\_696266|Original|hCoV-19^^Arizona|Human|Sonora Quest Laboratories|TGen North|French|USA  
>Spike|hCoV-19/Denmark/DCGC-21528/2020|2020-12-21|EPI\_ISL\_758213|Original|hCoV-19^^Sjaelland|Human|Department of Virus and Microbiological Special Diagnostics|Albertsen Lab|Michaelsen|Denmark  
>Spike|hCoV-19/Sweden/20-06169/2020|2020-03-23|EPI\_ISL\_452232|Original|hCoV-19^^Halland|Human|Saroledens Familjelakare|The Public Health Agency of Sweden|Svartstr\u00f6m|Sweden  
>Spike|hCoV-19/Australia/NSW2014/2020|2020-03-22|EPI\_ISL\_500600|Original|hCoV-19^^New South Wales|Human|Area of Virology|Area of Virology|Bull|Australia  
>Spike|hCoV-19/England/LEED-2A9C30/2020|2020-04-13|EPI\_ISL\_538946|Original|hCoV-19^^England|Human|Leeds Teaching Hospitals NHS Trust and Public Health England|Wellcome Sanger Institute for the COVID-19 Genomics UK (COG-UK) consortium|Davies|United Kingdom  
>Spike|hCoV-19/USA/CA-ALSR-2857/2020|2020-08-05|EPI\_ISL\_635716|Original|hCoV-19^^California|Human|San Diego County Public Health Laboratory|Andersen lab at Scripps Research|Gangavarapu|USA  
>Spike|hCoV-19/Hong Kong/HKSH0007/2020|2020-04-01|EPI\_ISL\_451957|Original|hCoV-19^^Hong Kong|Human|Molecular Pathology Division|Molecular Pathology Division|Au|China  
>Spike|hCoV-19/USA/WY-WPHL-20063197/2020|2020-08-17|EPI\_ISL\_770074|Original|hCoV-19^^Wyoming|Human|Wyoming Public Health Laboratory|Wyoming Public Health Laboratory|Hull|USA  
>Spike|hCoV-19/Bahrein/BAH-27/2020|2020-04-07|EPI\_ISL\_483565|Original|hCoV-19^^Bahrain|Human|Kingdom of Bahrein Ministry of Health|Erasmus Medical Center|Oude Munnink|Bahrain  
>Spike|hCoV-19/Russia/KDA-RII-MH4917S/2020|2020-10-17|EPI\_ISL\_733284|Original|hCoV-19^^Krasnodar|Human|WHO National Influenza Centre Russian Federation|WHO National Influenza Centre Russian Federation|Komissarov|Russia  
>Spike|hCoV-19/Spain/AN-IBV-002870/2020|2020-03-16|EPI\_ISL\_474860|Original|hCoV-19^^Andalucia|Human|Hospital Universitario Virgen de las Nieves de Granada-SAS|SeqCOVID-SPAIN consortium|IBV(CSIC)|Comas|Spain

>Spike|hCoV-19/Australia/VIC433/2020|2020-03-25|EPI\_ISL\_426732|Original|hCoV-19^^Victoria|Human|Victorian Infectious Diseases Reference Laboratory (VIDRL)|Microbiological Diagnostic Unit Public Health Laboratory and Victorian Infectious Diseases Reference Laboratory|Schultz|Australia

>Spike|hCoV-19/England/CAMC-B36A26/2020|2020-11-05|EPI\_ISL\_645238|Original|hCoV-19^^England|Human|Lighthouse Lab in Cambridge|Wellcome Sanger Institute for the COVID-19 Genomics UK (COG-UK) Consortium|Davies|United Kingdom

>Spike|hCoV-19/England/MILK-B025F5/2020|2020-10-24|EPI\_ISL\_642973|Original|hCoV-19^^England|Human|Lighthouse Lab in Milton Keynes|Wellcome Sanger Institute for the COVID-19 Genomics UK (COG-UK) Consortium|Davies|United Kingdom

>Spike|hCoV-19/USA/MI-UM-10036548314/2020|2020-10-21|EPI\_ISL\_640175|Original|hCoV-19^^Michigan|Human|University of Michigan Clinical Microbiology Laboratory|Lauring Lab|Valesano|USA

>Spike|hCoV-19/England/ALDP-9C60FE/2020|2020-09-10|EPI\_ISL\_567544|Original|hCoV-19^^England|Human|Lighthouse Lab in Alderley Park|Wellcome Sanger Institute for the COVID-19 Genomics UK (COG-UK) consortium|Davies|United Kingdom

>Spike|hCoV-19/Denmark/DCGC-14875/2020|2020-11-23|EPI\_ISL\_712042|Original|hCoV-19^^Sjaelland|Human|Department of Virus and Microbiological Special Diagnostics|Albertsen Lab|Michaelsen|Denmark

>Spike|hCoV-19/Denmark/DCGC-16585/2020|2020-11-16|EPI\_ISL\_714855|Original|hCoV-19^^Hovedstaden|Human|Department of Virus and Microbiological Special Diagnostics|Albertsen Lab|Michaelsen|Denmark

>Spike|hCoV-19/Japan/PG-7092/2020|2020-08-00|EPI\_ISL\_688197|Original|hCoV-19^^Japan|Human|Pathogen Genomics Center|Pathogen Genomics Center|Sekizuka|Japan

>Spike|hCoV-19/England/MILK-CA4196/2020|2020-12-16|EPI\_ISL\_762389|Original|hCoV-19^^England|Human|Lighthouse Lab in Milton Keynes|Wellcome Sanger Institute for the COVID-19 Genomics UK (COG-UK) Consortium|Davies|United Kingdom

>Spike|hCoV-19/England/CAMC-B51F44/2020|2020-11-08|EPI\_ISL\_657720|Original|hCoV-19^^England|Human|Lighthouse Lab in Cambridge|Wellcome Sanger Institute for the COVID-19 Genomics UK (COG-UK) Consortium|Davies|United Kingdom

>Spike|hCoV-19/France/PAC-MEPHI-1927/2020|2020-08-27|EPI\_ISL\_644461|Original|hCoV-19^^Provence-Alpes-Cote-d\u2019Azur|Human|MEPHI|MEPHI|Levasseur|France

>Spike|hCoV-19/Portugal/PT1660/2020|2020-11-11|EPI\_ISL\_731962|Original|hCoV-19^^Portugal|Human|Instituto Nacional de Saude (INSA)|Instituto Nacional de Saude (INSA)|Borges|Portugal

>Spike|hCoV-19/England/ALDP-953014/2020|2020-06-11|EPI\_ISL\_553663|Original|hCoV-19^^England|Human|Lighthouse Lab in Alderley Park|Wellcome Sanger Institute for the COVID-19 Genomics UK (COG-UK) consortium|Davies|United Kingdom

>Spike|hCoV-19/Norway/3911/2020|2020-09-28|EPI\_ISL\_668390|Original|hCoV-19^^Vestfold og Telemark|Human|Vestfold Hospital|Norwegian Institute of Public Health|Kopperud Riis|Norway

>Spike|hCoV-19/England/ALDP-9FDC54/2020|2020-10-02|EPI\_ISL\_587743|Original|hCoV-19^^England|Human|Lighthouse Lab in Alderley Park|Wellcome Sanger Institute for the COVID-19 Genomics UK (COG-UK) consortium|Davies|United Kingdom

>Spike|hCoV-19/England/CAMB-1B451A/2020|2020-06-02|EPI\_ISL\_492190|Original|hCoV-19^^England|Human|Department of Pathology|Wellcome Sanger Institute for the COVID-19 Genomics UK (COG-UK) consortium|Davies|United Kingdom

>Spike|hCoV-19/USA/WA-UW-4633/2020|2020-03-29|EPI\_ISL\_460632|Original|hCoV-19^^Washington|Human|UW Virology Lab|UW Virology Lab|Roychoudhury|USA

>Spike|hCoV-19/Canada/BC\_27283916/2020|2020-03-00|EPI\_ISL\_463267|Original|hCoV-19^^British Columbia|Human|BCCDC Public Health Laboratory|BCCDC Public Health Laboratory|Harrigan|Canada

>Spike|hCoV-19/England/BRIS-1240BA/2020|2020-04-07|EPI\_ISL\_492775|Original|hCoV-19^^England|Human|PHE South West Regional Laboratory|Wellcome Sanger Institute for the COVID-19 Genomics UK (COG-UK) consortium|Davies|United Kingdom

>Spike|hCoV-19/USA/OR-OHSU-1677/2020|2020-07-22|EPI\_ISL\_526000|Original|hCoV-19^^Oregon|Human|OHSU Lab Services Molecular Microbiology Lab|Oregon SARS-CoV-2 Genome Sequencing Center|O'Roak|USA

>Spike|hCoV-19/Denmark/DCGC-12420/2020|2020-11-16|EPI\_ISL\_682601|Original|hCoV-19^^Midtjylland|Human|Department of Virus and Microbiological Special Diagnostics|Albertsen Lab|Michaelsen|Denmark

>Spike|hCoV-19/England/QEUA-9F3CB8/2020|2020-09-24|EPI\_ISL\_588620|Original|hCoV-19^^England|Human|Lighthouse Lab in Glasgow|Wellcome Sanger Institute for the COVID-19 Genomics UK (COG-UK) consortium|Davies|United Kingdom

>Spike|hCoV-19/Australia/VIC11727/2020|2020-07-23|EPI\_ISL\_591840|Original|hCoV-19^^Victoria|Human|Microbiological Diagnostic Unit - Public Health Laboratory (MDU-PHL)|MDU-PHL|Schultz|Australia

>Spike|hCoV-19/United Arab Emirates/0929/2020|2020-06-27|EPI\_ISL\_699067|Original|hCoV-19^^Abu Dhabi|Human|Group 42 (G42) Healthcare|G42 Healthcare|Ogrodzki|United Arab Emirates

>Spike|hCoV-19/Luxembourg/LNS3609481/2020|2020-10-19|EPI\_ISL\_740342|Original|hCoV-19^^Luxembourg|Human|Laboratoire national de sant\u00e9|Laboratoire national de sant\u00e9|Wienecke-Baldacchino|Luxembourg

>Spike|hCoV-19/India/MH-ACTREC-677/2020|2020-09-18|EPI\_ISL\_700302|Original|hCoV-19^^Maharashtra|Human|Hematopathology Laboratory|Hematopathology Laboratory|Patkar|India

>Spike|hCoV-19/England/ALDP-A85C7E/2020|2020-10-17|EPI\_ISL\_610399|Original|hCoV-19^^England|Human|Lighthouse Lab in Alderley Park|Wellcome Sanger Institute for the COVID-19 Genomics UK (COG-UK) consortium|Davies|United Kingdom

>Spike|hCoV-19/Spain/MD-H12-3304/2020|2020-03-11|EPI\_ISL\_428703|Original|hCoV-19^^Madrid|Human|Hospital Universitario 12 de Octubre|Hospital Universitario 12 de Octubre|Viedma|Spain

>Spike|hCoV-19/England/QEUA-B0F90B/2020|2020-11-02|EPI\_ISL\_642177|Original|hCoV-19^^England|Human|Lighthouse Lab in Glasgow|Wellcome Sanger Institute for the COVID-19 Genomics UK (COG-UK) Consortium|Davies|United Kingdom

>Spike|hCoV-19/USA/NJ-CDC-2-3714169/2020|2020-11-16|EPI\_ISL\_751659|Original|hCoV-19^^New Jersey|Human|NJ Public Health and Environmental Laboratories|Genomics and Discovery|Queen|USA

>Spike|hCoV-19/Japan/PG-2008/2020|2020-04-00|EPI\_ISL\_685613|Original|hCoV-19^^Japan|Human|Tokyo Metropolitan Institute of Public Health|Pathogen Genomics Center|Sekizuka|Japan

>Spike|hCoV-19/England/CAMB-728B6/2020|2020-03-22|EPI\_ISL\_439941|Original|hCoV-19^^England|Human|Department of Pathology|Wellcome Sanger Institute for the COVID-19 Genomics UK (COG-UK) consortium|Amato|United Kingdom

>Spike|hCoV-19/USA/VA-DCLS-1446/2020|2020-08-18|EPI\_ISL\_572313|Original|hCoV-19^^Virginia|Human|Virginia DCLS|Virginia DCLS|St. Jacques|USA

>Spike|hCoV-19/Australia/VIC13851/2020|2020-08-21|EPI\_ISL\_563854|Original|hCoV-19^^Victoria|Human|Microbiological Diagnostic Unit - Public Health Laboratory (MDU-PHL)|MDU-PHL|Schultz|Australia

>Spike|hCoV-19/Spain/AR-IBV-98010626/2020|2020-09-30|EPI\_ISL\_722227|Original|hCoV-19^^Aragon|Human|Servicio de Microbiolog\u00eda|SeqCOVID-SPAIN consortium|IBV (CSIC)|Comas|Spain

>Spike|hCoV-19/England/SHEF-C393B/2020|2020-04-13|EPI\_ISL\_441948|Original|hCoV-19^^England|Human|Virology Department|COVID-19 Genomics UK (COG-UK) Consortium|de Silva|United Kingdom

>Spike|hCoV-19/South Korea/KCDC2665/2020|2020-05-25|EPI\_ISL\_522447|Original|hCoV-19^^South Korea|Human|Center for Laboratory Control of Infectious Diseases|Center for Laboratory Control of Infectious Diseases|Kim|South Korea

>Spike|hCoV-19/Poland/PL\_P34/2020|2020-03-25|EPI\_ISL\_455447|Original|hCoV-19^^Mazowieckie|Human|1. ViroGenetics - BSL3 Laboratory of Virology|1. ViroGenetics - BSL3 Laboratory of Virology|Pyrz|Poland

>Spike|hCoV-19/England/MILK-957F40/2020|2020-06-09|EPI\_ISL\_554671|Original|hCoV-19^^England|Human|Lighthouse Lab in Milton Keynes|Wellcome Sanger Institute for the COVID-19 Genomics UK (COG-UK) consortium|Davies|United Kingdom

>Spike|hCoV-19/USA/WY-WYPHL-00091/2020|2020-03-30|EPI\_ISL\_462982|Original|hCoV-19^^Wyoming|Human|Wyoming Public Health Laboratory|Center for Global Health|Domman|USA

>Spike|hCoV-19/Luxembourg/LNS2360335/2020|2020-12-03|EPI\_ISL\_770870|Original|hCoV-19^^Luxembourg|Human|Laboratoire national de sant\u00e9|Laboratoire national de sant\u00e9|Wienecke-Baldacchino|Luxembourg

>Spike|hCoV-19/England/QEUH-965307/2020|2020-08-12|EPI\_ISL\_531203|Original|hCoV-19^^England|Human|Lighthouse Lab in Glasgow|Wellcome Sanger Institute for the COVID-19 Genomics UK (COG-UK) consortium|Davies|United Kingdom

>Spike|hCoV-19/USA/VA-DCLS-0807/2020|2020-07-18|EPI\_ISL\_522815|Original|hCoV-19^^Virginia|Human|Virginia DCLS|Virginia DCLS|St. Jacques|USA

>Spike|hCoV-19/Wales/PHWC-48829D/2020|2020-10-27|EPI\_ISL\_639373|Original|hCoV-19^^Wales|Human|Wales Specialist Virology Centre Sequencing lab|COVID-19 Genomics UK (COG-UK) Consortium|Moore|United Kingdom

>Spike|hCoV-19/Russia/StPetersburg-RII5169S/2020|2020-04-09|EPI\_ISL\_430088|Original|hCoV-19^^Saint Petersburg|Human|WHO National Influenza Centre Russian Federation|WHO National Influenza Centre Russian Federation|Komissarov|Russia

>Spike|hCoV-19/England/ALDP-9EE175/2020|2020-05-08|EPI\_ISL\_589492|Original|hCoV-19^^England|Human|Lighthouse Lab in Alderley Park|Wellcome Sanger Institute for the COVID-19 Genomics UK (COG-UK) consortium|Davies|United Kingdom

>Spike|hCoV-19/USA/WA-UW-1638/2020|2020-03-19|EPI\_ISL\_424168|Original|hCoV-19^^Washington|Human|UW Virology Lab|UW Virology Lab|Roychoudhury|USA

>Spike|hCoV-19/England/MILK-993C14/2020|2020-08-27|EPI\_ISL\_552234|Original|hCoV-19^^England|Human|Lighthouse Lab in Milton Keynes|Wellcome Sanger Institute for the COVID-19 Genomics UK (COG-UK) consortium|Davies|United Kingdom

>Spike|hCoV-19/USA/TX-HMH-3069/2020|2020-06-10|EPI\_ISL\_543973|Original|hCoV-19^^Texas|Human|Houston Methodist Hospital|Houston Methodist Hospital|Long|USA

>Spike|hCoV-19/England/MILK-A1D3C1/2020|2020-10-03|EPI\_ISL\_595055|Original|hCoV-19^^England|Human|Queens Medical Centre|COVID-19 Genomics UK (COG-UK) Consortium|Loose|United Kingdom

>Spike|hCoV-19/England/ALDP-AA176C/2020|2020-10-22|EPI\_ISL\_625151|Original|hCoV-19^^England|Human|Lighthouse Lab in Alderley Park|Wellcome Sanger Institute for the COVID-19 Genomics UK (COG-UK) consortium|Davies|United Kingdom

>Spike|hCoV-19/Netherlands/UT-EMC-234/2020|2020-00-00|EPI\_ISL\_763186|Original|hCoV-19^^Utrecht|Human|Dutch COVID-19 response team|Erasmus Medical Center|Oude Munnink|Netherlands

>Spike|hCoV-19/Australia/VIC17512/2020|2020-08-21|EPI\_ISL\_663906|Original|hCoV-19^^Victoria|Human|Microbiological Diagnostic Unit - Public Health Laboratory (MDU-PHL)|MDU-PHL|Schultz|Australia

>Spike|hCoV-19/Wales/PHWC-16B925/2020|2020-09-17|EPI\_ISL\_573918|Original|hCoV-19^^Wales|Human|Wales Specialist Virology Centre Sequencing lab|COVID-19 Genomics UK (COG-UK) Consortium|Moore|United Kingdom

>Spike|hCoV-19/Wales/MILK-9EE61C/2020|2020-09-23|EPI\_ISL\_589772|Original|hCoV-19^^Wales|Human|Lighthouse Lab in Milton Keynes|Wellcome Sanger Institute for the COVID-19 Genomics UK (COG-UK) consortium|Davies|United Kingdom

>Spike|hCoV-19/USA/TX-HMH-MCoV-9249/2020|2020-07-03|EPI\_ISL\_780489|Original|hCoV-19^^Texas|Human|Houston Methodist Hospital|Houston Methodist Hospital|Long|USA

>Spike|hCoV-19/Netherlands/UT-RIVM-20431/2020|2020-12-13|EPI\_ISL\_728651|Original|hCoV-19^^Utrecht|Human|Dutch COVID-19 response team|National Institute for Public Health and the Environment (RIVM)|Meijer|Netherlands

>Spike|hCoV-19/Denmark/ALAB-SSI-890/2020|2020-03-31|EPI\_ISL\_444958|Original|hCoV-19^^Denmark|Human|Department of Virus and Microbiological Special Diagnostics|Albertsen lab|Kirkegaard|Denmark

>Spike|hCoV-19/England/MILK-BFDEC5/2020|2020-11-27|EPI\_ISL\_720673|Original|hCoV-19^^England|Human|Lighthouse Lab in Milton Keynes|Wellcome Sanger Institute for the COVID-19 Genomics UK (COG-UK) Consortium|Davies|United Kingdom

>Spike|hCoV-19/Thailand/SamutSakhon-CONI-0338/2020|2020-12-19|EPI\_ISL\_733532|Original|hCoV-19^^Samut Sakhon|Human|Institute for Urban Disease Control and Prevention|COVID-19 Network Investigations (CONI) Alliance|Batty|Thailand

>Spike|hCoV-19/Netherlands/UT-RIVM-20976/2020|2020-12-20|EPI\_ISL\_790997|Original|hCoV-19^^Utrecht|Human|Dutch COVID-19 response

team|National Institute for Public Health and the Environment  
(RIVM)|Meijer|Netherlands  
>Spike|hCoV-19/England/QEUA-A9F43D/2020|2020-10-20|EPI\_ISL\_611330|Original|hCoV-  
19^^England|Human|Lighthouse Lab in Glasgow|Wellcome Sanger Institute for the COVID-  
19 Genomics UK (COG-UK) consortium|Davies|United Kingdom  
>Spike|hCoV-19/USA/TX-HMH-MCoV-10059/2020|2020-07-06|EPI\_ISL\_789309|Original|hCoV-  
19^^Texas|Human|Houston Methodist Hospital|Houston Methodist Hospital|Long|USA  
>Spike|hCoV-19/Japan/PG-1644/2020|2020-04-00|EPI\_ISL\_685250|Original|hCoV-  
19^^Japan|Human|Pathogen Genomics Center|Pathogen Genomics Center|Sekizuka|Japan  
>Spike|hCoV-19/England/CAMB-7D912/2020|2020-04-06|EPI\_ISL\_441701|Original|hCoV-  
19^^England|Human|Department of Pathology|Wellcome Sanger Institute for the COVID-19  
Genomics UK (COG-UK) consortium|Amato|United Kingdom  
>Spike|hCoV-19/Denmark/DCGC-18841/2020|2020-12-07|EPI\_ISL\_748590|Original|hCoV-  
19^^Syddanmark|Human|Department of Virus and Microbiological Special  
Diagnostics|Albertsen Lab|Michaelsen|Denmark  
>Spike|hCoV-19/Canada/ON-PHL-20-03761/2020|2020-11-00|EPI\_ISL\_775071|Original|hCoV-  
19^^Ontario|Human|Public Health Ontario Laboratory|Public Health Ontario  
Laboratory|Guthrie|Canada  
>Spike|hCoV-19/Iceland/576/2020|2020-03-28|EPI\_ISL\_424596|Original|hCoV-  
19^^Reykjavik|Human|The National University Hospital of Iceland|deCODE  
genetics|J\u00f3nsson|Iceland  
>Spike|hCoV-19/England/MILK-B55089/2020|2020-11-06|EPI\_ISL\_657887|Original|hCoV-  
19^^England|Human|Lighthouse Lab in Milton Keynes|Wellcome Sanger Institute for the  
COVID-19 Genomics UK (COG-UK) Consortium|Davies|United Kingdom  
>Spike|hCoV-19/Portugal/PT0097/2020|2020-03-24|EPI\_ISL\_453813|Original|hCoV-  
19^^Portugal|Human|unknown|Instituto Nacional de Saude (INSA)|Borges|Portugal  
>Spike|hCoV-19/England/CAMC-B07772/2020|2020-10-29|EPI\_ISL\_643967|Original|hCoV-  
19^^England|Human|Lighthouse Lab in Cambridge|Wellcome Sanger Institute for the  
COVID-19 Genomics UK (COG-UK) Consortium|Davies|United Kingdom  
>Spike|hCoV-19/England/CAMB-7EBC0/2020|2020-04-07|EPI\_ISL\_443008|Original|hCoV-  
19^^England|Human|Department of Pathology|Wellcome Sanger Institute for the COVID-19  
Genomics UK (COG-UK) consortium|Amato|United Kingdom  
>Spike|hCoV-19/USA/AZ-TG377246/2020|2020-06-15|EPI\_ISL\_694618|Original|hCoV-  
19^^Arizona|Human|TGen North|TGen North|French|USA  
>Spike|hCoV-19/Bangladesh/DNAS\_DRCIM\_isl\_P2-101/2020|2020-07-  
02|EPI\_ISL\_774927|Original|hCoV-19^^Dhaka|Human|Designated Reference Institute for  
Chemical Measurements (DRICM)|DNA SOLUTION LTD.|Rabbi|Bangladesh  
>Spike|hCoV-19/Scotland/GCVR-1700BF/2020|2020-03-23|EPI\_ISL\_459532|Original|hCoV-  
19^^Scotland|Human|NHSGGC West of Scotland Specialist Virology Centre / MRC-  
University of Glasgow Centre for Virus Research|Wellcome Sanger Institute for the  
COVID-19 Genomics UK (COG-UK) consortium|Davies|United Kingdom  
>Spike|hCoV-19/England/CAMC-B20227/2020|2020-11-03|EPI\_ISL\_647599|Original|hCoV-  
19^^England|Human|Lighthouse Lab in Cambridge|Wellcome Sanger Institute for the  
COVID-19 Genomics UK (COG-UK) Consortium|Davies|United Kingdom  
>Spike|hCoV-19/Luxembourg/LNS2609501/2020|2020-12-01|EPI\_ISL\_770936|Original|hCoV-  
19^^Luxembourg|Human|Laboratoire national de sant\u00e9|Laboratoire national de  
sant\u00e9|Wienecke-Baldacchino|Luxembourg  
>Spike|hCoV-19/Kenya/C8387/2020|2020-05-17|EPI\_ISL\_568860|Original|hCoV-19^^Taita  
Taveta|Human|KEMRI-Wellcome Trust Research Programme/KEMRI-CGMR-C Kilifi|KEMRI-  
Wellcome Trust Research Programme/KEMRI-CGMR-C Kilifi|Githinji|Kenya  
>Spike|hCoV-19/USA/CA-CZB-15447/2020|2020-12-03|EPI\_ISL\_738954|Original|hCoV-  
19^^California|Human|Orange County Public Health Lab|Chan-Zuckerberg Biohub|Kamm|USA  
>Spike|hCoV-19/Denmark/DCGC-5625/2020|2020-09-28|EPI\_ISL\_620950|Original|hCoV-  
19^^Syddanmark|Human|Department of Virus and Microbiological Special  
Diagnostics|Albertsen lab|Michaelsen|Denmark  
>Spike|hCoV-19/Netherlands/ZuidHolland\_150/2020|2020-04-  
17|EPI\_ISL\_461323|Original|hCoV-19^^Zuid Holland|Human|Dutch COVID-19 response  
team|Erasmus Medical Center|Oude Munnink|Netherlands



>Spike|hCoV-19/Portugal/PT0936/2020|2020-04-03|EPI\_ISL\_511487|Original|hCoV-19^^Portugal|Human|Instituto Nacional de Saude (INSA)|Instituto Nacional de Saude (INSA) and Instituto Gulbenkian de Ciencia (IGC)|Borges|Portugal

>Spike|hCoV-19/Australia/VIC5392/2020|2020-07-18|EPI\_ISL\_520155|Original|hCoV-19^^Victoria|Human|Microbiological Diagnostic Unit - Public Health Laboratory (MDU-PHL)|MDU-PHL|Schultz|Australia

>Spike|hCoV-19/England/QEUA-B40F75/2020|2020-11-08|EPI\_ISL\_658656|Original|hCoV-19^^England|Human|Lighthouse Lab in Glasgow|Wellcome Sanger Institute for the COVID-19 Genomics UK (COG-UK) Consortium|Davies|United Kingdom

>Spike|hCoV-19/Japan/PG-1802/2020|2020-04-00|EPI\_ISL\_685408|Original|hCoV-19^^Japan|Human|Tokyo Metropolitan Institute of Public Health|Pathogen Genomics Center|Sekizuka|Japan

>Spike|hCoV-19/Wales/PHWC-4998B5/2020|2020-12-04|EPI\_ISL\_727371|Original|hCoV-19^^Wales|Human|Originating lab|COVID-19 Genomics UK (COG-UK) Consortium|Moore|United Kingdom

>Spike|hCoV-19/Wales/PHWC-15C9EB/2020|2020-04-13|EPI\_ISL\_472567|Original|hCoV-19^^Wales|Human|Wales Specialist Virology Centre Sequencing lab|COVID-19 Genomics UK (COG-UK) Consortium|Moore|United Kingdom

>Spike|hCoV-19/Switzerland/BL-ETHZ-380343/2020|2020-11-21|EPI\_ISL\_721789|Original|hCoV-19^^Basel-Landschaft|Human|Viollier AG|Department of Biosystems Science and Engineering|Nadeau|Switzerland

>Spike|hCoV-19/Spain/CN-IBV-97006485/2020|2020-03-25|EPI\_ISL\_537700|Original|hCoV-19^^Canary Islands|Human|Hospital Universitario de Gran Canaria Dr. Negr\u00ededn|SeqCOVID-SPAIN consortium|IBV(CSIC)|Comas|Spain

>Spike|hCoV-19/USA/CA-CZB-1629/2020|2020-05-09|EPI\_ISL\_468558|Original|hCoV-19^^California|Human|San Joaquin County Public Health Lab|Chan-Zuckerberg Biohub|Hao|USA

>Spike|hCoV-19/USA/MI-MDHHS-SC21809/2020|2020-07-16|EPI\_ISL\_565852|Original|hCoV-19^^Michigan|Human|Michigan Department of Health and Human Services|Michigan Department of Health and Human Services|Blankenship|USA

>Spike|hCoV-19/Scotland/CVR2060/2020|2020-04-10|EPI\_ISL\_493761|Original|hCoV-19^^Scotland|Human|West of Scotland Specialist Virology Centre|COVID-19 Genomics UK (COG-UK) Consortium|Robertson|United Kingdom

>Spike|hCoV-19/France/PAC-MEPHI-2014/2020|2020-08-28|EPI\_ISL\_644474|Original|hCoV-19^^Provence-Alpes-Cote-d\u00e9Azur|Human|MEPHI|MEPHI|Levasseur|France

>Spike|hCoV-19/Spain/IB-IBV-99011598/2020|2020-12-23|EPI\_ISL\_779915|Original|hCoV-19^^Balear Islands|Human|Servicio de Microbiolog\u00eda|SeqCOVID-SPAIN consortium|IBV(CSIC)|Comas|Spain

>Spike|hCoV-19/England/QEUA-9FFFFF/2020|2020-10-02|EPI\_ISL\_600425|Original|hCoV-19^^England|Human|Lighthouse Lab in Glasgow|Wellcome Sanger Institute for the COVID-19 Genomics UK (COG-UK) consortium|Davies|United Kingdom

>Spike|hCoV-19/India/WB-IICB-003/2020|2020-09-10|EPI\_ISL\_569861|Original|hCoV-19^^West Bengal|Human|CSIR-Indian Institute of Chemical Biology|CSIR-Indian Institute of Chemical Biology|Bhowmik|India

>Spike|hCoV-19/Switzerland/VB-ETHZ-300436/2020|2020-09-29|EPI\_ISL\_603390|Original|hCoV-19^^Valais|Human|Viollier AG|Department of Biosystems Science and Engineering|Nadeau|Switzerland

>Spike|hCoV-19/Wales/PHWC-4A4A84/2020|2020-12-15|EPI\_ISL\_764764|Original|hCoV-19^^Wales|Human|Wales Specialist Virology Centre Sequencing lab|COVID-19 Genomics UK (COG-UK) Consortium|Moore|United Kingdom

>Spike|hCoV-19/USA/TX-DSHS-1240/2020|2020-05-05|EPI\_ISL\_676613|Original|hCoV-19^^Texas|Human|Texas Department of State Health Services|Texas Department of State Health Services|Rahman|USA

>Spike|hCoV-19/Japan/PG-5749/2020|2020-08-00|EPI\_ISL\_688868|Original|hCoV-19^^Japan|Human|Pathogen Genomics Center|Pathogen Genomics Center|Sekizuka|Japan

>Spike|hCoV-19/England/ALDP-A2DDFD/2020|2020-10-06|EPI\_ISL\_586858|Original|hCoV-19^^England|Human|Lighthouse Lab in Alderley Park|Wellcome Sanger Institute for the COVID-19 Genomics UK (COG-UK) consortium|Davies|United Kingdom

>Spike|hCoV-19/USA/CA-ALSR-2735/2020|2020-07-15|EPI\_ISL\_635650|Original|hCoV-19^^California|Human|San Diego County Public Health Laboratory|Andersen lab at Scripps Research|Gangavarapu|USA

>Spike|hCoV-19/England/QEUH-AD0922/2020|2020-10-26|EPI\_ISL\_629792|Original|hCoV-19^^England|Human|Lighthouse Lab in Glasgow|Wellcome Sanger Institute for the COVID-19 Genomics UK (COG-UK) consortium|Davies|United Kingdom

>Spike|hCoV-19/England/ALDP-B82A67/2020|2020-11-14|EPI\_ISL\_675610|Original|hCoV-19^^England|Human|Lighthouse Lab in Alderley Park|Wellcome Sanger Institute for the COVID-19 Genomics UK (COG-UK) Consortium|Davies|United Kingdom

>Spike|hCoV-19/England/ALDP-95A60C/2020|2020-06-10|EPI\_ISL\_555080|Original|hCoV-19^^England|Human|Lighthouse Lab in Alderley Park|Wellcome Sanger Institute for the COVID-19 Genomics UK (COG-UK) consortium|Davies|United Kingdom

>Spike|hCoV-19/USA/FL-BPHL-1860/2020|2020-04-10|EPI\_ISL\_613938|Original|hCoV-19^^Florida|Human|Florida Bureau of Public Health Laboratories|Florida Bureau of Public Health Laboratories|Blanton|USA

>Spike|hCoV-19/England/BRIS-12D109/2020|2020-04-25|EPI\_ISL\_481920|Original|hCoV-19^^England|Human|PHE South West Regional Laboratory|Wellcome Sanger Institute for the COVID-19 Genomics UK (COG-UK) consortium|Davies|United Kingdom

>Spike|hCoV-19/England/NORT-1B71163/2020|2020-11-13|EPI\_ISL\_706304|Original|hCoV-19^^England|Human|Northumbria University / South Tees Hospitals NHS Foundation Trust / North Cumbria Integrated Care NHS Foundation Trust / North Tees and Hartlepool NHS Foundation Trust / Newcastle Hospitals NHS Foundation Trust|COVID-19 Genomics UK (COG-UK) Consortium|Bashton|United Kingdom

>Spike|hCoV-19/Denmark/DCGC-8701/2020|2020-10-26|EPI\_ISL\_626014|Original|hCoV-19^^Hovedstaden|Human|Department of Virus and Microbiological Special Diagnostics|Albertsen lab|Michaelsen|Denmark

>Spike|hCoV-19/Spain/AN-IBV-002860/2020|2020-03-13|EPI\_ISL\_474926|Original|hCoV-19^^Andalucia|Human|Hospital Universitario Virgen de las Nieves de Granada-SAS|SeqCOVID-SPAIN consortium/IBV(CSIC)|Comas|Spain

>Spike|hCoV-19/Japan/PG-0997/2020|2020-04-00|EPI\_ISL\_684607|Original|hCoV-19^^Japan|Human|Pathogen Genomics Center|Pathogen Genomics Center|Sekizuka|Japan

>Spike|hCoV-19/USA/IA\_6401/2020|2020-03-08|EPI\_ISL\_424897|Original|hCoV-19^^Iowa|Human|IA State Hygienic Laboratory|Pathogen Discovery|Queen|USA

>Spike|hCoV-19/USA/LA-EVTL906/2020|2020-07-09|EPI\_ISL\_653597|Original|hCoV-19^^Louisiana|Human|LSUHS Emerging Viral Threat Laboratory|Microbial Genome Sequencing Center|Kamil|USA

>Spike|hCoV-19/Saudi Arabia/85791C/2020|2020-03-15|EPI\_ISL\_469252|Original|hCoV-19^^Jeddah|Human|Special Infectious Agents Unit|Special Infectious Agents Unit|Submitter|Saudi Arabia

>Spike|hCoV-19/England/CAMC-B216DF/2020|2020-11-01|EPI\_ISL\_647292|Original|hCoV-19^^England|Human|Lighthouse Lab in Cambridge|Wellcome Sanger Institute for the COVID-19 Genomics UK (COG-UK) Consortium|Davies|United Kingdom

>Spike|hCoV-19/Belgium/UGent-327/2020|2020-12-13|EPI\_ISL\_745214|Original|hCoV-19^^Ghent|Human|Lab voor klinische biologie|Onderzoeksgroep Virologie|Lambrechts|Belgium

>Spike|hCoV-19/Luxembourg/LNS2618320/2020|2020-10-26|EPI\_ISL\_740159|Original|hCoV-19^^Luxembourg|Human|Laboratoire national de sant\u00e9|Laboratoire national de sant\u00e9|Wienecke-Baldacchino|Luxembourg

>Spike|hCoV-19/England/ALDP-496A1C/2020|2020-06-07|EPI\_ISL\_559353|Original|hCoV-19^^England|Human|Lighthouse Lab in Alderley Park|Wellcome Sanger Institute for the COVID-19 Genomics UK (COG-UK) Consortium|Davies|United Kingdom

>Spike|hCoV-19/England/MILK-A799C1/2020|2020-10-15|EPI\_ISL\_606864|Original|hCoV-19^^England|Human|Lighthouse Lab in Milton Keynes|Wellcome Sanger Institute for the COVID-19 Genomics UK (COG-UK) consortium|Davies|United Kingdom

>Spike|hCoV-19/Germany/HH-hpi-pl278/2020|2020-03-15|EPI\_ISL\_775875|Original|hCoV-19^^Hamburg|Human|University Medical Center Hamburg Eppendorf|Heinrich Pette Institute|Robitaille|Germany

>Spike|hCoV-19/Sweden/20-52156/2020|2020-06-24|EPI\_ISL\_539883|Original|hCoV-19^^Vastra Gotaland|Human|Omtanken Grimmered|The Public Health Agency of Sweden|Svartstr\u00f6m|Sweden

>Spike|hCoV-19/Wales/PHWC-16E6B2/2020|2020-10-01|EPI\_ISL\_585754|Original|hCoV-19^^Wales|Human|Wales Specialist Virology Centre Sequencing lab|COVID-19 Genomics UK (COG-UK) Consortium|Moore|United Kingdom

>Spike|hCoV-19/England/CAMC-B7A1C7/2020|2020-11-10|EPI\_ISL\_667902|Original|hCoV-19^^England|Human|Lighthouse Lab in Cambridge|Wellcome Sanger Institute for the COVID-19 Genomics UK (COG-UK) Consortium|Davies|United Kingdom

>Spike|hCoV-19/USA/TX-HMH-MCoV-19799/2020|2020-11-25|EPI\_ISL\_784135|Original|hCoV-19^^Texas|Human|Houston Methodist Hospital|Houston Methodist Hospital|Long|USA

>Spike|hCoV-19/England/20139060804/2020|2020-03-27|EPI\_ISL\_420734|Original|hCoV-19^^England|Human|Respiratory Virus Unit|Respiratory Virus Unit|Platt|United Kingdom

>Spike|hCoV-19/England/MILK-ABB5FC/2020|2020-10-21|EPI\_ISL\_623501|Original|hCoV-19^^England|Human|Lighthouse Lab in Milton Keynes|Wellcome Sanger Institute for the COVID-19 Genomics UK (COG-UK) consortium|Davies|United Kingdom

>Spike|hCoV-19/Wales/PHWC-496D9B/2020|2020-11-25|EPI\_ISL\_726726|Original|hCoV-19^^Wales|Human|Originating lab|COVID-19 Genomics UK (COG-UK) Consortium|Moore|United Kingdom

>Spike|hCoV-19/England/MILK-B02D66/2020|2020-10-24|EPI\_ISL\_642888|Original|hCoV-19^^England|Human|Lighthouse Lab in Milton Keynes|Wellcome Sanger Institute for the COVID-19 Genomics UK (COG-UK) Consortium|Davies|United Kingdom

>Spike|hCoV-19/England/MILK-9E035F/2020|2020-09-20|EPI\_ISL\_601392|Original|hCoV-19^^England|Human|Lighthouse Lab in Milton Keynes|Wellcome Sanger Institute for the COVID-19 Genomics UK (COG-UK) consortium|Davies|United Kingdom

>Spike|hCoV-19/England/TBSD-2488859/2020|2020-04-23|EPI\_ISL\_482127|Original|hCoV-19^^England|Human|The Department of Microbiology|Wellcome Sanger Institute for the COVID-19 Genomics UK (COG-UK) consortium|Davies|United Kingdom

>Spike|hCoV-19/Wales/PHWC-3664B/2020|2020-05-01|EPI\_ISL\_474694|Original|hCoV-19^^Wales|Human|Originating lab|COVID-19 Genomics UK (COG-UK) Consortium|Moore|United Kingdom

>Spike|hCoV-19/England/CAMB-1AE197/2020|2020-04-27|EPI\_ISL\_459461|Original|hCoV-19^^England|Human|Department of Pathology|Wellcome Sanger Institute for the COVID-19 Genomics UK (COG-UK) consortium|Davies|United Kingdom

>Spike|hCoV-19/USA/CA-CZB-12953/2020|2020-09-29|EPI\_ISL\_672109|Original|hCoV-19^^California|Human|Orange County Public Health Lab|Chan-Zuckerberg Biohub|Bhatt|USA

>Spike|hCoV-19/USA/NY-NYCPHL-000769/2020|2020-03-20|EPI\_ISL\_632149|Original|hCoV-19^^New York|Human|Jamaica Hospital Medical Center|New York City Public Health Laboratory|Wang|USA

>Spike|hCoV-19/USA/TX-HMH-MCoV-19768/2020|2020-11-21|EPI\_ISL\_783571|Original|hCoV-19^^Texas|Human|Houston Methodist Hospital|Houston Methodist Hospital|Long|USA

>Spike|hCoV-19/Scotland/CVR3987/2020|2020-08-31|EPI\_ISL\_540784|Original|hCoV-19^^Scotland|Human|West of Scotland Specialist Virology Centre|COVID-19 Genomics UK (COG-UK) Consortium|Robertson|United Kingdom

>Spike|hCoV-19/England/MILK-9EE8CB/2020|2020-09-23|EPI\_ISL\_580744|Original|hCoV-19^^England|Human|Lighthouse Lab in Milton Keynes|Wellcome Sanger Institute for the COVID-19 Genomics UK (COG-UK) consortium|Davies|United Kingdom

>Spike|hCoV-19/England/ALDP-A936F7/2020|2020-10-20|EPI\_ISL\_611183|Original|hCoV-19^^England|Human|Lighthouse Lab in Alderley Park|Wellcome Sanger Institute for the COVID-19 Genomics UK (COG-UK) consortium|Davies|United Kingdom

>Spike|hCoV-19/USA/MN-QDX-952/2020|2020-03-16|EPI\_ISL\_571753|Original|hCoV-19^^Minnesota|Human|Quest Diagnostics|Quest Diagnostics|Kagan|USA

>Spike|hCoV-19/England/ALDP-9CD516/2020|2020-09-16|EPI\_ISL\_566403|Original|hCoV-19^^England|Human|Lighthouse Lab in Alderley Park|Wellcome Sanger Institute for the COVID-19 Genomics UK (COG-UK) consortium|Davies|United Kingdom

>Spike|hCoV-19/England/ALDP-B1B438/2020|2020-11-01|EPI\_ISL\_645806|Original|hCoV-19^^England|Human|Lighthouse Lab in Alderley Park|Wellcome Sanger Institute for the COVID-19 Genomics UK (COG-UK) Consortium|Davies|United Kingdom

>Spike|hCoV-19/Australia/VIC4795/2020|2020-07-19|EPI\_ISL\_519181|Original|hCoV-19^^Victoria|Human|Microbiological Diagnostic Unit - Public Health Laboratory (MDU-PHL)|MDU-PHL|Schultz|Australia

>Spike|hCoV-19/Jordan/AQ-ALSR-5267/2020|2020-10-07|EPI\_ISL\_730505|Original|hCoV-19^^Aqaba|Human|Biolab Diagnostic Laboratories|Andersen lab at Scripps Research|Gangavarapu|Jordan

>Spike|hCoV-19/England/NORT-1B61773/2020|2020-10-30|EPI\_ISL\_706276|Original|hCoV-19^^England|Human|Northumbria University / South Tees Hospitals NHS Foundation Trust / North Cumbria Integrated Care NHS Foundation Trust / North Tees and Hartlepool NHS Foundation Trust / Newcastle Hospitals NHS Foundation Trust|COVID-19 Genomics UK (COG-UK) Consortium|Bashton|United Kingdom

>Spike|hCoV-19/USA/MI-MDHHS-SC20287/2020|2020-03-27|EPI\_ISL\_447085|Original|hCoV-19^^Michigan|Human|Michigan Department of Health and Human Services|Michigan Department of Health and Human Services|Blankenship|USA

>Spike|hCoV-19/England/CAMC-B0AAA3/2020|2020-10-29|EPI\_ISL\_643514|Original|hCoV-19^^England|Human|Lighthouse Lab in Cambridge|Wellcome Sanger Institute for the COVID-19 Genomics UK (COG-UK) Consortium|Davies|United Kingdom

>Spike|hCoV-19/Denmark/DCGC-4738/2020|2020-09-21|EPI\_ISL\_622177|Original|hCoV-19^^Nordjylland|Human|Department of Virus and Microbiological Special Diagnostics|Albertsen lab|Michaelsen|Denmark

>Spike|hCoV-19/Wales/PHWC-48629F/2020|2020-10-22|EPI\_ISL\_638148|Original|hCoV-19^^Wales|Human|Wales Specialist Virology Centre Sequencing lab|COVID-19 Genomics UK (COG-UK) Consortium|Moore|United Kingdom

>Spike|hCoV-19/England/QEUA-C34483/2020|2020-12-11|EPI\_ISL\_734011|Original|hCoV-19^^England|Human|Lighthouse Lab in Glasgow|Wellcome Sanger Institute for the COVID-19 Genomics UK (COG-UK) Consortium|Davies|United Kingdom

>Spike|hCoV-19/DRC/11157/2020|2020-05-25|EPI\_ISL\_527530|Original|hCoV-19^^Kinshasa|Human|Viral Respiratory Lab|Pathogen Sequencing Lab|Lokilo|Democratic Republic of the Congo

>Spike|hCoV-19/England/ALDP-935B26/2020|2020-06-21|EPI\_ISL\_552959|Original|hCoV-19^^England|Human|Lighthouse Lab in Alderley Park|Wellcome Sanger Institute for the COVID-19 Genomics UK (COG-UK) consortium|Davies|United Kingdom

>Spike|hCoV-19/Wales/PHWC-4A48C6/2020|2020-12-16|EPI\_ISL\_764745|Original|hCoV-19^^Wales|Human|Wales Specialist Virology Centre Sequencing lab|COVID-19 Genomics UK (COG-UK) Consortium|Moore|United Kingdom

>Spike|hCoV-19/USA/MA-QDX-1826/2020|2020-03-17|EPI\_ISL\_604110|Original|hCoV-19^^Massachusetts|Human|Quest Diagnostics|Quest Diagnostics|Kagan|USA

>Spike|hCoV-19/Japan/PG-7895/2020|2020-07-00|EPI\_ISL\_686996|Original|hCoV-19^^Japan|Human|Pathogen Genomics Center|Pathogen Genomics Center|Sekizuka|Japan

>Spike|hCoV-19/USA/FL-BPHL-2047/2020|2020-06-23|EPI\_ISL\_653200|Original|hCoV-19^^Florida|Human|Florida Bureau of Public Health Laboratories|Florida Bureau of Public Health Laboratories|Blanton|USA

>Spike|hCoV-19/USA/TX-HMH-MCoV-9022/2020|2020-07-02|EPI\_ISL\_780901|Original|hCoV-19^^Texas|Human|Houston Methodist Hospital|Houston Methodist Hospital|Long|USA

>Spike|hCoV-19/England/ALDP-9CDBAB/2020|2020-09-15|EPI\_ISL\_566329|Original|hCoV-19^^England|Human|Lighthouse Lab in Alderley Park|Wellcome Sanger Institute for the COVID-19 Genomics UK (COG-UK) consortium|Davies|United Kingdom

>Spike|hCoV-19/Gambia/GC19-3505/2020|2020-07-27|EPI\_ISL\_561188|Original|hCoV-19^^Kombo|Human|MRCG at LSHTM Genomics lab|MRCG at LSHTM Genomics lab|Sesay|Gambia

>Spike|hCoV-19/Wales/PHWC-483520/2020|2020-10-22|EPI\_ISL\_627830|Original|hCoV-19^^Wales|Human|Wales Specialist Virology Centre Sequencing lab|COVID-19 Genomics UK (COG-UK) Consortium|Moore|United Kingdom

>Spike|hCoV-19/England/20132090504/2020|2020-03-23|EPI\_ISL\_423819|Original|hCoV-19^^England|Human|Respiratory Virus Unit|Respiratory Virus Unit|Platt|United Kingdom

>Spike|hCoV-19/USA/VA-DCLS-1195/2020|2020-06-22|EPI\_ISL\_572274|Original|hCoV-19^^Virginia|Human|Virginia DCLS|Virginia DCLS|St. Jacques|USA

>Spike|hCoV-19/Denmark/DCGC-11212/2020|2020-11-02|EPI\_ISL\_670772|Original|hCoV-19^^Nordjylland|Human|Department of Virus and Microbiological Special Diagnostics|Albertsen Lab|Michaelsen|Denmark

>Spike|hCoV-19/Thailand/CO63-167-3/2020|2020-03-10|EPI\_ISL\_450962|Original|hCoV-19^^Thailand|Human|Center of Excellence in Clinical Virology|Center of Excellence in Clinical Virology|Poovorawan|Thailand

>Spike|hCoV-19/Denmark/ALAB-SSI451/2020|2020-03-25|EPI\_ISL\_429538|Original|hCoV-19^^Denmark|Human|Department of Virus and Microbiological Special Diagnostics|Albertsen lab|Kirkegaard|Denmark

>Spike|hCoV-19/USA/WA-S617/2020|2020-04-25|EPI\_ISL\_438170|Original|hCoV-19^^Washington|Human|Seattle Flu Study|Seattle Flu Study|Bedford|USA

>Spike|hCoV-19/USA/TX-HMH-4217/2020|2020-06-19|EPI\_ISL\_543446|Original|hCoV-19^^Texas|Human|Houston Methodist Hospital|Houston Methodist Hospital|Long|USA

>Spike|hCoV-19/USA/TX-HMH-MCoV-14127/2020|2020-10-01|EPI\_ISL\_787412|Original|hCoV-19^^Texas|Human|Houston Methodist Hospital|Houston Methodist Hospital|Long|USA

>Spike|hCoV-19/France/ARA-72266/2020|2020-09-14|EPI\_ISL\_693498|Original|hCoV-19^^Auvergne-Rh\u00f4ne-Alpes|Human|CNR Virus des Infections Respiratoires - France SUD|CNR Virus des Infections Respiratoires - France SUD|Bal|France

>Spike|hCoV-19/Australia/VIC5990/2020|2020-07-20|EPI\_ISL\_518765|Original|hCoV-19^^Victoria|Human|Microbiological Diagnostic Unit - Public Health Laboratory (MDU-PHL)|MDU-PHL|Schultz|Australia

>Spike|hCoV-19/USA/WI-UW-1536/2020|2020-09-14|EPI\_ISL\_605414|Original|hCoV-19^^Wisconsin|Human|University of Wisconsin-Madison AIDS Vaccine Research Laboratories|University of Wisconsin-Madison AIDS Vaccine Research Laboratories|Baczenas|USA

>Spike|hCoV-19/Australia/VIC16188/2020|2020-08-01|EPI\_ISL\_640719|Original|hCoV-19^^Victoria|Human|Microbiological Diagnostic Unit - Public Health Laboratory (MDU-PHL)|MDU-PHL|Schultz|Australia

>Spike|hCoV-19/Wales/PHWC-163F2B/2020|2020-04-24|EPI\_ISL\_474103|Original|hCoV-19^^Wales|Human|Originating lab|COVID-19 Genomics UK (COG-UK) Consortium|Moore|United Kingdom

>Spike|hCoV-19/England/BHRT-24B3521/2020|2020-05-09|EPI\_ISL\_528801|Original|hCoV-19^^England|Human|Microbiology Department|Wellcome Sanger Institute for the COVID-19 Genomics UK (COG-UK) consortium|Davies|United Kingdom

>Spike|hCoV-19/Bangladesh/BCSIR-DU-16/2020|2020-07-12|EPI\_ISL\_514253|Original|hCoV-19^^Dhaka|Human|Advanced Biotechnology Laboratory|Genomic Research Lab|Khan|Bangladesh

>Spike|hCoV-19/Australia/VIC2960/2020|2020-07-07|EPI\_ISL\_521790|Original|hCoV-19^^Victoria|Human|Microbiological Diagnostic Unit - Public Health Laboratory (MDU-PHL)|MDU-PHL|Schultz|Australia

>Spike|hCoV-19/England/CAMC-A58087/2020|2020-10-08|EPI\_ISL\_597063|Original|hCoV-19^^England|Human|Lighthouse Lab in Cambridge|Wellcome Sanger Institute for the COVID-19 Genomics UK (COG-UK) consortium|Davies|United Kingdom

>Spike|hCoV-19/England/ALDP-9FD9C6/2020|2020-10-02|EPI\_ISL\_587878|Original|hCoV-19^^England|Human|Lighthouse Lab in Alderley Park|Wellcome Sanger Institute for the COVID-19 Genomics UK (COG-UK) consortium|Davies|United Kingdom

>Spike|hCoV-19/England/MILK-B05880/2020|2020-10-24|EPI\_ISL\_652201|Original|hCoV-19^^England|Human|Queens Medical Centre|COVID-19 Genomics UK (COG-UK) Consortium|Loose|United Kingdom

>Spike|hCoV-19/USA/UT-UPHL-201016626/2020|2020-07-06|EPI\_ISL\_594060|Original|hCoV-19^^Utah|Human|Utah Public Health Laboratory|Utah Public Health Laboratory|Young|USA

>Spike|hCoV-19/England/QEUEH-B11942/2020|2020-11-02|EPI\_ISL\_642446|Original|hCoV-19^^England|Human|Lighthouse Lab in Glasgow|Wellcome Sanger Institute for the COVID-19 Genomics UK (COG-UK) Consortium|Davies|United Kingdom

>Spike|hCoV-19/Luxembourg/LNS2211019/2020|2020-12-28|EPI\_ISL\_771112|Original|hCoV-19^^Luxembourg|Human|Laboratoire national de sant\u00e9|Laboratoire national de sant\u00e9|Wienecke-Baldacchino|Luxembourg

>Spike|hCoV-19/Belgium/regal-10191095/2020|2020-10-19|EPI\_ISL\_735143|Original|hCoV-19^^Bost|Human|UZ Leuven|KU Leuven|Maes|Belgium

>Spike|hCoV-19/England/CAMC-BC0863/2020|2020-11-20|EPI\_ISL\_705128|Original|hCoV-19^^England|Human|Lighthouse Lab in Cambridge|Wellcome Sanger Institute for the COVID-19 Genomics UK (COG-UK) Consortium|Davies|United Kingdom

>Spike|hCoV-19/Costa Rica/INC-0124/2020|2020-08-08|EPI\_ISL\_682263|Original|hCoV-19^^San Jose|Human|HOSPITAL SAN JUAN DE DIOS|Inciensa|Soto-Garita|Costa Rica

>Spike|hCoV-19/England/QEUA-B9EA68/2020|2020-11-18|EPI\_ISL\_719900|Original|hCoV-19^^England|Human|Lighthouse Lab in Glasgow|Wellcome Sanger Institute for the COVID-19 Genomics UK (COG-UK) Consortium|Davies|United Kingdom

>Spike|hCoV-19/Denmark/DCGC-22492/2020|2020-12-14|EPI\_ISL\_757470|Original|hCoV-19^^Hovedstaden|Human|Department of Virus and Microbiological Special Diagnostics|Albertsen Lab|Michaelsen|Denmark

>Spike|hCoV-19/England/MILK-99DC56/2020|2020-08-30|EPI\_ISL\_550654|Original|hCoV-19^^England|Human|Lighthouse Lab in Milton Keynes|Wellcome Sanger Institute for the COVID-19 Genomics UK (COG-UK) consortium|Davies|United Kingdom

>Spike|hCoV-19/Portugal/PT1771/2020|2020-11-09|EPI\_ISL\_732002|Original|hCoV-19^^Portugal|Human|Instituto Nacional de Saude (INSA)|Instituto Nacional de Saude (INSA)|Borges|Portugal

>Spike|hCoV-19/Wales/PHWC-47F017/2020|2020-10-11|EPI\_ISL\_612617|Original|hCoV-19^^Wales|Human|Wales Specialist Virology Centre Sequencing lab|COVID-19 Genomics UK (COG-UK) Consortium|Moore|United Kingdom

>Spike|hCoV-19/England/CAMC-B22BDF/2020|2020-11-02|EPI\_ISL\_647456|Original|hCoV-19^^England|Human|Lighthouse Lab in Cambridge|Wellcome Sanger Institute for the COVID-19 Genomics UK (COG-UK) Consortium|Davies|United Kingdom

>Spike|hCoV-19/USA/TX-HMH-MCoV-15726/2020|2020-07-09|EPI\_ISL\_785410|Original|hCoV-19^^Texas|Human|Houston Methodist Hospital|Houston Methodist Hospital|Long|USA

>Spike|hCoV-19/Germany/NW-HHU-232/2020|2020-09-14|EPI\_ISL\_631365|Orginal|hCoV-19^^North Rhine-Westphalia|Human|ZOTZ KLIMAS MVZ D\u00f0fcsseldorf-Centrum GbR \u00dcBAG f\u00fcr Labormedizin|Center of Medical Microbiology|Wienemann|Germany

>Spike|hCoV-19/Switzerland/BE-ETHZ-270203/2020|2020-08-31|EPI\_ISL\_541444|Original|hCoV-19^^Bern|Human|Viollier AG|Department of Biosystems Science and Engineering|Nadeau|Switzerland

>Spike|hCoV-19/USA/TX-HMH-MCoV-8180/2020|2020-07-07|EPI\_ISL\_784249|Original|hCoV-19^^Texas|Human|Houston Methodist Hospital|Houston Methodist Hospital|Long|USA

>Spike|hCoV-19/United Arab Emirates/0218/2020|2020-05-17|EPI\_ISL\_698404|Original|hCoV-19^^Abu Dhabi|Human|Group 42 (G42) Healthcare|G42 Healthcare|Ogrodzki|United Arab Emirates

>Spike|hCoV-19/England/LOND-DA6EF/2020|2020-11-05|EPI\_ISL\_724656|Original|hCoV-19^^England|Human|University College London|COVID-19 Genomics UK (COG-UK) Consortium|Roy|United Kingdom

>Spike|hCoV-19/USA/CO-CSU-D2373-1/2020|2020-04-15|EPI\_ISL\_527463|Original|hCoV-19^^Colorado|Human|Colorado State University - Ebel Lab|Colorado State University - Ebel Lab|Cline|USA

>Spike|hCoV-19/Germany/NW-HHU-431/2020|2020-10-25|EPI\_ISL\_733506|Original|hCoV-19^^North Rhine-Westphalia|Human|ZOTZ KLIMAS MVZ D\u00f0fcsseldorf-Centrum GbR \u00dcBAG f\u00fcr Labormedizin|Center of Medical Microbiology|Wienemann|Germany

>Spike|hCoV-19/USA/NY-PV09494/2020|2020-03-21|EPI\_ISL\_450166|Original|hCoV-19^^New York|Human|MSHS Clinical Microbiology Laboratories|MSHS Pathogen Surveillance Program|van Bakel|USA

>Spike|hCoV-19/England/NORW-EFB51/2020|2020-00-00|EPI\_ISL\_549378|Original|hCoV-19^^England|Human|Quadram Institute Bioscience|COVID-19 Genomics UK (COG-UK) Consortium|Alikhan|United Kingdom

>Spike|hCoV-19/England/LIVE-DB4280/2020|2020-10-19|EPI\_ISL\_651344|Original|hCoV-19^^England|Human|Liverpool Clinical Laboratories|COVID-19 Genomics UK (COG-UK) Consortium|Haldenby|United Kingdom

>Spike|hCoV-19/USA/UT-01985/2020|2020-04-16|EPI\_ISL\_452171|Original|hCoV-19^^Utah|Human|Utah Public Health Laboratory|Utah Public Health Laboratory|Young|USA

>Spike|hCoV-19/England/MILK-9C3677/2020|2020-09-10|EPI\_ISL\_566684|Original|hCoV-19^^England|Human|Lighthouse Lab in Milton Keynes|Wellcome Sanger Institute for the COVID-19 Genomics UK (COG-UK) consortium|Davies|United Kingdom

>Spike|hCoV-19/Scotland/QEUA-98F61D/2020|2020-08-27|EPI\_ISL\_539959|Original|hCoV-19^^Scotland|Human|Lighthouse Lab in Glasgow|Wellcome Sanger Institute for the COVID-19 Genomics UK (COG-UK) consortium|Davies|United Kingdom

>Spike|hCoV-19/Denmark/DCGC-21917/2020|2020-12-21|EPI\_ISL\_758455|Original|hCoV-19^^Syddanmark|Human|Department of Virus and Microbiological Special Diagnostics|Albertsen Lab|Michaelsen|Denmark

>Spike|hCoV-19/USA/MA-MGH-00134/2020|2020-03-22|EPI\_ISL\_460316|Original|hCoV-19^^Massachusetts|Human|Massachusetts General Hospital|Infectious Disease Program|Lemieux|USA

>Spike|hCoV-19/Australia/NSW91/2020|2020-03-21|EPI\_ISL\_427712|Original|hCoV-19^^New South Wales|Human|Centre for Infectious Diseases and Microbiology Public Health|NSW Health Pathology - Institute of Clinical Pathology and Medical Research; Westmead Hospital; University of Sydney|Gall|Australia

>Spike|hCoV-19/Denmark/DCGC-15734/2020|2020-11-23|EPI\_ISL\_713988|Original|hCoV-19^^Syddanmark|Human|Department of Virus and Microbiological Special Diagnostics|Albertsen Lab|Michaelsen|Denmark

>Spike|hCoV-19/Denmark/DCGC-7972/2020|2020-10-26|EPI\_ISL\_617119|Original|hCoV-19^^Nordjylland|Human|Department of Virus and Microbiological Special Diagnostics|Albertsen lab|Michaelsen|Denmark

>Spike|hCoV-19/Australia/NSW490/2020|2020-04-23|EPI\_ISL\_455030|Original|hCoV-19^^New South Wales|Human|Pathology West - NSW Health Pathology|NSW Health Pathology - Institute of Clinical Pathology and Medical Research; Westmead Hospital; University of Sydney|Gall|Australia

>Spike|hCoV-19/Czech Republic/NRL-10328/2020|2020-10-23|EPI\_ISL\_660576|Original|hCoV-19^^Central Bohemian Region|Human|The National Institute of Public Health|State Veterinary Institute Prague|Nagy|Czech Republic

>Spike|hCoV-19/USA/MI-MDHHS-SC22325/2020|2020-11-09|EPI\_ISL\_708301|Original|hCoV-19^^Michigan|Human|Michigan Department of Health and Human Services|Michigan Department of Health and Human Services|Jacob|USA

>Spike|hCoV-19/England/MILK-9A66F2/2020|2020-09-01|EPI\_ISL\_550217|Original|hCoV-19^^England|Human|Lighthouse Lab in Milton Keynes|Wellcome Sanger Institute for the COVID-19 Genomics UK (COG-UK) consortium|Davies|United Kingdom

>Spike|hCoV-19/USA/WA-S1814/2020|2020-06-02|EPI\_ISL\_496240|Original|hCoV-19^^Washington|Human|Washington State Department of Health|Seattle Flu Study|Lee|USA

>Spike|hCoV-19/USA/MN-MDH-1965/2020|2020-10-13|EPI\_ISL\_634839|Original|hCoV-19^^Minnesota|Human|Minnesota Department of Health|Minnesota Department of Health|Lorentz|USA

>Spike|hCoV-19/England/MILK-AB7648/2020|2020-10-20|EPI\_ISL\_623283|Original|hCoV-19^^England|Human|Lighthouse Lab in Milton Keynes|Wellcome Sanger Institute for the COVID-19 Genomics UK (COG-UK) consortium|Davies|United Kingdom

>Spike|hCoV-19/USA/UT-03018/2020|2020-05-01|EPI\_ISL\_509560|Original|hCoV-19^^Utah|Human|Utah Public Health Laboratory|Utah Public Health Laboratory|Butz|USA

>Spike|hCoV-19/Australia/NSW944/2020|2020-08-02|EPI\_ISL\_545016|Original|hCoV-19^^New South Wales|Human|South Eastern Area Laboratory Services (SEALS)|NSW Health Pathology - Institute of Clinical Pathology and Medical Research; Westmead Hospital; University of Sydney|Gall|Australia

>Spike|hCoV-19/Poland/PL\_P15/2020|2020-04-07|EPI\_ISL\_451976|Original|hCoV-19^^Malopolska|Human|1. ViroGenetics - BSL3 Laboratory of Virology|1. ViroGenetics - BSL3 Laboratory of Virology|Pyrz|Poland

>Spike|hCoV-19/USA/TX-HMH-MCoV-9293/2020|2020-07-04|EPI\_ISL\_781042|Original|hCoV-19^^Texas|Human|Houston Methodist Hospital|Houston Methodist Hospital|Long|USA

>Spike|hCoV-19/England/QEUH-B6C92A/2020|2020-11-11|EPI\_ISL\_655008|Original|hCoV-19^^England|Human|Lighthouse Lab in Glasgow|Wellcome Sanger Institute for the COVID-19 Genomics UK (COG-UK) Consortium|Davies|United Kingdom

>Spike|hCoV-19/Denmark/DCGC-2473/2020|2020-08-10|EPI\_ISL\_617741|Original|hCoV-19^^Midtjylland|Human|Department of Virus and Microbiological Special Diagnostics|Albertsen lab|Michaelsen|Denmark

>Spike|hCoV-19/Austria/CeMM0088/2020|2020-03-24|EPI\_ISL\_437951|Original|hCoV-19^^Innsbruck|Human|Universitaetsklinik f\u00fcr Innere Medizin II|Innsbruck|Bergthaler laboratory|Bergthaler|Austria

>Spike|hCoV-19/Denmark/DCGC-19735/2020|2020-12-07|EPI\_ISL\_748519|Original|hCoV-19^^Hovedstaden|Human|Department of Virus and Microbiological Special Diagnostics|Albertsen Lab|Michaelsen|Denmark

>Spike|hCoV-19/India/WB-S48/2020|2020-05-05|EPI\_ISL\_455668|Original|hCoV-19^^West Bengal|Human|ICMR-National Institute of Cholera and Enteric Diseases|National Institute of Biomedical Genomics|Maitra|India

>Spike|hCoV-19/Japan/PG-6516/2020|2020-07-00|EPI\_ISL\_687630|Original|hCoV-19^^Japan|Human|Pathogen Genomics Center|Pathogen Genomics Center|Sekizuka|Japan

>Spike|hCoV-19/Bangladesh/BCSIR-NILMRC-130/2020|2020-06-17|EPI\_ISL\_480414|Original|hCoV-19^^Dhaka|Human|National Institute of Laboratory Medicine and Referral Center|Bangladesh Council of Scientific and Industrial Research|Khan|Bangladesh

>Spike|hCoV-19/Singapore/964/2020|2020-09-09|EPI\_ISL\_548973|Original|hCoV-19^^Singapore|Human|National Public Health Laboratory|National Public Health Laboratory|Mak|Singapore

>Spike|hCoV-19/Peru/LIM-UPCH-0068/2020|2020-06-18|EPI\_ISL\_540951|Original|hCoV-19^^Lima|Human|Laboratorio de Referencia Nacional de Virus Respiratorios|Laboratorio de Gen\u00f3mica Microbiana|Tsukayama|Peru

>Spike|hCoV-19/Denmark/DCGC-11189/2020|2020-11-02|EPI\_ISL\_669555|Original|hCoV-19^^Hovedstaden|Human|Department of Virus and Microbiological Special Diagnostics|Albertsen Lab|Michaelsen|Denmark

>Spike|hCoV-19/England/LOND-DADAE/2020|2020-11-08|EPI\_ISL\_724710|Original|hCoV-19^^England|Human|University College London|COVID-19 Genomics UK (COG-UK) Consortium|Roy|United Kingdom

>Spike|hCoV-19/England/MILK-9A8E25/2020|2020-08-30|EPI\_ISL\_551216|Original|hCoV-19^^England|Human|Lighthouse Lab in Milton Keynes|Wellcome Sanger Institute for the COVID-19 Genomics UK (COG-UK) consortium|Davies|United Kingdom

>Spike|hCoV-19/England/204180261/2020|2020-10-04|EPI\_ISL\_583992|Original|hCoV-19^^England|Human|Respiratory Virus Unit|Respiratory Virus Unit|Platt|United Kingdom

>Spike|hCoV-19/Spain/MD-IBV-99008636/2020|2020-09-29|EPI\_ISL\_654207|Original|hCoV-19^^Madrid|Human|Hospital General Universitario Gregorio Mara\u00f1a|SeqCOVID-SPAIN consortium|IBV (CSIC)|Comas|Spain

>Spike|hCoV-19/Sweden/RV-FOI-2/2020|2020-03-10|EPI\_ISL\_549176|Original|hCoV-19^^Vasterbotten|Human|Klinisk mikrobiologi|Unit for Biological Agents|Sjodin|Sweden

>Spike|hCoV-19/Canada/MB-NML-828/2020|2020-07-15|EPI\_ISL\_582324|Original|hCoV-19^^Manitoba|Human|Cadham Provincial Laboratory|National Microbiology Laboratory (NML)|Majer|Canada

>Spike|hCoV-19/Lithuania/MR-LUHS-Eilnr111/2020|2020-04-26|EPI\_ISL\_603117|Original|hCoV-19^^Marijampoles apskritis|Human|Lithuanian University of Health Sciences Hospital|Lithuanian University of Health Sciences|Zemaitis|Lithuania

>Spike|hCoV-19/Japan/IC-0210/2020|2020-06-00|EPI\_ISL\_667639|Original|hCoV-19^^Japan|Human|Pathogen Genomics Center|Pathogen Genomics Center|Sekizuka|Japan

>Spike|hCoV-19/Scotland/CVR2154/2020|2020-04-10|EPI\_ISL\_453023|Original|hCoV-19^^Scotland|Human|West of Scotland Specialist Virology Centre|COVID-19 Genomics UK (COG-UK) Consortium|Robertson|United Kingdom

>Spike|hCoV-19/Denmark/DCGC-7807/2020|2020-10-19|EPI\_ISL\_618771|Original|hCoV-19^^Midtjylland|Human|Department of Virus and Microbiological Special Diagnostics|Albertsen lab|Michaelsen|Denmark

>Spike|hCoV-19/England/ALDP-B74DAB/2020|2020-11-12|EPI\_ISL\_662071|Original|hCoV-19^^England|Human|Lighthouse Lab in Alderley Park|Wellcome Sanger Institute for the COVID-19 Genomics UK (COG-UK) Consortium|Davies|United Kingdom

>Spike|hCoV-19/Singapore/140/2020|2020-03-17|EPI\_ISL\_443232|Original|hCoV-19^^Singapore|Human|National Public Health Laboratory|National Public Health Laboratory|Mak|Singapore

>Spike|hCoV-19/USA/NY-Wadsworth-31124-01/2020|2020-03-27|EPI\_ISL\_676774|Original|hCoV-19^^New York|Human|Wadsworth Center|Wadsworth Center|Lasek-Nesselquist|USA

>Spike|hCoV-19/France/ARA97048/2020|2020-10-29|EPI\_ISL\_640007|Original|hCoV-19^^Auvergne-Rhone-Alpes|Human|CNR Virus des Infections Respiratoires - France SUD|CNR Virus des Infections Respiratoires - France SUD|Josset|France

>Spike|hCoV-19/England/BRIS-12C647/2020|2020-05-14|EPI\_ISL\_469483|Original|hCoV-19^^England|Human|PHE South West Regional Laboratory|Wellcome Sanger Institute for the COVID-19 Genomics UK (COG-UK) consortium|Davies|United Kingdom



>Spike|hCoV-19/Wales/PHWC-1662B6/2020|2020-06-13|EPI\_ISL\_490859|Original|hCoV-19^^Wales|Human|Wales Specialist Virology Centre Sequencing lab|COVID-19 Genomics UK (COG-UK) Consortium|Moore|United Kingdom

>Spike|hCoV-19/Wales/PHWC-34294/2020|2020-04-17|EPI\_ISL\_446895|Original|hCoV-19^^Wales|Human|Wales Specialist Virology Centre|Public Health Wales Microbiology Cardiff|Moore|United Kingdom

>Spike|hCoV-19/England/NORW-F14F7/2020|2020-10-21|EPI\_ISL\_627599|Original|hCoV-19^^England|Human|Quadram Institute Bioscience|COVID-19 Genomics UK (COG-UK) Consortium|Alikhan|United Kingdom

>Spike|hCoV-19/USA/WI-GMF-31991/2020|2020-11-06|EPI\_ISL\_661121|Original|hCoV-19^^Wisconsin|Human|Gundersen Molecular Diagnostics Laboratory|Kabara Cancer Research Institute|Kenny|USA

>Spike|hCoV-19/Australia/ACT0027/2020|2020-03-22|EPI\_ISL\_498494|Original|hCoV-19^^Australian Capital Territory|Human|ACT Pathology|Schwessinger Lab|Hall|Australia

>Spike|hCoV-19/England/QEUF-9C884F/2020|2020-09-10|EPI\_ISL\_567133|Original|hCoV-19^^England|Human|Lighthouse Lab in Glasgow|Wellcome Sanger Institute for the COVID-19 Genomics UK (COG-UK) consortium|Davies|United Kingdom

>Spike|hCoV-19/England/SHEF-10CC47A/2020|2020-12-06|EPI\_ISL\_702579|Original|hCoV-19^^England|Human|Virology Department|COVID-19 Genomics UK (COG-UK) Consortium|de Silva|United Kingdom

>Spike|hCoV-19/England/QEUF-9637D0/2020|2020-08-10|EPI\_ISL\_531828|Original|hCoV-19^^England|Human|Lighthouse Lab in Glasgow|Wellcome Sanger Institute for the COVID-19 Genomics UK (COG-UK) consortium|Davies|United Kingdom

>Spike|hCoV-19/Japan/PG-2027/2020|2020-04-00|EPI\_ISL\_685632|Original|hCoV-19^^Japan|Human|Pathogen Genomics Center|Pathogen Genomics Center|Sekizuka|Japan

>Spike|hCoV-19/USA/TX-DSHS-0248/2020|2020-04-25|EPI\_ISL\_527824|Original|hCoV-19^^Texas|Human|Texas Department of State Health Services|Texas Department of State Health Services|Rahman|USA

>Spike|hCoV-19/India/MH-MW29/2020|2020-05-23|EPI\_ISL\_508432|Original|hCoV-19^^Maharashtra|Human|Mahatma Gandhi Institute of Medical Sciences|National Institute of Biomedical Genomics|Maitra|India

>Spike|hCoV-19/Denmark/DCGC-21833/2020|2020-12-21|EPI\_ISL\_757785|Original|hCoV-19^^Syddanmark|Human|Department of Virus and Microbiological Special Diagnostics|Albertsen Lab|Michaelsen|Denmark

>Spike|hCoV-19/Germany/BE-ChVir-D2032-8244/2020|2020-10-12|EPI\_ISL\_753794|Original|hCoV-19^^Berlin|Human|Charit\u00e9 Universit\u00e4tsmedizin Berlin|Charit\u00e9 Universit\u00e4tsmedizin Berlin|Muehlemann|Germany

>Spike|hCoV-19/England/LOND-124C689/2020|2020-03-21|EPI\_ISL\_492908|Original|hCoV-19^^England|Human|Royal Free Hospital / Health Services Laboratories|Wellcome Sanger Institute for the COVID-19 Genomics UK (COG-UK) consortium|Davies|United Kingdom

>Spike|hCoV-19/USA/AZ-TG405037/2020|2020-06-23|EPI\_ISL\_694870|Original|hCoV-19^^Arizona|Human|TGen North|TGen North|French|USA

>Spike|hCoV-19/USA/AK-CDC-2-3714583/2020|2020-11-16|EPI\_ISL\_751598|Original|hCoV-19^^Alaska|Human|AK State Public Health Lab|Genomics and Discovery|Queen|USA

>Spike|hCoV-19/New Zealand/20VR2479/2020|2020-00-00|EPI\_ISL\_579240|Original|hCoV-19^^Auckland|Human|LabPLUS|Institute of Environmental Science and Research (ESR)|Wang|New Zealand

>Spike|hCoV-19/USA/TX-HMH-MCoV-19508/2020|2020-11-17|EPI\_ISL\_783545|Original|hCoV-19^^Texas|Human|Houston Methodist Hospital|Houston Methodist Hospital|Long|USA

>Spike|hCoV-19/USA/AR-QDX-537/2020|2020-03-18|EPI\_ISL\_571262|Original|hCoV-19^^Arkansas|Human|Quest Diagnostics|Quest Diagnostics|Kagan|USA

>Spike|hCoV-19/USA/KY-CDC-2-3693686/2020|2020-11-04|EPI\_ISL\_747091|Original|hCoV-19^^Kentucky|Human|Respiratory Viruses Branch|Respiratory Viruses Branch|Queen|USA

>Spike|hCoV-19/England/QEUF-AD5E6A/2020|2020-10-26|EPI\_ISL\_634585|Original|hCoV-19^^England|Human|Lighthouse Lab in Glasgow|Wellcome Sanger Institute for the COVID-19 Genomics UK (COG-UK) consortium|Davies|United Kingdom

>Spike|hCoV-19/USA/WA-S1399/2020|2020-05-19|EPI\_ISL\_495849|Original|hCoV-19^^Washington|Human|Washington State Department of Health|Seattle Flu Study|Lee|USA

>Spike|hCoV-19/Denmark/DCGC-2469/2020|2020-08-10|EPI\_ISL\_617570|Original|hCoV-19^^Midtjylland|Human|Department of Virus and Microbiological Special Diagnostics|Albertsen lab|Michaelsen|Denmark

>Spike|hCoV-19/USA/WI-UW-795/2020|2020-07-04|EPI\_ISL\_495499|Original|hCoV-19^^Wisconsin|Human|University of Wisconsin-Madison AIDS Vaccine Research Laboratories|University of Wisconsin-Madison AIDS Vaccine Research Laboratories|Baczenas|USA

>Spike|hCoV-19/Australia/WA474/2020|2020-03-30|EPI\_ISL\_708768|Original|hCoV-19^^Western Australia|Human|PathWest Laboratory Medicine WA|PathWest Laboratory Medicine WA Microbial Surveillance Unit|Sikazwe|Australia

>Spike|hCoV-19/England/ALDP-AA4F61/2020|2020-10-21|EPI\_ISL\_630944|Original|hCoV-19^^England|Human|Lighthouse Lab in Alderley Park|Wellcome Sanger Institute for the COVID-19 Genomics UK (COG-UK) consortium|Davies|United Kingdom

>Spike|hCoV-19/Spain/AN-IBV-98001807/2020|2020-04-01|EPI\_ISL\_538163|Original|hCoV-19^^Andalucia|Human|Servicio de Microbiolog\u00eda y Parasitolog\u00eda cl\u00ednica. UCEIMP. Hospital Universitario Virgen del Roc\u00edo/IBIS/CSIC/US|SeqCOVID-SPAIN consortium/IBV (CSIC) |Comas|Spain

>Spike|hCoV-19/USA/AZ-TG395896/2020|2020-06-05|EPI\_ISL\_694740|Original|hCoV-19^^Arizona|Human|AZ SPHL|TGen North|French|USA

>Spike|hCoV-19/Switzerland/ZH-ETHZ-310416/2020|2020-10-08|EPI\_ISL\_603490|Original|hCoV-19^^Zurich|Human|Viollier AG|Department of Biosystems Science and Engineering|Nadeau|Switzerland

>Spike|hCoV-19/England/CAMC-B7B69A/2020|2020-11-11|EPI\_ISL\_724024|Original|hCoV-19^^England|Human|Oxford Viromics|COVID-19 Genomics UK (COG-UK) Consortium|Golubchik|United Kingdom

>Spike|hCoV-19/Wales/PHWC-164889/2020|2020-06-05|EPI\_ISL\_479315|Original|hCoV-19^^Wales|Human|Wales Specialist Virology Centre Sequencing lab|COVID-19 Genomics UK (COG-UK) Consortium|Moore|United Kingdom

>Spike|hCoV-19/Scotland/QEUH-9E4D3F/2020|2020-09-24|EPI\_ISL\_601079|Original|hCoV-19^^Scotland|Human|Lighthouse Lab in Glasgow|Wellcome Sanger Institute for the COVID-19 Genomics UK (COG-UK) consortium|Davies|United Kingdom

>Spike|hCoV-19/England/MILK-9A962C/2020|2020-08-31|EPI\_ISL\_551027|Original|hCoV-19^^England|Human|Lighthouse Lab in Milton Keynes|Wellcome Sanger Institute for the COVID-19 Genomics UK (COG-UK) consortium|Davies|United Kingdom

>Spike|hCoV-19/Portugal/PT0808/2020|2020-03-20|EPI\_ISL\_511067|Original|hCoV-19^^Portugal|Human|Instituto Nacional de Saude (INSA)|Instituto Nacional de Saude (INSA) |Borges|Portugal

>Spike|hCoV-19/England/LOND-124C80B/2020|2020-00-00|EPI\_ISL\_490434|Original|hCoV-19^^England|Human|University College London Hospital|COVID-19 Genomics UK (COG-UK) Consortium|Byott|United Kingdom

>Spike|hCoV-19/USA/WA-S1329/2020|2020-05-15|EPI\_ISL\_495779|Original|hCoV-19^^Washington|Human|Washington State Department of Health|Seattle Flu Study|Lee|USA

>Spike|hCoV-19/Wales/PHWC-2A9D8/2020|2020-04-06|EPI\_ISL\_445648|Original|hCoV-19^^Wales|Human|Wales Specialist Virology Centre|Public Health Wales Microbiology Cardiff|Moore|United Kingdom

>Spike|hCoV-19/Brazil/SP-L15-CD285/2020|2020-03-30|EPI\_ISL\_476276|Original|hCoV-19^^S\u00e3o Paulo|Human|Hospital da Cl\u00ednicas da Faculdade de Medicina da Universidade de S\u00e3o Paulo|Instituto de Medicina Tropical da Univesidade de S\u00e3o Paulo|Faria|Brazil

>Spike|hCoV-19/Luxembourg/LNS8832723/2020|2020-10-19|EPI\_ISL\_744814|Original|hCoV-19^^Luxembourg|Human|Laboratoire national de sant\u00e9|Laboratoire national de sant\u00e9|Wienecke-Baldacchino|Luxembourg

>Spike|hCoV-19/USA/NE-11792/2020|2020-05-05|EPI\_ISL\_466682|Original|hCoV-19^^Nebraska|Human|Nebraska Public Health Laboratory|UNMC COVID-19 Response Team|Pratt|USA

>Spike|hCoV-19/England/SHEF-C11BD/2020|2020-04-07|EPI\_ISL\_432722|Original|hCoV-19^^England|Human|Virology Department|COVID-19 Genomics UK (COG-UK) Consortium|de Silva|United Kingdom

>Spike|hCoV-19/Netherlands/UT-RIVM-20898/2020|2020-12-16|EPI\_ISL\_790934|Original|hCoV-19^^Utrecht|Human|Dutch COVID-19 response

team|National Institute for Public Health and the Environment  
(RIVM)|Meijer|Netherlands  
>Spike|hCoV-19/USA/VA-DCLS-1574/2020|2020-08-14|EPI\_ISL\_610134|Original|hCoV-  
19^^Virginia|Human|Virginia DCLS|Virginia DCLS|St. Jacques|USA  
>Spike|hCoV-19/USA/WA-S1645/2020|2020-05-27|EPI\_ISL\_496071|Original|hCoV-  
19^^Washington|Human|Washington State Department of Health|Seattle Flu Study|Lee|USA  
>Spike|hCoV-19/Scotland/QEUH-BA182C/2020|2020-11-17|EPI\_ISL\_757202|Original|hCoV-  
19^^Scotland|Human|Lighthouse Lab in Glasgow|Wellcome Sanger Institute for the COVID-  
19 Genomics UK (COG-UK) Consortium|Davies|United Kingdom  
>Spike|hCoV-19/Japan/PG-1295/2020|2020-03-00|EPI\_ISL\_684903|Original|hCoV-  
19^^Japan|Human|Saitama Prefectural Institute of Public Health|Pathogen Genomics  
Center|Sekizuka|Japan  
>Spike|hCoV-19/England/MILK-B3868A/2020|2020-11-01|EPI\_ISL\_658801|Original|hCoV-  
19^^England|Human|Lighthouse Lab in Milton Keynes|Wellcome Sanger Institute for the  
COVID-19 Genomics UK (COG-UK) Consortium|Davies|United Kingdom  
>Spike|hCoV-19/Wales/PHWC-483F7D/2020|2020-10-23|EPI\_ISL\_627949|Original|hCoV-  
19^^Wales|Human|Wales Specialist Virology Centre Sequencing lab|COVID-19 Genomics UK  
(COG-UK) Consortium|Moore|United Kingdom  
>Spike|hCoV-19/Wales/PHWC-32542/2020|2020-04-06|EPI\_ISL\_474327|Original|hCoV-  
19^^Wales|Human|Originating lab|COVID-19 Genomics UK (COG-UK) Consortium|Moore|United  
Kingdom  
>Spike|hCoV-19/Australia/VIC9567/2020|2020-08-06|EPI\_ISL\_565605|Original|hCoV-  
19^^Victoria|Human|Microbiological Diagnostic Unit - Public Health Laboratory (MDU-  
PHL)|MDU-PHL|Schultz|Australia  
>Spike|hCoV-19/Spain/CL-IBV-97006288/2020|2020-04-21|EPI\_ISL\_537658|Original|hCoV-  
19^^Castilla y Leon|Human|Universidad de Le\u00f3n|SeqCOVID-SPAIN  
consortium/IBV (CSIC)|Comas|Spain  
>Spike|hCoV-19/England/ALDP-BBB300/2020|2020-11-21|EPI\_ISL\_701844|Original|hCoV-  
19^^England|Human|Lighthouse Lab in Alderley Park|Wellcome Sanger Institute for the  
COVID-19 Genomics UK (COG-UK) Consortium|Davies|United Kingdom  
>Spike|hCoV-19/England/ALDP-A6689D/2020|2020-10-12|EPI\_ISL\_630516|Original|hCoV-  
19^^England|Human|Lighthouse Lab in Alderley Park|Wellcome Sanger Institute for the  
COVID-19 Genomics UK (COG-UK) consortium|Davies|United Kingdom  
>Spike|hCoV-19/USA/WI-GMF-06776/2020|2020-06-17|EPI\_ISL\_489909|Original|hCoV-  
19^^Wisconsin|Human|Gundersen Molecular Diagnostics Laboratory|Kabara Cancer Research  
Institute|Kenny|USA  
>Spike|hCoV-19/Japan/PG-6458/2020|2020-08-00|EPI\_ISL\_689563|Original|hCoV-  
19^^Japan|Human|Pathogen Genomics Center|Pathogen Genomics Center|Sekizuka|Japan  
>Spike|hCoV-19/Scotland/EDB703/2020|2020-04-01|EPI\_ISL\_433226|Original|hCoV-  
19^^Scotland|Human|Virology Department|COVID-19 Genomics UK (COG-UK)  
Consortium|Williams|United Kingdom  
>Spike|hCoV-19/Taiwan/NTU01/2020|2020-01-31|EPI\_ISL\_408489|LLC-MK2|hCoV-  
19^^Taipei|Human|Department of Laboratory Medicine|Microbial Genomics Core  
Lab|Lin|Taiwan  
>Spike|hCoV-19/Brazil/SP-L4-CAMPI65/2020|2020-04-18|EPI\_ISL\_476398|Original|hCoV-  
19^^S\u00e3o Paulo|Human|Laborat\u00f3rio de Patologia Cl\u00ednica -  
UNICAMP|Laborat\u00f3rio de Estudos de V\u00edrus Emergentes - UNICAMP|Sabino|Brazil  
>Spike|hCoV-19/Australia/NSW1364/2020|2020-12-28|EPI\_ISL\_767930|Original|hCoV-19^^New  
South Wales|Human|Sydney South West Pathology Service (SSWPS) - Royal Prince Alfred  
Hospital - NSW Health Pathology|NSW Health Pathology - Institute of Clinical  
Pathology and Medical Research; Westmead Hospital; University of  
Sydney|Gall|Australia  
>Spike|hCoV-19/England/PORT-2D5AF5/2020|2020-12-18|EPI\_ISL\_765136|Original|hCoV-  
19^^England|Human|Centre for Enzyme Innovation|COVID-19 Genomics UK (COG-UK)  
Consortium|Robson|United Kingdom  
>Spike|hCoV-19/Luxembourg/LNS7114654/2020|2020-10-09|EPI\_ISL\_744515|Original|hCoV-  
19^^Luxembourg|Human|Laboratoire national de sant\u00e9|Laboratoire national de  
sant\u00e9|Wienecke-Baldacchino|Luxembourg

>Spike|hCoV-19/Australia/VIC6092/2020|2020-07-22|EPI\_ISL\_518117|Original|hCoV-19^^Victoria|Human|Victorian Infectious Diseases Reference Laboratory (VIDRL)|VIDRL and MDU-PHL|Schultz|Australia

>Spike|hCoV-19/USA/WI-WSLH-200487/2020|2020-05-20|EPI\_ISL\_578628|Original|hCoV-19^^Wisconsin|Human|Wisconsin State Laboratory of Hygiene Communicable Disease Division|Wisconsin State Laboratory of Hygiene Communicable Disease Division|Florek|USA

>Spike|hCoV-19/Australia/VIC12700/2020|2020-07-25|EPI\_ISL\_592059|Original|hCoV-19^^Victoria|Human|Microbiological Diagnostic Unit - Public Health Laboratory (MDU-PHL)|MDU-PHL|Schultz|Australia

>Spike|hCoV-19/USA/NM-DOH-2020316610/2020|2020-08-27|EPI\_ISL\_732723|Original|hCoV-19^^New Mexico|Human|New Mexico Department of Health Scientific Laboratory|New Mexico Department of Health Scientific Laboratory|Johnson|USA

>Spike|hCoV-19/England/CAMB-83E74/2020|2020-04-23|EPI\_ISL\_438702|Original|hCoV-19^^England|Human|Department of Pathology|COVID-19 Genomics UK (COG-UK) Consortium|Meredith|United Kingdom

>Spike|hCoV-19/Malaysia/UNIMAS-B022/2020|2020-10-23|EPI\_ISL\_718192|Original|hCoV-19^^Sarawak|Human|Borneo Medical Centre|Institute of Health and Community Medicine|Jonathan|Malaysia

>Spike|hCoV-19/USA/WA-UW-4603/2020|2020-03-31|EPI\_ISL\_515278|Original|hCoV-19^^Washington|Human|University of Washington Virology Lab|University of Washington Virology Lab|Roychoudhury|USA

>Spike|hCoV-19/England/ALDP-B5DA74/2020|2020-11-10|EPI\_ISL\_702847|Original|hCoV-19^^England|Human|Department of Pathology|COVID-19 Genomics UK (COG-UK) Consortium|Goodfellow|United Kingdom

>Spike|hCoV-19/USA/PA-MGEL-00753/2020|2020-09-15|EPI\_ISL\_682047|Original|hCoV-19^^Pennsylvania|Human|UPMC Clinical Microbiology Laboratory|Microbial Genomic Epidemiology Laboratory|Griffith|USA

>Spike|hCoV-19/England/BHRT-24B3679/2020|2020-05-14|EPI\_ISL\_528799|Original|hCoV-19^^England|Human|Microbiology Department|Wellcome Sanger Institute for the COVID-19 Genomics UK (COG-UK) consortium|Davies|United Kingdom

>Spike|hCoV-19/England/QEUH-969D05/2020|2020-08-12|EPI\_ISL\_530945|Original|hCoV-19^^England|Human|Lighthouse Lab in Glasgow|Wellcome Sanger Institute for the COVID-19 Genomics UK (COG-UK) consortium|Davies|United Kingdom

>Spike|hCoV-19/Denmark/DCGC-17020/2020|2020-12-14|EPI\_ISL\_750715|Original|hCoV-19^^Midtjylland|Human|Department of Virus and Microbiological Special Diagnostics|Albertsen Lab|Michaelsen|Denmark

>Spike|hCoV-19/England/CAMB-1AABBB/2020|2020-04-18|EPI\_ISL\_470185|Original|hCoV-19^^England|Human|Department of Pathology|Wellcome Sanger Institute for the COVID-19 Genomics UK (COG-UK) consortium|Davies|United Kingdom

>Spike|hCoV-19/Brazil/SP-L34-CD875/2020|2020-04-23|EPI\_ISL\_722037|Original|hCoV-19^^S\u00e3o Paulo|Human|Hospital das Cl\u00ednicas Universidade de S\u00e3o Paulo Medical School|Laborat\u00f3rio de Parasitologia M\u00e9dica - Instituto de Medicina Tropical - Universidade de S\u00e3o Paulo|de Jesus|Brazil

>Spike|hCoV-19/USA/ME-HETL-J0330/2020|2020-11-24|EPI\_ISL\_755458|Original|hCoV-19^^Maine|Human|Maine Health and Environmental Testing Laboratory|Tewhey Lab|Tewhey|USA

>Spike|hCoV-19/SaudiArabia/KAUST-JEDDAH991/2020|2020-06-23|EPI\_ISL\_513065|Original|hCoV-19^^Jeddah|Human|Pathogen Genomics Lab King Abdullah University of Science and Technology(KAUST)|Pathogen Genomics Lab King Abdullah University of Science and Technology(KAUST)|Mohamed Ghazzali|Saudi Arabia

>Spike|hCoV-19/USA/DC-HP00462/2020|2020-03-25|EPI\_ISL\_511863|Original|hCoV-19^^District of Columbia|Human|Johns Hopkins Hospital Department of Pathology|Johns Hopkins Hospital Department of Pathology|Ramakrishnan|USA

>Spike|hCoV-19/England/MILK-A7DF25/2020|2020-10-12|EPI\_ISL\_709935|Original|hCoV-19^^England|Human|Lighthouse Lab in Milton Keynes|Wellcome Sanger Institute for the COVID-19 Genomics UK (COG-UK) Consortium|Davies|United Kingdom

>Spike|hCoV-19/Australia/VIC5037/2020|2020-07-16|EPI\_ISL\_519841|Original|hCoV-19^^Victoria|Human|Microbiological Diagnostic Unit - Public Health Laboratory (MDU-PHL)|MDU-PHL|Schultz|Australia

>Spike|hCoV-19/Oman/205038017/2020|2020-05-21|EPI\_ISL\_491989|Original|hCoV-19^^Muscat|Human|Oman-NIC|Department of Microbiology and Immunology-SQUH|AL Zadjali|Oman

>Spike|hCoV-19/USA/NY-NYCPHL-001180/2020|2020-10-30|EPI\_ISL\_671759|Original|hCoV-19^^New York|Human|DOHMH Fort Greene|New York City Public Health Laboratory|Wang|USA

>Spike|hCoV-19/Wales/PHWC-2BB77/2020|2020-03-28|EPI\_ISL\_445814|Original|hCoV-19^^Wales|Human|Wales Specialist Virology Centre|Public Health Wales Microbiology Cardiff|Moore|United Kingdom

>Spike|hCoV-19/USA/AZ-TG308847/2020|2020-05-14|EPI\_ISL\_694316|Original|hCoV-19^^Arizona|Human|TGen North|TGen North|French|USA

>Spike|hCoV-19/Northern Ireland/QEUH-96EDF1/2020|2020-08-19|EPI\_ISL\_530517|Original|hCoV-19^^Northern Ireland|Human|Lighthouse Lab in Glasgow|Wellcome Sanger Institute for the COVID-19 Genomics UK (COG-UK) consortium|Davies|United Kingdom

>Spike|hCoV-19/Spain/GA-IBV-004025/2020|2020-03-12|EPI\_ISL\_510268|Original|hCoV-19^^Galicia|Human|Hospital Cl\u00e9nico Universitario de Santiago de Compostela|SeqCOVID-SPAIN consortium|IBV (CSIC)|Comas|Spain

>Spike|hCoV-19/USA/WA-UW-3988/2020|2020-03-29|EPI\_ISL\_427228|Original|hCoV-19^^Washington|Human|UW Virology Lab|UW Virology Lab|Roychoudhury|USA

>Spike|hCoV-19/USA/CA-ALSR-1626/2020|2020-04-26|EPI\_ISL\_494696|Original|hCoV-19^^California|Human|Scripps Medical Laboratory|Andersen lab at Scripps Research|Gangavarapu|USA

>Spike|hCoV-19/USA/WA-UW-596/2020|2020-03-12|EPI\_ISL\_430892|Original|hCoV-19^^Washington|Human|UW Virology Lab|UW Virology Lab|Roychoudhury|USA

>Spike|hCoV-19/England/ALDP-9DA0E8/2020|2020-09-18|EPI\_ISL\_576845|Original|hCoV-19^^England|Human|Oxford Viromics|COVID-19 Genomics UK (COG-UK) Consortium|Golubchik|United Kingdom

>Spike|hCoV-19/USA/CT-Yale-021/2020|2020-03-19|EPI\_ISL\_420089|Original|hCoV-19^^Connecticut|Human|Yale Clinical Virology Laboratory|Grubaugh Lab - Yale School of Public Health|Grubaugh|USA

>Spike|hCoV-19/USA/WA-S1998/2020|2020-06-04|EPI\_ISL\_497426|Original|hCoV-19^^Washington|Human|Washington State Department of Health|Seattle Flu Study|Lee|USA

>Spike|hCoV-19/Denmark/DCGC-1266/2020|2020-06-08|EPI\_ISL\_618045|Original|hCoV-19^^Nordjylland|Human|Department of Virus and Microbiological Special Diagnostics|Albertsen lab|Michaelsen|Denmark

>Spike|hCoV-19/Germany/NW-HHU-112/2020|2020-08-26|EPI\_ISL\_539589|Original|hCoV-19^^North Rhine-Westphalia|Human|ZOTZ KLIMAS MVZ D\u00fcsseldorf-Centrum GbR \u00dcBAG f\u00fcr Labormedizin|Center of Medical Microbiology|Wienemann|Germany

>Spike|hCoV-19/USA/TX-HMH-MCoV-10046/2020|2020-07-06|EPI\_ISL\_789302|Original|hCoV-19^^Texas|Human|Houston Methodist Hospital|Houston Methodist Hospital|Long|USA

>Spike|hCoV-19/USA/CA-ALSR-0721-SAN/2020|2020-03-27|EPI\_ISL\_483323|Original|hCoV-19^^California|Human|UC San Diego Center for Advanced Laboratory Medicine|Andersen lab at Scripps Research|Gangavarapu|USA

>Spike|hCoV-19/Denmark/DCGC-3090/2020|2020-08-31|EPI\_ISL\_616870|Original|hCoV-19^^Midtjylland|Human|Department of Virus and Microbiological Special Diagnostics|Albertsen lab|Michaelsen|Denmark

>Spike|hCoV-19/Japan/PG-6156/2020|2020-08-00|EPI\_ISL\_689268|Original|hCoV-19^^Japan|Human|Pathogen Genomics Center|Pathogen Genomics Center|Sekizuka|Japan

>Spike|hCoV-19/Bangladesh/BCSIR-NILMRC-178/2020|2020-06-15|EPI\_ISL\_483626|Original|hCoV-19^^Rajshahi|Human|National Institute of Laboratory Medicine and Referral Center|Genomic Research Lab|Khan|Bangladesh

>Spike|hCoV-19/England/MILK-B5513B/2020|2020-11-06|EPI\_ISL\_657783|Original|hCoV-19^^England|Human|Lighthouse Lab in Milton Keynes|Wellcome Sanger Institute for the COVID-19 Genomics UK (COG-UK) Consortium|Davies|United Kingdom

>Spike|hCoV-19/Canada/ON\_MU-S5/2020|2020-03-13|EPI\_ISL\_463988|Original|hCoV-19^^Ontario|Human|Toronto Invasive Bacterial Diseases Network|McMaster University|McArthur|Canada

>Spike|hCoV-19/Denmark/DCGC-12223/2020|2020-11-16|EPI\_ISL\_682404|Original|hCoV-19^^Hovedstaden|Human|Department of Virus and Microbiological Special Diagnostics|Albertsen Lab|Michaelsen|Denmark

>Spike|hCoV-19/Wales/MILK-99DA5C/2020|2020-08-30|EPI\_ISL\_550536|Original|hCoV-19^^Wales|Human|Lighthouse Lab in Milton Keynes|Wellcome Sanger Institute for the COVID-19 Genomics UK (COG-UK) consortium|Davies|United Kingdom

>Spike|hCoV-19/Belgium/ITM\_C053/2020|2020-03-26|EPI\_ISL\_434372|Original|hCoV-19^^Antwerp|Human|Hospital AZ Rivierenland|Institute of Tropical Medicine|Selhorst|Belgium

>Spike|hCoV-19/England/QEUH-AD6397/2020|2020-10-25|EPI\_ISL\_629883|Original|hCoV-19^^England|Human|Lighthouse Lab in Glasgow|Wellcome Sanger Institute for the COVID-19 Genomics UK (COG-UK) consortium|Davies|United Kingdom

>Spike|hCoV-19/Denmark/DCGC-7887/2020|2020-10-26|EPI\_ISL\_618854|Original|hCoV-19^^Hovedstaden|Human|Department of Virus and Microbiological Special Diagnostics|Albertsen lab|Michaelsen|Denmark

>Spike|hCoV-19/Luxembourg/LNS2581393/2020|2020-10-22|EPI\_ISL\_740147|Original|hCoV-19^^Luxembourg|Human|Laboratoire national de sant\u00e9|Laboratoire national de sant\u00e9|Wienecke-Baldacchino|Luxembourg

>Spike|hCoV-19/USA/WA-S2706/2020|2020-06-23|EPI\_ISL\_497338|Original|hCoV-19^^Washington|Human|Washington State Department of Health|Seattle Flu Study|Lee|USA

>Spike|hCoV-19/USA/TX-HMH-4102/2020|2020-06-18|EPI\_ISL\_543372|Original|hCoV-19^^Texas|Human|Houston Methodist Hospital|Houston Methodist Hospital|Long|USA

>Spike|hCoV-19/USA/WI-UW-618/2020|2020-06-24|EPI\_ISL\_484993|Original|hCoV-19^^Wisconsin|Human|University of Wisconsin-Madison AIDS Vaccine Research Laboratories|University of Wisconsin-Madison AIDS Vaccine Research Laboratories|Baczenas|USA

>Spike|hCoV-19/England/ALDP-691174/2020|2020-07-02|EPI\_ISL\_558011|Original|hCoV-19^^England|Human|Lighthouse Lab in Alderley Park|Wellcome Sanger Institute for the COVID-19 Genomics UK (COG-UK) consortium|Davies|United Kingdom

>Spike|hCoV-19/Portugal/PT1861/2020|2020-11-13|EPI\_ISL\_732080|Original|hCoV-19^^Portugal|Human|Instituto Nacional de Saude (INSA)|Instituto Nacional de Saude (INSA)|Borges|Portugal

>Spike|hCoV-19/Germany/BY-MVP-0296/2020|2020-05-26|EPI\_ISL\_466925|Original|hCoV-19^^Bavaria|Human|Max von Pettenkofer Institute|Laboratory for Functional Genome Analysis|Graf|Germany

>Spike|hCoV-19/USA/WA-UW-1279/2020|2020-03-17|EPI\_ISL\_422974|Original|hCoV-19^^Washington|Human|UW Virology Lab|UW Virology Lab|Roychoudhury|USA

>Spike|hCoV-19/England/ALDP-95CB47/2020|2020-06-17|EPI\_ISL\_553466|Original|hCoV-19^^England|Human|Lighthouse Lab in Alderley Park|Wellcome Sanger Institute for the COVID-19 Genomics UK (COG-UK) consortium|Davies|United Kingdom

>Spike|hCoV-19/USA/SD-SDPHL-0015/2020|2020-08-17|EPI\_ISL\_569623|Original|hCoV-19^^South Dakota|Human|Quick Care Watertown|South Dakota Public Health Laboratory|Carlson|USA

>Spike|hCoV-19/England/MILK-B5553F/2020|2020-11-05|EPI\_ISL\_657977|Original|hCoV-19^^England|Human|Lighthouse Lab in Milton Keynes|Wellcome Sanger Institute for the COVID-19 Genomics UK (COG-UK) Consortium|Davies|United Kingdom

>Spike|hCoV-19/England/CAMB-7425C/2020|2020-03-19|EPI\_ISL\_440348|Original|hCoV-19^^England|Human|Department of Pathology|Wellcome Sanger Institute for the COVID-19 Genomics UK (COG-UK) consortium|Amato|United Kingdom

>Spike|hCoV-19/Mexico/BCN-ALSR-1466/2020|2020-04-29|EPI\_ISL\_496339|Original|hCoV-19^^Baja California|Human|Infectolab|Andersen lab at Scripps Research|Gangavarapu|Mexico

>Spike|hCoV-19/USA/CA-CZB-2470/2020|2020-05-19|EPI\_ISL\_513874|Original|hCoV-19^^California|Human|San Francisco Public Health Laboratory|Chan-Zuckerberg Biohub|Kamm|USA

>Spike|hCoV-19/England/MILK-95D8E5/2020|2020-06-21|EPI\_ISL\_556293|Original|hCoV-19^^England|Human|Lighthouse Lab in Milton Keynes|Wellcome Sanger Institute for the COVID-19 Genomics UK (COG-UK) consortium|Davies|United Kingdom

>Spike|hCoV-19/USA/NY-PV09161/2020|2020-03-22|EPI\_ISL\_422526|Original|hCoV-19^^New York|Human|MSHS Clinical Microbiology Laboratories|MSHS Pathogen Surveillance Program|van Bakel|USA

>Spike|hCoV-19/South Korea/KDCA0266/2020|2020-09-18|EPI\_ISL\_760060|Original|hCoV-19^^South Korea|Human|Division of Emerging Infectious Diseases|Division of Emerging Infectious Diseases|Park|South Korea

>Spike|hCoV-19/Switzerland/BS-UHB-42191012/2020|2020-03-14|EPI\_ISL\_528087|Original|hCoV-19^^Basel-Stadt|Human|University Hospital Basel|University Hospital Basel|Roloff Handschin|Switzerland

>Spike|hCoV-19/England/QEUA-963AF5/2020|2020-08-10|EPI\_ISL\_536943|Original|hCoV-19^^England|Human|Lighthouse Lab in Glasgow|Wellcome Sanger Institute for the COVID-19 Genomics UK (COG-UK) consortium|Davies|United Kingdom

>Spike|hCoV-19/Netherlands/GE-EMC-236/2020|2020-00-00|EPI\_ISL\_523215|Original|hCoV-19^^Gelderland|Human|Dutch COVID-19 response team|Erasmus Medical Center|Oude Munnink|Netherlands

>Spike|hCoV-19/Denmark/DCGC-5711/2020|2020-09-28|EPI\_ISL\_621216|Original|hCoV-19^^Sjaelland|Human|Department of Virus and Microbiological Special Diagnostics|Albertsen lab|Michaelsen|Denmark

>Spike|hCoV-19/Germany/NW-HHU-387/2020|2020-11-01|EPI\_ISL\_718069|Original|hCoV-19^^North Rhine-Westphalia|Human|ZOTZ KLIMAS MVZ D\u00f0fcsseldorf-Centrum GbR \u00dcBAG f\u00fcr Labormedizin|Center of Medical Microbiology|Wienemann|Germany

>Spike|hCoV-19/England/LIVE-DB2B69/2020|2020-11-03|EPI\_ISL\_650161|Original|hCoV-19^^England|Human|Liverpool Clinical Laboratories|COVID-19 Genomics UK (COG-UK) Consortium|Haldenby|United Kingdom

>Spike|hCoV-19/Wales/MILK-9F0680/2020|2020-09-24|EPI\_ISL\_580855|Original|hCoV-19^^Wales|Human|Lighthouse Lab in Milton Keynes|Wellcome Sanger Institute for the COVID-19 Genomics UK (COG-UK) consortium|Davies|United Kingdom

>Spike|hCoV-19/Chile/RM-CMM-05207/2020|2020-04-30|EPI\_ISL\_468748|Original|hCoV-19^^Region Metropolitana de Santiago|Human|Facultad de Medicina UC|Center for Mathematical Modeling and Center for Genome Regulation. Santiago|Palma V\u00e9jares|Chile

>Spike|hCoV-19/Canada/QC\_AS1/2020|2020-04-02|EPI\_ISL\_463935|Original|hCoV-19^^Quebec|Human|Laboratoire de microbiologie|Smith Laboratory|Smith|Canada

>Spike|hCoV-19/England/QEUA-9F369C/2020|2020-09-24|EPI\_ISL\_588498|Original|hCoV-19^^England|Human|Lighthouse Lab in Glasgow|Wellcome Sanger Institute for the COVID-19 Genomics UK (COG-UK) consortium|Davies|United Kingdom

>Spike|hCoV-19/Belgium/reg-0414678/2020|2020-04-14|EPI\_ISL\_738213|Original|hCoV-19^^Chercq|Human|UZ Leuven|KU Leuven|Maes|Belgium

>Spike|hCoV-19/Wales/PHWC-27391/2020|2020-03-31|EPI\_ISL\_432232|Original|hCoV-19^^Wales|Human|Wales Specialist Virology Centre|Public Health Wales Microbiology Cardiff|Moore|United Kingdom

>Spike|hCoV-19/Canada/QC-LSPQ-L00243118/2020|2020-03-30|EPI\_ISL\_536349|Original|hCoV-19^^Quebec|Human|H\u00f0pital du Suro\u00eet|Laboratoire de sant\u00e9 publique du Qu\u00e9bec|Moreira|Canada

>Spike|hCoV-19/Denmark/DCGC-18148/2020|2020-12-14|EPI\_ISL\_749781|Original|hCoV-19^^Hovedstaden|Human|Department of Virus and Microbiological Special Diagnostics|Albertsen Lab|Michaelsen|Denmark

>Spike|hCoV-19/England/MILK-9D3FD3/2020|2020-09-18|EPI\_ISL\_601689|Original|hCoV-19^^England|Human|Lighthouse Lab in Milton Keynes|Wellcome Sanger Institute for the COVID-19 Genomics UK (COG-UK) consortium|Davies|United Kingdom

>Spike|hCoV-19/Wales/PHWC-4939C7/2020|2020-11-30|EPI\_ISL\_725967|Original|hCoV-19^^Wales|Human|Originating lab|COVID-19 Genomics UK (COG-UK) Consortium|Moore|United Kingdom

>Spike|hCoV-19/Portugal/PT1612/2020|2020-07-07|EPI\_ISL\_693614|Original|hCoV-19^^Portugal|Human|Instituto Nacional de Saude (INSA)|Instituto Nacional de Saude (INSA)|Borges|Portugal

>Spike|hCoV-19/USA/TX-HMH0267/2020|2020-03-26|EPI\_ISL\_434896|Original|hCoV-19^^Texas|Human|Houston Methodist Hospital|Houston Methodist Hospital|Long|USA

>Spike|hCoV-19/Wales/PHWC-27337/2020|2020-03-31|EPI\_ISL\_432081|Original|hCoV-19^^Wales|Human|Wales Specialist Virology Centre|Public Health Wales Microbiology Cardiff|Moore|United Kingdom

>Spike|hCoV-19/USA/WI-UW-1463/2020|2020-09-12|EPI\_ISL\_541595|Original|hCoV-19^^Wisconsin|Human|University of Wisconsin-Madison AIDS Vaccine Research

Laboratories|University of Wisconsin-Madison AIDS Vaccine Research  
Laboratories|Baczenas|USA  
>Spike|hCoV-19/Japan/IC-0401/2020|2020-12-00|EPI\_ISL\_736895|Original|hCoV-19^^Japan|Human|Pathogen Genomics Center|Pathogen Genomics Center|Sekizuka|Japan  
>Spike|hCoV-19/Wales/PHWC-26BA9/2020|2020-03-27|EPI\_ISL\_422170|Original|hCoV-19^^Wales|Human|Wales Specialist Virology Centre|Public Health Wales Microbiology Cardiff|Moore|United Kingdom  
>Spike|hCoV-19/England/EXET-13EF56/2020|2020-12-15|EPI\_ISL\_763383|Original|hCoV-19^^England|Human|University of Exeter|COVID-19 Genomics UK (COG-UK) Consortium|Temperton|United Kingdom  
>Spike|hCoV-19/USA/GA-QDX-2442/2020|2020-03-13|EPI\_ISL\_604777|Original|hCoV-19^^Georgia|Human|Quest Diagnostics|Quest Diagnostics|Kagan|USA  
>Spike|hCoV-19/Switzerland/ZH-ETHZ-350200/2020|2020-10-30|EPI\_ISL\_693848|Original|hCoV-19^^Zurich|Human|Viollier AG|Department of Biosystems Science and Engineering|Nadeau|Switzerland  
>Spike|hCoV-19/Netherlands/NH-EMC-71/2020|2020-09-13|EPI\_ISL\_632501|Original|hCoV-19^^Utrecht|Human|Dutch COVID-19 response team|Erasmus Medical Center|Oude Munnink|Netherlands  
>Spike|hCoV-19/England/CAMB-804A2/2020|2020-04-09|EPI\_ISL\_470428|Original|hCoV-19^^England|Human|Department of Pathology|Wellcome Sanger Institute for the COVID-19 Genomics UK (COG-UK) consortium|Davies|United Kingdom  
>Spike|hCoV-19/England/QEUH-9F9C49/2020|2020-09-26|EPI\_ISL\_595755|Original|hCoV-19^^England|Human|Oxford Viromics|COVID-19 Genomics UK (COG-UK) Consortium|Golubchik|United Kingdom  
>Spike|hCoV-19/France/ARA-SC016/2020|2020-03-03|EPI\_ISL\_629087|Original|hCoV-19^^Auvergne-Rh\u00f4ne-Alpes|Human|Laboratoire du Centre Hospitalier Annecy Genevois|CNR Virus des Infections Respiratoires - France SUD|Bal|France  
>Spike|hCoV-19/Wales/PHWC-498151/2020|2020-11-30|EPI\_ISL\_727032|Original|hCoV-19^^Wales|Human|Originating lab|COVID-19 Genomics UK (COG-UK) Consortium|Moore|United Kingdom  
>Spike|hCoV-19/USA/FL-BPHL-0769/2020|2020-06-29|EPI\_ISL\_512574|Original|hCoV-19^^Florida|Human|Florida Bureau of Public Health Laboratories|Florida Bureau of Public Health Laboratories|Blanton|USA  
>Spike|hCoV-19/England/OXON-AC561/2020|2020-04-07|EPI\_ISL\_448461|Original|hCoV-19^^England|Human|Oxford Viromics|COVID-19 Genomics UK (COG-UK) Consortium|Golubchik|United Kingdom  
>Spike|hCoV-19/England/ALDP-C04F12/2020|2020-12-04|EPI\_ISL\_720796|Original|hCoV-19^^England|Human|Lighthouse Lab in Alderley Park|Wellcome Sanger Institute for the COVID-19 Genomics UK (COG-UK) Consortium|Davies|United Kingdom  
>Spike|hCoV-19/England/EXET-1362CE/2020|2020-04-12|EPI\_ISL\_457216|Original|hCoV-19^^England|Human|University of Exeter|COVID-19 Genomics UK (COG-UK) Consortium|Temperton|United Kingdom  
>Spike|hCoV-19/USA/MI-UM-10036409513/2020|2020-10-12|EPI\_ISL\_610072|Original|hCoV-19^^Michigan|Human|University of Michigan Clinical Microbiology Laboratory|Lauring Lab|Valesano|USA  
>Spike|hCoV-19/USA/CA-CZB-13920/2020|2020-08-06|EPI\_ISL\_739519|Original|hCoV-19^^California|Human|Alameda County Public Health Lab|Chan-Zuckerberg Biohub|Kamm|USA  
>Spike|hCoV-19/England/C200042646/2020|2020-11-02|EPI\_ISL\_666741|Original|hCoV-19^^England|Human|Respiratory Virus Unit|COVID-19 Genomics UK (COG-UK) Consortium|Platt|United Kingdom  
>Spike|hCoV-19/England/ALDP-94F312/2020|2020-06-18|EPI\_ISL\_556020|Original|hCoV-19^^England|Human|Lighthouse Lab in Alderley Park|Wellcome Sanger Institute for the COVID-19 Genomics UK (COG-UK) consortium|Davies|United Kingdom  
>Spike|hCoV-19/USA/WA-S999/2020|2020-04-28|EPI\_ISL\_463489|Original|hCoV-19^^Washington|Human|Washington State Department of Health|Seattle Flu Study|Bedford|USA  
>Spike|hCoV-19/USA/CA-SEARCH-5404/2020|2020-10-18|EPI\_ISL\_755215|Original|hCoV-19^^California|Human|UCSD EXCITE lab|Andersen lab at Scripps Research|Gangavarapu|USA  
>Spike|hCoV-19/USA/TX-HMH-MCoV-12092/2020|2020-09-19|EPI\_ISL\_790198|Original|hCoV-19^^Texas|Human|Houston Methodist Hospital|Houston Methodist Hospital|Long|USA



>Spike|hCoV-19/Australia/VIC7916/2020|2020-08-03|EPI\_ISL\_564742|Original|hCoV-19^^Victoria|Human|Microbiological Diagnostic Unit - Public Health Laboratory (MDU-PHL)|MDU-PHL|Schultz|Australia

>Spike|hCoV-19/England/MILK-9A6B20/2020|2020-09-02|EPI\_ISL\_550160|Original|hCoV-19^^England|Human|Lighthouse Lab in Milton Keynes|Wellcome Sanger Institute for the COVID-19 Genomics UK (COG-UK) consortium|Davies|United Kingdom

>Spike|hCoV-19/Denmark/DCGC-20184/2020|2020-11-30|EPI\_ISL\_748036|Original|hCoV-19^^Hovedstaden|Human|Department of Virus and Microbiological Special Diagnostics|Albertsen Lab|Michaelsen|Denmark

>Spike|hCoV-19/USA/TX-HMH-MCoV-17981/2020|2020-11-16|EPI\_ISL\_786129|Original|hCoV-19^^Texas|Human|Houston Methodist Hospital|Houston Methodist Hospital|Long|USA

>Spike|hCoV-19/England/QEUA-A7925D/2020|2020-10-12|EPI\_ISL\_638792|Original|hCoV-19^^England|Human|Oxford Viromics|COVID-19 Genomics UK (COG-UK) Consortium|Golubchik|United Kingdom

>Spike|hCoV-19/USA/TX-HMH-MCoV-11872/2020|2020-09-14|EPI\_ISL\_790125|Original|hCoV-19^^Texas|Human|Houston Methodist Hospital|Houston Methodist Hospital|Long|USA

>Spike|hCoV-19/Wales/PHWC-2D638/2020|2020-04-04|EPI\_ISL\_446006|Original|hCoV-19^^Wales|Human|Wales Specialist Virology Centre|Public Health Wales Microbiology Cardiff|Moore|United Kingdom

>Spike|hCoV-19/Scotland/GCVR-170ADF/2020|2020-03-24|EPI\_ISL\_459671|Original|hCoV-19^^Scotland|Human|NHSGGC West of Scotland Specialist Virology Centre / MRC-University of Glasgow Centre for Virus Research|Wellcome Sanger Institute for the COVID-19 Genomics UK (COG-UK) consortium|Davies|United Kingdom

>Spike|hCoV-19/Portugal/PT2014/2020|2020-11-19|EPI\_ISL\_732233|Original|hCoV-19^^Portugal|Human|Instituto Nacional de Saude (INSA) and Instituto Gulbenkian de Ciencia (IGC)|Instituto Nacional de Saude (INSA) and Instituto Gulbenkian de Ciencia (IGC)|Borges|Portugal

>Spike|hCoV-19/England/QEUA-B9FA1C/2020|2020-11-18|EPI\_ISL\_721172|Original|hCoV-19^^England|Human|Lighthouse Lab in Glasgow|Wellcome Sanger Institute for the COVID-19 Genomics UK (COG-UK) Consortium|Davies|United Kingdom

>Spike|hCoV-19/England/CAMB-1ABE2A/2020|2020-04-21|EPI\_ISL\_470270|Original|hCoV-19^^England|Human|Department of Pathology|Wellcome Sanger Institute for the COVID-19 Genomics UK (COG-UK) consortium|Davies|United Kingdom

>Spike|hCoV-19/England/ALDP-B1B2B6/2020|2020-11-02|EPI\_ISL\_645839|Original|hCoV-19^^England|Human|Lighthouse Lab in Alderley Park|Wellcome Sanger Institute for the COVID-19 Genomics UK (COG-UK) Consortium|Davies|United Kingdom

>Spike|hCoV-19/England/ALDP-A2F8EB/2020|2020-10-06|EPI\_ISL\_587110|Original|hCoV-19^^England|Human|Lighthouse Lab in Alderley Park|Wellcome Sanger Institute for the COVID-19 Genomics UK (COG-UK) consortium|Davies|United Kingdom

>Spike|hCoV-19/USA/AZ-TG648723/2020|2020-04-13|EPI\_ISL\_695908|Original|hCoV-19^^Arizona|Human|Sonora Quest Laboratories|TGen North|French|USA

>Spike|hCoV-19/Denmark/DCGC-4255/2020|2020-09-14|EPI\_ISL\_622148|Original|hCoV-19^^Sjaelland|Human|Department of Virus and Microbiological Special Diagnostics|Albertsen lab|Michaelsen|Denmark

>Spike|hCoV-19/Brazil/SP-L37-CD965/2020|2020-05-04|EPI\_ISL\_722022|Original|hCoV-19^^S\u00e3o Paulo|Human|Hospital das Cl\u00ednicas Universidade de S\u00e3o Paulo Medical School|Laborat\u00f3rio de Parasitologia M\u00e9dica - Instituto de Medicina Tropical - Universidade de S\u00e3o Paulo|de Jesus|Brazil

>Spike|hCoV-19/Wales/MILK-9E0744/2020|2020-09-20|EPI\_ISL\_601487|Original|hCoV-19^^Wales|Human|Lighthouse Lab in Milton Keynes|Wellcome Sanger Institute for the COVID-19 Genomics UK (COG-UK) consortium|Davies|United Kingdom

>Spike|hCoV-19/India/DL-NCDC7166-CSIR-IGIB/2020|2020-05-27|EPI\_ISL\_482632|Original|hCoV-19^^Delhi|Human|National Centre for Disease control (NCDC)|NCDC/CSIR-IGIB|Singh|India

>Spike|hCoV-19/Wales/PHWC-493E5F/2020|2020-11-10|EPI\_ISL\_726033|Original|hCoV-19^^Wales|Human|Originating lab|COVID-19 Genomics UK (COG-UK) Consortium|Moore|United Kingdom

>Spike|hCoV-19/USA/WI-UW-1618/2020|2020-09-28|EPI\_ISL\_605496|Original|hCoV-19^^Wisconsin|Human|University of Wisconsin-Madison AIDS Vaccine Research

Laboratories|University of Wisconsin-Madison AIDS Vaccine Research  
Laboratories|Baczenas|USA  
>Spike|hCoV-19/Denmark/DCGC-16999/2020|2020-12-14|EPI\_ISL\_750700|Original|hCoV-19^^Nordjylland|Human|Department of Virus and Microbiological Special Diagnostics|Albertsen Lab|Michaelsen|Denmark  
>Spike|hCoV-19/England/MILK-ACEE28/2020|2020-10-21|EPI\_ISL\_629671|Original|hCoV-19^^England|Human|Lighthouse Lab in Milton Keynes|Wellcome Sanger Institute for the COVID-19 Genomics UK (COG-UK) consortium|Davies|United Kingdom  
>Spike|hCoV-19/Wales/PHWC-4A1CAF/2020|2020-12-13|EPI\_ISL\_743800|Original|hCoV-19^^Wales|Human|Wales Specialist Virology Centre Sequencing lab|COVID-19 Genomics UK (COG-UK) Consortium|Moore|United Kingdom  
>Spike|hCoV-19/USA/LA-EVTL1138/2020|2020-12-07|EPI\_ISL\_768407|Original|hCoV-19^^Louisiana|Human|LSUHS Emerging Viral Threat Laboratory|Microbial Genome Sequencing Center|Kamil|USA  
>Spike|hCoV-19/Wuhan/HB-WHCM2-276/2020|2020-02-24|EPI\_ISL\_455009|Original|hCoV-19^^Hubei|Human|Wuhan Chain Medical Labs (CMLabs)|State Key Laboratory of Biotherapy of Sichuan University|Tang|China  
>Spike|hCoV-19/USA/RI-CDC-6616/2020|2020-07-30|EPI\_ISL\_535359|Original|hCoV-19^^Rhode Island|Human|RI State Health Laboratories|Pathogen Discovery|Queen|USA  
>Spike|hCoV-19/England/20118060704/2020|2020-03-13|EPI\_ISL\_464934|Original|hCoV-19^^England|Human|Respiratory Virus Unit|Respiratory Virus Unit|Platt|United Kingdom  
>Spike|hCoV-19/Denmark/DCGC-3813/2020|2020-08-31|EPI\_ISL\_622703|Original|hCoV-19^^Hovedstaden|Human|Department of Virus and Microbiological Special Diagnostics|Albertsen lab|Michaelsen|Denmark  
>Spike|hCoV-19/England/EXET-136185/2020|2020-04-14|EPI\_ISL\_457205|Original|hCoV-19^^England|Human|University of Exeter|COVID-19 Genomics UK (COG-UK) Consortium|Temperton|United Kingdom  
>Spike|hCoV-19/England/MILK-B3BEDA/2020|2020-11-01|EPI\_ISL\_706107|Original|hCoV-19^^England|Human|Oxford Viromics|COVID-19 Genomics UK (COG-UK) Consortium|Golubchik|United Kingdom  
>Spike|hCoV-19/Brazil/RJ-2904/2020|2020-04-28|EPI\_ISL\_541363|Original|hCoV-19^^Rio de Janeiro|Human|Laboratory of Respiratory Viruses and Measles|Laboratory of Respiratory Viruses and Measles|Silva|Brazil  
>Spike|hCoV-19/England/MILK-958501/2020|2020-06-09|EPI\_ISL\_554835|Original|hCoV-19^^England|Human|Lighthouse Lab in Milton Keynes|Wellcome Sanger Institute for the COVID-19 Genomics UK (COG-UK) consortium|Davies|United Kingdom  
>Spike|hCoV-19/Spain/VC-FISABIO-268/2020|2020-03-18|EPI\_ISL\_436363|Original|hCoV-19^^Comunitat Valenciana|Human|Servicio de Microbiologia. Hospital Clinico Universitario de Valencia|Sequencing and Bioinformatics Service and Molecular Epidemiology Research Group. FISABIO-Public Health|Gonzalez-Candelas|Spain  
>Spike|hCoV-19/Wales/PHWC-48B5CE/2020|2020-11-08|EPI\_ISL\_666257|Original|hCoV-19^^Wales|Human|Wales Specialist Virology Centre Sequencing lab|COVID-19 Genomics UK (COG-UK) Consortium|Moore|United Kingdom  
>Spike|hCoV-19/Switzerland/NE-ETHZ-390323/2020|2020-11-29|EPI\_ISL\_721836|Original|hCoV-19^^Neuch\u00e2tel|Human|Viollier AG|Department of Biosystems Science and Engineering|Nadeau|Switzerland  
>Spike|hCoV-19/Wales/PHWC-16B10F/2020|2020-09-13|EPI\_ISL\_560245|Original|hCoV-19^^Wales|Human|Wales Specialist Virology Centre Sequencing lab|COVID-19 Genomics UK (COG-UK) Consortium|Moore|United Kingdom  
>Spike|hCoV-19/USA/AZ-TG670239/2020|2020-03-25|EPI\_ISL\_696419|Original|hCoV-19^^Arizona|Human|Sonora Quest Laboratories|TGen North|French|USA  
>Spike|hCoV-19/Japan/PG-4169/2020|2020-07-00|EPI\_ISL\_692408|Original|hCoV-19^^Japan|Human|Pathogen Genomics Center|Pathogen Genomics Center|Sekizuka|Japan  
>Spike|hCoV-19/England/ALDP-9E8120/2020|2020-09-24|EPI\_ISL\_638239|Original|hCoV-19^^England|Human|Department of Pathology|COVID-19 Genomics UK (COG-UK) Consortium|Goodfellow|United Kingdom  
>Spike|hCoV-19/England/QEUH-9F3474/2020|2020-09-24|EPI\_ISL\_588565|Original|hCoV-19^^England|Human|Lighthouse Lab in Glasgow|Wellcome Sanger Institute for the COVID-19 Genomics UK (COG-UK) consortium|Davies|United Kingdom

>Spike|hCoV-19/USA/LA-EVTL183/2020|2020-07-19|EPI\_ISL\_574318|Original|hCoV-19^^Louisiana|Human|LSUHS Emerging Viral Threat Laboratory|Microbial Genome Sequencing Center|Kamil|USA

>Spike|hCoV-19/Serbia/KV57-12-07/2020|2020-07-11|EPI\_ISL\_514427|Original|hCoV-19^^Serbia|Human|Laboratory Diagnostic|Laboratory Diagnostic|Submitter|Serbia

>Spike|hCoV-19/Scotland/GCVR-1709A5/2020|2020-03-25|EPI\_ISL\_459662|Original|hCoV-19^^Scotland|Human|NHSGGC West of Scotland Specialist Virology Centre / MRC-University of Glasgow Centre for Virus Research|Wellcome Sanger Institute for the COVID-19 Genomics UK (COG-UK) consortium|Davies|United Kingdom

>Spike|hCoV-19/Australia/NSW1370/2020|2020-12-31|EPI\_ISL\_767936|Original|hCoV-19^^New South Wales|Human|Pathology West - NSW Health Pathology|NSW Health Pathology - Institute of Clinical Pathology and Medical Research; Westmead Hospital; University of Sydney|Gall|Australia

>Spike|hCoV-19/England/ALDP-9E67F3/2020|2020-09-24|EPI\_ISL\_580547|Original|hCoV-19^^England|Human|Lighthouse Lab in Alderley Park|Wellcome Sanger Institute for the COVID-19 Genomics UK (COG-UK) consortium|Davies|United Kingdom

>Spike|hCoV-19/Australia/QLD1087/2020|2020-03-26|EPI\_ISL\_593606|Original|hCoV-19^^Australia|Human|unknown|Public Health Virology Laboratory|Nguyen|Australia

>Spike|hCoV-19/England/ALDP-5D02FF/2020|2020-06-19|EPI\_ISL\_558454|Original|hCoV-19^^England|Human|Lighthouse Lab in Alderley Park|Wellcome Sanger Institute for the COVID-19 Genomics UK (COG-UK) consortium|Davies|United Kingdom

>Spike|hCoV-19/England/ALDP-AA472D/2020|2020-10-22|EPI\_ISL\_624346|Original|hCoV-19^^England|Human|Lighthouse Lab in Alderley Park|Wellcome Sanger Institute for the COVID-19 Genomics UK (COG-UK) consortium|Davies|United Kingdom

>Spike|hCoV-19/Australia/NSW380/2020|2020-04-13|EPI\_ISL\_451640|Original|hCoV-19^^New South Wales|Human|Pathology West - NSW Health Pathology|NSW Health Pathology - Institute of Clinical Pathology and Medical Research; Westmead Hospital; University of Sydney|Gall|Australia

>Spike|hCoV-19/England/20142024504/2020|2020-03-29|EPI\_ISL\_465935|Original|hCoV-19^^England|Human|Respiratory Virus Unit|Respiratory Virus Unit|Platt|United Kingdom

>Spike|hCoV-19/Hangzhou/ZJU-011/2020|2020-02-04|EPI\_ISL\_418991|Vero|hCoV-19^^Hangzhou|Human|State Key Laboratory for Diagnosis and Treatment of Infectious Diseases|State Key Laboratory for Diagnosis and Treatment of Infectious Diseases|Jiang|China

>Spike|hCoV-19/USA/TX-HMH-3226/2020|2020-06-12|EPI\_ISL\_544093|Original|hCoV-19^^Texas|Human|Houston Methodist Hospital|Houston Methodist Hospital|Long|USA

>Spike|hCoV-19/Spain/CN-ISCI-201810/2020|2020-03-06|EPI\_ISL\_539532|Original|hCoV-19^^Canary Islands|Human|Hospital Universitario de Canarias|Instituto de Salud Carlos III|Caballero|Spain

>Spike|hCoV-19/England/ALDP-B46ABA/2020|2020-11-07|EPI\_ISL\_656161|Original|hCoV-19^^England|Human|Lighthouse Lab in Alderley Park|Wellcome Sanger Institute for the COVID-19 Genomics UK (COG-UK) Consortium|Davies|United Kingdom

>Spike|hCoV-19/England/20142130404/2020|2020-03-30|EPI\_ISL\_423467|Original|hCoV-19^^England|Human|Respiratory Virus Unit|Respiratory Virus Unit|Platt|United Kingdom

>Spike|hCoV-19/England/LIVE-AA044/2020|2020-03-22|EPI\_ISL\_517392|Original|hCoV-19^^England|Human|Liverpool Clinical Laboratories|COVID-19 Genomics UK (COG-UK) Consortium|Haldenby|United Kingdom

>Spike|hCoV-19/England/BRIS-1223FF/2020|2020-04-04|EPI\_ISL\_440802|Original|hCoV-19^^England|Human|PHE South West Regional Laboratory|Wellcome Sanger Institute for the COVID-19 Genomics UK (COG-UK) consortium|Amato|United Kingdom

>Spike|hCoV-19/Norway/5366/2020|2020-11-02|EPI\_ISL\_708065|Original|hCoV-19^^Troms og Finnmark|Human|University Hospital of Northern Norway|Norwegian Institute of Public Health|Kopperud Riis|Norway

>Spike|hCoV-19/England/QEUA-BA265E/2020|2020-11-18|EPI\_ISL\_672900|Original|hCoV-19^^England|Human|Lighthouse Lab in Glasgow|Wellcome Sanger Institute for the COVID-19 Genomics UK (COG-UK) Consortium|Davies|United Kingdom

>Spike|hCoV-19/England/QEUA-A0BAEF/2020|2020-10-01|EPI\_ISL\_599428|Original|hCoV-19^^England|Human|Lighthouse Lab in Glasgow|Wellcome Sanger Institute for the COVID-19 Genomics UK (COG-UK) consortium|Davies|United Kingdom

>Spike|hCoV-19/Brazil/RJ-INCA-C76/2020|2020-04-24|EPI\_ISL\_513566|Original|hCoV-19^^Rio de Janeiro|Human|Programa de Oncovirologia|Programa de Oncovirologia|Ramos Goes|Brazil

>Spike|hCoV-19/Australia/VIC6412/2020|2020-07-21|EPI\_ISL\_521204|Original|hCoV-19^^Victoria|Human|Microbiological Diagnostic Unit - Public Health Laboratory (MDU-PHL)|MDU-PHL|Schultz|Australia

>Spike|hCoV-19/Russia/OMS-ORINFI-3807S/2020|2020-05-13|EPI\_ISL\_569763|Original|hCoV-19^^Omsk|Human|Omsk Research Institute of Natural Focal Infections|WHO National Influenza Centre Russian Federation|Komissarov|Russia

>Spike|hCoV-19/USA/FL-BD6J/2020|2020-08-20|EPI\_ISL\_602321|Original|hCoV-19^^Florida|Human|University of Miami Immunology and Histocompatibility Laboratory|University of Miami Immunology and Histocompatibility Laboratory|Margolles-Clark|USA

>Spike|hCoV-19/Wales/PHWC-16F068/2020|2020-10-07|EPI\_ISL\_585905|Original|hCoV-19^^Wales|Human|Wales Specialist Virology Centre Sequencing lab|COVID-19 Genomics UK (COG-UK) Consortium|Moore|United Kingdom

>Spike|hCoV-19/Scotland/CVR2983/2020|2020-04-23|EPI\_ISL\_449176|Original|hCoV-19^^Scotland|Human|West of Scotland Specialist Virology Centre|COVID-19 Genomics UK (COG-UK) Consortium|Robertson|United Kingdom

>Spike|hCoV-19/Scotland/QEUH-9DEA22/2020|2020-09-21|EPI\_ISL\_601191|Original|hCoV-19^^Scotland|Human|Lighthouse Lab in Glasgow|Wellcome Sanger Institute for the COVID-19 Genomics UK (COG-UK) consortium|Davies|United Kingdom

>Spike|hCoV-19/Wales/PHWC-496083/2020|2020-11-23|EPI\_ISL\_726525|Original|hCoV-19^^Wales|Human|Originating lab|COVID-19 Genomics UK (COG-UK) Consortium|Moore|United Kingdom

>Spike|hCoV-19/Belgium/ULG-10878/2020|2020-11-13|EPI\_ISL\_678421|Original|hCoV-19^^Li\u00e8ge|Human|Department of Clinical Microbiology|GIGA Medical Genomics|Durkin|Belgium

>Spike|hCoV-19/England/LOND-125FD9D/2020|2020-04-06|EPI\_ISL\_516877|Original|hCoV-19^^England|Human|North West London Pathology|Wellcome Sanger Institute for the COVID-19 Genomics UK (COG-UK) consortium|Davies|United Kingdom

>Spike|hCoV-19/England/ALDP-9CAD02/2020|2020-09-16|EPI\_ISL\_575412|Original|hCoV-19^^England|Human|Lighthouse Lab in Alderley Park|Wellcome Sanger Institute for the COVID-19 Genomics UK (COG-UK) consortium|Davies|United Kingdom

>Spike|hCoV-19/England/CAMB-1B48F3/2020|2020-06-05|EPI\_ISL\_473485|Original|hCoV-19^^England|Human|Department of Pathology|COVID-19 Genomics UK (COG-UK) Consortium|Meredith|United Kingdom

>Spike|hCoV-19/Norway/6391/2020|2020-12-03|EPI\_ISL\_775497|Original|hCoV-19^^Viken|Human|Furst Medical Laboratory|Norwegian Institute of Public Health|Vollan|Norway

>Spike|hCoV-19/Bangladesh/BCSIR-NILMRC-070/2020|2020-05-26|EPI\_ISL\_466639|Original|hCoV-19^^Chittagong|Human|National Institute of Laboratory Medicine and Referral Center|Genomic Research Lab|Khan|Bangladesh

>Spike|hCoV-19/Denmark/ALAB-SSI-849/2020|2020-03-30|EPI\_ISL\_444940|Original|hCoV-19^^Denmark|Human|Department of Virus and Microbiological Special Diagnostics|Albertsen lab|Kirkegaard|Denmark

>Spike|hCoV-19/South Korea/KCDC2227/2020|2020-05-08|EPI\_ISL\_510565|Original|hCoV-19^^South Korea|Human|Division of Viral Diseases|Division of Viral Diseases|Kim|South Korea

>Spike|hCoV-19/England/ALDP-C3D754/2020|2020-12-10|EPI\_ISL\_731829|Original|hCoV-19^^England|Human|Lighthouse Lab in Alderley Park|Wellcome Sanger Institute for the COVID-19 Genomics UK (COG-UK) Consortium|Davies|United Kingdom

>Spike|hCoV-19/Spain/VC-IBV-98003506/2020|2020-03-26|EPI\_ISL\_537951|Original|hCoV-19^^Comunitat Valenciana|Human|Servicio de Microbiolog\u00eda. Hospital General Universitario de Castell\u00f3n|SeqCOVID-SPAIN consortium/IBV(CSIC)|Comas|Spain

>Spike|hCoV-19/South Africa/KRISP-K002234/2020|2020-07-21|EPI\_ISL\_515628|Original|hCoV-19^^KwaZulu-Natal|Human|NHLS-IALCH|KRISP|de Oliveira|South Africa

>Spike|hCoV-19/Wales/PHWC-16963F/2020|2020-07-20|EPI\_ISL\_512489|Original|hCoV-19^^Wales|Human|Wales Specialist Virology Centre Sequencing lab|COVID-19 Genomics UK (COG-UK) Consortium|Moore|United Kingdom

>Spike|hCoV-19/Ireland/G-NVRL-73IRL20450/2020|2020-09-04|EPI\_ISL\_578278|Original|hCoV-19^^Galway|Human|National Virus Reference Laboratory|National Virus Reference Laboratory|Gonzalez|Ireland

>Spike|hCoV-19/Scotland/GCVR-17141C/2020|2020-03-27|EPI\_ISL\_489600|Original|hCoV-19^^Scotland|Human|NHSGGC West of Scotland Specialist Virology Centre / MRC-University of Glasgow Centre for Virus Research|Wellcome Sanger Institute for the COVID-19 Genomics UK (COG-UK) consortium|Davies|United Kingdom

>Spike|hCoV-19/Vietnam/VNHN\_3096/2020|2020-03-27|EPI\_ISL\_455702|Original|hCoV-19^^Hanoi|Human|National Hospital of Tropical Diseases|Oxford University Clinical Research Unit|Nguyen|Vietnam

>Spike|hCoV-19/Denmark/DCGC-5939/2020|2020-10-05|EPI\_ISL\_620204|Original|hCoV-19^^Syddanmark|Human|Department of Virus and Microbiological Special Diagnostics|Albertsen lab|Michaelsen|Denmark

>Spike|hCoV-19/Australia/VIC16862/2020|2020-08-06|EPI\_ISL\_663611|Original|hCoV-19^^Victoria|Human|Microbiological Diagnostic Unit - Public Health Laboratory (MDU-PHL) |MDU-PHL|Schultz|Australia

>Spike|hCoV-19/Peru/CAL-INS-103/2020|2020-05-02|EPI\_ISL\_536502|Original|hCoV-19^^Callao|Human|Instituto Nacional de Salud|Laboratorio de Infecciones Respiratorias Agudas|Lopez|Peru

>Spike|hCoV-19/Panama/331789/2020|2020-03-21|EPI\_ISL\_496692|Original|hCoV-19^^Panama Center|Human|Gorgas Memorial Laboratory of Health Studies|Gorgas Memorial Laboratory of Health Studies|Martinez|Panama

>Spike|hCoV-19/England/QEUEH-AD1FC5/2020|2020-10-26|EPI\_ISL\_634004|Original|hCoV-19^^England|Human|Lighthouse Lab in Glasgow|Wellcome Sanger Institute for the COVID-19 Genomics UK (COG-UK) consortium|Davies|United Kingdom

>Spike|hCoV-19/England/PORT-2D3A9D/2020|2020-04-17|EPI\_ISL\_529375|Original|hCoV-19^^England|Human|Centre for Enzyme Innovation|COVID-19 Genomics UK (COG-UK) Consortium|Robson|United Kingdom

>Spike|hCoV-19/England/QEUEH-B1455A/2020|2020-11-03|EPI\_ISL\_642737|Original|hCoV-19^^England|Human|Lighthouse Lab in Glasgow|Wellcome Sanger Institute for the COVID-19 Genomics UK (COG-UK) Consortium|Davies|United Kingdom

>Spike|hCoV-19/New Zealand/20VR2534/2020|2020-00-00|EPI\_ISL\_579279|Original|hCoV-19^^Auckland|Human|LabPLUS|Institute of Environmental Science and Research (ESR) |Wang|New Zealand

>Spike|hCoV-19/Japan/PG-8001/2020|2020-08-00|EPI\_ISL\_687102|Original|hCoV-19^^Japan|Human|Pathogen Genomics Center|Pathogen Genomics Center|Sekizuka|Japan

>Spike|hCoV-19/England/ALDP-522917/2020|2020-06-02|EPI\_ISL\_559003|Original|hCoV-19^^England|Human|Lighthouse Lab in Alderley Park|Wellcome Sanger Institute for the COVID-19 Genomics UK (COG-UK) consortium|Davies|United Kingdom

>Spike|hCoV-19/Denmark/DCGC-18632/2020|2020-12-07|EPI\_ISL\_749177|Original|hCoV-19^^Hovedstaden|Human|Department of Virus and Microbiological Special Diagnostics|Albertsen Lab|Michaelsen|Denmark

>Spike|hCoV-19/England/ALDP-A70326/2020|2020-10-15|EPI\_ISL\_607767|Original|hCoV-19^^England|Human|Lighthouse Lab in Alderley Park|Wellcome Sanger Institute for the COVID-19 Genomics UK (COG-UK) consortium|Davies|United Kingdom

>Spike|hCoV-19/England/CAMC-B9947E/2020|2020-11-15|EPI\_ISL\_673852|Original|hCoV-19^^England|Human|Lighthouse Lab in Cambridge|Wellcome Sanger Institute for the COVID-19 Genomics UK (COG-UK) Consortium|Davies|United Kingdom

>Spike|hCoV-19/Japan/PG-5007/2020|2020-08-00|EPI\_ISL\_689638|Original|hCoV-19^^Japan|Human|Pathogen Genomics Center|Pathogen Genomics Center|Sekizuka|Japan

>Spike|hCoV-19/New Zealand/20VR2003/2020|2020-00-00|EPI\_ISL\_579199|Original|hCoV-19^^Combined Wellington|Human|Wellington SCL (WN)|Institute of Environmental Science and Research (ESR) |Wang|New Zealand

>Spike|hCoV-19/Switzerland/ZH-ETHZ-300240/2020|2020-10-01|EPI\_ISL\_603273|Original|hCoV-19^^Zurich|Human|Viollier AG|Department of Biosystems Science and Engineering|Nadeau|Switzerland

>Spike|hCoV-19/England/LIVE-9AA0D/2020|2020-03-28|EPI\_ISL\_449378|Original|hCoV-19^^England|Human|Liverpool Clinical Laboratories|COVID-19 Genomics UK (COG-UK) Consortium|Haldenby|United Kingdom

>Spike|hCoV-19/England/MILK-B3B20B/2020|2020-11-01|EPI\_ISL\_706054|Original|hCoV-19^^England|Human|Oxford Viromics|COVID-19 Genomics UK (COG-UK) Consortium|Golubchik|United Kingdom

>Spike|hCoV-19/USA/TX-HMH-3218/2020|2020-06-12|EPI\_ISL\_544086|Original|hCoV-19^^Texas|Human|Houston Methodist Hospital|Houston Methodist Hospital|Long|USA

>Spike|hCoV-19/USA/TX-HMH-MCoV-18581/2020|2020-11-20|EPI\_ISL\_784929|Original|hCoV-19^^Texas|Human|Houston Methodist Hospital|Houston Methodist Hospital|Long|USA

>Spike|hCoV-19/England/ALDP-9ECCD0/2020|2020-05-05|EPI\_ISL\_589329|Original|hCoV-19^^England|Human|Lighthouse Lab in Alderley Park|Wellcome Sanger Institute for the COVID-19 Genomics UK (COG-UK) Consortium|Davies|United Kingdom

>Spike|hCoV-19/Australia/QLD1094/2020|2020-04-01|EPI\_ISL\_593613|Original|hCoV-19^^Australia|Human|unknown|Public Health Virology Laboratory|Nguyen|Australia

>Spike|hCoV-19/Wales/PHWC-31929/2020|2020-04-11|EPI\_ISL\_446505|Original|hCoV-19^^Wales|Human|Wales Specialist Virology Centre|Public Health Wales Microbiology Cardiff|Moore|United Kingdom

>Spike|hCoV-19/Wales/PHWC-489B73/2020|2020-10-27|EPI\_ISL\_652460|Original|hCoV-19^^Wales|Human|Wales Specialist Virology Centre Sequencing lab|COVID-19 Genomics UK (COG-UK) Consortium|Moore|United Kingdom

>Spike|hCoV-19/Switzerland/SO-ETHZ-400297/2020|2020-12-07|EPI\_ISL\_729156|Original|hCoV-19^^Solothurn|Human|Viollier AG|Department of Biosystems Science and Engineering|Nadeau|Switzerland

>Spike|hCoV-19/England/OXON-B2049/2020|2020-05-01|EPI\_ISL\_479108|Original|hCoV-19^^England|Human|Oxford Viromics|COVID-19 Genomics UK (COG-UK) Consortium|Golubchik|United Kingdom

>Spike|hCoV-19/USA/MI-MDHHS-SC20010/2020|2020-03-10|EPI\_ISL\_437097|Original|hCoV-19^^Michigan|Human|Michigan Department of Health and Human Services|Michigan Department of Health and Human Services|Blankenship|USA

>Spike|hCoV-19/England/LIVE-A777F/2020|2020-03-27|EPI\_ISL\_517067|Original|hCoV-19^^England|Human|Liverpool Clinical Laboratories|COVID-19 Genomics UK (COG-UK) Consortium|Haldenby|United Kingdom

>Spike|hCoV-19/England/MILK-99A099/2020|2020-08-29|EPI\_ISL\_550286|Original|hCoV-19^^England|Human|Lighthouse Lab in Milton Keynes|Wellcome Sanger Institute for the COVID-19 Genomics UK (COG-UK) consortium|Davies|United Kingdom

>Spike|hCoV-19/Japan/PG-6013/2020|2020-07-00|EPI\_ISL\_689126|Original|hCoV-19^^Japan|Human|Pathogen Genomics Center|Pathogen Genomics Center|Sekizuka|Japan

>Spike|hCoV-19/Denmark/ALAB-SSI-800/2020|2020-03-28|EPI\_ISL\_437672|Original|hCoV-19^^Denmark|Human|Department of Virus and Microbiological Special Diagnostics|Albertsen lab|Kirkegaard|Denmark

>Spike|hCoV-19/Wales/PHWC-4A046C/2020|2020-12-10|EPI\_ISL\_743447|Original|hCoV-19^^Wales|Human|Wales Specialist Virology Centre Sequencing lab|COVID-19 Genomics UK (COG-UK) Consortium|Moore|United Kingdom

>Spike|hCoV-19/England/ALDP-7445BF/2020|2020-06-29|EPI\_ISL\_557522|Original|hCoV-19^^England|Human|Lighthouse Lab in Alderley Park|Wellcome Sanger Institute for the COVID-19 Genomics UK (COG-UK) consortium|Davies|United Kingdom

>Spike|hCoV-19/USA/WA-UW-12863/2020|2020-06-29|EPI\_ISL\_570916|Original|hCoV-19^^Washington|Human|UW Virology Lab|UW Virology Lab|Roychoudhury|USA

>Spike|hCoV-19/Germany/HH-hpi-pl830/2020|2020-03-22|EPI\_ISL\_776184|Original|hCoV-19^^Hamburg|Human|University Medical Center Hamburg Eppendorf|Heinrich Pette Institute|Robitaille|Germany

>Spike|hCoV-19/USA/CA-CZB-14892/2020|2020-11-25|EPI\_ISL\_739347|Original|hCoV-19^^California|Human|Orange County Public Health Lab|Chan-Zuckerberg Biohub|Kamm|USA

>Spike|hCoV-19/England/LIVE-1E1C6A/2020|2020-10-13|EPI\_ISL\_611570|Original|hCoV-19^^England|Human|Liverpool Clinical Laboratories|COVID-19 Genomics UK (COG-UK) Consortium|Haldenby|United Kingdom

>Spike|hCoV-19/France/PAC-IHU-0594/2020|2020-04-10|EPI\_ISL\_568878|Original|hCoV-19^^Provence-Alpes-C\00f4te-d\02019Azur|Human|MEPHI|MEPHI|Levasseur|France

>Spike|hCoV-19/England/NORT-281991/2020|2020-03-22|EPI\_ISL\_488747|Original|hCoV-19^^England|Human|NU-OMICS DNA Sequencing research facility|Wellcome Sanger Institute for the COVID-19 Genomics UK (COG-UK) consortium|Davies|United Kingdom

>Spike|hCoV-19/England/CAMB-1AA3C2/2020|2020-04-16|EPI\_ISL\_443515|Original|hCoV-19^^England|Human|Department of Pathology|Wellcome Sanger Institute for the COVID-19 Genomics UK (COG-UK) consortium|Amato|United Kingdom

>Spike|hCoV-19/USA/LA-EVTL770/2020|2020-07-21|EPI\_ISL\_653461|Original|hCoV-19^^Louisiana|Human|LSUHS Emerging Viral Threat Laboratory|Microbial Genome Sequencing Center|Kamil|USA

>Spike|hCoV-19/Wales/PHWC-32B8C/2020|2020-04-15|EPI\_ISL\_446658|Original|hCoV-19^^Wales|Human|Wales Specialist Virology Centre|Public Health Wales Microbiology Cardiff|Moore|United Kingdom

>Spike|hCoV-19/Netherlands/ZuidHolland\_214/2020|2020-05-08|EPI\_ISL\_461386|Original|hCoV-19^^Zuid Holland|Human|Dutch COVID-19 response team|Erasmus Medical Center|Oude Munnink|Netherlands

>Spike|hCoV-19/Germany/HH-hpi-p1765/2020|2020-03-19|EPI\_ISL\_776139|Original|hCoV-19^^Hamburg|Human|University Medical Center Hamburg Eppendorf|Heinrich Pette Institute|Robitaille|Germany

>Spike|hCoV-19/USA/NM-DOH-2020632321/2020|2020-12-19|EPI\_ISL\_766922|Original|hCoV-19^^New Mexico|Human|New Mexico Department of Health Scientific Laboratory|New Mexico Department of Health Scientific Laboratory|Malone|USA

>Spike|hCoV-19/Singapore/664/2020|2020-04-14|EPI\_ISL\_493424|Original|hCoV-19^^Singapore|Human|National Public Health Laboratory|National Public Health Laboratory|Mak|Singapore

>Spike|hCoV-19/USA/WI-UW-2605/2021|2021-01-02|EPI\_ISL\_791122|Original|hCoV-19^^Wisconsin|Human|University of Wisconsin-Madison AIDS Vaccine Research Laboratories|University of Wisconsin-Madison AIDS Vaccine Research Laboratories|Moreno|USA

>Spike|hCoV-19/Portugal/PT0617/2020|2020-03-17|EPI\_ISL\_454340|Original|hCoV-19^^Portugal|Human|unknown|Instituto Nacional de Saude (INSA)|Borges|Portugal

>Spike|hCoV-19/Singapore/315/2020|2020-02-19|EPI\_ISL\_462433|Original|hCoV-19^^Singapore|Human|National Public Health Laboratory|National Public Health Laboratory|Mak|Singapore

>Spike|hCoV-19/England/ALDP-95648E/2020|2020-06-08|EPI\_ISL\_553961|Original|hCoV-19^^England|Human|Lighthouse Lab in Alderley Park|Wellcome Sanger Institute for the COVID-19 Genomics UK (COG-UK) consortium|Davies|United Kingdom

>Spike|hCoV-19/Scotland/QEUEH-96D93A/2020|2020-08-20|EPI\_ISL\_534515|Original|hCoV-19^^Scotland|Human|NHSGGC West of Scotland Specialist Virology Centre / MRC-University of Glasgow Centre for Virus Research|Wellcome Sanger Institute for the COVID-19 Genomics UK (COG-UK) consortium|Davies|United Kingdom

>Spike|hCoV-19/USA/WI-WSLH-200032/2020|2020-04-24|EPI\_ISL\_471197|Original|hCoV-19^^Wisconsin|Human|Wisconsin State Laboratory of Hygiene Communicable Disease Division|Wisconsin State Laboratory of Hygiene Communicable Disease Division|Florek|USA

>Spike|hCoV-19/England/MILK-B8666F/2020|2020-11-13|EPI\_ISL\_673914|Original|hCoV-19^^England|Human|Lighthouse Lab in Milton Keynes|Wellcome Sanger Institute for the COVID-19 Genomics UK (COG-UK) Consortium|Davies|United Kingdom

>Spike|hCoV-19/England/EXET-13DCAB/2020|2020-12-02|EPI\_ISL\_724284|Original|hCoV-19^^England|Human|University of Exeter|COVID-19 Genomics UK (COG-UK) Consortium|Temperton|United Kingdom

>Spike|hCoV-19/France/ARA-SC001/2020|2020-02-28|EPI\_ISL\_629081|Original|hCoV-19^^Auvergne-Rh\u00f4ne-Alpes|Human|Laboratoire du Centre Hospitalier Annecy Genevois|CNR Virus des Infections Respiratoires - France SUD|Bal|France

>Spike|hCoV-19/Wales/MILK-9E152B/2020|2020-09-19|EPI\_ISL\_577405|Original|hCoV-19^^Wales|Human|Oxford Viromics|COVID-19 Genomics UK (COG-UK) Consortium|Golubchik|United Kingdom

>Spike|hCoV-19/Wales/PHWC-49A34A/2020|2020-12-01|EPI\_ISL\_727531|Original|hCoV-19^^Wales|Human|Originating lab|COVID-19 Genomics UK (COG-UK) Consortium|Moore|United Kingdom

>Spike|hCoV-19/England/CAMB-1B3593/2020|2020-05-26|EPI\_ISL\_461563|Original|hCoV-19^^England|Human|Department of Pathology|COVID-19 Genomics UK (COG-UK) Consortium|Meredith|United Kingdom

>Spike|hCoV-19/Thailand/Samut Sakorn\_894/2020|2020-12-19|EPI\_ISL\_768541|Original|hCoV-19^^Samut Sakorn|Human|Regional Medical Sciences Center 5 Samut Songkhram|National Institute of Health|Phuygun|Thailand

>Spike|hCoV-19/Wales/PHWC-166447/2020|2020-06-21|EPI\_ISL\_493998|Original|hCoV-19^^Wales|Human|Originating lab|COVID-19 Genomics UK (COG-UK) Consortium|Moore|United Kingdom

>Spike|hCoV-19/England/MILK-B3A846/2020|2020-11-01|EPI\_ISL\_679686|Original|hCoV-19^^England|Human|Oxford Viromics|COVID-19 Genomics UK (COG-UK) Consortium|Golubchik|United Kingdom

>Spike|hCoV-19/England/201361022/2020|2020-03-25|EPI\_ISL\_421790|Original|hCoV-19^^England|Human|Respiratory Virus Unit|Respiratory Virus Unit|Platt|United Kingdom

>Spike|hCoV-19/Denmark/DCGC-18322/2020|2020-12-07|EPI\_ISL\_749888|Original|hCoV-19^^Sjaelland|Human|Department of Virus and Microbiological Special Diagnostics|Albertsen Lab|Michaelsen|Denmark

>Spike|hCoV-19/England/QEUEH-B30B92/2020|2020-11-03|EPI\_ISL\_659813|Original|hCoV-19^^England|Human|Lighthouse Lab in Glasgow|Wellcome Sanger Institute for the COVID-19 Genomics UK (COG-UK) Consortium|Davies|United Kingdom

>Spike|hCoV-19/Netherlands/NB-RIVM-20609/2020|2020-03-30|EPI\_ISL\_790628|Original|hCoV-19^^Noord-Brabant|Human|Dutch COVID-19 response team|National Institute for Public Health and the Environment (RIVM)|Meijer|Netherlands

>Spike|hCoV-19/England/CAMB-74395/2020|2020-03-18|EPI\_ISL\_425284|Original|hCoV-19^^England|Human|Department of Pathology|COVID-19 Genomics UK (COG-UK) Consortium|Meredith|United Kingdom

>Spike|hCoV-19/USA/FL-ADPH/2020|2020-06-28|EPI\_ISL\_513278|Original|hCoV-19^^Florida|Human|University of Miami Immunology and Histocompatibility Laboratory|University of Miami Immunology and Histocompatibility Laboratory|Margolles-Clark|USA

>Spike|hCoV-19/England/QEUEH-9DF010/2020|2020-09-21|EPI\_ISL\_584842|Original|hCoV-19^^England|Human|University College London|COVID-19 Genomics UK (COG-UK) Consortium|Roy|United Kingdom

>Spike|hCoV-19/England/LIVE-9E9C0/2020|2020-04-12|EPI\_ISL\_453352|Original|hCoV-19^^England|Human|Liverpool Clinical Laboratories|COVID-19 Genomics UK (COG-UK) Consortium|Haldenby|United Kingdom

>Spike|hCoV-19/Singapore/362/2020|2020-04-13|EPI\_ISL\_469117|Original|hCoV-19^^Singapore|Human|National Public Health Laboratory|National Public Health Laboratory|Mak|Singapore

>Spike|hCoV-19/England/MILK-9731C0/2020|2020-08-20|EPI\_ISL\_575855|Original|hCoV-19^^England|Human|Lighthouse Lab in Milton Keynes|Wellcome Sanger Institute for the COVID-19 Genomics UK (COG-UK) consortium|Davies|United Kingdom

>Spike|hCoV-19/USA/WI-UW-1198/2020|2020-08-10|EPI\_ISL\_527808|Original|hCoV-19^^Wisconsin|Human|University of Wisconsin-Madison AIDS Vaccine Research Laboratories|University of Wisconsin-Madison AIDS Vaccine Research Laboratories|Baczenas|USA

>Spike|hCoV-19/Denmark/DCGC-9803/2020|2020-11-09|EPI\_ISL\_669192|Original|hCoV-19^^Midtjylland|Human|Department of Virus and Microbiological Special Diagnostics|Albertsen Lab|Michaelsen|Denmark

>Spike|hCoV-19/Russia/SVE-RII-MH2978S/2020|2020-10-03|EPI\_ISL\_733087|Original|hCoV-19^^Sverdlovsk|Human|HELIX LLC|WHO National Influenza Centre Russian Federation|Komissarov|Russia

>Spike|hCoV-19/England/CAMC-AAF582/2020|2020-10-22|EPI\_ISL\_631001|Original|hCoV-19^^England|Human|Lighthouse Lab in Cambridge|Wellcome Sanger Institute for the COVID-19 Genomics UK (COG-UK) consortium|Davies|United Kingdom

>Spike|hCoV-19/India/OR-ILSCV19048/2020|2020-05-16|EPI\_ISL\_463064|Original|hCoV-19^^Odisha|Human|Institute of Life Sciences|Immunogenomics lab|Raghav|India

>Spike|hCoV-19/USA/WA-UW-1435/2020|2020-03-17|EPI\_ISL\_423024|Original|hCoV-19^^Washington|Human|UW Virology Lab|UW Virology Lab|Roychoudhury|USA



>Spike|hCoV-19/England/MILK-B8C933/2020|2020-11-12|EPI\_ISL\_675907|Original|hCoV-19^^England|Human|Lighthouse Lab in Milton Keynes|Wellcome Sanger Institute for the COVID-19 Genomics UK (COG-UK) Consortium|Davies|United Kingdom

>Spike|hCoV-19/Belgium/ITM\_C366/2020|2020-04-08|EPI\_ISL\_434374|Original|hCoV-19^^Antwerp|Human|Hospital AZ Rivierenland|Institute of Tropical Medicine|Selhorst|Belgium

>Spike|hCoV-19/Bangladesh/BCSIR-NILMRC-118a/2020|2020-06-18|EPI\_ISL\_482487|Original|hCoV-19^^Dhaka|Human|National Institute of Laboratory Medicine and Referral Center|Genomic Research Lab|Khan|Bangladesh

>Spike|hCoV-19/England/ALDP-9540D7/2020|2020-06-12|EPI\_ISL\_553780|Original|hCoV-19^^England|Human|Lighthouse Lab in Alderley Park|Wellcome Sanger Institute for the COVID-19 Genomics UK (COG-UK) consortium|Davies|United Kingdom

>Spike|hCoV-19/Spain/AN-IBV-001921/2020|2020-03-17|EPI\_ISL\_467075|Original|hCoV-19^^Andalucia|Human|Hospital Universitario Puerta del Mar de C\u00e0ldiz - INIBICA|SeqCOVID-SPAIN consortium/IBV (CSIC)|Comas|Spain

>Spike|hCoV-19/Finland/29A53S/2020|2020-04-29|EPI\_ISL\_481637|Original|hCoV-19^^Uusimaa|Human|Department of Virology and Immunology|Department of Virology|Smura|Finland

>Spike|hCoV-19/England/CAMB-768B2/2020|2020-03-29|EPI\_ISL\_438347|Original|hCoV-19^^England|Human|Department of Pathology|Wellcome Sanger Institute for the COVID-19 Genomics UK (COG-UK) consortium|Amato|United Kingdom

>Spike|hCoV-19/Scotland/CVR5374/2020|2020-10-22|EPI\_ISL\_651783|Original|hCoV-19^^Scotland|Human|West of Scotland Specialist Virology Centre|COVID-19 Genomics UK (COG-UK) Consortium|Robertson|United Kingdom

>Spike|hCoV-19/England/204561474/2020|2020-11-05|EPI\_ISL\_678687|Original|hCoV-19^^England|Human|Respiratory Virus Unit|COVID-19 Genomics UK (COG-UK) Consortium|Platt|United Kingdom

>Spike|hCoV-19/England/QEUH-C5CA29/2020|2020-12-14|EPI\_ISL\_769540|Original|hCoV-19^^England|Human|Lighthouse Lab in Glasgow|Wellcome Sanger Institute for the COVID-19 Genomics UK (COG-UK) Consortium|Davies|United Kingdom

>Spike|hCoV-19/England/ALDP-9E9B7C/2020|2020-09-24|EPI\_ISL\_580104|Original|hCoV-19^^England|Human|Lighthouse Lab in Alderley Park|Wellcome Sanger Institute for the COVID-19 Genomics UK (COG-UK) consortium|Davies|United Kingdom

>Spike|hCoV-19/England/ALDP-908834/2020|2020-06-24|EPI\_ISL\_551369|Original|hCoV-19^^England|Human|Lighthouse Lab in Alderley Park|Wellcome Sanger Institute for the COVID-19 Genomics UK (COG-UK) consortium|Davies|United Kingdom

>Spike|hCoV-19/USA/MS-CDC-6554/2020|2020-09-03|EPI\_ISL\_648009|Original|hCoV-19^^Mississippi|Human|MS Public Health Laboratory|Pathogen Discovery|Queen|USA

>Spike|hCoV-19/Wales/PHWC-4A57B9/2020|2020-12-16|EPI\_ISL\_764920|Original|hCoV-19^^Wales|Human|Wales Specialist Virology Centre Sequencing lab|COVID-19 Genomics UK (COG-UK) Consortium|Moore|United Kingdom

>Spike|hCoV-19/USA/NY-NYUMC902/2020|2020-04-26|EPI\_ISL\_467395|Original|hCoV-19^^New York|Human|NYU Langone Health|Departments of Pathology and Medicine|Maurano|USA

>Spike|hCoV-19/USA/UT-QDX-1277/2020|2020-03-14|EPI\_ISL\_572043|Original|hCoV-19^^Utah|Human|Quest Diagnostics|Quest Diagnostics|Kagan|USA

>Spike|hCoV-19/USA/CO-CDPHE-2011210352/2020|2020-11-19|EPI\_ISL\_771276|Original|hCoV-19^^Colorado|Human|Colorado Department of Public Health and Environment|Colorado Department of Public Health and Environment|Bankers|USA

>Spike|hCoV-19/USA/WI-GMF-01978/2020|2020-04-28|EPI\_ISL\_436892|Original|hCoV-19^^Wisconsin|Human|Gundersen Molecular Diagnostics Laboratory|Kabara Cancer Research Institute|Kenny|USA

>Spike|hCoV-19/USA/WA-S334/2020|2020-04-04|EPI\_ISL\_434094|Original|hCoV-19^^Washington|Human|Washington State Department of Health|Seattle Flu Study|Bedford|USA

>Spike|hCoV-19/England/BRIS-13076B/2020|2020-04-12|EPI\_ISL\_492696|Original|hCoV-19^^England|Human|PHE South West Regional Laboratory|Wellcome Sanger Institute for the COVID-19 Genomics UK (COG-UK) consortium|Davies|United Kingdom

>Spike|hCoV-19/Australia/VIC1081/2020|2020-04-06|EPI\_ISL\_430580|Original|hCoV-19^^Victoria|Human|Victorian Infectious Diseases Reference Laboratory

(VIDRL)|Microbiological Diagnostic Unit Public Health Laboratory and Victorian Infectious Diseases Reference Laboratory|Schultz|Australia  
>Spike|hCoV-19/USA/TX-DSHS-1197/2020|2020-03-17|EPI\_ISL\_631659|Original|hCoV-19^^Texas|Human|Texas Department of State Health Services|Texas Department of State Health Services|Rahman|USA  
>Spike|hCoV-19/Luxembourg/LNS0102726/2020|2020-10-31|EPI\_ISL\_739711|Original|hCoV-19^^Luxembourg|Human|Laboratoire national de sant\u00e9|Laboratoire national de sant\u00e9|Wienecke-Baldacchino|Luxembourg  
>Spike|hCoV-19/USA/WI-UW-2320/2020|2020-11-13|EPI\_ISL\_728086|Original|hCoV-19^^Wisconsin|Human|University of Wisconsin-Madison AIDS Vaccine Research Laboratories|University of Wisconsin-Madison AIDS Vaccine Research Laboratories|Baczenas|USA  
>Spike|hCoV-19/Australia/WA90/2020|2020-03-24|EPI\_ISL\_512743|Original|hCoV-19^^Western Australia|Human|PathWest Laboratory Medicine WA|PathWest Laboratory Medicine WA Microbial Surveillance Unit|Sikazwe|Australia  
>Spike|hCoV-19/Wales/PHWC-33B21/2020|2020-04-21|EPI\_ISL\_446789|Original|hCoV-19^^Wales|Human|Wales Specialist Virology Centre|Public Health Wales Microbiology Cardiff|Moore|United Kingdom  
>Spike|hCoV-19/USA/TX-DSHS-1909/2020|2020-07-11|EPI\_ISL\_751536|Original|hCoV-19^^Texas|Human|Texas Department of State Health Services|Texas Department of State Health Services|Rahman|USA  
>Spike|hCoV-19/Denmark/DCGC-7812/2020|2020-10-19|EPI\_ISL\_618762|Original|hCoV-19^^Hovedstaden|Human|Department of Virus and Microbiological Special Diagnostics|Albertsen lab|Michaelsen|Denmark  
>Spike|hCoV-19/England/MILK-9C4676/2020|2020-09-07|EPI\_ISL\_549460|Original|hCoV-19^^England|Human|Centre for Enzyme Innovation|COVID-19 Genomics UK (COG-UK) Consortium|Robson|United Kingdom  
>Spike|hCoV-19/England/20169037604/2020|2020-04-14|EPI\_ISL\_465246|Original|hCoV-19^^England|Human|Respiratory Virus Unit|Respiratory Virus Unit|Platt|United Kingdom  
>Spike|hCoV-19/Scotland/EDB9299/2020|2020-11-04|EPI\_ISL\_666073|Original|hCoV-19^^Scotland|Human|Virology Department|COVID-19 Genomics UK (COG-UK) Consortium|McHugh|United Kingdom  
>Spike|hCoV-19/England/ALDP-5201F3/2020|2020-06-02|EPI\_ISL\_559094|Original|hCoV-19^^England|Human|Lighthouse Lab in Alderley Park|Wellcome Sanger Institute for the COVID-19 Genomics UK (COG-UK) consortium|Davies|United Kingdom  
>Spike|hCoV-19/Northern Ireland/NIRE-1086F6/2020|2020-09-13|EPI\_ISL\_585196|Original|hCoV-19^^Northern Ireland|Human|Regional Virus Laboratory|COVID-19 Genomics UK (COG-UK) Consortium|Fairley|United Kingdom  
>Spike|hCoV-19/Denmark/DCGC-22177/2020|2020-12-14|EPI\_ISL\_757824|Original|hCoV-19^^Hovedstaden|Human|Department of Virus and Microbiological Special Diagnostics|Albertsen Lab|Michaelsen|Denmark  
>Spike|hCoV-19/Spain/CL-IBV-97006305/2020|2020-04-22|EPI\_ISL\_537674|Original|hCoV-19^^Castilla y Leon|Human|Universidad de Le\u00f3n|SeqCOVID-SPAIN consortium|IBV (CSIC) |Comas|Spain  
>Spike|hCoV-19/Japan/PG-3076/2020|2020-04-00|EPI\_ISL\_691199|Original|hCoV-19^^Japan|Human|Pathogen Genomics Center|Pathogen Genomics Center|Sekizuka|Japan  
>Spike|hCoV-19/Japan/TKYE610670/2020|2020-04-00|EPI\_ISL\_479681|unknown|hCoV-19^^Japan|Human|unknown|Contact|Submitter|Japan  
>Spike|hCoV-19/Peru/LIM-UPCH-0152/2020|2020-08-28|EPI\_ISL\_568546|Original|hCoV-19^^Lima|Human|Laboratorio de Referencia Nacional de Virus Respiratorios|Laboratorio de Gen\u00f3mica Microbiana|Tsukayama|Peru  
>Spike|hCoV-19/USA/AK-PHL1822/2020|2020-07-22|EPI\_ISL\_528506|Original|hCoV-19^^Alaska|Human|Alaska State Virology Laboratory|Alaska State Virology Laboratory|Drown|USA  
>Spike|hCoV-19/Chile/RM-112634/2020|2020-06-28|EPI\_ISL\_746586|Original|hCoV-19^^Region Metropolitana de Santiago|Human|Genética Molecular and Subdepartamento de Virología ISP Chile|Instituto de Salud Pública de Chile|Tognarelli|Chile  
>Spike|hCoV-19/England/MILK-48ADE5/2020|2020-05-18|EPI\_ISL\_559671|Original|hCoV-19^^England|Human|Lighthouse Lab in Milton Keynes|Wellcome Sanger Institute for the COVID-19 Genomics UK (COG-UK) consortium|Davies|United Kingdom

>Spike|hCoV-19/Wales/PHWC-49C76A/2020|2020-11-18|EPI\_ISL\_742597|Original|hCoV-19^^Wales|Human|Wales Specialist Virology Centre Sequencing lab|COVID-19 Genomics UK (COG-UK) Consortium|Moore|United Kingdom

>Spike|hCoV-19/USA/WI-GMF-32239/2020|2020-11-08|EPI\_ISL\_661132|Original|hCoV-19^^Wisconsin|Human|Gundersen Molecular Diagnostics Laboratory|Kabara Cancer Research Institute|Kenny|USA

>Spike|hCoV-19/England/CAMB-1BD56C/2020|2020-00-00|EPI\_ISL\_764315|Original|hCoV-19^^England|Human|Department of Pathology|COVID-19 Genomics UK (COG-UK) Consortium|Goodfellow|United Kingdom

>Spike|hCoV-19/USA/TX-HMH-MCoV-13783/2020|2020-08-17|EPI\_ISL\_788876|Original|hCoV-19^^Texas|Human|Houston Methodist Hospital|Houston Methodist Hospital|Long|USA

>Spike|hCoV-19/USA/UT-UPHL-2012392301/2020|2020-11-18|EPI\_ISL\_746969|Original|hCoV-19^^Utah|Human|Utah Public Health Laboratory|Utah Public Health Laboratory|Gallagher|USA

>Spike|hCoV-19/USA/TX-DSHS-1994/2020|2020-06-21|EPI\_ISL\_766741|Original|hCoV-19^^Texas|Human|Texas Department of State Health Services|Texas Department of State Health Services|Rahman|USA

>Spike|hCoV-19/Luxembourg/LNS9049294/2020|2020-11-22|EPI\_ISL\_744838|Original|hCoV-19^^Luxembourg|Human|Laboratoire national de sant\u00e9|Laboratoire national de sant\u00e9|Wienecke-Baldacchino|Luxembourg

>Spike|hCoV-19/England/ALDP-A52876/2020|2020-10-07|EPI\_ISL\_598055|Original|hCoV-19^^England|Human|Lighthouse Lab in Alderley Park|Wellcome Sanger Institute for the COVID-19 Genomics UK (COG-UK) consortium|Davies|United Kingdom

>Spike|hCoV-19/USA/FL-BPHL-1456/2020|2020-04-08|EPI\_ISL\_549238|Original|hCoV-19^^Florida|Human|Florida Bureau of Public Health Laboratories|Florida Bureau of Public Health Laboratories|Blanton|USA

>Spike|hCoV-19/England/QEUEH-A1E4FA/2020|2020-10-01|EPI\_ISL\_587327|Original|hCoV-19^^England|Human|Lighthouse Lab in Glasgow|Wellcome Sanger Institute for the COVID-19 Genomics UK (COG-UK) consortium|Davies|United Kingdom

>Spike|hCoV-19/England/ALDP-AA1A90/2020|2020-10-22|EPI\_ISL\_624282|Original|hCoV-19^^England|Human|Lighthouse Lab in Alderley Park|Wellcome Sanger Institute for the COVID-19 Genomics UK (COG-UK) consortium|Davies|United Kingdom

>Spike|hCoV-19/Japan/PG-2016/2020|2020-03-00|EPI\_ISL\_685621|Original|hCoV-19^^Japan|Human|Pathogen Genomics Center|Pathogen Genomics Center|Sekizuka|Japan

>Spike|hCoV-19/USA/VA-DCLS-2239/2020|2020-11-03|EPI\_ISL\_734219|Original|hCoV-19^^Virginia|Human|Virginia Division of Consolidated Laboratory Services (DCLS)|Virginia Division of Consolidated Laboratory Services (DCLS)|St. Jacques|USA

>Spike|hCoV-19/South Africa/N00103/2020|2020-06-12|EPI\_ISL\_623023|Original|hCoV-19^^Mpumalanga|Human|National Health Laboratory Service|National Institute for Communicable Diseases of the National Health Laboratory Service|Allam|South Africa

>Spike|hCoV-19/England/QEUEH-B11A12/2020|2020-11-02|EPI\_ISL\_642440|Original|hCoV-19^^England|Human|Lighthouse Lab in Glasgow|Wellcome Sanger Institute for the COVID-19 Genomics UK (COG-UK) Consortium|Davies|United Kingdom

>Spike|hCoV-19/England/CAMC-B988BF/2020|2020-11-15|EPI\_ISL\_673777|Original|hCoV-19^^England|Human|Lighthouse Lab in Cambridge|Wellcome Sanger Institute for the COVID-19 Genomics UK (COG-UK) Consortium|Davies|United Kingdom

>Spike|hCoV-19/England/QEUEH-AD38C8/2020|2020-10-26|EPI\_ISL\_633737|Original|hCoV-19^^England|Human|Lighthouse Lab in Glasgow|Wellcome Sanger Institute for the COVID-19 Genomics UK (COG-UK) consortium|Davies|United Kingdom

>Spike|hCoV-19/Japan/IC-0268/2020|2020-11-00|EPI\_ISL\_667697|Original|hCoV-19^^Japan|Human|Pathogen Genomics Center|Pathogen Genomics Center|Sekizuka|Japan

>Spike|hCoV-19/USA/OR-OHSU-1427/2020|2020-07-16|EPI\_ISL\_509198|Original|hCoV-19^^Oregon|Human|OHSU Lab Services Molecular Microbiology Lab|Oregon SARS-CoV-2 Genome Sequencing Center|O'Roak|USA

>Spike|hCoV-19/England/QEUEH-9FA49B/2020|2020-09-28|EPI\_ISL\_588244|Original|hCoV-19^^England|Human|Lighthouse Lab in Glasgow|Wellcome Sanger Institute for the COVID-19 Genomics UK (COG-UK) consortium|Davies|United Kingdom

>Spike|hCoV-19/England/CAMB-7C254/2020|2020-04-15|EPI\_ISL\_434016|Original|hCoV-19^^England|Human|Department of Pathology|COVID-19 Genomics UK (COG-UK) Consortium|Meredith|United Kingdom

>Spike|hCoV-19/Scotland/QEUH-C14CAF/2020|2020-12-06|EPI\_ISL\_710697|Original|hCoV-19^^Scotland|Human|Lighthouse Lab in Glasgow|Wellcome Sanger Institute for the COVID-19 Genomics UK (COG-UK) Consortium|Davies|United Kingdom

>Spike|hCoV-19/Panama/328709/2020|2020-02-28|EPI\_ISL\_496605|Original|hCoV-19^^Panama Center|Human|Gorgas Memorial Laboratory of Health Studies|Gorgas Memorial Laboratory of Health Studies|Martinez|Panama

>Spike|hCoV-19/Lithuania/MR-LUHS-Eilnr460/2020|2020-09-12|EPI\_ISL\_636895|Original|hCoV-19^^Kauno apskritis|Human|Lithuanian University of Health Sciences Hospital|Lithuanian University of Health Sciences|Zemaitis|Lithuania

>Spike|hCoV-19/England/QEUH-9B4767/2020|2020-09-04|EPI\_ISL\_590421|Original|hCoV-19^^England|Human|Lighthouse Lab in Glasgow|Wellcome Sanger Institute for the COVID-19 Genomics UK (COG-UK) consortium|Davies|United Kingdom

>Spike|hCoV-19/USA/WA-UW339/2020|2020-03-16|EPI\_ISL\_418906|Original|hCoV-19^^Washington|Human|UW Virology Lab|UW Virology Lab|Roychoudhury|USA

>Spike|hCoV-19/Denmark/ALAB-SSI-742/2020|2020-03-27|EPI\_ISL\_444884|Original|hCoV-19^^Denmark|Human|Department of Virus and Microbiological Special Diagnostics|Albertsen lab|Kirkegaard|Denmark

>Spike|hCoV-19/England/QEUH-9CE9FB/2020|2020-09-17|EPI\_ISL\_590124|Original|hCoV-19^^England|Human|Lighthouse Lab in Glasgow|Wellcome Sanger Institute for the COVID-19 Genomics UK (COG-UK) consortium|Davies|United Kingdom

>Spike|hCoV-19/England/ALDP-C25F48/2020|2020-12-06|EPI\_ISL\_782856|Original|hCoV-19^^England|Human|Lighthouse Lab in Alderley Park|Wellcome Sanger Institute for the COVID-19 Genomics UK (COG-UK) Consortium|Davies|United Kingdom

>Spike|hCoV-19/England/CAMB-80E0E/2020|2020-04-10|EPI\_ISL\_442979|Original|hCoV-19^^England|Human|Department of Pathology|Wellcome Sanger Institute for the COVID-19 Genomics UK (COG-UK) consortium|Amato|United Kingdom

>Spike|hCoV-19/Belgium/ULG-10842/2020|2020-10-27|EPI\_ISL\_666877|Original|hCoV-19^^Li\u00e8ge|Human|Department of Clinical Microbiology|GIGA Medical Genomics|Durkin|Belgium

>Spike|hCoV-19/England/NORT-2896CF/2020|2020-03-31|EPI\_ISL\_458649|Original|hCoV-19^^England|Human|NU-OMICS DNA Sequencing research facility|Wellcome Sanger Institute for the COVID-19 Genomics UK (COG-UK) consortium|Davies|United Kingdom

>Spike|hCoV-19/USA/HI-H200105/2020|2020-04-16|EPI\_ISL\_752668|Original|hCoV-19^^Hawaii|Human|State Laboratories Division|State Laboratories Division|Sultana|USA

>Spike|hCoV-19/England/MILK-9E0ED6/2020|2020-09-20|EPI\_ISL\_581069|Original|hCoV-19^^England|Human|Lighthouse Lab in Milton Keynes|Wellcome Sanger Institute for the COVID-19 Genomics UK (COG-UK) consortium|Davies|United Kingdom

>Spike|hCoV-19/England/QEUH-A9FA0E/2020|2020-10-20|EPI\_ISL\_665628|Original|hCoV-19^^England|Human|Northumbria University / South Tees Hospitals NHS Foundation Trust / North Cumbria Integrated Care NHS Foundation Trust / North Tees and Hartlepool NHS Foundation Trust / Newcastle Hospitals NHS Foundation Trust|COVID-19 Genomics UK (COG-UK) Consortium|Bashton|United Kingdom

>Spike|hCoV-19/England/ALDP-A6938A/2020|2020-10-09|EPI\_ISL\_609124|Original|hCoV-19^^England|Human|Lighthouse Lab in Alderley Park|Wellcome Sanger Institute for the COVID-19 Genomics UK (COG-UK) consortium|Davies|United Kingdom

>Spike|hCoV-19/England/QEUH-96267A/2020|2020-08-10|EPI\_ISL\_531667|Original|hCoV-19^^England|Human|Lighthouse Lab in Glasgow|Wellcome Sanger Institute for the COVID-19 Genomics UK (COG-UK) consortium|Davies|United Kingdom

>Spike|hCoV-19/England/CAMB-76AF8/2020|2020-03-31|EPI\_ISL\_438473|Original|hCoV-19^^England|Human|Department of Pathology|Wellcome Sanger Institute for the COVID-19 Genomics UK (COG-UK) consortium|Amato|United Kingdom

>Spike|hCoV-19/Iran/K1r-117/2020|2020-05-00|EPI\_ISL\_596384|Original|hCoV-19^^Iran|Human|Virology|Virology|Ranjbar|Iran

>Spike|hCoV-19/Netherlands/ZH-EMC-744/2020|2020-10-04|EPI\_ISL\_632585|Original|hCoV-19^^Zuid Holland|Human|Dutch COVID-19 response team|Erasmus Medical Center|Oude Munnink|Netherlands

>Spike|hCoV-19/England/ALDP-B1CF09/2020|2020-11-01|EPI\_ISL\_645800|Original|hCoV-19^^England|Human|Lighthouse Lab in Alderley Park|Wellcome Sanger Institute for the COVID-19 Genomics UK (COG-UK) Consortium|Davies|United Kingdom

>Spike|hCoV-19/England/QEUA-B2DB89/2020|2020-11-03|EPI\_ISL\_647006|Original|hCoV-19^^England|Human|Lighthouse Lab in Glasgow|Wellcome Sanger Institute for the COVID-19 Genomics UK (COG-UK) Consortium|Davies|United Kingdom

>Spike|hCoV-19/England/204682089/2020|2020-11-12|EPI\_ISL\_693423|Original|hCoV-19^^England|Human|Respiratory Virus Unit|COVID-19 Genomics UK (COG-UK) Consortium|Platt|United Kingdom

>Spike|hCoV-19/Wales/PHWC-4A0693/2020|2020-12-09|EPI\_ISL\_743478|Original|hCoV-19^^Wales|Human|Wales Specialist Virology Centre Sequencing lab|COVID-19 Genomics UK (COG-UK) Consortium|Moore|United Kingdom

>Spike|hCoV-19/England/LIVE-9FB9C/2020|2020-06-05|EPI\_ISL\_472045|Original|hCoV-19^^England|Human|Liverpool Clinical Laboratories|COVID-19 Genomics UK (COG-UK) Consortium|Haldenby|United Kingdom

>Spike|hCoV-19/Scotland/CVR903/2020|2020-03-27|EPI\_ISL\_433359|Original|hCoV-19^^Scotland|Human|West of Scotland Specialist Virology Centre|COVID-19 Genomics UK (COG-UK) Consortium|Robertson|United Kingdom

>Spike|hCoV-19/Denmark/DCGC-22504/2020|2020-12-14|EPI\_ISL\_757598|Original|hCoV-19^^Nordjylland|Human|Department of Virus and Microbiological Special Diagnostics|Albertsen Lab|Michaelsen|Denmark

>Spike|hCoV-19/England/LOND-126259F/2020|2020-10-01|EPI\_ISL\_594862|Original|hCoV-19^^England|Human|University College London|COVID-19 Genomics UK (COG-UK) Consortium|Roy|United Kingdom

>Spike|hCoV-19/Scotland/CVR2322/2020|2020-04-13|EPI\_ISL\_477902|Original|hCoV-19^^Scotland|Human|West of Scotland Specialist Virology Centre|COVID-19 Genomics UK (COG-UK) Consortium|Robertson|United Kingdom

>Spike|hCoV-19/USA/MA-MGH-00749/2020|2020-04-10|EPI\_ISL\_791745|Original|hCoV-19^^Massachusetts|Human|Massachusetts General Hospital|Infectious Disease Program|Park|USA

>Spike|hCoV-19/Australia/VIC2994/2020|2020-07-07|EPI\_ISL\_521824|Original|hCoV-19^^Victoria|Human|Microbiological Diagnostic Unit - Public Health Laboratory (MDU-PHL)|MDU-PHL|Schultz|Australia

>Spike|hCoV-19/mink/Netherlands/NB-EMC-1-5/2020|2020-04-28|EPI\_ISL\_523022|Original|hCoV-19^^Noord Brabant|Neovison vison|Dutch COVID-19 response team|Erasmus Medical Center|Oude Munnink|Netherlands

>Spike|hCoV-19/England/MILK-994202/2020|2020-08-25|EPI\_ISL\_551700|Original|hCoV-19^^England|Human|Lighthouse Lab in Milton Keynes|Wellcome Sanger Institute for the COVID-19 Genomics UK (COG-UK) consortium|Davies|United Kingdom

>Spike|hCoV-19/USA/TX-DSHS-0322/2020|2020-06-13|EPI\_ISL\_534289|Original|hCoV-19^^Texas|Human|Texas Department of State Health Services|Texas Department of State Health Services|Rahman|USA

>Spike|hCoV-19/England/SHEF-C045B/2020|2020-03-29|EPI\_ISL\_420203|Original|hCoV-19^^England|Human|Virology Department|Department of Infection|de Silva|United Kingdom

>Spike|hCoV-19/Spain/NC-IBV-001380/2020|2020-03-14|EPI\_ISL\_452521|Original|hCoV-19^^Navarra|Human|Cl\u00ednica Universidad de Navarra. Servicio de Enfermedades Infecciosas y Microbiolog\u00eda cl\u00ednica|SeqCOVID-SPAIN consortium/IBV (CSIC)|Comas|Spain

>Spike|hCoV-19/Scotland/GCVR-16FCDD/2020|2020-03-23|EPI\_ISL\_489682|Original|hCoV-19^^Scotland|Human|NHSGGC West of Scotland Specialist Virology Centre / MRC-University of Glasgow Centre for Virus Research|Wellcome Sanger Institute for the COVID-19 Genomics UK (COG-UK) consortium|Davies|United Kingdom

>Spike|hCoV-19/Australia/NSW2565/2020|2020-04-05|EPI\_ISL\_678315|Original|hCoV-19^^New South Wales|Human|Area of Virology|Virology Research Laboratory; Area of Virology|Foster|Australia

>Spike|hCoV-19/Australia/VIC4403/2020|2020-07-14|EPI\_ISL\_519699|Original|hCoV-19^^Victoria|Human|Microbiological Diagnostic Unit - Public Health Laboratory (MDU-PHL)|MDU-PHL|Schultz|Australia

>Spike|hCoV-19/England/QEUA-788519/2020|2020-07-15|EPI\_ISL\_533028|Original|hCoV-19^^England|Human|Lighthouse Lab in Glasgow|Wellcome Sanger Institute for the COVID-19 Genomics UK (COG-UK) consortium|Davies|United Kingdom

>Spike|hCoV-19/Australia/VIC17754/2020|2020-08-25|EPI\_ISL\_779426|Original|hCoV-19^^Victoria|Human|Microbiological Diagnostic Unit - Public Health Laboratory (MDU-PHL) |MDU-PHL|Beck|Australia

>Spike|hCoV-19/Germany/NW-HHU-366/2020|2020-11-26|EPI\_ISL\_718045|Orginal|hCoV-19^^North Rhine-Westphalia|Human|ZOTZ KLIMAS MVZ D\u00f0fcsseldorf-Centrum GbR \u00dcBAG f\u00f0fcr Labormedizin|Center of Medical Microbiology|Wienemann|Germany

>Spike|hCoV-19/USA/NY-NYUMC799/2020|2020-03-27|EPI\_ISL\_456035|Original|hCoV-19^^New York|Human|NYU Langone Health|Departments of Pathology and Medicine|Maurano|USA

>Spike|hCoV-19/USA/CA-CHLA-PLM61564534/2020|2020-11-30|EPI\_ISL\_753472|Original|hCoV-19^^California|Human|Clinical virology Laboratory|Center for Personalized Medicine|Dien Bard|USA

>Spike|hCoV-19/USA/OR-OHSU-2886/2020|2020-09-04|EPI\_ISL\_667387|Original|hCoV-19^^Oregon|Human|OHSU Lab Services Molecular Microbiology Lab|Oregon SARS-CoV-2 Genome Sequencing Center|O'Roak|USA

>Spike|hCoV-19/Japan/PG-7662/2020|2020-08-00|EPI\_ISL\_686764|Original|hCoV-19^^Japan|Human|Chiba Prefectural Institute of Public Health|Pathogen Genomics Center|Sekizuka|Japan

>Spike|hCoV-19/South Korea/KCDC2269/2020|2020-05-14|EPI\_ISL\_510607|Original|hCoV-19^^South Korea|Human|Division of Viral Diseases|Division of Viral Diseases|Kim|South Korea

>Spike|hCoV-19/USA/TX-HMH-MCoV-14267/2020|2020-10-05|EPI\_ISL\_787552|Original|hCoV-19^^Texas|Human|Houston Methodist Hospital|Houston Methodist Hospital|Long|USA

>Spike|hCoV-19/Australia/VIC15744/2020|2020-08-02|EPI\_ISL\_593437|Original|hCoV-19^^Victoria|Human|Microbiological Diagnostic Unit - Public Health Laboratory (MDU-PHL) |MDU-PHL|Schultz|Australia

>Spike|hCoV-19/England/ALDP-B1CC20/2020|2020-11-02|EPI\_ISL\_664137|Original|hCoV-19^^England|Human|Centre for Enzyme Innovation|COVID-19 Genomics UK (COG-UK) Consortium|Robson|United Kingdom

>Spike|hCoV-19/Australia/VIC4251/2020|2020-07-13|EPI\_ISL\_519579|Original|hCoV-19^^Victoria|Human|Microbiological Diagnostic Unit - Public Health Laboratory (MDU-PHL) |MDU-PHL|Schultz|Australia

>Spike|hCoV-19/Wales/PHWC-48D90C/2020|2020-11-12|EPI\_ISL\_680699|Original|hCoV-19^^Wales|Human|Wales Specialist Virology Centre Sequencing lab|COVID-19 Genomics UK (COG-UK) Consortium|Moore|United Kingdom

>Spike|hCoV-19/USA/CA-CZB-3357/2020|2020-07-15|EPI\_ISL\_548291|Original|hCoV-19^^California|Human|Orange County Public Health Laboratory|Chan-Zuckerberg Biohub|Bhatt|USA

>Spike|hCoV-19/England/LIVE-DCC5B9/2020|2020-11-26|EPI\_ISL\_724518|Original|hCoV-19^^England|Human|Liverpool Clinical Laboratories|COVID-19 Genomics UK (COG-UK) Consortium|Haldenby|United Kingdom

>Spike|hCoV-19/USA/MI-MDHHS-SC22421/2020|2020-11-14|EPI\_ISL\_708254|Original|hCoV-19^^Michigan|Human|Michigan Department of Health and Human Services|Michigan Department of Health and Human Services|Jacob|USA

>Spike|hCoV-19/Uruguay/UY-NYUMC867/2020|2020-03-28|EPI\_ISL\_457963|Original|hCoV-19^^Montevideo|Human|Laboratorio de Biolog\u00eda Molecular Asociaci\u00f3n Espa\u00f1ola Primera en Salud|Departments of Pathology and Medicine|Maurano|Uruguay

>Spike|hCoV-19/Australia/NSW155/2020|2020-03-06|EPI\_ISL\_427647|Original|hCoV-19^^New South Wales|Human|Centre for Infectious Diseases and Microbiology Public Health|NSW Health Pathology - Institute of Clinical Pathology and Medical Research; Westmead Hospital; University of Sydney|Gall|Australia

>Spike|hCoV-19/USA/TX-HMH-MCoV-12340/2020|2020-09-25|EPI\_ISL\_790307|Original|hCoV-19^^Texas|Human|Houston Methodist Hospital|Houston Methodist Hospital|Long|USA

>Spike|hCoV-19/England/ALDP-AA45AB/2020|2020-10-21|EPI\_ISL\_624472|Original|hCoV-19^^England|Human|Lighthouse Lab in Alderley Park|Wellcome Sanger Institute for the COVID-19 Genomics UK (COG-UK) consortium|Davies|United Kingdom

>Spike|hCoV-19/USA/TX-DSHS-1735/2020|2020-06-20|EPI\_ISL\_710387|Original|hCoV-19^^Texas|Human|Texas Department of State Health Services|Texas Department of State Health Services|Rahman|USA

>Spike|hCoV-19/Lithuania/MR-LUHS-Eilnr100/2020|2020-04-19|EPI\_ISL\_603111|Original|hCoV-19^^Marijampoles apskritis|Human|Lithuanian

University of Health Sciences Hospital|Lithuanian University of Health Sciences|Zemaitis|Lithuania  
>Spike|hCoV-19/France/OCC-50/2020|2020-06-30|EPI\_ISL\_593865|Original|hCoV-19^^Occitanie|Human|CHU Purpan - Laboratoire de Virologie - Institut F\u00e9d\u00e9ratif de Biologie|CHU Purpan - Laboratoire de Virologie - Institut F\u00e9d\u00e9ratif de Biologie|Latour|France  
>Spike|hCoV-19/Netherlands/LI-EMC-79/2020|2020-06-03|EPI\_ISL\_523284|Original|hCoV-19^^Limburg|Human|Dutch COVID-19 response team|Erasmus Medical Center|Oude Munnink|Netherlands  
>Spike|hCoV-19/USA/CA-ALSR-4787/2020|2020-05-05|EPI\_ISL\_730140|Original|hCoV-19^^California|Human|Scripps Medical Laboratory|Andersen lab at Scripps Research|Gangavarapu|USA  
>Spike|hCoV-19/Brazil/RJ-1719/2020|2020-04-06|EPI\_ISL\_456088|Original|hCoV-19^^Rio de Janeiro|Human|LACEN RJ - Laborat\u00f3rio Central de Sa\u00fade P\u00fablica Noel Nutels|Laboratory of Respiratory Viruses and Measles|Silva|Brazil  
>Spike|hCoV-19/Australia/NSW1250/2020|2020-12-19|EPI\_ISL\_740881|Original|hCoV-19^^New South Wales|Human|Douglass Hanly Moir Pathology|NSW Health Pathology - Institute of Clinical Pathology and Medical Research; Westmead Hospital; University of Sydney|Gall|Australia  
>Spike|hCoV-19/Netherlands/GE-EMC-182/2020|2020-05-25|EPI\_ISL\_523164|Original|hCoV-19^^Gelderland|Human|Dutch COVID-19 response team|Erasmus Medical Center|Oude Munnink|Netherlands  
>Spike|hCoV-19/England/EXET-13E660/2020|2020-00-00|EPI\_ISL\_724340|Original|hCoV-19^^England|Human|University of Exeter|COVID-19 Genomics UK (COG-UK) Consortium|Temperton|United Kingdom  
>Spike|hCoV-19/England/QEUA-996367/2020|2020-08-28|EPI\_ISL\_549526|Original|hCoV-19^^England|Human|Oxford Viromics|COVID-19 Genomics UK (COG-UK) Consortium|Golubchik|United Kingdom  
>Spike|hCoV-19/England/CAMC-B9AE24/2020|2020-11-12|EPI\_ISL\_673389|Original|hCoV-19^^England|Human|Lighthouse Lab in Cambridge|Wellcome Sanger Institute for the COVID-19 Genomics UK (COG-UK) Consortium|Davies|United Kingdom  
>Spike|hCoV-19/Canada/MB-NML-580/2020|2020-04-07|EPI\_ISL\_582271|Original|hCoV-19^^Manitoba|Human|Cadham Provincial Laboratory|National Microbiology Laboratory (NML)|Majer|Canada  
>Spike|hCoV-19/Hungary/US-2587w/2020|2020-03-22|EPI\_ISL\_477618|Original|hCoV-19^^Csongr\u00e9d County|Human|University of Szeged|National Laboratory of Virology|Kemenesi|Hungary  
>Spike|hCoV-19/Belgium/ULG-10173/2020|2020-05-08|EPI\_ISL\_455961|Original|hCoV-19^^Li\u00e8ge|Human|Department of Clinical Microbiology|GIGA Medical Genomics|Durkin|Belgium  
>Spike|hCoV-19/Northern Ireland/NIRE-10385F/2020|2020-04-15|EPI\_ISL\_489189|Original|hCoV-19^^Northern Ireland|Human|Regional Virus Laboratory|Wellcome Sanger Institute for the COVID-19 Genomics UK (COG-UK) consortium|Davies|United Kingdom  
>Spike|hCoV-19/England/OXON-B2164/2020|2020-04-23|EPI\_ISL\_479122|Original|hCoV-19^^England|Human|Oxford Viromics|COVID-19 Genomics UK (COG-UK) Consortium|Golubchik|United Kingdom  
>Spike|hCoV-19/Scotland/GCVR-171F1B/2020|2020-03-31|EPI\_ISL\_469939|Original|hCoV-19^^Scotland|Human|NHSGGC West of Scotland Specialist Virology Centre / MRC-University of Glasgow Centre for Virus Research|Wellcome Sanger Institute for the COVID-19 Genomics UK (COG-UK) consortium|Davies|United Kingdom  
>Spike|hCoV-19/England/MILK-ACCBBA/2020|2020-10-21|EPI\_ISL\_634288|Original|hCoV-19^^England|Human|Lighthouse Lab in Milton Keynes|Wellcome Sanger Institute for the COVID-19 Genomics UK (COG-UK) consortium|Davies|United Kingdom  
>Spike|hCoV-19/England/EXET-13937D/2020|2020-10-26|EPI\_ISL\_665065|Original|hCoV-19^^England|Human|University of Exeter|COVID-19 Genomics UK (COG-UK) Consortium|Temperton|United Kingdom  
>Spike|hCoV-19/England/GSTT-265DDC5/2020|2020-03-27|EPI\_ISL\_484106|Original|hCoV-19^^England|Human|Centre for Clinical Infection and Diagnostics Research and Genomics Innovation Unit|COVID-19 Genomics UK (COG-UK) Consortium|Awan|United Kingdom

>Spike|hCoV-19/England/CAMB-82F63/2020|2020-04-12|EPI\_ISL\_443367|Original|hCoV-19^^England|Human|Department of Pathology|Wellcome Sanger Institute for the COVID-19 Genomics UK (COG-UK) consortium|Amato|United Kingdom

>Spike|hCoV-19/England/20136097704/2020|2020-03-24|EPI\_ISL\_420655|Original|hCoV-19^^England|Human|Respiratory Virus Unit|Respiratory Virus Unit|Platt|United Kingdom

>Spike|hCoV-19/Denmark/DCGC-11789/2020|2020-10-26|EPI\_ISL\_670761|Original|hCoV-19^^Hovedstaden|Human|Department of Virus and Microbiological Special Diagnostics|Albertsen Lab|Michaelsen|Denmark

>Spike|hCoV-19/Denmark/DCGC-7359/2020|2020-10-12|EPI\_ISL\_619320|Original|hCoV-19^^Hovedstaden|Human|Department of Virus and Microbiological Special Diagnostics|Albertsen lab|Michaelsen|Denmark

>Spike|hCoV-19/England/EXET-13843F/2020|2020-09-12|EPI\_ISL\_611607|Original|hCoV-19^^England|Human|University of Exeter|COVID-19 Genomics UK (COG-UK) Consortium|Temperton|United Kingdom

>Spike|hCoV-19/Northern Ireland/NIRE-FA69E/2020|2020-03-31|EPI\_ISL\_441733|Original|hCoV-19^^Northern Ireland|Human|Regional Virus Laboratory|Wellcome Sanger Institute for the COVID-19 Genomics UK (COG-UK) consortium|Amato|United Kingdom

>Spike|hCoV-19/England/ALDP-9BDBDB/2020|2020-09-09|EPI\_ISL\_567931|Original|hCoV-19^^England|Human|Lighthouse Lab in Alderley Park|Wellcome Sanger Institute for the COVID-19 Genomics UK (COG-UK) consortium|Davies|United Kingdom

>Spike|hCoV-19/Denmark/DCGC-10325/2020|2020-11-02|EPI\_ISL\_669901|Original|hCoV-19^^Nordjylland|Human|Department of Virus and Microbiological Special Diagnostics|Albertsen Lab|Michaelsen|Denmark

>Spike|hCoV-19/Scotland/EDB3561/2020|2020-04-14|EPI\_ISL\_487901|Original|hCoV-19^^Scotland|Human|Virology Department|Wellcome Sanger Institute for the COVID-19 Genomics UK (COG-UK) consortium|Davies|United Kingdom

>Spike|hCoV-19/Denmark/DCGC-11467/2020|2020-11-02|EPI\_ISL\_670481|Original|hCoV-19^^Syddanmark|Human|Department of Virus and Microbiological Special Diagnostics|Albertsen Lab|Michaelsen|Denmark

>Spike|hCoV-19/Wales/PHWC-4928E9/2020|2020-11-24|EPI\_ISL\_725717|Original|hCoV-19^^Wales|Human|Originating lab|COVID-19 Genomics UK (COG-UK) Consortium|Moore|United Kingdom

>Spike|hCoV-19/England/MILK-A9177E/2020|2020-10-19|EPI\_ISL\_705982|Original|hCoV-19^^England|Human|Oxford Viromics|COVID-19 Genomics UK (COG-UK) Consortium|Golubchik|United Kingdom

>Spike|hCoV-19/Denmark/DCGC-3103/2020|2020-08-31|EPI\_ISL\_615919|Original|hCoV-19^^Hovedstaden|Human|Department of Virus and Microbiological Special Diagnostics|Albertsen lab|Michaelsen|Denmark

>Spike|hCoV-19/Gibraltar/203360729/2020|2020-07-21|EPI\_ISL\_547444|Original|hCoV-19^^Gibraltar|Human|Microbiology|Respiratory Virus Unit|Platt|Gibraltar

>Spike|hCoV-19/USA/UT-UPHL-2008794/2020|2020-05-23|EPI\_ISL\_524821|Original|hCoV-19^^Utah|Human|Utah Public Health Laboratory|Utah Public Health Laboratory|Young|USA

>Spike|hCoV-19/England/MILK-BAB260/2020|2020-11-18|EPI\_ISL\_681496|Original|hCoV-19^^England|Human|Lighthouse Lab in Milton Keynes|Wellcome Sanger Institute for the COVID-19 Genomics UK (COG-UK) Consortium|Davies|United Kingdom

>Spike|hCoV-19/USA/TX-HMH-MCoV-13571/2020|2020-08-21|EPI\_ISL\_788682|Original|hCoV-19^^Texas|Human|Houston Methodist Hospital|Houston Methodist Hospital|Long|USA

>Spike|hCoV-19/Spain/VC-IBV-98003069/2020|2020-03-13|EPI\_ISL\_538009|Original|hCoV-19^^Comunitat Valenciana|Human|Hospital Universitari i Polit\u00e8cnic La Fe de Val\u00e8ncia|SeqCOVID-SPAIN consortium|IBV (CSIC)|Comas|Spain

>Spike|hCoV-19/England/C200045650/2020|2020-11-09|EPI\_ISL\_664064|Original|hCoV-19^^England|Human|Respiratory Virus Unit|COVID-19 Genomics UK (COG-UK) Consortium|Platt|United Kingdom

>Spike|hCoV-19/Spain/CL-IBV-97006199/2020|2020-04-13|EPI\_ISL\_537345|Original|hCoV-19^^Castilla y Leon|Human|Universidad de Le\u00f3n|SeqCOVID-SPAIN consortium|IBV (CSIC)|Comas|Spain

>Spike|hCoV-19/USA/TX-HMH-MCoV-10284/2020|2020-07-07|EPI\_ISL\_789411|Original|hCoV-19^^Texas|Human|Houston Methodist Hospital|Houston Methodist Hospital|Long|USA



>Spike|hCoV-19/England/ALDP-9E774D/2020|2020-09-24|EPI\_ISL\_638029|Original|hCoV-19^^England|Human|Department of Pathology|COVID-19 Genomics UK (COG-UK) Consortium|Goodfellow|United Kingdom

>Spike|hCoV-19/England/MILK-A46426/2020|2020-10-05|EPI\_ISL\_598639|Original|hCoV-19^^England|Human|Lighthouse Lab in Milton Keynes|Wellcome Sanger Institute for the COVID-19 Genomics UK (COG-UK) consortium|Davies|United Kingdom

>Spike|hCoV-19/Japan/PG-1942/2020|2020-04-00|EPI\_ISL\_685548|Original|hCoV-19^^Japan|Human|Pathogen Genomics Center|Pathogen Genomics Center|Sekizuka|Japan

>Spike|hCoV-19/USA/UT-UPHL-03883/2020|2020-04-13|EPI\_ISL\_577600|Original|hCoV-19^^Utah|Human|Utah Public Health Laboratory|Utah Public Health Laboratory|Young|USA

>Spike|hCoV-19/England/NORW-E9DBB/2020|2020-05-02|EPI\_ISL\_448367|Original|hCoV-19^^England|Human|Quadram Institute Bioscience|COVID-19 Genomics UK (COG-UK) Consortium|Alikhan|United Kingdom

>Spike|hCoV-19/England/CAMC-B209D7/2020|2020-11-02|EPI\_ISL\_647784|Original|hCoV-19^^England|Human|Lighthouse Lab in Cambridge|Wellcome Sanger Institute for the COVID-19 Genomics UK (COG-UK) Consortium|Davies|United Kingdom

>Spike|hCoV-19/USA/MN-MDH-1608/2020|2020-04-29|EPI\_ISL\_530204|Original|hCoV-19^^Minnesota|Human|Minnesota Department of Health|Minnesota Department of Health|Garfin|USA

>Spike|hCoV-19/Japan/PG-6632/2020|2020-09-00|EPI\_ISL\_687744|Original|hCoV-19^^Japan|Human|Pathogen Genomics Center|Pathogen Genomics Center|Sekizuka|Japan

>Spike|hCoV-19/Australia/VIC2525/2020|2020-06-30|EPI\_ISL\_522219|Original|hCoV-19^^Victoria|Human|Microbiological Diagnostic Unit - Public Health Laboratory (MDU-PHL)|MDU-PHL|Schultz|Australia

>Spike|hCoV-19/Spain/VC-FISABIO-198/2020|2020-03-24|EPI\_ISL\_436293|Original|hCoV-19^^Comunitat Valenciana|Human|Servicio de Microbiologia. Hospital Clinico Universitario de Valencia|Sequencing and Bioinformatics Service and Molecular Epidemiology Research Group. FISABIO-Public Health|Gonzalez-Candelas|Spain

>Spike|hCoV-19/Denmark/DCGC-1025/2020|2020-04-20|EPI\_ISL\_614485|Original|hCoV-19^^Hovedstaden|Human|Department of Virus and Microbiological Special Diagnostics|Albertsen lab|Michaelsen|Denmark

>Spike|hCoV-19/England/CAMC-B78F56/2020|2020-11-12|EPI\_ISL\_667911|Original|hCoV-19^^England|Human|Lighthouse Lab in Cambridge|Wellcome Sanger Institute for the COVID-19 Genomics UK (COG-UK) Consortium|Davies|United Kingdom

>Spike|hCoV-19/England/LIVE-DBAD10/2020|2020-11-13|EPI\_ISL\_665117|Original|hCoV-19^^England|Human|Liverpool Clinical Laboratories|COVID-19 Genomics UK (COG-UK) Consortium|Haldenby|United Kingdom

>Spike|hCoV-19/USA/TX-HMH-8009/2020|2020-07-01|EPI\_ISL\_545787|Original|hCoV-19^^Texas|Human|Houston Methodist Hospital|Houston Methodist Hospital|Long|USA

>Spike|hCoV-19/England/OXON-AD4BE/2020|2020-00-00|EPI\_ISL\_448582|Original|hCoV-19^^England|Human|Oxford Viromics|COVID-19 Genomics UK (COG-UK) Consortium|Golubchik|United Kingdom

>Spike|hCoV-19/USA/CT-UW-4237/2020|2020-03-30|EPI\_ISL\_437825|Original|hCoV-19^^Connecticut|Human|UW Virology Lab|UW Virology Lab|Roychoudhury|USA

>Spike|hCoV-19/Denmark/DCGC-2277/2020|2020-08-10|EPI\_ISL\_617635|Original|hCoV-19^^Syddanmark|Human|Department of Virus and Microbiological Special Diagnostics|Albertsen lab|Michaelsen|Denmark

>Spike|hCoV-19/England/20188018504/2020|2020-04-30|EPI\_ISL\_465497|Original|hCoV-19^^England|Human|Respiratory Virus Unit|Respiratory Virus Unit|Platt|United Kingdom

>Spike|hCoV-19/England/NORT-294C1A/2020|2020-03-28|EPI\_ISL\_478609|Original|hCoV-19^^England|Human|Northumbria University / South Tees Hospitals NHS Foundation Trust / North Cumbria Integrated Care NHS Foundation Trust / North Tees and Hartlepool NHS Foundation Trust / Newcastle Hospitals NHS Foundation Trust|COVID-19 Genomics UK (COG-UK) Consortium|Bashton|United Kingdom

>Spike|hCoV-19/USA/NY-NYUMC460/2020|2020-04-20|EPI\_ISL\_435526|Original|hCoV-19^^New York|Human|NYU Langone Health|Departments of Pathology and Medicine|Maurano|USA

>Spike|hCoV-19/England/QEUEH-B2ECFE/2020|2020-11-03|EPI\_ISL\_646837|Original|hCoV-19^^England|Human|Lighthouse Lab in Glasgow|Wellcome Sanger Institute for the COVID-19 Genomics UK (COG-UK) Consortium|Davies|United Kingdom

>Spike|hCoV-19/Wales/PHWC-4895A2/2020|2020-10-26|EPI\_ISL\_639590|Original|hCoV-19^^Wales|Human|Wales Specialist Virology Centre Sequencing lab|COVID-19 Genomics UK (COG-UK) Consortium|Moore|United Kingdom

>Spike|hCoV-19/England/CAMB-1B0C0A/2020|2020-05-13|EPI\_ISL\_452952|Original|hCoV-19^^England|Human|Department of Pathology|COVID-19 Genomics UK (COG-UK) Consortium|Meredith|United Kingdom

>Spike|hCoV-19/Saudi Arabia/KAUST-Makkah159/2020|2020-04-06|EPI\_ISL\_437477|Original|hCoV-19^^Makkah|Human|Pathogen Genomics Lab King Abdullah University of Science and Technology(KAUST)|Pathogen Genomics Lab King Abdullah University of Science and Technology(KAUST)|Mohamed Ghazzali|Saudi Arabia

>Spike|hCoV-19/England/MILK-B8E00F/2020|2020-11-13|EPI\_ISL\_674602|Original|hCoV-19^^England|Human|Lighthouse Lab in Milton Keynes|Wellcome Sanger Institute for the COVID-19 Genomics UK (COG-UK) Consortium|Davies|United Kingdom

>Spike|hCoV-19/USA/WA-S1960/2020|2020-06-03|EPI\_ISL\_497388|Original|hCoV-19^^Washington|Human|Washington State Department of Health|Seattle Flu Study|Lee|USA

>Spike|hCoV-19/England/CAMB-1AE892/2020|2020-05-01|EPI\_ISL\_459297|Original|hCoV-19^^England|Human|Department of Pathology|Wellcome Sanger Institute for the COVID-19 Genomics UK (COG-UK) consortium|Davies|United Kingdom

>Spike|hCoV-19/USA/TX-HMH-3403/2020|2020-06-14|EPI\_ISL\_544163|Original|hCoV-19^^Texas|Human|Houston Methodist Hospital|Houston Methodist Hospital|Long|USA

>Spike|hCoV-19/England/LIVE-DB40E0/2020|2020-10-19|EPI\_ISL\_652080|Original|hCoV-19^^England|Human|Liverpool Clinical Laboratories|COVID-19 Genomics UK (COG-UK) Consortium|Haldenby|United Kingdom

>Spike|hCoV-19/Portugal/PT0670/2020|2020-03-19|EPI\_ISL\_510929|Original|hCoV-19^^Portugal|Human|Instituto Nacional de Saude (INSA)|Instituto Nacional de Saude (INSA)|Borges|Portugal

>Spike|hCoV-19/Wales/PHWC-1627E8/2020|2020-06-01|EPI\_ISL\_473123|Original|hCoV-19^^Wales|Human|Wales Specialist Virology Centre Sequencing lab|COVID-19 Genomics UK (COG-UK) Consortium|Moore|United Kingdom

>Spike|hCoV-19/England/SHEF-C02F7/2020|2020-03-29|EPI\_ISL\_420222|Original|hCoV-19^^England|Human|Virology Department|Department of Infection|de Silva|United Kingdom

>Spike|hCoV-19/Canada/QC\_AS8/2020|2020-04-04|EPI\_ISL\_463938|Original|hCoV-19^^Quebec|Human|Laboratoire de microbiologie|Smith Laboratory|Smith|Canada

>Spike|hCoV-19/England/ALDP-C3A380/2020|2020-12-09|EPI\_ISL\_731160|Original|hCoV-19^^England|Human|Lighthouse Lab in Alderley Park|Wellcome Sanger Institute for the COVID-19 Genomics UK (COG-UK) Consortium|Davies|United Kingdom

>Spike|hCoV-19/England/QEUEH-AD2638/2020|2020-10-25|EPI\_ISL\_629833|Original|hCoV-19^^England|Human|Lighthouse Lab in Glasgow|Wellcome Sanger Institute for the COVID-19 Genomics UK (COG-UK) consortium|Davies|United Kingdom

>Spike|hCoV-19/USA/TX-DSHS-0962/2020|2020-06-15|EPI\_ISL\_613996|Original|hCoV-19^^Texas|Human|Texas Department of State Health Services|Texas Department of State Health Services|Rahman|USA

>Spike|hCoV-19/Wales/PHWC-2F135/2020|2020-04-06|EPI\_ISL\_446205|Original|hCoV-19^^Wales|Human|Wales Specialist Virology Centre|Public Health Wales Microbiology Cardiff|Moore|United Kingdom

>Spike|hCoV-19/Scotland/EDB8326/2020|2020-09-30|EPI\_ISL\_612320|Original|hCoV-19^^Scotland|Human|Virology Department|COVID-19 Genomics UK (COG-UK) Consortium|McHugh|United Kingdom

>Spike|hCoV-19/Northern Ireland/QEUEH-96FDB4/2020|2020-08-18|EPI\_ISL\_540292|Original|hCoV-19^^Northern Ireland|Human|Lighthouse Lab in Glasgow|Wellcome Sanger Institute for the COVID-19 Genomics UK (COG-UK) consortium|Davies|United Kingdom

>Spike|hCoV-19/Netherlands/GE-EMC-239/2020|2020-00-00|EPI\_ISL\_523218|Original|hCoV-19^^Gelderland|Human|Dutch COVID-19 response team|Erasmus Medical Center|Oude Munnink|Netherlands

>Spike|hCoV-19/England/LIVE-AA6CA/2020|2020-03-24|EPI\_ISL\_517487|Original|hCoV-19^^England|Human|Liverpool Clinical Laboratories|COVID-19 Genomics UK (COG-UK) Consortium|Haldenby|United Kingdom

>Spike|hCoV-19/Scotland/GCVR-171A47/2020|2020-03-27|EPI\_ISL\_489543|Original|hCoV-19^^Scotland|Human|NHSGGC West of Scotland Specialist Virology Centre / MRC-

University of Glasgow Centre for Virus Research|Wellcome Sanger Institute for the COVID-19 Genomics UK (COG-UK) consortium|Davies|United Kingdom  
>Spike|hCoV-19/Australia/VIC5809/2020|2020-07-20|EPI\_ISL\_518604|Original|hCoV-19^^Victoria|Human|Microbiological Diagnostic Unit - Public Health Laboratory (MDU-PHL)|MDU-PHL|Schultz|Australia  
>Spike|hCoV-19/England/QEUH-AF5505/2020|2020-10-30|EPI\_ISL\_663104|Original|hCoV-19^^England|Human|Lighthouse Lab in Glasgow|Wellcome Sanger Institute for the COVID-19 Genomics UK (COG-UK) Consortium|Davies|United Kingdom  
>Spike|hCoV-19/Denmark/DCGC-1716/2020|2020-03-23|EPI\_ISL\_615637|Original|hCoV-19^^Sjaelland|Human|Department of Virus and Microbiological Special Diagnostics|Albertsen lab|Michaelsen|Denmark  
>Spike|hCoV-19/Spain/PV-IBV-004210/2020|2020-04-03|EPI\_ISL\_510495|Original|hCoV-19^^Basque Country|Human|Servicio de Microbiolog\u00eda. Hospital Universitario Donostia. OSI Donostialdea. \u00c1rea de Enfermedades Infecciosas|SeqCOVID-SPAIN consortium/IBV (CSIC)|Comas|Spain  
>Spike|hCoV-19/Netherlands/UT-EMC-212/2020|2020-12-01|EPI\_ISL\_722372|Original|hCoV-19^^Utrecht|Human|Dutch COVID-19 response team|Erasmus Medical Center|Oude Munnink|Netherlands  
>Spike|hCoV-19/Gibraltar/205121193/2020|2020-00-00|EPI\_ISL\_766323|Original|hCoV-19^^Gibraltar|Human|Microbiology|Respiratory Virus Unit|Platt|Gibraltar  
>Spike|hCoV-19/USA/WA-UW365/2020|2020-03-16|EPI\_ISL\_418932|Original|hCoV-19^^Washington|Human|UW Virology Lab|UW Virology Lab|Roychoudhury|USA  
>Spike|hCoV-19/USA/WI-UW-495/2020|2020-06-13|EPI\_ISL\_484870|Original|hCoV-19^^Wisconsin|Human|University of Wisconsin-Madison AIDS Vaccine Research Laboratories|University of Wisconsin-Madison AIDS Vaccine Research Laboratories|Baczenas|USA  
>Spike|hCoV-19/Netherlands/ZH-EMC-1004/2020|2020-11-19|EPI\_ISL\_722677|Original|hCoV-19^^Zuid Holland|Human|Dutch COVID-19 response team|Erasmus Medical Center|Oude Munnink|Netherlands  
>Spike|hCoV-19/Denmark/DCGC-16637/2020|2020-11-16|EPI\_ISL\_714104|Original|hCoV-19^^Hovedstaden|Human|Department of Virus and Microbiological Special Diagnostics|Albertsen Lab|Michaelsen|Denmark  
>Spike|hCoV-19/Australia/VIC3104/2020|2020-07-04|EPI\_ISL\_520811|Original|hCoV-19^^Victoria|Human|Victorian Infectious Diseases Reference Laboratory (VIDRL)|VIDRL and MDU-PHL|Schultz|Australia  
>Spike|hCoV-19/England/ALDP-B48678/2020|2020-11-07|EPI\_ISL\_649455|Original|hCoV-19^^England|Human|Lighthouse Lab in Alderley Park|Wellcome Sanger Institute for the COVID-19 Genomics UK (COG-UK) Consortium|Davies|United Kingdom  
>Spike|hCoV-19/Scotland/QEUH-A00B05/2020|2020-10-02|EPI\_ISL\_585549|Original|hCoV-19^^Scotland|Human|University of Exeter|COVID-19 Genomics UK (COG-UK) Consortium|Temperton|United Kingdom  
>Spike|hCoV-19/Denmark/ALAB-SSI-576/2020|2020-03-27|EPI\_ISL\_436977|Original|hCoV-19^^Denmark|Human|Department of Virus and Microbiological Special Diagnostics|Albertsen lab|Kirkegaard|Denmark  
>Spike|hCoV-19/India/OR-ILSCV29997/2020|2020-05-23|EPI\_ISL\_481137|Original|hCoV-19^^Odisha|Human|Immunogenomics lab|Immunogenomics lab|Raghav|India  
>Spike|hCoV-19/England/NORT-29B9B2/2020|2020-06-08|EPI\_ISL\_507120|Original|hCoV-19^^England|Human|Northumbria University / South Tees Hospitals NHS Foundation Trust / North Cumbria Integrated Care NHS Foundation Trust / North Tees and Hartlepool NHS Foundation Trust / Newcastle Hospitals NHS Foundation Trust|COVID-19 Genomics UK (COG-UK) Consortium|Bashton|United Kingdom  
>Spike|hCoV-19/England/LOND-124F370/2020|2020-04-25|EPI\_ISL\_664540|Original|hCoV-19^^England|Human|University College London Hospital|COVID-19 Genomics UK (COG-UK) Consortium|Byott|United Kingdom  
>Spike|hCoV-19/Japan/PG-7166/2020|2020-07-00|EPI\_ISL\_688271|Original|hCoV-19^^Japan|Human|Pathogen Genomics Center|Pathogen Genomics Center|Sekizuka|Japan  
>Spike|hCoV-19/Australia/WA398/2020|2020-10-18|EPI\_ISL\_605874|Original|hCoV-19^^Western Australia|Human|PathWest Laboratory Medicine WA|PathWest Laboratory Medicine WA Microbial Surveillance Unit|Sikazwe|Australia

>Spike|hCoV-19/Belgium/regA-0331866/2020|2020-03-31|EPI\_ISL\_734526|Original|hCoV-19^^Gembloux|Human|UZ Leuven|KU Leuven|Maes|Belgium

>Spike|hCoV-19/Wales/PHWC-168B6E/2020|2020-04-19|EPI\_ISL\_494336|Original|hCoV-19^^Wales|Human|Originating lab|COVID-19 Genomics UK (COG-UK) Consortium|Moore|United Kingdom

>Spike|hCoV-19/England/20122119302/2020|2020-03-17|EPI\_ISL\_418680|Original|hCoV-19^^England|Human|Respiratory Virus Unit|Respiratory Virus Unit|Platt|United Kingdom

>Spike|hCoV-19/Russia/KDA-RII-MH4901S/2020|2020-10-14|EPI\_ISL\_733282|Original|hCoV-19^^Krasnodar|Human|WHO National Influenza Centre Russian Federation|WHO National Influenza Centre Russian Federation|Komissarov|Russia

>Spike|hCoV-19/Slovenia/5166/2020|2020-03-09|EPI\_ISL\_635215|Original|hCoV-19^^Slovenia|Human|Institute of Microbiology and Immunology|Institute of Microbiology and Immunology|Zakotnik|Slovenia

>Spike|hCoV-19/Wales/PHWC-47E0DC/2020|2020-09-29|EPI\_ISL\_595405|Original|hCoV-19^^Wales|Human|Originating lab|COVID-19 Genomics UK (COG-UK) Consortium|Moore|United Kingdom

>Spike|hCoV-19/Denmark/DCGC-6656/2020|2020-10-12|EPI\_ISL\_619559|Original|hCoV-19^^Hovedstaden|Human|Department of Virus and Microbiological Special Diagnostics|Albertsen lab|Michaelsen|Denmark

>Spike|hCoV-19/Colombia/AMA-INS-103039-2/2020|2020-04-28|EPI\_ISL\_526951|Original|hCoV-19^^Amazonas|Human|Instituto Nacional de Salud|Instituto Nacional de Salud|Franco-Mu\u00f1oz|Colombia

>Spike|hCoV-19/Australia/VIC12917/2020|2020-07-30|EPI\_ISL\_640796|Original|hCoV-19^^Victoria|Human|Microbiological Diagnostic Unit - Public Health Laboratory (MDU-PHL)|MDU-PHL|Schultz|Australia

>Spike|hCoV-19/Finland/1LS13D7/2020|2020-10-01|EPI\_ISL\_757349|Original|hCoV-19^^Uusimaa|Human|Department of Virology and Immunology|Department of Virology|Smura|Finland

>Spike|hCoV-19/England/MILK-AC81DA/2020|2020-10-20|EPI\_ISL\_629532|Original|hCoV-19^^England|Human|Lighthouse Lab in Milton Keynes|Wellcome Sanger Institute for the COVID-19 Genomics UK (COG-UK) consortium|Davies|United Kingdom

>Spike|hCoV-19/USA/TX-DSHS-0015/2020|2020-05-08|EPI\_ISL\_515260|Original|hCoV-19^^Texas|Human|Texas Department of State Health Services|Texas Department of State Health Services|Rahman|USA

>Spike|hCoV-19/USA/MI-UM-10036562497/2020|2020-10-21|EPI\_ISL\_640173|Original|hCoV-19^^Michigan|Human|University of Michigan Clinical Microbiology Laboratory|Lauring Lab|Valesano|USA

>Spike|hCoV-19/USA/UT-UPHL-201010022/2020|2020-06-19|EPI\_ISL\_602935|Original|hCoV-19^^Utah|Human|Utah Public Health Laboratory|Utah Public Health Laboratory|Young|USA

>Spike|hCoV-19/Portugal/PT0300/2020|2020-03-13|EPI\_ISL\_454016|Original|hCoV-19^^Portugal|Human|unknown|Instituto Nacional de Saude (INSA)|Borges|Portugal

>Spike|hCoV-19/England/QEUA-B684D2/2020|2020-11-11|EPI\_ISL\_654979|Original|hCoV-19^^England|Human|Lighthouse Lab in Glasgow|Wellcome Sanger Institute for the COVID-19 Genomics UK (COG-UK) Consortium|Davies|United Kingdom

>Spike|hCoV-19/England/20126027106/2020|2020-03-18|EPI\_ISL\_423896|Original|hCoV-19^^England|Human|Respiratory Virus Unit|Respiratory Virus Unit|Platt|United Kingdom

>Spike|hCoV-19/England/MILK-A8F03C/2020|2020-10-16|EPI\_ISL\_650587|Original|hCoV-19^^England|Human|Northumbria University / South Tees Hospitals NHS Foundation Trust / North Cumbria Integrated Care NHS Foundation Trust / North Tees and Hartlepool NHS Foundation Trust / Newcastle Hospitals NHS Foundation Trust|COVID-19 Genomics UK (COG-UK) Consortium|Bashton|United Kingdom

>Spike|hCoV-19/Denmark/DCGC-13031/2020|2020-11-30|EPI\_ISL\_712541|Original|hCoV-19^^Syddanmark|Human|Department of Virus and Microbiological Special Diagnostics|Albertsen Lab|Michaelsen|Denmark

>Spike|hCoV-19/England/ALDP-A50FDD/2020|2020-10-07|EPI\_ISL\_597609|Original|hCoV-19^^England|Human|Lighthouse Lab in Alderley Park|Wellcome Sanger Institute for the COVID-19 Genomics UK (COG-UK) consortium|Davies|United Kingdom

>Spike|hCoV-19/Netherlands/ZH-EMC-893/2020|2020-10-29|EPI\_ISL\_632354|Original|hCoV-19^^Zuid Holland|Human|Dutch COVID-19 response team|Erasmus Medical Center|Oude Munnink|Netherlands

>Spike|hCoV-19/Japan/PG-1995/2020|2020-04-00|EPI\_ISL\_685600|Original|hCoV-19^^Japan|Human|Pathogen Genomics Center|Pathogen Genomics Center|Sekizuka|Japan

>Spike|hCoV-19/Denmark/DCGC-20190/2020|2020-11-30|EPI\_ISL\_747646|Original|hCoV-19^^Hovedstaden|Human|Department of Virus and Microbiological Special Diagnostics|Albertsen Lab|Michaelsen|Denmark

>Spike|hCoV-19/Denmark/DCGC-17204/2020|2020-12-14|EPI\_ISL\_750516|Original|hCoV-19^^Sjaelland|Human|Department of Virus and Microbiological Special Diagnostics|Albertsen Lab|Michaelsen|Denmark

>Spike|hCoV-19/Ecuador/USFQ-203/2020|2020-08-20|EPI\_ISL\_527816|Original|hCoV-19^^Esmeraldas|Human|Institute of Microbiology|Institute of Microbiology|Cardenas|Ecuador

>Spike|hCoV-19/England/ALDP-950BAD/2020|2020-06-14|EPI\_ISL\_554582|Original|hCoV-19^^England|Human|Lighthouse Lab in Alderley Park|Wellcome Sanger Institute for the COVID-19 Genomics UK (COG-UK) consortium|Davies|United Kingdom

>Spike|hCoV-19/Russia/DA-RII-MH2743S/2020|2020-09-25|EPI\_ISL\_602421|Original|hCoV-19^^Dagestan|Human|HELIX LLC|WHO National Influenza Centre Russian Federation|Komissarov|Russia

>Spike|hCoV-19/Denmark/DCGC-5037/2020|2020-09-21|EPI\_ISL\_621804|Original|hCoV-19^^Hovedstaden|Human|Department of Virus and Microbiological Special Diagnostics|Albertsen lab|Michaelsen|Denmark

>Spike|hCoV-19/Portugal/IGC4489/2020|2020-06-08|EPI\_ISL\_491260|Original|hCoV-19^^Portugal|Human|Instituto Gulbenkian de Ci\u00eancia|Instituto Gulbenkian de Ci\u00eancia|Leite|Portugal

>Spike|hCoV-19/Chile/RM-CMM-05426/2020|2020-04-30|EPI\_ISL\_468750|Original|hCoV-19^^Region Metropolitana de Santiago|Human|Facultad de Medicina UC|Center for Mathematical Modeling and Center for Genome Regulation. Santiago|Palma V\u00e9jares|Chile

>Spike|hCoV-19/Australia/VIC2658/2020|2020-06-30|EPI\_ISL\_521504|Original|hCoV-19^^Victoria|Human|Victorian Infectious Diseases Reference Laboratory (VIDRL)|VIDRL and MDU-PHL|Schultz|Australia

>Spike|hCoV-19/South Africa/NHLS-UCT-GS-3513/2020|2020-10-07|EPI\_ISL\_640088|Original|hCoV-19^^Western Cape|Human|False Bay Hospital w FBH|NHLS/UCT|Iranzadeh|South Africa

>Spike|hCoV-19/England/CAMC-B215C3/2020|2020-11-03|EPI\_ISL\_647229|Original|hCoV-19^^England|Human|Lighthouse Lab in Cambridge|Wellcome Sanger Institute for the COVID-19 Genomics UK (COG-UK) Consortium|Davies|United Kingdom

>Spike|hCoV-19/England/MILK-A461E3/2020|2020-10-06|EPI\_ISL\_598691|Original|hCoV-19^^England|Human|Lighthouse Lab in Milton Keynes|Wellcome Sanger Institute for the COVID-19 Genomics UK (COG-UK) consortium|Davies|United Kingdom

>Spike|hCoV-19/USA/TX-HMH-5465/2020|2020-06-26|EPI\_ISL\_544793|Original|hCoV-19^^Texas|Human|Houston Methodist Hospital|Houston Methodist Hospital|Long|USA

>Spike|hCoV-19/France/PAC-SC246/2020|2020-04-24|EPI\_ISL\_641531|Original|hCoV-19^^Provence-Alpes-Cote-d\u2019Azur|Human|CHU de Nice - H\u00f4pital Archet 13|CNR Virus des Infections Respiratoires - France SUD|Bal|France

>Spike|hCoV-19/USA/UT-UPHL-2009349/2020|2020-06-22|EPI\_ISL\_524946|Original|hCoV-19^^Utah|Human|Utah Public Health Laboratory|Utah Public Health Laboratory|Young|USA

>Spike|hCoV-19/Panama/329108/2020|2020-03-10|EPI\_ISL\_496624|Original|hCoV-19^^Panama Center|Human|Gorgas Memorial Laboratory of Health Studies|Gorgas Memorial Laboratory of Health Studies|Martinez|Panama

>Spike|hCoV-19/Malaysia/189332/2020|2020-03-20|EPI\_ISL\_417917|Original|hCoV-19^^Kuala Lumpur|Human|Department of Medical Microbiology|Department of Medical Microbiology|Chan|Malaysia

>Spike|hCoV-19/USA/WI-UW-847/2020|2020-07-08|EPI\_ISL\_509853|Original|hCoV-19^^Wisconsin|Human|University of Wisconsin-Madison AIDS Vaccine Research Laboratories|University of Wisconsin-Madison AIDS Vaccine Research Laboratories|Baczenas|USA

>Spike|hCoV-19/England/EXET-13A9C5/2020|2020-11-08|EPI\_ISL\_664406|Original|hCoV-19^^England|Human|University of Exeter|COVID-19 Genomics UK (COG-UK) Consortium|Temperton|United Kingdom

>Spike|hCoV-19/England/QEUA-9FB184/2020|2020-09-29|EPI\_ISL\_588265|Original|hCoV-19^^England|Human|Lighthouse Lab in Glasgow|Wellcome Sanger Institute for the COVID-19 Genomics UK (COG-UK) consortium|Davies|United Kingdom

>Spike|hCoV-19/Spain/MD-IBV-99008680/2020|2020-10-05|EPI\_ISL\_654235|Original|hCoV-19^^Madrid|Human|Hospital General Universitario Gregorio Mara\u00f1a|SeqCOVID-SPAIN consortium/IBV (CSIC)|Comas|Spain

>Spike|hCoV-19/England/MILK-9AB50F/2020|2020-08-31|EPI\_ISL\_551097|Original|hCoV-19^^England|Human|Lighthouse Lab in Milton Keynes|Wellcome Sanger Institute for the COVID-19 Genomics UK (COG-UK) consortium|Davies|United Kingdom

>Spike|hCoV-19/England/SHEF-C9A50/2020|2020-03-22|EPI\_ISL\_432472|Original|hCoV-19^^England|Human|Virology Department|COVID-19 Genomics UK (COG-UK) Consortium|de Silva|United Kingdom

>Spike|hCoV-19/USA/TX-HMH-MCoV-15203/2020|2020-10-20|EPI\_ISL\_786687|Original|hCoV-19^^Texas|Human|Houston Methodist Hospital|Houston Methodist Hospital|Long|USA

>Spike|hCoV-19/England/QEUA-BA3189/2020|2020-11-18|EPI\_ISL\_672858|Original|hCoV-19^^England|Human|Lighthouse Lab in Glasgow|Wellcome Sanger Institute for the COVID-19 Genomics UK (COG-UK) Consortium|Davies|United Kingdom

>Spike|hCoV-19/Denmark/DCGC-4183/2020|2020-09-14|EPI\_ISL\_622003|Original|hCoV-19^^Syddanmark|Human|Department of Virus and Microbiological Special Diagnostics|Albertsen lab|Michaelsen|Denmark

>Spike|hCoV-19/South Korea/KCDC2784/2020|2020-07-24|EPI\_ISL\_526718|Original|hCoV-19^^South Korea|Human|Division of Viral Diseases|Division of Viral Diseases|Kim|South Korea

>Spike|hCoV-19/USA/MA-MASPHL-00797/2020|2020-10-04|EPI\_ISL\_692902|Original|hCoV-19^^Massachusetts|Human|Massachusetts State Public Health Laboratory|Massachusetts State Public Health Laboratory|Lang|USA

>Spike|hCoV-19/USA/ID-UW-6446/2020|2020-04-02|EPI\_ISL\_437830|Original|hCoV-19^^Idaho|Human|UW Virology Lab|UW Virology Lab|Roychoudhury|USA

>Spike|hCoV-19/England/MILK-BDB65C/2020|2020-11-26|EPI\_ISL\_709764|Original|hCoV-19^^England|Human|Lighthouse Lab in Milton Keynes|Wellcome Sanger Institute for the COVID-19 Genomics UK (COG-UK) Consortium|Davies|United Kingdom

>Spike|hCoV-19/England/OXON-B1790/2020|2020-04-17|EPI\_ISL\_479045|Original|hCoV-19^^England|Human|Oxford Viromics|COVID-19 Genomics UK (COG-UK) Consortium|Golubchik|United Kingdom

>Spike|hCoV-19/England/ALDP-BB39BB/2020|2020-11-19|EPI\_ISL\_702745|Original|hCoV-19^^England|Human|Lighthouse Lab in Alderley Park|Wellcome Sanger Institute for the COVID-19 Genomics UK (COG-UK) Consortium|Davies|United Kingdom

>Spike|hCoV-19/England/CAMC-B786BB/2020|2020-11-12|EPI\_ISL\_783499|Original|hCoV-19^^England|Human|Lighthouse Lab in Cambridge|Wellcome Sanger Institute for the COVID-19 Genomics UK (COG-UK) Consortium|Davies|United Kingdom

>Spike|hCoV-19/Wales/PHWC-49991C/2020|2020-12-04|EPI\_ISL\_727377|Original|hCoV-19^^Wales|Human|Originating lab|COVID-19 Genomics UK (COG-UK) Consortium|Moore|United Kingdom

>Spike|hCoV-19/USA/NY-Wadsworth-292258-01/2020|2020-12-01|EPI\_ISL\_767632|Original|hCoV-19^^New York|Human|MEMORIAL SLOAN KETTERING CANCER CENTER|Wadsworth Center|Lasek-Nesselquist|USA

>Spike|hCoV-19/Switzerland/AG-ETHZ-280072/2020|2020-09-07|EPI\_ISL\_560416|Original|hCoV-19^^Aargau|Human|Viollier AG|Department of Biosystems Science and Engineering|Nadeau|Switzerland

>Spike|hCoV-19/England/PORT-2E9083/2020|2020-00-00|EPI\_ISL\_763623|Original|hCoV-19^^England|Human|Centre for Enzyme Innovation|COVID-19 Genomics UK (COG-UK) Consortium|Robson|United Kingdom

>Spike|hCoV-19/England/ALDP-B1CF18/2020|2020-11-01|EPI\_ISL\_645821|Original|hCoV-19^^England|Human|Lighthouse Lab in Alderley Park|Wellcome Sanger Institute for the COVID-19 Genomics UK (COG-UK) Consortium|Davies|United Kingdom

>Spike|hCoV-19/USA/TX-HMH-MCoV-14582/2020|2020-10-09|EPI\_ISL\_787867|Original|hCoV-19^^Texas|Human|Houston Methodist Hospital|Houston Methodist Hospital|Long|USA

>Spike|hCoV-19/USA/IL-NM-0533/2020|2020-04-28|EPI\_ISL\_626444|Original|hCoV-19^^Illinois|Human|Northwestern Memorial Hospital|Ozer Lab|Ozer|USA

>Spike|hCoV-19/Denmark/DCGC-20457/2020|2020-12-21|EPI\_ISL\_759163|Original|hCoV-19^^Nordjylland|Human|Department of Virus and Microbiological Special Diagnostics|Albertsen Lab|Michaelsen|Denmark

>Spike|hCoV-19/England/ALDP-A85977/2020|2020-10-18|EPI\_ISL\_610337|Original|hCoV-19^^England|Human|Lighthouse Lab in Alderley Park|Wellcome Sanger Institute for the COVID-19 Genomics UK (COG-UK) consortium|Davies|United Kingdom

>Spike|hCoV-19/England/MILK-B55423/2020|2020-11-05|EPI\_ISL\_657733|Original|hCoV-19^^England|Human|Lighthouse Lab in Milton Keynes|Wellcome Sanger Institute for the COVID-19 Genomics UK (COG-UK) Consortium|Davies|United Kingdom

>Spike|hCoV-19/USA/WI-GMF-30619/2020|2020-11-01|EPI\_ISL\_661040|Original|hCoV-19^^Wisconsin|Human|Gundersen Molecular Diagnostics Laboratory|Kabara Cancer Research Institute|Kenny|USA

>Spike|hCoV-19/Denmark/DCGC-17980/2020|2020-12-14|EPI\_ISL\_749677|Original|hCoV-19^^Syddanmark|Human|Department of Virus and Microbiological Special Diagnostics|Albertsen Lab|Michaelsen|Denmark

>Spike|hCoV-19/France/ARA-15126/2020|2020-03-27|EPI\_ISL\_508901|Original|hCoV-19^^Auvergne-Rh\u00f4ne-Alpes|Human|Institut des Agents Infectieux (IAI)|CNR Virus des Infections Respiratoires - France SUD|Josset|France

>Spike|hCoV-19/Canada/NS-NML-949/2020|2020-03-26|EPI\_ISL\_579579|Original|hCoV-19^^Nova Scotia|Human|QEII Health Sciences Centre|National Microbiology Laboratory (NML)|Majer|Canada

>Spike|hCoV-19/Israel/2113601/2020|2020-04-15|EPI\_ISL\_447342|Original|hCoV-19^^Jerusalem District|Human|Clinical Virology Unit|Stern Lab|Miller|Israel

>Spike|hCoV-19/England/BHRT-24B34F7/2020|2020-05-07|EPI\_ISL\_528794|Original|hCoV-19^^England|Human|Microbiology Department|Wellcome Sanger Institute for the COVID-19 Genomics UK (COG-UK) consortium|Davies|United Kingdom

>Spike|hCoV-19/Sweden/20-13126/2020|2020-12-29|EPI\_ISL\_775572|Original|hCoV-19^^Ostergotland|Human|Klinisk mikrobiologi|The Public Health Agency of Sweden|Svartstr\u00f6m|Sweden

>Spike|hCoV-19/England/BRIS-126DEE/2020|2020-04-09|EPI\_ISL\_458967|Original|hCoV-19^^England|Human|PHE South West Regional Laboratory|Wellcome Sanger Institute for the COVID-19 Genomics UK (COG-UK) consortium|Davies|United Kingdom

>Spike|hCoV-19/Denmark/DCGC-7319/2020|2020-10-12|EPI\_ISL\_619314|Original|hCoV-19^^Hovedstaden|Human|Department of Virus and Microbiological Special Diagnostics|Albertsen lab|Michaelsen|Denmark

>Spike|hCoV-19/Mexico/QUE-INDRE-04/2020|2020-03-10|EPI\_ISL\_424670|Original|hCoV-19^^Queretaro|Human|Laboratorio Estatal de Salud Publica del Estado de Queretaro|Instituto de Diagn\u00f3stico y Referencia Epidemiologicos|Mendieta|Mexico

>Spike|hCoV-19/USA/TX-HMH-MCoV-12722/2020|2020-08-29|EPI\_ISL\_790485|Original|hCoV-19^^Texas|Human|Houston Methodist Hospital|Houston Methodist Hospital|Long|USA

>Spike|hCoV-19/Gambia/GC19-2501/2020|2020-07-21|EPI\_ISL\_561112|Original|hCoV-19^^Kombo|Human|MRCG at LSHTM Genomics lab|MRCG at LSHTM Genomics lab|Sesay|Gambia

>Spike|hCoV-19/England/QEUEH-9B46B5/2020|2020-09-04|EPI\_ISL\_590400|Original|hCoV-19^^England|Human|Lighthouse Lab in Glasgow|Wellcome Sanger Institute for the COVID-19 Genomics UK (COG-UK) consortium|Davies|United Kingdom

>Spike|hCoV-19/Spain/AN-IBV-001928/2020|2020-03-11|EPI\_ISL\_452446|Original|hCoV-19^^Andalucia|Human|Servicio de Microbiolog\u00eda. HRU de M\u00e9llaga. Servicio Andaluz de Salud|SeqCOVID-SPAIN consortium|IBV(CSIC)|Comas|Spain

>Spike|hCoV-19/USA/CA-CZB-14593/2020|2020-10-15|EPI\_ISL\_739004|Original|hCoV-19^^California|Human|UCSF Clinical Microbiology Laboratory|Chan-Zuckerberg Biohub|Kamm|USA

>Spike|hCoV-19/England/QEUEH-9D0A02/2020|2020-09-16|EPI\_ISL\_589980|Original|hCoV-19^^England|Human|Lighthouse Lab in Glasgow|Wellcome Sanger Institute for the COVID-19 Genomics UK (COG-UK) consortium|Davies|United Kingdom

>Spike|hCoV-19/USA/NM-DOH-2020616323/2020|2020-12-12|EPI\_ISL\_751816|Original|hCoV-19^^New Mexico|Human|New Mexico Department of Health Scientific Laboratory|New Mexico Department of Health Scientific Laboratory|Malone|USA

>Spike|hCoV-19/Gibraltar/205000650/2020|2020-12-00|EPI\_ISL\_709985|Original|hCoV-19^^Gibraltar|Human|Microbiology|Respiratory Virus Unit|Platt|Gibraltar

>Spike|hCoV-19/Canada/BC\_27304064/2020|2020-03-00|EPI\_ISL\_463274|Original|hCoV-19^^British Columbia|Human|BCCDC Public Health Laboratory|BCCDC Public Health Laboratory|Harrigan|Canada

>Spike|hCoV-19/Wales/PHWC-25F62/2020|2020-03-25|EPI\_ISL\_422168|Original|hCoV-19^^Wales|Human|Wales Specialist Virology Centre|Public Health Wales Microbiology Cardiff|Moore|United Kingdom

>Spike|hCoV-19/USA/UT-UPHL-03938/2020|2020-04-03|EPI\_ISL\_560844|Original|hCoV-19^^Utah|Human|Utah Public Health Laboratory|Utah Public Health Laboratory|Young|USA

>Spike|hCoV-19/Wales/QEUEH-8ADF3D/2020|2020-07-23|EPI\_ISL\_532819|Original|hCoV-19^^Wales|Human|Lighthouse Lab in Glasgow|Wellcome Sanger Institute for the COVID-19 Genomics UK (COG-UK) consortium|Davies|United Kingdom

>Spike|hCoV-19/England/QEUEH-96AC16/2020|2020-08-17|EPI\_ISL\_531343|Original|hCoV-19^^England|Human|Lighthouse Lab in Glasgow|Wellcome Sanger Institute for the COVID-19 Genomics UK (COG-UK) consortium|Davies|United Kingdom

>Spike|hCoV-19/Belgium/ULG-7134/2020|2020-03-16|EPI\_ISL\_418628|Original|hCoV-19^^Li\u00e8ge|Human|Department of Clinical Microbiology|GIGA Medical Genomics|Durkin|Belgium

>Spike|hCoV-19/England/QEUEH-B40106/2020|2020-11-08|EPI\_ISL\_657154|Original|hCoV-19^^England|Human|Lighthouse Lab in Glasgow|Wellcome Sanger Institute for the COVID-19 Genomics UK (COG-UK) Consortium|Davies|United Kingdom

>Spike|hCoV-19/USA/PA-MGEL75/2020|2020-03-23|EPI\_ISL\_454361|Original|hCoV-19^^Pennsylvania|Human|UPMC Clinical Microbiology Laboratory|Microbial Genome Sequencing Center|Mustapha|USA

>Spike|hCoV-19/Australia/VIC6290/2020|2020-07-21|EPI\_ISL\_518278|Original|hCoV-19^^Victoria|Human|Microbiological Diagnostic Unit - Public Health Laboratory (MDU-PHL)|MDU-PHL|Schultz|Australia

>Spike|hCoV-19/England/ALDP-6BAC0B/2020|2020-06-29|EPI\_ISL\_557951|Original|hCoV-19^^England|Human|Lighthouse Lab in Alderley Park|Wellcome Sanger Institute for the COVID-19 Genomics UK (COG-UK) consortium|Davies|United Kingdom

>Spike|hCoV-19/Portugal/PT1682/2020|2020-11-09|EPI\_ISL\_732149|Original|hCoV-19^^Portugal|Human|Instituto Nacional de Saude (INSA) and Instituto Gulbenkian de Ciencia (IGC)|Instituto Nacional de Saude (INSA) and Instituto Gulbenkian de Ciencia (IGC)|Borges|Portugal

>Spike|hCoV-19/England/SHEF-10C9E42/2020|2020-12-23|EPI\_ISL\_764105|Original|hCoV-19^^England|Human|Virology Department|COVID-19 Genomics UK (COG-UK) Consortium|de Silva|United Kingdom

>Spike|hCoV-19/Sweden/20-51773/2020|2020-05-27|EPI\_ISL\_510850|Original|hCoV-19^^Vastra Gotaland|Human|Skovde/Unilabs|The Public Health Agency of Sweden|Svartstr\u00f6m|Sweden

>Spike|hCoV-19/Wales/PHWC-49A1F5/2020|2020-12-01|EPI\_ISL\_727510|Original|hCoV-19^^Wales|Human|Originating lab|COVID-19 Genomics UK (COG-UK) Consortium|Moore|United Kingdom

>Spike|hCoV-19/England/MILK-975805/2020|2020-08-20|EPI\_ISL\_581397|Original|hCoV-19^^England|Human|Lighthouse Lab in Milton Keynes|Wellcome Sanger Institute for the COVID-19 Genomics UK (COG-UK) consortium|Davies|United Kingdom

>Spike|hCoV-19/Denmark/DCGC-4901/2020|2020-09-21|EPI\_ISL\_621587|Original|hCoV-19^^Sjaelland|Human|Department of Virus and Microbiological Special Diagnostics|Albertsen lab|Michaelsen|Denmark

>Spike|hCoV-19/United Arab Emirates/L920663561/2020|2020-04-14|EPI\_ISL\_520734|Original|hCoV-19^^United Arab Emirates|Human|Mohammed Bin Rashid University of Medicine and Health Sciences|Al Jalila Genomics Center|Ramaswamy|United Arab Emirates

>Spike|hCoV-19/Wales/MILK-9C3808/2020|2020-09-10|EPI\_ISL\_566689|Original|hCoV-19^^Wales|Human|Lighthouse Lab in Milton Keynes|Wellcome Sanger Institute for the COVID-19 Genomics UK (COG-UK) consortium|Davies|United Kingdom

>Spike|hCoV-19/England/LIVE-9D660/2020|2020-04-10|EPI\_ISL\_453220|Original|hCoV-19^^England|Human|Liverpool Clinical Laboratories|COVID-19 Genomics UK (COG-UK) Consortium|Haldenby|United Kingdom



>Spike|hCoV-19/France/IDF-2412/2020|2020-03-12|EPI\_ISL\_421502|Original|hCoV-19^^\u00cele-de-France|Human|Parc des Dames|National Reference Center for Viruses of Respiratory Infections|Enouf|France

>Spike|hCoV-19/New Zealand/20CV0155/2020|2020-08-25|EPI\_ISL\_548029|Original|hCoV-19^^Auckland|Human|North Shore Hospital|Institute of Environmental Science and Research (ESR)|Wang|New Zealand

>Spike|hCoV-19/England/EXET-1366D1/2020|2020-05-09|EPI\_ISL\_457231|Original|hCoV-19^^England|Human|University of Exeter|COVID-19 Genomics UK (COG-UK) Consortium|Temperton|United Kingdom

>Spike|hCoV-19/Denmark/DCGC-5973/2020|2020-09-28|EPI\_ISL\_621082|Original|hCoV-19^^Midtjylland|Human|Department of Virus and Microbiological Special Diagnostics|Albertsen lab|Michaelsen|Denmark

>Spike|hCoV-19/England/QEUEH-9983ED/2020|2020-08-24|EPI\_ISL\_539954|Original|hCoV-19^^England|Human|Lighthouse Lab in Glasgow|Wellcome Sanger Institute for the COVID-19 Genomics UK (COG-UK) consortium|Davies|United Kingdom

>Spike|hCoV-19/Wales/PHWC-489A3A/2020|2020-10-27|EPI\_ISL\_652441|Original|hCoV-19^^Wales|Human|Wales Specialist Virology Centre Sequencing lab|COVID-19 Genomics UK (COG-UK) Consortium|Moore|United Kingdom

>Spike|hCoV-19/USA/MD-HP00078/2020|2020-03-23|EPI\_ISL\_438235|Original|hCoV-19^^Maryland|Human|Johns Hopkins Hospital Department of Pathology|Johns Hopkins Hospital Department of Pathology|Mehoke|USA

>Spike|hCoV-19/England/EXET-13572A/2020|2020-04-07|EPI\_ISL\_478275|Original|hCoV-19^^England|Human|University of Exeter|COVID-19 Genomics UK (COG-UK) Consortium|Temperton|United Kingdom

>Spike|hCoV-19/USA/CA-CHLA-PLM56652692/2020|2020-12-17|EPI\_ISL\_753677|Original|hCoV-19^^California|Human|Clinical virology Laboratory|Center for Personalized Medicine|Dien Bard|USA

>Spike|hCoV-19/USA/TX-HMH-MCoV-11759/2020|2020-09-14|EPI\_ISL\_790102|Original|hCoV-19^^Texas|Human|Houston Methodist Hospital|Houston Methodist Hospital|Long|USA

>Spike|hCoV-19/USA/LA-GBCL-26674723/2020|2020-04-04|EPI\_ISL\_485251|Original|hCoV-19^^Louisiana|Human|River Road Testing Lab|Ginkgo Bioworks Clinical Laboratory|Smith|USA

>Spike|hCoV-19/Spain/MD-IBV-006368/2020|2020-06-01|EPI\_ISL\_510107|Original|hCoV-19^^Madrid|Human|Hospital General Universitario Gregorio Mara\u00f1\u00f3n|SeqCOVID-SPAIN consortium/IBV (CSIC)|Comas|Spain

>Spike|hCoV-19/England/QEUEH-C4BE7C/2020|2020-12-14|EPI\_ISL\_736700|Original|hCoV-19^^England|Human|Lighthouse Lab in Glasgow|Wellcome Sanger Institute for the COVID-19 Genomics UK (COG-UK) Consortium|Davies|United Kingdom

>Spike|hCoV-19/USA/AZ-TG274788/2020|2020-04-08|EPI\_ISL\_694079|Original|hCoV-19^^Arizona|Human|AZ SPHL|TGen North|French|USA

>Spike|hCoV-19/England/ALDP-BC78C6/2020|2020-11-22|EPI\_ISL\_721450|Original|hCoV-19^^England|Human|Lighthouse Lab in Alderley Park|Wellcome Sanger Institute for the COVID-19 Genomics UK (COG-UK) Consortium|Davies|United Kingdom

>Spike|hCoV-19/England/QEUEH-BC479F/2020|2020-11-25|EPI\_ISL\_703426|Original|hCoV-19^^England|Human|Lighthouse Lab in Glasgow|Wellcome Sanger Institute for the COVID-19 Genomics UK (COG-UK) Consortium|Davies|United Kingdom

>Spike|hCoV-19/USA/WA-UW-23313/2020|2020-08-07|EPI\_ISL\_576425|Original|hCoV-19^^Washington|Human|UW Virology Lab|UW Virology Lab|Roychoudhury|USA

>Spike|hCoV-19/Australia/SAP052/2020|2020-03-26|EPI\_ISL\_451091|Original|hCoV-19^^South Australia|Human|SA Pathology|SA Pathology|Leong|Australia

>Spike|hCoV-19/Romania/ROSV\_13109/2020|2020-06-15|EPI\_ISL\_491051|Original|hCoV-19^^Suceava|Human|Suceava County Emergency Hospital|\Stefan cel Mare\ University Metagenomics Lab|Lobiuc|Romania

>Spike|hCoV-19/Scotland/CVR4126/2020|2020-09-08|EPI\_ISL\_573768|Original|hCoV-19^^Scotland|Human|West of Scotland Specialist Virology Centre|COVID-19 Genomics UK (COG-UK) Consortium|Robertson|United Kingdom

>Spike|hCoV-19/USA/TX-HMH-MCoV-14573/2020|2020-10-08|EPI\_ISL\_787858|Original|hCoV-19^^Texas|Human|Houston Methodist Hospital|Houston Methodist Hospital|Long|USA

>Spike|hCoV-19/England/204500127/2020|2020-11-01|EPI\_ISL\_660775|Original|hCoV-19^^England|Human|Respiratory Virus Unit|COVID-19 Genomics UK (COG-UK) Consortium|Platt|United Kingdom

>Spike|hCoV-19/England/CAMC-A81B48/2020|2020-10-13|EPI\_ISL\_610851|Original|hCoV-19^^England|Human|Lighthouse Lab in Cambridge|Wellcome Sanger Institute for the COVID-19 Genomics UK (COG-UK) consortium|Davies|United Kingdom

>Spike|hCoV-19/Wales/PHWC-49E1C4/2020|2020-12-07|EPI\_ISL\_742966|Original|hCoV-19^^Wales|Human|Wales Specialist Virology Centre Sequencing lab|COVID-19 Genomics UK (COG-UK) Consortium|Moore|United Kingdom

>Spike|hCoV-19/Australia/VIC10045/2020|2020-08-23|EPI\_ISL\_562776|Original|hCoV-19^^Victoria|Human|Microbiological Diagnostic Unit - Public Health Laboratory (MDU-PHL)|MDU-PHL|Schultz|Australia

>Spike|hCoV-19/Australia/NSW1285/2020|2020-11-20|EPI\_ISL\_767851|Original|hCoV-19^^New South Wales|Human|South Eastern Area Laboratory Services (SEALS)|NSW Health Pathology - Institute of Clinical Pathology and Medical Research; Westmead Hospital; University of Sydney|Gall|Australia

>Spike|hCoV-19/Denmark/DCGC-11078/2020|2020-11-02|EPI\_ISL\_670381|Original|hCoV-19^^Sjaelland|Human|Department of Virus and Microbiological Special Diagnostics|Albertsen Lab|Michaelsen|Denmark

>Spike|hCoV-19/Japan/PG-1460/2020|2020-04-00|EPI\_ISL\_685067|Original|hCoV-19^^Japan|Human|Saitama Prefectural Institute of Public Health|Pathogen Genomics Center|Sekizuka|Japan

>Spike|hCoV-19/USA/AZ-TG670108/2020|2020-05-02|EPI\_ISL\_696326|Original|hCoV-19^^Arizona|Human|Sonora Quest Laboratories|TGen North|French|USA

>Spike|hCoV-19/England/MILK-B8ED26/2020|2020-11-13|EPI\_ISL\_674575|Original|hCoV-19^^England|Human|Lighthouse Lab in Milton Keynes|Wellcome Sanger Institute for the COVID-19 Genomics UK (COG-UK) Consortium|Davies|United Kingdom

>Spike|hCoV-19/England/CAMC-BDCC59/2020|2020-11-30|EPI\_ISL\_709854|Original|hCoV-19^^England|Human|Lighthouse Lab in Cambridge|Wellcome Sanger Institute for the COVID-19 Genomics UK (COG-UK) Consortium|Davies|United Kingdom

>Spike|hCoV-19/Australia/VIC6601/2020|2020-07-18|EPI\_ISL\_521363|Original|hCoV-19^^Victoria|Human|Victorian Infectious Diseases Reference Laboratory (VIDRL)|VIDRL and MDU-PHL|Schultz|Australia

>Spike|hCoV-19/Canada/ON-E1/2020|2020-04-11|EPI\_ISL\_593481|Original|hCoV-19^^Ontario|Human|Eastern Ontario Regional Laboratory Association|McMaster University|McArthur|Canada

>Spike|hCoV-19/England/CAMC-AEB04D/2020|2020-10-25|EPI\_ISL\_633291|Original|hCoV-19^^England|Human|Lighthouse Lab in Cambridge|Wellcome Sanger Institute for the COVID-19 Genomics UK (COG-UK) consortium|Davies|United Kingdom

>Spike|hCoV-19/England/PORT-2D2B7D/2020|2020-04-04|EPI\_ISL\_529341|Original|hCoV-19^^England|Human|Centre for Enzyme Innovation|COVID-19 Genomics UK (COG-UK) Consortium|Robson|United Kingdom

>Spike|hCoV-19/USA/NM-NMDOH-2020134991/2020|2020-06-18|EPI\_ISL\_535283|Original|hCoV-19^^New Mexico|Human|New Mexico Department of Health Scientific Laboratory|New Mexico Department of Health Scientific Laboratory|Johnson|USA

>Spike|hCoV-19/USA/TX-HMH-MCoV-18406/2020|2020-11-17|EPI\_ISL\_784754|Original|hCoV-19^^Texas|Human|Houston Methodist Hospital|Houston Methodist Hospital|Long|USA

>Spike|hCoV-19/England/OXON-B37AD/2020|2020-04-10|EPI\_ISL\_534888|Original|hCoV-19^^England|Human|Oxford Viromics|COVID-19 Genomics UK (COG-UK) Consortium|Golubchik|United Kingdom

>Spike|hCoV-19/England/PORT-2D0FA0/2020|2020-04-23|EPI\_ISL\_475314|Original|hCoV-19^^England|Human|Centre for Enzyme Innovation|COVID-19 Genomics UK (COG-UK) Consortium|Robson|United Kingdom

>Spike|hCoV-19/Australia/VIC15933/2020|2020-08-02|EPI\_ISL\_640652|Original|hCoV-19^^Victoria|Human|Microbiological Diagnostic Unit - Public Health Laboratory (MDU-PHL)|MDU-PHL|Schultz|Australia

>Spike|hCoV-19/Northern Ireland/NIRE-FAC32/2020|2020-04-15|EPI\_ISL\_470059|Original|hCoV-19^^Northern Ireland|Human|Regional Virus Laboratory|Wellcome Sanger Institute for the COVID-19 Genomics UK (COG-UK) consortium|Davies|United Kingdom

>Spike|hCoV-19/USA/TX-HMH-5793/2020|2020-06-23|EPI\_ISL\_547019|Original|hCoV-19^^Texas|Human|Houston Methodist Hospital|Houston Methodist Hospital|Long|USA

>Spike|hCoV-19/Portugal/PT0796/2020|2020-03-19|EPI\_ISL\_511055|Original|hCoV-19^^Portugal|Human|Instituto Nacional de Saude (INSA)|Instituto Nacional de Saude (INSA)|Borges|Portugal

>Spike|hCoV-19/Japan/PG-8035/2020|2020-08-00|EPI\_ISL\_687136|Original|hCoV-19^^Japan|Human|Pathogen Genomics Center|Pathogen Genomics Center|Sekizuka|Japan

>Spike|hCoV-19/Bangladesh/CHRF-01/2020|2020-04-18|EPI\_ISL\_447899|Original|hCoV-19^^Bangladesh|Human|Microbiology|Microbiology|Submitter|Bangladesh

>Spike|hCoV-19/USA/WA-UW-47130/2020|2020-12-15|EPI\_ISL\_756231|Original|hCoV-19^^Washington|Human|UW Virology Lab|UW Virology Lab|Roychoudhury|USA

>Spike|hCoV-19/Denmark/DCGC-16085/2020|2020-11-16|EPI\_ISL\_714578|Original|hCoV-19^^Sjaelland|Human|Department of Virus and Microbiological Special Diagnostics|Albertsen Lab|Michaelsen|Denmark

>Spike|hCoV-19/Denmark/DCGC-21293/2020|2020-12-21|EPI\_ISL\_759657|Original|hCoV-19^^Syddanmark|Human|Department of Virus and Microbiological Special Diagnostics|Albertsen Lab|Michaelsen|Denmark

>Spike|hCoV-19/Wales/PHWC-29DCE/2020|2020-04-04|EPI\_ISL\_432215|Original|hCoV-19^^Wales|Human|Wales Specialist Virology Centre|Public Health Wales Microbiology Cardiff|Moore|United Kingdom

>Spike|hCoV-19/France/HDF-CERBA-0160-202011/2020|2020-06-03|EPI\_ISL\_780418|Original|hCoV-19^^Hauts-de-France|Human|CERBA LAB|CERBA LAB|Roquebert|France

>Spike|hCoV-19/Denmark/DCGC-5463/2020|2020-09-21|EPI\_ISL\_620788|Original|hCoV-19^^Syddanmark|Human|Department of Virus and Microbiological Special Diagnostics|Albertsen lab|Michaelsen|Denmark

>Spike|hCoV-19/USA/ME-HETL-J0181/2020|2020-09-16|EPI\_ISL\_755361|Original|hCoV-19^^Maine|Human|Maine Health and Environmental Testing Laboratory|Tewhey Lab|Tewhey|USA

>Spike|hCoV-19/USA/CA-UCLA-231/2020|2020-06-02|EPI\_ISL\_537537|Original|hCoV-19^^California|Human|UCLA Pathology Clinical Microbiology Lab|Kruglyak Lab|Boocock|USA

>Spike|hCoV-19/Portugal/PT0048/2020|2020-03-18|EPI\_ISL\_421451|Original|hCoV-19^^Portugal|Human|Instituto Nacional de Saude (INSA)|Instituto Nacional de Saude (INSA)|Borges|Portugal

>Spike|hCoV-19/England/ALDP-C4860E/2020|2020-12-12|EPI\_ISL\_736715|Original|hCoV-19^^England|Human|Lighthouse Lab in Alderley Park|Wellcome Sanger Institute for the COVID-19 Genomics UK (COG-UK) Consortium|Davies|United Kingdom

>Spike|hCoV-19/Switzerland/BL-ETHZ-410137/2020|2020-12-17|EPI\_ISL\_737449|Original|hCoV-19^^Basel-Landschaft|Human|Viollier AG|Department of Biosystems Science and Engineering|Nadeau|Switzerland

>Spike|hCoV-19/Wales/PHWC-49D6C6/2020|2020-12-12|EPI\_ISL\_742820|Original|hCoV-19^^Wales|Human|Wales Specialist Virology Centre Sequencing lab|COVID-19 Genomics UK (COG-UK) Consortium|Moore|United Kingdom

>Spike|hCoV-19/Denmark/DCGC-9609/2020|2020-11-09|EPI\_ISL\_668611|Original|hCoV-19^^Nordjylland|Human|Department of Virus and Microbiological Special Diagnostics|Albertsen Lab|Michaelsen|Denmark

>Spike|hCoV-19/Russia/VGG-RII-MH9375S/2020|2020-10-10|EPI\_ISL\_733458|Original|hCoV-19^^Volgograd Region|Human|HELIX LLC|WHO National Influenza Centre Russian Federation|Komissarov|Russia

>Spike|hCoV-19/Chile/MA-ISPCH-6/2020|2020-03-19|EPI\_ISL\_445284|Original|hCoV-19^^Magallanes|Human|HOSPITAL REG.LAUTARO NAVARRO AVARIA|Instituto de Salud Publica de Chile|Fernandez|Chile

>Spike|hCoV-19/England/QEUA-AE3027/2020|2020-10-27|EPI\_ISL\_633532|Original|hCoV-19^^England|Human|Lighthouse Lab in Glasgow|Wellcome Sanger Institute for the COVID-19 Genomics UK (COG-UK) consortium|Davies|United Kingdom

>Spike|hCoV-19/USA/WA-S667/2020|2020-04-21|EPI\_ISL\_438220|Original|hCoV-19^^Washington|Human|Washington State Department of Health|Seattle Flu Study|Bedford|USA

>Spike|hCoV-19/Spain/RI-IBV-98002300/2020|2020-03-07|EPI\_ISL\_537823|Original|hCoV-19^^La Rioja|Human|Centro de Investigaci\u00f3n Biom\u00e9dica de La Rioja - Hospital San Pedro Logro\u00f1o|SeqCOVID-SPAIN consortium/IBV (CSIC)|Comas|Spain

>Spike|hCoV-19/England/LIVE-1D2BC9/2020|2020-03-29|EPI\_ISL\_612414|Original|hCoV-19^^England|Human|Liverpool Clinical Laboratories|COVID-19 Genomics UK (COG-UK) Consortium|Haldenby|United Kingdom

>Spike|hCoV-19/England/ALDP-A9386A/2020|2020-10-20|EPI\_ISL\_611041|Original|hCoV-19^^England|Human|Lighthouse Lab in Alderley Park|Wellcome Sanger Institute for the COVID-19 Genomics UK (COG-UK) consortium|Davies|United Kingdom

>Spike|hCoV-19/USA/CA-CZB-2071/2020|2020-05-04|EPI\_ISL\_486314|Original|hCoV-19^^California|Human|San Joaquin County Public Health Lab|Chan-Zuckerberg Biohub|McGeever|USA

>Spike|hCoV-19/England/MILK-A46F70/2020|2020-10-06|EPI\_ISL\_598250|Original|hCoV-19^^England|Human|Lighthouse Lab in Milton Keynes|Wellcome Sanger Institute for the COVID-19 Genomics UK (COG-UK) consortium|Davies|United Kingdom

>Spike|hCoV-19/Denmark/DCGC-16080/2020|2020-11-16|EPI\_ISL\_714266|Original|hCoV-19^^Hovedstaden|Human|Department of Virus and Microbiological Special Diagnostics|Albertsen Lab|Michaelsen|Denmark

>Spike|hCoV-19/USA/AZ-TG668334/2020|2020-05-12|EPI\_ISL\_696260|Original|hCoV-19^^Arizona|Human|Sonora Quest Laboratories|TGen North|French|USA

>Spike|hCoV-19/USA/VAN3626/2020|2020-04-20|EPI\_ISL\_677683|Original|hCoV-19^^New York|Human|Vanda Pharmaceuticals Clinical Site|Vanda Pharmaceuticals|Przychodzen|USA

>Spike|hCoV-19/Netherlands/ZH-EMC-1077/2020|2020-10-19|EPI\_ISL\_722515|Original|hCoV-19^^Zuid Holland|Human|Dutch COVID-19 response team|Erasmus Medical Center|Oude Munnink|Netherlands

>Spike|hCoV-19/France/PAC-IHU-0018/2020|2020-03-08|EPI\_ISL\_569247|Original|hCoV-19^^Provence-Alpes-C\u00f4te-d\u2019Azur|Human|MEPHI|MEPHI|Levasseur|France

>Spike|hCoV-19/USA/MD-MDH-0154/2020|2020-07-09|EPI\_ISL\_524882|Original|hCoV-19^^Maryland|Human|MD PHL|MD PHL|Keller|USA

>Spike|hCoV-19/Wales/PHWC-48DE85/2020|2020-11-06|EPI\_ISL\_680769|Original|hCoV-19^^Wales|Human|Wales Specialist Virology Centre Sequencing lab|COVID-19 Genomics UK (COG-UK) Consortium|Moore|United Kingdom

>Spike|hCoV-19/USA/CO-CDPHE-2100015131/2020|2020-11-20|EPI\_ISL\_771311|Original|hCoV-19^^Colorado|Human|Colorado Department of Public Health and Environment|Colorado Department of Public Health and Environment|Bankers|USA

>Spike|hCoV-19/England/MILK-A69E2F/2020|2020-10-09|EPI\_ISL\_608776|Original|hCoV-19^^England|Human|Lighthouse Lab in Milton Keynes|Wellcome Sanger Institute for the COVID-19 Genomics UK (COG-UK) consortium|Davies|United Kingdom

>Spike|hCoV-19/England/NORT-288E40/2020|2020-03-23|EPI\_ISL\_458642|Original|hCoV-19^^England|Human|NU-OMICS DNA Sequencing research facility|Wellcome Sanger Institute for the COVID-19 Genomics UK (COG-UK) consortium|Davies|United Kingdom

>Spike|hCoV-19/England/LOND-D6E45/2020|2020-04-02|EPI\_ISL\_478438|Original|hCoV-19^^England|Human|University College London|COVID-19 Genomics UK (COG-UK) Consortium|Roy|United Kingdom

>Spike|hCoV-19/USA/VA\_NIDDL\_2702/2020|2020-03-25|EPI\_ISL\_491913|Original|hCoV-19^^Virginia|Human|Naval Infectious Diseases Diagnostic Laboratory|Naval Medical Research Center Biological Defense Research Directorate|Voegtly|USA

>Spike|hCoV-19/England/CAMB-76ACB/2020|2020-03-30|EPI\_ISL\_438478|Original|hCoV-19^^England|Human|Department of Pathology|Wellcome Sanger Institute for the COVID-19 Genomics UK (COG-UK) consortium|Amato|United Kingdom

>Spike|hCoV-19/Japan/PG-5217/2020|2020-08-00|EPI\_ISL\_690320|Original|hCoV-19^^Japan|Human|Pathogen Genomics Center|Pathogen Genomics Center|Sekizuka|Japan

>Spike|hCoV-19/USA/TX-DSHS-1567/2020|2020-06-24|EPI\_ISL\_681867|Original|hCoV-19^^Texas|Human|Texas Department of State Health Services|Texas Department of State Health Services|Rahman|USA

>Spike|hCoV-19/Switzerland/BE-ETHZ-410199/2020|2020-12-13|EPI\_ISL\_737714|Original|hCoV-19^^Bern|Human|Viollier AG|Department of Biosystems Science and Engineering|Nadeau|Switzerland

>Spike|hCoV-19/USA/WI-WSLH-200386/2020|2020-04-22|EPI\_ISL\_578552|Original|hCoV-19^^Wisconsin|Human|Wisconsin State Laboratory of Hygiene Communicable Disease

Division|Wisconsin State Laboratory of Hygiene Communicable Disease  
Division|Florek|USA  
>Spike|hCoV-19/England/CAMB-792FD/2020|2020-04-03|EPI\_ISL\_441822|Original|hCoV-19^^England|Human|Department of Pathology|Wellcome Sanger Institute for the COVID-19 Genomics UK (COG-UK) consortium|Amato|United Kingdom  
>Spike|hCoV-19/Australia/NSW488/2020|2020-04-22|EPI\_ISL\_455028|Original|hCoV-19^^New South Wales|Human|Pathology West - NSW Health Pathology|NSW Health Pathology - Institute of Clinical Pathology and Medical Research; Westmead Hospital; University of Sydney|Gall|Australia  
>Spike|hCoV-19/Japan/PG-4708/2020|2020-08-00|EPI\_ISL\_689845|Original|hCoV-19^^Japan|Human|Pathogen Genomics Center|Pathogen Genomics Center|Sekizuka|Japan  
>Spike|hCoV-19/England/ALDP-A85ADE/2020|2020-10-17|EPI\_ISL\_610545|Original|hCoV-19^^England|Human|Lighthouse Lab in Alderley Park|Wellcome Sanger Institute for the COVID-19 Genomics UK (COG-UK) consortium|Davies|United Kingdom  
>Spike|hCoV-19/England/CAMB-1B87C5/2020|2020-10-28|EPI\_ISL\_651659|Original|hCoV-19^^England|Human|Department of Pathology|COVID-19 Genomics UK (COG-UK) Consortium|Goodfellow|United Kingdom  
>Spike|hCoV-19/England/ALDP-B749E3/2020|2020-11-12|EPI\_ISL\_662267|Original|hCoV-19^^England|Human|Lighthouse Lab in Alderley Park|Wellcome Sanger Institute for the COVID-19 Genomics UK (COG-UK) Consortium|Davies|United Kingdom  
>Spike|hCoV-19/Japan/PG-4190/2020|2020-07-00|EPI\_ISL\_692429|Original|hCoV-19^^Japan|Human|Pathogen Genomics Center|Pathogen Genomics Center|Sekizuka|Japan  
>Spike|hCoV-19/England/QEUH-9DC6D5/2020|2020-09-21|EPI\_ISL\_580934|Original|hCoV-19^^England|Human|Lighthouse Lab in Glasgow|Wellcome Sanger Institute for the COVID-19 Genomics UK (COG-UK) consortium|Davies|United Kingdom  
>Spike|hCoV-19/Denmark/DCGC-3077/2020|2020-08-31|EPI\_ISL\_616857|Original|hCoV-19^^Hovedstaden|Human|Department of Virus and Microbiological Special Diagnostics|Albertsen lab|Michaelsen|Denmark  
>Spike|hCoV-19/USA/UT-01982/2020|2020-04-16|EPI\_ISL\_452169|Original|hCoV-19^^Utah|Human|Utah Public Health Laboratory|Utah Public Health Laboratory|Young|USA  
>Spike|hCoV-19/England/MILK-A7C76A/2020|2020-10-16|EPI\_ISL\_607310|Original|hCoV-19^^England|Human|Lighthouse Lab in Milton Keynes|Wellcome Sanger Institute for the COVID-19 Genomics UK (COG-UK) consortium|Davies|United Kingdom  
>Spike|hCoV-19/England/ALDP-4F7EE0/2020|2020-06-24|EPI\_ISL\_559291|Original|hCoV-19^^England|Human|Lighthouse Lab in Alderley Park|Wellcome Sanger Institute for the COVID-19 Genomics UK (COG-UK) consortium|Davies|United Kingdom  
>Spike|hCoV-19/Scotland/QEUH-96EB15/2020|2020-08-19|EPI\_ISL\_534472|Original|hCoV-19^^Scotland|Human|NHSGGC West of Scotland Specialist Virology Centre / MRC - University of Glasgow Centre for Virus Research|Wellcome Sanger Institute for the COVID-19 Genomics UK (COG-UK) consortium|Davies|United Kingdom  
>Spike|hCoV-19/Denmark/DCGC-17969/2020|2020-12-14|EPI\_ISL\_749156|Original|hCoV-19^^Sjælland|Human|Department of Virus and Microbiological Special Diagnostics|Albertsen Lab|Michaelsen|Denmark  
>Spike|hCoV-19/Northern Ireland/NIRE-2343EA/2020|2020-10-15|EPI\_ISL\_680382|Original|hCoV-19^^Northern Ireland|Human|Regional Virus Laboratory|COVID-19 Genomics UK (COG-UK) Consortium|Fairley|United Kingdom  
>Spike|hCoV-19/Italy/LAZ-INMI-88/2020|2020-10-17|EPI\_ISL\_609996|Original|hCoV-19^^Lazio|Human|INMI Lazzaro Spallanzani IRCCS|INMI Lazzaro Spallanzani IRCCS|Gruber|Italy  
>Spike|hCoV-19/Ireland/D-NVRL-20Z04316/2020|2020-04-15|EPI\_ISL\_671395|Original|hCoV-19^^Dublin|Human|National Virus Reference Laboratory|Irish Coronavirus Sequencing Consortium - Teagasc Moorepark|Walsh|Ireland  
>Spike|hCoV-19/England/QEUH-9CA652/2020|2020-09-10|EPI\_ISL\_567276|Original|hCoV-19^^England|Human|Lighthouse Lab in Glasgow|Wellcome Sanger Institute for the COVID-19 Genomics UK (COG-UK) consortium|Davies|United Kingdom  
>Spike|hCoV-19/Brazil/SP-639/2020|2020-03-19|EPI\_ISL\_515554|Original|hCoV-19^^S\u00e3o Paulo|Human|Pronto Socorro Municipal de Perus|Instituto Adolfo Lutz|Sacchi|Brazil

>Spike|hCoV-19/England/MILK-B39364/2020|2020-11-01|EPI\_ISL\_658794|Original|hCoV-19^^England|Human|Lighthouse Lab in Milton Keynes|Wellcome Sanger Institute for the COVID-19 Genomics UK (COG-UK) Consortium|Davies|United Kingdom

>Spike|hCoV-19/England/20148046704/2020|2020-04-02|EPI\_ISL\_422011|Original|hCoV-19^^England|Human|Respiratory Virus Unit|Respiratory Virus Unit|Platt|United Kingdom

>Spike|hCoV-19/Denmark/ALAB-HH25/2020|2020-03-11|EPI\_ISL\_429283|Original|hCoV-19^^Denmark|Human|Department of Clinical Microbiology|Albertsen lab|Kirkegaard|Denmark

>Spike|hCoV-19/England/LIVE-9EB06/2020|2020-04-05|EPI\_ISL\_453366|Original|hCoV-19^^England|Human|Liverpool Clinical Laboratories|COVID-19 Genomics UK (COG-UK) Consortium|Haldenby|United Kingdom

>Spike|hCoV-19/England/QEUH-BCC6E5/2020|2020-11-27|EPI\_ISL\_704199|Original|hCoV-19^^England|Human|Lighthouse Lab in Glasgow|Wellcome Sanger Institute for the COVID-19 Genomics UK (COG-UK) Consortium|Davies|United Kingdom

>Spike|hCoV-19/Netherlands/NA\_595/2020|2020-04-15|EPI\_ISL\_460758|Original|hCoV-19^^Netherlands|Human|Dutch COVID-19 response team|Erasmus Medical Center|Oude Munnink|Netherlands

>Spike|hCoV-19/Singapore/136nan/2020|2020-03-18|EPI\_ISL\_648080|Original|hCoV-19^^Singapore|Human|Department of Laboratory Medicine|Department of Laboratory Medicine|Chen|Singapore

>Spike|hCoV-19/England/QEUH-A0AC35/2020|2020-10-01|EPI\_ISL\_599302|Original|hCoV-19^^England|Human|Lighthouse Lab in Glasgow|Wellcome Sanger Institute for the COVID-19 Genomics UK (COG-UK) consortium|Davies|United Kingdom

>Spike|hCoV-19/Luxembourg/LNS8999350/2020|2020-10-16|EPI\_ISL\_744833|Original|hCoV-19^^Luxembourg|Human|Laboratoire national de sant\u00e9|Laboratoire national de sant\u00e9|Wienecke-Baldacchino|Luxembourg

>Spike|hCoV-19/Wales/PHWC-49C1C6/2020|2020-12-07|EPI\_ISL\_742521|Original|hCoV-19^^Wales|Human|Wales Specialist Virology Centre Sequencing lab|COVID-19 Genomics UK (COG-UK) Consortium|Moore|United Kingdom

>Spike|hCoV-19/Australia/VIC3637/2020|2020-07-07|EPI\_ISL\_520377|Original|hCoV-19^^Victoria|Human|Victorian Infectious Diseases Reference Laboratory (VIDRL)|VIDRL and MDU-PHL|Schultz|Australia

>Spike|hCoV-19/Chile/MA-201640/2020|2020-10-08|EPI\_ISL\_746530|Original|hCoV-19^^Magallanes|Human|Genetica Molecular and Subdepartamento de Virologia ISP Chile|Instituto de Salud Publica de Chile|Tognarelli|Chile

>Spike|hCoV-19/Australia/SAP480/2020|2020-08-03|EPI\_ISL\_510544|Original|hCoV-19^^South Australia|Human|SA Pathology|SA Pathology|Leong|Australia

>Spike|hCoV-19/Australia/VIC31/2020|2020-03-10|EPI\_ISL\_419750|Original|hCoV-19^^Victoria|Human|Victorian Infectious Diseases Reference Laboratory (VIDRL)|Victorian Infectious Diseases Reference Laboratory and Microbiological Diagnostic Unit Public Health Laboratory|Schultz|Australia

>Spike|hCoV-19/England/MILK-B94EC0/2020|2020-11-13|EPI\_ISL\_676269|Original|hCoV-19^^England|Human|Lighthouse Lab in Milton Keynes|Wellcome Sanger Institute for the COVID-19 Genomics UK (COG-UK) Consortium|Davies|United Kingdom

>Spike|hCoV-19/Australia/VIC4588/2020|2020-07-12|EPI\_ISL\_518989|Original|hCoV-19^^Victoria|Human|Victorian Infectious Diseases Reference Laboratory (VIDRL)|VIDRL and MDU-PHL|Schultz|Australia

>Spike|hCoV-19/USA/NY-NYUMC209/2020|2020-04-03|EPI\_ISL\_427504|Original|hCoV-19^^New York|Human|NYU Langone Health|Departments of Pathology and Medicine|Maurano|USA

>Spike|hCoV-19/USA/WI-UW-2023/2020|2020-10-08|EPI\_ISL\_677430|Original|hCoV-19^^Wisconsin|Human|University of Wisconsin-Madison AIDS Vaccine Research Laboratories|University of Wisconsin-Madison AIDS Vaccine Research Laboratories|Baczenas|USA

>Spike|hCoV-19/Spain/PV-IBV-000905/2020|2020-03-26|EPI\_ISL\_452662|Original|hCoV-19^^Basque Country|Human|Servicio de Microbiolog\u00eda. Hospital Universitario Donostia. OSI Donostialdea. \u00c1rea de Enfermedades Infecciosas|SeqCOVID-SPAIN consortium|IBV (CSIC)|Comas|Spain

>Spike|hCoV-19/England/MILK-C0B75F/2020|2020-12-05|EPI\_ISL\_760905|Original|hCoV-19^^England|Human|Lighthouse Lab in Milton Keynes|Wellcome Sanger Institute for the COVID-19 Genomics UK (COG-UK) Consortium|Davies|United Kingdom

>Spike|hCoV-19/England/LIVE-DAE90C/2020|2020-10-20|EPI\_ISL\_637295|Original|hCoV-19^^England|Human|Liverpool Clinical Laboratories|COVID-19 Genomics UK (COG-UK) Consortium|Haldenby|United Kingdom

>Spike|hCoV-19/England/BRIS-12571E/2020|2020-03-27|EPI\_ISL\_443820|Original|hCoV-19^^England|Human|PHE South West Regional Laboratory|Wellcome Sanger Institute for the COVID-19 Genomics UK (COG-UK) consortium|Amato|United Kingdom

>Spike|hCoV-19/Luxembourg/LNS0155076/2020|2020-11-04|EPI\_ISL\_739725|Original|hCoV-19^^Luxembourg|Human|Laboratoire national de sant\u00e9|Laboratoire national de sant\u00e9|Wienecke-Baldacchino|Luxembourg

>Spike|hCoV-19/USA/MA-MGH-01257/2020|2020-05-04|EPI\_ISL\_791912|Original|hCoV-19^^Massachusetts|Human|Massachusetts General Hospital|Infectious Disease Program|Park|USA

>Spike|hCoV-19/England/NORT-1B6147C/2020|2020-10-25|EPI\_ISL\_637790|Original|hCoV-19^^England|Human|Northumbria University / South Tees Hospitals NHS Foundation Trust / North Cumbria Integrated Care NHS Foundation Trust / North Tees and Hartlepool NHS Foundation Trust / Newcastle Hospitals NHS Foundation Trust|COVID-19 Genomics UK (COG-UK) Consortium|Bashton|United Kingdom

>Spike|hCoV-19/England/NORT-1B71F96/2020|2020-11-23|EPI\_ISL\_706328|Original|hCoV-19^^England|Human|Northumbria University / South Tees Hospitals NHS Foundation Trust / North Cumbria Integrated Care NHS Foundation Trust / North Tees and Hartlepool NHS Foundation Trust / Newcastle Hospitals NHS Foundation Trust|COVID-19 Genomics UK (COG-UK) Consortium|Bashton|United Kingdom

>Spike|hCoV-19/England/BRIS-1256C6/2020|2020-03-28|EPI\_ISL\_443877|Original|hCoV-19^^England|Human|PHE South West Regional Laboratory|Wellcome Sanger Institute for the COVID-19 Genomics UK (COG-UK) consortium|Amato|United Kingdom

>Spike|hCoV-19/England/ALDP-59AB8D/2020|2020-06-15|EPI\_ISL\_558394|Original|hCoV-19^^England|Human|Lighthouse Lab in Alderley Park|Wellcome Sanger Institute for the COVID-19 Genomics UK (COG-UK) consortium|Davies|United Kingdom

>Spike|hCoV-19/England/MILK-A46B03/2020|2020-10-06|EPI\_ISL\_598354|Original|hCoV-19^^England|Human|Lighthouse Lab in Milton Keynes|Wellcome Sanger Institute for the COVID-19 Genomics UK (COG-UK) consortium|Davies|United Kingdom

>Spike|hCoV-19/Japan/PG-0769/2020|2020-03-00|EPI\_ISL\_684379|Original|hCoV-19^^Japan|Human|Pathogen Genomics Center|Pathogen Genomics Center|Sekizuka|Japan

>Spike|hCoV-19/Denmark/DCGC-22535/2020|2020-12-14|EPI\_ISL\_757497|Original|hCoV-19^^Syddanmark|Human|Department of Virus and Microbiological Special Diagnostics|Albertsen Lab|Michaelsen|Denmark

>Spike|hCoV-19/England/QEUEH-BA3259/2020|2020-11-18|EPI\_ISL\_720912|Original|hCoV-19^^England|Human|Lighthouse Lab in Glasgow|Wellcome Sanger Institute for the COVID-19 Genomics UK (COG-UK) Consortium|Davies|United Kingdom

>Spike|hCoV-19/Brazil/RJ-0277/2020|2020-04-22|EPI\_ISL\_470643|Original|hCoV-19^^Rio de Janeiro|Human|Laboratorio de Virologia Molecular / UFRJ|Bioinformatics Laboratory / LNCC|Almeida|Brazil

>Spike|hCoV-19/England/MILK-AC7A85/2020|2020-10-20|EPI\_ISL\_644059|Original|hCoV-19^^England|Human|Lighthouse Lab in Milton Keynes|Wellcome Sanger Institute for the COVID-19 Genomics UK (COG-UK) Consortium|Davies|United Kingdom

>Spike|hCoV-19/Denmark/DCGC-8396/2020|2020-10-26|EPI\_ISL\_617358|Original|hCoV-19^^Sjaelland|Human|Department of Virus and Microbiological Special Diagnostics|Albertsen lab|Michaelsen|Denmark

>Spike|hCoV-19/Scotland/CVR4022/2020|2020-08-29|EPI\_ISL\_535121|Original|hCoV-19^^Scotland|Human|West of Scotland Specialist Virology Centre|COVID-19 Genomics UK (COG-UK) Consortium|Robertson|United Kingdom

>Spike|hCoV-19/England/MILK-ACD3C0/2020|2020-10-19|EPI\_ISL\_634392|Original|hCoV-19^^England|Human|Lighthouse Lab in Milton Keynes|Wellcome Sanger Institute for the COVID-19 Genomics UK (COG-UK) consortium|Davies|United Kingdom

>Spike|hCoV-19/Northern Ireland/NIRE-FAA65/2020|2020-04-04|EPI\_ISL\_441694|Original|hCoV-19^^Northern Ireland|Human|Regional Virus Laboratory|Wellcome Sanger Institute for the COVID-19 Genomics UK (COG-UK) consortium|Amato|United Kingdom

>Spike|hCoV-19/England/PORT-2D1B05/2020|2020-04-02|EPI\_ISL\_493649|Original|hCoV-19^^England|Human|Centre for Enzyme Innovation|COVID-19 Genomics UK (COG-UK) Consortium|Robson|United Kingdom

>Spike|hCoV-19/England/NORW-21F831/2020|2020-12-11|EPI\_ISL\_725055|Original|hCoV-19^^England|Human|Quadram Institute Bioscience|COVID-19 Genomics UK (COG-UK) Consortium|Alikhan|United Kingdom

>Spike|hCoV-19/England/CAMB-A98522/2020|2020-12-23|EPI\_ISL\_764349|Original|hCoV-19^^England|Human|Department of Pathology|COVID-19 Genomics UK (COG-UK) Consortium|Goodfellow|United Kingdom

>Spike|hCoV-19/England/NOTT-11F2AD/2020|2020-11-24|EPI\_ISL\_679957|Original|hCoV-19^^England|Human|Lincolnshire Hospitals and DeepSeq Nottingham|COVID-19 Genomics UK (COG-UK) Consortium|Loose|United Kingdom

>Spike|hCoV-19/USA/VA-DCLS-1102/2020|2020-06-21|EPI\_ISL\_529909|Original|hCoV-19^^Virginia|Human|Virginia Division of Consolidated Laboratory Services|Virginia Division of Consolidated Laboratory Services|St. Jacques|USA

>Spike|hCoV-19/Netherlands/ZuidHolland\_8/2020|2020-03-06|EPI\_ISL\_414468|Original|hCoV-19^^Zuid Holland|Human|Dutch COVID-19 response team|Erasmus Medical Center|Oude Munnink|Netherlands

>Spike|hCoV-19/Denmark/DCGC-779/2020|2020-04-13|EPI\_ISL\_614450|Original|hCoV-19^^Hovedstaden|Human|Department of Virus and Microbiological Special Diagnostics|Albertsen lab|Michaelsen|Denmark

>Spike|hCoV-19/USA/NM-DOH-2020314850/2020|2020-08-25|EPI\_ISL\_574280|Original|hCoV-19^^New Mexico|Human|New Mexico Department of Health Scientific Laboratory|New Mexico Department of Health Scientific Laboratory|Johnson|USA

>Spike|hCoV-19/USA/WI-UW-172/2020|2020-03-19|EPI\_ISL\_428268|Original|hCoV-19^^Wisconsin|Human|University of Wisconsin-Madison AIDS Vaccine Research Laboratories|University of Wisconsin-Madison AIDS Vaccine Research Laboratories|Moreno|USA

>Spike|hCoV-19/Canada/QC-LSPQ-L00228787/2020|2020-03-20|EPI\_ISL\_535876|Original|hCoV-19^^Quebec|Human|CSSS Haut-Richelieu/Rouville (H\u00f4pital)|Laboratoire de sant\u00e9 publique du Qu\u00e9bec|Moreira|Canada

>Spike|hCoV-19/USA/NY-NYCPHL-000074/2020|2020-03-10|EPI\_ISL\_631567|Original|hCoV-19^^New York|Human|New York Presbyterian-Brooklyn Methodist Hospital|New York City Public Health Laboratory|Wang|USA

>Spike|hCoV-19/Thailand/Bangkok-CONI-0301/2020|2020-03-16|EPI\_ISL\_693374|Original|hCoV-19^^Bangkok|Human|Ramathibodi Hospital|COVID-19 Network Investigations (CONI) Alliance|Batty|Thailand

>Spike|hCoV-19/England/NORT-29EE1A/2020|2020-05-11|EPI\_ISL\_488092|Original|hCoV-19^^England|Human|NU-OMICS DNA Sequencing research facility|Wellcome Sanger Institute for the COVID-19 Genomics UK (COG-UK) consortium|Davies|United Kingdom

>Spike|hCoV-19/England/MILK-642CCC/2020|2020-07-04|EPI\_ISL\_556116|Original|hCoV-19^^England|Human|Lighthouse Lab in Milton Keynes|Wellcome Sanger Institute for the COVID-19 Genomics UK (COG-UK) consortium|Davies|United Kingdom

>Spike|hCoV-19/USA/FL-BPHL-1308/2020|2020-06-23|EPI\_ISL\_541246|Original|hCoV-19^^Florida|Human|Florida Bureau of Public Health Laboratories|Florida Bureau of Public Health Laboratories|Blanton|USA

>Spike|hCoV-19/Australia/VIC2013/2020|2020-06-01|EPI\_ISL\_480655|Original|hCoV-19^^Victoria|Human|Victorian Infectious Diseases Reference Laboratory (VIDRL)|VIDRL and MDU-PHL|Schultz|Australia

>Spike|hCoV-19/England/ALDP-9ED167/2020|2020-05-05|EPI\_ISL\_589441|Original|hCoV-19^^England|Human|Lighthouse Lab in Alderley Park|Wellcome Sanger Institute for the COVID-19 Genomics UK (COG-UK) consortium|Davies|United Kingdom

>Spike|hCoV-19/England/ALDP-49D24A/2020|2020-06-08|EPI\_ISL\_559570|Original|hCoV-19^^England|Human|Lighthouse Lab in Alderley Park|Wellcome Sanger Institute for the COVID-19 Genomics UK (COG-UK) consortium|Davies|United Kingdom

>Spike|hCoV-19/USA/TX-HMH-MCoV-15163/2020|2020-10-19|EPI\_ISL\_786647|Original|hCoV-19^^Texas|Human|Houston Methodist Hospital|Houston Methodist Hospital|Long|USA

>Spike|hCoV-19/Wales/PHWC-49CE47/2020|2020-12-09|EPI\_ISL\_742696|Original|hCoV-19^^Wales|Human|Wales Specialist Virology Centre Sequencing lab|COVID-19 Genomics UK (COG-UK) Consortium|Moore|United Kingdom



>Spike|hCoV-19/USA/PA-MGEL-00208/2020|2020-04-16|EPI\_ISL\_681963|Original|hCoV-19^^Pennsylvania|Human|UPMC Clinical Microbiology Laboratory|Microbial Genomic Epidemiology Laboratory|Griffith|USA

>Spike|hCoV-19/England/ALDP-A68206/2020|2020-10-12|EPI\_ISL\_608377|Original|hCoV-19^^England|Human|Lighthouse Lab in Alderley Park|Wellcome Sanger Institute for the COVID-19 Genomics UK (COG-UK) consortium|Davies|United Kingdom

>Spike|hCoV-19/Wales/MILK-9A94AA/2020|2020-09-01|EPI\_ISL\_551057|Original|hCoV-19^^Wales|Human|Lighthouse Lab in Milton Keynes|Wellcome Sanger Institute for the COVID-19 Genomics UK (COG-UK) consortium|Davies|United Kingdom

>Spike|hCoV-19/England/QEUEH-B2E933/2020|2020-11-03|EPI\_ISL\_659870|Original|hCoV-19^^England|Human|Lighthouse Lab in Glasgow|Wellcome Sanger Institute for the COVID-19 Genomics UK (COG-UK) Consortium|Davies|United Kingdom

>Spike|hCoV-19/New Zealand/20CV0457/2020|2020-10-19|EPI\_ISL\_622775|Original|hCoV-19^^Canterbury|Human|Canterbury Health Laboratories|Institute of Environmental Science and Research (ESR)|Wang|New Zealand

>Spike|hCoV-19/England/CAMC-B22744/2020|2020-11-02|EPI\_ISL\_647307|Original|hCoV-19^^England|Human|Lighthouse Lab in Cambridge|Wellcome Sanger Institute for the COVID-19 Genomics UK (COG-UK) Consortium|Davies|United Kingdom

>Spike|hCoV-19/England/ALDP-5B674B/2020|2020-06-19|EPI\_ISL\_558870|Original|hCoV-19^^England|Human|Lighthouse Lab in Alderley Park|Wellcome Sanger Institute for the COVID-19 Genomics UK (COG-UK) consortium|Davies|United Kingdom

>Spike|hCoV-19/England/QEUEH-B6702A/2020|2020-11-11|EPI\_ISL\_661585|Original|hCoV-19^^England|Human|Lighthouse Lab in Glasgow|Wellcome Sanger Institute for the COVID-19 Genomics UK (COG-UK) Consortium|Davies|United Kingdom

>Spike|hCoV-19/South Korea/KCDC2400/2020|2020-06-01|EPI\_ISL\_514803|Original|hCoV-19^^South Korea|Human|Division of Viral Diseases|Division of Viral Diseases|Kim|South Korea

>Spike|hCoV-19/Sweden/20-08905/2020|2020-05-24|EPI\_ISL\_510812|Original|hCoV-19^^Stockholm|Human|NA|The Public Health Agency of Sweden|Svartstr\u00f6m|Sweden

>Spike|hCoV-19/Denmark/DCGC-11845/2020|2020-10-26|EPI\_ISL\_671171|Original|hCoV-19^^Hovedstaden|Human|Department of Virus and Microbiological Special Diagnostics|Albertsen Lab|Michaelsen|Denmark

>Spike|hCoV-19/Belgium/ULG-10949/2020|2020-09-05|EPI\_ISL\_707728|Original|hCoV-19^^Li\u00e8ge|Human|Department of Clinical Microbiology|GIGA Medical Genomics|Durkin|Belgium

>Spike|hCoV-19/USA/TX-HMH-MCoV-14726/2020|2020-10-12|EPI\_ISL\_786211|Original|hCoV-19^^Texas|Human|Houston Methodist Hospital|Houston Methodist Hospital|Long|USA

>Spike|hCoV-19/Australia/VIC4780/2020|2020-07-18|EPI\_ISL\_519166|Original|hCoV-19^^Victoria|Human|Microbiological Diagnostic Unit - Public Health Laboratory (MDU-PHL)|MDU-PHL|Schultz|Australia

>Spike|hCoV-19/England/MILK-A22B85/2020|2020-10-03|EPI\_ISL\_611941|Original|hCoV-19^^England|Human|Northumbria University / South Tees Hospitals NHS Foundation Trust / North Cumbria Integrated Care NHS Foundation Trust / North Tees and Hartlepool NHS Foundation Trust / Newcastle Hospitals NHS Foundation Trust|COVID-19 Genomics UK (COG-UK) Consortium|Bashton|United Kingdom

>Spike|hCoV-19/England/CAMC-CB74C4/2020|2020-12-19|EPI\_ISL\_778085|Original|hCoV-19^^England|Human|Lighthouse Lab in Cambridge|Wellcome Sanger Institute for the COVID-19 Genomics UK (COG-UK) Consortium|Davies|United Kingdom

>Spike|hCoV-19/Australia/VIC12012/2020|2020-07-24|EPI\_ISL\_640743|Original|hCoV-19^^Victoria|Human|Microbiological Diagnostic Unit - Public Health Laboratory (MDU-PHL)|MDU-PHL|Schultz|Australia

>Spike|hCoV-19/Denmark/DCGC-4524/2020|2020-09-21|EPI\_ISL\_621320|Original|hCoV-19^^Hovedstaden|Human|Department of Virus and Microbiological Special Diagnostics|Albertsen lab|Michaelsen|Denmark

>Spike|hCoV-19/England/QEUEH-C33017/2020|2020-12-11|EPI\_ISL\_782705|Original|hCoV-19^^England|Human|Lighthouse Lab in Glasgow|Wellcome Sanger Institute for the COVID-19 Genomics UK (COG-UK) Consortium|Davies|United Kingdom

>Spike|hCoV-19/England/20149009204/2020|2020-03-30|EPI\_ISL\_466144|Original|hCoV-19^^England|Human|Respiratory Virus Unit|Respiratory Virus Unit|Platt|United Kingdom

>Spike|hCoV-19/France/HDF-2797/2020|2020-03-18|EPI\_ISL\_420044|Original|hCoV-19^^Hauts-de-France|Human|CH Jean de Navarre Laboratoire de Biologie|National Reference Center for Viruses of Respiratory Infections|Enouf|France

>Spike|hCoV-19/USA/OR-OHSU-2473/2020|2020-08-05|EPI\_ISL\_667220|Original|hCoV-19^^Oregon|Human|OHSU Lab Services Molecular Microbiology Lab|Oregon SARS-CoV-2 Genome Sequencing Center|O'Roak|USA

>Spike|hCoV-19/England/CAMC-B09AB3/2020|2020-10-31|EPI\_ISL\_672976|Original|hCoV-19^^England|Human|Lighthouse Lab in Cambridge|Wellcome Sanger Institute for the COVID-19 Genomics UK (COG-UK) Consortium|Davies|United Kingdom

>Spike|hCoV-19/Denmark/DCGC-16378/2020|2020-11-16|EPI\_ISL\_714734|Original|hCoV-19^^Hovedstaden|Human|Department of Virus and Microbiological Special Diagnostics|Albertsen Lab|Michaelsen|Denmark

>Spike|hCoV-19/USA/TX-HMH-MCoV-8336/2020|2020-07-07|EPI\_ISL\_784340|Original|hCoV-19^^Texas|Human|Houston Methodist Hospital|Houston Methodist Hospital|Long|USA

>Spike|hCoV-19/Denmark/DCGC-1446/2020|2020-04-27|EPI\_ISL\_622428|Original|hCoV-19^^Hovedstaden|Human|Department of Virus and Microbiological Special Diagnostics|Albertsen lab|Michaelsen|Denmark

>Spike|hCoV-19/Spain/AR-IBV-005092/2020|2020-04-23|EPI\_ISL\_500354|Original|hCoV-19^^Aragon|Human|Servicio de Microbiolog\u00eda|SeqCOVID-SPAIN consortium/IBV (CSIC) |Comas|Spain

>Spike|hCoV-19/England/SHEF-CB177/2020|2020-05-29|EPI\_ISL\_535072|Original|hCoV-19^^England|Human|Virology Department|COVID-19 Genomics UK (COG-UK) Consortium|de Silva|United Kingdom

>Spike|hCoV-19/Austria/CeMM0929/2020|2020-03-19|EPI\_ISL\_583781|Original|hCoV-19^^Austria|Human|Dr. Gernot Walder GmbH|Bergthaler laboratory|Bergthaler|Austria

>Spike|hCoV-19/England/QEUH-B9F4A5/2020|2020-11-18|EPI\_ISL\_721117|Original|hCoV-19^^England|Human|Lighthouse Lab in Glasgow|Wellcome Sanger Institute for the COVID-19 Genomics UK (COG-UK) Consortium|Davies|United Kingdom

>Spike|hCoV-19/England/ALDP-A4F9E2/2020|2020-10-07|EPI\_ISL\_597661|Original|hCoV-19^^England|Human|Lighthouse Lab in Alderley Park|Wellcome Sanger Institute for the COVID-19 Genomics UK (COG-UK) consortium|Davies|United Kingdom

>Spike|hCoV-19/Wales/PHWC-492193/2020|2020-11-17|EPI\_ISL\_706826|Original|hCoV-19^^Wales|Human|Originating lab|COVID-19 Genomics UK (COG-UK) Consortium|Moore|United Kingdom

>Spike|hCoV-19/USA/WA-S961/2020|2020-05-01|EPI\_ISL\_463451|Original|hCoV-19^^Washington|Human|Washington State Department of Health|Seattle Flu Study|Bedford|USA

>Spike|hCoV-19/England/CAMC-B33E4B/2020|2020-11-05|EPI\_ISL\_659394|Original|hCoV-19^^England|Human|Lighthouse Lab in Cambridge|Wellcome Sanger Institute for the COVID-19 Genomics UK (COG-UK) Consortium|Davies|United Kingdom

>Spike|hCoV-19/Netherlands/GE-EMC-425/2020|2020-12-01|EPI\_ISL\_722759|Original|hCoV-19^^Gelderland|Human|Dutch COVID-19 response team|Erasmus Medical Center|Oude Munnink|Netherlands

>Spike|hCoV-19/South Korea/KCDC2542/2020|2020-06-21|EPI\_ISL\_514945|Original|hCoV-19^^South Korea|Human|Division of Viral Diseases|Division of Viral Diseases|Kim|South Korea

>Spike|hCoV-19/England/ALDP-6D1406/2020|2020-07-02|EPI\_ISL\_556103|Original|hCoV-19^^England|Human|Lighthouse Lab in Alderley Park|Wellcome Sanger Institute for the COVID-19 Genomics UK (COG-UK) consortium|Davies|United Kingdom

>Spike|hCoV-19/Belgium/reg-0615694/2020|2020-06-15|EPI\_ISL\_734755|Original|hCoV-19^^Holsbeek|Human|UZ Leuven|KU Leuven|Maes|Belgium

>Spike|hCoV-19/England/GSTT-5288/2020|2020-03-19|EPI\_ISL\_560670|Original|hCoV-19^^England|Human|Centre for Clinical Infection and Diagnostics Research and Genomics Innovation Unit|Centre for Clinical Infection and Diagnostics Research and Genomics Innovation Unit|Awan|United Kingdom

>Spike|hCoV-19/Mexico/BCN-ALSR-2560/2020|2020-07-06|EPI\_ISL\_635563|Original|hCoV-19^^Baja California|Human|Centro de Diagn\u221a\u2265tico COVID-19 UABC Tijuana|Andersen lab at Scripps Research|Gangavarapu|Mexico

>Spike|hCoV-19/USA/NY-NYUMC832/2020|2020-03-20|EPI\_ISL\_456069|Original|hCoV-19^^New York|Human|NYU Langone Health|Departments of Pathology and Medicine|Maurano|USA

>Spike|hCoV-19/USA/MI-CDC-2-3713993/2020|2020-10-20|EPI\_ISL\_751622|Original|hCoV-19^^Michigan|Human|MI - Michigan Department of Health and Human Services - Bureau of Laboratories|Genomics and Discovery|Queen|USA

>Spike|hCoV-19/Jordan/AM-ALSR-4968/2020|2020-10-08|EPI\_ISL\_730241|Original|hCoV-19^^Amman|Human|Biolab Diagnostic Laboratories|Andersen lab at Scripps Research|Gangavarapu|Jordan

>Spike|hCoV-19/USA/UT-UPHL-2009070/2020|2020-05-11|EPI\_ISL\_525078|Original|hCoV-19^^Utah|Human|Utah Public Health Laboratory|Utah Public Health Laboratory|Young|USA

>Spike|hCoV-19/USA/CA-SR0421/2020|2020-03-10|EPI\_ISL\_467954|Original|hCoV-19^^California|Human|San Diego County Public Health Laboratory|Andersen lab at Scripps Research|Gangavarapu|USA

>Spike|hCoV-19/England/MILK-ABBF1C/2020|2020-10-22|EPI\_ISL\_631077|Original|hCoV-19^^England|Human|Lighthouse Lab in Milton Keynes|Wellcome Sanger Institute for the COVID-19 Genomics UK (COG-UK) consortium|Davies|United Kingdom

>Spike|hCoV-19/England/QEUEH-9F72A3/2020|2020-09-27|EPI\_ISL\_595676|Original|hCoV-19^^England|Human|Oxford Viromics|COVID-19 Genomics UK (COG-UK) Consortium|Golubchik|United Kingdom

>Spike|hCoV-19/England/QEUEH-B7FE61/2020|2020-11-14|EPI\_ISL\_661723|Original|hCoV-19^^England|Human|Lighthouse Lab in Glasgow|Wellcome Sanger Institute for the COVID-19 Genomics UK (COG-UK) Consortium|Davies|United Kingdom

>Spike|hCoV-19/Wales/PHWC-16EF4E/2020|2020-10-01|EPI\_ISL\_585888|Original|hCoV-19^^Wales|Human|Wales Specialist Virology Centre Sequencing lab|COVID-19 Genomics UK (COG-UK) Consortium|Moore|United Kingdom

>Spike|hCoV-19/England/NORT-283F7F/2020|2020-04-05|EPI\_ISL\_478529|Original|hCoV-19^^England|Human|Northumbria University / South Tees Hospitals NHS Foundation Trust / North Cumbria Integrated Care NHS Foundation Trust / North Tees and Hartlepool NHS Foundation Trust / Newcastle Hospitals NHS Foundation Trust|COVID-19 Genomics UK (COG-UK) Consortium|Bashton|United Kingdom

>Spike|hCoV-19/England/ALDP-944A09/2020|2020-06-07|EPI\_ISL\_555556|Original|hCoV-19^^England|Human|Lighthouse Lab in Alderley Park|Wellcome Sanger Institute for the COVID-19 Genomics UK (COG-UK) consortium|Davies|United Kingdom

>Spike|hCoV-19/USA/TX-HMH-5401/2020|2020-06-26|EPI\_ISL\_544746|Original|hCoV-19^^Texas|Human|Houston Methodist Hospital|Houston Methodist Hospital|Long|USA

>Spike|hCoV-19/England/NORT-29C1AA/2020|2020-06-22|EPI\_ISL\_499472|Original|hCoV-19^^England|Human|Northumbria University / South Tees Hospitals NHS Foundation Trust / North Cumbria Integrated Care NHS Foundation Trust / North Tees and Hartlepool NHS Foundation Trust / Newcastle Hospitals NHS Foundation Trust|COVID-19 Genomics UK (COG-UK) Consortium|Bashton|United Kingdom

>Spike|hCoV-19/England/NORW-E753D/2020|2020-05-04|EPI\_ISL\_449046|Original|hCoV-19^^England|Human|Quadram Institute Bioscience|COVID-19 Genomics UK (COG-UK) Consortium|Alikhan|United Kingdom

>Spike|hCoV-19/England/ALDP-BBA78D/2020|2020-11-20|EPI\_ISL\_701821|Original|hCoV-19^^England|Human|Lighthouse Lab in Alderley Park|Wellcome Sanger Institute for the COVID-19 Genomics UK (COG-UK) Consortium|Davies|United Kingdom

>Spike|hCoV-19/Japan/PG-5888/2020|2020-08-00|EPI\_ISL\_689003|Original|hCoV-19^^Japan|Human|Pathogen Genomics Center|Pathogen Genomics Center|Sekizuka|Japan

>Spike|hCoV-19/England/MILK-974A2E/2020|2020-08-21|EPI\_ISL\_575791|Original|hCoV-19^^England|Human|Lighthouse Lab in Milton Keynes|Wellcome Sanger Institute for the COVID-19 Genomics UK (COG-UK) consortium|Davies|United Kingdom

>Spike|hCoV-19/USA/NY-NYCPHL-000446/2020|2020-04-01|EPI\_ISL\_631920|Original|hCoV-19^^New York|Human|Richmond University Medical Center|New York City Public Health Laboratory|Wang|USA

>Spike|hCoV-19/England/CAMB-73651/2020|2020-03-21|EPI\_ISL\_439987|Original|hCoV-19^^England|Human|Department of Pathology|Wellcome Sanger Institute for the COVID-19 Genomics UK (COG-UK) consortium|Amato|United Kingdom

>Spike|hCoV-19/England/ALDP-5D5157/2020|2020-06-19|EPI\_ISL\_558564|Original|hCoV-19^^England|Human|Lighthouse Lab in Alderley Park|Wellcome Sanger Institute for the COVID-19 Genomics UK (COG-UK) consortium|Davies|United Kingdom

>Spike|hCoV-19/Australia/NSW1122/2020|2020-09-13|EPI\_ISL\_593736|Original|hCoV-19^^New South Wales|Human|South Eastern Area Laboratory Services (SEALS)|NSW Health Pathology

- Institute of Clinical Pathology and Medical Research; Westmead Hospital; University of Sydney|Gall|Australia  
>Spike|hCoV-19/USA/WI-UW-1783/2020|2020-09-16|EPI\_ISL\_605655|Original|hCoV-19^^Wisconsin|Human|University of Wisconsin-Madison AIDS Vaccine Research Laboratories|University of Wisconsin-Madison AIDS Vaccine Research Laboratories|Baczenas|USA  
>Spike|hCoV-19/England/CAMB-835F7/2020|2020-04-14|EPI\_ISL\_470353|Original|hCoV-19^^England|Human|Department of Pathology|Wellcome Sanger Institute for the COVID-19 Genomics UK (COG-UK) consortium|Davies|United Kingdom  
>Spike|hCoV-19/Wales/PHWC-326E5/2020|2020-04-15|EPI\_ISL\_474342|Original|hCoV-19^^Wales|Human|Originating lab|COVID-19 Genomics UK (COG-UK) Consortium|Moore|United Kingdom  
>Spike|hCoV-19/England/QEUA-A00570/2020|2020-10-02|EPI\_ISL\_600518|Original|hCoV-19^^England|Human|Lighthouse Lab in Glasgow|Wellcome Sanger Institute for the COVID-19 Genomics UK (COG-UK) consortium|Davies|United Kingdom  
>Spike|hCoV-19/England/QEUA-B7DD0C/2020|2020-11-14|EPI\_ISL\_727846|Original|hCoV-19^^England|Human|Oxford Viromics|COVID-19 Genomics UK (COG-UK) Consortium|Golubchik|United Kingdom  
>Spike|hCoV-19/Ireland/MN-NVRL-20IRL51554/2020|2020-09-30|EPI\_ISL\_639902|Original|hCoV-19^^Monaghan|Human|National Virus Reference Laboratory|National Virus Reference Laboratory|Gonzalez|Ireland  
>Spike|hCoV-19/England/CAMC-B98F41/2020|2020-11-15|EPI\_ISL\_673463|Original|hCoV-19^^England|Human|Lighthouse Lab in Cambridge|Wellcome Sanger Institute for the COVID-19 Genomics UK (COG-UK) Consortium|Davies|United Kingdom  
>Spike|hCoV-19/England/MILK-9A563F/2020|2020-09-03|EPI\_ISL\_550043|Original|hCoV-19^^England|Human|Lighthouse Lab in Milton Keynes|Wellcome Sanger Institute for the COVID-19 Genomics UK (COG-UK) consortium|Davies|United Kingdom  
>Spike|hCoV-19/Singapore/891/2020|2020-09-06|EPI\_ISL\_536432|Original|hCoV-19^^Singapore|Human|National Public Health Laboratory|National Public Health Laboratory|Mak|Singapore  
>Spike|hCoV-19/India/GJ-GBRC280/2020|2020-06-18|EPI\_ISL\_495017|Original|hCoV-19^^Gujarat|Human|B.J. Medical College and Civil hospital|Gujarat Biotechnology Research Centre|Joshi|India  
>Spike|hCoV-19/USA/UT-UPHL-2012538290/2020|2020-08-13|EPI\_ISL\_745923|Original|hCoV-19^^Utah|Human|Ginkgo Bioworks Clinical Laboratory|Utah Public Health Laboratory|Young|USA  
>Spike|hCoV-19/USA/CO-CDPHE-2009164005/2020|2020-09-16|EPI\_ISL\_710235|Original|hCoV-19^^Colorado|Human|Colorado Department of Public Health and Environment|Colorado Department of Public Health and Environment|Bankers|USA  
>Spike|hCoV-19/Belgium/ULG-10900/2020|2020-11-14|EPI\_ISL\_678442|Original|hCoV-19^^Li\u00e8ge|Human|Department of Clinical Microbiology|GIGA Medical Genomics|Durkin|Belgium  
>Spike|hCoV-19/Denmark/DCGC-14827/2020|2020-11-23|EPI\_ISL\_711169|Original|hCoV-19^^Hovedstaden|Human|Department of Virus and Microbiological Special Diagnostics|Albertsen Lab|Michaelsen|Denmark  
>Spike|hCoV-19/England/MILK-B54F41/2020|2020-11-06|EPI\_ISL\_657854|Original|hCoV-19^^England|Human|Lighthouse Lab in Milton Keynes|Wellcome Sanger Institute for the COVID-19 Genomics UK (COG-UK) Consortium|Davies|United Kingdom  
>Spike|hCoV-19/England/MILK-9C27DF/2020|2020-09-06|EPI\_ISL\_566583|Original|hCoV-19^^England|Human|Lighthouse Lab in Milton Keynes|Wellcome Sanger Institute for the COVID-19 Genomics UK (COG-UK) consortium|Davies|United Kingdom  
>Spike|hCoV-19/Norway/5861/2020|2020-11-09|EPI\_ISL\_775342|Original|hCoV-19^^Viken|Human|Ostfold Hospital Trust - Kalnes|Norwegian Institute of Public Health|Vollan|Norway  
>Spike|hCoV-19/USA/MD-MDH-0400/2020|2020-11-01|EPI\_ISL\_660094|Original|hCoV-19^^Maryland|Human|MD PHL|MD PHL|Keller|USA  
>Spike|hCoV-19/Japan/PG-3476/2020|2020-07-00|EPI\_ISL\_691586|Original|hCoV-19^^Japan|Human|Pathogen Genomics Center|Pathogen Genomics Center|Sekizuka|Japan

>Spike|hCoV-19/Denmark/DCGC-4245/2020|2020-09-14|EPI\_ISL\_622138|Original|hCoV-19^^Hovedstaden|Human|Department of Virus and Microbiological Special Diagnostics|Albertsen lab|Michaelsen|Denmark

>Spike|hCoV-19/Canada/ON-PHL-20-01781/2020|2020-07-00|EPI\_ISL\_636932|Original|hCoV-19^^Ontario|Human|Public Health Ontario Laboratory|Public Health Ontario Laboratory|Guthrie|Canada

>Spike|hCoV-19/Australia/VIC15562/2020|2020-07-31|EPI\_ISL\_593360|Original|hCoV-19^^Victoria|Human|Microbiological Diagnostic Unit - Public Health Laboratory (MDU-PHL)|MDU-PHL|Schultz|Australia

>Spike|hCoV-19/Portugal/PT0033/2020|2020-03-16|EPI\_ISL\_418018|Original|hCoV-19^^Portugal|Human|H Garcia de Orta|Instituto Nacional de Saude (INSA)|Borges|Portugal

>Spike|hCoV-19/England/ALDP-9FD1BF/2020|2020-10-02|EPI\_ISL\_588003|Original|hCoV-19^^England|Human|Lighthouse Lab in Alderley Park|Wellcome Sanger Institute for the COVID-19 Genomics UK (COG-UK) consortium|Davies|United Kingdom

>Spike|hCoV-19/Finland/18MR8cE9/2020|2020-11-18|EPI\_ISL\_757334|Original|hCoV-19^^Uusimaa|Human|Department of Virology and Immunology|Department of Virology|Smura|Finland

>Spike|hCoV-19/USA/MN-MDH-2165/2020|2020-12-02|EPI\_ISL\_708503|Original|hCoV-19^^Minnesota|Human|Minnesota Department of Health|Minnesota Department of Health|Lorentz|USA

>Spike|hCoV-19/England/ALDP-B62098/2020|2020-11-08|EPI\_ISL\_656407|Original|hCoV-19^^England|Human|Lighthouse Lab in Alderley Park|Wellcome Sanger Institute for the COVID-19 Genomics UK (COG-UK) Consortium|Davies|United Kingdom

>Spike|hCoV-19/Switzerland/BL-UHB-42185829/2020|2020-03-11|EPI\_ISL\_527990|Original|hCoV-19^^Basel-Land|Human|University Hospital Basel|University Hospital Basel|Roloff Handschin|Switzerland

>Spike|hCoV-19/England/ALDP-B1c385/2020|2020-11-01|EPI\_ISL\_645746|Original|hCoV-19^^England|Human|Lighthouse Lab in Alderley Park|Wellcome Sanger Institute for the COVID-19 Genomics UK (COG-UK) Consortium|Davies|United Kingdom

>Spike|hCoV-19/England/CAMC-B099E3/2020|2020-10-30|EPI\_ISL\_673035|Original|hCoV-19^^England|Human|Lighthouse Lab in Cambridge|Wellcome Sanger Institute for the COVID-19 Genomics UK (COG-UK) Consortium|Davies|United Kingdom

>Spike|hCoV-19/England/NORT-29A8E3/2020|2020-05-19|EPI\_ISL\_492453|Original|hCoV-19^^England|Human|NU-OMICS DNA Sequencing research facility|Wellcome Sanger Institute for the COVID-19 Genomics UK (COG-UK) consortium|Davies|United Kingdom

>Spike|hCoV-19/USA/IL-QDX-178/2020|2020-04-28|EPI\_ISL\_494513|Original|hCoV-19^^Illinois|Human|Quest Diagnostics|Quest Diagnostics|Kagan|USA

>Spike|hCoV-19/England/CAMC-B097E9/2020|2020-10-30|EPI\_ISL\_673088|Original|hCoV-19^^England|Human|Lighthouse Lab in Cambridge|Wellcome Sanger Institute for the COVID-19 Genomics UK (COG-UK) Consortium|Davies|United Kingdom

>Spike|hCoV-19/USA/TX-HMH-7747/2020|2020-06-26|EPI\_ISL\_545614|Original|hCoV-19^^Texas|Human|Houston Methodist Hospital|Houston Methodist Hospital|Long|USA

>Spike|hCoV-19/England/ALDP-AA2367/2020|2020-10-22|EPI\_ISL\_624398|Original|hCoV-19^^England|Human|Lighthouse Lab in Alderley Park|Wellcome Sanger Institute for the COVID-19 Genomics UK (COG-UK) consortium|Davies|United Kingdom

>Spike|hCoV-19/Scotland/EDB2692/2020|2020-03-26|EPI\_ISL\_487652|Original|hCoV-19^^Scotland|Human|Virology Department|Wellcome Sanger Institute for the COVID-19 Genomics UK (COG-UK) consortium|Davies|United Kingdom

>Spike|hCoV-19/England/MILK-ABC3C4/2020|2020-10-21|EPI\_ISL\_631124|Original|hCoV-19^^England|Human|Lighthouse Lab in Milton Keynes|Wellcome Sanger Institute for the COVID-19 Genomics UK (COG-UK) consortium|Davies|United Kingdom

>Spike|hCoV-19/Australia/VIC4918/2020|2020-07-13|EPI\_ISL\_519293|Original|hCoV-19^^Victoria|Human|Victorian Infectious Diseases Reference Laboratory (VIDRL)|VIDRL and MDU-PHL|Schultz|Australia

>Spike|hCoV-19/USA/UT-08715/2020|2020-05-18|EPI\_ISL\_524772|Original|hCoV-19^^Utah|Human|Utah Public Health Laboratory|Utah Public Health Laboratory|Young|USA

>Spike|hCoV-19/England/QEUH-54D4BB/2020|2020-05-12|EPI\_ISL\_533422|Original|hCoV-19^^England|Human|Lighthouse Lab in Glasgow|Wellcome Sanger Institute for the COVID-19 Genomics UK (COG-UK) consortium|Davies|United Kingdom

>Spike|hCoV-19/Saudi Arabia/610/2020|2020-02-20|EPI\_ISL\_490007|Original|hCoV-19^^Saudi Arabia|Human|King Fahad Medical City|King Fahad Medical City|Naeem|Saudi Arabia

>Spike|hCoV-19/England/QEUA-B6797A/2020|2020-11-11|EPI\_ISL\_661590|Original|hCoV-19^^England|Human|Lighthouse Lab in Glasgow|Wellcome Sanger Institute for the COVID-19 Genomics UK (COG-UK) Consortium|Davies|United Kingdom

>Spike|hCoV-19/England/MILK-9EF068/2020|2020-09-24|EPI\_ISL\_594896|Original|hCoV-19^^England|Human|Oxford Viromics|COVID-19 Genomics UK (COG-UK) Consortium|Golubchik|United Kingdom

>Spike|hCoV-19/England/20104004902/2020|2020-03-02|EPI\_ISL\_417226|Original|hCoV-19^^England|Human|Respiratory Virus Unit|Respiratory Virus Unit|Platt|United Kingdom

>Spike|hCoV-19/USA/MI-MDHHS-SC20343/2020|2020-03-28|EPI\_ISL\_450622|Original|hCoV-19^^Michigan|Human|Michigan Department of Health and Human Services|Michigan Department of Health and Human Services|Blankenship|USA

>Spike|hCoV-19/England/NORW-F5851/2020|2020-11-06|EPI\_ISL\_665364|Original|hCoV-19^^England|Human|Quadram Institute Bioscience|COVID-19 Genomics UK (COG-UK) Consortium|Alikhan|United Kingdom

>Spike|hCoV-19/Australia/VIC5435/2020|2020-07-15|EPI\_ISL\_520186|Original|hCoV-19^^Victoria|Human|Victorian Infectious Diseases Reference Laboratory (VIDRL)|VIDRL and MDU-PHL|Schultz|Australia

>Spike|hCoV-19/Spain/MD-HLP-80/2020|2020-05-13|EPI\_ISL\_530077|Original|hCoV-19^^Madrid|Human|Hospital Universitario La Paz|Hospital Universitario La Paz|Viedma|Spain

>Spike|hCoV-19/England/204881285/2020|2020-11-00|EPI\_ISL\_678810|Original|hCoV-19^^England|Human|Respiratory Virus Unit|COVID-19 Genomics UK (COG-UK) Consortium|Platt|United Kingdom

>Spike|hCoV-19/Wales/PHWC-4A2251/2020|2020-12-14|EPI\_ISL\_743863|Original|hCoV-19^^Wales|Human|Wales Specialist Virology Centre Sequencing lab|COVID-19 Genomics UK (COG-UK) Consortium|Moore|United Kingdom

>Spike|hCoV-19/England/ALDP-6B8C3A/2020|2020-07-10|EPI\_ISL\_557906|Original|hCoV-19^^England|Human|Lighthouse Lab in Alderley Park|Wellcome Sanger Institute for the COVID-19 Genomics UK (COG-UK) consortium|Davies|United Kingdom

>Spike|hCoV-19/England/LIVE-9BF67/2020|2020-03-24|EPI\_ISL\_449492|Original|hCoV-19^^England|Human|Liverpool Clinical Laboratories|COVID-19 Genomics UK (COG-UK) Consortium|Haldenby|United Kingdom

>Spike|hCoV-19/England/MILK-A45919/2020|2020-10-06|EPI\_ISL\_598795|Original|hCoV-19^^England|Human|Lighthouse Lab in Milton Keynes|Wellcome Sanger Institute for the COVID-19 Genomics UK (COG-UK) consortium|Davies|United Kingdom

>Spike|hCoV-19/England/KGHT-268426C/2020|2020-06-17|EPI\_ISL\_513587|Original|hCoV-19^^England|Human|Microbiology|Wellcome Sanger Institute for the COVID-19 Genomics UK (COG-UK) consortium|Davies|United Kingdom

>Spike|hCoV-19/Italy/LOM-INMI-12578/2020|2020-02-29|EPI\_ISL\_460093|Original|hCoV-19^^Lombardy|Human|Molecular Virology Unit|Laboratory of Virology|Gruber|Italy

>Spike|hCoV-19/Belgium/reg-0405288/2020|2020-04-07|EPI\_ISL\_464082|Original|hCoV-19^^Monceau-sur-sambre|Human|KU Leuven|KU Leuven|Maes|Belgium

>Spike|hCoV-19/England/ALDP-C3B7CF/2020|2020-12-11|EPI\_ISL\_730927|Original|hCoV-19^^England|Human|Lighthouse Lab in Alderley Park|Wellcome Sanger Institute for the COVID-19 Genomics UK (COG-UK) Consortium|Davies|United Kingdom

>Spike|hCoV-19/USA/TX-HMH-487/2020|2020-04-05|EPI\_ISL\_544392|Original|hCoV-19^^Texas|Human|Houston Methodist Hospital|Houston Methodist Hospital|Long|USA

>Spike|hCoV-19/England/BIRM-65E2D/2020|2020-10-08|EPI\_ISL\_612231|Original|hCoV-19^^England|Human|University of Birmingham|COVID-19 Genomics UK (COG-UK) Consortium|Loman|United Kingdom

>Spike|hCoV-19/England/QEUA-AE2082/2020|2020-10-26|EPI\_ISL\_633612|Original|hCoV-19^^England|Human|Lighthouse Lab in Glasgow|Wellcome Sanger Institute for the COVID-19 Genomics UK (COG-UK) consortium|Davies|United Kingdom

>Spike|hCoV-19/Scotland/EDB6305/2020|2020-04-04|EPI\_ISL\_487962|Original|hCoV-19^^Scotland|Human|Virology Department|Wellcome Sanger Institute for the COVID-19 Genomics UK (COG-UK) consortium|Davies|United Kingdom

>Spike|hCoV-19/England/MILK-A05450/2020|2020-09-30|EPI\_ISL\_599826|Original|hCoV-19^^England|Human|Lighthouse Lab in Milton Keynes|Wellcome Sanger Institute for the COVID-19 Genomics UK (COG-UK) consortium|Davies|United Kingdom

>Spike|hCoV-19/Denmark/DCGC-20501/2020|2020-12-21|EPI\_ISL\_759189|Original|hCoV-19^^Midtjylland|Human|Department of Virus and Microbiological Special Diagnostics|Albertsen Lab|Michaelsen|Denmark

>Spike|hCoV-19/India/OR-ILSCV32896/2020|2020-06-05|EPI\_ISL\_481175|Original|hCoV-19^^Odisha|Human|Immunogenomics lab|Immunogenomics lab|Raghav|India

>Spike|hCoV-19/England/CAMC-9BFE85/2020|2020-09-09|EPI\_ISL\_573158|Original|hCoV-19^^England|Human|Oxford Viromics|COVID-19 Genomics UK (COG-UK) Consortium|Golubchik|United Kingdom

>Spike|hCoV-19/USA/WI-UW-215/2020|2020-03-25|EPI\_ISL\_428311|Original|hCoV-19^^Wisconsin|Human|University of Wisconsin-Madison AIDS Vaccine Research Laboratories|University of Wisconsin-Madison AIDS Vaccine Research Laboratories|Moreno|USA

>Spike|hCoV-19/USA/TX-HMH-MCoV-18184/2020|2020-11-12|EPI\_ISL\_784532|Original|hCoV-19^^Texas|Human|Houston Methodist Hospital|Houston Methodist Hospital|Long|USA

>Spike|hCoV-19/USA/TX-HMH-MCoV-12851/2020|2020-08-19|EPI\_ISL\_788004|Original|hCoV-19^^Texas|Human|Houston Methodist Hospital|Houston Methodist Hospital|Long|USA

>Spike|hCoV-19/England/MILK-AB8216/2020|2020-10-21|EPI\_ISL\_623403|Original|hCoV-19^^England|Human|Lighthouse Lab in Milton Keynes|Wellcome Sanger Institute for the COVID-19 Genomics UK (COG-UK) consortium|Davies|United Kingdom

>Spike|hCoV-19/England/QEUA-A0C1AD/2020|2020-10-03|EPI\_ISL\_584958|Original|hCoV-19^^England|Human|Quadram Institute Bioscience|COVID-19 Genomics UK (COG-UK) Consortium|Alikhan|United Kingdom

>Spike|hCoV-19/USA/WA-UW-3070/2020|2020-03-27|EPI\_ISL\_486089|Original|hCoV-19^^Washington|Human|UW Virology Lab|UW Virology Lab|Roychoudhury|USA

>Spike|hCoV-19/USA/WA-UW-22286/2020|2020-08-06|EPI\_ISL\_570650|Original|hCoV-19^^Washington|Human|UW Virology Lab|UW Virology Lab|Roychoudhury|USA

>Spike|hCoV-19/England/NORT-1B71EE4/2020|2020-11-22|EPI\_ISL\_705356|Original|hCoV-19^^England|Human|Northumbria University / South Tees Hospitals NHS Foundation Trust / North Cumbria Integrated Care NHS Foundation Trust / North Tees and Hartlepool NHS Foundation Trust / Newcastle Hospitals NHS Foundation Trust|COVID-19 Genomics UK (COG-UK) Consortium|Bashton|United Kingdom

>Spike|hCoV-19/England/QEUA-9CA063/2020|2020-09-10|EPI\_ISL\_567500|Original|hCoV-19^^England|Human|Lighthouse Lab in Glasgow|Wellcome Sanger Institute for the COVID-19 Genomics UK (COG-UK) consortium|Davies|United Kingdom

>Spike|hCoV-19/England/MILK-AB938B/2020|2020-10-22|EPI\_ISL\_623851|Original|hCoV-19^^England|Human|Lighthouse Lab in Milton Keynes|Wellcome Sanger Institute for the COVID-19 Genomics UK (COG-UK) consortium|Davies|United Kingdom

>Spike|hCoV-19/Ireland/D-NVRL-78IRL71541/2020|2020-11-22|EPI\_ISL\_752543|Original|hCoV-19^^Dublin|Human|National Virus Reference Laboratory|National Virus Reference Laboratory|Gonzalez|Ireland

>Spike|hCoV-19/Austria/CeMM0534/2020|2020-04-06|EPI\_ISL\_475898|Original|hCoV-19^^Austria|Human|Zentralinstitut f\u00fcr medizinische und chemische Labordiagnostik|Bergthaler laboratory|Bergthaler|Austria

>Spike|hCoV-19/England/ALDP-B5C037/2020|2020-11-09|EPI\_ISL\_655688|Original|hCoV-19^^England|Human|Lighthouse Lab in Alderley Park|Wellcome Sanger Institute for the COVID-19 Genomics UK (COG-UK) Consortium|Davies|United Kingdom

>Spike|hCoV-19/England/ALDP-94B98D/2020|2020-06-11|EPI\_ISL\_555767|Original|hCoV-19^^England|Human|Lighthouse Lab in Alderley Park|Wellcome Sanger Institute for the COVID-19 Genomics UK (COG-UK) consortium|Davies|United Kingdom

>Spike|hCoV-19/Spain/CT-IBV-97009569/2020|2020-07-29|EPI\_ISL\_683644|Original|hCoV-19^^Catalunya|Human|Servicio de Microbiolog\u00eda|SeqCOVID-SPAIN consortium|IBV (CSIC) |Comas|Spain

>Spike|hCoV-19/Scotland/QEUA-9B860C/2020|2020-09-10|EPI\_ISL\_568286|Original|hCoV-19^^Scotland|Human|Lighthouse Lab in Glasgow|Wellcome Sanger Institute for the COVID-19 Genomics UK (COG-UK) consortium|Davies|United Kingdom

>Spike|hCoV-19/England/ALDP-B46504/2020|2020-11-07|EPI\_ISL\_655987|Original|hCoV-19^^England|Human|Lighthouse Lab in Alderley Park|Wellcome Sanger Institute for the COVID-19 Genomics UK (COG-UK) Consortium|Davies|United Kingdom

>Spike|hCoV-19/England/QEUEH-CDE9F5/2020|2020-12-26|EPI\_ISL\_782297|Original|hCoV-19^^England|Human|Lighthouse Lab in Glasgow|Wellcome Sanger Institute for the COVID-19 Genomics UK (COG-UK) Consortium|Davies|United Kingdom

>Spike|hCoV-19/Spain/MD-IBV-99009659/2020|2020-10-23|EPI\_ISL\_654331|Original|hCoV-19^^Madrid|Human|Hospital General Universitario Gregorio Mara\u00f1a|SeqCOVID-SPAIN consortium/IBV (CSIC)|Comas|Spain

>Spike|hCoV-19/Australia/VIC5341/2020|2020-07-18|EPI\_ISL\_520104|Original|hCoV-19^^Victoria|Human|Microbiological Diagnostic Unit - Public Health Laboratory (MDU-PHL)|MDU-PHL|Schultz|Australia

>Spike|hCoV-19/Poland/77235/2020|2020-11-00|EPI\_ISL\_732876|Original|hCoV-19^^Poland|Human|genXone SA|genXone SA|Kaszuba|Poland

>Spike|hCoV-19/Australia/WA17/2020|2020-04-08|EPI\_ISL\_470835|Original|hCoV-19^^Western Australia|Human|PathWest Laboratory Medicine WA|PathWest Laboratory Medicine WA|Sikazwe|Australia

>Spike|hCoV-19/England/LIVE-9EF19/2020|2020-04-09|EPI\_ISL\_453410|Original|hCoV-19^^England|Human|Liverpool Clinical Laboratories|COVID-19 Genomics UK (COG-UK) Consortium|Haldenby|United Kingdom

>Spike|hCoV-19/England/CAMC-A83092/2020|2020-10-14|EPI\_ISL\_610665|Original|hCoV-19^^England|Human|Lighthouse Lab in Cambridge|Wellcome Sanger Institute for the COVID-19 Genomics UK (COG-UK) consortium|Davies|United Kingdom

>Spike|hCoV-19/England/ALDP-A2DFE8/2020|2020-10-05|EPI\_ISL\_586706|Original|hCoV-19^^England|Human|Lighthouse Lab in Alderley Park|Wellcome Sanger Institute for the COVID-19 Genomics UK (COG-UK) consortium|Davies|United Kingdom

>Spike|hCoV-19/Russia/MOW-RII-MH2925S/2020|2020-09-23|EPI\_ISL\_733073|Original|hCoV-19^^Moscow|Human|HELIIX LLC|WHO National Influenza Centre Russian Federation|Komissarov|Russia

>Spike|hCoV-19/USA/ID-QDX-1756/2020|2020-03-18|EPI\_ISL\_604033|Original|hCoV-19^^Idaho|Human|Quest Diagnostics|Quest Diagnostics|Kagan|USA

>Spike|hCoV-19/Australia/VIC1186/2020|2020-04-11|EPI\_ISL\_430629|Original|hCoV-19^^Victoria|Human|Victorian Infectious Diseases Reference Laboratory (VIDRL)|Microbiological Diagnostic Unit Public Health Laboratory and Victorian Infectious Diseases Reference Laboratory|Schultz|Australia

>Spike|hCoV-19/USA/FL-BPHL-2170/2020|2020-08-14|EPI\_ISL\_653323|Original|hCoV-19^^Florida|Human|Florida Bureau of Public Health Laboratories|Florida Bureau of Public Health Laboratories|Blanton|USA

>Spike|hCoV-19/USA/NY-NYUMC170/2020|2020-04-01|EPI\_ISL\_426625|Original|hCoV-19^^New York|Human|NYU Langone Health|Departments of Pathology and Medicine|Maurano|USA

>Spike|hCoV-19/Australia/VIC11639/2020|2020-07-25|EPI\_ISL\_563442|Original|hCoV-19^^Victoria|Human|Microbiological Diagnostic Unit - Public Health Laboratory (MDU-PHL)|MDU-PHL|Schultz|Australia

>Spike|hCoV-19/New Zealand/20VR2559/2020|2020-00-00|EPI\_ISL\_579298|Original|hCoV-19^^Counties Manukau|Human|Middlemore Hospital|Institute of Environmental Science and Research (ESR)|Wang|New Zealand

>Spike|hCoV-19/England/QEUEH-A1DFAF/2020|2020-10-01|EPI\_ISL\_587509|Original|hCoV-19^^England|Human|Lighthouse Lab in Glasgow|Wellcome Sanger Institute for the COVID-19 Genomics UK (COG-UK) consortium|Davies|United Kingdom

>Spike|hCoV-19/USA/TX-HMH-MCoV-15776/2020|2020-07-09|EPI\_ISL\_785460|Original|hCoV-19^^Texas|Human|Houston Methodist Hospital|Houston Methodist Hospital|Long|USA

>Spike|hCoV-19/England/CAMC-B0B389/2020|2020-10-30|EPI\_ISL\_643437|Original|hCoV-19^^England|Human|Lighthouse Lab in Cambridge|Wellcome Sanger Institute for the COVID-19 Genomics UK (COG-UK) Consortium|Davies|United Kingdom

>Spike|hCoV-19/Australia/VIC15972/2020|2020-07-31|EPI\_ISL\_640382|Original|hCoV-19^^Victoria|Human|Microbiological Diagnostic Unit - Public Health Laboratory (MDU-PHL)|MDU-PHL|Schultz|Australia

>Spike|hCoV-19/USA/MN-MDH-1378/2020|2020-07-10|EPI\_ISL\_507966|Original|hCoV-19^^Minnesota|Human|Avera McKennan Laboratory|Minnesota Department of Health|Garfin|USA



>Spike|hCoV-19/Japan/PG-7257/2020|2020-08-00|EPI\_ISL\_688360|Original|hCoV-19^^Japan|Human|Saitama Prefectural Institute of Public Health|Pathogen Genomics Center|Sekizuka|Japan

>Spike|hCoV-19/Ghana/35019\_S18/2020|2020-05-23|EPI\_ISL\_515091|Original|hCoV-19^^Ghana|Human|Department of Biochemistry|WACCBIP|Amuzu|Ghana

>Spike|hCoV-19/England/MILK-99CEE8/2020|2020-08-30|EPI\_ISL\_549844|Original|hCoV-19^^England|Human|Lighthouse Lab in Milton Keynes|Wellcome Sanger Institute for the COVID-19 Genomics UK (COG-UK) consortium|Davies|United Kingdom

>Spike|hCoV-19/USA/MA-QDX-1458/2020|2020-03-12|EPI\_ISL\_603825|Original|hCoV-19^^Massachusetts|Human|Quest Diagnostics|Quest Diagnostics|Kagan|USA

>Spike|hCoV-19/Sweden/20-51349/2020|2020-05-11|EPI\_ISL\_455106|Original|hCoV-19^^Stockholm|Human|Surbrunns VC|The Public Health Agency of Sweden|Svartstr\u00f6m|Sweden

>Spike|hCoV-19/England/QEUA-CDE360/2020|2020-12-26|EPI\_ISL\_782379|Original|hCoV-19^^England|Human|Lighthouse Lab in Glasgow|Wellcome Sanger Institute for the COVID-19 Genomics UK (COG-UK) Consortium|Davies|United Kingdom

>Spike|hCoV-19/Scotland/EDB8443/2020|2020-10-16|EPI\_ISL\_612362|Original|hCoV-19^^Scotland|Human|Virology Department|COVID-19 Genomics UK (COG-UK) Consortium|McHugh|United Kingdom

>Spike|hCoV-19/USA/PA-MGEL-00159/2020|2020-04-13|EPI\_ISL\_681949|Original|hCoV-19^^Pennsylvania|Human|UPMC Clinical Microbiology Laboratory|Microbial Genomic Epidemiology Laboratory|Griffith|USA

>Spike|hCoV-19/Canada/QC-LSPQ-L00216909/2020|2020-03-13|EPI\_ISL\_535753|Original|hCoV-19^^Quebec|Human|CHUM - Microbiologie - H\u00f4pital Saint-Luc|Laboratoire de sant\u00e9 publique du Qu\u00e9bec|Moreira|Canada

>Spike|hCoV-19/USA/AK-PHL529/2020|2020-06-17|EPI\_ISL\_522403|Original|hCoV-19^^Alaska|Human|Alaska State Virology Laboratory|Alaska State Virology Laboratory|Chen|USA

>Spike|hCoV-19/Hong Kong/HKU-200823-002/2020|2020-08-17|EPI\_ISL\_516799|Original|hCoV-19^^Hong Kong|Human|Department of Microbiology|Department of Microbiology|Chan|China

>Spike|hCoV-19/Germany/BE-ChVir-D697-8137/2020|2020-03-05|EPI\_ISL\_754055|Original|hCoV-19^^Berlin|Human|Charit\u00e9 Universit\u00e4tsmedizin Berlin|Charit\u00e9 Universit\u00e4tsmedizin Berlin|Muehlemann|Germany

>Spike|hCoV-19/England/QEUA-A1F471/2020|2020-10-01|EPI\_ISL\_587351|Original|hCoV-19^^England|Human|Lighthouse Lab in Glasgow|Wellcome Sanger Institute for the COVID-19 Genomics UK (COG-UK) consortium|Davies|United Kingdom

>Spike|hCoV-19/England/QEUA-B121A3/2020|2020-11-02|EPI\_ISL\_642436|Original|hCoV-19^^England|Human|Lighthouse Lab in Glasgow|Wellcome Sanger Institute for the COVID-19 Genomics UK (COG-UK) Consortium|Davies|United Kingdom

>Spike|hCoV-19/England/QEUA-AF4120/2020|2020-10-30|EPI\_ISL\_663015|Original|hCoV-19^^England|Human|Lighthouse Lab in Glasgow|Wellcome Sanger Institute for the COVID-19 Genomics UK (COG-UK) Consortium|Davies|United Kingdom

>Spike|hCoV-19/Tunisia/55304/2020|2020-11-02|EPI\_ISL\_635059|Original|hCoV-19^^Tunis|Human|1-Laboratory of Microbiology|1-Clinical and Experimental Pharmacology Lab|Boutiba-Ben Boubaker|Tunisia

>Spike|hCoV-19/Switzerland/BL-UHB-42202242/2020|2020-03-22|EPI\_ISL\_528328|Original|hCoV-19^^Basel-Land|Human|University Hospital Basel|University Hospital Basel|Roloff Handschin|Switzerland

>Spike|hCoV-19/Denmark/DCGC-11030/2020|2020-11-02|EPI\_ISL\_670354|Original|hCoV-19^^Sjaelland|Human|Department of Virus and Microbiological Special Diagnostics|Albertsen Lab|Michaelsen|Denmark

>Spike|hCoV-19/England/CAMB-77DC1/2020|2020-04-01|EPI\_ISL\_438248|Original|hCoV-19^^England|Human|Department of Pathology|Wellcome Sanger Institute for the COVID-19 Genomics UK (COG-UK) consortium|Amato|United Kingdom

>Spike|hCoV-19/USA/CA-ALSR-1398/2020|2020-05-05|EPI\_ISL\_494584|Original|hCoV-19^^California|Human|San Diego County Public Health Laboratory|Andersen lab at Scripps Research|Gangavarapu|USA

>Spike|hCoV-19/England/CAMC-B78ADD/2020|2020-11-12|EPI\_ISL\_667815|Original|hCoV-19^^England|Human|Lighthouse Lab in Cambridge|Wellcome Sanger Institute for the COVID-19 Genomics UK (COG-UK) Consortium|Davies|United Kingdom

>Spike|hCoV-19/Wales/PHWC-31D3C/2020|2020-04-12|EPI\_ISL\_446559|Original|hCoV-19^^Wales|Human|Wales Specialist Virology Centre|Public Health Wales Microbiology Cardiff|Moore|United Kingdom

>Spike|hCoV-19/England/20190142001/2020|2020-05-04|EPI\_ISL\_465593|Original|hCoV-19^^England|Human|Respiratory Virus Unit|Respiratory Virus Unit|Platt|United Kingdom

>Spike|hCoV-19/USA/WA-S2812/2020|2020-09-02|EPI\_ISL\_574654|Original|hCoV-19^^Washington|Human|Seattle Flu Study|Seattle Flu Study|Lee|USA

>Spike|hCoV-19/England/ALDP-66EDE5/2020|2020-07-03|EPI\_ISL\_558118|Original|hCoV-19^^England|Human|Lighthouse Lab in Alderley Park|Wellcome Sanger Institute for the COVID-19 Genomics UK (COG-UK) consortium|Davies|United Kingdom

>Spike|hCoV-19/USA/MN-MDH-1827/2020|2020-09-18|EPI\_ISL\_602962|Original|hCoV-19^^Minnesota|Human|Minnesota Department of Health|Minnesota Department of Health|Garfin|USA

>Spike|hCoV-19/USA/NJ-NYUMC638/2020|2020-04-02|EPI\_ISL\_444755|Original|hCoV-19^^New Jersey|Human|NYU Langone Health|Departments of Pathology and Medicine|Maurano|USA

>Spike|hCoV-19/USA/NY-CDC-6683/2020|2020-04-06|EPI\_ISL\_480784|Original|hCoV-19^^New York|Human|NYC Department of Health and Mental Hygiene|Pathogen Discovery|Queen|USA

>Spike|hCoV-19/USA/DE-DHSS-F918049/2020|2020-03-26|EPI\_ISL\_593940|Original|hCoV-19^^Delaware|Human|Delaware Public Health Lab|Delaware Public Health Lab|Bajwa|USA

>Spike|hCoV-19/England/204381146/2020|2020-10-21|EPI\_ISL\_649850|Original|hCoV-19^^England|Human|Respiratory Virus Unit|COVID-19 Genomics UK (COG-UK) Consortium|Platt|United Kingdom

>Spike|hCoV-19/Australia/VIC12624/2020|2020-08-01|EPI\_ISL\_641198|Original|hCoV-19^^Victoria|Human|Microbiological Diagnostic Unit - Public Health Laboratory (MDU-PHL)|MDU-PHL|Schultz|Australia

>Spike|hCoV-19/Denmark/DCGC-14545/2020|2020-11-30|EPI\_ISL\_711143|Original|hCoV-19^^Hovedstaden|Human|Department of Virus and Microbiological Special Diagnostics|Albertsen Lab|Michaelsen|Denmark

>Spike|hCoV-19/USA/AZ-TG446582/2020|2020-06-27|EPI\_ISL\_695005|Original|hCoV-19^^Arizona|Human|TGen North|TGen North|French|USA

>Spike|hCoV-19/France/ARA-SC164/2020|2020-04-10|EPI\_ISL\_700353|Original|hCoV-19^^Auvergne-Rh\u00f4ne-Alpes|Human|Laboratoire de virologie|CNR Virus des Infections Respiratoires - France SUD|Bal|France

>Spike|hCoV-19/USA/TX-HMH-MCoV-14613/2020|2020-10-10|EPI\_ISL\_787898|Original|hCoV-19^^Texas|Human|Houston Methodist Hospital|Houston Methodist Hospital|Long|USA

>Spike|hCoV-19/England/QEUH-BCB5BC/2020|2020-11-27|EPI\_ISL\_704342|Original|hCoV-19^^England|Human|Lighthouse Lab in Glasgow|Wellcome Sanger Institute for the COVID-19 Genomics UK (COG-UK) Consortium|Davies|United Kingdom

>Spike|hCoV-19/Australia/VIC12187/2020|2020-07-27|EPI\_ISL\_641125|Original|hCoV-19^^Victoria|Human|Victorian Infectious Diseases Reference Laboratory (VIDRL)|VIDRL and MDU-PHL|Schultz|Australia

>Spike|hCoV-19/USA/CO-CDPHE-2009170169/2020|2020-09-16|EPI\_ISL\_677656|Original|hCoV-19^^Colorado|Human|Colorado Department of Public Health and Environment|Colorado Department of Public Health and Environment|Bankers|USA

>Spike|hCoV-19/United Arab Emirates/0898/2020|2020-06-25|EPI\_ISL\_699036|Original|hCoV-19^^Abu Dhabi|Human|Group 42 (G42) Healthcare|G42 Healthcare|Ogrodzki|United Arab Emirates

>Spike|hCoV-19/Denmark/DCGC-21010/2020|2020-12-21|EPI\_ISL\_759499|Original|hCoV-19^^Hovedstaden|Human|Department of Virus and Microbiological Special Diagnostics|Albertsen Lab|Michaelsen|Denmark

>Spike|hCoV-19/USA/LA-EVTL1284/2020|2020-12-10|EPI\_ISL\_778950|Original|hCoV-19^^Louisiana|Human|LSUHS Emerging Viral Threat Laboratory|Microbial Genome Sequencing Center|Kamil|USA

>Spike|hCoV-19/England/CAMB-1AB18B/2020|2020-04-19|EPI\_ISL\_470177|Original|hCoV-19^^England|Human|Department of Pathology|Wellcome Sanger Institute for the COVID-19 Genomics UK (COG-UK) consortium|Davies|United Kingdom

>Spike|hCoV-19/England/ALDP-AA32F0/2020|2020-10-22|EPI\_ISL\_624052|Original|hCoV-19^^England|Human|Lighthouse Lab in Alderley Park|Wellcome Sanger Institute for the COVID-19 Genomics UK (COG-UK) consortium|Davies|United Kingdom

>Spike|hCoV-19/USA/TX-HMH-MCoV-14192/2020|2020-10-02|EPI\_ISL\_787477|Original|hCoV-19^^Texas|Human|Houston Methodist Hospital|Houston Methodist Hospital|Long|USA

>Spike|hCoV-19/New Zealand/20VR2942/2020|2020-00-00|EPI\_ISL\_579363|Original|hCoV-19^^Auckland|Human|LabPLUS|Institute of Environmental Science and Research (ESR)|Wang|New Zealand

>Spike|hCoV-19/USA/MI-MDHHS-SC20329/2020|2020-03-18|EPI\_ISL\_450608|Original|hCoV-19^^Michigan|Human|Michigan Department of Health and Human Services|Michigan Department of Health and Human Services|Blankenship|USA

>Spike|hCoV-19/Scotland/CVR1379/2020|2020-04-01|EPI\_ISL\_433562|Original|hCoV-19^^Scotland|Human|West of Scotland Specialist Virology Centre|COVID-19 Genomics UK (COG-UK) Consortium|Robertson|United Kingdom

>Spike|hCoV-19/England/ALDP-BC8625/2020|2020-11-23|EPI\_ISL\_721490|Original|hCoV-19^^England|Human|Lighthouse Lab in Alderley Park|Wellcome Sanger Institute for the COVID-19 Genomics UK (COG-UK) Consortium|Davies|United Kingdom

>Spike|hCoV-19/Wales/PHWC-4887BC/2020|2020-10-20|EPI\_ISL\_639429|Original|hCoV-19^^Wales|Human|Wales Specialist Virology Centre Sequencing lab|COVID-19 Genomics UK (COG-UK) Consortium|Moore|United Kingdom

>Spike|hCoV-19/England/BRIS-12E162/2020|2020-04-20|EPI\_ISL\_482030|Original|hCoV-19^^England|Human|PHE South West Regional Laboratory|Wellcome Sanger Institute for the COVID-19 Genomics UK (COG-UK) consortium|Davies|United Kingdom

>Spike|hCoV-19/USA/TX-HMH-1831/2020|2020-05-12|EPI\_ISL\_542870|Original|hCoV-19^^Texas|Human|Houston Methodist Hospital|Houston Methodist Hospital|Long|USA

>Spike|hCoV-19/Denmark/DCGC-4475/2020|2020-09-14|EPI\_ISL\_615660|Original|hCoV-19^^Nordjylland|Human|Department of Virus and Microbiological Special Diagnostics|Albertsen lab|Michaelsen|Denmark

>Spike|hCoV-19/Australia/VIC1373/2020|2020-04-14|EPI\_ISL\_456415|Original|hCoV-19^^Victoria|Human|Victorian Infectious Diseases Reference Laboratory (VIDRL)|Microbiological Diagnostic Unit Public Health Laboratory and Victorian Infectious Diseases Reference Laboratory|Schultz|Australia

>Spike|hCoV-19/England/MILK-9D4804/2020|2020-09-18|EPI\_ISL\_601780|Original|hCoV-19^^England|Human|Lighthouse Lab in Milton Keynes|Wellcome Sanger Institute for the COVID-19 Genomics UK (COG-UK) consortium|Davies|United Kingdom

>Spike|hCoV-19/Denmark/DCGC-16210/2020|2020-11-16|EPI\_ISL\_714456|Original|hCoV-19^^Hovedstaden|Human|Department of Virus and Microbiological Special Diagnostics|Albertsen Lab|Michaelsen|Denmark

>Spike|hCoV-19/England/NORW-EE2E4/2020|2020-04-24|EPI\_ISL\_490528|Original|hCoV-19^^England|Human|Quadram Institute Bioscience|COVID-19 Genomics UK (COG-UK) Consortium|Alikhan|United Kingdom

>Spike|hCoV-19/England/CAMC-B34615/2020|2020-11-05|EPI\_ISL\_659613|Original|hCoV-19^^England|Human|Lighthouse Lab in Cambridge|Wellcome Sanger Institute for the COVID-19 Genomics UK (COG-UK) Consortium|Davies|United Kingdom

>Spike|hCoV-19/Australia/VIC3233/2020|2020-07-05|EPI\_ISL\_520915|Original|hCoV-19^^Victoria|Human|Victorian Infectious Diseases Reference Laboratory (VIDRL)|VIDRL and MDU-PHL|Schultz|Australia

>Spike|hCoV-19/England/ALDP-9883A4/2020|2020-08-03|EPI\_ISL\_529381|Original|hCoV-19^^England|Human|Quadram Institute Bioscience|COVID-19 Genomics UK (COG-UK) Consortium|Alikhan|United Kingdom

>Spike|hCoV-19/USA/MN-MDH-1441/2020|2020-03-25|EPI\_ISL\_514660|Original|hCoV-19^^Minnesota|Human|Minnesota Department of Health|Minnesota Department of Health|Garfin|USA

>Spike|hCoV-19/Norway/2857/2020|2020-07-02|EPI\_ISL\_500780|Original|hCoV-19^^Norway|Human|Akershus University Hospital|Norwegian Institute of Public Health|Kopperud Riis|Norway

>Spike|hCoV-19/England/CAMC-B77CD8/2020|2020-11-12|EPI\_ISL\_783535|Original|hCoV-19^^England|Human|Lighthouse Lab in Cambridge|Wellcome Sanger Institute for the COVID-19 Genomics UK (COG-UK) Consortium|Davies|United Kingdom

>Spike|hCoV-19/England/ALDP-5CFC04/2020|2020-06-20|EPI\_ISL\_558613|Original|hCoV-19^^England|Human|Lighthouse Lab in Alderley Park|Wellcome Sanger Institute for the COVID-19 Genomics UK (COG-UK) consortium|Davies|United Kingdom

>Spike|hCoV-19/Japan/IC-0384/2020|2020-12-00|EPI\_ISL\_721623|Original|hCoV-19^^Japan|Human|Pathogen Genomics Center|Pathogen Genomics Center|Sekizuka|Japan

>Spike|hCoV-19/USA/CA-CZB-13360/2020|2020-05-21|EPI\_ISL\_672448|Original|hCoV-19^^California|Human|Alameda County Public Health Lab|Chan-Zuckerberg Biohub|Bhatt|USA

>Spike|hCoV-19/Wales/PHWC-2F44B/2020|2020-04-08|EPI\_ISL\_446252|Original|hCoV-19^^Wales|Human|Wales Specialist Virology Centre|Public Health Wales Microbiology Cardiff|Moore|United Kingdom

>Spike|hCoV-19/England/NORT-286D45/2020|2020-10-25|EPI\_ISL\_652337|Original|hCoV-19^^England|Human|Northumbria University / South Tees Hospitals NHS Foundation Trust / North Cumbria Integrated Care NHS Foundation Trust / North Tees and Hartlepool NHS Foundation Trust / Newcastle Hospitals NHS Foundation Trust|COVID-19 Genomics UK (COG-UK) Consortium|Bashton|United Kingdom

>Spike|hCoV-19/England/MILK-970BB6/2020|2020-08-18|EPI\_ISL\_553184|Original|hCoV-19^^England|Human|Lighthouse Lab in Milton Keynes|Wellcome Sanger Institute for the COVID-19 Genomics UK (COG-UK) consortium|Davies|United Kingdom

>Spike|hCoV-19/USA/SC-DHEC-0645/2020|2020-06-19|EPI\_ISL\_538429|Original|hCoV-19^^South Carolina|Human|Microbiology Division|Microbiology Division|Flores|USA

>Spike|hCoV-19/Kenya/C656/2020|2020-04-13|EPI\_ISL\_457915|Original|hCoV-19^^Kenya|Human|KEMRI-CGMR-C|KEMRI-Wellcome Trust Research Programme/KEMRI-CGMR-C Kilifi|Githinji|Kenya

>Spike|hCoV-19/Spain/AN-IBV-001216/2020|2020-03-24|EPI\_ISL\_452557|Original|hCoV-19^^Andalucia|Human|Servicio de Microbiolog\u00eda y Parasitolog\u00eda cl\u00ednica. UCEIMP. Hospital Universitario Virgen del Roc\u00edo/IBIS/CSIC/US.|SeqCOVID-SPAIN consortium/IBV (CSIC) |Comas|Spain

>Spike|hCoV-19/Denmark/DCGC-16773/2020|2020-12-14|EPI\_ISL\_750554|Original|hCoV-19^^Syddanmark|Human|Department of Virus and Microbiological Special Diagnostics|Albertsen Lab|Michaelsen|Denmark

>Spike|hCoV-19/Australia/VIC8438/2020|2020-07-27|EPI\_ISL\_565012|Original|hCoV-19^^Victoria|Human|Microbiological Diagnostic Unit - Public Health Laboratory (MDU-PHL) |MDU-PHL|Schultz|Australia

>Spike|hCoV-19/USA/NE-CDC-2-3714268/2020|2020-10-29|EPI\_ISL\_751608|Original|hCoV-19^^Nebraska|Human|NE Public Health Laboratory|Genomics and Discovery|Queen|USA

>Spike|hCoV-19/United Arab Emirates/1092/2020|2020-05-15|EPI\_ISL\_708828|Original|hCoV-19^^Abu Dhabi|Human|Group 42 (G42) Healthcare|G42 Healthcare|Ogrodzki|United Arab Emirates

>Spike|hCoV-19/Denmark/ALAB-HH-189/2020|2020-04-14|EPI\_ISL\_452052|Original|hCoV-19^^Denmark|Human|Department of Clinical Microbiology|Albertsen lab|Kirkegaard|Denmark

>Spike|hCoV-19/England/CAMB-1B43E3/2020|2020-06-02|EPI\_ISL\_473471|Original|hCoV-19^^England|Human|Department of Pathology|COVID-19 Genomics UK (COG-UK) Consortium|Meredith|United Kingdom

>Spike|hCoV-19/USA/WI-UW-1243/2020|2020-08-19|EPI\_ISL\_536616|Original|hCoV-19^^Wisconsin|Human|University of Wisconsin-Madison AIDS Vaccine Research Laboratories|University of Wisconsin-Madison AIDS Vaccine Research Laboratories|Baczenas|USA

>Spike|hCoV-19/Spain/VC-FISABIO-61/2020|2020-03-10|EPI\_ISL\_425185|Original|hCoV-19^^Comunitat Valenciana|Human|Servicio de Microbiolog\u00eda. Consorcio Hospital General Universitario de Valencia|Sequencing and Bioinformatics Service and Molecular Epidemiology Research Group. FISABIO-Public Health|Gonzalez-Candelas|Spain

>Spike|hCoV-19/USA/WA-S568/2020|2020-03-31|EPI\_ISL\_434328|Original|hCoV-19^^Washington|Human|Washington State Department of Health|Seattle Flu Study|Bedford|USA

>Spike|hCoV-19/England/QEUH-AADBFB/2020|2020-10-22|EPI\_ISL\_623917|Original|hCoV-19^^England|Human|Lighthouse Lab in Glasgow|Wellcome Sanger Institute for the COVID-19 Genomics UK (COG-UK) consortium|Davies|United Kingdom

>Spike|hCoV-19/Netherlands/NoordBrabant\_17/2020|2020-03-06|EPI\_ISL\_414457|Original|hCoV-19^^Noord Brabant|Human|Dutch COVID-19 response team|Erasmus Medical Center|Oude Munnink|Netherlands

>Spike|hCoV-19/USA/TX-HMH-MCoV-14691/2020|2020-10-01|EPI\_ISL\_787976|Original|hCoV-19^^Texas|Human|Houston Methodist Hospital|Houston Methodist Hospital|Long|USA

>Spike|hCoV-19/USA/CA-CZB-2508/2020|2020-05-19|EPI\_ISL\_513893|Original|hCoV-19^^California|Human|UCSF Clinical Microbiology Laboratory|Chan-Zuckerberg Biohub|Kamm|USA

>Spike|hCoV-19/England/BIRM-5E7EO/2020|2020-03-24|EPI\_ISL\_444303|Original|hCoV-19^^England|Human|University of Birmingham|COVID-19 Genomics UK (COG-UK) Consortium|Loman|United Kingdom

>Spike|hCoV-19/England/ALDP-953278/2020|2020-06-11|EPI\_ISL\_554398|Original|hCoV-19^^England|Human|Lighthouse Lab in Alderley Park|Wellcome Sanger Institute for the COVID-19 Genomics UK (COG-UK) consortium|Davies|United Kingdom

>Spike|hCoV-19/USA/MA-MASPHL-00593/2020|2020-05-08|EPI\_ISL\_693016|Original|hCoV-19^^Massachusetts|Human|Massachusetts State Public Health Laboratory|Massachusetts State Public Health Laboratory|Lang|USA

>Spike|hCoV-19/Scotland/QEUH-A1FBE5/2020|2020-10-01|EPI\_ISL\_599037|Original|hCoV-19^^Scotland|Human|Lighthouse Lab in Glasgow|Wellcome Sanger Institute for the COVID-19 Genomics UK (COG-UK) consortium|Davies|United Kingdom

>Spike|hCoV-19/England/CAMB-1BB06D/2020|2020-11-11|EPI\_ISL\_664816|Original|hCoV-19^^England|Human|Department of Pathology|COVID-19 Genomics UK (COG-UK) Consortium|Goodfellow|United Kingdom

>Spike|hCoV-19/Denmark/DCGC-2400/2020|2020-08-10|EPI\_ISL\_617582|Original|hCoV-19^^Midtjylland|Human|Department of Virus and Microbiological Special Diagnostics|Albertsen lab|Michaelsen|Denmark

>Spike|hCoV-19/Denmark/DCGC-19955/2020|2020-12-07|EPI\_ISL\_747559|Original|hCoV-19^^Hovedstaden|Human|Department of Virus and Microbiological Special Diagnostics|Albertsen Lab|Michaelsen|Denmark

>Spike|hCoV-19/Scotland/EDB4642/2020|2020-05-08|EPI\_ISL\_478174|Original|hCoV-19^^Scotland|Human|Virology Department|COVID-19 Genomics UK (COG-UK) Consortium|Williams|United Kingdom

>Spike|hCoV-19/USA/OR-OHSU-0046/2020|2020-04-20|EPI\_ISL\_468085|Original|hCoV-19^^Oregon|Human|OHSU Lab Services Molecular Microbiology Lab|Oregon SARS-CoV-2 Genome Sequencing Center|O'Roak|USA

>Spike|hCoV-19/Netherlands/NH-RIVM-20629/2020|2020-12-16|EPI\_ISL\_790706|Original|hCoV-19^^Noord-Holland|Human|Dutch COVID-19 response team|National Institute for Public Health and the Environment (RIVM)|Meijer|Netherlands

>Spike|hCoV-19/Japan/PG-8769/2020|2020-09-00|EPI\_ISL\_686365|Original|hCoV-19^^Japan|Human|Pathogen Genomics Center|Pathogen Genomics Center|Sekizuka|Japan

>Spike|hCoV-19/Scotland/QEUH-C5412C/2020|2020-12-12|EPI\_ISL\_757062|Original|hCoV-19^^Scotland|Human|Lighthouse Lab in Glasgow|Wellcome Sanger Institute for the COVID-19 Genomics UK (COG-UK) Consortium|Davies|United Kingdom

>Spike|hCoV-19/USA/CA-QDX-1937/2020|2020-03-16|EPI\_ISL\_604209|Original|hCoV-19^^California|Human|Quest Diagnostics|Quest Diagnostics|Kagan|USA

>Spike|hCoV-19/England/CAMB-7B7FC/2020|2020-04-03|EPI\_ISL\_442331|Original|hCoV-19^^England|Human|Department of Pathology|Wellcome Sanger Institute for the COVID-19 Genomics UK (COG-UK) consortium|Amato|United Kingdom

>Spike|hCoV-19/England/MILK-AC77BB/2020|2020-10-21|EPI\_ISL\_630273|Original|hCoV-19^^England|Human|Lighthouse Lab in Milton Keynes|Wellcome Sanger Institute for the COVID-19 Genomics UK (COG-UK) consortium|Davies|United Kingdom

>Spike|hCoV-19/Australia/VIC1413/2020|2020-04-16|EPI\_ISL\_456434|Original|hCoV-19^^Victoria|Human|Victorian Infectious Diseases Reference Laboratory (VIDRL)|Microbiological Diagnostic Unit Public Health Laboratory and Victorian Infectious Diseases Reference Laboratory|Schultz|Australia

>Spike|hCoV-19/Saudi Arabia/KAUST-RIYADH1222/2020|2020-07-29|EPI\_ISL\_678211|Original|hCoV-19^^Riyadh|Human|Pathogen Genomics Lab King Abdullah University of Science and Technology(KAUST)|Pathogen Genomics Lab King Abdullah University of Science and Technology(KAUST)|Mohamed Ghazzali|Saudi Arabia

>Spike|hCoV-19/Australia/VIC3470/2020|2020-07-06|EPI\_ISL\_521131|Original|hCoV-19^^Victoria|Human|Victorian Infectious Diseases Reference Laboratory (VIDRL)|VIDRL and MDU-PHL|Schultz|Australia

>Spike|hCoV-19/Suriname/SR-31/2020|2020-06-25|EPI\_ISL\_517642|Original|hCoV-19^^Suriname|Human|Academic Hospital Paramaribo|Erasmus Medical Center|M\u00f4cnger|Suriname

>Spike|hCoV-19/Netherlands/Friesland\_20/2020|2020-04-07|EPI\_ISL\_460642|Original|hCoV-19^^Friesland|Human|Dutch COVID-19 response team|Erasmus Medical Center|Oude Munnink|Netherlands

>Spike|hCoV-19/USA/CA-CZB-7158/2020|2020-08-15|EPI\_ISL\_583227|Original|hCoV-19^^California|Human|UCSF Clinical Microbiology Laboratory|Chan-Zuckerberg Biohub|Bhatt|USA

>Spike|hCoV-19/England/PORT-2F5118/2020|2020-00-00|EPI\_ISL\_706885|Original|hCoV-19^^England|Human|Centre for Enzyme Innovation|COVID-19 Genomics UK (COG-UK) Consortium|Robson|United Kingdom

>Spike|hCoV-19/Malaysia/UNIMAS-2615/2020|2020-04-18|EPI\_ISL\_718141|Original|hCoV-19^^Sarawak|Human|Ministry of Health Hospitals|Institute of Health and Community Medicine|Jonathan|Malaysia

>Spike|hCoV-19/England/MILK-A6B5BF/2020|2020-10-09|EPI\_ISL\_608830|Original|hCoV-19^^England|Human|Lighthouse Lab in Milton Keynes|Wellcome Sanger Institute for the COVID-19 Genomics UK (COG-UK) consortium|Davies|United Kingdom

>Spike|hCoV-19/England/BRIS-12DE02/2020|2020-05-31|EPI\_ISL\_482011|Original|hCoV-19^^England|Human|PHE South West Regional Laboratory|Wellcome Sanger Institute for the COVID-19 Genomics UK (COG-UK) consortium|Davies|United Kingdom

>Spike|hCoV-19/England/CAMB-1B5E1E/2020|2020-09-08|EPI\_ISL\_549394|Original|hCoV-19^^England|Human|Department of Pathology|COVID-19 Genomics UK (COG-UK) Consortium|Goodfellow|United Kingdom

>Spike|hCoV-19/Denmark/DCGC-18087/2020|2020-12-14|EPI\_ISL\_749311|Original|hCoV-19^^Midtjylland|Human|Department of Virus and Microbiological Special Diagnostics|Albertsen Lab|Michaelsen|Denmark

>Spike|hCoV-19/USA/UT-QDX-1836/2020|2020-03-14|EPI\_ISL\_604154|Original|hCoV-19^^Utah|Human|Quest Diagnostics|Quest Diagnostics|Kagan|USA

>Spike|hCoV-19/Australia/VIC16654/2020|2020-08-08|EPI\_ISL\_640400|Original|hCoV-19^^Victoria|Human|Microbiological Diagnostic Unit - Public Health Laboratory (MDU-PHL)|MDU-PHL|Schultz|Australia

>Spike|hCoV-19/England/NORW-F007C/2020|2020-10-09|EPI\_ISL\_595176|Original|hCoV-19^^England|Human|Quadram Institute Bioscience|COVID-19 Genomics UK (COG-UK) Consortium|Alikhan|United Kingdom

>Spike|hCoV-19/Norway/3015/2020|2020-08-04|EPI\_ISL\_549074|Original|hCoV-19^^Viken|Human|Furst Medical Laboratory|Norwegian Institute of Public Health|Kopperud Riis|Norway

>Spike|hCoV-19/USA/NY-Wadsworth-143769-01/2020|2020-06-17|EPI\_ISL\_676979|Original|hCoV-19^^New York|Human|Wadsworth Center|Wadsworth Center|Lasek-Nesselquist|USA

>Spike|hCoV-19/Denmark/DCGC-1139/2020|2020-03-16|EPI\_ISL\_614640|Original|hCoV-19^^Hovedstaden|Human|Department of Virus and Microbiological Special Diagnostics|Albertsen lab|Michaelsen|Denmark

>Spike|hCoV-19/Scotland/CVR3173/2020|2020-04-26|EPI\_ISL\_456769|Original|hCoV-19^^Scotland|Human|West of Scotland Specialist Virology Centre|COVID-19 Genomics UK (COG-UK) Consortium|Robertson|United Kingdom

>Spike|hCoV-19/Spain/PV-IBV-000683/2020|2020-03-08|EPI\_ISL\_452778|Original|hCoV-19^^Basque Country|Human|Hospital Universitario Araba. Vitoria-Gasteiz,|SeqCOVID-SPAIN consortium|IBV (CSIC)|Comas|Spain

>Spike|hCoV-19/Nigeria/AK-CV321/2020|2020-07-17|EPI\_ISL\_729992|Original|hCoV-19^^Akwa-Ibom State|Human|Nigeria Centre for Disease Control (NCDC)|African Centre of Excellence for Genomics of Infectious Diseases (ACEGID)|Oluniyi|Nigeria

>Spike|hCoV-19/England/ALDP-C8B450/2020|2020-12-16|EPI\_ISL\_756435|Original|hCoV-19^^England|Human|Lighthouse Lab in Alderley Park|Wellcome Sanger Institute for the COVID-19 Genomics UK (COG-UK) Consortium|Davies|United Kingdom

>Spike|hCoV-19/USA/MI-MDHHS-SC21903/2020|2020-04-14|EPI\_ISL\_565964|Original|hCoV-19^^Michigan|Human|Michigan Department of Health and Human Services|Michigan Department of Health and Human Services|Blankenship|USA

>Spike|hCoV-19/England/ALDP-BBB41C/2020|2020-11-21|EPI\_ISL\_702595|Original|hCoV-19^^England|Human|Lighthouse Lab in Alderley Park|Wellcome Sanger Institute for the COVID-19 Genomics UK (COG-UK) Consortium|Davies|United Kingdom

>Spike|hCoV-19/France/ARA-SC729/2020|2020-11-16|EPI\_ISL\_779823|Original|hCoV-19^^Auvergne-Rh\u00f4ne-Alpes|Human|Laboratoire de virologie|CNR Virus des Infections Respiratoires - France SUD|Bal|France

>Spike|hCoV-19/Wales/PHWC-24033/2020|2020-03-15|EPI\_ISL\_418140|Original|hCoV-19^^Wales|Human|Wales Specialist Virology Centre|Public Health Wales Microbiology Cardiff|Moore|United Kingdom

>Spike|hCoV-19/England/LIVE-DAB3A7/2020|2020-10-16|EPI\_ISL\_626694|Original|hCoV-19^^England|Human|Liverpool Clinical Laboratories|COVID-19 Genomics UK (COG-UK) Consortium|Haldenby|United Kingdom

>Spike|hCoV-19/Australia/VIC3986/2020|2020-07-15|EPI\_ISL\_519376|Original|hCoV-19^^Victoria|Human|Microbiological Diagnostic Unit - Public Health Laboratory (MDU-PHL)|MDU-PHL|Schultz|Australia

>Spike|hCoV-19/England/NORT-2978AA/2020|2020-04-22|EPI\_ISL\_488031|Original|hCoV-19^^England|Human|NU-OMICS DNA Sequencing research facility|Wellcome Sanger Institute for the COVID-19 Genomics UK (COG-UK) consortium|Davies|United Kingdom

>Spike|hCoV-19/USA/NY-Wadsworth-88420-01/2020|2020-05-09|EPI\_ISL\_676725|Original|hCoV-19^^New York|Human|Wadsworth Center|Wadsworth Center|Lasek-Nesselquist|USA

>Spike|hCoV-19/England/BRIS-12283C/2020|2020-04-04|EPI\_ISL\_440636|Original|hCoV-19^^England|Human|PHE South West Regional Laboratory|Wellcome Sanger Institute for the COVID-19 Genomics UK (COG-UK) consortium|Amato|United Kingdom

>Spike|hCoV-19/Denmark/DCGC-14044/2020|2020-11-30|EPI\_ISL\_711534|Original|hCoV-19^^Nordjylland|Human|Department of Virus and Microbiological Special Diagnostics|Albertsen Lab|Michaelsen|Denmark

>Spike|hCoV-19/Australia/VIC4265/2020|2020-07-15|EPI\_ISL\_519593|Original|hCoV-19^^Victoria|Human|Microbiological Diagnostic Unit - Public Health Laboratory (MDU-PHL)|MDU-PHL|Schultz|Australia

>Spike|hCoV-19/Wales/PHWC-48D76C/2020|2020-11-05|EPI\_ISL\_680673|Original|hCoV-19^^Wales|Human|Wales Specialist Virology Centre Sequencing lab|COVID-19 Genomics UK (COG-UK) Consortium|Moore|United Kingdom

>Spike|hCoV-19/India/TG-CDFD-C1046/2020|2020-05-29|EPI\_ISL\_528544|Original|hCoV-19^^Telangana|Human|National Genomics Core-Center for DNA Fingerprinting and Diagnostics|National Genomics Core-Center for DNA Fingerprinting and Diagnostics (NGC-CDFD)- DBT's PAN-INDIA-1000 Genome consortium|Vashisht|India

>Spike|hCoV-19/Kuwait/KU-01/2020|2020-05-23|EPI\_ISL\_745191|Original|hCoV-19^^Kuwait|Human|Mubarak Al-Kabeer Hospital|Virology Unit|Madi|Kuwait

>Spike|hCoV-19/Denmark/DCGC-11814/2020|2020-10-26|EPI\_ISL\_670538|Original|hCoV-19^^Midtjylland|Human|Department of Virus and Microbiological Special Diagnostics|Albertsen Lab|Michaelsen|Denmark

>Spike|hCoV-19/USA/NY-NYCPHL-000133/2020|2020-04-02|EPI\_ISL\_631624|Original|hCoV-19^^New York|Human|Richmond University Medical Center|New York City Public Health Laboratory|Wang|USA

>Spike|hCoV-19/England/204221504/2020|2020-00-00|EPI\_ISL\_593832|Original|hCoV-19^^England|Human|Respiratory Virus Unit|Respiratory Virus Unit|Platt|United Kingdom

>Spike|hCoV-19/England/204742217/2020|2020-00-00|EPI\_ISL\_649922|Original|hCoV-19^^England|Human|Respiratory Virus Unit|COVID-19 Genomics UK (COG-UK) Consortium|Platt|United Kingdom

>Spike|hCoV-19/England/CAMB-1B6572/2020|2020-09-30|EPI\_ISL\_584288|Original|hCoV-19^^England|Human|Department of Pathology|COVID-19 Genomics UK (COG-UK) Consortium|Goodfellow|United Kingdom

>Spike|hCoV-19/Wales/ALDP-B1A8D3/2020|2020-11-01|EPI\_ISL\_711031|Original|hCoV-19^^Wales|Human|Lighthouse Lab in Alderley Park|Wellcome Sanger Institute for the COVID-19 Genomics UK (COG-UK) Consortium|Davies|United Kingdom

>Spike|hCoV-19/England/MILK-999F42/2020|2020-08-29|EPI\_ISL\_550315|Original|hCoV-19^^England|Human|Lighthouse Lab in Milton Keynes|Wellcome Sanger Institute for the COVID-19 Genomics UK (COG-UK) consortium|Davies|United Kingdom

>Spike|hCoV-19/Australia/VIC13441/2020|2020-09-06|EPI\_ISL\_592239|Original|hCoV-19^^Victoria|Human|Microbiological Diagnostic Unit - Public Health Laboratory (MDU-PHL)|MDU-PHL|Schultz|Australia

>Spike|hCoV-19/England/QEUH-A202CE/2020|2020-10-01|EPI\_ISL\_587580|Original|hCoV-19^^England|Human|Lighthouse Lab in Glasgow|Wellcome Sanger Institute for the COVID-19 Genomics UK (COG-UK) consortium|Davies|United Kingdom

>Spike|hCoV-19/Australia/VIC5890/2020|2020-07-21|EPI\_ISL\_518672|Original|hCoV-19^^Victoria|Human|Microbiological Diagnostic Unit - Public Health Laboratory (MDU-PHL)|MDU-PHL|Schultz|Australia

>Spike|hCoV-19/England/CAMB-1BB05E/2020|2020-11-11|EPI\_ISL\_664160|Original|hCoV-19^^England|Human|Department of Pathology|COVID-19 Genomics UK (COG-UK) Consortium|Goodfellow|United Kingdom

>Spike|hCoV-19/Wales/PHWC-49CDB3/2020|2020-12-09|EPI\_ISL\_742688|Original|hCoV-19^^Wales|Human|Wales Specialist Virology Centre Sequencing lab|COVID-19 Genomics UK (COG-UK) Consortium|Moore|United Kingdom

>Spike|hCoV-19/France/PAC-IHU-0756/2020|2020-03-15|EPI\_ISL\_568956|Original|hCoV-19^^Provence-Alpes-C\u00f4te-d\u2019Azur|Human|MEPHI|MEPHI|Levasseur|France

>Spike|hCoV-19/USA/WI-UW-2313/2020|2020-11-06|EPI\_ISL\_728079|Original|hCoV-19^^Wisconsin|Human|University of Wisconsin-Madison AIDS Vaccine Research Laboratories|University of Wisconsin-Madison AIDS Vaccine Research Laboratories|Baczenas|USA

>Spike|hCoV-19/Mexico/BCN-ALSR-2566/2020|2020-07-07|EPI\_ISL\_635568|Original|hCoV-19^^Baja California|Human|Centro de Diagn\u221a\u2265tico COVID-19 UABC Tijuana|Andersen lab at Scripps Research|Gangavarapu|Mexico

>Spike|hCoV-19/USA/NY-Wadsworth-37117-01/2020|2020-04-03|EPI\_ISL\_676798|Original|hCoV-19^^New York|Human|Wadsworth Center|Wadsworth Center|Lasek-Nesselquist|USA

>Spike|hCoV-19/USA/AZ-TG640847/2020|2020-04-27|EPI\_ISL\_695792|Original|hCoV-19^^Arizona|Human|Sonora Quest Laboratories|TGen North|French|USA

>Spike|hCoV-19/Japan/PG-3527/2020|2020-06-00|EPI\_ISL\_691783|Original|hCoV-19^^Japan|Human|Pathogen Genomics Center|Pathogen Genomics Center|Sekizuka|Japan

>Spike|hCoV-19/Wales/PHWC-490B2E/2020|2020-11-15|EPI\_ISL\_706539|Original|hCoV-19^^Wales|Human|Originating lab|COVID-19 Genomics UK (COG-UK) Consortium|Moore|United Kingdom

>Spike|hCoV-19/Wales/PHWC-258EF/2020|2020-03-24|EPI\_ISL\_422243|Original|hCoV-19^^Wales|Human|Wales Specialist Virology Centre|Public Health Wales Microbiology Cardiff|Moore|United Kingdom

>Spike|hCoV-19/USA/TX-DSHS-0633/2020|2020-06-26|EPI\_ISL\_576289|Original|hCoV-19^^Texas|Human|Texas Department of State Health Services|Texas Department of State Health Services|Rahman|USA

>Spike|hCoV-19/Scotland/QEUH-9606E5/2020|2020-08-05|EPI\_ISL\_531982|Original|hCoV-19^^Scotland|Human|NHSGGC West of Scotland Specialist Virology Centre / MRC-University of Glasgow Centre for Virus Research|Wellcome Sanger Institute for the COVID-19 Genomics UK (COG-UK) consortium|Davies|United Kingdom

>Spike|hCoV-19/Wales/PHWC-483845/2020|2020-10-20|EPI\_ISL\_627861|Original|hCoV-19^^Wales|Human|Wales Specialist Virology Centre Sequencing lab|COVID-19 Genomics UK (COG-UK) Consortium|Moore|United Kingdom

>Spike|hCoV-19/USA/LA-EVTL231/2020|2020-08-22|EPI\_ISL\_574365|Original|hCoV-19^^Louisiana|Human|LSUHS Emerging Viral Threat Laboratory|Microbial Genome Sequencing Center|Kamil|USA

>Spike|hCoV-19/Bangladesh/BCSIR-NILMRC-173/2020|2020-06-18|EPI\_ISL\_480450|Original|hCoV-19^^Rajshahi|Human|National Institute of Laboratory Medicine and Referral Center|Genomic Research Lab|Khan|Bangladesh

>Spike|hCoV-19/England/QEUH-AD0D9F/2020|2020-10-26|EPI\_ISL\_633981|Original|hCoV-19^^England|Human|Lighthouse Lab in Glasgow|Wellcome Sanger Institute for the COVID-19 Genomics UK (COG-UK) consortium|Davies|United Kingdom



>Spike|hCoV-19/Spain/IB-IBV-99010804/2020|2020-09-30|EPI\_ISL\_691678|Original|hCoV-19^^Balear Islands|Human|Servicio de Microbiolog\u00eda|SeqCOVID-SPAIN consortium/IBV (CSIC) |Comas|Spain

>Spike|hCoV-19/England/ALDP-B2487C/2020|2020-11-04|EPI\_ISL\_646907|Original|hCoV-19^^England|Human|Lighthouse Lab in Alderley Park|Wellcome Sanger Institute for the COVID-19 Genomics UK (COG-UK) Consortium|Davies|United Kingdom

>Spike|hCoV-19/Hungary/SRC-00620/2020|2020-03-27|EPI\_ISL\_435416|Original|hCoV-19^^Baranya|Human|Virological Research Group|Bioinformatics Research Group|Herczeg|Hungary

>Spike|hCoV-19/England/ALDP-91FF62/2020|2020-06-23|EPI\_ISL\_552908|Original|hCoV-19^^England|Human|Lighthouse Lab in Alderley Park|Wellcome Sanger Institute for the COVID-19 Genomics UK (COG-UK) consortium|Davies|United Kingdom

>Spike|hCoV-19/Australia/SAP383/2020|2020-03-22|EPI\_ISL\_492148|Original|hCoV-19^^South Australia|Human|SA Pathology|SA Pathology|Leong|Australia

>Spike|hCoV-19/USA/CA-IGI-0334/2020|2020-07-21|EPI\_ISL\_754870|Original|hCoV-19^^California|Human|Innovative Genomics Institute|Innovative Genomics Institute|Wyman|USA

>Spike|hCoV-19/France/ARA-41147/2020|2020-05-26|EPI\_ISL\_683360|Original|hCoV-19^^Auvergne-Rh\u00eane-Alpes|Human|CNR Virus des Infections Respiratoires - France SUD|CNR Virus des Infections Respiratoires - France SUD|Bal|France

>Spike|hCoV-19/England/ALDP-982C45/2020|2020-08-09|EPI\_ISL\_552607|Original|hCoV-19^^England|Human|Lighthouse Lab in Alderley Park|Wellcome Sanger Institute for the COVID-19 Genomics UK (COG-UK) consortium|Davies|United Kingdom

>Spike|hCoV-19/South Africa/KRISP-K001324/2020|2020-07-18|EPI\_ISL\_515809|Original|hCoV-19^^KwaZulu-Natal|Human|Medical Disagnostics Services (MDS) |KRISP|de Oliveira|South Africa

>Spike|hCoV-19/England/QEUIH-BC4BA2/2020|2020-11-25|EPI\_ISL\_703880|Original|hCoV-19^^England|Human|Lighthouse Lab in Glasgow|Wellcome Sanger Institute for the COVID-19 Genomics UK (COG-UK) Consortium|Davies|United Kingdom

>Spike|hCoV-19/USA/DE-DHSS-F918497/2020|2020-04-01|EPI\_ISL\_593974|Original|hCoV-19^^Delaware|Human|Delaware Public Health Lab|Delaware Public Health Lab|Bajwa|USA

>Spike|hCoV-19/England/CAMB-7C421/2020|2020-04-06|EPI\_ISL\_442324|Original|hCoV-19^^England|Human|Department of Pathology|Wellcome Sanger Institute for the COVID-19 Genomics UK (COG-UK) consortium|Amato|United Kingdom

>Spike|hCoV-19/Canada/NS-NML-1264/2020|2020-04-07|EPI\_ISL\_579652|Original|hCoV-19^^Nova Scotia|Human|QEII Health Sciences Centre|National Microbiology Laboratory (NML) |Majer|Canada

>Spike|hCoV-19/USA/FL-BPHL-1592/2020|2020-05-21|EPI\_ISL\_594282|Original|hCoV-19^^Florida|Human|Florida Bureau of Public Health Laboratories|Florida Bureau of Public Health Laboratories|Blanton|USA

>Spike|hCoV-19/Denmark/DCGC-14530/2020|2020-11-30|EPI\_ISL\_711820|Original|hCoV-19^^Hovedstaden|Human|Department of Virus and Microbiological Special Diagnostics|Albertsen Lab|Michaelsen|Denmark

>Spike|hCoV-19/USA/LA-EVTL1298/2020|2020-12-11|EPI\_ISL\_778964|Original|hCoV-19^^Louisiana|Human|LSUHS Emerging Viral Threat Laboratory|Microbial Genome Sequencing Center|Kamil|USA

>Spike|hCoV-19/England/QEUIH-AAAF10/2020|2020-10-21|EPI\_ISL\_652755|Original|hCoV-19^^England|Human|Oxford Viromics|COVID-19 Genomics UK (COG-UK) Consortium|Golubchik|United Kingdom

>Spike|hCoV-19/England/ALDP-BC79E1/2020|2020-11-23|EPI\_ISL\_721241|Original|hCoV-19^^England|Human|Lighthouse Lab in Alderley Park|Wellcome Sanger Institute for the COVID-19 Genomics UK (COG-UK) Consortium|Davies|United Kingdom

>Spike|hCoV-19/England/ALDP-C25CBA/2020|2020-12-06|EPI\_ISL\_782801|Original|hCoV-19^^England|Human|Lighthouse Lab in Alderley Park|Wellcome Sanger Institute for the COVID-19 Genomics UK (COG-UK) Consortium|Davies|United Kingdom

>Spike|hCoV-19/Luxembourg/LNS4102728/2020|2020-12-02|EPI\_ISL\_771010|Original|hCoV-19^^Luxembourg|Human|Laboratoire national de sant\u00e9|Laboratoire national de sant\u00e9|Wienecke-Baldacchino|Luxembourg

>Spike|hCoV-19/England/CAMC-B34211/2020|2020-11-05|EPI\_ISL\_659627|Original|hCoV-19^^England|Human|Lighthouse Lab in Cambridge|Wellcome Sanger Institute for the COVID-19 Genomics UK (COG-UK) Consortium|Davies|United Kingdom

>Spike|hCoV-19/Denmark/DCGC-19757/2020|2020-12-07|EPI\_ISL\_747763|Original|hCoV-19^^Syddanmark|Human|Department of Virus and Microbiological Special Diagnostics|Albertsen Lab|Michaelsen|Denmark

>Spike|hCoV-19/Peru/AMZ-UPCH-0255/2020|2020-09-21|EPI\_ISL\_729869|Original|hCoV-19^^Amazonas|Human|Instituto de Medicina Tropical|Laboratorio de Gen\u00f3mica Microbiana|Tsukayama|Peru

>Spike|hCoV-19/Spain/PV-IBV-98008355/2020|2020-10-27|EPI\_ISL\_654548|Original|hCoV-19^^Basque Country|Human|Servicio de Microbiolog\u00eda. Hospital Universitario Donostia. OSI Donostialdea. \u00c1rea de Enfermedades Infecciosas|SeqCOVID-SPAIN consortium/IBV (CSIC)|Comas|Spain

>Spike|hCoV-19/USA/OR-OHSU-2303/2020|2020-08-10|EPI\_ISL\_667176|Original|hCoV-19^^Oregon|Human|OHSU Lab Services Molecular Microbiology Lab|Oregon SARS-CoV-2 Genome Sequencing Center|O'Roak|USA

>Spike|hCoV-19/Wales/PHWC-47F211/2020|2020-10-05|EPI\_ISL\_612646|Original|hCoV-19^^Wales|Human|Wales Specialist Virology Centre Sequencing lab|COVID-19 Genomics UK (COG-UK) Consortium|Moore|United Kingdom

>Spike|hCoV-19/Scotland/EDB8112/2020|2020-10-05|EPI\_ISL\_585479|Original|hCoV-19^^Scotland|Human|Virology Department|COVID-19 Genomics UK (COG-UK) Consortium|McHugh|United Kingdom

>Spike|hCoV-19/England/CAMC-AEA785/2020|2020-10-26|EPI\_ISL\_633265|Original|hCoV-19^^England|Human|Lighthouse Lab in Cambridge|Wellcome Sanger Institute for the COVID-19 Genomics UK (COG-UK) consortium|Davies|United Kingdom

>Spike|hCoV-19/USA/UT-0500/2020|2020-03-31|EPI\_ISL\_430050|Original|hCoV-19^^Utah|Human|Utah Public Health Laboratory|Utah Public Health Laboratory|Young|USA

>Spike|hCoV-19/England/ALDP-CB402D/2020|2020-12-19|EPI\_ISL\_761352|Original|hCoV-19^^England|Human|Lighthouse Lab in Alderley Park|Wellcome Sanger Institute for the COVID-19 Genomics UK (COG-UK) Consortium|Davies|United Kingdom

>Spike|hCoV-19/England/QEUH-9F3EEF/2020|2020-09-24|EPI\_ISL\_588716|Original|hCoV-19^^England|Human|Lighthouse Lab in Glasgow|Wellcome Sanger Institute for the COVID-19 Genomics UK (COG-UK) consortium|Davies|United Kingdom

>Spike|hCoV-19/Australia/VIC2416/2020|2020-06-28|EPI\_ISL\_522127|Original|hCoV-19^^Victoria|Human|Victorian Infectious Diseases Reference Laboratory (VIDRL)|VIDRL and MDU-PHL|Schultz|Australia

>Spike|hCoV-19/Canada/NS-NML-1321/2020|2020-04-10|EPI\_ISL\_579701|Original|hCoV-19^^Nova Scotia|Human|QEII Health Sciences Centre|National Microbiology Laboratory (NML)|Majer|Canada

>Spike|hCoV-19/USA/CA-SR0365/2020|2020-05-17|EPI\_ISL\_458248|Original|hCoV-19^^California|Human|Scripps Medical Laboratory|Andersen lab at Scripps Research|Gangavarapu|USA

>Spike|hCoV-19/Scotland/GCVR-173D79/2020|2020-04-07|EPI\_ISL\_459114|Original|hCoV-19^^Scotland|Human|NHSGGC West of Scotland Specialist Virology Centre / MRC-University of Glasgow Centre for Virus Research|Wellcome Sanger Institute for the COVID-19 Genomics UK (COG-UK) consortium|Davies|United Kingdom

>Spike|hCoV-19/USA/CA-CZB-10834/2020|2020-07-19|EPI\_ISL\_583081|Original|hCoV-19^^California|Human|Humboldt County Public Health Laboratory|Chan-Zuckerberg Biohub|Bhatt|USA

>Spike|hCoV-19/Luxembourg/LNS1180930/2020|2020-12-28|EPI\_ISL\_771143|Original|hCoV-19^^Luxembourg|Human|Laboratoire national de sant\u00e9|Laboratoire national de sant\u00e9|Wienecke-Baldacchino|Luxembourg

>Spike|hCoV-19/USA/WA-UW-29772/2020|2020-09-28|EPI\_ISL\_717781|Original|hCoV-19^^Washington|Human|UW Virology Lab|UW Virology Lab|Roychoudhury|USA

>Spike|hCoV-19/USA/TX-HMH-1951/2020|2020-05-17|EPI\_ISL\_542917|Original|hCoV-19^^Texas|Human|Houston Methodist Hospital|Houston Methodist Hospital|Long|USA

>Spike|hCoV-19/Japan/PG-2693/2020|2020-03-00|EPI\_ISL\_690825|Original|hCoV-19^^Japan|Human|Kanagawa Prefectural Institute of Public Health|Pathogen Genomics Center|Sekizuka|Japan

>Spike|hCoV-19/Wales/MILK-9AB51E/2020|2020-08-31|EPI\_ISL\_602152|Original|hCoV-19^^Wales|Human|Lighthouse Lab in Milton Keynes|Wellcome Sanger Institute for the COVID-19 Genomics UK (COG-UK) consortium|Davies|United Kingdom

>Spike|hCoV-19/New Zealand/20VR3759/2020|2020-06-28|EPI\_ISL\_548133|Original|hCoV-19^^Auckland|Human|Middlemore Hospital|Institute of Environmental Science and Research (ESR)|Wang|New Zealand

>Spike|hCoV-19/England/CAMC-B535B9/2020|2020-11-08|EPI\_ISL\_656918|Original|hCoV-19^^England|Human|Lighthouse Lab in Cambridge|Wellcome Sanger Institute for the COVID-19 Genomics UK (COG-UK) Consortium|Davies|United Kingdom

>Spike|hCoV-19/Northern Ireland/NIRE-FCD79/2020|2020-04-27|EPI\_ISL\_489378|Original|hCoV-19^^Northern Ireland|Human|Regional Virus Laboratory|Wellcome Sanger Institute for the COVID-19 Genomics UK (COG-UK) consortium|Davies|United Kingdom

>Spike|hCoV-19/England/NORW-F642F/2020|2020-11-24|EPI\_ISL\_704892|Original|hCoV-19^^England|Human|Quadram Institute Bioscience|COVID-19 Genomics UK (COG-UK) Consortium|Alikhan|United Kingdom

>Spike|hCoV-19/United Arab Emirates/1076/2020|2020-06-12|EPI\_ISL\_698150|Original|hCoV-19^^Abu Dhabi|Human|Group 42 (G42) Healthcare|G42 Healthcare|Ogrodzki|United Arab Emirates

>Spike|hCoV-19/USA/NY-PV09464/2020|2020-03-19|EPI\_ISL\_450137|Original|hCoV-19^^New York|Human|MSHS Clinical Microbiology Laboratories|MSHS Pathogen Surveillance Program|van Bakel|USA

>Spike|hCoV-19/Australia/VIC13063/2020|2020-08-07|EPI\_ISL\_592171|Original|hCoV-19^^Victoria|Human|Victorian Infectious Diseases Reference Laboratory (VIDRL)|VIDRL and MDU-PHL|Schultz|Australia

>Spike|hCoV-19/England/ALDP-B82E4D/2020|2020-11-14|EPI\_ISL\_675580|Original|hCoV-19^^England|Human|Lighthouse Lab in Alderley Park|Wellcome Sanger Institute for the COVID-19 Genomics UK (COG-UK) Consortium|Davies|United Kingdom

>Spike|hCoV-19/England/QEUH-B7E58B/2020|2020-11-14|EPI\_ISL\_667972|Original|hCoV-19^^England|Human|Lighthouse Lab in Glasgow|Wellcome Sanger Institute for the COVID-19 Genomics UK (COG-UK) Consortium|Davies|United Kingdom

>Spike|hCoV-19/Colombia/ANT-GUV-92155/2020|2020-03-31|EPI\_ISL\_447762|Original|hCoV-19^^Antioquia|Human|Instituto Nacional de Salud|Grupo de Investigaciones Microbiol\u00f3gicas-UR (GIMUR)|Ram\u00e9dez|Colombia

>Spike|hCoV-19/England/MILK-B55AC7/2020|2020-11-05|EPI\_ISL\_657616|Original|hCoV-19^^England|Human|Lighthouse Lab in Milton Keynes|Wellcome Sanger Institute for the COVID-19 Genomics UK (COG-UK) Consortium|Davies|United Kingdom

>Spike|hCoV-19/England/CAMB-A9814C/2020|2020-12-14|EPI\_ISL\_764342|Original|hCoV-19^^England|Human|Department of Pathology|COVID-19 Genomics UK (COG-UK) Consortium|Goodfellow|United Kingdom

>Spike|hCoV-19/Denmark/DCGC-6710/2020|2020-04-20|EPI\_ISL\_622395|Original|hCoV-19^^Hovedstaden|Human|Department of Virus and Microbiological Special Diagnostics|Albertsen lab|Michaelsen|Denmark

>Spike|hCoV-19/USA/AR-CDC-2-3693771/2020|2020-10-29|EPI\_ISL\_747068|Original|hCoV-19^^Arkansas|Human|Respiratory Viruses Branch|Respiratory Viruses Branch|Queen|USA

>Spike|hCoV-19/England/QEUH-9D19B9/2020|2020-09-16|EPI\_ISL\_573672|Original|hCoV-19^^England|Human|University College London|COVID-19 Genomics UK (COG-UK) Consortium|Roy|United Kingdom

>Spike|hCoV-19/USA/MN-MDH-1358/2020|2020-04-22|EPI\_ISL\_507947|Original|hCoV-19^^Minnesota|Human|Minnesota Department of Health|Minnesota Department of Health|Garfin|USA

>Spike|hCoV-19/USA/TX-HMH-MCoV-10376/2020|2020-07-08|EPI\_ISL\_789177|Original|hCoV-19^^Texas|Human|Houston Methodist Hospital|Houston Methodist Hospital|Long|USA

>Spike|hCoV-19/USA/VA-DCLS-1691/2020|2020-09-08|EPI\_ISL\_609977|Original|hCoV-19^^Virginia|Human|Virginia DCLS|Virginia DCLS|St. Jacques|USA

>Spike|hCoV-19/Australia/VIC5204/2020|2020-07-18|EPI\_ISL\_519969|Original|hCoV-19^^Victoria|Human|Microbiological Diagnostic Unit - Public Health Laboratory (MDU-PHL)|MDU-PHL|Schultz|Australia

>Spike|hCoV-19/Sweden/20-50209/2020|2020-03-06|EPI\_ISL\_455870|Original|hCoV-19^^Stockholm|Human|Karolinska Universitetslaboratoriet|The Public Health Agency of Sweden|Svartstr\u00f6m|Sweden

>Spike|hCoV-19/England/SHEF-CA503/2020|2020-08-31|EPI\_ISL\_540749|Original|hCoV-19^^England|Human|Virology Department|COVID-19 Genomics UK (COG-UK) Consortium|de Silva|United Kingdom

>Spike|hCoV-19/USA/TX-HMH-5414/2020|2020-06-25|EPI\_ISL\_544758|Original|hCoV-19^^Texas|Human|Houston Methodist Hospital|Houston Methodist Hospital|Long|USA

>Spike|hCoV-19/Wales/PHWC-49161D/2020|2020-10-28|EPI\_ISL\_706671|Original|hCoV-19^^Wales|Human|Originating lab|COVID-19 Genomics UK (COG-UK) Consortium|Moore|United Kingdom

>Spike|hCoV-19/Northern Ireland/NIRE-1052B9/2020|2020-04-01|EPI\_ISL\_472141|Original|hCoV-19^^Northern Ireland|Human|Regional Virus Laboratory|COVID-19 Genomics UK (COG-UK) Consortium|Fairley|United Kingdom

>Spike|hCoV-19/England/QEUEH-9B7C74/2020|2020-09-04|EPI\_ISL\_590678|Original|hCoV-19^^England|Human|Lighthouse Lab in Glasgow|Wellcome Sanger Institute for the COVID-19 Genomics UK (COG-UK) consortium|Davies|United Kingdom

>Spike|hCoV-19/England/ALDP-A2D319/2020|2020-10-06|EPI\_ISL\_586674|Original|hCoV-19^^England|Human|Lighthouse Lab in Alderley Park|Wellcome Sanger Institute for the COVID-19 Genomics UK (COG-UK) consortium|Davies|United Kingdom

>Spike|hCoV-19/England/20131104204/2020|2020-03-21|EPI\_ISL\_423696|Original|hCoV-19^^England|Human|Respiratory Virus Unit|Respiratory Virus Unit|Platt|United Kingdom

>Spike|hCoV-19/England/ALDP-BB56D0/2020|2020-11-20|EPI\_ISL\_703006|Original|hCoV-19^^England|Human|Lighthouse Lab in Alderley Park|Wellcome Sanger Institute for the COVID-19 Genomics UK (COG-UK) Consortium|Davies|United Kingdom

>Spike|hCoV-19/Japan/PG-6706/2020|2020-07-00|EPI\_ISL\_687817|Original|hCoV-19^^Japan|Human|Pathogen Genomics Center|Pathogen Genomics Center|Sekizuka|Japan

>Spike|hCoV-19/England/QEUEH-9E56BB/2020|2020-09-22|EPI\_ISL\_579783|Original|hCoV-19^^England|Human|Lighthouse Lab in Glasgow|Wellcome Sanger Institute for the COVID-19 Genomics UK (COG-UK) consortium|Davies|United Kingdom

>Spike|hCoV-19/Sweden/20-51744/2020|2020-05-22|EPI\_ISL\_548251|Original|hCoV-19^^Vastra Gotaland|Human|Klinisk mikrobiologi NAL Trollhattan|The Public Health Agency of Sweden|Svartstr\u00f6m|Sweden

>Spike|hCoV-19/USA/TX-DSHS-0982/2020|2020-06-16|EPI\_ISL\_613977|Original|hCoV-19^^Texas|Human|Texas Department of State Health Services|Texas Department of State Health Services|Rahman|USA

>Spike|hCoV-19/England/NORW-F1530/2020|2020-10-17|EPI\_ISL\_627602|Original|hCoV-19^^England|Human|Quadram Institute Bioscience|COVID-19 Genomics UK (COG-UK) Consortium|Alikhan|United Kingdom

>Spike|hCoV-19/Saudi Arabia/KAUST-MADINAH662/2020|2020-04-01|EPI\_ISL\_678035|Original|hCoV-19^^Madinah|Human|Pathogen Genomics Lab King Abdullah University of Science and Technology(KAUST)|Pathogen Genomics Lab King Abdullah University of Science and Technology(KAUST)|Mohamed Ghazzali|Saudi Arabia

>Spike|hCoV-19/England/CAMC-9D1E23/2020|2020-09-19|EPI\_ISL\_601585|Original|hCoV-19^^England|Human|Lighthouse Lab in Cambridge|Wellcome Sanger Institute for the COVID-19 Genomics UK (COG-UK) consortium|Davies|United Kingdom

>Spike|hCoV-19/England/QEUEH-9B8129/2020|2020-09-04|EPI\_ISL\_590647|Original|hCoV-19^^England|Human|Lighthouse Lab in Glasgow|Wellcome Sanger Institute for the COVID-19 Genomics UK (COG-UK) consortium|Davies|United Kingdom

>Spike|hCoV-19/USA/MI-MDHHS-SC21343/2020|2020-04-01|EPI\_ISL\_507597|Original|hCoV-19^^Michigan|Human|Michigan Department of Health and Human Services|Michigan Department of Health and Human Services|Blankenship|USA

>Spike|hCoV-19/England/ALDP-944623/2020|2020-06-07|EPI\_ISL\_554696|Original|hCoV-19^^England|Human|Lighthouse Lab in Alderley Park|Wellcome Sanger Institute for the COVID-19 Genomics UK (COG-UK) consortium|Davies|United Kingdom

>Spike|hCoV-19/England/CAMC-9B2365/2020|2020-09-04|EPI\_ISL\_549408|Original|hCoV-19^^England|Human|Oxford Viromics|COVID-19 Genomics UK (COG-UK) Consortium|Golubchik|United Kingdom

>Spike|hCoV-19/USA/WA-S1046/2020|2020-05-03|EPI\_ISL\_463536|Original|hCoV-19^^Washington|Human|Washington State Department of Health|Seattle Flu Study|Bedford|USA

>Spike|hCoV-19/England/MILK-9E0647/2020|2020-09-21|EPI\_ISL\_601360|Original|hCoV-19^^England|Human|Lighthouse Lab in Milton Keynes|Wellcome Sanger Institute for the COVID-19 Genomics UK (COG-UK) consortium|Davies|United Kingdom

>Spike|hCoV-19/England/MILK-9C43CA/2020|2020-09-09|EPI\_ISL\_566711|Original|hCoV-19^^England|Human|Lighthouse Lab in Milton Keynes|Wellcome Sanger Institute for the COVID-19 Genomics UK (COG-UK) consortium|Davies|United Kingdom

>Spike|hCoV-19/Japan/Donner83/2020|2020-08-04|EPI\_ISL\_644987|Original|hCoV-19^^Kanto|Human|Department of Infectious Diseases|Center for Medical Genetics|Kosaki|Japan

>Spike|hCoV-19/USA/TX-HMH-MCoV-14387/2020|2020-10-06|EPI\_ISL\_787672|Original|hCoV-19^^Texas|Human|Houston Methodist Hospital|Houston Methodist Hospital|Long|USA

>Spike|hCoV-19/England/205081167/2020|2020-12-09|EPI\_ISL\_766291|Original|hCoV-19^^England|Human|Respiratory Virus Unit|COVID-19 Genomics UK (COG-UK) Consortium|Platt|United Kingdom

>Spike|hCoV-19/USA/AZ-TG366692/2020|2020-05-31|EPI\_ISL\_694459|Original|hCoV-19^^Arizona|Human|AZ SPHL|TGen North|French|USA

>Spike|hCoV-19/Russia/OMS-ORINFI-3769S/2020|2020-05-28|EPI\_ISL\_639923|Original|hCoV-19^^Omsk|Human|Omsk Research Institute of Natural Focal Infections|WHO National Influenza Centre Russian Federation|Komissarov|Russia

>Spike|hCoV-19/England/ALDP-94B5C5/2020|2020-06-11|EPI\_ISL\_556427|Original|hCoV-19^^England|Human|Lighthouse Lab in Alderley Park|Wellcome Sanger Institute for the COVID-19 Genomics UK (COG-UK) consortium|Davies|United Kingdom

>Spike|hCoV-19/Australia/VIC3369/2020|2020-07-06|EPI\_ISL\_521048|Original|hCoV-19^^Victoria|Human|Microbiological Diagnostic Unit - Public Health Laboratory (MDU-PHL)|MDU-PHL|Schultz|Australia

>Spike|hCoV-19/Australia/VIC7328/2020|2020-08-05|EPI\_ISL\_564345|Original|hCoV-19^^Victoria|Human|Victorian Infectious Diseases Reference Laboratory (VIDRL)|VIDRL and MDU-PHL|Schultz|Australia

>Spike|hCoV-19/England/20169003304/2020|2020-04-17|EPI\_ISL\_465173|Original|hCoV-19^^England|Human|Respiratory Virus Unit|Respiratory Virus Unit|Platt|United Kingdom

>Spike|hCoV-19/England/MILK-99580F/2020|2020-08-23|EPI\_ISL\_551686|Original|hCoV-19^^England|Human|Lighthouse Lab in Milton Keynes|Wellcome Sanger Institute for the COVID-19 Genomics UK (COG-UK) consortium|Davies|United Kingdom

>Spike|hCoV-19/USA/TX-HMH-MCoV-18542/2020|2020-11-20|EPI\_ISL\_784890|Original|hCoV-19^^Texas|Human|Houston Methodist Hospital|Houston Methodist Hospital|Long|USA

>Spike|hCoV-19/Sweden/20-53916/2020|2020-12-14|EPI\_ISL\_766729|Original|hCoV-19^^Uppsala|Human|Klinisk mikrobiologi|The Public Health Agency of Sweden|Svartstr\u00f6m|Sweden

>Spike|hCoV-19/Czech Republic/NRL\_9682/2020|2020-10-07|EPI\_ISL\_626603|Original|hCoV-19^^Prague|Human|The National Institute of Public Health|State Veterinary Institute Prague|Nagy|Czech Republic

>Spike|hCoV-19/Netherlands/UT-RIVM-20944/2020|2020-12-19|EPI\_ISL\_790970|Original|hCoV-19^^Utrecht|Human|Dutch COVID-19 response team|National Institute for Public Health and the Environment (RIVM)|Meijer|Netherlands

>Spike|hCoV-19/USA/MN-MDH-1901/2020|2020-10-18|EPI\_ISL\_613525|Original|hCoV-19^^Minnesota|Human|Public Health Laboratory - Infectious Disease Lab|Minnesota Department of Health|Lorentz|USA

>Spike|hCoV-19/Wales/ALDP-C3D00E/2020|2020-12-10|EPI\_ISL\_767290|Original|hCoV-19^^Wales|Human|Lighthouse Lab in Alderley Park|Wellcome Sanger Institute for the COVID-19 Genomics UK (COG-UK) Consortium|Davies|United Kingdom

>Spike|hCoV-19/USA/MA-MASPHL-00017/2020|2020-04-01|EPI\_ISL\_791523|Original|hCoV-19^^Massachusetts|Human|Massachusetts State Public Health Laboratory|Infectious Disease Program|Park|USA

>Spike|hCoV-19/England/MILK-B5654D/2020|2020-11-06|EPI\_ISL\_657574|Original|hCoV-19^^England|Human|Lighthouse Lab in Milton Keynes|Wellcome Sanger Institute for the COVID-19 Genomics UK (COG-UK) Consortium|Davies|United Kingdom

>Spike|hCoV-19/Wales/PHWC-4976BD/2020|2020-11-21|EPI\_ISL\_726866|Original|hCoV-19^^Wales|Human|Originating lab|COVID-19 Genomics UK (COG-UK) Consortium|Moore|United Kingdom

>Spike|hCoV-19/USA/CT-UW-6780/2020|2020-04-09|EPI\_ISL\_570145|Original|hCoV-19^^Connecticut|Human|UW Virology Lab|UW Virology Lab|Roychoudhury|USA

>Spike|hCoV-19/USA/WA-S2103/2020|2020-06-06|EPI\_ISL\_497531|Original|hCoV-19^^Washington|Human|Washington State Department of Health|Seattle Flu Study|Lee|USA

>Spike|hCoV-19/England/SHEF-C7551/2020|2020-09-30|EPI\_ISL\_596202|Original|hCoV-19^^England|Human|Virology Department|COVID-19 Genomics UK (COG-UK) Consortium|de Silva|United Kingdom

>Spike|hCoV-19/England/LOND-12F146B/2020|2020-12-16|EPI\_ISL\_763784|Original|hCoV-19^^England|Human|University College London|COVID-19 Genomics UK (COG-UK) Consortium|Roy|United Kingdom

>Spike|hCoV-19/Netherlands/ZH-EMC-830/2020|2020-09-27|EPI\_ISL\_632403|Original|hCoV-19^^Zuid Holland|Human|Dutch COVID-19 response team|Erasmus Medical Center|Oude Munnink|Netherlands

>Spike|hCoV-19/USA/WI-UW-382/2020|2020-05-22|EPI\_ISL\_480364|Original|hCoV-19^^Wisconsin|Human|University of Wisconsin-Madison AIDS Vaccine Research Laboratories|University of Wisconsin-Madison AIDS Vaccine Research Laboratories|Baczenas|USA

>Spike|hCoV-19/England/ALDP-B5DC41/2020|2020-11-09|EPI\_ISL\_723577|Original|hCoV-19^^England|Human|Northumbria University / South Tees Hospitals NHS Foundation Trust / North Cumbria Integrated Care NHS Foundation Trust / North Tees and Hartlepool NHS Foundation Trust / Newcastle Hospitals NHS Foundation Trust|COVID-19 Genomics UK (COG-UK) Consortium|Bashton|United Kingdom

>Spike|hCoV-19/England/MILK-B3C45F/2020|2020-11-02|EPI\_ISL\_706145|Original|hCoV-19^^England|Human|Oxford Viromics|COVID-19 Genomics UK (COG-UK) Consortium|Golubchik|United Kingdom

>Spike|hCoV-19/Suriname/SR-55/2020|2020-07-16|EPI\_ISL\_518804|Original|hCoV-19^^Suriname|Human|Academic Hospital Paramaribo|Erasmus Medical Center|M\u00f0fcnger|Suriname

>Spike|hCoV-19/USA/TX-HMH-6701/2020|2020-06-24|EPI\_ISL\_546180|Original|hCoV-19^^Texas|Human|Houston Methodist Hospital|Houston Methodist Hospital|Long|USA

>Spike|hCoV-19/England/ALDP-6E9D88/2020|2020-06-30|EPI\_ISL\_557628|Original|hCoV-19^^England|Human|Lighthouse Lab in Alderley Park|Wellcome Sanger Institute for the COVID-19 Genomics UK (COG-UK) consortium|Davies|United Kingdom

>Spike|hCoV-19/England/CAMC-B2129F/2020|2020-11-02|EPI\_ISL\_647636|Original|hCoV-19^^England|Human|Lighthouse Lab in Cambridge|Wellcome Sanger Institute for the COVID-19 Genomics UK (COG-UK) Consortium|Davies|United Kingdom

>Spike|hCoV-19/England/QEUA-AD1FB6/2020|2020-10-26|EPI\_ISL\_634248|Original|hCoV-19^^England|Human|Lighthouse Lab in Glasgow|Wellcome Sanger Institute for the COVID-19 Genomics UK (COG-UK) consortium|Davies|United Kingdom

>Spike|hCoV-19/England/CAMB-7F4A6/2020|2020-04-08|EPI\_ISL\_443047|Original|hCoV-19^^England|Human|Department of Pathology|Wellcome Sanger Institute for the COVID-19 Genomics UK (COG-UK) consortium|Amato|United Kingdom

>Spike|hCoV-19/USA/FL-BPHL-1800/2020|2020-08-03|EPI\_ISL\_613899|Original|hCoV-19^^Florida|Human|Florida Bureau of Public Health Laboratories|Florida Bureau of Public Health Laboratories|Blanton|USA

>Spike|hCoV-19/England/QEUA-9F96C3/2020|2020-09-25|EPI\_ISL\_589023|Original|hCoV-19^^England|Human|Lighthouse Lab in Glasgow|Wellcome Sanger Institute for the COVID-19 Genomics UK (COG-UK) consortium|Davies|United Kingdom

>Spike|hCoV-19/Scotland/EDB7128/2020|2020-08-04|EPI\_ISL\_517588|Original|hCoV-19^^Scotland|Human|Virology Department|COVID-19 Genomics UK (COG-UK) Consortium|Williams|United Kingdom

>Spike|hCoV-19/USA/MD-HP12164/2020|2020-12-23|EPI\_ISL\_791470|Original|hCoV-19^^Maryland|Human|Johns Hopkins Hospital Department of Pathology|Johns Hopkins Hospital Department of Pathology|Morris|USA

>Spike|hCoV-19/England/QEUA-AAE6F9/2020|2020-10-22|EPI\_ISL\_630853|Original|hCoV-19^^England|Human|Lighthouse Lab in Glasgow|Wellcome Sanger Institute for the COVID-19 Genomics UK (COG-UK) consortium|Davies|United Kingdom

>Spike|hCoV-19/United Arab Emirates/0497/2020|2020-05-18|EPI\_ISL\_698664|Original|hCoV-19^^Abu Dhabi|Human|Group 42 (G42) Healthcare|G42 Healthcare|Ogrodzki|United Arab Emirates

>Spike|hCoV-19/Switzerland/BE-ETHZ-310519/2020|2020-10-08|EPI\_ISL\_603587|Original|hCoV-19^^Bern|Human|Viollier AG|Department of Biosystems Science and Engineering|Nadeau|Switzerland

>Spike|hCoV-19/Turkey/IST-GLAB-263/2020|2020-05-19|EPI\_ISL\_735323|Original|hCoV-19^^Istanbul|Human|Genomic Laboratory (GLAB) (Conjoint lab of Health Directorate of Istanbul and Istanbul Technical University)|Genomic Laboratory (GLAB)|Karacan|Turkey

>Spike|hCoV-19/Australia/VIC6468/2020|2020-00-00|EPI\_ISL\_521246|Original|hCoV-19^^Victoria|Human|Microbiological Diagnostic Unit - Public Health Laboratory (MDU-PHL)|MDU-PHL|Schultz|Australia

>Spike|hCoV-19/England/ALDP-94E47A/2020|2020-06-17|EPI\_ISL\_555499|Original|hCoV-19^^England|Human|Lighthouse Lab in Alderley Park|Wellcome Sanger Institute for the COVID-19 Genomics UK (COG-UK) consortium|Davies|United Kingdom

>Spike|hCoV-19/USA/TX-HMH-MCoV-12311/2020|2020-09-26|EPI\_ISL\_790294|Original|hCoV-19^^Texas|Human|Houston Methodist Hospital|Houston Methodist Hospital|Long|USA

>Spike|hCoV-19/Austria/CeMM0318/2020|2020-03-30|EPI\_ISL\_475789|Original|hCoV-19^^Vienna|Human|Center for Virology|Bergthaler laboratory|Bergthaler|Austria

>Spike|hCoV-19/Denmark/DCGC-3495/2020|2020-08-31|EPI\_ISL\_616283|Original|hCoV-19^^Hovedstaden|Human|Department of Virus and Microbiological Special Diagnostics|Albertsen lab|Michaelsen|Denmark

>Spike|hCoV-19/England/ALDP-CB6261/2020|2020-12-18|EPI\_ISL\_761786|Original|hCoV-19^^England|Human|Lighthouse Lab in Alderley Park|Wellcome Sanger Institute for the COVID-19 Genomics UK (COG-UK) Consortium|Davies|United Kingdom

>Spike|hCoV-19/USA/NY-PV09090/2020|2020-03-19|EPI\_ISL\_421629|Original|hCoV-19^^New York|Human|MSSM Clinical Microbiology Laboratories|MSSM Pathogen Surveillance Program|van Bakel|USA

>Spike|hCoV-19/Wales/PHWC-4956CE/2020|2020-11-23|EPI\_ISL\_726382|Original|hCoV-19^^Wales|Human|Originating lab|COVID-19 Genomics UK (COG-UK) Consortium|Moore|United Kingdom

>Spike|hCoV-19/England/CAMB-1BB6E3/2020|2020-11-20|EPI\_ISL\_665018|Original|hCoV-19^^England|Human|Department of Pathology|COVID-19 Genomics UK (COG-UK) Consortium|Goodfellow|United Kingdom

>Spike|hCoV-19/England/NOTT-111B73/2020|2020-06-02|EPI\_ISL\_461966|Original|hCoV-19^^England|Human|Queens Medical Centre|COVID-19 Genomics UK (COG-UK) Consortium|Loose|United Kingdom

>Spike|hCoV-19/Portugal/PT2047/2020|2020-11-13|EPI\_ISL\_732262|Original|hCoV-19^^Portugal|Human|Instituto Nacional de Saude (INSA) and Instituto Gulbenkian de Ciencia (IGC)|Instituto Nacional de Saude (INSA) and Instituto Gulbenkian de Ciencia (IGC)|Borges|Portugal

>Spike|hCoV-19/USA/FL-BPHL-0229/2020|2020-04-22|EPI\_ISL\_480880|Original|hCoV-19^^Florida|Human|Florida Bureau of Public Health Laboratories|Florida Bureau of Public Health Laboratories|Blanton|USA

>Spike|hCoV-19/Denmark/DCGC-3404/2020|2020-08-31|EPI\_ISL\_616163|Original|hCoV-19^^Midtjylland|Human|Department of Virus and Microbiological Special Diagnostics|Albertsen lab|Michaelsen|Denmark

>Spike|hCoV-19/France/BFC-IPP10929/2020|2020-12-21|EPI\_ISL\_765477|Original|hCoV-19^^Bourgogne-Franche-Comt|Human|EHPAD|National Reference Center for Viruses of Respiratory Infections|Enouf|France

>Spike|hCoV-19/Scotland/QEUA-A217DD/2020|2020-10-01|EPI\_ISL\_598839|Original|hCoV-19^^Scotland|Human|Lighthouse Lab in Glasgow|Wellcome Sanger Institute for the COVID-19 Genomics UK (COG-UK) consortium|Davies|United Kingdom

>Spike|hCoV-19/England/CAMB-8466C/2020|2020-04-27|EPI\_ISL\_438746|Original|hCoV-19^^England|Human|Department of Pathology|COVID-19 Genomics UK (COG-UK) Consortium|Meredith|United Kingdom

>Spike|hCoV-19/Japan/IC-0010/2020|2020-03-00|EPI\_ISL\_591356|Original|hCoV-19^^Japan|Human|Pathogen Genomics Center|Pathogen Genomics Center|Sekizuka|Japan

>Spike|hCoV-19/England/ALDP-8FD930/2020|2020-06-24|EPI\_ISL\_551396|Original|hCoV-19^^England|Human|Lighthouse Lab in Alderley Park|Wellcome Sanger Institute for the COVID-19 Genomics UK (COG-UK) consortium|Davies|United Kingdom

>Spike|hCoV-19/Canada/ON-PHL-20-02234/2020|2020-09-00|EPI\_ISL\_671506|Original|hCoV-19^^Ontario|Human|Public Health Ontario Laboratory|Public Health Ontario Laboratory|Guthrie|Canada

>Spike|hCoV-19/Wales/PHWC-2A7DE/2020|2020-04-07|EPI\_ISL\_445619|Original|hCoV-19^^Wales|Human|Wales Specialist Virology Centre|Public Health Wales Microbiology Cardiff|Moore|United Kingdom

>Spike|hCoV-19/Wales/PHWC-490748/2020|2020-11-14|EPI\_ISL\_706506|Original|hCoV-19^^Wales|Human|Originating lab|COVID-19 Genomics UK (COG-UK) Consortium|Moore|United Kingdom

>Spike|hCoV-19/USA/MN-MDH-2183/2020|2020-11-29|EPI\_ISL\_723134|Original|hCoV-19^^Minnesota|Human|Minnesota Department of Health|Minnesota Department of Health|Lorentz|USA

>Spike|hCoV-19/England/QEUEH-961505/2020|2020-08-06|EPI\_ISL\_537051|Original|hCoV-19^^England|Human|Lighthouse Lab in Glasgow|Wellcome Sanger Institute for the COVID-19 Genomics UK (COG-UK) consortium|Davies|United Kingdom

>Spike|hCoV-19/USA/AZ-TG491531/2020|2020-06-20|EPI\_ISL\_695148|Original|hCoV-19^^Arizona|Human|AZ SPHL|TGen North|French|USA

>Spike|hCoV-19/Portugal/PT0527/2020|2020-04-06|EPI\_ISL\_454251|Original|hCoV-19^^Portugal|Human|unknown|Instituto Nacional de Saude (INSA)|Borges|Portugal

>Spike|hCoV-19/Denmark/DCGC-9855/2020|2020-11-09|EPI\_ISL\_669230|Original|hCoV-19^^Sjaelland|Human|Department of Virus and Microbiological Special Diagnostics|Albertsen Lab|Michaelsen|Denmark

>Spike|hCoV-19/Denmark/DCGC-22340/2020|2020-12-14|EPI\_ISL\_758688|Original|hCoV-19^^Nordjylland|Human|Department of Virus and Microbiological Special Diagnostics|Albertsen Lab|Michaelsen|Denmark

>Spike|hCoV-19/Wales/PHWC-16E9C8/2020|2020-10-01|EPI\_ISL\_585801|Original|hCoV-19^^Wales|Human|Wales Specialist Virology Centre Sequencing lab|COVID-19 Genomics UK (COG-UK) Consortium|Moore|United Kingdom

>Spike|hCoV-19/Japan/IC-0228/2020|2020-08-00|EPI\_ISL\_667657|Original|hCoV-19^^Japan|Human|Pathogen Genomics Center|Pathogen Genomics Center|Sekizuka|Japan

>Spike|hCoV-19/Scotland/EDB9976/2020|2020-11-18|EPI\_ISL\_705804|Original|hCoV-19^^Scotland|Human|Virology Department|COVID-19 Genomics UK (COG-UK) Consortium|McHugh|United Kingdom

>Spike|hCoV-19/England/ALDP-A6E006/2020|2020-10-14|EPI\_ISL\_607882|Original|hCoV-19^^England|Human|Lighthouse Lab in Alderley Park|Wellcome Sanger Institute for the COVID-19 Genomics UK (COG-UK) consortium|Davies|United Kingdom

>Spike|hCoV-19/England/ALDP-8D1255/2020|2020-06-24|EPI\_ISL\_557136|Original|hCoV-19^^England|Human|Lighthouse Lab in Alderley Park|Wellcome Sanger Institute for the COVID-19 Genomics UK (COG-UK) consortium|Davies|United Kingdom

>Spike|hCoV-19/USA/AZ-TG670136/2020|2020-05-02|EPI\_ISL\_696345|Original|hCoV-19^^Arizona|Human|Sonora Quest Laboratories|TGen North|French|USA

>Spike|hCoV-19/USA/TX-QDX-355/2020|2020-03-23|EPI\_ISL\_571151|Original|hCoV-19^^Texas|Human|Quest Diagnostics|Quest Diagnostics|Kagan|USA

>Spike|hCoV-19/England/QEUEH-B7E59A/2020|2020-11-14|EPI\_ISL\_667958|Original|hCoV-19^^England|Human|Lighthouse Lab in Glasgow|Wellcome Sanger Institute for the COVID-19 Genomics UK (COG-UK) Consortium|Davies|United Kingdom

>Spike|hCoV-19/Denmark/DCGC-19214/2020|2020-12-07|EPI\_ISL\_748424|Original|hCoV-19^^Hovedstaden|Human|Department of Virus and Microbiological Special Diagnostics|Albertsen Lab|Michaelsen|Denmark

>Spike|hCoV-19/Australia/VIC10776/2020|2020-08-31|EPI\_ISL\_562715|Original|hCoV-19^^Victoria|Human|Microbiological Diagnostic Unit - Public Health Laboratory (MDU-PHL)|MDU-PHL|Schultz|Australia

>Spike|hCoV-19/England/ALDP-A95ABD/2020|2020-10-19|EPI\_ISL\_624747|Original|hCoV-19^^England|Human|Lighthouse Lab in Alderley Park|Wellcome Sanger Institute for the COVID-19 Genomics UK (COG-UK) consortium|Davies|United Kingdom



>Spike|hCoV-19/New Zealand/20VR3188/2020|2020-03-26|EPI\_ISL\_579476|Original|hCoV-19^^Canterbury|Human|Canterbury Health Laboratories|Institute of Environmental Science and Research (ESR)|Wang|New Zealand

>Spike|hCoV-19/England/QEUA-9B4934/2020|2020-09-03|EPI\_ISL\_590204|Original|hCoV-19^^England|Human|Lighthouse Lab in Glasgow|Wellcome Sanger Institute for the COVID-19 Genomics UK (COG-UK) consortium|Davies|United Kingdom

>Spike|hCoV-19/Northern Ireland/QEUA-96FDA5/2020|2020-08-18|EPI\_ISL\_540335|Original|hCoV-19^^Northern Ireland|Human|Lighthouse Lab in Glasgow|Wellcome Sanger Institute for the COVID-19 Genomics UK (COG-UK) consortium|Davies|United Kingdom

>Spike|hCoV-19/USA/TX-HMH-2038/2020|2020-05-09|EPI\_ISL\_545078|Original|hCoV-19^^Texas|Human|Houston Methodist Hospital|Houston Methodist Hospital|Long|USA

>Spike|hCoV-19/South Africa/KRISP-K002858/2020|2020-08-31|EPI\_ISL\_602673|Original|hCoV-19^^KwaZulu-Natal|Human|NHLS-IALCH|KRISP|de Oliveira|South Africa

>Spike|hCoV-19/Wales/PHWC-4A519D/2020|2020-12-15|EPI\_ISL\_764831|Original|hCoV-19^^Wales|Human|Wales Specialist Virology Centre Sequencing lab|COVID-19 Genomics UK (COG-UK) Consortium|Moore|United Kingdom

>Spike|hCoV-19/England/CAMC-B3577B/2020|2020-11-05|EPI\_ISL\_659550|Original|hCoV-19^^England|Human|Lighthouse Lab in Cambridge|Wellcome Sanger Institute for the COVID-19 Genomics UK (COG-UK) Consortium|Davies|United Kingdom

>Spike|hCoV-19/Switzerland/GR-ETHZ-100157/2020|2020-03-17|EPI\_ISL\_574945|Original|hCoV-19^^Graub\u00fcnden|Human|Viollier AG|Department of Biosystems Science and Engineering|Nadeau|Switzerland

>Spike|hCoV-19/England/ALDP-928C6F/2020|2020-06-22|EPI\_ISL\_552922|Original|hCoV-19^^England|Human|Lighthouse Lab in Alderley Park|Wellcome Sanger Institute for the COVID-19 Genomics UK (COG-UK) consortium|Davies|United Kingdom

>Spike|hCoV-19/England/SHEF-CB62D/2020|2020-04-16|EPI\_ISL\_448877|Original|hCoV-19^^England|Human|Virology Department|COVID-19 Genomics UK (COG-UK) Consortium|de Silva|United Kingdom

>Spike|hCoV-19/Italy/APU-PODV-15937969/2020|2020-08-25|EPI\_ISL\_788958|Original|hCoV-19^^Apulia|Human|Ospedale \Di Venere\|Beaconlab (Bioinformatics|Chiara|Italy

>Spike|hCoV-19/USA/FL-BPHL-0829/2020|2020-06-15|EPI\_ISL\_514175|Original|hCoV-19^^Florida|Human|Florida Bureau of Public Health Laboratories|Florida Bureau of Public Health Laboratories|Blanton|USA

>Spike|hCoV-19/England/CAMB-7BE24/2020|2020-04-05|EPI\_ISL\_442053|Original|hCoV-19^^England|Human|Department of Pathology|Wellcome Sanger Institute for the COVID-19 Genomics UK (COG-UK) consortium|Amato|United Kingdom

>Spike|hCoV-19/Denmark/DCGC-22511/2020|2020-12-14|EPI\_ISL\_757605|Original|hCoV-19^^Nordjylland|Human|Department of Virus and Microbiological Special Diagnostics|Albertsen Lab|Michaelsen|Denmark

>Spike|hCoV-19/England/ALDP-9CD983/2020|2020-09-16|EPI\_ISL\_566352|Original|hCoV-19^^England|Human|Lighthouse Lab in Alderley Park|Wellcome Sanger Institute for the COVID-19 Genomics UK (COG-UK) consortium|Davies|United Kingdom

>Spike|hCoV-19/USA/TX-HMH-MCoV-18236/2020|2020-11-17|EPI\_ISL\_784584|Original|hCoV-19^^Texas|Human|Houston Methodist Hospital|Houston Methodist Hospital|Long|USA

>Spike|hCoV-19/Denmark/DCGC-18819/2020|2020-12-07|EPI\_ISL\_748577|Original|hCoV-19^^Hovedstaden|Human|Department of Virus and Microbiological Special Diagnostics|Albertsen Lab|Michaelsen|Denmark

>Spike|hCoV-19/England/MILK-A18DE6/2020|2020-10-01|EPI\_ISL\_612462|Original|hCoV-19^^England|Human|Wales Specialist Virology Centre Sequencing lab|COVID-19 Genomics UK (COG-UK) Consortium|Moore|United Kingdom

>Spike|hCoV-19/England/LEED-2A90DA/2020|2020-04-07|EPI\_ISL\_539060|Original|hCoV-19^^England|Human|Leeds Teaching Hospitals NHS Trust and Public Health England|Wellcome Sanger Institute for the COVID-19 Genomics UK (COG-UK) consortium|Davies|United Kingdom

>Spike|hCoV-19/Luxembourg/LNS8576610/2020|2020-12-24|EPI\_ISL\_771087|Original|hCoV-19^^Luxembourg|Human|Laboratoire national de sant\u00e9|Laboratoire national de sant\u00e9|Wienecke-Baldacchino|Luxembourg

>Spike|hCoV-19/Wales/PHWC-49B929/2020|2020-12-06|EPI\_ISL\_742404|Original|hCoV-19^^Wales|Human|Wales Specialist Virology Centre Sequencing lab|COVID-19 Genomics UK (COG-UK) Consortium|Moore|United Kingdom

>Spike|hCoV-19/Scotland/CVR6072/2020|2020-11-10|EPI\_ISL\_703718|Original|hCoV-19^^Scotland|Human|West of Scotland Specialist Virology Centre|COVID-19 Genomics UK (COG-UK) Consortium|Robertson|United Kingdom

>Spike|hCoV-19/England/ALDP-A2EA04/2020|2020-10-05|EPI\_ISL\_587209|Original|hCoV-19^^England|Human|Lighthouse Lab in Alderley Park|Wellcome Sanger Institute for the COVID-19 Genomics UK (COG-UK) consortium|Davies|United Kingdom

>Spike|hCoV-19/Russia/StPetersburg-RII21797S/2020|2020-06-07|EPI\_ISL\_507289|Original|hCoV-19^^Saint Petersburg|Human|WHO National Influenza Centre Russian Federation|WHO National Influenza Centre Russian Federation|Komissarov|Russia

>Spike|hCoV-19/Russia/OMS-ORINFI-MH10294S/2020|2020-11-17|EPI\_ISL\_733493|Original|hCoV-19^^Omsk|Human|Omsk Research Institute of Natural Focal Infections|WHO National Influenza Centre Russian Federation|Komissarov|Russia

>Spike|hCoV-19/Kenya/C4710/2020|2020-05-08|EPI\_ISL\_568735|Original|hCoV-19^^Mombasa|Human|KEMRI-Wellcome Trust Research Programme/KEMRI-CGMR-C Kilifi|KEMRI-Wellcome Trust Research Programme/KEMRI-CGMR-C Kilifi|Githinji|Kenya

>Spike|hCoV-19/England/CAMC-CF8EBA/2020|2020-12-21|EPI\_ISL\_781371|Original|hCoV-19^^England|Human|Lighthouse Lab in Cambridge|Wellcome Sanger Institute for the COVID-19 Genomics UK (COG-UK) Consortium|Davies|United Kingdom

>Spike|hCoV-19/USA/NY-Wadsworth-290631-01/2020|2020-12-24|EPI\_ISL\_767533|Original|hCoV-19^^New York|Human|Wadsworth Center|Wadsworth Center|Lasek-Nesselquist|USA

>Spike|hCoV-19/Belgium/reg-0420909/2020|2020-04-20|EPI\_ISL\_734632|Original|hCoV-19^^Beauvechain|Human|UZ Leuven|KU Leuven|Maes|Belgium

>Spike|hCoV-19/England/204881314/2020|2020-11-00|EPI\_ISL\_678824|Original|hCoV-19^^England|Human|Respiratory Virus Unit|COVID-19 Genomics UK (COG-UK) Consortium|Platt|United Kingdom

>Spike|hCoV-19/England/MILK-A7CABC/2020|2020-10-15|EPI\_ISL\_607583|Original|hCoV-19^^England|Human|Lighthouse Lab in Milton Keynes|Wellcome Sanger Institute for the COVID-19 Genomics UK (COG-UK) consortium|Davies|United Kingdom

>Spike|hCoV-19/England/20122069402/2020|2020-03-16|EPI\_ISL\_418674|Original|hCoV-19^^England|Human|Respiratory Virus Unit|Respiratory Virus Unit|Platt|United Kingdom

>Spike|hCoV-19/India/GJ-GBRC85/2020|2020-05-05|EPI\_ISL\_447546|Original|hCoV-19^^Gujarat|Human|Gujarat Biotechnology Research Centre|Gujarat Biotechnology Research Centre|Joshi|India

>Spike|hCoV-19/England/NORT-283917/2020|2020-04-01|EPI\_ISL\_488705|Original|hCoV-19^^England|Human|NU-OMICS DNA Sequencing research facility|Wellcome Sanger Institute for the COVID-19 Genomics UK (COG-UK) consortium|Davies|United Kingdom

>Spike|hCoV-19/Scotland/QEUH-96D74F/2020|2020-08-20|EPI\_ISL\_534557|Original|hCoV-19^^Scotland|Human|NHSGGC West of Scotland Specialist Virology Centre / MRC-University of Glasgow Centre for Virus Research|Wellcome Sanger Institute for the COVID-19 Genomics UK (COG-UK) consortium|Davies|United Kingdom

>Spike|hCoV-19/Switzerland/GR-ETHZ-410909/2020|2020-11-30|EPI\_ISL\_737762|Original|hCoV-19^^Graub\u00f6nden|Human|Viollier AG|Department of Biosystems Science and Engineering|Nadeau|Switzerland

>Spike|hCoV-19/USA/LA-EVTL1181/2020|2020-12-11|EPI\_ISL\_768450|Original|hCoV-19^^Louisiana|Human|LSUHS Emerging Viral Threat Laboratory|Microbial Genome Sequencing Center|Kamil|USA

>Spike|hCoV-19/Netherlands/ZH-EMC-691/2020|2020-09-28|EPI\_ISL\_632545|Original|hCoV-19^^Zuid Holland|Human|Dutch COVID-19 response team|Erasmus Medical Center|Oude Munnink|Netherlands

>Spike|hCoV-19/Wales/PHWC-49AE2B/2020|2020-12-03|EPI\_ISL\_727693|Original|hCoV-19^^Wales|Human|Originating lab|COVID-19 Genomics UK (COG-UK) Consortium|Moore|United Kingdom

>Spike|hCoV-19/England/EXET-13ACAE/2020|2020-11-10|EPI\_ISL\_664509|Original|hCoV-19^^England|Human|University of Exeter|COVID-19 Genomics UK (COG-UK) Consortium|Temperton|United Kingdom

>Spike|hCoV-19/Scotland/CVR5591/2020|2020-10-31|EPI\_ISL\_651855|Original|hCoV-19^^Scotland|Human|West of Scotland Specialist Virology Centre|COVID-19 Genomics UK (COG-UK) Consortium|Robertson|United Kingdom

>Spike|hCoV-19/Scotland/QEUIH-C30CAD/2020|2020-12-11|EPI\_ISL\_757128|Original|hCoV-19^^Scotland|Human|Lighthouse Lab in Glasgow|Wellcome Sanger Institute for the COVID-19 Genomics UK (COG-UK) Consortium|Davies|United Kingdom

>Spike|hCoV-19/Japan/PG-5114/2020|2020-08-00|EPI\_ISL\_690223|Original|hCoV-19^^Japan|Human|Gunma Prefectural Institute of Public Health and Environmental Sciences|Pathogen Genomics Center|Sekizuka|Japan

>Spike|hCoV-19/USA/HI-H200613/2020|2020-11-23|EPI\_ISL\_753139|Original|hCoV-19^^Hawaii|Human|State Laboratories Division|State Laboratories Division|Sultana|USA

>Spike|hCoV-19/Japan/PG-8072/2020|2020-07-00|EPI\_ISL\_687173|Original|hCoV-19^^Japan|Human|Pathogen Genomics Center|Pathogen Genomics Center|Sekizuka|Japan

>Spike|hCoV-19/Spain/VC-IBV-98003431/2020|2020-04-01|EPI\_ISL\_539248|Original|hCoV-19^^Comunitat Valenciana|Human|Hospital Universitario de La Ribera (Alzira|SeqCOVID-SPAIN consortium/IBV (CSIC)|Comas|Spain

>Spike|hCoV-19/England/MILK-99E411/2020|2020-08-31|EPI\_ISL\_550609|Original|hCoV-19^^England|Human|Lighthouse Lab in Milton Keynes|Wellcome Sanger Institute for the COVID-19 Genomics UK (COG-UK) consortium|Davies|United Kingdom

>Spike|hCoV-19/Austria/CeMM0500/2020|2020-03-25|EPI\_ISL\_583588|Original|hCoV-19^^Linz|Human|Institute for Medical and Chemical Laboratory Diagnostics|Bergthaler laboratory|Bergthaler|Austria

>Spike|hCoV-19/England/QEUIH-A9E146/2020|2020-10-20|EPI\_ISL\_680032|Original|hCoV-19^^England|Human|Centre for Enzyme Innovation|COVID-19 Genomics UK (COG-UK) Consortium|Robson|United Kingdom

>Spike|hCoV-19/England/QEUIH-9DED29/2020|2020-09-21|EPI\_ISL\_584826|Original|hCoV-19^^England|Human|University College London|COVID-19 Genomics UK (COG-UK) Consortium|Roy|United Kingdom

>Spike|hCoV-19/England/NORW-E7719/2020|2020-05-04|EPI\_ISL\_457327|Original|hCoV-19^^England|Human|Quadram Institute Bioscience|COVID-19 Genomics UK (COG-UK) Consortium|Alikhan|United Kingdom

>Spike|hCoV-19/England/ALDP-A6CE3B/2020|2020-10-15|EPI\_ISL\_608090|Original|hCoV-19^^England|Human|Lighthouse Lab in Alderley Park|Wellcome Sanger Institute for the COVID-19 Genomics UK (COG-UK) consortium|Davies|United Kingdom

>Spike|hCoV-19/Spain/RI-IBV-006028/2020|2020-03-07|EPI\_ISL\_500458|Original|hCoV-19^^La Rioja|Human|Centro de Investigaci\u00f3n Biom\u00e9dica de La Rioja - Hospital San Pedro Logro\u00f1o|SeqCOVID-SPAIN consortium/IBV (CSIC)|Comas|Spain

>Spike|hCoV-19/England/CAMB-727F5/2020|2020-03-23|EPI\_ISL\_439928|Original|hCoV-19^^England|Human|Department of Pathology|Wellcome Sanger Institute for the COVID-19 Genomics UK (COG-UK) consortium|Amato|United Kingdom

>Spike|hCoV-19/Japan/PG-0916/2020|2020-04-00|EPI\_ISL\_684526|Original|hCoV-19^^Japan|Human|Pathogen Genomics Center|Pathogen Genomics Center|Sekizuka|Japan

>Spike|hCoV-19/USA/NY-NYCPHL-001415/2020|2020-11-19|EPI\_ISL\_683787|Original|hCoV-19^^New York|Human|DOHMH PHL|New York City Public Health Laboratory|Wang|USA

>Spike|hCoV-19/England/QEUIH-9F712E/2020|2020-09-27|EPI\_ISL\_595664|Original|hCoV-19^^England|Human|Oxford Viromics|COVID-19 Genomics UK (COG-UK) Consortium|Golubchik|United Kingdom

>Spike|hCoV-19/USA/MN-MDH-1648/2020|2020-08-17|EPI\_ISL\_539842|Original|hCoV-19^^Minnesota|Human|Mayo Clinic & Mayo Clinic Laboratories|Minnesota Department of Health|Garfin|USA

>Spike|hCoV-19/Gambia/GC19-3812/2020|2020-07-27|EPI\_ISL\_561086|Original|hCoV-19^^Kombo|Human|MRCG at LSHTM Genomics lab|MRCG at LSHTM Genomics lab|Sesay|Gambia

>Spike|hCoV-19/England/MILK-B96426/2020|2020-11-13|EPI\_ISL\_676239|Original|hCoV-19^^England|Human|Lighthouse Lab in Milton Keynes|Wellcome Sanger Institute for the COVID-19 Genomics UK (COG-UK) Consortium|Davies|United Kingdom

>Spike|hCoV-19/England/PORT-2D3DB2/2020|2020-04-22|EPI\_ISL\_514505|Original|hCoV-19^^England|Human|Centre for Enzyme Innovation|COVID-19 Genomics UK (COG-UK) Consortium|Robson|United Kingdom

>Spike|hCoV-19/Luxembourg/LNS4085967/2020|2020-11-23|EPI\_ISL\_740420|Original|hCoV-19^^Luxembourg|Human|Laboratoire national de sant\u00e9|Laboratoire national de sant\u00e9|Wienecke-Baldacchino|Luxembourg

>Spike|hCoV-19/Scotland/QEUIH-AE2F2B/2020|2020-10-26|EPI\_ISL\_649634|Original|hCoV-19^^Scotland|Human|Lighthouse Lab in Glasgow|Wellcome Sanger Institute for the COVID-19 Genomics UK (COG-UK) Consortium|Davies|United Kingdom

>Spike|hCoV-19/Canada/ON-UHTC\_0122/2020|2020-05-20|EPI\_ISL\_526267|Original|hCoV-19^^Ontario|Human|Unity Health Toronto|Ontario Institute for Cancer Research|de Borja|Canada

>Spike|hCoV-19/Germany/BE-ChVir-W1341-4391/2020|2020-04-10|EPI\_ISL\_753761|Original|hCoV-19^^Berlin|Human|Charit\u00e9 Universit\u00e4tsmedizin Berlin|Charit\u00e9 Universit\u00e4tsmedizin Berlin|Muehlemann|Germany

>Spike|hCoV-19/Spain/MD-ISCI-2014829/2020|2020-08-26|EPI\_ISL\_691727|Original|hCoV-19^^Madrid|Human|Hospital Cl\u00e9nico San Carlos|Instituto de Salud Carlos III|Caballero|Spain

>Spike|hCoV-19/South Africa/KRISP-0164/2020|2020-06-01|EPI\_ISL\_467514|Original|hCoV-19^^KwaZulu-Natal|Human|NHL-IALCH|KRISP|de Oliveira|South Africa

>Spike|hCoV-19/USA/CA-ALSR-4356/2020|2020-07-16|EPI\_ISL\_648987|Original|hCoV-19^^California|Human|San Diego County Public Health Laboratory|Andersen lab at Scripps Research|Gangavarapu|USA

>Spike|hCoV-19/USA/WI-UW-269/2020|2020-04-06|EPI\_ISL\_434615|Original|hCoV-19^^Wisconsin|Human|University of Wisconsin-Madison AIDS Vaccine Research Laboratories|University of Wisconsin-Madison AIDS Vaccine Research Laboratories|Baczenas|USA

>Spike|hCoV-19/England/NOTT-11F6ED/2020|2020-11-25|EPI\_ISL\_725557|Original|hCoV-19^^England|Human|Lincolnshire Hospitals and DeepSeq Nottingham|COVID-19 Genomics UK (COG-UK) Consortium|Loose|United Kingdom

>Spike|hCoV-19/England/LIVE-9C555/2020|2020-03-23|EPI\_ISL\_449551|Original|hCoV-19^^England|Human|Liverpool Clinical Laboratories|COVID-19 Genomics UK (COG-UK) Consortium|Haldenby|United Kingdom

>Spike|hCoV-19/Wales/PHWC-2A3AD/2020|2020-04-05|EPI\_ISL\_445562|Original|hCoV-19^^Wales|Human|Wales Specialist Virology Centre|Public Health Wales Microbiology Cardiff|Moore|United Kingdom

>Spike|hCoV-19/Australia/VIC3311/2020|2020-07-11|EPI\_ISL\_520990|Original|hCoV-19^^Victoria|Human|Microbiological Diagnostic Unit - Public Health Laboratory (MDU-PHL)|MDU-PHL|Schultz|Australia

>Spike|hCoV-19/England/205161648/2020|2020-12-17|EPI\_ISL\_766447|Original|hCoV-19^^England|Human|Respiratory Virus Unit|COVID-19 Genomics UK (COG-UK) Consortium|Platt|United Kingdom

>Spike|hCoV-19/England/MILK-B54BE3/2020|2020-11-05|EPI\_ISL\_657915|Original|hCoV-19^^England|Human|Lighthouse Lab in Milton Keynes|Wellcome Sanger Institute for the COVID-19 Genomics UK (COG-UK) Consortium|Davies|United Kingdom

>Spike|hCoV-19/USA/TX-HMH-MCoV-9516/2020|2020-07-03|EPI\_ISL\_781159|Original|hCoV-19^^Texas|Human|Houston Methodist Hospital|Houston Methodist Hospital|Long|USA

>Spike|hCoV-19/India/TG-CCMB-L149/2020|2020-04-16|EPI\_ISL\_447861|Original|hCoV-19^^Telangana|Human|CSIR-Centre for Cellular and Molecular Biology|CSIR-Centre for Cellular and Molecular Biology|Banu|India

>Spike|hCoV-19/Denmark/DCGC-21700/2020|2020-12-21|EPI\_ISL\_758316|Original|hCoV-19^^Hovedstaden|Human|Department of Virus and Microbiological Special Diagnostics|Albertsen Lab|Michaelsen|Denmark

>Spike|hCoV-19/England/CAMC-B35E1C/2020|2020-11-05|EPI\_ISL\_645251|Original|hCoV-19^^England|Human|Lighthouse Lab in Cambridge|Wellcome Sanger Institute for the COVID-19 Genomics UK (COG-UK) Consortium|Davies|United Kingdom

>Spike|hCoV-19/Australia/VIC6149/2020|2020-07-22|EPI\_ISL\_518160|Original|hCoV-19^^Victoria|Human|Victorian Infectious Diseases Reference Laboratory (VIDRL)|VIDRL and MDU-PHL|Schultz|Australia

>Spike|hCoV-19/England/ALDP-A96506/2020|2020-10-20|EPI\_ISL\_624632|Original|hCoV-19^^England|Human|Lighthouse Lab in Alderley Park|Wellcome Sanger Institute for the COVID-19 Genomics UK (COG-UK) consortium|Davies|United Kingdom

>Spike|hCoV-19/Wales/PHWC-16A64D/2020|2020-09-06|EPI\_ISL\_540919|Original|hCoV-19^^Wales|Human|Wales Specialist Virology Centre Sequencing lab|COVID-19 Genomics UK (COG-UK) Consortium|Moore|United Kingdom

>Spike|hCoV-19/England/ALDP-A2F4E7/2020|2020-10-06|EPI\_ISL\_587292|Original|hCoV-19^^England|Human|Lighthouse Lab in Alderley Park|Wellcome Sanger Institute for the COVID-19 Genomics UK (COG-UK) consortium|Davies|United Kingdom

>Spike|hCoV-19/Netherlands/LI-EMC-87/2020|2020-09-22|EPI\_ISL\_577833|Original|hCoV-19^^Limburg|Human|Dutch COVID-19 response team|Erasmus Medical Center|Oude Munnink|Netherlands

>Spike|hCoV-19/Denmark/DCGC-4170/2020|2020-09-14|EPI\_ISL\_621990|Original|hCoV-19^^Sjaelland|Human|Department of Virus and Microbiological Special Diagnostics|Albertsen lab|Michaelsen|Denmark

>Spike|hCoV-19/Belgium/ULG-10909/2020|2020-11-14|EPI\_ISL\_678450|Original|hCoV-19^^Li\u00e8ge|Human|Department of Clinical Microbiology|GIGA Medical Genomics|Durkin|Belgium

>Spike|hCoV-19/USA/OR-PROV-083/2020|2020-04-18|EPI\_ISL\_482355|Original|hCoV-19^^Oregon|Human|Providence St. Joseph Health Molecular Genomics Laboratory|Providence St. Joseph Health Molecular Genomics Laboratory|Dowdell|USA

>Spike|hCoV-19/England/QEUH-9B5353/2020|2020-09-03|EPI\_ISL\_590222|Original|hCoV-19^^England|Human|Lighthouse Lab in Glasgow|Wellcome Sanger Institute for the COVID-19 Genomics UK (COG-UK) consortium|Davies|United Kingdom

>Spike|hCoV-19/USA/MA-MGH-00887/2020|2020-04-14|EPI\_ISL\_791811|Original|hCoV-19^^Massachusetts|Human|Massachusetts General Hospital|Infectious Disease Program|Park|USA

>Spike|hCoV-19/Denmark/DCGC-21579/2020|2020-12-21|EPI\_ISL\_758245|Original|hCoV-19^^Midtjylland|Human|Department of Virus and Microbiological Special Diagnostics|Albertsen Lab|Michaelsen|Denmark

>Spike|hCoV-19/England/ALDP-A93D5C/2020|2020-10-19|EPI\_ISL\_611011|Original|hCoV-19^^England|Human|Lighthouse Lab in Alderley Park|Wellcome Sanger Institute for the COVID-19 Genomics UK (COG-UK) consortium|Davies|United Kingdom

>Spike|hCoV-19/Australia/VIC6010/2020|2020-07-23|EPI\_ISL\_518785|Original|hCoV-19^^Victoria|Human|Microbiological Diagnostic Unit - Public Health Laboratory (MDU-PHL) |MDU-PHL|Schultz|Australia

>Spike|hCoV-19/England/SHEF-BFCB1/2020|2020-03-03|EPI\_ISL\_416730|Original|hCoV-19^^England|Human|Virology Department|Department of Infection|de Silva|United Kingdom

>Spike|hCoV-19/USA/CA-CZB-14912/2020|2020-11-27|EPI\_ISL\_738928|Original|hCoV-19^^California|Human|Orange County Public Health Lab|Chan-Zuckerberg Biohub|Kamm|USA

>Spike|hCoV-19/England/ALDP-A2D3BF/2020|2020-10-05|EPI\_ISL\_586796|Original|hCoV-19^^England|Human|Lighthouse Lab in Alderley Park|Wellcome Sanger Institute for the COVID-19 Genomics UK (COG-UK) consortium|Davies|United Kingdom

>Spike|hCoV-19/Japan/PG-8426/2020|2020-09-00|EPI\_ISL\_687525|Original|hCoV-19^^Japan|Human|Pathogen Genomics Center|Pathogen Genomics Center|Sekizuka|Japan

>Spike|hCoV-19/Scotland/EDB3498/2020|2020-04-13|EPI\_ISL\_439271|Original|hCoV-19^^Scotland|Human|Virology Department|COVID-19 Genomics UK (COG-UK) Consortium|Williams|United Kingdom

>Spike|hCoV-19/Scotland/CVR5683/2020|2020-11-08|EPI\_ISL\_651906|Original|hCoV-19^^Scotland|Human|West of Scotland Specialist Virology Centre|COVID-19 Genomics UK (COG-UK) Consortium|Robertson|United Kingdom

>Spike|hCoV-19/England/CAMB-76A70/2020|2020-03-30|EPI\_ISL\_438428|Original|hCoV-19^^England|Human|Department of Pathology|Wellcome Sanger Institute for the COVID-19 Genomics UK (COG-UK) consortium|Amato|United Kingdom

>Spike|hCoV-19/Japan/PG-7919/2020|2020-07-00|EPI\_ISL\_687020|Original|hCoV-19^^Japan|Human|Pathogen Genomics Center|Pathogen Genomics Center|Sekizuka|Japan

>Spike|hCoV-19/USA/WA-S680/2020|2020-04-08|EPI\_ISL\_449850|Original|hCoV-19^^Washington|Human|Washington State Department of Health|Seattle Flu Study|Bedford|USA

>Spike|hCoV-19/Australia/VIC4488/2020|2020-07-16|EPI\_ISL\_519784|Original|hCoV-19^^Victoria|Human|Microbiological Diagnostic Unit - Public Health Laboratory (MDU-PHL) |MDU-PHL|Schultz|Australia

>Spike|hCoV-19/USA/WI-UW-1487/2020|2020-09-16|EPI\_ISL\_541617|Original|hCoV-19^^Wisconsin|Human|University of Wisconsin-Madison AIDS Vaccine Research Laboratories|University of Wisconsin-Madison AIDS Vaccine Research Laboratories|Baczenas|USA

>Spike|hCoV-19/Australia/VIC3522/2020|2020-07-08|EPI\_ISL\_520274|Original|hCoV-19^^Victoria|Human|Victorian Infectious Diseases Reference Laboratory (VIDRL)|VIDRL and MDU-PHL|Schultz|Australia

>Spike|hCoV-19/Switzerland/SG-ETHZ-380401/2020|2020-11-23|EPI\_ISL\_721847|Original|hCoV-19^^St Gallen|Human|Viollier AG|Department of Biosystems Science and Engineering|Nadeau|Switzerland

>Spike|hCoV-19/Denmark/DCGC-13118/2020|2020-11-30|EPI\_ISL\_712593|Original|hCoV-19^^Midtjylland|Human|Department of Virus and Microbiological Special Diagnostics|Albertsen Lab|Michaelsen|Denmark

>Spike|hCoV-19/Germany/NW-HHU-186/2020|2020-03-28|EPI\_ISL\_602508|Original|hCoV-19^^North Rhine-Westphalia|Human|Institute for Virology|Center of Medical Microbiology|Wienemann|Germany

>Spike|hCoV-19/Denmark/DCGC-12407/2020|2020-11-16|EPI\_ISL\_682588|Original|hCoV-19^^Hovedstaden|Human|Department of Virus and Microbiological Special Diagnostics|Albertsen Lab|Michaelsen|Denmark

>Spike|hCoV-19/USA/CA-CZB-6928/2020|2020-08-19|EPI\_ISL\_582888|Original|hCoV-19^^California|Human|County of Santa Clara Public Health Department|Chan-Zuckerberg Biohub|Bhatt|USA

>Spike|hCoV-19/USA/TX-HMH-MCoV-10219/2020|2020-07-07|EPI\_ISL\_789375|Original|hCoV-19^^Texas|Human|Houston Methodist Hospital|Houston Methodist Hospital|Long|USA

>Spike|hCoV-19/Israel/2047772/2020|2020-03-30|EPI\_ISL\_447385|Original|hCoV-19^^North District|Human|Clinical Microbiology Laboratory|Stern Lab|Miller|Israel

>Spike|hCoV-19/England/CAMB-8092B/2020|2020-04-10|EPI\_ISL\_442922|Original|hCoV-19^^England|Human|Department of Pathology|Wellcome Sanger Institute for the COVID-19 Genomics UK (COG-UK) consortium|Amato|United Kingdom

>Spike|hCoV-19/England/QEUH-A0C43B/2020|2020-10-03|EPI\_ISL\_584975|Original|hCoV-19^^England|Human|Quadram Institute Bioscience|COVID-19 Genomics UK (COG-UK) Consortium|Alikhan|United Kingdom

>Spike|hCoV-19/USA/MI-UM-10036672489/2020|2020-10-28|EPI\_ISL\_650050|Original|hCoV-19^^Michigan|Human|University of Michigan Clinical Microbiology Laboratory|Lauring Lab|Valesano|USA

>Spike|hCoV-19/USA/NMDOH-2020305813/2020|2020-08-21|EPI\_ISL\_542059|Original|hCoV-19^^New Mexico|Human|New Mexico Department of Health Scientific Laboratory|New Mexico Department of Health Scientific Laboratory|Johnson|USA

>Spike|hCoV-19/USA/WA-S1020/2020|2020-04-29|EPI\_ISL\_463510|Original|hCoV-19^^Washington|Human|Washington State Department of Health|Seattle Flu Study|Bedford|USA

>Spike|hCoV-19/France/OCC-SC556/2020|2020-04-04|EPI\_ISL\_660725|Original|hCoV-19^^Occitanie|Human|CHU N\u00eemes|CNR Virus des Infections Respiratoires - France SUD|Bal|France

>Spike|hCoV-19/USA/VA-DCLS-0108/2020|2020-04-14|EPI\_ISL\_434600|Original|hCoV-19^^Virginia|Human|Virginia DCLS|Virginia DCLS|St. Jacques|USA

>Spike|hCoV-19/Denmark/DCGC-4829/2020|2020-09-21|EPI\_ISL\_621439|Original|hCoV-19^^Nordjylland|Human|Department of Virus and Microbiological Special Diagnostics|Albertsen lab|Michaelsen|Denmark

>Spike|hCoV-19/England/NORT-29CE49/2020|2020-05-01|EPI\_ISL\_499795|Original|hCoV-19^^England|Human|Northumbria University / South Tees Hospitals NHS Foundation Trust / North Cumbria Integrated Care NHS Foundation Trust / North Tees and Hartlepool NHS Foundation Trust / Newcastle Hospitals NHS Foundation Trust|COVID-19 Genomics UK (COG-UK) Consortium|Bashton|United Kingdom

>Spike|hCoV-19/Wales/PHWC-2AD45/2020|2020-04-06|EPI\_ISL\_445697|Original|hCoV-19^^Wales|Human|Wales Specialist Virology Centre|Public Health Wales Microbiology Cardiff|Moore|United Kingdom

>Spike|hCoV-19/Brazil/SP-RP9/2020|2020-04-01|EPI\_ISL\_613951|Original|hCoV-19^^S\u00e3o Paulo|Human|Laboratory of Molecular Biology|Laboratory of Molecular Biology|Slavov|Brazil

>Spike|hCoV-19/England/QEUA-B6A50A/2020|2020-11-11|EPI\_ISL\_662529|Original|hCoV-19^^England|Human|Lighthouse Lab in Glasgow|Wellcome Sanger Institute for the COVID-19 Genomics UK (COG-UK) Consortium|Davies|United Kingdom

>Spike|hCoV-19/SaudiArabia/KAUST-MADINAH406/2020|2020-04-24|EPI\_ISL\_513154|Original|hCoV-19^^Madinah|Human|Pathogen Genomics Lab King Abdullah University of Science and Technology(KAUST)|Pathogen Genomics Lab King Abdullah University of Science and Technology(KAUST)|Mohamed Ghazzali|Saudi Arabia

>Spike|hCoV-19/England/LIVE-DC2B48/2020|2020-11-24|EPI\_ISL\_705837|Original|hCoV-19^^England|Human|Liverpool Clinical Laboratories|COVID-19 Genomics UK (COG-UK) Consortium|Haldenby|United Kingdom

>Spike|hCoV-19/England/MILK-56BFD4/2020|2020-06-11|EPI\_ISL\_558386|Original|hCoV-19^^England|Human|Lighthouse Lab in Milton Keynes|Wellcome Sanger Institute for the COVID-19 Genomics UK (COG-UK) consortium|Davies|United Kingdom

>Spike|hCoV-19/England/NORT-291E80/2020|2020-05-06|EPI\_ISL\_489081|Original|hCoV-19^^England|Human|NU-OMICS DNA Sequencing research facility|Wellcome Sanger Institute for the COVID-19 Genomics UK (COG-UK) consortium|Davies|United Kingdom

>Spike|hCoV-19/Wales/MILK-9D3A5A/2020|2020-09-16|EPI\_ISL\_589801|Original|hCoV-19^^Wales|Human|Lighthouse Lab in Milton Keynes|Wellcome Sanger Institute for the COVID-19 Genomics UK (COG-UK) consortium|Davies|United Kingdom

>Spike|hCoV-19/USA/FL-BPHL-0529/2020|2020-06-19|EPI\_ISL\_508732|Original|hCoV-19^^Florida|Human|Florida Bureau of Public Health Laboratories|Florida Bureau of Public Health Laboratories|Blanton|USA

>Spike|hCoV-19/USA/LA-EVTL410/2020|2020-06-09|EPI\_ISL\_578816|Original|hCoV-19^^Louisiana|Human|LSUHS Emerging Viral Threat Laboratory|Microbial Genome Sequencing Center|Kamil|USA

>Spike|hCoV-19/England/GSTT-4177/2020|2020-03-12|EPI\_ISL\_561373|Original|hCoV-19^^England|Human|Centre for Clinical Infection and Diagnostics Research and Genomics Innovation Unit|Centre for Clinical Infection and Diagnostics Research and Genomics Innovation Unit|Awan|United Kingdom

>Spike|hCoV-19/Canada/BC-BCCDC-8388/2020|2020-11-00|EPI\_ISL\_740768|Original|hCoV-19^^British Columbia|Human|BCCDC Public Health Laboratory|BCCDC Public Health Laboratory|Prystajecky|Canada

>Spike|hCoV-19/USA/WI-GMF-24209/2020|2020-10-05|EPI\_ISL\_660897|Original|hCoV-19^^Wisconsin|Human|Gundersen Molecular Diagnostics Laboratory|Kabara Cancer Research Institute|Kenny|USA

>Spike|hCoV-19/Japan/PG-8364/2020|2020-07-00|EPI\_ISL\_687463|Original|hCoV-19^^Japan|Human|Pathogen Genomics Center|Pathogen Genomics Center|Sekizuka|Japan

>Spike|hCoV-19/USA/TX-HMH-688/2020|2020-04-15|EPI\_ISL\_546315|Original|hCoV-19^^Texas|Human|Houston Methodist Hospital|Houston Methodist Hospital|Long|USA

>Spike|hCoV-19/Wales/PHWC-48D140/2020|2020-11-04|EPI\_ISL\_666585|Original|hCoV-19^^Wales|Human|Wales Specialist Virology Centre Sequencing lab|COVID-19 Genomics UK (COG-UK) Consortium|Moore|United Kingdom

>Spike|hCoV-19/Japan/PG-5129/2020|2020-08-00|EPI\_ISL\_690236|Original|hCoV-19^^Japan|Human|Gunma Prefectural Institute of Public Health and Environmental Sciences|Pathogen Genomics Center|Sekizuka|Japan

>Spike|hCoV-19/Portugal/PT0746/2020|2020-03-22|EPI\_ISL\_511005|Original|hCoV-19^^Portugal|Human|Instituto Nacional de Saude (INSA)|Instituto Nacional de Saude (INSA)|Borges|Portugal

>Spike|hCoV-19/England/ALDP-9E970F/2020|2020-09-24|EPI\_ISL\_584239|Original|hCoV-19^^England|Human|Virology Department|COVID-19 Genomics UK (COG-UK) Consortium|de Silva|United Kingdom

>Spike|hCoV-19/Denmark/DCGC-15376/2020|2020-11-23|EPI\_ISL\_713789|Original|hCoV-19^^Hovedstaden|Human|Department of Virus and Microbiological Special Diagnostics|Albertsen Lab|Michaelsen|Denmark

>Spike|hCoV-19/England/SHEF-C9A05/2020|2020-05-03|EPI\_ISL\_457637|Original|hCoV-19^^England|Human|Virology Department|COVID-19 Genomics UK (COG-UK) Consortium|de Silva|United Kingdom

>Spike|hCoV-19/Senegal/55703/2020|2020-06-07|EPI\_ISL\_477148|Original|hCoV-19^^Dakar|Human|Institut Pasteur Dakar|Institut Pasteur de Dakar|Dia|Senegal

>Spike|hCoV-19/Denmark/DCGC-10409/2020|2020-11-02|EPI\_ISL\_669809|Original|hCoV-19^^Nordjylland|Human|Department of Virus and Microbiological Special Diagnostics|Albertsen Lab|Michaelsen|Denmark

>Spike|hCoV-19/England/QEUA-961D3A/2020|2020-08-02|EPI\_ISL\_537062|Original|hCoV-19^^England|Human|Lighthouse Lab in Glasgow|Wellcome Sanger Institute for the COVID-19 Genomics UK (COG-UK) consortium|Davies|United Kingdom

>Spike|hCoV-19/Sweden/20-08116/2020|2020-03-09|EPI\_ISL\_454487|Original|hCoV-19^^Stockholm|Human|Karolinska Universitetslaboratoriet|The Public Health Agency of Sweden|Svartstr\u00f6m|Sweden

>Spike|hCoV-19/Netherlands/un-EMC-732/2020|2020-06-12|EPI\_ISL\_523487|Original|hCoV-19^^Netherlands|Human|Dutch COVID-19 response team|Erasmus Medical Center|Oude Munnink|Netherlands

>Spike|hCoV-19/Wales/PHWC-16F8D9/2020|2020-10-10|EPI\_ISL\_586035|Original|hCoV-19^^Wales|Human|Wales Specialist Virology Centre Sequencing lab|COVID-19 Genomics UK (COG-UK) Consortium|Moore|United Kingdom

>Spike|hCoV-19/England/CAMB-1BAC6A/2020|2020-11-12|EPI\_ISL\_664789|Original|hCoV-19^^England|Human|Department of Pathology|COVID-19 Genomics UK (COG-UK) Consortium|Goodfellow|United Kingdom

>Spike|hCoV-19/England/QEUA-BCBA17/2020|2020-11-27|EPI\_ISL\_703824|Original|hCoV-19^^England|Human|Lighthouse Lab in Glasgow|Wellcome Sanger Institute for the COVID-19 Genomics UK (COG-UK) Consortium|Davies|United Kingdom

>Spike|hCoV-19/England/CAMC-B79F0A/2020|2020-11-12|EPI\_ISL\_741062|Original|hCoV-19^^England|Human|Oxford Viromics|COVID-19 Genomics UK (COG-UK) Consortium|Golubchik|United Kingdom

>Spike|hCoV-19/USA/LA-EVTL144/2020|2020-03-25|EPI\_ISL\_455987|Original|hCoV-19^^Louisiana|Human|LSUHS Emerging Viral Threat Laboratory|Microbial Genome Sequencing Center|Kamil|USA

>Spike|hCoV-19/Israel/CVL-46435/2020|2020-12-15|EPI\_ISL\_745073|Original|hCoV-19^^Haifa|Human|Israel Central Virology laboratory|Israel Central Virology laboratory|Zuckerman|Israel

>Spike|hCoV-19/Japan/PG-8775/2020|2020-08-00|EPI\_ISL\_686369|Original|hCoV-19^^Japan|Human|Pathogen Genomics Center|Pathogen Genomics Center|Sekizuka|Japan

>Spike|hCoV-19/England/LIVE-DCB550/2020|2020-11-24|EPI\_ISL\_724410|Original|hCoV-19^^England|Human|Liverpool Clinical Laboratories|COVID-19 Genomics UK (COG-UK) Consortium|Haldenby|United Kingdom

>Spike|hCoV-19/Peru/LIM-INS-089/2020|2020-07-04|EPI\_ISL\_536488|Original|hCoV-19^^Lima|Human|Instituto Nacional de Salud|Laboratorio de Infecciones Respiratorias Agudas|Lopez|Peru

>Spike|hCoV-19/England/CAMB-7E42F/2020|2020-04-07|EPI\_ISL\_524495|Original|hCoV-19^^England|Human|Department of Pathology|Wellcome Sanger Institute for the COVID-19 Genomics UK (COG-UK) consortium|Davies|United Kingdom

>Spike|hCoV-19/Denmark/DCGC-13231/2020|2020-11-30|EPI\_ISL\_712666|Original|hCoV-19^^Sjælland|Human|Department of Virus and Microbiological Special Diagnostics|Albertsen Lab|Michaelsen|Denmark

>Spike|hCoV-19/USA/CA-LACPHL-AF00019/2020|2020-12-16|EPI\_ISL\_737254|Original|hCoV-19^^California|Human|Los Angeles County PHL|Los Angeles County PHL|Hemarajata|USA

>Spike|hCoV-19/Denmark/DCGC-10035/2020|2020-11-09|EPI\_ISL\_669350|Original|hCoV-19^^Hovedstaden|Human|Department of Virus and Microbiological Special Diagnostics|Albertsen Lab|Michaelsen|Denmark

>Spike|hCoV-19/Egypt/EGY-S030/2020|2020-08-17|EPI\_ISL\_526996|Original|hCoV-19^^Egypt|Human|Biological prevention|Biological prevention|Seadawy|Egypt

>Spike|hCoV-19/Japan/PG-1170/2020|2020-04-00|EPI\_ISL\_684780|Original|hCoV-19^^Japan|Human|Pathogen Genomics Center|Pathogen Genomics Center|Sekizuka|Japan

>Spike|hCoV-19/England/MILK-9AAAF2/2020|2020-09-01|EPI\_ISL\_550840|Original|hCoV-19^^England|Human|Lighthouse Lab in Milton Keynes|Wellcome Sanger Institute for the COVID-19 Genomics UK (COG-UK) consortium|Davies|United Kingdom

>Spike|hCoV-19/England/MILK-B3C880/2020|2020-11-02|EPI\_ISL\_706163|Original|hCoV-19^^England|Human|Oxford Viromics|COVID-19 Genomics UK (COG-UK) Consortium|Golubchik|United Kingdom



>Spike|hCoV-19/Luxembourg/LNS9491271/2020|2020-10-19|EPI\_ISL\_744925|Original|hCoV-19^^Luxembourg|Human|Laboratoire national de sant\u00e9|Laboratoire national de sant\u00e9|Wienecke-Baldacchino|Luxembourg

>Spike|hCoV-19/England/QEUA-A78528/2020|2020-10-12|EPI\_ISL\_638758|Original|hCoV-19^^England|Human|Oxford Viromics|COVID-19 Genomics UK (COG-UK) Consortium|Golubchik|United Kingdom

>Spike|hCoV-19/England/C200021209/2020|2020-00-00|EPI\_ISL\_636687|Original|hCoV-19^^England|Human|Respiratory Virus Unit|Respiratory Virus Unit|Platt|United Kingdom

>Spike|hCoV-19/England/QEUA-A4D182/2020|2020-10-04|EPI\_ISL\_596097|Original|hCoV-19^^England|Human|Quadram Institute Bioscience|COVID-19 Genomics UK (COG-UK) Consortium|Alikhan|United Kingdom

>Spike|hCoV-19/Scotland/QEUA-964890/2020|2020-08-13|EPI\_ISL\_534381|Original|hCoV-19^^Scotland|Human|NHSGGC West of Scotland Specialist Virology Centre / MRC-University of Glasgow Centre for Virus Research|Wellcome Sanger Institute for the COVID-19 Genomics UK (COG-UK) consortium|Davies|United Kingdom

>Spike|hCoV-19/USA/TX-HMH-MCoV-15972/2020|2020-07-10|EPI\_ISL\_785656|Original|hCoV-19^^Texas|Human|Houston Methodist Hospital|Houston Methodist Hospital|Long|USA

>Spike|hCoV-19/India/DL-NCDC1969-CSIR-IGIB/2020|2020-05-18|EPI\_ISL\_482518|Original|hCoV-19^^Delhi|Human|National Centre for Disease control (NCDC)|NCDC/CSIR-IGIB|Pandey|India

>Spike|hCoV-19/England/ALDP-95174E/2020|2020-06-10|EPI\_ISL\_554403|Original|hCoV-19^^England|Human|Lighthouse Lab in Alderley Park|Wellcome Sanger Institute for the COVID-19 Genomics UK (COG-UK) consortium|Davies|United Kingdom

>Spike|hCoV-19/Luxembourg/LNS7493897/2020|2020-08-13|EPI\_ISL\_744577|Original|hCoV-19^^Luxembourg|Human|Laboratoire national de sant\u00e9|Laboratoire national de sant\u00e9|Wienecke-Baldacchino|Luxembourg

>Spike|hCoV-19/England/PORT-2D12F1/2020|2020-03-24|EPI\_ISL\_479179|Original|hCoV-19^^England|Human|Centre for Enzyme Innovation|COVID-19 Genomics UK (COG-UK) Consortium|Robson|United Kingdom

>Spike|hCoV-19/USA/NY-NYCPHL-000381/2020|2020-03-28|EPI\_ISL\_631874|Original|hCoV-19^^New York|Human|James J. Peters VA Medical Center|New York City Public Health Laboratory|Wang|USA

>Spike|hCoV-19/Rwanda/M95142-RD/2020|2020-07-23|EPI\_ISL\_707787|Original|hCoV-19^^Rwanda|Human|Rwanda National Reference Laboratory|Rwanda National Reference Laboratory|Mukantwari|Rwanda

>Spike|hCoV-19/Denmark/DCGC-11237/2020|2020-11-02|EPI\_ISL\_670787|Original|hCoV-19^^Hovedstaden|Human|Department of Virus and Microbiological Special Diagnostics|Albertsen Lab|Michaelsen|Denmark

>Spike|hCoV-19/Japan/PG-1222/2020|2020-04-00|EPI\_ISL\_684832|Original|hCoV-19^^Japan|Human|Yamagata Prefectural Institute of Public Health|Pathogen Genomics Center|Sekizuka|Japan

>Spike|hCoV-19/England/CAMC-9B1E92/2020|2020-09-04|EPI\_ISL\_549398|Original|hCoV-19^^England|Human|Oxford Viromics|COVID-19 Genomics UK (COG-UK) Consortium|Golubchik|United Kingdom

>Spike|hCoV-19/USA/TX-HMH-MCoV-13910/2020|2020-08-16|EPI\_ISL\_787202|Original|hCoV-19^^Texas|Human|Houston Methodist Hospital|Houston Methodist Hospital|Long|USA

>Spike|hCoV-19/Scotland/QEUA-9DEAD7/2020|2020-09-21|EPI\_ISL\_601215|Original|hCoV-19^^Scotland|Human|Lighthouse Lab in Glasgow|Wellcome Sanger Institute for the COVID-19 Genomics UK (COG-UK) consortium|Davies|United Kingdom

>Spike|hCoV-19/England/QEUA-A0007F/2020|2020-10-02|EPI\_ISL\_600149|Original|hCoV-19^^England|Human|Lighthouse Lab in Glasgow|Wellcome Sanger Institute for the COVID-19 Genomics UK (COG-UK) consortium|Davies|United Kingdom

>Spike|hCoV-19/Wales/PHWC-160A2D/2020|2020-05-20|EPI\_ISL\_479299|Original|hCoV-19^^Wales|Human|Wales Specialist Virology Centre Sequencing lab|COVID-19 Genomics UK (COG-UK) Consortium|Moore|United Kingdom

>Spike|hCoV-19/England/CAMC-B090B1/2020|2020-10-29|EPI\_ISL\_672964|Original|hCoV-19^^England|Human|Lighthouse Lab in Cambridge|Wellcome Sanger Institute for the COVID-19 Genomics UK (COG-UK) Consortium|Davies|United Kingdom

>Spike|hCoV-19/USA/MI-MDHHS-SC22709/2020|2020-12-07|EPI\_ISL\_767358|Original|hCoV-19^^Michigan|Human|Michigan Department of Health and Human Services|Michigan Department of Health and Human Services|Jacob|USA

>Spike|hCoV-19/England/ALDP-A4FF4A/2020|2020-10-07|EPI\_ISL\_597593|Original|hCoV-19^^England|Human|Lighthouse Lab in Alderley Park|Wellcome Sanger Institute for the COVID-19 Genomics UK (COG-UK) consortium|Davies|United Kingdom

>Spike|hCoV-19/Norway/3029/2020|2020-08-05|EPI\_ISL\_549078|Original|hCoV-19^^Viken|Human|Furst Medical Laboratory|Norwegian Institute of Public Health|Kopperud Riis|Norway

>Spike|hCoV-19/Peru/LIM-INS-006/2020|2020-03-11|EPI\_ISL\_489838|Original|hCoV-19^^Lima|Human|Laboratorio de Referencia Nacional de Virus Respiratorio. Instituto Nacional de Salud Per\u00fa|Laboratorio de Referencia Nacional de Biotecnolog\u00eda y Biolog\u00eda Molecular. Instituto Nacional de Salud Per\u00fa|Padilla Rojas|Peru

>Spike|hCoV-19/USA/FL-BPHL-1943/2020|2020-04-09|EPI\_ISL\_613802|Original|hCoV-19^^Florida|Human|Florida Bureau of Public Health Laboratories|Florida Bureau of Public Health Laboratories|Blanton|USA

>Spike|hCoV-19/Spain/AR-IBV-005058/2020|2020-04-21|EPI\_ISL\_500346|Original|hCoV-19^^Aragon|Human|Servicio de Microbiolog\u00eda|SeqCOVID-SPAIN consortium/IBV (CSIC) |Comas|Spain

>Spike|hCoV-19/Wales/PHWC-49EE63/2020|2020-12-01|EPI\_ISL\_743133|Original|hCoV-19^^Wales|Human|Wales Specialist Virology Centre Sequencing lab|COVID-19 Genomics UK (COG-UK) Consortium|Moore|United Kingdom

>Spike|hCoV-19/England/CAMC-9DF3EA/2020|2020-09-20|EPI\_ISL\_638405|Original|hCoV-19^^England|Human|Department of Pathology|COVID-19 Genomics UK (COG-UK) Consortium|Goodfellow|United Kingdom

>Spike|hCoV-19/USA/TX-HMH0185/2020|2020-03-23|EPI\_ISL\_434863|Original|hCoV-19^^Texas|Human|Houston Methodist Hospital|Houston Methodist Hospital|Long|USA

>Spike|hCoV-19/USA/ME-HETL-J0256/2020|2020-09-28|EPI\_ISL\_755405|Original|hCoV-19^^Maine|Human|Maine Health and Environmental Testing Laboratory|Tewhey Lab|Tewhey|USA

>Spike|hCoV-19/England/QEUH-A0BDD7/2020|2020-10-01|EPI\_ISL\_599473|Original|hCoV-19^^England|Human|Lighthouse Lab in Glasgow|Wellcome Sanger Institute for the COVID-19 Genomics UK (COG-UK) consortium|Davies|United Kingdom

>Spike|hCoV-19/England/ALDP-B24A0D/2020|2020-11-04|EPI\_ISL\_647077|Original|hCoV-19^^England|Human|Lighthouse Lab in Alderley Park|Wellcome Sanger Institute for the COVID-19 Genomics UK (COG-UK) Consortium|Davies|United Kingdom

>Spike|hCoV-19/Thailand/Bangkok\_580/2020|2020-02-01|EPI\_ISL\_447918|Vero P2|hCoV-19^^Bangkok|Human|n/a|National Institute of Health. Department of medical Sciences|Okada|Thailand

>Spike|hCoV-19/Scotland/CVR3097/2020|2020-04-25|EPI\_ISL\_461670|Original|hCoV-19^^Scotland|Human|West of Scotland Specialist Virology Centre|COVID-19 Genomics UK (COG-UK) Consortium|Robertson|United Kingdom

>Spike|hCoV-19/Japan/PG-4746/2020|2020-07-00|EPI\_ISL\_689882|Original|hCoV-19^^Japan|Human|Pathogen Genomics Center|Pathogen Genomics Center|Sekizuka|Japan

>Spike|hCoV-19/USA/CA-CDPH273/2020|2020-11-15|EPI\_ISL\_755100|Original|hCoV-19^^California|Human|California Department of Public Health|California Department of Public Health|Bell|USA

>Spike|hCoV-19/England/MILK-BB261F/2020|2020-11-18|EPI\_ISL\_720266|Original|hCoV-19^^England|Human|Lighthouse Lab in Milton Keynes|Wellcome Sanger Institute for the COVID-19 Genomics UK (COG-UK) Consortium|Davies|United Kingdom

>Spike|hCoV-19/England/ALDP-B47F50/2020|2020-11-07|EPI\_ISL\_649248|Original|hCoV-19^^England|Human|Lighthouse Lab in Alderley Park|Wellcome Sanger Institute for the COVID-19 Genomics UK (COG-UK) Consortium|Davies|United Kingdom

>Spike|hCoV-19/England/NOTT-10FB69/2020|2020-04-07|EPI\_ISL\_432691|Original|hCoV-19^^England|Human|Queens Medical Centre|COVID-19 Genomics UK (COG-UK) Consortium|Loose|United Kingdom

>Spike|hCoV-19/USA/VA-DCLS-0275/2020|2020-04-22|EPI\_ISL\_452844|Original|hCoV-19^^Virginia|Human|Virginia DCLS|Virginia DCLS|St. Jacques|USA

>Spike|hCoV-19/England/210100347/2021|2021-01-04|EPI\_ISL\_791231|Original|hCoV-19^^England|Human|Respiratory Virus Unit|COVID-19 Genomics UK (COG-UK) Consortium|Platt|United Kingdom

>Spike|hCoV-19/USA/FL-BPHL-1245/2020|2020-06-02|EPI\_ISL\_541338|Original|hCoV-19^^Florida|Human|Florida Bureau of Public Health Laboratories|Florida Bureau of Public Health Laboratories|Blanton|USA

>Spike|hCoV-19/Australia/NSW722/2020|2020-07-27|EPI\_ISL\_513365|Original|hCoV-19^^New South Wales|Human|St Vincent's Pathology (SydPath)|NSW Health Pathology - Institute of Clinical Pathology and Medical Research; Westmead Hospital; University of Sydney|Gall|Australia

>Spike|hCoV-19/USA/UT-UPHL-2009608/2020|2020-07-19|EPI\_ISL\_605286|Original|hCoV-19^^Utah|Human|Utah Public Health Laboratory|Utah Public Health Laboratory|Young|USA

>Spike|hCoV-19/Wales/PHWC-160C90/2020|2020-05-24|EPI\_ISL\_473035|Original|hCoV-19^^Wales|Human|Wales Specialist Virology Centre Sequencing lab|COVID-19 Genomics UK (COG-UK) Consortium|Moore|United Kingdom

>Spike|hCoV-19/Germany/NW-HHU-152/2020|2020-03-04|EPI\_ISL\_602522|Orginal|hCoV-19^^North Rhine-Westphalia|Human|Institute for Virology|Center of Medical Microbiology|Wienemann|Germany

>Spike|hCoV-19/England/ALDP-B623DB/2020|2020-11-09|EPI\_ISL\_656482|Original|hCoV-19^^England|Human|Lighthouse Lab in Alderley Park|Wellcome Sanger Institute for the COVID-19 Genomics UK (COG-UK) Consortium|Davies|United Kingdom

>Spike|hCoV-19/Spain/MD-IBV-005359/2020|2020-03-22|EPI\_ISL\_510235|Original|hCoV-19^^Madrid|Human|Hospital General Universitario Gregorio Mara\u00f1\u00f3n|SeqCOVID-SPAIN consortium/IBV (CSIC)|Comas|Spain

>Spike|hCoV-19/Denmark/DCGC-14508/2020|2020-11-30|EPI\_ISL\_711806|Original|hCoV-19^^Hovedstaden|Human|Department of Virus and Microbiological Special Diagnostics|Albertsen Lab|Michaelsen|Denmark

>Spike|hCoV-19/England/CAMB-73D4D/2020|2020-04-02|EPI\_ISL\_433690|Original|hCoV-19^^England|Human|Department of Pathology|COVID-19 Genomics UK (COG-UK) Consortium|Meredith|United Kingdom

>Spike|hCoV-19/Japan/PG-2880/2020|2020-04-00|EPI\_ISL\_691006|Original|hCoV-19^^Japan|Human|Pathogen Genomics Center|Pathogen Genomics Center|Sekizuka|Japan

>Spike|hCoV-19/USA/WA-S1552/2020|2020-05-26|EPI\_ISL\_495978|Original|hCoV-19^^Washington|Human|Washington State Department of Health|Seattle Flu Study|Lee|USA

>Spike|hCoV-19/England/ALDP-CB596D/2020|2020-12-19|EPI\_ISL\_761722|Original|hCoV-19^^England|Human|Lighthouse Lab in Alderley Park|Wellcome Sanger Institute for the COVID-19 Genomics UK (COG-UK) Consortium|Davies|United Kingdom

>Spike|hCoV-19/England/MILK-B9508D/2020|2020-11-13|EPI\_ISL\_673655|Original|hCoV-19^^England|Human|Lighthouse Lab in Milton Keynes|Wellcome Sanger Institute for the COVID-19 Genomics UK (COG-UK) Consortium|Davies|United Kingdom

>Spike|hCoV-19/USA/CA-CZB-11865/2020|2020-10-04|EPI\_ISL\_625619|Original|hCoV-19^^California|Human|Alameda County Public Health Lab|Chan-Zuckerberg Biohub|Bhatt|USA

>Spike|hCoV-19/Germany/HH-hpi-p1821/2020|2020-03-22|EPI\_ISL\_776177|Original|hCoV-19^^Hamburg|Human|University Medical Center Hamburg Eppendorf|Heinrich Pette Institute|Robitaille|Germany

>Spike|hCoV-19/England/204590568/2020|2020-11-06|EPI\_ISL\_700644|Original|hCoV-19^^England|Human|Respiratory Virus Unit|COVID-19 Genomics UK (COG-UK) Consortium|Platt|United Kingdom

>Spike|hCoV-19/USA/NY-PV08432/2020|2020-03-18|EPI\_ISL\_421388|Original|hCoV-19^^New York|Human|MSHS Clinical Microbiology Laboratories|MSHS Pathogen Surveillance Program|van Bakel|USA

>Spike|hCoV-19/USA/UT-UPHL-2012309436/2020|2020-08-16|EPI\_ISL\_745549|Original|hCoV-19^^Utah|Human|Ginkgo Bioworks Clinical Laboratory|Utah Public Health Laboratory|Young|USA

>Spike|hCoV-19/USA/CT-Yale-034/2020|2020-03-15|EPI\_ISL\_419524|Original|hCoV-19^^Connecticut|Human|Yale Clinical Virology Laboratory|Grubaugh Lab - Yale School of Public Health|Grubaugh|USA

>Spike|hCoV-19/Austria/CeMM0280/2020|2020-03-25|EPI\_ISL\_438107|Original|hCoV-19^^Vienna|Human|Center for Virology|Bergthaler laboratory|Bergthaler|Austria

>Spike|hCoV-19/USA/NE-11549/2020|2020-05-05|EPI\_ISL\_475228|Original|hCoV-19^^Nebraska|Human|Nebraska Public Health Laboratory|UNMC COVID-19 Response Team|Pratt|USA

>Spike|hCoV-19/England/SHEF-C00DF/2020|2020-03-23|EPI\_ISL\_420267|Original|hCoV-19^^England|Human|Virology Department|Department of Infection|de Silva|United Kingdom

>Spike|hCoV-19/England/MILK-B88357/2020|2020-11-14|EPI\_ISL\_674342|Original|hCoV-19^^England|Human|Lighthouse Lab in Milton Keynes|Wellcome Sanger Institute for the COVID-19 Genomics UK (COG-UK) Consortium|Davies|United Kingdom

>Spike|hCoV-19/USA/CA-CZB-3783/2020|2020-06-04|EPI\_ISL\_548410|Original|hCoV-19^^California|Human|Ventura County Public Health Lab|Chan-Zuckerberg Biohub|Bhatt|USA

>Spike|hCoV-19/Wales/PHWC-4A692B/2020|2020-12-17|EPI\_ISL\_765085|Original|hCoV-19^^Wales|Human|Wales Specialist Virology Centre Sequencing lab|COVID-19 Genomics UK (COG-UK) Consortium|Moore|United Kingdom

>Spike|hCoV-19/Scotland/EDB1711/2020|2020-04-15|EPI\_ISL\_433126|Original|hCoV-19^^Scotland|Human|Virology Department|COVID-19 Genomics UK (COG-UK) Consortium|Williams|United Kingdom

>Spike|hCoV-19/Netherlands/un-EMC-825/2020|2020-12-11|EPI\_ISL\_763178|Original|hCoV-19^^Netherlands|Human|Dutch COVID-19 response team|Erasmus Medical Center|Oude Munnink|Netherlands

>Spike|hCoV-19/USA/TX-DSHS-0694/2020|2020-08-01|EPI\_ISL\_576341|Original|hCoV-19^^Texas|Human|Texas Department of State Health Services|Texas Department of State Health Services|Rahman|USA

>Spike|hCoV-19/Scotland/EDB5065/2020|2020-04-24|EPI\_ISL\_487739|Original|hCoV-19^^Scotland|Human|Virology Department|Wellcome Sanger Institute for the COVID-19 Genomics UK (COG-UK) consortium|Davies|United Kingdom

>Spike|hCoV-19/USA/WI-UW-591/2020|2020-06-19|EPI\_ISL\_484966|Original|hCoV-19^^Wisconsin|Human|University of Wisconsin-Madison AIDS Vaccine Research Laboratories|University of Wisconsin-Madison AIDS Vaccine Research Laboratories|Baczenas|USA

>Spike|hCoV-19/England/MILK-93C9F8/2020|2020-06-21|EPI\_ISL\_553276|Original|hCoV-19^^England|Human|Lighthouse Lab in Milton Keynes|Wellcome Sanger Institute for the COVID-19 Genomics UK (COG-UK) consortium|Davies|United Kingdom

>Spike|hCoV-19/France/PAC-IHU-0789/2020|2020-05-01|EPI\_ISL\_568965|Original|hCoV-19^^Provence-Alpes-C\u00f4te-d\u0192Azur|Human|MEPHI|MEPHI|Levasseur|France

>Spike|hCoV-19/Scotland/EDB7378/2020|2020-08-31|EPI\_ISL\_529696|Original|hCoV-19^^Scotland|Human|Virology Department|COVID-19 Genomics UK (COG-UK) Consortium|Williams|United Kingdom

>Spike|hCoV-19/Scotland/QEUH-95E32F/2020|2020-08-10|EPI\_ISL\_534408|Original|hCoV-19^^Scotland|Human|NHSGGC West of Scotland Specialist Virology Centre / MRC-University of Glasgow Centre for Virus Research|Wellcome Sanger Institute for the COVID-19 Genomics UK (COG-UK) consortium|Davies|United Kingdom

>Spike|hCoV-19/Spain/AR-IBV-005083/2020|2020-04-22|EPI\_ISL\_510366|Original|hCoV-19^^Aragon|Human|Servicio de Microbiolog\u00eda|SeqCOVID-SPAIN consortium|IBV (CSIC)|Comas|Spain

>Spike|hCoV-19/England/NORT-283768/2020|2020-03-31|EPI\_ISL\_478511|Original|hCoV-19^^England|Human|Northumbria University / South Tees Hospitals NHS Foundation Trust / North Cumbria Integrated Care NHS Foundation Trust / North Tees and Hartlepool NHS Foundation Trust / Newcastle Hospitals NHS Foundation Trust|COVID-19 Genomics UK (COG-UK) Consortium|Bashton|United Kingdom

>Spike|hCoV-19/England/20100121007/2020|2020-02-29|EPI\_ISL\_415141|Original|hCoV-19^^England|Human|Respiratory Virus Unit|Respiratory Virus Unit|Platt|United Kingdom

>Spike|hCoV-19/USA/TX-HMH-MCoV-12488/2020|2020-09-28|EPI\_ISL\_790363|Original|hCoV-19^^Texas|Human|Houston Methodist Hospital|Houston Methodist Hospital|Long|USA

>Spike|hCoV-19/Norway/2989/2020|2020-07-22|EPI\_ISL\_549114|Original|hCoV-19^^MoreogRomsdal|Human|Ostfold Hospital Trust - K\u00e5lnes|Norwegian Institute of Public Health|Kopperud Riis|Norway

>Spike|hCoV-19/England/CAMC-B22717/2020|2020-11-02|EPI\_ISL\_647124|Original|hCoV-19^^England|Human|Lighthouse Lab in Cambridge|Wellcome Sanger Institute for the COVID-19 Genomics UK (COG-UK) Consortium|Davies|United Kingdom

>Spike|hCoV-19/USA/TX-HMH-3010/2020|2020-05-30|EPI\_ISL\_543930|Original|hCoV-19^^Texas|Human|Houston Methodist Hospital|Houston Methodist Hospital|Long|USA

>Spike|hCoV-19/Spain/PV-IBV-000957/2020|2020-03-28|EPI\_ISL\_452618|Original|hCoV-19^^Basque Country|Human|Servicio de Microbiolog\u00eda. Hospital Universitario Donostia. OSI Donostialdea. \u00clrea de Enfermedades Infecciosas|SeqCOVID-SPAIN consortium/IBV (CSIC) |Comas|Spain

>Spike|hCoV-19/England/ALDP-BC7DA9/2020|2020-11-23|EPI\_ISL\_721389|Original|hCoV-19^^England|Human|Lighthouse Lab in Alderley Park|Wellcome Sanger Institute for the COVID-19 Genomics UK (COG-UK) Consortium|Davies|United Kingdom

>Spike|hCoV-19/Russia/SPE-RII-22269V/2020|2020-06-08|EPI\_ISL\_524041|Vero P1|hCoV-19^^Saint Petersburg|Human|WHO National Influenza Centre Russian Federation|WHO National Influenza Centre Russian Federation|Komissarov|Russia

>Spike|hCoV-19/England/NOTT-10E098/2020|2020-03-18|EPI\_ISL\_425492|Original|hCoV-19^^England|Human|Queens Medical Centre|COVID-19 Genomics UK (COG-UK) Consortium|Loose|United Kingdom

>Spike|hCoV-19/Denmark/DCGC-17332/2020|2020-12-14|EPI\_ISL\_750914|Original|hCoV-19^^Nordjylland|Human|Department of Virus and Microbiological Special Diagnostics|Albertsen Lab|Michaelsen|Denmark

>Spike|hCoV-19/Japan/PG-5043/2020|2020-07-00|EPI\_ISL\_690154|Original|hCoV-19^^Japan|Human|Pathogen Genomics Center|Pathogen Genomics Center|Sekizuka|Japan

>Spike|hCoV-19/USA/UT-UPHL-2009694/2020|2020-07-27|EPI\_ISL\_605368|Original|hCoV-19^^Utah|Human|Utah Public Health Laboratory|Utah Public Health Laboratory|Young|USA

>Spike|hCoV-19/Canada/ON-PHL-20-01220/2020|2020-06-00|EPI\_ISL\_548842|Original|hCoV-19^^Ontario|Human|Public Health Ontario Laboratory|Public Health Ontario Laboratory|Guthrie|Canada

>Spike|hCoV-19/England/QEUH-B67BED/2020|2020-11-11|EPI\_ISL\_661446|Original|hCoV-19^^England|Human|Lighthouse Lab in Glasgow|Wellcome Sanger Institute for the COVID-19 Genomics UK (COG-UK) Consortium|Davies|United Kingdom

>Spike|hCoV-19/Sweden/20-14941/2020|2020-05-25|EPI\_ISL\_475523|Original|hCoV-19^^Stockholm|Human|Huddinge VC|The Public Health Agency of Sweden|Svartstr\u00f6m|Sweden

>Spike|hCoV-19/England/MILK-BB1CD2/2020|2020-11-17|EPI\_ISL\_720335|Original|hCoV-19^^England|Human|Lighthouse Lab in Milton Keynes|Wellcome Sanger Institute for the COVID-19 Genomics UK (COG-UK) Consortium|Davies|United Kingdom

>Spike|hCoV-19/England/ALDP-AA56C5/2020|2020-10-22|EPI\_ISL\_623905|Original|hCoV-19^^England|Human|Lighthouse Lab in Alderley Park|Wellcome Sanger Institute for the COVID-19 Genomics UK (COG-UK) consortium|Davies|United Kingdom

>Spike|hCoV-19/Wales/PHWC-16E333/2020|2020-09-28|EPI\_ISL\_585702|Original|hCoV-19^^Wales|Human|Wales Specialist Virology Centre Sequencing lab|COVID-19 Genomics UK (COG-UK) Consortium|Moore|United Kingdom

>Spike|hCoV-19/Colombia/CUN-GUR-0454/2020|2020-03-28|EPI\_ISL\_447744|Original|hCoV-19^^Cundinamarca|Human|Grupo de Investigaciones Microbiol\u00f3gicas-UR (GIMUR)|Grupo de Investigaciones Microbiol\u00f3gicas-UR (GIMUR)|Ram\u00e9rez|Colombia

>Spike|hCoV-19/England/ALDP-8EF658/2020|2020-06-25|EPI\_ISL\_556578|Original|hCoV-19^^England|Human|Lighthouse Lab in Alderley Park|Wellcome Sanger Institute for the COVID-19 Genomics UK (COG-UK) consortium|Davies|United Kingdom

>Spike|hCoV-19/England/ALDP-B63B5A/2020|2020-11-08|EPI\_ISL\_656497|Original|hCoV-19^^England|Human|Lighthouse Lab in Alderley Park|Wellcome Sanger Institute for the COVID-19 Genomics UK (COG-UK) Consortium|Davies|United Kingdom

>Spike|hCoV-19/New Zealand/20CV0294/2020|2020-03-26|EPI\_ISL\_579084|Original|hCoV-19^^Auckland|Human|Canterbury Health Laboratories|Institute of Environmental Science and Research (ESR)|Wang|New Zealand

>Spike|hCoV-19/Japan/PG-4208/2020|2020-07-00|EPI\_ISL\_692446|Original|hCoV-19^^Japan|Human|Fukuoka Institute of Health and Environmental Sciences|Pathogen Genomics Center|Sekizuka|Japan

>Spike|hCoV-19/England/ALDP-9FD3B9/2020|2020-10-02|EPI\_ISL\_587715|Original|hCoV-19^^England|Human|Lighthouse Lab in Alderley Park|Wellcome Sanger Institute for the COVID-19 Genomics UK (COG-UK) consortium|Davies|United Kingdom

>Spike|hCoV-19/England/SHEF-10D73E8/2020|2020-12-01|EPI\_ISL\_727985|Original|hCoV-19^^England|Human|Virology Department|COVID-19 Genomics UK (COG-UK) Consortium|de Silva|United Kingdom

>Spike|hCoV-19/England/BRIS-12612E/2020|2020-04-10|EPI\_ISL\_458922|Original|hCoV-19^^England|Human|PHE South West Regional Laboratory|Wellcome Sanger Institute for the COVID-19 Genomics UK (COG-UK) consortium|Davies|United Kingdom

>Spike|hCoV-19/England/NORW-FA27C/2020|2020-12-08|EPI\_ISL\_725486|Original|hCoV-19^^England|Human|Quadram Institute Bioscience|COVID-19 Genomics UK (COG-UK) Consortium|Alikhan|United Kingdom

>Spike|hCoV-19/Wales/PHWC-47FF0B/2020|2020-10-05|EPI\_ISL\_612829|Original|hCoV-19^^Wales|Human|Wales Specialist Virology Centre Sequencing lab|COVID-19 Genomics UK (COG-UK) Consortium|Moore|United Kingdom

>Spike|hCoV-19/USA/TX-HMH-MCoV-15339/2020|2020-10-19|EPI\_ISL\_786823|Original|hCoV-19^^Texas|Human|Houston Methodist Hospital|Houston Methodist Hospital|Long|USA

>Spike|hCoV-19/England/QEUEH-A63FF5/2020|2020-10-12|EPI\_ISL\_628683|Original|hCoV-19^^England|Human|Oxford Viromics|COVID-19 Genomics UK (COG-UK) Consortium|Golubchik|United Kingdom

>Spike|hCoV-19/England/BRIS-130E1B/2020|2020-03-24|EPI\_ISL\_501588|Original|hCoV-19^^England|Human|PHE South West Regional Laboratory|Wellcome Sanger Institute for the COVID-19 Genomics UK (COG-UK) consortium|Davies|United Kingdom

>Spike|hCoV-19/Canada/BC\_26172976/2020|2020-03-00|EPI\_ISL\_463231|Original|hCoV-19^^British Columbia|Human|BCCDC Public Health Laboratory|BCCDC Public Health Laboratory|Harrigan|Canada

>Spike|hCoV-19/Northern Ireland/QEUEH-96B86C/2020|2020-08-16|EPI\_ISL\_531306|Original|hCoV-19^^Northern Ireland|Human|Lighthouse Lab in Glasgow|Wellcome Sanger Institute for the COVID-19 Genomics UK (COG-UK) consortium|Davies|United Kingdom

>Spike|hCoV-19/England/CAMC-A40E1F/2020|2020-10-07|EPI\_ISL\_609445|Original|hCoV-19^^England|Human|Lighthouse Lab in Cambridge|Wellcome Sanger Institute for the COVID-19 Genomics UK (COG-UK) consortium|Davies|United Kingdom

>Spike|hCoV-19/Belgium/ULG-11056/2020|2020-12-02|EPI\_ISL\_722928|Original|hCoV-19^^Liege|Human|Department of Clinical Microbiology|GIGA Medical Genomics|Durkin|Belgium

>Spike|hCoV-19/USA/WI-UW-946/2020|2020-05-08|EPI\_ISL\_509945|Original|hCoV-19^^Wisconsin|Human|University of Wisconsin-Madison AIDS Vaccine Research Laboratories|University of Wisconsin-Madison AIDS Vaccine Research Laboratories|Baczenas|USA

>Spike|hCoV-19/Wales/PHWC-30A09/2020|2020-04-08|EPI\_ISL\_446306|Original|hCoV-19^^Wales|Human|Wales Specialist Virology Centre|Public Health Wales Microbiology Cardiff|Moore|United Kingdom

>Spike|hCoV-19/England/MILK-A479BD/2020|2020-10-05|EPI\_ISL\_598282|Original|hCoV-19^^England|Human|Lighthouse Lab in Milton Keynes|Wellcome Sanger Institute for the COVID-19 Genomics UK (COG-UK) consortium|Davies|United Kingdom

>Spike|hCoV-19/Germany/HH-hpi-p2392/2020|2020-05-02|EPI\_ISL\_776467|Original|hCoV-19^^Hamburg|Human|University Medical Center Hamburg Eppendorf|Heinrich Pette Institute|Robitaille|Germany

>Spike|hCoV-19/Saudi Arabia/KAUST-Makkah139/2020|2020-03-24|EPI\_ISL\_437694|Original|hCoV-19^^Makkah|Human|Pathogen Genomics Lab King Abdullah University of Science and Technology(KAUST)|Pathogen Genomics Lab King Abdullah University of Science and Technology(KAUST)|Mohamed Ghazzali|Saudi Arabia

>Spike|hCoV-19/Israel/CVL-45982/2020|2020-12-10|EPI\_ISL\_745059|Original|hCoV-19^^Central|Human|Israel Central Virology laboratory|Israel Central Virology laboratory|Zuckerman|Israel

>Spike|hCoV-19/Wales/PHWC-49AA63/2020|2020-12-03|EPI\_ISL\_727637|Original|hCoV-19^^Wales|Human|Originating lab|COVID-19 Genomics UK (COG-UK) Consortium|Moore|United Kingdom

>Spike|hCoV-19/England/20179042204/2020|2020-04-25|EPI\_ISL\_528431|Original|hCoV-19^^England|Human|Respiratory Virus Unit|Respiratory Virus Unit|Platt|United Kingdom

>Spike|hCoV-19/Scotland/CVR3081/2020|2020-04-24|EPI\_ISL\_461665|Original|hCoV-19^^Scotland|Human|West of Scotland Specialist Virology Centre|COVID-19 Genomics UK (COG-UK) Consortium|Robertson|United Kingdom

>Spike|hCoV-19/England/MILK-9A939E/2020|2020-09-01|EPI\_ISL\_551181|Original|hCoV-19^^England|Human|Lighthouse Lab in Milton Keynes|Wellcome Sanger Institute for the COVID-19 Genomics UK (COG-UK) consortium|Davies|United Kingdom

>Spike|hCoV-19/England/MILK-A0671A/2020|2020-10-01|EPI\_ISL\_599889|Original|hCoV-19^^England|Human|Lighthouse Lab in Milton Keynes|Wellcome Sanger Institute for the COVID-19 Genomics UK (COG-UK) consortium|Davies|United Kingdom

>Spike|hCoV-19/Scotland/CVR2201/2020|2020-04-09|EPI\_ISL\_490672|Original|hCoV-19^^Scotland|Human|West of Scotland Specialist Virology Centre|COVID-19 Genomics UK (COG-UK) Consortium|Robertson|United Kingdom

>Spike|hCoV-19/USA/ME-HETL-J0263/2020|2020-09-29|EPI\_ISL\_755410|Original|hCoV-19^^Maine|Human|Maine Health and Environmental Testing Laboratory|Tewhey Lab|Tewhey|USA

>Spike|hCoV-19/Denmark/DCGC-1180/2020|2020-03-16|EPI\_ISL\_614666|Original|hCoV-19^^Hovedstaden|Human|Department of Virus and Microbiological Special Diagnostics|Albertsen lab|Michaelsen|Denmark

>Spike|hCoV-19/USA/NY-Wadsworth-42205-01/2020|2020-04-09|EPI\_ISL\_676650|Original|hCoV-19^^New York|Human|Wadsworth Center|Wadsworth Center|Plitnick|USA

>Spike|hCoV-19/France/HDF-3668/2020|2020-03-25|EPI\_ISL\_443316|Original|hCoV-19^^Hauts-de-France|Human|CH Compi\00e8gne Laboratoire de Biologie|National Reference Center for Viruses of Respiratory Infections|Enouf|France

>Spike|hCoV-19/England/CAMC-B21068/2020|2020-11-02|EPI\_ISL\_647382|Original|hCoV-19^^England|Human|Lighthouse Lab in Cambridge|Wellcome Sanger Institute for the COVID-19 Genomics UK (COG-UK) Consortium|Davies|United Kingdom

>Spike|hCoV-19/England/QEUH-BC4B75/2020|2020-11-25|EPI\_ISL\_704018|Original|hCoV-19^^England|Human|Lighthouse Lab in Glasgow|Wellcome Sanger Institute for the COVID-19 Genomics UK (COG-UK) Consortium|Davies|United Kingdom

>Spike|hCoV-19/England/20139050804/2020|2020-03-27|EPI\_ISL\_420699|Original|hCoV-19^^England|Human|Respiratory Virus Unit|Respiratory Virus Unit|Platt|United Kingdom

>Spike|hCoV-19/England/MILK-B552B0/2020|2020-11-06|EPI\_ISL\_657776|Original|hCoV-19^^England|Human|Lighthouse Lab in Milton Keynes|Wellcome Sanger Institute for the COVID-19 Genomics UK (COG-UK) Consortium|Davies|United Kingdom

>Spike|hCoV-19/Denmark/DCGC-2311/2020|2020-08-10|EPI\_ISL\_617736|Original|hCoV-19^^Midtjylland|Human|Department of Virus and Microbiological Special Diagnostics|Albertsen lab|Michaelsen|Denmark

>Spike|hCoV-19/Switzerland/SO-ETHZ-420715/2020|2020-12-24|EPI\_ISL\_768211|Original|hCoV-19^^Solothurn|Human|Viollier AG|Department of Biosystems Science and Engineering|Nadeau|Switzerland

>Spike|hCoV-19/England/QEUH-CAD79B/2020|2020-12-20|EPI\_ISL\_767092|Original|hCoV-19^^England|Human|Lighthouse Lab in Glasgow|Wellcome Sanger Institute for the COVID-19 Genomics UK (COG-UK) Consortium|Davies|United Kingdom

>Spike|hCoV-19/Canada/QC-LSPQ-L00234287/2020|2020-03-23|EPI\_ISL\_536049|Original|hCoV-19^^Quebec|Human|H\00f4pital de Saint-Eustache|Laboratoire de sant\00e9 publique du Qu\00e9bec|Moreira|Canada

>Spike|hCoV-19/Wales/PHWC-491316/2020|2020-11-16|EPI\_ISL\_706642|Original|hCoV-19^^Wales|Human|Originating lab|COVID-19 Genomics UK (COG-UK) Consortium|Moore|United Kingdom

>Spike|hCoV-19/Wales/PHWC-499141/2020|2020-12-02|EPI\_ISL\_727261|Original|hCoV-19^^Wales|Human|Originating lab|COVID-19 Genomics UK (COG-UK) Consortium|Moore|United Kingdom

>Spike|hCoV-19/Netherlands/ZuidHolland\_61/2020|2020-03-23|EPI\_ISL\_422929|Original|hCoV-19^^Zuid Holland|Human|Dutch COVID-19 response team|Erasmus Medical Center|Oude Munnink|Netherlands

>Spike|hCoV-19/England/QEUH-A9F655/2020|2020-10-20|EPI\_ISL\_611478|Original|hCoV-19^^England|Human|Lighthouse Lab in Glasgow|Wellcome Sanger Institute for the COVID-19 Genomics UK (COG-UK) consortium|Davies|United Kingdom

>Spike|hCoV-19/France/PAC-MEPHI-1776/2020|2020-09-19|EPI\_ISL\_644381|Original|hCoV-19^^Provence-Alpes-Cote-d\u2019Azur|Human|MEPHI|MEPHI|Levasseur|France

>Spike|hCoV-19/USA/TX-HMH-2123/2020|2020-05-20|EPI\_ISL\_545132|Original|hCoV-19^^Texas|Human|Houston Methodist Hospital|Houston Methodist Hospital|Long|USA

>Spike|hCoV-19/England/MILK-B5A594/2020|2020-11-06|EPI\_ISL\_658243|Original|hCoV-19^^England|Human|Lighthouse Lab in Milton Keynes|Wellcome Sanger Institute for the COVID-19 Genomics UK (COG-UK) Consortium|Davies|United Kingdom

>Spike|hCoV-19/USA/CA-CZB-1955/2020|2020-05-06|EPI\_ISL\_486228|Original|hCoV-19^^California|Human|Orange County Public Health Laboratory|Chan-Zuckerberg Biohub|McGeever|USA

>Spike|hCoV-19/USA/MI-MDHHS-SC22322/2020|2020-11-10|EPI\_ISL\_708298|Original|hCoV-19^^Michigan|Human|Michigan Department of Health and Human Services|Michigan Department of Health and Human Services|Jacob|USA

>Spike|hCoV-19/England/BIRM-5E7FF/2020|2020-03-24|EPI\_ISL\_444304|Original|hCoV-19^^England|Human|University of Birmingham|COVID-19 Genomics UK (COG-UK) Consortium|Loman|United Kingdom

>Spike|hCoV-19/England/ALDP-A8628A/2020|2020-10-17|EPI\_ISL\_605977|Original|hCoV-19^^England|Human|Lighthouse Lab in Alderley Park|Wellcome Sanger Institute for the COVID-19 Genomics UK (COG-UK) consortium|Davies|United Kingdom

>Spike|hCoV-19/USA/WA-S1433/2020|2020-05-20|EPI\_ISL\_495883|Original|hCoV-19^^Washington|Human|Washington State Department of Health|Seattle Flu Study|Lee|USA

>Spike|hCoV-19/Spain/MD-IBV-004899/2020|2020-03-08|EPI\_ISL\_481089|Original|hCoV-19^^Madrid|Human|Hospital General Universitario Gregorio Mara\u00f1a|SeqCOVID-SPAIN consortium/IBV (CSIC)|Comas|Spain

>Spike|hCoV-19/Switzerland/BE-ETHZ-321082/2020|2020-10-14|EPI\_ISL\_737695|Original|hCoV-19^^Bern|Human|Viollier AG|Department of Biosystems Science and Engineering|Nadeau|Switzerland

>Spike|hCoV-19/USA/TX-HMH-MCoV-15038/2020|2020-10-16|EPI\_ISL\_786522|Original|hCoV-19^^Texas|Human|Houston Methodist Hospital|Houston Methodist Hospital|Long|USA

>Spike|hCoV-19/USA/CA-CZB-10109/2020|2020-05-19|EPI\_ISL\_672217|Original|hCoV-19^^California|Human|The Ashley Laboratory|Chan-Zuckerberg Biohub|Bhatt|USA

>Spike|hCoV-19/England/ALDP-CBDDFA/2020|2020-12-19|EPI\_ISL\_760360|Original|hCoV-19^^England|Human|Lighthouse Lab in Alderley Park|Wellcome Sanger Institute for the COVID-19 Genomics UK (COG-UK) Consortium|Davies|United Kingdom

>Spike|hCoV-19/USA/MI-MDHHS-SC20584/2020|2020-04-30|EPI\_ISL\_462666|Original|hCoV-19^^Michigan|Human|Michigan Department of Health and Human Services|Michigan Department of Health and Human Services|Blankenship|USA

>Spike|hCoV-19/Australia/VIC327/2020|2020-03-17|EPI\_ISL\_426637|Original|hCoV-19^^Victoria|Human|Victorian Infectious Diseases Reference Laboratory (VIDRL)|Microbiological Diagnostic Unit Public Health Laboratory and Victorian Infectious Diseases Reference Laboratory|Schultz|Australia

>Spike|hCoV-19/USA/TX-HMH-MCoV-16343/2020|2020-11-02|EPI\_ISL\_786027|Original|hCoV-19^^Texas|Human|Houston Methodist Hospital|Houston Methodist Hospital|Long|USA

>Spike|hCoV-19/England/MILK-AC7821/2020|2020-10-21|EPI\_ISL\_644061|Original|hCoV-19^^England|Human|Lighthouse Lab in Milton Keynes|Wellcome Sanger Institute for the COVID-19 Genomics UK (COG-UK) Consortium|Davies|United Kingdom

>Spike|hCoV-19/USA/NMDOH-2020321845/2020|2020-09-01|EPI\_ISL\_542073|Original|hCoV-19^^New Mexico|Human|New Mexico Department of Health Scientific Laboratory|New Mexico Department of Health Scientific Laboratory|Johnson|USA

>Spike|hCoV-19/Australia/VIC11662/2020|2020-07-25|EPI\_ISL\_563450|Original|hCoV-19^^Victoria|Human|Microbiological Diagnostic Unit - Public Health Laboratory (MDU-PHL)|MDU-PHL|Schultz|Australia

>Spike|hCoV-19/England/CAMB-7225E/2020|2020-03-28|EPI\_ISL\_439545|Original|hCoV-19^^England|Human|Department of Pathology|Wellcome Sanger Institute for the COVID-19 Genomics UK (COG-UK) consortium|Amato|United Kingdom

>Spike|hCoV-19/England/ALDP-920A12/2020|2020-06-23|EPI\_ISL\_552868|Original|hCoV-19^^England|Human|Lighthouse Lab in Alderley Park|Wellcome Sanger Institute for the COVID-19 Genomics UK (COG-UK) consortium|Davies|United Kingdom



>Spike|hCoV-19/Denmark/DCGC-13184/2020|2020-11-30|EPI\_ISL\_712147|Original|hCoV-19^^Hovedstaden|Human|Department of Virus and Microbiological Special Diagnostics|Albertsen Lab|Michaelsen|Denmark

>Spike|hCoV-19/USA/TX-HMH-6531/2020|2020-06-27|EPI\_ISL\_546062|Original|hCoV-19^^Texas|Human|Houston Methodist Hospital|Houston Methodist Hospital|Long|USA

>Spike|hCoV-19/Spain/PV-IBV-003190/2020|2020-03-08|EPI\_ISL\_480962|Original|hCoV-19^^Basque Country|Human|Servicio de Microbiolog\u00eda. Hospital Universitario Donostia. OSI Donostialdea. \u00clrea de Enfermedades Infecciosas|SeqCOVID-SPAIN consortium/IBV (CSIC)|Comas|Spain

>Spike|hCoV-19/England/ALDP-9D8B43/2020|2020-09-18|EPI\_ISL\_576651|Original|hCoV-19^^England|Human|Oxford Viromics|COVID-19 Genomics UK (COG-UK) Consortium|Golubchik|United Kingdom

>Spike|hCoV-19/South Korea/KCDC2181/2020|2020-03-25|EPI\_ISL\_506975|Original|hCoV-19^^South Korea|Human|Division of Viral Diseases|Division of Viral Diseases|Kim|South Korea

>Spike|hCoV-19/England/MILK-9A9F5E/2020|2020-08-31|EPI\_ISL\_550939|Original|hCoV-19^^England|Human|Lighthouse Lab in Milton Keynes|Wellcome Sanger Institute for the COVID-19 Genomics UK (COG-UK) consortium|Davies|United Kingdom

>Spike|hCoV-19/England/20142001904/2020|2020-03-30|EPI\_ISL\_465895|Original|hCoV-19^^England|Human|Respiratory Virus Unit|Respiratory Virus Unit|Platt|United Kingdom

>Spike|hCoV-19/England/QEUEH-95E4D1/2020|2020-08-10|EPI\_ISL\_537048|Original|hCoV-19^^England|Human|Lighthouse Lab in Glasgow|Wellcome Sanger Institute for the COVID-19 Genomics UK (COG-UK) consortium|Davies|United Kingdom

>Spike|hCoV-19/England/MILK-991997/2020|2020-08-26|EPI\_ISL\_577008|Original|hCoV-19^^England|Human|Northumbria University / South Tees Hospitals NHS Foundation Trust / North Cumbria Integrated Care NHS Foundation Trust / North Tees and Hartlepool NHS Foundation Trust / Newcastle Hospitals NHS Foundation Trust|COVID-19 Genomics UK (COG-UK) Consortium|Bashton|United Kingdom

>Spike|hCoV-19/England/QEUEH-B106F1/2020|2020-11-02|EPI\_ISL\_641694|Original|hCoV-19^^England|Human|Lighthouse Lab in Glasgow|Wellcome Sanger Institute for the COVID-19 Genomics UK (COG-UK) Consortium|Davies|United Kingdom

>Spike|hCoV-19/USA/CA-ALSR-4576/2020|2020-07-11|EPI\_ISL\_667016|Original|hCoV-19^^California|Human|San Diego County Public Health Laboratory|Andersen lab at Scripps Research|Gangavarapu|USA

>Spike|hCoV-19/USA/CA-CZB-2051/2020|2020-04-22|EPI\_ISL\_486295|Original|hCoV-19^^California|Human|San Joaquin County Public Health Lab|Chan-Zuckerberg Biohub|McGeever|USA

>Spike|hCoV-19/Wales/PHWC-495DD8/2020|2020-11-26|EPI\_ISL\_726485|Original|hCoV-19^^Wales|Human|Originating lab|COVID-19 Genomics UK (COG-UK) Consortium|Moore|United Kingdom

>Spike|hCoV-19/Denmark/DCGC-19730/2020|2020-12-07|EPI\_ISL\_749139|Original|hCoV-19^^Sjælland|Human|Department of Virus and Microbiological Special Diagnostics|Albertsen Lab|Michaelsen|Denmark

>Spike|hCoV-19/USA/MA-QDX-1505/2020|2020-03-17|EPI\_ISL\_603837|Original|hCoV-19^^Massachusetts|Human|Quest Diagnostics|Quest Diagnostics|Kagan|USA

>Spike|hCoV-19/Kenya/C587/2020|2020-04-11|EPI\_ISL\_457912|Original|hCoV-19^^Kenya|Human|KEMRI-CGMR-C|KEMRI-Wellcome Trust Research Programme/KEMRI-CGMR-C Kilifi|Githinji|Kenya

>Spike|hCoV-19/USA/TX-HMH-3110/2020|2020-06-10|EPI\_ISL\_543998|Original|hCoV-19^^Texas|Human|Houston Methodist Hospital|Houston Methodist Hospital|Long|USA

>Spike|hCoV-19/USA/WI-UW-386/2020|2020-05-21|EPI\_ISL\_480368|Original|hCoV-19^^Wisconsin|Human|University of Wisconsin-Madison AIDS Vaccine Research Laboratories|University of Wisconsin-Madison AIDS Vaccine Research Laboratories|Baczenas|USA

>Spike|hCoV-19/USA/CA-QDX-2413/2020|2020-03-17|EPI\_ISL\_604679|Original|hCoV-19^^California|Human|Quest Diagnostics|Quest Diagnostics|Kagan|USA

>Spike|hCoV-19/USA/TX-DSHS-1591/2020|2020-06-22|EPI\_ISL\_700702|Original|hCoV-19^^Texas|Human|Texas Department of State Health Services|Texas Department of State Health Services|Rahman|USA

>Spike|hCoV-19/Finland/10A80S14/2020|2020-04-10|EPI\_ISL\_481531|Original|hCoV-19^^Uusimaa|Human|Department of Virology and Immunology|Department of Virology|Smura|Finland

>Spike|hCoV-19/USA/TX-HMH0413/2020|2020-04-01|EPI\_ISL\_434998|Original|hCoV-19^^Texas|Human|Houston Methodist Hospital|Houston Methodist Hospital|Long|USA

>Spike|hCoV-19/Wales/PHWC-48798A/2020|2020-10-27|EPI\_ISL\_639257|Original|hCoV-19^^Wales|Human|Wales Specialist Virology Centre Sequencing lab|COVID-19 Genomics UK (COG-UK) Consortium|Moore|United Kingdom

>Spike|hCoV-19/Wales/PHWC-27258/2020|2020-03-31|EPI\_ISL\_432040|Original|hCoV-19^^Wales|Human|Wales Specialist Virology Centre|Public Health Wales Microbiology Cardiff|Moore|United Kingdom

>Spike|hCoV-19/Serbia/Novi Sad-158502905/2020|2020-05-28|EPI\_ISL\_676591|Original|hCoV-19^^Novi Sad|Human|Scientific Veterinary Institute Novi Sad|Veterinary Specialized Institute \Kraljevo\|Vidanovic|Serbia

>Spike|hCoV-19/USA/MN-MDH-1297/2020|2020-03-24|EPI\_ISL\_483017|Original|hCoV-19^^Minnesota|Human|Minnesota Department of Health|Minnesota Department of Health|Garfin|USA

>Spike|hCoV-19/USA/CA-SEARCH-5518/2020|2020-11-17|EPI\_ISL\_755134|Original|hCoV-19^^California|Human|San Diego County Public Health Laboratory|Andersen lab at Scripps Research|Gangavarapu|USA

>Spike|hCoV-19/USA/TX-HMH-MCoV-8379/2020|2020-06-19|EPI\_ISL\_784359|Original|hCoV-19^^Texas|Human|Houston Methodist Hospital|Houston Methodist Hospital|Long|USA

>Spike|hCoV-19/England/ALDP-A6E19A/2020|2020-10-15|EPI\_ISL\_607003|Original|hCoV-19^^England|Human|Lighthouse Lab in Alderley Park|Wellcome Sanger Institute for the COVID-19 Genomics UK (COG-UK) consortium|Davies|United Kingdom

>Spike|hCoV-19/Spain/PV-HUB-51235489/2020|2020-06-08|EPI\_ISL\_489833|Original|hCoV-19^^Basque Country|Human|Clinical Microbiology Laboratory- Basurto University Hospital|Biocruces-Bizkaia|Urrutikoetxea-Gutierrez|Spain

>Spike|hCoV-19/England/CAMC-B3475E/2020|2020-11-05|EPI\_ISL\_659688|Original|hCoV-19^^England|Human|Lighthouse Lab in Cambridge|Wellcome Sanger Institute for the COVID-19 Genomics UK (COG-UK) Consortium|Davies|United Kingdom

>Spike|hCoV-19/Netherlands/GE-EMC-347/2020|2020-10-28|EPI\_ISL\_632325|Original|hCoV-19^^Gelderland|Human|Dutch COVID-19 response team|Erasmus Medical Center|Oude Munnink|Netherlands

>Spike|hCoV-19/England/ALDP-9FC9B8/2020|2020-10-01|EPI\_ISL\_587789|Original|hCoV-19^^England|Human|Lighthouse Lab in Alderley Park|Wellcome Sanger Institute for the COVID-19 Genomics UK (COG-UK) consortium|Davies|United Kingdom

>Spike|hCoV-19/England/MILK-BB0259/2020|2020-11-18|EPI\_ISL\_720252|Original|hCoV-19^^England|Human|Lighthouse Lab in Milton Keynes|Wellcome Sanger Institute for the COVID-19 Genomics UK (COG-UK) Consortium|Davies|United Kingdom

>Spike|hCoV-19/Portugal/PT1239/2020|2020-03-31|EPI\_ISL\_511200|Original|hCoV-19^^Portugal|Human|Instituto Nacional de Saude (INSA) and Instituto Gulbenkian de Ciencia (IGC)|Instituto Nacional de Saude (INSA) and Instituto Gulbenkian de Ciencia (IGC)|Borges|Portugal

>Spike|hCoV-19/England/ALDP-9C50FF/2020|2020-09-10|EPI\_ISL\_567533|Original|hCoV-19^^England|Human|Lighthouse Lab in Alderley Park|Wellcome Sanger Institute for the COVID-19 Genomics UK (COG-UK) consortium|Davies|United Kingdom

>Spike|hCoV-19/USA/FL-BPHL-0159/2020|2020-04-01|EPI\_ISL\_480810|Original|hCoV-19^^Florida|Human|Florida Bureau of Public Health Laboratories|Florida Bureau of Public Health Laboratories|Blanton|USA

>Spike|hCoV-19/USA/CA-SEARCH-5504/2020|2020-11-25|EPI\_ISL\_755269|Original|hCoV-19^^California|Human|San Diego County Public Health Laboratory|Andersen lab at Scripps Research|Gangavarapu|USA

>Spike|hCoV-19/Australia/WA256/2020|2020-08-26|EPI\_ISL\_594170|Original|hCoV-19^^Western Australia|Human|PathWest Laboratory Medicine WA|PathWest Laboratory Medicine WA Microbial Surveillance Unit|Sikazwe|Australia

>Spike|hCoV-19/New Zealand/20CV0233/2020|2020-09-05|EPI\_ISL\_548072|Original|hCoV-19^^Auckland|Human|LabPLUS|Institute of Environmental Science and Research (ESR)|Wang|New Zealand

>Spike|hCoV-19/Wales/PHWC-47FD98/2020|2020-10-07|EPI\_ISL\_612808|Original|hCoV-19^^Wales|Human|Wales Specialist Virology Centre Sequencing lab|COVID-19 Genomics UK (COG-UK) Consortium|Moore|United Kingdom

>Spike|hCoV-19/England/MILK-974DF8/2020|2020-08-17|EPI\_ISL\_552548|Original|hCoV-19^^England|Human|Lighthouse Lab in Milton Keynes|Wellcome Sanger Institute for the COVID-19 Genomics UK (COG-UK) consortium|Davies|United Kingdom

>Spike|hCoV-19/Zhejiang/CN1/2020|2020-01-22|EPI\_ISL\_455683|unknown|hCoV-19^^Zhejiang|Human|unknown|Department of Microbiology|Submitter|China

>Spike|hCoV-19/Austria/CeMM0371/2020|2020-03-25|EPI\_ISL\_475816|Original|hCoV-19^^Mayrhofen|Human|Institut f\u00fcr Virologie am Department f\u00fcr Hygiene|Bergthaler laboratory|Bergthaler|Austria

>Spike|hCoV-19/USA/CO-CDPHE-2009053149/2020|2020-09-05|EPI\_ISL\_710284|Original|hCoV-19^^Colorado|Human|Colorado Department of Public Health and Environment|Colorado Department of Public Health and Environment|Bankers|USA

>Spike|hCoV-19/Northern Ireland/NIRE-103813/2020|2020-04-15|EPI\_ISL\_489164|Original|hCoV-19^^Northern Ireland|Human|Regional Virus Laboratory|Wellcome Sanger Institute for the COVID-19 Genomics UK (COG-UK) consortium|Davies|United Kingdom

>Spike|hCoV-19/Denmark/DCGC-14550/2020|2020-11-30|EPI\_ISL\_711832|Original|hCoV-19^^Hovedstaden|Human|Department of Virus and Microbiological Special Diagnostics|Albertsen Lab|Michaelsen|Denmark

>Spike|hCoV-19/Canada/ON-S329/2020|2020-03-29|EPI\_ISL\_755863|Original|hCoV-19^^Ontario|Human|Toronto Invasive Bacterial Diseases Network|McMaster University|McArthur|Canada

>Spike|hCoV-19/Denmark/DCGC-6162/2020|2020-10-05|EPI\_ISL\_620065|Original|hCoV-19^^Midtjylland|Human|Department of Virus and Microbiological Special Diagnostics|Albertsen lab|Michaelsen|Denmark

>Spike|hCoV-19/England/LOND-124E195/2020|2020-00-00|EPI\_ISL\_584664|Original|hCoV-19^^England|Human|University College London Hospital|COVID-19 Genomics UK (COG-UK) Consortium|Byott|United Kingdom

>Spike|hCoV-19/Wales/PHWC-484808/2020|2020-10-23|EPI\_ISL\_628047|Original|hCoV-19^^Wales|Human|Wales Specialist Virology Centre Sequencing lab|COVID-19 Genomics UK (COG-UK) Consortium|Moore|United Kingdom

>Spike|hCoV-19/Canada/ON-PHL-20-00015/2020|2020-00-00|EPI\_ISL\_548697|Original|hCoV-19^^Ontario|Human|Public Health Ontario Laboratory|Public Health Ontario Laboratory|Guthrie|Canada

>Spike|hCoV-19/USA/OR-OHSU-1957/2020|2020-07-30|EPI\_ISL\_526077|Original|hCoV-19^^Oregon|Human|OHSU Lab Services Molecular Microbiology Lab|Oregon SARS-CoV-2 Genome Sequencing Center|O'Roak|USA

>Spike|hCoV-19/USA/CA-CHLA-PLM22279170/2020|2020-12-01|EPI\_ISL\_753571|Original|hCoV-19^^California|Human|Clinical virology Laboratory|Center for Personalized Medicine|Dien Bard|USA

>Spike|hCoV-19/Denmark/DCGC-20154/2020|2020-12-07|EPI\_ISL\_747622|Original|hCoV-19^^Syddanmark|Human|Department of Virus and Microbiological Special Diagnostics|Albertsen Lab|Michaelsen|Denmark

>Spike|hCoV-19/Japan/PG-4518/2020|2020-07-00|EPI\_ISL\_689657|Original|hCoV-19^^Japan|Human|Pathogen Genomics Center|Pathogen Genomics Center|Sekizuka|Japan

>Spike|hCoV-19/India/WB-S74/2020|2020-05-20|EPI\_ISL\_508464|Original|hCoV-19^^West Bengal|Human|ICMR-National Institute of Cholera and Enteric Diseases|National Institute of Biomedical Genomics|Maitra|India

>Spike|hCoV-19/USA/MA-MGH-00247/2020|2020-04-06|EPI\_ISL\_460213|Original|hCoV-19^^Massachusetts|Human|Massachusetts General Hospital|Infectious Disease Program|Lemieux|USA

>Spike|hCoV-19/Canada/QC\_AV4/2020|2020-04-04|EPI\_ISL\_463949|Original|hCoV-19^^Quebec|Human|Laboratoire de microbiologie|Smith Laboratory|Smith|Canada

>Spike|hCoV-19/Scotland/EDB1671/2020|2020-04-15|EPI\_ISL\_433112|Original|hCoV-19^^Scotland|Human|Virology Department|COVID-19 Genomics UK (COG-UK) Consortium|Williams|United Kingdom

>Spike|hCoV-19/England/QEUA-A212BE/2020|2020-10-01|EPI\_ISL\_587667|Original|hCoV-19^^England|Human|Lighthouse Lab in Glasgow|Wellcome Sanger Institute for the COVID-19 Genomics UK (COG-UK) consortium|Davies|United Kingdom

>Spike|hCoV-19/Japan/PG-1755/2020|2020-04-00|EPI\_ISL\_685361|Original|hCoV-19^^Japan|Human|Pathogen Genomics Center|Pathogen Genomics Center|Sekizuka|Japan

>Spike|hCoV-19/England/LOND-D3789/2020|2020-03-31|EPI\_ISL\_440983|Original|hCoV-19^^England|Human|University College London|COVID-19 Genomics UK (COG-UK) Consortium|Roy|United Kingdom

>Spike|hCoV-19/USA/UT-UPHL-201029051/2020|2020-06-01|EPI\_ISL\_594023|Original|hCoV-19^^Utah|Human|Utah Public Health Laboratory|Utah Public Health Laboratory|Young|USA

>Spike|hCoV-19/Portugal/PT1581/2020|2020-06-30|EPI\_ISL\_693588|Original|hCoV-19^^Portugal|Human|Instituto Nacional de Saude (INSA)|Instituto Nacional de Saude (INSA)|Borges|Portugal

>Spike|hCoV-19/England/QEUA-AF672C/2020|2020-10-30|EPI\_ISL\_662970|Original|hCoV-19^^England|Human|Lighthouse Lab in Glasgow|Wellcome Sanger Institute for the COVID-19 Genomics UK (COG-UK) Consortium|Davies|United Kingdom

>Spike|hCoV-19/Wales/MILK-9F03C5/2020|2020-09-24|EPI\_ISL\_580726|Original|hCoV-19^^Wales|Human|Lighthouse Lab in Milton Keynes|Wellcome Sanger Institute for the COVID-19 Genomics UK (COG-UK) consortium|Davies|United Kingdom

>Spike|hCoV-19/England/QEUA-96AED4/2020|2020-08-14|EPI\_ISL\_531274|Original|hCoV-19^^England|Human|Lighthouse Lab in Glasgow|Wellcome Sanger Institute for the COVID-19 Genomics UK (COG-UK) consortium|Davies|United Kingdom

>Spike|hCoV-19/England/CAMC-AAFE0F/2020|2020-10-21|EPI\_ISL\_623386|Original|hCoV-19^^England|Human|Lighthouse Lab in Cambridge|Wellcome Sanger Institute for the COVID-19 Genomics UK (COG-UK) consortium|Davies|United Kingdom

>Spike|hCoV-19/Scotland/QEUA-B121D0/2020|2020-11-02|EPI\_ISL\_649577|Original|hCoV-19^^Scotland|Human|Lighthouse Lab in Glasgow|Wellcome Sanger Institute for the COVID-19 Genomics UK (COG-UK) Consortium|Davies|United Kingdom

>Spike|hCoV-19/England/ALDP-953FBD/2020|2020-06-13|EPI\_ISL\_554606|Original|hCoV-19^^England|Human|Lighthouse Lab in Alderley Park|Wellcome Sanger Institute for the COVID-19 Genomics UK (COG-UK) consortium|Davies|United Kingdom

>Spike|hCoV-19/England/20130034304/2020|2020-03-22|EPI\_ISL\_423606|Original|hCoV-19^^England|Human|Respiratory Virus Unit|Respiratory Virus Unit|Platt|United Kingdom

>Spike|hCoV-19/Wales/PHWC-3076C/2020|2020-04-08|EPI\_ISL\_446274|Original|hCoV-19^^Wales|Human|Wales Specialist Virology Centre|Public Health Wales Microbiology Cardiff|Moore|United Kingdom

>Spike|hCoV-19/Japan/PG-1474/2020|2020-04-00|EPI\_ISL\_685081|Original|hCoV-19^^Japan|Human|Saitama Prefectural Institute of Public Health|Pathogen Genomics Center|Sekizuka|Japan

>Spike|hCoV-19/Denmark/DCGC-17075/2020|2020-12-14|EPI\_ISL\_750397|Original|hCoV-19^^Syddanmark|Human|Department of Virus and Microbiological Special Diagnostics|Albertsen Lab|Michaelsen|Denmark

>Spike|hCoV-19/Israel/CVL-n4109/2020|2020-03-11|EPI\_ISL\_649072|Original|hCoV-19^^Elkana|Human|Israel Central Virology laboratory|Israel Central Virology laboratory|Zuckerman|Israel

>Spike|hCoV-19/India/MH-ACTREC-587/2020|2020-09-03|EPI\_ISL\_700226|Original|hCoV-19^^Maharashtra|Human|Hematopathology Laboratory|Hematopathology Laboratory|Patkar|India

>Spike|hCoV-19/England/ALDP-9CBBF8/2020|2020-09-16|EPI\_ISL\_575720|Original|hCoV-19^^England|Human|Lighthouse Lab in Alderley Park|Wellcome Sanger Institute for the COVID-19 Genomics UK (COG-UK) consortium|Davies|United Kingdom

>Spike|hCoV-19/USA/TX-HMH-810/2020|2020-04-08|EPI\_ISL\_545844|Original|hCoV-19^^Texas|Human|Houston Methodist Hospital|Houston Methodist Hospital|Long|USA

>Spike|hCoV-19/Jordan/AM-ALSR-5176/2020|2020-10-16|EPI\_ISL\_730415|Original|hCoV-19^^Amman|Human|Biolab Diagnostic Laboratories|Andersen lab at Scripps Research|Gangavarapu|Jordan

>Spike|hCoV-19/USA/MA-MASPHL-00557/2020|2020-05-08|EPI\_ISL\_693030|Original|hCoV-19^^Massachusetts|Human|Massachusetts State Public Health Laboratory|Massachusetts State Public Health Laboratory|Lang|USA

>Spike|hCoV-19/Wales/PHWC-49597A/2020|2020-11-24|EPI\_ISL\_726419|Original|hCoV-19^^Wales|Human|Originating lab|COVID-19 Genomics UK (COG-UK) Consortium|Moore|United Kingdom

>Spike|hCoV-19/England/EXET-13548D/2020|2020-04-17|EPI\_ISL\_457064|Original|hCoV-19^^England|Human|University of Exeter|COVID-19 Genomics UK (COG-UK) Consortium|Temperton|United Kingdom

>Spike|hCoV-19/Scotland/QEUEH-9D104B/2020|2020-09-16|EPI\_ISL\_577374|Original|hCoV-19^^Scotland|Human|University of Exeter|COVID-19 Genomics UK (COG-UK) Consortium|Temperton|United Kingdom

>Spike|hCoV-19/Switzerland/VD-ETHZ-310370/2020|2020-10-08|EPI\_ISL\_603444|Original|hCoV-19^^Vaud|Human|Viollier AG|Department of Biosystems Science and Engineering|Nadeau|Switzerland

>Spike|hCoV-19/England/QEUEH-9BA127/2020|2020-09-07|EPI\_ISL\_573580|Original|hCoV-19^^England|Human|Oxford Viromics|COVID-19 Genomics UK (COG-UK) Consortium|Golubchik|United Kingdom

>Spike|hCoV-19/England/QEUEH-B6837B/2020|2020-11-11|EPI\_ISL\_661472|Original|hCoV-19^^England|Human|Lighthouse Lab in Glasgow|Wellcome Sanger Institute for the COVID-19 Genomics UK (COG-UK) Consortium|Davies|United Kingdom

>Spike|hCoV-19/Wales/PHWC-4A4055/2020|2020-12-14|EPI\_ISL\_764655|Original|hCoV-19^^Wales|Human|Wales Specialist Virology Centre Sequencing lab|COVID-19 Genomics UK (COG-UK) Consortium|Moore|United Kingdom

>Spike|hCoV-19/England/QEUEH-A00525/2020|2020-10-02|EPI\_ISL\_584885|Original|hCoV-19^^England|Human|University of Exeter|COVID-19 Genomics UK (COG-UK) Consortium|Temperton|United Kingdom

>Spike|hCoV-19/Wales/PHWC-28AD7/2020|2020-04-02|EPI\_ISL\_445399|Original|hCoV-19^^Wales|Human|Wales Specialist Virology Centre|Public Health Wales Microbiology Cardiff|Moore|United Kingdom

>Spike|hCoV-19/Australia/VIC16421/2020|2020-07-29|EPI\_ISL\_640554|Original|hCoV-19^^Victoria|Human|Microbiological Diagnostic Unit - Public Health Laboratory (MDU-PHL)|MDU-PHL|Schultz|Australia

>Spike|hCoV-19/England/ALDP-9447F3/2020|2020-06-07|EPI\_ISL\_555607|Original|hCoV-19^^England|Human|Lighthouse Lab in Alderley Park|Wellcome Sanger Institute for the COVID-19 Genomics UK (COG-UK) consortium|Davies|United Kingdom

>Spike|hCoV-19/Japan/PG-3969/2020|2020-07-00|EPI\_ISL\_691739|Original|hCoV-19^^Japan|Human|Pathogen Genomics Center|Pathogen Genomics Center|Sekizuka|Japan

>Spike|hCoV-19/USA/TX-HMH-MCoV-19651/2020|2020-11-29|EPI\_ISL\_784011|Original|hCoV-19^^Texas|Human|Houston Methodist Hospital|Houston Methodist Hospital|Long|USA

>Spike|hCoV-19/England/BRIS-12664D/2020|2020-04-09|EPI\_ISL\_458916|Original|hCoV-19^^England|Human|PHE South West Regional Laboratory|Wellcome Sanger Institute for the COVID-19 Genomics UK (COG-UK) consortium|Davies|United Kingdom

>Spike|hCoV-19/USA/FL-BPHL-1382/2020|2020-07-21|EPI\_ISL\_541319|Original|hCoV-19^^Florida|Human|Florida Bureau of Public Health Laboratories|Florida Bureau of Public Health Laboratories|Blanton|USA

>Spike|hCoV-19/USA/CA-CZB-6807/2020|2020-07-14|EPI\_ISL\_582883|Original|hCoV-19^^California|Human|County of Santa Clara Public Health Department|Chan-Zuckerberg Biohub|Bhatt|USA

>Spike|hCoV-19/England/MILK-99D7FB/2020|2020-08-30|EPI\_ISL\_550751|Original|hCoV-19^^England|Human|Lighthouse Lab in Milton Keynes|Wellcome Sanger Institute for the COVID-19 Genomics UK (COG-UK) consortium|Davies|United Kingdom

>Spike|hCoV-19/England/ALDP-CBF471/2020|2020-12-20|EPI\_ISL\_778089|Original|hCoV-19^^England|Human|Lighthouse Lab in Alderley Park|Wellcome Sanger Institute for the COVID-19 Genomics UK (COG-UK) Consortium|Davies|United Kingdom

>Spike|hCoV-19/Scotland/EDB4598/2020|2020-05-07|EPI\_ISL\_478166|Original|hCoV-19^^Scotland|Human|Virology Department|COVID-19 Genomics UK (COG-UK) Consortium|Williams|United Kingdom

>Spike|hCoV-19/England/LIVE-A5F4C/2020|2020-03-21|EPI\_ISL\_499585|Original|hCoV-19^^England|Human|Liverpool Clinical Laboratories|COVID-19 Genomics UK (COG-UK) Consortium|Haldenby|United Kingdom

>Spike|hCoV-19/USA/MI-MDHHS-SC21971/2020|2020-08-17|EPI\_ISL\_566022|Original|hCoV-19^^Michigan|Human|Michigan Department of Health and Human Services|Michigan Department of Health and Human Services|Blankenship|USA

>Spike|hCoV-19/England/ALDP-B49370/2020|2020-11-07|EPI\_ISL\_649431|Original|hCoV-19^^England|Human|Lighthouse Lab in Alderley Park|Wellcome Sanger Institute for the COVID-19 Genomics UK (COG-UK) Consortium|Davies|United Kingdom

>Spike|hCoV-19/India/OR-ILSCV31984/2020|2020-05-29|EPI\_ISL\_481153|Original|hCoV-19^^Odisha|Human|Immunogenomics lab|Immunogenomics lab|Raghav|India

>Spike|hCoV-19/USA/TX-HMH-6808/2020|2020-06-25|EPI\_ISL\_546258|Original|hCoV-19^^Texas|Human|Houston Methodist Hospital|Houston Methodist Hospital|Long|USA

>Spike|hCoV-19/Ecuador/USFQ-506/2020|2020-10-10|EPI\_ISL\_660535|Original|hCoV-19^^El Oro|Human|Institute of Microbiology|Institute of Microbiology|Cardenas|Ecuador

>Spike|hCoV-19/England/QEUH-9DC65D/2020|2020-09-21|EPI\_ISL\_581039|Original|hCoV-19^^England|Human|Lighthouse Lab in Glasgow|Wellcome Sanger Institute for the COVID-19 Genomics UK (COG-UK) consortium|Davies|United Kingdom

>Spike|hCoV-19/England/20132020804/2020|2020-03-23|EPI\_ISL\_423740|Original|hCoV-19^^England|Human|Respiratory Virus Unit|Respiratory Virus Unit|Platt|United Kingdom

>Spike|hCoV-19/USA/NY-PV09056/2020|2020-03-21|EPI\_ISL\_421611|Original|hCoV-19^^New York|Human|MSHS Clinical Microbiology Laboratories|MSHS Pathogen Surveillance Program|van Bakel|USA

>Spike|hCoV-19/USA/NY-NYCPHL-001142/2020|2020-10-23|EPI\_ISL\_671725|Original|hCoV-19^^New York|Human|DOHMH Riverside|New York City Public Health Laboratory|Wang|USA

>Spike|hCoV-19/England/ALDP-A66A5B/2020|2020-10-12|EPI\_ISL\_630439|Original|hCoV-19^^England|Human|Lighthouse Lab in Alderley Park|Wellcome Sanger Institute for the COVID-19 Genomics UK (COG-UK) consortium|Davies|United Kingdom

>Spike|hCoV-19/USA/AZ-TG654306/2020|2020-04-13|EPI\_ISL\_695961|Original|hCoV-19^^Arizona|Human|Sonora Quest Laboratories|TGen North|French|USA

>Spike|hCoV-19/England/ALDP-B1A800/2020|2020-11-01|EPI\_ISL\_647553|Original|hCoV-19^^England|Human|Lighthouse Lab in Alderley Park|Wellcome Sanger Institute for the COVID-19 Genomics UK (COG-UK) Consortium|Davies|United Kingdom

>Spike|hCoV-19/Japan/IC-0129/2020|2020-08-00|EPI\_ISL\_591470|Original|hCoV-19^^Japan|Human|Pathogen Genomics Center|Pathogen Genomics Center|Sekizuka|Japan

>Spike|hCoV-19/USA/IL-UW-1481/2020|2020-09-15|EPI\_ISL\_541541|Original|hCoV-19^^Illinois|Human|University of Wisconsin-Madison AIDS Vaccine Research Laboratories|University of Wisconsin-Madison AIDS Vaccine Research Laboratories|Baczenas|USA

>Spike|hCoV-19/France/ARA-117723/2020|2020-12-08|EPI\_ISL\_745330|Original|hCoV-19^^Auvergne-Rh\u00f4ne-Alpes|Human|CNR Virus des Infections Respiratoires - France SUD|CNR Virus des Infections Respiratoires - France SUD|Bal|France

>Spike|hCoV-19/Denmark/DCGC-17267/2020|2020-12-14|EPI\_ISL\_750866|Original|hCoV-19^^Midtjylland|Human|Department of Virus and Microbiological Special Diagnostics|Albertsen Lab|Michaelsen|Denmark

>Spike|hCoV-19/USA/NY-PV09380/2020|2020-03-19|EPI\_ISL\_450063|Original|hCoV-19^^New York|Human|MSHS Clinical Microbiology Laboratories|MSHS Pathogen Surveillance Program|van Bakel|USA

>Spike|hCoV-19/England/ALDP-AA2A62/2020|2020-10-21|EPI\_ISL\_644106|Original|hCoV-19^^England|Human|Lighthouse Lab in Alderley Park|Wellcome Sanger Institute for the COVID-19 Genomics UK (COG-UK) Consortium|Davies|United Kingdom

>Spike|hCoV-19/USA/CA-UCLA-158/2020|2020-03-31|EPI\_ISL\_537497|Original|hCoV-19^^California|Human|UCLA Pathology Clinical Microbiology Lab|Kruglyak Lab|Boocock|USA

>Spike|hCoV-19/England/CAMB-84981/2020|2020-03-08|EPI\_ISL\_440497|Original|hCoV-19^^England|Human|Department of Pathology|Wellcome Sanger Institute for the COVID-19 Genomics UK (COG-UK) consortium|Amato|United Kingdom

>Spike|hCoV-19/USA/UT-UPHL-2012094810/2020|2020-10-25|EPI\_ISL\_745635|Original|hCoV-19^^Utah|Human|Ginkgo Bioworks Clinical Laboratory|Utah Public Health Laboratory|Young|USA

>Spike|hCoV-19/Australia/VIC11169/2020|2020-07-25|EPI\_ISL\_563281|Original|hCoV-19^^Victoria|Human|Microbiological Diagnostic Unit - Public Health Laboratory (MDU-PHL)|MDU-PHL|Schultz|Australia

>Spike|hCoV-19/Luxembourg/LNS0158952/2020|2020-03-18|EPI\_ISL\_417534|Original|hCoV-19^^Luxembourg|Human|Laboratoire Nationale de Sant\u00e9|Laboratoire Nationale de Sant\u00e9|Wienecke-Baldacchino|Luxembourg

>Spike|hCoV-19/Mexico/CMX-INMEGEN-06/2020|2020-08-01|EPI\_ISL\_522877|Original|hCoV-19^^Mexico City|Human|Instituto Nacional de Medicina Genomica|Instituto Nacional de Medicina Genomica|Hidalgo|Mexico

>Spike|hCoV-19/England/CAMB-1AB76B/2020|2020-04-28|EPI\_ISL\_444330|Original|hCoV-19^^England|Human|Department of Pathology|COVID-19 Genomics UK (COG-UK) Consortium|Meredith|United Kingdom

>Spike|hCoV-19/Australia/VIC13611/2020|2020-08-02|EPI\_ISL\_563784|Original|hCoV-19^^Victoria|Human|Microbiological Diagnostic Unit - Public Health Laboratory (MDU-PHL)|MDU-PHL|Schultz|Australia

>Spike|hCoV-19/USA/ID-UW-2480/2020|2020-03-28|EPI\_ISL\_485946|Original|hCoV-19^^Idaho|Human|UW Virology Lab|UW Virology Lab|Roychoudhury|USA

>Spike|hCoV-19/England/MILK-B399EA/2020|2020-11-01|EPI\_ISL\_679654|Original|hCoV-19^^England|Human|Oxford Viromics|COVID-19 Genomics UK (COG-UK) Consortium|Golubchik|United Kingdom

>Spike|hCoV-19/Wales/PHWC-48B106/2020|2020-11-05|EPI\_ISL\_665796|Original|hCoV-19^^Wales|Human|Wales Specialist Virology Centre Sequencing lab|COVID-19 Genomics UK (COG-UK) Consortium|Moore|United Kingdom

>Spike|hCoV-19/England/ALDP-B7618F/2020|2020-11-12|EPI\_ISL\_723741|Original|hCoV-19^^England|Human|Oxford Viromics|COVID-19 Genomics UK (COG-UK) Consortium|Golubchik|United Kingdom

>Spike|hCoV-19/England/BRIS-1299F6/2020|2020-04-01|EPI\_ISL\_458417|Original|hCoV-19^^England|Human|PHE South West Regional Laboratory|Wellcome Sanger Institute for the COVID-19 Genomics UK (COG-UK) consortium|Davies|United Kingdom

>Spike|hCoV-19/Japan/PG-6608/2020|2020-07-00|EPI\_ISL\_687720|Original|hCoV-19^^Japan|Human|Pathogen Genomics Center|Pathogen Genomics Center|Sekizuka|Japan

>Spike|hCoV-19/USA/OR-OHSU-0959/2020|2020-07-03|EPI\_ISL\_525936|Original|hCoV-19^^Oregon|Human|OHSU Lab Services Molecular Microbiology Lab|Oregon SARS-CoV-2 Genome Sequencing Center|O'Roak|USA

>Spike|hCoV-19/England/QEUEH-B7EE71/2020|2020-11-14|EPI\_ISL\_667975|Original|hCoV-19^^England|Human|Lighthouse Lab in Glasgow|Wellcome Sanger Institute for the COVID-19 Genomics UK (COG-UK) Consortium|Davies|United Kingdom

>Spike|hCoV-19/India/OR-RMRC30/2020|2020-04-04|EPI\_ISL\_455778|Original|hCoV-19^^Odisha|Human|REGIONAL VRDL,ICMR-RMRC BBSR|Immunogenomics lab|Raghav|India

>Spike|hCoV-19/England/QEUEH-9FA64A/2020|2020-09-28|EPI\_ISL\_588149|Original|hCoV-19^^England|Human|Lighthouse Lab in Glasgow|Wellcome Sanger Institute for the COVID-19 Genomics UK (COG-UK) consortium|Davies|United Kingdom

>Spike|hCoV-19/India/MH-NIV-29053/2020|2020-05-13|EPI\_ISL\_479531|Original|hCoV-19^^Maharashtra|Human|NIV Influenza|NIV Influenza|Potdar|India

>Spike|hCoV-19/USA/TX-HMH-MCoV-15460/2020|2020-10-24|EPI\_ISL\_786944|Original|hCoV-19^^Texas|Human|Houston Methodist Hospital|Houston Methodist Hospital|Long|USA

>Spike|hCoV-19/USA/OR-OHSU-4128/2020|2020-10-30|EPI\_ISL\_667527|Original|hCoV-19^^Oregon|Human|OHSU Lab Services Molecular Microbiology Lab|Oregon SARS-CoV-2 Genome Sequencing Center|O'Roak|USA

>Spike|hCoV-19/USA/CA-ALSR-4276/2020|2020-10-01|EPI\_ISL\_648931|Original|hCoV-19^^California|Human|San Diego County Public Health Laboratory|Andersen lab at Scripps Research|Gangavarapu|USA

>Spike|hCoV-19/Denmark/DCGC-18586/2020|2020-12-07|EPI\_ISL\_750062|Original|hCoV-19^^Hovedstaden|Human|Department of Virus and Microbiological Special Diagnostics|Albertsen Lab|Michaelsen|Denmark

>Spike|hCoV-19/England/ALDP-9C4E9C/2020|2020-09-10|EPI\_ISL\_567827|Original|hCoV-19^^England|Human|Lighthouse Lab in Alderley Park|Wellcome Sanger Institute for the COVID-19 Genomics UK (COG-UK) consortium|Davies|United Kingdom

>Spike|hCoV-19/England/ALDP-953603/2020|2020-06-08|EPI\_ISL\_553752|Original|hCoV-19^^England|Human|Lighthouse Lab in Alderley Park|Wellcome Sanger Institute for the COVID-19 Genomics UK (COG-UK) consortium|Davies|United Kingdom

>Spike|hCoV-19/Switzerland/ZH-ETHZ-410064/2020|2020-12-14|EPI\_ISL\_737913|Original|hCoV-19^^Zurich|Human|Viollier AG|Department of Biosystems Science and Engineering|Nadeau|Switzerland

>Spike|hCoV-19/USA/OR-PROV-220/2020|2020-03-27|EPI\_ISL\_482455|Original|hCoV-19^^Oregon|Human|Providence St. Joseph Health Molecular Genomics Laboratory|Providence St. Joseph Health Molecular Genomics Laboratory|Dowdell|USA

>Spike|hCoV-19/England/NORT-283F8E/2020|2020-04-04|EPI\_ISL\_478530|Original|hCoV-19^^England|Human|Northumbria University / South Tees Hospitals NHS Foundation Trust / North Cumbria Integrated Care NHS Foundation Trust / North Tees and Hartlepool NHS Foundation Trust / Newcastle Hospitals NHS Foundation Trust|COVID-19 Genomics UK (COG-UK) Consortium|Bashton|United Kingdom

>Spike|hCoV-19/Wales/PHWC-16EF7B/2020|2020-10-03|EPI\_ISL\_585891|Original|hCoV-19^^Wales|Human|Wales Specialist Virology Centre Sequencing lab|COVID-19 Genomics UK (COG-UK) Consortium|Moore|United Kingdom

>Spike|hCoV-19/Scotland/EDB5572/2020|2020-03-31|EPI\_ISL\_487817|Original|hCoV-19^^Scotland|Human|Virology Department|Wellcome Sanger Institute for the COVID-19 Genomics UK (COG-UK) consortium|Davies|United Kingdom

>Spike|hCoV-19/Germany/HH-hpi-p2431/2020|2020-04-21|EPI\_ISL\_776500|Original|hCoV-19^^Hamburg|Human|University Medical Center Hamburg Eppendorf|Heinrich Pette Institute|Robitaille|Germany

>Spike|hCoV-19/USA/AZ-TG290723/2020|2020-05-05|EPI\_ISL\_694239|Original|hCoV-19^^Arizona|Human|TGen North|TGen North|French|USA

>Spike|hCoV-19/England/QEUEH-B9EEC6/2020|2020-11-18|EPI\_ISL\_719956|Original|hCoV-19^^England|Human|Lighthouse Lab in Glasgow|Wellcome Sanger Institute for the COVID-19 Genomics UK (COG-UK) Consortium|Davies|United Kingdom

>Spike|hCoV-19/USA/WI-UW-815/2020|2020-06-30|EPI\_ISL\_509822|Original|hCoV-19^^Wisconsin|Human|University of Wisconsin-Madison AIDS Vaccine Research Laboratories|University of Wisconsin-Madison AIDS Vaccine Research Laboratories|Baczenas|USA

>Spike|hCoV-19/England/CAMC-A58834/2020|2020-10-09|EPI\_ISL\_597166|Original|hCoV-19^^England|Human|Lighthouse Lab in Cambridge|Wellcome Sanger Institute for the COVID-19 Genomics UK (COG-UK) consortium|Davies|United Kingdom

>Spike|hCoV-19/USA/NY-Wadsworth-69720-01/2020|2020-04-27|EPI\_ISL\_676885|Original|hCoV-19^^New York|Human|Wadsworth Center|Wadsworth Center|Lasek-Nesselquist|USA

>Spike|hCoV-19/England/ALDP-9552EF/2020|2020-06-12|EPI\_ISL\_554613|Original|hCoV-19^^England|Human|Lighthouse Lab in Alderley Park|Wellcome Sanger Institute for the COVID-19 Genomics UK (COG-UK) consortium|Davies|United Kingdom

>Spike|hCoV-19/USA/MN-MDH-2238/2020|2020-11-16|EPI\_ISL\_770812|Original|hCoV-19^^Minnesota|Human|Essentia Health-St. Mary's Medical Center|Minnesota Department of Health|Lorentz|USA

>Spike|hCoV-19/England/QEUEH-A2046E/2020|2020-10-01|EPI\_ISL\_587592|Original|hCoV-19^^England|Human|Lighthouse Lab in Glasgow|Wellcome Sanger Institute for the COVID-19 Genomics UK (COG-UK) consortium|Davies|United Kingdom

>Spike|hCoV-19/England/CAMB-831E4/2020|2020-04-14|EPI\_ISL\_443429|Original|hCoV-19^^England|Human|Department of Pathology|Wellcome Sanger Institute for the COVID-19 Genomics UK (COG-UK) consortium|Amato|United Kingdom

>Spike|hCoV-19/USA/TX-HMH-690/2020|2020-04-15|EPI\_ISL\_546334|Original|hCoV-19^^Texas|Human|Houston Methodist Hospital|Houston Methodist Hospital|Long|USA

>Spike|hCoV-19/England/CAMC-B22094/2020|2020-11-02|EPI\_ISL\_645981|Original|hCoV-19^^England|Human|Lighthouse Lab in Cambridge|Wellcome Sanger Institute for the COVID-19 Genomics UK (COG-UK) Consortium|Davies|United Kingdom

>Spike|hCoV-19/England/ALDP-B74A86/2020|2020-11-12|EPI\_ISL\_678965|Original|hCoV-19^^England|Human|Queens Medical Centre|COVID-19 Genomics UK (COG-UK) Consortium|Loose|United Kingdom

>Spike|hCoV-19/Northern Ireland/NIRE-108D88/2020|2020-10-09|EPI\_ISL\_627558|Original|hCoV-19^^Northern Ireland|Human|Regional Virus Laboratory|COVID-19 Genomics UK (COG-UK) Consortium|Fairley|United Kingdom



>Spike|hCoV-19/England/MILK-970521/2020|2020-08-18|EPI\_ISL\_553268|Original|hCoV-19^^England|Human|Lighthouse Lab in Milton Keynes|Wellcome Sanger Institute for the COVID-19 Genomics UK (COG-UK) consortium|Davies|United Kingdom

>Spike|hCoV-19/England/SHEF-10D1FAE/2020|2020-12-03|EPI\_ISL\_742040|Original|hCoV-19^^England|Human|Virology Department|COVID-19 Genomics UK (COG-UK) Consortium|de Silva|United Kingdom

>Spike|hCoV-19/USA/TX-HMH-MCoV-9001/2020|2020-07-02|EPI\_ISL\_780886|Original|hCoV-19^^Texas|Human|Houston Methodist Hospital|Houston Methodist Hospital|Long|USA

>Spike|hCoV-19/Scotland/QEUEH-9F6FBC/2020|2020-09-27|EPI\_ISL\_595650|Original|hCoV-19^^Scotland|Human|Oxford Viromics|COVID-19 Genomics UK (COG-UK) Consortium|Golubchik|United Kingdom

>Spike|hCoV-19/Scotland/QEUEH-A4B5F1/2020|2020-10-08|EPI\_ISL\_637846|Original|hCoV-19^^Scotland|Human|Department of Pathology|COVID-19 Genomics UK (COG-UK) Consortium|Goodfellow|United Kingdom

>Spike|hCoV-19/England/BRIS-12A49A/2020|2020-04-30|EPI\_ISL\_458495|Original|hCoV-19^^England|Human|PHE South West Regional Laboratory|Wellcome Sanger Institute for the COVID-19 Genomics UK (COG-UK) consortium|Davies|United Kingdom

>Spike|hCoV-19/USA/CA-SR0448/2020|2020-04-18|EPI\_ISL\_467972|Original|hCoV-19^^California|Human|Scripps Medical Laboratory|Andersen lab at Scripps Research|Gangavarapu|USA

>Spike|hCoV-19/USA/NM-UNM-00627/2020|2020-05-11|EPI\_ISL\_560353|Original|hCoV-19^^New Mexico|Human|TriCore Reference Laboratories|Center for Global Health|Domman|USA

>Spike|hCoV-19/Scotland/CVR2247/2020|2020-04-12|EPI\_ISL\_477883|Original|hCoV-19^^Scotland|Human|West of Scotland Specialist Virology Centre|COVID-19 Genomics UK (COG-UK) Consortium|Robertson|United Kingdom

>Spike|hCoV-19/England/QEUEH-AD0667/2020|2020-10-23|EPI\_ISL\_629868|Original|hCoV-19^^England|Human|Lighthouse Lab in Glasgow|Wellcome Sanger Institute for the COVID-19 Genomics UK (COG-UK) consortium|Davies|United Kingdom

>Spike|hCoV-19/USA/UT-UPHL-2012252797/2020|2020-08-03|EPI\_ISL\_745759|Original|hCoV-19^^Utah|Human|Ginkgo Bioworks Clinical Laboratory|Utah Public Health Laboratory|Young|USA

>Spike|hCoV-19/England/NORW-21FA68/2020|2020-12-11|EPI\_ISL\_725066|Original|hCoV-19^^England|Human|Quadram Institute Bioscience|COVID-19 Genomics UK (COG-UK) Consortium|Alikhan|United Kingdom

>Spike|hCoV-19/Spain/MD-ISCIIE-2014630/2020|2020-08-18|EPI\_ISL\_691713|Original|hCoV-19^^Madrid|Human|Hospital Cl\u00e9nico San Carlos|Instituto de Salud Carlos III|Caballero|Spain

>Spike|hCoV-19/Scotland/EDB063/2020|2020-03-19|EPI\_ISL\_425863|Original|hCoV-19^^Scotland|Human|Virology Department|COVID-19 Genomics UK (COG-UK) Consortium|Williams|United Kingdom

>Spike|hCoV-19/England/ALDP-5CD0DD/2020|2020-06-19|EPI\_ISL\_558542|Original|hCoV-19^^England|Human|Lighthouse Lab in Alderley Park|Wellcome Sanger Institute for the COVID-19 Genomics UK (COG-UK) consortium|Davies|United Kingdom

>Spike|hCoV-19/England/CAMB-803A5/2020|2020-04-09|EPI\_ISL\_470375|Original|hCoV-19^^England|Human|Department of Pathology|Wellcome Sanger Institute for the COVID-19 Genomics UK (COG-UK) consortium|Davies|United Kingdom

>Spike|hCoV-19/England/ALDP-951DC4/2020|2020-06-10|EPI\_ISL\_551339|Original|hCoV-19^^England|Human|Lighthouse Lab in Alderley Park|Wellcome Sanger Institute for the COVID-19 Genomics UK (COG-UK) consortium|Davies|United Kingdom

>Spike|hCoV-19/United Arab Emirates/0731/2020|2020-05-15|EPI\_ISL\_698882|Original|hCoV-19^^Abu Dhabi|Human|Group 42 (G42) Healthcare|G42 Healthcare|Ogrodzki|United Arab Emirates

>Spike|hCoV-19/Australia/TAS76/2020|2020-04-06|EPI\_ISL\_522747|Original|hCoV-19^^Tasmania|Human|Royal Hobart Hospital Microbiology Department|MDU-PHL|Schultz|Australia

>Spike|hCoV-19/USA/UT-02054/2020|2020-04-20|EPI\_ISL\_470670|Original|hCoV-19^^Utah|Human|Utah Public Health Laboratory|Utah Public Health Laboratory|Young|USA

>Spike|hCoV-19/Denmark/DCGC-20967/2020|2020-12-21|EPI\_ISL\_758928|Original|hCoV-19^^Nordjylland|Human|Department of Virus and Microbiological Special Diagnostics|Albertsen Lab|Michaelsen|Denmark

>Spike|hCoV-19/USA/CA-CZB-11010/2020|2020-09-04|EPI\_ISL\_582952|Original|hCoV-19^^California|Human|County of Santa Clara Public Health Department|Chan-Zuckerberg Biohub|Bhatt|USA

>Spike|hCoV-19/India/TG-CCMB-OM16/2020|2020-05-17|EPI\_ISL\_495282|Original|hCoV-19^^Telangana|Human|Osmania Medical College|CSIR-Centre for Cellular and Molecular Biology|Banu|India

>Spike|hCoV-19/USA/MI-MDHHS-SC21335/2020|2020-04-02|EPI\_ISL\_507590|Original|hCoV-19^^Michigan|Human|Michigan Department of Health and Human Services|Michigan Department of Health and Human Services|Blankenship|USA

>Spike|hCoV-19/Scotland/QEUH-A7941B/2020|2020-10-14|EPI\_ISL\_638998|Original|hCoV-19^^Scotland|Human|Oxford Viromics|COVID-19 Genomics UK (COG-UK) Consortium|Golubchik|United Kingdom

>Spike|hCoV-19/USA/TX-HMH-MCoV-14310/2020|2020-10-05|EPI\_ISL\_787595|Original|hCoV-19^^Texas|Human|Houston Methodist Hospital|Houston Methodist Hospital|Long|USA

>Spike|hCoV-19/Switzerland/BE-UNIBE-164-0436/2020|2020-03-16|EPI\_ISL\_574804|Original|hCoV-19^^Bern|Human|Institute for Infectious Diseases|Institute for Infectious Diseases|Koch|Switzerland

>Spike|hCoV-19/Morocco/RMPS-12/2020|2020-05-08|EPI\_ISL\_482737|Original|hCoV-19^^Morocco|Human|LNR National Reference Laboratory|Medical Biotechnology Laboratory|Kartti|Morocco

>Spike|hCoV-19/England/CAMB-1B1304/2020|2020-05-07|EPI\_ISL\_459191|Original|hCoV-19^^England|Human|Department of Pathology|Wellcome Sanger Institute for the COVID-19 Genomics UK (COG-UK) consortium|Davies|United Kingdom

>Spike|hCoV-19/Denmark/DCGC-16511/2020|2020-11-16|EPI\_ISL\_714808|Original|hCoV-19^^Hovedstaden|Human|Department of Virus and Microbiological Special Diagnostics|Albertsen Lab|Michaelsen|Denmark

>Spike|hCoV-19/England/QEUH-BC3AE2/2020|2020-11-25|EPI\_ISL\_704013|Original|hCoV-19^^England|Human|Lighthouse Lab in Glasgow|Wellcome Sanger Institute for the COVID-19 Genomics UK (COG-UK) Consortium|Davies|United Kingdom

>Spike|hCoV-19/USA/TX-HMH063/2020|2020-03-18|EPI\_ISL\_434772|Original|hCoV-19^^Texas|Human|Houston Methodist Hospital|Houston Methodist Hospital|Long|USA

>Spike|hCoV-19/England/CAMC-B99B1F/2020|2020-11-15|EPI\_ISL\_673516|Original|hCoV-19^^England|Human|Lighthouse Lab in Cambridge|Wellcome Sanger Institute for the COVID-19 Genomics UK (COG-UK) Consortium|Davies|United Kingdom

>Spike|hCoV-19/Luxembourg/LNS7350759/2020|2020-11-01|EPI\_ISL\_744556|Original|hCoV-19^^Luxembourg|Human|Laboratoire national de sant\u00e9|Laboratoire national de sant\u00e9|Wienecke-Baldacchino|Luxembourg

>Spike|hCoV-19/Germany/HH-hpi-pl894/2020|2020-03-24|EPI\_ISL\_776234|Original|hCoV-19^^Hamburg|Human|University Medical Center Hamburg Eppendorf|Heinrich Pette Institute|Robitaille|Germany

>Spike|hCoV-19/USA/UT-03039/2020|2020-05-01|EPI\_ISL\_522311|Original|hCoV-19^^Utah|Human|Utah Public Health Laboratory|Utah Public Health Laboratory|Young|USA

>Spike|hCoV-19/Australia/NSW344/2020|2020-04-02|EPI\_ISL\_451605|Original|hCoV-19^^New South Wales|Human|Childrens Hospital Westmead|NSW Health Pathology - Institute of Clinical Pathology and Medical Research; Westmead Hospital; University of Sydney|Gall|Australia

>Spike|hCoV-19/USA/WI-UW-1848/2020|2020-09-10|EPI\_ISL\_605720|Original|hCoV-19^^Wisconsin|Human|University of Wisconsin-Madison AIDS Vaccine Research Laboratories|University of Wisconsin-Madison AIDS Vaccine Research Laboratories|Baczenas|USA

>Spike|hCoV-19/Wales/PHWC-48996A/2020|2020-10-26|EPI\_ISL\_652430|Original|hCoV-19^^Wales|Human|Wales Specialist Virology Centre Sequencing lab|COVID-19 Genomics UK (COG-UK) Consortium|Moore|United Kingdom

>Spike|hCoV-19/France/HDF-2174/2020|2020-03-09|EPI\_ISL\_415654|Original|hCoV-19^^Hauts-de-France|Human|Centre Hospitalier Compiegne Laboratoire de Biologie|National Reference Center for Viruses of Respiratory Infections|Enouf|France

>Spike|hCoV-19/India/MH-NIV-7098/2020|2020-04-03|EPI\_ISL\_454548|Original|hCoV-19^^Maharashtra|Human|NIV Influenza|NIV Influenza|Potdar|India

>Spike|hCoV-19/USA/WA-S517/2020|2020-03-24|EPI\_ISL\_434277|Original|hCoV-19^^Washington|Human|Washington State Department of Health|Seattle Flu Study|Bedford|USA

>Spike|hCoV-19/USA/NY-Wadsworth-192871-01/2020|2020-06-21|EPI\_ISL\_677002|Original|hCoV-19^^New York|Human|Masonic Medical Research Institute|Wadsworth Center|Lasek-Nesselquist|USA

>Spike|hCoV-19/England/20139033404/2020|2020-03-27|EPI\_ISL\_421921|Original|hCoV-19^^England|Human|Respiratory Virus Unit|Respiratory Virus Unit|Platt|United Kingdom

>Spike|hCoV-19/England/CAMC-9EC3F9/2020|2020-09-24|EPI\_ISL\_580502|Original|hCoV-19^^England|Human|Lighthouse Lab in Cambridge|Wellcome Sanger Institute for the COVID-19 Genomics UK (COG-UK) consortium|Davies|United Kingdom

>Spike|hCoV-19/USA/FL-BPHL-2036/2020|2020-07-16|EPI\_ISL\_653189|Original|hCoV-19^^Florida|Human|Florida Bureau of Public Health Laboratories|Florida Bureau of Public Health Laboratories|Blanton|USA

>Spike|hCoV-19/United Arab Emirates/0951/2020|2020-06-28|EPI\_ISL\_699087|Original|hCoV-19^^Abu Dhabi|Human|Group 42 (G42) Healthcare|G42 Healthcare|Ogrodzki|United Arab Emirates

>Spike|hCoV-19/England/ALDP-94C54C/2020|2020-06-15|EPI\_ISL\_555871|Original|hCoV-19^^England|Human|Lighthouse Lab in Alderley Park|Wellcome Sanger Institute for the COVID-19 Genomics UK (COG-UK) consortium|Davies|United Kingdom

>Spike|hCoV-19/England/LIVE-A7566/2020|2020-03-27|EPI\_ISL\_517037|Original|hCoV-19^^England|Human|Liverpool Clinical Laboratories|COVID-19 Genomics UK (COG-UK) Consortium|Haldenby|United Kingdom

>Spike|hCoV-19/Spain/AR-IBV-005129/2020|2020-05-07|EPI\_ISL\_500367|Original|hCoV-19^^Aragon|Human|Servicio de Microbiolog\u00eda|SeqCOVID-SPAIN consortium|IBV (CSIC)|Comas|Spain

>Spike|hCoV-19/Senegal/618/2020|2020-03-20|EPI\_ISL\_420077|Original|hCoV-19^^Dakar|Human|Institut Pasteur Dakar|Institut Pasteur de Dakar|Dia|Senegal

>Spike|hCoV-19/England/BRIS-124032/2020|2020-04-08|EPI\_ISL\_492795|Original|hCoV-19^^England|Human|PHE South West Regional Laboratory|Wellcome Sanger Institute for the COVID-19 Genomics UK (COG-UK) consortium|Davies|United Kingdom

>Spike|hCoV-19/England/LIVE-AAE95/2020|2020-07-27|EPI\_ISL\_540622|Original|hCoV-19^^England|Human|Liverpool Clinical Laboratories|COVID-19 Genomics UK (COG-UK) Consortium|Haldenby|United Kingdom

>Spike|hCoV-19/USA/CA-ALSR-1115-SAN/2020|2020-06-23|EPI\_ISL\_483538|Original|hCoV-19^^California|Human|San Diego County Public Health Laboratory|Andersen lab at Scripps Research|Gangavarapu|USA

>Spike|hCoV-19/Wales/ALDP-BB4EF7/2020|2020-11-20|EPI\_ISL\_710716|Original|hCoV-19^^Wales|Human|Lighthouse Lab in Alderley Park|Wellcome Sanger Institute for the COVID-19 Genomics UK (COG-UK) Consortium|Davies|United Kingdom

>Spike|hCoV-19/USA/TX-HMH-7430/2020|2020-06-30|EPI\_ISL\_546762|Original|hCoV-19^^Texas|Human|Houston Methodist Hospital|Houston Methodist Hospital|Long|USA

>Spike|hCoV-19/USA/NY-NYUMC124/2020|2020-04-01|EPI\_ISL\_424931|Original|hCoV-19^^New York|Human|NYU Langone Health|Departments of Pathology and Medicine|Maurano|USA

>Spike|hCoV-19/USA/LA-EVTL740/2020|2020-07-17|EPI\_ISL\_653431|Original|hCoV-19^^Louisiana|Human|LSUHS Emerging Viral Threat Laboratory|Microbial Genome Sequencing Center|Kamil|USA

>Spike|hCoV-19/USA/WA-UW-12361/2020|2020-06-27|EPI\_ISL\_570514|Original|hCoV-19^^Washington|Human|UW Virology Lab|UW Virology Lab|Roychoudhury|USA

>Spike|hCoV-19/USA/UT-UPHL-2009494/2020|2020-07-18|EPI\_ISL\_605178|Original|hCoV-19^^Utah|Human|Utah Public Health Laboratory|Utah Public Health Laboratory|Young|USA

>Spike|hCoV-19/Australia/VIC12814/2020|2020-07-30|EPI\_ISL\_641129|Original|hCoV-19^^Victoria|Human|Microbiological Diagnostic Unit - Public Health Laboratory (MDU-PHL)|MDU-PHL|Schultz|Australia

>Spike|hCoV-19/England/ALDP-A850BE/2020|2020-10-17|EPI\_ISL\_610521|Original|hCoV-19^^England|Human|Lighthouse Lab in Alderley Park|Wellcome Sanger Institute for the COVID-19 Genomics UK (COG-UK) consortium|Davies|United Kingdom

>Spike|hCoV-19/Australia/VIC11968/2020|2020-07-27|EPI\_ISL\_591712|Original|hCoV-19^^Victoria|Human|Microbiological Diagnostic Unit - Public Health Laboratory (MDU-PHL)|MDU-PHL|Schultz|Australia

>Spike|hCoV-19/Portugal/PT1338/2020|2020-03-19|EPI\_ISL\_511297|Original|hCoV-19^^Portugal|Human|Instituto Nacional de Saude (INSA) and Instituto Gulbenkian de Ciencia (IGC)|Instituto Nacional de Saude (INSA) and Instituto Gulbenkian de Ciencia (IGC)|Borges|Portugal

>Spike|hCoV-19/England/QEUA-A029CD/2020|2020-09-29|EPI\_ISL\_584941|Original|hCoV-19^^England|Human|Quadram Institute Bioscience|COVID-19 Genomics UK (COG-UK) Consortium|Alikhan|United Kingdom

>Spike|hCoV-19/USA/CA-CZB-13839/2020|2020-08-11|EPI\_ISL\_738613|Original|hCoV-19^^California|Human|Alameda County Public Health Lab|Chan-Zuckerberg Biohub|Kamm|USA

>Spike|hCoV-19/Japan/IC-0450/2020|2020-10-00|EPI\_ISL\_768659|Original|hCoV-19^^Japan|Human|Pathogen Genomics Center|Pathogen Genomics Center|Sekizuka|Japan

>Spike|hCoV-19/USA/NE-10933/2020|2020-05-04|EPI\_ISL\_466669|Original|hCoV-19^^Nebraska|Human|Nebraska Public Health Laboratory|UNMC COVID-19 Response Team|Pratt|USA

>Spike|hCoV-19/USA/MI-QDX-720/2020|2020-03-20|EPI\_ISL\_571453|Original|hCoV-19^^Michigan|Human|Quest Diagnostics|Quest Diagnostics|Kagan|USA

>Spike|hCoV-19/Scotland/GCVR-16FDE9/2020|2020-03-23|EPI\_ISL\_489650|Original|hCoV-19^^Scotland|Human|NHSGGC West of Scotland Specialist Virology Centre / MRC-University of Glasgow Centre for Virus Research|Wellcome Sanger Institute for the COVID-19 Genomics UK (COG-UK) consortium|Davies|United Kingdom

>Spike|hCoV-19/India/OR-ILSCV13695/2020|2020-05-09|EPI\_ISL\_463021|Original|hCoV-19^^Odisha|Human|Institute of Life Sciences|Immunogenomics lab|Raghav|India

>Spike|hCoV-19/Belgium/reg-10191272/2020|2020-10-19|EPI\_ISL\_735182|Original|hCoV-19^^Overijse|Human|UZ Leuven|KU Leuven|Maes|Belgium

>Spike|hCoV-19/South Africa/KRISP-K004338/2020|2020-10-28|EPI\_ISL\_660214|Original|hCoV-19^^KwaZulu-Natal|Human|NHLs-IALCH|KRISP|de Oliveira|South Africa

>Spike|hCoV-19/Luxembourg/LNS4007359/2020|2020-10-09|EPI\_ISL\_740401|Original|hCoV-19^^Luxembourg|Human|Laboratoire national de sant\u00e9|Laboratoire national de sant\u00e9|Wienecke-Baldacchino|Luxembourg

>Spike|hCoV-19/England/ALDP-CB42CD/2020|2020-12-20|EPI\_ISL\_761022|Original|hCoV-19^^England|Human|Lighthouse Lab in Alderley Park|Wellcome Sanger Institute for the COVID-19 Genomics UK (COG-UK) Consortium|Davies|United Kingdom

>Spike|hCoV-19/Finland/4A75S1/2020|2020-04-04|EPI\_ISL\_481672|Original|hCoV-19^^Uusimaa|Human|Department of Virology and Immunology|Department of Virology|Smura|Finland

>Spike|hCoV-19/USA/UT-UPHL-201226180/2020|2020-04-06|EPI\_ISL\_678522|Original|hCoV-19^^Utah|Human|Utah Public Health Laboratory|Utah Public Health Laboratory|Young|USA

>Spike|hCoV-19/USA/AL-CDC-2-3693759/2020|2020-11-05|EPI\_ISL\_747045|Original|hCoV-19^^Alabama|Human|Respiratory Viruses Branch|Respiratory Viruses Branch|Queen|USA

>Spike|hCoV-19/Belgium/RHA-0324177/2020|2020-03-24|EPI\_ISL\_420434|Original|hCoV-19^^Tertre|Human|KU Leuven|KU Leuven|Maes|Belgium

>Spike|hCoV-19/England/ALDP-981D61/2020|2020-08-10|EPI\_ISL\_552779|Original|hCoV-19^^England|Human|Lighthouse Lab in Alderley Park|Wellcome Sanger Institute for the COVID-19 Genomics UK (COG-UK) consortium|Davies|United Kingdom

>Spike|hCoV-19/Peru/LIM-INS-013/2020|2020-03-10|EPI\_ISL\_491463|Original|hCoV-19^^Lima|Human|Laboratorio de Referencia Nacional de Virus Respiratorio. Instituto Nacional de Salud Per\u00fa|Laboratorio de Referencia Nacional de Biotecnolog\u00eda y Biolog\u00eda Molecular. Instituto Nacional de Salud Per\u00fa|Padilla Rojas|Peru

>Spike|hCoV-19/England/MILK-B3867B/2020|2020-11-01|EPI\_ISL\_658758|Original|hCoV-19^^England|Human|Lighthouse Lab in Milton Keynes|Wellcome Sanger Institute for the COVID-19 Genomics UK (COG-UK) Consortium|Davies|United Kingdom

>Spike|hCoV-19/Denmark/DCGC-7749/2020|2020-10-19|EPI\_ISL\_618718|Original|hCoV-19^^Syddanmark|Human|Department of Virus and Microbiological Special Diagnostics|Albertsen lab|Michaelsen|Denmark

>Spike|hCoV-19/England/MILK-9587ED/2020|2020-06-11|EPI\_ISL\_554684|Original|hCoV-19^^England|Human|Lighthouse Lab in Milton Keynes|Wellcome Sanger Institute for the COVID-19 Genomics UK (COG-UK) consortium|Davies|United Kingdom

>Spike|hCoV-19/Denmark/DCGC-8782/2020|2020-10-26|EPI\_ISL\_626049|Original|hCoV-19^^Sjaelland|Human|Department of Virus and Microbiological Special Diagnostics|Albertsen lab|Michaelsen|Denmark

>Spike|hCoV-19/Ireland/D-NVRL-MPZ66737/2020|2020-04-09|EPI\_ISL\_767787|Original|hCoV-19^^Dublin|Human|National Virus Reference Laboratory|Irish Coronavirus Sequencing Consortium - Teagasc Moorepark|Walsh|Ireland

>Spike|hCoV-19/Netherlands/ZH-RIVM-21018/2020|2020-12-09|EPI\_ISL\_791034|Original|hCoV-19^^Zuid-holland|Human|Dutch COVID-19 response team|National Institute for Public Health and the Environment (RIVM)|Meijer|Netherlands

>Spike|hCoV-19/Wales/PHWC-168876/2020|2020-04-01|EPI\_ISL\_494296|Original|hCoV-19^^Wales|Human|Originating lab|COVID-19 Genomics UK (COG-UK) Consortium|Moore|United Kingdom

>Spike|hCoV-19/Japan/PG-4845/2020|2020-07-00|EPI\_ISL\_689967|Original|hCoV-19^^Japan|Human|Pathogen Genomics Center|Pathogen Genomics Center|Sekizuka|Japan

>Spike|hCoV-19/Australia/VIC3891/2020|2020-07-13|EPI\_ISL\_520603|Original|hCoV-19^^Victoria|Human|Microbiological Diagnostic Unit - Public Health Laboratory (MDU-PHL)|MDU-PHL|Schultz|Australia

>Spike|hCoV-19/Netherlands/NA\_564/2020|2020-04-11|EPI\_ISL\_460729|Original|hCoV-19^^Netherlands|Human|Dutch COVID-19 response team|Erasmus Medical Center|Oude Munnink|Netherlands

>Spike|hCoV-19/USA/UT-QDX-2599/2020|2020-03-12|EPI\_ISL\_604968|Original|hCoV-19^^Utah|Human|Quest Diagnostics|Quest Diagnostics|Kagan|USA

>Spike|hCoV-19/USA/CA-CDPH006/2020|2020-03-24|EPI\_ISL\_515899|Original|hCoV-19^^California|Human|California Department of Public Health|California Department of Public Health|Bell|USA

>Spike|hCoV-19/England/QEUA-A0C9E1/2020|2020-10-03|EPI\_ISL\_585002|Original|hCoV-19^^England|Human|Quadram Institute Bioscience|COVID-19 Genomics UK (COG-UK) Consortium|Alikhan|United Kingdom

>Spike|hCoV-19/USA/TX-HMH-MCoV-19510/2020|2020-11-17|EPI\_ISL\_783890|Original|hCoV-19^^Texas|Human|Houston Methodist Hospital|Houston Methodist Hospital|Long|USA

>Spike|hCoV-19/USA/TX-HMH-MCoV-18748/2020|2020-11-20|EPI\_ISL\_785087|Original|hCoV-19^^Texas|Human|Houston Methodist Hospital|Houston Methodist Hospital|Long|USA

>Spike|hCoV-19/Portugal/PT0905/2020|2020-03-28|EPI\_ISL\_511162|Original|hCoV-19^^Portugal|Human|Instituto Nacional de Saude (INSA)|Instituto Nacional de Saude (INSA)|Borges|Portugal

>Spike|hCoV-19/USA/NY-NYCPHL-000589/2020|2020-03-10|EPI\_ISL\_632047|Original|hCoV-19^^New York|Human|New York Presbyterian Lower Manhattan|New York City Public Health Laboratory|Wang|USA

>Spike|hCoV-19/USA/MD-HP12153/2020|2020-12-26|EPI\_ISL\_791462|Original|hCoV-19^^Maryland|Human|Johns Hopkins Hospital Department of Pathology|Johns Hopkins Hospital Department of Pathology|Morris|USA

>Spike|hCoV-19/Belgium/reg-0411469/2020|2020-04-11|EPI\_ISL\_476979|Original|hCoV-19^^Paal|Human|KU Leuven|KU Leuven|Maes|Belgium

>Spike|hCoV-19/Australia/VIC7850/2020|2020-07-27|EPI\_ISL\_564701|Original|hCoV-19^^Victoria|Human|Microbiological Diagnostic Unit - Public Health Laboratory (MDU-PHL)|MDU-PHL|Schultz|Australia

>Spike|hCoV-19/Japan/TK-YE63738d/2020|2020-03-00|EPI\_ISL\_582143|Original|hCoV-19^^Tokyo|Human|Tokyo Metropolitan Institute of Public Health|Tokyo Metropolitan Institute of Public Health|Nagashima|Japan

>Spike|hCoV-19/England/ALDP-BC67E8/2020|2020-11-22|EPI\_ISL\_721489|Original|hCoV-19^^England|Human|Lighthouse Lab in Alderley Park|Wellcome Sanger Institute for the COVID-19 Genomics UK (COG-UK) Consortium|Davies|United Kingdom

>Spike|hCoV-19/USA/MI-MDHHS-SC21996/2020|2020-09-26|EPI\_ISL\_576219|Original|hCoV-19^^Michigan|Human|Michigan Department of Health and Human Services|Michigan Department of Health and Human Services|Blankenship|USA

>Spike|hCoV-19/Spain/IB-IBV-2512/2020|2020-03-20|EPI\_ISL\_469001|Original|hCoV-19^^Illes Balears|Human|Servicio de Microbiolog\u00eda|SeqCOVID-SPAIN consortium|IBV (CSIC)|Comas|Spain

>Spike|hCoV-19/England/MILK-A47100/2020|2020-10-06|EPI\_ISL\_598479|Original|hCoV-19^^England|Human|Lighthouse Lab in Milton Keynes|Wellcome Sanger Institute for the COVID-19 Genomics UK (COG-UK) consortium|Davies|United Kingdom

>Spike|hCoV-19/USA/TX-HMH-777/2020|2020-04-07|EPI\_ISL\_545627|Original|hCoV-19^^Texas|Human|Houston Methodist Hospital|Houston Methodist Hospital|Long|USA

>Spike|hCoV-19/Japan/PG-4220/2020|2020-07-00|EPI\_ISL\_692458|Original|hCoV-19^^Japan|Human|Fukuoka Institute of Health and Environmental Sciences|Pathogen Genomics Center|Sekizuka|Japan

>Spike|hCoV-19/Brazil/RS-15273/2020|2020-07-17|EPI\_ISL\_729844|Original|hCoV-19^^Rio Grande do Sul|Human|Laboratorio Central de Saude Publica do Estado do Rio Grande do Sul (LACEN-RS)|Laboratory of Respiratory Viruses and Measles|Silva|Brazil

>Spike|hCoV-19/England/MILK-A7D57E/2020|2020-10-13|EPI\_ISL\_606538|Original|hCoV-19^^England|Human|Lighthouse Lab in Milton Keynes|Wellcome Sanger Institute for the COVID-19 Genomics UK (COG-UK) consortium|Davies|United Kingdom

>Spike|hCoV-19/Brazil/SP-844R2/2020|2020-11-21|EPI\_ISL\_708530|Original|hCoV-19^^S\u00e3o Paulo|Human|Secretaria Municipal de Saude de Fernand\u00f3polis|Instituto Adolfo Lutz|Sacchi|Brazil

>Spike|hCoV-19/Australia/VIC868/2020|2020-04-05|EPI\_ISL\_427123|Original|hCoV-19^^Victoria|Human|Victorian Infectious Diseases Reference Laboratory (VIDRL)|Microbiological Diagnostic Unit Public Health Laboratory and Victorian Infectious Diseases Reference Laboratory|Schultz|Australia

>Spike|hCoV-19/Spain/CT-IBV-97010112/2020|2020-11-12|EPI\_ISL\_683648|Original|hCoV-19^^Catalunya|Human|Servicio de Microbiolog\u00eda|SeqCOVID-SPAIN consortium|IBV (CSIC)|Comas|Spain

>Spike|hCoV-19/England/MILK-B3CC1B/2020|2020-11-01|EPI\_ISL\_679822|Original|hCoV-19^^England|Human|Oxford Viromics|COVID-19 Genomics UK (COG-UK) Consortium|Golubchik|United Kingdom

>Spike|hCoV-19/Denmark/DCGC-3412/2020|2020-08-31|EPI\_ISL\_616171|Original|hCoV-19^^Syddanmark|Human|Department of Virus and Microbiological Special Diagnostics|Albertsen lab|Michaelsen|Denmark

>Spike|hCoV-19/USA/LA-GBCL-26629247/2020|2020-04-21|EPI\_ISL\_485235|Original|hCoV-19^^Louisiana|Human|River Road Testing Lab|Ginkgo Bioworks Clinical Laboratory|Smith|USA

>Spike|hCoV-19/Peru/CAL-UPCH-0047/2020|2020-06-18|EPI\_ISL\_540938|Original|hCoV-19^^Callao|Human|Laboratorio de Referencia Nacional de Virus Respiratorios|Laboratorio de Gen\u00f3mica Microbiana|Tsukayama|Peru

>Spike|hCoV-19/Netherlands/NH-RIVM-20717/2020|2020-12-21|EPI\_ISL\_790783|Original|hCoV-19^^Noord-Holland|Human|Dutch COVID-19 response team|National Institute for Public Health and the Environment (RIVM)|Meijer|Netherlands

>Spike|hCoV-19/England/QEUEH-5EF47F/2020|2020-06-16|EPI\_ISL\_533249|Original|hCoV-19^^England|Human|Lighthouse Lab in Glasgow|Wellcome Sanger Institute for the COVID-19 Genomics UK (COG-UK) consortium|Davies|United Kingdom

>Spike|hCoV-19/Australia/NSW2229/2020|2020-03-19|EPI\_ISL\_500677|Original|hCoV-19^^New South Wales|Human|Area of Virology|Area of Virology|Bull|Australia

>Spike|hCoV-19/England/MILK-9F13C4/2020|2020-09-24|EPI\_ISL\_589589|Original|hCoV-19^^England|Human|Lighthouse Lab in Milton Keynes|Wellcome Sanger Institute for the COVID-19 Genomics UK (COG-UK) consortium|Davies|United Kingdom

>Spike|hCoV-19/USA/TX-HMH-MCoV-13204/2020|2020-08-26|EPI\_ISL\_788355|Original|hCoV-19^^Texas|Human|Houston Methodist Hospital|Houston Methodist Hospital|Long|USA

>Spike|hCoV-19/England/MILK-B38CE2/2020|2020-11-01|EPI\_ISL\_659052|Original|hCoV-19^^England|Human|Lighthouse Lab in Milton Keynes|Wellcome Sanger Institute for the COVID-19 Genomics UK (COG-UK) Consortium|Davies|United Kingdom

>Spike|hCoV-19/England/ALDP-C3CDDDB/2020|2020-12-10|EPI\_ISL\_731625|Original|hCoV-19^^England|Human|Lighthouse Lab in Alderley Park|Wellcome Sanger Institute for the COVID-19 Genomics UK (COG-UK) Consortium|Davies|United Kingdom

>Spike|hCoV-19/USA/CA-CZB-3285/2020|2020-07-17|EPI\_ISL\_548310|Original|hCoV-19^^California|Human|County of Santa Clara Public Health Department|Chan-Zuckerberg Biohub|Bhatt|USA

>Spike|hCoV-19/Japan/PG-4016/2020|2020-07-00|EPI\_ISL\_692257|Original|hCoV-19^^Japan|Human|Pathogen Genomics Center|Pathogen Genomics Center|Sekizuka|Japan

>Spike|hCoV-19/Japan/PG-6022/2020|2020-07-00|EPI\_ISL\_689134|Original|hCoV-19^^Japan|Human|Pathogen Genomics Center|Pathogen Genomics Center|Sekizuka|Japan

>Spike|hCoV-19/USA/WI-UW-1605/2020|2020-09-24|EPI\_ISL\_605482|Original|hCoV-19^^Wisconsin|Human|University of Wisconsin-Madison AIDS Vaccine Research Laboratories|University of Wisconsin-Madison AIDS Vaccine Research Laboratories|Baczenas|USA

>Spike|hCoV-19/USA/NY-NYCPHL-000875/2020|2020-03-26|EPI\_ISL\_632947|Original|hCoV-19^^New York|Human|Flushing Hospital Medical Center|New York City Public Health Laboratory|Wang|USA

>Spike|hCoV-19/England/BIRM-61C09/2020|2020-03-24|EPI\_ISL\_529221|Original|hCoV-19^^England|Human|University of Birmingham|COVID-19 Genomics UK (COG-UK) Consortium|Loman|United Kingdom

>Spike|hCoV-19/Scotland/CVR4438/2020|2020-09-19|EPI\_ISL\_585308|Original|hCoV-19^^Scotland|Human|Lighthouse Lab in Glasgow / MRC-University of Glasgow Centre for Virus Research|COVID-19 Genomics UK (COG-UK) Consortium|Robertson|United Kingdom

>Spike|hCoV-19/Scotland/CVR1452/2020|2020-04-02|EPI\_ISL\_433591|Original|hCoV-19^^Scotland|Human|West of Scotland Specialist Virology Centre|COVID-19 Genomics UK (COG-UK) Consortium|Robertson|United Kingdom

>Spike|hCoV-19/USA/WA-S475/2020|2020-04-01|EPI\_ISL\_434235|Original|hCoV-19^^Washington|Human|Washington State Department of Health|Seattle Flu Study|Bedford|USA

>Spike|hCoV-19/India/WB-S27/2020|2020-04-30|EPI\_ISL\_455656|Original|hCoV-19^^West Bengal|Human|ICMR-National Institute of Cholera and Enteric Diseases|National Institute of Biomedical Genomics|Maitra|India

>Spike|hCoV-19/England/MILK-A471C4/2020|2020-10-06|EPI\_ISL\_598493|Original|hCoV-19^^England|Human|Lighthouse Lab in Milton Keynes|Wellcome Sanger Institute for the COVID-19 Genomics UK (COG-UK) consortium|Davies|United Kingdom

>Spike|hCoV-19/Gibraltar/205121268/2020|2020-00-00|EPI\_ISL\_766387|Original|hCoV-19^^Gibraltar|Human|Microbiology|Respiratory Virus Unit|Platt|Gibraltar

>Spike|hCoV-19/England/QEUEH-B12334/2020|2020-11-02|EPI\_ISL\_642583|Original|hCoV-19^^England|Human|Lighthouse Lab in Glasgow|Wellcome Sanger Institute for the COVID-19 Genomics UK (COG-UK) Consortium|Davies|United Kingdom

>Spike|hCoV-19/Denmark/DCGC-16277/2020|2020-11-16|EPI\_ISL\_714418|Original|hCoV-19^^Hovedstaden|Human|Department of Virus and Microbiological Special Diagnostics|Albertsen Lab|Michaelsen|Denmark

>Spike|hCoV-19/USA/MI-MDHHS-SC21778/2020|2020-08-13|EPI\_ISL\_529896|Original|hCoV-19^^Michigan|Human|Michigan Department of Health and Human Services|Michigan Department of Health and Human Services|Blankenship|USA

>Spike|hCoV-19/USA/TX-DSHS-1767/2020|2020-06-20|EPI\_ISL\_710409|Original|hCoV-19^^Texas|Human|Texas Department of State Health Services|Texas Department of State Health Services|Rahman|USA

>Spike|hCoV-19/Denmark/DCGC-1733/2020|2020-03-30|EPI\_ISL\_622201|Original|hCoV-19^^Hovedstaden|Human|Department of Virus and Microbiological Special Diagnostics|Albertsen lab|Michaelsen|Denmark

>Spike|hCoV-19/Belgium/CA-0319111/2020|2020-03-19|EPI\_ISL\_420368|Original|hCoV-19^^Boussu|Human|KU Leuven|KU Leuven|Maes|Belgium

>Spike|hCoV-19/USA/TX-HMH-MCoV-18221/2020|2020-11-11|EPI\_ISL\_784569|Original|hCoV-19^^Texas|Human|Houston Methodist Hospital|Houston Methodist Hospital|Long|USA

>Spike|hCoV-19/Wuhan/HB-WH4-209/2020|2020-03-19|EPI\_ISL\_454958|Original|hCoV-19^^Hubei|Human|Wuhan Chain Medical Labs (CMLabs)|State Key Laboratory of Biotherapy of Sichuan University|Tang|China

>Spike|hCoV-19/Scotland/QEUEH-A00B23/2020|2020-10-02|EPI\_ISL\_585550|Original|hCoV-19^^Scotland|Human|University of Exeter|COVID-19 Genomics UK (COG-UK) Consortium|Temperton|United Kingdom

>Spike|hCoV-19/Denmark/DCGC-11348/2020|2020-11-02|EPI\_ISL\_670856|Original|hCoV-19^^Nordjylland|Human|Department of Virus and Microbiological Special Diagnostics|Albertsen Lab|Michaelsen|Denmark

>Spike|hCoV-19/Denmark/DCGC-2462/2020|2020-08-03|EPI\_ISL\_617422|Original|hCoV-19^^Syddanmark|Human|Department of Virus and Microbiological Special Diagnostics|Albertsen lab|Michaelsen|Denmark

>Spike|hCoV-19/England/QEUA-A89F71/2020|2020-10-16|EPI\_ISL\_638834|Original|hCoV-19^^England|Human|Oxford Viromics|COVID-19 Genomics UK (COG-UK) Consortium|Golubchik|United Kingdom

>Spike|hCoV-19/Japan/PG-4727/2020|2020-07-00|EPI\_ISL\_689863|Original|hCoV-19^^Japan|Human|Pathogen Genomics Center|Pathogen Genomics Center|Sekizuka|Japan

>Spike|hCoV-19/England/PORT-2D1419/2020|2020-03-18|EPI\_ISL\_512385|Original|hCoV-19^^England|Human|Centre for Enzyme Innovation|COVID-19 Genomics UK (COG-UK) Consortium|Robson|United Kingdom

>Spike|hCoV-19/Ecuador/USFQ-131/2020|2020-04-13|EPI\_ISL\_491935|Original|hCoV-19^^Guayas|Human|Centro de Investigaciones|Institute of Microbiology|Cardenas|Ecuador

>Spike|hCoV-19/USA/TX-HMH-6762/2020|2020-06-24|EPI\_ISL\_546225|Original|hCoV-19^^Texas|Human|Houston Methodist Hospital|Houston Methodist Hospital|Long|USA

>Spike|hCoV-19/Australia/VIC2664/2020|2020-06-29|EPI\_ISL\_521508|Original|hCoV-19^^Victoria|Human|Victorian Infectious Diseases Reference Laboratory (VIDRL)|VIDRL and MDU-PHL|Schultz|Australia

>Spike|hCoV-19/USA/MI-MDHHS-SC20610/2020|2020-04-30|EPI\_ISL\_462692|Original|hCoV-19^^Michigan|Human|Michigan Department of Health and Human Services|Michigan Department of Health and Human Services|Blankenship|USA

>Spike|hCoV-19/England/ALDP-C3C209/2020|2020-12-10|EPI\_ISL\_731179|Original|hCoV-19^^England|Human|Lighthouse Lab in Alderley Park|Wellcome Sanger Institute for the COVID-19 Genomics UK (COG-UK) Consortium|Davies|United Kingdom

>Spike|hCoV-19/Denmark/DCGC-2353/2020|2020-08-10|EPI\_ISL\_617691|Original|hCoV-19^^Midtjylland|Human|Department of Virus and Microbiological Special Diagnostics|Albertsen lab|Michaelsen|Denmark

>Spike|hCoV-19/USA/WI-UW-119/2020|2020-03-00|EPI\_ISL\_425176|Original|hCoV-19^^Wisconsin|Human|University of Wisconsin-Madison AIDS Vaccine Research Laboratories|University of Wisconsin-Madison AIDS Vaccine Research Laboratories|Baczenas|USA

>Spike|hCoV-19/USA/WY-WPHL-20061934/2020|2020-08-16|EPI\_ISL\_769900|Original|hCoV-19^^Wyoming|Human|Wyoming Public Health Laboratory|Wyoming Public Health Laboratory|Hull|USA

>Spike|hCoV-19/Germany/BY-ChVir-1530/2020|2020-02-00|EPI\_ISL\_450210|Original|hCoV-19^^Bavaria|Human|Department of Virology|Department of Virology|B\u00f6hmer|Germany

>Spike|hCoV-19/USA/AZ-TG296708/2020|2020-05-08|EPI\_ISL\_694244|Original|hCoV-19^^Arizona|Human|TGen North|TGen North|French|USA

>Spike|hCoV-19/Australia/VIC13545/2020|2020-08-01|EPI\_ISL\_563744|Original|hCoV-19^^Victoria|Human|Microbiological Diagnostic Unit - Public Health Laboratory (MDU-PHL)|MDU-PHL|Schultz|Australia

>Spike|hCoV-19/Equatorial Guinea/7432/2020|2020-05-11|EPI\_ISL\_648346|Original|hCoV-19^^Bioko Norte|Human|Laboratorio de Investigaciones de Baney|University Hospital Basel|Hosch|Equatorial Guinea

>Spike|hCoV-19/Denmark/DCGC-2390/2020|2020-08-10|EPI\_ISL\_617571|Original|hCoV-19^^Midtjylland|Human|Department of Virus and Microbiological Special Diagnostics|Albertsen lab|Michaelsen|Denmark

>Spike|hCoV-19/USA/IL-UW-361/2020|2020-04-18|EPI\_ISL\_450715|Original|hCoV-19^^Illinois|Human|University of Wisconsin-Madison AIDS Vaccine Research Laboratories|University of Wisconsin-Madison AIDS Vaccine Research Laboratories|Baczenas|USA

>Spike|hCoV-19/USA/WA-S2783/2020|2020-08-10|EPI\_ISL\_530140|Original|hCoV-19^^Washington|Human|Seattle Flu Study|Seattle Flu Study|Lee|USA

>Spike|hCoV-19/England/NOTT-11294B/2020|2020-04-20|EPI\_ISL\_493565|Original|hCoV-19^^England|Human|Lincolnshire Hospitals and DeepSeq Nottingham|COVID-19 Genomics UK (COG-UK) Consortium|Loose|United Kingdom

>Spike|hCoV-19/Wales/PHWC-4973C5/2020|2020-11-27|EPI\_ISL\_726823|Original|hCoV-19^^Wales|Human|Originating lab|COVID-19 Genomics UK (COG-UK) Consortium|Moore|United Kingdom



>Spike|hCoV-19/Netherlands/UT-RIVM-20055/2020|2020-11-13|EPI\_ISL\_723239|Original|hCoV-19^^Utrecht|Human|Dutch COVID-19 response team|National Institute for Public Health and the Environment (RIVM)|Meijer|Netherlands

>Spike|hCoV-19/Scotland/EDB964/2020|2020-04-06|EPI\_ISL\_432891|Original|hCoV-19^^Scotland|Human|Virology Department|COVID-19 Genomics UK (COG-UK) Consortium|Williams|United Kingdom

>Spike|hCoV-19/Japan/PG-1945/2020|2020-04-00|EPI\_ISL\_685551|Original|hCoV-19^^Japan|Human|Pathogen Genomics Center|Pathogen Genomics Center|Sekizuka|Japan

>Spike|hCoV-19/USA/MN-MDH-1186/2020|2020-04-20|EPI\_ISL\_477276|Original|hCoV-19^^Minnesota|Human|Mayo Clinic & Mayo Clinic Laboratories|Minnesota Department of Health|Garfin|USA

>Spike|hCoV-19/England/QEUA-B7BFBD/2020|2020-11-14|EPI\_ISL\_668181|Original|hCoV-19^^England|Human|Lighthouse Lab in Glasgow|Wellcome Sanger Institute for the COVID-19 Genomics UK (COG-UK) Consortium|Davies|United Kingdom

>Spike|hCoV-19/England/MILK-BB1E27/2020|2020-11-18|EPI\_ISL\_719996|Original|hCoV-19^^England|Human|Lighthouse Lab in Milton Keynes|Wellcome Sanger Institute for the COVID-19 Genomics UK (COG-UK) Consortium|Davies|United Kingdom

>Spike|hCoV-19/SaudiArabia/KAUST-MADINAH360/2020|2020-04-23|EPI\_ISL\_513137|Original|hCoV-19^^Madinah|Human|Pathogen Genomics Lab King Abdullah University of Science and Technology(KAUST)|Pathogen Genomics Lab King Abdullah University of Science and Technology(KAUST)|Mohamed Ghazzali|Saudi Arabia

>Spike|hCoV-19/USA/CA-CZB-1431/2020|2020-03-24|EPI\_ISL\_468401|Original|hCoV-19^^California|Human|County of San Luis Obispo Public Health Laboratory|Chan-Zuckerberg Biohub|Hao|USA

>Spike|hCoV-19/England/ALDP-A6DD00/2020|2020-10-14|EPI\_ISL\_607138|Original|hCoV-19^^England|Human|Lighthouse Lab in Alderley Park|Wellcome Sanger Institute for the COVID-19 Genomics UK (COG-UK) consortium|Davies|United Kingdom

>Spike|hCoV-19/Denmark/DCGC-8420/2020|2020-10-26|EPI\_ISL\_617923|Original|hCoV-19^^Nordjylland|Human|Department of Virus and Microbiological Special Diagnostics|Albertsen lab|Michaelsen|Denmark

>Spike|hCoV-19/England/BRIS-125BB8/2020|2020-03-29|EPI\_ISL\_443806|Original|hCoV-19^^England|Human|PHE South West Regional Laboratory|Wellcome Sanger Institute for the COVID-19 Genomics UK (COG-UK) consortium|Amato|United Kingdom

>Spike|hCoV-19/USA/NM-NMDOH-2020324092/2020|2020-09-03|EPI\_ISL\_569637|Original|hCoV-19^^New Mexico|Human|New Mexico Department of Health Scientific Laboratory|New Mexico Department of Health Scientific Laboratory|Johnson|USA

>Spike|hCoV-19/Hungary/UD-94349/2020|2020-10-08|EPI\_ISL\_678390|Original|hCoV-19^^Borsod-Aba\u00faj-Zempl\u00e9n county|Human|University of Debrecen|National Laboratory of Virology|Kemenesi|Hungary

>Spike|hCoV-19/India/MH-ACTREC-117/2020|2020-05-25|EPI\_ISL\_699773|Original|hCoV-19^^Maharashtra|Human|Hematopathology Laboratory|Hematopathology Laboratory|Patkar|India

>Spike|hCoV-19/Australia/VIC17549/2020|2020-08-24|EPI\_ISL\_663919|Original|hCoV-19^^Victoria|Human|Microbiological Diagnostic Unit - Public Health Laboratory (MDU-PHL)|MDU-PHL|Schultz|Australia

>Spike|hCoV-19/Spain/MD-H12-43/2020|2020-04-06|EPI\_ISL\_529978|Original|hCoV-19^^Madrid|Human|Hospital Universitario 12 de Octubre|Hospital Universitario 12 de Octubre|Viedma|Spain

>Spike|hCoV-19/England/NORT-288596/2020|2020-12-05|EPI\_ISL\_725024|Original|hCoV-19^^England|Human|Northumbria University / South Tees Hospitals NHS Foundation Trust / North Cumbria Integrated Care NHS Foundation Trust / North Tees and Hartlepool NHS Foundation Trust / Newcastle Hospitals NHS Foundation Trust|COVID-19 Genomics UK (COG-UK) Consortium|Bashton|United Kingdom

>Spike|hCoV-19/England/SHEF-C00A2/2020|2020-03-20|EPI\_ISL\_420286|Original|hCoV-19^^England|Human|Virology Department|Department of Infection|de Silva|United Kingdom

>Spike|hCoV-19/England/20144024404/2020|2020-03-26|EPI\_ISL\_423533|Original|hCoV-19^^England|Human|Respiratory Virus Unit|Respiratory Virus Unit|Platt|United Kingdom

>Spike|hCoV-19/USA/TX-DSHS-1078/2020|2020-06-16|EPI\_ISL\_628724|Original|hCoV-19^^Texas|Human|Texas Department of State Health Services|Texas Department of State Health Services|Rahman|USA

>Spike|hCoV-19/England/LOND-1251AFE/2020|2020-11-22|EPI\_ISL\_704102|Original|hCoV-19^^England|Human|University College London Hospital|COVID-19 Genomics UK (COG-UK) Consortium|Byott|United Kingdom

>Spike|hCoV-19/England/CAMC-B226DE/2020|2020-11-02|EPI\_ISL\_647298|Original|hCoV-19^^England|Human|Lighthouse Lab in Cambridge|Wellcome Sanger Institute for the COVID-19 Genomics UK (COG-UK) Consortium|Davies|United Kingdom

>Spike|hCoV-19/England/ALDP-9502F3/2020|2020-06-16|EPI\_ISL\_555291|Original|hCoV-19^^England|Human|Lighthouse Lab in Alderley Park|Wellcome Sanger Institute for the COVID-19 Genomics UK (COG-UK) consortium|Davies|United Kingdom

>Spike|hCoV-19/England/ALDP-B1CABD/2020|2020-11-01|EPI\_ISL\_723527|Original|hCoV-19^^England|Human|Centre for Enzyme Innovation|COVID-19 Genomics UK (COG-UK) Consortium|Robson|United Kingdom

>Spike|hCoV-19/Panama/337467/2020|2020-07-04|EPI\_ISL\_496861|Original|hCoV-19^^Panama West|Human|Gorgas Memorial Laboratory of Health Studies|Gorgas Memorial Laboratory of Health Studies|Martinez|Panama

>Spike|hCoV-19/Denmark/ALAB-SSI411A/2020|2020-03-23|EPI\_ISL\_429506|Original|hCoV-19^^Denmark|Human|Department of Virus and Microbiological Special Diagnostics|Albertsen lab|Kirkegaard|Denmark

>Spike|hCoV-19/England/LOND-1251760/2020|2020-11-21|EPI\_ISL\_679432|Original|hCoV-19^^England|Human|University College London Hospital|COVID-19 Genomics UK (COG-UK) Consortium|Byott|United Kingdom

>Spike|hCoV-19/USA/WI-GMF-18957/2020|2020-09-05|EPI\_ISL\_547789|Original|hCoV-19^^Wisconsin|Human|Gundersen Molecular Diagnostics Laboratory|Kabara Cancer Research Institute|Kenny|USA

>Spike|hCoV-19/Denmark/DCGC-9004/2020|2020-10-26|EPI\_ISL\_626205|Original|hCoV-19^^Nordjylland|Human|Department of Virus and Microbiological Special Diagnostics|Albertsen lab|Michaelsen|Denmark

>Spike|hCoV-19/USA/WI-WSLH-200157/2020|2020-03-31|EPI\_ISL\_578384|Original|hCoV-19^^Wisconsin|Human|Wisconsin State Laboratory of Hygiene Communicable Disease Division|Wisconsin State Laboratory of Hygiene Communicable Disease Division|Florek|USA

>Spike|hCoV-19/England/QEUEH-96157E/2020|2020-08-03|EPI\_ISL\_537147|Original|hCoV-19^^England|Human|Lighthouse Lab in Glasgow|Wellcome Sanger Institute for the COVID-19 Genomics UK (COG-UK) consortium|Davies|United Kingdom

>Spike|hCoV-19/England/ALDP-A6CD6B/2020|2020-10-15|EPI\_ISL\_608240|Original|hCoV-19^^England|Human|Lighthouse Lab in Alderley Park|Wellcome Sanger Institute for the COVID-19 Genomics UK (COG-UK) consortium|Davies|United Kingdom

>Spike|hCoV-19/USA/TX-HMH-MCoV-12276/2020|2020-09-24|EPI\_ISL\_790279|Original|hCoV-19^^Texas|Human|Houston Methodist Hospital|Houston Methodist Hospital|Long|USA

>Spike|hCoV-19/USA/VA-DCLS-0057/2020|2020-03-31|EPI\_ISL\_426465|Original|hCoV-19^^Virginia|Human|Virginia DCLS|Virginia DCLS|St. Jacques|USA

>Spike|hCoV-19/France/ARA-24935/2020|2020-04-14|EPI\_ISL\_676551|Original|hCoV-19^^Auvergne-Rh\u00f4ne-Alpes|Human|CNR Virus des Infections Respiratoires - France SUD|CNR Virus des Infections Respiratoires - France SUD|Bal|France

>Spike|hCoV-19/England/QEUEH-A00947/2020|2020-09-30|EPI\_ISL\_600262|Original|hCoV-19^^England|Human|Lighthouse Lab in Glasgow|Wellcome Sanger Institute for the COVID-19 Genomics UK (COG-UK) consortium|Davies|United Kingdom

>Spike|hCoV-19/Bangladesh/DNAS\_DRCIM\_isl\_SIBL-7/2020|2020-06-30|EPI\_ISL\_774938|Original|hCoV-19^^Dhaka|Human|Designated Reference Institute for Chemical Measurements (DRICM)|DNA SOLUTION LTD.|Rabbi|Bangladesh

>Spike|hCoV-19/Japan/PG-3438/2020|2020-06-00|EPI\_ISL\_690616|Original|hCoV-19^^Japan|Human|Pathogen Genomics Center|Pathogen Genomics Center|Sekizuka|Japan

>Spike|hCoV-19/England/CAMB-1B7CC7/2020|2020-10-23|EPI\_ISL\_705540|Original|hCoV-19^^England|Human|Department of Pathology|COVID-19 Genomics UK (COG-UK) Consortium|Goodfellow|United Kingdom

>Spike|hCoV-19/India/WB-IICB-031/2020|2020-10-29|EPI\_ISL\_661304|Original|hCoV-19^^West Bengal|Human|CSIR-Indian Institute of Chemical Biology|CSIR-Indian Institute of Chemical Biology|Bhowmik|India

>Spike|hCoV-19/Scotland/QEUA-A00AAE/2020|2020-10-02|EPI\_ISL\_585545|Original|hCoV-19^^Scotland|Human|University of Exeter|COVID-19 Genomics UK (COG-UK) Consortium|Temperton|United Kingdom

>Spike|hCoV-19/USA/MD-HP12102/2020|2020-12-24|EPI\_ISL\_791420|Original|hCoV-19^^Maryland|Human|Johns Hopkins Hospital Department of Pathology|Johns Hopkins Hospital Department of Pathology|Morris|USA

>Spike|hCoV-19/England/MILK-ACCCB7/2020|2020-10-21|EPI\_ISL\_630154|Original|hCoV-19^^England|Human|Lighthouse Lab in Milton Keynes|Wellcome Sanger Institute for the COVID-19 Genomics UK (COG-UK) consortium|Davies|United Kingdom

>Spike|hCoV-19/England/CAMC-AAF713/2020|2020-10-23|EPI\_ISL\_631208|Original|hCoV-19^^England|Human|Lighthouse Lab in Cambridge|Wellcome Sanger Institute for the COVID-19 Genomics UK (COG-UK) consortium|Davies|United Kingdom

>Spike|hCoV-19/England/ALDP-C04A02/2020|2020-12-04|EPI\_ISL\_720825|Original|hCoV-19^^England|Human|Lighthouse Lab in Alderley Park|Wellcome Sanger Institute for the COVID-19 Genomics UK (COG-UK) Consortium|Davies|United Kingdom

>Spike|hCoV-19/England/QEUA-55336A/2020|2020-05-12|EPI\_ISL\_532157|Original|hCoV-19^^England|Human|Lighthouse Lab in Glasgow|Wellcome Sanger Institute for the COVID-19 Genomics UK (COG-UK) consortium|Davies|United Kingdom

>Spike|hCoV-19/South Korea/KDCA0216/2020|2020-11-19|EPI\_ISL\_747451|Original|hCoV-19^^South Korea|Human|Division of Emerging Infectious Diseases|Division of Emerging Infectious Diseases|Park|South Korea

>Spike|hCoV-19/England/QEUA-9ACF00/2020|2020-09-02|EPI\_ISL\_559815|Original|hCoV-19^^England|Human|Oxford Viromics|COVID-19 Genomics UK (COG-UK) Consortium|Golubchik|United Kingdom

>Spike|hCoV-19/England/ALDP-A92A47/2020|2020-10-19|EPI\_ISL\_611072|Original|hCoV-19^^England|Human|Lighthouse Lab in Alderley Park|Wellcome Sanger Institute for the COVID-19 Genomics UK (COG-UK) consortium|Davies|United Kingdom

>Spike|hCoV-19/Scotland/CVR125/2020|2020-03-14|EPI\_ISL\_425668|Original|hCoV-19^^Scotland|Human|West of Scotland Specialist Virology Centre|COVID-19 Genomics UK (COG-UK) Consortium|Robertson|United Kingdom

>Spike|hCoV-19/USA/TX-HMH-MCoV-9342/2020|2020-07-03|EPI\_ISL\_781069|Original|hCoV-19^^Texas|Human|Houston Methodist Hospital|Houston Methodist Hospital|Long|USA

>Spike|hCoV-19/England/ALDP-B84ACF/2020|2020-11-14|EPI\_ISL\_674400|Original|hCoV-19^^England|Human|Lighthouse Lab in Alderley Park|Wellcome Sanger Institute for the COVID-19 Genomics UK (COG-UK) Consortium|Davies|United Kingdom

>Spike|hCoV-19/USA/WA-S2712/2020|2020-06-25|EPI\_ISL\_525702|Original|hCoV-19^^Washington|Human|Seattle Flu Study|Seattle Flu Study|Lee|USA

>Spike|hCoV-19/USA/UT-UPHL-2012067652/2020|2020-08-11|EPI\_ISL\_745952|Original|hCoV-19^^Utah|Human|Ginkgo Bioworks Clinical Laboratory|Utah Public Health Laboratory|Young|USA

>Spike|hCoV-19/Australia/VIC2882/2020|2020-06-29|EPI\_ISL\_521713|Original|hCoV-19^^Victoria|Human|Microbiological Diagnostic Unit - Public Health Laboratory (MDU-PHL)|MDU-PHL|Schultz|Australia

>Spike|hCoV-19/England/QEUA-9D0D18/2020|2020-09-14|EPI\_ISL\_589924|Original|hCoV-19^^England|Human|Lighthouse Lab in Glasgow|Wellcome Sanger Institute for the COVID-19 Genomics UK (COG-UK) consortium|Davies|United Kingdom

>Spike|hCoV-19/England/MILK-B59717/2020|2020-11-06|EPI\_ISL\_679860|Original|hCoV-19^^England|Human|Virology Department|COVID-19 Genomics UK (COG-UK) Consortium|de Silva|United Kingdom

>Spike|hCoV-19/England/ALDP-953D59/2020|2020-06-12|EPI\_ISL\_554475|Original|hCoV-19^^England|Human|Lighthouse Lab in Alderley Park|Wellcome Sanger Institute for the COVID-19 Genomics UK (COG-UK) consortium|Davies|United Kingdom

>Spike|hCoV-19/USA/WA-S193/2020|2020-03-19|EPI\_ISL\_430231|Original|hCoV-19^^Washington|Human|Washington State Department of Health|Seattle Flu Study|Bedford|USA

>Spike|hCoV-19/India/WB-S13/2020|2020-03-30|EPI\_ISL\_455643|Original|hCoV-19^^West Bengal|Human|ICMR-National Institute of Cholera and Enteric Diseases|National Institute of Biomedical Genomics|Maitra|India

>Spike|hCoV-19/England/CAMC-B541C3/2020|2020-11-08|EPI\_ISL\_656899|Original|hCoV-19^^England|Human|Lighthouse Lab in Cambridge|Wellcome Sanger Institute for the COVID-19 Genomics UK (COG-UK) Consortium|Davies|United Kingdom

>Spike|hCoV-19/England/ALDP-B1BD6A/2020|2020-11-01|EPI\_ISL\_646082|Original|hCoV-19^^England|Human|Lighthouse Lab in Alderley Park|Wellcome Sanger Institute for the COVID-19 Genomics UK (COG-UK) Consortium|Davies|United Kingdom

>Spike|hCoV-19/Wales/PHWC-2D647/2020|2020-04-04|EPI\_ISL\_446007|Original|hCoV-19^^Wales|Human|Wales Specialist Virology Centre|Public Health Wales Microbiology Cardiff|Moore|United Kingdom

>Spike|hCoV-19/USA/TX-DSHS-1091/2020|2020-05-14|EPI\_ISL\_615130|Original|hCoV-19^^Texas|Human|Texas Department of State Health Services|Texas Department of State Health Services|Rahman|USA

>Spike|hCoV-19/Denmark/DCGC-11396/2020|2020-11-02|EPI\_ISL\_670542|Original|hCoV-19^^Hovedstaden|Human|Department of Virus and Microbiological Special Diagnostics|Albertsen Lab|Michaelsen|Denmark

>Spike|hCoV-19/Denmark/DCGC-21806/2020|2020-12-21|EPI\_ISL\_758375|Original|hCoV-19^^Hovedstaden|Human|Department of Virus and Microbiological Special Diagnostics|Albertsen Lab|Michaelsen|Denmark

>Spike|hCoV-19/England/MILK-A912D7/2020|2020-10-16|EPI\_ISL\_638520|Original|hCoV-19^^England|Human|Oxford Viromics|COVID-19 Genomics UK (COG-UK) Consortium|Golubchik|United Kingdom

>Spike|hCoV-19/England/MILK-A7A0AD/2020|2020-10-15|EPI\_ISL\_606774|Original|hCoV-19^^England|Human|Lighthouse Lab in Milton Keynes|Wellcome Sanger Institute for the COVID-19 Genomics UK (COG-UK) consortium|Davies|United Kingdom

>Spike|hCoV-19/Denmark/DCGC-22311/2020|2020-12-14|EPI\_ISL\_758670|Original|hCoV-19^^Sjaelland|Human|Department of Virus and Microbiological Special Diagnostics|Albertsen Lab|Michaelsen|Denmark

>Spike|hCoV-19/USA/MN-MDH-2048/2020|2020-11-05|EPI\_ISL\_654729|Original|hCoV-19^^Minnesota|Human|Minnesota Department of Health|Minnesota Department of Health|Lorentz|USA

>Spike|hCoV-19/USA/CA-QDX-692/2020|2020-03-20|EPI\_ISL\_571411|Original|hCoV-19^^California|Human|Quest Diagnostics|Quest Diagnostics|Kagan|USA

>Spike|hCoV-19/Australia/VIC9901/2020|2020-08-24|EPI\_ISL\_562750|Original|hCoV-19^^Victoria|Human|Microbiological Diagnostic Unit - Public Health Laboratory (MDU-PHL)|MDU-PHL|Schultz|Australia

>Spike|hCoV-19/England/ALDP-B76EF1/2020|2020-11-12|EPI\_ISL\_723826|Original|hCoV-19^^England|Human|Oxford Viromics|COVID-19 Genomics UK (COG-UK) Consortium|Golubchik|United Kingdom

>Spike|hCoV-19/Denmark/DCGC-22153/2020|2020-12-14|EPI\_ISL\_758590|Original|hCoV-19^^Midtjylland|Human|Department of Virus and Microbiological Special Diagnostics|Albertsen Lab|Michaelsen|Denmark

>Spike|hCoV-19/USA/LA-EVTL977/2020|2020-08-18|EPI\_ISL\_653668|Original|hCoV-19^^Louisiana|Human|LSUHS Emerging Viral Threat Laboratory|Microbial Genome Sequencing Center|Kamil|USA

>Spike|hCoV-19/Scotland/EDB3330/2020|2020-04-09|EPI\_ISL\_487770|Original|hCoV-19^^Scotland|Human|Virology Department|Wellcome Sanger Institute for the COVID-19 Genomics UK (COG-UK) consortium|Davies|United Kingdom

>Spike|hCoV-19/USA/WI-UW-1827/2020|2020-09-09|EPI\_ISL\_605699|Original|hCoV-19^^Wisconsin|Human|University of Wisconsin-Madison AIDS Vaccine Research Laboratories|University of Wisconsin-Madison AIDS Vaccine Research Laboratories|Baczenas|USA

>Spike|hCoV-19/Australia/VIC15262/2020|2020-08-25|EPI\_ISL\_592849|Original|hCoV-19^^Victoria|Human|Microbiological Diagnostic Unit - Public Health Laboratory (MDU-PHL)|MDU-PHL|Schultz|Australia

>Spike|hCoV-19/Scotland/QEUH-A1FB12/2020|2020-10-01|EPI\_ISL\_598987|Original|hCoV-19^^Scotland|Human|Lighthouse Lab in Glasgow|Wellcome Sanger Institute for the COVID-19 Genomics UK (COG-UK) consortium|Davies|United Kingdom

>Spike|hCoV-19/USA/UN-UW-5620/2020|2020-04-08|EPI\_ISL\_461437|Original|hCoV-19^^USA|Human|UW Virology Lab|UW Virology Lab|Roychoudhury|USA

>Spike|hCoV-19/Italy/VEN-UniVR-46/2020|2020-03-12|EPI\_ISL\_751356|Original|hCoV-19^^Veneto|Human|IRCCS Sacro Cuore Don Calabria Hospital|University of Verona|Mori|Italy

>Spike|hCoV-19/Canada/BC\_00576317/2020|2020-04-00|EPI\_ISL\_466696|Original|hCoV-19^^British Columbia|Human|BCCDC Public Health Laboratory|BCCDC Public Health Laboratory|Harrigan|Canada

>Spike|hCoV-19/England/EXET-13F2F2/2020|2020-12-16|EPI\_ISL\_763434|Original|hCoV-19^^England|Human|University of Exeter|COVID-19 Genomics UK (COG-UK) Consortium|Temperton|United Kingdom

>Spike|hCoV-19/USA/NV-QDX-419/2020|2020-03-18|EPI\_ISL\_571249|Original|hCoV-19^^Nevada|Human|Quest Diagnostics|Quest Diagnostics|Kagan|USA

>Spike|hCoV-19/USA/UT-UPHL-201011129/2020|2020-06-20|EPI\_ISL\_611499|Original|hCoV-19^^Utah|Human|Utah Public Health Laboratory|Utah Public Health Laboratory|Young|USA

>Spike|hCoV-19/Scotland/CVR2623/2020|2020-04-17|EPI\_ISL\_484620|Original|hCoV-19^^Scotland|Human|West of Scotland Specialist Virology Centre|COVID-19 Genomics UK (COG-UK) Consortium|Robertson|United Kingdom

>Spike|hCoV-19/USA/WA-S2133/2020|2020-06-08|EPI\_ISL\_497561|Original|hCoV-19^^Washington|Human|Washington State Department of Health|Seattle Flu Study|Lee|USA

>Spike|hCoV-19/England/MILK-9D3F5B/2020|2020-09-18|EPI\_ISL\_601568|Original|hCoV-19^^England|Human|Lighthouse Lab in Milton Keynes|Wellcome Sanger Institute for the COVID-19 Genomics UK (COG-UK) consortium|Davies|United Kingdom

>Spike|hCoV-19/Belgium/ULG-10255/2020|2020-07-17|EPI\_ISL\_515062|Original|hCoV-19^^Liege|Human|Department of Clinical Microbiology|GIGA Medical Genomics|Durkin|Belgium

>Spike|hCoV-19/England/ALDP-65D94F/2020|2020-07-03|EPI\_ISL\_555518|Original|hCoV-19^^England|Human|Lighthouse Lab in Alderley Park|Wellcome Sanger Institute for the COVID-19 Genomics UK (COG-UK) consortium|Davies|United Kingdom

>Spike|hCoV-19/England/MILK-ACD621/2020|2020-10-20|EPI\_ISL\_630085|Original|hCoV-19^^England|Human|Lighthouse Lab in Milton Keynes|Wellcome Sanger Institute for the COVID-19 Genomics UK (COG-UK) consortium|Davies|United Kingdom

>Spike|hCoV-19/England/ALDP-A2E11E/2020|2020-10-06|EPI\_ISL\_586699|Original|hCoV-19^^England|Human|Lighthouse Lab in Alderley Park|Wellcome Sanger Institute for the COVID-19 Genomics UK (COG-UK) consortium|Davies|United Kingdom

>Spike|hCoV-19/Canada/QC-LSPQ-L00235424/2020|2020-03-24|EPI\_ISL\_536097|Original|hCoV-19^^Quebec|Human|H\u00f4pital du Suro\u00eet|Laboratoire de sant\u00e9 publique du Qu\u00e9bec|Moreira|Canada

>Spike|hCoV-19/Denmark/DCGC-16282/2020|2020-11-16|EPI\_ISL\_714681|Original|hCoV-19^^Sjælland|Human|Department of Virus and Microbiological Special Diagnostics|Albertsen Lab|Michaelsen|Denmark

>Spike|hCoV-19/USA/NY-NYUMC748/2020|2020-03-20|EPI\_ISL\_451463|Original|hCoV-19^^New York|Human|NYU Langone Health|Departments of Pathology and Medicine|Maurano|USA

>Spike|hCoV-19/Australia/VIC5219/2020|2020-07-17|EPI\_ISL\_519984|Original|hCoV-19^^Victoria|Human|Microbiological Diagnostic Unit - Public Health Laboratory (MDU-PHL)|MDU-PHL|Schultz|Australia

>Spike|hCoV-19/Finland/8LS12G9/2020|2020-10-08|EPI\_ISL\_755972|Original|hCoV-19^^Uusimaa|Human|Department of Virology and Immunology|Department of Virology|Smura|Finland

>Spike|hCoV-19/USA/IN-CDC-2-3693679/2020|2020-11-07|EPI\_ISL\_747085|Original|hCoV-19^^Indiana|Human|Respiratory Viruses Branch|Respiratory Viruses Branch|Queen|USA

>Spike|hCoV-19/England/20130062904/2020|2020-03-21|EPI\_ISL\_423644|Original|hCoV-19^^England|Human|Respiratory Virus Unit|Respiratory Virus Unit|Platt|United Kingdom

>Spike|hCoV-19/Wales/PHWC-48BB53/2020|2020-10-28|EPI\_ISL\_666329|Original|hCoV-19^^Wales|Human|Wales Specialist Virology Centre Sequencing lab|COVID-19 Genomics UK (COG-UK) Consortium|Moore|United Kingdom

>Spike|hCoV-19/Netherlands/ZH-EMC-553/2020|2020-09-08|EPI\_ISL\_577981|Original|hCoV-19^^Zuid Holland|Human|Dutch COVID-19 response team|Erasmus Medical Center|Oude Munnink|Netherlands

>Spike|hCoV-19/Denmark/DCGC-5045/2020|2020-09-21|EPI\_ISL\_621822|Original|hCoV-19^^Hovedstaden|Human|Department of Virus and Microbiological Special Diagnostics|Albertsen lab|Michaelsen|Denmark

>Spike|hCoV-19/Japan/PG-7447/2020|2020-07-00|EPI\_ISL\_688549|Original|hCoV-19^^Japan|Human|Pathogen Genomics Center|Pathogen Genomics Center|Sekizuka|Japan

>Spike|hCoV-19/USA/TX-HMH-7923/2020|2020-06-30|EPI\_ISL\_545709|Original|hCoV-19^^Texas|Human|Houston Methodist Hospital|Houston Methodist Hospital|Long|USA

>Spike|hCoV-19/Canada/ON-PHL-20-03664/2020|2020-11-00|EPI\_ISL\_775102|Original|hCoV-19^^Ontario|Human|Public Health Ontario Laboratory|Public Health Ontario Laboratory|Guthrie|Canada

>Spike|hCoV-19/England/QEUA-AD5B81/2020|2020-10-25|EPI\_ISL\_634671|Original|hCoV-19^^England|Human|Lighthouse Lab in Glasgow|Wellcome Sanger Institute for the COVID-19 Genomics UK (COG-UK) consortium|Davies|United Kingdom

>Spike|hCoV-19/Northern Ireland/NIRE-1020B2/2020|2020-03-21|EPI\_ISL\_441377|Original|hCoV-19^^Northern Ireland|Human|Regional Virus Laboratory|COVID-19 Genomics UK (COG-UK) Consortium|Fairley|United Kingdom

>Spike|hCoV-19/Germany/SH-ChVir8332/2020|2020-08-04|EPI\_ISL\_729585|Original|hCoV-19^^Schleswig-Holstein|Human|A. Krumbholz|Charit\u00e9 Universit\u00e4tsmedizin Berlin|Muehlemann|Germany

>Spike|hCoV-19/Scotland/QEUA-A1E06F/2020|2020-10-01|EPI\_ISL\_598905|Original|hCoV-19^^Scotland|Human|Lighthouse Lab in Glasgow|Wellcome Sanger Institute for the COVID-19 Genomics UK (COG-UK) consortium|Davies|United Kingdom

>Spike|hCoV-19/Australia/NSW1262/2020|2020-12-18|EPI\_ISL\_740893|Original|hCoV-19^^New South Wales|Human|Laverty Pathology|NSW Health Pathology - Institute of Clinical Pathology and Medical Research; Westmead Hospital; University of Sydney|Gall|Australia

>Spike|hCoV-19/Australia/VIC12952/2020|2020-07-30|EPI\_ISL\_592121|Original|hCoV-19^^Victoria|Human|Microbiological Diagnostic Unit - Public Health Laboratory (MDU-PHL)|MDU-PHL|Schultz|Australia

>Spike|hCoV-19/USA/TX-HMH-MCoV-18494/2020|2020-11-20|EPI\_ISL\_784842|Original|hCoV-19^^Texas|Human|Houston Methodist Hospital|Houston Methodist Hospital|Long|USA

>Spike|hCoV-19/Finland/13M83/2020|2020-03-13|EPI\_ISL\_418400|Original|hCoV-19^^Finland|Human|Department of Virology and Immunology|Department of Virology|Smura|Finland

>Spike|hCoV-19/England/PORT-2EE65F/2020|2020-11-15|EPI\_ISL\_741720|Original|hCoV-19^^England|Human|Centre for Enzyme Innovation|COVID-19 Genomics UK (COG-UK) Consortium|Robson|United Kingdom

>Spike|hCoV-19/England/ALDP-A67F2E/2020|2020-10-12|EPI\_ISL\_608574|Original|hCoV-19^^England|Human|Lighthouse Lab in Alderley Park|Wellcome Sanger Institute for the COVID-19 Genomics UK (COG-UK) consortium|Davies|United Kingdom

>Spike|hCoV-19/Spain/IB-IBV-99011526/2020|2020-12-18|EPI\_ISL\_779866|Original|hCoV-19^^Balear Islands|Human|Servicio de Microbiolog\u00eda|SeqCOVID-SPAIN consortium|IBV (CSIC)|Comas|Spain

>Spike|hCoV-19/England/MILK-BDBDB1/2020|2020-11-26|EPI\_ISL\_709742|Original|hCoV-19^^England|Human|Lighthouse Lab in Milton Keynes|Wellcome Sanger Institute for the COVID-19 Genomics UK (COG-UK) Consortium|Davies|United Kingdom

>Spike|hCoV-19/Australia/VIC16703/2020|2020-08-06|EPI\_ISL\_640516|Original|hCoV-19^^Victoria|Human|Microbiological Diagnostic Unit - Public Health Laboratory (MDU-PHL)|MDU-PHL|Schultz|Australia

>Spike|hCoV-19/Denmark/DCGC-15066/2020|2020-11-23|EPI\_ISL\_713198|Original|hCoV-19^^Hovedstaden|Human|Department of Virus and Microbiological Special Diagnostics|Albertsen Lab|Michaelsen|Denmark

>Spike|hCoV-19/Belgium/VHC-030655/2020|2020-03-06|EPI\_ISL\_420449|Original|hCoV-19^^Dalhem|Human|KU Leuven|KU Leuven|Maes|Belgium

>Spike|hCoV-19/Ireland/D-NVRL-MPS28551/2020|2020-04-11|EPI\_ISL\_767747|Original|hCoV-19^^Dublin|Human|National Virus Reference Laboratory|Irish Coronavirus Sequencing Consortium - Teagasc Moorepark|Walsh|Ireland

>Spike|hCoV-19/England/MILK-99D63A/2020|2020-08-31|EPI\_ISL\_549888|Original|hCoV-19^^England|Human|Lighthouse Lab in Milton Keynes|Wellcome Sanger Institute for the COVID-19 Genomics UK (COG-UK) consortium|Davies|United Kingdom

>Spike|hCoV-19/England/MILK-B8D282/2020|2020-11-13|EPI\_ISL\_674069|Original|hCoV-19^^England|Human|Lighthouse Lab in Milton Keynes|Wellcome Sanger Institute for the COVID-19 Genomics UK (COG-UK) Consortium|Davies|United Kingdom

>Spike|hCoV-19/France/PAC-IHU-0118/2020|2020-03-24|EPI\_ISL\_569318|Original|hCoV-19^^Provence-Alpes-C\u00f4te-d\u00a0Azur|Human|MEPHI|MEPHI|Levasseur|France

>Spike|hCoV-19/England/OXON-ADF9F/2020|2020-00-00|EPI\_ISL\_448651|Original|hCoV-19^^England|Human|Oxford Viromics|COVID-19 Genomics UK (COG-UK) Consortium|Golubchik|United Kingdom

>Spike|hCoV-19/Denmark/DCGC-4626/2020|2020-09-21|EPI\_ISL\_621295|Original|hCoV-19^^Sjaelland|Human|Department of Virus and Microbiological Special Diagnostics|Albertsen lab|Michaelsen|Denmark

>Spike|hCoV-19/England/ALDP-7474FB/2020|2020-06-29|EPI\_ISL\_557449|Original|hCoV-19^^England|Human|Lighthouse Lab in Alderley Park|Wellcome Sanger Institute for the COVID-19 Genomics UK (COG-UK) consortium|Davies|United Kingdom

>Spike|hCoV-19/Spain/CL-IBV-97006230/2020|2020-04-14|EPI\_ISL\_537376|Original|hCoV-19^^Castilla y Leon|Human|Universidad de Le\u00f3n|SeqCOVID-SPAIN consortium|IBV (CSIC) |Comas|Spain

>Spike|hCoV-19/England/LIVE-AA150/2020|2020-03-23|EPI\_ISL\_517409|Original|hCoV-19^^England|Human|Liverpool Clinical Laboratories|COVID-19 Genomics UK (COG-UK) Consortium|Haldenby|United Kingdom

>Spike|hCoV-19/Wales/ALDP-C22FE1/2020|2020-12-06|EPI\_ISL\_767242|Original|hCoV-19^^Wales|Human|Lighthouse Lab in Alderley Park|Wellcome Sanger Institute for the COVID-19 Genomics UK (COG-UK) Consortium|Davies|United Kingdom

>Spike|hCoV-19/USA/WA-UW-10508/2020|2020-06-08|EPI\_ISL\_570324|Original|hCoV-19^^Washington|Human|UW Virology Lab|UW Virology Lab|Roychoudhury|USA

>Spike|hCoV-19/England/LOND-DAD17/2020|2020-11-14|EPI\_ISL\_724704|Original|hCoV-19^^England|Human|University College London|COVID-19 Genomics UK (COG-UK) Consortium|Roy|United Kingdom

>Spike|hCoV-19/Portugal/PT1281/2020|2020-03-23|EPI\_ISL\_511242|Original|hCoV-19^^Portugal|Human|Instituto Nacional de Saude (INSA) and Instituto Gulbenkian de Ciencia (IGC)|Instituto Nacional de Saude (INSA) and Instituto Gulbenkian de Ciencia (IGC) |Borges|Portugal

>Spike|hCoV-19/Wales/PHWC-482794/2020|2020-10-19|EPI\_ISL\_613241|Original|hCoV-19^^Wales|Human|Wales Specialist Virology Centre Sequencing lab|COVID-19 Genomics UK (COG-UK) Consortium|Moore|United Kingdom

>Spike|hCoV-19/England/MILK-A06668/2020|2020-10-01|EPI\_ISL\_600100|Original|hCoV-19^^England|Human|Lighthouse Lab in Milton Keynes|Wellcome Sanger Institute for the COVID-19 Genomics UK (COG-UK) consortium|Davies|United Kingdom

>Spike|hCoV-19/Norway/5186/2020|2020-10-28|EPI\_ISL\_708048|Original|hCoV-19^^Vestfold og Telemark|Human|Unilabs Laboratory Medicine|Norwegian Institute of Public Health|Kopperud Riis|Norway

>Spike|hCoV-19/England/QEUH-B4068F/2020|2020-11-08|EPI\_ISL\_657210|Original|hCoV-19^^England|Human|Lighthouse Lab in Glasgow|Wellcome Sanger Institute for the COVID-19 Genomics UK (COG-UK) Consortium|Davies|United Kingdom

>Spike|hCoV-19/Wales/PHWC-16DA20/2020|2020-09-18|EPI\_ISL\_577480|Original|hCoV-19^^Wales|Human|Wales Specialist Virology Centre Sequencing lab|COVID-19 Genomics UK (COG-UK) Consortium|Moore|United Kingdom

>Spike|hCoV-19/Japan/IC-0085/2020|2020-07-00|EPI\_ISL\_591427|Original|hCoV-19^^Japan|Human|Pathogen Genomics Center|Pathogen Genomics Center|Sekizuka|Japan

>Spike|hCoV-19/USA/TX-HMH-MCoV-10639/2020|2020-07-08|EPI\_ISL\_789571|Original|hCoV-19^^Texas|Human|Houston Methodist Hospital|Houston Methodist Hospital|Long|USA

>Spike|hCoV-19/Australia/SAP049/2020|2020-03-24|EPI\_ISL\_451088|Original|hCoV-19^^South Australia|Human|SA Pathology|SA Pathology|Leong|Australia

>Spike|hCoV-19/Canada/ON-S216/2020|2020-03-26|EPI\_ISL\_755821|Original|hCoV-19^^Ontario|Human|Toronto Invasive Bacterial Diseases Network|McMaster University|McArthur|Canada

>Spike|hCoV-19/England/LIVE-994B5/2020|2020-04-08|EPI\_ISL\_439728|Original|hCoV-19^^England|Human|Liverpool Clinical Laboratories|COVID-19 Genomics UK (COG-UK) Consortium|Haldenby|United Kingdom

>Spike|hCoV-19/England/BRIS-1853D48/2020|2020-04-27|EPI\_ISL\_492245|Original|hCoV-19^^England|Human|PHE South West Regional Laboratory|Wellcome Sanger Institute for the COVID-19 Genomics UK (COG-UK) consortium|Davies|United Kingdom

>Spike|hCoV-19/Peru/LIM-INS-001/2020|2020-04-01|EPI\_ISL\_545955|unknown|hCoV-19^^Lima|Human|Laboratorio de Infecciones Respiratorias Agudas. Centro Nacional de Salud Publica, Instituto Nacional de Salud|Laboratorio de Infecciones Respiratorias Agudas. Centro Nacional de Salud Publica, Instituto Nacional de Salud|Lopez|Peru

>Spike|hCoV-19/Australia/VIC15958/2020|2020-08-01|EPI\_ISL\_641141|Original|hCoV-19^^Victoria|Human|Microbiological Diagnostic Unit - Public Health Laboratory (MDU-PHL) |MDU-PHL|Schultz|Australia

>Spike|hCoV-19/England/QEUA-A4D850/2020|2020-10-07|EPI\_ISL\_627286|Original|hCoV-19^^England|Human|Oxford Viromics|COVID-19 Genomics UK (COG-UK) Consortium|Golubchik|United Kingdom

>Spike|hCoV-19/Germany/HH-hpi-p1696/2020|2020-03-18|EPI\_ISL\_776101|Original|hCoV-19^^Hamburg|Human|University Medical Center Hamburg Eppendorf|Heinrich Pette Institute|Robitaille|Germany

>Spike|hCoV-19/England/MILK-AB7A2E/2020|2020-10-22|EPI\_ISL\_623297|Original|hCoV-19^^England|Human|Lighthouse Lab in Milton Keynes|Wellcome Sanger Institute for the COVID-19 Genomics UK (COG-UK) consortium|Davies|United Kingdom

>Spike|hCoV-19/USA/TX-DSHS-1691/2020|2020-05-22|EPI\_ISL\_708610|Original|hCoV-19^^Texas|Human|Texas Department of State Health Services|Texas Department of State Health Services|Rahman|USA

>Spike|hCoV-19/England/201360111/2020|2020-03-25|EPI\_ISL\_423212|Original|hCoV-19^^England|Human|Respiratory Virus Unit|Respiratory Virus Unit|Platt|United Kingdom

>Spike|hCoV-19/England/QEUA-AAE635/2020|2020-10-22|EPI\_ISL\_630733|Original|hCoV-19^^England|Human|Lighthouse Lab in Glasgow|Wellcome Sanger Institute for the COVID-19 Genomics UK (COG-UK) consortium|Davies|United Kingdom

>Spike|hCoV-19/England/BRIS-121879/2020|2020-03-09|EPI\_ISL\_440178|Original|hCoV-19^^England|Human|PHE South West Regional Laboratory|Wellcome Sanger Institute for the COVID-19 Genomics UK (COG-UK) consortium|Amato|United Kingdom

>Spike|hCoV-19/Australia/VIC12062/2020|2020-08-10|EPI\_ISL\_640817|Original|hCoV-19^^Victoria|Human|Microbiological Diagnostic Unit - Public Health Laboratory (MDU-PHL) |MDU-PHL|Schultz|Australia

>Spike|hCoV-19/Australia/VIC9163/2020|2020-08-20|EPI\_ISL\_565420|Original|hCoV-19^^Victoria|Human|Microbiological Diagnostic Unit - Public Health Laboratory (MDU-PHL) |MDU-PHL|Schultz|Australia

>Spike|hCoV-19/Wales/PHWC-1668F0/2020|2020-06-27|EPI\_ISL\_494058|Original|hCoV-19^^Wales|Human|Originating lab|COVID-19 Genomics UK (COG-UK) Consortium|Moore|United Kingdom

>Spike|hCoV-19/England/QEUA-AF4E0B/2020|2020-10-30|EPI\_ISL\_663137|Original|hCoV-19^^England|Human|Lighthouse Lab in Glasgow|Wellcome Sanger Institute for the COVID-19 Genomics UK (COG-UK) Consortium|Davies|United Kingdom

>Spike|hCoV-19/England/QEUA-9B5308/2020|2020-09-03|EPI\_ISL\_590426|Original|hCoV-19^^England|Human|Lighthouse Lab in Glasgow|Wellcome Sanger Institute for the COVID-19 Genomics UK (COG-UK) consortium|Davies|United Kingdom

>Spike|hCoV-19/Wales/PHWC-2B5A6/2020|2020-04-10|EPI\_ISL\_445730|Original|hCoV-19^^Wales|Human|Wales Specialist Virology Centre|Public Health Wales Microbiology Cardiff|Moore|United Kingdom

>Spike|hCoV-19/Gambia/GC19-2707/2020|2020-07-21|EPI\_ISL\_561134|Original|hCoV-19^^Kombo|Human|MRCG at LSHTM Genomics lab|MRCG at LSHTM Genomics lab|Sesay|Gambia

>Spike|hCoV-19/England/ALDP-C8959B/2020|2020-12-16|EPI\_ISL\_756465|Original|hCoV-19^^England|Human|Lighthouse Lab in Alderley Park|Wellcome Sanger Institute for the COVID-19 Genomics UK (COG-UK) Consortium|Davies|United Kingdom

>Spike|hCoV-19/England/MILK-ACC22E/2020|2020-10-21|EPI\_ISL\_629142|Original|hCoV-19^^England|Human|Lighthouse Lab in Milton Keynes|Wellcome Sanger Institute for the COVID-19 Genomics UK (COG-UK) consortium|Davies|United Kingdom

>Spike|hCoV-19/England/204620001\_RPT/2020|2020-11-09|EPI\_ISL\_636735|Original|hCoV-19^^England|Human|Respiratory Virus Unit|Respiratory Virus Unit|Platt|United Kingdom

>Spike|hCoV-19/France/ARA-SC098/2020|2020-03-16|EPI\_ISL\_666684|Original|hCoV-19^^Auvergne-Rh\u00f4ne-Alpes|Human|Centre hospitalier M\u00e9tropole Savoie|CNR Virus des Infections Respiratoires - France SUD|Bal|France



>Spike|hCoV-19/Denmark/DCGC-13041/2020|2020-11-30|EPI\_ISL\_712131|Original|hCoV-19^^Hovedstaden|Human|Department of Virus and Microbiological Special Diagnostics|Albertsen Lab|Michaelsen|Denmark

>Spike|hCoV-19/England/OXON-B0913/2020|2020-04-21|EPI\_ISL\_478920|Original|hCoV-19^^England|Human|Oxford Viromics|COVID-19 Genomics UK (COG-UK) Consortium|Golubchik|United Kingdom

>Spike|hCoV-19/England/ALDP-A2D9CC/2020|2020-10-06|EPI\_ISL\_586631|Original|hCoV-19^^England|Human|Lighthouse Lab in Alderley Park|Wellcome Sanger Institute for the COVID-19 Genomics UK (COG-UK) consortium|Davies|United Kingdom

>Spike|hCoV-19/Japan/PG-7499/2020|2020-08-00|EPI\_ISL\_688601|Original|hCoV-19^^Japan|Human|Tokyo Metropolitan Institute of Public Health|Pathogen Genomics Center|Sekizuka|Japan

>Spike|hCoV-19/England/ALDP-638555/2020|2020-07-04|EPI\_ISL\_556205|Original|hCoV-19^^England|Human|Lighthouse Lab in Alderley Park|Wellcome Sanger Institute for the COVID-19 Genomics UK (COG-UK) consortium|Davies|United Kingdom

>Spike|hCoV-19/Denmark/DCGC-7081/2020|2020-10-12|EPI\_ISL\_619129|Original|hCoV-19^^Hovedstaden|Human|Department of Virus and Microbiological Special Diagnostics|Albertsen lab|Michaelsen|Denmark

>Spike|hCoV-19/USA/MI-MDHHS-SC22195/2020|2020-10-20|EPI\_ISL\_614246|Original|hCoV-19^^Michigan|Human|Michigan Department of Health and Human Services|Michigan Department of Health and Human Services|Jacob|USA

>Spike|hCoV-19/France/PAC-IHU-0592/2020|2020-04-10|EPI\_ISL\_569608|Original|hCoV-19^^Provence-Alpes-C\u00f4te-d\u0192Azur|Human|MEPHI|MEPHI|Levasseur|France

>Spike|hCoV-19/England/QEUH-A8C3BE/2020|2020-10-18|EPI\_ISL\_643156|Original|hCoV-19^^England|Human|Lighthouse Lab in Glasgow|Wellcome Sanger Institute for the COVID-19 Genomics UK (COG-UK) Consortium|Davies|United Kingdom

>Spike|hCoV-19/England/ALDP-B738E7/2020|2020-11-12|EPI\_ISL\_662575|Original|hCoV-19^^England|Human|Lighthouse Lab in Alderley Park|Wellcome Sanger Institute for the COVID-19 Genomics UK (COG-UK) Consortium|Davies|United Kingdom

>Spike|hCoV-19/USA/WA-S1121/2020|2020-05-04|EPI\_ISL\_463611|Original|hCoV-19^^Washington|Human|Washington State Department of Health|Seattle Flu Study|Bedford|USA

>Spike|hCoV-19/Northern Ireland/NIRE-10733C/2020|2020-03-30|EPI\_ISL\_585139|Original|hCoV-19^^Northern Ireland|Human|Regional Virus Laboratory|COVID-19 Genomics UK (COG-UK) Consortium|Fairley|United Kingdom

>Spike|hCoV-19/United Arab Emirates/0039/2020|2020-05-17|EPI\_ISL\_698248|Original|hCoV-19^^Abu Dhabi|Human|Group 42 (G42) Healthcare|G42 Healthcare|Ogrodzki|United Arab Emirates

>Spike|hCoV-19/Sweden/20-50249/2020|2020-03-08|EPI\_ISL\_455888|Original|hCoV-19^^Stockholm|Human|Karolinska Universitetslaboratoriet|The Public Health Agency of Sweden|Svartstr\u00f6m|Sweden

>Spike|hCoV-19/England/CAMB-798EC/2020|2020-04-01|EPI\_ISL\_441082|Original|hCoV-19^^England|Human|Department of Pathology|Wellcome Sanger Institute for the COVID-19 Genomics UK (COG-UK) consortium|Amato|United Kingdom

>Spike|hCoV-19/USA/NY-NYUMC762/2020|2020-03-20|EPI\_ISL\_451476|Original|hCoV-19^^New York|Human|NYU Langone Health|Departments of Pathology and Medicine|Maurano|USA

>Spike|hCoV-19/USA/TX-HMH-MCoV-14270/2020|2020-10-05|EPI\_ISL\_787555|Original|hCoV-19^^Texas|Human|Houston Methodist Hospital|Houston Methodist Hospital|Long|USA

>Spike|hCoV-19/Canada/QC-LSPQ-L00234990/2020|2020-03-24|EPI\_ISL\_536082|Original|hCoV-19^^Quebec|Human|H\u00f4pital Charles-LeMoine|Laboratoire de sant\u00e9 publique du Qu\u00e9bec|Moreira|Canada

>Spike|hCoV-19/USA/TX-HMH-3360/2020|2020-06-12|EPI\_ISL\_544145|Original|hCoV-19^^Texas|Human|Houston Methodist Hospital|Houston Methodist Hospital|Long|USA

>Spike|hCoV-19/Turkey/HSGM-8964/2020|2020-03-22|EPI\_ISL\_428723|Original|hCoV-19^^Aksaray|Human|Ministry of Health Turkey|Ministry of Health Turkey|Bayrakdar|Turkey

>Spike|hCoV-19/Germany/SH-ChVir8596/2020|2020-08-19|EPI\_ISL\_729590|Original|hCoV-19^^Schleswig-Holstein|Human|A. Krumbholz|Charit\u00e9 Universit\u00e4tsmedizin Berlin|Muehlemann|Germany

>Spike|hCoV-19/Netherlands/ZH-EMC-907/2020|2020-11-03|EPI\_ISL\_722702|Original|hCoV-19^^Zuid Holland|Human|Dutch COVID-19 response team|Erasmus Medical Center|Oude Munnink|Netherlands

>Spike|hCoV-19/Australia/VIC12930/2020|2020-07-31|EPI\_ISL\_640951|Original|hCoV-19^^Victoria|Human|Microbiological Diagnostic Unit - Public Health Laboratory (MDU-PHL)|MDU-PHL|Schultz|Australia

>Spike|hCoV-19/England/ALDP-9E6711/2020|2020-09-24|EPI\_ISL\_580491|Original|hCoV-19^^England|Human|Lighthouse Lab in Alderley Park|Wellcome Sanger Institute for the COVID-19 Genomics UK (COG-UK) consortium|Davies|United Kingdom

>Spike|hCoV-19/Croatia/Zagreb-25/2020|2020-09-28|EPI\_ISL\_710565|Original|hCoV-19^^Zagreb|Human|University Hospital Dubrava|Ru\u0111er Bo\u0161kovic Institute; Forensic Science Centre Ivan Vu\u010deti\u0107; University of Zagreb Faculty of Science|Karlic|Croatia

>Spike|hCoV-19/England/CAMB-7D46C/2020|2020-04-05|EPI\_ISL\_441667|Original|hCoV-19^^England|Human|Department of Pathology|Wellcome Sanger Institute for the COVID-19 Genomics UK (COG-UK) consortium|Amato|United Kingdom

>Spike|hCoV-19/Australia/VIC1632/2020|2020-05-05|EPI\_ISL\_456537|Original|hCoV-19^^Victoria|Human|Victorian Infectious Diseases Reference Laboratory (VIDRL)|Microbiological Diagnostic Unit Public Health Laboratory and Victorian Infectious Diseases Reference Laboratory|Schultz|Australia

>Spike|hCoV-19/England/LIVE-A0D92/2020|2020-05-27|EPI\_ISL\_478397|Original|hCoV-19^^England|Human|Liverpool Clinical Laboratories|COVID-19 Genomics UK (COG-UK) Consortium|Haldenby|United Kingdom

>Spike|hCoV-19/Wales/PHWC-2ABC3/2020|2020-04-05|EPI\_ISL\_445676|Original|hCoV-19^^Wales|Human|Wales Specialist Virology Centre|Public Health Wales Microbiology Cardiff|Moore|United Kingdom

>Spike|hCoV-19/England/QEUH-AF28A5/2020|2020-10-30|EPI\_ISL\_662874|Original|hCoV-19^^England|Human|Lighthouse Lab in Glasgow|Wellcome Sanger Institute for the COVID-19 Genomics UK (COG-UK) Consortium|Davies|United Kingdom

>Spike|hCoV-19/USA/TX-HMH-MCoV-13575/2020|2020-08-21|EPI\_ISL\_788685|Original|hCoV-19^^Texas|Human|Houston Methodist Hospital|Houston Methodist Hospital|Long|USA

>Spike|hCoV-19/England/201360067/2020|2020-03-24|EPI\_ISL\_423207|Original|hCoV-19^^England|Human|Respiratory Virus Unit|Respiratory Virus Unit|Platt|United Kingdom

>Spike|hCoV-19/Japan/IC-0408/2020|2020-12-00|EPI\_ISL\_737208|Original|hCoV-19^^Japan|Human|Pathogen Genomics Center|Pathogen Genomics Center|Sekizuka|Japan

>Spike|hCoV-19/USA/WA-S1990/2020|2020-06-04|EPI\_ISL\_497418|Original|hCoV-19^^Washington|Human|Washington State Department of Health|Seattle Flu Study|Lee|USA

>Spike|hCoV-19/USA/UT-UPHL-2008800/2020|2020-05-29|EPI\_ISL\_524826|Original|hCoV-19^^Utah|Human|Utah Public Health Laboratory|Utah Public Health Laboratory|Young|USA

>Spike|hCoV-19/Japan/PG-1579/2020|2020-04-00|EPI\_ISL\_685185|Original|hCoV-19^^Japan|Human|Pathogen Genomics Center|Pathogen Genomics Center|Sekizuka|Japan

>Spike|hCoV-19/USA/NY-NYCPHL-001387/2020|2020-11-17|EPI\_ISL\_683992|Original|hCoV-19^^New York|Human|DOHMH Morrisania|New York City Public Health Laboratory|Wang|USA

>Spike|hCoV-19/Scotland/QEUH-A4BBE0/2020|2020-10-08|EPI\_ISL\_628515|Original|hCoV-19^^Scotland|Human|Oxford Viromics|COVID-19 Genomics UK (COG-UK) Consortium|Golubchik|United Kingdom

>Spike|hCoV-19/USA/MD-MDH-0317/2020|2020-10-19|EPI\_ISL\_633093|Original|hCoV-19^^Maryland|Human|MD PHL|MD PHL|Keller|USA

>Spike|hCoV-19/England/LOND-D56F3/2020|2020-04-16|EPI\_ISL\_449716|Original|hCoV-19^^England|Human|University College London|COVID-19 Genomics UK (COG-UK) Consortium|Roy|United Kingdom

>Spike|hCoV-19/Singapore/595/2020|2020-06-26|EPI\_ISL\_483618|Original|hCoV-19^^Singapore|Human|National Public Health Laboratory|National Public Health Laboratory|Mak|Singapore

>Spike|hCoV-19/Suriname/SR-01/2020|2020-05-00|EPI\_ISL\_517612|Original|hCoV-19^^Suriname|Human|Academic Hospital Paramaribo|Erasmus Medical Center|M\u00f6niger|Suriname

>Spike|hCoV-19/England/HECH-259A264/2020|2020-05-26|EPI\_ISL\_488865|Original|hCoV-19^^England|Human|Microbiology Department|Wellcome Sanger Institute for the COVID-19 Genomics UK (COG-UK) consortium|Davies|United Kingdom

>Spike|hCoV-19/England/QEUA-B1107A/2020|2020-11-03|EPI\_ISL\_642004|Original|hCoV-19^^England|Human|Lighthouse Lab in Glasgow|Wellcome Sanger Institute for the COVID-19 Genomics UK (COG-UK) Consortium|Davies|United Kingdom

>Spike|hCoV-19/Netherlands/NH-RIVM-20800/2020|2020-12-21|EPI\_ISL\_790859|Original|hCoV-19^^Noord-Holland|Human|Dutch COVID-19 response team|National Institute for Public Health and the Environment (RIVM)|Meijer|Netherlands

>Spike|hCoV-19/USA/CA-SEARCH-5537/2020|2020-11-30|EPI\_ISL\_755283|Original|hCoV-19^^California|Human|San Diego County Public Health Laboratory|Andersen lab at Scripps Research|Gangavarapu|USA

>Spike|hCoV-19/USA/VA-DCLS-0253/2020|2020-04-20|EPI\_ISL\_452827|Original|hCoV-19^^Virginia|Human|Virginia DCLS|Virginia DCLS|St. Jacques|USA

>Spike|hCoV-19/Brazil/MA-IEC-165425/2020|2020-04-25|EPI\_ISL\_524794|Original|hCoV-19^^Maranh\u00e3o|Human|\uffeffEvandro Chagas Institute|\uffeffEvandro Chagas Institute|Sousa J\u00fanior|Brazil

>Spike|hCoV-19/USA/FL-BPHL-2061/2020|2020-06-11|EPI\_ISL\_653214|Original|hCoV-19^^Florida|Human|Florida Bureau of Public Health Laboratories|Florida Bureau of Public Health Laboratories|Blanton|USA

>Spike|hCoV-19/England/ALDP-94FE02/2020|2020-06-15|EPI\_ISL\_555206|Original|hCoV-19^^England|Human|Lighthouse Lab in Alderley Park|Wellcome Sanger Institute for the COVID-19 Genomics UK (COG-UK) consortium|Davies|United Kingdom

>Spike|hCoV-19/England/LIVE-9E34A/2020|2020-04-02|EPI\_ISL\_453291|Original|hCoV-19^^England|Human|Liverpool Clinical Laboratories|COVID-19 Genomics UK (COG-UK) Consortium|Haldenby|United Kingdom

>Spike|hCoV-19/Canada/ON-OICR-SLB2827/2020|2020-04-02|EPI\_ISL\_538353|Original|hCoV-19^^Ontario|Human|Kingston Health Sciences Centre / Queen's University|Ontario Institute for Cancer Research|de Borja|Canada

>Spike|hCoV-19/USA/MI-MDHHS-SC21695/2020|2020-03-24|EPI\_ISL\_529814|Original|hCoV-19^^Michigan|Human|Michigan Department of Health and Human Services|Michigan Department of Health and Human Services|Blankenship|USA

>Spike|hCoV-19/Australia/VIC12726/2020|2020-07-29|EPI\_ISL\_640450|Original|hCoV-19^^Victoria|Human|Microbiological Diagnostic Unit - Public Health Laboratory (MDU-PHL)|MDU-PHL|Schultz|Australia

>Spike|hCoV-19/USA/MD-HP00083/2020|2020-03-24|EPI\_ISL\_438239|Original|hCoV-19^^Maryland|Human|Johns Hopkins Hospital Department of Pathology|Johns Hopkins Hospital Department of Pathology|Mehoke|USA

>Spike|hCoV-19/England/NORW-F39F6/2020|2020-12-06|EPI\_ISL\_725148|Original|hCoV-19^^England|Human|Quadram Institute Bioscience|COVID-19 Genomics UK (COG-UK) Consortium|Alikhan|United Kingdom

>Spike|hCoV-19/England/QEUA-A9FA3B/2020|2020-10-20|EPI\_ISL\_665988|Original|hCoV-19^^England|Human|Northumbria University / South Tees Hospitals NHS Foundation Trust / North Cumbria Integrated Care NHS Foundation Trust / North Tees and Hartlepool NHS Foundation Trust / Newcastle Hospitals NHS Foundation Trust|COVID-19 Genomics UK (COG-UK) Consortium|Bashton|United Kingdom

>Spike|hCoV-19/Japan/PG-3679/2020|2020-04-00|EPI\_ISL\_691932|Original|hCoV-19^^Japan|Human|Pathogen Genomics Center|Pathogen Genomics Center|Sekizuka|Japan

>Spike|hCoV-19/Denmark/DCGC-2035/2020|2020-07-20|EPI\_ISL\_618326|Original|hCoV-19^^Hovedstaden|Human|Department of Virus and Microbiological Special Diagnostics|Albertsen lab|Michaelsen|Denmark

>Spike|hCoV-19/USA/MI-MDHHS-SC20294/2020|2020-03-20|EPI\_ISL\_447091|Original|hCoV-19^^Michigan|Human|Michigan Department of Health and Human Services|Michigan Department of Health and Human Services|Blankenship|USA

>Spike|hCoV-19/Scotland/EDB4883/2020|2020-05-13|EPI\_ISL\_453171|Original|hCoV-19^^Scotland|Human|Virology Department|COVID-19 Genomics UK (COG-UK) Consortium|Williams|United Kingdom

>Spike|hCoV-19/England/204683210/2020|2020-11-13|EPI\_ISL\_693431|Original|hCoV-19^^England|Human|Respiratory Virus Unit|COVID-19 Genomics UK (COG-UK) Consortium|Platt|United Kingdom

>Spike|hCoV-19/USA/MD-MDH-0377/2020|2020-10-26|EPI\_ISL\_660100|Original|hCoV-19^^Maryland|Human|MD PHL|MD PHL|Keller|USA

>Spike|hCoV-19/Wales/PHWC-25F44/2020|2020-03-25|EPI\_ISL\_422029|Original|hCoV-19^^Wales|Human|Wales Specialist Virology Centre|Public Health Wales Microbiology Cardiff|Moore|United Kingdom

>Spike|hCoV-19/England/20098017504/2020|2020-02-27|EPI\_ISL\_464194|Original|hCoV-19^^England|Human|Respiratory Virus Unit|Respiratory Virus Unit|Platt|United Kingdom

>Spike|hCoV-19/United Arab Emirates/1003/2020|2020-06-10|EPI\_ISL\_699135|Original|hCoV-19^^Abu Dhabi|Human|Group 42 (G42) Healthcare|G42 Healthcare|Ogrodzki|United Arab Emirates

>Spike|hCoV-19/England/ALDP-6C9E9A/2020|2020-07-02|EPI\_ISL\_556299|Original|hCoV-19^^England|Human|Lighthouse Lab in Alderley Park|Wellcome Sanger Institute for the COVID-19 Genomics UK (COG-UK) consortium|Davies|United Kingdom

>Spike|hCoV-19/England/ALDP-9C5930/2020|2020-09-10|EPI\_ISL\_567844|Original|hCoV-19^^England|Human|Lighthouse Lab in Alderley Park|Wellcome Sanger Institute for the COVID-19 Genomics UK (COG-UK) consortium|Davies|United Kingdom

>Spike|hCoV-19/Denmark/DCGC-14195/2020|2020-11-30|EPI\_ISL\_711618|Original|hCoV-19^^Hovedstaden|Human|Department of Virus and Microbiological Special Diagnostics|Albertsen Lab|Michaelsen|Denmark

>Spike|hCoV-19/Australia/VIC1604/2020|2020-05-10|EPI\_ISL\_456516|Original|hCoV-19^^Victoria|Human|Victorian Infectious Diseases Reference Laboratory (VIDRL)|Microbiological Diagnostic Unit Public Health Laboratory and Victorian Infectious Diseases Reference Laboratory|Schultz|Australia

>Spike|hCoV-19/England/20148041104/2020|2020-04-02|EPI\_ISL\_423590|Original|hCoV-19^^England|Human|Respiratory Virus Unit|Respiratory Virus Unit|Platt|United Kingdom

>Spike|hCoV-19/England/NORT-28B1EA/2020|2020-04-18|EPI\_ISL\_492928|Original|hCoV-19^^England|Human|NU-OMICS DNA Sequencing research facility|Wellcome Sanger Institute for the COVID-19 Genomics UK (COG-UK) consortium|Davies|United Kingdom

>Spike|hCoV-19/Denmark/DCGC-5335/2020|2020-09-14|EPI\_ISL\_615266|Original|hCoV-19^^Syddanmark|Human|Department of Virus and Microbiological Special Diagnostics|Albertsen lab|Michaelsen|Denmark

>Spike|hCoV-19/Spain/PV-IBV-98007609/2020|2020-09-04|EPI\_ISL\_582059|Original|hCoV-19^^Basque Country|Human|Servicio de Microbiolog\u00eda. Hospital Universitario Donostia. OSI Donostialdea. \u00clrea de Enfermedades Infecciosas|SeqCOVID-SPAIN consortium|IBV (CSIC)|Comas|Spain

>Spike|hCoV-19/England/NOTT-1161E5/2020|2020-10-19|EPI\_ISL\_595309|Original|hCoV-19^^England|Human|Queens Medical Centre|COVID-19 Genomics UK (COG-UK) Consortium|Loose|United Kingdom

>Spike|hCoV-19/South Korea/S1/2020|2020-03-25|EPI\_ISL\_485392|Original|hCoV-19^^Uijeongbu|Human|University of Ulsan College of Medicine and Asan Medical Center|University of Ulsan College of Medicine and Asan Medical Center|Yoon|South Korea

>Spike|hCoV-19/Scotland/EDB4494/2020|2020-05-05|EPI\_ISL\_456944|Original|hCoV-19^^Scotland|Human|Virology Department|COVID-19 Genomics UK (COG-UK) Consortium|Williams|United Kingdom

>Spike|hCoV-19/USA/MA-MASPHL-00157/2020|2020-04-03|EPI\_ISL\_791625|Original|hCoV-19^^Massachusetts|Human|Massachusetts State Public Health Laboratory|Infectious Disease Program|Park|USA

>Spike|hCoV-19/Australia/VIC4274/2020|2020-07-13|EPI\_ISL\_519602|Original|hCoV-19^^Victoria|Human|Microbiological Diagnostic Unit - Public Health Laboratory (MDU-PHL)|MDU-PHL|Schultz|Australia

>Spike|hCoV-19/England/BRIS-12A834/2020|2020-04-29|EPI\_ISL\_458474|Original|hCoV-19^^England|Human|PHE South West Regional Laboratory|Wellcome Sanger Institute for the COVID-19 Genomics UK (COG-UK) consortium|Davies|United Kingdom

>Spike|hCoV-19/France/ARA-SC144/2020|2020-05-05|EPI\_ISL\_700408|Original|hCoV-19^^Auvergne-Rh\u00f4ne-Alpes|Human|Centre hospitalier M\u00e9tropole Savoie|CNR Virus des Infections Respiratoires - France SUD|Bal|France

>Spike|hCoV-19/SaudiArabia/KAUST-MADINAH342/2020|2020-04-24|EPI\_ISL\_513129|Original|hCoV-19^^Madinah|Human|Pathogen Genomics Lab King Abdullah University of Science and Technology(KAUST)|Pathogen Genomics Lab King Abdullah University of Science and Technology(KAUST)|Mohamed Ghazzali|Saudi Arabia

>Spike|hCoV-19/Wales/PHWC-48CE2C/2020|2020-11-07|EPI\_ISL\_666545|Original|hCoV-19^^Wales|Human|Wales Specialist Virology Centre Sequencing lab|COVID-19 Genomics UK (COG-UK) Consortium|Moore|United Kingdom

>Spike|hCoV-19/England/ALDP-9B5809/2020|2020-08-28|EPI\_ISL\_590319|Original|hCoV-19^^England|Human|Lighthouse Lab in Alderley Park|Wellcome Sanger Institute for the COVID-19 Genomics UK (COG-UK) consortium|Davies|United Kingdom

>Spike|hCoV-19/USA/TX-HMH-5891/2020|2020-06-30|EPI\_ISL\_547089|Original|hCoV-19^^Texas|Human|Houston Methodist Hospital|Houston Methodist Hospital|Long|USA

>Spike|hCoV-19/England/CAMC-B20FD5/2020|2020-11-02|EPI\_ISL\_647463|Original|hCoV-19^^England|Human|Lighthouse Lab in Cambridge|Wellcome Sanger Institute for the COVID-19 Genomics UK (COG-UK) Consortium|Davies|United Kingdom

>Spike|hCoV-19/Canada/ON-OICR-SLB2853/2020|2020-04-07|EPI\_ISL\_538372|Original|hCoV-19^^Ontario|Human|Kingston Health Sciences Centre / Queen's University|Ontario Institute for Cancer Research|de Borja|Canada

>Spike|hCoV-19/USA/LA-SR0174/2020|2020-04-04|EPI\_ISL\_435472|Original|hCoV-19^^Louisiana|Human|Robert Garry lab|Andersen lab at Scripps Research|Gangavarapu|USA

>Spike|hCoV-19/England/CAMB-778B1/2020|2020-03-31|EPI\_ISL\_439441|Original|hCoV-19^^England|Human|Department of Pathology|Wellcome Sanger Institute for the COVID-19 Genomics UK (COG-UK) consortium|Amato|United Kingdom

>Spike|hCoV-19/Wales/PHWC-15D294/2020|2020-03-27|EPI\_ISL\_472693|Original|hCoV-19^^Wales|Human|Wales Specialist Virology Centre Sequencing lab|COVID-19 Genomics UK (COG-UK) Consortium|Moore|United Kingdom

>Spike|hCoV-19/England/MILK-A7BB23/2020|2020-10-15|EPI\_ISL\_607395|Original|hCoV-19^^England|Human|Lighthouse Lab in Milton Keynes|Wellcome Sanger Institute for the COVID-19 Genomics UK (COG-UK) consortium|Davies|United Kingdom

>Spike|hCoV-19/Indonesia/SA-EIJK13/2020|2020-03-24|EPI\_ISL\_574604|Original|hCoV-19^^North Sulawesi|Human|RSUP Prof. Dr. R. Kandou Manado|Eijkman Institute for Molecular Biology|Soebandrio|Indonesia

>Spike|hCoV-19/USA/NY-NYUMC91/2020|2020-03-18|EPI\_ISL\_421592|Original|hCoV-19^^New York|Human|NYU Langone Health|Departments of Pathology and Medicine|Maurano|USA

>Spike|hCoV-19/England/CAMC-BBC9B2/2020|2020-11-21|EPI\_ISL\_679261|Original|hCoV-19^^England|Human|Queens Medical Centre|COVID-19 Genomics UK (COG-UK) Consortium|Loose|United Kingdom

>Spike|hCoV-19/Wales/PHWC-49984C/2020|2020-12-03|EPI\_ISL\_727365|Original|hCoV-19^^Wales|Human|Originating lab|COVID-19 Genomics UK (COG-UK) Consortium|Moore|United Kingdom

>Spike|hCoV-19/Wales/PHWC-47E0AF/2020|2020-09-25|EPI\_ISL\_595402|Original|hCoV-19^^Wales|Human|Originating lab|COVID-19 Genomics UK (COG-UK) Consortium|Moore|United Kingdom

>Spike|hCoV-19/Sweden/20-53861/2020|2020-12-14|EPI\_ISL\_789040|Original|hCoV-19^^Uppsala|Human|Klinisk mikrobiologi|The Public Health Agency of Sweden|Svartstr\u00f6m|Sweden

>Spike|hCoV-19/Northern Ireland/NIRE-106B80/2020|2020-05-18|EPI\_ISL\_501067|Original|hCoV-19^^Northern Ireland|Human|Regional Virus Laboratory|Wellcome Sanger Institute for the COVID-19 Genomics UK (COG-UK) consortium|Davies|United Kingdom

>Spike|hCoV-19/Denmark/DCGC-17697/2020|2020-12-14|EPI\_ISL\_751153|Original|hCoV-19^^Syddanmark|Human|Department of Virus and Microbiological Special Diagnostics|Albertsen Lab|Michaelsen|Denmark

>Spike|hCoV-19/USA/LA-GBCL-26492486/2020|2020-04-25|EPI\_ISL\_485876|Original|hCoV-19^^Louisiana|Human|River Road Testing Lab|Ginkgo Bioworks Clinical Laboratory|Smith|USA

>Spike|hCoV-19/Spain/RI-IBV-005952/2020|2020-03-27|EPI\_ISL\_500386|Original|hCoV-19^^La Rioja|Human|Centro de Investigaci\u00f3n Biom\u00e9dica de La Rioja - Hospital San Pedro Logro\u00f1o|SeqCOVID-SPAIN consortium|IBV (CSIC)|Comas|Spain

>Spike|hCoV-19/Australia/VIC298/2020|2020-03-23|EPI\_ISL\_419989|Original|hCoV-19^^Victoria|Human|Victorian Infectious Diseases Reference Laboratory (VIDRL)|Victorian Infectious Diseases Reference Laboratory and Microbiological Diagnostic Unit Public Health Laboratory|Schultz|Australia

>Spike|hCoV-19/England/NORT-1B72478/2020|2020-11-30|EPI\_ISL\_724882|Original|hCoV-19^^England|Human|Northumbria University / South Tees Hospitals NHS Foundation Trust / North Cumbria Integrated Care NHS Foundation Trust / North Tees and Hartlepool NHS Foundation Trust / Newcastle Hospitals NHS Foundation Trust|COVID-19 Genomics UK (COG-UK) Consortium|Bashton|United Kingdom

>Spike|hCoV-19/Malaysia/MGI-G812/2020|2020-04-07|EPI\_ISL\_568874|Original|hCoV-19^^Selangor|Human|Malaysia Genome Institute|Malaysia Genome Institute|Mat Isa|Malaysia

>Spike|hCoV-19/England/ALDP-71D072/2020|2020-07-01|EPI\_ISL\_557593|Original|hCoV-19^^England|Human|Lighthouse Lab in Alderley Park|Wellcome Sanger Institute for the COVID-19 Genomics UK (COG-UK) consortium|Davies|United Kingdom

>Spike|hCoV-19/India/TG-CCMB-W903/2020|2020-07-14|EPI\_ISL\_528834|Original|hCoV-19^^Telangana|Human|CSIR-Centre for Cellular and Molecular Biology|CSIR-Centre for Cellular and Molecular Biology|Banu|India

>Spike|hCoV-19/Denmark/DCGC-6253/2020|2020-10-05|EPI\_ISL\_620013|Original|hCoV-19^^Sjaelland|Human|Department of Virus and Microbiological Special Diagnostics|Albertsen lab|Michaelsen|Denmark

>Spike|hCoV-19/England/ALDP-A4FFB3/2020|2020-10-07|EPI\_ISL\_597553|Original|hCoV-19^^England|Human|Lighthouse Lab in Alderley Park|Wellcome Sanger Institute for the COVID-19 Genomics UK (COG-UK) consortium|Davies|United Kingdom

>Spike|hCoV-19/England/204622815/2020|2020-11-10|EPI\_ISL\_700606|Original|hCoV-19^^England|Human|Respiratory Virus Unit|COVID-19 Genomics UK (COG-UK) Consortium|Platt|United Kingdom

>Spike|hCoV-19/Belgium/reg-09171048/2020|2020-09-17|EPI\_ISL\_734973|Original|hCoV-19^^Tervuren|Human|UZ Leuven|KU Leuven|Maes|Belgium

>Spike|hCoV-19/Wales/PHWC-488BED/2020|2020-11-02|EPI\_ISL\_639479|Original|hCoV-19^^Wales|Human|Wales Specialist Virology Centre Sequencing lab|COVID-19 Genomics UK (COG-UK) Consortium|Moore|United Kingdom

>Spike|hCoV-19/USA/TX-HMH-MCoV-12074/2020|2020-09-22|EPI\_ISL\_790192|Original|hCoV-19^^Texas|Human|Houston Methodist Hospital|Houston Methodist Hospital|Long|USA

>Spike|hCoV-19/USA/MN-MDH-1672/2020|2020-04-06|EPI\_ISL\_560759|Original|hCoV-19^^Minnesota|Human|Minnesota Department of Health|Minnesota Department of Health|Garfin|USA

>Spike|hCoV-19/Australia/VIC6689/2020|2020-07-20|EPI\_ISL\_521445|Original|hCoV-19^^Victoria|Human|Victorian Infectious Diseases Reference Laboratory (VIDRL)|VIDRL and MDU-PHL|Schultz|Australia

>Spike|hCoV-19/USA/MI-MDHHS-SC21770/2020|2020-08-13|EPI\_ISL\_529888|Original|hCoV-19^^Michigan|Human|Michigan Department of Health and Human Services|Michigan Department of Health and Human Services|Blankenship|USA

>Spike|hCoV-19/England/QEUEH-B7EC86/2020|2020-11-14|EPI\_ISL\_661905|Original|hCoV-19^^England|Human|Lighthouse Lab in Glasgow|Wellcome Sanger Institute for the COVID-19 Genomics UK (COG-UK) Consortium|Davies|United Kingdom

>Spike|hCoV-19/Denmark/ALAB-SSI-659/2020|2020-03-28|EPI\_ISL\_437026|Original|hCoV-19^^Denmark|Human|Department of Virus and Microbiological Special Diagnostics|Albertsen lab|Kirkegaard|Denmark

>Spike|hCoV-19/Denmark/DCGC-21954/2020|2020-12-21|EPI\_ISL\_758475|Original|hCoV-19^^Hovedstaden|Human|Department of Virus and Microbiological Special Diagnostics|Albertsen Lab|Michaelsen|Denmark

>Spike|hCoV-19/USA/CA-CZB-12859/2020|2020-10-12|EPI\_ISL\_648515|Original|hCoV-19^^California|Human|Orange County Public Health Lab|Chan-Zuckerberg Biohub|Bhatt|USA

>Spike|hCoV-19/USA/MI-MDHHS-SC21857/2020|2020-05-04|EPI\_ISL\_565900|Original|hCoV-19^^Michigan|Human|Michigan Department of Health and Human Services|Michigan Department of Health and Human Services|Blankenship|USA

>Spike|hCoV-19/USA/VA-DCLS-2507/2020|2020-11-16|EPI\_ISL\_734282|Original|hCoV-19^^Virginia|Human|Virginia Division of Consolidated Laboratory Services (DCLS)|Virginia Division of Consolidated Laboratory Services (DCLS)|St. Jacques|USA

>Spike|hCoV-19/Australia/VIC12881/2020|2020-07-23|EPI\_ISL\_592100|Original|hCoV-19^^Victoria|Human|Microbiological Diagnostic Unit - Public Health Laboratory (MDU-PHL)|MDU-PHL|Schultz|Australia

>Spike|hCoV-19/Belgium/regA-0630828/2020|2020-06-30|EPI\_ISL\_734787|Original|hCoV-19^^Schaerbeek|Human|UZ Leuven|KU Leuven|Maes|Belgium

>Spike|hCoV-19/Netherlands/GR-RIVM-20425/2020|2020-12-01|EPI\_ISL\_728645|Original|hCoV-19^^Groningen|Human|Dutch COVID-19 response team|National Institute for Public Health and the Environment (RIVM)|Meijer|Netherlands

>Spike|hCoV-19/Spain/VC-FISABIO-96/2020|2020-03-17|EPI\_ISL\_425220|Original|hCoV-19^^Comunitat Valenciana|Human|Servicio de Microbiolog\u00eda. Consorcio Hospital General Universitario de Valencia|Sequencing and Bioinformatics Service and Molecular Epidemiology Research Group. FISABIO-Public Health|Gonzalez-Candelas|Spain

>Spike|hCoV-19/Gibraltar/204841738/2020|2020-00-00|EPI\_ISL\_671305|Original|hCoV-19^^Gibraltar|Human|Microbiology|Respiratory Virus Unit|Platt|Gibraltar

>Spike|hCoV-19/England/ALDP-9555B9/2020|2020-06-12|EPI\_ISL\_553479|Original|hCoV-19^^England|Human|Lighthouse Lab in Alderley Park|Wellcome Sanger Institute for the COVID-19 Genomics UK (COG-UK) consortium|Davies|United Kingdom

>Spike|hCoV-19/Wales/MILK-975D24/2020|2020-08-20|EPI\_ISL\_552725|Original|hCoV-19^^Wales|Human|Lighthouse Lab in Milton Keynes|Wellcome Sanger Institute for the COVID-19 Genomics UK (COG-UK) consortium|Davies|United Kingdom

>Spike|hCoV-19/USA/MA-MGH-00441/2020|2020-03-05|EPI\_ISL\_460428|Original|hCoV-19^^Massachusetts|Human|Massachusetts General Hospital|Infectious Disease Program|Lemieux|USA

>Spike|hCoV-19/USA/IL-NM-1242/2020|2020-06-24|EPI\_ISL\_626510|Original|hCoV-19^^Illinois|Human|Northwestern Memorial Hospital|Ozer Lab|Ozer|USA

>Spike|hCoV-19/England/MILK-A05872/2020|2020-10-01|EPI\_ISL\_599998|Original|hCoV-19^^England|Human|Lighthouse Lab in Milton Keynes|Wellcome Sanger Institute for the COVID-19 Genomics UK (COG-UK) consortium|Davies|United Kingdom

>Spike|hCoV-19/USA/NY-NYCPHL-001215/2020|2020-11-04|EPI\_ISL\_683848|Original|hCoV-19^^New York|Human|DOHMH Central Harlem|New York City Public Health Laboratory|Wang|USA

>Spike|hCoV-19/USA/WA-S1900/2020|2020-05-28|EPI\_ISL\_496326|Original|hCoV-19^^Washington|Human|Washington State Department of Health|Seattle Flu Study|Lee|USA

>Spike|hCoV-19/Wales/PHWC-2F1F9/2020|2020-04-06|EPI\_ISL\_446217|Original|hCoV-19^^Wales|Human|Wales Specialist Virology Centre|Public Health Wales Microbiology Cardiff|Moore|United Kingdom

>Spike|hCoV-19/USA/TX-HMH-MCoV-14854/2020|2020-10-13|EPI\_ISL\_786338|Original|hCoV-19^^Texas|Human|Houston Methodist Hospital|Houston Methodist Hospital|Long|USA

>Spike|hCoV-19/England/LEED-2A9438/2020|2020-04-09|EPI\_ISL\_538883|Original|hCoV-19^^England|Human|Leeds Teaching Hospitals NHS Trust and Public Health England|Wellcome Sanger Institute for the COVID-19 Genomics UK (COG-UK) consortium|Davies|United Kingdom

>Spike|hCoV-19/USA/AZ-TG532103/2020|2020-07-01|EPI\_ISL\_695416|Original|hCoV-19^^Arizona|Human|AZ SPHL|TGen North|French|USA

>Spike|hCoV-19/Denmark/DCGC-12565/2020|2020-11-16|EPI\_ISL\_682746|Original|hCoV-19^^Nordjylland|Human|Department of Virus and Microbiological Special Diagnostics|Albertsen Lab|Michaelsen|Denmark

>Spike|hCoV-19/England/QEUA-A9F1FA/2020|2020-10-20|EPI\_ISL\_652677|Original|hCoV-19^^England|Human|University of Exeter|COVID-19 Genomics UK (COG-UK) Consortium|Temperton|United Kingdom

>Spike|hCoV-19/England/LIVE-AA74F/2020|2020-03-24|EPI\_ISL\_517495|Original|hCoV-19^^England|Human|Liverpool Clinical Laboratories|COVID-19 Genomics UK (COG-UK) Consortium|Haldenby|United Kingdom

>Spike|hCoV-19/England/CAMB-1ACEFC/2020|2020-04-24|EPI\_ISL\_489551|Original|hCoV-19^^England|Human|Department of Pathology|Wellcome Sanger Institute for the COVID-19 Genomics UK (COG-UK) consortium|Davies|United Kingdom

>Spike|hCoV-19/USA/UNKNOWN-UW-31229/2020|2020-10-13|EPI\_ISL\_735466|Original|hCoV-19^^USA|Human|UW Virology Lab|UW Virology Lab|Roychoudhury|USA

>Spike|hCoV-19/England/ALDP-C57FE3/2020|2020-12-14|EPI\_ISL\_735889|Original|hCoV-19^^England|Human|Lighthouse Lab in Alderley Park|Wellcome Sanger Institute for the COVID-19 Genomics UK (COG-UK) Consortium|Davies|United Kingdom

>Spike|hCoV-19/USA/MI-MDHHS-SC20073/2020|2020-03-24|EPI\_ISL\_437160|Original|hCoV-19^^Michigan|Human|Michigan Department of Health and Human Services|Michigan Department of Health and Human Services|Blankenship|USA

>Spike|hCoV-19/Belgium/rega-10191222/2020|2020-10-19|EPI\_ISL\_735163|Original|hCoV-19^^Sint-Joris-Weert|Human|UZ Leuven|KU Leuven|Maes|Belgium

>Spike|hCoV-19/USA/CA-CZB-2216/2020|2020-05-28|EPI\_ISL\_513764|Original|hCoV-19^^California|Human|Orange County Public Health Lab|Chan-Zuckerberg Biohub|Kamm|USA

>Spike|hCoV-19/England/ALDP-BC62C9/2020|2020-11-23|EPI\_ISL\_721230|Original|hCoV-19^^England|Human|Lighthouse Lab in Alderley Park|Wellcome Sanger Institute for the COVID-19 Genomics UK (COG-UK) Consortium|Davies|United Kingdom

>Spike|hCoV-19/Denmark/DCGC-12434/2020|2020-11-16|EPI\_ISL\_682615|Original|hCoV-19^^Midtjylland|Human|Department of Virus and Microbiological Special Diagnostics|Albertsen Lab|Michaelsen|Denmark

>Spike|hCoV-19/Wales/PHWC-169FBC/2020|2020-08-11|EPI\_ISL\_529297|Original|hCoV-19^^Wales|Human|Wales Specialist Virology Centre Sequencing lab|COVID-19 Genomics UK (COG-UK) Consortium|Moore|United Kingdom

>Spike|hCoV-19/USA/OR-OHSU-1723/2020|2020-07-24|EPI\_ISL\_526014|Original|hCoV-19^^Oregon|Human|OHSU Lab Services Molecular Microbiology Lab|Oregon SARS-CoV-2 Genome Sequencing Center|O'Roak|USA

>Spike|hCoV-19/Switzerland/VD-ETHZ-350209/2020|2020-10-30|EPI\_ISL\_693857|Original|hCoV-19^^Vaud|Human|Viollier AG|Department of Biosystems Science and Engineering|Nadeau|Switzerland

>Spike|hCoV-19/Scotland/QEUH-9DAEEE/2020|2020-09-22|EPI\_ISL\_601120|Original|hCoV-19^^Scotland|Human|Lighthouse Lab in Glasgow|Wellcome Sanger Institute for the COVID-19 Genomics UK (COG-UK) consortium|Davies|United Kingdom

>Spike|hCoV-19/Wuhan/HB-WHCM2-270/2020|2020-03-02|EPI\_ISL\_455005|Original|hCoV-19^^Hubei|Human|Wuhan Chain Medical Labs (CMLabs)|State Key Laboratory of Biotherapy of Sichuan University|Tang|China

>Spike|hCoV-19/Iceland/34/2020|2020-03-03|EPI\_ISL\_417843|Original|hCoV-19^^Reykjavik|Human|The National University Hospital of Iceland|deCODE genetics|J\u00f3nsson|Iceland

>Spike|hCoV-19/USA/MI-MDHHS-SC22354/2020|2020-11-12|EPI\_ISL\_708334|Original|hCoV-19^^Michigan|Human|Michigan Department of Health and Human Services|Michigan Department of Health and Human Services|Jacob|USA

>Spike|hCoV-19/England/SHEF-10D14AF/2020|2020-12-19|EPI\_ISL\_765181|Original|hCoV-19^^England|Human|Virology Department|COVID-19 Genomics UK (COG-UK) Consortium|de Silva|United Kingdom

>Spike|hCoV-19/England/NOTT-11C291/2020|2020-11-16|EPI\_ISL\_665901|Original|hCoV-19^^England|Human|Queens Medical Centre|COVID-19 Genomics UK (COG-UK) Consortium|Loose|United Kingdom

>Spike|hCoV-19/Japan/PG-4630/2020|2020-07-00|EPI\_ISL\_689767|Original|hCoV-19^^Japan|Human|Fukuoka Institute of Health and Environmental Sciences|Pathogen Genomics Center|Sekizuka|Japan

>Spike|hCoV-19/USA/AZ-TG670235/2020|2020-03-27|EPI\_ISL\_696415|Original|hCoV-19^^Arizona|Human|Sonora Quest Laboratories|TGen North|French|USA

>Spike|hCoV-19/England/LOND-D473D/2020|2020-04-09|EPI\_ISL\_444148|Original|hCoV-19^^England|Human|University College London|COVID-19 Genomics UK (COG-UK) Consortium|Roy|United Kingdom

>Spike|hCoV-19/England/MILK-958677/2020|2020-06-10|EPI\_ISL\_554839|Original|hCoV-19^^England|Human|Lighthouse Lab in Milton Keynes|Wellcome Sanger Institute for the COVID-19 Genomics UK (COG-UK) consortium|Davies|United Kingdom

>Spike|hCoV-19/Finland/4LS8A9/2020|2020-08-08|EPI\_ISL\_756007|Original|hCoV-19^^Uusimaa|Human|Department of Virology and Immunology|Department of Virology|Smura|Finland

>Spike|hCoV-19/SaudiArabia/KAUST-JEDDAH497/2020|2020-04-09|EPI\_ISL\_512939|Original|hCoV-19^^Jeddah|Human|Pathogen Genomics Lab King Abdullah University of Science and Technology(KAUST)|Pathogen Genomics Lab King Abdullah University of Science and Technology(KAUST)|Mohamed Ghazzali|Saudi Arabia



>Spike|hCoV-19/Denmark/DCGC-20177/2020|2020-11-30|EPI\_ISL\_748029|Original|hCoV-19^^Hovedstaden|Human|Department of Virus and Microbiological Special Diagnostics|Albertsen Lab|Michaelsen|Denmark

>Spike|hCoV-19/Bangladesh/BCSIR-NILMRC-245/2020|2020-07-06|EPI\_ISL\_487385|Original|hCoV-19^^Barisal|Human|National Institute of Laboratory Medicine and Referral Center|Genomic Research Lab|Khan|Bangladesh

>Spike|hCoV-19/USA/UT-UPHL-01393/2020|2020-04-04|EPI\_ISL\_575048|Original|hCoV-19^^Utah|Human|Utah Public Health Laboratory|Utah Public Health Laboratory|Young|USA

>Spike|hCoV-19/USA/MI-MDHHS-SC21595/2020|2020-03-26|EPI\_ISL\_516322|Original|hCoV-19^^Michigan|Human|Michigan Department of Health and Human Services|Michigan Department of Health and Human Services|Blankenship|USA

>Spike|hCoV-19/Spain/CN-IBV-97006486/2020|2020-03-25|EPI\_ISL\_537701|Original|hCoV-19^^Canary Islands|Human|Hospital Universitario de Gran Canaria Dr. Negr\u00ededn|SeqCOVID-SPAIN consortium|IBV(CSIC)|Comas|Spain

>Spike|hCoV-19/South Africa/KRISP-K001394/2020|2020-07-18|EPI\_ISL\_515878|Original|hCoV-19^^KwaZulu-Natal|Human|Medical Disagnostics Services (MDS)|KRISP|de Oliveira|South Africa

>Spike|hCoV-19/Denmark/DCGC-19664/2020|2020-12-07|EPI\_ISL\_749095|Original|hCoV-19^^Hovedstaden|Human|Department of Virus and Microbiological Special Diagnostics|Albertsen Lab|Michaelsen|Denmark

>Spike|hCoV-19/Uganda/UG094/2020|2020-08-15|EPI\_ISL\_738002|Original|hCoV-19^^Uganda|Human|Uganda Central Public Health Lab and Uganda Virus Research Institute|MRC/UVRI & LSHTM Uganda\u00a0Research Unit|Cotten|Uganda

>Spike|hCoV-19/Scotland/QEUA-AAB1CE/2020|2020-10-21|EPI\_ISL\_651529|Original|hCoV-19^^Scotland|Human|Oxford Viromics|COVID-19 Genomics UK (COG-UK) Consortium|Golubchik|United Kingdom

>Spike|hCoV-19/England/NORT-299019/2020|2020-04-22|EPI\_ISL\_493480|Original|hCoV-19^^England|Human|Northumbria University / South Tees Hospitals NHS Foundation Trust / North Cumbria Integrated Care NHS Foundation Trust / North Tees and Hartlepool NHS Foundation Trust / Newcastle Hospitals NHS Foundation Trust|COVID-19 Genomics UK (COG-UK) Consortium|Bashton|United Kingdom

>Spike|hCoV-19/Australia/VIC6416/2020|2020-07-23|EPI\_ISL\_521208|Original|hCoV-19^^Victoria|Human|Microbiological Diagnostic Unit - Public Health Laboratory (MDU-PHL)|MDU-PHL|Schultz|Australia

>Spike|hCoV-19/France/ARA-63103/2020|2020-08-23|EPI\_ISL\_692759|Original|hCoV-19^^Auvergne-Rh\u00f4ne-Alpes|Human|CNR Virus des Infections Respiratoires - France SUD|CNR Virus des Infections Respiratoires - France SUD|Bal|France

>Spike|hCoV-19/Switzerland/BS-42260094/2020|2020-05-07|EPI\_ISL\_581927|Original|hCoV-19^^Basel-Stadt|Human|University Hospital Basel|University Hospital Basel|Roloff Handschin|Switzerland

>Spike|hCoV-19/England/NORT-28357D/2020|2020-03-31|EPI\_ISL\_478497|Original|hCoV-19^^England|Human|Northumbria University / South Tees Hospitals NHS Foundation Trust / North Cumbria Integrated Care NHS Foundation Trust / North Tees and Hartlepool NHS Foundation Trust / Newcastle Hospitals NHS Foundation Trust|COVID-19 Genomics UK (COG-UK) Consortium|Bashton|United Kingdom

>Spike|hCoV-19/Wales/PHWC-49F0A8/2020|2020-12-09|EPI\_ISL\_743164|Original|hCoV-19^^Wales|Human|Wales Specialist Virology Centre Sequencing lab|COVID-19 Genomics UK (COG-UK) Consortium|Moore|United Kingdom

>Spike|hCoV-19/England/MILK-C61238/2020|2020-12-13|EPI\_ISL\_735657|Original|hCoV-19^^England|Human|Lighthouse Lab in Milton Keynes|Wellcome Sanger Institute for the COVID-19 Genomics UK (COG-UK) Consortium|Davies|United Kingdom

>Spike|hCoV-19/Denmark/DCGC-4345/2020|2020-09-07|EPI\_ISL\_615547|Original|hCoV-19^^Sjælland|Human|Department of Virus and Microbiological Special Diagnostics|Albertsen lab|Michaelsen|Denmark

>Spike|hCoV-19/Scotland/QEUA-BC38CA/2020|2020-11-25|EPI\_ISL\_710760|Original|hCoV-19^^Scotland|Human|Lighthouse Lab in Glasgow|Wellcome Sanger Institute for the COVID-19 Genomics UK (COG-UK) Consortium|Davies|United Kingdom

>Spike|hCoV-19/England/OXON-B0403/2020|2020-04-10|EPI\_ISL\_478878|Original|hCoV-19^^England|Human|Oxford Viromics|COVID-19 Genomics UK (COG-UK) Consortium|Golubchik|United Kingdom

>Spike|hCoV-19/England/QEUEH-B677BC/2020|2020-11-11|EPI\_ISL\_661398|Original|hCoV-19^^England|Human|Lighthouse Lab in Glasgow|Wellcome Sanger Institute for the COVID-19 Genomics UK (COG-UK) Consortium|Davies|United Kingdom

>Spike|hCoV-19/USA/TX-HMH-MCoV-13505/2020|2020-08-22|EPI\_ISL\_788633|Original|hCoV-19^^Texas|Human|Houston Methodist Hospital|Houston Methodist Hospital|Long|USA

>Spike|hCoV-19/England/CAMB-840F5/2020|2020-04-26|EPI\_ISL\_438737|Original|hCoV-19^^England|Human|Department of Pathology|COVID-19 Genomics UK (COG-UK) Consortium|Meredith|United Kingdom

>Spike|hCoV-19/England/CAMC-A5960C/2020|2020-10-09|EPI\_ISL\_596997|Original|hCoV-19^^England|Human|Lighthouse Lab in Cambridge|Wellcome Sanger Institute for the COVID-19 Genomics UK (COG-UK) consortium|Davies|United Kingdom

>Spike|hCoV-19/England/CAMC-A8238B/2020|2020-10-11|EPI\_ISL\_610905|Original|hCoV-19^^England|Human|Lighthouse Lab in Cambridge|Wellcome Sanger Institute for the COVID-19 Genomics UK (COG-UK) consortium|Davies|United Kingdom

>Spike|hCoV-19/England/ALDP-9EAF60/2020|2020-09-24|EPI\_ISL\_580071|Original|hCoV-19^^England|Human|Lighthouse Lab in Alderley Park|Wellcome Sanger Institute for the COVID-19 Genomics UK (COG-UK) consortium|Davies|United Kingdom

>Spike|hCoV-19/Germany/BW-ChVir1611/2020|2020-02-26|EPI\_ISL\_729475|Original|hCoV-19^^Baden-Wuerttemberg|Human|Charit\u00e9 Universit\u00e4tsmedizin Berlin|Charit\u00e9 Universit\u00e4tsmedizin Berlin|Muehlemann|Germany

>Spike|hCoV-19/England/MILK-99590C/2020|2020-08-23|EPI\_ISL\_551719|Original|hCoV-19^^England|Human|Lighthouse Lab in Milton Keynes|Wellcome Sanger Institute for the COVID-19 Genomics UK (COG-UK) consortium|Davies|United Kingdom

>Spike|hCoV-19/England/QEUEH-965950/2020|2020-08-12|EPI\_ISL\_531026|Original|hCoV-19^^England|Human|Lighthouse Lab in Glasgow|Wellcome Sanger Institute for the COVID-19 Genomics UK (COG-UK) consortium|Davies|United Kingdom

>Spike|hCoV-19/Denmark/DCGC-11869/2020|2020-10-26|EPI\_ISL\_671189|Original|hCoV-19^^Nordjylland|Human|Department of Virus and Microbiological Special Diagnostics|Albertsen Lab|Michaelsen|Denmark

>Spike|hCoV-19/France/CVL-IPP9554/2020|2020-11-02|EPI\_ISL\_660324|Original|hCoV-19^^Centre-Val de Loire|Human|General practitioner|National Reference Center for Viruses of Respiratory Infections|Enouf|France

>Spike|hCoV-19/Switzerland/BL-ETHZ-100081/2020|2020-03-13|EPI\_ISL\_451673|Original|hCoV-19^^Basel-Landschaft|Human|Viollier AG|Department of Biosystems Science and Engineering|Nadeau|Switzerland

>Spike|hCoV-19/England/QEUEH-AF573C/2020|2020-10-30|EPI\_ISL\_663129|Original|hCoV-19^^England|Human|Lighthouse Lab in Glasgow|Wellcome Sanger Institute for the COVID-19 Genomics UK (COG-UK) Consortium|Davies|United Kingdom

>Spike|hCoV-19/USA/FL-BPHL-0748/2020|2020-06-22|EPI\_ISL\_512554|Original|hCoV-19^^Florida|Human|Florida Bureau of Public Health Laboratories|Florida Bureau of Public Health Laboratories|Blanton|USA

>Spike|hCoV-19/Denmark/DCGC-19432/2020|2020-12-07|EPI\_ISL\_748941|Original|hCoV-19^^Hovedstaden|Human|Department of Virus and Microbiological Special Diagnostics|Albertsen Lab|Michaelsen|Denmark

>Spike|hCoV-19/USA/VA-DCLS-1640/2020|2020-08-20|EPI\_ISL\_614043|Original|hCoV-19^^Virginia|Human|Virginia DCLS|Virginia DCLS|St. Jacques|USA

>Spike|hCoV-19/England/CAMB-80D5C/2020|2020-04-09|EPI\_ISL\_442960|Original|hCoV-19^^England|Human|Department of Pathology|Wellcome Sanger Institute for the COVID-19 Genomics UK (COG-UK) consortium|Amato|United Kingdom

>Spike|hCoV-19/Spain/RI-IBV-99005928/2020|2020-03-25|EPI\_ISL\_537463|Original|hCoV-19^^La Rioja|Human|Centro de Investigaci\u00f3n Biom\u00e9dica de La Rioja - Hospital San Pedro Logro\u00f1o|SeqCOVID-SPAIN consortium/IBV (CSIC)|Comas|Spain

>Spike|hCoV-19/USA/LA-EVTL756/2020|2020-07-20|EPI\_ISL\_653447|Original|hCoV-19^^Louisiana|Human|LSUHS Emerging Viral Threat Laboratory|Microbial Genome Sequencing Center|Kamil|USA

>Spike|hCoV-19/USA/TX-HMH-MCoV-15267/2020|2020-10-19|EPI\_ISL\_786751|Original|hCoV-19^^Texas|Human|Houston Methodist Hospital|Houston Methodist Hospital|Long|USA

>Spike|hCoV-19/England/ALDP-A4FA0D/2020|2020-10-07|EPI\_ISL\_597579|Original|hCoV-19^^England|Human|Lighthouse Lab in Alderley Park|Wellcome Sanger Institute for the COVID-19 Genomics UK (COG-UK) consortium|Davies|United Kingdom

>Spike|hCoV-19/Denmark/DCGC-10644/2020|2020-11-02|EPI\_ISL\_669602|Original|hCoV-19^^Hovedstaden|Human|Department of Virus and Microbiological Special Diagnostics|Albertsen Lab|Michaelsen|Denmark

>Spike|hCoV-19/USA/TX-DSHS-1546/2020|2020-06-22|EPI\_ISL\_681875|Original|hCoV-19^^Texas|Human|Texas Department of State Health Services|Texas Department of State Health Services|Rahman|USA

>Spike|hCoV-19/England/ALDP-A6C68E/2020|2020-10-15|EPI\_ISL\_608261|Original|hCoV-19^^England|Human|Lighthouse Lab in Alderley Park|Wellcome Sanger Institute for the COVID-19 Genomics UK (COG-UK) consortium|Davies|United Kingdom

>Spike|hCoV-19/England/CAMC-B07684/2020|2020-10-30|EPI\_ISL\_643959|Original|hCoV-19^^England|Human|Lighthouse Lab in Cambridge|Wellcome Sanger Institute for the COVID-19 Genomics UK (COG-UK) Consortium|Davies|United Kingdom

>Spike|hCoV-19/USA/LA-EVTL1165/2020|2020-12-10|EPI\_ISL\_768434|Original|hCoV-19^^Louisiana|Human|LSUHS Emerging Viral Threat Laboratory|Microbial Genome Sequencing Center|Kamil|USA

>Spike|hCoV-19/England/MILK-4B0F2C/2020|2020-06-04|EPI\_ISL\_559163|Original|hCoV-19^^England|Human|Lighthouse Lab in Milton Keynes|Wellcome Sanger Institute for the COVID-19 Genomics UK (COG-UK) consortium|Davies|United Kingdom

>Spike|hCoV-19/USA/NY-QDX-1921/2020|2020-03-16|EPI\_ISL\_604252|Original|hCoV-19^^New York|Human|Quest Diagnostics|Quest Diagnostics|Kagan|USA

>Spike|hCoV-19/England/SHEF-C2705/2020|2020-10-11|EPI\_ISL\_596193|Original|hCoV-19^^England|Human|Virology Department|COVID-19 Genomics UK (COG-UK) Consortium|de Silva|United Kingdom

>Spike|hCoV-19/India/UN-4507/2020|2020-00-00|EPI\_ISL\_490104|Original|hCoV-19^^India|Human|CSIR-CDRI/SGPGI|CSIR-CDRI/SGPGI|Singh|India

>Spike|hCoV-19/Netherlands/ZH-EMC-902/2020|2020-10-27|EPI\_ISL\_632792|Original|hCoV-19^^Zuid Holland|Human|Dutch COVID-19 response team|Erasmus Medical Center|Oude Munnink|Netherlands

>Spike|hCoV-19/Wales/PHWC-496D13/2020|2020-11-24|EPI\_ISL\_726718|Original|hCoV-19^^Wales|Human|Originating lab|COVID-19 Genomics UK (COG-UK) Consortium|Moore|United Kingdom

>Spike|hCoV-19/Brazil/SP-L14-CD239/2020|2020-03-26|EPI\_ISL\_476243|Original|hCoV-19^^S\u00e3o Paulo|Human|Hospital da Cl\u00ednicas da Faculdade de Medicina da Universidade de S\u00e3o Paulo|Instituto de Medicina Tropical da Univesidade de S\u00e3o Paulo|Sabino|Brazil

>Spike|hCoV-19/USA/IN-CDC-2-3713970/2020|2020-12-04|EPI\_ISL\_751672|Original|hCoV-19^^Indiana|Human|IN State Department of Health Laboratory Services|Genomics and Discovery|Queen|USA

>Spike|hCoV-19/England/QEUA-9DD917/2020|2020-09-21|EPI\_ISL\_599615|Original|hCoV-19^^England|Human|Lighthouse Lab in Glasgow|Wellcome Sanger Institute for the COVID-19 Genomics UK (COG-UK) consortium|Davies|United Kingdom

>Spike|hCoV-19/England/ALDP-9FCC64/2020|2020-10-01|EPI\_ISL\_587934|Original|hCoV-19^^England|Human|Lighthouse Lab in Alderley Park|Wellcome Sanger Institute for the COVID-19 Genomics UK (COG-UK) consortium|Davies|United Kingdom

>Spike|hCoV-19/England/MILK-ACBDB5/2020|2020-10-20|EPI\_ISL\_629214|Original|hCoV-19^^England|Human|Lighthouse Lab in Milton Keynes|Wellcome Sanger Institute for the COVID-19 Genomics UK (COG-UK) consortium|Davies|United Kingdom

>Spike|hCoV-19/England/CAMC-A64DBE/2020|2020-10-11|EPI\_ISL\_608637|Original|hCoV-19^^England|Human|Lighthouse Lab in Cambridge|Wellcome Sanger Institute for the COVID-19 Genomics UK (COG-UK) consortium|Davies|United Kingdom

>Spike|hCoV-19/Scotland/EDB3897/2020|2020-05-01|EPI\_ISL\_439360|Original|hCoV-19^^Scotland|Human|Virology Department|COVID-19 Genomics UK (COG-UK) Consortium|Williams|United Kingdom

>Spike|hCoV-19/England/NORT-283FBB/2020|2020-04-24|EPI\_ISL\_488632|Original|hCoV-19^^England|Human|NU-OMICS DNA Sequencing research facility|Wellcome Sanger Institute for the COVID-19 Genomics UK (COG-UK) consortium|Davies|United Kingdom

>Spike|hCoV-19/England/ALDP-AA4550/2020|2020-10-22|EPI\_ISL\_625227|Original|hCoV-19^^England|Human|Lighthouse Lab in Alderley Park|Wellcome Sanger Institute for the COVID-19 Genomics UK (COG-UK) consortium|Davies|United Kingdom

>Spike|hCoV-19/USA/MI-UM-10033792567/2020|2020-03-27|EPI\_ISL\_578116|Original|hCoV-19^^Michigan|Human|University of Michigan Clinical Microbiology Laboratory|Lauring Lab|Valesano|USA

>Spike|hCoV-19/Wales/PHWC-4945D1/2020|2020-11-20|EPI\_ISL\_726140|Original|hCoV-19^^Wales|Human|Originating lab|COVID-19 Genomics UK (COG-UK) Consortium|Moore|United Kingdom

>Spike|hCoV-19/England/QEUEH-B3191F/2020|2020-11-04|EPI\_ISL\_646210|Original|hCoV-19^^England|Human|Lighthouse Lab in Glasgow|Wellcome Sanger Institute for the COVID-19 Genomics UK (COG-UK) Consortium|Davies|United Kingdom

>Spike|hCoV-19/England/CAMB-7830A/2020|2020-00-00|EPI\_ISL\_433716|Original|hCoV-19^^England|Human|Department of Pathology|COVID-19 Genomics UK (COG-UK) Consortium|Meredith|United Kingdom

>Spike|hCoV-19/England/ALDP-A923B5/2020|2020-10-19|EPI\_ISL\_611100|Original|hCoV-19^^England|Human|Lighthouse Lab in Alderley Park|Wellcome Sanger Institute for the COVID-19 Genomics UK (COG-UK) consortium|Davies|United Kingdom

>Spike|hCoV-19/New Zealand/20VR2077/2020|2020-04-09|EPI\_ISL\_456364|Original|hCoV-19^^Canterbury|Human|Canterbury Health Laboratories|Institute of Environmental Science and Research (ESR)|de Ligt|New Zealand

>Spike|hCoV-19/Switzerland/GE-SNRCI-8290/2020|2020-03-00|EPI\_ISL\_548220|Original|hCoV-19^^Geneve|Human|Laboratoire de Virologie|Swiss National Reference Centre for Influenza|Gon\u00e7alves Cabecinhas|Switzerland

>Spike|hCoV-19/France/ARA-32910/2020|2020-04-30|EPI\_ISL\_678541|Original|hCoV-19^^Auvergne-Rh\u00f4ne-Alpes|Human|CNR Virus des Infections Respiratoires - France SUD|CNR Virus des Infections Respiratoires - France SUD|Bal|France

>Spike|hCoV-19/England/ALDP-B74154/2020|2020-11-12|EPI\_ISL\_664483|Original|hCoV-19^^England|Human|Quadram Institute Bioscience|COVID-19 Genomics UK (COG-UK) Consortium|Alikhan|United Kingdom

>Spike|hCoV-19/England/ALDP-951298/2020|2020-06-14|EPI\_ISL\_554507|Original|hCoV-19^^England|Human|Lighthouse Lab in Alderley Park|Wellcome Sanger Institute for the COVID-19 Genomics UK (COG-UK) consortium|Davies|United Kingdom

>Spike|hCoV-19/England/201380042/2020|2020-03-25|EPI\_ISL\_421804|Original|hCoV-19^^England|Human|Respiratory Virus Unit|Respiratory Virus Unit|Platt|United Kingdom

>Spike|hCoV-19/England/CAMC-A418B6/2020|2020-10-06|EPI\_ISL\_609333|Original|hCoV-19^^England|Human|Lighthouse Lab in Cambridge|Wellcome Sanger Institute for the COVID-19 Genomics UK (COG-UK) consortium|Davies|United Kingdom

>Spike|hCoV-19/England/LOND-D41D5/2020|2020-04-06|EPI\_ISL\_444099|Original|hCoV-19^^England|Human|University College London|COVID-19 Genomics UK (COG-UK) Consortium|Roy|United Kingdom

>Spike|hCoV-19/USA/TX-HMH-MCoV-13034/2020|2020-09-08|EPI\_ISL\_788185|Original|hCoV-19^^Texas|Human|Houston Methodist Hospital|Houston Methodist Hospital|Long|USA

>Spike|hCoV-19/England/ALDP-BCA025/2020|2020-11-23|EPI\_ISL\_703397|Original|hCoV-19^^England|Human|Lighthouse Lab in Alderley Park|Wellcome Sanger Institute for the COVID-19 Genomics UK (COG-UK) Consortium|Davies|United Kingdom

>Spike|hCoV-19/Spain/CT-HUVH-VH7280/2020|2020-04-06|EPI\_ISL\_444973|Original|hCoV-19^^Catalunya|Human|Hospital Universitari Vall d'Hebron - Vall d'Hebron Institut de Recerca|Hospital Universitari Vall d'Hebron|Anton|Spain

>Spike|hCoV-19/Switzerland/ZH-ETHZ-350339/2020|2020-11-03|EPI\_ISL\_728781|Original|hCoV-19^^Zurich|Human|Viollier AG|Department of Biosystems Science and Engineering|Nadeau|Switzerland

>Spike|hCoV-19/Denmark/DCGC-5057/2020|2020-09-21|EPI\_ISL\_621595|Original|hCoV-19^^Nordjylland|Human|Department of Virus and Microbiological Special Diagnostics|Albertsen lab|Michaelsen|Denmark

>Spike|hCoV-19/Northern Ireland/NIRE-2359AB/2020|2020-11-10|EPI\_ISL\_742170|Original|hCoV-19^^Northern Ireland|Human|Regional Virus Laboratory|COVID-19 Genomics UK (COG-UK) Consortium|Fairley|United Kingdom

>Spike|hCoV-19/USA/VA-DCLS-2272/2020|2020-11-16|EPI\_ISL\_723513|Original|hCoV-19^^Virginia|Human|Virginia Division of Consolidated Laboratory Services (DCLS)|Virginia Division of Consolidated Laboratory Services (DCLS)|St. Jacques|USA

>Spike|hCoV-19/USA/CA-CZB-11511/2020|2020-08-02|EPI\_ISL\_625584|Original|hCoV-19^^California|Human|NaN|Chan-Zuckerberg Biohub|Bhatt|USA

>Spike|hCoV-19/Shandong/LY006-2/2020|2020-01-25|EPI\_ISL\_414939|Original|hCoV-19^^Shandong|Human|Shandong Provincial Center for Disease Control and Prevention|Beijing Institute of Microbiology and Epidemiology|Ma|China

>Spike|hCoV-19/Germany/BB-RKI-NP-0057/2020|2020-12-14|EPI\_ISL\_763056|Original|hCoV-19^^Brandenburg|Human|Unit 17|Project group Epidemiology of Highly Pathogenic Microorganisms|Schubert|Germany

>Spike|hCoV-19/Wales/PHWC-49BE75/2020|2020-12-06|EPI\_ISL\_742475|Original|hCoV-19^^Wales|Human|Wales Specialist Virology Centre Sequencing lab|COVID-19 Genomics UK (COG-UK) Consortium|Moore|United Kingdom

>Spike|hCoV-19/Switzerland/GE-ETHZ-340103/2020|2020-10-26|EPI\_ISL\_721810|Original|hCoV-19^^Geneva|Human|Viollier AG|Department of Biosystems Science and Engineering|Nadeau|Switzerland

>Spike|hCoV-19/Singapore/583/2020|2020-05-19|EPI\_ISL\_483606|Original|hCoV-19^^Singapore|Human|National Public Health Laboratory|National Public Health Laboratory|Mak|Singapore

>Spike|hCoV-19/England/201040073/2020|2020-03-03|EPI\_ISL\_464318|Original|hCoV-19^^England|Human|Respiratory Virus Unit|Respiratory Virus Unit|Platt|United Kingdom

>Spike|hCoV-19/England/ALDP-B84160/2020|2020-11-14|EPI\_ISL\_675130|Original|hCoV-19^^England|Human|Lighthouse Lab in Alderley Park|Wellcome Sanger Institute for the COVID-19 Genomics UK (COG-UK) Consortium|Davies|United Kingdom

>Spike|hCoV-19/Denmark/DCGC-15749/2020|2020-11-23|EPI\_ISL\_713997|Original|hCoV-19^^Nordjylland|Human|Department of Virus and Microbiological Special Diagnostics|Albertsen Lab|Michaelsen|Denmark

>Spike|hCoV-19/Canada/NS-NML-1211/2020|2020-04-03|EPI\_ISL\_579609|Original|hCoV-19^^Nova Scotia|Human|QEII Health Sciences Centre|National Microbiology Laboratory (NML)|Majer|Canada

>Spike|hCoV-19/England/ALDP-A51E84/2020|2020-10-07|EPI\_ISL\_597983|Original|hCoV-19^^England|Human|Lighthouse Lab in Alderley Park|Wellcome Sanger Institute for the COVID-19 Genomics UK (COG-UK) consortium|Davies|United Kingdom

>Spike|hCoV-19/England/NORT-281621/2020|2020-03-17|EPI\_ISL\_488774|Original|hCoV-19^^England|Human|NU-OMICS DNA Sequencing research facility|Wellcome Sanger Institute for the COVID-19 Genomics UK (COG-UK) consortium|Davies|United Kingdom

>Spike|hCoV-19/England/BRIS-12BD43/2020|2020-05-09|EPI\_ISL\_469397|Original|hCoV-19^^England|Human|PHE South West Regional Laboratory|Wellcome Sanger Institute for the COVID-19 Genomics UK (COG-UK) consortium|Davies|United Kingdom

>Spike|hCoV-19/Australia/VIC6431/2020|2020-07-24|EPI\_ISL\_521222|Original|hCoV-19^^Victoria|Human|Microbiological Diagnostic Unit - Public Health Laboratory (MDU-PHL)|MDU-PHL|Schultz|Australia

>Spike|hCoV-19/Wales/PHWC-49D08C/2020|2020-12-10|EPI\_ISL\_742728|Original|hCoV-19^^Wales|Human|Wales Specialist Virology Centre Sequencing lab|COVID-19 Genomics UK (COG-UK) Consortium|Moore|United Kingdom

>Spike|hCoV-19/Denmark/DCGC-14659/2020|2020-11-23|EPI\_ISL\_711429|Original|hCoV-19^^Sjælland|Human|Department of Virus and Microbiological Special Diagnostics|Albertsen Lab|Michaelsen|Denmark

>Spike|hCoV-19/Denmark/DCGC-17057/2020|2020-12-14|EPI\_ISL\_750735|Original|hCoV-19^^Hovedstaden|Human|Department of Virus and Microbiological Special Diagnostics|Albertsen Lab|Michaelsen|Denmark

>Spike|hCoV-19/USA/CO-CDPHE-2100015827/2020|2020-11-20|EPI\_ISL\_771316|Original|hCoV-19^^Colorado|Human|Colorado Department of Public Health and Environment|Colorado Department of Public Health and Environment|Bankers|USA

>Spike|hCoV-19/England/ALDP-59EA8C/2020|2020-06-13|EPI\_ISL\_558792|Original|hCoV-19^^England|Human|Lighthouse Lab in Alderley Park|Wellcome Sanger Institute for the COVID-19 Genomics UK (COG-UK) consortium|Davies|United Kingdom

>Spike|hCoV-19/Colombia/DC-INS-027/2020|2020-08-18|EPI\_ISL\_526969|Original|hCoV-19^^Bogota|Human|Instituto Nacional de Salud|Instituto Nacional de Salud|Franco-Mu\u00f1oz|Colombia

>Spike|hCoV-19/USA/MI-MDHHS-SC20922/2020|2020-05-26|EPI\_ISL\_476058|Original|hCoV-19^^Michigan|Human|Michigan Department of Health and Human Services|Michigan Department of Health and Human Services|Blankenship|USA

>Spike|hCoV-19/Northern Ireland/NIRE-103752/2020|2020-04-16|EPI\_ISL\_489190|Original|hCoV-19^^Northern Ireland|Human|Regional Virus Laboratory|Wellcome Sanger Institute for the COVID-19 Genomics UK (COG-UK) consortium|Davies|United Kingdom

>Spike|hCoV-19/Kenya/C2884/2020|2020-04-27|EPI\_ISL\_457894|Original|hCoV-19^^Kenya|Human|KEMRI-CGMR-C|KEMRI-Wellcome Trust Research Programme/KEMRI-CGMR-C Kilifi|Githinji|Kenya

>Spike|hCoV-19/Canada/ON-S100/2020|2020-03-21|EPI\_ISL\_586279|Original|hCoV-19^^Ontario|Human|Toronto Invasive Bacterial Diseases Network|McMaster University|McArthur|Canada

>Spike|hCoV-19/England/ALDP-B24108/2020|2020-11-04|EPI\_ISL\_646356|Original|hCoV-19^^England|Human|Lighthouse Lab in Alderley Park|Wellcome Sanger Institute for the COVID-19 Genomics UK (COG-UK) Consortium|Davies|United Kingdom

>Spike|hCoV-19/England/QEUEH-B1220A/2020|2020-11-02|EPI\_ISL\_642347|Original|hCoV-19^^England|Human|Lighthouse Lab in Glasgow|Wellcome Sanger Institute for the COVID-19 Genomics UK (COG-UK) Consortium|Davies|United Kingdom

>Spike|hCoV-19/Japan/PG-7144/2020|2020-08-00|EPI\_ISL\_688249|Original|hCoV-19^^Japan|Human|Pathogen Genomics Center|Pathogen Genomics Center|Sekizuka|Japan

>Spike|hCoV-19/USA/TX-HMH-MCoV-14460/2020|2020-10-08|EPI\_ISL\_787745|Original|hCoV-19^^Texas|Human|Houston Methodist Hospital|Houston Methodist Hospital|Long|USA

>Spike|hCoV-19/Italy/ABR-IZSGC-TE13491/2020|2020-04-08|EPI\_ISL\_435148|Original|hCoV-19^^Abruzzo|Human|Ospedale SS Annunziata|Istituto Zooprofilattico Sperimentale dell'Abruzzo e Molise \G.Caporale\|Lorusso|Italy

>Spike|hCoV-19/USA/TX-DSHS-0087/2020|2020-05-24|EPI\_ISL\_522372|Original|hCoV-19^^Texas|Human|Texas Department of State Health Services|Texas Department of State Health Services|Rahman|USA

>Spike|hCoV-19/Denmark/DCGC-12381/2020|2020-11-16|EPI\_ISL\_682562|Original|hCoV-19^^Hovedstaden|Human|Department of Virus and Microbiological Special Diagnostics|Albertsen Lab|Michaelsen|Denmark

>Spike|hCoV-19/Belgium/ULG-10706/2020|2020-10-26|EPI\_ISL\_636678|Original|hCoV-19^^Li\u00e8ge|Human|Department of Clinical Microbiology|GIGA Medical Genomics|Durkin|Belgium

>Spike|hCoV-19/England/QEUEH-A4CF2F/2020|2020-10-05|EPI\_ISL\_596068|Original|hCoV-19^^England|Human|Quadram Institute Bioscience|COVID-19 Genomics UK (COG-UK) Consortium|Alikhan|United Kingdom

>Spike|hCoV-19/USA/WI-WSLH-200466/2020|2020-05-18|EPI\_ISL\_578608|Original|hCoV-19^^Wisconsin|Human|Wisconsin State Laboratory of Hygiene Communicable Disease Division|Wisconsin State Laboratory of Hygiene Communicable Disease Division|Florek|USA

>Spike|hCoV-19/Japan/PG-2471/2020|2020-05-00|EPI\_ISL\_686076|Original|hCoV-19^^Japan|Human|Pathogen Genomics Center|Pathogen Genomics Center|Sekizuka|Japan

>Spike|hCoV-19/Australia/VIC7690/2020|2020-08-02|EPI\_ISL\_564579|Original|hCoV-19^^Victoria|Human|Microbiological Diagnostic Unit - Public Health Laboratory (MDU-PHL)|MDU-PHL|Schultz|Australia

>Spike|hCoV-19/Canada/ON-E13/2020|2020-05-05|EPI\_ISL\_593493|Original|hCoV-19^^Ontario|Human|Eastern Ontario Regional Laboratory Association|McMaster University|McArthur|Canada

>Spike|hCoV-19/England/MILK-BA9F5C/2020|2020-11-17|EPI\_ISL\_681561|Original|hCoV-19^^England|Human|Lighthouse Lab in Milton Keynes|Wellcome Sanger Institute for the COVID-19 Genomics UK (COG-UK) Consortium|Davies|United Kingdom

>Spike|hCoV-19/England/ALDP-B4659B/2020|2020-11-07|EPI\_ISL\_656014|Original|hCoV-19^^England|Human|Lighthouse Lab in Alderley Park|Wellcome Sanger Institute for the COVID-19 Genomics UK (COG-UK) Consortium|Davies|United Kingdom

>Spike|hCoV-19/Denmark/DCGC-14942/2020|2020-11-23|EPI\_ISL\_713273|Original|hCoV-19^^Hovedstaden|Human|Department of Virus and Microbiological Special Diagnostics|Albertsen Lab|Michaelsen|Denmark

>Spike|hCoV-19/England/NORT-295129/2020|2020-03-30|EPI\_ISL\_478631|Original|hCoV-19^^England|Human|Northumbria University / South Tees Hospitals NHS Foundation Trust / North Cumbria Integrated Care NHS Foundation Trust / North Tees and Hartlepool NHS

Foundation Trust / Newcastle Hospitals NHS Foundation Trust|COVID-19 Genomics UK (COG-UK) Consortium|Bashton|United Kingdom  
>Spike|hCoV-19/USA/NY-Wadsworth-290354-01/2020|2020-12-16|EPI\_ISL\_765540|Original|hCoV-19^^New York|Human|MONTEFIORE MEDICAL CENTER LABORATORIES|Wadsworth Center|Lasek-Nesselquist|USA  
>Spike|hCoV-19/Scotland/QEUH-B9E628/2020|2020-11-18|EPI\_ISL\_757222|Original|hCoV-19^^Scotland|Human|Lighthouse Lab in Glasgow|Wellcome Sanger Institute for the COVID-19 Genomics UK (COG-UK) Consortium|Davies|United Kingdom  
>Spike|hCoV-19/Wales/PHWC-49E258/2020|2020-12-07|EPI\_ISL\_742974|Original|hCoV-19^^Wales|Human|Wales Specialist Virology Centre Sequencing lab|COVID-19 Genomics UK (COG-UK) Consortium|Moore|United Kingdom  
>Spike|hCoV-19/England/BRIS-1250C8/2020|2020-03-27|EPI\_ISL\_443728|Original|hCoV-19^^England|Human|PHE South West Regional Laboratory|Wellcome Sanger Institute for the COVID-19 Genomics UK (COG-UK) consortium|Amato|United Kingdom  
>Spike|hCoV-19/England/QEUH-B2D59A/2020|2020-11-04|EPI\_ISL\_659792|Original|hCoV-19^^England|Human|Lighthouse Lab in Glasgow|Wellcome Sanger Institute for the COVID-19 Genomics UK (COG-UK) Consortium|Davies|United Kingdom  
>Spike|hCoV-19/USA/NJ-NYUMC329/2020|2020-04-02|EPI\_ISL\_430356|Original|hCoV-19^^New Jersey|Human|NYU Langone Health|Departments of Pathology and Medicine|Maurano|USA  
>Spike|hCoV-19/Luxembourg/LNS4470394/2020|2020-11-01|EPI\_ISL\_740477|Original|hCoV-19^^Luxembourg|Human|Laboratoire national de sant\u00e9|Laboratoire national de sant\u00e9|Wienecke-Baldacchino|Luxembourg  
>Spike|hCoV-19/England/QEUH-A9E5FF/2020|2020-10-20|EPI\_ISL\_727803|Original|hCoV-19^^England|Human|Centre for Enzyme Innovation|COVID-19 Genomics UK (COG-UK) Consortium|Robson|United Kingdom  
>Spike|hCoV-19/Singapore/375/2020|2020-03-19|EPI\_ISL\_469124|Original|hCoV-19^^Singapore|Human|National Public Health Laboratory|National Public Health Laboratory|Mak|Singapore  
>Spike|hCoV-19/Luxembourg/LNS1113037/2020|2020-11-25|EPI\_ISL\_739890|Original|hCoV-19^^Luxembourg|Human|Laboratoire national de sant\u00e9|Laboratoire national de sant\u00e9|Wienecke-Baldacchino|Luxembourg  
>Spike|hCoV-19/England/CAMC-B7792C/2020|2020-11-11|EPI\_ISL\_661869|Original|hCoV-19^^England|Human|Lighthouse Lab in Cambridge|Wellcome Sanger Institute for the COVID-19 Genomics UK (COG-UK) Consortium|Davies|United Kingdom  
>Spike|hCoV-19/England/QEUH-9B99A8/2020|2020-09-07|EPI\_ISL\_549731|Original|hCoV-19^^England|Human|Lighthouse Lab in Glasgow|Wellcome Sanger Institute for the COVID-19 Genomics UK (COG-UK) consortium|Davies|United Kingdom  
>Spike|hCoV-19/Switzerland/BL-UHB-42203375/2020|2020-03-22|EPI\_ISL\_528352|Original|hCoV-19^^Basel-Land|Human|University Hospital Basel|University Hospital Basel|Roloff Handschin|Switzerland  
>Spike|hCoV-19/England/QEUH-9C8232/2020|2020-09-11|EPI\_ISL\_567191|Original|hCoV-19^^England|Human|Lighthouse Lab in Glasgow|Wellcome Sanger Institute for the COVID-19 Genomics UK (COG-UK) consortium|Davies|United Kingdom  
>Spike|hCoV-19/England/LOND-12604FE/2020|2020-04-07|EPI\_ISL\_524664|Original|hCoV-19^^England|Human|North West London Pathology|Wellcome Sanger Institute for the COVID-19 Genomics UK (COG-UK) consortium|Davies|United Kingdom  
>Spike|hCoV-19/USA/ME-HETL-J0206/2020|2020-09-21|EPI\_ISL\_755373|Original|hCoV-19^^Maine|Human|Maine Health and Environmental Testing Laboratory|Tewhey Lab|Tewhey|USA  
>Spike|hCoV-19/England/CAMB-1AD74B/2020|2020-05-01|EPI\_ISL\_448002|Original|hCoV-19^^England|Human|Department of Pathology|COVID-19 Genomics UK (COG-UK) Consortium|Meredith|United Kingdom  
>Spike|hCoV-19/England/CAMC-B22489/2020|2020-11-03|EPI\_ISL\_647204|Original|hCoV-19^^England|Human|Lighthouse Lab in Cambridge|Wellcome Sanger Institute for the COVID-19 Genomics UK (COG-UK) Consortium|Davies|United Kingdom  
>Spike|hCoV-19/Australia/VIC4522/2020|2020-07-17|EPI\_ISL\_518933|Original|hCoV-19^^Victoria|Human|Microbiological Diagnostic Unit - Public Health Laboratory (MDU-PHL)|MDU-PHL|Schultz|Australia

>Spike|hCoV-19/England/OXON-B2B2A/2020|2020-04-09|EPI\_ISL\_534795|Original|hCoV-19^^England|Human|Oxford Viromics|COVID-19 Genomics UK (COG-UK) Consortium|Golubchik|United Kingdom

>Spike|hCoV-19/Denmark/DCGC-3806/2020|2020-08-24|EPI\_ISL\_622676|Original|hCoV-19^^Hovedstaden|Human|Department of Virus and Microbiological Special Diagnostics|Albertsen lab|Michaelsen|Denmark

>Spike|hCoV-19/USA/UT-QDX-2295/2020|2020-03-13|EPI\_ISL\_604611|Original|hCoV-19^^Utah|Human|Quest Diagnostics|Quest Diagnostics|Kagan|USA

>Spike|hCoV-19/Denmark/DCGC-746/2020|2020-03-02|EPI\_ISL\_613541|Original|hCoV-19^^Sjaelland|Human|Department of Virus and Microbiological Special Diagnostics|Albertsen lab|Michaelsen|Denmark

>Spike|hCoV-19/England/ALDP-6B4CA7/2020|2020-07-01|EPI\_ISL\_581433|Original|hCoV-19^^England|Human|Lighthouse Lab in Alderley Park|Wellcome Sanger Institute for the COVID-19 Genomics UK (COG-UK) consortium|Davies|United Kingdom

>Spike|hCoV-19/England/ALDP-BB5931/2020|2020-11-20|EPI\_ISL\_702686|Original|hCoV-19^^England|Human|Lighthouse Lab in Alderley Park|Wellcome Sanger Institute for the COVID-19 Genomics UK (COG-UK) Consortium|Davies|United Kingdom

>Spike|hCoV-19/USA/HI-H200177/2020|2020-07-29|EPI\_ISL\_752737|Original|hCoV-19^^Hawaii|Human|State Laboratories Division|State Laboratories Division|Sultana|USA

>Spike|hCoV-19/Denmark/DCGC-4200/2020|2020-09-14|EPI\_ISL\_622093|Original|hCoV-19^^Sjaelland|Human|Department of Virus and Microbiological Special Diagnostics|Albertsen lab|Michaelsen|Denmark

>Spike|hCoV-19/USA/MD-MDH-0087/2020|2020-05-26|EPI\_ISL\_509491|Original|hCoV-19^^Maryland|Human|Maryland Department of Health|Maryland Department of Health|Keller|USA

>Spike|hCoV-19/England/QEUEH-961A7F/2020|2020-08-02|EPI\_ISL\_536976|Original|hCoV-19^^England|Human|Lighthouse Lab in Glasgow|Wellcome Sanger Institute for the COVID-19 Genomics UK (COG-UK) consortium|Davies|United Kingdom

>Spike|hCoV-19/Japan/PG-4775/2020|2020-08-00|EPI\_ISL\_689911|Original|hCoV-19^^Japan|Human|Pathogen Genomics Center|Pathogen Genomics Center|Sekizuka|Japan

>Spike|hCoV-19/Australia/VIC5503/2020|2020-07-21|EPI\_ISL\_518339|Original|hCoV-19^^Victoria|Human|Microbiological Diagnostic Unit - Public Health Laboratory (MDU-PHL)|MDU-PHL|Schultz|Australia

>Spike|hCoV-19/USA/WA-S1406/2020|2020-05-19|EPI\_ISL\_495856|Original|hCoV-19^^Washington|Human|Washington State Department of Health|Seattle Flu Study|Lee|USA

>Spike|hCoV-19/England/ALDP-B83B54/2020|2020-11-14|EPI\_ISL\_675686|Original|hCoV-19^^England|Human|Lighthouse Lab in Alderley Park|Wellcome Sanger Institute for the COVID-19 Genomics UK (COG-UK) Consortium|Davies|United Kingdom

>Spike|hCoV-19/Japan/PG-8682/2020|2020-09-00|EPI\_ISL\_686278|Original|hCoV-19^^Japan|Human|Pathogen Genomics Center|Pathogen Genomics Center|Sekizuka|Japan

>Spike|hCoV-19/Denmark/DCGC-14102/2020|2020-11-30|EPI\_ISL\_711569|Original|hCoV-19^^Syddanmark|Human|Department of Virus and Microbiological Special Diagnostics|Albertsen Lab|Michaelsen|Denmark

>Spike|hCoV-19/Denmark/DCGC-6521/2020|2020-10-05|EPI\_ISL\_619421|Original|hCoV-19^^Syddanmark|Human|Department of Virus and Microbiological Special Diagnostics|Albertsen lab|Michaelsen|Denmark

>Spike|hCoV-19/Netherlands/Zeeland\_10/2020|2020-03-24|EPI\_ISL\_461248|Original|hCoV-19^^Zeeland|Human|Dutch COVID-19 response team|Erasmus Medical Center|Oude Munnink|Netherlands

>Spike|hCoV-19/Denmark/DCGC-3641/2020|2020-08-31|EPI\_ISL\_615412|Original|hCoV-19^^Hovedstaden|Human|Department of Virus and Microbiological Special Diagnostics|Albertsen lab|Michaelsen|Denmark

>Spike|hCoV-19/England/QEUEH-9B753D/2020|2020-09-06|EPI\_ISL\_590630|Original|hCoV-19^^England|Human|Lighthouse Lab in Glasgow|Wellcome Sanger Institute for the COVID-19 Genomics UK (COG-UK) consortium|Davies|United Kingdom

>Spike|hCoV-19/England/205140903/2020|2020-12-14|EPI\_ISL\_766403|Original|hCoV-19^^England|Human|Respiratory Virus Unit|COVID-19 Genomics UK (COG-UK) Consortium|Platt|United Kingdom



>Spike|hCoV-19/Luxembourg/LNS5744578/2020|2020-10-31|EPI\_ISL\_744290|Original|hCoV-19^^Luxembourg|Human|Laboratoire national de sant\u00e9|Laboratoire national de sant\u00e9|Wienecke-Baldacchino|Luxembourg

>Spike|hCoV-19/England/CAMC-AB220D/2020|2020-10-23|EPI\_ISL\_623664|Original|hCoV-19^^England|Human|Lighthouse Lab in Cambridge|Wellcome Sanger Institute for the COVID-19 Genomics UK (COG-UK) consortium|Davies|United Kingdom

>Spike|hCoV-19/Japan/PG-2078/2020|2020-04-00|EPI\_ISL\_685683|Original|hCoV-19^^Japan|Human|Tokyo Metropolitan Institute of Public Health|Pathogen Genomics Center|Sekizuka|Japan

>Spike|hCoV-19/India/MH-ACTREC-085/2020|2020-05-21|EPI\_ISL\_699741|Original|hCoV-19^^Maharashtra|Human|Hematopathology Laboratory|Hematopathology Laboratory|Patkar|India

>Spike|hCoV-19/Ireland/WH-NVRL-75IRL78231/2020|2020-10-13|EPI\_ISL\_671936|Original|hCoV-19^^Westmeath|Human|National Virus Reference Laboratory|National Virus Reference Laboratory|Gonzalez|Ireland

>Spike|hCoV-19/England/QEUEH-A22226/2020|2020-10-01|EPI\_ISL\_587680|Original|hCoV-19^^England|Human|Lighthouse Lab in Glasgow|Wellcome Sanger Institute for the COVID-19 Genomics UK (COG-UK) consortium|Davies|United Kingdom

>Spike|hCoV-19/Japan/PG-8887/2020|2020-08-00|EPI\_ISL\_686433|Original|hCoV-19^^Japan|Human|Pathogen Genomics Center|Pathogen Genomics Center|Sekizuka|Japan

>Spike|hCoV-19/England/BRIS-12AF5D/2020|2020-05-01|EPI\_ISL\_458458|Original|hCoV-19^^England|Human|PHE South West Regional Laboratory|Wellcome Sanger Institute for the COVID-19 Genomics UK (COG-UK) consortium|Davies|United Kingdom

>Spike|hCoV-19/USA/CA-CZB-6995/2020|2020-09-01|EPI\_ISL\_582922|Original|hCoV-19^^California|Human|County of Santa Clara Public Health Department|Chan-Zuckerberg Biohub|Bhatt|USA

>Spike|hCoV-19/Norway/5467/2020|2020-10-31|EPI\_ISL\_708103|Original|hCoV-19^^Nordland|Human|Nordland Hospital - Bodo|Norwegian Institute of Public Health|Kopperud Riis|Norway

>Spike|hCoV-19/USA/UT-UPHL-2012629112/2020|2020-08-08|EPI\_ISL\_746021|Original|hCoV-19^^Utah|Human|Ginkgo Bioworks Clinical Laboratory|Utah Public Health Laboratory|Young|USA

>Spike|hCoV-19/Israel/701002540/2020|2020-03-25|EPI\_ISL\_447292|Original|hCoV-19^^South Coast District|Human|Microbiology Division|Stern Lab|Miller|Israel

>Spike|hCoV-19/Denmark/DCGC-19204/2020|2020-12-07|EPI\_ISL\_748814|Original|hCoV-19^^Hovedstaden|Human|Department of Virus and Microbiological Special Diagnostics|Albertsen Lab|Michaelsen|Denmark

>Spike|hCoV-19/Germany/NW-HHU-347/2020|2020-09-04|EPI\_ISL\_666634|Original|hCoV-19^^North Rhine-Westphalia|Human|ZOTZ KLIMAS MVZ D\u00f0fcsseldorf-Centrum GbR \u00dcBAG f\u00fcr Labormedizin|Center of Medical Microbiology|Wienemann|Germany

>Spike|hCoV-19/USA/NY-NYCPHL-000028/2020|2020-03-12|EPI\_ISL\_631524|Original|hCoV-19^^New York|Human|Jamaica Hospital Medical Center|New York City Public Health Laboratory|Wang|USA

>Spike|hCoV-19/USA/MI-QDX-1134/2020|2020-03-21|EPI\_ISL\_571864|Original|hCoV-19^^Michigan|Human|Quest Diagnostics|Quest Diagnostics|Kagan|USA

>Spike|hCoV-19/Russia/SVE-RII-MH1438S/2020|2020-09-06|EPI\_ISL\_596275|Original|hCoV-19^^Sverdlovsk|Human|HELIIX LCC|WHO National Influenza Centre Russian Federation|Komissarov|Russia

>Spike|hCoV-19/Denmark/DCGC-13252/2020|2020-11-30|EPI\_ISL\_712261|Original|hCoV-19^^Sjaelland|Human|Department of Virus and Microbiological Special Diagnostics|Albertsen Lab|Michaelsen|Denmark

>Spike|hCoV-19/Belgium/Rega-0329230/2020|2020-03-29|EPI\_ISL\_458200|Original|hCoV-19^^Edingen|Human|KU Leuven|KU Leuven|Maes|Belgium

>Spike|hCoV-19/Wales/PHWC-49171A/2020|2020-11-05|EPI\_ISL\_706684|Original|hCoV-19^^Wales|Human|Originating lab|COVID-19 Genomics UK (COG-UK) Consortium|Moore|United Kingdom

>Spike|hCoV-19/England/QEUEH-969C26/2020|2020-08-12|EPI\_ISL\_530898|Original|hCoV-19^^England|Human|Lighthouse Lab in Glasgow|Wellcome Sanger Institute for the COVID-19 Genomics UK (COG-UK) consortium|Davies|United Kingdom

>Spike|hCoV-19/USA/WA-S2118/2020|2020-06-07|EPI\_ISL\_497546|Original|hCoV-19^^Washington|Human|Washington State Department of Health|Seattle Flu Study|Lee|USA

>Spike|hCoV-19/USA/AZ-TG395938/2020|2020-06-08|EPI\_ISL\_694773|Original|hCoV-19^^Arizona|Human|AZ SPHL|TGen North|French|USA

>Spike|hCoV-19/USA/CT-Yale-057/2020|2020-03-28|EPI\_ISL\_428378|Original|hCoV-19^^Connecticut|Human|Yale COVID-19 Biorepository|Grubaugh Lab - Yale School of Public Health|Grubaugh|USA

>Spike|hCoV-19/England/QEUEH-C4BB93/2020|2020-12-14|EPI\_ISL\_769861|Original|hCoV-19^^England|Human|Lighthouse Lab in Glasgow|Wellcome Sanger Institute for the COVID-19 Genomics UK (COG-UK) Consortium|Davies|United Kingdom

>Spike|hCoV-19/Scotland/CVR5946/2020|2020-11-22|EPI\_ISL\_705687|Original|hCoV-19^^Scotland|Human|West of Scotland Specialist Virology Centre|COVID-19 Genomics UK (COG-UK) Consortium|Robertson|United Kingdom

>Spike|hCoV-19/USA/TX-HMH-2510/2020|2020-05-31|EPI\_ISL\_545347|Original|hCoV-19^^Texas|Human|Houston Methodist Hospital|Houston Methodist Hospital|Long|USA

>Spike|hCoV-19/Jordan/SEARCH-5425/2020|2020-08-23|EPI\_ISL\_755233|Original|hCoV-19^^Amman|Human|Biolab Diagnostic Laboratories|Andersen lab at Scripps Research|Gangavarapu|Jordan

>Spike|hCoV-19/Japan/PG-8285/2020|2020-08-00|EPI\_ISL\_687384|Original|hCoV-19^^Japan|Human|Pathogen Genomics Center|Pathogen Genomics Center|Sekizuka|Japan

>Spike|hCoV-19/USA/TX-HMH-MCoV-15618/2020|2020-10-26|EPI\_ISL\_785302|Original|hCoV-19^^Texas|Human|Houston Methodist Hospital|Houston Methodist Hospital|Long|USA

>Spike|hCoV-19/England/CAMC-B223E6/2020|2020-11-02|EPI\_ISL\_646018|Original|hCoV-19^^England|Human|Lighthouse Lab in Cambridge|Wellcome Sanger Institute for the COVID-19 Genomics UK (COG-UK) Consortium|Davies|United Kingdom

>Spike|hCoV-19/USA/CA-ALSR-2410/2020|2020-06-30|EPI\_ISL\_635466|Original|hCoV-19^^California|Human|San Diego County Public Health Laboratory|Andersen lab at Scripps Research|Gangavarapu|USA

>Spike|hCoV-19/England/QEUEH-9DAB8D/2020|2020-09-21|EPI\_ISL\_580920|Original|hCoV-19^^England|Human|Lighthouse Lab in Glasgow|Wellcome Sanger Institute for the COVID-19 Genomics UK (COG-UK) consortium|Davies|United Kingdom

>Spike|hCoV-19/England/BRIS-12C0A3/2020|2020-05-09|EPI\_ISL\_469384|Original|hCoV-19^^England|Human|PHE South West Regional Laboratory|Wellcome Sanger Institute for the COVID-19 Genomics UK (COG-UK) consortium|Davies|United Kingdom

>Spike|hCoV-19/Scotland/QEUEH-9F44DD/2020|2020-09-27|EPI\_ISL\_600740|Original|hCoV-19^^Scotland|Human|Lighthouse Lab in Glasgow|Wellcome Sanger Institute for the COVID-19 Genomics UK (COG-UK) consortium|Davies|United Kingdom

>Spike|hCoV-19/USA/CA-CZB-1245/2020|2020-04-14|EPI\_ISL\_454665|Original|hCoV-19^^California|Human|County of Santa Clara Public Health Department|Chan-Zuckerberg Biohub|Hao|USA

>Spike|hCoV-19/USA/CA-CDC-4691/2020|2020-06-03|EPI\_ISL\_535669|Original|hCoV-19^^California|Human|CDPH|Pathogen Discovery|Queen|USA

>Spike|hCoV-19/Denmark/DCGC-15650/2020|2020-11-23|EPI\_ISL\_713939|Original|hCoV-19^^Midtjylland|Human|Department of Virus and Microbiological Special Diagnostics|Albertsen Lab|Michaelsen|Denmark

>Spike|hCoV-19/Russia/OMS-ORINFI-9815S/2020|2020-05-21|EPI\_ISL\_569756|Original|hCoV-19^^Omsk|Human|Omsk Research Institute of Natural Focal Infections|WHO National Influenza Centre Russian Federation|Komissarov|Russia

>Spike|hCoV-19/Denmark/DCGC-19970/2020|2020-12-07|EPI\_ISL\_747899|Original|hCoV-19^^Syddanmark|Human|Department of Virus and Microbiological Special Diagnostics|Albertsen Lab|Michaelsen|Denmark

>Spike|hCoV-19/England/NORT-2A5065/2020|2020-09-21|EPI\_ISL\_584683|Original|hCoV-19^^England|Human|Northumbria University / South Tees Hospitals NHS Foundation Trust / North Cumbria Integrated Care NHS Foundation Trust / North Tees and Hartlepool NHS Foundation Trust / Newcastle Hospitals NHS Foundation Trust|COVID-19 Genomics UK (COG-UK) Consortium|Bashton|United Kingdom

>Spike|hCoV-19/England/SHEF-C7C7A/2020|2020-04-24|EPI\_ISL\_490609|Original|hCoV-19^^England|Human|Virology Department|COVID-19 Genomics UK (COG-UK) Consortium|de Silva|United Kingdom

>Spike|hCoV-19/South Africa/KRISP-0421/2020|2020-07-01|EPI\_ISL\_495544|Original|hCoV-19^^KwaZulu-Natal|Human|NHLs-IALCH|KRISP|de Oliveira|South Africa

>Spike|hCoV-19/Australia/VIC6453/2020|2020-07-23|EPI\_ISL\_521231|Original|hCoV-19^^Victoria|Human|Microbiological Diagnostic Unit - Public Health Laboratory (MDU-PHL)|MDU-PHL|Schultz|Australia

>Spike|hCoV-19/USA/CA-CZB-14780/2020|2020-11-10|EPI\_ISL\_739367|Original|hCoV-19^^California|Human|Humboldt County Public Health Laboratory|Chan-Zuckerberg Biohub|Kamm|USA

>Spike|hCoV-19/USA/MD-MDH-0132/2020|2020-07-08|EPI\_ISL\_524896|Original|hCoV-19^^Maryland|Human|MD PHL|MD PHL|Keller|USA

>Spike|hCoV-19/England/QEUA-AD0403/2020|2020-10-24|EPI\_ISL\_634162|Original|hCoV-19^^England|Human|Lighthouse Lab in Glasgow|Wellcome Sanger Institute for the COVID-19 Genomics UK (COG-UK) consortium|Davies|United Kingdom

>Spike|hCoV-19/England/MILK-B8D3DA/2020|2020-11-13|EPI\_ISL\_674122|Original|hCoV-19^^England|Human|Lighthouse Lab in Milton Keynes|Wellcome Sanger Institute for the COVID-19 Genomics UK (COG-UK) Consortium|Davies|United Kingdom

>Spike|hCoV-19/Japan/PG-3217/2020|2020-04-00|EPI\_ISL\_691335|Original|hCoV-19^^Japan|Human|Pathogen Genomics Center|Pathogen Genomics Center|Sekizuka|Japan

>Spike|hCoV-19/Denmark/DCGC-7470/2020|2020-10-12|EPI\_ISL\_618921|Original|hCoV-19^^Hovedstaden|Human|Department of Virus and Microbiological Special Diagnostics|Albertsen lab|Michaelsen|Denmark

>Spike|hCoV-19/Poland/1111112/2020|2020-03-31|EPI\_ISL\_450529|Original|hCoV-19^^Pomorskie|Human|Hematology Laboratory|Department of Virology|Smura|Poland

>Spike|hCoV-19/South Africa/LR00119/2020|2020-07-20|EPI\_ISL\_514412|Original|hCoV-19^^Gauteng|Human|National Institute for Communicable Diseases of the National Health Laboratory Service|National Institute for Communicable Diseases of the National Health Laboratory Service|Allam|South Africa

>Spike|hCoV-19/England/MILK-B3E0B3/2020|2020-11-01|EPI\_ISL\_679847|Original|hCoV-19^^England|Human|Oxford Viromics|COVID-19 Genomics UK (COG-UK) Consortium|Golubchik|United Kingdom

>Spike|hCoV-19/USA/FL-BPHL-0719/2020|2020-07-16|EPI\_ISL\_509777|Original|hCoV-19^^Florida|Human|Florida Bureau of Public Health Laboratories|Florida Bureau of Public Health Laboratories|Blanton|USA

>Spike|hCoV-19/Denmark/DCGC-6738/2020|2020-04-20|EPI\_ISL\_622375|Original|hCoV-19^^Hovedstaden|Human|Department of Virus and Microbiological Special Diagnostics|Albertsen lab|Michaelsen|Denmark

>Spike|hCoV-19/England/CAMC-B07420/2020|2020-10-30|EPI\_ISL\_643716|Original|hCoV-19^^England|Human|Lighthouse Lab in Cambridge|Wellcome Sanger Institute for the COVID-19 Genomics UK (COG-UK) Consortium|Davies|United Kingdom

>Spike|hCoV-19/England/ALDP-A8533D/2020|2020-10-16|EPI\_ISL\_610417|Original|hCoV-19^^England|Human|Lighthouse Lab in Alderley Park|Wellcome Sanger Institute for the COVID-19 Genomics UK (COG-UK) consortium|Davies|United Kingdom

>Spike|hCoV-19/Denmark/DCGC-21266/2020|2020-12-21|EPI\_ISL\_759643|Original|hCoV-19^^Denmark|Human|Department of Virus and Microbiological Special Diagnostics|Albertsen Lab|Michaelsen|Denmark

>Spike|hCoV-19/England/QEUA-B81628/2020|2020-11-14|EPI\_ISL\_667992|Original|hCoV-19^^England|Human|Lighthouse Lab in Glasgow|Wellcome Sanger Institute for the COVID-19 Genomics UK (COG-UK) Consortium|Davies|United Kingdom

>Spike|hCoV-19/England/NORT-1B72047/2020|2020-11-23|EPI\_ISL\_704198|Original|hCoV-19^^England|Human|Northumbria University / South Tees Hospitals NHS Foundation Trust / North Cumbria Integrated Care NHS Foundation Trust / North Tees and Hartlepool NHS Foundation Trust / Newcastle Hospitals NHS Foundation Trust|COVID-19 Genomics UK (COG-UK) Consortium|Bashton|United Kingdom

>Spike|hCoV-19/Hong Kong/VM20009604/2020|2020-04-06|EPI\_ISL\_444037|Original|hCoV-19^^Hong Kong|Human|Hong Kong Adventist Hospital|Hong Kong Department of Health|Mak|China

>Spike|hCoV-19/Scotland/EDB8727/2020|2020-10-25|EPI\_ISL\_650152|Original|hCoV-19^^Scotland|Human|Virology Department|COVID-19 Genomics UK (COG-UK) Consortium|McHugh|United Kingdom

>Spike|hCoV-19/Denmark/DCGC-18552/2020|2020-12-07|EPI\_ISL\_750038|Original|hCoV-19^^Midtjylland|Human|Department of Virus and Microbiological Special Diagnostics|Albertsen Lab|Michaelsen|Denmark

>Spike|hCoV-19/Australia/VIC3993/2020|2020-07-17|EPI\_ISL\_519383|Original|hCoV-19^^Victoria|Human|Microbiological Diagnostic Unit - Public Health Laboratory (MDU-PHL)|MDU-PHL|Schultz|Australia

>Spike|hCoV-19/Germany/BY-ChVir-W1122-5753/2020|2020-03-27|EPI\_ISL\_754029|Original|hCoV-19^^Bavaria|Human|Charit\u00e9 Universit\u00e4tsmedizin Berlin|Charit\u00e9 Universit\u00e4tsmedizin Berlin|Muehlemann|Germany

>Spike|hCoV-19/England/ALDP-B84124/2020|2020-11-14|EPI\_ISL\_675385|Original|hCoV-19^^England|Human|Lighthouse Lab in Alderley Park|Wellcome Sanger Institute for the COVID-19 Genomics UK (COG-UK) Consortium|Davies|United Kingdom

>Spike|hCoV-19/England/CAMC-A3EF99/2020|2020-10-05|EPI\_ISL\_609578|Original|hCoV-19^^England|Human|Lighthouse Lab in Cambridge|Wellcome Sanger Institute for the COVID-19 Genomics UK (COG-UK) consortium|Davies|United Kingdom

>Spike|hCoV-19/England/ALDP-AA074F/2020|2020-10-22|EPI\_ISL\_624168|Original|hCoV-19^^England|Human|Lighthouse Lab in Alderley Park|Wellcome Sanger Institute for the COVID-19 Genomics UK (COG-UK) consortium|Davies|United Kingdom

>Spike|hCoV-19/Scotland/QEUH-C336AC/2020|2020-12-11|EPI\_ISL\_757179|Original|hCoV-19^^Scotland|Human|Lighthouse Lab in Glasgow|Wellcome Sanger Institute for the COVID-19 Genomics UK (COG-UK) Consortium|Davies|United Kingdom

>Spike|hCoV-19/Italy/ABR-IZSGC-TE4925/2020|2020-03-14|EPI\_ISL\_418255|Original|hCoV-19^^Abruzzo|Human|Presidio Ospedaliero \S. Spirito\ - PESCARA|Istituto Zooprofilattico Sperimentale dell'Abruzzo e Molise \G. Caporale\\Lorusso|Italy

>Spike|hCoV-19/Belgium/Rega-0329245/2020|2020-03-29|EPI\_ISL\_458215|Original|hCoV-19^^Morlanwelz|Human|KU Leuven|KU Leuven|Maes|Belgium

>Spike|hCoV-19/Luxembourg/LNS0566366/2020|2020-11-10|EPI\_ISL\_739799|Original|hCoV-19^^Luxembourg|Human|Laboratoire national de sant\u00e9|Laboratoire national de sant\u00e9|Wienecke-Baldacchino|Luxembourg

>Spike|hCoV-19/Portugal/PT0502/2020|2020-03-17|EPI\_ISL\_454226|Original|hCoV-19^^Portugal|Human|unknown|Instituto Nacional de Saude (INSA)|Borges|Portugal

>Spike|hCoV-19/Italy/VEN-IZSVE-14-48/2020|2020-03-24|EPI\_ISL\_636470|Original|hCoV-19^^Veneto|Human|ULSS6 Distretto Padova Terme Colli|Istituto Zooprofilattico Sperimentale delle Venezie|Quaranta|Italy

>Spike|hCoV-19/Wales/PHWC-49EB5D/2020|2020-12-08|EPI\_ISL\_743099|Original|hCoV-19^^Wales|Human|Wales Specialist Virology Centre Sequencing lab|COVID-19 Genomics UK (COG-UK) Consortium|Moore|United Kingdom

>Spike|hCoV-19/Denmark/DCGC-17584/2020|2020-12-14|EPI\_ISL\_751084|Original|hCoV-19^^Syddanmark|Human|Department of Virus and Microbiological Special Diagnostics|Albertsen Lab|Michaelsen|Denmark

>Spike|hCoV-19/Spain/MD-IBV-97010081/2020|2020-03-18|EPI\_ISL\_779764|Original|hCoV-19^^Madrid|Human|IdISSC/Hospital Cl\u00e9nico San Carlos de Madrid\u200b|SeqCOVID-SPAIN consortium|IBV (CSIC)|Comas|Spain

>Spike|hCoV-19/England/ALDP-8FDE22/2020|2020-06-24|EPI\_ISL\_557141|Original|hCoV-19^^England|Human|Lighthouse Lab in Alderley Park|Wellcome Sanger Institute for the COVID-19 Genomics UK (COG-UK) consortium|Davies|United Kingdom

>Spike|hCoV-19/Burkina Faso/2359/2020|2020-09-11|EPI\_ISL\_660481|Original|hCoV-19^^N'Dorola|Human|Laboratoire de Microbiologie CHU Sour\u00e9 Sanou|Centre Muraz|Ouedraogo|Burkina Faso

>Spike|hCoV-19/Australia/VIC15208/2020|2020-08-12|EPI\_ISL\_593190|Original|hCoV-19^^Victoria|Human|Microbiological Diagnostic Unit - Public Health Laboratory (MDU-PHL)|MDU-PHL|Schultz|Australia

>Spike|hCoV-19/England/MILK-A7A368/2020|2020-10-15|EPI\_ISL\_606746|Original|hCoV-19^^England|Human|Lighthouse Lab in Milton Keynes|Wellcome Sanger Institute for the COVID-19 Genomics UK (COG-UK) consortium|Davies|United Kingdom

>Spike|hCoV-19/USA/TX-HMH-MCoV-18392/2020|2020-11-18|EPI\_ISL\_784740|Original|hCoV-19^^Texas|Human|Houston Methodist Hospital|Houston Methodist Hospital|Long|USA

>Spike|hCoV-19/Denmark/DCGC-4072/2020|2020-09-14|EPI\_ISL\_622028|Original|hCoV-19^^Hovedstaden|Human|Department of Virus and Microbiological Special Diagnostics|Albertsen Lab|Michaelsen|Denmark

>Spike|hCoV-19/Denmark/DCGC-16947/2020|2020-12-14|EPI\_ISL\_750660|Original|hCoV-19^^Midtjylland|Human|Department of Virus and Microbiological Special Diagnostics|Albertsen Lab|Michaelsen|Denmark

>Spike|hCoV-19/USA/ME-HETL-J0002/2020|2020-03-12|EPI\_ISL\_513415|Original|hCoV-19^^Maine|Human|Maine HETL|Tewhey Lab|Tewhey|USA

>Spike|hCoV-19/Switzerland/BL-ETHZ-270101/2020|2020-09-03|EPI\_ISL\_541448|Original|hCoV-19^^Basel-Landschaft|Human|Viollier AG|Department of Biosystems Science and Engineering|Nadeau|Switzerland

>Spike|hCoV-19/Denmark/DCGC-16193/2020|2020-11-16|EPI\_ISL\_714631|Original|hCoV-19^^Hovedstaden|Human|Department of Virus and Microbiological Special Diagnostics|Albertsen Lab|Michaelsen|Denmark

>Spike|hCoV-19/England/QEUH-BC41DD/2020|2020-11-24|EPI\_ISL\_703561|Original|hCoV-19^^England|Human|Lighthouse Lab in Glasgow|Wellcome Sanger Institute for the COVID-19 Genomics UK (COG-UK) Consortium|Davies|United Kingdom

>Spike|hCoV-19/England/BRIS-1233A3/2020|2020-04-05|EPI\_ISL\_442792|Original|hCoV-19^^England|Human|PHE South West Regional Laboratory|Wellcome Sanger Institute for the COVID-19 Genomics UK (COG-UK) consortium|Amato|United Kingdom

>Spike|hCoV-19/USA/WI-GMF-32355/2020|2020-11-08|EPI\_ISL\_661138|Original|hCoV-19^^Wisconsin|Human|Gundersen Molecular Diagnostics Laboratory|Kabara Cancer Research Institute|Kenny|USA

>Spike|hCoV-19/England/ALDP-AA3E92/2020|2020-10-22|EPI\_ISL\_624235|Original|hCoV-19^^England|Human|Lighthouse Lab in Alderley Park|Wellcome Sanger Institute for the COVID-19 Genomics UK (COG-UK) consortium|Davies|United Kingdom

>Spike|hCoV-19/England/ALDP-B1BFA0/2020|2020-11-01|EPI\_ISL\_645656|Original|hCoV-19^^England|Human|Lighthouse Lab in Alderley Park|Wellcome Sanger Institute for the COVID-19 Genomics UK (COG-UK) Consortium|Davies|United Kingdom

>Spike|hCoV-19/England/QEUH-B2F60E/2020|2020-11-04|EPI\_ISL\_659794|Original|hCoV-19^^England|Human|Lighthouse Lab in Glasgow|Wellcome Sanger Institute for the COVID-19 Genomics UK (COG-UK) Consortium|Davies|United Kingdom

>Spike|hCoV-19/Scotland/CVR5033/2020|2020-10-09|EPI\_ISL\_594767|Original|hCoV-19^^Scotland|Human|West of Scotland Specialist Virology Centre|COVID-19 Genomics UK (COG-UK) Consortium|Robertson|United Kingdom

>Spike|hCoV-19/England/20129017104/2020|2020-03-20|EPI\_ISL\_424003|Original|hCoV-19^^England|Human|Respiratory Virus Unit|Respiratory Virus Unit|Platt|United Kingdom

>Spike|hCoV-19/England/BIRM-5F10F/2020|2020-05-04|EPI\_ISL\_473313|Original|hCoV-19^^England|Human|University of Birmingham|COVID-19 Genomics UK (COG-UK) Consortium|Loman|United Kingdom

>Spike|hCoV-19/USA/TX-HMH-MCoV-18265/2020|2020-11-16|EPI\_ISL\_784613|Original|hCoV-19^^Texas|Human|Houston Methodist Hospital|Houston Methodist Hospital|Long|USA

>Spike|hCoV-19/Scotland/EDB1108/2020|2020-04-08|EPI\_ISL\_491540|Original|hCoV-19^^Scotland|Human|Virology Department|Wellcome Sanger Institute for the COVID-19 Genomics UK (COG-UK) consortium|Davies|United Kingdom

>Spike|hCoV-19/USA/MA-MASPHL-01083/2020|2020-11-28|EPI\_ISL\_692775|Original|hCoV-19^^Massachusetts|Human|Massachusetts State Public Health Laboratory|Massachusetts State Public Health Laboratory|Lang|USA

>Spike|hCoV-19/England/QEUH-B12853/2020|2020-11-02|EPI\_ISL\_642341|Original|hCoV-19^^England|Human|Lighthouse Lab in Glasgow|Wellcome Sanger Institute for the COVID-19 Genomics UK (COG-UK) Consortium|Davies|United Kingdom

>Spike|hCoV-19/England/LIVE-DC4ED4/2020|2020-11-09|EPI\_ISL\_705920|Original|hCoV-19^^England|Human|Liverpool Clinical Laboratories|COVID-19 Genomics UK (COG-UK) Consortium|Haldenby|United Kingdom

>Spike|hCoV-19/England/BRIS-127AD7/2020|2020-04-16|EPI\_ISL\_469629|Original|hCoV-19^^England|Human|PHE South West Regional Laboratory|Wellcome Sanger Institute for the COVID-19 Genomics UK (COG-UK) consortium|Davies|United Kingdom

>Spike|hCoV-19/England/LIVE-A7672/2020|2020-03-28|EPI\_ISL\_517052|Original|hCoV-19^^England|Human|Liverpool Clinical Laboratories|COVID-19 Genomics UK (COG-UK) Consortium|Haldenby|United Kingdom

>Spike|hCoV-19/Northern Ireland/QEUA-9906A0/2020|2020-08-26|EPI\_ISL\_530369|Original|hCoV-19^^Northern Ireland|Human|Lighthouse Lab in Glasgow|Wellcome Sanger Institute for the COVID-19 Genomics UK (COG-UK) consortium|Davies|United Kingdom

>Spike|hCoV-19/England/ALDP-9CD15E/2020|2020-09-16|EPI\_ISL\_566325|Original|hCoV-19^^England|Human|Lighthouse Lab in Alderley Park|Wellcome Sanger Institute for the COVID-19 Genomics UK (COG-UK) consortium|Davies|United Kingdom

>Spike|hCoV-19/Denmark/DCGC-9583/2020|2020-11-09|EPI\_ISL\_669049|Original|hCoV-19^^Hovedstaden|Human|Department of Virus and Microbiological Special Diagnostics|Albertsen Lab|Michaelsen|Denmark

>Spike|hCoV-19/England/PORT-2D2005/2020|2020-03-20|EPI\_ISL\_535024|Original|hCoV-19^^England|Human|Centre for Enzyme Innovation|COVID-19 Genomics UK (COG-UK) Consortium|Robson|United Kingdom

>Spike|hCoV-19/England/MILK-ACC983/2020|2020-10-20|EPI\_ISL\_634297|Original|hCoV-19^^England|Human|Lighthouse Lab in Milton Keynes|Wellcome Sanger Institute for the COVID-19 Genomics UK (COG-UK) consortium|Davies|United Kingdom

>Spike|hCoV-19/Spain/CT-IBV-97010163/2020|2020-10-14|EPI\_ISL\_683638|Original|hCoV-19^^Catalunya|Human|Servicio de Microbiolog\u00eda|SeqCOVID-SPAIN consortium|IBV (CSIC) |Comas|Spain

>Spike|hCoV-19/Luxembourg/LNS1689160/2020|2020-06-28|EPI\_ISL\_739978|Original|hCoV-19^^Luxembourg|Human|Laboratoire national de sant\u00e9|Laboratoire national de sant\u00e9|Wienecke-Baldacchino|Luxembourg

>Spike|hCoV-19/England/CWAR-24FE126/2020|2020-05-01|EPI\_ISL\_584576|Original|hCoV-19^^England|Human|UHCW / University of Warwick|COVID-19 Genomics UK (COG-UK) Consortium|Stark|United Kingdom

>Spike|hCoV-19/England/CAMB-1BB6C5/2020|2020-11-20|EPI\_ISL\_664326|Original|hCoV-19^^England|Human|Department of Pathology|COVID-19 Genomics UK (COG-UK) Consortium|Goodfellow|United Kingdom

>Spike|hCoV-19/England/ALDP-BC626F/2020|2020-11-23|EPI\_ISL\_721444|Original|hCoV-19^^England|Human|Lighthouse Lab in Alderley Park|Wellcome Sanger Institute for the COVID-19 Genomics UK (COG-UK) Consortium|Davies|United Kingdom

>Spike|hCoV-19/Denmark/DCGC-7361/2020|2020-10-12|EPI\_ISL\_618934|Original|hCoV-19^^Hovedstaden|Human|Department of Virus and Microbiological Special Diagnostics|Albertsen lab|Michaelsen|Denmark

>Spike|hCoV-19/Japan/P4-7/2020|2020-03-20|EPI\_ISL\_419307|Original|hCoV-19^^Saitama|Human|Saitama Prefectural Institute of Public Health|Pathogen Genomics Center|Sekizuka|Japan

>Spike|hCoV-19/Germany/SH-ChVir3046/2020|2020-03-18|EPI\_ISL\_729466|Original|hCoV-19^^Schleswig-Holstein|Human|A. Krumbholz|Charit\u00e9 Universit\u00e4tsmedizin Berlin|Muehlemann|Germany

>Spike|hCoV-19/England/BRIS-121A55/2020|2020-03-15|EPI\_ISL\_440175|Original|hCoV-19^^England|Human|PHE South West Regional Laboratory|Wellcome Sanger Institute for the COVID-19 Genomics UK (COG-UK) consortium|Amato|United Kingdom

>Spike|hCoV-19/England/CAMB-1BD6A5/2020|2020-12-08|EPI\_ISL\_740970|Original|hCoV-19^^England|Human|Department of Pathology|COVID-19 Genomics UK (COG-UK) Consortium|Goodfellow|United Kingdom

>Spike|hCoV-19/England/WSFT-25C0DBF/2020|2020-05-16|EPI\_ISL\_492842|Original|hCoV-19^^England|Human|Department of Medical Microbiology|Wellcome Sanger Institute for the COVID-19 Genomics UK (COG-UK) consortium|Davies|United Kingdom

>Spike|hCoV-19/Denmark/DCGC-8487/2020|2020-06-08|EPI\_ISL\_618063|Original|hCoV-19^^Nordjylland|Human|Department of Virus and Microbiological Special Diagnostics|Albertsen lab|Michaelsen|Denmark

>Spike|hCoV-19/England/SHEF-C8936/2020|2020-04-22|EPI\_ISL\_453731|Original|hCoV-19^^England|Human|Virology Department|COVID-19 Genomics UK (COG-UK) Consortium|de Silva|United Kingdom

>Spike|hCoV-19/Belgium/ULG-10600/2020|2020-08-30|EPI\_ISL\_626237|Original|hCoV-19^^Li\u00e8ge|Human|Department of Clinical Microbiology|GIGA Medical Genomics|Durkin|Belgium

>Spike|hCoV-19/Brazil/SP-L17-CD357/2020|2020-03-31|EPI\_ISL\_476303|Original|hCoV-19^^S\u00e3o Paulo|Human|DB Diagn\u00f3sticos do Brasil|Instituto de Medicina Tropical da Universidade de S\u00e3o Paulo|Sabino|Brazil

>Spike|hCoV-19/England/QEUI-B100F3/2020|2020-11-02|EPI\_ISL\_642519|Original|hCoV-19^^England|Human|Lighthouse Lab in Glasgow|Wellcome Sanger Institute for the COVID-19 Genomics UK (COG-UK) Consortium|Davies|United Kingdom

>Spike|hCoV-19/Canada/MB-NML-1086/2020|2020-08-06|EPI\_ISL\_582436|Original|hCoV-19^^Manitoba|Human|Cadham Provincial Laboratory|National Microbiology Laboratory (NML)|Majer|Canada

>Spike|hCoV-19/England/ALDP-AA2D0F/2020|2020-10-22|EPI\_ISL\_625087|Original|hCoV-19^^England|Human|Lighthouse Lab in Alderley Park|Wellcome Sanger Institute for the COVID-19 Genomics UK (COG-UK) consortium|Davies|United Kingdom

>Spike|hCoV-19/England/OXON-AC482/2020|2020-04-07|EPI\_ISL\_448452|Original|hCoV-19^^England|Human|Oxford Viromics|COVID-19 Genomics UK (COG-UK) Consortium|Golubchik|United Kingdom

>Spike|hCoV-19/Portugal/PT0853/2020|2020-03-27|EPI\_ISL\_511112|Original|hCoV-19^^Portugal|Human|Instituto Nacional de Saude (INSA)|Instituto Nacional de Saude (INSA)|Borges|Portugal

>Spike|hCoV-19/USA/GA-CDC-6424/2020|2020-07-29|EPI\_ISL\_527661|Original|hCoV-19^^Georgia|Human|GA Department of Public Health Laboratory|Pathogen Discovery|Queen|USA

>Spike|hCoV-19/India/GJ-GBRC59/2020|2020-05-03|EPI\_ISL\_447034|Original|hCoV-19^^Gujarat|Human|B.J. Medical College and Civil hospital|Gujarat Biotechnology Research Centre|Joshi|India

>Spike|hCoV-19/USA/MI-MDHHS-SC20723/2020|2020-04-20|EPI\_ISL\_471747|Original|hCoV-19^^Michigan|Human|Michigan Department of Health and Human Services|Michigan Department of Health and Human Services|Blankenship|USA

>Spike|hCoV-19/England/QEUI-A31145/2020|2020-10-05|EPI\_ISL\_595869|Original|hCoV-19^^England|Human|Quadram Institute Bioscience|COVID-19 Genomics UK (COG-UK) Consortium|Alikhan|United Kingdom

>Spike|hCoV-19/USA/WI-GMF-27517/2020|2020-10-24|EPI\_ISL\_660980|Original|hCoV-19^^Wisconsin|Human|Gundersen Molecular Diagnostics Laboratory|Kabara Cancer Research Institute|Kenny|USA

>Spike|hCoV-19/Singapore/651/2020|2020-05-08|EPI\_ISL\_493411|Original|hCoV-19^^Singapore|Human|National Public Health Laboratory|National Public Health Laboratory|Mak|Singapore

>Spike|hCoV-19/United Arab Emirates/0432/2020|2020-05-16|EPI\_ISL\_698606|Original|hCoV-19^^Abu Dhabi|Human|Group 42 (G42) Healthcare|G42 Healthcare|Ogrodzki|United Arab Emirates

>Spike|hCoV-19/England/CAMC-B515D9/2020|2020-11-08|EPI\_ISL\_657895|Original|hCoV-19^^England|Human|Lighthouse Lab in Cambridge|Wellcome Sanger Institute for the COVID-19 Genomics UK (COG-UK) Consortium|Davies|United Kingdom

>Spike|hCoV-19/England/BRIS-1263DD/2020|2020-04-11|EPI\_ISL\_459025|Original|hCoV-19^^England|Human|PHE South West Regional Laboratory|Wellcome Sanger Institute for the COVID-19 Genomics UK (COG-UK) consortium|Davies|United Kingdom

>Spike|hCoV-19/Japan/PG-2243/2020|2020-04-00|EPI\_ISL\_685848|Original|hCoV-19^^Japan|Human|Pathogen Genomics Center|Pathogen Genomics Center|Sekizuka|Japan

>Spike|hCoV-19/Netherlands/ZH-EMC-941/2020|2020-10-06|EPI\_ISL\_722596|Original|hCoV-19^^Zuid Holland|Human|Dutch COVID-19 response team|Erasmus Medical Center|Oude Munnink|Netherlands

>Spike|hCoV-19/Germany/HH-hpi-p1466/2020|2020-03-11|EPI\_ISL\_775686|Original|hCoV-19^^Hamburg|Human|University Medical Center Hamburg Eppendorf|Heinrich Pette Institute|Robitaille|Germany

>Spike|hCoV-19/USA/WI-UW-2611/2021|2021-01-03|EPI\_ISL\_791128|Original|hCoV-19^^Wisconsin|Human|University of Wisconsin-Madison AIDS Vaccine Research Laboratories|University of Wisconsin-Madison AIDS Vaccine Research Laboratories|Moreno|USA

>Spike|hCoV-19/Belgium/ULG-10944/2020|2020-11-25|EPI\_ISL\_678483|Original|hCoV-19^^Li\u00e8ge|Human|Department of Clinical Microbiology|GIGA Medical Genomics|Durkin|Belgium

>Spike|hCoV-19/England/CAMC-B78A37/2020|2020-11-12|EPI\_ISL\_668077|Original|hCoV-19^^England|Human|Lighthouse Lab in Cambridge|Wellcome Sanger Institute for the COVID-19 Genomics UK (COG-UK) Consortium|Davies|United Kingdom

>Spike|hCoV-19/England/CAMC-A41A74/2020|2020-10-07|EPI\_ISL\_609414|Original|hCoV-19^^England|Human|Lighthouse Lab in Cambridge|Wellcome Sanger Institute for the COVID-19 Genomics UK (COG-UK) consortium|Davies|United Kingdom

>Spike|hCoV-19/England/QEUA-AF0D5D/2020|2020-10-29|EPI\_ISL\_665318|Original|hCoV-19^^England|Human|Northumbria University / South Tees Hospitals NHS Foundation Trust / North Cumbria Integrated Care NHS Foundation Trust / North Tees and Hartlepool NHS Foundation Trust / Newcastle Hospitals NHS Foundation Trust|COVID-19 Genomics UK (COG-UK) Consortium|Bashton|United Kingdom

>Spike|hCoV-19/USA/WA-UW-3992/2020|2020-03-29|EPI\_ISL\_427231|Original|hCoV-19^^Washington|Human|UW Virology Lab|UW Virology Lab|Roychoudhury|USA

>Spike|hCoV-19/Scotland/CVR2807/2020|2020-04-20|EPI\_ISL\_473574|Original|hCoV-19^^Scotland|Human|West of Scotland Specialist Virology Centre|COVID-19 Genomics UK (COG-UK) Consortium|Robertson|United Kingdom

>Spike|hCoV-19/Denmark/DCGC-5401/2020|2020-09-14|EPI\_ISL\_615333|Original|hCoV-19^^Nordjylland|Human|Department of Virus and Microbiological Special Diagnostics|Albertsen lab|Michaelsen|Denmark

>Spike|hCoV-19/England/204790981/2020|2020-11-20|EPI\_ISL\_678763|Original|hCoV-19^^England|Human|Respiratory Virus Unit|COVID-19 Genomics UK (COG-UK) Consortium|Platt|United Kingdom

>Spike|hCoV-19/USA/WI-UW-1342/2020|2020-09-09|EPI\_ISL\_536713|Original|hCoV-19^^Wisconsin|Human|University of Wisconsin-Madison AIDS Vaccine Research Laboratories|University of Wisconsin-Madison AIDS Vaccine Research Laboratories|Baczenas|USA

>Spike|hCoV-19/Scotland/CVR2226/2020|2020-04-12|EPI\_ISL\_448168|Original|hCoV-19^^Scotland|Human|West of Scotland Specialist Virology Centre|COVID-19 Genomics UK (COG-UK) Consortium|Robertson|United Kingdom

>Spike|hCoV-19/Germany/HH-hpi-pl478/2020|2020-03-14|EPI\_ISL\_775989|Original|hCoV-19^^Hamburg|Human|University Medical Center Hamburg Eppendorf|Heinrich Pette Institute|Robitaille|Germany

>Spike|hCoV-19/USA/MA-MGH-00654/2020|2020-04-02|EPI\_ISL\_460330|Original|hCoV-19^^Massachusetts|Human|Massachusetts General Hospital|Infectious Disease Program|Lemieux|USA

>Spike|hCoV-19/Austria/CeMM0902/2020|2020-03-30|EPI\_ISL\_583755|Original|hCoV-19^^Austria|Human|Dr. Gernot Walder GmbH|Bergthaler laboratory|Bergthaler|Austria

>Spike|hCoV-19/England/QEUA-B13069/2020|2020-11-01|EPI\_ISL\_641796|Original|hCoV-19^^England|Human|Lighthouse Lab in Glasgow|Wellcome Sanger Institute for the COVID-19 Genomics UK (COG-UK) Consortium|Davies|United Kingdom

>Spike|hCoV-19/Singapore/750/2020|2020-06-15|EPI\_ISL\_500565|Original|hCoV-19^^Singapore|Human|Singapore General Hospital|Department of Microbiology|Abdul Rahman|Singapore

>Spike|hCoV-19/Switzerland/LU-ETHZ-380329/2020|2020-11-26|EPI\_ISL\_721829|Original|hCoV-19^^Lucerne|Human|Viollier AG|Department of Biosystems Science and Engineering|Nadeau|Switzerland

>Spike|hCoV-19/USA/TX-HMH-5115/2020|2020-06-29|EPI\_ISL\_544534|Original|hCoV-19^^Texas|Human|Houston Methodist Hospital|Houston Methodist Hospital|Long|USA

>Spike|hCoV-19/Japan/PG-0128/2020|2020-03-12|EPI\_ISL\_479855|Original|hCoV-19^^Kansai|Human|Department of Infectious Diseases|Pathogen Genomics Center|Sekizuka|Japan

>Spike|hCoV-19/England/ALDP-A685EF/2020|2020-10-12|EPI\_ISL\_608415|Original|hCoV-19^^England|Human|Lighthouse Lab in Alderley Park|Wellcome Sanger Institute for the COVID-19 Genomics UK (COG-UK) consortium|Davies|United Kingdom

>Spike|hCoV-19/Germany/BW-UKT-a038/2020|2020-03-23|EPI\_ISL\_723092|Original|hCoV-19^^Baden-Wuerttemberg|Human|Institute of Medical Genetics and Applied Genomics|Institute of Medical Genetics and Applied Genomics|Gross|Germany

>Spike|hCoV-19/Switzerland/VD-ETHZ-320531/2020|2020-10-13|EPI\_ISL\_737898|Original|hCoV-19^^Vaud|Human|Viollier AG|Department of Biosystems Science and Engineering|Nadeau|Switzerland



>Spike|hCoV-19/Australia/VIC12616/2020|2020-07-25|EPI\_ISL\_592040|Original|hCoV-19^^Victoria|Human|Microbiological Diagnostic Unit - Public Health Laboratory (MDU-PHL)|MDU-PHL|Schultz|Australia

>Spike|hCoV-19/USA/TX-HMH-MCoV-18575/2020|2020-11-19|EPI\_ISL\_784923|Original|hCoV-19^^Texas|Human|Houston Methodist Hospital|Houston Methodist Hospital|Long|USA

>Spike|hCoV-19/England/210100406/2021|2021-01-00|EPI\_ISL\_791275|Original|hCoV-19^^England|Human|Respiratory Virus Unit|COVID-19 Genomics UK (COG-UK) Consortium|Platt|United Kingdom

>Spike|hCoV-19/Wales/PHWC-49A6F6/2020|2020-12-02|EPI\_ISL\_727586|Original|hCoV-19^^Wales|Human|Originating lab|COVID-19 Genomics UK (COG-UK) Consortium|Moore|United Kingdom

>Spike|hCoV-19/Denmark/DCGC-18127/2020|2020-12-14|EPI\_ISL\_749366|Original|hCoV-19^^Hovedstaden|Human|Department of Virus and Microbiological Special Diagnostics|Albertsen Lab|Michaelsen|Denmark

>Spike|hCoV-19/England/MILK-99C880/2020|2020-08-23|EPI\_ISL\_550789|Original|hCoV-19^^England|Human|Lighthouse Lab in Milton Keynes|Wellcome Sanger Institute for the COVID-19 Genomics UK (COG-UK) consortium|Davies|United Kingdom

>Spike|hCoV-19/USA/TX-HMH-MCoV-15886/2020|2020-07-10|EPI\_ISL\_785570|Original|hCoV-19^^Texas|Human|Houston Methodist Hospital|Houston Methodist Hospital|Long|USA

>Spike|hCoV-19/England/ALDP-98295D/2020|2020-08-10|EPI\_ISL\_552665|Original|hCoV-19^^England|Human|Lighthouse Lab in Alderley Park|Wellcome Sanger Institute for the COVID-19 Genomics UK (COG-UK) consortium|Davies|United Kingdom

>Spike|hCoV-19/England/MILK-A23AD2/2020|2020-10-03|EPI\_ISL\_595101|Original|hCoV-19^^England|Human|Centre for Enzyme Innovation|COVID-19 Genomics UK (COG-UK) Consortium|Robson|United Kingdom

>Spike|hCoV-19/USA/TX-HMH-MCoV-19475/2020|2020-11-29|EPI\_ISL\_783862|Original|hCoV-19^^Texas|Human|Houston Methodist Hospital|Houston Methodist Hospital|Long|USA

>Spike|hCoV-19/Scotland/CVR2916/2020|2020-04-22|EPI\_ISL\_473629|Original|hCoV-19^^Scotland|Human|West of Scotland Specialist Virology Centre|COVID-19 Genomics UK (COG-UK) Consortium|Robertson|United Kingdom

>Spike|hCoV-19/USA/CA-CZB-14378/2020|2020-07-07|EPI\_ISL\_739648|Original|hCoV-19^^California|Human|Alameda County Public Health Lab|Chan-Zuckerberg Biohub|Kamm|USA

>Spike|hCoV-19/England/CAMB-805FA/2020|2020-04-08|EPI\_ISL\_470499|Original|hCoV-19^^England|Human|Department of Pathology|Wellcome Sanger Institute for the COVID-19 Genomics UK (COG-UK) consortium|Davies|United Kingdom

>Spike|hCoV-19/Australia/VIC237/2020|2020-03-21|EPI\_ISL\_419932|Original|hCoV-19^^Victoria|Human|Victorian Infectious Diseases Reference Laboratory (VIDRL)|Victorian Infectious Diseases Reference Laboratory and Microbiological Diagnostic Unit Public Health Laboratory|Schultz|Australia

>Spike|hCoV-19/Wales/PHWC-167FBE/2020|2020-05-19|EPI\_ISL\_494184|Original|hCoV-19^^Wales|Human|Originating lab|COVID-19 Genomics UK (COG-UK) Consortium|Moore|United Kingdom

>Spike|hCoV-19/USA/NY-Wadsworth-24179-01/2020|2020-03-19|EPI\_ISL\_676752|Original|hCoV-19^^New York|Human|Wadsworth Center|Wadsworth Center|Lasek-Nesselquist|USA

>Spike|hCoV-19/USA/MN-QDX-1721/2020|2020-03-16|EPI\_ISL\_604070|Original|hCoV-19^^Minnesota|Human|Quest Diagnostics|Quest Diagnostics|Kagan|USA

>Spike|hCoV-19/England/ALDP-C3C9B9/2020|2020-12-09|EPI\_ISL\_731836|Original|hCoV-19^^England|Human|Lighthouse Lab in Alderley Park|Wellcome Sanger Institute for the COVID-19 Genomics UK (COG-UK) Consortium|Davies|United Kingdom

>Spike|hCoV-19/England/LIVE-DCA427/2020|2020-12-05|EPI\_ISL\_724360|Original|hCoV-19^^England|Human|Liverpool Clinical Laboratories|COVID-19 Genomics UK (COG-UK) Consortium|Haldenby|United Kingdom

>Spike|hCoV-19/England/OXON-B18D9/2020|2020-04-15|EPI\_ISL\_479051|Original|hCoV-19^^England|Human|Oxford Viromics|COVID-19 Genomics UK (COG-UK) Consortium|Golubchik|United Kingdom

>Spike|hCoV-19/England/LIVE-DBAD01/2020|2020-11-13|EPI\_ISL\_665116|Original|hCoV-19^^England|Human|Liverpool Clinical Laboratories|COVID-19 Genomics UK (COG-UK) Consortium|Haldenby|United Kingdom

>Spike|hCoV-19/France/PAC-MEPHI-2295/2020|2020-10-06|EPI\_ISL\_644535|Original|hCoV-19^^Provence-Alpes-Cote-d\u2019Azur|Human|MEPHI|MEPHI|Levasseur|France

>Spike|hCoV-19/Mexico/CMX-INCMNSZ-03/2020|2020-03-12|EPI\_ISL\_426363|Original|hCoV-19^^Mexico City|Human|Instituto Nacional de Ciencias Medicas y Nutricion Salvador Zubiran|Instituto Nacional de Ciencias Medicas y Nutricion Salvador Zubiran|Ramos|Mexico

>Spike|hCoV-19/England/QEUEH-C328F2/2020|2020-12-10|EPI\_ISL\_782562|Original|hCoV-19^^England|Human|Lighthouse Lab in Glasgow|Wellcome Sanger Institute for the COVID-19 Genomics UK (COG-UK) Consortium|Davies|United Kingdom

>Spike|hCoV-19/USA/MA-MGH-03075/2020|2020-08-11|EPI\_ISL\_765699|Original|hCoV-19^^Massachusetts|Human|Massachusetts General Hospital|Infectious Disease Program|Park|USA

>Spike|hCoV-19/USA/WY-UNM-00142/2020|2020-07-03|EPI\_ISL\_614261|Original|hCoV-19^^Wyoming|Human|Wyoming Public Health Laboratory|Center for Global Health|Domman|USA

>Spike|hCoV-19/England/ALDP-A5092A/2020|2020-10-07|EPI\_ISL\_597854|Original|hCoV-19^^England|Human|Lighthouse Lab in Alderley Park|Wellcome Sanger Institute for the COVID-19 Genomics UK (COG-UK) consortium|Davies|United Kingdom

>Spike|hCoV-19/Japan/PG-7219/2020|2020-07-00|EPI\_ISL\_688323|Original|hCoV-19^^Japan|Human|Saitama Prefectural Institute of Public Health|Pathogen Genomics Center|Sekizuka|Japan

>Spike|hCoV-19/Scotland/CVR5655/2020|2020-11-08|EPI\_ISL\_651886|Original|hCoV-19^^Scotland|Human|Lighthouse Lab in Glasgow / MRC-University of Glasgow Centre for Virus Research|COVID-19 Genomics UK (COG-UK) Consortium|Robertson|United Kingdom

>Spike|hCoV-19/Wales/ALDP-94C764/2020|2020-06-15|EPI\_ISL\_555978|Original|hCoV-19^^Wales|Human|Lighthouse Lab in Alderley Park|Wellcome Sanger Institute for the COVID-19 Genomics UK (COG-UK) consortium|Davies|United Kingdom

>Spike|hCoV-19/Spain/CL-IBV-97006270/2020|2020-04-21|EPI\_ISL\_537641|Original|hCoV-19^^Castilla y Leon|Human|Universidad de Le\u00f3n|SeqCOVID-SPAIN consortium/IBV (CSIC) |Comas|Spain

>Spike|hCoV-19/USA/FL-BPHL-1265/2020|2020-06-08|EPI\_ISL\_541172|Original|hCoV-19^^Florida|Human|Florida Bureau of Public Health Laboratories|Florida Bureau of Public Health Laboratories|Blanton|USA

>Spike|hCoV-19/Switzerland/GR-ETHZ-140090/2020|2020-04-18|EPI\_ISL\_476132|Original|hCoV-19^^Graubunden|Human|Viollier AG|Department of Biosystems Science and Engineering|Nadeau|Switzerland

>Spike|hCoV-19/England/NORW-EBDE6/2020|2020-05-08|EPI\_ISL\_457511|Original|hCoV-19^^England|Human|Quadram Institute Bioscience|COVID-19 Genomics UK (COG-UK) Consortium|Alikhan|United Kingdom

>Spike|hCoV-19/England/CAMC-A80CA0/2020|2020-10-13|EPI\_ISL\_610775|Original|hCoV-19^^England|Human|Lighthouse Lab in Cambridge|Wellcome Sanger Institute for the COVID-19 Genomics UK (COG-UK) consortium|Davies|United Kingdom

>Spike|hCoV-19/Germany/NW-HHU-268/2020|2020-09-23|EPI\_ISL\_631356|Original|hCoV-19^^North Rhine-Westphalia|Human|ZOTZ KLIMAS MVZ D\u00fcsseldorf-Centrum GbR \u00dcBAG f\u00fcr Labormedizin|Center of Medical Microbiology|Wienemann|Germany

>Spike|hCoV-19/Denmark/DCGC-12574/2020|2020-11-16|EPI\_ISL\_682755|Original|hCoV-19^^Sjælland|Human|Department of Virus and Microbiological Special Diagnostics|Albertsen Lab|Michaelsen|Denmark

>Spike|hCoV-19/Germany/HH-hpi-p1588/2020|2020-03-16|EPI\_ISL\_776060|Original|hCoV-19^^Hamburg|Human|University Medical Center Hamburg Eppendorf|Heinrich Pette Institute|Robitaille|Germany

>Spike|hCoV-19/England/MILK-A7B5F8/2020|2020-10-15|EPI\_ISL\_607498|Original|hCoV-19^^England|Human|Lighthouse Lab in Milton Keynes|Wellcome Sanger Institute for the COVID-19 Genomics UK (COG-UK) consortium|Davies|United Kingdom

>Spike|hCoV-19/England/NORT-284521/2020|2020-03-21|EPI\_ISL\_478555|Original|hCoV-19^^England|Human|Northumbria University / South Tees Hospitals NHS Foundation Trust / North Cumbria Integrated Care NHS Foundation Trust / North Tees and Hartlepool NHS Foundation Trust / Newcastle Hospitals NHS Foundation Trust|COVID-19 Genomics UK (COG-UK) Consortium|Bashton|United Kingdom

>Spike|hCoV-19/India/TG-CCMB-AC314/2020|2020-08-19|EPI\_ISL\_539723|Original|hCoV-19^^Telangana|Human|CSIR-Centre for Cellular and Molecular Biology|CSIR-Centre for Cellular and Molecular Biology|Mukherjee|India

>Spike|hCoV-19/Poland/PL\_MCB\_32/2020|2020-04-22|EPI\_ISL\_645031|Original|hCoV-19^^Poland|Human|Human Genome Variation Research Group|Human Genome Variation Research Group||Poland

>Spike|hCoV-19/USA/TX-HMH-4717/2020|2020-06-22|EPI\_ISL\_544282|Original|hCoV-19^^Texas|Human|Houston Methodist Hospital|Houston Methodist Hospital|Long|USA

>Spike|hCoV-19/United Arab Emirates/1001/2020|2020-06-10|EPI\_ISL\_699133|Original|hCoV-19^^Abu Dhabi|Human|Group 42 (G42) Healthcare|G42 Healthcare|Ogrodzki|United Arab Emirates

>Spike|hCoV-19/Japan/PG-4803/2020|2020-08-00|EPI\_ISL\_689928|Original|hCoV-19^^Japan|Human|Pathogen Genomics Center|Pathogen Genomics Center|Sekizuka|Japan

>Spike|hCoV-19/England/LIVE-A8592/2020|2020-03-27|EPI\_ISL\_517183|Original|hCoV-19^^England|Human|Liverpool Clinical Laboratories|COVID-19 Genomics UK (COG-UK) Consortium|Haldenby|United Kingdom

>Spike|hCoV-19/England/QEUH-766405/2020|2020-07-15|EPI\_ISL\_533008|Original|hCoV-19^^England|Human|Lighthouse Lab in Glasgow|Wellcome Sanger Institute for the COVID-19 Genomics UK (COG-UK) consortium|Davies|United Kingdom

>Spike|hCoV-19/England/20134017104/2020|2020-03-23|EPI\_ISL\_423093|Original|hCoV-19^^England|Human|Respiratory Virus Unit|Respiratory Virus Unit|Platt|United Kingdom

>Spike|hCoV-19/Spain/AR-IBV-98010717/2020|2020-10-07|EPI\_ISL\_722220|Original|hCoV-19^^Aragon|Human|Servicio de Microbiolog\u00eda|SeqCOVID-SPAIN consortium/IBV (CSIC) |Comas|Spain

>Spike|hCoV-19/England/QEUH-95DD9B/2020|2020-08-07|EPI\_ISL\_537019|Original|hCoV-19^^England|Human|Lighthouse Lab in Glasgow|Wellcome Sanger Institute for the COVID-19 Genomics UK (COG-UK) consortium|Davies|United Kingdom

>Spike|hCoV-19/England/QEUH-9DBFF9/2020|2020-09-21|EPI\_ISL\_601380|Original|hCoV-19^^England|Human|Lighthouse Lab in Glasgow|Wellcome Sanger Institute for the COVID-19 Genomics UK (COG-UK) consortium|Davies|United Kingdom

>Spike|hCoV-19/Australia/VIC2668/2020|2020-07-02|EPI\_ISL\_521510|Original|hCoV-19^^Victoria|Human|Victorian Infectious Diseases Reference Laboratory (VIDRL)|VIDRL and MDU-PHL|Schultz|Australia

>Spike|hCoV-19/Denmark/DCGC-7291/2020|2020-10-12|EPI\_ISL\_619253|Original|hCoV-19^^Midtjylland|Human|Department of Virus and Microbiological Special Diagnostics|Albertsen lab|Michaelsen|Denmark

>Spike|hCoV-19/Ireland/WH-NVRL-MPP60633/2020|2020-04-10|EPI\_ISL\_768750|Original|hCoV-19^^Westmeath|Human|National Virus Reference Laboratory|Irish Coronavirus Sequencing Consortium - Teagasc Moorepark|Walsh|Ireland

>Spike|hCoV-19/Canada/ON-PHL-20-90107/2020|2020-03-00|EPI\_ISL\_548940|Original|hCoV-19^^Ontario|Human|Public Health Ontario Laboratory|Public Health Ontario Laboratory|Guthrie|Canada

>Spike|hCoV-19/Iran/SA-Isf-51-2/2020|2020-06-10|EPI\_ISL\_672605|Original|hCoV-19^^Iran|Human|Infectious Diseases and Tropical Medicine Research Center|Infectious Diseases and Tropical Medicine Research Center|Ahangarzadeh, S.|Iran

>Spike|hCoV-19/Finland/4LS20E5/2020|2020-08-08|EPI\_ISL\_756001|Original|hCoV-19^^Uusimaa|Human|Department of Virology and Immunology|Department of Virology|Smura|Finland

>Spike|hCoV-19/Denmark/DCGC-17195/2020|2020-12-14|EPI\_ISL\_750816|Original|hCoV-19^^Midtjylland|Human|Department of Virus and Microbiological Special Diagnostics|Albertsen Lab|Michaelsen|Denmark

>Spike|hCoV-19/Scotland/QEUH-A0C116/2020|2020-10-03|EPI\_ISL\_585600|Original|hCoV-19^^Scotland|Human|Quadram Institute Bioscience|COVID-19 Genomics UK (COG-UK) Consortium|Alikhan|United Kingdom

>Spike|hCoV-19/USA/CA-CZB-13014/2020|2020-10-26|EPI\_ISL\_672300|Original|hCoV-19^^California|Human|Santa Clara County Public Health Laboratory|Chan-Zuckerberg Biohub|Bhatt|USA

>Spike|hCoV-19/Jordan/AM-ALSR-3988/2020|2020-10-03|EPI\_ISL\_636351|Original|hCoV-19^^Amman|Human|Biolab Diagnostic Laboratories|Andersen lab at Scripps Research|Gangavarapu|Jordan

>Spike|hCoV-19/Denmark/DCGC-13053/2020|2020-11-30|EPI\_ISL\_712555|Original|hCoV-19^^Hovedstaden|Human|Department of Virus and Microbiological Special Diagnostics|Albertsen Lab|Michaelsen|Denmark

>Spike|hCoV-19/Scotland/EDB1640/2020|2020-04-14|EPI\_ISL\_433099|Original|hCoV-19^^Scotland|Human|Virology Department|COVID-19 Genomics UK (COG-UK) Consortium|Williams|United Kingdom

>Spike|hCoV-19/Luxembourg/LNS4612590/2020|2020-11-05|EPI\_ISL\_740508|Original|hCoV-19^^Luxembourg|Human|Laboratoire national de sant\u00e9|Laboratoire national de sant\u00e9|Wienecke-Baldacchino|Luxembourg

>Spike|hCoV-19/England/MILK-A22BFE/2020|2020-10-03|EPI\_ISL\_611980|Original|hCoV-19^^England|Human|Northumbria University / South Tees Hospitals NHS Foundation Trust / North Cumbria Integrated Care NHS Foundation Trust / North Tees and Hartlepool NHS Foundation Trust / Newcastle Hospitals NHS Foundation Trust|COVID-19 Genomics UK (COG-UK) Consortium|Bashton|United Kingdom

>Spike|hCoV-19/USA/WI-UW-2667/2020|2020-12-31|EPI\_ISL\_791180|Original|hCoV-19^^Wisconsin|Human|University of Wisconsin-Madison AIDS Vaccine Research Laboratories|University of Wisconsin-Madison AIDS Vaccine Research Laboratories|Moreno|USA

>Spike|hCoV-19/England/ALDP-9B5B1F/2020|2020-08-28|EPI\_ISL\_590259|Original|hCoV-19^^England|Human|Lighthouse Lab in Alderley Park|Wellcome Sanger Institute for the COVID-19 Genomics UK (COG-UK) consortium|Davies|United Kingdom

>Spike|hCoV-19/England/ALDP-BCAA72/2020|2020-11-23|EPI\_ISL\_703418|Original|hCoV-19^^England|Human|Lighthouse Lab in Alderley Park|Wellcome Sanger Institute for the COVID-19 Genomics UK (COG-UK) Consortium|Davies|United Kingdom

>Spike|hCoV-19/Chile/RM-170366/2020|2020-09-05|EPI\_ISL\_746715|Original|hCoV-19^^Region Metropolitana de Santiago|Human|Genetica Molecular and Subdepartamento de Virologia ISP Chile|Instituto de Salud Publica de Chile|Tognarelli|Chile

>Spike|hCoV-19/USA/WA-S2069/2020|2020-06-05|EPI\_ISL\_497497|Original|hCoV-19^^Washington|Human|Washington State Department of Health|Seattle Flu Study|Lee|USA

>Spike|hCoV-19/England/ALDP-AA1E67/2020|2020-10-22|EPI\_ISL\_624946|Original|hCoV-19^^England|Human|Lighthouse Lab in Alderley Park|Wellcome Sanger Institute for the COVID-19 Genomics UK (COG-UK) consortium|Davies|United Kingdom

>Spike|hCoV-19/England/MILK-A7B23D/2020|2020-10-14|EPI\_ISL\_607563|Original|hCoV-19^^England|Human|Lighthouse Lab in Milton Keynes|Wellcome Sanger Institute for the COVID-19 Genomics UK (COG-UK) consortium|Davies|United Kingdom

>Spike|hCoV-19/Switzerland/ZH-ETHZ-360328/2020|2020-11-06|EPI\_ISL\_729214|Original|hCoV-19^^Zurich|Human|Viollier AG|Department of Biosystems Science and Engineering|Nadeau|Switzerland

>Spike|hCoV-19/England/QEUA-AAD760/2020|2020-10-20|EPI\_ISL\_637350|Original|hCoV-19^^England|Human|Liverpool Clinical Laboratories|COVID-19 Genomics UK (COG-UK) Consortium|Haldenby|United Kingdom

>Spike|hCoV-19/Wales/PHWC-25946/2020|2020-03-25|EPI\_ISL\_422169|Original|hCoV-19^^Wales|Human|Wales Specialist Virology Centre|Public Health Wales Microbiology Cardiff|Moore|United Kingdom

>Spike|hCoV-19/England/CAMB-1ACA25/2020|2020-04-23|EPI\_ISL\_489404|Original|hCoV-19^^England|Human|Department of Pathology|Wellcome Sanger Institute for the COVID-19 Genomics UK (COG-UK) consortium|Davies|United Kingdom

>Spike|hCoV-19/New Zealand/20VR2652/2020|2020-00-00|EPI\_ISL\_579320|Original|hCoV-19^^Auckland|Human|LabPLUS|Institute of Environmental Science and Research (ESR)|Wang|New Zealand

>Spike|hCoV-19/England/CAMC-AEA688/2020|2020-10-25|EPI\_ISL\_633341|Original|hCoV-19^^England|Human|Lighthouse Lab in Cambridge|Wellcome Sanger Institute for the COVID-19 Genomics UK (COG-UK) consortium|Davies|United Kingdom

>Spike|hCoV-19/England/ALDP-B5B50C/2020|2020-11-09|EPI\_ISL\_655583|Original|hCoV-19^^England|Human|Lighthouse Lab in Alderley Park|Wellcome Sanger Institute for the COVID-19 Genomics UK (COG-UK) Consortium|Davies|United Kingdom

>Spike|hCoV-19/Luxembourg/LNS4596559/2020|2020-11-30|EPI\_ISL\_770931|Original|hCoV-19^^Luxembourg|Human|Laboratoire national de sant\u00e9|Laboratoire national de sant\u00e9|Wienecke-Baldacchino|Luxembourg

>Spike|hCoV-19/USA/TX-HMH-MCoV-18336/2020|2020-11-18|EPI\_ISL\_784684|Original|hCoV-19^^Texas|Human|Houston Methodist Hospital|Houston Methodist Hospital|Long|USA

>Spike|hCoV-19/Scotland/GCVR-1713A6/2020|2020-03-26|EPI\_ISL\_459535|Original|hCoV-19^^Scotland|Human|NHSGGC West of Scotland Specialist Virology Centre / MRC-University of Glasgow Centre for Virus Research|Wellcome Sanger Institute for the COVID-19 Genomics UK (COG-UK) consortium|Davies|United Kingdom

>Spike|hCoV-19/Netherlands/NB-EMC-343/2020|2020-10-31|EPI\_ISL\_722583|Original|hCoV-19^^Noord Brabant|Human|Dutch COVID-19 response team|Erasmus Medical Center|Oude Munnink|Netherlands

>Spike|hCoV-19/England/ALDP-9E627A/2020|2020-09-24|EPI\_ISL\_580315|Original|hCoV-19^^England|Human|Lighthouse Lab in Alderley Park|Wellcome Sanger Institute for the COVID-19 Genomics UK (COG-UK) consortium|Davies|United Kingdom

>Spike|hCoV-19/Iran/K1r-19/2020|2020-03-22|EPI\_ISL\_568488|Original|hCoV-19^^Iran|Human|Virology|Virology|Ranjbar|Iran

>Spike|hCoV-19/England/GSTT-265D1F6/2020|2020-03-15|EPI\_ISL\_483925|Original|hCoV-19^^England|Human|Centre for Clinical Infection and Diagnostics Research and Genomics Innovation Unit|COVID-19 Genomics UK (COG-UK) Consortium|Awan|United Kingdom

>Spike|hCoV-19/France/IDF-3384/2020|2020-03-23|EPI\_ISL\_428347|Original|hCoV-19^^\u00cele-de-France|Human|Service de Biologie M\u00e9dicale - BP 125|National Reference Center for Viruses of Respiratory Infections|Enouf|France

>Spike|hCoV-19/Belgium/ULG-10363/2020|2020-08-06|EPI\_ISL\_540530|Original|hCoV-19^^Li\u00e8ge|Human|Department of Clinical Microbiology|GIGA Medical Genomics|Durkin|Belgium

>Spike|hCoV-19/Brazil/SP-128/2020|2020-04-02|EPI\_ISL\_523955|Original|hCoV-19^^S\u00e3o Paulo|Human|Hospital Municipal do Tatuape Carmino Caricchio|Instituto Adolfo Lutz|Sacchi|Brazil

>Spike|hCoV-19/Ireland/WW-NVRL-20IRL60901/2020|2020-10-13|EPI\_ISL\_639885|Original|hCoV-19^^Wicklow|Human|National Virus Reference Laboratory|National Virus Reference Laboratory|Gonzalez|Ireland

>Spike|hCoV-19/USA/AZ-QDX-1580/2020|2020-03-17|EPI\_ISL\_603873|Original|hCoV-19^^Arizona|Human|Quest Diagnostics|Quest Diagnostics|Kagan|USA

>Spike|hCoV-19/England/CAMB-7DFF2/2020|2020-04-07|EPI\_ISL\_442200|Original|hCoV-19^^England|Human|Department of Pathology|Wellcome Sanger Institute for the COVID-19 Genomics UK (COG-UK) consortium|Amato|United Kingdom

>Spike|hCoV-19/England/ALDP-B63B96/2020|2020-11-08|EPI\_ISL\_656365|Original|hCoV-19^^England|Human|Lighthouse Lab in Alderley Park|Wellcome Sanger Institute for the COVID-19 Genomics UK (COG-UK) Consortium|Davies|United Kingdom

>Spike|hCoV-19/France/PAC-MEPHI-2214/2020|2020-10-02|EPI\_ISL\_644378|Original|hCoV-19^^Provence-Alpes-Cote-d\u2019Azur|Human|MEPHI|MEPHI|Levasseur|France

>Spike|hCoV-19/Denmark/DCGC-1708/2020|2020-03-23|EPI\_ISL\_617993|Original|hCoV-19^^Sjælland|Human|Department of Virus and Microbiological Special Diagnostics|Albertsen lab|Michaelsen|Denmark

>Spike|hCoV-19/India/MH-NCCS-NR-7123/2020|2020-06-26|EPI\_ISL\_721660|Original|hCoV-19^^Maharashtra|Human|National Centre For Cell Science|National Centre For Cell Science|Paul|India

>Spike|hCoV-19/USA/TX-DSHS-1004/2020|2020-07-03|EPI\_ISL\_613982|Original|hCoV-19^^Texas|Human|Texas Department of State Health Services|Texas Department of State Health Services|Rahman|USA

>Spike|hCoV-19/USA/CA-LACPHL-AE00011/2020|2020-07-01|EPI\_ISL\_707908|Original|hCoV-19^^California|Human|Los Angeles County Public Health Laboratory|Los Angeles County Public Health Laboratory|Hemarajata|USA

>Spike|hCoV-19/USA/CO-CDPHE-2009163590/2020|2020-09-16|EPI\_ISL\_677243|Original|hCoV-19^^Colorado|Human|Colorado Department of Public Health and Environment|Colorado Department of Public Health and Environment|Bankers|USA

>Spike|hCoV-19/South Korea/KCDC2296/2020|2020-05-22|EPI\_ISL\_510632|Original|hCoV-19^^South Korea|Human|Division of Viral Diseases|Division of Viral Diseases|Kim|South Korea

>Spike|hCoV-19/England/LOND-126168E/2020|2020-03-28|EPI\_ISL\_524648|Original|hCoV-19^^England|Human|North West London Pathology|Wellcome Sanger Institute for the COVID-19 Genomics UK (COG-UK) consortium|Davies|United Kingdom

>Spike|hCoV-19/Japan/PG-5866/2020|2020-08-00|EPI\_ISL\_688981|Original|hCoV-19^^Japan|Human|Pathogen Genomics Center|Pathogen Genomics Center|Sekizuka|Japan

>Spike|hCoV-19/USA/LA-GBCL-26791773/2020|2020-04-04|EPI\_ISL\_485381|Original|hCoV-19^^Louisiana|Human|River Road Testing Lab|Ginkgo Bioworks Clinical Laboratory|Smith|USA

>Spike|hCoV-19/USA/VA-DCLS-1837/2020|2020-09-22|EPI\_ISL\_614129|Original|hCoV-19^^Virginia|Human|Virginia DCLS|Virginia DCLS|St. Jacques|USA

>Spike|hCoV-19/Scotland/EDB101/2020|2020-03-21|EPI\_ISL\_425891|Original|hCoV-19^^Scotland|Human|Virology Department|COVID-19 Genomics UK (COG-UK) Consortium|Williams|United Kingdom

>Spike|hCoV-19/England/CAMB-7D129/2020|2020-04-06|EPI\_ISL\_441655|Original|hCoV-19^^England|Human|Department of Pathology|Wellcome Sanger Institute for the COVID-19 Genomics UK (COG-UK) consortium|Amato|United Kingdom

>Spike|hCoV-19/Iceland/290/2020|2020-03-18|EPI\_ISL\_417619|Original|hCoV-19^^Reykjavik|Human|The National University Hospital of Iceland|deCODE genetics|J\u00f3nsson|Iceland

>Spike|hCoV-19/Russia/DA-RII-MH2742S/2020|2020-09-23|EPI\_ISL\_602420|Original|hCoV-19^^Dagestan|Human|HELIX LLC|WHO National Influenza Centre Russian Federation|Komissarov|Russia

>Spike|hCoV-19/England/LIVE-A6831/2020|2020-03-16|EPI\_ISL\_499746|Original|hCoV-19^^England|Human|Liverpool Clinical Laboratories|COVID-19 Genomics UK (COG-UK) Consortium|Haldenby|United Kingdom

>Spike|hCoV-19/Scotland/EDB5806/2020|2020-04-27|EPI\_ISL\_473860|Original|hCoV-19^^Scotland|Human|Virology Department|COVID-19 Genomics UK (COG-UK) Consortium|Williams|United Kingdom

>Spike|hCoV-19/Australia/VIC2217/2020|2020-06-14|EPI\_ISL\_521957|Original|hCoV-19^^Victoria|Human|Victorian Infectious Diseases Reference Laboratory (VIDRL)|VIDRL and MDU-PHL|Schultz|Australia

>Spike|hCoV-19/Scotland/QEUA-9A472E/2020|2020-09-01|EPI\_ISL\_568383|Original|hCoV-19^^Scotland|Human|Lighthouse Lab in Glasgow|Wellcome Sanger Institute for the COVID-19 Genomics UK (COG-UK) consortium|Davies|United Kingdom

>Spike|hCoV-19/England/ALDP-645203/2020|2020-07-04|EPI\_ISL\_558008|Original|hCoV-19^^England|Human|Lighthouse Lab in Alderley Park|Wellcome Sanger Institute for the COVID-19 Genomics UK (COG-UK) consortium|Davies|United Kingdom

>Spike|hCoV-19/USA/TX-HMH-MCoV-18517/2020|2020-11-20|EPI\_ISL\_784865|Original|hCoV-19^^Texas|Human|Houston Methodist Hospital|Houston Methodist Hospital|Long|USA

>Spike|hCoV-19/USA/TX-HMH-2413/2020|2020-05-25|EPI\_ISL\_545296|Original|hCoV-19^^Texas|Human|Houston Methodist Hospital|Houston Methodist Hospital|Long|USA

>Spike|hCoV-19/South Africa/NHLS-UCT-GS-0033/2020|2020-08-20|EPI\_ISL\_640034|Original|hCoV-19^^Western Cape|Human|Sedgefield Clinic w SGE|NHLS/UCT|Iranzadeh|South Africa

>Spike|hCoV-19/USA/FL-BPHL-1349/2020|2020-07-15|EPI\_ISL\_541287|Original|hCoV-19^^Florida|Human|Florida Bureau of Public Health Laboratories|Florida Bureau of Public Health Laboratories|Blanton|USA

>Spike|hCoV-19/England/ALDP-A6C6D9/2020|2020-10-15|EPI\_ISL\_608056|Original|hCoV-19^^England|Human|Lighthouse Lab in Alderley Park|Wellcome Sanger Institute for the COVID-19 Genomics UK (COG-UK) consortium|Davies|United Kingdom

>Spike|hCoV-19/England/NORW-E6DDC/2020|2020-04-19|EPI\_ISL\_448979|Original|hCoV-19^^England|Human|Quadram Institute Bioscience|COVID-19 Genomics UK (COG-UK) Consortium|Alikhan|United Kingdom

>Spike|hCoV-19/England/QEUA-9DD05E/2020|2020-09-21|EPI\_ISL\_599571|Original|hCoV-19^^England|Human|Lighthouse Lab in Glasgow|Wellcome Sanger Institute for the COVID-19 Genomics UK (COG-UK) consortium|Davies|United Kingdom

>Spike|hCoV-19/Netherlands/NH-RIVM-20049/2020|2020-11-08|EPI\_ISL\_723234|Original|hCoV-19^^Noord-Holland|Human|Dutch COVID-19 response team|National Institute for Public Health and the Environment (RIVM)|Meijer|Netherlands

>Spike|hCoV-19/France/PAC-IHU-0906/2020|2020-03-15|EPI\_ISL\_568989|Original|hCoV-19^^Provence-Alpes-C\u00f4te-d\u00e0z|Human|MEPHI|MEPHI|Levasseur|France

>Spike|hCoV-19/Scotland/QEUH-9FF6AF/2020|2020-10-02|EPI\_ISL\_600394|Original|hCoV-19^^Scotland|Human|Lighthouse Lab in Glasgow|Wellcome Sanger Institute for the COVID-19 Genomics UK (COG-UK) consortium|Davies|United Kingdom

>Spike|hCoV-19/Scotland/QEUH-A1FACA/2020|2020-10-01|EPI\_ISL\_599074|Original|hCoV-19^^Scotland|Human|Lighthouse Lab in Glasgow|Wellcome Sanger Institute for the COVID-19 Genomics UK (COG-UK) consortium|Davies|United Kingdom

>Spike|hCoV-19/Denmark/DCGC-15503/2020|2020-11-23|EPI\_ISL\_713855|Original|hCoV-19^^Midtjylland|Human|Department of Virus and Microbiological Special Diagnostics|Albertsen Lab|Michaelsen|Denmark

>Spike|hCoV-19/England/LOND-DC5A4/2020|2020-11-12|EPI\_ISL\_679624|Original|hCoV-19^^England|Human|University College London|COVID-19 Genomics UK (COG-UK) Consortium|Roy|United Kingdom

>Spike|hCoV-19/England/QEUH-B696CC/2020|2020-11-11|EPI\_ISL\_655168|Original|hCoV-19^^England|Human|Lighthouse Lab in Glasgow|Wellcome Sanger Institute for the COVID-19 Genomics UK (COG-UK) Consortium|Davies|United Kingdom

>Spike|hCoV-19/England/ALDP-A6D9A2/2020|2020-10-14|EPI\_ISL\_607135|Original|hCoV-19^^England|Human|Lighthouse Lab in Alderley Park|Wellcome Sanger Institute for the COVID-19 Genomics UK (COG-UK) consortium|Davies|United Kingdom

>Spike|hCoV-19/India/GJ-GBRC125/2020|2020-05-02|EPI\_ISL\_455022|Original|hCoV-19^^Gujarat|Human|Government Medical College|Gujarat Biotechnology Research Centre|Joshi|India

>Spike|hCoV-19/England/QEUH-9DC31A/2020|2020-09-21|EPI\_ISL\_581068|Original|hCoV-19^^England|Human|Lighthouse Lab in Glasgow|Wellcome Sanger Institute for the COVID-19 Genomics UK (COG-UK) consortium|Davies|United Kingdom

>Spike|hCoV-19/USA/NY-NYCPHL-001360/2020|2020-11-16|EPI\_ISL\_683981|Original|hCoV-19^^New York|Human|DOHMH Chelsea|New York City Public Health Laboratory|Wang|USA

>Spike|hCoV-19/USA/MD-HP12101/2020|2020-12-23|EPI\_ISL\_791419|Original|hCoV-19^^Maryland|Human|Johns Hopkins Hospital Department of Pathology|Johns Hopkins Hospital Department of Pathology|Morris|USA

>Spike|hCoV-19/Spain/MD-IBV-003661/2020|2020-04-01|EPI\_ISL\_467245|Original|hCoV-19^^Madrid|Human|Hospital General Universitario Gregorio Mara\u00f1a|SeqCOVID-SPAIN consortium|IBV (CSIC)|Comas|Spain

>Spike|hCoV-19/England/QEUH-9DA965/2020|2020-09-21|EPI\_ISL\_601402|Original|hCoV-19^^England|Human|Lighthouse Lab in Glasgow|Wellcome Sanger Institute for the COVID-19 Genomics UK (COG-UK) consortium|Davies|United Kingdom

>Spike|hCoV-19/USA/UT-UPHL-2012891289/2020|2020-08-16|EPI\_ISL\_745539|Original|hCoV-19^^Utah|Human|Ginkgo Bioworks Clinical Laboratory|Utah Public Health Laboratory|Young|USA

>Spike|hCoV-19/USA/UT-UPHL-2008809/2020|2020-05-23|EPI\_ISL\_524835|Original|hCoV-19^^Utah|Human|Utah Public Health Laboratory|Utah Public Health Laboratory|Young|USA

>Spike|hCoV-19/Denmark/DCGC-13166/2020|2020-11-30|EPI\_ISL\_712629|Original|hCoV-19^^Hovedstaden|Human|Department of Virus and Microbiological Special Diagnostics|Albertsen Lab|Michaelsen|Denmark

>Spike|hCoV-19/Australia/VIC8153/2020|2020-08-07|EPI\_ISL\_564875|Original|hCoV-19^^Victoria|Human|Microbiological Diagnostic Unit - Public Health Laboratory (MDU-PHL)|MDU-PHL|Schultz|Australia

>Spike|hCoV-19/England/ALDP-C3DAF1/2020|2020-12-10|EPI\_ISL\_730950|Original|hCoV-19^^England|Human|Lighthouse Lab in Alderley Park|Wellcome Sanger Institute for the COVID-19 Genomics UK (COG-UK) Consortium|Davies|United Kingdom

>Spike|hCoV-19/USA/TX-HMH-2523/2020|2020-06-03|EPI\_ISL\_545359|Original|hCoV-19^^Texas|Human|Houston Methodist Hospital|Houston Methodist Hospital|Long|USA

>Spike|hCoV-19/England/QEUH-AE2DF4/2020|2020-10-27|EPI\_ISL\_633585|Original|hCoV-19^^England|Human|Lighthouse Lab in Glasgow|Wellcome Sanger Institute for the COVID-19 Genomics UK (COG-UK) consortium|Davies|United Kingdom

>Spike|hCoV-19/England/LIVE-DC6898/2020|2020-11-23|EPI\_ISL\_703261|Original|hCoV-19^^England|Human|Liverpool Clinical Laboratories|COVID-19 Genomics UK (COG-UK) Consortium|Haldenby|United Kingdom

>Spike|hCoV-19/England/ALDP-B1F5E6/2020|2020-11-01|EPI\_ISL\_646006|Original|hCoV-19^^England|Human|Lighthouse Lab in Alderley Park|Wellcome Sanger Institute for the COVID-19 Genomics UK (COG-UK) Consortium|Davies|United Kingdom

>Spike|hCoV-19/England/ALDP-AA3FCC/2020|2020-10-22|EPI\_ISL\_630735|Original|hCoV-19^^England|Human|Lighthouse Lab in Alderley Park|Wellcome Sanger Institute for the COVID-19 Genomics UK (COG-UK) consortium|Davies|United Kingdom

>Spike|hCoV-19/England/ALDP-BE96B5/2020|2020-12-03|EPI\_ISL\_708919|Original|hCoV-19^^England|Human|Lighthouse Lab in Alderley Park|Wellcome Sanger Institute for the COVID-19 Genomics UK (COG-UK) Consortium|Davies|United Kingdom

>Spike|hCoV-19/England/CAMB-7915A/2020|2020-04-03|EPI\_ISL\_441222|Original|hCoV-19^^England|Human|Department of Pathology|Wellcome Sanger Institute for the COVID-19 Genomics UK (COG-UK) consortium|Amato|United Kingdom

>Spike|hCoV-19/Canada/QC-LSPQ-L00238812/2020|2020-03-24|EPI\_ISL\_536222|Original|hCoV-19^^Quebec|Human|Conseil Cri de la SSS de la Baie-James|Laboratoire de sant\u00e9 publique du Qu\u00e9bec|Moreira|Canada

>Spike|hCoV-19/England/205120840/2020|2020-12-15|EPI\_ISL\_766316|Original|hCoV-19^^England|Human|Respiratory Virus Unit|COVID-19 Genomics UK (COG-UK) Consortium|Platt|United Kingdom

>Spike|hCoV-19/France/PAC-IHU-1295/2020|2020-08-18|EPI\_ISL\_569110|Original|hCoV-19^^Provence-Alpes-C\u00f4te-d\u00e9Azur|Human|MEPHI|MEPHI|Levasseur|France

>Spike|hCoV-19/USA/OR-OHSU-2122/2020|2020-08-04|EPI\_ISL\_667120|Original|hCoV-19^^Oregon|Human|OHSU Lab Services Molecular Microbiology Lab|Oregon SARS-CoV-2 Genome Sequencing Center|O'Roak|USA

>Spike|hCoV-19/England/MILK-AB7CBF/2020|2020-10-21|EPI\_ISL\_623826|Original|hCoV-19^^England|Human|Lighthouse Lab in Milton Keynes|Wellcome Sanger Institute for the COVID-19 Genomics UK (COG-UK) consortium|Davies|United Kingdom

>Spike|hCoV-19/Peru/LIM-UPCH-0179/2020|2020-10-13|EPI\_ISL\_729882|Original|hCoV-19^^Lima|Human|Laboratorio de Referencia Nacional de Virus Respiratorios|Laboratorio de Gen\u00f3mica Microbiana|Tsukayama|Peru

>Spike|hCoV-19/England/LIVE-A6181/2020|2020-03-21|EPI\_ISL\_499689|Original|hCoV-19^^England|Human|Liverpool Clinical Laboratories|COVID-19 Genomics UK (COG-UK) Consortium|Haldenby|United Kingdom

>Spike|hCoV-19/England/CAMC-BBCEB3/2020|2020-11-18|EPI\_ISL\_724207|Original|hCoV-19^^England|Human|Quadram Institute Bioscience|COVID-19 Genomics UK (COG-UK) Consortium|Alikhan|United Kingdom

>Spike|hCoV-19/Australia/VIC4884/2020|2020-07-13|EPI\_ISL\_519266|Original|hCoV-19^^Victoria|Human|Victorian Infectious Diseases Reference Laboratory (VIDRL)|VIDRL and MDU-PHL|Schultz|Australia

>Spike|hCoV-19/USA/TX-HMH-MCoV-18569/2020|2020-11-20|EPI\_ISL\_784917|Original|hCoV-19^^Texas|Human|Houston Methodist Hospital|Houston Methodist Hospital|Long|USA

>Spike|hCoV-19/England/CAMC-B545C7/2020|2020-11-08|EPI\_ISL\_658095|Original|hCoV-19^^England|Human|Lighthouse Lab in Cambridge|Wellcome Sanger Institute for the COVID-19 Genomics UK (COG-UK) Consortium|Davies|United Kingdom

>Spike|hCoV-19/England/QEUEH-9DCBC7/2020|2020-09-21|EPI\_ISL\_580983|Original|hCoV-19^^England|Human|Lighthouse Lab in Glasgow|Wellcome Sanger Institute for the COVID-19 Genomics UK (COG-UK) consortium|Davies|United Kingdom

>Spike|hCoV-19/Colombia/TOL-INS-0341-T15/2020|2020-04-14|EPI\_ISL\_526964|Original|hCoV-19^^Tolima|Human|Instituto Nacional de Salud|Instituto Nacional de Salud|Franco-Mu\u00f1oz|Colombia

>Spike|hCoV-19/England/LIVE-A64E2/2020|2020-03-18|EPI\_ISL\_499569|Original|hCoV-19^^England|Human|Liverpool Clinical Laboratories|COVID-19 Genomics UK (COG-UK) Consortium|Haldenby|United Kingdom

>Spike|hCoV-19/USA/CA-CHLA-PLM20114271/2020|2020-12-02|EPI\_ISL\_753588|Original|hCoV-19^^California|Human|Clinical virology Laboratory|Center for Personalized Medicine|Dien Bard|USA

>Spike|hCoV-19/USA/MI-MDHHS-SC21578/2020|2020-03-23|EPI\_ISL\_516305|Original|hCoV-19^^Michigan|Human|Michigan Department of Health and Human Services|Michigan Department of Health and Human Services|Blankenship|USA

>Spike|hCoV-19/England/CAMB-81AEB/2020|2020-04-11|EPI\_ISL\_443093|Original|hCoV-19^^England|Human|Department of Pathology|Wellcome Sanger Institute for the COVID-19 Genomics UK (COG-UK) consortium|Amato|United Kingdom



>Spike|hCoV-19/Scotland/QEUH-98F3BC/2020|2020-08-25|EPI\_ISL\_540349|Original|hCoV-19^^Scotland|Human|Lighthouse Lab in Glasgow|Wellcome Sanger Institute for the COVID-19 Genomics UK (COG-UK) consortium|Davies|United Kingdom

>Spike|hCoV-19/USA/NY-Wadsworth-291750-01/2020|2020-12-26|EPI\_ISL\_767612|Original|hCoV-19^^New York|Human|SARATOGA HOSPITAL LABORATORY|Wadsworth Center|Lasek-Nesselquist|USA

>Spike|hCoV-19/USA/FL-BPHL-06/2020|2020-04-04|EPI\_ISL\_436510|Original|hCoV-19^^Florida|Human|Florida Bureau of Public Health Laboratories|Florida Bureau of Public Health Laboratories|Blanton|USA

>Spike|hCoV-19/USA/NY-NYCPHL-000200/2020|2020-04-17|EPI\_ISL\_631734|Original|hCoV-19^^New York|Human|Jamaica Hospital Medical Center|New York City Public Health Laboratory|Wang|USA

>Spike|hCoV-19/England/QEUH-A762D8/2020|2020-10-13|EPI\_ISL\_613314|Original|hCoV-19^^England|Human|Queens Medical Centre|COVID-19 Genomics UK (COG-UK) Consortium|Loose|United Kingdom

>Spike|hCoV-19/Japan/PG-0381/2020|2020-03-01|EPI\_ISL\_480050|Original|hCoV-19^^Chubu|Human|Nagoya City Public Health Research Institute|Pathogen Genomics Center|Sekizuka|Japan

>Spike|hCoV-19/USA/NMDOH-2020117650/2020|2020-06-09|EPI\_ISL\_542016|Original|hCoV-19^^New Mexico|Human|New Mexico Department of Health Scientific Laboratory|New Mexico Department of Health Scientific Laboratory|Johnson|USA

>Spike|hCoV-19/USA/AZ-TG276778/2020|2020-04-17|EPI\_ISL\_694135|Original|hCoV-19^^Arizona|Human|AZ SPHL|TGen North|French|USA

>Spike|hCoV-19/USA/NV-NSPHL-A0019/2020|2020-03-15|EPI\_ISL\_515306|Original|hCoV-19^^Nevada|Human|Nevada State Public Health Laboratory|Nevada State Public Health Laboratory|Sevinsky|USA

>Spike|hCoV-19/Japan/PG-5013/2020|2020-08-00|EPI\_ISL\_690124|Original|hCoV-19^^Japan|Human|Pathogen Genomics Center|Pathogen Genomics Center|Sekizuka|Japan

>Spike|hCoV-19/Vietnam/HCMC-35006/2020|2020-03-22|EPI\_ISL\_498183|unknown|hCoV-19^^Ho Chi Minh City|Human|OUCRU|OUCRU|Nguyen|Vietnam

>Spike|hCoV-19/Wales/PHWC-16E7FB/2020|2020-10-06|EPI\_ISL\_585772|Original|hCoV-19^^Wales|Human|Wales Specialist Virology Centre Sequencing lab|COVID-19 Genomics UK (COG-UK) Consortium|Moore|United Kingdom

>Spike|hCoV-19/Switzerland/BE-ETHZ-100154/2020|2020-03-16|EPI\_ISL\_451738|Original|hCoV-19^^Bern|Human|Viollier AG|Department of Biosystems Science and Engineering|Nadeau|Switzerland

>Spike|hCoV-19/USA/CA-ALSR-3819/2020|2020-06-12|EPI\_ISL\_636223|Original|hCoV-19^^California|Human|San Diego County Public Health Laboratory|Andersen lab at Scripps Research|Gangavarapu|USA

>Spike|hCoV-19/USA/DE-DHSS-F980768/2020|2020-08-23|EPI\_ISL\_708418|Original|hCoV-19^^Delaware|Human|Delaware Public Health Lab|Delaware Public Health Lab|Bajwa|USA

>Spike|hCoV-19/Australia/VIC16161/2020|2020-08-10|EPI\_ISL\_640510|Original|hCoV-19^^Victoria|Human|Microbiological Diagnostic Unit - Public Health Laboratory (MDU-PHL)|MDU-PHL|Schultz|Australia

>Spike|hCoV-19/Germany/HH-hpi-p1991/2020|2020-03-27|EPI\_ISL\_776309|Original|hCoV-19^^Hamburg|Human|University Medical Center Hamburg Eppendorf|Heinrich Pette Institute|Robitaille|Germany

>Spike|hCoV-19/Scotland/QEUH-9B3C69/2020|2020-09-08|EPI\_ISL\_560060|Original|hCoV-19^^Scotland|Human|Virology Department|COVID-19 Genomics UK (COG-UK) Consortium|de Silva|United Kingdom

>Spike|hCoV-19/USA/WI-UW-745/2020|2020-07-01|EPI\_ISL\_491418|Original|hCoV-19^^Wisconsin|Human|University of Wisconsin-Madison AIDS Vaccine Research Laboratories|University of Wisconsin-Madison AIDS Vaccine Research Laboratories|Baczenas|USA

>Spike|hCoV-19/Scotland/EDB8241/2020|2020-10-01|EPI\_ISL\_585492|Original|hCoV-19^^Scotland|Human|Virology Department|COVID-19 Genomics UK (COG-UK) Consortium|McHugh|United Kingdom

>Spike|hCoV-19/Austria/CeMM0272/2020|2020-03-24|EPI\_ISL\_438099|Original|hCoV-19^^Vienna|Human|Center for Virology|Bergthaler laboratory|Bergthaler|Austria

>Spike|hCoV-19/England/MILK-A7BD1E/2020|2020-10-15|EPI\_ISL\_607411|Original|hCoV-19^^England|Human|Lighthouse Lab in Milton Keynes|Wellcome Sanger Institute for the COVID-19 Genomics UK (COG-UK) consortium|Davies|United Kingdom

>Spike|hCoV-19/Spain/PV-IBV-000895/2020|2020-03-26|EPI\_ISL\_452668|Original|hCoV-19^^Basque Country|Human|Servicio de Microbiolog\u00eda. Hospital Universitario Donostia. OSI Donostialdea. \u00clrea de Enfermedades Infecciosas|SeqCOVID-SPAIN consortium/IBV (CSIC) |Comas|Spain

>Spike|hCoV-19/USA/UT-03950/2020|2020-04-17|EPI\_ISL\_454728|Original|hCoV-19^^Utah|Human|Utah Public Health Laboratory|Utah Public Health Laboratory|Young|USA

>Spike|hCoV-19/England/MILK-9EEDBD/2020|2020-09-24|EPI\_ISL\_580762|Original|hCoV-19^^England|Human|Lighthouse Lab in Milton Keynes|Wellcome Sanger Institute for the COVID-19 Genomics UK (COG-UK) consortium|Davies|United Kingdom

>Spike|hCoV-19/England/QEUH-AE4D6B/2020|2020-10-27|EPI\_ISL\_633233|Original|hCoV-19^^England|Human|Lighthouse Lab in Glasgow|Wellcome Sanger Institute for the COVID-19 Genomics UK (COG-UK) consortium|Davies|United Kingdom

>Spike|hCoV-19/USA/WA-S1112/2020|2020-05-04|EPI\_ISL\_463602|Original|hCoV-19^^Washington|Human|Washington State Department of Health|Seattle Flu Study|Bedford|USA

>Spike|hCoV-19/Netherlands/NA\_367/2020|2020-04-08|EPI\_ISL\_455171|Original|hCoV-19^^Netherlands|Human|Dutch COVID-19 response team|Erasmus Medical Center|Oude Munnink|Netherlands

>Spike|hCoV-19/Scotland/QEUH-A49B6A/2020|2020-10-06|EPI\_ISL\_628455|Original|hCoV-19^^Scotland|Human|Oxford Viromics|COVID-19 Genomics UK (COG-UK) Consortium|Golubchik|United Kingdom

>Spike|hCoV-19/Germany/NI-hpi-p1718/2020|2020-03-15|EPI\_ISL\_776551|Original|hCoV-19^^Niedersachsen|Human|University Medical Center Hamburg Eppendorf|Heinrich Pette Institute|Robitaille|Germany

>Spike|hCoV-19/Australia/VIC13586/2020|2020-07-31|EPI\_ISL\_563768|Original|hCoV-19^^Victoria|Human|Microbiological Diagnostic Unit - Public Health Laboratory (MDU-PHL) |MDU-PHL|Schultz|Australia

>Spike|hCoV-19/Wales/PHWC-498A1A/2020|2020-12-04|EPI\_ISL\_727159|Original|hCoV-19^^Wales|Human|Originating lab|COVID-19 Genomics UK (COG-UK) Consortium|Moore|United Kingdom

>Spike|hCoV-19/Japan/PG-8944/2020|2020-08-00|EPI\_ISL\_686490|Original|hCoV-19^^Japan|Human|Pathogen Genomics Center|Pathogen Genomics Center|Sekizuka|Japan

>Spike|hCoV-19/Denmark/DCGC-22021/2020|2020-12-14|EPI\_ISL\_758514|Original|hCoV-19^^Nordjylland|Human|Department of Virus and Microbiological Special Diagnostics|Albertsen Lab|Michaelsen|Denmark

>Spike|hCoV-19/England/SHEF-C043D/2020|2020-03-27|EPI\_ISL\_420217|Original|hCoV-19^^England|Human|Virology Department|Department of Infection|de Silva|United Kingdom

>Spike|hCoV-19/USA/CA-UCLA-221/2020|2020-06-12|EPI\_ISL\_537528|Original|hCoV-19^^California|Human|UCLA Pathology Clinical Microbiology Lab|Kruglyak Lab|Boocock|USA

>Spike|hCoV-19/England/LIVE-9A5EE/2020|2020-03-25|EPI\_ISL\_449353|Original|hCoV-19^^England|Human|Liverpool Clinical Laboratories|COVID-19 Genomics UK (COG-UK) Consortium|Haldenby|United Kingdom

>Spike|hCoV-19/Netherlands/UT-RIVM-20778/2020|2020-12-16|EPI\_ISL\_790919|Original|hCoV-19^^Utrecht|Human|Dutch COVID-19 response team|National Institute for Public Health and the Environment (RIVM) |Meijer|Netherlands

>Spike|hCoV-19/France/ARA-0591/2020|2020-03-01|EPI\_ISL\_508934|Original|hCoV-19^^Auvergne-Rh\u00f4ne-Alpes|Human|Centre hospitalier M\u00e9tropole Savoie|CNR Virus des Infections Respiratoires - France SUD|Josset|France

>Spike|hCoV-19/USA/OR-OHSU-0476/2020|2020-06-11|EPI\_ISL\_525821|Original|hCoV-19^^Oregon|Human|OHSU Lab Services Molecular Microbiology Lab|Ginkgo Bioworks Clinical Laboratory|O'Roak|USA

>Spike|hCoV-19/England/QEUH-9C81EA/2020|2020-09-11|EPI\_ISL\_567067|Original|hCoV-19^^England|Human|Lighthouse Lab in Glasgow|Wellcome Sanger Institute for the COVID-19 Genomics UK (COG-UK) consortium|Davies|United Kingdom

>Spike|hCoV-19/Scotland/CVR1955/2020|2020-04-08|EPI\_ISL\_493752|Original|hCoV-19^^Scotland|Human|West of Scotland Specialist Virology Centre|COVID-19 Genomics UK (COG-UK) Consortium|Robertson|United Kingdom

>Spike|hCoV-19/England/CAMC-B7AD2D/2020|2020-11-13|EPI\_ISL\_723959|Original|hCoV-19^^England|Human|Oxford Viromics|COVID-19 Genomics UK (COG-UK) Consortium|Golubchik|United Kingdom

>Spike|hCoV-19/USA/UT-08536/2020|2020-05-18|EPI\_ISL\_524297|Original|hCoV-19^^Utah|Human|Utah Public Health Laboratory|Utah Public Health Laboratory|Young|USA

>Spike|hCoV-19/England/CAMC-B79DB5/2020|2020-11-12|EPI\_ISL\_667862|Original|hCoV-19^^England|Human|Lighthouse Lab in Cambridge|Wellcome Sanger Institute for the COVID-19 Genomics UK (COG-UK) Consortium|Davies|United Kingdom

>Spike|hCoV-19/England/CAMC-B51788/2020|2020-11-08|EPI\_ISL\_658360|Original|hCoV-19^^England|Human|Lighthouse Lab in Cambridge|Wellcome Sanger Institute for the COVID-19 Genomics UK (COG-UK) Consortium|Davies|United Kingdom

>Spike|hCoV-19/Australia/VIC4808/2020|2020-07-14|EPI\_ISL\_519193|Original|hCoV-19^^Victoria|Human|Microbiological Diagnostic Unit - Public Health Laboratory (MDU-PHL)|MDU-PHL|Schultz|Australia

>Spike|hCoV-19/USA/MI-MDHHS-SC20903/2020|2020-04-24|EPI\_ISL\_476040|Original|hCoV-19^^Michigan|Human|Michigan Department of Health and Human Services|Michigan Department of Health and Human Services|Blankenship|USA

>Spike|hCoV-19/Italy/FVG-ICGEB-S9/2020|2020-03-01|EPI\_ISL\_417423|Vero E6 P1|hCoV-19^^Friuli Venezia Giulia|Human|Laboratory of Molecular Virology International Center for Genetic Engineering and Biotechnology (ICGEB)|ARGO Open Lab Platform for Genome sequencing|Marcello|Italy

>Spike|hCoV-19/Switzerland/BL-UHB-42193100/2020|2020-03-16|EPI\_ISL\_528144|Original|hCoV-19^^Basel-Land|Human|University Hospital Basel|University Hospital Basel|Roloff Handschin|Switzerland

>Spike|hCoV-19/England/BRIS-12B46C/2020|2020-05-25|EPI\_ISL\_487552|Original|hCoV-19^^England|Human|PHE South West Regional Laboratory|Wellcome Sanger Institute for the COVID-19 Genomics UK (COG-UK) consortium|Davies|United Kingdom

>Spike|hCoV-19/England/ALDP-982AC3/2020|2020-08-09|EPI\_ISL\_552644|Original|hCoV-19^^England|Human|Lighthouse Lab in Alderley Park|Wellcome Sanger Institute for the COVID-19 Genomics UK (COG-UK) consortium|Davies|United Kingdom

>Spike|hCoV-19/Belgium/ULG-11045/2020|2020-12-01|EPI\_ISL\_722958|Original|hCoV-19^^Liege|Human|Department of Clinical Microbiology|GIGA Medical Genomics|Durkin|Belgium

>Spike|hCoV-19/England/ALDP-C5803A/2020|2020-12-13|EPI\_ISL\_736152|Original|hCoV-19^^England|Human|Lighthouse Lab in Alderley Park|Wellcome Sanger Institute for the COVID-19 Genomics UK (COG-UK) Consortium|Davies|United Kingdom

>Spike|hCoV-19/England/203420511/2020|2020-08-13|EPI\_ISL\_566066|Original|hCoV-19^^England|Human|Respiratory Virus Unit|Respiratory Virus Unit|Platt|United Kingdom

>Spike|hCoV-19/England/NOTT-10EF5F/2020|2020-03-30|EPI\_ISL\_432946|Original|hCoV-19^^England|Human|Queens Medical Centre|COVID-19 Genomics UK (COG-UK) Consortium|Loose|United Kingdom

>Spike|hCoV-19/USA/LA-GBCL-26544517/2020|2020-04-20|EPI\_ISL\_485106|Original|hCoV-19^^Louisiana|Human|River Road Testing Lab|Ginkgo Bioworks Clinical Laboratory|Smith|USA

>Spike|hCoV-19/Switzerland/BL-ETHZ-360005/2020|2020-11-12|EPI\_ISL\_693865|Original|hCoV-19^^Basel-Landschaft|Human|Viollier AG|Department of Biosystems Science and Engineering|Nadeau|Switzerland

>Spike|hCoV-19/Japan/PG-2937/2020|2020-04-00|EPI\_ISL\_691063|Original|hCoV-19^^Japan|Human|Pathogen Genomics Center|Pathogen Genomics Center|Sekizuka|Japan

>Spike|hCoV-19/Australia/NSW3725/2020|2020-12-28|EPI\_ISL\_745029|Original|hCoV-19^^New South Wales|Human|Area of Virology|Area of Virology|Yeang|Australia

>Spike|hCoV-19/England/SHEF-BFFB8/2020|2020-03-25|EPI\_ISL\_418318|Original|hCoV-19^^England|Human|Virology Department|Department of Infection|de Silva|United Kingdom

>Spike|hCoV-19/Scotland/QEUH-C5B86C/2020|2020-12-14|EPI\_ISL\_757034|Original|hCoV-19^^Scotland|Human|Lighthouse Lab in Glasgow|Wellcome Sanger Institute for the COVID-19 Genomics UK (COG-UK) Consortium|Davies|United Kingdom

>Spike|hCoV-19/Australia/VIC14920/2020|2020-08-19|EPI\_ISL\_593060|Original|hCoV-19^^Victoria|Human|Microbiological Diagnostic Unit - Public Health Laboratory (MDU-PHL)|MDU-PHL|Schultz|Australia

>Spike|hCoV-19/England/ALDP-66F379/2020|2020-07-03|EPI\_ISL\_558232|Original|hCoV-19^^England|Human|Lighthouse Lab in Alderley Park|Wellcome Sanger Institute for the COVID-19 Genomics UK (COG-UK) consortium|Davies|United Kingdom

>Spike|hCoV-19/Wales/QEUA-AD1208/2020|2020-10-26|EPI\_ISL\_647945|Original|hCoV-19^^Wales|Human|Lighthouse Lab in Glasgow|Wellcome Sanger Institute for the COVID-19 Genomics UK (COG-UK) Consortium|Davies|United Kingdom

>Spike|hCoV-19/England/MILK-ACD120/2020|2020-10-21|EPI\_ISL\_630225|Original|hCoV-19^^England|Human|Lighthouse Lab in Milton Keynes|Wellcome Sanger Institute for the COVID-19 Genomics UK (COG-UK) consortium|Davies|United Kingdom

>Spike|hCoV-19/England/ALDP-9FCC28/2020|2020-10-01|EPI\_ISL\_587765|Original|hCoV-19^^England|Human|Lighthouse Lab in Alderley Park|Wellcome Sanger Institute for the COVID-19 Genomics UK (COG-UK) consortium|Davies|United Kingdom

>Spike|hCoV-19/Gambia/GC19-2641/2020|2020-07-21|EPI\_ISL\_561127|Original|hCoV-19^^Kombo|Human|MRCG at LSHTM Genomics lab|MRCG at LSHTM Genomics lab|Sesay|Gambia

>Spike|hCoV-19/USA/CT-Yale-052/2020|2020-03-26|EPI\_ISL\_428373|Original|hCoV-19^^Connecticut|Human|Yale COVID-19 Biorepository|Grubaugh Lab - Yale School of Public Health|Grubaugh|USA

>Spike|hCoV-19/England/ALDP-B1AD3E/2020|2020-11-01|EPI\_ISL\_646013|Original|hCoV-19^^England|Human|Lighthouse Lab in Alderley Park|Wellcome Sanger Institute for the COVID-19 Genomics UK (COG-UK) Consortium|Davies|United Kingdom

>Spike|hCoV-19/Scotland/CVR2766/2020|2020-04-20|EPI\_ISL\_473555|Original|hCoV-19^^Scotland|Human|West of Scotland Specialist Virology Centre|COVID-19 Genomics UK (COG-UK) Consortium|Robertson|United Kingdom

>Spike|hCoV-19/USA/UT-UPHL-2012918599/2020|2020-12-01|EPI\_ISL\_746893|Original|hCoV-19^^Utah|Human|Utah Public Health Laboratory|Utah Public Health Laboratory|Gallagher|USA

>Spike|hCoV-19/United Arab Emirates/0774/2020|2020-05-15|EPI\_ISL\_698917|Original|hCoV-19^^Abu Dhabi|Human|Group 42 (G42) Healthcare|G42 Healthcare|Ogrodzki|United Arab Emirates

>Spike|hCoV-19/England/LIVE-A9A47/2020|2020-03-25|EPI\_ISL\_517311|Original|hCoV-19^^England|Human|Liverpool Clinical Laboratories|COVID-19 Genomics UK (COG-UK) Consortium|Haldenby|United Kingdom

>Spike|hCoV-19/Scotland/QEUA-C330F9/2020|2020-12-11|EPI\_ISL\_757167|Original|hCoV-19^^Scotland|Human|Lighthouse Lab in Glasgow|Wellcome Sanger Institute for the COVID-19 Genomics UK (COG-UK) Consortium|Davies|United Kingdom

>Spike|hCoV-19/Scotland/GCVR-172CAA/2020|2020-04-06|EPI\_ISL\_459157|Original|hCoV-19^^Scotland|Human|NHSGGC West of Scotland Specialist Virology Centre / MRC-University of Glasgow Centre for Virus Research|Wellcome Sanger Institute for the COVID-19 Genomics UK (COG-UK) consortium|Davies|United Kingdom

>Spike|hCoV-19/Switzerland/SO-ETHZ-360168/2020|2020-11-06|EPI\_ISL\_693936|Original|hCoV-19^^Solothurn|Human|Viollier AG|Department of Biosystems Science and Engineering|Nadeau|Switzerland

>Spike|hCoV-19/Hungary/US-55489w/2020|2020-10-01|EPI\_ISL\_677772|Original|hCoV-19^^Csongr\u00e9ld county|Human|University of Szeged|National Laboratory of Virology|Kemenesi|Hungary

>Spike|hCoV-19/USA/CA-CZB-1540/2020|2020-04-22|EPI\_ISL\_468485|Original|hCoV-19^^California|Human|Ventura County Public Health Lab|Chan-Zuckerberg Biohub|Hao|USA

>Spike|hCoV-19/Germany/SH-ChVir20736/2020|2020-11-17|EPI\_ISL\_729676|Original|hCoV-19^^Schleswig-Holstein|Human|A. Krumbholz|Charit\u00e9 Universit\u00e4tsmedizin Berlin|Muehlemann|Germany

>Spike|hCoV-19/USA/WA-UW-6718/2020|2020-04-11|EPI\_ISL\_570139|Original|hCoV-19^^Washington|Human|UW Virology Lab|UW Virology Lab|Roychoudhury|USA

>Spike|hCoV-19/USA/UT-UPHL-03273/2020|2020-05-08|EPI\_ISL\_575274|Original|hCoV-19^^Utah|Human|Utah Public Health Laboratory|Utah Public Health Laboratory|Young|USA

>Spike|hCoV-19/Australia/NSW582/2020|2020-03-14|EPI\_ISL\_478694|Original|hCoV-19^^New South Wales|Human|South Eastern Area Laboratory Services (SEALS)|NSW Health Pathology

- Institute of Clinical Pathology and Medical Research; Westmead Hospital; University of Sydney|Gall|Australia  
>Spike|hCoV-19/USA/CA-QDX-2642/2020|2020-03-16|EPI\_ISL\_604906|Original|hCoV-19^^California|Human|Quest Diagnostics|Quest Diagnostics|Kagan|USA  
>Spike|hCoV-19/England/MILK-B384CC/2020|2020-11-01|EPI\_ISL\_658884|Original|hCoV-19^^England|Human|Lighthouse Lab in Milton Keynes|Wellcome Sanger Institute for the COVID-19 Genomics UK (COG-UK) Consortium|Davies|United Kingdom  
>Spike|hCoV-19/Australia/VIC15340/2020|2020-09-08|EPI\_ISL\_592865|Original|hCoV-19^^Victoria|Human|Victorian Infectious Diseases Reference Laboratory (VIDRL)|VIDRL and MDU-PHL|Schultz|Australia  
>Spike|hCoV-19/USA/MI-UM-10035824100/2020|2020-09-05|EPI\_ISL\_583322|Original|hCoV-19^^Michigan|Human|University of Michigan Clinical Microbiology Laboratory|Lauring Lab|Valesano|USA  
>Spike|hCoV-19/USA/FL-BPHL-0261/2020|2020-05-04|EPI\_ISL\_480912|Original|hCoV-19^^Florida|Human|Florida Bureau of Public Health Laboratories|Florida Bureau of Public Health Laboratories|Blanton|USA  
>Spike|hCoV-19/England/20128037804/2020|2020-03-19|EPI\_ISL\_423958|Original|hCoV-19^^England|Human|Respiratory Virus Unit|Respiratory Virus Unit|Platt|United Kingdom  
>Spike|hCoV-19/England/CAMC-A3F2F9/2020|2020-10-05|EPI\_ISL\_609686|Original|hCoV-19^^England|Human|Lighthouse Lab in Cambridge|Wellcome Sanger Institute for the COVID-19 Genomics UK (COG-UK) consortium|Davies|United Kingdom  
>Spike|hCoV-19/USA/UT-UPHL-04902/2020|2020-05-26|EPI\_ISL\_575194|Original|hCoV-19^^Utah|Human|Utah Public Health Laboratory|Utah Public Health Laboratory|Young|USA  
>Spike|hCoV-19/USA/CA-CZB-3762/2020|2020-06-05|EPI\_ISL\_548475|Original|hCoV-19^^California|Human|Ventura County Public Health Lab|Chan-Zuckerberg Biohub|Bhatt|USA  
>Spike|hCoV-19/England/CAMC-B23084/2020|2020-11-02|EPI\_ISL\_651715|Original|hCoV-19^^England|Human|Virology Department|COVID-19 Genomics UK (COG-UK) Consortium|de Silva|United Kingdom  
>Spike|hCoV-19/Wales/ALDP-B1CC11/2020|2020-11-01|EPI\_ISL\_680578|Original|hCoV-19^^Wales|Human|Centre for Enzyme Innovation|COVID-19 Genomics UK (COG-UK) Consortium|Robson|United Kingdom  
>Spike|hCoV-19/England/ALDP-9C63E6/2020|2020-09-10|EPI\_ISL\_567863|Original|hCoV-19^^England|Human|Lighthouse Lab in Alderley Park|Wellcome Sanger Institute for the COVID-19 Genomics UK (COG-UK) consortium|Davies|United Kingdom  
>Spike|hCoV-19/Japan/PG-4337/2020|2020-07-00|EPI\_ISL\_692565|Original|hCoV-19^^Japan|Human|Pathogen Genomics Center|Pathogen Genomics Center|Sekizuka|Japan  
>Spike|hCoV-19/Japan/PG-0959/2020|2020-04-00|EPI\_ISL\_684569|Original|hCoV-19^^Japan|Human|Gunma Prefectural Institute of Public Health and Environmental Sciences|Pathogen Genomics Center|Sekizuka|Japan  
>Spike|hCoV-19/England/MILK-C61317/2020|2020-12-13|EPI\_ISL\_735806|Original|hCoV-19^^England|Human|Lighthouse Lab in Milton Keynes|Wellcome Sanger Institute for the COVID-19 Genomics UK (COG-UK) Consortium|Davies|United Kingdom  
>Spike|hCoV-19/USA/OR-OHSU-1491/2020|2020-07-18|EPI\_ISL\_525972|Original|hCoV-19^^Oregon|Human|OHSU Lab Services Molecular Microbiology Lab|Oregon SARS-CoV-2 Genome Sequencing Center|O'Roak|USA  
>Spike|hCoV-19/Canada/QC-LSPQ-L00228964/2020|2020-03-20|EPI\_ISL\_535883|Original|hCoV-19^^Quebec|Human|H\u00f4pital Pierre-Le Gardeur|Laboratoire de sant\u00e9 publique du Qu\u00e9bec|Moreira|Canada  
>Spike|hCoV-19/Scotland/QEUA-9FA8EA/2020|2020-09-28|EPI\_ISL\_600545|Original|hCoV-19^^Scotland|Human|Lighthouse Lab in Glasgow|Wellcome Sanger Institute for the COVID-19 Genomics UK (COG-UK) consortium|Davies|United Kingdom  
>Spike|hCoV-19/USA/CA-CZB-14766/2020|2020-11-05|EPI\_ISL\_738786|Original|hCoV-19^^California|Human|Humboldt County Public Health Laboratory|Chan-Zuckerberg Biohub|Kamm|USA  
>Spike|hCoV-19/England/CAMB-72379/2020|2020-03-24|EPI\_ISL\_439535|Original|hCoV-19^^England|Human|Department of Pathology|Wellcome Sanger Institute for the COVID-19 Genomics UK (COG-UK) consortium|Amato|United Kingdom

>Spike|hCoV-19/England/ALDP-A6CDB6/2020|2020-10-15|EPI\_ISL\_608062|Original|hCoV-19^^England|Human|Lighthouse Lab in Alderley Park|Wellcome Sanger Institute for the COVID-19 Genomics UK (COG-UK) consortium|Davies|United Kingdom

>Spike|hCoV-19/England/20168032304/2020|2020-04-16|EPI\_ISL\_466607|Original|hCoV-19^^England|Human|Respiratory Virus Unit|Respiratory Virus Unit|Platt|United Kingdom

>Spike|hCoV-19/England/CAMC-C4406E/2020|2020-12-10|EPI\_ISL\_719540|Original|hCoV-19^^England|Human|Lighthouse Lab in Cambridge|Wellcome Sanger Institute for the COVID-19 Genomics UK (COG-UK) Consortium|Davies|United Kingdom

>Spike|hCoV-19/Germany/BY-MVP-0281/2020|2020-05-07|EPI\_ISL\_466908|Original|hCoV-19^^Bavaria|Human|Max von Pettenkofer Institute|Laboratory for Functional Genome Analysis|Graf|Germany

>Spike|hCoV-19/England/CAMC-A82B0B/2020|2020-10-12|EPI\_ISL\_610754|Original|hCoV-19^^England|Human|Lighthouse Lab in Cambridge|Wellcome Sanger Institute for the COVID-19 Genomics UK (COG-UK) consortium|Davies|United Kingdom

>Spike|hCoV-19/USA/TX-HMH-MCoV-15718/2020|2020-07-09|EPI\_ISL\_785402|Original|hCoV-19^^Texas|Human|Houston Methodist Hospital|Houston Methodist Hospital|Long|USA

>Spike|hCoV-19/England/MILK-A7CE74/2020|2020-10-13|EPI\_ISL\_606758|Original|hCoV-19^^England|Human|Lighthouse Lab in Milton Keynes|Wellcome Sanger Institute for the COVID-19 Genomics UK (COG-UK) consortium|Davies|United Kingdom

>Spike|hCoV-19/Scotland/EDB9264/2020|2020-11-04|EPI\_ISL\_666067|Original|hCoV-19^^Scotland|Human|Virology Department|COVID-19 Genomics UK (COG-UK) Consortium|McHugh|United Kingdom

>Spike|hCoV-19/England/ALDP-B62C58/2020|2020-11-08|EPI\_ISL\_655459|Original|hCoV-19^^England|Human|Lighthouse Lab in Alderley Park|Wellcome Sanger Institute for the COVID-19 Genomics UK (COG-UK) Consortium|Davies|United Kingdom

>Spike|hCoV-19/Saudi Arabia/KAUST-MAKKAH1416/2020|2020-06-28|EPI\_ISL\_678049|Original|hCoV-19^^Makkah|Human|Pathogen Genomics Lab King Abdullah University of Science and Technology(KAUST)|Pathogen Genomics Lab King Abdullah University of Science and Technology(KAUST)|Mohamed Ghazzali|Saudi Arabia

>Spike|hCoV-19/USA/TX-DSHS-1892/2020|2020-07-08|EPI\_ISL\_751522|Original|hCoV-19^^Texas|Human|Texas Department of State Health Services|Texas Department of State Health Services|Rahman|USA

>Spike|hCoV-19/England/LIVE-DC7EB3/2020|2020-11-19|EPI\_ISL\_702623|Original|hCoV-19^^England|Human|Liverpool Clinical Laboratories|COVID-19 Genomics UK (COG-UK) Consortium|Haldenby|United Kingdom

>Spike|hCoV-19/Netherlands/ZH-EMC-442/2020|2020-08-12|EPI\_ISL\_523780|Original|hCoV-19^^Zuid Holland|Human|Dutch COVID-19 response team|Erasmus Medical Center|Oude Munnink|Netherlands

>Spike|hCoV-19/Shanghai/SH0020/2020|2020-02-01|EPI\_ISL\_416329|Original|hCoV-19^^Shanghai|Human|Shanghai Public Health Clinical Center|National Research Center for Translational Medicine (Shanghai)|Zhang|China

>Spike|hCoV-19/Canada/ON-S1283/2020|2020-04-28|EPI\_ISL\_586332|Original|hCoV-19^^Ontario|Human|Toronto Invasive Bacterial Diseases Network|McMaster University|McArthur|Canada

>Spike|hCoV-19/USA/FL-BPHL-1233/2020|2020-04-19|EPI\_ISL\_541153|Original|hCoV-19^^Florida|Human|Florida Bureau of Public Health Laboratories|Florida Bureau of Public Health Laboratories|Blanton|USA

>Spike|hCoV-19/France/CVL-8265/2020|2020-03-30|EPI\_ISL\_560570|Original|hCoV-19^^Centre-Val de Loire|Human|h\u00f4pital|National Reference Center for Viruses of Respiratory Infections|Enouf|France

>Spike|hCoV-19/Denmark/DCGC-5017/2020|2020-09-14|EPI\_ISL\_621783|Original|hCoV-19^^Hovedstaden|Human|Department of Virus and Microbiological Special Diagnostics|Albertsen lab|Michaelsen|Denmark

>Spike|hCoV-19/USA/MI-UM-10036598549/2020|2020-10-23|EPI\_ISL\_649974|Original|hCoV-19^^Michigan|Human|University of Michigan Clinical Microbiology Laboratory|Lauring Lab|Valesano|USA

>Spike|hCoV-19/England/MILK-B5A5C1/2020|2020-11-06|EPI\_ISL\_658233|Original|hCoV-19^^England|Human|Lighthouse Lab in Milton Keynes|Wellcome Sanger Institute for the COVID-19 Genomics UK (COG-UK) Consortium|Davies|United Kingdom

>Spike|hCoV-19/England/QEUEH-A1E15D/2020|2020-10-01|EPI\_ISL\_587554|Original|hCoV-19^^England|Human|Lighthouse Lab in Glasgow|Wellcome Sanger Institute for the COVID-19 Genomics UK (COG-UK) consortium|Davies|United Kingdom

>Spike|hCoV-19/Gibraltar/204462914/2020|2020-10-29|EPI\_ISL\_632812|Original|hCoV-19^^Gibraltar|Human|Microbiology|Respiratory Virus Unit|Platt|Gibraltar

>Spike|hCoV-19/England/ALDP-A877C6/2020|2020-10-17|EPI\_ISL\_605938|Original|hCoV-19^^England|Human|Lighthouse Lab in Alderley Park|Wellcome Sanger Institute for the COVID-19 Genomics UK (COG-UK) consortium|Davies|United Kingdom

>Spike|hCoV-19/USA/CA-IGI-0359/2020|2020-07-10|EPI\_ISL\_576543|Original|hCoV-19^^California|Human|Innovative Genomics Institute|Innovative Genomics Institute|Wyman|USA

>Spike|hCoV-19/England/QEUEH-9F5C6B/2020|2020-09-24|EPI\_ISL\_588437|Original|hCoV-19^^England|Human|Lighthouse Lab in Glasgow|Wellcome Sanger Institute for the COVID-19 Genomics UK (COG-UK) consortium|Davies|United Kingdom

>Spike|hCoV-19/England/20140002304/2020|2020-03-28|EPI\_ISL\_465867|Original|hCoV-19^^England|Human|Respiratory Virus Unit|Respiratory Virus Unit|Platt|United Kingdom

>Spike|hCoV-19/England/QEUEH-AE4958/2020|2020-10-26|EPI\_ISL\_633144|Original|hCoV-19^^England|Human|Lighthouse Lab in Glasgow|Wellcome Sanger Institute for the COVID-19 Genomics UK (COG-UK) consortium|Davies|United Kingdom

>Spike|hCoV-19/England/LIVE-DC45FD/2020|2020-11-11|EPI\_ISL\_702913|Original|hCoV-19^^England|Human|Liverpool Clinical Laboratories|COVID-19 Genomics UK (COG-UK) Consortium|Haldenby|United Kingdom

>Spike|hCoV-19/USA/MA-MASPHL-00790/2020|2020-09-25|EPI\_ISL\_692908|Original|hCoV-19^^Massachusetts|Human|Massachusetts State Public Health Laboratory|Massachusetts State Public Health Laboratory|Lang|USA

>Spike|hCoV-19/Wales/PHWC-23F46/2020|2020-03-15|EPI\_ISL\_418129|Original|hCoV-19^^Wales|Human|Wales Specialist Virology Centre|Public Health Wales Microbiology Cardiff|Moore|United Kingdom

>Spike|hCoV-19/Japan/PG-5820/2020|2020-08-00|EPI\_ISL\_688937|Original|hCoV-19^^Japan|Human|Fukuoka Institute of Health and Environmental Sciences|Pathogen Genomics Center|Sekizuka|Japan

>Spike|hCoV-19/Australia/VIC15330/2020|2020-08-03|EPI\_ISL\_593251|Original|hCoV-19^^Victoria|Human|Microbiological Diagnostic Unit - Public Health Laboratory (MDU-PHL) |MDU-PHL|Schultz|Australia

>Spike|hCoV-19/USA/CA-UW-606/2020|2020-06-27|EPI\_ISL\_484981|Original|hCoV-19^^California|Human|University of Wisconsin-Madison AIDS Vaccine Research Laboratories|University of Wisconsin-Madison AIDS Vaccine Research Laboratories|Baczenas|USA

>Spike|hCoV-19/Wales/PHWC-366A5/2020|2020-05-02|EPI\_ISL\_474698|Original|hCoV-19^^Wales|Human|Originating lab|COVID-19 Genomics UK (COG-UK) Consortium|Moore|United Kingdom

>Spike|hCoV-19/USA/TX-HMH-2278/2020|2020-05-22|EPI\_ISL\_545220|Original|hCoV-19^^Texas|Human|Houston Methodist Hospital|Houston Methodist Hospital|Long|USA

>Spike|hCoV-19/England/QEUEH-9E4467/2020|2020-09-22|EPI\_ISL\_579872|Original|hCoV-19^^England|Human|Lighthouse Lab in Glasgow|Wellcome Sanger Institute for the COVID-19 Genomics UK (COG-UK) consortium|Davies|United Kingdom

>Spike|hCoV-19/USA/CA-QDX-1524/2020|2020-03-17|EPI\_ISL\_603777|Original|hCoV-19^^California|Human|Quest Diagnostics|Quest Diagnostics|Kagan|USA

>Spike|hCoV-19/USA/CA-LACPHL-AE00001/2020|2020-06-05|EPI\_ISL\_707903|Original|hCoV-19^^California|Human|Los Angeles County Public Health Laboratory|Los Angeles County Public Health Laboratory|Hemarajata|USA

>Spike|hCoV-19/USA/AZ-TG295775/2020|2020-05-07|EPI\_ISL\_694242|Original|hCoV-19^^Arizona|Human|TGen North|TGen North|French|USA

>Spike|hCoV-19/Australia/VIC13472/2020|2020-08-03|EPI\_ISL\_592250|Original|hCoV-19^^Victoria|Human|Microbiological Diagnostic Unit - Public Health Laboratory (MDU-PHL) |MDU-PHL|Schultz|Australia

>Spike|hCoV-19/England/NORW-E8059/2020|2020-00-00|EPI\_ISL\_449099|Original|hCoV-19^^England|Human|Quadram Institute Bioscience|COVID-19 Genomics UK (COG-UK) Consortium|Alikhan|United Kingdom

>Spike|hCoV-19/Spain/AR-IBV-2477/2020|2020-03-26|EPI\_ISL\_468855|Original|hCoV-19^^Aragon|Human|Servicio de Microbiolog\u00eda|SeqCOVID-SPAIN consortium/IBV (CSIC) |Comas|Spain

>Spike|hCoV-19/England/BRIS-128696/2020|2020-04-14|EPI\_ISL\_458731|Original|hCoV-19^^England|Human|PHE South West Regional Laboratory|Wellcome Sanger Institute for the COVID-19 Genomics UK (COG-UK) consortium|Davies|United Kingdom

>Spike|hCoV-19/Denmark/DCGC-3907/2020|2020-09-14|EPI\_ISL\_615628|Original|hCoV-19^^Syddanmark|Human|Department of Virus and Microbiological Special Diagnostics|Albertsen lab|Michaelsen|Denmark

>Spike|hCoV-19/Switzerland/BL-UHB-42198622/2020|2020-03-19|EPI\_ISL\_528226|Original|hCoV-19^^Basel-Land|Human|University Hospital Basel|University Hospital Basel|Roloff Handschin|Switzerland

>Spike|hCoV-19/Wales/PHWC-2A02E/2020|2020-04-03|EPI\_ISL\_432373|Original|hCoV-19^^Wales|Human|Wales Specialist Virology Centre|Public Health Wales Microbiology Cardiff|Moore|United Kingdom

>Spike|hCoV-19/England/ALDP-9E9BA9/2020|2020-09-24|EPI\_ISL\_579921|Original|hCoV-19^^England|Human|Lighthouse Lab in Alderley Park|Wellcome Sanger Institute for the COVID-19 Genomics UK (COG-UK) consortium|Davies|United Kingdom

>Spike|hCoV-19/USA/TX-HMH-MCoV-15949/2020|2020-07-10|EPI\_ISL\_785633|Original|hCoV-19^^Texas|Human|Houston Methodist Hospital|Houston Methodist Hospital|Long|USA

>Spike|hCoV-19/England/NOTT-10FA4E/2020|2020-04-05|EPI\_ISL\_432676|Original|hCoV-19^^England|Human|Queens Medical Centre|COVID-19 Genomics UK (COG-UK) Consortium|Loose|United Kingdom

>Spike|hCoV-19/England/MILK-BFCF87/2020|2020-12-03|EPI\_ISL\_720784|Original|hCoV-19^^England|Human|Lighthouse Lab in Milton Keynes|Wellcome Sanger Institute for the COVID-19 Genomics UK (COG-UK) Consortium|Davies|United Kingdom

>Spike|hCoV-19/England/QEUH-A0B9F1/2020|2020-10-03|EPI\_ISL\_599271|Original|hCoV-19^^England|Human|Lighthouse Lab in Glasgow|Wellcome Sanger Institute for the COVID-19 Genomics UK (COG-UK) consortium|Davies|United Kingdom

>Spike|hCoV-19/USA/TX-HMH-MCoV-9191/2020|2020-07-02|EPI\_ISL\_780991|Original|hCoV-19^^Texas|Human|Houston Methodist Hospital|Houston Methodist Hospital|Long|USA

>Spike|hCoV-19/Spain/MD-H12-87/2020|2020-04-18|EPI\_ISL\_530015|Original|hCoV-19^^Madrid|Human|Hospital Universitario 12 de Octubre|Hospital Universitario 12 de Octubre|Viedma|Spain

>Spike|hCoV-19/England/MILK-A69C25/2020|2020-10-09|EPI\_ISL\_608756|Original|hCoV-19^^England|Human|Lighthouse Lab in Milton Keynes|Wellcome Sanger Institute for the COVID-19 Genomics UK (COG-UK) consortium|Davies|United Kingdom

>Spike|hCoV-19/England/204900605/2020|2020-11-30|EPI\_ISL\_722967|Original|hCoV-19^^England|Human|Respiratory Virus Unit|COVID-19 Genomics UK (COG-UK) Consortium|Platt|United Kingdom

>Spike|hCoV-19/Guadeloupe/IPG-7336/2020|2020-03-22|EPI\_ISL\_613435|Original|hCoV-19^^Sainte-Anne|Human|Institut Pasteur de la Guadeloupe|Institut Pasteur de la Guadeloupe|Enouf|Guadeloupe

>Spike|hCoV-19/England/MILK-B56431/2020|2020-11-05|EPI\_ISL\_657464|Original|hCoV-19^^England|Human|Lighthouse Lab in Milton Keynes|Wellcome Sanger Institute for the COVID-19 Genomics UK (COG-UK) Consortium|Davies|United Kingdom

>Spike|hCoV-19/USA/WA-S1496/2020|2020-05-22|EPI\_ISL\_495922|Original|hCoV-19^^Washington|Human|Washington State Department of Health|Seattle Flu Study|Lee|USA

>Spike|hCoV-19/England/ALDP-A6D1E6/2020|2020-10-14|EPI\_ISL\_608253|Original|hCoV-19^^England|Human|Lighthouse Lab in Alderley Park|Wellcome Sanger Institute for the COVID-19 Genomics UK (COG-UK) consortium|Davies|United Kingdom

>Spike|hCoV-19/England/ALDP-9C5781/2020|2020-09-10|EPI\_ISL\_567600|Original|hCoV-19^^England|Human|Lighthouse Lab in Alderley Park|Wellcome Sanger Institute for the COVID-19 Genomics UK (COG-UK) consortium|Davies|United Kingdom

>Spike|hCoV-19/Netherlands/UT-EMC-164/2020|2020-10-31|EPI\_ISL\_722588|Original|hCoV-19^^Utrecht|Human|Dutch COVID-19 response team|Erasmus Medical Center|Oude Munnink|Netherlands

>Spike|hCoV-19/England/ALDP-4F5486/2020|2020-06-24|EPI\_ISL\_559151|Original|hCoV-19^^England|Human|Lighthouse Lab in Alderley Park|Wellcome Sanger Institute for the COVID-19 Genomics UK (COG-UK) consortium|Davies|United Kingdom



>Spike|hCoV-19/England/SHEF-CCDAF/2020|2020-09-30|EPI\_ISL\_585053|Original|hCoV-19^^England|Human|Virology Department|COVID-19 Genomics UK (COG-UK) Consortium|de Silva|United Kingdom

>Spike|hCoV-19/Singapore/836/2020|2020-06-16|EPI\_ISL\_517999|Original|hCoV-19^^Singapore|Human|Singapore General Hospital|Department of Microbiology|Abdul Rahman|Singapore

>Spike|hCoV-19/England/QEUEH-B67D41/2020|2020-11-11|EPI\_ISL\_655030|Original|hCoV-19^^England|Human|Lighthouse Lab in Glasgow|Wellcome Sanger Institute for the COVID-19 Genomics UK (COG-UK) Consortium|Davies|United Kingdom

>Spike|hCoV-19/Denmark/DCGC-2656/2020|2020-08-17|EPI\_ISL\_617876|Original|hCoV-19^^Midtjylland|Human|Department of Virus and Microbiological Special Diagnostics|Albertsen lab|Michaelsen|Denmark

>Spike|hCoV-19/USA/WA-S2721/2020|2020-07-02|EPI\_ISL\_525711|Original|hCoV-19^^Washington|Human|Seattle Flu Study|Seattle Flu Study|Lee|USA

>Spike|hCoV-19/India/TG-NGC-CDFD-26/2020|2020-05-30|EPI\_ISL\_466864|Original|hCoV-19^^Telangana|Human|National Genomics Core-Center for DNA Fingerprinting and Diagnostics|National Genomics Core-Center for DNA Fingerprinting and Diagnostics (NGC-CDFD)- DBT's PAN-INDIA-1000 Genome consortium|Vashisht|India

>Spike|hCoV-19/England/NORW-F5A79/2020|2020-11-12|EPI\_ISL\_725291|Original|hCoV-19^^England|Human|Quadram Institute Bioscience|COVID-19 Genomics UK (COG-UK) Consortium|Alikhan|United Kingdom

>Spike|hCoV-19/England/ALDP-BC6627/2020|2020-11-20|EPI\_ISL\_721280|Original|hCoV-19^^England|Human|Lighthouse Lab in Alderley Park|Wellcome Sanger Institute for the COVID-19 Genomics UK (COG-UK) Consortium|Davies|United Kingdom

>Spike|hCoV-19/India/DL-NCDC7032-CSIR-IGIB/2020|2020-05-26|EPI\_ISL\_482620|Original|hCoV-19^^Delhi|Human|National Centre for Disease control (NCDC)|NCDC/CSIR-IGIB|Singh|India

>Spike|hCoV-19/Egypt/CUNCI-HGC012/2020|2020-05-02|EPI\_ISL\_468051|Original|hCoV-19^^Egypt|Human|Egyptian National Cancer Institute (ENCI)|Egyptian National Cancer Institute (ENCI)|Zekri|Egypt

>Spike|hCoV-19/Switzerland/BE-ETHZ-100160/2020|2020-03-16|EPI\_ISL\_574913|Original|hCoV-19^^Bern|Human|Viollier AG|Department of Biosystems Science and Engineering|Nadeau|Switzerland

>Spike|hCoV-19/Wales/PHWC-48DD2E/2020|2020-11-06|EPI\_ISL\_680749|Original|hCoV-19^^Wales|Human|Wales Specialist Virology Centre Sequencing lab|COVID-19 Genomics UK (COG-UK) Consortium|Moore|United Kingdom

>Spike|hCoV-19/Denmark/DCGC-20672/2020|2020-12-21|EPI\_ISL\_759289|Original|hCoV-19^^Hovedstaden|Human|Department of Virus and Microbiological Special Diagnostics|Albertsen Lab|Michaelsen|Denmark

>Spike|hCoV-19/Northern Ireland/NIRE-FCB33/2020|2020-04-22|EPI\_ISL\_459366|Original|hCoV-19^^Northern Ireland|Human|Regional Virus Laboratory|Wellcome Sanger Institute for the COVID-19 Genomics UK (COG-UK) consortium|Davies|United Kingdom

>Spike|hCoV-19/England/QEUEH-CC4813/2020|2020-12-21|EPI\_ISL\_760779|Original|hCoV-19^^England|Human|Lighthouse Lab in Glasgow|Wellcome Sanger Institute for the COVID-19 Genomics UK (COG-UK) Consortium|Davies|United Kingdom

>Spike|hCoV-19/Germany/NW-HHU-454/2020|2020-12-11|EPI\_ISL\_770688|Original|hCoV-19^^North Rhine-Westphalia|Human|ZOTZ KLIMAS MVZ D\u00fcsseldorf-Centrum GbR \u00dcBAG f\u00fcr Labormedizin|Center of Medical Microbiology|Wienemann|Germany

>Spike|hCoV-19/USA/TX-HMH027/2020|2020-03-11|EPI\_ISL\_434736|Original|hCoV-19^^Texas|Human|Houston Methodist Hospital|Houston Methodist Hospital|Long|USA

>Spike|hCoV-19/Denmark/DCGC-4258/2020|2020-09-07|EPI\_ISL\_615695|Original|hCoV-19^^Midtjylland|Human|Department of Virus and Microbiological Special Diagnostics|Albertsen lab|Michaelsen|Denmark

>Spike|hCoV-19/Netherlands/NB-EMC-294/2020|2020-07-29|EPI\_ISL\_577843|Original|hCoV-19^^Noord Brabant|Human|Dutch COVID-19 response team|Erasmus Medical Center|Oude Munnink|Netherlands

>Spike|hCoV-19/England/SHEF-10D6765/2020|2020-12-13|EPI\_ISL\_727977|Original|hCoV-19^^England|Human|Virology Department|COVID-19 Genomics UK (COG-UK) Consortium|de Silva|United Kingdom

>Spike|hCoV-19/England/20134071804/2020|2020-03-23|EPI\_ISL\_423163|Original|hCoV-19^^England|Human|Respiratory Virus Unit|Respiratory Virus Unit|Platt|United Kingdom

>Spike|hCoV-19/Denmark/DCGC-16050/2020|2020-11-23|EPI\_ISL\_714558|Original|hCoV-19^^Syddanmark|Human|Department of Virus and Microbiological Special Diagnostics|Albertsen Lab|Michaelsen|Denmark

>Spike|hCoV-19/USA/WY-WPHL-20044542/2020|2020-07-16|EPI\_ISL\_769913|Original|hCoV-19^^Wyoming|Human|Wyoming Public Health Laboratory|Wyoming Public Health Laboratory|Hull|USA

>Spike|hCoV-19/USA/LA-EVTL1442/2020|2020-12-15|EPI\_ISL\_779108|Original|hCoV-19^^Louisiana|Human|LSUHS Emerging Viral Threat Laboratory|Microbial Genome Sequencing Center|Kamil|USA

>Spike|hCoV-19/England/MILK-B3A837/2020|2020-11-01|EPI\_ISL\_706040|Original|hCoV-19^^England|Human|Oxford Viromics|COVID-19 Genomics UK (COG-UK) Consortium|Golubchik|United Kingdom

>Spike|hCoV-19/Bangladesh/BCSIR-NILMRC-074/2020|2020-06-01|EPI\_ISL\_466690|Original|hCoV-19^^Dhaka|Human|National Institute of Laboratory Medicine and Referral Center|Genomic Research Lab|Khan|Bangladesh

>Spike|hCoV-19/USA/WI-UW-554/2020|2020-06-25|EPI\_ISL\_484929|Original|hCoV-19^^Wisconsin|Human|University of Wisconsin-Madison AIDS Vaccine Research Laboratories|University of Wisconsin-Madison AIDS Vaccine Research Laboratories|Baczenas|USA

>Spike|hCoV-19/South Africa/KRISP-0562/2020|2020-07-15|EPI\_ISL\_498101|Original|hCoV-19^^KwaZulu-Natal|Human|NHLs-IALCH|KRISP|de Oliveira|South Africa

>Spike|hCoV-19/Australia/VIC4490/2020|2020-07-16|EPI\_ISL\_518901|Original|hCoV-19^^Victoria|Human|Microbiological Diagnostic Unit - Public Health Laboratory (MDU-PHL)|MDU-PHL|Schultz|Australia

>Spike|hCoV-19/England/CAMC-B22D15/2020|2020-11-02|EPI\_ISL\_647236|Original|hCoV-19^^England|Human|Lighthouse Lab in Cambridge|Wellcome Sanger Institute for the COVID-19 Genomics UK (COG-UK) Consortium|Davies|United Kingdom

>Spike|hCoV-19/Switzerland/SO-ETHZ-410742/2020|2020-12-12|EPI\_ISL\_737592|Original|hCoV-19^^Solothurn|Human|Viollier AG|Department of Biosystems Science and Engineering|Nadeau|Switzerland

>Spike|hCoV-19/Japan/PG-6217/2020|2020-08-00|EPI\_ISL\_689329|Original|hCoV-19^^Japan|Human|Pathogen Genomics Center|Pathogen Genomics Center|Sekizuka|Japan

>Spike|hCoV-19/England/ALDP-4AE0C4/2020|2020-06-08|EPI\_ISL\_559512|Original|hCoV-19^^England|Human|Lighthouse Lab in Alderley Park|Wellcome Sanger Institute for the COVID-19 Genomics UK (COG-UK) consortium|Davies|United Kingdom

>Spike|hCoV-19/England/QEUA-7E54E0/2020|2020-07-19|EPI\_ISL\_532955|Original|hCoV-19^^England|Human|Lighthouse Lab in Glasgow|Wellcome Sanger Institute for the COVID-19 Genomics UK (COG-UK) consortium|Davies|United Kingdom

>Spike|hCoV-19/USA/AZ-TG395908/2020|2020-06-08|EPI\_ISL\_694752|Original|hCoV-19^^Arizona|Human|AZ SPHL|TGen North|French|USA

>Spike|hCoV-19/England/QEUA-95E7BA/2020|2020-08-07|EPI\_ISL\_532507|Original|hCoV-19^^England|Human|Lighthouse Lab in Glasgow|Wellcome Sanger Institute for the COVID-19 Genomics UK (COG-UK) consortium|Davies|United Kingdom

>Spike|hCoV-19/England/MILK-A45D68/2020|2020-10-06|EPI\_ISL\_598633|Original|hCoV-19^^England|Human|Lighthouse Lab in Milton Keynes|Wellcome Sanger Institute for the COVID-19 Genomics UK (COG-UK) consortium|Davies|United Kingdom

>Spike|hCoV-19/Russia/StPetersburg-RII5017V/2020|2020-04-09|EPI\_ISL\_430084|Vero P1|hCoV-19^^Saint Petersburg|Human|WHO National Influenza Centre Russian Federation|WHO National Influenza Centre Russian Federation|Komissarov|Russia

>Spike|hCoV-19/USA/ME-HETL-J0411/2020|2020-12-16|EPI\_ISL\_755519|Original|hCoV-19^^Maine|Human|Maine Health and Environmental Testing Laboratory|Tewhey Lab|Tewhey|USA

>Spike|hCoV-19/Pakistan/JRCGR-KHI05/2020|2020-05-20|EPI\_ISL\_779255|Original|hCoV-19^^Karachi|Human|Jamil-ur-Rahman Center for Genome Research|Jamil-ur-Rahman Center for Genome Research|Shakeel|Pakistan

>Spike|hCoV-19/Scotland/EDB4515/2020|2020-05-06|EPI\_ISL\_456949|Original|hCoV-19^^Scotland|Human|Virology Department|COVID-19 Genomics UK (COG-UK) Consortium|Williams|United Kingdom

>Spike|hCoV-19/Spain/CT-IBV-004165/2020|2020-04-20|EPI\_ISL\_510074|Original|hCoV-19^^Catalunya|Human|Instituto de Investigaciones Biomédicas de Barcelona (CSIC)|SeqCOVID-SPAIN consortium/IBV(CSIC)|Comas|Spain

>Spike|hCoV-19/England/ALDP-8FEC72/2020|2020-06-24|EPI\_ISL\_551368|Original|hCoV-19^^England|Human|Lighthouse Lab in Alderley Park|Wellcome Sanger Institute for the COVID-19 Genomics UK (COG-UK) consortium|Davies|United Kingdom

>Spike|hCoV-19/USA/NV-NSPHL-A0057/2020|2020-03-28|EPI\_ISL\_515339|Original|hCoV-19^^Nevada|Human|Nevada State Public Health Laboratory|Nevada State Public Health Laboratory|Sevinsky|USA

>Spike|hCoV-19/Vietnam/VNHN\_979/2020|2020-03-17|EPI\_ISL\_455716|Original|hCoV-19^^Hanoi|Human|National Hospital of Tropical Diseases|Oxford University Clinical Research Unit|Nguyen|Vietnam

>Spike|hCoV-19/USA/MA-MASPHL-00163/2020|2020-04-03|EPI\_ISL\_791628|Original|hCoV-19^^Massachusetts|Human|Massachusetts State Public Health Laboratory|Infectious Disease Program|Park|USA

>Spike|hCoV-19/Australia/NSW1127/2020|2020-09-08|EPI\_ISL\_593741|Original|hCoV-19^^New South Wales|Human|South Eastern Area Laboratory Services (SEALS)|NSW Health Pathology - Institute of Clinical Pathology and Medical Research; Westmead Hospital; University of Sydney|Gall|Australia

>Spike|hCoV-19/England/ALDP-B5BCDA/2020|2020-11-09|EPI\_ISL\_655793|Original|hCoV-19^^England|Human|Lighthouse Lab in Alderley Park|Wellcome Sanger Institute for the COVID-19 Genomics UK (COG-UK) Consortium|Davies|United Kingdom

>Spike|hCoV-19/Wales/PHWC-277A4/2020|2020-03-31|EPI\_ISL\_432288|Original|hCoV-19^^Wales|Human|Wales Specialist Virology Centre|Public Health Wales Microbiology Cardiff|Moore|United Kingdom

>Spike|hCoV-19/Germany/BY-ChVir-W1059-5700/2020|2020-03-30|EPI\_ISL\_753704|Original|hCoV-19^^Bavaria|Human|Charit Universitätmedizin Berlin|Charit Universitätmedizin Berlin|Muehlemann|Germany

>Spike|hCoV-19/England/QEUH-5318CD/2020|2020-05-18|EPI\_ISL\_532151|Original|hCoV-19^^England|Human|Lighthouse Lab in Glasgow|Wellcome Sanger Institute for the COVID-19 Genomics UK (COG-UK) consortium|Davies|United Kingdom

>Spike|hCoV-19/England/MILK-A45DA4/2020|2020-10-06|EPI\_ISL\_598760|Original|hCoV-19^^England|Human|Lighthouse Lab in Milton Keynes|Wellcome Sanger Institute for the COVID-19 Genomics UK (COG-UK) consortium|Davies|United Kingdom

>Spike|hCoV-19/South Africa/KRISP-K001375/2020|2020-07-16|EPI\_ISL\_515860|Original|hCoV-19^^KwaZulu-Natal|Human|Medical Disagnostics Services (MDS)|KRISP|de Oliveira|South Africa

>Spike|hCoV-19/Scotland/CVR2900/2020|2020-04-22|EPI\_ISL\_473622|Original|hCoV-19^^Scotland|Human|West of Scotland Specialist Virology Centre|COVID-19 Genomics UK (COG-UK) Consortium|Robertson|United Kingdom

>Spike|hCoV-19/England/ALDP-B1A0BD/2020|2020-11-02|EPI\_ISL\_645731|Original|hCoV-19^^England|Human|Lighthouse Lab in Alderley Park|Wellcome Sanger Institute for the COVID-19 Genomics UK (COG-UK) Consortium|Davies|United Kingdom

>Spike|hCoV-19/USA/TX-HMH-MCoV-19330/2020|2020-11-27|EPI\_ISL\_783766|Original|hCoV-19^^Texas|Human|Houston Methodist Hospital|Houston Methodist Hospital|Long|USA

>Spike|hCoV-19/Luxembourg/LNS7081939/2020|2020-10-10|EPI\_ISL\_744507|Original|hCoV-19^^Luxembourg|Human|Laboratoire national de santé|Laboratoire national de santé|Wienecke-Baldacchino|Luxembourg

>Spike|hCoV-19/Scotland/QEUH-AD145D/2020|2020-10-27|EPI\_ISL\_649702|Original|hCoV-19^^Scotland|Human|Lighthouse Lab in Glasgow|Wellcome Sanger Institute for the COVID-19 Genomics UK (COG-UK) Consortium|Davies|United Kingdom

>Spike|hCoV-19/France/PAC-IHU-1540/2020|2020-08-13|EPI\_ISL\_569192|Original|hCoV-19^^Provence-Alpes-Côte-d'Azur|Human|MEPHI|MEPHI|Levasseur|France

>Spike|hCoV-19/Northern Ireland/NIRE-101815/2020|2020-05-12|EPI\_ISL\_489242|Original|hCoV-19^^Northern Ireland|Human|Regional Virus Laboratory|Wellcome Sanger Institute for the COVID-19 Genomics UK (COG-UK) consortium|Davies|United Kingdom

>Spike|hCoV-19/Australia/VIC12400/2020|2020-07-28|EPI\_ISL\_563559|Original|hCoV-19^^Victoria|Human|Microbiological Diagnostic Unit - Public Health Laboratory (MDU-PHL)|MDU-PHL|Schultz|Australia

>Spike|hCoV-19/England/ALDP-B75C16/2020|2020-11-12|EPI\_ISL\_740944|Original|hCoV-19^^England|Human|Oxford Viromics|COVID-19 Genomics UK (COG-UK) Consortium|Golubchik|United Kingdom

>Spike|hCoV-19/Australia/VIC9161/2020|2020-08-21|EPI\_ISL\_565419|Original|hCoV-19^^Victoria|Human|Microbiological Diagnostic Unit - Public Health Laboratory (MDU-PHL)|MDU-PHL|Schultz|Australia

>Spike|hCoV-19/England/EXET-136219/2020|2020-04-13|EPI\_ISL\_457211|Original|hCoV-19^^England|Human|University of Exeter|COVID-19 Genomics UK (COG-UK) Consortium|Temperton|United Kingdom

>Spike|hCoV-19/England/ALDP-5A2D04/2020|2020-06-14|EPI\_ISL\_558812|Original|hCoV-19^^England|Human|Lighthouse Lab in Alderley Park|Wellcome Sanger Institute for the COVID-19 Genomics UK (COG-UK) consortium|Davies|United Kingdom

>Spike|hCoV-19/USA/CA-ALSR-5122/2020|2020-12-03|EPI\_ISL\_730365|Original|hCoV-19^^California|Human|San Diego County Public Health Laboratory|Andersen lab at Scripps Research|Gangavarapu|USA

>Spike|hCoV-19/England/ALDP-C3CCCF/2020|2020-12-10|EPI\_ISL\_731039|Original|hCoV-19^^England|Human|Lighthouse Lab in Alderley Park|Wellcome Sanger Institute for the COVID-19 Genomics UK (COG-UK) Consortium|Davies|United Kingdom

>Spike|hCoV-19/England/MILK-ABBD21/2020|2020-10-21|EPI\_ISL\_631153|Original|hCoV-19^^England|Human|Lighthouse Lab in Milton Keynes|Wellcome Sanger Institute for the COVID-19 Genomics UK (COG-UK) consortium|Davies|United Kingdom

>Spike|hCoV-19/USA/IL-UW-2449/2020|2020-12-27|EPI\_ISL\_759724|Original|hCoV-19^^Illinois|Human|University of Wisconsin-Madison AIDS Vaccine Research Laboratories|University of Wisconsin-Madison AIDS Vaccine Research Laboratories|Moreno|USA

>Spike|hCoV-19/England/ALDP-94BB96/2020|2020-06-13|EPI\_ISL\_555792|Original|hCoV-19^^England|Human|Lighthouse Lab in Alderley Park|Wellcome Sanger Institute for the COVID-19 Genomics UK (COG-UK) consortium|Davies|United Kingdom

>Spike|hCoV-19/USA/NY-NYUMC463/2020|2020-04-16|EPI\_ISL\_435722|Original|hCoV-19^^New York|Human|NYU Langone Health|Departments of Pathology and Medicine|Maurano|USA

>Spike|hCoV-19/Denmark/DCGC-3115/2020|2020-08-31|EPI\_ISL\_615932|Original|hCoV-19^^Hovedstaden|Human|Department of Virus and Microbiological Special Diagnostics|Albertsen lab|Michaelsen|Denmark

>Spike|hCoV-19/Denmark/DCGC-3480/2020|2020-08-31|EPI\_ISL\_616268|Original|hCoV-19^^Hovedstaden|Human|Department of Virus and Microbiological Special Diagnostics|Albertsen lab|Michaelsen|Denmark

>Spike|hCoV-19/Scotland/EDB6903/2020|2020-05-01|EPI\_ISL\_526509|Original|hCoV-19^^Scotland|Human|Virology Department|COVID-19 Genomics UK (COG-UK) Consortium|Williams|United Kingdom

>Spike|hCoV-19/Denmark/DCGC-9486/2020|2020-11-09|EPI\_ISL\_668996|Original|hCoV-19^^Hovedstaden|Human|Department of Virus and Microbiological Special Diagnostics|Albertsen Lab|Michaelsen|Denmark

>Spike|hCoV-19/England/OXON-AEDFE/2020|2020-04-08|EPI\_ISL\_448786|Original|hCoV-19^^England|Human|Oxford Viromics|COVID-19 Genomics UK (COG-UK) Consortium|Golubchik|United Kingdom

>Spike|hCoV-19/USA/NY-NYCPHL-000543/2020|2020-03-22|EPI\_ISL\_632003|Original|hCoV-19^^New York|Human|Flushing Hospital Medical Center|New York City Public Health Laboratory|Wang|USA

>Spike|hCoV-19/New Zealand/20VR2949/2020|2020-00-00|EPI\_ISL\_579369|Original|hCoV-19^^Auckland|Human|LabPLUS|Institute of Environmental Science and Research (ESR)|Wang|New Zealand

>Spike|hCoV-19/England/ALDP-9D9BD9/2020|2020-09-18|EPI\_ISL\_576800|Original|hCoV-19^^England|Human|Oxford Viromics|COVID-19 Genomics UK (COG-UK) Consortium|Golubchik|United Kingdom

>Spike|hCoV-19/Wales/PHWC-497B09/2020|2020-11-23|EPI\_ISL\_726934|Original|hCoV-19^^Wales|Human|Originating lab|COVID-19 Genomics UK (COG-UK) Consortium|Moore|United Kingdom

>Spike|hCoV-19/Wales/QEUA-AD5723/2020|2020-10-26|EPI\_ISL\_647938|Original|hCoV-19^^Wales|Human|Lighthouse Lab in Glasgow|Wellcome Sanger Institute for the COVID-19 Genomics UK (COG-UK) Consortium|Davies|United Kingdom

>Spike|hCoV-19/USA/TX-HMH-MCoV-13886/2020|2020-08-16|EPI\_ISL\_787178|Original|hCoV-19^^Texas|Human|Houston Methodist Hospital|Houston Methodist Hospital|Long|USA

>Spike|hCoV-19/Netherlands/LI-RIVM-10330/2020|2020-03-23|EPI\_ISL\_636540|Original|hCoV-19^^Limburg|Human|Dutch COVID-19 response team|National Institute for Public Health and the Environment (RIVM)|Meijer|Netherlands

>Spike|hCoV-19/Austria/CeMM0957/2020|2020-03-29|EPI\_ISL\_583806|Original|hCoV-19^^Austria|Human|Dr. Gernot Walder GmbH|Bergthaler laboratory|Bergthaler|Austria

>Spike|hCoV-19/Japan/PG-7911/2020|2020-08-00|EPI\_ISL\_687012|Original|hCoV-19^^Japan|Human|Pathogen Genomics Center|Pathogen Genomics Center|Sekizuka|Japan

>Spike|hCoV-19/Japan/PG-2209/2020|2020-04-00|EPI\_ISL\_685814|Original|hCoV-19^^Japan|Human|Pathogen Genomics Center|Pathogen Genomics Center|Sekizuka|Japan

>Spike|hCoV-19/USA/TX-DSHS-1301/2020|2020-03-31|EPI\_ISL\_648251|Original|hCoV-19^^Texas|Human|Texas Department of State Health Services|Texas Department of State Health Services|Rahman|USA

>Spike|hCoV-19/India/MH-ACTREC-665/2020|2020-09-16|EPI\_ISL\_723073|Original|hCoV-19^^Maharashtra|Human|Hematopathology Laboratory|Hematopathology Laboratory|Patkar|India

>Spike|hCoV-19/USA/TX-HMH-MCoV-14007/2020|2020-07-05|EPI\_ISL\_787298|Original|hCoV-19^^Texas|Human|Houston Methodist Hospital|Houston Methodist Hospital|Long|USA

>Spike|hCoV-19/England/BRIS-1222B6/2020|2020-03-22|EPI\_ISL\_440116|Original|hCoV-19^^England|Human|PHE South West Regional Laboratory|Wellcome Sanger Institute for the COVID-19 Genomics UK (COG-UK) consortium|Amato|United Kingdom

>Spike|hCoV-19/Spain/VC-FISABIO-10/2020|2020-03-06|EPI\_ISL\_417206|Original|hCoV-19^^Comunitat Valenciana|Human|Servicio de Microbiologia. Consorcio Hospital General Universitario de Valencia|Sequencing and Bioinformatics Service and Molecular Epidemiology Research Group. FISABIO-Public Health|Gonzalez-Candelas|Spain

>Spike|hCoV-19/Japan/PG-5702/2020|2020-07-00|EPI\_ISL\_688826|Original|hCoV-19^^Japan|Human|Pathogen Genomics Center|Pathogen Genomics Center|Sekizuka|Japan

>Spike|hCoV-19/England/MILK-8579E9/2020|2020-07-17|EPI\_ISL\_557391|Original|hCoV-19^^England|Human|Lighthouse Lab in Milton Keynes|Wellcome Sanger Institute for the COVID-19 Genomics UK (COG-UK) consortium|Davies|United Kingdom

>Spike|hCoV-19/Spain/NA-ISCI-201951/2020|2020-03-09|EPI\_ISL\_539571|Original|hCoV-19^^Navarra|Human|Complejo Hospitalario de Navarra|Instituto de Salud Carlos III|Caballero|Spain

>Spike|hCoV-19/Australia/VIC496/2020|2020-03-23|EPI\_ISL\_426769|Original|hCoV-19^^Victoria|Human|Victorian Infectious Diseases Reference Laboratory (VIDRL)|Microbiological Diagnostic Unit Public Health Laboratory and Victorian Infectious Diseases Reference Laboratory|Schultz|Australia

>Spike|hCoV-19/England/QEUA-A61795/2020|2020-10-13|EPI\_ISL\_628633|Original|hCoV-19^^England|Human|Oxford Viromics|COVID-19 Genomics UK (COG-UK) Consortium|Golubchik|United Kingdom

>Spike|hCoV-19/USA/LA-GBCL-26629227/2020|2020-04-23|EPI\_ISL\_485226|Original|hCoV-19^^Louisiana|Human|River Road Testing Lab|Ginkgo Bioworks Clinical Laboratory|Smith|USA

>Spike|hCoV-19/Wales/PHWC-31C99/2020|2020-04-14|EPI\_ISL\_446553|Original|hCoV-19^^Wales|Human|Wales Specialist Virology Centre|Public Health Wales Microbiology Cardiff|Moore|United Kingdom

>Spike|hCoV-19/Spain/PV-IBV-001505/2020|2020-03-17|EPI\_ISL\_467170|Original|hCoV-19^^Basque Country|Human|Hospital Universitario Araba. Vitoria-Gasteiz|SeqCOVID-SPAIN consortium|IBV (CSIC)|Comas|Spain

>Spike|hCoV-19/England/ALDP-B84FFD/2020|2020-11-14|EPI\_ISL\_675802|Original|hCoV-19^^England|Human|Lighthouse Lab in Alderley Park|Wellcome Sanger Institute for the COVID-19 Genomics UK (COG-UK) Consortium|Davies|United Kingdom

>Spike|hCoV-19/Switzerland/ZH-ETHZ-230049/2020|2020-08-04|EPI\_ISL\_516588|Original|hCoV-19^^Zurich|Human|Viollier AG|Department of Biosystems Science and Engineering|Nadeau|Switzerland

>Spike|hCoV-19/USA/TX-HMH-702/2020|2020-04-18|EPI\_ISL\_546439|Original|hCoV-19^^Texas|Human|Houston Methodist Hospital|Houston Methodist Hospital|Long|USA

>Spike|hCoV-19/mink/Netherlands/NB-EMC-44-7/2020|2020-09-02|EPI\_ISL\_577801|Original|hCoV-19^^Noord Brabant|Neovison vison|Dutch COVID-19 response team|Erasmus Medical Center|Oude Munnink|Netherlands

>Spike|hCoV-19/England/ALDP-A52445/2020|2020-10-07|EPI\_ISL\_598232|Original|hCoV-19^^England|Human|Lighthouse Lab in Alderley Park|Wellcome Sanger Institute for the COVID-19 Genomics UK (COG-UK) consortium|Davies|United Kingdom

>Spike|hCoV-19/India/GJ-GBRC296b/2020|2020-06-15|EPI\_ISL\_495037|Original|hCoV-19^^Gujarat|Human|GMERS Medical College & Hospital|Gujarat Biotechnology Research Centre|Joshi|India

>Spike|hCoV-19/USA/CA-CZB-15479/2020|2020-12-04|EPI\_ISL\_738548|Original|hCoV-19^^California|Human|Orange County Public Health Lab|Chan-Zuckerberg Biohub|Kamm|USA

>Spike|hCoV-19/England/ALDP-A93660/2020|2020-10-20|EPI\_ISL\_611023|Original|hCoV-19^^England|Human|Lighthouse Lab in Alderley Park|Wellcome Sanger Institute for the COVID-19 Genomics UK (COG-UK) consortium|Davies|United Kingdom

>Spike|hCoV-19/USA/MI-MDHHS-SC22089/2020|2020-03-29|EPI\_ISL\_594201|Original|hCoV-19^^Michigan|Human|Michigan Department of Health and Human Services|Michigan Department of Health and Human Services|Jacob|USA

>Spike|hCoV-19/Denmark/ALAB-SSI-615/2020|2020-03-24|EPI\_ISL\_436997|Original|hCoV-19^^Denmark|Human|Department of Virus and Microbiological Special Diagnostics|Albertsen lab|Kirkegaard|Denmark

>Spike|hCoV-19/England/QEUA-96C018/2020|2020-08-12|EPI\_ISL\_530900|Original|hCoV-19^^England|Human|Lighthouse Lab in Glasgow|Wellcome Sanger Institute for the COVID-19 Genomics UK (COG-UK) consortium|Davies|United Kingdom

>Spike|hCoV-19/Netherlands/NoordBrabant\_82/2020|2020-03-12|EPI\_ISL\_422877|Original|hCoV-19^^Noord Brabant|Human|Dutch COVID-19 response team|Erasmus Medical Center|Oude Munnink|Netherlands

>Spike|hCoV-19/England/CAMB-1B2FB4/2020|2020-05-23|EPI\_ISL\_456742|Original|hCoV-19^^England|Human|Department of Pathology|COVID-19 Genomics UK (COG-UK) Consortium|Meredith|United Kingdom

>Spike|hCoV-19/Denmark/DCGC-8868/2020|2020-10-26|EPI\_ISL\_626109|Original|hCoV-19^^Hovedstaden|Human|Department of Virus and Microbiological Special Diagnostics|Albertsen lab|Michaelsen|Denmark

>Spike|hCoV-19/Serbia/Kraljevo-00152307/2020|2020-07-22|EPI\_ISL\_644569|Original|hCoV-19^^Kraljevo|Human|Veterinary Specialized Institute \Kraljevo\|Veterinary Specialized Institute \Kraljevo\|Vidanovic|Serbia

>Spike|hCoV-19/England/QEUA-B7F6F0/2020|2020-11-14|EPI\_ISL\_668225|Original|hCoV-19^^England|Human|Lighthouse Lab in Glasgow|Wellcome Sanger Institute for the COVID-19 Genomics UK (COG-UK) Consortium|Davies|United Kingdom

>Spike|hCoV-19/England/QEUA-BA34DB/2020|2020-11-18|EPI\_ISL\_721071|Original|hCoV-19^^England|Human|Lighthouse Lab in Glasgow|Wellcome Sanger Institute for the COVID-19 Genomics UK (COG-UK) Consortium|Davies|United Kingdom

>Spike|hCoV-19/England/MILK-ACBD88/2020|2020-10-20|EPI\_ISL\_629139|Original|hCoV-19^^England|Human|Lighthouse Lab in Milton Keynes|Wellcome Sanger Institute for the COVID-19 Genomics UK (COG-UK) consortium|Davies|United Kingdom

>Spike|hCoV-19/Scotland/EDB7118/2020|2020-08-01|EPI\_ISL\_514537|Original|hCoV-19^^Scotland|Human|Virology Department|COVID-19 Genomics UK (COG-UK) Consortium|Williams|United Kingdom

>Spike|hCoV-19/England/QEUA-CADE69/2020|2020-12-20|EPI\_ISL\_761031|Original|hCoV-19^^England|Human|Lighthouse Lab in Glasgow|Wellcome Sanger Institute for the COVID-19 Genomics UK (COG-UK) Consortium|Davies|United Kingdom

>Spike|hCoV-19/Wales/PHWC-49A09E/2020|2020-11-30|EPI\_ISL\_727489|Original|hCoV-19^^Wales|Human|Originating lab|COVID-19 Genomics UK (COG-UK) Consortium|Moore|United Kingdom

>Spike|hCoV-19/England/CAMB-72018/2020|2020-03-27|EPI\_ISL\_439548|Original|hCoV-19^^England|Human|Department of Pathology|Wellcome Sanger Institute for the COVID-19 Genomics UK (COG-UK) consortium|Amato|United Kingdom

>Spike|hCoV-19/England/CAMB-82060/2020|2020-04-21|EPI\_ISL\_438614|Original|hCoV-19^^England|Human|Department of Pathology|COVID-19 Genomics UK (COG-UK) Consortium|Meredith|United Kingdom

>Spike|hCoV-19/Scotland/EDB7797/2020|2020-09-18|EPI\_ISL\_577358|Original|hCoV-19^^Scotland|Human|Virology Department|COVID-19 Genomics UK (COG-UK) Consortium|Williams|United Kingdom

>Spike|hCoV-19/Switzerland/BE-ETHZ-100053/2020|2020-03-12|EPI\_ISL\_466975|Original|hCoV-19^^Bern|Human|Viollier AG|Department of Biosystems Science and Engineering|Nadeau|Switzerland

>Spike|hCoV-19/Wales/PHWC-2A2DD/2020|2020-04-06|EPI\_ISL\_445550|Original|hCoV-19^^Wales|Human|Wales Specialist Virology Centre|Public Health Wales Microbiology Cardiff|Moore|United Kingdom

>Spike|hCoV-19/Bangladesh/DNAS\_DRCIM\_CPH\_isl\_515\_BGD/2020|2020-04-29|EPI\_ISL\_774887|Original|hCoV-19^^Dhaka|Human|Designated Reference Institute for Chemical Measurements (DRICM)|DNA SOLUTION LTD.|Rabbi|Bangladesh

>Spike|hCoV-19/USA/FL-BPHL-0512/2020|2020-06-10|EPI\_ISL\_508715|Original|hCoV-19^^Florida|Human|Florida Bureau of Public Health Laboratories|Florida Bureau of Public Health Laboratories|Blanton|USA

>Spike|hCoV-19/England/ALDP-94432C/2020|2020-06-07|EPI\_ISL\_554697|Original|hCoV-19^^England|Human|Lighthouse Lab in Alderley Park|Wellcome Sanger Institute for the COVID-19 Genomics UK (COG-UK) consortium|Davies|United Kingdom

>Spike|hCoV-19/England/LIVE-A842C/2020|2020-03-26|EPI\_ISL\_517162|Original|hCoV-19^^England|Human|Liverpool Clinical Laboratories|COVID-19 Genomics UK (COG-UK) Consortium|Haldenby|United Kingdom

>Spike|hCoV-19/USA/CA-CZB-1495/2020|2020-03-24|EPI\_ISL\_468445|Original|hCoV-19^^California|Human|Humboldt County Public Health Laboratory|Chan-Zuckerberg Biohub|Hao|USA

>Spike|hCoV-19/England/ALDP-CF140A/2020|2020-12-17|EPI\_ISL\_781881|Original|hCoV-19^^England|Human|Lighthouse Lab in Alderley Park|Wellcome Sanger Institute for the COVID-19 Genomics UK (COG-UK) Consortium|Davies|United Kingdom

>Spike|hCoV-19/USA/TX-HMH-MCoV-15612/2020|2020-10-26|EPI\_ISL\_787096|Original|hCoV-19^^Texas|Human|Houston Methodist Hospital|Houston Methodist Hospital|Long|USA

>Spike|hCoV-19/USA/TX-DSHS-1124/2020|2020-06-21|EPI\_ISL\_615161|Original|hCoV-19^^Texas|Human|Texas Department of State Health Services|Texas Department of State Health Services|Rahman|USA

>Spike|hCoV-19/Scotland/QEUH-A4B7CE/2020|2020-10-08|EPI\_ISL\_628480|Original|hCoV-19^^Scotland|Human|Oxford Viromics|COVID-19 Genomics UK (COG-UK) Consortium|Golubchik|United Kingdom

>Spike|hCoV-19/England/ALDP-955698/2020|2020-06-15|EPI\_ISL\_554392|Original|hCoV-19^^England|Human|Lighthouse Lab in Alderley Park|Wellcome Sanger Institute for the COVID-19 Genomics UK (COG-UK) consortium|Davies|United Kingdom

>Spike|hCoV-19/England/EXET-135308/2020|2020-04-05|EPI\_ISL\_457048|Original|hCoV-19^^England|Human|University of Exeter|COVID-19 Genomics UK (COG-UK) Consortium|Temperton|United Kingdom

>Spike|hCoV-19/Wales/PHWC-4926C1/2020|2020-11-23|EPI\_ISL\_725685|Original|hCoV-19^^Wales|Human|Originating lab|COVID-19 Genomics UK (COG-UK) Consortium|Moore|United Kingdom

>Spike|hCoV-19/Netherlands/ZH-EMC-940/2020|2020-10-11|EPI\_ISL\_722499|Original|hCoV-19^^Zuid Holland|Human|Dutch COVID-19 response team|Erasmus Medical Center|Oude Munnink|Netherlands

>Spike|hCoV-19/USA/MI-MDHHS-SC20307/2020|2020-04-03|EPI\_ISL\_447104|Original|hCoV-19^^Michigan|Human|Michigan Department of Health and Human Services|Michigan Department of Health and Human Services|Blankenship|USA

>Spike|hCoV-19/Netherlands/ZH-EMC-400/2020|2020-07-22|EPI\_ISL\_523740|Original|hCoV-19^^Zuid Holland|Human|Dutch COVID-19 response team|Erasmus Medical Center|Oude Munnink|Netherlands

>Spike|hCoV-19/USA/CA-QDX-2406/2020|2020-03-17|EPI\_ISL\_604674|Original|hCoV-19^^California|Human|Quest Diagnostics|Quest Diagnostics|Kagan|USA

>Spike|hCoV-19/Spain/AN-IBV-98001686/2020|2020-04-08|EPI\_ISL\_538126|Original|hCoV-19^^Andalucia|Human|Servicio de Microbiolog\u00eda y Parasitolog\u00eda cl\u00ednica.

UCEIMP. Hospital Universitario Virgen del Roc\u00e9do/IBV (CSIC) |Comas|Spain  
>Spike|hCoV-19/Switzerland/VD-ETHZ-270169/2020|2020-08-28|EPI\_ISL\_541496|Original|hCoV-19^^Vaud|Human|Viollier AG|Department of Biosystems Science and Engineering|Nadeau|Switzerland  
>Spike|hCoV-19/USA/WA-UW-6767/2020|2020-04-10|EPI\_ISL\_570144|Original|hCoV-19^^Washington|Human|UW Virology Lab|UW Virology Lab|Roychoudhury|USA  
>Spike|hCoV-19/Gambia/GC19-029/2020|2020-04-20|EPI\_ISL\_428857|Original|hCoV-19^^West Coast Region|Human|MRCG at LSHTM Genomics lab|MRCG at LSHTM Genomics lab|Sesay|Gambia  
>Spike|hCoV-19/USA/TX-HMH-2357/2020|2020-05-27|EPI\_ISL\_545262|Original|hCoV-19^^Texas|Human|Houston Methodist Hospital|Houston Methodist Hospital|Long|USA  
>Spike|hCoV-19/England/CAMB-72D99/2020|2020-03-23|EPI\_ISL\_440045|Original|hCoV-19^^England|Human|Department of Pathology|Wellcome Sanger Institute for the COVID-19 Genomics UK (COG-UK) consortium|Amato|United Kingdom  
>Spike|hCoV-19/USA/WA-S1663/2020|2020-05-29|EPI\_ISL\_496089|Original|hCoV-19^^Washington|Human|Washington State Department of Health|Seattle Flu Study|Lee|USA  
>Spike|hCoV-19/Canada/QC-LSPQ-L00242384/2020|2020-03-29|EPI\_ISL\_536319|Original|hCoV-19^^Quebec|Human|H\u00f4pital du Suro\u00eet|Laboratoire de sant\u00e9 publique du Qu\u00e9bec|Moreira|Canada  
>Spike|hCoV-19/England/QEUA-B6C81E/2020|2020-11-09|EPI\_ISL\_655779|Original|hCoV-19^^England|Human|Lighthouse Lab in Glasgow|Wellcome Sanger Institute for the COVID-19 Genomics UK (COG-UK) Consortium|Davies|United Kingdom  
>Spike|hCoV-19/Scotland/GCVR-1720BD/2020|2020-03-31|EPI\_ISL\_469950|Original|hCoV-19^^Scotland|Human|NHSGGC West of Scotland Specialist Virology Centre / MRC-University of Glasgow Centre for Virus Research|Wellcome Sanger Institute for the COVID-19 Genomics UK (COG-UK) consortium|Davies|United Kingdom  
>Spike|hCoV-19/Denmark/DCGC-15142/2020|2020-11-23|EPI\_ISL\_713655|Original|hCoV-19^^Midtjylland|Human|Department of Virus and Microbiological Special Diagnostics|Albertsen Lab|Michaelsen|Denmark  
>Spike|hCoV-19/England/QEUA-A4CAE2/2020|2020-10-07|EPI\_ISL\_596018|Original|hCoV-19^^England|Human|Quadram Institute Bioscience|COVID-19 Genomics UK (COG-UK) Consortium|Alikhan|United Kingdom  
>Spike|hCoV-19/Canada/MB-NML-614/2020|2020-03-23|EPI\_ISL\_632916|Original|hCoV-19^^Manitoba|Human|Cadham Provincial laboratory|Cadham Provincial laboratory|Majer|Canada  
>Spike|hCoV-19/Spain/GA-IBV-002734/2020|2020-04-13|EPI\_ISL\_467285|Original|hCoV-19^^Galicia|Human|Hospital Cl\u00e9nico Universitario de Santiago de Compostela|SeqCOVID-SPAIN consortium/IBV (CSIC) |Comas|Spain  
>Spike|hCoV-19/Australia/VIC6474/2020|2020-07-23|EPI\_ISL\_521252|Original|hCoV-19^^Victoria|Human|Microbiological Diagnostic Unit - Public Health Laboratory (MDU-PHL) |MDU-PHL|Schultz|Australia  
>Spike|hCoV-19/USA/MA-MGH-03316/2020|2020-10-31|EPI\_ISL\_765783|Original|hCoV-19^^Massachusetts|Human|Massachusetts General Hospital|Infectious Disease Program|Park|USA  
>Spike|hCoV-19/Australia/VIC16306/2020|2020-08-04|EPI\_ISL\_641187|Original|hCoV-19^^Victoria|Human|Microbiological Diagnostic Unit - Public Health Laboratory (MDU-PHL) |MDU-PHL|Schultz|Australia  
>Spike|hCoV-19/Australia/VIC1018/2020|2020-04-01|EPI\_ISL\_430490|Original|hCoV-19^^Victoria|Human|Victorian Infectious Diseases Reference Laboratory (VIDRL) |Microbiological Diagnostic Unit Public Health Laboratory and Victorian Infectious Diseases Reference Laboratory|Schultz|Australia  
>Spike|hCoV-19/USA/VA-DCLS-0538/2020|2020-03-13|EPI\_ISL\_485839|Original|hCoV-19^^Virginia|Human|Virginia DCLS|Virginia DCLS|St. Jacques|USA  
>Spike|hCoV-19/India/TG-CCMB-AA28/2020|2020-08-10|EPI\_ISL\_539684|Original|hCoV-19^^Telangana|Human|CSIR-Centre for Cellular and Molecular Biology|CSIR-Centre for Cellular and Molecular Biology|Mukherjee|India  
>Spike|hCoV-19/USA/WI-WSLH-200453/2020|2020-05-19|EPI\_ISL\_578598|Original|hCoV-19^^Wisconsin|Human|Wisconsin State Laboratory of Hygiene Communicable Disease Division|Wisconsin State Laboratory of Hygiene Communicable Disease Division|Florek|USA



>Spike|hCoV-19/England/ALDP-9E673F/2020|2020-09-24|EPI\_ISL\_580349|Original|hCoV-19^^England|Human|Lighthouse Lab in Alderley Park|Wellcome Sanger Institute for the COVID-19 Genomics UK (COG-UK) consortium|Davies|United Kingdom

>Spike|hCoV-19/USA/WA-UW-11279/2020|2020-06-21|EPI\_ISL\_501095|Original|hCoV-19^^Washington|Human|University of Washington Virology Lab|University of Washington Virology Lab|Roychoudhury|USA

>Spike|hCoV-19/Australia/VIC14814/2020|2020-09-20|EPI\_ISL\_593008|Original|hCoV-19^^Victoria|Human|Microbiological Diagnostic Unit - Public Health Laboratory (MDU-PHL) |MDU-PHL|Schultz|Australia

>Spike|hCoV-19/Denmark/DCGC-13211/2020|2020-11-30|EPI\_ISL\_712654|Original|hCoV-19^^Hovedstaden|Human|Department of Virus and Microbiological Special Diagnostics|Albertsen Lab|Michaelsen|Denmark

>Spike|hCoV-19/Spain/AN-IBV-003021/2020|2020-04-04|EPI\_ISL\_474893|Original|hCoV-19^^Andalucia|Human|Hospital Universitario Virgen de las Nieves de Granada-SAS|SeqCOVID-SPAIN consortium/IBV(CSIC) |Comas|Spain

>Spike|hCoV-19/Wales/PHWC-164458/2020|2020-04-29|EPI\_ISL\_474179|Original|hCoV-19^^Wales|Human|Originating lab|COVID-19 Genomics UK (COG-UK) Consortium|Moore|United Kingdom

>Spike|hCoV-19/USA/CA-ALSR-3494/2020|2020-09-02|EPI\_ISL\_636050|Original|hCoV-19^^California|Human|San Diego County Public Health Laboratory|Andersen lab at Scripps Research|Gangavarapu|USA

>Spike|hCoV-19/USA/UT-035/2020|2020-03-18|EPI\_ISL\_421560|Original|hCoV-19^^Utah|Human|Utah Public Health Laboratory|Utah Public Health Laboratory|Young|USA

>Spike|hCoV-19/Japan/PG-7059/2020|2020-08-00|EPI\_ISL\_688164|Original|hCoV-19^^Japan|Human|Pathogen Genomics Center|Pathogen Genomics Center|Sekizuka|Japan

>Spike|hCoV-19/Brazil/SP-366/2020|2020-06-24|EPI\_ISL\_693207|Original|hCoV-19^^S\u00e3o Paulo|Human|Cs II Doutor Antonio Vicoso Moreira de Rezende|Instituto Adolfo Lutz|Sacchi|Brazil

>Spike|hCoV-19/England/ALDP-B237CB/2020|2020-11-04|EPI\_ISL\_646991|Original|hCoV-19^^England|Human|Lighthouse Lab in Alderley Park|Wellcome Sanger Institute for the COVID-19 Genomics UK (COG-UK) Consortium|Davies|United Kingdom

>Spike|hCoV-19/England/ALDP-95C28E/2020|2020-06-17|EPI\_ISL\_554863|Original|hCoV-19^^England|Human|Lighthouse Lab in Alderley Park|Wellcome Sanger Institute for the COVID-19 Genomics UK (COG-UK) consortium|Davies|United Kingdom

>Spike|hCoV-19/Scotland/QEUH-9B86FD/2020|2020-09-10|EPI\_ISL\_568231|Original|hCoV-19^^Scotland|Human|Lighthouse Lab in Glasgow|Wellcome Sanger Institute for the COVID-19 Genomics UK (COG-UK) consortium|Davies|United Kingdom

>Spike|hCoV-19/Norway/4588/2020|2020-10-18|EPI\_ISL\_635100|Original|hCoV-19^^Tr\u00f8ndelag|Human|Department of Medical Microbiology|Norwegian Institute of Public Health|Vollan|Norway

>Spike|hCoV-19/Scotland/CVR2311/2020|2020-04-13|EPI\_ISL\_493787|Original|hCoV-19^^Scotland|Human|West of Scotland Specialist Virology Centre|COVID-19 Genomics UK (COG-UK) Consortium|Robertson|United Kingdom

>Spike|hCoV-19/Canada/ON-S818/2020|2020-04-00|EPI\_ISL\_586451|Original|hCoV-19^^Ontario|Human|Toronto Invasive Bacterial Diseases Network|McMaster University|McArthur|Canada

>Spike|hCoV-19/Spain/IB-IBV-2515/2020|2020-03-21|EPI\_ISL\_469007|Original|hCoV-19^^Illes Balears|Human|Servicio de Microbiolog\u00eda|SeqCOVID-SPAIN consortium/IBV(CSIC) |Comas|Spain

>Spike|hCoV-19/England/NORW-EE3E1/2020|2020-00-00|EPI\_ISL\_490537|Original|hCoV-19^^England|Human|Quadram Institute Bioscience|COVID-19 Genomics UK (COG-UK) Consortium|Alikhan|United Kingdom

>Spike|hCoV-19/Spain/AR-IBV-2399/2020|2020-03-27|EPI\_ISL\_468802|Original|hCoV-19^^Aragon|Human|Servicio de Microbiolog\u00eda|SeqCOVID-SPAIN consortium/IBV(CSIC) |Comas|Spain

>Spike|hCoV-19/USA/TX-HMH0393/2020|2020-03-31|EPI\_ISL\_434980|Original|hCoV-19^^Texas|Human|Houston Methodist Hospital|Houston Methodist Hospital|Long|USA

>Spike|hCoV-19/England/CAMC-B0B25F/2020|2020-10-29|EPI\_ISL\_643480|Original|hCoV-19^^England|Human|Lighthouse Lab in Cambridge|Wellcome Sanger Institute for the COVID-19 Genomics UK (COG-UK) Consortium|Davies|United Kingdom

>Spike|hCoV-19/England/NORT-29E982/2020|2020-05-12|EPI\_ISL\_493534|Original|hCoV-19^^England|Human|Northumbria University / South Tees Hospitals NHS Foundation Trust / North Cumbria Integrated Care NHS Foundation Trust / North Tees and Hartlepool NHS Foundation Trust / Newcastle Hospitals NHS Foundation Trust|COVID-19 Genomics UK (COG-UK) Consortium|Bashton|United Kingdom

>Spike|hCoV-19/England/CAMC-BBB986/2020|2020-11-21|EPI\_ISL\_724074|Original|hCoV-19^^England|Human|Northumbria University / South Tees Hospitals NHS Foundation Trust / North Cumbria Integrated Care NHS Foundation Trust / North Tees and Hartlepool NHS Foundation Trust / Newcastle Hospitals NHS Foundation Trust|COVID-19 Genomics UK (COG-UK) Consortium|Bashton|United Kingdom

>Spike|hCoV-19/USA/WI-UW-2280/2020|2020-11-16|EPI\_ISL\_728047|Original|hCoV-19^^Wisconsin|Human|University of Wisconsin-Madison AIDS Vaccine Research Laboratories|University of Wisconsin-Madison AIDS Vaccine Research Laboratories|Baczenas|USA

>Spike|hCoV-19/England/MILK-978583/2020|2020-07-30|EPI\_ISL\_526418|Original|hCoV-19^^England|Human|Queens Medical Centre|COVID-19 Genomics UK (COG-UK) Consortium|Loose|United Kingdom

>Spike|hCoV-19/Costa Rica/INC-0076/2020|2020-06-29|EPI\_ISL\_527744|Original|hCoV-19^^San Jose|Human|Hospital Cima|Inciensa|Soto-Garita|Costa Rica

>Spike|hCoV-19/Germany/NW-UBI-18/2020|2020-04-08|EPI\_ISL\_602299|original|hCoV-19^^North Rhine-Westphalia|Human|Evangelisches Klinikum Bethel|Bielefeld University|Brandt|Germany

>Spike|hCoV-19/Japan/PG-4839/2020|2020-07-00|EPI\_ISL\_689961|Original|hCoV-19^^Japan|Human|Pathogen Genomics Center|Pathogen Genomics Center|Sekizuka|Japan

>Spike|hCoV-19/Japan/PG-7430/2020|2020-07-00|EPI\_ISL\_688532|Original|hCoV-19^^Japan|Human|Pathogen Genomics Center|Pathogen Genomics Center|Sekizuka|Japan

>Spike|hCoV-19/England/SHEF-C469D/2020|2020-05-01|EPI\_ISL\_457605|Original|hCoV-19^^England|Human|Virology Department|COVID-19 Genomics UK (COG-UK) Consortium|de Silva|United Kingdom

>Spike|hCoV-19/England/MILK-99477C/2020|2020-08-25|EPI\_ISL\_552422|Original|hCoV-19^^England|Human|Lighthouse Lab in Milton Keynes|Wellcome Sanger Institute for the COVID-19 Genomics UK (COG-UK) consortium|Davies|United Kingdom

>Spike|hCoV-19/England/ALDP-BBA996/2020|2020-11-20|EPI\_ISL\_702516|Original|hCoV-19^^England|Human|Lighthouse Lab in Alderley Park|Wellcome Sanger Institute for the COVID-19 Genomics UK (COG-UK) Consortium|Davies|United Kingdom

>Spike|hCoV-19/England/ALDP-94D280/2020|2020-06-14|EPI\_ISL\_556433|Original|hCoV-19^^England|Human|Lighthouse Lab in Alderley Park|Wellcome Sanger Institute for the COVID-19 Genomics UK (COG-UK) Consortium|Davies|United Kingdom

>Spike|hCoV-19/USA/NM-UNM-00684/2020|2020-05-08|EPI\_ISL\_560340|Original|hCoV-19^^New Mexico|Human|TriCore Reference Laboratories|Center for Global Health|Domman|USA

>Spike|hCoV-19/Bahrain/02/2020|2020-06-23|EPI\_ISL\_486887|Original|hCoV-19^^Bahrain|Human|National Influenza Center|National Influenza Center|Altaif|Bahrain

>Spike|hCoV-19/England/MILK-D0BFA1/2020|2020-12-20|EPI\_ISL\_782093|Original|hCoV-19^^England|Human|Lighthouse Lab in Milton Keynes|Wellcome Sanger Institute for the COVID-19 Genomics UK (COG-UK) Consortium|Davies|United Kingdom

>Spike|hCoV-19/USA/TX-HMH-MCoV-9012/2020|2020-07-02|EPI\_ISL\_780895|Original|hCoV-19^^Texas|Human|Houston Methodist Hospital|Houston Methodist Hospital|Long|USA

>Spike|hCoV-19/USA/MN-QDX-1754/2020|2020-03-16|EPI\_ISL\_604084|Original|hCoV-19^^Minnesota|Human|Quest Diagnostics|Quest Diagnostics|Kagan|USA

>Spike|hCoV-19/England/LIVE-1DD6DC/2020|2020-10-02|EPI\_ISL\_612088|Original|hCoV-19^^England|Human|Liverpool Clinical Laboratories|COVID-19 Genomics UK (COG-UK) Consortium|Haldenby|United Kingdom

>Spike|hCoV-19/England/CAMB-81F91/2020|2020-04-21|EPI\_ISL\_438601|Original|hCoV-19^^England|Human|Department of Pathology|COVID-19 Genomics UK (COG-UK) Consortium|Meredith|United Kingdom

>Spike|hCoV-19/USA/CO-CSU-D0590-1/2020|2020-04-15|EPI\_ISL\_527419|Original|hCoV-19^^Colorado|Human|Colorado State University - Ebel Lab|Colorado State University - Ebel Lab|Cline|USA

>Spike|hCoV-19/France/OCC-17/2020|2020-04-09|EPI\_ISL\_434632|Original|hCoV-19^^Occitanie|Human|CHU Purpan - Laboratoire de Virologie - Institut

F\u00e9ratif de Biologie|Laboratoire de virologie - \u0c9cole Nationale  
V\u00e9rinaire de Toulouse|Croville|France  
>Spike|hCoV-19/USA/WY-WPHL-20168039/2020|2020-12-18|EPI\_ISL\_766780|Original|hCoV-  
19^^Wyoming|Human|Wyoming Public Health Laboratory|Wyoming Public Health  
Laboratory|Hull|USA  
>Spike|hCoV-19/England/QEUH-AE4FB0/2020|2020-10-27|EPI\_ISL\_633113|Original|hCoV-  
19^^England|Human|Lighthouse Lab in Glasgow|Wellcome Sanger Institute for the COVID-  
19 Genomics UK (COG-UK) consortium|Davies|United Kingdom  
>Spike|hCoV-19/India/OR-RMRC112/2020|2020-05-06|EPI\_ISL\_455754|Original|hCoV-  
19^^Odisha|Human|REGIONAL VRDL, ICMR-RMRC BBSR|Immunogenomics lab|Raghav|India  
>Spike|hCoV-19/Belgium/ULG-10315/2020|2020-07-27|EPI\_ISL\_540482|Original|hCoV-  
19^^Li\u00e8ge|Human|Department of Clinical Microbiology|GIGA Medical  
Genomics|Durkin|Belgium  
>Spike|hCoV-19/England/20134005104/2020|2020-03-24|EPI\_ISL\_423067|Original|hCoV-  
19^^England|Human|Respiratory Virus Unit|Respiratory Virus Unit|Platt|United Kingdom  
>Spike|hCoV-19/England/MILK-B8E8CB/2020|2020-11-13|EPI\_ISL\_674517|Original|hCoV-  
19^^England|Human|Lighthouse Lab in Milton Keynes|Wellcome Sanger Institute for the  
COVID-19 Genomics UK (COG-UK) Consortium|Davies|United Kingdom  
>Spike|hCoV-19/Japan/PG-1398/2020|2020-04-00|EPI\_ISL\_685005|Original|hCoV-  
19^^Japan|Human|Saitama Prefectural Institute of Public Health|Pathogen Genomics  
Center|Sekizuka|Japan  
>Spike|hCoV-19/England/MILK-A475B9/2020|2020-10-06|EPI\_ISL\_598374|Original|hCoV-  
19^^England|Human|Lighthouse Lab in Milton Keynes|Wellcome Sanger Institute for the  
COVID-19 Genomics UK (COG-UK) consortium|Davies|United Kingdom  
>Spike|hCoV-19/England/NORT-2865C5/2020|2020-10-10|EPI\_ISL\_638564|Original|hCoV-  
19^^England|Human|Northumbria University / South Tees Hospitals NHS Foundation Trust  
/ North Cumbria Integrated Care NHS Foundation Trust / North Tees and Hartlepool NHS  
Foundation Trust / Newcastle Hospitals NHS Foundation Trust|COVID-19 Genomics UK  
(COG-UK) Consortium|Bashton|United Kingdom  
>Spike|hCoV-19/Denmark/DCGC-15409/2020|2020-11-23|EPI\_ISL\_713809|Original|hCoV-  
19^^Sjaelland|Human|Department of Virus and Microbiological Special  
Diagnostics|Albertsen Lab|Michaelsen|Denmark  
>Spike|hCoV-19/Denmark/DCGC-16931/2020|2020-12-14|EPI\_ISL\_750313|Original|hCoV-  
19^^Syddanmark|Human|Department of Virus and Microbiological Special  
Diagnostics|Albertsen Lab|Michaelsen|Denmark  
>Spike|hCoV-19/England/QEUH-B7D373/2020|2020-11-14|EPI\_ISL\_741854|Original|hCoV-  
19^^England|Human|Oxford Viromics|COVID-19 Genomics UK (COG-UK)  
Consortium|Golubchik|United Kingdom  
>Spike|hCoV-19/South Korea/KCDC2076/2020|2020-02-21|EPI\_ISL\_497977|Original|hCoV-  
19^^South Korea|Human|Division of Viral Diseases|Division of Viral Diseases|Kim|South  
Korea  
>Spike|hCoV-19/Canada/BC\_18173416/2020|2020-04-00|EPI\_ISL\_469209|Original|hCoV-  
19^^British Columbia|Human|BCCDC Public Health Laboratory|BCCDC Public Health  
Laboratory|Harrigan|Canada  
>Spike|hCoV-19/England/MILK-BAC681/2020|2020-11-18|EPI\_ISL\_681511|Original|hCoV-  
19^^England|Human|Lighthouse Lab in Milton Keynes|Wellcome Sanger Institute for the  
COVID-19 Genomics UK (COG-UK) Consortium|Davies|United Kingdom  
>Spike|hCoV-19/Scotland/QEUH-96E526/2020|2020-08-20|EPI\_ISL\_534487|Original|hCoV-  
19^^Scotland|Human|NHSGGC West of Scotland Specialist Virology Centre / MRC-  
University of Glasgow Centre for Virus Research|Wellcome Sanger Institute for the  
COVID-19 Genomics UK (COG-UK) consortium|Davies|United Kingdom  
>Spike|hCoV-19/England/CAMC-B7B58E/2020|2020-11-12|EPI\_ISL\_741181|Original|hCoV-  
19^^England|Human|Oxford Viromics|COVID-19 Genomics UK (COG-UK)  
Consortium|Golubchik|United Kingdom  
>Spike|hCoV-19/Italy/LAZ-INMI-40/2020|2020-06-12|EPI\_ISL\_603147|Original|hCoV-  
19^^Lazio|Human|INMI Lazzaro Spallanzani IRCCS|INMI Lazzaro Spallanzani  
IRCCS|Gruber|Italy  
>Spike|hCoV-19/USA/WA-UW-5717/2020|2020-04-06|EPI\_ISL\_430913|Original|hCoV-  
19^^Washington|Human|UW Virology Lab|UW Virology Lab|Roychoudhury|USA

>Spike|hCoV-19/England/20129158804/2020|2020-03-21|EPI\_ISL\_424119|Original|hCoV-19^^England|Human|Respiratory Virus Unit|Respiratory Virus Unit|Platt|United Kingdom

>Spike|hCoV-19/Australia/VIC3309/2020|2020-07-07|EPI\_ISL\_520988|Original|hCoV-19^^Victoria|Human|Microbiological Diagnostic Unit - Public Health Laboratory (MDU-PHL)|MDU-PHL|Schultz|Australia

>Spike|hCoV-19/England/BRIS-122B42/2020|2020-04-02|EPI\_ISL\_440637|Original|hCoV-19^^England|Human|PHE South West Regional Laboratory|Wellcome Sanger Institute for the COVID-19 Genomics UK (COG-UK) consortium|Amato|United Kingdom

>Spike|hCoV-19/Singapore/1341/2020|2020-06-07|EPI\_ISL\_648690|Original|hCoV-19^^Singapore|Human|Department of Laboratory Medicine|Department of Laboratory Medicine|Chen|Singapore

>Spike|hCoV-19/USA/TX-DSHS-0198/2020|2020-05-29|EPI\_ISL\_524073|Original|hCoV-19^^Texas|Human|Texas Department of State Health Services|Texas Department of State Health Services|Rahman|USA

>Spike|hCoV-19/England/MILK-9C3CC0/2020|2020-09-09|EPI\_ISL\_566835|Original|hCoV-19^^England|Human|Lighthouse Lab in Milton Keynes|Wellcome Sanger Institute for the COVID-19 Genomics UK (COG-UK) consortium|Davies|United Kingdom

>Spike|hCoV-19/England/QEUEH-96C582/2020|2020-08-13|EPI\_ISL\_530879|Original|hCoV-19^^England|Human|Lighthouse Lab in Glasgow|Wellcome Sanger Institute for the COVID-19 Genomics UK (COG-UK) consortium|Davies|United Kingdom

>Spike|hCoV-19/USA/NY-NYCPHL-000811/2020|2020-03-24|EPI\_ISL\_632190|Original|hCoV-19^^New York|Human|Flushing Hospital Medical Center|New York City Public Health Laboratory|Wang|USA

>Spike|hCoV-19/England/QEUEH-5E8537/2020|2020-06-16|EPI\_ISL\_533323|Original|hCoV-19^^England|Human|Lighthouse Lab in Glasgow|Wellcome Sanger Institute for the COVID-19 Genomics UK (COG-UK) consortium|Davies|United Kingdom

>Spike|hCoV-19/England/OXON-B35A3/2020|2020-03-31|EPI\_ISL\_534868|Original|hCoV-19^^England|Human|Oxford Viromics|COVID-19 Genomics UK (COG-UK) Consortium|Golubchik|United Kingdom

>Spike|hCoV-19/USA/TX-HMH-6506/2020|2020-06-27|EPI\_ISL\_546045|Original|hCoV-19^^Texas|Human|Houston Methodist Hospital|Houston Methodist Hospital|Long|USA

>Spike|hCoV-19/USA/NV-NSPHL-A0062/2020|2020-03-30|EPI\_ISL\_515344|Original|hCoV-19^^Nevada|Human|Nevada State Public Health Laboratory|Nevada State Public Health Laboratory|Sevinsky|USA

>Spike|hCoV-19/USA/WI-UW-2073/2020|2020-10-19|EPI\_ISL\_677478|Original|hCoV-19^^Wisconsin|Human|University of Wisconsin-Madison AIDS Vaccine Research Laboratories|University of Wisconsin-Madison AIDS Vaccine Research Laboratories|Baczenas|USA

>Spike|hCoV-19/Netherlands/UT-RIVM-20400/2020|2020-12-06|EPI\_ISL\_728620|Original|hCoV-19^^Utrecht|Human|Dutch COVID-19 response team|National Institute for Public Health and the Environment (RIVM)|Meijer|Netherlands

>Spike|hCoV-19/Canada/ON-SLB3079/2020|2020-04-14|EPI\_ISL\_717728|Original|hCoV-19^^Ontario|Human|Kingston Health Sciences Centre and Queen's University|Ontario Institute for Cancer Research|de Borja|Canada

>Spike|hCoV-19/Scotland/EDB10499/2020|2020-11-03|EPI\_ISL\_764356|Original|hCoV-19^^Scotland|Human|Virology Department|COVID-19 Genomics UK (COG-UK) Consortium|McHugh|United Kingdom

>Spike|hCoV-19/England/PORT-2D1B8D/2020|2020-03-31|EPI\_ISL\_493656|Original|hCoV-19^^England|Human|Centre for Enzyme Innovation|COVID-19 Genomics UK (COG-UK) Consortium|Robson|United Kingdom

>Spike|hCoV-19/England/ALDP-AA13E0/2020|2020-10-22|EPI\_ISL\_623937|Original|hCoV-19^^England|Human|Lighthouse Lab in Alderley Park|Wellcome Sanger Institute for the COVID-19 Genomics UK (COG-UK) consortium|Davies|United Kingdom

>Spike|hCoV-19/Spain/VC-FISABIO-164/2020|2020-03-19|EPI\_ISL\_436259|Original|hCoV-19^^Comunitat Valenciana|Human|Servicio de Microbiología. Hospital Universitario Doctor Peset|Sequencing and Bioinformatics Service and Molecular Epidemiology Research Group. FISABIO-Public Health|Gonzalez-Candelas|Spain

>Spike|hCoV-19/England/EXET-137157/2020|2020-04-21|EPI\_ISL\_471952|Original|hCoV-19^^England|Human|University of Exeter|COVID-19 Genomics UK (COG-UK) Consortium|Temperton|United Kingdom

>Spike|hCoV-19/England/MILK-9749C7/2020|2020-08-17|EPI\_ISL\_575829|Original|hCoV-19^^England|Human|Lighthouse Lab in Milton Keynes|Wellcome Sanger Institute for the COVID-19 Genomics UK (COG-UK) consortium|Davies|United Kingdom

>Spike|hCoV-19/England/NORT-2842EE/2020|2020-03-17|EPI\_ISL\_488588|Original|hCoV-19^^England|Human|NU-OMICS DNA Sequencing research facility|Wellcome Sanger Institute for the COVID-19 Genomics UK (COG-UK) consortium|Davies|United Kingdom

>Spike|hCoV-19/England/LIVE-9DADD/2020|2020-04-29|EPI\_ISL\_449614|Original|hCoV-19^^England|Human|Liverpool Clinical Laboratories|COVID-19 Genomics UK (COG-UK) Consortium|Haldenby|United Kingdom

>Spike|hCoV-19/Japan/PG-4304/2020|2020-07-00|EPI\_ISL\_692532|Original|hCoV-19^^Japan|Human|Pathogen Genomics Center|Pathogen Genomics Center|Sekizuka|Japan

>Spike|hCoV-19/Tunisia/ADAGE-17873/2020|2020-10-14|EPI\_ISL\_710534|Original|hCoV-19^^Monastir|Human|H\u00f4pital Fattouma-Bourguiba de Monastir|Laboratoire des Proc\u00e9s de Criblage Mol\u00e9culaire et Cellulaire-Centre de Biotechnologie de Sfax|Abid|Tunisia

>Spike|hCoV-19/USA/TX-HMH-MCoV-19823/2020|2020-11-25|EPI\_ISL\_784151|Original|hCoV-19^^Texas|Human|Houston Methodist Hospital|Houston Methodist Hospital|Long|USA

>Spike|hCoV-19/France/PAC-IHU-0432/2020|2020-04-02|EPI\_ISL\_569504|Original|hCoV-19^^Provence-Alpes-C\u00f4te-d\u2019Azur|Human|MEPHI|MEPHI|Levasseur|France

>Spike|hCoV-19/Wales/PHWC-2F056/2020|2020-04-05|EPI\_ISL\_446192|Original|hCoV-19^^Wales|Human|Wales Specialist Virology Centre|Public Health Wales Microbiology Cardiff|Moore|United Kingdom

>Spike|hCoV-19/South Korea/KDCA0081/2020|2020-10-09|EPI\_ISL\_747321|Original|hCoV-19^^South Korea|Human|Division of Emerging Infectious Diseases|Division of Emerging Infectious Diseases|Park|South Korea

>Spike|hCoV-19/SaudiArabia/KAUST-MADINAH947/2020|2020-05-26|EPI\_ISL\_513204|Original|hCoV-19^^Madinah|Human|Pathogen Genomics Lab King Abdullah University of Science and Technology(KAUST)|Pathogen Genomics Lab King Abdullah University of Science and Technology(KAUST)|Mohamed Ghazzali|Saudi Arabia

>Spike|hCoV-19/Scotland/EDB5220/2020|2020-05-20|EPI\_ISL\_456989|Original|hCoV-19^^Scotland|Human|Virology Department|COVID-19 Genomics UK (COG-UK) Consortium|Williams|United Kingdom

>Spike|hCoV-19/England/CAMB-7D00E/2020|2020-04-06|EPI\_ISL\_442183|Original|hCoV-19^^England|Human|Department of Pathology|Wellcome Sanger Institute for the COVID-19 Genomics UK (COG-UK) consortium|Amato|United Kingdom

>Spike|hCoV-19/USA/CA-ALSR-4262/2020|2020-09-30|EPI\_ISL\_648922|Original|hCoV-19^^California|Human|San Diego County Public Health Laboratory|Andersen lab at Scripps Research|Gangavarapu|USA

>Spike|hCoV-19/England/NORW-F6F97/2020|2020-12-03|EPI\_ISL\_725317|Original|hCoV-19^^England|Human|Quadram Institute Bioscience|COVID-19 Genomics UK (COG-UK) Consortium|Alikhan|United Kingdom

>Spike|hCoV-19/Denmark/DCGC-12542/2020|2020-11-16|EPI\_ISL\_682723|Original|hCoV-19^^Midtjylland|Human|Department of Virus and Microbiological Special Diagnostics|Albertsen Lab|Michaelsen|Denmark

>Spike|hCoV-19/USA/CA-ALSR-4492/2020|2020-10-30|EPI\_ISL\_666967|Original|hCoV-19^^California|Human|San Diego County Public Health Laboratory|Andersen lab at Scripps Research|Gangavarapu|USA

>Spike|hCoV-19/England/CAMB-1BB09A/2020|2020-11-11|EPI\_ISL\_664161|Original|hCoV-19^^England|Human|Department of Pathology|COVID-19 Genomics UK (COG-UK) Consortium|Goodfellow|United Kingdom

>Spike|hCoV-19/England/CAMC-B783F0/2020|2020-11-11|EPI\_ISL\_783515|Original|hCoV-19^^England|Human|Lighthouse Lab in Cambridge|Wellcome Sanger Institute for the COVID-19 Genomics UK (COG-UK) Consortium|Davies|United Kingdom

>Spike|hCoV-19/New Zealand/20VR2539/2020|2020-04-15|EPI\_ISL\_456383|Original|hCoV-19^^Auckland|Human|LabPLUS|Institute of Environmental Science and Research (ESR)|de Ligt|New Zealand

>Spike|hCoV-19/USA/TX-HMH-3599/2020|2020-06-15|EPI\_ISL\_543055|Original|hCoV-19^^Texas|Human|Houston Methodist Hospital|Houston Methodist Hospital|Long|USA

>Spike|hCoV-19/England/BRIS-1853DA2/2020|2020-04-27|EPI\_ISL\_492352|Original|hCoV-19^^England|Human|PHE South West Regional Laboratory|Wellcome Sanger Institute for the COVID-19 Genomics UK (COG-UK) consortium|Davies|United Kingdom

>Spike|hCoV-19/England/ALDP-AA3DFF/2020|2020-10-22|EPI\_ISL\_624424|Original|hCoV-19^^England|Human|Lighthouse Lab in Alderley Park|Wellcome Sanger Institute for the COVID-19 Genomics UK (COG-UK) consortium|Davies|United Kingdom

>Spike|hCoV-19/USA/CA-QDX-2710/2020|2020-03-17|EPI\_ISL\_605007|Original|hCoV-19^^California|Human|Quest Diagnostics|Quest Diagnostics|Kagan|USA

>Spike|hCoV-19/United Arab Emirates/0009/2020|2020-05-07|EPI\_ISL\_698219|Original|hCoV-19^^Abu Dhabi|Human|Group 42 (G42) Healthcare|G42 Healthcare|Ogrodzki|United Arab Emirates

>Spike|hCoV-19/England/CAMC-B998EB/2020|2020-11-15|EPI\_ISL\_673734|Original|hCoV-19^^England|Human|Lighthouse Lab in Cambridge|Wellcome Sanger Institute for the COVID-19 Genomics UK (COG-UK) Consortium|Davies|United Kingdom

>Spike|hCoV-19/England/QEUH-A8B452/2020|2020-10-17|EPI\_ISL\_643309|Original|hCoV-19^^England|Human|Lighthouse Lab in Glasgow|Wellcome Sanger Institute for the COVID-19 Genomics UK (COG-UK) Consortium|Davies|United Kingdom

>Spike|hCoV-19/Colombia/NSA-INS-79504/2020|2020-03-13|EPI\_ISL\_456130|Original|hCoV-19^^Norte de Santander|Human|Instituto Nacional de Salud - Unidad de Secuenciación y Análisis Genómico|Instituto Nacional de Salud|Díaz|Colombia

>Spike|hCoV-19/Australia/WA264/2020|2020-09-26|EPI\_ISL\_594176|Original|hCoV-19^^Western Australia|Human|PathWest Laboratory Medicine WA|PathWest Laboratory Medicine WA Microbial Surveillance Unit|Sikazwe|Australia

>Spike|hCoV-19/England/QEUH-BCC0AB/2020|2020-11-27|EPI\_ISL\_704082|Original|hCoV-19^^England|Human|Lighthouse Lab in Glasgow|Wellcome Sanger Institute for the COVID-19 Genomics UK (COG-UK) Consortium|Davies|United Kingdom

>Spike|hCoV-19/England/LIVE-DC8C8B/2020|2020-11-18|EPI\_ISL\_704968|Original|hCoV-19^^England|Human|Liverpool Clinical Laboratories|COVID-19 Genomics UK (COG-UK) Consortium|Haldenby|United Kingdom

>Spike|hCoV-19/Denmark/DCGC-13695/2020|2020-11-30|EPI\_ISL\_712964|Original|hCoV-19^^Sjælland|Human|Department of Virus and Microbiological Special Diagnostics|Albertsen Lab|Michaelsen|Denmark

>Spike|hCoV-19/Switzerland/VB-ETHZ-160007/2020|2020-06-20|EPI\_ISL\_486504|Original|hCoV-19^^Valais|Human|Viollier AG|Department of Biosystems Science and Engineering|Nadeau|Switzerland

>Spike|hCoV-19/USA/UT-02842/2020|2020-04-29|EPI\_ISL\_513652|Original|hCoV-19^^Utah|Human|Utah Public Health Laboratory|Utah Public Health Laboratory|Butz|USA

>Spike|hCoV-19/USA/MI-UM-10036797904/2020|2020-11-05|EPI\_ISL\_707838|Original|hCoV-19^^Michigan|Human|University of Michigan Clinical Microbiology Laboratory|Lauring Lab|Valesano|USA

>Spike|hCoV-19/England/CAMB-793BE/2020|2020-04-02|EPI\_ISL\_441180|Original|hCoV-19^^England|Human|Department of Pathology|Wellcome Sanger Institute for the COVID-19 Genomics UK (COG-UK) consortium|Amato|United Kingdom

>Spike|hCoV-19/Germany/HH-hpi-p2309/2020|2020-03-22|EPI\_ISL\_776440|Original|hCoV-19^^Hamburg|Human|University Medical Center Hamburg Eppendorf|Heinrich Pette Institute|Robitaille|Germany

>Spike|hCoV-19/England/20132023904/2020|2020-03-23|EPI\_ISL\_423753|Original|hCoV-19^^England|Human|Respiratory Virus Unit|Respiratory Virus Unit|Platt|United Kingdom

>Spike|hCoV-19/England/NORW-EBBFB/2020|2020-05-06|EPI\_ISL\_457489|Original|hCoV-19^^England|Human|Quadram Institute Bioscience|COVID-19 Genomics UK (COG-UK) Consortium|Alikhan|United Kingdom

>Spike|hCoV-19/England/MILK-BB1BE4/2020|2020-11-17|EPI\_ISL\_720109|Original|hCoV-19^^England|Human|Lighthouse Lab in Milton Keynes|Wellcome Sanger Institute for the COVID-19 Genomics UK (COG-UK) Consortium|Davies|United Kingdom

>Spike|hCoV-19/Denmark/DCGC-12489/2020|2020-11-16|EPI\_ISL\_682670|Original|hCoV-19^^Hovedstaden|Human|Department of Virus and Microbiological Special Diagnostics|Albertsen Lab|Michaelsen|Denmark

>Spike|hCoV-19/Belgium/ULG-10220/2020|2020-05-23|EPI\_ISL\_484708|Original|hCoV-19^^Belgium|Human|Department of Clinical Microbiology|GIGA Medical Genomics|Durkin|Belgium

>Spike|hCoV-19/USA/CA-CZB-14225/2020|2020-11-13|EPI\_ISL\_739386|Original|hCoV-19^^California|Human|Orange County Public Health Lab|Chan-Zuckerberg Biohub|Kamm|USA

>Spike|hCoV-19/USA/WA-S263/2020|2020-03-05|EPI\_ISL\_430117|Original|hCoV-19^^Washington|Human|Seattle Flu Study|Seattle Flu Study|Bedford|USA

>Spike|hCoV-19/USA/FL-BPHL-2212/2020|2020-05-12|EPI\_ISL\_666834|Original|hCoV-19^^Florida|Human|Florida Bureau of Public Health Laboratories|Florida Bureau of Public Health Laboratories|Blanton|USA

>Spike|hCoV-19/Wales/PHWC-16C793/2020|2020-09-17|EPI\_ISL\_574091|Original|hCoV-19^^Wales|Human|Wales Specialist Virology Centre Sequencing lab|COVID-19 Genomics UK (COG-UK) Consortium|Moore|United Kingdom

>Spike|hCoV-19/USA/WI-GMF-27242/2020|2020-10-23|EPI\_ISL\_660974|Original|hCoV-19^^Wisconsin|Human|Gundersen Molecular Diagnostics Laboratory|Kabara Cancer Research Institute|Kenny|USA

>Spike|hCoV-19/Japan/PG-5578/2020|2020-08-00|EPI\_ISL\_688703|Original|hCoV-19^^Japan|Human|Sakai City Institute of Public Health|Pathogen Genomics Center|Sekizuka|Japan

>Spike|hCoV-19/USA/CA-CZB-1264/2020|2020-04-12|EPI\_ISL\_454684|Original|hCoV-19^^California|Human|County of Santa Clara Public Health Department|Chan-Zuckerberg Biohub|Hao|USA

>Spike|hCoV-19/Denmark/DCGC-14648/2020|2020-11-23|EPI\_ISL\_711889|Original|hCoV-19^^Hovedstaden|Human|Department of Virus and Microbiological Special Diagnostics|Albertsen Lab|Michaelsen|Denmark

>Spike|hCoV-19/England/LOND-D6012/2020|2020-04-20|EPI\_ISL\_444270|Original|hCoV-19^^England|Human|University College London|COVID-19 Genomics UK (COG-UK) Consortium|Roy|United Kingdom

>Spike|hCoV-19/India/MH-ACTREC-289/2020|2020-07-13|EPI\_ISL\_699941|Original|hCoV-19^^Maharashtra|Human|Hematopathology Laboratory|Hematopathology Laboratory|Patkar|India

>Spike|hCoV-19/Russia/SVE-RII-MH1711S/2020|2020-09-17|EPI\_ISL\_602348|Original|hCoV-19^^Sverdlovsk|Human|HELIX LLC|WHO National Influenza Centre Russian Federation|Komissarov|Russia

>Spike|hCoV-19/USA/CA-CDC-4712/2020|2020-06-04|EPI\_ISL\_535688|Original|hCoV-19^^California|Human|CDPH|Pathogen Discovery|Queen|USA

>Spike|hCoV-19/Japan/PG-3710/2020|2020-04-00|EPI\_ISL\_691963|Original|hCoV-19^^Japan|Human|Pathogen Genomics Center|Pathogen Genomics Center|Sekizuka|Japan

>Spike|hCoV-19/England/CAMC-B54891/2020|2020-11-08|EPI\_ISL\_658337|Original|hCoV-19^^England|Human|Lighthouse Lab in Cambridge|Wellcome Sanger Institute for the COVID-19 Genomics UK (COG-UK) Consortium|Davies|United Kingdom

>Spike|hCoV-19/Australia/VIC9837/2020|2020-08-16|EPI\_ISL\_565739|Original|hCoV-19^^Victoria|Human|Victorian Infectious Diseases Reference Laboratory (VIDRL)|VIDRL and MDU-PHL|Schultz|Australia

>Spike|hCoV-19/Belgium/ULG-10906/2020|2020-11-14|EPI\_ISL\_678448|Original|hCoV-19^^Li\u00e8ge|Human|Department of Clinical Microbiology|GIGA Medical Genomics|Durkin|Belgium

>Spike|hCoV-19/England/SHEF-CD360/2020|2020-09-14|EPI\_ISL\_573735|Original|hCoV-19^^England|Human|Virology Department|COVID-19 Genomics UK (COG-UK) Consortium|de Silva|United Kingdom

>Spike|hCoV-19/England/NORW-E889D/2020|2020-04-11|EPI\_ISL\_448243|Original|hCoV-19^^England|Human|Quadram Institute Bioscience|COVID-19 Genomics UK (COG-UK) Consortium|Alikhan|United Kingdom

>Spike|hCoV-19/USA/MN-MDH-1291/2020|2020-03-24|EPI\_ISL\_483011|Original|hCoV-19^^Minnesota|Human|Minnesota Department of Health|Minnesota Department of Health|Garfin|USA

>Spike|hCoV-19/Spain/MD-IBV-97010011/2020|2020-04-12|EPI\_ISL\_683671|Original|hCoV-19^^Madrid|Human|IdISSC/Hospital Cl\u00e9nico San Carlos de Madrid\u00b7SeqCOVID-SPAIN consortium/IBV (CSIC)|Comas|Spain

>Spike|hCoV-19/Denmark/DCGC-14471/2020|2020-11-30|EPI\_ISL\_711786|Original|hCoV-19^^Midtjylland|Human|Department of Virus and Microbiological Special Diagnostics|Albertsen Lab|Michaelsen|Denmark

>Spike|hCoV-19/England/QEUH-999470/2020|2020-08-25|EPI\_ISL\_559761|Original|hCoV-19^^England|Human|Oxford Viromics|COVID-19 Genomics UK (COG-UK) Consortium|Golubchik|United Kingdom

>Spike|hCoV-19/USA/FL-BPHL-1143/2020|2020-08-17|EPI\_ISL\_526629|Original|hCoV-19^^Florida|Human|Florida Bureau of Public Health Laboratories|Florida Bureau of Public Health Laboratories|Blanton|USA

>Spike|hCoV-19/England/LOND-D4FEA/2020|2020-04-14|EPI\_ISL\_444190|Original|hCoV-19^^England|Human|University College London|COVID-19 Genomics UK (COG-UK) Consortium|Roy|United Kingdom

>Spike|hCoV-19/South Korea/KCDC2047/2020|2020-02-20|EPI\_ISL\_471453|Original|hCoV-19^^South Korea|Human|Division of Viral Diseases|Division of Viral Diseases|Kim|South Korea

>Spike|hCoV-19/USA/WI-WSLH-200506/2020|2020-05-23|EPI\_ISL\_578647|Original|hCoV-19^^Wisconsin|Human|Wisconsin State Laboratory of Hygiene Communicable Disease Division|Wisconsin State Laboratory of Hygiene Communicable Disease Division|Florek|USA

>Spike|hCoV-19/Australia/VIC12606/2020|2020-00-00|EPI\_ISL\_592036|Original|hCoV-19^^Victoria|Human|Microbiological Diagnostic Unit - Public Health Laboratory (MDU-PHL)|MDU-PHL|Schultz|Australia

>Spike|hCoV-19/England/ALDP-9D8CF5/2020|2020-09-18|EPI\_ISL\_576663|Original|hCoV-19^^England|Human|Oxford Viromics|COVID-19 Genomics UK (COG-UK) Consortium|Golubchik|United Kingdom

>Spike|hCoV-19/England/ALDP-BCA386/2020|2020-11-23|EPI\_ISL\_703365|Original|hCoV-19^^England|Human|Lighthouse Lab in Alderley Park|Wellcome Sanger Institute for the COVID-19 Genomics UK (COG-UK) Consortium|Davies|United Kingdom

>Spike|hCoV-19/USA/WA-UW-46885/2020|2020-12-10|EPI\_ISL\_756199|Original|hCoV-19^^Washington|Human|UW Virology Lab|UW Virology Lab|Roychoudhury|USA

>Spike|hCoV-19/Netherlands/NA\_532/2020|2020-04-03|EPI\_ISL\_460705|Original|hCoV-19^^Netherlands|Human|Dutch COVID-19 response team|Erasmus Medical Center|Oude Munnink|Netherlands

>Spike|hCoV-19/Scotland/EDB1115/2020|2020-04-07|EPI\_ISL\_433404|Original|hCoV-19^^Scotland|Human|Virology Department|COVID-19 Genomics UK (COG-UK) Consortium|Williams|United Kingdom

>Spike|hCoV-19/England/MILK-9C3370/2020|2020-09-10|EPI\_ISL\_566792|Original|hCoV-19^^England|Human|Lighthouse Lab in Milton Keynes|Wellcome Sanger Institute for the COVID-19 Genomics UK (COG-UK) consortium|Davies|United Kingdom

>Spike|hCoV-19/Brazil/SP-298/2020|2020-04-20|EPI\_ISL\_527861|Original|hCoV-19^^S\u00e3o Paulo|Human|Hospital e Maternidade Celso Pierro|Instituto Adolfo Lutz|Sacchi|Brazil

>Spike|hCoV-19/Denmark/DCGC-5694/2020|2020-09-21|EPI\_ISL\_621199|Original|hCoV-19^^Syddanmark|Human|Department of Virus and Microbiological Special Diagnostics|Albertsen lab|Michaelsen|Denmark

>Spike|hCoV-19/England/SHEF-C0084/2020|2020-03-23|EPI\_ISL\_420240|Original|hCoV-19^^England|Human|Virology Department|Department of Infection|de Silva|United Kingdom

>Spike|hCoV-19/England/QEUH-9F71C4/2020|2020-09-25|EPI\_ISL\_595669|Original|hCoV-19^^England|Human|Oxford Viromics|COVID-19 Genomics UK (COG-UK) Consortium|Golubchik|United Kingdom

>Spike|hCoV-19/England/MILK-B39A6F/2020|2020-11-02|EPI\_ISL\_652302|Original|hCoV-19^^England|Human|University of Exeter|COVID-19 Genomics UK (COG-UK) Consortium|Temperton|United Kingdom

>Spike|hCoV-19/Switzerland/AG-ETHZ-100351/2020|2020-03-19|EPI\_ISL\_574880|Original|hCoV-19^^Aargau|Human|Viollier AG|Department of Biosystems Science and Engineering|Nadeau|Switzerland

>Spike|hCoV-19/Denmark/DCGC-6222/2020|2020-10-05|EPI\_ISL\_620125|Original|hCoV-19^^Syddanmark|Human|Department of Virus and Microbiological Special Diagnostics|Albertsen lab|Michaelsen|Denmark



>Spike|hCoV-19/USA/WI-UW-1643/2020|2020-09-11|EPI\_ISL\_605517|Original|hCoV-19^^Wisconsin|Human|University of Wisconsin-Madison AIDS Vaccine Research Laboratories|University of Wisconsin-Madison AIDS Vaccine Research Laboratories|Baczenas|USA

>Spike|hCoV-19/England/ALDP-AA40F5/2020|2020-10-21|EPI\_ISL\_624134|Original|hCoV-19^^England|Human|Lighthouse Lab in Alderley Park|Wellcome Sanger Institute for the COVID-19 Genomics UK (COG-UK) consortium|Davies|United Kingdom

>Spike|hCoV-19/USA/TX-DSHS-1618/2020|2020-10-09|EPI\_ISL\_700730|Original|hCoV-19^^Texas|Human|Texas Department of State Health Services|Texas Department of State Health Services|Rahman|USA

>Spike|hCoV-19/Canada/BC-BCCDC-8393/2020|2020-11-00|EPI\_ISL\_740770|Original|hCoV-19^^British Columbia|Human|BCCDC Public Health Laboratory|BCCDC Public Health Laboratory|Prystajecky|Canada

>Spike|hCoV-19/USA/MI-QDX-493/2020|2020-03-23|EPI\_ISL\_571227|Original|hCoV-19^^Michigan|Human|Quest Diagnostics|Quest Diagnostics|Kagan|USA

>Spike|hCoV-19/USA/MD-MDH-0124/2020|2020-05-28|EPI\_ISL\_522871|Original|hCoV-19^^Maryland|Human|Maryland Department of Health|Maryland Department of Health|Keller|USA

>Spike|hCoV-19/Spain/VC-FISABIO-538/2020|2020-03-29|EPI\_ISL\_447483|Original|hCoV-19^^Comunitat Valenciana|Human|Servicio de Microbiología. Hospital Clínico Universitario de Valencia|Sequencing and Bioinformatics Service and Molecular Epidemiology Research Group. FISABIO-Public Health|Gonzalez-Candelas|Spain

>Spike|hCoV-19/France/PAC-IHU-0176/2020|2020-03-26|EPI\_ISL\_569349|Original|hCoV-19^^Provence-Alpes-C\u00f4te-d\u2019Azur|Human|MEPHI|MEPHI|Levasseur|France

>Spike|hCoV-19/USA/TX-DSHS-1234/2020|2020-04-30|EPI\_ISL\_654747|Original|hCoV-19^^Texas|Human|Texas Department of State Health Services|Texas Department of State Health Services|Rahman|USA

>Spike|hCoV-19/USA/UT-UPHL-2012050615/2020|2020-06-17|EPI\_ISL\_746335|Original|hCoV-19^^Utah|Human|Utah Public Health Laboratory|Utah Public Health Laboratory|Gallagher|USA

>Spike|hCoV-19/USA/MI-MDHHS-SC21474/2020|2020-07-01|EPI\_ISL\_516201|Original|hCoV-19^^Michigan|Human|Michigan Department of Health and Human Services|Michigan Department of Health and Human Services|Blankenship|USA

>Spike|hCoV-19/Switzerland/VD-ETHZ-280240/2020|2020-09-10|EPI\_ISL\_560532|Original|hCoV-19^^Vaud|Human|Viollier AG|Department of Biosystems Science and Engineering|Nadeau|Switzerland

>Spike|hCoV-19/Russia/SPE-RII-MH1489S/2020|2020-09-11|EPI\_ISL\_596281|Original|hCoV-19^^Saint Petersburg|Human|HELIX LCC|WHO National Influenza Centre Russian Federation|Komissarov|Russia

>Spike|hCoV-19/Canada/ON-S17/2020|2020-03-16|EPI\_ISL\_586370|Original|hCoV-19^^Ontario|Human|Toronto Invasive Bacterial Diseases Network|McMaster University|McArthur|Canada

>Spike|hCoV-19/England/CWAR-24FDAFF/2020|2020-05-02|EPI\_ISL\_584479|Original|hCoV-19^^England|Human|UHCW / University of Warwick|COVID-19 Genomics UK (COG-UK) Consortium|Stark|United Kingdom

>Spike|hCoV-19/England/PORT-2D1AAE/2020|2020-04-03|EPI\_ISL\_493643|Original|hCoV-19^^England|Human|Centre for Enzyme Innovation|COVID-19 Genomics UK (COG-UK) Consortium|Robson|United Kingdom

>Spike|hCoV-19/England/ALDP-95B146/2020|2020-06-13|EPI\_ISL\_555614|Original|hCoV-19^^England|Human|Lighthouse Lab in Alderley Park|Wellcome Sanger Institute for the COVID-19 Genomics UK (COG-UK) consortium|Davies|United Kingdom

>Spike|hCoV-19/Wales/PHWC-16D440/2020|2020-09-14|EPI\_ISL\_574237|Original|hCoV-19^^Wales|Human|Wales Specialist Virology Centre Sequencing lab|COVID-19 Genomics UK (COG-UK) Consortium|Moore|United Kingdom

>Spike|hCoV-19/England/SHEF-D277B/2020|2020-04-28|EPI\_ISL\_475504|Original|hCoV-19^^England|Human|Virology Department|COVID-19 Genomics UK (COG-UK) Consortium|de Silva|United Kingdom

>Spike|hCoV-19/Portugal/PT0403/2020|2020-03-17|EPI\_ISL\_454127|Original|hCoV-19^^Portugal|Human|unknown|Instituto Nacional de Saúde (INSA)|Borges|Portugal

>Spike|hCoV-19/USA/NMDOH-2020305740/2020|2020-08-21|EPI\_ISL\_542041|Original|hCoV-19^^New Mexico|Human|New Mexico Department of Health Scientific Laboratory|New Mexico Department of Health Scientific Laboratory|Johnson|USA

>Spike|hCoV-19/Japan/PG-8124/2020|2020-08-00|EPI\_ISL\_687223|Original|hCoV-19^^Japan|Human|Pathogen Genomics Center|Pathogen Genomics Center|Sekizuka|Japan

>Spike|hCoV-19/England/QEUA-A00A17/2020|2020-10-02|EPI\_ISL\_584896|Original|hCoV-19^^England|Human|University of Exeter|COVID-19 Genomics UK (COG-UK) Consortium|Temperton|United Kingdom

>Spike|hCoV-19/Canada/ON-PHL-20-02408/2020|2020-09-00|EPI\_ISL\_671590|Original|hCoV-19^^Ontario|Human|Public Health Ontario Laboratory|Public Health Ontario Laboratory|Guthrie|Canada

>Spike|hCoV-19/England/MILK-C61CFE/2020|2020-12-13|EPI\_ISL\_735618|Original|hCoV-19^^England|Human|Lighthouse Lab in Milton Keynes|Wellcome Sanger Institute for the COVID-19 Genomics UK (COG-UK) Consortium|Davies|United Kingdom

>Spike|hCoV-19/USA/WA-UW-4897/2020|2020-04-08|EPI\_ISL\_429635|Original|hCoV-19^^Washington|Human|UW Virology Lab|UW Virology Lab|Roychoudhury|USA

>Spike|hCoV-19/USA/TX-HMH-2875/2020|2020-06-08|EPI\_ISL\_543844|Original|hCoV-19^^Texas|Human|Houston Methodist Hospital|Houston Methodist Hospital|Long|USA

>Spike|hCoV-19/Australia/QLD1124/2020|2020-03-22|EPI\_ISL\_639741|Original|hCoV-19^^Australia|Human|unknown|Public Health Virology Laboratory|Nguyen|Australia

>Spike|hCoV-19/England/LOND-D5F43/2020|2020-04-18|EPI\_ISL\_444265|Original|hCoV-19^^England|Human|University College London|COVID-19 Genomics UK (COG-UK) Consortium|Roy|United Kingdom

>Spike|hCoV-19/USA/MN-QDX-1390/2020|2020-03-14|EPI\_ISL\_572179|Original|hCoV-19^^Minnesota|Human|Quest Diagnostics|Quest Diagnostics|Kagan|USA

>Spike|hCoV-19/England/CAMB-1BBBC6/2020|2020-11-17|EPI\_ISL\_679204|Original|hCoV-19^^England|Human|Department of Pathology|COVID-19 Genomics UK (COG-UK) Consortium|Goodfellow|United Kingdom

>Spike|hCoV-19/England/MILK-BAB637/2020|2020-11-18|EPI\_ISL\_681468|Original|hCoV-19^^England|Human|Lighthouse Lab in Milton Keynes|Wellcome Sanger Institute for the COVID-19 Genomics UK (COG-UK) Consortium|Davies|United Kingdom

>Spike|hCoV-19/USA/WI-UW-1166/2020|2020-08-11|EPI\_ISL\_522922|Original|hCoV-19^^Wisconsin|Human|University of Wisconsin-Madison AIDS Vaccine Research Laboratories|University of Wisconsin-Madison AIDS Vaccine Research Laboratories|Baczenas|USA

>Spike|hCoV-19/Canada/BC\_07720149/2020|2020-04-00|EPI\_ISL\_466819|Original|hCoV-19^^British Columbia|Human|BCCDC Public Health Laboratory|BCCDC Public Health Laboratory|Harrigan|Canada

>Spike|hCoV-19/Denmark/DCGC-3728/2020|2020-08-31|EPI\_ISL\_615508|Original|hCoV-19^^Hovedstaden|Human|Department of Virus and Microbiological Special Diagnostics|Albertsen lab|Michaelsen|Denmark

>Spike|hCoV-19/Switzerland/BL-UHB-42191693/2020|2020-03-15|EPI\_ISL\_528106|Original|hCoV-19^^Basel-Land|Human|University Hospital Basel|University Hospital Basel|Roloff Handschin|Switzerland

>Spike|hCoV-19/Scotland/QEUA-A4CBFE/2020|2020-10-08|EPI\_ISL\_596032|Original|hCoV-19^^Scotland|Human|Quadram Institute Bioscience|COVID-19 Genomics UK (COG-UK) Consortium|Alikhan|United Kingdom

>Spike|hCoV-19/Japan/PG-5695/2020|2020-07-00|EPI\_ISL\_688819|Original|hCoV-19^^Japan|Human|Pathogen Genomics Center|Pathogen Genomics Center|Sekizuka|Japan

>Spike|hCoV-19/England/ALDP-C48BB4/2020|2020-12-12|EPI\_ISL\_736748|Original|hCoV-19^^England|Human|Lighthouse Lab in Alderley Park|Wellcome Sanger Institute for the COVID-19 Genomics UK (COG-UK) Consortium|Davies|United Kingdom

>Spike|hCoV-19/Austria/CeMM0024/2020|2020-03-09|EPI\_ISL\_437914|Original|hCoV-19^^Ischgl|Human|Institut f\u00fcr Virologie am Department f\u00fcr Hygiene|Bergthaler laboratory|Bergthaler|Austria

>Spike|hCoV-19/Denmark/DCGC-5968/2020|2020-09-28|EPI\_ISL\_621077|Original|hCoV-19^^Midtjylland|Human|Department of Virus and Microbiological Special Diagnostics|Albertsen lab|Michaelsen|Denmark

>Spike|hCoV-19/USA/WA-UW-11098/2020|2020-06-17|EPI\_ISL\_570375|Original|hCoV-19^^Washington|Human|UW Virology Lab|UW Virology Lab|Roychoudhury|USA

>Spike|hCoV-19/England/EXET-135F40/2020|2020-00-00|EPI\_ISL\_478280|Original|hCoV-19^^England|Human|University of Exeter|COVID-19 Genomics UK (COG-UK) Consortium|Temperton|United Kingdom

>Spike|hCoV-19/Japan/PG-2851/2020|2020-05-00|EPI\_ISL\_690977|Original|hCoV-19^^Japan|Human|Pathogen Genomics Center|Pathogen Genomics Center|Sekizuka|Japan

>Spike|hCoV-19/Denmark/DCGC-18711/2020|2020-12-07|EPI\_ISL\_750137|Original|hCoV-19^^Midtjylland|Human|Department of Virus and Microbiological Special Diagnostics|Albertsen Lab|Michaelsen|Denmark

>Spike|hCoV-19/Denmark/DCGC-7391/2020|2020-10-12|EPI\_ISL\_619363|Original|hCoV-19^^Syddanmark|Human|Department of Virus and Microbiological Special Diagnostics|Albertsen lab|Michaelsen|Denmark

>Spike|hCoV-19/England/QEUEH-A9EE9A/2020|2020-10-20|EPI\_ISL\_611341|Original|hCoV-19^^England|Human|Lighthouse Lab in Glasgow|Wellcome Sanger Institute for the COVID-19 Genomics UK (COG-UK) consortium|Davies|United Kingdom

>Spike|hCoV-19/Netherlands/Gelderland\_20/2020|2020-03-19|EPI\_ISL\_460656|Original|hCoV-19^^Gelderland|Human|Dutch COVID-19 response team|Erasmus Medical Center|Oude Munnink|Netherlands

>Spike|hCoV-19/USA/WI-UW-1566/2020|2020-09-16|EPI\_ISL\_605444|Original|hCoV-19^^Wisconsin|Human|University of Wisconsin-Madison AIDS Vaccine Research Laboratories|University of Wisconsin-Madison AIDS Vaccine Research Laboratories|Baczenas|USA

>Spike|hCoV-19/Canada/ON-S1853/2020|2020-11-24|EPI\_ISL\_729262|Original|hCoV-19^^Ontario|Human|Toronto Invasive Bacterial Diseases Network|McMaster University|McArthur|Canada

>Spike|hCoV-19/England/LIVE-A5C81/2020|2020-03-17|EPI\_ISL\_499583|Original|hCoV-19^^England|Human|Liverpool Clinical Laboratories|COVID-19 Genomics UK (COG-UK) Consortium|Haldenby|United Kingdom

>Spike|hCoV-19/Austria/CeMM0357/2020|2020-03-19|EPI\_ISL\_438120|Original|hCoV-19^^Vienna|Human|Center for Virology|Bergthaler laboratory|Bergthaler|Austria

>Spike|hCoV-19/Scotland/GCVR-171106/2020|2020-03-27|EPI\_ISL\_459543|Original|hCoV-19^^Scotland|Human|NHSGGC West of Scotland Specialist Virology Centre / MRC-University of Glasgow Centre for Virus Research|Wellcome Sanger Institute for the COVID-19 Genomics UK (COG-UK) consortium|Davies|United Kingdom

>Spike|hCoV-19/Germany/HH-hpi-p1777/2020|2020-03-19|EPI\_ISL\_776150|Original|hCoV-19^^Hamburg|Human|University Medical Center Hamburg Eppendorf|Heinrich Pette Institute|Robitaille|Germany

>Spike|hCoV-19/England/ALDP-9EE087/2020|2020-05-06|EPI\_ISL\_589518|Original|hCoV-19^^England|Human|Lighthouse Lab in Alderley Park|Wellcome Sanger Institute for the COVID-19 Genomics UK (COG-UK) consortium|Davies|United Kingdom

>Spike|hCoV-19/USA/TX-HMH-MCoV-13854/2020|2020-08-17|EPI\_ISL\_787147|Original|hCoV-19^^Texas|Human|Houston Methodist Hospital|Houston Methodist Hospital|Long|USA

>Spike|hCoV-19/Japan/PG-8777/2020|2020-08-00|EPI\_ISL\_686371|Original|hCoV-19^^Japan|Human|Pathogen Genomics Center|Pathogen Genomics Center|Sekizuka|Japan

>Spike|hCoV-19/Luxembourg/LNS0010795/2020|2020-11-15|EPI\_ISL\_739696|Original|hCoV-19^^Luxembourg|Human|Laboratoire national de sant\u00e9|Laboratoire national de sant\u00e9|Wienecke-Baldacchino|Luxembourg

>Spike|hCoV-19/England/MILK-B39E63/2020|2020-11-02|EPI\_ISL\_679673|Original|hCoV-19^^England|Human|Oxford Viromics|COVID-19 Genomics UK (COG-UK) Consortium|Golubchik|United Kingdom

>Spike|hCoV-19/Australia/NSW116/2020|2020-03-21|EPI\_ISL\_427698|Original|hCoV-19^^New South Wales|Human|Centre for Infectious Diseases and Microbiology Public Health|NSW Health Pathology - Institute of Clinical Pathology and Medical Research; Westmead Hospital; University of Sydney|Gall|Australia

>Spike|hCoV-19/England/MILK-994A64/2020|2020-08-25|EPI\_ISL\_552271|Original|hCoV-19^^England|Human|Lighthouse Lab in Milton Keynes|Wellcome Sanger Institute for the COVID-19 Genomics UK (COG-UK) consortium|Davies|United Kingdom

>Spike|hCoV-19/Japan/PG-0742/2020|2020-04-00|EPI\_ISL\_684352|Original|hCoV-19^^Japan|Human|Pathogen Genomics Center|Pathogen Genomics Center|Sekizuka|Japan

>Spike|hCoV-19/Italy/LAZ-INMI-66/2020|2020-06-10|EPI\_ISL\_603173|Original|hCoV-19^^Lazio|Human|INMI Lazzaro Spallanzani IRCCS|INMI Lazzaro Spallanzani IRCCS|Gruber|Italy

>Spike|hCoV-19/England/QEUEH-B0EADC/2020|2020-11-02|EPI\_ISL\_641935|Original|hCoV-19^^England|Human|Lighthouse Lab in Glasgow|Wellcome Sanger Institute for the COVID-19 Genomics UK (COG-UK) Consortium|Davies|United Kingdom

>Spike|hCoV-19/Scotland/EDB4557/2020|2020-05-06|EPI\_ISL\_461725|Original|hCoV-19^^Scotland|Human|Virology Department|COVID-19 Genomics UK (COG-UK) Consortium|Williams|United Kingdom

>Spike|hCoV-19/USA/CA-CZB-2502/2020|2020-05-25|EPI\_ISL\_513887|Original|hCoV-19^^California|Human|UCSF Clinical Microbiology Laboratory|Chan-Zuckerberg Biohub|Kamm|USA

>Spike|hCoV-19/Chile/RM-127908/2020|2020-07-18|EPI\_ISL\_746611|Original|hCoV-19^^Region Metropolitana de Santiago|Human|Genetica Molecular and Subdepartamento de Virologia ISP Chile|Instituto de Salud Publica de Chile|Tognarelli|Chile

>Spike|hCoV-19/Wales/PHWC-4A5D02/2020|2020-12-14|EPI\_ISL\_764968|Original|hCoV-19^^Wales|Human|Wales Specialist Virology Centre Sequencing lab|COVID-19 Genomics UK (COG-UK) Consortium|Moore|United Kingdom

>Spike|hCoV-19/England/QEUEH-C34720/2020|2020-12-11|EPI\_ISL\_734133|Original|hCoV-19^^England|Human|Lighthouse Lab in Glasgow|Wellcome Sanger Institute for the COVID-19 Genomics UK (COG-UK) Consortium|Davies|United Kingdom

>Spike|hCoV-19/England/201160216/2020|2020-03-10|EPI\_ISL\_464788|Original|hCoV-19^^England|Human|Respiratory Virus Unit|Respiratory Virus Unit|Platt|United Kingdom

>Spike|hCoV-19/England/QEUEH-9F9881/2020|2020-09-26|EPI\_ISL\_589232|Original|hCoV-19^^England|Human|Lighthouse Lab in Glasgow|Wellcome Sanger Institute for the COVID-19 Genomics UK (COG-UK) consortium|Davies|United Kingdom

>Spike|hCoV-19/England/QEUEH-CC2253/2020|2020-12-21|EPI\_ISL\_760676|Original|hCoV-19^^England|Human|Lighthouse Lab in Glasgow|Wellcome Sanger Institute for the COVID-19 Genomics UK (COG-UK) Consortium|Davies|United Kingdom

>Spike|hCoV-19/England/ALDP-94E8AB/2020|2020-06-16|EPI\_ISL\_555330|Original|hCoV-19^^England|Human|Lighthouse Lab in Alderley Park|Wellcome Sanger Institute for the COVID-19 Genomics UK (COG-UK) consortium|Davies|United Kingdom

>Spike|hCoV-19/Scotland/QEUEH-AADD7D/2020|2020-10-22|EPI\_ISL\_623903|Original|hCoV-19^^Scotland|Human|Lighthouse Lab in Glasgow|Wellcome Sanger Institute for the COVID-19 Genomics UK (COG-UK) consortium|Davies|United Kingdom

>Spike|hCoV-19/England/ALDP-A4FF86/2020|2020-10-07|EPI\_ISL\_597719|Original|hCoV-19^^England|Human|Lighthouse Lab in Alderley Park|Wellcome Sanger Institute for the COVID-19 Genomics UK (COG-UK) consortium|Davies|United Kingdom

>Spike|hCoV-19/USA/MA-MASPHL-00209/2020|2020-04-10|EPI\_ISL\_791661|Original|hCoV-19^^Massachusetts|Human|Massachusetts State Public Health Laboratory|Infectious Disease Program|Park|USA

>Spike|hCoV-19/England/201580203/2020|2020-04-09|EPI\_ISL\_466361|Original|hCoV-19^^England|Human|Respiratory Virus Unit|Respiratory Virus Unit|Platt|United Kingdom

>Spike|hCoV-19/England/LEED-2A877C/2020|2020-04-01|EPI\_ISL\_539139|Original|hCoV-19^^England|Human|Leeds Teaching Hospitals NHS Trust and Public Health England|Wellcome Sanger Institute for the COVID-19 Genomics UK (COG-UK) consortium|Davies|United Kingdom

>Spike|hCoV-19/Australia/NSW2947/2020|2020-10-31|EPI\_ISL\_678377|Original|hCoV-19^^New South Wales|Human|Area of Virology|Virology Research Laboratory; Area of Virology|Foster|Australia

>Spike|hCoV-19/Wales/PHWC-2A738/2020|2020-04-05|EPI\_ISL\_445613|Original|hCoV-19^^Wales|Human|Wales Specialist Virology Centre|Public Health Wales Microbiology Cardiff|Moore|United Kingdom

>Spike|hCoV-19/Denmark/DCGC-22116/2020|2020-12-14|EPI\_ISL\_758562|Original|hCoV-19^^Midtjylland|Human|Department of Virus and Microbiological Special Diagnostics|Albertsen Lab|Michaelsen|Denmark

>Spike|hCoV-19/England/CAMC-A831DB/2020|2020-10-12|EPI\_ISL\_610885|Original|hCoV-19^^England|Human|Lighthouse Lab in Cambridge|Wellcome Sanger Institute for the COVID-19 Genomics UK (COG-UK) consortium|Davies|United Kingdom

>Spike|hCoV-19/England/QEUA-C3151A/2020|2020-12-11|EPI\_ISL\_731426|Original|hCoV-19^^England|Human|Lighthouse Lab in Glasgow|Wellcome Sanger Institute for the COVID-19 Genomics UK (COG-UK) Consortium|Davies|United Kingdom

>Spike|hCoV-19/Denmark/DCGC-1565/2020|2020-04-06|EPI\_ISL\_619211|Original|hCoV-19^^Hovedstaden|Human|Department of Virus and Microbiological Special Diagnostics|Albertsen lab|Michaelsen|Denmark

>Spike|hCoV-19/USA/WA-S1104/2020|2020-05-04|EPI\_ISL\_463594|Original|hCoV-19^^Washington|Human|Washington State Department of Health|Seattle Flu Study|Bedford|USA

>Spike|hCoV-19/USA/AZ-TG396356/2020|2020-06-10|EPI\_ISL\_694814|Original|hCoV-19^^Arizona|Human|AZ SPHL|TGen North|French|USA

>Spike|hCoV-19/Wales/PHWC-480AD9/2020|2020-10-22|EPI\_ISL\_612969|Original|hCoV-19^^Wales|Human|Wales Specialist Virology Centre Sequencing lab|COVID-19 Genomics UK (COG-UK) Consortium|Moore|United Kingdom

>Spike|hCoV-19/England/ALDP-AA3111/2020|2020-10-22|EPI\_ISL\_624115|Original|hCoV-19^^England|Human|Lighthouse Lab in Alderley Park|Wellcome Sanger Institute for the COVID-19 Genomics UK (COG-UK) consortium|Davies|United Kingdom

>Spike|hCoV-19/Wuhan/HB-WHCM-106/2020|2020-03-02|EPI\_ISL\_455402|Original|hCoV-19^^Hubei|Human|Wuhan Chain Medical Labs (CMLabs)|State Key Laboratory of Biotherapy of Sichuan University|Tang|China

>Spike|hCoV-19/USA/TX-HMH-7256/2020|2020-06-29|EPI\_ISL\_546629|Original|hCoV-19^^Texas|Human|Houston Methodist Hospital|Houston Methodist Hospital|Long|USA

>Spike|hCoV-19/England/MILK-957D82/2020|2020-06-09|EPI\_ISL\_554634|Original|hCoV-19^^England|Human|Lighthouse Lab in Milton Keynes|Wellcome Sanger Institute for the COVID-19 Genomics UK (COG-UK) consortium|Davies|United Kingdom

>Spike|hCoV-19/Scotland/QEUA-A4902F/2020|2020-10-08|EPI\_ISL\_595947|Original|hCoV-19^^Scotland|Human|Quadram Institute Bioscience|COVID-19 Genomics UK (COG-UK) Consortium|Alikhan|United Kingdom

>Spike|hCoV-19/England/MILK-971308/2020|2020-08-18|EPI\_ISL\_553190|Original|hCoV-19^^England|Human|Lighthouse Lab in Milton Keynes|Wellcome Sanger Institute for the COVID-19 Genomics UK (COG-UK) consortium|Davies|United Kingdom

>Spike|hCoV-19/Wales/PHWC-495E8A/2020|2020-11-26|EPI\_ISL\_726496|Original|hCoV-19^^Wales|Human|Originating lab|COVID-19 Genomics UK (COG-UK) Consortium|Moore|United Kingdom

>Spike|hCoV-19/England/ALDP-9CB008/2020|2020-09-16|EPI\_ISL\_575712|Original|hCoV-19^^England|Human|Lighthouse Lab in Alderley Park|Wellcome Sanger Institute for the COVID-19 Genomics UK (COG-UK) consortium|Davies|United Kingdom

>Spike|hCoV-19/India/GJ-GBRC240/2020|2020-06-05|EPI\_ISL\_483821|Original|hCoV-19^^Gujarat|Human|Government Medical College|Gujarat Biotechnology Research Centre|Joshi|India

>Spike|hCoV-19/Denmark/DCGC-14747/2020|2020-11-23|EPI\_ISL\_711953|Original|hCoV-19^^Sjælland|Human|Department of Virus and Microbiological Special Diagnostics|Albertsen Lab|Michaelsen|Denmark

>Spike|hCoV-19/Wales/PHWC-16668D/2020|2020-06-27|EPI\_ISL\_494028|Original|hCoV-19^^Wales|Human|Originating lab|COVID-19 Genomics UK (COG-UK) Consortium|Moore|United Kingdom

>Spike|hCoV-19/USA/TX-HMH-3201/2020|2020-06-12|EPI\_ISL\_544073|Original|hCoV-19^^Texas|Human|Houston Methodist Hospital|Houston Methodist Hospital|Long|USA

>Spike|hCoV-19/Japan/PG-3899/2020|2020-07-00|EPI\_ISL\_692150|Original|hCoV-19^^Japan|Human|Pathogen Genomics Center|Pathogen Genomics Center|Sekizuka|Japan

>Spike|hCoV-19/Wales/PHWC-496706/2020|2020-11-20|EPI\_ISL\_726625|Original|hCoV-19^^Wales|Human|Originating lab|COVID-19 Genomics UK (COG-UK) Consortium|Moore|United Kingdom

>Spike|hCoV-19/England/QEUA-B0DFCF/2020|2020-11-02|EPI\_ISL\_642061|Original|hCoV-19^^England|Human|Lighthouse Lab in Glasgow|Wellcome Sanger Institute for the COVID-19 Genomics UK (COG-UK) Consortium|Davies|United Kingdom

>Spike|hCoV-19/Scotland/QEUA-9CE2C3/2020|2020-09-16|EPI\_ISL\_602021|Original|hCoV-19^^Scotland|Human|Lighthouse Lab in Glasgow|Wellcome Sanger Institute for the COVID-19 Genomics UK (COG-UK) consortium|Davies|United Kingdom

>Spike|hCoV-19/England/LIVE-9A1CC/2020|2020-04-17|EPI\_ISL\_439857|Original|hCoV-19^^England|Human|Liverpool Clinical Laboratories|COVID-19 Genomics UK (COG-UK) Consortium|Haldenby|United Kingdom

>Spike|hCoV-19/Scotland/EDB2274/2020|2020-04-21|EPI\_ISL\_491660|Original|hCoV-19^^Scotland|Human|Virology Department|Wellcome Sanger Institute for the COVID-19 Genomics UK (COG-UK) consortium|Davies|United Kingdom

>Spike|hCoV-19/Wales/PHWC-2C208/2020|2020-04-04|EPI\_ISL\_474292|Original|hCoV-19^^Wales|Human|Originating lab|COVID-19 Genomics UK (COG-UK) Consortium|Moore|United Kingdom

>Spike|hCoV-19/England/QEUEH-B2B277/2020|2020-11-03|EPI\_ISL\_646575|Original|hCoV-19^^England|Human|Lighthouse Lab in Glasgow|Wellcome Sanger Institute for the COVID-19 Genomics UK (COG-UK) Consortium|Davies|United Kingdom

>Spike|hCoV-19/USA/TX-HMH-MCoV-16276/2020|2020-10-30|EPI\_ISL\_785960|Original|hCoV-19^^Texas|Human|Houston Methodist Hospital|Houston Methodist Hospital|Long|USA

>Spike|hCoV-19/England/MILK-A47FAC/2020|2020-10-06|EPI\_ISL\_598291|Original|hCoV-19^^England|Human|Lighthouse Lab in Milton Keynes|Wellcome Sanger Institute for the COVID-19 Genomics UK (COG-UK) consortium|Davies|United Kingdom

>Spike|hCoV-19/Sweden/20-51747/2020|2020-05-22|EPI\_ISL\_615091|Original|hCoV-19^^Vastra Gotaland|Human|Klinisk mikrobiologi NAL Trollhattan|The Public Health Agency of Sweden|Svartstr\u00f6m|Sweden

>Spike|hCoV-19/Belgium/regal-0411464/2020|2020-04-11|EPI\_ISL\_476974|Original|hCoV-19^^Braine-Le-Comte|Human|KU Leuven|KU Leuven|Maes|Belgium

>Spike|hCoV-19/New Zealand/20VR2958/2020|2020-00-00|EPI\_ISL\_579377|Original|hCoV-19^^Auckland|Human|LabPLUS|Institute of Environmental Science and Research (ESR)|Wang|New Zealand

>Spike|hCoV-19/England/204661404/2020|2020-11-11|EPI\_ISL\_683518|Original|hCoV-19^^England|Human|Respiratory Virus Unit|COVID-19 Genomics UK (COG-UK) Consortium|Platt|United Kingdom

>Spike|hCoV-19/USA/AZ-TG547382/2020|2020-07-07|EPI\_ISL\_695514|Original|hCoV-19^^Arizona|Human|AZ SPHL|TGen North|French|USA

>Spike|hCoV-19/England/NORW-F5569/2020|2020-10-25|EPI\_ISL\_725270|Original|hCoV-19^^England|Human|Quadram Institute Bioscience|COVID-19 Genomics UK (COG-UK) Consortium|Alikhan|United Kingdom

>Spike|hCoV-19/England/CAMB-1BA040/2020|2020-11-04|EPI\_ISL\_651578|Original|hCoV-19^^England|Human|Department of Pathology|COVID-19 Genomics UK (COG-UK) Consortium|Goodfellow|United Kingdom

>Spike|hCoV-19/England/ALDP-94F35E/2020|2020-06-18|EPI\_ISL\_555869|Original|hCoV-19^^England|Human|Lighthouse Lab in Alderley Park|Wellcome Sanger Institute for the COVID-19 Genomics UK (COG-UK) consortium|Davies|United Kingdom

>Spike|hCoV-19/England/BRIS-1853962/2020|2020-04-16|EPI\_ISL\_492288|Original|hCoV-19^^England|Human|PHE South West Regional Laboratory|Wellcome Sanger Institute for the COVID-19 Genomics UK (COG-UK) consortium|Davies|United Kingdom

>Spike|hCoV-19/USA/TX-HMH-6441/2020|2020-07-06|EPI\_ISL\_545998|Original|hCoV-19^^Texas|Human|Houston Methodist Hospital|Houston Methodist Hospital|Long|USA

>Spike|hCoV-19/USA/UT-03474/2020|2020-03-14|EPI\_ISL\_450541|Original|hCoV-19^^Utah|Human|Utah Public Health Laboratory|Utah Public Health Laboratory|Young|USA

>Spike|hCoV-19/Malaysia/IMR-WC268551/2020|2020-11-11|EPI\_ISL\_728242|Original|hCoV-19^^Malaysia|Human|Institute for Medical Research|Institute for Medical Research|Suppiah|Malaysia

>Spike|hCoV-19/Belgium/DAA-0327369/2020|2020-03-27|EPI\_ISL\_462223|Original|hCoV-19^^Deerlijk|Human|KU Leuven|KU Leuven|Maes|Belgium

>Spike|hCoV-19/Wales/MILK-6AA406/2020|2020-07-02|EPI\_ISL\_551777|Original|hCoV-19^^Wales|Human|Lighthouse Lab in Milton Keynes|Wellcome Sanger Institute for the COVID-19 Genomics UK (COG-UK) consortium|Davies|United Kingdom

>Spike|hCoV-19/England/QEUEH-B9FFE0/2020|2020-11-18|EPI\_ISL\_719790|Original|hCoV-19^^England|Human|Lighthouse Lab in Glasgow|Wellcome Sanger Institute for the COVID-19 Genomics UK (COG-UK) Consortium|Davies|United Kingdom

>Spike|hCoV-19/India/UP-NBRI-N51-TEH465/2020|2020-05-25|EPI\_ISL\_516979|Original|hCoV-19^^Uttar Pradesh|Human|King Georges Medical University|CSIR-National Botanical Research Institute|Bag|India

>Spike|hCoV-19/Denmark/DCGC-19502/2020|2020-12-07|EPI\_ISL\_748992|Original|hCoV-19^^Hovedstaden|Human|Department of Virus and Microbiological Special Diagnostics|Albertsen Lab|Michaelsen|Denmark

>Spike|hCoV-19/Denmark/DCGC-19298/2020|2020-12-07|EPI\_ISL\_748869|Original|hCoV-19^^Hovedstaden|Human|Department of Virus and Microbiological Special Diagnostics|Albertsen Lab|Michaelsen|Denmark

>Spike|hCoV-19/SaudiArabia/KAUST-MAKKAH304/2020|2020-04-21|EPI\_ISL\_513225|Original|hCoV-19^^Makkah|Human|Pathogen Genomics Lab King Abdullah University of Science and Technology(KAUST)|Pathogen Genomics Lab King Abdullah University of Science and Technology(KAUST)|Mohamed Ghazzali|Saudi Arabia

>Spike|hCoV-19/Australia/VIC1302/2020|2020-04-10|EPI\_ISL\_430680|Original|hCoV-19^^Victoria|Human|Microbiological Diagnostic Unit Public Health Laboratory|Microbiological Diagnostic Unit Public Health Laboratory|Schultz|Australia

>Spike|hCoV-19/England/NORT-282D1C/2020|2020-03-29|EPI\_ISL\_472229|Original|hCoV-19^^England|Human|Northumbria University / South Tees Hospitals NHS Foundation Trust / North Cumbria Integrated Care NHS Foundation Trust / North Tees and Hartlepool NHS Foundation Trust / Newcastle Hospitals NHS Foundation Trust|COVID-19 Genomics UK (COG-UK) Consortium|Bashton|United Kingdom

>Spike|hCoV-19/England/CAMB-7DF6B/2020|2020-04-07|EPI\_ISL\_441617|Original|hCoV-19^^England|Human|Department of Pathology|Wellcome Sanger Institute for the COVID-19 Genomics UK (COG-UK) consortium|Amato|United Kingdom

>Spike|hCoV-19/Switzerland/Vs-ETHZ-110042/2020|2020-04-01|EPI\_ISL\_486476|Original|hCoV-19^^Valais|Human|Viollier AG|Department of Biosystems Science and Engineering|Nadeau|Switzerland

>Spike|hCoV-19/England/QEUH-C32731/2020|2020-12-11|EPI\_ISL\_782588|Original|hCoV-19^^England|Human|Lighthouse Lab in Glasgow|Wellcome Sanger Institute for the COVID-19 Genomics UK (COG-UK) Consortium|Davies|United Kingdom

>Spike|hCoV-19/Portugal/PT0770a/2020|2020-04-08|EPI\_ISL\_511029|Original|hCoV-19^^Portugal|Human|Instituto Nacional de Saude (INSA)|Instituto Nacional de Saude (INSA)|Borges|Portugal

>Spike|hCoV-19/England/NOTT-120643/2020|2020-12-09|EPI\_ISL\_725633|Original|hCoV-19^^England|Human|Queens Medical Centre|COVID-19 Genomics UK (COG-UK) Consortium|Loose|United Kingdom

>Spike|hCoV-19/Japan/PG-8620/2020|2020-08-00|EPI\_ISL\_686216|Original|hCoV-19^^Japan|Human|Pathogen Genomics Center|Pathogen Genomics Center|Sekizuka|Japan

>Spike|hCoV-19/Scotland/CVR3971/2020|2020-08-22|EPI\_ISL\_529685|Original|hCoV-19^^Scotland|Human|West of Scotland Specialist Virology Centre|COVID-19 Genomics UK (COG-UK) Consortium|Robertson|United Kingdom

>Spike|hCoV-19/Lithuania/MR-LUHS-Eilnr72/2020|2020-04-14|EPI\_ISL\_541872|Original|hCoV-19^^Marijampoles apskritis|Human|Lithuanian University of Health Sciences Hospital|Lithuanian University of Health Sciences|Zemaitis|Lithuania

>Spike|hCoV-19/Wales/PHWC-495DBA/2020|2020-11-26|EPI\_ISL\_726483|Original|hCoV-19^^Wales|Human|Originating lab|COVID-19 Genomics UK (COG-UK) Consortium|Moore|United Kingdom

>Spike|hCoV-19/England/CAMB-7BEBB/2020|2020-04-04|EPI\_ISL\_470520|Original|hCoV-19^^England|Human|Department of Pathology|Wellcome Sanger Institute for the COVID-19 Genomics UK (COG-UK) consortium|Davies|United Kingdom

>Spike|hCoV-19/England/ALDP-B463CE/2020|2020-11-07|EPI\_ISL\_656327|Original|hCoV-19^^England|Human|Lighthouse Lab in Alderley Park|Wellcome Sanger Institute for the COVID-19 Genomics UK (COG-UK) Consortium|Davies|United Kingdom

>Spike|hCoV-19/England/SHEF-C9786/2020|2020-10-08|EPI\_ISL\_596208|Original|hCoV-19^^England|Human|Virology Department|COVID-19 Genomics UK (COG-UK) Consortium|de Silva|United Kingdom

>Spike|hCoV-19/USA/TX-DSHS-1598/2020|2020-08-21|EPI\_ISL\_700704|Original|hCoV-19^^Texas|Human|Texas Department of State Health Services|Texas Department of State Health Services|Rahman|USA

>Spike|hCoV-19/England/OXON-AE3FC/2020|2020-00-00|EPI\_ISL\_448689|Original|hCoV-19^^England|Human|Oxford Viromics|COVID-19 Genomics UK (COG-UK) Consortium|Golubchik|United Kingdom

>Spike|hCoV-19/Italy/LOM-IZSGC-TE31074/2020|2020-05-02|EPI\_ISL\_528936|Original|hCoV-19^^Lombardy|Human|Agenzia di Tutela della Salute di Bergamo|Istituto Zooprofilattico Sperimentale dell'Abruzzo e Molise \G.Caporale\|Lorusso|Italy

>Spike|hCoV-19/India/MH-AFCO-14763/2020|2020-07-22|EPI\_ISL\_722197|Original|hCoV-19^^Maharashtra|Human|Armed Forces Medical College|National Centre For Cell Science|Paul|India

>Spike|hCoV-19/Russia/StPetersburg-RII4728S/2020|2020-04-07|EPI\_ISL\_427335|Original|hCoV-19^^Saint Petersburg|Human|WHO National Influenza Centre Russian Federation|WHO National Influenza Centre Russian Federation|Komissarov|Russia

>Spike|hCoV-19/Wales/PHWC-27D57/2020|2020-04-01|EPI\_ISL\_432431|Original|hCoV-19^^Wales|Human|Wales Specialist Virology Centre|Public Health Wales Microbiology Cardiff|Moore|United Kingdom

>Spike|hCoV-19/USA/MN-MDH-1384/2020|2020-07-09|EPI\_ISL\_507972|Original|hCoV-19^^Minnesota|Human|Avera McKennan Laboratory|Minnesota Department of Health|Garfin|USA

>Spike|hCoV-19/USA/CA-CDPH068/2020|2020-04-13|EPI\_ISL\_755040|Original|hCoV-19^^California|Human|California Department of Public Health|California Department of Public Health|Bell|USA

>Spike|hCoV-19/Japan/PG-6600/2020|2020-08-00|EPI\_ISL\_687712|Original|hCoV-19^^Japan|Human|Niigata Prefectural Institute of Public Health and Environmental Sciences|Pathogen Genomics Center|Sekizuka|Japan

>Spike|hCoV-19/Switzerland/BS-UHB-65238783/2020|2020-03-23|EPI\_ISL\_528381|Original|hCoV-19^^Basel-Stadt|Human|University Hospital Basel|University Hospital Basel|Roloff Handschin|Switzerland

>Spike|hCoV-19/USA/MN-MDH-2074/2020|2020-10-31|EPI\_ISL\_683703|Original|hCoV-19^^Minnesota|Human|Essentia Health-St. Mary's Medical Center|Minnesota Department of Health|Garfin|USA

>Spike|hCoV-19/Luxembourg/LNS4081687/2020|2020-10-22|EPI\_ISL\_740419|Original|hCoV-19^^Luxembourg|Human|Laboratoire national de sant\u00e9|Laboratoire national de sant\u00e9|Wienecke-Baldacchino|Luxembourg

>Spike|hCoV-19/Wales/PHWC-498C05/2020|2020-12-02|EPI\_ISL\_727187|Original|hCoV-19^^Wales|Human|Originating lab|COVID-19 Genomics UK (COG-UK) Consortium|Moore|United Kingdom

>Spike|hCoV-19/Scotland/EDB5442/2020|2020-04-12|EPI\_ISL\_473822|Original|hCoV-19^^Scotland|Human|Virology Department|COVID-19 Genomics UK (COG-UK) Consortium|Williams|United Kingdom

>Spike|hCoV-19/England/MILK-BDC248/2020|2020-11-26|EPI\_ISL\_709727|Original|hCoV-19^^England|Human|Lighthouse Lab in Milton Keynes|Wellcome Sanger Institute for the COVID-19 Genomics UK (COG-UK) Consortium|Davies|United Kingdom

>Spike|hCoV-19/Switzerland/GR-ETHZ-400291/2020|2020-12-06|EPI\_ISL\_729058|Original|hCoV-19^^Graub\u00fcnden|Human|Viollier AG|Department of Biosystems Science and Engineering|Nadeau|Switzerland

>Spike|hCoV-19/Singapore/151/2020|2020-03-18|EPI\_ISL\_443243|Original|hCoV-19^^Singapore|Human|National Public Health Laboratory|National Public Health Laboratory|Mak|Singapore

>Spike|hCoV-19/Norway/3020/2020|2020-08-05|EPI\_ISL\_549054|Original|hCoV-19^^Oslo|Human|Furst Medical Laboratory|Norwegian Institute of Public Health|Kopperud Riis|Norway

>Spike|hCoV-19/England/PORT-2F5F96/2020|2020-10-27|EPI\_ISL\_651068|Original|hCoV-19^^England|Human|Centre for Enzyme Innovation|COVID-19 Genomics UK (COG-UK) Consortium|Robson|United Kingdom

>Spike|hCoV-19/Singapore/878/2020|2020-08-29|EPI\_ISL\_536419|Original|hCoV-19^^Singapore|Human|National Public Health Laboratory|National Public Health Laboratory|Mak|Singapore

>Spike|hCoV-19/Austria/CeMM0311/2020|2020-03-30|EPI\_ISL\_475783|Original|hCoV-19^^Vienna|Human|Center for Virology|Bergthaler laboratory|Bergthaler|Austria

>Spike|hCoV-19/Japan/PG-1542/2020|2020-04-00|EPI\_ISL\_685148|Original|hCoV-19^^Japan|Human|Pathogen Genomics Center|Pathogen Genomics Center|Sekizuka|Japan



>Spike|hCoV-19/England/MILK-B3B010/2020|2020-11-01|EPI\_ISL\_679735|Original|hCoV-19^^England|Human|Oxford Viromics|COVID-19 Genomics UK (COG-UK) Consortium|Golubchik|United Kingdom

>Spike|hCoV-19/England/CAMC-B5463D/2020|2020-11-08|EPI\_ISL\_658316|Original|hCoV-19^^England|Human|Lighthouse Lab in Cambridge|Wellcome Sanger Institute for the COVID-19 Genomics UK (COG-UK) Consortium|Davies|United Kingdom

>Spike|hCoV-19/England/ALDP-C47D28/2020|2020-12-12|EPI\_ISL\_718739|Original|hCoV-19^^England|Human|Lighthouse Lab in Alderley Park|Wellcome Sanger Institute for the COVID-19 Genomics UK (COG-UK) Consortium|Davies|United Kingdom

>Spike|hCoV-19/England/QEUEH-B412E4/2020|2020-11-08|EPI\_ISL\_658613|Original|hCoV-19^^England|Human|Lighthouse Lab in Glasgow|Wellcome Sanger Institute for the COVID-19 Genomics UK (COG-UK) Consortium|Davies|United Kingdom

>Spike|hCoV-19/South Korea/KCDC2014/2020|2020-02-12|EPI\_ISL\_426187|Vero E6 P1|hCoV-19^^South Korea|Human|Division of Viral Diseases|Division of Viral Diseases|Kim|South Korea

>Spike|hCoV-19/England/MILK-A8EF30/2020|2020-10-16|EPI\_ISL\_651388|Original|hCoV-19^^England|Human|Northumbria University / South Tees Hospitals NHS Foundation Trust / North Cumbria Integrated Care NHS Foundation Trust / North Tees and Hartlepool NHS Foundation Trust / Newcastle Hospitals NHS Foundation Trust|COVID-19 Genomics UK (COG-UK) Consortium|Bashton|United Kingdom

>Spike|hCoV-19/England/QEUEH-A618A1/2020|2020-10-12|EPI\_ISL\_628638|Original|hCoV-19^^England|Human|Oxford Viromics|COVID-19 Genomics UK (COG-UK) Consortium|Golubchik|United Kingdom

>Spike|hCoV-19/USA/TX-HMH-2561/2020|2020-06-03|EPI\_ISL\_545387|Original|hCoV-19^^Texas|Human|Houston Methodist Hospital|Houston Methodist Hospital|Long|USA

>Spike|hCoV-19/England/CAMB-83287/2020|2020-04-14|EPI\_ISL\_443615|Original|hCoV-19^^England|Human|Department of Pathology|Wellcome Sanger Institute for the COVID-19 Genomics UK (COG-UK) consortium|Amato|United Kingdom

>Spike|hCoV-19/USA/FL-BPHL-0788/2020|2020-04-07|EPI\_ISL\_512592|Original|hCoV-19^^Florida|Human|Florida Bureau of Public Health Laboratories|Florida Bureau of Public Health Laboratories|Blanton|USA

>Spike|hCoV-19/USA/CA-CZB-13080/2020|2020-05-07|EPI\_ISL\_672342|Original|hCoV-19^^California|Human|Alameda County Public Health Lab|Chan-Zuckerberg Biohub|Bhatt|USA

>Spike|hCoV-19/Denmark/DCGC-17997/2020|2020-12-14|EPI\_ISL\_749689|Original|hCoV-19^^Nordjylland|Human|Department of Virus and Microbiological Special Diagnostics|Albertsen Lab|Michaelsen|Denmark

>Spike|hCoV-19/Northern Ireland/NIRE-FB888/2020|2020-04-15|EPI\_ISL\_459392|Original|hCoV-19^^Northern Ireland|Human|Regional Virus Laboratory|Wellcome Sanger Institute for the COVID-19 Genomics UK (COG-UK) consortium|Davies|United Kingdom

>Spike|hCoV-19/Denmark/DCGC-21810/2020|2020-12-21|EPI\_ISL\_758121|Original|hCoV-19^^Hovedstaden|Human|Department of Virus and Microbiological Special Diagnostics|Albertsen Lab|Michaelsen|Denmark

>Spike|hCoV-19/Japan/PG-6114/2020|2020-08-00|EPI\_ISL\_689226|Original|hCoV-19^^Japan|Human|Pathogen Genomics Center|Pathogen Genomics Center|Sekizuka|Japan

>Spike|hCoV-19/England/LOND-12636E6/2020|2020-11-03|EPI\_ISL\_679468|Original|hCoV-19^^England|Human|University College London|COVID-19 Genomics UK (COG-UK) Consortium|Roy|United Kingdom

>Spike|hCoV-19/England/QEUEH-A78A47/2020|2020-10-14|EPI\_ISL\_638774|Original|hCoV-19^^England|Human|Oxford Viromics|COVID-19 Genomics UK (COG-UK) Consortium|Golubchik|United Kingdom

>Spike|hCoV-19/Japan/PG-5771/2020|2020-07-00|EPI\_ISL\_688890|Original|hCoV-19^^Japan|Human|Pathogen Genomics Center|Pathogen Genomics Center|Sekizuka|Japan

>Spike|hCoV-19/Spain/RI-IBV-99005876/2020|2020-03-10|EPI\_ISL\_537418|Original|hCoV-19^^La Rioja|Human|Centro de Investigaci\u00f3n Biom\u00e9dica de La Rioja - Hospital San Pedro Logro\u00f1o|SeqCOVID-SPAIN consortium/IBV (CSIC) |Comas|Spain

>Spike|hCoV-19/England/MILK-BB1E63/2020|2020-11-18|EPI\_ISL\_720128|Original|hCoV-19^^England|Human|Lighthouse Lab in Milton Keynes|Wellcome Sanger Institute for the COVID-19 Genomics UK (COG-UK) Consortium|Davies|United Kingdom

>Spike|hCoV-19/England/QEUA-AAE626/2020|2020-10-22|EPI\_ISL\_630859|Original|hCoV-19^^England|Human|Lighthouse Lab in Glasgow|Wellcome Sanger Institute for the COVID-19 Genomics UK (COG-UK) consortium|Davies|United Kingdom

>Spike|hCoV-19/England/QEUA-B7F775/2020|2020-11-14|EPI\_ISL\_674808|Original|hCoV-19^^England|Human|Lighthouse Lab in Glasgow|Wellcome Sanger Institute for the COVID-19 Genomics UK (COG-UK) Consortium|Davies|United Kingdom

>Spike|hCoV-19/England/NORT-2A5FD1/2020|2020-10-12|EPI\_ISL\_637312|Original|hCoV-19^^England|Human|Northumbria University / South Tees Hospitals NHS Foundation Trust / North Cumbria Integrated Care NHS Foundation Trust / North Tees and Hartlepool NHS Foundation Trust / Newcastle Hospitals NHS Foundation Trust|COVID-19 Genomics UK (COG-UK) Consortium|Bashton|United Kingdom

>Spike|hCoV-19/USA/CA-CZB-1157/2020|2020-04-26|EPI\_ISL\_454618|Original|hCoV-19^^California|Human|UCSF Clinical Microbiology Laboratory|Chan-Zuckerberg Biohub|Hao|USA

>Spike|hCoV-19/USA/AZ-TG333552/2020|2020-05-28|EPI\_ISL\_694358|Original|hCoV-19^^Arizona|Human|TGen North|TGen North|French|USA

>Spike|hCoV-19/England/ALDP-A680FD/2020|2020-10-10|EPI\_ISL\_609146|Original|hCoV-19^^England|Human|Lighthouse Lab in Alderley Park|Wellcome Sanger Institute for the COVID-19 Genomics UK (COG-UK) consortium|Davies|United Kingdom

>Spike|hCoV-19/England/CAMB-73CAA/2020|2020-04-02|EPI\_ISL\_433683|Original|hCoV-19^^England|Human|Department of Pathology|COVID-19 Genomics UK (COG-UK) Consortium|Meredith|United Kingdom

>Spike|hCoV-19/England/QEUA-962391/2020|2020-08-10|EPI\_ISL\_531605|Original|hCoV-19^^England|Human|Lighthouse Lab in Glasgow|Wellcome Sanger Institute for the COVID-19 Genomics UK (COG-UK) consortium|Davies|United Kingdom

>Spike|hCoV-19/England/CAMB-1BB55F/2020|2020-11-17|EPI\_ISL\_664516|Original|hCoV-19^^England|Human|Department of Pathology|COVID-19 Genomics UK (COG-UK) Consortium|Goodfellow|United Kingdom

>Spike|hCoV-19/England/MILK-B06BC2/2020|2020-10-29|EPI\_ISL\_652265|Original|hCoV-19^^England|Human|Quadram Institute Bioscience|COVID-19 Genomics UK (COG-UK) Consortium|Alikhan|United Kingdom

>Spike|hCoV-19/England/MILK-BB12D0/2020|2020-11-17|EPI\_ISL\_720117|Original|hCoV-19^^England|Human|Lighthouse Lab in Milton Keynes|Wellcome Sanger Institute for the COVID-19 Genomics UK (COG-UK) Consortium|Davies|United Kingdom

>Spike|hCoV-19/Denmark/DCGC-10025/2020|2020-11-09|EPI\_ISL\_669343|Original|hCoV-19^^Sjælland|Human|Department of Virus and Microbiological Special Diagnostics|Albertsen Lab|Michaelsen|Denmark

>Spike|hCoV-19/Poland/PL\_P7/2020|2020-03-29|EPI\_ISL\_428930|Original|hCoV-19^^Malopolskie|Human|ViroGenetics - BSL3 Laboratory of Virology; Human Genome Variation Research Group & Genomics Centre MCB; Bioinformatics Research Group; Wojew\u00f3dzka Stacja Sanitarno-Epidemiologiczna w Krakowie|ViroGenetics - BSL3 Laboratory of Virology; Human Genome Variation Research Group & Genomics Centre MCB; Bioinformatics Research Group|Kopera|Poland

>Spike|hCoV-19/Singapore/1052/2020|2020-03-23|EPI\_ISL\_574537|Original|hCoV-19^^Singapore|Human|National Public Health Laboratory|National Public Health Laboratory|Mak|Singapore

>Spike|hCoV-19/South Africa/LR00025/2020|2020-07-05|EPI\_ISL\_515154|Original|hCoV-19^^Gauteng|Human|National Institute for Communicable Diseases of the National Health Laboratory Service|National Institute for Communicable Diseases of the National Health Laboratory Service|Allam|South Africa

>Spike|hCoV-19/USA/CA-CZB-11792/2020|2020-09-22|EPI\_ISL\_625635|Original|hCoV-19^^California|Human|Orange County Public Health Lab|Chan-Zuckerberg Biohub|Bhatt|USA

>Spike|hCoV-19/Scotland/QEUA-9FF78E/2020|2020-10-02|EPI\_ISL\_600207|Original|hCoV-19^^Scotland|Human|Lighthouse Lab in Glasgow|Wellcome Sanger Institute for the COVID-19 Genomics UK (COG-UK) consortium|Davies|United Kingdom

>Spike|hCoV-19/Denmark/DCGC-5086/2020|2020-09-21|EPI\_ISL\_621624|Original|hCoV-19^^Sjælland|Human|Department of Virus and Microbiological Special Diagnostics|Albertsen lab|Michaelsen|Denmark

>Spike|hCoV-19/South Africa/NHLS-UCT-GS-0619/2020|2020-10-22|EPI\_ISL\_700588|Original|hCoV-19^^Western Cape|Human|Sedgefield Clinic wc SGE|NHLS/UCT|Iranzadeh|South Africa

>Spike|hCoV-19/England/20132106704/2020|2020-03-22|EPI\_ISL\_423842|Original|hCoV-19^^England|Human|Respiratory Virus Unit|Respiratory Virus Unit|Platt|United Kingdom

>Spike|hCoV-19/USA/CA-QDX-205/2020|2020-05-01|EPI\_ISL\_494507|Original|hCoV-19^^California|Human|Quest Diagnostics|Quest Diagnostics|Kagan|USA

>Spike|hCoV-19/Denmark/DCGC-16242/2020|2020-11-16|EPI\_ISL\_714468|Original|hCoV-19^^Hovedstaden|Human|Department of Virus and Microbiological Special Diagnostics|Albertsen Lab|Michaelsen|Denmark

>Spike|hCoV-19/Denmark/DCGC-16639/2020|2020-11-16|EPI\_ISL\_714887|Original|hCoV-19^^Syddanmark|Human|Department of Virus and Microbiological Special Diagnostics|Albertsen Lab|Michaelsen|Denmark

>Spike|hCoV-19/USA/CA-ALSR-2310/2020|2020-07-10|EPI\_ISL\_635424|Original|hCoV-19^^California|Human|San Diego County Public Health Laboratory|Andersen lab at Scripps Research|Gangavarapu|USA

>Spike|hCoV-19/USA/TX-HMH-MCoV-15656/2020|2020-07-09|EPI\_ISL\_785340|Original|hCoV-19^^Texas|Human|Houston Methodist Hospital|Houston Methodist Hospital|Long|USA

>Spike|hCoV-19/Denmark/DCGC-20593/2020|2020-12-21|EPI\_ISL\_759242|Original|hCoV-19^^Syddanmark|Human|Department of Virus and Microbiological Special Diagnostics|Albertsen Lab|Michaelsen|Denmark

>Spike|hCoV-19/Northern Ireland/NIRE-23561D/2020|2020-11-10|EPI\_ISL\_742121|Original|hCoV-19^^Northern Ireland|Human|Regional Virus Laboratory|COVID-19 Genomics UK (COG-UK) Consortium|Fairley|United Kingdom

>Spike|hCoV-19/Panama/335097/2020|2020-04-01|EPI\_ISL\_496804|Original|hCoV-19^^Panama Center|Human|Gorgas Memorial Laboratory of Health Studies|Gorgas Memorial Laboratory of Health Studies|Martinez|Panama

>Spike|hCoV-19/USA/FL-BPHL-0809/2020|2020-05-20|EPI\_ISL\_514155|Original|hCoV-19^^Florida|Human|Florida Bureau of Public Health Laboratories|Florida Bureau of Public Health Laboratories|Blanton|USA

>Spike|hCoV-19/USA/WI-WSLH-200732/2020|2020-07-09|EPI\_ISL\_631488|Original|hCoV-19^^Wisconsin|Human|Wisconsin State Laboratory of Hygiene Communicable Disease Division|Wisconsin State Laboratory of Hygiene Communicable Disease Division|Florek|USA

>Spike|hCoV-19/Australia/VIC2650/2020|2020-07-01|EPI\_ISL\_521496|Original|hCoV-19^^Victoria|Human|Victorian Infectious Diseases Reference Laboratory (VIDRL)|VIDRL and MDU-PHL|Schultz|Australia

>Spike|hCoV-19/Denmark/DCGC-10931/2020|2020-11-02|EPI\_ISL\_670291|Original|hCoV-19^^Sjaelland|Human|Department of Virus and Microbiological Special Diagnostics|Albertsen Lab|Michaelsen|Denmark

>Spike|hCoV-19/Australia/VIC5653/2020|2020-07-17|EPI\_ISL\_518463|Original|hCoV-19^^Victoria|Human|Victorian Infectious Diseases Reference Laboratory (VIDRL)|VIDRL and MDU-PHL|Schultz|Australia

>Spike|hCoV-19/USA/NY-NYCPHL-001050/2020|2020-10-14|EPI\_ISL\_633061|Original|hCoV-19^^New York|Human|DOHMH Jamaica|New York City Public Health Laboratory|Wang|USA

>Spike|hCoV-19/Japan/PG-0171/2020|2020-03-14|EPI\_ISL\_479880|Original|hCoV-19^^Hokkaido|Human|Sapporo City Institute of Public Health|Pathogen Genomics Center|Sekizuka|Japan

>Spike|hCoV-19/United Arab Emirates/L0/2020|2020-03-12|EPI\_ISL\_435119|Original|hCoV-19^^United Arab Emirates|Human|Mohammed Bin Rashid University of Medicine and Health Sciences|Al Jalila Children's Hospital|Ramaswamy|United Arab Emirates

>Spike|hCoV-19/USA/NY-NYCPHL-000241/2020|2020-04-11|EPI\_ISL\_631768|Original|hCoV-19^^New York|Human|Jamaica Hospital Medical Center|New York City Public Health Laboratory|Wang|USA

>Spike|hCoV-19/USA/LA-SR0277/2020|2020-04-02|EPI\_ISL\_445132|Original|hCoV-19^^Louisiana|Human|Robert Garry lab|Andersen lab at Scripps Research|Gangavarapu|USA

>Spike|hCoV-19/England/20186098804/2020|2020-04-29|EPI\_ISL\_528408|Original|hCoV-19^^England|Human|Respiratory Virus Unit|Respiratory Virus Unit|Miah|United Kingdom

>Spike|hCoV-19/England/MILK-A91705/2020|2020-10-19|EPI\_ISL\_705977|Original|hCoV-19^^England|Human|Oxford Viromics|COVID-19 Genomics UK (COG-UK) Consortium|Golubchik|United Kingdom

>Spike|hCoV-19/England/ALDP-8D74A4/2020|2020-07-01|EPI\_ISL\_557045|Original|hCoV-19^^England|Human|Lighthouse Lab in Alderley Park|Wellcome Sanger Institute for the COVID-19 Genomics UK (COG-UK) consortium|Davies|United Kingdom

>Spike|hCoV-19/USA/MI-UM-10036245036/2020|2020-10-02|EPI\_ISL\_590721|Original|hCoV-19^^Michigan|Human|University of Michigan Clinical Microbiology Laboratory|Lauring Lab|Valesano|USA

>Spike|hCoV-19/England/CAMC-C46DCF/2020|2020-12-11|EPI\_ISL\_718706|Original|hCoV-19^^England|Human|Lighthouse Lab in Cambridge|Wellcome Sanger Institute for the COVID-19 Genomics UK (COG-UK) Consortium|Davies|United Kingdom

>Spike|hCoV-19/England/20129059204/2020|2020-03-09|EPI\_ISL\_424054|Original|hCoV-19^^England|Human|Respiratory Virus Unit|Respiratory Virus Unit|Platt|United Kingdom

>Spike|hCoV-19/Australia/VIC595/2020|2020-03-25|EPI\_ISL\_426852|Original|hCoV-19^^Victoria|Human|Victorian Infectious Diseases Reference Laboratory (VIDRL)|Microbiological Diagnostic Unit Public Health Laboratory and Victorian Infectious Diseases Reference Laboratory|Schultz|Australia

>Spike|hCoV-19/USA/MD-MDH-0382/2020|2020-10-27|EPI\_ISL\_660080|Original|hCoV-19^^Maryland|Human|MD PHL|MD PHL|Keller|USA

>Spike|hCoV-19/India/OR-RMRC24/2020|2020-04-04|EPI\_ISL\_455775|Original|hCoV-19^^Odisha|Human|REGIONAL VRDL, ICMR-RMRC BBSR|Immunogenomics lab|Raghav|India

>Spike|hCoV-19/England/MILK-9C354D/2020|2020-09-10|EPI\_ISL\_566724|Original|hCoV-19^^England|Human|Lighthouse Lab in Milton Keynes|Wellcome Sanger Institute for the COVID-19 Genomics UK (COG-UK) consortium|Davies|United Kingdom

>Spike|hCoV-19/England/QEUEH-9DC004/2020|2020-09-21|EPI\_ISL\_601355|Original|hCoV-19^^England|Human|Lighthouse Lab in Glasgow|Wellcome Sanger Institute for the COVID-19 Genomics UK (COG-UK) consortium|Davies|United Kingdom

>Spike|hCoV-19/England/QEUEH-AD5222/2020|2020-10-24|EPI\_ISL\_634073|Original|hCoV-19^^England|Human|Lighthouse Lab in Glasgow|Wellcome Sanger Institute for the COVID-19 Genomics UK (COG-UK) consortium|Davies|United Kingdom

>Spike|hCoV-19/England/CAMC-A3F45D/2020|2020-10-02|EPI\_ISL\_609592|Original|hCoV-19^^England|Human|Lighthouse Lab in Cambridge|Wellcome Sanger Institute for the COVID-19 Genomics UK (COG-UK) consortium|Davies|United Kingdom

>Spike|hCoV-19/Denmark/DCGC-16253/2020|2020-11-16|EPI\_ISL\_714666|Original|hCoV-19^^Syddanmark|Human|Department of Virus and Microbiological Special Diagnostics|Albertsen Lab|Michaelsen|Denmark

>Spike|hCoV-19/France/IDF-rega-0508543/2020|2020-05-08|EPI\_ISL\_735245|Original|hCoV-19^^\u00cele-de-France|Human|UZ Leuven|KU Leuven|Maes|France

>Spike|hCoV-19/Denmark/DCGC-18277/2020|2020-12-14|EPI\_ISL\_749857|Original|hCoV-19^^Sjaelland|Human|Department of Virus and Microbiological Special Diagnostics|Albertsen Lab|Michaelsen|Denmark

>Spike|hCoV-19/Spain/AN-IBV-004020/2020|2020-04-24|EPI\_ISL\_500206|Original|hCoV-19^^Andalucia|Human|Hospital Universitario Virgen de las Nieves de Granada-SAS|SeqCOVID-SPAIN consortium|IBV(CSIC)|Comas|Spain

>Spike|hCoV-19/England/LOND-D681A/2020|2020-04-24|EPI\_ISL\_482200|Original|hCoV-19^^England|Human|University College London|Wellcome Sanger Institute for the COVID-19 Genomics UK (COG-UK) consortium|Davies|United Kingdom

>Spike|hCoV-19/England/LIVE-A4921/2020|2020-03-13|EPI\_ISL\_499889|Original|hCoV-19^^England|Human|Liverpool Clinical Laboratories|COVID-19 Genomics UK (COG-UK) Consortium|Haldenby|United Kingdom

>Spike|hCoV-19/England/QEUEH-9FABB4/2020|2020-09-28|EPI\_ISL\_588219|Original|hCoV-19^^England|Human|Lighthouse Lab in Glasgow|Wellcome Sanger Institute for the COVID-19 Genomics UK (COG-UK) consortium|Davies|United Kingdom

>Spike|hCoV-19/USA/MN-QDX-1002/2020|2020-03-14|EPI\_ISL\_571729|Original|hCoV-19^^Minnesota|Human|Quest Diagnostics|Quest Diagnostics|Kagan|USA

>Spike|hCoV-19/Australia/VIC12362/2020|2020-08-02|EPI\_ISL\_640314|Original|hCoV-19^^Victoria|Human|Microbiological Diagnostic Unit - Public Health Laboratory (MDU-PHL)|MDU-PHL|Schultz|Australia

>Spike|hCoV-19/USA/CA-CSMC40/2020|2020-04-03|EPI\_ISL\_475652|Original|hCoV-19^^California|Human|Cedars-Sinai Medical Center|Cedars-Sinai Medical Center|Zhang|USA

>Spike|hCoV-19/USA/AZ-TG271900/2020|2020-03-27|EPI\_ISL\_426553|Original|hCoV-19^^Arizona|Human|AZ SPHL|TGen North|Lemmer|USA

>Spike|hCoV-19/Russia/Moscow-62508/2020|2020-03-11|EPI\_ISL\_428863|Vero|hCoV-19^^Moscow|Human|State Research Center of Virology and Biotechnology VECTOR|State Research Center of Virology and Biotechnology VECTOR|Shvalov|Russia

>Spike|hCoV-19/England/QEUA-B68074/2020|2020-11-11|EPI\_ISL\_662082|Original|hCoV-19^^England|Human|Lighthouse Lab in Glasgow|Wellcome Sanger Institute for the COVID-19 Genomics UK (COG-UK) Consortium|Davies|United Kingdom

>Spike|hCoV-19/England/ALDP-AA1BD9/2020|2020-10-22|EPI\_ISL\_630935|Original|hCoV-19^^England|Human|Lighthouse Lab in Alderley Park|Wellcome Sanger Institute for the COVID-19 Genomics UK (COG-UK) consortium|Davies|United Kingdom

>Spike|hCoV-19/Switzerland/BE-ETHZ-420289/2020|2020-12-20|EPI\_ISL\_768026|Original|hCoV-19^^Bern|Human|Viollier AG|Department of Biosystems Science and Engineering|Nadeau|Switzerland

>Spike|hCoV-19/Wales/PHWC-26F34/2020|2020-03-30|EPI\_ISL\_422047|Original|hCoV-19^^Wales|Human|Wales Specialist Virology Centre|Public Health Wales Microbiology Cardiff|Moore|United Kingdom

>Spike|hCoV-19/USA/WA-UW-10029/2020|2020-05-29|EPI\_ISL\_461452|Original|hCoV-19^^Washington|Human|UW Virology Lab|UW Virology Lab|Roychoudhury|USA

>Spike|hCoV-19/Netherlands/NB-RIVM-20268/2020|2020-11-17|EPI\_ISL\_723411|Original|hCoV-19^^Noord-Brabant|Human|Dutch COVID-19 response team|National Institute for Public Health and the Environment (RIVM)|Meijer|Netherlands

>Spike|hCoV-19/Wales/PHWC-48BF57/2020|2020-11-07|EPI\_ISL\_666373|Original|hCoV-19^^Wales|Human|Wales Specialist Virology Centre Sequencing lab|COVID-19 Genomics UK (COG-UK) Consortium|Moore|United Kingdom

>Spike|hCoV-19/Australia/NSW2717/2020|2020-08-25|EPI\_ISL\_527180|Original|hCoV-19^^New South Wales|Human|Area of Virology|Area of Virology|Yeang|Australia

>Spike|hCoV-19/England/OXON-B1CBF/2020|2020-04-14|EPI\_ISL\_479084|Original|hCoV-19^^England|Human|Oxford Viromics|COVID-19 Genomics UK (COG-UK) Consortium|Golubchik|United Kingdom

>Spike|hCoV-19/England/CAMC-B98E62/2020|2020-11-15|EPI\_ISL\_673825|Original|hCoV-19^^England|Human|Lighthouse Lab in Cambridge|Wellcome Sanger Institute for the COVID-19 Genomics UK (COG-UK) Consortium|Davies|United Kingdom

>Spike|hCoV-19/Wales/PHWC-494E21/2020|2020-11-21|EPI\_ISL\_726259|Original|hCoV-19^^Wales|Human|Originating lab|COVID-19 Genomics UK (COG-UK) Consortium|Moore|United Kingdom

>Spike|hCoV-19/USA/WA-S203/2020|2020-03-20|EPI\_ISL\_430241|Original|hCoV-19^^Washington|Human|Washington State Department of Health|Seattle Flu Study|Bedford|USA

>Spike|hCoV-19/USA/VA-DCLS-1294/2020|2020-07-23|EPI\_ISL\_572287|Original|hCoV-19^^Virginia|Human|Virginia DCLS|Virginia DCLS|St. Jacques|USA

>Spike|hCoV-19/USA/TX-HMH-4614/2020|2020-06-21|EPI\_ISL\_543755|Original|hCoV-19^^Texas|Human|Houston Methodist Hospital|Houston Methodist Hospital|Long|USA

>Spike|hCoV-19/Norway/4282/2020|2020-10-11|EPI\_ISL\_635189|Original|hCoV-19^^Agder|Human|Hospital of Southern Norway - Kristiansand|Norwegian Institute of Public Health|Vollan|Norway

>Spike|hCoV-19/Portugal/PT1642/2020|2020-11-13|EPI\_ISL\_731918|Original|hCoV-19^^Portugal|Human|Instituto Nacional de Saude (INSA)|Instituto Nacional de Saude (INSA)|Borges|Portugal

>Spike|hCoV-19/Scotland/QEUA-9BA989/2020|2020-09-07|EPI\_ISL\_573831|Original|hCoV-19^^Scotland|Human|Oxford Viromics|COVID-19 Genomics UK (COG-UK) Consortium|Golubchik|United Kingdom

>Spike|hCoV-19/England/CAMB-1B7201/2020|2020-10-13|EPI\_ISL\_637560|Original|hCoV-19^^England|Human|Department of Pathology|COVID-19 Genomics UK (COG-UK) Consortium|Goodfellow|United Kingdom

>Spike|hCoV-19/England/MILK-B02267/2020|2020-10-24|EPI\_ISL\_642909|Original|hCoV-19^^England|Human|Lighthouse Lab in Milton Keynes|Wellcome Sanger Institute for the COVID-19 Genomics UK (COG-UK) Consortium|Davies|United Kingdom

>Spike|hCoV-19/Denmark/DCGC-14866/2020|2020-11-23|EPI\_ISL\_712038|Original|hCoV-19^^Nordjylland|Human|Department of Virus and Microbiological Special Diagnostics|Albertsen Lab|Michaelsen|Denmark

>Spike|hCoV-19/USA/FL-BPHL-0794/2020|2020-03-15|EPI\_ISL\_514140|Original|hCoV-19^^Florida|Human|Florida Bureau of Public Health Laboratories|Florida Bureau of Public Health Laboratories|Blanton|USA

>Spike|hCoV-19/Australia/VIC590/2020|2020-03-22|EPI\_ISL\_426847|Original|hCoV-19^^Victoria|Human|Victorian Infectious Diseases Reference Laboratory (VIDRL)|Microbiological Diagnostic Unit Public Health Laboratory and Victorian Infectious Diseases Reference Laboratory|Schultz|Australia

>Spike|hCoV-19/England/LIVE-A738A/2020|2020-03-28|EPI\_ISL\_517010|Original|hCoV-19^^England|Human|Liverpool Clinical Laboratories|COVID-19 Genomics UK (COG-UK) Consortium|Haldenby|United Kingdom

>Spike|hCoV-19/England/MILK-B38AF7/2020|2020-10-31|EPI\_ISL\_659060|Original|hCoV-19^^England|Human|Lighthouse Lab in Milton Keynes|Wellcome Sanger Institute for the COVID-19 Genomics UK (COG-UK) Consortium|Davies|United Kingdom

>Spike|hCoV-19/England/CAMC-C84EC2/2020|2020-12-17|EPI\_ISL\_756389|Original|hCoV-19^^England|Human|Lighthouse Lab in Cambridge|Wellcome Sanger Institute for the COVID-19 Genomics UK (COG-UK) Consortium|Davies|United Kingdom

>Spike|hCoV-19/USA/AZ-TG487006/2020|2020-07-09|EPI\_ISL\_695093|Original|hCoV-19^^Arizona|Human|TGen North|TGen North|French|USA

>Spike|hCoV-19/England/ALDP-A6DFFB/2020|2020-10-14|EPI\_ISL\_607959|Original|hCoV-19^^England|Human|Lighthouse Lab in Alderley Park|Wellcome Sanger Institute for the COVID-19 Genomics UK (COG-UK) consortium|Davies|United Kingdom

>Spike|hCoV-19/Saint Martin/IPG-7357/2020|2020-04-07|EPI\_ISL\_613456|Original|hCoV-19^^Saint Martin|Human|Institut Pasteur de la Guadeloupe|Institut Pasteur de la Guadeloupe|Enouf|Saint Martin

>Spike|hCoV-19/England/MILK-B96B7C/2020|2020-11-14|EPI\_ISL\_674822|Original|hCoV-19^^England|Human|Lighthouse Lab in Milton Keynes|Wellcome Sanger Institute for the COVID-19 Genomics UK (COG-UK) Consortium|Davies|United Kingdom

>Spike|hCoV-19/USA/UT-UPHL-2012264858/2020|2020-08-05|EPI\_ISL\_745570|Original|hCoV-19^^Utah|Human|Ginkgo Bioworks Clinical Laboratory|Utah Public Health Laboratory|Young|USA

>Spike|hCoV-19/England/MILK-B3C8AE/2020|2020-11-01|EPI\_ISL\_706165|Original|hCoV-19^^England|Human|Oxford Viromics|COVID-19 Genomics UK (COG-UK) Consortium|Golubchik|United Kingdom

>Spike|hCoV-19/England/CAMC-B2295D/2020|2020-11-02|EPI\_ISL\_647313|Original|hCoV-19^^England|Human|Lighthouse Lab in Cambridge|Wellcome Sanger Institute for the COVID-19 Genomics UK (COG-UK) Consortium|Davies|United Kingdom

>Spike|hCoV-19/Finland/22SS11D7/2020|2020-09-22|EPI\_ISL\_757388|Original|hCoV-19^^Uusimaa|Human|Department of Virology and Immunology|Department of Virology|Smura|Finland

>Spike|hCoV-19/USA/WI-UW-1472/2020|2020-09-11|EPI\_ISL\_541604|Original|hCoV-19^^Wisconsin|Human|University of Wisconsin-Madison AIDS Vaccine Research Laboratories|University of Wisconsin-Madison AIDS Vaccine Research Laboratories|Baczenas|USA

>Spike|hCoV-19/England/CAMC-B0ABDD/2020|2020-10-30|EPI\_ISL\_643607|Original|hCoV-19^^England|Human|Lighthouse Lab in Cambridge|Wellcome Sanger Institute for the COVID-19 Genomics UK (COG-UK) Consortium|Davies|United Kingdom

>Spike|hCoV-19/England/QEUEH-9F7F24/2020|2020-09-27|EPI\_ISL\_595724|Original|hCoV-19^^England|Human|Oxford Viromics|COVID-19 Genomics UK (COG-UK) Consortium|Golubchik|United Kingdom

>Spike|hCoV-19/Romania/USAFSAM-S548/2020|2020-11-28|EPI\_ISL\_738331|Original|hCoV-19^^Romania|Human|Landstuhl Regional Medical Center|United States Air Force School of Aerospace Medicine|Fries|Romania

>Spike|hCoV-19/Belgium/ULG-10568/2020|2020-10-23|EPI\_ISL\_626275|Original|hCoV-19^^Li\u00e8ge|Human|Department of Clinical Microbiology|GIGA Medical Genomics|Durkin|Belgium

>Spike|hCoV-19/USA/WA-OHSU-2287/2020|2020-08-10|EPI\_ISL\_667169|Original|hCoV-19^^Washington|Human|OHSU Lab Services Molecular Microbiology Lab|Oregon SARS-CoV-2 Genome Sequencing Center|O'Roak|USA

>Spike|hCoV-19/USA/MI-MDHHS-SC21837/2020|2020-04-16|EPI\_ISL\_565880|Original|hCoV-19^^Michigan|Human|Michigan Department of Health and Human Services|Michigan Department of Health and Human Services|Blankenship|USA

>Spike|hCoV-19/England/CAMC-B20245/2020|2020-11-02|EPI\_ISL\_647616|Original|hCoV-19^^England|Human|Lighthouse Lab in Cambridge|Wellcome Sanger Institute for the COVID-19 Genomics UK (COG-UK) Consortium|Davies|United Kingdom

>Spike|hCoV-19/England/MILK-9C4360/2020|2020-09-09|EPI\_ISL\_566883|Original|hCoV-19^^England|Human|Lighthouse Lab in Milton Keynes|Wellcome Sanger Institute for the COVID-19 Genomics UK (COG-UK) consortium|Davies|United Kingdom

>Spike|hCoV-19/Scotland/EDB7986/2020|2020-09-28|EPI\_ISL\_585466|Original|hCoV-19^^Scotland|Human|Virology Department|COVID-19 Genomics UK (COG-UK) Consortium|McHugh|United Kingdom

>Spike|hCoV-19/USA/AZ-TG547311/2020|2020-07-06|EPI\_ISL\_695478|Original|hCoV-19^^Arizona|Human|AZ SPHL|TGen North|French|USA

>Spike|hCoV-19/Netherlands/GE-EMC-285/2020|2020-06-04|EPI\_ISL\_523264|Original|hCoV-19^^Gelderland|Human|Dutch COVID-19 response team|Erasmus Medical Center|Oude Munnink|Netherlands

>Spike|hCoV-19/England/QEUH-B7C0AA/2020|2020-11-14|EPI\_ISL\_668159|Original|hCoV-19^^England|Human|Lighthouse Lab in Glasgow|Wellcome Sanger Institute for the COVID-19 Genomics UK (COG-UK) Consortium|Davies|United Kingdom

>Spike|hCoV-19/Italy/APU-IZSPB-156APT/2020|2020-07-18|EPI\_ISL\_722857|Original|hCoV-19^^Apulia|Human|Dipartimento di Scienze Biomediche e Oncologia Umana - Azienda Ospedaliero Universitaria Consorziale Policlinico|Istituto Zooprofilattico Sperimentale della Puglia e della Basilicata|Parisi|Italy

>Spike|hCoV-19/Japan/PG-2601/2020|2020-04-00|EPI\_ISL\_690735|Original|hCoV-19^^Japan|Human|Pathogen Genomics Center|Pathogen Genomics Center|Sekizuka|Japan

>Spike|hCoV-19/Portugal/PT0957/2020|2020-04-19|EPI\_ISL\_511506|Original|hCoV-19^^Portugal|Human|Instituto Nacional de Saude (INSA)|Instituto Nacional de Saude (INSA) and Instituto Gulbenkian de Ciencia (IGC)|Borges|Portugal

>Spike|hCoV-19/Australia/VIC13385/2020|2020-07-27|EPI\_ISL\_592233|Original|hCoV-19^^Victoria|Human|Microbiological Diagnostic Unit - Public Health Laboratory (MDU-PHL)|MDU-PHL|Schultz|Australia

>Spike|hCoV-19/South Africa/Tygerberg-386/2020|2020-12-01|EPI\_ISL\_745126|Original|hCoV-19^^Northern Cape|Human|Okiep CHC|National Health Laboratory Service (NHLS)|de Oliveira|South Africa

>Spike|hCoV-19/USA/TX-HMH-815/2020|2020-04-10|EPI\_ISL\_545849|Original|hCoV-19^^Texas|Human|Houston Methodist Hospital|Houston Methodist Hospital|Long|USA

>Spike|hCoV-19/Germany/HH-hpi-p2457/2020|2020-05-31|EPI\_ISL\_776518|Original|hCoV-19^^Hamburg|Human|University Medical Center Hamburg Eppendorf|Heinrich Pette Institute|Robitaille|Germany

>Spike|hCoV-19/Wales/PHWC-49C4BE/2020|2020-12-10|EPI\_ISL\_742562|Original|hCoV-19^^Wales|Human|Wales Specialist Virology Centre Sequencing lab|COVID-19 Genomics UK (COG-UK) Consortium|Moore|United Kingdom

>Spike|hCoV-19/USA/IL-NM075/2020|2020-03-16|EPI\_ISL\_444570|Original|hCoV-19^^Illinois|Human|Northwestern Memorial Hospital|Ozer Lab|Ozer|USA

>Spike|hCoV-19/USA/CA-IGI-0173/2020|2020-06-19|EPI\_ISL\_677821|Original|hCoV-19^^California|Human|Innovative Genomics Institute|Innovative Genomics Institute|Wyman|USA

>Spike|hCoV-19/England/CAMC-A6497E/2020|2020-10-10|EPI\_ISL\_608969|Original|hCoV-19^^England|Human|Lighthouse Lab in Cambridge|Wellcome Sanger Institute for the COVID-19 Genomics UK (COG-UK) consortium|Davies|United Kingdom

>Spike|hCoV-19/Portugal/IGC3857/2020|2020-05-28|EPI\_ISL\_491209|Original|hCoV-19^^Portugal|Human|Instituto Gulbenkian de Ci\u00eancia|Instituto Gulbenkian de Ci\u00eancia|Leite|Portugal

>Spike|hCoV-19/USA/UT-02552/2020|2020-04-24|EPI\_ISL\_487205|Original|hCoV-19^^Utah|Human|Utah Public Health Laboratory|Utah Public Health Laboratory|Butz|USA

>Spike|hCoV-19/United Arab Emirates/0664/2020|2020-05-15|EPI\_ISL\_698818|Original|hCoV-19^^Abu Dhabi|Human|Group 42 (G42) Healthcare|G42 Healthcare|Ogrodzki|United Arab Emirates

>Spike|hCoV-19/England/CAMC-B21B1C/2020|2020-11-01|EPI\_ISL\_647240|Original|hCoV-19^^England|Human|Lighthouse Lab in Cambridge|Wellcome Sanger Institute for the COVID-19 Genomics UK (COG-UK) Consortium|Davies|United Kingdom

>Spike|hCoV-19/England/LIVE-DB3D71/2020|2020-10-21|EPI\_ISL\_650847|Original|hCoV-19^^England|Human|Liverpool Clinical Laboratories|COVID-19 Genomics UK (COG-UK) Consortium|Haldenby|United Kingdom

>Spike|hCoV-19/Australia/VIC3650/2020|2020-07-09|EPI\_ISL\_520389|Original|hCoV-19^^Victoria|Human|Victorian Infectious Diseases Reference Laboratory (VIDRL)|VIDRL and MDU-PHL|Schultz|Australia

>Spike|hCoV-19/USA/DE-DHSS-F1020823/2020|2020-10-29|EPI\_ISL\_708451|Original|hCoV-19^^Delaware|Human|Delaware Public Health Lab|Delaware Public Health Lab|Bajwa|USA

>Spike|hCoV-19/England/LOND-D7CFF/2020|2020-04-15|EPI\_ISL\_492501|Original|hCoV-19^^England|Human|University College London|Wellcome Sanger Institute for the COVID-19 Genomics UK (COG-UK) consortium|Davies|United Kingdom

>Spike|hCoV-19/England/ALDP-A68D6F/2020|2020-10-12|EPI\_ISL\_630397|Original|hCoV-19^^England|Human|Lighthouse Lab in Alderley Park|Wellcome Sanger Institute for the COVID-19 Genomics UK (COG-UK) consortium|Davies|United Kingdom

>Spike|hCoV-19/Japan/DP0289/2020|2020-02-16|EPI\_ISL\_416590|Original|hCoV-19^^Japan|Human|Japanese Quarantine Stations|Pathogen Genomics Center|Sekizuka|Japan

>Spike|hCoV-19/England/QEUEH-AF4B6E/2020|2020-10-30|EPI\_ISL\_663096|Original|hCoV-19^^England|Human|Lighthouse Lab in Glasgow|Wellcome Sanger Institute for the COVID-19 Genomics UK (COG-UK) Consortium|Davies|United Kingdom

>Spike|hCoV-19/Jordan/AM-ALSR-5179/2020|2020-10-11|EPI\_ISL\_730418|Original|hCoV-19^^Amman|Human|Biolab Diagnostic Laboratories|Andersen lab at Scripps Research|Gangavarapu|Jordan

>Spike|hCoV-19/England/CAMC-B98A31/2020|2020-11-15|EPI\_ISL\_673782|Original|hCoV-19^^England|Human|Lighthouse Lab in Cambridge|Wellcome Sanger Institute for the COVID-19 Genomics UK (COG-UK) Consortium|Davies|United Kingdom

>Spike|hCoV-19/Netherlands/GE-EMC-417/2020|2020-11-01|EPI\_ISL\_722405|Original|hCoV-19^^Gelderland|Human|Dutch COVID-19 response team|Erasmus Medical Center|Oude Munnink|Netherlands

>Spike|hCoV-19/England/QEUEH-B7D425/2020|2020-11-14|EPI\_ISL\_741860|Original|hCoV-19^^England|Human|Oxford Viromics|COVID-19 Genomics UK (COG-UK) Consortium|Golubchik|United Kingdom

>Spike|hCoV-19/England/CAMB-7855F/2020|2020-00-00|EPI\_ISL\_433747|Original|hCoV-19^^England|Human|Department of Pathology|COVID-19 Genomics UK (COG-UK) Consortium|Meredith|United Kingdom

>Spike|hCoV-19/Luxembourg/LNS2156711/2020|2020-04-21|EPI\_ISL\_445074|Original|hCoV-19^^Luxembourg|Human|Laboratoire National de Sante|Laboratoire National de Sante|Wienecke-Baldacchino|Luxembourg

>Spike|hCoV-19/England/CAMC-C47A4F/2020|2020-12-11|EPI\_ISL\_718345|Original|hCoV-19^^England|Human|Lighthouse Lab in Cambridge|Wellcome Sanger Institute for the COVID-19 Genomics UK (COG-UK) Consortium|Davies|United Kingdom

>Spike|hCoV-19/Denmark/DCGC-5921/2020|2020-10-05|EPI\_ISL\_620186|Original|hCoV-19^^Sjaelland|Human|Department of Virus and Microbiological Special Diagnostics|Albertsen lab|Michaelsen|Denmark

>Spike|hCoV-19/Japan/PG-1058/2020|2020-04-00|EPI\_ISL\_684668|Original|hCoV-19^^Japan|Human|Fukuoka Institute of Health and Environmental Sciences|Pathogen Genomics Center|Sekizuka|Japan

>Spike|hCoV-19/USA/NM-DOH-2020322589/2020|2020-09-03|EPI\_ISL\_575295|Original|hCoV-19^^New Mexico|Human|Molecular Biology|Molecular Biology|Johnson|USA

>Spike|hCoV-19/England/CAMB-7D305/2020|2020-04-05|EPI\_ISL\_441560|Original|hCoV-19^^England|Human|Department of Pathology|Wellcome Sanger Institute for the COVID-19 Genomics UK (COG-UK) consortium|Amato|United Kingdom



>Spike|hCoV-19/England/MILK-9A8845/2020|2020-08-31|EPI\_ISL\_549428|Original|hCoV-19^^England|Human|Oxford Viromics|COVID-19 Genomics UK (COG-UK) Consortium|Golubchik|United Kingdom

>Spike|hCoV-19/Switzerland/VD-ETHZ-310375/2020|2020-10-08|EPI\_ISL\_603449|Original|hCoV-19^^Vaud|Human|Viollier AG|Department of Biosystems Science and Engineering|Nadeau|Switzerland

>Spike|hCoV-19/Scotland/CVR3676/2020|2020-05-23|EPI\_ISL\_478090|Original|hCoV-19^^Scotland|Human|West of Scotland Specialist Virology Centre|COVID-19 Genomics UK (COG-UK) Consortium|Robertson|United Kingdom

>Spike|hCoV-19/England/20134068704/2020|2020-03-24|EPI\_ISL\_423159|Original|hCoV-19^^England|Human|Respiratory Virus Unit|Respiratory Virus Unit|Platt|United Kingdom

>Spike|hCoV-19/England/CAMC-BBF5FC/2020|2020-11-20|EPI\_ISL\_704987|Original|hCoV-19^^England|Human|Lighthouse Lab in Cambridge|Wellcome Sanger Institute for the COVID-19 Genomics UK (COG-UK) Consortium|Davies|United Kingdom

>Spike|hCoV-19/Japan/PG-8238/2020|2020-08-00|EPI\_ISL\_687337|Original|hCoV-19^^Japan|Human|Pathogen Genomics Center|Pathogen Genomics Center|Sekizuka|Japan

>Spike|hCoV-19/Spain/MD-IBV-006372/2020|2020-04-03|EPI\_ISL\_510108|Original|hCoV-19^^Madrid|Human|Hospital General Universitario Gregorio Mara\u00f1a|SeqCOVID-SPAIN consortium/IBV (CSIC)|Comas|Spain

>Spike|hCoV-19/Wales/PHWC-16A8FC/2020|2020-09-10|EPI\_ISL\_560123|Original|hCoV-19^^Wales|Human|Wales Specialist Virology Centre Sequencing lab|COVID-19 Genomics UK (COG-UK) Consortium|Moore|United Kingdom

>Spike|hCoV-19/England/OXON-AE71E/2020|2020-00-00|EPI\_ISL\_448714|Original|hCoV-19^^England|Human|Oxford Viromics|COVID-19 Genomics UK (COG-UK) Consortium|Golubchik|United Kingdom

>Spike|hCoV-19/Canada/ON-UHTC\_0086/2020|2020-04-15|EPI\_ISL\_464058|unknown|hCoV-19^^Ontario|Human|Unity Health Toronto|Ontario Institute for Cancer Research|de Borja|Canada

>Spike|hCoV-19/USA/NY-Wadsworth-291676-01/2020|2020-12-24|EPI\_ISL\_767602|Original|hCoV-19^^New York|Human|SARATOGA HOSPITAL LABORATORY|Wadsworth Center|Lasek-Nesselquist|USA

>Spike|hCoV-19/USA/MI-MDHHS-SC21588/2020|2020-03-25|EPI\_ISL\_516315|Original|hCoV-19^^Michigan|Human|Michigan Department of Health and Human Services|Michigan Department of Health and Human Services|Blankenship|USA

>Spike|hCoV-19/USA/WA-S2864/2020|2020-09-19|EPI\_ISL\_596395|Original|hCoV-19^^Washington|Human|Seattle Flu Study|Seattle Flu Study|Lee|USA

>Spike|hCoV-19/South Korea/IHC18670/2020|2020-07-01|EPI\_ISL\_541005|Original|hCoV-19^^Gwangju|Human|Health and Environmental Research Institute of Gwangju Metropolitan city|Health and Environmental Research Institute of Gwangju Metropolitan city|Kim|South Korea

>Spike|hCoV-19/Japan/PG-5284/2020|2020-07-00|EPI\_ISL\_690387|Original|hCoV-19^^Japan|Human|Pathogen Genomics Center|Pathogen Genomics Center|Sekizuka|Japan

>Spike|hCoV-19/England/CAMC-B7A0CA/2020|2020-11-12|EPI\_ISL\_741080|Original|hCoV-19^^England|Human|Oxford Viromics|COVID-19 Genomics UK (COG-UK) Consortium|Golubchik|United Kingdom

>Spike|hCoV-19/USA/CA-ALSR-2928/2020|2020-08-03|EPI\_ISL\_635735|Original|hCoV-19^^California|Human|San Diego County Public Health Laboratory|Andersen lab at Scripps Research|Gangavarapu|USA

>Spike|hCoV-19/Belgium/ULG-10177/2020|2020-05-09|EPI\_ISL\_455965|Original|hCoV-19^^Li\u00e8ge|Human|Department of Clinical Microbiology|GIGA Medical Genomics|Durkin|Belgium

>Spike|hCoV-19/USA/TX-HMH-978/2020|2020-04-09|EPI\_ISL\_545943|Original|hCoV-19^^Texas|Human|Houston Methodist Hospital|Houston Methodist Hospital|Long|USA

>Spike|hCoV-19/Denmark/DCGC-14598/2020|2020-11-23|EPI\_ISL\_711866|Original|hCoV-19^^Syddanmark|Human|Department of Virus and Microbiological Special Diagnostics|Albertsen Lab|Michaelsen|Denmark

>Spike|hCoV-19/USA/TX-HMH-6754/2020|2020-06-24|EPI\_ISL\_546219|Original|hCoV-19^^Texas|Human|Houston Methodist Hospital|Houston Methodist Hospital|Long|USA

>Spike|hCoV-19/USA/MD\_NIDDL\_3202/2020|2020-04-16|EPI\_ISL\_491909|Original|hCoV-19^^Maryland|Human|Naval Infectious Diseases Diagnostic Laboratory|Naval Medical Research Center Biological Defense Research Directorate|Voegtly|USA

>Spike|hCoV-19/England/MILK-956B10/2020|2020-06-06|EPI\_ISL\_554204|Original|hCoV-19^^England|Human|Lighthouse Lab in Milton Keynes|Wellcome Sanger Institute for the COVID-19 Genomics UK (COG-UK) consortium|Davies|United Kingdom

>Spike|hCoV-19/Australia/VIC10623/2020|2020-08-03|EPI\_ISL\_562998|Original|hCoV-19^^Victoria|Human|Microbiological Diagnostic Unit - Public Health Laboratory (MDU-PHL)|MDU-PHL|Schultz|Australia

>Spike|hCoV-19/England/PORT-2CFF0E/2020|2020-03-23|EPI\_ISL\_475248|Original|hCoV-19^^England|Human|Centre for Enzyme Innovation|COVID-19 Genomics UK (COG-UK) Consortium|Robson|United Kingdom

>Spike|hCoV-19/USA/MI-MDHHS-SC22548/2020|2020-11-04|EPI\_ISL\_708606|Original|hCoV-19^^Michigan|Human|Michigan Department of Health and Human Services|Michigan Department of Health and Human Services|Jacob|USA

>Spike|hCoV-19/Wales/PHWC-47F9B2/2020|2020-10-06|EPI\_ISL\_612753|Original|hCoV-19^^Wales|Human|Wales Specialist Virology Centre Sequencing lab|COVID-19 Genomics UK (COG-UK) Consortium|Moore|United Kingdom

>Spike|hCoV-19/USA/HI-H200116/2020|2020-06-26|EPI\_ISL\_752679|Original|hCoV-19^^Hawaii|Human|State Laboratories Division|State Laboratories Division|Sultana|USA

>Spike|hCoV-19/Sri Lanka/COV486/2020|2020-03-31|EPI\_ISL\_428673|Original|hCoV-19^^Sri Lanka|Human|Centre for Dengue Research|Centre for Dengue Research|Malavige|Sri Lanka

>Spike|hCoV-19/USA/TX-HMH-2513/2020|2020-06-03|EPI\_ISL\_545349|Original|hCoV-19^^Texas|Human|Houston Methodist Hospital|Houston Methodist Hospital|Long|USA

>Spike|hCoV-19/USA/CT-Yale-382/2020|2020-05-01|EPI\_ISL\_594124|Original|hCoV-19^^Delaware|Human|Yale COVID-19 Biorepository|Grubaugh Lab - Yale School of Public Health|Grubaugh|USA

>Spike|hCoV-19/USA/UT-UPHL-2009190/2020|2020-05-27|EPI\_ISL\_525173|Original|hCoV-19^^Utah|Human|Utah Public Health Laboratory|Utah Public Health Laboratory|Young|USA

>Spike|hCoV-19/England/QEUEH-9B4E62/2020|2020-09-04|EPI\_ISL\_590430|Original|hCoV-19^^England|Human|Lighthouse Lab in Glasgow|Wellcome Sanger Institute for the COVID-19 Genomics UK (COG-UK) consortium|Davies|United Kingdom

>Spike|hCoV-19/USA/TX-HMH-MCoV-15925/2020|2020-07-10|EPI\_ISL\_785609|Original|hCoV-19^^Texas|Human|Houston Methodist Hospital|Houston Methodist Hospital|Long|USA

>Spike|hCoV-19/Brazil/RJ-DCVN3/2020|2020-07-20|EPI\_ISL\_529140|Vero E6|hCoV-19^^Rio de Janeiro|Human|Centro de Desenvolvimento Tecnológico em Saude|Centro de Desenvolvimento Tecnológico em Saude|Souza|Brazil

>Spike|hCoV-19/Spain/VC-FISABIO-263/2020|2020-03-26|EPI\_ISL\_436358|Original|hCoV-19^^Comunitat Valenciana|Human|Servicio de Microbiología. Hospital Clínico Universitario de Valencia|Sequencing and Bioinformatics Service and Molecular Epidemiology Research Group. FISABIO-Public Health|Gonzalez-Candelas|Spain

>Spike|hCoV-19/England/CAMC-B7B64F/2020|2020-11-12|EPI\_ISL\_724019|Original|hCoV-19^^England|Human|Oxford Viromics|COVID-19 Genomics UK (COG-UK) Consortium|Golubchik|United Kingdom

>Spike|hCoV-19/England/ALDP-BC88E3/2020|2020-11-22|EPI\_ISL\_721354|Original|hCoV-19^^England|Human|Lighthouse Lab in Alderley Park|Wellcome Sanger Institute for the COVID-19 Genomics UK (COG-UK) Consortium|Davies|United Kingdom

>Spike|hCoV-19/England/ALDP-953DA4/2020|2020-06-12|EPI\_ISL\_554357|Original|hCoV-19^^England|Human|Lighthouse Lab in Alderley Park|Wellcome Sanger Institute for the COVID-19 Genomics UK (COG-UK) consortium|Davies|United Kingdom

>Spike|hCoV-19/England/QEUEH-9FA668/2020|2020-09-27|EPI\_ISL\_588255|Original|hCoV-19^^England|Human|Lighthouse Lab in Glasgow|Wellcome Sanger Institute for the COVID-19 Genomics UK (COG-UK) consortium|Davies|United Kingdom

>Spike|hCoV-19/Japan/PG-3011/2020|2020-04-00|EPI\_ISL\_691135|Original|hCoV-19^^Japan|Human|Pathogen Genomics Center|Pathogen Genomics Center|Sekizuka|Japan

>Spike|hCoV-19/England/BRIS-12209E/2020|2020-03-22|EPI\_ISL\_439962|Original|hCoV-19^^England|Human|PHE South West Regional Laboratory|Wellcome Sanger Institute for the COVID-19 Genomics UK (COG-UK) consortium|Amato|United Kingdom

>Spike|hCoV-19/Canada/BC\_10601737/2020|2020-04-00|EPI\_ISL\_477117|Original|hCoV-19^^British Columbia|Human|BCCDC Public Health Laboratory|BCCDC Public Health Laboratory|Harrigan|Canada

>Spike|hCoV-19/Saudi Arabia/KAUST-MAKKAH799/2020|2020-04-24|EPI\_ISL\_513256|Original|hCoV-19^^Makkah|Human|Pathogen Genomics Lab King Abdullah University of Science and Technology(KAUST)|Pathogen Genomics Lab King Abdullah University of Science and Technology(KAUST)|Mohamed Ghazzali|Saudi Arabia

>Spike|hCoV-19/England/ALDP-A2E9E9/2020|2020-10-05|EPI\_ISL\_586980|Original|hCoV-19^^England|Human|Lighthouse Lab in Alderley Park|Wellcome Sanger Institute for the COVID-19 Genomics UK (COG-UK) consortium|Davies|United Kingdom

>Spike|hCoV-19/England/LIVE-9A539/2020|2020-03-25|EPI\_ISL\_449343|Original|hCoV-19^^England|Human|Liverpool Clinical Laboratories|COVID-19 Genomics UK (COG-UK) Consortium|Haldenby|United Kingdom

>Spike|hCoV-19/USA/NM-UNM-00529/2020|2020-05-09|EPI\_ISL\_542951|Original|hCoV-19^^New Mexico|Human|TriCore Reference Laboratories|Center for Global Health|Domman|USA

>Spike|hCoV-19/Japan/PG-5079/2020|2020-08-00|EPI\_ISL\_690189|Original|hCoV-19^^Japan|Human|Pathogen Genomics Center|Pathogen Genomics Center|Sekizuka|Japan

>Spike|hCoV-19/Luxembourg/LNS9371467/2020|2020-12-15|EPI\_ISL\_744894|Original|hCoV-19^^Luxembourg|Human|Laboratoire national de sant\u00e9|Laboratoire national de sant\u00e9|Wienecke-Baldacchino|Luxembourg

>Spike|hCoV-19/England/BRIS-12C708/2020|2020-05-06|EPI\_ISL\_469481|Original|hCoV-19^^England|Human|PHE South West Regional Laboratory|Wellcome Sanger Institute for the COVID-19 Genomics UK (COG-UK) consortium|Davies|United Kingdom

>Spike|hCoV-19/USA/WA-UW-24373/2020|2020-08-14|EPI\_ISL\_570764|Original|hCoV-19^^Washington|Human|UW Virology Lab|UW Virology Lab|Roychoudhury|USA

>Spike|hCoV-19/Luxembourg/LNS0772976/2020|2020-11-07|EPI\_ISL\_739830|Original|hCoV-19^^Luxembourg|Human|Laboratoire national de sant\u00e9|Laboratoire national de sant\u00e9|Wienecke-Baldacchino|Luxembourg

>Spike|hCoV-19/England/CAMC-B79650/2020|2020-11-13|EPI\_ISL\_667934|Original|hCoV-19^^England|Human|Lighthouse Lab in Cambridge|Wellcome Sanger Institute for the COVID-19 Genomics UK (COG-UK) Consortium|Davies|United Kingdom

>Spike|hCoV-19/Japan/PG-6649/2020|2020-07-00|EPI\_ISL\_687761|Original|hCoV-19^^Japan|Human|Pathogen Genomics Center|Pathogen Genomics Center|Sekizuka|Japan

>Spike|hCoV-19/Australia/VIC3822/2020|2020-07-09|EPI\_ISL\_520535|Original|hCoV-19^^Victoria|Human|Microbiological Diagnostic Unit - Public Health Laboratory (MDU-PHL)|MDU-PHL|Schultz|Australia

>Spike|hCoV-19/USA/WA-UW-12706/2020|2020-06-29|EPI\_ISL\_501116|Original|hCoV-19^^Washington|Human|University of Washington Virology Lab|University of Washington Virology Lab|Roychoudhury|USA

>Spike|hCoV-19/Northern Ireland/NIRE-233916/2020|2020-10-04|EPI\_ISL\_680325|Original|hCoV-19^^Northern Ireland|Human|Regional Virus Laboratory|COVID-19 Genomics UK (COG-UK) Consortium|Fairley|United Kingdom

>Spike|hCoV-19/England/ALDP-A68400/2020|2020-10-12|EPI\_ISL\_608387|Original|hCoV-19^^England|Human|Lighthouse Lab in Alderley Park|Wellcome Sanger Institute for the COVID-19 Genomics UK (COG-UK) consortium|Davies|United Kingdom

>Spike|hCoV-19/England/CAMC-C3EFC4/2020|2020-12-10|EPI\_ISL\_719040|Original|hCoV-19^^England|Human|Lighthouse Lab in Cambridge|Wellcome Sanger Institute for the COVID-19 Genomics UK (COG-UK) Consortium|Davies|United Kingdom

>Spike|hCoV-19/Scotland/QEUH-9DD698/2020|2020-09-21|EPI\_ISL\_599540|Original|hCoV-19^^Scotland|Human|Lighthouse Lab in Glasgow|Wellcome Sanger Institute for the COVID-19 Genomics UK (COG-UK) consortium|Davies|United Kingdom

>Spike|hCoV-19/USA/WY-WPHL-20149984/2020|2020-11-24|EPI\_ISL\_770104|Original|hCoV-19^^Wyoming|Human|Wyoming Public Health Laboratory|Wyoming Public Health Laboratory|Hull|USA

>Spike|hCoV-19/USA/TX-HMH-MCoV-13671/2020|2020-08-20|EPI\_ISL\_788768|Original|hCoV-19^^Texas|Human|Houston Methodist Hospital|Houston Methodist Hospital|Long|USA

>Spike|hCoV-19/Switzerland/BL-ETHZ-270150/2020|2020-08-28|EPI\_ISL\_541453|Original|hCoV-19^^Basel-Landschaft|Human|Viollier AG|Department of Biosystems Science and Engineering|Nadeau|Switzerland

>Spike|hCoV-19/Austria/CeMM0260/2020|2020-03-23|EPI\_ISL\_438089|Original|hCoV-19^^Vienna|Human|Center for Virology|Bergthaler laboratory|Bergthaler|Austria

>Spike|hCoV-19/USA/LA-EVTL445/2020|2020-07-30|EPI\_ISL\_578849|Original|hCoV-19^^Louisiana|Human|LSUHS Emerging Viral Threat Laboratory|Microbial Genome Sequencing Center|Kamil|USA

>Spike|hCoV-19/USA/CA-CZB-10107/2020|2020-06-23|EPI\_ISL\_672079|Original|hCoV-19^^California|Human|The Ashley Laboratory|Chan-Zuckerberg Biohub|Bhatt|USA

>Spike|hCoV-19/Belgium/ULG-10838/2020|2020-10-27|EPI\_ISL\_666873|Original|hCoV-19^^Li\u00e8ge|Human|Department of Clinical Microbiology|GIGA Medical Genomics|Durkin|Belgium

>Spike|hCoV-19/Switzerland/VD-ETHZ-100171/2020|2020-03-16|EPI\_ISL\_574981|Original|hCoV-19^^Vaud|Human|Viollier AG|Department of Biosystems Science and Engineering|Nadeau|Switzerland

>Spike|hCoV-19/USA/WA-S381/2020|2020-03-29|EPI\_ISL\_434141|Original|hCoV-19^^Washington|Human|Washington State Department of Health|Seattle Flu Study|Bedford|USA

>Spike|hCoV-19/USA/CA-QDX-1622/2020|2020-03-19|EPI\_ISL\_603904|Original|hCoV-19^^California|Human|Quest Diagnostics|Quest Diagnostics|Kagan|USA

>Spike|hCoV-19/Singapore/290/2020|2020-04-14|EPI\_ISL\_462408|Original|hCoV-19^^Singapore|Human|National Public Health Laboratory|National Public Health Laboratory|Mak|Singapore

>Spike|hCoV-19/England/CAMB-1B69A3/2020|2020-00-00|EPI\_ISL\_584320|Original|hCoV-19^^England|Human|Department of Pathology|COVID-19 Genomics UK (COG-UK) Consortium|Goodfellow|United Kingdom

>Spike|hCoV-19/United Arab Emirates/0913/2020|2020-06-26|EPI\_ISL\_699051|Original|hCoV-19^^Abu Dhabi|Human|Group 42 (G42) Healthcare|G42 Healthcare|Ogrodzki|United Arab Emirates

>Spike|hCoV-19/England/EXET-1383C9/2020|2020-09-12|EPI\_ISL\_611616|Original|hCoV-19^^England|Human|University of Exeter|COVID-19 Genomics UK (COG-UK) Consortium|Temperton|United Kingdom

>Spike|hCoV-19/Switzerland/VD-ETHZ-230015/2020|2020-08-02|EPI\_ISL\_516558|Original|hCoV-19^^Vaud|Human|Viollier AG|Department of Biosystems Science and Engineering|Nadeau|Switzerland

>Spike|hCoV-19/Netherlands/ZH-EMC-1083/2020|2020-12-12|EPI\_ISL\_722342|Original|hCoV-19^^Zuid Holland|Human|Dutch COVID-19 response team|Erasmus Medical Center|Oude Munnink|Netherlands

>Spike|hCoV-19/Australia/VIC14017/2020|2020-07-24|EPI\_ISL\_563931|Original|hCoV-19^^Victoria|Human|Microbiological Diagnostic Unit - Public Health Laboratory (MDU-PHL)|MDU-PHL|Schultz|Australia

>Spike|hCoV-19/USA/NY-NYCPHL-000399/2020|2020-03-23|EPI\_ISL\_631883|Original|hCoV-19^^New York|Human|Jamaica Hospital Medical Center|New York City Public Health Laboratory|Wang|USA

>Spike|hCoV-19/England/ALDP-9E777A/2020|2020-09-24|EPI\_ISL\_638217|Original|hCoV-19^^England|Human|Department of Pathology|COVID-19 Genomics UK (COG-UK) Consortium|Goodfellow|United Kingdom

>Spike|hCoV-19/England/LOND-1262DE2/2020|2020-10-16|EPI\_ISL\_627460|Original|hCoV-19^^England|Human|University College London|COVID-19 Genomics UK (COG-UK) Consortium|Roy|United Kingdom

>Spike|hCoV-19/Japan/PG-3278/2020|2020-07-00|EPI\_ISL\_691393|Original|hCoV-19^^Japan|Human|Pathogen Genomics Center|Pathogen Genomics Center|Sekizuka|Japan

>Spike|hCoV-19/USA/WA-UW-22077/2020|2020-08-03|EPI\_ISL\_570622|Original|hCoV-19^^Washington|Human|UW Virology Lab|UW Virology Lab|Roychoudhury|USA

>Spike|hCoV-19/USA/VA-DCLS-0258/2020|2020-04-22|EPI\_ISL\_452831|Original|hCoV-19^^Virginia|Human|Virginia DCLS|Virginia DCLS|St. Jacques|USA

>Spike|hCoV-19/England/ALDP-C8B766/2020|2020-12-17|EPI\_ISL\_756520|Original|hCoV-19^^England|Human|Lighthouse Lab in Alderley Park|Wellcome Sanger Institute for the COVID-19 Genomics UK (COG-UK) Consortium|Davies|United Kingdom

>Spike|hCoV-19/England/MILK-9F1D99/2020|2020-09-24|EPI\_ISL\_589617|Original|hCoV-19^^England|Human|Lighthouse Lab in Milton Keynes|Wellcome Sanger Institute for the COVID-19 Genomics UK (COG-UK) consortium|Davies|United Kingdom

>Spike|hCoV-19/Australia/NSW1154/2020|2020-10-25|EPI\_ISL\_629007|Original|hCoV-19^^New South Wales|Human|Laverty Pathology|NSW Health Pathology - Institute of Clinical Pathology and Medical Research; Westmead Hospital; University of Sydney|Gall|Australia

>Spike|hCoV-19/Norway/3201/2020|2020-08-08|EPI\_ISL\_549032|Original|hCoV-19^^Viken|Human|Oslo University Hospital|Norwegian Institute of Public Health|Kopperud Riis|Norway

>Spike|hCoV-19/Denmark/DCGC-20436/2020|2020-12-21|EPI\_ISL\_759146|Original|hCoV-19^^Nordjylland|Human|Department of Virus and Microbiological Special Diagnostics|Albertsen Lab|Michaelsen|Denmark

>Spike|hCoV-19/England/NOTT-110A77/2020|2020-04-30|EPI\_ISL\_441890|Original|hCoV-19^^England|Human|Queens Medical Centre|COVID-19 Genomics UK (COG-UK) Consortium|Loose|United Kingdom

>Spike|hCoV-19/Wales/PHWC-168928/2020|2020-04-20|EPI\_ISL\_494306|Original|hCoV-19^^Wales|Human|Originating lab|COVID-19 Genomics UK (COG-UK) Consortium|Moore|United Kingdom

>Spike|hCoV-19/England/ALDP-94F109/2020|2020-06-18|EPI\_ISL\_556340|Original|hCoV-19^^England|Human|Lighthouse Lab in Alderley Park|Wellcome Sanger Institute for the COVID-19 Genomics UK (COG-UK) consortium|Davies|United Kingdom

>Spike|hCoV-19/Australia/VIC208/2020|2020-03-20|EPI\_ISL\_419903|Original|hCoV-19^^Victoria|Human|Victorian Infectious Diseases Reference Laboratory (VIDRL)|Victorian Infectious Diseases Reference Laboratory and Microbiological Diagnostic Unit Public Health Laboratory|Schultz|Australia

>Spike|hCoV-19/USA/UT-01856/2020|2020-04-13|EPI\_ISL\_498630|Original|hCoV-19^^Utah|Human|Utah Public Health Laboratory|Utah Public Health Laboratory|Butz|USA

>Spike|hCoV-19/England/CAMB-74B9D/2020|2020-03-17|EPI\_ISL\_425351|Original|hCoV-19^^England|Human|Department of Pathology|COVID-19 Genomics UK (COG-UK) Consortium|Meredith|United Kingdom

>Spike|hCoV-19/Wales/PHWC-47E2E5/2020|2020-09-28|EPI\_ISL\_595435|Original|hCoV-19^^Wales|Human|Originating lab|COVID-19 Genomics UK (COG-UK) Consortium|Moore|United Kingdom

>Spike|hCoV-19/France/PAC-IHU-0019/2020|2020-03-08|EPI\_ISL\_569248|Original|hCoV-19^^Provence-Alpes-C\u00f4te-d\u2019Azur|Human|MEPHI|MEPHI|Levasseur|France

>Spike|hCoV-19/Switzerland/BL-UHB-42194077/2020|2020-03-16|EPI\_ISL\_528154|Original|hCoV-19^^Basel-Land|Human|University Hospital Basel|University Hospital Basel|Roloff Handschin|Switzerland

>Spike|hCoV-19/USA/WA-S2172/2020|2020-06-08|EPI\_ISL\_497600|Original|hCoV-19^^Washington|Human|Washington State Department of Health|Seattle Flu Study|Lee|USA

>Spike|hCoV-19/England/CAMB-789EA/2020|2020-04-06|EPI\_ISL\_433804|Original|hCoV-19^^England|Human|Department of Pathology|COVID-19 Genomics UK (COG-UK) Consortium|Meredith|United Kingdom

>Spike|hCoV-19/England/BRIS-124B6E/2020|2020-03-25|EPI\_ISL\_443720|Original|hCoV-19^^England|Human|PHE South West Regional Laboratory|Wellcome Sanger Institute for the COVID-19 Genomics UK (COG-UK) consortium|Amato|United Kingdom

>Spike|hCoV-19/USA/WA-S2905/2020|2020-10-04|EPI\_ISL\_596436|Original|hCoV-19^^Washington|Human|Seattle Flu Study|Seattle Flu Study|Lee|USA

>Spike|hCoV-19/USA/AZ-TG276768/2020|2020-04-15|EPI\_ISL\_694130|Original|hCoV-19^^Arizona|Human|AZ SPHL|TGen North|French|USA

>Spike|hCoV-19/Ecuador/USFQ-105/2020|2020-07-01|EPI\_ISL\_486842|Original|hCoV-19^^Chimborazo|Human|Institute of Microbiology|Institute of Microbiology|Cardenas|Ecuador

>Spike|hCoV-19/Portugal/PT0451/2020|2020-04-03|EPI\_ISL\_454175|Original|hCoV-19^^Portugal|Human|unknown|Instituto Nacional de Saude (INSA)|Borges|Portugal

>Spike|hCoV-19/England/ALDP-B2442D/2020|2020-11-04|EPI\_ISL\_646807|Original|hCoV-19^^England|Human|Lighthouse Lab in Alderley Park|Wellcome Sanger Institute for the COVID-19 Genomics UK (COG-UK) Consortium|Davies|United Kingdom

>Spike|hCoV-19/USA/MN-GMF-22820/2020|2020-09-28|EPI\_ISL\_660860|Original|hCoV-19^^Minnesota|Human|Gundersen Molecular Diagnostics Laboratory|Kabara Cancer Research Institute|Kenny|USA

>Spike|hCoV-19/USA/WA-UW-6186/2020|2020-04-01|EPI\_ISL\_430954|Original|hCoV-19^^Washington|Human|UW Virology Lab|UW Virology Lab|Roychoudhury|USA

>Spike|hCoV-19/England/MILK-B96C1F/2020|2020-11-13|EPI\_ISL\_674980|Original|hCoV-19^^England|Human|Lighthouse Lab in Milton Keynes|Wellcome Sanger Institute for the COVID-19 Genomics UK (COG-UK) Consortium|Davies|United Kingdom

>Spike|hCoV-19/Wales/PHWC-488084/2020|2020-10-30|EPI\_ISL\_639345|Original|hCoV-19^^Wales|Human|Wales Specialist Virology Centre Sequencing lab|COVID-19 Genomics UK (COG-UK) Consortium|Moore|United Kingdom

>Spike|hCoV-19/USA/TX-HMH-MCoV-9411/2020|2020-07-03|EPI\_ISL\_781106|Original|hCoV-19^^Texas|Human|Houston Methodist Hospital|Houston Methodist Hospital|Long|USA

>Spike|hCoV-19/Denmark/DCGC-17520/2020|2020-12-14|EPI\_ISL\_751037|Original|hCoV-19^^Sjaelland|Human|Department of Virus and Microbiological Special Diagnostics|Albertsen Lab|Michaelsen|Denmark

>Spike|hCoV-19/Luxembourg/LNS6783622/2020|2020-03-20|EPI\_ISL\_429734|Original|hCoV-19^^Luxembourg|Human|Laboratoire National de Sante|Laboratoire National de Sante|Wienecke-Baldacchino|Luxembourg

>Spike|hCoV-19/Scotland/CVR3004/2020|2020-04-23|EPI\_ISL\_453089|Original|hCoV-19^^Scotland|Human|West of Scotland Specialist Virology Centre|COVID-19 Genomics UK (COG-UK) Consortium|Robertson|United Kingdom

>Spike|hCoV-19/Scotland/CVR4688/2020|2020-09-30|EPI\_ISL\_612310|Original|hCoV-19^^Scotland|Human|West of Scotland Specialist Virology Centre|COVID-19 Genomics UK (COG-UK) Consortium|Robertson|United Kingdom

>Spike|hCoV-19/India/GJ-GBRC357b/2020|2020-06-25|EPI\_ISL\_514607|Original|hCoV-19^^Gujarat|Human|B.J. Medical College and Civil hospital|Gujarat Biotechnology Research Centre|Joshi|India

>Spike|hCoV-19/Japan/PG-2647/2020|2020-04-00|EPI\_ISL\_690779|Original|hCoV-19^^Japan|Human|Pathogen Genomics Center|Pathogen Genomics Center|Sekizuka|Japan

>Spike|hCoV-19/Australia/VIC8266/2020|2020-08-20|EPI\_ISL\_564923|Original|hCoV-19^^Victoria|Human|Microbiological Diagnostic Unit - Public Health Laboratory (MDU-PHL)|MDU-PHL|Schultz|Australia

>Spike|hCoV-19/Canada/BC\_10111910/2020|2020-04-00|EPI\_ISL\_467313|Original|hCoV-19^^British Columbia|Human|BCCDC Public Health Laboratory|BCCDC Public Health Laboratory|Harrigan|Canada

>Spike|hCoV-19/Wales/PHWC-47EFEE/2020|2020-10-11|EPI\_ISL\_612615|Original|hCoV-19^^Wales|Human|Wales Specialist Virology Centre Sequencing lab|COVID-19 Genomics UK (COG-UK) Consortium|Moore|United Kingdom

>Spike|hCoV-19/France/ARA-06756/2020|2020-03-07|EPI\_ISL\_417338|Original|hCoV-19^^Auvergne-Rh\u00f4ne-Alpes|Human|Centre Hospitalier de Macon|CNR Virus des Infections Respiratoires - France SUD|Josset|France

>Spike|hCoV-19/England/QEUH-9CF57E/2020|2020-09-17|EPI\_ISL\_590073|Original|hCoV-19^^England|Human|Lighthouse Lab in Glasgow|Wellcome Sanger Institute for the COVID-19 Genomics UK (COG-UK) consortium|Davies|United Kingdom

>Spike|hCoV-19/Australia/VIC10993/2020|2020-08-03|EPI\_ISL\_563188|Original|hCoV-19^^Victoria|Human|Microbiological Diagnostic Unit - Public Health Laboratory (MDU-PHL)|MDU-PHL|Schultz|Australia

>Spike|hCoV-19/South Africa/NHLS-UCT-GS-0669/2020|2020-10-23|EPI\_ISL\_700482|Original|hCoV-19^^Western Cape|Human|Themba lethu CDC wc THC|NHLS/UCT|Iranzadeh|South Africa

>Spike|hCoV-19/Wales/PHWC-4861FC/2020|2020-10-30|EPI\_ISL\_639018|Original|hCoV-19^^Wales|Human|Wales Specialist Virology Centre Sequencing lab|COVID-19 Genomics UK (COG-UK) Consortium|Moore|United Kingdom

>Spike|hCoV-19/Denmark/DCGC-16054/2020|2020-11-23|EPI\_ISL\_714562|Original|hCoV-19^^Hovedstaden|Human|Department of Virus and Microbiological Special Diagnostics|Albertsen Lab|Michaelsen|Denmark

>Spike|hCoV-19/Japan/PG-6965/2020|2020-07-00|EPI\_ISL\_688070|Original|hCoV-19^^Japan|Human|Pathogen Genomics Center|Pathogen Genomics Center|Sekizuka|Japan

>Spike|hCoV-19/England/MILK-ACE75A/2020|2020-10-21|EPI\_ISL\_644083|Original|hCoV-19^^England|Human|Lighthouse Lab in Milton Keynes|Wellcome Sanger Institute for the COVID-19 Genomics UK (COG-UK) Consortium|Davies|United Kingdom

>Spike|hCoV-19/Japan/PG-7473/2020|2020-07-00|EPI\_ISL\_688575|Original|hCoV-19^^Japan|Human|Pathogen Genomics Center|Pathogen Genomics Center|Sekizuka|Japan

>Spike|hCoV-19/USA/WA-UW-32830/2020|2020-10-15|EPI\_ISL\_737092|Original|hCoV-19^^Washington|Human|UW Virology Lab|UW Virology Lab|Roychoudhury|USA

>Spike|hCoV-19/Belgium/rega-0414676/2020|2020-04-14|EPI\_ISL\_738211|Original|hCoV-19^^Diest|Human|UZ Leuven|KU Leuven|Maes|Belgium

>Spike|hCoV-19/England/ALDP-94EC45/2020|2020-06-17|EPI\_ISL\_556474|Original|hCoV-19^^England|Human|Lighthouse Lab in Alderley Park|Wellcome Sanger Institute for the COVID-19 Genomics UK (COG-UK) consortium|Davies|United Kingdom

>Spike|hCoV-19/USA/WI-UW-1008/2020|2020-07-20|EPI\_ISL\_516434|Original|hCoV-19^^Wisconsin|Human|University of Wisconsin-Madison AIDS Vaccine Research Laboratories|University of Wisconsin-Madison AIDS Vaccine Research Laboratories|Baczenas|USA

>Spike|hCoV-19/England/BIRM-6A505/2020|2020-11-09|EPI\_ISL\_679067|Original|hCoV-19^^England|Human|University of Birmingham|COVID-19 Genomics UK (COG-UK) Consortium|Loman|United Kingdom

>Spike|hCoV-19/USA/TX-HMH-5028/2020|2020-06-24|EPI\_ISL\_544469|Original|hCoV-19^^Texas|Human|Houston Methodist Hospital|Houston Methodist Hospital|Long|USA

>Spike|hCoV-19/USA/TX-HMH-MCoV-19615/2020|2020-11-16|EPI\_ISL\_783982|Original|hCoV-19^^Texas|Human|Houston Methodist Hospital|Houston Methodist Hospital|Long|USA

>Spike|hCoV-19/Japan/PG-8012/2020|2020-08-00|EPI\_ISL\_687113|Original|hCoV-19^^Japan|Human|Pathogen Genomics Center|Pathogen Genomics Center|Sekizuka|Japan

>Spike|hCoV-19/Japan/PG-2310/2020|2020-05-00|EPI\_ISL\_685915|Original|hCoV-19^^Japan|Human|Pathogen Genomics Center|Pathogen Genomics Center|Sekizuka|Japan

>Spike|hCoV-19/Wales/PHWC-4A37E8/2020|2020-12-11|EPI\_ISL\_764576|Original|hCoV-19^^Wales|Human|Wales Specialist Virology Centre Sequencing lab|COVID-19 Genomics UK (COG-UK) Consortium|Moore|United Kingdom

>Spike|hCoV-19/USA/MN-CDC-6332/2020|2020-05-14|EPI\_ISL\_527703|Original|hCoV-19^^Minnesota|Human|MN PHL Division|Pathogen Discovery|Queen|USA

>Spike|hCoV-19/Scotland/CVR4656/2020|2020-09-23|EPI\_ISL\_611875|Original|hCoV-19^^Scotland|Human|West of Scotland Specialist Virology Centre|COVID-19 Genomics UK (COG-UK) Consortium|Robertson|United Kingdom

>Spike|hCoV-19/USA/WA-S2799/2020|2020-08-23|EPI\_ISL\_530156|Original|hCoV-19^^Washington|Human|Seattle Flu Study|Seattle Flu Study|Lee|USA

>Spike|hCoV-19/Australia/SAP550/2020|2020-11-14|EPI\_ISL\_654797|Original|hCoV-19^^South Australia|Human|SA Pathology|SA Pathology|Leong|Australia

>Spike|hCoV-19/England/QEUH-AE4976/2020|2020-10-27|EPI\_ISL\_633209|Original|hCoV-19^^England|Human|Lighthouse Lab in Glasgow|Wellcome Sanger Institute for the COVID-19 Genomics UK (COG-UK) consortium|Davies|United Kingdom

>Spike|hCoV-19/USA/CA-ALSR-3678/2020|2020-09-28|EPI\_ISL\_636144|Original|hCoV-19^^California|Human|San Diego County Public Health Laboratory|Andersen lab at Scripps Research|Gangavarapu|USA

>Spike|hCoV-19/Germany/BY-MVP-0020/2020|2020-04-06|EPI\_ISL\_437220|Original|hCoV-19^^Bavaria|Human|Max von Pettenkofer Institute|Laboratory for Functional Genome Analysis|Graf|Germany

>Spike|hCoV-19/Denmark/DCGC-4063/2020|2020-09-14|EPI\_ISL\_622019|Original|hCoV-19^^Syddanmark|Human|Department of Virus and Microbiological Special Diagnostics|Albertsen lab|Michaelsen|Denmark

>Spike|hCoV-19/England/MILK-A44C4E/2020|2020-10-05|EPI\_ISL\_598636|Original|hCoV-19^^England|Human|Lighthouse Lab in Milton Keynes|Wellcome Sanger Institute for the COVID-19 Genomics UK (COG-UK) consortium|Davies|United Kingdom

>Spike|hCoV-19/Switzerland/BE-UNIBE-212-9055/2020|2020-04-03|EPI\_ISL\_574850|Original|hCoV-19^^Bern|Human|Institute for Infectious Diseases|Institute for Infectious Diseases|Koch|Switzerland

>Spike|hCoV-19/Scotland/QEUH-9CA379/2020|2020-09-13|EPI\_ISL\_576056|Original|hCoV-19^^Scotland|Human|Lighthouse Lab in Glasgow|Wellcome Sanger Institute for the COVID-19 Genomics UK (COG-UK) consortium|Davies|United Kingdom

>Spike|hCoV-19/USA/TX-HMH-MCoV-9466/2020|2020-07-03|EPI\_ISL\_781139|Original|hCoV-19^^Texas|Human|Houston Methodist Hospital|Houston Methodist Hospital|Long|USA

>Spike|hCoV-19/USA/NY-NYUMC117/2020|2020-03-18|EPI\_ISL\_421729|Original|hCoV-19^^New York|Human|NYU Langone Health|Departments of Pathology and Medicine|Maurano|USA

>Spike|hCoV-19/South Africa/LR00068/2020|2020-07-13|EPI\_ISL\_514380|Original|hCoV-19^^North West|Human|National Institute for Communicable Diseases of the National Health Laboratory Service|National Institute for Communicable Diseases of the National Health Laboratory Service|Allam|South Africa

>Spike|hCoV-19/England/MILK-84717B/2020|2020-07-14|EPI\_ISL\_557170|Original|hCoV-19^^England|Human|Lighthouse Lab in Milton Keynes|Wellcome Sanger Institute for the COVID-19 Genomics UK (COG-UK) consortium|Davies|United Kingdom

>Spike|hCoV-19/England/QEUEH-B9FE10/2020|2020-11-18|EPI\_ISL\_721023|Original|hCoV-19^^England|Human|Lighthouse Lab in Glasgow|Wellcome Sanger Institute for the COVID-19 Genomics UK (COG-UK) Consortium|Davies|United Kingdom

>Spike|hCoV-19/Scotland/QEUEH-964AF4/2020|2020-08-11|EPI\_ISL\_531157|Original|hCoV-19^^Scotland|Human|NHSGGC West of Scotland Specialist Virology Centre / MRC-University of Glasgow Centre for Virus Research|Wellcome Sanger Institute for the COVID-19 Genomics UK (COG-UK) consortium|Davies|United Kingdom

>Spike|hCoV-19/England/ALDP-9E6517/2020|2020-09-25|EPI\_ISL\_580405|Original|hCoV-19^^England|Human|Lighthouse Lab in Alderley Park|Wellcome Sanger Institute for the COVID-19 Genomics UK (COG-UK) consortium|Davies|United Kingdom

>Spike|hCoV-19/USA/WI-GMF-31666/2020|2020-11-05|EPI\_ISL\_661109|Original|hCoV-19^^Wisconsin|Human|Gundersen Molecular Diagnostics Laboratory|Kabara Cancer Research Institute|Kenny|USA

>Spike|hCoV-19/Wales/PHWC-314BF/2020|2020-04-12|EPI\_ISL\_446452|Original|hCoV-19^^Wales|Human|Wales Specialist Virology Centre|Public Health Wales Microbiology Cardiff|Moore|United Kingdom

>Spike|hCoV-19/Ireland/D-NVRL-73IRL27709/2020|2020-09-16|EPI\_ISL\_578269|Original|hCoV-19^^Dublin|Human|National Virus Reference Laboratory|National Virus Reference Laboratory|Gonzalez|Ireland

>Spike|hCoV-19/England/MILK-9A55D8/2020|2020-09-03|EPI\_ISL\_550031|Original|hCoV-19^^England|Human|Lighthouse Lab in Milton Keynes|Wellcome Sanger Institute for the COVID-19 Genomics UK (COG-UK) consortium|Davies|United Kingdom

>Spike|hCoV-19/USA/AZ-TG494844/2020|2020-07-10|EPI\_ISL\_695253|Original|hCoV-19^^Arizona|Human|TGen North|TGen North|French|USA

>Spike|hCoV-19/Wales/PHWC-49E012/2020|2020-12-06|EPI\_ISL\_742943|Original|hCoV-19^^Wales|Human|Wales Specialist Virology Centre Sequencing lab|COVID-19 Genomics UK (COG-UK) Consortium|Moore|United Kingdom

>Spike|hCoV-19/USA/RI\_0556/2020|2020-03-01|EPI\_ISL\_420795|Original|hCoV-19^^Rhode Island|Human|RI State Health Laboratory|Pathogen Discovery|Queen|USA

>Spike|hCoV-19/Wales/PHWC-48E75C/2020|2020-11-13|EPI\_ISL\_680905|Original|hCoV-19^^Wales|Human|Wales Specialist Virology Centre Sequencing lab|COVID-19 Genomics UK (COG-UK) Consortium|Moore|United Kingdom

>Spike|hCoV-19/England/ALDP-B630D3/2020|2020-11-08|EPI\_ISL\_655293|Original|hCoV-19^^England|Human|Lighthouse Lab in Alderley Park|Wellcome Sanger Institute for the COVID-19 Genomics UK (COG-UK) Consortium|Davies|United Kingdom

>Spike|hCoV-19/Brazil/RJ-0256/2020|2020-04-03|EPI\_ISL\_470624|Original|hCoV-19^^Rio de Janeiro|Human|Laboratorio de Virologia Molecular / UFRJ|Bioinformatics Laboratory / LNCC|Almeida|Brazil

>Spike|hCoV-19/England/CAMC-B994F6/2020|2020-11-12|EPI\_ISL\_673411|Original|hCoV-19^^England|Human|Lighthouse Lab in Cambridge|Wellcome Sanger Institute for the COVID-19 Genomics UK (COG-UK) Consortium|Davies|United Kingdom

>Spike|hCoV-19/USA/WI-UW-2627/2021|2021-01-03|EPI\_ISL\_791328|Original|hCoV-19^^Wisconsin|Human|University of Wisconsin-Madison AIDS Vaccine Research Laboratories|University of Wisconsin-Madison AIDS Vaccine Research Laboratories|Moreno|USA

>Spike|hCoV-19/England/QEUEH-9DBF08/2020|2020-09-21|EPI\_ISL\_601333|Original|hCoV-19^^England|Human|Lighthouse Lab in Glasgow|Wellcome Sanger Institute for the COVID-19 Genomics UK (COG-UK) consortium|Davies|United Kingdom

>Spike|hCoV-19/Netherlands/NA\_135/2020|2020-03-19|EPI\_ISL\_422679|Original|hCoV-19^^Netherlands|Human|Dutch COVID-19 response team|Erasmus Medical Center|Oude Munnink|Netherlands



>Spike|hCoV-19/England/CAMB-73B61/2020|2020-04-03|EPI\_ISL\_433667|Original|hCoV-19^^England|Human|Department of Pathology|COVID-19 Genomics UK (COG-UK) Consortium|Meredith|United Kingdom

>Spike|hCoV-19/England/QEUA-B69EA6/2020|2020-11-11|EPI\_ISL\_655020|Original|hCoV-19^^England|Human|Lighthouse Lab in Glasgow|Wellcome Sanger Institute for the COVID-19 Genomics UK (COG-UK) Consortium|Davies|United Kingdom

>Spike|hCoV-19/England/ALDP-A51561/2020|2020-10-07|EPI\_ISL\_597909|Original|hCoV-19^^England|Human|Lighthouse Lab in Alderley Park|Wellcome Sanger Institute for the COVID-19 Genomics UK (COG-UK) consortium|Davies|United Kingdom

>Spike|hCoV-19/Brazil/RS-00629/2020|2020-11-24|EPI\_ISL\_770578|Original|hCoV-19^^Rio Grande do Sul|Human|Laborat\u00f3rio de Microbiologia Molecular - Universidade FEEVALE|Bioinformatics Laboratory / LNCC|Almeida|Brazil

>Spike|hCoV-19/USA/CO-CDPHE-2008064470/2020|2020-08-06|EPI\_ISL\_710247|Original|hCoV-19^^Colorado|Human|Colorado Department of Public Health and Environment|Colorado Department of Public Health and Environment|Bankers|USA

>Spike|hCoV-19/England/MILK-C63263/2020|2020-12-13|EPI\_ISL\_735675|Original|hCoV-19^^England|Human|Lighthouse Lab in Milton Keynes|Wellcome Sanger Institute for the COVID-19 Genomics UK (COG-UK) Consortium|Davies|United Kingdom

>Spike|hCoV-19/Germany/HH-hpi-pl608/2020|2020-03-16|EPI\_ISL\_775635|Original|hCoV-19^^Hamburg|Human|University Medical Center Hamburg Eppendorf|Heinrich Pette Institute|Robitaille|Germany

>Spike|hCoV-19/France/PDL-SC609/2020|2020-03-22|EPI\_ISL\_663256|Original|hCoV-19^^Pays-de-la-Loire|Human|CHU Nantes|CNR Virus des Infections Respiratoires - France SUD|Bal|France

>Spike|hCoV-19/USA/OR-OHSU-2549/2020|2020-08-19|EPI\_ISL\_667247|Original|hCoV-19^^Oregon|Human|OHSU Lab Services Molecular Microbiology Lab|Oregon SARS-CoV-2 Genome Sequencing Center|O'Roak|USA

>Spike|hCoV-19/England/204682055/2020|2020-11-12|EPI\_ISL\_693418|Original|hCoV-19^^England|Human|Respiratory Virus Unit|COVID-19 Genomics UK (COG-UK) Consortium|Platt|United Kingdom

>Spike|hCoV-19/Wales/PHWC-487717/2020|2020-10-26|EPI\_ISL\_639229|Original|hCoV-19^^Wales|Human|Wales Specialist Virology Centre Sequencing lab|COVID-19 Genomics UK (COG-UK) Consortium|Moore|United Kingdom

>Spike|hCoV-19/Finland/1LS11H9/2020|2020-10-01|EPI\_ISL\_757346|Original|hCoV-19^^Uusimaa|Human|Department of Virology and Immunology|Department of Virology|Smura|Finland

>Spike|hCoV-19/USA/LA-GBCL-26684452/2020|2020-04-11|EPI\_ISL\_485274|Original|hCoV-19^^Louisiana|Human|River Road Testing Lab|Ginkgo Bioworks Clinical Laboratory|Smith|USA

>Spike|hCoV-19/England/20144001204/2020|2020-03-30|EPI\_ISL\_423476|Original|hCoV-19^^England|Human|Respiratory Virus Unit|Respiratory Virus Unit|Platt|United Kingdom

>Spike|hCoV-19/USA/TX-HMH016/2020|2020-03-13|EPI\_ISL\_434726|Original|hCoV-19^^Texas|Human|Houston Methodist Hospital|Houston Methodist Hospital|Long|USA

>Spike|hCoV-19/Germany/NW-HHU-464/2020|2020-12-11|EPI\_ISL\_770698|Original|hCoV-19^^North Rhine-Westphalia|Human|ZOTZ KLIMAS MVZ D\u00fcsseldorf-Centrum GbR \u00dcBAG f\u00fcr Labormedizin|Center of Medical Microbiology|Wienemann|Germany

>Spike|hCoV-19/Belgium/UGent-214/2020|2020-10-23|EPI\_ISL\_717603|Original|hCoV-19^^Ghent|Human|Lab voor klinische biologie|Onderzoeksgroep Virologie|Lambrechts|Belgium

>Spike|hCoV-19/England/QEUA-AD13F6/2020|2020-10-27|EPI\_ISL\_633950|Original|hCoV-19^^England|Human|Lighthouse Lab in Glasgow|Wellcome Sanger Institute for the COVID-19 Genomics UK (COG-UK) consortium|Davies|United Kingdom

>Spike|hCoV-19/England/MILK-9F185C/2020|2020-09-25|EPI\_ISL\_589695|Original|hCoV-19^^England|Human|Lighthouse Lab in Milton Keynes|Wellcome Sanger Institute for the COVID-19 Genomics UK (COG-UK) consortium|Davies|United Kingdom

>Spike|hCoV-19/England/BRIS-12B2DB/2020|2020-05-02|EPI\_ISL\_487620|Original|hCoV-19^^England|Human|PHE South West Regional Laboratory|Wellcome Sanger Institute for the COVID-19 Genomics UK (COG-UK) consortium|Davies|United Kingdom

>Spike|hCoV-19/Wales/PHWC-1637BA/2020|2020-05-12|EPI\_ISL\_473995|Original|hCoV-19^^Wales|Human|Originating lab|COVID-19 Genomics UK (COG-UK) Consortium|Moore|United Kingdom

>Spike|hCoV-19/USA/UT-08429/2020|2020-05-19|EPI\_ISL\_524205|Original|hCoV-19^^Utah|Human|Utah Public Health Laboratory|Utah Public Health Laboratory|Young|USA

>Spike|hCoV-19/USA/NE-10765/2020|2020-05-04|EPI\_ISL\_475182|Original|hCoV-19^^Nebraska|Human|Nebraska Public Health Laboratory|UNMC COVID-19 Response Team|Pratt|USA

>Spike|hCoV-19/England/NOTT-115632/2020|2020-10-15|EPI\_ISL\_595252|Original|hCoV-19^^England|Human|Queens Medical Centre|COVID-19 Genomics UK (COG-UK) Consortium|Loose|United Kingdom

>Spike|hCoV-19/England/CAMB-7F251/2020|2020-04-08|EPI\_ISL\_442942|Original|hCoV-19^^England|Human|Department of Pathology|Wellcome Sanger Institute for the COVID-19 Genomics UK (COG-UK) consortium|Amato|United Kingdom

>Spike|hCoV-19/England/ALDP-A6950C/2020|2020-10-12|EPI\_ISL\_608849|Original|hCoV-19^^England|Human|Lighthouse Lab in Alderley Park|Wellcome Sanger Institute for the COVID-19 Genomics UK (COG-UK) consortium|Davies|United Kingdom

>Spike|hCoV-19/England/QEUEH-B42131/2020|2020-11-08|EPI\_ISL\_657291|Original|hCoV-19^^England|Human|Lighthouse Lab in Glasgow|Wellcome Sanger Institute for the COVID-19 Genomics UK (COG-UK) Consortium|Davies|United Kingdom

>Spike|hCoV-19/Luxembourg/LNS9610397/2020|2020-11-29|EPI\_ISL\_744950|Original|hCoV-19^^Luxembourg|Human|Laboratoire national de sant\u00e9|Laboratoire national de sant\u00e9|Wienecke-Baldacchino|Luxembourg

>Spike|hCoV-19/USA/UT-UPHL-2012381065/2020|2020-08-17|EPI\_ISL\_746156|Original|hCoV-19^^Utah|Human|Ginkgo Bioworks Clinical Laboratory|Utah Public Health Laboratory|Young|USA

>Spike|hCoV-19/Netherlands/Utrecht\_21/2020|2020-03-03|EPI\_ISL\_422898|Original|hCoV-19^^Utrecht|Human|Dutch COVID-19 response team|Erasmus Medical Center|Oude Munnink|Netherlands

>Spike|hCoV-19/Czech Republic/IAB\_14/2020|2020-04-02|EPI\_ISL\_426889|Original|hCoV-19^^Czech Republic|Human|Motol University Hospital|Institute of Applied Biotechnologies a.s.|Broz|Czech Republic

>Spike|hCoV-19/USA/AZ-TG305962/2020|2020-04-28|EPI\_ISL\_694301|Original|hCoV-19^^Arizona|Human|AZ SPHL|TGen North|French|USA

>Spike|hCoV-19/England/QEUEH-A8C1D2/2020|2020-10-16|EPI\_ISL\_643091|Original|hCoV-19^^England|Human|Lighthouse Lab in Glasgow|Wellcome Sanger Institute for the COVID-19 Genomics UK (COG-UK) Consortium|Davies|United Kingdom

>Spike|hCoV-19/USA/MI-MDHHS-SC20755/2020|2020-04-22|EPI\_ISL\_471776|Original|hCoV-19^^Michigan|Human|Michigan Department of Health and Human Services|Michigan Department of Health and Human Services|Blankenship|USA

>Spike|hCoV-19/England/MILK-991CF8/2020|2020-08-27|EPI\_ISL\_552228|Original|hCoV-19^^England|Human|Lighthouse Lab in Milton Keynes|Wellcome Sanger Institute for the COVID-19 Genomics UK (COG-UK) consortium|Davies|United Kingdom

>Spike|hCoV-19/England/ALDP-A86C6E/2020|2020-10-16|EPI\_ISL\_606267|Original|hCoV-19^^England|Human|Lighthouse Lab in Alderley Park|Wellcome Sanger Institute for the COVID-19 Genomics UK (COG-UK) consortium|Davies|United Kingdom

>Spike|hCoV-19/Switzerland/GE-SNRCI-8187/2020|2020-03-00|EPI\_ISL\_548217|Original|hCoV-19^^Geneve|Human|Laboratoire de Virologie|Swiss National Reference Centre for Influenza|Gon\u00e7alves Cabecinhas|Switzerland

>Spike|hCoV-19/Switzerland/BE-UNIBE-207-8159/2020|2020-04-01|EPI\_ISL\_574845|Original|hCoV-19^^Bern|Human|Institute for Infectious Diseases|Institute for Infectious Diseases|Koch|Switzerland

>Spike|hCoV-19/Denmark/DCGC-19179/2020|2020-12-07|EPI\_ISL\_748797|Original|hCoV-19^^Syddanmark|Human|Department of Virus and Microbiological Special Diagnostics|Albertsen Lab|Michaelsen|Denmark

>Spike|hCoV-19/England/ALDP-B1B4B0/2020|2020-10-31|EPI\_ISL\_645592|Original|hCoV-19^^England|Human|Lighthouse Lab in Alderley Park|Wellcome Sanger Institute for the COVID-19 Genomics UK (COG-UK) Consortium|Davies|United Kingdom

>Spike|hCoV-19/Japan/PG-4375/2020|2020-06-00|EPI\_ISL\_692602|Original|hCoV-19^^Japan|Human|Pathogen Genomics Center|Pathogen Genomics Center|Sekizuka|Japan

>Spike|hCoV-19/USA/UN-NR-52282/2020|2020-03-23|EPI\_ISL\_456656|Vero E6 - CRL-1586|hCoV-19^^USA|Human|American Type Culture Collection Inc. (ATCC)|American Type Culture Collection Inc. (ATCC)|Riojas|USA

>Spike|hCoV-19/England/NORT-29C0CB/2020|2020-10-20|EPI\_ISL\_637455|Original|hCoV-19^^England|Human|Northumbria University / South Tees Hospitals NHS Foundation Trust / North Cumbria Integrated Care NHS Foundation Trust / North Tees and Hartlepool NHS Foundation Trust / Newcastle Hospitals NHS Foundation Trust|COVID-19 Genomics UK (COG-UK) Consortium|Bashton|United Kingdom

>Spike|hCoV-19/South Korea/KCDC2188/2020|2020-03-28|EPI\_ISL\_506982|Original|hCoV-19^^South Korea|Human|Division of Viral Diseases|Division of Viral Diseases|Kim|South Korea

>Spike|hCoV-19/England/ALDP-A95C8A/2020|2020-10-20|EPI\_ISL\_624714|Original|hCoV-19^^England|Human|Lighthouse Lab in Alderley Park|Wellcome Sanger Institute for the COVID-19 Genomics UK (COG-UK) consortium|Davies|United Kingdom

>Spike|hCoV-19/England/CAMC-B9A10D/2020|2020-11-15|EPI\_ISL\_673404|Original|hCoV-19^^England|Human|Lighthouse Lab in Cambridge|Wellcome Sanger Institute for the COVID-19 Genomics UK (COG-UK) Consortium|Davies|United Kingdom

>Spike|hCoV-19/England/LOND-125F814/2020|2020-04-06|EPI\_ISL\_516873|Original|hCoV-19^^England|Human|North West London Pathology|Wellcome Sanger Institute for the COVID-19 Genomics UK (COG-UK) consortium|Davies|United Kingdom

>Spike|hCoV-19/Japan/PG-2502/2020|2020-04-00|EPI\_ISL\_686107|Original|hCoV-19^^Japan|Human|Saitama Prefectural Institute of Public Health|Pathogen Genomics Center|Sekizuka|Japan

>Spike|hCoV-19/England/MILK-9A8BA6/2020|2020-09-01|EPI\_ISL\_550024|Original|hCoV-19^^England|Human|Lighthouse Lab in Milton Keynes|Wellcome Sanger Institute for the COVID-19 Genomics UK (COG-UK) consortium|Davies|United Kingdom

>Spike|hCoV-19/Wales/PHWC-16631D/2020|2020-06-21|EPI\_ISL\_490864|Original|hCoV-19^^Wales|Human|Wales Specialist Virology Centre Sequencing lab|COVID-19 Genomics UK (COG-UK) Consortium|Moore|United Kingdom

>Spike|hCoV-19/Wales/PHWC-48A0DD/2020|2020-10-29|EPI\_ISL\_652522|Original|hCoV-19^^Wales|Human|Wales Specialist Virology Centre Sequencing lab|COVID-19 Genomics UK (COG-UK) Consortium|Moore|United Kingdom

>Spike|hCoV-19/USA/CO-CDPHE-2100037635/2020|2020-11-25|EPI\_ISL\_771187|Original|hCoV-19^^Colorado|Human|Colorado Department of Public Health and Environment|Colorado Department of Public Health and Environment|Bankers|USA

>Spike|hCoV-19/Australia/NSW1141/2020|2020-10-03|EPI\_ISL\_593751|Original|hCoV-19^^New South Wales|Human|South Eastern Area Laboratory Services (SEALS)|NSW Health Pathology - Institute of Clinical Pathology and Medical Research; Westmead Hospital; University of Sydney|Gall|Australia

>Spike|hCoV-19/Australia/NSW870/2020|2020-08-14|EPI\_ISL\_526212|Original|hCoV-19^^New South Wales|Human|Australian Clinical Labs (formerly Healthscope Pathology)|NSW Health Pathology - Institute of Clinical Pathology and Medical Research; Westmead Hospital; University of Sydney|Gall|Australia

>Spike|hCoV-19/USA/MI-MDHHS-SC21377/2020|2020-03-21|EPI\_ISL\_507631|Original|hCoV-19^^Michigan|Human|Michigan Department of Health and Human Services|Michigan Department of Health and Human Services|Blankenship|USA

>Spike|hCoV-19/Scotland/CVR4061/2020|2020-08-30|EPI\_ISL\_535153|Original|hCoV-19^^Scotland|Human|West of Scotland Specialist Virology Centre|COVID-19 Genomics UK (COG-UK) Consortium|Robertson|United Kingdom

>Spike|hCoV-19/United Arab Emirates/0314/2020|2020-05-18|EPI\_ISL\_698491|Original|hCoV-19^^Abu Dhabi|Human|Group 42 (G42) Healthcare|G42 Healthcare|Ogrodzki|United Arab Emirates

>Spike|hCoV-19/USA/WI-UW-564/2020|2020-06-28|EPI\_ISL\_484939|Original|hCoV-19^^Wisconsin|Human|University of Wisconsin-Madison AIDS Vaccine Research Laboratories|University of Wisconsin-Madison AIDS Vaccine Research Laboratories|Baczenas|USA

>Spike|hCoV-19/England/ALDP-A66A97/2020|2020-10-12|EPI\_ISL\_630649|Original|hCoV-19^^England|Human|Lighthouse Lab in Alderley Park|Wellcome Sanger Institute for the COVID-19 Genomics UK (COG-UK) consortium|Davies|United Kingdom

>Spike|hCoV-19/Scotland/CVR4541/2020|2020-09-22|EPI\_ISL\_585400|Original|hCoV-19^^Scotland|Human|Lighthouse Lab in Glasgow / MRC-University of Glasgow Centre for Virus Research|COVID-19 Genomics UK (COG-UK) Consortium|Robertson|United Kingdom

>Spike|hCoV-19/USA/TX-HMH-MCoV-15801/2020|2020-09-08|EPI\_ISL\_785485|Original|hCoV-19^^Texas|Human|Houston Methodist Hospital|Houston Methodist Hospital|Long|USA

>Spike|hCoV-19/England/20096101804/2020|2020-02-27|EPI\_ISL\_464189|Original|hCoV-19^^England|Human|Respiratory Virus Unit|Respiratory Virus Unit|Platt|United Kingdom

>Spike|hCoV-19/Australia/VIC15026/2020|2020-07-29|EPI\_ISL\_593109|Original|hCoV-19^^Victoria|Human|Microbiological Diagnostic Unit - Public Health Laboratory (MDU-PHL)|MDU-PHL|Schultz|Australia

>Spike|hCoV-19/USA/NY-PV09169/2020|2020-03-19|EPI\_ISL\_422531|Original|hCoV-19^^New York|Human|MSHS Clinical Microbiology Laboratories|MSHS Pathogen Surveillance Program|van Bakel|USA

>Spike|hCoV-19/England/ALDP-B5CB18/2020|2020-11-08|EPI\_ISL\_655831|Original|hCoV-19^^England|Human|Lighthouse Lab in Alderley Park|Wellcome Sanger Institute for the COVID-19 Genomics UK (COG-UK) Consortium|Davies|United Kingdom

>Spike|hCoV-19/South Africa/Tygerberg-453/2020|2020-12-07|EPI\_ISL\_745140|Original|hCoV-19^^Western Cape|Human|Tygerberg Hospital w/ TBH|National Health Laboratory Service (NHLS)|de Oliveira|South Africa

>Spike|hCoV-19/England/ALDP-95374C/2020|2020-06-08|EPI\_ISL\_554368|Original|hCoV-19^^England|Human|Lighthouse Lab in Alderley Park|Wellcome Sanger Institute for the COVID-19 Genomics UK (COG-UK) consortium|Davies|United Kingdom

>Spike|hCoV-19/USA/WA-UW-46903/2020|2020-12-12|EPI\_ISL\_756201|Original|hCoV-19^^Washington|Human|UW Virology Lab|UW Virology Lab|Roychoudhury|USA

>Spike|hCoV-19/England/QEUH-A778F3/2020|2020-10-12|EPI\_ISL\_638738|Original|hCoV-19^^England|Human|Oxford Viromics|COVID-19 Genomics UK (COG-UK) Consortium|Golubchik|United Kingdom

>Spike|hCoV-19/Wales/PHWC-49A298/2020|2020-12-01|EPI\_ISL\_727520|Original|hCoV-19^^Wales|Human|Originating lab|COVID-19 Genomics UK (COG-UK) Consortium|Moore|United Kingdom

>Spike|hCoV-19/England/BRIS-127F9C/2020|2020-04-18|EPI\_ISL\_469550|Original|hCoV-19^^England|Human|PHE South West Regional Laboratory|Wellcome Sanger Institute for the COVID-19 Genomics UK (COG-UK) consortium|Davies|United Kingdom

>Spike|hCoV-19/Wales/PHWC-166A36/2020|2020-06-23|EPI\_ISL\_494071|Original|hCoV-19^^Wales|Human|Originating lab|COVID-19 Genomics UK (COG-UK) Consortium|Moore|United Kingdom

>Spike|hCoV-19/Canada/QC-LSPQ-L00231569/2020|2020-03-22|EPI\_ISL\_535957|Original|hCoV-19^^Quebec|Human|H\u00f4pital Charles-LeMoine|Laboratoire de sant\u00e9 publique du Qu\u00e9bec|Moreira|Canada

>Spike|hCoV-19/England/ALDP-BB9C8F/2020|2020-11-21|EPI\_ISL\_702417|Original|hCoV-19^^England|Human|Lighthouse Lab in Alderley Park|Wellcome Sanger Institute for the COVID-19 Genomics UK (COG-UK) Consortium|Davies|United Kingdom

>Spike|hCoV-19/Sweden/20-14262/2020|2020-05-02|EPI\_ISL\_469055|Original|hCoV-19^^Ostergotland|Human|Jourcentralen|The Public Health Agency of Sweden|Svartstr\u00f6m|Sweden

>Spike|hCoV-19/Netherlands/NA\_642/2020|2020-03-31|EPI\_ISL\_461077|Original|hCoV-19^^Netherlands|Human|Dutch COVID-19 response team|Erasmus Medical Center|Oude Munnink|Netherlands

>Spike|hCoV-19/England/NORW-ECB90/2020|2020-05-28|EPI\_ISL\_472336|Original|hCoV-19^^England|Human|Quadram Institute Bioscience|COVID-19 Genomics UK (COG-UK) Consortium|Alikhan|United Kingdom

>Spike|hCoV-19/France/ARA-15456/2020|2020-03-27|EPI\_ISL\_678498|Original|hCoV-19^^Auvergne-Rh\u00f4ne-Alpes|Human|CNR Virus des Infections Respiratoires - France SUD|CNR Virus des Infections Respiratoires - France SUD|Bal|France

>Spike|hCoV-19/USA/AZ-TG463627/2020|2020-07-01|EPI\_ISL\_695048|Original|hCoV-19^^Arizona|Human|TGen North|TGen North|French|USA

>Spike|hCoV-19/England/QEUH-BCB983/2020|2020-11-27|EPI\_ISL\_703844|Original|hCoV-19^^England|Human|Lighthouse Lab in Glasgow|Wellcome Sanger Institute for the COVID-19 Genomics UK (COG-UK) Consortium|Davies|United Kingdom

>Spike|hCoV-19/England/QEUA-A4BDCC/2020|2020-10-05|EPI\_ISL\_628529|Original|hCoV-19^^England|Human|Oxford Viromics|COVID-19 Genomics UK (COG-UK) Consortium|Golubchik|United Kingdom

>Spike|hCoV-19/USA/AR-CDC-4271/2020|2020-07-15|EPI\_ISL\_527645|Original|hCoV-19^^Arkansas|Human|AR Dept. of Health-Public Health Lab|Pathogen Discovery|Queen|USA

>Spike|hCoV-19/England/20118058004/2020|2020-03-12|EPI\_ISL\_464930|Original|hCoV-19^^England|Human|Respiratory Virus Unit|Respiratory Virus Unit|Platt|United Kingdom

>Spike|hCoV-19/Netherlands/ZH-EMC-644/2020|2020-00-00|EPI\_ISL\_578072|Original|hCoV-19^^Zuid Holland|Human|Dutch COVID-19 response team|Erasmus Medical Center|Oude Munnink|Netherlands

>Spike|hCoV-19/Denmark/DCGC-9469/2020|2020-11-09|EPI\_ISL\_668986|Original|hCoV-19^^Hovedstaden|Human|Department of Virus and Microbiological Special Diagnostics|Albertsen Lab|Michaelsen|Denmark

>Spike|hCoV-19/USA/CA-ALSR-1623/2020|2020-05-18|EPI\_ISL\_494694|Original|hCoV-19^^California|Human|Scripps Medical Laboratory|Andersen lab at Scripps Research|Gangavarapu|USA

>Spike|hCoV-19/England/QEUA-AF483A/2020|2020-10-30|EPI\_ISL\_662848|Original|hCoV-19^^England|Human|Lighthouse Lab in Glasgow|Wellcome Sanger Institute for the COVID-19 Genomics UK (COG-UK) Consortium|Davies|United Kingdom

>Spike|hCoV-19/USA/MI-UM-10036367756/2020|2020-10-09|EPI\_ISL\_596612|Original|hCoV-19^^Michigan|Human|University of Michigan Clinical Microbiology Laboratory|Lauring Lab|Valesano|USA

>Spike|hCoV-19/Denmark/DCGC-6641/2020|2020-10-12|EPI\_ISL\_619543|Original|hCoV-19^^Syddanmark|Human|Department of Virus and Microbiological Special Diagnostics|Albertsen lab|Michaelsen|Denmark

>Spike|hCoV-19/England/SHEF-10C89CA/2020|2020-12-09|EPI\_ISL\_741955|Original|hCoV-19^^England|Human|Virology Department|COVID-19 Genomics UK (COG-UK) Consortium|de Silva|United Kingdom

>Spike|hCoV-19/Wales/PHWC-358DD/2020|2020-04-23|EPI\_ISL\_474493|Original|hCoV-19^^Wales|Human|Originating lab|COVID-19 Genomics UK (COG-UK) Consortium|Moore|United Kingdom

>Spike|hCoV-19/England/QEUA-B69F1C/2020|2020-11-11|EPI\_ISL\_655035|Original|hCoV-19^^England|Human|Lighthouse Lab in Glasgow|Wellcome Sanger Institute for the COVID-19 Genomics UK (COG-UK) Consortium|Davies|United Kingdom

>Spike|hCoV-19/Italy/APU-IZSPB\_329PT/2020|2020-11-04|EPI\_ISL\_653822|Original|hCoV-19^^Apulia|Human|I.R.C.C.S. \S. De Bellis\ - Ente Ospedaliero|Istituto Zooprofilattico Sperimentale della Puglia e della Basilicata|Parisi|Italy

>Spike|hCoV-19/England/ALDP-A671DD/2020|2020-10-12|EPI\_ISL\_630447|Original|hCoV-19^^England|Human|Lighthouse Lab in Alderley Park|Wellcome Sanger Institute for the COVID-19 Genomics UK (COG-UK) consortium|Davies|United Kingdom

>Spike|hCoV-19/England/QEUA-9ACCAF/2020|2020-09-02|EPI\_ISL\_559803|Original|hCoV-19^^England|Human|Oxford Viromics|COVID-19 Genomics UK (COG-UK) Consortium|Golubchik|United Kingdom

>Spike|hCoV-19/England/NOTT-11178E/2020|2020-05-19|EPI\_ISL\_461920|Original|hCoV-19^^England|Human|Queens Medical Centre|COVID-19 Genomics UK (COG-UK) Consortium|Loose|United Kingdom

>Spike|hCoV-19/England/CAMC-B0A19F/2020|2020-10-30|EPI\_ISL\_673052|Original|hCoV-19^^England|Human|Lighthouse Lab in Cambridge|Wellcome Sanger Institute for the COVID-19 Genomics UK (COG-UK) Consortium|Davies|United Kingdom

>Spike|hCoV-19/Scotland/EDB10767/2020|2020-12-07|EPI\_ISL\_724228|Original|hCoV-19^^Scotland|Human|Virology Department|COVID-19 Genomics UK (COG-UK) Consortium|McHugh|United Kingdom

>Spike|hCoV-19/England/SHEF-C8F61/2020|2020-10-14|EPI\_ISL\_611681|Original|hCoV-19^^England|Human|Virology Department|COVID-19 Genomics UK (COG-UK) Consortium|de Silva|United Kingdom

>Spike|hCoV-19/England/204590294/2020|2020-11-06|EPI\_ISL\_686551|Original|hCoV-19^^England|Human|Respiratory Virus Unit|COVID-19 Genomics UK (COG-UK) Consortium|Platt|United Kingdom

>Spike|hCoV-19/England/ALDP-B46C78/2020|2020-11-06|EPI\_ISL\_656165|Original|hCoV-19^^England|Human|Lighthouse Lab in Alderley Park|Wellcome Sanger Institute for the COVID-19 Genomics UK (COG-UK) Consortium|Davies|United Kingdom

>Spike|hCoV-19/Japan/PG-4939/2020|2020-07-00|EPI\_ISL\_690058|Original|hCoV-19^^Japan|Human|Pathogen Genomics Center|Pathogen Genomics Center|Sekizuka|Japan

>Spike|hCoV-19/Denmark/DCGC-7408/2020|2020-10-12|EPI\_ISL\_618910|Original|hCoV-19^^Hovedstaden|Human|Department of Virus and Microbiological Special Diagnostics|Albertsen lab|Michaelsen|Denmark

>Spike|hCoV-19/England/ALDP-BC6557/2020|2020-11-19|EPI\_ISL\_721460|Original|hCoV-19^^England|Human|Lighthouse Lab in Alderley Park|Wellcome Sanger Institute for the COVID-19 Genomics UK (COG-UK) Consortium|Davies|United Kingdom

>Spike|hCoV-19/England/QEUA-A60C4C/2020|2020-10-12|EPI\_ISL\_665494|Original|hCoV-19^^England|Human|Northumbria University / South Tees Hospitals NHS Foundation Trust / North Cumbria Integrated Care NHS Foundation Trust / North Tees and Hartlepool NHS Foundation Trust / Newcastle Hospitals NHS Foundation Trust|COVID-19 Genomics UK (COG-UK) Consortium|Bashton|United Kingdom

>Spike|hCoV-19/USA/WI-UW-543/2020|2020-06-21|EPI\_ISL\_484918|Original|hCoV-19^^Wisconsin|Human|University of Wisconsin-Madison AIDS Vaccine Research Laboratories|University of Wisconsin-Madison AIDS Vaccine Research Laboratories|Baczenas|USA

>Spike|hCoV-19/Czech Republic/NRL\_3969/2020|2020-03-18|EPI\_ISL\_490112|Original|hCoV-19^^Litovel|Human|The National Institute of Public Health|The National Institute of Public Health and State Veterinary Institute Prague|Nagy|Czech Republic

>Spike|hCoV-19/Wales/PHWC-480611/2020|2020-10-09|EPI\_ISL\_612911|Original|hCoV-19^^Wales|Human|Wales Specialist Virology Centre Sequencing lab|COVID-19 Genomics UK (COG-UK) Consortium|Moore|United Kingdom

>Spike|hCoV-19/England/MILK-ABB6BD/2020|2020-10-24|EPI\_ISL\_623529|Original|hCoV-19^^England|Human|Lighthouse Lab in Milton Keynes|Wellcome Sanger Institute for the COVID-19 Genomics UK (COG-UK) consortium|Davies|United Kingdom

>Spike|hCoV-19/Spain/PV-IBV-98007627/2020|2020-09-06|EPI\_ISL\_582065|Original|hCoV-19^^Basque Country|Human|Servicio de Microbiolog\u00eda. Hospital Universitario Donostia. OSI Donostialdea. \u00clrea de Enfermedades Infecciosas|SeqCOVID-SPAIN consortium/IBV (CSIC)|Comas|Spain

>Spike|hCoV-19/England/MILK-975085/2020|2020-08-20|EPI\_ISL\_552451|Original|hCoV-19^^England|Human|Lighthouse Lab in Milton Keynes|Wellcome Sanger Institute for the COVID-19 Genomics UK (COG-UK) consortium|Davies|United Kingdom

>Spike|hCoV-19/USA/UT-QDX-131/2020|2020-03-13|EPI\_ISL\_467912|Original|hCoV-19^^Utah|Human|Quest Diagnostics|Quest Diagnostics|Kagan|USA

>Spike|hCoV-19/Italy/VEN-IZSve-6-55/2020|2020-03-22|EPI\_ISL\_636475|Original|hCoV-19^^Veneto|Human|ULSS6 Distretto Padova Terme Colli|Istituto Zooprofilattico Sperimentale delle Venezie|Quaranta|Italy

>Spike|hCoV-19/USA/CA-CDPH-UC9/2020|2020-03-05|EPI\_ISL\_413928|Original|hCoV-19^^California|Human|California Department of Public Health|Chiu Laboratory|Chiu|USA

>Spike|hCoV-19/USA/WA-S787/2020|2020-04-14|EPI\_ISL\_449957|Original|hCoV-19^^Washington|Human|Washington State Department of Health|Seattle Flu Study|Bedford|USA

>Spike|hCoV-19/Wales/PHWC-4A2AC2/2020|2020-12-13|EPI\_ISL\_743976|Original|hCoV-19^^Wales|Human|Wales Specialist Virology Centre Sequencing lab|COVID-19 Genomics UK (COG-UK) Consortium|Moore|United Kingdom

>Spike|hCoV-19/England/QEUA-CC2A2E/2020|2020-12-21|EPI\_ISL\_760553|Original|hCoV-19^^England|Human|Lighthouse Lab in Glasgow|Wellcome Sanger Institute for the COVID-19 Genomics UK (COG-UK) Consortium|Davies|United Kingdom

>Spike|hCoV-19/England/LIVE-DC6E87/2020|2020-11-24|EPI\_ISL\_705121|Original|hCoV-19^^England|Human|Liverpool Clinical Laboratories|COVID-19 Genomics UK (COG-UK) Consortium|Haldenby|United Kingdom

>Spike|hCoV-19/Wales/PHWC-4917CF/2020|2020-11-05|EPI\_ISL\_706694|Original|hCoV-19^^Wales|Human|Originating lab|COVID-19 Genomics UK (COG-UK) Consortium|Moore|United Kingdom

>Spike|hCoV-19/Scotland/CVR4564/2020|2020-09-17|EPI\_ISL\_585421|Original|hCoV-19^^Scotland|Human|Lighthouse Lab in Glasgow / MRC-University of Glasgow Centre for Virus Research|COVID-19 Genomics UK (COG-UK) Consortium|Robertson|United Kingdom

>Spike|hCoV-19/USA/UT-QDX-2296/2020|2020-03-13|EPI\_ISL\_604612|Original|hCoV-19^^Utah|Human|Quest Diagnostics|Quest Diagnostics|Kagan|USA

>Spike|hCoV-19/USA/TX-HMH-7294/2020|2020-06-29|EPI\_ISL\_546651|Original|hCoV-19^^Texas|Human|Houston Methodist Hospital|Houston Methodist Hospital|Long|USA

>Spike|hCoV-19/England/ALDP-B270F9/2020|2020-11-04|EPI\_ISL\_664190|Original|hCoV-19^^England|Human|Northumbria University / South Tees Hospitals NHS Foundation Trust / North Cumbria Integrated Care NHS Foundation Trust / North Tees and Hartlepool NHS Foundation Trust / Newcastle Hospitals NHS Foundation Trust|COVID-19 Genomics UK (COG-UK) Consortium|Bashton|United Kingdom

>Spike|hCoV-19/USA/TX-HMH-MCoV-15735/2020|2020-07-09|EPI\_ISL\_785419|Original|hCoV-19^^Texas|Human|Houston Methodist Hospital|Houston Methodist Hospital|Long|USA

>Spike|hCoV-19/England/NORT-28648C/2020|2020-10-04|EPI\_ISL\_637794|Original|hCoV-19^^England|Human|Northumbria University / South Tees Hospitals NHS Foundation Trust / North Cumbria Integrated Care NHS Foundation Trust / North Tees and Hartlepool NHS Foundation Trust / Newcastle Hospitals NHS Foundation Trust|COVID-19 Genomics UK (COG-UK) Consortium|Bashton|United Kingdom

>Spike|hCoV-19/England/QEUEH-9CFE64/2020|2020-09-15|EPI\_ISL\_589840|Original|hCoV-19^^England|Human|Lighthouse Lab in Glasgow|Wellcome Sanger Institute for the COVID-19 Genomics UK (COG-UK) consortium|Davies|United Kingdom

>Spike|hCoV-19/England/CAMC-A593F6/2020|2020-10-08|EPI\_ISL\_597184|Original|hCoV-19^^England|Human|Lighthouse Lab in Cambridge|Wellcome Sanger Institute for the COVID-19 Genomics UK (COG-UK) consortium|Davies|United Kingdom

>Spike|hCoV-19/Brazil/RJ-0118/2020|2020-03-19|EPI\_ISL\_417984|Original|hCoV-19^^Rio de Janeiro|Human|Universidade Federal do Rio de Janeiro|Bioinformatics Laboratory - LNCC|Almeida|Brazil

>Spike|hCoV-19/USA/TX-HMH-3502/2020|2020-06-10|EPI\_ISL\_544205|Original|hCoV-19^^Texas|Human|Houston Methodist Hospital|Houston Methodist Hospital|Long|USA

>Spike|hCoV-19/Switzerland/ZH-ETHZ-240053/2020|2020-08-12|EPI\_ISL\_523894|Original|hCoV-19^^Zurich|Human|Viollier AG|Department of Biosystems Science and Engineering|Nadeau|Switzerland

>Spike|hCoV-19/England/NORW-E9D24/2020|2020-04-30|EPI\_ISL\_461852|Original|hCoV-19^^England|Human|Quadram Institute Bioscience|COVID-19 Genomics UK (COG-UK) Consortium|Alikhan|United Kingdom

>Spike|hCoV-19/England/ALDP-B1CDE1/2020|2020-11-01|EPI\_ISL\_645653|Original|hCoV-19^^England|Human|Lighthouse Lab in Alderley Park|Wellcome Sanger Institute for the COVID-19 Genomics UK (COG-UK) Consortium|Davies|United Kingdom

>Spike|hCoV-19/Denmark/DCGC-14329/2020|2020-11-30|EPI\_ISL\_711699|Original|hCoV-19^^Sjaelland|Human|Department of Virus and Microbiological Special Diagnostics|Albertsen Lab|Michaelsen|Denmark

>Spike|hCoV-19/England/MILK-B88199/2020|2020-11-13|EPI\_ISL\_674381|Original|hCoV-19^^England|Human|Lighthouse Lab in Milton Keynes|Wellcome Sanger Institute for the COVID-19 Genomics UK (COG-UK) Consortium|Davies|United Kingdom

>Spike|hCoV-19/USA/MI-MDHHS-SC21868/2020|2020-03-27|EPI\_ISL\_565929|Original|hCoV-19^^Michigan|Human|Michigan Department of Health and Human Services|Michigan Department of Health and Human Services|Blankenship|USA

>Spike|hCoV-19/England/NORT-1B71DE7/2020|2020-11-20|EPI\_ISL\_704425|Original|hCoV-19^^England|Human|Northumbria University / South Tees Hospitals NHS Foundation Trust / North Cumbria Integrated Care NHS Foundation Trust / North Tees and Hartlepool NHS Foundation Trust / Newcastle Hospitals NHS Foundation Trust|COVID-19 Genomics UK (COG-UK) Consortium|Bashton|United Kingdom

>Spike|hCoV-19/USA/UT-UPHL-2012459187/2020|2020-08-03|EPI\_ISL\_745739|Original|hCoV-19^^Utah|Human|Ginkgo Bioworks Clinical Laboratory|Utah Public Health Laboratory|Young|USA

>Spike|hCoV-19/Switzerland/AG-ETHZ-260148/2020|2020-08-26|EPI\_ISL\_539444|Original|hCoV-19^^Aargau|Human|Viollier AG|Department of Biosystems Science and Engineering|Nadeau|Switzerland

>Spike|hCoV-19/USA/NY-Wadsworth-30491-01/2020|2020-03-30|EPI\_ISL\_676768|Original|hCoV-19^^New York|Human|Wadsworth Center|Wadsworth Center|Lasek-Nesselquist|USA

>Spike|hCoV-19/England/LOND-D36C8/2020|2020-03-31|EPI\_ISL\_440974|Original|hCoV-19^^England|Human|University College London|COVID-19 Genomics UK (COG-UK) Consortium|Roy|United Kingdom

>Spike|hCoV-19/England/ALDP-B47ECC/2020|2020-11-07|EPI\_ISL\_649365|Original|hCoV-19^^England|Human|Lighthouse Lab in Alderley Park|Wellcome Sanger Institute for the COVID-19 Genomics UK (COG-UK) Consortium|Davies|United Kingdom

>Spike|hCoV-19/Scotland/EDB9203/2020|2020-11-03|EPI\_ISL\_702937|Original|hCoV-19^^Scotland|Human|Virology Department|COVID-19 Genomics UK (COG-UK) Consortium|McHugh|United Kingdom

>Spike|hCoV-19/USA/WA-S1626/2020|2020-05-27|EPI\_ISL\_496052|Original|hCoV-19^^Washington|Human|Washington State Department of Health|Seattle Flu Study|Lee|USA

>Spike|hCoV-19/USA/CO-CDPHE-2009170094/2020|2020-09-16|EPI\_ISL\_710273|Original|hCoV-19^^Colorado|Human|Colorado Department of Public Health and Environment|Colorado Department of Public Health and Environment|Bankers|USA

>Spike|hCoV-19/USA/CA-QDX-99/2020|2020-03-13|EPI\_ISL\_468570|Original|hCoV-19^^California|Human|Quest Diagnostics|Quest Diagnostics|Kagan|USA

>Spike|hCoV-19/Wales/PHWC-48F76A/2020|2020-11-10|EPI\_ISL\_681134|Original|hCoV-19^^Wales|Human|Wales Specialist Virology Centre Sequencing lab|COVID-19 Genomics UK (COG-UK) Consortium|Moore|United Kingdom

>Spike|hCoV-19/USA/FL-BPHL-1099/2020|2020-07-31|EPI\_ISL\_526585|Original|hCoV-19^^Florida|Human|Florida Bureau of Public Health Laboratories|Florida Bureau of Public Health Laboratories|Blanton|USA

>Spike|hCoV-19/Australia/TAS129/2020|2020-04-06|EPI\_ISL\_522594|Original|hCoV-19^^Tasmania|Human|Royal Hobart Hospital Microbiology Department|MDU-PHL|Schultz|Australia

>Spike|hCoV-19/England/ALDP-BCA6D8/2020|2020-11-23|EPI\_ISL\_703437|Original|hCoV-19^^England|Human|Lighthouse Lab in Alderley Park|Wellcome Sanger Institute for the COVID-19 Genomics UK (COG-UK) Consortium|Davies|United Kingdom

>Spike|hCoV-19/England/ALDP-CB398D/2020|2020-12-16|EPI\_ISL\_760852|Original|hCoV-19^^England|Human|Lighthouse Lab in Alderley Park|Wellcome Sanger Institute for the COVID-19 Genomics UK (COG-UK) Consortium|Davies|United Kingdom

>Spike|hCoV-19/England/NOTT-110127/2020|2020-04-11|EPI\_ISL\_441474|Original|hCoV-19^^England|Human|Queens Medical Centre|COVID-19 Genomics UK (COG-UK) Consortium|Loose|United Kingdom

>Spike|hCoV-19/Scotland/CVR5028/2020|2020-10-09|EPI\_ISL\_594762|Original|hCoV-19^^Scotland|Human|West of Scotland Specialist Virology Centre|COVID-19 Genomics UK (COG-UK) Consortium|Robertson|United Kingdom

>Spike|hCoV-19/England/EXET-1384A8/2020|2020-09-13|EPI\_ISL\_611540|Original|hCoV-19^^England|Human|University of Exeter|COVID-19 Genomics UK (COG-UK) Consortium|Temperton|United Kingdom

>Spike|hCoV-19/England/LIVE-DB64C4/2020|2020-11-07|EPI\_ISL\_651500|Original|hCoV-19^^England|Human|Liverpool Clinical Laboratories|COVID-19 Genomics UK (COG-UK) Consortium|Haldenby|United Kingdom

>Spike|hCoV-19/USA/WI-UW-146/2020|2020-04-06|EPI\_ISL\_427453|Original|hCoV-19^^Wisconsin|Human|University of Wisconsin-Madison AIDS Vaccine Research Laboratories|University of Wisconsin-Madison AIDS Vaccine Research Laboratories|Baczenas|USA

>Spike|hCoV-19/USA/TX-HMH-3813/2020|2020-06-12|EPI\_ISL\_543217|Original|hCoV-19^^Texas|Human|Houston Methodist Hospital|Houston Methodist Hospital|Long|USA

>Spike|hCoV-19/England/ALDP-9ED6D1/2020|2020-05-08|EPI\_ISL\_589319|Original|hCoV-19^^England|Human|Lighthouse Lab in Alderley Park|Wellcome Sanger Institute for the COVID-19 Genomics UK (COG-UK) consortium|Davies|United Kingdom

>Spike|hCoV-19/Denmark/DCGC-7478/2020|2020-10-12|EPI\_ISL\_618931|Original|hCoV-19^^Hovedstaden|Human|Department of Virus and Microbiological Special Diagnostics|Albertsen lab|Michaelsen|Denmark

>Spike|hCoV-19/USA/WI-UW-1868/2020|2020-09-09|EPI\_ISL\_605740|Original|hCoV-19^^Wisconsin|Human|University of Wisconsin-Madison AIDS Vaccine Research



Laboratories|University of Wisconsin-Madison AIDS Vaccine Research  
Laboratories|Baczenas|USA  
>Spike|hCoV-19/England/CAMC-AB15D8/2020|2020-10-23|EPI\_ISL\_623828|Original|hCoV-19^^England|Human|Lighthouse Lab in Cambridge|Wellcome Sanger Institute for the COVID-19 Genomics UK (COG-UK) consortium|Davies|United Kingdom  
>Spike|hCoV-19/England/MILK-9D3E12/2020|2020-09-17|EPI\_ISL\_601751|Original|hCoV-19^^England|Human|Lighthouse Lab in Milton Keynes|Wellcome Sanger Institute for the COVID-19 Genomics UK (COG-UK) consortium|Davies|United Kingdom  
>Spike|hCoV-19/USA/MI-QDX-326/2020|2020-03-23|EPI\_ISL\_571070|Original|hCoV-19^^Michigan|Human|Quest Diagnostics|Quest Diagnostics|Kagan|USA  
>Spike|hCoV-19/Spain/PV-IBV-004298/2020|2020-04-09|EPI\_ISL\_510413|Original|hCoV-19^^Basque Country|Human|Servicio de Microbiolog\u00eda. Hospital Universitario Donostia. OSI Donostialdea. \u00clrea de Enfermedades Infecciosas|SeqCOVID-SPAIN consortium/IBV (CSIC) |Comas|Spain  
>Spike|hCoV-19/France/IDF-IPP9608/2020|2020-11-09|EPI\_ISL\_693771|Original|hCoV-19^^\u00cele-de-France|Human|General practitioner|National Reference Center for Viruses of Respiratory Infections|Enouf|France  
>Spike|hCoV-19/England/NORW-EE475/2020|2020-06-23|EPI\_ISL\_490544|Original|hCoV-19^^England|Human|Quadram Institute Bioscience|COVID-19 Genomics UK (COG-UK) Consortium|Alikhan|United Kingdom  
>Spike|hCoV-19/India/GJ-GBRC33/2020|2020-04-29|EPI\_ISL\_444464|Original|hCoV-19^^Gujarat|Human|B.J. Medical College and Civil hospital|Gujarat Biotechnology Research Centre|Joshi|India  
>Spike|hCoV-19/England/ALDP-BB9F95/2020|2020-11-20|EPI\_ISL\_701686|Original|hCoV-19^^England|Human|Lighthouse Lab in Alderley Park|Wellcome Sanger Institute for the COVID-19 Genomics UK (COG-UK) Consortium|Davies|United Kingdom  
>Spike|hCoV-19/England/MILK-99DE9C/2020|2020-08-30|EPI\_ISL\_581386|Original|hCoV-19^^England|Human|Lighthouse Lab in Milton Keynes|Wellcome Sanger Institute for the COVID-19 Genomics UK (COG-UK) consortium|Davies|United Kingdom  
>Spike|hCoV-19/USA/WA-UW342/2020|2020-03-16|EPI\_ISL\_418909|Original|hCoV-19^^Washington|Human|UW Virology Lab|UW Virology Lab|Roychoudhury|USA  
>Spike|hCoV-19/England/LIVE-DC2322/2020|2020-11-22|EPI\_ISL\_679405|Original|hCoV-19^^England|Human|Liverpool Clinical Laboratories|COVID-19 Genomics UK (COG-UK) Consortium|Haldenby|United Kingdom  
>Spike|hCoV-19/USA/VA-DCLS-1803/2020|2020-09-16|EPI\_ISL\_614055|Original|hCoV-19^^Virginia|Human|Virginia DCLS|Virginia DCLS|St. Jacques|USA  
>Spike|hCoV-19/Wales/PHWC-480004/2020|2020-10-16|EPI\_ISL\_612842|Original|hCoV-19^^Wales|Human|Wales Specialist Virology Centre Sequencing lab|COVID-19 Genomics UK (COG-UK) Consortium|Moore|United Kingdom  
>Spike|hCoV-19/Wales/MILK-9C3DAF/2020|2020-09-09|EPI\_ISL\_566698|Original|hCoV-19^^Wales|Human|Lighthouse Lab in Milton Keynes|Wellcome Sanger Institute for the COVID-19 Genomics UK (COG-UK) consortium|Davies|United Kingdom  
>Spike|hCoV-19/USA/TX-HMH-MCoV-13588/2020|2020-08-21|EPI\_ISL\_788698|Original|hCoV-19^^Texas|Human|Houston Methodist Hospital|Houston Methodist Hospital|Long|USA  
>Spike|hCoV-19/Scotland/CVR5193/2020|2020-10-15|EPI\_ISL\_626838|Original|hCoV-19^^Scotland|Human|West of Scotland Specialist Virology Centre|COVID-19 Genomics UK (COG-UK) Consortium|Robertson|United Kingdom  
>Spike|hCoV-19/Netherlands/NB-EMC-302/2020|2020-10-02|EPI\_ISL\_632537|Original|hCoV-19^^Noord Brabant|Human|Dutch COVID-19 response team|Erasmus Medical Center|Oude Munnink|Netherlands  
>Spike|hCoV-19/USA/UN-UW-5231/2020|2020-04-09|EPI\_ISL\_576489|Original|hCoV-19^^USA|Human|UW Virology Lab|UW Virology Lab|Roychoudhury|USA  
>Spike|hCoV-19/Japan/PG-7973/2020|2020-07-00|EPI\_ISL\_687074|Original|hCoV-19^^Japan|Human|Kanagawa Prefectural Institute of Public Health|Pathogen Genomics Center|Sekizuka|Japan  
>Spike|hCoV-19/Scotland/QEUA-9631F0/2020|2020-08-11|EPI\_ISL\_531668|Original|hCoV-19^^Scotland|Human|NHSGGC West of Scotland Specialist Virology Centre / MRC-University of Glasgow Centre for Virus Research|Wellcome Sanger Institute for the COVID-19 Genomics UK (COG-UK) consortium|Davies|United Kingdom

>Spike|hCoV-19/England/QEUA-96E6BA/2020|2020-08-19|EPI\_ISL\_530534|Original|hCoV-19^^England|Human|Lighthouse Lab in Glasgow|Wellcome Sanger Institute for the COVID-19 Genomics UK (COG-UK) consortium|Davies|United Kingdom

>Spike|hCoV-19/Canada/ON-S1434/2020|2020-08-25|EPI\_ISL\_591197|Original|hCoV-19^^Ontario|Human|Toronto Invasive Bacterial Diseases Network|McMaster University|McArthur|Canada

>Spike|hCoV-19/USA/FL-BPHL-1010/2020|2020-07-15|EPI\_ISL\_517900|Original|hCoV-19^^Florida|Human|Florida Bureau of Public Health Laboratories|Florida Bureau of Public Health Laboratories|Blanton|USA

>Spike|hCoV-19/USA/TX-DSHS-1545/2020|2020-06-22|EPI\_ISL\_681863|Original|hCoV-19^^Texas|Human|Texas Department of State Health Services|Texas Department of State Health Services|Rahman|USA

>Spike|hCoV-19/England/20122069804/2020|2020-03-15|EPI\_ISL\_465759|Original|hCoV-19^^England|Human|Respiratory Virus Unit|Respiratory Virus Unit|Platt|United Kingdom

>Spike|hCoV-19/England/CAMB-81E85/2020|2020-04-22|EPI\_ISL\_438587|Original|hCoV-19^^England|Human|Department of Pathology|COVID-19 Genomics UK (COG-UK) Consortium|Meredith|United Kingdom

>Spike|hCoV-19/England/CAMC-AB223A/2020|2020-10-23|EPI\_ISL\_623661|Original|hCoV-19^^England|Human|Lighthouse Lab in Cambridge|Wellcome Sanger Institute for the COVID-19 Genomics UK (COG-UK) consortium|Davies|United Kingdom

>Spike|hCoV-19/Japan/PG-6755/2020|2020-08-00|EPI\_ISL\_687865|Original|hCoV-19^^Japan|Human|Pathogen Genomics Center|Pathogen Genomics Center|Sekizuka|Japan

>Spike|hCoV-19/India/WB-IK89/2020|2020-05-19|EPI\_ISL\_511906|Original|hCoV-19^^West Bengal|Human|Institute of Post Graduate Medical Education & Research|National Institute of Biomedical Genomics -\u00a0DBT's PAN-INDIA 1000 SARS--CoV-2 RNA Genome Sequencing Consortium|Maitra|India

>Spike|hCoV-19/Wales/PHWC-490F40/2020|2020-11-19|EPI\_ISL\_703074|Original|hCoV-19^^Wales|Human|Originating lab|COVID-19 Genomics UK (COG-UK) Consortium|Moore|United Kingdom

>Spike|hCoV-19/Wales/PHWC-48F2D2/2020|2020-11-08|EPI\_ISL\_681072|Original|hCoV-19^^Wales|Human|Wales Specialist Virology Centre Sequencing lab|COVID-19 Genomics UK (COG-UK) Consortium|Moore|United Kingdom

>Spike|hCoV-19/England/205260453/2020|2020-12-21|EPI\_ISL\_754364|Original|hCoV-19^^England|Human|Respiratory Virus Unit|COVID-19 Genomics UK (COG-UK) Consortium|Platt|United Kingdom

>Spike|hCoV-19/Japan/DP0752/2020|2020-02-17|EPI\_ISL\_416622|Original|hCoV-19^^Japan|Human|Japanese Quarantine Stations|Pathogen Genomics Center|Sekizuka|Japan

>Spike|hCoV-19/England/MILK-ACCFFA/2020|2020-10-21|EPI\_ISL\_630025|Original|hCoV-19^^England|Human|Lighthouse Lab in Milton Keynes|Wellcome Sanger Institute for the COVID-19 Genomics UK (COG-UK) consortium|Davies|United Kingdom

>Spike|hCoV-19/England/CAMC-A576FF/2020|2020-10-08|EPI\_ISL\_597494|Original|hCoV-19^^England|Human|Lighthouse Lab in Cambridge|Wellcome Sanger Institute for the COVID-19 Genomics UK (COG-UK) consortium|Davies|United Kingdom

>Spike|hCoV-19/Gibraltar/205121233/2020|2020-00-00|EPI\_ISL\_766103|Original|hCoV-19^^Gibraltar|Human|Microbiology|Respiratory Virus Unit|Platt|Gibraltar

>Spike|hCoV-19/England/ALDP-9CB949/2020|2020-09-16|EPI\_ISL\_575422|Original|hCoV-19^^England|Human|Lighthouse Lab in Alderley Park|Wellcome Sanger Institute for the COVID-19 Genomics UK (COG-UK) consortium|Davies|United Kingdom

>Spike|hCoV-19/Scotland/QEUA-9627E0/2020|2020-08-11|EPI\_ISL\_531473|Original|hCoV-19^^Scotland|Human|NHSGGC West of Scotland Specialist Virology Centre / MRC-University of Glasgow Centre for Virus Research|Wellcome Sanger Institute for the COVID-19 Genomics UK (COG-UK) consortium|Davies|United Kingdom

>Spike|hCoV-19/Singapore/1469/2020|2020-12-16|EPI\_ISL\_754084|Original|hCoV-19^^Singapore|Human|National Public Health Laboratory|National Public Health Laboratory|Mak|Singapore

>Spike|hCoV-19/England/ALDP-A2E7EF/2020|2020-10-05|EPI\_ISL\_586936|Original|hCoV-19^^England|Human|Lighthouse Lab in Alderley Park|Wellcome Sanger Institute for the COVID-19 Genomics UK (COG-UK) consortium|Davies|United Kingdom

>Spike|hCoV-19/England/CAMC-B37418/2020|2020-11-05|EPI\_ISL\_645343|Original|hCoV-19^^England|Human|Lighthouse Lab in Cambridge|Wellcome Sanger Institute for the COVID-19 Genomics UK (COG-UK) Consortium|Davies|United Kingdom

>Spike|hCoV-19/England/QEUA-A224E4/2020|2020-10-01|EPI\_ISL\_587685|Original|hCoV-19^^England|Human|Lighthouse Lab in Glasgow|Wellcome Sanger Institute for the COVID-19 Genomics UK (COG-UK) consortium|Davies|United Kingdom

>Spike|hCoV-19/England/ALDP-AA2419/2020|2020-10-22|EPI\_ISL\_624225|Original|hCoV-19^^England|Human|Lighthouse Lab in Alderley Park|Wellcome Sanger Institute for the COVID-19 Genomics UK (COG-UK) consortium|Davies|United Kingdom

>Spike|hCoV-19/USA/CA-ALSR-3842/2020|2020-06-28|EPI\_ISL\_636238|Original|hCoV-19^^California|Human|San Diego County Public Health Laboratory|Andersen lab at Scripps Research|Gangavarapu|USA

>Spike|hCoV-19/USA/IL-NM-0173/2020|2020-03-24|EPI\_ISL\_626374|Original|hCoV-19^^Illinois|Human|Northwestern Memorial Hospital|Ozer Lab|Ozer|USA

>Spike|hCoV-19/England/MILK-AC7997/2020|2020-10-21|EPI\_ISL\_634369|Original|hCoV-19^^England|Human|Lighthouse Lab in Milton Keynes|Wellcome Sanger Institute for the COVID-19 Genomics UK (COG-UK) consortium|Davies|United Kingdom

>Spike|hCoV-19/Australia/VIC3624/2020|2020-07-10|EPI\_ISL\_520366|Original|hCoV-19^^Victoria|Human|Victorian Infectious Diseases Reference Laboratory (VIDRL)|VIDRL and MDU-PHL|Schultz|Australia

>Spike|hCoV-19/England/NOTT-116ADB/2020|2020-10-15|EPI\_ISL\_595320|Original|hCoV-19^^England|Human|Queens Medical Centre|COVID-19 Genomics UK (COG-UK) Consortium|Loose|United Kingdom

>Spike|hCoV-19/USA/AZ-TG280854/2020|2020-04-21|EPI\_ISL\_694193|Original|hCoV-19^^Arizona|Human|AZ SPHL|TGen North|French|USA

>Spike|hCoV-19/Canada/ON-PHL-20-02290/2020|2020-09-00|EPI\_ISL\_671561|Original|hCoV-19^^Ontario|Human|Public Health Ontario Laboratory|Public Health Ontario Laboratory|Guthrie|Canada

>Spike|hCoV-19/England/ALDP-95C3B8/2020|2020-06-20|EPI\_ISL\_554956|Original|hCoV-19^^England|Human|Lighthouse Lab in Alderley Park|Wellcome Sanger Institute for the COVID-19 Genomics UK (COG-UK) consortium|Davies|United Kingdom

>Spike|hCoV-19/USA/MI-MDHHS-SC22012/2020|2020-08-28|EPI\_ISL\_577573|Original|hCoV-19^^Michigan|Human|Michigan Department of Health and Human Services|Michigan Department of Health and Human Services|Jacob|USA

>Spike|hCoV-19/USA/TX-DSHS-1511/2020|2020-06-22|EPI\_ISL\_683426|Original|hCoV-19^^Texas|Human|Texas Department of State Health Services|Texas Department of State Health Services|Rahman|USA

>Spike|hCoV-19/England/ALDP-A6841F/2020|2020-10-12|EPI\_ISL\_608634|Original|hCoV-19^^England|Human|Lighthouse Lab in Alderley Park|Wellcome Sanger Institute for the COVID-19 Genomics UK (COG-UK) consortium|Davies|United Kingdom

>Spike|hCoV-19/Denmark/DCGC-5558/2020|2020-09-28|EPI\_ISL\_620883|Original|hCoV-19^^Syddanmark|Human|Department of Virus and Microbiological Special Diagnostics|Albertsen lab|Michaelsen|Denmark

>Spike|hCoV-19/Ireland/D-NVRL-20Z06353/2020|2020-04-17|EPI\_ISL\_671384|Original|hCoV-19^^Dublin|Human|National Virus Reference Laboratory|Irish Coronavirus Sequencing Consortium - Teagasc Moorepark|Walsh|Ireland

>Spike|hCoV-19/USA/UT-0284/2020|2020-03-14|EPI\_ISL\_420806|Original|hCoV-19^^Utah|Human|Utah Public Health Laboratory|Utah Public Health Laboratory|Young|USA

>Spike|hCoV-19/England/CAMC-B9807B/2020|2020-11-15|EPI\_ISL\_674923|Original|hCoV-19^^England|Human|Lighthouse Lab in Cambridge|Wellcome Sanger Institute for the COVID-19 Genomics UK (COG-UK) Consortium|Davies|United Kingdom

>Spike|hCoV-19/England/CAMB-8358E/2020|2020-04-14|EPI\_ISL\_443463|Original|hCoV-19^^England|Human|Department of Pathology|Wellcome Sanger Institute for the COVID-19 Genomics UK (COG-UK) consortium|Amato|United Kingdom

>Spike|hCoV-19/USA/IL-UW-368/2020|2020-04-14|EPI\_ISL\_450722|Original|hCoV-19^^Illinois|Human|University of Wisconsin-Madison AIDS Vaccine Research Laboratories|University of Wisconsin-Madison AIDS Vaccine Research Laboratories|Baczenas|USA

>Spike|hCoV-19/USA/HI-H200655/2020|2020-12-01|EPI\_ISL\_753178|Original|hCoV-19^^Hawaii|Human|State Laboratories Division|State Laboratories Division|Sultana|USA

>Spike|hCoV-19/England/CAMC-C98766/2020|2020-12-18|EPI\_ISL\_777616|Original|hCoV-19^^England|Human|Lighthouse Lab in Cambridge|Wellcome Sanger Institute for the COVID-19 Genomics UK (COG-UK) Consortium|Davies|United Kingdom

>Spike|hCoV-19/England/EXET-1356B4/2020|2020-04-12|EPI\_ISL\_457086|Original|hCoV-19^^England|Human|University of Exeter|COVID-19 Genomics UK (COG-UK) Consortium|Temperton|United Kingdom

>Spike|hCoV-19/England/LIVE-A2AC6/2020|2020-05-18|EPI\_ISL\_499873|Original|hCoV-19^^England|Human|Liverpool Clinical Laboratories|COVID-19 Genomics UK (COG-UK) Consortium|Haldenby|United Kingdom

>Spike|hCoV-19/Netherlands/ZE-RIVM-21040/2020|2020-12-30|EPI\_ISL\_791054|Original|hCoV-19^^Zeeland|Human|Dutch COVID-19 response team|National Institute for Public Health and the Environment (RIVM)|Meijer|Netherlands

>Spike|hCoV-19/England/QEUEH-9D1B77/2020|2020-09-16|EPI\_ISL\_573682|Original|hCoV-19^^England|Human|University College London|COVID-19 Genomics UK (COG-UK) Consortium|Roy|United Kingdom

>Spike|hCoV-19/England/ALDP-9FDB0C/2020|2020-10-01|EPI\_ISL\_587937|Original|hCoV-19^^England|Human|Lighthouse Lab in Alderley Park|Wellcome Sanger Institute for the COVID-19 Genomics UK (COG-UK) consortium|Davies|United Kingdom

>Spike|hCoV-19/USA/CA-ALSR-4108/2020|2020-07-01|EPI\_ISL\_648828|Original|hCoV-19^^California|Human|San Diego County Public Health Laboratory|Andersen lab at Scripps Research|Gangavarapu|USA

>Spike|hCoV-19/USA/TX-HMH-MCoV-10134/2020|2020-07-06|EPI\_ISL\_789334|Original|hCoV-19^^Texas|Human|Houston Methodist Hospital|Houston Methodist Hospital|Long|USA

>Spike|hCoV-19/England/QEUEH-BA0456/2020|2020-11-18|EPI\_ISL\_719740|Original|hCoV-19^^England|Human|Lighthouse Lab in Glasgow|Wellcome Sanger Institute for the COVID-19 Genomics UK (COG-UK) Consortium|Davies|United Kingdom

>Spike|hCoV-19/USA/LA-CDC-2-3714570/2020|2020-12-04|EPI\_ISL\_751722|Original|hCoV-19^^Louisiana|Human|LA Office of Public Health Laboratories|Genomics and Discovery|Queen|USA

>Spike|hCoV-19/Switzerland/AG-ETHZ-340143/2020|2020-10-27|EPI\_ISL\_721709|Original|hCoV-19^^Aargau|Human|Viollier AG|Department of Biosystems Science and Engineering|Nadeau|Switzerland

>Spike|hCoV-19/Portugal/PT0843/2020|2020-03-22|EPI\_ISL\_511102|Original|hCoV-19^^Portugal|Human|Instituto Nacional de Saude (INSA)|Instituto Nacional de Saude (INSA)|Borges|Portugal

>Spike|hCoV-19/Denmark/DCGC-19536/2020|2020-12-07|EPI\_ISL\_749014|Original|hCoV-19^^Sjaelland|Human|Department of Virus and Microbiological Special Diagnostics|Albertsen Lab|Michaelsen|Denmark

>Spike|hCoV-19/Denmark/DCGC-5125/2020|2020-09-21|EPI\_ISL\_621663|Original|hCoV-19^^Syddanmark|Human|Department of Virus and Microbiological Special Diagnostics|Albertsen lab|Michaelsen|Denmark

>Spike|hCoV-19/Wales/PHWC-47E75F/2020|2020-09-29|EPI\_ISL\_595496|Original|hCoV-19^^Wales|Human|Originating lab|COVID-19 Genomics UK (COG-UK) Consortium|Moore|United Kingdom

>Spike|hCoV-19/Gansu/NPRC0003/2020|2020-02-24|EPI\_ISL\_575329|Vero|hCoV-19^^Gansu|Human|National Institute for Viral Disease Control and Prevention|National Institute for Viral Disease Control and Prevention|Gao|China

>Spike|hCoV-19/England/MILK-BB0338/2020|2020-11-17|EPI\_ISL\_720150|Original|hCoV-19^^England|Human|Lighthouse Lab in Milton Keynes|Wellcome Sanger Institute for the COVID-19 Genomics UK (COG-UK) Consortium|Davies|United Kingdom

>Spike|hCoV-19/England/QEUEH-9B9F2E/2020|2020-09-06|EPI\_ISL\_549594|Original|hCoV-19^^England|Human|Lighthouse Lab in Glasgow|Wellcome Sanger Institute for the COVID-19 Genomics UK (COG-UK) consortium|Davies|United Kingdom

>Spike|hCoV-19/Netherlands/ZH-EMC-618/2020|2020-09-22|EPI\_ISL\_578046|Original|hCoV-19^^Zuid Holland|Human|Dutch COVID-19 response team|Erasmus Medical Center|Oude Munnink|Netherlands

>Spike|hCoV-19/USA/CA-CZB-14836/2020|2020-11-19|EPI\_ISL\_738969|Original|hCoV-19^^California|Human|Humboldt County Public Health Laboratory|Chan-Zuckerberg Biohub|Kamm|USA

>Spike|hCoV-19/Wales/MILK-9E08F6/2020|2020-09-21|EPI\_ISL\_601419|Original|hCoV-19^^Wales|Human|Lighthouse Lab in Milton Keynes|Wellcome Sanger Institute for the COVID-19 Genomics UK (COG-UK) consortium|Davies|United Kingdom

>Spike|hCoV-19/Australia/VIC6518/2020|2020-07-28|EPI\_ISL\_521289|Original|hCoV-19^^Victoria|Human|Microbiological Diagnostic Unit - Public Health Laboratory (MDU-PHL)|MDU-PHL|Schultz|Australia

>Spike|hCoV-19/Scotland/QEUIH-9F6A8E/2020|2020-09-27|EPI\_ISL\_600745|Original|hCoV-19^^Scotland|Human|Lighthouse Lab in Glasgow|Wellcome Sanger Institute for the COVID-19 Genomics UK (COG-UK) consortium|Davies|United Kingdom

>Spike|hCoV-19/England/QEUIH-B2C9AE/2020|2020-11-01|EPI\_ISL\_646645|Original|hCoV-19^^England|Human|Lighthouse Lab in Glasgow|Wellcome Sanger Institute for the COVID-19 Genomics UK (COG-UK) Consortium|Davies|United Kingdom

>Spike|hCoV-19/USA/NY-MSK-1A/2020|2020-04-14|EPI\_ISL\_583427|Original|hCoV-19^^New York|Human|Memorial Sloan Kettering Cancer Center|van Bakel Laboratory|van Bakel|USA

>Spike|hCoV-19/USA/MN-MDH-1223/2020|2020-06-03|EPI\_ISL\_477312|Original|hCoV-19^^Minnesota|Human|Mayo Clinic & Mayo Clinic Laboratories|Minnesota Department of Health|Garfin|USA

>Spike|hCoV-19/England/ALDP-9EDCDF/2020|2020-05-08|EPI\_ISL\_580697|Original|hCoV-19^^England|Human|Lighthouse Lab in Alderley Park|Wellcome Sanger Institute for the COVID-19 Genomics UK (COG-UK) consortium|Davies|United Kingdom

>Spike|hCoV-19/Australia/NSW2046/2020|2020-03-20|EPI\_ISL\_500617|Original|hCoV-19^^New South Wales|Human|Area of Virology|Area of Virology|Bull|Australia

>Spike|hCoV-19/England/MILK-AB7F01/2020|2020-10-21|EPI\_ISL\_623732|Original|hCoV-19^^England|Human|Lighthouse Lab in Milton Keynes|Wellcome Sanger Institute for the COVID-19 Genomics UK (COG-UK) consortium|Davies|United Kingdom

>Spike|hCoV-19/Gibraltar/204462874/2020|2020-10-29|EPI\_ISL\_615041|Original|hCoV-19^^Gibraltar|Human|Microbiology|Respiratory Virus Unit|Platt|Gibraltar

>Spike|hCoV-19/England/QEUIH-9AF35C/2020|2020-08-29|EPI\_ISL\_559837|Original|hCoV-19^^England|Human|Oxford Viromics|COVID-19 Genomics UK (COG-UK) Consortium|Golubchik|United Kingdom

>Spike|hCoV-19/USA/CA-CZB-1127/2020|2020-04-05|EPI\_ISL\_445175|Original|hCoV-19^^California|Human|UCSF Clinical Microbiology Laboratory|Chan-Zuckerberg Biohub|Kamm|USA

>Spike|hCoV-19/England/204200157/2020|2020-10-09|EPI\_ISL\_609869|Original|hCoV-19^^England|Human|Respiratory Virus Unit|Respiratory Virus Unit|Platt|United Kingdom

>Spike|hCoV-19/mink/Netherlands/NB-EMC-17-3/2020|2020-07-02|EPI\_ISL\_523038|Original|hCoV-19^^Noord Brabant|Neovison vison|Dutch COVID-19 response team|Erasmus Medical Center|Oude Munnink|Netherlands

>Spike|hCoV-19/USA/MI-QDX-321/2020|2020-03-22|EPI\_ISL\_571065|Original|hCoV-19^^Michigan|Human|Quest Diagnostics|Quest Diagnostics|Kagan|USA

>Spike|hCoV-19/England/MILK-B3E04A/2020|2020-10-31|EPI\_ISL\_679842|Original|hCoV-19^^England|Human|Oxford Viromics|COVID-19 Genomics UK (COG-UK) Consortium|Golubchik|United Kingdom

>Spike|hCoV-19/Gambia/GC19-3535/2020|2020-07-27|EPI\_ISL\_561194|Original|hCoV-19^^Kombo|Human|MRCG at LSHTM Genomics lab|MRCG at LSHTM Genomics lab|Sesay|Gambia

>Spike|hCoV-19/Scotland/CVR2363/2020|2020-04-14|EPI\_ISL\_477918|Original|hCoV-19^^Scotland|Human|West of Scotland Specialist Virology Centre|COVID-19 Genomics UK (COG-UK) Consortium|Robertson|United Kingdom

>Spike|hCoV-19/USA/TX-HMH-MCoV-14468/2020|2020-10-07|EPI\_ISL\_787753|Original|hCoV-19^^Texas|Human|Houston Methodist Hospital|Houston Methodist Hospital|Long|USA

>Spike|hCoV-19/Australia/VIC14749/2020|2020-08-24|EPI\_ISL\_592985|Original|hCoV-19^^Victoria|Human|Victorian Infectious Diseases Reference Laboratory (VIDRL)|VIDRL and MDU-PHL|Schultz|Australia

>Spike|hCoV-19/England/SHEF-10D696F/2020|2020-12-17|EPI\_ISL\_727979|Original|hCoV-19^^England|Human|Virology Department|COVID-19 Genomics UK (COG-UK) Consortium|de Silva|United Kingdom

>Spike|hCoV-19/England/ALDP-9E9CA6/2020|2020-09-24|EPI\_ISL\_579992|Original|hCoV-19^^England|Human|Lighthouse Lab in Alderley Park|Wellcome Sanger Institute for the COVID-19 Genomics UK (COG-UK) consortium|Davies|United Kingdom

>Spike|hCoV-19/Scotland/QEUH-B69495/2020|2020-11-11|EPI\_ISL\_676314|Original|hCoV-19^^Scotland|Human|Lighthouse Lab in Glasgow|Wellcome Sanger Institute for the COVID-19 Genomics UK (COG-UK) Consortium|Davies|United Kingdom

>Spike|hCoV-19/Sweden/20-08804/2020|2020-04-05|EPI\_ISL\_475121|Original|hCoV-19^^Halland|Human|Halmstad klinisk mikrobiologi|The Public Health Agency of Sweden|Svartstr\u00f6m|Sweden

>Spike|hCoV-19/USA/CA-CHLA-PLM72903549/2020|2020-11-16|EPI\_ISL\_753349|Original|hCoV-19^^California|Human|Clinical virology Laboratory|Center for Personalized Medicine|Dien Bard|USA

>Spike|hCoV-19/Scotland/QEUH-A4CCBF/2020|2020-10-08|EPI\_ISL\_596041|Original|hCoV-19^^Scotland|Human|Quadram Institute Bioscience|COVID-19 Genomics UK (COG-UK) Consortium|Alikhan|United Kingdom

>Spike|hCoV-19/England/NOTT-11C7DE/2020|2020-11-17|EPI\_ISL\_650979|Original|hCoV-19^^England|Human|Queens Medical Centre|COVID-19 Genomics UK (COG-UK) Consortium|Loose|United Kingdom

>Spike|hCoV-19/Japan/IC-0063/2020|2020-06-00|EPI\_ISL\_591405|Original|hCoV-19^^Japan|Human|Pathogen Genomics Center|Pathogen Genomics Center|Sekizuka|Japan

>Spike|hCoV-19/England/20118158906/2020|2020-03-12|EPI\_ISL\_464986|Original|hCoV-19^^England|Human|Respiratory Virus Unit|Respiratory Virus Unit|Platt|United Kingdom

>Spike|hCoV-19/USA/TX-HMH-5322/2020|2020-06-25|EPI\_ISL\_544679|Original|hCoV-19^^Texas|Human|Houston Methodist Hospital|Houston Methodist Hospital|Long|USA

>Spike|hCoV-19/Wuhan/0126-C106/2020|2020-01-26|EPI\_ISL\_493186|Original|hCoV-19^^Hubei|Human|National Virus Resource Center|Computational Virology Group|Liu|China

>Spike|hCoV-19/England/MILK-A23C54/2020|2020-10-03|EPI\_ISL\_595111|Original|hCoV-19^^England|Human|Centre for Enzyme Innovation|COVID-19 Genomics UK (COG-UK) Consortium|Robson|United Kingdom

>Spike|hCoV-19/England/QEUH-B13DAE/2020|2020-11-02|EPI\_ISL\_641834|Original|hCoV-19^^England|Human|Lighthouse Lab in Glasgow|Wellcome Sanger Institute for the COVID-19 Genomics UK (COG-UK) Consortium|Davies|United Kingdom

>Spike|hCoV-19/Australia/NSW140/2020|2020-03-25|EPI\_ISL\_427799|Original|hCoV-19^^New South Wales|Human|Centre for Infectious Diseases and Microbiology Public Health|NSW Health Pathology - Institute of Clinical Pathology and Medical Research; Westmead Hospital; University of Sydney|Gall|Australia

>Spike|hCoV-19/USA/CA-SEARCH-5335/2020|2020-12-08|EPI\_ISL\_755154|Original|hCoV-19^^California|Human|UCSD EXCITE lab|Andersen lab at Scripps Research|Gangavarapu|USA

>Spike|hCoV-19/Australia/SAP231/2020|2020-03-16|EPI\_ISL\_483077|Original|hCoV-19^^South Australia|Human|SA Pathology|SA Pathology|Leong|Australia

>Spike|hCoV-19/Scotland/CVR2986/2020|2020-04-23|EPI\_ISL\_449179|Original|hCoV-19^^Scotland|Human|West of Scotland Specialist Virology Centre|COVID-19 Genomics UK (COG-UK) Consortium|Robertson|United Kingdom

>Spike|hCoV-19/Wales/MILK-9C2256/2020|2020-09-11|EPI\_ISL\_566552|Original|hCoV-19^^Wales|Human|Lighthouse Lab in Milton Keynes|Wellcome Sanger Institute for the COVID-19 Genomics UK (COG-UK) consortium|Davies|United Kingdom

>Spike|hCoV-19/England/CAMC-A65807/2020|2020-10-11|EPI\_ISL\_637650|Original|hCoV-19^^England|Human|Department of Pathology|COVID-19 Genomics UK (COG-UK) Consortium|Goodfellow|United Kingdom

>Spike|hCoV-19/England/NOTT-10F219/2020|2020-04-01|EPI\_ISL\_432977|Original|hCoV-19^^England|Human|Queens Medical Centre|COVID-19 Genomics UK (COG-UK) Consortium|Loose|United Kingdom

>Spike|hCoV-19/United Arab Emirates/0459/2020|2020-05-18|EPI\_ISL\_698629|Original|hCoV-19^^Abu Dhabi|Human|Group 42 (G42) Healthcare|G42 Healthcare|Ogrodzki|United Arab Emirates

>Spike|hCoV-19/England/QEUH-AD43A8/2020|2020-10-26|EPI\_ISL\_634700|Original|hCoV-19^^England|Human|Lighthouse Lab in Glasgow|Wellcome Sanger Institute for the COVID-19 Genomics UK (COG-UK) consortium|Davies|United Kingdom

>Spike|hCoV-19/England/QEUH-9CE21E/2020|2020-09-14|EPI\_ISL\_590101|Original|hCoV-19^^England|Human|Lighthouse Lab in Glasgow|Wellcome Sanger Institute for the COVID-19 Genomics UK (COG-UK) consortium|Davies|United Kingdom

>Spike|hCoV-19/England/ALDP-BCA30E/2020|2020-11-23|EPI\_ISL\_703245|Original|hCoV-19^^England|Human|Lighthouse Lab in Alderley Park|Wellcome Sanger Institute for the COVID-19 Genomics UK (COG-UK) Consortium|Davies|United Kingdom

>Spike|hCoV-19/England/HECH-2599E9E/2020|2020-05-02|EPI\_ISL\_482076|Original|hCoV-19^^England|Human|Microbiology Department|Wellcome Sanger Institute for the COVID-19 Genomics UK (COG-UK) consortium|Davies|United Kingdom

>Spike|hCoV-19/England/ALDP-C3A1C2/2020|2020-12-09|EPI\_ISL\_731527|Original|hCoV-19^^England|Human|Lighthouse Lab in Alderley Park|Wellcome Sanger Institute for the COVID-19 Genomics UK (COG-UK) Consortium|Davies|United Kingdom

>Spike|hCoV-19/USA/TX-HMH-3139/2020|2020-06-11|EPI\_ISL\_544021|Original|hCoV-19^^Texas|Human|Houston Methodist Hospital|Houston Methodist Hospital|Long|USA

>Spike|hCoV-19/USA/CA-LACPHL-AA00006/2020|2020-08-03|EPI\_ISL\_710104|Original|hCoV-19^^California|Human|Los Angeles County PHL|Los Angeles County PHL|Hemarajata|USA

>Spike|hCoV-19/USA/MI-MDHHS-SC20846/2020|2020-04-29|EPI\_ISL\_471867|Original|hCoV-19^^Michigan|Human|Michigan Department of Health and Human Services|Michigan Department of Health and Human Services|Blankenship|USA

>Spike|hCoV-19/Denmark/DCGC-21936/2020|2020-12-21|EPI\_ISL\_758463|Original|hCoV-19^^Hovedstaden|Human|Department of Virus and Microbiological Special Diagnostics|Albertsen Lab|Michaelsen|Denmark

>Spike|hCoV-19/Switzerland/AG-ETHZ-420519/2020|2020-12-22|EPI\_ISL\_767984|Original|hCoV-19^^Aargau|Human|Viollier AG|Department of Biosystems Science and Engineering|Nadeau|Switzerland

>Spike|hCoV-19/Canada/BC\_09273580/2020|2020-05-00|EPI\_ISL\_477070|Original|hCoV-19^^British Columbia|Human|BCCDC Public Health Laboratory|BCCDC Public Health Laboratory|Harrigan|Canada

>Spike|hCoV-19/USA/SC-DHEC-0032/2020|2020-03-20|EPI\_ISL\_529174|Original|hCoV-19^^South Carolina|Human|South Carolina Department of Health and Environmental Control|South Carolina Department of Health and Environmental Control|Flores|USA

>Spike|hCoV-19/England/CAMC-B344A2/2020|2020-11-06|EPI\_ISL\_659655|Original|hCoV-19^^England|Human|Lighthouse Lab in Cambridge|Wellcome Sanger Institute for the COVID-19 Genomics UK (COG-UK) Consortium|Davies|United Kingdom

>Spike|hCoV-19/USA/WI-WSLH-200173/2020|2020-04-03|EPI\_ISL\_578399|Original|hCoV-19^^Wisconsin|Human|Wisconsin State Laboratory of Hygiene Communicable Disease Division|Wisconsin State Laboratory of Hygiene Communicable Disease Division|Florek|USA

>Spike|hCoV-19/England/ALDP-9530E7/2020|2020-06-11|EPI\_ISL\_553674|Original|hCoV-19^^England|Human|Lighthouse Lab in Alderley Park|Wellcome Sanger Institute for the COVID-19 Genomics UK (COG-UK) consortium|Davies|United Kingdom

>Spike|hCoV-19/Scotland/EDB8753/2020|2020-10-23|EPI\_ISL\_650798|Original|hCoV-19^^Scotland|Human|Virology Department|COVID-19 Genomics UK (COG-UK) Consortium|McHugh|United Kingdom

>Spike|hCoV-19/Australia/NSW802/2020|2020-04-13|EPI\_ISL\_526144|Original|hCoV-19^^New South Wales|Human|South Eastern Area Laboratory Services (SEALS)|NSW Health Pathology - Institute of Clinical Pathology and Medical Research; Westmead Hospital; University of Sydney|Gall|Australia

>Spike|hCoV-19/England/CAMC-AEACA4/2020|2020-10-26|EPI\_ISL\_633217|Original|hCoV-19^^England|Human|Lighthouse Lab in Cambridge|Wellcome Sanger Institute for the COVID-19 Genomics UK (COG-UK) consortium|Davies|United Kingdom

>Spike|hCoV-19/USA/WA-S2447/2020|2020-06-16|EPI\_ISL\_497079|Original|hCoV-19^^Washington|Human|Washington State Department of Health|Seattle Flu Study|Lee|USA

>Spike|hCoV-19/Costa Rica/03/2020|2020-03-17|EPI\_ISL\_434536|Original|hCoV-19^^Costa Rica|Human|Hospital San Vicente de Paul|Inciensa|Brenes Porras|Costa Rica

>Spike|hCoV-19/Spain/VC-IBV-98004414/2020|2020-04-13|EPI\_ISL\_583919|Original|hCoV-19^^Comunitat Valenciana|Human|Servicio de Microbiolog\u00eda. Hospital General Universitario de Castell\u00f3n|SeqCOVID-SPAIN consortium|IBV(CSIC)|Comas|Spain

>Spike|hCoV-19/England/SHEF-C050D/2020|2020-03-25|EPI\_ISL\_420233|Original|hCoV-19^^England|Human|Virology Department|Department of Infection|de Silva|United Kingdom

>Spike|hCoV-19/USA/CA-CZB-3726/2020|2020-07-21|EPI\_ISL\_548444|Original|hCoV-19^^California|Human|Orange County Public Health Laboratory|Chan-Zuckerberg Biohub|Bhatt|USA

>Spike|hCoV-19/England/QEUA-B8102A/2020|2020-11-14|EPI\_ISL\_661840|Original|hCoV-19^^England|Human|Lighthouse Lab in Glasgow|Wellcome Sanger Institute for the COVID-19 Genomics UK (COG-UK) Consortium|Davies|United Kingdom

>Spike|hCoV-19/England/EXET-136EE8/2020|2020-04-20|EPI\_ISL\_471934|Original|hCoV-19^^England|Human|University of Exeter|COVID-19 Genomics UK (COG-UK) Consortium|Temperton|United Kingdom

>Spike|hCoV-19/England/LOND-D4C98/2020|2020-04-15|EPI\_ISL\_449672|Original|hCoV-19^^England|Human|University College London|COVID-19 Genomics UK (COG-UK) Consortium|Roy|United Kingdom

>Spike|hCoV-19/Wales/PHWC-494B57/2020|2020-11-24|EPI\_ISL\_726221|Original|hCoV-19^^Wales|Human|Originating lab|COVID-19 Genomics UK (COG-UK) Consortium|Moore|United Kingdom

>Spike|hCoV-19/England/CAMB-72EF0/2020|2020-03-23|EPI\_ISL\_439956|Original|hCoV-19^^England|Human|Department of Pathology|Wellcome Sanger Institute for the COVID-19 Genomics UK (COG-UK) consortium|Amato|United Kingdom

>Spike|hCoV-19/England/ALDP-C23214/2020|2020-12-06|EPI\_ISL\_733598|Original|hCoV-19^^England|Human|Lighthouse Lab in Alderley Park|Wellcome Sanger Institute for the COVID-19 Genomics UK (COG-UK) Consortium|Davies|United Kingdom

>Spike|hCoV-19/England/QEUA-9CF16B/2020|2020-09-15|EPI\_ISL\_590052|Original|hCoV-19^^England|Human|Lighthouse Lab in Glasgow|Wellcome Sanger Institute for the COVID-19 Genomics UK (COG-UK) consortium|Davies|United Kingdom

>Spike|hCoV-19/Denmark/DCGC-15829/2020|2020-11-23|EPI\_ISL\_714046|Original|hCoV-19^^Nordjylland|Human|Department of Virus and Microbiological Special Diagnostics|Albertsen Lab|Michaelsen|Denmark

>Spike|hCoV-19/Vietnam/PIHCM-462/2020|2020-03-23|EPI\_ISL\_654886|Vero E6|hCoV-19^^Ho Chi Minh city|Human|Pasteur Institute in Ho Chi Minh city|Department of Microbiology and Immunology - Pasteur Institute in Ho Chi Minh city|Vu|Viet Nam

>Spike|hCoV-19/Portugal/PT1374/2020|2020-03-25|EPI\_ISL\_511333|Original|hCoV-19^^Portugal|Human|Instituto Nacional de Saude (INSA)|Instituto Nacional de Saude (INSA)|Borges|Portugal

>Spike|hCoV-19/England/LOND-125FE6D/2020|2020-04-06|EPI\_ISL\_516878|Original|hCoV-19^^England|Human|North West London Pathology|Wellcome Sanger Institute for the COVID-19 Genomics UK (COG-UK) consortium|Davies|United Kingdom

>Spike|hCoV-19/England/205141222/2020|2020-12-16|EPI\_ISL\_756157|Original|hCoV-19^^England|Human|Respiratory Virus Unit|COVID-19 Genomics UK (COG-UK) Consortium|Miah|United Kingdom

>Spike|hCoV-19/Denmark/DCGC-1069/2020|2020-06-01|EPI\_ISL\_614494|Original|hCoV-19^^Hovedstaden|Human|Department of Virus and Microbiological Special Diagnostics|Albertsen lab|Michaelsen|Denmark

>Spike|hCoV-19/England/ALDP-A67F00/2020|2020-10-12|EPI\_ISL\_608556|Original|hCoV-19^^England|Human|Lighthouse Lab in Alderley Park|Wellcome Sanger Institute for the COVID-19 Genomics UK (COG-UK) consortium|Davies|United Kingdom

>Spike|hCoV-19/Japan/PG-6643/2020|2020-07-00|EPI\_ISL\_687755|Original|hCoV-19^^Japan|Human|Pathogen Genomics Center|Pathogen Genomics Center|Sekizuka|Japan

>Spike|hCoV-19/England/ALDP-AA4A24/2020|2020-10-21|EPI\_ISL\_625146|Original|hCoV-19^^England|Human|Lighthouse Lab in Alderley Park|Wellcome Sanger Institute for the COVID-19 Genomics UK (COG-UK) consortium|Davies|United Kingdom

>Spike|hCoV-19/Norway/3117/2020|2020-08-06|EPI\_ISL\_549140|Original|hCoV-19^^Oslo|Human|Ostfold Hospital Trust - Kalnes|Norwegian Institute of Public Health|Kopperud Riis|Norway

>Spike|hCoV-19/USA/CA-IGI-0106/2020|2020-06-10|EPI\_ISL\_495128|Original|hCoV-19^^California|Human|Innovative Genomics Institute|Innovative Genomics Institute|Shivram|USA

>Spike|hCoV-19/Denmark/DCGC-2016/2020|2020-07-27|EPI\_ISL\_618242|Original|hCoV-19^^NA|Human|Department of Virus and Microbiological Special Diagnostics|Albertsen lab|Michaelsen|Denmark

>Spike|hCoV-19/England/ALDP-A95FAF/2020|2020-10-19|EPI\_ISL\_624810|Original|hCoV-19^^England|Human|Lighthouse Lab in Alderley Park|Wellcome Sanger Institute for the COVID-19 Genomics UK (COG-UK) consortium|Davies|United Kingdom



>Spike|hCoV-19/England/ALDP-A2E0A8/2020|2020-10-05|EPI\_ISL\_586606|Original|hCoV-19^^England|Human|Lighthouse Lab in Alderley Park|Wellcome Sanger Institute for the COVID-19 Genomics UK (COG-UK) consortium|Davies|United Kingdom

>Spike|hCoV-19/England/CAMC-C7569F/2020|2020-12-15|EPI\_ISL\_768909|Original|hCoV-19^^England|Human|Lighthouse Lab in Cambridge|Wellcome Sanger Institute for the COVID-19 Genomics UK (COG-UK) Consortium|Davies|United Kingdom

>Spike|hCoV-19/United Arab Emirates/skmc-008/2020|2020-02-21|EPI\_ISL\_582617|Original|hCoV-19^^United Arab Emirates|Human|Sheikh Khalifa Medical City|Molecular/Surveillance lab\nSheikh Khalifa Medical City|Amirtharaj|United Arab Emirates

>Spike|hCoV-19/England/CAMB-1B6ED1/2020|2020-10-17|EPI\_ISL\_638038|Original|hCoV-19^^England|Human|Department of Pathology|COVID-19 Genomics UK (COG-UK) Consortium|Goodfellow|United Kingdom

>Spike|hCoV-19/Portugal/PT1541/2020|2020-06-04|EPI\_ISL\_693555|Original|hCoV-19^^Portugal|Human|Instituto Nacional de Saude (INSA)|Instituto Nacional de Saude (INSA)|Borges|Portugal

>Spike|hCoV-19/USA/VA-DCLS-0938/2020|2020-05-21|EPI\_ISL\_522802|Original|hCoV-19^^Virginia|Human|Virginia DCLS|Virginia DCLS|St. Jacques|USA

>Spike|hCoV-19/Denmark/DCGC-9234/2020|2020-11-16|EPI\_ISL\_668863|Original|hCoV-19^^Nordjylland|Human|Department of Virus and Microbiological Special Diagnostics|Albertsen Lab|Michaelsen|Denmark

>Spike|hCoV-19/USA/TX-HMH-MCoV-14139/2020|2020-10-01|EPI\_ISL\_787424|Original|hCoV-19^^Texas|Human|Houston Methodist Hospital|Houston Methodist Hospital|Long|USA

>Spike|hCoV-19/England/CAMC-B997EE/2020|2020-11-15|EPI\_ISL\_673311|Original|hCoV-19^^England|Human|Lighthouse Lab in Cambridge|Wellcome Sanger Institute for the COVID-19 Genomics UK (COG-UK) Consortium|Davies|United Kingdom

>Spike|hCoV-19/USA/CO-CDPHE-2008161334/2020|2020-08-16|EPI\_ISL\_677300|Original|hCoV-19^^Colorado|Human|Colorado Department of Public Health and Environment|Colorado Department of Public Health and Environment|Bankers|USA

>Spike|hCoV-19/England/QEUH-A89ECF/2020|2020-10-15|EPI\_ISL\_638829|Original|hCoV-19^^England|Human|Oxford Viromics|COVID-19 Genomics UK (COG-UK) Consortium|Golubchik|United Kingdom

>Spike|hCoV-19/Belgium/reg-0916980/2020|2020-09-16|EPI\_ISL\_734970|Original|hCoV-19^^Winksele|Human|UZ Leuven|KU Leuven|Maes|Belgium

>Spike|hCoV-19/Taiwan/TSGH-24/2020|2020-04-02|EPI\_ISL\_436099|Original|hCoV-19^^Taipei|Human|TSGH-CP molecular lab|TSGH-CP molecular lab|Shang|Taiwan

>Spike|hCoV-19/Australia/VIC15977/2020|2020-08-01|EPI\_ISL\_641176|Original|hCoV-19^^Victoria|Human|Microbiological Diagnostic Unit - Public Health Laboratory (MDU-PHL)|MDU-PHL|Schultz|Australia

>Spike|hCoV-19/England/ALDP-950DE3/2020|2020-06-17|EPI\_ISL\_554225|Original|hCoV-19^^England|Human|Lighthouse Lab in Alderley Park|Wellcome Sanger Institute for the COVID-19 Genomics UK (COG-UK) consortium|Davies|United Kingdom

>Spike|hCoV-19/England/ALDP-9CAD99/2020|2020-09-16|EPI\_ISL\_575606|Original|hCoV-19^^England|Human|Lighthouse Lab in Alderley Park|Wellcome Sanger Institute for the COVID-19 Genomics UK (COG-UK) consortium|Davies|United Kingdom

>Spike|hCoV-19/England/MILK-9A69AE/2020|2020-09-01|EPI\_ISL\_550234|Original|hCoV-19^^England|Human|Lighthouse Lab in Milton Keynes|Wellcome Sanger Institute for the COVID-19 Genomics UK (COG-UK) consortium|Davies|United Kingdom

>Spike|hCoV-19/England/BRIS-125F9E/2020|2020-04-10|EPI\_ISL\_459020|Original|hCoV-19^^England|Human|PHE South West Regional Laboratory|Wellcome Sanger Institute for the COVID-19 Genomics UK (COG-UK) consortium|Davies|United Kingdom

>Spike|hCoV-19/Belgium/reg-09231003/2020|2020-09-23|EPI\_ISL\_735026|Original|hCoV-19^^Sint-Stevens-Woluwe|Human|UZ Leuven|KU Leuven|Maes|Belgium

>Spike|hCoV-19/USA/MN-MDH-1744/2020|2020-04-10|EPI\_ISL\_576253|Original|hCoV-19^^Minnesota|Human|Minnesota Department of Health|Minnesota Department of Health|Garfin|USA

>Spike|hCoV-19/England/ALDP-C3C351/2020|2020-12-10|EPI\_ISL\_731037|Original|hCoV-19^^England|Human|Lighthouse Lab in Alderley Park|Wellcome Sanger Institute for the COVID-19 Genomics UK (COG-UK) Consortium|Davies|United Kingdom

>Spike|hCoV-19/Scotland/EDB2470/2020|2020-04-23|EPI\_ISL\_491627|Original|hCoV-19^^Scotland|Human|Virology Department|Wellcome Sanger Institute for the COVID-19 Genomics UK (COG-UK) consortium|Davies|United Kingdom

>Spike|hCoV-19/Scotland/QUEH-A75E3F/2020|2020-10-15|EPI\_ISL\_612197|Original|hCoV-19^^Scotland|Human|Queens Medical Centre|COVID-19 Genomics UK (COG-UK) Consortium|Loose|United Kingdom

>Spike|hCoV-19/England/CAMC-B37506/2020|2020-11-05|EPI\_ISL\_645287|Original|hCoV-19^^England|Human|Lighthouse Lab in Cambridge|Wellcome Sanger Institute for the COVID-19 Genomics UK (COG-UK) Consortium|Davies|United Kingdom

>Spike|hCoV-19/Brazil/SE-6549/2020|2020-04-26|EPI\_ISL\_541379|Original|hCoV-19^^Sergipe|Human|LACEN/SE|Laboratory of Respiratory Viruses and Measles|Silva|Brazil

>Spike|hCoV-19/United Arab Emirates/0793/2020|2020-05-19|EPI\_ISL\_698933|Original|hCoV-19^^Abu Dhabi|Human|Group 42 (G42) Healthcare|G42 Healthcare|Ogrodzki|United Arab Emirates

>Spike|hCoV-19/England/ALDP-B1F7D1/2020|2020-11-01|EPI\_ISL\_646037|Original|hCoV-19^^England|Human|Lighthouse Lab in Alderley Park|Wellcome Sanger Institute for the COVID-19 Genomics UK (COG-UK) Consortium|Davies|United Kingdom

>Spike|hCoV-19/Spain/CB-IBV-98007086/2020|2020-04-03|EPI\_ISL\_582109|Original|hCoV-19^^Cantabria|Human|Hospital Universitario Marqu\u00e9s de Valdecilla - IDIVAL (Santander|SeqCOVID-SPAIN consortium|IBV (CSIC)|Comas|Spain

>Spike|hCoV-19/England/LIVE-1DD45A/2020|2020-10-03|EPI\_ISL\_594852|Original|hCoV-19^^England|Human|Liverpool Clinical Laboratories|COVID-19 Genomics UK (COG-UK) Consortium|Haldenby|United Kingdom

>Spike|hCoV-19/Germany/BAV-MVP0108/2020|2020-04-13|EPI\_ISL\_548950|Original|hCoV-19^^Bavaria|Human|Max von Pettenkofer Institute|Laboratory for Functional Genome Analysis|Graf|Germany

>Spike|hCoV-19/Switzerland/BE-ETHZ-300432/2020|2020-09-30|EPI\_ISL\_603387|Original|hCoV-19^^Bern|Human|Viollier AG|Department of Biosystems Science and Engineering|Nadeau|Switzerland

>Spike|hCoV-19/Norway/2382/2020|2020-03-30|EPI\_ISL\_449789|Original|hCoV-19^^Norway|Human|Dept. of Medical Microbiology|Norwegian Institute of Public Health|Hungnes|Norway

>Spike|hCoV-19/Switzerland/Vs-ETHZ-420703/2020|2020-12-24|EPI\_ISL\_768245|Original|hCoV-19^^Valais|Human|Viollier AG|Department of Biosystems Science and Engineering|Nadeau|Switzerland

>Spike|hCoV-19/Netherlands/NH-EMC-90/2020|2020-10-14|EPI\_ISL\_632350|Original|hCoV-19^^Noord Holland|Human|Dutch COVID-19 response team|Erasmus Medical Center|Oude Munnink|Netherlands

>Spike|hCoV-19/England/CAMC-A65AB6/2020|2020-10-11|EPI\_ISL\_608410|Original|hCoV-19^^England|Human|Lighthouse Lab in Cambridge|Wellcome Sanger Institute for the COVID-19 Genomics UK (COG-UK) consortium|Davies|United Kingdom

>Spike|hCoV-19/England/ALDP-9447B7/2020|2020-06-07|EPI\_ISL\_555721|Original|hCoV-19^^England|Human|Lighthouse Lab in Alderley Park|Wellcome Sanger Institute for the COVID-19 Genomics UK (COG-UK) consortium|Davies|United Kingdom

>Spike|hCoV-19/England/ALDP-C8A55E/2020|2020-12-17|EPI\_ISL\_756514|Original|hCoV-19^^England|Human|Lighthouse Lab in Alderley Park|Wellcome Sanger Institute for the COVID-19 Genomics UK (COG-UK) Consortium|Davies|United Kingdom

>Spike|hCoV-19/USA/MI-MDHHS-SC20011/2020|2020-03-12|EPI\_ISL\_437098|Original|hCoV-19^^Michigan|Human|Michigan Department of Health and Human Services|Michigan Department of Health and Human Services|Blankenship|USA

>Spike|hCoV-19/Portugal/PT1227/2020|2020-03-25|EPI\_ISL\_511770|Original|hCoV-19^^Portugal|Human|Instituto Nacional de Saude (INSA)|Instituto Nacional de Saude (INSA) and Instituto Gulbenkian de Ciencia (IGC)|Borges|Portugal

>Spike|hCoV-19/England/MILK-B597AE/2020|2020-11-06|EPI\_ISL\_679868|Original|hCoV-19^^England|Human|Virology Department|COVID-19 Genomics UK (COG-UK) Consortium|de Silva|United Kingdom

>Spike|hCoV-19/Brazil/RJ-00518/2020|2020-07-18|EPI\_ISL\_717907|Original|hCoV-19^^Rio de Janeiro|Human|LACEN RJ - Noel Nutels|Bioinformatics Laboratory / LNCC|Almeida|Brazil

>Spike|hCoV-19/England/MILK-994A91/2020|2020-08-25|EPI\_ISL\_552365|Original|hCoV-19^^England|Human|Lighthouse Lab in Milton Keynes|Wellcome Sanger Institute for the COVID-19 Genomics UK (COG-UK) consortium|Davies|United Kingdom

>Spike|hCoV-19/England/MILK-A23BC0/2020|2020-10-03|EPI\_ISL\_595104|Original|hCoV-19^^England|Human|Centre for Enzyme Innovation|COVID-19 Genomics UK (COG-UK) Consortium|Robson|United Kingdom

>Spike|hCoV-19/England/QEUEH-B6A3D3/2020|2020-11-11|EPI\_ISL\_662404|Original|hCoV-19^^England|Human|Lighthouse Lab in Glasgow|Wellcome Sanger Institute for the COVID-19 Genomics UK (COG-UK) Consortium|Davies|United Kingdom

>Spike|hCoV-19/Scotland/CVR3043/2020|2020-04-24|EPI\_ISL\_461631|Original|hCoV-19^^Scotland|Human|West of Scotland Specialist Virology Centre|COVID-19 Genomics UK (COG-UK) Consortium|Robertson|United Kingdom

>Spike|hCoV-19/USA/WY-WPHL-20063233/2020|2020-08-18|EPI\_ISL\_770076|Original|hCoV-19^^Wyoming|Human|Wyoming Public Health Laboratory|Wyoming Public Health Laboratory|Hull|USA

>Spike|hCoV-19/England/QEUEH-C34438/2020|2020-12-11|EPI\_ISL\_734027|Original|hCoV-19^^England|Human|Lighthouse Lab in Glasgow|Wellcome Sanger Institute for the COVID-19 Genomics UK (COG-UK) Consortium|Davies|United Kingdom

>Spike|hCoV-19/England/QEUEH-99915B/2020|2020-08-23|EPI\_ISL\_541792|Original|hCoV-19^^England|Human|Lighthouse Lab in Glasgow|Wellcome Sanger Institute for the COVID-19 Genomics UK (COG-UK) consortium|Davies|United Kingdom

>Spike|hCoV-19/USA/CA-ALSR-1291/2020|2020-05-02|EPI\_ISL\_494484|Original|hCoV-19^^California|Human|San Diego County Public Health Laboratory|Andersen lab at Scripps Research|Gangavarapu|USA

>Spike|hCoV-19/Denmark/DCGC-22171/2020|2020-12-14|EPI\_ISL\_758598|Original|hCoV-19^^Hovedstaden|Human|Department of Virus and Microbiological Special Diagnostics|Albertsen Lab|Michaelsen|Denmark

>Spike|hCoV-19/England/MILK-995ABE/2020|2020-08-23|EPI\_ISL\_551663|Original|hCoV-19^^England|Human|Lighthouse Lab in Milton Keynes|Wellcome Sanger Institute for the COVID-19 Genomics UK (COG-UK) consortium|Davies|United Kingdom

>Spike|hCoV-19/Netherlands/FR-EMC-49/2020|2020-05-27|EPI\_ISL\_523141|Original|hCoV-19^^Friesland|Human|Dutch COVID-19 response team|Erasmus Medical Center|Oude Munnink|Netherlands

>Spike|hCoV-19/Germany/HH-hpi-p2048/2020|2020-03-20|EPI\_ISL\_776338|Original|hCoV-19^^Hamburg|Human|University Medical Center Hamburg Eppendorf|Heinrich Pette Institute|Robitaille|Germany

>Spike|hCoV-19/Wales/PHWC-16D56B/2020|2020-06-26|EPI\_ISL\_574251|Original|hCoV-19^^Wales|Human|Wales Specialist Virology Centre Sequencing lab|COVID-19 Genomics UK (COG-UK) Consortium|Moore|United Kingdom

>Spike|hCoV-19/England/MILK-ACE778/2020|2020-10-21|EPI\_ISL\_629465|Original|hCoV-19^^England|Human|Lighthouse Lab in Milton Keynes|Wellcome Sanger Institute for the COVID-19 Genomics UK (COG-UK) consortium|Davies|United Kingdom

>Spike|hCoV-19/USA/TX-HMH-MCoV-13753/2020|2020-08-17|EPI\_ISL\_788846|Original|hCoV-19^^Texas|Human|Houston Methodist Hospital|Houston Methodist Hospital|Long|USA

>Spike|hCoV-19/Japan/PG-8523/2020|2020-07-00|EPI\_ISL\_686119|Original|hCoV-19^^Japan|Human|Pathogen Genomics Center|Pathogen Genomics Center|Sekizuka|Japan

>Spike|hCoV-19/England/SHEF-CADDE/2020|2020-11-30|EPI\_ISL\_702607|Original|hCoV-19^^England|Human|Virology Department|COVID-19 Genomics UK (COG-UK) Consortium|de Silva|United Kingdom

>Spike|hCoV-19/USA/OH\_0023/2020|2020-03-08|EPI\_ISL\_424880|Original|hCoV-19^^Ohio|Human|OH Department of Health Laboratory|Pathogen Discovery|Queen|USA

>Spike|hCoV-19/USA/WI-GMF-22325/2020|2020-09-25|EPI\_ISL\_660854|Original|hCoV-19^^Wisconsin|Human|Gundersen Molecular Diagnostics Laboratory|Kabara Cancer Research Institute|Kenny|USA

>Spike|hCoV-19/Switzerland/VD-ETHZ-310357/2020|2020-10-07|EPI\_ISL\_603431|Original|hCoV-19^^Vaud|Human|Viollier AG|Department of Biosystems Science and Engineering|Nadeau|Switzerland

>Spike|hCoV-19/Scotland/CVR5126/2020|2020-10-16|EPI\_ISL\_650730|Original|hCoV-19^^Scotland|Human|West of Scotland Specialist Virology Centre|COVID-19 Genomics UK (COG-UK) Consortium|Robertson|United Kingdom

>Spike|hCoV-19/England/SHEF-CE3AB/2020|2020-10-27|EPI\_ISL\_653085|Original|hCoV-19^^England|Human|Virology Department|COVID-19 Genomics UK (COG-UK) Consortium|de Silva|United Kingdom

>Spike|hCoV-19/Netherlands/NA\_283/2020|2020-03-31|EPI\_ISL\_422592|Original|hCoV-19^^Netherlands|Human|Dutch COVID-19 response team|Erasmus Medical Center|Oude Munnink|Netherlands

>Spike|hCoV-19/England/ALDP-B83301/2020|2020-11-14|EPI\_ISL\_675607|Original|hCoV-19^^England|Human|Lighthouse Lab in Alderley Park|Wellcome Sanger Institute for the COVID-19 Genomics UK (COG-UK) Consortium|Davies|United Kingdom

>Spike|hCoV-19/USA/LA-ALSR-0066-NBG/2020|2020-03-23|EPI\_ISL\_434523|Original|hCoV-19^^Louisiana|Human|Robert Garry lab|Andersen lab at Scripps Research|Gangavarapu|USA

>Spike|hCoV-19/England/NORW-F10B7/2020|2020-10-14|EPI\_ISL\_626954|Original|hCoV-19^^England|Human|Quadram Institute Bioscience|COVID-19 Genomics UK (COG-UK) Consortium|Alikhan|United Kingdom

>Spike|hCoV-19/England/MILK-BB0417/2020|2020-11-17|EPI\_ISL\_720029|Original|hCoV-19^^England|Human|Lighthouse Lab in Milton Keynes|Wellcome Sanger Institute for the COVID-19 Genomics UK (COG-UK) Consortium|Davies|United Kingdom

>Spike|hCoV-19/Wales/PHWC-496DE6/2020|2020-11-25|EPI\_ISL\_726731|Original|hCoV-19^^Wales|Human|Originating lab|COVID-19 Genomics UK (COG-UK) Consortium|Moore|United Kingdom

>Spike|hCoV-19/England/CAMC-BBFFEA/2020|2020-11-22|EPI\_ISL\_704848|Original|hCoV-19^^England|Human|Lighthouse Lab in Cambridge|Wellcome Sanger Institute for the COVID-19 Genomics UK (COG-UK) Consortium|Davies|United Kingdom

>Spike|hCoV-19/USA/WA-UW-14353/2020|2020-07-08|EPI\_ISL\_776680|Original|hCoV-19^^Washington|Human|UW Virology Lab|UW Virology Lab|Roychoudhury|USA

>Spike|hCoV-19/South Korea/A7/2020|2020-04-17|EPI\_ISL\_485391|Original|hCoV-19^^Seoul|Human|University of Ulsan College of Medicine and Asan Medical Center|University of Ulsan College of Medicine and Asan Medical Center|Yoon|South Korea

>Spike|hCoV-19/USA/CA-CZB-2224/2020|2020-05-31|EPI\_ISL\_513772|Original|hCoV-19^^California|Human|Orange County Public Health Lab|Chan-Zuckerberg Biohub|Kamm|USA

>Spike|hCoV-19/Denmark/DCGC-6907/2020|2020-10-12|EPI\_ISL\_619753|Original|hCoV-19^^Syddanmark|Human|Department of Virus and Microbiological Special Diagnostics|Albertsen lab|Michaelsen|Denmark

>Spike|hCoV-19/Egypt/C-CU002b-S3/2020|2020-06-19|EPI\_ISL\_529032|Original|hCoV-19^^Cairo|Human|Central Molecular Microbiology Laboratory and Next Generation Sequencing Reference Laboratory|Next Generation Sequencing Reference Laboratory|Aziz|Egypt

>Spike|hCoV-19/Bangladesh/CHRF-0027/2020|2020-06-16|EPI\_ISL\_477136|Original|hCoV-19^^Bangladesh|Human|Child Health Research Foundation|Child Health Research Foundation|Saha|Bangladesh

>Spike|hCoV-19/Australia/NSW2914/2020|2020-10-11|EPI\_ISL\_678367|Original|hCoV-19^^New South Wales|Human|Area of Virology|Virology Research Laboratory; Area of Virology|Foster|Australia

>Spike|hCoV-19/Spain/AR-IBV-98010737/2020|2020-11-12|EPI\_ISL\_722272|Original|hCoV-19^^Aragon|Human|Servicio de Microbiolog\u00eda|SeqCOVID-SPAIN consortium|IBV (CSIC) |Comas|Spain

>Spike|hCoV-19/Denmark/DCGC-6349/2020|2020-09-28|EPI\_ISL\_622318|Original|hCoV-19^^Hovedstaden|Human|Department of Virus and Microbiological Special Diagnostics|Albertsen lab|Michaelsen|Denmark

>Spike|hCoV-19/Australia/VIC1639/2020|2020-05-02|EPI\_ISL\_456542|Original|hCoV-19^^Victoria|Human|Victorian Infectious Diseases Reference Laboratory (VIDRL)|Microbiological Diagnostic Unit Public Health Laboratory and Victorian Infectious Diseases Reference Laboratory|Schultz|Australia

>Spike|hCoV-19/Japan/PG-7427/2020|2020-07-00|EPI\_ISL\_688529|Original|hCoV-19^^Japan|Human|Pathogen Genomics Center|Pathogen Genomics Center|Sekizuka|Japan

>Spike|hCoV-19/Peru/LIM-UPCH-0003/2020|2020-06-17|EPI\_ISL\_529065|Original|hCoV-19^^Lima|Human|Laboratorio de Referencia Nacional de Virus Respiratorios|Laboratorio de Gen\u00f3mica Microbiana|Tsukayama|Peru

>Spike|hCoV-19/Brazil/SP-789/2020|2020-07-01|EPI\_ISL\_735427|Original|hCoV-19^^S\u00e3o Paulo|Human|Instituto Adolfo Lutz - Regional de Santos|Instituto Adolfo Lutz|Sacchi|Brazil

>Spike|hCoV-19/USA/WI-UW-595/2020|2020-06-25|EPI\_ISL\_484970|Original|hCoV-19^^Wisconsin|Human|University of Wisconsin-Madison AIDS Vaccine Research Laboratories|University of Wisconsin-Madison AIDS Vaccine Research Laboratories|Baczenas|USA

>Spike|hCoV-19/Australia/VIC5864/2020|2020-07-20|EPI\_ISL\_518657|Original|hCoV-19^^Victoria|Human|Microbiological Diagnostic Unit - Public Health Laboratory (MDU-PHL)|MDU-PHL|Schultz|Australia

>Spike|hCoV-19/USA/MN-MDH-1445/2020|2020-03-26|EPI\_ISL\_514664|Original|hCoV-19^^Minnesota|Human|Minnesota Department of Health|Minnesota Department of Health|Garfin|USA

>Spike|hCoV-19/England/CAMB-1ADE73/2020|2020-04-25|EPI\_ISL\_459421|Original|hCoV-19^^England|Human|Department of Pathology|Wellcome Sanger Institute for the COVID-19 Genomics UK (COG-UK) consortium|Davies|United Kingdom

>Spike|hCoV-19/USA/TX-HMH-MCoV-15541/2020|2020-10-24|EPI\_ISL\_787025|Original|hCoV-19^^Texas|Human|Houston Methodist Hospital|Houston Methodist Hospital|Long|USA

>Spike|hCoV-19/England/CAMB-1B82D3/2020|2020-10-19|EPI\_ISL\_637741|Original|hCoV-19^^England|Human|Department of Pathology|COVID-19 Genomics UK (COG-UK) Consortium|Goodfellow|United Kingdom

>Spike|hCoV-19/USA/CA-SCCPHD-UC149/2020|2020-03-10|EPI\_ISL\_435628|Original|hCoV-19^^California|Human|Santa Clara County Public Health Department|Chiu Laboratory|Chiu|USA

>Spike|hCoV-19/India/MH-ACTREC-559/2020|2020-08-29|EPI\_ISL\_700204|Original|hCoV-19^^Maharashtra|Human|Hematopathology Laboratory|Hematopathology Laboratory|Patkar|India

>Spike|hCoV-19/Scotland/QEUEH-9CE3DF/2020|2020-09-16|EPI\_ISL\_601965|Original|hCoV-19^^Scotland|Human|Lighthouse Lab in Glasgow|Wellcome Sanger Institute for the COVID-19 Genomics UK (COG-UK) consortium|Davies|United Kingdom

>Spike|hCoV-19/Scotland/QEUEH-9ACDBB/2020|2020-09-06|EPI\_ISL\_560006|Original|hCoV-19^^Scotland|Human|Oxford Viromics|COVID-19 Genomics UK (COG-UK) Consortium|Golubchik|United Kingdom

>Spike|hCoV-19/USA/MN59-MDH59/2020|2020-03-14|EPI\_ISL\_417503|Original|hCoV-19^^Minnesota|Human|Minnesota Department of Health|Minnesota Department of Health|Wang|USA

>Spike|hCoV-19/England/CAMB-739A3/2020|2020-00-00|EPI\_ISL\_425261|Original|hCoV-19^^England|Human|Department of Pathology|COVID-19 Genomics UK (COG-UK) Consortium|Meredith|United Kingdom

>Spike|hCoV-19/Wales/PHWC-28F9C/2020|2020-04-01|EPI\_ISL\_432131|Original|hCoV-19^^Wales|Human|Wales Specialist Virology Centre|Public Health Wales Microbiology Cardiff|Moore|United Kingdom

>Spike|hCoV-19/USA/VA-DCLS-2249/2020|2020-11-03|EPI\_ISL\_723496|Original|hCoV-19^^Virginia|Human|Virginia Division of Consolidated Laboratory Services (DCLS)|Virginia Division of Consolidated Laboratory Services (DCLS)|St. Jacques|USA

>Spike|hCoV-19/England/ALDP-94EA87/2020|2020-06-17|EPI\_ISL\_554996|Original|hCoV-19^^England|Human|Lighthouse Lab in Alderley Park|Wellcome Sanger Institute for the COVID-19 Genomics UK (COG-UK) consortium|Davies|United Kingdom

>Spike|hCoV-19/England/LEED-2A9F19/2020|2020-04-10|EPI\_ISL\_538770|Original|hCoV-19^^England|Human|Leeds Teaching Hospitals NHS Trust and Public Health England|Wellcome Sanger Institute for the COVID-19 Genomics UK (COG-UK) consortium|Davies|United Kingdom

>Spike|hCoV-19/England/ALDP-BE97EF/2020|2020-12-03|EPI\_ISL\_708891|Original|hCoV-19^^England|Human|Lighthouse Lab in Alderley Park|Wellcome Sanger Institute for the COVID-19 Genomics UK (COG-UK) Consortium|Davies|United Kingdom

>Spike|hCoV-19/Wales/PHWC-4A3539/2020|2020-12-14|EPI\_ISL\_744108|Original|hCoV-19^^Wales|Human|Wales Specialist Virology Centre Sequencing lab|COVID-19 Genomics UK (COG-UK) Consortium|Moore|United Kingdom

>Spike|hCoV-19/Australia/VIC4360/2020|2020-07-15|EPI\_ISL\_519656|Original|hCoV-19^^Victoria|Human|Microbiological Diagnostic Unit - Public Health Laboratory (MDU-PHL)|MDU-PHL|Schultz|Australia

>Spike|hCoV-19/England/QEUEH-C32E5A/2020|2020-12-11|EPI\_ISL\_733988|Original|hCoV-19^^England|Human|Lighthouse Lab in Glasgow|Wellcome Sanger Institute for the COVID-19 Genomics UK (COG-UK) Consortium|Davies|United Kingdom

>Spike|hCoV-19/England/CAMC-B52EA0/2020|2020-11-09|EPI\_ISL\_657626|Original|hCoV-19^^England|Human|Lighthouse Lab in Cambridge|Wellcome Sanger Institute for the COVID-19 Genomics UK (COG-UK) Consortium|Davies|United Kingdom

>Spike|hCoV-19/USA/WA-UW-8698/2020|2020-05-06|EPI\_ISL\_570217|Original|hCoV-19^^Washington|Human|UW Virology Lab|UW Virology Lab|Roychoudhury|USA

>Spike|hCoV-19/England/ALDP-953E1A/2020|2020-06-12|EPI\_ISL\_554579|Original|hCoV-19^^England|Human|Lighthouse Lab in Alderley Park|Wellcome Sanger Institute for the COVID-19 Genomics UK (COG-UK) consortium|Davies|United Kingdom

>Spike|hCoV-19/Japan/PG-4495/2020|2020-07-00|EPI\_ISL\_692718|Original|hCoV-19^^Japan|Human|Pathogen Genomics Center|Pathogen Genomics Center|Sekizuka|Japan

>Spike|hCoV-19/USA/ME-HETL-J0267/2020|2020-09-29|EPI\_ISL\_755413|Original|hCoV-19^^Maine|Human|Maine Health and Environmental Testing Laboratory|Tewhey Lab|Tewhey|USA

>Spike|hCoV-19/England/CAMC-BC1808/2020|2020-11-22|EPI\_ISL\_702703|Original|hCoV-19^^England|Human|Department of Pathology|COVID-19 Genomics UK (COG-UK) Consortium|Goodfellow|United Kingdom

>Spike|hCoV-19/Wales/PHWC-272B2/2020|2020-03-30|EPI\_ISL\_432062|Original|hCoV-19^^Wales|Human|Wales Specialist Virology Centre|Public Health Wales Microbiology Cardiff|Moore|United Kingdom

>Spike|hCoV-19/Denmark/DCGC-8834/2020|2020-10-26|EPI\_ISL\_626107|Original|hCoV-19^^Nordjylland|Human|Department of Virus and Microbiological Special Diagnostics|Albertsen lab|Michaelsen|Denmark

>Spike|hCoV-19/England/ALDP-A2E3FA/2020|2020-10-06|EPI\_ISL\_586717|Original|hCoV-19^^England|Human|Lighthouse Lab in Alderley Park|Wellcome Sanger Institute for the COVID-19 Genomics UK (COG-UK) consortium|Davies|United Kingdom

>Spike|hCoV-19/England/SHEF-D1D7A/2020|2020-10-14|EPI\_ISL\_611528|Original|hCoV-19^^England|Human|Virology Department|COVID-19 Genomics UK (COG-UK) Consortium|de Silva|United Kingdom

>Spike|hCoV-19/Spain/CT-IBV-005602/2020|2020-03-26|EPI\_ISL\_508648|Original|hCoV-19^^Catalunya|Human|Departamento de Microbiolog\u00eda|SeqCOVID-SPAIN consortium/IBV (CSIC)|Comas|Spain

>Spike|hCoV-19/England/ALDP-94A845/2020|2020-06-12|EPI\_ISL\_556323|Original|hCoV-19^^England|Human|Lighthouse Lab in Alderley Park|Wellcome Sanger Institute for the COVID-19 Genomics UK (COG-UK) consortium|Davies|United Kingdom

>Spike|hCoV-19/Belgium/reg-0414492/2020|2020-04-14|EPI\_ISL\_734575|Original|hCoV-19^^Heusden-Zolder|Human|UZ Leuven|KU Leuven|Maes|Belgium

>Spike|hCoV-19/England/CAMC-99092F/2020|2020-08-26|EPI\_ISL\_551868|Original|hCoV-19^^England|Human|Lighthouse Lab in Cambridge|Wellcome Sanger Institute for the COVID-19 Genomics UK (COG-UK) consortium|Davies|United Kingdom

>Spike|hCoV-19/USA/UT-08678/2020|2020-05-26|EPI\_ISL\_524401|Original|hCoV-19^^Utah|Human|Utah Public Health Laboratory|Utah Public Health Laboratory|Young|USA

>Spike|hCoV-19/Wales/PHWC-16DF9A/2020|2020-09-30|EPI\_ISL\_585647|Original|hCoV-19^^Wales|Human|Wales Specialist Virology Centre Sequencing lab|COVID-19 Genomics UK (COG-UK) Consortium|Moore|United Kingdom

>Spike|hCoV-19/USA/TX-DSHS-1926/2020|2020-06-21|EPI\_ISL\_765897|Original|hCoV-19^^Texas|Human|TXDSHS|TXDSHS|Rahman|USA

>Spike|hCoV-19/Denmark/DCGC-1034/2020|2020-03-09|EPI\_ISL\_614585|Original|hCoV-19^^Sjaelland|Human|Department of Virus and Microbiological Special Diagnostics|Albertsen lab|Michaelsen|Denmark

>Spike|hCoV-19/Spain/IB-IBV-99010843/2020|2020-09-09|EPI\_ISL\_691648|Original|hCoV-19^^Balear Islands|Human|Servicio de Microbiolog\u00eda|SeqCOVID-SPAIN consortium/IBV (CSIC)|Comas|Spain

>Spike|hCoV-19/USA/AR-QDX-377/2020|2020-03-23|EPI\_ISL\_571018|Original|hCoV-19^^Arkansas|Human|Quest Diagnostics|Quest Diagnostics|Kagan|USA

>Spike|hCoV-19/Malaysia/IMR\_WC80109/2020|2020-05-23|EPI\_ISL\_490094|Original|hCoV-19^^Malaysia|Human|Institute for Medical Research|Institute for Medical Research|Suppiah|Malaysia

>Spike|hCoV-19/Wales/PHWC-4A46F9/2020|2020-12-16|EPI\_ISL\_764724|Original|hCoV-19^^Wales|Human|Wales Specialist Virology Centre Sequencing lab|COVID-19 Genomics UK (COG-UK) Consortium|Moore|United Kingdom

>Spike|hCoV-19/Scotland/QEUH-96D76D/2020|2020-08-20|EPI\_ISL\_534610|Original|hCoV-19^^Scotland|Human|NHSGGC West of Scotland Specialist Virology Centre / MRC-University of Glasgow Centre for Virus Research|Wellcome Sanger Institute for the COVID-19 Genomics UK (COG-UK) consortium|Davies|United Kingdom

>Spike|hCoV-19/Sweden/20-51536/2020|2020-05-14|EPI\_ISL\_510829|Original|hCoV-19^^Sormland|Human|Unilabs Eskilstuna|The Public Health Agency of Sweden|Svartstr\u00f6m|Sweden

>Spike|hCoV-19/England/MILK-85762E/2020|2020-07-15|EPI\_ISL\_557322|Original|hCoV-19^^England|Human|Lighthouse Lab in Milton Keynes|Wellcome Sanger Institute for the COVID-19 Genomics UK (COG-UK) consortium|Davies|United Kingdom

>Spike|hCoV-19/England/ALDP-71EDC5/2020|2020-07-01|EPI\_ISL\_557627|Original|hCoV-19^^England|Human|Lighthouse Lab in Alderley Park|Wellcome Sanger Institute for the COVID-19 Genomics UK (COG-UK) consortium|Davies|United Kingdom

>Spike|hCoV-19/USA/TX-HMH-MCoV-14508/2020|2020-10-09|EPI\_ISL\_787793|Original|hCoV-19^^Texas|Human|Houston Methodist Hospital|Houston Methodist Hospital|Long|USA

>Spike|hCoV-19/Austria/CeMM0797/2020|2020-05-15|EPI\_ISL\_583707|Original|hCoV-19^^Austria|Human|Center for Virology|Bergthaler laboratory|Bergthaler|Austria

>Spike|hCoV-19/USA/MA-MGH-00183/2020|2020-03-27|EPI\_ISL\_460362|Original|hCoV-19^^Massachusetts|Human|Massachusetts General Hospital|Infectious Disease Program|Lemieux|USA

>Spike|hCoV-19/England/BIRM-6A9AF/2020|2020-11-11|EPI\_ISL\_651635|Original|hCoV-19^^England|Human|University of Birmingham|COVID-19 Genomics UK (COG-UK) Consortium|Loman|United Kingdom

>Spike|hCoV-19/England/LIVE-DAE492/2020|2020-10-14|EPI\_ISL\_627106|Original|hCoV-19^^England|Human|Liverpool Clinical Laboratories|COVID-19 Genomics UK (COG-UK) Consortium|Haldenby|United Kingdom

>Spike|hCoV-19/Australia/SAP291/2020|2020-03-27|EPI\_ISL\_483088|Original|hCoV-19^^South Australia|Human|SA Pathology|SA Pathology|Leong|Australia

>Spike|hCoV-19/Iceland/153/2020|2020-03-13|EPI\_ISL\_417802|Original|hCoV-19^^Reykjavik|Human|The National University Hospital of Iceland|deCODE genetics|J\u00f3nsson|Iceland

>Spike|hCoV-19/Portugal/PT0137/2020|2020-03-26|EPI\_ISL\_453853|Original|hCoV-19^^Portugal|Human|unknown|Instituto Nacional de Saude (INSA)|Borges|Portugal

>Spike|hCoV-19/India/TG-CCMB-R159/2020|2020-08-09|EPI\_ISL\_539622|Original|hCoV-19^^Telangana|Human|CSIR-Centre for Cellular and Molecular Biology|CSIR-Centre for Cellular and Molecular Biology|Mukherjee|India

>Spike|hCoV-19/Australia/NSW210/2020|2020-03-25|EPI\_ISL\_427766|Original|hCoV-19^^New South Wales|Human|Centre for Infectious Diseases and Microbiology Public Health|NSW Health Pathology - Institute of Clinical Pathology and Medical Research; Westmead Hospital; University of Sydney|Gall|Australia

>Spike|hCoV-19/USA/TX-HMH-MCoV-12153/2020|2020-09-21|EPI\_ISL\_790226|Original|hCoV-19^^Texas|Human|Houston Methodist Hospital|Houston Methodist Hospital|Long|USA

>Spike|hCoV-19/USA/TX-HMH-3704/2020|2020-06-16|EPI\_ISL\_543122|Original|hCoV-19^^Texas|Human|Houston Methodist Hospital|Houston Methodist Hospital|Long|USA

>Spike|hCoV-19/England/QEUH-B2CDC0/2020|2020-11-04|EPI\_ISL\_659918|Original|hCoV-19^^England|Human|Lighthouse Lab in Glasgow|Wellcome Sanger Institute for the COVID-19 Genomics UK (COG-UK) Consortium|Davies|United Kingdom

>Spike|hCoV-19/USA/TX-HMH-5970/2020|2020-06-30|EPI\_ISL\_547133|Original|hCoV-19^^Texas|Human|Houston Methodist Hospital|Houston Methodist Hospital|Long|USA

>Spike|hCoV-19/Spain/MD-IBV-003673/2020|2020-04-01|EPI\_ISL\_467223|Original|hCoV-19^^Madrid|Human|Hospital General Universitario Gregorio Mara\u00f1a|SeqCOVID-SPAIN consortium/IBV (CSIC)|Comas|Spain

>Spike|hCoV-19/USA/WI-UW-1598/2020|2020-09-21|EPI\_ISL\_605475|Original|hCoV-19^^Wisconsin|Human|University of Wisconsin-Madison AIDS Vaccine Research

Laboratories|University of Wisconsin-Madison AIDS Vaccine Research  
Laboratories|Baczenas|USA  
>Spike|hCoV-19/England/CAMB-7E93F/2020|2020-04-08|EPI\_ISL\_442611|Original|hCoV-19^^England|Human|Department of Pathology|Wellcome Sanger Institute for the COVID-19 Genomics UK (COG-UK) consortium|Amato|United Kingdom  
>Spike|hCoV-19/USA/UT-UPHL-2008833/2020|2020-06-01|EPI\_ISL\_524853|Original|hCoV-19^^Utah|Human|Utah Public Health Laboratory|Utah Public Health Laboratory|Young|USA  
>Spike|hCoV-19/USA/AZ-TG381367/2020|2020-06-15|EPI\_ISL\_694658|Original|hCoV-19^^Arizona|Human|TGen North|TGen North|French|USA  
>Spike|hCoV-19/England/BIRM-67D79/2020|2020-11-04|EPI\_ISL\_650772|Original|hCoV-19^^England|Human|University of Birmingham|COVID-19 Genomics UK (COG-UK) Consortium|Loman|United Kingdom  
>Spike|hCoV-19/England/MILK-B8F350/2020|2020-11-13|EPI\_ISL\_675340|Original|hCoV-19^^England|Human|Lighthouse Lab in Milton Keynes|Wellcome Sanger Institute for the COVID-19 Genomics UK (COG-UK) Consortium|Davies|United Kingdom  
>Spike|hCoV-19/England/OXON-B0B95/2020|2020-04-17|EPI\_ISL\_478940|Original|hCoV-19^^England|Human|Oxford Viromics|COVID-19 Genomics UK (COG-UK) Consortium|Golubchik|United Kingdom  
>Spike|hCoV-19/USA/NY-Wadsworth-278030-01/2020|2020-11-22|EPI\_ISL\_754609|Original|hCoV-19^^New York|Human|Wadsworth Center|Wadsworth Center|Lasek-Nesselquist|USA  
>Spike|hCoV-19/Spain/MD-IBV-99008740/2020|2020-10-16|EPI\_ISL\_654266|Original|hCoV-19^^Madrid|Human|Hospital General Universitario Gregorio Mara\u00f1a|SeqCOVID-SPAIN consortium/IBV (CSIC)|Comas|Spain  
>Spike|hCoV-19/England/LOND-124D363/2020|2020-03-23|EPI\_ISL\_507088|Original|hCoV-19^^England|Human|University College London Hospital|COVID-19 Genomics UK (COG-UK) Consortium|Byott|United Kingdom  
>Spike|hCoV-19/England/QEUEH-9E4C23/2020|2020-09-22|EPI\_ISL\_579799|Original|hCoV-19^^England|Human|Lighthouse Lab in Glasgow|Wellcome Sanger Institute for the COVID-19 Genomics UK (COG-UK) consortium|Davies|United Kingdom  
>Spike|hCoV-19/Ireland/MN-NVRL-MPH48921/2020|2020-04-17|EPI\_ISL\_767732|Original|hCoV-19^^Monaghan|Human|National Virus Reference Laboratory|Irish Coronavirus Sequencing Consortium - Teagasc Moorepark|Walsh|Ireland  
>Spike|hCoV-19/England/202822175/2020|2020-06-14|EPI\_ISL\_490232|Original|hCoV-19^^England|Human|Respiratory Virus Unit|Respiratory Virus Unit|Platt|United Kingdom  
>Spike|hCoV-19/England/QEUEH-CC7B62/2020|2020-12-22|EPI\_ISL\_760376|Original|hCoV-19^^England|Human|Lighthouse Lab in Glasgow|Wellcome Sanger Institute for the COVID-19 Genomics UK (COG-UK) Consortium|Davies|United Kingdom  
>Spike|hCoV-19/USA/MI-MDHHS-SC21893/2020|2020-04-06|EPI\_ISL\_565954|Original|hCoV-19^^Michigan|Human|Michigan Department of Health and Human Services|Michigan Department of Health and Human Services|Blankenship|USA  
>Spike|hCoV-19/England/NORT-283B3F/2020|2020-04-03|EPI\_ISL\_488504|Original|hCoV-19^^England|Human|NU-OMICS DNA Sequencing research facility|Wellcome Sanger Institute for the COVID-19 Genomics UK (COG-UK) consortium|Davies|United Kingdom  
>Spike|hCoV-19/England/ALDP-4AD1B3/2020|2020-06-14|EPI\_ISL\_559603|Original|hCoV-19^^England|Human|Lighthouse Lab in Alderley Park|Wellcome Sanger Institute for the COVID-19 Genomics UK (COG-UK) consortium|Davies|United Kingdom  
>Spike|hCoV-19/Scotland/EDB5998/2020|2020-05-05|EPI\_ISL\_487787|Original|hCoV-19^^Scotland|Human|Virology Department|Wellcome Sanger Institute for the COVID-19 Genomics UK (COG-UK) consortium|Davies|United Kingdom  
>Spike|hCoV-19/USA/TX-HMH-4066/2020|2020-06-18|EPI\_ISL\_543339|Original|hCoV-19^^Texas|Human|Houston Methodist Hospital|Houston Methodist Hospital|Long|USA  
>Spike|hCoV-19/England/MILK-B56B5A/2020|2020-11-06|EPI\_ISL\_656980|Original|hCoV-19^^England|Human|Lighthouse Lab in Milton Keynes|Wellcome Sanger Institute for the COVID-19 Genomics UK (COG-UK) Consortium|Davies|United Kingdom  
>Spike|hCoV-19/Denmark/DCGC-4795/2020|2020-09-21|EPI\_ISL\_621405|Original|hCoV-19^^Sjaelland|Human|Department of Virus and Microbiological Special Diagnostics|Albertsen lab|Michaelsen|Denmark



>Spike|hCoV-19/Portugal/IGC4108/2020|2020-06-01|EPI\_ISL\_491233|Original|hCoV-19^^Portugal|Human|Instituto Gulbenkian de Ci\u00eancia|Instituto Gulbenkian de Ci\u00eancia|Leite|Portugal

>Spike|hCoV-19/Austria/CeMM0681/2020|2020-04-13|EPI\_ISL\_583641|Original|hCoV-19^^Austria|Human|Austrian Agency for Health and Food Safety (AGES)|Bergthaler laboratory|Bergthaler|Austria

>Spike|hCoV-19/England/20169002104/2020|2020-04-17|EPI\_ISL\_465169|Original|hCoV-19^^England|Human|Respiratory Virus Unit|Respiratory Virus Unit|Platt|United Kingdom

>Spike|hCoV-19/Sweden/20-08328/2020|2020-03-22|EPI\_ISL\_475098|Original|hCoV-19^^Halland|Human|Halmstad klinisk mikrobiologi|The Public Health Agency of Sweden|Svartstr\u00f6m|Sweden

>Spike|hCoV-19/Canada/QC-LSPQ-L00242011/2020|2020-03-28|EPI\_ISL\_536302|Original|hCoV-19^^Quebec|Human|CSSS Haut-Richelieu/Rouville (H\u00f4pital)|Laboratoire de sant\u00e9 publique du Qu\u00e9bec|Moreira|Canada

>Spike|hCoV-19/India/MH-ACTREC-567/2020|2020-08-31|EPI\_ISL\_700211|Original|hCoV-19^^Maharashtra|Human|Hematopathology Laboratory|Hematopathology Laboratory|Patkar|India

>Spike|hCoV-19/England/CAMB-1B2D6F/2020|2020-05-18|EPI\_ISL\_477791|Original|hCoV-19^^England|Human|Department of Pathology|COVID-19 Genomics UK (COG-UK) Consortium|Meredith|United Kingdom

>Spike|hCoV-19/England/QEUA-9620D6/2020|2020-08-10|EPI\_ISL\_531746|Original|hCoV-19^^England|Human|Lighthouse Lab in Glasgow|Wellcome Sanger Institute for the COVID-19 Genomics UK (COG-UK) consortium|Davies|United Kingdom

>Spike|hCoV-19/Spain/PV-IBV-004230/2020|2020-04-05|EPI\_ISL\_500294|Original|hCoV-19^^Basque Country|Human|Servicio de Microbiolog\u00eda. Hospital Universitario Donostia. OSI Donostialdea. \u00c1rea de Enfermedades Infecciosas|SeqCOVID-SPAIN consortium|IBV (CSIC)|Comas|Spain

>Spike|hCoV-19/USA/TX-HMH-MCoV-12484/2020|2020-09-27|EPI\_ISL\_790360|Original|hCoV-19^^Texas|Human|Houston Methodist Hospital|Houston Methodist Hospital Long|USA

>Spike|hCoV-19/England/ALDP-A6E561/2020|2020-10-15|EPI\_ISL\_607830|Original|hCoV-19^^England|Human|Lighthouse Lab in Alderley Park|Wellcome Sanger Institute for the COVID-19 Genomics UK (COG-UK) consortium|Davies|United Kingdom

>Spike|hCoV-19/Denmark/DCGC-13289/2020|2020-11-30|EPI\_ISL\_712709|Original|hCoV-19^^Hovedstaden|Human|Department of Virus and Microbiological Special Diagnostics|Albertsen Lab|Michaelsen|Denmark

>Spike|hCoV-19/Germany/HH-hpi-p1529/2020|2020-03-15|EPI\_ISL\_776027|Original|hCoV-19^^Hamburg|Human|University Medical Center Hamburg Eppendorf|Heinrich Pette Institute|Robitaille|Germany

>Spike|hCoV-19/England/CAMB-1BB5F5/2020|2020-11-22|EPI\_ISL\_664150|Original|hCoV-19^^England|Human|Department of Pathology|COVID-19 Genomics UK (COG-UK) Consortium|Goodfellow|United Kingdom

>Spike|hCoV-19/England/QEUA-BA3D3A/2020|2020-11-17|EPI\_ISL\_720981|Original|hCoV-19^^England|Human|Lighthouse Lab in Glasgow|Wellcome Sanger Institute for the COVID-19 Genomics UK (COG-UK) Consortium|Davies|United Kingdom

>Spike|hCoV-19/England/ALDP-9B5CFE/2020|2020-08-28|EPI\_ISL\_590453|Original|hCoV-19^^England|Human|Lighthouse Lab in Alderley Park|Wellcome Sanger Institute for the COVID-19 Genomics UK (COG-UK) consortium|Davies|United Kingdom

>Spike|hCoV-19/England/QEUA-9F3580/2020|2020-09-24|EPI\_ISL\_588580|Original|hCoV-19^^England|Human|Lighthouse Lab in Glasgow|Wellcome Sanger Institute for the COVID-19 Genomics UK (COG-UK) consortium|Davies|United Kingdom

>Spike|hCoV-19/Wales/PHWC-498485/2020|2020-12-01|EPI\_ISL\_727079|Original|hCoV-19^^Wales|Human|Originating lab|COVID-19 Genomics UK (COG-UK) Consortium|Moore|United Kingdom

>Spike|hCoV-19/England/NORW-EE40C/2020|2020-04-24|EPI\_ISL\_490539|Original|hCoV-19^^England|Human|Quadram Institute Bioscience|COVID-19 Genomics UK (COG-UK) Consortium|Alikhan|United Kingdom

>Spike|hCoV-19/Japan/PG-2095/2020|2020-03-00|EPI\_ISL\_685700|Original|hCoV-19^^Japan|Human|Pathogen Genomics Center|Pathogen Genomics Center|Sekizuka|Japan

>Spike|hCoV-19/Brazil/RJ-2044/2020|2020-04-15|EPI\_ISL\_456101|Original|hCoV-19^^Rio de Janeiro|Human|Laboratory of Respiratory Viruses and Measles|Laboratory of Respiratory Viruses and Measles|Silva|Brazil

>Spike|hCoV-19/England/QEUA-B0EAAF/2020|2020-11-02|EPI\_ISL\_642064|Original|hCoV-19^^England|Human|Lighthouse Lab in Glasgow|Wellcome Sanger Institute for the COVID-19 Genomics UK (COG-UK) Consortium|Davies|United Kingdom

>Spike|hCoV-19/England/ALDP-BC6399/2020|2020-11-20|EPI\_ISL\_721481|Original|hCoV-19^^England|Human|Lighthouse Lab in Alderley Park|Wellcome Sanger Institute for the COVID-19 Genomics UK (COG-UK) Consortium|Davies|United Kingdom

>Spike|hCoV-19/USA/OR-OHSU-3046/2020|2020-09-30|EPI\_ISL\_667456|Original|hCoV-19^^Oregon|Human|OHSU Lab Services Molecular Microbiology Lab|Oregon SARS-CoV-2 Genome Sequencing Center|O'Roak|USA

>Spike|hCoV-19/Australia/VIC9231/2020|2020-08-11|EPI\_ISL\_565455|Original|hCoV-19^^Victoria|Human|Microbiological Diagnostic Unit - Public Health Laboratory (MDU-PHL)|MDU-PHL|Schultz|Australia

>Spike|hCoV-19/India/GJ-GBRC-387a/2020|2020-07-11|EPI\_ISL\_524749|Original|hCoV-19^^Gujarat|Human|Sir M P Shah Government Medical College|Gujarat Biotechnology Research Centre|Joshi|India

>Spike|hCoV-19/USA/TX-DSHS-2044/2020|2020-11-23|EPI\_ISL\_766660|Original|hCoV-19^^Texas|Human|Texas Department of State Health Services|Texas Department of State Health Services|Rahman|USA

>Spike|hCoV-19/England/MILK-B05756/2020|2020-10-24|EPI\_ISL\_652195|Original|hCoV-19^^England|Human|Queens Medical Centre|COVID-19 Genomics UK (COG-UK) Consortium|Loose|United Kingdom

>Spike|hCoV-19/Scotland/QEUA-9DBEA1/2020|2020-09-22|EPI\_ISL\_575341|Original|hCoV-19^^Scotland|Human|Lighthouse Lab in Glasgow|Wellcome Sanger Institute for the COVID-19 Genomics UK (COG-UK) consortium|Davies|United Kingdom

>Spike|hCoV-19/USA/MD-MDH-0204/2020|2020-09-15|EPI\_ISL\_560817|Original|hCoV-19^^Maryland|Human|Maryland Public Health Laboratory|Maryland Public Health Laboratory|Keller|USA

>Spike|hCoV-19/Scotland/EDB1131/2020|2020-04-07|EPI\_ISL\_491585|Original|hCoV-19^^Scotland|Human|Virology Department|Wellcome Sanger Institute for the COVID-19 Genomics UK (COG-UK) consortium|Davies|United Kingdom

>Spike|hCoV-19/Ireland/LH-NVRL-20ILR08018/2020|2020-11-09|EPI\_ISL\_732420|Original|hCoV-19^^Louth|Human|National Virus Reference Laboratory|National Virus Reference Laboratory|Gonzalez|Ireland

>Spike|hCoV-19/Ireland/D-NVRL-AIIDV0081v1/2020|2020-04-13|EPI\_ISL\_644279|Original|hCoV-19^^Dublin|Human|CEPHR / Vincent's Hospital|Irish Coronavirus Sequencing Consortium - National Virus Reference Laboratory|Gonzalez|Ireland

>Spike|hCoV-19/England/NORT-291D74/2020|2020-05-05|EPI\_ISL\_489153|Original|hCoV-19^^England|Human|NU-OMICS DNA Sequencing research facility|Wellcome Sanger Institute for the COVID-19 Genomics UK (COG-UK) consortium|Davies|United Kingdom

>Spike|hCoV-19/Gibraltar/204462862/2020|2020-10-29|EPI\_ISL\_615029|Original|hCoV-19^^Gibraltar|Human|Microbiology|Respiratory Virus Unit|Platt|Gibraltar

>Spike|hCoV-19/Italy/LOM-UniMI01/2020|2020-02-24|EPI\_ISL\_417445|Vero E6 P1|hCoV-19^^Lombardy|Human|Laboratory of Infectious Diseases|Laboratory of Infectious Diseases|Zehender|Italy

>Spike|hCoV-19/England/ALDP-9559EA/2020|2020-06-12|EPI\_ISL\_555483|Original|hCoV-19^^England|Human|Lighthouse Lab in Alderley Park|Wellcome Sanger Institute for the COVID-19 Genomics UK (COG-UK) consortium|Davies|United Kingdom

>Spike|hCoV-19/Northern Ireland/NIRE-1023C8/2020|2020-03-18|EPI\_ISL\_441409|Original|hCoV-19^^Northern Ireland|Human|Regional Virus Laboratory|COVID-19 Genomics UK (COG-UK) Consortium|Fairley|United Kingdom

>Spike|hCoV-19/Wales/PHWC-16AA14/2020|2020-09-09|EPI\_ISL\_560140|Original|hCoV-19^^Wales|Human|Wales Specialist Virology Centre Sequencing lab|COVID-19 Genomics UK (COG-UK) Consortium|Moore|United Kingdom

>Spike|hCoV-19/England/MILK-A44EA2/2020|2020-10-06|EPI\_ISL\_598823|Original|hCoV-19^^England|Human|Lighthouse Lab in Milton Keynes|Wellcome Sanger Institute for the COVID-19 Genomics UK (COG-UK) consortium|Davies|United Kingdom

>Spike|hCoV-19/England/ALDP-A87BAC/2020|2020-10-17|EPI\_ISL\_606088|Original|hCoV-19^^England|Human|Lighthouse Lab in Alderley Park|Wellcome Sanger Institute for the COVID-19 Genomics UK (COG-UK) consortium|Davies|United Kingdom

>Spike|hCoV-19/Japan/PG-6537/2020|2020-08-00|EPI\_ISL\_687651|Original|hCoV-19^^Japan|Human|Pathogen Genomics Center|Pathogen Genomics Center|Sekizuka|Japan

>Spike|hCoV-19/England/ALDP-C8B6D2/2020|2020-12-16|EPI\_ISL\_756556|Original|hCoV-19^^England|Human|Lighthouse Lab in Alderley Park|Wellcome Sanger Institute for the COVID-19 Genomics UK (COG-UK) Consortium|Davies|United Kingdom

>Spike|hCoV-19/USA/MA-MGH-00738/2020|2020-04-09|EPI\_ISL\_791737|Original|hCoV-19^^Massachusetts|Human|Massachusetts General Hospital|Infectious Disease Program|Park|USA

>Spike|hCoV-19/England/CAMC-B37FCC/2020|2020-11-05|EPI\_ISL\_658933|Original|hCoV-19^^England|Human|Lighthouse Lab in Cambridge|Wellcome Sanger Institute for the COVID-19 Genomics UK (COG-UK) Consortium|Davies|United Kingdom

>Spike|hCoV-19/England/ALDP-A6D4CF/2020|2020-10-15|EPI\_ISL\_608168|Original|hCoV-19^^England|Human|Lighthouse Lab in Alderley Park|Wellcome Sanger Institute for the COVID-19 Genomics UK (COG-UK) consortium|Davies|United Kingdom

>Spike|hCoV-19/England/ALDP-C489D8/2020|2020-12-12|EPI\_ISL\_736753|Original|hCoV-19^^England|Human|Lighthouse Lab in Alderley Park|Wellcome Sanger Institute for the COVID-19 Genomics UK (COG-UK) Consortium|Davies|United Kingdom

>Spike|hCoV-19/USA/TX-DSHS-1317/2020|2020-03-31|EPI\_ISL\_654900|Original|hCoV-19^^Texas|Human|Texas Department of State Health Services|Texas Department of State Health Services|Rahman|USA

>Spike|hCoV-19/England/ALDP-CB4D71/2020|2020-12-17|EPI\_ISL\_761146|Original|hCoV-19^^England|Human|Lighthouse Lab in Alderley Park|Wellcome Sanger Institute for the COVID-19 Genomics UK (COG-UK) Consortium|Davies|United Kingdom

>Spike|hCoV-19/Australia/VIC6391/2020|2020-07-24|EPI\_ISL\_521183|Original|hCoV-19^^Victoria|Human|Microbiological Diagnostic Unit - Public Health Laboratory (MDU-PHL)|MDU-PHL|Schultz|Australia

>Spike|hCoV-19/England/ALDP-B84E69/2020|2020-11-14|EPI\_ISL\_675826|Original|hCoV-19^^England|Human|Lighthouse Lab in Alderley Park|Wellcome Sanger Institute for the COVID-19 Genomics UK (COG-UK) Consortium|Davies|United Kingdom

>Spike|hCoV-19/England/CWAR-24FDE3F/2020|2020-06-03|EPI\_ISL\_584531|Original|hCoV-19^^England|Human|UHCW / University of Warwick|COVID-19 Genomics UK (COG-UK) Consortium|Stark|United Kingdom

>Spike|hCoV-19/USA/NY-NYCPHL-000391/2020|2020-04-06|EPI\_ISL\_631877|Original|hCoV-19^^New York|Human|Jamaica Hospital Medical Center|New York City Public Health Laboratory|Wang|USA

>Spike|hCoV-19/USA/TX-HMH-MCoV-12670/2020|2020-08-30|EPI\_ISL\_790454|Original|hCoV-19^^Texas|Human|Houston Methodist Hospital|Houston Methodist Hospital|Long|USA

>Spike|hCoV-19/USA/CA-ALSR-2980/2020|2020-09-02|EPI\_ISL\_635769|Original|hCoV-19^^California|Human|San Diego County Public Health Laboratory|Andersen lab at Scripps Research|Gangavarapu|USA

>Spike|hCoV-19/England/MILK-AB8D06/2020|2020-10-22|EPI\_ISL\_623765|Original|hCoV-19^^England|Human|Lighthouse Lab in Milton Keynes|Wellcome Sanger Institute for the COVID-19 Genomics UK (COG-UK) consortium|Davies|United Kingdom

>Spike|hCoV-19/England/QEUH-96FC5D/2020|2020-08-17|EPI\_ISL\_540305|Original|hCoV-19^^England|Human|Lighthouse Lab in Glasgow|Wellcome Sanger Institute for the COVID-19 Genomics UK (COG-UK) consortium|Davies|United Kingdom

>Spike|hCoV-19/England/LOND-126459D/2020|2020-11-18|EPI\_ISL\_705967|Original|hCoV-19^^England|Human|University College London|COVID-19 Genomics UK (COG-UK) Consortium|Roy|United Kingdom

>Spike|hCoV-19/USA/HI-H200135/2020|2020-07-10|EPI\_ISL\_752698|Original|hCoV-19^^Hawaii|Human|State Laboratories Division|State Laboratories Division|Sultana|USA

>Spike|hCoV-19/Canada/ON-UHTC\_0053/2020|2020-04-07|EPI\_ISL\_464004|unknown|hCoV-19^^Ontario|Human|Unity Health Toronto|Ontario Institute for Cancer Research|de Borja|Canada

>Spike|hCoV-19/England/CAMB-1B88D1/2020|2020-10-30|EPI\_ISL\_651542|Original|hCoV-19^^England|Human|Department of Pathology|COVID-19 Genomics UK (COG-UK) Consortium|Goodfellow|United Kingdom

>Spike|hCoV-19/England/C200045799/2020|2020-11-10|EPI\_ISL\_664081|Original|hCoV-19^^England|Human|Respiratory Virus Unit|COVID-19 Genomics UK (COG-UK) Consortium|Platt|United Kingdom

>Spike|hCoV-19/Australia/VIC10598/2020|2020-08-02|EPI\_ISL\_562979|Original|hCoV-19^^Victoria|Human|Microbiological Diagnostic Unit - Public Health Laboratory (MDU-PHL)|MDU-PHL|Schultz|Australia

>Spike|hCoV-19/Belgium/ULG-8808/2020|2020-03-19|EPI\_ISL\_418644|Original|hCoV-19^^Li\u00e8ge|Human|Department of Clinical Microbiology|GIGA Medical Genomics|Durkin|Belgium

>Spike|hCoV-19/USA/CA-CHLA-PLM50354444/2020|2020-12-02|EPI\_ISL\_753579|Original|hCoV-19^^California|Human|Clinical virology Laboratory|Center for Personalized Medicine|Dien Bard|USA

>Spike|hCoV-19/Denmark/DCGC-13230/2020|2020-11-30|EPI\_ISL\_712665|Original|hCoV-19^^Hovedstaden|Human|Department of Virus and Microbiological Special Diagnostics|Albertsen Lab|Michaelsen|Denmark

>Spike|hCoV-19/England/20149012804/2020|2020-04-03|EPI\_ISL\_466155|Original|hCoV-19^^England|Human|Respiratory Virus Unit|Respiratory Virus Unit|Platt|United Kingdom

>Spike|hCoV-19/India/TG-CCMB-J232/2020|2020-04-02|EPI\_ISL\_447576|Original|hCoV-19^^Telangana|Human|CSIR-Centre for Cellular and Molecular Biology|CSIR-Centre for Cellular and Molecular Biology|Banu|India

>Spike|hCoV-19/Saint Martin/IPG-7354/2020|2020-04-02|EPI\_ISL\_613453|Original|hCoV-19^^Saint Martin|Human|Institut Pasteur de la Guadeloupe|Institut Pasteur de la Guadeloupe|Enouf|Saint Martin

>Spike|hCoV-19/France/OCC-177/2020|2020-10-05|EPI\_ISL\_751495|Original|hCoV-19^^Occitanie|Human|CHU Purpan - Laboratoire de Virologie - Institut F\u00e9d\u00e9ratif de Biologie|CHU Purpan - Laboratoire de Virologie - Institut F\u00e9d\u00e9ratif de Biologie|Latour|France

>Spike|hCoV-19/Switzerland/SH-ETHZ-420087/2020|2020-12-18|EPI\_ISL\_768165|Original|hCoV-19^^Schaffhausen|Human|Viollier AG|Department of Biosystems Science and Engineering|Nadeau|Switzerland

>Spike|hCoV-19/USA/WA-S676/2020|2020-04-07|EPI\_ISL\_449846|Original|hCoV-19^^Washington|Human|Washington State Department of Health|Seattle Flu Study|Bedford|USA

>Spike|hCoV-19/England/MILK-9570D4/2020|2020-06-10|EPI\_ISL\_554258|Original|hCoV-19^^England|Human|Lighthouse Lab in Milton Keynes|Wellcome Sanger Institute for the COVID-19 Genomics UK (COG-UK) consortium|Davies|United Kingdom

>Spike|hCoV-19/England/MILK-B5A6EC/2020|2020-11-06|EPI\_ISL\_658384|Original|hCoV-19^^England|Human|Lighthouse Lab in Milton Keynes|Wellcome Sanger Institute for the COVID-19 Genomics UK (COG-UK) Consortium|Davies|United Kingdom

>Spike|hCoV-19/Scotland/CVR5688/2020|2020-11-05|EPI\_ISL\_651910|Original|hCoV-19^^Scotland|Human|West of Scotland Specialist Virology Centre|COVID-19 Genomics UK (COG-UK) Consortium|Robertson|United Kingdom

>Spike|hCoV-19/Netherlands/Limburg\_26/2020|2020-04-19|EPI\_ISL\_461014|Original|hCoV-19^^Limburg|Human|Dutch COVID-19 response team|Erasmus Medical Center|Oude Munnink|Netherlands

>Spike|hCoV-19/England/20119001804/2020|2020-03-10|EPI\_ISL\_465005|Original|hCoV-19^^England|Human|Respiratory Virus Unit|Respiratory Virus Unit|Platt|United Kingdom

>Spike|hCoV-19/England/QEUA-9C8108/2020|2020-09-11|EPI\_ISL\_567083|Original|hCoV-19^^England|Human|Lighthouse Lab in Glasgow|Wellcome Sanger Institute for the COVID-19 Genomics UK (COG-UK) consortium|Davies|United Kingdom

>Spike|hCoV-19/Wales/PHWC-49827C/2020|2020-12-01|EPI\_ISL\_727046|Original|hCoV-19^^Wales|Human|Originating lab|COVID-19 Genomics UK (COG-UK) Consortium|Moore|United Kingdom

>Spike|hCoV-19/England/QEUA-B3F9C6/2020|2020-11-08|EPI\_ISL\_658561|Original|hCoV-19^^England|Human|Lighthouse Lab in Glasgow|Wellcome Sanger Institute for the COVID-19 Genomics UK (COG-UK) Consortium|Davies|United Kingdom

>Spike|hCoV-19/Denmark/DCGC-20611/2020|2020-12-21|EPI\_ISL\_759252|Original|hCoV-19^^Midtjylland|Human|Department of Virus and Microbiological Special Diagnostics|Albertsen Lab|Michaelsen|Denmark

>Spike|hCoV-19/England/QEUA-96D18D/2020|2020-08-18|EPI\_ISL\_530696|Original|hCoV-19^^England|Human|Lighthouse Lab in Glasgow|Wellcome Sanger Institute for the COVID-19 Genomics UK (COG-UK) consortium|Davies|United Kingdom

>Spike|hCoV-19/Denmark/DCGC-11562/2020|2020-11-02|EPI\_ISL\_670739|Original|hCoV-19^^Nordjylland|Human|Department of Virus and Microbiological Special Diagnostics|Albertsen Lab|Michaelsen|Denmark

>Spike|hCoV-19/Spain/MD-IBV-99008473/2020|2020-08-08|EPI\_ISL\_654057|Original|hCoV-19^^Madrid|Human|Hospital General Universitario Gregorio Mara\u00f1a|SeqCOVID-SPAIN consortium/IBV (CSIC)|Comas|Spain

>Spike|hCoV-19/Denmark/DCGC-1610/2020|2020-04-13|EPI\_ISL\_619378|Original|hCoV-19^^Nordjylland|Human|Department of Virus and Microbiological Special Diagnostics|Albertsen lab|Michaelsen|Denmark

>Spike|hCoV-19/Wales/PHWC-166535/2020|2020-06-15|EPI\_ISL\_494012|Original|hCoV-19^^Wales|Human|Originating lab|COVID-19 Genomics UK (COG-UK) Consortium|Moore|United Kingdom

>Spike|hCoV-19/Japan/PG-3046/2020|2020-04-00|EPI\_ISL\_691169|Original|hCoV-19^^Japan|Human|Pathogen Genomics Center|Pathogen Genomics Center|Sekizuka|Japan

>Spike|hCoV-19/USA/WA-S1367/2020|2020-05-18|EPI\_ISL\_495817|Original|hCoV-19^^Washington|Human|Washington State Department of Health|Seattle Flu Study|Lee|USA

>Spike|hCoV-19/Netherlands/ZH-EMC-425/2020|2020-08-11|EPI\_ISL\_523764|Original|hCoV-19^^Zuid Holland|Human|Dutch COVID-19 response team|Erasmus Medical Center|Oude Munnink|Netherlands

>Spike|hCoV-19/England/ALDP-9D790E/2020|2020-09-18|EPI\_ISL\_576598|Original|hCoV-19^^England|Human|Oxford Viromics|COVID-19 Genomics UK (COG-UK) Consortium|Golubchik|United Kingdom

>Spike|hCoV-19/Netherlands/GE-EMC-282/2020|2020-05-27|EPI\_ISL\_523261|Original|hCoV-19^^Gelderland|Human|Dutch COVID-19 response team|Erasmus Medical Center|Oude Munnink|Netherlands

>Spike|hCoV-19/England/NORT-1B7982A/2020|2020-11-29|EPI\_ISL\_741437|Original|hCoV-19^^England|Human|Northumbria University / South Tees Hospitals NHS Foundation Trust / North Cumbria Integrated Care NHS Foundation Trust / North Tees and Hartlepool NHS Foundation Trust / Newcastle Hospitals NHS Foundation Trust|COVID-19 Genomics UK (COG-UK) Consortium|Bashton|United Kingdom

>Spike|hCoV-19/Spain/PV-IBV-000852/2020|2020-03-11|EPI\_ISL\_452699|Original|hCoV-19^^Basque Country|Human|Hospital Universitario Araba. Vitoria-Gasteiz,|SeqCOVID-SPAIN consortium/IBV (CSIC)|Comas|Spain

>Spike|hCoV-19/England/ALDP-AA38D0/2020|2020-10-22|EPI\_ISL\_630925|Original|hCoV-19^^England|Human|Lighthouse Lab in Alderley Park|Wellcome Sanger Institute for the COVID-19 Genomics UK (COG-UK) consortium|Davies|United Kingdom

>Spike|hCoV-19/United Arab Emirates/0551/2020|2020-05-15|EPI\_ISL\_698712|Original|hCoV-19^^Abu Dhabi|Human|Group 42 (G42) Healthcare|G42 Healthcare|Ogrodzki|United Arab Emirates

>Spike|hCoV-19/South Africa/KRISP-K002625/2020|2020-07-29|EPI\_ISL\_535488|Original|hCoV-19^^KwaZulu-Natal|Human|NHLS-IALCH|KRISP|de Oliveira|South Africa

>Spike|hCoV-19/Scotland/QEUA-A0BC52/2020|2020-10-03|EPI\_ISL\_599344|Original|hCoV-19^^Scotland|Human|Lighthouse Lab in Glasgow|Wellcome Sanger Institute for the COVID-19 Genomics UK (COG-UK) consortium|Davies|United Kingdom

>Spike|hCoV-19/Japan/PG-3788/2020|2020-04-00|EPI\_ISL\_692039|Original|hCoV-19^^Japan|Human|Pathogen Genomics Center|Pathogen Genomics Center|Sekizuka|Japan

>Spike|hCoV-19/England/CAMB-1B1A2D/2020|2020-05-15|EPI\_ISL\_452996|Original|hCoV-19^^England|Human|Department of Pathology|COVID-19 Genomics UK (COG-UK) Consortium|Meredith|United Kingdom

>Spike|hCoV-19/USA/CA-SR0341/2020|2020-05-08|EPI\_ISL\_450190|Original|hCoV-19^^California|Human|Rady's Childrens Hospital|Andersen lab at Scripps Research|Gangavarapu|USA

>Spike|hCoV-19/USA/NY-Wadsworth-11171-01/2020|2020-03-06|EPI\_ISL\_525579|Original|hCoV-19^^New York|Human|Wadsworth Center|Wadsworth Center|Plitnick|USA

>Spike|hCoV-19/Belgium/ULG-10562/2020|2020-10-23|EPI\_ISL\_626323|Original|hCoV-19^^Li\u00e8ge|Human|Department of Clinical Microbiology|GIGA Medical Genomics|Durkin|Belgium

>Spike|hCoV-19/England/OXON-B1DF8/2020|2020-00-00|EPI\_ISL\_479094|Original|hCoV-19^^England|Human|Oxford Viromics|COVID-19 Genomics UK (COG-UK) Consortium|Golubchik|United Kingdom

>Spike|hCoV-19/England/NORW-F3871/2020|2020-10-27|EPI\_ISL\_637864|Original|hCoV-19^^England|Human|Quadram Institute Bioscience|COVID-19 Genomics UK (COG-UK) Consortium|Alikhan|United Kingdom

>Spike|hCoV-19/USA/FL-BPHL-0672/2020|2020-03-24|EPI\_ISL\_509730|Original|hCoV-19^^Florida|Human|Florida Bureau of Public Health Laboratories|Florida Bureau of Public Health Laboratories|Blanton|USA

>Spike|hCoV-19/Switzerland/BE-ETHZ-110019/2020|2020-04-01|EPI\_ISL\_486459|Original|hCoV-19^^Bern|Human|Viollier AG|Department of Biosystems Science and Engineering|Nadeau|Switzerland

>Spike|hCoV-19/Wales/PHWC-498704/2020|2020-11-25|EPI\_ISL\_727115|Original|hCoV-19^^Wales|Human|Originating lab|COVID-19 Genomics UK (COG-UK) Consortium|Moore|United Kingdom

>Spike|hCoV-19/USA/OR-OHSU-0285/2020|2020-04-15|EPI\_ISL\_667082|Original|hCoV-19^^Oregon|Human|OHSU Lab Services Molecular Microbiology Lab|Oregon SARS-CoV-2 Genome Sequencing Center|O'Roak|USA

>Spike|hCoV-19/Netherlands/ZH-EMC-548/2020|2020-09-16|EPI\_ISL\_577976|Original|hCoV-19^^Zuid Holland|Human|Dutch COVID-19 response team|Erasmus Medical Center|Oude Munnink|Netherlands

>Spike|hCoV-19/England/MILK-ACDA07/2020|2020-10-21|EPI\_ISL\_634383|Original|hCoV-19^^England|Human|Lighthouse Lab in Milton Keynes|Wellcome Sanger Institute for the COVID-19 Genomics UK (COG-UK) consortium|Davies|United Kingdom

>Spike|hCoV-19/Germany/HH-hpi-p2061/2020|2020-03-21|EPI\_ISL\_776345|Original|hCoV-19^^Hamburg|Human|University Medical Center Hamburg Eppendorf|Heinrich Pette Institute|Robitaille|Germany

>Spike|hCoV-19/England/CAMC-B09A4A/2020|2020-10-31|EPI\_ISL\_673162|Original|hCoV-19^^England|Human|Lighthouse Lab in Cambridge|Wellcome Sanger Institute for the COVID-19 Genomics UK (COG-UK) Consortium|Davies|United Kingdom

>Spike|hCoV-19/England/20139003404/2020|2020-03-27|EPI\_ISL\_421850|Original|hCoV-19^^England|Human|Respiratory Virus Unit|Respiratory Virus Unit|Platt|United Kingdom

>Spike|hCoV-19/England/NORW-E8DDA/2020|2020-04-26|EPI\_ISL\_461810|Original|hCoV-19^^England|Human|Quadram Institute Bioscience|COVID-19 Genomics UK (COG-UK) Consortium|Alikhan|United Kingdom

>Spike|hCoV-19/England/MILK-BDB601/2020|2020-11-26|EPI\_ISL\_709708|Original|hCoV-19^^England|Human|Lighthouse Lab in Milton Keynes|Wellcome Sanger Institute for the COVID-19 Genomics UK (COG-UK) Consortium|Davies|United Kingdom

>Spike|hCoV-19/USA/CruiseA-19/2020|2020-02-18|EPI\_ISL\_414479|Original|hCoV-19^^USA|Human|unknown|Pathogen Discovery|Queen|USA

>Spike|hCoV-19/England/ALDP-C48D72/2020|2020-12-10|EPI\_ISL\_736600|Original|hCoV-19^^England|Human|Lighthouse Lab in Alderley Park|Wellcome Sanger Institute for the COVID-19 Genomics UK (COG-UK) Consortium|Davies|United Kingdom

>Spike|hCoV-19/Northern Ireland/NIRE-1020EF/2020|2020-03-21|EPI\_ISL\_441380|Original|hCoV-19^^Northern Ireland|Human|Regional Virus Laboratory|COVID-19 Genomics UK (COG-UK) Consortium|Fairley|United Kingdom

>Spike|hCoV-19/England/MILK-BAC232/2020|2020-11-18|EPI\_ISL\_783343|Original|hCoV-19^^England|Human|Lighthouse Lab in Milton Keynes|Wellcome Sanger Institute for the COVID-19 Genomics UK (COG-UK) Consortium|Davies|United Kingdom

>Spike|hCoV-19/USA/TX-HMH-MCoV-18460/2020|2020-11-19|EPI\_ISL\_784808|Original|hCoV-19^^Texas|Human|Houston Methodist Hospital|Houston Methodist Hospital|Long|USA

>Spike|hCoV-19/England/QEUH-AE232F/2020|2020-10-27|EPI\_ISL\_633427|Original|hCoV-19^^England|Human|Lighthouse Lab in Glasgow|Wellcome Sanger Institute for the COVID-19 Genomics UK (COG-UK) consortium|Davies|United Kingdom

>Spike|hCoV-19/Lithuania/MR-LUHS-Eilnr320/2020|2020-08-17|EPI\_ISL\_636865|Original|hCoV-19^^Kauno apskritis|Human|Lithuanian University of Health Sciences Hospital|Lithuanian University of Health Sciences|Zemaitis|Lithuania

>Spike|hCoV-19/Luxembourg/LNS5731562/2020|2020-03-18|EPI\_ISL\_417529|Original|hCoV-19^^Luxembourg|Human|Laboratoire Nationale de Sant\u00e9|Laboratoire Nationale de Sant\u00e9|Wienecke-Baldacchino|Luxembourg

>Spike|hCoV-19/England/CAMC-A666A2/2020|2020-10-11|EPI\_ISL\_627322|Original|hCoV-19^^England|Human|University of Exeter|COVID-19 Genomics UK (COG-UK) Consortium|Temperton|United Kingdom

>Spike|hCoV-19/England/ALDP-A96445/2020|2020-10-20|EPI\_ISL\_624878|Original|hCoV-19^^England|Human|Lighthouse Lab in Alderley Park|Wellcome Sanger Institute for the COVID-19 Genomics UK (COG-UK) consortium|Davies|United Kingdom

>Spike|hCoV-19/England/MILK-A44CC6/2020|2020-10-06|EPI\_ISL\_598640|Original|hCoV-19^^England|Human|Lighthouse Lab in Milton Keynes|Wellcome Sanger Institute for the COVID-19 Genomics UK (COG-UK) consortium|Davies|United Kingdom

>Spike|hCoV-19/England/MILK-974727/2020|2020-08-21|EPI\_ISL\_575795|Original|hCoV-19^^England|Human|Lighthouse Lab in Milton Keynes|Wellcome Sanger Institute for the COVID-19 Genomics UK (COG-UK) consortium|Davies|United Kingdom

>Spike|hCoV-19/Belgium/DVG-0325146/2020|2020-03-25|EPI\_ISL\_420403|Original|hCoV-19^^Geraardsbergen|Human|KU Leuven|KU Leuven|Maes|Belgium

>Spike|hCoV-19/Australia/VIC4711/2020|2020-07-16|EPI\_ISL\_519099|Original|hCoV-19^^Victoria|Human|Microbiological Diagnostic Unit - Public Health Laboratory (MDU-PHL) |MDU-PHL|Schultz|Australia

>Spike|hCoV-19/England/204881383/2020|2020-11-27|EPI\_ISL\_754333|Original|hCoV-19^^England|Human|Respiratory Virus Unit|COVID-19 Genomics UK (COG-UK) Consortium|Platt|United Kingdom

>Spike|hCoV-19/Switzerland/VD-ETHZ-280230/2020|2020-09-10|EPI\_ISL\_560529|Original|hCoV-19^^Vaud|Human|Viollier AG|Department of Biosystems Science and Engineering|Nadeau|Switzerland

>Spike|hCoV-19/USA/TX-HMH-MCoV-13080/2020|2020-08-27|EPI\_ISL\_788231|Original|hCoV-19^^Texas|Human|Houston Methodist Hospital|Houston Methodist Hospital|Long|USA

>Spike|hCoV-19/England/ALDP-94C807/2020|2020-06-15|EPI\_ISL\_555900|Original|hCoV-19^^England|Human|Lighthouse Lab in Alderley Park|Wellcome Sanger Institute for the COVID-19 Genomics UK (COG-UK) consortium|Davies|United Kingdom

>Spike|hCoV-19/Australia/VIC5085/2020|2020-07-17|EPI\_ISL\_519888|Original|hCoV-19^^Victoria|Human|Microbiological Diagnostic Unit - Public Health Laboratory (MDU-PHL) |MDU-PHL|Schultz|Australia

>Spike|hCoV-19/USA/WA-S683/2020|2020-04-07|EPI\_ISL\_449853|Original|hCoV-19^^Washington|Human|Washington State Department of Health|Seattle Flu Study|Bedford|USA

>Spike|hCoV-19/England/CAMB-837B5/2020|2020-04-15|EPI\_ISL\_443572|Original|hCoV-19^^England|Human|Department of Pathology|Wellcome Sanger Institute for the COVID-19 Genomics UK (COG-UK) consortium|Amato|United Kingdom

>Spike|hCoV-19/USA/CA-CZB-13536/2020|2020-06-11|EPI\_ISL\_672025|Original|hCoV-19^^California|Human|UCSF Clinical Microbiology Laboratory|Chan-Zuckerberg Biohub|Bhatt|USA

>Spike|hCoV-19/India/TG-CCMB-J057/2020|2020-03-31|EPI\_ISL\_447563|Original|hCoV-19^^Telangana|Human|CSIR-Centre for Cellular and Molecular Biology|CSIR-Centre for Cellular and Molecular Biology|Banu|India

>Spike|hCoV-19/Denmark/DCGC-10028/2020|2020-11-09|EPI\_ISL\_669346|Original|hCoV-19^^Sjælland|Human|Department of Virus and Microbiological Special Diagnostics|Albertsen Lab|Michaelsen|Denmark

>Spike|hCoV-19/Wales/PHWC-16C2ED/2020|2020-09-10|EPI\_ISL\_574037|Original|hCoV-19^^Wales|Human|Wales Specialist Virology Centre Sequencing lab|COVID-19 Genomics UK (COG-UK) Consortium|Moore|United Kingdom

>Spike|hCoV-19/USA/CA-LACPHL-AF00007/2020|2020-12-16|EPI\_ISL\_737242|Original|hCoV-19^^California|Human|Los Angeles County PHL|Los Angeles County PHL|Hemarajata|USA

>Spike|hCoV-19/Belgium/reg-0909929/2020|2020-09-09|EPI\_ISL\_734918|Original|hCoV-19^^Haacht|Human|UZ Leuven|KU Leuven|Maes|Belgium

>Spike|hCoV-19/USA/TX-HMH-MCoV-10223/2020|2020-07-07|EPI\_ISL\_789376|Original|hCoV-19^^Texas|Human|Houston Methodist Hospital|Houston Methodist Hospital|Long|USA

>Spike|hCoV-19/England/LOND-D5909/2020|2020-04-17|EPI\_ISL\_457277|Original|hCoV-19^^England|Human|University College London|COVID-19 Genomics UK (COG-UK) Consortium|Roy|United Kingdom

>Spike|hCoV-19/England/MILK-975AF0/2020|2020-08-20|EPI\_ISL\_552555|Original|hCoV-19^^England|Human|Lighthouse Lab in Milton Keynes|Wellcome Sanger Institute for the COVID-19 Genomics UK (COG-UK) consortium|Davies|United Kingdom

>Spike|hCoV-19/England/QEUA-BA1938/2020|2020-11-18|EPI\_ISL\_719702|Original|hCoV-19^^England|Human|Lighthouse Lab in Glasgow|Wellcome Sanger Institute for the COVID-19 Genomics UK (COG-UK) Consortium|Davies|United Kingdom

>Spike|hCoV-19/Switzerland/BS-UHB-42199864/2020|2020-03-20|EPI\_ISL\_528255|Original|hCoV-19^^Basel-Stadt|Human|University Hospital Basel|University Hospital Basel|Roloff Handschin|Switzerland

>Spike|hCoV-19/Denmark/DCGC-2820/2020|2020-08-17|EPI\_ISL\_616456|Original|hCoV-19^^Syddanmark|Human|Department of Virus and Microbiological Special Diagnostics|Albertsen lab|Michaelsen|Denmark

>Spike|hCoV-19/Scotland/EDB6123/2020|2020-05-13|EPI\_ISL\_478233|Original|hCoV-19^^Scotland|Human|Virology Department|COVID-19 Genomics UK (COG-UK) Consortium|Williams|United Kingdom

>Spike|hCoV-19/England/QEUA-C57BC1/2020|2020-12-12|EPI\_ISL\_736243|Original|hCoV-19^^England|Human|Lighthouse Lab in Glasgow|Wellcome Sanger Institute for the COVID-19 Genomics UK (COG-UK) Consortium|Davies|United Kingdom

>Spike|hCoV-19/Denmark/DCGC-4173/2020|2020-09-14|EPI\_ISL\_621993|Original|hCoV-19^^Sjaelland|Human|Department of Virus and Microbiological Special Diagnostics|Albertsen lab|Michaelsen|Denmark

>Spike|hCoV-19/Netherlands/NA\_214/2020|2020-03-25|EPI\_ISL\_422749|Original|hCoV-19^^Netherlands|Human|Dutch COVID-19 response team|Erasmus Medical Center|Oude Munnink|Netherlands

>Spike|hCoV-19/England/ALDP-9EA2B2/2020|2020-09-24|EPI\_ISL\_580030|Original|hCoV-19^^England|Human|Lighthouse Lab in Alderley Park|Wellcome Sanger Institute for the COVID-19 Genomics UK (COG-UK) consortium|Davies|United Kingdom

>Spike|hCoV-19/USA/TX-HMH-MCoV-11950/2020|2020-09-17|EPI\_ISL\_790144|Original|hCoV-19^^Texas|Human|Houston Methodist Hospital|Houston Methodist Hospital|Long|USA

>Spike|hCoV-19/Denmark/DCGC-11244/2020|2020-11-02|EPI\_ISL\_670791|Original|hCoV-19^^Hovedstaden|Human|Department of Virus and Microbiological Special Diagnostics|Albertsen Lab|Michaelsen|Denmark

>Spike|hCoV-19/USA/IL-UW-799/2020|2020-07-07|EPI\_ISL\_495503|Original|hCoV-19^^Illinois|Human|University of Wisconsin-Madison AIDS Vaccine Research Laboratories|University of Wisconsin-Madison AIDS Vaccine Research Laboratories|Baczenas|USA

>Spike|hCoV-19/Wales/PHWC-4A0280/2020|2020-12-04|EPI\_ISL\_743420|Original|hCoV-19^^Wales|Human|Wales Specialist Virology Centre Sequencing lab|COVID-19 Genomics UK (COG-UK) Consortium|Moore|United Kingdom

>Spike|hCoV-19/Scotland/CVR3273/2020|2020-05-06|EPI\_ISL\_456773|Original|hCoV-19^^Scotland|Human|West of Scotland Specialist Virology Centre|COVID-19 Genomics UK (COG-UK) Consortium|Robertson|United Kingdom

>Spike|hCoV-19/Scotland/CVR4972/2020|2020-10-06|EPI\_ISL\_594735|Original|hCoV-19^^Scotland|Human|West of Scotland Specialist Virology Centre|COVID-19 Genomics UK (COG-UK) Consortium|Robertson|United Kingdom

>Spike|hCoV-19/USA/NY-MSK-10B/2020|2020-05-02|EPI\_ISL\_583465|Original|hCoV-19^^New York|Human|Memorial Sloan Kettering Cancer Center|van Bakel Laboratory|van Bakel|USA

>Spike|hCoV-19/England/QEUA-A1EB8C/2020|2020-09-29|EPI\_ISL\_587474|Original|hCoV-19^^England|Human|Lighthouse Lab in Glasgow|Wellcome Sanger Institute for the COVID-19 Genomics UK (COG-UK) consortium|Davies|United Kingdom

>Spike|hCoV-19/USA/CO-CDPHE-2009131675/2020|2020-09-12|EPI\_ISL\_710224|Original|hCoV-19^^Colorado|Human|Colorado Department of Public Health and Environment|Colorado Department of Public Health and Environment|Bankers|USA

>Spike|hCoV-19/Ireland/OY-NVRL-20G43526/2020|2020-03-24|EPI\_ISL\_681889|Original|hCoV-19^^Offaly|Human|National Virus Reference Laboratory|Irish Coronavirus Sequencing Consortium - Teagasc Moorepark|Walsh|Ireland



>Spike|hCoV-19/USA/MD-MDH-0483/2020|2020-11-12|EPI\_ISL\_710097|Original|hCoV-19^^Maryland|Human|Maryland Public Health Laboratory|Maryland Public Health Laboratory|Keller|USA

>Spike|hCoV-19/South Africa/KRISP-0167/2020|2020-06-02|EPI\_ISL\_467517|Original|hCoV-19^^KwaZulu-Natal|Human|NHLIS-IALCH|KRISP|de Oliveira|South Africa

>Spike|hCoV-19/Sierra Leone/KGH-G-8604/2020|2020-04-03|EPI\_ISL\_512814|Original|hCoV-19^^Sierra Leone|Human|Kenema Government Hospital|Kenema Government Hospital|Sandi|Sierra Leone

>Spike|hCoV-19/Japan/PG-8575/2020|2020-08-00|EPI\_ISL\_686171|Original|hCoV-19^^Japan|Human|Pathogen Genomics Center|Pathogen Genomics Center|Sekizuka|Japan

>Spike|hCoV-19/Luxembourg/LNS2447440/2020|2020-10-18|EPI\_ISL\_740126|Original|hCoV-19^^Luxembourg|Human|Laboratoire national de sant\u00e9|Laboratoire national de sant\u00e9|Wienecke-Baldacchino|Luxembourg

>Spike|hCoV-19/Wales/PHWC-49DE64/2020|2020-12-04|EPI\_ISL\_742920|Original|hCoV-19^^Wales|Human|Wales Specialist Virology Centre Sequencing lab|COVID-19 Genomics UK (COG-UK) Consortium|Moore|United Kingdom

>Spike|hCoV-19/Thailand/Bangkok-0022/2020|2020-03-18|EPI\_ISL\_423043|Original|hCoV-19^^Bangkok|Human|Ramathibodi Hospital|COVID-19 Network Investigations (CONI) Alliance|Batty|Thailand

>Spike|hCoV-19/England/CAMB-1B4FD0/2020|2020-06-17|EPI\_ISL\_477809|Original|hCoV-19^^England|Human|Department of Pathology|COVID-19 Genomics UK (COG-UK) Consortium|Meredith|United Kingdom

>Spike|hCoV-19/England/QEUA-B821AE/2020|2020-11-14|EPI\_ISL\_668214|Original|hCoV-19^^England|Human|Lighthouse Lab in Glasgow|Wellcome Sanger Institute for the COVID-19 Genomics UK (COG-UK) Consortium|Davies|United Kingdom

>Spike|hCoV-19/England/CAMC-A3E56A/2020|2020-10-06|EPI\_ISL\_609677|Original|hCoV-19^^England|Human|Lighthouse Lab in Cambridge|Wellcome Sanger Institute for the COVID-19 Genomics UK (COG-UK) consortium|Davies|United Kingdom

>Spike|hCoV-19/Scotland/CVR4026/2020|2020-08-29|EPI\_ISL\_535125|Original|hCoV-19^^Scotland|Human|West of Scotland Specialist Virology Centre|COVID-19 Genomics UK (COG-UK) Consortium|Robertson|United Kingdom

>Spike|hCoV-19/Finland/2A10SVIIC/2020|2020-04-02|EPI\_ISL\_481650|Original|hCoV-19^^Uusimaa|Human|Department of Virology and Immunology|Department of Virology|Smura|Finland

>Spike|hCoV-19/Oman/RESP-20-5414/2020|2020-03-24|EPI\_ISL\_457993|Original|hCoV-19^^Dakhiliyah|Human|Oman-NIC|Oman-NIC|Al Mahruqi|Oman

>Spike|hCoV-19/England/205260860/2020|2020-12-18|EPI\_ISL\_754326|Original|hCoV-19^^England|Human|Respiratory Virus Unit|COVID-19 Genomics UK (COG-UK) Consortium|Platt|United Kingdom

>Spike|hCoV-19/England/NORT-292669/2020|2020-05-12|EPI\_ISL\_489097|Original|hCoV-19^^England|Human|NU-OMICS DNA Sequencing research facility|Wellcome Sanger Institute for the COVID-19 Genomics UK (COG-UK) consortium|Davies|United Kingdom

>Spike|hCoV-19/USA/NY-Wadsworth-29389-01/2020|2020-03-24|EPI\_ISL\_525631|Original|hCoV-19^^New York|Human|Wadsworth Center|Wadsworth Center|Plitnick|USA

>Spike|hCoV-19/Japan/PG-1414/2020|2020-04-00|EPI\_ISL\_685021|Original|hCoV-19^^Japan|Human|Saitama Prefectural Institute of Public Health|Pathogen Genomics Center|Sekizuka|Japan

>Spike|hCoV-19/Spain/AR-IBV-97010748/2020|2020-10-02|EPI\_ISL\_779736|Original|hCoV-19^^Aragon|Human|Servicio de Microbiolog\u00eda|SeqCOVID-SPAIN consortium|IBV (CSIC) |Comas|Spain

>Spike|hCoV-19/Japan/PG-1918/2020|2020-03-00|EPI\_ISL\_685524|Original|hCoV-19^^Japan|Human|Pathogen Genomics Center|Pathogen Genomics Center|Sekizuka|Japan

>Spike|hCoV-19/Denmark/DCGC-19972/2020|2020-12-07|EPI\_ISL\_747562|Original|hCoV-19^^Hovedstaden|Human|Department of Virus and Microbiological Special Diagnostics|Albertsen Lab|Michaelsen|Denmark

>Spike|hCoV-19/England/ALDP-5AA9EA/2020|2020-06-15|EPI\_ISL\_558628|Original|hCoV-19^^England|Human|Lighthouse Lab in Alderley Park|Wellcome Sanger Institute for the COVID-19 Genomics UK (COG-UK) consortium|Davies|United Kingdom

>Spike|hCoV-19/Denmark/DCGC-18492/2020|2020-12-07|EPI\_ISL\_749400|Original|hCoV-19^^Syddanmark|Human|Department of Virus and Microbiological Special Diagnostics|Albertsen Lab|Michaelsen|Denmark

>Spike|hCoV-19/England/QEUEH-B42298/2020|2020-11-08|EPI\_ISL\_657041|Original|hCoV-19^^England|Human|Lighthouse Lab in Glasgow|Wellcome Sanger Institute for the COVID-19 Genomics UK (COG-UK) Consortium|Davies|United Kingdom

>Spike|hCoV-19/USA/VA-DCLS-2159/2020|2020-10-28|EPI\_ISL\_734241|Original|hCoV-19^^Virginia|Human|Virginia Division of Consolidated Laboratory Services (DCLS)|Virginia Division of Consolidated Laboratory Services (DCLS)|St. Jacques|USA

>Spike|hCoV-19/Denmark/DCGC-14285/2020|2020-11-30|EPI\_ISL\_711673|Original|hCoV-19^^Midtjylland|Human|Department of Virus and Microbiological Special Diagnostics|Albertsen Lab|Michaelsen|Denmark

>Spike|hCoV-19/England/MILK-481443/2020|2020-04-28|EPI\_ISL\_559694|Original|hCoV-19^^England|Human|Lighthouse Lab in Milton Keynes|Wellcome Sanger Institute for the COVID-19 Genomics UK (COG-UK) consortium|Davies|United Kingdom

>Spike|hCoV-19/Spain/IB-IBV-99011536/2020|2020-12-15|EPI\_ISL\_779884|Original|hCoV-19^^Balear Islands|Human|Servicio de Microbiolog\u00eda|SeqCOVID-SPAIN consortium/IBV (CSIC) |Comas|Spain

>Spike|hCoV-19/England/CAMC-B08674/2020|2020-10-29|EPI\_ISL\_643744|Original|hCoV-19^^England|Human|Lighthouse Lab in Cambridge|Wellcome Sanger Institute for the COVID-19 Genomics UK (COG-UK) Consortium|Davies|United Kingdom

>Spike|hCoV-19/England/NORT-28AE5D/2020|2020-04-16|EPI\_ISL\_492943|Original|hCoV-19^^England|Human|NU-OMICS DNA Sequencing research facility|Wellcome Sanger Institute for the COVID-19 Genomics UK (COG-UK) consortium|Davies|United Kingdom

>Spike|hCoV-19/USA/FL-BPHL-1545/2020|2020-08-28|EPI\_ISL\_568643|Original|hCoV-19^^Florida|Human|Florida Bureau of Public Health Laboratories|Florida Bureau of Public Health Laboratories|Blanton|USA

>Spike|hCoV-19/Australia/VIC6128/2020|2020-07-22|EPI\_ISL\_518142|Original|hCoV-19^^Victoria|Human|Victorian Infectious Diseases Reference Laboratory (VIDRL)|VIDRL and MDU-PHL|Schultz|Australia

>Spike|hCoV-19/Finland/5LS4D11/2020|2020-10-05|EPI\_ISL\_756058|Original|hCoV-19^^Uusimaa|Human|Department of Virology and Immunology|Department of Virology|Smura|Finland

>Spike|hCoV-19/England/ALDP-CB5A97/2020|2020-12-18|EPI\_ISL\_761898|Original|hCoV-19^^England|Human|Lighthouse Lab in Alderley Park|Wellcome Sanger Institute for the COVID-19 Genomics UK (COG-UK) Consortium|Davies|United Kingdom

>Spike|hCoV-19/Wales/PHWC-164713/2020|2020-05-09|EPI\_ISL\_474221|Original|hCoV-19^^Wales|Human|Originating lab|COVID-19 Genomics UK (COG-UK) Consortium|Moore|United Kingdom

>Spike|hCoV-19/England/ALDP-9507F4/2020|2020-06-14|EPI\_ISL\_554434|Original|hCoV-19^^England|Human|Lighthouse Lab in Alderley Park|Wellcome Sanger Institute for the COVID-19 Genomics UK (COG-UK) consortium|Davies|United Kingdom

>Spike|hCoV-19/Denmark/DCGC-16058/2020|2020-11-16|EPI\_ISL\_714214|Original|hCoV-19^^Hovedstaden|Human|Department of Virus and Microbiological Special Diagnostics|Albertsen Lab|Michaelsen|Denmark

>Spike|hCoV-19/England/QEUEH-B11BA6/2020|2020-11-02|EPI\_ISL\_642332|Original|hCoV-19^^England|Human|Lighthouse Lab in Glasgow|Wellcome Sanger Institute for the COVID-19 Genomics UK (COG-UK) Consortium|Davies|United Kingdom

>Spike|hCoV-19/Wales/PHWC-482DCF/2020|2020-10-15|EPI\_ISL\_627740|Original|hCoV-19^^Wales|Human|Wales Specialist Virology Centre Sequencing lab|COVID-19 Genomics UK (COG-UK) Consortium|Moore|United Kingdom

>Spike|hCoV-19/England/QEUEH-A1E779/2020|2020-09-29|EPI\_ISL\_587455|Original|hCoV-19^^England|Human|Lighthouse Lab in Glasgow|Wellcome Sanger Institute for the COVID-19 Genomics UK (COG-UK) consortium|Davies|United Kingdom

>Spike|hCoV-19/Canada/ON-UHTC\_0065/2020|2020-04-22|EPI\_ISL\_464030|unknown|hCoV-19^^Ontario|Human|Unity Health Toronto|Ontario Institute for Cancer Research|de Borja|Canada

>Spike|hCoV-19/Canada/MB-NML-608/2020|2020-04-03|EPI\_ISL\_632913|Original|hCoV-19^^Manitoba|Human|Cadham Provincial laboratory|Cadham Provincial laboratory|Majer|Canada

>Spike|hCoV-19/USA/MI-UM-10036139449/2020|2020-09-25|EPI\_ISL\_590705|Original|hCoV-19^^Michigan|Human|University of Michigan Clinical Microbiology Laboratory|Lauring Lab|Valesano|USA

>Spike|hCoV-19/New Zealand/20VR3007/2020|2020-00-00|EPI\_ISL\_579379|Original|hCoV-19^^Combined Wellington|Human|Wellington SCL (WN)|Institute of Environmental Science and Research (ESR)|Wang|New Zealand

>Spike|hCoV-19/England/CAMC-94C2FA/2020|2020-07-16|EPI\_ISL\_556685|Original|hCoV-19^^England|Human|Lighthouse Lab in Cambridge|Wellcome Sanger Institute for the COVID-19 Genomics UK (COG-UK) consortium|Davies|United Kingdom

>Spike|hCoV-19/Denmark/DCGC-10057/2020|2020-11-09|EPI\_ISL\_669367|Original|hCoV-19^^Hovedstaden|Human|Department of Virus and Microbiological Special Diagnostics|Albertsen Lab|Michaelsen|Denmark

>Spike|hCoV-19/England/C200003912/2020|2020-08-03|EPI\_ISL\_676510|Original|hCoV-19^^England|Human|Respiratory Virus Unit|COVID-19 Genomics UK (COG-UK) Consortium|Platt|United Kingdom

>Spike|hCoV-19/England/CAMC-B78527/2020|2020-11-11|EPI\_ISL\_661640|Original|hCoV-19^^England|Human|Lighthouse Lab in Cambridge|Wellcome Sanger Institute for the COVID-19 Genomics UK (COG-UK) Consortium|Davies|United Kingdom

>Spike|hCoV-19/England/ALDP-A6EA08/2020|2020-10-15|EPI\_ISL\_607968|Original|hCoV-19^^England|Human|Lighthouse Lab in Alderley Park|Wellcome Sanger Institute for the COVID-19 Genomics UK (COG-UK) consortium|Davies|United Kingdom

>Spike|hCoV-19/Switzerland/LU-ETHZ-410188/2020|2020-12-12|EPI\_ISL\_737766|Original|hCoV-19^^Lucerne|Human|Viollier AG|Department of Biosystems Science and Engineering|Nadeau|Switzerland

>Spike|hCoV-19/Denmark/DCGC-5659/2020|2020-09-28|EPI\_ISL\_619946|Original|hCoV-19^^Hovedstaden|Human|Department of Virus and Microbiological Special Diagnostics|Albertsen lab|Michaelsen|Denmark

>Spike|hCoV-19/USA/TX-HMH-5179/2020|2020-06-21|EPI\_ISL\_544578|Original|hCoV-19^^Texas|Human|Houston Methodist Hospital|Houston Methodist Hospital|Long|USA

>Spike|hCoV-19/Canada/ON-OICR-SLB2868/2020|2020-04-10|EPI\_ISL\_538385|Original|hCoV-19^^Ontario|Human|Kingston Health Sciences Centre / Queen's University|Ontario Institute for Cancer Research|de Borja|Canada

>Spike|hCoV-19/USA/MA-MGH-03429/2020|2020-11-12|EPI\_ISL\_765834|Original|hCoV-19^^Massachusetts|Human|Massachusetts General Hospital|Infectious Disease Program|Park|USA

>Spike|hCoV-19/England/ALDP-9EAE09/2020|2020-09-24|EPI\_ISL\_579973|Original|hCoV-19^^England|Human|Lighthouse Lab in Alderley Park|Wellcome Sanger Institute for the COVID-19 Genomics UK (COG-UK) consortium|Davies|United Kingdom

>Spike|hCoV-19/England/MILK-B8E7FB/2020|2020-11-13|EPI\_ISL\_673952|Original|hCoV-19^^England|Human|Lighthouse Lab in Milton Keynes|Wellcome Sanger Institute for the COVID-19 Genomics UK (COG-UK) Consortium|Davies|United Kingdom

>Spike|hCoV-19/England/PORT-2D213F/2020|2020-03-21|EPI\_ISL\_613282|Original|hCoV-19^^England|Human|Centre for Enzyme Innovation|COVID-19 Genomics UK (COG-UK) Consortium|Robson|United Kingdom

>Spike|hCoV-19/England/QEUEH-54D55E/2020|2020-05-12|EPI\_ISL\_533412|Original|hCoV-19^^England|Human|Lighthouse Lab in Glasgow|Wellcome Sanger Institute for the COVID-19 Genomics UK (COG-UK) consortium|Davies|United Kingdom

>Spike|hCoV-19/USA/NY-Wadsworth-290636-01/2020|2020-12-24|EPI\_ISL\_767537|Original|hCoV-19^^New York|Human|Wadsworth Center|Wadsworth Center|Lasek-Nesselquist|USA

>Spike|hCoV-19/USA/CO-CDPHE-2009053300/2020|2020-09-04|EPI\_ISL\_710158|Original|hCoV-19^^Colorado|Human|Colorado Department of Public Health and Environment|Colorado Department of Public Health and Environment|Bankers|USA

>Spike|hCoV-19/Bangladesh/BCSIR-NILMRC-227/2020|2020-07-06|EPI\_ISL\_487367|Original|hCoV-19^^Barisal|Human|National Institute of Laboratory Medicine and Referral Center|Genomic Research Lab|Khan|Bangladesh

>Spike|hCoV-19/USA/AZ-TG408213/2020|2020-06-17|EPI\_ISL\_694949|Original|hCoV-19^^Arizona|Human|AZ SPHL|TGen North|French|USA

>Spike|hCoV-19/England/CAMC-C3EDF7/2020|2020-12-10|EPI\_ISL\_719226|Original|hCoV-19^^England|Human|Lighthouse Lab in Cambridge|Wellcome Sanger Institute for the COVID-19 Genomics UK (COG-UK) Consortium|Davies|United Kingdom

>Spike|hCoV-19/England/LOND-D432A/2020|2020-04-06|EPI\_ISL\_444117|Original|hCoV-19^^England|Human|University College London|COVID-19 Genomics UK (COG-UK) Consortium|Roy|United Kingdom

>Spike|hCoV-19/England/MILK-B56A7B/2020|2020-11-04|EPI\_ISL\_656865|Original|hCoV-19^^England|Human|Lighthouse Lab in Milton Keynes|Wellcome Sanger Institute for the COVID-19 Genomics UK (COG-UK) Consortium|Davies|United Kingdom

>Spike|hCoV-19/England/ALDP-51F42B/2020|2020-06-02|EPI\_ISL\_559050|Original|hCoV-19^^England|Human|Lighthouse Lab in Alderley Park|Wellcome Sanger Institute for the COVID-19 Genomics UK (COG-UK) consortium|Davies|United Kingdom

>Spike|hCoV-19/England/SHEF-C6F81/2020|2020-10-05|EPI\_ISL\_653071|Original|hCoV-19^^England|Human|Virology Department|COVID-19 Genomics UK (COG-UK) Consortium|de Silva|United Kingdom

>Spike|hCoV-19/Wales/PHWC-168867/2020|2020-04-20|EPI\_ISL\_494295|Original|hCoV-19^^Wales|Human|Originating lab|COVID-19 Genomics UK (COG-UK) Consortium|Moore|United Kingdom

>Spike|hCoV-19/Netherlands/Friesland\_10/2020|2020-03-30|EPI\_ISL\_422566|Original|hCoV-19^^Friesland|Human|Dutch COVID-19 response team|Erasmus Medical Center|Oude Munnink|Netherlands

>Spike|hCoV-19/England/QEUEH-B4019D/2020|2020-11-08|EPI\_ISL\_657060|Original|hCoV-19^^England|Human|Lighthouse Lab in Glasgow|Wellcome Sanger Institute for the COVID-19 Genomics UK (COG-UK) Consortium|Davies|United Kingdom

>Spike|hCoV-19/England/ALDP-9C5C73/2020|2020-09-10|EPI\_ISL\_567701|Original|hCoV-19^^England|Human|Lighthouse Lab in Alderley Park|Wellcome Sanger Institute for the COVID-19 Genomics UK (COG-UK) consortium|Davies|United Kingdom

>Spike|hCoV-19/England/BRIS-1852F61/2020|2020-03-29|EPI\_ISL\_492368|Original|hCoV-19^^England|Human|PHE South West Regional Laboratory|Wellcome Sanger Institute for the COVID-19 Genomics UK (COG-UK) consortium|Davies|United Kingdom

>Spike|hCoV-19/England/QEUEH-A8B689/2020|2020-10-16|EPI\_ISL\_643180|Original|hCoV-19^^England|Human|Lighthouse Lab in Glasgow|Wellcome Sanger Institute for the COVID-19 Genomics UK (COG-UK) Consortium|Davies|United Kingdom

>Spike|hCoV-19/England/ALDP-B636D1/2020|2020-11-09|EPI\_ISL\_656639|Original|hCoV-19^^England|Human|Lighthouse Lab in Alderley Park|Wellcome Sanger Institute for the COVID-19 Genomics UK (COG-UK) Consortium|Davies|United Kingdom

>Spike|hCoV-19/Belgium/ULG-10828/2020|2020-11-13|EPI\_ISL\_661216|Original|hCoV-19^^Li\u00e8ge|Human|Department of Clinical Microbiology|GIGA Medical Genomics|Durkin|Belgium

>Spike|hCoV-19/England/QEUEH-7C86B0/2020|2020-07-23|EPI\_ISL\_532912|Original|hCoV-19^^England|Human|Lighthouse Lab in Glasgow|Wellcome Sanger Institute for the COVID-19 Genomics UK (COG-UK) consortium|Davies|United Kingdom

>Spike|hCoV-19/England/ALDP-9CD0CA/2020|2020-09-16|EPI\_ISL\_566158|Original|hCoV-19^^England|Human|Lighthouse Lab in Alderley Park|Wellcome Sanger Institute for the COVID-19 Genomics UK (COG-UK) consortium|Davies|United Kingdom

>Spike|hCoV-19/USA/CA-ALSR-0563-SAN/2020|2020-05-10|EPI\_ISL\_483225|Original|hCoV-19^^California|Human|UC San Diego Center for Advanced Laboratory Medicine|Andersen lab at Scripps Research|Gangavarapu|USA

>Spike|hCoV-19/England/QEUEH-C4BDBB/2020|2020-12-14|EPI\_ISL\_736689|Original|hCoV-19^^England|Human|Lighthouse Lab in Glasgow|Wellcome Sanger Institute for the COVID-19 Genomics UK (COG-UK) Consortium|Davies|United Kingdom

>Spike|hCoV-19/Belgium/Rega-0327216/2020|2020-03-27|EPI\_ISL\_458186|Original|hCoV-19^^Givry|Human|KU Leuven|KU Leuven|Maes|Belgium

>Spike|hCoV-19/Scotland/CVR3919/2020|2020-06-21|EPI\_ISL\_512467|Original|hCoV-19^^Scotland|Human|West of Scotland Specialist Virology Centre|COVID-19 Genomics UK (COG-UK) Consortium|Robertson|United Kingdom

>Spike|hCoV-19/Wales/PHWC-4906F0/2020|2020-11-13|EPI\_ISL\_706502|Original|hCoV-19^^Wales|Human|Originating lab|COVID-19 Genomics UK (COG-UK) Consortium|Moore|United Kingdom

>Spike|hCoV-19/Japan/PG-0894/2020|2020-04-00|EPI\_ISL\_684504|Original|hCoV-19^^Japan|Human|Pathogen Genomics Center|Pathogen Genomics Center|Sekizuka|Japan

>Spike|hCoV-19/Serbia/Novi Pazar-00391007/2020|2020-07-09|EPI\_ISL\_644579|Original|hCoV-19^^Novi Pazar|Human|Veterinary Specialized Institute \Kraljevo\|Veterinary Specialized Institute \Kraljevo\|Vidanovic|Serbia

>Spike|hCoV-19/England/MILK-9D453A/2020|2020-09-18|EPI\_ISL\_601674|Original|hCoV-19^^England|Human|Lighthouse Lab in Milton Keynes|Wellcome Sanger Institute for the COVID-19 Genomics UK (COG-UK) consortium|Davies|United Kingdom

>Spike|hCoV-19/Denmark/DCGC-860/2020|2020-05-18|EPI\_ISL\_614827|Original|hCoV-19^^Hovedstaden|Human|Department of Virus and Microbiological Special Diagnostics|Albertsen lab|Michaelsen|Denmark

>Spike|hCoV-19/England/ALDP-952A17/2020|2020-06-11|EPI\_ISL\_554062|Original|hCoV-19^^England|Human|Lighthouse Lab in Alderley Park|Wellcome Sanger Institute for the COVID-19 Genomics UK (COG-UK) consortium|Davies|United Kingdom

>Spike|hCoV-19/USA/AZ-TG491678/2020|2020-06-25|EPI\_ISL\_695211|Original|hCoV-19^^Arizona|Human|AZ SPHL|TGen North|French|USA

>Spike|hCoV-19/Switzerland/ZH-ETHZ-410315/2020|2020-12-16|EPI\_ISL\_737568|Original|hCoV-19^^Zurich|Human|Viollier AG|Department of Biosystems Science and Engineering|Nadeau|Switzerland

>Spike|hCoV-19/USA/WA-UW-16246/2020|2020-07-10|EPI\_ISL\_776674|Original|hCoV-19^^Washington|Human|UW Virology Lab|UW Virology Lab|Roychoudhury|USA

>Spike|hCoV-19/USA/NY-Wadsworth-290345-01/2020|2020-12-18|EPI\_ISL\_765535|Original|hCoV-19^^New York|Human|MONTEFIORE MEDICAL CENTER LABORATORIES|Wadsworth Center|Lasek-Nesselquist|USA

>Spike|hCoV-19/England/CAMB-729FF/2020|2020-03-22|EPI\_ISL\_439558|Original|hCoV-19^^England|Human|Department of Pathology|Wellcome Sanger Institute for the COVID-19 Genomics UK (COG-UK) consortium|Amato|United Kingdom

>Spike|hCoV-19/South Korea/KCDC2806/2020|2020-07-30|EPI\_ISL\_526740|Original|hCoV-19^^South Korea|Human|Center for Laboratory Control of Infectious Diseases|Center for Laboratory Control of Infectious Diseases|Kim|South Korea

>Spike|hCoV-19/England/CAMB-7FC53/2020|2020-04-16|EPI\_ISL\_433496|Original|hCoV-19^^England|Human|Department of Pathology|COVID-19 Genomics UK (COG-UK) Consortium|Meredith|United Kingdom

>Spike|hCoV-19/England/CAMC-9D2156/2020|2020-09-18|EPI\_ISL\_601594|Original|hCoV-19^^England|Human|Lighthouse Lab in Cambridge|Wellcome Sanger Institute for the COVID-19 Genomics UK (COG-UK) consortium|Davies|United Kingdom

>Spike|hCoV-19/Denmark/DCGC-16213/2020|2020-11-16|EPI\_ISL\_714642|Original|hCoV-19^^Midtjylland|Human|Department of Virus and Microbiological Special Diagnostics|Albertsen Lab|Michaelsen|Denmark

>Spike|hCoV-19/Wales/PHWC-16003A/2020|2020-05-25|EPI\_ISL\_472885|Original|hCoV-19^^Wales|Human|Wales Specialist Virology Centre Sequencing lab|COVID-19 Genomics UK (COG-UK) Consortium|Moore|United Kingdom

>Spike|hCoV-19/Taiwan/TSGH-06/2020|2020-03-15|EPI\_ISL\_427393|Original|hCoV-19^^Taipei|Human|TSGH-CP molecular lab|TSGH-CP molecular lab|Shang|Taiwan

>Spike|hCoV-19/England/20118016704/2020|2020-03-11|EPI\_ISL\_464889|Original|hCoV-19^^England|Human|Respiratory Virus Unit|Respiratory Virus Unit|Platt|United Kingdom

>Spike|hCoV-19/USA/CA-CZB-15137/2020|2020-11-23|EPI\_ISL\_739252|Original|hCoV-19^^California|Human|Santa Clara County Public Health Laboratory|Chan-Zuckerberg Biohub|Kamm|USA

>Spike|hCoV-19/Japan/PG-6695/2020|2020-07-00|EPI\_ISL\_687806|Original|hCoV-19^^Japan|Human|Pathogen Genomics Center|Pathogen Genomics Center|Sekizuka|Japan

>Spike|hCoV-19/USA/NY-NYCPHL-001454/2020|2020-11-25|EPI\_ISL\_683817|Original|hCoV-19^^New York|Human|DOHMH Corona|New York City Public Health Laboratory|Wang|USA

>Spike|hCoV-19/Spain/MD-IBV-97010031/2020|2020-03-11|EPI\_ISL\_779717|Original|hCoV-19^^Madrid|Human|IdISSC/Hospital Cl\u00e9nico San Carlos de Madrid\u200b|SeqCOVID-SPAIN consortium|IBV (CSIC)|Comas|Spain

>Spike|hCoV-19/USA/WA-S2466/2020|2020-06-15|EPI\_ISL\_497098|Original|hCoV-19^^Washington|Human|Washington State Department of Health|Seattle Flu Study|Lee|USA

>Spike|hCoV-19/England/BRIS-129A99/2020|2020-04-15|EPI\_ISL\_458320|Original|hCoV-19^^England|Human|PHE South West Regional Laboratory|Wellcome Sanger Institute for the COVID-19 Genomics UK (COG-UK) consortium|Davies|United Kingdom

>Spike|hCoV-19/Bangladesh/BCSIR-NILMRC-367/2020|2020-07-21|EPI\_ISL\_514239|Original|hCoV-19^^Chittagong|Human|National Institute of Laboratory Medicine and Referral Center|Genomic Research Lab|Khan|Bangladesh

>Spike|hCoV-19/USA/AZ-TG333445/2020|2020-05-27|EPI\_ISL\_694356|Original|hCoV-19^^Arizona|Human|TGen North|TGen North|French|USA

>Spike|hCoV-19/Scotland/CVR5717/2020|2020-11-05|EPI\_ISL\_651931|Original|hCoV-19^^Scotland|Human|West of Scotland Specialist Virology Centre|COVID-19 Genomics UK (COG-UK) Consortium|Robertson|United Kingdom

>Spike|hCoV-19/Australia/VIC14076/2020|2020-09-17|EPI\_ISL\_592344|Original|hCoV-19^^Victoria|Human|Microbiological Diagnostic Unit - Public Health Laboratory (MDU-PHL)|MDU-PHL|Schultz|Australia

>Spike|hCoV-19/England/ALDP-9E6A45/2020|2020-09-24|EPI\_ISL\_580359|Original|hCoV-19^^England|Human|Lighthouse Lab in Alderley Park|Wellcome Sanger Institute for the COVID-19 Genomics UK (COG-UK) consortium|Davies|United Kingdom

>Spike|hCoV-19/USA/CA-CHLA-PLM28392841/2020|2020-11-30|EPI\_ISL\_753558|Original|hCoV-19^^California|Human|Clinical virology Laboratory|Center for Personalized Medicine|Dien Bard|USA

>Spike|hCoV-19/USA/UT-UPHL-2008841/2020|2020-05-22|EPI\_ISL\_524858|Original|hCoV-19^^Utah|Human|Utah Public Health Laboratory|Utah Public Health Laboratory|Young|USA

>Spike|hCoV-19/Belgium/ULG-9742/2020|2020-03-22|EPI\_ISL\_418665|Original|hCoV-19^^Li\u00e8ge|Human|Department of Clinical Microbiology|GIGA Medical Genomics|Durkin|Belgium

>Spike|hCoV-19/USA/MI-MDHHS-SC20328/2020|2020-03-18|EPI\_ISL\_450607|Original|hCoV-19^^Michigan|Human|Michigan Department of Health and Human Services|Michigan Department of Health and Human Services|Blankenship|USA

>Spike|hCoV-19/England/NORW-F0C1E/2020|2020-10-13|EPI\_ISL\_595205|Original|hCoV-19^^England|Human|Quadram Institute Bioscience|COVID-19 Genomics UK (COG-UK) Consortium|Alikhan|United Kingdom

>Spike|hCoV-19/South Korea/IHC597/2020|2020-02-20|EPI\_ISL\_540993|Vero|hCoV-19^^Gwangju|Human|Health and Environmental Research Institute of Gwangju Metropolitan city|Health and Environmental Research Institute of Gwangju Metropolitan city|Kim|South Korea

>Spike|hCoV-19/USA/TX-DSHS-1246/2020|2020-05-30|EPI\_ISL\_644187|Original|hCoV-19^^Texas|Human|Texas Department of State Health Services|Texas Department of State Health Services|Rahman|USA

>Spike|hCoV-19/England/CAMC-AAF5FB/2020|2020-10-22|EPI\_ISL\_631101|Original|hCoV-19^^England|Human|Lighthouse Lab in Cambridge|Wellcome Sanger Institute for the COVID-19 Genomics UK (COG-UK) consortium|Davies|United Kingdom

>Spike|hCoV-19/England/SHEF-10D02C4/2020|2020-12-20|EPI\_ISL\_765176|Original|hCoV-19^^England|Human|Virology Department|COVID-19 Genomics UK (COG-UK) Consortium|de Silva|United Kingdom

>Spike|hCoV-19/Denmark/DCGC-13000/2020|2020-12-07|EPI\_ISL\_712519|Original|hCoV-19^^Midtjylland|Human|Department of Virus and Microbiological Special Diagnostics|Albertsen Lab|Michaelsen|Denmark

>Spike|hCoV-19/England/QEUEH-9F4367/2020|2020-09-25|EPI\_ISL\_588523|Original|hCoV-19^^England|Human|Lighthouse Lab in Glasgow|Wellcome Sanger Institute for the COVID-19 Genomics UK (COG-UK) consortium|Davies|United Kingdom

>Spike|hCoV-19/India/DL-NCDC3832-CSIR-IGIB/2020|2020-05-20|EPI\_ISL\_482587|Original|hCoV-19^^Delhi|Human|National Centre for Disease control (NCDC)|NCDC/CSIR-IGIB|Singh|India

>Spike|hCoV-19/Denmark/DCGC-4862/2020|2020-09-14|EPI\_ISL\_621548|Original|hCoV-19^^Nordjylland|Human|Department of Virus and Microbiological Special Diagnostics|Albertsen lab|Michaelsen|Denmark

>Spike|hCoV-19/England/CAMC-A572BF/2020|2020-10-15|EPI\_ISL\_597354|Original|hCoV-19^^England|Human|Lighthouse Lab in Cambridge|Wellcome Sanger Institute for the COVID-19 Genomics UK (COG-UK) consortium|Davies|United Kingdom

>Spike|hCoV-19/Northern Ireland/NIRE-FB3D2/2020|2020-03-20|EPI\_ISL\_441417|Original|hCoV-19^^Northern Ireland|Human|Regional Virus Laboratory|COVID-19 Genomics UK (COG-UK) Consortium|Fairley|United Kingdom

>Spike|hCoV-19/Bahrain/530223991\_s30\_L001/2020|2020-10-14|EPI\_ISL\_632906|Original|hCoV-19^^Bahrain|Human|Communicable Disease Laboratory|Communicable Disease Laboratory|Altaif|Bahrain

>Spike|hCoV-19/England/MILK-A7A3A4/2020|2020-10-15|EPI\_ISL\_606673|Original|hCoV-19^^England|Human|Lighthouse Lab in Milton Keynes|Wellcome Sanger Institute for the COVID-19 Genomics UK (COG-UK) consortium|Davies|United Kingdom

>Spike|hCoV-19/Denmark/DCGC-16326/2020|2020-11-16|EPI\_ISL\_714704|Original|hCoV-19^^Syddanmark|Human|Department of Virus and Microbiological Special Diagnostics|Albertsen Lab|Michaelsen|Denmark

>Spike|hCoV-19/England/MILK-A468DF/2020|2020-10-05|EPI\_ISL\_598732|Original|hCoV-19^^England|Human|Lighthouse Lab in Milton Keynes|Wellcome Sanger Institute for the COVID-19 Genomics UK (COG-UK) consortium|Davies|United Kingdom

>Spike|hCoV-19/Ireland/D-NVRL-76IRL32009/2020|2020-10-18|EPI\_ISL\_732483|Original|hCoV-19^^Dublin|Human|National Virus Reference Laboratory|National Virus Reference Laboratory|Gonzalez|Ireland

>Spike|hCoV-19/USA/TX-HMH-MCoV-9973/2020|2020-07-06|EPI\_ISL\_780361|Original|hCoV-19^^Texas|Human|Houston Methodist Hospital|Houston Methodist Hospital|Long|USA

>Spike|hCoV-19/England/QEUEH-B69F2B/2020|2020-11-11|EPI\_ISL\_655077|Original|hCoV-19^^England|Human|Lighthouse Lab in Glasgow|Wellcome Sanger Institute for the COVID-19 Genomics UK (COG-UK) Consortium|Davies|United Kingdom

>Spike|hCoV-19/England/ALDP-94F1AF/2020|2020-06-20|EPI\_ISL\_556328|Original|hCoV-19^^England|Human|Lighthouse Lab in Alderley Park|Wellcome Sanger Institute for the COVID-19 Genomics UK (COG-UK) consortium|Davies|United Kingdom

>Spike|hCoV-19/England/MILK-B38E55/2020|2020-11-01|EPI\_ISL\_658841|Original|hCoV-19^^England|Human|Lighthouse Lab in Milton Keynes|Wellcome Sanger Institute for the COVID-19 Genomics UK (COG-UK) Consortium|Davies|United Kingdom

>Spike|hCoV-19/USA/TX-HMH-4051/2020|2020-06-18|EPI\_ISL\_543327|Original|hCoV-19^^Texas|Human|Houston Methodist Hospital|Houston Methodist Hospital|Long|USA

>Spike|hCoV-19/England/20146001704/2020|2020-04-01|EPI\_ISL\_423572|Original|hCoV-19^^England|Human|Respiratory Virus Unit|Respiratory Virus Unit|Platt|United Kingdom

>Spike|hCoV-19/England/QEUEH-B7E855/2020|2020-11-14|EPI\_ISL\_668220|Original|hCoV-19^^England|Human|Lighthouse Lab in Glasgow|Wellcome Sanger Institute for the COVID-19 Genomics UK (COG-UK) Consortium|Davies|United Kingdom

>Spike|hCoV-19/England/NOTT-11F3C8/2020|2020-05-12|EPI\_ISL\_679967|Original|hCoV-19^^England|Human|Lincolnshire Hospitals and DeepSeq Nottingham|COVID-19 Genomics UK (COG-UK) Consortium|Loose|United Kingdom

>Spike|hCoV-19/USA/CA-ALSR-3214/2020|2020-07-27|EPI\_ISL\_635914|Original|hCoV-19^^California|Human|San Diego County Public Health Laboratory|Andersen lab at Scripps Research|Gangavarapu|USA

>Spike|hCoV-19/India/WB-ACTREC-076/2020|2020-05-18|EPI\_ISL\_699732|Original|hCoV-19^^West Bengal|Human|Hematopathology Laboratory|Hematopathology Laboratory|Patkar|India

>Spike|hCoV-19/USA/MA-MGH-00150/2020|2020-03-26|EPI\_ISL\_460462|Original|hCoV-19^^Massachusetts|Human|Massachusetts General Hospital|Infectious Disease Program|Lemieux|USA

>Spike|hCoV-19/India/MH-GA2/2020|2020-06-17|EPI\_ISL\_508215|Original|hCoV-19^^Maharashtra|Human|Government Medical College|National Institute of Biomedical Genomics|Maitra|India

>Spike|hCoV-19/England/BIRM-605B4/2020|2020-05-28|EPI\_ISL\_477732|Original|hCoV-19^^England|Human|University of Birmingham|COVID-19 Genomics UK (COG-UK) Consortium|Loman|United Kingdom

>Spike|hCoV-19/Japan/PG-6702/2020|2020-07-00|EPI\_ISL\_687813|Original|hCoV-19^^Japan|Human|Pathogen Genomics Center|Pathogen Genomics Center|Sekizuka|Japan

>Spike|hCoV-19/USA/OR-OHSU-2837/2020|2020-09-02|EPI\_ISL\_667343|Original|hCoV-19^^Oregon|Human|OHSU Lab Services Molecular Microbiology Lab|Oregon SARS-CoV-2 Genome Sequencing Center|O'Roak|USA

>Spike|hCoV-19/Scotland/QEUI-A32241/2020|2020-10-07|EPI\_ISL\_627303|Original|hCoV-19^^Scotland|Human|Oxford Viromics|COVID-19 Genomics UK (COG-UK) Consortium|Golubchik|United Kingdom

>Spike|hCoV-19/Switzerland/SO-ETHZ-410340/2020|2020-12-17|EPI\_ISL\_737398|Original|hCoV-19^^Solothurn|Human|Viollier AG|Department of Biosystems Science and Engineering|Nadeau|Switzerland

>Spike|hCoV-19/England/NOTT-110682/2020|2020-04-20|EPI\_ISL\_441544|Original|hCoV-19^^England|Human|Queens Medical Centre|COVID-19 Genomics UK (COG-UK) Consortium|Loose|United Kingdom

>Spike|hCoV-19/England/QEUI-960B7D/2020|2020-08-03|EPI\_ISL\_532050|Original|hCoV-19^^England|Human|Lighthouse Lab in Glasgow|Wellcome Sanger Institute for the COVID-19 Genomics UK (COG-UK) consortium|Davies|United Kingdom

>Spike|hCoV-19/Spain/VC-FISABIO-101/2020|2020-03-15|EPI\_ISL\_436196|Original|hCoV-19^^Comunitat Valenciana|Human|Servicio de Microbiolog\u00eda. Consorcio Hospital General Universitario de Valencia|Sequencing and Bioinformatics Service and Molecular Epidemiology Research Group. FISABIO-Public Health|Gonzalez-Candelas|Spain

>Spike|hCoV-19/Singapore/8/2020|2020-02-03|EPI\_ISL\_410714|Original|hCoV-19^^Singapore|Human|National Public Health Laboratory|National Public Health Laboratory|Mak|Singapore

>Spike|hCoV-19/England/NORT-282990/2020|2020-03-27|EPI\_ISL\_488647|Original|hCoV-19^^England|Human|NU-OMICS DNA Sequencing research facility|Wellcome Sanger Institute for the COVID-19 Genomics UK (COG-UK) consortium|Davies|United Kingdom

>Spike|hCoV-19/South Africa/KRISP-GD00687523/2020|2020-11-25|EPI\_ISL\_736993|Original|hCoV-19^^KwaZulu-Natal|Human|NHLS-IALCH|KRISP|de Oliveira|South Africa

>Spike|hCoV-19/England/CAMC-B7A473/2020|2020-11-12|EPI\_ISL\_741113|Original|hCoV-19^^England|Human|Oxford Viromics|COVID-19 Genomics UK (COG-UK) Consortium|Golubchik|United Kingdom

>Spike|hCoV-19/France/IDF-9449/2020|2020-10-12|EPI\_ISL\_614285|Original|hCoV-19^^\u00cele-de-France|Human|General practitioner|National Reference Center for Viruses of Respiratory Infections|Enouf|France

>Spike|hCoV-19/Switzerland/BS-UHB-42202292/2020|2020-03-22|EPI\_ISL\_528332|Original|hCoV-19^^Basel-Stadt|Human|University Hospital Basel|University Hospital Basel|Roloff Handschin|Switzerland

>Spike|hCoV-19/Germany/HH-hpi-p2366/2020|2020-03-24|EPI\_ISL\_775883|Original|hCoV-19^^Hamburg|Human|University Medical Center Hamburg Eppendorf|Heinrich Pette Institute|Robitaille|Germany

>Spike|hCoV-19/Spain/VC-FISABIO-181/2020|2020-03-22|EPI\_ISL\_436276|Original|hCoV-19^^Comunitat Valenciana|Human|Servicio de Microbiolog\u00eda. Consorcio Hospital General Universitario de Valencia|Sequencing and Bioinformatics Service and Molecular Epidemiology Research Group. FISABIO-Public Health|Gonzalez-Candelas|Spain

>Spike|hCoV-19/England/MILK-9918B8/2020|2020-08-26|EPI\_ISL\_577000|Original|hCoV-19^^England|Human|Northumbria University / South Tees Hospitals NHS Foundation Trust / North Cumbria Integrated Care NHS Foundation Trust / North Tees and Hartlepool NHS Foundation Trust / Newcastle Hospitals NHS Foundation Trust|COVID-19 Genomics UK (COG-UK) Consortium|Bashton|United Kingdom

>Spike|hCoV-19/England/QEUI-7A7E55/2020|2020-07-11|EPI\_ISL\_533051|Original|hCoV-19^^England|Human|Lighthouse Lab in Glasgow|Wellcome Sanger Institute for the COVID-19 Genomics UK (COG-UK) consortium|Davies|United Kingdom

>Spike|hCoV-19/Scotland/EDB6288/2020|2020-04-03|EPI\_ISL\_487724|Original|hCoV-19^^Scotland|Human|Virology Department|Wellcome Sanger Institute for the COVID-19 Genomics UK (COG-UK) consortium|Davies|United Kingdom

>Spike|hCoV-19/USA/UT-QDX-2230/2020|2020-03-12|EPI\_ISL\_604591|Original|hCoV-19^^Utah|Human|Quest Diagnostics|Quest Diagnostics|Kagan|USA

>Spike|hCoV-19/England/ALDP-B1A3E1/2020|2020-11-01|EPI\_ISL\_646138|Original|hCoV-19^^England|Human|Lighthouse Lab in Alderley Park|Wellcome Sanger Institute for the COVID-19 Genomics UK (COG-UK) Consortium|Davies|United Kingdom

>Spike|hCoV-19/England/CAMB-76E38/2020|2020-03-31|EPI\_ISL\_425432|Original|hCoV-19^^England|Human|Department of Pathology|COVID-19 Genomics UK (COG-UK) Consortium|Meredith|United Kingdom



>Spike|hCoV-19/United Arab Emirates/1069/2020|2020-06-11|EPI\_ISL\_708827|Original|hCoV-19^^Abu Dhabi|Human|Group 42 (G42) Healthcare|G42 Healthcare|Ogrodzki|United Arab Emirates

>Spike|hCoV-19/Spain/MD-IBV-99008585/2020|2020-09-21|EPI\_ISL\_654125|Original|hCoV-19^^Madrid|Human|Hospital General Universitario Gregorio Mara\u00f1\u00f3n|SeqCOVID-SPAIN consortium/IBV (CSIC)|Comas|Spain

>Spike|hCoV-19/Germany/NW-HHU-505/2020|2020-09-17|EPI\_ISL\_770721|Original|hCoV-19^^North Rhine-Westphalia|Human|ZOTZ KLIMAS MVZ D\u00fcsseldorf-Centrum GbR \u00dcBAG f\u00fcr Labormedizin|Center of Medical Microbiology|Wienemann|Germany

>Spike|hCoV-19/USA/LA-EVTL692/2020|2020-07-14|EPI\_ISL\_653384|Original|hCoV-19^^Louisiana|Human|LSUHS Emerging Viral Threat Laboratory|Microbial Genome Sequencing Center|Kamil|USA

>Spike|hCoV-19/England/GSTT-5178/2020|2020-03-18|EPI\_ISL\_560655|Original|hCoV-19^^England|Human|Centre for Clinical Infection and Diagnostics Research and Genomics Innovation Unit|Centre for Clinical Infection and Diagnostics Research and Genomics Innovation Unit|Awan|United Kingdom

>Spike|hCoV-19/Scotland/CVR5315/2020|2020-10-22|EPI\_ISL\_651752|Original|hCoV-19^^Scotland|Human|West of Scotland Specialist Virology Centre|COVID-19 Genomics UK (COG-UK) Consortium|Robertson|United Kingdom

>Spike|hCoV-19/England/CAMC-C860CA/2020|2020-12-17|EPI\_ISL\_756499|Original|hCoV-19^^England|Human|Lighthouse Lab in Cambridge|Wellcome Sanger Institute for the COVID-19 Genomics UK (COG-UK) Consortium|Davies|United Kingdom

>Spike|hCoV-19/England/QEUEH-AD4609/2020|2020-10-26|EPI\_ISL\_634625|Original|hCoV-19^^England|Human|Lighthouse Lab in Glasgow|Wellcome Sanger Institute for the COVID-19 Genomics UK (COG-UK) consortium|Davies|United Kingdom

>Spike|hCoV-19/England/204501161/2020|2020-11-02|EPI\_ISL\_660785|Original|hCoV-19^^England|Human|Respiratory Virus Unit|COVID-19 Genomics UK (COG-UK) Consortium|Platt|United Kingdom

>Spike|hCoV-19/England/CAMC-A57CA2/2020|2020-10-09|EPI\_ISL\_597285|Original|hCoV-19^^England|Human|Lighthouse Lab in Cambridge|Wellcome Sanger Institute for the COVID-19 Genomics UK (COG-UK) consortium|Davies|United Kingdom

>Spike|hCoV-19/England/ALDP-6C53EA/2020|2020-07-01|EPI\_ISL\_556119|Original|hCoV-19^^England|Human|Lighthouse Lab in Alderley Park|Wellcome Sanger Institute for the COVID-19 Genomics UK (COG-UK) consortium|Davies|United Kingdom

>Spike|hCoV-19/England/QEUEH-941170/2020|2020-07-29|EPI\_ISL\_532637|Original|hCoV-19^^England|Human|Lighthouse Lab in Glasgow|Wellcome Sanger Institute for the COVID-19 Genomics UK (COG-UK) consortium|Davies|United Kingdom

>Spike|hCoV-19/Wales/PHWC-496F4A/2020|2020-11-25|EPI\_ISL\_726752|Original|hCoV-19^^Wales|Human|Originating lab|COVID-19 Genomics UK (COG-UK) Consortium|Moore|United Kingdom

>Spike|hCoV-19/USA/MI-QDX-488/2020|2020-03-23|EPI\_ISL\_571222|Original|hCoV-19^^Michigan|Human|Quest Diagnostics|Quest Diagnostics|Kagan|USA

>Spike|hCoV-19/Austria/CeMM0246/2020|2020-03-21|EPI\_ISL\_438076|Original|hCoV-19^^Vienna|Human|Center for Virology|Bergthaler laboratory|Bergthaler|Austria

>Spike|hCoV-19/South Korea/KCDC2305/2020|2020-05-25|EPI\_ISL\_510641|Original|hCoV-19^^South Korea|Human|Division of Viral Diseases|Division of Viral Diseases|Kim|South Korea

>Spike|hCoV-19/Denmark/DCGC-13323/2020|2020-11-30|EPI\_ISL\_712728|Original|hCoV-19^^Hovedstaden|Human|Department of Virus and Microbiological Special Diagnostics|Albertsen Lab|Michaelsen|Denmark

>Spike|hCoV-19/England/ALDP-B6346E/2020|2020-11-09|EPI\_ISL\_656613|Original|hCoV-19^^England|Human|Lighthouse Lab in Alderley Park|Wellcome Sanger Institute for the COVID-19 Genomics UK (COG-UK) Consortium|Davies|United Kingdom

>Spike|hCoV-19/Northern Ireland/NIRE-FBB43/2020|2020-04-12|EPI\_ISL\_470014|Original|hCoV-19^^Northern Ireland|Human|Regional Virus Laboratory|Wellcome Sanger Institute for the COVID-19 Genomics UK (COG-UK) consortium|Davies|United Kingdom

>Spike|hCoV-19/England/ALDP-AA077C/2020|2020-10-22|EPI\_ISL\_624131|Original|hCoV-19^^England|Human|Lighthouse Lab in Alderley Park|Wellcome Sanger Institute for the COVID-19 Genomics UK (COG-UK) consortium|Davies|United Kingdom

>Spike|hCoV-19/Wales/MILK-9A94C8/2020|2020-09-01|EPI\_ISL\_551058|Original|hCoV-19^^Wales|Human|Lighthouse Lab in Milton Keynes|Wellcome Sanger Institute for the COVID-19 Genomics UK (COG-UK) consortium|Davies|United Kingdom

>Spike|hCoV-19/India/KA-IB19/2020|2020-06-17|EPI\_ISL\_508297|Original|hCoV-19^^Karnataka|Human|Indian Institute of Science|National Institute of Biomedical Genomics|Maitra|India

>Spike|hCoV-19/England/LIVE-DC4609/2020|2020-11-10|EPI\_ISL\_705897|Original|hCoV-19^^England|Human|Liverpool Clinical Laboratories|COVID-19 Genomics UK (COG-UK) Consortium|Haldenby|United Kingdom

>Spike|hCoV-19/Wales/PHWC-4A2C44/2020|2020-12-13|EPI\_ISL\_743997|Original|hCoV-19^^Wales|Human|Wales Specialist Virology Centre Sequencing lab|COVID-19 Genomics UK (COG-UK) Consortium|Moore|United Kingdom

>Spike|hCoV-19/England/LOND-1266C69/2020|2020-12-10|EPI\_ISL\_741191|Original|hCoV-19^^England|Human|University College London|COVID-19 Genomics UK (COG-UK) Consortium|Roy|United Kingdom

>Spike|hCoV-19/Japan/PG-5904/2020|2020-08-00|EPI\_ISL\_689019|Original|hCoV-19^^Japan|Human|Pathogen Genomics Center|Pathogen Genomics Center|Sekizuka|Japan

>Spike|hCoV-19/USA/MI-MDHHS-SC20212/2020|2020-03-17|EPI\_ISL\_447183|Original|hCoV-19^^Michigan|Human|Michigan Department of Health and Human Services|Michigan Department of Health and Human Services|Blankenship|USA

>Spike|hCoV-19/Spain/CL-IBV-97006255/2020|2020-04-20|EPI\_ISL\_537627|Original|hCoV-19^^Castilla y Leon|Human|Universidad de Le\u00f3n|SeqCOVID-SPAIN consortium/IBV (CSIC) |Comas|Spain

>Spike|hCoV-19/Ireland/D-NVRL-20Z04363/2020|2020-04-15|EPI\_ISL\_671370|Original|hCoV-19^^Dublin|Human|National Virus Reference Laboratory|Irish Coronavirus Sequencing Consortium - Teagasc Moorepark|Walsh|Ireland

>Spike|hCoV-19/South Africa/Tygerberg\_38/2020|2020-04-08|EPI\_ISL\_464149|Original|hCoV-19^^Western Cape|Human|National Health Laboratory Service (NHLS)|Division of Medical Virology|Engelbrecht|South Africa

>Spike|hCoV-19/Scotland/QEUH-9AF19E/2020|2020-09-03|EPI\_ISL\_560032|Original|hCoV-19^^Scotland|Human|Oxford Viromics|COVID-19 Genomics UK (COG-UK) Consortium|Golubchik|United Kingdom

>Spike|hCoV-19/Chile/RM-133547/2020|2020-07-25|EPI\_ISL\_746635|Original|hCoV-19^^Region Metropolitana de Santiago|Human|Genetica Molecular and Subdepartamento de Virologia ISP Chile|Instituto de Salud Publica de Chile|Tognarelli|Chile

>Spike|hCoV-19/England/ALDP-981E8C/2020|2020-08-10|EPI\_ISL\_552750|Original|hCoV-19^^England|Human|Lighthouse Lab in Alderley Park|Wellcome Sanger Institute for the COVID-19 Genomics UK (COG-UK) consortium|Davies|United Kingdom

>Spike|hCoV-19/USA/NV-NSPHL-A0076/2020|2020-04-11|EPI\_ISL\_515354|Original|hCoV-19^^Nevada|Human|Nevada State Public Health Laboratory|Nevada State Public Health Laboratory|Sevinsky|USA

>Spike|hCoV-19/Portugal/PT0399a/2020|2020-04-19|EPI\_ISL\_454122|Original|hCoV-19^^Portugal|Human|unknown|Instituto Nacional de Saude (INSA)|Borges|Portugal

>Spike|hCoV-19/England/CAMC-C47906/2020|2020-12-10|EPI\_ISL\_718954|Original|hCoV-19^^England|Human|Lighthouse Lab in Cambridge|Wellcome Sanger Institute for the COVID-19 Genomics UK (COG-UK) Consortium|Davies|United Kingdom

>Spike|hCoV-19/England/ALDP-9E8F9F/2020|2020-09-24|EPI\_ISL\_584179|Original|hCoV-19^^England|Human|Centre for Enzyme Innovation|COVID-19 Genomics UK (COG-UK) Consortium|Robson|United Kingdom

>Spike|hCoV-19/Wales/PHWC-16BE35/2020|2020-09-18|EPI\_ISL\_573979|Original|hCoV-19^^Wales|Human|Wales Specialist Virology Centre Sequencing lab|COVID-19 Genomics UK (COG-UK) Consortium|Moore|United Kingdom

>Spike|hCoV-19/USA/TX-HMH-1119/2020|2020-04-17|EPI\_ISL\_542541|Original|hCoV-19^^Texas|Human|Houston Methodist Hospital|Houston Methodist Hospital|Long|USA

>Spike|hCoV-19/France/ARA-SC066/2020|2020-04-17|EPI\_ISL\_629103|Original|hCoV-19^^Auvergne-Rh\u00f4ne-Alpes|Human|Laboratoire du Centre Hospitalier Annecy Genevois|CNR Virus des Infections Respiratoires - France SUD|Bal|France

>Spike|hCoV-19/Wales/PHWC-16D3DA/2020|2020-09-18|EPI\_ISL\_574232|Original|hCoV-19^^Wales|Human|Wales Specialist Virology Centre Sequencing lab|COVID-19 Genomics UK (COG-UK) Consortium|Moore|United Kingdom

>Spike|hCoV-19/England/ALDP-4ADF31/2020|2020-06-08|EPI\_ISL\_559622|Original|hCoV-19^^England|Human|Lighthouse Lab in Alderley Park|Wellcome Sanger Institute for the COVID-19 Genomics UK (COG-UK) consortium|Davies|United Kingdom

>Spike|hCoV-19/Wales/PHWC-32DB3/2020|2020-04-14|EPI\_ISL\_446689|Original|hCoV-19^^Wales|Human|Wales Specialist Virology Centre|Public Health Wales Microbiology Cardiff|Moore|United Kingdom

>Spike|hCoV-19/USA/MI-MDHHS-SC22696/2020|2020-12-08|EPI\_ISL\_767345|Original|hCoV-19^^Michigan|Human|Michigan Department of Health and Human Services|Michigan Department of Health and Human Services|Jacob|USA

>Spike|hCoV-19/Italy/VEN-UniVR-139/2020|2020-04-04|EPI\_ISL\_751436|Original|hCoV-19^^Veneto|Human|IRCCS Sacro Cuore Don Calabria Hospital|University of Verona|Mori|Italy

>Spike|hCoV-19/USA/ME-HETL-J0284/2020|2020-10-05|EPI\_ISL\_755427|Original|hCoV-19^^Maine|Human|Maine Health and Environmental Testing Laboratory|Tewhey Lab|Tewhey|USA

>Spike|hCoV-19/USA/FL-BPHL-0416/2020|2020-05-14|EPI\_ISL\_489825|Original|hCoV-19^^Florida|Human|Florida Bureau of Public Health Laboratories|Florida Bureau of Public Health Laboratories|Blanton|USA

>Spike|hCoV-19/Wales/PHWC-15C5E7/2020|2020-05-04|EPI\_ISL\_472513|Original|hCoV-19^^Wales|Human|Wales Specialist Virology Centre Sequencing lab|COVID-19 Genomics UK (COG-UK) Consortium|Moore|United Kingdom

>Spike|hCoV-19/Australia/VIC261/2020|2020-03-21|EPI\_ISL\_419954|Original|hCoV-19^^Victoria|Human|Victorian Infectious Diseases Reference Laboratory (VIDRL)|Victorian Infectious Diseases Reference Laboratory and Microbiological Diagnostic Unit Public Health Laboratory|Schultz|Australia

>Spike|hCoV-19/England/SHEF-C391D/2020|2020-06-18|EPI\_ISL\_484445|Original|hCoV-19^^England|Human|Virology Department|COVID-19 Genomics UK (COG-UK) Consortium|de Silva|United Kingdom

>Spike|hCoV-19/Singapore/341/2020|2020-04-16|EPI\_ISL\_469095|Original|hCoV-19^^Singapore|Human|National Public Health Laboratory|National Public Health Laboratory|Mak|Singapore

>Spike|hCoV-19/USA/WA-S2569/2020|2020-06-18|EPI\_ISL\_497201|Original|hCoV-19^^Washington|Human|Washington State Department of Health|Seattle Flu Study|Lee|USA

>Spike|hCoV-19/England/CAMB-7EDE8/2020|2020-04-07|EPI\_ISL\_442997|Original|hCoV-19^^England|Human|Department of Pathology|Wellcome Sanger Institute for the COVID-19 Genomics UK (COG-UK) consortium|Amato|United Kingdom

>Spike|hCoV-19/USA/IN-CDC-2013/2020|2020-03-09|EPI\_ISL\_452131|Original|hCoV-19^^Indiana|Human|IN State Department of Health Laboratory Services|Pathogen Discovery|Queen|USA

>Spike|hCoV-19/Scotland/CVR2264/2020|2020-04-10|EPI\_ISL\_473512|Original|hCoV-19^^Scotland|Human|West of Scotland Specialist Virology Centre|COVID-19 Genomics UK (COG-UK) Consortium|Robertson|United Kingdom

>Spike|hCoV-19/France/ARA-12630/2020|2020-03-23|EPI\_ISL\_420613|Original|hCoV-19^^Auvergne-Rhône-Alpes|Human|Centre Hospitalier de Macon|CNR Virus des Infections Respiratoires - France SUD|Josset|France

>Spike|hCoV-19/New Zealand/20CV0217/2020|2020-08-29|EPI\_ISL\_548064|Original|hCoV-19^^Waikato|Human|Waikato Hospital|Institute of Environmental Science and Research (ESR)|Wang|New Zealand

>Spike|hCoV-19/Spain/MD-IBV-99012359/2020|2020-11-22|EPI\_ISL\_780003|Original|hCoV-19^^Madrid|Human|Hospital General Universitario Gregorio Marañón|SeqCOVID-SPAIN consortium|IBV (CSIC)|Comas|Spain

>Spike|hCoV-19/Australia/VIC12756/2020|2020-09-10|EPI\_ISL\_563589|Original|hCoV-19^^Victoria|Human|Microbiological Diagnostic Unit - Public Health Laboratory (MDU-PHL)|MDU-PHL|Schultz|Australia

>Spike|hCoV-19/England/ALDP-922CFC/2020|2020-06-23|EPI\_ISL\_553307|Original|hCoV-19^^England|Human|Lighthouse Lab in Alderley Park|Wellcome Sanger Institute for the COVID-19 Genomics UK (COG-UK) consortium|Davies|United Kingdom

>Spike|hCoV-19/USA/WI-UW-650/2020|2020-06-26|EPI\_ISL\_491341|Original|hCoV-19^^Wisconsin|Human|University of Wisconsin-Madison AIDS Vaccine Research

Laboratories|University of Wisconsin-Madison AIDS Vaccine Research  
Laboratories|Baczenas|USA  
>Spike|hCoV-19/England/MILK-6754AA/2020|2020-07-03|EPI\_ISL\_558195|Original|hCoV-19^^England|Human|Lighthouse Lab in Milton Keynes|Wellcome Sanger Institute for the COVID-19 Genomics UK (COG-UK) consortium|Davies|United Kingdom  
>Spike|hCoV-19/Scotland/CVR3244/2020|2020-04-27|EPI\_ISL\_449252|Original|hCoV-19^^Scotland|Human|West of Scotland Specialist Virology Centre|COVID-19 Genomics UK (COG-UK) Consortium|Robertson|United Kingdom  
>Spike|hCoV-19/Brazil/RJ-00320/2020|2020-05-12|EPI\_ISL\_623123|Original|hCoV-19^^Rio de Janeiro|Human|Laboratorio de Virologia Molecular / UFRJ|Bioinformatics Laboratory / LNCC|Almeida|Brazil  
>Spike|hCoV-19/England/ALDP-9553DD/2020|2020-06-12|EPI\_ISL\_553602|Original|hCoV-19^^England|Human|Lighthouse Lab in Alderley Park|Wellcome Sanger Institute for the COVID-19 Genomics UK (COG-UK) consortium|Davies|United Kingdom  
>Spike|hCoV-19/Denmark/DCGC-10145/2020|2020-11-09|EPI\_ISL\_668514|Original|hCoV-19^^Nordjylland|Human|Department of Virus and Microbiological Special Diagnostics|Albertsen Lab|Michaelsen|Denmark  
>Spike|hCoV-19/Luxembourg/LNS3513703/2020|2020-11-20|EPI\_ISL\_740323|Original|hCoV-19^^Luxembourg|Human|Laboratoire national de sant\u00e9|Laboratoire national de sant\u00e9|Wienecke-Baldacchino|Luxembourg  
>Spike|hCoV-19/India/OR-ILSCV31684/2020|2020-05-26|EPI\_ISL\_481150|Original|hCoV-19^^Odisha|Human|Immunogenomics lab|Immunogenomics lab|Raghav|India  
>Spike|hCoV-19/England/QEUH-9F6A9D/2020|2020-09-27|EPI\_ISL\_588344|Original|hCoV-19^^England|Human|Lighthouse Lab in Glasgow|Wellcome Sanger Institute for the COVID-19 Genomics UK (COG-UK) consortium|Davies|United Kingdom  
>Spike|hCoV-19/USA/MI-MDHHS-SC22361/2020|2020-10-31|EPI\_ISL\_708341|Original|hCoV-19^^Michigan|Human|Michigan Department of Health and Human Services|Michigan Department of Health and Human Services|Jacob|USA  
>Spike|hCoV-19/Wales/PHWC-481B6C/2020|2020-10-21|EPI\_ISL\_613148|Original|hCoV-19^^Wales|Human|Wales Specialist Virology Centre Sequencing lab|COVID-19 Genomics UK (COG-UK) Consortium|Moore|United Kingdom  
>Spike|hCoV-19/Ireland/D-NVRL-20G35149/2020|2020-03-20|EPI\_ISL\_605144|Original|hCoV-19^^Dublin|Human|National Virus Reference Laboratory|Irish Coronavirus Sequencing Consortium - Helixworks|Chalapathi|Ireland  
>Spike|hCoV-19/Scotland/GCVR-17131F/2020|2020-03-26|EPI\_ISL\_459546|Original|hCoV-19^^Scotland|Human|NHSGGC West of Scotland Specialist Virology Centre / MRC-University of Glasgow Centre for Virus Research|Wellcome Sanger Institute for the COVID-19 Genomics UK (COG-UK) consortium|Davies|United Kingdom  
>Spike|hCoV-19/Denmark/DCGC-17770/2020|2020-12-14|EPI\_ISL\_749558|Original|hCoV-19^^Hovedstaden|Human|Department of Virus and Microbiological Special Diagnostics|Albertsen Lab|Michaelsen|Denmark  
>Spike|hCoV-19/England/OXON-B0EBA/2020|2020-04-09|EPI\_ISL\_478974|Original|hCoV-19^^England|Human|Oxford Viromics|COVID-19 Genomics UK (COG-UK) Consortium|Golubchik|United Kingdom  
>Spike|hCoV-19/England/MILK-AB7727/2020|2020-10-19|EPI\_ISL\_623338|Original|hCoV-19^^England|Human|Lighthouse Lab in Milton Keynes|Wellcome Sanger Institute for the COVID-19 Genomics UK (COG-UK) consortium|Davies|United Kingdom  
>Spike|hCoV-19/England/ALDP-B845FB/2020|2020-11-15|EPI\_ISL\_675374|Original|hCoV-19^^England|Human|Lighthouse Lab in Alderley Park|Wellcome Sanger Institute for the COVID-19 Genomics UK (COG-UK) Consortium|Davies|United Kingdom  
>Spike|hCoV-19/Brunei/1/2020|2020-03-11|EPI\_ISL\_443187|Original|hCoV-19^^Brunei|Human|National Virology Reference Laboratory|National Public Health Laboratory|Mak|Brunei  
>Spike|hCoV-19/USA/CA-CDPH208/2020|2020-11-12|EPI\_ISL\_755064|Original|hCoV-19^^California|Human|California Department of Public Health|California Department of Public Health|Bell|USA  
>Spike|hCoV-19/USA/WA-UW-2541/2020|2020-03-30|EPI\_ISL\_477718|Original|hCoV-19^^Washington|Human|UW Virology Lab|UW Virology Lab|Roychoudhury|USA

>Spike|hCoV-19/Iceland/395/2020|2020-03-19|EPI\_ISL\_424419|Original|hCoV-19^^Reykjavik|Human|The National University Hospital of Iceland|deCODE genetics|J\|u00f3nsson|Iceland

>Spike|hCoV-19/USA/CA-QDX-2204/2020|2020-03-15|EPI\_ISL\_604506|Original|hCoV-19^^California|Human|Quest Diagnostics|Quest Diagnostics|Kagan|USA

>Spike|hCoV-19/New Zealand/20VR1848/2020|2020-03-26|EPI\_ISL\_579148|Original|hCoV-19^^Southern|Human|Southern Community Labs Dunedin|Institute of Environmental Science and Research (ESR)|Wang|New Zealand

>Spike|hCoV-19/USA/LA-EVTL925/2020|2020-08-11|EPI\_ISL\_653616|Original|hCoV-19^^Louisiana|Human|LSUHS Emerging Viral Threat Laboratory|Microbial Genome Sequencing Center|Kamil|USA

>Spike|hCoV-19/USA/UT-UPHL-2012270978/2020|2020-08-03|EPI\_ISL\_745770|Original|hCoV-19^^Utah|Human|Ginkgo Bioworks Clinical Laboratory|Utah Public Health Laboratory|Young|USA

>Spike|hCoV-19/Denmark/DCGC-16150/2020|2020-11-16|EPI\_ISL\_714098|Original|hCoV-19^^Hovedstaden|Human|Department of Virus and Microbiological Special Diagnostics|Albertsen Lab|Michaelsen|Denmark

>Spike|hCoV-19/Canada/ON-PHL-20-02436/2020|2020-09-00|EPI\_ISL\_671580|Original|hCoV-19^^Ontario|Human|Public Health Ontario Laboratory|Public Health Ontario Laboratory|Guthrie|Canada

>Spike|hCoV-19/Japan/PG-2702/2020|2020-04-00|EPI\_ISL\_690834|Original|hCoV-19^^Japan|Human|Kanagawa Prefectural Institute of Public Health|Pathogen Genomics Center|Sekizuka|Japan

>Spike|hCoV-19/England/CAMB-7BD36/2020|2020-04-05|EPI\_ISL\_442186|Original|hCoV-19^^England|Human|Department of Pathology|Wellcome Sanger Institute for the COVID-19 Genomics UK (COG-UK) consortium|Amato|United Kingdom

>Spike|hCoV-19/England/LOND-D373E/2020|2020-03-31|EPI\_ISL\_440980|Original|hCoV-19^^England|Human|University College London|COVID-19 Genomics UK (COG-UK) Consortium|Roy|United Kingdom

>Spike|hCoV-19/England/MILK-9C3D90/2020|2020-09-09|EPI\_ISL\_566782|Original|hCoV-19^^England|Human|Lighthouse Lab in Milton Keynes|Wellcome Sanger Institute for the COVID-19 Genomics UK (COG-UK) consortium|Davies|United Kingdom

>Spike|hCoV-19/Gambia/GC19-1575/2020|2020-05-20|EPI\_ISL\_561026|Original|hCoV-19^^Kombo|Human|MRCG at LSHTM Genomics lab|MRCG at LSHTM Genomics lab|Sesay|Gambia

>Spike|hCoV-19/USA/CA-CZB-11912/2020|2020-10-05|EPI\_ISL\_672288|Original|hCoV-19^^California|Human|Santa Clara County Public Health Laboratory|Chan-Zuckerberg Biohub|Bhatt|USA

>Spike|hCoV-19/Brazil/RJ-00513/2020|2020-07-28|EPI\_ISL\_717790|Original|hCoV-19^^Rio de Janeiro|Human|LACEN RJ - Noel Nutels|Bioinformatics Laboratory / LNCC|Almeida|Brazil

>Spike|hCoV-19/England/2009900804/2020|2020-02-28|EPI\_ISL\_464201|Original|hCoV-19^^England|Human|Respiratory Virus Unit|Respiratory Virus Unit|Platt|United Kingdom

>Spike|hCoV-19/England/MILK-C51505/2020|2020-12-11|EPI\_ISL\_769664|Original|hCoV-19^^England|Human|Lighthouse Lab in Milton Keynes|Wellcome Sanger Institute for the COVID-19 Genomics UK (COG-UK) Consortium|Davies|United Kingdom

>Spike|hCoV-19/Wales/PHWC-49B80E/2020|2020-12-05|EPI\_ISL\_742389|Original|hCoV-19^^Wales|Human|Wales Specialist Virology Centre Sequencing lab|COVID-19 Genomics UK (COG-UK) Consortium|Moore|United Kingdom

>Spike|hCoV-19/England/ALDP-A6F0F6/2020|2020-10-14|EPI\_ISL\_607804|Original|hCoV-19^^England|Human|Lighthouse Lab in Alderley Park|Wellcome Sanger Institute for the COVID-19 Genomics UK (COG-UK) consortium|Davies|United Kingdom

>Spike|hCoV-19/England/CAMC-B337AA/2020|2020-11-05|EPI\_ISL\_659180|Original|hCoV-19^^England|Human|Lighthouse Lab in Cambridge|Wellcome Sanger Institute for the COVID-19 Genomics UK (COG-UK) Consortium|Davies|United Kingdom

>Spike|hCoV-19/England/ALDP-A6802A/2020|2020-10-12|EPI\_ISL\_609031|Original|hCoV-19^^England|Human|Lighthouse Lab in Alderley Park|Wellcome Sanger Institute for the COVID-19 Genomics UK (COG-UK) consortium|Davies|United Kingdom

>Spike|hCoV-19/Wales/PHWC-16EF3F/2020|2020-09-28|EPI\_ISL\_585887|Original|hCoV-19^^Wales|Human|Wales Specialist Virology Centre Sequencing lab|COVID-19 Genomics UK (COG-UK) Consortium|Moore|United Kingdom

>Spike|hCoV-19/Northern Ireland/NIRE-FACF6/2020|2020-04-15|EPI\_ISL\_459400|Original|hCoV-19^^Northern Ireland|Human|Regional Virus Laboratory|Wellcome Sanger Institute for the COVID-19 Genomics UK (COG-UK) consortium|Davies|United Kingdom

>Spike|hCoV-19/USA/CA-ALSR-2216/2020|2020-06-29|EPI\_ISL\_635389|Original|hCoV-19^^California|Human|San Diego County Public Health Laboratory|Andersen lab at Scripps Research|Gangavarapu|USA

>Spike|hCoV-19/Wales/PHWC-47EE4B/2020|2020-10-09|EPI\_ISL\_595599|Original|hCoV-19^^Wales|Human|Originating lab|COVID-19 Genomics UK (COG-UK) Consortium|Moore|United Kingdom

>Spike|hCoV-19/England/CAMC-BBDB60/2020|2020-11-22|EPI\_ISL\_703723|Original|hCoV-19^^England|Human|Virology Department|COVID-19 Genomics UK (COG-UK) Consortium|de Silva|United Kingdom

>Spike|hCoV-19/USA/LA-EVTL1357/2020|2020-12-11|EPI\_ISL\_779023|Original|hCoV-19^^Louisiana|Human|LSUHS Emerging Viral Threat Laboratory|Microbial Genome Sequencing Center|Kamil|USA

>Spike|hCoV-19/England/CAMC-A3EC29/2020|2020-10-05|EPI\_ISL\_609787|Original|hCoV-19^^England|Human|Lighthouse Lab in Cambridge|Wellcome Sanger Institute for the COVID-19 Genomics UK (COG-UK) consortium|Davies|United Kingdom

>Spike|hCoV-19/USA/AZ-TG411559/2020|2020-06-25|EPI\_ISL\_694976|Original|hCoV-19^^Arizona|Human|TGen North|TGen North|French|USA

>Spike|hCoV-19/England/ALDP-A513A3/2020|2020-10-08|EPI\_ISL\_598140|Original|hCoV-19^^England|Human|Lighthouse Lab in Alderley Park|Wellcome Sanger Institute for the COVID-19 Genomics UK (COG-UK) consortium|Davies|United Kingdom

>Spike|hCoV-19/England/BRIS-12899D/2020|2020-04-14|EPI\_ISL\_458900|Original|hCoV-19^^England|Human|PHE South West Regional Laboratory|Wellcome Sanger Institute for the COVID-19 Genomics UK (COG-UK) consortium|Davies|United Kingdom

>Spike|hCoV-19/Sichuan/SC-WCH4-293/2020|2020-02-03|EPI\_ISL\_451394|Original|hCoV-19^^Sichuan|Human|West China Hospital of Sichuan University|State Key Laboratory of Biotherapy of Sichuan University|Tang|China

>Spike|hCoV-19/USA/TX-HMH-7551/2020|2020-06-25|EPI\_ISL\_546844|Original|hCoV-19^^Texas|Human|Houston Methodist Hospital|Houston Methodist Hospital|Long|USA

>Spike|hCoV-19/Wales/MILK-9E128E/2020|2020-09-20|EPI\_ISL\_580979|Original|hCoV-19^^Wales|Human|Lighthouse Lab in Milton Keynes|Wellcome Sanger Institute for the COVID-19 Genomics UK (COG-UK) consortium|Davies|United Kingdom

>Spike|hCoV-19/New Zealand/20CV0232/2020|2020-09-05|EPI\_ISL\_548071|Original|hCoV-19^^Auckland|Human|LabPLUS|Institute of Environmental Science and Research (ESR)|Wang|New Zealand

>Spike|hCoV-19/England/ALDP-9CAFDF/2020|2020-09-16|EPI\_ISL\_575590|Original|hCoV-19^^England|Human|Lighthouse Lab in Alderley Park|Wellcome Sanger Institute for the COVID-19 Genomics UK (COG-UK) consortium|Davies|United Kingdom

>Spike|hCoV-19/England/CAMC-AAFB08/2020|2020-10-23|EPI\_ISL\_623433|Original|hCoV-19^^England|Human|Lighthouse Lab in Cambridge|Wellcome Sanger Institute for the COVID-19 Genomics UK (COG-UK) consortium|Davies|United Kingdom

>Spike|hCoV-19/United Arab Emirates/0806/2020|2020-05-19|EPI\_ISL\_698945|Original|hCoV-19^^Abu Dhabi|Human|Group 42 (G42) Healthcare|G42 Healthcare|Ogrodzki|United Arab Emirates

>Spike|hCoV-19/Scotland/CVR5263/2020|2020-10-15|EPI\_ISL\_627422|Original|hCoV-19^^Scotland|Human|West of Scotland Specialist Virology Centre|COVID-19 Genomics UK (COG-UK) Consortium|Robertson|United Kingdom

>Spike|hCoV-19/Scotland/CVR1343/2020|2020-03-31|EPI\_ISL\_433547|Original|hCoV-19^^Scotland|Human|West of Scotland Specialist Virology Centre|COVID-19 Genomics UK (COG-UK) Consortium|Robertson|United Kingdom

>Spike|hCoV-19/England/CAMC-B5415A/2020|2020-11-06|EPI\_ISL\_656755|Original|hCoV-19^^England|Human|Lighthouse Lab in Cambridge|Wellcome Sanger Institute for the COVID-19 Genomics UK (COG-UK) Consortium|Davies|United Kingdom

>Spike|hCoV-19/Spain/MD-IBV-003711/2020|2020-04-02|EPI\_ISL\_467202|Original|hCoV-19^^Madrid|Human|Hospital General Universitario Gregorio Mara\u00f1a|SeqCOVID-SPAIN consortium/IBV (CSIC)|Comas|Spain

>Spike|hCoV-19/Scotland/CVR5063/2020|2020-10-10|EPI\_ISL\_594796|Original|hCoV-19^^Scotland|Human|West of Scotland Specialist Virology Centre|COVID-19 Genomics UK (COG-UK) Consortium|Robertson|United Kingdom

>Spike|hCoV-19/USA/UT-03777/2020|2020-04-01|EPI\_ISL\_509588|Original|hCoV-19^^Utah|Human|Utah Public Health Laboratory|Utah Public Health Laboratory|Butz|USA

>Spike|hCoV-19/Luxembourg/LNS3577548/2020|2020-10-21|EPI\_ISL\_740336|Original|hCoV-19^^Luxembourg|Human|Laboratoire national de sant\u00e9|Laboratoire national de sant\u00e9|Wienecke-Baldacchino|Luxembourg

>Spike|hCoV-19/England/EXET-136000/2020|2020-04-18|EPI\_ISL\_457189|Original|hCoV-19^^England|Human|University of Exeter|COVID-19 Genomics UK (COG-UK) Consortium|Temperton|United Kingdom

>Spike|hCoV-19/France/PAC-41071320/2020|2020-04-10|EPI\_ISL\_505003|Original|hCoV-19^^Provence-Alpes-C\u00f4te d'Azur|Human|Biology Dpt|Microbiology and Infections Diseases|Gorge|France

>Spike|hCoV-19/England/MILK-4B8698/2020|2020-06-04|EPI\_ISL\_559181|Original|hCoV-19^^England|Human|Lighthouse Lab in Milton Keynes|Wellcome Sanger Institute for the COVID-19 Genomics UK (COG-UK) consortium|Davies|United Kingdom

>Spike|hCoV-19/England/CAMC-991117/2020|2020-08-27|EPI\_ISL\_551849|Original|hCoV-19^^England|Human|Lighthouse Lab in Cambridge|Wellcome Sanger Institute for the COVID-19 Genomics UK (COG-UK) consortium|Davies|United Kingdom

>Spike|hCoV-19/USA/CA-CZB-1610/2020|2020-04-08|EPI\_ISL\_468539|Original|hCoV-19^^California|Human|San Joaquin County Public Health Lab|Chan-Zuckerberg Biohub|Hao|USA

>Spike|hCoV-19/Wales/PHWC-16F47B/2020|2020-10-04|EPI\_ISL\_585969|Original|hCoV-19^^Wales|Human|Wales Specialist Virology Centre Sequencing lab|COVID-19 Genomics UK (COG-UK) Consortium|Moore|United Kingdom

>Spike|hCoV-19/Malaysia/UNIMAS-B023/2020|2020-10-23|EPI\_ISL\_718218|Original|hCoV-19^^Sarawak|Human|Borneo Medical Centre|Institute of Health and Community Medicine|Jonathan|Malaysia

>Spike|hCoV-19/England/MILK-B95C7A/2020|2020-11-14|EPI\_ISL\_674891|Original|hCoV-19^^England|Human|Lighthouse Lab in Milton Keynes|Wellcome Sanger Institute for the COVID-19 Genomics UK (COG-UK) Consortium|Davies|United Kingdom

>Spike|hCoV-19/Belgium/ULG-10415/2020|2020-08-14|EPI\_ISL\_581597|Original|hCoV-19^^Li\u00e8ge|Human|Department of Clinical Microbiology|GIGA Medical Genomics|Durkin|Belgium

>Spike|hCoV-19/Wales/PHWC-16C7C0/2020|2020-09-25|EPI\_ISL\_574094|Original|hCoV-19^^Wales|Human|Wales Specialist Virology Centre Sequencing lab|COVID-19 Genomics UK (COG-UK) Consortium|Moore|United Kingdom

>Spike|hCoV-19/Switzerland/BE-ETHZ-360203/2020|2020-11-10|EPI\_ISL\_728879|Original|hCoV-19^^Bern|Human|Viollier AG|Department of Biosystems Science and Engineering|Nadeau|Switzerland

>Spike|hCoV-19/England/CAMB-1B5DA8/2020|2020-09-04|EPI\_ISL\_549390|Original|hCoV-19^^England|Human|Department of Pathology|COVID-19 Genomics UK (COG-UK) Consortium|Goodfellow|United Kingdom

>Spike|hCoV-19/Wales/PHWC-34908/2020|2020-04-19|EPI\_ISL\_446993|Original|hCoV-19^^Wales|Human|Wales Specialist Virology Centre|Public Health Wales Microbiology Cardiff|Moore|United Kingdom

>Spike|hCoV-19/USA/WI-WSLH-200117/2020|2020-04-09|EPI\_ISL\_578347|Original|hCoV-19^^Wisconsin|Human|Wisconsin State Laboratory of Hygiene Communicable Disease Division|Wisconsin State Laboratory of Hygiene Communicable Disease Division|Florek|USA

>Spike|hCoV-19/Wales/PHWC-4838EB/2020|2020-10-21|EPI\_ISL\_627870|Original|hCoV-19^^Wales|Human|Wales Specialist Virology Centre Sequencing lab|COVID-19 Genomics UK (COG-UK) Consortium|Moore|United Kingdom

>Spike|hCoV-19/England/MILK-9D3F1F/2020|2020-09-18|EPI\_ISL\_601718|Original|hCoV-19^^England|Human|Lighthouse Lab in Milton Keynes|Wellcome Sanger Institute for the COVID-19 Genomics UK (COG-UK) consortium|Davies|United Kingdom

>Spike|hCoV-19/USA/UT-UPHL-2012633389/2020|2020-08-14|EPI\_ISL\_746138|Original|hCoV-19^^Utah|Human|Ginkgo Bioworks Clinical Laboratory|Utah Public Health Laboratory|Young|USA

>Spike|hCoV-19/Lebanon/LAU-uk2/2020|2020-12-21|EPI\_ISL\_768798|Original|hCoV-19^^Beirut|Human|MoPH (Lebanese ministry of Public Health)|Microbial genomics lab LAU|Koweyes|Lebanon

>Spike|hCoV-19/USA/CA-CHLA-PLM47954122/2020|2020-11-19|EPI\_ISL\_753384|Original|hCoV-19^^California|Human|Clinical virology Laboratory|Center for Personalized Medicine|Dien Bard|USA

>Spike|hCoV-19/Denmark/DCGC-5421/2020|2020-09-14|EPI\_ISL\_615353|Original|hCoV-19^^Midtjylland|Human|Department of Virus and Microbiological Special Diagnostics|Albertsen lab|Michaelsen|Denmark

>Spike|hCoV-19/Netherlands/Gelderland\_19/2020|2020-03-18|EPI\_ISL\_460655|Original|hCoV-19^^Gelderland|Human|Dutch COVID-19 response team|Erasmus Medical Center|Oude Munnink|Netherlands

>Spike|hCoV-19/USA/WY-WYPHL012/2020|2020-03-14|EPI\_ISL\_421549|Original|hCoV-19^^Wyoming|Human|Wyoming Public Health Laboratory|Center for Global Health|Domman|USA

>Spike|hCoV-19/England/CAMC-94870E/2020|2020-07-18|EPI\_ISL\_556549|Original|hCoV-19^^England|Human|Lighthouse Lab in Cambridge|Wellcome Sanger Institute for the COVID-19 Genomics UK (COG-UK) consortium|Davies|United Kingdom

>Spike|hCoV-19/Denmark/DCGC-10396/2020|2020-11-02|EPI\_ISL\_669941|Original|hCoV-19^^Syddanmark|Human|Department of Virus and Microbiological Special Diagnostics|Albertsen Lab|Michaelsen|Denmark

>Spike|hCoV-19/Belgium/ULG-10378/2020|2020-08-07|EPI\_ISL\_540545|Original|hCoV-19^^Li\u00e8ge|Human|Department of Clinical Microbiology|GIGA Medical Genomics|Durkin|Belgium

>Spike|hCoV-19/England/MILK-BAB321/2020|2020-11-17|EPI\_ISL\_783155|Original|hCoV-19^^England|Human|Lighthouse Lab in Milton Keynes|Wellcome Sanger Institute for the COVID-19 Genomics UK (COG-UK) Consortium|Davies|United Kingdom

>Spike|hCoV-19/USA/CA-CSMC92/2020|2020-04-02|EPI\_ISL\_475709|Original|hCoV-19^^California|Human|Cedars-Sinai Medical Center|Cedars-Sinai Medical Center|Zhang|USA

>Spike|hCoV-19/England/MILK-56B217/2020|2020-06-10|EPI\_ISL\_558273|Original|hCoV-19^^England|Human|Lighthouse Lab in Milton Keynes|Wellcome Sanger Institute for the COVID-19 Genomics UK (COG-UK) consortium|Davies|United Kingdom

>Spike|hCoV-19/England/BIRM-65BDB/2020|2020-10-10|EPI\_ISL\_612212|Original|hCoV-19^^England|Human|University of Birmingham|COVID-19 Genomics UK (COG-UK) Consortium|Loman|United Kingdom

>Spike|hCoV-19/England/CAMC-B99E9E/2020|2020-11-15|EPI\_ISL\_673671|Original|hCoV-19^^England|Human|Lighthouse Lab in Cambridge|Wellcome Sanger Institute for the COVID-19 Genomics UK (COG-UK) Consortium|Davies|United Kingdom

>Spike|hCoV-19/Australia/TAS108/2020|2020-04-15|EPI\_ISL\_522573|Original|hCoV-19^^Tasmania|Human|Royal Hobart Hospital Microbiology Department|MDU-PHL|Schultz|Australia

>Spike|hCoV-19/Switzerland/ZH-ETHZ-350126/2020|2020-11-02|EPI\_ISL\_693824|Original|hCoV-19^^Zurich|Human|Viollier AG|Department of Biosystems Science and Engineering|Nadeau|Switzerland

>Spike|hCoV-19/Ireland/D-SVUH-R6380/2020|2020-04-03|EPI\_ISL\_596669|Original|hCoV-19^^Dublin|Human|St.Vincent's University Hospital|St.Vincent's University Hospital|Gonzalez|Ireland

>Spike|hCoV-19/USA/WA-S350/2020|2020-04-02|EPI\_ISL\_434110|Original|hCoV-19^^Washington|Human|Washington State Department of Health|Seattle Flu Study|Bedford|USA

>Spike|hCoV-19/England/ALDP-C3D657/2020|2020-12-10|EPI\_ISL\_730904|Original|hCoV-19^^England|Human|Lighthouse Lab in Alderley Park|Wellcome Sanger Institute for the COVID-19 Genomics UK (COG-UK) Consortium|Davies|United Kingdom

>Spike|hCoV-19/England/NOTT-1102AC/2020|2020-04-11|EPI\_ISL\_441493|Original|hCoV-19^^England|Human|Queens Medical Centre|COVID-19 Genomics UK (COG-UK) Consortium|Loose|United Kingdom

>Spike|hCoV-19/Denmark/DCGC-11404/2020|2020-11-02|EPI\_ISL\_670893|Original|hCoV-19^^Syddanmark|Human|Department of Virus and Microbiological Special Diagnostics|Albertsen Lab|Michaelsen|Denmark



>Spike|hCoV-19/USA/WA-QDX-02-2/2020|2020-03-13|EPI\_ISL\_454692|Original|hCoV-19^^Washington|Human|Quest Diagnostics|Quest Diagnostics|Kagan|USA

>Spike|hCoV-19/Japan/PG-5590/2020|2020-08-00|EPI\_ISL\_688715|Original|hCoV-19^^Japan|Human|Pathogen Genomics Center|Pathogen Genomics Center|Sekizuka|Japan

>Spike|hCoV-19/England/QEUA-AD0D53/2020|2020-10-26|EPI\_ISL\_634128|Original|hCoV-19^^England|Human|Lighthouse Lab in Glasgow|Wellcome Sanger Institute for the COVID-19 Genomics UK (COG-UK) consortium|Davies|United Kingdom

>Spike|hCoV-19/England/QEUA-A0B144/2020|2020-10-01|EPI\_ISL\_599152|Original|hCoV-19^^England|Human|Lighthouse Lab in Glasgow|Wellcome Sanger Institute for the COVID-19 Genomics UK (COG-UK) consortium|Davies|United Kingdom

>Spike|hCoV-19/India/UN-2020772/2020|2020-00-00|EPI\_ISL\_420548|Vero CCL81 P1|hCoV-19^^India|Human|Indian Council of Medical Research-National Institute of Virology|Indian Council of Medical Research-National Institute of Virology|Yadav|India

>Spike|hCoV-19/USA/WA-S114/2020|2020-03-05|EPI\_ISL\_417167|Original|hCoV-19^^Washington|Human|Washington State Department of Health|Seattle Flu Study|Bedford|USA

>Spike|hCoV-19/England/MILK-B024CB/2020|2020-10-24|EPI\_ISL\_643042|Original|hCoV-19^^England|Human|Lighthouse Lab in Milton Keynes|Wellcome Sanger Institute for the COVID-19 Genomics UK (COG-UK) Consortium|Davies|United Kingdom

>Spike|hCoV-19/Japan/PG-2290/2020|2020-04-00|EPI\_ISL\_685895|Original|hCoV-19^^Japan|Human|Pathogen Genomics Center|Pathogen Genomics Center|Sekizuka|Japan

>Spike|hCoV-19/Luxembourg/LNS6246495/2020|2020-11-03|EPI\_ISL\_744389|Original|hCoV-19^^Luxembourg|Human|Laboratoire national de sant\u00e9|Laboratoire national de sant\u00e9|Wienecke-Baldacchino|Luxembourg

>Spike|hCoV-19/USA/DE-DHSS-F952774/2020|2020-04-02|EPI\_ISL\_593976|Original|hCoV-19^^Delaware|Human|Delaware Public Health Lab|Delaware Public Health Lab|Bajwa|USA

>Spike|hCoV-19/Wales/ALDP-AA49AF/2020|2020-10-21|EPI\_ISL\_625065|Original|hCoV-19^^Wales|Human|Lighthouse Lab in Alderley Park|Wellcome Sanger Institute for the COVID-19 Genomics UK (COG-UK) consortium|Davies|United Kingdom

>Spike|hCoV-19/England/QEUA-C93A17/2020|2020-12-16|EPI\_ISL\_777152|Original|hCoV-19^^England|Human|Lighthouse Lab in Glasgow|Wellcome Sanger Institute for the COVID-19 Genomics UK (COG-UK) Consortium|Davies|United Kingdom

>Spike|hCoV-19/USA/LA-EVTL233/2020|2020-08-22|EPI\_ISL\_574367|Original|hCoV-19^^Louisiana|Human|LSUHS Emerging Viral Threat Laboratory|Microbial Genome Sequencing Center|Kamil|USA

>Spike|hCoV-19/England/CAMB-1BCFC9/2020|2020-00-00|EPI\_ISL\_723918|Original|hCoV-19^^England|Human|Department of Pathology|COVID-19 Genomics UK (COG-UK) Consortium|Goodfellow|United Kingdom

>Spike|hCoV-19/England/SHEF-10CCA1/2020|2020-12-16|EPI\_ISL\_727909|Original|hCoV-19^^England|Human|Virology Department|COVID-19 Genomics UK (COG-UK) Consortium|de Silva|United Kingdom

>Spike|hCoV-19/Netherlands/UT-EMC-111/2020|2020-10-09|EPI\_ISL\_632630|Original|hCoV-19^^Utrecht|Human|Dutch COVID-19 response team|Erasmus Medical Center|Oude Munnink|Netherlands

>Spike|hCoV-19/USA/TX-HMH-MCoV-11964/2020|2020-09-18|EPI\_ISL\_790149|Original|hCoV-19^^Texas|Human|Houston Methodist Hospital|Houston Methodist Hospital|Long|USA

>Spike|hCoV-19/Portugal/PT1249/2020|2020-03-16|EPI\_ISL\_511210|Original|hCoV-19^^Portugal|Human|Instituto Nacional de Saude (INSA) and Instituto Gulbenkian de Ciencia (IGC)|Instituto Nacional de Saude (INSA) and Instituto Gulbenkian de Ciencia (IGC)|Borges|Portugal

>Spike|hCoV-19/Luxembourg/LNS2204274/2020|2020-10-26|EPI\_ISL\_740078|Original|hCoV-19^^Luxembourg|Human|Laboratoire national de sant\u00e9|Laboratoire national de sant\u00e9|Wienecke-Baldacchino|Luxembourg

>Spike|hCoV-19/England/CAMB-80DF2/2020|2020-04-10|EPI\_ISL\_442991|Original|hCoV-19^^England|Human|Department of Pathology|Wellcome Sanger Institute for the COVID-19 Genomics UK (COG-UK) consortium|Amato|United Kingdom

>Spike|hCoV-19/USA/NY-NYCPHL-000142/2020|2020-04-03|EPI\_ISL\_631633|Original|hCoV-19^^New York|Human|Richmond University Medical Center|New York City Public Health Laboratory|Wang|USA

>Spike|hCoV-19/Denmark/DCGC-20097/2020|2020-12-07|EPI\_ISL\_747980|Original|hCoV-19^^Midtjylland|Human|Department of Virus and Microbiological Special Diagnostics|Albertsen Lab|Michaelsen|Denmark

>Spike|hCoV-19/Switzerland/AG-ETHZ-180023/2020|2020-06-29|EPI\_ISL\_489970|Original|hCoV-19^^Aargau|Human|Viollier AG|Department of Biosystems Science and Engineering|Nadeau|Switzerland

>Spike|hCoV-19/USA/CA-ALSR-4715/2020|2020-10-29|EPI\_ISL\_730100|Original|hCoV-19^^California|Human|San Diego County Public Health Laboratory|Andersen lab at Scripps Research|Gangavarapu|USA

>Spike|hCoV-19/England/NORT-2985DF/2020|2020-04-22|EPI\_ISL\_488026|Original|hCoV-19^^England|Human|NU-OMICS DNA Sequencing research facility|Wellcome Sanger Institute for the COVID-19 Genomics UK (COG-UK) consortium|Davies|United Kingdom

>Spike|hCoV-19/France/BRE-5374/2020|2020-03-25|EPI\_ISL\_443274|Original|hCoV-19^^Bretagne|Human|CHU - H\u00f4pital Cavale Blanche - Labo. de Virologie|National Reference Center for Viruses of Respiratory Infections|Enouf|France

>Spike|hCoV-19/Wales/MILK-9E325F/2020|2020-09-21|EPI\_ISL\_581232|Original|hCoV-19^^Wales|Human|Lighthouse Lab in Milton Keynes|Wellcome Sanger Institute for the COVID-19 Genomics UK (COG-UK) consortium|Davies|United Kingdom

>Spike|hCoV-19/USA/NM-UNM-00439/2020|2020-05-04|EPI\_ISL\_538247|Original|hCoV-19^^New Mexico|Human|TriCore Reference Laboratories|Center for Global Health|Domman|USA

>Spike|hCoV-19/Nigeria/OS-CV307/2020|2020-10-12|EPI\_ISL\_729985|Original|hCoV-19^^Osun State|Human|Nigeria Centre for Disease Control (NCDC)|African Centre of Excellence for Genomics of Infectious Diseases (ACEGID)|Oluniyi|Nigeria

>Spike|hCoV-19/Wales/PHWC-3175C/2020|2020-04-13|EPI\_ISL\_446481|Original|hCoV-19^^Wales|Human|Wales Specialist Virology Centre|Public Health Wales Microbiology Cardiff|Moore|United Kingdom

>Spike|hCoV-19/Spain/IB-IBV-99011545/2020|2020-12-06|EPI\_ISL\_779889|Original|hCoV-19^^Balear Islands|Human|Servicio de Microbiolog\u00eda|SeqCOVID-SPAIN consortium/IBV (CSIC)|Comas|Spain

>Spike|hCoV-19/England/LIVE-9D23F/2020|2020-04-06|EPI\_ISL\_449602|Original|hCoV-19^^England|Human|Liverpool Clinical Laboratories|COVID-19 Genomics UK (COG-UK) Consortium|Haldenby|United Kingdom

>Spike|hCoV-19/England/MILK-991CE9/2020|2020-08-27|EPI\_ISL\_577039|Original|hCoV-19^^England|Human|Northumbria University / South Tees Hospitals NHS Foundation Trust / North Cumbria Integrated Care NHS Foundation Trust / North Tees and Hartlepool NHS Foundation Trust / Newcastle Hospitals NHS Foundation Trust|COVID-19 Genomics UK (COG-UK) Consortium|Bashton|United Kingdom

>Spike|hCoV-19/Scotland/EDB9746/2020|2020-11-13|EPI\_ISL\_680539|Original|hCoV-19^^Scotland|Human|Virology Department|COVID-19 Genomics UK (COG-UK) Consortium|McHugh|United Kingdom

>Spike|hCoV-19/Scotland/CVR4709/2020|2020-09-21|EPI\_ISL\_611714|Original|hCoV-19^^Scotland|Human|West of Scotland Specialist Virology Centre|COVID-19 Genomics UK (COG-UK) Consortium|Robertson|United Kingdom

>Spike|hCoV-19/USA/CA-CZB-14832/2020|2020-11-19|EPI\_ISL\_739123|Original|hCoV-19^^California|Human|Humboldt County Public Health Laboratory|Chan-Zuckerberg Biohub|Kamm|USA

>Spike|hCoV-19/USA/NY-Wadsworth-292839-01/2020|2020-12-27|EPI\_ISL\_769978|Original|hCoV-19^^New York|Human|Albany Medical Center Hospital Clinical Laboratories|Wadsworth Center|Lasek-Nesselquist|USA

>Spike|hCoV-19/USA/WI-UW-1247/2020|2020-08-15|EPI\_ISL\_536620|Original|hCoV-19^^Wisconsin|Human|University of Wisconsin-Madison AIDS Vaccine Research Laboratories|University of Wisconsin-Madison AIDS Vaccine Research Laboratories|Baczenas|USA

>Spike|hCoV-19/Wales/PHWC-2EFD2/2020|2020-04-04|EPI\_ISL\_446184|Original|hCoV-19^^Wales|Human|Wales Specialist Virology Centre|Public Health Wales Microbiology Cardiff|Moore|United Kingdom

>Spike|hCoV-19/USA/UT-02571/2020|2020-04-25|EPI\_ISL\_487218|Original|hCoV-19^^Utah|Human|Utah Public Health Laboratory|Utah Public Health Laboratory|Butz|USA

>Spike|hCoV-19/USA/TX-HMH-MCoV-19817/2020|2020-11-30|EPI\_ISL\_784147|Original|hCoV-19^^Texas|Human|Houston Methodist Hospital|Houston Methodist Hospital|Long|USA

>Spike|hCoV-19/England/ALDP-A8778A/2020|2020-10-17|EPI\_ISL\_606141|Original|hCoV-19^^England|Human|Lighthouse Lab in Alderley Park|Wellcome Sanger Institute for the COVID-19 Genomics UK (COG-UK) consortium|Davies|United Kingdom

>Spike|hCoV-19/England/CAMB-7E137/2020|2020-04-16|EPI\_ISL\_434043|Original|hCoV-19^^England|Human|Department of Pathology|COVID-19 Genomics UK (COG-UK) Consortium|Meredit|United Kingdom

>Spike|hCoV-19/Wales/PHWC-4849C9/2020|2020-10-23|EPI\_ISL\_626931|Original|hCoV-19^^Wales|Human|Wales Specialist Virology Centre Sequencing lab|COVID-19 Genomics UK (COG-UK) Consortium|Moore|United Kingdom

>Spike|hCoV-19/Portugal/PT1593/2020|2020-07-03|EPI\_ISL\_693598|Original|hCoV-19^^Portugal|Human|Instituto Nacional de Saude (INSA)|Instituto Nacional de Saude (INSA)|Borges|Portugal

>Spike|hCoV-19/Wales/PHWC-16CDDD/2020|2020-09-24|EPI\_ISL\_574169|Original|hCoV-19^^Wales|Human|Wales Specialist Virology Centre Sequencing lab|COVID-19 Genomics UK (COG-UK) Consortium|Moore|United Kingdom

>Spike|hCoV-19/Wales/PHWC-2F539/2020|2020-04-18|EPI\_ISL\_446264|Original|hCoV-19^^Wales|Human|Wales Specialist Virology Centre|Public Health Wales Microbiology Cardiff|Moore|United Kingdom

>Spike|hCoV-19/Russia/StPetersburg-RII8275S/2020|2020-04-21|EPI\_ISL\_450268|Original|hCoV-19^^Saint Petersburg|Human|WHO National Influenza Centre Russian Federation|WHO National Influenza Centre Russian Federation|Komissarov|Russia

>Spike|hCoV-19/USA/NY-NYU-VC-015/2020|2020-03-26|EPI\_ISL\_479669|Original|hCoV-19^^New York|Human|Center for Genomics and System Biology|Center for Genomics and System Biology|Ghedini|USA

>Spike|hCoV-19/England/QEUEH-BCCDE0/2020|2020-11-26|EPI\_ISL\_704227|Original|hCoV-19^^England|Human|Lighthouse Lab in Glasgow|Wellcome Sanger Institute for the COVID-19 Genomics UK (COG-UK) Consortium|Davies|United Kingdom

>Spike|hCoV-19/Spain/AN-IBV-002042/2020|2020-03-16|EPI\_ISL\_452384|Original|hCoV-19^^Andalucia|Human|Servicio de Microbiolog\u00eda. HRU de M\u00e9llaga. Servicio Andaluz de Salud|SeqCOVID-SPAIN consortium/IBV(CSIC)|Comas|Spain

>Spike|hCoV-19/Spain/PV-IBV-003209/2020|2020-03-13|EPI\_ISL\_481005|Original|hCoV-19^^Basque Country|Human|Servicio de Microbiolog\u00eda. Hospital Universitario Donostia. OSI Donostialdea. \u00c1rea de Enfermedades Infecciosas|SeqCOVID-SPAIN consortium/IBV(CSIC)|Comas|Spain

>Spike|hCoV-19/England/ALDP-A669B8/2020|2020-10-12|EPI\_ISL\_630429|Original|hCoV-19^^England|Human|Lighthouse Lab in Alderley Park|Wellcome Sanger Institute for the COVID-19 Genomics UK (COG-UK) consortium|Davies|United Kingdom

>Spike|hCoV-19/Ireland/MO-NVRL-20Z06675/2020|2020-04-18|EPI\_ISL\_681891|Original|hCoV-19^^Mayo|Human|National Virus Reference Laboratory|Irish Coronavirus Sequencing Consortium - Teagasc Moorepark|Walsh|Ireland

>Spike|hCoV-19/England/MILK-A7B5BC/2020|2020-10-16|EPI\_ISL\_607503|Original|hCoV-19^^England|Human|Lighthouse Lab in Milton Keynes|Wellcome Sanger Institute for the COVID-19 Genomics UK (COG-UK) consortium|Davies|United Kingdom

>Spike|hCoV-19/Chile/RM-72428/2020|2020-05-22|EPI\_ISL\_746775|Original|hCoV-19^^Region Metropolitana de Santiago|Human|Genetica Molecular and Subdepartamento de Virologia ISP Chile|Instituto de Salud Publica de Chile|Tognarelli|Chile

>Spike|hCoV-19/USA/TX-HMH-6113/2020|2020-06-22|EPI\_ISL\_547249|Original|hCoV-19^^Texas|Human|Houston Methodist Hospital|Houston Methodist Hospital|Long|USA

>Spike|hCoV-19/USA/WI-GMF-01828/2020|2020-04-26|EPI\_ISL\_435401|Original|hCoV-19^^Iowa|Human|Gundersen Molecular Diagnostics Laboratory|Kabara Cancer Research Institute|Kenny|USA

>Spike|hCoV-19/Australia/VIC10661/2020|2020-09-05|EPI\_ISL\_563022|Original|hCoV-19^^Victoria|Human|Microbiological Diagnostic Unit - Public Health Laboratory (MDU-PHL)|MDU-PHL|Schultz|Australia

>Spike|hCoV-19/Canada/BC-BCCDC-6413/2020|2020-10-00|EPI\_ISL\_740568|Original|hCoV-19^^British Columbia|Human|BCCDC Public Health Laboratory|BCCDC Public Health Laboratory|Prystajek|Canada

>Spike|hCoV-19/England/CAMB-84ACA/2020|2020-03-09|EPI\_ISL\_440487|Original|hCoV-19^^England|Human|Department of Pathology|Wellcome Sanger Institute for the COVID-19 Genomics UK (COG-UK) consortium|Amato|United Kingdom

>Spike|hCoV-19/England/CAMC-B231FA/2020|2020-11-03|EPI\_ISL\_665030|Original|hCoV-19^^England|Human|Virology Department|COVID-19 Genomics UK (COG-UK) Consortium|de Silva|United Kingdom

>Spike|hCoV-19/England/CAMB-8277A/2020|2020-04-13|EPI\_ISL\_443637|Original|hCoV-19^^England|Human|Department of Pathology|Wellcome Sanger Institute for the COVID-19 Genomics UK (COG-UK) consortium|Amato|United Kingdom

>Spike|hCoV-19/Luxembourg/LNS8539717/2020|2020-12-02|EPI\_ISL\_771007|Original|hCoV-19^^Luxembourg|Human|Laboratoire national de sant\u00e9|Laboratoire national de sant\u00e9|Wienecke-Baldacchino|Luxembourg

>Spike|hCoV-19/England/CAMC-B356C9/2020|2020-11-05|EPI\_ISL\_659630|Original|hCoV-19^^England|Human|Lighthouse Lab in Cambridge|Wellcome Sanger Institute for the COVID-19 Genomics UK (COG-UK) Consortium|Davies|United Kingdom

>Spike|hCoV-19/USA/NY-Wadsworth-282645-01/2020|2020-12-02|EPI\_ISL\_754435|Original|hCoV-19^^New York|Human|Wadsworth Center|Wadsworth Center|Lasek-Nesselquist|USA

>Spike|hCoV-19/Japan/PG-6092/2020|2020-08-00|EPI\_ISL\_689204|Original|hCoV-19^^Japan|Human|Pathogen Genomics Center|Pathogen Genomics Center|Sekizuka|Japan

>Spike|hCoV-19/Colombia/VAC-INS-79449/2020|2020-03-12|EPI\_ISL\_456133|Original|hCoV-19^^Valle del Cauca|Human|Instituto Nacional de Salud - Unidad de Secuenciación y An\u00e9lisis Gen\u00f3mico|Instituto Nacional de Salud|D\u00e9|Colombia

>Spike|hCoV-19/England/EXET-13860C/2020|2020-10-19|EPI\_ISL\_627424|Original|hCoV-19^^England|Human|University of Exeter|COVID-19 Genomics UK (COG-UK) Consortium|Temperton|United Kingdom

>Spike|hCoV-19/England/CAMC-B225D1/2020|2020-11-01|EPI\_ISL\_646047|Original|hCoV-19^^England|Human|Lighthouse Lab in Cambridge|Wellcome Sanger Institute for the COVID-19 Genomics UK (COG-UK) Consortium|Davies|United Kingdom

>Spike|hCoV-19/Wuhan/HB-WH3-188/2020|2020-03-03|EPI\_ISL\_455383|Original|hCoV-19^^Hubei|Human|Wuhan Chain Medical Labs (CMLabs)|State Key Laboratory of Biotherapy of Sichuan University|Tang|China

>Spike|hCoV-19/England/ALDP-9EA021/2020|2020-09-24|EPI\_ISL\_580095|Original|hCoV-19^^England|Human|Lighthouse Lab in Alderley Park|Wellcome Sanger Institute for the COVID-19 Genomics UK (COG-UK) consortium|Davies|United Kingdom

>Spike|hCoV-19/England/NORT-29348C/2020|2020-06-22|EPI\_ISL\_499595|Original|hCoV-19^^England|Human|Northumbria University / South Tees Hospitals NHS Foundation Trust / North Cumbria Integrated Care NHS Foundation Trust / North Tees and Hartlepool NHS Foundation Trust / Newcastle Hospitals NHS Foundation Trust|COVID-19 Genomics UK (COG-UK) Consortium|Bashton|United Kingdom

>Spike|hCoV-19/USA/WI-UW-1962/2020|2020-10-01|EPI\_ISL\_677370|Original|hCoV-19^^Wisconsin|Human|University of Wisconsin-Madison AIDS Vaccine Research Laboratories|University of Wisconsin-Madison AIDS Vaccine Research Laboratories|Baczenas|USA

>Spike|hCoV-19/Denmark/DCGC-2952/2020|2020-08-24|EPI\_ISL\_616713|Original|hCoV-19^^Hovedstaden|Human|Department of Virus and Microbiological Special Diagnostics|Albertsen lab|Michaelsen|Denmark

>Spike|hCoV-19/Wales/PHWC-4A0709/2020|2020-12-08|EPI\_ISL\_743485|Original|hCoV-19^^Wales|Human|Wales Specialist Virology Centre Sequencing lab|COVID-19 Genomics UK (COG-UK) Consortium|Moore|United Kingdom

>Spike|hCoV-19/England/QEUA-AF47F1/2020|2020-10-30|EPI\_ISL\_662826|Original|hCoV-19^^England|Human|Lighthouse Lab in Glasgow|Wellcome Sanger Institute for the COVID-19 Genomics UK (COG-UK) Consortium|Davies|United Kingdom

>Spike|hCoV-19/USA/IL-NM-1110/2020|2020-06-10|EPI\_ISL\_626498|Original|hCoV-19^^Illinois|Human|Northwestern Memorial Hospital|Ozer Lab|Ozer|USA

>Spike|hCoV-19/Australia/NSW1181/2020|2020-10-22|EPI\_ISL\_667784|Original|hCoV-19^^New South Wales|Human|South Eastern Area Laboratory Services (SEALS)|NSW Health Pathology - Institute of Clinical Pathology and Medical Research; Westmead Hospital; University of Sydney|Gall|Australia

>Spike|hCoV-19/USA/LA-GBCL-26544582/2020|2020-04-17|EPI\_ISL\_485152|Original|hCoV-19^^Louisiana|Human|River Road Testing Lab|Ginkgo Bioworks Clinical Laboratory|Smith|USA

>Spike|hCoV-19/Germany/HH-hpi-p2329/2020|2020-03-18|EPI\_ISL\_776443|Original|hCoV-19^^Hamburg|Human|University Medical Center Hamburg Eppendorf|Heinrich Pette Institute|Robitaille|Germany

>Spike|hCoV-19/England/ALDP-CB539C/2020|2020-12-19|EPI\_ISL\_761713|Original|hCoV-19^^England|Human|Lighthouse Lab in Alderley Park|Wellcome Sanger Institute for the COVID-19 Genomics UK (COG-UK) Consortium|Davies|United Kingdom

>Spike|hCoV-19/England/MILK-576F4F/2020|2020-06-11|EPI\_ISL\_558266|Original|hCoV-19^^England|Human|Lighthouse Lab in Milton Keynes|Wellcome Sanger Institute for the COVID-19 Genomics UK (COG-UK) consortium|Davies|United Kingdom

>Spike|hCoV-19/Denmark/DCGC-16108/2020|2020-11-16|EPI\_ISL\_714290|Original|hCoV-19^^Syddanmark|Human|Department of Virus and Microbiological Special Diagnostics|Albertsen Lab|Michaelsen|Denmark

>Spike|hCoV-19/England/ALDP-B45E73/2020|2020-11-07|EPI\_ISL\_656256|Original|hCoV-19^^England|Human|Lighthouse Lab in Alderley Park|Wellcome Sanger Institute for the COVID-19 Genomics UK (COG-UK) Consortium|Davies|United Kingdom

>Spike|hCoV-19/Japan/PG-3164/2020|2020-06-00|EPI\_ISL\_691284|Original|hCoV-19^^Japan|Human|Chiba Prefectural Institute of Public Health|Pathogen Genomics Center|Sekizuka|Japan

>Spike|hCoV-19/Denmark/ALAB-HH-220/2020|2020-04-28|EPI\_ISL\_452071|Original|hCoV-19^^Denmark|Human|Department of Clinical Microbiology|Albertsen lab|Kirkegaard|Denmark

>Spike|hCoV-19/England/QEUA-A5E33D/2020|2020-10-12|EPI\_ISL\_597296|Original|hCoV-19^^England|Human|Lighthouse Lab in Glasgow|Wellcome Sanger Institute for the COVID-19 Genomics UK (COG-UK) consortium|Davies|United Kingdom

>Spike|hCoV-19/England/BIRM-64E5B/2020|2020-09-24|EPI\_ISL\_594523|Original|hCoV-19^^England|Human|University of Birmingham|COVID-19 Genomics UK (COG-UK) Consortium|Loman|United Kingdom

>Spike|hCoV-19/England/QEUA-B80A69/2020|2020-11-14|EPI\_ISL\_661825|Original|hCoV-19^^England|Human|Lighthouse Lab in Glasgow|Wellcome Sanger Institute for the COVID-19 Genomics UK (COG-UK) Consortium|Davies|United Kingdom

>Spike|hCoV-19/England/EXET-13847B/2020|2020-09-13|EPI\_ISL\_611701|Original|hCoV-19^^England|Human|University of Exeter|COVID-19 Genomics UK (COG-UK) Consortium|Temperton|United Kingdom

>Spike|hCoV-19/Japan/PG-0296/2020|2020-03-27|EPI\_ISL\_479973|Original|hCoV-19^^HokurikuShinsyu|Human|Fukui Prefectural Institute of Public Health and Environmental Science|Pathogen Genomics Center|Sekizuka|Japan

>Spike|hCoV-19/Brazil/PE-IAM939/2020|2020-05-03|EPI\_ISL\_572361|Original|hCoV-19^^Pernambuco|Human|LACEN/PE|WallauLab|Wallau|Brazil

>Spike|hCoV-19/England/QEUA-A338C6/2020|2020-10-03|EPI\_ISL\_628414|Original|hCoV-19^^England|Human|Oxford Viromics|COVID-19 Genomics UK (COG-UK) Consortium|Golubchik|United Kingdom

>Spike|hCoV-19/England/MILK-CA68AE/2020|2020-12-16|EPI\_ISL\_761640|Original|hCoV-19^^England|Human|Lighthouse Lab in Milton Keynes|Wellcome Sanger Institute for the COVID-19 Genomics UK (COG-UK) Consortium|Davies|United Kingdom

>Spike|hCoV-19/England/MILK-C50603/2020|2020-12-11|EPI\_ISL\_736550|Original|hCoV-19^^England|Human|Lighthouse Lab in Milton Keynes|Wellcome Sanger Institute for the COVID-19 Genomics UK (COG-UK) Consortium|Davies|United Kingdom

>Spike|hCoV-19/England/NORT-283BF3/2020|2020-04-03|EPI\_ISL\_478520|Original|hCoV-19^^England|Human|Northumbria University / South Tees Hospitals NHS Foundation Trust / North Cumbria Integrated Care NHS Foundation Trust / North Tees and Hartlepool NHS Foundation Trust / Newcastle Hospitals NHS Foundation Trust|COVID-19 Genomics UK (COG-UK) Consortium|Bashton|United Kingdom

>Spike|hCoV-19/Wales/PHWC-48F463/2020|2020-11-09|EPI\_ISL\_681095|Original|hCoV-19^^Wales|Human|Wales Specialist Virology Centre Sequencing lab|COVID-19 Genomics UK (COG-UK) Consortium|Moore|United Kingdom

>Spike|hCoV-19/England/LIVE-DC40A1/2020|2020-11-08|EPI\_ISL\_705884|Original|hCoV-19^^England|Human|Liverpool Clinical Laboratories|COVID-19 Genomics UK (COG-UK) Consortium|Haldenby|United Kingdom

>Spike|hCoV-19/England/ALDP-B73EC7/2020|2020-11-12|EPI\_ISL\_664467|Original|hCoV-19^^England|Human|Quadram Institute Bioscience|COVID-19 Genomics UK (COG-UK) Consortium|Alikhan|United Kingdom

>Spike|hCoV-19/USA/MI-MDHHS-SC21247/2020|2020-04-04|EPI\_ISL\_507502|Original|hCoV-19^^Michigan|Human|Michigan Department of Health and Human Services|Michigan Department of Health and Human Services|Blankenship|USA

>Spike|hCoV-19/Denmark/DCGC-10605/2020|2020-11-02|EPI\_ISL\_670082|Original|hCoV-19^^Sjaelland|Human|Department of Virus and Microbiological Special Diagnostics|Albertsen Lab|Michaelsen|Denmark

>Spike|hCoV-19/England/BRIS-13084A/2020|2020-04-12|EPI\_ISL\_492654|Original|hCoV-19^^England|Human|PHE South West Regional Laboratory|Wellcome Sanger Institute for the COVID-19 Genomics UK (COG-UK) consortium|Davies|United Kingdom

>Spike|hCoV-19/England/QEUE-B7E882/2020|2020-11-14|EPI\_ISL\_668151|Original|hCoV-19^^England|Human|Lighthouse Lab in Glasgow|Wellcome Sanger Institute for the COVID-19 Genomics UK (COG-UK) Consortium|Davies|United Kingdom

>Spike|hCoV-19/England/20138024604/2020|2020-03-26|EPI\_ISL\_423306|Original|hCoV-19^^England|Human|Respiratory Virus Unit|Respiratory Virus Unit|Platt|United Kingdom

>Spike|hCoV-19/Germany/NW-HHU-279/2020|2020-09-28|EPI\_ISL\_631323|Original|hCoV-19^^North Rhine-Westphalia|Human|ZOTZ KLIMAS MVZ D\u00f0fcsseldorf-Centrum GbR \u00dcBAG f\u00fcr Labormedizin|Center of Medical Microbiology|Wienemann|Germany

>Spike|hCoV-19/Australia/NSW3724/2020|2020-12-25|EPI\_ISL\_738137|Original|hCoV-19^^New South Wales|Human|Area of Virology|Area of Virology|Yeang|Australia

>Spike|hCoV-19/England/ALDP-A95DC3/2020|2020-10-20|EPI\_ISL\_624875|Original|hCoV-19^^England|Human|Lighthouse Lab in Alderley Park|Wellcome Sanger Institute for the COVID-19 Genomics UK (COG-UK) consortium|Davies|United Kingdom

>Spike|hCoV-19/England/NORT-2810E7/2020|2020-03-04|EPI\_ISL\_472156|Original|hCoV-19^^England|Human|Northumbria University / South Tees Hospitals NHS Foundation Trust / North Cumbria Integrated Care NHS Foundation Trust / North Tees and Hartlepool NHS Foundation Trust / Newcastle Hospitals NHS Foundation Trust|COVID-19 Genomics UK (COG-UK) Consortium|Bashton|United Kingdom

>Spike|hCoV-19/Spain/CM-IBV-003886/2020|2020-05-20|EPI\_ISL\_474941|Original|hCoV-19^^Castilla La Mancha|Human|Complejo Hospitalario Universitario de Albacete|SeqCOVID-SPAIN consortium|IBV(CSIC)|Comas|Spain

>Spike|hCoV-19/USA/MI-UM-10036455304/2020|2020-10-15|EPI\_ISL\_628846|Original|hCoV-19^^Michigan|Human|University of Michigan Clinical Microbiology Laboratory|Lauring Lab|Valesano|USA

>Spike|hCoV-19/Denmark/ALAB-HH17/2020|2020-03-10|EPI\_ISL\_429275|Original|hCoV-19^^Denmark|Human|Department of Clinical Microbiology|Albertsen lab|Kirkegaard|Denmark

>Spike|hCoV-19/Wales/PHWC-27892/2020|2020-03-31|EPI\_ISL\_432413|Original|hCoV-19^^Wales|Human|Wales Specialist Virology Centre|Public Health Wales Microbiology Cardiff|Moore|United Kingdom

>Spike|hCoV-19/Canada/ON-S154/2020|2020-03-24|EPI\_ISL\_586366|Original|hCoV-19^^Ontario|Human|Toronto Invasive Bacterial Diseases Network|McMaster University|McArthur|Canada

>Spike|hCoV-19/USA/CA-CDPH206/2020|2020-11-12|EPI\_ISL\_755062|Original|hCoV-19^^California|Human|California Department of Public Health|California Department of Public Health|Bell|USA

>Spike|hCoV-19/England/ALDP-6D9714/2020|2020-07-02|EPI\_ISL\_556257|Original|hCoV-19^^England|Human|Lighthouse Lab in Alderley Park|Wellcome Sanger Institute for the COVID-19 Genomics UK (COG-UK) consortium|Davies|United Kingdom

>Spike|hCoV-19/Japan/PG-3577/2020|2020-06-00|EPI\_ISL\_691833|Original|hCoV-19^^Japan|Human|Pathogen Genomics Center|Pathogen Genomics Center|Sekizuka|Japan

>Spike|hCoV-19/Australia/VIC9715/2020|2020-08-25|EPI\_ISL\_565669|Original|hCoV-19^^Victoria|Human|Microbiological Diagnostic Unit - Public Health Laboratory (MDU-PHL)|MDU-PHL|Schultz|Australia

>Spike|hCoV-19/USA/LA-EVTL1096/2020|2020-12-01|EPI\_ISL\_768366|Original|hCoV-19^^Louisiana|Human|LSUHS Emerging Viral Threat Laboratory|Microbial Genome Sequencing Center|Kamil|USA

>Spike|hCoV-19/Australia/VIC4375/2020|2020-07-13|EPI\_ISL\_519671|Original|hCoV-19^^Victoria|Human|Microbiological Diagnostic Unit - Public Health Laboratory (MDU-PHL)|MDU-PHL|Schultz|Australia

>Spike|hCoV-19/USA/TX-HMH-5518/2020|2020-06-23|EPI\_ISL\_544840|Original|hCoV-19^^Texas|Human|Houston Methodist Hospital|Houston Methodist Hospital|Long|USA

>Spike|hCoV-19/Japan/PG-5054/2020|2020-08-00|EPI\_ISL\_690165|Original|hCoV-19^^Japan|Human|Pathogen Genomics Center|Pathogen Genomics Center|Sekizuka|Japan

>Spike|hCoV-19/USA/WY-WPHL-20157068/2020|2020-12-02|EPI\_ISL\_756132|Original|hCoV-19^^Wyoming|Human|Wyoming Public Health Laboratory|Wyoming Public Health Laboratory|Hull|USA

>Spike|hCoV-19/Scotland/MILK-A6BD99/2020|2020-10-08|EPI\_ISL\_625426|Original|hCoV-19^^Scotland|Human|Lighthouse Lab in Milton Keynes|Wellcome Sanger Institute for the COVID-19 Genomics UK (COG-UK) consortium|Davies|United Kingdom

>Spike|hCoV-19/England/CAMB-1B09D6/2020|2020-05-12|EPI\_ISL\_452926|Original|hCoV-19^^England|Human|Department of Pathology|COVID-19 Genomics UK (COG-UK) Consortium|Meredith|United Kingdom

>Spike|hCoV-19/Scotland/QEUA-A639E8/2020|2020-10-09|EPI\_ISL\_596177|Original|hCoV-19^^Scotland|Human|Quadram Institute Bioscience|COVID-19 Genomics UK (COG-UK) Consortium|Alikhan|United Kingdom

>Spike|hCoV-19/Wales/MILK-9EFA3D/2020|2020-09-23|EPI\_ISL\_594971|Original|hCoV-19^^Wales|Human|Queens Medical Centre|COVID-19 Genomics UK (COG-UK) Consortium|Loose|United Kingdom

>Spike|hCoV-19/England/MILK-A05E43/2020|2020-10-01|EPI\_ISL\_600014|Original|hCoV-19^^England|Human|Lighthouse Lab in Milton Keynes|Wellcome Sanger Institute for the COVID-19 Genomics UK (COG-UK) consortium|Davies|United Kingdom

>Spike|hCoV-19/England/BRIS-130BC9/2020|2020-03-16|EPI\_ISL\_492536|Original|hCoV-19^^England|Human|PHE South West Regional Laboratory|Wellcome Sanger Institute for the COVID-19 Genomics UK (COG-UK) consortium|Davies|United Kingdom

>Spike|hCoV-19/Russia/OMS-ORINFI-6390S/2020|2020-06-05|EPI\_ISL\_639934|Original|hCoV-19^^Omsk|Human|Omsk Research Institute of Natural Focal Infections|WHO National Influenza Centre Russian Federation|Komissarov|Russia

>Spike|hCoV-19/England/ALDP-9CDE57/2020|2020-09-16|EPI\_ISL\_566203|Original|hCoV-19^^England|Human|Lighthouse Lab in Alderley Park|Wellcome Sanger Institute for the COVID-19 Genomics UK (COG-UK) consortium|Davies|United Kingdom

>Spike|hCoV-19/England/ALDP-BBA064/2020|2020-11-20|EPI\_ISL\_701718|Original|hCoV-19^^England|Human|Lighthouse Lab in Alderley Park|Wellcome Sanger Institute for the COVID-19 Genomics UK (COG-UK) Consortium|Davies|United Kingdom

>Spike|hCoV-19/Netherlands/ZH-EMC-516/2020|2020-09-01|EPI\_ISL\_577944|Original|hCoV-19^^Zuid Holland|Human|Dutch COVID-19 response team|Erasmus Medical Center|Oude Munnink|Netherlands

>Spike|hCoV-19/Scotland/EDB081/2020|2020-03-20|EPI\_ISL\_425873|Original|hCoV-19^^Scotland|Human|Virology Department|COVID-19 Genomics UK (COG-UK) Consortium|Williams|United Kingdom

>Spike|hCoV-19/England/CWAR-24FD8F5/2020|2020-04-22|EPI\_ISL\_584450|Original|hCoV-19^^England|Human|UHCW / University of Warwick|COVID-19 Genomics UK (COG-UK) Consortium|Stark|United Kingdom

>Spike|hCoV-19/England/205041400/2020|2020-12-05|EPI\_ISL\_766286|Original|hCoV-19^^England|Human|Respiratory Virus Unit|COVID-19 Genomics UK (COG-UK) Consortium|Platt|United Kingdom

>Spike|hCoV-19/South Korea/KCDC2052/2020|2020-02-21|EPI\_ISL\_481372|Original|hCoV-19^^South Korea|Human|Division of Viral Diseases|Division of Viral Diseases|Kim|South Korea

>Spike|hCoV-19/England/LIVE-A993B/2020|2020-03-23|EPI\_ISL\_517294|Original|hCoV-19^^England|Human|Liverpool Clinical Laboratories|COVID-19 Genomics UK (COG-UK) Consortium|Haldenby|United Kingdom

>Spike|hCoV-19/USA/LA-EVTL082/2020|2020-05-07|EPI\_ISL\_451243|Original|hCoV-19^^Louisiana|Human|LSUHS Emerging Viral Threat Laboratory|Microbial Genome Sequencing Center|Kamil|USA

>Spike|hCoV-19/England/CAMC-B3622E/2020|2020-11-05|EPI\_ISL\_645326|Original|hCoV-19^^England|Human|Lighthouse Lab in Cambridge|Wellcome Sanger Institute for the COVID-19 Genomics UK (COG-UK) Consortium|Davies|United Kingdom

>Spike|hCoV-19/England/QEUH-AD23B9/2020|2020-10-26|EPI\_ISL\_634051|Original|hCoV-19^^England|Human|Lighthouse Lab in Glasgow|Wellcome Sanger Institute for the COVID-19 Genomics UK (COG-UK) consortium|Davies|United Kingdom

>Spike|hCoV-19/England/CAMC-C46E9F/2020|2020-12-10|EPI\_ISL\_718677|Original|hCoV-19^^England|Human|Lighthouse Lab in Cambridge|Wellcome Sanger Institute for the COVID-19 Genomics UK (COG-UK) Consortium|Davies|United Kingdom

>Spike|hCoV-19/USA/CA-CZB-15118/2020|2020-11-23|EPI\_ISL\_739254|Original|hCoV-19^^California|Human|Santa Clara County Public Health Laboratory|Chan-Zuckerberg Biohub|Kamm|USA

>Spike|hCoV-19/Denmark/DCGC-10477/2020|2020-11-02|EPI\_ISL\_670000|Original|hCoV-19^^Hovedstaden|Human|Department of Virus and Microbiological Special Diagnostics|Albertsen Lab|Michaelsen|Denmark

>Spike|hCoV-19/USA/GA-QDX-241/2020|2020-04-28|EPI\_ISL\_498718|Original|hCoV-19^^Georgia|Human|Quest Diagnostics|Quest Diagnostics|Kagan|USA

>Spike|hCoV-19/England/20140007604/2020|2020-03-29|EPI\_ISL\_423384|Original|hCoV-19^^England|Human|Respiratory Virus Unit|Respiratory Virus Unit|Platt|United Kingdom

>Spike|hCoV-19/England/QEUH-9608FE/2020|2020-08-03|EPI\_ISL\_532043|Original|hCoV-19^^England|Human|Lighthouse Lab in Glasgow|Wellcome Sanger Institute for the COVID-19 Genomics UK (COG-UK) consortium|Davies|United Kingdom

>Spike|hCoV-19/Japan/PG-4429/2020|2020-07-00|EPI\_ISL\_692653|Original|hCoV-19^^Japan|Human|Sakai City Institute of Public Health|Pathogen Genomics Center|Sekizuka|Japan

>Spike|hCoV-19/New Zealand/20VR2548/2020|2020-00-00|EPI\_ISL\_579291|Original|hCoV-19^^Auckland|Human|LabPLUS|Institute of Environmental Science and Research (ESR)|Wang|New Zealand

>Spike|hCoV-19/USA/TX-HMH-MCoV-8143/2020|2020-06-30|EPI\_ISL\_784230|Original|hCoV-19^^Texas|Human|Houston Methodist Hospital|Houston Methodist Hospital|Long|USA

>Spike|hCoV-19/Norway/3844/2020|2020-09-28|EPI\_ISL\_591009|original|hCoV-19^^Viken|Human|Ostfold Hospital Trust - Kalnes|Norwegian Institute of Public Health|Vollan|Norway

>Spike|hCoV-19/Canada/ON-UHTC-0376/2020|2020-10-04|EPI\_ISL\_671659|Original|hCoV-19^^Ontario|Human|Unity Health Toronto|Ontario Institute for Cancer Research|de Borja|Canada

>Spike|hCoV-19/England/CAMC-B51F26/2020|2020-11-08|EPI\_ISL\_657931|Original|hCoV-19^^England|Human|Lighthouse Lab in Cambridge|Wellcome Sanger Institute for the COVID-19 Genomics UK (COG-UK) Consortium|Davies|United Kingdom

>Spike|hCoV-19/Japan/PG-4116/2020|2020-07-00|EPI\_ISL\_692356|Original|hCoV-19^^Japan|Human|Pathogen Genomics Center|Pathogen Genomics Center|Sekizuka|Japan

>Spike|hCoV-19/USA/CA-CZB-1961/2020|2020-05-06|EPI\_ISL\_486233|Original|hCoV-19^^California|Human|Orange County Public Health Laboratory|Chan-Zuckerberg Biohub|McGeever|USA

>Spike|hCoV-19/Scotland/EDB6643/2020|2020-05-26|EPI\_ISL\_493965|Original|hCoV-19^^Scotland|Human|Virology Department|COVID-19 Genomics UK (COG-UK) Consortium|Williams|United Kingdom

>Spike|hCoV-19/Burkina Faso/1698/2020|2020-08-14|EPI\_ISL\_660449|Original|hCoV-19^^Bobo Dioulasso|Human|Laboratoire de Microbiologie CHU Souro Sanou|Centre Muraz|Ouedraogo|Burkina Faso

>Spike|hCoV-19/England/QEUH-C93F81/2020|2020-12-17|EPI\_ISL\_777376|Original|hCoV-19^^England|Human|Lighthouse Lab in Glasgow|Wellcome Sanger Institute for the COVID-19 Genomics UK (COG-UK) Consortium|Davies|United Kingdom

>Spike|hCoV-19/Scotland/EDB3655/2020|2020-04-27|EPI\_ISL\_439306|Original|hCoV-19^^Scotland|Human|Virology Department|COVID-19 Genomics UK (COG-UK) Consortium|Williams|United Kingdom



>Spike|hCoV-19/USA/WI-UW-2277/2020|2020-11-12|EPI\_ISL\_728044|Original|hCoV-19^^Wisconsin|Human|University of Wisconsin-Madison AIDS Vaccine Research Laboratories|University of Wisconsin-Madison AIDS Vaccine Research Laboratories|Baczenas|USA

>Spike|hCoV-19/United Arab Emirates/0559/2020|2020-05-19|EPI\_ISL\_698720|Original|hCoV-19^^Abu Dhabi|Human|Group 42 (G42) Healthcare|G42 Healthcare|Ogrodzki|United Arab Emirates

>Spike|hCoV-19/USA/NY-NYCPHL-000695/2020|2020-03-10|EPI\_ISL\_632111|Original|hCoV-19^^New York|Human|Montefiore Medical Center|New York City Public Health Laboratory|Wang|USA

>Spike|hCoV-19/England/LOND-DAAF2/2020|2020-11-06|EPI\_ISL\_724692|Original|hCoV-19^^England|Human|University College London|COVID-19 Genomics UK (COG-UK) Consortium|Roy|United Kingdom

>Spike|hCoV-19/Netherlands/NA\_136/2020|2020-03-19|EPI\_ISL\_422680|Original|hCoV-19^^Netherlands|Human|Dutch COVID-19 response team|Erasmus Medical Center|Oude Munnink|Netherlands

>Spike|hCoV-19/Scotland/QEUA-A0B4B4/2020|2020-10-03|EPI\_ISL\_599376|Original|hCoV-19^^Scotland|Human|Lighthouse Lab in Glasgow|Wellcome Sanger Institute for the COVID-19 Genomics UK (COG-UK) consortium|Davies|United Kingdom

>Spike|hCoV-19/England/CAMC-B206EF/2020|2020-11-02|EPI\_ISL\_647772|Original|hCoV-19^^England|Human|Lighthouse Lab in Cambridge|Wellcome Sanger Institute for the COVID-19 Genomics UK (COG-UK) Consortium|Davies|United Kingdom

>Spike|hCoV-19/Wales/ALDP-9C5EE6/2020|2020-09-10|EPI\_ISL\_567808|Original|hCoV-19^^Wales|Human|Lighthouse Lab in Alderley Park|Wellcome Sanger Institute for the COVID-19 Genomics UK (COG-UK) consortium|Davies|United Kingdom

>Spike|hCoV-19/Japan/PG-0892/2020|2020-04-00|EPI\_ISL\_684502|Original|hCoV-19^^Japan|Human|Pathogen Genomics Center|Pathogen Genomics Center|Sekizuka|Japan

>Spike|hCoV-19/England/QEUA-C32ACF/2020|2020-12-11|EPI\_ISL\_782595|Original|hCoV-19^^England|Human|Lighthouse Lab in Glasgow|Wellcome Sanger Institute for the COVID-19 Genomics UK (COG-UK) Consortium|Davies|United Kingdom

>Spike|hCoV-19/England/QEUA-95DE2F/2020|2020-08-07|EPI\_ISL\_537053|Original|hCoV-19^^England|Human|Lighthouse Lab in Glasgow|Wellcome Sanger Institute for the COVID-19 Genomics UK (COG-UK) consortium|Davies|United Kingdom

>Spike|hCoV-19/USA/HI-H200031/2020|2020-03-21|EPI\_ISL\_752617|Original|hCoV-19^^Hawaii|Human|State Laboratories Division|State Laboratories Division|Sultana|USA

>Spike|hCoV-19/Australia/VIC11344/2020|2020-08-24|EPI\_ISL\_563340|Original|hCoV-19^^Victoria|Human|Microbiological Diagnostic Unit - Public Health Laboratory (MDU-PHL)|MDU-PHL|Schultz|Australia

>Spike|hCoV-19/England/ALDP-AA4D94/2020|2020-10-21|EPI\_ISL\_630844|Original|hCoV-19^^England|Human|Lighthouse Lab in Alderley Park|Wellcome Sanger Institute for the COVID-19 Genomics UK (COG-UK) consortium|Davies|United Kingdom

>Spike|hCoV-19/Denmark/DCGC-20488/2020|2020-12-21|EPI\_ISL\_759180|Original|hCoV-19^^Sjaelland|Human|Department of Virus and Microbiological Special Diagnostics|Albertsen Lab|Michaelsen|Denmark

>Spike|hCoV-19/England/MILK-A46FE9/2020|2020-10-06|EPI\_ISL\_598299|Original|hCoV-19^^England|Human|Lighthouse Lab in Milton Keynes|Wellcome Sanger Institute for the COVID-19 Genomics UK (COG-UK) consortium|Davies|United Kingdom

>Spike|hCoV-19/Wales/PHWC-49AE0D/2020|2020-12-03|EPI\_ISL\_727691|Original|hCoV-19^^Wales|Human|Originating lab|COVID-19 Genomics UK (COG-UK) Consortium|Moore|United Kingdom

>Spike|hCoV-19/Brazil/RS-6240/2020|2020-06-01|EPI\_ISL\_729841|Original|hCoV-19^^Rio Grande do Sul|Human|Laboratorio Central de Saude Publica do Estado do Rio Grande do Sul (LACEN-RS)|Laboratory of Respiratory Viruses and Measles|Silva|Brazil

>Spike|hCoV-19/Switzerland/VD-ETHZ-321447/2020|2020-10-14|EPI\_ISL\_603670|Original|hCoV-19^^Vaud|Human|Viollier AG|Department of Biosystems Science and Engineering|Nadeau|Switzerland

>Spike|hCoV-19/Canada/ON-S824/2020|2020-04-11|EPI\_ISL\_586452|Original|hCoV-19^^Ontario|Human|Toronto Invasive Bacterial Diseases Network|McMaster University|McArthur|Canada

>Spike|hCoV-19/Japan/PG-7062/2020|2020-08-00|EPI\_ISL\_688167|Original|hCoV-19^^Japan|Human|Pathogen Genomics Center|Pathogen Genomics Center|Sekizuka|Japan

>Spike|hCoV-19/England/CAMC-9497B2/2020|2020-07-27|EPI\_ISL\_556066|Original|hCoV-19^^England|Human|Lighthouse Lab in Cambridge|Wellcome Sanger Institute for the COVID-19 Genomics UK (COG-UK) consortium|Davies|United Kingdom

>Spike|hCoV-19/England/ALDP-BC7A75/2020|2020-11-23|EPI\_ISL\_721431|Original|hCoV-19^^England|Human|Lighthouse Lab in Alderley Park|Wellcome Sanger Institute for the COVID-19 Genomics UK (COG-UK) Consortium|Davies|United Kingdom

>Spike|hCoV-19/India/MH-ACTREC-363/2020|2020-07-23|EPI\_ISL\_700012|Original|hCoV-19^^Maharashtra|Human|Hematopathology Laboratory|Hematopathology Laboratory|Patkar|India

>Spike|hCoV-19/Denmark/DCGC-16530/2020|2020-11-16|EPI\_ISL\_714818|Original|hCoV-19^^Hovedstaden|Human|Department of Virus and Microbiological Special Diagnostics|Albertsen Lab|Michaelsen|Denmark

>Spike|hCoV-19/USA/TX-HMH-MCoV-8504/2020|2020-07-01|EPI\_ISL\_780597|Original|hCoV-19^^Texas|Human|Houston Methodist Hospital|Houston Methodist Hospital|Long|USA

>Spike|hCoV-19/Finland/8May35S7/2020|2020-05-08|EPI\_ISL\_481724|Original|hCoV-19^^Uusimaa|Human|Department of Virology and Immunology|Department of Virology|Smura|Finland

>Spike|hCoV-19/Ireland/MN-NVRL-20IRL82802/2020|2020-10-05|EPI\_ISL\_639867|Original|hCoV-19^^Monaghan|Human|National Virus Reference Laboratory|National Virus Reference Laboratory|Gonzalez|Ireland

>Spike|hCoV-19/USA/CA-ALSR-3112/2020|2020-08-25|EPI\_ISL\_635854|Original|hCoV-19^^California|Human|San Diego County Public Health Laboratory|Andersen lab at Scripps Research|Gangavarapu|USA

>Spike|hCoV-19/Australia/NSW1080/2020|2020-08-10|EPI\_ISL\_593653|Original|hCoV-19^^New South Wales|Human|Laverty Pathology|NSW Health Pathology - Institute of Clinical Pathology and Medical Research; Westmead Hospital; University of Sydney|Gall|Australia

>Spike|hCoV-19/Wales/PHWC-4957AD/2020|2020-11-23|EPI\_ISL\_726395|Original|hCoV-19^^Wales|Human|Originating lab|COVID-19 Genomics UK (COG-UK) Consortium|Moore|United Kingdom

>Spike|hCoV-19/South Africa/KRISP-K002782/2020|2020-08-20|EPI\_ISL\_529776|Original|hCoV-19^^KwaZulu-Natal|Human|NHLS-IALCH|KRISP|de Oliveira|South Africa

>Spike|hCoV-19/USA/CA-CZB-10918/2020|2020-08-28|EPI\_ISL\_583147|Original|hCoV-19^^California|Human|Humboldt County Public Health Laboratory|Chan-Zuckerberg Biohub|Bhatt|USA

>Spike|hCoV-19/England/MILK-AC91F7/2020|2020-10-22|EPI\_ISL\_629699|Original|hCoV-19^^England|Human|Lighthouse Lab in Milton Keynes|Wellcome Sanger Institute for the COVID-19 Genomics UK (COG-UK) consortium|Davies|United Kingdom

>Spike|hCoV-19/England/CAMB-1B9B6E/2020|2020-11-10|EPI\_ISL\_664959|Original|hCoV-19^^England|Human|Department of Pathology|COVID-19 Genomics UK (COG-UK) Consortium|Goodfellow|United Kingdom

>Spike|hCoV-19/England/QEUA-AD20C1/2020|2020-10-27|EPI\_ISL\_634102|Original|hCoV-19^^England|Human|Lighthouse Lab in Glasgow|Wellcome Sanger Institute for the COVID-19 Genomics UK (COG-UK) consortium|Davies|United Kingdom

>Spike|hCoV-19/Wales/PHWC-4A01B0/2020|2020-12-04|EPI\_ISL\_743407|Original|hCoV-19^^Wales|Human|Wales Specialist Virology Centre Sequencing lab|COVID-19 Genomics UK (COG-UK) Consortium|Moore|United Kingdom

>Spike|hCoV-19/USA/CA-QDX-2411/2020|2020-03-16|EPI\_ISL\_604677|Original|hCoV-19^^California|Human|Quest Diagnostics|Quest Diagnostics|Kagan|USA

>Spike|hCoV-19/Japan/PG-6496/2020|2020-09-00|EPI\_ISL\_689598|Original|hCoV-19^^Japan|Human|Pathogen Genomics Center|Pathogen Genomics Center|Sekizuka|Japan

>Spike|hCoV-19/England/MILK-B3DF4E/2020|2020-11-01|EPI\_ISL\_741410|Original|hCoV-19^^England|Human|Oxford Viromics|COVID-19 Genomics UK (COG-UK) Consortium|Golubchik|United Kingdom

>Spike|hCoV-19/England/NORW-E9FF1/2020|2020-05-03|EPI\_ISL\_448384|Original|hCoV-19^^England|Human|Quadram Institute Bioscience|COVID-19 Genomics UK (COG-UK) Consortium|Alikhan|United Kingdom

>Spike|hCoV-19/Australia/VIC187/2020|2020-03-19|EPI\_ISL\_419883|Original|hCoV-19^^Victoria|Human|Victorian Infectious Diseases Reference Laboratory (VIDRL)|Victorian Infectious Diseases Reference Laboratory and Microbiological Diagnostic Unit Public Health Laboratory|Schultz|Australia

>Spike|hCoV-19/USA/NM-UNM-00688/2020|2020-05-07|EPI\_ISL\_560356|Original|hCoV-19^^New Mexico|Human|TriCore Reference Laboratories|Center for Global Health|Domman|USA

>Spike|hCoV-19/Japan/PG-0279/2020|2020-03-19|EPI\_ISL\_479959|Original|hCoV-19^^Kanto|Human|Tokyo Metropolitan Institute of Public Health|Pathogen Genomics Center|Sekizuka|Japan

>Spike|hCoV-19/Iceland/324/2020|2020-03-18|EPI\_ISL\_417653|Original|hCoV-19^^Reykjavik|Human|The National University Hospital of Iceland|deCODE genetics|J\u00f3nsson|Iceland

>Spike|hCoV-19/England/CAMC-B07068/2020|2020-10-29|EPI\_ISL\_643776|Original|hCoV-19^^England|Human|Lighthouse Lab in Cambridge|Wellcome Sanger Institute for the COVID-19 Genomics UK (COG-UK) Consortium|Davies|United Kingdom

>Spike|hCoV-19/England/ALDP-95B076/2020|2020-06-13|EPI\_ISL\_555695|Original|hCoV-19^^England|Human|Lighthouse Lab in Alderley Park|Wellcome Sanger Institute for the COVID-19 Genomics UK (COG-UK) consortium|Davies|United Kingdom

>Spike|hCoV-19/France/PAC-IHU-0981/2020|2020-07-27|EPI\_ISL\_569028|Original|hCoV-19^^Provence-Alpes-C\u00f4te-d\u2019Azur|Human|MEPHI|MEPHI|Levasseur|France

>Spike|hCoV-19/Wales/PHWC-2B1A2/2020|2020-04-07|EPI\_ISL\_432261|Original|hCoV-19^^Wales|Human|Wales Specialist Virology Centre|Public Health Wales Microbiology Cardiff|Moore|United Kingdom

>Spike|hCoV-19/USA/NY-Wadsworth-288190-01/2020|2020-12-15|EPI\_ISL\_767477|Original|hCoV-19^^New York|Human|Wadsworth Center|Wadsworth Center|Lasek-Nesselquist|USA

>Spike|hCoV-19/England/MILK-B55A30/2020|2020-11-05|EPI\_ISL\_657393|Original|hCoV-19^^England|Human|Lighthouse Lab in Milton Keynes|Wellcome Sanger Institute for the COVID-19 Genomics UK (COG-UK) Consortium|Davies|United Kingdom

>Spike|hCoV-19/USA/CA-CZB-1099/2020|2020-04-28|EPI\_ISL\_444057|Original|hCoV-19^^California|Human|UCSF Clinical Microbiology Laboratory|Chan-Zuckerberg Biohub|Hao|USA

>Spike|hCoV-19/USA/CA-CZB-13738/2020|2020-09-09|EPI\_ISL\_738745|Original|hCoV-19^^California|Human|Alameda County Public Health Lab|Chan-Zuckerberg Biohub|Kamm|USA

>Spike|hCoV-19/England/CAMB-7F066/2020|2020-04-07|EPI\_ISL\_442840|Original|hCoV-19^^England|Human|Department of Pathology|Wellcome Sanger Institute for the COVID-19 Genomics UK (COG-UK) consortium|Amato|United Kingdom

>Spike|hCoV-19/Japan/IC-0329/2020|2020-11-00|EPI\_ISL\_721577|Original|hCoV-19^^Japan|Human|Pathogen Genomics Center|Pathogen Genomics Center|Sekizuka|Japan

>Spike|hCoV-19/South Africa/KRISP-K004328/2020|2020-10-24|EPI\_ISL\_660204|Original|hCoV-19^^KwaZulu-Natal|Human|NHLS-IALCH|KRISP|de Oliveira|South Africa

>Spike|hCoV-19/England/EXET-138ED7/2020|2020-10-23|EPI\_ISL\_664215|Original|hCoV-19^^England|Human|University of Exeter|COVID-19 Genomics UK (COG-UK) Consortium|Temperton|United Kingdom

>Spike|hCoV-19/South Africa/KRISP-K002290/2020|2020-07-23|EPI\_ISL\_515668|Original|hCoV-19^^KwaZulu-Natal|Human|NHLS-IALCH|KRISP|de Oliveira|South Africa

>Spike|hCoV-19/India/TG-CCMB-L1885/2020|2020-06-03|EPI\_ISL\_495167|Original|hCoV-19^^Telangana|Human|CSIR-Centre for Cellular and Molecular Biology|CSIR-Centre for Cellular and Molecular Biology|Banu|India

>Spike|hCoV-19/USA/CO-CDPHE-2009170340/2020|2020-09-16|EPI\_ISL\_710345|Original|hCoV-19^^Colorado|Human|Colorado Department of Public Health and Environment|Colorado Department of Public Health and Environment|Bankers|USA

>Spike|hCoV-19/England/MILK-9704D9/2020|2020-08-18|EPI\_ISL\_553130|Original|hCoV-19^^England|Human|Lighthouse Lab in Milton Keynes|Wellcome Sanger Institute for the COVID-19 Genomics UK (COG-UK) consortium|Davies|United Kingdom

>Spike|hCoV-19/Wales/PHWC-495AC2/2020|2020-11-25|EPI\_ISL\_726436|Original|hCoV-19^^Wales|Human|Originating lab|COVID-19 Genomics UK (COG-UK) Consortium|Moore|United Kingdom

>Spike|hCoV-19/Japan/IC-0211/2020|2020-06-00|EPI\_ISL\_667640|Original|hCoV-19^^Japan|Human|Pathogen Genomics Center|Pathogen Genomics Center|Sekizuka|Japan

>Spike|hCoV-19/USA/LA-GBCL-26513063/2020|2020-04-21|EPI\_ISL\_485096|Original|hCoV-19^^Louisiana|Human|River Road Testing Lab|Ginkgo Bioworks Clinical Laboratory|Smith|USA

>Spike|hCoV-19/India/TG-CCMB-J132/2020|2020-04-01|EPI\_ISL\_447850|Original|hCoV-19^^Telangana|Human|CSIR-Centre for Cellular and Molecular Biology|CSIR-Centre for Cellular and Molecular Biology|Banu|India

>Spike|hCoV-19/Wales/PHWC-1600FE/2020|2020-05-25|EPI\_ISL\_472896|Original|hCoV-19^^Wales|Human|Wales Specialist Virology Centre Sequencing lab|COVID-19 Genomics UK (COG-UK) Consortium|Moore|United Kingdom

>Spike|hCoV-19/Canada/QC-LSPQ-L00234248/2020|2020-03-23|EPI\_ISL\_536047|Original|hCoV-19^^Quebec|Human|Centre Hospitalier R\u00e9gional de Lanaud\u00e9re|Laboratoire de sant\u00e9 publique du Qu\u00e9bec|Moreira|Canada

>Spike|hCoV-19/Morocco/RMPS-07/2020|2020-04-04|EPI\_ISL\_482732|Original|hCoV-19^^Morocco|Human|LNR National Reference Laboratory|Medical Biotechnology Laboratory|Kartti|Morocco

>Spike|hCoV-19/England/SHEF-D3507/2020|2020-09-08|EPI\_ISL\_540774|Original|hCoV-19^^England|Human|Virology Department|COVID-19 Genomics UK (COG-UK) Consortium|de Silva|United Kingdom

>Spike|hCoV-19/England/CAMB-1AE67A/2020|2020-04-27|EPI\_ISL\_459491|Original|hCoV-19^^England|Human|Department of Pathology|Wellcome Sanger Institute for the COVID-19 Genomics UK (COG-UK) consortium|Davies|United Kingdom

>Spike|hCoV-19/England/LEED-2A9447/2020|2020-04-09|EPI\_ISL\_538872|Original|hCoV-19^^England|Human|Leeds Teaching Hospitals NHS Trust and Public Health England|Wellcome Sanger Institute for the COVID-19 Genomics UK (COG-UK) consortium|Davies|United Kingdom

>Spike|hCoV-19/England/MILK-A79606/2020|2020-10-13|EPI\_ISL\_606726|Original|hCoV-19^^England|Human|Lighthouse Lab in Milton Keynes|Wellcome Sanger Institute for the COVID-19 Genomics UK (COG-UK) consortium|Davies|United Kingdom

>Spike|hCoV-19/India/MH-ACTREC-010/2020|2020-05-02|EPI\_ISL\_699667|Original|hCoV-19^^Maharashtra|Human|Hematopathology Laboratory|Hematopathology Laboratory|Patkar|India

>Spike|hCoV-19/Portugal/PT2045/2020|2020-11-12|EPI\_ISL\_732260|Original|hCoV-19^^Portugal|Human|Instituto Nacional de Saude (INSA) and Instituto Gulbenkian de Ciencia (IGC)|Instituto Nacional de Saude (INSA) and Instituto Gulbenkian de Ciencia (IGC)|Borges|Portugal

>Spike|hCoV-19/England/QEUA-B9FA94/2020|2020-11-18|EPI\_ISL\_721121|Original|hCoV-19^^England|Human|Lighthouse Lab in Glasgow|Wellcome Sanger Institute for the COVID-19 Genomics UK (COG-UK) Consortium|Davies|United Kingdom

>Spike|hCoV-19/England/ALDP-C06D8F/2020|2020-12-06|EPI\_ISL\_709379|Original|hCoV-19^^England|Human|Lighthouse Lab in Alderley Park|Wellcome Sanger Institute for the COVID-19 Genomics UK (COG-UK) Consortium|Davies|United Kingdom

>Spike|hCoV-19/USA/UT-03870/2020|2020-04-08|EPI\_ISL\_470726|Original|hCoV-19^^Utah|Human|Utah Public Health Laboratory|Utah Public Health Laboratory|Butz|USA

>Spike|hCoV-19/USA/TX-HMH-6132/2020|2020-06-22|EPI\_ISL\_547263|Original|hCoV-19^^Texas|Human|Houston Methodist Hospital|Houston Methodist Hospital|Long|USA

>Spike|hCoV-19/Switzerland/BE-ETHZ-350469/2020|2020-11-03|EPI\_ISL\_728855|Original|hCoV-19^^Bern|Human|Viollier AG|Department of Biosystems Science and Engineering|Nadeau|Switzerland

>Spike|hCoV-19/England/ALDP-97FEEB/2020|2020-08-06|EPI\_ISL\_529266|Original|hCoV-19^^England|Human|Queens Medical Centre|COVID-19 Genomics UK (COG-UK) Consortium|Loose|United Kingdom

>Spike|hCoV-19/Netherlands/NB-RIVM-10069/2020|2020-04-23|EPI\_ISL\_547486|Original|hCoV-19^^Noord Brabant|Human|Dutch COVID-19 response team|National Institute for Public Health and the Environment (RIVM)|Meijer|Netherlands

>Spike|hCoV-19/England/20129064904/2020|2020-03-10|EPI\_ISL\_424063|Original|hCoV-19^^England|Human|Respiratory Virus Unit|Respiratory Virus Unit|Platt|United Kingdom

>Spike|hCoV-19/England/QEUA-BA159E/2020|2020-11-18|EPI\_ISL\_719882|Original|hCoV-19^^England|Human|Lighthouse Lab in Glasgow|Wellcome Sanger Institute for the COVID-19 Genomics UK (COG-UK) Consortium|Davies|United Kingdom

>Spike|hCoV-19/USA/WA-UW-3490/2020|2020-03-27|EPI\_ISL\_491025|Original|hCoV-19^^Washington|Human|UW Virology Lab|UW Virology Lab|Roychoudhury|USA

>Spike|hCoV-19/Japan/PG-3962/2020|2020-07-00|EPI\_ISL\_692210|Original|hCoV-19^^Japan|Human|Pathogen Genomics Center|Pathogen Genomics Center|Sekizuka|Japan

>Spike|hCoV-19/USA/NY-NYCPHL-001291/2020|2020-11-09|EPI\_ISL\_683957|Original|hCoV-19^^New York|Human|DOHMH Chelsea|New York City Public Health Laboratory|Wang|USA

>Spike|hCoV-19/England/BRIS-127178/2020|2020-04-23|EPI\_ISL\_469649|Original|hCoV-19^^England|Human|PHE South West Regional Laboratory|Wellcome Sanger Institute for the COVID-19 Genomics UK (COG-UK) consortium|Davies|United Kingdom

>Spike|hCoV-19/England/NORT-286D63/2020|2020-10-25|EPI\_ISL\_651060|Original|hCoV-19^^England|Human|Northumbria University / South Tees Hospitals NHS Foundation Trust / North Cumbria Integrated Care NHS Foundation Trust / North Tees and Hartlepool NHS Foundation Trust / Newcastle Hospitals NHS Foundation Trust|COVID-19 Genomics UK (COG-UK) Consortium|Bashton|United Kingdom

>Spike|hCoV-19/England/LIVE-DCC11F/2020|2020-11-22|EPI\_ISL\_724489|Original|hCoV-19^^England|Human|Liverpool Clinical Laboratories|COVID-19 Genomics UK (COG-UK) Consortium|Haldenby|United Kingdom

>Spike|hCoV-19/Ireland/D-NVRL-AIIDV0125v1/2020|2020-04-16|EPI\_ISL\_644261|Original|hCoV-19^^Dublin|Human|CEPHR / Vincent's Hospital|Irish Coronavirus Sequencing Consortium - National Virus Reference Laboratory|Gonzalez|Ireland

>Spike|hCoV-19/Australia/SAP278/2020|2020-03-28|EPI\_ISL\_483085|Original|hCoV-19^^South Australia|Human|SA Pathology|SA Pathology|Leong|Australia

>Spike|hCoV-19/USA/OR-UW-13394/2020|2020-07-01|EPI\_ISL\_501083|Original|hCoV-19^^Oregon|Human|University of Washington Virology Lab|University of Washington Virology Lab|Roychoudhury|USA

>Spike|hCoV-19/England/ALDP-B75CCB/2020|2020-11-12|EPI\_ISL\_723695|Original|hCoV-19^^England|Human|Oxford Viromics|COVID-19 Genomics UK (COG-UK) Consortium|Golubchik|United Kingdom

>Spike|hCoV-19/England/QEUA-B42553/2020|2020-11-08|EPI\_ISL\_657120|Original|hCoV-19^^England|Human|Lighthouse Lab in Glasgow|Wellcome Sanger Institute for the COVID-19 Genomics UK (COG-UK) Consortium|Davies|United Kingdom

>Spike|hCoV-19/England/MILK-BB105E/2020|2020-11-17|EPI\_ISL\_720425|Original|hCoV-19^^England|Human|Lighthouse Lab in Milton Keynes|Wellcome Sanger Institute for the COVID-19 Genomics UK (COG-UK) Consortium|Davies|United Kingdom

>Spike|hCoV-19/Wales/PHWC-1607EA/2020|2020-04-26|EPI\_ISL\_472978|Original|hCoV-19^^Wales|Human|Wales Specialist Virology Centre Sequencing lab|COVID-19 Genomics UK (COG-UK) Consortium|Moore|United Kingdom

>Spike|hCoV-19/Spain/PV-IBV-2124/2020|2020-04-11|EPI\_ISL\_468947|Original|hCoV-19^^Basque Country|Human|Servicio de Microbiolog\u00eda. Hospital Universitario Donostia. OSI Donostialdea. \u00clrea de Enfermedades Infecciosas|SeqCOVID-SPAIN consortium|IBV (CSIC) |Comas|Spain

>Spike|hCoV-19/Scotland/CVR1925/2020|2020-04-08|EPI\_ISL\_448137|Original|hCoV-19^^Scotland|Human|West of Scotland Specialist Virology Centre|COVID-19 Genomics UK (COG-UK) Consortium|Robertson|United Kingdom

>Spike|hCoV-19/England/CAMC-C46E44/2020|2020-12-10|EPI\_ISL\_718883|Original|hCoV-19^^England|Human|Lighthouse Lab in Cambridge|Wellcome Sanger Institute for the COVID-19 Genomics UK (COG-UK) Consortium|Davies|United Kingdom

>Spike|hCoV-19/England/NORW-F0BF3/2020|2020-10-13|EPI\_ISL\_595203|Original|hCoV-19^^England|Human|Quadram Institute Bioscience|COVID-19 Genomics UK (COG-UK) Consortium|Alikhan|United Kingdom

>Spike|hCoV-19/Switzerland/BE-ETHZ-300393/2020|2020-09-29|EPI\_ISL\_603360|Original|hCoV-19^^Bern|Human|Viollier AG|Department of Biosystems Science and Engineering|Nadeau|Switzerland

>Spike|hCoV-19/Australia/NSW07/2020|2020-02-29|EPI\_ISL\_413214|Original|hCoV-19^^New South Wales|Human|Centre for Infectious Diseases and Microbiology Laboratory

Services|NSW Health Pathology - Institute of Clinical Pathology and Medical Research;  
Westmead Hospital; University of Sydney|Eden|Australia  
>Spike|hCoV-19/England/CAMB-1BCA9B/2020|2020-12-01|EPI\_ISL\_764291|Original|hCoV-  
19^^England|Human|Department of Pathology|COVID-19 Genomics UK (COG-UK)  
Consortium|Goodfellow|United Kingdom  
>Spike|hCoV-19/Wales/PHWC-48B2B8/2020|2020-11-05|EPI\_ISL\_666217|Original|hCoV-  
19^^Wales|Human|Wales Specialist Virology Centre Sequencing lab|COVID-19 Genomics UK  
(COG-UK) Consortium|Moore|United Kingdom  
>Spike|hCoV-19/Switzerland/BL-UHB-42200091/2020|2020-03-  
19|EPI\_ISL\_528267|Original|hCoV-19^^Basel-Land|Human|University Hospital  
Basel|University Hospital Basel|Roloff Handschin|Switzerland  
>Spike|hCoV-19/England/ALDP-B84B9F/2020|2020-11-14|EPI\_ISL\_675973|Original|hCoV-  
19^^England|Human|Lighthouse Lab in Alderley Park|Wellcome Sanger Institute for the  
COVID-19 Genomics UK (COG-UK) Consortium|Davies|United Kingdom  
>Spike|hCoV-19/England/ALDP-A671CE/2020|2020-10-12|EPI\_ISL\_630394|Original|hCoV-  
19^^England|Human|Lighthouse Lab in Alderley Park|Wellcome Sanger Institute for the  
COVID-19 Genomics UK (COG-UK) consortium|Davies|United Kingdom  
>Spike|hCoV-19/Denmark/DCGC-21686/2020|2020-12-21|EPI\_ISL\_757760|Original|hCoV-  
19^^Hovedstaden|Human|Department of Virus and Microbiological Special  
Diagnostics|Albertsen Lab|Michaelsen|Denmark  
>Spike|hCoV-19/Canada/ON-PHL-20-01264/2020|2020-06-00|EPI\_ISL\_548878|Original|hCoV-  
19^^Ontario|Human|Public Health Ontario Laboratory|Public Health Ontario  
Laboratory|Guthrie|Canada  
>Spike|hCoV-19/USA/VA-DCLS-0114/2020|2020-04-09|EPI\_ISL\_434605|Original|hCoV-  
19^^Virginia|Human|Virginia DCLS|Virginia DCLS|St. Jacques|USA  
>Spike|hCoV-19/England/CAMC-A82109/2020|2020-10-13|EPI\_ISL\_610804|Original|hCoV-  
19^^England|Human|Lighthouse Lab in Cambridge|Wellcome Sanger Institute for the  
COVID-19 Genomics UK (COG-UK) consortium|Davies|United Kingdom  
>Spike|hCoV-19/USA/UT-UPHL-2009677/2020|2020-07-27|EPI\_ISL\_605352|Original|hCoV-  
19^^Utah|Human|Utah Public Health Laboratory|Utah Public Health Laboratory|Young|USA  
>Spike|hCoV-19/USA/AZ-TG491711/2020|2020-06-25|EPI\_ISL\_695223|Original|hCoV-  
19^^Arizona|Human|AZ SPHL|TGen North|French|USA  
>Spike|hCoV-19/Wales/PHWC-165DB6/2020|2020-05-15|EPI\_ISL\_490801|Original|hCoV-  
19^^Wales|Human|Wales Specialist Virology Centre Sequencing lab|COVID-19 Genomics UK  
(COG-UK) Consortium|Moore|United Kingdom  
>Spike|hCoV-19/USA/OH-USAFSAM-S042/2020|2020-03-26|EPI\_ISL\_512807|Original|hCoV-  
19^^Ohio|Human|Public Health|Public Health|Fries|USA  
>Spike|hCoV-19/USA/TX-HMH-2601/2020|2020-06-05|EPI\_ISL\_545418|Original|hCoV-  
19^^Texas|Human|Houston Methodist Hospital|Houston Methodist Hospital|Long|USA  
>Spike|hCoV-19/Saudi Arabia/KAUST-MADINAH1374/2020|2020-06-  
04|EPI\_ISL\_678016|Original|hCoV-19^^Madinah|Human|Pathogen Genomics Lab King Abdullah  
University of Science and Technology(KAUST)|Pathogen Genomics Lab King Abdullah  
University of Science and Technology(KAUST)|Mohamed Ghazzali|Saudi Arabia  
>Spike|hCoV-19/England/ALDP-B74330/2020|2020-11-12|EPI\_ISL\_662029|Original|hCoV-  
19^^England|Human|Lighthouse Lab in Alderley Park|Wellcome Sanger Institute for the  
COVID-19 Genomics UK (COG-UK) Consortium|Davies|United Kingdom  
>Spike|hCoV-19/England/ALDP-AA231C/2020|2020-10-22|EPI\_ISL\_624491|Original|hCoV-  
19^^England|Human|Lighthouse Lab in Alderley Park|Wellcome Sanger Institute for the  
COVID-19 Genomics UK (COG-UK) consortium|Davies|United Kingdom  
>Spike|hCoV-19/England/BRIS-125ABB/2020|2020-03-30|EPI\_ISL\_443860|Original|hCoV-  
19^^England|Human|PHE South West Regional Laboratory|Wellcome Sanger Institute for  
the COVID-19 Genomics UK (COG-UK) consortium|Amato|United Kingdom  
>Spike|hCoV-19/New Zealand/20CV0615/2020|2020-11-26|EPI\_ISL\_682293|Original|hCoV-  
19^^Auckland|Human|LabPLUS|Institute of Environmental Science and Research  
(ESR)|Wang|New Zealand  
>Spike|hCoV-19/USA/SC-DHEC-0867/2020|2020-06-26|EPI\_ISL\_538401|Original|hCoV-  
19^^South Carolina|Human|Microbiology Division|Microbiology Division|Flores|USA  
>Spike|hCoV-19/USA/AZ-TG271884/2020|2020-03-25|EPI\_ISL\_426545|Original|hCoV-  
19^^Arizona|Human|AZ SPHL|TGen North|Lemmer|USA

>Spike|hCoV-19/Japan/TKYE610419/2020|2020-04-00|EPI\_ISL\_479677|unknown|hCoV-19^^Japan|Human|unknown|Contact|Submitter|Japan

>Spike|hCoV-19/Belgium/regal-12111432/2020|2020-12-11|EPI\_ISL\_738484|Original|hCoV-19^^Mol|Human|UZ Leuven|KU Leuven|Maes|Belgium

>Spike|hCoV-19/USA/TX-DSHS-0570/2020|2020-05-14|EPI\_ISL\_574472|Original|hCoV-19^^Texas|Human|Texas Department of State Health Services|Texas Department of State Health Services|Rahman|USA

>Spike|hCoV-19/USA/NY-Wadsworth-11017-01/2020|2020-03-05|EPI\_ISL\_426040|Original|hCoV-19^^New York|Human|Wadsworth Center|Wadsworth Center|Lasek-Nesselquist|USA

>Spike|hCoV-19/USA/WA-S2084/2020|2020-06-06|EPI\_ISL\_497512|Original|hCoV-19^^Washington|Human|Washington State Department of Health|Seattle Flu Study|Lee|USA

>Spike|hCoV-19/Australia/VIC3920/2020|2020-07-08|EPI\_ISL\_520632|Original|hCoV-19^^Victoria|Human|Microbiological Diagnostic Unit - Public Health Laboratory (MDU-PHL)|MDU-PHL|Schultz|Australia

>Spike|hCoV-19/England/BRIS-12C568/2020|2020-05-06|EPI\_ISL\_469466|Original|hCoV-19^^England|Human|PHE South West Regional Laboratory|Wellcome Sanger Institute for the COVID-19 Genomics UK (COG-UK) consortium|Davies|United Kingdom

>Spike|hCoV-19/England/QEUEH-BC47DB/2020|2020-11-25|EPI\_ISL\_703378|Original|hCoV-19^^England|Human|Lighthouse Lab in Glasgow|Wellcome Sanger Institute for the COVID-19 Genomics UK (COG-UK) Consortium|Davies|United Kingdom

>Spike|hCoV-19/Vietnam/HCMC-3013/2020|2020-03-22|EPI\_ISL\_498174|unknown|hCoV-19^^Ho Chi Minh City|Human|OUCRU|OUCRU|Nguyen|Vietnam

>Spike|hCoV-19/Denmark/DCGC-15579/2020|2020-11-23|EPI\_ISL\_713289|Original|hCoV-19^^Syddanmark|Human|Department of Virus and Microbiological Special Diagnostics|Albertsen Lab|Michaelsen|Denmark

>Spike|hCoV-19/USA/VA-DCLS-1886/2020|2020-09-23|EPI\_ISL\_644919|Original|hCoV-19^^Virginia|Human|Virginia DCLS|Virginia DCLS|St. Jacques|USA

>Spike|hCoV-19/England/204881289/2020|2020-11-00|EPI\_ISL\_678812|Original|hCoV-19^^England|Human|Respiratory Virus Unit|COVID-19 Genomics UK (COG-UK) Consortium|Platt|United Kingdom

>Spike|hCoV-19/England/NOTT-110804/2020|2020-04-21|EPI\_ISL\_441862|Original|hCoV-19^^England|Human|Queens Medical Centre|COVID-19 Genomics UK (COG-UK) Consortium|Loose|United Kingdom

>Spike|hCoV-19/England/QEUEH-B400BE/2020|2020-11-08|EPI\_ISL\_657101|Original|hCoV-19^^England|Human|Lighthouse Lab in Glasgow|Wellcome Sanger Institute for the COVID-19 Genomics UK (COG-UK) Consortium|Davies|United Kingdom

>Spike|hCoV-19/Japan/PG-4668/2020|2020-08-00|EPI\_ISL\_689805|Original|hCoV-19^^Japan|Human|Fukuoka Institute of Health and Environmental Sciences|Pathogen Genomics Center|Sekizuka|Japan

>Spike|hCoV-19/USA/WA-S670/2020|2020-04-08|EPI\_ISL\_449840|Original|hCoV-19^^Washington|Human|Washington State Department of Health|Seattle Flu Study|Bedford|USA

>Spike|hCoV-19/England/LIVE-99831/2020|2020-04-10|EPI\_ISL\_439764|Original|hCoV-19^^England|Human|Liverpool Clinical Laboratories|COVID-19 Genomics UK (COG-UK) Consortium|Haldenby|United Kingdom

>Spike|hCoV-19/Denmark/DCGC-7626/2020|2020-10-19|EPI\_ISL\_618527|Original|hCoV-19^^Hovedstaden|Human|Department of Virus and Microbiological Special Diagnostics|Albertsen lab|Michaelsen|Denmark

>Spike|hCoV-19/Luxembourg/LNS1726686/2020|2020-11-23|EPI\_ISL\_739984|Original|hCoV-19^^Luxembourg|Human|Laboratoire national de sant\u00e9|Laboratoire national de sant\u00e9|Wienecke-Baldacchino|Luxembourg

>Spike|hCoV-19/England/20124021106/2020|2020-03-18|EPI\_ISL\_423854|Original|hCoV-19^^England|Human|Respiratory Virus Unit|Respiratory Virus Unit|Platt|United Kingdom

>Spike|hCoV-19/England/PORT-2D515A/2020|2020-00-00|EPI\_ISL\_741682|Original|hCoV-19^^England|Human|Centre for Enzyme Innovation|COVID-19 Genomics UK (COG-UK) Consortium|Robson|United Kingdom

>Spike|hCoV-19/USA/WI-UW-2477/2020|2020-12-27|EPI\_ISL\_759751|Original|hCoV-19^^Wisconsin|Human|University of Wisconsin-Madison AIDS Vaccine Research

Laboratories|University of Wisconsin-Madison AIDS Vaccine Research  
Laboratories|Moreno|USA  
>Spike|hCoV-19/USA/UT-UPHL-2012955640/2020|2020-08-14|EPI\_ISL\_746126|Original|hCoV-19^^Utah|Human|Ginkgo Bioworks Clinical Laboratory|Utah Public Health Laboratory|Young|USA  
>Spike|hCoV-19/England/QEUA-547C8C/2020|2020-05-14|EPI\_ISL\_533420|Original|hCoV-19^^England|Human|Lighthouse Lab in Glasgow|Wellcome Sanger Institute for the COVID-19 Genomics UK (COG-UK) consortium|Davies|United Kingdom  
>Spike|hCoV-19/Scotland/QEUA-A0C33E/2020|2020-10-03|EPI\_ISL\_599211|Original|hCoV-19^^Scotland|Human|Lighthouse Lab in Glasgow|Wellcome Sanger Institute for the COVID-19 Genomics UK (COG-UK) consortium|Davies|United Kingdom  
>Spike|hCoV-19/England/QEUA-AF2614/2020|2020-10-30|EPI\_ISL\_662722|Original|hCoV-19^^England|Human|Lighthouse Lab in Glasgow|Wellcome Sanger Institute for the COVID-19 Genomics UK (COG-UK) Consortium|Davies|United Kingdom  
>Spike|hCoV-19/USA/CA-CDC-1/2020|2020-01-23|EPI\_ISL\_406034|Original|hCoV-19^^California|Human|California Department of Public Health|Pathogen Discovery|Queen|USA  
>Spike|hCoV-19/Switzerland/SG-ETHZ-331461/2020|2020-10-21|EPI\_ISL\_614946|Original|hCoV-19^^St Gallen|Human|Viollier AG|Department of Biosystems Science and Engineering|Nadeau|Switzerland  
>Spike|hCoV-19/England/MILK-9A8362/2020|2020-09-02|EPI\_ISL\_550112|Original|hCoV-19^^England|Human|Lighthouse Lab in Milton Keynes|Wellcome Sanger Institute for the COVID-19 Genomics UK (COG-UK) consortium|Davies|United Kingdom  
>Spike|hCoV-19/Wales/PHWC-16A5AA/2020|2020-09-09|EPI\_ISL\_540909|Original|hCoV-19^^Wales|Human|Wales Specialist Virology Centre Sequencing lab|COVID-19 Genomics UK (COG-UK) Consortium|Moore|United Kingdom  
>Spike|hCoV-19/Wales/MILK-A46C2E/2020|2020-10-06|EPI\_ISL\_609232|Original|hCoV-19^^Wales|Human|Lighthouse Lab in Milton Keynes|Wellcome Sanger Institute for the COVID-19 Genomics UK (COG-UK) consortium|Davies|United Kingdom  
>Spike|hCoV-19/England/ALDP-B480B6/2020|2020-11-07|EPI\_ISL\_649272|Original|hCoV-19^^England|Human|Lighthouse Lab in Alderley Park|Wellcome Sanger Institute for the COVID-19 Genomics UK (COG-UK) Consortium|Davies|United Kingdom  
>Spike|hCoV-19/Wales/PHWC-48E22E/2020|2020-11-11|EPI\_ISL\_680826|Original|hCoV-19^^Wales|Human|Wales Specialist Virology Centre Sequencing lab|COVID-19 Genomics UK (COG-UK) Consortium|Moore|United Kingdom  
>Spike|hCoV-19/Australia/VIC852/2020|2020-04-04|EPI\_ISL\_427112|Original|hCoV-19^^Victoria|Human|Victorian Infectious Diseases Reference Laboratory (VIDRL)|Microbiological Diagnostic Unit Public Health Laboratory and Victorian Infectious Diseases Reference Laboratory|Schultz|Australia  
>Spike|hCoV-19/Australia/NSW1023/2020|2020-04-28|EPI\_ISL\_593667|Original|hCoV-19^^New South Wales|Human|Pathology West - NSW Health Pathology|NSW Health Pathology - Institute of Clinical Pathology and Medical Research; Westmead Hospital; University of Sydney|Gall|Australia  
>Spike|hCoV-19/Canada/BC-BCCDC-6408/2020|2020-10-00|EPI\_ISL\_740563|Original|hCoV-19^^British Columbia|Human|BCCDC Public Health Laboratory|BCCDC Public Health Laboratory|Prystajecky|Canada  
>Spike|hCoV-19/England/ALDP-95127A/2020|2020-06-13|EPI\_ISL\_554406|Original|hCoV-19^^England|Human|Lighthouse Lab in Alderley Park|Wellcome Sanger Institute for the COVID-19 Genomics UK (COG-UK) consortium|Davies|United Kingdom  
>Spike|hCoV-19/England/SHEF-10CD7BC/2020|2020-11-23|EPI\_ISL\_727917|Original|hCoV-19^^England|Human|Virology Department|COVID-19 Genomics UK (COG-UK) Consortium|de Silva|United Kingdom  
>Spike|hCoV-19/England/ALDP-BBB4B2/2020|2020-11-21|EPI\_ISL\_701970|Original|hCoV-19^^England|Human|Lighthouse Lab in Alderley Park|Wellcome Sanger Institute for the COVID-19 Genomics UK (COG-UK) Consortium|Davies|United Kingdom  
>Spike|hCoV-19/Denmark/DCGC-13894/2020|2020-11-30|EPI\_ISL\_713087|Original|hCoV-19^^Hovedstaden|Human|Department of Virus and Microbiological Special Diagnostics|Albertsen Lab|Michaelsen|Denmark  
>Spike|hCoV-19/England/20109002804/2020|2020-03-04|EPI\_ISL\_464507|Original|hCoV-19^^England|Human|Respiratory Virus Unit|Respiratory Virus Unit|Platt|United Kingdom



>Spike|hCoV-19/Luxembourg/LNS6322021/2020|2020-11-06|EPI\_ISL\_744397|Original|hCoV-19^^Luxembourg|Human|Laboratoire national de sant\u00e9|Laboratoire national de sant\u00e9|Wienecke-Baldacchino|Luxembourg

>Spike|hCoV-19/Wales/PHWC-16F420/2020|2020-09-30|EPI\_ISL\_585964|Original|hCoV-19^^Wales|Human|Wales Specialist Virology Centre Sequencing lab|COVID-19 Genomics UK (COG-UK) Consortium|Moore|United Kingdom

>Spike|hCoV-19/USA/CA-CZB-14782/2020|2020-11-11|EPI\_ISL\_738985|Original|hCoV-19^^California|Human|Humboldt County Public Health Laboratory|Chan-Zuckerberg Biohub|Kamm|USA

>Spike|hCoV-19/Italy/LOM-ASST-14/2020|2020-03-24|EPI\_ISL\_486651|Original|hCoV-19^^Lombardy|Human|Microbiology|Microbiology|Comandatore|Italy

>Spike|hCoV-19/England/ALDP-B5D801/2020|2020-11-09|EPI\_ISL\_703473|Original|hCoV-19^^England|Human|Department of Pathology|COVID-19 Genomics UK (COG-UK) Consortium|Goodfellow|United Kingdom

>Spike|hCoV-19/England/QEUEH-C5BAA2/2020|2020-12-14|EPI\_ISL\_769282|Original|hCoV-19^^England|Human|Lighthouse Lab in Glasgow|Wellcome Sanger Institute for the COVID-19 Genomics UK (COG-UK) Consortium|Davies|United Kingdom

>Spike|hCoV-19/England/ALDP-A50113/2020|2020-10-07|EPI\_ISL\_597596|Original|hCoV-19^^England|Human|Lighthouse Lab in Alderley Park|Wellcome Sanger Institute for the COVID-19 Genomics UK (COG-UK) consortium|Davies|United Kingdom

>Spike|hCoV-19/Morocco/FMP-35/2020|2020-12-00|EPI\_ISL\_768834|Original|hCoV-19^^Temara|Human|Laboratoire Biolife|Laboratoire de Biotechnologie|Ouahgiri|Morocco

>Spike|hCoV-19/Australia/NSW10/2020|2020-02-28|EPI\_ISL\_413596|Original|hCoV-19^^New South Wales|Human|Centre for Infectious Diseases and Microbiology - Public Health|NSW Health Pathology - Institute of Clinical Pathology and Medical Research; Westmead Hospital; University of Sydney|Rockett|Australia

>Spike|hCoV-19/Scotland/QEUEH-AA05CD/2020|2020-10-21|EPI\_ISL\_666090|Original|hCoV-19^^Scotland|Human|Northumbria University / South Tees Hospitals NHS Foundation Trust / North Cumbria Integrated Care NHS Foundation Trust / North Tees and Hartlepool NHS Foundation Trust / Newcastle Hospitals NHS Foundation Trust|COVID-19 Genomics UK (COG-UK) Consortium|Bashton|United Kingdom

>Spike|hCoV-19/Scotland/EDB8003/2020|2020-09-29|EPI\_ISL\_585470|Original|hCoV-19^^Scotland|Human|Virology Department|COVID-19 Genomics UK (COG-UK) Consortium|McHugh|United Kingdom

>Spike|hCoV-19/USA/CA-ALSR-3643/2020|2020-09-25|EPI\_ISL\_636121|Original|hCoV-19^^California|Human|San Diego County Public Health Laboratory|Andersen lab at Scripps Research|Gangavarapu|USA

>Spike|hCoV-19/England/QEUEH-AD3DAB/2020|2020-10-26|EPI\_ISL\_629756|Original|hCoV-19^^England|Human|Lighthouse Lab in Glasgow|Wellcome Sanger Institute for the COVID-19 Genomics UK (COG-UK) consortium|Davies|United Kingdom

>Spike|hCoV-19/USA/UT-03282/2020|2020-05-07|EPI\_ISL\_493013|Original|hCoV-19^^Utah|Human|Utah Public Health Laboratory|Utah Public Health Laboratory|Butz|USA

>Spike|hCoV-19/England/QEUEH-96E122/2020|2020-08-18|EPI\_ISL\_530436|Original|hCoV-19^^England|Human|Lighthouse Lab in Glasgow|Wellcome Sanger Institute for the COVID-19 Genomics UK (COG-UK) consortium|Davies|United Kingdom

>Spike|hCoV-19/England/LOND-1264C98/2020|2020-11-23|EPI\_ISL\_724553|Original|hCoV-19^^England|Human|University College London|COVID-19 Genomics UK (COG-UK) Consortium|Roy|United Kingdom

>Spike|hCoV-19/Portugal/PT0548/2020|2020-05-02|EPI\_ISL\_454272|Original|hCoV-19^^Portugal|Human|unknown|Instituto Nacional de Saude (INSA)|Borges|Portugal

>Spike|hCoV-19/Australia/VIC13290/2020|2020-07-29|EPI\_ISL\_592225|Original|hCoV-19^^Victoria|Human|Microbiological Diagnostic Unit - Public Health Laboratory (MDU-PHL)|MDU-PHL|Schultz|Australia

>Spike|hCoV-19/USA/CA-CZB-13456/2020|2020-09-09|EPI\_ISL\_672475|Original|hCoV-19^^California|Human|Alameda County Public Health Lab|Chan-Zuckerberg Biohub|Bhatt|USA

>Spike|hCoV-19/Netherlands/GE-EMC-210/2020|2020-05-29|EPI\_ISL\_523192|Original|hCoV-19^^Gelderland|Human|Dutch COVID-19 response team|Erasmus Medical Center|Oude Munnink|Netherlands

>Spike|hCoV-19/England/NORT-295B58/2020|2020-04-03|EPI\_ISL\_488595|Original|hCoV-19^^England|Human|NU-OMICS DNA Sequencing research facility|Wellcome Sanger Institute for the COVID-19 Genomics UK (COG-UK) consortium|Davies|United Kingdom

>Spike|hCoV-19/Australia/VIC13788/2020|2020-08-21|EPI\_ISL\_563838|Original|hCoV-19^^Victoria|Human|Microbiological Diagnostic Unit - Public Health Laboratory (MDU-PHL)|MDU-PHL|Schultz|Australia

>Spike|hCoV-19/Wales/PHWC-498661/2020|2020-11-23|EPI\_ISL\_727106|Original|hCoV-19^^Wales|Human|Originating lab|COVID-19 Genomics UK (COG-UK) Consortium|Moore|United Kingdom

>Spike|hCoV-19/England/QEUEH-AF0722/2020|2020-10-29|EPI\_ISL\_662664|Original|hCoV-19^^England|Human|Lighthouse Lab in Glasgow|Wellcome Sanger Institute for the COVID-19 Genomics UK (COG-UK) Consortium|Davies|United Kingdom

>Spike|hCoV-19/USA/CT-UW213/2020|2020-03-13|EPI\_ISL\_417362|Original|hCoV-19^^Connecticut|Human|UW Virology Lab|UW Virology Lab|Roychoudhury|USA

>Spike|hCoV-19/England/NORT-2923EA/2020|2020-05-04|EPI\_ISL\_457322|Original|hCoV-19^^England|Human|Northumbria University / South Tees Hospitals NHS Foundation Trust / North Cumbria Integrated Care NHS Foundation Trust / North Tees and Hartlepool NHS Foundation Trust / Newcastle Hospitals NHS Foundation Trust|COVID-19 Genomics UK (COG-UK) Consortium|Bashton|United Kingdom

>Spike|hCoV-19/England/QEUEH-9B3A7E/2020|2020-09-04|EPI\_ISL\_573526|Original|hCoV-19^^England|Human|Virology Department|COVID-19 Genomics UK (COG-UK) Consortium|de Silva|United Kingdom

>Spike|hCoV-19/USA/UT-UPHL-2012666124/2020|2020-08-03|EPI\_ISL\_746060|Original|hCoV-19^^Utah|Human|Ginkgo Bioworks Clinical Laboratory|Utah Public Health Laboratory|Young|USA

>Spike|hCoV-19/USA/CA-UCLA-48/2020|2020-03-12|EPI\_ISL\_537577|Original|hCoV-19^^California|Human|UCLA Pathology Clinical Microbiology Lab|Kruglyak Lab|Boocock|USA

>Spike|hCoV-19/England/LOND-D3877/2020|2020-04-02|EPI\_ISL\_440998|Original|hCoV-19^^England|Human|University College London|COVID-19 Genomics UK (COG-UK) Consortium|Roy|United Kingdom

>Spike|hCoV-19/England/NOTT-11F692/2020|2020-11-25|EPI\_ISL\_725552|Original|hCoV-19^^England|Human|Lincolnshire Hospitals and DeepSeq Nottingham|COVID-19 Genomics UK (COG-UK) Consortium|Loose|United Kingdom

>Spike|hCoV-19/USA/TX-HMH-6195/2020|2020-07-04|EPI\_ISL\_547304|Original|hCoV-19^^Texas|Human|Houston Methodist Hospital|Houston Methodist Hospital|Long|USA

>Spike|hCoV-19/Mexico/AGS-INDRE-82/2020|2020-11-02|EPI\_ISL\_658873|Original|hCoV-19^^Aguascalientes|Human|Instituto de Diagnostico y Referencia Epidemiologicos (INDRE)|Instituto de Diagnostico y Referencia Epidemiologicos (INDRE)|Rodriguez|Mexico

>Spike|hCoV-19/USA/HI-H200740/2020|2020-12-09|EPI\_ISL\_753261|Original|hCoV-19^^Hawaii|Human|State Laboratories Division|State Laboratories Division|Sultana|USA

>Spike|hCoV-19/England/QEUEH-B6977E/2020|2020-11-11|EPI\_ISL\_661469|Original|hCoV-19^^England|Human|Lighthouse Lab in Glasgow|Wellcome Sanger Institute for the COVID-19 Genomics UK (COG-UK) Consortium|Davies|United Kingdom

>Spike|hCoV-19/Germany/HH-hpi-p2111/2020|2020-03-22|EPI\_ISL\_776356|Original|hCoV-19^^Hamburg|Human|University Medical Center Hamburg Eppendorf|Heinrich Pette Institute|Robitaille|Germany

>Spike|hCoV-19/Japan/DP0274/2020|2020-02-16|EPI\_ISL\_416586|Original|hCoV-19^^Japan|Human|Japanese Quarantine Stations|Pathogen Genomics Center|Sekizuka|Japan

>Spike|hCoV-19/England/ALDP-BB3D37/2020|2020-11-19|EPI\_ISL\_701739|Original|hCoV-19^^England|Human|Lighthouse Lab in Alderley Park|Wellcome Sanger Institute for the COVID-19 Genomics UK (COG-UK) Consortium|Davies|United Kingdom

>Spike|hCoV-19/Denmark/DCGC-6076/2020|2020-10-05|EPI\_ISL\_620270|Original|hCoV-19^^Sjaelland|Human|Department of Virus and Microbiological Special Diagnostics|Albertsen lab|Michaelsen|Denmark

>Spike|hCoV-19/England/CAMB-1AADB5/2020|2020-04-19|EPI\_ISL\_470344|Original|hCoV-19^^England|Human|Department of Pathology|Wellcome Sanger Institute for the COVID-19 Genomics UK (COG-UK) consortium|Davies|United Kingdom

>Spike|hCoV-19/USA/TX-HMH-MCoV-12349/2020|2020-09-26|EPI\_ISL\_789894|Original|hCoV-19^^Texas|Human|Houston Methodist Hospital|Houston Methodist Hospital|Long|USA

>Spike|hCoV-19/England/NOTT-11393B/2020|2020-09-15|EPI\_ISL\_572527|Original|hCoV-19^^England|Human|Lincolnshire Hospitals and DeepSeq Nottingham|COVID-19 Genomics UK (COG-UK) Consortium|Loose|United Kingdom

>Spike|hCoV-19/England/MILK-9710C5/2020|2020-08-17|EPI\_ISL\_553104|Original|hCoV-19^^England|Human|Lighthouse Lab in Milton Keynes|Wellcome Sanger Institute for the COVID-19 Genomics UK (COG-UK) consortium|Davies|United Kingdom

>Spike|hCoV-19/England/MILK-AC75B1/2020|2020-10-21|EPI\_ISL\_630061|Original|hCoV-19^^England|Human|Lighthouse Lab in Milton Keynes|Wellcome Sanger Institute for the COVID-19 Genomics UK (COG-UK) consortium|Davies|United Kingdom

>Spike|hCoV-19/Japan/IC-0552/2020|2020-12-00|EPI\_ISL\_779235|Original|hCoV-19^^Japan|Human|Pathogen Genomics Center|Pathogen Genomics Center|Sekizuka|Japan

>Spike|hCoV-19/Scotland/CVR3657/2020|2020-05-21|EPI\_ISL\_478086|Original|hCoV-19^^Scotland|Human|West of Scotland Specialist Virology Centre|COVID-19 Genomics UK (COG-UK) Consortium|Robertson|United Kingdom

>Spike|hCoV-19/USA/UT-UPHL-2009027/2020|2020-05-11|EPI\_ISL\_525332|Original|hCoV-19^^Utah|Human|Utah Public Health Laboratory|Utah Public Health Laboratory|Young|USA

>Spike|hCoV-19/Scotland/QEUH-9BA7DA/2020|2020-09-09|EPI\_ISL\_573827|Original|hCoV-19^^Scotland|Human|Oxford Viromics|COVID-19 Genomics UK (COG-UK) Consortium|Golubchik|United Kingdom

>Spike|hCoV-19/USA/CA-CHLA-PLM02726594/2020|2020-12-04|EPI\_ISL\_753637|Original|hCoV-19^^California|Human|Clinical virology Laboratory|Center for Personalized Medicine|Dien Bard|USA

>Spike|hCoV-19/Spain/IB-IBV-99010780/2020|2020-10-06|EPI\_ISL\_691671|Original|hCoV-19^^Balear Islands|Human|Servicio de Microbiolog\u00eda|SeqCOVID-SPAIN consortium/IBV (CSIC) |Comas|Spain

>Spike|hCoV-19/USA/VA-DCLS-1275/2020|2020-08-12|EPI\_ISL\_572291|Original|hCoV-19^^Virginia|Human|Virginia DCLS|Virginia DCLS|St. Jacques|USA

>Spike|hCoV-19/Australia/NSW374/2020|2020-03-21|EPI\_ISL\_451634|Original|hCoV-19^^New South Wales|Human|South Eastern Area Laboratory Services|NSW Health Pathology - Institute of Clinical Pathology and Medical Research; Westmead Hospital; University of Sydney|Gall|Australia

>Spike|hCoV-19/USA/GA-CDC-7347/2020|2020-10-22|EPI\_ISL\_681780|Original|hCoV-19^^Georgia|Human|GA Department of Public Health Laboratory|Pathogen Discovery|Queen|USA

>Spike|hCoV-19/Denmark/DCGC-17866/2020|2020-12-14|EPI\_ISL\_749608|Original|hCoV-19^^Hovedstaden|Human|Department of Virus and Microbiological Special Diagnostics|Albertsen Lab|Michaelsen|Denmark

>Spike|hCoV-19/USA/FL-BPHL-0810/2020|2020-05-20|EPI\_ISL\_514156|Original|hCoV-19^^Florida|Human|Florida Bureau of Public Health Laboratories|Florida Bureau of Public Health Laboratories|Blanton|USA

>Spike|hCoV-19/USA/CA-CHLA-PLM70845114/2020|2020-11-15|EPI\_ISL\_753332|Original|hCoV-19^^California|Human|Clinical virology Laboratory|Center for Personalized Medicine|Dien Bard|USA

>Spike|hCoV-19/Spain/RI-IBV-99010905/2020|2020-11-04|EPI\_ISL\_732751|Original|hCoV-19^^La Rioja|Human|Centro de Investigaci\u00f3n Biom\u00e9dica de La Rioja - Hospital San Pedro Logro\u00f1o|SeqCOVID-SPAIN consortium/IBV (CSIC) |Comas|Spain

>Spike|hCoV-19/USA/UT-03810/2020|2020-04-03|EPI\_ISL\_470712|Original|hCoV-19^^Utah|Human|Utah Public Health Laboratory|Utah Public Health Laboratory|Young|USA

>Spike|hCoV-19/Sichuan/SC-NC-072/2020|2020-02-02|EPI\_ISL\_451331|Original|hCoV-19^^Sichuan|Human|West China Hospital of Sichuan University|State Key Laboratory of Biotherapy of Sichuan University|Tang|China

>Spike|hCoV-19/Canada/BC\_06975953/2020|2020-04-00|EPI\_ISL\_466811|Original|hCoV-19^^British Columbia|Human|BCCDC Public Health Laboratory|BCCDC Public Health Laboratory|Harrigan|Canada

>Spike|hCoV-19/USA/MI-UM-10036231954/2020|2020-10-01|EPI\_ISL\_590722|Original|hCoV-19^^Michigan|Human|University of Michigan Clinical Microbiology Laboratory|Lauring Lab|Valesano|USA

>Spike|hCoV-19/England/LIVE-A6224/2020|2020-03-21|EPI\_ISL\_499536|Original|hCoV-19^^England|Human|Liverpool Clinical Laboratories|COVID-19 Genomics UK (COG-UK) Consortium|Haldenby|United Kingdom

>Spike|hCoV-19/England/ALDP-A4FD8C/2020|2020-10-07|EPI\_ISL\_597583|Original|hCoV-19^^England|Human|Lighthouse Lab in Alderley Park|Wellcome Sanger Institute for the COVID-19 Genomics UK (COG-UK) consortium|Davies|United Kingdom

>Spike|hCoV-19/USA/CA-CZB-10937/2020|2020-09-04|EPI\_ISL\_583166|Original|hCoV-19^^California|Human|Humboldt County Public Health Laboratory|Chan-Zuckerberg Biohub|Bhatt|USA

>Spike|hCoV-19/Australia/VIC14995/2020|2020-09-02|EPI\_ISL\_593097|Original|hCoV-19^^Victoria|Human|Microbiological Diagnostic Unit - Public Health Laboratory (MDU-PHL) |MDU-PHL|Schultz|Australia

>Spike|hCoV-19/USA/CA-CZB-3760/2020|2020-07-30|EPI\_ISL\_548389|Original|hCoV-19^^California|Human|Orange County Public Health Laboratory|Chan-Zuckerberg Biohub|Bhatt|USA

>Spike|hCoV-19/England/CAMB-81c4F/2020|2020-04-12|EPI\_ISL\_443071|Original|hCoV-19^^England|Human|Department of Pathology|Wellcome Sanger Institute for the COVID-19 Genomics UK (COG-UK) consortium|Amato|United Kingdom

>Spike|hCoV-19/England/NORW-EBC52/2020|2020-05-07|EPI\_ISL\_457494|Original|hCoV-19^^England|Human|Quadram Institute Bioscience|COVID-19 Genomics UK (COG-UK) Consortium|Alikhan|United Kingdom

>Spike|hCoV-19/England/NOTT-110303/2020|2020-04-11|EPI\_ISL\_441498|Original|hCoV-19^^England|Human|Queens Medical Centre|COVID-19 Genomics UK (COG-UK) Consortium|Loose|United Kingdom

>Spike|hCoV-19/USA/MI-UM-2006S000858/2020|2020-03-27|EPI\_ISL\_484715|Original|hCoV-19^^Michigan|Human|University of Michigan Clinical Microbiology Laboratory|Lauring Lab|Valesano|USA

>Spike|hCoV-19/England/CAMC-9B2F8F/2020|2020-09-05|EPI\_ISL\_549335|Original|hCoV-19^^England|Human|Oxford Viromics|COVID-19 Genomics UK (COG-UK) Consortium|Golubchik|United Kingdom

>Spike|hCoV-19/Northern Ireland/NIRE-23562C/2020|2020-11-10|EPI\_ISL\_742122|Original|hCoV-19^^Northern Ireland|Human|Regional Virus Laboratory|COVID-19 Genomics UK (COG-UK) Consortium|Fairley|United Kingdom

>Spike|hCoV-19/Saudi Arabia/656/2020|2020-02-26|EPI\_ISL\_490010|Original|hCoV-19^^Saudi Arabia|Human|King Fahad Medical City|King Fahad Medical City|Naeem|Saudi Arabia

>Spike|hCoV-19/Japan/PG-1623/2020|2020-04-00|EPI\_ISL\_685229|Original|hCoV-19^^Japan|Human|Tokyo Metropolitan Institute of Public Health|Pathogen Genomics Center|Sekizuka|Japan

>Spike|hCoV-19/England/ALDP-A521A8/2020|2020-10-07|EPI\_ISL\_598158|Original|hCoV-19^^England|Human|Lighthouse Lab in Alderley Park|Wellcome Sanger Institute for the COVID-19 Genomics UK (COG-UK) consortium|Davies|United Kingdom

>Spike|hCoV-19/Wales/MILK-9928A8/2020|2020-08-27|EPI\_ISL\_552056|Original|hCoV-19^^Wales|Human|Lighthouse Lab in Milton Keynes|Wellcome Sanger Institute for the COVID-19 Genomics UK (COG-UK) consortium|Davies|United Kingdom

>Spike|hCoV-19/England/QEUEH-AD4E6B/2020|2020-10-26|EPI\_ISL\_633935|Original|hCoV-19^^England|Human|Lighthouse Lab in Glasgow|Wellcome Sanger Institute for the COVID-19 Genomics UK (COG-UK) consortium|Davies|United Kingdom

>Spike|hCoV-19/Scotland/EDB2373/2020|2020-04-22|EPI\_ISL\_439194|Original|hCoV-19^^Scotland|Human|Virology Department|COVID-19 Genomics UK (COG-UK) Consortium|Williams|United Kingdom

>Spike|hCoV-19/Belgium/UGent-15/2020|2020-03-25|EPI\_ISL\_425056|Original|hCoV-19^^Ghent|Human|Lab voor klinische biologie|Onderzoeksgroep Virologie|Lambrechts|Belgium

>Spike|hCoV-19/Denmark/DCGC-4696/2020|2020-09-21|EPI\_ISL\_621928|Original|hCoV-19^^Hovedstaden|Human|Department of Virus and Microbiological Special Diagnostics|Albertsen lab|Michaelsen|Denmark

>Spike|hCoV-19/Canada/MB-NML-1131/2020|2020-08-03|EPI\_ISL\_582462|Original|hCoV-19^^Manitoba|Human|Cadham Provincial Laboratory|National Microbiology Laboratory (NML) |Majer|Canada

>Spike|hCoV-19/USA/IA-GMF-31330/2020|2020-11-04|EPI\_ISL\_661082|Original|hCoV-19^^Iowa|Human|Gundersen Molecular Diagnostics Laboratory|Kabara Cancer Research Institute|Kenny|USA

>Spike|hCoV-19/Wales/MILK-9A8A30/2020|2020-09-01|EPI\_ISL\_550185|Original|hCoV-19^^Wales|Human|Lighthouse Lab in Milton Keynes|Wellcome Sanger Institute for the COVID-19 Genomics UK (COG-UK) consortium|Davies|United Kingdom

>Spike|hCoV-19/USA/NY-QDX-2508/2020|2020-03-15|EPI\_ISL\_604820|Original|hCoV-19^^New York|Human|Quest Diagnostics|Quest Diagnostics|Kagan|USA

>Spike|hCoV-19/USA/CA-ALSR-2297/2020|2020-07-10|EPI\_ISL\_635418|Original|hCoV-19^^California|Human|San Diego County Public Health Laboratory|Andersen lab at Scripps Research|Gangavarapu|USA

>Spike|hCoV-19/Netherlands/NA\_488/2020|2020-03-24|EPI\_ISL\_460661|Original|hCoV-19^^Netherlands|Human|Dutch COVID-19 response team|Erasmus Medical Center|Oude Munnink|Netherlands

>Spike|hCoV-19/England/ALDP-A51FDC/2020|2020-10-07|EPI\_ISL\_598167|Original|hCoV-19^^England|Human|Lighthouse Lab in Alderley Park|Wellcome Sanger Institute for the COVID-19 Genomics UK (COG-UK) consortium|Davies|United Kingdom

>Spike|hCoV-19/USA/WA-UW-2736/2020|2020-04-22|EPI\_ISL\_486023|Original|hCoV-19^^Washington|Human|UW Virology Lab|UW Virology Lab|Roychoudhury|USA

>Spike|hCoV-19/Japan/PG-5774/2020|2020-07-00|EPI\_ISL\_688893|Original|hCoV-19^^Japan|Human|Pathogen Genomics Center|Pathogen Genomics Center|Sekizuka|Japan

>Spike|hCoV-19/England/QEUH-9F3702/2020|2020-09-24|EPI\_ISL\_588593|Original|hCoV-19^^England|Human|Lighthouse Lab in Glasgow|Wellcome Sanger Institute for the COVID-19 Genomics UK (COG-UK) consortium|Davies|United Kingdom

>Spike|hCoV-19/England/BRIS-1264F8/2020|2020-04-10|EPI\_ISL\_459071|Original|hCoV-19^^England|Human|PHE South West Regional Laboratory|Wellcome Sanger Institute for the COVID-19 Genomics UK (COG-UK) consortium|Davies|United Kingdom

>Spike|hCoV-19/USA/TX-HMH-959/2020|2020-04-07|EPI\_ISL\_545933|Original|hCoV-19^^Texas|Human|Houston Methodist Hospital|Houston Methodist Hospital|Long|USA

>Spike|hCoV-19/England/NOTT-1106EC/2020|2020-04-07|EPI\_ISL\_441848|Original|hCoV-19^^England|Human|Queens Medical Centre|COVID-19 Genomics UK (COG-UK) Consortium|Loose|United Kingdom

>Spike|hCoV-19/England/MILK-C4FD20/2020|2020-12-11|EPI\_ISL\_769710|Original|hCoV-19^^England|Human|Lighthouse Lab in Milton Keynes|Wellcome Sanger Institute for the COVID-19 Genomics UK (COG-UK) Consortium|Davies|United Kingdom

>Spike|hCoV-19/Wales/PHWC-2BE7E/2020|2020-04-10|EPI\_ISL\_445859|Original|hCoV-19^^Wales|Human|Wales Specialist Virology Centre|Public Health Wales Microbiology Cardiff|Moore|United Kingdom

>Spike|hCoV-19/Canada/NS-NML-1277/2020|2020-04-07|EPI\_ISL\_579664|Original|hCoV-19^^Nova Scotia|Human|QEII Health Sciences Centre|National Microbiology Laboratory (NML)|Majer|Canada

>Spike|hCoV-19/Australia/VIC2321/2020|2020-06-25|EPI\_ISL\_522042|Original|hCoV-19^^Victoria|Human|Microbiological Diagnostic Unit - Public Health Laboratory (MDU-PHL)|MDU-PHL|Schultz|Australia

>Spike|hCoV-19/India/TG-CCMB-X87/2020|2020-07-14|EPI\_ISL\_528866|Original|hCoV-19^^Telangana|Human|CSIR-Centre for Cellular and Molecular Biology|CSIR-Centre for Cellular and Molecular Biology|Banu|India

>Spike|hCoV-19/England/ALDP-B5D2F4/2020|2020-11-09|EPI\_ISL\_678885|Original|hCoV-19^^England|Human|Department of Pathology|COVID-19 Genomics UK (COG-UK) Consortium|Goodfellow|United Kingdom

>Spike|hCoV-19/Scotland/CVR780/2020|2020-03-27|EPI\_ISL\_433338|Original|hCoV-19^^Scotland|Human|West of Scotland Specialist Virology Centre|COVID-19 Genomics UK (COG-UK) Consortium|Robertson|United Kingdom

>Spike|hCoV-19/England/MILK-974AE2/2020|2020-08-21|EPI\_ISL\_552631|Original|hCoV-19^^England|Human|Lighthouse Lab in Milton Keynes|Wellcome Sanger Institute for the COVID-19 Genomics UK (COG-UK) consortium|Davies|United Kingdom

>Spike|hCoV-19/England/BRIS-12B2BD/2020|2020-05-02|EPI\_ISL\_487527|Original|hCoV-19^^England|Human|PHE South West Regional Laboratory|Wellcome Sanger Institute for the COVID-19 Genomics UK (COG-UK) consortium|Davies|United Kingdom

>Spike|hCoV-19/England/QEUA-C34052/2020|2020-12-11|EPI\_ISL\_734076|Original|hCoV-19^^England|Human|Lighthouse Lab in Glasgow|Wellcome Sanger Institute for the COVID-19 Genomics UK (COG-UK) Consortium|Davies|United Kingdom

>Spike|hCoV-19/USA/TX-HMH-6043/2020|2020-06-30|EPI\_ISL\_547188|Original|hCoV-19^^Texas|Human|Houston Methodist Hospital|Houston Methodist Hospital|Long|USA

>Spike|hCoV-19/Singapore/1112/2020|2020-10-19|EPI\_ISL\_605821|Original|hCoV-19^^Singapore|Human|National Public Health Laboratory|National Public Health Laboratory|Mak|Singapore

>Spike|hCoV-19/USA/UT-08687/2020|2020-05-26|EPI\_ISL\_524407|Original|hCoV-19^^Utah|Human|Utah Public Health Laboratory|Utah Public Health Laboratory|Young|USA

>Spike|hCoV-19/Colombia/RIS-INS-81402/2020|2020-03-18|EPI\_ISL\_497736|Original|hCoV-19^^Risaralda|Human|Instituto Nacional de Salud|Instituto Nacional de Salud|Franco-Mu\u00f1oz|Colombia

>Spike|hCoV-19/Wales/PHWC-162609/2020|2020-05-20|EPI\_ISL\_473098|Original|hCoV-19^^Wales|Human|Wales Specialist Virology Centre Sequencing lab|COVID-19 Genomics UK (COG-UK) Consortium|Moore|United Kingdom

>Spike|hCoV-19/USA/WI-GMF-28010/2020|2020-10-27|EPI\_ISL\_661000|Original|hCoV-19^^Wisconsin|Human|Gundersen Molecular Diagnostics Laboratory|Kabara Cancer Research Institute|Kenny|USA

>Spike|hCoV-19/USA/TX-HMH-6634/2020|2020-06-24|EPI\_ISL\_546134|Original|hCoV-19^^Texas|Human|Houston Methodist Hospital|Houston Methodist Hospital|Long|USA

>Spike|hCoV-19/USA/TX-HMH-5648/2020|2020-06-20|EPI\_ISL\_544932|Original|hCoV-19^^Texas|Human|Houston Methodist Hospital|Houston Methodist Hospital|Long|USA

>Spike|hCoV-19/Denmark/DCGC-16504/2020|2020-11-16|EPI\_ISL\_714806|Original|hCoV-19^^Hovedstaden|Human|Department of Virus and Microbiological Special Diagnostics|Albertsen Lab|Michaelsen|Denmark

>Spike|hCoV-19/Australia/VIC4821/2020|2020-07-17|EPI\_ISL\_519206|Original|hCoV-19^^Victoria|Human|Microbiological Diagnostic Unit - Public Health Laboratory (MDU-PHL)|MDU-PHL|Schultz|Australia

>Spike|hCoV-19/Scotland/CVR2344/2020|2020-04-13|EPI\_ISL\_448181|Original|hCoV-19^^Scotland|Human|West of Scotland Specialist Virology Centre|COVID-19 Genomics UK (COG-UK) Consortium|Robertson|United Kingdom

>Spike|hCoV-19/England/NORT-297A0E/2020|2020-04-22|EPI\_ISL\_488141|Original|hCoV-19^^England|Human|NU-OMICS DNA Sequencing research facility|Wellcome Sanger Institute for the COVID-19 Genomics UK (COG-UK) consortium|Davies|United Kingdom

>Spike|hCoV-19/England/LIVE-DB3AB6/2020|2020-10-21|EPI\_ISL\_651138|Original|hCoV-19^^England|Human|Liverpool Clinical Laboratories|COVID-19 Genomics UK (COG-UK) Consortium|Haldenby|United Kingdom

>Spike|hCoV-19/Chile/AT-CMM-ATAC11/2020|2020-08-07|EPI\_ISL\_626557|Original|hCoV-19^^Atacama|Human|Laboratorio de Biología Molecular|Center for Mathematical Modeling and Center for Genome Regulation. Santiago|Palma V\u00e9jar|Chile

>Spike|hCoV-19/Scotland/EDB5381/2020|2020-03-31|EPI\_ISL\_461733|Original|hCoV-19^^Scotland|Human|Virology Department|COVID-19 Genomics UK (COG-UK) Consortium|Williams|United Kingdom

>Spike|hCoV-19/England/QEUA-B6AA29/2020|2020-11-11|EPI\_ISL\_662506|Original|hCoV-19^^England|Human|Lighthouse Lab in Glasgow|Wellcome Sanger Institute for the COVID-19 Genomics UK (COG-UK) Consortium|Davies|United Kingdom

>Spike|hCoV-19/Switzerland/BE-ETHZ-320588/2020|2020-10-12|EPI\_ISL\_737690|Original|hCoV-19^^Bern|Human|Viollier AG|Department of Biosystems Science and Engineering|Nadeau|Switzerland

>Spike|hCoV-19/Japan/PG-7274/2020|2020-08-00|EPI\_ISL\_688377|Original|hCoV-19^^Japan|Human|Saitama Prefectural Institute of Public Health|Pathogen Genomics Center|Sekizuka|Japan

>Spike|hCoV-19/Scotland/CVR4363/2020|2020-09-14|EPI\_ISL\_572518|Original|hCoV-19^^Scotland|Human|West of Scotland Specialist Virology Centre|COVID-19 Genomics UK (COG-UK) Consortium|Robertson|United Kingdom

>Spike|hCoV-19/England/BRIS-12CCAF/2020|2020-04-16|EPI\_ISL\_481966|Original|hCoV-19^^England|Human|PHE South West Regional Laboratory|Wellcome Sanger Institute for the COVID-19 Genomics UK (COG-UK) consortium|Davies|United Kingdom

>Spike|hCoV-19/USA/WA-NH19/2020|2020-03-13|EPI\_ISL\_418786|Original|hCoV-19^^Washington|Human|WA State Department of Health|Pathogen Discovery|Queen|USA

>Spike|hCoV-19/England/QEUEH-5EC4BE/2020|2020-06-16|EPI\_ISL\_533301|Original|hCoV-19^^England|Human|Lighthouse Lab in Glasgow|Wellcome Sanger Institute for the COVID-19 Genomics UK (COG-UK) consortium|Davies|United Kingdom

>Spike|hCoV-19/USA/NMDOH-2020322097/2020|2020-09-01|EPI\_ISL\_542076|Original|hCoV-19^^New Mexico|Human|New Mexico Department of Health Scientific Laboratory|New Mexico Department of Health Scientific Laboratory|Johnson|USA

>Spike|hCoV-19/Russia/MOS-CRIE-13678497/2020|2020-11-09|EPI\_ISL\_745252|Original|hCoV-19^^Moscow|Human|Molecular diagnostic laboratory of Federal Budget Institution of Science \Central Research Institute of Epidemiology\ of The Federal Service on Customers' Rights Protection and Human Well-being Surveillance|Group of Genomics and Postgenomic Technologies of Central Research Institute of Epidemiology

>y|Korneenko|Russia

>Spike|hCoV-19/Portugal/PT1418/2020|2020-03-26|EPI\_ISL\_511377|Original|hCoV-19^^Portugal|Human|Instituto Nacional de Saude (INSA)|Instituto Nacional de Saude (INSA)|Borges|Portugal

>Spike|hCoV-19/England/MILK-B01E19/2020|2020-10-24|EPI\_ISL\_642873|Original|hCoV-19^^England|Human|Lighthouse Lab in Milton Keynes|Wellcome Sanger Institute for the COVID-19 Genomics UK (COG-UK) Consortium|Davies|United Kingdom

>Spike|hCoV-19/England/MILK-993704/2020|2020-08-24|EPI\_ISL\_552187|Original|hCoV-19^^England|Human|Lighthouse Lab in Milton Keynes|Wellcome Sanger Institute for the COVID-19 Genomics UK (COG-UK) consortium|Davies|United Kingdom

>Spike|hCoV-19/England/NORW-21FDF6/2020|2020-12-11|EPI\_ISL\_725068|Original|hCoV-19^^England|Human|Quadram Institute Bioscience|COVID-19 Genomics UK (COG-UK) Consortium|Alikhan|United Kingdom

>Spike|hCoV-19/USA/TX-HMH-MCoV-15043/2020|2020-10-15|EPI\_ISL\_786527|Original|hCoV-19^^Texas|Human|Houston Methodist Hospital|Houston Methodist Hospital|Long|USA

>Spike|hCoV-19/Wales/PHWC-483BB5/2020|2020-10-12|EPI\_ISL\_627904|Original|hCoV-19^^Wales|Human|Wales Specialist Virology Centre Sequencing lab|COVID-19 Genomics UK (COG-UK) Consortium|Moore|United Kingdom

>Spike|hCoV-19/England/QEUEH-9B76C1/2020|2020-09-08|EPI\_ISL\_590513|Original|hCoV-19^^England|Human|Lighthouse Lab in Glasgow|Wellcome Sanger Institute for the COVID-19 Genomics UK (COG-UK) consortium|Davies|United Kingdom

>Spike|hCoV-19/Singapore/430/2020|2020-03-16|EPI\_ISL\_475961|Original|hCoV-19^^Singapore|Human|National Public Health Laboratory|National Public Health Laboratory|Mak|Singapore

>Spike|hCoV-19/England/ALDP-954AF7/2020|2020-06-11|EPI\_ISL\_553763|Original|hCoV-19^^England|Human|Lighthouse Lab in Alderley Park|Wellcome Sanger Institute for the COVID-19 Genomics UK (COG-UK) consortium|Davies|United Kingdom

>Spike|hCoV-19/USA/WA-S1655/2020|2020-05-29|EPI\_ISL\_496081|Original|hCoV-19^^Washington|Human|Washington State Department of Health|Seattle Flu Study|Lee|USA

>Spike|hCoV-19/USA/TX-HMH-MCoV-15491/2020|2020-10-24|EPI\_ISL\_786975|Original|hCoV-19^^Texas|Human|Houston Methodist Hospital|Houston Methodist Hospital|Long|USA

>Spike|hCoV-19/France/ARA-101986/2020|2020-11-05|EPI\_ISL\_732680|Original|hCoV-19^^Auvergne-Rh\u00f4ne-Alpes|Human|CNR Virus des Infections Respiratoires - France SUD|CNR Virus des Infections Respiratoires - France SUD|Bal|France

>Spike|hCoV-19/USA/LA-BIE-019/2020|2020-04-08|EPI\_ISL\_468710|Original|hCoV-19^^Louisiana|Human|Ochsner Health|Bioinfoexperts|Cross|USA

>Spike|hCoV-19/South Korea/KCDC2176/2020|2020-03-23|EPI\_ISL\_506970|Original|hCoV-19^^South Korea|Human|Division of Viral Diseases|Division of Viral Diseases|Kim|South Korea

>Spike|hCoV-19/Denmark/DCGC-12520/2020|2020-11-16|EPI\_ISL\_682701|Original|hCoV-19^^Hovedstaden|Human|Department of Virus and Microbiological Special Diagnostics|Albertsen Lab|Michaelsen|Denmark

>Spike|hCoV-19/USA/WA-UW-1314/2020|2020-03-17|EPI\_ISL\_422991|Original|hCoV-19^^Washington|Human|UW Virology Lab|UW Virology Lab|Roychoudhury|USA

>Spike|hCoV-19/Denmark/DCGC-2835/2020|2020-08-24|EPI\_ISL\_616661|Original|hCoV-19^^Syddanmark|Human|Department of Virus and Microbiological Special Diagnostics|Albertsen lab|Michaelsen|Denmark

>Spike|hCoV-19/England/MILK-9D4F2D/2020|2020-09-19|EPI\_ISL\_601531|Original|hCoV-19^^England|Human|Lighthouse Lab in Milton Keynes|Wellcome Sanger Institute for the COVID-19 Genomics UK (COG-UK) consortium|Davies|United Kingdom

>Spike|hCoV-19/England/ALDP-AA306F/2020|2020-10-22|EPI\_ISL\_630909|Original|hCoV-19^^England|Human|Lighthouse Lab in Alderley Park|Wellcome Sanger Institute for the COVID-19 Genomics UK (COG-UK) consortium|Davies|United Kingdom

>Spike|hCoV-19/Wales/PHWC-15E58B/2020|2020-05-14|EPI\_ISL\_472820|Original|hCoV-19^^Wales|Human|Wales Specialist Virology Centre Sequencing lab|COVID-19 Genomics UK (COG-UK) Consortium|Moore|United Kingdom

>Spike|hCoV-19/England/ALDP-9C544E/2020|2020-09-10|EPI\_ISL\_567719|Original|hCoV-19^^England|Human|Lighthouse Lab in Alderley Park|Wellcome Sanger Institute for the COVID-19 Genomics UK (COG-UK) consortium|Davies|United Kingdom

>Spike|hCoV-19/USA/TX-HMH-MCoV-15539/2020|2020-10-22|EPI\_ISL\_787023|Original|hCoV-19^^Texas|Human|Houston Methodist Hospital|Houston Methodist Hospital|Long|USA

>Spike|hCoV-19/Scotland/EDB2954/2020|2020-04-02|EPI\_ISL\_489013|Original|hCoV-19^^Scotland|Human|Virology Department|Wellcome Sanger Institute for the COVID-19 Genomics UK (COG-UK) consortium|Davies|United Kingdom

>Spike|hCoV-19/USA/IL-NM-0452/2020|2020-04-16|EPI\_ISL\_626411|Original|hCoV-19^^Illinois|Human|Northwestern Memorial Hospital|Ozer Lab|Ozer|USA

>Spike|hCoV-19/England/MILK-B567CF/2020|2020-11-05|EPI\_ISL\_657486|Original|hCoV-19^^England|Human|Lighthouse Lab in Milton Keynes|Wellcome Sanger Institute for the COVID-19 Genomics UK (COG-UK) Consortium|Davies|United Kingdom

>Spike|hCoV-19/USA/CT-Yale-610/2020|2020-05-07|EPI\_ISL\_730072|Original|hCoV-19^^Connecticut|Human|Yale Clinical Virology Laboratory|Grubaugh Lab - Yale School of Public Health|Grubaugh|USA

>Spike|hCoV-19/Scotland/QEUH-A4CA3D/2020|2020-10-07|EPI\_ISL\_596010|Original|hCoV-19^^Scotland|Human|Quadram Institute Bioscience|COVID-19 Genomics UK (COG-UK) Consortium|Alikhan|United Kingdom

>Spike|hCoV-19/USA/AZ-TG312407/2020|2020-05-16|EPI\_ISL\_694013|Original|hCoV-19^^Arizona|Human|TGen North|TGen North|French|USA

>Spike|hCoV-19/India/TG-CCMB-L989/2020|2020-05-11|EPI\_ISL\_458065|Original|hCoV-19^^Telangana|Human|CSIR-Centre for Cellular and Molecular Biology|CSIR-Centre for Cellular and Molecular Biology|Banu|India

>Spike|hCoV-19/England/CWAR-24FDCCC/2020|2020-05-05|EPI\_ISL\_584508|Original|hCoV-19^^England|Human|UHCW / University of Warwick|COVID-19 Genomics UK (COG-UK) Consortium|Stark|United Kingdom

>Spike|hCoV-19/England/SHEF-C17CA/2020|2020-05-06|EPI\_ISL\_490582|Original|hCoV-19^^England|Human|Virology Department|COVID-19 Genomics UK (COG-UK) Consortium|de Silva|United Kingdom

>Spike|hCoV-19/England/CAMC-B09C71/2020|2020-10-30|EPI\_ISL\_673008|Original|hCoV-19^^England|Human|Lighthouse Lab in Cambridge|Wellcome Sanger Institute for the COVID-19 Genomics UK (COG-UK) Consortium|Davies|United Kingdom

>Spike|hCoV-19/USA/LA-EVTL625/2020|2020-08-06|EPI\_ISL\_579029|Original|hCoV-19^^Louisiana|Human|LSUHS Emerging Viral Threat Laboratory|Microbial Genome Sequencing Center|Kamil|USA

>Spike|hCoV-19/England/CAMC-B2096E/2020|2020-10-15|EPI\_ISL\_647697|Original|hCoV-19^^England|Human|Lighthouse Lab in Cambridge|Wellcome Sanger Institute for the COVID-19 Genomics UK (COG-UK) Consortium|Davies|United Kingdom

>Spike|hCoV-19/USA/TX-HMH-5174/2020|2020-06-29|EPI\_ISL\_544575|Original|hCoV-19^^Texas|Human|Houston Methodist Hospital|Houston Methodist Hospital|Long|USA

>Spike|hCoV-19/Switzerland/VD-ETHZ-170021/2020|2020-06-24|EPI\_ISL\_486533|Original|hCoV-19^^Vaud|Human|Viollier AG|Department of Biosystems Science and Engineering|Nadeau|Switzerland

>Spike|hCoV-19/Wales/PHWC-489E2F/2020|2020-11-02|EPI\_ISL\_652496|Original|hCoV-19^^Wales|Human|Wales Specialist Virology Centre Sequencing lab|COVID-19 Genomics UK (COG-UK) Consortium|Moore|United Kingdom

>Spike|hCoV-19/USA/LA-EVTL1345/2020|2020-12-11|EPI\_ISL\_779011|Original|hCoV-19^^Louisiana|Human|LSUHS Emerging Viral Threat Laboratory|Microbial Genome Sequencing Center|Kamil|USA



>Spike|hCoV-19/England/QEUA-9F3A81/2020|2020-09-24|EPI\_ISL\_588586|Original|hCoV-19^^England|Human|Lighthouse Lab in Glasgow|Wellcome Sanger Institute for the COVID-19 Genomics UK (COG-UK) consortium|Davies|United Kingdom

>Spike|hCoV-19/Norway/7107/2020|2020-12-21|EPI\_ISL\_775527|Original|hCoV-19^^Viken|Human|Furst Medical Laboratory|Norwegian Institute of Public Health|Vollan|Norway

>Spike|hCoV-19/Japan/PG-2828/2020|2020-04-00|EPI\_ISL\_690955|Original|hCoV-19^^Japan|Human|Pathogen Genomics Center|Pathogen Genomics Center|Sekizuka|Japan

>Spike|hCoV-19/England/QEUA-9DA5BC/2020|2020-09-22|EPI\_ISL\_601477|Original|hCoV-19^^England|Human|Lighthouse Lab in Glasgow|Wellcome Sanger Institute for the COVID-19 Genomics UK (COG-UK) consortium|Davies|United Kingdom

>Spike|hCoV-19/USA/MI-UM-2006S001135/2020|2020-05-05|EPI\_ISL\_495592|Original|hCoV-19^^Michigan|Human|University of Michigan Clinical Microbiology Laboratory|Lauring Lab|Valesano|USA

>Spike|hCoV-19/USA/TX-HMH-1518/2020|2020-04-28|EPI\_ISL\_542768|Original|hCoV-19^^Texas|Human|Houston Methodist Hospital|Houston Methodist Hospital|Long|USA

>Spike|hCoV-19/Portugal/PT1510/2020|2020-03-28|EPI\_ISL\_511469|Original|hCoV-19^^Portugal|Human|Instituto Nacional de Saude (INSA)|Instituto Nacional de Saude (INSA)|Borges|Portugal

>Spike|hCoV-19/Luxembourg/LNS7673816/2020|2020-10-26|EPI\_ISL\_744610|Original|hCoV-19^^Luxembourg|Human|Laboratoire national de sant\u00e9|Laboratoire national de sant\u00e9|Wienecke-Baldacchino|Luxembourg

>Spike|hCoV-19/England/MILK-A477C2/2020|2020-10-05|EPI\_ISL\_598292|Original|hCoV-19^^England|Human|Lighthouse Lab in Milton Keynes|Wellcome Sanger Institute for the COVID-19 Genomics UK (COG-UK) consortium|Davies|United Kingdom

>Spike|hCoV-19/India/TG-CCMB-AB364/2020|2020-08-13|EPI\_ISL\_539631|Original|hCoV-19^^Telangana|Human|CSIR-Centre for Cellular and Molecular Biology|CSIR-Centre for Cellular and Molecular Biology|Mukherjee|India

>Spike|hCoV-19/England/QEUA-CCCABB/2020|2020-12-21|EPI\_ISL\_782228|Original|hCoV-19^^England|Human|Lighthouse Lab in Glasgow|Wellcome Sanger Institute for the COVID-19 Genomics UK (COG-UK) Consortium|Davies|United Kingdom

>Spike|hCoV-19/Wales/PHWC-492CDE/2020|2020-11-27|EPI\_ISL\_725776|Original|hCoV-19^^Wales|Human|Originating lab|COVID-19 Genomics UK (COG-UK) Consortium|Moore|United Kingdom

>Spike|hCoV-19/England/MILK-999FD9/2020|2020-08-30|EPI\_ISL\_550270|Original|hCoV-19^^England|Human|Lighthouse Lab in Milton Keynes|Wellcome Sanger Institute for the COVID-19 Genomics UK (COG-UK) consortium|Davies|United Kingdom

>Spike|hCoV-19/Bangladesh/DNAS-CPH-isl-509/2020|2020-04-29|EPI\_ISL\_605889|Original|hCoV-19^^Bangladesh|Human|NGS Lab|NGS Lab|Rabbi|Bangladesh

>Spike|hCoV-19/Ireland/un-NVRL-20W266/2020|2020-04-00|EPI\_ISL\_437684|Original|hCoV-19^^Ireland|Human|UCD National Virus Reference Laboratory|UCD National Virus Reference Laboratory|Gonzalez|Ireland

>Spike|hCoV-19/Australia/VIC1329/2020|2020-04-12|EPI\_ISL\_430696|Original|hCoV-19^^Victoria|Human|Victorian Infectious Diseases Reference Laboratory (VIDRL)|Microbiological Diagnostic Unit Public Health Laboratory and Victorian Infectious Diseases Reference Laboratory|Schultz|Australia

>Spike|hCoV-19/USA/NY-Wadsworth-287637-01/2020|2020-12-15|EPI\_ISL\_767469|Original|hCoV-19^^New York|Human|Wadsworth Center|Wadsworth Center|Lasek-Nesselquist|USA

>Spike|hCoV-19/Japan/PG-0432/2020|2020-04-05|EPI\_ISL\_480098|Original|hCoV-19^^Kansai|Human|Department of Infectious Diseases|Pathogen Genomics Center|Sekizuka|Japan

>Spike|hCoV-19/Denmark/DCGC-4430/2020|2020-09-14|EPI\_ISL\_621851|Original|hCoV-19^^Sjaelland|Human|Department of Virus and Microbiological Special Diagnostics|Albertsen lab|Michaelsen|Denmark

>Spike|hCoV-19/England/EXET-137351/2020|2020-03-28|EPI\_ISL\_471965|Original|hCoV-19^^England|Human|University of Exeter|COVID-19 Genomics UK (COG-UK) Consortium|Temperton|United Kingdom

>Spike|hCoV-19/England/MILK-A7C0E7/2020|2020-10-15|EPI\_ISL\_606465|Original|hCoV-19^^England|Human|Lighthouse Lab in Milton Keynes|Wellcome Sanger Institute for the COVID-19 Genomics UK (COG-UK) consortium|Davies|United Kingdom

>Spike|hCoV-19/Wales/PHWC-35AF5/2020|2020-04-25|EPI\_ISL\_474527|Original|hCoV-19^^Wales|Human|Originating lab|COVID-19 Genomics UK (COG-UK) Consortium|Moore|United Kingdom

>Spike|hCoV-19/Kenya/C3205/2020|2020-04-28|EPI\_ISL\_457902|Original|hCoV-19^^Kenya|Human|KEMRI-CGMR-C|KEMRI-Wellcome Trust Research Programme/KEMRI-CGMR-C Kilifi|Githinji|Kenya

>Spike|hCoV-19/England/QEUH-9D0194/2020|2020-09-16|EPI\_ISL\_589886|Original|hCoV-19^^England|Human|Lighthouse Lab in Glasgow|Wellcome Sanger Institute for the COVID-19 Genomics UK (COG-UK) consortium|Davies|United Kingdom

>Spike|hCoV-19/England/CAMC-9DF405/2020|2020-09-21|EPI\_ISL\_637752|Original|hCoV-19^^England|Human|Department of Pathology|COVID-19 Genomics UK (COG-UK) Consortium|Goodfellow|United Kingdom

>Spike|hCoV-19/USA/MN-QDX-2719/2020|2020-03-13|EPI\_ISL\_605030|Original|hCoV-19^^Minnesota|Human|Quest Diagnostics|Quest Diagnostics|Kagan|USA

>Spike|hCoV-19/USA/TX-HMH-MCoV-9831/2020|2020-07-06|EPI\_ISL\_780297|Original|hCoV-19^^Texas|Human|Houston Methodist Hospital|Houston Methodist Hospital|Long|USA

>Spike|hCoV-19/USA/CA-ALSR-4461/2020|2020-07-08|EPI\_ISL\_649043|Original|hCoV-19^^California|Human|San Diego County Public Health Laboratory|Andersen lab at Scripps Research|Gangavarapu|USA

>Spike|hCoV-19/USA/WA-S2396/2020|2020-06-14|EPI\_ISL\_497028|Original|hCoV-19^^Washington|Human|Washington State Department of Health|Seattle Flu Study|Lee|USA

>Spike|hCoV-19/England/201161425/2020|2020-03-11|EPI\_ISL\_464839|Original|hCoV-19^^England|Human|Respiratory Virus Unit|Respiratory Virus Unit|Platt|United Kingdom

>Spike|hCoV-19/England/ALDP-9CDCA8/2020|2020-09-16|EPI\_ISL\_566155|Original|hCoV-19^^England|Human|Lighthouse Lab in Alderley Park|Wellcome Sanger Institute for the COVID-19 Genomics UK (COG-UK) consortium|Davies|United Kingdom

>Spike|hCoV-19/USA/TX-HMH-MCoV-18435/2020|2020-11-18|EPI\_ISL\_784783|Original|hCoV-19^^Texas|Human|Houston Methodist Hospital|Houston Methodist Hospital|Long|USA

>Spike|hCoV-19/Canada/BC-BCCDC-8362/2020|2020-11-00|EPI\_ISL\_740752|Original|hCoV-19^^British Columbia|Human|BCCDC Public Health Laboratory|BCCDC Public Health Laboratory|Prystajecky|Canada

>Spike|hCoV-19/Wales/PHWC-484EBB/2020|2020-10-23|EPI\_ISL\_628125|Original|hCoV-19^^Wales|Human|Wales Specialist Virology Centre Sequencing lab|COVID-19 Genomics UK (COG-UK) Consortium|Moore|United Kingdom

>Spike|hCoV-19/USA/TX-HMH-4370/2020|2020-06-18|EPI\_ISL\_543567|Original|hCoV-19^^Texas|Human|Houston Methodist Hospital|Houston Methodist Hospital|Long|USA

>Spike|hCoV-19/England/20169034404/2020|2020-04-17|EPI\_ISL\_465232|Original|hCoV-19^^England|Human|Respiratory Virus Unit|Respiratory Virus Unit|Platt|United Kingdom

>Spike|hCoV-19/USA/MI-MDHHS-SC22169/2020|2020-10-16|EPI\_ISL\_614220|Original|hCoV-19^^Michigan|Human|Michigan Department of Health and Human Services|Michigan Department of Health and Human Services|Jacob|USA

>Spike|hCoV-19/Spain/MD-IBV-99008769/2020|2020-10-20|EPI\_ISL\_654260|Original|hCoV-19^^Madrid|Human|Hospital General Universitario Gregorio Mara\u00f1a|SeqCOVID-SPAIN consortium|IBV (CSIC)|Comas|Spain

>Spike|hCoV-19/Norway/2986/2020|2020-07-24|EPI\_ISL\_549111|Original|hCoV-19^^Agder|Human|Ostfold Hospital Trust - Kalnes|Norwegian Institute of Public Health|Kopperud Riis|Norway

>Spike|hCoV-19/Denmark/DCGC-20988/2020|2020-12-21|EPI\_ISL\_759065|Original|hCoV-19^^Syddanmark|Human|Department of Virus and Microbiological Special Diagnostics|Albertsen Lab|Michaelsen|Denmark

>Spike|hCoV-19/Brazil/SP-L16-CD384/2020|2020-04-02|EPI\_ISL\_476293|Original|hCoV-19^^S\u00e3o Paulo|Human|DB Diagn\u00f3sticos do Brasil|Instituto de Medicina Tropical da Universidade de S\u00e3o Paulo|Sabino|Brazil

>Spike|hCoV-19/England/ALDP-952613/2020|2020-06-09|EPI\_ISL\_555636|Original|hCoV-19^^England|Human|Lighthouse Lab in Alderley Park|Wellcome Sanger Institute for the COVID-19 Genomics UK (COG-UK) consortium|Davies|United Kingdom

>Spike|hCoV-19/South Africa/KRISP-K002299/2020|2020-07-22|EPI\_ISL\_515676|Original|hCoV-19^^KwaZulu-Natal|Human|NHLS-IALCH|KRISP|de Oliveira|South Africa

>Spike|hCoV-19/Scotland/EDB11314/2020|2020-12-24|EPI\_ISL\_764361|Original|hCoV-19^^Scotland|Human|Virology Department|COVID-19 Genomics UK (COG-UK) Consortium|McHugh|United Kingdom

>Spike|hCoV-19/Wales/PHWC-2EB38/2020|2020-04-08|EPI\_ISL\_446118|Original|hCoV-19^^Wales|Human|Wales Specialist Virology Centre|Public Health Wales Microbiology Cardiff|Moore|United Kingdom

>Spike|hCoV-19/USA/VA-DCLS-0626/2020|2020-04-07|EPI\_ISL\_495299|Original|hCoV-19^^Virginia|Human|Virginia DCLS|Virginia DCLS|St. Jacques|USA

>Spike|hCoV-19/Canada/ON-PHL-20-01225/2020|2020-06-00|EPI\_ISL\_548847|Original|hCoV-19^^Ontario|Human|Public Health Ontario Laboratory|Public Health Ontario Laboratory|Guthrie|Canada

>Spike|hCoV-19/England/ALDP-A6CB70/2020|2020-10-14|EPI\_ISL\_608002|Original|hCoV-19^^England|Human|Lighthouse Lab in Alderley Park|Wellcome Sanger Institute for the COVID-19 Genomics UK (COG-UK) consortium|Davies|United Kingdom

>Spike|hCoV-19/Switzerland/SO-ETHZ-300258/2020|2020-10-01|EPI\_ISL\_603290|Original|hCoV-19^^Solothurn|Human|Viollier AG|Department of Biosystems Science and Engineering|Nadeau|Switzerland

>Spike|hCoV-19/Netherlands/LI-EMC-97/2020|2020-10-19|EPI\_ISL\_632715|Original|hCoV-19^^Limburg|Human|Dutch COVID-19 response team|Erasmus Medical Center|Oude Munnink|Netherlands

>Spike|hCoV-19/Denmark/DCGC-8314/2020|2020-10-26|EPI\_ISL\_617327|Original|hCoV-19^^Midtjylland|Human|Department of Virus and Microbiological Special Diagnostics|Albertsen lab|Michaelsen|Denmark

>Spike|hCoV-19/USA/TX-HMH-6305/2020|2020-07-04|EPI\_ISL\_547379|Original|hCoV-19^^Texas|Human|Houston Methodist Hospital|Houston Methodist Hospital|Long|USA

>Spike|hCoV-19/USA/UT-UPHL-2012529719/2020|2020-07-27|EPI\_ISL\_745715|Original|hCoV-19^^Utah|Human|Ginkgo Bioworks Clinical Laboratory|Utah Public Health Laboratory|Young|USA

>Spike|hCoV-19/Scotland/QEUH-A1F9AF/2020|2020-10-01|EPI\_ISL\_599077|Original|hCoV-19^^Scotland|Human|Lighthouse Lab in Glasgow|Wellcome Sanger Institute for the COVID-19 Genomics UK (COG-UK) Consortium|Davies|United Kingdom

>Spike|hCoV-19/England/MILK-BB0FCB/2020|2020-11-18|EPI\_ISL\_719998|Original|hCoV-19^^England|Human|Lighthouse Lab in Milton Keynes|Wellcome Sanger Institute for the COVID-19 Genomics UK (COG-UK) Consortium|Davies|United Kingdom

>Spike|hCoV-19/South Africa/R10199/2020|2020-05-22|EPI\_ISL\_490263|Original|hCoV-19^^Western Cape|Human|National Institute for Communicable Diseases of the National Health Laboratory Service|National Institute for Communicable Diseases of the National Health Laboratory Service|Allam|South Africa

>Spike|hCoV-19/Henan/HN04/2020|2020-02-24|EPI\_ISL\_605930|Vero|hCoV-19^^Henan|Human|Department of Infectious Disease Prevention and Control|Department of Infectious Disease Prevention and Control|Li,X.|China

>Spike|hCoV-19/USA/WA-UW-2140/2020|2020-03-25|EPI\_ISL\_426095|Original|hCoV-19^^Washington|Human|UW Virology Lab|UW Virology Lab|Roychoudhury|USA

>Spike|hCoV-19/England/PORT-2E9C16/2020|2020-00-00|EPI\_ISL\_703548|Original|hCoV-19^^England|Human|Centre for Enzyme Innovation|COVID-19 Genomics UK (COG-UK) Consortium|Robson|United Kingdom

>Spike|hCoV-19/USA/MN-MDH-1188/2020|2020-05-02|EPI\_ISL\_477278|Original|hCoV-19^^Minnesota|Human|M Health Fairview|Minnesota Department of Health|Garfin|USA

>Spike|hCoV-19/Norway/CS-01/2020|2020-03-29|EPI\_ISL\_664101|Original|hCoV-19^^Viken|Human|Dept. of Microbiology and Infection Control|Dept. of Microbiology and Infection Control|Hesselberg L\u00f8vestad|Norway

>Spike|hCoV-19/England/BRIS-123B8D/2020|2020-04-07|EPI\_ISL\_442706|Original|hCoV-19^^England|Human|PHE South West Regional Laboratory|Wellcome Sanger Institute for the COVID-19 Genomics UK (COG-UK) consortium|Amato|United Kingdom

>Spike|hCoV-19/Canada/BC-BCCDC-7538/2020|2020-11-00|EPI\_ISL\_740705|Original|hCoV-19^^British Columbia|Human|BCCDC Public Health Laboratory|BCCDC Public Health Laboratory|Prystajeky|Canada

>Spike|hCoV-19/Panama/329198/2020|2020-03-08|EPI\_ISL\_496626|Original|hCoV-19^^Panama Center|Human|Gorgas Memorial Laboratory of Health Studies|Gorgas Memorial Laboratory of Health Studies|Martinez|Panama

>Spike|hCoV-19/England/QEUA-AD0A7A/2020|2020-10-26|EPI\_ISL\_633714|Original|hCoV-19^^England|Human|Lighthouse Lab in Glasgow|Wellcome Sanger Institute for the COVID-19 Genomics UK (COG-UK) consortium|Davies|United Kingdom

>Spike|hCoV-19/Australia/VIC15017/2020|2020-07-29|EPI\_ISL\_593104|Original|hCoV-19^^Victoria|Human|Microbiological Diagnostic Unit - Public Health Laboratory (MDU-PHL)|MDU-PHL|Schultz|Australia

>Spike|hCoV-19/England/QEUA-9629AE/2020|2020-08-10|EPI\_ISL\_531717|Original|hCoV-19^^England|Human|Lighthouse Lab in Glasgow|Wellcome Sanger Institute for the COVID-19 Genomics UK (COG-UK) consortium|Davies|United Kingdom

>Spike|hCoV-19/Spain/AR-IBV-005025/2020|2020-04-19|EPI\_ISL\_510334|Original|hCoV-19^^Aragon|Human|Servicio de Microbiolog\u00eda|SeqCOVID-SPAIN consortium/IBV (CSIC)|Comas|Spain

>Spike|hCoV-19/Wales/PHWC-4A1313/2020|2020-12-09|EPI\_ISL\_743655|Original|hCoV-19^^Wales|Human|Wales Specialist Virology Centre Sequencing lab|COVID-19 Genomics UK (COG-UK) Consortium|Moore|United Kingdom

>Spike|hCoV-19/USA/TX-HMH-2291/2020|2020-05-14|EPI\_ISL\_545228|Original|hCoV-19^^Texas|Human|Houston Methodist Hospital|Houston Methodist Hospital|Long|USA

>Spike|hCoV-19/USA/TX-HMH-5729/2020|2020-06-30|EPI\_ISL\_546972|Original|hCoV-19^^Texas|Human|Houston Methodist Hospital|Houston Methodist Hospital|Long|USA

>Spike|hCoV-19/England/201141523/2020|2020-03-09|EPI\_ISL\_464761|Original|hCoV-19^^England|Human|Respiratory Virus Unit|Respiratory Virus Unit|Platt|United Kingdom

>Spike|hCoV-19/Wuhan/HB-WHCM2-265/2020|2020-02-14|EPI\_ISL\_455000|Original|hCoV-19^^Hubei|Human|Wuhan Chain Medical Labs (CMLabs)|State Key Laboratory of Biotherapy of Sichuan University|Tang|China

>Spike|hCoV-19/Germany/HH-hpi-p2192/2020|2020-03-21|EPI\_ISL\_776420|Original|hCoV-19^^Hamburg|Human|University Medical Center Hamburg Eppendorf|Heinrich Pette Institute|Robitaille|Germany

>Spike|hCoV-19/England/201360198/2020|2020-03-24|EPI\_ISL\_423236|Original|hCoV-19^^England|Human|Respiratory Virus Unit|Respiratory Virus Unit|Platt|United Kingdom

>Spike|hCoV-19/England/ALDP-71DCF6/2020|2020-07-01|EPI\_ISL\_557583|Original|hCoV-19^^England|Human|Lighthouse Lab in Alderley Park|Wellcome Sanger Institute for the COVID-19 Genomics UK (COG-UK) consortium|Davies|United Kingdom

>Spike|hCoV-19/Saudi Arabia/KAUST-RIYADH1157/2020|2020-06-15|EPI\_ISL\_678190|Original|hCoV-19^^Riyadh|Human|Pathogen Genomics Lab King Abdullah University of Science and Technology(KAUST)|Pathogen Genomics Lab King Abdullah University of Science and Technology(KAUST)|Mohamed Ghazzali|Saudi Arabia

>Spike|hCoV-19/Australia/SA02/2020|2020-01-30|EPI\_ISL\_480779|Original|hCoV-19^^South Australia|Human|Victorian Infectious Diseases Reference Laboratory (VIDRL)|VIDRL and MDU-PHL|Schultz|Australia

>Spike|hCoV-19/England/ALDP-C58164/2020|2020-12-13|EPI\_ISL\_736165|Original|hCoV-19^^England|Human|Lighthouse Lab in Alderley Park|Wellcome Sanger Institute for the COVID-19 Genomics UK (COG-UK) Consortium|Davies|United Kingdom

>Spike|hCoV-19/England/MILK-99E2AE/2020|2020-08-31|EPI\_ISL\_550722|Original|hCoV-19^^England|Human|Lighthouse Lab in Milton Keynes|Wellcome Sanger Institute for the COVID-19 Genomics UK (COG-UK) consortium|Davies|United Kingdom

>Spike|hCoV-19/Switzerland/AG-ETHZ-210015/2020|2020-07-20|EPI\_ISL\_510762|Original|hCoV-19^^Aargau|Human|Viollier AG|Department of Biosystems Science and Engineering|Nadeau|Switzerland

>Spike|hCoV-19/Australia/NSW694/2020|2020-07-20|EPI\_ISL\_513337|Original|hCoV-19^^New South Wales|Human|Sydney South West Pathology Service (SSWPS) - Liverpool Hospital - NSW Health Pathology|NSW Health Pathology - Institute of Clinical Pathology and Medical Research; Westmead Hospital; University of Sydney|Gall|Australia

>Spike|hCoV-19/USA/VA-DCLS-1855/2020|2020-09-23|EPI\_ISL\_614079|Original|hCoV-19^^Virginia|Human|Virginia DCLS|Virginia DCLS|St. Jacques|USA

>Spike|hCoV-19/England/ALDP-B1B1E6/2020|2020-11-02|EPI\_ISL\_645791|Original|hCoV-19^^England|Human|Lighthouse Lab in Alderley Park|Wellcome Sanger Institute for the COVID-19 Genomics UK (COG-UK) Consortium|Davies|United Kingdom

>Spike|hCoV-19/Switzerland/BL-UHB-42180261/2020|2020-03-06|EPI\_ISL\_527947|Original|hCoV-19^^Basel-Land|Human|University Hospital Basel|University Hospital Basel|Roloff Handschin|Switzerland

>Spike|hCoV-19/Suriname/SR-12/2020|2020-06-20|EPI\_ISL\_517623|Original|hCoV-19^^Suriname|Human|Academic Hospital Paramaribo|Erasmus Medical Center|M\u00f0fcnger|Suriname

>Spike|hCoV-19/USA/WA-S526/2020|2020-03-31|EPI\_ISL\_434286|Original|hCoV-19^^Washington|Human|Washington State Department of Health|Seattle Flu Study|Bedford|USA

>Spike|hCoV-19/England/SHEF-C5D97/2020|2020-04-21|EPI\_ISL\_453718|Original|hCoV-19^^England|Human|Virology Department|COVID-19 Genomics UK (COG-UK) Consortium|de Silva|United Kingdom

>Spike|hCoV-19/Australia/VIC17331/2020|2020-07-24|EPI\_ISL\_663844|Original|hCoV-19^^Victoria|Human|Microbiological Diagnostic Unit - Public Health Laboratory (MDU-PHL) |MDU-PHL|Schultz|Australia

>Spike|hCoV-19/USA/CA-ALSR-3040/2020|2020-08-28|EPI\_ISL\_635808|Original|hCoV-19^^California|Human|San Diego County Public Health Laboratory|Andersen lab at Scripps Research|Gangavarapu|USA

>Spike|hCoV-19/England/PORT-2D5C3B/2020|2020-12-19|EPI\_ISL\_765139|Original|hCoV-19^^England|Human|Centre for Enzyme Innovation|COVID-19 Genomics UK (COG-UK) Consortium|Robson|United Kingdom

>Spike|hCoV-19/Scotland/EDB8291/2020|2020-10-12|EPI\_ISL\_594841|Original|hCoV-19^^Scotland|Human|Virology Department|COVID-19 Genomics UK (COG-UK) Consortium|McHugh|United Kingdom

>Spike|hCoV-19/England/MILK-B05EF7/2020|2020-10-24|EPI\_ISL\_642962|Original|hCoV-19^^England|Human|Lighthouse Lab in Milton Keynes|Wellcome Sanger Institute for the COVID-19 Genomics UK (COG-UK) Consortium|Davies|United Kingdom

>Spike|hCoV-19/USA/NY-PV09318/2020|2020-03-21|EPI\_ISL\_450010|Original|hCoV-19^^New York|Human|MSHS Clinical Microbiology Laboratories|MSHS Pathogen Surveillance Program|van Bakel|USA

>Spike|hCoV-19/England/CAMC-B36A44/2020|2020-11-05|EPI\_ISL\_645229|Original|hCoV-19^^England|Human|Lighthouse Lab in Cambridge|Wellcome Sanger Institute for the COVID-19 Genomics UK (COG-UK) Consortium|Davies|United Kingdom

>Spike|hCoV-19/USA/WA-UW-22346/2020|2020-08-05|EPI\_ISL\_570605|Original|hCoV-19^^Washington|Human|UW Virology Lab|UW Virology Lab|Roychoudhury|USA

>Spike|hCoV-19/Australia/NSW889/2020|2020-08-24|EPI\_ISL\_544970|Original|hCoV-19^^New South Wales|Human|South Eastern Area Laboratory Services (SEALS)|NSW Health Pathology - Institute of Clinical Pathology and Medical Research; Westmead Hospital; University of Sydney|Gall|Australia

>Spike|hCoV-19/England/OXON-AE848/2020|2020-00-00|EPI\_ISL\_448726|Original|hCoV-19^^England|Human|Oxford Viromics|COVID-19 Genomics UK (COG-UK) Consortium|Golubchik|United Kingdom

>Spike|hCoV-19/England/QEUH-C3480F/2020|2020-12-11|EPI\_ISL\_734034|Original|hCoV-19^^England|Human|Lighthouse Lab in Glasgow|Wellcome Sanger Institute for the COVID-19 Genomics UK (COG-UK) Consortium|Davies|United Kingdom

>Spike|hCoV-19/England/ALDP-CC0756/2020|2020-12-20|EPI\_ISL\_778047|Original|hCoV-19^^England|Human|Lighthouse Lab in Alderley Park|Wellcome Sanger Institute for the COVID-19 Genomics UK (COG-UK) Consortium|Davies|United Kingdom

>Spike|hCoV-19/Germany/MV-Cento-70002372/2020|2020-03-28|EPI\_ISL\_459964|Original|hCoV-19^^Mecklenburg-Western Pomerania|Human|Centogene AG|Centogene AG|Kandaswamy|Germany

>Spike|hCoV-19/USA/WA-S2729/2020|2020-07-09|EPI\_ISL\_525719|Original|hCoV-19^^Washington|Human|Seattle Flu Study|Seattle Flu Study|Lee|USA

>Spike|hCoV-19/England/BRIS-12847E/2020|2020-04-16|EPI\_ISL\_469600|Original|hCoV-19^^England|Human|PHE South West Regional Laboratory|Wellcome Sanger Institute for the COVID-19 Genomics UK (COG-UK) consortium|Davies|United Kingdom

>Spike|hCoV-19/Scotland/QEUH-9DEDCE/2020|2020-09-21|EPI\_ISL\_601198|Original|hCoV-19^^Scotland|Human|Lighthouse Lab in Glasgow|Wellcome Sanger Institute for the COVID-19 Genomics UK (COG-UK) consortium|Davies|United Kingdom

>Spike|hCoV-19/France/OCC-92/2020|2020-10-02|EPI\_ISL\_593900|Original|hCoV-19^^Occitanie|Human|CHU Purpan - Laboratoire de Virologie - Institut F\u00e9d\u00e9ratif de Biologie|CHU Purpan - Laboratoire de Virologie - Institut F\u00e9d\u00e9ratif de Biologie|Latour|France

>Spike|hCoV-19/England/QEUH-B66410/2020|2020-11-11|EPI\_ISL\_662417|Original|hCoV-19^^England|Human|Lighthouse Lab in Glasgow|Wellcome Sanger Institute for the COVID-19 Genomics UK (COG-UK) Consortium|Davies|United Kingdom

>Spike|hCoV-19/England/ALDP-9CB6AC/2020|2020-09-16|EPI\_ISL\_575753|Original|hCoV-19^^England|Human|Lighthouse Lab in Alderley Park|Wellcome Sanger Institute for the COVID-19 Genomics UK (COG-UK) consortium|Davies|United Kingdom

>Spike|hCoV-19/India/GJ-GBRC265/2020|2020-06-13|EPI\_ISL\_483860|Original|hCoV-19^^Gujarat|Human|Department of Microbiology|Gujarat Biotechnology Research Centre|Joshi|India

>Spike|hCoV-19/USA/TX-HMH-MCoV-15590/2020|2020-10-24|EPI\_ISL\_787074|Original|hCoV-19^^Texas|Human|Houston Methodist Hospital|Houston Methodist Hospital|Long|USA

>Spike|hCoV-19/Denmark/DCGC-3540/2020|2020-08-31|EPI\_ISL\_616333|Original|hCoV-19^^Hovedstaden|Human|Department of Virus and Microbiological Special Diagnostics|Albertsen lab|Michaelsen|Denmark

>Spike|hCoV-19/Luxembourg/LNS9999244/2020|2020-11-30|EPI\_ISL\_770874|Original|hCoV-19^^Luxembourg|Human|Laboratoire national de sant\u00e9|Laboratoire national de sant\u00e9|Wienecke-Baldacchino|Luxembourg

>Spike|hCoV-19/Turkey/IST-GLAB-225/2020|2020-05-14|EPI\_ISL\_735293|Original|hCoV-19^^Istanbul|Human|Genomic Laboratory (GLAB) (Conjoint lab of Health Directorate of Istanbul and Istanbul Technical University)|Genomic Laboratory (GLAB)|Karacan|Turkey

>Spike|hCoV-19/England/CAMB-1ACA8F/2020|2020-04-22|EPI\_ISL\_489541|Original|hCoV-19^^England|Human|Department of Pathology|Wellcome Sanger Institute for the COVID-19 Genomics UK (COG-UK) consortium|Davies|United Kingdom

>Spike|hCoV-19/England/QEUH-B6BDD4/2020|2020-11-11|EPI\_ISL\_655223|Original|hCoV-19^^England|Human|Lighthouse Lab in Glasgow|Wellcome Sanger Institute for the COVID-19 Genomics UK (COG-UK) Consortium|Davies|United Kingdom

>Spike|hCoV-19/Australia/WA313/2020|2020-03-22|EPI\_ISL\_596856|Original|hCoV-19^^Western Australia|Human|PathWest Laboratory Medicine WA|PathWest Laboratory Medicine WA Microbial Surveillance Unit|Sikazwe|Australia

>Spike|hCoV-19/England/MILK-AB83E6/2020|2020-10-21|EPI\_ISL\_623510|Original|hCoV-19^^England|Human|Lighthouse Lab in Milton Keynes|Wellcome Sanger Institute for the COVID-19 Genomics UK (COG-UK) consortium|Davies|United Kingdom

>Spike|hCoV-19/USA/NC\_200271/2020|2020-04-00|EPI\_ISL\_454810|Original|hCoV-19^^North Carolina|Human|Dirk Dittmer|Dirk Dittmer|Moorad|USA

>Spike|hCoV-19/United Arab Emirates/0715/2020|2020-05-19|EPI\_ISL\_698866|Original|hCoV-19^^Abu Dhabi|Human|Group 42 (G42) Healthcare|G42 Healthcare|Ogrodzki|United Arab Emirates

>Spike|hCoV-19/England/ALDP-A68BDE/2020|2020-10-12|EPI\_ISL\_608917|Original|hCoV-19^^England|Human|Lighthouse Lab in Alderley Park|Wellcome Sanger Institute for the COVID-19 Genomics UK (COG-UK) consortium|Davies|United Kingdom

>Spike|hCoV-19/USA/CA-CZB-1798/2020|2020-04-16|EPI\_ISL\_486127|Original|hCoV-19^^California|Human|Orange County Public Health Laboratory|Chan-Zuckerberg Biohub|McGeever|USA

>Spike|hCoV-19/New Zealand/20VR3194/2020|2020-03-26|EPI\_ISL\_579480|Original|hCoV-19^^Canterbury|Human|Canterbury Health Laboratories|Institute of Environmental Science and Research (ESR)|Wang|New Zealand

>Spike|hCoV-19/Wales/PHWC-272C1/2020|2020-03-30|EPI\_ISL\_431967|Original|hCoV-19^^Wales|Human|Wales Specialist Virology Centre|Public Health Wales Microbiology Cardiff|Moore|United Kingdom

>Spike|hCoV-19/USA/TX-HMH-MCoV-8515/2020|2020-07-01|EPI\_ISL\_780430|Original|hCoV-19^^Texas|Human|Houston Methodist Hospital|Houston Methodist Hospital|Long|USA

>Spike|hCoV-19/New Zealand/20VR1978/2020|2020-04-07|EPI\_ISL\_579185|Original|hCoV-19^^Southern|Human|Southern Community Labs Dunedin|Institute of Environmental Science and Research (ESR)|Wang|New Zealand

>Spike|hCoV-19/USA/TX-HMH-5019/2020|2020-06-24|EPI\_ISL\_544464|Original|hCoV-19^^Texas|Human|Houston Methodist Hospital|Houston Methodist Hospital|Long|USA

>Spike|hCoV-19/USA/MN-MDH-2154/2020|2020-11-29|EPI\_ISL\_708492|Original|hCoV-19^^Minnesota|Human|Minnesota Department of Health|Minnesota Department of Health|Lorentz|USA

>Spike|hCoV-19/USA/TX-DSHS-0652/2020|2020-07-19|EPI\_ISL\_576306|Original|hCoV-19^^Texas|Human|Texas Department of State Health Services|Texas Department of State Health Services|Rahman|USA

>Spike|hCoV-19/France/ARA-10968/2020|2020-03-18|EPI\_ISL\_418431|Original|hCoV-19^^Auvergne-Rh\u00f4ne-Alpes|Human|Institut des Agents Infectieux (IAI)|CNR Virus des Infections Respiratoires - France SUD|Josset|France

>Spike|hCoV-19/Australia/VIC10818/2020|2020-07-30|EPI\_ISL\_563107|Original|hCoV-19^^Victoria|Human|Microbiological Diagnostic Unit - Public Health Laboratory (MDU-PHL)|MDU-PHL|Schultz|Australia

>Spike|hCoV-19/Scotland/QEUH-BA14FB/2020|2020-11-18|EPI\_ISL\_757218|Original|hCoV-19^^Scotland|Human|Lighthouse Lab in Glasgow|Wellcome Sanger Institute for the COVID-19 Genomics UK (COG-UK) Consortium|Davies|United Kingdom

>Spike|hCoV-19/England/QEUH-BC3657/2020|2020-11-25|EPI\_ISL\_704119|Original|hCoV-19^^England|Human|Lighthouse Lab in Glasgow|Wellcome Sanger Institute for the COVID-19 Genomics UK (COG-UK) Consortium|Davies|United Kingdom

>Spike|hCoV-19/USA/NY-Wadsworth-288936-01/2020|2020-12-21|EPI\_ISL\_767496|Original|hCoV-19^^New York|Human|Wadsworth Center|Wadsworth Center|Lasek-Nesselquist|USA

>Spike|hCoV-19/England/MILK-BB14F8/2020|2020-11-17|EPI\_ISL\_720092|Original|hCoV-19^^England|Human|Lighthouse Lab in Milton Keynes|Wellcome Sanger Institute for the COVID-19 Genomics UK (COG-UK) Consortium|Davies|United Kingdom

>Spike|hCoV-19/England/QEUH-A1DFEB/2020|2020-10-01|EPI\_ISL\_587549|Original|hCoV-19^^England|Human|Lighthouse Lab in Glasgow|Wellcome Sanger Institute for the COVID-19 Genomics UK (COG-UK) consortium|Davies|United Kingdom

>Spike|hCoV-19/England/ALDP-A962A5/2020|2020-10-20|EPI\_ISL\_624803|Original|hCoV-19^^England|Human|Lighthouse Lab in Alderley Park|Wellcome Sanger Institute for the COVID-19 Genomics UK (COG-UK) consortium|Davies|United Kingdom

>Spike|hCoV-19/England/ALDP-CB46FE/2020|2020-12-19|EPI\_ISL\_760938|Original|hCoV-19^^England|Human|Lighthouse Lab in Alderley Park|Wellcome Sanger Institute for the COVID-19 Genomics UK (COG-UK) Consortium|Davies|United Kingdom

>Spike|hCoV-19/England/ALDP-954B7C/2020|2020-06-11|EPI\_ISL\_553469|Original|hCoV-19^^England|Human|Lighthouse Lab in Alderley Park|Wellcome Sanger Institute for the COVID-19 Genomics UK (COG-UK) consortium|Davies|United Kingdom

>Spike|hCoV-19/Germany/NW-MPP-33/2020|2020-06-17|EPI\_ISL\_487423|Original|hCoV-19^^North Rhine-Westphalia|Human|Labor Knei\u00dfler GmbH & Co. KG|Heinrich Pette Institute|G\u00f6ttingen|Germany

>Spike|hCoV-19/Spain/MD-IBV-99008661/2020|2020-09-29|EPI\_ISL\_654222|Original|hCoV-19^^Madrid|Human|Hospital General Universitario Gregorio Mara\u00f1\u00f3n|SeqCOVID-SPAIN consortium/IBV (CSIC)|Comas|Spain

>Spike|hCoV-19/Denmark/DCGC-2003/2020|2020-07-20|EPI\_ISL\_618251|Original|hCoV-19^^Sjælland|Human|Department of Virus and Microbiological Special Diagnostics|Albertsen lab|Michaelsen|Denmark

>Spike|hCoV-19/Switzerland/ZH-ETHZ-280198/2020|2020-09-09|EPI\_ISL\_560552|Original|hCoV-19^^Zurich|Human|Viollier AG|Department of Biosystems Science and Engineering|Nadeau|Switzerland

>Spike|hCoV-19/USA/FL-BPHL-2077/2020|2020-07-17|EPI\_ISL\_653230|Original|hCoV-19^^Florida|Human|Florida Bureau of Public Health Laboratories|Florida Bureau of Public Health Laboratories|Blanton|USA

>Spike|hCoV-19/Finland/23LS8C1/2020|2020-10-23|EPI\_ISL\_759791|Original|hCoV-19^^Uusimaa|Human|Department of Virology and Immunology|Department of Virology|Smura|Finland

>Spike|hCoV-19/Sweden/20-50305/2020|2020-03-12|EPI\_ISL\_475132|Original|hCoV-19^^Ostergötland|Human|Orebro klinisk mikrobiologi|The Public Health Agency of Sweden|Svartstr\u00f6m|Sweden

>Spike|hCoV-19/USA/TX-HMH-MCoV-14939/2020|2020-10-15|EPI\_ISL\_786423|Original|hCoV-19^^Texas|Human|Houston Methodist Hospital|Houston Methodist Hospital|Long|USA

>Spike|hCoV-19/England/BRIS-121800/2020|2020-03-03|EPI\_ISL\_440214|Original|hCoV-19^^England|Human|PHE South West Regional Laboratory|Wellcome Sanger Institute for the COVID-19 Genomics UK (COG-UK) consortium|Amato|United Kingdom

>Spike|hCoV-19/England/CAMC-B225A4/2020|2020-11-02|EPI\_ISL\_645836|Original|hCoV-19^^England|Human|Lighthouse Lab in Cambridge|Wellcome Sanger Institute for the COVID-19 Genomics UK (COG-UK) Consortium|Davies|United Kingdom

>Spike|hCoV-19/USA/TX-HMH-MCoV-14585/2020|2020-10-09|EPI\_ISL\_787870|Original|hCoV-19^^Texas|Human|Houston Methodist Hospital|Houston Methodist Hospital|Long|USA

>Spike|hCoV-19/Northern Ireland/NIRE-233099/2020|2020-09-27|EPI\_ISL\_680251|Original|hCoV-19^^Northern Ireland|Human|Regional Virus Laboratory|COVID-19 Genomics UK (COG-UK) Consortium|Fairley|United Kingdom

>Spike|hCoV-19/England/20166000704/2020|2020-04-15|EPI\_ISL\_466496|Original|hCoV-19^^England|Human|Respiratory Virus Unit|Respiratory Virus Unit|Platt|United Kingdom

>Spike|hCoV-19/USA/MA-MASPHL-00450/2020|2020-04-30|EPI\_ISL\_693110|Original|hCoV-19^^Massachusetts|Human|Massachusetts State Public Health Laboratory|Massachusetts State Public Health Laboratory|Lang|USA

>Spike|hCoV-19/Russia/KDA-RII-MH4887S/2020|2020-10-25|EPI\_ISL\_733280|Original|hCoV-19^^Krasnodar|Human|WHO National Influenza Centre Russian Federation|WHO National Influenza Centre Russian Federation|Komissarov|Russia

>Spike|hCoV-19/England/BRIS-12B3C9/2020|2020-05-01|EPI\_ISL\_487570|Original|hCoV-19^^England|Human|PHE South West Regional Laboratory|Wellcome Sanger Institute for the COVID-19 Genomics UK (COG-UK) consortium|Davies|United Kingdom

>Spike|hCoV-19/Ukraine/203100347/2020|2020-05-16|EPI\_ISL\_512626|Original|hCoV-19^^Ukraine|Human|National Laboratory for Influenza/Virology reference laboratory|Respiratory Virus Unit|Platt|Ukraine

>Spike|hCoV-19/Australia/VIC6427/2020|2020-07-24|EPI\_ISL\_521218|Original|hCoV-19^^Victoria|Human|Microbiological Diagnostic Unit - Public Health Laboratory (MDU-PHL)|MDU-PHL|Schultz|Australia

>Spike|hCoV-19/USA/FL-BPHL-2248/2020|2020-11-18|EPI\_ISL\_763331|Original|hCoV-19^^Florida|Human|Florida Bureau of Public Health Laboratories|Florida Bureau of Public Health Laboratories|Blanton|USA

>Spike|hCoV-19/England/MILK-99D7DD/2020|2020-08-30|EPI\_ISL\_550737|Original|hCoV-19^^England|Human|Lighthouse Lab in Milton Keynes|Wellcome Sanger Institute for the COVID-19 Genomics UK (COG-UK) consortium|Davies|United Kingdom

>Spike|hCoV-19/Luxembourg/LNS7907966/2020|2020-10-23|EPI\_ISL\_744652|Original|hCoV-19^^Luxembourg|Human|Laboratoire national de sant\u00e9|Laboratoire national de sant\u00e9|Wienecke-Baldacchino|Luxembourg

>Spike|hCoV-19/England/QEUEH-9C9FC1/2020|2020-09-10|EPI\_ISL\_567318|Original|hCoV-19^^England|Human|Lighthouse Lab in Glasgow|Wellcome Sanger Institute for the COVID-19 Genomics UK (COG-UK) consortium|Davies|United Kingdom

>Spike|hCoV-19/USA/TX-HMH0271/2020|2020-03-26|EPI\_ISL\_434899|Original|hCoV-19^^Texas|Human|Houston Methodist Hospital|Houston Methodist Hospital|Long|USA

>Spike|hCoV-19/Wales/PHWC-4941CE/2020|2020-11-16|EPI\_ISL\_726081|Original|hCoV-19^^Wales|Human|Originating lab|COVID-19 Genomics UK (COG-UK) Consortium|Moore|United Kingdom

>Spike|hCoV-19/England/QEUEH-9DA701/2020|2020-09-21|EPI\_ISL\_601435|Original|hCoV-19^^England|Human|Lighthouse Lab in Glasgow|Wellcome Sanger Institute for the COVID-19 Genomics UK (COG-UK) consortium|Davies|United Kingdom

>Spike|hCoV-19/USA/WA-S1839/2020|2020-05-27|EPI\_ISL\_496265|Original|hCoV-19^^Washington|Human|Washington State Department of Health|Seattle Flu Study|Lee|USA

>Spike|hCoV-19/USA/TX-HMH-6391/2020|2020-07-05|EPI\_ISL\_545964|Original|hCoV-19^^Texas|Human|Houston Methodist Hospital|Houston Methodist Hospital|Long|USA

>Spike|hCoV-19/England/ALDP-95281D/2020|2020-06-11|EPI\_ISL\_553968|Original|hCoV-19^^England|Human|Lighthouse Lab in Alderley Park|Wellcome Sanger Institute for the COVID-19 Genomics UK (COG-UK) consortium|Davies|United Kingdom

>Spike|hCoV-19/India/KA-nimh-3720/2020|2020-04-23|EPI\_ISL\_486394|Original|hCoV-19^^Karnataka|Human|MIMS|Department of Neurovirology|Pattabiraman|India

>Spike|hCoV-19/England/QEUEH-AD2BC0/2020|2020-10-26|EPI\_ISL\_634216|Original|hCoV-19^^England|Human|Lighthouse Lab in Glasgow|Wellcome Sanger Institute for the COVID-19 Genomics UK (COG-UK) consortium|Davies|United Kingdom



>Spike|hCoV-19/Switzerland/VD-ETHZ-321398/2020|2020-10-13|EPI\_ISL\_603639|Original|hCoV-19^^Vaud|Human|Viollier AG|Department of Biosystems Science and Engineering|Nadeau|Switzerland

>Spike|hCoV-19/England/QEUA-AD3B1A/2020|2020-10-24|EPI\_ISL\_629962|Original|hCoV-19^^England|Human|Lighthouse Lab in Glasgow|Wellcome Sanger Institute for the COVID-19 Genomics UK (COG-UK) consortium|Davies|United Kingdom

>Spike|hCoV-19/Gibraltar/205121191/2020|2020-00-00|EPI\_ISL\_766321|Original|hCoV-19^^Gibraltar|Human|Microbiology|Respiratory Virus Unit|Platt|Gibraltar

>Spike|hCoV-19/Italy/APU-IZSPB\_294PT/2020|2020-11-03|EPI\_ISL\_653788|Original|hCoV-19^^Apulia|Human|I.R.C.C.S. \S. De Bellis\ - Ente Ospedaliero|Istituto Zooprofilattico Sperimentale della Puglia e della Basilicata|Parisi|Italy

>Spike|hCoV-19/England/ALDP-A863A5/2020|2020-10-17|EPI\_ISL\_606071|Original|hCoV-19^^England|Human|Lighthouse Lab in Alderley Park|Wellcome Sanger Institute for the COVID-19 Genomics UK (COG-UK) consortium|Davies|United Kingdom

>Spike|hCoV-19/Denmark/DCGC-11873/2020|2020-10-26|EPI\_ISL\_670742|Original|hCoV-19^^Nordjylland|Human|Department of Virus and Microbiological Special Diagnostics|Albertsen Lab|Michaelsen|Denmark

>Spike|hCoV-19/Denmark/DCGC-7336/2020|2020-10-12|EPI\_ISL\_619303|Original|hCoV-19^^Hovedstaden|Human|Department of Virus and Microbiological Special Diagnostics|Albertsen lab|Michaelsen|Denmark

>Spike|hCoV-19/Sweden/20-53640/2020|2020-11-02|EPI\_ISL\_766624|Original|hCoV-19^^Vastra Gotaland|Human|Klinisk mikrobiologi|The Public Health Agency of Sweden|Svartstr\u00f6m|Sweden

>Spike|hCoV-19/USA/CA-CZB-1672/2020|2020-05-14|EPI\_ISL\_468614|Original|hCoV-19^^California|Human|Orange County Public Health Lab|Chan-Zuckerberg Biohub|McGeever|USA

>Spike|hCoV-19/England/20119030104/2020|2020-03-14|EPI\_ISL\_465041|Original|hCoV-19^^England|Human|Respiratory Virus Unit|Respiratory Virus Unit|Platt|United Kingdom

>Spike|hCoV-19/Denmark/DCGC-11770/2020|2020-10-26|EPI\_ISL\_671124|Original|hCoV-19^^Syddanmark|Human|Department of Virus and Microbiological Special Diagnostics|Albertsen Lab|Michaelsen|Denmark

>Spike|hCoV-19/England/ALDP-9CCAEB/2020|2020-09-16|EPI\_ISL\_573127|Original|hCoV-19^^England|Human|Quadram Institute Bioscience|COVID-19 Genomics UK (COG-UK) Consortium|Alikhan|United Kingdom

>Spike|hCoV-19/Iran/Q100/2020|2020-03-10|EPI\_ISL\_637099|Original|hCoV-19^^Iran|Human|Indian Council of Medical Research-National Institute of Virology,\u00a0Microbial Containment Complex|Indian Council of Medical Research-National Institute of Virology,\u00a0Microbial Containment Complex|Yadav|Iran

>Spike|hCoV-19/England/ALDP-BE93BE/2020|2020-12-03|EPI\_ISL\_708911|Original|hCoV-19^^England|Human|Lighthouse Lab in Alderley Park|Wellcome Sanger Institute for the COVID-19 Genomics UK (COG-UK) Consortium|Davies|United Kingdom

>Spike|hCoV-19/England/204490998/2020|2020-10-31|EPI\_ISL\_654013|Original|hCoV-19^^England|Human|Respiratory Virus Unit|COVID-19 Genomics UK (COG-UK) Consortium|Platt|United Kingdom

>Spike|hCoV-19/England/QEUA-AAB683/2020|2020-10-21|EPI\_ISL\_652804|Original|hCoV-19^^England|Human|Oxford Viromics|COVID-19 Genomics UK (COG-UK) Consortium|Golubchik|United Kingdom

>Spike|hCoV-19/England/CAMC-C3F0DF/2020|2020-12-10|EPI\_ISL\_719256|Original|hCoV-19^^England|Human|Lighthouse Lab in Cambridge|Wellcome Sanger Institute for the COVID-19 Genomics UK (COG-UK) Consortium|Davies|United Kingdom

>Spike|hCoV-19/USA/CA-UCLA-119/2020|2020-04-07|EPI\_ISL\_537473|Original|hCoV-19^^California|Human|UCLA Pathology Clinical Microbiology Lab|Kruglyak Lab|Boocock|USA

>Spike|hCoV-19/England/LIVE-DC21DD/2020|2020-11-23|EPI\_ISL\_679403|Original|hCoV-19^^England|Human|Liverpool Clinical Laboratories|COVID-19 Genomics UK (COG-UK) Consortium|Haldenby|United Kingdom

>Spike|hCoV-19/Slovenia/V0-6255/2020|2020-04-07|EPI\_ISL\_635295|Original|hCoV-19^^Slovenia|Human|Institute of Microbiology and Immunology|Institute of Microbiology and Immunology|Zakotnik|Slovenia

>Spike|hCoV-19/England/MILK-A6B27C/2020|2020-10-09|EPI\_ISL\_608774|Original|hCoV-19^^England|Human|Lighthouse Lab in Milton Keynes|Wellcome Sanger Institute for the COVID-19 Genomics UK (COG-UK) consortium|Davies|United Kingdom

>Spike|hCoV-19/Switzerland/AG-ETHZ-260013/2020|2020-08-21|EPI\_ISL\_539349|Original|hCoV-19^^Aargau|Human|Viollier AG|Department of Biosystems Science and Engineering|Nadeau|Switzerland

>Spike|hCoV-19/Luxembourg/LNS6136324/2020|2020-11-25|EPI\_ISL\_744368|Original|hCoV-19^^Luxembourg|Human|Laboratoire national de sant\u00e9|Laboratoire national de sant\u00e9|Wienecke-Baldacchino|Luxembourg

>Spike|hCoV-19/Colombia/ANT-INS-103237/2020|2020-10-20|EPI\_ISL\_739674|Original|hCoV-19^^Antioquia|Human|Instituto Nacional de Salud|Instituto Nacional de Salud|Franco-Mu\u00f1oz|Colombia

>Spike|hCoV-19/USA/FL-BPHL-1097/2020|2020-08-19|EPI\_ISL\_526583|Original|hCoV-19^^Florida|Human|Florida Bureau of Public Health Laboratories|Florida Bureau of Public Health Laboratories|Blanton|USA

>Spike|hCoV-19/Japan/PG-1516/2020|2020-04-00|EPI\_ISL\_685123|Original|hCoV-19^^Japan|Human|Saitama Prefectural Institute of Public Health|Pathogen Genomics Center|Sekizuka|Japan

>Spike|hCoV-19/England/MILK-B85F74/2020|2020-11-13|EPI\_ISL\_674134|Original|hCoV-19^^England|Human|Lighthouse Lab in Milton Keynes|Wellcome Sanger Institute for the COVID-19 Genomics UK (COG-UK) Consortium|Davies|United Kingdom

>Spike|hCoV-19/USA/WI-UW-2499/2020|2020-12-30|EPI\_ISL\_779331|Original|hCoV-19^^Wisconsin|Human|University of Wisconsin-Madison AIDS Vaccine Research Laboratories|University of Wisconsin-Madison AIDS Vaccine Research Laboratories|Moreno|USA

>Spike|hCoV-19/England/QEUEH-9F2CB9/2020|2020-09-25|EPI\_ISL\_588546|Original|hCoV-19^^England|Human|Lighthouse Lab in Glasgow|Wellcome Sanger Institute for the COVID-19 Genomics UK (COG-UK) consortium|Davies|United Kingdom

>Spike|hCoV-19/England/NOTT-1116AF/2020|2020-05-20|EPI\_ISL\_461907|Original|hCoV-19^^England|Human|Queens Medical Centre|COVID-19 Genomics UK (COG-UK) Consortium|Loose|United Kingdom

>Spike|hCoV-19/England/LEED-2A99C0/2020|2020-04-12|EPI\_ISL\_538811|Original|hCoV-19^^England|Human|Leeds Teaching Hospitals NHS Trust and Public Health England|Wellcome Sanger Institute for the COVID-19 Genomics UK (COG-UK) Consortium|Davies|United Kingdom

>Spike|hCoV-19/Switzerland/GR-ETHZ-300457/2020|2020-09-30|EPI\_ISL\_603408|Original|hCoV-19^^Graubunden|Human|Viollier AG|Department of Biosystems Science and Engineering|Nadeau|Switzerland

>Spike|hCoV-19/Wales/PHWC-4880C0/2020|2020-10-26|EPI\_ISL\_639348|Original|hCoV-19^^Wales|Human|Wales Specialist Virology Centre Sequencing lab|COVID-19 Genomics UK (COG-UK) Consortium|Moore|United Kingdom

>Spike|hCoV-19/England/OXON-B2EB8/2020|2020-03-28|EPI\_ISL\_534822|Original|hCoV-19^^England|Human|Oxford Viromics|COVID-19 Genomics UK (COG-UK) Consortium|Golubchik|United Kingdom

>Spike|hCoV-19/England/QEUEH-9D3577/2020|2020-09-18|EPI\_ISL\_577338|Original|hCoV-19^^England|Human|Centre for Enzyme Innovation|COVID-19 Genomics UK (COG-UK) Consortium|Robson|United Kingdom

>Spike|hCoV-19/USA/FL-BPHL-1643/2020|2020-07-02|EPI\_ISL\_594332|Original|hCoV-19^^Florida|Human|Florida Bureau of Public Health Laboratories|Florida Bureau of Public Health Laboratories|Blanton|USA

>Spike|hCoV-19/England/QEUEH-B12905/2020|2020-11-02|EPI\_ISL\_642211|Original|hCoV-19^^England|Human|Lighthouse Lab in Glasgow|Wellcome Sanger Institute for the COVID-19 Genomics UK (COG-UK) Consortium|Davies|United Kingdom

>Spike|hCoV-19/India/MH-BJMC-2442/2020|2020-04-20|EPI\_ISL\_496551|Original|hCoV-19^^Maharashtra|Human|B.J. Govt. Medical College|National Centre For Cell Science|Paul|India

>Spike|hCoV-19/Scotland/EDB7151/2020|2020-08-04|EPI\_ISL\_514557|Original|hCoV-19^^Scotland|Human|Virology Department|COVID-19 Genomics UK (COG-UK) Consortium|Williams|United Kingdom

>Spike|hCoV-19/England/QEUH-9F47C5/2020|2020-09-27|EPI\_ISL\_588415|Original|hCoV-19^^England|Human|Lighthouse Lab in Glasgow|Wellcome Sanger Institute for the COVID-19 Genomics UK (COG-UK) consortium|Davies|United Kingdom

>Spike|hCoV-19/USA/WI-UW-184/2020|2020-03-22|EPI\_ISL\_428280|Original|hCoV-19^^Wisconsin|Human|University of Wisconsin-Madison AIDS Vaccine Research Laboratories|University of Wisconsin-Madison AIDS Vaccine Research Laboratories|Moreno|USA

>Spike|hCoV-19/Australia/VIC4342/2020|2020-07-13|EPI\_ISL\_519638|Original|hCoV-19^^Victoria|Human|Microbiological Diagnostic Unit - Public Health Laboratory (MDU-PHL)|MDU-PHL|Schultz|Australia

>Spike|hCoV-19/England/ALDP-AA3B31/2020|2020-10-22|EPI\_ISL\_624236|Original|hCoV-19^^England|Human|Lighthouse Lab in Alderley Park|Wellcome Sanger Institute for the COVID-19 Genomics UK (COG-UK) consortium|Davies|United Kingdom

>Spike|hCoV-19/USA/NY-Wadsworth-290362-01/2020|2020-12-19|EPI\_ISL\_765545|Original|hCoV-19^^New York|Human|MONTEFIORE MEDICAL CENTER LABORATORIES|Wadsworth Center|Lasek-Nesselquist|USA

>Spike|hCoV-19/England/ALDP-A96339/2020|2020-10-20|EPI\_ISL\_624733|Original|hCoV-19^^England|Human|Lighthouse Lab in Alderley Park|Wellcome Sanger Institute for the COVID-19 Genomics UK (COG-UK) consortium|Davies|United Kingdom

>Spike|hCoV-19/Scotland/CVR5678/2020|2020-11-06|EPI\_ISL\_650806|Original|hCoV-19^^Scotland|Human|West of Scotland Specialist Virology Centre|COVID-19 Genomics UK (COG-UK) Consortium|Robertson|United Kingdom

>Spike|hCoV-19/England/QEUH-9E37E7/2020|2020-09-24|EPI\_ISL\_584874|Original|hCoV-19^^England|Human|Northumbria University / South Tees Hospitals NHS Foundation Trust / North Cumbria Integrated Care NHS Foundation Trust / North Tees and Hartlepool NHS Foundation Trust / Newcastle Hospitals NHS Foundation Trust|COVID-19 Genomics UK (COG-UK) Consortium|Bashton|United Kingdom

>Spike|hCoV-19/Wales/PHWC-47DB63/2020|2020-10-13|EPI\_ISL\_595333|Original|hCoV-19^^Wales|Human|Originating lab|COVID-19 Genomics UK (COG-UK) Consortium|Moore|United Kingdom

>Spike|hCoV-19/England/NORW-EAD9C/2020|2020-04-29|EPI\_ISL\_457375|Original|hCoV-19^^England|Human|Quadram Institute Bioscience|COVID-19 Genomics UK (COG-UK) Consortium|Alikhan|United Kingdom

>Spike|hCoV-19/Spain/AR-IBV-2436/2020|2020-03-17|EPI\_ISL\_468778|Original|hCoV-19^^Aragon|Human|Servicio de Microbiolog\u00eda|SeqCOVID-SPAIN consortium|IBV (CSIC)|Comas|Spain

>Spike|hCoV-19/England/QEUH-B678C8/2020|2020-11-10|EPI\_ISL\_655719|Original|hCoV-19^^England|Human|Lighthouse Lab in Glasgow|Wellcome Sanger Institute for the COVID-19 Genomics UK (COG-UK) Consortium|Davies|United Kingdom

>Spike|hCoV-19/USA/IL-NM-0143/2020|2020-03-23|EPI\_ISL\_626367|Original|hCoV-19^^Illinois|Human|Northwestern Memorial Hospital|Ozer Lab|Ozer|USA

>Spike|hCoV-19/USA/UT-QDX-151/2020|2020-03-13|EPI\_ISL\_467914|Original|hCoV-19^^Utah|Human|Quest Diagnostics|Quest Diagnostics|Kagan|USA

>Spike|hCoV-19/England/SHEF-C2D4F/2020|2020-09-27|EPI\_ISL\_573691|Original|hCoV-19^^England|Human|Virology Department|COVID-19 Genomics UK (COG-UK) Consortium|de Silva|United Kingdom

>Spike|hCoV-19/USA/HI-H200171/2020|2020-07-27|EPI\_ISL\_752732|Original|hCoV-19^^Hawaii|Human|State Laboratories Division|State Laboratories Division|Sultana|USA

>Spike|hCoV-19/USA/UT-UPHL-03214/2020|2020-05-06|EPI\_ISL\_575269|Original|hCoV-19^^Utah|Human|Utah Public Health Laboratory|Utah Public Health Laboratory|Young|USA

>Spike|hCoV-19/Australia/VIC9122/2020|2020-08-19|EPI\_ISL\_565398|Original|hCoV-19^^Victoria|Human|Microbiological Diagnostic Unit - Public Health Laboratory (MDU-PHL)|MDU-PHL|Schultz|Australia

>Spike|hCoV-19/USA/MA-MASPHL-00038/2020|2020-04-02|EPI\_ISL\_791542|Original|hCoV-19^^Massachusetts|Human|Massachusetts State Public Health Laboratory|Infectious Disease Program|Park|USA

>Spike|hCoV-19/Scotland/QEUH-A9D156/2020|2020-10-20|EPI\_ISL\_652658|Original|hCoV-19^^Scotland|Human|Queens Medical Centre|COVID-19 Genomics UK (COG-UK) Consortium|Loose|United Kingdom

>Spike|hCoV-19/England/PORT-2D0EFE/2020|2020-04-20|EPI\_ISL\_475303|Original|hCoV-19^^England|Human|Centre for Enzyme Innovation|COVID-19 Genomics UK (COG-UK) Consortium|Robson|United Kingdom

>Spike|hCoV-19/England/ALDP-BB2BF2/2020|2020-11-19|EPI\_ISL\_702683|Original|hCoV-19^^England|Human|Lighthouse Lab in Alderley Park|Wellcome Sanger Institute for the COVID-19 Genomics UK (COG-UK) Consortium|Davies|United Kingdom

>Spike|hCoV-19/England/MILK-BAC6CD/2020|2020-11-18|EPI\_ISL\_681422|Original|hCoV-19^^England|Human|Lighthouse Lab in Milton Keynes|Wellcome Sanger Institute for the COVID-19 Genomics UK (COG-UK) Consortium|Davies|United Kingdom

>Spike|hCoV-19/USA/CA-CZB-14952/2020|2020-06-06|EPI\_ISL\_739364|Original|hCoV-19^^California|Human|Monterey County Public Health Lab|Chan-Zuckerberg Biohub|Kamm|USA

>Spike|hCoV-19/Netherlands/ZE-RIVM-10356/2020|2020-07-30|EPI\_ISL\_636588|Original|hCoV-19^^Zeeland|Human|Dutch COVID-19 response team|National Institute for Public Health and the Environment (RIVM)|Meijer|Netherlands

>Spike|hCoV-19/England/ALDP-94BB69/2020|2020-06-11|EPI\_ISL\_555802|Original|hCoV-19^^England|Human|Lighthouse Lab in Alderley Park|Wellcome Sanger Institute for the COVID-19 Genomics UK (COG-UK) consortium|Davies|United Kingdom

>Spike|hCoV-19/England/QEUA-B7EAD7/2020|2020-11-14|EPI\_ISL\_661698|Original|hCoV-19^^England|Human|Lighthouse Lab in Glasgow|Wellcome Sanger Institute for the COVID-19 Genomics UK (COG-UK) Consortium|Davies|United Kingdom

>Spike|hCoV-19/England/QEUA-98EEAD/2020|2020-08-28|EPI\_ISL\_540354|Original|hCoV-19^^England|Human|Lighthouse Lab in Glasgow|Wellcome Sanger Institute for the COVID-19 Genomics UK (COG-UK) consortium|Davies|United Kingdom

>Spike|hCoV-19/Japan/PG-7154/2020|2020-09-00|EPI\_ISL\_688259|Original|hCoV-19^^Japan|Human|Pathogen Genomics Center|Pathogen Genomics Center|Sekizuka|Japan

>Spike|hCoV-19/England/20109029704/2020|2020-03-05|EPI\_ISL\_464550|Original|hCoV-19^^England|Human|Respiratory Virus Unit|Respiratory Virus Unit|Platt|United Kingdom

>Spike|hCoV-19/England/ALDP-A66DE9/2020|2020-10-12|EPI\_ISL\_630475|Original|hCoV-19^^England|Human|Lighthouse Lab in Alderley Park|Wellcome Sanger Institute for the COVID-19 Genomics UK (COG-UK) consortium|Davies|United Kingdom

>Spike|hCoV-19/Iceland/488/2020|2020-03-20|EPI\_ISL\_424510|Original|hCoV-19^^Reykjavik|Human|The National University Hospital of Iceland|deCODE genetics|J\u00f3nsson|Iceland

>Spike|hCoV-19/Australia/VIC5068/2020|2020-07-17|EPI\_ISL\_519871|Original|hCoV-19^^Victoria|Human|Microbiological Diagnostic Unit - Public Health Laboratory (MDU-PHL)|MDU-PHL|Schultz|Australia

>Spike|hCoV-19/England/ALDP-A5067E/2020|2020-10-07|EPI\_ISL\_597621|Original|hCoV-19^^England|Human|Lighthouse Lab in Alderley Park|Wellcome Sanger Institute for the COVID-19 Genomics UK (COG-UK) consortium|Davies|United Kingdom

>Spike|hCoV-19/USA/CA-ALSR-3085/2020|2020-09-02|EPI\_ISL\_635837|Original|hCoV-19^^California|Human|San Diego County Public Health Laboratory|Andersen lab at Scripps Research|Gangavarapu|USA

>Spike|hCoV-19/USA/MA-MGH-00773/2020|2020-04-12|EPI\_ISL\_791759|Original|hCoV-19^^Massachusetts|Human|Massachusetts General Hospital|Infectious Disease Program|Park|USA

>Spike|hCoV-19/Germany/HH-hpi-p1916/2020|2020-03-25|EPI\_ISL\_776247|Original|hCoV-19^^Hamburg|Human|University Medical Center Hamburg Eppendorf|Heinrich Pette Institute|Robitaille|Germany

>Spike|hCoV-19/England/MILK-C6F66B/2020|2020-12-13|EPI\_ISL\_778398|Original|hCoV-19^^England|Human|Lighthouse Lab in Milton Keynes|Wellcome Sanger Institute for the COVID-19 Genomics UK (COG-UK) Consortium|Davies|United Kingdom

>Spike|hCoV-19/England/SHEF-C87A5/2020|2020-04-19|EPI\_ISL\_442032|Original|hCoV-19^^England|Human|Virology Department|COVID-19 Genomics UK (COG-UK) Consortium|de Silva|United Kingdom

>Spike|hCoV-19/New Zealand/20VR3906/2020|2020-08-12|EPI\_ISL\_548096|Original|hCoV-19^^Auckland|Human|Middlemore Hospital|Institute of Environmental Science and Research (ESR)|Wang|New Zealand

>Spike|hCoV-19/England/MILK-B3C1FE/2020|2020-11-01|EPI\_ISL\_706131|Original|hCoV-19^^England|Human|Oxford Viromics|COVID-19 Genomics UK (COG-UK) Consortium|Golubchik|United Kingdom

>Spike|hCoV-19/England/CAMB-1BD317/2020|2020-12-07|EPI\_ISL\_740966|Original|hCoV-19^^England|Human|Department of Pathology|COVID-19 Genomics UK (COG-UK) Consortium|Goodfellow|United Kingdom

>Spike|hCoV-19/England/ALDP-5AC335/2020|2020-06-17|EPI\_ISL\_558830|Original|hCoV-19^^England|Human|Lighthouse Lab in Alderley Park|Wellcome Sanger Institute for the COVID-19 Genomics UK (COG-UK) consortium|Davies|United Kingdom

>Spike|hCoV-19/USA/TX-HMH-MCoV-15617/2020|2020-10-26|EPI\_ISL\_785301|Original|hCoV-19^^Texas|Human|Houston Methodist Hospital|Houston Methodist Hospital|Long|USA

>Spike|hCoV-19/Switzerland/ZH-ETHZ-300284/2020|2020-10-01|EPI\_ISL\_603316|Original|hCoV-19^^Zurich|Human|Viollier AG|Department of Biosystems Science and Engineering|Nadeau|Switzerland

>Spike|hCoV-19/Kenya/C5246/2020|2020-05-09|EPI\_ISL\_568754|Original|hCoV-19^^Mombasa|Human|KEMRI-Wellcome Trust Research Programme/KEMRI-CGMR-C Kilifi|KEMRI-Wellcome Trust Research Programme/KEMRI-CGMR-C Kilifi|Githinji|Kenya

>Spike|hCoV-19/England/NOTT-113F39/2020|2020-10-01|EPI\_ISL\_577123|Original|hCoV-19^^England|Human|Queens Medical Centre|COVID-19 Genomics UK (COG-UK) Consortium|Loose|United Kingdom

>Spike|hCoV-19/Switzerland/BS-42225323/2020|2020-04-08|EPI\_ISL\_581690|Original|hCoV-19^^Basel-Stadt|Human|University Hospital Basel|University Hospital Basel|Roloff Handschin|Switzerland

>Spike|hCoV-19/Australia/VIC5486/2020|2020-07-20|EPI\_ISL\_520233|Original|hCoV-19^^Victoria|Human|Microbiological Diagnostic Unit - Public Health Laboratory (MDU-PHL) |MDU-PHL|Schultz|Australia

>Spike|hCoV-19/USA/LA-EVTL259/2020|2020-08-22|EPI\_ISL\_574393|Original|hCoV-19^^Louisiana|Human|LSUHS Emerging Viral Threat Laboratory|Microbial Genome Sequencing Center|Kamil|USA

>Spike|hCoV-19/USA/MA-MGH-00015/2020|2020-03-25|EPI\_ISL\_460319|Original|hCoV-19^^Massachusetts|Human|Massachusetts General Hospital|Infectious Disease Program|Lemieux|USA

>Spike|hCoV-19/Japan/PG-4716/2020|2020-07-00|EPI\_ISL\_689852|Original|hCoV-19^^Japan|Human|Pathogen Genomics Center|Pathogen Genomics Center|Sekizuka|Japan

>Spike|hCoV-19/England/BRIS-127E80/2020|2020-04-17|EPI\_ISL\_469682|Original|hCoV-19^^England|Human|PHE South West Regional Laboratory|Wellcome Sanger Institute for the COVID-19 Genomics UK (COG-UK) consortium|Davies|United Kingdom

>Spike|hCoV-19/USA/TX-HMH-MCoV-14766/2020|2020-10-07|EPI\_ISL\_786251|Original|hCoV-19^^Texas|Human|Houston Methodist Hospital|Houston Methodist Hospital|Long|USA

>Spike|hCoV-19/USA/WI-UW-2583/2021|2021-01-04|EPI\_ISL\_791101|Original|hCoV-19^^Wisconsin|Human|University of Wisconsin-Madison AIDS Vaccine Research Laboratories|University of Wisconsin-Madison AIDS Vaccine Research Laboratories|Moreno|USA

>Spike|hCoV-19/Canada/ON-S128/2020|2020-03-23|EPI\_ISL\_591184|Original|hCoV-19^^Ontario|Human|Toronto Invasive Bacterial Diseases Network|McMaster University|McArthur|Canada

>Spike|hCoV-19/England/ALDP-956239/2020|2020-06-08|EPI\_ISL\_553942|Original|hCoV-19^^England|Human|Lighthouse Lab in Alderley Park|Wellcome Sanger Institute for the COVID-19 Genomics UK (COG-UK) consortium|Davies|United Kingdom

>Spike|hCoV-19/Luxembourg/LNS9967957/2020|2020-11-19|EPI\_ISL\_745021|Original|hCoV-19^^Luxembourg|Human|Laboratoire national de sant\u00e9|Laboratoire national de sant\u00e9|Wienecke-Baldacchino|Luxembourg

>Spike|hCoV-19/Luxembourg/LNS8076261/2020|2020-11-11|EPI\_ISL\_744678|Original|hCoV-19^^Luxembourg|Human|Laboratoire national de sant\u00e9|Laboratoire national de sant\u00e9|Wienecke-Baldacchino|Luxembourg

>Spike|hCoV-19/England/SHEF-D1509/2020|2020-06-08|EPI\_ISL\_479276|Original|hCoV-19^^England|Human|Virology Department|COVID-19 Genomics UK (COG-UK) Consortium|de Silva|United Kingdom

>Spike|hCoV-19/England/ALDP-CB5AB5/2020|2020-12-18|EPI\_ISL\_767104|Original|hCoV-19^^England|Human|Lighthouse Lab in Alderley Park|Wellcome Sanger Institute for the COVID-19 Genomics UK (COG-UK) Consortium|Davies|United Kingdom

>Spike|hCoV-19/Singapore/1103/2020|2020-10-14|EPI\_ISL\_596493|Original|hCoV-19^^Singapore|Human|National Public Health Laboratory|National Public Health Laboratory|Mak|Singapore

>Spike|hCoV-19/Thailand/Bangkok-0038/2020|2020-03-25|EPI\_ISL\_429174|Original|hCoV-19^^Bangkok|Human|Ramathibodi Hospital|COVID-19 Network Investigations (CONI) Alliance|Batty|Thailand

>Spike|hCoV-19/Netherlands/UT-RIVM-20180/2020|2020-11-30|EPI\_ISL\_723155|Original|hCoV-19^^Utrecht|Human|Dutch COVID-19 response team|National Institute for Public Health and the Environment (RIVM)|Meijer|Netherlands

>Spike|hCoV-19/England/QEUH-BA0052/2020|2020-11-18|EPI\_ISL\_719615|Original|hCoV-19^^England|Human|Lighthouse Lab in Glasgow|Wellcome Sanger Institute for the COVID-19 Genomics UK (COG-UK) Consortium|Davies|United Kingdom

>Spike|hCoV-19/Iceland/296/2020|2020-03-18|EPI\_ISL\_417625|Original|hCoV-19^^Reykjavik|Human|The National University Hospital of Iceland|deCODE genetics|J\u00f3nsson|Iceland

>Spike|hCoV-19/USA/WI-UW-1297/2020|2020-08-28|EPI\_ISL\_536669|Original|hCoV-19^^Wisconsin|Human|University of Wisconsin-Madison AIDS Vaccine Research Laboratories|University of Wisconsin-Madison AIDS Vaccine Research Laboratories|Baczenas|USA

>Spike|hCoV-19/USA/FL-BPHL-1442/2020|2020-09-07|EPI\_ISL\_549224|Original|hCoV-19^^Florida|Human|Florida Bureau of Public Health Laboratories|Florida Bureau of Public Health Laboratories|Blanton|USA

>Spike|hCoV-19/England/QEUH-9B70A5/2020|2020-09-08|EPI\_ISL\_602119|Original|hCoV-19^^England|Human|Lighthouse Lab in Glasgow|Wellcome Sanger Institute for the COVID-19 Genomics UK (COG-UK) consortium|Davies|United Kingdom

>Spike|hCoV-19/Denmark/DCGC-19208/2020|2020-12-07|EPI\_ISL\_748817|Original|hCoV-19^^Sjaelland|Human|Department of Virus and Microbiological Special Diagnostics|Albertsen Lab|Michaelsen|Denmark

>Spike|hCoV-19/USA/TX-HMH-MCoV-18968/2020|2020-11-25|EPI\_ISL\_785252|Original|hCoV-19^^Texas|Human|Houston Methodist Hospital|Houston Methodist Hospital|Long|USA

>Spike|hCoV-19/England/ALDP-4A44E0/2020|2020-06-03|EPI\_ISL\_559530|Original|hCoV-19^^England|Human|Lighthouse Lab in Alderley Park|Wellcome Sanger Institute for the COVID-19 Genomics UK (COG-UK) consortium|Davies|United Kingdom

>Spike|hCoV-19/England/ALDP-B6349B/2020|2020-11-09|EPI\_ISL\_656359|Original|hCoV-19^^England|Human|Lighthouse Lab in Alderley Park|Wellcome Sanger Institute for the COVID-19 Genomics UK (COG-UK) Consortium|Davies|United Kingdom

>Spike|hCoV-19/USA/MN-QDX-969/2020|2020-03-15|EPI\_ISL\_571768|Original|hCoV-19^^Minnesota|Human|Quest Diagnostics|Quest Diagnostics|Kagan|USA

>Spike|hCoV-19/USA/AZ-TG491500/2020|2020-06-18|EPI\_ISL\_695129|Original|hCoV-19^^Arizona|Human|AZ SPHL|TGen North|French|USA

>Spike|hCoV-19/England/MILK-5127F2/2020|2020-06-12|EPI\_ISL\_559088|Original|hCoV-19^^England|Human|Lighthouse Lab in Milton Keynes|Wellcome Sanger Institute for the COVID-19 Genomics UK (COG-UK) consortium|Davies|United Kingdom

>Spike|hCoV-19/Australia/VIC3825/2020|2020-07-09|EPI\_ISL\_520538|Original|hCoV-19^^Victoria|Human|Microbiological Diagnostic Unit - Public Health Laboratory (MDU-PHL)|MDU-PHL|Schultz|Australia

>Spike|hCoV-19/Germany/HH-hpi-p2112/2020|2020-03-22|EPI\_ISL\_775741|Original|hCoV-19^^Hamburg|Human|University Medical Center Hamburg Eppendorf|Heinrich Pette Institute|Robitaille|Germany

>Spike|hCoV-19/England/CAMB-7C6D0/2020|2020-04-05|EPI\_ISL\_442281|Original|hCoV-19^^England|Human|Department of Pathology|Wellcome Sanger Institute for the COVID-19 Genomics UK (COG-UK) consortium|Amato|United Kingdom

>Spike|hCoV-19/England/ALDP-9D7643/2020|2020-09-18|EPI\_ISL\_576574|Original|hCoV-19^^England|Human|Oxford Viromics|COVID-19 Genomics UK (COG-UK) Consortium|Golubchik|United Kingdom

>Spike|hCoV-19/France/PAC-IHU-0589/2020|2020-04-10|EPI\_ISL\_569606|Original|hCoV-19^^Provence-Alpes-C\u00f4te-d\u0020Azur|Human|MEPHI|MEPHI|Levasseur|France

>Spike|hCoV-19/USA/TX-HMH-MCoV-13667/2020|2020-08-20|EPI\_ISL\_788765|Original|hCoV-19^^Texas|Human|Houston Methodist Hospital|Houston Methodist Hospital|Long|USA

>Spike|hCoV-19/England/ALDP-CB460D/2020|2020-12-19|EPI\_ISL\_760912|Original|hCoV-19^^England|Human|Lighthouse Lab in Alderley Park|Wellcome Sanger Institute for the COVID-19 Genomics UK (COG-UK) Consortium|Davies|United Kingdom

>Spike|hCoV-19/England/MILK-BAB655/2020|2020-11-18|EPI\_ISL\_681571|Original|hCoV-19^^England|Human|Lighthouse Lab in Milton Keynes|Wellcome Sanger Institute for the COVID-19 Genomics UK (COG-UK) Consortium|Davies|United Kingdom

>Spike|hCoV-19/England/MILK-B3D719/2020|2020-11-02|EPI\_ISL\_645345|Original|hCoV-19^^England|Human|Lighthouse Lab in Milton Keynes|Wellcome Sanger Institute for the COVID-19 Genomics UK (COG-UK) Consortium|Davies|United Kingdom

>Spike|hCoV-19/Scotland/EDB8881/2020|2020-10-27|EPI\_ISL\_652015|Original|hCoV-19^^Scotland|Human|Virology Department|COVID-19 Genomics UK (COG-UK) Consortium|McHugh|United Kingdom

>Spike|hCoV-19/France/IDF-10064DR/2020|2020-03-00|EPI\_ISL\_447729|Original|hCoV-19^^France|Human|H\u00f4pital Henri-Mondor Ap-Hp|H\u00f4pital Henri-Mondor Ap-Hp|Rodriguez|France

>Spike|hCoV-19/Wales/PHWC-489F86/2020|2020-11-03|EPI\_ISL\_652510|Original|hCoV-19^^Wales|Human|Wales Specialist Virology Centre Sequencing lab|COVID-19 Genomics UK (COG-UK) Consortium|Moore|United Kingdom

>Spike|hCoV-19/Australia/VIC28/2020|2020-03-10|EPI\_ISL\_419747|Original|hCoV-19^^Victoria|Human|Victorian Infectious Diseases Reference Laboratory (VIDRL)|Victorian Infectious Diseases Reference Laboratory and Microbiological Diagnostic Unit Public Health Laboratory|Schultz|Australia

>Spike|hCoV-19/USA/SC-DHEC-0931/2020|2020-06-26|EPI\_ISL\_541671|Original|hCoV-19^^South Carolina|Human|Microbiology Division|Microbiology Division|Flores|USA

>Spike|hCoV-19/Australia/VIC5462/2020|2020-07-15|EPI\_ISL\_520212|Original|hCoV-19^^Victoria|Human|Victorian Infectious Diseases Reference Laboratory (VIDRL)|VIDRL and MDU-PHL|Schultz|Australia

>Spike|hCoV-19/England/ALDP-CB560C/2020|2020-12-20|EPI\_ISL\_761861|Original|hCoV-19^^England|Human|Lighthouse Lab in Alderley Park|Wellcome Sanger Institute for the COVID-19 Genomics UK (COG-UK) Consortium|Davies|United Kingdom

>Spike|hCoV-19/Spain/VC-FISABIO-279/2020|2020-03-16|EPI\_ISL\_436374|Original|hCoV-19^^Comunitat Valenciana|Human|Servicio de Microbiologia. Hospital Universitario Doctor Peset|Sequencing and Bioinformatics Service and Molecular Epidemiology Research Group. FISABIO-Public Health|Gonzalez-Candelas|Spain

>Spike|hCoV-19/England/20132091504/2020|2020-03-22|EPI\_ISL\_423822|Original|hCoV-19^^England|Human|Respiratory Virus Unit|Respiratory Virus Unit|Platt|United Kingdom

>Spike|hCoV-19/Denmark/ALAB-SSI409/2020|2020-03-10|EPI\_ISL\_429503|Original|hCoV-19^^Denmark|Human|Department of Virus and Microbiological Special Diagnostics|Albertsen lab|Kirkegaard|Denmark

>Spike|hCoV-19/Brazil/SE-6533/2020|2020-03-19|EPI\_ISL\_541374|Original|hCoV-19^^Sergipe|Human|LACEN/SE|Laboratory of Respiratory Viruses and Measles|Silva|Brazil

>Spike|hCoV-19/England/MILK-9AAB2C/2020|2020-08-31|EPI\_ISL\_550833|Original|hCoV-19^^England|Human|Lighthouse Lab in Milton Keynes|Wellcome Sanger Institute for the COVID-19 Genomics UK (COG-UK) consortium|Davies|United Kingdom

>Spike|hCoV-19/England/MILK-99340D/2020|2020-08-26|EPI\_ISL\_552035|Original|hCoV-19^^England|Human|Lighthouse Lab in Milton Keynes|Wellcome Sanger Institute for the COVID-19 Genomics UK (COG-UK) consortium|Davies|United Kingdom

>Spike|hCoV-19/India/GJ-GBRC338a/2020|2020-07-09|EPI\_ISL\_512075|Original|hCoV-19^^Gujarat|Human|Dr. RSS Hospital|Gujarat Biotechnology Research Centre|Joshi|India

>Spike|hCoV-19/Australia/VIC7924/2020|2020-08-06|EPI\_ISL\_564746|Original|hCoV-19^^Victoria|Human|Microbiological Diagnostic Unit - Public Health Laboratory (MDU-PHL)|MDU-PHL|Schultz|Australia

>Spike|hCoV-19/Wuhan/HB-WH4-194/2020|2020-03-24|EPI\_ISL\_454948|Original|hCoV-19^^Hubei|Human|Wuhan Chain Medical Labs (CMLabs)|State Key Laboratory of Biotherapy of Sichuan University|Tang|China

>Spike|hCoV-19/England/ALDP-A2EBD4/2020|2020-10-05|EPI\_ISL\_587249|Original|hCoV-19^^England|Human|Lighthouse Lab in Alderley Park|Wellcome Sanger Institute for the COVID-19 Genomics UK (COG-UK) consortium|Davies|United Kingdom

>Spike|hCoV-19/Spain/GA-IBV-002718/2020|2020-04-07|EPI\_ISL\_467279|Original|hCoV-19^^Galicia|Human|Hospital Cl\u00e9nico Universitario de Santiago de Compostela|SeqCOVID-SPAIN consortium/IBV (CSIC)|Comas|Spain

>Spike|hCoV-19/USA/NV-NSPHL-A0173/2020|2020-05-18|EPI\_ISL\_515431|Original|hCoV-19^^Nevada|Human|Nevada State Public Health Laboratory|Nevada State Public Health Laboratory|Sevinsky|USA

>Spike|hCoV-19/England/QEUH-9C9CCA/2020|2020-09-10|EPI\_ISL\_567313|Original|hCoV-19^^England|Human|Lighthouse Lab in Glasgow|Wellcome Sanger Institute for the COVID-19 Genomics UK (COG-UK) consortium|Davies|United Kingdom

>Spike|hCoV-19/England/CAMB-1B91E4/2020|2020-00-00|EPI\_ISL\_705545|Original|hCoV-19^^England|Human|Department of Pathology|COVID-19 Genomics UK (COG-UK) Consortium|Goodfellow|United Kingdom

>Spike|hCoV-19/England/ALDP-8B6F9B/2020|2020-06-29|EPI\_ISL\_557098|Original|hCoV-19^^England|Human|Lighthouse Lab in Alderley Park|Wellcome Sanger Institute for the COVID-19 Genomics UK (COG-UK) consortium|Davies|United Kingdom

>Spike|hCoV-19/England/LIVE-DCBDA3/2020|2020-11-28|EPI\_ISL\_724463|Original|hCoV-19^^England|Human|Liverpool Clinical Laboratories|COVID-19 Genomics UK (COG-UK) Consortium|Haldenby|United Kingdom

>Spike|hCoV-19/Gibraltar/205000673/2020|2020-12-00|EPI\_ISL\_709999|Original|hCoV-19^^Gibraltar|Human|Microbiology|Respiratory Virus Unit|Platt|Gibraltar

>Spike|hCoV-19/USA/WI-UW-297/2020|2020-04-13|EPI\_ISL\_436591|Original|hCoV-19^^Wisconsin|Human|University of Wisconsin-Madison AIDS Vaccine Research Laboratories|University of Wisconsin-Madison AIDS Vaccine Research Laboratories|Baczenas|USA

>Spike|hCoV-19/England/ALDP-C3C6EF/2020|2020-12-10|EPI\_ISL\_731662|Original|hCoV-19^^England|Human|Lighthouse Lab in Alderley Park|Wellcome Sanger Institute for the COVID-19 Genomics UK (COG-UK) Consortium|Davies|United Kingdom

>Spike|hCoV-19/USA/LA-SR0297/2020|2020-04-08|EPI\_ISL\_445152|Original|hCoV-19^^Louisiana|Human|Robert Garry lab|Andersen lab at Scripps Research|Gangavarapu|USA

>Spike|hCoV-19/Scotland/QEUH-96FF54/2020|2020-08-18|EPI\_ISL\_568428|Original|hCoV-19^^Scotland|Human|Lighthouse Lab in Glasgow|Wellcome Sanger Institute for the COVID-19 Genomics UK (COG-UK) consortium|Davies|United Kingdom

>Spike|hCoV-19/England/MILK-956EAE/2020|2020-06-10|EPI\_ISL\_554295|Original|hCoV-19^^England|Human|Lighthouse Lab in Milton Keynes|Wellcome Sanger Institute for the COVID-19 Genomics UK (COG-UK) consortium|Davies|United Kingdom

>Spike|hCoV-19/England/QEUH-AD301B/2020|2020-10-26|EPI\_ISL\_634140|Original|hCoV-19^^England|Human|Lighthouse Lab in Glasgow|Wellcome Sanger Institute for the COVID-19 Genomics UK (COG-UK) consortium|Davies|United Kingdom

>Spike|hCoV-19/Wales/PHWC-484B5A/2020|2020-10-21|EPI\_ISL\_628082|Original|hCoV-19^^Wales|Human|Wales Specialist Virology Centre Sequencing lab|COVID-19 Genomics UK (COG-UK) Consortium|Moore|United Kingdom

>Spike|hCoV-19/France/PDL-SC602/2020|2020-03-14|EPI\_ISL\_663250|Original|hCoV-19^^Pays-de-la-Loire|Human|CHU Nantes|CNR Virus des Infections Respiratoires - France SUD|Bal|France

>Spike|hCoV-19/Denmark/DCGC-10646/2020|2020-11-02|EPI\_ISL\_670111|Original|hCoV-19^^Nordjylland|Human|Department of Virus and Microbiological Special Diagnostics|Albertsen Lab|Michaelsen|Denmark

>Spike|hCoV-19/England/LIVE-A9FDF/2020|2020-03-25|EPI\_ISL\_517385|Original|hCoV-19^^England|Human|Liverpool Clinical Laboratories|COVID-19 Genomics UK (COG-UK) Consortium|Haldenby|United Kingdom

>Spike|hCoV-19/England/MILK-A69B73/2020|2020-10-09|EPI\_ISL\_665548|Original|hCoV-19^^England|Human|University of Exeter|COVID-19 Genomics UK (COG-UK) Consortium|Temperton|United Kingdom

>Spike|hCoV-19/England/MILK-B046F0/2020|2020-10-24|EPI\_ISL\_652167|Original|hCoV-19^^England|Human|Department of Pathology|COVID-19 Genomics UK (COG-UK) Consortium|Goodfellow|United Kingdom

>Spike|hCoV-19/USA/PA-MGEL-00770/2020|2020-09-14|EPI\_ISL\_682056|Original|hCoV-19^^Pennsylvania|Human|UPMC Clinical Microbiology Laboratory|Microbial Genomic Epidemiology Laboratory|Griffith|USA



>Spike|hCoV-19/Wales/PHWC-48E3B2/2020|2020-11-12|EPI\_ISL\_680850|Original|hCoV-19^^Wales|Human|Wales Specialist Virology Centre Sequencing lab|COVID-19 Genomics UK (COG-UK) Consortium|Moore|United Kingdom

>Spike|hCoV-19/Luxembourg/LNS1880857/2020|2020-10-27|EPI\_ISL\_740010|Original|hCoV-19^^Luxembourg|Human|Laboratoire national de sant\u00e9|Laboratoire national de sant\u00e9|Wienecke-Baldacchino|Luxembourg

>Spike|hCoV-19/USA/NM-DOH-2020318368/2020|2020-08-27|EPI\_ISL\_732732|Original|hCoV-19^^New Mexico|Human|New Mexico Department of Health Scientific Laboratory|New Mexico Department of Health Scientific Laboratory|Johnson|USA

>Spike|hCoV-19/Denmark/DCGC-10467/2020|2020-11-02|EPI\_ISL\_669994|Original|hCoV-19^^Hovedstaden|Human|Department of Virus and Microbiological Special Diagnostics|Albertsen Lab|Michaelsen|Denmark

>Spike|hCoV-19/Scotland/QEUEH-964E16/2020|2020-08-13|EPI\_ISL\_531002|Original|hCoV-19^^Scotland|Human|NHSGGC West of Scotland Specialist Virology Centre / MRC-University of Glasgow Centre for Virus Research|Wellcome Sanger Institute for the COVID-19 Genomics UK (COG-UK) consortium|Davies|United Kingdom

>Spike|hCoV-19/Scotland/EDB6573/2020|2020-05-24|EPI\_ISL\_478256|Original|hCoV-19^^Scotland|Human|Virology Department|COVID-19 Genomics UK (COG-UK) Consortium|Williams|United Kingdom

>Spike|hCoV-19/USA/CA-CHLA-PLM04835647/2020|2020-12-04|EPI\_ISL\_753654|Original|hCoV-19^^California|Human|Clinical virology Laboratory|Center for Personalized Medicine|Dien Bard|USA

>Spike|hCoV-19/England/QEUEH-A3287C/2020|2020-10-06|EPI\_ISL\_628362|Original|hCoV-19^^England|Human|Oxford Viromics|COVID-19 Genomics UK (COG-UK) Consortium|Golubchik|United Kingdom

>Spike|hCoV-19/England/QEUEH-960D1D/2020|2020-08-06|EPI\_ISL\_532001|Original|hCoV-19^^England|Human|Lighthouse Lab in Glasgow|Wellcome Sanger Institute for the COVID-19 Genomics UK (COG-UK) consortium|Davies|United Kingdom

>Spike|hCoV-19/Egypt/MASRI-014/2020|2020-04-30|EPI\_ISL\_482765|Original|hCoV-19^^Egypt|Human|Medical Ain Shams Research Institute (MASRI)|Medical Ain Shams Research Institute (MASRI)|Moustafa|Egypt

>Spike|hCoV-19/England/LIVE-AA2E4/2020|2020-03-23|EPI\_ISL\_517433|Original|hCoV-19^^England|Human|Liverpool Clinical Laboratories|COVID-19 Genomics UK (COG-UK) Consortium|Haldenby|United Kingdom

>Spike|hCoV-19/Iceland/231/2020|2020-03-17|EPI\_ISL\_417559|Original|hCoV-19^^Reykjavik|Human|The National University Hospital of Iceland|deCODE genetics|J\u00f3nsson|Iceland

>Spike|hCoV-19/England/LIVE-DC2CEB/2020|2020-11-24|EPI\_ISL\_705844|Original|hCoV-19^^England|Human|Liverpool Clinical Laboratories|COVID-19 Genomics UK (COG-UK) Consortium|Haldenby|United Kingdom

>Spike|hCoV-19/USA/FL-BPHL-1842/2020|2020-04-09|EPI\_ISL\_613922|Original|hCoV-19^^Florida|Human|Florida Bureau of Public Health Laboratories|Florida Bureau of Public Health Laboratories|Blanton|USA

>Spike|hCoV-19/USA/TX-HMH-MCoV-8218/2020|2020-07-07|EPI\_ISL\_784272|Original|hCoV-19^^Texas|Human|Houston Methodist Hospital|Houston Methodist Hospital|Long|USA

>Spike|hCoV-19/Canada/ON-SLB3098/2020|2020-04-17|EPI\_ISL\_717756|Original|hCoV-19^^Ontario|Human|Kingston Health Sciences Centre and Queen's University|Ontario Institute for Cancer Research|de Borja|Canada

>Spike|hCoV-19/Scotland/QEUEH-AE26AE/2020|2020-10-27|EPI\_ISL\_649652|Original|hCoV-19^^Scotland|Human|Lighthouse Lab in Glasgow|Wellcome Sanger Institute for the COVID-19 Genomics UK (COG-UK) Consortium|Davies|United Kingdom

>Spike|hCoV-19/England/ALDP-9CDE75/2020|2020-09-16|EPI\_ISL\_566241|Original|hCoV-19^^England|Human|Lighthouse Lab in Alderley Park|Wellcome Sanger Institute for the COVID-19 Genomics UK (COG-UK) consortium|Davies|United Kingdom

>Spike|hCoV-19/Wales/PHWC-16B907/2020|2020-09-19|EPI\_ISL\_573917|Original|hCoV-19^^Wales|Human|Wales Specialist Virology Centre Sequencing lab|COVID-19 Genomics UK (COG-UK) Consortium|Moore|United Kingdom

>Spike|hCoV-19/Norway/5560/2020|2020-11-08|EPI\_ISL\_708121|Original|hCoV-19^^Oslo|Human|Oslo University Hospital|Norwegian Institute of Public Health|Kopperud Riis|Norway

>Spike|hCoV-19/USA/LA-GBCL-26791695/2020|2020-04-10|EPI\_ISL\_485321|Original|hCoV-19^^Louisiana|Human|River Road Testing Lab|Ginkgo Bioworks Clinical Laboratory|Smith|USA

>Spike|hCoV-19/Denmark/DCGC-17402/2020|2020-12-14|EPI\_ISL\_750958|Original|hCoV-19^^Hovedstaden|Human|Department of Virus and Microbiological Special Diagnostics|Albertsen Lab|Michaelsen|Denmark

>Spike|hCoV-19/USA/MI-UM-10036740188/2020|2020-11-02|EPI\_ISL\_682105|Original|hCoV-19^^Michigan|Human|University of Michigan Clinical Microbiology Laboratory|Lauring Lab|Valesano|USA

>Spike|hCoV-19/Israel/CVL-39-ngs/2020|2020-12-24|EPI\_ISL\_776630|Original|hCoV-19^^Israel|Human|Israel Central Virology laboratory|Israel Central Virology laboratory|Zuckerman|Israel

>Spike|hCoV-19/USA/NY-Wadsworth-287512-01/2020|2020-12-14|EPI\_ISL\_767420|Original|hCoV-19^^New York|Human|Wadsworth Center|Wadsworth Center|Lasek-Nesselquist|USA

>Spike|hCoV-19/Australia/VIC3932/2020|2020-07-13|EPI\_ISL\_520644|Original|hCoV-19^^Victoria|Human|Microbiological Diagnostic Unit - Public Health Laboratory (MDU-PHL)|Microbiological Diagnostic Unit - Public Health Laboratory (MDU-PHL)|Schultz|Australia

>Spike|hCoV-19/England/20110000606/2020|2020-03-06|EPI\_ISL\_417301|Original|hCoV-19^^England|Human|Respiratory Virus Unit|Respiratory Virus Unit|Platt|United Kingdom

>Spike|hCoV-19/England/CAMB-7C904/2020|2020-04-05|EPI\_ISL\_442817|Original|hCoV-19^^England|Human|Department of Pathology|Wellcome Sanger Institute for the COVID-19 Genomics UK (COG-UK) consortium|Amato|United Kingdom

>Spike|hCoV-19/England/204900615/2020|2020-11-30|EPI\_ISL\_766279|Original|hCoV-19^^England|Human|Respiratory Virus Unit|COVID-19 Genomics UK (COG-UK) Consortium|Platt|United Kingdom

>Spike|hCoV-19/Singapore/523/2020|2020-04-15|EPI\_ISL\_479601|Original|hCoV-19^^Singapore|Human|National Public Health Laboratory|National Public Health Laboratory|Mak|Singapore

>Spike|hCoV-19/Israel/130711104/2020|2020-04-20|EPI\_ISL\_447455|Original|hCoV-19^^Tel Aviv District|Human|Clinical Microbiology Laboratory|Stern Lab|Miller|Israel

>Spike|hCoV-19/England/QEUEH-96E81E/2020|2020-08-19|EPI\_ISL\_581402|Original|hCoV-19^^England|Human|Lighthouse Lab in Glasgow|Wellcome Sanger Institute for the COVID-19 Genomics UK (COG-UK) consortium|Davies|United Kingdom

>Spike|hCoV-19/England/NORW-F88A9/2020|2020-12-10|EPI\_ISL\_725369|Original|hCoV-19^^England|Human|Quadram Institute Bioscience|COVID-19 Genomics UK (COG-UK) Consortium|Alikhan|United Kingdom

>Spike|hCoV-19/Denmark/DCGC-21177/2020|2020-12-21|EPI\_ISL\_759594|Original|hCoV-19^^Midtjylland|Human|Department of Virus and Microbiological Special Diagnostics|Albertsen Lab|Michaelsen|Denmark

>Spike|hCoV-19/England/MILK-ACBFFB/2020|2020-10-21|EPI\_ISL\_629230|Original|hCoV-19^^England|Human|Lighthouse Lab in Milton Keynes|Wellcome Sanger Institute for the COVID-19 Genomics UK (COG-UK) consortium|Davies|United Kingdom

>Spike|hCoV-19/England/ALDP-BC87D7/2020|2020-11-23|EPI\_ISL\_721378|Original|hCoV-19^^England|Human|Lighthouse Lab in Alderley Park|Wellcome Sanger Institute for the COVID-19 Genomics UK (COG-UK) Consortium|Davies|United Kingdom

>Spike|hCoV-19/Belgium/ULG-11130/2020|2020-12-18|EPI\_ISL\_737374|Original|hCoV-19^^Li\u00e8ge|Human|Department of Clinical Microbiology|GIGA Medical Genomics|Durkin|Belgium

>Spike|hCoV-19/England/ALDP-9E5897/2020|2020-09-24|EPI\_ISL\_589420|Original|hCoV-19^^England|Human|Lighthouse Lab in Alderley Park|Wellcome Sanger Institute for the COVID-19 Genomics UK (COG-UK) consortium|Davies|United Kingdom

>Spike|hCoV-19/Japan/IC-0066/2020|2020-06-00|EPI\_ISL\_591408|Original|hCoV-19^^Japan|Human|Pathogen Genomics Center|Pathogen Genomics Center|Sekizuka|Japan

>Spike|hCoV-19/USA/CA-CZB-4038/2020|2020-08-10|EPI\_ISL\_548647|Original|hCoV-19^^California|Human|County of Santa Clara Public Health Department|Chan-Zuckerberg Biohub|Bhatt|USA

>Spike|hCoV-19/France/OCC-SC568/2020|2020-05-20|EPI\_ISL\_663245|Original|hCoV-19^^Occitanie|Human|CHU N\u00eemes|CNR Virus des Infections Respiratoires - France SUD|Bal|France

>Spike|hCoV-19/Czech Republic/ChVir1912/2020|2020-03-05|EPI\_ISL\_416743|Original|hCoV-19^^Prague|Human|NRL for Influenza|Charite Universitaetsmedizin Berlin|Muehlemann|Czech Republic

>Spike|hCoV-19/South Korea/KDCA0206/2020|2020-11-26|EPI\_ISL\_747441|Original|hCoV-19^^South Korea|Human|Division of Emerging Infectious Diseases|Division of Emerging Infectious Diseases|Park|South Korea

>Spike|hCoV-19/Switzerland/ZH-ETHZ-270207/2020|2020-08-30|EPI\_ISL\_541539|Original|hCoV-19^^Zurich|Human|Viollier AG|Department of Biosystems Science and Engineering|Nadeau|Switzerland

>Spike|hCoV-19/Scotland/QEUH-9BAEF3/2020|2020-09-09|EPI\_ISL\_573851|Original|hCoV-19^^Scotland|Human|Oxford Viromics|COVID-19 Genomics UK (COG-UK) Consortium|Golubchik|United Kingdom

>Spike|hCoV-19/Wales/PHWC-489CAD/2020|2020-10-23|EPI\_ISL\_652477|Original|hCoV-19^^Wales|Human|Wales Specialist Virology Centre Sequencing lab|COVID-19 Genomics UK (COG-UK) Consortium|Moore|United Kingdom

>Spike|hCoV-19/USA/CA-SR0198/2020|2020-03-21|EPI\_ISL\_437585|Original|hCoV-19^^California|Human|Scripps Medical Laboratory|Andersen lab at Scripps Research|Gangavarapu|USA

>Spike|hCoV-19/USA/VA-DCLS-1657/2020|2020-08-29|EPI\_ISL\_644829|Original|hCoV-19^^Virginia|Human|Virginia DCLS|Virginia DCLS|St. Jacques|USA

>Spike|hCoV-19/England/ALDP-B84713/2020|2020-11-15|EPI\_ISL\_675411|Original|hCoV-19^^England|Human|Lighthouse Lab in Alderley Park|Wellcome Sanger Institute for the COVID-19 Genomics UK (COG-UK) Consortium|Davies|United Kingdom

>Spike|hCoV-19/USA/WA-UW-45110/2020|2020-12-08|EPI\_ISL\_747219|Original|hCoV-19^^Washington|Human|UW Virology Lab|UW Virology Lab|Roychoudhury|USA

>Spike|hCoV-19/USA/TX-HMH-MCoV-18037/2020|2020-11-16|EPI\_ISL\_786185|Original|hCoV-19^^Texas|Human|Houston Methodist Hospital|Houston Methodist Hospital|Long|USA

>Spike|hCoV-19/India/GJ-GBRC-362a/2020|2020-06-18|EPI\_ISL\_524713|Original|hCoV-19^^Gujarat|Human|B.J. Medical College and Civil hospital|Gujarat Biotechnology Research Centre|Joshi|India

>Spike|hCoV-19/Gibraltar/204462823/2020|2020-10-29|EPI\_ISL\_614998|Original|hCoV-19^^Gibraltar|Human|Microbiology|Respiratory Virus Unit|Platt|Gibraltar

>Spike|hCoV-19/Netherlands/NA\_250/2020|2020-03-29|EPI\_ISL\_422784|Original|hCoV-19^^Netherlands|Human|Dutch COVID-19 response team|Erasmus Medical Center|Oude Munnink|Netherlands

>Spike|hCoV-19/USA/TX-HMH079/2020|2020-03-19|EPI\_ISL\_434788|Original|hCoV-19^^Texas|Human|Houston Methodist Hospital|Houston Methodist Hospital|Long|USA

>Spike|hCoV-19/Netherlands/NA\_636/2020|2020-04-02|EPI\_ISL\_461071|Original|hCoV-19^^Netherlands|Human|Dutch COVID-19 response team|Erasmus Medical Center|Oude Munnink|Netherlands

>Spike|hCoV-19/England/OXON-AC631/2020|2020-04-06|EPI\_ISL\_448470|Original|hCoV-19^^England|Human|Oxford Viromics|COVID-19 Genomics UK (COG-UK) Consortium|Golubchik|United Kingdom

>Spike|hCoV-19/USA/TX-HMH-MCoV-14996/2020|2020-10-16|EPI\_ISL\_786480|Original|hCoV-19^^Texas|Human|Houston Methodist Hospital|Houston Methodist Hospital|Long|USA

>Spike|hCoV-19/USA/FL-BPHL-0759/2020|2020-06-27|EPI\_ISL\_512565|Original|hCoV-19^^Florida|Human|Florida Bureau of Public Health Laboratories|Florida Bureau of Public Health Laboratories|Blanton|USA

>Spike|hCoV-19/England/QEUH-B12D63/2020|2020-11-01|EPI\_ISL\_641884|Original|hCoV-19^^England|Human|Lighthouse Lab in Glasgow|Wellcome Sanger Institute for the COVID-19 Genomics UK (COG-UK) Consortium|Davies|United Kingdom

>Spike|hCoV-19/Netherlands/NB-EMC-298/2020|2020-09-29|EPI\_ISL\_632510|Original|hCoV-19^^Noord Brabant|Human|Dutch COVID-19 response team|Erasmus Medical Center|Oude Munnink|Netherlands

>Spike|hCoV-19/Denmark/DCGC-13127/2020|2020-11-30|EPI\_ISL\_712600|Original|hCoV-19^^Hovedstaden|Human|Department of Virus and Microbiological Special Diagnostics|Albertsen Lab|Michaelsen|Denmark

>Spike|hCoV-19/England/ALDP-B5D1F7/2020|2020-11-09|EPI\_ISL\_678871|Original|hCoV-19^^England|Human|Department of Pathology|COVID-19 Genomics UK (COG-UK) Consortium|Goodfellow|United Kingdom

>Spike|hCoV-19/England/CAMC-B0845C/2020|2020-10-30|EPI\_ISL\_643587|Original|hCoV-19^^England|Human|Lighthouse Lab in Cambridge|Wellcome Sanger Institute for the COVID-19 Genomics UK (COG-UK) Consortium|Davies|United Kingdom

>Spike|hCoV-19/England/CAMC-A41E69/2020|2020-10-03|EPI\_ISL\_609409|Original|hCoV-19^^England|Human|Lighthouse Lab in Cambridge|Wellcome Sanger Institute for the COVID-19 Genomics UK (COG-UK) consortium|Davies|United Kingdom

>Spike|hCoV-19/Poland/79290/2020|2020-11-00|EPI\_ISL\_732895|Original|hCoV-19^^Poland|Human|genXone SA|genXone SA|Kaszuba|Poland

>Spike|hCoV-19/Spain/VC-IBV-98003098/2020|2020-03-15|EPI\_ISL\_538034|Original|hCoV-19^^Comunitat Valenciana|Human|Hospital Universitari i Polit\u00e8nic La Fe de Val\u00e8ncia|SeqCOVID-SPAIN consortium/IBV(CSIC)|Comas|Spain

>Spike|hCoV-19/England/NORT-1B727CA/2020|2020-12-03|EPI\_ISL\_724899|Original|hCoV-19^^England|Human|Northumbria University / South Tees Hospitals NHS Foundation Trust / North Cumbria Integrated Care NHS Foundation Trust / North Tees and Hartlepool NHS Foundation Trust / Newcastle Hospitals NHS Foundation Trust|COVID-19 Genomics UK (COG-UK) Consortium|Bashton|United Kingdom

>Spike|hCoV-19/USA/CA-ALSR-3400/2020|2020-07-07|EPI\_ISL\_636004|Original|hCoV-19^^California|Human|San Diego County Public Health Laboratory|Andersen lab at Scripps Research|Gangavarapu|USA

>Spike|hCoV-19/USA/MN-MDH-1637/2020|2020-05-12|EPI\_ISL\_539831|Original|hCoV-19^^Minnesota|Human|Minnesota Department of Health|Minnesota Department of Health|Garfin|USA

>Spike|hCoV-19/Scotland/QEUH-98FF12/2020|2020-08-26|EPI\_ISL\_568336|Original|hCoV-19^^Scotland|Human|Lighthouse Lab in Glasgow|Wellcome Sanger Institute for the COVID-19 Genomics UK (COG-UK) consortium|Davies|United Kingdom

>Spike|hCoV-19/England/MILK-B96F43/2020|2020-11-13|EPI\_ISL\_675047|Original|hCoV-19^^England|Human|Lighthouse Lab in Milton Keynes|Wellcome Sanger Institute for the COVID-19 Genomics UK (COG-UK) Consortium|Davies|United Kingdom

>Spike|hCoV-19/Denmark/DCGC-18165/2020|2020-12-14|EPI\_ISL\_749790|Original|hCoV-19^^Syddanmark|Human|Department of Virus and Microbiological Special Diagnostics|Albertsen Lab|Michaelsen|Denmark

>Spike|hCoV-19/Australia/WA305/2020|2020-03-25|EPI\_ISL\_596848|Original|hCoV-19^^Western Australia|Human|PathWest Laboratory Medicine WA|PathWest Laboratory Medicine WA Microbial Surveillance Unit|Sikazwe|Australia

>Spike|hCoV-19/Spain/PV-IBV-98007698/2020|2020-09-15|EPI\_ISL\_582042|Original|hCoV-19^^Basque Country|Human|Servicio de Microbiolog\u00eda. Hospital Universitario Donostia. OSI Donostialdea. \u00c1rea de Enfermedades Infecciosas|SeqCOVID-SPAIN consortium/IBV(CSIC)|Comas|Spain

>Spike|hCoV-19/USA/TX-HMH-MCoV-18985/2020|2020-11-25|EPI\_ISL\_785266|Original|hCoV-19^^Texas|Human|Houston Methodist Hospital|Houston Methodist Hospital|Long|USA

>Spike|hCoV-19/Australia/VIC3940/2020|2020-07-15|EPI\_ISL\_520651|Original|hCoV-19^^Victoria|Human|Microbiological Diagnostic Unit - Public Health Laboratory (MDU-PHL)|MDU-PHL|Schultz|Australia

>Spike|hCoV-19/India/TG-CCMB-OM12/2020|2020-05-15|EPI\_ISL\_495278|Original|hCoV-19^^Telangana|Human|Osmania Medical College|CSIR-Centre for Cellular and Molecular Biology|Banu|India

>Spike|hCoV-19/England/MILK-ACBDA6/2020|2020-10-20|EPI\_ISL\_629225|Original|hCoV-19^^England|Human|Lighthouse Lab in Milton Keynes|Wellcome Sanger Institute for the COVID-19 Genomics UK (COG-UK) consortium|Davies|United Kingdom

>Spike|hCoV-19/Netherlands/OV-EMC-109/2020|2020-09-28|EPI\_ISL\_722837|Original|hCoV-19^^Overijssel|Human|Dutch COVID-19 response team|Erasmus Medical Center|Oude Munnink|Netherlands

>Spike|hCoV-19/Israel/CVL-n-6131/2020|2020-03-15|EPI\_ISL\_474994|Original|hCoV-19^^Kiryat Ono|Human|Israel Central Virology laboratory|Israel Central Virology laboratory|Zuckerman|Israel

>Spike|hCoV-19/England/NOTT-1128F3/2020|2020-04-19|EPI\_ISL\_493560|Original|hCoV-19^^England|Human|Lincolnshire Hospitals and DeepSeq Nottingham|COVID-19 Genomics UK (COG-UK) Consortium|Loose|United Kingdom

>Spike|hCoV-19/England/LIVE-DB643D/2020|2020-11-06|EPI\_ISL\_650290|Original|hCoV-19^^England|Human|Liverpool Clinical Laboratories|COVID-19 Genomics UK (COG-UK) Consortium|Haldenby|United Kingdom

>Spike|hCoV-19/Japan/PG-7999/2020|2020-08-00|EPI\_ISL\_687100|Original|hCoV-19^^Japan|Human|Pathogen Genomics Center|Pathogen Genomics Center|Sekizuka|Japan

>Spike|hCoV-19/USA/WA-UW-46937/2020|2020-12-08|EPI\_ISL\_756207|Original|hCoV-19^^Washington|Human|UW Virology Lab|UW Virology Lab|Roychoudhury|USA

>Spike|hCoV-19/Scotland/QEUH-9990B8/2020|2020-08-24|EPI\_ISL\_541838|Original|hCoV-19^^Scotland|Human|Lighthouse Lab in Glasgow|Wellcome Sanger Institute for the COVID-19 Genomics UK (COG-UK) consortium|Davies|United Kingdom

>Spike|hCoV-19/England/ALDP-95C840/2020|2020-06-21|EPI\_ISL\_555032|Original|hCoV-19^^England|Human|Lighthouse Lab in Alderley Park|Wellcome Sanger Institute for the COVID-19 Genomics UK (COG-UK) consortium|Davies|United Kingdom

>Spike|hCoV-19/USA/NM-NMDOH-2020321214/2020|2020-09-03|EPI\_ISL\_569632|Original|hCoV-19^^New Mexico|Human|New Mexico Department of Health Scientific Laboratory|New Mexico Department of Health Scientific Laboratory|Johnson|USA

>Spike|hCoV-19/England/QEUH-B7D64D/2020|2020-11-14|EPI\_ISL\_674543|Original|hCoV-19^^England|Human|Lighthouse Lab in Glasgow|Wellcome Sanger Institute for the COVID-19 Genomics UK (COG-UK) Consortium|Davies|United Kingdom

>Spike|hCoV-19/Scotland/CVR5660/2020|2020-11-06|EPI\_ISL\_650728|Original|hCoV-19^^Scotland|Human|West of Scotland Specialist Virology Centre|COVID-19 Genomics UK (COG-UK) Consortium|Robertson|United Kingdom

>Spike|hCoV-19/Belgium/ULG-10743/2020|2020-09-19|EPI\_ISL\_641585|Original|hCoV-19^^Li\u00e8ge|Human|Department of Clinical Microbiology|GIGA Medical Genomics|Durkin|Belgium

>Spike|hCoV-19/England/MILK-9A5383/2020|2020-09-03|EPI\_ISL\_550022|Original|hCoV-19^^England|Human|Lighthouse Lab in Milton Keynes|Wellcome Sanger Institute for the COVID-19 Genomics UK (COG-UK) consortium|Davies|United Kingdom

>Spike|hCoV-19/England/CAMC-C3F5FE/2020|2020-12-10|EPI\_ISL\_719399|Original|hCoV-19^^England|Human|Lighthouse Lab in Cambridge|Wellcome Sanger Institute for the COVID-19 Genomics UK (COG-UK) Consortium|Davies|United Kingdom

>Spike|hCoV-19/England/ALDP-B45C88/2020|2020-11-07|EPI\_ISL\_656030|Original|hCoV-19^^England|Human|Lighthouse Lab in Alderley Park|Wellcome Sanger Institute for the COVID-19 Genomics UK (COG-UK) Consortium|Davies|United Kingdom

>Spike|hCoV-19/England/LOND-D6337/2020|2020-04-21|EPI\_ISL\_482195|Original|hCoV-19^^England|Human|University College London|Wellcome Sanger Institute for the COVID-19 Genomics UK (COG-UK) consortium|Davies|United Kingdom

>Spike|hCoV-19/England/MILK-B59C81/2020|2020-11-06|EPI\_ISL\_679923|Original|hCoV-19^^England|Human|Virology Department|COVID-19 Genomics UK (COG-UK) Consortium|de Silva|United Kingdom

>Spike|hCoV-19/Australia/NSW1028/2020|2020-03-16|EPI\_ISL\_593757|Original|hCoV-19^^New South Wales|Human|Sydney South West Pathology Service (SSWPS) - Liverpool Hospital - NSW Health Pathology|NSW Health Pathology - Institute of Clinical Pathology and Medical Research; Westmead Hospital; University of Sydney|Gall|Australia

>Spike|hCoV-19/England/CAMC-B09D05/2020|2020-10-30|EPI\_ISL\_673107|Original|hCoV-19^^England|Human|Lighthouse Lab in Cambridge|Wellcome Sanger Institute for the COVID-19 Genomics UK (COG-UK) Consortium|Davies|United Kingdom

>Spike|hCoV-19/Wales/PHWC-495057/2020|2020-11-25|EPI\_ISL\_726291|Original|hCoV-19^^Wales|Human|Originating lab|COVID-19 Genomics UK (COG-UK) Consortium|Moore|United Kingdom

>Spike|hCoV-19/England/ALDP-A4FAB2/2020|2020-10-07|EPI\_ISL\_597746|Original|hCoV-19^^England|Human|Lighthouse Lab in Alderley Park|Wellcome Sanger Institute for the COVID-19 Genomics UK (COG-UK) consortium|Davies|United Kingdom

>Spike|hCoV-19/Canada/ON-PHL-20-03708/2020|2020-11-00|EPI\_ISL\_775190|Original|hCoV-19^^Ontario|Human|Public Health Ontario Laboratory|Public Health Ontario Laboratory|Guthrie|Canada

>Spike|hCoV-19/Singapore/498/2020|2020-04-18|EPI\_ISL\_479576|Original|hCoV-19^^Singapore|Human|National Public Health Laboratory|National Public Health Laboratory|Mak|Singapore

>Spike|hCoV-19/USA/MI-MDHHS-SC20257/2020|2020-03-12|EPI\_ISL\_447227|Original|hCoV-19^^Michigan|Human|Michigan Department of Health and Human Services|Michigan Department of Health and Human Services|Blankenship|USA

>Spike|hCoV-19/Netherlands/NA\_106/2020|2020-03-18|EPI\_ISL\_422655|Original|hCoV-19^^Netherlands|Human|Dutch COVID-19 response team|Erasmus Medical Center|Oude Munnink|Netherlands

>Spike|hCoV-19/England/MILK-B01F34/2020|2020-10-23|EPI\_ISL\_642805|Original|hCoV-19^^England|Human|Lighthouse Lab in Milton Keynes|Wellcome Sanger Institute for the COVID-19 Genomics UK (COG-UK) Consortium|Davies|United Kingdom

>Spike|hCoV-19/England/CAMB-7A21A/2020|2020-04-02|EPI\_ISL\_440583|Original|hCoV-19^^England|Human|Department of Pathology|Wellcome Sanger Institute for the COVID-19 Genomics UK (COG-UK) consortium|Amato|United Kingdom

>Spike|hCoV-19/USA/NY-NYCPHL-000847/2020|2020-03-30|EPI\_ISL\_632224|Original|hCoV-19^^New York|Human|Flushing Hospital Medical Center|New York City Public Health Laboratory|Wang|USA

>Spike|hCoV-19/Singapore/1008/2020|2020-03-25|EPI\_ISL\_574493|Original|hCoV-19^^Singapore|Human|National Public Health Laboratory|National Public Health Laboratory|Mak|Singapore

>Spike|hCoV-19/India/DL-NCDC-4476/2020|2020-04-13|EPI\_ISL\_436455|Original|hCoV-19^^Delhi|Human|National Centre for Disease control (NCDC)|NCDC/CSIR-IGIB|Singh|India

>Spike|hCoV-19/England/QEUA-A8B953/2020|2020-10-16|EPI\_ISL\_643153|Original|hCoV-19^^England|Human|Lighthouse Lab in Glasgow|Wellcome Sanger Institute for the COVID-19 Genomics UK (COG-UK) Consortium|Davies|United Kingdom

>Spike|hCoV-19/England/201061225/2020|2020-03-04|EPI\_ISL\_464408|Original|hCoV-19^^England|Human|Respiratory Virus Unit|Respiratory Virus Unit|Platt|United Kingdom

>Spike|hCoV-19/USA/CA-CDPH059/2020|2020-06-19|EPI\_ISL\_755035|Original|hCoV-19^^California|Human|California Department of Public Health|California Department of Public Health|Bell|USA

>Spike|hCoV-19/England/205260475/2020|2020-12-17|EPI\_ISL\_754369|Original|hCoV-19^^England|Human|Respiratory Virus Unit|COVID-19 Genomics UK (COG-UK) Consortium|Platt|United Kingdom

>Spike|hCoV-19/England/CAMB-7E3C8/2020|2020-04-07|EPI\_ISL\_524522|Original|hCoV-19^^England|Human|Department of Pathology|Wellcome Sanger Institute for the COVID-19 Genomics UK (COG-UK) consortium|Davies|United Kingdom

>Spike|hCoV-19/Australia/VIC6804/2020|2020-07-21|EPI\_ISL\_564067|Original|hCoV-19^^Victoria|Human|Victorian Infectious Diseases Reference Laboratory (VIDRL)|VIDRL and MDU-PHL|Schultz|Australia

>Spike|hCoV-19/England/QEUA-B41ABF/2020|2020-11-08|EPI\_ISL\_658735|Original|hCoV-19^^England|Human|Lighthouse Lab in Glasgow|Wellcome Sanger Institute for the COVID-19 Genomics UK (COG-UK) Consortium|Davies|United Kingdom

>Spike|hCoV-19/USA/WY-WPHL-20149740/2020|2020-11-24|EPI\_ISL\_770102|Original|hCoV-19^^Wyoming|Human|Wyoming Public Health Laboratory|Wyoming Public Health Laboratory|Hull|USA

>Spike|hCoV-19/England/NORT-294157/2020|2020-07-26|EPI\_ISL\_573337|Original|hCoV-19^^England|Human|Northumbria University / South Tees Hospitals NHS Foundation Trust / North Cumbria Integrated Care NHS Foundation Trust / North Tees and Hartlepool NHS Foundation Trust / Newcastle Hospitals NHS Foundation Trust|COVID-19 Genomics UK (COG-UK) Consortium|Bashton|United Kingdom

>Spike|hCoV-19/USA/OH-OSUP0024/2020|2020-04-12|EPI\_ISL\_430010|Original|hCoV-19^^Ohio|Human|OSU Wexner Medical Center|James Molecular Lab - OSUWMC|Jones|USA

>Spike|hCoV-19/France/PAC-IHU-0632/2020|2020-04-13|EPI\_ISL\_568903|Original|hCoV-19^^Provence-Alpes-C\u00f4te-d\u00e0z|Human|MEPHI|MEPHI|Levasseur|France

>Spike|hCoV-19/Denmark/DCGC-16302/2020|2020-11-16|EPI\_ISL\_714691|Original|hCoV-19^^Nordjylland|Human|Department of Virus and Microbiological Special Diagnostics|Albertsen Lab|Michaelsen|Denmark

>Spike|hCoV-19/USA/WA-UW-47147/2020|2020-12-18|EPI\_ISL\_756238|Original|hCoV-19^^Washington|Human|UW Virology Lab|UW Virology Lab|Roychoudhury|USA

>Spike|hCoV-19/Germany/HH-hpi-p2497/2020|2020-06-26|EPI\_ISL\_776547|Original|hCoV-19^^Hamburg|Human|University Medical Center Hamburg Eppendorf|Heinrich Pette Institute|Robitaille|Germany

>Spike|hCoV-19/USA/CA-CZB-1139/2020|2020-04-02|EPI\_ISL\_447890|Original|hCoV-19^^California|Human|University of California|Chan-Zuckerberg Biohub|Hao|USA

>Spike|hCoV-19/Denmark/DCGC-3521/2020|2020-08-31|EPI\_ISL\_616312|Original|hCoV-19^^Hovedstaden|Human|Department of Virus and Microbiological Special Diagnostics|Albertsen lab|Michaelsen|Denmark

>Spike|hCoV-19/England/20166060504/2020|2020-04-03|EPI\_ISL\_466559|Original|hCoV-19^^England|Human|Respiratory Virus Unit|Respiratory Virus Unit|Platt|United Kingdom

>Spike|hCoV-19/Japan/PG-6503/2020|2020-07-00|EPI\_ISL\_689605|Original|hCoV-19^^Japan|Human|Pathogen Genomics Center|Pathogen Genomics Center|Sekizuka|Japan

>Spike|hCoV-19/Wales/PHWC-16BE44/2020|2020-09-18|EPI\_ISL\_573980|Original|hCoV-19^^Wales|Human|Wales Specialist Virology Centre Sequencing lab|COVID-19 Genomics UK (COG-UK) Consortium|Moore|United Kingdom

>Spike|hCoV-19/Wales/PHWC-4A137D/2020|2020-12-09|EPI\_ISL\_743661|Original|hCoV-19^^Wales|Human|Wales Specialist Virology Centre Sequencing lab|COVID-19 Genomics UK (COG-UK) Consortium|Moore|United Kingdom

>Spike|hCoV-19/Canada/QC-LSPQ-L00243608/2020|2020-03-30|EPI\_ISL\_536367|Original|hCoV-19^^Quebec|Human|H\u00f4pital de Hull|Laboratoire de sant\u00e9 publique du Qu\u00e9bec|Moreira|Canada

>Spike|hCoV-19/Switzerland/SH-ETHZ-400021/2020|2020-12-04|EPI\_ISL\_729090|Original|hCoV-19^^Schaffhausen|Human|Viollier AG|Department of Biosystems Science and Engineering|Nadeau|Switzerland

>Spike|hCoV-19/England/MILK-A44D0F/2020|2020-10-06|EPI\_ISL\_598547|Original|hCoV-19^^England|Human|Lighthouse Lab in Milton Keynes|Wellcome Sanger Institute for the COVID-19 Genomics UK (COG-UK) consortium|Davies|United Kingdom

>Spike|hCoV-19/England/201141471/2020|2020-03-09|EPI\_ISL\_464755|Original|hCoV-19^^England|Human|Respiratory Virus Unit|Respiratory Virus Unit|Platt|United Kingdom

>Spike|hCoV-19/England/QEUH-BCB4CE/2020|2020-11-25|EPI\_ISL\_704185|Original|hCoV-19^^England|Human|Lighthouse Lab in Glasgow|Wellcome Sanger Institute for the COVID-19 Genomics UK (COG-UK) Consortium|Davies|United Kingdom

>Spike|hCoV-19/Australia/WA334/2020|2020-03-17|EPI\_ISL\_596877|Original|hCoV-19^^Western Australia|Human|PathWest Laboratory Medicine WA|PathWest Laboratory Medicine WA Microbial Surveillance Unit|Sikazwe|Australia

>Spike|hCoV-19/USA/MI-UM-10035823850/2020|2020-09-05|EPI\_ISL\_583321|Original|hCoV-19^^Michigan|Human|University of Michigan Clinical Microbiology Laboratory|Lauring Lab|Valesano|USA

>Spike|hCoV-19/England/ALDP-A94F37/2020|2020-10-19|EPI\_ISL\_624790|Original|hCoV-19^^England|Human|Lighthouse Lab in Alderley Park|Wellcome Sanger Institute for the COVID-19 Genomics UK (COG-UK) consortium|Davies|United Kingdom

>Spike|hCoV-19/USA/LA-EVTL135/2020|2020-05-09|EPI\_ISL\_451296|Original|hCoV-19^^Louisiana|Human|LSUHS Emerging Viral Threat Laboratory|Microbial Genome Sequencing Center|Kamil|USA

>Spike|hCoV-19/Denmark/DCGC-15868/2020|2020-11-23|EPI\_ISL\_714074|Original|hCoV-19^^Nordjylland|Human|Department of Virus and Microbiological Special Diagnostics|Albertsen Lab|Michaelsen|Denmark

>Spike|hCoV-19/USA/WI-UW-2086/2020|2020-09-23|EPI\_ISL\_677491|Original|hCoV-19^^Wisconsin|Human|University of Wisconsin-Madison AIDS Vaccine Research Laboratories|University of Wisconsin-Madison AIDS Vaccine Research Laboratories|Baczenas|USA

>Spike|hCoV-19/Canada/ON-PHL-20-01295/2020|2020-06-00|EPI\_ISL\_548899|Original|hCoV-19^^Ontario|Human|Public Health Ontario Laboratory|Public Health Ontario Laboratory|Guthrie|Canada

>Spike|hCoV-19/USA/LA-GBCL-26544513/2020|2020-04-22|EPI\_ISL\_485105|Original|hCoV-19^^Louisiana|Human|River Road Testing Lab|Ginkgo Bioworks Clinical Laboratory|Smith|USA

>Spike|hCoV-19/England/ALDP-9FDED6/2020|2020-10-01|EPI\_ISL\_587869|Original|hCoV-19^^England|Human|Lighthouse Lab in Alderley Park|Wellcome Sanger Institute for the COVID-19 Genomics UK (COG-UK) consortium|Davies|United Kingdom

>Spike|hCoV-19/Cyprus/007/2020|2020-04-17|EPI\_ISL\_463747|Original|hCoV-19^^Cyprus|Human|Department of Molecular Virology|Department of Molecular Virology|Richter|Cyprus

>Spike|hCoV-19/Belgium/reg-0916967/2020|2020-09-16|EPI\_ISL\_734957|Original|hCoV-19^^Berg|Human|UZ Leuven|KU Leuven|Maes|Belgium

>Spike|hCoV-19/USA/NM-DOH-2020329070/2020|2020-09-02|EPI\_ISL\_575324|Original|hCoV-19^^New Mexico|Human|Molecular Biology|Molecular Biology|Johnson|USA

>Spike|hCoV-19/Denmark/DCGC-6277/2020|2020-10-05|EPI\_ISL\_620037|Original|hCoV-19^^Nordjylland|Human|Department of Virus and Microbiological Special Diagnostics|Albertsen lab|Michaelsen|Denmark

>Spike|hCoV-19/India/TG-CCMB-OM25/2020|2020-09-20|EPI\_ISL\_644719|Original|hCoV-19^^Telangana|Human|Osmania Medical College|CSIR-Centre for Cellular and Molecular Biology|Mukherjee|India

>Spike|hCoV-19/England/201090792/2020|2020-03-05|EPI\_ISL\_464606|Original|hCoV-19^^England|Human|Respiratory Virus Unit|Respiratory Virus Unit|Platt|United Kingdom

>Spike|hCoV-19/England/MILK-852A09/2020|2020-07-17|EPI\_ISL\_557352|Original|hCoV-19^^England|Human|Lighthouse Lab in Milton Keynes|Wellcome Sanger Institute for the COVID-19 Genomics UK (COG-UK) consortium|Davies|United Kingdom

>Spike|hCoV-19/Spain/MD-H12-LP16-6193/2020|2020-03-09|EPI\_ISL\_428675|Original|hCoV-19^^Madrid|Human|Hospital Universitario La Paz|Hospital Universitario 12 de Octubre|Viedma|Spain

>Spike|hCoV-19/England/CAMC-A575F2/2020|2020-10-08|EPI\_ISL\_597392|Original|hCoV-19^^England|Human|Lighthouse Lab in Cambridge|Wellcome Sanger Institute for the COVID-19 Genomics UK (COG-UK) consortium|Davies|United Kingdom

>Spike|hCoV-19/Spain/AN-IBV-001875/2020|2020-03-07|EPI\_ISL\_452470|Original|hCoV-19^^Andalucia|Human|Hospital Universitario Puerta del Mar de C\u00e1diz - INIBICA|SeqCOVID-SPAIN consortium|IBV (CSIC)|Comas|Spain

>Spike|hCoV-19/England/ALDP-B853A5/2020|2020-11-15|EPI\_ISL\_674277|Original|hCoV-19^^England|Human|Lighthouse Lab in Alderley Park|Wellcome Sanger Institute for the COVID-19 Genomics UK (COG-UK) Consortium|Davies|United Kingdom

>Spike|hCoV-19/Denmark/DCGC-956/2020|2020-03-09|EPI\_ISL\_614548|Original|hCoV-19^^Syddanmark|Human|Department of Virus and Microbiological Special Diagnostics|Albertsen lab|Michaelsen|Denmark

>Spike|hCoV-19/Australia/VIC5688/2020|2020-07-20|EPI\_ISL\_518494|Original|hCoV-19^^Victoria|Human|Microbiological Diagnostic Unit - Public Health Laboratory (MDU-PHL)|MDU-PHL|Schultz|Australia

>Spike|hCoV-19/Wales/PHWC-31F63/2020|2020-04-13|EPI\_ISL\_446590|Original|hCoV-19^^Wales|Human|Wales Specialist Virology Centre|Public Health Wales Microbiology Cardiff|Moore|United Kingdom

>Spike|hCoV-19/mink/Netherlands/NB-EMC-17-10/2020|2020-07-02|EPI\_ISL\_523035|Original|hCoV-19^^Noord Brabant|Neovison vison|Dutch COVID-19 response team|Erasmus Medical Center|Oude Munnink|Netherlands

>Spike|hCoV-19/Wales/PHWC-489AA3/2020|2020-10-27|EPI\_ISL\_652448|Original|hCoV-19^^Wales|Human|Wales Specialist Virology Centre Sequencing lab|COVID-19 Genomics UK (COG-UK) Consortium|Moore|United Kingdom

>Spike|hCoV-19/England/LIVE-1D2B23/2020|2020-03-29|EPI\_ISL\_612408|Original|hCoV-19^^England|Human|Liverpool Clinical Laboratories|COVID-19 Genomics UK (COG-UK) Consortium|Haldenby|United Kingdom

>Spike|hCoV-19/Australia/VIC5614/2020|2020-07-16|EPI\_ISL\_518429|Original|hCoV-19^^Victoria|Human|Victorian Infectious Diseases Reference Laboratory (VIDRL)|VIDRL and MDU-PHL|Schultz|Australia

>Spike|hCoV-19/Denmark/DCGC-10614/2020|2020-11-02|EPI\_ISL\_669551|Original|hCoV-19^^Hovedstaden|Human|Department of Virus and Microbiological Special Diagnostics|Albertsen Lab|Michaelsen|Denmark

>Spike|hCoV-19/England/MILK-B3D38E/2020|2020-10-31|EPI\_ISL\_741366|Original|hCoV-19^^England|Human|Oxford Viromics|COVID-19 Genomics UK (COG-UK) Consortium|Golubchik|United Kingdom

>Spike|hCoV-19/France/ARA-117777/2020|2020-12-09|EPI\_ISL\_745377|Original|hCoV-19^^Auvergne-Rh\u00f4ne-Alpes|Human|CNR Virus des Infections Respiratoires - France SUD|CNR Virus des Infections Respiratoires - France SUD|Bal|France



>Spike|hCoV-19/France/ARA-06923/2020|2020-03-09|EPI\_ISL\_508937|Original|hCoV-19^^Auvergne-Rh\u00f4ne-Alpes|Human|CNR Virus des Infections Respiratoires - France SUD|CNR Virus des Infections Respiratoires - France SUD|Josset|France

>Spike|hCoV-19/Netherlands/ZH-EMC-791/2020|2020-10-05|EPI\_ISL\_632672|Original|hCoV-19^^Zuid Holland|Human|Dutch COVID-19 response team|Erasmus Medical Center|Oude Munnink|Netherlands

>Spike|hCoV-19/England/MILK-B3CB5A/2020|2020-11-01|EPI\_ISL\_706187|Original|hCoV-19^^England|Human|Oxford Viromics|COVID-19 Genomics UK (COG-UK) Consortium|Golubchik|United Kingdom

>Spike|hCoV-19/Hong Kong/VM20095816/2020|2020-08-01|EPI\_ISL\_602619|Original|hCoV-19^^Hong Kong|Human|United Christian Hospital|Hong Kong Department of Health|Mak|China

>Spike|hCoV-19/England/CAMC-B234B5/2020|2020-11-02|EPI\_ISL\_651518|Original|hCoV-19^^England|Human|Virology Department|COVID-19 Genomics UK (COG-UK) Consortium|de Silva|United Kingdom

>Spike|hCoV-19/England/MILK-A7D0F5/2020|2020-10-11|EPI\_ISL\_606608|Original|hCoV-19^^England|Human|Lighthouse Lab in Milton Keynes|Wellcome Sanger Institute for the COVID-19 Genomics UK (COG-UK) Consortium|Davies|United Kingdom

>Spike|hCoV-19/Australia/WA133/2020|2020-04-02|EPI\_ISL\_596696|Original|hCoV-19^^Western Australia|Human|PathWest Laboratory Medicine WA|PathWest Laboratory Medicine WA Microbial Surveillance Unit|Sikazwe|Australia

>Spike|hCoV-19/USA/CA-CZB-14522/2020|2020-11-11|EPI\_ISL\_738536|Original|hCoV-19^^California|Human|Santa Clara County Public Health Laboratory|Chan-Zuckerberg Biohub|Kamm|USA

>Spike|hCoV-19/Australia/NSW1266/2020|2020-12-16|EPI\_ISL\_745097|Original|hCoV-19^^New South Wales|Human|Pathology North - Royal North Shore Hospital - NSW Health Pathology|CIDM-PH|Gall|Australia

>Spike|hCoV-19/Japan/PG-7147/2020|2020-09-00|EPI\_ISL\_688252|Original|hCoV-19^^Japan|Human|Pathogen Genomics Center|Pathogen Genomics Center|Sekizuka|Japan

>Spike|hCoV-19/USA/OR-OHSU-0106/2020|2020-04-29|EPI\_ISL\_509061|Original|hCoV-19^^Oregon|Human|OHSU Lab Services Molecular Microbiology Lab|Oregon SARS-CoV-2 Genome Sequencing Center|O'Roak|USA

>Spike|hCoV-19/England/CAMC-B7A17C/2020|2020-11-12|EPI\_ISL\_741086|Original|hCoV-19^^England|Human|Oxford Viromics|COVID-19 Genomics UK (COG-UK) Consortium|Golubchik|United Kingdom

>Spike|hCoV-19/Romania/ROSV\_2492/2020|2020-04-16|EPI\_ISL\_491058|Original|hCoV-19^^Suceava|Human|Suceava County Emergency Hospital|\Stefan cel Mare\ University Metagenomics Lab|Lobiuc|Romania

>Spike|hCoV-19/Australia/VIC6357/2020|2020-07-22|EPI\_ISL\_518337|Original|hCoV-19^^Victoria|Human|Microbiological Diagnostic Unit - Public Health Laboratory (MDU-PHL)|MDU-PHL|Schultz|Australia

>Spike|hCoV-19/Australia/VIC13510/2020|2020-07-30|EPI\_ISL\_592279|Original|hCoV-19^^Victoria|Human|Microbiological Diagnostic Unit - Public Health Laboratory (MDU-PHL)|MDU-PHL|Schultz|Australia

>Spike|hCoV-19/Poland/PL\_MCB\_7/2020|2020-04-07|EPI\_ISL\_645006|Original|hCoV-19^^Poland|Human|Human Genome Variation Research Group|Human Genome Variation Research Group||Poland

>Spike|hCoV-19/England/MILK-9C29E8/2020|2020-09-10|EPI\_ISL\_566426|Original|hCoV-19^^England|Human|Lighthouse Lab in Milton Keynes|Wellcome Sanger Institute for the COVID-19 Genomics UK (COG-UK) consortium|Davies|United Kingdom

>Spike|hCoV-19/Scotland/QEUEH-C32E78/2020|2020-12-11|EPI\_ISL\_757171|Original|hCoV-19^^Scotland|Human|Lighthouse Lab in Glasgow|Wellcome Sanger Institute for the COVID-19 Genomics UK (COG-UK) Consortium|Davies|United Kingdom

>Spike|hCoV-19/England/NORT-295B85/2020|2020-04-03|EPI\_ISL\_488629|Original|hCoV-19^^England|Human|NU-OMICS DNA Sequencing research facility|Wellcome Sanger Institute for the COVID-19 Genomics UK (COG-UK) consortium|Davies|United Kingdom

>Spike|hCoV-19/England/ALDP-B6339E/2020|2020-11-09|EPI\_ISL\_656642|Original|hCoV-19^^England|Human|Lighthouse Lab in Alderley Park|Wellcome Sanger Institute for the COVID-19 Genomics UK (COG-UK) Consortium|Davies|United Kingdom

>Spike|hCoV-19/Denmark/DCGC-5906/2020|2020-10-05|EPI\_ISL\_620171|Original|hCoV-19^^Hovedstaden|Human|Department of Virus and Microbiological Special Diagnostics|Albertsen lab|Michaelsen|Denmark

>Spike|hCoV-19/England/QEUH-AE50F8/2020|2020-10-27|EPI\_ISL\_633230|Original|hCoV-19^^England|Human|Lighthouse Lab in Glasgow|Wellcome Sanger Institute for the COVID-19 Genomics UK (COG-UK) consortium|Davies|United Kingdom

>Spike|hCoV-19/England/CAMB-7CE7E/2020|2020-04-06|EPI\_ISL\_441597|Original|hCoV-19^^England|Human|Department of Pathology|Wellcome Sanger Institute for the COVID-19 Genomics UK (COG-UK) consortium|Amato|United Kingdom

>Spike|hCoV-19/Wales/PHWC-2A589/2020|2020-04-07|EPI\_ISL\_445586|Original|hCoV-19^^Wales|Human|Wales Specialist Virology Centre|Public Health Wales Microbiology Cardiff|Moore|United Kingdom

>Spike|hCoV-19/Portugal/PT1775/2020|2020-11-11|EPI\_ISL\_732006|Original|hCoV-19^^Portugal|Human|Instituto Nacional de Saude (INSA)|Instituto Nacional de Saude (INSA)|Borges|Portugal

>Spike|hCoV-19/England/LIVE-A50B2/2020|2020-03-01|EPI\_ISL\_500104|Original|hCoV-19^^England|Human|Liverpool Clinical Laboratories|COVID-19 Genomics UK (COG-UK) Consortium|Haldenby|United Kingdom

>Spike|hCoV-19/England/MILK-B39249/2020|2020-11-01|EPI\_ISL\_658892|Original|hCoV-19^^England|Human|Lighthouse Lab in Milton Keynes|Wellcome Sanger Institute for the COVID-19 Genomics UK (COG-UK) Consortium|Davies|United Kingdom

>Spike|hCoV-19/USA/UT-UPHL-2008928/2020|2020-05-28|EPI\_ISL\_525033|Original|hCoV-19^^Utah|Human|Utah Public Health Laboratory|Utah Public Health Laboratory|Young|USA

>Spike|hCoV-19/Canada/ON-UHTC\_0150/2020|2020-06-09|EPI\_ISL\_526283|Original|hCoV-19^^Ontario|Human|Unity Health Toronto|Ontario Institute for Cancer Research|de Borja|Canada

>Spike|hCoV-19/England/EXET-136CDF/2020|2020-04-24|EPI\_ISL\_471913|Original|hCoV-19^^England|Human|University of Exeter|COVID-19 Genomics UK (COG-UK) Consortium|Temperton|United Kingdom

>Spike|hCoV-19/Ireland/CO-NVRL-72IRL34461/2020|2020-08-15|EPI\_ISL\_578250|Original|hCoV-19^^Cork|Human|National Virus Reference Laboratory|National Virus Reference Laboratory|Gonzalez|Ireland

>Spike|hCoV-19/USA/CA-UCLA-71/2020|2020-03-17|EPI\_ISL\_537596|Original|hCoV-19^^California|Human|UCLA Pathology Clinical Microbiology Lab|Kruglyak Lab|Boocock|USA

>Spike|hCoV-19/Ireland/un-NVRL-AIIDB0141v1/2020|2020-12-17|EPI\_ISL\_791311|Original|hCoV-19^^Ireland|Human|National Virus Reference Laboratory|Irish Coronavirus Sequencing Consortium - Teagasc Moorepark|Walsh|Ireland

>Spike|hCoV-19/Wales/PHWC-47DF67/2020|2020-10-07|EPI\_ISL\_595385|Original|hCoV-19^^Wales|Human|Originating lab|COVID-19 Genomics UK (COG-UK) Consortium|Moore|United Kingdom

>Spike|hCoV-19/Wales/PHWC-16CEF8/2020|2020-09-25|EPI\_ISL\_574183|Original|hCoV-19^^Wales|Human|Wales Specialist Virology Centre Sequencing lab|COVID-19 Genomics UK (COG-UK) Consortium|Moore|United Kingdom

>Spike|hCoV-19/England/BRIS-1223D1/2020|2020-04-04|EPI\_ISL\_440676|Original|hCoV-19^^England|Human|PHE South West Regional Laboratory|Wellcome Sanger Institute for the COVID-19 Genomics UK (COG-UK) consortium|Amato|United Kingdom

>Spike|hCoV-19/Switzerland/BS-UHB-42186303/2020|2020-03-11|EPI\_ISL\_528001|Original|hCoV-19^^Basel-Stadt|Human|University Hospital Basel|University Hospital Basel|Roloff Handschin|Switzerland

>Spike|hCoV-19/USA/ID-UW-4418/2020|2020-03-28|EPI\_ISL\_430952|Original|hCoV-19^^Idaho|Human|UW Virology Lab|UW Virology Lab|Roychoudhury|USA

>Spike|hCoV-19/Portugal/PT0005/2020|2020-03-04|EPI\_ISL\_417989|Original|hCoV-19^^Portugal|Human|Centro Hospitalar e Universitario de Sao Joao|Instituto Nacional de Saude (INSA)|Borges|Portugal

>Spike|hCoV-19/Brazil/RJ-00471/2020|2020-08-03|EPI\_ISL\_717866|Original|hCoV-19^^Rio de Janeiro|Human|Laboratorio de Virologia Molecular / UFRJ|Bioinformatics Laboratory / LNCC|Almeida|Brazil

>Spike|hCoV-19/France/OCC-57/2020|2020-07-15|EPI\_ISL\_593872|Original|hCoV-19^^Occitanie|Human|CHU Purpan - Laboratoire de Virologie - Institut

F\u00e9ratif de Biologie|CHU Purpan - Laboratoire de Virologie - Institut  
F\u00e9ratif de Biologie|Latour|France  
>Spike|hCoV-19/England/SHEF-C85F6/2020|2020-03-22|EPI\_ISL\_432451|Original|hCoV-  
19^^England|Human|Virology Department|COVID-19 Genomics UK (COG-UK) Consortium|de  
Silva|United Kingdom  
>Spike|hCoV-19/Peru/ARE-INS-075/2020|2020-04-16|EPI\_ISL\_527787|Original|hCoV-  
19^^Arequipa|Human|Laboratorio de Referencia Nacional de Virus Respiratorio. Centro  
Nacional de Salud Publica. Instituto Nacional de Salud Peru.|Laboratorio de  
Referencia Nacional de Biotecnolog\u00eda y Biolog\u00eda Molecular. Centro Nacional  
de Salud Publica. Instituto Nacional de Salud Peru.|Padilla Rojas|Peru  
>Spike|hCoV-19/Spain/MD-IBV-99008652/2020|2020-09-28|EPI\_ISL\_654216|Original|hCoV-  
19^^Madrid|Human|Hospital General Universitario Gregorio Marañ\u00f1\u00f3n|SeqCOVID-  
SPAIN consortium/IBV (CSIC) |Comas|Spain  
>Spike|hCoV-19/England/QEUH-B8095D/2020|2020-11-14|EPI\_ISL\_674569|Original|hCoV-  
19^^England|Human|Lighthouse Lab in Glasgow|Wellcome Sanger Institute for the COVID-  
19 Genomics UK (COG-UK) Consortium|Davies|United Kingdom  
>Spike|hCoV-19/USA/CA-ALSR-2777/2020|2020-07-15|EPI\_ISL\_635675|Original|hCoV-  
19^^California|Human|San Diego County Public Health Laboratory|Andersen lab at  
Scripps Research|Gangavarapu|USA  
>Spike|hCoV-19/USA/WI-WSLH-200464/2020|2020-05-18|EPI\_ISL\_578606|Original|hCoV-  
19^^Wisconsin|Human|Wisconsin State Laboratory of Hygiene Communicable Disease  
Division|Wisconsin State Laboratory of Hygiene Communicable Disease  
Division|Florek|USA  
>Spike|hCoV-19/Australia/VIC12778/2020|2020-07-27|EPI\_ISL\_592077|Original|hCoV-  
19^^Victoria|Human|Microbiological Diagnostic Unit - Public Health Laboratory (MDU-  
PHL) |MDU-PHL|Schultz|Australia  
>Spike|hCoV-19/Switzerland/ZH-ETHZ-190038/2020|2020-07-  
08|EPI\_ISL\_500900|Original|hCoV-19^^Zurich|Human|Viollier AG|Department of Biosystems  
Science and Engineering|Nadeau|Switzerland  
>Spike|hCoV-19/USA/AZ-TG517513/2020|2020-06-28|EPI\_ISL\_695339|Original|hCoV-  
19^^Arizona|Human|AZ SPHL|TGen North|French|USA  
>Spike|hCoV-19/England/ALDP-95AEF5/2020|2020-06-14|EPI\_ISL\_555713|Original|hCoV-  
19^^England|Human|Lighthouse Lab in Alderley Park|Wellcome Sanger Institute for the  
COVID-19 Genomics UK (COG-UK) consortium|Davies|United Kingdom  
>Spike|hCoV-19/Scotland/QEUH-964089/2020|2020-08-12|EPI\_ISL\_534370|Original|hCoV-  
19^^Scotland|Human|NHSGGC West of Scotland Specialist Virology Centre / MRC-  
University of Glasgow Centre for Virus Research|Wellcome Sanger Institute for the  
COVID-19 Genomics UK (COG-UK) consortium|Davies|United Kingdom  
>Spike|hCoV-19/England/NORW-F2BE2/2020|2020-11-18|EPI\_ISL\_665697|Original|hCoV-  
19^^England|Human|Quadram Institute Bioscience|COVID-19 Genomics UK (COG-UK)  
Consortium|Alikhan|United Kingdom  
>Spike|hCoV-19/England/QEUH-B133AC/2020|2020-11-02|EPI\_ISL\_641813|Original|hCoV-  
19^^England|Human|Lighthouse Lab in Glasgow|Wellcome Sanger Institute for the COVID-  
19 Genomics UK (COG-UK) Consortium|Davies|United Kingdom  
>Spike|hCoV-19/Denmark/DCGC-1739/2020|2020-03-09|EPI\_ISL\_619980|Original|hCoV-  
19^^Nordjylland|Human|Department of Virus and Microbiological Special  
Diagnostics|Albertsen lab|Michaelsen|Denmark  
>Spike|hCoV-19/Japan/PG-5291/2020|2020-08-00|EPI\_ISL\_690394|Original|hCoV-  
19^^Japan|Human|Pathogen Genomics Center|Pathogen Genomics Center|Sekizuka|Japan  
>Spike|hCoV-19/USA/MA-MGH-01022/2020|2020-04-30|EPI\_ISL\_791848|Original|hCoV-  
19^^Massachusetts|Human|Massachusetts General Hospital|Infectious Disease  
Program|Park|USA  
>Spike|hCoV-19/England/CAMB-1B92B4/2020|2020-11-03|EPI\_ISL\_651008|Original|hCoV-  
19^^England|Human|Department of Pathology|COVID-19 Genomics UK (COG-UK)  
Consortium|Goodfellow|United Kingdom  
>Spike|hCoV-19/Spain/RI-IBV-99010974/2020|2020-09-23|EPI\_ISL\_732802|Original|hCoV-  
19^^La Rioja|Human|Centro de Investigaci\u00f3n Biom\u00e9dica de La Rioja - Hospital  
San Pedro Logro\u00f1o|SeqCOVID-SPAIN consortium/IBV (CSIC) |Comas|Spain

>Spike|hCoV-19/England/CAMC-C995D4/2020|2020-12-18|EPI\_ISL\_762059|Original|hCoV-19^^England|Human|Lighthouse Lab in Cambridge|Wellcome Sanger Institute for the COVID-19 Genomics UK (COG-UK) Consortium|Davies|United Kingdom

>Spike|hCoV-19/England/MILK-A7B15E/2020|2020-10-15|EPI\_ISL\_607541|Original|hCoV-19^^England|Human|Lighthouse Lab in Milton Keynes|Wellcome Sanger Institute for the COVID-19 Genomics UK (COG-UK) consortium|Davies|United Kingdom

>Spike|hCoV-19/USA/UT-01820/2020|2020-04-10|EPI\_ISL\_509571|Original|hCoV-19^^Utah|Human|Utah Public Health Laboratory|Utah Public Health Laboratory|Butz|USA

>Spike|hCoV-19/Denmark/DCGC-5788/2020|2020-09-28|EPI\_ISL\_620975|Original|hCoV-19^^Sjaelland|Human|Department of Virus and Microbiological Special Diagnostics|Albertsen lab|Michaelsen|Denmark

>Spike|hCoV-19/England/CAMC-B09C17/2020|2020-10-31|EPI\_ISL\_672995|Original|hCoV-19^^England|Human|Lighthouse Lab in Cambridge|Wellcome Sanger Institute for the COVID-19 Genomics UK (COG-UK) Consortium|Davies|United Kingdom

>Spike|hCoV-19/USA/CO-CDPHE-2004230658/2020|2020-04-23|EPI\_ISL\_677637|Original|hCoV-19^^Colorado|Human|Colorado Department of Public Health and Environment|Colorado Department of Public Health and Environment|Bankers|USA

>Spike|hCoV-19/Wales/QEUA-AD10E0/2020|2020-10-26|EPI\_ISL\_647953|Original|hCoV-19^^Wales|Human|Lighthouse Lab in Glasgow|Wellcome Sanger Institute for the COVID-19 Genomics UK (COG-UK) Consortium|Davies|United Kingdom

>Spike|hCoV-19/England/ALDP-9CB77C/2020|2020-09-16|EPI\_ISL\_575634|Original|hCoV-19^^England|Human|Lighthouse Lab in Alderley Park|Wellcome Sanger Institute for the COVID-19 Genomics UK (COG-UK) consortium|Davies|United Kingdom

>Spike|hCoV-19/USA/MI-MDHHS-SC20378/2020|2020-03-24|EPI\_ISL\_450589|Original|hCoV-19^^Michigan|Human|Michigan Department of Health and Human Services|Michigan Department of Health and Human Services|Blankenship|USA

>Spike|hCoV-19/USA/TX-HMH-MCoV-9388/2020|2020-07-03|EPI\_ISL\_780557|Original|hCoV-19^^Texas|Human|Houston Methodist Hospital|Houston Methodist Hospital|Long|USA

>Spike|hCoV-19/Luxembourg/LNS7550441/2020|2020-07-10|EPI\_ISL\_744586|Original|hCoV-19^^Luxembourg|Human|Laboratoire national de sant\u00e9|Laboratoire national de sant\u00e9|Wienecke-Baldacchino|Luxembourg

>Spike|hCoV-19/Scotland/CVR4686/2020|2020-09-29|EPI\_ISL\_611610|Original|hCoV-19^^Scotland|Human|West of Scotland Specialist Virology Centre|COVID-19 Genomics UK (COG-UK) Consortium|Robertson|United Kingdom

>Spike|hCoV-19/Luxembourg/LNS9699068/2020|2020-11-08|EPI\_ISL\_744969|Original|hCoV-19^^Luxembourg|Human|Laboratoire national de sant\u00e9|Laboratoire national de sant\u00e9|Wienecke-Baldacchino|Luxembourg

>Spike|hCoV-19/England/QEUA-998514/2020|2020-08-24|EPI\_ISL\_540017|Original|hCoV-19^^England|Human|Lighthouse Lab in Glasgow|Wellcome Sanger Institute for the COVID-19 Genomics UK (COG-UK) consortium|Davies|United Kingdom

>Spike|hCoV-19/USA/TX-HMH-1746/2020|2020-05-12|EPI\_ISL\_542811|Original|hCoV-19^^Texas|Human|Houston Methodist Hospital|Houston Methodist Hospital|Long|USA

>Spike|hCoV-19/Luxembourg/LNS2285274/2020|2020-08-24|EPI\_ISL\_740092|Original|hCoV-19^^Luxembourg|Human|Laboratoire national de sant\u00e9|Laboratoire national de sant\u00e9|Wienecke-Baldacchino|Luxembourg

>Spike|hCoV-19/England/ALDP-95611E/2020|2020-06-08|EPI\_ISL\_554082|Original|hCoV-19^^England|Human|Lighthouse Lab in Alderley Park|Wellcome Sanger Institute for the COVID-19 Genomics UK (COG-UK) consortium|Davies|United Kingdom

>Spike|hCoV-19/Russia/KC-RII-MH2746S/2020|2020-09-17|EPI\_ISL\_602424|Original|hCoV-19^^Karachay-Cherkess|Human|HELIX LLC|WHO National Influenza Centre Russian Federation|Komissarov|Russia

>Spike|hCoV-19/England/QEUA-B2B286/2020|2020-11-03|EPI\_ISL\_646475|Original|hCoV-19^^England|Human|Lighthouse Lab in Glasgow|Wellcome Sanger Institute for the COVID-19 Genomics UK (COG-UK) Consortium|Davies|United Kingdom

>Spike|hCoV-19/Greece/221\_33038/2020|2020-03-12|EPI\_ISL\_437888|Original|hCoV-19^^Athens|Human|Laboratory of Microbiology|Laboratory of Biology|Karakasiliotis|Greece

>Spike|hCoV-19/Wales/PHWC-494B39/2020|2020-11-25|EPI\_ISL\_726220|Original|hCoV-19^^Wales|Human|Originating lab|COVID-19 Genomics UK (COG-UK) Consortium|Moore|United Kingdom

>Spike|hCoV-19/Australia/VIC7243/2020|2020-07-27|EPI\_ISL\_564309|Original|hCoV-19^^Victoria|Human|Microbiological Diagnostic Unit - Public Health Laboratory (MDU-PHL)|MDU-PHL|Schultz|Australia

>Spike|hCoV-19/Italy/FVG-ICGEB-bal16/2020|2020-04-12|EPI\_ISL\_479618|Original|hCoV-19^^Friuli Venezia Giulia|Human|Laboratory of Molecular Virology of the International Centre for Genetic Engineering and Biotechnology (ICGEB)|ARGO Open Lab Platform for Genome Sequencing|Marcello|Italy

>Spike|hCoV-19/Denmark/DCGC-3530/2020|2020-08-31|EPI\_ISL\_616321|Original|hCoV-19^^Sjaelland|Human|Department of Virus and Microbiological Special Diagnostics|Albertsen lab|Michaelsen|Denmark

>Spike|hCoV-19/England/MILK-99CD45/2020|2020-08-30|EPI\_ISL\_549816|Original|hCoV-19^^England|Human|Lighthouse Lab in Milton Keynes|Wellcome Sanger Institute for the COVID-19 Genomics UK (COG-UK) consortium|Davies|United Kingdom

>Spike|hCoV-19/England/MILK-99DDEA/2020|2020-08-31|EPI\_ISL\_550676|Original|hCoV-19^^England|Human|Lighthouse Lab in Milton Keynes|Wellcome Sanger Institute for the COVID-19 Genomics UK (COG-UK) consortium|Davies|United Kingdom

>Spike|hCoV-19/England/CAMC-A3F2AE/2020|2020-10-05|EPI\_ISL\_609556|Original|hCoV-19^^England|Human|Lighthouse Lab in Cambridge|Wellcome Sanger Institute for the COVID-19 Genomics UK (COG-UK) consortium|Davies|United Kingdom

>Spike|hCoV-19/USA/TX-HMH-4328/2020|2020-06-18|EPI\_ISL\_543537|Original|hCoV-19^^Texas|Human|Houston Methodist Hospital|Houston Methodist Hospital|Long|USA

>Spike|hCoV-19/England/CAMC-A666EE/2020|2020-10-11|EPI\_ISL\_626940|Original|hCoV-19^^England|Human|University of Exeter|COVID-19 Genomics UK (COG-UK) Consortium|Temperton|United Kingdom

>Spike|hCoV-19/England/ALDP-AA407D/2020|2020-10-22|EPI\_ISL\_624146|Original|hCoV-19^^England|Human|Lighthouse Lab in Alderley Park|Wellcome Sanger Institute for the COVID-19 Genomics UK (COG-UK) consortium|Davies|United Kingdom

>Spike|hCoV-19/Northern Ireland/NIRE-FB8B5/2020|2020-04-07|EPI\_ISL\_470063|Original|hCoV-19^^Northern Ireland|Human|Regional Virus Laboratory|Wellcome Sanger Institute for the COVID-19 Genomics UK (COG-UK) consortium|Davies|United Kingdom

>Spike|hCoV-19/England/20139070504/2020|2020-03-28|EPI\_ISL\_423362|Original|hCoV-19^^England|Human|Respiratory Virus Unit|Respiratory Virus Unit|Platt|United Kingdom

>Spike|hCoV-19/USA/MI-UM-10036474937/2020|2020-10-16|EPI\_ISL\_628822|Original|hCoV-19^^Michigan|Human|University of Michigan Clinical Microbiology Laboratory|Lauring Lab|Valesano|USA

>Spike|hCoV-19/England/MILK-61A735/2020|2020-07-06|EPI\_ISL\_557885|Original|hCoV-19^^England|Human|Lighthouse Lab in Milton Keynes|Wellcome Sanger Institute for the COVID-19 Genomics UK (COG-UK) Consortium|Davies|United Kingdom

>Spike|hCoV-19/USA/AK-PHL779/2020|2020-06-29|EPI\_ISL\_528522|Original|hCoV-19^^Alaska|Human|Alaska State Virology Laboratory|Alaska State Virology Laboratory|Drown|USA

>Spike|hCoV-19/England/ALDP-925567/2020|2020-06-23|EPI\_ISL\_552828|Original|hCoV-19^^England|Human|Lighthouse Lab in Alderley Park|Wellcome Sanger Institute for the COVID-19 Genomics UK (COG-UK) consortium|Davies|United Kingdom

>Spike|hCoV-19/Mexico/GUA-INdRE-19/2020|2020-03-27|EPI\_ISL\_493334|Original|hCoV-19^^Guanajuato|Human|Instituto de Diagnostico y Referencia Epidemiologicos (INDRE)|Instituto de Diagnostico y Referencia Epidemiologicos (INDRE)|Rodriguez|Mexico

>Spike|hCoV-19/USA/WA-S2361/2020|2020-06-10|EPI\_ISL\_496993|Original|hCoV-19^^Washington|Human|Washington State Department of Health|Seattle Flu Study|Lee|USA

>Spike|hCoV-19/USA/TX-HMH-MCoV-18716/2020|2020-11-22|EPI\_ISL\_785064|Original|hCoV-19^^Texas|Human|Houston Methodist Hospital|Houston Methodist Hospital|Long|USA

>Spike|hCoV-19/Scotland/CVR2992/2020|2020-04-23|EPI\_ISL\_473638|Original|hCoV-19^^Scotland|Human|West of Scotland Specialist Virology Centre|COVID-19 Genomics UK (COG-UK) Consortium|Robertson|United Kingdom

>Spike|hCoV-19/Palestine/AAS24/2020|2020-11-29|EPI\_ISL\_739659|Original|hCoV-19^^West Bank|Human|Al-Quds Nutrition and Health Research Institute|Al-Quds Nutrition and Health Research Institute|Ereqat|Palestine

>Spike|hCoV-19/England/MILK-99392C/2020|2020-08-26|EPI\_ISL\_552371|Original|hCoV-19^^England|Human|Lighthouse Lab in Milton Keynes|Wellcome Sanger Institute for the COVID-19 Genomics UK (COG-UK) consortium|Davies|United Kingdom

>Spike|hCoV-19/England/NORW-E86DF/2020|2020-04-17|EPI\_ISL\_448224|Original|hCoV-19^^England|Human|Quadram Institute Bioscience|COVID-19 Genomics UK (COG-UK) Consortium|Alikhan|United Kingdom

>Spike|hCoV-19/USA/WI-GMF-24788/2020|2020-10-08|EPI\_ISL\_660913|Original|hCoV-19^^Wisconsin|Human|Gundersen Molecular Diagnostics Laboratory|Kabara Cancer Research Institute|Kenny|USA

>Spike|hCoV-19/Japan/PG-6327/2020|2020-07-00|EPI\_ISL\_689438|Original|hCoV-19^^Japan|Human|Pathogen Genomics Center|Pathogen Genomics Center|Sekizuka|Japan

>Spike|hCoV-19/USA/OR-OHSU-2589/2020|2020-08-20|EPI\_ISL\_667258|Original|hCoV-19^^Oregon|Human|OHSU Lab Services Molecular Microbiology Lab|Oregon SARS-CoV-2 Genome Sequencing Center|O'Roak|USA

>Spike|hCoV-19/Spain/PV-HUB-52580776/2020|2020-06-10|EPI\_ISL\_483573|Original|hCoV-19^^Basque Country|Human|Clinical Microbiology Laboratory- Basurto University Hospital|Biocruces-Bizkaia|Urrutikoetxea-Gutierrez|Spain

>Spike|hCoV-19/England/OXON-B001E/2020|2020-04-18|EPI\_ISL\_478845|Original|hCoV-19^^England|Human|Oxford Viromics|COVID-19 Genomics UK (COG-UK) Consortium|Golubchik|United Kingdom

>Spike|hCoV-19/USA/MN-MDH-1939/2020|2020-09-23|EPI\_ISL\_613487|Original|hCoV-19^^Minnesota|Human|Public Health Laboratory - Infectious Disease Lab|Minnesota Department of Health|Lorentz|USA

>Spike|hCoV-19/Faroe Islands/HFS-11/2020|2020-03-14|EPI\_ISL\_526941|Original|hCoV-19^^Faroe Islands|Human|Faroese National Reference Laboratory for Fish and Animal Diseases|Faroese National Reference Laboratory for Fish and Animal Diseases|Dahl|Faroe Islands

>Spike|hCoV-19/USA/WA-S939/2020|2020-04-23|EPI\_ISL\_463429|Original|hCoV-19^^Washington|Human|Washington State Department of Health|Seattle Flu Study|Bedford|USA

>Spike|hCoV-19/England/ALDP-A928E3/2020|2020-10-20|EPI\_ISL\_610938|Original|hCoV-19^^England|Human|Lighthouse Lab in Alderley Park|Wellcome Sanger Institute for the COVID-19 Genomics UK (COG-UK) consortium|Davies|United Kingdom

>Spike|hCoV-19/USA/UT-02897/2020|2020-04-30|EPI\_ISL\_513688|Original|hCoV-19^^Utah|Human|Utah Public Health Laboratory|Utah Public Health Laboratory|Butz|USA

>Spike|hCoV-19/England/MILK-975BDF/2020|2020-08-21|EPI\_ISL\_552594|Original|hCoV-19^^England|Human|Lighthouse Lab in Milton Keynes|Wellcome Sanger Institute for the COVID-19 Genomics UK (COG-UK) consortium|Davies|United Kingdom

>Spike|hCoV-19/England/ALDP-67D7C7/2020|2020-07-03|EPI\_ISL\_551799|Original|hCoV-19^^England|Human|Lighthouse Lab in Alderley Park|Wellcome Sanger Institute for the COVID-19 Genomics UK (COG-UK) consortium|Davies|United Kingdom

>Spike|hCoV-19/England/QEUA-B125A7/2020|2020-11-02|EPI\_ISL\_642537|Original|hCoV-19^^England|Human|Lighthouse Lab in Glasgow|Wellcome Sanger Institute for the COVID-19 Genomics UK (COG-UK) Consortium|Davies|United Kingdom

>Spike|hCoV-19/England/LOND-D5796/2020|2020-04-17|EPI\_ISL\_449720|Original|hCoV-19^^England|Human|University College London|COVID-19 Genomics UK (COG-UK) Consortium|Roy|United Kingdom

>Spike|hCoV-19/USA/WA-S1771/2020|2020-06-01|EPI\_ISL\_496197|Original|hCoV-19^^Washington|Human|Washington State Department of Health|Seattle Flu Study|Lee|USA

>Spike|hCoV-19/England/MILK-B39962/2020|2020-11-02|EPI\_ISL\_651373|Original|hCoV-19^^England|Human|University of Exeter|COVID-19 Genomics UK (COG-UK) Consortium|Temperton|United Kingdom

>Spike|hCoV-19/USA/MN66-MDH66/2020|2020-03-14|EPI\_ISL\_419394|Original|hCoV-19^^Minnesota|Human|Minnesota Department of Health|Minnesota Department of Health|Wang|USA

>Spike|hCoV-19/Scotland/CVR2785/2020|2020-04-20|EPI\_ISL\_473565|Original|hCoV-19^^Scotland|Human|West of Scotland Specialist Virology Centre|COVID-19 Genomics UK (COG-UK) Consortium|Robertson|United Kingdom

>Spike|hCoV-19/Australia/VIC12467/2020|2020-07-29|EPI\_ISL\_641282|Original|hCoV-19^^Victoria|Human|Microbiological Diagnostic Unit - Public Health Laboratory (MDU-PHL)|MDU-PHL|Schultz|Australia

>Spike|hCoV-19/USA/TX-HMH-MCoV-18041/2020|2020-11-16|EPI\_ISL\_786189|Original|hCoV-19^^Texas|Human|Houston Methodist Hospital|Houston Methodist Hospital|Long|USA

>Spike|hCoV-19/Wales/PHWC-48464A/2020|2020-10-12|EPI\_ISL\_628026|Original|hCoV-19^^Wales|Human|Wales Specialist Virology Centre Sequencing lab|COVID-19 Genomics UK (COG-UK) Consortium|Moore|United Kingdom

>Spike|hCoV-19/Luxembourg/LNS7841987/2020|2020-10-26|EPI\_ISL\_744640|Original|hCoV-19^^Luxembourg|Human|Laboratoire national de sant\u00e9|Laboratoire national de sant\u00e9|Wienecke-Baldacchino|Luxembourg

>Spike|hCoV-19/New Zealand/20CV0392/2020|2020-10-05|EPI\_ISL\_622802|Original|hCoV-19^^Counties Manukau|Human|Middlemore Hospital|Institute of Environmental Science and Research (ESR)|Wang|New Zealand

>Spike|hCoV-19/USA/CA-CZB-13996/2020|2020-06-14|EPI\_ISL\_738957|Original|hCoV-19^^California|Human|Alameda County Public Health Lab|Chan-Zuckerberg Biohub|Kamm|USA

>Spike|hCoV-19/USA/WI-UW-294/2020|2020-04-09|EPI\_ISL\_436588|Original|hCoV-19^^Wisconsin|Human|University of Wisconsin-Madison AIDS Vaccine Research Laboratories|University of Wisconsin-Madison AIDS Vaccine Research Laboratories|Baczenas|USA

>Spike|hCoV-19/Uruguay/UY-4/2020|2020-03-17|EPI\_ISL\_426479|Original|hCoV-19^^Montevideo|Human|Microbial Genomics Laboratory|Microbial Genomics Laboratory|Iraola|Uruguay

>Spike|hCoV-19/England/CAMC-A57CFD/2020|2020-10-08|EPI\_ISL\_597041|Original|hCoV-19^^England|Human|Lighthouse Lab in Cambridge|Wellcome Sanger Institute for the COVID-19 Genomics UK (COG-UK) consortium|Davies|United Kingdom

>Spike|hCoV-19/USA/ME-HETL-J0408/2020|2020-12-16|EPI\_ISL\_755516|Original|hCoV-19^^Maine|Human|Maine Health and Environmental Testing Laboratory|Tewhey Lab|Tewhey|USA

>Spike|hCoV-19/USA/CO-QDX-2403/2020|2020-03-16|EPI\_ISL\_604691|Original|hCoV-19^^Colorado|Human|Quest Diagnostics|Quest Diagnostics|Kagan|USA

>Spike|hCoV-19/Japan/DP0568/2020|2020-02-17|EPI\_ISL\_416609|Original|hCoV-19^^Japan|Human|Japanese Quarantine Stations|Pathogen Genomics Center|Sekizuka|Japan

>Spike|hCoV-19/Japan/PG-6389/2020|2020-08-00|EPI\_ISL\_688622|Original|hCoV-19^^Japan|Human|Fukuoka Institute of Health and Environmental Sciences|Pathogen Genomics Center|Sekizuka|Japan

>Spike|hCoV-19/Thailand/Bangkok\_KC0004/2020|2020-12-05|EPI\_ISL\_768612|Original|hCoV-19^^Bangkok|Human|Emergency Operation Center|National Institute of Health|Phuygun|Thailand

>Spike|hCoV-19/USA/NY-Wadsworth-288888-01/2020|2020-12-18|EPI\_ISL\_767491|Original|hCoV-19^^New York|Human|Wadsworth Center|Wadsworth Center|Lasek-Nesselquist|USA

>Spike|hCoV-19/Kenya/C256/2020|2020-04-04|EPI\_ISL\_568697|Original|hCoV-19^^Mombasa|Human|KEMRI-Wellcome Trust Research Programme|KEMRI-CGMR-C Kilifi|KEMRI-Wellcome Trust Research Programme|KEMRI-CGMR-C Kilifi|Githinji|Kenya

>Spike|hCoV-19/India/MH-NIV-46317/2020|2020-06-01|EPI\_ISL\_479550|Original|hCoV-19^^Maharashtra|Human|NIV Influenza|NIV Influenza|Potdar|India

>Spike|hCoV-19/USA/DE-DHSS-F1013301/2020|2020-10-07|EPI\_ISL\_708428|Original|hCoV-19^^Delaware|Human|Delaware Public Health Lab|Delaware Public Health Lab|Bajwa|USA

>Spike|hCoV-19/USA/CA-ALSR-1301/2020|2020-05-03|EPI\_ISL\_494485|Original|hCoV-19^^California|Human|San Diego County Public Health Laboratory|Andersen lab at Scripps Research|Gangavarapu|USA

>Spike|hCoV-19/USA/WI-UW-1057/2020|2020-07-24|EPI\_ISL\_516483|Original|hCoV-19^^Wisconsin|Human|University of Wisconsin-Madison AIDS Vaccine Research Laboratories|University of Wisconsin-Madison AIDS Vaccine Research Laboratories|Baczenas|USA

>Spike|hCoV-19/England/MILK-B94EFD/2020|2020-11-13|EPI\_ISL\_676253|Original|hCoV-19^^England|Human|Lighthouse Lab in Milton Keynes|Wellcome Sanger Institute for the COVID-19 Genomics UK (COG-UK) Consortium|Davies|United Kingdom

>Spike|hCoV-19/USA/CA-ALSR-3283/2020|2020-09-17|EPI\_ISL\_635949|Original|hCoV-19^^California|Human|San Diego County Public Health Laboratory|Andersen lab at Scripps Research|Gangavarapu|USA

>Spike|hCoV-19/Wales/MILK-9F025F/2020|2020-09-24|EPI\_ISL\_589771|Original|hCoV-19^^Wales|Human|Lighthouse Lab in Milton Keynes|Wellcome Sanger Institute for the COVID-19 Genomics UK (COG-UK) consortium|Davies|United Kingdom

>Spike|hCoV-19/France/BRE-8940/2020|2020-08-01|EPI\_ISL\_560608|Original|hCoV-19^^Bretagne|Human|Hospital|National Reference Center for Viruses of Respiratory Infections|Enouf|France

>Spike|hCoV-19/Australia/VIC2672/2020|2020-07-02|EPI\_ISL\_521514|Original|hCoV-19^^Victoria|Human|Victorian Infectious Diseases Reference Laboratory (VIDRL)|VIDRL and MDU-PHL|Schultz|Australia

>Spike|hCoV-19/England/QEUEH-A8BFAC/2020|2020-10-15|EPI\_ISL\_643228|Original|hCoV-19^^England|Human|Lighthouse Lab in Glasgow|Wellcome Sanger Institute for the COVID-19 Genomics UK (COG-UK) Consortium|Davies|United Kingdom

>Spike|hCoV-19/Scotland/QEUEH-9E5615/2020|2020-09-24|EPI\_ISL\_600932|Original|hCoV-19^^Scotland|Human|Lighthouse Lab in Glasgow|Wellcome Sanger Institute for the COVID-19 Genomics UK (COG-UK) consortium|Davies|United Kingdom

>Spike|hCoV-19/USA/TX-HMH-MCoV-8378/2020|2020-06-29|EPI\_ISL\_783567|Original|hCoV-19^^Texas|Human|Houston Methodist Hospital|Houston Methodist Hospital|Long|USA

>Spike|hCoV-19/England/ALDP-AA417A/2020|2020-10-21|EPI\_ISL\_624153|Original|hCoV-19^^England|Human|Lighthouse Lab in Alderley Park|Wellcome Sanger Institute for the COVID-19 Genomics UK (COG-UK) consortium|Davies|United Kingdom

>Spike|hCoV-19/Poland/PL\_MCB\_36/2020|2020-04-21|EPI\_ISL\_645035|Original|hCoV-19^^Poland|Human|Human Genome Variation Research Group|Human Genome Variation Research Group||Poland

>Spike|hCoV-19/England/QEUEH-9FFF68/2020|2020-10-01|EPI\_ISL\_600338|Original|hCoV-19^^England|Human|Lighthouse Lab in Glasgow|Wellcome Sanger Institute for the COVID-19 Genomics UK (COG-UK) consortium|Davies|United Kingdom

>Spike|hCoV-19/USA/TX-HMH-8064/2020|2020-07-03|EPI\_ISL\_545830|Original|hCoV-19^^Texas|Human|Houston Methodist Hospital|Houston Methodist Hospital|Long|USA

>Spike|hCoV-19/Luxembourg/LNS2884060/2020|2020-11-23|EPI\_ISL\_740212|Original|hCoV-19^^Luxembourg|Human|Laboratoire national de sant\u00e9|Laboratoire national de sant\u00e9|Wienecke-Baldacchino|Luxembourg

>Spike|hCoV-19/USA/WA-S1905/2020|2020-05-29|EPI\_ISL\_496331|Original|hCoV-19^^Washington|Human|Washington State Department of Health|Seattle Flu Study|Lee|USA

>Spike|hCoV-19/Wales/PHWC-4A2840/2020|2020-12-09|EPI\_ISL\_743948|Original|hCoV-19^^Wales|Human|Wales Specialist Virology Centre Sequencing lab|COVID-19 Genomics UK (COG-UK) Consortium|Moore|United Kingdom

>Spike|hCoV-19/Scotland/CVR4348/2020|2020-09-12|EPI\_ISL\_572746|Original|hCoV-19^^Scotland|Human|West of Scotland Specialist Virology Centre|COVID-19 Genomics UK (COG-UK) Consortium|Robertson|United Kingdom

>Spike|hCoV-19/England/LOND-124C416/2020|2020-03-24|EPI\_ISL\_492879|Original|hCoV-19^^England|Human|Royal Free Hospital / Health Services Laboratories|Wellcome Sanger Institute for the COVID-19 Genomics UK (COG-UK) consortium|Davies|United Kingdom

>Spike|hCoV-19/Denmark/DCGC-18732/2020|2020-12-07|EPI\_ISL\_750150|Original|hCoV-19^^Nordjylland|Human|Department of Virus and Microbiological Special Diagnostics|Albertsen Lab|Michaelsen|Denmark

>Spike|hCoV-19/England/CAMC-B32213/2020|2020-11-05|EPI\_ISL\_659344|Original|hCoV-19^^England|Human|Lighthouse Lab in Cambridge|Wellcome Sanger Institute for the COVID-19 Genomics UK (COG-UK) Consortium|Davies|United Kingdom

>Spike|hCoV-19/England/CAMC-C807DA/2020|2020-12-17|EPI\_ISL\_762632|Original|hCoV-19^^England|Human|Lighthouse Lab in Cambridge|Wellcome Sanger Institute for the COVID-19 Genomics UK (COG-UK) Consortium|Davies|United Kingdom

>Spike|hCoV-19/England/ALDP-744DB7/2020|2020-06-29|EPI\_ISL\_557374|Original|hCoV-19^^England|Human|Lighthouse Lab in Alderley Park|Wellcome Sanger Institute for the COVID-19 Genomics UK (COG-UK) consortium|Davies|United Kingdom

>Spike|hCoV-19/USA/AZ-TG670214/2020|2020-05-01|EPI\_ISL\_696402|Original|hCoV-19^^Arizona|Human|Sonora Quest Laboratories|TGen North|French|USA



>Spike|hCoV-19/England/ALDP-C3C7DD/2020|2020-12-10|EPI\_ISL\_731036|Original|hCoV-19^^England|Human|Lighthouse Lab in Alderley Park|Wellcome Sanger Institute for the COVID-19 Genomics UK (COG-UK) Consortium|Davies|United Kingdom

>Spike|hCoV-19/USA/TX-HMH-MCoV-8446/2020|2020-07-01|EPI\_ISL\_780564|Original|hCoV-19^^Texas|Human|Houston Methodist Hospital|Houston Methodist Hospital|Long|USA

>Spike|hCoV-19/England/MILK-B8C2A1/2020|2020-11-12|EPI\_ISL\_674251|Original|hCoV-19^^England|Human|Lighthouse Lab in Milton Keynes|Wellcome Sanger Institute for the COVID-19 Genomics UK (COG-UK) Consortium|Davies|United Kingdom

>Spike|hCoV-19/India/UN-3239/2020|2020-03-17|EPI\_ISL\_424365|Original|hCoV-19^^India|Human|National Influenza Center|Indian Council of Medical Research-National Institute of Virology|Yadav|India

>Spike|hCoV-19/USA/WI-UW-909/2020|2020-07-10|EPI\_ISL\_509910|Original|hCoV-19^^Wisconsin|Human|University of Wisconsin-Madison AIDS Vaccine Research Laboratories|University of Wisconsin-Madison AIDS Vaccine Research Laboratories|Baczenas|USA

>Spike|hCoV-19/USA/DC-HP00122/2020|2020-03-18|EPI\_ISL\_457814|Original|hCoV-19^^District of Columbia|Human|Johns Hopkins Hospital Department of Pathology|Johns Hopkins Hospital Department of Pathology|Ramakrishnan|USA

>Spike|hCoV-19/England/MILK-A6C017/2020|2020-10-09|EPI\_ISL\_609115|Original|hCoV-19^^England|Human|Lighthouse Lab in Milton Keynes|Wellcome Sanger Institute for the COVID-19 Genomics UK (COG-UK) consortium|Davies|United Kingdom

>Spike|hCoV-19/Peru/LAM-INS-043/2020|2020-03-31|EPI\_ISL\_514264|Original|hCoV-19^^Lambayeque|Human|Laboratorio de Referencia Nacional de Virus Respiratorio. Instituto Nacional de Salud. Per\u00fa|Laboratorio de Referencia Nacional de Biotecnologia y Biologia Molecular.Instituto Nacional de Salud.Per\u00fa|Padilla Rojas|Peru

>Spike|hCoV-19/USA/WI-UW-1545/2020|2020-09-15|EPI\_ISL\_605423|Original|hCoV-19^^Wisconsin|Human|University of Wisconsin-Madison AIDS Vaccine Research Laboratories|University of Wisconsin-Madison AIDS Vaccine Research Laboratories|Baczenas|USA

>Spike|hCoV-19/England/ALDP-A50429/2020|2020-10-07|EPI\_ISL\_597551|Original|hCoV-19^^England|Human|Lighthouse Lab in Alderley Park|Wellcome Sanger Institute for the COVID-19 Genomics UK (COG-UK) consortium|Davies|United Kingdom

>Spike|hCoV-19/England/BRIS-123BC9/2020|2020-04-06|EPI\_ISL\_442647|Original|hCoV-19^^England|Human|PHE South West Regional Laboratory|Wellcome Sanger Institute for the COVID-19 Genomics UK (COG-UK) consortium|Amato|United Kingdom

>Spike|hCoV-19/USA/LA-EVTL583/2020|2020-06-30|EPI\_ISL\_578987|Original|hCoV-19^^Louisiana|Human|LSUHS Emerging Viral Threat Laboratory|Microbial Genome Sequencing Center|Kamil|USA

>Spike|hCoV-19/USA/TX-HMH-MCoV-18347/2020|2020-11-18|EPI\_ISL\_784695|Original|hCoV-19^^Texas|Human|Houston Methodist Hospital|Houston Methodist Hospital|Long|USA

>Spike|hCoV-19/Scotland/CVR1441/2020|2020-04-01|EPI\_ISL\_438810|Original|hCoV-19^^Scotland|Human|West of Scotland Specialist Virology Centre|COVID-19 Genomics UK (COG-UK) Consortium|Robertson|United Kingdom

>Spike|hCoV-19/England/QEUA-A0AFA5/2020|2020-10-01|EPI\_ISL\_599433|Original|hCoV-19^^England|Human|Lighthouse Lab in Glasgow|Wellcome Sanger Institute for the COVID-19 Genomics UK (COG-UK) consortium|Davies|United Kingdom

>Spike|hCoV-19/Germany/BE-ChVir-D666-2/2020|2020-03-07|EPI\_ISL\_516630|Original|hCoV-19^^Berlin|Human|Charite\u0301 Universita\u0308tsmedizin Berlin|Charite\u0301 Universita\u0308tsmedizin Berlin|Muehlemann|Germany

>Spike|hCoV-19/Switzerland/ZH-ETHZ-270100/2020|2020-09-03|EPI\_ISL\_541520|Original|hCoV-19^^Zurich|Human|Viollier AG|Department of Biosystems Science and Engineering|Nadeau|Switzerland

>Spike|hCoV-19/England/NORT-293783/2020|2020-07-02|EPI\_ISL\_499559|Original|hCoV-19^^England|Human|Northumbria University / South Tees Hospitals NHS Foundation Trust / North Cumbria Integrated Care NHS Foundation Trust / North Tees and Hartlepool NHS Foundation Trust / Newcastle Hospitals NHS Foundation Trust|COVID-19 Genomics UK (COG-UK) Consortium|Bashton|United Kingdom

>Spike|hCoV-19/Brazil/RJ-00517/2020|2020-07-29|EPI\_ISL\_717906|Original|hCoV-19^^Rio de Janeiro|Human|LACEN RJ - Noel Nutels|Bioinformatics Laboratory / LNCC|Almeida|Brazil

>Spike|hCoV-19/Sweden/20-53866/2020|2020-12-14|EPI\_ISL\_789042|Original|hCoV-19^^Uppsala|Human|Klinisk mikrobiologi|The Public Health Agency of Sweden|Svartstr\u00f6m|Sweden

>Spike|hCoV-19/Northern Ireland/NIRE-23311E/2020|2020-09-29|EPI\_ISL\_680256|Original|hCoV-19^^Northern Ireland|Human|Regional Virus Laboratory|COVID-19 Genomics UK (COG-UK) Consortium|Fairley|United Kingdom

>Spike|hCoV-19/Ireland/D-NVRL-AIIDV0432v4/2020|2020-04-07|EPI\_ISL\_644287|Original|hCoV-19^^Dublin|Human|CEPHR / Vincent's Hospital|Irish Coronavirus Sequencing Consortium - National Virus Reference Laboratory|Gonzalez|Ireland

>Spike|hCoV-19/England/MILK-97164B/2020|2020-08-18|EPI\_ISL\_553038|Original|hCoV-19^^England|Human|Lighthouse Lab in Milton Keynes|Wellcome Sanger Institute for the COVID-19 Genomics UK (COG-UK) consortium|Davies|United Kingdom

>Spike|hCoV-19/England/20164087204/2020|2020-04-14|EPI\_ISL\_466491|Original|hCoV-19^^England|Human|Respiratory Virus Unit|Respiratory Virus Unit|Platt|United Kingdom

>Spike|hCoV-19/Australia/VIC17142/2020|2020-08-14|EPI\_ISL\_663759|Original|hCoV-19^^Victoria|Human|Microbiological Diagnostic Unit - Public Health Laboratory (MDU-PHL)|MDU-PHL|Schultz|Australia

>Spike|hCoV-19/USA/TX-HMH-MCoV-18724/2020|2020-11-22|EPI\_ISL\_785071|Original|hCoV-19^^Texas|Human|Houston Methodist Hospital|Houston Methodist Hospital|Long|USA

>Spike|hCoV-19/Scotland/EDB4800/2020|2020-05-12|EPI\_ISL\_453152|Original|hCoV-19^^Scotland|Human|Virology Department|COVID-19 Genomics UK (COG-UK) Consortium|Williams|United Kingdom

>Spike|hCoV-19/Ecuador/USFQ-556/2020|2020-12-01|EPI\_ISL\_728204|Original|hCoV-19^^Santo Domingo|Human|Institute of Microbiology|Institute of Microbiology|Cardenas|Ecuador

>Spike|hCoV-19/mink/Netherlands/NB-EMC-58-4/2020|2020-00-00|EPI\_ISL\_632351|Original|hCoV-19^^Noord Brabant|Neovision vison|Dutch COVID-19 response team|Erasmus Medical Center|Oude Munnink|Netherlands

>Spike|hCoV-19/Spain/IB-IBV-99011576/2020|2020-12-08|EPI\_ISL\_779903|Original|hCoV-19^^Balear Islands|Human|Servicio de Microbiolog\u00eda|SeqCOVID-SPAIN consortium|IBV (CSIC)|Comas|Spain

>Spike|hCoV-19/Wales/PHWC-498519/2020|2020-12-01|EPI\_ISL\_727087|Original|hCoV-19^^Wales|Human|Originating lab|COVID-19 Genomics UK (COG-UK) Consortium|Moore|United Kingdom

>Spike|hCoV-19/England/ALDP-9449C0/2020|2020-06-07|EPI\_ISL\_555720|Original|hCoV-19^^England|Human|Lighthouse Lab in Alderley Park|Wellcome Sanger Institute for the COVID-19 Genomics UK (COG-UK) consortium|Davies|United Kingdom

>Spike|hCoV-19/Spain/CT-IBV-97009575/2020|2020-09-16|EPI\_ISL\_683603|Original|hCoV-19^^Catalunya|Human|Servicio de Microbiolog\u00eda|SeqCOVID-SPAIN consortium|IBV (CSIC)|Comas|Spain

>Spike|hCoV-19/England/CAMC-BBCF83/2020|2020-11-20|EPI\_ISL\_705614|Original|hCoV-19^^England|Human|Queens Medical Centre|COVID-19 Genomics UK (COG-UK) Consortium|Loose|United Kingdom

>Spike|hCoV-19/USA/TX-HMH-3220/2020|2020-06-12|EPI\_ISL\_544088|Original|hCoV-19^^Texas|Human|Houston Methodist Hospital|Houston Methodist Hospital|Long|USA

>Spike|hCoV-19/USA/FL-BPHL-2084/2020|2020-06-09|EPI\_ISL\_653237|Original|hCoV-19^^Florida|Human|Florida Bureau of Public Health Laboratories|Florida Bureau of Public Health Laboratories|Blanton|USA

>Spike|hCoV-19/Denmark/DCGC-17180/2020|2020-12-14|EPI\_ISL\_750807|Original|hCoV-19^^Syddanmark|Human|Department of Virus and Microbiological Special Diagnostics|Albertsen Lab|Michaelsen|Denmark

>Spike|hCoV-19/Switzerland/AG-ETHZ-410263/2020|2020-12-14|EPI\_ISL\_737473|Original|hCoV-19^^Aargau|Human|Viollier AG|Department of Biosystems Science and Engineering|Nadeau|Switzerland

>Spike|hCoV-19/England/LIVE-1D2B8D/2020|2020-03-29|EPI\_ISL\_612411|Original|hCoV-19^^England|Human|Liverpool Clinical Laboratories|COVID-19 Genomics UK (COG-UK) Consortium|Haldenby|United Kingdom

>Spike|hCoV-19/Scotland/EDB232/2020|2020-03-27|EPI\_ISL\_425951|Original|hCoV-19^^Scotland|Human|Virology Department|COVID-19 Genomics UK (COG-UK) Consortium|Williams|United Kingdom

>Spike|hCoV-19/Denmark/DCGC-15924/2020|2020-11-23|EPI\_ISL\_714486|Original|hCoV-19^^Syddanmark|Human|Department of Virus and Microbiological Special Diagnostics|Albertsen Lab|Michaelsen|Denmark

>Spike|hCoV-19/USA/CA-CZB-4072/2020|2020-08-05|EPI\_ISL\_548581|Original|hCoV-19^^California|Human|Orange County Public Health Laboratory|Chan-Zuckerberg Biohub|Bhatt|USA

>Spike|hCoV-19/Netherlands/NH-EMC-70/2020|2020-09-16|EPI\_ISL\_577866|Original|hCoV-19^^Noord Holland|Human|Dutch COVID-19 response team|Erasmus Medical Center|Oude Munnink|Netherlands

>Spike|hCoV-19/England/CAMC-A80D70/2020|2020-10-13|EPI\_ISL\_610912|Original|hCoV-19^^England|Human|Lighthouse Lab in Cambridge|Wellcome Sanger Institute for the COVID-19 Genomics UK (COG-UK) consortium|Davies|United Kingdom

>Spike|hCoV-19/USA/FL-BPHL-1178/2020|2020-08-20|EPI\_ISL\_526664|Original|hCoV-19^^Florida|Human|Florida Bureau of Public Health Laboratories|Florida Bureau of Public Health Laboratories|Blanton|USA

>Spike|hCoV-19/England/QEUEH-BC3AF1/2020|2020-11-25|EPI\_ISL\_704072|Original|hCoV-19^^England|Human|Lighthouse Lab in Glasgow|Wellcome Sanger Institute for the COVID-19 Genomics UK (COG-UK) Consortium|Davies|United Kingdom

>Spike|hCoV-19/England/SHEF-C66B9/2020|2020-07-26|EPI\_ISL\_517553|Original|hCoV-19^^England|Human|Virology Department|COVID-19 Genomics UK (COG-UK) Consortium|de Silva|United Kingdom

>Spike|hCoV-19/Australia/VIC6429/2020|2020-07-24|EPI\_ISL\_521220|Original|hCoV-19^^Victoria|Human|Microbiological Diagnostic Unit - Public Health Laboratory (MDU-PHL)|MDU-PHL|Schultz|Australia

>Spike|hCoV-19/Denmark/DCGC-5792/2020|2020-09-28|EPI\_ISL\_620979|Original|hCoV-19^^Sjaelland|Human|Department of Virus and Microbiological Special Diagnostics|Albertsen lab|Michaelsen|Denmark

>Spike|hCoV-19/USA/OR-OHSU-1979/2020|2020-07-30|EPI\_ISL\_526081|Original|hCoV-19^^Oregon|Human|OHSU Lab Services Molecular Microbiology Lab|Oregon SARS-CoV-2 Genome Sequencing Center|O'Roak|USA

>Spike|hCoV-19/USA/CA-CHLA-PLM53624288/2020|2020-12-02|EPI\_ISL\_753587|Original|hCoV-19^^California|Human|Clinical virology Laboratory|Center for Personalized Medicine|Dien Bard|USA

>Spike|hCoV-19/England/ALDP-9E74DD/2020|2020-09-24|EPI\_ISL\_580386|Original|hCoV-19^^England|Human|Lighthouse Lab in Alderley Park|Wellcome Sanger Institute for the COVID-19 Genomics UK (COG-UK) consortium|Davies|United Kingdom

>Spike|hCoV-19/Netherlands/ZH-EMC-961/2020|2020-10-17|EPI\_ISL\_722510|Original|hCoV-19^^Zuid Holland|Human|Dutch COVID-19 response team|Erasmus Medical Center|Oude Munnink|Netherlands

>Spike|hCoV-19/Japan/PG-5295/2020|2020-08-00|EPI\_ISL\_690398|Original|hCoV-19^^Japan|Human|Pathogen Genomics Center|Pathogen Genomics Center|Sekizuka|Japan

>Spike|hCoV-19/England/CAMB-1B8C8A/2020|2020-11-02|EPI\_ISL\_651004|Original|hCoV-19^^England|Human|Department of Pathology|COVID-19 Genomics UK (COG-UK) Consortium|Goodfellow|United Kingdom

>Spike|hCoV-19/Australia/TAS13/2020|2020-04-15|EPI\_ISL\_522595|Original|hCoV-19^^Tasmania|Human|Royal Hobart Hospital Microbiology Department|MDU-PHL|Schultz|Australia

>Spike|hCoV-19/Netherlands/NB-EMC-301/2020|2020-10-02|EPI\_ISL\_632536|Original|hCoV-19^^Noord Brabant|Human|Dutch COVID-19 response team|Erasmus Medical Center|Oude Munnink|Netherlands

>Spike|hCoV-19/England/201620360/2020|2020-04-07|EPI\_ISL\_466413|Original|hCoV-19^^England|Human|Respiratory Virus Unit|Respiratory Virus Unit|Platt|United Kingdom

>Spike|hCoV-19/Denmark/DCGC-15744/2020|2020-11-23|EPI\_ISL\_713995|Original|hCoV-19^^Syddanmark|Human|Department of Virus and Microbiological Special Diagnostics|Albertsen Lab|Michaelsen|Denmark

>Spike|hCoV-19/USA/PA-MGEL88/2020|2020-04-02|EPI\_ISL\_454371|Original|hCoV-19^^Pennsylvania|Human|UPMC Clinical Microbiology Laboratory|Microbial Genome Sequencing Center|Mustapha|USA

>Spike|hCoV-19/Indonesia/JB-WJHL-ITB-L18952/2020|2020-10-04|EPI\_ISL\_745033|Original|hCoV-19^^West Java|Human|West Java Health Laboratory|West Java Health Laboratory|Fibriani|Indonesia

>Spike|hCoV-19/England/SHEF-BFE9D/2020|2020-03-24|EPI\_ISL\_418302|Original|hCoV-19^^England|Human|Virology Department|Department of Infection|de Silva|United Kingdom

>Spike|hCoV-19/Denmark/DCGC-9535/2020|2020-11-09|EPI\_ISL\_668549|Original|hCoV-19^^Nordjylland|Human|Department of Virus and Microbiological Special Diagnostics|Albertsen Lab|Michaelsen|Denmark

>Spike|hCoV-19/USA/UT-00352/2020|2020-03-27|EPI\_ISL\_449805|Original|hCoV-19^^Utah|Human|Utah Public Health Laboratory|Utah Public Health Laboratory|Young|USA

>Spike|hCoV-19/USA/AZ-TG480748/2020|2020-07-08|EPI\_ISL\_695068|Original|hCoV-19^^Arizona|Human|TGen North|TGen North|French|USA

>Spike|hCoV-19/Denmark/DCGC-7789/2020|2020-10-19|EPI\_ISL\_618682|Original|hCoV-19^^Syddanmark|Human|Department of Virus and Microbiological Special Diagnostics|Albertsen lab|Michaelsen|Denmark

>Spike|hCoV-19/England/CAMB-1BA769/2020|2020-11-16|EPI\_ISL\_664995|Original|hCoV-19^^England|Human|Department of Pathology|COVID-19 Genomics UK (COG-UK) Consortium|Goodfellow|United Kingdom

>Spike|hCoV-19/USA/AZ-TG664521/2020|2020-04-19|EPI\_ISL\_696138|Original|hCoV-19^^Arizona|Human|Sonora Quest Laboratories|TGen North|French|USA

>Spike|hCoV-19/Scotland/EDB2742/2020|2020-03-27|EPI\_ISL\_456897|Original|hCoV-19^^Scotland|Human|Virology Department|COVID-19 Genomics UK (COG-UK) Consortium|Williams|United Kingdom

>Spike|hCoV-19/England/QEUH-896FFB/2020|2020-07-24|EPI\_ISL\_532739|Original|hCoV-19^^England|Human|Lighthouse Lab in Glasgow|Wellcome Sanger Institute for the COVID-19 Genomics UK (COG-UK) consortium|Davies|United Kingdom

>Spike|hCoV-19/England/CAMB-1B6062/2020|2020-09-19|EPI\_ISL\_572779|Original|hCoV-19^^England|Human|Department of Pathology|COVID-19 Genomics UK (COG-UK) Consortium|Goodfellow|United Kingdom

>Spike|hCoV-19/USA/VA-DCLS-1735/2020|2020-09-03|EPI\_ISL\_614054|Original|hCoV-19^^Virginia|Human|Virginia DCLS|Virginia DCLS|St. Jacques|USA

>Spike|hCoV-19/England/LIVE-9D75E/2020|2020-04-11|EPI\_ISL\_453230|Original|hCoV-19^^England|Human|Liverpool Clinical Laboratories|COVID-19 Genomics UK (COG-UK) Consortium|Haldenby|United Kingdom

>Spike|hCoV-19/USA/CA-CZB-5160/2020|2020-08-12|EPI\_ISL\_672393|Original|hCoV-19^^California|Human|UCSF Clinical Microbiology Laboratory|Chan-Zuckerberg Biohub|Bhatt|USA

>Spike|hCoV-19/England/QEUH-76BF2D/2020|2020-07-16|EPI\_ISL\_533160|Original|hCoV-19^^England|Human|Lighthouse Lab in Glasgow|Wellcome Sanger Institute for the COVID-19 Genomics UK (COG-UK) consortium|Davies|United Kingdom

>Spike|hCoV-19/Canada/QC-LSPQ-L00232101/2020|2020-03-22|EPI\_ISL\_535977|Original|hCoV-19^^Quebec|Human|Centre de SSS de Trois-Rivières|Laboratoire de santé publique du Québec|Moreira|Canada

>Spike|hCoV-19/Switzerland/ZH-ETHZ-230000/2020|2020-07-31|EPI\_ISL\_516552|Original|hCoV-19^^Zurich|Human|Viollier AG|Department of Biosystems Science and Engineering|Nadeau|Switzerland

>Spike|hCoV-19/Belgium/ULG-10621/2020|2020-08-17|EPI\_ISL\_626233|Original|hCoV-19^^Liège|Human|Department of Clinical Microbiology|GIGA Medical Genomics|Durkin|Belgium

>Spike|hCoV-19/Denmark/DCGC-11767/2020|2020-10-26|EPI\_ISL\_671123|Original|hCoV-19^^Syddanmark|Human|Department of Virus and Microbiological Special Diagnostics|Albertsen Lab|Michaelsen|Denmark

>Spike|hCoV-19/England/CAMC-B07C28/2020|2020-10-29|EPI\_ISL\_643641|Original|hCoV-19^^England|Human|Lighthouse Lab in Cambridge|Wellcome Sanger Institute for the COVID-19 Genomics UK (COG-UK) Consortium|Davies|United Kingdom

>Spike|hCoV-19/mink/Netherlands/NB-EMC-3-2/2020|2020-05-06|EPI\_ISL\_523091|Original|hCoV-19^^Noord Brabant|Neovison vison|Dutch COVID-19 response team|Erasmus Medical Center|Oude Munnink|Netherlands

>Spike|hCoV-19/USA/UT-0297/2020|2020-03-27|EPI\_ISL\_420812|Original|hCoV-19^^Utah|Human|Utah Public Health Laboratory|Utah Public Health Laboratory|Young|USA

>Spike|hCoV-19/USA/CA-CDPH255/2020|2020-11-14|EPI\_ISL\_755091|Original|hCoV-19^^California|Human|California Department of Public Health|California Department of Public Health|Bell|USA

>Spike|hCoV-19/USA/MI-MDHHS-SC22211/2020|2020-10-26|EPI\_ISL\_644356|Original|hCoV-19^^Michigan|Human|Michigan Department of Health and Human Services|Michigan Department of Health and Human Services|Jacob|USA

>Spike|hCoV-19/England/CAMC-B987D0/2020|2020-11-15|EPI\_ISL\_673779|Original|hCoV-19^^England|Human|Lighthouse Lab in Cambridge|Wellcome Sanger Institute for the COVID-19 Genomics UK (COG-UK) Consortium|Davies|United Kingdom

>Spike|hCoV-19/Sweden/20-50256/2020|2020-03-07|EPI\_ISL\_455894|Original|hCoV-19^^Stockholm|Human|Karolinska Universitetslaboratoriet|The Public Health Agency of Sweden|Svartstr\u00f6m|Sweden

>Spike|hCoV-19/Scotland/QEUH-A9D262/2020|2020-10-20|EPI\_ISL\_680562|Original|hCoV-19^^Scotland|Human|Centre for Enzyme Innovation|COVID-19 Genomics UK (COG-UK) Consortium|Robson|United Kingdom

>Spike|hCoV-19/Singapore/1091/2020|2020-09-26|EPI\_ISL\_596481|Original|hCoV-19^^Singapore|Human|National Public Health Laboratory|National Public Health Laboratory|Mak|Singapore

>Spike|hCoV-19/Wales/PHWC-490E16/2020|2020-11-17|EPI\_ISL\_706575|Original|hCoV-19^^Wales|Human|Originating lab|COVID-19 Genomics UK (COG-UK) Consortium|Moore|United Kingdom

>Spike|hCoV-19/USA/WI-UW-544/2020|2020-06-22|EPI\_ISL\_484919|Original|hCoV-19^^Wisconsin|Human|University of Wisconsin-Madison AIDS Vaccine Research Laboratories|University of Wisconsin-Madison AIDS Vaccine Research Laboratories|Baczenas|USA

>Spike|hCoV-19/Germany/NW-HHU-494/2020|2020-12-03|EPI\_ISL\_770743|Original|hCoV-19^^North Rhine-Westphalia|Human|ZOTZ KLIMAS MVZ D\u00fcsseldorf-Centrum GbR \u00dcBAG f\u00fcr Labormedizin|Center of Medical Microbiology|Wienemann|Germany

>Spike|hCoV-19/Denmark/ALAB-SSI349/2020|2020-03-23|EPI\_ISL\_429463|Original|hCoV-19^^Denmark|Human|Department of Virus and Microbiological Special Diagnostics|Albertsen lab|Kirkegaard|Denmark

>Spike|hCoV-19/USA/CA-UCLA-220/2020|2020-06-09|EPI\_ISL\_537527|Original|hCoV-19^^California|Human|UCLA Pathology Clinical Microbiology Lab|Kruglyak Lab|Boocock|USA

>Spike|hCoV-19/USA/VA-DCLS-1236/2020|2020-07-30|EPI\_ISL\_528655|Original|hCoV-19^^Virginia|Human|Virginia DCLS|Virginia DCLS|St. Jacques|USA

>Spike|hCoV-19/England/QEUH-AE21DA/2020|2020-10-26|EPI\_ISL\_633464|Original|hCoV-19^^England|Human|Lighthouse Lab in Glasgow|Wellcome Sanger Institute for the COVID-19 Genomics UK (COG-UK) consortium|Davies|United Kingdom

>Spike|hCoV-19/England/CAMB-1BAA42/2020|2020-11-13|EPI\_ISL\_664774|Original|hCoV-19^^England|Human|Department of Pathology|COVID-19 Genomics UK (COG-UK) Consortium|Goodfellow|United Kingdom

>Spike|hCoV-19/USA/WI-UW-2028/2020|2020-09-21|EPI\_ISL\_677435|Original|hCoV-19^^Wisconsin|Human|University of Wisconsin-Madison AIDS Vaccine Research Laboratories|University of Wisconsin-Madison AIDS Vaccine Research Laboratories|Baczenas|USA

>Spike|hCoV-19/Australia/TAS51/2020|2020-04-09|EPI\_ISL\_522726|Original|hCoV-19^^Tasmania|Human|Royal Hobart Hospital Microbiology Department|MDU-PHL|Schultz|Australia

>Spike|hCoV-19/USA/NY-Wadsworth-226966-01/2020|2020-09-24|EPI\_ISL\_677130|Original|hCoV-19^^New York|Human|Wadsworth Center|Wadsworth Center|Lasek-Nesselquist|USA

>Spike|hCoV-19/England/CAMC-B09B0B/2020|2020-10-31|EPI\_ISL\_673121|Original|hCoV-19^^England|Human|Lighthouse Lab in Cambridge|Wellcome Sanger Institute for the COVID-19 Genomics UK (COG-UK) Consortium|Davies|United Kingdom

>Spike|hCoV-19/Sweden/20-09861/2020|2020-11-04|EPI\_ISL\_676489|Original|hCoV-19^^Skane|Human|Klinisk mikrobiologi|The Public Health Agency of Sweden|Svartstr\u00f6m|Sweden

>Spike|hCoV-19/Japan/PG-6761/2020|2020-08-00|EPI\_ISL\_687871|Original|hCoV-19^^Japan|Human|Pathogen Genomics Center|Pathogen Genomics Center|Sekizuka|Japan

>Spike|hCoV-19/Australia/VIC9615/2020|2020-08-02|EPI\_ISL\_565627|Original|hCoV-19^^Victoria|Human|Microbiological Diagnostic Unit - Public Health Laboratory (MDU-PHL)|MDU-PHL|Schultz|Australia

>Spike|hCoV-19/England/LOND-D3A17/2020|2020-04-06|EPI\_ISL\_441023|Original|hCoV-19^^England|Human|University College London|COVID-19 Genomics UK (COG-UK) Consortium|Roy|United Kingdom

>Spike|hCoV-19/England/ALDP-A93C13/2020|2020-10-19|EPI\_ISL\_611117|Original|hCoV-19^^England|Human|Lighthouse Lab in Alderley Park|Wellcome Sanger Institute for the COVID-19 Genomics UK (COG-UK) consortium|Davies|United Kingdom

>Spike|hCoV-19/Scotland/QEUH-BEAECB/2020|2020-12-04|EPI\_ISL\_710624|Original|hCoV-19^^Scotland|Human|Lighthouse Lab in Glasgow|Wellcome Sanger Institute for the COVID-19 Genomics UK (COG-UK) Consortium|Davies|United Kingdom

>Spike|hCoV-19/England/LIVE-9C081/2020|2020-03-31|EPI\_ISL\_449504|Original|hCoV-19^^England|Human|Liverpool Clinical Laboratories|COVID-19 Genomics UK (COG-UK) Consortium|Haldenby|United Kingdom

>Spike|hCoV-19/Austria/CeMM0267/2020|2020-03-24|EPI\_ISL\_438096|Original|hCoV-19^^Styria|Human|Center for Virology|Bergthaler laboratory|Bergthaler|Austria

>Spike|hCoV-19/USA/HI-H200110/2020|2020-06-23|EPI\_ISL\_752673|Original|hCoV-19^^Hawaii|Human|State Laboratories Division|State Laboratories Division|Sultana|USA

>Spike|hCoV-19/England/CAMC-BBB8C5/2020|2020-11-21|EPI\_ISL\_705563|Original|hCoV-19^^England|Human|Department of Pathology|COVID-19 Genomics UK (COG-UK) Consortium|Goodfellow|United Kingdom

>Spike|hCoV-19/USA/CA-CZB-14660/2020|2020-11-16|EPI\_ISL\_738968|Original|hCoV-19^^California|Human|Orange County Public Health Lab|Chan-Zuckerberg Biohub|Kamm|USA

>Spike|hCoV-19/Denmark/DCGC-11353/2020|2020-11-02|EPI\_ISL\_670860|Original|hCoV-19^^Hovedstaden|Human|Department of Virus and Microbiological Special Diagnostics|Albertsen Lab|Michaelsen|Denmark

>Spike|hCoV-19/United Arab Emirates/0443/2020|2020-05-17|EPI\_ISL\_698617|Original|hCoV-19^^Abu Dhabi|Human|Group 42 (G42) Healthcare|G42 Healthcare|Ogrodzki|United Arab Emirates

>Spike|hCoV-19/England/LOND-D6D48/2020|2020-04-01|EPI\_ISL\_478428|Original|hCoV-19^^England|Human|University College London|COVID-19 Genomics UK (COG-UK) Consortium|Roy|United Kingdom

>Spike|hCoV-19/England/204221434/2020|2020-00-00|EPI\_ISL\_593985|Original|hCoV-19^^England|Human|Respiratory Virus Unit|Respiratory Virus Unit|Platt|United Kingdom

>Spike|hCoV-19/USA/LA-GBCL-26544523/2020|2020-04-20|EPI\_ISL\_485109|Original|hCoV-19^^Louisiana|Human|River Road Testing Lab|Ginkgo Bioworks Clinical Laboratory|Smith|USA

>Spike|hCoV-19/England/CAMB-8090D/2020|2020-04-10|EPI\_ISL\_443034|Original|hCoV-19^^England|Human|Department of Pathology|Wellcome Sanger Institute for the COVID-19 Genomics UK (COG-UK) consortium|Amato|United Kingdom

>Spike|hCoV-19/England/QEUH-A31312/2020|2020-10-04|EPI\_ISL\_595878|Original|hCoV-19^^England|Human|Quadram Institute Bioscience|COVID-19 Genomics UK (COG-UK) Consortium|Alikhan|United Kingdom

>Spike|hCoV-19/Japan/PG-4719/2020|2020-07-00|EPI\_ISL\_689855|Original|hCoV-19^^Japan|Human|Pathogen Genomics Center|Pathogen Genomics Center|Sekizuka|Japan

>Spike|hCoV-19/mink/Netherlands/NB-EMC-25-12/2020|2020-07-26|EPI\_ISL\_523084|Original|hCoV-19^^Noord Brabant|Neovison vison|Dutch COVID-19 response team|Erasmus Medical Center|Oude Munnink|Netherlands

>Spike|hCoV-19/Scotland/QEUH-9B9C63/2020|2020-09-07|EPI\_ISL\_568256|Original|hCoV-19^^Scotland|Human|Lighthouse Lab in Glasgow|Wellcome Sanger Institute for the COVID-19 Genomics UK (COG-UK) consortium|Davies|United Kingdom

>Spike|hCoV-19/England/20132080104/2020|2020-03-24|EPI\_ISL\_423804|Original|hCoV-19^^England|Human|Respiratory Virus Unit|Respiratory Virus Unit|Platt|United Kingdom

>Spike|hCoV-19/England/QEUEH-9B8781/2020|2020-09-08|EPI\_ISL\_549675|Original|hCoV-19^^England|Human|Lighthouse Lab in Glasgow|Wellcome Sanger Institute for the COVID-19 Genomics UK (COG-UK) consortium|Davies|United Kingdom

>Spike|hCoV-19/Northern Ireland/NIRE-2346D2/2020|2020-10-14|EPI\_ISL\_680424|Original|hCoV-19^^Northern Ireland|Human|Regional Virus Laboratory|COVID-19 Genomics UK (COG-UK) Consortium|Fairley|United Kingdom

>Spike|hCoV-19/England/ALDP-C6BA45/2020|2020-12-14|EPI\_ISL\_778627|Original|hCoV-19^^England|Human|Lighthouse Lab in Alderley Park|Wellcome Sanger Institute for the COVID-19 Genomics UK (COG-UK) Consortium|Davies|United Kingdom

>Spike|hCoV-19/USA/TX-HMH-MCoV-15622/2020|2020-10-26|EPI\_ISL\_785306|Original|hCoV-19^^Texas|Human|Houston Methodist Hospital|Houston Methodist Hospital|Long|USA

>Spike|hCoV-19/Sweden/20-51849/2020|2020-06-01|EPI\_ISL\_510855|Original|hCoV-19^^Vasternorrland|Human|Klinisk mikrobiologi Vasternorrland|The Public Health Agency of Sweden|Svartstr\u00f6m|Sweden

>Spike|hCoV-19/USA/CA-CZB-11500/2020|2020-08-02|EPI\_ISL\_625593|Original|hCoV-19^^California|Human|NaN|Chan-Zuckerberg Biohub|Bhatt|USA

>Spike|hCoV-19/USA/CA-ALSR-4109/2020|2020-07-01|EPI\_ISL\_648829|Original|hCoV-19^^California|Human|San Diego County Public Health Laboratory|Andersen lab at Scripps Research|Gangavarapu|USA

>Spike|hCoV-19/England/QEUEH-9F8248/2020|2020-09-27|EPI\_ISL\_588906|Original|hCoV-19^^England|Human|Lighthouse Lab in Glasgow|Wellcome Sanger Institute for the COVID-19 Genomics UK (COG-UK) consortium|Davies|United Kingdom

>Spike|hCoV-19/England/MILK-B38B8B/2020|2020-11-01|EPI\_ISL\_658965|Original|hCoV-19^^England|Human|Lighthouse Lab in Milton Keynes|Wellcome Sanger Institute for the COVID-19 Genomics UK (COG-UK) Consortium|Davies|United Kingdom

>Spike|hCoV-19/USA/MD-MDH-0459/2020|2020-11-11|EPI\_ISL\_682070|Original|hCoV-19^^Maryland|Human|Maryland Public Health Laboratory|Maryland Public Health Laboratory|Keller|USA

>Spike|hCoV-19/England/QEUEH-9DC7B4/2020|2020-09-21|EPI\_ISL\_580999|Original|hCoV-19^^England|Human|Lighthouse Lab in Glasgow|Wellcome Sanger Institute for the COVID-19 Genomics UK (COG-UK) consortium|Davies|United Kingdom

>Spike|hCoV-19/Belgium/UGent-230/2020|2020-11-12|EPI\_ISL\_717623|Original|hCoV-19^^Ghent|Human|Lab voor klinische biologie|Onderzoeksgroep Virologie|Lambrechts|Belgium

>Spike|hCoV-19/USA/LA-EVTL1027/2020|2020-08-25|EPI\_ISL\_653718|Original|hCoV-19^^Louisiana|Human|LSUHS Emerging Viral Threat Laboratory|Microbial Genome Sequencing Center|Kamil|USA

>Spike|hCoV-19/India/KA-IB54/2020|2020-06-20|EPI\_ISL\_508331|Original|hCoV-19^^Karnataka|Human|Indian Institute of Science|National Institute of Biomedical Genomics|Maitra|India

>Spike|hCoV-19/France/BRE-IPP9990/2020|2020-10-17|EPI\_ISL\_718245|Original|hCoV-19^^Bretagne|Human|Hospital|National Reference Center for Viruses of Respiratory Infections|Enouf|France

>Spike|hCoV-19/England/204321426/2020|2020-10-19|EPI\_ISL\_649828|Original|hCoV-19^^England|Human|Respiratory Virus Unit|COVID-19 Genomics UK (COG-UK) Consortium|Platt|United Kingdom

>Spike|hCoV-19/USA/NY-NYCPHL-001344/2020|2020-11-13|EPI\_ISL\_683926|Original|hCoV-19^^New York|Human|DOHMH Corona|New York City Public Health Laboratory|Wang|USA

>Spike|hCoV-19/Japan/PG-6829/2020|2020-07-00|EPI\_ISL\_687937|Original|hCoV-19^^Japan|Human|Pathogen Genomics Center|Pathogen Genomics Center|Sekizuka|Japan

>Spike|hCoV-19/USA/LA-EVTL506/2020|2020-06-24|EPI\_ISL\_578910|Original|hCoV-19^^Louisiana|Human|LSUHS Emerging Viral Threat Laboratory|Microbial Genome Sequencing Center|Kamil|USA

>Spike|hCoV-19/Wales/PHWC-48DF28/2020|2020-11-09|EPI\_ISL\_680779|Original|hCoV-19^^Wales|Human|Wales Specialist Virology Centre Sequencing lab|COVID-19 Genomics UK (COG-UK) Consortium|Moore|United Kingdom

>Spike|hCoV-19/South Africa/NHLS-UCT-GS-1387/2020|2020-11-12|EPI\_ISL\_700420|Original|hCoV-19^Western Cape|Human|D'Almeida Clinic wc DAL|NHLS/UCT|Iranzadeh|South Africa

>Spike|hCoV-19/Spain/CT-IBV-99009878/2020|2020-07-31|EPI\_ISL\_660275|Original|hCoV-19^Catalunya|Human|Servicio de Microbiolog\u00eda|SeqCOVID-SPAIN consortium/IBV (CSIC) |Comas|Spain

>Spike|hCoV-19/England/ALDP-9E61F5/2020|2020-09-24|EPI\_ISL\_580425|Original|hCoV-19^England|Human|Lighthouse Lab in Alderley Park|Wellcome Sanger Institute for the COVID-19 Genomics UK (COG-UK) consortium|Davies|United Kingdom

>Spike|hCoV-19/USA/WA-UW-1420/2020|2020-03-18|EPI\_ISL\_423000|Original|hCoV-19^Washington|Human|UW Virology Lab|UW Virology Lab|Roychoudhury|USA

>Spike|hCoV-19/England/CAMC-A64A99/2020|2020-10-11|EPI\_ISL\_608987|Original|hCoV-19^England|Human|Lighthouse Lab in Cambridge|Wellcome Sanger Institute for the COVID-19 Genomics UK (COG-UK) consortium|Davies|United Kingdom

>Spike|hCoV-19/Switzerland/ZH-UZH-1000483258/2020|2020-03-15|EPI\_ISL\_508868|Original|hCoV-19^Zurich|Human|Division of Infectious Diseases and Hospital Epidemiology|Institute of Medical Virology|Huber|Switzerland

>Spike|hCoV-19/Australia/VIC8987/2020|2020-07-25|EPI\_ISL\_565337|Original|hCoV-19^Victoria|Human|Microbiological Diagnostic Unit - Public Health Laboratory (MDU-PHL) |MDU-PHL|Schultz|Australia

>Spike|hCoV-19/England/MILK-9C2E70/2020|2020-09-10|EPI\_ISL\_566482|Original|hCoV-19^England|Human|Lighthouse Lab in Milton Keynes|Wellcome Sanger Institute for the COVID-19 Genomics UK (COG-UK) consortium|Davies|United Kingdom

>Spike|hCoV-19/England/NOTT-117876/2020|2020-10-23|EPI\_ISL\_627671|Original|hCoV-19^England|Human|Queens Medical Centre|COVID-19 Genomics UK (COG-UK) Consortium|Loose|United Kingdom

>Spike|hCoV-19/Scotland/CVR3164/2020|2020-04-22|EPI\_ISL\_453096|Original|hCoV-19^Scotland|Human|West of Scotland Specialist Virology Centre|COVID-19 Genomics UK (COG-UK) Consortium|Robertson|United Kingdom

>Spike|hCoV-19/Scotland/QEUH-96EA63/2020|2020-08-19|EPI\_ISL\_534462|Original|hCoV-19^Scotland|Human|NHSGGC West of Scotland Specialist Virology Centre / MRC - University of Glasgow Centre for Virus Research|Wellcome Sanger Institute for the COVID-19 Genomics UK (COG-UK) consortium|Davies|United Kingdom

>Spike|hCoV-19/Japan/PG-4770/2020|2020-08-00|EPI\_ISL\_689906|Original|hCoV-19^Japan|Human|Pathogen Genomics Center|Pathogen Genomics Center|Sekizuka|Japan

>Spike|hCoV-19/Italy/SIC-IZSBM169-76/2020|2020-06-00|EPI\_ISL\_582694|Original|hCoV-19^Sicily|Human|Laboratorio di Riferimento Regionale della Sicilia Occidentale per l'Emergenza COVID-19|Istituto Zooprofilattico Sperimentale della Sicilia|Reale|Italy

>Spike|hCoV-19/England/ALDP-951A90/2020|2020-06-10|EPI\_ISL\_555504|Original|hCoV-19^England|Human|Lighthouse Lab in Alderley Park|Wellcome Sanger Institute for the COVID-19 Genomics UK (COG-UK) consortium|Davies|United Kingdom

>Spike|hCoV-19/Japan/PG-2634/2020|2020-04-00|EPI\_ISL\_690766|Original|hCoV-19^Japan|Human|Pathogen Genomics Center|Pathogen Genomics Center|Sekizuka|Japan

>Spike|hCoV-19/Denmark/DCGC-2242/2020|2020-08-10|EPI\_ISL\_617547|Original|hCoV-19^Hovedstaden|Human|Department of Virus and Microbiological Special Diagnostics|Albertsen lab|Michaelsen|Denmark

>Spike|hCoV-19/England/20148002204/2020|2020-04-02|EPI\_ISL\_466050|Original|hCoV-19^England|Human|Respiratory Virus Unit|Respiratory Virus Unit|Platt|United Kingdom

>Spike|hCoV-19/USA/TX-HMH-MCoV-15116/2020|2020-10-17|EPI\_ISL\_786600|Original|hCoV-19^Texas|Human|Houston Methodist Hospital|Houston Methodist Hospital|Long|USA

>Spike|hCoV-19/USA/UT-QDX-2285/2020|2020-03-13|EPI\_ISL\_604606|Original|hCoV-19^Utah|Human|Quest Diagnostics|Quest Diagnostics|Kagan|USA

>Spike|hCoV-19/England/ALDP-4A4C9D/2020|2020-06-07|EPI\_ISL\_559537|Original|hCoV-19^England|Human|Lighthouse Lab in Alderley Park|Wellcome Sanger Institute for the COVID-19 Genomics UK (COG-UK) consortium|Davies|United Kingdom

>Spike|hCoV-19/Wales/ALDP-B1D5D9/2020|2020-11-01|EPI\_ISL\_710983|Original|hCoV-19^Wales|Human|Lighthouse Lab in Alderley Park|Wellcome Sanger Institute for the COVID-19 Genomics UK (COG-UK) Consortium|Davies|United Kingdom



>Spike|hCoV-19/England/CAMC-B2145D/2020|2020-10-03|EPI\_ISL\_647213|Original|hCoV-19^^England|Human|Lighthouse Lab in Cambridge|Wellcome Sanger Institute for the COVID-19 Genomics UK (COG-UK) Consortium|Davies|United Kingdom

>Spike|hCoV-19/England/PORT-2D1DA5/2020|2020-04-05|EPI\_ISL\_499278|Original|hCoV-19^^England|Human|Centre for Enzyme Innovation|COVID-19 Genomics UK (COG-UK) Consortium|Robson|United Kingdom

>Spike|hCoV-19/Denmark/ALAB-SSI370/2020|2020-03-23|EPI\_ISL\_429476|Original|hCoV-19^^Denmark|Human|Department of Virus and Microbiological Special Diagnostics|Albertsen lab|Kirkegaard|Denmark

>Spike|hCoV-19/Wuhan/HBCDC-HB-04/2020|2020-01-18|EPI\_ISL\_412980|Original|hCoV-19^^Hubei|Human|Union Hospital of Tongji Medical College|Hubei Provincial Center for Disease Control and Prevention|Fang|China

>Spike|hCoV-19/South Korea/KDCA0144/2020|2020-10-20|EPI\_ISL\_747379|Original|hCoV-19^^South Korea|Human|Division of Emerging Infectious Diseases|Division of Emerging Infectious Diseases|Park|South Korea

>Spike|hCoV-19/England/ALDP-92D435/2020|2020-06-21|EPI\_ISL\_553719|Original|hCoV-19^^England|Human|Lighthouse Lab in Alderley Park|Wellcome Sanger Institute for the COVID-19 Genomics UK (COG-UK) consortium|Davies|United Kingdom

>Spike|hCoV-19/Australia/VIC14406/2020|2020-08-16|EPI\_ISL\_592485|Original|hCoV-19^^Victoria|Human|Victorian Infectious Diseases Reference Laboratory (VIDRL)|VIDRL and MDU-PHL|Schultz|Australia

>Spike|hCoV-19/USA/TX-HMH-7930/2020|2020-06-29|EPI\_ISL\_545715|Original|hCoV-19^^Texas|Human|Houston Methodist Hospital|Houston Methodist Hospital|Long|USA

>Spike|hCoV-19/North Macedonia/2531/2020|2020-06-06|EPI\_ISL\_516414|Original|hCoV-19^^Skopje|Human|Center for public health - Skopje|Research Center for Genetic Engineering and Biotechnology \Georgi D. Efremov\u201d|Dimovski|North Macedonia

>Spike|hCoV-19/Spain/RI-IBV-005984/2020|2020-03-22|EPI\_ISL\_500418|Original|hCoV-19^^La Rioja|Human|Centro de Investigaci\u00f3n Biom\u00e9dica de La Rioja - Hospital San Pedro Logro\u00f1o|SeqCOVID-SPAIN consortium/IBV (CSIC)|Comas|Spain

>Spike|hCoV-19/Scotland/GCVR-17133D/2020|2020-03-26|EPI\_ISL\_459672|Original|hCoV-19^^Scotland|Human|NHSGGC West of Scotland Specialist Virology Centre / MRC-University of Glasgow Centre for Virus Research|Wellcome Sanger Institute for the COVID-19 Genomics UK (COG-UK) consortium|Davies|United Kingdom

>Spike|hCoV-19/Switzerland/BE-ETHZ-321476/2020|2020-10-14|EPI\_ISL\_603688|Original|hCoV-19^^Bern|Human|Viollier AG|Department of Biosystems Science and Engineering|Nadeau|Switzerland

>Spike|hCoV-19/England/QEUEH-BA3329/2020|2020-11-18|EPI\_ISL\_721171|Original|hCoV-19^^England|Human|Lighthouse Lab in Glasgow|Wellcome Sanger Institute for the COVID-19 Genomics UK (COG-UK) Consortium|Davies|United Kingdom

>Spike|hCoV-19/Netherlands/NH-EMC-56/2020|2020-00-00|EPI\_ISL\_577852|Original|hCoV-19^^Noord Holland|Human|Dutch COVID-19 response team|Erasmus Medical Center|Oude Munnink|Netherlands

>Spike|hCoV-19/Spain/CT-IBV-97009538/2020|2020-10-28|EPI\_ISL\_671840|Original|hCoV-19^^Catalunya|Human|Servicio de Microbiolog\u00eda|SeqCOVID-SPAIN consortium/IBV (CSIC)|Comas|Spain

>Spike|hCoV-19/England/MILK-A47337/2020|2020-10-06|EPI\_ISL\_598484|Original|hCoV-19^^England|Human|Lighthouse Lab in Milton Keynes|Wellcome Sanger Institute for the COVID-19 Genomics UK (COG-UK) consortium|Davies|United Kingdom

>Spike|hCoV-19/Luxembourg/LNS1527323/2020|2020-10-25|EPI\_ISL\_739948|Original|hCoV-19^^Luxembourg|Human|Laboratoire national de sant\u00e9|Laboratoire national de sant\u00e9|Wienecke-Baldacchino|Luxembourg

>Spike|hCoV-19/England/ALDP-B622B0/2020|2020-11-09|EPI\_ISL\_656474|Original|hCoV-19^^England|Human|Lighthouse Lab in Alderley Park|Wellcome Sanger Institute for the COVID-19 Genomics UK (COG-UK) Consortium|Davies|United Kingdom

>Spike|hCoV-19/England/MILK-B88B04/2020|2020-11-14|EPI\_ISL\_675851|Original|hCoV-19^^England|Human|Lighthouse Lab in Milton Keynes|Wellcome Sanger Institute for the COVID-19 Genomics UK (COG-UK) Consortium|Davies|United Kingdom

>Spike|hCoV-19/England/ALDP-BC76CC/2020|2020-11-22|EPI\_ISL\_721474|Original|hCoV-19^^England|Human|Lighthouse Lab in Alderley Park|Wellcome Sanger Institute for the COVID-19 Genomics UK (COG-UK) Consortium|Davies|United Kingdom

>Spike|hCoV-19/Japan/PG-0478/2020|2020-04-02|EPI\_ISL\_480138|Original|hCoV-19^^HokurikuShinsyu|Human|Fukui Prefectural Institute of Public Health and Environmental Science|Pathogen Genomics Center|Sekizuka|Japan

>Spike|hCoV-19/England/CAMC-9B1D95/2020|2020-09-04|EPI\_ISL\_566610|Original|hCoV-19^^England|Human|Lighthouse Lab in Cambridge|Wellcome Sanger Institute for the COVID-19 Genomics UK (COG-UK) consortium|Davies|United Kingdom

>Spike|hCoV-19/England/QEUA-B10A13/2020|2020-11-02|EPI\_ISL\_642674|Original|hCoV-19^^England|Human|Lighthouse Lab in Glasgow|Wellcome Sanger Institute for the COVID-19 Genomics UK (COG-UK) Consortium|Davies|United Kingdom

>Spike|hCoV-19/England/LIVE-1D2A44/2020|2020-03-29|EPI\_ISL\_611575|Original|hCoV-19^^England|Human|Liverpool Clinical Laboratories|COVID-19 Genomics UK (COG-UK) Consortium|Haldenby|United Kingdom

>Spike|hCoV-19/USA/MN-QDX-1326/2020|2020-03-16|EPI\_ISL\_572115|Original|hCoV-19^^Minnesota|Human|Quest Diagnostics|Quest Diagnostics|Kagan|USA

>Spike|hCoV-19/India/KA-IB31/2020|2020-06-03|EPI\_ISL\_508310|Original|hCoV-19^^Karnataka|Human|Indian Institute of Science|National Institute of Biomedical Genomics|Maitra|India

>Spike|hCoV-19/Japan/PG-1503/2020|2020-04-00|EPI\_ISL\_685110|Original|hCoV-19^^Japan|Human|Saitama Prefectural Institute of Public Health|Pathogen Genomics Center|Sekizuka|Japan

>Spike|hCoV-19/Jordan/AM-ALSR-5303/2020|2020-11-04|EPI\_ISL\_730539|Original|hCoV-19^^Amman|Human|Biolab Diagnostic Laboratories|Andersen lab at Scripps Research|Gangavarapu|Jordan

>Spike|hCoV-19/England/NORT-296C27/2020|2020-04-28|EPI\_ISL\_484274|Original|hCoV-19^^England|Human|Northumbria University / South Tees Hospitals NHS Foundation Trust / North Cumbria Integrated Care NHS Foundation Trust / North Tees and Hartlepool NHS Foundation Trust / Newcastle Hospitals NHS Foundation Trust|COVID-19 Genomics UK (COG-UK) Consortium|Bashton|United Kingdom

>Spike|hCoV-19/Luxembourg/LNS9905208/2020|2020-10-26|EPI\_ISL\_745007|Original|hCoV-19^^Luxembourg|Human|Laboratoire national de sant\u00e9|Laboratoire national de sant\u00e9|Wienecke-Baldacchino|Luxembourg

>Spike|hCoV-19/England/CAMB-76973/2020|2020-03-29|EPI\_ISL\_438449|Original|hCoV-19^^England|Human|Department of Pathology|Wellcome Sanger Institute for the COVID-19 Genomics UK (COG-UK) consortium|Amato|United Kingdom

>Spike|hCoV-19/Scotland/EDB2446/2020|2020-04-23|EPI\_ISL\_439210|Original|hCoV-19^^Scotland|Human|Virology Department|COVID-19 Genomics UK (COG-UK) Consortium|Williams|United Kingdom

>Spike|hCoV-19/England/PORT-2D58CE/2020|2020-12-18|EPI\_ISL\_764121|Original|hCoV-19^^England|Human|Centre for Enzyme Innovation|COVID-19 Genomics UK (COG-UK) Consortium|Robson|United Kingdom

>Spike|hCoV-19/Denmark/DCGC-11325/2020|2020-11-02|EPI\_ISL\_670841|Original|hCoV-19^^Hovedstaden|Human|Department of Virus and Microbiological Special Diagnostics|Albertsen Lab|Michaelsen|Denmark

>Spike|hCoV-19/Ireland/D-NVRL-73IRL76207/2020|2020-09-15|EPI\_ISL\_596909|Original|hCoV-19^^Dublin|Human|National Virus Reference Laboratory|National Virus Reference Laboratory|Gonzalez|Ireland

>Spike|hCoV-19/USA/WI-WSLH-200695/2020|2020-09-17|EPI\_ISL\_631452|Original|hCoV-19^^Wisconsin|Human|Wisconsin State Laboratory of Hygiene Communicable Disease Division|Wisconsin State Laboratory of Hygiene Communicable Disease Division|Florek|USA

>Spike|hCoV-19/England/QEUA-CDF48A/2020|2020-12-26|EPI\_ISL\_782186|Original|hCoV-19^^England|Human|Lighthouse Lab in Glasgow|Wellcome Sanger Institute for the COVID-19 Genomics UK (COG-UK) Consortium|Davies|United Kingdom

>Spike|hCoV-19/USA/CA-CZB-1678/2020|2020-03-30|EPI\_ISL\_468618|Original|hCoV-19^^California|Human|Contra Costa Public Health Lab|Chan-Zuckerberg Biohub|McGeever|USA

>Spike|hCoV-19/England/MILK-B3C0A6/2020|2020-11-01|EPI\_ISL\_706117|Original|hCoV-19^^England|Human|Oxford Viromics|COVID-19 Genomics UK (COG-UK) Consortium|Golubchik|United Kingdom

>Spike|hCoV-19/England/MILK-B862B6/2020|2020-11-13|EPI\_ISL\_673911|Original|hCoV-19^^England|Human|Lighthouse Lab in Milton Keynes|Wellcome Sanger Institute for the COVID-19 Genomics UK (COG-UK) Consortium|Davies|United Kingdom

>Spike|hCoV-19/England/ALDP-B24EC5/2020|2020-11-04|EPI\_ISL\_646538|Original|hCoV-19^^England|Human|Lighthouse Lab in Alderley Park|Wellcome Sanger Institute for the COVID-19 Genomics UK (COG-UK) Consortium|Davies|United Kingdom

>Spike|hCoV-19/England/CAMC-D0264B/2020|2020-12-21|EPI\_ISL\_781633|Original|hCoV-19^^England|Human|Lighthouse Lab in Cambridge|Wellcome Sanger Institute for the COVID-19 Genomics UK (COG-UK) Consortium|Davies|United Kingdom

>Spike|hCoV-19/England/MILK-A46FBC/2020|2020-10-06|EPI\_ISL\_598439|Original|hCoV-19^^England|Human|Lighthouse Lab in Milton Keynes|Wellcome Sanger Institute for the COVID-19 Genomics UK (COG-UK) consortium|Davies|United Kingdom

>Spike|hCoV-19/USA/CA-CZB046/2020|2020-03-25|EPI\_ISL\_429001|Original|hCoV-19^^California|Human|UCSF Clinical Microbiology Laboratory|Chan-Zuckerberg Biohub|Kamm|USA

>Spike|hCoV-19/Denmark/DCGC-13341/2020|2020-11-30|EPI\_ISL\_712741|Original|hCoV-19^^Hovedstaden|Human|Department of Virus and Microbiological Special Diagnostics|Albertsen Lab|Michaelsen|Denmark

>Spike|hCoV-19/USA/AZ-TG395912/2020|2020-06-08|EPI\_ISL\_694756|Original|hCoV-19^^Arizona|Human|AZ SPHL|TGen North|French|USA

>Spike|hCoV-19/Scotland/QEUH-B1303C/2020|2020-11-03|EPI\_ISL\_649508|Original|hCoV-19^^Scotland|Human|Lighthouse Lab in Glasgow|Wellcome Sanger Institute for the COVID-19 Genomics UK (COG-UK) Consortium|Davies|United Kingdom

>Spike|hCoV-19/USA/UT-0536/2020|2020-04-04|EPI\_ISL\_435370|Original|hCoV-19^^Utah|Human|Utah Public Health Laboratory|Utah Public Health Laboratory|Young|USA

>Spike|hCoV-19/Denmark/DCGC-18633/2020|2020-12-07|EPI\_ISL\_749167|Original|hCoV-19^^Hovedstaden|Human|Department of Virus and Microbiological Special Diagnostics|Albertsen Lab|Michaelsen|Denmark

>Spike|hCoV-19/South Africa/N00129/2020|2020-07-06|EPI\_ISL\_623019|Original|hCoV-19^^Mpumalanga|Human|National Health Laboratory Service|National Institute for Communicable Diseases of the National Health Laboratory Service|Allam|South Africa

>Spike|hCoV-19/England/ALDP-950B52/2020|2020-06-14|EPI\_ISL\_554599|Original|hCoV-19^^England|Human|Lighthouse Lab in Alderley Park|Wellcome Sanger Institute for the COVID-19 Genomics UK (COG-UK) consortium|Davies|United Kingdom

>Spike|hCoV-19/Denmark/DCGC-10973/2020|2020-11-02|EPI\_ISL\_670318|Original|hCoV-19^^Syddanmark|Human|Department of Virus and Microbiological Special Diagnostics|Albertsen Lab|Michaelsen|Denmark

>Spike|hCoV-19/USA/TX-DSHS-0358/2020|2020-06-13|EPI\_ISL\_538295|Original|hCoV-19^^Texas|Human|Texas Department of State Health Services|Texas Department of State Health Services|Rahman|USA

>Spike|hCoV-19/USA/NM-NMDOH-2020327015/2020|2020-09-03|EPI\_ISL\_644587|Original|hCoV-19^^New Mexico|Human|New Mexico Department of Health Scientific Laboratory|New Mexico Department of Health Scientific Laboratory|Johnson|USA

>Spike|hCoV-19/England/201620041/2020|2020-04-13|EPI\_ISL\_466391|Original|hCoV-19^^England|Human|Respiratory Virus Unit|Respiratory Virus Unit|Platt|United Kingdom

>Spike|hCoV-19/England/PORT-2F5D32/2020|2020-04-09|EPI\_ISL\_512424|Original|hCoV-19^^England|Human|Centre for Enzyme Innovation|COVID-19 Genomics UK (COG-UK) Consortium|Robson|United Kingdom

>Spike|hCoV-19/England/QEUH-AAE1E9/2020|2020-10-22|EPI\_ISL\_652964|Original|hCoV-19^^England|Human|Oxford Viromics|COVID-19 Genomics UK (COG-UK) Consortium|Golubchik|United Kingdom

>Spike|hCoV-19/USA/NMDOH-2020323686/2020|2020-09-01|EPI\_ISL\_542090|Original|hCoV-19^^New Mexico|Human|New Mexico Department of Health Scientific Laboratory|New Mexico Department of Health Scientific Laboratory|Johnson|USA

>Spike|hCoV-19/Italy/VEN-UniVR-42/2020|2020-03-11|EPI\_ISL\_751354|Original|hCoV-19^^Veneto|Human|IRCCS Sacro Cuore Don Calabria Hospital|University of Verona|Mori|Italy

>Spike|hCoV-19/Wales/PHWC-365F3/2020|2020-05-01|EPI\_ISL\_474689|Original|hCoV-19^^Wales|Human|Originating lab|COVID-19 Genomics UK (COG-UK) Consortium|Moore|United Kingdom

>Spike|hCoV-19/USA/CA-ALSR-0627-IPL/2020|2020-04-21|EPI\_ISL\_483266|Original|hCoV-19^^California|Human|UC San Diego Center for Advanced Laboratory Medicine|Andersen lab at Scripps Research|Gangavarapu|USA

>Spike|hCoV-19/USA/MI-UM-10036650310/2020|2020-10-27|EPI\_ISL\_682102|Original|hCoV-19^^Michigan|Human|University of Michigan Clinical Microbiology Laboratory|Lauring Lab|Valesano|USA

>Spike|hCoV-19/England/ALDP-95606C/2020|2020-06-08|EPI\_ISL\_554021|Original|hCoV-19^^England|Human|Lighthouse Lab in Alderley Park|Wellcome Sanger Institute for the COVID-19 Genomics UK (COG-UK) consortium|Davies|United Kingdom

>Spike|hCoV-19/England/CAMC-A823E5/2020|2020-10-10|EPI\_ISL\_610875|Original|hCoV-19^^England|Human|Lighthouse Lab in Cambridge|Wellcome Sanger Institute for the COVID-19 Genomics UK (COG-UK) consortium|Davies|United Kingdom

>Spike|hCoV-19/Wales/PHWC-497161/2020|2020-11-26|EPI\_ISL\_726786|Original|hCoV-19^^Wales|Human|Originating lab|COVID-19 Genomics UK (COG-UK) Consortium|Moore|United Kingdom

>Spike|hCoV-19/USA/CA-LACPHL-AF00062/2020|2020-12-21|EPI\_ISL\_765999|Original|hCoV-19^^California|Human|Los Angeles County PHL|Los Angeles County PHL|Hemarajata|USA

>Spike|hCoV-19/USA/TX-HMH-MCoV-14335/2020|2020-10-05|EPI\_ISL\_787620|Original|hCoV-19^^Texas|Human|Houston Methodist Hospital|Houston Methodist Hospital|Long|USA

>Spike|hCoV-19/USA/TX-HMH-MCoV-9769/2020|2020-07-06|EPI\_ISL\_780264|Original|hCoV-19^^Texas|Human|Houston Methodist Hospital|Houston Methodist Hospital|Long|USA

>Spike|hCoV-19/England/BRIS-124E0B/2020|2020-03-26|EPI\_ISL\_443811|Original|hCoV-19^^England|Human|PHE South West Regional Laboratory|Wellcome Sanger Institute for the COVID-19 Genomics UK (COG-UK) consortium|Amato|United Kingdom

>Spike|hCoV-19/USA/SD-SDPHL-0012/2020|2020-07-29|EPI\_ISL\_569620|Original|hCoV-19^^South Dakota|Human|McCrossan Boys Ranch|South Dakota Public Health Laboratory|Carlson|USA

>Spike|hCoV-19/Belgium/regal-10141396/2020|2020-10-14|EPI\_ISL\_738448|Original|hCoV-19^^Putte|Human|UZ Leuven|KU Leuven|Maes|Belgium

>Spike|hCoV-19/England/204941525/2020|2020-12-02|EPI\_ISL\_754344|Original|hCoV-19^^England|Human|Respiratory Virus Unit|COVID-19 Genomics UK (COG-UK) Consortium|Platt|United Kingdom

>Spike|hCoV-19/Wales/PHWC-49E57D/2020|2020-12-07|EPI\_ISL\_743014|Original|hCoV-19^^Wales|Human|Wales Specialist Virology Centre Sequencing lab|COVID-19 Genomics UK (COG-UK) Consortium|Moore|United Kingdom

>Spike|hCoV-19/India/KA-nimh-1519/2020|2020-04-15|EPI\_ISL\_515937|Original|hCoV-19^^Karnataka|Human|BIMS|Department of Neurovirology|Pattabiraman|India

>Spike|hCoV-19/Netherlands/NA\_289/2020|2020-03-31|EPI\_ISL\_422598|Original|hCoV-19^^Netherlands|Human|Dutch COVID-19 response team|Erasmus Medical Center|Oude Munnink|Netherlands

>Spike|hCoV-19/USA/MI-MDHHS-SC20675/2020|2020-05-14|EPI\_ISL\_471699|Original|hCoV-19^^Michigan|Human|Michigan Department of Health and Human Services|Michigan Department of Health and Human Services|Blankenship|USA

>Spike|hCoV-19/England/BRIS-130525/2020|2020-04-11|EPI\_ISL\_492693|Original|hCoV-19^^England|Human|PHE South West Regional Laboratory|Wellcome Sanger Institute for the COVID-19 Genomics UK (COG-UK) consortium|Davies|United Kingdom

>Spike|hCoV-19/Wales/PHWC-1694DB/2020|2020-06-06|EPI\_ISL\_499401|Original|hCoV-19^^Wales|Human|Wales Specialist Virology Centre Sequencing lab|COVID-19 Genomics UK (COG-UK) Consortium|Moore|United Kingdom

>Spike|hCoV-19/USA/OR-OHSU-2797/2020|2020-08-31|EPI\_ISL\_667315|Original|hCoV-19^^Oregon|Human|OHSU Lab Services Molecular Microbiology Lab|Oregon SARS-CoV-2 Genome Sequencing Center|O'Roak|USA

>Spike|hCoV-19/Panama/331254/2020|2020-03-11|EPI\_ISL\_496682|Original|hCoV-19^^Panama Center|Human|Gorgas Memorial Laboratory of Health Studies|Gorgas Memorial Laboratory of Health Studies|Martinez|Panama

>Spike|hCoV-19/England/QEUH-AD2085/2020|2020-10-26|EPI\_ISL\_634014|Original|hCoV-19^^England|Human|Lighthouse Lab in Glasgow|Wellcome Sanger Institute for the COVID-19 Genomics UK (COG-UK) consortium|Davies|United Kingdom

>Spike|hCoV-19/USA/WA-S891/2020|2020-04-28|EPI\_ISL\_463381|Original|hCoV-19^^Washington|Human|Washington State Department of Health|Seattle Flu Study|Bedford|USA

>Spike|hCoV-19/Denmark/DCGC-19153/2020|2020-12-07|EPI\_ISL\_748783|Original|hCoV-19^^Sjaelland|Human|Department of Virus and Microbiological Special Diagnostics|Albertsen Lab|Michaelsen|Denmark

>Spike|hCoV-19/India/TG-CCMB-OM27/2020|2020-09-20|EPI\_ISL\_644721|Original|hCoV-19^^Telangana|Human|Osmania Medical College|CSIR-Centre for Cellular and Molecular Biology|Mukherjee|India

>Spike|hCoV-19/Wales/PHWC-497D8B/2020|2020-11-30|EPI\_ISL\_726972|Original|hCoV-19^^Wales|Human|Originating lab|COVID-19 Genomics UK (COG-UK) Consortium|Moore|United Kingdom

>Spike|hCoV-19/England/SHEF-CB05C/2020|2020-06-03|EPI\_ISL\_479245|Original|hCoV-19^^England|Human|Virology Department|COVID-19 Genomics UK (COG-UK) Consortium|de Silva|United Kingdom

>Spike|hCoV-19/Germany/HH-hpi-p1754/2020|2020-03-19|EPI\_ISL\_776129|Original|hCoV-19^^Hamburg|Human|University Medical Center Hamburg Eppendorf|Heinrich Pette Institute|Robitaille|Germany

>Spike|hCoV-19/Netherlands/NB-RIVM-10304/2020|2020-03-04|EPI\_ISL\_636506|Original|hCoV-19^^NoordBrabant|Human|Dutch COVID-19 response team|National Institute for Public Health and the Environment (RIVM)|Meijer|Netherlands

>Spike|hCoV-19/USA/UT-UPHL-201232095/2020|2020-03-30|EPI\_ISL\_672557|Original|hCoV-19^^Utah|Human|Utah Public Health Laboratory|Utah Public Health Laboratory|Young|USA

>Spike|hCoV-19/Australia/VIC9141/2020|2020-08-22|EPI\_ISL\_565408|Original|hCoV-19^^Victoria|Human|Microbiological Diagnostic Unit - Public Health Laboratory (MDU-PHL)|MDU-PHL|Schultz|Australia

>Spike|hCoV-19/England/CAMC-BC0933/2020|2020-11-22|EPI\_ISL\_704904|Original|hCoV-19^^England|Human|Lighthouse Lab in Cambridge|Wellcome Sanger Institute for the COVID-19 Genomics UK (COG-UK) Consortium|Davies|United Kingdom

>Spike|hCoV-19/Australia/VIC2586/2020|2020-06-30|EPI\_ISL\_521459|Original|hCoV-19^^Victoria|Human|Microbiological Diagnostic Unit - Public Health Laboratory (MDU-PHL)|MDU-PHL|Schultz|Australia

>Spike|hCoV-19/Wales/MILK-9E18B9/2020|2020-09-19|EPI\_ISL\_577415|Original|hCoV-19^^Wales|Human|Oxford Viromics|COVID-19 Genomics UK (COG-UK) Consortium|Golubchik|United Kingdom

>Spike|hCoV-19/USA/NM-UNM-00303/2020|2020-05-13|EPI\_ISL\_508058|Original|hCoV-19^^New Mexico|Human|New Mexico Department of Health Scientific Laboratory Division|Center for Global Health|Domman|USA

>Spike|hCoV-19/New Zealand/20CV0137/2020|2020-08-22|EPI\_ISL\_548018|Original|hCoV-19^^Auckland|Human|North Shore Hospital|Institute of Environmental Science and Research (ESR)|Wang|New Zealand

>Spike|hCoV-19/England/QEUH-990321/2020|2020-08-26|EPI\_ISL\_540087|Original|hCoV-19^^England|Human|Lighthouse Lab in Glasgow|Wellcome Sanger Institute for the COVID-19 Genomics UK (COG-UK) consortium|Davies|United Kingdom

>Spike|hCoV-19/Luxembourg/LNS1834890/2020|2020-10-22|EPI\_ISL\_740002|Original|hCoV-19^^Luxembourg|Human|Laboratoire national de sant\u00e9|Laboratoire national de sant\u00e9|Wienecke-Baldacchino|Luxembourg

>Spike|hCoV-19/Finland/1LS16E3/2020|2020-10-01|EPI\_ISL\_757352|Original|hCoV-19^^Uusimaa|Human|Department of Virology and Immunology|Department of Virology|Smura|Finland

>Spike|hCoV-19/England/CAMC-C71B76/2020|2020-12-15|EPI\_ISL\_769106|Original|hCoV-19^^England|Human|Lighthouse Lab in Cambridge|Wellcome Sanger Institute for the COVID-19 Genomics UK (COG-UK) Consortium|Davies|United Kingdom

>Spike|hCoV-19/USA/TX-DSHS-0065/2020|2020-05-09|EPI\_ISL\_522351|Original|hCoV-19^^Texas|Human|Texas Department of State Health Services|Texas Department of State Health Services|Rahman|USA

>Spike|hCoV-19/Scotland/QEUH-AD13BA/2020|2020-10-27|EPI\_ISL\_649713|Original|hCoV-19^^Scotland|Human|Lighthouse Lab in Glasgow|Wellcome Sanger Institute for the COVID-19 Genomics UK (COG-UK) Consortium|Davies|United Kingdom

>Spike|hCoV-19/Scotland/QEUI-9D1597/2020|2020-09-16|EPI\_ISL\_573856|Original|hCoV-19^^Scotland|Human|University College London|COVID-19 Genomics UK (COG-UK) Consortium|Roy|United Kingdom

>Spike|hCoV-19/Scotland/GCVR-17050B/2020|2020-03-23|EPI\_ISL\_459667|Original|hCoV-19^^Scotland|Human|NHSGCC West of Scotland Specialist Virology Centre / MRC-University of Glasgow Centre for Virus Research|Wellcome Sanger Institute for the COVID-19 Genomics UK (COG-UK) consortium|Davies|United Kingdom

>Spike|hCoV-19/England/QEUI-A4D322/2020|2020-10-05|EPI\_ISL\_628595|Original|hCoV-19^^England|Human|Oxford Viromics|COVID-19 Genomics UK (COG-UK) Consortium|Golubchik|United Kingdom

>Spike|hCoV-19/USA/LA-SR0285/2020|2020-04-01|EPI\_ISL\_445140|Original|hCoV-19^^Louisiana|Human|Robert Garry lab|Andersen lab at Scripps Research|Gangavarapu|USA

>Spike|hCoV-19/England/MILK-A467E1/2020|2020-10-06|EPI\_ISL\_598771|Original|hCoV-19^^England|Human|Lighthouse Lab in Milton Keynes|Wellcome Sanger Institute for the COVID-19 Genomics UK (COG-UK) consortium|Davies|United Kingdom

>Spike|hCoV-19/England/MILK-6F62D4/2020|2020-06-30|EPI\_ISL\_557532|Original|hCoV-19^^England|Human|Lighthouse Lab in Milton Keynes|Wellcome Sanger Institute for the COVID-19 Genomics UK (COG-UK) consortium|Davies|United Kingdom

>Spike|hCoV-19/Denmark/DCGC-20485/2020|2020-12-21|EPI\_ISL\_758734|Original|hCoV-19^^Hovedstaden|Human|Department of Virus and Microbiological Special Diagnostics|Albertsen Lab|Michaelsen|Denmark

>Spike|hCoV-19/USA/TX-HMH-MCoV-8562/2020|2020-07-01|EPI\_ISL\_780627|Original|hCoV-19^^Texas|Human|Houston Methodist Hospital|Houston Methodist Hospital|Long|USA

>Spike|hCoV-19/Denmark/DCGC-4368/2020|2020-08-31|EPI\_ISL\_615571|Original|hCoV-19^^Syddanmark|Human|Department of Virus and Microbiological Special Diagnostics|Albertsen lab|Michaelsen|Denmark

>Spike|hCoV-19/England/MILK-B887C4/2020|2020-11-13|EPI\_ISL\_675917|Original|hCoV-19^^England|Human|Lighthouse Lab in Milton Keynes|Wellcome Sanger Institute for the COVID-19 Genomics UK (COG-UK) Consortium|Davies|United Kingdom

>Spike|hCoV-19/France/ARA-10282/2020|2020-03-17|EPI\_ISL\_418428|Original|hCoV-19^^Auvergne-Rh\u00f4ne-Alpes|Human|Centre Hospitalier Lucien Hessel|CNR Virus des Infections Respiratoires - France SUD|Josset|France

>Spike|hCoV-19/USA/OR-OHSU-1019/2020|2020-07-09|EPI\_ISL\_525949|Original|hCoV-19^^Oregon|Human|OHSU Lab Services Molecular Microbiology Lab|Oregon SARS-CoV-2 Genome Sequencing Center|O'Roak|USA

>Spike|hCoV-19/Italy/APU-UniMI-39/2020|2020-03-16|EPI\_ISL\_477194|Original|hCoV-19^^Apulia|Human|Istituto Zooprofilattico Sperimentale Puglia e Basilicata;|Beaconlab (Bioinformatics|Chiara|Italy

>Spike|hCoV-19/England/QEUI-C57AA6/2020|2020-12-12|EPI\_ISL\_736367|Original|hCoV-19^^England|Human|Lighthouse Lab in Glasgow|Wellcome Sanger Institute for the COVID-19 Genomics UK (COG-UK) Consortium|Davies|United Kingdom

>Spike|hCoV-19/Wales/PHWC-360F2/2020|2020-04-27|EPI\_ISL\_474621|Original|hCoV-19^^Wales|Human|Originating lab|COVID-19 Genomics UK (COG-UK) Consortium|Moore|United Kingdom

>Spike|hCoV-19/Netherlands/ZH-EMC-1110/2020|2020-12-15|EPI\_ISL\_722782|Original|hCoV-19^^Zuid Holland|Human|Dutch COVID-19 response team|Erasmus Medical Center|Oude Munnink|Netherlands

>Spike|hCoV-19/United Arab Emirates/1053/2020|2020-06-11|EPI\_ISL\_698128|Original|hCoV-19^^Abu Dhabi|Human|Group 42 (G42) Healthcare|G42 Healthcare|Ogrodzki|United Arab Emirates

>Spike|hCoV-19/USA/AZ-TG494588/2020|2020-07-13|EPI\_ISL\_695247|Original|hCoV-19^^Arizona|Human|TGen North|TGen North|French|USA

>Spike|hCoV-19/Wales/PHWC-49CBD7/2020|2020-12-07|EPI\_ISL\_742658|Original|hCoV-19^^Wales|Human|Wales Specialist Virology Centre Sequencing lab|COVID-19 Genomics UK (COG-UK) Consortium|Moore|United Kingdom

>Spike|hCoV-19/England/QEUI-B100C6/2020|2020-11-02|EPI\_ISL\_642732|Original|hCoV-19^^England|Human|Lighthouse Lab in Glasgow|Wellcome Sanger Institute for the COVID-19 Genomics UK (COG-UK) Consortium|Davies|United Kingdom

>Spike|hCoV-19/South Africa/KRISP-K003384/2020|2020-09-10|EPI\_ISL\_602772|Original|hCoV-19^^KwaZulu-Natal|Human|NHLS-IALCH|KRISP|de Oliveira|South Africa

>Spike|hCoV-19/England/MILK-A79EFF/2020|2020-10-15|EPI\_ISL\_606763|Original|hCoV-19^^England|Human|Lighthouse Lab in Milton Keynes|Wellcome Sanger Institute for the COVID-19 Genomics UK (COG-UK) consortium|Davies|United Kingdom

>Spike|hCoV-19/England/MILK-99276F/2020|2020-08-27|EPI\_ISL\_551973|Original|hCoV-19^^England|Human|Lighthouse Lab in Milton Keynes|Wellcome Sanger Institute for the COVID-19 Genomics UK (COG-UK) consortium|Davies|United Kingdom

>Spike|hCoV-19/England/LIVE-DC2FC4/2020|2020-11-25|EPI\_ISL\_705856|Original|hCoV-19^^England|Human|Liverpool Clinical Laboratories|COVID-19 Genomics UK (COG-UK) Consortium|Haldenby|United Kingdom

>Spike|hCoV-19/USA/UT-UPHL-2012436214/2020|2020-08-08|EPI\_ISL\_745816|Original|hCoV-19^^Utah|Human|Ginkgo Bioworks Clinical Laboratory|Utah Public Health Laboratory|Young|USA

>Spike|hCoV-19/USA/TX-HMH-MCoV-13102/2020|2020-08-27|EPI\_ISL\_788253|Original|hCoV-19^^Texas|Human|Houston Methodist Hospital|Houston Methodist Hospital|Long|USA

>Spike|hCoV-19/Netherlands/UT-EMC-223/2020|2020-12-09|EPI\_ISL\_722462|Original|hCoV-19^^Utrecht|Human|Dutch COVID-19 response team|Erasmus Medical Center|Oude Munnink|Netherlands

>Spike|hCoV-19/Finland/16CH7/2020|2020-12-03|EPI\_ISL\_732593|Original|hCoV-19^^Uusimaa|Human|Department of Virology and Immunology|Department of Virology|Smura|Finland

>Spike|hCoV-19/Denmark/DCGC-1946/2020|2020-03-30|EPI\_ISL\_622508|Original|hCoV-19^^Hovedstaden|Human|Department of Virus and Microbiological Special Diagnostics|Albertsen lab|Michaelsen|Denmark

>Spike|hCoV-19/USA/CA-CZB-10961/2020|2020-09-17|EPI\_ISL\_583044|Original|hCoV-19^^California|Human|Orange County Public Health Lab|Chan-Zuckerberg Biohub|Bhatt|USA

>Spike|hCoV-19/Wales/PHWC-481407/2020|2020-10-19|EPI\_ISL\_613067|Original|hCoV-19^^Wales|Human|Wales Specialist Virology Centre Sequencing lab|COVID-19 Genomics UK (COG-UK) Consortium|Moore|United Kingdom

>Spike|hCoV-19/Portugal/PT0234/2020|2020-03-31|EPI\_ISL\_453948|Original|hCoV-19^^Portugal|Human|unknown|Instituto Nacional de Saude (INSA)|Borges|Portugal

>Spike|hCoV-19/Portugal/PT0805/2020|2020-03-19|EPI\_ISL\_511064|Original|hCoV-19^^Portugal|Human|Instituto Nacional de Saude (INSA)|Instituto Nacional de Saude (INSA)|Borges|Portugal

>Spike|hCoV-19/England/201360492/2020|2020-03-24|EPI\_ISL\_421780|Original|hCoV-19^^England|Human|Respiratory Virus Unit|Respiratory Virus Unit|Platt|United Kingdom

>Spike|hCoV-19/Japan/PG-7281/2020|2020-08-00|EPI\_ISL\_688384|Original|hCoV-19^^Japan|Human|Saitama Prefectural Institute of Public Health|Pathogen Genomics Center|Sekizuka|Japan

>Spike|hCoV-19/USA/TX-DSHS-1154/2020|2020-07-03|EPI\_ISL\_634956|Original|hCoV-19^^Texas|Human|Texas Department of State Health Services|Texas Department of State Health Services|Rahman|USA

>Spike|hCoV-19/England/LOND-1250B92/2020|2020-11-04|EPI\_ISL\_665251|Original|hCoV-19^^England|Human|University College London Hospital|COVID-19 Genomics UK (COG-UK) Consortium|Byott|United Kingdom

>Spike|hCoV-19/Canada/BC-BCCDC-7546/2020|2020-11-00|EPI\_ISL\_740709|Original|hCoV-19^^British Columbia|Human|BCCDC Public Health Laboratory|BCCDC Public Health Laboratory|Prystajacky|Canada

>Spike|hCoV-19/England/MILK-ACBB9D/2020|2020-10-21|EPI\_ISL\_629222|Original|hCoV-19^^England|Human|Lighthouse Lab in Milton Keynes|Wellcome Sanger Institute for the COVID-19 Genomics UK (COG-UK) consortium|Davies|United Kingdom

>Spike|hCoV-19/Scotland/CVR458/2020|2020-03-23|EPI\_ISL\_433298|Original|hCoV-19^^Scotland|Human|West of Scotland Specialist Virology Centre|COVID-19 Genomics UK (COG-UK) Consortium|Robertson|United Kingdom

>Spike|hCoV-19/Canada/BC-BCCDC-8447/2020|2020-11-00|EPI\_ISL\_740806|Original|hCoV-19^^British Columbia|Human|BCCDC Public Health Laboratory|BCCDC Public Health Laboratory|Prystajacky|Canada

>Spike|hCoV-19/Italy/VEN-UniVR-20/2020|2020-08-26|EPI\_ISL\_751341|Original|hCoV-19^^Veneto|Human|IRCCS Sacro Cuore Don Calabria Hospital|University of Verona|Mori|Italy

>Spike|hCoV-19/Denmark/DCGC-3770/2020|2020-04-20|EPI\_ISL\_622655|Original|hCoV-19^^Hovedstaden|Human|Department of Virus and Microbiological Special Diagnostics|Albertsen lab|Michaelsen|Denmark

>Spike|hCoV-19/Wales/PHWC-47CE10/2020|2020-10-06|EPI\_ISL\_586054|Original|hCoV-19^^Wales|Human|Wales Specialist Virology Centre Sequencing lab|COVID-19 Genomics UK (COG-UK) Consortium|Moore|United Kingdom

>Spike|hCoV-19/Australia/VIC16303/2020|2020-09-11|EPI\_ISL\_640583|Original|hCoV-19^^Victoria|Human|Victorian Infectious Diseases Reference Laboratory (VIDRL)|VIDRL and MDU-PHL|Schultz|Australia

>Spike|hCoV-19/Singapore/277/2020|2020-04-08|EPI\_ISL\_462395|Original|hCoV-19^^Singapore|Human|National Public Health Laboratory|National Public Health Laboratory|Mak|Singapore

>Spike|hCoV-19/Wales/PHWC-1628E5/2020|2020-05-31|EPI\_ISL\_473138|Original|hCoV-19^^Wales|Human|Wales Specialist Virology Centre Sequencing lab|COVID-19 Genomics UK (COG-UK) Consortium|Moore|United Kingdom

>Spike|hCoV-19/England/QEUEH-B9EF96/2020|2020-11-18|EPI\_ISL\_719626|Original|hCoV-19^^England|Human|Lighthouse Lab in Glasgow|Wellcome Sanger Institute for the COVID-19 Genomics UK (COG-UK) Consortium|Davies|United Kingdom

>Spike|hCoV-19/England/ALDP-AC1238/2020|2020-10-10|EPI\_ISL\_631011|Original|hCoV-19^^England|Human|Lighthouse Lab in Alderley Park|Wellcome Sanger Institute for the COVID-19 Genomics UK (COG-UK) consortium|Davies|United Kingdom

>Spike|hCoV-19/England/BRIS-12952F/2020|2020-04-19|EPI\_ISL\_458805|Original|hCoV-19^^England|Human|PHE South West Regional Laboratory|Wellcome Sanger Institute for the COVID-19 Genomics UK (COG-UK) consortium|Davies|United Kingdom

>Spike|hCoV-19/England/SHEF-10D2BD6/2020|2020-12-08|EPI\_ISL\_706984|Original|hCoV-19^^England|Human|Virology Department|COVID-19 Genomics UK (COG-UK) Consortium|de Silva|United Kingdom

>Spike|hCoV-19/England/MILK-A44B50/2020|2020-10-07|EPI\_ISL\_598540|Original|hCoV-19^^England|Human|Lighthouse Lab in Milton Keynes|Wellcome Sanger Institute for the COVID-19 Genomics UK (COG-UK) consortium|Davies|United Kingdom

>Spike|hCoV-19/Denmark/DCGC-12309/2020|2020-11-16|EPI\_ISL\_682490|Original|hCoV-19^^Hovedstaden|Human|Department of Virus and Microbiological Special Diagnostics|Albertsen Lab|Michaelsen|Denmark

>Spike|hCoV-19/England/ALDP-97B896/2020|2020-07-11|EPI\_ISL\_526291|Original|hCoV-19^^England|Human|University of Birmingham|COVID-19 Genomics UK (COG-UK) Consortium|Loman|United Kingdom

>Spike|hCoV-19/England/QEUEH-A209AB/2020|2020-10-01|EPI\_ISL\_587632|Original|hCoV-19^^England|Human|Lighthouse Lab in Glasgow|Wellcome Sanger Institute for the COVID-19 Genomics UK (COG-UK) consortium|Davies|United Kingdom

>Spike|hCoV-19/England/QEUEH-B7D856/2020|2020-11-14|EPI\_ISL\_741885|Original|hCoV-19^^England|Human|Oxford Viromics|COVID-19 Genomics UK (COG-UK) Consortium|Golubchik|United Kingdom

>Spike|hCoV-19/USA/MN-CDC-6551/2020|2020-04-16|EPI\_ISL\_527728|Original|hCoV-19^^Minnesota|Human|MN PHL Division|Pathogen Discovery|Queen|USA

>Spike|hCoV-19/South Africa/L00164/2020|2020-07-27|EPI\_ISL\_622965|Original|hCoV-19^^Gauteng|Human|Lancet Laboratories|National Institute for Communicable Diseases of the National Health Laboratory Service|Allam|South Africa

>Spike|hCoV-19/Fuzhou/JX2019/2020|2020-02-10|EPI\_ISL\_455465|Original|hCoV-19^^Jiangxi|Human|Jiangxi Province Center for Disease Control and Prevention|Jiangxi Province Center for Disease Control and Prevention|Xiong|China

>Spike|hCoV-19/Russia/LEN-RII-MH6113S/2020|2020-11-10|EPI\_ISL\_733348|Original|hCoV-19^^Leningrad|Human|HELIX LLC|WHO National Influenza Centre Russian Federation|Komissarov|Russia

>Spike|hCoV-19/Australia/NSW829/2020|2020-08-09|EPI\_ISL\_526171|Original|hCoV-19^^New South Wales|Human|St Vincent's Pathology (SydPath)|NSW Health Pathology - Institute of Clinical Pathology and Medical Research; Westmead Hospital; University of Sydney|Gall|Australia



>Spike|hCoV-19/Luxembourg/LNS8359656/2020|2020-10-22|EPI\_ISL\_744727|Original|hCoV-19^^Luxembourg|Human|Laboratoire national de sant\u00e9|Laboratoire national de sant\u00e9|Wienecke-Baldacchino|Luxembourg

>Spike|hCoV-19/Austria/CeMM0194/2020|2020-03-14|EPI\_ISL\_438035|Original|hCoV-19^^Vienna|Human|Center for Virology|Bergthaler laboratory|Bergthaler|Austria

>Spike|hCoV-19/England/MILK-A7C1A8/2020|2020-10-15|EPI\_ISL\_607400|Original|hCoV-19^^England|Human|Lighthouse Lab in Milton Keynes|Wellcome Sanger Institute for the COVID-19 Genomics UK (COG-UK) consortium|Davies|United Kingdom

>Spike|hCoV-19/Russia/StPetersburg-RII8913S/2020|2020-04-23|EPI\_ISL\_450290|Original|hCoV-19^^Saint Petersburg|Human|WHO National Influenza Centre Russian Federation|WHO National Influenza Centre Russian Federation|Komissarov|Russia

>Spike|hCoV-19/Australia/VIC147/2020|2020-03-17|EPI\_ISL\_419844|Original|hCoV-19^^Victoria|Human|Victorian Infectious Diseases Reference Laboratory (VIDRL)|Victorian Infectious Diseases Reference Laboratory and Microbiological Diagnostic Unit Public Health Laboratory|Schultz|Australia

>Spike|hCoV-19/Japan/PG-0725/2020|2020-04-00|EPI\_ISL\_684335|Original|hCoV-19^^Japan|Human|Gunma Prefectural Institute of Public Health and Environmental Sciences|Pathogen Genomics Center|Sekizuka|Japan

>Spike|hCoV-19/USA/WI-GMF-08729/2020|2020-06-30|EPI\_ISL\_489935|Original|hCoV-19^^Wisconsin|Human|Gundersen Molecular Diagnostics Laboratory|Kabara Cancer Research Institute|Kenny|USA

>Spike|hCoV-19/Spain/MD-IBV-99008630/2020|2020-09-24|EPI\_ISL\_654204|Original|hCoV-19^^Madrid|Human|Hospital General Universitario Gregorio Mara\u00f1a|SeqCOVID-SPAIN consortium/IBV (CSIC)|Comas|Spain

>Spike|hCoV-19/USA/MA-MGH-01235/2020|2020-05-04|EPI\_ISL\_791909|Original|hCoV-19^^Massachusetts|Human|Massachusetts General Hospital|Infectious Disease Program|Park|USA

>Spike|hCoV-19/USA/CA-ALSR-3832/2020|2020-07-14|EPI\_ISL\_636232|Original|hCoV-19^^California|Human|San Diego County Public Health Laboratory|Andersen lab at Scripps Research|Gangavarapu|USA

>Spike|hCoV-19/USA/CT-Yale-259/2020|2020-04-01|EPI\_ISL\_469185|Original|hCoV-19^^Connecticut|Human|Yale Clinical Virology Laboratory|Grubaugh Lab - Yale School of Public Health|Grubaugh|USA

>Spike|hCoV-19/USA/VA-DCLS-0168/2020|2020-04-13|EPI\_ISL\_437801|Original|hCoV-19^^Virginia|Human|Virginia DCLS|Virginia DCLS|St. Jacques|USA

>Spike|hCoV-19/England/QEUEH-95FD4E/2020|2020-08-03|EPI\_ISL\_531896|Original|hCoV-19^^England|Human|Lighthouse Lab in Glasgow|Wellcome Sanger Institute for the COVID-19 Genomics UK (COG-UK) consortium|Davies|United Kingdom

>Spike|hCoV-19/USA/AZ-TG352039/2020|2020-05-27|EPI\_ISL\_694421|Original|hCoV-19^^Arizona|Human|AZ SPHL|TGen North|French|USA

>Spike|hCoV-19/England/QEUEH-9F765C/2020|2020-09-27|EPI\_ISL\_595692|Original|hCoV-19^^England|Human|Oxford Viromics|COVID-19 Genomics UK (COG-UK) Consortium|Golubchik|United Kingdom

>Spike|hCoV-19/Czech Republic/NRL\_5186/2020|2020-03-17|EPI\_ISL\_471553|Original|hCoV-19^^Prague|Human|The National Institute of Public Health|State Veterinary Institute Prague and The National Institute of Public Health|Nagy|Czech Republic

>Spike|hCoV-19/England/BRIS-12C5FF/2020|2020-05-08|EPI\_ISL\_469480|Original|hCoV-19^^England|Human|PHE South West Regional Laboratory|Wellcome Sanger Institute for the COVID-19 Genomics UK (COG-UK) consortium|Davies|United Kingdom

>Spike|hCoV-19/USA/TX-HMH-MCoV-8936/2020|2020-07-02|EPI\_ISL\_780844|Original|hCoV-19^^Texas|Human|Houston Methodist Hospital|Houston Methodist Hospital|Long|USA

>Spike|hCoV-19/England/QEUEH-9FAAB7/2020|2020-09-29|EPI\_ISL\_588109|Original|hCoV-19^^England|Human|Lighthouse Lab in Glasgow|Wellcome Sanger Institute for the COVID-19 Genomics UK (COG-UK) consortium|Davies|United Kingdom

>Spike|hCoV-19/USA/MI-MDHHS-SC20296/2020|2020-03-14|EPI\_ISL\_447093|Original|hCoV-19^^Michigan|Human|Michigan Department of Health and Human Services|Michigan Department of Health and Human Services|Blankenship|USA

>Spike|hCoV-19/England/NOTT-119EDC/2020|2020-11-03|EPI\_ISL\_627729|Original|hCoV-19^^England|Human|Queens Medical Centre|COVID-19 Genomics UK (COG-UK) Consortium|Loose|United Kingdom

>Spike|hCoV-19/Poland/PL\_P14/2020|2020-03-31|EPI\_ISL\_451975|Original|hCoV-19^^Malopolska|Human|1. ViroGenetics - BSL3 Laboratory of Virology|1. ViroGenetics - BSL3 Laboratory of Virology|Pyrz|Poland

>Spike|hCoV-19/Taiwan/225/2020|2020-03-22|EPI\_ISL\_421651|Original|hCoV-19^^Taipei|Human|Centers for Disease Control|Centers for Disease Control|Yang|Taiwan

>Spike|hCoV-19/England/ALDP-B843D3/2020|2020-11-14|EPI\_ISL\_674428|Original|hCoV-19^^England|Human|Lighthouse Lab in Alderley Park|Wellcome Sanger Institute for the COVID-19 Genomics UK (COG-UK) Consortium|Davies|United Kingdom

>Spike|hCoV-19/Wales/PHWC-4874C5/2020|2020-10-29|EPI\_ISL\_639202|Original|hCoV-19^^Wales|Human|Wales Specialist Virology Centre Sequencing lab|COVID-19 Genomics UK (COG-UK) Consortium|Moore|United Kingdom

>Spike|hCoV-19/Ukraine/203100320/2020|2020-06-23|EPI\_ISL\_512600|Original|hCoV-19^^Ukraine|Human|National Laboratory for Influenza/Virology reference laboratory|Respiratory Virus Unit|Platt|Ukraine

>Spike|hCoV-19/England/BRIS-12276C/2020|2020-04-04|EPI\_ISL\_440737|Original|hCoV-19^^England|Human|PHE South West Regional Laboratory|Wellcome Sanger Institute for the COVID-19 Genomics UK (COG-UK) consortium|Amato|United Kingdom

>Spike|hCoV-19/South Africa/KRISP-K004598/2020|2020-11-05|EPI\_ISL\_660628|Original|hCoV-19^^KwaZulu-Natal|Human|NHLS-IALCH|KRISP|de Oliveira|South Africa

>Spike|hCoV-19/England/ALDP-94DAA6/2020|2020-06-17|EPI\_ISL\_555204|Original|hCoV-19^^England|Human|Lighthouse Lab in Alderley Park|Wellcome Sanger Institute for the COVID-19 Genomics UK (COG-UK) consortium|Davies|United Kingdom

>Spike|hCoV-19/Northern Ireland/QEUI-96CBAE/2020|2020-08-21|EPI\_ISL\_530676|Original|hCoV-19^^Northern Ireland|Human|Lighthouse Lab in Glasgow|Wellcome Sanger Institute for the COVID-19 Genomics UK (COG-UK) consortium|Davies|United Kingdom

>Spike|hCoV-19/England/ALDP-5C191A/2020|2020-06-15|EPI\_ISL\_558881|Original|hCoV-19^^England|Human|Lighthouse Lab in Alderley Park|Wellcome Sanger Institute for the COVID-19 Genomics UK (COG-UK) consortium|Davies|United Kingdom

>Spike|hCoV-19/USA/TX-DSHS-0391/2020|2020-05-31|EPI\_ISL\_542451|Original|hCoV-19^^Texas|Human|Texas Department of State Health Services|Texas Department of State Health Services|Rahman|USA

>Spike|hCoV-19/Peru/LIM-UPCH-0200/2020|2020-10-15|EPI\_ISL\_729893|Original|hCoV-19^^Lima|Human|Laboratorio de Referencia Nacional de Virus Respiratorios|Laboratorio de Gen\u00f3mica Microbiana|Tsukayama|Peru

>Spike|hCoV-19/Wales/PHWC-31FFA/2020|2020-04-13|EPI\_ISL\_446597|Original|hCoV-19^^Wales|Human|Wales Specialist Virology Centre|Public Health Wales Microbiology Cardiff|Moore|United Kingdom

>Spike|hCoV-19/USA/CO-CDC-2-3714069/2020|2020-12-02|EPI\_ISL\_751728|Original|hCoV-19^^Colorado|Human|CO Dept. of Public Health and Environment|Genomics and Discovery|Queen|USA

>Spike|hCoV-19/England/MILK-C2F913/2020|2020-12-07|EPI\_ISL\_733811|Original|hCoV-19^^England|Human|Lighthouse Lab in Milton Keynes|Wellcome Sanger Institute for the COVID-19 Genomics UK (COG-UK) Consortium|Davies|United Kingdom

>Spike|hCoV-19/England/ALDP-9BED7A/2020|2020-09-10|EPI\_ISL\_567934|Original|hCoV-19^^England|Human|Lighthouse Lab in Alderley Park|Wellcome Sanger Institute for the COVID-19 Genomics UK (COG-UK) consortium|Davies|United Kingdom

>Spike|hCoV-19/Germany/TH-IIMK-CaSe-7/2020|2020-05-19|EPI\_ISL\_728298|Original|hCoV-19^^Thuringia|Human|Jena University Hospital|Institute of infectious medicine & hospital hygiene|Brandt|Germany

>Spike|hCoV-19/Canada/ON-CVD01417/2020|2020-11-24|EPI\_ISL\_755739|Original|hCoV-19^^Ontario|Human|Toronto Invasive Bacterial Diseases Network|McMaster University|McArthur|Canada

>Spike|hCoV-19/England/SHEF-C962F/2020|2020-10-13|EPI\_ISL\_611602|Original|hCoV-19^^England|Human|Virology Department|COVID-19 Genomics UK (COG-UK) Consortium|de Silva|United Kingdom

>Spike|hCoV-19/Hungary/mb11/2020|2020-03-17|EPI\_ISL\_416426|Original|hCoV-19^^Budapest|Human|Virological Research Group|Bioinformatics Research Group|Herczeg|Hungary

>Spike|hCoV-19/USA/UT-UPHL-201004959/2020|2020-04-24|EPI\_ISL\_594420|Original|hCoV-19^^Utah|Human|Utah Public Health Laboratory|Utah Public Health Laboratory|Young|USA

>Spike|hCoV-19/Australia/VIC9195/2020|2020-08-22|EPI\_ISL\_565437|Original|hCoV-19^^Victoria|Human|Microbiological Diagnostic Unit - Public Health Laboratory (MDU-PHL)|MDU-PHL|Schultz|Australia

>Spike|hCoV-19/USA/WI-UW-479/2020|2020-06-10|EPI\_ISL\_484854|Original|hCoV-19^^Wisconsin|Human|University of Wisconsin-Madison AIDS Vaccine Research Laboratories|University of Wisconsin-Madison AIDS Vaccine Research Laboratories|Baczenas|USA

>Spike|hCoV-19/New Zealand/20VR0712/2020|2020-03-11|EPI\_ISL\_456163|Original|hCoV-19^^Lakes|Human|PathLab Bay of Plenty|Institute of Environmental Science and Research (ESR)|de Ligt|New Zealand

>Spike|hCoV-19/United Arab Emirates/H27/2020|2020-04-30|EPI\_ISL\_528718|Original|hCoV-19^^Abu Dhabi|Human|Alsafar - Khalifa University Abu Dhabi|Alsafar - Khalifa University Abu Dhabi|Daw Elbait|United Arab Emirates

>Spike|hCoV-19/Belgium/ULG-10080/2020|2020-04-03|EPI\_ISL\_424641|Original|hCoV-19^^Li\u00e8ge|Human|Department of Clinical Microbiology|GIGA Medical Genomics|Durkin|Belgium

>Spike|hCoV-19/England/QEUA-AAA824/2020|2020-10-21|EPI\_ISL\_652712|Original|hCoV-19^^England|Human|Oxford Viromics|COVID-19 Genomics UK (COG-UK) Consortium|Golubchik|United Kingdom

>Spike|hCoV-19/England/QEUA-AE4F65/2020|2020-10-27|EPI\_ISL\_633371|Original|hCoV-19^^England|Human|Lighthouse Lab in Glasgow|Wellcome Sanger Institute for the COVID-19 Genomics UK (COG-UK) consortium|Davies|United Kingdom

>Spike|hCoV-19/England/ALDP-5C0E94/2020|2020-06-18|EPI\_ISL\_558733|Original|hCoV-19^^England|Human|Lighthouse Lab in Alderley Park|Wellcome Sanger Institute for the COVID-19 Genomics UK (COG-UK) consortium|Davies|United Kingdom

>Spike|hCoV-19/Japan/PG-3452/2020|2020-07-00|EPI\_ISL\_691562|Original|hCoV-19^^Japan|Human|Pathogen Genomics Center|Pathogen Genomics Center|Sekizuka|Japan

>Spike|hCoV-19/England/CAMC-A58175/2020|2020-10-08|EPI\_ISL\_597075|Original|hCoV-19^^England|Human|Lighthouse Lab in Cambridge|Wellcome Sanger Institute for the COVID-19 Genomics UK (COG-UK) consortium|Davies|United Kingdom

>Spike|hCoV-19/USA/TX-HMH-6753/2020|2020-06-25|EPI\_ISL\_546218|Original|hCoV-19^^Texas|Human|Houston Methodist Hospital|Houston Methodist Hospital|Long|USA

>Spike|hCoV-19/England/MILK-9A8CEF/2020|2020-09-02|EPI\_ISL\_550214|Original|hCoV-19^^England|Human|Lighthouse Lab in Milton Keynes|Wellcome Sanger Institute for the COVID-19 Genomics UK (COG-UK) consortium|Davies|United Kingdom

>Spike|hCoV-19/Bangladesh/DNAS-isl-6841/2020|2020-05-18|EPI\_ISL\_605916|Original|hCoV-19^^Bangladesh|Human|NGS Lab|NGS Lab|Rabbi|Bangladesh

>Spike|hCoV-19/England/CAMC-B2244D/2020|2020-11-03|EPI\_ISL\_647150|Original|hCoV-19^^England|Human|Lighthouse Lab in Cambridge|Wellcome Sanger Institute for the COVID-19 Genomics UK (COG-UK) Consortium|Davies|United Kingdom

>Spike|hCoV-19/India/UT-AR55/2020|2020-06-09|EPI\_ISL\_511919|Original|hCoV-19^^Uttarakhand|Human|All india institute of Medical Sciences Rishikesh|National Institute of Biomedical Genomics -\u00a0DBT's PAN-INDIA 1000 SARS--CoV-2 RNA Genome Sequencing Consortium|Maitra|India

>Spike|hCoV-19/England/LIVE-A049D/2020|2020-05-24|EPI\_ISL\_472113|Original|hCoV-19^^England|Human|Liverpool Clinical Laboratories|COVID-19 Genomics UK (COG-UK) Consortium|Haldenby|United Kingdom

>Spike|hCoV-19/Wales/PHWC-498CF6/2020|2020-11-27|EPI\_ISL\_727200|Original|hCoV-19^^Wales|Human|Originating lab|COVID-19 Genomics UK (COG-UK) Consortium|Moore|United Kingdom

>Spike|hCoV-19/England/QEUA-B3F5E0/2020|2020-11-08|EPI\_ISL\_658727|Original|hCoV-19^^England|Human|Lighthouse Lab in Glasgow|Wellcome Sanger Institute for the COVID-19 Genomics UK (COG-UK) Consortium|Davies|United Kingdom

>Spike|hCoV-19/Scotland/CVR4114/2020|2020-09-08|EPI\_ISL\_540814|Original|hCoV-19^^Scotland|Human|West of Scotland Specialist Virology Centre|COVID-19 Genomics UK (COG-UK) Consortium|Robertson|United Kingdom

>Spike|hCoV-19/Australia/VIC7839/2020|2020-07-29|EPI\_ISL\_564690|Original|hCoV-19^^Victoria|Human|Microbiological Diagnostic Unit - Public Health Laboratory (MDU-PHL)|MDU-PHL|Schultz|Australia

>Spike|hCoV-19/Japan/PG-5322/2020|2020-08-00|EPI\_ISL\_690425|Original|hCoV-19^^Japan|Human|Pathogen Genomics Center|Pathogen Genomics Center|Sekizuka|Japan

>Spike|hCoV-19/USA/OR-OHSU-1071/2020|2020-07-09|EPI\_ISL\_525963|Original|hCoV-19^^Oregon|Human|OHSU Lab Services Molecular Microbiology Lab|Oregon SARS-CoV-2 Genome Sequencing Center|O'Roak|USA

>Spike|hCoV-19/Denmark/DCGC-14322/2020|2020-11-30|EPI\_ISL\_711693|Original|hCoV-19^^Hovedstaden|Human|Department of Virus and Microbiological Special Diagnostics|Albertsen Lab|Michaelsen|Denmark

>Spike|hCoV-19/Denmark/DCGC-7588/2020|2020-10-12|EPI\_ISL\_618487|Original|hCoV-19^^Hovedstaden|Human|Department of Virus and Microbiological Special Diagnostics|Albertsen lab|Michaelsen|Denmark

>Spike|hCoV-19/Switzerland/GE-SNRCI-2895/2020|2020-03-00|EPI\_ISL\_548161|Original|hCoV-19^^Geneve|Human|Laboratoire de Virologie|Swiss National Reference Centre for Influenza|Gon\u00e7alves Cabecinhas|Switzerland

>Spike|hCoV-19/England/QEUA-BCC120/2020|2020-11-27|EPI\_ISL\_704197|Original|hCoV-19^^England|Human|Lighthouse Lab in Glasgow|Wellcome Sanger Institute for the COVID-19 Genomics UK (COG-UK) Consortium|Davies|United Kingdom

>Spike|hCoV-19/Australia/VIC17769/2020|2020-08-19|EPI\_ISL\_779436|Original|hCoV-19^^Victoria|Human|Microbiological Diagnostic Unit - Public Health Laboratory (MDU-PHL)|MDU-PHL|Beck|Australia

>Spike|hCoV-19/England/CAMC-A64AB7/2020|2020-10-11|EPI\_ISL\_608924|Original|hCoV-19^^England|Human|Lighthouse Lab in Cambridge|Wellcome Sanger Institute for the COVID-19 Genomics UK (COG-UK) consortium|Davies|United Kingdom

>Spike|hCoV-19/Netherlands/GE-EMC-359/2020|2020-11-04|EPI\_ISL\_722715|Original|hCoV-19^^Gelderland|Human|Dutch COVID-19 response team|Erasmus Medical Center|Oude Munnink|Netherlands

>Spike|hCoV-19/England/MILK-97063D/2020|2020-08-18|EPI\_ISL\_553202|Original|hCoV-19^^England|Human|Lighthouse Lab in Milton Keynes|Wellcome Sanger Institute for the COVID-19 Genomics UK (COG-UK) consortium|Davies|United Kingdom

>Spike|hCoV-19/England/ALDP-C5801C/2020|2020-12-14|EPI\_ISL\_736010|Original|hCoV-19^^England|Human|Lighthouse Lab in Alderley Park|Wellcome Sanger Institute for the COVID-19 Genomics UK (COG-UK) Consortium|Davies|United Kingdom

>Spike|hCoV-19/Canada/BC-BCCDC-7562/2020|2020-11-00|EPI\_ISL\_740723|Original|hCoV-19^^British Columbia|Human|BCCDC Public Health Laboratory|BCCDC Public Health Laboratory|Prystajek|Canada

>Spike|hCoV-19/Romania/284489/2020|2020-05-14|EPI\_ISL\_455470|Original|hCoV-19^^Bucuresti|Human|Laboratory for Respiratory Viruses|Cantacuzino Institute|Lazar|Romania

>Spike|hCoV-19/England/QEUA-AF49DD/2020|2020-10-30|EPI\_ISL\_662930|Original|hCoV-19^^England|Human|Lighthouse Lab in Glasgow|Wellcome Sanger Institute for the COVID-19 Genomics UK (COG-UK) Consortium|Davies|United Kingdom

>Spike|hCoV-19/England/SHEF-C56AB/2020|2020-03-27|EPI\_ISL\_432804|Original|hCoV-19^^England|Human|Virology Department|COVID-19 Genomics UK (COG-UK) Consortium|de Silva|United Kingdom

>Spike|hCoV-19/England/ALDP-AA130E/2020|2020-10-22|EPI\_ISL\_624167|Original|hCoV-19^^England|Human|Lighthouse Lab in Alderley Park|Wellcome Sanger Institute for the COVID-19 Genomics UK (COG-UK) consortium|Davies|United Kingdom

>Spike|hCoV-19/USA/WI-UW-1670/2020|2020-09-17|EPI\_ISL\_605544|Original|hCoV-19^^Wisconsin|Human|University of Wisconsin-Madison AIDS Vaccine Research Laboratories|University of Wisconsin-Madison AIDS Vaccine Research Laboratories|Baczenas|USA

>Spike|hCoV-19/Japan/PG-8675/2020|2020-09-00|EPI\_ISL\_686271|Original|hCoV-19^^Japan|Human|Pathogen Genomics Center|Pathogen Genomics Center|Sekizuka|Japan

>Spike|hCoV-19/USA/UT-02421/2020|2020-04-21|EPI\_ISL\_470547|Original|hCoV-19^^Utah|Human|Utah Public Health Laboratory|Utah Public Health Laboratory|Young|USA

>Spike|hCoV-19/England/ALDP-9EA11F/2020|2020-09-24|EPI\_ISL\_580263|Original|hCoV-19^^England|Human|Lighthouse Lab in Alderley Park|Wellcome Sanger Institute for the COVID-19 Genomics UK (COG-UK) consortium|Davies|United Kingdom

>Spike|hCoV-19/England/ALDP-B1AC22/2020|2020-11-01|EPI\_ISL\_646002|Original|hCoV-19^^England|Human|Lighthouse Lab in Alderley Park|Wellcome Sanger Institute for the COVID-19 Genomics UK (COG-UK) Consortium|Davies|United Kingdom

>Spike|hCoV-19/Australia/VIC14637/2020|2020-08-01|EPI\_ISL\_592927|Original|hCoV-19^^Victoria|Human|Microbiological Diagnostic Unit - Public Health Laboratory (MDU-PHL)|MDU-PHL|Schultz|Australia

>Spike|hCoV-19/USA/TX-HMH-3113/2020|2020-05-26|EPI\_ISL\_544001|Original|hCoV-19^^Texas|Human|Houston Methodist Hospital|Houston Methodist Hospital|Long|USA

>Spike|hCoV-19/Australia/VIC6178/2020|2020-07-22|EPI\_ISL\_518183|Original|hCoV-19^^Victoria|Human|Victorian Infectious Diseases Reference Laboratory (VIDRL)|VIDRL and MDU-PHL|Schultz|Australia

>Spike|hCoV-19/USA/CA-ALSR-4129/2020|2020-07-02|EPI\_ISL\_648837|Original|hCoV-19^^California|Human|San Diego County Public Health Laboratory|Andersen lab at Scripps Research|Gangavarapu|USA

>Spike|hCoV-19/Canada/MB-NML-1090/2020|2020-08-05|EPI\_ISL\_582439|Original|hCoV-19^^Manitoba|Human|Cadham Provincial Laboratory|National Microbiology Laboratory (NML)|Majer|Canada

>Spike|hCoV-19/Austria/CeMM0428/2020|2020-03-21|EPI\_ISL\_475856|Original|hCoV-19^^Austria|Human|Austrian Agency for Health and Food Safety (AGES)|Bergthaler laboratory|Bergthaler|Austria

>Spike|hCoV-19/USA/AZ-TG618044/2020|2020-07-20|EPI\_ISL\_695686|Original|hCoV-19^^Arizona|Human|AZ SPHL|TGen North|French|USA

>Spike|hCoV-19/USA/CA-CZB-15325/2020|2020-11-25|EPI\_ISL\_739020|Original|hCoV-19^^California|Human|Santa Clara County Public Health Laboratory|Chan-Zuckerberg Biohub|Kamm|USA

>Spike|hCoV-19/Scotland/EDB1898/2020|2020-04-17|EPI\_ISL\_491612|Original|hCoV-19^^Scotland|Human|Virology Department|Wellcome Sanger Institute for the COVID-19 Genomics UK (COG-UK) consortium|Davies|United Kingdom

>Spike|hCoV-19/USA/CA-LACPHL-AA00028/2020|2020-10-13|EPI\_ISL\_710421|Original|hCoV-19^^California|Human|Los Angeles County PHL|Los Angeles County PHL|Hemarajata|USA

>Spike|hCoV-19/Australia/VIC5679/2020|2020-07-09|EPI\_ISL\_518486|Original|hCoV-19^^Victoria|Human|Microbiological Diagnostic Unit - Public Health Laboratory (MDU-PHL)|MDU-PHL|Schultz|Australia

>Spike|hCoV-19/USA/HI-H200495/2020|2020-10-09|EPI\_ISL\_753034|Original|hCoV-19^^Hawaii|Human|State Laboratories Division|State Laboratories Division|Sultana|USA

>Spike|hCoV-19/Israel/CVL-45176/2020|2020-12-02|EPI\_ISL\_745038|Original|hCoV-19^^Tel Aviv|Human|Israel Central Virology laboratory|Israel Central Virology laboratory|Zuckerman|Israel

>Spike|hCoV-19/Japan/PG-2273/2020|2020-04-00|EPI\_ISL\_685878|Original|hCoV-19^^Japan|Human|Pathogen Genomics Center|Pathogen Genomics Center|Sekizuka|Japan

>Spike|hCoV-19/USA/WI-UW-2227/2020|2020-10-02|EPI\_ISL\_677630|Original|hCoV-19^^Wisconsin|Human|University of Wisconsin-Madison AIDS Vaccine Research Laboratories|University of Wisconsin-Madison AIDS Vaccine Research Laboratories|Baczenas|USA

>Spike|hCoV-19/USA/WA-UW-23600/2020|2020-08-11|EPI\_ISL\_576483|Original|hCoV-19^^Washington|Human|UW Virology Lab|UW Virology Lab|Roychoudhury|USA

>Spike|hCoV-19/Australia/VIC14939/2020|2020-09-01|EPI\_ISL\_593071|Original|hCoV-19^^Victoria|Human|Microbiological Diagnostic Unit - Public Health Laboratory (MDU-PHL)|MDU-PHL|Schultz|Australia

>Spike|hCoV-19/Japan/PG-3467/2020|2020-07-00|EPI\_ISL\_691577|Original|hCoV-19^^Japan|Human|Pathogen Genomics Center|Pathogen Genomics Center|Sekizuka|Japan

>Spike|hCoV-19/Slovakia/UKBA-317/2020|2020-09-16|EPI\_ISL\_583485|Original|hCoV-19^^Surany|Human|Institute of Virology|Faculty of Natural Sciences|Vinar|Slovakia

>Spike|hCoV-19/England/MILK-95820A/2020|2020-06-13|EPI\_ISL\_554715|Original|hCoV-19^^England|Human|Lighthouse Lab in Milton Keynes|Wellcome Sanger Institute for the COVID-19 Genomics UK (COG-UK) consortium|Davies|United Kingdom

>Spike|hCoV-19/England/MILK-BAA03A/2020|2020-11-17|EPI\_ISL\_681486|Original|hCoV-19^^England|Human|Lighthouse Lab in Milton Keynes|Wellcome Sanger Institute for the COVID-19 Genomics UK (COG-UK) Consortium|Davies|United Kingdom

>Spike|hCoV-19/England/MILK-ACD7C4/2020|2020-10-21|EPI\_ISL\_630169|Original|hCoV-19^^England|Human|Lighthouse Lab in Milton Keynes|Wellcome Sanger Institute for the COVID-19 Genomics UK (COG-UK) consortium|Davies|United Kingdom

>Spike|hCoV-19/Slovenia/5775/2020|2020-03-11|EPI\_ISL\_635224|Original|hCoV-19^^Slovenia|Human|Institute of Microbiology and Immunology|Institute of Microbiology and Immunology|Zakotnik|Slovenia

>Spike|hCoV-19/Israel/CVL-245-ngs/2020|2020-12-27|EPI\_ISL\_776854|Original|hCoV-19^^Israel|Human|Israel Central Virology laboratory|Israel Central Virology laboratory|Zuckerman|Israel

>Spike|hCoV-19/USA/UT-UPHL-201123731/2020|2020-10-09|EPI\_ISL\_628950|Original|hCoV-19^^Utah|Human|Utah Public Health Laboratory|Utah Public Health Laboratory|Young|USA

>Spike|hCoV-19/England/CAMC-B51533/2020|2020-11-08|EPI\_ISL\_657818|Original|hCoV-19^^England|Human|Lighthouse Lab in Cambridge|Wellcome Sanger Institute for the COVID-19 Genomics UK (COG-UK) Consortium|Davies|United Kingdom

>Spike|hCoV-19/USA/TX-HMH-MCoV-9858/2020|2020-07-06|EPI\_ISL\_780308|Original|hCoV-19^^Texas|Human|Houston Methodist Hospital|Houston Methodist Hospital|Long|USA

>Spike|hCoV-19/Italy/APU-IZSPB\_315PT/2020|2020-11-02|EPI\_ISL\_653809|Original|hCoV-19^^Apulia|Human|I.R.C.C.S. \S. De Bellis\ - Ente Ospedaliero|Istituto Zooprofilattico Sperimentale della Puglia e della Basilicata|Parisi|Italy

>Spike|hCoV-19/England/LOND-D5B5E/2020|2020-04-18|EPI\_ISL\_444236|Original|hCoV-19^^England|Human|University College London|COVID-19 Genomics UK (COG-UK) Consortium|Roy|United Kingdom

>Spike|hCoV-19/England/20109028804/2020|2020-03-06|EPI\_ISL\_464549|Original|hCoV-19^^England|Human|Respiratory Virus Unit|Respiratory Virus Unit|Platt|United Kingdom

>Spike|hCoV-19/Australia/VIC10747/2020|2020-07-31|EPI\_ISL\_563067|Original|hCoV-19^^Victoria|Human|Microbiological Diagnostic Unit - Public Health Laboratory (MDU-PHL) |MDU-PHL|Schultz|Australia

>Spike|hCoV-19/Germany/HH-hpi-p1322/2020|2020-03-22|EPI\_ISL\_775904|Original|hCoV-19^^Hamburg|Human|University Medical Center Hamburg Eppendorf|Heinrich Pette Institute|Robitaille|Germany

>Spike|hCoV-19/Canada/MB-NML-1162/2020|2020-07-24|EPI\_ISL\_582484|Original|hCoV-19^^Manitoba|Human|Cadham Provincial Laboratory|National Microbiology Laboratory (NML) |Majer|Canada

>Spike|hCoV-19/Portugal/PT1651/2020|2020-11-07|EPI\_ISL\_731955|Original|hCoV-19^^Portugal|Human|Instituto Nacional de Saude (INSA)|Instituto Nacional de Saude (INSA) |Borges|Portugal

>Spike|hCoV-19/Sweden/20-08357/2020|2020-03-24|EPI\_ISL\_475101|Original|hCoV-19^^Vastmanland|Human|Klinisk Mikrobiologi|The Public Health Agency of Sweden|Svartstr\u00f6m|Sweden

>Spike|hCoV-19/France/PAC-MEPHI-1907/2020|2020-08-27|EPI\_ISL\_644456|Original|hCoV-19^^Provence-Alpes-Cote-d\u2019Azur|Human|MEPHI|MEPHI|Levasseur|France

>Spike|hCoV-19/USA/NY-NYCPHL-001021/2020|2020-09-18|EPI\_ISL\_633039|Original|hCoV-19^^New York|Human|DOHMH Chelsea|New York City Public Health Laboratory|Wang|USA

>Spike|hCoV-19/Germany/NW-HHU-517/2020|2020-06-23|EPI\_ISL\_779937|Original|hCoV-19^^North Rhine-Westphalia|Human|Center of Medical Microbiology|Center of Medical Microbiology|Wienemann|Germany

>Spike|hCoV-19/USA/WA-UW269/2020|2020-03-16|EPI\_ISL\_418054|Original|hCoV-19^^Washington|Human|UW Virology Lab|UW Virology Lab|Roychoudhury|USA

>Spike|hCoV-19/Wales/ALDP-B6301F/2020|2020-11-08|EPI\_ISL\_710873|Original|hCoV-19^^Wales|Human|Lighthouse Lab in Alderley Park|Wellcome Sanger Institute for the COVID-19 Genomics UK (COG-UK) Consortium|Davies|United Kingdom

>Spike|hCoV-19/South Korea/KDCA0048/2020|2020-09-04|EPI\_ISL\_747289|Original|hCoV-19^^South Korea|Human|Division of Emerging Infectious Diseases|Division of Emerging Infectious Diseases|Park|South Korea

>Spike|hCoV-19/England/SHEF-C7E92/2020|2020-04-26|EPI\_ISL\_475404|Original|hCoV-19^^England|Human|Virology Department|COVID-19 Genomics UK (COG-UK) Consortium|de Silva|United Kingdom

>Spike|hCoV-19/England/20109054806/2020|2020-03-07|EPI\_ISL\_417280|Original|hCoV-19^^England|Human|Respiratory Virus Unit|Respiratory Virus Unit|Platt|United Kingdom

>Spike|hCoV-19/USA/WA-S2568/2020|2020-06-18|EPI\_ISL\_497200|Original|hCoV-19^^Washington|Human|Washington State Department of Health|Seattle Flu Study|Lee|USA

>Spike|hCoV-19/England/QEUEH-B2DD56/2020|2020-11-03|EPI\_ISL\_646902|Original|hCoV-19^^England|Human|Lighthouse Lab in Glasgow|Wellcome Sanger Institute for the COVID-19 Genomics UK (COG-UK) Consortium|Davies|United Kingdom

>Spike|hCoV-19/Denmark/DCGC-8110/2020|2020-10-26|EPI\_ISL\_617205|Original|hCoV-19^^Sjaelland|Human|Department of Virus and Microbiological Special Diagnostics|Albertsen lab|Michaelsen|Denmark

>Spike|hCoV-19/England/NOTT-121123/2020|2020-12-15|EPI\_ISL\_741626|Original|hCoV-19^^England|Human|Queens Medical Centre|COVID-19 Genomics UK (COG-UK) Consortium|Loose|United Kingdom

>Spike|hCoV-19/England/QEUEH-9B89A9/2020|2020-09-07|EPI\_ISL\_549681|Original|hCoV-19^^England|Human|Lighthouse Lab in Glasgow|Wellcome Sanger Institute for the COVID-19 Genomics UK (COG-UK) consortium|Davies|United Kingdom

>Spike|hCoV-19/USA/UT-UPHL-2012043379/2020|2020-08-03|EPI\_ISL\_745637|Original|hCoV-19^^Utah|Human|Ginkgo Bioworks Clinical Laboratory|Utah Public Health Laboratory|Young|USA

>Spike|hCoV-19/England/CAMB-82E2A/2020|2020-04-14|EPI\_ISL\_443625|Original|hCoV-19^^England|Human|Department of Pathology|Wellcome Sanger Institute for the COVID-19 Genomics UK (COG-UK) consortium|Amato|United Kingdom

>Spike|hCoV-19/Scotland/EDB6334/2020|2020-06-04|EPI\_ISL\_473941|Original|hCoV-19^^Scotland|Human|Virology Department|COVID-19 Genomics UK (COG-UK) Consortium|Williams|United Kingdom

>Spike|hCoV-19/USA/UT-03879/2020|2020-04-13|EPI\_ISL\_450564|Original|hCoV-19^^Utah|Human|Utah Public Health Laboratory|Utah Public Health Laboratory|Young|USA

>Spike|hCoV-19/England/QEUEH-B81AD1/2020|2020-11-14|EPI\_ISL\_667824|Original|hCoV-19^^England|Human|Lighthouse Lab in Glasgow|Wellcome Sanger Institute for the COVID-19 Genomics UK (COG-UK) Consortium|Davies|United Kingdom

>Spike|hCoV-19/England/CAMB-7AF8C/2020|2020-04-09|EPI\_ISL\_433901|Original|hCoV-19^^England|Human|Department of Pathology|COVID-19 Genomics UK (COG-UK) Consortium|Meredith|United Kingdom

>Spike|hCoV-19/USA/TX-HMH-MCoV-9216/2020|2020-07-02|EPI\_ISL\_781003|Original|hCoV-19^^Texas|Human|Houston Methodist Hospital|Houston Methodist Hospital|Long|USA

>Spike|hCoV-19/Wales/PHWC-47DA39/2020|2020-10-06|EPI\_ISL\_586227|Original|hCoV-19^^Wales|Human|Wales Specialist Virology Centre Sequencing lab|COVID-19 Genomics UK (COG-UK) Consortium|Moore|United Kingdom

>Spike|hCoV-19/Japan/PG-7993/2020|2020-08-00|EPI\_ISL\_687094|Original|hCoV-19^^Japan|Human|Pathogen Genomics Center|Pathogen Genomics Center|Sekizuka|Japan

>Spike|hCoV-19/USA/MI-UM-10036873336/2020|2020-11-10|EPI\_ISL\_728482|Original|hCoV-19^^Michigan|Human|University of Michigan Clinical Microbiology Laboratory|Lauring Lab|Valesano|USA

>Spike|hCoV-19/Denmark/DCGC-8715/2020|2020-10-26|EPI\_ISL\_625687|Original|hCoV-19^^Sjaelland|Human|Department of Virus and Microbiological Special Diagnostics|Albertsen lab|Michaelsen|Denmark

>Spike|hCoV-19/Belgium/ULG-10918/2020|2020-11-24|EPI\_ISL\_678459|Original|hCoV-19^^Li\u00e8ge|Human|Department of Clinical Microbiology|GIGA Medical Genomics|Durkin|Belgium

>Spike|hCoV-19/USA/UT-UPHL-2012364630/2020|2020-08-11|EPI\_ISL\_745938|Original|hCoV-19^^Utah|Human|Ginkgo Bioworks Clinical Laboratory|Utah Public Health Laboratory|Young|USA

>Spike|hCoV-19/England/CAMC-B1FE72/2020|2020-11-02|EPI\_ISL\_647551|Original|hCoV-19^^England|Human|Lighthouse Lab in Cambridge|Wellcome Sanger Institute for the COVID-19 Genomics UK (COG-UK) Consortium|Davies|United Kingdom

>Spike|hCoV-19/Canada/ON-PHL-20-01777/2020|2020-07-00|EPI\_ISL\_636929|Original|hCoV-19^^Ontario|Human|Public Health Ontario Laboratory|Public Health Ontario Laboratory|Guthrie|Canada

>Spike|hCoV-19/Chile/RM-207231/2020|2020-10-14|EPI\_ISL\_746767|Original|hCoV-19^^Region Metropolitana de Santiago|Human|Genetica Molecular and Subdepartamento de Virologia ISP Chile|Instituto de Salud Publica de Chile|Tognarelli|Chile

>Spike|hCoV-19/Wales/QEUH-AA0509/2020|2020-10-19|EPI\_ISL\_625382|Original|hCoV-19^^Wales|Human|Lighthouse Lab in Glasgow|Wellcome Sanger Institute for the COVID-19 Genomics UK (COG-UK) consortium|Davies|United Kingdom

>Spike|hCoV-19/Scotland/GCVR-16FFD4/2020|2020-03-23|EPI\_ISL\_459547|Original|hCoV-19^^Scotland|Human|NHSGGC West of Scotland Specialist Virology Centre / MRC-University of Glasgow Centre for Virus Research|Wellcome Sanger Institute for the COVID-19 Genomics UK (COG-UK) consortium|Davies|United Kingdom

>Spike|hCoV-19/USA/FL-BPHL-2203/2020|2020-06-17|EPI\_ISL\_666825|Original|hCoV-19^^Florida|Human|Florida Bureau of Public Health Laboratories|Florida Bureau of Public Health Laboratories|Blanton|USA

>Spike|hCoV-19/USA/WI-GMF-M00002/2020|2020-05-10|EPI\_ISL\_455574|Original|hCoV-19^^Wisconsin|Human|Gundersen Clinical Microbiology Laboratory|Kabara Cancer Research Institute|Kenny|USA

>Spike|hCoV-19/Denmark/DCGC-2940/2020|2020-08-24|EPI\_ISL\_616701|Original|hCoV-19^^Hovedstaden|Human|Department of Virus and Microbiological Special Diagnostics|Albertsen lab|Michaelsen|Denmark

>Spike|hCoV-19/Kenya/C6882/2020|2020-05-15|EPI\_ISL\_568815|Original|hCoV-19^^Taita Taveta|Human|KEMRI-Wellcome Trust Research Programme/KEMRI-CGMR-C Kilifi|KEMRI-Wellcome Trust Research Programme/KEMRI-CGMR-C Kilifi|Githinji|Kenya

>Spike|hCoV-19/Wales/CAMC-A588CB/2020|2020-10-09|EPI\_ISL\_609176|Original|hCoV-19^^Wales|Human|Lighthouse Lab in Cambridge|Wellcome Sanger Institute for the COVID-19 Genomics UK (COG-UK) consortium|Davies|United Kingdom

>Spike|hCoV-19/Denmark/DCGC-3442/2020|2020-08-31|EPI\_ISL\_616204|Original|hCoV-19^^Sjaelland|Human|Department of Virus and Microbiological Special Diagnostics|Albertsen lab|Michaelsen|Denmark

>Spike|hCoV-19/England/CAMC-9EC0B6/2020|2020-09-24|EPI\_ISL\_580367|Original|hCoV-19^^England|Human|Lighthouse Lab in Cambridge|Wellcome Sanger Institute for the COVID-19 Genomics UK (COG-UK) consortium|Davies|United Kingdom

>Spike|hCoV-19/Kenya/C2439/2020|2020-04-24|EPI\_ISL\_457877|Original|hCoV-19^^Kenya|Human|KEMRI-CGMR-C|KEMRI-Wellcome Trust Research Programme/KEMRI-CGMR-C Kilifi|Githinji|Kenya

>Spike|hCoV-19/Australia/VIC9946/2020|2020-07-23|EPI\_ISL\_565795|Original|hCoV-19^^Victoria|Human|Microbiological Diagnostic Unit - Public Health Laboratory (MDU-PHL)|MDU-PHL|Schultz|Australia

>Spike|hCoV-19/England/BRIS-13380B/2020|2020-07-30|EPI\_ISL\_524489|Original|hCoV-19^^England|Human|PHE South West Regional Laboratory|Wellcome Sanger Institute for the COVID-19 Genomics UK (COG-UK) consortium|Davies|United Kingdom

>Spike|hCoV-19/Netherlands/UT-EMC-71/2020|2020-08-25|EPI\_ISL\_577887|Original|hCoV-19^^Utrecht|Human|Dutch COVID-19 response team|Erasmus Medical Center|Oude Munnink|Netherlands

>Spike|hCoV-19/England/MILK-AC9A92/2020|2020-10-21|EPI\_ISL\_630263|Original|hCoV-19^^England|Human|Lighthouse Lab in Milton Keynes|Wellcome Sanger Institute for the COVID-19 Genomics UK (COG-UK) consortium|Davies|United Kingdom

>Spike|hCoV-19/Japan/PG-0081/2020|2020-03-02|EPI\_ISL\_479832|Original|hCoV-19^^Hokkaido|Human|Sapporo City Institute of Public Health|Pathogen Genomics Center|Sekizuka|Japan

>Spike|hCoV-19/Japan/PG-2115/2020|2020-05-00|EPI\_ISL\_685720|Original|hCoV-19^^Japan|Human|Pathogen Genomics Center|Pathogen Genomics Center|Sekizuka|Japan

>Spike|hCoV-19/England/QEUH-A35DF2/2020|2020-10-05|EPI\_ISL\_706895|Original|hCoV-19^^England|Human|Oxford Viromics|COVID-19 Genomics UK (COG-UK) Consortium|Golubchik|United Kingdom

>Spike|hCoV-19/Wuhan/HB-WH2-159/2020|2020-02-28|EPI\_ISL\_454927|Original|hCoV-19^^Hubei|Human|Wuhan Chain Medical Labs (CMLabs)|State Key Laboratory of Biotherapy of Sichuan University|Tang|China



>Spike|hCoV-19/England/QEUA-A0B45A/2020|2020-10-01|EPI\_ISL\_599208|Original|hCoV-19^^England|Human|Lighthouse Lab in Glasgow|Wellcome Sanger Institute for the COVID-19 Genomics UK (COG-UK) consortium|Davies|United Kingdom

>Spike|hCoV-19/Sweden/20-53793/2020|2020-12-14|EPI\_ISL\_766640|Original|hCoV-19^^Gavleborg|Human|Laboratoriemedicin|The Public Health Agency of Sweden|Svartstr\u00f6m|Sweden

>Spike|hCoV-19/England/BRIS-1853319/2020|2020-04-03|EPI\_ISL\_492343|Original|hCoV-19^^England|Human|PHE South West Regional Laboratory|Wellcome Sanger Institute for the COVID-19 Genomics UK (COG-UK) consortium|Davies|United Kingdom

>Spike|hCoV-19/Scotland/QEUA-C319F0/2020|2020-12-11|EPI\_ISL\_757121|Original|hCoV-19^^Scotland|Human|Lighthouse Lab in Glasgow|Wellcome Sanger Institute for the COVID-19 Genomics UK (COG-UK) Consortium|Davies|United Kingdom

>Spike|hCoV-19/England/CAMC-B989BC/2020|2020-11-15|EPI\_ISL\_673725|Original|hCoV-19^^England|Human|Lighthouse Lab in Cambridge|Wellcome Sanger Institute for the COVID-19 Genomics UK (COG-UK) Consortium|Davies|United Kingdom

>Spike|hCoV-19/USA/MN-MDH-1432/2020|2020-03-27|EPI\_ISL\_514651|Original|hCoV-19^^Minnesota|Human|Allina Health Laboratory|Minnesota Department of Health|Garfin|USA

>Spike|hCoV-19/England/BRIS-1236C8/2020|2020-04-07|EPI\_ISL\_442777|Original|hCoV-19^^England|Human|PHE South West Regional Laboratory|Wellcome Sanger Institute for the COVID-19 Genomics UK (COG-UK) consortium|Amato|United Kingdom

>Spike|hCoV-19/USA/WI-UW-2303/2020|2020-11-25|EPI\_ISL\_728069|Original|hCoV-19^^Wisconsin|Human|University of Wisconsin-Madison AIDS Vaccine Research Laboratories|University of Wisconsin-Madison AIDS Vaccine Research Laboratories|Baczenas|USA

>Spike|hCoV-19/England/CAMC-A5720A/2020|2020-10-09|EPI\_ISL\_597461|Original|hCoV-19^^England|Human|Lighthouse Lab in Cambridge|Wellcome Sanger Institute for the COVID-19 Genomics UK (COG-UK) consortium|Davies|United Kingdom

>Spike|hCoV-19/Brazil/SC-766/2020|2020-03-10|EPI\_ISL\_427305|Original|hCoV-19^^Santa Catarina|Human|LACEN-SC - Laboratorio Central de Santa Catarina|Instituto Oswaldo Cruz FIOCRUZ - Laboratory of Respiratory Viruses and Measles (LVRs)|Silva|Brazil

>Spike|hCoV-19/England/MILK-B8DE51/2020|2020-11-13|EPI\_ISL\_674664|Original|hCoV-19^^England|Human|Lighthouse Lab in Milton Keynes|Wellcome Sanger Institute for the COVID-19 Genomics UK (COG-UK) Consortium|Davies|United Kingdom

>Spike|hCoV-19/USA/VA-DCLS-1995/2020|2020-09-30|EPI\_ISL\_644900|Original|hCoV-19^^Virginia|Human|Virginia DCLS|Virginia DCLS|St. Jacques|USA

>Spike|hCoV-19/Wales/PHWC-16F87F/2020|2020-10-10|EPI\_ISL\_586029|Original|hCoV-19^^Wales|Human|Wales Specialist Virology Centre Sequencing lab|COVID-19 Genomics UK (COG-UK) Consortium|Moore|United Kingdom

>Spike|hCoV-19/England/LOND-1250FB4/2020|2020-11-08|EPI\_ISL\_665826|Original|hCoV-19^^England|Human|University College London Hospital|COVID-19 Genomics UK (COG-UK) Consortium|Byott|United Kingdom

>Spike|hCoV-19/USA/MA-MGH-00486/2020|2020-03-27|EPI\_ISL\_460204|Original|hCoV-19^^Massachusetts|Human|Massachusetts General Hospital|Infectious Disease Program|Lemieux|USA

>Spike|hCoV-19/England/ALDP-9C4BFF/2020|2020-09-11|EPI\_ISL\_567825|Original|hCoV-19^^England|Human|Lighthouse Lab in Alderley Park|Wellcome Sanger Institute for the COVID-19 Genomics UK (COG-UK) consortium|Davies|United Kingdom

>Spike|hCoV-19/Denmark/DCGC-21779/2020|2020-12-21|EPI\_ISL\_757779|Original|hCoV-19^^Hovedstaden|Human|Department of Virus and Microbiological Special Diagnostics|Albertsen Lab|Michaelsen|Denmark

>Spike|hCoV-19/England/CAMC-B52E0A/2020|2020-11-09|EPI\_ISL\_657613|Original|hCoV-19^^England|Human|Lighthouse Lab in Cambridge|Wellcome Sanger Institute for the COVID-19 Genomics UK (COG-UK) Consortium|Davies|United Kingdom

>Spike|hCoV-19/Scotland/GCVR-1716DA/2020|2020-03-27|EPI\_ISL\_489678|Original|hCoV-19^^Scotland|Human|NHSGGC West of Scotland Specialist Virology Centre / MRC - University of Glasgow Centre for Virus Research|Wellcome Sanger Institute for the COVID-19 Genomics UK (COG-UK) consortium|Davies|United Kingdom

>Spike|hCoV-19/England/QEUA-AD1F98/2020|2020-10-26|EPI\_ISL\_634699|Original|hCoV-19^^England|Human|Lighthouse Lab in Glasgow|Wellcome Sanger Institute for the COVID-19 Genomics UK (COG-UK) consortium|Davies|United Kingdom

>Spike|hCoV-19/South Africa/KRISP-K000654/2020|2020-07-13|EPI\_ISL\_509297|Original|hCoV-19^^KwaZulu-Natal|Human|NHL-SIALCH|KRISP|de Oliveira|South Africa

>Spike|hCoV-19/Japan/PG-8128/2020|2020-08-00|EPI\_ISL\_687227|Original|hCoV-19^^Japan|Human|Pathogen Genomics Center|Pathogen Genomics Center|Sekizuka|Japan

>Spike|hCoV-19/Denmark/DCGC-20758/2020|2020-12-21|EPI\_ISL\_758915|Original|hCoV-19^^Syddanmark|Human|Department of Virus and Microbiological Special Diagnostics|Albertsen Lab|Michaelsen|Denmark

>Spike|hCoV-19/Brazil/SP-L1-CAMPI13/2020|2020-04-07|EPI\_ISL\_476155|Original|hCoV-19^^S\u00e3o Paulo|Human|Laborat\u00f3rio de Patologia Cl\u00ednica - UNICAMP|Laborat\u00f3rio de Estudos de V\u00edrus Emergentes - UNICAMP|Sabino|Brazil

>Spike|hCoV-19/England/NORW-222464/2020|2020-12-19|EPI\_ISL\_741495|Original|hCoV-19^^England|Human|Quadram Institute Bioscience|COVID-19 Genomics UK (COG-UK) Consortium|Alikhan|United Kingdom

>Spike|hCoV-19/Denmark/DCGC-13431/2020|2020-11-30|EPI\_ISL\_712794|Original|hCoV-19^^Sjaelland|Human|Department of Virus and Microbiological Special Diagnostics|Albertsen Lab|Michaelsen|Denmark

>Spike|hCoV-19/USA/NY-NYUMC520/2020|2020-03-30|EPI\_ISL\_444637|Original|hCoV-19^^New York|Human|NYU Langone Health|Departments of Pathology and Medicine|Maurano|USA

>Spike|hCoV-19/USA/VA-CDC-2-3714355/2020|2020-11-18|EPI\_ISL\_751564|Original|hCoV-19^^Virginia|Human|VA-Division of Consolidated Laboratory Services|Genomics and Discovery|Queen|USA

>Spike|hCoV-19/Chile/RM-133318/2020|2020-07-25|EPI\_ISL\_746634|Original|hCoV-19^^Region Metropolitana de Santiago|Human|Genética Molecular and Subdepartamento de Virología ISP Chile|Instituto de Salud Pública de Chile|Tognarelli|Chile

>Spike|hCoV-19/Scotland/CVR2596/2020|2020-04-16|EPI\_ISL\_453062|Original|hCoV-19^^Scotland|Human|West of Scotland Specialist Virology Centre|COVID-19 Genomics UK (COG-UK) Consortium|Robertson|United Kingdom

>Spike|hCoV-19/Norway/3114/2020|2020-08-06|EPI\_ISL\_549137|Original|hCoV-19^^Viken|Human|Ostfold Hospital Trust - Kalnes|Norwegian Institute of Public Health|Kopperud Riis|Norway

>Spike|hCoV-19/England/ALDP-A51060/2020|2020-10-07|EPI\_ISL\_597833|Original|hCoV-19^^England|Human|Lighthouse Lab in Alderley Park|Wellcome Sanger Institute for the COVID-19 Genomics UK (COG-UK) consortium|Davies|United Kingdom

>Spike|hCoV-19/USA/FL-BPHL-1680/2020|2020-08-11|EPI\_ISL\_594369|Original|hCoV-19^^Florida|Human|Florida Bureau of Public Health Laboratories|Florida Bureau of Public Health Laboratories|Blanton|USA

>Spike|hCoV-19/Japan/PG-0767/2020|2020-03-00|EPI\_ISL\_684377|Original|hCoV-19^^Japan|Human|Pathogen Genomics Center|Pathogen Genomics Center|Sekizuka|Japan

>Spike|hCoV-19/USA/NY-Wadsworth-292705-01/2020|2020-12-04|EPI\_ISL\_767712|Original|hCoV-19^^New York|Human|MEMORIAL SLOAN KETTERING CANCER CENTER|Wadsworth Center|Lasek-Nesselquist|USA

>Spike|hCoV-19/Australia/VIC3863/2020|2020-07-13|EPI\_ISL\_520576|Original|hCoV-19^^Victoria|Human|Microbiological Diagnostic Unit - Public Health Laboratory (MDU-PHL)|MDU-PHL|Schultz|Australia

>Spike|hCoV-19/Australia/NSW197/2020|2020-03-23|EPI\_ISL\_427746|Original|hCoV-19^^New South Wales|Human|Centre for Infectious Diseases and Microbiology Public Health|NSW Health Pathology - Institute of Clinical Pathology and Medical Research; Westmead Hospital; University of Sydney|Gall|Australia

>Spike|hCoV-19/England/CAMB-1B3D9B/2020|2020-05-28|EPI\_ISL\_492205|Original|hCoV-19^^England|Human|Department of Pathology|Wellcome Sanger Institute for the COVID-19 Genomics UK (COG-UK) consortium|Davies|United Kingdom

>Spike|hCoV-19/Wales/PHWC-160629/2020|2020-04-19|EPI\_ISL\_472955|Original|hCoV-19^^Wales|Human|Wales Specialist Virology Centre Sequencing lab|COVID-19 Genomics UK (COG-UK) Consortium|Moore|United Kingdom

>Spike|hCoV-19/Canada/ON-E62/2020|2020-06-02|EPI\_ISL\_593536|Original|hCoV-19^^Ontario|Human|Eastern Ontario Regional Laboratory Association|McMaster University|McArthur|Canada

>Spike|hCoV-19/England/CAMC-A413A6/2020|2020-10-05|EPI\_ISL\_609466|Original|hCoV-19^^England|Human|Lighthouse Lab in Cambridge|Wellcome Sanger Institute for the COVID-19 Genomics UK (COG-UK) consortium|Davies|United Kingdom

>Spike|hCoV-19/England/QEUH-990400/2020|2020-08-26|EPI\_ISL\_540052|Original|hCoV-19^^England|Human|Lighthouse Lab in Glasgow|Wellcome Sanger Institute for the COVID-19 Genomics UK (COG-UK) consortium|Davies|United Kingdom

>Spike|hCoV-19/Japan/PG-1277/2020|2020-03-00|EPI\_ISL\_684886|Original|hCoV-19^^Japan|Human|Saitama Prefectural Institute of Public Health|Pathogen Genomics Center|Sekizuka|Japan

>Spike|hCoV-19/Wales/PHWC-486AD3/2020|2020-10-31|EPI\_ISL\_639108|Original|hCoV-19^^Wales|Human|Wales Specialist Virology Centre Sequencing lab|COVID-19 Genomics UK (COG-UK) Consortium|Moore|United Kingdom

>Spike|hCoV-19/Luxembourg/LNS1752469/2020|2020-11-09|EPI\_ISL\_739988|Original|hCoV-19^^Luxembourg|Human|Laboratoire national de sant\u00e9|Laboratoire national de sant\u00e9|Wienecke-Baldacchino|Luxembourg

>Spike|hCoV-19/Japan/PG-2130/2020|2020-04-00|EPI\_ISL\_685735|Original|hCoV-19^^Japan|Human|Pathogen Genomics Center|Pathogen Genomics Center|Sekizuka|Japan

>Spike|hCoV-19/Belgium/reg-10061011/2020|2020-10-06|EPI\_ISL\_735051|Original|hCoV-19^^Tervuren|Human|UZ Leuven|KU Leuven|Maes|Belgium

>Spike|hCoV-19/Spain/AN-IBV-001961/2020|2020-03-14|EPI\_ISL\_452420|Original|hCoV-19^^Andalucia|Human|Servicio de Microbiolog\u00eda. HRU de M\u00e9llaga. Servicio Andaluz de Salud|SeqCOVID-SPAIN consortium|IBV(CSIC)|Comas|Spain

>Spike|hCoV-19/Denmark/DCGC-21846/2020|2020-12-21|EPI\_ISL\_758401|Original|hCoV-19^^Hovedstaden|Human|Department of Virus and Microbiological Special Diagnostics|Albertsen Lab|Michaelsen|Denmark

>Spike|hCoV-19/USA/MA-MGH-00296/2020|2020-04-01|EPI\_ISL\_460342|Original|hCoV-19^^Massachusetts|Human|Massachusetts General Hospital|Infectious Disease Program|Lemieux|USA

>Spike|hCoV-19/Gibraltar/204421245/2020|2020-10-27|EPI\_ISL\_613704|Original|hCoV-19^^Gibraltar|Human|Microbiology|Respiratory Virus Unit|Platt|Gibraltar

>Spike|hCoV-19/USA/GA-CDC-7596/2020|2020-10-25|EPI\_ISL\_681799|Original|hCoV-19^^Georgia|Human|GA Department of Public Health Laboratory|Pathogen Discovery|Queen|USA

>Spike|hCoV-19/Switzerland/BS-42216821/2020|2020-04-03|EPI\_ISL\_581676|Original|hCoV-19^^Basel-Stadt|Human|University Hospital Basel|University Hospital Basel|Roloff Handschin|Switzerland

>Spike|hCoV-19/India/MH-NIV-701-3/2020|2020-04-06|EPI\_ISL\_454560|Original|hCoV-19^^Maharashtra|Human|NIV Influenza|NIV Influenza|Potdar|India

>Spike|hCoV-19/England/ALDP-B733E6/2020|2020-11-12|EPI\_ISL\_662296|Original|hCoV-19^^England|Human|Lighthouse Lab in Alderley Park|Wellcome Sanger Institute for the COVID-19 Genomics UK (COG-UK) Consortium|Davies|United Kingdom

>Spike|hCoV-19/England/ALDP-A682BB/2020|2020-10-12|EPI\_ISL\_608888|Original|hCoV-19^^England|Human|Lighthouse Lab in Alderley Park|Wellcome Sanger Institute for the COVID-19 Genomics UK (COG-UK) consortium|Davies|United Kingdom

>Spike|hCoV-19/USA/UT-QDX-1833/2020|2020-03-14|EPI\_ISL\_604151|Original|hCoV-19^^Utah|Human|Quest Diagnostics|Quest Diagnostics|Kagan|USA

>Spike|hCoV-19/USA/TX-HMH-MCoV-18603/2020|2020-11-20|EPI\_ISL\_784951|Original|hCoV-19^^Texas|Human|Houston Methodist Hospital|Houston Methodist Hospital|Long|USA

>Spike|hCoV-19/England/ALDP-9ECDBF/2020|2020-05-05|EPI\_ISL\_589351|Original|hCoV-19^^England|Human|Lighthouse Lab in Alderley Park|Wellcome Sanger Institute for the COVID-19 Genomics UK (COG-UK) consortium|Davies|United Kingdom

>Spike|hCoV-19/England/ALDP-BC793C/2020|2020-11-22|EPI\_ISL\_721409|Original|hCoV-19^^England|Human|Lighthouse Lab in Alderley Park|Wellcome Sanger Institute for the COVID-19 Genomics UK (COG-UK) Consortium|Davies|United Kingdom

>Spike|hCoV-19/England/LOND-DB1ED/2020|2020-11-11|EPI\_ISL\_724744|Original|hCoV-19^^England|Human|University College London|COVID-19 Genomics UK (COG-UK) Consortium|Roy|United Kingdom

>Spike|hCoV-19/Japan/PG-1124/2020|2020-04-00|EPI\_ISL\_684734|Original|hCoV-19^^Japan|Human|Tokyo Metropolitan Institute of Public Health|Pathogen Genomics Center|Sekizuka|Japan

>Spike|hCoV-19/Suriname/SR-50/2020|2020-07-16|EPI\_ISL\_518799|Original|hCoV-19^^Suriname|Human|Academic Hospital Paramaribo|Erasmus Medical Center|M\u00f0fcnger|Suriname

>Spike|hCoV-19/Morocco/FMP-39/2020|2020-00-00|EPI\_ISL\_768838|Original|hCoV-19^^Morocco|Human|Laboratoire Biolife|Laboratoire de Biotechnologie|Oudghiri|Morocco

>Spike|hCoV-19/Wales/PHWC-2AFF4/2020|2020-04-08|EPI\_ISL\_432042|Original|hCoV-19^^Wales|Human|Wales Specialist Virology Centre|Public Health Wales Microbiology Cardiff|Moore|United Kingdom

>Spike|hCoV-19/Australia/VIC7514/2020|2020-00-00|EPI\_ISL\_564461|Original|hCoV-19^^Victoria|Human|Microbiological Diagnostic Unit - Public Health Laboratory (MDU-PHL)|MDU-PHL|Schultz|Australia

>Spike|hCoV-19/Denmark/DCGC-2111/2020|2020-07-20|EPI\_ISL\_618373|Original|hCoV-19^^Hovedstaden|Human|Department of Virus and Microbiological Special Diagnostics|Albertsen lab|Michaelsen|Denmark

>Spike|hCoV-19/Wales/PHWC-496214/2020|2020-11-22|EPI\_ISL\_726548|Original|hCoV-19^^Wales|Human|Originating lab|COVID-19 Genomics UK (COG-UK) Consortium|Moore|United Kingdom

>Spike|hCoV-19/Japan/AI-I-004/2020|2020-01-25|EPI\_ISL\_407084|Vero E6 / TMPRSS2|hCoV-19^^Aichi|Human|Department of Virology III|Pathogen Genomics Center|Nao|Japan

>Spike|hCoV-19/England/ALDP-A84B18/2020|2020-10-17|EPI\_ISL\_610351|Original|hCoV-19^^England|Human|Lighthouse Lab in Alderley Park|Wellcome Sanger Institute for the COVID-19 Genomics UK (COG-UK) consortium|Davies|United Kingdom

>Spike|hCoV-19/England/CAMB-731BA/2020|2020-03-22|EPI\_ISL\_440265|Original|hCoV-19^^England|Human|Department of Pathology|Wellcome Sanger Institute for the COVID-19 Genomics UK (COG-UK) consortium|Amato|United Kingdom

>Spike|hCoV-19/USA/WA-S1029/2020|2020-05-01|EPI\_ISL\_463519|Original|hCoV-19^^Washington|Human|Washington State Department of Health|Seattle Flu Study|Bedford|USA

>Spike|hCoV-19/Wales/PHWC-4A36FA/2020|2020-12-15|EPI\_ISL\_744128|Original|hCoV-19^^Wales|Human|Wales Specialist Virology Centre Sequencing lab|COVID-19 Genomics UK (COG-UK) Consortium|Moore|United Kingdom

>Spike|hCoV-19/USA/NMDOH-2020305755/2020|2020-08-21|EPI\_ISL\_542050|Original|hCoV-19^^New Mexico|Human|New Mexico Department of Health Scientific Laboratory|New Mexico Department of Health Scientific Laboratory|Johnson|USA

>Spike|hCoV-19/England/MILK-B565F2/2020|2020-11-05|EPI\_ISL\_657606|Original|hCoV-19^^England|Human|Lighthouse Lab in Milton Keynes|Wellcome Sanger Institute for the COVID-19 Genomics UK (COG-UK) Consortium|Davies|United Kingdom

>Spike|hCoV-19/England/ALDP-AA3CD4/2020|2020-10-21|EPI\_ISL\_624278|Original|hCoV-19^^England|Human|Lighthouse Lab in Alderley Park|Wellcome Sanger Institute for the COVID-19 Genomics UK (COG-UK) consortium|Davies|United Kingdom

>Spike|hCoV-19/Germany/BY-MGZ-03/2020|2020-04-19|EPI\_ISL\_490207|Original|hCoV-19^^Bavaria|Human|M\u00f0fcnchen Klinik Schwabing|MGZ Medical Genetics Center|Wolf|Germany

>Spike|hCoV-19/Australia/VIC7616/2020|2020-07-21|EPI\_ISL\_564532|Original|hCoV-19^^Victoria|Human|Microbiological Diagnostic Unit - Public Health Laboratory (MDU-PHL)|MDU-PHL|Schultz|Australia

>Spike|hCoV-19/USA/CA-ALSR-2685/2020|2020-07-09|EPI\_ISL\_635630|Original|hCoV-19^^California|Human|San Diego County Public Health Laboratory|Andersen lab at Scripps Research|Gangavarapu|USA

>Spike|hCoV-19/Brazil/SP-L7-CD79/2020|2020-03-23|EPI\_ISL\_476445|Original|hCoV-19^^S\u00e3o Paulo|Human|Hospital da Cl\u00ednicas da Faculdade de Medicina da Universidade de S\u00e3o Paulo|Instituto de Medicina Tropical da Univesidade de S\u00e3o Paulo|Faria|Brazil

>Spike|hCoV-19/England/CAMC-C40E77/2020|2020-12-10|EPI\_ISL\_719016|Original|hCoV-19^^England|Human|Lighthouse Lab in Cambridge|Wellcome Sanger Institute for the COVID-19 Genomics UK (COG-UK) Consortium|Davies|United Kingdom

>Spike|hCoV-19/Scotland/CVR2796/2020|2020-04-20|EPI\_ISL\_453077|Original|hCoV-19^^Scotland|Human|West of Scotland Specialist Virology Centre|COVID-19 Genomics UK (COG-UK) Consortium|Robertson|United Kingdom

>Spike|hCoV-19/Denmark/DCGC-14040/2020|2020-11-30|EPI\_ISL\_711531|Original|hCoV-19^^Hovedstaden|Human|Department of Virus and Microbiological Special Diagnostics|Albertsen Lab|Michaelsen|Denmark

>Spike|hCoV-19/USA/CA-ALSR-4730/2020|2020-10-28|EPI\_ISL\_730112|Original|hCoV-19^^California|Human|San Diego County Public Health Laboratory|Andersen lab at Scripps Research|Gangavarapu|USA

>Spike|hCoV-19/England/QEUH-5DAF1C/2020|2020-06-17|EPI\_ISL\_533327|Original|hCoV-19^^England|Human|Lighthouse Lab in Glasgow|Wellcome Sanger Institute for the COVID-19 Genomics UK (COG-UK) consortium|Davies|United Kingdom

>Spike|hCoV-19/Netherlands/FL-RIVM-20074/2020|2020-11-08|EPI\_ISL\_723253|Original|hCoV-19^^Flevoland|Human|Dutch COVID-19 response team|National Institute for Public Health and the Environment (RIVM)|Meijer|Netherlands

>Spike|hCoV-19/USA/CA-ALSR-2073/2020|2020-05-22|EPI\_ISL\_635335|Original|hCoV-19^^California|Human|San Diego County Public Health Laboratory|Andersen lab at Scripps Research|Gangavarapu|USA

>Spike|hCoV-19/Scotland/GCVR-17219C/2020|2020-03-30|EPI\_ISL\_470000|Original|hCoV-19^^Scotland|Human|NHSGGC West of Scotland Specialist Virology Centre / MRC-University of Glasgow Centre for Virus Research|Wellcome Sanger Institute for the COVID-19 Genomics UK (COG-UK) consortium|Davies|United Kingdom

>Spike|hCoV-19/Austria/CeMM0229/2020|2020-03-18|EPI\_ISL\_438062|Original|hCoV-19^^Vienna|Human|Center for Virology|Bergthaler laboratory|Bergthaler|Austria

>Spike|hCoV-19/Australia/NSW784/2020|2020-07-30|EPI\_ISL\_526126|Original|hCoV-19^^New South Wales|Human|Sydney South West Pathology Service (SSWPS) - Liverpool Hospital - NSW Health Pathology|NSW Health Pathology - Institute of Clinical Pathology and Medical Research; Westmead Hospital; University of Sydney|Gall|Australia

>Spike|hCoV-19/Australia/VIC2427/2020|2020-06-27|EPI\_ISL\_522137|Original|hCoV-19^^Victoria|Human|Victorian Infectious Diseases Reference Laboratory (VIDRL)|VIDRL and MDU-PHL|Schultz|Australia

>Spike|hCoV-19/England/CAMC-B08331/2020|2020-10-29|EPI\_ISL\_643854|Original|hCoV-19^^England|Human|Lighthouse Lab in Cambridge|Wellcome Sanger Institute for the COVID-19 Genomics UK (COG-UK) Consortium|Davies|United Kingdom

>Spike|hCoV-19/England/ALDP-B46E36/2020|2020-11-07|EPI\_ISL\_656302|Original|hCoV-19^^England|Human|Lighthouse Lab in Alderley Park|Wellcome Sanger Institute for the COVID-19 Genomics UK (COG-UK) Consortium|Davies|United Kingdom

>Spike|hCoV-19/England/CAMC-A65A10/2020|2020-10-11|EPI\_ISL\_637761|Original|hCoV-19^^England|Human|Department of Pathology|COVID-19 Genomics UK (COG-UK) Consortium|Goodfellow|United Kingdom

>Spike|hCoV-19/USA/NY-PV09304/2020|2020-03-21|EPI\_ISL\_422558|Original|hCoV-19^^New York|Human|MSHS Clinical Microbiology Laboratories|MSHS Pathogen Surveillance Program|van Bakel|USA

>Spike|hCoV-19/Australia/VIC12349/2020|2020-07-26|EPI\_ISL\_591966|Original|hCoV-19^^Victoria|Human|Microbiological Diagnostic Unit - Public Health Laboratory (MDU-PHL)|MDU-PHL|Schultz|Australia

>Spike|hCoV-19/Australia/VIC983/2020|2020-03-30|EPI\_ISL\_430545|Original|hCoV-19^^Victoria|Human|Victorian Infectious Diseases Reference Laboratory (VIDRL)|Microbiological Diagnostic Unit Public Health Laboratory and Victorian Infectious Diseases Reference Laboratory|Schultz|Australia

>Spike|hCoV-19/England/ALDP-B739A8/2020|2020-11-12|EPI\_ISL\_664460|Original|hCoV-19^^England|Human|Quadram Institute Bioscience|COVID-19 Genomics UK (COG-UK) Consortium|Alikhan|United Kingdom

>Spike|hCoV-19/USA/TX-HMH-MCoV-16119/2020|2020-10-29|EPI\_ISL\_785803|Original|hCoV-19^^Texas|Human|Houston Methodist Hospital|Houston Methodist Hospital|Long|USA

>Spike|hCoV-19/USA/UT-UPHL-2012322580/2020|2020-06-19|EPI\_ISL\_746399|Original|hCoV-19^^Utah|Human|Utah Public Health Laboratory|Utah Public Health Laboratory|Gallagher|USA

>Spike|hCoV-19/Peru/LOR-INS-081/2020|2020-04-22|EPI\_ISL\_514341|Original|hCoV-19^^Loreto|Human|Laboratorio de Referencia Nacional de Virus Respiratorio. Instituto

Nacional de Salud Per\u00fa|Laboratorio de Referencia Nacional de Biotecnolog\u00eda y Biolog\u00eda Molecular. Instituto Nacional de Salud Per\u00fa|Padilla Rojas|Peru  
>Spike|hCoV-19/France/HDF-1465/2020|2020-02-21|EPI\_ISL\_418218|Original|hCoV-19^^Hauts-de-France|Human|Centre Hospitalier Compi\u00e8gne Laboratoire de Biologie|National Reference Center for Viruses of Respiratory Infections|Enouf|France  
>Spike|hCoV-19/Canada/ON-PHL-20-03638/2020|2020-11-00|EPI\_ISL\_775142|Original|hCoV-19^^Ontario|Human|Public Health Ontario Laboratory|Public Health Ontario Laboratory|Guthrie|Canada  
>Spike|hCoV-19/England/205041770/2020|2020-00-00|EPI\_ISL\_710530|Original|hCoV-19^^England|Human|Respiratory Virus Unit|COVID-19 Genomics UK (COG-UK) Consortium|Platt|United Kingdom  
>Spike|hCoV-19/Norway/4695/2020|2020-10-14|EPI\_ISL\_635068|Original|hCoV-19^^Troms og Finnmark|Human|University Hospital of Northern Norway|Norwegian Institute of Public Health|Vollan|Norway  
>Spike|hCoV-19/England/QEUA-A2161C/2020|2020-10-01|EPI\_ISL\_587665|Original|hCoV-19^^England|Human|Lighthouse Lab in Glasgow|Wellcome Sanger Institute for the COVID-19 Genomics UK (COG-UK) consortium|Davies|United Kingdom  
>Spike|hCoV-19/England/20099000504/2020|2020-02-27|EPI\_ISL\_464200|Original|hCoV-19^^England|Human|Respiratory Virus Unit|Respiratory Virus Unit|Platt|United Kingdom  
>Spike|hCoV-19/Japan/PG-3530/2020|2020-06-00|EPI\_ISL\_691786|Original|hCoV-19^^Japan|Human|Pathogen Genomics Center|Pathogen Genomics Center|Sekizuka|Japan  
>Spike|hCoV-19/USA/MI-UM-10036783209/2020|2020-11-04|EPI\_ISL\_710035|Original|hCoV-19^^Michigan|Human|University of Michigan Clinical Microbiology Laboratory|Lauring Lab|Valesano|USA  
>Spike|hCoV-19/Denmark/DCGC-12647/2020|2020-11-16|EPI\_ISL\_682828|Original|hCoV-19^^Syddanmark|Human|Department of Virus and Microbiological Special Diagnostics|Albertsen Lab|Michaelsen|Denmark  
>Spike|hCoV-19/England/MILK-ACCB6F/2020|2020-10-22|EPI\_ISL\_629195|Original|hCoV-19^^England|Human|Lighthouse Lab in Milton Keynes|Wellcome Sanger Institute for the COVID-19 Genomics UK (COG-UK) consortium|Davies|United Kingdom  
>Spike|hCoV-19/Brazil/SP-L13-CD103/2020|2020-03-19|EPI\_ISL\_476222|Original|hCoV-19^^S\u00e3o Paulo|Human|Hospital da Cl\u00ednicas da Faculdade de Medicina da Universidade de S\u00e3o Paulo|Instituto de Medicina Tropical da Univesidade de S\u00e3o Paulo|Faria|Brazil  
>Spike|hCoV-19/USA/FL-BPHL-1324/2020|2020-07-14|EPI\_ISL\_541262|Original|hCoV-19^^Florida|Human|Florida Bureau of Public Health Laboratories|Florida Bureau of Public Health Laboratories|Blanton|USA  
>Spike|hCoV-19/USA/ME-HETL-J0103/2020|2020-08-25|EPI\_ISL\_755307|Original|hCoV-19^^Maine|Human|Maine Health and Environmental Testing Laboratory|Tewhey Lab|Tewhey|USA  
>Spike|hCoV-19/Netherlands/ZH-EMC-1222/2020|2020-12-16|EPI\_ISL\_763291|Original|hCoV-19^^Zuid Holland|Human|Dutch COVID-19 response team|Erasmus Medical Center|Oude Munnink|Netherlands  
>Spike|hCoV-19/Benin/1409/2020|2020-04-06|EPI\_ISL\_476828|Original|hCoV-19^^Cotonou|Human|Laboratoire des Fi\u00e9vres H\u00e9morragiques Virales du Benin|Charit\u00e9-Universit\u00e4tsmedizin Berlin|Moreira-Soto|Benin  
>Spike|hCoV-19/Denmark/DCGC-11486/2020|2020-11-02|EPI\_ISL\_670950|Original|hCoV-19^^Hovedstaden|Human|Department of Virus and Microbiological Special Diagnostics|Albertsen Lab|Michaelsen|Denmark  
>Spike|hCoV-19/USA/UT-04136/2020|2020-05-13|EPI\_ISL\_493035|Original|hCoV-19^^Utah|Human|Utah Public Health Laboratory|Utah Public Health Laboratory|Butz|USA  
>Spike|hCoV-19/USA/WY-WPHL-20158678/2020|2020-12-04|EPI\_ISL\_756257|Original|hCoV-19^^Wyoming|Human|Wyoming Public Health Laboratory|Wyoming Public Health Laboratory|Hull|USA  
>Spike|hCoV-19/England/ALDP-94E498/2020|2020-06-17|EPI\_ISL\_555062|Original|hCoV-19^^England|Human|Lighthouse Lab in Alderley Park|Wellcome Sanger Institute for the COVID-19 Genomics UK (COG-UK) consortium|Davies|United Kingdom  
>Spike|hCoV-19/USA/PA-MGEL-00156/2020|2020-04-07|EPI\_ISL\_681947|Original|hCoV-19^^Pennsylvania|Human|UPMC Clinical Microbiology Laboratory|Microbial Genomic Epidemiology Laboratory|Griffith|USA

>Spike|hCoV-19/USA/TX-HMH-MCoV-16197/2020|2020-10-26|EPI\_ISL\_785881|Original|hCoV-19^^Texas|Human|Houston Methodist Hospital|Houston Methodist Hospital|Long|USA

>Spike|hCoV-19/England/ALDP-A679D5/2020|2020-10-12|EPI\_ISL\_630542|Original|hCoV-19^^England|Human|Lighthouse Lab in Alderley Park|Wellcome Sanger Institute for the COVID-19 Genomics UK (COG-UK) consortium|Davies|United Kingdom

>Spike|hCoV-19/USA/TX-DSHS-0999/2020|2020-07-03|EPI\_ISL\_613967|Original|hCoV-19^^Texas|Human|Texas Department of State Health Services|Texas Department of State Health Services|Rahman|USA

>Spike|hCoV-19/England/CAMC-C2C916/2020|2020-12-08|EPI\_ISL\_733698|Original|hCoV-19^^England|Human|Lighthouse Lab in Cambridge|Wellcome Sanger Institute for the COVID-19 Genomics UK (COG-UK) Consortium|Davies|United Kingdom

>Spike|hCoV-19/England/QEUH-B67D50/2020|2020-11-11|EPI\_ISL\_655130|Original|hCoV-19^^England|Human|Lighthouse Lab in Glasgow|Wellcome Sanger Institute for the COVID-19 Genomics UK (COG-UK) Consortium|Davies|United Kingdom

>Spike|hCoV-19/Romania/Bucuresti-13907/2020|2020-04-15|EPI\_ISL\_468151|Original|hCoV-19^^Bucuresti|Human|[Romania|[Romania|Paraschiv|Romania

>Spike|hCoV-19/Taiwan/TSGH-05/2020|2020-03-14|EPI\_ISL\_427392|Original|hCoV-19^^New Taipei City|Human|TSGH-CP molecular lab|TSGH-CP molecular lab|Shang|Taiwan

>Spike|hCoV-19/USA/MD-MDH-0054/2020|2020-05-26|EPI\_ISL\_509458|Original|hCoV-19^^Maryland|Human|Maryland Department of Health|Maryland Department of Health|Keller|USA

>Spike|hCoV-19/Denmark/DCGC-3197/2020|2020-08-31|EPI\_ISL\_616020|Original|hCoV-19^^Hovedstaden|Human|Department of Virus and Microbiological Special Diagnostics|Albertsen lab|Michaelsen|Denmark

>Spike|hCoV-19/England/CAMC-BFBAB4/2020|2020-12-04|EPI\_ISL\_709238|Original|hCoV-19^^England|Human|Lighthouse Lab in Cambridge|Wellcome Sanger Institute for the COVID-19 Genomics UK (COG-UK) Consortium|Davies|United Kingdom

>Spike|hCoV-19/Australia/VIC10448/2020|2020-08-29|EPI\_ISL\_562710|Original|hCoV-19^^Victoria|Human|Microbiological Diagnostic Unit - Public Health Laboratory (MDU-PHL)|MDU-PHL|Schultz|Australia

>Spike|hCoV-19/Scotland/EDB5710/2020|2020-04-12|EPI\_ISL\_473838|Original|hCoV-19^^Scotland|Human|Virology Department|COVID-19 Genomics UK (COG-UK) Consortium|Williams|United Kingdom

>Spike|hCoV-19/Denmark/DCGC-15219/2020|2020-11-23|EPI\_ISL\_713702|Original|hCoV-19^^Syddanmark|Human|Department of Virus and Microbiological Special Diagnostics|Albertsen Lab|Michaelsen|Denmark

>Spike|hCoV-19/South Africa/NHLS-UCT-GS-1384/2020|2020-11-13|EPI\_ISL\_700443|Original|hCoV-19^^Western Cape|Human|Crags Clinic wc CRG|NHLS/UCT|Iranzadeh|South Africa

>Spike|hCoV-19/USA/VA-DCLS-0893/2020|2020-05-12|EPI\_ISL\_516679|Original|hCoV-19^^Virginia|Human|Virginia DCLS|Virginia DCLS|St. Jacques|USA

>Spike|hCoV-19/England/PORT-2D3374/2020|2020-04-11|EPI\_ISL\_517525|Original|hCoV-19^^England|Human|Centre for Enzyme Innovation|COVID-19 Genomics UK (COG-UK) Consortium|Robson|United Kingdom

>Spike|hCoV-19/Australia/SAP244/2020|2020-03-24|EPI\_ISL\_468002|Original|hCoV-19^^South Australia|Human|SA Pathology|SA Pathology|Leong|Australia

>Spike|hCoV-19/Netherlands/NH-RIVM-10061/2020|2020-04-01|EPI\_ISL\_547494|Original|hCoV-19^^Noord Holland|Human|Dutch COVID-19 response team|National Institute for Public Health and the Environment (RIVM)|Meijer|Netherlands

>Spike|hCoV-19/England/BIRM-5F9E9/2020|2020-05-14|EPI\_ISL\_473361|Original|hCoV-19^^England|Human|University of Birmingham|COVID-19 Genomics UK (COG-UK) Consortium|Loman|United Kingdom

>Spike|hCoV-19/Japan/PG-5613/2020|2020-07-00|EPI\_ISL\_688738|Original|hCoV-19^^Japan|Human|Pathogen Genomics Center|Pathogen Genomics Center|Sekizuka|Japan

>Spike|hCoV-19/Denmark/DCGC-4216/2020|2020-09-14|EPI\_ISL\_622109|Original|hCoV-19^^Hovedstaden|Human|Department of Virus and Microbiological Special Diagnostics|Albertsen lab|Michaelsen|Denmark

>Spike|hCoV-19/Germany/HH-hpi-p1631/2020|2020-03-17|EPI\_ISL\_775676|Original|hCoV-19^^Hamburg|Human|University Medical Center Hamburg Eppendorf|Heinrich Pette Institute|Robitaille|Germany

>Spike|hCoV-19/England/NORW-E8AF1/2020|2020-04-13|EPI\_ISL\_448278|Original|hCoV-19^^England|Human|Quadram Institute Bioscience|COVID-19 Genomics UK (COG-UK) Consortium|Alikhan|United Kingdom

>Spike|hCoV-19/Romania/ROSV\_11161/2020|2020-05-29|EPI\_ISL\_491037|Original|hCoV-19^^Suceava|Human|Suceava County Emergency Hospital|\Stefan cel Mare\ University Metagenomics Lab|Lobiuc|Romania

>Spike|hCoV-19/Scotland/QEUH-9D0B1E/2020|2020-09-16|EPI\_ISL\_601829|Original|hCoV-19^^Scotland|Human|Lighthouse Lab in Glasgow|Wellcome Sanger Institute for the COVID-19 Genomics UK (COG-UK) consortium|Davies|United Kingdom

>Spike|hCoV-19/England/MILK-A7A7C6/2020|2020-10-15|EPI\_ISL\_606362|Original|hCoV-19^^England|Human|Lighthouse Lab in Milton Keynes|Wellcome Sanger Institute for the COVID-19 Genomics UK (COG-UK) consortium|Davies|United Kingdom

>Spike|hCoV-19/England/ALDP-A927D7/2020|2020-10-19|EPI\_ISL\_611032|Original|hCoV-19^^England|Human|Lighthouse Lab in Alderley Park|Wellcome Sanger Institute for the COVID-19 Genomics UK (COG-UK) consortium|Davies|United Kingdom

>Spike|hCoV-19/Wales/ALDP-A2FAD6/2020|2020-10-03|EPI\_ISL\_587151|Original|hCoV-19^^Wales|Human|Lighthouse Lab in Alderley Park|Wellcome Sanger Institute for the COVID-19 Genomics UK (COG-UK) consortium|Davies|United Kingdom

>Spike|hCoV-19/Scotland/EDB181/2020|2020-03-24|EPI\_ISL\_425927|Original|hCoV-19^^Scotland|Human|Virology Department|COVID-19 Genomics UK (COG-UK) Consortium|Williams|United Kingdom

>Spike|hCoV-19/Wales/PHWC-16E04B/2020|2020-09-29|EPI\_ISL\_585658|Original|hCoV-19^^Wales|Human|Wales Specialist Virology Centre Sequencing lab|COVID-19 Genomics UK (COG-UK) Consortium|Moore|United Kingdom

>Spike|hCoV-19/England/CAMB-A97918/2020|2020-12-09|EPI\_ISL\_723935|Original|hCoV-19^^England|Human|Department of Pathology|COVID-19 Genomics UK (COG-UK) Consortium|Goodfellow|United Kingdom

>Spike|hCoV-19/England/CAMB-77E19/2020|2020-04-04|EPI\_ISL\_438253|Original|hCoV-19^^England|Human|Department of Pathology|Wellcome Sanger Institute for the COVID-19 Genomics UK (COG-UK) consortium|Amato|United Kingdom

>Spike|hCoV-19/England/LIVE-DB4E5F/2020|2020-10-23|EPI\_ISL\_650924|Original|hCoV-19^^England|Human|Liverpool Clinical Laboratories|COVID-19 Genomics UK (COG-UK) Consortium|Haldenby|United Kingdom

>Spike|hCoV-19/England/MILK-BA9F4D/2020|2020-11-17|EPI\_ISL\_783225|Original|hCoV-19^^England|Human|Lighthouse Lab in Milton Keynes|Wellcome Sanger Institute for the COVID-19 Genomics UK (COG-UK) Consortium|Davies|United Kingdom

>Spike|hCoV-19/England/NORW-F3677/2020|2020-10-29|EPI\_ISL\_637550|Original|hCoV-19^^England|Human|Quadram Institute Bioscience|COVID-19 Genomics UK (COG-UK) Consortium|Alikhan|United Kingdom

>Spike|hCoV-19/France/ARA-120096/2020|2020-12-14|EPI\_ISL\_745318|Original|hCoV-19^^Auvergne-Rh\u00f4ne-Alpes|Human|CNR Virus des Infections Respiratoires - France SUD|CNR Virus des Infections Respiratoires - France SUD|Bal|France

>Spike|hCoV-19/England/ALDP-950EC2/2020|2020-06-14|EPI\_ISL\_554130|Original|hCoV-19^^England|Human|Lighthouse Lab in Alderley Park|Wellcome Sanger Institute for the COVID-19 Genomics UK (COG-UK) consortium|Davies|United Kingdom

>Spike|hCoV-19/England/20139045504/2020|2020-03-29|EPI\_ISL\_420685|Original|hCoV-19^^England|Human|Respiratory Virus Unit|Respiratory Virus Unit|Platt|United Kingdom

>Spike|hCoV-19/England/MILK-992F85/2020|2020-08-26|EPI\_ISL\_552070|Original|hCoV-19^^England|Human|Lighthouse Lab in Milton Keynes|Wellcome Sanger Institute for the COVID-19 Genomics UK (COG-UK) consortium|Davies|United Kingdom

>Spike|hCoV-19/England/EXET-13ED6B/2020|2020-12-14|EPI\_ISL\_763527|Original|hCoV-19^^England|Human|University of Exeter|COVID-19 Genomics UK (COG-UK) Consortium|Temperton|United Kingdom

>Spike|hCoV-19/Denmark/DCGC-20638/2020|2020-12-21|EPI\_ISL\_759267|Original|hCoV-19^^Hovedstaden|Human|Department of Virus and Microbiological Special Diagnostics|Albertsen Lab|Michaelsen|Denmark



>Spike|hCoV-19/England/CAMC-B21A97/2020|2020-11-01|EPI\_ISL\_647323|Original|hCoV-19^^England|Human|Lighthouse Lab in Cambridge|Wellcome Sanger Institute for the COVID-19 Genomics UK (COG-UK) Consortium|Davies|United Kingdom

>Spike|hCoV-19/Thailand/NIH\_3744/2020|2020-03-00|EPI\_ISL\_515291|Vero P1|hCoV-19^^Thailand|Human|National Institute of Health. Department of medical Sciences|National Institute of Health. Department of medical Sciences|Phuygun|Thailand

>Spike|hCoV-19/USA/FL-BPHL-1930/2020|2020-07-30|EPI\_ISL\_613786|Original|hCoV-19^^Florida|Human|Florida Bureau of Public Health Laboratories|Florida Bureau of Public Health Laboratories|Blanton|USA

>Spike|hCoV-19/England/NORW-EE387/2020|2020-04-24|EPI\_ISL\_490533|Original|hCoV-19^^England|Human|Quadram Institute Bioscience|COVID-19 Genomics UK (COG-UK) Consortium|Alikhan|United Kingdom

>Spike|hCoV-19/USA/LA-QDX-1242/2020|2020-03-16|EPI\_ISL\_571950|Original|hCoV-19^^Louisiana|Human|Quest Diagnostics|Quest Diagnostics|Kagan|USA

>Spike|hCoV-19/England/QEUH-AF51D4/2020|2020-10-30|EPI\_ISL\_663148|Original|hCoV-19^^England|Human|Lighthouse Lab in Glasgow|Wellcome Sanger Institute for the COVID-19 Genomics UK (COG-UK) Consortium|Davies|United Kingdom

>Spike|hCoV-19/Denmark/DCGC-924/2020|2020-03-30|EPI\_ISL\_614527|Original|hCoV-19^^Syddanmark|Human|Department of Virus and Microbiological Special Diagnostics|Albertsen lab|Michaelsen|Denmark

>Spike|hCoV-19/England/CAMC-B7B17B/2020|2020-11-12|EPI\_ISL\_723988|Original|hCoV-19^^England|Human|Oxford Viromics|COVID-19 Genomics UK (COG-UK) Consortium|Golubchik|United Kingdom

>Spike|hCoV-19/Denmark/DCGC-10790/2020|2020-11-02|EPI\_ISL\_670209|Original|hCoV-19^^Syddanmark|Human|Department of Virus and Microbiological Special Diagnostics|Albertsen Lab|Michaelsen|Denmark

>Spike|hCoV-19/USA/MD\_0027/2020|2020-03-04|EPI\_ISL\_426425|Original|hCoV-19^^Maryland|Human|MD DOH Laboratories Administration|Pathogen Discovery|Queen|USA

>Spike|hCoV-19/USA/MI-MDHHS-SC20711/2020|2020-04-28|EPI\_ISL\_471735|Original|hCoV-19^^Michigan|Human|Michigan Department of Health and Human Services|Michigan Department of Health and Human Services|Blankenship|USA

>Spike|hCoV-19/USA/WA-UW-12324/2020|2020-06-27|EPI\_ISL\_570503|Original|hCoV-19^^Washington|Human|UW Virology Lab|UW Virology Lab|Roychoudhury|USA

>Spike|hCoV-19/England/MILK-A05A6D/2020|2020-09-29|EPI\_ISL\_599828|Original|hCoV-19^^England|Human|Lighthouse Lab in Milton Keynes|Wellcome Sanger Institute for the COVID-19 Genomics UK (COG-UK) consortium|Davies|United Kingdom

>Spike|hCoV-19/England/LCST-24D6DC6/2020|2020-06-11|EPI\_ISL\_484236|Original|hCoV-19^^England|Human|University Hospitals Of Leicester NHS Trust and DeepSeq Nottingham|COVID-19 Genomics UK (COG-UK) Consortium|Loose|United Kingdom

>Spike|hCoV-19/England/LOND-124DF41/2020|2020-00-00|EPI\_ISL\_584659|Original|hCoV-19^^England|Human|University College London Hospital|COVID-19 Genomics UK (COG-UK) Consortium|Byott|United Kingdom

>Spike|hCoV-19/England/MILK-B944FB/2020|2020-11-13|EPI\_ISL\_676014|Original|hCoV-19^^England|Human|Lighthouse Lab in Milton Keynes|Wellcome Sanger Institute for the COVID-19 Genomics UK (COG-UK) Consortium|Davies|United Kingdom

>Spike|hCoV-19/England/204881308/2020|2020-11-00|EPI\_ISL\_678821|Original|hCoV-19^^England|Human|Respiratory Virus Unit|COVID-19 Genomics UK (COG-UK) Consortium|Platt|United Kingdom

>Spike|hCoV-19/Denmark/DCGC-13206/2020|2020-11-30|EPI\_ISL\_712650|Original|hCoV-19^^Hovedstaden|Human|Department of Virus and Microbiological Special Diagnostics|Albertsen Lab|Michaelsen|Denmark

>Spike|hCoV-19/England/MILK-ACC26A/2020|2020-10-21|EPI\_ISL\_629326|Original|hCoV-19^^England|Human|Lighthouse Lab in Milton Keynes|Wellcome Sanger Institute for the COVID-19 Genomics UK (COG-UK) consortium|Davies|United Kingdom

>Spike|hCoV-19/Denmark/DCGC-22225/2020|2020-12-14|EPI\_ISL\_758625|Original|hCoV-19^^Hovedstaden|Human|Department of Virus and Microbiological Special Diagnostics|Albertsen Lab|Michaelsen|Denmark

>Spike|hCoV-19/USA/CA-ALSR-1681/2020|2020-04-01|EPI\_ISL\_494739|Original|hCoV-19^^California|Human|San Diego County Public Health Laboratory|Andersen lab at Scripps Research|Gangavarapu|USA

>Spike|hCoV-19/England/LOND-D3E48/2020|2020-04-04|EPI\_ISL\_441040|Original|hCoV-19^^England|Human|University College London|COVID-19 Genomics UK (COG-UK) Consortium|Roy|United Kingdom

>Spike|hCoV-19/USA/OR-OHSU-1135/2020|2020-07-10|EPI\_ISL\_509148|Original|hCoV-19^^Oregon|Human|OHSU Lab Services Molecular Microbiology Lab|Oregon SARS-CoV-2 Genome Sequencing Center|O'Roak|USA

>Spike|hCoV-19/Japan/IC-0218/2020|2020-07-00|EPI\_ISL\_667647|Original|hCoV-19^^Japan|Human|Pathogen Genomics Center|Pathogen Genomics Center|Sekizuka|Japan

>Spike|hCoV-19/Denmark/DCGC-16814/2020|2020-12-14|EPI\_ISL\_750302|Original|hCoV-19^^Sjaelland|Human|Department of Virus and Microbiological Special Diagnostics|Albertsen Lab|Michaelsen|Denmark

>Spike|hCoV-19/USA/TX-HMH-4699/2020|2020-06-22|EPI\_ISL\_544267|Original|hCoV-19^^Texas|Human|Houston Methodist Hospital|Houston Methodist Hospital|Long|USA

>Spike|hCoV-19/India/MH-NCCS-NR2108/2020|2020-05-21|EPI\_ISL\_496535|Original|hCoV-19^^Maharashtra|Human|National Centre For Cell Science|National Centre For Cell Science|Paul|India

>Spike|hCoV-19/Spain/CT-IBV-005479/2020|2020-05-12|EPI\_ISL\_510522|Original|hCoV-19^^Catalunya|Human|Servicio de Microbiolog\u00eda|SeqCOVID-SPAIN consortium/IBV (CSIC) |Comas|Spain

>Spike|hCoV-19/England/QEUEH-9651D0/2020|2020-08-12|EPI\_ISL\_531101|Original|hCoV-19^^England|Human|Lighthouse Lab in Glasgow|Wellcome Sanger Institute for the COVID-19 Genomics UK (COG-UK) consortium|Davies|United Kingdom

>Spike|hCoV-19/Wales/PHWC-16BB6B/2020|2020-09-09|EPI\_ISL\_573947|Original|hCoV-19^^Wales|Human|Wales Specialist Virology Centre Sequencing lab|COVID-19 Genomics UK (COG-UK) Consortium|Moore|United Kingdom

>Spike|hCoV-19/England/20139009704/2020|2020-03-27|EPI\_ISL\_421870|Original|hCoV-19^^England|Human|Respiratory Virus Unit|Respiratory Virus Unit|Platt|United Kingdom

>Spike|hCoV-19/USA/NY-NYCPHL-000421/2020|2020-03-31|EPI\_ISL\_631904|Original|hCoV-19^^New York|Human|Jamaica Hospital Medical Center|New York City Public Health Laboratory|Wang|USA

>Spike|hCoV-19/France/OCC-97/2020|2020-10-06|EPI\_ISL\_671944|Original|hCoV-19^^Occitanie|Human|CHU Purpan - Laboratoire de Virologie - Institut F\u00e9d\u00e9ratif de Biologie|CHU Purpan - Laboratoire de Virologie - Institut F\u00e9d\u00e9ratif de Biologie|Latour|France

>Spike|hCoV-19/England/ALDP-952A53/2020|2020-06-13|EPI\_ISL\_554076|Original|hCoV-19^^England|Human|Lighthouse Lab in Alderley Park|Wellcome Sanger Institute for the COVID-19 Genomics UK (COG-UK) consortium|Davies|United Kingdom

>Spike|hCoV-19/USA/TX-DSHS-0746/2020|2020-05-14|EPI\_ISL\_584147|Original|hCoV-19^^Texas|Human|Texas Department of State Health Services|Texas Department of State Health Services|Rahman|USA

>Spike|hCoV-19/USA/TX-HMH-3430/2020|2020-06-14|EPI\_ISL\_544187|Original|hCoV-19^^Texas|Human|Houston Methodist Hospital|Houston Methodist Hospital|Long|USA

>Spike|hCoV-19/England/MILK-A05BD3/2020|2020-09-30|EPI\_ISL\_600039|Original|hCoV-19^^England|Human|Lighthouse Lab in Milton Keynes|Wellcome Sanger Institute for the COVID-19 Genomics UK (COG-UK) consortium|Davies|United Kingdom

>Spike|hCoV-19/Japan/PG-5854/2020|2020-08-00|EPI\_ISL\_688971|Original|hCoV-19^^Japan|Human|Pathogen Genomics Center|Pathogen Genomics Center|Sekizuka|Japan

>Spike|hCoV-19/England/ALDP-A865BE/2020|2020-10-16|EPI\_ISL\_606179|Original|hCoV-19^^England|Human|Lighthouse Lab in Alderley Park|Wellcome Sanger Institute for the COVID-19 Genomics UK (COG-UK) consortium|Davies|United Kingdom

>Spike|hCoV-19/Canada/ON-PHL-20-02251/2020|2020-09-00|EPI\_ISL\_671516|Original|hCoV-19^^Ontario|Human|Public Health Ontario Laboratory|Public Health Ontario Laboratory|Guthrie|Canada

>Spike|hCoV-19/England/MILK-A795AF/2020|2020-10-14|EPI\_ISL\_606893|Original|hCoV-19^^England|Human|Lighthouse Lab in Milton Keynes|Wellcome Sanger Institute for the COVID-19 Genomics UK (COG-UK) consortium|Davies|United Kingdom

>Spike|hCoV-19/England/QEUA-BF0C8C/2020|2020-12-05|EPI\_ISL\_709290|Original|hCoV-19^^England|Human|Lighthouse Lab in Glasgow|Wellcome Sanger Institute for the COVID-19 Genomics UK (COG-UK) Consortium|Davies|United Kingdom

>Spike|hCoV-19/Australia/VIC6724/2020|2020-07-26|EPI\_ISL\_561508|Original|hCoV-19^^Victoria|Human|Victorian Infectious Diseases Reference Laboratory (VIDRL)|VIDRL and MDU-PHL|Schultz|Australia

>Spike|hCoV-19/England/MILK-BAB53A/2020|2020-11-18|EPI\_ISL\_681358|Original|hCoV-19^^England|Human|Lighthouse Lab in Milton Keynes|Wellcome Sanger Institute for the COVID-19 Genomics UK (COG-UK) Consortium|Davies|United Kingdom

>Spike|hCoV-19/Brazil/SP-L14-CD231/2020|2020-03-26|EPI\_ISL\_476237|Original|hCoV-19^^S\u00e3o Paulo|Human|Hospital da Cl\u00ednicas da Faculdade de Medicina da Universidade de S\u00e3o Paulo|Instituto de Medicina Tropical da Univesidade de S\u00e3o Paulo|Faria|Brazil

>Spike|hCoV-19/Canada/ON-PHL-20-03685/2020|2020-11-00|EPI\_ISL\_775168|Original|hCoV-19^^Ontario|Human|Public Health Ontario Laboratory|Public Health Ontario Laboratory|Guthrie|Canada

>Spike|hCoV-19/USA/UT-QDX-2224/2020|2020-03-13|EPI\_ISL\_604590|Original|hCoV-19^^Utah|Human|Quest Diagnostics|Quest Diagnostics|Kagan|USA

>Spike|hCoV-19/USA/WY-WPHL-20157841/2020|2020-12-03|EPI\_ISL\_756242|Original|hCoV-19^^Wyoming|Human|Wyoming Public Health Laboratory|Wyoming Public Health Laboratory|Hull|USA

>Spike|hCoV-19/England/ALDP-B5BF68/2020|2020-11-10|EPI\_ISL\_655872|Original|hCoV-19^^England|Human|Lighthouse Lab in Alderley Park|Wellcome Sanger Institute for the COVID-19 Genomics UK (COG-UK) Consortium|Davies|United Kingdom

>Spike|hCoV-19/USA/MN-QDX-2717/2020|2020-03-13|EPI\_ISL\_605029|Original|hCoV-19^^Minnesota|Human|Quest Diagnostics|Quest Diagnostics|Kagan|USA

>Spike|hCoV-19/England/CAMC-A81AB4/2020|2020-10-13|EPI\_ISL\_610790|Original|hCoV-19^^England|Human|Lighthouse Lab in Cambridge|Wellcome Sanger Institute for the COVID-19 Genomics UK (COG-UK) consortium|Davies|United Kingdom

>Spike|hCoV-19/Denmark/DCGC-9843/2020|2020-11-09|EPI\_ISL\_669220|Original|hCoV-19^^Hovedstaden|Human|Department of Virus and Microbiological Special Diagnostics|Albertsen Lab|Michaelsen|Denmark

>Spike|hCoV-19/England/MILK-C7B23B/2020|2020-12-15|EPI\_ISL\_756747|Original|hCoV-19^^England|Human|Lighthouse Lab in Milton Keynes|Wellcome Sanger Institute for the COVID-19 Genomics UK (COG-UK) Consortium|Davies|United Kingdom

>Spike|hCoV-19/Australia/VIC11018/2020|2020-00-00|EPI\_ISL\_563201|Original|hCoV-19^^Victoria|Human|Microbiological Diagnostic Unit - Public Health Laboratory (MDU-PHL)|MDU-PHL|Schultz|Australia

>Spike|hCoV-19/Switzerland/BE-ETHZ-420683/2020|2020-12-23|EPI\_ISL\_768016|Original|hCoV-19^^Bern|Human|Viollier AG|Department of Biosystems Science and Engineering|Nadeau|Switzerland

>Spike|hCoV-19/USA/TX-HMH-MCoV-18181/2020|2020-11-11|EPI\_ISL\_784529|Original|hCoV-19^^Texas|Human|Houston Methodist Hospital|Houston Methodist Hospital|Long|USA

>Spike|hCoV-19/Wales/PHWC-160C18/2020|2020-05-14|EPI\_ISL\_473029|Original|hCoV-19^^Wales|Human|Wales Specialist Virology Centre Sequencing lab|COVID-19 Genomics UK (COG-UK) Consortium|Moore|United Kingdom

>Spike|hCoV-19/England/SHEF-CDE8D/2020|2020-04-23|EPI\_ISL\_453756|Original|hCoV-19^^England|Human|Virology Department|COVID-19 Genomics UK (COG-UK) Consortium|de Silva|United Kingdom

>Spike|hCoV-19/Wales/PHWC-2C1CF/2020|2020-04-04|EPI\_ISL\_474288|Original|hCoV-19^^Wales|Human|Originating lab|COVID-19 Genomics UK (COG-UK) Consortium|Moore|United Kingdom

>Spike|hCoV-19/England/MILK-9A85C6/2020|2020-09-02|EPI\_ISL\_550189|Original|hCoV-19^^England|Human|Lighthouse Lab in Milton Keynes|Wellcome Sanger Institute for the COVID-19 Genomics UK (COG-UK) consortium|Davies|United Kingdom

>Spike|hCoV-19/England/ALDP-AA514C/2020|2020-10-22|EPI\_ISL\_630759|Original|hCoV-19^^England|Human|Lighthouse Lab in Alderley Park|Wellcome Sanger Institute for the COVID-19 Genomics UK (COG-UK) consortium|Davies|United Kingdom

>Spike|hCoV-19/England/ALDP-B5DBF9/2020|2020-11-10|EPI\_ISL\_723572|Original|hCoV-19^^England|Human|Northumbria University / South Tees Hospitals NHS Foundation Trust

/ North Cumbria Integrated Care NHS Foundation Trust / North Tees and Hartlepool NHS Foundation Trust / Newcastle Hospitals NHS Foundation Trust|COVID-19 Genomics UK (COG-UK) Consortium|Bashton|United Kingdom  
>Spike|hCoV-19/England/ALDP-921E7F/2020|2020-06-23|EPI\_ISL\_553339|Original|hCoV-19^^England|Human|Lighthouse Lab in Alderley Park|Wellcome Sanger Institute for the COVID-19 Genomics UK (COG-UK) consortium|Davies|United Kingdom  
>Spike|hCoV-19/Switzerland/ZH-ETHZ-220047/2020|2020-07-30|EPI\_ISL\_512025|Original|hCoV-19^^Zurich|Human|Viollier AG|Department of Biosystems Science and Engineering|Nadeau|Switzerland  
>Spike|hCoV-19/Japan/PG-7191/2020|2020-07-00|EPI\_ISL\_688295|Original|hCoV-19^^Japan|Human|Saitama Prefectural Institute of Public Health|Pathogen Genomics Center|Sekizuka|Japan  
>Spike|hCoV-19/USA/MI-MDHHS-SC21117/2020|2020-03-26|EPI\_ISL\_507893|Original|hCoV-19^^Michigan|Human|Michigan Department of Health and Human Services|Michigan Department of Health and Human Services|Blankenship|USA  
>Spike|hCoV-19/England/ALDP-9B5C58/2020|2020-08-28|EPI\_ISL\_590214|Original|hCoV-19^^England|Human|Lighthouse Lab in Alderley Park|Wellcome Sanger Institute for the COVID-19 Genomics UK (COG-UK) consortium|Davies|United Kingdom  
>Spike|hCoV-19/Denmark/DCGC-2594/2020|2020-08-17|EPI\_ISL\_617830|Original|hCoV-19^^Midtjylland|Human|Department of Virus and Microbiological Special Diagnostics|Albertsen lab|Michaelsen|Denmark  
>Spike|hCoV-19/England/LOND-1251AEF/2020|2020-11-24|EPI\_ISL\_705947|Original|hCoV-19^^England|Human|University College London Hospital|COVID-19 Genomics UK (COG-UK) Consortium|Byott|United Kingdom  
>Spike|hCoV-19/England/LIVE-DC486D/2020|2020-11-10|EPI\_ISL\_703150|Original|hCoV-19^^England|Human|Liverpool Clinical Laboratories|COVID-19 Genomics UK (COG-UK) Consortium|Haldenby|United Kingdom  
>Spike|hCoV-19/USA/NY-Wadsworth-118181-01/2020|2020-05-27|EPI\_ISL\_676956|Original|hCoV-19^^New York|Human|Wadsworth Center|Wadsworth Center|Lasek-Nesselquist|USA  
>Spike|hCoV-19/Luxembourg/LNS3879580/2020|2020-03-14|EPI\_ISL\_419585|Original|hCoV-19^^Luxembourg|Human|Laboratoire National de Sant\u00e9|Laboratoire National de Sant\u00e9|Wienecke-Baldacchino|Luxembourg  
>Spike|hCoV-19/USA/WI-UW-1163/2020|2020-08-05|EPI\_ISL\_522919|Original|hCoV-19^^Wisconsin|Human|University of Wisconsin-Madison AIDS Vaccine Research Laboratories|University of Wisconsin-Madison AIDS Vaccine Research Laboratories|Baczenas|USA  
>Spike|hCoV-19/England/CAMC-B35641/2020|2020-11-05|EPI\_ISL\_659540|Original|hCoV-19^^England|Human|Lighthouse Lab in Cambridge|Wellcome Sanger Institute for the COVID-19 Genomics UK (COG-UK) Consortium|Davies|United Kingdom  
>Spike|hCoV-19/Denmark/DCGC-17095/2020|2020-12-14|EPI\_ISL\_750754|Original|hCoV-19^^Nordjylland|Human|Department of Virus and Microbiological Special Diagnostics|Albertsen Lab|Michaelsen|Denmark  
>Spike|hCoV-19/USA/TX-HMH-3910/2020|2020-06-16|EPI\_ISL\_543275|Original|hCoV-19^^Texas|Human|Houston Methodist Hospital|Houston Methodist Hospital|Long|USA  
>Spike|hCoV-19/England/ALDP-98A67C/2020|2020-08-04|EPI\_ISL\_529484|Original|hCoV-19^^England|Human|Liverpool Clinical Laboratories|COVID-19 Genomics UK (COG-UK) Consortium|Haldenby|United Kingdom  
>Spike|hCoV-19/England/ALDP-BC85BF/2020|2020-11-23|EPI\_ISL\_721423|Original|hCoV-19^^England|Human|Lighthouse Lab in Alderley Park|Wellcome Sanger Institute for the COVID-19 Genomics UK (COG-UK) Consortium|Davies|United Kingdom  
>Spike|hCoV-19/Russia/StPetersburg-RII10066V/2020|2020-04-29|EPI\_ISL\_507224|Vero P1|hCoV-19^^Saint Petersburg|Human|WHO National Influenza Centre Russian Federation|WHO National Influenza Centre Russian Federation|Komissarov|Russia  
>Spike|hCoV-19/England/QEUA-A5E090/2020|2020-10-12|EPI\_ISL\_597355|Original|hCoV-19^^England|Human|Lighthouse Lab in Glasgow|Wellcome Sanger Institute for the COVID-19 Genomics UK (COG-UK) consortium|Davies|United Kingdom  
>Spike|hCoV-19/England/ALDP-9EAD0C/2020|2020-09-24|EPI\_ISL\_580005|Original|hCoV-19^^England|Human|Lighthouse Lab in Alderley Park|Wellcome Sanger Institute for the COVID-19 Genomics UK (COG-UK) consortium|Davies|United Kingdom

>Spike|hCoV-19/USA/WI-UW-124/2020|2020-04-07|EPI\_ISL\_427431|Original|hCoV-19^^Wisconsin|Human|University of Wisconsin-Madison AIDS Vaccine Research Laboratories|University of Wisconsin-Madison AIDS Vaccine Research Laboratories|Baczenas|USA

>Spike|hCoV-19/Wales/PHWC-496AB2/2020|2020-11-23|EPI\_ISL\_726682|Original|hCoV-19^^Wales|Human|Originating lab|COVID-19 Genomics UK (COG-UK) Consortium|Moore|United Kingdom

>Spike|hCoV-19/USA/WA-UW-22003/2020|2020-08-05|EPI\_ISL\_571012|Original|hCoV-19^^Washington|Human|UW Virology Lab|UW Virology Lab|Roychoudhury|USA

>Spike|hCoV-19/Denmark/DCGC-21989/2020|2020-12-14|EPI\_ISL\_758496|Original|hCoV-19^^Sjaelland|Human|Department of Virus and Microbiological Special Diagnostics|Albertsen Lab|Michaelsen|Denmark

>Spike|hCoV-19/South Africa/NHLS-UCT-GS-1377/2020|2020-11-13|EPI\_ISL\_700505|Original|hCoV-19^^Western Cape|Human|Khayeletu Clinic w KLC|NHLS/UCT|Iranzadeh|South Africa

>Spike|hCoV-19/Spain/PV-IBV-001539/2020|2020-03-16|EPI\_ISL\_467174|Original|hCoV-19^^Basque Country|Human|Hospital Universitario Araba. Vitoria-Gasteiz|SeqCOVID-SPAIN consortium|IBV (CSIC) |Comas|Spain

>Spike|hCoV-19/Denmark/DCGC-2718/2020|2020-08-17|EPI\_ISL\_616463|Original|hCoV-19^^Hovedstaden|Human|Department of Virus and Microbiological Special Diagnostics|Albertsen lab|Michaelsen|Denmark

>Spike|hCoV-19/USA/FL-BPHL-0673/2020|2020-03-24|EPI\_ISL\_509731|Original|hCoV-19^^Florida|Human|Florida Bureau of Public Health Laboratories|Florida Bureau of Public Health Laboratories|Blanton|USA

>Spike|hCoV-19/Spain/IB-IBV-99011546/2020|2020-12-13|EPI\_ISL\_779890|Original|hCoV-19^^Balear Islands|Human|Servicio de Microbiolog\u00eda|SeqCOVID-SPAIN consortium|IBV (CSIC) |Comas|Spain

>Spike|hCoV-19/Scotland/CVR1857/2020|2020-04-08|EPI\_ISL\_512452|Original|hCoV-19^^Scotland|Human|West of Scotland Specialist Virology Centre|COVID-19 Genomics UK (COG-UK) Consortium|Robertson|United Kingdom

>Spike|hCoV-19/Sweden/20-08114/2020|2020-03-08|EPI\_ISL\_454485|Original|hCoV-19^^Stockholm|Human|Karolinska Universitetslaboratoriet|The Public Health Agency of Sweden|Svartstr\u00f6m|Sweden

>Spike|hCoV-19/England/ALDP-52AB46/2020|2020-06-01|EPI\_ISL\_558933|Original|hCoV-19^^England|Human|Lighthouse Lab in Alderley Park|Wellcome Sanger Institute for the COVID-19 Genomics UK (COG-UK) consortium|Davies|United Kingdom

>Spike|hCoV-19/USA/WI-UW-1267/2020|2020-08-24|EPI\_ISL\_536639|Original|hCoV-19^^Wisconsin|Human|University of Wisconsin-Madison AIDS Vaccine Research Laboratories|University of Wisconsin-Madison AIDS Vaccine Research Laboratories|Baczenas|USA

>Spike|hCoV-19/Wales/PHWC-16DD27/2020|2020-09-21|EPI\_ISL\_577525|Original|hCoV-19^^Wales|Human|Wales Specialist Virology Centre Sequencing lab|COVID-19 Genomics UK (COG-UK) Consortium|Moore|United Kingdom

>Spike|hCoV-19/England/QEUH-9B3B4E/2020|2020-09-04|EPI\_ISL\_573534|Original|hCoV-19^^England|Human|Virology Department|COVID-19 Genomics UK (COG-UK) Consortium|de Silva|United Kingdom

>Spike|hCoV-19/England/MILK-BB15F5/2020|2020-11-17|EPI\_ISL\_720055|Original|hCoV-19^^England|Human|Lighthouse Lab in Milton Keynes|Wellcome Sanger Institute for the COVID-19 Genomics UK (COG-UK) Consortium|Davies|United Kingdom

>Spike|hCoV-19/Portugal/PT0952/2020|2020-04-13|EPI\_ISL\_511502|Original|hCoV-19^^Portugal|Human|Instituto Nacional de Saude (INSA)|Instituto Nacional de Saude (INSA) and Instituto Gulbenkian de Ciencia (IGC)|Borges|Portugal

>Spike|hCoV-19/England/QEUH-C14E7C/2020|2020-12-06|EPI\_ISL\_709454|Original|hCoV-19^^England|Human|Lighthouse Lab in Glasgow|Wellcome Sanger Institute for the COVID-19 Genomics UK (COG-UK) Consortium|Davies|United Kingdom

>Spike|hCoV-19/England/MILK-9AAEBA/2020|2020-08-31|EPI\_ISL\_551047|Original|hCoV-19^^England|Human|Lighthouse Lab in Milton Keynes|Wellcome Sanger Institute for the COVID-19 Genomics UK (COG-UK) consortium|Davies|United Kingdom

>Spike|hCoV-19/England/QEUEH-B2DF05/2020|2020-11-04|EPI\_ISL\_659860|Original|hCoV-19^^England|Human|Lighthouse Lab in Glasgow|Wellcome Sanger Institute for the COVID-19 Genomics UK (COG-UK) Consortium|Davies|United Kingdom

>Spike|hCoV-19/England/ALDP-BB3915/2020|2020-11-20|EPI\_ISL\_701899|Original|hCoV-19^^England|Human|Lighthouse Lab in Alderley Park|Wellcome Sanger Institute for the COVID-19 Genomics UK (COG-UK) Consortium|Davies|United Kingdom

>Spike|hCoV-19/Japan/PG-8689/2020|2020-08-00|EPI\_ISL\_686285|Original|hCoV-19^^Japan|Human|Pathogen Genomics Center|Pathogen Genomics Center|Sekizuka|Japan

>Spike|hCoV-19/USA/MA-MGH-00432/2020|2020-03-07|EPI\_ISL\_460442|Original|hCoV-19^^Massachusetts|Human|Massachusetts General Hospital|Infectious Disease Program|Lemieux|USA

>Spike|hCoV-19/England/MILK-B0552F/2020|2020-10-24|EPI\_ISL\_638554|Original|hCoV-19^^England|Human|Virology Department|COVID-19 Genomics UK (COG-UK) Consortium|de Silva|United Kingdom

>Spike|hCoV-19/England/ALDP-9E70E8/2020|2020-09-24|EPI\_ISL\_580297|Original|hCoV-19^^England|Human|Lighthouse Lab in Alderley Park|Wellcome Sanger Institute for the COVID-19 Genomics UK (COG-UK) consortium|Davies|United Kingdom

>Spike|hCoV-19/USA/WI-UW-881/2020|2020-07-13|EPI\_ISL\_509883|Original|hCoV-19^^Wisconsin|Human|University of Wisconsin-Madison AIDS Vaccine Research Laboratories|University of Wisconsin-Madison AIDS Vaccine Research Laboratories|Baczenas|USA

>Spike|hCoV-19/England/MILK-BFCE02/2020|2020-12-03|EPI\_ISL\_720902|Original|hCoV-19^^England|Human|Lighthouse Lab in Milton Keynes|Wellcome Sanger Institute for the COVID-19 Genomics UK (COG-UK) Consortium|Davies|United Kingdom

>Spike|hCoV-19/South Africa/N00119/2020|2020-06-23|EPI\_ISL\_622984|Original|hCoV-19^^Mpumalanga|Human|National Health Laboratory Service|National Institute for Communicable Diseases of the National Health Laboratory Service|Allam|South Africa

>Spike|hCoV-19/England/ALDP-AC5E03/2020|2020-10-14|EPI\_ISL\_630999|Original|hCoV-19^^England|Human|Lighthouse Lab in Alderley Park|Wellcome Sanger Institute for the COVID-19 Genomics UK (COG-UK) consortium|Davies|United Kingdom

>Spike|hCoV-19/England/ALDP-954D85/2020|2020-06-12|EPI\_ISL\_553413|Original|hCoV-19^^England|Human|Lighthouse Lab in Alderley Park|Wellcome Sanger Institute for the COVID-19 Genomics UK (COG-UK) consortium|Davies|United Kingdom

>Spike|hCoV-19/England/QEUEH-9F7B8A/2020|2020-09-27|EPI\_ISL\_589209|Original|hCoV-19^^England|Human|Lighthouse Lab in Glasgow|Wellcome Sanger Institute for the COVID-19 Genomics UK (COG-UK) consortium|Davies|United Kingdom

>Spike|hCoV-19/USA/WA-S1585/2020|2020-05-26|EPI\_ISL\_496011|Original|hCoV-19^^Washington|Human|Washington State Department of Health|Seattle Flu Study|Lee|USA

>Spike|hCoV-19/Norway/5713/2020|2020-11-11|EPI\_ISL\_708150|Original|hCoV-19^^Vestfold og Telemark|Human|Unilabs Laboratory Medicine|Norwegian Institute of Public Health|Kopperud Riis|Norway

>Spike|hCoV-19/England/QEUEH-A36A09/2020|2020-10-05|EPI\_ISL\_637437|Original|hCoV-19^^England|Human|Wales Specialist Virology Centre Sequencing lab|COVID-19 Genomics UK (COG-UK) Consortium|Moore|United Kingdom

>Spike|hCoV-19/Wales/PHWC-485A01/2020|2020-10-26|EPI\_ISL\_628240|Original|hCoV-19^^Wales|Human|Wales Specialist Virology Centre Sequencing lab|COVID-19 Genomics UK (COG-UK) Consortium|Moore|United Kingdom

>Spike|hCoV-19/England/201280165/2020|2020-03-20|EPI\_ISL\_465800|Original|hCoV-19^^England|Human|Respiratory Virus Unit|Respiratory Virus Unit|Platt|United Kingdom

>Spike|hCoV-19/Switzerland/VD-ETHZ-100826/2020|2020-03-26|EPI\_ISL\_451775|Original|hCoV-19^^Vaud|Human|Viollier AG|Department of Biosystems Science and Engineering|Nadeau|Switzerland

>Spike|hCoV-19/Japan/PG-1857/2020|2020-05-00|EPI\_ISL\_685463|Original|hCoV-19^^Japan|Human|Tokyo Metropolitan Institute of Public Health|Pathogen Genomics Center|Sekizuka|Japan

>Spike|hCoV-19/England/OXON-AEA33/2020|2020-00-00|EPI\_ISL\_448749|Original|hCoV-19^^England|Human|Oxford Viromics|COVID-19 Genomics UK (COG-UK) Consortium|Golubchik|United Kingdom

>Spike|hCoV-19/Luxembourg/LNS3841144/2020|2020-10-24|EPI\_ISL\_740381|Original|hCoV-19^^Luxembourg|Human|Laboratoire national de sant\u00e9|Laboratoire national de sant\u00e9|Wienecke-Baldacchino|Luxembourg

>Spike|hCoV-19/England/ALDP-B8442B/2020|2020-11-14|EPI\_ISL\_674474|Original|hCoV-19^^England|Human|Lighthouse Lab in Alderley Park|Wellcome Sanger Institute for the COVID-19 Genomics UK (COG-UK) Consortium|Davies|United Kingdom

>Spike|hCoV-19/New Zealand/20VR1814/2020|2020-03-27|EPI\_ISL\_456262|Original|hCoV-19^^Southern|Human|Southern Community Labs Dunedin|Institute of Environmental Science and Research (ESR)|de Ligt|New Zealand

>Spike|hCoV-19/Iceland/519/2020|2020-03-00|EPI\_ISL\_424540|Original|hCoV-19^^Reykjavik|Human|deCODE genetics|deCODE genetics|J\u00f3nsson|Iceland

>Spike|hCoV-19/England/QEUEH-9DD30A/2020|2020-09-21|EPI\_ISL\_581098|Original|hCoV-19^^England|Human|Lighthouse Lab in Glasgow|Wellcome Sanger Institute for the COVID-19 Genomics UK (COG-UK) consortium|Davies|United Kingdom

>Spike|hCoV-19/USA/NC-CDC-2-3693770/2020|2020-11-02|EPI\_ISL\_747120|Original|hCoV-19^^North Carolina|Human|Respiratory Viruses Branch|Respiratory Viruses Branch|Queen|USA

>Spike|hCoV-19/Denmark/DCGC-4167/2020|2020-09-14|EPI\_ISL\_621987|Original|hCoV-19^^Sjaelland|Human|Department of Virus and Microbiological Special Diagnostics|Albertsen lab|Michaelsen|Denmark

>Spike|hCoV-19/England/ALDP-CB361D/2020|2020-12-20|EPI\_ISL\_761147|Original|hCoV-19^^England|Human|Lighthouse Lab in Alderley Park|Wellcome Sanger Institute for the COVID-19 Genomics UK (COG-UK) Consortium|Davies|United Kingdom

>Spike|hCoV-19/Ireland/LH-NVRL-73IRL70372/2020|2020-09-14|EPI\_ISL\_639854|Original|hCoV-19^^Louth|Human|National Virus Reference Laboratory|National Virus Reference Laboratory|Gonzalez|Ireland

>Spike|hCoV-19/England/EXET-1387EB/2020|2020-10-17|EPI\_ISL\_627190|Original|hCoV-19^^England|Human|University of Exeter|COVID-19 Genomics UK (COG-UK) Consortium|Temperton|United Kingdom

>Spike|hCoV-19/England/CAMC-BC18F9/2020|2020-11-21|EPI\_ISL\_704535|Original|hCoV-19^^England|Human|Department of Pathology|COVID-19 Genomics UK (COG-UK) Consortium|Goodfellow|United Kingdom

>Spike|hCoV-19/England/QEUEH-B14217/2020|2020-11-03|EPI\_ISL\_641752|Original|hCoV-19^^England|Human|Lighthouse Lab in Glasgow|Wellcome Sanger Institute for the COVID-19 Genomics UK (COG-UK) Consortium|Davies|United Kingdom

>Spike|hCoV-19/Sweden/20-50562/2020|2020-04-01|EPI\_ISL\_475148|Original|hCoV-19^^Vasternorrland|Human|Klinisk mikrobiologi Vasternorrland|The Public Health Agency of Sweden|Svartstr\u00f6m|Sweden

>Spike|hCoV-19/England/CAMB-81D6A/2020|2020-04-13|EPI\_ISL\_442567|Original|hCoV-19^^England|Human|Department of Pathology|Wellcome Sanger Institute for the COVID-19 Genomics UK (COG-UK) consortium|Amato|United Kingdom

>Spike|hCoV-19/Gambia/0268/2020|2020-03-21|EPI\_ISL\_471159|Original|hCoV-19^^Kombo|Human|MRCG at LSHTM Genomics lab|MRCG at LSHTM Genomics lab|Sesay|Gambia

>Spike|hCoV-19/Denmark/DCGC-14476/2020|2020-11-30|EPI\_ISL\_711789|Original|hCoV-19^^Midtjylland|Human|Department of Virus and Microbiological Special Diagnostics|Albertsen Lab|Michaelsen|Denmark

>Spike|hCoV-19/England/NORW-F9969/2020|2020-12-03|EPI\_ISL\_725413|Original|hCoV-19^^England|Human|Quadram Institute Bioscience|COVID-19 Genomics UK (COG-UK) Consortium|Alikhan|United Kingdom

>Spike|hCoV-19/England/ALDP-BC836A/2020|2020-11-23|EPI\_ISL\_721402|Original|hCoV-19^^England|Human|Lighthouse Lab in Alderley Park|Wellcome Sanger Institute for the COVID-19 Genomics UK (COG-UK) Consortium|Davies|United Kingdom

>Spike|hCoV-19/Wales/PHWC-48E1D6/2020|2020-11-13|EPI\_ISL\_680821|Original|hCoV-19^^Wales|Human|Wales Specialist Virology Centre Sequencing lab|COVID-19 Genomics UK (COG-UK) Consortium|Moore|United Kingdom

>Spike|hCoV-19/Beijing/BJ710/2020|2020-02-07|EPI\_ISL\_430740|Original|hCoV-19^^Beijing|Human|Chinese PLA Institute for Disease Control and Prevention|Chinese PLA Institute for Disease Control and Prevention|Li|China

>Spike|hCoV-19/Denmark/DCGC-3388/2020|2020-08-31|EPI\_ISL\_616147|Original|hCoV-19^^Syddanmark|Human|Department of Virus and Microbiological Special Diagnostics|Albertsen lab|Michaelsen|Denmark

>Spike|hCoV-19/USA/TX-DSHS-0871/2020|2020-06-16|EPI\_ISL\_610007|Original|hCoV-19^^Texas|Human|Texas Department of State Health Services|Texas Department of State Health Services|Rahman|USA

>Spike|hCoV-19/England/MILK-B8E096/2020|2020-11-13|EPI\_ISL\_674729|Original|hCoV-19^^England|Human|Lighthouse Lab in Milton Keynes|Wellcome Sanger Institute for the COVID-19 Genomics UK (COG-UK) Consortium|Davies|United Kingdom

>Spike|hCoV-19/England/ALDP-94CCED/2020|2020-06-15|EPI\_ISL\_556055|Original|hCoV-19^^England|Human|Lighthouse Lab in Alderley Park|Wellcome Sanger Institute for the COVID-19 Genomics UK (COG-UK) consortium|Davies|United Kingdom

>Spike|hCoV-19/USA/UT-UPHL-2012066229/2020|2020-07-26|EPI\_ISL\_745694|Original|hCoV-19^^Utah|Human|Ginkgo Bioworks Clinical Laboratory|Utah Public Health Laboratory|Young|USA

>Spike|hCoV-19/USA/WA-UW27/2020|2020-03-04|EPI\_ISL\_414596|Original|hCoV-19^^Washington|Human|UW Virology Lab|UW Virology Lab|Roychoudhury|USA

>Spike|hCoV-19/USA/NY-Wadsworth-240550-01/2020|2020-10-08|EPI\_ISL\_734306|Original|hCoV-19^^New York|Human|Wadsworth Center|Wadsworth Center|Lasek-Nesselquist|USA

>Spike|hCoV-19/USA/MA-MGH-03357/2020|2020-11-06|EPI\_ISL\_765801|Original|hCoV-19^^Massachusetts|Human|Massachusetts General Hospital|Infectious Disease Program|Park|USA

>Spike|hCoV-19/England/ALDP-9BDD4E/2020|2020-09-09|EPI\_ISL\_567968|Original|hCoV-19^^England|Human|Lighthouse Lab in Alderley Park|Wellcome Sanger Institute for the COVID-19 Genomics UK (COG-UK) consortium|Davies|United Kingdom

>Spike|hCoV-19/USA/FL-BPHL-1609/2020|2020-07-28|EPI\_ISL\_594299|Original|hCoV-19^^Florida|Human|Florida Bureau of Public Health Laboratories|Florida Bureau of Public Health Laboratories|Blanton|USA

>Spike|hCoV-19/USA/TX-HMH-6790/2020|2020-06-25|EPI\_ISL\_546244|Original|hCoV-19^^Texas|Human|Houston Methodist Hospital|Houston Methodist Hospital|Long|USA

>Spike|hCoV-19/Portugal/PT0897/2020|2020-03-26|EPI\_ISL\_511154|Original|hCoV-19^^Portugal|Human|Instituto Nacional de Saude (INSA)|Instituto Nacional de Saude (INSA)|Borges|Portugal

>Spike|hCoV-19/England/QEUA-A0077A/2020|2020-10-02|EPI\_ISL\_600216|Original|hCoV-19^^England|Human|Lighthouse Lab in Glasgow|Wellcome Sanger Institute for the COVID-19 Genomics UK (COG-UK) consortium|Davies|United Kingdom

>Spike|hCoV-19/USA/LA-EVTL1192/2020|2020-12-11|EPI\_ISL\_768461|Original|hCoV-19^^Louisiana|Human|LSUHS Emerging Viral Threat Laboratory|Microbial Genome Sequencing Center|Kamil|USA

>Spike|hCoV-19/USA/CA-CZB-11967/2020|2020-07-11|EPI\_ISL\_625624|Original|hCoV-19^^California|Human|County of San Luis Obispo Public Health Laboratory|Chan-Zuckerberg Biohub|Bhatt|USA

>Spike|hCoV-19/United Arab Emirates/0158/2020|2020-05-18|EPI\_ISL\_698345|Original|hCoV-19^^Abu Dhabi|Human|Group 42 (G42) Healthcare|G42 Healthcare|Ogrodzki|United Arab Emirates

>Spike|hCoV-19/Scotland/QEUA-7AC3BB/2020|2020-07-20|EPI\_ISL\_532874|Original|hCoV-19^^Scotland|Human|NHSGGC West of Scotland Specialist Virology Centre / MRC-University of Glasgow Centre for Virus Research|Wellcome Sanger Institute for the COVID-19 Genomics UK (COG-UK) consortium|Davies|United Kingdom

>Spike|hCoV-19/England/QEUA-C7F932/2020|2020-12-16|EPI\_ISL\_762940|Original|hCoV-19^^England|Human|Lighthouse Lab in Glasgow|Wellcome Sanger Institute for the COVID-19 Genomics UK (COG-UK) Consortium|Davies|United Kingdom

>Spike|hCoV-19/USA/TX-HMH-MCoV-15220/2020|2020-10-20|EPI\_ISL\_786704|Original|hCoV-19^^Texas|Human|Houston Methodist Hospital|Houston Methodist Hospital|Long|USA

>Spike|hCoV-19/Scotland/QEUA-A9EA3C/2020|2020-10-20|EPI\_ISL\_625321|Original|hCoV-19^^Scotland|Human|Lighthouse Lab in Glasgow|Wellcome Sanger Institute for the COVID-19 Genomics UK (COG-UK) consortium|Davies|United Kingdom



>Spike|hCoV-19/England/QEUA-B6990F/2020|2020-11-11|EPI\_ISL\_661370|Original|hCoV-19^^England|Human|Lighthouse Lab in Glasgow|Wellcome Sanger Institute for the COVID-19 Genomics UK (COG-UK) Consortium|Davies|United Kingdom

>Spike|hCoV-19/England/QEUA-969C80/2020|2020-08-11|EPI\_ISL\_530863|Original|hCoV-19^^England|Human|Lighthouse Lab in Glasgow|Wellcome Sanger Institute for the COVID-19 Genomics UK (COG-UK) consortium|Davies|United Kingdom

>Spike|hCoV-19/England/MILK-BA99A9/2020|2020-11-17|EPI\_ISL\_681534|Original|hCoV-19^^England|Human|Lighthouse Lab in Milton Keynes|Wellcome Sanger Institute for the COVID-19 Genomics UK (COG-UK) Consortium|Davies|United Kingdom

>Spike|hCoV-19/Bangladesh/BCSIR-NILMRC-004-2/2020|2020-05-21|EPI\_ISL\_482701|Original|hCoV-19^^Dhaka|Human|National Institute of Laboratory Medicine and Referral Center|Genomic Research Lab|Khan|Bangladesh

>Spike|hCoV-19/USA/NY-Wadsworth-42494-01/2020|2020-04-09|EPI\_ISL\_676831|Original|hCoV-19^^New York|Human|Wadsworth Center|Wadsworth Center|Lasek-Nesselquist|USA

>Spike|hCoV-19/England/MILK-9A8A12/2020|2020-09-01|EPI\_ISL\_549439|Original|hCoV-19^^England|Human|Oxford Viromics|COVID-19 Genomics UK (COG-UK) Consortium|Golubchik|United Kingdom

>Spike|hCoV-19/USA/CA-IGI-0342/2020|2020-06-29|EPI\_ISL\_576531|Original|hCoV-19^^California|Human|Innovative Genomics Institute|Innovative Genomics Institute|Wyman|USA

>Spike|hCoV-19/Wales/PHWC-1681A8/2020|2020-05-20|EPI\_ISL\_494208|Original|hCoV-19^^Wales|Human|Originating lab|COVID-19 Genomics UK (COG-UK) Consortium|Moore|United Kingdom

>Spike|hCoV-19/Australia/VIC9716/2020|2020-08-24|EPI\_ISL\_565670|Original|hCoV-19^^Victoria|Human|Microbiological Diagnostic Unit - Public Health Laboratory (MDU-PHL)|MDU-PHL|Schultz|Australia

>Spike|hCoV-19/England/QEUA-B68C34/2020|2020-11-11|EPI\_ISL\_655111|Original|hCoV-19^^England|Human|Lighthouse Lab in Glasgow|Wellcome Sanger Institute for the COVID-19 Genomics UK (COG-UK) Consortium|Davies|United Kingdom

>Spike|hCoV-19/India/MH-ACTREC-152/2020|2020-06-02|EPI\_ISL\_699808|Original|hCoV-19^^Maharashtra|Human|Hematopathology Laboratory|Hematopathology Laboratory|Patkar|India

>Spike|hCoV-19/England/201080055/2020|2020-03-05|EPI\_ISL\_464446|Original|hCoV-19^^England|Human|Respiratory Virus Unit|Respiratory Virus Unit|Platt|United Kingdom

>Spike|hCoV-19/USA/LA-EVTL918/2020|2020-07-09|EPI\_ISL\_653609|Original|hCoV-19^^Louisiana|Human|LSUHS Emerging Viral Threat Laboratory|Microbial Genome Sequencing Center|Kamil|USA

>Spike|hCoV-19/France/PAC-MEPHI-2410/2020|2020-10-13|EPI\_ISL\_644559|Original|hCoV-19^^Provence-Alpes-Cote-d\u2019Azur|Human|MEPHI|MEPHI|Levasseur|France

>Spike|hCoV-19/England/MILK-ACC394/2020|2020-10-21|EPI\_ISL\_629109|Original|hCoV-19^^England|Human|Lighthouse Lab in Milton Keynes|Wellcome Sanger Institute for the COVID-19 Genomics UK (COG-UK) consortium|Davies|United Kingdom

>Spike|hCoV-19/Australia/QLD1009/2020|2020-03-22|EPI\_ISL\_530269|Original|hCoV-19^^Queensland|Human|Queensland Health Forensic and Scientific Services|Public Health Virology Laboratory|Nguyen|Australia

>Spike|hCoV-19/USA/NY-NYUMC41/2020|2020-03-18|EPI\_ISL\_419702|Original|hCoV-19^^New York|Human|NYU Langone Health|Departments of Pathology and Medicine|Maurano|USA

>Spike|hCoV-19/Norway/3832/2020|2020-09-25|EPI\_ISL\_590979|original|hCoV-19^^Oslo|Human|Oslo University Hospital|Norwegian Institute of Public Health|Vollan|Norway

>Spike|hCoV-19/Denmark/DCGC-1002/2020|2020-05-11|EPI\_ISL\_614807|Original|hCoV-19^^Hovedstaden|Human|Department of Virus and Microbiological Special Diagnostics|Albertsen lab|Michaelsen|Denmark

>Spike|hCoV-19/Wales/PHWC-4A3F95/2020|2020-12-13|EPI\_ISL\_764649|Original|hCoV-19^^Wales|Human|Wales Specialist Virology Centre Sequencing lab|COVID-19 Genomics UK (COG-UK) Consortium|Moore|United Kingdom

>Spike|hCoV-19/England/ALDP-B481C2/2020|2020-11-07|EPI\_ISL\_649333|Original|hCoV-19^^England|Human|Lighthouse Lab in Alderley Park|Wellcome Sanger Institute for the COVID-19 Genomics UK (COG-UK) Consortium|Davies|United Kingdom

>Spike|hCoV-19/USA/WA-S1930/2020|2020-06-03|EPI\_ISL\_497358|Original|hCoV-19^^Washington|Human|Washington State Department of Health|Seattle Flu Study|Lee|USA

>Spike|hCoV-19/USA/AK-PHL489/2020|2020-06-13|EPI\_ISL\_512142|Original|hCoV-19^^Alaska|Human|Alaska State Virology Laboratory|Alaska State Virology Laboratory|Drown|USA

>Spike|hCoV-19/England/ALDP-49828B/2020|2020-05-25|EPI\_ISL\_559390|Original|hCoV-19^^England|Human|Lighthouse Lab in Alderley Park|Wellcome Sanger Institute for the COVID-19 Genomics UK (COG-UK) consortium|Davies|United Kingdom

>Spike|hCoV-19/Australia/NSW1239/2020|2020-12-11|EPI\_ISL\_740870|Original|hCoV-19^^New South Wales|Human|South Eastern Area Laboratory Services (SEALS)|NSW Health Pathology - Institute of Clinical Pathology and Medical Research; Westmead Hospital; University of Sydney|Gall|Australia

>Spike|hCoV-19/England/QEUEH-9F8BF2/2020|2020-09-27|EPI\_ISL\_588817|Original|hCoV-19^^England|Human|Lighthouse Lab in Glasgow|Wellcome Sanger Institute for the COVID-19 Genomics UK (COG-UK) consortium|Davies|United Kingdom

>Spike|hCoV-19/USA/NY-PV08473/2020|2020-03-18|EPI\_ISL\_421416|Original|hCoV-19^^New York|Human|MSHS Clinical Microbiology Laboratories|MSHS Pathogen Surveillance Program|van Bakel|USA

>Spike|hCoV-19/England/CAMB-80994/2020|2020-04-10|EPI\_ISL\_442873|Original|hCoV-19^^England|Human|Department of Pathology|Wellcome Sanger Institute for the COVID-19 Genomics UK (COG-UK) consortium|Amato|United Kingdom

>Spike|hCoV-19/USA/TX-HMH-MCoV-13799/2020|2020-08-17|EPI\_ISL\_788892|Original|hCoV-19^^Texas|Human|Houston Methodist Hospital|Houston Methodist Hospital|Long|USA

>Spike|hCoV-19/England/ALDP-B74EE4/2020|2020-11-12|EPI\_ISL\_679005|Original|hCoV-19^^England|Human|Queens Medical Centre|COVID-19 Genomics UK (COG-UK) Consortium|Loose|United Kingdom

>Spike|hCoV-19/England/QEUEH-9DE442/2020|2020-09-21|EPI\_ISL\_599655|Original|hCoV-19^^England|Human|Lighthouse Lab in Glasgow|Wellcome Sanger Institute for the COVID-19 Genomics UK (COG-UK) consortium|Davies|United Kingdom

>Spike|hCoV-19/England/QEUEH-AD392F/2020|2020-10-26|EPI\_ISL\_633861|Original|hCoV-19^^England|Human|Lighthouse Lab in Glasgow|Wellcome Sanger Institute for the COVID-19 Genomics UK (COG-UK) consortium|Davies|United Kingdom

>Spike|hCoV-19/Denmark/DCGC-21201/2020|2020-12-21|EPI\_ISL\_759610|Original|hCoV-19^^Hovedstaden|Human|Department of Virus and Microbiological Special Diagnostics|Albertsen Lab|Michaelsen|Denmark

>Spike|hCoV-19/Russia/LEN-R11-34268M/2020|2020-09-00|EPI\_ISL\_596233|Original|hCoV-19^^Leningrad|Human|WHO National Influenza Centre Russian Federation|WHO National Influenza Centre Russian Federation|Komissarov|Russia

>Spike|hCoV-19/Wales/PHWC-2C9E5/2020|2020-03-31|EPI\_ISL\_445932|Original|hCoV-19^^Wales|Human|Wales Specialist Virology Centre|Public Health Wales Microbiology Cardiff|Moore|United Kingdom

>Spike|hCoV-19/Australia/VIC4639/2020|2020-07-12|EPI\_ISL\_519030|Original|hCoV-19^^Victoria|Human|Victorian Infectious Diseases Reference Laboratory (VIDRL)|VIDRL and MDU-PHL|Schultz|Australia

>Spike|hCoV-19/Scotland/QEUEH-95E1AD/2020|2020-08-10|EPI\_ISL\_534420|Original|hCoV-19^^Scotland|Human|NHSGGC West of Scotland Specialist Virology Centre / MRC-University of Glasgow Centre for Virus Research|Wellcome Sanger Institute for the COVID-19 Genomics UK (COG-UK) consortium|Davies|United Kingdom

>Spike|hCoV-19/England/MILK-A1D789/2020|2020-10-03|EPI\_ISL\_595083|Original|hCoV-19^^England|Human|Queens Medical Centre|COVID-19 Genomics UK (COG-UK) Consortium|Loose|United Kingdom

>Spike|hCoV-19/England/NOTT-120397/2020|2020-12-07|EPI\_ISL\_725608|Original|hCoV-19^^England|Human|Queens Medical Centre|COVID-19 Genomics UK (COG-UK) Consortium|Loose|United Kingdom

>Spike|hCoV-19/Australia/VIC5886/2020|2020-07-21|EPI\_ISL\_518669|Original|hCoV-19^^Victoria|Human|Microbiological Diagnostic Unit - Public Health Laboratory (MDU-PHL)|MDU-PHL|Schultz|Australia

>Spike|hCoV-19/England/LOND-12506FB/2020|2020-10-21|EPI\_ISL\_665227|Original|hCoV-19^^England|Human|University College London Hospital|COVID-19 Genomics UK (COG-UK) Consortium|Byott|United Kingdom

>Spike|hCoV-19/Denmark/DCGC-4607/2020|2020-09-21|EPI\_ISL\_621276|Original|hCoV-19^^Hovedstaden|Human|Department of Virus and Microbiological Special Diagnostics|Albertsen lab|Michaelsen|Denmark

>Spike|hCoV-19/Australia/VIC11076/2020|2020-07-31|EPI\_ISL\_563235|Original|hCoV-19^^Victoria|Human|Microbiological Diagnostic Unit - Public Health Laboratory (MDU-PHL)|MDU-PHL|Schultz|Australia

>Spike|hCoV-19/Japan/PG-0867/2020|2020-00-00|EPI\_ISL\_684477|Original|hCoV-19^^Japan|Human|Fukuoka Institute of Health and Environmental Sciences|Pathogen Genomics Center|Sekizuka|Japan

>Spike|hCoV-19/USA/MN-GMF-31369/2020|2020-11-04|EPI\_ISL\_661085|Original|hCoV-19^^Minnesota|Human|Gundersen Molecular Diagnostics Laboratory|Kabara Cancer Research Institute|Kenny|USA

>Spike|hCoV-19/England/NORW-ECCAC/2020|2020-06-02|EPI\_ISL\_472341|Original|hCoV-19^^England|Human|Quadram Institute Bioscience|COVID-19 Genomics UK (COG-UK) Consortium|Alikhan|United Kingdom

>Spike|hCoV-19/Switzerland/BS-UHB-42199841/2020|2020-03-20|EPI\_ISL\_528254|Original|hCoV-19^^Basel-Stadt|Human|University Hospital Basel|University Hospital Basel|Roloff Handschin|Switzerland

>Spike|hCoV-19/Switzerland/VS-ETHZ-321417/2020|2020-10-14|EPI\_ISL\_603656|Original|hCoV-19^^Valais|Human|Viollier AG|Department of Biosystems Science and Engineering|Nadeau|Switzerland

>Spike|hCoV-19/England/MILK-C539DA/2020|2020-12-12|EPI\_ISL\_769827|Original|hCoV-19^^England|Human|Lighthouse Lab in Milton Keynes|Wellcome Sanger Institute for the COVID-19 Genomics UK (COG-UK) Consortium|Davies|United Kingdom

>Spike|hCoV-19/Spain/RI-IBV-99005881/2020|2020-03-10|EPI\_ISL\_537423|Original|hCoV-19^^La Rioja|Human|Centro de Investigaci\u00f3n Biom\u00e9dica de La Rioja - Hospital San Pedro Logro\u00f1o|SeqCOVID-SPAIN consortium/IBV(CSIC)|Comas|Spain

>Spike|hCoV-19/Scotland/CVR1370/2020|2020-03-31|EPI\_ISL\_433558|Original|hCoV-19^^Scotland|Human|West of Scotland Specialist Virology Centre|COVID-19 Genomics UK (COG-UK) Consortium|Robertson|United Kingdom

>Spike|hCoV-19/Oman/RESP-20-B-15879/2020|2020-05-22|EPI\_ISL\_518835|Original|hCoV-19^^Muscat|Human|Oman-National Influenza Center|Biotechnology & OMICs Laboratory|Al Mahruqi|Oman

>Spike|hCoV-19/USA/TX-HMH-MCoV-10692/2020|2020-07-09|EPI\_ISL\_789592|Original|hCoV-19^^Texas|Human|Houston Methodist Hospital|Houston Methodist Hospital|Long|USA

>Spike|hCoV-19/England/QEUEH-B2E863/2020|2020-11-03|EPI\_ISL\_660039|Original|hCoV-19^^England|Human|Lighthouse Lab in Glasgow|Wellcome Sanger Institute for the COVID-19 Genomics UK (COG-UK) Consortium|Davies|United Kingdom

>Spike|hCoV-19/Denmark/DCGC-17762/2020|2020-12-14|EPI\_ISL\_749552|Original|hCoV-19^^Nordjylland|Human|Department of Virus and Microbiological Special Diagnostics|Albertsen Lab|Michaelsen|Denmark

>Spike|hCoV-19/England/MILK-ACDB8C/2020|2020-10-21|EPI\_ISL\_630188|Original|hCoV-19^^England|Human|Lighthouse Lab in Milton Keynes|Wellcome Sanger Institute for the COVID-19 Genomics UK (COG-UK) consortium|Davies|United Kingdom

>Spike|hCoV-19/England/QEUEH-9C95ED/2020|2020-09-10|EPI\_ISL\_567377|Original|hCoV-19^^England|Human|Lighthouse Lab in Glasgow|Wellcome Sanger Institute for the COVID-19 Genomics UK (COG-UK) consortium|Davies|United Kingdom

>Spike|hCoV-19/Wales/PHWC-2BE9C/2020|2020-04-10|EPI\_ISL\_445861|Original|hCoV-19^^Wales|Human|Wales Specialist Virology Centre|Public Health Wales Microbiology Cardiff|Moore|United Kingdom

>Spike|hCoV-19/England/QEUEH-B2F6D1/2020|2020-11-04|EPI\_ISL\_659926|Original|hCoV-19^^England|Human|Lighthouse Lab in Glasgow|Wellcome Sanger Institute for the COVID-19 Genomics UK (COG-UK) Consortium|Davies|United Kingdom

>Spike|hCoV-19/Scotland/QEUEH-96CD8A/2020|2020-08-21|EPI\_ISL\_534573|Original|hCoV-19^^Scotland|Human|NHSGGC West of Scotland Specialist Virology Centre / MRC - University of Glasgow Centre for Virus Research|Wellcome Sanger Institute for the COVID-19 Genomics UK (COG-UK) consortium|Davies|United Kingdom

>Spike|hCoV-19/England/MILK-B3D5A6/2020|2020-11-02|EPI\_ISL\_706229|Original|hCoV-19^^England|Human|Oxford Viromics|COVID-19 Genomics UK (COG-UK) Consortium|Golubchik|United Kingdom

>Spike|hCoV-19/Luxembourg/LNS3950198/2020|2020-11-09|EPI\_ISL\_740394|Original|hCoV-19^^Luxembourg|Human|Laboratoire national de sant\u00e9|Laboratoire national de sant\u00e9|Wienecke-Baldacchino|Luxembourg

>Spike|hCoV-19/Scotland/CVR3074/2020|2020-04-24|EPI\_ISL\_461658|Original|hCoV-19^^Scotland|Human|West of Scotland Specialist Virology Centre|COVID-19 Genomics UK (COG-UK) Consortium|Robertson|United Kingdom

>Spike|hCoV-19/England/LIVE-AA7D6/2020|2020-03-24|EPI\_ISL\_517504|Original|hCoV-19^^England|Human|Liverpool Clinical Laboratories|COVID-19 Genomics UK (COG-UK) Consortium|Haldenby|United Kingdom

>Spike|hCoV-19/Brazil/SP-L32-CD828/2020|2020-04-09|EPI\_ISL\_722042|Original|hCoV-19^^S\u00e3o Paulo|Human|Hospital das Cl\u00ednicas Universidade de S\u00e3o Paulo Medical School|Laborat\u00f3rio de Parasitologia M\u00e9dica - Instituto de Medicina Tropical - Universidade de S\u00e3o Paulo|de Jesus|Brazil

>Spike|hCoV-19/Scotland/EDB2281/2020|2020-04-21|EPI\_ISL\_491513|Original|hCoV-19^^Scotland|Human|Virology Department|Wellcome Sanger Institute for the COVID-19 Genomics UK (COG-UK) consortium|Davies|United Kingdom

>Spike|hCoV-19/South Africa/KRISP-K002841/2020|2020-09-01|EPI\_ISL\_602657|Original|hCoV-19^^KwaZulu-Natal|Human|NHLS-IALCH|KRISP|de Oliveira|South Africa

>Spike|hCoV-19/England/QEUEH-B68162/2020|2020-11-11|EPI\_ISL\_662168|Original|hCoV-19^^England|Human|Lighthouse Lab in Glasgow|Wellcome Sanger Institute for the COVID-19 Genomics UK (COG-UK) Consortium|Davies|United Kingdom

>Spike|hCoV-19/Canada/BC\_21346429/2020|2020-03-00|EPI\_ISL\_462807|Original|hCoV-19^^British Columbia|Human|BCCDC Public Health Laboratory|BCCDC Public Health Laboratory|Harrigan|Canada

>Spike|hCoV-19/Denmark/DCGC-8876/2020|2020-11-02|EPI\_ISL\_626139|Original|hCoV-19^^Sjælland|Human|Department of Virus and Microbiological Special Diagnostics|Albertsen lab|Michaelsen|Denmark

>Spike|hCoV-19/Sweden/20-52184/2020|2020-06-28|EPI\_ISL\_582837|Original|hCoV-19^^Västernorrland|Human|Klinisk mikrobiologi Västernorrland|The Public Health Agency of Sweden|Svartstr\u00f6m|Sweden

>Spike|hCoV-19/Japan/PG-3258/2020|2020-06-00|EPI\_ISL\_691373|Original|hCoV-19^^Japan|Human|Saitama Prefectural Institute of Public Health|Pathogen Genomics Center|Sekizuka|Japan

>Spike|hCoV-19/England/ALDP-B1CE57/2020|2020-11-01|EPI\_ISL\_645756|Original|hCoV-19^^England|Human|Lighthouse Lab in Alderley Park|Wellcome Sanger Institute for the COVID-19 Genomics UK (COG-UK) Consortium|Davies|United Kingdom

>Spike|hCoV-19/USA/TX-HMH-MCoV-19223/2020|2020-11-28|EPI\_ISL\_783701|Original|hCoV-19^^Texas|Human|Houston Methodist Hospital|Houston Methodist Hospital|Long|USA

>Spike|hCoV-19/Denmark/DCGC-18496/2020|2020-12-07|EPI\_ISL\_749335|Original|hCoV-19^^Midtjylland|Human|Department of Virus and Microbiological Special Diagnostics|Albertsen Lab|Michaelsen|Denmark

>Spike|hCoV-19/England/MILK-B062AF/2020|2020-10-24|EPI\_ISL\_642927|Original|hCoV-19^^England|Human|Lighthouse Lab in Milton Keynes|Wellcome Sanger Institute for the COVID-19 Genomics UK (COG-UK) Consortium|Davies|United Kingdom

>Spike|hCoV-19/Japan/PG-8241/2020|2020-08-00|EPI\_ISL\_687340|Original|hCoV-19^^Japan|Human|Pathogen Genomics Center|Pathogen Genomics Center|Sekizuka|Japan

>Spike|hCoV-19/DRC/11005/2020|2020-05-24|EPI\_ISL\_527550|Original|hCoV-19^^Kinshasa|Human|Viral Respiratory Lab|Pathogen Sequencing Lab|Lokilo|Democratic Republic of the Congo

>Spike|hCoV-19/USA/WA-S1742/2020|2020-06-02|EPI\_ISL\_496168|Original|hCoV-19^^Washington|Human|Washington State Department of Health|Seattle Flu Study|Lee|USA

>Spike|hCoV-19/France/PAC-MEPHI-1730/2020|2020-09-16|EPI\_ISL\_644435|Original|hCoV-19^^Provence-Alpes-Cote-d\u2019Azur|Human|MEPHI|MEPHI|Levasseur|France

>Spike|hCoV-19/England/CAMC-A648AE/2020|2020-10-11|EPI\_ISL\_608446|Original|hCoV-19^^England|Human|Lighthouse Lab in Cambridge|Wellcome Sanger Institute for the COVID-19 Genomics UK (COG-UK) consortium|Davies|United Kingdom

>Spike|hCoV-19/Denmark/DCGC-12991/2020|2020-12-07|EPI\_ISL\_712513|Original|hCoV-19^^Hovedstaden|Human|Department of Virus and Microbiological Special Diagnostics|Albertsen Lab|Michaelsen|Denmark

>Spike|hCoV-19/Spain/IB-IBV-99010834/2020|2020-08-16|EPI\_ISL\_691649|Original|hCoV-19^^Balear Islands|Human|Servicio de Microbiolog\u00eda|SeqCOVID-SPAIN consortium/IBV (CSIC)|Comas|Spain

>Spike|hCoV-19/Germany/BE-ChVir-D2012-8249/2020|2020-10-15|EPI\_ISL\_753900|Original|hCoV-19^^Berlin|Human|Charit\u00e9 Universit\u00e4tsmedizin Berlin|Charit\u00e9 Universit\u00e4tsmedizin Berlin|Muehlemann|Germany

>Spike|hCoV-19/England/BRIS-1853F42/2020|2020-04-27|EPI\_ISL\_492299|Original|hCoV-19^^England|Human|PHE South West Regional Laboratory|Wellcome Sanger Institute for the COVID-19 Genomics UK (COG-UK) consortium|Davies|United Kingdom

>Spike|hCoV-19/England/LOND-D5EA0/2020|2020-04-19|EPI\_ISL\_444255|Original|hCoV-19^^England|Human|University College London|COVID-19 Genomics UK (COG-UK) Consortium|Roy|United Kingdom

>Spike|hCoV-19/England/QEUEH-B3F647/2020|2020-11-08|EPI\_ISL\_658617|Original|hCoV-19^^England|Human|Lighthouse Lab in Glasgow|Wellcome Sanger Institute for the COVID-19 Genomics UK (COG-UK) Consortium|Davies|United Kingdom

>Spike|hCoV-19/USA/TX-HMH-MCoV-15839/2020|2020-07-10|EPI\_ISL\_785523|Original|hCoV-19^^Texas|Human|Houston Methodist Hospital|Houston Methodist Hospital|Long|USA

>Spike|hCoV-19/England/CAMB-7477B/2020|2020-03-29|EPI\_ISL\_425333|Original|hCoV-19^^England|Human|Department of Pathology|COVID-19 Genomics UK (COG-UK) Consortium|Meredith|United Kingdom

>Spike|hCoV-19/USA/NY-NYUMC633/2020|2020-04-02|EPI\_ISL\_444750|Original|hCoV-19^^New York|Human|NYU Langone Health|Departments of Pathology and Medicine|Maurano|USA

>Spike|hCoV-19/Wales/PHWC-4A5643/2020|2020-12-15|EPI\_ISL\_764897|Original|hCoV-19^^Wales|Human|Wales Specialist Virology Centre Sequencing lab|COVID-19 Genomics UK (COG-UK) Consortium|Moore|United Kingdom

>Spike|hCoV-19/USA/NY-NYUMC131/2020|2020-04-01|EPI\_ISL\_424938|Original|hCoV-19^^New York|Human|NYU Langone Health|Departments of Pathology and Medicine|Maurano|USA

>Spike|hCoV-19/Australia/NSW287/2020|2020-04-03|EPI\_ISL\_451551|Original|hCoV-19^^New South Wales|Human|Pathology West - NSW Health Pathology|NSW Health Pathology - Institute of Clinical Pathology and Medical Research; Westmead Hospital; University of Sydney|Gall|Australia

>Spike|hCoV-19/Wales/MILK-9F02D7/2020|2020-09-24|EPI\_ISL\_580656|Original|hCoV-19^^Wales|Human|Lighthouse Lab in Milton Keynes|Wellcome Sanger Institute for the COVID-19 Genomics UK (COG-UK) consortium|Davies|United Kingdom

>Spike|hCoV-19/USA/MN-MDH-1716/2020|2020-08-25|EPI\_ISL\_560803|Original|hCoV-19^^Minnesota|Human|M Health Fairview|Minnesota Department of Health|Garfin|USA

>Spike|hCoV-19/USA/TX-HMH-MCoV-12154/2020|2020-09-20|EPI\_ISL\_790227|Original|hCoV-19^^Texas|Human|Houston Methodist Hospital|Houston Methodist Hospital|Long|USA

>Spike|hCoV-19/Denmark/DCGC-18462/2020|2020-12-07|EPI\_ISL\_749982|Original|hCoV-19^^Hovedstaden|Human|Department of Virus and Microbiological Special Diagnostics|Albertsen Lab|Michaelsen|Denmark

>Spike|hCoV-19/USA/AZ-TG445157/2020|2020-06-26|EPI\_ISL\_695000|Original|hCoV-19^^Arizona|Human|TGen North|TGen North|French|USA

>Spike|hCoV-19/Austria/CeMM0153/2020|2020-03-03|EPI\_ISL\_437999|Original|hCoV-19^^Vienna|Human|Center for Virology|Bergthaler laboratory|Bergthaler|Austria

>Spike|hCoV-19/Denmark/DCGC-6608/2020|2020-10-12|EPI\_ISL\_619656|Original|hCoV-19^^Hovedstaden|Human|Department of Virus and Microbiological Special Diagnostics|Albertsen lab|Michaelsen|Denmark

>Spike|hCoV-19/Australia/VIC7079/2020|2020-08-01|EPI\_ISL\_564218|Original|hCoV-19^^Victoria|Human|Victorian Infectious Diseases Reference Laboratory (VIDRL)|VIDRL and MDU-PHL|Schultz|Australia

>Spike|hCoV-19/Denmark/DCGC-9668/2020|2020-11-09|EPI\_ISL\_669098|Original|hCoV-19^^Hovedstaden|Human|Department of Virus and Microbiological Special Diagnostics|Albertsen Lab|Michaelsen|Denmark

>Spike|hCoV-19/England/20126006006/2020|2020-03-19|EPI\_ISL\_423879|Original|hCoV-19^^England|Human|Respiratory Virus Unit|Respiratory Virus Unit|Platt|United Kingdom

>Spike|hCoV-19/USA/GA-CDC-8427/2020|2020-03-06|EPI\_ISL\_594456|original|hCoV-19^^Georgia|Human|Georgia Public Health Laboratory|Pathogen Discovery|Queen|USA

>Spike|hCoV-19/Brazil/RJ-00313/2020|2020-04-07|EPI\_ISL\_623116|Original|hCoV-19^^Rio de Janeiro|Human|Laboratorio de Virologia Molecular / UFRJ|Bioinformatics Laboratory / LNCC|Almeida|Brazil

>Spike|hCoV-19/Wales/PHWC-49679D/2020|2020-11-20|EPI\_ISL\_726634|Original|hCoV-19^^Wales|Human|Originating lab|COVID-19 Genomics UK (COG-UK) Consortium|Moore|United Kingdom

>Spike|hCoV-19/Denmark/DCGC-18232/2020|2020-12-14|EPI\_ISL\_749388|Original|hCoV-19^^Syddanmark|Human|Department of Virus and Microbiological Special Diagnostics|Albertsen Lab|Michaelsen|Denmark

>Spike|hCoV-19/USA/TX-HMH-MCoV-12861/2020|2020-08-18|EPI\_ISL\_788014|Original|hCoV-19^^Texas|Human|Houston Methodist Hospital|Houston Methodist Hospital|Long|USA

>Spike|hCoV-19/USA/OR-OHSU-2977/2020|2020-09-09|EPI\_ISL\_667442|Original|hCoV-19^^Oregon|Human|OHSU Lab Services Molecular Microbiology Lab|Oregon SARS-CoV-2 Genome Sequencing Center|O'Roak|USA

>Spike|hCoV-19/USA/CA-CZB-14949/2020|2020-09-10|EPI\_ISL\_739546|Original|hCoV-19^^California|Human|Monterey County Public Health Lab|Chan-Zuckerberg Biohub|Kamm|USA

>Spike|hCoV-19/England/CAMC-A5946C/2020|2020-10-09|EPI\_ISL\_596955|Original|hCoV-19^^England|Human|Lighthouse Lab in Cambridge|Wellcome Sanger Institute for the COVID-19 Genomics UK (COG-UK) consortium|Davies|United Kingdom

>Spike|hCoV-19/USA/WA-S2657/2020|2020-06-21|EPI\_ISL\_497289|Original|hCoV-19^^Washington|Human|Washington State Department of Health|Seattle Flu Study|Lee|USA

>Spike|hCoV-19/DRC/158/2020|2020-03-20|EPI\_ISL\_417950|Original|hCoV-19^^Kinshasa|Human|Viral Respiratory Lab|Pathogen Sequencing Lab|Pratt|Democratic Republic of the Congo

>Spike|hCoV-19/Hong Kong/VM20021516/2020|2020-06-05|EPI\_ISL\_482783|Original|hCoV-19^^Hong Kong|Human|Tuen Mun Hospital|Hong Kong Department of Health|Mak|China

>Spike|hCoV-19/England/MILK-9D47CB/2020|2020-09-17|EPI\_ISL\_601536|Original|hCoV-19^^England|Human|Lighthouse Lab in Milton Keynes|Wellcome Sanger Institute for the COVID-19 Genomics UK (COG-UK) consortium|Davies|United Kingdom

>Spike|hCoV-19/New Zealand/20VR2473/2020|2020-00-00|EPI\_ISL\_579235|Original|hCoV-19^^Auckland|Human|LabPLUS|Institute of Environmental Science and Research (ESR)|Wang|New Zealand

>Spike|hCoV-19/Japan/PG-6492/2020|2020-09-00|EPI\_ISL\_689594|Original|hCoV-19^^Japan|Human|Pathogen Genomics Center|Pathogen Genomics Center|Sekizuka|Japan

>Spike|hCoV-19/Finland/11A36S7/2020|2020-04-11|EPI\_ISL\_481533|Original|hCoV-19^^Uusimaa|Human|Department of Virology and Immunology|Department of Virology|Smura|Finland

>Spike|hCoV-19/England/ALDP-94DDCB/2020|2020-06-20|EPI\_ISL\_555579|Original|hCoV-19^^England|Human|Lighthouse Lab in Alderley Park|Wellcome Sanger Institute for the COVID-19 Genomics UK (COG-UK) consortium|Davies|United Kingdom

>Spike|hCoV-19/USA/WA-S1095/2020|2020-05-01|EPI\_ISL\_463585|Original|hCoV-19^^Washington|Human|Washington State Department of Health|Seattle Flu Study|Bedford|USA

>Spike|hCoV-19/England/LIVE-A8EE2/2020|2020-03-26|EPI\_ISL\_517230|Original|hCoV-19^^England|Human|Liverpool Clinical Laboratories|COVID-19 Genomics UK (COG-UK) Consortium|Haldenby|United Kingdom

>Spike|hCoV-19/Wales/PHWC-49FAAA/2020|2020-12-09|EPI\_ISL\_743315|Original|hCoV-19^^Wales|Human|Wales Specialist Virology Centre Sequencing lab|COVID-19 Genomics UK (COG-UK) Consortium|Moore|United Kingdom

>Spike|hCoV-19/USA/TX-HMH-MCoV-17950/2020|2020-11-16|EPI\_ISL\_786098|Original|hCoV-19^^Texas|Human|Houston Methodist Hospital|Houston Methodist Hospital|Long|USA

>Spike|hCoV-19/Denmark/DCGC-18574/2020|2020-12-07|EPI\_ISL\_750054|Original|hCoV-19^^Midtjylland|Human|Department of Virus and Microbiological Special Diagnostics|Albertsen Lab|Michaelsen|Denmark

>Spike|hCoV-19/Germany/NW-HHU-336/2020|2020-10-13|EPI\_ISL\_718036|Original|hCoV-19^^North Rhine-Westphalia|Human|ZOTZ KLIMAS MVZ D\u00f0fcsselndorf-Centrum GbR \u00dcBAG f\u00f0fcr Labormedizin|Center of Medical Microbiology|Wienemann|Germany

>Spike|hCoV-19/USA/MN-MDH-2003/2020|2020-10-16|EPI\_ISL\_644934|Original|hCoV-19^^Minnesota|Human|Essentia Health-St. Mary's Medical Center|Minnesota Department of Health|Lorentz|USA

>Spike|hCoV-19/Denmark/DCGC-19783/2020|2020-12-07|EPI\_ISL\_747601|Original|hCoV-19^^Midtjylland|Human|Department of Virus and Microbiological Special Diagnostics|Albertsen Lab|Michaelsen|Denmark

>Spike|hCoV-19/Wales/PHWC-483EBC/2020|2020-10-23|EPI\_ISL\_627054|Original|hCoV-19^^Wales|Human|Wales Specialist Virology Centre Sequencing lab|COVID-19 Genomics UK (COG-UK) Consortium|Moore|United Kingdom

>Spike|hCoV-19/Wales/PHWC-162B82/2020|2020-06-03|EPI\_ISL\_473171|Original|hCoV-19^^Wales|Human|Wales Specialist Virology Centre Sequencing lab|COVID-19 Genomics UK (COG-UK) Consortium|Moore|United Kingdom

>Spike|hCoV-19/New Zealand/20VR1935/2020|2020-04-04|EPI\_ISL\_579168|Original|hCoV-19^^Southern|Human|Southern Community Labs Dunedin|Institute of Environmental Science and Research (ESR)|Wang|New Zealand

>Spike|hCoV-19/Canada/ON-UHTC-0175/2020|2020-05-23|EPI\_ISL\_569973|Original|hCoV-19^^Ontario|Human|Unity Health Toronto|Ontario Institute for Cancer Research|de Borja|Canada

>Spike|hCoV-19/Denmark/DCGC-9785/2020|2020-11-09|EPI\_ISL\_669176|Original|hCoV-19^^Syddanmark|Human|Department of Virus and Microbiological Special Diagnostics|Albertsen Lab|Michaelsen|Denmark

>Spike|hCoV-19/Wales/ALDP-A8635A/2020|2020-10-17|EPI\_ISL\_625400|Original|hCoV-19^^Wales|Human|Lighthouse Lab in Alderley Park|Wellcome Sanger Institute for the COVID-19 Genomics UK (COG-UK) consortium|Davies|United Kingdom

>Spike|hCoV-19/England/204020549/2020|2020-09-22|EPI\_ISL\_574702|Original|hCoV-19^^England|Human|Respiratory Virus Unit|Respiratory Virus Unit|Platt|United Kingdom

>Spike|hCoV-19/England/QEUEH-AAEB18/2020|2020-10-20|EPI\_ISL\_652985|Original|hCoV-19^^England|Human|Oxford Viromics|COVID-19 Genomics UK (COG-UK) Consortium|Golubchik|United Kingdom

>Spike|hCoV-19/England/CAMB-1AFA7D/2020|2020-05-01|EPI\_ISL\_459278|Original|hCoV-19^^England|Human|Department of Pathology|Wellcome Sanger Institute for the COVID-19 Genomics UK (COG-UK) consortium|Davies|United Kingdom

>Spike|hCoV-19/England/QEUEH-BC3C0A/2020|2020-11-25|EPI\_ISL\_704149|Original|hCoV-19^^England|Human|Lighthouse Lab in Glasgow|Wellcome Sanger Institute for the COVID-19 Genomics UK (COG-UK) Consortium|Davies|United Kingdom

>Spike|hCoV-19/England/QEUEH-9B7281/2020|2020-09-07|EPI\_ISL\_590649|Original|hCoV-19^^England|Human|Lighthouse Lab in Glasgow|Wellcome Sanger Institute for the COVID-19 Genomics UK (COG-UK) consortium|Davies|United Kingdom

>Spike|hCoV-19/England/ALDP-A955F8/2020|2020-10-20|EPI\_ISL\_624853|Original|hCoV-19^^England|Human|Lighthouse Lab in Alderley Park|Wellcome Sanger Institute for the COVID-19 Genomics UK (COG-UK) consortium|Davies|United Kingdom

>Spike|hCoV-19/USA/NY-NYCPHL-000108/2020|2020-03-27|EPI\_ISL\_631600|Original|hCoV-19^^New York|Human|James J. Peters VA Medical Center|New York City Public Health Laboratory|Wang|USA

>Spike|hCoV-19/England/EXET-1352FC/2020|2020-04-05|EPI\_ISL\_457047|Original|hCoV-19^^England|Human|University of Exeter|COVID-19 Genomics UK (COG-UK) Consortium|Temperton|United Kingdom

>Spike|hCoV-19/Spain/MD-IBV-99008750/2020|2020-10-19|EPI\_ISL\_654272|Original|hCoV-19^^Madrid|Human|Hospital General Universitario Gregorio Mara\u00f1a|SeqCOVID-SPAIN consortium/IBV (CSIC)|Comas|Spain

>Spike|hCoV-19/USA/MA-MGH-00199/2020|2020-03-27|EPI\_ISL\_460468|Original|hCoV-19^^Massachusetts|Human|Massachusetts General Hospital|Infectious Disease Program|Lemieux|USA

>Spike|hCoV-19/Scotland/EDB5382/2020|2020-03-31|EPI\_ISL\_461734|Original|hCoV-19^^Scotland|Human|Virology Department|COVID-19 Genomics UK (COG-UK) Consortium|Williams|United Kingdom

>Spike|hCoV-19/USA/NM-DOH-2020617119/2020|2020-12-12|EPI\_ISL\_751844|Original|hCoV-19^^New Mexico|Human|New Mexico Department of Health Scientific Laboratory|New Mexico Department of Health Scientific Laboratory|Malone|USA

>Spike|hCoV-19/England/20192007504/2020|2020-05-04|EPI\_ISL\_526544|Original|hCoV-19^^England|Human|Respiratory Virus Unit|Respiratory Virus Unit|Ledesma|United Kingdom

>Spike|hCoV-19/England/BRIS-18530D6/2020|2020-04-02|EPI\_ISL\_492231|Original|hCoV-19^^England|Human|PHE South West Regional Laboratory|Wellcome Sanger Institute for the COVID-19 Genomics UK (COG-UK) consortium|Davies|United Kingdom

>Spike|hCoV-19/England/QEUI-9F9CD0/2020|2020-09-27|EPI\_ISL\_589038|Original|hCoV-19^^England|Human|Lighthouse Lab in Glasgow|Wellcome Sanger Institute for the COVID-19 Genomics UK (COG-UK) consortium|Davies|United Kingdom

>Spike|hCoV-19/USA/MI-MDHHS-SC20545/2020|2020-04-06|EPI\_ISL\_460593|Original|hCoV-19^^Michigan|Human|Michigan Department of Health and Human Services|Michigan Department of Health and Human Services|Blankenship|USA

>Spike|hCoV-19/Switzerland/AG-ETHZ-250086/2020|2020-08-19|EPI\_ISL\_535605|Original|hCoV-19^^Aargau|Human|Viollier AG|Department of Biosystems Science and Engineering|Nadeau|Switzerland

>Spike|hCoV-19/England/LOND-1250172/2020|2020-10-13|EPI\_ISL\_664507|Original|hCoV-19^^England|Human|University College London Hospital|COVID-19 Genomics UK (COG-UK) Consortium|Byott|United Kingdom

>Spike|hCoV-19/Wales/PHWC-481D66/2020|2020-10-02|EPI\_ISL\_613168|Original|hCoV-19^^Wales|Human|Wales Specialist Virology Centre Sequencing lab|COVID-19 Genomics UK (COG-UK) Consortium|Moore|United Kingdom

>Spike|hCoV-19/USA/MI-QDX-1690/2020|2020-03-17|EPI\_ISL\_603973|Original|hCoV-19^^Michigan|Human|Quest Diagnostics|Quest Diagnostics|Kagan|USA

>Spike|hCoV-19/USA/MI-QDX-624/2020|2020-03-18|EPI\_ISL\_571351|Original|hCoV-19^^Michigan|Human|Quest Diagnostics|Quest Diagnostics|Kagan|USA

>Spike|hCoV-19/Netherlands/NB-RIVM-20666/2020|2020-12-15|EPI\_ISL\_790737|Original|hCoV-19^^Noord-Brabant|Human|Dutch COVID-19 response team|National Institute for Public Health and the Environment (RIVM)|Meijer|Netherlands

>Spike|hCoV-19/USA/WI-UW-1584/2020|2020-09-17|EPI\_ISL\_605461|Original|hCoV-19^^Wisconsin|Human|University of Wisconsin-Madison AIDS Vaccine Research Laboratories|University of Wisconsin-Madison AIDS Vaccine Research Laboratories|Baczenas|USA

>Spike|hCoV-19/Japan/PG-6125/2020|2020-08-00|EPI\_ISL\_689237|Original|hCoV-19^^Japan|Human|Pathogen Genomics Center|Pathogen Genomics Center|Sekizuka|Japan

>Spike|hCoV-19/England/ALDP-AA4CF1/2020|2020-10-21|EPI\_ISL\_630747|Original|hCoV-19^^England|Human|Lighthouse Lab in Alderley Park|Wellcome Sanger Institute for the COVID-19 Genomics UK (COG-UK) consortium|Davies|United Kingdom

>Spike|hCoV-19/England/BRIS-12E1EA/2020|2020-04-08|EPI\_ISL\_482020|Original|hCoV-19^^England|Human|PHE South West Regional Laboratory|Wellcome Sanger Institute for the COVID-19 Genomics UK (COG-UK) consortium|Davies|United Kingdom

>Spike|hCoV-19/USA/FL-BPHL-0464/2020|2020-03-24|EPI\_ISL\_495370|Original|hCoV-19^^Florida|Human|Florida Bureau of Public Health Laboratories|Florida Bureau of Public Health Laboratories|Blanton|USA

>Spike|hCoV-19/England/QEUI-B66A69/2020|2020-11-11|EPI\_ISL\_654983|Original|hCoV-19^^England|Human|Lighthouse Lab in Glasgow|Wellcome Sanger Institute for the COVID-19 Genomics UK (COG-UK) Consortium|Davies|United Kingdom

>Spike|hCoV-19/Japan/PG-1598/2020|2020-04-00|EPI\_ISL\_685204|Original|hCoV-19^^Japan|Human|Pathogen Genomics Center|Pathogen Genomics Center|Sekizuka|Japan

>Spike|hCoV-19/England/CAMB-1B9F9F/2020|2020-11-06|EPI\_ISL\_650992|Original|hCoV-19^^England|Human|Department of Pathology|COVID-19 Genomics UK (COG-UK) Consortium|Goodfellow|United Kingdom

>Spike|hCoV-19/England/BIRM-67623/2020|2020-10-27|EPI\_ISL\_651621|Original|hCoV-19^^England|Human|University of Birmingham|COVID-19 Genomics UK (COG-UK) Consortium|Loman|United Kingdom

>Spike|hCoV-19/England/CAMB-7FDF6/2020|2020-04-19|EPI\_ISL\_444418|Original|hCoV-19^^England|Human|Department of Pathology|COVID-19 Genomics UK (COG-UK) Consortium|Meredith|United Kingdom



>Spike|hCoV-19/Wales/PHWC-160CBE/2020|2020-04-21|EPI\_ISL\_473037|Original|hCoV-19^^Wales|Human|Wales Specialist Virology Centre Sequencing lab|COVID-19 Genomics UK (COG-UK) Consortium|Moore|United Kingdom

>Spike|hCoV-19/Japan/PG-4595/2020|2020-08-00|EPI\_ISL\_689732|Original|hCoV-19^^Japan|Human|Pathogen Genomics Center|Pathogen Genomics Center|Sekizuka|Japan

>Spike|hCoV-19/Wales/PHWC-2C244/2020|2020-04-04|EPI\_ISL\_474296|Original|hCoV-19^^Wales|Human|Originating lab|COVID-19 Genomics UK (COG-UK) Consortium|Moore|United Kingdom

>Spike|hCoV-19/Luxembourg/LNS1162404/2020|2020-11-20|EPI\_ISL\_739901|Original|hCoV-19^^Luxembourg|Human|Laboratoire national de sant\u00e9|Laboratoire national de sant\u00e9|Wienecke-Baldacchino|Luxembourg

>Spike|hCoV-19/Belgium/ULG-10473/2020|2020-09-22|EPI\_ISL\_581642|Original|hCoV-19^^Li\u00e8ge|Human|Department of Clinical Microbiology|GIGA Medical Genomics|Durkin|Belgium

>Spike|hCoV-19/Wales/PHWC-26BF4/2020|2020-03-28|EPI\_ISL\_422267|Original|hCoV-19^^Wales|Human|Wales Specialist Virology Centre|Public Health Wales Microbiology Cardiff|Moore|United Kingdom

>Spike|hCoV-19/Switzerland/ZH-ETHZ-230055/2020|2020-08-05|EPI\_ISL\_516592|Original|hCoV-19^^Zurich|Human|Viollier AG|Department of Biosystems Science and Engineering|Nadeau|Switzerland

>Spike|hCoV-19/Denmark/DCGC-10760/2020|2020-11-02|EPI\_ISL\_669535|Original|hCoV-19^^Sjaelland|Human|Department of Virus and Microbiological Special Diagnostics|Albertsen Lab|Michaelsen|Denmark

>Spike|hCoV-19/England/ALDP-9ED237/2020|2020-05-08|EPI\_ISL\_589365|Original|hCoV-19^^England|Human|Lighthouse Lab in Alderley Park|Wellcome Sanger Institute for the COVID-19 Genomics UK (COG-UK) consortium|Davies|United Kingdom

>Spike|hCoV-19/USA/MN-MDH-1798/2020|2020-04-14|EPI\_ISL\_590800|Original|hCoV-19^^Minnesota|Human|Minnesota Department of Health|Minnesota Department of Health|Lorentz|USA

>Spike|hCoV-19/USA/MI-MDHHS-SC20890/2020|2020-05-21|EPI\_ISL\_476027|Original|hCoV-19^^Michigan|Human|Michigan Department of Health and Human Services|Michigan Department of Health and Human Services|Blankenship|USA

>Spike|hCoV-19/Australia/VIC5338/2020|2020-07-18|EPI\_ISL\_520101|Original|hCoV-19^^Victoria|Human|Microbiological Diagnostic Unit - Public Health Laboratory (MDU-PHL)|MDU-PHL|Schultz|Australia

>Spike|hCoV-19/Latvia/212/2020|2020-09-16|EPI\_ISL\_770035|Original|hCoV-19^^Latvia|Human|E. Gulbja Laboratorija|Latvian Biomedical Research and Study Centre|Zrelavs|Latvia

>Spike|hCoV-19/England/QEUA-5F5625/2020|2020-06-24|EPI\_ISL\_533240|Original|hCoV-19^^England|Human|Lighthouse Lab in Glasgow|Wellcome Sanger Institute for the COVID-19 Genomics UK (COG-UK) consortium|Davies|United Kingdom

>Spike|hCoV-19/Scotland/CVR4643/2020|2020-09-27|EPI\_ISL\_612289|Original|hCoV-19^^Scotland|Human|West of Scotland Specialist Virology Centre|COVID-19 Genomics UK (COG-UK) Consortium|Robertson|United Kingdom

>Spike|hCoV-19/USA/NY-Wadsworth-292230-01/2020|2020-12-01|EPI\_ISL\_767660|Original|hCoV-19^^New York|Human|MEMORIAL SLOAN KETTERING CANCER CENTER|Wadsworth Center|Lasek-Nesselquist|USA

>Spike|hCoV-19/Norway/2797/2020|2020-06-26|EPI\_ISL\_493363|Original|hCoV-19^^Norway|Human|Furst Medical Laboratory|Norwegian Institute of Public Health|Kopperud Riis|Norway

>Spike|hCoV-19/Czech Republic/NRL\_1885/2020|2020-03-10|EPI\_ISL\_471530|Original|hCoV-19^^Melnik|Human|The National Institute of Public Health|State Veterinary Institute Prague and The National Institute of Public Health|Nagy|Czech Republic

>Spike|hCoV-19/England/QEUA-B683F3/2020|2020-11-11|EPI\_ISL\_661444|Original|hCoV-19^^England|Human|Lighthouse Lab in Glasgow|Wellcome Sanger Institute for the COVID-19 Genomics UK (COG-UK) Consortium|Davies|United Kingdom

>Spike|hCoV-19/England/CAMC-A662DB/2020|2020-10-11|EPI\_ISL\_637408|Original|hCoV-19^^England|Human|Department of Pathology|COVID-19 Genomics UK (COG-UK) Consortium|Goodfellow|United Kingdom

>Spike|hCoV-19/USA/VA-DCLS-2416/2020|2020-11-23|EPI\_ISL\_723482|Original|hCoV-19^^Virginia|Human|Virginia DCLS|Virginia DCLS|St. Jacques|USA

>Spike|hCoV-19/Sweden/20-52565/2020|2020-08-11|EPI\_ISL\_534252|Original|hCoV-19^^Vasternorrland|Human|Laboratoriemedicin Vasternorrland|The Public Health Agency of Sweden|Svartstr\u00f6m|Sweden

>Spike|hCoV-19/Denmark/DCGC-9771/2020|2020-11-09|EPI\_ISL\_669163|Original|hCoV-19^^Sjaelland|Human|Department of Virus and Microbiological Special Diagnostics|Albertsen Lab|Michaelsen|Denmark

>Spike|hCoV-19/England/QEUEH-C5D554/2020|2020-12-14|EPI\_ISL\_735861|Original|hCoV-19^^England|Human|Lighthouse Lab in Glasgow|Wellcome Sanger Institute for the COVID-19 Genomics UK (COG-UK) Consortium|Davies|United Kingdom

>Spike|hCoV-19/USA/CA-QDX-1544/2020|2020-03-18|EPI\_ISL\_603792|Original|hCoV-19^^California|Human|Quest Diagnostics|Quest Diagnostics|Kagan|USA

>Spike|hCoV-19/England/MILK-9943A5/2020|2020-08-26|EPI\_ISL\_551620|Original|hCoV-19^^England|Human|Lighthouse Lab in Milton Keynes|Wellcome Sanger Institute for the COVID-19 Genomics UK (COG-UK) consortium|Davies|United Kingdom

>Spike|hCoV-19/Scotland/EDB343/2020|2020-03-30|EPI\_ISL\_433199|Original|hCoV-19^^Scotland|Human|Virology Department|COVID-19 Genomics UK (COG-UK) Consortium|Williams|United Kingdom

>Spike|hCoV-19/Scotland/EDB5678/2020|2020-05-27|EPI\_ISL\_473833|Original|hCoV-19^^Scotland|Human|Virology Department|COVID-19 Genomics UK (COG-UK) Consortium|Williams|United Kingdom

>Spike|hCoV-19/England/CAMC-BD1ED6/2020|2020-11-28|EPI\_ISL\_702341|Original|hCoV-19^^England|Human|Lighthouse Lab in Cambridge|Wellcome Sanger Institute for the COVID-19 Genomics UK (COG-UK) Consortium|Davies|United Kingdom

>Spike|hCoV-19/India/MH-NIV-223127/2020|2020-09-23|EPI\_ISL\_577647|Original|hCoV-19^^Maharashtra|Human|NIV Influenza|NIV Influenza|Potdar|India

>Spike|hCoV-19/Denmark/DCGC-21126/2020|2020-12-21|EPI\_ISL\_759567|Original|hCoV-19^^Hovedstaden|Human|Department of Virus and Microbiological Special Diagnostics|Albertsen Lab|Michaelsen|Denmark

>Spike|hCoV-19/Germany/BY-MVP-0072/2020|2020-03-28|EPI\_ISL\_437268|Original|hCoV-19^^Bavaria|Human|Max von Pettenkofer Institute|Laboratory for Functional Genome Analysis|Graf|Germany

>Spike|hCoV-19/England/OXON-B345B/2020|2020-05-25|EPI\_ISL\_534858|Original|hCoV-19^^England|Human|Oxford Viromics|COVID-19 Genomics UK (COG-UK) Consortium|Golubchik|United Kingdom

>Spike|hCoV-19/USA/CA-ALSR-1038-SAN/2020|2020-06-21|EPI\_ISL\_483477|Original|hCoV-19^^California|Human|UC San Diego Center for Advanced Laboratory Medicine|Andersen lab at Scripps Research|Gangavarapu|USA

>Spike|hCoV-19/England/CAMC-A41E3C/2020|2020-10-05|EPI\_ISL\_609501|Original|hCoV-19^^England|Human|Lighthouse Lab in Cambridge|Wellcome Sanger Institute for the COVID-19 Genomics UK (COG-UK) consortium|Davies|United Kingdom

>Spike|hCoV-19/Luxembourg/LNS5491473/2020|2020-10-26|EPI\_ISL\_744241|Original|hCoV-19^^Luxembourg|Human|Laboratoire national de sant\u00e9|Laboratoire national de sant\u00e9|Wienecke-Baldacchino|Luxembourg

>Spike|hCoV-19/England/ALDP-B46768/2020|2020-11-07|EPI\_ISL\_656336|Original|hCoV-19^^England|Human|Lighthouse Lab in Alderley Park|Wellcome Sanger Institute for the COVID-19 Genomics UK (COG-UK) Consortium|Davies|United Kingdom

>Spike|hCoV-19/USA/AK-PHL115/2020|2020-03-25|EPI\_ISL\_427621|Original|hCoV-19^^Alaska|Human|Alaska State Virology Laboratory|Alaska State Virology Laboratory|Chen|USA

>Spike|hCoV-19/England/MILK-9706C4/2020|2020-08-17|EPI\_ISL\_553194|Original|hCoV-19^^England|Human|Lighthouse Lab in Milton Keynes|Wellcome Sanger Institute for the COVID-19 Genomics UK (COG-UK) consortium|Davies|United Kingdom

>Spike|hCoV-19/USA/WI-GMF-14857/2020|2020-08-11|EPI\_ISL\_547691|Original|hCoV-19^^Wisconsin|Human|Gundersen Molecular Diagnostics Laboratory|Kabara Cancer Research Institute|Kenny|USA

>Spike|hCoV-19/Australia/VIC3374/2020|2020-07-07|EPI\_ISL\_521053|Original|hCoV-19^^Victoria|Human|Microbiological Diagnostic Unit - Public Health Laboratory (MDU-PHL)|MDU-PHL|Schultz|Australia

>Spike|hCoV-19/England/MILK-973245/2020|2020-08-20|EPI\_ISL\_575819|Original|hCoV-19^^England|Human|Lighthouse Lab in Milton Keynes|Wellcome Sanger Institute for the COVID-19 Genomics UK (COG-UK) consortium|Davies|United Kingdom

>Spike|hCoV-19/Hong Kong/VM20002861/2020|2020-02-24|EPI\_ISL\_426398|Original|hCoV-19^^Hong Kong|Human|Ruttonjee Hospital|Hong Kong Department of Health|Mak|China

>Spike|hCoV-19/Wales/PHWC-16F6EE/2020|2020-10-05|EPI\_ISL\_586008|Original|hCoV-19^^Wales|Human|Wales Specialist Virology Centre Sequencing lab|COVID-19 Genomics UK (COG-UK) Consortium|Moore|United Kingdom

>Spike|hCoV-19/New Zealand/20CV0223/2020|2020-08-30|EPI\_ISL\_548117|Original|hCoV-19^^Canterbury|Human|Canterbury Health Laboratories|Institute of Environmental Science and Research (ESR)|Wang|New Zealand

>Spike|hCoV-19/England/NORT-28ADF6/2020|2020-04-16|EPI\_ISL\_492968|Original|hCoV-19^^England|Human|NU-OMICS DNA Sequencing research facility|Wellcome Sanger Institute for the COVID-19 Genomics UK (COG-UK) consortium|Davies|United Kingdom

>Spike|hCoV-19/Australia/VIC1317/2020|2020-04-11|EPI\_ISL\_430691|Original|hCoV-19^^Victoria|Human|Victorian Infectious Diseases Reference Laboratory (VIDRL)|Microbiological Diagnostic Unit Public Health Laboratory and Victorian Infectious Diseases Reference Laboratory|Schultz|Australia

>Spike|hCoV-19/England/LOND-D61D3/2020|2020-04-20|EPI\_ISL\_482173|Original|hCoV-19^^England|Human|University College London|Wellcome Sanger Institute for the COVID-19 Genomics UK (COG-UK) consortium|Davies|United Kingdom

>Spike|hCoV-19/Brazil/SP-796/2020|2020-07-01|EPI\_ISL\_735433|Original|hCoV-19^^S\u00e3o Paulo|Human|Posto de Atendimento Saude Cidade Pasc Cajati|Instituto Adolfo Lutz|Sacchi|Brazil

>Spike|hCoV-19/England/MILK-BB1F33/2020|2020-11-18|EPI\_ISL\_720324|Original|hCoV-19^^England|Human|Lighthouse Lab in Milton Keynes|Wellcome Sanger Institute for the COVID-19 Genomics UK (COG-UK) Consortium|Davies|United Kingdom

>Spike|hCoV-19/USA/MN-MDH-2072/2020|2020-11-02|EPI\_ISL\_683701|Original|hCoV-19^^Minnesota|Human|Essentia Health-St. Mary's Medical Center|Minnesota Department of Health|Garfin|USA

>Spike|hCoV-19/England/CAMB-7AC85/2020|2020-04-08|EPI\_ISL\_433860|Original|hCoV-19^^England|Human|Department of Pathology|COVID-19 Genomics UK (COG-UK) Consortium|Meredith|United Kingdom

>Spike|hCoV-19/Switzerland/AG-ETHZ-100809/2020|2020-03-26|EPI\_ISL\_451759|Original|hCoV-19^^Aargau|Human|Viollier AG|Department of Biosystems Science and Engineering|Nadeau|Switzerland

>Spike|hCoV-19/USA/CA-CZB-1765/2020|2020-03-13|EPI\_ISL\_476782|Original|hCoV-19^^California|Human|Stanford clinical virology lab|Chan-Zuckerberg Biohub|Kamm|USA

>Spike|hCoV-19/England/CAMB-72546/2020|2020-03-23|EPI\_ISL\_439541|Original|hCoV-19^^England|Human|Department of Pathology|Wellcome Sanger Institute for the COVID-19 Genomics UK (COG-UK) consortium|Amato|United Kingdom

>Spike|hCoV-19/England/QEUA-B6828D/2020|2020-11-11|EPI\_ISL\_661457|Original|hCoV-19^^England|Human|Lighthouse Lab in Glasgow|Wellcome Sanger Institute for the COVID-19 Genomics UK (COG-UK) Consortium|Davies|United Kingdom

>Spike|hCoV-19/England/ALDP-B2379E/2020|2020-11-04|EPI\_ISL\_646863|Original|hCoV-19^^England|Human|Lighthouse Lab in Alderley Park|Wellcome Sanger Institute for the COVID-19 Genomics UK (COG-UK) Consortium|Davies|United Kingdom

>Spike|hCoV-19/England/CAMB-7CCA1/2020|2020-04-06|EPI\_ISL\_441548|Original|hCoV-19^^England|Human|Department of Pathology|Wellcome Sanger Institute for the COVID-19 Genomics UK (COG-UK) consortium|Amato|United Kingdom

>Spike|hCoV-19/Denmark/DCGC-802/2020|2020-04-20|EPI\_ISL\_614731|Original|hCoV-19^^Nordjylland|Human|Department of Virus and Microbiological Special Diagnostics|Albertsen lab|Michaelsen|Denmark

>Spike|hCoV-19/England/QEUA-AF1536/2020|2020-10-29|EPI\_ISL\_666013|Original|hCoV-19^^England|Human|Northumbria University / South Tees Hospitals NHS Foundation Trust / North Cumbria Integrated Care NHS Foundation Trust / North Tees and Hartlepool NHS Foundation Trust / Newcastle Hospitals NHS Foundation Trust|COVID-19 Genomics UK (COG-UK) Consortium|Bashton|United Kingdom

>Spike|hCoV-19/Scotland/QEUH-A7940C/2020|2020-10-14|EPI\_ISL\_638997|Original|hCoV-19^^Scotland|Human|Oxford Viromics|COVID-19 Genomics UK (COG-UK) Consortium|Golubchik|United Kingdom

>Spike|hCoV-19/Canada/ON-S1309/2020|2020-05-26|EPI\_ISL\_586346|Original|hCoV-19^^Ontario|Human|Toronto Invasive Bacterial Diseases Network|McMaster University|McArthur|Canada

>Spike|hCoV-19/Australia/VIC9677/2020|2020-08-19|EPI\_ISL\_565649|Original|hCoV-19^^Victoria|Human|Microbiological Diagnostic Unit - Public Health Laboratory (MDU-PHL)|MDU-PHL|Schultz|Australia

>Spike|hCoV-19/England/ALDP-BBA40E/2020|2020-11-21|EPI\_ISL\_701808|Original|hCoV-19^^England|Human|Lighthouse Lab in Alderley Park|Wellcome Sanger Institute for the COVID-19 Genomics UK (COG-UK) Consortium|Davies|United Kingdom

>Spike|hCoV-19/Denmark/DCGC-22320/2020|2020-12-14|EPI\_ISL\_757844|Original|hCoV-19^^Sjaelland|Human|Department of Virus and Microbiological Special Diagnostics|Albertsen Lab|Michaelsen|Denmark

>Spike|hCoV-19/Ireland/CE-NVRL-AIIDV1105v7/2020|2020-05-02|EPI\_ISL\_644338|Original|hCoV-19^^Clare|Human|CEPHR / Vincent's Hospital|Irish Coronavirus Sequencing Consortium - National Virus Reference Laboratory|Gonzalez|Ireland

>Spike|hCoV-19/Australia/SAP062/2020|2020-03-28|EPI\_ISL\_451101|Original|hCoV-19^^South Australia|Human|SA Pathology|SA Pathology|Leong|Australia

>Spike|hCoV-19/Scotland/QEUH-A1F70F/2020|2020-10-01|EPI\_ISL\_599089|Original|hCoV-19^^Scotland|Human|Lighthouse Lab in Glasgow|Wellcome Sanger Institute for the COVID-19 Genomics UK (COG-UK) consortium|Davies|United Kingdom

>Spike|hCoV-19/Germany/HH-hpi-p1284/2020|2020-03-16|EPI\_ISL\_775780|Original|hCoV-19^^Hamburg|Human|University Medical Center Hamburg Eppendorf|Heinrich Pette Institute|Robitaille|Germany

>Spike|hCoV-19/England/CAMC-B08DAC/2020|2020-10-29|EPI\_ISL\_673212|Original|hCoV-19^^England|Human|Lighthouse Lab in Cambridge|Wellcome Sanger Institute for the COVID-19 Genomics UK (COG-UK) Consortium|Davies|United Kingdom

>Spike|hCoV-19/Australia/VIC15755/2020|2020-00-00|EPI\_ISL\_593442|Original|hCoV-19^^Victoria|Human|Microbiological Diagnostic Unit - Public Health Laboratory (MDU-PHL)|MDU-PHL|Schultz|Australia

>Spike|hCoV-19/England/ALDP-5CD34D/2020|2020-06-19|EPI\_ISL\_558610|Original|hCoV-19^^England|Human|Lighthouse Lab in Alderley Park|Wellcome Sanger Institute for the COVID-19 Genomics UK (COG-UK) consortium|Davies|United Kingdom

>Spike|hCoV-19/Bangladesh/BCSIR-NILMRC\_396/2020|2020-10-08|EPI\_ISL\_603239|Original|hCoV-19^^Dhaka|Human|National Institute of Laboratory Medicine and Referral Center|Genomic Research Lab|Khan|Bangladesh

>Spike|hCoV-19/Scotland/EDB3313/2020|2020-04-08|EPI\_ISL\_488944|Original|hCoV-19^^Scotland|Human|Virology Department|Wellcome Sanger Institute for the COVID-19 Genomics UK (COG-UK) consortium|Davies|United Kingdom

>Spike|hCoV-19/England/QEUH-9CEBC8/2020|2020-09-17|EPI\_ISL\_590017|Original|hCoV-19^^England|Human|Lighthouse Lab in Glasgow|Wellcome Sanger Institute for the COVID-19 Genomics UK (COG-UK) consortium|Davies|United Kingdom

>Spike|hCoV-19/Germany/NW-HHU-328/2020|2020-10-12|EPI\_ISL\_718030|Original|hCoV-19^^North Rhine-Westphalia|Human|ZOTZ KLIMAS MVZ D\u00fcsseldorf-Centrum GbR \u00dcBAG f\u00fcr Labormedizin|Center of Medical Microbiology|Wienemann|Germany

>Spike|hCoV-19/USA/CA-CZB-15100/2020|2020-11-20|EPI\_ISL\_739413|Original|hCoV-19^^California|Human|Santa Clara County Public Health Laboratory|Chan-Zuckerberg Biohub|Kamm|USA

>Spike|hCoV-19/Australia/VIC2707/2020|2020-07-04|EPI\_ISL\_521545|Original|hCoV-19^^Victoria|Human|Victorian Infectious Diseases Reference Laboratory (VIDRL)|VIDRL and MDU-PHL|Schultz|Australia

>Spike|hCoV-19/USA/CT-Yale-110/2020|2020-04-09|EPI\_ISL\_428751|Original|hCoV-19^^Connecticut|Human|Yale COVID-19 Biorepository|Grubaugh Lab - Yale School of Public Health|Grubaugh|USA

>Spike|hCoV-19/USA/AZ-TG654368/2020|2020-04-13|EPI\_ISL\_696005|Original|hCoV-19^^Arizona|Human|Sonora Quest Laboratories|TGen North|French|USA

>Spike|hCoV-19/USA/CA-CZB-1871/2020|2020-04-28|EPI\_ISL\_486171|Original|hCoV-19^^California|Human|Orange County Public Health Laboratory|Chan-Zuckerberg Biohub|McGeever|USA

>Spike|hCoV-19/England/QEUA-BA0438/2020|2020-11-18|EPI\_ISL\_719669|Original|hCoV-19^^England|Human|Lighthouse Lab in Glasgow|Wellcome Sanger Institute for the COVID-19 Genomics UK (COG-UK) Consortium|Davies|United Kingdom

>Spike|hCoV-19/Wales/PHWC-4A6A0A/2020|2020-12-17|EPI\_ISL\_765094|Original|hCoV-19^^Wales|Human|Wales Specialist Virology Centre Sequencing lab|COVID-19 Genomics UK (COG-UK) Consortium|Moore|United Kingdom

>Spike|hCoV-19/England/MILK-BB2336/2020|2020-11-18|EPI\_ISL\_720399|Original|hCoV-19^^England|Human|Lighthouse Lab in Milton Keynes|Wellcome Sanger Institute for the COVID-19 Genomics UK (COG-UK) Consortium|Davies|United Kingdom

>Spike|hCoV-19/USA/MI-MDHHS-SC20039/2020|2020-03-19|EPI\_ISL\_437126|Original|hCoV-19^^Michigan|Human|Michigan Department of Health and Human Services|Michigan Department of Health and Human Services|Blankenship|USA

>Spike|hCoV-19/England/QEUA-C936C8/2020|2020-12-17|EPI\_ISL\_777089|Original|hCoV-19^^England|Human|Lighthouse Lab in Glasgow|Wellcome Sanger Institute for the COVID-19 Genomics UK (COG-UK) Consortium|Davies|United Kingdom

>Spike|hCoV-19/England/204990417/2020|2020-00-00|EPI\_ISL\_710517|Original|hCoV-19^^England|Human|Respiratory Virus Unit|COVID-19 Genomics UK (COG-UK) Consortium|Platt|United Kingdom

>Spike|hCoV-19/England/QEUA-AD3AD1/2020|2020-10-24|EPI\_ISL\_629867|Original|hCoV-19^^England|Human|Lighthouse Lab in Glasgow|Wellcome Sanger Institute for the COVID-19 Genomics UK (COG-UK) consortium|Davies|United Kingdom

>Spike|hCoV-19/England/NORT-288FB6/2020|2020-03-25|EPI\_ISL\_458629|Original|hCoV-19^^England|Human|NU-OMICS DNA Sequencing research facility|Wellcome Sanger Institute for the COVID-19 Genomics UK (COG-UK) consortium|Davies|United Kingdom

>Spike|hCoV-19/USA/MN-MDH-1718/2020|2020-08-29|EPI\_ISL\_560805|Original|hCoV-19^^Minnesota|Human|M Health Fairview|Minnesota Department of Health|Garfin|USA

>Spike|hCoV-19/England/ALDP-5BFE5C/2020|2020-06-18|EPI\_ISL\_558743|Original|hCoV-19^^England|Human|Lighthouse Lab in Alderley Park|Wellcome Sanger Institute for the COVID-19 Genomics UK (COG-UK) consortium|Davies|United Kingdom

>Spike|hCoV-19/England/CAMC-C7210A/2020|2020-12-15|EPI\_ISL\_769214|Original|hCoV-19^^England|Human|Lighthouse Lab in Cambridge|Wellcome Sanger Institute for the COVID-19 Genomics UK (COG-UK) Consortium|Davies|United Kingdom

>Spike|hCoV-19/Netherlands/NoordBrabant\_49/2020|2020-03-11|EPI\_ISL\_415506|Original|hCoV-19^^Noord Brabant|Human|Dutch COVID-19 response team|Erasmus Medical Center|Oude Munnink|Netherlands

>Spike|hCoV-19/England/CAMC-C26B52/2020|2020-12-07|EPI\_ISL\_782739|Original|hCoV-19^^England|Human|Lighthouse Lab in Cambridge|Wellcome Sanger Institute for the COVID-19 Genomics UK (COG-UK) Consortium|Davies|United Kingdom

>Spike|hCoV-19/England/QEUA-C53E71/2020|2020-12-12|EPI\_ISL\_736423|Original|hCoV-19^^England|Human|Lighthouse Lab in Glasgow|Wellcome Sanger Institute for the COVID-19 Genomics UK (COG-UK) Consortium|Davies|United Kingdom

>Spike|hCoV-19/England/ALDP-A93FA1/2020|2020-10-19|EPI\_ISL\_611097|Original|hCoV-19^^England|Human|Lighthouse Lab in Alderley Park|Wellcome Sanger Institute for the COVID-19 Genomics UK (COG-UK) consortium|Davies|United Kingdom

>Spike|hCoV-19/England/QEUA-AE2DC7/2020|2020-10-25|EPI\_ISL\_633604|Original|hCoV-19^^England|Human|Lighthouse Lab in Glasgow|Wellcome Sanger Institute for the COVID-19 Genomics UK (COG-UK) consortium|Davies|United Kingdom

>Spike|hCoV-19/United Arab Emirates/0182/2020|2020-05-18|EPI\_ISL\_698369|Original|hCoV-19^^Abu Dhabi|Human|Group 42 (G42) Healthcare|G42 Healthcare|Ogrodzki|United Arab Emirates

>Spike|hCoV-19/USA/TX-HMH-MCoV-12147/2020|2020-09-21|EPI\_ISL\_790221|Original|hCoV-19^^Texas|Human|Houston Methodist Hospital|Houston Methodist Hospital|Long|USA

>Spike|hCoV-19/USA/TX-HMH-4862/2020|2020-06-21|EPI\_ISL\_544384|Original|hCoV-19^^Texas|Human|Houston Methodist Hospital|Houston Methodist Hospital|Long|USA

>Spike|hCoV-19/Belgium/DLDJ-030569/2020|2020-03-05|EPI\_ISL\_420325|Original|hCoV-19^^Poppel|Human|KU Leuven|KU Leuven|Maes|Belgium

>Spike|hCoV-19/USA/TX-HMH-MCoV-13374/2020|2020-08-24|EPI\_ISL\_788517|Original|hCoV-19^^Texas|Human|Houston Methodist Hospital|Houston Methodist Hospital|Long|USA

>Spike|hCoV-19/Canada/QC-LSPQ-L00239296/2020|2020-03-26|EPI\_ISL\_536243|Original|hCoV-19^^Quebec|Human|CSSS Haut-Richelieu/Rouville (H\u00f4pital)|Laboratoire de sant\u00e9 publique du Qu\u00e9bec|Moreira|Canada

>Spike|hCoV-19/England/CAMB-1AADE2/2020|2020-04-19|EPI\_ISL\_470294|Original|hCoV-19^^England|Human|Department of Pathology|Wellcome Sanger Institute for the COVID-19 Genomics UK (COG-UK) consortium|Davies|United Kingdom

>Spike|hCoV-19/Saudi Arabia/KAUST-MAKKAH197/2020|2020-04-06|EPI\_ISL\_678233|Original|hCoV-19^^Makkah|Human|Pathogen Genomics Lab King Abdullah University of Science and Technology(KAUST)|Pathogen Genomics Lab King Abdullah University of Science and Technology(KAUST)|Mohamed Ghazzali|Saudi Arabia

>Spike|hCoV-19/USA/CA-SR0234/2020|2020-04-24|EPI\_ISL\_437570|Original|hCoV-19^^California|Human|Scripps Medical Laboratory|Andersen lab at Scripps Research|Gangavarapu|USA

>Spike|hCoV-19/USA/TX-HMH-3190/2020|2020-06-13|EPI\_ISL\_544064|Original|hCoV-19^^Texas|Human|Houston Methodist Hospital|Houston Methodist Hospital|Long|USA

>Spike|hCoV-19/England/MILK-A6ADC7/2020|2020-10-08|EPI\_ISL\_608812|Original|hCoV-19^^England|Human|Lighthouse Lab in Milton Keynes|Wellcome Sanger Institute for the COVID-19 Genomics UK (COG-UK) consortium|Davies|United Kingdom

>Spike|hCoV-19/England/CAMC-B217CD/2020|2020-11-03|EPI\_ISL\_647386|Original|hCoV-19^^England|Human|Lighthouse Lab in Cambridge|Wellcome Sanger Institute for the COVID-19 Genomics UK (COG-UK) Consortium|Davies|United Kingdom

>Spike|hCoV-19/India/TG-CCMB-J130/2020|2020-04-01|EPI\_ISL\_458071|Original|hCoV-19^^Telangana|Human|CSIR-Centre for Cellular and Molecular Biology|CSIR-Centre for Cellular and Molecular Biology|Banu|India

>Spike|hCoV-19/Wales/PHWC-48049F/2020|2020-10-17|EPI\_ISL\_612890|Original|hCoV-19^^Wales|Human|Wales Specialist Virology Centre Sequencing lab|COVID-19 Genomics UK (COG-UK) Consortium|Moore|United Kingdom

>Spike|hCoV-19/USA/MI-UM-10036429696/2020|2020-10-13|EPI\_ISL\_610096|Original|hCoV-19^^Michigan|Human|University of Michigan Clinical Microbiology Laboratory|Lauring Lab|Valesano|USA

>Spike|hCoV-19/England/ALDP-A963B1/2020|2020-10-20|EPI\_ISL\_624609|Original|hCoV-19^^England|Human|Lighthouse Lab in Alderley Park|Wellcome Sanger Institute for the COVID-19 Genomics UK (COG-UK) consortium|Davies|United Kingdom

>Spike|hCoV-19/England/WSFT-25C12A0/2020|2020-05-07|EPI\_ISL\_492895|Original|hCoV-19^^England|Human|Department of Medical Microbiology|Wellcome Sanger Institute for the COVID-19 Genomics UK (COG-UK) consortium|Davies|United Kingdom

>Spike|hCoV-19/Ireland/D-NVRL-71IRL79659/2020|2020-07-23|EPI\_ISL\_512095|Original|hCoV-19^^Dublin|Human|National Virus Reference Laboratory|National Virus Reference Laboratory|Gonzalez|Ireland

>Spike|hCoV-19/Scotland/CVR3423/2020|2020-05-07|EPI\_ISL\_456844|Original|hCoV-19^^Scotland|Human|West of Scotland Specialist Virology Centre|COVID-19 Genomics UK (COG-UK) Consortium|Robertson|United Kingdom

>Spike|hCoV-19/Denmark/DCGC-8135/2020|2020-10-26|EPI\_ISL\_617237|Original|hCoV-19^^Nordjylland|Human|Department of Virus and Microbiological Special Diagnostics|Albertsen lab|Michaelsen|Denmark

>Spike|hCoV-19/Australia/VIC10633/2020|2020-08-31|EPI\_ISL\_563002|Original|hCoV-19^^Victoria|Human|Microbiological Diagnostic Unit - Public Health Laboratory (MDU-PHL)|MDU-PHL|Schultz|Australia

>Spike|hCoV-19/Austria/CeMM0033/2020|2020-03-12|EPI\_ISL\_437922|Original|hCoV-19^^Ischgl|Human|Institut f\u00fcr Virologie am Department f\u00fcr Hygiene|Bergthaler laboratory|Bergthaler|Austria

>Spike|hCoV-19/Australia/VIC14474/2020|2020-07-22|EPI\_ISL\_592510|Original|hCoV-19^^Victoria|Human|Microbiological Diagnostic Unit - Public Health Laboratory (MDU-PHL)|MDU-PHL|Schultz|Australia

>Spike|hCoV-19/USA/CT-Yale-302/2020|2020-03-28|EPI\_ISL\_476531|Original|hCoV-19^^Connecticut|Human|Yale Clinical Virology Laboratory|Grubaugh Lab - Yale School of Public Health|Grubaugh|USA

>Spike|hCoV-19/USA/CA-CZB-10929/2020|2020-08-31|EPI\_ISL\_583158|Original|hCoV-19^^California|Human|Humboldt County Public Health Laboratory|Chan-Zuckerberg Biohub|Bhatt|USA

>Spike|hCoV-19/USA/UT-05811/2020|2020-05-11|EPI\_ISL\_483032|Original|hCoV-19^^Utah|Human|Utah Public Health Laboratory|Utah Public Health Laboratory|Butz|USA

>Spike|hCoV-19/Wales/PHWC-168D77/2020|2020-06-06|EPI\_ISL\_494362|Original|hCoV-19^^Wales|Human|Originating lab|COVID-19 Genomics UK (COG-UK) Consortium|Moore|United Kingdom

>Spike|hCoV-19/England/LIVE-A7575/2020|2020-03-28|EPI\_ISL\_517038|Original|hCoV-19^^England|Human|Liverpool Clinical Laboratories|COVID-19 Genomics UK (COG-UK) Consortium|Haldenby|United Kingdom

>Spike|hCoV-19/England/QEUA-A0B9D3/2020|2020-10-01|EPI\_ISL\_599167|Original|hCoV-19^^England|Human|Lighthouse Lab in Glasgow|Wellcome Sanger Institute for the COVID-19 Genomics UK (COG-UK) consortium|Davies|United Kingdom

>Spike|hCoV-19/England/MILK-A7CB04/2020|2020-10-15|EPI\_ISL\_607523|Original|hCoV-19^^England|Human|Lighthouse Lab in Milton Keynes|Wellcome Sanger Institute for the COVID-19 Genomics UK (COG-UK) consortium|Davies|United Kingdom

>Spike|hCoV-19/Sweden/20-50231/2020|2020-03-09|EPI\_ISL\_430863|Original|hCoV-19^^Orebro lan|Human|Klinisk mikrobiologi Orebro|The Public Health Agency of Sweden|Svartstr\u00f6m|Sweden

>Spike|hCoV-19/England/BRIS-1223A4/2020|2020-04-03|EPI\_ISL\_440747|Original|hCoV-19^^England|Human|PHE South West Regional Laboratory|Wellcome Sanger Institute for the COVID-19 Genomics UK (COG-UK) consortium|Amato|United Kingdom

>Spike|hCoV-19/England/MILK-BB0936/2020|2020-11-17|EPI\_ISL\_720197|Original|hCoV-19^^England|Human|Lighthouse Lab in Milton Keynes|Wellcome Sanger Institute for the COVID-19 Genomics UK (COG-UK) Consortium|Davies|United Kingdom

>Spike|hCoV-19/Wales/PHWC-487AE1/2020|2020-10-28|EPI\_ISL\_639272|Original|hCoV-19^^Wales|Human|Wales Specialist Virology Centre Sequencing lab|COVID-19 Genomics UK (COG-UK) Consortium|Moore|United Kingdom

>Spike|hCoV-19/USA/VA-DCLS-1014/2020|2020-06-03|EPI\_ISL\_526905|Original|hCoV-19^^Virginia|Human|Virginia DCLS|Virginia DCLS|St. Jacques|USA

>Spike|hCoV-19/Denmark/DCGC-16333/2020|2020-11-16|EPI\_ISL\_714708|Original|hCoV-19^^Hovedstaden|Human|Department of Virus and Microbiological Special Diagnostics|Albertsen Lab|Michaelsen|Denmark

>Spike|hCoV-19/Wales/PHWC-3312F/2020|2020-04-14|EPI\_ISL\_446741|Original|hCoV-19^^Wales|Human|Wales Specialist Virology Centre|Public Health Wales Microbiology Cardiff|Moore|United Kingdom

>Spike|hCoV-19/USA/MI-MDHHS-SC20181/2020|2020-03-25|EPI\_ISL\_436865|Original|hCoV-19^^Michigan|Human|Michigan Department of Health and Human Services|Michigan Department of Health and Human Services|Blankenship|USA

>Spike|hCoV-19/Wuhan/HB-WHCM-103/2020|2020-03-02|EPI\_ISL\_455400|Original|hCoV-19^^Hubei|Human|Wuhan Chain Medical Labs (CMLabs)|State Key Laboratory of Biotherapy of Sichuan University|Tang|China

>Spike|hCoV-19/England/MILK-9D496B/2020|2020-09-19|EPI\_ISL\_601525|Original|hCoV-19^^England|Human|Lighthouse Lab in Milton Keynes|Wellcome Sanger Institute for the COVID-19 Genomics UK (COG-UK) consortium|Davies|United Kingdom

>Spike|hCoV-19/USA/MI-QDX-469/2020|2020-03-22|EPI\_ISL\_571204|Original|hCoV-19^^Michigan|Human|Quest Diagnostics|Quest Diagnostics|Kagan|USA

>Spike|hCoV-19/England/CAMC-B071DE/2020|2020-10-30|EPI\_ISL\_643866|Original|hCoV-19^^England|Human|Lighthouse Lab in Cambridge|Wellcome Sanger Institute for the COVID-19 Genomics UK (COG-UK) Consortium|Davies|United Kingdom

>Spike|hCoV-19/India/MH-ACTREC-246/2020|2020-07-07|EPI\_ISL\_699899|Original|hCoV-19^^Maharashtra|Human|Hematopathology Laboratory|Hematopathology Laboratory|Patkar|India

>Spike|hCoV-19/England/QEUA-961D2B/2020|2020-07-31|EPI\_ISL\_537059|Original|hCoV-19^^England|Human|Lighthouse Lab in Glasgow|Wellcome Sanger Institute for the COVID-19 Genomics UK (COG-UK) consortium|Davies|United Kingdom

>Spike|hCoV-19/Denmark/DCGC-2761/2020|2020-08-24|EPI\_ISL\_616595|Original|hCoV-19^^Midtjylland|Human|Department of Virus and Microbiological Special Diagnostics|Albertsen lab|Michaelsen|Denmark

>Spike|hCoV-19/USA/UT-UPHL-2008939/2020|2020-05-28|EPI\_ISL\_525044|Original|hCoV-19^^Utah|Human|Utah Public Health Laboratory|Utah Public Health Laboratory|Young|USA

>Spike|hCoV-19/India/GJ-GBRC351a/2020|2020-06-18|EPI\_ISL\_514596|Original|hCoV-19^^Gujarat|Human|B.J. Medical College and Civil hospital|Gujarat Biotechnology Research Centre|Joshi|India

>Spike|hCoV-19/Denmark/DCGC-13439/2020|2020-11-30|EPI\_ISL\_712801|Original|hCoV-19^^Midtjylland|Human|Department of Virus and Microbiological Special Diagnostics|Albertsen Lab|Michaelsen|Denmark

>Spike|hCoV-19/Denmark/DCGC-18563/2020|2020-12-07|EPI\_ISL\_750047|Original|hCoV-19^^Midtjylland|Human|Department of Virus and Microbiological Special Diagnostics|Albertsen Lab|Michaelsen|Denmark

>Spike|hCoV-19/Bangladesh/BCSIR-NILMRC-257/2020|2020-07-07|EPI\_ISL\_490168|Original|hCoV-19^^Khulna|Human|National Institute of Laboratory Medicine and Referral Center|Genomic Research Lab|Khan|Bangladesh

>Spike|hCoV-19/Japan/PG-1745/2020|2020-05-00|EPI\_ISL\_685351|Original|hCoV-19^^Japan|Human|Pathogen Genomics Center|Pathogen Genomics Center|Sekizuka|Japan

>Spike|hCoV-19/Scotland/EDB4711/2020|2020-04-27|EPI\_ISL\_449327|Original|hCoV-19^^Scotland|Human|Virology Department|COVID-19 Genomics UK (COG-UK) Consortium|Williams|United Kingdom

>Spike|hCoV-19/USA/CA-ALSR-0568-SAN/2020|2020-05-13|EPI\_ISL\_483229|Original|hCoV-19^^California|Human|UC San Diego Center for Advanced Laboratory Medicine|Andersen lab at Scripps Research|Gangavarapu|USA

>Spike|hCoV-19/England/QEUEH-98FD54/2020|2020-08-26|EPI\_ISL\_540133|Original|hCoV-19^^England|Human|Lighthouse Lab in Glasgow|Wellcome Sanger Institute for the COVID-19 Genomics UK (COG-UK) consortium|Davies|United Kingdom

>Spike|hCoV-19/England/CAMC-C836E9/2020|2020-12-17|EPI\_ISL\_762725|Original|hCoV-19^^England|Human|Lighthouse Lab in Cambridge|Wellcome Sanger Institute for the COVID-19 Genomics UK (COG-UK) Consortium|Davies|United Kingdom

>Spike|hCoV-19/Hong Kong/VM20009042/2020|2020-04-04|EPI\_ISL\_444048|Original|hCoV-19^^Hong Kong|Human|Queen Elizabeth Hospital|Hong Kong Department of Health|Mak|China

>Spike|hCoV-19/Denmark/DCGC-18002/2020|2020-12-14|EPI\_ISL\_749275|Original|hCoV-19^^Syddanmark|Human|Department of Virus and Microbiological Special Diagnostics|Albertsen Lab|Michaelsen|Denmark

>Spike|hCoV-19/South Africa/KRISP-K003503/2020|2020-09-16|EPI\_ISL\_602827|Original|hCoV-19^^KwaZulu-Natal|Human|NHLs-IALCH|KRISP|de Oliveira|South Africa

>Spike|hCoV-19/USA/TX-HMH-MCoV-19018/2020|2020-11-24|EPI\_ISL\_785286|Original|hCoV-19^^Texas|Human|Houston Methodist Hospital|Houston Methodist Hospital|Long|USA

>Spike|hCoV-19/Hong Kong/CM20000417/2020|2020-12-06|EPI\_ISL\_733575|Original|hCoV-19^^Hong Kong|Human|Temporary Specimen Collection Centre|Hong Kong Department of Health|Tsang|China

>Spike|hCoV-19/USA/PA-MGEL137/2020|2020-04-05|EPI\_ISL\_454401|Original|hCoV-19^^Pennsylvania|Human|UPMC Clinical Microbiology Laboratory|Microbial Genome Sequencing Center|Mustapha|USA

>Spike|hCoV-19/USA/MI-QDX-2193/2020|2020-03-13|EPI\_ISL\_604535|Original|hCoV-19^^Michigan|Human|Quest Diagnostics|Quest Diagnostics|Kagan|USA

>Spike|hCoV-19/England/PORT-2F6223/2020|2020-12-07|EPI\_ISL\_741752|Original|hCoV-19^^England|Human|Centre for Enzyme Innovation|COVID-19 Genomics UK (COG-UK) Consortium|Robson|United Kingdom

>Spike|hCoV-19/Denmark/DCGC-22356/2020|2020-12-14|EPI\_ISL\_757851|Original|hCoV-19^^Hovedstaden|Human|Department of Virus and Microbiological Special Diagnostics|Albertsen Lab|Michaelsen|Denmark

>Spike|hCoV-19/Denmark/DCGC-17529/2020|2020-12-14|EPI\_ISL\_751046|Original|hCoV-19^^Midtjylland|Human|Department of Virus and Microbiological Special Diagnostics|Albertsen Lab|Michaelsen|Denmark

>Spike|hCoV-19/England/EXET-13C037/2020|2020-00-00|EPI\_ISL\_679374|Original|hCoV-19^^England|Human|University of Exeter|COVID-19 Genomics UK (COG-UK) Consortium|Temperton|United Kingdom

>Spike|hCoV-19/USA/DE-CDC-2-3713961/2020|2020-10-20|EPI\_ISL\_751543|Original|hCoV-19^^Delaware|Human|DE Public Health Laboratory|Genomics and Discovery|Queen|USA



>Spike|hCoV-19/USA/CA-ALSR-1660/2020|2020-03-20|EPI\_ISL\_494721|Original|hCoV-19^^California|Human|San Diego County Public Health Laboratory|Andersen lab at Scripps Research|Gangavarapu|USA

>Spike|hCoV-19/England/CAMC-B0C4B2/2020|2020-10-29|EPI\_ISL\_643434|Original|hCoV-19^^England|Human|Lighthouse Lab in Cambridge|Wellcome Sanger Institute for the COVID-19 Genomics UK (COG-UK) Consortium|Davies|United Kingdom

>Spike|hCoV-19/England/QEUH-997C89/2020|2020-08-28|EPI\_ISL\_559757|Original|hCoV-19^^England|Human|Oxford Viromics|COVID-19 Genomics UK (COG-UK) Consortium|Golubchik|United Kingdom

>Spike|hCoV-19/USA/NY-Wadsworth-192890-01/2020|2020-07-04|EPI\_ISL\_677018|Original|hCoV-19^^New York|Human|Masonic Medical Research Institute|Wadsworth Center|Lasek-Nesselquist|USA

>Spike|hCoV-19/Germany/TH-IIMK-CaSe-27/2020|2020-04-01|EPI\_ISL\_763092|Original|hCoV-19^^Thuringia|Human|Jena University Hospital|Institute of infectious medicine & hospital hygiene|Brandt|Germany

>Spike|hCoV-19/Switzerland/SO-ETHZ-420313/2020|2020-12-20|EPI\_ISL\_768200|Original|hCoV-19^^Solothurn|Human|Viollier AG|Department of Biosystems Science and Engineering|Nadeau|Switzerland

>Spike|hCoV-19/England/SHEF-C63C1/2020|2020-04-24|EPI\_ISL\_484463|Original|hCoV-19^^England|Human|Virology Department|COVID-19 Genomics UK (COG-UK) Consortium|de Silva|United Kingdom

>Spike|hCoV-19/Shaoxing/05/2020|2020-01-31|EPI\_ISL\_463897|Original|hCoV-19^^Zhejiang|Human|Shaoxing Center for Disease Control and Prevention|Department of Pathology and Laboratory Medicine|Yang|China

>Spike|hCoV-19/Denmark/DCGC-20748/2020|2020-12-21|EPI\_ISL\_758861|Original|hCoV-19^^Sjaelland|Human|Department of Virus and Microbiological Special Diagnostics|Albertsen Lab|Michaelsen|Denmark

>Spike|hCoV-19/Netherlands/ZE-EMC-53/2020|2020-06-01|EPI\_ISL\_523552|Original|hCoV-19^^Zeeland|Human|Dutch COVID-19 response team|Erasmus Medical Center|Oude Munnink|Netherlands

>Spike|hCoV-19/England/20190042401/2020|2020-05-02|EPI\_ISL\_465585|Original|hCoV-19^^England|Human|Respiratory Virus Unit|Respiratory Virus Unit|Platt|United Kingdom

>Spike|hCoV-19/Israel/CVL-252-ngs/2020|2020-12-27|EPI\_ISL\_776824|Original|hCoV-19^^Israel|Human|Israel Central Virology laboratory|Israel Central Virology laboratory|Zuckerman|Israel

>Spike|hCoV-19/England/MILK-9C39AB/2020|2020-09-10|EPI\_ISL\_566950|Original|hCoV-19^^England|Human|Lighthouse Lab in Milton Keynes|Wellcome Sanger Institute for the COVID-19 Genomics UK (COG-UK) consortium|Davies|United Kingdom

>Spike|hCoV-19/Spain/AS-IBV-98006589/2020|2020-03-11|EPI\_ISL\_654637|Original|hCoV-19^^Asturias|Human|Servicio de Microbiolog\u00eda|SeqCOVID-SPAIN consortium|IBV (CSIC) |Comas|Spain

>Spike|hCoV-19/Denmark/DCGC-8851/2020|2020-10-26|EPI\_ISL\_626115|Original|hCoV-19^^Nordjylland|Human|Department of Virus and Microbiological Special Diagnostics|Albertsen lab|Michaelsen|Denmark

>Spike|hCoV-19/Australia/VIC7504/2020|2020-07-22|EPI\_ISL\_564453|Original|hCoV-19^^Victoria|Human|Microbiological Diagnostic Unit - Public Health Laboratory (MDU-PHL) |MDU-PHL|Schultz|Australia

>Spike|hCoV-19/USA/TX-HMH-MCoV-18687/2020|2020-11-20|EPI\_ISL\_785035|Original|hCoV-19^^Texas|Human|Houston Methodist Hospital|Houston Methodist Hospital|Long|USA

>Spike|hCoV-19/USA/TX-HMH-MCoV-19408/2020|2020-11-30|EPI\_ISL\_783822|Original|hCoV-19^^Texas|Human|Houston Methodist Hospital|Houston Methodist Hospital|Long|USA

>Spike|hCoV-19/England/ALDP-94E708/2020|2020-06-24|EPI\_ISL\_555181|Original|hCoV-19^^England|Human|Lighthouse Lab in Alderley Park|Wellcome Sanger Institute for the COVID-19 Genomics UK (COG-UK) consortium|Davies|United Kingdom

>Spike|hCoV-19/Scotland/CVR5711/2020|2020-11-04|EPI\_ISL\_651928|Original|hCoV-19^^Scotland|Human|West of Scotland Specialist Virology Centre|COVID-19 Genomics UK (COG-UK) Consortium|Robertson|United Kingdom

>Spike|hCoV-19/Wales/QEUH-AD5BEB/2020|2020-10-26|EPI\_ISL\_647924|Original|hCoV-19^^Wales|Human|Lighthouse Lab in Glasgow|Wellcome Sanger Institute for the COVID-19 Genomics UK (COG-UK) Consortium|Davies|United Kingdom

>Spike|hCoV-19/Australia/NSW516/2020|2020-04-14|EPI\_ISL\_455056|Original|hCoV-19^^New South Wales|Human|Pathology West - NSW Health Pathology|NSW Health Pathology - Institute of Clinical Pathology and Medical Research; Westmead Hospital; University of Sydney|Gall|Australia

>Spike|hCoV-19/England/201090535/2020|2020-03-07|EPI\_ISL\_464584|Original|hCoV-19^^England|Human|Respiratory Virus Unit|Respiratory Virus Unit|Platt|United Kingdom

>Spike|hCoV-19/Japan/PG-2876/2020|2020-04-00|EPI\_ISL\_691002|Original|hCoV-19^^Japan|Human|Pathogen Genomics Center|Pathogen Genomics Center|Sekizuka|Japan

>Spike|hCoV-19/England/CAMB-73D89/2020|2020-04-01|EPI\_ISL\_433694|Original|hCoV-19^^England|Human|Department of Pathology|COVID-19 Genomics UK (COG-UK) Consortium|Meredith|United Kingdom

>Spike|hCoV-19/England/GSTT-265D4FD/2020|2020-03-23|EPI\_ISL\_483970|Original|hCoV-19^^England|Human|Centre for Clinical Infection and Diagnostics Research and Genomics Innovation Unit|COVID-19 Genomics UK (COG-UK) Consortium|Awan|United Kingdom

>Spike|hCoV-19/England/201360275/2020|2020-03-25|EPI\_ISL\_423260|Original|hCoV-19^^England|Human|Respiratory Virus Unit|Respiratory Virus Unit|Platt|United Kingdom

>Spike|hCoV-19/USA/CA-CZB-15305/2020|2020-11-20|EPI\_ISL\_738906|Original|hCoV-19^^California|Human|Santa Clara County Public Health Laboratory|Chan-Zuckerberg Biohub|Kamm|USA

>Spike|hCoV-19/Scotland/CVR1718/2020|2020-04-06|EPI\_ISL\_448128|Original|hCoV-19^^Scotland|Human|West of Scotland Specialist Virology Centre|COVID-19 Genomics UK (COG-UK) Consortium|Robertson|United Kingdom

>Spike|hCoV-19/England/MILK-B3C7A1/2020|2020-11-02|EPI\_ISL\_706158|Original|hCoV-19^^England|Human|Oxford Viromics|COVID-19 Genomics UK (COG-UK) Consortium|Golubchik|United Kingdom

>Spike|hCoV-19/Denmark/DCGC-18669/2020|2020-12-07|EPI\_ISL\_750114|Original|hCoV-19^^Midtjylland|Human|Department of Virus and Microbiological Special Diagnostics|Albertsen Lab|Michaelsen|Denmark

>Spike|hCoV-19/England/ALDP-B62B5B/2020|2020-11-08|EPI\_ISL\_655333|Original|hCoV-19^^England|Human|Lighthouse Lab in Alderley Park|Wellcome Sanger Institute for the COVID-19 Genomics UK (COG-UK) Consortium|Davies|United Kingdom

>Spike|hCoV-19/USA/CA-CZB-13836/2020|2020-08-15|EPI\_ISL\_739555|Original|hCoV-19^^California|Human|Alameda County Public Health Lab|Chan-Zuckerberg Biohub|Kamm|USA

>Spike|hCoV-19/Chile/RM-ISPCH-4/2020|2020-03-08|EPI\_ISL\_445247|Original|hCoV-19^^Region Metropolitana de Santiago|Human|UNIVERSIDAD DE LOS ANDES|Instituto de Salud Publica de Chile|Fernandez|Chile

>Spike|hCoV-19/England/QEUA-AAC86E/2020|2020-10-21|EPI\_ISL\_652878|Original|hCoV-19^^England|Human|Oxford Viromics|COVID-19 Genomics UK (COG-UK) Consortium|Golubchik|United Kingdom

>Spike|hCoV-19/USA/WA-S1223/2020|2020-05-08|EPI\_ISL\_495673|Original|hCoV-19^^Washington|Human|Washington State Department of Health|Seattle Flu Study|Lee|USA

>Spike|hCoV-19/Spain/AN-IBV-001970/2020|2020-03-14|EPI\_ISL\_452412|Original|hCoV-19^^Andalucia|Human|Servicio de Microbiolog\u00eda. HRU de M\u00e9llaga. Servicio Andaluz de Salud|SeqCOVID-SPAIN consortium/IBV(CSIC)|Comas|Spain

>Spike|hCoV-19/Wales/PHWC-2B676/2020|2020-04-13|EPI\_ISL\_445742|Original|hCoV-19^^Wales|Human|Wales Specialist Virology Centre|Public Health Wales Microbiology Cardiff|Moore|United Kingdom

>Spike|hCoV-19/Japan/PG-4597/2020|2020-08-00|EPI\_ISL\_689734|Original|hCoV-19^^Japan|Human|Pathogen Genomics Center|Pathogen Genomics Center|Sekizuka|Japan

>Spike|hCoV-19/Germany/HH-hpi-p1970/2020|2020-03-25|EPI\_ISL\_776293|Original|hCoV-19^^Hamburg|Human|University Medical Center Hamburg Eppendorf|Heinrich Pette Institute|Robitaille|Germany

>Spike|hCoV-19/Wales/PHWC-166562/2020|2020-06-12|EPI\_ISL\_494015|Original|hCoV-19^^Wales|Human|Originating lab|COVID-19 Genomics UK (COG-UK) Consortium|Moore|United Kingdom

>Spike|hCoV-19/England/QEUA-B67C44/2020|2020-11-11|EPI\_ISL\_661593|Original|hCoV-19^^England|Human|Lighthouse Lab in Glasgow|Wellcome Sanger Institute for the COVID-19 Genomics UK (COG-UK) Consortium|Davies|United Kingdom

>Spike|hCoV-19/Jordan/SEARCH-5499/2020|2020-09-12|EPI\_ISL\_755266|Original|hCoV-19^^Amman|Human|Biolab Diagnostic Laboratories|Andersen lab at Scripps Research|Gangavarapu|Jordan

>Spike|hCoV-19/Scotland/CVR1501/2020|2020-04-03|EPI\_ISL\_448117|Original|hCoV-19^^Scotland|Human|West of Scotland Specialist Virology Centre|COVID-19 Genomics UK (COG-UK) Consortium|Robertson|United Kingdom

>Spike|hCoV-19/Wales/PHWC-47D592/2020|2020-10-01|EPI\_ISL\_586162|Original|hCoV-19^^Wales|Human|Wales Specialist Virology Centre Sequencing lab|COVID-19 Genomics UK (COG-UK) Consortium|Moore|United Kingdom

>Spike|hCoV-19/Australia/VIC14719/2020|2020-08-12|EPI\_ISL\_592968|Original|hCoV-19^^Victoria|Human|Microbiological Diagnostic Unit - Public Health Laboratory (MDU-PHL)|MDU-PHL|Schultz|Australia

>Spike|hCoV-19/England/QEUEH-B3FD15/2020|2020-11-08|EPI\_ISL\_658566|Original|hCoV-19^^England|Human|Lighthouse Lab in Glasgow|Wellcome Sanger Institute for the COVID-19 Genomics UK (COG-UK) Consortium|Davies|United Kingdom

>Spike|hCoV-19/Wales/PHWC-493183/2020|2020-11-28|EPI\_ISL\_725847|Original|hCoV-19^^Wales|Human|Originating lab|COVID-19 Genomics UK (COG-UK) Consortium|Moore|United Kingdom

>Spike|hCoV-19/Peru/LIM-UPCH-0167/2020|2020-10-14|EPI\_ISL\_729874|Original|hCoV-19^^Lima|Human|Laboratorio de Referencia Nacional de Virus Respiratorios|Laboratorio de Gen\u00f3mica Microbiana|Tsukayama|Peru

>Spike|hCoV-19/Wales/PHWC-271F1/2020|2020-03-31|EPI\_ISL\_432312|Original|hCoV-19^^Wales|Human|Wales Specialist Virology Centre|Public Health Wales Microbiology Cardiff|Moore|United Kingdom

>Spike|hCoV-19/Japan/PG-5481/2020|2020-08-00|EPI\_ISL\_690584|Original|hCoV-19^^Japan|Human|Pathogen Genomics Center|Pathogen Genomics Center|Sekizuka|Japan

>Spike|hCoV-19/England/LIVE-DB3C83/2020|2020-10-20|EPI\_ISL\_650544|Original|hCoV-19^^England|Human|Liverpool Clinical Laboratories|COVID-19 Genomics UK (COG-UK) Consortium|Haldenby|United Kingdom

>Spike|hCoV-19/England/SHEF-C79DD/2020|2020-09-27|EPI\_ISL\_585032|Original|hCoV-19^^England|Human|Virology Department|COVID-19 Genomics UK (COG-UK) Consortium|de Silva|United Kingdom

>Spike|hCoV-19/England/MILK-BABB56/2020|2020-11-18|EPI\_ISL\_720405|Original|hCoV-19^^England|Human|Lighthouse Lab in Milton Keynes|Wellcome Sanger Institute for the COVID-19 Genomics UK (COG-UK) Consortium|Davies|United Kingdom

>Spike|hCoV-19/England/QEUEH-B41211/2020|2020-11-08|EPI\_ISL\_658686|Original|hCoV-19^^England|Human|Lighthouse Lab in Glasgow|Wellcome Sanger Institute for the COVID-19 Genomics UK (COG-UK) Consortium|Davies|United Kingdom

>Spike|hCoV-19/Netherlands/ZH-EMC-588/2020|2020-09-18|EPI\_ISL\_578016|Original|hCoV-19^^Zuid Holland|Human|Dutch COVID-19 response team|Erasmus Medical Center|Oude Munnink|Netherlands

>Spike|hCoV-19/England/MILK-9C7181/2020|2020-09-08|EPI\_ISL\_573284|Original|hCoV-19^^England|Human|Northumbria University / South Tees Hospitals NHS Foundation Trust / North Cumbria Integrated Care NHS Foundation Trust / North Tees and Hartlepool NHS Foundation Trust / Newcastle Hospitals NHS Foundation Trust|COVID-19 Genomics UK (COG-UK) Consortium|Bashton|United Kingdom

>Spike|hCoV-19/Mexico/CMX-INMEGEN-18/2020|2020-08-06|EPI\_ISL\_522983|Original|hCoV-19^^Mexico City|Human|Instituto Nacional de Medicina Gen\u00f3mica|Instituto Nacional de Medicina Gen\u00f3mica|Hidalgo|Mexico

>Spike|hCoV-19/England/MILK-9E097B/2020|2020-09-20|EPI\_ISL\_601449|Original|hCoV-19^^England|Human|Lighthouse Lab in Milton Keynes|Wellcome Sanger Institute for the COVID-19 Genomics UK (COG-UK) consortium|Davies|United Kingdom

>Spike|hCoV-19/Japan/PG-3426/2020|2020-04-00|EPI\_ISL\_691538|Original|hCoV-19^^Japan|Human|Sakai City Institute of Public Health|Pathogen Genomics Center|Sekizuka|Japan

>Spike|hCoV-19/Australia/VIC11449/2020|2020-08-30|EPI\_ISL\_563375|Original|hCoV-19^^Victoria|Human|Microbiological Diagnostic Unit - Public Health Laboratory (MDU-PHL)|MDU-PHL|Schultz|Australia

>Spike|hCoV-19/USA/AZ-TG382137/2020|2020-06-15|EPI\_ISL\_694675|Original|hCoV-19^^Arizona|Human|TGen North|TGen North|French|USA

>Spike|hCoV-19/England/MILK-A6B29A/2020|2020-10-08|EPI\_ISL\_608737|Original|hCoV-19^^England|Human|Lighthouse Lab in Milton Keynes|Wellcome Sanger Institute for the COVID-19 Genomics UK (COG-UK) consortium|Davies|United Kingdom

>Spike|hCoV-19/USA/ME-HETL-J0097/2020|2020-03-20|EPI\_ISL\_513506|Original|hCoV-19^^Maine|Human|Maine HETL|Tewhey Lab|Tewhey|USA

>Spike|hCoV-19/Brazil/SP-L35-CD902/2020|2020-04-25|EPI\_ISL\_722051|Original|hCoV-19^^S\u00e3o Paulo|Human|Hospital das Cl\u00ednicas Universidade de S\u00e3o Paulo Medical School|Laborat\u00f3rio de Parasitologia M\u00e9dica - Instituto de Medicina Tropical - Universidade de S\u00e3o Paulo|de Jesus|Brazil

>Spike|hCoV-19/Northern Ireland/QEUH-96FFBE/2020|2020-08-18|EPI\_ISL\_540302|Original|hCoV-19^^Northern Ireland|Human|Lighthouse Lab in Glasgow|Wellcome Sanger Institute for the COVID-19 Genomics UK (COG-UK) consortium|Davies|United Kingdom

>Spike|hCoV-19/USA/AZ-TG486811/2020|2020-07-09|EPI\_ISL\_695091|Original|hCoV-19^^Arizona|Human|TGen North|TGen North|French|USA

>Spike|hCoV-19/England/CAMB-1B59C2/2020|2020-07-31|EPI\_ISL\_514447|Original|hCoV-19^^England|Human|Department of Pathology|COVID-19 Genomics UK (COG-UK) Consortium|Meredith|United Kingdom

>Spike|hCoV-19/Spain/IB-IBV-99010768/2020|2020-06-28|EPI\_ISL\_691665|Original|hCoV-19^^Balear Islands|Human|Servicio de Microbiolog\u00eda|SeqCOVID-SPAIN consortium/IBV (CSIC) |Comas|Spain

>Spike|hCoV-19/USA/UT-01886/2020|2020-04-13|EPI\_ISL\_470706|Original|hCoV-19^^Utah|Human|Utah Public Health Laboratory|Utah Public Health Laboratory|Young|USA

>Spike|hCoV-19/England/ALDP-B46DC0/2020|2020-11-07|EPI\_ISL\_656101|Original|hCoV-19^^England|Human|Lighthouse Lab in Alderley Park|Wellcome Sanger Institute for the COVID-19 Genomics UK (COG-UK) Consortium|Davies|United Kingdom

>Spike|hCoV-19/USA/NY-Wadsworth-24149-01/2020|2020-03-19|EPI\_ISL\_525623|Original|hCoV-19^^New York|Human|Wadsworth Center|Wadsworth Center|Plitnick|USA

>Spike|hCoV-19/USA/WI-UW-883/2020|2020-07-15|EPI\_ISL\_509885|Original|hCoV-19^^Wisconsin|Human|University of Wisconsin-Madison AIDS Vaccine Research Laboratories|University of Wisconsin-Madison AIDS Vaccine Research Laboratories|Baczenas|USA

>Spike|hCoV-19/Belgium/regal-12111386/2020|2020-12-11|EPI\_ISL\_738438|Original|hCoV-19^^Mol|Human|UZ Leuven|KU Leuven|Maes|Belgium

>Spike|hCoV-19/England/ALDP-A94043/2020|2020-10-19|EPI\_ISL\_611153|Original|hCoV-19^^England|Human|Lighthouse Lab in Alderley Park|Wellcome Sanger Institute for the COVID-19 Genomics UK (COG-UK) consortium|Davies|United Kingdom

>Spike|hCoV-19/Wales/PHWC-16EBFF/2020|2020-10-02|EPI\_ISL\_585836|Original|hCoV-19^^Wales|Human|Wales Specialist Virology Centre Sequencing lab|COVID-19 Genomics UK (COG-UK) Consortium|Moore|United Kingdom

>Spike|hCoV-19/England/OXON-B34C4/2020|2020-05-26|EPI\_ISL\_534861|Original|hCoV-19^^England|Human|Oxford Viromics|COVID-19 Genomics UK (COG-UK) Consortium|Golubchik|United Kingdom

>Spike|hCoV-19/Wales/PHWC-4A5B44/2020|2020-12-12|EPI\_ISL\_764955|Original|hCoV-19^^Wales|Human|Wales Specialist Virology Centre Sequencing lab|COVID-19 Genomics UK (COG-UK) Consortium|Moore|United Kingdom

>Spike|hCoV-19/USA/MA-MGH-00266/2020|2020-04-01|EPI\_ISL\_460141|Original|hCoV-19^^Massachusetts|Human|Massachusetts General Hospital|Infectious Disease Program|Lemieux|USA

>Spike|hCoV-19/England/20129143204/2020|2020-03-11|EPI\_ISL\_424110|Original|hCoV-19^^England|Human|Respiratory Virus Unit|Respiratory Virus Unit|Platt|United Kingdom

>Spike|hCoV-19/USA/AZ-TG408134/2020|2020-06-14|EPI\_ISL\_694894|Original|hCoV-19^^Arizona|Human|AZ SPHL|TGen North|French|USA

>Spike|hCoV-19/Spain/AR-IBV-2388/2020|2020-03-26|EPI\_ISL\_468786|Original|hCoV-19^^Aragon|Human|Servicio de Microbiolog\u00eda|SeqCOVID-SPAIN consortium/IBV (CSIC) |Comas|Spain

>Spike|hCoV-19/England/CAMC-941B54/2020|2020-07-21|EPI\_ISL\_556857|Original|hCoV-19^^England|Human|Lighthouse Lab in Cambridge|Wellcome Sanger Institute for the COVID-19 Genomics UK (COG-UK) consortium|Davies|United Kingdom

>Spike|hCoV-19/USA/CA-CHLA-PLM24203810/2020|2020-11-04|EPI\_ISL\_753275|Original|hCoV-19^^California|Human|Clinical virology Laboratory|Center for Personalized Medicine|Dien Bard|USA

>Spike|hCoV-19/Japan/IC-0151/2020|2020-08-00|EPI\_ISL\_667580|Original|hCoV-19^^Japan|Human|Pathogen Genomics Center|Pathogen Genomics Center|Sekizuka|Japan

>Spike|hCoV-19/Australia/VIC14546/2020|2020-08-07|EPI\_ISL\_592886|Original|hCoV-19^^Victoria|Human|Microbiological Diagnostic Unit - Public Health Laboratory (MDU-PHL)|MDU-PHL|Schultz|Australia

>Spike|hCoV-19/England/ALDP-AA0ADD/2020|2020-10-22|EPI\_ISL\_625129|Original|hCoV-19^^England|Human|Lighthouse Lab in Alderley Park|Wellcome Sanger Institute for the COVID-19 Genomics UK (COG-UK) consortium|Davies|United Kingdom

>Spike|hCoV-19/England/NORT-294904/2020|2020-03-27|EPI\_ISL\_490452|Original|hCoV-19^^England|Human|Northumbria University / South Tees Hospitals NHS Foundation Trust / North Cumbria Integrated Care NHS Foundation Trust / North Tees and Hartlepool NHS Foundation Trust / Newcastle Hospitals NHS Foundation Trust|COVID-19 Genomics UK (COG-UK) Consortium|Bashton|United Kingdom

>Spike|hCoV-19/England/MILK-487A69/2020|2020-05-14|EPI\_ISL\_559686|Original|hCoV-19^^England|Human|Lighthouse Lab in Milton Keynes|Wellcome Sanger Institute for the COVID-19 Genomics UK (COG-UK) consortium|Davies|United Kingdom

>Spike|hCoV-19/Northern Ireland/QEUI-961BE5/2020|2020-08-02|EPI\_ISL\_537066|Original|hCoV-19^^Northern Ireland|Human|Lighthouse Lab in Glasgow|Wellcome Sanger Institute for the COVID-19 Genomics UK (COG-UK) consortium|Davies|United Kingdom

>Spike|hCoV-19/England/NORT-2949B9/2020|2020-03-27|EPI\_ISL\_488581|Original|hCoV-19^^England|Human|NU-OMICS DNA Sequencing research facility|Wellcome Sanger Institute for the COVID-19 Genomics UK (COG-UK) consortium|Davies|United Kingdom

>Spike|hCoV-19/USA/NY-Wadsworth-292807-01/2020|2020-12-25|EPI\_ISL\_769967|Original|hCoV-19^^New York|Human|Albany Medical Center Hospital Clinical Laboratories|Wadsworth Center|Lasek-Nesselquist|USA

>Spike|hCoV-19/USA/CA-ALSR-0550-SAN/2020|2020-05-05|EPI\_ISL\_483216|Original|hCoV-19^^California|Human|UC San Diego Center for Advanced Laboratory Medicine|Andersen lab at Scripps Research|Gangavarapu|USA

>Spike|hCoV-19/England/BRIS-12C44D/2020|2020-05-12|EPI\_ISL\_469467|Original|hCoV-19^^England|Human|PHE South West Regional Laboratory|Wellcome Sanger Institute for the COVID-19 Genomics UK (COG-UK) consortium|Davies|United Kingdom

>Spike|hCoV-19/Denmark/DCGC-1703/2020|2020-06-29|EPI\_ISL\_618170|Original|hCoV-19^^Nordjylland|Human|Department of Virus and Microbiological Special Diagnostics|Albertsen lab|Michaelsen|Denmark

>Spike|hCoV-19/Wales/PHWC-499C04/2020|2020-11-30|EPI\_ISL\_727417|Original|hCoV-19^^Wales|Human|Originating lab|COVID-19 Genomics UK (COG-UK) Consortium|Moore|United Kingdom

>Spike|hCoV-19/Denmark/DCGC-3773/2020|2020-05-04|EPI\_ISL\_622630|Original|hCoV-19^^Hovedstaden|Human|Department of Virus and Microbiological Special Diagnostics|Albertsen lab|Michaelsen|Denmark

>Spike|hCoV-19/Netherlands/NA\_551/2020|2020-03-31|EPI\_ISL\_460719|Original|hCoV-19^^Netherlands|Human|Dutch COVID-19 response team|Erasmus Medical Center|Oude Munnink|Netherlands

>Spike|hCoV-19/USA/NY-QDX-2667/2020|2020-03-15|EPI\_ISL\_604958|Original|hCoV-19^^New York|Human|Quest Diagnostics|Quest Diagnostics|Kagan|USA

>Spike|hCoV-19/USA/TX-HMH-MCoV-18896/2020|2020-11-25|EPI\_ISL\_785204|Original|hCoV-19^^Texas|Human|Houston Methodist Hospital|Houston Methodist Hospital|Long|USA

>Spike|hCoV-19/Denmark/DCGC-20695/2020|2020-12-21|EPI\_ISL\_759306|Original|hCoV-19^^Nordjylland|Human|Department of Virus and Microbiological Special Diagnostics|Albertsen Lab|Michaelsen|Denmark

>Spike|hCoV-19/Wales/PHWC-47EE0F/2020|2020-10-07|EPI\_ISL\_595595|Original|hCoV-19^^Wales|Human|Originating lab|COVID-19 Genomics UK (COG-UK) Consortium|Moore|United Kingdom

>Spike|hCoV-19/USA/HI-H200212/2020|2020-08-14|EPI\_ISL\_752771|Original|hCoV-19^^Hawaii|Human|State Laboratories Division|State Laboratories Division|Sultana|USA

>Spike|hCoV-19/USA/MA-MASPHL-00485/2020|2020-05-01|EPI\_ISL\_693082|Original|hCoV-19^^Massachusetts|Human|Massachusetts State Public Health Laboratory|Massachusetts State Public Health Laboratory|Lang|USA

>Spike|hCoV-19/England/QEUEH-AF6012/2020|2020-10-30|EPI\_ISL\_653042|Original|hCoV-19^^England|Human|Quadram Institute Bioscience|COVID-19 Genomics UK (COG-UK) Consortium|Alikhan|United Kingdom

>Spike|hCoV-19/England/CAMC-C26BF8/2020|2020-12-07|EPI\_ISL\_783019|Original|hCoV-19^^England|Human|Lighthouse Lab in Cambridge|Wellcome Sanger Institute for the COVID-19 Genomics UK (COG-UK) Consortium|Davies|United Kingdom

>Spike|hCoV-19/England/ALDP-9C4DAE/2020|2020-09-10|EPI\_ISL\_567732|Original|hCoV-19^^England|Human|Lighthouse Lab in Alderley Park|Wellcome Sanger Institute for the COVID-19 Genomics UK (COG-UK) consortium|Davies|United Kingdom

>Spike|hCoV-19/England/QEUEH-B2D8EC/2020|2020-11-03|EPI\_ISL\_659866|Original|hCoV-19^^England|Human|Lighthouse Lab in Glasgow|Wellcome Sanger Institute for the COVID-19 Genomics UK (COG-UK) Consortium|Davies|United Kingdom

>Spike|hCoV-19/England/QEUEH-B6A9C2/2020|2020-11-11|EPI\_ISL\_662590|Original|hCoV-19^^England|Human|Lighthouse Lab in Glasgow|Wellcome Sanger Institute for the COVID-19 Genomics UK (COG-UK) Consortium|Davies|United Kingdom

>Spike|hCoV-19/England/CAMC-B7A6E6/2020|2020-11-12|EPI\_ISL\_741135|Original|hCoV-19^^England|Human|Oxford Viromics|COVID-19 Genomics UK (COG-UK) Consortium|Golubchik|United Kingdom

>Spike|hCoV-19/England/MILK-AC8987/2020|2020-10-22|EPI\_ISL\_629742|Original|hCoV-19^^England|Human|Lighthouse Lab in Milton Keynes|Wellcome Sanger Institute for the COVID-19 Genomics UK (COG-UK) consortium|Davies|United Kingdom

>Spike|hCoV-19/Denmark/DCGC-13902/2020|2020-11-30|EPI\_ISL\_713093|Original|hCoV-19^^Sjaelland|Human|Department of Virus and Microbiological Special Diagnostics|Albertsen Lab|Michaelsen|Denmark

>Spike|hCoV-19/England/ALDP-A6EE57/2020|2020-10-15|EPI\_ISL\_607019|Original|hCoV-19^^England|Human|Lighthouse Lab in Alderley Park|Wellcome Sanger Institute for the COVID-19 Genomics UK (COG-UK) consortium|Davies|United Kingdom

>Spike|hCoV-19/England/QEUEH-962DFD/2020|2020-08-11|EPI\_ISL\_531685|Original|hCoV-19^^England|Human|Lighthouse Lab in Glasgow|Wellcome Sanger Institute for the COVID-19 Genomics UK (COG-UK) consortium|Davies|United Kingdom

>Spike|hCoV-19/Norway/3006/2020|2020-07-31|EPI\_ISL\_549069|Original|hCoV-19^^Oslo|Human|Furst Medical Laboratory|Norwegian Institute of Public Health|Kopperud Riis|Norway

>Spike|hCoV-19/France/PDL-SC655/2020|2020-04-23|EPI\_ISL\_649186|Original|hCoV-19^^Pays-de-la-Loire|Human|CHU Nantes|CNR Virus des Infections Respiratoires - France SUD|Bal|France

>Spike|hCoV-19/England/QEUEH-AD3B47/2020|2020-10-26|EPI\_ISL\_634122|Original|hCoV-19^^England|Human|Lighthouse Lab in Glasgow|Wellcome Sanger Institute for the COVID-19 Genomics UK (COG-UK) consortium|Davies|United Kingdom

>Spike|hCoV-19/Northern Ireland/NIRE-FB448/2020|2020-03-20|EPI\_ISL\_441424|Original|hCoV-19^^Northern Ireland|Human|Regional Virus Laboratory|COVID-19 Genomics UK (COG-UK) Consortium|Fairley|United Kingdom

>Spike|hCoV-19/France/PAC-IHU-1584/2020|2020-09-01|EPI\_ISL\_569213|Original|hCoV-19^^Provence-Alpes-C\u00f4te-d\u2019Azur|Human|MEPHI|MEPHI|Levasseur|France

>Spike|hCoV-19/Belgium/UGent-208/2020|2020-10-22|EPI\_ISL\_717587|Original|hCoV-19^^Ghent|Human|Lab voor klinische biologie|Onderzoeksgroep Virologie|Lambrechts|Belgium

>Spike|hCoV-19/USA/TX-HMH-MCoV-10543/2020|2020-07-08|EPI\_ISL\_789529|Original|hCoV-19^^Texas|Human|Houston Methodist Hospital|Houston Methodist Hospital|Long|USA

>Spike|hCoV-19/England/ALDP-95280E/2020|2020-06-11|EPI\_ISL\_554117|Original|hCoV-19^^England|Human|Lighthouse Lab in Alderley Park|Wellcome Sanger Institute for the COVID-19 Genomics UK (COG-UK) consortium|Davies|United Kingdom

>Spike|hCoV-19/England/MILK-BABCBD/2020|2020-11-18|EPI\_ISL\_783202|Original|hCoV-19^^England|Human|Lighthouse Lab in Milton Keynes|Wellcome Sanger Institute for the COVID-19 Genomics UK (COG-UK) Consortium|Davies|United Kingdom

>Spike|hCoV-19/Wales/PHWC-2E127/2020|2020-04-11|EPI\_ISL\_446060|Original|hCoV-19^^Wales|Human|Wales Specialist Virology Centre|Public Health Wales Microbiology Cardiff|Moore|United Kingdom

>Spike|hCoV-19/USA/LA-EVTL1421/2020|2020-12-14|EPI\_ISL\_779087|Original|hCoV-19^^Louisiana|Human|LSUHS Emerging Viral Threat Laboratory|Microbial Genome Sequencing Center|Kamil|USA

>Spike|hCoV-19/England/PORT-2D5DFC/2020|2020-12-18|EPI\_ISL\_765145|Original|hCoV-19^^England|Human|Centre for Enzyme Innovation|COVID-19 Genomics UK (COG-UK) Consortium|Robson|United Kingdom

>Spike|hCoV-19/Russia/IVA-RII-MH3366S/2020|2020-10-07|EPI\_ISL\_733109|Original|hCoV-19^^Ivanovo|Human|HELIX LLC|WHO National Influenza Centre Russian Federation|Komissarov|Russia

>Spike|hCoV-19/England/MILK-B88445/2020|2020-11-13|EPI\_ISL\_674282|Original|hCoV-19^^England|Human|Lighthouse Lab in Milton Keynes|Wellcome Sanger Institute for the COVID-19 Genomics UK (COG-UK) Consortium|Davies|United Kingdom

>Spike|hCoV-19/Denmark/DCGC-22542/2020|2020-12-14|EPI\_ISL\_757627|Original|hCoV-19^^Nordjylland|Human|Department of Virus and Microbiological Special Diagnostics|Albertsen Lab|Michaelsen|Denmark

>Spike|hCoV-19/USA/AZ-TG611130/2020|2020-08-13|EPI\_ISL\_695661|Original|hCoV-19^^Arizona|Human|TGen North|TGen North|French|USA

>Spike|hCoV-19/Denmark/DCGC-13123/2020|2020-11-30|EPI\_ISL\_712597|Original|hCoV-19^^Hovedstaden|Human|Department of Virus and Microbiological Special Diagnostics|Albertsen Lab|Michaelsen|Denmark

>Spike|hCoV-19/England/CAMC-B79201/2020|2020-11-12|EPI\_ISL\_667894|Original|hCoV-19^^England|Human|Lighthouse Lab in Cambridge|Wellcome Sanger Institute for the COVID-19 Genomics UK (COG-UK) Consortium|Davies|United Kingdom

>Spike|hCoV-19/Switzerland/BE-ETHZ-170003/2020|2020-06-26|EPI\_ISL\_486518|Original|hCoV-19^^Bern|Human|Viollier AG|Department of Biosystems Science and Engineering|Nadeau|Switzerland

>Spike|hCoV-19/Switzerland/SZ-ETHZ-100096/2020|2020-03-12|EPI\_ISL\_451688|Original|hCoV-19^^Schwyz|Human|Viollier AG|Department of Biosystems Science and Engineering|Nadeau|Switzerland

>Spike|hCoV-19/Vietnam/VNHN\_1492/2020|2020-03-21|EPI\_ISL\_455699|Original|hCoV-19^^Hanoi|Human|National Hospital of Tropical Diseases|Oxford University Clinical Research Unit|Nguyen|Vietnam

>Spike|hCoV-19/Kenya/C3739/2020|2020-05-04|EPI\_ISL\_568717|Original|hCoV-19^^Kwale|Human|KEMRI-Wellcome Trust Research Programme/KEMRI-CGMR-C Kilifi|KEMRI-Wellcome Trust Research Programme/KEMRI-CGMR-C Kilifi|Githinji|Kenya

>Spike|hCoV-19/Hungary/UD-90635/2020|2020-10-04|EPI\_ISL\_671477|Original|hCoV-19^^Szabolcs-Szatm\u00e9l\u00e9r-Bereg county|Human|University of Debrecen|National Laboratory of Virology|Kemenesi|Hungary

>Spike|hCoV-19/England/QEUA-A0B029/2020|2020-10-01|EPI\_ISL\_599205|Original|hCoV-19^^England|Human|Lighthouse Lab in Glasgow|Wellcome Sanger Institute for the COVID-19 Genomics UK (COG-UK) consortium|Davies|United Kingdom

>Spike|hCoV-19/England/CAMC-B548CE/2020|2020-11-09|EPI\_ISL\_658076|Original|hCoV-19^^England|Human|Lighthouse Lab in Cambridge|Wellcome Sanger Institute for the COVID-19 Genomics UK (COG-UK) Consortium|Davies|United Kingdom

>Spike|hCoV-19/USA/NV-NSPHL-A0199/2020|2020-05-27|EPI\_ISL\_515453|Original|hCoV-19^^Nevada|Human|Nevada State Public Health Laboratory|Nevada State Public Health Laboratory|Sevinsky|USA

>Spike|hCoV-19/England/MILK-A6B458/2020|2020-10-09|EPI\_ISL\_608722|Original|hCoV-19^^England|Human|Lighthouse Lab in Milton Keynes|Wellcome Sanger Institute for the COVID-19 Genomics UK (COG-UK) consortium|Davies|United Kingdom

>Spike|hCoV-19/Scotland/EDB3502/2020|2020-04-13|EPI\_ISL\_439275|Original|hCoV-19^^Scotland|Human|Virology Department|COVID-19 Genomics UK (COG-UK) Consortium|Williams|United Kingdom

>Spike|hCoV-19/England/MILK-B972FE/2020|2020-11-14|EPI\_ISL\_674835|Original|hCoV-19^^England|Human|Lighthouse Lab in Milton Keynes|Wellcome Sanger Institute for the COVID-19 Genomics UK (COG-UK) Consortium|Davies|United Kingdom

>Spike|hCoV-19/England/NORW-F588E/2020|2020-11-07|EPI\_ISL\_665372|Original|hCoV-19^^England|Human|Quadram Institute Bioscience|COVID-19 Genomics UK (COG-UK) Consortium|Alikhan|United Kingdom

>Spike|hCoV-19/Denmark/DCGC-11300/2020|2020-11-02|EPI\_ISL\_670824|Original|hCoV-19^^Hovedstaden|Human|Department of Virus and Microbiological Special Diagnostics|Albertsen Lab|Michaelsen|Denmark

>Spike|hCoV-19/England/ALDP-9C4D08/2020|2020-09-10|EPI\_ISL\_567674|Original|hCoV-19^^England|Human|Lighthouse Lab in Alderley Park|Wellcome Sanger Institute for the COVID-19 Genomics UK (COG-UK) consortium|Davies|United Kingdom

>Spike|hCoV-19/England/ALDP-6B11F6/2020|2020-07-01|EPI\_ISL\_557910|Original|hCoV-19^^England|Human|Lighthouse Lab in Alderley Park|Wellcome Sanger Institute for the COVID-19 Genomics UK (COG-UK) consortium|Davies|United Kingdom

>Spike|hCoV-19/USA/OR-OHSU-0294/2020|2020-05-20|EPI\_ISL\_509094|Original|hCoV-19^^Oregon|Human|OHSU Lab Services Molecular Microbiology Lab|Oregon SARS-CoV-2 Genome Sequencing Center|O'Roak|USA

>Spike|hCoV-19/USA/LA-EVTL153/2020|2020-04-01|EPI\_ISL\_455996|Original|hCoV-19^^Louisiana|Human|LSUHS Emerging Viral Threat Laboratory|Microbial Genome Sequencing Center|Kamil|USA

>Spike|hCoV-19/Hong Kong/VM20002961/2020|2020-02-26|EPI\_ISL\_426402|Original|hCoV-19^^Hong Kong|Human|Queen Mary Hospital|Hong Kong Department of Health|Mak|China

>Spike|hCoV-19/Australia/VIC9949/2020|2020-07-23|EPI\_ISL\_565798|Original|hCoV-19^^Victoria|Human|Microbiological Diagnostic Unit - Public Health Laboratory (MDU-PHL)|MDU-PHL|Schultz|Australia

>Spike|hCoV-19/England/MILK-569677/2020|2020-06-10|EPI\_ISL\_558279|Original|hCoV-19^^England|Human|Lighthouse Lab in Milton Keynes|Wellcome Sanger Institute for the COVID-19 Genomics UK (COG-UK) consortium|Davies|United Kingdom

>Spike|hCoV-19/England/204221297/2020|2020-10-12|EPI\_ISL\_603206|Original|hCoV-19^^England|Human|Respiratory Virus Unit|Respiratory Virus Unit|Platt|United Kingdom

>Spike|hCoV-19/Wales/PHWC-16DDDC/2020|2020-09-27|EPI\_ISL\_577536|Original|hCoV-19^^Wales|Human|Wales Specialist Virology Centre Sequencing lab|COVID-19 Genomics UK (COG-UK) Consortium|Moore|United Kingdom

>Spike|hCoV-19/USA/IL-NM072/2020|2020-03-18|EPI\_ISL\_444567|Original|hCoV-19^^Illinois|Human|Northwestern Memorial Hospital|Ozer Lab|Ozer|USA

>Spike|hCoV-19/Denmark/DCGC-11607/2020|2020-11-02|EPI\_ISL\_671021|Original|hCoV-19^^Hovedstaden|Human|Department of Virus and Microbiological Special Diagnostics|Albertsen Lab|Michaelsen|Denmark

>Spike|hCoV-19/England/ALDP-B1AB61/2020|2020-11-01|EPI\_ISL\_647752|Original|hCoV-19^^England|Human|Lighthouse Lab in Alderley Park|Wellcome Sanger Institute for the COVID-19 Genomics UK (COG-UK) Consortium|Davies|United Kingdom

>Spike|hCoV-19/USA/MN-MDH-1652/2020|2020-08-18|EPI\_ISL\_539846|Original|hCoV-19^^Minnesota|Human|Mayo Clinic & Mayo Clinic Laboratories|Minnesota Department of Health|Garfin|USA

>Spike|hCoV-19/Scotland/EDB5415/2020|2020-04-06|EPI\_ISL\_487717|Original|hCoV-19^^Scotland|Human|Virology Department|Wellcome Sanger Institute for the COVID-19 Genomics UK (COG-UK) consortium|Davies|United Kingdom

>Spike|hCoV-19/USA/TX-DSHS-0564/2020|2020-05-14|EPI\_ISL\_574466|Original|hCoV-19^^Texas|Human|Texas Department of State Health Services|Texas Department of State Health Services|Rahman|USA

>Spike|hCoV-19/Denmark/DCGC-5041/2020|2020-09-14|EPI\_ISL\_621775|Original|hCoV-19^^Hovedstaden|Human|Department of Virus and Microbiological Special Diagnostics|Albertsen lab|Michaelsen|Denmark

>Spike|hCoV-19/England/QEUH-AF63CE/2020|2020-10-29|EPI\_ISL\_653057|Original|hCoV-19^^England|Human|Quadram Institute Bioscience|COVID-19 Genomics UK (COG-UK) Consortium|Alikhan|United Kingdom

>Spike|hCoV-19/England/MILK-BB0268/2020|2020-11-18|EPI\_ISL\_720046|Original|hCoV-19^^England|Human|Lighthouse Lab in Milton Keynes|Wellcome Sanger Institute for the COVID-19 Genomics UK (COG-UK) Consortium|Davies|United Kingdom

>Spike|hCoV-19/Denmark/DCGC-16984/2020|2020-12-14|EPI\_ISL\_750688|Original|hCoV-19^^Midtjylland|Human|Department of Virus and Microbiological Special Diagnostics|Albertsen Lab|Michaelsen|Denmark



>Spike|hCoV-19/USA/UT-UPHL-201131519/2020|2020-10-06|EPI\_ISL\_634926|Original|hCoV-19^^Utah|Human|Utah Public Health Laboratory|Utah Public Health Laboratory|Young|USA

>Spike|hCoV-19/Germany/BY-MVP-0045/2020|2020-03-08|EPI\_ISL\_437244|Original|hCoV-19^^Bavaria|Human|Max von Pettenkofer Institute|Laboratory for Functional Genome Analysis|Graf|Germany

>Spike|hCoV-19/England/MILK-A45BE6/2020|2020-10-06|EPI\_ISL\_598652|Original|hCoV-19^^England|Human|Lighthouse Lab in Milton Keynes|Wellcome Sanger Institute for the COVID-19 Genomics UK (COG-UK) consortium|Davies|United Kingdom

>Spike|hCoV-19/England/OXON-ADA16/2020|2020-00-00|EPI\_ISL\_448609|Original|hCoV-19^^England|Human|Oxford Viromics|COVID-19 Genomics UK (COG-UK) Consortium|Golubchik|United Kingdom

>Spike|hCoV-19/Scotland/QEUEH-9C7CAE/2020|2020-09-15|EPI\_ISL\_576032|Original|hCoV-19^^Scotland|Human|Lighthouse Lab in Glasgow|Wellcome Sanger Institute for the COVID-19 Genomics UK (COG-UK) consortium|Davies|United Kingdom

>Spike|hCoV-19/England/QEUEH-BCCE74/2020|2020-11-26|EPI\_ISL\_704290|Original|hCoV-19^^England|Human|Lighthouse Lab in Glasgow|Wellcome Sanger Institute for the COVID-19 Genomics UK (COG-UK) Consortium|Davies|United Kingdom

>Spike|hCoV-19/England/SHEF-C6C02/2020|2020-04-11|EPI\_ISL\_441998|Original|hCoV-19^^England|Human|Virology Department|COVID-19 Genomics UK (COG-UK) Consortium|de Silva|United Kingdom

>Spike|hCoV-19/South Africa/R12662-20/2020|2020-06-16|EPI\_ISL\_504215|Original|hCoV-19^^North West|Human|National Institute for Communicable Diseases of the National Health Laboratory Service|National Institute for Communicable Diseases of the National Health Laboratory Service|Allam|South Africa

>Spike|hCoV-19/Denmark/DCGC-21763/2020|2020-12-21|EPI\_ISL\_757774|Original|hCoV-19^^Hovedstaden|Human|Department of Virus and Microbiological Special Diagnostics|Albertsen Lab|Michaelsen|Denmark

>Spike|hCoV-19/USA/CA-ALSR-3236/2020|2020-07-28|EPI\_ISL\_635927|Original|hCoV-19^^California|Human|San Diego County Public Health Laboratory|Andersen lab at Scripps Research|Gangavarapu|USA

>Spike|hCoV-19/USA/TX-HMH-6196/2020|2020-07-04|EPI\_ISL\_547305|Original|hCoV-19^^Texas|Human|Houston Methodist Hospital|Houston Methodist Hospital|Long|USA

>Spike|hCoV-19/Singapore/132nan/2020|2020-03-21|EPI\_ISL\_648069|Original|hCoV-19^^Singapore|Human|Department of Laboratory Medicine|Department of Laboratory Medicine|Chen|Singapore

>Spike|hCoV-19/South Korea/KDCA0145/2020|2020-10-20|EPI\_ISL\_747380|Original|hCoV-19^^South Korea|Human|Division of Emerging Infectious Diseases|Division of Emerging Infectious Diseases|Park|South Korea

>Spike|hCoV-19/England/CAMC-B37120/2020|2020-11-05|EPI\_ISL\_645306|Original|hCoV-19^^England|Human|Lighthouse Lab in Cambridge|Wellcome Sanger Institute for the COVID-19 Genomics UK (COG-UK) Consortium|Davies|United Kingdom

>Spike|hCoV-19/USA/WA-S2659/2020|2020-06-21|EPI\_ISL\_497291|Original|hCoV-19^^Washington|Human|Washington State Department of Health|Seattle Flu Study|Lee|USA

>Spike|hCoV-19/Wales/PHWC-488822/2020|2020-11-01|EPI\_ISL\_639434|Original|hCoV-19^^Wales|Human|Wales Specialist Virology Centre Sequencing lab|COVID-19 Genomics UK (COG-UK) Consortium|Moore|United Kingdom

>Spike|hCoV-19/USA/NY-Wadsworth-290495-01/2020|2020-12-23|EPI\_ISL\_767530|Original|hCoV-19^^New York|Human|Wadsworth Center|Wadsworth Center|Lasek-Nesselquist|USA

>Spike|hCoV-19/Denmark/DCGC-18324/2020|2020-12-07|EPI\_ISL\_749390|Original|hCoV-19^^Syddanmark|Human|Department of Virus and Microbiological Special Diagnostics|Albertsen Lab|Michaelsen|Denmark

>Spike|hCoV-19/Denmark/DCGC-8312/2020|2020-10-26|EPI\_ISL\_617294|Original|hCoV-19^^Midtjylland|Human|Department of Virus and Microbiological Special Diagnostics|Albertsen lab|Michaelsen|Denmark

>Spike|hCoV-19/England/QEUEH-9F7926/2020|2020-09-27|EPI\_ISL\_595712|Original|hCoV-19^^England|Human|Oxford Viromics|COVID-19 Genomics UK (COG-UK) Consortium|Golubchik|United Kingdom

>Spike|hCoV-19/Canada/ON-PHL-20-03817/2020|2020-11-00|EPI\_ISL\_775028|Original|hCoV-19^^Ontario|Human|Public Health Ontario Laboratory|Public Health Ontario Laboratory|Guthrie|Canada

>Spike|hCoV-19/England/QEUEH-95FE5A/2020|2020-08-03|EPI\_ISL\_531916|Original|hCoV-19^^England|Human|Lighthouse Lab in Glasgow|Wellcome Sanger Institute for the COVID-19 Genomics UK (COG-UK) consortium|Davies|United Kingdom

>Spike|hCoV-19/USA/AZ-TG328534/2020|2020-05-26|EPI\_ISL\_694344|Original|hCoV-19^^Arizona|Human|TGen North|TGen North|French|USA

>Spike|hCoV-19/England/ALDP-BCA8B4/2020|2020-11-23|EPI\_ISL\_703814|Original|hCoV-19^^England|Human|Lighthouse Lab in Alderley Park|Wellcome Sanger Institute for the COVID-19 Genomics UK (COG-UK) Consortium|Davies|United Kingdom

>Spike|hCoV-19/Bangladesh/DNAS-CPH-isl-475/2020|2020-04-29|EPI\_ISL\_605883|Original|hCoV-19^^Bangladesh|Human|NGS Lab|NGS Lab|Rabbi|Bangladesh

>Spike|hCoV-19/England/MILK-9C1F7E/2020|2020-09-10|EPI\_ISL\_566509|Original|hCoV-19^^England|Human|Lighthouse Lab in Milton Keynes|Wellcome Sanger Institute for the COVID-19 Genomics UK (COG-UK) consortium|Davies|United Kingdom

>Spike|hCoV-19/England/ALDP-C49CA1/2020|2020-12-11|EPI\_ISL\_718798|Original|hCoV-19^^England|Human|Lighthouse Lab in Alderley Park|Wellcome Sanger Institute for the COVID-19 Genomics UK (COG-UK) Consortium|Davies|United Kingdom

>Spike|hCoV-19/England/NORT-285E61/2020|2020-06-06|EPI\_ISL\_493465|Original|hCoV-19^^England|Human|Northumbria University / South Tees Hospitals NHS Foundation Trust / North Cumbria Integrated Care NHS Foundation Trust / North Tees and Hartlepool NHS Foundation Trust / Newcastle Hospitals NHS Foundation Trust|COVID-19 Genomics UK (COG-UK) Consortium|Bashton|United Kingdom

>Spike|hCoV-19/England/204881318/2020|2020-11-00|EPI\_ISL\_678827|Original|hCoV-19^^England|Human|Respiratory Virus Unit|COVID-19 Genomics UK (COG-UK) Consortium|Platt|United Kingdom

>Spike|hCoV-19/England/QEUEH-9CA5FB/2020|2020-09-10|EPI\_ISL\_567350|Original|hCoV-19^^England|Human|Lighthouse Lab in Glasgow|Wellcome Sanger Institute for the COVID-19 Genomics UK (COG-UK) consortium|Davies|United Kingdom

>Spike|hCoV-19/Wales/PHWC-499A73/2020|2020-12-05|EPI\_ISL\_727395|Original|hCoV-19^^Wales|Human|Originating lab|COVID-19 Genomics UK (COG-UK) Consortium|Moore|United Kingdom

>Spike|hCoV-19/Kenya/C7409/2020|2020-05-17|EPI\_ISL\_568839|Original|hCoV-19^^Taita Taveta|Human|KEMRI-Wellcome Trust Research Programme/KEMRI-CGMR-C Kilifi|KEMRI-Wellcome Trust Research Programme/KEMRI-CGMR-C Kilifi|Githinji|Kenya

>Spike|hCoV-19/Scotland/CVR702/2020|2020-03-25|EPI\_ISL\_433327|Original|hCoV-19^^Scotland|Human|West of Scotland Specialist Virology Centre|COVID-19 Genomics UK (COG-UK) Consortium|Robertson|United Kingdom

>Spike|hCoV-19/USA/MI-MDHHS-SC20487/2020|2020-03-31|EPI\_ISL\_460026|Original|hCoV-19^^Michigan|Human|Michigan Department of Health and Human Services|Michigan Department of Health and Human Services|Blankenship|USA

>Spike|hCoV-19/Australia/VIC8795/2020|2020-07-31|EPI\_ISL\_565201|Original|hCoV-19^^Victoria|Human|Victorian Infectious Diseases Reference Laboratory (VIDRL)|VIDRL and MDU-PHL|Schultz|Australia

>Spike|hCoV-19/Scotland/CVR2136/2020|2020-04-10|EPI\_ISL\_490668|Original|hCoV-19^^Scotland|Human|West of Scotland Specialist Virology Centre|COVID-19 Genomics UK (COG-UK) Consortium|Robertson|United Kingdom

>Spike|hCoV-19/England/MILK-BDC55E/2020|2020-11-27|EPI\_ISL\_709588|Original|hCoV-19^^England|Human|Lighthouse Lab in Milton Keynes|Wellcome Sanger Institute for the COVID-19 Genomics UK (COG-UK) Consortium|Davies|United Kingdom

>Spike|hCoV-19/Singapore/370/2020|2020-04-06|EPI\_ISL\_482675|Original|hCoV-19^^Singapore|Human|Singapore General Hospital|Department of Microbiology|Abdul Rahman|Singapore

>Spike|hCoV-19/USA/FL-BPHL-0399/2020|2020-03-17|EPI\_ISL\_489808|Original|hCoV-19^^Florida|Human|Florida Bureau of Public Health Laboratories|Florida Bureau of Public Health Laboratories|Blanton|USA

>Spike|hCoV-19/Denmark/DCGC-21607/2020|2020-12-21|EPI\_ISL\_758260|Original|hCoV-19^^Syddanmark|Human|Department of Virus and Microbiological Special Diagnostics|Albertsen Lab|Michaelsen|Denmark

>Spike|hCoV-19/Wales/ALDP-94C773/2020|2020-06-15|EPI\_ISL\_555860|Original|hCoV-19^^Wales|Human|Lighthouse Lab in Alderley Park|Wellcome Sanger Institute for the COVID-19 Genomics UK (COG-UK) consortium|Davies|United Kingdom

>Spike|hCoV-19/United Arab Emirates/0960/2020|2020-06-28|EPI\_ISL\_699096|Original|hCoV-19^^Abu Dhabi|Human|Group 42 (G42) Healthcare|G42 Healthcare|Ogrodzki|United Arab Emirates

>Spike|hCoV-19/Germany/HH-hpi-p1881/2020|2020-03-24|EPI\_ISL\_776225|Original|hCoV-19^^Hamburg|Human|University Medical Center Hamburg Eppendorf|Heinrich Pette Institute|Robitaille|Germany

>Spike|hCoV-19/USA/WI-GMF-18658/2020|2020-09-03|EPI\_ISL\_547772|Original|hCoV-19^^Wisconsin|Human|Gundersen Molecular Diagnostics Laboratory|Kabara Cancer Research Institute|Kenny|USA

>Spike|hCoV-19/England/ALDP-9E6C30/2020|2020-09-24|EPI\_ISL\_580513|Original|hCoV-19^^England|Human|Lighthouse Lab in Alderley Park|Wellcome Sanger Institute for the COVID-19 Genomics UK (COG-UK) consortium|Davies|United Kingdom

>Spike|hCoV-19/Spain/AR-IBV-97009527/2020|2020-11-14|EPI\_ISL\_671804|Original|hCoV-19^^Aragon|Human|Hospital Cl\u00ednico Universitario Lozano Blesa de Zaragoza (Espa\u00f1a)|SeqCOVID-SPAIN consortium/IBV(CSIC)|Comas|Spain

>Spike|hCoV-19/England/ALDP-B47020/2020|2020-11-07|EPI\_ISL\_656135|Original|hCoV-19^^England|Human|Lighthouse Lab in Alderley Park|Wellcome Sanger Institute for the COVID-19 Genomics UK (COG-UK) Consortium|Davies|United Kingdom

>Spike|hCoV-19/Netherlands/un-EMC-799/2020|2020-11-02|EPI\_ISL\_722680|Original|hCoV-19^^Netherlands|Human|Dutch COVID-19 response team|Erasmus Medical Center|Oude Munnink|Netherlands

>Spike|hCoV-19/Norway/3841/2020|2020-09-28|EPI\_ISL\_591008|original|hCoV-19^^Vestland|Human|Foerde Hospital|Norwegian Institute of Public Health|Vollan|Norway

>Spike|hCoV-19/Switzerland/BL-42216293/2020|2020-04-01|EPI\_ISL\_581813|Original|hCoV-19^^Basel-Land|Human|University Hospital Basel|University Hospital Basel|Roloff Handschin|Switzerland

>Spike|hCoV-19/USA/CO-CDPHE-2010120393/2020|2020-10-09|EPI\_ISL\_710351|Original|hCoV-19^^Colorado|Human|Colorado Department of Public Health and Environment|Colorado Department of Public Health and Environment|Bankers|USA

>Spike|hCoV-19/Peru/CAL-INS-163/2020|2020-03-21|EPI\_ISL\_536556|Original|hCoV-19^^Callao|Human|Instituto Nacional de Salud|Laboratorio de Infecciones Respiratorias Agudas|Lopez|Peru

>Spike|hCoV-19/Netherlands/Utrecht\_31/2020|2020-04-23|EPI\_ISL\_461229|Original|hCoV-19^^Utrecht|Human|Dutch COVID-19 response team|Erasmus Medical Center|Oude Munnink|Netherlands

>Spike|hCoV-19/France/PAC-IHU-0194/2020|2020-03-27|EPI\_ISL\_569361|Original|hCoV-19^^Provence-Alpes-C\u00f4te-d\u2019Azur|Human|MEPHI|MEPHI|Levasseur|France

>Spike|hCoV-19/England/CAMC-9ECB1F/2020|2020-09-23|EPI\_ISL\_594640|Original|hCoV-19^^England|Human|Oxford Viromics|COVID-19 Genomics UK (COG-UK) Consortium|Golubchik|United Kingdom

>Spike|hCoV-19/Finland/9CB12/2020|2020-12-03|EPI\_ISL\_732622|Original|hCoV-19^^Uusimaa|Human|Department of Virology and Immunology|Department of Virology|Smura|Finland

>Spike|hCoV-19/USA/LA-GBCL-26791746/2020|2020-04-06|EPI\_ISL\_485362|Original|hCoV-19^^Louisiana|Human|River Road Testing Lab|Ginkgo Bioworks Clinical Laboratory|Smith|USA

>Spike|hCoV-19/Japan/PG-8561/2020|2020-08-00|EPI\_ISL\_686157|Original|hCoV-19^^Japan|Human|Pathogen Genomics Center|Pathogen Genomics Center|Sekizuka|Japan

>Spike|hCoV-19/Scotland/EDB3021/2020|2020-04-03|EPI\_ISL\_456909|Original|hCoV-19^^Scotland|Human|Virology Department|COVID-19 Genomics UK (COG-UK) Consortium|Williams|United Kingdom

>Spike|hCoV-19/USA/WI-UW-1790/2020|2020-09-14|EPI\_ISL\_605662|Original|hCoV-19^^Wisconsin|Human|University of Wisconsin-Madison AIDS Vaccine Research Laboratories|University of Wisconsin-Madison AIDS Vaccine Research Laboratories|Baczenas|USA

>Spike|hCoV-19/England/NORW-E9137/2020|2020-04-28|EPI\_ISL\_461823|Original|hCoV-19^^England|Human|Quadram Institute Bioscience|COVID-19 Genomics UK (COG-UK) Consortium|Alikhan|United Kingdom

>Spike|hCoV-19/Wales/PHWC-48BD3F/2020|2020-10-27|EPI\_ISL\_666350|Original|hCoV-19^^Wales|Human|Wales Specialist Virology Centre Sequencing lab|COVID-19 Genomics UK (COG-UK) Consortium|Moore|United Kingdom

>Spike|hCoV-19/England/MILK-ABB574/2020|2020-10-22|EPI\_ISL\_631040|Original|hCoV-19^^England|Human|Lighthouse Lab in Milton Keynes|Wellcome Sanger Institute for the COVID-19 Genomics UK (COG-UK) consortium|Davies|United Kingdom

>Spike|hCoV-19/England/MILK-ACC2D3/2020|2020-10-21|EPI\_ISL\_629193|Original|hCoV-19^^England|Human|Lighthouse Lab in Milton Keynes|Wellcome Sanger Institute for the COVID-19 Genomics UK (COG-UK) consortium|Davies|United Kingdom

>Spike|hCoV-19/England/MILK-B96E64/2020|2020-11-14|EPI\_ISL\_675011|Original|hCoV-19^^England|Human|Lighthouse Lab in Milton Keynes|Wellcome Sanger Institute for the COVID-19 Genomics UK (COG-UK) Consortium|Davies|United Kingdom

>Spike|hCoV-19/England/QEUH-9B9C36/2020|2020-09-05|EPI\_ISL\_549743|Original|hCoV-19^^England|Human|Lighthouse Lab in Glasgow|Wellcome Sanger Institute for the COVID-19 Genomics UK (COG-UK) consortium|Davies|United Kingdom

>Spike|hCoV-19/Wales/PHWC-493666/2020|2020-11-29|EPI\_ISL\_725920|Original|hCoV-19^^Wales|Human|Originating lab|COVID-19 Genomics UK (COG-UK) Consortium|Moore|United Kingdom

>Spike|hCoV-19/Denmark/DCGC-20100/2020|2020-12-07|EPI\_ISL\_747619|Original|hCoV-19^^Syddanmark|Human|Department of Virus and Microbiological Special Diagnostics|Albertsen Lab|Michaelsen|Denmark

>Spike|hCoV-19/Switzerland/ZH-ETHZ-240003/2020|2020-08-07|EPI\_ISL\_523858|Original|hCoV-19^^Zurich|Human|Viollier AG|Department of Biosystems Science and Engineering|Nadeau|Switzerland

>Spike|hCoV-19/India/TG-CDFD-N5334/2020|2020-05-31|EPI\_ISL\_528625|Original|hCoV-19^^Telangana|Human|National Genomics Core-Center for DNA Fingerprinting and Diagnostics|National Genomics Core-Center for DNA Fingerprinting and Diagnostics (NGC-CDFD)- DBT's PAN-INDIA-1000 Genome consortium|Vashisht|India

>Spike|hCoV-19/England/LOND-D5B30/2020|2020-04-17|EPI\_ISL\_457302|Original|hCoV-19^^England|Human|University College London|COVID-19 Genomics UK (COG-UK) Consortium|Roy|United Kingdom

>Spike|hCoV-19/USA/TX-HMH-MCoV-10938/2020|2020-07-09|EPI\_ISL\_789203|Original|hCoV-19^^Texas|Human|Houston Methodist Hospital|Houston Methodist Hospital|Long|USA

>Spike|hCoV-19/Wales/PHWC-16DCA2/2020|2020-09-27|EPI\_ISL\_577517|Original|hCoV-19^^Wales|Human|Wales Specialist Virology Centre Sequencing lab|COVID-19 Genomics UK (COG-UK) Consortium|Moore|United Kingdom

>Spike|hCoV-19/USA/MN-MDH-1209/2020|2020-05-19|EPI\_ISL\_477298|Original|hCoV-19^^Minnesota|Human|Mayo Clinic & Mayo Clinic Laboratories|Minnesota Department of Health|Garfin|USA

>Spike|hCoV-19/Wales/PHWC-16CB97/2020|2020-09-21|EPI\_ISL\_574142|Original|hCoV-19^^Wales|Human|Wales Specialist Virology Centre Sequencing lab|COVID-19 Genomics UK (COG-UK) Consortium|Moore|United Kingdom

>Spike|hCoV-19/Wales/ALDP-C3BEE8/2020|2020-12-10|EPI\_ISL\_767286|Original|hCoV-19^^Wales|Human|Lighthouse Lab in Alderley Park|Wellcome Sanger Institute for the COVID-19 Genomics UK (COG-UK) Consortium|Davies|United Kingdom

>Spike|hCoV-19/Scotland/EDB7917/2020|2020-09-24|EPI\_ISL\_585450|Original|hCoV-19^^Scotland|Human|Virology Department|COVID-19 Genomics UK (COG-UK) Consortium|McHugh|United Kingdom

>Spike|hCoV-19/Denmark/DCGC-11493/2020|2020-11-02|EPI\_ISL\_670956|Original|hCoV-19^^Hovedstaden|Human|Department of Virus and Microbiological Special Diagnostics|Albertsen Lab|Michaelsen|Denmark

>Spike|hCoV-19/England/MILK-BB009B/2020|2020-11-18|EPI\_ISL\_720562|Original|hCoV-19^^England|Human|Lighthouse Lab in Milton Keynes|Wellcome Sanger Institute for the COVID-19 Genomics UK (COG-UK) Consortium|Davies|United Kingdom

>Spike|hCoV-19/USA/TX-HMH-2943/2020|2020-06-09|EPI\_ISL\_543879|Original|hCoV-19^^Texas|Human|Houston Methodist Hospital|Houston Methodist Hospital|Long|USA

>Spike|hCoV-19/England/ALDP-A68743/2020|2020-10-12|EPI\_ISL\_630402|Original|hCoV-19^^England|Human|Lighthouse Lab in Alderley Park|Wellcome Sanger Institute for the COVID-19 Genomics UK (COG-UK) consortium|Davies|United Kingdom

>Spike|hCoV-19/USA/TX-HMH-MCoV-8407/2020|2020-06-22|EPI\_ISL\_784377|Original|hCoV-19^^Texas|Human|Houston Methodist Hospital|Houston Methodist Hospital|Long|USA

>Spike|hCoV-19/Gambia/NPHL-038/2020|2020-00-00|EPI\_ISL\_561205|Original|hCoV-19^^Kombo|Human|MRCG at LSHTM Genomics lab|MRCG at LSHTM Genomics lab|Sesay|Gambia

>Spike|hCoV-19/Scotland/QEUA-9F42C4/2020|2020-09-27|EPI\_ISL\_600789|Original|hCoV-19^^Scotland|Human|Lighthouse Lab in Glasgow|Wellcome Sanger Institute for the COVID-19 Genomics UK (COG-UK) consortium|Davies|United Kingdom

>Spike|hCoV-19/South Africa/KRISP-0405/2020|2020-06-23|EPI\_ISL\_495530|Original|hCoV-19^^KwaZulu-Natal|Human|NHL-IALCH|KRISP|de Oliveira|South Africa

>Spike|hCoV-19/Japan/PG-6366/2020|2020-08-00|EPI\_ISL\_689477|Original|hCoV-19^^Japan|Human|Fukuoka Institute of Health and Environmental Sciences|Pathogen Genomics Center|Sekizuka|Japan

>Spike|hCoV-19/Sweden/20-52673/2020|2020-08-17|EPI\_ISL\_582805|Original|hCoV-19^^Halland|Human|Halmstad klinisk mikrobiologi|The Public Health Agency of Sweden|Svartstr\u00f6m|Sweden

>Spike|hCoV-19/Scotland/CVR5076/2020|2020-10-11|EPI\_ISL\_594809|Original|hCoV-19^^Scotland|Human|West of Scotland Specialist Virology Centre|COVID-19 Genomics UK (COG-UK) Consortium|Robertson|United Kingdom

>Spike|hCoV-19/Denmark/ALAB-SSI-1386/2020|2020-04-03|EPI\_ISL\_444852|Original|hCoV-19^^Denmark|Human|Department of Virus and Microbiological Special Diagnostics|Albertsen lab|Kirkegaard|Denmark

>Spike|hCoV-19/England/20139047704/2020|2020-03-29|EPI\_ISL\_420696|Original|hCoV-19^^England|Human|Respiratory Virus Unit|Respiratory Virus Unit|Platt|United Kingdom

>Spike|hCoV-19/Wales/PHWC-4A476F/2020|2020-12-16|EPI\_ISL\_764728|Original|hCoV-19^^Wales|Human|Wales Specialist Virology Centre Sequencing lab|COVID-19 Genomics UK (COG-UK) Consortium|Moore|United Kingdom

>Spike|hCoV-19/England/CWAR-24FDD50/2020|2020-05-05|EPI\_ISL\_584517|Original|hCoV-19^^England|Human|UHCW / University of Warwick|COVID-19 Genomics UK (COG-UK) Consortium|Stark|United Kingdom

>Spike|hCoV-19/England/ALDP-9E624D/2020|2020-09-24|EPI\_ISL\_580506|Original|hCoV-19^^England|Human|Lighthouse Lab in Alderley Park|Wellcome Sanger Institute for the COVID-19 Genomics UK (COG-UK) consortium|Davies|United Kingdom

>Spike|hCoV-19/USA/TX-HMH-MCoV-8475/2020|2020-07-01|EPI\_ISL\_780583|Original|hCoV-19^^Texas|Human|Houston Methodist Hospital|Houston Methodist Hospital|Long|USA

>Spike|hCoV-19/Austria/CeMM0146/2020|2020-02-28|EPI\_ISL\_437994|Original|hCoV-19^^Vienna|Human|Center for Virology|Bergthaler laboratory|Bergthaler|Austria

>Spike|hCoV-19/England/QEUA-AD0B95/2020|2020-10-26|EPI\_ISL\_633900|Original|hCoV-19^^England|Human|Lighthouse Lab in Glasgow|Wellcome Sanger Institute for the COVID-19 Genomics UK (COG-UK) consortium|Davies|United Kingdom

>Spike|hCoV-19/Portugal/PT1749/2020|2020-11-10|EPI\_ISL\_731986|Original|hCoV-19^^Portugal|Human|Instituto Nacional de Saude (INSA)|Instituto Nacional de Saude (INSA)|Borges|Portugal

>Spike|hCoV-19/England/MILK-A7AABE/2020|2020-10-15|EPI\_ISL\_606529|Original|hCoV-19^^England|Human|Lighthouse Lab in Milton Keynes|Wellcome Sanger Institute for the COVID-19 Genomics UK (COG-UK) consortium|Davies|United Kingdom

>Spike|hCoV-19/England/ALDP-C585A4/2020|2020-12-14|EPI\_ISL\_735997|Original|hCoV-19^^England|Human|Lighthouse Lab in Alderley Park|Wellcome Sanger Institute for the COVID-19 Genomics UK (COG-UK) Consortium|Davies|United Kingdom

>Spike|hCoV-19/England/CAMC-BD1832/2020|2020-11-27|EPI\_ISL\_702157|Original|hCoV-19^^England|Human|Lighthouse Lab in Cambridge|Wellcome Sanger Institute for the COVID-19 Genomics UK (COG-UK) Consortium|Davies|United Kingdom

>Spike|hCoV-19/USA/TX-DSHS-1026/2020|2020-03-27|EPI\_ISL\_644180|Original|hCoV-19^^Texas|Human|Texas Department of State Health Services|Texas Department of State Health Services|Rahman|USA

>Spike|hCoV-19/Denmark/DCGC-1329/2020|2020-06-01|EPI\_ISL\_618002|Original|hCoV-19^^Hovedstaden|Human|Department of Virus and Microbiological Special Diagnostics|Albertsen lab|Michaelsen|Denmark

>Spike|hCoV-19/Ireland/D-NVRL-AIIDV1488v1/2020|2020-12-16|EPI\_ISL\_791296|Original|hCoV-19^^Dublin|Human|National Virus Reference Laboratory|Irish Coronavirus Sequencing Consortium - Teagasc Moorepark|Walsh|Ireland

>Spike|hCoV-19/Japan/PG-7845/2020|2020-08-00|EPI\_ISL\_686946|Original|hCoV-19^^Japan|Human|Pathogen Genomics Center|Pathogen Genomics Center|Sekizuka|Japan

>Spike|hCoV-19/USA/WI-UW-333/2020|2020-03-24|EPI\_ISL\_436627|Original|hCoV-19^^Wisconsin|Human|University of Wisconsin-Madison AIDS Vaccine Research Laboratories|University of Wisconsin-Madison AIDS Vaccine Research Laboratories|Baczenas|USA

>Spike|hCoV-19/Russia/OMS-ORINFI-MH10280S/2020|2020-11-06|EPI\_ISL\_733485|Original|hCoV-19^^Omsk|Human|Omsk Research Institute of Natural Focal Infections|WHO National Influenza Centre Russian Federation|Komissarov|Russia

>Spike|hCoV-19/England/ALDP-5AA80B/2020|2020-06-15|EPI\_ISL\_558847|Original|hCoV-19^^England|Human|Lighthouse Lab in Alderley Park|Wellcome Sanger Institute for the COVID-19 Genomics UK (COG-UK) consortium|Davies|United Kingdom

>Spike|hCoV-19/England/CAMC-B22E6D/2020|2020-11-01|EPI\_ISL\_647330|Original|hCoV-19^^England|Human|Lighthouse Lab in Cambridge|Wellcome Sanger Institute for the COVID-19 Genomics UK (COG-UK) Consortium|Davies|United Kingdom

>Spike|hCoV-19/Denmark/DCGC-4521/2020|2020-09-21|EPI\_ISL\_621317|Original|hCoV-19^^Syddanmark|Human|Department of Virus and Microbiological Special Diagnostics|Albertsen lab|Michaelsen|Denmark

>Spike|hCoV-19/USA/UT-QDX-2356/2020|2020-03-14|EPI\_ISL\_604725|Original|hCoV-19^^Utah|Human|Quest Diagnostics|Quest Diagnostics|Kagan|USA

>Spike|hCoV-19/Wales/CAMC-A81E5E/2020|2020-10-14|EPI\_ISL\_625306|Original|hCoV-19^^Wales|Human|Lighthouse Lab in Cambridge|Wellcome Sanger Institute for the COVID-19 Genomics UK (COG-UK) consortium|Davies|United Kingdom

>Spike|hCoV-19/England/QEUEH-B10943/2020|2020-11-02|EPI\_ISL\_642698|Original|hCoV-19^^England|Human|Lighthouse Lab in Glasgow|Wellcome Sanger Institute for the COVID-19 Genomics UK (COG-UK) Consortium|Davies|United Kingdom

>Spike|hCoV-19/England/QEUEH-A8AAD9/2020|2020-10-16|EPI\_ISL\_638872|Original|hCoV-19^^England|Human|Oxford Viromics|COVID-19 Genomics UK (COG-UK) Consortium|Golubchik|United Kingdom

>Spike|hCoV-19/Scotland/CVR5725/2020|2020-11-08|EPI\_ISL\_651936|Original|hCoV-19^^Scotland|Human|West of Scotland Specialist Virology Centre|COVID-19 Genomics UK (COG-UK) Consortium|Robertson|United Kingdom

>Spike|hCoV-19/India/WB-S83/2020|2020-05-26|EPI\_ISL\_511899|Original|hCoV-19^^West Bengal|Human|ICMR-National Institute of Cholera and Enteric Diseases|National Institute of Biomedical Genomics -\u00a0DBT's PAN-INDIA 1000 SARS--CoV-2 RNA Genome Sequencing Consortium|Maitra|India

>Spike|hCoV-19/USA/WI-UW-2662/2020|2020-12-29|EPI\_ISL\_791176|Original|hCoV-19^^Wisconsin|Human|University of Wisconsin-Madison AIDS Vaccine Research Laboratories|University of Wisconsin-Madison AIDS Vaccine Research Laboratories|Moreno|USA

>Spike|hCoV-19/Netherlands/LI-RIVM-10335/2020|2020-03-31|EPI\_ISL\_636542|Original|hCoV-19^^Limburg|Human|Dutch COVID-19 response team|National Institute for Public Health and the Environment (RIVM)|Meijer|Netherlands

>Spike|hCoV-19/England/QEUEH-9DC602/2020|2020-09-21|EPI\_ISL\_581002|Original|hCoV-19^^England|Human|Lighthouse Lab in Glasgow|Wellcome Sanger Institute for the COVID-19 Genomics UK (COG-UK) consortium|Davies|United Kingdom

>Spike|hCoV-19/Turkey/IST-GLAB-030/2020|2020-04-18|EPI\_ISL\_480234|Original|hCoV-19^^Istanbul|Human|Genomic Laboratory (GLAB) (Conjoint lab of Health Directorate of Istanbul and Istanbul Technical University)|Genomic Laboratory (GLAB)|Karacan|Turkey

>Spike|hCoV-19/Scotland/QEUEH-96D642/2020|2020-08-20|EPI\_ISL\_534541|Original|hCoV-19^^Scotland|Human|NHSGGC West of Scotland Specialist Virology Centre / MRC-University of Glasgow Centre for Virus Research|Wellcome Sanger Institute for the COVID-19 Genomics UK (COG-UK) consortium|Davies|United Kingdom

>Spike|hCoV-19/USA/TX-QDX-1764/2020|2020-03-19|EPI\_ISL\_604093|Original|hCoV-19^^Texas|Human|Quest Diagnostics|Quest Diagnostics|Kagan|USA

>Spike|hCoV-19/England/LIVE-9E526/2020|2020-04-04|EPI\_ISL\_453306|Original|hCoV-19^^England|Human|Liverpool Clinical Laboratories|COVID-19 Genomics UK (COG-UK) Consortium|Haldenby|United Kingdom

>Spike|hCoV-19/England/MILK-50FCEA/2020|2020-06-11|EPI\_ISL\_558914|Original|hCoV-19^^England|Human|Lighthouse Lab in Milton Keynes|Wellcome Sanger Institute for the COVID-19 Genomics UK (COG-UK) consortium|Davies|United Kingdom

>Spike|hCoV-19/USA/CA-ALSR-1261/2020|2020-05-05|EPI\_ISL\_494462|Original|hCoV-19^^California|Human|San Diego County Public Health Laboratory|Andersen lab at Scripps Research|Gangavarapu|USA

>Spike|hCoV-19/England/CAMB-84C5B/2020|2020-03-11|EPI\_ISL\_440542|Original|hCoV-19^^England|Human|Department of Pathology|Wellcome Sanger Institute for the COVID-19 Genomics UK (COG-UK) consortium|Amato|United Kingdom

>Spike|hCoV-19/England/QEUA-A202BF/2020|2020-10-01|EPI\_ISL\_587649|Original|hCoV-19^^England|Human|Lighthouse Lab in Glasgow|Wellcome Sanger Institute for the COVID-19 Genomics UK (COG-UK) consortium|Davies|United Kingdom

>Spike|hCoV-19/USA/TX-HMH-2203/2020|2020-05-23|EPI\_ISL\_545180|Original|hCoV-19^^Texas|Human|Houston Methodist Hospital|Houston Methodist Hospital|Long|USA

>Spike|hCoV-19/France/GES-9388/2020|2020-10-05|EPI\_ISL\_614282|Original|hCoV-19^^Grand-Est|Human|General practitioner|National Reference Center for Viruses of Respiratory Infections|Enouf|France

>Spike|hCoV-19/England/CAMC-A412C7/2020|2020-10-07|EPI\_ISL\_609519|Original|hCoV-19^^England|Human|Lighthouse Lab in Cambridge|Wellcome Sanger Institute for the COVID-19 Genomics UK (COG-UK) consortium|Davies|United Kingdom

>Spike|hCoV-19/USA/TX-HMH-5420/2020|2020-06-26|EPI\_ISL\_544764|Original|hCoV-19^^Texas|Human|Houston Methodist Hospital|Houston Methodist Hospital|Long|USA

>Spike|hCoV-19/Turkey/IST-GLAB-127/2020|2020-04-30|EPI\_ISL\_735273|Original|hCoV-19^^Istanbul|Human|Genomic Laboratory (GLAB) (Conjoint lab of Health Directorate of Istanbul and Istanbul Technical University)|Genomic Laboratory (GLAB)|Karacan|Turkey

>Spike|hCoV-19/England/QEUA-AD493D/2020|2020-10-24|EPI\_ISL\_634045|Original|hCoV-19^^England|Human|Lighthouse Lab in Glasgow|Wellcome Sanger Institute for the COVID-19 Genomics UK (COG-UK) consortium|Davies|United Kingdom

>Spike|hCoV-19/England/205260447/2020|2020-12-19|EPI\_ISL\_754315|Original|hCoV-19^^England|Human|Respiratory Virus Unit|COVID-19 Genomics UK (COG-UK) Consortium|Platt|United Kingdom

>Spike|hCoV-19/England/CAMC-B09CF9/2020|2020-10-30|EPI\_ISL\_673144|Original|hCoV-19^^England|Human|Lighthouse Lab in Cambridge|Wellcome Sanger Institute for the COVID-19 Genomics UK (COG-UK) Consortium|Davies|United Kingdom

>Spike|hCoV-19/Luxembourg/LNS4050385/2020|2020-10-30|EPI\_ISL\_740410|Original|hCoV-19^^Luxembourg|Human|Laboratoire national de sant\u00e9|Laboratoire national de sant\u00e9|Wienecke-Baldacchino|Luxembourg

>Spike|hCoV-19/England/MILK-99E305/2020|2020-08-31|EPI\_ISL\_550564|Original|hCoV-19^^England|Human|Lighthouse Lab in Milton Keynes|Wellcome Sanger Institute for the COVID-19 Genomics UK (COG-UK) consortium|Davies|United Kingdom

>Spike|hCoV-19/Portugal/PT1131/2020|2020-04-10|EPI\_ISL\_511678|Original|hCoV-19^^Portugal|Human|Instituto Nacional de Saude (INSA)|Instituto Nacional de Saude (INSA)|Borges|Portugal

>Spike|hCoV-19/Scotland/CVR5465/2020|2020-10-28|EPI\_ISL\_650864|Original|hCoV-19^^Scotland|Human|West of Scotland Specialist Virology Centre|COVID-19 Genomics UK (COG-UK) Consortium|Robertson|United Kingdom

>Spike|hCoV-19/USA/TX-HMH-6234/2020|2020-07-02|EPI\_ISL\_547331|Original|hCoV-19^^Texas|Human|Houston Methodist Hospital|Houston Methodist Hospital|Long|USA

>Spike|hCoV-19/USA/NY-Wadsworth-290328-01/2020|2020-12-21|EPI\_ISL\_765527|Original|hCoV-19^^New York|Human|SARATOGA HOSPITAL LABORATORY|Wadsworth Center|Lasek-Nesselquist|USA

>Spike|hCoV-19/Saudi Arabia/KAUST-Madinah57/2020|2020-03-26|EPI\_ISL\_437495|Original|hCoV-19^^Madinah|Human|Pathogen Genomics Lab King Abdullah University of Science and Technology(KAUST)|Pathogen Genomics Lab King Abdullah University of Science and Technology(KAUST)|Mohamed Ghazzali|Saudi Arabia

>Spike|hCoV-19/England/ALDP-9CBF1A/2020|2020-09-16|EPI\_ISL\_575453|Original|hCoV-19^^England|Human|Lighthouse Lab in Alderley Park|Wellcome Sanger Institute for the COVID-19 Genomics UK (COG-UK) consortium|Davies|United Kingdom

>Spike|hCoV-19/Gibraltar/204421183/2020|2020-10-27|EPI\_ISL\_613644|Original|hCoV-19^^Gibraltar|Human|Microbiology|Respiratory Virus Unit|Platt|Gibraltar

>Spike|hCoV-19/Wales/MILK-A19583/2020|2020-10-03|EPI\_ISL\_612518|Original|hCoV-19^^Wales|Human|Wales Specialist Virology Centre Sequencing lab|COVID-19 Genomics UK (COG-UK) Consortium|Moore|United Kingdom

>Spike|hCoV-19/England/NORT-283A7E/2020|2020-04-01|EPI\_ISL\_488522|Original|hCoV-19^^England|Human|NU-OMICS DNA Sequencing research facility|Wellcome Sanger Institute for the COVID-19 Genomics UK (COG-UK) consortium|Davies|United Kingdom

>Spike|hCoV-19/England/ALDP-B633DA/2020|2020-11-09|EPI\_ISL\_656549|Original|hCoV-19^^England|Human|Lighthouse Lab in Alderley Park|Wellcome Sanger Institute for the COVID-19 Genomics UK (COG-UK) Consortium|Davies|United Kingdom

>Spike|hCoV-19/Netherlands/DR-EMC-7/2020|2020-05-29|EPI\_ISL\_523125|Original|hCoV-19^^Drenthe|Human|Dutch COVID-19 response team|Erasmus Medical Center|Oude Munnink|Netherlands

>Spike|hCoV-19/Singapore/809/2020|2020-07-08|EPI\_ISL\_516809|Original|hCoV-19^^Singapore|Human|National Public Health Laboratory|National Public Health Laboratory|Mak|Singapore

>Spike|hCoV-19/England/ALDP-51BD60/2020|2020-06-02|EPI\_ISL\_558996|Original|hCoV-19^^England|Human|Lighthouse Lab in Alderley Park|Wellcome Sanger Institute for the COVID-19 Genomics UK (COG-UK) consortium|Davies|United Kingdom

>Spike|hCoV-19/Wales/PHWC-4A3F2C/2020|2020-12-13|EPI\_ISL\_764644|Original|hCoV-19^^Wales|Human|Wales Specialist Virology Centre Sequencing lab|COVID-19 Genomics UK (COG-UK) Consortium|Moore|United Kingdom

>Spike|hCoV-19/Wales/CAMC-9457F2/2020|2020-07-16|EPI\_ISL\_556746|Original|hCoV-19^^Wales|Human|Lighthouse Lab in Cambridge|Wellcome Sanger Institute for the COVID-19 Genomics UK (COG-UK) consortium|Davies|United Kingdom

>Spike|hCoV-19/Spain/VC-FISABIO-536/2020|2020-03-29|EPI\_ISL\_447481|Original|hCoV-19^^Comunitat Valenciana|Human|Servicio de Microbiología. Hospital Clínico Universitario de Valencia|Sequencing and Bioinformatics Service and Molecular Epidemiology Research Group. FISABIO-Public Health|Gonzalez-Candelas|Spain

>Spike|hCoV-19/England/ALDP-59F06B/2020|2020-06-13|EPI\_ISL\_558699|Original|hCoV-19^^England|Human|Lighthouse Lab in Alderley Park|Wellcome Sanger Institute for the COVID-19 Genomics UK (COG-UK) consortium|Davies|United Kingdom

>Spike|hCoV-19/USA/TX-HMH-2584/2020|2020-06-06|EPI\_ISL\_545407|Original|hCoV-19^^Texas|Human|Houston Methodist Hospital|Houston Methodist Hospital|Long|USA

>Spike|hCoV-19/Canada/ON-PHL-20-00233/2020|2020-03-00|EPI\_ISL\_548768|Original|hCoV-19^^Ontario|Human|Public Health Ontario Laboratory|Public Health Ontario Laboratory|Guthrie|Canada

>Spike|hCoV-19/England/CAMB-738D3/2020|2020-03-31|EPI\_ISL\_425252|Original|hCoV-19^^England|Human|Department of Pathology|COVID-19 Genomics UK (COG-UK) Consortium|Meredith|United Kingdom

>Spike|hCoV-19/Japan/PG-7696/2020|2020-08-00|EPI\_ISL\_686798|Original|hCoV-19^^Japan|Human|Chiba Prefectural Institute of Public Health|Pathogen Genomics Center|Sekizuka|Japan

>Spike|hCoV-19/USA/WA-UW-7882/2020|2020-04-21|EPI\_ISL\_501153|Original|hCoV-19^^Washington|Human|University of Washington Virology Lab|University of Washington Virology Lab|Roychoudhury|USA

>Spike|hCoV-19/Denmark/DCGC-1882/2020|2020-07-13|EPI\_ISL\_622573|Original|hCoV-19^^Hovedstaden|Human|Department of Virus and Microbiological Special Diagnostics|Albertsen lab|Michaelsen|Denmark

>Spike|hCoV-19/Denmark/DCGC-6992/2020|2020-10-12|EPI\_ISL\_619838|Original|hCoV-19^^Hovedstaden|Human|Department of Virus and Microbiological Special Diagnostics|Albertsen lab|Michaelsen|Denmark

>Spike|hCoV-19/Denmark/DCGC-1758/2020|2020-03-09|EPI\_ISL\_620127|Original|hCoV-19^^Sjælland|Human|Department of Virus and Microbiological Special Diagnostics|Albertsen lab|Michaelsen|Denmark



>Spike|hCoV-19/England/QEUA-54CC78/2020|2020-05-12|EPI\_ISL\_533389|Original|hCoV-19^^England|Human|Lighthouse Lab in Glasgow|Wellcome Sanger Institute for the COVID-19 Genomics UK (COG-UK) consortium|Davies|United Kingdom

>Spike|hCoV-19/England/BRIS-12FEC4/2020|2020-04-10|EPI\_ISL\_492640|Original|hCoV-19^^England|Human|PHE South West Regional Laboratory|Wellcome Sanger Institute for the COVID-19 Genomics UK (COG-UK) consortium|Davies|United Kingdom

>Spike|hCoV-19/USA/TX-HMH-3285/2020|2020-06-11|EPI\_ISL\_544103|Original|hCoV-19^^Texas|Human|Houston Methodist Hospital|Houston Methodist Hospital|Long|USA

>Spike|hCoV-19/Sweden/20-50089/2020|2020-03-03|EPI\_ISL\_454872|Original|hCoV-19^^Stockholm|Human|Karolinska Universitetslaboratoriet|The Public Health Agency of Sweden|Svartstr\u00f6m|Sweden

>Spike|hCoV-19/USA/CA-CZB-14243/2020|2020-08-27|EPI\_ISL\_739427|Original|hCoV-19^^California|Human|Alameda County Public Health Lab|Chan-Zuckerberg Biohub|Kamm|USA

>Spike|hCoV-19/England/205041751/2020|2020-00-00|EPI\_ISL\_710523|Original|hCoV-19^^England|Human|Respiratory Virus Unit|COVID-19 Genomics UK (COG-UK) Consortium|Platt|United Kingdom

>Spike|hCoV-19/Australia/VIC13777/2020|2020-03-24|EPI\_ISL\_563832|Original|hCoV-19^^Victoria|Human|Victorian Infectious Diseases Reference Laboratory (VIDRL)|VIDRL and MDU-PHL|Schultz|Australia

>Spike|hCoV-19/England/LOND-1250E3F/2020|2020-11-14|EPI\_ISL\_665820|Original|hCoV-19^^England|Human|University College London Hospital|COVID-19 Genomics UK (COG-UK) Consortium|Byott|United Kingdom

>Spike|hCoV-19/Wales/PHWC-2A89F/2020|2020-04-08|EPI\_ISL\_445630|Original|hCoV-19^^Wales|Human|Wales Specialist Virology Centre|Public Health Wales Microbiology Cardiff|Moore|United Kingdom

>Spike|hCoV-19/Scotland/QEUA-A9B45F/2020|2020-10-20|EPI\_ISL\_625339|Original|hCoV-19^^Scotland|Human|Lighthouse Lab in Glasgow|Wellcome Sanger Institute for the COVID-19 Genomics UK (COG-UK) consortium|Davies|United Kingdom

>Spike|hCoV-19/Belgium/reg-0411447/2020|2020-04-11|EPI\_ISL\_476957|Original|hCoV-19^^Haasrode|Human|KU Leuven|KU Leuven|Maes|Belgium

>Spike|hCoV-19/Gibraltar/204841732/2020|2020-00-00|EPI\_ISL\_671299|Original|hCoV-19^^Gibraltar|Human|Microbiology|Respiratory Virus Unit|Platt|Gibraltar

>Spike|hCoV-19/England/ALDP-9519FD/2020|2020-06-10|EPI\_ISL\_555418|Original|hCoV-19^^England|Human|Lighthouse Lab in Alderley Park|Wellcome Sanger Institute for the COVID-19 Genomics UK (COG-UK) consortium|Davies|United Kingdom

>Spike|hCoV-19/England/201640168/2020|2020-04-14|EPI\_ISL\_466449|Original|hCoV-19^^England|Human|Respiratory Virus Unit|Respiratory Virus Unit|Platt|United Kingdom

>Spike|hCoV-19/England/MILK-9C25E4/2020|2020-09-10|EPI\_ISL\_566523|Original|hCoV-19^^England|Human|Lighthouse Lab in Milton Keynes|Wellcome Sanger Institute for the COVID-19 Genomics UK (COG-UK) consortium|Davies|United Kingdom

>Spike|hCoV-19/England/QEUA-53CFAF/2020|2020-05-18|EPI\_ISL\_532266|Original|hCoV-19^^England|Human|Lighthouse Lab in Glasgow|Wellcome Sanger Institute for the COVID-19 Genomics UK (COG-UK) consortium|Davies|United Kingdom

>Spike|hCoV-19/England/ALDP-9551F1/2020|2020-06-12|EPI\_ISL\_553605|Original|hCoV-19^^England|Human|Lighthouse Lab in Alderley Park|Wellcome Sanger Institute for the COVID-19 Genomics UK (COG-UK) consortium|Davies|United Kingdom

>Spike|hCoV-19/Luxembourg/LNS7726435/2020|2020-12-02|EPI\_ISL\_771013|Original|hCoV-19^^Luxembourg|Human|Laboratoire national de sant\u00e9|Laboratoire national de sant\u00e9|Wienecke-Baldacchino|Luxembourg

>Spike|hCoV-19/Switzerland/BS-UHB-42177236/2020|2020-03-05|EPI\_ISL\_527930|Original|hCoV-19^^Basel-Stadt|Human|University Hospital Basel|University Hospital Basel|Roloff Handschin|Switzerland

>Spike|hCoV-19/England/CAMB-7D7AF/2020|2020-04-06|EPI\_ISL\_441772|Original|hCoV-19^^England|Human|Department of Pathology|Wellcome Sanger Institute for the COVID-19 Genomics UK (COG-UK) consortium|Amato|United Kingdom

>Spike|hCoV-19/USA/AK-PHL403/2020|2020-06-01|EPI\_ISL\_522397|Original|hCoV-19^^Alaska|Human|Alaska State Virology Laboratory|Alaska State Virology Laboratory|Chen|USA

>Spike|hCoV-19/Japan/PG-4578/2020|2020-07-00|EPI\_ISL\_689715|Original|hCoV-19^^Japan|Human|Pathogen Genomics Center|Pathogen Genomics Center|Sekizuka|Japan

>Spike|hCoV-19/England/QEUEH-AF5462/2020|2020-10-30|EPI\_ISL\_663164|Original|hCoV-19^^England|Human|Lighthouse Lab in Glasgow|Wellcome Sanger Institute for the COVID-19 Genomics UK (COG-UK) Consortium|Davies|United Kingdom

>Spike|hCoV-19/Canada/ON-S906/2020|2020-04-12|EPI\_ISL\_586479|Original|hCoV-19^^Ontario|Human|Toronto Invasive Bacterial Diseases Network|McMaster University|McArthur|Canada

>Spike|hCoV-19/England/CAMC-B33072/2020|2020-11-05|EPI\_ISL\_659321|Original|hCoV-19^^England|Human|Lighthouse Lab in Cambridge|Wellcome Sanger Institute for the COVID-19 Genomics UK (COG-UK) Consortium|Davies|United Kingdom

>Spike|hCoV-19/England/QEUEH-AAC60A/2020|2020-10-21|EPI\_ISL\_652859|Original|hCoV-19^^England|Human|Oxford Viromics|COVID-19 Genomics UK (COG-UK) Consortium|Golubchik|United Kingdom

>Spike|hCoV-19/Colombia/QUI-INS-79911/2020|2020-03-15|EPI\_ISL\_456127|Original|hCoV-19^^Quindio|Human|Instituto Nacional de Salud - Unidad de Secuenciación y Análisis Genómico|Instituto Nacional de Salud|Díaz|Colombia

>Spike|hCoV-19/England/QEUEH-B40537/2020|2020-11-08|EPI\_ISL\_657243|Original|hCoV-19^^England|Human|Lighthouse Lab in Glasgow|Wellcome Sanger Institute for the COVID-19 Genomics UK (COG-UK) Consortium|Davies|United Kingdom

>Spike|hCoV-19/Russia/SVE-RII-MH9083S/2020|2020-10-01|EPI\_ISL\_733407|Original|hCoV-19^^Sverdlovsk|Human|UMMC-Health|WHO National Influenza Centre Russian Federation|Komissarov|Russia

>Spike|hCoV-19/Wales/PHWC-25B13/2020|2020-03-25|EPI\_ISL\_422240|Original|hCoV-19^^Wales|Human|Wales Specialist Virology Centre|Public Health Wales Microbiology Cardiff|Moore|United Kingdom

>Spike|hCoV-19/England/ALDP-AA39CE/2020|2020-10-22|EPI\_ISL\_624338|Original|hCoV-19^^England|Human|Lighthouse Lab in Alderley Park|Wellcome Sanger Institute for the COVID-19 Genomics UK (COG-UK) consortium|Davies|United Kingdom

>Spike|hCoV-19/England/MILK-BB0F70/2020|2020-11-18|EPI\_ISL\_720243|Original|hCoV-19^^England|Human|Lighthouse Lab in Milton Keynes|Wellcome Sanger Institute for the COVID-19 Genomics UK (COG-UK) Consortium|Davies|United Kingdom

>Spike|hCoV-19/USA/MA-MASPHL-00361/2020|2020-05-20|EPI\_ISL\_693172|Original|hCoV-19^^Massachusetts|Human|Massachusetts State Public Health Laboratory|Massachusetts State Public Health Laboratory|Lang|USA

>Spike|hCoV-19/Chile/MA-UMAG-Catg-2/2020|2020-08-10|EPI\_ISL\_625681|Original|hCoV-19^^Magallanes|Human|Laboratory of Molecular Medicine|Centro Asistencial Docente y de Investigación|Navarrete|Chile

>Spike|hCoV-19/Brazil/SP-486/2020|2020-04-27|EPI\_ISL\_574583|Original|hCoV-19^^São Paulo|Human|Secretaria Municipal de Saude de Jandira|Instituto Adolfo Lutz|Sacchi|Brazil

>Spike|hCoV-19/USA/WA-UW-22521/2020|2020-08-04|EPI\_ISL\_570592|Original|hCoV-19^^Washington|Human|UW Virology Lab|UW Virology Lab|Roychoudhury|USA

>Spike|hCoV-19/Canada/ON-S857/2020|2020-04-00|EPI\_ISL\_591171|Original|hCoV-19^^Ontario|Human|Toronto Invasive Bacterial Diseases Network|McMaster University|McArthur|Canada

>Spike|hCoV-19/Singapore/1445/2020|2020-12-05|EPI\_ISL\_728181|Original|hCoV-19^^Singapore|Human|National Public Health Laboratory|National Public Health Laboratory|Mak|Singapore

>Spike|hCoV-19/Finland/10A10S14/2020|2020-04-10|EPI\_ISL\_481514|Original|hCoV-19^^Uusimaa|Human|Department of Virology and Immunology|Department of Virology|Smura|Finland

>Spike|hCoV-19/Netherlands/NA\_18/2020|2020-03-09|EPI\_ISL\_415474|Original|hCoV-19^^Netherlands|Human|Dutch COVID-19 response team|Erasmus Medical Center|Oude Munnink|Netherlands

>Spike|hCoV-19/England/ALDP-B62A8B/2020|2020-11-09|EPI\_ISL\_656601|Original|hCoV-19^^England|Human|Lighthouse Lab in Alderley Park|Wellcome Sanger Institute for the COVID-19 Genomics UK (COG-UK) Consortium|Davies|United Kingdom

>Spike|hCoV-19/Canada/ON-S1593/2020|2020-09-04|EPI\_ISL\_755934|Original|hCoV-19^^Ontario|Human|Toronto Invasive Bacterial Diseases Network|McMaster University|McArthur|Canada

>Spike|hCoV-19/USA/MI-MDHHS-SC20020/2020|2020-03-13|EPI\_ISL\_437107|Original|hCoV-19^^Michigan|Human|Michigan Department of Health and Human Services|Michigan Department of Health and Human Services|Blankenship|USA

>Spike|hCoV-19/Denmark/DCGC-4443/2020|2020-09-21|EPI\_ISL\_621864|Original|hCoV-19^^Nordjylland|Human|Department of Virus and Microbiological Special Diagnostics|Albertsen lab|Michaelsen|Denmark

>Spike|hCoV-19/Denmark/DCGC-16808/2020|2020-12-14|EPI\_ISL\_750576|Original|hCoV-19^^Hovedstaden|Human|Department of Virus and Microbiological Special Diagnostics|Albertsen Lab|Michaelsen|Denmark

>Spike|hCoV-19/USA/TX-HMH-MCoV-9930/2020|2020-07-06|EPI\_ISL\_780142|Original|hCoV-19^^Texas|Human|Houston Methodist Hospital|Houston Methodist Hospital|Long|USA

>Spike|hCoV-19/England/ALDP-A51B41/2020|2020-10-07|EPI\_ISL\_598014|Original|hCoV-19^^England|Human|Lighthouse Lab in Alderley Park|Wellcome Sanger Institute for the COVID-19 Genomics UK (COG-UK) consortium|Davies|United Kingdom

>Spike|hCoV-19/England/ALDP-4A279E/2020|2020-05-22|EPI\_ISL\_559388|Original|hCoV-19^^England|Human|Lighthouse Lab in Alderley Park|Wellcome Sanger Institute for the COVID-19 Genomics UK (COG-UK) consortium|Davies|United Kingdom

>Spike|hCoV-19/Netherlands/NB-EMC-433/2020|2020-11-09|EPI\_ISL\_722751|Original|hCoV-19^^Noord Brabant|Human|Dutch COVID-19 response team|Erasmus Medical Center|Oude Munnink|Netherlands

>Spike|hCoV-19/USA/UT-UPHL-201127728/2020|2020-04-06|EPI\_ISL\_648572|Original|hCoV-19^^Utah|Human|Utah Public Health Laboratory|Utah Public Health Laboratory|Young|USA

>Spike|hCoV-19/Finland/2A92SVIIC/2020|2020-04-02|EPI\_ISL\_481649|Original|hCoV-19^^Uusimaa|Human|Department of Virology and Immunology|Department of Virology|Smura|Finland

>Spike|hCoV-19/Scotland/EDB10261/2020|2020-11-23|EPI\_ISL\_705737|Original|hCoV-19^^Scotland|Human|Virology Department|COVID-19 Genomics UK (COG-UK) Consortium|McHugh|United Kingdom

>Spike|hCoV-19/Russia/MOW-RII-MH2868S/2020|2020-09-24|EPI\_ISL\_733044|Original|hCoV-19^^Moscow|Human|HELIX LLC|WHO National Influenza Centre Russian Federation|Komissarov|Russia

>Spike|hCoV-19/England/NORT-295639/2020|2020-03-31|EPI\_ISL\_488537|Original|hCoV-19^^England|Human|NU-OMICS DNA Sequencing research facility|Wellcome Sanger Institute for the COVID-19 Genomics UK (COG-UK) consortium|Davies|United Kingdom

>Spike|hCoV-19/England/CAMB-73E1D/2020|2020-03-18|EPI\_ISL\_440330|Original|hCoV-19^^England|Human|Department of Pathology|Wellcome Sanger Institute for the COVID-19 Genomics UK (COG-UK) consortium|Amato|United Kingdom

>Spike|hCoV-19/Japan/PG-8692/2020|2020-08-00|EPI\_ISL\_686288|Original|hCoV-19^^Japan|Human|Pathogen Genomics Center|Pathogen Genomics Center|Sekizuka|Japan

>Spike|hCoV-19/Australia/VIC3852/2020|2020-07-11|EPI\_ISL\_520565|Original|hCoV-19^^Victoria|Human|Microbiological Diagnostic Unit - Public Health Laboratory (MDU-PHL)|MDU-PHL|Schultz|Australia

>Spike|hCoV-19/India/MH-NIV-212999/2020|2020-09-15|EPI\_ISL\_577675|Original|hCoV-19^^Maharashtra|Human|NIV Influenza|NIV Influenza|Potdar|India

>Spike|hCoV-19/USA/WY-WPHL-20171712/2020|2020-12-29|EPI\_ISL\_770451|Original|hCoV-19^^Wyoming|Human|Wyoming Public Health Laboratory|Wyoming Public Health Laboratory|Hull|USA

>Spike|hCoV-19/USA/TX-DSHS-1365/2020|2020-05-06|EPI\_ISL\_654750|Original|hCoV-19^^Texas|Human|Texas Department of State Health Services|Texas Department of State Health Services|Rahman|USA

>Spike|hCoV-19/Mali/M002672/2020|2020-04-10|EPI\_ISL\_487454|Original|hCoV-19^^Bamako|Human|CICM-Mali|Bundeswehr Institut of Microbiology|Antwerpen|Mali

>Spike|hCoV-19/Scotland/QEUH-9AD118/2020|2020-09-05|EPI\_ISL\_560020|Original|hCoV-19^^Scotland|Human|Oxford Viromics|COVID-19 Genomics UK (COG-UK) Consortium|Golubchik|United Kingdom

>Spike|hCoV-19/England/QEUH-AD15D2/2020|2020-10-25|EPI\_ISL\_633997|Original|hCoV-19^^England|Human|Lighthouse Lab in Glasgow|Wellcome Sanger Institute for the COVID-19 Genomics UK (COG-UK) consortium|Davies|United Kingdom

>Spike|hCoV-19/Norway/4699/2020|2020-10-16|EPI\_ISL\_635180|Original|hCoV-19^^Troms og Finnmark|Human|University Hospital of Northern Norway|Norwegian Institute of Public Health|Vollan|Norway

>Spike|hCoV-19/USA/TX-DSHS-0363/2020|2020-06-13|EPI\_ISL\_538300|Original|hCoV-19^^Texas|Human|Texas Department of State Health Services|Texas Department of State Health Services|Rahman|USA

>Spike|hCoV-19/England/QEUA-9994AD/2020|2020-08-24|EPI\_ISL\_559763|Original|hCoV-19^^England|Human|Oxford Viromics|COVID-19 Genomics UK (COG-UK) Consortium|Golubchik|United Kingdom

>Spike|hCoV-19/England/CAMB-8369A/2020|2020-04-14|EPI\_ISL\_443636|Original|hCoV-19^^England|Human|Department of Pathology|Wellcome Sanger Institute for the COVID-19 Genomics UK (COG-UK) consortium|Amato|United Kingdom

>Spike|hCoV-19/Russia/OMS-ORINFI-6240S/2020|2020-07-15|EPI\_ISL\_569807|Original|hCoV-19^^Omsk|Human|Omsk Research Institute of Natural Focal Infections|WHO National Influenza Centre Russian Federation|Komissarov|Russia

>Spike|hCoV-19/England/NOTT-115F37/2020|2020-10-18|EPI\_ISL\_595295|Original|hCoV-19^^England|Human|Queens Medical Centre|COVID-19 Genomics UK (COG-UK) Consortium|Loose|United Kingdom

>Spike|hCoV-19/England/QEUA-B6700C/2020|2020-11-11|EPI\_ISL\_661525|Original|hCoV-19^^England|Human|Lighthouse Lab in Glasgow|Wellcome Sanger Institute for the COVID-19 Genomics UK (COG-UK) Consortium|Davies|United Kingdom

>Spike|hCoV-19/England/SHEF-CB6B4/2020|2020-05-05|EPI\_ISL\_475440|Original|hCoV-19^^England|Human|Virology Department|COVID-19 Genomics UK (COG-UK) Consortium|de Silva|United Kingdom

>Spike|hCoV-19/Denmark/DCGC-4879/2020|2020-09-21|EPI\_ISL\_621565|Original|hCoV-19^^Hovedstaden|Human|Department of Virus and Microbiological Special Diagnostics|Albertsen lab|Michaelsen|Denmark

>Spike|hCoV-19/England/QEUA-AE279C/2020|2020-10-26|EPI\_ISL\_633578|Original|hCoV-19^^England|Human|Lighthouse Lab in Glasgow|Wellcome Sanger Institute for the COVID-19 Genomics UK (COG-UK) consortium|Davies|United Kingdom

>Spike|hCoV-19/England/CAMC-B9A149/2020|2020-11-15|EPI\_ISL\_673538|Original|hCoV-19^^England|Human|Lighthouse Lab in Cambridge|Wellcome Sanger Institute for the COVID-19 Genomics UK (COG-UK) Consortium|Davies|United Kingdom

>Spike|hCoV-19/USA/UT-02899/2020|2020-04-30|EPI\_ISL\_509532|Original|hCoV-19^^Utah|Human|Utah Public Health Laboratory|Utah Public Health Laboratory|Butz|USA

>Spike|hCoV-19/England/ALDP-B1A41B/2020|2020-11-01|EPI\_ISL\_645841|Original|hCoV-19^^England|Human|Lighthouse Lab in Alderley Park|Wellcome Sanger Institute for the COVID-19 Genomics UK (COG-UK) Consortium|Davies|United Kingdom

>Spike|hCoV-19/Hong Kong/HKU-200723-052/2020|2020-03-27|EPI\_ISL\_497819|Original|hCoV-19^^Hong Kong|Human|Department of Microbiology|Department of Microbiology|Chan|China

>Spike|hCoV-19/England/CAMC-A58BFF/2020|2020-10-08|EPI\_ISL\_597099|Original|hCoV-19^^England|Human|Lighthouse Lab in Cambridge|Wellcome Sanger Institute for the COVID-19 Genomics UK (COG-UK) Consortium|Davies|United Kingdom

>Spike|hCoV-19/England/ALDP-A68707/2020|2020-10-12|EPI\_ISL\_630495|Original|hCoV-19^^England|Human|Lighthouse Lab in Alderley Park|Wellcome Sanger Institute for the COVID-19 Genomics UK (COG-UK) consortium|Davies|United Kingdom

>Spike|hCoV-19/England/MILK-AC78E5/2020|2020-10-21|EPI\_ISL\_634484|Original|hCoV-19^^England|Human|Lighthouse Lab in Milton Keynes|Wellcome Sanger Institute for the COVID-19 Genomics UK (COG-UK) consortium|Davies|United Kingdom

>Spike|hCoV-19/Scotland/CVR5058/2020|2020-10-10|EPI\_ISL\_594791|Original|hCoV-19^^Scotland|Human|West of Scotland Specialist Virology Centre|COVID-19 Genomics UK (COG-UK) Consortium|Robertson|United Kingdom

>Spike|hCoV-19/Denmark/DCGC-2951/2020|2020-08-24|EPI\_ISL\_616712|Original|hCoV-19^^Syddanmark|Human|Department of Virus and Microbiological Special Diagnostics|Albertsen lab|Michaelsen|Denmark

>Spike|hCoV-19/Denmark/DCGC-18884/2020|2020-12-07|EPI\_ISL\_748616|Original|hCoV-19^^Hovedstaden|Human|Department of Virus and Microbiological Special Diagnostics|Albertsen Lab|Michaelsen|Denmark

>Spike|hCoV-19/England/QEUA-AAADDA/2020|2020-10-21|EPI\_ISL\_652743|Original|hCoV-19^^England|Human|Oxford Viromics|COVID-19 Genomics UK (COG-UK) Consortium|Golubchik|United Kingdom

>Spike|hCoV-19/Australia/NSW312/2020|2020-03-27|EPI\_ISL\_451576|Original|hCoV-19^^New South Wales|Human|Pathology West - NSW Health Pathology|NSW Health Pathology - Institute of Clinical Pathology and Medical Research; Westmead Hospital; University of Sydney|Gall|Australia

>Spike|hCoV-19/USA/WI-WSLH-200044/2020|2020-04-14|EPI\_ISL\_471209|Original|hCoV-19^^Wisconsin|Human|Wisconsin State Laboratory of Hygiene Communicable Disease Division|Wisconsin State Laboratory of Hygiene Communicable Disease Division|Florek|USA

>Spike|hCoV-19/England/QEUA-AAF0DC/2020|2020-10-20|EPI\_ISL\_630775|Original|hCoV-19^^England|Human|Lighthouse Lab in Glasgow|Wellcome Sanger Institute for the COVID-19 Genomics UK (COG-UK) consortium|Davies|United Kingdom

>Spike|hCoV-19/England/ALDP-9EA5AA/2020|2020-09-24|EPI\_ISL\_580094|Original|hCoV-19^^England|Human|Lighthouse Lab in Alderley Park|Wellcome Sanger Institute for the COVID-19 Genomics UK (COG-UK) consortium|Davies|United Kingdom

>Spike|hCoV-19/Australia/VIC12837/2020|2020-07-27|EPI\_ISL\_592089|Original|hCoV-19^^Victoria|Human|Microbiological Diagnostic Unit - Public Health Laboratory (MDU-PHL)|MDU-PHL|Schultz|Australia

>Spike|hCoV-19/Switzerland/BE-ETHZ-220026/2020|2020-07-28|EPI\_ISL\_512009|Original|hCoV-19^^Bern|Human|Viollier AG|Department of Biosystems Science and Engineering|Nadeau|Switzerland

>Spike|hCoV-19/England/ALDP-9FDA69/2020|2020-10-01|EPI\_ISL\_587730|Original|hCoV-19^^England|Human|Lighthouse Lab in Alderley Park|Wellcome Sanger Institute for the COVID-19 Genomics UK (COG-UK) consortium|Davies|United Kingdom

>Spike|hCoV-19/Denmark/DCGC-13111/2020|2020-11-30|EPI\_ISL\_712589|Original|hCoV-19^^Midtjylland|Human|Department of Virus and Microbiological Special Diagnostics|Albertsen Lab|Michaelsen|Denmark

>Spike|hCoV-19/Ireland/LK-UHL120/2020|2020-04-06|EPI\_ISL\_681722|Original|hCoV-19^^Limerick|Human|University Hospital Limerick|Irish Coronavirus Sequencing Consortium - Teagasc Moorepark|Walsh|Ireland

>Spike|hCoV-19/USA/TX-HMH-MCoV-18204/2020|2020-11-14|EPI\_ISL\_784552|Original|hCoV-19^^Texas|Human|Houston Methodist Hospital|Houston Methodist Hospital|Long|USA

>Spike|hCoV-19/Japan/PG-0828/2020|2020-03-00|EPI\_ISL\_684438|Original|hCoV-19^^Japan|Human|Fukuoka Institute of Health and Environmental Sciences|Pathogen Genomics Center|Sekizuka|Japan

>Spike|hCoV-19/Australia/VIC6371/2020|2020-07-21|EPI\_ISL\_521165|Original|hCoV-19^^Victoria|Human|Microbiological Diagnostic Unit - Public Health Laboratory (MDU-PHL)|MDU-PHL|Schultz|Australia

>Spike|hCoV-19/Brazil/SP-165/2020|2020-03-24|EPI\_ISL\_523963|Original|hCoV-19^^S\u00e3o Paulo|Human|UBS Vila Silvia|Instituto Adolfo Lutz|Sacchi|Brazil

>Spike|hCoV-19/Wuhan/HB-WH4-214/2020|2020-03-20|EPI\_ISL\_454963|Original|hCoV-19^^Hubei|Human|Wuhan Chain Medical Labs (CMLabs)|State Key Laboratory of Biotherapy of Sichuan University|Tang|China

>Spike|hCoV-19/Australia/VIC16480/2020|2020-08-06|EPI\_ISL\_640806|Original|hCoV-19^^Victoria|Human|Microbiological Diagnostic Unit - Public Health Laboratory (MDU-PHL)|MDU-PHL|Schultz|Australia

>Spike|hCoV-19/England/ALDP-A87D4C/2020|2020-10-17|EPI\_ISL\_606051|Original|hCoV-19^^England|Human|Lighthouse Lab in Alderley Park|Wellcome Sanger Institute for the COVID-19 Genomics UK (COG-UK) consortium|Davies|United Kingdom

>Spike|hCoV-19/USA/UT-01989/2020|2020-04-15|EPI\_ISL\_452174|Original|hCoV-19^^Utah|Human|Utah Public Health Laboratory|Utah Public Health Laboratory|Young|USA

>Spike|hCoV-19/England/QEUA-8AD331/2020|2020-07-24|EPI\_ISL\_532721|Original|hCoV-19^^England|Human|Lighthouse Lab in Glasgow|Wellcome Sanger Institute for the COVID-19 Genomics UK (COG-UK) consortium|Davies|United Kingdom

>Spike|hCoV-19/England/CAMC-B32F58/2020|2020-11-05|EPI\_ISL\_659363|Original|hCoV-19^^England|Human|Lighthouse Lab in Cambridge|Wellcome Sanger Institute for the COVID-19 Genomics UK (COG-UK) Consortium|Davies|United Kingdom

>Spike|hCoV-19/Germany/HH-hpi-p1730/2020|2020-03-15|EPI\_ISL\_776110|Original|hCoV-19^^Hamburg|Human|University Medical Center Hamburg Eppendorf|Heinrich Pette Institute|Robitaille|Germany

>Spike|hCoV-19/Wales/PHWC-16C65A/2020|2020-09-21|EPI\_ISL\_574079|Original|hCoV-19^^Wales|Human|Wales Specialist Virology Centre Sequencing lab|COVID-19 Genomics UK (COG-UK) Consortium|Moore|United Kingdom

>Spike|hCoV-19/England/QEUH-A4955D/2020|2020-10-08|EPI\_ISL\_627297|Original|hCoV-19^^England|Human|Oxford Viromics|COVID-19 Genomics UK (COG-UK) Consortium|Golubchik|United Kingdom

>Spike|hCoV-19/Denmark/DCGC-10756/2020|2020-11-02|EPI\_ISL\_670187|Original|hCoV-19^^Midtjylland|Human|Department of Virus and Microbiological Special Diagnostics|Albertsen Lab|Michaelsen|Denmark

>Spike|hCoV-19/USA/WA-UW-5403/2020|2020-03-25|EPI\_ISL\_570068|Original|hCoV-19^^Washington|Human|UW Virology Lab|UW Virology Lab|Roychoudhury|USA

>Spike|hCoV-19/England/NP3/2020|2020-00-00|EPI\_ISL\_479779|unknown|hCoV-19^^England|Human|Breuer Lab|Breuer Lab|Pang|United Kingdom

>Spike|hCoV-19/Japan/IC-0610/2021|2021-01-00|EPI\_ISL\_779696|Original|hCoV-19^^Japan|Human|Pathogen Genomics Center|Pathogen Genomics Center|Sekizuka|Japan

>Spike|hCoV-19/England/QEUH-9F47D4/2020|2020-09-27|EPI\_ISL\_588301|Original|hCoV-19^^England|Human|Lighthouse Lab in Glasgow|Wellcome Sanger Institute for the COVID-19 Genomics UK (COG-UK) consortium|Davies|United Kingdom

>Spike|hCoV-19/Thailand/Bangkok-0088/2020|2020-04-07|EPI\_ISL\_447028|Original|hCoV-19^^Bangkok|Human|Ramathibodi Hospital|COVID-19 Network Investigations (CONI) Alliance|Batty|Thailand

>Spike|hCoV-19/USA/TX-HMH-MCoV-16217/2020|2020-10-30|EPI\_ISL\_785901|Original|hCoV-19^^Texas|Human|Houston Methodist Hospital|Houston Methodist Hospital|Long|USA

>Spike|hCoV-19/England/ALDP-A6F454/2020|2020-10-14|EPI\_ISL\_607907|Original|hCoV-19^^England|Human|Lighthouse Lab in Alderley Park|Wellcome Sanger Institute for the COVID-19 Genomics UK (COG-UK) consortium|Davies|United Kingdom

>Spike|hCoV-19/England/204742182/2020|2020-00-00|EPI\_ISL\_649898|Original|hCoV-19^^England|Human|Respiratory Virus Unit|COVID-19 Genomics UK (COG-UK) Consortium|Platt|United Kingdom

>Spike|hCoV-19/England/CAMB-7F400/2020|2020-04-08|EPI\_ISL\_443039|Original|hCoV-19^^England|Human|Department of Pathology|Wellcome Sanger Institute for the COVID-19 Genomics UK (COG-UK) consortium|Amato|United Kingdom

>Spike|hCoV-19/USA/VA-DCLS-0552/2020|2020-03-14|EPI\_ISL\_485853|Original|hCoV-19^^Virginia|Human|Virginia DCLS|Virginia DCLS|St. Jacques|USA

>Spike|hCoV-19/England/ALDP-C3AFD7/2020|2020-12-09|EPI\_ISL\_731649|Original|hCoV-19^^England|Human|Lighthouse Lab in Alderley Park|Wellcome Sanger Institute for the COVID-19 Genomics UK (COG-UK) Consortium|Davies|United Kingdom

>Spike|hCoV-19/USA/OR-PROV-036/2020|2020-03-26|EPI\_ISL\_482318|Original|hCoV-19^^Oregon|Human|Providence St. Joseph Health Molecular Genomics Laboratory|Providence St. Joseph Health Molecular Genomics Laboratory|Dowdell|USA

>Spike|hCoV-19/USA/CA-QDX-98/2020|2020-03-13|EPI\_ISL\_468569|Original|hCoV-19^^California|Human|Quest Diagnostics|Quest Diagnostics|Kagan|USA

>Spike|hCoV-19/Switzerland/ZH-ETHZ-310473/2020|2020-10-07|EPI\_ISL\_603544|Original|hCoV-19^^Zurich|Human|Viollier AG|Department of Biosystems Science and Engineering|Nadeau|Switzerland

>Spike|hCoV-19/Japan/PG-5631/2020|2020-08-00|EPI\_ISL\_688756|Original|hCoV-19^^Japan|Human|Pathogen Genomics Center|Pathogen Genomics Center|Sekizuka|Japan

>Spike|hCoV-19/Chile/RM-170979/2020|2020-09-06|EPI\_ISL\_746723|Original|hCoV-19^^Region Metropolitana de Santiago|Human|Genetica Molecular and Subdepartamento de Virologia ISP Chile|Instituto de Salud Publica de Chile|Tognarelli|Chile

>Spike|hCoV-19/England/CAMC-A59420/2020|2020-10-08|EPI\_ISL\_596998|Original|hCoV-19^^England|Human|Lighthouse Lab in Cambridge|Wellcome Sanger Institute for the COVID-19 Genomics UK (COG-UK) consortium|Davies|United Kingdom

>Spike|hCoV-19/England/CAMB-78E36/2020|2020-04-02|EPI\_ISL\_441288|Original|hCoV-19^^England|Human|Department of Pathology|Wellcome Sanger Institute for the COVID-19 Genomics UK (COG-UK) consortium|Amato|United Kingdom

>Spike|hCoV-19/Ireland/D-NVRL-AIIDM0161v1/2020|2020-09-21|EPI\_ISL\_768766|Original|hCoV-19^^Dublin|Human|AIID|Irish Coronavirus Sequencing Consortium - National Virus Reference Laboratory|Gonzalez|Ireland

>Spike|hCoV-19/England/MILK-A7A535/2020|2020-10-15|EPI\_ISL\_606906|Original|hCoV-19^^England|Human|Lighthouse Lab in Milton Keynes|Wellcome Sanger Institute for the COVID-19 Genomics UK (COG-UK) consortium|Davies|United Kingdom

>Spike|hCoV-19/USA/WI-WSLH-200471/2020|2020-05-19|EPI\_ISL\_578612|Original|hCoV-19^^Wisconsin|Human|Wisconsin State Laboratory of Hygiene Communicable Disease Division|Wisconsin State Laboratory of Hygiene Communicable Disease Division|Florek|USA

>Spike|hCoV-19/England/CAMC-9C0425/2020|2020-09-09|EPI\_ISL\_573185|Original|hCoV-19^^England|Human|Oxford Viromics|COVID-19 Genomics UK (COG-UK) Consortium|Golubchik|United Kingdom

>Spike|hCoV-19/Scotland/EDB226/2020|2020-03-26|EPI\_ISL\_425949|Original|hCoV-19^^Scotland|Human|Virology Department|COVID-19 Genomics UK (COG-UK) Consortium|Williams|United Kingdom

>Spike|hCoV-19/Belgium/VSP-0328388/2020|2020-03-28|EPI\_ISL\_462242|Original|hCoV-19^^Overpelt|Human|KU Leuven|KU Leuven|Maes|Belgium

>Spike|hCoV-19/Belgium/ULG-10453/2020|2020-08-26|EPI\_ISL\_581627|Original|hCoV-19^^Liège|Human|Department of Clinical Microbiology|GIGA Medical Genomics|Durkin|Belgium

>Spike|hCoV-19/USA/WA12-UW8/2020|2020-03-03|EPI\_ISL\_413563|Original|hCoV-19^^Washington|Human|UW Virology Lab|UW Virology Lab|Roychoudhury|USA

>Spike|hCoV-19/Japan/PG-0723/2020|2020-04-00|EPI\_ISL\_684333|Original|hCoV-19^^Japan|Human|Gunma Prefectural Institute of Public Health and Environmental Sciences|Pathogen Genomics Center|Sekizuka|Japan

>Spike|hCoV-19/Northern Ireland/NIRE-108289/2020|2020-04-01|EPI\_ISL\_585180|Original|hCoV-19^^Northern Ireland|Human|Regional Virus Laboratory|COVID-19 Genomics UK (COG-UK) Consortium|Fairley|United Kingdom

>Spike|hCoV-19/USA/NM-DOH-2020314819/2020|2020-08-25|EPI\_ISL\_574277|Original|hCoV-19^^New Mexico|Human|New Mexico Department of Health Scientific Laboratory|New Mexico Department of Health Scientific Laboratory|Johnson|USA

>Spike|hCoV-19/England/OXON-B1B1C/2020|2020-04-14|EPI\_ISL\_479072|Original|hCoV-19^^England|Human|Oxford Viromics|COVID-19 Genomics UK (COG-UK) Consortium|Golubchik|United Kingdom

>Spike|hCoV-19/England/LEED-2A8509/2020|2020-03-30|EPI\_ISL\_539158|Original|hCoV-19^^England|Human|Leeds Teaching Hospitals NHS Trust and Public Health England|Wellcome Sanger Institute for the COVID-19 Genomics UK (COG-UK) consortium|Davies|United Kingdom

>Spike|hCoV-19/Scotland/QEUH-C01B99/2020|2020-12-05|EPI\_ISL\_757238|Original|hCoV-19^^Scotland|Human|Lighthouse Lab in Glasgow|Wellcome Sanger Institute for the COVID-19 Genomics UK (COG-UK) Consortium|Davies|United Kingdom

>Spike|hCoV-19/Germany/BE-ChVir3083/2020|2020-03-24|EPI\_ISL\_729529|Original|hCoV-19^^Berlin|Human|Charité Universitätsmedizin Berlin|Charité Universitätsmedizin Berlin|Muehlemann|Germany

>Spike|hCoV-19/England/MILK-9EF666/2020|2020-09-23|EPI\_ISL\_594927|Original|hCoV-19^^England|Human|Queens Medical Centre|COVID-19 Genomics UK (COG-UK) Consortium|Loose|United Kingdom

>Spike|hCoV-19/England/MILK-ABB662/2020|2020-10-21|EPI\_ISL\_623530|Original|hCoV-19^^England|Human|Lighthouse Lab in Milton Keynes|Wellcome Sanger Institute for the COVID-19 Genomics UK (COG-UK) consortium|Davies|United Kingdom

>Spike|hCoV-19/France/PAC-IHU-1128/2020|2020-08-07|EPI\_ISL\_569054|Original|hCoV-19^^Provence-Alpes-Côte d'Azur|Human|MEPHI|MEPHI|Levasseur|France

>Spike|hCoV-19/Wales/PHWC-16BE53/2020|2020-09-18|EPI\_ISL\_573981|Original|hCoV-19^^Wales|Human|Wales Specialist Virology Centre Sequencing lab|COVID-19 Genomics UK (COG-UK) Consortium|Moore|United Kingdom

>Spike|hCoV-19/England/QEUH-AD0333/2020|2020-10-26|EPI\_ISL\_629811|Original|hCoV-19^^England|Human|Lighthouse Lab in Glasgow|Wellcome Sanger Institute for the COVID-19 Genomics UK (COG-UK) consortium|Davies|United Kingdom

>Spike|hCoV-19/England/ALDP-71ED6B/2020|2020-07-01|EPI\_ISL\_557705|Original|hCoV-19^^England|Human|Lighthouse Lab in Alderley Park|Wellcome Sanger Institute for the COVID-19 Genomics UK (COG-UK) consortium|Davies|United Kingdom

>Spike|hCoV-19/India/OR-RMRC6/2020|2020-04-02|EPI\_ISL\_455783|Original|hCoV-19^^Odisha|Human|REGIONAL VRDL,ICMR-RMRC BBSR|Immunogenomics lab|Raghav|India

>Spike|hCoV-19/England/CAMB-1B7A90/2020|2020-10-20|EPI\_ISL\_638356|Original|hCoV-19^^England|Human|Department of Pathology|COVID-19 Genomics UK (COG-UK) Consortium|Goodfellow|United Kingdom

>Spike|hCoV-19/Scotland/QEUEH-A4998E/2020|2020-10-08|EPI\_ISL\_628442|Original|hCoV-19^^Scotland|Human|Oxford Viromics|COVID-19 Genomics UK (COG-UK) Consortium|Golubchik|United Kingdom

>Spike|hCoV-19/Scotland/EDB3584/2020|2020-04-27|EPI\_ISL\_526472|Original|hCoV-19^^Scotland|Human|Virology Department|COVID-19 Genomics UK (COG-UK) Consortium|Williams|United Kingdom

>Spike|hCoV-19/Denmark/DCGC-3938/2020|2020-09-14|EPI\_ISL\_615849|Original|hCoV-19^^Midtjylland|Human|Department of Virus and Microbiological Special Diagnostics|Albertsen lab|Michaelsen|Denmark

>Spike|hCoV-19/USA/WI-UW-861/2020|2020-07-14|EPI\_ISL\_509864|Original|hCoV-19^^Wisconsin|Human|University of Wisconsin-Madison AIDS Vaccine Research Laboratories|University of Wisconsin-Madison AIDS Vaccine Research Laboratories|Baczenas|USA

>Spike|hCoV-19/Scotland/CVR5494/2020|2020-10-19|EPI\_ISL\_651818|Original|hCoV-19^^Scotland|Human|West of Scotland Specialist Virology Centre|COVID-19 Genomics UK (COG-UK) Consortium|Robertson|United Kingdom

>Spike|hCoV-19/Scotland/QEUEH-B0DAFB/2020|2020-11-02|EPI\_ISL\_649524|Original|hCoV-19^^Scotland|Human|Lighthouse Lab in Glasgow|Wellcome Sanger Institute for the COVID-19 Genomics UK (COG-UK) Consortium|Davies|United Kingdom

>Spike|hCoV-19/USA/NY-NYCPHL-000798/2020|2020-03-23|EPI\_ISL\_632178|Original|hCoV-19^^New York|Human|OCME Office Of Chief Medical Examiner|New York City Public Health Laboratory|Wang|USA

>Spike|hCoV-19/England/MILK-9D489B/2020|2020-09-17|EPI\_ISL\_601546|Original|hCoV-19^^England|Human|Lighthouse Lab in Milton Keynes|Wellcome Sanger Institute for the COVID-19 Genomics UK (COG-UK) consortium|Davies|United Kingdom

>Spike|hCoV-19/England/20172001604/2020|2020-04-20|EPI\_ISL\_465316|Original|hCoV-19^^England|Human|Respiratory Virus Unit|Respiratory Virus Unit|Platt|United Kingdom

>Spike|hCoV-19/USA/AZ-TG668345/2020|2020-05-13|EPI\_ISL\_696268|Original|hCoV-19^^Arizona|Human|Sonora Quest Laboratories|TGen North|French|USA

>Spike|hCoV-19/USA/UT-UPHL-2012876879/2020|2020-10-27|EPI\_ISL\_746233|Original|hCoV-19^^Utah|Human|Ginkgo Bioworks Clinical Laboratory|Utah Public Health Laboratory|Young|USA

>Spike|hCoV-19/Denmark/DCGC-1460/2020|2020-04-27|EPI\_ISL\_622477|Original|hCoV-19^^Hovedstaden|Human|Department of Virus and Microbiological Special Diagnostics|Albertsen lab|Michaelsen|Denmark

>Spike|hCoV-19/Denmark/DCGC-5835/2020|2020-09-28|EPI\_ISL\_621022|Original|hCoV-19^^Syddanmark|Human|Department of Virus and Microbiological Special Diagnostics|Albertsen lab|Michaelsen|Denmark

>Spike|hCoV-19/United Arab Emirates/0377/2020|2020-05-15|EPI\_ISL\_698552|Original|hCoV-19^^Abu Dhabi|Human|Group 42 (G42) Healthcare|G42 Healthcare|Ogrodzki|United Arab Emirates

>Spike|hCoV-19/USA/TX-HMH-MCoV-14932/2020|2020-10-14|EPI\_ISL\_786416|Original|hCoV-19^^Texas|Human|Houston Methodist Hospital|Houston Methodist Hospital|Long|USA

>Spike|hCoV-19/USA/TX-HMH-MCoV-18567/2020|2020-11-19|EPI\_ISL\_784915|Original|hCoV-19^^Texas|Human|Houston Methodist Hospital|Houston Methodist Hospital|Long|USA

>Spike|hCoV-19/Japan/PG-7892/2020|2020-07-00|EPI\_ISL\_686993|Original|hCoV-19^^Japan|Human|Pathogen Genomics Center|Pathogen Genomics Center|Sekizuka|Japan

>Spike|hCoV-19/Denmark/DCGC-17219/2020|2020-12-14|EPI\_ISL\_750835|Original|hCoV-19^^Syddanmark|Human|Department of Virus and Microbiological Special Diagnostics|Albertsen Lab|Michaelsen|Denmark



>Spike|hCoV-19/Canada/ON-PHL-20-02196/2020|2020-09-00|EPI\_ISL\_671496|Original|hCoV-19^^Ontario|Human|Public Health Ontario Laboratory|Public Health Ontario Laboratory|Guthrie|Canada

>Spike|hCoV-19/England/QEUH-963D56/2020|2020-08-12|EPI\_ISL\_531539|Original|hCoV-19^^England|Human|Lighthouse Lab in Glasgow|Wellcome Sanger Institute for the COVID-19 Genomics UK (COG-UK) consortium|Davies|United Kingdom

>Spike|hCoV-19/Wales/PHWC-48897A/2020|2020-11-03|EPI\_ISL\_639449|Original|hCoV-19^^Wales|Human|Wales Specialist Virology Centre Sequencing lab|COVID-19 Genomics UK (COG-UK) Consortium|Moore|United Kingdom

>Spike|hCoV-19/Wales/PHWC-16D738/2020|2020-09-24|EPI\_ISL\_577439|Original|hCoV-19^^Wales|Human|Wales Specialist Virology Centre Sequencing lab|COVID-19 Genomics UK (COG-UK) Consortium|Moore|United Kingdom

>Spike|hCoV-19/United Arab Emirates/L920638060/2020|2020-04-02|EPI\_ISL\_520729|Original|hCoV-19^^United Arab Emirates|Human|Mohammed Bin Rashid University of Medicine and Health Sciences|Al Jalila Genomics Center|Ramaswamy|United Arab Emirates

>Spike|hCoV-19/Netherlands/ZH-EMC-976/2020|2020-11-17|EPI\_ISL\_722345|Original|hCoV-19^^Zuid Holland|Human|Dutch COVID-19 response team|Erasmus Medical Center|Oude Munnink|Netherlands

>Spike|hCoV-19/USA/CA-ALSR-3168/2020|2020-06-03|EPI\_ISL\_635895|Original|hCoV-19^^California|Human|San Diego County Public Health Laboratory|Andersen lab at Scripps Research|Gangavarapu|USA

>Spike|hCoV-19/Iceland/50/2020|2020-03-05|EPI\_ISL\_417769|Original|hCoV-19^^Reykjavik|Human|The National University Hospital of Iceland|deCODE genetics|J\u00f3nsson|Iceland

>Spike|hCoV-19/England/LIVE-A5999/2020|2020-03-17|EPI\_ISL\_499636|Original|hCoV-19^^England|Human|Liverpool Clinical Laboratories|COVID-19 Genomics UK (COG-UK) Consortium|Haldenby|United Kingdom

>Spike|hCoV-19/England/CAMB-769CE/2020|2020-03-30|EPI\_ISL\_438295|Original|hCoV-19^^England|Human|Department of Pathology|Wellcome Sanger Institute for the COVID-19 Genomics UK (COG-UK) consortium|Amato|United Kingdom

>Spike|hCoV-19/England/MILK-A918B7/2020|2020-10-19|EPI\_ISL\_705994|Original|hCoV-19^^England|Human|Oxford Viromics|COVID-19 Genomics UK (COG-UK) Consortium|Golubchik|United Kingdom

>Spike|hCoV-19/Australia/VIC6276/2020|2020-07-24|EPI\_ISL\_518265|Original|hCoV-19^^Victoria|Human|Microbiological Diagnostic Unit - Public Health Laboratory (MDU-PHL)|MDU-PHL|Schultz|Australia

>Spike|hCoV-19/Wales/PHWC-16F5D2/2020|2020-10-06|EPI\_ISL\_585991|Original|hCoV-19^^Wales|Human|Wales Specialist Virology Centre Sequencing lab|COVID-19 Genomics UK (COG-UK) Consortium|Moore|United Kingdom

>Spike|hCoV-19/Denmark/DCGC-15009/2020|2020-11-23|EPI\_ISL\_713577|Original|hCoV-19^^Midtjylland|Human|Department of Virus and Microbiological Special Diagnostics|Albertsen Lab|Michaelsen|Denmark

>Spike|hCoV-19/Denmark/DCGC-10764/2020|2020-11-02|EPI\_ISL\_670192|Original|hCoV-19^^Hovedstaden|Human|Department of Virus and Microbiological Special Diagnostics|Albertsen Lab|Michaelsen|Denmark

>Spike|hCoV-19/Wales/PHWC-2AB1E/2020|2020-04-06|EPI\_ISL\_445667|Original|hCoV-19^^Wales|Human|Wales Specialist Virology Centre|Public Health Wales Microbiology Cardiff|Moore|United Kingdom

>Spike|hCoV-19/England/NORT-283B6C/2020|2020-04-02|EPI\_ISL\_472248|Original|hCoV-19^^England|Human|Northumbria University / South Tees Hospitals NHS Foundation Trust / North Cumbria Integrated Care NHS Foundation Trust / North Tees and Hartlepool NHS Foundation Trust / Newcastle Hospitals NHS Foundation Trust|COVID-19 Genomics UK (COG-UK) Consortium|Bashton|United Kingdom

>Spike|hCoV-19/Japan/PG-6509/2020|2020-07-00|EPI\_ISL\_689611|Original|hCoV-19^^Japan|Human|Pathogen Genomics Center|Pathogen Genomics Center|Sekizuka|Japan

>Spike|hCoV-19/Bermuda/205081294/2020|2020-10-31|EPI\_ISL\_780405|Original|hCoV-19^^Bermuda|Human|Bermuda Government Molecular Diagnostics Laboratory (MDL)|Respiratory Virus Unit|Platt|Bermuda

>Spike|hCoV-19/Austria/CeMM0546/2020|2020-04-28|EPI\_ISL\_475903|Original|hCoV-19^^Austria|Human|Zentralinstitut f\u00fcr medizinische und chemische Labordiagnostik|Bergthaler laboratory|Bergthaler|Austria

>Spike|hCoV-19/Panama/341003/2020|2020-04-14|EPI\_ISL\_496909|Original|hCoV-19^^Colon|Human|Gorgas Memorial Laboratory of Health Studies|Gorgas Memorial Laboratory of Health Studies|Martinez|Panama

>Spike|hCoV-19/England/ALDP-A94508/2020|2020-10-20|EPI\_ISL\_624784|Original|hCoV-19^^England|Human|Lighthouse Lab in Alderley Park|Wellcome Sanger Institute for the COVID-19 Genomics UK (COG-UK) consortium|Davies|United Kingdom

>Spike|hCoV-19/Portugal/IGC4251/2020|2020-06-03|EPI\_ISL\_491242|Original|hCoV-19^^Portugal|Human|Instituto Gulbenkian de Ci\u00eancia|Instituto Gulbenkian de Ci\u00eancia|Leite|Portugal

>Spike|hCoV-19/India/MH-ACTREC-534/2020|2020-08-25|EPI\_ISL\_700180|Original|hCoV-19^^Maharashtra|Human|Hematopathology Laboratory|Hematopathology Laboratory|Patkar|India

>Spike|hCoV-19/England/QEUA-B68821/2020|2020-11-11|EPI\_ISL\_655216|Original|hCoV-19^^England|Human|Lighthouse Lab in Glasgow|Wellcome Sanger Institute for the COVID-19 Genomics UK (COG-UK) Consortium|Davies|United Kingdom

>Spike|hCoV-19/England/ALDP-B23C80/2020|2020-11-04|EPI\_ISL\_646157|Original|hCoV-19^^England|Human|Lighthouse Lab in Alderley Park|Wellcome Sanger Institute for the COVID-19 Genomics UK (COG-UK) Consortium|Davies|United Kingdom

>Spike|hCoV-19/Wales/PHWC-33EDD/2020|2020-04-16|EPI\_ISL\_446838|Original|hCoV-19^^Wales|Human|Wales Specialist Virology Centre|Public Health Wales Microbiology Cardiff|Moore|United Kingdom

>Spike|hCoV-19/England/CAMC-BC0F04/2020|2020-11-22|EPI\_ISL\_704774|Original|hCoV-19^^England|Human|Lighthouse Lab in Cambridge|Wellcome Sanger Institute for the COVID-19 Genomics UK (COG-UK) Consortium|Davies|United Kingdom

>Spike|hCoV-19/Japan/PG-4158/2020|2020-07-00|EPI\_ISL\_692397|Original|hCoV-19^^Japan|Human|Pathogen Genomics Center|Pathogen Genomics Center|Sekizuka|Japan

>Spike|hCoV-19/England/QEUA-999276/2020|2020-08-24|EPI\_ISL\_541813|Original|hCoV-19^^England|Human|Lighthouse Lab in Glasgow|Wellcome Sanger Institute for the COVID-19 Genomics UK (COG-UK) consortium|Davies|United Kingdom

>Spike|hCoV-19/USA/TX-HMH-3507/2020|2020-06-14|EPI\_ISL\_544209|Original|hCoV-19^^Texas|Human|Houston Methodist Hospital|Houston Methodist Hospital|Long|USA

>Spike|hCoV-19/England/CAMC-B33D99/2020|2020-11-05|EPI\_ISL\_659178|Original|hCoV-19^^England|Human|Lighthouse Lab in Cambridge|Wellcome Sanger Institute for the COVID-19 Genomics UK (COG-UK) Consortium|Davies|United Kingdom

>Spike|hCoV-19/England/ALDP-A2F335/2020|2020-10-05|EPI\_ISL\_587079|Original|hCoV-19^^England|Human|Lighthouse Lab in Alderley Park|Wellcome Sanger Institute for the COVID-19 Genomics UK (COG-UK) consortium|Davies|United Kingdom

>Spike|hCoV-19/Switzerland/BE-ETHZ-270181/2020|2020-08-29|EPI\_ISL\_541441|Original|hCoV-19^^Bern|Human|Viollier AG|Department of Biosystems Science and Engineering|Nadeau|Switzerland

>Spike|hCoV-19/USA/TX-HMH-2649/2020|2020-06-05|EPI\_ISL\_545450|Original|hCoV-19^^Texas|Human|Houston Methodist Hospital|Houston Methodist Hospital|Long|USA

>Spike|hCoV-19/USA/NY-Wadsworth-29254-01/2020|2020-03-25|EPI\_ISL\_676764|Original|hCoV-19^^New York|Human|Wadsworth Center|Wadsworth Center|Lasek-Nesselquist|USA

>Spike|hCoV-19/Switzerland/ZH-UZH-1000486784/2020|2020-03-19|EPI\_ISL\_508870|Original|hCoV-19^^Zurich|Human|Division of Infectious Diseases and Hospital Epidemiology|Institute of Medical Virology|Huber|Switzerland

>Spike|hCoV-19/England/CAMC-B992CF/2020|2020-11-15|EPI\_ISL\_673429|Original|hCoV-19^^England|Human|Lighthouse Lab in Cambridge|Wellcome Sanger Institute for the COVID-19 Genomics UK (COG-UK) Consortium|Davies|United Kingdom

>Spike|hCoV-19/USA/TX-HMH0431/2020|2020-04-02|EPI\_ISL\_435014|Original|hCoV-19^^Texas|Human|Houston Methodist Hospital|Houston Methodist Hospital|Long|USA

>Spike|hCoV-19/USA/NY-WCMP4C01P/2020|2020-03-13|EPI\_ISL\_427533|Original|hCoV-19^^New York|Human|NewYork-Presbyterian & Mason Lab|Mason Lab|Mason|USA

>Spike|hCoV-19/England/20144022804/2020|2020-03-30|EPI\_ISL\_423522|Original|hCoV-19^^England|Human|Respiratory Virus Unit|Respiratory Virus Unit|Platt|United Kingdom

>Spike|hCoV-19/Australia/VIC11546/2020|2020-08-10|EPI\_ISL\_563408|Original|hCoV-19^^Victoria|Human|Victorian Infectious Diseases Reference Laboratory (VIDRL)|VIDRL and MDU-PHL|Schultz|Australia

>Spike|hCoV-19/USA/TX-HMH-MCoV-19119/2020|2020-11-23|EPI\_ISL\_783637|Original|hCoV-19^^Texas|Human|Houston Methodist Hospital|Houston Methodist Hospital|Long|USA

>Spike|hCoV-19/USA/DE-DHSS-F981198/2020|2020-08-14|EPI\_ISL\_708425|Original|hCoV-19^^Delaware|Human|Delaware Public Health Lab|Delaware Public Health Lab|Bajwa|USA

>Spike|hCoV-19/USA/TX-HMH-MCoV-14341/2020|2020-10-06|EPI\_ISL\_787626|Original|hCoV-19^^Texas|Human|Houston Methodist Hospital|Houston Methodist Hospital|Long|USA

>Spike|hCoV-19/Wales/PHWC-48A18F/2020|2020-10-30|EPI\_ISL\_652530|Original|hCoV-19^^Wales|Human|Wales Specialist Virology Centre Sequencing lab|COVID-19 Genomics UK (COG-UK) Consortium|Moore|United Kingdom

>Spike|hCoV-19/Ireland/LK-NVRL-75IRL23376/2020|2020-10-06|EPI\_ISL\_671915|Original|hCoV-19^^Limerick|Human|National Virus Reference Laboratory|National Virus Reference Laboratory|Gonzalez|Ireland

>Spike|hCoV-19/Denmark/DCGC-12220/2020|2020-11-16|EPI\_ISL\_682401|Original|hCoV-19^^Hovedstaden|Human|Department of Virus and Microbiological Special Diagnostics|Albertsen Lab|Michaelsen|Denmark

>Spike|hCoV-19/India/MH-NCCS-NR1709/2020|2020-05-18|EPI\_ISL\_496564|Original|hCoV-19^^Maharashtra|Human|National Centre For Cell Science|National Centre For Cell Science|Paul|India

>Spike|hCoV-19/England/NORW-21F619/2020|2020-12-10|EPI\_ISL\_725035|Original|hCoV-19^^England|Human|Quadram Institute Bioscience|COVID-19 Genomics UK (COG-UK) Consortium|Alikhan|United Kingdom

>Spike|hCoV-19/Australia/VIC44/2020|2020-03-11|EPI\_ISL\_419767|Original|hCoV-19^^Victoria|Human|Victorian Infectious Diseases Reference Laboratory (VIDRL)|Victorian Infectious Diseases Reference Laboratory and Microbiological Diagnostic Unit Public Health Laboratory|Schultz|Australia

>Spike|hCoV-19/Spain/CL-IBV-97006277/2020|2020-04-21|EPI\_ISL\_537648|Original|hCoV-19^^Castilla y Leon|Human|Universidad de Le\u00f3n|SeqCOVID-SPAIN consortium/IBV (CSIC)|Comas|Spain

>Spike|hCoV-19/Germany/HH-hpi-p1339/2020|2020-03-25|EPI\_ISL\_775761|Original|hCoV-19^^Hamburg|Human|University Medical Center Hamburg Eppendorf|Heinrich Pette Institute|Robitaille|Germany

>Spike|hCoV-19/USA/CO-CDPHE-2005220686/2020|2020-05-21|EPI\_ISL\_710313|Original|hCoV-19^^Colorado|Human|Colorado Department of Public Health and Environment|Colorado Department of Public Health and Environment|Bankers|USA

>Spike|hCoV-19/Spain/MD-IBV-99008667/2020|2020-09-30|EPI\_ISL\_654228|Original|hCoV-19^^Madrid|Human|Hospital General Universitario Gregorio Mara\u00f1\u00f3n|SeqCOVID-SPAIN consortium/IBV (CSIC)|Comas|Spain

>Spike|hCoV-19/Norway/3136/2020|2020-08-08|EPI\_ISL\_549159|Original|hCoV-19^^Viken|Human|Ostfold Hospital Trust - Kalnes|Norwegian Institute of Public Health|Kopperud Riis|Norway

>Spike|hCoV-19/USA/CA-ALSR-4835/2020|2020-11-09|EPI\_ISL\_730169|Original|hCoV-19^^California|Human|San Diego County Public Health Laboratory|Andersen lab at Scripps Research|Gangavarapu|USA

>Spike|hCoV-19/USA/CA-CZB-14068/2020|2020-06-24|EPI\_ISL\_739217|Original|hCoV-19^^California|Human|Alameda County Public Health Lab|Chan-Zuckerberg Biohub|Kamm|USA

>Spike|hCoV-19/Germany/BY-MVP-0277/2020|2020-05-25|EPI\_ISL\_466920|Original|hCoV-19^^Bavaria|Human|Max von Pettenkofer Institute|Laboratory for Functional Genome Analysis|Graf|Germany

>Spike|hCoV-19/England/201161690/2020|2020-03-12|EPI\_ISL\_464871|Original|hCoV-19^^England|Human|Respiratory Virus Unit|Respiratory Virus Unit|Platt|United Kingdom

>Spike|hCoV-19/Wales/PHWC-4992C6/2020|2020-12-03|EPI\_ISL\_727284|Original|hCoV-19^^Wales|Human|Originating lab|COVID-19 Genomics UK (COG-UK) Consortium|Moore|United Kingdom

>Spike|hCoV-19/Spain/AN-IBV-98001110/2020|2020-03-29|EPI\_ISL\_538173|Original|hCoV-19^^Andalucia|Human|Servicio de Microbiolog\u00eda y Parasitolog\u00eda cl\u00ednica. UCEIMP. Hospital Universitario Virgen del Roc\u00e9do/IBIS/CSIC/US|SeqCOVID-SPAIN consortium/IBV (CSIC)|Comas|Spain

>Spike|hCoV-19/England/MILK-B95A9E/2020|2020-11-13|EPI\_ISL\_674905|Original|hCoV-19^^England|Human|Lighthouse Lab in Milton Keynes|Wellcome Sanger Institute for the COVID-19 Genomics UK (COG-UK) Consortium|Davies|United Kingdom

>Spike|hCoV-19/England/NORT-282D85/2020|2020-03-29|EPI\_ISL\_488617|Original|hCoV-19^^England|Human|NU-OMICS DNA Sequencing research facility|Wellcome Sanger Institute for the COVID-19 Genomics UK (COG-UK) consortium|Davies|United Kingdom

>Spike|hCoV-19/USA/GA-QDX-2218/2020|2020-03-15|EPI\_ISL\_661253|Original|hCoV-19^^Georgia|Human|Quest Diagnostics|Quest Diagnostics|Kagan|USA

>Spike|hCoV-19/USA/WA-S2794/2020|2020-08-14|EPI\_ISL\_530151|Original|hCoV-19^^Washington|Human|Seattle Flu Study|Seattle Flu Study|Lee|USA

>Spike|hCoV-19/USA/TX-HMH-MCoV-15813/2020|2020-07-10|EPI\_ISL\_785497|Original|hCoV-19^^Texas|Human|Houston Methodist Hospital|Houston Methodist Hospital|Long|USA

>Spike|hCoV-19/USA/CA-QDX-2071/2020|2020-03-17|EPI\_ISL\_604324|Original|hCoV-19^^California|Human|Quest Diagnostics|Quest Diagnostics|Kagan|USA

>Spike|hCoV-19/Netherlands/NH-RIVM-21058/2020|2020-12-18|EPI\_ISL\_791072|Original|hCoV-19^^Noord-Holland|Human|Dutch COVID-19 response team|National Institute for Public Health and the Environment (RIVM)|Meijer|Netherlands

>Spike|hCoV-19/Belgium/ULG-10259/2020|2020-07-11|EPI\_ISL\_515066|Original|hCoV-19^^Liege|Human|Department of Clinical Microbiology|GIGA Medical Genomics|Durkin|Belgium

>Spike|hCoV-19/Portugal/PT0818/2020|2020-03-20|EPI\_ISL\_511077|Original|hCoV-19^^Portugal|Human|Instituto Nacional de Saude (INSA)|Instituto Nacional de Saude (INSA)|Borges|Portugal

>Spike|hCoV-19/USA/WA-UW-11459/2020|2020-06-15|EPI\_ISL\_570414|Original|hCoV-19^^Washington|Human|UW Virology Lab|UW Virology Lab|Roychoudhury|USA

>Spike|hCoV-19/USA/OR-PROV-194/2020|2020-05-18|EPI\_ISL\_482439|Original|hCoV-19^^Oregon|Human|Providence St. Joseph Health Molecular Genomics Laboratory|Providence St. Joseph Health Molecular Genomics Laboratory|Dowdell|USA

>Spike|hCoV-19/USA/TX-DSHS-1940/2020|2020-06-21|EPI\_ISL\_765922|Original|hCoV-19^^Texas|Human|TXDSHS|TXDSHS|Rahman|USA

>Spike|hCoV-19/Northern Ireland/QEUA-7663F9/2020|2020-07-17|EPI\_ISL\_533001|Original|hCoV-19^^Northern Ireland|Human|Lighthouse Lab in Glasgow|Wellcome Sanger Institute for the COVID-19 Genomics UK (COG-UK) consortium|Davies|United Kingdom

>Spike|hCoV-19/England/BIRM-6A471/2020|2020-11-09|EPI\_ISL\_679060|Original|hCoV-19^^England|Human|University of Birmingham|COVID-19 Genomics UK (COG-UK) Consortium|Loman|United Kingdom

>Spike|hCoV-19/USA/CT-Yale-124/2020|2020-04-16|EPI\_ISL\_431087|Original|hCoV-19^^Connecticut|Human|Yale COVID-19 Biorepository|Grubaugh Lab - Yale School of Public Health|Grubaugh|USA

>Spike|hCoV-19/Denmark/DCGC-11640/2020|2020-10-26|EPI\_ISL\_671042|Original|hCoV-19^^Midtjylland|Human|Department of Virus and Microbiological Special Diagnostics|Albertsen Lab|Michaelsen|Denmark

>Spike|hCoV-19/England/ALDP-A85E78/2020|2020-10-17|EPI\_ISL\_610421|Original|hCoV-19^^England|Human|Lighthouse Lab in Alderley Park|Wellcome Sanger Institute for the COVID-19 Genomics UK (COG-UK) consortium|Davies|United Kingdom

>Spike|hCoV-19/England/ALDP-A6F65E/2020|2020-10-15|EPI\_ISL\_607771|Original|hCoV-19^^England|Human|Lighthouse Lab in Alderley Park|Wellcome Sanger Institute for the COVID-19 Genomics UK (COG-UK) consortium|Davies|United Kingdom

>Spike|hCoV-19/USA/UT-UPHL-2009726/2020|2020-07-25|EPI\_ISL\_605398|Original|hCoV-19^^Utah|Human|Utah Public Health Laboratory|Utah Public Health Laboratory|Young|USA

>Spike|hCoV-19/Portugal/PT0662/2020|2020-04-04|EPI\_ISL\_510921|Original|hCoV-19^^Portugal|Human|Instituto Nacional de Saude (INSA)|Instituto Nacional de Saude (INSA)|Borges|Portugal

>Spike|hCoV-19/USA/WA-S2304/2020|2020-06-12|EPI\_ISL\_496936|Original|hCoV-19^^Washington|Human|Washington State Department of Health|Seattle Flu Study|Lee|USA

>Spike|hCoV-19/USA/TX-HMH-MCoV-18997/2020|2020-11-25|EPI\_ISL\_785272|Original|hCoV-19^^Texas|Human|Houston Methodist Hospital|Houston Methodist Hospital|Long|USA

>Spike|hCoV-19/Portugal/PT1438/2020|2020-03-21|EPI\_ISL\_511397|Original|hCoV-19^^Portugal|Human|Instituto Nacional de Saude (INSA)|Instituto Nacional de Saude (INSA)|Borges|Portugal

>Spike|hCoV-19/England/ALDP-BE922A/2020|2020-12-03|EPI\_ISL\_708877|Original|hCoV-19^^England|Human|Lighthouse Lab in Alderley Park|Wellcome Sanger Institute for the COVID-19 Genomics UK (COG-UK) Consortium|Davies|United Kingdom

>Spike|hCoV-19/England/MILK-B89DEF/2020|2020-11-13|EPI\_ISL\_675556|Original|hCoV-19^^England|Human|Lighthouse Lab in Milton Keynes|Wellcome Sanger Institute for the COVID-19 Genomics UK (COG-UK) Consortium|Davies|United Kingdom

>Spike|hCoV-19/USA/VA-DCLS-0053/2020|2020-03-27|EPI\_ISL\_426461|Original|hCoV-19^^Virginia|Human|Virginia DCLS|Virginia DCLS|St. Jacques|USA

>Spike|hCoV-19/USA/VA\_NIDDL\_2932/2020|2020-04-04|EPI\_ISL\_491924|Original|hCoV-19^^Virginia|Human|Naval Infectious Diseases Diagnostic Laboratory|Naval Medical Research Center Biological Defense Research Directorate|Voegtly|USA

>Spike|hCoV-19/Luxembourg/LNS9867466/2020|2020-10-23|EPI\_ISL\_745001|Original|hCoV-19^^Luxembourg|Human|Laboratoire national de sant\u00e9|Laboratoire national de sant\u00e9|Wienecke-Baldacchino|Luxembourg

>Spike|hCoV-19/USA/TX-HMH-6013/2020|2020-06-26|EPI\_ISL\_547168|Original|hCoV-19^^Texas|Human|Houston Methodist Hospital|Houston Methodist Hospital|Long|USA

>Spike|hCoV-19/Scotland/EDB3341/2020|2020-04-08|EPI\_ISL\_487928|Original|hCoV-19^^Scotland|Human|Virology Department|Wellcome Sanger Institute for the COVID-19 Genomics UK (COG-UK) consortium|Davies|United Kingdom

>Spike|hCoV-19/England/MILK-9F2053/2020|2020-09-24|EPI\_ISL\_589077|Original|hCoV-19^^England|Human|Lighthouse Lab in Milton Keynes|Wellcome Sanger Institute for the COVID-19 Genomics UK (COG-UK) consortium|Davies|United Kingdom

>Spike|hCoV-19/United Arab Emirates/0460/2020|2020-05-18|EPI\_ISL\_698630|Original|hCoV-19^^Abu Dhabi|Human|Group 42 (G42) Healthcare|G42 Healthcare|Ogrodzki|United Arab Emirates

>Spike|hCoV-19/England/EXET-13EC8C/2020|2020-12-14|EPI\_ISL\_763563|Original|hCoV-19^^England|Human|University of Exeter|COVID-19 Genomics UK (COG-UK) Consortium|Temperton|United Kingdom

>Spike|hCoV-19/Northern Ireland/NIRE-235783/2020|2020-11-05|EPI\_ISL\_742140|Original|hCoV-19^^Northern Ireland|Human|Regional Virus Laboratory|COVID-19 Genomics UK (COG-UK) Consortium|Fairley|United Kingdom

>Spike|hCoV-19/Denmark/DCGC-7365/2020|2020-10-12|EPI\_ISL\_619309|Original|hCoV-19^^Hovedstaden|Human|Department of Virus and Microbiological Special Diagnostics|Albertsen lab|Michaelsen|Denmark

>Spike|hCoV-19/England/BIRM-60DF8/2020|2020-07-14|EPI\_ISL\_529468|Original|hCoV-19^^England|Human|University of Birmingham|COVID-19 Genomics UK (COG-UK) Consortium|Loman|United Kingdom

>Spike|hCoV-19/Japan/PG-0525/2020|2020-04-03|EPI\_ISL\_480183|Original|hCoV-19^^Kanto|Human|Ibaraki Prefectural Institute of Public Health|Pathogen Genomics Center|Sekizuka|Japan

>Spike|hCoV-19/Canada/ON-S843/2020|2020-04-00|EPI\_ISL\_591244|Original|hCoV-19^^Ontario|Human|Toronto Invasive Bacterial Diseases Network|McMaster University|McArthur|Canada

>Spike|hCoV-19/England/LIVE-9D475/2020|2020-04-16|EPI\_ISL\_453202|Original|hCoV-19^^England|Human|Liverpool Clinical Laboratories|COVID-19 Genomics UK (COG-UK) Consortium|Haldenby|United Kingdom

>Spike|hCoV-19/Wales/PHWC-16378D/2020|2020-05-10|EPI\_ISL\_473992|Original|hCoV-19^^Wales|Human|Originating lab|COVID-19 Genomics UK (COG-UK) Consortium|Moore|United Kingdom

>Spike|hCoV-19/USA/TX-HMH-MCoV-18230/2020|2020-11-17|EPI\_ISL\_784578|Original|hCoV-19^^Texas|Human|Houston Methodist Hospital|Houston Methodist Hospital|Long|USA

>Spike|hCoV-19/England/SHEF-C3C7E/2020|2020-04-23|EPI\_ISL\_453707|Original|hCoV-19^^England|Human|Virology Department|COVID-19 Genomics UK (COG-UK) Consortium|de Silva|United Kingdom

>Spike|hCoV-19/Brazil/RS-15283/2020|2020-08-09|EPI\_ISL\_729802|Original|hCoV-19^^Rio Grande do Sul|Human|Laboratorio Central de Saude Publica do Estado do Rio Grande do Sul (LACEN-RS)|Laboratory of Respiratory Viruses and Measles|Silva|Brazil

>Spike|hCoV-19/Scotland/EDB6741/2020|2020-04-13|EPI\_ISL\_491696|Original|hCoV-19^^Scotland|Human|Virology Department|Wellcome Sanger Institute for the COVID-19 Genomics UK (COG-UK) consortium|Davies|United Kingdom

>Spike|hCoV-19/England/ALDP-C3A256/2020|2020-12-09|EPI\_ISL\_731086|Original|hCoV-19^^England|Human|Lighthouse Lab in Alderley Park|Wellcome Sanger Institute for the COVID-19 Genomics UK (COG-UK) Consortium|Davies|United Kingdom

>Spike|hCoV-19/England/LIVE-AA9D0/2020|2020-07-23|EPI\_ISL\_540591|Original|hCoV-19^^England|Human|Liverpool Clinical Laboratories|COVID-19 Genomics UK (COG-UK) Consortium|Haldenby|United Kingdom

>Spike|hCoV-19/Netherlands/NH-EMC-58/2020|2020-08-27|EPI\_ISL\_577854|Original|hCoV-19^^Noord Holland|Human|Dutch COVID-19 response team|Erasmus Medical Center|Oude Munnink|Netherlands

>Spike|hCoV-19/England/BRIS-12CC45/2020|2020-04-18|EPI\_ISL\_481767|Original|hCoV-19^^England|Human|PHE South West Regional Laboratory|Wellcome Sanger Institute for the COVID-19 Genomics UK (COG-UK) consortium|Davies|United Kingdom

>Spike|hCoV-19/England/CAMB-1B8A71/2020|2020-00-00|EPI\_ISL\_650960|Original|hCoV-19^^England|Human|Department of Pathology|COVID-19 Genomics UK (COG-UK) Consortium|Goodfellow|United Kingdom

>Spike|hCoV-19/India/MH-ACTREC-402/2020|2020-07-29|EPI\_ISL\_700051|Original|hCoV-19^^Maharashtra|Human|Hematopathology Laboratory|Hematopathology Laboratory|Patkar|India

>Spike|hCoV-19/France/OCC-139/2020|2020-11-23|EPI\_ISL\_751459|Original|hCoV-19^^Occitanie|Human|CHU Purpan - Laboratoire de Virologie - Institut F\u00e9d\u00e9ratif de Biologie|CHU Purpan - Laboratoire de Virologie - Institut F\u00e9d\u00e9ratif de Biologie|Latour|France

>Spike|hCoV-19/USA/MN-MDH-1017/2020|2020-04-30|EPI\_ISL\_462862|Original|hCoV-19^^Minnesota|Human|Minnesota Department of Health|Minnesota Department of Health|Garfin|USA

>Spike|hCoV-19/USA/TX-HMH-MCoV-8576/2020|2020-07-01|EPI\_ISL\_780634|Original|hCoV-19^^Texas|Human|Houston Methodist Hospital|Houston Methodist Hospital|Long|USA

>Spike|hCoV-19/England/LEED-2A9F64/2020|2020-04-09|EPI\_ISL\_538977|Original|hCoV-19^^England|Human|Leeds Teaching Hospitals NHS Trust and Public Health England|Wellcome Sanger Institute for the COVID-19 Genomics UK (COG-UK) consortium|Davies|United Kingdom

>Spike|hCoV-19/USA/MD-HP00885/2020|2020-03-31|EPI\_ISL\_511873|Original|hCoV-19^^Maryland|Human|Johns Hopkins Hospital Department of Pathology|Johns Hopkins Hospital Department of Pathology|Ramakrishnan|USA

>Spike|hCoV-19/USA/OR-PROV-052/2020|2020-03-24|EPI\_ISL\_482332|Original|hCoV-19^^Oregon|Human|Providence St. Joseph Health Molecular Genomics Laboratory|Providence St. Joseph Health Molecular Genomics Laboratory|Dowdell|USA

>Spike|hCoV-19/England/ALDP-8DE100/2020|2020-06-25|EPI\_ISL\_557024|Original|hCoV-19^^England|Human|Lighthouse Lab in Alderley Park|Wellcome Sanger Institute for the COVID-19 Genomics UK (COG-UK) consortium|Davies|United Kingdom

>Spike|hCoV-19/USA/CA-CZB-3637/2020|2020-03-16|EPI\_ISL\_548356|Original|hCoV-19^^California|Human|Ventura County Public Health Lab|Chan-Zuckerberg Biohub|Bhatt|USA

>Spike|hCoV-19/England/BRIS-124EB0/2020|2020-03-26|EPI\_ISL\_443944|Original|hCoV-19^^England|Human|PHE South West Regional Laboratory|Wellcome Sanger Institute for the COVID-19 Genomics UK (COG-UK) consortium|Amato|United Kingdom

>Spike|hCoV-19/India/KA-IB38/2020|2020-06-15|EPI\_ISL\_508316|Original|hCoV-19^^Karnataka|Human|Indian Institute of Science|National Institute of Biomedical Genomics|Maitra|India

>Spike|hCoV-19/England/QEUH-9C81CC/2020|2020-09-03|EPI\_ISL\_567254|Original|hCoV-19^^England|Human|Lighthouse Lab in Glasgow|Wellcome Sanger Institute for the COVID-19 Genomics UK (COG-UK) consortium|Davies|United Kingdom

>Spike|hCoV-19/Australia/NSW806/2020|2020-04-09|EPI\_ISL\_526148|Original|hCoV-19^^New South Wales|Human|South Eastern Area Laboratory Services (SEALS)|NSW Health Pathology - Institute of Clinical Pathology and Medical Research; Westmead Hospital; University of Sydney|Gall|Australia

>Spike|hCoV-19/Scotland/QEUH-A78203/2020|2020-10-14|EPI\_ISL\_638963|Original|hCoV-19^^Scotland|Human|Oxford Viromics|COVID-19 Genomics UK (COG-UK) Consortium|Golubchik|United Kingdom

>Spike|hCoV-19/England/ALDP-A6F964/2020|2020-10-15|EPI\_ISL\_607261|Original|hCoV-19^^England|Human|Lighthouse Lab in Alderley Park|Wellcome Sanger Institute for the COVID-19 Genomics UK (COG-UK) consortium|Davies|United Kingdom

>Spike|hCoV-19/USA/NY-NYCPHL-000014/2020|2020-03-09|EPI\_ISL\_631512|Original|hCoV-19^^New York|Human|Mount Sinai Hospital|New York City Public Health Laboratory|Wang|USA

>Spike|hCoV-19/France/BRE-8942/2020|2020-08-03|EPI\_ISL\_560610|Original|hCoV-19^^Bretagne|Human|Hospital|National Reference Center for Viruses of Respiratory Infections|Enouf|France

>Spike|hCoV-19/Denmark/DCGC-8473/2020|2020-10-26|EPI\_ISL\_617390|Original|hCoV-19^^Midtjylland|Human|Department of Virus and Microbiological Special Diagnostics|Albertsen lab|Michaelsen|Denmark

>Spike|hCoV-19/England/CAMC-B232CA/2020|2020-11-03|EPI\_ISL\_651728|Original|hCoV-19^^England|Human|Virology Department|COVID-19 Genomics UK (COG-UK) Consortium|de Silva|United Kingdom

>Spike|hCoV-19/USA/TX-HMH-7944/2020|2020-06-30|EPI\_ISL\_545727|Original|hCoV-19^^Texas|Human|Houston Methodist Hospital|Houston Methodist Hospital|Long|USA

>Spike|hCoV-19/England/CAMC-B09321/2020|2020-10-29|EPI\_ISL\_673106|Original|hCoV-19^^England|Human|Lighthouse Lab in Cambridge|Wellcome Sanger Institute for the COVID-19 Genomics UK (COG-UK) Consortium|Davies|United Kingdom

>Spike|hCoV-19/Scotland/QEUH-9E4591/2020|2020-09-23|EPI\_ISL\_600997|Original|hCoV-19^^Scotland|Human|Lighthouse Lab in Glasgow|Wellcome Sanger Institute for the COVID-19 Genomics UK (COG-UK) consortium|Davies|United Kingdom

>Spike|hCoV-19/USA/UT-QDX-2668/2020|2020-03-14|EPI\_ISL\_604986|Original|hCoV-19^^Utah|Human|Quest Diagnostics|Quest Diagnostics|Kagan|USA

>Spike|hCoV-19/Northern Ireland/NIRE-1043E4/2020|2020-04-15|EPI\_ISL\_489306|Original|hCoV-19^^Northern Ireland|Human|Regional Virus Laboratory|Wellcome Sanger Institute for the COVID-19 Genomics UK (COG-UK) consortium|Davies|United Kingdom

>Spike|hCoV-19/USA/NY-Wadsworth-288854-01/2020|2020-12-18|EPI\_ISL\_767489|Original|hCoV-19^^New York|Human|Wadsworth Center|Wadsworth Center|Lasek-Nesselquist|USA

>Spike|hCoV-19/Portugal/PT0730/2020|2020-03-19|EPI\_ISL\_510989|Original|hCoV-19^^Portugal|Human|Instituto Nacional de Saude (INSA)|Instituto Nacional de Saude (INSA)|Borges|Portugal

>Spike|hCoV-19/Australia/VIC15332/2020|2020-08-03|EPI\_ISL\_593253|Original|hCoV-19^^Victoria|Human|Microbiological Diagnostic Unit - Public Health Laboratory (MDU-PHL)|MDU-PHL|Schultz|Australia

>Spike|hCoV-19/USA/TX-HMH-MCoV-14048/2020|2020-08-14|EPI\_ISL\_787336|Original|hCoV-19^^Texas|Human|Houston Methodist Hospital|Houston Methodist Hospital|Long|USA

>Spike|hCoV-19/USA/TX-HMH-MCoV-18415/2020|2020-11-18|EPI\_ISL\_784763|Original|hCoV-19^^Texas|Human|Houston Methodist Hospital|Houston Methodist Hospital|Long|USA

>Spike|hCoV-19/Denmark/DCGC-10569/2020|2020-11-02|EPI\_ISL\_670056|Original|hCoV-19^^Midtjylland|Human|Department of Virus and Microbiological Special Diagnostics|Albertsen Lab|Michaelsen|Denmark

>Spike|hCoV-19/Denmark/DCGC-2933/2020|2020-08-24|EPI\_ISL\_616694|Original|hCoV-19^^Nordjylland|Human|Department of Virus and Microbiological Special Diagnostics|Albertsen lab|Michaelsen|Denmark

>Spike|hCoV-19/England/MILK-74B1A5/2020|2020-06-30|EPI\_ISL\_557467|Original|hCoV-19^^England|Human|Lighthouse Lab in Milton Keynes|Wellcome Sanger Institute for the COVID-19 Genomics UK (COG-UK) consortium|Davies|United Kingdom

>Spike|hCoV-19/England/ALDP-C3CC47/2020|2020-12-10|EPI\_ISL\_731220|Original|hCoV-19^^England|Human|Lighthouse Lab in Alderley Park|Wellcome Sanger Institute for the COVID-19 Genomics UK (COG-UK) Consortium|Davies|United Kingdom

>Spike|hCoV-19/England/MILK-A4667B/2020|2020-10-05|EPI\_ISL\_598624|Original|hCoV-19^^England|Human|Lighthouse Lab in Milton Keynes|Wellcome Sanger Institute for the COVID-19 Genomics UK (COG-UK) consortium|Davies|United Kingdom

>Spike|hCoV-19/Iceland/452/2020|2020-03-19|EPI\_ISL\_424476|Original|hCoV-19^^Reykjavik|Human|The National University Hospital of Iceland|deCODE genetics|J\|u00f3nsson|Iceland

>Spike|hCoV-19/England/QEUH-9CFC6A/2020|2020-09-15|EPI\_ISL\_589866|Original|hCoV-19^^England|Human|Lighthouse Lab in Glasgow|Wellcome Sanger Institute for the COVID-19 Genomics UK (COG-UK) consortium|Davies|United Kingdom

>Spike|hCoV-19/Australia/VIC2820/2020|2020-07-01|EPI\_ISL\_521651|Original|hCoV-19^^Victoria|Human|Microbiological Diagnostic Unit - Public Health Laboratory (MDU-PHL)|MDU-PHL|Schultz|Australia

>Spike|hCoV-19/USA/LA-GBCL-26684441/2020|2020-04-11|EPI\_ISL\_485266|Original|hCoV-19^^Louisiana|Human|River Road Testing Lab|Ginkgo Bioworks Clinical Laboratory|Smith|USA

>Spike|hCoV-19/England/ALDP-B48432/2020|2020-11-07|EPI\_ISL\_649210|Original|hCoV-19^^England|Human|Lighthouse Lab in Alderley Park|Wellcome Sanger Institute for the COVID-19 Genomics UK (COG-UK) Consortium|Davies|United Kingdom

>Spike|hCoV-19/England/LIVE-AA035/2020|2020-03-23|EPI\_ISL\_517391|Original|hCoV-19^^England|Human|Liverpool Clinical Laboratories|COVID-19 Genomics UK (COG-UK) Consortium|Haldenby|United Kingdom

>Spike|hCoV-19/England/CAMB-1B2B38/2020|2020-05-15|EPI\_ISL\_469905|Original|hCoV-19^^England|Human|Department of Pathology|Wellcome Sanger Institute for the COVID-19 Genomics UK (COG-UK) consortium|Davies|United Kingdom

>Spike|hCoV-19/England/QEUH-B2B59C/2020|2020-11-02|EPI\_ISL\_646596|Original|hCoV-19^^England|Human|Lighthouse Lab in Glasgow|Wellcome Sanger Institute for the COVID-19 Genomics UK (COG-UK) Consortium|Davies|United Kingdom

>Spike|hCoV-19/Japan/NGY-NNH-038/2020|2020-07-31|EPI\_ISL\_637004|Original|hCoV-19^^Aichi|Human|Department of Infectious Diseases and Immunology|Clinical Research Center|Iwatani|Japan

>Spike|hCoV-19/USA/NY-Wadsworth-199741-01/2020|2020-08-17|EPI\_ISL\_677044|Original|hCoV-19^^New York|Human|Wadsworth Center|Wadsworth Center|Lasek-Nesselquist|USA

>Spike|hCoV-19/USA/MI-MDHHS-SC22544/2020|2020-11-08|EPI\_ISL\_708563|Original|hCoV-19^^Michigan|Human|Michigan Department of Health and Human Services|Michigan Department of Health and Human Services|Jacob|USA

>Spike|hCoV-19/Spain/PV-IBV-001436/2020|2020-03-17|EPI\_ISL\_467130|Original|hCoV-19^^Basque Country|Human|Hospital Universitario Araba. Vitoria-Gasteiz|SeqCOVID-SPAIN consortium|IBV (CSIC)|Comas|Spain

>Spike|hCoV-19/India/MH-NIV-QC-802/2020|2020-04-27|EPI\_ISL\_452216|Original|hCoV-19^^Maharashtra|Human|NIV Influenza|NIV Influenza|Potdar|India

>Spike|hCoV-19/USA/FL-BPHL-1750/2020|2020-10-02|EPI\_ISL\_613865|Original|hCoV-19^^Florida|Human|Florida Bureau of Public Health Laboratories|Florida Bureau of Public Health Laboratories|Blanton|USA

>Spike|hCoV-19/Denmark/DCGC-3176/2020|2020-08-24|EPI\_ISL\_615998|Original|hCoV-19^^Hovedstaden|Human|Department of Virus and Microbiological Special Diagnostics|Albertsen lab|Michaelsen|Denmark

>Spike|hCoV-19/Denmark/DCGC-17692/2020|2020-12-14|EPI\_ISL\_751149|Original|hCoV-19^^Sjælland|Human|Department of Virus and Microbiological Special Diagnostics|Albertsen Lab|Michaelsen|Denmark

>Spike|hCoV-19/England/ALDP-A6D483/2020|2020-10-15|EPI\_ISL\_607985|Original|hCoV-19^^England|Human|Lighthouse Lab in Alderley Park|Wellcome Sanger Institute for the COVID-19 Genomics UK (COG-UK) consortium|Davies|United Kingdom

>Spike|hCoV-19/England/20164086704/2020|2020-04-15|EPI\_ISL\_466489|Original|hCoV-19^^England|Human|Respiratory Virus Unit|Respiratory Virus Unit|Platt|United Kingdom

>Spike|hCoV-19/England/MILK-9703BE/2020|2020-08-18|EPI\_ISL\_553020|Original|hCoV-19^^England|Human|Lighthouse Lab in Milton Keynes|Wellcome Sanger Institute for the COVID-19 Genomics UK (COG-UK) consortium|Davies|United Kingdom

>Spike|hCoV-19/Wales/PHWC-28DED/2020|2020-04-03|EPI\_ISL\_445443|Original|hCoV-19^^Wales|Human|Wales Specialist Virology Centre|Public Health Wales Microbiology Cardiff|Moore|United Kingdom



>Spike|hCoV-19/England/ALDP-B5BBDD/2020|2020-11-09|EPI\_ISL\_655537|Original|hCoV-19^^England|Human|Lighthouse Lab in Alderley Park|Wellcome Sanger Institute for the COVID-19 Genomics UK (COG-UK) Consortium|Davies|United Kingdom

>Spike|hCoV-19/Switzerland/NE-ETHZ-350401/2020|2020-11-03|EPI\_ISL\_728816|Original|hCoV-19^^Neuch\u00e2tel|Human|Viollier AG|Department of Biosystems Science and Engineering|Nadeau|Switzerland

>Spike|hCoV-19/England/QEUH-A89EED/2020|2020-10-16|EPI\_ISL\_638830|Original|hCoV-19^^England|Human|Oxford Viromics|COVID-19 Genomics UK (COG-UK) Consortium|Golubchik|United Kingdom

>Spike|hCoV-19/USA/MI-MDHHS-SC21181/2020|2020-06-30|EPI\_ISL\_507438|Original|hCoV-19^^Michigan|Human|Michigan Department of Health and Human Services|Michigan Department of Health and Human Services|Blankenship|USA

>Spike|hCoV-19/Switzerland/ZH-ETHZ-210023/2020|2020-07-21|EPI\_ISL\_510768|Original|hCoV-19^^Zurich|Human|Viollier AG|Department of Biosystems Science and Engineering|Nadeau|Switzerland

>Spike|hCoV-19/England/BIRM-6004A/2020|2020-00-00|EPI\_ISL\_493432|Original|hCoV-19^^England|Human|University of Birmingham|COVID-19 Genomics UK (COG-UK) Consortium|Loman|United Kingdom

>Spike|hCoV-19/Japan/PG-6377/2020|2020-08-00|EPI\_ISL\_689488|Original|hCoV-19^^Japan|Human|Fukuoka Institute of Health and Environmental Sciences|Pathogen Genomics Center|Sekizuka|Japan

>Spike|hCoV-19/USA/TX-HMH-4257/2020|2020-06-19|EPI\_ISL\_543469|Original|hCoV-19^^Texas|Human|Houston Methodist Hospital|Houston Methodist Hospital|Long|USA

>Spike|hCoV-19/USA/CA-ALSR-4704/2020|2020-09-28|EPI\_ISL\_730092|Original|hCoV-19^^California|Human|San Diego County Public Health Laboratory|Andersen lab at Scripps Research|Gangavarapu|USA

>Spike|hCoV-19/England/LIVE-99C80/2020|2020-04-13|EPI\_ISL\_584608|Original|hCoV-19^^England|Human|Liverpool Clinical Laboratories|COVID-19 Genomics UK (COG-UK) Consortium|Haldenby|United Kingdom

>Spike|hCoV-19/USA/CA-IGI-0834\_H06/2020|2020-07-23|EPI\_ISL\_756355|Original|hCoV-19^^California|Human|Innovative Genomics Institute|Innovative Genomics Institute|Wyman|USA

>Spike|hCoV-19/Thailand/MUMT-3/2020|2020-02-25|EPI\_ISL\_493137|Vero P3|hCoV-19^^Bangkok|Human|Center for Research and Innovation|Center for Research and Innovation|Sangsiriwut|Thailand

>Spike|hCoV-19/Hong Kong/HKU-IHCE0511-006a/2020|2020-01-29|EPI\_ISL\_538530|Original|hCoV-19^^Hong Kong|Human|Department of Microbiology|Department of Microbiology|Chan|China

>Spike|hCoV-19/Japan/PG-7331/2020|2020-08-00|EPI\_ISL\_688434|Original|hCoV-19^^Japan|Human|Pathogen Genomics Center|Pathogen Genomics Center|Sekizuka|Japan

>Spike|hCoV-19/Brazil/RJ-00356/2020|2020-05-27|EPI\_ISL\_623159|Original|hCoV-19^^Rio de Janeiro|Human|Laboratorio de Virologia Molecular / UFRJ|Bioinformatics Laboratory / LNCC|Almeida|Brazil

>Spike|hCoV-19/England/ALDP-B1A9A3/2020|2020-11-01|EPI\_ISL\_647677|Original|hCoV-19^^England|Human|Lighthouse Lab in Alderley Park|Wellcome Sanger Institute for the COVID-19 Genomics UK (COG-UK) Consortium|Davies|United Kingdom

>Spike|hCoV-19/Morocco/RMPS-04/2020|2020-03-30|EPI\_ISL\_469052|Original|hCoV-19^^Morocco|Human|LNR National Reference Laboratory|Medical Biotechnology Laboratory|Kartti|Morocco

>Spike|hCoV-19/Wales/PHWC-487128/2020|2020-10-31|EPI\_ISL\_639166|Original|hCoV-19^^Wales|Human|Wales Specialist Virology Centre Sequencing lab|COVID-19 Genomics UK (COG-UK) Consortium|Moore|United Kingdom

>Spike|hCoV-19/South Korea/KCDC2144/2020|2020-03-22|EPI\_ISL\_498045|Original|hCoV-19^^South Korea|Human|Division of Viral Diseases|Division of Viral Diseases|Kim|South Korea

>Spike|hCoV-19/India/WB-S12/2020|2020-04-06|EPI\_ISL\_437539|Original|hCoV-19^^West Bengal|Human|ICMR-National Institute of Cholera and Enteric Diseases|National Institute of Biomedical Genomics|Maitra|India

>Spike|hCoV-19/Argentina/PAIS-A0006/2020|2020-03-28|EPI\_ISL\_430798|Original|hCoV-19^^Buenos Aires|Human|Departamento de Biolog\u00eda y gen\u00e9tica

molecular|Area de Secuenciación del Laboratorio de Virología del Hospital de Niños Dr. Ricardo Gutierrez|Viegas|Argentina  
>Spike|hCoV-19/United Arab Emirates/L3290263088/2020|2020-05-20|EPI\_ISL\_520703|Original|hCoV-19^United Arab Emirates|Human|Mohammed Bin Rashid University of Medicine and Health Sciences|Al Jalila Genomics Center|Ramaswamy|United Arab Emirates  
>Spike|hCoV-19/England/QEUA-9F5A07/2020|2020-09-25|EPI\_ISL\_588934|Original|hCoV-19^England|Human|Lighthouse Lab in Glasgow|Wellcome Sanger Institute for the COVID-19 Genomics UK (COG-UK) consortium|Davies|United Kingdom  
>Spike|hCoV-19/Japan/PG-1319/2020|2020-04-00|EPI\_ISL\_684927|Original|hCoV-19^Japan|Human|Saitama Prefectural Institute of Public Health|Pathogen Genomics Center|Sekizuka|Japan  
>Spike|hCoV-19/Japan/PG-8525/2020|2020-07-00|EPI\_ISL\_686121|Original|hCoV-19^Japan|Human|Pathogen Genomics Center|Pathogen Genomics Center|Sekizuka|Japan  
>Spike|hCoV-19/Wales/PHWC-48E956/2020|2020-11-13|EPI\_ISL\_680936|Original|hCoV-19^Wales|Human|Wales Specialist Virology Centre Sequencing lab|COVID-19 Genomics UK (COG-UK) Consortium|Moore|United Kingdom  
>Spike|hCoV-19/England/LOND-1264560/2020|2020-11-17|EPI\_ISL\_702930|Original|hCoV-19^England|Human|University College London|COVID-19 Genomics UK (COG-UK) Consortium|Roy|United Kingdom  
>Spike|hCoV-19/England/ALDP-956178/2020|2020-06-08|EPI\_ISL\_554013|Original|hCoV-19^England|Human|Lighthouse Lab in Alderley Park|Wellcome Sanger Institute for the COVID-19 Genomics UK (COG-UK) consortium|Davies|United Kingdom  
>Spike|hCoV-19/DRC/3764/2020|2020-04-24|EPI\_ISL\_447238|Original|hCoV-19^Kinshasa|Human|Viral Respiratory Lab|Pathogen Sequencing Lab|Amuri|Democratic Republic of the Congo  
>Spike|hCoV-19/Denmark/ALAB-SSI-895/2020|2020-03-30|EPI\_ISL\_444962|Original|hCoV-19^Denmark|Human|Department of Virus and Microbiological Special Diagnostics|Albertsen lab|Kirkegaard|Denmark  
>Spike|hCoV-19/England/ALDP-9E9CC4/2020|2020-09-24|EPI\_ISL\_580133|Original|hCoV-19^England|Human|Lighthouse Lab in Alderley Park|Wellcome Sanger Institute for the COVID-19 Genomics UK (COG-UK) consortium|Davies|United Kingdom  
>Spike|hCoV-19/Costa Rica/INC-0174/2020|2020-11-06|EPI\_ISL\_769998|Original|hCoV-19^Cartago|Human|Area De Salud Catedral Noreste|Inciensa|Soto-Garita|Costa Rica  
>Spike|hCoV-19/Netherlands/GE-EMC-197/2020|2020-05-18|EPI\_ISL\_523179|Original|hCoV-19^Gelderland|Human|Dutch COVID-19 response team|Erasmus Medical Center|Oude Munnink|Netherlands  
>Spike|hCoV-19/England/CAMC-9EBEDB/2020|2020-09-22|EPI\_ISL\_584427|Original|hCoV-19^England|Human|Queens Medical Centre|COVID-19 Genomics UK (COG-UK) Consortium|Loose|United Kingdom  
>Spike|hCoV-19/England/CAMB-7822B/2020|2020-04-05|EPI\_ISL\_433707|Original|hCoV-19^England|Human|Department of Pathology|COVID-19 Genomics UK (COG-UK) Consortium|Meredith|United Kingdom  
>Spike|hCoV-19/Greece/34\_36284/2020|2020-03-24|EPI\_ISL\_447832|unknown|hCoV-19^Athens|Human|unknown|Department of Medicine|Submitter|Greece  
>Spike|hCoV-19/England/201080001/2020|2020-03-05|EPI\_ISL\_464417|Original|hCoV-19^England|Human|Respiratory Virus Unit|Respiratory Virus Unit|Platt|United Kingdom  
>Spike|hCoV-19/USA/NY-NYCPHL-001217/2020|2020-11-04|EPI\_ISL\_683866|Original|hCoV-19^New York|Human|DOHMH Riverside|New York City Public Health Laboratory|Wang|USA  
>Spike|hCoV-19/England/C200049134/2020|2020-11-18|EPI\_ISL\_683489|Original|hCoV-19^England|Human|Respiratory Virus Unit|COVID-19 Genomics UK (COG-UK) Consortium|Platt|United Kingdom  
>Spike|hCoV-19/Netherlands/NB-EMC-176/2020|2020-00-00|EPI\_ISL\_523299|Original|hCoV-19^Noord Brabant|Human|Dutch COVID-19 response team|Erasmus Medical Center|Oude Munnink|Netherlands  
>Spike|hCoV-19/England/205180595/2020|2020-12-17|EPI\_ISL\_766111|Original|hCoV-19^England|Human|Respiratory Virus Unit|COVID-19 Genomics UK (COG-UK) Consortium|Platt|United Kingdom

>Spike|hCoV-19/England/NORW-21FC80/2020|2020-12-15|EPI\_ISL\_741472|Original|hCoV-19^^England|Human|Quadram Institute Bioscience|COVID-19 Genomics UK (COG-UK) Consortium|Alikhan|United Kingdom

>Spike|hCoV-19/England/SHEF-C5B42/2020|2020-04-01|EPI\_ISL\_432809|Original|hCoV-19^^England|Human|Virology Department|COVID-19 Genomics UK (COG-UK) Consortium|de Silva|United Kingdom

>Spike|hCoV-19/England/MILK-A699D3/2020|2020-10-09|EPI\_ISL\_665276|Original|hCoV-19^^England|Human|University of Exeter|COVID-19 Genomics UK (COG-UK) Consortium|Temperton|United Kingdom

>Spike|hCoV-19/USA/WI-UW-1135/2020|2020-08-11|EPI\_ISL\_522892|Original|hCoV-19^^Wisconsin|Human|University of Wisconsin-Madison AIDS Vaccine Research Laboratories|University of Wisconsin-Madison AIDS Vaccine Research Laboratories|Baczenas|USA

>Spike|hCoV-19/England/QEUH-998FE9/2020|2020-08-24|EPI\_ISL\_541818|Original|hCoV-19^^England|Human|Lighthouse Lab in Glasgow|Wellcome Sanger Institute for the COVID-19 Genomics UK (COG-UK) consortium|Davies|United Kingdom

>Spike|hCoV-19/England/MILK-9A9CB1/2020|2020-09-01|EPI\_ISL\_551003|Original|hCoV-19^^England|Human|Lighthouse Lab in Milton Keynes|Wellcome Sanger Institute for the COVID-19 Genomics UK (COG-UK) consortium|Davies|United Kingdom

>Spike|hCoV-19/Switzerland/BL-ETHZ-110465/2020|2020-04-07|EPI\_ISL\_451883|Original|hCoV-19^^Basel-Landschaft|Human|Viollier AG|Department of Biosystems Science and Engineering|Nadeau|Switzerland

>Spike|hCoV-19/USA/MI-MDHHS-SC22416/2020|2020-11-18|EPI\_ISL\_708249|Original|hCoV-19^^Michigan|Human|Michigan Department of Health and Human Services|Michigan Department of Health and Human Services|Jacob|USA

>Spike|hCoV-19/USA/CA-CSMC13/2020|2020-03-28|EPI\_ISL\_475607|Original|hCoV-19^^California|Human|Cedars-Sinai Medical Center|Cedars-Sinai Medical Center|Zhang|USA

>Spike|hCoV-19/USA/CA-CZB-12878/2020|2020-09-09|EPI\_ISL\_672423|Original|hCoV-19^^California|Human|Fresno County Public Health Laboratory|Chan-Zuckerberg Biohub|Bhatt|USA

>Spike|hCoV-19/Wales/PHWC-2D28F/2020|2020-04-02|EPI\_ISL\_445963|Original|hCoV-19^^Wales|Human|Wales Specialist Virology Centre|Public Health Wales Microbiology Cardiff|Moore|United Kingdom

>Spike|hCoV-19/England/NORT-2A5E98/2020|2020-10-07|EPI\_ISL\_611846|Original|hCoV-19^^England|Human|Northumbria University / South Tees Hospitals NHS Foundation Trust / North Cumbria Integrated Care NHS Foundation Trust / North Tees and Hartlepool NHS Foundation Trust / Newcastle Hospitals NHS Foundation Trust|COVID-19 Genomics UK (COG-UK) Consortium|Bashton|United Kingdom

>Spike|hCoV-19/Australia/VIC4673/2020|2020-07-14|EPI\_ISL\_519061|Original|hCoV-19^^Victoria|Human|Microbiological Diagnostic Unit - Public Health Laboratory (MDU-PHL)|MDU-PHL|Schultz|Australia

>Spike|hCoV-19/England/MILK-B95937/2020|2020-11-13|EPI\_ISL\_675067|Original|hCoV-19^^England|Human|Lighthouse Lab in Milton Keynes|Wellcome Sanger Institute for the COVID-19 Genomics UK (COG-UK) Consortium|Davies|United Kingdom

>Spike|hCoV-19/Gambia/GC19-3381/2020|2020-07-27|EPI\_ISL\_561068|Original|hCoV-19^^Kombo|Human|MRCG at LSHTM Genomics lab|MRCG at LSHTM Genomics lab|Sesay|Gambia

>Spike|hCoV-19/England/BIRM-6A417/2020|2020-11-09|EPI\_ISL\_679054|Original|hCoV-19^^England|Human|University of Birmingham|COVID-19 Genomics UK (COG-UK) Consortium|Loman|United Kingdom

>Spike|hCoV-19/England/MILK-A458C1/2020|2020-10-06|EPI\_ISL\_598558|Original|hCoV-19^^England|Human|Lighthouse Lab in Milton Keynes|Wellcome Sanger Institute for the COVID-19 Genomics UK (COG-UK) consortium|Davies|United Kingdom

>Spike|hCoV-19/England/LIVE-A4235/2020|2020-06-17|EPI\_ISL\_490410|Original|hCoV-19^^England|Human|Liverpool Clinical Laboratories|COVID-19 Genomics UK (COG-UK) Consortium|Haldenby|United Kingdom

>Spike|hCoV-19/England/20176046604/2020|2020-04-20|EPI\_ISL\_465416|Original|hCoV-19^^England|Human|Respiratory Virus Unit|Respiratory Virus Unit|Platt|United Kingdom

>Spike|hCoV-19/Denmark/DCGC-8121/2020|2020-10-26|EPI\_ISL\_616907|Original|hCoV-19^^Hovedstaden|Human|Department of Virus and Microbiological Special Diagnostics|Albertsen lab|Michaelsen|Denmark

>Spike|hCoV-19/Wales/PHWC-496C8F/2020|2020-11-23|EPI\_ISL\_726709|Original|hCoV-19^^Wales|Human|Originating lab|COVID-19 Genomics UK (COG-UK) Consortium|Moore|United Kingdom

>Spike|hCoV-19/USA/HI-H200500/2020|2020-10-23|EPI\_ISL\_753039|Original|hCoV-19^^Hawaii|Human|State Laboratories Division|State Laboratories Division|Sultana|USA

>Spike|hCoV-19/England/BRIS-126E18/2020|2020-04-09|EPI\_ISL\_459018|Original|hCoV-19^^England|Human|PHE South West Regional Laboratory|Wellcome Sanger Institute for the COVID-19 Genomics UK (COG-UK) consortium|Davies|United Kingdom

>Spike|hCoV-19/Luxembourg/LNS3827372/2020|2020-11-21|EPI\_ISL\_740378|Original|hCoV-19^^Luxembourg|Human|Laboratoire national de sant\u00e9|Laboratoire national de sant\u00e9|Wienecke-Baldacchino|Luxembourg

>Spike|hCoV-19/England/20162037504/2020|2020-04-09|EPI\_ISL\_466415|Original|hCoV-19^^England|Human|Respiratory Virus Unit|Respiratory Virus Unit|Platt|United Kingdom

>Spike|hCoV-19/England/BRIS-12749D/2020|2020-04-22|EPI\_ISL\_469696|Original|hCoV-19^^England|Human|PHE South West Regional Laboratory|Wellcome Sanger Institute for the COVID-19 Genomics UK (COG-UK) consortium|Davies|United Kingdom

>Spike|hCoV-19/England/204941330/2020|2020-11-30|EPI\_ISL\_754298|Original|hCoV-19^^England|Human|Respiratory Virus Unit|COVID-19 Genomics UK (COG-UK) Consortium|Platt|United Kingdom

>Spike|hCoV-19/England/QEUEH-9B87BE/2020|2020-09-10|EPI\_ISL\_549586|Original|hCoV-19^^England|Human|Lighthouse Lab in Glasgow|Wellcome Sanger Institute for the COVID-19 Genomics UK (COG-UK) consortium|Davies|United Kingdom

>Spike|hCoV-19/Denmark/DCGC-2447/2020|2020-08-10|EPI\_ISL\_617407|Original|hCoV-19^^Syddanmark|Human|Department of Virus and Microbiological Special Diagnostics|Albertsen lab|Michaelsen|Denmark

>Spike|hCoV-19/England/MILK-A69812/2020|2020-10-08|EPI\_ISL\_665325|Original|hCoV-19^^England|Human|University of Exeter|COVID-19 Genomics UK (COG-UK) Consortium|Temperton|United Kingdom

>Spike|hCoV-19/USA/MN-MDH-1470/2020|2020-03-25|EPI\_ISL\_518864|Original|hCoV-19^^Minnesota|Human|Mayo Clinic & Mayo Clinic Laboratories|Minnesota Department of Health|Garfin|USA

>Spike|hCoV-19/USA/TX-DSHS-0907/2020|2020-07-01|EPI\_ISL\_610043|Original|hCoV-19^^Texas|Human|Texas Department of State Health Services|Texas Department of State Health Services|Rahman|USA

>Spike|hCoV-19/Japan/PG-2802/2020|2020-04-00|EPI\_ISL\_690929|Original|hCoV-19^^Japan|Human|Pathogen Genomics Center|Pathogen Genomics Center|Sekizuka|Japan

>Spike|hCoV-19/Denmark/DCGC-8486/2020|2020-06-08|EPI\_ISL\_618061|Original|hCoV-19^^Nordjylland|Human|Department of Virus and Microbiological Special Diagnostics|Albertsen lab|Michaelsen|Denmark

>Spike|hCoV-19/England/QEUEH-C3227C/2020|2020-12-11|EPI\_ISL\_730656|Original|hCoV-19^^England|Human|Lighthouse Lab in Glasgow|Wellcome Sanger Institute for the COVID-19 Genomics UK (COG-UK) Consortium|Davies|United Kingdom

>Spike|hCoV-19/Scotland/CVR5951/2020|2020-11-23|EPI\_ISL\_705690|Original|hCoV-19^^Scotland|Human|West of Scotland Specialist Virology Centre|COVID-19 Genomics UK (COG-UK) Consortium|Robertson|United Kingdom

>Spike|hCoV-19/Spain/VC-FISABIO-246/2020|2020-03-29|EPI\_ISL\_436341|Original|hCoV-19^^Comunitat Valenciana|Human|Servicio de Microbiología. Hospital Clínico Universitario de Valencia|Sequencing and Bioinformatics Service and Molecular Epidemiology Research Group. FISABIO-Public Health|Gonzalez-Candelas|Spain

>Spike|hCoV-19/Japan/PG-4612/2020|2020-08-00|EPI\_ISL\_689749|Original|hCoV-19^^Japan|Human|Pathogen Genomics Center|Pathogen Genomics Center|Sekizuka|Japan

>Spike|hCoV-19/USA/CA-CZB-13142/2020|2020-10-26|EPI\_ISL\_672395|Original|hCoV-19^^California|Human|Madera County Department of Public Health|Chan-Zuckerberg Biohub|Bhatt|USA

>Spike|hCoV-19/England/QEUEH-B3F595/2020|2020-11-08|EPI\_ISL\_658524|Original|hCoV-19^^England|Human|Lighthouse Lab in Glasgow|Wellcome Sanger Institute for the COVID-19 Genomics UK (COG-UK) Consortium|Davies|United Kingdom

>Spike|hCoV-19/USA/IA-GMF-15466/2020|2020-08-14|EPI\_ISL\_547704|Original|hCoV-19^^Iowa|Human|Gundersen Molecular Diagnostics Laboratory|Kabara Cancer Research Institute|Kenny|USA

>Spike|hCoV-19/England/QEUEH-BCE8B0/2020|2020-11-26|EPI\_ISL\_704571|Original|hCoV-19^^England|Human|Lighthouse Lab in Glasgow|Wellcome Sanger Institute for the COVID-19 Genomics UK (COG-UK) Consortium|Davies|United Kingdom

>Spike|hCoV-19/Germany/HH-hpi-p2162/2020|2020-03-28|EPI\_ISL\_775909|Original|hCoV-19^^Hamburg|Human|University Medical Center Hamburg Eppendorf|Heinrich Pette Institute|Robitaille|Germany

>Spike|hCoV-19/Ireland/CO-NVRL-75IRL32904/2020|2020-10-07|EPI\_ISL\_671872|Original|hCoV-19^^Cork|Human|National Virus Reference Laboratory|National Virus Reference Laboratory|Gonzalez|Ireland

>Spike|hCoV-19/USA/WA-S1680/2020|2020-05-29|EPI\_ISL\_496106|Original|hCoV-19^^Washington|Human|Washington State Department of Health|Seattle Flu Study|Lee|USA

>Spike|hCoV-19/USA/WA-UW274/2020|2020-03-13|EPI\_ISL\_418059|Original|hCoV-19^^Washington|Human|UW Virology Lab|UW Virology Lab|Roychoudhury|USA

>Spike|hCoV-19/England/PORT-2E9B64/2020|2020-00-00|EPI\_ISL\_706872|Original|hCoV-19^^England|Human|Centre for Enzyme Innovation|COVID-19 Genomics UK (COG-UK) Consortium|Robson|United Kingdom

>Spike|hCoV-19/USA/TX-HMH-606/2020|2020-04-09|EPI\_ISL\_547201|Original|hCoV-19^^Texas|Human|Houston Methodist Hospital|Houston Methodist Hospital|Long|USA

>Spike|hCoV-19/Russia/StPetersburg-RII11172S/2020|2020-05-02|EPI\_ISL\_507241|Original|hCoV-19^^Saint Petersburg|Human|WHO National Influenza Centre Russian Federation|WHO National Influenza Centre Russian Federation|Komissarov|Russia

>Spike|hCoV-19/Wales/PHWC-169040/2020|2020-06-30|EPI\_ISL\_499385|Original|hCoV-19^^Wales|Human|Originating lab|COVID-19 Genomics UK (COG-UK) Consortium|Moore|United Kingdom

>Spike|hCoV-19/England/NORT-296E5E/2020|2020-04-28|EPI\_ISL\_488128|Original|hCoV-19^^England|Human|NU-OMICS DNA Sequencing research facility|Wellcome Sanger Institute for the COVID-19 Genomics UK (COG-UK) consortium|Davies|United Kingdom

>Spike|hCoV-19/Spain/IB-IBV-2554/2020|2020-03-28|EPI\_ISL\_468998|Original|hCoV-19^^Illes Balears|Human|Servicio de Microbiolog\u00eda|SeqCOVID-SPAIN consortium|IBV (CSIC) |Comas|Spain

>Spike|hCoV-19/DRC/2563/2020|2020-04-15|EPI\_ISL\_437340|Original|hCoV-19^^Kinshasa|Human|Viral Respiratory Lab|Pathogen Sequencing Lab|Muyembe|Democratic Republic of the Congo

>Spike|hCoV-19/USA/TX-HMH-MCoV-8513/2020|2020-07-01|EPI\_ISL\_780600|Original|hCoV-19^^Texas|Human|Houston Methodist Hospital|Houston Methodist Hospital|Long|USA

>Spike|hCoV-19/Switzerland/BE-ETHZ-100382/2020|2020-03-20|EPI\_ISL\_574930|Original|hCoV-19^^Bern|Human|Viollier AG|Department of Biosystems Science and Engineering|Nadeau|Switzerland

>Spike|hCoV-19/Saudi Arabia/KAUST-MAKKAH1539/2020|2020-04-13|EPI\_ISL\_678106|Original|hCoV-19^^Makkah|Human|Pathogen Genomics Lab King Abdullah University of Science and Technology(KAUST)|Pathogen Genomics Lab King Abdullah University of Science and Technology(KAUST)|Mohamed Ghazzali|Saudi Arabia

>Spike|hCoV-19/England/ALDP-A9242B/2020|2020-10-19|EPI\_ISL\_611042|Original|hCoV-19^^England|Human|Lighthouse Lab in Alderley Park|Wellcome Sanger Institute for the COVID-19 Genomics UK (COG-UK) consortium|Davies|United Kingdom

>Spike|hCoV-19/England/MILK-ACD3A2/2020|2020-10-21|EPI\_ISL\_634470|Original|hCoV-19^^England|Human|Lighthouse Lab in Milton Keynes|Wellcome Sanger Institute for the COVID-19 Genomics UK (COG-UK) consortium|Davies|United Kingdom

>Spike|hCoV-19/Denmark/DCGC-17377/2020|2020-12-14|EPI\_ISL\_750234|Original|hCoV-19^^Nordjylland|Human|Department of Virus and Microbiological Special Diagnostics|Albertsen Lab|Michaelsen|Denmark

>Spike|hCoV-19/USA/TX-HMH-4817/2020|2020-06-22|EPI\_ISL\_544351|Original|hCoV-19^^Texas|Human|Houston Methodist Hospital|Houston Methodist Hospital|Long|USA

>Spike|hCoV-19/Spain/PV-IBV-004236/2020|2020-04-05|EPI\_ISL\_500300|Original|hCoV-19^^Basque Country|Human|Servicio de Microbiolog\u00eda. Hospital Universitario

Donostia. OSI Donostialdea. \u00clrea de Enfermedades Infecciosas|SeqCOVID-SPAIN consortium/IBV (CSIC) |Comas|Spain  
>Spike|hCoV-19/USA/CA-SCCPHD-UC173/2020|2020-03-13|EPI\_ISL\_435652|Original|hCoV-19^^California|Human|Santa Clara County Public Health Department|Chiu Laboratory|Chiu|USA  
>Spike|hCoV-19/Finland/9SS20H11/2020|2020-09-10|EPI\_ISL\_755968|Original|hCoV-19^^Uusimaa|Human|Department of Virology and Immunology|Department of Virology|Smura|Finland  
>Spike|hCoV-19/Denmark/DCGC-1845/2020|2020-05-11|EPI\_ISL\_622587|Original|hCoV-19^^Hovedstaden|Human|Department of Virus and Microbiological Special Diagnostics|Albertsen lab|Michaelsen|Denmark  
>Spike|hCoV-19/England/NORW-21FBED/2020|2020-12-15|EPI\_ISL\_741467|Original|hCoV-19^^England|Human|Quadram Institute Bioscience|COVID-19 Genomics UK (COG-UK) Consortium|Alikhan|United Kingdom  
>Spike|hCoV-19/England/CAMC-9DFC1C/2020|2020-09-21|EPI\_ISL\_576927|Original|hCoV-19^^England|Human|Oxford Viromics|COVID-19 Genomics UK (COG-UK) Consortium|Golubchik|United Kingdom  
>Spike|hCoV-19/Norway/3835/2020|2020-09-25|EPI\_ISL\_590980|original|hCoV-19^^Oslo|Human|Oslo University Hospital|Norwegian Institute of Public Health|Vollan|Norway  
>Spike|hCoV-19/England/QEUEH-C314FF/2020|2020-12-10|EPI\_ISL\_730710|Original|hCoV-19^^England|Human|Lighthouse Lab in Glasgow|Wellcome Sanger Institute for the COVID-19 Genomics UK (COG-UK) Consortium|Davies|United Kingdom  
>Spike|hCoV-19/Denmark/DCGC-3801/2020|2020-07-27|EPI\_ISL\_622667|Original|hCoV-19^^Hovedstaden|Human|Department of Virus and Microbiological Special Diagnostics|Albertsen lab|Michaelsen|Denmark  
>Spike|hCoV-19/USA/TX-DSHS-1857/2020|2020-06-24|EPI\_ISL\_745293|Original|hCoV-19^^Texas|Human|Texas Department of State Health Services|Texas Department of State Health Services|Rahman|USA  
>Spike|hCoV-19/England/QEUEH-9DD67A/2020|2020-09-21|EPI\_ISL\_599611|Original|hCoV-19^^England|Human|Lighthouse Lab in Glasgow|Wellcome Sanger Institute for the COVID-19 Genomics UK (COG-UK) consortium|Davies|United Kingdom  
>Spike|hCoV-19/Singapore/386/2020|2020-04-17|EPI\_ISL\_469135|Original|hCoV-19^^Singapore|Human|National Public Health Laboratory|National Public Health Laboratory|Mak|Singapore  
>Spike|hCoV-19/Switzerland/LU-ETHZ-120195/2020|2020-04-27|EPI\_ISL\_468269|Original|hCoV-19^^Luzern|Human|Viollier AG|Department of Biosystems Science and Engineering|Nadeau|Switzerland  
>Spike|hCoV-19/Wales/PHWC-316D7/2020|2020-04-12|EPI\_ISL\_446474|Original|hCoV-19^^Wales|Human|Wales Specialist Virology Centre|Public Health Wales Microbiology Cardiff|Moore|United Kingdom  
>Spike|hCoV-19/England/EXET-13AA77/2020|2020-11-09|EPI\_ISL\_664262|Original|hCoV-19^^England|Human|University of Exeter|COVID-19 Genomics UK (COG-UK) Consortium|Temperton|United Kingdom  
>Spike|hCoV-19/England/ALDP-B85A46/2020|2020-11-11|EPI\_ISL\_675925|Original|hCoV-19^^England|Human|Lighthouse Lab in Alderley Park|Wellcome Sanger Institute for the COVID-19 Genomics UK (COG-UK) Consortium|Davies|United Kingdom  
>Spike|hCoV-19/England/ALDP-A502F2/2020|2020-10-07|EPI\_ISL\_597773|Original|hCoV-19^^England|Human|Lighthouse Lab in Alderley Park|Wellcome Sanger Institute for the COVID-19 Genomics UK (COG-UK) consortium|Davies|United Kingdom  
>Spike|hCoV-19/Wales/PHWC-2D52C/2020|2020-04-04|EPI\_ISL\_474316|Original|hCoV-19^^Wales|Human|Originating lab|COVID-19 Genomics UK (COG-UK) Consortium|Moore|United Kingdom  
>Spike|hCoV-19/India/MH-AFMC-5807/2020|2020-05-25|EPI\_ISL\_496545|Original|hCoV-19^^Maharashtra|Human|Armed Forces Medical College|National Centre For Cell Science|Paul|India  
>Spike|hCoV-19/USA/TX-HMH-4478/2020|2020-06-17|EPI\_ISL\_543653|Original|hCoV-19^^Texas|Human|Houston Methodist Hospital|Houston Methodist Hospital|Long|USA

>Spike|hCoV-19/Netherlands/NA\_428/2020|2020-04-06|EPI\_ISL\_455230|Original|hCoV-19^^Netherlands|Human|Dutch COVID-19 response team|Erasmus Medical Center|Oude Munnink|Netherlands

>Spike|hCoV-19/England/MILK-ACEB4F/2020|2020-10-21|EPI\_ISL\_629448|Original|hCoV-19^^England|Human|Lighthouse Lab in Milton Keynes|Wellcome Sanger Institute for the COVID-19 Genomics UK (COG-UK) consortium|Davies|United Kingdom

>Spike|hCoV-19/Finland/S3CA12/2020|2020-10-30|EPI\_ISL\_732641|Original|hCoV-19^^Uusimaa|Human|Department of Virology and Immunology|Department of Virology|Smura|Finland

>Spike|hCoV-19/England/NORW-FA537/2020|2020-12-07|EPI\_ISL\_725511|Original|hCoV-19^^England|Human|Quadram Institute Bioscience|COVID-19 Genomics UK (COG-UK) Consortium|Alikhan|United Kingdom

>Spike|hCoV-19/Japan/PG-8538/2020|2020-07-00|EPI\_ISL\_686134|Original|hCoV-19^^Japan|Human|Pathogen Genomics Center|Pathogen Genomics Center|Sekizuka|Japan

>Spike|hCoV-19/England/OXON-B3084/2020|2020-05-15|EPI\_ISL\_534836|Original|hCoV-19^^England|Human|Oxford Viromics|COVID-19 Genomics UK (COG-UK) Consortium|Golubchik|United Kingdom

>Spike|hCoV-19/USA/WI-UW-2423/2020|2020-12-04|EPI\_ISL\_754666|Original|hCoV-19^^Wisconsin|Human|University of Wisconsin-Madison AIDS Vaccine Research Laboratories|University of Wisconsin-Madison AIDS Vaccine Research Laboratories|Moreno|USA

>Spike|hCoV-19/England/QEUEH-969CCC/2020|2020-08-11|EPI\_ISL\_530827|Original|hCoV-19^^England|Human|Lighthouse Lab in Glasgow|Wellcome Sanger Institute for the COVID-19 Genomics UK (COG-UK) consortium|Davies|United Kingdom

>Spike|hCoV-19/England/NOTT-1105EF/2020|2020-04-26|EPI\_ISL\_441535|Original|hCoV-19^^England|Human|Queens Medical Centre|COVID-19 Genomics UK (COG-UK) Consortium|Loose|United Kingdom

>Spike|hCoV-19/England/ALDP-A95CD5/2020|2020-10-20|EPI\_ISL\_624828|Original|hCoV-19^^England|Human|Lighthouse Lab in Alderley Park|Wellcome Sanger Institute for the COVID-19 Genomics UK (COG-UK) consortium|Davies|United Kingdom

>Spike|hCoV-19/Australia/VIC15203/2020|2020-08-10|EPI\_ISL\_593187|Original|hCoV-19^^Victoria|Human|Microbiological Diagnostic Unit - Public Health Laboratory (MDU-PHL)|MDU-PHL|Schultz|Australia

>Spike|hCoV-19/Denmark/DCGC-15633/2020|2020-11-23|EPI\_ISL\_713182|Original|hCoV-19^^Hovedstaden|Human|Department of Virus and Microbiological Special Diagnostics|Albertsen Lab|Michaelsen|Denmark

>Spike|hCoV-19/Switzerland/GE-SNRCI-8378/2020|2020-03-00|EPI\_ISL\_548224|Original|hCoV-19^^Geneve|Human|Laboratoire de Virologie|Swiss National Reference Centre for Influenza|Gon\00e7alves Cabecinhas|Switzerland

>Spike|hCoV-19/England/QEUEH-BC3B76/2020|2020-11-25|EPI\_ISL\_703999|Original|hCoV-19^^England|Human|Lighthouse Lab in Glasgow|Wellcome Sanger Institute for the COVID-19 Genomics UK (COG-UK) Consortium|Davies|United Kingdom

>Spike|hCoV-19/England/CAMC-B99BF1/2020|2020-11-15|EPI\_ISL\_673564|Original|hCoV-19^^England|Human|Lighthouse Lab in Cambridge|Wellcome Sanger Institute for the COVID-19 Genomics UK (COG-UK) Consortium|Davies|United Kingdom

>Spike|hCoV-19/Canada/NS-NML-896/2020|2020-03-21|EPI\_ISL\_579545|Original|hCoV-19^^Nova Scotia|Human|QEII Health Sciences Centre|National Microbiology Laboratory (NML)|Majer|Canada

>Spike|hCoV-19/Denmark/DCGC-7148/2020|2020-10-12|EPI\_ISL\_618923|Original|hCoV-19^^Sjaelland|Human|Department of Virus and Microbiological Special Diagnostics|Albertsen lab|Michaelsen|Denmark

>Spike|hCoV-19/England/ALDP-A707EE/2020|2020-10-15|EPI\_ISL\_608138|Original|hCoV-19^^England|Human|Lighthouse Lab in Alderley Park|Wellcome Sanger Institute for the COVID-19 Genomics UK (COG-UK) consortium|Davies|United Kingdom

>Spike|hCoV-19/USA/WI-UW-1881/2020|2020-09-14|EPI\_ISL\_605752|Original|hCoV-19^^Wisconsin|Human|University of Wisconsin-Madison AIDS Vaccine Research Laboratories|University of Wisconsin-Madison AIDS Vaccine Research Laboratories|Baczenas|USA

>Spike|hCoV-19/England/CWAR-24FE01A/2020|2020-06-16|EPI\_ISL\_584561|Original|hCoV-19^^England|Human|UHCW / University of Warwick|COVID-19 Genomics UK (COG-UK) Consortium|Stark|United Kingdom

>Spike|hCoV-19/Canada/NB\_248/2020|2020-04-01|EPI\_ISL\_481746|Original|hCoV-19^^New Brunswick|Human|Dr. Georges-L.-Dumont University Hospital Centre|National Microbiology Laboratory|Grudeski|Canada

>Spike|hCoV-19/England/PORT-2D34BD/2020|2020-04-14|EPI\_ISL\_535033|Original|hCoV-19^^England|Human|Centre for Enzyme Innovation|COVID-19 Genomics UK (COG-UK) Consortium|Robson|United Kingdom

>Spike|hCoV-19/England/MILK-CA936E/2020|2020-12-17|EPI\_ISL\_762543|Original|hCoV-19^^England|Human|Lighthouse Lab in Milton Keynes|Wellcome Sanger Institute for the COVID-19 Genomics UK (COG-UK) Consortium|Davies|United Kingdom

>Spike|hCoV-19/USA/TX-HMH-4808/2020|2020-06-22|EPI\_ISL\_544344|Original|hCoV-19^^Texas|Human|Houston Methodist Hospital|Houston Methodist Hospital|Long|USA

>Spike|hCoV-19/Scotland/QEUA-A5DDA9/2020|2020-10-12|EPI\_ISL\_609184|Original|hCoV-19^^Scotland|Human|Lighthouse Lab in Glasgow|Wellcome Sanger Institute for the COVID-19 Genomics UK (COG-UK) consortium|Davies|United Kingdom

>Spike|hCoV-19/England/NORT-2816E5/2020|2020-03-19|EPI\_ISL\_488765|Original|hCoV-19^^England|Human|NU-OMICS DNA Sequencing research facility|Wellcome Sanger Institute for the COVID-19 Genomics UK (COG-UK) consortium|Davies|United Kingdom

>Spike|hCoV-19/Luxembourg/LNS8076949/2020|2020-10-19|EPI\_ISL\_744679|Original|hCoV-19^^Luxembourg|Human|Laboratoire national de sant\u00e9|Laboratoire national de sant\u00e9|Wienecke-Baldacchino|Luxembourg

>Spike|hCoV-19/Belgium/ULG-11037/2020|2020-11-30|EPI\_ISL\_722951|Original|hCoV-19^^Liege|Human|Department of Clinical Microbiology|GIGA Medical Genomics|Durkin|Belgium

>Spike|hCoV-19/England/204790156/2020|2020-11-20|EPI\_ISL\_683572|Original|hCoV-19^^England|Human|Respiratory Virus Unit|COVID-19 Genomics UK (COG-UK) Consortium|Platt|United Kingdom

>Spike|hCoV-19/England/204742176/2020|2020-00-00|EPI\_ISL\_649893|Original|hCoV-19^^England|Human|Respiratory Virus Unit|COVID-19 Genomics UK (COG-UK) Consortium|Platt|United Kingdom

>Spike|hCoV-19/England/QEUA-B9F047/2020|2020-11-18|EPI\_ISL\_719848|Original|hCoV-19^^England|Human|Lighthouse Lab in Glasgow|Wellcome Sanger Institute for the COVID-19 Genomics UK (COG-UK) Consortium|Davies|United Kingdom

>Spike|hCoV-19/Netherlands/NH-EMC-78/2020|2020-09-02|EPI\_ISL\_632525|Original|hCoV-19^^Noord Holland|Human|Dutch COVID-19 response team|Erasmus Medical Center|Oude Munnink|Netherlands

>Spike|hCoV-19/Japan/PG-7965/2020|2020-05-00|EPI\_ISL\_687066|Original|hCoV-19^^Japan|Human|Kanagawa Prefectural Institute of Public Health|Pathogen Genomics Center|Sekizuka|Japan

>Spike|hCoV-19/USA/CA-CZB0731/2020|2020-03-31|EPI\_ISL\_429026|Original|hCoV-19^^California|Human|UCSF Clinical Microbiology Laboratory|Chan-Zuckerberg Biohub|Kamm|USA

>Spike|hCoV-19/Australia/VIC7176/2020|2020-07-23|EPI\_ISL\_564263|Original|hCoV-19^^Victoria|Human|Microbiological Diagnostic Unit - Public Health Laboratory (MDU-PHL)|MDU-PHL|Schultz|Australia

>Spike|hCoV-19/Morocco/FMP-42/2020|2020-12-14|EPI\_ISL\_769863|Original|hCoV-19^^Casablanca|Human|Laboratoire Biolife|Laboratoire de Biotechnologie|Ouadghiri|Morocco

>Spike|hCoV-19/USA/TX-HMH-3137/2020|2020-06-11|EPI\_ISL\_544019|Original|hCoV-19^^Texas|Human|Houston Methodist Hospital|Houston Methodist Hospital|Long|USA

>Spike|hCoV-19/Canada/ON-S943/2020|2020-04-14|EPI\_ISL\_591265|Original|hCoV-19^^Ontario|Human|Toronto Invasive Bacterial Diseases Network|McMaster University|McArthur|Canada

>Spike|hCoV-19/Netherlands/NH-RIVM-20797/2020|2020-12-21|EPI\_ISL\_790856|Original|hCoV-19^^Noord-Holland|Human|Dutch COVID-19 response team|National Institute for Public Health and the Environment (RIVM)|Meijer|Netherlands



>Spike|hCoV-19/England/NOTT-112705/2020|2020-04-16|EPI\_ISL\_490569|Original|hCoV-19^^England|Human|Lincolnshire Hospitals and DeepSeq Nottingham|COVID-19 Genomics UK (COG-UK) Consortium|Loose|United Kingdom

>Spike|hCoV-19/England/MILK-A190A0/2020|2020-10-01|EPI\_ISL\_612480|Original|hCoV-19^^England|Human|Wales Specialist Virology Centre Sequencing lab|COVID-19 Genomics UK (COG-UK) Consortium|Moore|United Kingdom

>Spike|hCoV-19/USA/TX-HMH-MCoV-12724/2020|2020-08-31|EPI\_ISL\_790486|Original|hCoV-19^^Texas|Human|Houston Methodist Hospital|Houston Methodist Hospital|Long|USA

>Spike|hCoV-19/USA/TX-DSHS-1762/2020|2020-06-20|EPI\_ISL\_710406|Original|hCoV-19^^Texas|Human|Texas Department of State Health Services|Texas Department of State Health Services|Rahman|USA

>Spike|hCoV-19/USA/NY-Wadsworth-248513-01/2020|2020-10-18|EPI\_ISL\_734368|Original|hCoV-19^^New York|Human|Wadsworth Center|Wadsworth Center|Lasek-Nesselquist|USA

>Spike|hCoV-19/Canada/ON-PHL-20-03764/2020|2020-11-00|EPI\_ISL\_775074|Original|hCoV-19^^Ontario|Human|Public Health Ontario Laboratory|Public Health Ontario Laboratory|Guthrie|Canada

>Spike|hCoV-19/Denmark/DCGC-18848/2020|2020-12-07|EPI\_ISL\_748595|Original|hCoV-19^^Syddanmark|Human|Department of Virus and Microbiological Special Diagnostics|Albertsen Lab|Michaelsen|Denmark

>Spike|hCoV-19/USA/WI-UW-2463/2020|2020-12-21|EPI\_ISL\_759738|Original|hCoV-19^^Wisconsin|Human|University of Wisconsin-Madison AIDS Vaccine Research Laboratories|University of Wisconsin-Madison AIDS Vaccine Research Laboratories|Moreno|USA

>Spike|hCoV-19/England/QEUH-B9EC71/2020|2020-11-18|EPI\_ISL\_719778|Original|hCoV-19^^England|Human|Lighthouse Lab in Glasgow|Wellcome Sanger Institute for the COVID-19 Genomics UK (COG-UK) Consortium|Davies|United Kingdom

>Spike|hCoV-19/Wales/PHWC-160F00/2020|2020-05-18|EPI\_ISL\_473066|Original|hCoV-19^^Wales|Human|Wales Specialist Virology Centre Sequencing lab|COVID-19 Genomics UK (COG-UK) Consortium|Moore|United Kingdom

>Spike|hCoV-19/Spain/AN-IBV-001929/2020|2020-03-11|EPI\_ISL\_452445|Original|hCoV-19^^Andalucia|Human|Servicio de Microbiolog\u00eda. HRU de M\u00ella. Servicio Andaluz de Salud|SeqCOVID-SPAIN consortium/IBV(CSIC)|Comas|Spain

>Spike|hCoV-19/England/SHEF-CAB7A/2020|2020-06-07|EPI\_ISL\_484489|Original|hCoV-19^^England|Human|Virology Department|COVID-19 Genomics UK (COG-UK) Consortium|de Silva|United Kingdom

>Spike|hCoV-19/Japan/PG-4626/2020|2020-07-00|EPI\_ISL\_689763|Original|hCoV-19^^Japan|Human|Fukuoka Institute of Health and Environmental Sciences|Pathogen Genomics Center|Sekizuka|Japan

>Spike|hCoV-19/England/HECH-259A079/2020|2020-05-14|EPI\_ISL\_482071|Original|hCoV-19^^England|Human|Microbiology Department|Wellcome Sanger Institute for the COVID-19 Genomics UK (COG-UK) consortium|Davies|United Kingdom

>Spike|hCoV-19/Wales/PHWC-49F363/2020|2020-12-07|EPI\_ISL\_743202|Original|hCoV-19^^Wales|Human|Wales Specialist Virology Centre Sequencing lab|COVID-19 Genomics UK (COG-UK) Consortium|Moore|United Kingdom

>Spike|hCoV-19/England/ALDP-9D95CC/2020|2020-09-18|EPI\_ISL\_576744|Original|hCoV-19^^England|Human|Oxford Viromics|COVID-19 Genomics UK (COG-UK) Consortium|Golubchik|United Kingdom

>Spike|hCoV-19/Wales/PHWC-488B38/2020|2020-11-01|EPI\_ISL\_639468|Original|hCoV-19^^Wales|Human|Wales Specialist Virology Centre Sequencing lab|COVID-19 Genomics UK (COG-UK) Consortium|Moore|United Kingdom

>Spike|hCoV-19/Luxembourg/LNS9610099/2020|2020-11-04|EPI\_ISL\_744949|Original|hCoV-19^^Luxembourg|Human|Laboratoire national de sant\u00e9|Laboratoire national de sant\u00e9|Wienecke-Baldacchino|Luxembourg

>Spike|hCoV-19/Scotland/QEUH-87EF35/2020|2020-07-25|EPI\_ISL\_532715|Original|hCoV-19^^Scotland|Human|NHSGGC West of Scotland Specialist Virology Centre / MRC-University of Glasgow Centre for Virus Research|Wellcome Sanger Institute for the COVID-19 Genomics UK (COG-UK) consortium|Davies|United Kingdom

>Spike|hCoV-19/England/CAMC-B084A7/2020|2020-10-29|EPI\_ISL\_643368|Original|hCoV-19^^England|Human|Lighthouse Lab in Cambridge|Wellcome Sanger Institute for the COVID-19 Genomics UK (COG-UK) Consortium|Davies|United Kingdom

>Spike|hCoV-19/Mexico/CMX-INdRE-06/2020|2020-03-12|EPI\_ISL\_424673|Original|hCoV-19^^Mexico City|Human|Instituto de Diagnostico y Referencia Epidemiologicos|Instituto de Diagnostico y Referencia Epidemiologicos|Mendieta|Mexico

>Spike|hCoV-19/USA/CO-CDPHE-2009042326/2020|2020-09-03|EPI\_ISL\_677312|Original|hCoV-19^^Colorado|Human|Colorado Department of Public Health and Environment|Colorado Department of Public Health and Environment|Bankers|USA

>Spike|hCoV-19/England/CAMB-1AC3EE/2020|2020-04-22|EPI\_ISL\_489406|Original|hCoV-19^^England|Human|Department of Pathology|Wellcome Sanger Institute for the COVID-19 Genomics UK (COG-UK) consortium|Davies|United Kingdom

>Spike|hCoV-19/USA/LA-BIE-029/2020|2020-04-06|EPI\_ISL\_463277|Original|hCoV-19^^Louisiana|Human|Ochsner Health|Bioinfoexperts|Cross|USA

>Spike|hCoV-19/England/MILK-BB1337/2020|2020-11-17|EPI\_ISL\_720168|Original|hCoV-19^^England|Human|Lighthouse Lab in Milton Keynes|Wellcome Sanger Institute for the COVID-19 Genomics UK (COG-UK) Consortium|Davies|United Kingdom

>Spike|hCoV-19/England/CAMB-1B6A37/2020|2020-10-06|EPI\_ISL\_612265|Original|hCoV-19^^England|Human|Department of Pathology|COVID-19 Genomics UK (COG-UK) Consortium|Goodfellow|United Kingdom

>Spike|hCoV-19/England/CAMC-B08340/2020|2020-10-29|EPI\_ISL\_643962|Original|hCoV-19^^England|Human|Lighthouse Lab in Cambridge|Wellcome Sanger Institute for the COVID-19 Genomics UK (COG-UK) Consortium|Davies|United Kingdom

>Spike|hCoV-19/England/MILK-99CD81/2020|2020-08-30|EPI\_ISL\_549943|Original|hCoV-19^^England|Human|Lighthouse Lab in Milton Keynes|Wellcome Sanger Institute for the COVID-19 Genomics UK (COG-UK) consortium|Davies|United Kingdom

>Spike|hCoV-19/Scotland/EDB6911/2020|2020-05-02|EPI\_ISL\_526515|Original|hCoV-19^^Scotland|Human|Virology Department|COVID-19 Genomics UK (COG-UK) Consortium|Williams|United Kingdom

>Spike|hCoV-19/USA/UT-UPHL-2009504/2020|2020-07-11|EPI\_ISL\_605188|Original|hCoV-19^^Utah|Human|Utah Public Health Laboratory|Utah Public Health Laboratory|Young|USA

>Spike|hCoV-19/England/MILK-A7DBB8/2020|2020-10-13|EPI\_ISL\_638469|Original|hCoV-19^^England|Human|Oxford Viromics|COVID-19 Genomics UK (COG-UK) Consortium|Golubchik|United Kingdom

>Spike|hCoV-19/USA/AK-PHL699/2020|2020-06-29|EPI\_ISL\_586257|Original|hCoV-19^^Alaska|Human|Alaska State Virology Laboratory|Alaska State Virology Laboratory|Chen|USA

>Spike|hCoV-19/England/QEUEH-B13D80/2020|2020-11-01|EPI\_ISL\_641833|Original|hCoV-19^^England|Human|Lighthouse Lab in Glasgow|Wellcome Sanger Institute for the COVID-19 Genomics UK (COG-UK) Consortium|Davies|United Kingdom

>Spike|hCoV-19/Wales/PHWC-2B11B/2020|2020-04-07|EPI\_ISL\_432027|Original|hCoV-19^^Wales|Human|Wales Specialist Virology Centre|Public Health Wales Microbiology Cardiff|Moore|United Kingdom

>Spike|hCoV-19/Scotland/QEUEH-96ACAD/2020|2020-08-17|EPI\_ISL\_534655|Original|hCoV-19^^Scotland|Human|NHSGGC West of Scotland Specialist Virology Centre / MRC-University of Glasgow Centre for Virus Research|Wellcome Sanger Institute for the COVID-19 Genomics UK (COG-UK) consortium|Davies|United Kingdom

>Spike|hCoV-19/England/QEUEH-A9EEB8/2020|2020-10-20|EPI\_ISL\_611388|Original|hCoV-19^^England|Human|Lighthouse Lab in Glasgow|Wellcome Sanger Institute for the COVID-19 Genomics UK (COG-UK) consortium|Davies|United Kingdom

>Spike|hCoV-19/England/CAMB-7B52F/2020|2020-04-13|EPI\_ISL\_433971|Original|hCoV-19^^England|Human|Department of Pathology|COVID-19 Genomics UK (COG-UK) Consortium|Meredith|United Kingdom

>Spike|hCoV-19/USA/CA-QDX-2152/2020|2020-03-17|EPI\_ISL\_604431|Original|hCoV-19^^California|Human|Quest Diagnostics|Quest Diagnostics|Kagan|USA

>Spike|hCoV-19/England/ALDP-AA5461/2020|2020-10-21|EPI\_ISL\_625012|Original|hCoV-19^^England|Human|Lighthouse Lab in Alderley Park|Wellcome Sanger Institute for the COVID-19 Genomics UK (COG-UK) consortium|Davies|United Kingdom

>Spike|hCoV-19/Luxembourg/LNS1531431/2020|2020-11-26|EPI\_ISL\_739950|Original|hCoV-19^^Luxembourg|Human|Laboratoire national de sant\u00e9|Laboratoire national de sant\u00e9|Wienecke-Baldacchino|Luxembourg

>Spike|hCoV-19/Denmark/DCGC-19493/2020|2020-12-07|EPI\_ISL\_748528|Original|hCoV-19^^Midtjylland|Human|Department of Virus and Microbiological Special Diagnostics|Albertsen Lab|Michaelsen|Denmark

>Spike|hCoV-19/England/QEUA-5DA170/2020|2020-06-17|EPI\_ISL\_533342|Original|hCoV-19^^England|Human|Lighthouse Lab in Glasgow|Wellcome Sanger Institute for the COVID-19 Genomics UK (COG-UK) consortium|Davies|United Kingdom

>Spike|hCoV-19/USA/NY-Wadsworth-10495-01/2020|2020-03-03|EPI\_ISL\_425224|Original|hCoV-19^^New York|Human|Wadsworth Center|Wadsworth Center|Lasek-Nesselquist|USA

>Spike|hCoV-19/Wales/PHWC-1686D6/2020|2020-04-20|EPI\_ISL\_494273|Original|hCoV-19^^Wales|Human|Originating lab|COVID-19 Genomics UK (COG-UK) Consortium|Moore|United Kingdom

>Spike|hCoV-19/England/MILK-ACD1C6/2020|2020-10-22|EPI\_ISL\_634509|Original|hCoV-19^^England|Human|Lighthouse Lab in Milton Keynes|Wellcome Sanger Institute for the COVID-19 Genomics UK (COG-UK) consortium|Davies|United Kingdom

>Spike|hCoV-19/Canada/ON-PHL-20-02521/2020|2020-09-00|EPI\_ISL\_671604|Original|hCoV-19^^Ontario|Human|Public Health Ontario Laboratory|Public Health Ontario Laboratory|Guthrie|Canada

>Spike|hCoV-19/England/NORT-2843EB/2020|2020-03-19|EPI\_ISL\_488554|Original|hCoV-19^^England|Human|NU-OMICS DNA Sequencing research facility|Wellcome Sanger Institute for the COVID-19 Genomics UK (COG-UK) consortium|Davies|United Kingdom

>Spike|hCoV-19/Denmark/DCGC-2266/2020|2020-08-10|EPI\_ISL\_617623|Original|hCoV-19^^Syddanmark|Human|Department of Virus and Microbiological Special Diagnostics|Albertsen lab|Michaelsen|Denmark

>Spike|hCoV-19/Luxembourg/LNS4376605/2020|2020-11-18|EPI\_ISL\_740459|Original|hCoV-19^^Luxembourg|Human|Laboratoire national de sant\u00e9|Laboratoire national de sant\u00e9|Wienecke-Baldacchino|Luxembourg

>Spike|hCoV-19/England/QEUA-BA1279/2020|2020-11-18|EPI\_ISL\_672754|Original|hCoV-19^^England|Human|Lighthouse Lab in Glasgow|Wellcome Sanger Institute for the COVID-19 Genomics UK (COG-UK) Consortium|Davies|United Kingdom

>Spike|hCoV-19/Northern Ireland/NIRE-FB958/2020|2020-03-31|EPI\_ISL\_585254|Original|hCoV-19^^Northern Ireland|Human|Regional Virus Laboratory|COVID-19 Genomics UK (COG-UK) Consortium|Fairley|United Kingdom

>Spike|hCoV-19/USA/TX-HMH-MCoV-8989/2020|2020-07-02|EPI\_ISL\_780876|Original|hCoV-19^^Texas|Human|Houston Methodist Hospital|Houston Methodist Hospital|Long|USA

>Spike|hCoV-19/England/CAMB-774BD/2020|2020-03-31|EPI\_ISL\_439503|Original|hCoV-19^^England|Human|Department of Pathology|Wellcome Sanger Institute for the COVID-19 Genomics UK (COG-UK) consortium|Amato|United Kingdom

>Spike|hCoV-19/Australia/VIC11565/2020|2020-08-27|EPI\_ISL\_563416|Original|hCoV-19^^Victoria|Human|Victorian Infectious Diseases Reference Laboratory (VIDRL)|VIDRL and MDU-PHL|Schultz|Australia

>Spike|hCoV-19/Denmark/DCGC-19341/2020|2020-12-07|EPI\_ISL\_748894|Original|hCoV-19^^Syddanmark|Human|Department of Virus and Microbiological Special Diagnostics|Albertsen Lab|Michaelsen|Denmark

>Spike|hCoV-19/USA/CA-CDPH070/2020|2020-07-01|EPI\_ISL\_754956|Original|hCoV-19^^California|Human|California Department of Public Health|California Department of Public Health|Bell|USA

>Spike|hCoV-19/USA/MS-CDC-6562/2020|2020-09-03|EPI\_ISL\_648014|Original|hCoV-19^^Mississippi|Human|MS Public Health Laboratory|Pathogen Discovery|Queen|USA

>Spike|hCoV-19/USA/TX-DSHS-2010/2020|2020-11-13|EPI\_ISL\_766763|Original|hCoV-19^^Texas|Human|Texas Department of State Health Services|Texas Department of State Health Services|Rahman|USA

>Spike|hCoV-19/USA/AK-PHL456/2020|2020-06-08|EPI\_ISL\_512139|Original|hCoV-19^^Alaska|Human|Alaska State Virology Laboratory|Alaska State Virology Laboratory|Drown|USA

>Spike|hCoV-19/USA/TX-HMH-3416/2020|2020-06-14|EPI\_ISL\_544175|Original|hCoV-19^^Texas|Human|Houston Methodist Hospital|Houston Methodist Hospital|Long|USA

>Spike|hCoV-19/USA/AZ-TG396390/2020|2020-06-12|EPI\_ISL\_694841|Original|hCoV-19^^Arizona|Human|AZ SPHL|TGen North|French|USA

>Spike|hCoV-19/Netherlands/ZH-EMC-468/2020|2020-08-16|EPI\_ISL\_523804|Original|hCoV-19^^Zuid Holland|Human|Dutch COVID-19 response team|Erasmus Medical Center|Oude Munnink|Netherlands

>Spike|hCoV-19/USA/TX-HMH-5029/2020|2020-06-24|EPI\_ISL\_544470|Original|hCoV-19^^Texas|Human|Houston Methodist Hospital|Houston Methodist Hospital|Long|USA

>Spike|hCoV-19/Japan/PG-4325/2020|2020-07-00|EPI\_ISL\_692553|Original|hCoV-19^^Japan|Human|Pathogen Genomics Center|Pathogen Genomics Center|Sekizuka|Japan

>Spike|hCoV-19/Australia/NSW2624/2020|2020-04-05|EPI\_ISL\_678322|Original|hCoV-19^^New South Wales|Human|Area of Virology|Virology Research Laboratory; Area of Virology|Foster|Australia

>Spike|hCoV-19/Australia/VIC8497/2020|2020-08-19|EPI\_ISL\_565053|Original|hCoV-19^^Victoria|Human|Microbiological Diagnostic Unit - Public Health Laboratory (MDU-PHL)|MDU-PHL|Schultz|Australia

>Spike|hCoV-19/Wales/PHWC-490CC1/2020|2020-11-16|EPI\_ISL\_706559|Original|hCoV-19^^Wales|Human|Originating lab|COVID-19 Genomics UK (COG-UK) Consortium|Moore|United Kingdom

>Spike|hCoV-19/Wales/PHWC-48A723/2020|2020-11-04|EPI\_ISL\_652593|Original|hCoV-19^^Wales|Human|Wales Specialist Virology Centre Sequencing lab|COVID-19 Genomics UK (COG-UK) Consortium|Moore|United Kingdom

>Spike|hCoV-19/England/QEUH-AF61B5/2020|2020-10-30|EPI\_ISL\_663041|Original|hCoV-19^^England|Human|Lighthouse Lab in Glasgow|Wellcome Sanger Institute for the COVID-19 Genomics UK (COG-UK) Consortium|Davies|United Kingdom

>Spike|hCoV-19/France/PAC-IHU-1146/2020|2020-08-07|EPI\_ISL\_569060|Original|hCoV-19^^Provence-Alpes-C\u00f4te-d\u2019Azur|Human|MEPHI|MEPHI|Levasseur|France

>Spike|hCoV-19/England/MILK-ACD560/2020|2020-10-21|EPI\_ISL\_634351|Original|hCoV-19^^England|Human|Lighthouse Lab in Milton Keynes|Wellcome Sanger Institute for the COVID-19 Genomics UK (COG-UK) consortium|Davies|United Kingdom

>Spike|hCoV-19/England/QEUH-9B7333/2020|2020-09-07|EPI\_ISL\_590550|Original|hCoV-19^^England|Human|Lighthouse Lab in Glasgow|Wellcome Sanger Institute for the COVID-19 Genomics UK (COG-UK) consortium|Davies|United Kingdom

>Spike|hCoV-19/USA/LA-ALSR-0077-NBG/2020|2020-03-31|EPI\_ISL\_434531|Original|hCoV-19^^Louisiana|Human|Robert Garry lab|Andersen lab at Scripps Research|Gangavarapu|USA

>Spike|hCoV-19/USA/WA-S1428/2020|2020-05-20|EPI\_ISL\_495878|Original|hCoV-19^^Washington|Human|Washington State Department of Health|Seattle Flu Study|Lee|USA

>Spike|hCoV-19/USA/TX-HMH-3574/2020|2020-06-15|EPI\_ISL\_543034|Original|hCoV-19^^Texas|Human|Houston Methodist Hospital|Houston Methodist Hospital|Long|USA

>Spike|hCoV-19/Japan/PG-2982/2020|2020-05-00|EPI\_ISL\_691106|Original|hCoV-19^^Japan|Human|Pathogen Genomics Center|Pathogen Genomics Center|Sekizuka|Japan

>Spike|hCoV-19/Scotland/QEUH-AAE50B/2020|2020-10-22|EPI\_ISL\_624140|Original|hCoV-19^^Scotland|Human|Lighthouse Lab in Glasgow|Wellcome Sanger Institute for the COVID-19 Genomics UK (COG-UK) consortium|Davies|United Kingdom

>Spike|hCoV-19/England/CAMC-B9A8AE/2020|2020-11-15|EPI\_ISL\_673250|Original|hCoV-19^^England|Human|Lighthouse Lab in Cambridge|Wellcome Sanger Institute for the COVID-19 Genomics UK (COG-UK) Consortium|Davies|United Kingdom

>Spike|hCoV-19/England/QEUH-C3275F/2020|2020-12-11|EPI\_ISL\_782628|Original|hCoV-19^^England|Human|Lighthouse Lab in Glasgow|Wellcome Sanger Institute for the COVID-19 Genomics UK (COG-UK) Consortium|Davies|United Kingdom

>Spike|hCoV-19/Wales/PHWC-2621D/2020|2020-03-26|EPI\_ISL\_422038|Original|hCoV-19^^Wales|Human|Wales Specialist Virology Centre|Public Health Wales Microbiology Cardiff|Moore|United Kingdom

>Spike|hCoV-19/England/LIVE-AA703/2020|2020-03-24|EPI\_ISL\_517491|Original|hCoV-19^^England|Human|Liverpool Clinical Laboratories|COVID-19 Genomics UK (COG-UK) Consortium|Haldenby|United Kingdom

>Spike|hCoV-19/Luxembourg/LNS7113377/2020|2020-12-28|EPI\_ISL\_770860|Original|hCoV-19^^Luxembourg|Human|Laboratoire national de sant\u00e9|Laboratoire national de sant\u00e9|Wienecke-Baldacchino|Luxembourg

>Spike|hCoV-19/USA/TX-HMH-MCoV-15805/2020|2020-07-10|EPI\_ISL\_785489|Original|hCoV-19^^Texas|Human|Houston Methodist Hospital|Houston Methodist Hospital|Long|USA

>Spike|hCoV-19/USA/DE-DHSS-FLW00404994/2020|2020-12-02|EPI\_ISL\_766997|Original|hCoV-19^^Delaware|Human|Delaware Public Health Laboratory|Delaware Public Health Laboratory|Bajwa|USA

>Spike|hCoV-19/England/ALDP-B755DF/2020|2020-11-12|EPI\_ISL\_662106|Original|hCoV-19^^England|Human|Lighthouse Lab in Alderley Park|Wellcome Sanger Institute for the COVID-19 Genomics UK (COG-UK) Consortium|Davies|United Kingdom

>Spike|hCoV-19/England/NORW-EB52A/2020|2020-05-01|EPI\_ISL\_457440|Original|hCoV-19^^England|Human|Quadram Institute Bioscience|COVID-19 Genomics UK (COG-UK) Consortium|Alikhan|United Kingdom

>Spike|hCoV-19/USA/WA-S2052/2020|2020-06-05|EPI\_ISL\_497480|Original|hCoV-19^^Washington|Human|Washington State Department of Health|Seattle Flu Study|Lee|USA

>Spike|hCoV-19/England/CAMB-1B7DF1/2020|2020-10-14|EPI\_ISL\_638179|Original|hCoV-19^^England|Human|Department of Pathology|COVID-19 Genomics UK (COG-UK) Consortium|Goodfellow|United Kingdom

>Spike|hCoV-19/Australia/VIC6428/2020|2020-07-24|EPI\_ISL\_521219|Original|hCoV-19^^Victoria|Human|Microbiological Diagnostic Unit - Public Health Laboratory (MDU-PHL) |MDU-PHL|Schultz|Australia

>Spike|hCoV-19/Australia/VIC5382/2020|2020-07-15|EPI\_ISL\_520145|Original|hCoV-19^^Victoria|Human|Microbiological Diagnostic Unit - Public Health Laboratory (MDU-PHL) |MDU-PHL|Schultz|Australia

>Spike|hCoV-19/India/MH-NIV-7511/2020|2020-04-05|EPI\_ISL\_452208|Original|hCoV-19^^Maharashtra|Human|NIV Influenza|NIV Influenza|Potdar|India

>Spike|hCoV-19/England/SHEF-10D7746/2020|2020-12-16|EPI\_ISL\_763635|Original|hCoV-19^^England|Human|Virology Department|COVID-19 Genomics UK (COG-UK) Consortium|de Silva|United Kingdom

>Spike|hCoV-19/Brazil/RS-00623/2020|2020-11-23|EPI\_ISL\_770574|Original|hCoV-19^^Rio Grande do Sul|Human|Laborat\u00f3rio de Microbiologia Molecular - Universidade FEEVALE|Bioinformatics Laboratory / LNCC|Almeida|Brazil

>Spike|hCoV-19/Ireland/D-NVRL-AIIDV0216v1/2020|2020-04-22|EPI\_ISL\_644281|Original|hCoV-19^^Dublin|Human|CEPHR / Vincent's Hospital|Irish Coronavirus Sequencing Consortium - National Virus Reference Laboratory|Gonzalez|Ireland

>Spike|hCoV-19/Australia/VIC10723/2020|2020-09-06|EPI\_ISL\_563055|Original|hCoV-19^^Victoria|Human|Microbiological Diagnostic Unit - Public Health Laboratory (MDU-PHL) |MDU-PHL|Schultz|Australia

>Spike|hCoV-19/England/NOTT-1215CD/2020|2020-12-17|EPI\_ISL\_741643|Original|hCoV-19^^England|Human|Queens Medical Centre|COVID-19 Genomics UK (COG-UK) Consortium|Loose|United Kingdom

>Spike|hCoV-19/England/ALDP-A6ECE4/2020|2020-10-15|EPI\_ISL\_607694|Original|hCoV-19^^England|Human|Lighthouse Lab in Alderley Park|Wellcome Sanger Institute for the COVID-19 Genomics UK (COG-UK) consortium|Davies|United Kingdom

>Spike|hCoV-19/Finland/23LS7G2/2020|2020-10-23|EPI\_ISL\_759790|Original|hCoV-19^^Uusimaa|Human|Department of Virology and Immunology|Department of Virology|Smura|Finland

>Spike|hCoV-19/England/OXON-F408A3/2020|2020-12-10|EPI\_ISL\_764271|Original|hCoV-19^^England|Human|Oxford Viromics|COVID-19 Genomics UK (COG-UK) Consortium|Golubchik|United Kingdom

>Spike|hCoV-19/England/QEUH-969A1D/2020|2020-08-12|EPI\_ISL\_531008|Original|hCoV-19^^England|Human|Lighthouse Lab in Glasgow|Wellcome Sanger Institute for the COVID-19 Genomics UK (COG-UK) consortium|Davies|United Kingdom

>Spike|hCoV-19/France/PAC-MEPHI-1935/2020|2020-08-27|EPI\_ISL\_644464|Original|hCoV-19^^Provence-Alpes-Cote-d\u2019Azur|Human|MEPHI|MEPHI|Levasseur|France

>Spike|hCoV-19/England/MILK-A7BEEE/2020|2020-10-15|EPI\_ISL\_607391|Original|hCoV-19^^England|Human|Lighthouse Lab in Milton Keynes|Wellcome Sanger Institute for the COVID-19 Genomics UK (COG-UK) consortium|Davies|United Kingdom

>Spike|hCoV-19/Switzerland/BL-ETHZ-190078/2020|2020-07-05|EPI\_ISL\_500935|Original|hCoV-19^^Basel-Landschaft|Human|Viollier AG|Department of Biosystems Science and Engineering|Nadeau|Switzerland

>Spike|hCoV-19/Germany/BAV-MVP0292/2020|2020-05-25|EPI\_ISL\_548957|Original|hCoV-19^^Bavaria|Human|Max von Pettenkofer Institute|Laboratory for Functional Genome Analysis|Graf|Germany

>Spike|hCoV-19/USA/CA-QDX-2578/2020|2020-03-16|EPI\_ISL\_604876|Original|hCoV-19^^California|Human|Quest Diagnostics|Quest Diagnostics|Kagan|USA

>Spike|hCoV-19/USA/OR-OHSU-2915/2020|2020-09-05|EPI\_ISL\_667413|Original|hCoV-19^^Oregon|Human|OHSU Lab Services Molecular Microbiology Lab|Oregon SARS-CoV-2 Genome Sequencing Center|O'Roak|USA

>Spike|hCoV-19/Scotland/QEUA-9F85A9/2020|2020-09-27|EPI\_ISL\_600867|Original|hCoV-19^^Scotland|Human|Lighthouse Lab in Glasgow|Wellcome Sanger Institute for the COVID-19 Genomics UK (COG-UK) consortium|Davies|United Kingdom

>Spike|hCoV-19/England/QEUA-A37042/2020|2020-10-03|EPI\_ISL\_638721|Original|hCoV-19^^England|Human|Wales Specialist Virology Centre Sequencing lab|COVID-19 Genomics UK (COG-UK) Consortium|Moore|United Kingdom

>Spike|hCoV-19/England/MILK-95854D/2020|2020-06-10|EPI\_ISL\_554828|Original|hCoV-19^^England|Human|Lighthouse Lab in Milton Keynes|Wellcome Sanger Institute for the COVID-19 Genomics UK (COG-UK) consortium|Davies|United Kingdom

>Spike|hCoV-19/England/ALDP-B1CAEA/2020|2020-11-01|EPI\_ISL\_723528|Original|hCoV-19^^England|Human|Centre for Enzyme Innovation|COVID-19 Genomics UK (COG-UK) Consortium|Robson|United Kingdom

>Spike|hCoV-19/England/QEUA-9B9C81/2020|2020-09-07|EPI\_ISL\_549659|Original|hCoV-19^^England|Human|Lighthouse Lab in Glasgow|Wellcome Sanger Institute for the COVID-19 Genomics UK (COG-UK) consortium|Davies|United Kingdom

>Spike|hCoV-19/Denmark/DCGC-4710/2020|2020-09-21|EPI\_ISL\_621941|Original|hCoV-19^^Nordjylland|Human|Department of Virus and Microbiological Special Diagnostics|Albertsen lab|Michaelsen|Denmark

>Spike|hCoV-19/Wales/PHWC-2B39D/2020|2020-04-12|EPI\_ISL\_445700|Original|hCoV-19^^Wales|Human|Wales Specialist Virology Centre|Public Health Wales Microbiology Cardiff|Moore|United Kingdom

>Spike|hCoV-19/England/201040079/2020|2020-03-03|EPI\_ISL\_464323|Original|hCoV-19^^England|Human|Respiratory Virus Unit|Respiratory Virus Unit|Platt|United Kingdom

>Spike|hCoV-19/Portugal/PT2066/2020|2020-11-11|EPI\_ISL\_732280|Original|hCoV-19^^Portugal|Human|Instituto Nacional de Saude (INSA) and Instituto Gulbenkian de Ciencia (IGC)|Instituto Nacional de Saude (INSA) and Instituto Gulbenkian de Ciencia (IGC)|Borges|Portugal

>Spike|hCoV-19/Ireland/LK-UHL5/2020|2020-04-01|EPI\_ISL\_681754|Original|hCoV-19^^Limerick|Human|University Hospital Limerick|Irish Coronavirus Sequencing Consortium - Teagasc Moorepark|Walsh|Ireland

>Spike|hCoV-19/Denmark/DCGC-18825/2020|2020-12-07|EPI\_ISL\_748580|Original|hCoV-19^^Syddanmark|Human|Department of Virus and Microbiological Special Diagnostics|Albertsen Lab|Michaelsen|Denmark

>Spike|hCoV-19/England/ALDP-9521E5/2020|2020-06-09|EPI\_ISL\_553666|Original|hCoV-19^^England|Human|Lighthouse Lab in Alderley Park|Wellcome Sanger Institute for the COVID-19 Genomics UK (COG-UK) consortium|Davies|United Kingdom

>Spike|hCoV-19/England/QEUA-9F5FF9/2020|2020-09-25|EPI\_ISL\_588320|Original|hCoV-19^^England|Human|Lighthouse Lab in Glasgow|Wellcome Sanger Institute for the COVID-19 Genomics UK (COG-UK) consortium|Davies|United Kingdom

>Spike|hCoV-19/Ireland/CO-NVRL-76IRL32468/2020|2020-10-18|EPI\_ISL\_732465|Original|hCoV-19^^Cork|Human|National Virus Reference Laboratory|National Virus Reference Laboratory|Gonzalez|Ireland

>Spike|hCoV-19/USA/FL-QDX-1616/2020|2020-03-18|EPI\_ISL\_603937|Original|hCoV-19^^Florida|Human|Quest Diagnostics|Quest Diagnostics|Kagan|USA

>Spike|hCoV-19/Saint Barthelemy/IPG-7329/2020|2020-03-13|EPI\_ISL\_613429|Original|hCoV-19^^Saint Barth\ue9lemy|Human|Institut Pasteur de la Guadeloupe|Institut Pasteur de la Guadeloupe|Enouf|Saint Barth\ue9lemy

>Spike|hCoV-19/England/QEUA-C03EDA/2020|2020-12-04|EPI\_ISL\_720897|Original|hCoV-19^^England|Human|Lighthouse Lab in Glasgow|Wellcome Sanger Institute for the COVID-19 Genomics UK (COG-UK) Consortium|Davies|United Kingdom

>Spike|hCoV-19/Norway/6295/2020|2020-10-23|EPI\_ISL\_775381|Original|hCoV-19^^Nordland|Human|Nordland Hospital - Bodo|Norwegian Institute of Public Health|Vollan|Norway

>Spike|hCoV-19/England/EXET-136DEB/2020|2020-04-20|EPI\_ISL\_471926|Original|hCoV-19^^England|Human|University of Exeter|COVID-19 Genomics UK (COG-UK) Consortium|Temperton|United Kingdom

>Spike|hCoV-19/England/QEUH-B813B8/2020|2020-11-14|EPI\_ISL\_661852|Original|hCoV-19^^England|Human|Lighthouse Lab in Glasgow|Wellcome Sanger Institute for the COVID-19 Genomics UK (COG-UK) Consortium|Davies|United Kingdom

>Spike|hCoV-19/England/MILK-B97382/2020|2020-11-14|EPI\_ISL\_675058|Original|hCoV-19^^England|Human|Lighthouse Lab in Milton Keynes|Wellcome Sanger Institute for the COVID-19 Genomics UK (COG-UK) Consortium|Davies|United Kingdom

>Spike|hCoV-19/United Arab Emirates/0311/2020|2020-05-18|EPI\_ISL\_698488|Original|hCoV-19^^Abu Dhabi|Human|Group 42 (G42) Healthcare|G42 Healthcare|Ogrodzki|United Arab Emirates

>Spike|hCoV-19/USA/NY-Wadsworth-261037-01/2020|2020-11-02|EPI\_ISL\_754511|Original|hCoV-19^^New York|Human|Wadsworth Center|Wadsworth Center|Lasek-Nesselquist|USA

>Spike|hCoV-19/USA/TX-HMH-MCoV-19194/2020|2020-11-23|EPI\_ISL\_783681|Original|hCoV-19^^Texas|Human|Houston Methodist Hospital|Houston Methodist Hospital|Long|USA

>Spike|hCoV-19/USA/WI-GMF-00232/2020|2020-03-23|EPI\_ISL\_418188|Original|hCoV-19^^Wisconsin|Human|Gundersen Molecular Diagnostics Laboratory|Kabara Cancer Research Institute|Kenny|USA

>Spike|hCoV-19/England/NOTT-10DF14/2020|2020-03-12|EPI\_ISL\_425469|Original|hCoV-19^^England|Human|Queens Medical Centre|COVID-19 Genomics UK (COG-UK) Consortium|Loose|United Kingdom

>Spike|hCoV-19/England/QEUH-A1DC99/2020|2020-09-29|EPI\_ISL\_587310|Original|hCoV-19^^England|Human|Lighthouse Lab in Glasgow|Wellcome Sanger Institute for the COVID-19 Genomics UK (COG-UK) consortium|Davies|United Kingdom

>Spike|hCoV-19/Wales/PHWC-3658A/2020|2020-04-30|EPI\_ISL\_474684|Original|hCoV-19^^Wales|Human|Originating lab|COVID-19 Genomics UK (COG-UK) Consortium|Moore|United Kingdom

>Spike|hCoV-19/England/CAMB-1ADB7C/2020|2020-05-03|EPI\_ISL\_448039|Original|hCoV-19^^England|Human|Department of Pathology|COVID-19 Genomics UK (COG-UK) Consortium|Meredith|United Kingdom

>Spike|hCoV-19/USA/TX-HMH-7312/2020|2020-06-29|EPI\_ISL\_546669|Original|hCoV-19^^Texas|Human|Houston Methodist Hospital|Houston Methodist Hospital|Long|USA

>Spike|hCoV-19/England/QEUH-A5E6F8/2020|2020-10-12|EPI\_ISL\_597404|Original|hCoV-19^^England|Human|Lighthouse Lab in Glasgow|Wellcome Sanger Institute for the COVID-19 Genomics UK (COG-UK) consortium|Davies|United Kingdom

>Spike|hCoV-19/USA/WI-UW-1703/2020|2020-09-11|EPI\_ISL\_605576|Original|hCoV-19^^Wisconsin|Human|University of Wisconsin-Madison AIDS Vaccine Research Laboratories|University of Wisconsin-Madison AIDS Vaccine Research Laboratories|Baczenas|USA

>Spike|hCoV-19/England/CAMB-77514/2020|2020-03-31|EPI\_ISL\_438517|Original|hCoV-19^^England|Human|Department of Pathology|Wellcome Sanger Institute for the COVID-19 Genomics UK (COG-UK) consortium|Amato|United Kingdom

>Spike|hCoV-19/Denmark/DCGC-5251/2020|2020-09-14|EPI\_ISL\_615182|Original|hCoV-19^^Sjaelland|Human|Department of Virus and Microbiological Special Diagnostics|Albertsen lab|Michaelsen|Denmark

>Spike|hCoV-19/USA/OH-ODH-SC35079/2020|2020-04-23|EPI\_ISL\_776567|Original|hCoV-19^^Ohio|Human|Ohio Department of Health Laboratory|Ohio Department of Health Laboratory|Holmes|USA

>Spike|hCoV-19/Wales/PHWC-2F144/2020|2020-04-06|EPI\_ISL\_446206|Original|hCoV-19^^Wales|Human|Wales Specialist Virology Centre|Public Health Wales Microbiology Cardiff|Moore|United Kingdom

>Spike|hCoV-19/Australia/VIC6314/2020|2020-07-24|EPI\_ISL\_518302|Original|hCoV-19^^Victoria|Human|Microbiological Diagnostic Unit - Public Health Laboratory (MDU-PHL)|MDU-PHL|Schultz|Australia

>Spike|hCoV-19/Australia/VIC12107/2020|2020-07-22|EPI\_ISL\_591916|Original|hCoV-19^^Victoria|Human|Microbiological Diagnostic Unit - Public Health Laboratory (MDU-PHL) |MDU-PHL|Schultz|Australia

>Spike|hCoV-19/Australia/VIC15027/2020|2020-07-27|EPI\_ISL\_593110|Original|hCoV-19^^Victoria|Human|Microbiological Diagnostic Unit - Public Health Laboratory (MDU-PHL) |MDU-PHL|Schultz|Australia

>Spike|hCoV-19/England/204421152/2020|2020-10-27|EPI\_ISL\_653968|Original|hCoV-19^^England|Human|Respiratory Virus Unit|COVID-19 Genomics UK (COG-UK) Consortium|Platt|United Kingdom

>Spike|hCoV-19/USA/FL-BPHL-1848/2020|2020-04-09|EPI\_ISL\_613928|Original|hCoV-19^^Florida|Human|Florida Bureau of Public Health Laboratories|Florida Bureau of Public Health Laboratories|Blanton|USA

>Spike|hCoV-19/Wales/ALDP-B1AB52/2020|2020-11-01|EPI\_ISL\_711044|Original|hCoV-19^^Wales|Human|Lighthouse Lab in Alderley Park|Wellcome Sanger Institute for the COVID-19 Genomics UK (COG-UK) Consortium|Davies|United Kingdom

>Spike|hCoV-19/Wales/PHWC-168630/2020|2020-04-22|EPI\_ISL\_494266|Original|hCoV-19^^Wales|Human|Originating lab|COVID-19 Genomics UK (COG-UK) Consortium|Moore|United Kingdom

>Spike|hCoV-19/Switzerland/GR-ETHZ-200009/2020|2020-07-11|EPI\_ISL\_510698|Original|hCoV-19^^Graubunden|Human|Viollier AG|Department of Biosystems Science and Engineering|Nadeau|Switzerland

>Spike|hCoV-19/Gibraltar/204841747/2020|2020-00-00|EPI\_ISL\_671314|Original|hCoV-19^^Gibraltar|Human|Microbiology|Respiratory Virus Unit|Platt|Gibraltar

>Spike|hCoV-19/Wales/PHWC-26ECE/2020|2020-03-30|EPI\_ISL\_422090|Original|hCoV-19^^Wales|Human|Wales Specialist Virology Centre|Public Health Wales Microbiology Cardiff|Moore|United Kingdom

>Spike|hCoV-19/Indonesia/JK-EIJK-40/2020|2020-05-27|EPI\_ISL\_568691|Original|hCoV-19^^Jakarta|Human|RSUP Fatmawati|Eijkman Institute for Molecular Biology|Soebandrio|Indonesia

>Spike|hCoV-19/England/CAMB-1B4B36/2020|2020-06-10|EPI\_ISL\_473498|Original|hCoV-19^^England|Human|Department of Pathology|COVID-19 Genomics UK (COG-UK) Consortium|Meredith|United Kingdom

>Spike|hCoV-19/USA/TX-HMH-MCoV-8103/2020|2020-06-30|EPI\_ISL\_784198|Original|hCoV-19^^Texas|Human|Houston Methodist Hospital|Houston Methodist Hospital|Long|USA

>Spike|hCoV-19/Japan/PG-4999/2020|2020-08-00|EPI\_ISL\_690112|Original|hCoV-19^^Japan|Human|Pathogen Genomics Center|Pathogen Genomics Center|Sekizuka|Japan

>Spike|hCoV-19/Scotland/QEUIH-A4D1CE/2020|2020-10-07|EPI\_ISL\_596100|Original|hCoV-19^^Scotland|Human|Quadram Institute Bioscience|COVID-19 Genomics UK (COG-UK) Consortium|Alikhan|United Kingdom

>Spike|hCoV-19/South Africa/KRISP-K003679/2020|2020-09-20|EPI\_ISL\_602865|Original|hCoV-19^^KwaZulu-Natal|Human|NHLS-IALCH|KRISP|de Oliveira|South Africa

>Spike|hCoV-19/England/C200032834/2020|2020-10-15|EPI\_ISL\_636710|Original|hCoV-19^^England|Human|Respiratory Virus Unit|Respiratory Virus Unit|Platt|United Kingdom

>Spike|hCoV-19/Scotland/QEUIH-A0ABFC/2020|2020-10-01|EPI\_ISL\_599383|Original|hCoV-19^^Scotland|Human|Lighthouse Lab in Glasgow|Wellcome Sanger Institute for the COVID-19 Genomics UK (COG-UK) consortium|Davies|United Kingdom

>Spike|hCoV-19/England/MILK-99417E/2020|2020-08-25|EPI\_ISL\_551664|Original|hCoV-19^^England|Human|Lighthouse Lab in Milton Keynes|Wellcome Sanger Institute for the COVID-19 Genomics UK (COG-UK) consortium|Davies|United Kingdom

>Spike|hCoV-19/Japan/PG-6635/2020|2020-06-00|EPI\_ISL\_687747|Original|hCoV-19^^Japan|Human|Pathogen Genomics Center|Pathogen Genomics Center|Sekizuka|Japan

>Spike|hCoV-19/Australia/NSW1312/2020|2020-12-18|EPI\_ISL\_767878|Original|hCoV-19^^New South Wales|Human|Laverty Pathology|NSW Health Pathology - Institute of Clinical Pathology and Medical Research; Westmead Hospital; University of Sydney|Gall|Australia

>Spike|hCoV-19/USA/OR-OHSU-1023/2020|2020-07-07|EPI\_ISL\_525951|Original|hCoV-19^^Oregon|Human|OHSU Lab Services Molecular Microbiology Lab|Oregon SARS-CoV-2 Genome Sequencing Center|O'Roak|USA



>Spike|hCoV-19/England/ALDP-AA1DF1/2020|2020-10-22|EPI\_ISL\_625154|Original|hCoV-19^^England|Human|Lighthouse Lab in Alderley Park|Wellcome Sanger Institute for the COVID-19 Genomics UK (COG-UK) consortium|Davies|United Kingdom

>Spike|hCoV-19/USA/NY-QDX-2304/2020|2020-03-15|EPI\_ISL\_604577|Original|hCoV-19^^New York|Human|Quest Diagnostics|Quest Diagnostics|Kagan|USA

>Spike|hCoV-19/England/ALDP-CB4DAE/2020|2020-12-18|EPI\_ISL\_761285|Original|hCoV-19^^England|Human|Lighthouse Lab in Alderley Park|Wellcome Sanger Institute for the COVID-19 Genomics UK (COG-UK) Consortium|Davies|United Kingdom

>Spike|hCoV-19/Denmark/DCGC-4330/2020|2020-09-07|EPI\_ISL\_615530|Original|hCoV-19^^Sjaelland|Human|Department of Virus and Microbiological Special Diagnostics|Albertsen lab|Michaelsen|Denmark

>Spike|hCoV-19/England/NOTT-113BDB/2020|2020-09-28|EPI\_ISL\_572444|Original|hCoV-19^^England|Human|Queens Medical Centre|COVID-19 Genomics UK (COG-UK) Consortium|Loose|United Kingdom

>Spike|hCoV-19/England/QEUEH-BA0720/2020|2020-11-18|EPI\_ISL\_719789|Original|hCoV-19^^England|Human|Lighthouse Lab in Glasgow|Wellcome Sanger Institute for the COVID-19 Genomics UK (COG-UK) Consortium|Davies|United Kingdom

>Spike|hCoV-19/USA/WA-UW-21998/2020|2020-08-05|EPI\_ISL\_571011|Original|hCoV-19^^Washington|Human|UW Virology Lab|UW Virology Lab|Roychoudhury|USA

>Spike|hCoV-19/Luxembourg/LNS2104020/2020|2020-12-22|EPI\_ISL\_771094|Original|hCoV-19^^Luxembourg|Human|Laboratoire national de sant\u00e9|Laboratoire national de sant\u00e9|Wienecke-Baldacchino|Luxembourg

>Spike|hCoV-19/England/ALDP-9CAC8D/2020|2020-09-16|EPI\_ISL\_575505|Original|hCoV-19^^England|Human|Lighthouse Lab in Alderley Park|Wellcome Sanger Institute for the COVID-19 Genomics UK (COG-UK) consortium|Davies|United Kingdom

>Spike|hCoV-19/USA/CA-CHLA-PLM93963490/2020|2020-11-10|EPI\_ISL\_753302|Original|hCoV-19^^California|Human|Clinical virology Laboratory|Center for Personalized Medicine|Dien Bard|USA

>Spike|hCoV-19/USA/TX-HMH-MCoV-19748/2020|2020-11-19|EPI\_ISL\_784092|Original|hCoV-19^^Texas|Human|Houston Methodist Hospital|Houston Methodist Hospital|Long|USA

>Spike|hCoV-19/England/NOTT-10E58A/2020|2020-03-26|EPI\_ISL\_425563|Original|hCoV-19^^England|Human|Queens Medical Centre|COVID-19 Genomics UK (COG-UK) Consortium|Loose|United Kingdom

>Spike|hCoV-19/Wales/PHWC-34346/2020|2020-04-12|EPI\_ISL\_446906|Original|hCoV-19^^Wales|Human|Wales Specialist Virology Centre|Public Health Wales Microbiology Cardiff|Moore|United Kingdom

>Spike|hCoV-19/Wales/PHWC-4A4DA9/2020|2020-12-09|EPI\_ISL\_764790|Original|hCoV-19^^Wales|Human|Wales Specialist Virology Centre Sequencing lab|COVID-19 Genomics UK (COG-UK) Consortium|Moore|United Kingdom

>Spike|hCoV-19/England/QEUEH-9DC0F5/2020|2020-09-21|EPI\_ISL\_601288|Original|hCoV-19^^England|Human|Lighthouse Lab in Glasgow|Wellcome Sanger Institute for the COVID-19 Genomics UK (COG-UK) consortium|Davies|United Kingdom

>Spike|hCoV-19/USA/HI-H200353/2020|2020-09-17|EPI\_ISL\_752909|Original|hCoV-19^^Hawaii|Human|State Laboratories Division|State Laboratories Division|Sultana|USA

>Spike|hCoV-19/England/QEUEH-A0AE99/2020|2020-10-03|EPI\_ISL\_599234|Original|hCoV-19^^England|Human|Lighthouse Lab in Glasgow|Wellcome Sanger Institute for the COVID-19 Genomics UK (COG-UK) consortium|Davies|United Kingdom

>Spike|hCoV-19/Canada/ON-S782/2020|2020-04-10|EPI\_ISL\_586443|Original|hCoV-19^^Ontario|Human|Toronto Invasive Bacterial Diseases Network|McMaster University|McArthur|Canada

>Spike|hCoV-19/Portugal/PT1746/2020|2020-11-10|EPI\_ISL\_731983|Original|hCoV-19^^Portugal|Human|Instituto Nacional de Saude (INSA)|Instituto Nacional de Saude (INSA)|Borges|Portugal

>Spike|hCoV-19/Norway/3908/2020|2020-09-21|EPI\_ISL\_635112|Original|hCoV-19^^Vestfold og Telemark|Human|Vestfold Hospital|Norwegian Institute of Public Health|Vollan|Norway

>Spike|hCoV-19/Bangladesh/DNAS-CPH-isl-510/2020|2020-04-29|EPI\_ISL\_605893|Original|hCoV-19^^Bangladesh|Human|NGS Lab|NGS Lab|Rabbi|Bangladesh

>Spike|hCoV-19/England/QEUEH-9F7BE4/2020|2020-09-27|EPI\_ISL\_589025|Original|hCoV-19^^England|Human|Lighthouse Lab in Glasgow|Wellcome Sanger Institute for the COVID-19 Genomics UK (COG-UK) consortium|Davies|United Kingdom

>Spike|hCoV-19/England/NORT-289638/2020|2020-03-31|EPI\_ISL\_458627|Original|hCoV-19^^England|Human|NU-OMICS DNA Sequencing research facility|Wellcome Sanger Institute for the COVID-19 Genomics UK (COG-UK) consortium|Davies|United Kingdom

>Spike|hCoV-19/USA/MI-MDHHS-SC20326/2020|2020-03-14|EPI\_ISL\_450605|Original|hCoV-19^^Michigan|Human|Michigan Department of Health and Human Services|Michigan Department of Health and Human Services|Blankenship|USA

>Spike|hCoV-19/England/SHEF-C7339/2020|2020-05-01|EPI\_ISL\_457617|Original|hCoV-19^^England|Human|Virology Department|COVID-19 Genomics UK (COG-UK) Consortium|de Silva|United Kingdom

>Spike|hCoV-19/Wales/PHWC-2B01E/2020|2020-04-08|EPI\_ISL\_432265|Original|hCoV-19^^Wales|Human|Wales Specialist Virology Centre|Public Health Wales Microbiology Cardiff|Moore|United Kingdom

>Spike|hCoV-19/England/ALDP-A6E0BB/2020|2020-10-14|EPI\_ISL\_607723|Original|hCoV-19^^England|Human|Lighthouse Lab in Alderley Park|Wellcome Sanger Institute for the COVID-19 Genomics UK (COG-UK) consortium|Davies|United Kingdom

>Spike|hCoV-19/Scotland/EDB1816/2020|2020-04-16|EPI\_ISL\_433139|Original|hCoV-19^^Scotland|Human|Virology Department|COVID-19 Genomics UK (COG-UK) Consortium|Williams|United Kingdom

>Spike|hCoV-19/Denmark/DCGC-15963/2020|2020-11-23|EPI\_ISL\_714508|Original|hCoV-19^^Hovedstaden|Human|Department of Virus and Microbiological Special Diagnostics|Albertsen Lab|Michaelsen|Denmark

>Spike|hCoV-19/USA/TX-HMH-MCoV-11152/2020|2020-09-02|EPI\_ISL\_789716|Original|hCoV-19^^Texas|Human|Houston Methodist Hospital|Houston Methodist Hospital|Long|USA

>Spike|hCoV-19/Wales/PHWC-490827/2020|2020-11-14|EPI\_ISL\_706515|Original|hCoV-19^^Wales|Human|Originating lab|COVID-19 Genomics UK (COG-UK) Consortium|Moore|United Kingdom

>Spike|hCoV-19/Netherlands/LI-RIVM-20952/2020|2020-12-21|EPI\_ISL\_790976|Original|hCoV-19^^Limburg|Human|Dutch COVID-19 response team|National Institute for Public Health and the Environment (RIVM)|Meijer|Netherlands

>Spike|hCoV-19/Northern Ireland/NIRE-108DA6/2020|2020-10-12|EPI\_ISL\_627559|Original|hCoV-19^^Northern Ireland|Human|Regional Virus Laboratory|COVID-19 Genomics UK (COG-UK) Consortium|Fairley|United Kingdom

>Spike|hCoV-19/England/CAMC-B52417/2020|2020-11-08|EPI\_ISL\_656921|Original|hCoV-19^^England|Human|Lighthouse Lab in Cambridge|Wellcome Sanger Institute for the COVID-19 Genomics UK (COG-UK) Consortium|Davies|United Kingdom

>Spike|hCoV-19/Denmark/DCGC-8220/2020|2020-10-26|EPI\_ISL\_616961|Original|hCoV-19^^Sjaelland|Human|Department of Virus and Microbiological Special Diagnostics|Albertsen lab|Michaelsen|Denmark

>Spike|hCoV-19/France/OCC-26/2020|2020-06-10|EPI\_ISL\_482884|Original|hCoV-19^^Occitanie|Human|CHU Purpan - Laboratoire de Virologie - Institut F\u00e9d\u00e9ratif de Biologie|Laboratoire de virologie - \u00e9cole Nationale V\u00e9t\u00e9rinaire de Toulouse|Crouille|France

>Spike|hCoV-19/USA/LA-EVTL378/2020|2020-06-02|EPI\_ISL\_578784|Original|hCoV-19^^Louisiana|Human|LSUHS Emerging Viral Threat Laboratory|Microbial Genome Sequencing Center|Kamil|USA

>Spike|hCoV-19/England/MILK-A79A64/2020|2020-10-15|EPI\_ISL\_606890|Original|hCoV-19^^England|Human|Lighthouse Lab in Milton Keynes|Wellcome Sanger Institute for the COVID-19 Genomics UK (COG-UK) consortium|Davies|United Kingdom

>Spike|hCoV-19/Wales/PHWC-167E2A/2020|2020-06-06|EPI\_ISL\_494162|Original|hCoV-19^^Wales|Human|Originating lab|COVID-19 Genomics UK (COG-UK) Consortium|Moore|United Kingdom

>Spike|hCoV-19/USA/MN-MDH-1903/2020|2020-10-19|EPI\_ISL\_613523|Original|hCoV-19^^Minnesota|Human|Public Health Laboratory - Infectious Disease Lab|Minnesota Department of Health|Lorentz|USA

>Spike|hCoV-19/South Africa/LR00137/2020|2020-07-20|EPI\_ISL\_514368|Original|hCoV-19^^Gauteng|Human|National Institute for Communicable Diseases of the National Health

Laboratory Service|National Institute for Communicable Diseases of the National Health Laboratory Service|Allam|South Africa

>Spike|hCoV-19/England/ALDP-6C3030/2020|2020-07-01|EPI\_ISL\_557872|Original|hCoV-19^^England|Human|Lighthouse Lab in Alderley Park|Wellcome Sanger Institute for the COVID-19 Genomics UK (COG-UK) consortium|Davies|United Kingdom

>Spike|hCoV-19/England/MILK-B55265/2020|2020-11-05|EPI\_ISL\_709899|Original|hCoV-19^^England|Human|Lighthouse Lab in Milton Keynes|Wellcome Sanger Institute for the COVID-19 Genomics UK (COG-UK) Consortium|Davies|United Kingdom

>Spike|hCoV-19/France/ARA-111638/2020|2020-11-24|EPI\_ISL\_728550|Original|hCoV-19^^Auvergne-Rh\u00f4ne-Alpes|Human|CNR Virus des Infections Respiratoires - France SUD|CNR Virus des Infections Respiratoires - France SUD|Bal|France

>Spike|hCoV-19/England/ALDP-CEBAC5/2020|2020-12-21|EPI\_ISL\_782361|Original|hCoV-19^^England|Human|Lighthouse Lab in Alderley Park|Wellcome Sanger Institute for the COVID-19 Genomics UK (COG-UK) Consortium|Davies|United Kingdom

>Spike|hCoV-19/Australia/VIC15125/2020|2020-08-28|EPI\_ISL\_593149|Original|hCoV-19^^Victoria|Human|Microbiological Diagnostic Unit - Public Health Laboratory (MDU-PHL)|MDU-PHL|Schultz|Australia

>Spike|hCoV-19/Denmark/DCGC-18285/2020|2020-12-07|EPI\_ISL\_749864|Original|hCoV-19^^Midtjylland|Human|Department of Virus and Microbiological Special Diagnostics|Albertsen Lab|Michaelsen|Denmark

>Spike|hCoV-19/England/ALDP-A2F3BD/2020|2020-10-06|EPI\_ISL\_587014|Original|hCoV-19^^England|Human|Lighthouse Lab in Alderley Park|Wellcome Sanger Institute for the COVID-19 Genomics UK (COG-UK) consortium|Davies|United Kingdom

>Spike|hCoV-19/USA/AZ-QDX-1678/2020|2020-03-18|EPI\_ISL\_603880|Original|hCoV-19^^Arizona|Human|Quest Diagnostics|Quest Diagnostics|Kagan|USA

>Spike|hCoV-19/England/QEUEH-CC9386/2020|2020-12-22|EPI\_ISL\_781886|Original|hCoV-19^^England|Human|Lighthouse Lab in Glasgow|Wellcome Sanger Institute for the COVID-19 Genomics UK (COG-UK) Consortium|Davies|United Kingdom

>Spike|hCoV-19/Wales/PHWC-49E73B/2020|2020-12-08|EPI\_ISL\_743040|Original|hCoV-19^^Wales|Human|Wales Specialist Virology Centre Sequencing lab|COVID-19 Genomics UK (COG-UK) Consortium|Moore|United Kingdom

>Spike|hCoV-19/USA/NY-Wadsworth-13977-01/2020|2020-03-12|EPI\_ISL\_525607|Original|hCoV-19^^New York|Human|Wadsworth Center|Wadsworth Center|Plitnick|USA

>Spike|hCoV-19/England/QEUEH-943C31/2020|2020-07-12|EPI\_ISL\_532557|Original|hCoV-19^^England|Human|Lighthouse Lab in Glasgow|Wellcome Sanger Institute for the COVID-19 Genomics UK (COG-UK) consortium|Davies|United Kingdom

>Spike|hCoV-19/Spain/VC-FISABIO-41/2020|2020-03-11|EPI\_ISL\_420125|Original|hCoV-19^^Comunitat Valenciana|Human|Servicio de Microbiologia. Hospital Clinico Universitario de Valencia|Sequencing and Bioinformatics Service and Molecular Epidemiology Research Group. FISABIO-Public Health|Gonzalez-Candelas|Spain

>Spike|hCoV-19/England/MILK-B85E95/2020|2020-11-13|EPI\_ISL\_674000|Original|hCoV-19^^England|Human|Lighthouse Lab in Milton Keynes|Wellcome Sanger Institute for the COVID-19 Genomics UK (COG-UK) Consortium|Davies|United Kingdom

>Spike|hCoV-19/Scotland/CVR4850/2020|2020-10-04|EPI\_ISL\_594650|Original|hCoV-19^^Scotland|Human|West of Scotland Specialist Virology Centre|COVID-19 Genomics UK (COG-UK) Consortium|Robertson|United Kingdom

>Spike|hCoV-19/England/CAMC-B526C6/2020|2020-11-06|EPI\_ISL\_656693|Original|hCoV-19^^England|Human|Lighthouse Lab in Cambridge|Wellcome Sanger Institute for the COVID-19 Genomics UK (COG-UK) Consortium|Davies|United Kingdom

>Spike|hCoV-19/England/LIVE-9C652/2020|2020-03-23|EPI\_ISL\_449564|Original|hCoV-19^^England|Human|Liverpool Clinical Laboratories|COVID-19 Genomics UK (COG-UK) Consortium|Haldenby|United Kingdom

>Spike|hCoV-19/USA/LA-GBCL-26791757/2020|2020-04-06|EPI\_ISL\_485372|Original|hCoV-19^^Louisiana|Human|River Road Testing Lab|Ginkgo Bioworks Clinical Laboratory|Smith|USA

>Spike|hCoV-19/England/QEUEH-A9F6EC/2020|2020-10-20|EPI\_ISL\_611297|Original|hCoV-19^^England|Human|Lighthouse Lab in Glasgow|Wellcome Sanger Institute for the COVID-19 Genomics UK (COG-UK) consortium|Davies|United Kingdom

>Spike|hCoV-19/England/MILK-BEE35F/2020|2020-11-30|EPI\_ISL\_708898|Original|hCoV-19^^England|Human|Lighthouse Lab in Milton Keynes|Wellcome Sanger Institute for the COVID-19 Genomics UK (COG-UK) Consortium|Davies|United Kingdom

>Spike|hCoV-19/England/ALDP-9CB0CC/2020|2020-09-16|EPI\_ISL\_575456|Original|hCoV-19^^England|Human|Lighthouse Lab in Alderley Park|Wellcome Sanger Institute for the COVID-19 Genomics UK (COG-UK) consortium|Davies|United Kingdom

>Spike|hCoV-19/France/OCC-SC517/2020|2020-04-29|EPI\_ISL\_660705|Original|hCoV-19^^Occitanie|Human|CHU Montpellier|CNR Virus des Infections Respiratoires - France SUD|Bal|France

>Spike|hCoV-19/England/BRIS-12A6B2/2020|2020-04-30|EPI\_ISL\_458429|Original|hCoV-19^^England|Human|PHE South West Regional Laboratory|Wellcome Sanger Institute for the COVID-19 Genomics UK (COG-UK) consortium|Davies|United Kingdom

>Spike|hCoV-19/USA/MI-QDX-403/2020|2020-03-24|EPI\_ISL\_571142|Original|hCoV-19^^Michigan|Human|Quest Diagnostics|Quest Diagnostics|Kagan|USA

>Spike|hCoV-19/England/ALDP-B6357A/2020|2020-11-09|EPI\_ISL\_656573|Original|hCoV-19^^England|Human|Lighthouse Lab in Alderley Park|Wellcome Sanger Institute for the COVID-19 Genomics UK (COG-UK) Consortium|Davies|United Kingdom

>Spike|hCoV-19/USA/MN-MDH-2139/2020|2020-11-08|EPI\_ISL\_708477|Original|hCoV-19^^Minnesota|Human|Minnesota Department of Health|Minnesota Department of Health|Lorentz|USA

>Spike|hCoV-19/Switzerland/VD-ETHZ-360312/2020|2020-11-06|EPI\_ISL\_729054|Original|hCoV-19^^Vaud|Human|Viollier AG|Department of Biosystems Science and Engineering|Nadeau|Switzerland

>Spike|hCoV-19/USA/TX-HMH-MCoV-19165/2020|2020-11-23|EPI\_ISL\_783665|Original|hCoV-19^^Texas|Human|Houston Methodist Hospital|Houston Methodist Hospital|Long|USA

>Spike|hCoV-19/England/MILK-A45F62/2020|2020-10-06|EPI\_ISL\_598583|Original|hCoV-19^^England|Human|Lighthouse Lab in Milton Keynes|Wellcome Sanger Institute for the COVID-19 Genomics UK (COG-UK) consortium|Davies|United Kingdom

>Spike|hCoV-19/Scotland/CVR5649/2020|2020-10-29|EPI\_ISL\_680444|Original|hCoV-19^^Scotland|Human|West of Scotland Specialist Virology Centre|COVID-19 Genomics UK (COG-UK) Consortium|Robertson|United Kingdom

>Spike|hCoV-19/England/QEUEH-B143C9/2020|2020-11-03|EPI\_ISL\_642568|Original|hCoV-19^^England|Human|Lighthouse Lab in Glasgow|Wellcome Sanger Institute for the COVID-19 Genomics UK (COG-UK) Consortium|Davies|United Kingdom

>Spike|hCoV-19/Wales/PHWC-4A4D30/2020|2020-12-09|EPI\_ISL\_764785|Original|hCoV-19^^Wales|Human|Wales Specialist Virology Centre Sequencing lab|COVID-19 Genomics UK (COG-UK) Consortium|Moore|United Kingdom

>Spike|hCoV-19/Denmark/DCGC-10749/2020|2020-11-02|EPI\_ISL\_669580|Original|hCoV-19^^Hovedstaden|Human|Department of Virus and Microbiological Special Diagnostics|Albertsen Lab|Michaelsen|Denmark

>Spike|hCoV-19/England/MILK-A7AF55/2020|2020-10-12|EPI\_ISL\_607585|Original|hCoV-19^^England|Human|Lighthouse Lab in Milton Keynes|Wellcome Sanger Institute for the COVID-19 Genomics UK (COG-UK) consortium|Davies|United Kingdom

>Spike|hCoV-19/Germany/HH-hpi-p2405/2020|2020-04-23|EPI\_ISL\_776478|Original|hCoV-19^^Hamburg|Human|University Medical Center Hamburg Eppendorf|Heinrich Pette Institute|Robitaille|Germany

>Spike|hCoV-19/England/QEUEH-B2D22A/2020|2020-11-04|EPI\_ISL\_659904|Original|hCoV-19^^England|Human|Lighthouse Lab in Glasgow|Wellcome Sanger Institute for the COVID-19 Genomics UK (COG-UK) Consortium|Davies|United Kingdom

>Spike|hCoV-19/England/CAMB-76524/2020|2020-03-29|EPI\_ISL\_438408|Original|hCoV-19^^England|Human|Department of Pathology|Wellcome Sanger Institute for the COVID-19 Genomics UK (COG-UK) consortium|Amato|United Kingdom

>Spike|hCoV-19/England/CAMC-BC072A/2020|2020-11-22|EPI\_ISL\_705006|Original|hCoV-19^^England|Human|Lighthouse Lab in Cambridge|Wellcome Sanger Institute for the COVID-19 Genomics UK (COG-UK) Consortium|Davies|United Kingdom

>Spike|hCoV-19/England/QEUEH-9D00D3/2020|2020-09-15|EPI\_ISL\_589967|Original|hCoV-19^^England|Human|Lighthouse Lab in Glasgow|Wellcome Sanger Institute for the COVID-19 Genomics UK (COG-UK) consortium|Davies|United Kingdom

>Spike|hCoV-19/Australia/NT39/2020|2020-00-00|EPI\_ISL\_430497|Original|hCoV-19^^Northern Territory|Human|Royal Darwin Hospital Pathology|Microbiological

Diagnostic Unit Public Health Laboratory and Victorian Infectious Diseases Reference Laboratory|Schultz|Australia  
>Spike|hCoV-19/USA/WA-S2916/2020|2020-07-24|EPI\_ISL\_771361|Original|hCoV-19^^Washington|Human|Washington State Department of Health|Seattle Flu Study|Lee|USA  
>Spike|hCoV-19/USA/NJ-QDX-2468/2020|2020-03-14|EPI\_ISL\_604788|Original|hCoV-19^^New Jersey|Human|Quest Diagnostics|Quest Diagnostics|Kagan|USA  
>Spike|hCoV-19/USA/WA-S155/2020|2020-03-16|EPI\_ISL\_430192|Original|hCoV-19^^Washington|Human|Washington State Department of Health|Seattle Flu Study|Bedford|USA  
>Spike|hCoV-19/Australia/VIC5346/2020|2020-07-21|EPI\_ISL\_520109|Original|hCoV-19^^Victoria|Human|Microbiological Diagnostic Unit - Public Health Laboratory (MDU-PHL)|MDU-PHL|Schultz|Australia  
>Spike|hCoV-19/England/QEUA-A2153D/2020|2020-10-01|EPI\_ISL\_587457|Original|hCoV-19^^England|Human|Lighthouse Lab in Glasgow|Wellcome Sanger Institute for the COVID-19 Genomics UK (COG-UK) consortium|Davies|United Kingdom  
>Spike|hCoV-19/England/QEUA-B134A9/2020|2020-11-02|EPI\_ISL\_641765|Original|hCoV-19^^England|Human|Lighthouse Lab in Glasgow|Wellcome Sanger Institute for the COVID-19 Genomics UK (COG-UK) Consortium|Davies|United Kingdom  
>Spike|hCoV-19/Wales/PHWC-15C2FF/2020|2020-04-06|EPI\_ISL\_472468|Original|hCoV-19^^Wales|Human|Wales Specialist Virology Centre Sequencing lab|COVID-19 Genomics UK (COG-UK) Consortium|Moore|United Kingdom  
>Spike|hCoV-19/Iceland/400/2020|2020-03-19|EPI\_ISL\_424424|Original|hCoV-19^^Reykjavik|Human|The National University Hospital of Iceland|deCODE genetics|J\u00f3nsson|Iceland  
>Spike|hCoV-19/Scotland/QEUA-9CF013/2020|2020-09-17|EPI\_ISL\_601979|Original|hCoV-19^^Scotland|Human|Lighthouse Lab in Glasgow|Wellcome Sanger Institute for the COVID-19 Genomics UK (COG-UK) consortium|Davies|United Kingdom  
>Spike|hCoV-19/USA/WA-S1343/2020|2020-05-13|EPI\_ISL\_495793|Original|hCoV-19^^Washington|Human|Washington State Department of Health|Seattle Flu Study|Lee|USA  
>Spike|hCoV-19/England/QEUA-BCE540/2020|2020-11-26|EPI\_ISL\_704451|Original|hCoV-19^^England|Human|Lighthouse Lab in Glasgow|Wellcome Sanger Institute for the COVID-19 Genomics UK (COG-UK) Consortium|Davies|United Kingdom  
>Spike|hCoV-19/Wales/ALDP-955856/2020|2020-06-11|EPI\_ISL\_554565|Original|hCoV-19^^Wales|Human|Lighthouse Lab in Alderley Park|Wellcome Sanger Institute for the COVID-19 Genomics UK (COG-UK) consortium|Davies|United Kingdom  
>Spike|hCoV-19/England/BRIS-1270C6/2020|2020-04-23|EPI\_ISL\_469804|Original|hCoV-19^^England|Human|PHE South West Regional Laboratory|Wellcome Sanger Institute for the COVID-19 Genomics UK (COG-UK) consortium|Davies|United Kingdom  
>Spike|hCoV-19/England/ALDP-9E9E91/2020|2020-09-24|EPI\_ISL\_580140|Original|hCoV-19^^England|Human|Lighthouse Lab in Alderley Park|Wellcome Sanger Institute for the COVID-19 Genomics UK (COG-UK) consortium|Davies|United Kingdom  
>Spike|hCoV-19/USA/WI-UW-2034/2020|2020-09-24|EPI\_ISL\_677440|Original|hCoV-19^^Wisconsin|Human|University of Wisconsin-Madison AIDS Vaccine Research Laboratories|University of Wisconsin-Madison AIDS Vaccine Research Laboratories|Baczenas|USA  
>Spike|hCoV-19/England/ALDP-A95604/2020|2020-10-20|EPI\_ISL\_624741|Original|hCoV-19^^England|Human|Lighthouse Lab in Alderley Park|Wellcome Sanger Institute for the COVID-19 Genomics UK (COG-UK) consortium|Davies|United Kingdom  
>Spike|hCoV-19/England/CAMC-B36570/2020|2020-11-03|EPI\_ISL\_645322|Original|hCoV-19^^England|Human|Lighthouse Lab in Cambridge|Wellcome Sanger Institute for the COVID-19 Genomics UK (COG-UK) Consortium|Davies|United Kingdom  
>Spike|hCoV-19/Saudi Arabia/KAUST-Madinah30/2020|2020-03-26|EPI\_ISL\_437485|Original|hCoV-19^^Madinah|Human|Pathogen Genomics Lab King Abdullah University of Science and Technology(KAUST)|Pathogen Genomics Lab King Abdullah University of Science and Technology(KAUST)|Mohamed Ghazzali|Saudi Arabia  
>Spike|hCoV-19/Portugal/PT0086/2020|2020-03-20|EPI\_ISL\_421489|Original|hCoV-19^^Portugal|Human|HSE Ilha Terceira - Angra do Heroismo|Instituto Nacional de Saude (INSA)|Borges|Portugal

>Spike|hCoV-19/England/MILK-B389FA/2020|2020-10-31|EPI\_ISL\_658856|Original|hCoV-19^^England|Human|Lighthouse Lab in Milton Keynes|Wellcome Sanger Institute for the COVID-19 Genomics UK (COG-UK) Consortium|Davies|United Kingdom

>Spike|hCoV-19/England/CAMB-81FEC/2020|2020-04-21|EPI\_ISL\_438606|Original|hCoV-19^^England|Human|Department of Pathology|COVID-19 Genomics UK (COG-UK) Consortium|Meredith|United Kingdom

>Spike|hCoV-19/England/MILK-B563DA/2020|2020-11-05|EPI\_ISL\_657382|Original|hCoV-19^^England|Human|Lighthouse Lab in Milton Keynes|Wellcome Sanger Institute for the COVID-19 Genomics UK (COG-UK) Consortium|Davies|United Kingdom

>Spike|hCoV-19/England/SHEF-10D3294/2020|2020-12-18|EPI\_ISL\_742054|Original|hCoV-19^^England|Human|Virology Department|COVID-19 Genomics UK (COG-UK) Consortium|de Silva|United Kingdom

>Spike|hCoV-19/Wales/PHWC-489302/2020|2020-11-01|EPI\_ISL\_639562|Original|hCoV-19^^Wales|Human|Wales Specialist Virology Centre Sequencing lab|COVID-19 Genomics UK (COG-UK) Consortium|Moore|United Kingdom

>Spike|hCoV-19/Japan/PG-0430/2020|2020-04-05|EPI\_ISL\_480097|Original|hCoV-19^^Kansai|Human|Department of Infectious Diseases|Pathogen Genomics Center|Sekizuka|Japan

>Spike|hCoV-19/Wales/PHWC-47DC06/2020|2020-10-10|EPI\_ISL\_595341|Original|hCoV-19^^Wales|Human|Originating lab|COVID-19 Genomics UK (COG-UK) Consortium|Moore|United Kingdom

>Spike|hCoV-19/England/QEUEH-9B853C/2020|2020-09-07|EPI\_ISL\_549746|Original|hCoV-19^^England|Human|Lighthouse Lab in Glasgow|Wellcome Sanger Institute for the COVID-19 Genomics UK (COG-UK) consortium|Davies|United Kingdom

>Spike|hCoV-19/Switzerland/BS-UHB-42202218/2020|2020-03-21|EPI\_ISL\_528325|Original|hCoV-19^^Basel-Stadt|Human|University Hospital Basel|University Hospital Basel|Roloff Handschin|Switzerland

>Spike|hCoV-19/Northern Ireland/NIRE-107448/2020|2020-03-30|EPI\_ISL\_585150|Original|hCoV-19^^Northern Ireland|Human|Regional Virus Laboratory|COVID-19 Genomics UK (COG-UK) Consortium|Fairley|United Kingdom

>Spike|hCoV-19/Russia/Kipen-RII6907V/2020|2020-04-19|EPI\_ISL\_450246|Vero P1|hCoV-19^^Leningrad|Human|WHO National Influenza Centre Russian Federation|WHO National Influenza Centre Russian Federation|Komissarov|Russia

>Spike|hCoV-19/England/MILK-B54AC8/2020|2020-11-05|EPI\_ISL\_657988|Original|hCoV-19^^England|Human|Lighthouse Lab in Milton Keynes|Wellcome Sanger Institute for the COVID-19 Genomics UK (COG-UK) Consortium|Davies|United Kingdom

>Spike|hCoV-19/USA/TX-HMH-MCoV-9832/2020|2020-07-06|EPI\_ISL\_780298|Original|hCoV-19^^Texas|Human|Houston Methodist Hospital|Houston Methodist Hospital|Long|USA

>Spike|hCoV-19/Switzerland/VD-ETHZ-270098/2020|2020-09-03|EPI\_ISL\_541484|Original|hCoV-19^^Vaud|Human|Viollier AG|Department of Biosystems Science and Engineering|Nadeau|Switzerland

>Spike|hCoV-19/England/CAMB-830AB/2020|2020-04-14|EPI\_ISL\_443402|Original|hCoV-19^^England|Human|Department of Pathology|Wellcome Sanger Institute for the COVID-19 Genomics UK (COG-UK) consortium|Amato|United Kingdom

>Spike|hCoV-19/England/MILK-B939C0/2020|2020-11-13|EPI\_ISL\_676144|Original|hCoV-19^^England|Human|Lighthouse Lab in Milton Keynes|Wellcome Sanger Institute for the COVID-19 Genomics UK (COG-UK) Consortium|Davies|United Kingdom

>Spike|hCoV-19/USA/TX-HMH0400/2020|2020-04-01|EPI\_ISL\_434987|Original|hCoV-19^^Texas|Human|Houston Methodist Hospital|Houston Methodist Hospital|Long|USA

>Spike|hCoV-19/Spain/AR-IBV-2428/2020|2020-03-26|EPI\_ISL\_468805|Original|hCoV-19^^Aragon|Human|Servicio de Microbiolog\u00eda|SeqCOVID-SPAIN consortium|IBV (CSIC) |Comas|Spain

>Spike|hCoV-19/Italy/APU-IZSPB-186PT/2020|2020-08-28|EPI\_ISL\_722864|Original|hCoV-19^^Apulia|Human|I.R.C.C.S. \S. De Bellis\ - Ente Ospedaliero|Istituto Zooprofilattico Sperimentale della Puglia e della Basilicata|Parisi|Italy

>Spike|hCoV-19/Scotland/QEUEH-A369C0/2020|2020-10-04|EPI\_ISL\_638931|Original|hCoV-19^^Scotland|Human|Wales Specialist Virology Centre Sequencing lab|COVID-19 Genomics UK (COG-UK) Consortium|Moore|United Kingdom

>Spike|hCoV-19/Australia/VIC16093/2020|2020-08-04|EPI\_ISL\_641051|Original|hCoV-19^^Victoria|Human|Microbiological Diagnostic Unit - Public Health Laboratory (MDU-PHL)|MDU-PHL|Schultz|Australia

>Spike|hCoV-19/Japan/PG-6776/2020|2020-08-00|EPI\_ISL\_687886|Original|hCoV-19^^Japan|Human|Pathogen Genomics Center|Pathogen Genomics Center|Sekizuka|Japan

>Spike|hCoV-19/Singapore/758/2020|2020-03-14|EPI\_ISL\_507003|Original|hCoV-19^^Singapore|Human|Department of Laboratory Medicine|Department of Laboratory Medicine|Chen|Singapore

>Spike|hCoV-19/Denmark/DCGC-16989/2020|2020-12-14|EPI\_ISL\_750693|Original|hCoV-19^^Syddanmark|Human|Department of Virus and Microbiological Special Diagnostics|Albertsen Lab|Michaelsen|Denmark

>Spike|hCoV-19/South Africa/R13443-20/2020|2020-07-10|EPI\_ISL\_622931|Original|hCoV-19^^Western Cape|Human|National Institute for Communicable Diseases of the National Health Laboratory Service|National Institute for Communicable Diseases of the National Health Laboratory Service|Allam|South Africa

>Spike|hCoV-19/Switzerland/BL-ETHZ-100311/2020|2020-03-19|EPI\_ISL\_574892|Original|hCoV-19^^Basel-Landschaft|Human|Viollier AG|Department of Biosystems Science and Engineering|Nadeau|Switzerland

>Spike|hCoV-19/Australia/VIC11061/2020|2020-09-07|EPI\_ISL\_563228|Original|hCoV-19^^Victoria|Human|Microbiological Diagnostic Unit - Public Health Laboratory (MDU-PHL)|MDU-PHL|Schultz|Australia

>Spike|hCoV-19/England/ALDP-953005/2020|2020-06-11|EPI\_ISL\_554607|Original|hCoV-19^^England|Human|Lighthouse Lab in Alderley Park|Wellcome Sanger Institute for the COVID-19 Genomics UK (COG-UK) consortium|Davies|United Kingdom

>Spike|hCoV-19/England/MILK-B86966/2020|2020-11-14|EPI\_ISL\_674097|Original|hCoV-19^^England|Human|Lighthouse Lab in Milton Keynes|Wellcome Sanger Institute for the COVID-19 Genomics UK (COG-UK) Consortium|Davies|United Kingdom

>Spike|hCoV-19/USA/WI-UW-1258/2020|2020-08-23|EPI\_ISL\_536631|Original|hCoV-19^^Wisconsin|Human|University of Wisconsin-Madison AIDS Vaccine Research Laboratories|University of Wisconsin-Madison AIDS Vaccine Research Laboratories|Baczenas|USA

>Spike|hCoV-19/England/CAMB-7C8F8/2020|2020-04-06|EPI\_ISL\_442184|Original|hCoV-19^^England|Human|Department of Pathology|Wellcome Sanger Institute for the COVID-19 Genomics UK (COG-UK) consortium|Amato|United Kingdom

>Spike|hCoV-19/USA/NY-NYUMC261/2020|2020-04-05|EPI\_ISL\_428775|Original|hCoV-19^^New York|Human|NYU Langone Health|Departments of Pathology and Medicine|Maurano|USA

>Spike|hCoV-19/England/CAMB-83D1D/2020|2020-04-22|EPI\_ISL\_438684|Original|hCoV-19^^England|Human|Department of Pathology|COVID-19 Genomics UK (COG-UK) Consortium|Meredith|United Kingdom

>Spike|hCoV-19/Gambia/GC19-1556/2020|2020-05-18|EPI\_ISL\_561024|Original|hCoV-19^^Kombo|Human|MRCG at LSHTM Genomics lab|MRCG at LSHTM Genomics lab|Sesay|Gambia

>Spike|hCoV-19/England/ALDP-C39E08/2020|2020-12-08|EPI\_ISL\_731110|Original|hCoV-19^^England|Human|Lighthouse Lab in Alderley Park|Wellcome Sanger Institute for the COVID-19 Genomics UK (COG-UK) Consortium|Davies|United Kingdom

>Spike|hCoV-19/England/CAMB-7B9D8/2020|2020-04-03|EPI\_ISL\_441631|Original|hCoV-19^^England|Human|Department of Pathology|Wellcome Sanger Institute for the COVID-19 Genomics UK (COG-UK) consortium|Amato|United Kingdom

>Spike|hCoV-19/Denmark/DCGC-15358/2020|2020-11-23|EPI\_ISL\_713783|Original|hCoV-19^^Hovedstaden|Human|Department of Virus and Microbiological Special Diagnostics|Albertsen Lab|Michaelsen|Denmark

>Spike|hCoV-19/Singapore/1086/2020|2020-08-05|EPI\_ISL\_596476|Original|hCoV-19^^Singapore|Human|National Public Health Laboratory|National Public Health Laboratory|Mak|Singapore

>Spike|hCoV-19/England/MILK-9D3C72/2020|2020-09-17|EPI\_ISL\_601649|Original|hCoV-19^^England|Human|Lighthouse Lab in Milton Keynes|Wellcome Sanger Institute for the COVID-19 Genomics UK (COG-UK) consortium|Davies|United Kingdom

>Spike|hCoV-19/Bahrain/340859906\_S10/2020|2020-10-14|EPI\_ISL\_632277|Original|hCoV-19^^Bahrain|Human|Communicable Disease Laboratory|Communicable Disease Laboratory|Altaif|Bahrain

>Spike|hCoV-19/Scotland/EDB4952/2020|2020-05-14|EPI\_ISL\_473804|Original|hCoV-19^^Scotland|Human|Virology Department|COVID-19 Genomics UK (COG-UK) Consortium|Williams|United Kingdom

>Spike|hCoV-19/England/ALDP-4A822E/2020|2020-06-11|EPI\_ISL\_559635|Original|hCoV-19^^England|Human|Lighthouse Lab in Alderley Park|Wellcome Sanger Institute for the COVID-19 Genomics UK (COG-UK) consortium|Davies|United Kingdom

>Spike|hCoV-19/Wales/PHWC-498FDF/2020|2020-12-01|EPI\_ISL\_727241|Original|hCoV-19^^Wales|Human|Originating lab|COVID-19 Genomics UK (COG-UK) Consortium|Moore|United Kingdom

>Spike|hCoV-19/England/MILK-B38426/2020|2020-11-01|EPI\_ISL\_658766|Original|hCoV-19^^England|Human|Lighthouse Lab in Milton Keynes|Wellcome Sanger Institute for the COVID-19 Genomics UK (COG-UK) Consortium|Davies|United Kingdom

>Spike|hCoV-19/USA/TX-HMH-2597/2020|2020-06-04|EPI\_ISL\_545417|Original|hCoV-19^^Texas|Human|Houston Methodist Hospital|Houston Methodist Hospital|Long|USA

>Spike|hCoV-19/England/EXET-139DF7/2020|2020-00-00|EPI\_ISL\_679345|Original|hCoV-19^^England|Human|University of Exeter|COVID-19 Genomics UK (COG-UK) Consortium|Temperton|United Kingdom

>Spike|hCoV-19/England/OXON-ADABC/2020|2020-00-00|EPI\_ISL\_448612|Original|hCoV-19^^England|Human|Oxford Viromics|COVID-19 Genomics UK (COG-UK) Consortium|Golubchik|United Kingdom

>Spike|hCoV-19/England/QEUEH-B12EF7/2020|2020-11-02|EPI\_ISL\_642759|Original|hCoV-19^^England|Human|Lighthouse Lab in Glasgow|Wellcome Sanger Institute for the COVID-19 Genomics UK (COG-UK) Consortium|Davies|United Kingdom

>Spike|hCoV-19/England/CAMC-B549BC/2020|2020-11-09|EPI\_ISL\_658263|Original|hCoV-19^^England|Human|Lighthouse Lab in Cambridge|Wellcome Sanger Institute for the COVID-19 Genomics UK (COG-UK) Consortium|Davies|United Kingdom

>Spike|hCoV-19/Shanghai/SH0076/2020|2020-02-01|EPI\_ISL\_416379|Original|hCoV-19^^Shanghai|Human|Shanghai Public Health Clinical Center|National Research Center for Translational Medicine (Shanghai)|Zhang|China

>Spike|hCoV-19/Canada/MB-NML-1006/2020|2020-07-18|EPI\_ISL\_582373|Original|hCoV-19^^Manitoba|Human|Cadham Provincial Laboratory|National Microbiology Laboratory (NML)|Majer|Canada

>Spike|hCoV-19/Denmark/DCGC-1644/2020|2020-04-06|EPI\_ISL\_619895|Original|hCoV-19^^Hovedstaden|Human|Department of Virus and Microbiological Special Diagnostics|Albertsen lab|Michaelsen|Denmark

>Spike|hCoV-19/England/QEUEH-C5C3A6/2020|2020-12-14|EPI\_ISL\_769468|Original|hCoV-19^^England|Human|Lighthouse Lab in Glasgow|Wellcome Sanger Institute for the COVID-19 Genomics UK (COG-UK) Consortium|Davies|United Kingdom

>Spike|hCoV-19/Australia/VIC7974/2020|2020-08-13|EPI\_ISL\_564782|Original|hCoV-19^^Victoria|Human|Microbiological Diagnostic Unit - Public Health Laboratory (MDU-PHL)|MDU-PHL|Schultz|Australia

>Spike|hCoV-19/England/ALDP-94D99A/2020|2020-06-20|EPI\_ISL\_555250|Original|hCoV-19^^England|Human|Lighthouse Lab in Alderley Park|Wellcome Sanger Institute for the COVID-19 Genomics UK (COG-UK) consortium|Davies|United Kingdom

>Spike|hCoV-19/England/ALDP-C04AF3/2020|2020-12-04|EPI\_ISL\_720756|Original|hCoV-19^^England|Human|Lighthouse Lab in Alderley Park|Wellcome Sanger Institute for the COVID-19 Genomics UK (COG-UK) Consortium|Davies|United Kingdom

>Spike|hCoV-19/Finland/19MR1cE8/2020|2020-11-19|EPI\_ISL\_757339|Original|hCoV-19^^Uusimaa|Human|Department of Virology and Immunology|Department of Virology|Smura|Finland

>Spike|hCoV-19/England/NOTT-115CC7/2020|2020-10-17|EPI\_ISL\_595290|Original|hCoV-19^^England|Human|Queens Medical Centre|COVID-19 Genomics UK (COG-UK) Consortium|Loose|United Kingdom

>Spike|hCoV-19/England/LIVE-DBB025/2020|2020-11-12|EPI\_ISL\_664368|Original|hCoV-19^^England|Human|Liverpool Clinical Laboratories|COVID-19 Genomics UK (COG-UK) Consortium|Haldenby|United Kingdom

>Spike|hCoV-19/USA/OR-OHSU-0652/2020|2020-06-18|EPI\_ISL\_525871|Original|hCoV-19^^Oregon|Human|OHSU Lab Services Molecular Microbiology Lab|Ginkgo Bioworks Clinical Laboratory|O'Roak|USA



>Spike|hCoV-19/Sweden/20-53855/2020|2020-12-09|EPI\_ISL\_789037|Original|hCoV-19^^Vastra Gotalandsregionen|Human|Klinisk mikrobiologi|The Public Health Agency of Sweden|Svartstr\u00f6m|Sweden

>Spike|hCoV-19/Singapore/1061/2020|2020-08-17|EPI\_ISL\_583896|original|hCoV-19^^Singapore|Human|Singapore General Hospital|Department of Microbiology|Abdul Rahman|Singapore

>Spike|hCoV-19/Spain/CM-IBV-003788/2020|2020-04-02|EPI\_ISL\_474816|Original|hCoV-19^^Castilla La Mancha|Human|Complejo Hospitalario Universitario de Albacete|SeqCOVID-SPAIN consortium/IBV(CSIC)|Comas|Spain

>Spike|hCoV-19/England/MILK-A6ACCA/2020|2020-10-08|EPI\_ISL\_608784|Original|hCoV-19^^England|Human|Lighthouse Lab in Milton Keynes|Wellcome Sanger Institute for the COVID-19 Genomics UK (COG-UK) consortium|Davies|United Kingdom

>Spike|hCoV-19/Slovenia/13456/2020|2020-03-26|EPI\_ISL\_635265|Original|hCoV-19^^Slovenia|Human|Institute of Microbiology and Immunology|Institute of Microbiology and Immunology|Zakotnik|Slovenia

>Spike|hCoV-19/USA/WA-UW-6204/2020|2020-04-01|EPI\_ISL\_570087|Original|hCoV-19^^Washington|Human|UW Virology Lab|UW Virology Lab|Roychoudhury|USA

>Spike|hCoV-19/USA/WA-OHSU-0035/2020|2020-04-17|EPI\_ISL\_468083|Original|hCoV-19^^Washington|Human|OHSU Lab Services Molecular Microbiology Lab|Oregon SARS-CoV-2 Genome Sequencing Center|O'Roak|USA

>Spike|hCoV-19/United Arab Emirates/0479/2020|2020-05-18|EPI\_ISL\_698648|Original|hCoV-19^^Abu Dhabi|Human|Group 42 (G42) Healthcare|G42 Healthcare|Ogrodzki|United Arab Emirates

>Spike|hCoV-19/USA/NY-NYCPHL-000623/2020|2020-03-12|EPI\_ISL\_632079|Original|hCoV-19^^New York|Human|NYU Langone Health|New York City Public Health Laboratory|Wang|USA

>Spike|hCoV-19/England/MILK-ACDD95/2020|2020-10-21|EPI\_ISL\_630195|Original|hCoV-19^^England|Human|Lighthouse Lab in Milton Keynes|Wellcome Sanger Institute for the COVID-19 Genomics UK (COG-UK) consortium|Davies|United Kingdom

>Spike|hCoV-19/Scotland/GCVR-170F85/2020|2020-03-27|EPI\_ISL\_459551|Original|hCoV-19^^Scotland|Human|NHSGGC West of Scotland Specialist Virology Centre / MRC-University of Glasgow Centre for Virus Research|Wellcome Sanger Institute for the COVID-19 Genomics UK (COG-UK) consortium|Davies|United Kingdom

>Spike|hCoV-19/USA/CA-CZB-15945/2020|2020-11-28|EPI\_ISL\_739381|Original|hCoV-19^^California|Human|Santa Clara County Public Health Laboratory|Chan-Zuckerberg Biohub|Kamm|USA

>Spike|hCoV-19/Portugal/PT1899/2020|2020-11-23|EPI\_ISL\_732113|Original|hCoV-19^^Portugal|Human|Instituto Nacional de Saude (INSA)|Instituto Nacional de Saude (INSA)|Borges|Portugal

>Spike|hCoV-19/USA/TX-HMH-6358/2020|2020-07-05|EPI\_ISL\_547415|Original|hCoV-19^^Texas|Human|Houston Methodist Hospital|Houston Methodist Hospital|Long|USA

>Spike|hCoV-19/England/CAMC-B07217/2020|2020-10-29|EPI\_ISL\_643904|Original|hCoV-19^^England|Human|Lighthouse Lab in Cambridge|Wellcome Sanger Institute for the COVID-19 Genomics UK (COG-UK) Consortium|Davies|United Kingdom

>Spike|hCoV-19/Spain/CT-IrsiCaixa-spl42/2020|2020-03-24|EPI\_ISL\_462448|Original|hCoV-19^^Catalunya|Human|Fundaci\u00f3 Lluita contra la SIDA (FLSida)/Hospital Universitari Germans Trias i Pujol|IrsiCaixa AIDS Research Lab|Noguera-Julian|Spain

>Spike|hCoV-19/USA/NY-Wadsworth-214818-01/2020|2020-09-10|EPI\_ISL\_677671|Original|hCoV-19^^New York|Human|Wadsworth Center|Wadsworth Center|Lasek-Nesselquist|USA

>Spike|hCoV-19/Peru/ANC-INS-083/2020|2020-06-30|EPI\_ISL\_536482|Original|hCoV-19^^Ancash|Human|Instituto Nacional de Salud|Laboratorio de Infecciones Respiratorias Agudas|Lopez|Peru

>Spike|hCoV-19/England/BRIS-126759/2020|2020-04-09|EPI\_ISL\_459054|Original|hCoV-19^^England|Human|PHE South West Regional Laboratory|Wellcome Sanger Institute for the COVID-19 Genomics UK (COG-UK) consortium|Davies|United Kingdom

>Spike|hCoV-19/Switzerland/BE-ETHZ-380224/2020|2020-11-23|EPI\_ISL\_721757|Original|hCoV-19^^Bern|Human|Viollier AG|Department of Biosystems Science and Engineering|Nadeau|Switzerland

>Spike|hCoV-19/Wales/PHWC-169778/2020|2020-07-24|EPI\_ISL\_512509|Original|hCoV-19^^Wales|Human|Wales Specialist Virology Centre Sequencing lab|COVID-19 Genomics UK (COG-UK) Consortium|Moore|United Kingdom

>Spike|hCoV-19/Japan/PG-0066/2020|2020-02-15|EPI\_ISL\_479824|Original|hCoV-19^^Kyusyu|Human|Kumamoto Prefectural Institute of Public Health and Environmental Science|Pathogen Genomics Center|Sekizuka|Japan

>Spike|hCoV-19/England/ALDP-9FD8D8/2020|2020-10-02|EPI\_ISL\_587735|Original|hCoV-19^^England|Human|Lighthouse Lab in Alderley Park|Wellcome Sanger Institute for the COVID-19 Genomics UK (COG-UK) consortium|Davies|United Kingdom

>Spike|hCoV-19/Denmark/DCGC-11843/2020|2020-10-26|EPI\_ISL\_671169|Original|hCoV-19^^Sjaelland|Human|Department of Virus and Microbiological Special Diagnostics|Albertsen Lab|Michaelsen|Denmark

>Spike|hCoV-19/England/ALDP-9BC95A/2020|2020-09-09|EPI\_ISL\_568209|Original|hCoV-19^^England|Human|Lighthouse Lab in Alderley Park|Wellcome Sanger Institute for the COVID-19 Genomics UK (COG-UK) consortium|Davies|United Kingdom

>Spike|hCoV-19/Switzerland/BS-UHB-42199777/2020|2020-03-20|EPI\_ISL\_528249|Original|hCoV-19^^Basel-Stadt|Human|University Hospital Basel|University Hospital Basel|Roloff Handschin|Switzerland

>Spike|hCoV-19/Japan/PG-4568/2020|2020-07-00|EPI\_ISL\_689705|Original|hCoV-19^^Japan|Human|Pathogen Genomics Center|Pathogen Genomics Center|Sekizuka|Japan

>Spike|hCoV-19/England/ALDP-B74C53/2020|2020-11-12|EPI\_ISL\_662228|Original|hCoV-19^^England|Human|Lighthouse Lab in Alderley Park|Wellcome Sanger Institute for the COVID-19 Genomics UK (COG-UK) Consortium|Davies|United Kingdom

>Spike|hCoV-19/England/CAMC-B9A5D4/2020|2020-11-15|EPI\_ISL\_673580|Original|hCoV-19^^England|Human|Lighthouse Lab in Cambridge|Wellcome Sanger Institute for the COVID-19 Genomics UK (COG-UK) Consortium|Davies|United Kingdom

>Spike|hCoV-19/England/QEUH-9CE5CA/2020|2020-09-17|EPI\_ISL\_590160|Original|hCoV-19^^England|Human|Lighthouse Lab in Glasgow|Wellcome Sanger Institute for the COVID-19 Genomics UK (COG-UK) consortium|Davies|United Kingdom

>Spike|hCoV-19/USA/NMDOH-2020305746/2020|2020-08-21|EPI\_ISL\_542046|Original|hCoV-19^^New Mexico|Human|New Mexico Department of Health Scientific Laboratory|New Mexico Department of Health Scientific Laboratory|Johnson|USA

>Spike|hCoV-19/Japan/PG-0325/2020|2020-03-23|EPI\_ISL\_480000|Original|hCoV-19^^HokurikuShinsyu|Human|Nagano Environmental Conservation Research Institute|Pathogen Genomics Center|Sekizuka|Japan

>Spike|hCoV-19/England/NORW-EAEB7/2020|2020-04-30|EPI\_ISL\_457390|Original|hCoV-19^^England|Human|Quadram Institute Bioscience|COVID-19 Genomics UK (COG-UK) Consortium|Alikhan|United Kingdom

>Spike|hCoV-19/South Africa/KRISP-K002561/2020|2020-07-30|EPI\_ISL\_535429|Original|hCoV-19^^KwaZulu-Natal|Human|NHLS-IALCH|KRISP|de Oliveira|South Africa

>Spike|hCoV-19/Japan/PG-8125/2020|2020-08-00|EPI\_ISL\_687224|Original|hCoV-19^^Japan|Human|Pathogen Genomics Center|Pathogen Genomics Center|Sekizuka|Japan

>Spike|hCoV-19/Wales/PHWC-4A3EE3/2020|2020-12-12|EPI\_ISL\_764641|Original|hCoV-19^^Wales|Human|Wales Specialist Virology Centre Sequencing lab|COVID-19 Genomics UK (COG-UK) Consortium|Moore|United Kingdom

>Spike|hCoV-19/South Africa/KRISP-K002451/2020|2020-07-18|EPI\_ISL\_518039|Original|hCoV-19^^KwaZulu-Natal|Human|NHLS-IALCH|KRISP|de Oliveira|South Africa

>Spike|hCoV-19/DRC/4430/2020|2020-04-29|EPI\_ISL\_496509|Original|hCoV-19^^Kinshasa|Human|Viral Respiratory Lab|Pathogen Sequencing Lab|Lokilo|Democratic Republic of the Congo

>Spike|hCoV-19/United Arab Emirates/0272/2020|2020-05-18|EPI\_ISL\_698453|Original|hCoV-19^^Abu Dhabi|Human|Group 42 (G42) Healthcare|G42 Healthcare|Ogrodzki|United Arab Emirates

>Spike|hCoV-19/Wales/PHWC-490FD7/2020|2020-11-16|EPI\_ISL\_706597|Original|hCoV-19^^Wales|Human|Originating lab|COVID-19 Genomics UK (COG-UK) Consortium|Moore|United Kingdom

>Spike|hCoV-19/England/CAMB-7ABF1/2020|2020-04-09|EPI\_ISL\_433851|Original|hCoV-19^^England|Human|Department of Pathology|COVID-19 Genomics UK (COG-UK) Consortium|Meredit|United Kingdom

>Spike|hCoV-19/USA/CA-IGI-0238/2020|2020-07-10|EPI\_ISL\_569944|Original|hCoV-19^^California|Human|Innovative Genomics Institute|Innovative Genomics Institute|Wyman|USA

>Spike|hCoV-19/England/QEUEH-C3240D/2020|2020-12-11|EPI\_ISL\_782506|Original|hCoV-19^^England|Human|Lighthouse Lab in Glasgow|Wellcome Sanger Institute for the COVID-19 Genomics UK (COG-UK) Consortium|Davies|United Kingdom

>Spike|hCoV-19/England/ALDP-B245EE/2020|2020-11-04|EPI\_ISL\_647104|Original|hCoV-19^^England|Human|Lighthouse Lab in Alderley Park|Wellcome Sanger Institute for the COVID-19 Genomics UK (COG-UK) Consortium|Davies|United Kingdom

>Spike|hCoV-19/England/ALDP-A93BE9/2020|2020-10-19|EPI\_ISL\_611148|Original|hCoV-19^^England|Human|Lighthouse Lab in Alderley Park|Wellcome Sanger Institute for the COVID-19 Genomics UK (COG-UK) consortium|Davies|United Kingdom

>Spike|hCoV-19/England/LIVE-990A2/2020|2020-04-07|EPI\_ISL\_439690|Original|hCoV-19^^England|Human|Liverpool Clinical Laboratories|COVID-19 Genomics UK (COG-UK) Consortium|Haldenby|United Kingdom

>Spike|hCoV-19/USA/MI-MDHHS-SC21479/2020|2020-07-16|EPI\_ISL\_516206|Original|hCoV-19^^Michigan|Human|Michigan Department of Health and Human Services|Michigan Department of Health and Human Services|Blankenship|USA

>Spike|hCoV-19/England/BRIS-12292A/2020|2020-04-02|EPI\_ISL\_440625|Original|hCoV-19^^England|Human|PHE South West Regional Laboratory|Wellcome Sanger Institute for the COVID-19 Genomics UK (COG-UK) consortium|Amato|United Kingdom

>Spike|hCoV-19/USA/UT-UPHL-2012592318/2020|2020-08-17|EPI\_ISL\_745487|Original|hCoV-19^^Utah|Human|Ginkgo Bioworks Clinical Laboratory|Utah Public Health Laboratory|Young|USA

>Spike|hCoV-19/England/ALDP-CBF22C/2020|2020-12-20|EPI\_ISL\_778166|Original|hCoV-19^^England|Human|Lighthouse Lab in Alderley Park|Wellcome Sanger Institute for the COVID-19 Genomics UK (COG-UK) Consortium|Davies|United Kingdom

>Spike|hCoV-19/Italy/CAM-IZSM-119242/2020|2020-08-26|EPI\_ISL\_738126|Original|hCoV-19^^Campania|Human|IZSM-U.O.C. Virologia|Istituto Zooprofilattico Sperimentale del Mezzogiorno|Viscardi|Italy

>Spike|hCoV-19/England/CAMC-9451B8/2020|2020-07-15|EPI\_ISL\_556743|Original|hCoV-19^^England|Human|Lighthouse Lab in Cambridge|Wellcome Sanger Institute for the COVID-19 Genomics UK (COG-UK) consortium|Davies|United Kingdom

>Spike|hCoV-19/Scotland/QEUEH-9AE5B1/2020|2020-09-01|EPI\_ISL\_577360|Original|hCoV-19^^Scotland|Human|University of Exeter|COVID-19 Genomics UK (COG-UK) Consortium|Temperton|United Kingdom

>Spike|hCoV-19/Canada/ON-PHL-20-03741/2020|2020-11-00|EPI\_ISL\_775209|Original|hCoV-19^^Ontario|Human|Public Health Ontario Laboratory|Public Health Ontario Laboratory|Guthrie|Canada

>Spike|hCoV-19/USA/UT-UPHL-201131032/2020|2020-10-06|EPI\_ISL\_634928|Original|hCoV-19^^Utah|Human|Utah Public Health Laboratory|Utah Public Health Laboratory|Young|USA

>Spike|hCoV-19/Northern Ireland/NIRE-FB897/2020|2020-04-07|EPI\_ISL\_470016|Original|hCoV-19^^Northern Ireland|Human|Regional Virus Laboratory|Wellcome Sanger Institute for the COVID-19 Genomics UK (COG-UK) consortium|Davies|United Kingdom

>Spike|hCoV-19/Wales/PHWC-33909/2020|2020-04-16|EPI\_ISL\_446765|Original|hCoV-19^^Wales|Human|Wales Specialist Virology Centre|Public Health Wales Microbiology Cardiff|Moore|United Kingdom

>Spike|hCoV-19/England/QEUEH-9FFD40/2020|2020-10-02|EPI\_ISL\_600358|Original|hCoV-19^^England|Human|Lighthouse Lab in Glasgow|Wellcome Sanger Institute for the COVID-19 Genomics UK (COG-UK) consortium|Davies|United Kingdom

>Spike|hCoV-19/Russia/STA-RII-MH2786S/2020|2020-09-19|EPI\_ISL\_602451|Original|hCoV-19^^Stavropol|Human|HELIX LLC|WHO National Influenza Centre Russian Federation|Komissarov|Russia

>Spike|hCoV-19/England/SHEF-C85AB/2020|2020-05-01|EPI\_ISL\_457628|Original|hCoV-19^^England|Human|Virology Department|COVID-19 Genomics UK (COG-UK) Consortium|de Silva|United Kingdom

>Spike|hCoV-19/Scotland/QEUH-AD1684/2020|2020-10-26|EPI\_ISL\_649683|Original|hCoV-19^^Scotland|Human|Lighthouse Lab in Glasgow|Wellcome Sanger Institute for the COVID-19 Genomics UK (COG-UK) Consortium|Davies|United Kingdom

>Spike|hCoV-19/Denmark/DCGC-11127/2020|2020-11-02|EPI\_ISL\_669816|Original|hCoV-19^^Nordjylland|Human|Department of Virus and Microbiological Special Diagnostics|Albertsen Lab|Michaelsen|Denmark

>Spike|hCoV-19/Australia/VIC10068/2020|2020-08-20|EPI\_ISL\_562784|Original|hCoV-19^^Victoria|Human|Microbiological Diagnostic Unit - Public Health Laboratory (MDU-PHL)|MDU-PHL|Schultz|Australia

>Spike|hCoV-19/Luxembourg/LNS5091746/2020|2020-11-22|EPI\_ISL\_744183|Original|hCoV-19^^Luxembourg|Human|Laboratoire national de sant\u00e9|Laboratoire national de sant\u00e9|Wienecke-Baldacchino|Luxembourg

>Spike|hCoV-19/England/LOND-D3868/2020|2020-04-02|EPI\_ISL\_440997|Original|hCoV-19^^England|Human|University College London|COVID-19 Genomics UK (COG-UK) Consortium|Roy|United Kingdom

>Spike|hCoV-19/Wales/PHWC-2914A/2020|2020-04-03|EPI\_ISL\_445486|Original|hCoV-19^^Wales|Human|Wales Specialist Virology Centre|Public Health Wales Microbiology Cardiff|Moore|United Kingdom

>Spike|hCoV-19/England/QEUH-CC22DB/2020|2020-12-21|EPI\_ISL\_778088|Original|hCoV-19^^England|Human|Lighthouse Lab in Glasgow|Wellcome Sanger Institute for the COVID-19 Genomics UK (COG-UK) Consortium|Davies|United Kingdom

>Spike|hCoV-19/England/ALDP-943F92/2020|2020-06-07|EPI\_ISL\_554741|Original|hCoV-19^^England|Human|Lighthouse Lab in Alderley Park|Wellcome Sanger Institute for the COVID-19 Genomics UK (COG-UK) consortium|Davies|United Kingdom

>Spike|hCoV-19/Canada/BC-BCCDC-7232/2020|2020-11-00|EPI\_ISL\_740624|Original|hCoV-19^^British Columbia|Human|BCCDC Public Health Laboratory|BCCDC Public Health Laboratory|Prystajecky|Canada

>Spike|hCoV-19/USA/UT-01229/2020|2020-04-08|EPI\_ISL\_436912|Original|hCoV-19^^Utah|Human|Utah Public Health Laboratory|Utah Public Health Laboratory|Young|USA

>Spike|hCoV-19/England/NORT-281418/2020|2020-03-14|EPI\_ISL\_488826|Original|hCoV-19^^England|Human|NU-OMICS DNA Sequencing research facility|Wellcome Sanger Institute for the COVID-19 Genomics UK (COG-UK) consortium|Davies|United Kingdom

>Spike|hCoV-19/England/ALDP-A95D96/2020|2020-10-20|EPI\_ISL\_624685|Original|hCoV-19^^England|Human|Lighthouse Lab in Alderley Park|Wellcome Sanger Institute for the COVID-19 Genomics UK (COG-UK) consortium|Davies|United Kingdom

>Spike|hCoV-19/Japan/PG-3925/2020|2020-07-00|EPI\_ISL\_692176|Original|hCoV-19^^Japan|Human|Pathogen Genomics Center|Pathogen Genomics Center|Sekizuka|Japan

>Spike|hCoV-19/Switzerland/ZH-ETHZ-220038/2020|2020-07-29|EPI\_ISL\_512019|Original|hCoV-19^^Zurich|Human|Viollier AG|Department of Biosystems Science and Engineering|Nadeau|Switzerland

>Spike|hCoV-19/Australia/NSW702/2020|2020-07-25|EPI\_ISL\_513345|Original|hCoV-19^^New South Wales|Human|Pathology West - NSW Health Pathology|NSW Health Pathology - Institute of Clinical Pathology and Medical Research; Westmead Hospital; University of Sydney|Gall|Australia

>Spike|hCoV-19/Wales/PHWC-49F7EF/2020|2020-12-08|EPI\_ISL\_743271|Original|hCoV-19^^Wales|Human|Wales Specialist Virology Centre Sequencing lab|COVID-19 Genomics UK (COG-UK) Consortium|Moore|United Kingdom

>Spike|hCoV-19/Denmark/DCGC-12401/2020|2020-11-16|EPI\_ISL\_682582|Original|hCoV-19^^Syddanmark|Human|Department of Virus and Microbiological Special Diagnostics|Albertsen Lab|Michaelsen|Denmark

>Spike|hCoV-19/USA/UT-UPHL-2012519731/2020|2020-07-27|EPI\_ISL\_745689|Original|hCoV-19^^Utah|Human|Ginkgo Bioworks Clinical Laboratory|Utah Public Health Laboratory|Young|USA

>Spike|hCoV-19/England/NORT-1B6C031/2020|2020-10-02|EPI\_ISL\_611643|Original|hCoV-19^^England|Human|Northumbria University / South Tees Hospitals NHS Foundation Trust / North Cumbria Integrated Care NHS Foundation Trust / North Tees and Hartlepool NHS Foundation Trust / Newcastle Hospitals NHS Foundation Trust|COVID-19 Genomics UK (COG-UK) Consortium|Bashton|United Kingdom

>Spike|hCoV-19/Switzerland/VS-ETHZ-410052/2020|2020-12-17|EPI\_ISL\_737841|Original|hCoV-19^^Valais|Human|Viollier AG|Department of Biosystems Science and Engineering|Nadeau|Switzerland

>Spike|hCoV-19/Germany/HH-hpi-p1429/2020|2020-03-09|EPI\_ISL\_775950|Original|hCoV-19^^Hamburg|Human|University Medical Center Hamburg Eppendorf|Heinrich Pette Institute|Robitaille|Germany

>Spike|hCoV-19/Wales/PHWC-48B86B/2020|2020-10-30|EPI\_ISL\_666291|Original|hCoV-19^^Wales|Human|Wales Specialist Virology Centre Sequencing lab|COVID-19 Genomics UK (COG-UK) Consortium|Moore|United Kingdom

>Spike|hCoV-19/USA/LA-EVTL1423/2020|2020-12-14|EPI\_ISL\_779089|Original|hCoV-19^^Louisiana|Human|LSUHS Emerging Viral Threat Laboratory|Microbial Genome Sequencing Center|Kamil|USA

>Spike|hCoV-19/Belgium/ULG-10498/2020|2020-09-23|EPI\_ISL\_581660|Original|hCoV-19^^Li\u00e8ge|Human|Department of Clinical Microbiology|GIGA Medical Genomics|Durkin|Belgium

>Spike|hCoV-19/England/CAMB-1BB7D1/2020|2020-11-19|EPI\_ISL\_665021|Original|hCoV-19^^England|Human|Department of Pathology|COVID-19 Genomics UK (COG-UK) Consortium|Goodfellow|United Kingdom

>Spike|hCoV-19/USA/FL-BPHL-0813/2020|2020-05-22|EPI\_ISL\_514159|Original|hCoV-19^^Florida|Human|Florida Bureau of Public Health Laboratories|Florida Bureau of Public Health Laboratories|Blanton|USA

>Spike|hCoV-19/England/ALDP-B484E7/2020|2020-11-07|EPI\_ISL\_649268|Original|hCoV-19^^England|Human|Lighthouse Lab in Alderley Park|Wellcome Sanger Institute for the COVID-19 Genomics UK (COG-UK) Consortium|Davies|United Kingdom

>Spike|hCoV-19/Denmark/DCGC-16558/2020|2020-11-16|EPI\_ISL\_714836|Original|hCoV-19^^Hovedstaden|Human|Department of Virus and Microbiological Special Diagnostics|Albertsen Lab|Michaelsen|Denmark

>Spike|hCoV-19/Denmark/DCGC-14292/2020|2020-11-30|EPI\_ISL\_711291|Original|hCoV-19^^Syddanmark|Human|Department of Virus and Microbiological Special Diagnostics|Albertsen Lab|Michaelsen|Denmark

>Spike|hCoV-19/Australia/VIC15617/2020|2020-07-29|EPI\_ISL\_593378|Original|hCoV-19^^Victoria|Human|Microbiological Diagnostic Unit - Public Health Laboratory (MDU-PHL)|MDU-PHL|Schultz|Australia

>Spike|hCoV-19/England/ALDP-9E88D0/2020|2020-09-24|EPI\_ISL\_637579|Original|hCoV-19^^England|Human|Department of Pathology|COVID-19 Genomics UK (COG-UK) Consortium|Goodfellow|United Kingdom

>Spike|hCoV-19/USA/NY-Wadsworth-192909-01/2020|2020-07-27|EPI\_ISL\_676665|Original|hCoV-19^^New York|Human|Masonic Medical Research Institute|Wadsworth Center|Lasek-Nesselquist|USA

>Spike|hCoV-19/England/QEUEH-B4181F/2020|2020-11-08|EPI\_ISL\_658620|Original|hCoV-19^^England|Human|Lighthouse Lab in Glasgow|Wellcome Sanger Institute for the COVID-19 Genomics UK (COG-UK) Consortium|Davies|United Kingdom

>Spike|hCoV-19/South Korea/KDCA0203/2020|2020-11-20|EPI\_ISL\_747438|Original|hCoV-19^^South Korea|Human|Division of Emerging Infectious Diseases|Division of Emerging Infectious Diseases|Park|South Korea

>Spike|hCoV-19/Spain/MD-IBV-99008761/2020|2020-10-20|EPI\_ISL\_654316|Original|hCoV-19^^Madrid|Human|Hospital General Universitario Gregorio Mara\u00f1\u00f3n|SeqCOVID-SPAIN consortium|IBV (CSIC)|Comas|Spain

>Spike|hCoV-19/England/ALDP-A6DE0D/2020|2020-10-15|EPI\_ISL\_607017|Original|hCoV-19^^England|Human|Lighthouse Lab in Alderley Park|Wellcome Sanger Institute for the COVID-19 Genomics UK (COG-UK) consortium|Davies|United Kingdom

>Spike|hCoV-19/England/20128090902/2020|2020-03-18|EPI\_ISL\_420483|Original|hCoV-19^^England|Human|Respiratory Virus Unit|Respiratory Virus Unit|Platt|United Kingdom

>Spike|hCoV-19/USA/HI-H200586/2020|2020-11-05|EPI\_ISL\_753112|Original|hCoV-19^^Hawaii|Human|State Laboratories Division|State Laboratories Division|Sultana|USA

>Spike|hCoV-19/USA/LA-GBCL-26492453/2020|2020-04-28|EPI\_ISL\_485031|Original|hCoV-19^^Louisiana|Human|River Road Testing Lab|Ginkgo Bioworks Clinical Laboratory|Smith|USA

>Spike|hCoV-19/Australia/VIC16497/2020|2020-07-25|EPI\_ISL\_640339|Original|hCoV-19^^Victoria|Human|Microbiological Diagnostic Unit - Public Health Laboratory (MDU-PHL)|MDU-PHL|Schultz|Australia

>Spike|hCoV-19/England/CAMB-7D7DC/2020|2020-04-06|EPI\_ISL\_442250|Original|hCoV-19^^England|Human|Department of Pathology|Wellcome Sanger Institute for the COVID-19 Genomics UK (COG-UK) consortium|Amato|United Kingdom

>Spike|hCoV-19/England/NORT-29EE0B/2020|2020-05-11|EPI\_ISL\_493538|Original|hCoV-19^^England|Human|Northumbria University / South Tees Hospitals NHS Foundation Trust / North Cumbria Integrated Care NHS Foundation Trust / North Tees and Hartlepool NHS Foundation Trust / Newcastle Hospitals NHS Foundation Trust|COVID-19 Genomics UK (COG-UK) Consortium|Bashton|United Kingdom

>Spike|hCoV-19/England/ALDP-5CAC18/2020|2020-06-19|EPI\_ISL\_558600|Original|hCoV-19^^England|Human|Lighthouse Lab in Alderley Park|Wellcome Sanger Institute for the COVID-19 Genomics UK (COG-UK) consortium|Davies|United Kingdom

>Spike|hCoV-19/Denmark/DCGC-19136/2020|2020-12-07|EPI\_ISL\_748774|Original|hCoV-19^^Hovedstaden|Human|Department of Virus and Microbiological Special Diagnostics|Albertsen Lab|Michaelsen|Denmark

>Spike|hCoV-19/England/MILK-AC8222/2020|2020-10-22|EPI\_ISL\_629498|Original|hCoV-19^^England|Human|Lighthouse Lab in Milton Keynes|Wellcome Sanger Institute for the COVID-19 Genomics UK (COG-UK) consortium|Davies|United Kingdom

>Spike|hCoV-19/USA/TX-HMH-3317/2020|2020-06-10|EPI\_ISL\_544127|Original|hCoV-19^^Texas|Human|Houston Methodist Hospital|Houston Methodist Hospital|Long|USA

>Spike|hCoV-19/USA/WA-S1103/2020|2020-05-03|EPI\_ISL\_463593|Original|hCoV-19^^Washington|Human|Washington State Department of Health|Seattle Flu Study|Bedford|USA

>Spike|hCoV-19/Australia/VIC86/2020|2020-03-15|EPI\_ISL\_419796|Original|hCoV-19^^Victoria|Human|Victorian Infectious Diseases Reference Laboratory (VIDRL)|Victorian Infectious Diseases Reference Laboratory and Microbiological Diagnostic Unit Public Health Laboratory|Schultz|Australia

>Spike|hCoV-19/Germany/HH-hpi-p2146/2020|2020-03-28|EPI\_ISL\_776378|Original|hCoV-19^^Hamburg|Human|University Medical Center Hamburg Eppendorf|Heinrich Pette Institute|Robitaille|Germany

>Spike|hCoV-19/England/ALDP-BB5676/2020|2020-11-20|EPI\_ISL\_701717|Original|hCoV-19^^England|Human|Lighthouse Lab in Alderley Park|Wellcome Sanger Institute for the COVID-19 Genomics UK (COG-UK) Consortium|Davies|United Kingdom

>Spike|hCoV-19/France/ARA-125198/2020|2020-12-27|EPI\_ISL\_779811|Original|hCoV-19^^Auvergne-Rh\u00f4ne-Alpes|Human|CNR Virus des Infections Respiratoires - France SUD|CNR Virus des Infections Respiratoires - France SUD|Bal|France

>Spike|hCoV-19/England/LOND-12670B7/2020|2020-12-10|EPI\_ISL\_741252|Original|hCoV-19^^England|Human|University College London|COVID-19 Genomics UK (COG-UK) Consortium|Roy|United Kingdom

>Spike|hCoV-19/Norway/3574/2020|2020-07-31|EPI\_ISL\_590950|Original|hCoV-19^^Norway|Human|University Hospital of Northern Norway|Norwegian Institute of Public Health|Vollan|Norway

>Spike|hCoV-19/USA/TX-HMH-MCoV-18487/2020|2020-11-18|EPI\_ISL\_784835|Original|hCoV-19^^Texas|Human|Houston Methodist Hospital|Houston Methodist Hospital|Long|USA

>Spike|hCoV-19/USA/GA-QDX-240/2020|2020-04-27|EPI\_ISL\_498717|Original|hCoV-19^^Georgia|Human|Quest Diagnostics|Quest Diagnostics|Kagan|USA

>Spike|hCoV-19/England/ALDP-A2E345/2020|2020-10-05|EPI\_ISL\_586653|Original|hCoV-19^^England|Human|Lighthouse Lab in Alderley Park|Wellcome Sanger Institute for the COVID-19 Genomics UK (COG-UK) consortium|Davies|United Kingdom

>Spike|hCoV-19/Denmark/DCGC-21121/2020|2020-12-21|EPI\_ISL\_759564|Original|hCoV-19^^Hovedstaden|Human|Department of Virus and Microbiological Special Diagnostics|Albertsen Lab|Michaelsen|Denmark

>Spike|hCoV-19/England/NOTT-112AEE/2020|2020-04-24|EPI\_ISL\_493585|Original|hCoV-19^^England|Human|Lincolnshire Hospitals and DeepSeq Nottingham|COVID-19 Genomics UK (COG-UK) Consortium|Loose|United Kingdom

>Spike|hCoV-19/Belgium/ULG-11140/2020|2020-12-19|EPI\_ISL\_737384|Original|hCoV-19^^Li\u00e8ge|Human|Department of Clinical Microbiology|GIGA Medical Genomics|Durkin|Belgium

>Spike|hCoV-19/USA/TX-HMH0315/2020|2020-03-28|EPI\_ISL\_434931|Original|hCoV-19^^Texas|Human|Houston Methodist Hospital|Houston Methodist Hospital|Long|USA

>Spike|hCoV-19/England/ALDP-BC7AFD/2020|2020-11-23|EPI\_ISL\_721388|Original|hCoV-19^^England|Human|Lighthouse Lab in Alderley Park|Wellcome Sanger Institute for the COVID-19 Genomics UK (COG-UK) Consortium|Davies|United Kingdom

>Spike|hCoV-19/Wales/PHWC-165897/2020|2020-06-05|EPI\_ISL\_490735|Original|hCoV-19^^Wales|Human|Wales Specialist Virology Centre Sequencing lab|COVID-19 Genomics UK (COG-UK) Consortium|Moore|United Kingdom

>Spike|hCoV-19/Spain/CL-IBV-97006154/2020|2020-04-05|EPI\_ISL\_537301|Original|hCoV-19^^Castilla y Leon|Human|Universidad de Le\u00f3n|SeqCOVID-SPAIN consortium/IBV (CSIC) |Comas|Spain

>Spike|hCoV-19/Belgium/regal-12111349/2020|2020-12-11|EPI\_ISL\_738402|Original|hCoV-19^^Mol|Human|UZ Leuven|KU Leuven|Maes|Belgium

>Spike|hCoV-19/England/CAMC-B22F5B/2020|2020-11-02|EPI\_ISL\_647396|Original|hCoV-19^^England|Human|Lighthouse Lab in Cambridge|Wellcome Sanger Institute for the COVID-19 Genomics UK (COG-UK) Consortium|Davies|United Kingdom

>Spike|hCoV-19/England/NOTT-10FB5A/2020|2020-04-07|EPI\_ISL\_432690|Original|hCoV-19^^England|Human|Queens Medical Centre|COVID-19 Genomics UK (COG-UK) Consortium|Loose|United Kingdom

>Spike|hCoV-19/England/QEUA-96F1F4/2020|2020-08-17|EPI\_ISL\_530616|Original|hCoV-19^^England|Human|Lighthouse Lab in Glasgow|Wellcome Sanger Institute for the COVID-19 Genomics UK (COG-UK) consortium|Davies|United Kingdom

>Spike|hCoV-19/USA/MN-MDH-1801/2020|2020-04-14|EPI\_ISL\_590803|Original|hCoV-19^^Minnesota|Human|Minnesota Department of Health|Minnesota Department of Health|Lorentz|USA

>Spike|hCoV-19/England/ALDP-B24399/2020|2020-11-04|EPI\_ISL\_646920|Original|hCoV-19^^England|Human|Lighthouse Lab in Alderley Park|Wellcome Sanger Institute for the COVID-19 Genomics UK (COG-UK) Consortium|Davies|United Kingdom

>Spike|hCoV-19/Australia/VIC497/2020|2020-03-23|EPI\_ISL\_426770|Original|hCoV-19^^Victoria|Human|Victorian Infectious Diseases Reference Laboratory (VIDRL)|Microbiological Diagnostic Unit Public Health Laboratory and Victorian Infectious Diseases Reference Laboratory|Schultz|Australia

>Spike|hCoV-19/Japan/PG-6539/2020|2020-08-00|EPI\_ISL\_687653|Original|hCoV-19^^Japan|Human|Pathogen Genomics Center|Pathogen Genomics Center|Sekizuka|Japan

>Spike|hCoV-19/Portugal/PT1645/2020|2020-11-17|EPI\_ISL\_731920|Original|hCoV-19^^Portugal|Human|Instituto Nacional de Saude (INSA)|Instituto Nacional de Saude (INSA)|Borges|Portugal

>Spike|hCoV-19/Germany/HH-hpi-pl456/2020|2020-03-11|EPI\_ISL\_775971|Original|hCoV-19^^Hamburg|Human|University Medical Center Hamburg Eppendorf|Heinrich Pette Institute|Robitaille|Germany

>Spike|hCoV-19/Australia/VIC17276/2020|2020-08-01|EPI\_ISL\_663817|Original|hCoV-19^^Victoria|Human|Microbiological Diagnostic Unit - Public Health Laboratory (MDU-PHL)|MDU-PHL|Schultz|Australia

>Spike|hCoV-19/Wales/PHWC-48C69D/2020|2020-11-09|EPI\_ISL\_666455|Original|hCoV-19^^Wales|Human|Wales Specialist Virology Centre Sequencing lab|COVID-19 Genomics UK (COG-UK) Consortium|Moore|United Kingdom

>Spike|hCoV-19/Denmark/DCGC-18380/2020|2020-12-07|EPI\_ISL\_749929|Original|hCoV-19^^Midtjylland|Human|Department of Virus and Microbiological Special Diagnostics|Albertsen Lab|Michaelsen|Denmark

>Spike|hCoV-19/South Africa/KRISP-K002785/2020|2020-08-24|EPI\_ISL\_529779|Original|hCoV-19^^KwaZulu-Natal|Human|NHLs-IALCH|KRISP|de Oliveira|South Africa

>Spike|hCoV-19/SaudiArabia/KAUST-JEDDAH890/2020|2020-05-24|EPI\_ISL\_513039|Original|hCoV-19^^Jeddah|Human|Pathogen Genomics Lab King Abdullah University of Science and Technology(KAUST)|Pathogen Genomics Lab King Abdullah University of Science and Technology(KAUST)|Mohamed Ghazzali|Saudi Arabia

>Spike|hCoV-19/Scotland/EDB8748/2020|2020-10-25|EPI\_ISL\_651990|Original|hCoV-19^^Scotland|Human|Virology Department|COVID-19 Genomics UK (COG-UK) Consortium|McHugh|United Kingdom

>Spike|hCoV-19/England/QEUA-B40160/2020|2020-11-08|EPI\_ISL\_657187|Original|hCoV-19^^England|Human|Lighthouse Lab in Glasgow|Wellcome Sanger Institute for the COVID-19 Genomics UK (COG-UK) Consortium|Davies|United Kingdom

>Spike|hCoV-19/England/QEUA-997BAA/2020|2020-08-28|EPI\_ISL\_549543|Original|hCoV-19^^England|Human|Oxford Viromics|COVID-19 Genomics UK (COG-UK) Consortium|Golubchik|United Kingdom

>Spike|hCoV-19/Denmark/DCGC-20904/2020|2020-12-21|EPI\_ISL\_759437|Original|hCoV-19^^Hovedstaden|Human|Department of Virus and Microbiological Special Diagnostics|Albertsen Lab|Michaelsen|Denmark

>Spike|hCoV-19/USA/WA-UW-5189/2020|2020-04-01|EPI\_ISL\_430873|Original|hCoV-19^^Washington|Human|UW Virology Lab|UW Virology Lab|Roychoudhury|USA

>Spike|hCoV-19/Denmark/DCGC-16353/2020|2020-11-16|EPI\_ISL\_714718|Original|hCoV-19^^Hovedstaden|Human|Department of Virus and Microbiological Special Diagnostics|Albertsen Lab|Michaelsen|Denmark

>Spike|hCoV-19/Germany/BY-MVP-0192/2020|2020-04-15|EPI\_ISL\_466882|Original|hCoV-19^^Bavaria|Human|Max von Pettenkofer Institute|Laboratory for Functional Genome Analysis|Graf|Germany

>Spike|hCoV-19/England/ALDP-A6E437/2020|2020-10-15|EPI\_ISL\_607961|Original|hCoV-19^^England|Human|Lighthouse Lab in Alderley Park|Wellcome Sanger Institute for the COVID-19 Genomics UK (COG-UK) consortium|Davies|United Kingdom

>Spike|hCoV-19/England/CAMB-7CBC2/2020|2020-04-04|EPI\_ISL\_442303|Original|hCoV-19^^England|Human|Department of Pathology|Wellcome Sanger Institute for the COVID-19 Genomics UK (COG-UK) consortium|Amato|United Kingdom

>Spike|hCoV-19/England/MILK-99CBF0/2020|2020-08-30|EPI\_ISL\_549911|Original|hCoV-19^^England|Human|Lighthouse Lab in Milton Keynes|Wellcome Sanger Institute for the COVID-19 Genomics UK (COG-UK) consortium|Davies|United Kingdom

>Spike|hCoV-19/USA/CT-Yale-458/2020|2020-09-12|EPI\_ISL\_729741|Original|hCoV-19^^Connecticut|Human|Connecticut Department of Health|Grubaugh Lab - Yale School of Public Health|Grubaugh|USA

>Spike|hCoV-19/Denmark/DCGC-8499/2020|2020-10-26|EPI\_ISL\_625917|Original|hCoV-19^^Syddanmark|Human|Department of Virus and Microbiological Special Diagnostics|Albertsen lab|Michaelsen|Denmark

>Spike|hCoV-19/England/QEUA-A20774/2020|2020-10-01|EPI\_ISL\_587701|Original|hCoV-19^^England|Human|Lighthouse Lab in Glasgow|Wellcome Sanger Institute for the COVID-19 Genomics UK (COG-UK) consortium|Davies|United Kingdom

>Spike|hCoV-19/Belgium/CD-030679/2020|2020-03-06|EPI\_ISL\_420335|Original|hCoV-19^^Bierset|Human|KU Leuven|KU Leuven|Maes|Belgium

>Spike|hCoV-19/France/PAC-IHU-1427/2020|2020-08-10|EPI\_ISL\_569161|Original|hCoV-19^^Provence-Alpes-C\u00f4te-d\u2019Azur|Human|MEPHI|MEPHI|Levasseur|France

>Spike|hCoV-19/England/ALDP-C3CF99/2020|2020-12-10|EPI\_ISL\_731077|Original|hCoV-19^^England|Human|Lighthouse Lab in Alderley Park|Wellcome Sanger Institute for the COVID-19 Genomics UK (COG-UK) Consortium|Davies|United Kingdom

>Spike|hCoV-19/USA/ID-CDC-2-3714462/2020|2020-11-18|EPI\_ISL\_751748|Original|hCoV-19^^Idaho|Human|ID Bureau of Laboratories|Genomics and Discovery|Queen|USA

>Spike|hCoV-19/Denmark/DCGC-16493/2020|2020-11-16|EPI\_ISL\_714445|Original|hCoV-19^^Hovedstaden|Human|Department of Virus and Microbiological Special Diagnostics|Albertsen Lab|Michaelsen|Denmark

>Spike|hCoV-19/Switzerland/Vs-ETHZ-410638/2020|2020-12-09|EPI\_ISL\_737860|Original|hCoV-19^^Valais|Human|Viollier AG|Department of Biosystems Science and Engineering|Nadeau|Switzerland

>Spike|hCoV-19/England/ALDP-B6370B/2020|2020-11-09|EPI\_ISL\_656483|Original|hCoV-19^^England|Human|Lighthouse Lab in Alderley Park|Wellcome Sanger Institute for the COVID-19 Genomics UK (COG-UK) Consortium|Davies|United Kingdom

>Spike|hCoV-19/England/201101383/2020|2020-03-09|EPI\_ISL\_464661|Original|hCoV-19^^England|Human|Respiratory Virus Unit|Respiratory Virus Unit|Platt|United Kingdom

>Spike|hCoV-19/USA/WI-WSLH-200651/2020|2020-06-18|EPI\_ISL\_631418|Original|hCoV-19^^Wisconsin|Human|Wisconsin State Laboratory of Hygiene Communicable Disease Division|Wisconsin State Laboratory of Hygiene Communicable Disease Division|Florek|USA



>Spike|hCoV-19/England/ALDP-95AB0D/2020|2020-06-11|EPI\_ISL\_554994|Original|hCoV-19^^England|Human|Lighthouse Lab in Alderley Park|Wellcome Sanger Institute for the COVID-19 Genomics UK (COG-UK) consortium|Davies|United Kingdom

>Spike|hCoV-19/Bangladesh/CU-CTG-38/2020|2020-12-04|EPI\_ISL\_735498|Original|hCoV-19^^Chittagong|Human|University of Chittagong|Central Biological Research Laboratory and Department of Biochemistry and Molecular Biology|Faruque|Bangladesh

>Spike|hCoV-19/England/QEUH-AAEB36/2020|2020-10-20|EPI\_ISL\_652986|Original|hCoV-19^^England|Human|Oxford Viromics|COVID-19 Genomics UK (COG-UK) Consortium|Golubchik|United Kingdom

>Spike|hCoV-19/Gibraltar/204421214/2020|2020-10-27|EPI\_ISL\_613675|Original|hCoV-19^^Gibraltar|Human|Microbiology|Respiratory Virus Unit|Platt|Gibraltar

>Spike|hCoV-19/Denmark/DCGC-6008/2020|2020-09-21|EPI\_ISL\_621117|Original|hCoV-19^^Midtjylland|Human|Department of Virus and Microbiological Special Diagnostics|Albertsen lab|Michaelsen|Denmark

>Spike|hCoV-19/Scotland/CVR1874/2020|2020-04-07|EPI\_ISL\_484520|Original|hCoV-19^^Scotland|Human|West of Scotland Specialist Virology Centre|COVID-19 Genomics UK (COG-UK) Consortium|Robertson|United Kingdom

>Spike|hCoV-19/England/SHEF-C1DD7/2020|2020-06-22|EPI\_ISL\_493670|Original|hCoV-19^^England|Human|Virology Department|COVID-19 Genomics UK (COG-UK) Consortium|de Silva|United Kingdom

>Spike|hCoV-19/England/QEUH-9F37A8/2020|2020-09-26|EPI\_ISL\_588479|Original|hCoV-19^^England|Human|Lighthouse Lab in Glasgow|Wellcome Sanger Institute for the COVID-19 Genomics UK (COG-UK) consortium|Davies|United Kingdom

>Spike|hCoV-19/USA/CA-CZB-1957/2020|2020-05-06|EPI\_ISL\_486229|Original|hCoV-19^^California|Human|Orange County Public Health Laboratory|Chan-Zuckerberg Biohub|McGeever|USA

>Spike|hCoV-19/USA/MI-MDHHS-SC21505/2020|2020-03-31|EPI\_ISL\_516232|Original|hCoV-19^^Michigan|Human|Michigan Department of Health and Human Services|Michigan Department of Health and Human Services|Blankenship|USA

>Spike|hCoV-19/USA/MI-MDHHS-SC22323/2020|2020-11-10|EPI\_ISL\_708299|Original|hCoV-19^^Michigan|Human|Michigan Department of Health and Human Services|Michigan Department of Health and Human Services|Jacob|USA

>Spike|hCoV-19/England/20120054804/2020|2020-03-16|EPI\_ISL\_465726|Original|hCoV-19^^England|Human|Respiratory Virus Unit|Respiratory Virus Unit|Platt|United Kingdom

>Spike|hCoV-19/Wales/PHWC-48CB70/2020|2020-10-31|EPI\_ISL\_666513|Original|hCoV-19^^Wales|Human|Wales Specialist Virology Centre Sequencing lab|COVID-19 Genomics UK (COG-UK) Consortium|Moore|United Kingdom

>Spike|hCoV-19/Canada/MB-NML-876/2020|2020-03-19|EPI\_ISL\_582352|Original|hCoV-19^^Manitoba|Human|Cadham Provincial Laboratory|National Microbiology Laboratory (NML)|Majer|Canada

>Spike|hCoV-19/England/ALDP-B7729A/2020|2020-11-12|EPI\_ISL\_662502|Original|hCoV-19^^England|Human|Lighthouse Lab in Alderley Park|Wellcome Sanger Institute for the COVID-19 Genomics UK (COG-UK) Consortium|Davies|United Kingdom

>Spike|hCoV-19/England/QEUH-C3333C/2020|2020-12-11|EPI\_ISL\_734121|Original|hCoV-19^^England|Human|Lighthouse Lab in Glasgow|Wellcome Sanger Institute for the COVID-19 Genomics UK (COG-UK) Consortium|Davies|United Kingdom

>Spike|hCoV-19/Australia/VIC5279/2020|2020-07-17|EPI\_ISL\_520044|Original|hCoV-19^^Victoria|Human|Microbiological Diagnostic Unit - Public Health Laboratory (MDU-PHL)|MDU-PHL|Schultz|Australia

>Spike|hCoV-19/USA/TX-HMH-MCoV-15789/2020|2020-07-10|EPI\_ISL\_785473|Original|hCoV-19^^Texas|Human|Houston Methodist Hospital|Houston Methodist Hospital|Long|USA

>Spike|hCoV-19/England/QEUH-9DD8FC/2020|2020-09-21|EPI\_ISL\_599589|Original|hCoV-19^^England|Human|Lighthouse Lab in Glasgow|Wellcome Sanger Institute for the COVID-19 Genomics UK (COG-UK) consortium|Davies|United Kingdom

>Spike|hCoV-19/England/QEUH-B7C040/2020|2020-11-14|EPI\_ISL\_668174|Original|hCoV-19^^England|Human|Lighthouse Lab in Glasgow|Wellcome Sanger Institute for the COVID-19 Genomics UK (COG-UK) Consortium|Davies|United Kingdom

>Spike|hCoV-19/England/CAMC-A41018/2020|2020-10-05|EPI\_ISL\_609517|Original|hCoV-19^^England|Human|Lighthouse Lab in Cambridge|Wellcome Sanger Institute for the COVID-19 Genomics UK (COG-UK) consortium|Davies|United Kingdom

>Spike|hCoV-19/USA/AZ-TG392969/2020|2020-06-18|EPI\_ISL\_694709|Original|hCoV-19^^Arizona|Human|TGen North|TGen North|French|USA

>Spike|hCoV-19/Australia/VIC2399/2020|2020-06-26|EPI\_ISL\_522115|Original|hCoV-19^^Victoria|Human|Microbiological Diagnostic Unit - Public Health Laboratory (MDU-PHL)|MDU-PHL|Schultz|Australia

>Spike|hCoV-19/USA/WA-S1176/2020|2020-05-05|EPI\_ISL\_463666|Original|hCoV-19^^Washington|Human|Washington State Department of Health|Seattle Flu Study|Bedford|USA

>Spike|hCoV-19/USA/TX-HMH-5851/2020|2020-06-29|EPI\_ISL\_547062|Original|hCoV-19^^Texas|Human|Houston Methodist Hospital|Houston Methodist Hospital|Long|USA

>Spike|hCoV-19/India/MH-ACTREC-236/2020|2020-07-05|EPI\_ISL\_699889|Original|hCoV-19^^Maharashtra|Human|Hematopathology Laboratory|Hematopathology Laboratory|Patkar|India

>Spike|hCoV-19/England/LIVE-DB7C34/2020|2020-10-28|EPI\_ISL\_651181|Original|hCoV-19^^England|Human|Liverpool Clinical Laboratories|COVID-19 Genomics UK (COG-UK) Consortium|Haldenby|United Kingdom

>Spike|hCoV-19/India/MH-ACTREC-561/2020|2020-08-29|EPI\_ISL\_700206|Original|hCoV-19^^Maharashtra|Human|Hematopathology Laboratory|Hematopathology Laboratory|Patkar|India

>Spike|hCoV-19/Australia/VIC7339/2020|2020-08-07|EPI\_ISL\_564348|Original|hCoV-19^^Victoria|Human|Victorian Infectious Diseases Reference Laboratory (VIDRL)|VIDRL and MDU-PHL|Schultz|Australia

>Spike|hCoV-19/England/QEUH-B2FC93/2020|2020-11-03|EPI\_ISL\_659746|Original|hCoV-19^^England|Human|Lighthouse Lab in Glasgow|Wellcome Sanger Institute for the COVID-19 Genomics UK (COG-UK) Consortium|Davies|United Kingdom

>Spike|hCoV-19/USA/NY-NYUMC355/2020|2020-04-09|EPI\_ISL\_430382|Original|hCoV-19^^New York|Human|NYU Langone Health|Departments of Pathology and Medicine|Maurano|USA

>Spike|hCoV-19/USA/CA-SR0455/2020|2020-03-16|EPI\_ISL\_467978|Original|hCoV-19^^California|Human|San Diego County Public Health Laboratory|Andersen lab at Scripps Research|Gangavarapu|USA

>Spike|hCoV-19/Denmark/DCGC-11018/2020|2020-11-02|EPI\_ISL\_670347|Original|hCoV-19^^Hovedstaden|Human|Department of Virus and Microbiological Special Diagnostics|Albertsen Lab|Michaelsen|Denmark

>Spike|hCoV-19/Wales/PHWC-2A677/2020|2020-04-07|EPI\_ISL\_445601|Original|hCoV-19^^Wales|Human|Wales Specialist Virology Centre|Public Health Wales Microbiology Cardiff|Moore|United Kingdom

>Spike|hCoV-19/France/ARA78518/2020|2020-09-26|EPI\_ISL\_639993|Original|hCoV-19^^Auvergne-Rhone-Alpes|Human|CNR Virus des Infections Respiratoires - France SUD|CNR Virus des Infections Respiratoires - France SUD|Josset|France

>Spike|hCoV-19/Switzerland/SO-ETHZ-321530/2020|2020-10-15|EPI\_ISL\_603739|Original|hCoV-19^^Solothurn|Human|Viollier AG|Department of Biosystems Science and Engineering|Nadeau|Switzerland

>Spike|hCoV-19/Denmark/DCGC-15762/2020|2020-11-23|EPI\_ISL\_714006|Original|hCoV-19^^Midtjylland|Human|Department of Virus and Microbiological Special Diagnostics|Albertsen Lab|Michaelsen|Denmark

>Spike|hCoV-19/USA/WA-S1096/2020|2020-05-01|EPI\_ISL\_463586|Original|hCoV-19^^Washington|Human|Washington State Department of Health|Seattle Flu Study|Bedford|USA

>Spike|hCoV-19/Japan/PG-6261/2020|2020-08-00|EPI\_ISL\_689372|Original|hCoV-19^^Japan|Human|Pathogen Genomics Center|Pathogen Genomics Center|Sekizuka|Japan

>Spike|hCoV-19/Denmark/DCGC-5299/2020|2020-09-14|EPI\_ISL\_615230|Original|hCoV-19^^Sjaelland|Human|Department of Virus and Microbiological Special Diagnostics|Albertsen lab|Michaelsen|Denmark

>Spike|hCoV-19/Northern Ireland/NIRE-108CD6/2020|2020-10-05|EPI\_ISL\_627552|Original|hCoV-19^^Northern Ireland|Human|Regional Virus Laboratory|COVID-19 Genomics UK (COG-UK) Consortium|Fairley|United Kingdom

>Spike|hCoV-19/Luxembourg/LNS3485994/2020|2020-11-19|EPI\_ISL\_740315|Original|hCoV-19^^Luxembourg|Human|Laboratoire national de sant\u00e9|Laboratoire national de sant\u00e9|Wienecke-Baldacchino|Luxembourg

>Spike|hCoV-19/England/PORT-2EA204/2020|2020-11-11|EPI\_ISL\_665348|Original|hCoV-19^^England|Human|Centre for Enzyme Innovation|COVID-19 Genomics UK (COG-UK) Consortium|Robson|United Kingdom

>Spike|hCoV-19/USA/WA-UW-4322/2020|2020-03-31|EPI\_ISL\_427261|Original|hCoV-19^^Washington|Human|UW Virology Lab|UW Virology Lab|Roychoudhury|USA

>Spike|hCoV-19/Scotland/CVR3827/2020|2020-05-29|EPI\_ISL\_478153|Original|hCoV-19^^Scotland|Human|West of Scotland Specialist Virology Centre|COVID-19 Genomics UK (COG-UK) Consortium|Robertson|United Kingdom

>Spike|hCoV-19/Germany/HH-hpi-p1793/2020|2020-03-19|EPI\_ISL\_776163|Original|hCoV-19^^Hamburg|Human|University Medical Center Hamburg Eppendorf|Heinrich Pette Institute|Robitaille|Germany

>Spike|hCoV-19/England/QEUA-8854C3/2020|2020-07-23|EPI\_ISL\_532752|Original|hCoV-19^^England|Human|Lighthouse Lab in Glasgow|Wellcome Sanger Institute for the COVID-19 Genomics UK (COG-UK) consortium|Davies|United Kingdom

>Spike|hCoV-19/USA/CO-CDPHE-2004220708/2020|2020-04-22|EPI\_ISL\_710144|Original|hCoV-19^^Colorado|Human|Colorado Department of Public Health and Environment|Colorado Department of Public Health and Environment|Bankers|USA

>Spike|hCoV-19/Japan/PG-2817/2020|2020-04-00|EPI\_ISL\_690944|Original|hCoV-19^^Japan|Human|Pathogen Genomics Center|Pathogen Genomics Center|Sekizuka|Japan

>Spike|hCoV-19/USA/FL-BPHL-0460/2020|2020-03-24|EPI\_ISL\_495366|Original|hCoV-19^^Florida|Human|Florida Bureau of Public Health Laboratories|Florida Bureau of Public Health Laboratories|Blanton|USA

>Spike|hCoV-19/England/MILK-B56D45/2020|2020-11-04|EPI\_ISL\_656879|Original|hCoV-19^^England|Human|Lighthouse Lab in Milton Keynes|Wellcome Sanger Institute for the COVID-19 Genomics UK (COG-UK) Consortium|Davies|United Kingdom

>Spike|hCoV-19/Switzerland/SO-ETHZ-380290/2020|2020-11-25|EPI\_ISL\_721879|Original|hCoV-19^^Solothurn|Human|Viollier AG|Department of Biosystems Science and Engineering|Nadeau|Switzerland

>Spike|hCoV-19/Switzerland/BL-ETHZ-170007/2020|2020-06-26|EPI\_ISL\_486522|Original|hCoV-19^^Basel-Landschaft|Human|Viollier AG|Department of Biosystems Science and Engineering|Nadeau|Switzerland

>Spike|hCoV-19/Norway/3713/2020|2020-09-18|EPI\_ISL\_635119|Original|hCoV-19^^Viken|Human|Oslo University Hospital|Norwegian Institute of Public Health|Vollan|Norway

>Spike|hCoV-19/Austria/CeMM0795/2020|2020-05-18|EPI\_ISL\_583705|Original|hCoV-19^^Austria|Human|Center for Virology|Bergthaler laboratory|Bergthaler|Austria

>Spike|hCoV-19/Belgium/ULG-10492/2020|2020-09-23|EPI\_ISL\_581654|Original|hCoV-19^^Li\u00e8ge|Human|Department of Clinical Microbiology|GIGA Medical Genomics|Durkin|Belgium

>Spike|hCoV-19/United Arab Emirates/L0184/2020|2020-02-25|EPI\_ISL\_435121|Original|hCoV-19^^United Arab Emirates|Human|Mohammed Bin Rashid University of Medicine and Health Sciences|Al Jalila Genomics Center|Ramaswamy|United Arab Emirates

>Spike|hCoV-19/Australia/VIC16153/2020|2020-08-06|EPI\_ISL\_640427|Original|hCoV-19^^Victoria|Human|Microbiological Diagnostic Unit - Public Health Laboratory (MDU-PHL)|MDU-PHL|Schultz|Australia

>Spike|hCoV-19/England/ALDP-95224C/2020|2020-06-09|EPI\_ISL\_553689|Original|hCoV-19^^England|Human|Lighthouse Lab in Alderley Park|Wellcome Sanger Institute for the COVID-19 Genomics UK (COG-UK) consortium|Davies|United Kingdom

>Spike|hCoV-19/USA/FL-BPHL-0791/2020|2020-04-07|EPI\_ISL\_512595|Original|hCoV-19^^Florida|Human|Florida Bureau of Public Health Laboratories|Florida Bureau of Public Health Laboratories|Blanton|USA

>Spike|hCoV-19/England/20149055304/2020|2020-04-05|EPI\_ISL\_466220|Original|hCoV-19^^England|Human|Respiratory Virus Unit|Respiratory Virus Unit|Platt|United Kingdom

>Spike|hCoV-19/England/QEUA-BA16F5/2020|2020-11-18|EPI\_ISL\_719782|Original|hCoV-19^^England|Human|Lighthouse Lab in Glasgow|Wellcome Sanger Institute for the COVID-19 Genomics UK (COG-UK) Consortium|Davies|United Kingdom

>Spike|hCoV-19/England/SHEF-C84F9/2020|2020-06-13|EPI\_ISL\_484473|Original|hCoV-19^^England|Human|Virology Department|COVID-19 Genomics UK (COG-UK) Consortium|de Silva|United Kingdom

>Spike|hCoV-19/Denmark/DCGC-18499/2020|2020-12-07|EPI\_ISL\_749336|Original|hCoV-19^^Midtjylland|Human|Department of Virus and Microbiological Special Diagnostics|Albertsen Lab|Michaelsen|Denmark

>Spike|hCoV-19/USA/MI-MDHHS-SC20652/2020|2020-04-24|EPI\_ISL\_462734|Original|hCoV-19^^Michigan|Human|Michigan Department of Health and Human Services|Michigan Department of Health and Human Services|Blankenship|USA

>Spike|hCoV-19/Switzerland/ZH-ETHZ-331073/2020|2020-10-20|EPI\_ISL\_614968|Original|hCoV-19^^Zurich|Human|Viollier AG|Department of Biosystems Science and Engineering|Nadeau|Switzerland

>Spike|hCoV-19/Scotland/QEUH-BCCD68/2020|2020-11-26|EPI\_ISL\_710813|Original|hCoV-19^^Scotland|Human|Lighthouse Lab in Glasgow|Wellcome Sanger Institute for the COVID-19 Genomics UK (COG-UK) Consortium|Davies|United Kingdom

>Spike|hCoV-19/England/ALDP-9E578B/2020|2020-09-24|EPI\_ISL\_589373|Original|hCoV-19^^England|Human|Lighthouse Lab in Alderley Park|Wellcome Sanger Institute for the COVID-19 Genomics UK (COG-UK) consortium|Davies|United Kingdom

>Spike|hCoV-19/England/ALDP-9553CE/2020|2020-06-12|EPI\_ISL\_553569|Original|hCoV-19^^England|Human|Lighthouse Lab in Alderley Park|Wellcome Sanger Institute for the COVID-19 Genomics UK (COG-UK) consortium|Davies|United Kingdom

>Spike|hCoV-19/USA/CA-ALSR-1108-SAN/2020|2020-06-25|EPI\_ISL\_483532|Original|hCoV-19^^California|Human|San Diego County Public Health Laboratory|Andersen lab at Scripps Research|Gangavarapu|USA

>Spike|hCoV-19/England/MILK-C3026F/2020|2020-12-07|EPI\_ISL\_782781|Original|hCoV-19^^England|Human|Lighthouse Lab in Milton Keynes|Wellcome Sanger Institute for the COVID-19 Genomics UK (COG-UK) Consortium|Davies|United Kingdom

>Spike|hCoV-19/Australia/NSW2214/2020|2020-03-21|EPI\_ISL\_500668|Original|hCoV-19^^New South Wales|Human|Area of Virology|Area of Virology|Bull|Australia

>Spike|hCoV-19/USA/NY-NYUMC636/2020|2020-04-02|EPI\_ISL\_444753|Original|hCoV-19^^New York|Human|NYU Langone Health|Departments of Pathology and Medicine|Maurano|USA

>Spike|hCoV-19/Switzerland/UR-ETHZ-210068/2020|2020-07-21|EPI\_ISL\_510799|Original|hCoV-19^^Uri|Human|Viollier AG|Department of Biosystems Science and Engineering|Nadeau|Switzerland

>Spike|hCoV-19/USA/TX-HMH0202/2020|2020-03-24|EPI\_ISL\_434877|Original|hCoV-19^^Texas|Human|Houston Methodist Hospital|Houston Methodist Hospital|Long|USA

>Spike|hCoV-19/Luxembourg/LNS4757989/2020|2020-04-15|EPI\_ISL\_434498|Original|hCoV-19^^Luxembourg|Human|Laboratoire National de Sante|Laboratoire National de Sante|Wienecke-Baldacchino|Luxembourg

>Spike|hCoV-19/England/MILK-B3ADFC/2020|2020-11-01|EPI\_ISL\_679732|Original|hCoV-19^^England|Human|Oxford Viromics|COVID-19 Genomics UK (COG-UK) Consortium|Golubchik|United Kingdom

>Spike|hCoV-19/Germany/BE-ChVir-D2020-4418/2020|2020-10-11|EPI\_ISL\_753903|Original|hCoV-19^^Berlin|Human|Charit\u00e9 Universit\u00e4tsmedizin Berlin|Charit\u00e9 Universit\u00e4tsmedizin Berlin|Muehlemann|Germany

>Spike|hCoV-19/England/SHEF-C775B/2020|2020-09-17|EPI\_ISL\_573713|Original|hCoV-19^^England|Human|Virology Department|COVID-19 Genomics UK (COG-UK) Consortium|de Silva|United Kingdom

>Spike|hCoV-19/Scotland/MILK-95999B/2020|2020-06-08|EPI\_ISL\_568470|Original|hCoV-19^^Scotland|Human|Lighthouse Lab in Milton Keynes|Wellcome Sanger Institute for the COVID-19 Genomics UK (COG-UK) consortium|Davies|United Kingdom

>Spike|hCoV-19/Canada/ON-S390/2020|2020-03-30|EPI\_ISL\_591140|Original|hCoV-19^^Ontario|Human|Toronto Invasive Bacterial Diseases Network|McMaster University|McArthur|Canada

>Spike|hCoV-19/Canada/QC-LSPQ-L00236367/2020|2020-03-24|EPI\_ISL\_536124|Original|hCoV-19^^Quebec|Human|H\u00f4pital de Hull|Laboratoire de sant\u00e9 publique du Qu\u00e9bec|Moreira|Canada

>Spike|hCoV-19/England/LIVE-AA800/2020|2020-03-24|EPI\_ISL\_517507|Original|hCoV-19^^England|Human|Liverpool Clinical Laboratories|COVID-19 Genomics UK (COG-UK) Consortium|Haldenby|United Kingdom

>Spike|hCoV-19/USA/MN-QDX-1386/2020|2020-03-16|EPI\_ISL\_572175|Original|hCoV-19^^Minnesota|Human|Quest Diagnostics|Quest Diagnostics|Kagan|USA

>Spike|hCoV-19/Saudi Arabia/KAUST-QATIF1353/2020|2020-06-20|EPI\_ISL\_678154|Original|hCoV-19^^Qatif|Human|Pathogen Genomics Lab King Abdullah University of Science and Technology(KAUST)|Pathogen Genomics Lab King Abdullah University of Science and Technology(KAUST)|Mohamed Ghazzali|Saudi Arabia

>Spike|hCoV-19/Denmark/DCGC-17112/2020|2020-12-14|EPI\_ISL\_750763|Original|hCoV-19^^Syddanmark|Human|Department of Virus and Microbiological Special Diagnostics|Albertsen Lab|Michaelsen|Denmark

>Spike|hCoV-19/USA/WA-S638/2020|2020-04-17|EPI\_ISL\_438191|Original|hCoV-19^^Washington|Human|Washington State Department of Health|Seattle Flu Study|Bedford|USA

>Spike|hCoV-19/Japan/PG-3485/2020|2020-07-00|EPI\_ISL\_691595|Original|hCoV-19^^Japan|Human|Pathogen Genomics Center|Pathogen Genomics Center|Sekizuka|Japan

>Spike|hCoV-19/Wales/PHWC-483292/2020|2020-10-11|EPI\_ISL\_627266|Original|hCoV-19^^Wales|Human|Wales Specialist Virology Centre Sequencing lab|COVID-19 Genomics UK (COG-UK) Consortium|Moore|United Kingdom

>Spike|hCoV-19/Wales/PHWC-4A4CAC/2020|2020-12-09|EPI\_ISL\_763658|Original|hCoV-19^^Wales|Human|Wales Specialist Virology Centre Sequencing lab|COVID-19 Genomics UK (COG-UK) Consortium|Moore|United Kingdom

>Spike|hCoV-19/USA/TX-HMH-MCoV-13224/2020|2020-08-25|EPI\_ISL\_788375|Original|hCoV-19^^Texas|Human|Houston Methodist Hospital|Houston Methodist Hospital|Long|USA

>Spike|hCoV-19/USA/AZ-TG486040/2020|2020-07-09|EPI\_ISL\_695081|Original|hCoV-19^^Arizona|Human|TGen North|TGen North|French|USA

>Spike|hCoV-19/England/QEUEH-B667EA/2020|2020-11-10|EPI\_ISL\_655041|Original|hCoV-19^^England|Human|Lighthouse Lab in Glasgow|Wellcome Sanger Institute for the COVID-19 Genomics UK (COG-UK) Consortium|Davies|United Kingdom

>Spike|hCoV-19/Spain/MD-IBV-99012367/2020|2020-11-22|EPI\_ISL\_779968|Original|hCoV-19^^Madrid|Human|Hospital General Universitario Gregorio Mara\u00f1a|SeqCOVID-SPAIN consortium/IBV(CSIC)|Comas|Spain

>Spike|hCoV-19/USA/LA-BIE-068/2020|2020-04-04|EPI\_ISL\_455621|Original|hCoV-19^^Louisiana|Human|Ochsner Health|Bioinfoexperts|Cross|USA

>Spike|hCoV-19/England/QEUEH-BA34F9/2020|2020-11-18|EPI\_ISL\_721111|Original|hCoV-19^^England|Human|Lighthouse Lab in Glasgow|Wellcome Sanger Institute for the COVID-19 Genomics UK (COG-UK) Consortium|Davies|United Kingdom

>Spike|hCoV-19/Scotland/QEUEH-9DE6F1/2020|2020-09-21|EPI\_ISL\_601201|Original|hCoV-19^^Scotland|Human|Lighthouse Lab in Glasgow|Wellcome Sanger Institute for the COVID-19 Genomics UK (COG-UK) consortium|Davies|United Kingdom

>Spike|hCoV-19/England/CAMB-7C9E6/2020|2020-04-06|EPI\_ISL\_442074|Original|hCoV-19^^England|Human|Department of Pathology|Wellcome Sanger Institute for the COVID-19 Genomics UK (COG-UK) consortium|Amato|United Kingdom

>Spike|hCoV-19/England/ALDP-A2E2B1/2020|2020-10-06|EPI\_ISL\_586825|Original|hCoV-19^^England|Human|Lighthouse Lab in Alderley Park|Wellcome Sanger Institute for the COVID-19 Genomics UK (COG-UK) consortium|Davies|United Kingdom

>Spike|hCoV-19/England/ALDP-C8D98C/2020|2020-12-15|EPI\_ISL\_777458|Original|hCoV-19^^England|Human|Lighthouse Lab in Alderley Park|Wellcome Sanger Institute for the COVID-19 Genomics UK (COG-UK) Consortium|Davies|United Kingdom

>Spike|hCoV-19/USA/UT-UPHL-2012471033/2020|2020-11-30|EPI\_ISL\_746860|Original|hCoV-19^^Utah|Human|Utah Public Health Laboratory|Utah Public Health Laboratory|Gallagher|USA

>Spike|hCoV-19/Wales/PHWC-16D8CC/2020|2020-09-17|EPI\_ISL\_577460|Original|hCoV-19^^Wales|Human|Wales Specialist Virology Centre Sequencing lab|COVID-19 Genomics UK (COG-UK) Consortium|Moore|United Kingdom

>Spike|hCoV-19/England/MILK-A69D04/2020|2020-10-09|EPI\_ISL\_608828|Original|hCoV-19^^England|Human|Lighthouse Lab in Milton Keynes|Wellcome Sanger Institute for the COVID-19 Genomics UK (COG-UK) consortium|Davies|United Kingdom

>Spike|hCoV-19/USA/CA-ALSR-0783-SAN/2020|2020-04-07|EPI\_ISL\_483355|Original|hCoV-19^^California|Human|UC San Diego Center for Advanced Laboratory Medicine|Andersen lab at Scripps Research|Gangavarapu|USA

>Spike|hCoV-19/England/LOND-1262A72/2020|2020-10-11|EPI\_ISL\_594885|Original|hCoV-19^^England|Human|University College London|COVID-19 Genomics UK (COG-UK) Consortium|Roy|United Kingdom

>Spike|hCoV-19/England/MILK-992CAC/2020|2020-08-26|EPI\_ISL\_552052|Original|hCoV-19^^England|Human|Lighthouse Lab in Milton Keynes|Wellcome Sanger Institute for the COVID-19 Genomics UK (COG-UK) consortium|Davies|United Kingdom

>Spike|hCoV-19/Japan/PG-0451/2020|2020-03-00|EPI\_ISL\_684171|Original|hCoV-19^^Japan|Human|Pathogen Genomics Center|Pathogen Genomics Center|Sekizuka|Japan

>Spike|hCoV-19/England/MILK-B56CA2/2020|2020-11-05|EPI\_ISL\_656846|Original|hCoV-19^^England|Human|Lighthouse Lab in Milton Keynes|Wellcome Sanger Institute for the COVID-19 Genomics UK (COG-UK) Consortium|Davies|United Kingdom

>Spike|hCoV-19/Wales/PHWC-344E9/2020|2020-04-16|EPI\_ISL\_446932|Original|hCoV-19^^Wales|Human|Wales Specialist Virology Centre|Public Health Wales Microbiology Cardiff|Moore|United Kingdom

>Spike|hCoV-19/England/CAMB-773ED/2020|2020-03-31|EPI\_ISL\_439495|Original|hCoV-19^^England|Human|Department of Pathology|Wellcome Sanger Institute for the COVID-19 Genomics UK (COG-UK) consortium|Amato|United Kingdom

>Spike|hCoV-19/USA/TX-HMH-MCoV-15663/2020|2020-07-09|EPI\_ISL\_785347|Original|hCoV-19^^Texas|Human|Houston Methodist Hospital|Houston Methodist Hospital|Long|USA

>Spike|hCoV-19/England/MILK-A46E37/2020|2020-10-06|EPI\_ISL\_598459|Original|hCoV-19^^England|Human|Lighthouse Lab in Milton Keynes|Wellcome Sanger Institute for the COVID-19 Genomics UK (COG-UK) consortium|Davies|United Kingdom

>Spike|hCoV-19/Luxembourg/LNS1807556/2020|2020-07-15|EPI\_ISL\_739995|Original|hCoV-19^^Luxembourg|Human|Laboratoire national de sant\u00e9|Laboratoire national de sant\u00e9|Wienecke-Baldacchino|Luxembourg

>Spike|hCoV-19/Spain/VC-FISABIO-218/2020|2020-03-25|EPI\_ISL\_436313|Original|hCoV-19^^Comunitat Valenciana|Human|Servicio de Microbiologia. Hospital Clinico Universitario de Valencia|Sequencing and Bioinformatics Service and Molecular Epidemiology Research Group. FISABIO-Public Health|Gonzalez-Candelas|Spain

>Spike|hCoV-19/USA/AR-CDC-4191/2020|2020-07-08|EPI\_ISL\_509674|Original|hCoV-19^^Arkansas|Human|AR Dept. of Health-Public Health Lab|Pathogen Discovery|Queen|USA

>Spike|hCoV-19/Netherlands/UT-RIVM-10349/2020|2020-05-08|EPI\_ISL\_636573|Original|hCoV-19^^Utrecht|Human|Dutch COVID-19 response team|National Institute for Public Health and the Environment (RIVM)|Meijer|Netherlands

>Spike|hCoV-19/England/204241000/2020|2020-10-14|EPI\_ISL\_609894|Original|hCoV-19^^England|Human|Respiratory Virus Unit|Respiratory Virus Unit|Platt|United Kingdom

>Spike|hCoV-19/England/QEUEH-9DCDFE/2020|2020-09-21|EPI\_ISL\_581033|Original|hCoV-19^^England|Human|Lighthouse Lab in Glasgow|Wellcome Sanger Institute for the COVID-19 Genomics UK (COG-UK) consortium|Davies|United Kingdom

>Spike|hCoV-19/Canada/ON-PHL-6980/2020|2020-03-00|EPI\_ISL\_418356|Original|hCoV-19^^Ontario|Human|Public Health Ontario Laboratories|Public Health Ontario Laboratories|Eshaghi|Canada

>Spike|hCoV-19/England/MILK-BB064E/2020|2020-11-17|EPI\_ISL\_720415|Original|hCoV-19^^England|Human|Lighthouse Lab in Milton Keynes|Wellcome Sanger Institute for the COVID-19 Genomics UK (COG-UK) Consortium|Davies|United Kingdom

>Spike|hCoV-19/USA/CA-CZB-9603/2020|2020-04-15|EPI\_ISL\_672027|Original|hCoV-19^^California|Human|The Ashley Laboratory|Chan-Zuckerberg Biohub|Bhatt|USA

>Spike|hCoV-19/England/MILK-9C72E8/2020|2020-09-08|EPI\_ISL\_573294|Original|hCoV-19^^England|Human|Northumbria University / South Tees Hospitals NHS Foundation Trust / North Cumbria Integrated Care NHS Foundation Trust / North Tees and Hartlepool NHS Foundation Trust / Newcastle Hospitals NHS Foundation Trust|COVID-19 Genomics UK (COG-UK) Consortium|Bashton|United Kingdom

>Spike|hCoV-19/England/MILK-A6AD6D/2020|2020-10-08|EPI\_ISL\_608727|Original|hCoV-19^^England|Human|Lighthouse Lab in Milton Keynes|Wellcome Sanger Institute for the COVID-19 Genomics UK (COG-UK) consortium|Davies|United Kingdom

>Spike|hCoV-19/England/SHEF-C7A9E/2020|2020-05-12|EPI\_ISL\_479230|Original|hCoV-19^^England|Human|Virology Department|COVID-19 Genomics UK (COG-UK) Consortium|de Silva|United Kingdom

>Spike|hCoV-19/England/ALDP-6BEF68/2020|2020-07-01|EPI\_ISL\_557749|Original|hCoV-19^^England|Human|Lighthouse Lab in Alderley Park|Wellcome Sanger Institute for the COVID-19 Genomics UK (COG-UK) consortium|Davies|United Kingdom

>Spike|hCoV-19/Switzerland/ZH-ETHZ-410527/2020|2020-11-26|EPI\_ISL\_737919|Original|hCoV-19^^Zurich|Human|Viollier AG|Department of Biosystems Science and Engineering|Nadeau|Switzerland

>Spike|hCoV-19/Wales/PHWC-498625/2020|2020-12-03|EPI\_ISL\_727102|Original|hCoV-19^^Wales|Human|Originating lab|COVID-19 Genomics UK (COG-UK) Consortium|Moore|United Kingdom

>Spike|hCoV-19/USA/PA-QDX-1061/2020|2020-03-18|EPI\_ISL\_571821|Original|hCoV-19^^Pennsylvania|Human|Quest Diagnostics|Quest Diagnostics|Kagan|USA

>Spike|hCoV-19/Scotland/CVR1630/2020|2020-04-05|EPI\_ISL\_512444|Original|hCoV-19^^Scotland|Human|West of Scotland Specialist Virology Centre|COVID-19 Genomics UK (COG-UK) Consortium|Robertson|United Kingdom

>Spike|hCoV-19/England/QEUEH-AF5AD9/2020|2020-10-30|EPI\_ISL\_663039|Original|hCoV-19^^England|Human|Lighthouse Lab in Glasgow|Wellcome Sanger Institute for the COVID-19 Genomics UK (COG-UK) Consortium|Davies|United Kingdom

>Spike|hCoV-19/England/NOTT-119B6C/2020|2020-11-04|EPI\_ISL\_627068|Original|hCoV-19^^England|Human|Queens Medical Centre|COVID-19 Genomics UK (COG-UK) Consortium|Loose|United Kingdom

>Spike|hCoV-19/England/CAMC-B21A1F/2020|2020-11-02|EPI\_ISL\_647252|Original|hCoV-19^^England|Human|Lighthouse Lab in Cambridge|Wellcome Sanger Institute for the COVID-19 Genomics UK (COG-UK) Consortium|Davies|United Kingdom

>Spike|hCoV-19/Netherlands/ZH-RIVM-20910/2020|2020-10-01|EPI\_ISL\_790942|Original|hCoV-19^^Zuid-holland|Human|Dutch COVID-19 response team|National Institute for Public Health and the Environment (RIVM)|Meijer|Netherlands

>Spike|hCoV-19/England/ALDP-CEC156/2020|2020-12-19|EPI\_ISL\_781205|Original|hCoV-19^^England|Human|Lighthouse Lab in Alderley Park|Wellcome Sanger Institute for the COVID-19 Genomics UK (COG-UK) Consortium|Davies|United Kingdom

>Spike|hCoV-19/Netherlands/NA\_536/2020|2020-00-00|EPI\_ISL\_460709|Original|hCoV-19^^Netherlands|Human|Dutch COVID-19 response team|Erasmus Medical Center|Oude Munnink|Netherlands

>Spike|hCoV-19/USA/MN-MDH-1909/2020|2020-10-18|EPI\_ISL\_613517|Original|hCoV-19^^Minnesota|Human|Public Health Laboratory - Infectious Disease Lab|Minnesota Department of Health|Lorentz|USA

>Spike|hCoV-19/Spain/VC-IBV-98003432/2020|2020-04-02|EPI\_ISL\_539249|Original|hCoV-19^^Comunitat Valenciana|Human|Hospital Universitario de La Ribera (Alzira)|SeqCOVID-SPAIN consortium|IBV (CSIC)|Comas|Spain

>Spike|hCoV-19/USA/CA-ALSR-3647/2020|2020-09-17|EPI\_ISL\_636125|Original|hCoV-19^^California|Human|San Diego County Public Health Laboratory|Andersen lab at Scripps Research|Gangavarapu|USA

>Spike|hCoV-19/England/MILK-99D236/2020|2020-08-30|EPI\_ISL\_550608|Original|hCoV-19^^England|Human|Lighthouse Lab in Milton Keynes|Wellcome Sanger Institute for the COVID-19 Genomics UK (COG-UK) consortium|Davies|United Kingdom

>Spike|hCoV-19/USA/NY-NYUMC565/2020|2020-03-30|EPI\_ISL\_444682|Original|hCoV-19^^New York|Human|NYU Langone Health|Departments of Pathology and Medicine|Maurano|USA

>Spike|hCoV-19/USA/WA-UW-7242/2020|2020-04-07|EPI\_ISL\_570177|Original|hCoV-19^^Washington|Human|UW Virology Lab|UW Virology Lab|Roychoudhury|USA

>Spike|hCoV-19/Netherlands/OV-EMC-99/2020|2020-09-07|EPI\_ISL\_722845|Original|hCoV-19^^Overijssel|Human|Dutch COVID-19 response team|Erasmus Medical Center|Oude Munnink|Netherlands

>Spike|hCoV-19/Japan/PG-4823/2020|2020-07-00|EPI\_ISL\_689947|Original|hCoV-19^^Japan|Human|Pathogen Genomics Center|Pathogen Genomics Center|Sekizuka|Japan

>Spike|hCoV-19/Ireland/WW-NVRL-AIIDV0351v2/2020|2020-05-04|EPI\_ISL\_644302|Original|hCoV-19^^Wicklow|Human|CEPHR / Vincent's Hospital|Irish Coronavirus Sequencing Consortium - National Virus Reference Laboratory|Gonzalez|Ireland

>Spike|hCoV-19/India/TG-CCMB-L912/2020|2020-05-09|EPI\_ISL\_471644|Original|hCoV-19^^Telangana|Human|CSIR-Centre for Cellular and Molecular Biology|CSIR-Centre for Cellular and Molecular Biology|Banu|India

>Spike|hCoV-19/England/ALDP-B738AB/2020|2020-11-12|EPI\_ISL\_662580|Original|hCoV-19^^England|Human|Lighthouse Lab in Alderley Park|Wellcome Sanger Institute for the COVID-19 Genomics UK (COG-UK) Consortium|Davies|United Kingdom

>Spike|hCoV-19/England/QEUEH-B2F361/2020|2020-11-03|EPI\_ISL\_659876|Original|hCoV-19^^England|Human|Lighthouse Lab in Glasgow|Wellcome Sanger Institute for the COVID-19 Genomics UK (COG-UK) Consortium|Davies|United Kingdom

>Spike|hCoV-19/England/NORW-F6BDF/2020|2020-12-01|EPI\_ISL\_706379|Original|hCoV-19^^England|Human|Quadram Institute Bioscience|COVID-19 Genomics UK (COG-UK) Consortium|Alikhan|United Kingdom

>Spike|hCoV-19/India/MH-ACTREC-654/2020|2020-09-14|EPI\_ISL\_700284|Original|hCoV-19^^Maharashtra|Human|Hematopathology Laboratory|Hematopathology Laboratory|Patkar|India

>Spike|hCoV-19/USA/CA-ALSR-3782/2020|2020-05-28|EPI\_ISL\_636198|Original|hCoV-19^^California|Human|San Diego County Public Health Laboratory|Andersen lab at Scripps Research|Gangavarapu|USA

>Spike|hCoV-19/England/MILK-ACE022/2020|2020-10-21|EPI\_ISL\_630065|Original|hCoV-19^^England|Human|Lighthouse Lab in Milton Keynes|Wellcome Sanger Institute for the COVID-19 Genomics UK (COG-UK) consortium|Davies|United Kingdom

>Spike|hCoV-19/USA/FL-BPHL-0523/2020|2020-06-19|EPI\_ISL\_508726|Original|hCoV-19^^Florida|Human|Florida Bureau of Public Health Laboratories|Florida Bureau of Public Health Laboratories|Blanton|USA

>Spike|hCoV-19/USA/MA-MGH-00302/2020|2020-04-01|EPI\_ISL\_460151|Original|hCoV-19^^Massachusetts|Human|Massachusetts General Hospital|Infectious Disease Program|Lemieux|USA

>Spike|hCoV-19/England/CAMC-A82AB3/2020|2020-10-12|EPI\_ISL\_610815|Original|hCoV-19^^England|Human|Lighthouse Lab in Cambridge|Wellcome Sanger Institute for the COVID-19 Genomics UK (COG-UK) consortium|Davies|United Kingdom

>Spike|hCoV-19/England/QEUEH-AE2C15/2020|2020-10-27|EPI\_ISL\_633430|Original|hCoV-19^^England|Human|Lighthouse Lab in Glasgow|Wellcome Sanger Institute for the COVID-19 Genomics UK (COG-UK) consortium|Davies|United Kingdom

>Spike|hCoV-19/England/ALDP-A2EDCF/2020|2020-10-05|EPI\_ISL\_586976|Original|hCoV-19^^England|Human|Lighthouse Lab in Alderley Park|Wellcome Sanger Institute for the COVID-19 Genomics UK (COG-UK) consortium|Davies|United Kingdom

>Spike|hCoV-19/Denmark/DCGC-7327/2020|2020-10-12|EPI\_ISL\_619281|Original|hCoV-19^^Hovedstaden|Human|Department of Virus and Microbiological Special Diagnostics|Albertsen lab|Michaelsen|Denmark

>Spike|hCoV-19/England/MILK-9C3194/2020|2020-09-10|EPI\_ISL\_566723|Original|hCoV-19^^England|Human|Lighthouse Lab in Milton Keynes|Wellcome Sanger Institute for the COVID-19 Genomics UK (COG-UK) consortium|Davies|United Kingdom

>Spike|hCoV-19/USA/VA-DCLS-2011/2020|2020-10-14|EPI\_ISL\_677164|Original|hCoV-19^^Virginia|Human|Virginia Division of Consolidated Laboratory Services|Virginia Division of Consolidated Laboratory Services|St. Jacques|USA

>Spike|hCoV-19/England/CAMB-73448/2020|2020-03-22|EPI\_ISL\_439994|Original|hCoV-19^^England|Human|Department of Pathology|Wellcome Sanger Institute for the COVID-19 Genomics UK (COG-UK) consortium|Amato|United Kingdom

>Spike|hCoV-19/Denmark/DCGC-15251/2020|2020-11-23|EPI\_ISL\_713720|Original|hCoV-19^^Hovedstaden|Human|Department of Virus and Microbiological Special Diagnostics|Albertsen Lab|Michaelsen|Denmark

>Spike|hCoV-19/Australia/ACT0064/2020|2020-03-31|EPI\_ISL\_498526|Original|hCoV-19^^Australian Capital Territory|Human|ACT Pathology|Schwessinger Lab|Hall|Australia

>Spike|hCoV-19/USA/TX-HMH-7742/2020|2020-06-30|EPI\_ISL\_545612|Original|hCoV-19^^Texas|Human|Houston Methodist Hospital|Houston Methodist Hospital|Long|USA

>Spike|hCoV-19/Scotland/QEUEH-AABFE2/2020|2020-10-21|EPI\_ISL\_652842|Original|hCoV-19^^Scotland|Human|Oxford Viromics|COVID-19 Genomics UK (COG-UK) Consortium|Golubchik|United Kingdom

>Spike|hCoV-19/England/CAMC-B2288D/2020|2020-11-01|EPI\_ISL\_647314|Original|hCoV-19^^England|Human|Lighthouse Lab in Cambridge|Wellcome Sanger Institute for the COVID-19 Genomics UK (COG-UK) Consortium|Davies|United Kingdom



>Spike|hCoV-19/England/HECH-259A1D0/2020|2020-05-21|EPI\_ISL\_488838|Original|hCoV-19^^England|Human|Microbiology Department|Wellcome Sanger Institute for the COVID-19 Genomics UK (COG-UK) consortium|Davies|United Kingdom

>Spike|hCoV-19/England/MILK-B3C853/2020|2020-11-01|EPI\_ISL\_706162|Original|hCoV-19^^England|Human|Oxford Viromics|COVID-19 Genomics UK (COG-UK) Consortium|Golubchik|United Kingdom

>Spike|hCoV-19/USA/UT-UPHL-2012303079/2020|2020-08-08|EPI\_ISL\_745577|Original|hCoV-19^^Utah|Human|Ginkgo Bioworks Clinical Laboratory|Utah Public Health Laboratory|Young|USA

>Spike|hCoV-19/USA/WA-S2017/2020|2020-06-05|EPI\_ISL\_497445|Original|hCoV-19^^Washington|Human|Washington State Department of Health|Seattle Flu Study|Lee|USA

>Spike|hCoV-19/England/ALDP-9D9F0A/2020|2020-09-18|EPI\_ISL\_576826|Original|hCoV-19^^England|Human|Oxford Viromics|COVID-19 Genomics UK (COG-UK) Consortium|Golubchik|United Kingdom

>Spike|hCoV-19/England/ALDP-AA1C03/2020|2020-10-22|EPI\_ISL\_630874|Original|hCoV-19^^England|Human|Lighthouse Lab in Alderley Park|Wellcome Sanger Institute for the COVID-19 Genomics UK (COG-UK) consortium|Davies|United Kingdom

>Spike|hCoV-19/USA/CA-CZB-1277/2020|2020-03-15|EPI\_ISL\_454635|Original|hCoV-19^^California|Human|County Of San Luis Obispo Public Health Laboratory|Chan-Zuckerberg Biohub|Hao|USA

>Spike|hCoV-19/England/MILK-B975AA/2020|2020-11-14|EPI\_ISL\_674825|Original|hCoV-19^^England|Human|Lighthouse Lab in Milton Keynes|Wellcome Sanger Institute for the COVID-19 Genomics UK (COG-UK) Consortium|Davies|United Kingdom

>Spike|hCoV-19/Japan/PG-8774/2020|2020-08-00|EPI\_ISL\_686368|Original|hCoV-19^^Japan|Human|Pathogen Genomics Center|Pathogen Genomics Center|Sekizuka|Japan

>Spike|hCoV-19/Japan/TKY10466/2020|2020-04-00|EPI\_ISL\_462443|unknown|hCoV-19^^Japan|Human|unknown|Ryota Kumagai Tokyo Metropolitan Institute of Public Health|Submitter|Japan

>Spike|hCoV-19/Australia/VIC16229/2020|2020-08-10|EPI\_ISL\_641109|Original|hCoV-19^^Victoria|Human|Microbiological Diagnostic Unit - Public Health Laboratory (MDU-PHL)|MDU-PHL|Schultz|Australia

>Spike|hCoV-19/USA/UT-UPHL-2012706136/2020|2020-08-13|EPI\_ISL\_745998|Original|hCoV-19^^Utah|Human|Ginkgo Bioworks Clinical Laboratory|Utah Public Health Laboratory|Young|USA

>Spike|hCoV-19/USA/MN-CDC-6312/2020|2020-05-11|EPI\_ISL\_527699|Original|hCoV-19^^Minnesota|Human|MN PHL Division|Pathogen Discovery|Queen|USA

>Spike|hCoV-19/Australia/VIC5018/2020|2020-07-18|EPI\_ISL\_519822|Original|hCoV-19^^Victoria|Human|Microbiological Diagnostic Unit - Public Health Laboratory (MDU-PHL)|MDU-PHL|Schultz|Australia

>Spike|hCoV-19/England/ALDP-A92E78/2020|2020-10-20|EPI\_ISL\_611005|Original|hCoV-19^^England|Human|Lighthouse Lab in Alderley Park|Wellcome Sanger Institute for the COVID-19 Genomics UK (COG-UK) consortium|Davies|United Kingdom

>Spike|hCoV-19/England/CAMB-75CC6/2020|2020-03-28|EPI\_ISL\_438481|Original|hCoV-19^^England|Human|Department of Pathology|Wellcome Sanger Institute for the COVID-19 Genomics UK (COG-UK) consortium|Amato|United Kingdom

>Spike|hCoV-19/Australia/VIC9827/2020|2020-08-15|EPI\_ISL\_565735|Original|hCoV-19^^Victoria|Human|Victorian Infectious Diseases Reference Laboratory (VIDRL)|VIDRL and MDU-PHL|Schultz|Australia

>Spike|hCoV-19/Japan/PG-3994/2020|2020-07-00|EPI\_ISL\_692235|Original|hCoV-19^^Japan|Human|Pathogen Genomics Center|Pathogen Genomics Center|Sekizuka|Japan

>Spike|hCoV-19/Australia/VIC14972/2020|2020-08-19|EPI\_ISL\_593086|Original|hCoV-19^^Victoria|Human|Microbiological Diagnostic Unit - Public Health Laboratory (MDU-PHL)|MDU-PHL|Schultz|Australia

>Spike|hCoV-19/England/CAMC-9DF3DB/2020|2020-09-20|EPI\_ISL\_638404|Original|hCoV-19^^England|Human|Department of Pathology|COVID-19 Genomics UK (COG-UK) Consortium|Goodfellow|United Kingdom

>Spike|hCoV-19/England/LOND-12644FA/2020|2020-11-16|EPI\_ISL\_705965|Original|hCoV-19^^England|Human|University College London|COVID-19 Genomics UK (COG-UK) Consortium|Roy|United Kingdom

>Spike|hCoV-19/England/NORW-EB4F0/2020|2020-05-01|EPI\_ISL\_457438|Original|hCoV-19^^England|Human|Quadram Institute Bioscience|COVID-19 Genomics UK (COG-UK) Consortium|Alikhan|United Kingdom

>Spike|hCoV-19/South Korea/KDCA0190/2020|2020-11-21|EPI\_ISL\_747426|Original|hCoV-19^^South Korea|Human|Division of Emerging Infectious Diseases|Division of Emerging Infectious Diseases|Park|South Korea

>Spike|hCoV-19/Netherlands/UT-RIVM-20137/2020|2020-11-24|EPI\_ISL\_723308|Original|hCoV-19^^Utrecht|Human|Dutch COVID-19 response team|National Institute for Public Health and the Environment (RIVM)|Meijer|Netherlands

>Spike|hCoV-19/England/LIVE-DC437B/2020|2020-11-14|EPI\_ISL\_704033|Original|hCoV-19^^England|Human|Liverpool Clinical Laboratories|COVID-19 Genomics UK (COG-UK) Consortium|Haldenby|United Kingdom

>Spike|hCoV-19/Canada/NS-NML-41/2020|2020-03-16|EPI\_ISL\_579517|Original|hCoV-19^^Nova Scotia|Human|QEII Health Sciences Centre|National Microbiology Laboratory (NML)|Majer|Canada

>Spike|hCoV-19/Denmark/DCGC-20192/2020|2020-11-30|EPI\_ISL\_748040|Original|hCoV-19^^Syddanmark|Human|Department of Virus and Microbiological Special Diagnostics|Albertsen Lab|Michaelsen|Denmark

>Spike|hCoV-19/England/CAMB-7C870/2020|2020-04-04|EPI\_ISL\_442061|Original|hCoV-19^^England|Human|Department of Pathology|Wellcome Sanger Institute for the COVID-19 Genomics UK (COG-UK) consortium|Amato|United Kingdom

>Spike|hCoV-19/Wales/PHWC-486129/2020|2020-10-25|EPI\_ISL\_628310|Original|hCoV-19^^Wales|Human|Wales Specialist Virology Centre Sequencing lab|COVID-19 Genomics UK (COG-UK) Consortium|Moore|United Kingdom

>Spike|hCoV-19/England/ALDP-CB3EE8/2020|2020-12-17|EPI\_ISL\_761144|Original|hCoV-19^^England|Human|Lighthouse Lab in Alderley Park|Wellcome Sanger Institute for the COVID-19 Genomics UK (COG-UK) Consortium|Davies|United Kingdom

>Spike|hCoV-19/Denmark/DCGC-22561/2020|2020-12-14|EPI\_ISL\_757637|Original|hCoV-19^^Nordjylland|Human|Department of Virus and Microbiological Special Diagnostics|Albertsen Lab|Michaelsen|Denmark

>Spike|hCoV-19/England/SHEF-10CCDD9/2020|2020-12-13|EPI\_ISL\_727913|Original|hCoV-19^^England|Human|Virology Department|COVID-19 Genomics UK (COG-UK) Consortium|de Silva|United Kingdom

>Spike|hCoV-19/USA/IL-QDX-279/2020|2020-03-19|EPI\_ISL\_571030|Original|hCoV-19^^Illinois|Human|Quest Diagnostics|Quest Diagnostics|Kagan|USA

>Spike|hCoV-19/USA/NY-Wadsworth-192894-01/2020|2020-07-06|EPI\_ISL\_677022|Original|hCoV-19^^New York|Human|Masonic Medical Research Institute|Wadsworth Center|Lasek-Nesselquist|USA

>Spike|hCoV-19/England/CAMC-A3F0C2/2020|2020-10-05|EPI\_ISL\_609580|Original|hCoV-19^^England|Human|Lighthouse Lab in Cambridge|Wellcome Sanger Institute for the COVID-19 Genomics UK (COG-UK) consortium|Davies|United Kingdom

>Spike|hCoV-19/Scotland/EDB789/2020|2020-04-03|EPI\_ISL\_433245|Original|hCoV-19^^Scotland|Human|Virology Department|COVID-19 Genomics UK (COG-UK) Consortium|Williams|United Kingdom

>Spike|hCoV-19/Japan/IC-0541/2020|2020-10-00|EPI\_ISL\_779224|Original|hCoV-19^^Japan|Human|Pathogen Genomics Center|Pathogen Genomics Center|Sekizuka|Japan

>Spike|hCoV-19/Australia/VIC6566/2020|2020-07-17|EPI\_ISL\_521332|Original|hCoV-19^^Victoria|Human|Victorian Infectious Diseases Reference Laboratory (VIDRL)|VIDRL and MDU-PHL|Schultz|Australia

>Spike|hCoV-19/South Africa/KRISP-0202/2020|2020-06-11|EPI\_ISL\_482717|Original|hCoV-19^^KwaZulu-Natal|Human|Molecular Diagnostics Services (MDS)|KRISP|de Oliveira|South Africa

>Spike|hCoV-19/England/QEUAH-96C6F8/2020|2020-08-07|EPI\_ISL\_530875|Original|hCoV-19^^England|Human|Lighthouse Lab in Glasgow|Wellcome Sanger Institute for the COVID-19 Genomics UK (COG-UK) consortium|Davies|United Kingdom

>Spike|hCoV-19/England/ALDP-A67656/2020|2020-10-12|EPI\_ISL\_630575|Original|hCoV-19^^England|Human|Lighthouse Lab in Alderley Park|Wellcome Sanger Institute for the COVID-19 Genomics UK (COG-UK) consortium|Davies|United Kingdom

>Spike|hCoV-19/Denmark/DCGC-18257/2020|2020-12-14|EPI\_ISL\_749845|Original|hCoV-19^^Syddanmark|Human|Department of Virus and Microbiological Special Diagnostics|Albertsen Lab|Michaelsen|Denmark

>Spike|hCoV-19/England/205180413/2020|2020-12-16|EPI\_ISL\_766453|Original|hCoV-19^^England|Human|Respiratory Virus Unit|COVID-19 Genomics UK (COG-UK) Consortium|Platt|United Kingdom

>Spike|hCoV-19/USA/UT-UPHL-201208274/2020|2020-04-07|EPI\_ISL\_678517|Original|hCoV-19^^Utah|Human|Utah Public Health Laboratory|Utah Public Health Laboratory|Young|USA

>Spike|hCoV-19/USA/CA-CZB-1517/2020|2020-05-13|EPI\_ISL\_468463|Original|hCoV-19^^California|Human|Ventura County Public Health Lab|Chan-Zuckerberg Biohub|Hao|USA

>Spike|hCoV-19/Australia/VIC2806/2020|2020-07-02|EPI\_ISL\_521637|Original|hCoV-19^^Victoria|Human|Microbiological Diagnostic Unit - Public Health Laboratory (MDU-PHL)|MDU-PHL|Schultz|Australia

>Spike|hCoV-19/England/ALDP-9CDEB1/2020|2020-09-15|EPI\_ISL\_566233|Original|hCoV-19^^England|Human|Lighthouse Lab in Alderley Park|Wellcome Sanger Institute for the COVID-19 Genomics UK (COG-UK) consortium|Davies|United Kingdom

>Spike|hCoV-19/Finland/29M60S2/2020|2020-03-29|EPI\_ISL\_481647|Original|hCoV-19^^Uusimaa|Human|Department of Virology and Immunology|Department of Virology|Smura|Finland

>Spike|hCoV-19/England/QEUH-9F5E38/2020|2020-09-27|EPI\_ISL\_588453|Original|hCoV-19^^England|Human|Lighthouse Lab in Glasgow|Wellcome Sanger Institute for the COVID-19 Genomics UK (COG-UK) consortium|Davies|United Kingdom

>Spike|hCoV-19/USA/CA-CZB-3898/2020|2020-07-24|EPI\_ISL\_548493|Original|hCoV-19^^California|Human|County of San Luis Obispo Public Health Laboratory|Chan-Zuckerberg Biohub|Bhatt|USA

>Spike|hCoV-19/Luxembourg/LNS4229406/2020|2020-11-02|EPI\_ISL\_740434|Original|hCoV-19^^Luxembourg|Human|Laboratoire national de sant\u00e9|Laboratoire national de sant\u00e9|Wienecke-Baldacchino|Luxembourg

>Spike|hCoV-19/Singapore/812/2020|2020-08-11|EPI\_ISL\_516812|Original|hCoV-19^^Singapore|Human|National Public Health Laboratory|National Public Health Laboratory|Mak|Singapore

>Spike|hCoV-19/Luxembourg/LNS2500324/2020|2020-10-09|EPI\_ISL\_740131|Original|hCoV-19^^Luxembourg|Human|Laboratoire national de sant\u00e9|Laboratoire national de sant\u00e9|Wienecke-Baldacchino|Luxembourg

>Spike|hCoV-19/Denmark/DCGC-15179/2020|2020-11-23|EPI\_ISL\_713230|Original|hCoV-19^^Midtjylland|Human|Department of Virus and Microbiological Special Diagnostics|Albertsen Lab|Michaelsen|Denmark

>Spike|hCoV-19/USA/TX-HMH-MCoV-11369/2020|2020-09-05|EPI\_ISL\_790000|Original|hCoV-19^^Texas|Human|Houston Methodist Hospital|Houston Methodist Hospital|Long|USA

>Spike|hCoV-19/England/CAMC-A811DD/2020|2020-10-13|EPI\_ISL\_610800|Original|hCoV-19^^England|Human|Lighthouse Lab in Cambridge|Wellcome Sanger Institute for the COVID-19 Genomics UK (COG-UK) consortium|Davies|United Kingdom

>Spike|hCoV-19/England/CAMB-80B61/2020|2020-04-11|EPI\_ISL\_442865|Original|hCoV-19^^England|Human|Department of Pathology|Wellcome Sanger Institute for the COVID-19 Genomics UK (COG-UK) consortium|Amato|United Kingdom

>Spike|hCoV-19/England/SHEF-C2028/2020|2020-04-02|EPI\_ISL\_432741|Original|hCoV-19^^England|Human|Virology Department|COVID-19 Genomics UK (COG-UK) Consortium|de Silva|United Kingdom

>Spike|hCoV-19/Wales/PHWC-16DD36/2020|2020-09-28|EPI\_ISL\_577526|Original|hCoV-19^^Wales|Human|Wales Specialist Virology Centre Sequencing lab|COVID-19 Genomics UK (COG-UK) Consortium|Moore|United Kingdom

>Spike|hCoV-19/Germany/NW-HHU-468/2020|2020-12-11|EPI\_ISL\_770702|Original|hCoV-19^^North Rhine-Westphalia|Human|ZOTZ KLIMAS MVZ D\u00fcrsselfeldorf-Centrum GbR \u00dcBAG f\u00fcr Labormedizin|Center of Medical Microbiology|Wienemann|Germany

>Spike|hCoV-19/England/QEUH-B9EFA5/2020|2020-11-18|EPI\_ISL\_719646|Original|hCoV-19^^England|Human|Lighthouse Lab in Glasgow|Wellcome Sanger Institute for the COVID-19 Genomics UK (COG-UK) Consortium|Davies|United Kingdom

>Spike|hCoV-19/USA/CA-SR0418/2020|2020-03-18|EPI\_ISL\_467952|Original|hCoV-19^^California|Human|San Diego County Public Health Laboratory|Andersen lab at Scripps Research|Gangavarapu|USA

>Spike|hCoV-19/Denmark/DCGC-786/2020|2020-03-30|EPI\_ISL\_614443|Original|hCoV-19^^Nordjylland|Human|Department of Virus and Microbiological Special Diagnostics|Albertsen lab|Michaelsen|Denmark

>Spike|hCoV-19/USA/NY-Wadsworth-292797-01/2020|2020-12-24|EPI\_ISL\_769962|Original|hCoV-19^^New York|Human|Albany Medical Center Hospital Clinical Laboratories|Wadsworth Center|Lasek-Nesselquist|USA

>Spike|hCoV-19/England/QEUA-95FD11/2020|2020-08-07|EPI\_ISL\_531874|Original|hCoV-19^^England|Human|Lighthouse Lab in Glasgow|Wellcome Sanger Institute for the COVID-19 Genomics UK (COG-UK) consortium|Davies|United Kingdom

>Spike|hCoV-19/Wales/PHWC-48653C/2020|2020-10-30|EPI\_ISL\_639053|Original|hCoV-19^^Wales|Human|Wales Specialist Virology Centre Sequencing lab|COVID-19 Genomics UK (COG-UK) Consortium|Moore|United Kingdom

>Spike|hCoV-19/Netherlands/NB-EMC-487/2020|2020-08-11|EPI\_ISL\_763146|Original|hCoV-19^^Noord Brabant|Human|Dutch COVID-19 response team|Erasmus Medical Center|Oude Munnink|Netherlands

>Spike|hCoV-19/England/ALDP-9C4B95/2020|2020-09-11|EPI\_ISL\_567737|Original|hCoV-19^^England|Human|Lighthouse Lab in Alderley Park|Wellcome Sanger Institute for the COVID-19 Genomics UK (COG-UK) consortium|Davies|United Kingdom

>Spike|hCoV-19/England/ALDP-A2FE9E/2020|2020-10-05|EPI\_ISL\_587088|Original|hCoV-19^^England|Human|Lighthouse Lab in Alderley Park|Wellcome Sanger Institute for the COVID-19 Genomics UK (COG-UK) consortium|Davies|United Kingdom

>Spike|hCoV-19/England/ALDP-A51437/2020|2020-10-08|EPI\_ISL\_597893|Original|hCoV-19^^England|Human|Lighthouse Lab in Alderley Park|Wellcome Sanger Institute for the COVID-19 Genomics UK (COG-UK) consortium|Davies|United Kingdom

>Spike|hCoV-19/England/LIVE-DBD393/2020|2020-10-27|EPI\_ISL\_664468|Original|hCoV-19^^England|Human|Liverpool Clinical Laboratories|COVID-19 Genomics UK (COG-UK) Consortium|Haldenby|United Kingdom

>Spike|hCoV-19/USA/AZ-TG648675/2020|2020-04-27|EPI\_ISL\_695890|Original|hCoV-19^^Arizona|Human|Sonora Quest Laboratories|TGen North|French|USA

>Spike|hCoV-19/England/204180128/2020|2020-09-28|EPI\_ISL\_583973|Original|hCoV-19^^England|Human|Respiratory Virus Unit|Respiratory Virus Unit|Platt|United Kingdom

>Spike|hCoV-19/USA/UT-UPHL-2012250113/2020|2020-11-30|EPI\_ISL\_779299|Original|hCoV-19^^Utah|Human|Utah Public Health Laboratory|Utah Public Health Laboratory|Gallagher|USA

>Spike|hCoV-19/Japan/PG-2598/2020|2020-04-00|EPI\_ISL\_690732|Original|hCoV-19^^Japan|Human|Pathogen Genomics Center|Pathogen Genomics Center|Sekizuka|Japan

>Spike|hCoV-19/England/CAMC-9DFA03/2020|2020-09-21|EPI\_ISL\_576922|Original|hCoV-19^^England|Human|Oxford Viromics|COVID-19 Genomics UK (COG-UK) Consortium|Golubchik|United Kingdom

>Spike|hCoV-19/Scotland/QEUA-A78063/2020|2020-10-14|EPI\_ISL\_638952|Original|hCoV-19^^Scotland|Human|Oxford Viromics|COVID-19 Genomics UK (COG-UK) Consortium|Golubchik|United Kingdom

>Spike|hCoV-19/Sweden/20-09865/2020|2020-11-10|EPI\_ISL\_661277|Original|hCoV-19^^Skane|Human|Klinisk mikrobiologi|The Public Health Agency of Sweden|Svartstr\u00f6m|Sweden

>Spike|hCoV-19/England/CAMB-765BB/2020|2020-03-30|EPI\_ISL\_438538|Original|hCoV-19^^England|Human|Department of Pathology|Wellcome Sanger Institute for the COVID-19 Genomics UK (COG-UK) consortium|Amato|United Kingdom

>Spike|hCoV-19/England/NORT-284B4D/2020|2020-03-25|EPI\_ISL\_478578|Original|hCoV-19^^England|Human|Northumbria University / South Tees Hospitals NHS Foundation Trust / North Cumbria Integrated Care NHS Foundation Trust / North Tees and Hartlepool NHS Foundation Trust / Newcastle Hospitals NHS Foundation Trust|COVID-19 Genomics UK (COG-UK) Consortium|Bashton|United Kingdom

>Spike|hCoV-19/USA/WA-S1392/2020|2020-05-19|EPI\_ISL\_495842|Original|hCoV-19^^Washington|Human|Washington State Department of Health|Seattle Flu Study|Lee|USA

>Spike|hCoV-19/England/ALDP-A6FE65/2020|2020-10-15|EPI\_ISL\_608333|Original|hCoV-19^^England|Human|Lighthouse Lab in Alderley Park|Wellcome Sanger Institute for the COVID-19 Genomics UK (COG-UK) consortium|Davies|United Kingdom

>Spike|hCoV-19/England/EXET-135696/2020|2020-04-03|EPI\_ISL\_457084|Original|hCoV-19^^England|Human|University of Exeter|COVID-19 Genomics UK (COG-UK) Consortium|Temperton|United Kingdom

>Spike|hCoV-19/USA/CA-CSMC139/2020|2020-04-12|EPI\_ISL\_475617|Original|hCoV-19^^California|Human|Cedars-Sinai Medical Center|Cedars-Sinai Medical Center|Zhang|USA

>Spike|hCoV-19/USA/MI-MDHHS-SC21923/2020|2020-04-08|EPI\_ISL\_565983|Original|hCoV-19^^Michigan|Human|Michigan Department of Health and Human Services|Michigan Department of Health and Human Services|Blankenship|USA

>Spike|hCoV-19/Scotland/CVR475/2020|2020-03-23|EPI\_ISL\_439081|Original|hCoV-19^^Scotland|Human|West of Scotland Specialist Virology Centre|COVID-19 Genomics UK (COG-UK) Consortium|Robertson|United Kingdom

>Spike|hCoV-19/Spain/AR-IBV-98008085/2020|2020-09-30|EPI\_ISL\_654454|Original|hCoV-19^^Aragon|Human|Servicio de Microbiolog\u00eda|SeqCOVID-SPAIN consortium/IBV (CSIC) |Comas|Spain

>Spike|hCoV-19/England/QEUH-9B8A5B/2020|2020-09-07|EPI\_ISL\_549725|Original|hCoV-19^^England|Human|Lighthouse Lab in Glasgow|Wellcome Sanger Institute for the COVID-19 Genomics UK (COG-UK) consortium|Davies|United Kingdom

>Spike|hCoV-19/England/NORW-EAC26/2020|2020-05-10|EPI\_ISL\_457364|Original|hCoV-19^^England|Human|Quadram Institute Bioscience|COVID-19 Genomics UK (COG-UK) Consortium|Alikhan|United Kingdom

>Spike|hCoV-19/USA/CA-CZB-14940/2020|2020-11-29|EPI\_ISL\_738737|Original|hCoV-19^^California|Human|Orange County Public Health Lab|Chan-Zuckerberg Biohub|Kamm|USA

>Spike|hCoV-19/Netherlands/ZH-RIVM-20845/2020|2020-12-13|EPI\_ISL\_790900|Original|hCoV-19^^Zuid-holland|Human|Dutch COVID-19 response team|National Institute for Public Health and the Environment (RIVM)|Meijer|Netherlands

>Spike|hCoV-19/Netherlands/FR-RIVM-20316/2020|2020-12-02|EPI\_ISL\_723454|Original|hCoV-19^^Friesland|Human|Dutch COVID-19 response team|National Institute for Public Health and the Environment (RIVM)|Meijer|Netherlands

>Spike|hCoV-19/USA/ME-HETL-J0190/2020|2020-09-17|EPI\_ISL\_755367|Original|hCoV-19^^Maine|Human|Maine Health and Environmental Testing Laboratory|Tewhey Lab|Tewhey|USA

>Spike|hCoV-19/England/ALDP-BC86F8/2020|2020-11-23|EPI\_ISL\_721505|Original|hCoV-19^^England|Human|Lighthouse Lab in Alderley Park|Wellcome Sanger Institute for the COVID-19 Genomics UK (COG-UK) Consortium|Davies|United Kingdom

>Spike|hCoV-19/England/ALDP-9CB86A/2020|2020-09-16|EPI\_ISL\_575420|Original|hCoV-19^^England|Human|Lighthouse Lab in Alderley Park|Wellcome Sanger Institute for the COVID-19 Genomics UK (COG-UK) consortium|Davies|United Kingdom

>Spike|hCoV-19/England/MILK-BAFA46/2020|2020-11-17|EPI\_ISL\_783316|Original|hCoV-19^^England|Human|Lighthouse Lab in Milton Keynes|Wellcome Sanger Institute for the COVID-19 Genomics UK (COG-UK) Consortium|Davies|United Kingdom

>Spike|hCoV-19/USA/NY-Wadsworth-12211-01/2020|2020-03-09|EPI\_ISL\_525591|Original|hCoV-19^^New York|Human|Wadsworth Center|Wadsworth Center|Plitnick|USA

>Spike|hCoV-19/Luxembourg/LNS6807787/2020|2020-08-20|EPI\_ISL\_744472|Original|hCoV-19^^Luxembourg|Human|Laboratoire national de sant\u00e9|Laboratoire national de sant\u00e9|Wienecke-Baldacchino|Luxembourg

>Spike|hCoV-19/England/NORT-1B6BF35/2020|2020-09-25|EPI\_ISL\_612554|Original|hCoV-19^^England|Human|Northumbria University / South Tees Hospitals NHS Foundation Trust / North Cumbria Integrated Care NHS Foundation Trust / North Tees and Hartlepool NHS Foundation Trust / Newcastle Hospitals NHS Foundation Trust|COVID-19 Genomics UK (COG-UK) Consortium|Bashton|United Kingdom

>Spike|hCoV-19/USA/TX-HMH-MCoV-14317/2020|2020-10-06|EPI\_ISL\_787602|Original|hCoV-19^^Texas|Human|Houston Methodist Hospital|Houston Methodist Hospital|Long|USA

>Spike|hCoV-19/France/PAC-MEPHI-2161/2020|2020-09-30|EPI\_ISL\_644518|Original|hCoV-19^^Provence-Alpes-Cote-d\u2019Azur|Human|MEPHI|MEPHI|Levasseur|France

>Spike|hCoV-19/Spain/VC-FISABIO-656/2020|2020-03-31|EPI\_ISL\_455730|Original|hCoV-19^^Comunitat Valenciana|Human|Servicio de Microbiologia. Hospital Clinico

Universitario de Valencia|Sequencing and Bioinformatics Service and Molecular Epidemiology Research Group. FISABIO-Public Health|Gonzalez-Candelas|Spain  
>Spike|hCoV-19/India/MH-ACTREC-195/2020|2020-06-22|EPI\_ISL\_699849|Original|hCoV-19^^Maharashtra|Human|Hematopathology Laboratory|Hematopathology Laboratory|Patkar|India  
>Spike|hCoV-19/England/MILK-BE6FEA/2020|2020-11-29|EPI\_ISL\_709852|Original|hCoV-19^^England|Human|Lighthouse Lab in Milton Keynes|Wellcome Sanger Institute for the COVID-19 Genomics UK (COG-UK) Consortium|Davies|United Kingdom  
>Spike|hCoV-19/Denmark/DCGC-18202/2020|2020-12-14|EPI\_ISL\_749812|Original|hCoV-19^^Sjaelland|Human|Department of Virus and Microbiological Special Diagnostics|Albertsen Lab|Michaelsen|Denmark  
>Spike|hCoV-19/Switzerland/BL-42329662/2020|2020-06-26|EPI\_ISL\_581875|Original|hCoV-19^^Basel-Land|Human|University Hospital Basel|University Hospital Basel|Roloff Handschin|Switzerland  
>Spike|hCoV-19/Denmark/DCGC-17616/2020|2020-12-14|EPI\_ISL\_750377|Original|hCoV-19^^Midtjylland|Human|Department of Virus and Microbiological Special Diagnostics|Albertsen Lab|Michaelsen|Denmark  
>Spike|hCoV-19/Japan/PG-6757/2020|2020-08-00|EPI\_ISL\_687867|Original|hCoV-19^^Japan|Human|Pathogen Genomics Center|Pathogen Genomics Center|Sekizuka|Japan  
>Spike|hCoV-19/USA/NY-Wadsworth-63708-01/2020|2020-04-22|EPI\_ISL\_676870|Original|hCoV-19^^New York|Human|Wadsworth Center|Wadsworth Center|Lasek-Nesselquist|USA  
>Spike|hCoV-19/Switzerland/UR-ETHZ-300472/2020|2020-09-30|EPI\_ISL\_603419|Original|hCoV-19^^Uri|Human|Viollier AG|Department of Biosystems Science and Engineering|Nadeau|Switzerland  
>Spike|hCoV-19/Spain/RI-IBV-98002307/2020|2020-03-10|EPI\_ISL\_537830|Original|hCoV-19^^La Rioja|Human|Centro de Investigaci\u00f3n Biom\u00e9dica de La Rioja - Hospital San Pedro Logro\u00f1o|SeqCOVID-SPAIN consortium/IBV (CSIC)|Comas|Spain  
>Spike|hCoV-19/England/MILK-B3DFF3/2020|2020-11-01|EPI\_ISL\_679840|Original|hCoV-19^^England|Human|Oxford Viromics|COVID-19 Genomics UK (COG-UK) Consortium|Golubchik|United Kingdom  
>Spike|hCoV-19/Jordan/AM-ALSR-4006/2020|2020-10-03|EPI\_ISL\_636369|Original|hCoV-19^^Amman|Human|Biolab Diagnostic Laboratories|Andersen lab at Scripps Research|Gangavarapu|Jordan  
>Spike|hCoV-19/England/20134064004/2020|2020-03-23|EPI\_ISL\_423150|Original|hCoV-19^^England|Human|Respiratory Virus Unit|Respiratory Virus Unit|Platt|United Kingdom  
>Spike|hCoV-19/Spain/CT-IBV-97009565/2020|2020-07-28|EPI\_ISL\_671862|Original|hCoV-19^^Catalunya|Human|Servicio de Microbiolog\u00eda|SeqCOVID-SPAIN consortium/IBV (CSIC)|Comas|Spain  
>Spike|hCoV-19/Japan/PG-2457/2020|2020-04-00|EPI\_ISL\_686062|Original|hCoV-19^^Japan|Human|Pathogen Genomics Center|Pathogen Genomics Center|Sekizuka|Japan  
>Spike|hCoV-19/USA/TX-HMH-3796/2020|2020-06-15|EPI\_ISL\_543200|Original|hCoV-19^^Texas|Human|Houston Methodist Hospital|Houston Methodist Hospital|Long|USA  
>Spike|hCoV-19/England/CAMC-A57BE1/2020|2020-10-08|EPI\_ISL\_597320|Original|hCoV-19^^England|Human|Lighthouse Lab in Cambridge|Wellcome Sanger Institute for the COVID-19 Genomics UK (COG-UK) consortium|Davies|United Kingdom  
>Spike|hCoV-19/USA/NY-QDX-881/2020|2020-03-16|EPI\_ISL\_571682|Original|hCoV-19^^New York|Human|Quest Diagnostics|Quest Diagnostics|Kagan|USA  
>Spike|hCoV-19/Hong Kong/HKU-200723-073/2020|2020-03-18|EPI\_ISL\_497840|Original|hCoV-19^^Hong Kong|Human|Department of Microbiology|Department of Microbiology|Chan|China  
>Spike|hCoV-19/USA/WA-S2732/2020|2020-07-12|EPI\_ISL\_525722|Original|hCoV-19^^Washington|Human|Seattle Flu Study|Seattle Flu Study|Lee|USA  
>Spike|hCoV-19/Australia/VIC13122/2020|2020-07-28|EPI\_ISL\_563622|Original|hCoV-19^^Victoria|Human|Microbiological Diagnostic Unit - Public Health Laboratory (MDU-PHL)|MDU-PHL|Schultz|Australia  
>Spike|hCoV-19/Denmark/DCGC-13866/2020|2020-11-30|EPI\_ISL\_713069|Original|hCoV-19^^Hovedstaden|Human|Department of Virus and Microbiological Special Diagnostics|Albertsen Lab|Michaelsen|Denmark  
>Spike|hCoV-19/USA/WI-WSLH-200372/2020|2020-04-22|EPI\_ISL\_578541|Original|hCoV-19^^Wisconsin|Human|Wisconsin State Laboratory of Hygiene Communicable Disease

Division|Wisconsin State Laboratory of Hygiene Communicable Disease  
Division|Florek|USA  
>Spike|hCoV-19/USA/WA-S1984/2020|2020-06-04|EPI\_ISL\_497412|Original|hCoV-19^^Washington|Human|Washington State Department of Health|Seattle Flu Study|Lee|USA  
>Spike|hCoV-19/England/MILK-A6AEC4/2020|2020-10-09|EPI\_ISL\_608765|Original|hCoV-19^^England|Human|Lighthouse Lab in Milton Keynes|Wellcome Sanger Institute for the COVID-19 Genomics UK (COG-UK) consortium|Davies|United Kingdom  
>Spike|hCoV-19/Denmark/DCGC-9979/2020|2020-11-09|EPI\_ISL\_669306|Original|hCoV-19^^Midtjylland|Human|Department of Virus and Microbiological Special Diagnostics|Albertsen Lab|Michaelsen|Denmark  
>Spike|hCoV-19/England/CAMC-A40E88/2020|2020-10-07|EPI\_ISL\_609439|Original|hCoV-19^^England|Human|Lighthouse Lab in Cambridge|Wellcome Sanger Institute for the COVID-19 Genomics UK (COG-UK) consortium|Davies|United Kingdom  
>Spike|hCoV-19/Wales/PHWC-47E722/2020|2020-09-28|EPI\_ISL\_595494|Original|hCoV-19^^Wales|Human|Originating lab|COVID-19 Genomics UK (COG-UK) Consortium|Moore|United Kingdom  
>Spike|hCoV-19/England/CAMC-AAFD11/2020|2020-10-21|EPI\_ISL\_623288|Original|hCoV-19^^England|Human|Lighthouse Lab in Cambridge|Wellcome Sanger Institute for the COVID-19 Genomics UK (COG-UK) consortium|Davies|United Kingdom  
>Spike|hCoV-19/New Zealand/20VR2650/2020|2020-00-00|EPI\_ISL\_579318|Original|hCoV-19^^Auckland|Human|LabPLUS|Institute of Environmental Science and Research (ESR)|Wang|New Zealand  
>Spike|hCoV-19/India/TG-CCMB-OM22/2020|2020-09-20|EPI\_ISL\_644716|Original|hCoV-19^^Telangana|Human|Osmania Medical College|CSIR-Centre for Cellular and Molecular Biology|Mukherjee|India  
>Spike|hCoV-19/Wales/PHWC-34768/2020|2020-04-20|EPI\_ISL\_446970|Original|hCoV-19^^Wales|Human|Wales Specialist Virology Centre|Public Health Wales Microbiology Cardiff|Moore|United Kingdom  
>Spike|hCoV-19/India/GJ-GBRC-368a/2020|2020-06-18|EPI\_ISL\_524723|Original|hCoV-19^^Gujarat|Human|B.J. Medical College and Civil hospital|Gujarat Biotechnology Research Centre|Joshi|India  
>Spike|hCoV-19/USA/NY-PV09416/2020|2020-03-13|EPI\_ISL\_450096|Original|hCoV-19^^New York|Human|MSSH Clinical Microbiology Laboratories|MSSH Pathogen Surveillance Program|van Bakel|USA  
>Spike|hCoV-19/England/QEUEH-A0B153/2020|2020-10-01|EPI\_ISL\_599242|Original|hCoV-19^^England|Human|Lighthouse Lab in Glasgow|Wellcome Sanger Institute for the COVID-19 Genomics UK (COG-UK) consortium|Davies|United Kingdom  
>Spike|hCoV-19/England/CAMC-B073BA/2020|2020-10-30|EPI\_ISL\_643657|Original|hCoV-19^^England|Human|Lighthouse Lab in Cambridge|Wellcome Sanger Institute for the COVID-19 Genomics UK (COG-UK) Consortium|Davies|United Kingdom  
>Spike|hCoV-19/Japan/PG-6574/2020|2020-09-00|EPI\_ISL\_687686|Original|hCoV-19^^Japan|Human|Pathogen Genomics Center|Pathogen Genomics Center|Sekizuka|Japan  
>Spike|hCoV-19/Wales/PHWC-485649/2020|2020-10-22|EPI\_ISL\_628201|Original|hCoV-19^^Wales|Human|Wales Specialist Virology Centre Sequencing lab|COVID-19 Genomics UK (COG-UK) Consortium|Moore|United Kingdom  
>Spike|hCoV-19/Scotland/GCVR-17136A/2020|2020-03-26|EPI\_ISL\_459716|Original|hCoV-19^^Scotland|Human|NHSGGC West of Scotland Specialist Virology Centre / MRC-University of Glasgow Centre for Virus Research|Wellcome Sanger Institute for the COVID-19 Genomics UK (COG-UK) consortium|Davies|United Kingdom  
>Spike|hCoV-19/England/QEUEH-A1FC79/2020|2020-10-01|EPI\_ISL\_587692|Original|hCoV-19^^England|Human|Lighthouse Lab in Glasgow|Wellcome Sanger Institute for the COVID-19 Genomics UK (COG-UK) consortium|Davies|United Kingdom  
>Spike|hCoV-19/England/QEUEH-AD0E41/2020|2020-10-26|EPI\_ISL\_633888|Original|hCoV-19^^England|Human|Lighthouse Lab in Glasgow|Wellcome Sanger Institute for the COVID-19 Genomics UK (COG-UK) consortium|Davies|United Kingdom  
>Spike|hCoV-19/England/LOND-1262E85/2020|2020-10-17|EPI\_ISL\_627082|Original|hCoV-19^^England|Human|University College London|COVID-19 Genomics UK (COG-UK) Consortium|Roy|United Kingdom  
>Spike|hCoV-19/USA/NY-NYUMC267/2020|2020-04-06|EPI\_ISL\_428781|Original|hCoV-19^^New York|Human|NYU Langone Health|Departments of Pathology and Medicine|Maurano|USA

>Spike|hCoV-19/Denmark/DCGC-15900/2020|2020-11-23|EPI\_ISL\_713272|Original|hCoV-19^^Syddanmark|Human|Department of Virus and Microbiological Special Diagnostics|Albertsen Lab|Michaelsen|Denmark

>Spike|hCoV-19/Brazil/RJ-1902/2020|2020-04-09|EPI\_ISL\_456090|Original|hCoV-19^^Rio de Janeiro|Human|Laboratory of Respiratory Viruses and Measles|Laboratory of Respiratory Viruses and Measles|Silva|Brazil

>Spike|hCoV-19/Australia/TAS50/2020|2020-04-09|EPI\_ISL\_522725|Original|hCoV-19^^Tasmania|Human|Royal Hobart Hospital Microbiology Department|MDU-PHL|Schultz|Australia

>Spike|hCoV-19/USA/CA-CDPH146/2020|2020-09-26|EPI\_ISL\_754979|Original|hCoV-19^^California|Human|California Department of Public Health|California Department of Public Health|Bell|USA

>Spike|hCoV-19/Australia/VIC10020/2020|2020-08-24|EPI\_ISL\_562765|Original|hCoV-19^^Victoria|Human|Microbiological Diagnostic Unit - Public Health Laboratory (MDU-PHL)|MDU-PHL|Schultz|Australia

>Spike|hCoV-19/England/LIVE-DC4478/2020|2020-11-14|EPI\_ISL\_702935|Original|hCoV-19^^England|Human|Liverpool Clinical Laboratories|COVID-19 Genomics UK (COG-UK) Consortium|Haldenby|United Kingdom

>Spike|hCoV-19/England/203690368/2020|2020-09-05|EPI\_ISL\_534729|Original|hCoV-19^^England|Human|Respiratory Virus Unit|Respiratory Virus Unit|Platt|United Kingdom

>Spike|hCoV-19/Gambia/NPHL-923/2020|2020-00-00|EPI\_ISL\_561330|Original|hCoV-19^^Kombo|Human|MRCG at LSHTM Genomics lab|MRCG at LSHTM Genomics lab|Sesay|Gambia

>Spike|hCoV-19/USA/NC\_200241/2020|2020-03-00|EPI\_ISL\_454799|Original|hCoV-19^^North Carolina|Human|Dirk Dittmer|Dirk Dittmer|Moorad|USA

>Spike|hCoV-19/USA/LA-EVTL451/2020|2020-06-20|EPI\_ISL\_578855|Original|hCoV-19^^Louisiana|Human|LSUHS Emerging Viral Threat Laboratory|Microbial Genome Sequencing Center|Kamil|USA

>Spike|hCoV-19/England/CAMC-C71D70/2020|2020-12-15|EPI\_ISL\_768921|Original|hCoV-19^^England|Human|Lighthouse Lab in Cambridge|Wellcome Sanger Institute for the COVID-19 Genomics UK (COG-UK) Consortium|Davies|United Kingdom

>Spike|hCoV-19/Northern Ireland/NIRE-23406B/2020|2020-10-16|EPI\_ISL\_680339|Original|hCoV-19^^Northern Ireland|Human|Regional Virus Laboratory|COVID-19 Genomics UK (COG-UK) Consortium|Fairley|United Kingdom

>Spike|hCoV-19/SaudiArabia/KAUST-MADINAH1113/2020|2020-06-11|EPI\_ISL\_513117|Original|hCoV-19^^Madinah|Human|Pathogen Genomics Lab King Abdullah University of Science and Technology(KAUST)|Pathogen Genomics Lab King Abdullah University of Science and Technology(KAUST)|Mohamed Ghazzali|Saudi Arabia

>Spike|hCoV-19/USA/AZ-TG491598/2020|2020-06-24|EPI\_ISL\_695185|Original|hCoV-19^^Arizona|Human|AZ SPHL|TGen North|French|USA

>Spike|hCoV-19/England/20166017804/2020|2020-04-16|EPI\_ISL\_466543|Original|hCoV-19^^England|Human|Respiratory Virus Unit|Respiratory Virus Unit|Platt|United Kingdom

>Spike|hCoV-19/Poland/PL\_MCB\_10/2020|2020-04-07|EPI\_ISL\_645009|Original|hCoV-19^^Poland|Human|Human Genome Variation Research Group|Human Genome Variation Research Group||Poland

>Spike|hCoV-19/Japan/PG-5172/2020|2020-08-00|EPI\_ISL\_690275|Original|hCoV-19^^Japan|Human|Pathogen Genomics Center|Pathogen Genomics Center|Sekizuka|Japan

>Spike|hCoV-19/USA/NY-NYUMC755/2020|2020-03-26|EPI\_ISL\_451469|Original|hCoV-19^^New York|Human|NYU Langone Health|Departments of Pathology and Medicine|Maurano|USA

>Spike|hCoV-19/England/OXON-B0F7B/2020|2020-04-17|EPI\_ISL\_478982|Original|hCoV-19^^England|Human|Oxford Viromics|COVID-19 Genomics UK (COG-UK) Consortium|Golubchik|United Kingdom

>Spike|hCoV-19/Wales/PHWC-33101/2020|2020-04-14|EPI\_ISL\_446739|Original|hCoV-19^^Wales|Human|Wales Specialist Virology Centre|Public Health Wales Microbiology Cardiff|Moore|United Kingdom

>Spike|hCoV-19/South Africa/L00166/2020|2020-07-27|EPI\_ISL\_622978|Original|hCoV-19^^Gauteng|Human|Lancet Laboratories|National Institute for Communicable Diseases of the National Health Laboratory Service|Allam|South Africa

>Spike|hCoV-19/New Zealand/20CV0588/2020|2020-11-19|EPI\_ISL\_661262|Original|hCoV-19^^Auckland|Human|LabPLUS|Institute of Environmental Science and Research (ESR)|Wang|New Zealand



>Spike|hCoV-19/England/LIVE-DC4C70/2020|2020-11-11|EPI\_ISL\_702687|Original|hCoV-19^^England|Human|Liverpool Clinical Laboratories|COVID-19 Genomics UK (COG-UK) Consortium|Haldenby|United Kingdom

>Spike|hCoV-19/Australia/VIC11753/2020|2020-07-22|EPI\_ISL\_563484|Original|hCoV-19^^Victoria|Human|Microbiological Diagnostic Unit - Public Health Laboratory (MDU-PHL) |MDU-PHL|Schultz|Australia

>Spike|hCoV-19/Canada/ON-PHL-20-03749/2020|2020-11-00|EPI\_ISL\_775108|Original|hCoV-19^^Ontario|Human|Public Health Ontario Laboratory|Public Health Ontario Laboratory|Guthrie|Canada

>Spike|hCoV-19/Switzerland/ZH-ETHZ-380358/2020|2020-11-22|EPI\_ISL\_721942|Original|hCoV-19^^Zurich|Human|Viollier AG|Department of Biosystems Science and Engineering|Nadeau|Switzerland

>Spike|hCoV-19/England/MILK-9D5496/2020|2020-09-19|EPI\_ISL\_577061|Original|hCoV-19^^England|Human|Centre for Enzyme Innovation|COVID-19 Genomics UK (COG-UK) Consortium|Robson|United Kingdom

>Spike|hCoV-19/USA/UT-08620/2020|2020-05-26|EPI\_ISL\_524360|Original|hCoV-19^^Utah|Human|Utah Public Health Laboratory|Utah Public Health Laboratory|Young|USA

>Spike|hCoV-19/Japan/PG-0960/2020|2020-04-00|EPI\_ISL\_684570|Original|hCoV-19^^Japan|Human|Gunma Prefectural Institute of Public Health and Environmental Sciences|Pathogen Genomics Center|Sekizuka|Japan

>Spike|hCoV-19/USA/UT-UPHL-2012189893/2020|2020-08-08|EPI\_ISL\_745786|Original|hCoV-19^^Utah|Human|Ginkgo Bioworks Clinical Laboratory|Utah Public Health Laboratory|Young|USA

>Spike|hCoV-19/England/CAMB-1BA7A5/2020|2020-11-15|EPI\_ISL\_664996|Original|hCoV-19^^England|Human|Department of Pathology|COVID-19 Genomics UK (COG-UK) Consortium|Goodfellow|United Kingdom

>Spike|hCoV-19/England/CAMC-AB1329/2020|2020-10-23|EPI\_ISL\_623798|Original|hCoV-19^^England|Human|Lighthouse Lab in Cambridge|Wellcome Sanger Institute for the COVID-19 Genomics UK (COG-UK) consortium|Davies|United Kingdom

>Spike|hCoV-19/Ghana/84182\_S43/2020|2020-05-25|EPI\_ISL\_515104|Original|hCoV-19^^Ghana|Human|Department of Biochemistry|WACCBIP|Amuzu|Ghana

>Spike|hCoV-19/Wales/PHWC-16E263/2020|2020-09-30|EPI\_ISL\_585690|Original|hCoV-19^^Wales|Human|Wales Specialist Virology Centre Sequencing lab|COVID-19 Genomics UK (COG-UK) Consortium|Moore|United Kingdom

>Spike|hCoV-19/Japan/PG-0813/2020|2020-04-00|EPI\_ISL\_684423|Original|hCoV-19^^Japan|Human|Fukuoka Institute of Health and Environmental Sciences|Pathogen Genomics Center|Sekizuka|Japan

>Spike|hCoV-19/USA/MI-MDHHS-SC20375/2020|2020-03-24|EPI\_ISL\_450586|Original|hCoV-19^^Michigan|Human|Michigan Department of Health and Human Services|Michigan Department of Health and Human Services|Blankenship|USA

>Spike|hCoV-19/England/CAMC-C71DCB/2020|2020-12-15|EPI\_ISL\_769199|Original|hCoV-19^^England|Human|Lighthouse Lab in Cambridge|Wellcome Sanger Institute for the COVID-19 Genomics UK (COG-UK) Consortium|Davies|United Kingdom

>Spike|hCoV-19/Denmark/DCGC-11764/2020|2020-10-26|EPI\_ISL\_671120|Original|hCoV-19^^Syddanmark|Human|Department of Virus and Microbiological Special Diagnostics|Albertsen Lab|Michaelsen|Denmark

>Spike|hCoV-19/England/QEUA-9984AE/2020|2020-08-24|EPI\_ISL\_539947|Original|hCoV-19^^England|Human|Lighthouse Lab in Glasgow|Wellcome Sanger Institute for the COVID-19 Genomics UK (COG-UK) consortium|Davies|United Kingdom

>Spike|hCoV-19/Brazil/RS-6208/2020|2020-05-19|EPI\_ISL\_729833|Original|hCoV-19^^Rio Grande do Sul|Human|Laboratorio Central de Saude Publica do Estado do Rio Grande do Sul (LACEN-RS)|Laboratory of Respiratory Viruses and Measles|Silva|Brazil

>Spike|hCoV-19/USA/NY-Wadsworth-57117-01/2020|2020-04-20|EPI\_ISL\_676684|Original|hCoV-19^^New York|Human|Wadsworth Center|Wadsworth Center|Lasek-Nesselquist|USA

>Spike|hCoV-19/Wales/PHWC-16D71A/2020|2020-09-21|EPI\_ISL\_577437|Original|hCoV-19^^Wales|Human|Wales Specialist Virology Centre Sequencing lab|COVID-19 Genomics UK (COG-UK) Consortium|Moore|United Kingdom

>Spike|hCoV-19/England/ALDP-4FFF30/2020|2020-06-25|EPI\_ISL\_559297|Original|hCoV-19^^England|Human|Lighthouse Lab in Alderley Park|Wellcome Sanger Institute for the COVID-19 Genomics UK (COG-UK) consortium|Davies|United Kingdom

>Spike|hCoV-19/Australia/VIC15658/2020|2020-08-04|EPI\_ISL\_593399|Original|hCoV-19^^Victoria|Human|Microbiological Diagnostic Unit - Public Health Laboratory (MDU-PHL)|MDU-PHL|Schultz|Australia

>Spike|hCoV-19/England/MILK-9AA281/2020|2020-09-01|EPI\_ISL\_550803|Original|hCoV-19^^England|Human|Lighthouse Lab in Milton Keynes|Wellcome Sanger Institute for the COVID-19 Genomics UK (COG-UK) consortium|Davies|United Kingdom

>Spike|hCoV-19/Netherlands/ZH-EMC-255/2020|2020-06-30|EPI\_ISL\_523597|Original|hCoV-19^^Zuid Holland|Human|Dutch COVID-19 response team|Erasmus Medical Center|Oude Munnink|Netherlands

>Spike|hCoV-19/England/MILK-A6A671/2020|2020-10-11|EPI\_ISL\_626735|Original|hCoV-19^^England|Human|Virology Department|COVID-19 Genomics UK (COG-UK) Consortium|de Silva|United Kingdom

>Spike|hCoV-19/Wuhan/HB-WH2-154/2020|2020-02-28|EPI\_ISL\_455373|Original|hCoV-19^^Hubei|Human|Wuhan Chain Medical Labs (CMLabs)|State Key Laboratory of Biotherapy of Sichuan University|Tang|China

>Spike|hCoV-19/Spain/AR-ISCI-201782/2020|2020-03-08|EPI\_ISL\_539515|Original|hCoV-19^^Aragon|Human|Hospital Universitario Miguel Servet|Instituto de Salud Carlos III|Caballero|Spain

>Spike|hCoV-19/France/OCC-SC559/2020|2020-04-20|EPI\_ISL\_645207|Original|hCoV-19^^Occitanie|Human|CHU N\u00eemes|CNR Virus des Infections Respiratoires - France SUD|Bal|France

>Spike|hCoV-19/Sweden/20-53189/2020|2020-10-13|EPI\_ISL\_648168|Original|hCoV-19^^Sweden|Human|Eskilstuna|The Public Health Agency of Sweden|Svartstr\u00f6m|Sweden

>Spike|hCoV-19/Wales/PHWC-48E455/2020|2020-11-12|EPI\_ISL\_680860|Original|hCoV-19^^Wales|Human|Wales Specialist Virology Centre Sequencing lab|COVID-19 Genomics UK (COG-UK) Consortium|Moore|United Kingdom

>Spike|hCoV-19/Iran/2297/2020|2020-04-13|EPI\_ISL\_594185|Original|hCoV-19^^Tehran|Human|Department of Pathology|Genetics Research Center|Najmabadi|Iran

>Spike|hCoV-19/Denmark/DCGC-15922/2020|2020-11-23|EPI\_ISL\_714485|Original|hCoV-19^^Hovedstaden|Human|Department of Virus and Microbiological Special Diagnostics|Albertsen Lab|Michaelsen|Denmark

>Spike|hCoV-19/USA/TX-HMH-MCoV-19314/2020|2020-11-28|EPI\_ISL\_783755|Original|hCoV-19^^Texas|Human|Houston Methodist Hospital|Houston Methodist Hospital|Long|USA

>Spike|hCoV-19/England/LIVE-DC6E4B/2020|2020-11-24|EPI\_ISL\_705927|Original|hCoV-19^^England|Human|Liverpool Clinical Laboratories|COVID-19 Genomics UK (COG-UK) Consortium|Haldenby|United Kingdom

>Spike|hCoV-19/England/LIVE-DC7DB6/2020|2020-11-17|EPI\_ISL\_702769|Original|hCoV-19^^England|Human|Liverpool Clinical Laboratories|COVID-19 Genomics UK (COG-UK) Consortium|Haldenby|United Kingdom

>Spike|hCoV-19/Wales/PHWC-493C91/2020|2020-11-20|EPI\_ISL\_726007|Original|hCoV-19^^Wales|Human|Originating lab|COVID-19 Genomics UK (COG-UK) Consortium|Moore|United Kingdom

>Spike|hCoV-19/England/MILK-B8E719/2020|2020-11-13|EPI\_ISL\_674130|Original|hCoV-19^^England|Human|Lighthouse Lab in Milton Keynes|Wellcome Sanger Institute for the COVID-19 Genomics UK (COG-UK) Consortium|Davies|United Kingdom

>Spike|hCoV-19/USA/TX-HMH-MCoV-15864/2020|2020-07-10|EPI\_ISL\_785548|Original|hCoV-19^^Texas|Human|Houston Methodist Hospital|Houston Methodist Hospital|Long|USA

>Spike|hCoV-19/England/ALDP-B859C1/2020|2020-11-14|EPI\_ISL\_675756|Original|hCoV-19^^England|Human|Lighthouse Lab in Alderley Park|Wellcome Sanger Institute for the COVID-19 Genomics UK (COG-UK) Consortium|Davies|United Kingdom

>Spike|hCoV-19/England/ALDP-A6DDC4/2020|2020-10-15|EPI\_ISL\_607074|Original|hCoV-19^^England|Human|Lighthouse Lab in Alderley Park|Wellcome Sanger Institute for the COVID-19 Genomics UK (COG-UK) consortium|Davies|United Kingdom

>Spike|hCoV-19/USA/CO-CDPHE-2100021189/2020|2020-11-21|EPI\_ISL\_771328|Original|hCoV-19^^Colorado|Human|Colorado Department of Public Health and Environment|Colorado Department of Public Health and Environment|Bankers|USA

>Spike|hCoV-19/Ukraine/203100343/2020|2020-05-27|EPI\_ISL\_512622|Original|hCoV-19^^Ukraine|Human|National Laboratory for Influenza/Virology reference laboratory|Respiratory Virus Unit|Platt|Ukraine

>Spike|hCoV-19/USA/FL-BPHL-2081/2020|2020-07-29|EPI\_ISL\_653234|Original|hCoV-19^^Florida|Human|Florida Bureau of Public Health Laboratories|Florida Bureau of Public Health Laboratories|Blanton|USA

>Spike|hCoV-19/Netherlands/ZH-EMC-788/2020|2020-10-14|EPI\_ISL\_632657|Original|hCoV-19^^Zuid Holland|Human|Dutch COVID-19 response team|Erasmus Medical Center|Oude Munnink|Netherlands

>Spike|hCoV-19/Japan/PG-8215/2020|2020-08-00|EPI\_ISL\_687314|Original|hCoV-19^^Japan|Human|Pathogen Genomics Center|Pathogen Genomics Center|Sekizuka|Japan

>Spike|hCoV-19/USA/AZ-TG513425/2020|2020-07-15|EPI\_ISL\_695309|Original|hCoV-19^^Arizona|Human|TGen North|TGen North|French|USA

>Spike|hCoV-19/India/WB-S19/2020|2020-04-20|EPI\_ISL\_455649|Original|hCoV-19^^West Bengal|Human|ICMR-National Institute of Cholera and Enteric Diseases|National Institute of Biomedical Genomics|Maitra|India

>Spike|hCoV-19/USA/MI-MDHHS-SC22602/2020|2020-11-23|EPI\_ISL\_737175|Original|hCoV-19^^Michigan|Human|Michigan Department of Health and Human Services|Michigan Department of Health and Human Services|Blankenship|USA

>Spike|hCoV-19/Russia/CRIE5027243/2020|2020-07-16|EPI\_ISL\_534340|Original|hCoV-19^^Moscow|Human|Molecular diagnostic laboratory of Federal Budget Institution of Science \Central Research Institute of Epidemiology\ of The Federal Service on Customers' Rights Protection and Human Well-being Surveillance|Group of Genomics and Postgenomic Technologies of Central Research Institute of Epidemiology|Speranskaya|Russia

>Spike|hCoV-19/England/MILK-BB25D6/2020|2020-11-18|EPI\_ISL\_720225|Original|hCoV-19^^England|Human|Lighthouse Lab in Milton Keynes|Wellcome Sanger Institute for the COVID-19 Genomics UK (COG-UK) Consortium|Davies|United Kingdom

>Spike|hCoV-19/USA/CA-ALSR-1360/2020|2020-04-21|EPI\_ISL\_494568|Original|hCoV-19^^California|Human|San Diego County Public Health Laboratory|Andersen lab at Scripps Research|Gangavarapu|USA

>Spike|hCoV-19/Switzerland/Vs-ETHZ-320189/2020|2020-10-10|EPI\_ISL\_737822|Original|hCoV-19^^Valais|Human|Viollier AG|Department of Biosystems Science and Engineering|Nadeau|Switzerland

>Spike|hCoV-19/USA/CA-LACPHL-AA00036/2020|2020-10-13|EPI\_ISL\_710416|Original|hCoV-19^^California|Human|Los Angeles County PHL|Los Angeles County PHL|Hemarajata|USA

>Spike|hCoV-19/England/ALDP-9BE457/2020|2020-09-10|EPI\_ISL\_567916|Original|hCoV-19^^England|Human|Lighthouse Lab in Alderley Park|Wellcome Sanger Institute for the COVID-19 Genomics UK (COG-UK) consortium|Davies|United Kingdom

>Spike|hCoV-19/France/PAC-IHU-1336/2020|2020-08-19|EPI\_ISL\_569123|Original|hCoV-19^^Provence-Alpes-C\u00f4te-d\u2019Azur|Human|MEPHI|MEPHI|Levasseur|France

>Spike|hCoV-19/Northern Ireland/NIRE-FAACF/2020|2020-03-27|EPI\_ISL\_441714|Original|hCoV-19^^Northern Ireland|Human|Regional Virus Laboratory|Wellcome Sanger Institute for the COVID-19 Genomics UK (COG-UK) consortium|Amato|United Kingdom

>Spike|hCoV-19/Spain/PV-IBV-004208/2020|2020-04-03|EPI\_ISL\_510493|Original|hCoV-19^^Basque Country|Human|Servicio de Microbiolog\u00eda. Hospital Universitario Donostia. OSI Donostialdea. \u00c1rea de Enfermedades Infecciosas|SeqCOVID-SPAIN consortium|IBV (CSIC) |Comas|Spain

>Spike|hCoV-19/England/QEUA-B434CE/2020|2020-11-08|EPI\_ISL\_657298|Original|hCoV-19^^England|Human|Lighthouse Lab in Glasgow|Wellcome Sanger Institute for the COVID-19 Genomics UK (COG-UK) Consortium|Davies|United Kingdom

>Spike|hCoV-19/Scotland/QEUA-9B54F6/2020|2020-09-07|EPI\_ISL\_602064|Original|hCoV-19^^Scotland|Human|Lighthouse Lab in Glasgow|Wellcome Sanger Institute for the COVID-19 Genomics UK (COG-UK) consortium|Davies|United Kingdom

>Spike|hCoV-19/England/ALDP-B5B6EB/2020|2020-11-08|EPI\_ISL\_655374|Original|hCoV-19^^England|Human|Lighthouse Lab in Alderley Park|Wellcome Sanger Institute for the COVID-19 Genomics UK (COG-UK) Consortium|Davies|United Kingdom

>Spike|hCoV-19/Wales/PHWC-47FADD/2020|2020-10-05|EPI\_ISL\_612770|Original|hCoV-19^^Wales|Human|Wales Specialist Virology Centre Sequencing lab|COVID-19 Genomics UK (COG-UK) Consortium|Moore|United Kingdom

>Spike|hCoV-19/USA/TX-DSHS-1697/2020|2020-06-15|EPI\_ISL\_708625|Original|hCoV-19^^Texas|Human|Texas Department of State Health Services|Texas Department of State Health Services|Rahman|USA

>Spike|hCoV-19/USA/CT-UW-685/2020|2020-03-12|EPI\_ISL\_476931|Original|hCoV-19^^Connecticut|Human|UW Virology Lab|UW Virology Lab|Roychoudhury|USA

>Spike|hCoV-19/England/EXET-13F113/2020|2020-12-16|EPI\_ISL\_764129|Original|hCoV-19^^England|Human|University of Exeter|COVID-19 Genomics UK (COG-UK) Consortium|Temperton|United Kingdom

>Spike|hCoV-19/Gibraltar/205000670/2020|2020-12-00|EPI\_ISL\_709996|Original|hCoV-19^^Gibraltar|Human|Microbiology|Respiratory Virus Unit|Platt|Gibraltar

>Spike|hCoV-19/Netherlands/ZH-EMC-306/2020|2020-07-04|EPI\_ISL\_523648|Original|hCoV-19^^Zuid Holland|Human|Dutch COVID-19 response team|Erasmus Medical Center|Oude Munnink|Netherlands

>Spike|hCoV-19/Italy/ABR-IZSGC-TE6225/2020|2020-03-23|EPI\_ISL\_420592|Original|hCoV-19^^Abruzzo|Human|Ospedale Civile Giuseppe Mazzini|Istituto Zooprofilattico Sperimentale dell'Abruzzo e Molise \G.Caporale\|Lorusso|Italy

>Spike|hCoV-19/New Zealand/20VR3198/2020|2020-03-28|EPI\_ISL\_579484|Original|hCoV-19^^Canterbury|Human|Canterbury Health Laboratories|Institute of Environmental Science and Research (ESR)|Wang|New Zealand

>Spike|hCoV-19/Japan/PG-0196/2020|2020-03-19|EPI\_ISL\_479901|Original|hCoV-19^^Kanto|Human|Gunma Prefectural Institute of Public Health and Environmental Sciences|Pathogen Genomics Center|Sekizuka|Japan

>Spike|hCoV-19/Scotland/QEUAH-95F9FF/2020|2020-08-06|EPI\_ISL\_532353|Original|hCoV-19^^Scotland|Human|NHSGGC West of Scotland Specialist Virology Centre / MRC-University of Glasgow Centre for Virus Research|Wellcome Sanger Institute for the COVID-19 Genomics UK (COG-UK) consortium|Davies|United Kingdom

>Spike|hCoV-19/Gambia/GC19-3219/2020|2020-07-27|EPI\_ISL\_561052|Original|hCoV-19^^Kombo|Human|MRCG at LSHTM Genomics lab|MRCG at LSHTM Genomics lab|Sesay|Gambia

>Spike|hCoV-19/England/LIVE-DC7062/2020|2020-12-01|EPI\_ISL\_702558|Original|hCoV-19^^England|Human|Liverpool Clinical Laboratories|COVID-19 Genomics UK (COG-UK) Consortium|Haldenby|United Kingdom

>Spike|hCoV-19/Wales/PHWC-2F117/2020|2020-04-06|EPI\_ISL\_446203|Original|hCoV-19^^Wales|Human|Wales Specialist Virology Centre|Public Health Wales Microbiology Cardiff|Moore|United Kingdom

>Spike|hCoV-19/Hungary/US-32542w/2020|2020-09-02|EPI\_ISL\_677754|Original|hCoV-19^^Csongr\u00e9ld county|Human|University of Szeged|National Laboratory of Virology|Kemenesi|Hungary

>Spike|hCoV-19/England/MILK-95D7AC/2020|2020-06-19|EPI\_ISL\_556298|Original|hCoV-19^^England|Human|Lighthouse Lab in Milton Keynes|Wellcome Sanger Institute for the COVID-19 Genomics UK (COG-UK) consortium|Davies|United Kingdom

>Spike|hCoV-19/England/CAMB-7C5C4/2020|2020-04-06|EPI\_ISL\_442212|Original|hCoV-19^^England|Human|Department of Pathology|Wellcome Sanger Institute for the COVID-19 Genomics UK (COG-UK) consortium|Amato|United Kingdom

>Spike|hCoV-19/England/MILK-A054BA/2020|2020-09-30|EPI\_ISL\_599931|Original|hCoV-19^^England|Human|Lighthouse Lab in Milton Keynes|Wellcome Sanger Institute for the COVID-19 Genomics UK (COG-UK) consortium|Davies|United Kingdom

>Spike|hCoV-19/England/ALDP-C487CF/2020|2020-12-12|EPI\_ISL\_736522|Original|hCoV-19^^England|Human|Lighthouse Lab in Alderley Park|Wellcome Sanger Institute for the COVID-19 Genomics UK (COG-UK) Consortium|Davies|United Kingdom

>Spike|hCoV-19/England/MILK-9F040E/2020|2020-09-24|EPI\_ISL\_580751|Original|hCoV-19^^England|Human|Lighthouse Lab in Milton Keynes|Wellcome Sanger Institute for the COVID-19 Genomics UK (COG-UK) consortium|Davies|United Kingdom

>Spike|hCoV-19/Scotland/EDB2167/2020|2020-04-20|EPI\_ISL\_491496|Original|hCoV-19^^Scotland|Human|Virology Department|Wellcome Sanger Institute for the COVID-19 Genomics UK (COG-UK) consortium|Davies|United Kingdom

>Spike|hCoV-19/England/NORW-F07FF/2020|2020-10-05|EPI\_ISL\_584740|Original|hCoV-19^^England|Human|Quadram Institute Bioscience|COVID-19 Genomics UK (COG-UK) Consortium|Alikhan|United Kingdom

>Spike|hCoV-19/Saudi Arabia/86267/2020|2020-03-15|EPI\_ISL\_469247|Original|hCoV-19^^Jeddah|Human|Special Infectious Agents Unit|Special Infectious Agents Unit|Submitter|Saudi Arabia

>Spike|hCoV-19/USA/TX-HMH-2664/2020|2020-06-05|EPI\_ISL\_545461|Original|hCoV-19^^Texas|Human|Houston Methodist Hospital|Houston Methodist Hospital|Long|USA

>Spike|hCoV-19/England/ALDP-B75627/2020|2020-11-12|EPI\_ISL\_662050|Original|hCoV-19^^England|Human|Lighthouse Lab in Alderley Park|Wellcome Sanger Institute for the COVID-19 Genomics UK (COG-UK) Consortium|Davies|United Kingdom

>Spike|hCoV-19/Denmark/DCGC-4054/2020|2020-09-14|EPI\_ISL\_622010|Original|hCoV-19^^Hovedstaden|Human|Department of Virus and Microbiological Special Diagnostics|Albertsen lab|Michaelsen|Denmark

>Spike|hCoV-19/England/20170030904/2020|2020-04-13|EPI\_ISL\_465274|Original|hCoV-19^^England|Human|Respiratory Virus Unit|Respiratory Virus Unit|Platt|United Kingdom

>Spike|hCoV-19/Japan/PG-3585/2020|2020-06-00|EPI\_ISL\_691841|Original|hCoV-19^^Japan|Human|Pathogen Genomics Center|Pathogen Genomics Center|Sekizuka|Japan

>Spike|hCoV-19/Canada/ON-S1250/2020|2020-05-13|EPI\_ISL\_586314|Original|hCoV-19^^Ontario|Human|Toronto Invasive Bacterial Diseases Network|McMaster University|McArthur|Canada

>Spike|hCoV-19/England/MILK-9AB208/2020|2020-08-31|EPI\_ISL\_551084|Original|hCoV-19^^England|Human|Lighthouse Lab in Milton Keynes|Wellcome Sanger Institute for the COVID-19 Genomics UK (COG-UK) consortium|Davies|United Kingdom

>Spike|hCoV-19/England/MILK-B052FB/2020|2020-10-24|EPI\_ISL\_650237|Original|hCoV-19^^England|Human|Virology Department|COVID-19 Genomics UK (COG-UK) Consortium|de Silva|United Kingdom

>Spike|hCoV-19/England/QEUA-9F95A8/2020|2020-09-27|EPI\_ISL\_589197|Original|hCoV-19^^England|Human|Lighthouse Lab in Glasgow|Wellcome Sanger Institute for the COVID-19 Genomics UK (COG-UK) consortium|Davies|United Kingdom

>Spike|hCoV-19/France/BRE-9326/2020|2020-08-11|EPI\_ISL\_614266|Original|hCoV-19^^Bretagne|Human|Eurofins|National Reference Center for Viruses of Respiratory Infections|Enouf|France

>Spike|hCoV-19/England/PORT-2D2B6E/2020|2020-04-04|EPI\_ISL\_529668|Original|hCoV-19^^England|Human|Centre for Enzyme Innovation|COVID-19 Genomics UK (COG-UK) Consortium|Robson|United Kingdom

>Spike|hCoV-19/USA/CA-ALSR-3803/2020|2020-05-30|EPI\_ISL\_636210|Original|hCoV-19^^California|Human|San Diego County Public Health Laboratory|Andersen lab at Scripps Research|Gangavarapu|USA

>Spike|hCoV-19/England/QEUA-BA0632/2020|2020-11-18|EPI\_ISL\_719686|Original|hCoV-19^^England|Human|Lighthouse Lab in Glasgow|Wellcome Sanger Institute for the COVID-19 Genomics UK (COG-UK) Consortium|Davies|United Kingdom

>Spike|hCoV-19/Wales/PHWC-162D8C/2020|2020-05-29|EPI\_ISL\_473198|Original|hCoV-19^^Wales|Human|Wales Specialist Virology Centre Sequencing lab|COVID-19 Genomics UK (COG-UK) Consortium|Moore|United Kingdom

>Spike|hCoV-19/Denmark/DCGC-9710/2020|2020-11-09|EPI\_ISL\_669122|Original|hCoV-19^^Hovedstaden|Human|Department of Virus and Microbiological Special Diagnostics|Albertsen Lab|Michaelsen|Denmark

>Spike|hCoV-19/England/ALDP-9E9DFE/2020|2020-09-24|EPI\_ISL\_580109|Original|hCoV-19^^England|Human|Lighthouse Lab in Alderley Park|Wellcome Sanger Institute for the COVID-19 Genomics UK (COG-UK) consortium|Davies|United Kingdom

>Spike|hCoV-19/England/ALDP-4AEB1E/2020|2020-06-14|EPI\_ISL\_559346|Original|hCoV-19^^England|Human|Lighthouse Lab in Alderley Park|Wellcome Sanger Institute for the COVID-19 Genomics UK (COG-UK) consortium|Davies|United Kingdom

>Spike|hCoV-19/USA/NY-PV09480/2020|2020-03-20|EPI\_ISL\_450152|Original|hCoV-19^^New York|Human|MSHS Clinical Microbiology Laboratories|MSHS Pathogen Surveillance Program|van Bakel|USA

>Spike|hCoV-19/USA/NMDOH-2020174703/2020|2020-07-02|EPI\_ISL\_542025|Original|hCoV-19^^Texas|Human|New Mexico Department of Health Scientific Laboratory|New Mexico Department of Health Scientific Laboratory|Johnson|USA

>Spike|hCoV-19/Denmark/DCGC-16674/2020|2020-11-09|EPI\_ISL\_714906|Original|hCoV-19^^Hovedstaden|Human|Department of Virus and Microbiological Special Diagnostics|Albertsen Lab|Michaelsen|Denmark

>Spike|hCoV-19/USA/MI-MDHHS-SC22135/2020|2020-10-15|EPI\_ISL\_614186|Original|hCoV-19^^Michigan|Human|Michigan Department of Health and Human Services|Michigan Department of Health and Human Services|Jacob|USA

>Spike|hCoV-19/Denmark/DCGC-21434/2020|2020-12-21|EPI\_ISL\_758164|Original|hCoV-19^^Hovedstaden|Human|Department of Virus and Microbiological Special Diagnostics|Albertsen Lab|Michaelsen|Denmark

>Spike|hCoV-19/USA/NY-Wadsworth-223558-01/2020|2020-09-21|EPI\_ISL\_765485|Original|hCoV-19^^New York|Human|Wadsworth Center|Wadsworth Center|Lasèk-Nesselquist|USA

>Spike|hCoV-19/England/LOND-D474C/2020|2020-04-09|EPI\_ISL\_444149|Original|hCoV-19^^England|Human|University College London|COVID-19 Genomics UK (COG-UK) Consortium|Roy|United Kingdom

>Spike|hCoV-19/Denmark/DCGC-7346/2020|2020-10-12|EPI\_ISL\_619312|Original|hCoV-19^^Syddanmark|Human|Department of Virus and Microbiological Special Diagnostics|Albertsen lab|Michaelsen|Denmark

>Spike|hCoV-19/Portugal/PT2076/2020|2020-11-13|EPI\_ISL\_732290|Original|hCoV-19^^Portugal|Human|Instituto Nacional de Saude (INSA) and Instituto Gulbenkian de Ciencia (IGC)|Instituto Nacional de Saude (INSA) and Instituto Gulbenkian de Ciencia (IGC)|Borges|Portugal

>Spike|hCoV-19/Denmark/DCGC-982/2020|2020-03-09|EPI\_ISL\_614578|Original|hCoV-19^^Nordjylland|Human|Department of Virus and Microbiological Special Diagnostics|Albertsen lab|Michaelsen|Denmark

>Spike|hCoV-19/Austria/CeMM0463/2020|2020-03-16|EPI\_ISL\_475874|Original|hCoV-19^^Austria|Human|Austrian Agency for Health and Food Safety (AGES)|Bergthaler laboratory|Bergthaler|Austria

>Spike|hCoV-19/Brazil/RJ-00354/2020|2020-04-30|EPI\_ISL\_623157|Original|hCoV-19^^Rio de Janeiro|Human|Laboratorio de Virologia Molecular / UFRJ|Bioinformatics Laboratory / LNCC|Almeida|Brazil

>Spike|hCoV-19/Russia/SAR-RARI-3187/2020|2020-07-30|EPI\_ISL\_678274|Original|hCoV-19^^Saratov|Human|Mikrobiologie|Mikrobiologie|Krasnov|Russia

>Spike|hCoV-19/England/BRIS-185413C/2020|2020-04-28|EPI\_ISL\_492265|Original|hCoV-19^^England|Human|PHE South West Regional Laboratory|Wellcome Sanger Institute for the COVID-19 Genomics UK (COG-UK) consortium|Davies|United Kingdom

>Spike|hCoV-19/Gibraltar/205000648/2020|2020-12-00|EPI\_ISL\_709983|Original|hCoV-19^^Gibraltar|Human|Microbiology|Respiratory Virus Unit|Platt|Gibraltar

>Spike|hCoV-19/Luxembourg/LNS3683612/2020|2020-10-19|EPI\_ISL\_740357|Original|hCoV-19^^Luxembourg|Human|Laboratoire national de sant\u00e9|Laboratoire national de sant\u00e9|Wienecke-Baldacchino|Luxembourg

>Spike|hCoV-19/Japan/PG-6375/2020|2020-08-00|EPI\_ISL\_689486|Original|hCoV-19^^Japan|Human|Fukuoka Institute of Health and Environmental Sciences|Pathogen Genomics Center|Sekizuka|Japan

>Spike|hCoV-19/England/204720848/2020|2020-11-16|EPI\_ISL\_686605|Original|hCoV-19^^England|Human|Respiratory Virus Unit|COVID-19 Genomics UK (COG-UK) Consortium|Platt|United Kingdom

>Spike|hCoV-19/Portugal/PT1942/2020|2020-11-10|EPI\_ISL\_732170|Original|hCoV-19^^Portugal|Human|Instituto Nacional de Saude (INSA) and Instituto Gulbenkian de Ciencia (IGC)|Instituto Nacional de Saude (INSA) and Instituto Gulbenkian de Ciencia (IGC)|Borges|Portugal

>Spike|hCoV-19/England/ALDP-71D87A/2020|2020-07-01|EPI\_ISL\_557587|Original|hCoV-19^^England|Human|Lighthouse Lab in Alderley Park|Wellcome Sanger Institute for the COVID-19 Genomics UK (COG-UK) consortium|Davies|United Kingdom

>Spike|hCoV-19/England/ALDP-95508B/2020|2020-06-12|EPI\_ISL\_553596|Original|hCoV-19^^England|Human|Lighthouse Lab in Alderley Park|Wellcome Sanger Institute for the COVID-19 Genomics UK (COG-UK) consortium|Davies|United Kingdom

>Spike|hCoV-19/USA/TX-HMH0135/2020|2020-03-21|EPI\_ISL\_434835|Original|hCoV-19^^Texas|Human|Houston Methodist Hospital|Houston Methodist Hospital|Long|USA

>Spike|hCoV-19/Japan/IC-0065/2020|2020-06-00|EPI\_ISL\_591407|Original|hCoV-19^^Japan|Human|Pathogen Genomics Center|Pathogen Genomics Center|Sekizuka|Japan

>Spike|hCoV-19/England/QEUEH-997D68/2020|2020-08-23|EPI\_ISL\_537205|Original|hCoV-19^^England|Human|Lighthouse Lab in Glasgow|Wellcome Sanger Institute for the COVID-19 Genomics UK (COG-UK) consortium|Davies|United Kingdom

>Spike|hCoV-19/England/LOND-D5383/2020|2020-04-15|EPI\_ISL\_444214|Original|hCoV-19^^England|Human|University College London|COVID-19 Genomics UK (COG-UK) Consortium|Roy|United Kingdom

>Spike|hCoV-19/USA/NY-NYCPHL-001172/2020|2020-10-29|EPI\_ISL\_671752|Original|hCoV-19^^New York|Human|DOHMH Morrisania|New York City Public Health Laboratory|Wang|USA

>Spike|hCoV-19/Poland/X\_348r/2020|2020-06-00|EPI\_ISL\_509051|Original|hCoV-19^^Lodzkie|Human|genXone SA|genXone SA|Kaszuba|Poland

>Spike|hCoV-19/USA/TX-HMH-MCoV-19486/2020|2020-11-17|EPI\_ISL\_783870|Original|hCoV-19^^Texas|Human|Houston Methodist Hospital|Houston Methodist Hospital|Long|USA

>Spike|hCoV-19/Scotland/QEUEH-ALFFAD/2020|2020-10-01|EPI\_ISL\_599120|Original|hCoV-19^^Scotland|Human|Lighthouse Lab in Glasgow|Wellcome Sanger Institute for the COVID-19 Genomics UK (COG-UK) consortium|Davies|United Kingdom

>Spike|hCoV-19/Australia/VIC7425/2020|2020-07-29|EPI\_ISL\_564401|Original|hCoV-19^^Victoria|Human|Microbiological Diagnostic Unit - Public Health Laboratory (MDU-PHL) |MDU-PHL|Schultz|Australia

>Spike|hCoV-19/England/ALDP-B5E527/2020|2020-11-09|EPI\_ISL\_723665|Original|hCoV-19^^England|Human|Oxford Viromics|COVID-19 Genomics UK (COG-UK) Consortium|Golubchik|United Kingdom

>Spike|hCoV-19/Portugal/PT1224/2020|2020-03-29|EPI\_ISL\_511767|Original|hCoV-19^^Portugal|Human|Instituto Nacional de Saude (INSA)|Instituto Nacional de Saude (INSA) and Instituto Gulbenkian de Ciencia (IGC)|Borges|Portugal

>Spike|hCoV-19/Denmark/DCGC-17971/2020|2020-12-14|EPI\_ISL\_749671|Original|hCoV-19^^Sjaelland|Human|Department of Virus and Microbiological Special Diagnostics|Albertsen Lab|Michaelsen|Denmark

>Spike|hCoV-19/Scotland/CVR2385/2020|2020-04-13|EPI\_ISL\_477925|Original|hCoV-19^^Scotland|Human|West of Scotland Specialist Virology Centre|COVID-19 Genomics UK (COG-UK) Consortium|Robertson|United Kingdom

>Spike|hCoV-19/England/MILK-ACFF51/2020|2020-10-22|EPI\_ISL\_741356|Original|hCoV-19^^England|Human|Oxford Viromics|COVID-19 Genomics UK (COG-UK) Consortium|Golubchik|United Kingdom

>Spike|hCoV-19/USA/WA-UW-4581/2020|2020-03-31|EPI\_ISL\_515273|Original|hCoV-19^^Washington|Human|University of Washington Virology Lab|University of Washington Virology Lab|Roychoudhury|USA

>Spike|hCoV-19/Denmark/DCGC-20665/2020|2020-12-21|EPI\_ISL\_759285|Original|hCoV-19^^Hovedstaden|Human|Department of Virus and Microbiological Special Diagnostics|Albertsen Lab|Michaelsen|Denmark

>Spike|hCoV-19/Denmark/DCGC-17187/2020|2020-12-14|EPI\_ISL\_750811|Original|hCoV-19^^Sjaelland|Human|Department of Virus and Microbiological Special Diagnostics|Albertsen Lab|Michaelsen|Denmark

>Spike|hCoV-19/France/ARA-16251/2020|2020-03-29|EPI\_ISL\_508907|Original|hCoV-19^^Auvergne-Rh\u00f4ne-Alpes|Human|Institut des Agents Infectieux (IAI)|CNR Virus des Infections Respiratoires - France SUD|Josset|France

>Spike|hCoV-19/England/ALDP-C49825/2020|2020-12-12|EPI\_ISL\_718873|Original|hCoV-19^^England|Human|Lighthouse Lab in Alderley Park|Wellcome Sanger Institute for the COVID-19 Genomics UK (COG-UK) Consortium|Davies|United Kingdom

>Spike|hCoV-19/England/ALDP-C3D6B1/2020|2020-12-10|EPI\_ISL\_731598|Original|hCoV-19^^England|Human|Lighthouse Lab in Alderley Park|Wellcome Sanger Institute for the COVID-19 Genomics UK (COG-UK) Consortium|Davies|United Kingdom

>Spike|hCoV-19/USA/NY-PV09325/2020|2020-03-18|EPI\_ISL\_450014|Original|hCoV-19^^New York|Human|MSHS Clinical Microbiology Laboratories|MSHS Pathogen Surveillance Program|van Bakel|USA

>Spike|hCoV-19/USA/TX-HMH-MCoV-14647/2020|2020-10-10|EPI\_ISL\_787932|Original|hCoV-19^^Texas|Human|Houston Methodist Hospital|Houston Methodist Hospital|Long|USA

>Spike|hCoV-19/Australia/VIC5116/2020|2020-07-18|EPI\_ISL\_519919|Original|hCoV-19^^Victoria|Human|Microbiological Diagnostic Unit - Public Health Laboratory (MDU-PHL)|MDU-PHL|Schultz|Australia

>Spike|hCoV-19/England/MILK-9AB086/2020|2020-08-31|EPI\_ISL\_551091|Original|hCoV-19^^England|Human|Lighthouse Lab in Milton Keynes|Wellcome Sanger Institute for the COVID-19 Genomics UK (COG-UK) consortium|Davies|United Kingdom

>Spike|hCoV-19/England/205000535/2020|2020-12-03|EPI\_ISL\_754359|Original|hCoV-19^^England|Human|Respiratory Virus Unit|COVID-19 Genomics UK (COG-UK) Consortium|Platt|United Kingdom

>Spike|hCoV-19/Brazil/RJ-00448/2020|2020-04-20|EPI\_ISL\_717843|Original|hCoV-19^^Rio de Janeiro|Human|Laboratorio de Virologia Molecular / UFRJ|Bioinformatics Laboratory / LNCC|Almeida|Brazil

>Spike|hCoV-19/Australia/SAP352/2020|2020-03-23|EPI\_ISL\_483126|Original|hCoV-19^^South Australia|Human|SA Pathology|SA Pathology|Leong|Australia

>Spike|hCoV-19/England/204380933/2020|2020-10-17|EPI\_ISL\_609907|Original|hCoV-19^^England|Human|Respiratory Virus Unit|Respiratory Virus Unit|Platt|United Kingdom

>Spike|hCoV-19/New Zealand/20CV0068/2020|2020-08-12|EPI\_ISL\_547977|Original|hCoV-19^^Combined Auckland|Human|LabTests|Institute of Environmental Science and Research (ESR)|Wang|New Zealand

>Spike|hCoV-19/Gibraltar/204841737/2020|2020-00-00|EPI\_ISL\_671304|Original|hCoV-19^^Gibraltar|Human|Microbiology|Respiratory Virus Unit|Platt|Gibraltar

>Spike|hCoV-19/Scotland/EDB6607/2020|2020-05-11|EPI\_ISL\_484682|Original|hCoV-19^^Scotland|Human|Virology Department|COVID-19 Genomics UK (COG-UK) Consortium|Williams|United Kingdom

>Spike|hCoV-19/USA/WI-GMF-21955/2020|2020-09-22|EPI\_ISL\_660843|Original|hCoV-19^^Wisconsin|Human|Gundersen Molecular Diagnostics Laboratory|Kabara Cancer Research Institute|Kenny|USA

>Spike|hCoV-19/Wales/ALDP-C3A669/2020|2020-12-09|EPI\_ISL\_767262|Original|hCoV-19^^Wales|Human|Lighthouse Lab in Alderley Park|Wellcome Sanger Institute for the COVID-19 Genomics UK (COG-UK) Consortium|Davies|United Kingdom

>Spike|hCoV-19/USA/HI-H200696/2020|2020-12-01|EPI\_ISL\_753218|Original|hCoV-19^^Hawaii|Human|State Laboratories Division|State Laboratories Division|Sultana|USA

>Spike|hCoV-19/England/GSTT-265DB25/2020|2020-03-27|EPI\_ISL\_484067|Original|hCoV-19^^England|Human|Centre for Clinical Infection and Diagnostics Research and Genomics Innovation Unit|COVID-19 Genomics UK (COG-UK) Consortium|Awan|United Kingdom

>Spike|hCoV-19/England/ALDP-C39B7A/2020|2020-12-09|EPI\_ISL\_730797|Original|hCoV-19^^England|Human|Lighthouse Lab in Alderley Park|Wellcome Sanger Institute for the COVID-19 Genomics UK (COG-UK) Consortium|Davies|United Kingdom

>Spike|hCoV-19/Germany/SH-ChVir3037/2020|2020-03-17|EPI\_ISL\_729518|Original|hCoV-19^^Schleswig-Holstein|Human|A. Krumbholz|Charit\u00e9 Universit\u00e4tsmedizin Berlin|Muehlemann|Germany

>Spike|hCoV-19/England/OXON-B1772/2020|2020-04-16|EPI\_ISL\_479043|Original|hCoV-19^^England|Human|Oxford Viromics|COVID-19 Genomics UK (COG-UK) Consortium|Golubchik|United Kingdom

>Spike|hCoV-19/Denmark/DCGC-18047/2020|2020-12-14|EPI\_ISL\_749722|Original|hCoV-19^^Hovedstaden|Human|Department of Virus and Microbiological Special Diagnostics|Albertsen Lab|Michaelsen|Denmark

>Spike|hCoV-19/England/OXON-AD71F/2020|2020-00-00|EPI\_ISL\_448591|Original|hCoV-19^^England|Human|Oxford Viromics|COVID-19 Genomics UK (COG-UK) Consortium|Golubchik|United Kingdom

>Spike|hCoV-19/Scotland/CVR2231/2020|2020-04-12|EPI\_ISL\_477876|Original|hCoV-19^^Scotland|Human|West of Scotland Specialist Virology Centre|COVID-19 Genomics UK (COG-UK) Consortium|Robertson|United Kingdom

>Spike|hCoV-19/England/CAMC-9EBC4A/2020|2020-09-23|EPI\_ISL\_584408|Original|hCoV-19^^England|Human|Queens Medical Centre|COVID-19 Genomics UK (COG-UK) Consortium|Loose|United Kingdom

>Spike|hCoV-19/India/MH-ACTREC-123/2020|2020-05-25|EPI\_ISL\_699779|Original|hCoV-19^^Maharashtra|Human|Hematopathology Laboratory|Hematopathology Laboratory|Patkar|India



>Spike|hCoV-19/England/LEED-2A8484/2020|2020-03-28|EPI\_ISL\_539169|Original|hCoV-19^^England|Human|Leeds Teaching Hospitals NHS Trust and Public Health England|Wellcome Sanger Institute for the COVID-19 Genomics UK (COG-UK) consortium|Davies|United Kingdom

>Spike|hCoV-19/France/PAC-MEPHI-2211/2020|2020-10-01|EPI\_ISL\_644527|Original|hCoV-19^^Provence-Alpes-Cote-d\u2019Azur|Human|MEPHI|MEPHI|Levasseur|France

>Spike|hCoV-19/USA/CA-CZB-3710/2020|2020-07-21|EPI\_ISL\_548446|Original|hCoV-19^^California|Human|County of Santa Clara Public Health Department|Chan-Zuckerberg Biohub|Bhatt|USA

>Spike|hCoV-19/England/MILK-9D3F00/2020|2020-09-18|EPI\_ISL\_601697|Original|hCoV-19^^England|Human|Lighthouse Lab in Milton Keynes|Wellcome Sanger Institute for the COVID-19 Genomics UK (COG-UK) consortium|Davies|United Kingdom

>Spike|hCoV-19/England/LIVE-DC67E6/2020|2020-11-30|EPI\_ISL\_703611|Original|hCoV-19^^England|Human|Liverpool Clinical Laboratories|COVID-19 Genomics UK (COG-UK) Consortium|Haldenby|United Kingdom

>Spike|hCoV-19/USA/MI-UM-10035725364/2020|2020-08-31|EPI\_ISL\_583311|Original|hCoV-19^^Michigan|Human|University of Michigan Clinical Microbiology Laboratory|Lauring Lab|Valesano|USA

>Spike|hCoV-19/England/ALDP-C3DDBC/2020|2020-12-10|EPI\_ISL\_730825|Original|hCoV-19^^England|Human|Lighthouse Lab in Alderley Park|Wellcome Sanger Institute for the COVID-19 Genomics UK (COG-UK) Consortium|Davies|United Kingdom

>Spike|hCoV-19/England/20088028304/2020|2020-02-20|EPI\_ISL\_464180|Original|hCoV-19^^England|Human|Respiratory Virus Unit|Respiratory Virus Unit|Platt|United Kingdom

>Spike|hCoV-19/USA/TX-HMH-1358/2020|2020-04-12|EPI\_ISL\_542668|Original|hCoV-19^^Texas|Human|Houston Methodist Hospital|Houston Methodist Hospital|Long|USA

>Spike|hCoV-19/Norway/CS-10/2020|2020-05-12|EPI\_ISL\_665259|Original|hCoV-19^^Viken|Human|Dept. of Microbiology and Infection Control|Dept. of Microbiology and Infection Control|Hesselberg L\u00f8vestad|Norway

>Spike|hCoV-19/England/CAMC-94531C/2020|2020-07-15|EPI\_ISL\_556788|Original|hCoV-19^^England|Human|Lighthouse Lab in Cambridge|Wellcome Sanger Institute for the COVID-19 Genomics UK (COG-UK) consortium|Davies|United Kingdom

>Spike|hCoV-19/England/QEUA-960A9E/2020|2020-08-06|EPI\_ISL\_581418|Original|hCoV-19^^England|Human|Lighthouse Lab in Glasgow|Wellcome Sanger Institute for the COVID-19 Genomics UK (COG-UK) consortium|Davies|United Kingdom

>Spike|hCoV-19/Costa Rica/INC-0101/2020|2020-07-13|EPI\_ISL\_682242|Original|hCoV-19^^Heredia|Human|HOSPITAL SAN VICENTE DE PAUL|Inciensa|Soto-Garita|Costa Rica

>Spike|hCoV-19/Ireland/MH-NVRL-20G49748/2020|2020-04-07|EPI\_ISL\_681918|Original|hCoV-19^^Meath|Human|National Virus Reference Laboratory|Irish Coronavirus Sequencing Consortium - Teagasc Moorepark|Walsh|Ireland

>Spike|hCoV-19/India/GJ-GBRC272b/2020|2020-06-13|EPI\_ISL\_483871|Original|hCoV-19^^Gujarat|Human|Department of Microbiology|Gujarat Biotechnology Research Centre|Joshi|India

>Spike|hCoV-19/Scotland/QEUA-C33C8C/2020|2020-12-11|EPI\_ISL\_757154|Original|hCoV-19^^Scotland|Human|Lighthouse Lab in Glasgow|Wellcome Sanger Institute for the COVID-19 Genomics UK (COG-UK) Consortium|Davies|United Kingdom

>Spike|hCoV-19/England/QEUA-B32107/2020|2020-11-04|EPI\_ISL\_646293|Original|hCoV-19^^England|Human|Lighthouse Lab in Glasgow|Wellcome Sanger Institute for the COVID-19 Genomics UK (COG-UK) Consortium|Davies|United Kingdom

>Spike|hCoV-19/SaudiArabia/KAUST-MADINAH694/2020|2020-05-08|EPI\_ISL\_513180|Original|hCoV-19^^Madinah|Human|Pathogen Genomics Lab King Abdullah University of Science and Technology(KAUST)|Pathogen Genomics Lab King Abdullah University of Science and Technology(KAUST)|Mohamed Ghazzali|Saudi Arabia

>Spike|hCoV-19/England/ALDP-C3AFB9/2020|2020-12-09|EPI\_ISL\_731796|Original|hCoV-19^^England|Human|Lighthouse Lab in Alderley Park|Wellcome Sanger Institute for the COVID-19 Genomics UK (COG-UK) Consortium|Davies|United Kingdom

>Spike|hCoV-19/New Zealand/20VR1618/2020|2020-03-23|EPI\_ISL\_456228|Original|hCoV-19^^Southern|Human|Southern Community Labs Dunedin|Institute of Environmental Science and Research (ESR)|de Ligt|New Zealand

>Spike|hCoV-19/Wales/PHWC-4A2479/2020|2020-12-13|EPI\_ISL\_743891|Original|hCoV-19^^Wales|Human|Wales Specialist Virology Centre Sequencing lab|COVID-19 Genomics UK (COG-UK) Consortium|Moore|United Kingdom

>Spike|hCoV-19/USA/CA-CZB-1121/2020|2020-03-28|EPI\_ISL\_445169|Original|hCoV-19^^California|Human|UCSF Clinical Microbiology Laboratory|Chan-Zuckerberg Biohub|Kamm|USA

>Spike|hCoV-19/USA/LA-EVTL1227/2020|2020-12-16|EPI\_ISL\_768496|Original|hCoV-19^^Louisiana|Human|LSUHS Emerging Viral Threat Laboratory|Microbial Genome Sequencing Center|Kamil|USA

>Spike|hCoV-19/England/NOTT-110A95/2020|2020-04-30|EPI\_ISL\_441892|Original|hCoV-19^^England|Human|Queens Medical Centre|COVID-19 Genomics UK (COG-UK) Consortium|Loose|United Kingdom

>Spike|hCoV-19/England/ALDP-C3B8EA/2020|2020-12-10|EPI\_ISL\_731659|Original|hCoV-19^^England|Human|Lighthouse Lab in Alderley Park|Wellcome Sanger Institute for the COVID-19 Genomics UK (COG-UK) Consortium|Davies|United Kingdom

>Spike|hCoV-19/Denmark/DCGC-15610/2020|2020-11-23|EPI\_ISL\_713920|Original|hCoV-19^^Hovedstaden|Human|Department of Virus and Microbiological Special Diagnostics|Albertsen Lab|Michaelsen|Denmark

>Spike|hCoV-19/Romania/ROSV\_12812/2020|2020-06-11|EPI\_ISL\_491049|Original|hCoV-19^^Suceava|Human|Suceava County Emergency Hospital|\Stefan cel Mare\ University Metagenomics Lab|Lobiuc|Romania

>Spike|hCoV-19/USA/UT-01859/2020|2020-04-13|EPI\_ISL\_498632|Original|hCoV-19^^Utah|Human|Utah Public Health Laboratory|Utah Public Health Laboratory|Butz|USA

>Spike|hCoV-19/Argentina/PAIS-A0014/2020|2020-04-01|EPI\_ISL\_430805|Original|hCoV-19^^Buenos Aires|Human|Departamento de Biología y genética molecular|\u00clrea de Secuenciación del Laboratorio de Virología del Hospital de Niños Dr. Ricardo Gutiérrez|Viegas|Argentina

>Spike|hCoV-19/Singapore/1410/2020|2020-05-14|EPI\_ISL\_648786|Original|hCoV-19^^Singapore|Human|Department of Laboratory Medicine|Department of Laboratory Medicine|Chen|Singapore

>Spike|hCoV-19/USA/MI-MDHHS-SC20916/2020|2020-05-26|EPI\_ISL\_476052|Original|hCoV-19^^Michigan|Human|Michigan Department of Health and Human Services|Michigan Department of Health and Human Services|Blankenship|USA

>Spike|hCoV-19/England/NORW-EBA85/2020|2020-05-02|EPI\_ISL\_457471|Original|hCoV-19^^England|Human|Quadram Institute Bioscience|COVID-19 Genomics UK (COG-UK) Consortium|Alikhan|United Kingdom

>Spike|hCoV-19/Spain/RI-IBV-99010979/2020|2020-07-11|EPI\_ISL\_732806|Original|hCoV-19^^La Rioja|Human|Centro de Investigación Biomédica de La Rioja - Hospital San Pedro Logroño|SeqCOVID-SPAIN consortium/IBV (CSIC)|Comas|Spain

>Spike|hCoV-19/USA/CA-ALSR-3585/2020|2020-06-24|EPI\_ISL\_636097|Original|hCoV-19^^California|Human|San Diego County Public Health Laboratory|Andersen lab at Scripps Research|Gangavarapu|USA

>Spike|hCoV-19/USA/LA-GBCL-26674721/2020|2020-04-11|EPI\_ISL\_485249|Original|hCoV-19^^Louisiana|Human|River Road Testing Lab|Ginkgo Bioworks Clinical Laboratory|Smith|USA

>Spike|hCoV-19/USA/WA-UW-22051/2020|2020-08-03|EPI\_ISL\_570620|Original|hCoV-19^^Washington|Human|UW Virology Lab|UW Virology Lab|Roychoudhury|USA

>Spike|hCoV-19/England/OXON-AF759/2020|2020-04-15|EPI\_ISL\_478768|Original|hCoV-19^^England|Human|Oxford Viromics|COVID-19 Genomics UK (COG-UK) Consortium|Golubchik|United Kingdom

>Spike|hCoV-19/England/QEUA-A0C626/2020|2020-10-01|EPI\_ISL\_584995|Original|hCoV-19^^England|Human|Quadram Institute Bioscience|COVID-19 Genomics UK (COG-UK) Consortium|Alikhan|United Kingdom

>Spike|hCoV-19/England/CAMC-A57FF4/2020|2020-10-09|EPI\_ISL\_596988|Original|hCoV-19^^England|Human|Lighthouse Lab in Cambridge|Wellcome Sanger Institute for the COVID-19 Genomics UK (COG-UK) consortium|Davies|United Kingdom

>Spike|hCoV-19/England/ALDP-9EE069/2020|2020-05-08|EPI\_ISL\_589310|Original|hCoV-19^^England|Human|Lighthouse Lab in Alderley Park|Wellcome Sanger Institute for the COVID-19 Genomics UK (COG-UK) consortium|Davies|United Kingdom

>Spike|hCoV-19/England/CAMB-79D29/2020|2020-04-02|EPI\_ISL\_441298|Original|hCoV-19^^England|Human|Department of Pathology|Wellcome Sanger Institute for the COVID-19 Genomics UK (COG-UK) consortium|Amato|United Kingdom

>Spike|hCoV-19/England/MILK-B3CD63/2020|2020-11-01|EPI\_ISL\_706196|Original|hCoV-19^^England|Human|Oxford Viromics|COVID-19 Genomics UK (COG-UK) Consortium|Golubchik|United Kingdom

>Spike|hCoV-19/USA/CA-SEARCH-5565/2020|2020-11-25|EPI\_ISL\_755297|Original|hCoV-19^^California|Human|San Diego County Public Health Laboratory|Andersen lab at Scripps Research|Gangavarapu|USA

>Spike|hCoV-19/England/MILK-9E33D4/2020|2020-09-21|EPI\_ISL\_581332|Original|hCoV-19^^England|Human|Lighthouse Lab in Milton Keynes|Wellcome Sanger Institute for the COVID-19 Genomics UK (COG-UK) consortium|Davies|United Kingdom

>Spike|hCoV-19/England/ALDP-B84722/2020|2020-11-15|EPI\_ISL\_675187|Original|hCoV-19^^England|Human|Lighthouse Lab in Alderley Park|Wellcome Sanger Institute for the COVID-19 Genomics UK (COG-UK) Consortium|Davies|United Kingdom

>Spike|hCoV-19/USA/UT-UPHL-01644/2020|2020-04-07|EPI\_ISL\_575068|Original|hCoV-19^^Utah|Human|Utah Public Health Laboratory|Utah Public Health Laboratory|Young|USA

>Spike|hCoV-19/England/CAMC-BBDD3/2020|2020-11-21|EPI\_ISL\_705623|Original|hCoV-19^^England|Human|Virology Department|COVID-19 Genomics UK (COG-UK) Consortium|de Silva|United Kingdom

>Spike|hCoV-19/Scotland/QEUH-B675EF/2020|2020-11-11|EPI\_ISL\_676337|Original|hCoV-19^^Scotland|Human|Lighthouse Lab in Glasgow|Wellcome Sanger Institute for the COVID-19 Genomics UK (COG-UK) Consortium|Davies|United Kingdom

>Spike|hCoV-19/England/NOTT-114660/2020|2020-10-06|EPI\_ISL\_577184|Original|hCoV-19^^England|Human|Queens Medical Centre|COVID-19 Genomics UK (COG-UK) Consortium|Loose|United Kingdom

>Spike|hCoV-19/USA/FL-BPHL-1893/2020|2020-07-14|EPI\_ISL\_613745|Original|hCoV-19^^Florida|Human|Florida Bureau of Public Health Laboratories|Florida Bureau of Public Health Laboratories|Blanton|USA

>Spike|hCoV-19/Ireland/KK-NVRL-72IRL50388/2020|2020-08-19|EPI\_ISL\_578307|Original|hCoV-19^^Kilkenny|Human|National Virus Reference Laboratory|National Virus Reference Laboratory|Gonzalez|Ireland

>Spike|hCoV-19/England/CAMC-B1FC2D/2020|2020-11-01|EPI\_ISL\_647658|Original|hCoV-19^^England|Human|Lighthouse Lab in Cambridge|Wellcome Sanger Institute for the COVID-19 Genomics UK (COG-UK) Consortium|Davies|United Kingdom

>Spike|hCoV-19/England/NOTT-10F413/2020|2020-04-02|EPI\_ISL\_433002|Original|hCoV-19^^England|Human|Queens Medical Centre|COVID-19 Genomics UK (COG-UK) Consortium|Loose|United Kingdom

>Spike|hCoV-19/England/MILK-AC936A/2020|2020-10-21|EPI\_ISL\_630237|Original|hCoV-19^^England|Human|Lighthouse Lab in Milton Keynes|Wellcome Sanger Institute for the COVID-19 Genomics UK (COG-UK) consortium|Davies|United Kingdom

>Spike|hCoV-19/Canada/ON-PHL-20-03789/2020|2020-11-00|EPI\_ISL\_775050|Original|hCoV-19^^Ontario|Human|Public Health Ontario Laboratory|Public Health Ontario Laboratory|Guthrie|Canada

>Spike|hCoV-19/Singapore/533/2020|2020-04-26|EPI\_ISL\_479489|Original|hCoV-19^^Singapore|Human|Department of Laboratory Medicine Tan Tock Seng Hospital|Department of Laboratory Medicine Tan Tock Seng Hospital|Chen|Singapore

>Spike|hCoV-19/United Arab Emirates/0759/2020|2020-05-15|EPI\_ISL\_698905|Original|hCoV-19^^Abu Dhabi|Human|Group 42 (G42) Healthcare|G42 Healthcare|Ogrodzki|United Arab Emirates

>Spike|hCoV-19/England/QEUH-AD1095/2020|2020-10-26|EPI\_ISL\_634723|Original|hCoV-19^^England|Human|Lighthouse Lab in Glasgow|Wellcome Sanger Institute for the COVID-19 Genomics UK (COG-UK) consortium|Davies|United Kingdom

>Spike|hCoV-19/England/QEUH-B7F872/2020|2020-11-14|EPI\_ISL\_674763|Original|hCoV-19^^England|Human|Lighthouse Lab in Glasgow|Wellcome Sanger Institute for the COVID-19 Genomics UK (COG-UK) Consortium|Davies|United Kingdom

>Spike|hCoV-19/England/20109050806/2020|2020-03-05|EPI\_ISL\_417269|Original|hCoV-19^^England|Human|Respiratory Virus Unit|Respiratory Virus Unit|Platt|United Kingdom

>Spike|hCoV-19/England/QEUA-89523F/2020|2020-07-25|EPI\_ISL\_532731|Original|hCoV-19^^England|Human|Lighthouse Lab in Glasgow|Wellcome Sanger Institute for the COVID-19 Genomics UK (COG-UK) consortium|Davies|United Kingdom

>Spike|hCoV-19/England/MILK-958079/2020|2020-06-10|EPI\_ISL\_554819|Original|hCoV-19^^England|Human|Lighthouse Lab in Milton Keynes|Wellcome Sanger Institute for the COVID-19 Genomics UK (COG-UK) consortium|Davies|United Kingdom

>Spike|hCoV-19/USA/WA-UW-3889/2020|2020-03-27|EPI\_ISL\_427202|Original|hCoV-19^^Washington|Human|UW Virology Lab|UW Virology Lab|Roychoudhury|USA

>Spike|hCoV-19/USA/WA-UW-1274/2020|2020-03-17|EPI\_ISL\_476905|Original|hCoV-19^^Washington|Human|UW Virology Lab|UW Virology Lab|Roychoudhury|USA

>Spike|hCoV-19/USA/WA-S383/2020|2020-03-27|EPI\_ISL\_434143|Original|hCoV-19^^Washington|Human|Washington State Department of Health|Seattle Flu Study|Bedford|USA

>Spike|hCoV-19/Denmark/DCGC-2449/2020|2020-08-10|EPI\_ISL\_617409|Original|hCoV-19^^Syddanmark|Human|Department of Virus and Microbiological Special Diagnostics|Albertsen lab|Michaelsen|Denmark

>Spike|hCoV-19/Spain/CL-IBV-97006152/2020|2020-04-05|EPI\_ISL\_537299|Original|hCoV-19^^Castilla y Leon|Human|Universidad de Le\u00f3n|SeqCOVID-SPAIN consortium|IBV (CSIC) |Comas|Spain

>Spike|hCoV-19/South Africa/UFS-VIRO-NGS-22/2020|2020-09-30|EPI\_ISL\_682330|Original|hCoV-19^^Free State|Human|NHLs Universitas Academic|UFS Virology|Bester|South Africa

>Spike|hCoV-19/England/MILK-A06158/2020|2020-10-01|EPI\_ISL\_599856|Original|hCoV-19^^England|Human|Lighthouse Lab in Milton Keynes|Wellcome Sanger Institute for the COVID-19 Genomics UK (COG-UK) consortium|Davies|United Kingdom

>Spike|hCoV-19/Australia/VIC4528/2020|2020-07-16|EPI\_ISL\_518939|Original|hCoV-19^^Victoria|Human|Microbiological Diagnostic Unit - Public Health Laboratory (MDU-PHL) |MDU-PHL|Schultz|Australia

>Spike|hCoV-19/Japan/PG-8596/2020|2020-08-00|EPI\_ISL\_686192|Original|hCoV-19^^Japan|Human|Pathogen Genomics Center|Pathogen Genomics Center|Sekizuka|Japan

>Spike|hCoV-19/USA/AZ-TG403895/2020|2020-06-23|EPI\_ISL\_694865|Original|hCoV-19^^Arizona|Human|TGen North|TGen North|French|USA

>Spike|hCoV-19/Italy/VEN-UniVR-58/2020|2020-03-12|EPI\_ISL\_751368|Original|hCoV-19^^Veneto|Human|IRCCS Sacro Cuore Don Calabria Hospital|University of Verona|Mori|Italy

>Spike|hCoV-19/England/BIRM-65555/2020|2020-10-06|EPI\_ISL\_594565|Original|hCoV-19^^England|Human|University of Birmingham|COVID-19 Genomics UK (COG-UK) Consortium|Loman|United Kingdom

>Spike|hCoV-19/USA/WA-UW-47123/2020|2020-12-16|EPI\_ISL\_756229|Original|hCoV-19^^Washington|Human|UW Virology Lab|UW Virology Lab|Roychoudhury|USA

>Spike|hCoV-19/South Korea/KCDC2693/2020|2020-07-04|EPI\_ISL\_522473|Original|hCoV-19^^South Korea|Human|Center for Laboratory Control of Infectious Diseases|Center for Laboratory Control of Infectious Diseases|Kim|South Korea

>Spike|hCoV-19/India/MH-ACTREC-632/2020|2020-09-12|EPI\_ISL\_700265|Original|hCoV-19^^Maharashtra|Human|Hematopathology Laboratory|Hematopathology Laboratory|Patkar|India

>Spike|hCoV-19/USA/TX-HMH-MCoV-16158/2020|2020-10-28|EPI\_ISL\_785842|Original|hCoV-19^^Texas|Human|Houston Methodist Hospital|Houston Methodist Hospital|Long|USA

>Spike|hCoV-19/USA/AZ-TG268417/2020|2020-03-00|EPI\_ISL\_426508|Original|hCoV-19^^Arizona|Human|TGen North|TGen North|Lemmer|USA

>Spike|hCoV-19/USA/CA-CDPH272/2020|2020-11-15|EPI\_ISL\_755099|Original|hCoV-19^^California|Human|California Department of Public Health|California Department of Public Health|Bell|USA

>Spike|hCoV-19/Netherlands/NA\_373/2020|2020-04-08|EPI\_ISL\_455176|Original|hCoV-19^^Netherlands|Human|Dutch COVID-19 response team|Erasmus Medical Center|Oude Munnink|Netherlands

>Spike|hCoV-19/USA/MN-MDH-2036/2020|2020-11-03|EPI\_ISL\_654717|Original|hCoV-19^^Minnesota|Human|Minnesota Department of Health|Minnesota Department of Health|Lorentz|USA

>Spike|hCoV-19/England/20169036004/2020|2020-04-14|EPI\_ISL\_465240|Original|hCoV-19^^England|Human|Respiratory Virus Unit|Respiratory Virus Unit|Platt|United Kingdom

>Spike|hCoV-19/USA/ME-HETL-J0417/2020|2020-12-16|EPI\_ISL\_755521|Original|hCoV-19^^Maine|Human|Maine Health and Environmental Testing Laboratory|Tewhey Lab|Tewhey|USA

>Spike|hCoV-19/England/MILK-B948D1/2020|2020-11-14|EPI\_ISL\_676184|Original|hCoV-19^^England|Human|Lighthouse Lab in Milton Keynes|Wellcome Sanger Institute for the COVID-19 Genomics UK (COG-UK) Consortium|Davies|United Kingdom

>Spike|hCoV-19/Scotland/CAMC-A824E2/2020|2020-10-10|EPI\_ISL\_625285|Original|hCoV-19^^Scotland|Human|Lighthouse Lab in Cambridge|Wellcome Sanger Institute for the COVID-19 Genomics UK (COG-UK) consortium|Davies|United Kingdom

>Spike|hCoV-19/USA/TX-HMH-MCoV-9407/2020|2020-07-03|EPI\_ISL\_781104|Original|hCoV-19^^Texas|Human|Houston Methodist Hospital|Houston Methodist Hospital|Long|USA

>Spike|hCoV-19/USA/CA-ALSR-1929/2020|2020-07-08|EPI\_ISL\_512240|Original|hCoV-19^^California|Human|San Diego County Public Health Laboratory|Andersen lab at Scripps Research|Gangavarapu|USA

>Spike|hCoV-19/England/LIVE-DC9EEE/2020|2020-12-02|EPI\_ISL\_724353|Original|hCoV-19^^England|Human|Liverpool Clinical Laboratories|COVID-19 Genomics UK (COG-UK) Consortium|Haldenby|United Kingdom

>Spike|hCoV-19/Denmark/DCGC-11116/2020|2020-11-02|EPI\_ISL\_670399|Original|hCoV-19^^Syddanmark|Human|Department of Virus and Microbiological Special Diagnostics|Albertsen Lab|Michaelsen|Denmark

>Spike|hCoV-19/Scotland/QEUH-AE4BCB/2020|2020-10-28|EPI\_ISL\_649669|Original|hCoV-19^^Scotland|Human|Lighthouse Lab in Glasgow|Wellcome Sanger Institute for the COVID-19 Genomics UK (COG-UK) Consortium|Davies|United Kingdom

>Spike|hCoV-19/USA/NY-NYCPHL-000859/2020|2020-03-26|EPI\_ISL\_632235|Original|hCoV-19^^New York|Human|NYC HH Lincoln Medical And Mental Health Center|New York City Public Health Laboratory|Wang|USA

>Spike|hCoV-19/England/MILK-BDB892/2020|2020-11-26|EPI\_ISL\_709743|Original|hCoV-19^^England|Human|Lighthouse Lab in Milton Keynes|Wellcome Sanger Institute for the COVID-19 Genomics UK (COG-UK) Consortium|Davies|United Kingdom

>Spike|hCoV-19/England/ALDP-A4FED4/2020|2020-10-07|EPI\_ISL\_597768|Original|hCoV-19^^England|Human|Lighthouse Lab in Alderley Park|Wellcome Sanger Institute for the COVID-19 Genomics UK (COG-UK) consortium|Davies|United Kingdom

>Spike|hCoV-19/Netherlands/un-EMC-717/2020|2020-03-19|EPI\_ISL\_523472|Original|hCoV-19^^Netherlands|Human|Dutch COVID-19 response team|Erasmus Medical Center|Oude Munnink|Netherlands

>Spike|hCoV-19/England/SHEF-10D6D45/2020|2020-12-16|EPI\_ISL\_742094|Original|hCoV-19^^England|Human|Virology Department|COVID-19 Genomics UK (COG-UK) Consortium|de Silva|United Kingdom

>Spike|hCoV-19/Singapore/135/2020|2020-03-16|EPI\_ISL\_443227|Original|hCoV-19^^Singapore|Human|National Public Health Laboratory|National Public Health Laboratory|Mak|Singapore

>Spike|hCoV-19/Denmark/DCGC-1215/2020|2020-05-18|EPI\_ISL\_614858|Original|hCoV-19^^Hovedstaden|Human|Department of Virus and Microbiological Special Diagnostics|Albertsen lab|Michaelsen|Denmark

>Spike|hCoV-19/USA/VA-DCLS-0638/2020|2020-04-10|EPI\_ISL\_495310|Original|hCoV-19^^Virginia|Human|Virginia DCLS|Virginia DCLS|St. Jacques|USA

>Spike|hCoV-19/Northern Ireland/NIRE-104153/2020|2020-04-14|EPI\_ISL\_482040|Original|hCoV-19^^Northern Ireland|Human|Regional Virus Laboratory|Wellcome Sanger Institute for the COVID-19 Genomics UK (COG-UK) consortium|Davies|United Kingdom

>Spike|hCoV-19/Switzerland/BE-ETHZ-300287/2020|2020-10-01|EPI\_ISL\_603319|Original|hCoV-19^^Bern|Human|Viollier AG|Department of Biosystems Science and Engineering|Nadeau|Switzerland

>Spike|hCoV-19/England/QEUH-9CF259/2020|2020-09-15|EPI\_ISL\_590137|Original|hCoV-19^^England|Human|Lighthouse Lab in Glasgow|Wellcome Sanger Institute for the COVID-19 Genomics UK (COG-UK) consortium|Davies|United Kingdom

>Spike|hCoV-19/England/QEUA-AD0F5D/2020|2020-10-24|EPI\_ISL\_629947|Original|hCoV-19^^England|Human|Lighthouse Lab in Glasgow|Wellcome Sanger Institute for the COVID-19 Genomics UK (COG-UK) consortium|Davies|United Kingdom

>Spike|hCoV-19/England/NOTT-11F4C5/2020|2020-11-24|EPI\_ISL\_703776|Original|hCoV-19^^England|Human|Queens Medical Centre|COVID-19 Genomics UK (COG-UK) Consortium|Loose|United Kingdom

>Spike|hCoV-19/England/NORT-2935C5/2020|2020-06-26|EPI\_ISL\_499626|Original|hCoV-19^^England|Human|Northumbria University / South Tees Hospitals NHS Foundation Trust / North Cumbria Integrated Care NHS Foundation Trust / North Tees and Hartlepool NHS Foundation Trust / Newcastle Hospitals NHS Foundation Trust|COVID-19 Genomics UK (COG-UK) Consortium|Bashton|United Kingdom

>Spike|hCoV-19/England/SHEF-C1FFF/2020|2020-06-11|EPI\_ISL\_479199|Original|hCoV-19^^England|Human|Virology Department|COVID-19 Genomics UK (COG-UK) Consortium|de Silva|United Kingdom

>Spike|hCoV-19/England/ALDP-9FDA4B/2020|2020-10-01|EPI\_ISL\_587762|Original|hCoV-19^^England|Human|Lighthouse Lab in Alderley Park|Wellcome Sanger Institute for the COVID-19 Genomics UK (COG-UK) consortium|Davies|United Kingdom

>Spike|hCoV-19/USA/LA-EVTL1410/2020|2020-12-11|EPI\_ISL\_779076|Original|hCoV-19^^Louisiana|Human|LSUHS Emerging Viral Threat Laboratory|Microbial Genome Sequencing Center|Kamil|USA

>Spike|hCoV-19/USA/TX-HMH-MCoV-9264/2020|2020-07-03|EPI\_ISL\_780546|Original|hCoV-19^^Texas|Human|Houston Methodist Hospital|Houston Methodist Hospital|Long|USA

>Spike|hCoV-19/USA/FL-BPHL-1995/2020|2020-04-17|EPI\_ISL\_653148|Original|hCoV-19^^Florida|Human|Florida Bureau of Public Health Laboratories|Florida Bureau of Public Health Laboratories|Blanton|USA

>Spike|hCoV-19/Scotland/QEUA-96E8F0/2020|2020-08-19|EPI\_ISL\_530528|Original|hCoV-19^^Scotland|Human|NHSGGC West of Scotland Specialist Virology Centre / MRC-University of Glasgow Centre for Virus Research|Wellcome Sanger Institute for the COVID-19 Genomics UK (COG-UK) consortium|Davies|United Kingdom

>Spike|hCoV-19/Switzerland/ZH-ETHZ-340160/2020|2020-10-28|EPI\_ISL\_721700|Original|hCoV-19^^Zurich|Human|Viollier AG|Department of Biosystems Science and Engineering|Nadeau|Switzerland

>Spike|hCoV-19/USA/CA-CDC-4687/2020|2020-06-02|EPI\_ISL\_535665|Original|hCoV-19^^California|Human|CDPH|Pathogen Discovery|Queen|USA

>Spike|hCoV-19/England/QEUA-BC3FC5/2020|2020-11-24|EPI\_ISL\_703496|Original|hCoV-19^^England|Human|Lighthouse Lab in Glasgow|Wellcome Sanger Institute for the COVID-19 Genomics UK (COG-UK) Consortium|Davies|United Kingdom

>Spike|hCoV-19/England/CAMC-A65931/2020|2020-10-11|EPI\_ISL\_637363|Original|hCoV-19^^England|Human|Department of Pathology|COVID-19 Genomics UK (COG-UK) Consortium|Goodfellow|United Kingdom

>Spike|hCoV-19/Denmark/DCGC-2978/2020|2020-08-24|EPI\_ISL\_616740|Original|hCoV-19^^Midtjylland|Human|Department of Virus and Microbiological Special Diagnostics|Albertsen lab|Michaelsen|Denmark

>Spike|hCoV-19/England/NOTT-10EF04/2020|2020-03-29|EPI\_ISL\_432941|Original|hCoV-19^^England|Human|Queens Medical Centre|COVID-19 Genomics UK (COG-UK) Consortium|Loose|United Kingdom

>Spike|hCoV-19/Denmark/DCGC-17165/2020|2020-12-14|EPI\_ISL\_750797|Original|hCoV-19^^Hovedstaden|Human|Department of Virus and Microbiological Special Diagnostics|Albertsen Lab|Michaelsen|Denmark

>Spike|hCoV-19/England/MILK-A6A662/2020|2020-10-11|EPI\_ISL\_626824|Original|hCoV-19^^England|Human|Virology Department|COVID-19 Genomics UK (COG-UK) Consortium|de Silva|United Kingdom

>Spike|hCoV-19/USA/UT-UPHL-05416/2020|2020-05-30|EPI\_ISL\_560876|Original|hCoV-19^^Utah|Human|Utah Public Health Laboratory|Utah Public Health Laboratory|Young|USA

>Spike|hCoV-19/Luxembourg/LNS5447190/2020|2020-12-24|EPI\_ISL\_770902|Original|hCoV-19^^Luxembourg|Human|Laboratoire national de sant\u00e9|Laboratoire national de sant\u00e9|Wienecke-Baldacchino|Luxembourg

>Spike|hCoV-19/England/CAMC-BBC4FD/2020|2020-11-18|EPI\_ISL\_724148|Original|hCoV-19^^England|Human|Quadram Institute Bioscience|COVID-19 Genomics UK (COG-UK) Consortium|Alikhan|United Kingdom

>Spike|hCoV-19/Singapore/648/2020|2020-04-24|EPI\_ISL\_493408|Original|hCoV-19^^Singapore|Human|National Public Health Laboratory|National Public Health Laboratory|Mak|Singapore

>Spike|hCoV-19/USA/NY-NYCPHL-000675/2020|2020-03-13|EPI\_ISL\_632093|Original|hCoV-19^^New York|Human|Jamaica Hospital Medical Center|New York City Public Health Laboratory|Wang|USA

>Spike|hCoV-19/Australia/WA33/2020|2020-03-28|EPI\_ISL\_470850|Original|hCoV-19^^Western Australia|Human|PathWest Laboratory Medicine WA|PathWest Laboratory Medicine WA|Sikazwe|Australia

>Spike|hCoV-19/Japan/PG-4028/2020|2020-07-00|EPI\_ISL\_692269|Original|hCoV-19^^Japan|Human|Pathogen Genomics Center|Pathogen Genomics Center|Sekizuka|Japan

>Spike|hCoV-19/Japan/PG-0655/2020|2020-04-00|EPI\_ISL\_684265|Original|hCoV-19^^Japan|Human|Gunma Prefectural Institute of Public Health and Environmental Sciences|Pathogen Genomics Center|Sekizuka|Japan

>Spike|hCoV-19/USA/WA-S2866/2020|2020-09-20|EPI\_ISL\_596397|Original|hCoV-19^^Washington|Human|Seattle Flu Study|Seattle Flu Study|Lee|USA

>Spike|hCoV-19/Denmark/DCGC-21844/2020|2020-12-21|EPI\_ISL\_757964|Original|hCoV-19^^Syddanmark|Human|Department of Virus and Microbiological Special Diagnostics|Albertsen Lab|Michaelsen|Denmark

>Spike|hCoV-19/USA/TX-HMH-MCoV-14570/2020|2020-10-09|EPI\_ISL\_787855|Original|hCoV-19^^Texas|Human|Houston Methodist Hospital|Houston Methodist Hospital|Long|USA

>Spike|hCoV-19/Wales/PHWC-48C4EE/2020|2020-11-07|EPI\_ISL\_666436|Original|hCoV-19^^Wales|Human|Wales Specialist Virology Centre Sequencing lab|COVID-19 Genomics UK (COG-UK) Consortium|Moore|United Kingdom

>Spike|hCoV-19/Denmark/DCGC-20443/2020|2020-12-21|EPI\_ISL\_759151|Original|hCoV-19^^Midtjylland|Human|Department of Virus and Microbiological Special Diagnostics|Albertsen Lab|Michaelsen|Denmark

>Spike|hCoV-19/Belgium/ULG-10179/2020|2020-05-09|EPI\_ISL\_455967|Original|hCoV-19^^Li\u00e8ge|Human|Department of Clinical Microbiology|GIGA Medical Genomics|Durkin|Belgium

>Spike|hCoV-19/England/CAMB-73484/2020|2020-03-22|EPI\_ISL\_440231|Original|hCoV-19^^England|Human|Department of Pathology|Wellcome Sanger Institute for the COVID-19 Genomics UK (COG-UK) consortium|Amato|United Kingdom

>Spike|hCoV-19/USA/MA-MGH-00767/2020|2020-04-11|EPI\_ISL\_791756|Original|hCoV-19^^Massachusetts|Human|Massachusetts General Hospital|Infectious Disease Program|Park|USA

>Spike|hCoV-19/Wales/PHWC-4834BA/2020|2020-10-12|EPI\_ISL\_627825|Original|hCoV-19^^Wales|Human|Wales Specialist Virology Centre Sequencing lab|COVID-19 Genomics UK (COG-UK) Consortium|Moore|United Kingdom

>Spike|hCoV-19/USA/TX-HMH-7024/2020|2020-06-26|EPI\_ISL\_546443|Original|hCoV-19^^Texas|Human|Houston Methodist Hospital|Houston Methodist Hospital|Long|USA

>Spike|hCoV-19/USA/CA-CZB-12822/2020|2020-09-30|EPI\_ISL\_648473|Original|hCoV-19^^California|Human|Santa Clara County Public Health Laboratory|Chan-Zuckerberg Biohub|Bhatt|USA

>Spike|hCoV-19/India/DL-IGIB11305020/2020|2020-07-00|EPI\_ISL\_751293|Original|hCoV-19^^Delhi|Human|Devki Devi Foundation|CSIR-IGIB/Max|Pandey|India

>Spike|hCoV-19/Sweden/20-53166/2020|2020-10-19|EPI\_ISL\_648176|Original|hCoV-19^^Sweden|Human|The Public Health Agency of Sweden|The Public Health Agency of Sweden|Svartstr\u00f6m|Sweden

>Spike|hCoV-19/Japan/PG-4946/2020|2020-08-00|EPI\_ISL\_690065|Original|hCoV-19^^Japan|Human|Pathogen Genomics Center|Pathogen Genomics Center|Sekizuka|Japan

>Spike|hCoV-19/England/GSTT-265DD6B/2020|2020-03-28|EPI\_ISL\_484100|Original|hCoV-19^^England|Human|Centre for Clinical Infection and Diagnostics Research and Genomics Innovation Unit|COVID-19 Genomics UK (COG-UK) Consortium|Awan|United Kingdom

>Spike|hCoV-19/England/ALDP-8D640F/2020|2020-06-25|EPI\_ISL\_557158|Original|hCoV-19^^England|Human|Lighthouse Lab in Alderley Park|Wellcome Sanger Institute for the COVID-19 Genomics UK (COG-UK) consortium|Davies|United Kingdom

>Spike|hCoV-19/France/CVL-8287/2020|2020-03-25|EPI\_ISL\_560577|Original|hCoV-19^^Centre-Val de Loire|Human|h\u00f4pital|National Reference Center for Viruses of Respiratory Infections|Enouf|France

>Spike|hCoV-19/England/BIRM-637CA/2020|2020-08-19|EPI\_ISL\_529649|Original|hCoV-19^^England|Human|University of Birmingham|COVID-19 Genomics UK (COG-UK) Consortium|Loman|United Kingdom

>Spike|hCoV-19/England/OXON-ADEFC/2020|2020-00-00|EPI\_ISL\_448645|Original|hCoV-19^^England|Human|Oxford Viromics|COVID-19 Genomics UK (COG-UK) Consortium|Golubchik|United Kingdom

>Spike|hCoV-19/Australia/NSW655/2020|2020-07-12|EPI\_ISL\_498774|Original|hCoV-19^^New South Wales|Human|Histopath|NSW Health Pathology - Institute of Clinical Pathology and Medical Research; Westmead Hospital; University of Sydney|Gall|Australia

>Spike|hCoV-19/Australia/VIC8403/2020|2020-07-23|EPI\_ISL\_564989|Original|hCoV-19^^Victoria|Human|Microbiological Diagnostic Unit - Public Health Laboratory (MDU-PHL)|MDU-PHL|Schultz|Australia

>Spike|hCoV-19/England/MILK-9C4A01/2020|2020-09-10|EPI\_ISL\_549473|Original|hCoV-19^^England|Human|Centre for Enzyme Innovation|COVID-19 Genomics UK (COG-UK) Consortium|Robson|United Kingdom

>Spike|hCoV-19/USA/CA-ALSR-2133/2020|2020-05-27|EPI\_ISL\_635361|Original|hCoV-19^^California|Human|San Diego County Public Health Laboratory|Andersen lab at Scripps Research|Gangavarapu|USA

>Spike|hCoV-19/Portugal/PT0438/2020|2020-03-22|EPI\_ISL\_454162|Original|hCoV-19^^Portugal|Human|unknown|Instituto Nacional de Saude (INSA)|Borges|Portugal

>Spike|hCoV-19/USA/CA-CDPH218/2020|2020-11-15|EPI\_ISL\_754967|Original|hCoV-19^^California|Human|California Department of Public Health|California Department of Public Health|Bell|USA

>Spike|hCoV-19/England/ALDP-AA225B/2020|2020-10-22|EPI\_ISL\_625170|Original|hCoV-19^^England|Human|Lighthouse Lab in Alderley Park|Wellcome Sanger Institute for the COVID-19 Genomics UK (COG-UK) consortium|Davies|United Kingdom

>Spike|hCoV-19/Scotland/EDB5746/2020|2020-06-02|EPI\_ISL\_473853|Original|hCoV-19^^Scotland|Human|Virology Department|COVID-19 Genomics UK (COG-UK) Consortium|Williams|United Kingdom

>Spike|hCoV-19/USA/WA-UW-29741/2020|2020-09-28|EPI\_ISL\_717778|Original|hCoV-19^^Washington|Human|UW Virology Lab|UW Virology Lab|Roychoudhury|USA

>Spike|hCoV-19/England/SHEF-C5F55/2020|2020-10-15|EPI\_ISL\_637887|Original|hCoV-19^^England|Human|Virology Department|COVID-19 Genomics UK (COG-UK) Consortium|de Silva|United Kingdom

>Spike|hCoV-19/England/ALDP-952464/2020|2020-06-09|EPI\_ISL\_555651|Original|hCoV-19^^England|Human|Lighthouse Lab in Alderley Park|Wellcome Sanger Institute for the COVID-19 Genomics UK (COG-UK) Consortium|Davies|United Kingdom

>Spike|hCoV-19/Australia/VIC3354/2020|2020-07-08|EPI\_ISL\_521033|Original|hCoV-19^^Victoria|Human|Microbiological Diagnostic Unit - Public Health Laboratory (MDU-PHL)|MDU-PHL|Schultz|Australia

>Spike|hCoV-19/England/CWAR-24FDB1A/2020|2020-05-03|EPI\_ISL\_584481|Original|hCoV-19^^England|Human|UHCW / University of Warwick|COVID-19 Genomics UK (COG-UK) Consortium|Stark|United Kingdom

>Spike|hCoV-19/USA/UT-UPHL-2012023081/2020|2020-08-09|EPI\_ISL\_745798|Original|hCoV-19^^Utah|Human|Ginkgo Bioworks Clinical Laboratory|Utah Public Health Laboratory|Young|USA

>Spike|hCoV-19/Scotland/EDB1824/2020|2020-04-16|EPI\_ISL\_433144|Original|hCoV-19^^Scotland|Human|Virology Department|COVID-19 Genomics UK (COG-UK) Consortium|Williams|United Kingdom

>Spike|hCoV-19/South Africa/KRISP-K005326/2020|2020-11-16|EPI\_ISL\_678616|Original|hCoV-19^^KwaZulu-Natal|Human|NHLS-IALCH|KRISP|de Oliveira|South Africa

>Spike|hCoV-19/USA/LA-EVTL131/2020|2020-05-06|EPI\_ISL\_451292|Original|hCoV-19^^Louisiana|Human|LSUHS Emerging Viral Threat Laboratory|Microbial Genome Sequencing Center|Kamil|USA

>Spike|hCoV-19/Denmark/DCGC-18526/2020|2020-12-07|EPI\_ISL\_750021|Original|hCoV-19^^Syddanmark|Human|Department of Virus and Microbiological Special Diagnostics|Albertsen Lab|Michaelsen|Denmark

>Spike|hCoV-19/USA/WI-UW-529/2020|2020-06-23|EPI\_ISL\_484904|Original|hCoV-19^^Wisconsin|Human|University of Wisconsin-Madison AIDS Vaccine Research



Laboratories|University of Wisconsin-Madison AIDS Vaccine Research  
Laboratories|Baczenas|USA  
>Spike|hCoV-19/Portugal/IGC4435/2020|2020-06-08|EPI\_ISL\_491252|Original|hCoV-19^^Portugal|Human|Instituto Gulbenkian de Ci\u00eancia|Instituto Gulbenkian de Ci\u00eancia|Leite|Portugal  
>Spike|hCoV-19/England/CAMC-B996D2/2020|2020-11-15|EPI\_ISL\_673484|Original|hCoV-19^^England|Human|Lighthouse Lab in Cambridge|Wellcome Sanger Institute for the COVID-19 Genomics UK (COG-UK) Consortium|Davies|United Kingdom  
>Spike|hCoV-19/Gibraltar/204462900/2020|2020-10-29|EPI\_ISL\_632798|Original|hCoV-19^^Gibraltar|Human|Microbiology|Respiratory Virus Unit|Platt|Gibraltar  
>Spike|hCoV-19/USA/TX-HMH-MCoV-15423/2020|2020-10-22|EPI\_ISL\_786907|Original|hCoV-19^^Texas|Human|Houston Methodist Hospital|Houston Methodist Hospital|Long|USA  
>Spike|hCoV-19/USA/CA-CHLA-PLM47560065/2020|2020-11-09|EPI\_ISL\_753291|Original|hCoV-19^^California|Human|Clinical virology Laboratory|Center for Personalized Medicine|Dien Bard|USA  
>Spike|hCoV-19/Denmark/DCGC-11718/2020|2020-10-26|EPI\_ISL\_670634|Original|hCoV-19^^Sjaelland|Human|Department of Virus and Microbiological Special Diagnostics|Albertsen Lab|Michaelsen|Denmark  
>Spike|hCoV-19/Scotland/QEUH-759739/2020|2020-07-18|EPI\_ISL\_532978|Original|hCoV-19^^Scotland|Human|Virology Department|Wellcome Sanger Institute for the COVID-19 Genomics UK (COG-UK) consortium|Davies|United Kingdom  
>Spike|hCoV-19/USA/HI-H200167/2020|2020-07-20|EPI\_ISL\_752728|Original|hCoV-19^^Hawaii|Human|State Laboratories Division|State Laboratories Division|Sultana|USA  
>Spike|hCoV-19/Scotland/QEUH-B0F288/2020|2020-11-02|EPI\_ISL\_649521|Original|hCoV-19^^Scotland|Human|Lighthouse Lab in Glasgow|Wellcome Sanger Institute for the COVID-19 Genomics UK (COG-UK) Consortium|Davies|United Kingdom  
>Spike|hCoV-19/England/MILK-C309D3/2020|2020-12-07|EPI\_ISL\_783040|Original|hCoV-19^^England|Human|Lighthouse Lab in Milton Keynes|Wellcome Sanger Institute for the COVID-19 Genomics UK (COG-UK) Consortium|Davies|United Kingdom  
>Spike|hCoV-19/Russia/SVE-RII-MH1452S/2020|2020-09-08|EPI\_ISL\_596279|Original|hCoV-19^^Sverdlovsk|Human|HELIX LCC|WHO National Influenza Centre Russian Federation|Komissarov|Russia  
>Spike|hCoV-19/England/MILK-5768AE/2020|2020-06-12|EPI\_ISL\_558366|Original|hCoV-19^^England|Human|Lighthouse Lab in Milton Keynes|Wellcome Sanger Institute for the COVID-19 Genomics UK (COG-UK) consortium|Davies|United Kingdom  
>Spike|hCoV-19/England/QEUH-AD59C3/2020|2020-10-26|EPI\_ISL\_633724|Original|hCoV-19^^England|Human|Lighthouse Lab in Glasgow|Wellcome Sanger Institute for the COVID-19 Genomics UK (COG-UK) consortium|Davies|United Kingdom  
>Spike|hCoV-19/England/MILK-9C2D37/2020|2020-09-10|EPI\_ISL\_566437|Original|hCoV-19^^England|Human|Lighthouse Lab in Milton Keynes|Wellcome Sanger Institute for the COVID-19 Genomics UK (COG-UK) consortium|Davies|United Kingdom  
>Spike|hCoV-19/USA/TX-HMH-5787/2020|2020-06-28|EPI\_ISL\_547014|Original|hCoV-19^^Texas|Human|Houston Methodist Hospital|Houston Methodist Hospital|Long|USA  
>Spike|hCoV-19/Denmark/DCGC-14729/2020|2020-11-23|EPI\_ISL\_711937|Original|hCoV-19^^Midtjylland|Human|Department of Virus and Microbiological Special Diagnostics|Albertsen Lab|Michaelsen|Denmark  
>Spike|hCoV-19/USA/NY-Wadsworth-10683-01/2020|2020-03-04|EPI\_ISL\_426027|Original|hCoV-19^^New York|Human|Wadsworth Center|Wadsworth Center|Lasek-Nesselquist|USA  
>Spike|hCoV-19/England/20116159902/2020|2020-03-11|EPI\_ISL\_464861|Original|hCoV-19^^England|Human|Respiratory Virus Unit|Respiratory Virus Unit|Platt|United Kingdom  
>Spike|hCoV-19/Netherlands/NB-EMC-375/2020|2020-09-28|EPI\_ISL\_722833|Original|hCoV-19^^Noord Brabant|Human|Dutch COVID-19 response team|Erasmus Medical Center|Oude Munnink|Netherlands  
>Spike|hCoV-19/Denmark/DCGC-13371/2020|2020-11-30|EPI\_ISL\_712757|Original|hCoV-19^^Syddanmark|Human|Department of Virus and Microbiological Special Diagnostics|Albertsen Lab|Michaelsen|Denmark  
>Spike|hCoV-19/Wales/PHWC-2CAD3/2020|2020-04-01|EPI\_ISL\_445947|Original|hCoV-19^^Wales|Human|Wales Specialist Virology Centre|Public Health Wales Microbiology Cardiff|Moore|United Kingdom

>Spike|hCoV-19/England/SHEF-C3F66/2020|2020-04-09|EPI\_ISL\_441956|Original|hCoV-19^^England|Human|Virology Department|COVID-19 Genomics UK (COG-UK) Consortium|de Silva|United Kingdom

>Spike|hCoV-19/England/ALDP-B629CA/2020|2020-11-09|EPI\_ISL\_656369|Original|hCoV-19^^England|Human|Lighthouse Lab in Alderley Park|Wellcome Sanger Institute for the COVID-19 Genomics UK (COG-UK) Consortium|Davies|United Kingdom

>Spike|hCoV-19/Denmark/DCGC-5268/2020|2020-09-14|EPI\_ISL\_615199|Original|hCoV-19^^Hovedstaden|Human|Department of Virus and Microbiological Special Diagnostics|Albertsen lab|Michaelsen|Denmark

>Spike|hCoV-19/Equatorial Guinea/7692/2020|2020-05-12|EPI\_ISL\_648347|Original|hCoV-19^^Bioko Norte|Human|Laboratorio de Investigaciones de Baney|University Hospital Basel|Hosch|Equatorial Guinea

>Spike|hCoV-19/England/CAMC-B20F11/2020|2020-11-02|EPI\_ISL\_647721|Original|hCoV-19^^England|Human|Lighthouse Lab in Cambridge|Wellcome Sanger Institute for the COVID-19 Genomics UK (COG-UK) Consortium|Davies|United Kingdom

>Spike|hCoV-19/Spain/NC-IBV-001383/2020|2020-03-15|EPI\_ISL\_452518|Original|hCoV-19^^Navarra|Human|Cl\u00ednica Universidad de Navarra. Servicio de Enfermedades Infecciosas y Microbiolog\u00eda cl\u00ednica|SeqCOVID-SPAIN consortium/IBV (CSIC) |Comas|Spain

>Spike|hCoV-19/Bahrain/341013933\_S13\_L001/2020|2020-11-11|EPI\_ISL\_681319|Original|hCoV-19^^Bahrain|Human|Communicable Disease Laboratory|Communicable Disease Laboratory|Altaif|Bahrain

>Spike|hCoV-19/Japan/PG-3807/2020|2020-07-00|EPI\_ISL\_692058|Original|hCoV-19^^Japan|Human|Sakai City Institute of Public Health|Pathogen Genomics Center|Sekizuka|Japan

>Spike|hCoV-19/Australia/VIC9454/2020|2020-08-18|EPI\_ISL\_565558|Original|hCoV-19^^Victoria|Human|Microbiological Diagnostic Unit - Public Health Laboratory (MDU-PHL) |MDU-PHL|Schultz|Australia

>Spike|hCoV-19/United Arab Emirates/0514/2020|2020-05-18|EPI\_ISL\_698196|Original|hCoV-19^^Abu Dhabi|Human|Group 42 (G42) Healthcare|G42 Healthcare|Ogrodzki|United Arab Emirates

>Spike|hCoV-19/Mexico/BCN-ALSR-2497/2020|2020-06-01|EPI\_ISL\_635506|Original|hCoV-19^^Baja California|Human|Centro de Diagn\u00f3stico COVID-19 UABC Tijuana|Andersen lab at Scripps Research|Gangavarapu|Mexico

>Spike|hCoV-19/England/ALDP-A6E394/2020|2020-10-15|EPI\_ISL\_607264|Original|hCoV-19^^England|Human|Lighthouse Lab in Alderley Park|Wellcome Sanger Institute for the COVID-19 Genomics UK (COG-UK) consortium|Davies|United Kingdom

>Spike|hCoV-19/USA/WA-S1082/2020|2020-04-29|EPI\_ISL\_463572|Original|hCoV-19^^Washington|Human|Washington State Department of Health|Seattle Flu Study|Bedford|USA

>Spike|hCoV-19/England/CAMB-1B479C/2020|2020-06-03|EPI\_ISL\_473483|Original|hCoV-19^^England|Human|Department of Pathology|COVID-19 Genomics UK (COG-UK) Consortium|Meredith|United Kingdom

>Spike|hCoV-19/USA/CO-CSU-D1773/2020|2020-04-02|EPI\_ISL\_527449|Original|hCoV-19^^Colorado|Human|Colorado State University - Ebel Lab|Colorado State University - Ebel Lab|Cline|USA

>Spike|hCoV-19/Denmark/DCGC-17389/2020|2020-12-14|EPI\_ISL\_750949|Original|hCoV-19^^Nordjylland|Human|Department of Virus and Microbiological Special Diagnostics|Albertsen Lab|Michaelsen|Denmark

>Spike|hCoV-19/England/20139069704/2020|2020-03-29|EPI\_ISL\_465860|Original|hCoV-19^^England|Human|Respiratory Virus Unit|Respiratory Virus Unit|Platt|United Kingdom

>Spike|hCoV-19/USA/NY-NYCPHL-000478/2020|2020-05-05|EPI\_ISL\_631945|Original|hCoV-19^^New York|Human|St Barnabas Hospital|New York City Public Health Laboratory|Wang|USA

>Spike|hCoV-19/England/CAMB-A9811F/2020|2020-12-14|EPI\_ISL\_764339|Original|hCoV-19^^England|Human|Department of Pathology|COVID-19 Genomics UK (COG-UK) Consortium|Goodfellow|United Kingdom

>Spike|hCoV-19/Singapore/460/2020|2020-04-20|EPI\_ISL\_475991|Original|hCoV-19^^Singapore|Human|National Public Health Laboratory|National Public Health Laboratory|Mak|Singapore

>Spike|hCoV-19/Wales/QEUI-AE1C43/2020|2020-10-24|EPI\_ISL\_647893|Original|hCoV-19^^Wales|Human|Lighthouse Lab in Glasgow|Wellcome Sanger Institute for the COVID-19 Genomics UK (COG-UK) Consortium|Davies|United Kingdom

>Spike|hCoV-19/Colombia/COR-GVI-97517/2020|2020-04-07|EPI\_ISL\_447816|Original|hCoV-19^^Cordoba|Human|Instituto Nacional de Salud|Grupo de Investigaciones Microbiol\u00f3gicas-UR (GIMUR)|Ram\u00e9drez|Colombia

>Spike|hCoV-19/England/LIVE-9C2C7/2020|2020-03-30|EPI\_ISL\_449526|Original|hCoV-19^^England|Human|Liverpool Clinical Laboratories|COVID-19 Genomics UK (COG-UK) Consortium|Haldenby|United Kingdom

>Spike|hCoV-19/Switzerland/BE-UNIBE-209-8650/2020|2020-04-02|EPI\_ISL\_574847|Original|hCoV-19^^Bern|Human|Institute for Infectious Diseases|Institute for Infectious Diseases|Koch|Switzerland

>Spike|hCoV-19/USA/TX-HMH-MCoV-13653/2020|2020-08-20|EPI\_ISL\_788755|Original|hCoV-19^^Texas|Human|Houston Methodist Hospital|Houston Methodist Hospital|Long|USA

>Spike|hCoV-19/Wales/ALDP-C39864/2020|2020-12-08|EPI\_ISL\_767269|Original|hCoV-19^^Wales|Human|Lighthouse Lab in Alderley Park|Wellcome Sanger Institute for the COVID-19 Genomics UK (COG-UK) Consortium|Davies|United Kingdom

>Spike|hCoV-19/Wales/PHWC-165B34/2020|2020-06-05|EPI\_ISL\_490769|Original|hCoV-19^^Wales|Human|Wales Specialist Virology Centre Sequencing lab|COVID-19 Genomics UK (COG-UK) Consortium|Moore|United Kingdom

>Spike|hCoV-19/USA/MN-MDH-1187/2020|2020-04-29|EPI\_ISL\_477277|Original|hCoV-19^^Minnesota|Human|M Health Fairview|Minnesota Department of Health|Garfin|USA

>Spike|hCoV-19/USA/MA-MGH-00228/2020|2020-04-06|EPI\_ISL\_460127|Original|hCoV-19^^Massachusetts|Human|Massachusetts General Hospital|Infectious Disease Program|Lemieux|USA

>Spike|hCoV-19/England/CAMC-BBBC14/2020|2020-11-21|EPI\_ISL\_724099|Original|hCoV-19^^England|Human|Northumbria University / South Tees Hospitals NHS Foundation Trust / North Cumbria Integrated Care NHS Foundation Trust / North Tees and Hartlepool NHS Foundation Trust / Newcastle Hospitals NHS Foundation Trust|COVID-19 Genomics UK (COG-UK) Consortium|Bashton|United Kingdom

>Spike|hCoV-19/England/ALDP-B1B948/2020|2020-11-01|EPI\_ISL\_645723|Original|hCoV-19^^England|Human|Lighthouse Lab in Alderley Park|Wellcome Sanger Institute for the COVID-19 Genomics UK (COG-UK) Consortium|Davies|United Kingdom

>Spike|hCoV-19/Luxembourg/LNS4595968/2020|2020-11-02|EPI\_ISL\_740504|Original|hCoV-19^^Luxembourg|Human|Laboratoire national de sant\u00e9|Laboratoire national de sant\u00e9|Wienecke-Baldacchino|Luxembourg

>Spike|hCoV-19/USA/TX-HMH-4581/2020|2020-06-21|EPI\_ISL\_543731|Original|hCoV-19^^Texas|Human|Houston Methodist Hospital|Houston Methodist Hospital|Long|USA

>Spike|hCoV-19/England/CAMC-C4607B/2020|2020-12-10|EPI\_ISL\_718497|Original|hCoV-19^^England|Human|Lighthouse Lab in Cambridge|Wellcome Sanger Institute for the COVID-19 Genomics UK (COG-UK) Consortium|Davies|United Kingdom

>Spike|hCoV-19/USA/MI-MDHHS-SC21816/2020|2020-03-12|EPI\_ISL\_565859|Original|hCoV-19^^Michigan|Human|Michigan Department of Health and Human Services|Michigan Department of Health and Human Services|Blankenship|USA

>Spike|hCoV-19/Canada/NS-NML-943/2020|2020-03-26|EPI\_ISL\_579574|Original|hCoV-19^^Nova Scotia|Human|QEII Health Sciences Centre|National Microbiology Laboratory (NML)|Majer|Canada

>Spike|hCoV-19/England/ALDP-A51C20/2020|2020-10-07|EPI\_ISL\_598197|Original|hCoV-19^^England|Human|Lighthouse Lab in Alderley Park|Wellcome Sanger Institute for the COVID-19 Genomics UK (COG-UK) consortium|Davies|United Kingdom

>Spike|hCoV-19/USA/TX-HMH021/2020|2020-03-17|EPI\_ISL\_434731|Original|hCoV-19^^Texas|Human|Houston Methodist Hospital|Houston Methodist Hospital|Long|USA

>Spike|hCoV-19/England/20142079804/2020|2020-03-30|EPI\_ISL\_423461|Original|hCoV-19^^England|Human|Respiratory Virus Unit|Respiratory Virus Unit|Platt|United Kingdom

>Spike|hCoV-19/Wales/PHWC-48E31C/2020|2020-11-11|EPI\_ISL\_680841|Original|hCoV-19^^Wales|Human|Wales Specialist Virology Centre Sequencing lab|COVID-19 Genomics UK (COG-UK) Consortium|Moore|United Kingdom

>Spike|hCoV-19/Denmark/DCGC-4399/2020|2020-09-07|EPI\_ISL\_615397|Original|hCoV-19^^Midtjylland|Human|Department of Virus and Microbiological Special Diagnostics|Albertsen lab|Michaelsen|Denmark

>Spike|hCoV-19/USA/TX-HMH-5309/2020|2020-06-25|EPI\_ISL\_544670|Original|hCoV-19^^Texas|Human|Houston Methodist Hospital|Houston Methodist Hospital|Long|USA

>Spike|hCoV-19/USA/NY-PV08400/2020|2020-03-15|EPI\_ISL\_421368|Original|hCoV-19^^New York|Human|MHS Clinical Microbiology Laboratories|MHS Pathogen Surveillance Program|van Bakel|USA

>Spike|hCoV-19/England/CAMB-1B2B92/2020|2020-00-00|EPI\_ISL\_456707|Original|hCoV-19^^England|Human|Department of Pathology|COVID-19 Genomics UK (COG-UK) Consortium|Meredith|United Kingdom

>Spike|hCoV-19/India/GJ-GBRC315b/2020|2020-06-17|EPI\_ISL\_495072|Original|hCoV-19^^Gujarat|Human|Department of MicroBiology|Gujarat Biotechnology Research Centre|Joshi|India

>Spike|hCoV-19/USA/CA-ALSR-1148/2020|2020-04-27|EPI\_ISL\_494393|Original|hCoV-19^^California|Human|San Diego County Public Health Laboratory|Andersen lab at Scripps Research|Gangavarapu|USA

>Spike|hCoV-19/Luxembourg/LNS9923262/2020|2020-03-13|EPI\_ISL\_745011|Original|hCoV-19^^Luxembourg|Human|Laboratoire national de sant\u00e9|Laboratoire national de sant\u00e9|Wienecke-Baldacchino|Luxembourg

>Spike|hCoV-19/England/ALDP-AA26D7/2020|2020-10-22|EPI\_ISL\_630817|Original|hCoV-19^^England|Human|Lighthouse Lab in Alderley Park|Wellcome Sanger Institute for the COVID-19 Genomics UK (COG-UK) consortium|Davies|United Kingdom

>Spike|hCoV-19/England/20149008204/2020|2020-04-01|EPI\_ISL\_466134|Original|hCoV-19^^England|Human|Respiratory Virus Unit|Respiratory Virus Unit|Platt|United Kingdom

>Spike|hCoV-19/USA/NY-NYCPHL-000551/2020|2020-03-24|EPI\_ISL\_632011|Original|hCoV-19^^New York|Human|Jamaica Hospital Medical Center|New York City Public Health Laboratory|Wang|USA

>Spike|hCoV-19/USA/CA-CZB-1236/2020|2020-05-12|EPI\_ISL\_454656|Original|hCoV-19^^California|Human|County of Santa Clara Public Health Department|Chan-Zuckerberg Biohub|Hao|USA

>Spike|hCoV-19/USA/WI-UW-1448/2020|2020-09-13|EPI\_ISL\_541580|Original|hCoV-19^^Wisconsin|Human|University of Wisconsin-Madison AIDS Vaccine Research Laboratories|University of Wisconsin-Madison AIDS Vaccine Research Laboratories|Baczenas|USA

>Spike|hCoV-19/England/CAMC-B9847F/2020|2020-11-15|EPI\_ISL\_674846|Original|hCoV-19^^England|Human|Lighthouse Lab in Cambridge|Wellcome Sanger Institute for the COVID-19 Genomics UK (COG-UK) Consortium|Davies|United Kingdom

>Spike|hCoV-19/USA/TX-HMH-1452/2020|2020-05-03|EPI\_ISL\_542730|Original|hCoV-19^^Texas|Human|Houston Methodist Hospital|Houston Methodist Hospital|Long|USA

>Spike|hCoV-19/Australia/NSW695/2020|2020-07-20|EPI\_ISL\_513338|Original|hCoV-19^^New South Wales|Human|Pathology West - NSW Health Pathology|NSW Health Pathology - Institute of Clinical Pathology and Medical Research; Westmead Hospital; University of Sydney|Gall|Australia

>Spike|hCoV-19/USA/WI-UW-493/2020|2020-06-03|EPI\_ISL\_484868|Original|hCoV-19^^Wisconsin|Human|University of Wisconsin-Madison AIDS Vaccine Research Laboratories|University of Wisconsin-Madison AIDS Vaccine Research Laboratories|Baczenas|USA

>Spike|hCoV-19/Spain/RI-IBV-99005919/2020|2020-03-29|EPI\_ISL\_537456|Original|hCoV-19^^La Rioja|Human|Centro de Investigaci\u00f3n Biom\u00e9dica de La Rioja - Hospital San Pedro Logro\u00f1o|SeqCOVID-SPAIN consortium/IBV (CSIC)|Comas|Spain

>Spike|hCoV-19/England/SHEF-D0A65/2020|2020-05-05|EPI\_ISL\_475490|Original|hCoV-19^^England|Human|Virology Department|COVID-19 Genomics UK (COG-UK) Consortium|de Silva|United Kingdom

>Spike|hCoV-19/Wales/ALDP-5AD941/2020|2020-06-17|EPI\_ISL\_558800|Original|hCoV-19^^Wales|Human|Lighthouse Lab in Alderley Park|Wellcome Sanger Institute for the COVID-19 Genomics UK (COG-UK) consortium|Davies|United Kingdom

>Spike|hCoV-19/Scotland/CVR2628/2020|2020-04-17|EPI\_ISL\_477993|Original|hCoV-19^^Scotland|Human|West of Scotland Specialist Virology Centre|COVID-19 Genomics UK (COG-UK) Consortium|Robertson|United Kingdom

>Spike|hCoV-19/Denmark/DCGC-7648/2020|2020-10-19|EPI\_ISL\_618540|Original|hCoV-19^^Midtjylland|Human|Department of Virus and Microbiological Special Diagnostics|Albertsen lab|Michaelsen|Denmark

>Spike|hCoV-19/Japan/PG-0792/2020|2020-04-00|EPI\_ISL\_684402|Original|hCoV-19^^Japan|Human|Pathogen Genomics Center|Pathogen Genomics Center|Sekizuka|Japan

>Spike|hCoV-19/England/NOTT-1126EA/2020|2020-04-16|EPI\_ISL\_490567|Original|hCoV-19^^England|Human|Lincolnshire Hospitals and DeepSeq Nottingham|COVID-19 Genomics UK (COG-UK) Consortium|Loose|United Kingdom

>Spike|hCoV-19/Brazil/RS-2550/2020|2020-03-20|EPI\_ISL\_729812|Original|hCoV-19^^Rio Grande do Sul|Human|Laboratorio Central de Saude Publica do Estado do Rio Grande do Sul (LACEN-RS)|Laboratory of Respiratory Viruses and Measles|Silva|Brazil

>Spike|hCoV-19/USA/TX-HMH-MCoV-18220/2020|2020-11-17|EPI\_ISL\_784568|Original|hCoV-19^^Texas|Human|Houston Methodist Hospital|Houston Methodist Hospital|Long|USA

>Spike|hCoV-19/Wales/ALDP-9EAEDC/2020|2020-09-24|EPI\_ISL\_579926|Original|hCoV-19^^Wales|Human|Lighthouse Lab in Alderley Park|Wellcome Sanger Institute for the COVID-19 Genomics UK (COG-UK) consortium|Davies|United Kingdom

>Spike|hCoV-19/Wales/PHWC-160F3D/2020|2020-05-26|EPI\_ISL\_473068|Original|hCoV-19^^Wales|Human|Wales Specialist Virology Centre Sequencing lab|COVID-19 Genomics UK (COG-UK) Consortium|Moore|United Kingdom

>Spike|hCoV-19/England/CAMB-80F1A/2020|2020-04-16|EPI\_ISL\_444447|Original|hCoV-19^^England|Human|Department of Pathology|COVID-19 Genomics UK (COG-UK) Consortium|Meredith|United Kingdom

>Spike|hCoV-19/England/QEUEH-9F5CB6/2020|2020-09-25|EPI\_ISL\_588425|Original|hCoV-19^^England|Human|Lighthouse Lab in Glasgow|Wellcome Sanger Institute for the COVID-19 Genomics UK (COG-UK) consortium|Davies|United Kingdom

>Spike|hCoV-19/USA/AZ-TG351930/2020|2020-05-22|EPI\_ISL\_694408|Original|hCoV-19^^Arizona|Human|AZ SPHL|TGen North|French|USA

>Spike|hCoV-19/Singapore/453/2020|2020-03-19|EPI\_ISL\_475984|Original|hCoV-19^^Singapore|Human|National Public Health Laboratory|National Public Health Laboratory|Mak|Singapore

>Spike|hCoV-19/England/CAMC-B08A78/2020|2020-10-29|EPI\_ISL\_643798|Original|hCoV-19^^England|Human|Lighthouse Lab in Cambridge|Wellcome Sanger Institute for the COVID-19 Genomics UK (COG-UK) Consortium|Davies|United Kingdom

>Spike|hCoV-19/England/ALDP-BB98E5/2020|2020-11-20|EPI\_ISL\_702901|Original|hCoV-19^^England|Human|Lighthouse Lab in Alderley Park|Wellcome Sanger Institute for the COVID-19 Genomics UK (COG-UK) Consortium|Davies|United Kingdom

>Spike|hCoV-19/USA/UT-UPHL-2009645/2020|2020-07-26|EPI\_ISL\_605320|Original|hCoV-19^^Utah|Human|Utah Public Health Laboratory|Utah Public Health Laboratory|Young|USA

>Spike|hCoV-19/Denmark/DCGC-1224/2020|2020-05-25|EPI\_ISL\_614867|Original|hCoV-19^^Hovedstaden|Human|Department of Virus and Microbiological Special Diagnostics|Albertsen lab|Michaelsen|Denmark

>Spike|hCoV-19/USA/CA-CZB-6971/2020|2020-09-02|EPI\_ISL\_582904|Original|hCoV-19^^California|Human|County of Santa Clara Public Health Department|Chan-Zuckerberg Biohub|Bhatt|USA

>Spike|hCoV-19/England/204440445/2020|2020-10-27|EPI\_ISL\_660752|Original|hCoV-19^^England|Human|Respiratory Virus Unit|COVID-19 Genomics UK (COG-UK) Consortium|Platt|United Kingdom

>Spike|hCoV-19/Spain/PV-IBV-003196/2020|2020-03-10|EPI\_ISL\_480982|Original|hCoV-19^^Basque Country|Human|Servicio de Microbiolog\u00eda. Hospital Universitario Donostia. OSI Donostialdea. \u00clrea de Enfermedades Infecciosas|SeqCOVID-SPAIN consortium|IBV (CSIC) |Comas|Spain

>Spike|hCoV-19/Scotland/EDB734/2020|2020-04-02|EPI\_ISL\_433233|Original|hCoV-19^^Scotland|Human|Virology Department|COVID-19 Genomics UK (COG-UK) Consortium|Williams|United Kingdom

>Spike|hCoV-19/England/QEUEH-B12000/2020|2020-11-02|EPI\_ISL\_642724|Original|hCoV-19^^England|Human|Lighthouse Lab in Glasgow|Wellcome Sanger Institute for the COVID-19 Genomics UK (COG-UK) Consortium|Davies|United Kingdom

>Spike|hCoV-19/England/LIVE-9C388/2020|2020-03-29|EPI\_ISL\_449533|Original|hCoV-19^^England|Human|Liverpool Clinical Laboratories|COVID-19 Genomics UK (COG-UK) Consortium|Haldenby|United Kingdom

>Spike|hCoV-19/Belgium/ULG-10752/2020|2020-09-19|EPI\_ISL\_641594|Original|hCoV-19^^Li\u00e8ge|Human|Department of Clinical Microbiology|GIGA Medical Genomics|Durkin|Belgium

>Spike|hCoV-19/Belgium/regA-11271168/2020|2020-11-27|EPI\_ISL\_735221|Original|hCoV-19^^Riemst|Human|UZ Leuven|KU Leuven|Maes|Belgium

>Spike|hCoV-19/Wales/PHWC-48D32C/2020|2020-11-14|EPI\_ISL\_680608|Original|hCoV-19^^Wales|Human|Wales Specialist Virology Centre Sequencing lab|COVID-19 Genomics UK (COG-UK) Consortium|Moore|United Kingdom

>Spike|hCoV-19/England/QEUA-9D30EF/2020|2020-09-18|EPI\_ISL\_577308|Original|hCoV-19^^England|Human|Centre for Enzyme Innovation|COVID-19 Genomics UK (COG-UK) Consortium|Robson|United Kingdom

>Spike|hCoV-19/USA/TX-HMH-MCoV-9772/2020|2020-07-04|EPI\_ISL\_780267|Original|hCoV-19^^Texas|Human|Houston Methodist Hospital|Houston Methodist Hospital|Long|USA

>Spike|hCoV-19/Spain/MD-IBV-004952/2020|2020-04-20|EPI\_ISL\_481069|Original|hCoV-19^^Madrid|Human|Hospital General Universitario Gregorio Mara\u00f1a|SeqCOVID-SPAIN consortium/IBV (CSIC)|Comas|Spain

>Spike|hCoV-19/Scotland/CVR5560/2020|2020-10-27|EPI\_ISL\_651837|Original|hCoV-19^^Scotland|Human|West of Scotland Specialist Virology Centre|COVID-19 Genomics UK (COG-UK) Consortium|Robertson|United Kingdom

>Spike|hCoV-19/Scotland/CVR4667/2020|2020-09-28|EPI\_ISL\_611877|Original|hCoV-19^^Scotland|Human|West of Scotland Specialist Virology Centre|COVID-19 Genomics UK (COG-UK) Consortium|Robertson|United Kingdom

>Spike|hCoV-19/USA/HI-H200139/2020|2020-07-15|EPI\_ISL\_752702|Original|hCoV-19^^Hawaii|Human|State Laboratories Division|State Laboratories Division|Sultana|USA

>Spike|hCoV-19/England/QEUA-C7F871/2020|2020-12-16|EPI\_ISL\_762866|Original|hCoV-19^^England|Human|Lighthouse Lab in Glasgow|Wellcome Sanger Institute for the COVID-19 Genomics UK (COG-UK) Consortium|Davies|United Kingdom

>Spike|hCoV-19/Japan/PG-5572/2020|2020-08-00|EPI\_ISL\_688697|Original|hCoV-19^^Japan|Human|Pathogen Genomics Center|Pathogen Genomics Center|Sekizuka|Japan

>Spike|hCoV-19/England/MILK-B01E0A/2020|2020-10-24|EPI\_ISL\_642799|Original|hCoV-19^^England|Human|Lighthouse Lab in Milton Keynes|Wellcome Sanger Institute for the COVID-19 Genomics UK (COG-UK) Consortium|Davies|United Kingdom

>Spike|hCoV-19/Wales/PHWC-15FFB9/2020|2020-05-23|EPI\_ISL\_472878|Original|hCoV-19^^Wales|Human|Wales Specialist Virology Centre Sequencing lab|COVID-19 Genomics UK (COG-UK) Consortium|Moore|United Kingdom

>Spike|hCoV-19/Wales/PHWC-26981/2020|2020-03-30|EPI\_ISL\_422023|Original|hCoV-19^^Wales|Human|Wales Specialist Virology Centre|Public Health Wales Microbiology Cardiff|Moore|United Kingdom

>Spike|hCoV-19/England/QEUA-9F863D/2020|2020-09-25|EPI\_ISL\_588877|Original|hCoV-19^^England|Human|Lighthouse Lab in Glasgow|Wellcome Sanger Institute for the COVID-19 Genomics UK (COG-UK) consortium|Davies|United Kingdom

>Spike|hCoV-19/USA/WY-WPHL-20044526/2020|2020-07-16|EPI\_ISL\_769914|Original|hCoV-19^^Wyoming|Human|Wyoming Public Health Laboratory|Wyoming Public Health Laboratory|Hull|USA

>Spike|hCoV-19/England/CAMC-B08182/2020|2020-10-29|EPI\_ISL\_643725|Original|hCoV-19^^England|Human|Lighthouse Lab in Cambridge|Wellcome Sanger Institute for the COVID-19 Genomics UK (COG-UK) Consortium|Davies|United Kingdom

>Spike|hCoV-19/Canada/QC\_AB3/2020|2020-04-06|EPI\_ISL\_444501|Original|hCoV-19^^Quebec|Human|Laboratoire de microbiologie|Smith Laboratory|Smith|Canada

>Spike|hCoV-19/England/20139026904/2020|2020-03-26|EPI\_ISL\_421899|Original|hCoV-19^^England|Human|Respiratory Virus Unit|Respiratory Virus Unit|Platt|United Kingdom

>Spike|hCoV-19/Australia/VIC3599/2020|2020-07-09|EPI\_ISL\_520345|Original|hCoV-19^^Victoria|Human|Victorian Infectious Diseases Reference Laboratory (VIDRL)|VIDRL and MDU-PHL|Schultz|Australia

>Spike|hCoV-19/Singapore/356/2020|2020-04-08|EPI\_ISL\_469111|Original|hCoV-19^^Singapore|Human|National Public Health Laboratory|National Public Health Laboratory|Mak|Singapore

>Spike|hCoV-19/Wales/PHWC-48A6DB/2020|2020-11-03|EPI\_ISL\_652588|Original|hCoV-19^^Wales|Human|Wales Specialist Virology Centre Sequencing lab|COVID-19 Genomics UK (COG-UK) Consortium|Moore|United Kingdom

>Spike|hCoV-19/USA/TX-HMH-1441/2020|2020-05-02|EPI\_ISL\_542725|Original|hCoV-19^^Texas|Human|Houston Methodist Hospital|Houston Methodist Hospital|Long|USA

>Spike|hCoV-19/USA/MI-UM-10036309295/2020|2020-10-06|EPI\_ISL\_596605|Original|hCoV-19^^Michigan|Human|University of Michigan Clinical Microbiology Laboratory|Lauring Lab|Valesano|USA

>Spike|hCoV-19/England/MILK-B939B1/2020|2020-11-13|EPI\_ISL\_676055|Original|hCoV-19^^England|Human|Lighthouse Lab in Milton Keynes|Wellcome Sanger Institute for the COVID-19 Genomics UK (COG-UK) Consortium|Davies|United Kingdom

>Spike|hCoV-19/England/CAMB-832D2/2020|2020-04-15|EPI\_ISL\_443513|Original|hCoV-19^^England|Human|Department of Pathology|Wellcome Sanger Institute for the COVID-19 Genomics UK (COG-UK) consortium|Amato|United Kingdom

>Spike|hCoV-19/Wales/PHWC-487CCD/2020|2020-10-30|EPI\_ISL\_639296|Original|hCoV-19^^Wales|Human|Wales Specialist Virology Centre Sequencing lab|COVID-19 Genomics UK (COG-UK) Consortium|Moore|United Kingdom

>Spike|hCoV-19/England/LIVE-A404A/2020|2020-06-25|EPI\_ISL\_584618|Original|hCoV-19^^England|Human|Liverpool Clinical Laboratories|COVID-19 Genomics UK (COG-UK) Consortium|Haldenby|United Kingdom

>Spike|hCoV-19/England/QEUEH-BCC21E/2020|2020-11-27|EPI\_ISL\_704318|Original|hCoV-19^^England|Human|Lighthouse Lab in Glasgow|Wellcome Sanger Institute for the COVID-19 Genomics UK (COG-UK) Consortium|Davies|United Kingdom

>Spike|hCoV-19/England/ALDP-A8592C/2020|2020-10-18|EPI\_ISL\_610392|Original|hCoV-19^^England|Human|Lighthouse Lab in Alderley Park|Wellcome Sanger Institute for the COVID-19 Genomics UK (COG-UK) consortium|Davies|United Kingdom

>Spike|hCoV-19/USA/NY-Wadsworth-292655-01/2020|2020-12-07|EPI\_ISL\_767697|Original|hCoV-19^^New York|Human|MEMORIAL SLOAN KETTERING CANCER CENTER|Wadsworth Center|Lasek-Nesselquist|USA

>Spike|hCoV-19/USA/WI-WSLH-200394/2020|2020-04-22|EPI\_ISL\_578560|Original|hCoV-19^^Wisconsin|Human|Wisconsin State Laboratory of Hygiene Communicable Disease Division|Wisconsin State Laboratory of Hygiene Communicable Disease Division|Florek|USA

>Spike|hCoV-19/Portugal/PT0623/2020|2020-03-26|EPI\_ISL\_454346|Original|hCoV-19^^Portugal|Human|unknown|Instituto Nacional de Saude (INSA)|Borges|Portugal

>Spike|hCoV-19/USA/TX-HMH-MCoV-15937/2020|2020-07-10|EPI\_ISL\_785621|Original|hCoV-19^^Texas|Human|Houston Methodist Hospital|Houston Methodist Hospital|Long|USA

>Spike|hCoV-19/USA/NJ-QDX-141/2020|2020-03-15|EPI\_ISL\_467877|Original|hCoV-19^^New Jersey|Human|Quest Diagnostics|Quest Diagnostics|Kagan|USA

>Spike|hCoV-19/Switzerland/LU-ETHZ-340112/2020|2020-10-26|EPI\_ISL\_721825|Original|hCoV-19^^Lucerne|Human|Viollier AG|Department of Biosystems Science and Engineering|Nadeau|Switzerland

>Spike|hCoV-19/Denmark/DCGC-3085/2020|2020-08-31|EPI\_ISL\_616865|Original|hCoV-19^^Nordjylland|Human|Department of Virus and Microbiological Special Diagnostics|Albertsen lab|Michaelsen|Denmark

>Spike|hCoV-19/England/QEUEH-AABDE8/2020|2020-10-21|EPI\_ISL\_652834|Original|hCoV-19^^England|Human|Oxford Viromics|COVID-19 Genomics UK (COG-UK) Consortium|Golubchik|United Kingdom

>Spike|hCoV-19/England/BRIS-12708A/2020|2020-04-23|EPI\_ISL\_469547|Original|hCoV-19^^England|Human|PHE South West Regional Laboratory|Wellcome Sanger Institute for the COVID-19 Genomics UK (COG-UK) consortium|Davies|United Kingdom

>Spike|hCoV-19/England/NORT-2A4E8A/2020|2020-09-19|EPI\_ISL\_573412|Original|hCoV-19^^England|Human|Northumbria University / South Tees Hospitals NHS Foundation Trust / North Cumbria Integrated Care NHS Foundation Trust / North Tees and Hartlepool NHS Foundation Trust / Newcastle Hospitals NHS Foundation Trust|COVID-19 Genomics UK (COG-UK) Consortium|Bashton|United Kingdom

>Spike|hCoV-19/Japan/PG-0078/2020|2020-02-00|EPI\_ISL\_684112|Original|hCoV-19^^Japan|Human|Pathogen Genomics Center|Pathogen Genomics Center|Sekizuka|Japan

>Spike|hCoV-19/England/ALDP-C3D833/2020|2020-12-10|EPI\_ISL\_730667|Original|hCoV-19^^England|Human|Lighthouse Lab in Alderley Park|Wellcome Sanger Institute for the COVID-19 Genomics UK (COG-UK) Consortium|Davies|United Kingdom

>Spike|hCoV-19/England/LIVE-A9F93/2020|2020-03-23|EPI\_ISL\_517381|Original|hCoV-19^^England|Human|Liverpool Clinical Laboratories|COVID-19 Genomics UK (COG-UK) Consortium|Haldenby|United Kingdom

>Spike|hCoV-19/England/ALDP-C3C069/2020|2020-12-10|EPI\_ISL\_731586|Original|hCoV-19^^England|Human|Lighthouse Lab in Alderley Park|Wellcome Sanger Institute for the COVID-19 Genomics UK (COG-UK) Consortium|Davies|United Kingdom

>Spike|hCoV-19/Australia/VIC15452/2020|2020-07-31|EPI\_ISL\_593310|Original|hCoV-19^^Victoria|Human|Microbiological Diagnostic Unit - Public Health Laboratory (MDU-PHL)|MDU-PHL|Schultz|Australia

>Spike|hCoV-19/USA/TX-HMH-3212/2020|2020-06-12|EPI\_ISL\_544080|Original|hCoV-19^^Texas|Human|Houston Methodist Hospital|Houston Methodist Hospital|Long|USA

>Spike|hCoV-19/England/ALDP-A947D5/2020|2020-10-19|EPI\_ISL\_624650|Original|hCoV-19^^England|Human|Lighthouse Lab in Alderley Park|Wellcome Sanger Institute for the COVID-19 Genomics UK (COG-UK) consortium|Davies|United Kingdom

>Spike|hCoV-19/France/PAC-IHU-1552/2020|2020-08-14|EPI\_ISL\_569195|Original|hCoV-19^^Provence-Alpes-C\u00f4te-d\u2019Azur|Human|MEPHI|MEPHI|Levasseur|France

>Spike|hCoV-19/USA/CA-CZB-12808/2020|2020-10-13|EPI\_ISL\_648459|Original|hCoV-19^^California|Human|Santa Clara County Public Health Laboratory|Chan-Zuckerberg Biohub|Bhatt|USA

>Spike|hCoV-19/USA/CA-CZB-13039/2020|2020-05-15|EPI\_ISL\_672319|Original|hCoV-19^^California|Human|Alameda County Public Health Lab|Chan-Zuckerberg Biohub|Bhatt|USA

>Spike|hCoV-19/United Arab Emirates/0393/2020|2020-05-15|EPI\_ISL\_698568|Original|hCoV-19^^Abu Dhabi|Human|Group 42 (G42) Healthcare|G42 Healthcare|Ogrodzki|United Arab Emirates

>Spike|hCoV-19/England/CAMC-BOA153/2020|2020-10-30|EPI\_ISL\_673045|Original|hCoV-19^^England|Human|Lighthouse Lab in Cambridge|Wellcome Sanger Institute for the COVID-19 Genomics UK (COG-UK) Consortium|Davies|United Kingdom

>Spike|hCoV-19/Australia/VIC932/2020|2020-03-31|EPI\_ISL\_427160|Original|hCoV-19^^Victoria|Human|Victorian Infectious Diseases Reference Laboratory (VIDRL)|Microbiological Diagnostic Unit Public Health Laboratory and Victorian Infectious Diseases Reference Laboratory|Schultz|Australia

>Spike|hCoV-19/USA/TX-HMH-MCoV-14485/2020|2020-10-08|EPI\_ISL\_787770|Original|hCoV-19^^Texas|Human|Houston Methodist Hospital|Houston Methodist Hospital|Long|USA

>Spike|hCoV-19/Switzerland/VD-ETHZ-320521/2020|2020-10-13|EPI\_ISL\_737894|Original|hCoV-19^^Vaud|Human|Viollier AG|Department of Biosystems Science and Engineering|Nadeau|Switzerland

>Spike|hCoV-19/Japan/IC-0311/2020|2020-11-00|EPI\_ISL\_667740|Original|hCoV-19^^Japan|Human|Pathogen Genomics Center|Pathogen Genomics Center|Sekizuka|Japan

>Spike|hCoV-19/Germany/HH-hpi-p2417/2020|2020-04-21|EPI\_ISL\_776487|Original|hCoV-19^^Hamburg|Human|University Medical Center Hamburg Eppendorf|Heinrich Pette Institute|Robitaille|Germany

>Spike|hCoV-19/Wales/PHWC-496135/2020|2020-11-27|EPI\_ISL\_726536|Original|hCoV-19^^Wales|Human|Originating lab|COVID-19 Genomics UK (COG-UK) Consortium|Moore|United Kingdom

>Spike|hCoV-19/Wales/PHWC-484BB4/2020|2020-10-24|EPI\_ISL\_628086|Original|hCoV-19^^Wales|Human|Wales Specialist Virology Centre Sequencing lab|COVID-19 Genomics UK (COG-UK) Consortium|Moore|United Kingdom

>Spike|hCoV-19/Scotland/CVR5015/2020|2020-10-09|EPI\_ISL\_594754|Original|hCoV-19^^Scotland|Human|West of Scotland Specialist Virology Centre|COVID-19 Genomics UK (COG-UK) Consortium|Robertson|United Kingdom

>Spike|hCoV-19/Germany/HH-hpi-p1828/2020|2020-03-22|EPI\_ISL\_776182|Original|hCoV-19^^Hamburg|Human|University Medical Center Hamburg Eppendorf|Heinrich Pette Institute|Robitaille|Germany

>Spike|hCoV-19/England/CAMC-BFBE7/2020|2020-12-04|EPI\_ISL\_709064|Original|hCoV-19^^England|Human|Lighthouse Lab in Cambridge|Wellcome Sanger Institute for the COVID-19 Genomics UK (COG-UK) Consortium|Davies|United Kingdom

>Spike|hCoV-19/England/202740182/2020|2020-07-30|EPI\_ISL\_566058|Original|hCoV-19^^England|Human|Respiratory Virus Unit|Respiratory Virus Unit|Platt|United Kingdom

>Spike|hCoV-19/USA/WA-S1992/2020|2020-06-04|EPI\_ISL\_497420|Original|hCoV-19^^Washington|Human|Washington State Department of Health|Seattle Flu Study|Lee|USA



>Spike|hCoV-19/Denmark/DCGC-11342/2020|2020-11-02|EPI\_ISL\_670851|Original|hCoV-19^^Sjaelland|Human|Department of Virus and Microbiological Special Diagnostics|Albertsen Lab|Michaelsen|Denmark

>Spike|hCoV-19/USA/VA-DCLS-1423/2020|2020-07-13|EPI\_ISL\_581546|Original|hCoV-19^^Virginia|Human|Virginia DCLS|Virginia DCLS|St. Jacques|USA

>Spike|hCoV-19/England/20106087206/2020|2020-03-02|EPI\_ISL\_417245|Original|hCoV-19^^England|Human|Respiratory Virus Unit|Respiratory Virus Unit|Platt|United Kingdom

>Spike|hCoV-19/USA/CA-CZB-3883/2020|2020-07-21|EPI\_ISL\_548518|Original|hCoV-19^^California|Human|County of Santa Clara Public Health Department|Chan-Zuckerberg Biohub|Bhatt|USA

>Spike|hCoV-19/Canada/QC-LSPQ-L00231304/2020|2020-03-20|EPI\_ISL\_535953|Original|hCoV-19^^Quebec|Human|H\u00f4pital Charles-LeMoine|Laboratoire de sant\u00e9 publique du Qu\u00e9bec|Moreira|Canada

>Spike|hCoV-19/Wales/PHWC-49304A/2020|2020-11-28|EPI\_ISL\_725827|Original|hCoV-19^^Wales|Human|Originating lab|COVID-19 Genomics UK (COG-UK) Consortium|Moore|United Kingdom

>Spike|hCoV-19/England/NORW-F8B82/2020|2020-11-24|EPI\_ISL\_706402|Original|hCoV-19^^England|Human|Quadram Institute Bioscience|COVID-19 Genomics UK (COG-UK) Consortium|Alikhan|United Kingdom

>Spike|hCoV-19/Australia/VIC7147/2020|2020-08-04|EPI\_ISL\_564254|Original|hCoV-19^^Victoria|Human|Victorian Infectious Diseases Reference Laboratory (VIDRL)|VIDRL and MDU-PHL|Schultz|Australia

>Spike|hCoV-19/England/20144076304/2020|2020-04-01|EPI\_ISL\_421964|Original|hCoV-19^^England|Human|Respiratory Virus Unit|Respiratory Virus Unit|Platt|United Kingdom

>Spike|hCoV-19/England/ALDP-B1ADA7/2020|2020-11-01|EPI\_ISL\_646090|Original|hCoV-19^^England|Human|Lighthouse Lab in Alderley Park|Wellcome Sanger Institute for the COVID-19 Genomics UK (COG-UK) Consortium|Davies|United Kingdom

>Spike|hCoV-19/France/PAC-IHU-0388/2020|2020-03-28|EPI\_ISL\_569483|Original|hCoV-19^^Provence-Alpes-C\u00f4te-d\u2019Azur|Human|MEPHI|MEPHI|Levasseur|France

>Spike|hCoV-19/England/CAMB-83C5C/2020|2020-04-15|EPI\_ISL\_443358|Original|hCoV-19^^England|Human|Department of Pathology|Wellcome Sanger Institute for the COVID-19 Genomics UK (COG-UK) consortium|Amato|United Kingdom

>Spike|hCoV-19/Switzerland/BE-ETHZ-331456/2020|2020-10-21|EPI\_ISL\_614927|Original|hCoV-19^^Bern|Human|Viollier AG|Department of Biosystems Science and Engineering|Nadeau|Switzerland

>Spike|hCoV-19/England/CAMB-1B2655/2020|2020-05-18|EPI\_ISL\_456701|Original|hCoV-19^^England|Human|Department of Pathology|COVID-19 Genomics UK (COG-UK) Consortium|Meredith|United Kingdom

>Spike|hCoV-19/England/NOTT-113661/2020|2020-09-11|EPI\_ISL\_549519|Original|hCoV-19^^England|Human|Lincolnshire Hospitals and DeepSeq Nottingham|COVID-19 Genomics UK (COG-UK) Consortium|Loose|United Kingdom

>Spike|hCoV-19/USA/WA-UW-12797/2020|2020-06-29|EPI\_ISL\_570903|Original|hCoV-19^^Washington|Human|UW Virology Lab|UW Virology Lab|Roychoudhury|USA

>Spike|hCoV-19/England/MILK-BAA87E/2020|2020-11-17|EPI\_ISL\_681414|Original|hCoV-19^^England|Human|Lighthouse Lab in Milton Keynes|Wellcome Sanger Institute for the COVID-19 Genomics UK (COG-UK) Consortium|Davies|United Kingdom

>Spike|hCoV-19/South Africa/KRISP-K002722/2020|2020-08-15|EPI\_ISL\_529723|Original|hCoV-19^^KwaZulu-Natal|Human|NHLS-IALCH|KRISP|de Oliveira|South Africa

>Spike|hCoV-19/Australia/VIC5043/2020|2020-07-18|EPI\_ISL\_519847|Original|hCoV-19^^Victoria|Human|Microbiological Diagnostic Unit - Public Health Laboratory (MDU-PHL)|MDU-PHL|Schultz|Australia

>Spike|hCoV-19/India/MH-NIV-QC-797/2020|2020-04-22|EPI\_ISL\_452215|Original|hCoV-19^^Maharashtra|Human|NIV Influenza|NIV Influenza|Potdar|India

>Spike|hCoV-19/England/20132054704/2020|2020-03-23|EPI\_ISL\_423787|Original|hCoV-19^^England|Human|Respiratory Virus Unit|Respiratory Virus Unit|Platt|United Kingdom

>Spike|hCoV-19/Wales/PHWC-35916/2020|2020-04-23|EPI\_ISL\_474497|Original|hCoV-19^^Wales|Human|Originating lab|COVID-19 Genomics UK (COG-UK) Consortium|Moore|United Kingdom

>Spike|hCoV-19/England/205141224/2020|2020-12-16|EPI\_ISL\_756158|Original|hCoV-19^^England|Human|Respiratory Virus Unit|COVID-19 Genomics UK (COG-UK) Consortium|Miah|United Kingdom

>Spike|hCoV-19/Thailand/Chiang Rai\_MM/2020|2020-12-03|EPI\_ISL\_768609|Original|hCoV-19^^Chiang Rai|Human|Regional Medical Sciences Center 1/1 Chiang Rai|National Institute of Health|Phuygun|Thailand

>Spike|hCoV-19/Spain/PV-IBV-003234/2020|2020-03-15|EPI\_ISL\_480991|Original|hCoV-19^^Basque Country|Human|Servicio de Microbiolog\u00eda. Hospital Universitario Donostia. OSI Donostialdea. \u00clrea de Enfermedades Infecciosas|SeqCOVID-SPAIN consortium/IBV (CSIC)|Comas|Spain

>Spike|hCoV-19/Wales/PHWC-2ED41/2020|2020-04-06|EPI\_ISL\_446146|Original|hCoV-19^^Wales|Human|Wales Specialist Virology Centre|Public Health Wales Microbiology Cardiff|Moore|United Kingdom

>Spike|hCoV-19/England/EXET-13A6EC/2020|2020-11-08|EPI\_ISL\_664255|Original|hCoV-19^^England|Human|University of Exeter|COVID-19 Genomics UK (COG-UK) Consortium|Temperton|United Kingdom

>Spike|hCoV-19/Belgium/UGent-45/2020|2020-03-29|EPI\_ISL\_434361|Original|hCoV-19^^Ghent|Human|Lab voor klinische biologie|Onderzoeksgroep Virologie|Lambrechts|Belgium

>Spike|hCoV-19/USA/TX-HMH-MCoV-18812/2020|2020-11-26|EPI\_ISL\_785139|Original|hCoV-19^^Texas|Human|Houston Methodist Hospital|Houston Methodist Hospital|Long|USA

>Spike|hCoV-19/England/20124000504/2020|2020-03-14|EPI\_ISL\_465769|Original|hCoV-19^^England|Human|Respiratory Virus Unit|Respiratory Virus Unit|Platt|United Kingdom

>Spike|hCoV-19/England/ALDP-CB4F7B/2020|2020-12-17|EPI\_ISL\_761697|Original|hCoV-19^^England|Human|Lighthouse Lab in Alderley Park|Wellcome Sanger Institute for the COVID-19 Genomics UK (COG-UK) Consortium|Davies|United Kingdom

>Spike|hCoV-19/England/LIVE-DC2F1F/2020|2020-11-24|EPI\_ISL\_705853|Original|hCoV-19^^England|Human|Liverpool Clinical Laboratories|COVID-19 Genomics UK (COG-UK) Consortium|Haldenby|United Kingdom

>Spike|hCoV-19/Switzerland/BS-UHB-42187936/2020|2020-03-12|EPI\_ISL\_528029|Original|hCoV-19^^Basel-Stadt|Human|University Hospital Basel|University Hospital Basel|Roloff Handschin|Switzerland

>Spike|hCoV-19/Japan/PG-6460/2020|2020-08-00|EPI\_ISL\_689565|Original|hCoV-19^^Japan|Human|Pathogen Genomics Center|Pathogen Genomics Center|Sekizuka|Japan

>Spike|hCoV-19/England/OXON-B2C18/2020|2020-05-02|EPI\_ISL\_534801|Original|hCoV-19^^England|Human|Oxford Viromics|COVID-19 Genomics UK (COG-UK) Consortium|Golubchik|United Kingdom

>Spike|hCoV-19/USA/MI-MDHHS-SC20164/2020|2020-03-26|EPI\_ISL\_436887|Original|hCoV-19^^Michigan|Human|Michigan Department of Health and Human Services|Michigan Department of Health and Human Services|Blankenship|USA

>Spike|hCoV-19/Netherlands/GE-EMC-226/2020|2020-06-07|EPI\_ISL\_523206|Original|hCoV-19^^Gelderland|Human|Dutch COVID-19 response team|Erasmus Medical Center|Oude Munnink|Netherlands

>Spike|hCoV-19/USA/WA-S2145/2020|2020-06-08|EPI\_ISL\_497573|Original|hCoV-19^^Washington|Human|Washington State Department of Health|Seattle Flu Study|Lee|USA

>Spike|hCoV-19/England/QEUEH-C314C2/2020|2020-12-10|EPI\_ISL\_730828|Original|hCoV-19^^England|Human|Lighthouse Lab in Glasgow|Wellcome Sanger Institute for the COVID-19 Genomics UK (COG-UK) Consortium|Davies|United Kingdom

>Spike|hCoV-19/Netherlands/NH-RIVM-20106/2020|2020-11-10|EPI\_ISL\_723283|Original|hCoV-19^^Noord-Holland|Human|Dutch COVID-19 response team|National Institute for Public Health and the Environment (RIVM)|Meijer|Netherlands

>Spike|hCoV-19/England/LIVE-DCCD75/2020|2020-12-11|EPI\_ISL\_724527|Original|hCoV-19^^England|Human|Liverpool Clinical Laboratories|COVID-19 Genomics UK (COG-UK) Consortium|Haldenby|United Kingdom

>Spike|hCoV-19/Japan/PG-2299/2020|2020-05-00|EPI\_ISL\_685904|Original|hCoV-19^^Japan|Human|Pathogen Genomics Center|Pathogen Genomics Center|Sekizuka|Japan

>Spike|hCoV-19/Denmark/DCGC-6999/2020|2020-10-12|EPI\_ISL\_619846|Original|hCoV-19^^Hovedstaden|Human|Department of Virus and Microbiological Special Diagnostics|Albertsen lab|Michaelsen|Denmark

>Spike|hCoV-19/Wales/PHWC-15C3FC/2020|2020-04-21|EPI\_ISL\_472484|Original|hCoV-19^^Wales|Human|Wales Specialist Virology Centre Sequencing lab|COVID-19 Genomics UK (COG-UK) Consortium|Moore|United Kingdom

>Spike|hCoV-19/Portugal/PT1137/2020|2020-05-06|EPI\_ISL\_511684|Original|hCoV-19^^Portugal|Human|Instituto Nacional de Saude (INSA)|Instituto Nacional de Saude (INSA)|Borges|Portugal

>Spike|hCoV-19/USA/WA-UW-32735/2020|2020-10-19|EPI\_ISL\_737083|Original|hCoV-19^^Washington|Human|UW Virology Lab|UW Virology Lab|Roychoudhury|USA

>Spike|hCoV-19/Denmark/DCGC-6904/2020|2020-10-12|EPI\_ISL\_619749|Original|hCoV-19^^Syddanmark|Human|Department of Virus and Microbiological Special Diagnostics|Albertsen lab|Michaelsen|Denmark

>Spike|hCoV-19/Chile/BI-194033/2020|2020-09-30|EPI\_ISL\_746511|Original|hCoV-19^^Biobio|Human|Genetica Molecular and Subdepartamento de Virologia ISP Chile|Instituto de Salud Publica de Chile|Tognarelli|Chile

>Spike|hCoV-19/USA/VA-DCLS-1713/2020|2020-09-02|EPI\_ISL\_614123|Original|hCoV-19^^Virginia|Human|Virginia DCLS|Virginia DCLS|St. Jacques|USA

>Spike|hCoV-19/England/QEUEH-AAE5DE/2020|2020-10-20|EPI\_ISL\_652974|Original|hCoV-19^^England|Human|Oxford Viromics|COVID-19 Genomics UK (COG-UK) Consortium|Golubchik|United Kingdom

>Spike|hCoV-19/England/201141651/2020|2020-03-09|EPI\_ISL\_464768|Original|hCoV-19^^England|Human|Respiratory Virus Unit|Respiratory Virus Unit|Platt|United Kingdom

>Spike|hCoV-19/England/NOTT-10DF6F/2020|2020-03-14|EPI\_ISL\_425474|Original|hCoV-19^^England|Human|Queens Medical Centre|COVID-19 Genomics UK (COG-UK) Consortium|Loose|United Kingdom

>Spike|hCoV-19/England/CAMC-A570A6/2020|2020-10-09|EPI\_ISL\_597307|Original|hCoV-19^^England|Human|Lighthouse Lab in Cambridge|Wellcome Sanger Institute for the COVID-19 Genomics UK (COG-UK) consortium|Davies|United Kingdom

>Spike|hCoV-19/England/MILK-B38918/2020|2020-11-01|EPI\_ISL\_658941|Original|hCoV-19^^England|Human|Lighthouse Lab in Milton Keynes|Wellcome Sanger Institute for the COVID-19 Genomics UK (COG-UK) Consortium|Davies|United Kingdom

>Spike|hCoV-19/USA/CA-CHLA-PLM78829447/2020|2020-11-16|EPI\_ISL\_753353|Original|hCoV-19^^California|Human|Clinical virology Laboratory|Center for Personalized Medicine|Dien Bard|USA

>Spike|hCoV-19/England/ALDP-B24CE9/2020|2020-11-04|EPI\_ISL\_646580|Original|hCoV-19^^England|Human|Lighthouse Lab in Alderley Park|Wellcome Sanger Institute for the COVID-19 Genomics UK (COG-UK) Consortium|Davies|United Kingdom

>Spike|hCoV-19/USA/CA-CHLA-PLM80441786/2020|2020-12-03|EPI\_ISL\_753656|Original|hCoV-19^^California|Human|Clinical virology Laboratory|Center for Personalized Medicine|Dien Bard|USA

>Spike|hCoV-19/England/PORT-2D5697/2020|2020-12-20|EPI\_ISL\_765125|Original|hCoV-19^^England|Human|Centre for Enzyme Innovation|COVID-19 Genomics UK (COG-UK) Consortium|Robson|United Kingdom

>Spike|hCoV-19/Hong Kong/HKU-200723-001/2020|2020-07-10|EPI\_ISL\_497768|Original|hCoV-19^^Hong Kong|Human|Department of Microbiology|Department of Microbiology|Chan|China

>Spike|hCoV-19/England/MILK-B06F5D/2020|2020-10-29|EPI\_ISL\_652285|Original|hCoV-19^^England|Human|Quadram Institute Bioscience|COVID-19 Genomics UK (COG-UK) Consortium|Alikhan|United Kingdom

>Spike|hCoV-19/England/CAMC-B37F44/2020|2020-11-05|EPI\_ISL\_659017|Original|hCoV-19^^England|Human|Lighthouse Lab in Cambridge|Wellcome Sanger Institute for the COVID-19 Genomics UK (COG-UK) Consortium|Davies|United Kingdom

>Spike|hCoV-19/England/ALDP-94BB4B/2020|2020-06-11|EPI\_ISL\_555821|Original|hCoV-19^^England|Human|Lighthouse Lab in Alderley Park|Wellcome Sanger Institute for the COVID-19 Genomics UK (COG-UK) consortium|Davies|United Kingdom

>Spike|hCoV-19/England/ALDP-A93DD4/2020|2020-10-19|EPI\_ISL\_611075|Original|hCoV-19^^England|Human|Lighthouse Lab in Alderley Park|Wellcome Sanger Institute for the COVID-19 Genomics UK (COG-UK) consortium|Davies|United Kingdom

>Spike|hCoV-19/USA/LA-GBCL-26556560/2020|2020-04-15|EPI\_ISL\_485190|Original|hCoV-19^^Louisiana|Human|River Road Testing Lab|Ginkgo Bioworks Clinical Laboratory|Smith|USA

>Spike|hCoV-19/India/OR-ILSCV33983/2020|2020-06-08|EPI\_ISL\_481181|Original|hCoV-19^^Odisha|Human|Immunogenomics lab|Immunogenomics lab|Raghav|India

>Spike|hCoV-19/England/QEUEH-52DBE9/2020|2020-05-18|EPI\_ISL\_532150|Original|hCoV-19^^England|Human|Lighthouse Lab in Glasgow|Wellcome Sanger Institute for the COVID-19 Genomics UK (COG-UK) consortium|Davies|United Kingdom

>Spike|hCoV-19/England/QEUEH-9F384B/2020|2020-09-24|EPI\_ISL\_588690|Original|hCoV-19^^England|Human|Lighthouse Lab in Glasgow|Wellcome Sanger Institute for the COVID-19 Genomics UK (COG-UK) consortium|Davies|United Kingdom

>Spike|hCoV-19/USA/MI-UM-10036207074/2020|2020-09-30|EPI\_ISL\_590743|Original|hCoV-19^^Michigan|Human|University of Michigan Clinical Microbiology Laboratory|Lauring Lab|Valesano|USA

>Spike|hCoV-19/Denmark/DCGC-20409/2020|2020-12-21|EPI\_ISL\_758724|Original|hCoV-19^^Hovedstaden|Human|Department of Virus and Microbiological Special Diagnostics|Albertsen Lab|Michaelsen|Denmark

>Spike|hCoV-19/Norway/6432/2020|2020-11-28|EPI\_ISL\_775389|Original|hCoV-19^^Viken|Human|Akershus University Hospital|Norwegian Institute of Public Health|Vollan|Norway

>Spike|hCoV-19/USA/CA-CZB-9730/2020|2020-03-13|EPI\_ISL\_672042|Original|hCoV-19^^California|Human|The Ashley Laboratory|Chan-Zuckerberg Biohub|Bhatt|USA

>Spike|hCoV-19/USA/MI-UM-2006S000967/2020|2020-03-29|EPI\_ISL\_484774|Original|hCoV-19^^Michigan|Human|University of Michigan Clinical Microbiology Laboratory|Lauring Lab|Valesano|USA

>Spike|hCoV-19/England/CAMB-1B6D01/2020|2020-10-13|EPI\_ISL\_612278|Original|hCoV-19^^England|Human|Department of Pathology|COVID-19 Genomics UK (COG-UK) Consortium|Goodfellow|United Kingdom

>Spike|hCoV-19/England/QEUEH-A0BDE6/2020|2020-10-01|EPI\_ISL\_599185|Original|hCoV-19^^England|Human|Lighthouse Lab in Glasgow|Wellcome Sanger Institute for the COVID-19 Genomics UK (COG-UK) consortium|Davies|United Kingdom

>Spike|hCoV-19/Austria/CeMM1011/2020|2020-03-26|EPI\_ISL\_583850|Original|hCoV-19^^Austria|Human|Dr. Gernot Walder GmbH|Bergthaler laboratory|Bergthaler|Austria

>Spike|hCoV-19/England/CAMB-797D0/2020|2020-04-01|EPI\_ISL\_441816|Original|hCoV-19^^England|Human|Department of Pathology|Wellcome Sanger Institute for the COVID-19 Genomics UK (COG-UK) consortium|Amato|United Kingdom

>Spike|hCoV-19/USA/TX-HMH-MCoV-10756/2020|2020-07-08|EPI\_ISL\_789614|Original|hCoV-19^^Texas|Human|Houston Methodist Hospital|Houston Methodist Hospital|Long|USA

>Spike|hCoV-19/England/NOTT-11D157/2020|2020-11-20|EPI\_ISL\_665918|Original|hCoV-19^^England|Human|Queens Medical Centre|COVID-19 Genomics UK (COG-UK) Consortium|Loose|United Kingdom

>Spike|hCoV-19/Spain/AN-IBV-002011/2020|2020-03-15|EPI\_ISL\_509611|Original|hCoV-19^^Andalucia|Human|Servicio de Microbiolog\u00eda. HRU de M\u00e9llaga. Servicio Andaluz de Salud|SeqCOVID-SPAIN consortium|IBV(CSIC)|Comas|Spain

>Spike|hCoV-19/England/QEUEH-A0C019/2020|2020-09-30|EPI\_ISL\_599265|Original|hCoV-19^^England|Human|Lighthouse Lab in Glasgow|Wellcome Sanger Institute for the COVID-19 Genomics UK (COG-UK) consortium|Davies|United Kingdom

>Spike|hCoV-19/Japan/PG-7810/2020|2020-07-00|EPI\_ISL\_686912|Original|hCoV-19^^Japan|Human|Pathogen Genomics Center|Pathogen Genomics Center|Sekizuka|Japan

>Spike|hCoV-19/Denmark/DCGC-21082/2020|2020-12-21|EPI\_ISL\_758896|Original|hCoV-19^^Syddanmark|Human|Department of Virus and Microbiological Special Diagnostics|Albertsen Lab|Michaelsen|Denmark

>Spike|hCoV-19/Northern Ireland/NIRE-106A92/2020|2020-05-20|EPI\_ISL\_500980|Original|hCoV-19^^Northern Ireland|Human|Regional Virus Laboratory|Wellcome Sanger Institute for the COVID-19 Genomics UK (COG-UK) consortium|Davies|United Kingdom

>Spike|hCoV-19/England/C200043921/2020|2020-11-06|EPI\_ISL\_666747|Original|hCoV-19^^England|Human|Respiratory Virus Unit|COVID-19 Genomics UK (COG-UK) Consortium|Platt|United Kingdom

>Spike|hCoV-19/England/QEUEH-A9FB74/2020|2020-10-20|EPI\_ISL\_611328|Original|hCoV-19^^England|Human|Lighthouse Lab in Glasgow|Wellcome Sanger Institute for the COVID-19 Genomics UK (COG-UK) consortium|Davies|United Kingdom

>Spike|hCoV-19/England/MILK-9939D1/2020|2020-08-26|EPI\_ISL\_552284|Original|hCoV-19^^England|Human|Lighthouse Lab in Milton Keynes|Wellcome Sanger Institute for the COVID-19 Genomics UK (COG-UK) consortium|Davies|United Kingdom

>Spike|hCoV-19/Italy/LAZ-INMI-79/2020|2020-05-19|EPI\_ISL\_603186|Original|hCoV-19^^Lazio|Human|INMI Lazzaro Spallanzani IRCCS|INMI Lazzaro Spallanzani IRCCS|Gruber|Italy

>Spike|hCoV-19/Japan/PG-8016/2020|2020-08-00|EPI\_ISL\_687117|Original|hCoV-19^^Japan|Human|Pathogen Genomics Center|Pathogen Genomics Center|Sekizuka|Japan

>Spike|hCoV-19/Denmark/DCGC-20059/2020|2020-12-07|EPI\_ISL\_747957|Original|hCoV-19^^Midtjylland|Human|Department of Virus and Microbiological Special Diagnostics|Albertsen Lab|Michaelsen|Denmark

>Spike|hCoV-19/Canada/BC\_11656112/2020|2020-04-00|EPI\_ISL\_467328|Original|hCoV-19^^British Columbia|Human|BCCDC Public Health Laboratory|BCCDC Public Health Laboratory|Harrigan|Canada

>Spike|hCoV-19/Netherlands/OV-RIVM-20121/2020|2020-11-16|EPI\_ISL\_723296|Original|hCoV-19^^Overijssel|Human|Dutch COVID-19 response team|National Institute for Public Health and the Environment (RIVM)|Meijer|Netherlands

>Spike|hCoV-19/Luxembourg/LNS8778022/2020|2020-11-28|EPI\_ISL\_744807|Original|hCoV-19^^Luxembourg|Human|Laboratoire national de sant\u00e9|Laboratoire national de sant\u00e9|Wienecke-Baldacchino|Luxembourg

>Spike|hCoV-19/Italy/VEN-UniVR-39/2020|2020-03-10|EPI\_ISL\_751351|Original|hCoV-19^^Veneto|Human|IRCCS Sacro Cuore Don Calabria Hospital|University of Verona|Mori|Italy

>Spike|hCoV-19/England/ALDP-94D824/2020|2020-06-19|EPI\_ISL\_554973|Original|hCoV-19^^England|Human|Lighthouse Lab in Alderley Park|Wellcome Sanger Institute for the COVID-19 Genomics UK (COG-UK) consortium|Davies|United Kingdom

>Spike|hCoV-19/England/QEUA-9A46A9/2020|2020-09-01|EPI\_ISL\_540179|Original|hCoV-19^^England|Human|Lighthouse Lab in Glasgow|Wellcome Sanger Institute for the COVID-19 Genomics UK (COG-UK) consortium|Davies|United Kingdom

>Spike|hCoV-19/England/QEUA-A1E3B1/2020|2020-09-29|EPI\_ISL\_587318|Original|hCoV-19^^England|Human|Lighthouse Lab in Glasgow|Wellcome Sanger Institute for the COVID-19 Genomics UK (COG-UK) consortium|Davies|United Kingdom

>Spike|hCoV-19/Spain/MD-IBV-99008631/2020|2020-09-25|EPI\_ISL\_654176|Original|hCoV-19^^Madrid|Human|Hospital General Universitario Gregorio Mara\u00f1a|SeqCOVID-SPAIN consortium|IBV (CSIC)|Comas|Spain

>Spike|hCoV-19/Denmark/DCGC-8327/2020|2020-10-26|EPI\_ISL\_616930|Original|hCoV-19^^Hovedstaden|Human|Department of Virus and Microbiological Special Diagnostics|Albertsen lab|Michaelsen|Denmark

>Spike|hCoV-19/England/QEUA-B7F56C/2020|2020-11-14|EPI\_ISL\_674609|Original|hCoV-19^^England|Human|Lighthouse Lab in Glasgow|Wellcome Sanger Institute for the COVID-19 Genomics UK (COG-UK) Consortium|Davies|United Kingdom

>Spike|hCoV-19/USA/MN-MDH-1175/2020|2020-05-21|EPI\_ISL\_476760|Original|hCoV-19^^Minnesota|Human|Minnesota Department of Health|Minnesota Department of Health|Garfin|USA

>Spike|hCoV-19/England/OXON-ACD69/2020|2020-04-06|EPI\_ISL\_448534|Original|hCoV-19^^England|Human|Oxford Viromics|COVID-19 Genomics UK (COG-UK) Consortium|Golubchik|United Kingdom

>Spike|hCoV-19/Switzerland/ZH-ETHZ-390399/2020|2020-12-02|EPI\_ISL\_721970|Original|hCoV-19^^Zurich|Human|Viollier AG|Department of Biosystems Science and Engineering|Nadeau|Switzerland

>Spike|hCoV-19/England/20134018602/2020|2020-03-23|EPI\_ISL\_423099|Original|hCoV-19^^England|Human|Respiratory Virus Unit|Respiratory Virus Unit|Platt|United Kingdom

>Spike|hCoV-19/Spain/VC-FISABIO-130/2020|2020-03-16|EPI\_ISL\_436225|Original|hCoV-19^^Comunitat Valenciana|Human|Servicio de Microbiolog\u00eda. Consorcio Hospital General Universitario de Valencia|Sequencing and Bioinformatics Service and Molecular Epidemiology Research Group. FISABIO-Public Health|Gonzalez-Candelas|Spain

>Spike|hCoV-19/Wales/PHWC-49500C/2020|2020-11-25|EPI\_ISL\_726286|Original|hCoV-19^^Wales|Human|Originating lab|COVID-19 Genomics UK (COG-UK) Consortium|Moore|United Kingdom

>Spike|hCoV-19/Luxembourg/LNS4300818/2020|2020-03-21|EPI\_ISL\_740444|Original|hCoV-19^^Luxembourg|Human|Laboratoire national de sant\u00e9|Laboratoire national de sant\u00e9|Wienecke-Baldacchino|Luxembourg

>Spike|hCoV-19/Northern Ireland/QEUI-9697F8/2020|2020-08-14|EPI\_ISL\_531153|Original|hCoV-19^^Northern Ireland|Human|Lighthouse Lab in Glasgow|Wellcome Sanger Institute for the COVID-19 Genomics UK (COG-UK) consortium|Davies|United Kingdom

>Spike|hCoV-19/England/ALDP-692B48/2020|2020-07-02|EPI\_ISL\_558017|Original|hCoV-19^^England|Human|Lighthouse Lab in Alderley Park|Wellcome Sanger Institute for the COVID-19 Genomics UK (COG-UK) consortium|Davies|United Kingdom

>Spike|hCoV-19/England/CAMB-1AFD0B/2020|2020-05-04|EPI\_ISL\_459221|Original|hCoV-19^^England|Human|Department of Pathology|Wellcome Sanger Institute for the COVID-19 Genomics UK (COG-UK) consortium|Davies|United Kingdom

>Spike|hCoV-19/Egypt/MASRI-016/2020|2020-05-11|EPI\_ISL\_482767|Original|hCoV-19^^Egypt|Human|Medical Ain Shams Research Institute (MASRI)|Medical Ain Shams Research Institute (MASRI)|Moustafa|Egypt

>Spike|hCoV-19/Wales/CVR4782/2020|2020-09-14|EPI\_ISL\_627350|Original|hCoV-19^^Wales|Human|West of Scotland Specialist Virology Centre|COVID-19 Genomics UK (COG-UK) Consortium|Robertson|United Kingdom

>Spike|hCoV-19/USA/NY-Wadsworth-39698-01/2020|2020-04-01|EPI\_ISL\_525656|Original|hCoV-19^^New York|Human|Wadsworth Center|Wadsworth Center|Plitnick|USA

>Spike|hCoV-19/USA/UT-UPHL-2012606373/2020|2020-08-08|EPI\_ISL\_745806|Original|hCoV-19^^Utah|Human|Ginkgo Bioworks Clinical Laboratory|Utah Public Health Laboratory|Young|USA

>Spike|hCoV-19/England/MILK-A47B20/2020|2020-10-06|EPI\_ISL\_598337|Original|hCoV-19^^England|Human|Lighthouse Lab in Milton Keynes|Wellcome Sanger Institute for the COVID-19 Genomics UK (COG-UK) consortium|Davies|United Kingdom

>Spike|hCoV-19/England/MILK-B8F8E8/2020|2020-11-13|EPI\_ISL\_674554|Original|hCoV-19^^England|Human|Lighthouse Lab in Milton Keynes|Wellcome Sanger Institute for the COVID-19 Genomics UK (COG-UK) Consortium|Davies|United Kingdom

>Spike|hCoV-19/Morocco/FMP-58/2020|2020-12-21|EPI\_ISL\_775258|Original|hCoV-19^^Temara|Human|Laboratoire Biolife|Laboratoire de Biotechnologie|Ouahgiri|Morocco

>Spike|hCoV-19/England/NORT-286219/2020|2020-09-06|EPI\_ISL\_573320|Original|hCoV-19^^England|Human|Northumbria University / South Tees Hospitals NHS Foundation Trust / North Cumbria Integrated Care NHS Foundation Trust / North Tees and Hartlepool NHS Foundation Trust / Newcastle Hospitals NHS Foundation Trust|COVID-19 Genomics UK (COG-UK) Consortium|Bashton|United Kingdom

>Spike|hCoV-19/England/CAMC-A64BA5/2020|2020-10-11|EPI\_ISL\_608693|Original|hCoV-19^^England|Human|Lighthouse Lab in Cambridge|Wellcome Sanger Institute for the COVID-19 Genomics UK (COG-UK) consortium|Davies|United Kingdom

>Spike|hCoV-19/England/BRIS-122948/2020|2020-04-02|EPI\_ISL\_440674|Original|hCoV-19^^England|Human|PHE South West Regional Laboratory|Wellcome Sanger Institute for the COVID-19 Genomics UK (COG-UK) consortium|Amato|United Kingdom

>Spike|hCoV-19/Iceland/236/2020|2020-03-17|EPI\_ISL\_417564|Original|hCoV-19^^Reykjavik|Human|The National University Hospital of Iceland|deCODE genetics|J\u00f3nsson|Iceland

>Spike|hCoV-19/Russia/StPetersburg-73603/2020|2020-03-20|EPI\_ISL\_428883|Vero|hCoV-19^^Saint Petersburg|Human|State Research Center of Virology and Biotechnology VECTOR|State Research Center of Virology and Biotechnology VECTOR|Shvalov|Russia

>Spike|hCoV-19/Wales/PHWC-48D09E/2020|2020-11-09|EPI\_ISL\_666576|Original|hCoV-19^^Wales|Human|Wales Specialist Virology Centre Sequencing lab|COVID-19 Genomics UK (COG-UK) Consortium|Moore|United Kingdom

>Spike|hCoV-19/USA/IL-NM-1643/2020|2020-07-20|EPI\_ISL\_626536|Original|hCoV-19^^Illinois|Human|Northwestern Memorial Hospital|Ozer Lab|Ozer|USA

>Spike|hCoV-19/Finland/18SS6F5/2020|2020-09-18|EPI\_ISL\_756292|Original|hCoV-19^^Uusimaa|Human|Department of Virology and Immunology|Department of Virology|Smura|Finland

>Spike|hCoV-19/England/QEUEH-B0E571/2020|2020-11-02|EPI\_ISL\_641942|Original|hCoV-19^^England|Human|Lighthouse Lab in Glasgow|Wellcome Sanger Institute for the COVID-19 Genomics UK (COG-UK) Consortium|Davies|United Kingdom

>Spike|hCoV-19/Canada/MB-NML-848/2020|2020-03-24|EPI\_ISL\_582337|Original|hCoV-19^^Manitoba|Human|Cadham Provincial Laboratory|National Microbiology Laboratory (NML)|Majer|Canada

>Spike|hCoV-19/Switzerland/GE-SNRCI-9268/2020|2020-03-00|EPI\_ISL\_548239|Original|hCoV-19^^Geneve|Human|Laboratoire de Virologie|Swiss National Reference Centre for Influenza|Gon\u00e7alves Cabecinhas|Switzerland

>Spike|hCoV-19/England/QEUEH-95FE87/2020|2020-08-07|EPI\_ISL\_531886|Original|hCoV-19^^England|Human|Lighthouse Lab in Glasgow|Wellcome Sanger Institute for the COVID-19 Genomics UK (COG-UK) consortium|Davies|United Kingdom

>Spike|hCoV-19/USA/TX-HMH-MCoV-15062/2020|2020-10-16|EPI\_ISL\_786546|Original|hCoV-19^^Texas|Human|Houston Methodist Hospital|Houston Methodist Hospital|Long|USA

>Spike|hCoV-19/USA/UT-UPHL-2012150388/2020|2020-08-03|EPI\_ISL\_745736|Original|hCoV-19^^Utah|Human|Ginkgo Bioworks Clinical Laboratory|Utah Public Health Laboratory|Young|USA

>Spike|hCoV-19/Scotland/CVR2039/2020|2020-04-09|EPI\_ISL\_484545|Original|hCoV-19^^Scotland|Human|West of Scotland Specialist Virology Centre|COVID-19 Genomics UK (COG-UK) Consortium|Robertson|United Kingdom

>Spike|hCoV-19/Germany/HH-hpi-p1990/2020|2020-03-27|EPI\_ISL\_776308|Original|hCoV-19^^Hamburg|Human|University Medical Center Hamburg Eppendorf|Heinrich Pette Institute|Robitaille|Germany

>Spike|hCoV-19/Germany/HH-hpi-p1413/2020|2020-03-09|EPI\_ISL\_775852|Original|hCoV-19^^Hamburg|Human|University Medical Center Hamburg Eppendorf|Heinrich Pette Institute|Robitaille|Germany

>Spike|hCoV-19/England/GSTT-5446/2020|2020-03-20|EPI\_ISL\_560684|Original|hCoV-19^^England|Human|Centre for Clinical Infection and Diagnostics Research and Genomics Innovation Unit|Centre for Clinical Infection and Diagnostics Research and Genomics Innovation Unit|Awan|United Kingdom

>Spike|hCoV-19/USA/LA-EVTL351/2020|2020-05-25|EPI\_ISL\_578757|Original|hCoV-19^^Louisiana|Human|LSUHS Emerging Viral Threat Laboratory|Microbial Genome Sequencing Center|Kamil|USA

>Spike|hCoV-19/Netherlands/un-EMC-719/2020|2020-03-20|EPI\_ISL\_523474|Original|hCoV-19^^Netherlands|Human|Dutch COVID-19 response team|Erasmus Medical Center|Oude Munnink|Netherlands

>Spike|hCoV-19/Tunisia/19695/2020|2020-07-12|EPI\_ISL\_733500|Original|hCoV-19^^Ben Arous|Human|1-Laboratory of Microbiology|1-Clinical and Experimental Pharmacology Lab|Boutiba-Ben Boubaker|Tunisia

>Spike|hCoV-19/England/MILK-ABB0A0/2020|2020-10-20|EPI\_ISL\_623526|Original|hCoV-19^^England|Human|Lighthouse Lab in Milton Keynes|Wellcome Sanger Institute for the COVID-19 Genomics UK (COG-UK) consortium|Davies|United Kingdom

>Spike|hCoV-19/Scotland/EDB1450/2020|2020-04-13|EPI\_ISL\_433452|Original|hCoV-19^^Scotland|Human|Virology Department|COVID-19 Genomics UK (COG-UK) Consortium|Williams|United Kingdom

>Spike|hCoV-19/USA/TX-HMH-MCoV-15430/2020|2020-10-21|EPI\_ISL\_786914|Original|hCoV-19^^Texas|Human|Houston Methodist Hospital|Houston Methodist Hospital|Long|USA

>Spike|hCoV-19/Japan/PG-4343/2020|2020-07-00|EPI\_ISL\_692571|Original|hCoV-19^^Japan|Human|Pathogen Genomics Center|Pathogen Genomics Center|Sekizuka|Japan

>Spike|hCoV-19/England/ALDP-C39ECC/2020|2020-12-09|EPI\_ISL\_731154|Original|hCoV-19^^England|Human|Lighthouse Lab in Alderley Park|Wellcome Sanger Institute for the COVID-19 Genomics UK (COG-UK) Consortium|Davies|United Kingdom

>Spike|hCoV-19/England/CAMC-B09761/2020|2020-10-29|EPI\_ISL\_673192|Original|hCoV-19^^England|Human|Lighthouse Lab in Cambridge|Wellcome Sanger Institute for the COVID-19 Genomics UK (COG-UK) Consortium|Davies|United Kingdom

>Spike|hCoV-19/Wales/PHWC-16277F/2020|2020-06-01|EPI\_ISL\_473117|Original|hCoV-19^^Wales|Human|Wales Specialist Virology Centre Sequencing lab|COVID-19 Genomics UK (COG-UK) Consortium|Moore|United Kingdom

>Spike|hCoV-19/England/QEUA-AD0DAE/2020|2020-10-26|EPI\_ISL\_633838|Original|hCoV-19^^England|Human|Lighthouse Lab in Glasgow|Wellcome Sanger Institute for the COVID-19 Genomics UK (COG-UK) consortium|Davies|United Kingdom

>Spike|hCoV-19/USA/UT-02981/2020|2020-05-01|EPI\_ISL\_522290|Original|hCoV-19^^Utah|Human|Utah Public Health Laboratory|Utah Public Health Laboratory|Young|USA

>Spike|hCoV-19/Poland/PL\_MCB\_5/2020|2020-04-07|EPI\_ISL\_645004|Original|hCoV-19^^Poland|Human|Human Genome Variation Research Group|Human Genome Variation Research Group||Poland

>Spike|hCoV-19/Luxembourg/LNS5454479/2020|2020-10-30|EPI\_ISL\_744232|Original|hCoV-19^^Luxembourg|Human|Laboratoire national de sant\u00e9|Laboratoire national de sant\u00e9|Wienecke-Baldacchino|Luxembourg

>Spike|hCoV-19/Scotland/EDB1702/2020|2020-04-15|EPI\_ISL\_526464|Original|hCoV-19^^Scotland|Human|Virology Department|COVID-19 Genomics UK (COG-UK) Consortium|Williams|United Kingdom

>Spike|hCoV-19/USA/TX-DSHS-0534/2020|2020-05-14|EPI\_ISL\_574439|Original|hCoV-19^^Texas|Human|Texas Department of State Health Services|Texas Department of State Health Services|Rahman|USA

>Spike|hCoV-19/Wales/PHWC-4A2AFF/2020|2020-12-12|EPI\_ISL\_743979|Original|hCoV-19^^Wales|Human|Wales Specialist Virology Centre Sequencing lab|COVID-19 Genomics UK (COG-UK) Consortium|Moore|United Kingdom

>Spike|hCoV-19/USA/CA-CZB-11254/2020|2020-04-24|EPI\_ISL\_738820|Original|hCoV-19^^California|Human|Napa-Solano-Yolo- Marin County (NSYM) Public Health Laboratories|Chan-Zuckerberg Biohub|Kamm|USA

>Spike|hCoV-19/USA/WA-UW147/2020|2020-03-15|EPI\_ISL\_416685|Original|hCoV-19^^Washington|Human|UW Virology Lab|UW Virology Lab|Roychoudhury|USA

>Spike|hCoV-19/India/GJ-GBRC355a/2020|2020-06-25|EPI\_ISL\_514603|Original|hCoV-19^^Gujarat|Human|B.J. Medical College and Civil hospital|Gujarat Biotechnology Research Centre|Joshi|India

>Spike|hCoV-19/USA/CA-CHLA-PLM45672452/2020|2020-11-30|EPI\_ISL\_753467|Original|hCoV-19^^California|Human|Clinical virology Laboratory|Center for Personalized Medicine|Dien Bard|USA

>Spike|hCoV-19/USA/VA-DCLS-1191/2020|2020-06-23|EPI\_ISL\_572272|Original|hCoV-19^^Virginia|Human|Virginia DCLS|Virginia DCLS|St. Jacques|USA

>Spike|hCoV-19/England/QEUA-AF4C5C/2020|2020-10-30|EPI\_ISL\_663130|Original|hCoV-19^^England|Human|Lighthouse Lab in Glasgow|Wellcome Sanger Institute for the COVID-19 Genomics UK (COG-UK) Consortium|Davies|United Kingdom

>Spike|hCoV-19/USA/TX-HMH-MCoV-8450/2020|2020-07-02|EPI\_ISL\_780555|Original|hCoV-19^^Texas|Human|Houston Methodist Hospital|Houston Methodist Hospital|Long|USA

>Spike|hCoV-19/England/20104004304/2020|2020-03-02|EPI\_ISL\_464314|Original|hCoV-19^^England|Human|Respiratory Virus Unit|Respiratory Virus Unit|Platt|United Kingdom

>Spike|hCoV-19/Australia/NSW1223/2020|2020-11-03|EPI\_ISL\_710121|Original|hCoV-19^^New South Wales|Human|South Eastern Area Laboratory Services (SEALS)|CIDM-PH et al.|Gall|Australia

>Spike|hCoV-19/England/204790752/2020|2020-11-21|EPI\_ISL\_678756|Original|hCoV-19^^England|Human|Respiratory Virus Unit|COVID-19 Genomics UK (COG-UK) Consortium|Platt|United Kingdom

>Spike|hCoV-19/England/ALDP-94F51C/2020|2020-06-18|EPI\_ISL\_556019|Original|hCoV-19^^England|Human|Lighthouse Lab in Alderley Park|Wellcome Sanger Institute for the COVID-19 Genomics UK (COG-UK) consortium|Davies|United Kingdom

>Spike|hCoV-19/England/QEUA-B0E131/2020|2020-11-02|EPI\_ISL\_642016|Original|hCoV-19^^England|Human|Lighthouse Lab in Glasgow|Wellcome Sanger Institute for the COVID-19 Genomics UK (COG-UK) Consortium|Davies|United Kingdom

>Spike|hCoV-19/USA/LA-EVTL1267/2020|2020-12-04|EPI\_ISL\_778933|Original|hCoV-19^^Louisiana|Human|LSUHS Emerging Viral Threat Laboratory|Microbial Genome Sequencing Center|Kamil|USA

>Spike|hCoV-19/USA/TX-HMH-MCoV-15264/2020|2020-10-22|EPI\_ISL\_786748|Original|hCoV-19^^Texas|Human|Houston Methodist Hospital|Houston Methodist Hospital|Long|USA

>Spike|hCoV-19/England/20136012004/2020|2020-03-25|EPI\_ISL\_423215|Original|hCoV-19^^England|Human|Respiratory Virus Unit|Respiratory Virus Unit|Platt|United Kingdom



>Spike|hCoV-19/England/ALDP-9E6A81/2020|2020-09-24|EPI\_ISL\_580630|Original|hCoV-19^^England|Human|Lighthouse Lab in Alderley Park|Wellcome Sanger Institute for the COVID-19 Genomics UK (COG-UK) consortium|Davies|United Kingdom

>Spike|hCoV-19/Japan/PG-3462/2020|2020-07-00|EPI\_ISL\_691572|Original|hCoV-19^^Japan|Human|Pathogen Genomics Center|Pathogen Genomics Center|Sekizuka|Japan

>Spike|hCoV-19/England/ALDP-B5D124/2020|2020-11-09|EPI\_ISL\_678859|Original|hCoV-19^^England|Human|Department of Pathology|COVID-19 Genomics UK (COG-UK) Consortium|Goodfellow|United Kingdom

>Spike|hCoV-19/Canada/BC-BCCDC-7308/2020|2020-11-00|EPI\_ISL\_740675|Original|hCoV-19^^British Columbia|Human|BCCDC Public Health Laboratory|BCCDC Public Health Laboratory|Prystajecky|Canada

>Spike|hCoV-19/Netherlands/GE-RIVM-10320/2020|2020-03-14|EPI\_ISL\_636529|Original|hCoV-19^^Gelderland|Human|Dutch COVID-19 response team|National Institute for Public Health and the Environment (RIVM)|Meijer|Netherlands

>Spike|hCoV-19/Ireland/D-NVRL-20G32290/2020|2020-03-18|EPI\_ISL\_605117|Original|hCoV-19^^Dublin|Human|National Virus Reference Laboratory|Irish Coronavirus Sequencing Consortium - Helixworks|Chalapati|Ireland

>Spike|hCoV-19/Scotland/QEUH-A4BA7A/2020|2020-10-08|EPI\_ISL\_628507|Original|hCoV-19^^Scotland|Human|Oxford Viromics|COVID-19 Genomics UK (COG-UK) Consortium|Golubchik|United Kingdom

>Spike|hCoV-19/England/MILK-993B62/2020|2020-08-27|EPI\_ISL\_552355|Original|hCoV-19^^England|Human|Lighthouse Lab in Milton Keynes|Wellcome Sanger Institute for the COVID-19 Genomics UK (COG-UK) consortium|Davies|United Kingdom

>Spike|hCoV-19/England/MILK-9704BB/2020|2020-08-18|EPI\_ISL\_553009|Original|hCoV-19^^England|Human|Lighthouse Lab in Milton Keynes|Wellcome Sanger Institute for the COVID-19 Genomics UK (COG-UK) consortium|Davies|United Kingdom

>Spike|hCoV-19/Denmark/DCGC-15619/2020|2020-11-23|EPI\_ISL\_713926|Original|hCoV-19^^Hovedstaden|Human|Department of Virus and Microbiological Special Diagnostics|Albertsen Lab|Michaelsen|Denmark

>Spike|hCoV-19/Canada/MB-NML-568/2020|2020-03-26|EPI\_ISL\_582264|Original|hCoV-19^^Manitoba|Human|Cadham Provincial Laboratory|National Microbiology Laboratory (NML)|Majer|Canada

>Spike|hCoV-19/Denmark/DCGC-19950/2020|2020-12-07|EPI\_ISL\_747886|Original|hCoV-19^^Hovedstaden|Human|Department of Virus and Microbiological Special Diagnostics|Albertsen Lab|Michaelsen|Denmark

>Spike|hCoV-19/Australia/VIC4101/2020|2020-07-14|EPI\_ISL\_519482|Original|hCoV-19^^Victoria|Human|Microbiological Diagnostic Unit - Public Health Laboratory (MDU-PHL)|MDU-PHL|Schultz|Australia

>Spike|hCoV-19/USA/UT-08380/2020|2020-05-15|EPI\_ISL\_524163|Original|hCoV-19^^Utah|Human|Utah Public Health Laboratory|Utah Public Health Laboratory|Young|USA

>Spike|hCoV-19/India/TN-CCMB-C3-14/2020|2020-04-16|EPI\_ISL\_447586|Original|hCoV-19^^Tamil Nadu|Human|Tamil Nadu Veterinary and Animal Sciences University|CSIR-Centre for Cellular and Molecular Biology|Banu|India

>Spike|hCoV-19/USA/WI-UW-2506/2020|2020-12-30|EPI\_ISL\_779338|Original|hCoV-19^^Wisconsin|Human|University of Wisconsin-Madison AIDS Vaccine Research Laboratories|University of Wisconsin-Madison AIDS Vaccine Research Laboratories|Moreno|USA

>Spike|hCoV-19/Uganda/UG117/2020|2020-00-00|EPI\_ISL\_738024|Original|hCoV-19^^Uganda|Human|Uganda Central Public Health Lab and Uganda Virus Research Institute|MRC/UVRI & LSHTM Uganda Research Unit|Cotten|Uganda

>Spike|hCoV-19/England/MILK-ABBF94/2020|2020-10-21|EPI\_ISL\_631230|Original|hCoV-19^^England|Human|Lighthouse Lab in Milton Keynes|Wellcome Sanger Institute for the COVID-19 Genomics UK (COG-UK) consortium|Davies|United Kingdom

>Spike|hCoV-19/England/20129020004/2020|2020-03-20|EPI\_ISL\_424009|Original|hCoV-19^^England|Human|Respiratory Virus Unit|Respiratory Virus Unit|Platt|United Kingdom

>Spike|hCoV-19/USA/MI-MDHHS-SC20918/2020|2020-05-26|EPI\_ISL\_476054|Original|hCoV-19^^Michigan|Human|Michigan Department of Health and Human Services|Michigan Department of Health and Human Services|Blankenship|USA

>Spike|hCoV-19/England/QEUEH-996482/2020|2020-08-28|EPI\_ISL\_549533|Original|hCoV-19^^England|Human|Oxford Viromics|COVID-19 Genomics UK (COG-UK) Consortium|Golubchik|United Kingdom

>Spike|hCoV-19/England/CAMC-B99E8F/2020|2020-11-15|EPI\_ISL\_673579|Original|hCoV-19^^England|Human|Lighthouse Lab in Cambridge|Wellcome Sanger Institute for the COVID-19 Genomics UK (COG-UK) Consortium|Davies|United Kingdom

>Spike|hCoV-19/USA/TX-HMH-6662/2020|2020-06-24|EPI\_ISL\_546155|Original|hCoV-19^^Texas|Human|Houston Methodist Hospital|Houston Methodist Hospital|Long|USA

>Spike|hCoV-19/USA/WI-GMF-30874/2020|2020-11-02|EPI\_ISL\_661061|Original|hCoV-19^^Wisconsin|Human|Gundersen Molecular Diagnostics Laboratory|Kabara Cancer Research Institute|Kenny|USA

>Spike|hCoV-19/England/ALDP-AA2D2D/2020|2020-10-22|EPI\_ISL\_625030|Original|hCoV-19^^England|Human|Lighthouse Lab in Alderley Park|Wellcome Sanger Institute for the COVID-19 Genomics UK (COG-UK) consortium|Davies|United Kingdom

>Spike|hCoV-19/Wales/PHWC-4835E4/2020|2020-10-15|EPI\_ISL\_627836|Original|hCoV-19^^Wales|Human|Wales Specialist Virology Centre Sequencing lab|COVID-19 Genomics UK (COG-UK) Consortium|Moore|United Kingdom

>Spike|hCoV-19/Peru/LIM-UPCH-0182/2020|2020-10-13|EPI\_ISL\_729883|Original|hCoV-19^^Lima|Human|Laboratorio de Referencia Nacional de Virus Respiratorios|Laboratorio de Gen\u00f3mica Microbiana|Tsukayama|Peru

>Spike|hCoV-19/Spain/CT-IBV-97010141/2020|2020-11-10|EPI\_ISL\_683632|Original|hCoV-19^^Catalunya|Human|Servicio de Microbiolog\u00eda|SeqCOVID-SPAIN consortium|IBV (CSIC) |Comas|Spain

>Spike|hCoV-19/Australia/QLD1229/2020|2020-10-19|EPI\_ISL\_639818|Original|hCoV-19^^Australia|Human|unknown|Public Health Virology Laboratory|Nguyen|Australia

>Spike|hCoV-19/Northern Ireland/QEUEH-9905FE/2020|2020-08-26|EPI\_ISL\_530363|Original|hCoV-19^^Northern Ireland|Human|Lighthouse Lab in Glasgow|Wellcome Sanger Institute for the COVID-19 Genomics UK (COG-UK) consortium|Davies|United Kingdom

>Spike|hCoV-19/USA/UT-02974/2020|2020-05-01|EPI\_ISL\_522285|Original|hCoV-19^^Utah|Human|Utah Public Health Laboratory|Utah Public Health Laboratory|Young|USA

>Spike|hCoV-19/France/PAC-IHU-1135/2020|2020-08-07|EPI\_ISL\_569057|Original|hCoV-19^^Provence-Alpes-C\u00f4te-d\u2019Azur|Human|MEPHI|MEPHI|Levasseur|France

>Spike|hCoV-19/India/MH-AFCO-15534/2020|2020-07-27|EPI\_ISL\_722200|Original|hCoV-19^^Maharashtra|Human|Armed Forces Medical College|National Centre For Cell Science|Paul|India

>Spike|hCoV-19/Luxembourg/LNS6722121/2020|2020-12-21|EPI\_ISL\_771101|Original|hCoV-19^^Luxembourg|Human|Laboratoire national de sant\u00e9|Laboratoire national de sant\u00e9|Wienecke-Baldacchino|Luxembourg

>Spike|hCoV-19/USA/VA-DCLS-0484/2020|2020-05-10|EPI\_ISL\_526791|Original|hCoV-19^^Virginia|Human|Virginia DCLS|Virginia DCLS|St. Jacques|USA

>Spike|hCoV-19/South Africa/KRISP-K005318/2020|2020-11-15|EPI\_ISL\_678610|Original|hCoV-19^^KwaZulu-Natal|Human|NHLS-IALCH|KRISP|de Oliveira|South Africa

>Spike|hCoV-19/England/QEUEH-C31161/2020|2020-12-11|EPI\_ISL\_731444|Original|hCoV-19^^England|Human|Lighthouse Lab in Glasgow|Wellcome Sanger Institute for the COVID-19 Genomics UK (COG-UK) Consortium|Davies|United Kingdom

>Spike|hCoV-19/Denmark/DCGC-15345/2020|2020-11-23|EPI\_ISL\_713432|Original|hCoV-19^^Hovedstaden|Human|Department of Virus and Microbiological Special Diagnostics|Albertsen Lab|Michaelsen|Denmark

>Spike|hCoV-19/USA/AZ-QDX-518/2020|2020-03-18|EPI\_ISL\_571264|Original|hCoV-19^^Arizona|Human|Quest Diagnostics|Quest Diagnostics|Kagan|USA

>Spike|hCoV-19/USA/TX-DSHS-1514/2020|2020-06-22|EPI\_ISL\_683429|Original|hCoV-19^^Texas|Human|Texas Department of State Health Services|Texas Department of State Health Services|Rahman|USA

>Spike|hCoV-19/England/LEED-2A840C/2020|2020-03-30|EPI\_ISL\_539206|Original|hCoV-19^^England|Human|Leeds Teaching Hospitals NHS Trust and Public Health England|Wellcome Sanger Institute for the COVID-19 Genomics UK (COG-UK) consortium|Davies|United Kingdom

>Spike|hCoV-19/USA/MD-MDH-0494/2020|2020-12-02|EPI\_ISL\_778875|Original|hCoV-19^^Maryland|Human|Maryland Public Health Laboratory|Maryland Public Health Laboratory|Keller|USA

>Spike|hCoV-19/Scotland/QEUH-A4997F/2020|2020-10-08|EPI\_ISL\_628441|Original|hCoV-19^^Scotland|Human|Oxford Viromics|COVID-19 Genomics UK (COG-UK) Consortium|Golubchik|United Kingdom

>Spike|hCoV-19/Australia/VIC17029/2020|2020-08-13|EPI\_ISL\_663693|Original|hCoV-19^^Victoria|Human|Microbiological Diagnostic Unit - Public Health Laboratory (MDU-PHL)|MDU-PHL|Schultz|Australia

>Spike|hCoV-19/USA/CA-SR0094/2020|2020-03-17|EPI\_ISL\_445094|Original|hCoV-19^^California|Human|UC San Diego Center for Advanced Laboratory Medicine|Andersen lab at Scripps Research|Gangavarapu|USA

>Spike|hCoV-19/Japan/IC-0253/2020|2020-10-00|EPI\_ISL\_667682|Original|hCoV-19^^Japan|Human|Pathogen Genomics Center|Pathogen Genomics Center|Sekizuka|Japan

>Spike|hCoV-19/Sweden/20-52937/2020|2020-09-23|EPI\_ISL\_660423|Original|hCoV-19^^Orebro|Human|Orebro klinisk mikrobiologi|The Public Health Agency of Sweden|Svartstr\u00f6m|Sweden

>Spike|hCoV-19/England/ALDP-B83592/2020|2020-11-14|EPI\_ISL\_675622|Original|hCoV-19^^England|Human|Lighthouse Lab in Alderley Park|Wellcome Sanger Institute for the COVID-19 Genomics UK (COG-UK) Consortium|Davies|United Kingdom

>Spike|hCoV-19/England/MILK-9E337A/2020|2020-09-21|EPI\_ISL\_581192|Original|hCoV-19^^England|Human|Lighthouse Lab in Milton Keynes|Wellcome Sanger Institute for the COVID-19 Genomics UK (COG-UK) consortium|Davies|United Kingdom

>Spike|hCoV-19/England/MILK-CA455E/2020|2020-12-16|EPI\_ISL\_762418|Original|hCoV-19^^England|Human|Lighthouse Lab in Milton Keynes|Wellcome Sanger Institute for the COVID-19 Genomics UK (COG-UK) Consortium|Davies|United Kingdom

>Spike|hCoV-19/Australia/VIC7660/2020|2020-08-08|EPI\_ISL\_564560|Original|hCoV-19^^Victoria|Human|Victorian Infectious Diseases Reference Laboratory (VIDRL)|VIDRL and MDU-PHL|Schultz|Australia

>Spike|hCoV-19/Denmark/DCGC-21013/2020|2020-12-21|EPI\_ISL\_759501|Original|hCoV-19^^Hovedstaden|Human|Department of Virus and Microbiological Special Diagnostics|Albertsen Lab|Michaelsen|Denmark

>Spike|hCoV-19/England/ALDP-4A6721/2020|2020-06-10|EPI\_ISL\_559584|Original|hCoV-19^^England|Human|Lighthouse Lab in Alderley Park|Wellcome Sanger Institute for the COVID-19 Genomics UK (COG-UK) consortium|Davies|United Kingdom

>Spike|hCoV-19/Thailand/Bangkok-CONI-0209/2020|2020-03-18|EPI\_ISL\_512859|Original|hCoV-19^^Bangkok|Human|Ramathibodi Hospital|COVID-19 Network Investigations (CONI) Alliance|Batty|Thailand

>Spike|hCoV-19/England/NOTT-11D166/2020|2020-11-20|EPI\_ISL\_725519|Original|hCoV-19^^England|Human|Queens Medical Centre|COVID-19 Genomics UK (COG-UK) Consortium|Loose|United Kingdom

>Spike|hCoV-19/England/ALDP-C488AE/2020|2020-12-13|EPI\_ISL\_736658|Original|hCoV-19^^England|Human|Lighthouse Lab in Alderley Park|Wellcome Sanger Institute for the COVID-19 Genomics UK (COG-UK) Consortium|Davies|United Kingdom

>Spike|hCoV-19/England/ALDP-BC8573/2020|2020-11-23|EPI\_ISL\_721508|Original|hCoV-19^^England|Human|Lighthouse Lab in Alderley Park|Wellcome Sanger Institute for the COVID-19 Genomics UK (COG-UK) Consortium|Davies|United Kingdom

>Spike|hCoV-19/England/LOND-125FEF4/2020|2020-03-08|EPI\_ISL\_516848|Original|hCoV-19^^England|Human|North West London Pathology|Wellcome Sanger Institute for the COVID-19 Genomics UK (COG-UK) consortium|Davies|United Kingdom

>Spike|hCoV-19/Wales/PHWC-48C624/2020|2020-11-07|EPI\_ISL\_665433|Original|hCoV-19^^Wales|Human|Wales Specialist Virology Centre Sequencing lab|COVID-19 Genomics UK (COG-UK) Consortium|Moore|United Kingdom

>Spike|hCoV-19/England/MILK-B027E0/2020|2020-10-24|EPI\_ISL\_642807|Original|hCoV-19^^England|Human|Lighthouse Lab in Milton Keynes|Wellcome Sanger Institute for the COVID-19 Genomics UK (COG-UK) Consortium|Davies|United Kingdom

>Spike|hCoV-19/England/QEUH-A635E4/2020|2020-10-12|EPI\_ISL\_596122|Original|hCoV-19^^England|Human|Quadram Institute Bioscience|COVID-19 Genomics UK (COG-UK) Consortium|Alikhan|United Kingdom

>Spike|hCoV-19/USA/TX-HMH-MCoV-8933/2020|2020-07-02|EPI\_ISL\_780841|Original|hCoV-19^^Texas|Human|Houston Methodist Hospital|Houston Methodist Hospital|Long|USA

>Spike|hCoV-19/Singapore/142/2020|2020-03-17|EPI\_ISL\_443234|Original|hCoV-19^^Singapore|Human|National Public Health Laboratory|National Public Health Laboratory|Mak|Singapore

>Spike|hCoV-19/USA/CA-CZB-7003/2020|2020-09-05|EPI\_ISL\_582928|Original|hCoV-19^^California|Human|County of Santa Clara Public Health Department|Chan-Zuckerberg Biohub|Bhatt|USA

>Spike|hCoV-19/USA/NY-Wadsworth-30942-01/2020|2020-03-27|EPI\_ISL\_676772|Original|hCoV-19^^New York|Human|Wadsworth Center|Wadsworth Center|Lasek-Nesselquist|USA

>Spike|hCoV-19/England/MILK-ACE3FC/2020|2020-10-21|EPI\_ISL\_629145|Original|hCoV-19^^England|Human|Lighthouse Lab in Milton Keynes|Wellcome Sanger Institute for the COVID-19 Genomics UK (COG-UK) consortium|Davies|United Kingdom

>Spike|hCoV-19/Wales/PHWC-4857BF/2020|2020-10-26|EPI\_ISL\_628219|Original|hCoV-19^^Wales|Human|Wales Specialist Virology Centre Sequencing lab|COVID-19 Genomics UK (COG-UK) Consortium|Moore|United Kingdom

>Spike|hCoV-19/Japan/PG-3513/2020|2020-06-00|EPI\_ISL\_691769|Original|hCoV-19^^Japan|Human|Pathogen Genomics Center|Pathogen Genomics Center|Sekizuka|Japan

>Spike|hCoV-19/Spain/AS-IBV-98006616/2020|2020-03-14|EPI\_ISL\_654657|Original|hCoV-19^^Asturias|Human|Servicio de Microbiolog\u00eda|SeqCOVID-SPAIN consortium|IBV (CSIC) |Comas|Spain

>Spike|hCoV-19/Scotland/EDB3554/2020|2020-04-14|EPI\_ISL\_439282|Original|hCoV-19^^Scotland|Human|Virology Department|COVID-19 Genomics UK (COG-UK) Consortium|Williams|United Kingdom

>Spike|hCoV-19/England/CAMC-AAF5EC/2020|2020-10-22|EPI\_ISL\_631225|Original|hCoV-19^^England|Human|Lighthouse Lab in Cambridge|Wellcome Sanger Institute for the COVID-19 Genomics UK (COG-UK) consortium|Davies|United Kingdom

>Spike|hCoV-19/Wales/PHWC-16A935/2020|2020-07-13|EPI\_ISL\_560127|Original|hCoV-19^^Wales|Human|Wales Specialist Virology Centre Sequencing lab|COVID-19 Genomics UK (COG-UK) Consortium|Moore|United Kingdom

>Spike|hCoV-19/England/204691065/2020|2020-11-14|EPI\_ISL\_693436|Original|hCoV-19^^England|Human|Respiratory Virus Unit|COVID-19 Genomics UK (COG-UK) Consortium|Platt|United Kingdom

>Spike|hCoV-19/England/SHEF-C63B2/2020|2020-05-06|EPI\_ISL\_490603|Original|hCoV-19^^England|Human|Virology Department|COVID-19 Genomics UK (COG-UK) Consortium|de Silva|United Kingdom

>Spike|hCoV-19/Australia/VIC5075/2020|2020-07-17|EPI\_ISL\_519878|Original|hCoV-19^^Victoria|Human|Microbiological Diagnostic Unit - Public Health Laboratory (MDU-PHL) |MDU-PHL|Schultz|Australia

>Spike|hCoV-19/Denmark/DCGC-2611/2020|2020-08-17|EPI\_ISL\_617848|Original|hCoV-19^^Hovedstaden|Human|Department of Virus and Microbiological Special Diagnostics|Albertsen lab|Michaelsen|Denmark

>Spike|hCoV-19/Denmark/DCGC-2067/2020|2020-07-20|EPI\_ISL\_618321|Original|hCoV-19^^Hovedstaden|Human|Department of Virus and Microbiological Special Diagnostics|Albertsen lab|Michaelsen|Denmark

>Spike|hCoV-19/USA/CO-CDPHE-2010234610/2020|2020-10-20|EPI\_ISL\_710269|Original|hCoV-19^^Colorado|Human|Colorado Department of Public Health and Environment|Colorado Department of Public Health and Environment|Bankers|USA

>Spike|hCoV-19/Russia/VLA-RII-MH3422S/2020|2020-10-07|EPI\_ISL\_733143|Original|hCoV-19^^Vladimir|Human|HELIX LLC|WHO National Influenza Centre Russian Federation|Komissarov|Russia

>Spike|hCoV-19/Wales/MILK-ACD0AB/2020|2020-10-21|EPI\_ISL\_630299|Original|hCoV-19^^Wales|Human|Lighthouse Lab in Milton Keynes|Wellcome Sanger Institute for the COVID-19 Genomics UK (COG-UK) consortium|Davies|United Kingdom

>Spike|hCoV-19/USA/NY-NYCPHL-001008/2020|2020-10-06|EPI\_ISL\_633029|Original|hCoV-19^^New York|Human|DOHMH Morrisania|New York City Public Health Laboratory|Wang|USA

>Spike|hCoV-19/Austria/CeMM0096/2020|2020-03-23|EPI\_ISL\_437957|Original|hCoV-19^^Innsbruck|Human|Universitaetsklinik f\u00fcr Innere Medizin II Innsbruck|Bergthaler laboratory|Bergthaler|Austria

>Spike|hCoV-19/England/CAMB-774DB/2020|2020-03-30|EPI\_ISL\_439467|Original|hCoV-19^^England|Human|Department of Pathology|Wellcome Sanger Institute for the COVID-19 Genomics UK (COG-UK) consortium|Amato|United Kingdom

>Spike|hCoV-19/USA/TX-HMH-5664/2020|2020-06-23|EPI\_ISL\_544946|Original|hCoV-19^^Texas|Human|Houston Methodist Hospital|Houston Methodist Hospital|Long|USA

>Spike|hCoV-19/Switzerland/BE-ETHZ-330518/2020|2020-10-19|EPI\_ISL\_614918|Original|hCoV-19^^Bern|Human|Viollier AG|Department of Biosystems Science and Engineering|Nadeau|Switzerland

>Spike|hCoV-19/USA/TX-HMH-MCoV-9037/2020|2020-07-02|EPI\_ISL\_780912|Original|hCoV-19^^Texas|Human|Houston Methodist Hospital|Houston Methodist Hospital|Long|USA

>Spike|hCoV-19/Thailand/CO63-896-3/2020|2020-03-20|EPI\_ISL\_450971|Original|hCoV-19^^Thailand|Human|Center of Excellence in Clinical Virology|Center of Excellence in Clinical Virology|Poovorawan|Thailand

>Spike|hCoV-19/England/ALDP-A2EF32/2020|2020-10-05|EPI\_ISL\_587261|Original|hCoV-19^^England|Human|Lighthouse Lab in Alderley Park|Wellcome Sanger Institute for the COVID-19 Genomics UK (COG-UK) consortium|Davies|United Kingdom

>Spike|hCoV-19/Australia/VIC17941/2020|2020-08-18|EPI\_ISL\_779575|Original|hCoV-19^^Victoria|Human|Microbiological Diagnostic Unit - Public Health Laboratory (MDU-PHL)|MDU-PHL|Beck|Australia

>Spike|hCoV-19/England/CAMC-A64695/2020|2020-10-09|EPI\_ISL\_608867|Original|hCoV-19^^England|Human|Lighthouse Lab in Cambridge|Wellcome Sanger Institute for the COVID-19 Genomics UK (COG-UK) consortium|Davies|United Kingdom

>Spike|hCoV-19/USA/TX-HMH-7519/2020|2020-06-25|EPI\_ISL\_546817|Original|hCoV-19^^Texas|Human|Houston Methodist Hospital|Houston Methodist Hospital|Long|USA

>Spike|hCoV-19/England/QEUH-885FE0/2020|2020-07-25|EPI\_ISL\_532722|Original|hCoV-19^^England|Human|Lighthouse Lab in Glasgow|Wellcome Sanger Institute for the COVID-19 Genomics UK (COG-UK) consortium|Davies|United Kingdom

>Spike|hCoV-19/Brazil/RJ-00362/2020|2020-05-05|EPI\_ISL\_623165|Original|hCoV-19^^Rio de Janeiro|Human|Laboratorio de Virologia Molecular / UFRJ|Bioinformatics Laboratory / LNCC|Almeida|Brazil

>Spike|hCoV-19/Switzerland/BL-ETHZ-360004/2020|2020-11-12|EPI\_ISL\_693864|Original|hCoV-19^^Basel-Landschaft|Human|Viollier AG|Department of Biosystems Science and Engineering|Nadeau|Switzerland

>Spike|hCoV-19/Scotland/QEUH-C5B8C6/2020|2020-12-14|EPI\_ISL\_757035|Original|hCoV-19^^Scotland|Human|Lighthouse Lab in Glasgow|Wellcome Sanger Institute for the COVID-19 Genomics UK (COG-UK) Consortium|Davies|United Kingdom

>Spike|hCoV-19/Switzerland/GE-HUG-57410/2020|2020-10-25|EPI\_ISL\_708307|Original|hCoV-19^^Geneva|Human|University Hospitals of Geneva|University Hospitals of Geneva|Cordey|Switzerland

>Spike|hCoV-19/Germany/SH-ChVir20845/2020|2020-12-03|EPI\_ISL\_729724|Original|hCoV-19^^Schleswig-Holstein|Human|A. Krumbholz|Charit\u00e9 Universit\u00e4tsmedizin Berlin|Muehlemann|Germany

>Spike|hCoV-19/USA/LA-EVTL1169/2020|2020-12-10|EPI\_ISL\_768438|Original|hCoV-19^^Louisiana|Human|LSUHS Emerging Viral Threat Laboratory|Microbial Genome Sequencing Center|Kamil|USA

>Spike|hCoV-19/England/QEUH-9F31AA/2020|2020-09-24|EPI\_ISL\_588607|Original|hCoV-19^^England|Human|Lighthouse Lab in Glasgow|Wellcome Sanger Institute for the COVID-19 Genomics UK (COG-UK) consortium|Davies|United Kingdom

>Spike|hCoV-19/India/TG-CCMB-GC2/2020|2020-05-24|EPI\_ISL\_528812|Original|hCoV-19^^Telangana|Human|Department of Medicine|CSIR-Centre for Cellular and Molecular Biology|Banu|India

>Spike|hCoV-19/England/QEUH-C5BF2B/2020|2020-12-14|EPI\_ISL\_769261|Original|hCoV-19^^England|Human|Lighthouse Lab in Glasgow|Wellcome Sanger Institute for the COVID-19 Genomics UK (COG-UK) Consortium|Davies|United Kingdom

>Spike|hCoV-19/USA/WA-UW-3932/2020|2020-03-27|EPI\_ISL\_427211|Original|hCoV-19^^Washington|Human|UW Virology Lab|UW Virology Lab|Roychoudhury|USA

>Spike|hCoV-19/Scotland/QEUH-A9B932/2020|2020-10-20|EPI\_ISL\_625378|Original|hCoV-19^^Scotland|Human|Lighthouse Lab in Glasgow|Wellcome Sanger Institute for the COVID-19 Genomics UK (COG-UK) consortium|Davies|United Kingdom

>Spike|hCoV-19/England/ALDP-5AA65C/2020|2020-06-15|EPI\_ISL\_558736|Original|hCoV-19^^England|Human|Lighthouse Lab in Alderley Park|Wellcome Sanger Institute for the COVID-19 Genomics UK (COG-UK) consortium|Davies|United Kingdom

>Spike|hCoV-19/Belgium/ULG-10757/2020|2020-09-20|EPI\_ISL\_641599|Original|hCoV-19^^Li\u00e8ge|Human|Department of Clinical Microbiology|GIGA Medical Genomics|Durkin|Belgium

>Spike|hCoV-19/Wales/ALDP-C3A6E1/2020|2020-12-09|EPI\_ISL\_767271|Original|hCoV-19^^Wales|Human|Lighthouse Lab in Alderley Park|Wellcome Sanger Institute for the COVID-19 Genomics UK (COG-UK) Consortium|Davies|United Kingdom

>Spike|hCoV-19/England/MILK-A1D358/2020|2020-10-03|EPI\_ISL\_595053|Original|hCoV-19^^England|Human|Queens Medical Centre|COVID-19 Genomics UK (COG-UK) Consortium|Loose|United Kingdom

>Spike|hCoV-19/England/QEUEH-9F96E1/2020|2020-09-27|EPI\_ISL\_589191|Original|hCoV-19^^England|Human|Lighthouse Lab in Glasgow|Wellcome Sanger Institute for the COVID-19 Genomics UK (COG-UK) consortium|Davies|United Kingdom

>Spike|hCoV-19/England/MILK-9946AC/2020|2020-08-25|EPI\_ISL\_552232|Original|hCoV-19^^England|Human|Lighthouse Lab in Milton Keynes|Wellcome Sanger Institute for the COVID-19 Genomics UK (COG-UK) consortium|Davies|United Kingdom

>Spike|hCoV-19/Wales/PHWC-168621/2020|2020-04-27|EPI\_ISL\_494265|Original|hCoV-19^^Wales|Human|Originating lab|COVID-19 Genomics UK (COG-UK) Consortium|Moore|United Kingdom

>Spike|hCoV-19/England/ALDP-B5C055/2020|2020-11-08|EPI\_ISL\_655896|Original|hCoV-19^^England|Human|Lighthouse Lab in Alderley Park|Wellcome Sanger Institute for the COVID-19 Genomics UK (COG-UK) Consortium|Davies|United Kingdom

>Spike|hCoV-19/Brazil/RJ-00455/2020|2020-06-01|EPI\_ISL\_717850|Original|hCoV-19^^Rio de Janeiro|Human|Laboratorio de Virologia Molecular / UFRJ|Bioinformatics Laboratory / LNCC|Almeida|Brazil

>Spike|hCoV-19/England/ALDP-C3BE60/2020|2020-12-10|EPI\_ISL\_731837|Original|hCoV-19^^England|Human|Lighthouse Lab in Alderley Park|Wellcome Sanger Institute for the COVID-19 Genomics UK (COG-UK) Consortium|Davies|United Kingdom

>Spike|hCoV-19/England/QEUEH-969BA1/2020|2020-08-12|EPI\_ISL\_531158|Original|hCoV-19^^England|Human|Lighthouse Lab in Glasgow|Wellcome Sanger Institute for the COVID-19 Genomics UK (COG-UK) consortium|Davies|United Kingdom

>Spike|hCoV-19/Netherlands/NoordBrabant\_148/2020|2020-04-26|EPI\_ISL\_461183|Original|hCoV-19^^Noord Brabant|Human|Dutch COVID-19 response team|Erasmus Medical Center|Oude Munnink|Netherlands

>Spike|hCoV-19/England/NORT-29F59C/2020|2020-04-30|EPI\_ISL\_490491|Original|hCoV-19^^England|Human|Northumbria University / South Tees Hospitals NHS Foundation Trust / North Cumbria Integrated Care NHS Foundation Trust / North Tees and Hartlepool NHS Foundation Trust / Newcastle Hospitals NHS Foundation Trust|COVID-19 Genomics UK (COG-UK) Consortium|Bashton|United Kingdom

>Spike|hCoV-19/USA/CA-CZB-10182/2020|2020-05-14|EPI\_ISL\_672247|Original|hCoV-19^^California|Human|The Ashley Laboratory|Chan-Zuckerberg Biohub|Bhatt|USA

>Spike|hCoV-19/USA/TX-HMH-MCoV-15436/2020|2020-10-21|EPI\_ISL\_786920|Original|hCoV-19^^Texas|Human|Houston Methodist Hospital|Houston Methodist Hospital|Long|USA

>Spike|hCoV-19/Scotland/EDB9462/2020|2020-10-30|EPI\_ISL\_651230|Original|hCoV-19^^Scotland|Human|Virology Department|COVID-19 Genomics UK (COG-UK) Consortium|McHugh|United Kingdom

>Spike|hCoV-19/USA/UT-UPHL-2009718/2020|2020-07-27|EPI\_ISL\_605390|Original|hCoV-19^^Utah|Human|Utah Public Health Laboratory|Utah Public Health Laboratory|Young|USA

>Spike|hCoV-19/USA/MN-MDH-2205/2020|2020-11-03|EPI\_ISL\_770779|Original|hCoV-19^^Minnesota|Human|Minnesota Department of Health|Minnesota Department of Health|Lorentz|USA

>Spike|hCoV-19/USA/NY-WCMP11B04P/2020|2020-03-16|EPI\_ISL\_427586|Original|hCoV-19^^New York|Human|NewYork-Presbyterian & Mason Lab|Mason Lab|Mason|USA

>Spike|hCoV-19/England/MILK-99C6A4/2020|2020-08-30|EPI\_ISL\_550586|Original|hCoV-19^^England|Human|Lighthouse Lab in Milton Keynes|Wellcome Sanger Institute for the COVID-19 Genomics UK (COG-UK) consortium|Davies|United Kingdom

>Spike|hCoV-19/USA/CA-CZB-14918/2020|2020-11-27|EPI\_ISL\_739142|Original|hCoV-19^^California|Human|Orange County Public Health Lab|Chan-Zuckerberg Biohub|Kamm|USA

>Spike|hCoV-19/Canada/QC-LSPQ-L00243024/2020|2020-03-30|EPI\_ISL\_536344|Original|hCoV-19^^Quebec|Human|CSSS Haut-Richelieu/Rouville (H\u00f4pital)|Laboratoire de sant\u00e9 publique du Qu\u00e9bec|Moreira|Canada

>Spike|hCoV-19/Denmark/DCGC-10279/2020|2020-11-09|EPI\_ISL\_669873|Original|hCoV-19^^Nordjylland|Human|Department of Virus and Microbiological Special Diagnostics|Albertsen Lab|Michaelsen|Denmark

>Spike|hCoV-19/Wales/PHWC-32A16/2020|2020-04-15|EPI\_ISL\_474382|Original|hCoV-19^^Wales|Human|Originating lab|COVID-19 Genomics UK (COG-UK) Consortium|Moore|United Kingdom

>Spike|hCoV-19/Switzerland/BL-ETHZ-410863/2020|2020-12-15|EPI\_ISL\_737678|Original|hCoV-19^^Basel-Landschaft|Human|Viollier AG|Department of Biosystems Science and Engineering|Nadeau|Switzerland

>Spike|hCoV-19/Scotland/QEUH-C3378B/2020|2020-12-11|EPI\_ISL\_757147|Original|hCoV-19^^Scotland|Human|Lighthouse Lab in Glasgow|Wellcome Sanger Institute for the COVID-19 Genomics UK (COG-UK) Consortium|Davies|United Kingdom

>Spike|hCoV-19/England/QEUH-A4AF03/2020|2020-10-05|EPI\_ISL\_628460|Original|hCoV-19^^England|Human|Oxford Viromics|COVID-19 Genomics UK (COG-UK) Consortium|Golubchik|United Kingdom

>Spike|hCoV-19/USA/TX-HMH-MCoV-16186/2020|2020-10-30|EPI\_ISL\_785870|Original|hCoV-19^^Texas|Human|Houston Methodist Hospital|Houston Methodist Hospital|Long|USA

>Spike|hCoV-19/Australia/NSW112/2020|2020-03-15|EPI\_ISL\_427666|Original|hCoV-19^^New South Wales|Human|Centre for Infectious Diseases and Microbiology Public Health|NSW Health Pathology - Institute of Clinical Pathology and Medical Research; Westmead Hospital; University of Sydney|Gall|Australia

>Spike|hCoV-19/Wales/PHWC-4852DC/2020|2020-10-25|EPI\_ISL\_628165|Original|hCoV-19^^Wales|Human|Wales Specialist Virology Centre Sequencing lab|COVID-19 Genomics UK (COG-UK) Consortium|Moore|United Kingdom

>Spike|hCoV-19/Belgium/reg-0729922/2020|2020-07-29|EPI\_ISL\_734827|Original|hCoV-19^^Holsbeek|Human|UZ Leuven|KU Leuven|Maes|Belgium

>Spike|hCoV-19/Northern Ireland/NIRE-FBA37/2020|2020-04-11|EPI\_ISL\_470073|Original|hCoV-19^^Northern Ireland|Human|Regional Virus Laboratory|Wellcome Sanger Institute for the COVID-19 Genomics UK (COG-UK) consortium|Davies|United Kingdom

>Spike|hCoV-19/USA/CA-CZB-3938/2020|2020-07-30|EPI\_ISL\_548506|Original|hCoV-19^^California|Human|Contra Costa Public Health Lab|Chan-Zuckerberg Biohub|Bhatt|USA

>Spike|hCoV-19/Wales/PHWC-160F6A/2020|2020-04-23|EPI\_ISL\_473070|Original|hCoV-19^^Wales|Human|Wales Specialist Virology Centre Sequencing lab|COVID-19 Genomics UK (COG-UK) Consortium|Moore|United Kingdom

>Spike|hCoV-19/England/SHEF-10D41A5/2020|2020-12-18|EPI\_ISL\_765193|Original|hCoV-19^^England|Human|Virology Department|COVID-19 Genomics UK (COG-UK) Consortium|de Silva|United Kingdom

>Spike|hCoV-19/England/ALDP-9FD8C9/2020|2020-10-02|EPI\_ISL\_587745|Original|hCoV-19^^England|Human|Lighthouse Lab in Alderley Park|Wellcome Sanger Institute for the COVID-19 Genomics UK (COG-UK) consortium|Davies|United Kingdom

>Spike|hCoV-19/Australia/VIC8625/2020|2020-07-31|EPI\_ISL\_565116|Original|hCoV-19^^Victoria|Human|Microbiological Diagnostic Unit - Public Health Laboratory (MDU-PHL)|MDU-PHL|Schultz|Australia

>Spike|hCoV-19/England/20139042404/2020|2020-03-28|EPI\_ISL\_420674|Original|hCoV-19^^England|Human|Respiratory Virus Unit|Respiratory Virus Unit|Platt|United Kingdom

>Spike|hCoV-19/England/QEUH-AD1639/2020|2020-10-26|EPI\_ISL\_634711|Original|hCoV-19^^England|Human|Lighthouse Lab in Glasgow|Wellcome Sanger Institute for the COVID-19 Genomics UK (COG-UK) consortium|Davies|United Kingdom

>Spike|hCoV-19/Peru/ANC-INS-066/2020|2020-03-16|EPI\_ISL\_516987|Original|hCoV-19^^Ancash|Human|Laboratorio de Referencia Nacional de Virus Respiratorio. Centro Nacional de Salud Publica. Instituto Nacional de Salud Peru.|Laboratorio de Referencia Nacional de Biotecnolog\u00eda y Biolog\u00eda Molecular. Centro Nacional de Salud Publica. Instituto Nacional de Salud Peru.|Padilla Rojas|Peru

>Spike|hCoV-19/Scotland/QEUH-9B50F2/2020|2020-09-07|EPI\_ISL\_602062|Original|hCoV-19^^Scotland|Human|Lighthouse Lab in Glasgow|Wellcome Sanger Institute for the COVID-19 Genomics UK (COG-UK) consortium|Davies|United Kingdom

>Spike|hCoV-19/England/ALDP-9D966F/2020|2020-09-18|EPI\_ISL\_576752|Original|hCoV-19^^England|Human|Oxford Viromics|COVID-19 Genomics UK (COG-UK) Consortium|Golubchik|United Kingdom

>Spike|hCoV-19/England/QEUEH-9F89E9/2020|2020-09-25|EPI\_ISL\_588929|Original|hCoV-19^^England|Human|Lighthouse Lab in Glasgow|Wellcome Sanger Institute for the COVID-19 Genomics UK (COG-UK) consortium|Davies|United Kingdom

>Spike|hCoV-19/England/ALDP-9E6D4C/2020|2020-09-24|EPI\_ISL\_580604|Original|hCoV-19^^England|Human|Lighthouse Lab in Alderley Park|Wellcome Sanger Institute for the COVID-19 Genomics UK (COG-UK) consortium|Davies|United Kingdom

>Spike|hCoV-19/India/MH-ACTREC-679/2020|2020-09-19|EPI\_ISL\_700304|Original|hCoV-19^^Maharashtra|Human|Hematopathology Laboratory|Hematopathology Laboratory|Patkar|India

>Spike|hCoV-19/Japan/PG-8717/2020|2020-08-00|EPI\_ISL\_686313|Original|hCoV-19^^Japan|Human|Pathogen Genomics Center|Pathogen Genomics Center|Sekizuka|Japan

>Spike|hCoV-19/USA/MD-HP00118/2020|2020-03-29|EPI\_ISL\_457811|Original|hCoV-19^^Maryland|Human|Johns Hopkins Hospital Department of Pathology|Johns Hopkins Hospital Department of Pathology|Ramakrishnan|USA

>Spike|hCoV-19/England/CAMB-1B6897/2020|2020-10-06|EPI\_ISL\_584310|Original|hCoV-19^^England|Human|Department of Pathology|COVID-19 Genomics UK (COG-UK) Consortium|Goodfellow|United Kingdom

>Spike|hCoV-19/Australia/VIC6261/2020|2020-07-25|EPI\_ISL\_518252|Original|hCoV-19^^Victoria|Human|Microbiological Diagnostic Unit - Public Health Laboratory (MDU-PHL)|MDU-PHL|Schultz|Australia

>Spike|hCoV-19/Singapore/994/2020|2020-03-22|EPI\_ISL\_549002|Original|hCoV-19^^Singapore|Human|National Public Health Laboratory|National Public Health Laboratory|Mak|Singapore

>Spike|hCoV-19/France/IDF-9171/2020|2020-08-31|EPI\_ISL\_593917|Original|hCoV-19^^\u00cele-de-France|Human|Hospital|National Reference Center for Viruses of Respiratory Infections|Enouf|France

>Spike|hCoV-19/Denmark/DCGC-17699/2020|2020-12-14|EPI\_ISL\_751154|Original|hCoV-19^^Hovedstaden|Human|Department of Virus and Microbiological Special Diagnostics|Albertsen Lab|Michaelsen|Denmark

>Spike|hCoV-19/England/CAMC-AAF8F2/2020|2020-10-23|EPI\_ISL\_631204|Original|hCoV-19^^England|Human|Lighthouse Lab in Cambridge|Wellcome Sanger Institute for the COVID-19 Genomics UK (COG-UK) consortium|Davies|United Kingdom

>Spike|hCoV-19/Singapore/702/2020|2020-07-06|EPI\_ISL\_498600|Original|hCoV-19^^Singapore|Human|National Public Health Laboratory|National Public Health Laboratory|Mak|Singapore

>Spike|hCoV-19/England/MILK-9A7F41/2020|2020-09-02|EPI\_ISL\_573247|Original|hCoV-19^^England|Human|Virology Department|COVID-19 Genomics UK (COG-UK) Consortium|Williams|United Kingdom

>Spike|hCoV-19/England/MILK-975BB1/2020|2020-07-19|EPI\_ISL\_552664|Original|hCoV-19^^England|Human|Lighthouse Lab in Milton Keynes|Wellcome Sanger Institute for the COVID-19 Genomics UK (COG-UK) consortium|Davies|United Kingdom

>Spike|hCoV-19/Bahrein/BAH-22/2020|2020-04-08|EPI\_ISL\_483563|Original|hCoV-19^^Bahrain|Human|Kingdom of Bahrein Ministry of Health|Erasmus Medical Center|Oude Munnink|Bahrain

>Spike|hCoV-19/Denmark/DCGC-17174/2020|2020-12-14|EPI\_ISL\_750802|Original|hCoV-19^^Midtjylland|Human|Department of Virus and Microbiological Special Diagnostics|Albertsen Lab|Michaelsen|Denmark

>Spike|hCoV-19/England/QEUEH-9F56E5/2020|2020-09-27|EPI\_ISL\_588994|Original|hCoV-19^^England|Human|Lighthouse Lab in Glasgow|Wellcome Sanger Institute for the COVID-19 Genomics UK (COG-UK) consortium|Davies|United Kingdom

>Spike|hCoV-19/USA/WA-S949/2020|2020-04-27|EPI\_ISL\_463439|Original|hCoV-19^^Washington|Human|Washington State Department of Health|Seattle Flu Study|Bedford|USA

>Spike|hCoV-19/England/MILK-9E29B5/2020|2020-09-20|EPI\_ISL\_581300|Original|hCoV-19^^England|Human|Lighthouse Lab in Milton Keynes|Wellcome Sanger Institute for the COVID-19 Genomics UK (COG-UK) consortium|Davies|United Kingdom



>Spike|hCoV-19/Spain/CT-IBV-97010108/2020|2020-11-10|EPI\_ISL\_683606|Original|hCoV-19^^Catalunya|Human|Servicio de Microbiolog\u00eda|SeqCOVID-SPAIN consortium/IBV (CSIC) |Comas|Spain

>Spike|hCoV-19/Kazakhstan/26549/2020|2020-04-26|EPI\_ISL\_454513|Original|hCoV-19^^Nur-Sultan|Human|RSE \National Center for Biotechnology\|RSE \National Center for Biotechnology\|Kalendar|Kazakhstan

>Spike|hCoV-19/England/LIVE-AAB16/2020|2020-07-31|EPI\_ISL\_540599|Original|hCoV-19^^England|Human|Liverpool Clinical Laboratories|COVID-19 Genomics UK (COG-UK) Consortium|Haldenby|United Kingdom

>Spike|hCoV-19/USA/NY-NYCPHL-000981/2020|2020-10-07|EPI\_ISL\_633008|Original|hCoV-19^^New York|Human|DOHMH Jamaica|New York City Public Health Laboratory|Wang|USA

>Spike|hCoV-19/Australia/VIC4460/2020|2020-07-16|EPI\_ISL\_519756|Original|hCoV-19^^Victoria|Human|Microbiological Diagnostic Unit - Public Health Laboratory (MDU-PHL) |MDU-PHL|Schultz|Australia

>Spike|hCoV-19/France/PAC-MEPHI-1976/2020|2020-08-27|EPI\_ISL\_644467|Original|hCoV-19^^Provence-Alpes-Cote-d\u2019Azur|Human|MEPHI|MEPHI|Levasseur|France

>Spike|hCoV-19/USA/FL-BPHL-0881/2020|2020-04-03|EPI\_ISL\_517772|Original|hCoV-19^^Florida|Human|Florida Bureau of Public Health Laboratories|Florida Bureau of Public Health Laboratories|Blanton|USA

>Spike|hCoV-19/England/ALDP-71DB80/2020|2020-07-01|EPI\_ISL\_557732|Original|hCoV-19^^England|Human|Lighthouse Lab in Alderley Park|Wellcome Sanger Institute for the COVID-19 Genomics UK (COG-UK) consortium|Davies|United Kingdom

>Spike|hCoV-19/USA/MN-MDH-2147/2020|2020-11-23|EPI\_ISL\_708485|Original|hCoV-19^^Minnesota|Human|Minnesota Department of Health|Minnesota Department of Health|Lorentz|USA

>Spike|hCoV-19/USA/TX-HMH-5033/2020|2020-06-22|EPI\_ISL\_544473|Original|hCoV-19^^Texas|Human|Houston Methodist Hospital|Houston Methodist Hospital|Long|USA

>Spike|hCoV-19/USA/NY-QDX-01/2020|2020-03-12|EPI\_ISL\_444519|Original|hCoV-19^^New York|Human|Molecular Infectious Disease|Molecular Infectious Disease|Anderson|USA

>Spike|hCoV-19/Denmark/DCGC-15823/2020|2020-11-23|EPI\_ISL\_714042|Original|hCoV-19^^Nordjylland|Human|Department of Virus and Microbiological Special Diagnostics|Albertsen Lab|Michaelsen|Denmark

>Spike|hCoV-19/USA/NM-UNM-00539/2020|2020-05-12|EPI\_ISL\_542961|Original|hCoV-19^^New Mexico|Human|TriCore Reference Laboratories|Center for Global Health|Domman|USA

>Spike|hCoV-19/Norway/5810/2020|2020-11-17|EPI\_ISL\_708180|Original|hCoV-19^^Viken|Human|Norwegian Institute of Public Health|Norwegian Institute of Public Health|Kopperud Riis|Norway

>Spike|hCoV-19/Denmark/DCGC-8448/2020|2020-10-26|EPI\_ISL\_617398|Original|hCoV-19^^Hovedstaden|Human|Department of Virus and Microbiological Special Diagnostics|Albertsen lab|Michaelsen|Denmark

>Spike|hCoV-19/Wales/PHWC-32F71/2020|2020-04-13|EPI\_ISL\_446715|Original|hCoV-19^^Wales|Human|Wales Specialist Virology Centre|Public Health Wales Microbiology Cardiff|Moore|United Kingdom

>Spike|hCoV-19/Wales/PHWC-4993D2/2020|2020-12-03|EPI\_ISL\_727299|Original|hCoV-19^^Wales|Human|Originating lab|COVID-19 Genomics UK (COG-UK) Consortium|Moore|United Kingdom

>Spike|hCoV-19/Belgium/ULG-10131/2020|2020-04-07|EPI\_ISL\_427376|Original|hCoV-19^^Liege|Human|Department of Clinical Microbiology|GIGA Medical Genomics|Durkin|Belgium

>Spike|hCoV-19/Wales/PHWC-15FE16/2020|2020-05-19|EPI\_ISL\_472860|Original|hCoV-19^^Wales|Human|Wales Specialist Virology Centre Sequencing lab|COVID-19 Genomics UK (COG-UK) Consortium|Moore|United Kingdom

>Spike|hCoV-19/England/QEUEH-CAD4EF/2020|2020-12-20|EPI\_ISL\_760992|Original|hCoV-19^^England|Human|Lighthouse Lab in Glasgow|Wellcome Sanger Institute for the COVID-19 Genomics UK (COG-UK) Consortium|Davies|United Kingdom

>Spike|hCoV-19/Australia/VIC8219/2020|2020-08-10|EPI\_ISL\_564906|Original|hCoV-19^^Victoria|Human|Microbiological Diagnostic Unit - Public Health Laboratory (MDU-PHL) |MDU-PHL|Schultz|Australia

>Spike|hCoV-19/Finland/17A37S12/2020|2020-04-17|EPI\_ISL\_481574|Original|hCoV-19^^Uusimaa|Human|Department of Virology and Immunology|Department of Virology|Smura|Finland

>Spike|hCoV-19/England/ALDP-B6298E/2020|2020-11-09|EPI\_ISL\_656364|Original|hCoV-19^^England|Human|Lighthouse Lab in Alderley Park|Wellcome Sanger Institute for the COVID-19 Genomics UK (COG-UK) Consortium|Davies|United Kingdom

>Spike|hCoV-19/England/LIVE-A1265/2020|2020-05-25|EPI\_ISL\_499848|Original|hCoV-19^^England|Human|Liverpool Clinical Laboratories|COVID-19 Genomics UK (COG-UK) Consortium|Haldenby|United Kingdom

>Spike|hCoV-19/USA/UT-03912/2020|2020-04-13|EPI\_ISL\_470563|Original|hCoV-19^^Utah|Human|Utah Public Health Laboratory|Utah Public Health Laboratory|Young|USA

>Spike|hCoV-19/England/LIVE-DB3087/2020|2020-11-01|EPI\_ISL\_650299|Original|hCoV-19^^England|Human|Liverpool Clinical Laboratories|COVID-19 Genomics UK (COG-UK) Consortium|Haldenby|United Kingdom

>Spike|hCoV-19/USA/NY-Wadsworth-36877-01/2020|2020-04-02|EPI\_ISL\_525648|Original|hCoV-19^^New York|Human|Wadsworth Center|Wadsworth Center|Plitnick|USA

>Spike|hCoV-19/England/QEUEH-B0F895/2020|2020-11-02|EPI\_ISL\_641963|Original|hCoV-19^^England|Human|Lighthouse Lab in Glasgow|Wellcome Sanger Institute for the COVID-19 Genomics UK (COG-UK) Consortium|Davies|United Kingdom

>Spike|hCoV-19/England/ALDP-A5018C/2020|2020-10-07|EPI\_ISL\_597840|Original|hCoV-19^^England|Human|Lighthouse Lab in Alderley Park|Wellcome Sanger Institute for the COVID-19 Genomics UK (COG-UK) consortium|Davies|United Kingdom

>Spike|hCoV-19/England/204221531/2020|2020-00-00|EPI\_ISL\_593851|Original|hCoV-19^^England|Human|Respiratory Virus Unit|Respiratory Virus Unit|Platt|United Kingdom

>Spike|hCoV-19/USA/ME-HETL-J0394/2020|2020-12-15|EPI\_ISL\_755506|Original|hCoV-19^^Maine|Human|Maine Health and Environmental Testing Laboratory|Tewhey Lab|Tewhey|USA

>Spike|hCoV-19/USA/CT-UW-6362/2020|2020-04-02|EPI\_ISL\_430971|Original|hCoV-19^^Connecticut|Human|UW Virology Lab|UW Virology Lab|Roychoudhury|USA

>Spike|hCoV-19/England/BRIS-1227E4/2020|2020-04-04|EPI\_ISL\_440655|Original|hCoV-19^^England|Human|PHE South West Regional Laboratory|Wellcome Sanger Institute for the COVID-19 Genomics UK (COG-UK) consortium|Amato|United Kingdom

>Spike|hCoV-19/USA/TX-HMH-2415/2020|2020-05-11|EPI\_ISL\_545297|Original|hCoV-19^^Texas|Human|Houston Methodist Hospital|Houston Methodist Hospital|Long|USA

>Spike|hCoV-19/England/MILK-9E3064/2020|2020-09-21|EPI\_ISL\_581246|Original|hCoV-19^^England|Human|Lighthouse Lab in Milton Keynes|Wellcome Sanger Institute for the COVID-19 Genomics UK (COG-UK) consortium|Davies|United Kingdom

>Spike|hCoV-19/USA/TX-HMH-5498/2020|2020-06-26|EPI\_ISL\_544821|Original|hCoV-19^^Texas|Human|Houston Methodist Hospital|Houston Methodist Hospital|Long|USA

>Spike|hCoV-19/England/ALDP-BB52FA/2020|2020-11-20|EPI\_ISL\_702919|Original|hCoV-19^^England|Human|Lighthouse Lab in Alderley Park|Wellcome Sanger Institute for the COVID-19 Genomics UK (COG-UK) Consortium|Davies|United Kingdom

>Spike|hCoV-19/Belgium/UGent-116/2020|2020-03-23|EPI\_ISL\_475076|Original|hCoV-19^^Ghent|Human|Lab voor klinische biologie|Onderzoeksgroep Virologie|Lambrechts|Belgium

>Spike|hCoV-19/Switzerland/BS-42206234/2020|2020-03-25|EPI\_ISL\_581743|Original|hCoV-19^^Basel-Stadt|Human|University Hospital Basel|University Hospital Basel|Roloff Handschin|Switzerland

>Spike|hCoV-19/USA/MD-HP12185/2020|2020-12-14|EPI\_ISL\_791484|Original|hCoV-19^^Maryland|Human|Johns Hopkins Hospital Department of Pathology|Johns Hopkins Hospital Department of Pathology|Morris|USA

>Spike|hCoV-19/England/MILK-A7B622/2020|2020-10-15|EPI\_ISL\_607562|Original|hCoV-19^^England|Human|Lighthouse Lab in Milton Keynes|Wellcome Sanger Institute for the COVID-19 Genomics UK (COG-UK) consortium|Davies|United Kingdom

>Spike|hCoV-19/Germany/BE-ChVir-W1282-4384/2020|2020-04-17|EPI\_ISL\_753947|Original|hCoV-19^^Berlin|Human|Charit\u00e9 Universit\u00e4tsmedizin Berlin|Charit\u00e9 Universit\u00e4tsmedizin Berlin|Muehlemann|Germany

>Spike|hCoV-19/England/LIVE-A15E4/2020|2020-06-11|EPI\_ISL\_490332|Original|hCoV-19^^England|Human|Liverpool Clinical Laboratories|COVID-19 Genomics UK (COG-UK) Consortium|Haldenby|United Kingdom

>Spike|hCoV-19/England/QEUEH-98F2BF/2020|2020-08-27|EPI\_ISL\_540369|Original|hCoV-19^^England|Human|Lighthouse Lab in Glasgow|Wellcome Sanger Institute for the COVID-19 Genomics UK (COG-UK) consortium|Davies|United Kingdom

>Spike|hCoV-19/India/MH-NCCS-NR099/2020|2020-04-28|EPI\_ISL\_497879|Original|hCoV-19^^Maharashtra|Human|National Centre For Cell Science|National Centre For Cell Science|Paul|India

>Spike|hCoV-19/Northern Ireland/NIRE-233011/2020|2020-09-28|EPI\_ISL\_680246|Original|hCoV-19^^Northern Ireland|Human|Regional Virus Laboratory|COVID-19 Genomics UK (COG-UK) Consortium|Fairley|United Kingdom

>Spike|hCoV-19/England/ALDP-9015E9/2020|2020-06-24|EPI\_ISL\_557039|Original|hCoV-19^^England|Human|Lighthouse Lab in Alderley Park|Wellcome Sanger Institute for the COVID-19 Genomics UK (COG-UK) consortium|Davies|United Kingdom

>Spike|hCoV-19/USA/WA-S727/2020|2020-04-10|EPI\_ISL\_449897|Original|hCoV-19^^Washington|Human|Washington State Department of Health|Seattle Flu Study|Bedford|USA

>Spike|hCoV-19/England/GSTT-265D6CA/2020|2020-03-24|EPI\_ISL\_483999|Original|hCoV-19^^England|Human|Centre for Clinical Infection and Diagnostics Research and Genomics Innovation Unit|COVID-19 Genomics UK (COG-UK) Consortium|Awan|United Kingdom

>Spike|hCoV-19/England/ALDP-B7361A/2020|2020-11-12|EPI\_ISL\_662415|Original|hCoV-19^^England|Human|Lighthouse Lab in Alderley Park|Wellcome Sanger Institute for the COVID-19 Genomics UK (COG-UK) Consortium|Davies|United Kingdom

>Spike|hCoV-19/England/MILK-ACC613/2020|2020-10-21|EPI\_ISL\_634459|Original|hCoV-19^^England|Human|Lighthouse Lab in Milton Keynes|Wellcome Sanger Institute for the COVID-19 Genomics UK (COG-UK) consortium|Davies|United Kingdom

>Spike|hCoV-19/Italy/PIE-SLL-MS46/2020|2020-02-22|EPI\_ISL\_569867|Vero|hCoV-19^^Piedmont|Human|Amedeo di savoia|Crosetto lab|Harbers|Italy

>Spike|hCoV-19/USA/TX-HMH-MCoV-19347/2020|2020-11-27|EPI\_ISL\_783779|Original|hCoV-19^^Texas|Human|Houston Methodist Hospital|Houston Methodist Hospital|Long|USA

>Spike|hCoV-19/Finland/23LS6F8/2020|2020-10-23|EPI\_ISL\_759786|Original|hCoV-19^^Uusimaa|Human|Department of Virology and Immunology|Department of Virology|Smura|Finland

>Spike|hCoV-19/USA/OR-OHSU-0458/2020|2020-06-09|EPI\_ISL\_525814|Original|hCoV-19^^Oregon|Human|OHSU Lab Services Molecular Microbiology Lab|Ginkgo Bioworks Clinical Laboratory|O'Roak|USA

>Spike|hCoV-19/South Africa/KRISP-K002406/2020|2020-07-29|EPI\_ISL\_515770|Original|hCoV-19^^KwaZulu-Natal|Human|NHLS-IALCH|KRISP|de Oliveira|South Africa

>Spike|hCoV-19/South Africa/NHLS-UCT-GP-5895/2020|2020-05-25|EPI\_ISL\_700549|Original|hCoV-19^^Western Cape|Human|Heideveld CDC wc HVP|NHLS/UCT|Iranzadeh|South Africa

>Spike|hCoV-19/Spain/CB-IBV-98002760/2020|2020-03-22|EPI\_ISL\_537809|Original|hCoV-19^^Cantabria|Human|Hospital Universitario Marqu\u00e9s de Valdecilla (Santander)|SeqCOVID-SPAIN consortium/IBV(CSIC)|Comas|Spain

>Spike|hCoV-19/England/CAMB-1B7447/2020|2020-10-20|EPI\_ISL\_637509|Original|hCoV-19^^England|Human|Department of Pathology|COVID-19 Genomics UK (COG-UK) Consortium|Goodfellow|United Kingdom

>Spike|hCoV-19/Australia/NSW745/2020|2020-07-28|EPI\_ISL\_513388|Original|hCoV-19^^New South Wales|Human|Pathology North - NSW Health Pathology|NSW Health Pathology - Institute of Clinical Pathology and Medical Research; Westmead Hospital; University of Sydney|Gall|Australia

>Spike|hCoV-19/England/MILK-A7B992/2020|2020-10-15|EPI\_ISL\_607387|Original|hCoV-19^^England|Human|Lighthouse Lab in Milton Keynes|Wellcome Sanger Institute for the COVID-19 Genomics UK (COG-UK) consortium|Davies|United Kingdom

>Spike|hCoV-19/Japan/PG-8208/2020|2020-08-00|EPI\_ISL\_687307|Original|hCoV-19^^Japan|Human|Pathogen Genomics Center|Pathogen Genomics Center|Sekizuka|Japan

>Spike|hCoV-19/England/MILK-9A97ED/2020|2020-09-02|EPI\_ISL\_551224|Original|hCoV-19^^England|Human|Lighthouse Lab in Milton Keynes|Wellcome Sanger Institute for the COVID-19 Genomics UK (COG-UK) consortium|Davies|United Kingdom

>Spike|hCoV-19/England/QEUEH-C7C6F2/2020|2020-12-16|EPI\_ISL\_762622|Original|hCoV-19^^England|Human|Lighthouse Lab in Glasgow|Wellcome Sanger Institute for the COVID-19 Genomics UK (COG-UK) Consortium|Davies|United Kingdom

>Spike|hCoV-19/Japan/PG-6153/2020|2020-08-00|EPI\_ISL\_689265|Original|hCoV-19^^Japan|Human|Pathogen Genomics Center|Pathogen Genomics Center|Sekizuka|Japan

>Spike|hCoV-19/England/ALDP-A86E86/2020|2020-10-16|EPI\_ISL\_606066|Original|hCoV-19^^England|Human|Lighthouse Lab in Alderley Park|Wellcome Sanger Institute for the COVID-19 Genomics UK (COG-UK) consortium|Davies|United Kingdom

>Spike|hCoV-19/England/NOTT-11CC66/2020|2020-11-18|EPI\_ISL\_665906|Original|hCoV-19^^England|Human|Queens Medical Centre|COVID-19 Genomics UK (COG-UK) Consortium|Loose|United Kingdom

>Spike|hCoV-19/Denmark/DCGC-8598/2020|2020-10-26|EPI\_ISL\_625946|Original|hCoV-19^^Syddanmark|Human|Department of Virus and Microbiological Special Diagnostics|Albertsen lab|Michaelsen|Denmark

>Spike|hCoV-19/England/LOND-D6BB7/2020|2020-03-27|EPI\_ISL\_478412|Original|hCoV-19^^England|Human|University College London|COVID-19 Genomics UK (COG-UK) Consortium|Roy|United Kingdom

>Spike|hCoV-19/England/MILK-A7D778/2020|2020-10-12|EPI\_ISL\_606386|Original|hCoV-19^^England|Human|Lighthouse Lab in Milton Keynes|Wellcome Sanger Institute for the COVID-19 Genomics UK (COG-UK) consortium|Davies|United Kingdom

>Spike|hCoV-19/England/QEUEH-9F580D/2020|2020-09-25|EPI\_ISL\_588336|Original|hCoV-19^^England|Human|Lighthouse Lab in Glasgow|Wellcome Sanger Institute for the COVID-19 Genomics UK (COG-UK) consortium|Davies|United Kingdom

>Spike|hCoV-19/Switzerland/VD-ETHZ-360318/2020|2020-11-06|EPI\_ISL\_729215|Original|hCoV-19^^Vaud|Human|Viollier AG|Department of Biosystems Science and Engineering|Nadeau|Switzerland

>Spike|hCoV-19/Denmark/DCGC-6241/2020|2020-10-05|EPI\_ISL\_620001|Original|hCoV-19^^Syddanmark|Human|Department of Virus and Microbiological Special Diagnostics|Albertsen lab|Michaelsen|Denmark

>Spike|hCoV-19/USA/CO-CDPHE-2009041479/2020|2020-09-03|EPI\_ISL\_677311|Original|hCoV-19^^Colorado|Human|Colorado Department of Public Health and Environment|Colorado Department of Public Health and Environment|Bankers|USA

>Spike|hCoV-19/Scotland/CVR5733/2020|2020-11-06|EPI\_ISL\_651943|Original|hCoV-19^^Scotland|Human|West of Scotland Specialist Virology Centre|COVID-19 Genomics UK (COG-UK) Consortium|Robertson|United Kingdom

>Spike|hCoV-19/Scotland/QEUEH-96D536/2020|2020-08-19|EPI\_ISL\_534534|Original|hCoV-19^^Scotland|Human|NHSGGC West of Scotland Specialist Virology Centre / MRC-University of Glasgow Centre for Virus Research|Wellcome Sanger Institute for the COVID-19 Genomics UK (COG-UK) consortium|Davies|United Kingdom

>Spike|hCoV-19/England/QEUEH-B2D64C/2020|2020-11-04|EPI\_ISL\_659961|Original|hCoV-19^^England|Human|Lighthouse Lab in Glasgow|Wellcome Sanger Institute for the COVID-19 Genomics UK (COG-UK) Consortium|Davies|United Kingdom

>Spike|hCoV-19/Wales/PHWC-497BBE/2020|2020-11-24|EPI\_ISL\_726943|Original|hCoV-19^^Wales|Human|Originating lab|COVID-19 Genomics UK (COG-UK) Consortium|Moore|United Kingdom

>Spike|hCoV-19/England/ALDP-BC84D0/2020|2020-11-23|EPI\_ISL\_721208|Original|hCoV-19^^England|Human|Lighthouse Lab in Alderley Park|Wellcome Sanger Institute for the COVID-19 Genomics UK (COG-UK) Consortium|Davies|United Kingdom

>Spike|hCoV-19/Sri Lanka/CDR503/2020|2020-03-31|EPI\_ISL\_525479|Original|hCoV-19^^Kalutara|Human|Centre for Dengue Research|Centre for Dengue Research|Malavige|Sri Lanka

>Spike|hCoV-19/Scotland/QEUEH-961FAD/2020|2020-08-10|EPI\_ISL\_531599|Original|hCoV-19^^Scotland|Human|NHSGGC West of Scotland Specialist Virology Centre / MRC-University of Glasgow Centre for Virus Research|Wellcome Sanger Institute for the COVID-19 Genomics UK (COG-UK) consortium|Davies|United Kingdom

>Spike|hCoV-19/England/ALDP-A87447/2020|2020-10-17|EPI\_ISL\_606059|Original|hCoV-19^^England|Human|Lighthouse Lab in Alderley Park|Wellcome Sanger Institute for the COVID-19 Genomics UK (COG-UK) consortium|Davies|United Kingdom

>Spike|hCoV-19/England/ALDP-A6C69D/2020|2020-10-15|EPI\_ISL\_608186|Original|hCoV-19^^England|Human|Lighthouse Lab in Alderley Park|Wellcome Sanger Institute for the COVID-19 Genomics UK (COG-UK) consortium|Davies|United Kingdom

>Spike|hCoV-19/Denmark/DCGC-8614/2020|2020-10-26|EPI\_ISL\_625979|Original|hCoV-19^^Hovedstaden|Human|Department of Virus and Microbiological Special Diagnostics|Albertsen lab|Michaelsen|Denmark

>Spike|hCoV-19/England/201420048/2020|2020-03-28|EPI\_ISL\_465901|Original|hCoV-19^^England|Human|Respiratory Virus Unit|Respiratory Virus Unit|Platt|United Kingdom

>Spike|hCoV-19/England/MILK-AC76AF/2020|2020-10-19|EPI\_ISL\_630292|Original|hCoV-19^^England|Human|Lighthouse Lab in Milton Keynes|Wellcome Sanger Institute for the COVID-19 Genomics UK (COG-UK) consortium|Davies|United Kingdom

>Spike|hCoV-19/Northern Ireland/NIRE-10940A/2020|2020-10-22|EPI\_ISL\_680199|Original|hCoV-19^^Northern Ireland|Human|Regional Virus Laboratory|COVID-19 Genomics UK (COG-UK) Consortium|Fairley|United Kingdom

>Spike|hCoV-19/USA/WI-UW-1415/2020|2020-08-26|EPI\_ISL\_536785|Original|hCoV-19^^Wisconsin|Human|University of Wisconsin-Madison Campus AIDS Vaccine Research Laboratories|University of Wisconsin-Madison AIDS Vaccine Research Laboratories|Baczenas|USA

>Spike|hCoV-19/Denmark/DCGC-8185/2020|2020-10-26|EPI\_ISL\_617249|Original|hCoV-19^^Hovedstaden|Human|Department of Virus and Microbiological Special Diagnostics|Albertsen lab|Michaelsen|Denmark

>Spike|hCoV-19/USA/MD-MDH-0464/2020|2020-11-11|EPI\_ISL\_682075|Original|hCoV-19^^Maryland|Human|Maryland Public Health Laboratory|Maryland Public Health Laboratory|Keller|USA

>Spike|hCoV-19/England/LIVE-A75FD/2020|2020-03-27|EPI\_ISL\_517046|Original|hCoV-19^^England|Human|Liverpool Clinical Laboratories|COVID-19 Genomics UK (COG-UK) Consortium|Haldenby|United Kingdom

>Spike|hCoV-19/Australia/VIC9889/2020|2020-08-25|EPI\_ISL\_565764|Original|hCoV-19^^Victoria|Human|Microbiological Diagnostic Unit - Public Health Laboratory (MDU-PHL) |MDU-PHL|Schultz|Australia

>Spike|hCoV-19/England/BRIS-124EED/2020|2020-03-26|EPI\_ISL\_443966|Original|hCoV-19^^England|Human|PHE South West Regional Laboratory|Wellcome Sanger Institute for the COVID-19 Genomics UK (COG-UK) consortium|Amato|United Kingdom

>Spike|hCoV-19/Iceland/490/2020|2020-03-20|EPI\_ISL\_424512|Original|hCoV-19^^Reykjavik|Human|The National University Hospital of Iceland|deCODE genetics|J\u00f3nsson|Iceland

>Spike|hCoV-19/USA/LA-EVTL343/2020|2020-05-26|EPI\_ISL\_578749|Original|hCoV-19^^Louisiana|Human|LSUHS Emerging Viral Threat Laboratory|Microbial Genome Sequencing Center|Kamil|USA

>Spike|hCoV-19/England/QEUH-A61A6F/2020|2020-10-13|EPI\_ISL\_706937|Original|hCoV-19^^England|Human|Oxford Viromics|COVID-19 Genomics UK (COG-UK) Consortium|Golubchik|United Kingdom

>Spike|hCoV-19/Denmark/DCGC-16835/2020|2020-12-14|EPI\_ISL\_750594|Original|hCoV-19^^Midtjylland|Human|Department of Virus and Microbiological Special Diagnostics|Albertsen Lab|Michaelsen|Denmark

>Spike|hCoV-19/India/MH-BJMC-1658/2020|2020-04-18|EPI\_ISL\_496546|Original|hCoV-19^^Maharashtra|Human|B.J. Govt. Medical College|National Centre For Cell Science|Paul|India

>Spike|hCoV-19/USA/UT-UPHL-2012538042/2020|2020-08-10|EPI\_ISL\_745827|Original|hCoV-19^^Utah|Human|Ginkgo Bioworks Clinical Laboratory|Utah Public Health Laboratory|Young|USA

>Spike|hCoV-19/USA/FL-BPHL-1235/2020|2020-05-29|EPI\_ISL\_541159|Original|hCoV-19^^Florida|Human|Florida Bureau of Public Health Laboratories|Florida Bureau of Public Health Laboratories|Blanton|USA

>Spike|hCoV-19/England/QEUH-B318C7/2020|2020-11-04|EPI\_ISL\_646217|Original|hCoV-19^^England|Human|Lighthouse Lab in Glasgow|Wellcome Sanger Institute for the COVID-19 Genomics UK (COG-UK) Consortium|Davies|United Kingdom

>Spike|hCoV-19/Switzerland/GE-SNRCI-8451/2020|2020-03-00|EPI\_ISL\_548227|Original|hCoV-19^^Geneve|Human|Laboratoire de Virologie|Swiss National Reference Centre for Influenza|Gon\u00e7alves Cabecinhas|Switzerland

>Spike|hCoV-19/Saudi Arabia/KAUST-MAKKAH144/2020|2020-03-24|EPI\_ISL\_678043|Original|hCoV-19^^Makkah|Human|Pathogen Genomics Lab King Abdullah University of Science and Technology(KAUST)|Pathogen Genomics Lab King Abdullah University of Science and Technology(KAUST)|Mohamed Ghazzali|Saudi Arabia

>Spike|hCoV-19/USA/NY-Wadsworth-65679-01/2020|2020-04-23|EPI\_ISL\_676876|Original|hCoV-19^^New York|Human|Wadsworth Center|Wadsworth Center|Lasek-Nesselquist|USA

>Spike|hCoV-19/Scotland/EDB607/2020|2020-04-01|EPI\_ISL\_433214|Original|hCoV-19^^Scotland|Human|Virology Department|COVID-19 Genomics UK (COG-UK) Consortium|Williams|United Kingdom

>Spike|hCoV-19/Scotland/EDB7877/2020|2020-09-23|EPI\_ISL\_585430|Original|hCoV-19^^Scotland|Human|Virology Department|COVID-19 Genomics UK (COG-UK) Consortium|McHugh|United Kingdom

>Spike|hCoV-19/Spain/AN-IBV-98001776/2020|2020-04-02|EPI\_ISL\_538151|Original|hCoV-19^^Andalucia|Human|Servicio de Microbiolog\u00eda y Parasitolog\u00eda cl\u00ednica. UCEIMP. Hospital Universitario Virgen del Roc\u00edo/IBIS/CSIC/US|SeqCOVID-SPAIN consortium/IBV (CSIC) |Comas|Spain

>Spike|hCoV-19/Denmark/DCGC-5562/2020|2020-09-28|EPI\_ISL\_620887|Original|hCoV-19^^Nordjylland|Human|Department of Virus and Microbiological Special Diagnostics|Albertsen lab|Michaelsen|Denmark

>Spike|hCoV-19/Australia/VIC3289/2020|2020-07-08|EPI\_ISL\_520968|Original|hCoV-19^^Victoria|Human|Microbiological Diagnostic Unit - Public Health Laboratory (MDU-PHL) |MDU-PHL|Schultz|Australia

>Spike|hCoV-19/USA/MN-MDH-1577/2020|2020-07-02|EPI\_ISL\_530173|Original|hCoV-19^^Minnesota|Human|Minnesota Department of Health|Minnesota Department of Health|Garfin|USA

>Spike|hCoV-19/England/NORT-288E04/2020|2020-03-23|EPI\_ISL\_458704|Original|hCoV-19^^England|Human|NU-OMICS DNA Sequencing research facility|Wellcome Sanger Institute for the COVID-19 Genomics UK (COG-UK) consortium|Davies|United Kingdom

>Spike|hCoV-19/Denmark/DCGC-17590/2020|2020-12-14|EPI\_ISL\_751090|Original|hCoV-19^^Midtjylland|Human|Department of Virus and Microbiological Special Diagnostics|Albertsen Lab|Michaelsen|Denmark

>Spike|hCoV-19/Germany/BE-ChVir-D2007-8200/2020|2020-10-15|EPI\_ISL\_753896|Original|hCoV-19^^Berlin|Human|Charit\u00e9 Universit\u00e4tsmedizin Berlin|Charit\u00e9 Universit\u00e4tsmedizin Berlin|Muehlemann|Germany

>Spike|hCoV-19/USA/CA-SCCPHD-UC172/2020|2020-03-13|EPI\_ISL\_435651|Original|hCoV-19^^California|Human|Santa Clara County Public Health Department|Chiu Laboratory|Chiu|USA

>Spike|hCoV-19/England/LOND-124D169/2020|2020-03-23|EPI\_ISL\_507059|Original|hCoV-19^^England|Human|University College London Hospital|COVID-19 Genomics UK (COG-UK) Consortium|Byott|United Kingdom

>Spike|hCoV-19/Czech Republic/NRL\_9654/2020|2020-10-07|EPI\_ISL\_626595|Original|hCoV-19^^Prague|Human|The National Institute of Public Health|State Veterinary Institute Prague|Nagy|Czech Republic

>Spike|hCoV-19/USA/MA-JLL-26N/2020|2020-00-00|EPI\_ISL\_632290|Original|hCoV-19^^Massachusetts|Human|Brigham and Women's Hospital|Jonathan Li laboratory|Choudhary|USA

>Spike|hCoV-19/USA/TX-DSHS-1957/2020|2020-06-21|EPI\_ISL\_765900|Original|hCoV-19^^Texas|Human|TXDSHS|TXDSHS|Rahman|USA

>Spike|hCoV-19/Scotland/GCVR-1714EF/2020|2020-03-28|EPI\_ISL\_489689|Original|hCoV-19^^Scotland|Human|NHSGGC West of Scotland Specialist Virology Centre / MRC-University of Glasgow Centre for Virus Research|Wellcome Sanger Institute for the COVID-19 Genomics UK (COG-UK) consortium|Davies|United Kingdom

>Spike|hCoV-19/USA/IL-NM-0149/2020|2020-03-23|EPI\_ISL\_626370|Original|hCoV-19^^Illinois|Human|Northwestern Memorial Hospital|Ozer Lab|Ozer|USA

>Spike|hCoV-19/Japan/PG-5380/2020|2020-08-00|EPI\_ISL\_690483|Original|hCoV-19^^Japan|Human|Fukuoka Institute of Health and Environmental Sciences|Pathogen Genomics Center|Sekizuka|Japan

>Spike|hCoV-19/England/CAMC-B087BD/2020|2020-10-30|EPI\_ISL\_643702|Original|hCoV-19^^England|Human|Lighthouse Lab in Cambridge|Wellcome Sanger Institute for the COVID-19 Genomics UK (COG-UK) Consortium|Davies|United Kingdom

>Spike|hCoV-19/England/QEUH-B2C2B2/2020|2020-11-02|EPI\_ISL\_680077|Original|hCoV-19^^England|Human|Department of Pathology|COVID-19 Genomics UK (COG-UK) Consortium|Goodfellow|United Kingdom

>Spike|hCoV-19/Germany/NW-HHU-278/2020|2020-09-28|EPI\_ISL\_770753|Original|hCoV-19^^North Rhine-Westphalia|Human|ZOTZ KLIMAS MVZ D\u00f0fcsseldorf-Centrum GbR \u00dcBAG f\u00f0fcr Labormedizin|Center of Medical Microbiology|Wienemann|Germany

>Spike|hCoV-19/England/CAMC-B5457C/2020|2020-11-06|EPI\_ISL\_658164|Original|hCoV-19^^England|Human|Lighthouse Lab in Cambridge|Wellcome Sanger Institute for the COVID-19 Genomics UK (COG-UK) Consortium|Davies|United Kingdom

>Spike|hCoV-19/England/ALDP-A95CC6/2020|2020-10-20|EPI\_ISL\_624799|Original|hCoV-19^^England|Human|Lighthouse Lab in Alderley Park|Wellcome Sanger Institute for the COVID-19 Genomics UK (COG-UK) consortium|Davies|United Kingdom

>Spike|hCoV-19/SaudiArabia/KAUST-MAKKAH809/2020|2020-04-24|EPI\_ISL\_513259|Original|hCoV-19^^Makkah|Human|Pathogen Genomics Lab King Abdullah University of Science and Technology(KAUST)|Pathogen Genomics Lab King Abdullah University of Science and Technology(KAUST)|Mohamed Ghazzali|Saudi Arabia

>Spike|hCoV-19/Japan/PG-6950/2020|2020-00-00|EPI\_ISL\_688055|Original|hCoV-19^^Japan|Human|Pathogen Genomics Center|Pathogen Genomics Center|Sekizuka|Japan

>Spike|hCoV-19/Denmark/DCGC-19206/2020|2020-12-07|EPI\_ISL\_748815|Original|hCoV-19^^Syddanmark|Human|Department of Virus and Microbiological Special Diagnostics|Albertsen Lab|Michaelsen|Denmark

>Spike|hCoV-19/Wales/ALDP-B1D621/2020|2020-11-01|EPI\_ISL\_710986|Original|hCoV-19^^Wales|Human|Lighthouse Lab in Alderley Park|Wellcome Sanger Institute for the COVID-19 Genomics UK (COG-UK) Consortium|Davies|United Kingdom

>Spike|hCoV-19/Spain/AR-ISCIII-201779/2020|2020-03-07|EPI\_ISL\_539513|Original|hCoV-19^^Aragon|Human|Hospital Universitario Miguel Servet|Instituto de Salud Carlos III|Caballero|Spain

>Spike|hCoV-19/Denmark/ALAB-SSI-1260/2020|2020-03-11|EPI\_ISL\_444832|Original|hCoV-19^^Denmark|Human|Department of Virus and Microbiological Special Diagnostics|Albertsen lab|Kirkegaard|Denmark

>Spike|hCoV-19/England/QEUH-96503D/2020|2020-08-13|EPI\_ISL\_531034|Original|hCoV-19^^England|Human|Lighthouse Lab in Glasgow|Wellcome Sanger Institute for the COVID-19 Genomics UK (COG-UK) consortium|Davies|United Kingdom

>Spike|hCoV-19/USA/LA-EVTL1017/2020|2020-08-25|EPI\_ISL\_653708|Original|hCoV-19^^Louisiana|Human|LSUHS Emerging Viral Threat Laboratory|Microbial Genome Sequencing Center|Kamil|USA

>Spike|hCoV-19/Poland/Sla7/2020|2020-05-05|EPI\_ISL\_451661|Original|hCoV-19^^Slask|Human|State Sanitary Inspectorate|Laboratory of Recombinant Vaccines|Rabalski|Poland

>Spike|hCoV-19/Gibraltar/204462883/2020|2020-10-29|EPI\_ISL\_615050|Original|hCoV-19^^Gibraltar|Human|Microbiology|Respiratory Virus Unit|Platt|Gibraltar

>Spike|hCoV-19/Belgium/ULG-10856/2020|2020-11-13|EPI\_ISL\_678400|Original|hCoV-19^^Li\u00e8ge|Human|Department of Clinical Microbiology|GIGA Medical Genomics|Durkin|Belgium

>Spike|hCoV-19/England/QEUH-9D1139/2020|2020-09-16|EPI\_ISL\_589917|Original|hCoV-19^^England|Human|Lighthouse Lab in Glasgow|Wellcome Sanger Institute for the COVID-19 Genomics UK (COG-UK) consortium|Davies|United Kingdom

>Spike|hCoV-19/England/LIVE-A7681/2020|2020-03-27|EPI\_ISL\_517053|Original|hCoV-19^^England|Human|Liverpool Clinical Laboratories|COVID-19 Genomics UK (COG-UK) Consortium|Haldenby|United Kingdom

>Spike|hCoV-19/England/204620607/2020|2020-11-09|EPI\_ISL\_700683|Original|hCoV-19^^England|Human|Respiratory Virus Unit|COVID-19 Genomics UK (COG-UK) Consortium|Platt|United Kingdom

>Spike|hCoV-19/England/QEUA-B12E60/2020|2020-11-02|EPI\_ISL\_642645|Original|hCoV-19^^England|Human|Lighthouse Lab in Glasgow|Wellcome Sanger Institute for the COVID-19 Genomics UK (COG-UK) Consortium|Davies|United Kingdom

>Spike|hCoV-19/Wales/PHWC-28F41/2020|2020-04-03|EPI\_ISL\_445461|Original|hCoV-19^^Wales|Human|Wales Specialist Virology Centre|Public Health Wales Microbiology Cardiff|Moore|United Kingdom

>Spike|hCoV-19/England/ALDP-A84C9D/2020|2020-10-16|EPI\_ISL\_610618|Original|hCoV-19^^England|Human|Lighthouse Lab in Alderley Park|Wellcome Sanger Institute for the COVID-19 Genomics UK (COG-UK) consortium|Davies|United Kingdom

>Spike|hCoV-19/England/20129016404/2020|2020-03-20|EPI\_ISL\_424002|Original|hCoV-19^^England|Human|Respiratory Virus Unit|Respiratory Virus Unit|Platt|United Kingdom

>Spike|hCoV-19/USA/TX-HMH-MCoV-18264/2020|2020-11-17|EPI\_ISL\_784612|Original|hCoV-19^^Texas|Human|Houston Methodist Hospital|Houston Methodist Hospital|Long|USA

>Spike|hCoV-19/USA/WI-UW-1978/2020|2020-09-18|EPI\_ISL\_677386|Original|hCoV-19^^Wisconsin|Human|University of Wisconsin-Madison AIDS Vaccine Research Laboratories|University of Wisconsin-Madison AIDS Vaccine Research Laboratories|Baczenas|USA

>Spike|hCoV-19/South Africa/KRISP-0460/2020|2020-07-02|EPI\_ISL\_495550|Original|hCoV-19^^KwaZulu-Natal|Human|NHLs-IALCH|KRISP|de Oliveira|South Africa

>Spike|hCoV-19/Finland/13KS15A3/2020|2020-06-13|EPI\_ISL\_737211|Original|hCoV-19^^Uusimaa|Human|Department of Virology and Immunology|Department of Virology|Smura|Finland

>Spike|hCoV-19/Wales/PHWC-497C8E/2020|2020-11-26|EPI\_ISL\_726956|Original|hCoV-19^^Wales|Human|Originating lab|COVID-19 Genomics UK (COG-UK) Consortium|Moore|United Kingdom

>Spike|hCoV-19/England/QEUA-B6650E/2020|2020-11-11|EPI\_ISL\_661337|Original|hCoV-19^^England|Human|Lighthouse Lab in Glasgow|Wellcome Sanger Institute for the COVID-19 Genomics UK (COG-UK) Consortium|Davies|United Kingdom

>Spike|hCoV-19/USA/CA-QDX-2449/2020|2020-03-16|EPI\_ISL\_604745|Original|hCoV-19^^California|Human|Quest Diagnostics|Quest Diagnostics|Kagan|USA

>Spike|hCoV-19/USA/CA-ALSR-3021/2020|2020-07-29|EPI\_ISL\_635792|Original|hCoV-19^^California|Human|San Diego County Public Health Laboratory|Andersen lab at Scripps Research|Gangavarapu|USA

>Spike|hCoV-19/England/QEUA-B6A3F1/2020|2020-11-11|EPI\_ISL\_662482|Original|hCoV-19^^England|Human|Lighthouse Lab in Glasgow|Wellcome Sanger Institute for the COVID-19 Genomics UK (COG-UK) Consortium|Davies|United Kingdom

>Spike|hCoV-19/Denmark/DCGC-8488/2020|2020-07-27|EPI\_ISL\_618382|Original|hCoV-19^^Midtjylland|Human|Department of Virus and Microbiological Special Diagnostics|Albertsen lab|Michaelsen|Denmark

>Spike|hCoV-19/Denmark/DCGC-15738/2020|2020-11-23|EPI\_ISL\_713990|Original|hCoV-19^^Hovedstaden|Human|Department of Virus and Microbiological Special Diagnostics|Albertsen Lab|Michaelsen|Denmark

>Spike|hCoV-19/England/QEUA-9F9DDD/2020|2020-09-26|EPI\_ISL\_595767|Original|hCoV-19^^England|Human|Oxford Viromics|COVID-19 Genomics UK (COG-UK) Consortium|Golubchik|United Kingdom

>Spike|hCoV-19/Australia/VIC5682/2020|2020-07-10|EPI\_ISL\_518488|Original|hCoV-19^^Victoria|Human|Microbiological Diagnostic Unit - Public Health Laboratory (MDU-PHL)|MDU-PHL|Schultz|Australia

>Spike|hCoV-19/USA/MN-CDC-2-3714173/2020|2020-11-28|EPI\_ISL\_751733|Original|hCoV-19^^Minnesota|Human|MN PHL Division|Genomics and Discovery|Queen|USA

>Spike|hCoV-19/Scotland/QEUA-96131A/2020|2020-08-04|EPI\_ISL\_531963|Original|hCoV-19^^Scotland|Human|NHSGGC West of Scotland Specialist Virology Centre / MRC-University of Glasgow Centre for Virus Research|Wellcome Sanger Institute for the COVID-19 Genomics UK (COG-UK) consortium|Davies|United Kingdom

>Spike|hCoV-19/England/NOTT-114071/2020|2020-10-03|EPI\_ISL\_577134|Original|hCoV-19^^England|Human|Queens Medical Centre|COVID-19 Genomics UK (COG-UK) Consortium|Loose|United Kingdom

>Spike|hCoV-19/England/NOTT-115799/2020|2020-10-14|EPI\_ISL\_595262|Original|hCoV-19^^England|Human|Queens Medical Centre|COVID-19 Genomics UK (COG-UK) Consortium|Loose|United Kingdom



>Spike|hCoV-19/Japan/PG-8291/2020|2020-08-00|EPI\_ISL\_687390|Original|hCoV-19^^Japan|Human|Pathogen Genomics Center|Pathogen Genomics Center|Sekizuka|Japan

>Spike|hCoV-19/USA/WA-UW-22447/2020|2020-08-05|EPI\_ISL\_570690|Original|hCoV-19^^Washington|Human|UW Virology Lab|UW Virology Lab|Roychoudhury|USA

>Spike|hCoV-19/England/ALDP-C3D5B4/2020|2020-12-10|EPI\_ISL\_730655|Original|hCoV-19^^England|Human|Lighthouse Lab in Alderley Park|Wellcome Sanger Institute for the COVID-19 Genomics UK (COG-UK) Consortium|Davies|United Kingdom

>Spike|hCoV-19/England/EXET-1357A2/2020|2020-04-12|EPI\_ISL\_457097|Original|hCoV-19^^England|Human|University of Exeter|COVID-19 Genomics UK (COG-UK) Consortium|Temperton|United Kingdom

>Spike|hCoV-19/Germany/SH-ChVir20000/2020|2020-11-04|EPI\_ISL\_729669|Original|hCoV-19^^Schleswig-Holstein|Human|A. Krumbholz|Charit\u00e9 Universit\u00e4tsmedizin Berlin|Muehlemann|Germany

>Spike|hCoV-19/Japan/PG-4787/2020|2020-08-00|EPI\_ISL\_689916|Original|hCoV-19^^Japan|Human|Pathogen Genomics Center|Pathogen Genomics Center|Sekizuka|Japan

>Spike|hCoV-19/France/ARA-109970/2020|2020-11-20|EPI\_ISL\_728535|Original|hCoV-19^^Auvergne-Rh\u00f4ne-Alpes|Human|CNR Virus des Infections Respiratoires - France SUD|CNR Virus des Infections Respiratoires - France SUD|Bal|France

>Spike|hCoV-19/USA/AZ-TG268289/2020|2020-03-17|EPI\_ISL\_426505|Original|hCoV-19^^Arizona|Human|TGen North|TGen North|Lemmer|USA

>Spike|hCoV-19/England/QEUH-C9368C/2020|2020-12-17|EPI\_ISL\_777302|Original|hCoV-19^^England|Human|Lighthouse Lab in Glasgow|Wellcome Sanger Institute for the COVID-19 Genomics UK (COG-UK) Consortium|Davies|United Kingdom

>Spike|hCoV-19/Wales/MILK-9F0626/2020|2020-09-24|EPI\_ISL\_580768|Original|hCoV-19^^Wales|Human|Lighthouse Lab in Milton Keynes|Wellcome Sanger Institute for the COVID-19 Genomics UK (COG-UK) consortium|Davies|United Kingdom

>Spike|hCoV-19/Denmark/DCGC-3576/2020|2020-08-31|EPI\_ISL\_616904|Original|hCoV-19^^Sjælland|Human|Department of Virus and Microbiological Special Diagnostics|Albertsen lab|Michaelsen|Denmark

>Spike|hCoV-19/Wales/PHWC-488EA8/2020|2020-11-02|EPI\_ISL\_639512|Original|hCoV-19^^Wales|Human|Wales Specialist Virology Centre Sequencing lab|COVID-19 Genomics UK (COG-UK) Consortium|Moore|United Kingdom

>Spike|hCoV-19/Nigeria/OS-CV285/2020|2020-06-24|EPI\_ISL\_729966|Original|hCoV-19^^Osun State|Human|Nigeria Centre for Disease Control (NCDC)|African Centre of Excellence for Genomics of Infectious Diseases (ACEGID)|Oluniyi|Nigeria

>Spike|hCoV-19/USA/CruiseA-18/2020|2020-02-24|EPI\_ISL\_413623|Original|hCoV-19^^USA|Human|unknown|Pathogen Discovery|Queen|USA

>Spike|hCoV-19/USA/CruiseA-23/2020|2020-02-18|EPI\_ISL\_414482|Original|hCoV-19^^USA|Human|unknown|Pathogen Discovery|Queen|USA

>Spike|hCoV-19/Luxembourg/LNS1148230/2020|2020-03-22|EPI\_ISL\_739897|Original|hCoV-19^^Luxembourg|Human|Laboratoire national de sant\u00e9|Laboratoire national de sant\u00e9|Wienecke-Baldacchino|Luxembourg

>Spike|hCoV-19/England/QEUH-B9FE2F/2020|2020-11-18|EPI\_ISL\_721013|Original|hCoV-19^^England|Human|Lighthouse Lab in Glasgow|Wellcome Sanger Institute for the COVID-19 Genomics UK (COG-UK) Consortium|Davies|United Kingdom

>Spike|hCoV-19/USA/CA-CZB-12377/2020|2020-09-29|EPI\_ISL\_648538|Original|hCoV-19^^California|Human|Tulare County Public Health Lab|Chan-Zuckerberg Biohub|Bhatt|USA

>Spike|hCoV-19/Luxembourg/LNS6743711/2020|2020-10-23|EPI\_ISL\_744461|Original|hCoV-19^^Luxembourg|Human|Laboratoire national de sant\u00e9|Laboratoire national de sant\u00e9|Wienecke-Baldacchino|Luxembourg

>Spike|hCoV-19/Iran/K1r-142/2020|2020-06-00|EPI\_ISL\_767844|Original|hCoV-19^^Iran|Human|Virology|Virology|Ranjbar|Iran

>Spike|hCoV-19/Ireland/LS-NVRL-75IRL79312/2020|2020-10-13|EPI\_ISL\_671922|Original|hCoV-19^^Laois|Human|National Virus Reference Laboratory|National Virus Reference Laboratory|Gonzalez|Ireland

>Spike|hCoV-19/Denmark/DCGC-14983/2020|2020-11-23|EPI\_ISL\_713274|Original|hCoV-19^^Syddanmark|Human|Department of Virus and Microbiological Special Diagnostics|Albertsen Lab|Michaelsen|Denmark

>Spike|hCoV-19/South Korea/KCDC2798/2020|2020-07-27|EPI\_ISL\_526732|Original|hCoV-19^^South Korea|Human|Division of Viral Diseases|Division of Viral Diseases|Kim|South Korea

>Spike|hCoV-19/Australia/VIC10017/2020|2020-08-25|EPI\_ISL\_562763|Original|hCoV-19^^Victoria|Human|Microbiological Diagnostic Unit - Public Health Laboratory (MDU-PHL)|MDU-PHL|Schultz|Australia

>Spike|hCoV-19/USA/TX-HMH-MCoV-16364/2020|2020-11-02|EPI\_ISL\_786048|Original|hCoV-19^^Texas|Human|Houston Methodist Hospital|Houston Methodist Hospital|Long|USA

>Spike|hCoV-19/England/MILK-BAC250/2020|2020-11-18|EPI\_ISL\_783305|Original|hCoV-19^^England|Human|Lighthouse Lab in Milton Keynes|Wellcome Sanger Institute for the COVID-19 Genomics UK (COG-UK) Consortium|Davies|United Kingdom

>Spike|hCoV-19/USA/CA-CZB-13936/2020|2020-08-02|EPI\_ISL\_739220|Original|hCoV-19^^California|Human|Alameda County Public Health Lab|Chan-Zuckerberg Biohub|Kamm|USA

>Spike|hCoV-19/USA/CO-CDPHE-2011020311/2020|2020-11-01|EPI\_ISL\_771242|Original|hCoV-19^^Colorado|Human|Colorado Department of Public Health and Environment|Colorado Department of Public Health and Environment|Bankers|USA

>Spike|hCoV-19/Denmark/DCGC-6535/2020|2020-10-05|EPI\_ISL\_619435|Original|hCoV-19^^Hovedstaden|Human|Department of Virus and Microbiological Special Diagnostics|Albertsen lab|Michaelsen|Denmark

>Spike|hCoV-19/USA/TX-DSHS-0956/2020|2020-07-16|EPI\_ISL\_602253|Original|hCoV-19^^Texas|Human|Texas Department of State Health Services|Texas Department of State Health Services|Rahman|USA

>Spike|hCoV-19/USA/FL-BPHL-1828/2020|2020-04-08|EPI\_ISL\_613914|Original|hCoV-19^^Florida|Human|Florida Bureau of Public Health Laboratories|Florida Bureau of Public Health Laboratories|Blanton|USA

>Spike|hCoV-19/England/ALDP-A878D2/2020|2020-10-17|EPI\_ISL\_606242|Original|hCoV-19^^England|Human|Lighthouse Lab in Alderley Park|Wellcome Sanger Institute for the COVID-19 Genomics UK (COG-UK) consortium|Davies|United Kingdom

>Spike|hCoV-19/Denmark/DCGC-15775/2020|2020-11-23|EPI\_ISL\_713194|Original|hCoV-19^^Hovedstaden|Human|Department of Virus and Microbiological Special Diagnostics|Albertsen Lab|Michaelsen|Denmark

>Spike|hCoV-19/England/NORW-F1DA1/2020|2020-10-23|EPI\_ISL\_627636|Original|hCoV-19^^England|Human|Quadram Institute Bioscience|COVID-19 Genomics UK (COG-UK) Consortium|Alikhan|United Kingdom

>Spike|hCoV-19/England/CAMC-C45FE8/2020|2020-12-10|EPI\_ISL\_718351|Original|hCoV-19^^England|Human|Lighthouse Lab in Cambridge|Wellcome Sanger Institute for the COVID-19 Genomics UK (COG-UK) Consortium|Davies|United Kingdom

>Spike|hCoV-19/England/QEUEH-BCCDA4/2020|2020-11-26|EPI\_ISL\_704293|Original|hCoV-19^^England|Human|Lighthouse Lab in Glasgow|Wellcome Sanger Institute for the COVID-19 Genomics UK (COG-UK) Consortium|Davies|United Kingdom

>Spike|hCoV-19/England/MILK-C638BC/2020|2020-12-13|EPI\_ISL\_735741|Original|hCoV-19^^England|Human|Lighthouse Lab in Milton Keynes|Wellcome Sanger Institute for the COVID-19 Genomics UK (COG-UK) Consortium|Davies|United Kingdom

>Spike|hCoV-19/Switzerland/BE-UNIBE-199-5783/2020|2020-03-26|EPI\_ISL\_574837|Original|hCoV-19^^Bern|Human|Institute for Infectious Diseases|Institute for Infectious Diseases|Koch|Switzerland

>Spike|hCoV-19/England/ALDP-9CB141/2020|2020-09-16|EPI\_ISL\_575464|Original|hCoV-19^^England|Human|Lighthouse Lab in Alderley Park|Wellcome Sanger Institute for the COVID-19 Genomics UK (COG-UK) consortium|Davies|United Kingdom

>Spike|hCoV-19/India/MH-ACTREC-515/2020|2020-08-19|EPI\_ISL\_700162|Original|hCoV-19^^Maharashtra|Human|Hematopathology Laboratory|Hematopathology Laboratory|Patkar|India

>Spike|hCoV-19/USA/AZ-TG637309/2020|2020-07-29|EPI\_ISL\_695731|Original|hCoV-19^^Arizona|Human|AZ SPHL|TGen North|French|USA

>Spike|hCoV-19/England/CAMB-75D5A/2020|2020-03-29|EPI\_ISL\_438324|Original|hCoV-19^^England|Human|Department of Pathology|Wellcome Sanger Institute for the COVID-19 Genomics UK (COG-UK) consortium|Amato|United Kingdom

>Spike|hCoV-19/Russia/OMS-ORINFI-2096S/2020|2020-07-02|EPI\_ISL\_639917|Original|hCoV-19^^Omsk|Human|Omsk Research Institute of Natural Focal Infections|WHO National Influenza Centre Russian Federation|Komissarov|Russia

>Spike|hCoV-19/England/MILK-BDC512/2020|2020-11-27|EPI\_ISL\_709719|Original|hCoV-19^^England|Human|Lighthouse Lab in Milton Keynes|Wellcome Sanger Institute for the COVID-19 Genomics UK (COG-UK) Consortium|Davies|United Kingdom

>Spike|hCoV-19/England/LIVE-DBB6C9/2020|2020-11-13|EPI\_ISL\_664223|Original|hCoV-19^^England|Human|Liverpool Clinical Laboratories|COVID-19 Genomics UK (COG-UK) Consortium|Haldenby|United Kingdom

>Spike|hCoV-19/New Zealand/20VR1853/2020|2020-03-27|EPI\_ISL\_579152|Original|hCoV-19^^Southern|Human|Southern Community Labs Dunedin|Institute of Environmental Science and Research (ESR)|Wang|New Zealand

>Spike|hCoV-19/England/QEUH-9B88CA/2020|2020-09-07|EPI\_ISL\_549761|Original|hCoV-19^^England|Human|Lighthouse Lab in Glasgow|Wellcome Sanger Institute for the COVID-19 Genomics UK (COG-UK) consortium|Davies|United Kingdom

>Spike|hCoV-19/England/QEUH-9DEC3B/2020|2020-09-21|EPI\_ISL\_584821|Original|hCoV-19^^England|Human|University College London|COVID-19 Genomics UK (COG-UK) Consortium|Roy|United Kingdom

>Spike|hCoV-19/Japan/PG-3178/2020|2020-03-00|EPI\_ISL\_691298|Original|hCoV-19^^Japan|Human|Pathogen Genomics Center|Pathogen Genomics Center|Sekizuka|Japan

>Spike|hCoV-19/USA/AK-PHL560/2020|2020-06-22|EPI\_ISL\_512147|Original|hCoV-19^^Alaska|Human|Alaska State Virology Laboratory|Alaska State Virology Laboratory|Drown|USA

>Spike|hCoV-19/Scotland/QEUH-AA0615/2020|2020-10-21|EPI\_ISL\_666092|Original|hCoV-19^^Scotland|Human|Northumbria University / South Tees Hospitals NHS Foundation Trust / North Cumbria Integrated Care NHS Foundation Trust / North Tees and Hartlepool NHS Foundation Trust / Newcastle Hospitals NHS Foundation Trust|COVID-19 Genomics UK (COG-UK) Consortium|Bashton|United Kingdom

>Spike|hCoV-19/England/CAMC-B7BD3B/2020|2020-11-12|EPI\_ISL\_724054|Original|hCoV-19^^England|Human|Oxford Viromics|COVID-19 Genomics UK (COG-UK) Consortium|Golubchik|United Kingdom

>Spike|hCoV-19/Belgium/ULG-11064/2020|2020-12-14|EPI\_ISL\_737315|Original|hCoV-19^^Li\u00e8ge|Human|Department of Clinical Microbiology|GIGA Medical Genomics|Durkin|Belgium

>Spike|hCoV-19/England/SHEF-C2617/2020|2020-04-30|EPI\_ISL\_462006|Original|hCoV-19^^England|Human|Virology Department|COVID-19 Genomics UK (COG-UK) Consortium|de Silva|United Kingdom

>Spike|hCoV-19/Japan/PG-8632/2020|2020-08-00|EPI\_ISL\_686228|Original|hCoV-19^^Japan|Human|Pathogen Genomics Center|Pathogen Genomics Center|Sekizuka|Japan

>Spike|hCoV-19/England/SHEF-C3124/2020|2020-07-03|EPI\_ISL\_526438|Original|hCoV-19^^England|Human|Virology Department|COVID-19 Genomics UK (COG-UK) Consortium|de Silva|United Kingdom

>Spike|hCoV-19/England/QEUH-B405FB/2020|2020-11-08|EPI\_ISL\_657045|Original|hCoV-19^^England|Human|Lighthouse Lab in Glasgow|Wellcome Sanger Institute for the COVID-19 Genomics UK (COG-UK) Consortium|Davies|United Kingdom

>Spike|hCoV-19/England/BRIS-12F26E/2020|2020-04-13|EPI\_ISL\_488372|Original|hCoV-19^^England|Human|PHE South West Regional Laboratory|Wellcome Sanger Institute for the COVID-19 Genomics UK (COG-UK) consortium|Davies|United Kingdom

>Spike|hCoV-19/Australia/VIC12742/2020|2020-07-28|EPI\_ISL\_563586|Original|hCoV-19^^Victoria|Human|Microbiological Diagnostic Unit - Public Health Laboratory (MDU-PHL)|MDU-PHL|Schultz|Australia

>Spike|hCoV-19/USA/TX-HMH-MCoV-15657/2020|2020-07-09|EPI\_ISL\_785341|Original|hCoV-19^^Texas|Human|Houston Methodist Hospital|Houston Methodist Hospital|Long|USA

>Spike|hCoV-19/France/ARA-118746/2020|2020-12-11|EPI\_ISL\_745381|Original|hCoV-19^^Auvergne-Rh\u00f4ne-Alpes|Human|CNR Virus des Infections Respiratoires - France SUD|CNR Virus des Infections Respiratoires - France SUD|Bal|France

>Spike|hCoV-19/England/QEUH-A0C40E/2020|2020-10-01|EPI\_ISL\_584972|Original|hCoV-19^^England|Human|Quadram Institute Bioscience|COVID-19 Genomics UK (COG-UK) Consortium|Alikhan|United Kingdom

>Spike|hCoV-19/USA/FL-BPHL-0158/2020|2020-04-01|EPI\_ISL\_480809|Original|hCoV-19^^Florida|Human|Florida Bureau of Public Health Laboratories|Florida Bureau of Public Health Laboratories|Blanton|USA

>Spike|hCoV-19/Spain/RI-IBV-99005884/2020|2020-03-10|EPI\_ISL\_537426|Original|hCoV-19^^La Rioja|Human|Centro de Investigaci\u00f3n Biom\u00e9dica de La Rioja - Hospital San Pedro Logro\u00f1o|SeqCOVID-SPAIN consortium/IBV (CSIC)|Comas|Spain

>Spike|hCoV-19/England/QEUI-9984DB/2020|2020-08-24|EPI\_ISL\_539916|Original|hCoV-19^^England|Human|Lighthouse Lab in Glasgow|Wellcome Sanger Institute for the COVID-19 Genomics UK (COG-UK) consortium|Davies|United Kingdom

>Spike|hCoV-19/Spain/PV-IBV-98008291/2020|2020-10-04|EPI\_ISL\_654543|Original|hCoV-19^^Basque Country|Human|Servicio de Microbiolog\u00eda. Hospital Universitario Donostia. OSI Donostialdea. \u00c1rea de Enfermedades Infecciosas|SeqCOVID-SPAIN consortium/IBV (CSIC)|Comas|Spain

>Spike|hCoV-19/Switzerland/BE-ETHZ-321413/2020|2020-10-14|EPI\_ISL\_603653|Original|hCoV-19^^Bern|Human|Viollier AG|Department of Biosystems Science and Engineering|Nadeau|Switzerland

>Spike|hCoV-19/England/ALDP-CB4C92/2020|2020-12-18|EPI\_ISL\_761800|Original|hCoV-19^^England|Human|Lighthouse Lab in Alderley Park|Wellcome Sanger Institute for the COVID-19 Genomics UK (COG-UK) Consortium|Davies|United Kingdom

>Spike|hCoV-19/USA/TX-HMH-5918/2020|2020-06-28|EPI\_ISL\_547108|Original|hCoV-19^^Texas|Human|Houston Methodist Hospital|Houston Methodist Hospital|Long|USA

>Spike|hCoV-19/England/BRIS-124F53/2020|2020-03-26|EPI\_ISL\_443999|Original|hCoV-19^^England|Human|PHE South West Regional Laboratory|Wellcome Sanger Institute for the COVID-19 Genomics UK (COG-UK) consortium|Amato|United Kingdom

>Spike|hCoV-19/Japan/PG-4675/2020|2020-08-00|EPI\_ISL\_689812|Original|hCoV-19^^Japan|Human|Fukuoka Institute of Health and Environmental Sciences|Pathogen Genomics Center|Sekizuka|Japan

>Spike|hCoV-19/Wales/PHWC-4978F3/2020|2020-11-22|EPI\_ISL\_726901|Original|hCoV-19^^Wales|Human|Originating lab|COVID-19 Genomics UK (COG-UK) Consortium|Moore|United Kingdom

>Spike|hCoV-19/England/NORT-289313/2020|2020-03-29|EPI\_ISL\_458615|Original|hCoV-19^^England|Human|NU-OMICS DNA Sequencing research facility|Wellcome Sanger Institute for the COVID-19 Genomics UK (COG-UK) consortium|Davies|United Kingdom

>Spike|hCoV-19/USA/UT-UPHL-2008852/2020|2020-05-22|EPI\_ISL\_524868|Original|hCoV-19^^Utah|Human|Utah Public Health Laboratory|Utah Public Health Laboratory|Young|USA

>Spike|hCoV-19/Spain/MD-IBV-003670/2020|2020-04-01|EPI\_ISL\_467218|Original|hCoV-19^^Madrid|Human|Hospital General Universitario Gregorio Mara\u00f1\u00f3n|SeqCOVID-SPAIN consortium/IBV (CSIC)|Comas|Spain

>Spike|hCoV-19/Switzerland/BL-ETHZ-400393/2020|2020-12-10|EPI\_ISL\_728863|Original|hCoV-19^^Basel-Landschaft|Human|Viollier AG|Department of Biosystems Science and Engineering|Nadeau|Switzerland

>Spike|hCoV-19/Turkey/HSGM-510/2020|2020-03-26|EPI\_ISL\_437314|Vero Pl|hCoV-19^^Ankara|Human|Ministry of Health Turkey|Ministry of Health Turkey|Bayrakdar|Turkey

>Spike|hCoV-19/Canada/BC\_21228218/2020|2020-03-00|EPI\_ISL\_462802|Original|hCoV-19^^British Columbia|Human|BCCDC Public Health Laboratory|BCCDC Public Health Laboratory|Harrigan|Canada

>Spike|hCoV-19/England/MILK-A7A3C2/2020|2020-10-15|EPI\_ISL\_606643|Original|hCoV-19^^England|Human|Lighthouse Lab in Milton Keynes|Wellcome Sanger Institute for the COVID-19 Genomics UK (COG-UK) consortium|Davies|United Kingdom

>Spike|hCoV-19/Denmark/DCGC-20587/2020|2020-12-21|EPI\_ISL\_758747|Original|hCoV-19^^Sjaelland|Human|Department of Virus and Microbiological Special Diagnostics|Albertsen Lab|Michaelsen|Denmark

>Spike|hCoV-19/England/ALDP-BB8F78/2020|2020-11-20|EPI\_ISL\_702738|Original|hCoV-19^^England|Human|Lighthouse Lab in Alderley Park|Wellcome Sanger Institute for the COVID-19 Genomics UK (COG-UK) Consortium|Davies|United Kingdom

>Spike|hCoV-19/Gibraltar/204462833/2020|2020-10-29|EPI\_ISL\_615007|Original|hCoV-19^^Gibraltar|Human|Microbiology|Respiratory Virus Unit|Platt|Gibraltar

>Spike|hCoV-19/Australia/VIC6299/2020|2020-07-23|EPI\_ISL\_518287|Original|hCoV-19^^Victoria|Human|Microbiological Diagnostic Unit - Public Health Laboratory (MDU-PHL)|MDU-PHL|Schultz|Australia

>Spike|hCoV-19/England/BRIS-12D251/2020|2020-05-04|EPI\_ISL\_481808|Original|hCoV-19^^England|Human|PHE South West Regional Laboratory|Wellcome Sanger Institute for the COVID-19 Genomics UK (COG-UK) consortium|Davies|United Kingdom

>Spike|hCoV-19/Scotland/GCVR-170617/2020|2020-03-24|EPI\_ISL\_459614|Original|hCoV-19^^Scotland|Human|NHSGGC West of Scotland Specialist Virology Centre / MRC-University of Glasgow Centre for Virus Research|Wellcome Sanger Institute for the COVID-19 Genomics UK (COG-UK) consortium|Davies|United Kingdom

>Spike|hCoV-19/England/NOTT-12128A/2020|2020-12-15|EPI\_ISL\_741628|Original|hCoV-19^^England|Human|Queens Medical Centre|COVID-19 Genomics UK (COG-UK) Consortium|Loose|United Kingdom

>Spike|hCoV-19/Sweden/20-53089/2020|2020-07-15|EPI\_ISL\_648139|Original|hCoV-19^^Sweden|Human|The Public Health Agency of Sweden|The Public Health Agency of Sweden|Svartstr\u00f6m|Sweden

>Spike|hCoV-19/Brazil/SP-751/2020|2020-06-17|EPI\_ISL\_735409|Original|hCoV-19^^S\u00e3o Paulo|Human|Unidade de Pronto Atendimento Carlos Lourenco|Instituto Adolfo Lutz|Sacchi|Brazil

>Spike|hCoV-19/England/QEUH-9B3B11/2020|2020-09-04|EPI\_ISL\_573531|Original|hCoV-19^^England|Human|Virology Department|COVID-19 Genomics UK (COG-UK) Consortium|de Silva|United Kingdom

>Spike|hCoV-19/USA/CA-CZB-11681/2020|2020-09-25|EPI\_ISL\_625492|Original|hCoV-19^^California|Human|Santa Clara County Public Health Laboratory|Chan-Zuckerberg Biohub|Bhatt|USA

>Spike|hCoV-19/Denmark/DCGC-17448/2020|2020-12-14|EPI\_ISL\_750991|Original|hCoV-19^^Midtjylland|Human|Department of Virus and Microbiological Special Diagnostics|Albertsen Lab|Michaelsen|Denmark

>Spike|hCoV-19/Denmark/ALAB-HH-235/2020|2020-04-28|EPI\_ISL\_452078|Original|hCoV-19^^Denmark|Human|Department of Clinical Microbiology|Albertsen lab|Kirkegaard|Denmark

>Spike|hCoV-19/Wales/PHWC-484334/2020|2020-10-22|EPI\_ISL\_627991|Original|hCoV-19^^Wales|Human|Wales Specialist Virology Centre Sequencing lab|COVID-19 Genomics UK (COG-UK) Consortium|Moore|United Kingdom

>Spike|hCoV-19/England/NOTT-111065/2020|2020-05-06|EPI\_ISL\_453621|Original|hCoV-19^^England|Human|Queens Medical Centre|COVID-19 Genomics UK (COG-UK) Consortium|Loose|United Kingdom

>Spike|hCoV-19/England/QEUH-AD4FE0/2020|2020-10-26|EPI\_ISL\_633871|Original|hCoV-19^^England|Human|Lighthouse Lab in Glasgow|Wellcome Sanger Institute for the COVID-19 Genomics UK (COG-UK) consortium|Davies|United Kingdom

>Spike|hCoV-19/Australia/VIC7692/2020|2020-07-31|EPI\_ISL\_564581|Original|hCoV-19^^Victoria|Human|Microbiological Diagnostic Unit - Public Health Laboratory (MDU-PHL)|MDU-PHL|Schultz|Australia

>Spike|hCoV-19/USA/NY-NYCPHL-000156/2020|2020-04-08|EPI\_ISL\_631692|Original|hCoV-19^^New York|Human|Flushing Hospital Medical Center|New York City Public Health Laboratory|Wang|USA

>Spike|hCoV-19/England/CAMB-759CF/2020|2020-04-01|EPI\_ISL\_591082|Original|hCoV-19^^England|Human|Department of Pathology|Wellcome Sanger Institute for the COVID-19 Genomics UK (COG-UK) consortium|Davies|United Kingdom

>Spike|hCoV-19/Japan/IC-0367/2020|2020-11-00|EPI\_ISL\_721609|Original|hCoV-19^^Japan|Human|Pathogen Genomics Center|Pathogen Genomics Center|Sekizuka|Japan

>Spike|hCoV-19/England/ALDP-C06192/2020|2020-12-05|EPI\_ISL\_709451|Original|hCoV-19^^England|Human|Lighthouse Lab in Alderley Park|Wellcome Sanger Institute for the COVID-19 Genomics UK (COG-UK) Consortium|Davies|United Kingdom

>Spike|hCoV-19/Netherlands/Overijssel\_26/2020|2020-03-16|EPI\_ISL\_460815|Original|hCoV-19^^Overijssel|Human|Dutch COVID-19 response team|Erasmus Medical Center|Oude Munnink|Netherlands

>Spike|hCoV-19/England/ALDP-49D23B/2020|2020-06-08|EPI\_ISL\_559565|Original|hCoV-19^^England|Human|Lighthouse Lab in Alderley Park|Wellcome Sanger Institute for the COVID-19 Genomics UK (COG-UK) consortium|Davies|United Kingdom

>Spike|hCoV-19/Scotland/QEUH-54BF25/2020|2020-05-12|EPI\_ISL\_533394|Original|hCoV-19^^Scotland|Human|NHSGGC West of Scotland Specialist Virology Centre / MRC-University of Glasgow Centre for Virus Research|Wellcome Sanger Institute for the COVID-19 Genomics UK (COG-UK) consortium|Davies|United Kingdom

>Spike|hCoV-19/Scotland/CVR2711/2020|2020-04-18|EPI\_ISL\_484651|Original|hCoV-19^^Scotland|Human|West of Scotland Specialist Virology Centre|COVID-19 Genomics UK (COG-UK) Consortium|Robertson|United Kingdom

>Spike|hCoV-19/USA/ME-HETL-J0044/2020|2020-03-16|EPI\_ISL\_513456|Original|hCoV-19^^Maine|Human|Maine HETL|Tewhey Lab|Tewhey|USA

>Spike|hCoV-19/Japan/PG-1059/2020|2020-04-00|EPI\_ISL\_684669|Original|hCoV-19^^Japan|Human|Fukuoka Institute of Health and Environmental Sciences|Pathogen Genomics Center|Sekizuka|Japan

>Spike|hCoV-19/England/QEUEH-9608EF/2020|2020-08-03|EPI\_ISL\_532075|Original|hCoV-19^^England|Human|Lighthouse Lab in Glasgow|Wellcome Sanger Institute for the COVID-19 Genomics UK (COG-UK) consortium|Davies|United Kingdom

>Spike|hCoV-19/USA/UT-UPHL-2009019/2020|2020-05-15|EPI\_ISL\_525325|Original|hCoV-19^^Utah|Human|Utah Public Health Laboratory|Utah Public Health Laboratory|Young|USA

>Spike|hCoV-19/Denmark/DCGC-796/2020|2020-04-13|EPI\_ISL\_614718|Original|hCoV-19^^Syddanmark|Human|Department of Virus and Microbiological Special Diagnostics|Albertsen lab|Michaelsen|Denmark

>Spike|hCoV-19/Saudi Arabia/KAUST-Jeddah70/2020|2020-03-30|EPI\_ISL\_437757|Original|hCoV-19^^Jeddah|Human|Pathogen Genomics Lab King Abdullah University of Science and Technology(KAUST)|Pathogen Genomics Lab King Abdullah University of Science and Technology(KAUST)|Mohamed Ghazzali|Saudi Arabia

>Spike|hCoV-19/USA/TX-HMH-MCoV-9675/2020|2020-07-04|EPI\_ISL\_780217|Original|hCoV-19^^Texas|Human|Houston Methodist Hospital|Houston Methodist Hospital|Long|USA

>Spike|hCoV-19/England/CAMC-B0A584/2020|2020-10-31|EPI\_ISL\_673166|Original|hCoV-19^^England|Human|Lighthouse Lab in Cambridge|Wellcome Sanger Institute for the COVID-19 Genomics UK (COG-UK) Consortium|Davies|United Kingdom

>Spike|hCoV-19/England/ALDP-B1A78B/2020|2020-11-01|EPI\_ISL\_645615|Original|hCoV-19^^England|Human|Lighthouse Lab in Alderley Park|Wellcome Sanger Institute for the COVID-19 Genomics UK (COG-UK) Consortium|Davies|United Kingdom

>Spike|hCoV-19/Denmark/DCGC-2635/2020|2020-08-17|EPI\_ISL\_616514|Original|hCoV-19^^Midtjylland|Human|Department of Virus and Microbiological Special Diagnostics|Albertsen lab|Michaelsen|Denmark

>Spike|hCoV-19/Denmark/DCGC-16118/2020|2020-11-16|EPI\_ISL\_714592|Original|hCoV-19^^Midtjylland|Human|Department of Virus and Microbiological Special Diagnostics|Albertsen Lab|Michaelsen|Denmark

>Spike|hCoV-19/Germany/BE-ChVir-D1987-4459/2020|2020-10-02|EPI\_ISL\_753773|Original|hCoV-19^^Berlin|Human|Charit\u00e99 Universit\u00e4tsmedizin Berlin|Charit\u00e99 Universit\u00e4tsmedizin Berlin|Muehlemann|Germany

>Spike|hCoV-19/USA/TX-DSHS-0300/2020|2020-06-13|EPI\_ISL\_534268|Original|hCoV-19^^Texas|Human|Texas Department of State Health Services|Texas Department of State Health Services|Rahman|USA

>Spike|hCoV-19/Nigeria/BO-CV330/2020|2020-04-26|EPI\_ISL\_729999|Original|hCoV-19^^Borno State|Human|Nigeria Centre for Disease Control (NCDC)|African Centre of Excellence for Genomics of Infectious Diseases (ACEGID)|Oluniyi|Nigeria

>Spike|hCoV-19/USA/CA-CZB-5140/2020|2020-08-17|EPI\_ISL\_582974|Original|hCoV-19^^California|Human|San Luis Obispo Public Health Department|Chan-Zuckerberg Biohub|Bhatt|USA

>Spike|hCoV-19/England/ALDP-A2F924/2020|2020-10-06|EPI\_ISL\_586965|Original|hCoV-19^^England|Human|Lighthouse Lab in Alderley Park|Wellcome Sanger Institute for the COVID-19 Genomics UK (COG-UK) consortium|Davies|United Kingdom

>Spike|hCoV-19/Wales/MILK-9C3C57/2020|2020-09-09|EPI\_ISL\_566730|Original|hCoV-19^^Wales|Human|Lighthouse Lab in Milton Keynes|Wellcome Sanger Institute for the COVID-19 Genomics UK (COG-UK) consortium|Davies|United Kingdom

>Spike|hCoV-19/Wales/PHWC-4A36DC/2020|2020-12-15|EPI\_ISL\_744126|Original|hCoV-19^^Wales|Human|Wales Specialist Virology Centre Sequencing lab|COVID-19 Genomics UK (COG-UK) Consortium|Moore|United Kingdom

>Spike|hCoV-19/Hong Kong/HKPU42-0302/2020|2020-02-10|EPI\_ISL\_419217|Original|hCoV-19^^Hong Kong|Human|Department of Pathology|Department of Health Technology and Informatics|Leung|China

>Spike|hCoV-19/England/CAMB-1B9C01/2020|2020-11-09|EPI\_ISL\_664580|Original|hCoV-19^^England|Human|Department of Pathology|COVID-19 Genomics UK (COG-UK) Consortium|Goodfellow|United Kingdom

>Spike|hCoV-19/Denmark/DCGC-21601/2020|2020-12-21|EPI\_ISL\_758257|Original|hCoV-19^^Hovedstaden|Human|Department of Virus and Microbiological Special Diagnostics|Albertsen Lab|Michaelsen|Denmark

>Spike|hCoV-19/USA/ME-HETL-J0096/2020|2020-03-19|EPI\_ISL\_513505|Original|hCoV-19^^Maine|Human|Maine HETL|Tewhey Lab|Tewhey|USA

>Spike|hCoV-19/Canada/ON-UHTC\_0023/2020|2020-03-31|EPI\_ISL\_464000|unknown|hCoV-19^^Ontario|Human|Unity Health Toronto|Ontario Institute for Cancer Research|de Borja|Canada

>Spike|hCoV-19/England/QEUA-A1E3A2/2020|2020-09-28|EPI\_ISL\_587465|Original|hCoV-19^^England|Human|Lighthouse Lab in Glasgow|Wellcome Sanger Institute for the COVID-19 Genomics UK (COG-UK) consortium|Davies|United Kingdom

>Spike|hCoV-19/USA/NY-MSK-15B/2020|2020-04-13|EPI\_ISL\_583474|Original|hCoV-19^^New York|Human|Memorial Sloan Kettering Cancer Center|van Bakel Laboratory|van Bakel|USA

>Spike|hCoV-19/England/NORW-F60A3/2020|2020-11-08|EPI\_ISL\_650915|Original|hCoV-19^^England|Human|Quadram Institute Bioscience|COVID-19 Genomics UK (COG-UK) Consortium|Alikhan|United Kingdom

>Spike|hCoV-19/Hungary/SRC-00186/2020|2020-03-22|EPI\_ISL\_435408|Original|hCoV-19^^Baranya|Human|Virological Research Group|Bioinformatics Research Group|Herczeg|Hungary

>Spike|hCoV-19/USA/MA-MASPHL-00908/2020|2020-10-19|EPI\_ISL\_692839|Original|hCoV-19^^Massachusetts|Human|Massachusetts State Public Health Laboratory|Massachusetts State Public Health Laboratory|Lang|USA

>Spike|hCoV-19/South Africa/KRISP-K002702/2020|2020-07-30|EPI\_ISL\_535562|Original|hCoV-19^^KwaZulu-Natal|Human|NHLS-IALCH|KRISP|de Oliveira|South Africa

>Spike|hCoV-19/Switzerland/BL-42219090/2020|2020-04-03|EPI\_ISL\_581678|Original|hCoV-19^^Basel-Land|Human|University Hospital Basel|University Hospital Basel|Roloff Handschin|Switzerland

>Spike|hCoV-19/England/20134019102/2020|2020-03-24|EPI\_ISL\_423101|Original|hCoV-19^^England|Human|Respiratory Virus Unit|Respiratory Virus Unit|Platt|United Kingdom

>Spike|hCoV-19/USA/WI-UW-1834/2020|2020-09-09|EPI\_ISL\_605706|Original|hCoV-19^^Wisconsin|Human|University of Wisconsin-Madison AIDS Vaccine Research Laboratories|University of Wisconsin-Madison AIDS Vaccine Research Laboratories|Baczenas|USA

>Spike|hCoV-19/Australia/VIC850/2020|2020-04-04|EPI\_ISL\_427110|Original|hCoV-19^^Victoria|Human|Victorian Infectious Diseases Reference Laboratory (VIDRL)|Microbiological Diagnostic Unit Public Health Laboratory and Victorian Infectious Diseases Reference Laboratory|Schultz|Australia

>Spike|hCoV-19/Wales/PHWC-48B84D/2020|2020-11-05|EPI\_ISL\_666289|Original|hCoV-19^^Wales|Human|Wales Specialist Virology Centre Sequencing lab|COVID-19 Genomics UK (COG-UK) Consortium|Moore|United Kingdom

>Spike|hCoV-19/England/204021315/2020|2020-09-28|EPI\_ISL\_686536|Original|hCoV-19^^England|Human|Respiratory Virus Unit|COVID-19 Genomics UK (COG-UK) Consortium|Platt|United Kingdom

>Spike|hCoV-19/Northern Ireland/QEUA-961AD9/2020|2020-08-02|EPI\_ISL\_537136|Original|hCoV-19^^Northern Ireland|Human|Lighthouse Lab in Glasgow|Wellcome Sanger Institute for the COVID-19 Genomics UK (COG-UK) consortium|Davies|United Kingdom

>Spike|hCoV-19/England/QEUA-789D2F/2020|2020-07-15|EPI\_ISL\_533127|Original|hCoV-19^^England|Human|Lighthouse Lab in Glasgow|Wellcome Sanger Institute for the COVID-19 Genomics UK (COG-UK) consortium|Davies|United Kingdom

>Spike|hCoV-19/USA/VA-DCLS-0413/2020|2020-04-26|EPI\_ISL\_467807|Original|hCoV-19^^Virginia|Human|Virginia DCLS|Virginia DCLS|St. Jacques|USA

>Spike|hCoV-19/England/MILK-9925ED/2020|2020-08-27|EPI\_ISL\_552041|Original|hCoV-19^^England|Human|Lighthouse Lab in Milton Keynes|Wellcome Sanger Institute for the COVID-19 Genomics UK (COG-UK) consortium|Davies|United Kingdom

>Spike|hCoV-19/USA/FL-BPHL-1363/2020|2020-07-17|EPI\_ISL\_541300|Original|hCoV-19^^Florida|Human|Florida Bureau of Public Health Laboratories|Florida Bureau of Public Health Laboratories|Blanton|USA

>Spike|hCoV-19/England/ALDP-9C5DDA/2020|2020-09-10|EPI\_ISL\_567582|Original|hCoV-19^^England|Human|Lighthouse Lab in Alderley Park|Wellcome Sanger Institute for the COVID-19 Genomics UK (COG-UK) consortium|Davies|United Kingdom

>Spike|hCoV-19/Denmark/DCGC-5003/2020|2020-09-14|EPI\_ISL\_622760|Original|hCoV-19^^Hovedstaden|Human|Department of Virus and Microbiological Special Diagnostics|Albertsen lab|Michaelsen|Denmark

>Spike|hCoV-19/England/QEUEH-A8C8CE/2020|2020-10-16|EPI\_ISL\_643303|Original|hCoV-19^^England|Human|Lighthouse Lab in Glasgow|Wellcome Sanger Institute for the COVID-19 Genomics UK (COG-UK) Consortium|Davies|United Kingdom

>Spike|hCoV-19/Wales/PHWC-491DFA/2020|2020-11-14|EPI\_ISL\_706781|Original|hCoV-19^^Wales|Human|Originating lab|COVID-19 Genomics UK (COG-UK) Consortium|Moore|United Kingdom

>Spike|hCoV-19/Zimbabwe/ZW-8911/2020|2020-06-01|EPI\_ISL\_644747|Original|hCoV-19^^Zimbabwe|Human|National Microbiology Reference Laboratory|Quadram Institute Bioscience|Alikhan|Zimbabwe

>Spike|hCoV-19/England/QEUEH-C328C5/2020|2020-12-09|EPI\_ISL\_782710|Original|hCoV-19^^England|Human|Lighthouse Lab in Glasgow|Wellcome Sanger Institute for the COVID-19 Genomics UK (COG-UK) Consortium|Davies|United Kingdom

>Spike|hCoV-19/England/ALDP-A51051/2020|2020-10-07|EPI\_ISL\_597529|Original|hCoV-19^^England|Human|Lighthouse Lab in Alderley Park|Wellcome Sanger Institute for the COVID-19 Genomics UK (COG-UK) consortium|Davies|United Kingdom

>Spike|hCoV-19/Denmark/DCGC-10044/2020|2020-11-09|EPI\_ISL\_669357|Original|hCoV-19^^Midtjylland|Human|Department of Virus and Microbiological Special Diagnostics|Albertsen Lab|Michaelsen|Denmark

>Spike|hCoV-19/England/NORT-1B62B94/2020|2020-11-29|EPI\_ISL\_706284|Original|hCoV-19^^England|Human|Northumbria University / South Tees Hospitals NHS Foundation Trust / North Cumbria Integrated Care NHS Foundation Trust / North Tees and Hartlepool NHS Foundation Trust / Newcastle Hospitals NHS Foundation Trust|COVID-19 Genomics UK (COG-UK) Consortium|Bashton|United Kingdom

>Spike|hCoV-19/USA/FL-BPHL-1056/2020|2020-06-04|EPI\_ISL\_517946|Original|hCoV-19^^Florida|Human|Florida Bureau of Public Health Laboratories|Florida Bureau of Public Health Laboratories|Blanton|USA

>Spike|hCoV-19/Portugal/PT0893/2020|2020-03-20|EPI\_ISL\_511151|Original|hCoV-19^^Portugal|Human|Instituto Nacional de Saude (INSA)|Instituto Nacional de Saude (INSA)|Borges|Portugal

>Spike|hCoV-19/England/QEUEH-AF2641/2020|2020-10-30|EPI\_ISL\_662810|Original|hCoV-19^^England|Human|Lighthouse Lab in Glasgow|Wellcome Sanger Institute for the COVID-19 Genomics UK (COG-UK) Consortium|Davies|United Kingdom

>Spike|hCoV-19/Scotland/QEUEH-AAB119/2020|2020-10-21|EPI\_ISL\_652774|Original|hCoV-19^^Scotland|Human|Oxford Viromics|COVID-19 Genomics UK (COG-UK) Consortium|Golubchik|United Kingdom

>Spike|hCoV-19/USA/MD-MDH-0200/2020|2020-06-09|EPI\_ISL\_560813|Original|hCoV-19^^Maryland|Human|Maryland Public Health Laboratory|Maryland Public Health Laboratory|Keller|USA

>Spike|hCoV-19/England/BRIS-130552/2020|2020-04-12|EPI\_ISL\_492731|Original|hCoV-19^^England|Human|PHE South West Regional Laboratory|Wellcome Sanger Institute for the COVID-19 Genomics UK (COG-UK) consortium|Davies|United Kingdom

>Spike|hCoV-19/Portugal/PT1908/2020|2020-11-13|EPI\_ISL\_732121|Original|hCoV-19^^Portugal|Human|Instituto Nacional de Saude (INSA) and Instituto Gulbenkian de Ciencia (IGC)|Instituto Nacional de Saude (INSA) and Instituto Gulbenkian de Ciencia (IGC)|Borges|Portugal

>Spike|hCoV-19/England/ALDP-B73D60/2020|2020-11-12|EPI\_ISL\_664502|Original|hCoV-19^^England|Human|Quadram Institute Bioscience|COVID-19 Genomics UK (COG-UK) Consortium|Alikhan|United Kingdom

>Spike|hCoV-19/England/QEUEH-BCBA9F/2020|2020-11-27|EPI\_ISL\_704357|Original|hCoV-19^^England|Human|Lighthouse Lab in Glasgow|Wellcome Sanger Institute for the COVID-19 Genomics UK (COG-UK) Consortium|Davies|United Kingdom



>Spike|hCoV-19/England/MILK-BB1A05/2020|2020-11-18|EPI\_ISL\_720439|Original|hCoV-19^^England|Human|Lighthouse Lab in Milton Keynes|Wellcome Sanger Institute for the COVID-19 Genomics UK (COG-UK) Consortium|Davies|United Kingdom

>Spike|hCoV-19/Denmark/DCGC-9413/2020|2020-11-09|EPI\_ISL\_668531|Original|hCoV-19^^Midtjylland|Human|Department of Virus and Microbiological Special Diagnostics|Albertsen Lab|Michaelsen|Denmark

>Spike|hCoV-19/Denmark/DCGC-10427/2020|2020-11-02|EPI\_ISL\_669962|Original|hCoV-19^^Syddanmark|Human|Department of Virus and Microbiological Special Diagnostics|Albertsen Lab|Michaelsen|Denmark

>Spike|hCoV-19/Scotland/GCVR-17088A/2020|2020-03-25|EPI\_ISL\_459683|Original|hCoV-19^^Scotland|Human|NHSGGC West of Scotland Specialist Virology Centre / MRC-University of Glasgow Centre for Virus Research|Wellcome Sanger Institute for the COVID-19 Genomics UK (COG-UK) consortium|Davies|United Kingdom

>Spike|hCoV-19/USA/OR-OHSU-2241/2020|2020-08-07|EPI\_ISL\_667157|Original|hCoV-19^^Oregon|Human|OHSU Lab Services Molecular Microbiology Lab|Oregon SARS-CoV-2 Genome Sequencing Center|O'Roak|USA

>Spike|hCoV-19/Australia/VIC6643/2020|2020-07-19|EPI\_ISL\_521400|Original|hCoV-19^^Victoria|Human|Victorian Infectious Diseases Reference Laboratory (VIDRL)|VIDRL and MDU-PHL|Schultz|Australia

>Spike|hCoV-19/Wales/PHWC-48FC89/2020|2020-11-11|EPI\_ISL\_681210|Original|hCoV-19^^Wales|Human|Wales Specialist Virology Centre Sequencing lab|COVID-19 Genomics UK (COG-UK) Consortium|Moore|United Kingdom

>Spike|hCoV-19/South Korea/KCDC2426/2020|2020-06-04|EPI\_ISL\_514829|Original|hCoV-19^^South Korea|Human|Division of Viral Diseases|Division of Viral Diseases|Kim|South Korea

>Spike|hCoV-19/England/QEUA-A9F34F/2020|2020-10-20|EPI\_ISL\_611361|Original|hCoV-19^^England|Human|Lighthouse Lab in Glasgow|Wellcome Sanger Institute for the COVID-19 Genomics UK (COG-UK) consortium|Davies|United Kingdom

>Spike|hCoV-19/Denmark/DCGC-20640/2020|2020-12-21|EPI\_ISL\_759269|Original|hCoV-19^^Midtjylland|Human|Department of Virus and Microbiological Special Diagnostics|Albertsen Lab|Michaelsen|Denmark

>Spike|hCoV-19/England/CAMB-7D1B0/2020|2020-04-06|EPI\_ISL\_442058|Original|hCoV-19^^England|Human|Department of Pathology|Wellcome Sanger Institute for the COVID-19 Genomics UK (COG-UK) consortium|Amato|United Kingdom

>Spike|hCoV-19/USA/TX-HMH-MCoV-9150/2020|2020-07-02|EPI\_ISL\_780971|Original|hCoV-19^^Texas|Human|Houston Methodist Hospital|Houston Methodist Hospital|Long|USA

>Spike|hCoV-19/USA/VA-DCLS-1903/2020|2020-10-05|EPI\_ISL\_614091|Original|hCoV-19^^Virginia|Human|Virginia DCLS|Virginia DCLS|St. Jacques|USA

>Spike|hCoV-19/England/ALDP-A6CF56/2020|2020-10-14|EPI\_ISL\_608153|Original|hCoV-19^^England|Human|Lighthouse Lab in Alderley Park|Wellcome Sanger Institute for the COVID-19 Genomics UK (COG-UK) consortium|Davies|United Kingdom

>Spike|hCoV-19/Portugal/PT0042/2020|2020-03-17|EPI\_ISL\_418027|Original|hCoV-19^^Portugal|Human|CHTMAD|Instituto Nacional de Saude (INSA)|Borges|Portugal

>Spike|hCoV-19/Northern Ireland/QEUA-96E5F9/2020|2020-08-17|EPI\_ISL\_530610|Original|hCoV-19^^Northern Ireland|Human|Lighthouse Lab in Glasgow|Wellcome Sanger Institute for the COVID-19 Genomics UK (COG-UK) consortium|Davies|United Kingdom

>Spike|hCoV-19/USA/TX-HMH-6620/2020|2020-06-24|EPI\_ISL\_546123|Original|hCoV-19^^Texas|Human|Houston Methodist Hospital|Houston Methodist Hospital|Long|USA

>Spike|hCoV-19/Denmark/DCGC-2733/2020|2020-08-17|EPI\_ISL\_616478|Original|hCoV-19^^Hovedstaden|Human|Department of Virus and Microbiological Special Diagnostics|Albertsen lab|Michaelsen|Denmark

>Spike|hCoV-19/England/MILK-9F1F84/2020|2020-09-24|EPI\_ISL\_589665|Original|hCoV-19^^England|Human|Lighthouse Lab in Milton Keynes|Wellcome Sanger Institute for the COVID-19 Genomics UK (COG-UK) consortium|Davies|United Kingdom

>Spike|hCoV-19/USA/AZ-TG366769/2020|2020-06-04|EPI\_ISL\_694514|Original|hCoV-19^^Arizona|Human|AZ SPHL|TGen North|French|USA

>Spike|hCoV-19/Australia/VIC278/2020|2020-03-22|EPI\_ISL\_419971|Original|hCoV-19^^Victoria|Human|Victorian Infectious Diseases Reference Laboratory

(VIDRL)|Victorian Infectious Diseases Reference Laboratory and Microbiological Diagnostic Unit Public Health Laboratory|Schultz|Australia  
>Spike|hCoV-19/England/20206139704/2020|2020-05-14|EPI\_ISL\_465666|Original|hCoV-19^^England|Human|Respiratory Virus Unit|Respiratory Virus Unit|Platt|United Kingdom  
>Spike|hCoV-19/Denmark/DCGC-21623/2020|2020-12-21|EPI\_ISL\_758268|Original|hCoV-19^^Hovedstaden|Human|Department of Virus and Microbiological Special Diagnostics|Albertsen Lab|Michaelsen|Denmark  
>Spike|hCoV-19/Canada/ON-S729/2020|2020-04-00|EPI\_ISL\_591153|Original|hCoV-19^^Ontario|Human|Toronto Invasive Bacterial Diseases Network|McMaster University|McArthur|Canada  
>Spike|hCoV-19/England/NORT-29C8A5/2020|2020-05-03|EPI\_ISL\_484285|Original|hCoV-19^^England|Human|Northumbria University / South Tees Hospitals NHS Foundation Trust / North Cumbria Integrated Care NHS Foundation Trust / North Tees and Hartlepool NHS Foundation Trust / Newcastle Hospitals NHS Foundation Trust|COVID-19 Genomics UK (COG-UK) Consortium|Bashton|United Kingdom  
>Spike|hCoV-19/Gambia/NPHL-1230/2020|2020-06-30|EPI\_ISL\_561218|Original|hCoV-19^^Kombo|Human|MRCG at LSHTM Genomics lab|MRCG at LSHTM Genomics lab|Sesay|Gambia  
>Spike|hCoV-19/Wales/PHWC-16AA50/2020|2020-09-13|EPI\_ISL\_560144|Original|hCoV-19^^Wales|Human|Wales Specialist Virology Centre Sequencing lab|COVID-19 Genomics UK (COG-UK) Consortium|Moore|United Kingdom  
>Spike|hCoV-19/England/CAMB-746AB/2020|2020-03-29|EPI\_ISL\_425323|Original|hCoV-19^^England|Human|Department of Pathology|COVID-19 Genomics UK (COG-UK) Consortium|Meredith|United Kingdom  
>Spike|hCoV-19/Luxembourg/LNS0921251/2020|2020-11-21|EPI\_ISL\_739857|Original|hCoV-19^^Luxembourg|Human|Laboratoire national de sant\u00e9|Laboratoire national de sant\u00e9|Wienecke-Baldacchino|Luxembourg  
>Spike|hCoV-19/England/ALDP-4A667F/2020|2020-06-10|EPI\_ISL\_559607|Original|hCoV-19^^England|Human|Lighthouse Lab in Alderley Park|Wellcome Sanger Institute for the COVID-19 Genomics UK (COG-UK) consortium|Davies|United Kingdom  
>Spike|hCoV-19/USA/CA-CZB-10364/2020|2020-09-12|EPI\_ISL\_648545|Original|hCoV-19^^California|Human|Madera County Department of Public Health|Chan-Zuckerberg Biohub|Bhatt|USA  
>Spike|hCoV-19/USA/MN-UMGC-6/2020|2020-03-30|EPI\_ISL\_443257|Original|hCoV-19^^Minnesota|Human|M Health Fairview|University of Minnesota Genomics Center|Garbe|USA  
>Spike|hCoV-19/Netherlands/NB-EMC-280/2020|2020-05-01|EPI\_ISL\_523402|Original|hCoV-19^^Noord Brabant|Human|Dutch COVID-19 response team|Erasmus Medical Center|Oude Munnink|Netherlands  
>Spike|hCoV-19/England/MILK-ACC9ED/2020|2020-10-21|EPI\_ISL\_629423|Original|hCoV-19^^England|Human|Lighthouse Lab in Milton Keynes|Wellcome Sanger Institute for the COVID-19 Genomics UK (COG-UK) consortium|Davies|United Kingdom  
>Spike|hCoV-19/Australia/VIC15916/2020|2020-07-31|EPI\_ISL\_640687|Original|hCoV-19^^Victoria|Human|Microbiological Diagnostic Unit - Public Health Laboratory (MDU-PHL)|MDU-PHL|Schultz|Australia  
>Spike|hCoV-19/USA/CT-Yale-280/2020|2020-04-02|EPI\_ISL\_469203|Original|hCoV-19^^Connecticut|Human|Yale Clinical Virology Laboratory|Grubaugh Lab - Yale School of Public Health|Grubaugh|USA  
>Spike|hCoV-19/USA/WA-NH24/2020|2020-03-13|EPI\_ISL\_418791|Original|hCoV-19^^Washington|Human|WA State Department of Health|Pathogen Discovery|Queen|USA  
>Spike|hCoV-19/Wales/PHWC-47E889/2020|2020-09-29|EPI\_ISL\_595514|Original|hCoV-19^^Wales|Human|Originating lab|COVID-19 Genomics UK (COG-UK) Consortium|Moore|United Kingdom  
>Spike|hCoV-19/USA/TX-HMH-MCoV-10273/2020|2020-07-07|EPI\_ISL\_789156|Original|hCoV-19^^Texas|Human|Houston Methodist Hospital|Houston Methodist Hospital|Long|USA  
>Spike|hCoV-19/Denmark/DCGC-8250/2020|2020-10-26|EPI\_ISL\_617092|Original|hCoV-19^^Hovedstaden|Human|Department of Virus and Microbiological Special Diagnostics|Albertsen lab|Michaelsen|Denmark  
>Spike|hCoV-19/USA/TX-HMH-2100/2020|2020-05-20|EPI\_ISL\_545120|Original|hCoV-19^^Texas|Human|Houston Methodist Hospital|Houston Methodist Hospital|Long|USA

>Spike|hCoV-19/France/ARA-111583/2020|2020-11-24|EPI\_ISL\_728548|Original|hCoV-19^^Auvergne-Rh\u00f4ne-Alpes|Human|CNR Virus des Infections Respiratoires - France SUD|CNR Virus des Infections Respiratoires - France SUD|Bal|France

>Spike|hCoV-19/England/20166015404/2020|2020-04-15|EPI\_ISL\_466538|Original|hCoV-19^^England|Human|Respiratory Virus Unit|Respiratory Virus Unit|Platt|United Kingdom

>Spike|hCoV-19/Poland/PL\_MCB\_73/2020|2020-04-16|EPI\_ISL\_645072|Original|hCoV-19^^Poland|Human|Human Genome Variation Research Group|Human Genome Variation Research Group||Poland

>Spike|hCoV-19/Wales/QEUIH-AE1D13/2020|2020-10-26|EPI\_ISL\_647874|Original|hCoV-19^^Wales|Human|Lighthouse Lab in Glasgow|Wellcome Sanger Institute for the COVID-19 Genomics UK (COG-UK) Consortium|Davies|United Kingdom

>Spike|hCoV-19/Germany/NW-UBI-12/2020|2020-04-06|EPI\_ISL\_602293|original|hCoV-19^^North Rhine-Westphalia|Human|Evangelisches Klinikum Bethel|Bielefeld University|Brandt|Germany

>Spike|hCoV-19/Spain/PV-IBV-003201/2020|2020-03-11|EPI\_ISL\_481026|Original|hCoV-19^^Basque Country|Human|Servicio de Microbiolog\u00eda. Hospital Universitario Donostia. OSI Donostialdea. \u00c1rea de Enfermedades Infecciosas|SeqCOVID-SPAIN consortium/IBV (CSIC)|Comas|Spain

>Spike|hCoV-19/Japan/PG-8606/2020|2020-08-00|EPI\_ISL\_686202|Original|hCoV-19^^Japan|Human|Pathogen Genomics Center|Pathogen Genomics Center|Sekizuka|Japan

>Spike|hCoV-19/Brazil/SP-354/2020|2020-06-19|EPI\_ISL\_547574|Original|hCoV-19^^S\u00e3o Paulo|Human|Hospital Universitario da USP|Instituto Adolfo Lutz|Sacchi|Brazil

>Spike|hCoV-19/Wales/PHWC-24A17/2020|2020-03-19|EPI\_ISL\_419470|Original|hCoV-19^^Wales|Human|Wales Specialist Virology Centre|Public Health Wales Microbiology Cardiff|Moore|United Kingdom

>Spike|hCoV-19/USA/TX-HMH-4368/2020|2020-06-17|EPI\_ISL\_543565|Original|hCoV-19^^Texas|Human|Houston Methodist Hospital|Houston Methodist Hospital|Long|USA

>Spike|hCoV-19/Japan/PG-3749/2020|2020-04-00|EPI\_ISL\_692002|Original|hCoV-19^^Japan|Human|Pathogen Genomics Center|Pathogen Genomics Center|Sekizuka|Japan

>Spike|hCoV-19/USA/TX-HMH-MCoV-16404/2020|2020-11-02|EPI\_ISL\_786088|Original|hCoV-19^^Texas|Human|Houston Methodist Hospital|Houston Methodist Hospital|Long|USA

>Spike|hCoV-19/England/QEUIH-9F8776/2020|2020-09-27|EPI\_ISL\_588838|Original|hCoV-19^^England|Human|Lighthouse Lab in Glasgow|Wellcome Sanger Institute for the COVID-19 Genomics UK (COG-UK) consortium|Davies|United Kingdom

>Spike|hCoV-19/USA/MA-MGH-02694/2020|2020-09-14|EPI\_ISL\_765587|Original|hCoV-19^^Massachusetts|Human|Brigham and Womens Hospital|Infectious Disease Program|Park|USA

>Spike|hCoV-19/USA/TX-HMH-MCoV-19840/2020|2020-11-28|EPI\_ISL\_784164|Original|hCoV-19^^Texas|Human|Houston Methodist Hospital|Houston Methodist Hospital|Long|USA

>Spike|hCoV-19/Israel/CVL-n18467/2020|2020-06-04|EPI\_ISL\_516896|Original|hCoV-19^^Tel Aviv|Human|Israel Central Virology laboratory|Israel Central Virology laboratory|Zuckerman|Israel

>Spike|hCoV-19/England/QEUIH-AD3A68/2020|2020-10-26|EPI\_ISL\_629871|Original|hCoV-19^^England|Human|Lighthouse Lab in Glasgow|Wellcome Sanger Institute for the COVID-19 Genomics UK (COG-UK) consortium|Davies|United Kingdom

>Spike|hCoV-19/Canada/QC-LSPQ-L00242035/2020|2020-03-28|EPI\_ISL\_536306|Original|hCoV-19^^Quebec|Human|H\u00f4pital Pierre-Boucher|Laboratoire de sant\u00e9 publique du Qu\u00e9bec|Moreira|Canada

>Spike|hCoV-19/Australia/NSW2944/2020|2020-11-02|EPI\_ISL\_678376|Original|hCoV-19^^New South Wales|Human|Area of Virology|Virology Research Laboratory; Area of Virology|Foster|Australia

>Spike|hCoV-19/Scotland/QEUIH-9F6FAD/2020|2020-09-27|EPI\_ISL\_595649|Original|hCoV-19^^Scotland|Human|Oxford Viromics|COVID-19 Genomics UK (COG-UK) Consortium|Golubchik|United Kingdom

>Spike|hCoV-19/Peru/CAL-UPCH-0037/2020|2020-06-17|EPI\_ISL\_529074|Original|hCoV-19^^Callao|Human|Laboratorio de Referencia Nacional de Virus Respiratorios|Laboratorio de Gen\u00f3mica Microbiana|Tsukayama|Peru

>Spike|hCoV-19/England/ALDP-A68E3F/2020|2020-10-12|EPI\_ISL\_608443|Original|hCoV-19^^England|Human|Lighthouse Lab in Alderley Park|Wellcome Sanger Institute for the COVID-19 Genomics UK (COG-UK) consortium|Davies|United Kingdom

>Spike|hCoV-19/USA/LA-BIE-064/2020|2020-04-08|EPI\_ISL\_455618|Original|hCoV-19^^Louisiana|Human|Ochsner Health|Bioinfoexperts|Cross|USA

>Spike|hCoV-19/Norway/2534/2020|2020-05-04|EPI\_ISL\_471176|Original|hCoV-19^^Norway|Human|Hospital of Southern Norway - Kristiansand|Norwegian Institute of Public Health|Hungnes|Norway

>Spike|hCoV-19/Australia/NSW348/2020|2020-03-23|EPI\_ISL\_451609|Original|hCoV-19^^New South Wales|Human|Laverty Pathology|NSW Health Pathology - Institute of Clinical Pathology and Medical Research; Westmead Hospital; University of Sydney|Gall|Australia

>Spike|hCoV-19/Denmark/DCGC-3222/2020|2020-08-31|EPI\_ISL\_616882|Original|hCoV-19^^Syddanmark|Human|Department of Virus and Microbiological Special Diagnostics|Albertsen lab|Michaelsen|Denmark

>Spike|hCoV-19/England/ALDP-94D9C7/2020|2020-06-20|EPI\_ISL\_555277|Original|hCoV-19^^England|Human|Lighthouse Lab in Alderley Park|Wellcome Sanger Institute for the COVID-19 Genomics UK (COG-UK) consortium|Davies|United Kingdom

>Spike|hCoV-19/Switzerland/AG-ETHZ-370522/2020|2020-11-19|EPI\_ISL\_694004|Original|hCoV-19^^Aargau|Human|Viollier AG|Department of Biosystems Science and Engineering|Nadeau|Switzerland

>Spike|hCoV-19/Australia/WA434/2020|2020-09-25|EPI\_ISL\_672646|Original|hCoV-19^^Western Australia|Human|PathWest Laboratory Medicine WA|PathWest Laboratory Medicine WA Microbial Surveillance Unit|Sikazwe|Australia

>Spike|hCoV-19/USA/TX-HMH-MCoV-18025/2020|2020-11-16|EPI\_ISL\_786173|Original|hCoV-19^^Texas|Human|Houston Methodist Hospital|Houston Methodist Hospital|Long|USA

>Spike|hCoV-19/Wales/PHWC-4A6B9E/2020|2020-12-17|EPI\_ISL\_763581|Original|hCoV-19^^Wales|Human|Wales Specialist Virology Centre Sequencing lab|COVID-19 Genomics UK (COG-UK) Consortium|Moore|United Kingdom

>Spike|hCoV-19/Belgium/reg-0501634/2020|2020-05-01|EPI\_ISL\_734691|Original|hCoV-19^^Vilvoorde|Human|UZ Leuven|KU Leuven|Maes|Belgium

>Spike|hCoV-19/Canada/MB-NML-577/2020|2020-04-28|EPI\_ISL\_632909|Original|hCoV-19^^Manitoba|Human|Cadham Provincial laboratory|Cadham Provincial laboratory|Majer|Canada

>Spike|hCoV-19/Northern Ireland/NIRE-FB3E1/2020|2020-03-20|EPI\_ISL\_441418|Original|hCoV-19^^Northern Ireland|Human|Regional Virus Laboratory|COVID-19 Genomics UK (COG-UK) Consortium|Fairley|United Kingdom

>Spike|hCoV-19/USA/NJ-QDX-2518/2020|2020-03-14|EPI\_ISL\_604790|Original|hCoV-19^^New Jersey|Human|Quest Diagnostics|Quest Diagnostics|Kagan|USA

>Spike|hCoV-19/Netherlands/OV-RIVM-20157/2020|2020-11-16|EPI\_ISL\_723324|Original|hCoV-19^^Overijssel|Human|Dutch COVID-19 response team|National Institute for Public Health and the Environment (RIVM)|Meijer|Netherlands

>Spike|hCoV-19/England/BRIS-121CD7/2020|2020-03-18|EPI\_ISL\_440241|Original|hCoV-19^^England|Human|PHE South West Regional Laboratory|Wellcome Sanger Institute for the COVID-19 Genomics UK (COG-UK) consortium|Amato|United Kingdom

>Spike|hCoV-19/USA/TX-HMH-MCoV-9281/2020|2020-07-03|EPI\_ISL\_781032|Original|hCoV-19^^Texas|Human|Houston Methodist Hospital|Houston Methodist Hospital|Long|USA

>Spike|hCoV-19/Japan/PG-7121/2020|2020-08-00|EPI\_ISL\_688226|Original|hCoV-19^^Japan|Human|Pathogen Genomics Center|Pathogen Genomics Center|Sekizuka|Japan

>Spike|hCoV-19/England/QEUEH-95F485/2020|2020-08-06|EPI\_ISL\_532409|Original|hCoV-19^^England|Human|Lighthouse Lab in Glasgow|Wellcome Sanger Institute for the COVID-19 Genomics UK (COG-UK) consortium|Davies|United Kingdom

>Spike|hCoV-19/England/MILK-9939FF/2020|2020-08-26|EPI\_ISL\_552336|Original|hCoV-19^^England|Human|Lighthouse Lab in Milton Keynes|Wellcome Sanger Institute for the COVID-19 Genomics UK (COG-UK) consortium|Davies|United Kingdom

>Spike|hCoV-19/USA/WI-WSLH-200428/2020|2020-04-24|EPI\_ISL\_578587|Original|hCoV-19^^Wisconsin|Human|Wisconsin State Laboratory of Hygiene Communicable Disease Division|Wisconsin State Laboratory of Hygiene Communicable Disease Division|Florek|USA

>Spike|hCoV-19/USA/CA-QDX-1982/2020|2020-03-18|EPI\_ISL\_604295|Original|hCoV-19^^California|Human|Quest Diagnostics|Quest Diagnostics|Kagan|USA

>Spike|hCoV-19/USA/MI-MDHHS-SC20535/2020|2020-05-12|EPI\_ISL\_460583|Original|hCoV-19^^Michigan|Human|Michigan Department of Health and Human Services|Michigan Department of Health and Human Services|Blankenship|USA

>Spike|hCoV-19/USA/TX-HMH-MCoV-13879/2020|2020-08-17|EPI\_ISL\_787172|Original|hCoV-19^^Texas|Human|Houston Methodist Hospital|Houston Methodist Hospital|Long|USA

>Spike|hCoV-19/USA/NJ-QDX-1883/2020|2020-03-14|EPI\_ISL\_604228|Original|hCoV-19^^New Jersey|Human|Quest Diagnostics|Quest Diagnostics|Kagan|USA

>Spike|hCoV-19/Japan/PG-7539/2020|2020-08-00|EPI\_ISL\_686641|Original|hCoV-19^^Japan|Human|Pathogen Genomics Center|Pathogen Genomics Center|Sekizuka|Japan

>Spike|hCoV-19/England/NORT-2A5E89/2020|2020-10-06|EPI\_ISL\_611591|Original|hCoV-19^^England|Human|Northumbria University / South Tees Hospitals NHS Foundation Trust / North Cumbria Integrated Care NHS Foundation Trust / North Tees and Hartlepool NHS Foundation Trust / Newcastle Hospitals NHS Foundation Trust|COVID-19 Genomics UK (COG-UK) Consortium|Bashton|United Kingdom

>Spike|hCoV-19/Portugal/PT1922/2020|2020-11-14|EPI\_ISL\_732134|Original|hCoV-19^^Portugal|Human|Instituto Nacional de Saude (INSA) and Instituto Gulbenkian de Ciencia (IGC)|Instituto Nacional de Saude (INSA) and Instituto Gulbenkian de Ciencia (IGC)|Borges|Portugal

>Spike|hCoV-19/Bangladesh/DNAS\_DRCIM\_isl MMC-01/2020|2020-06-28|EPI\_ISL\_774963|Original|hCoV-19^^Dhaka|Human|Designated Reference Institute for Chemical Measurements (DRICM)|DNA SOLUTION LTD.|Rabbi|Bangladesh

>Spike|hCoV-19/Germany/HH-hpi-p1796/2020|2020-03-19|EPI\_ISL\_776165|Original|hCoV-19^^Hamburg|Human|University Medical Center Hamburg Eppendorf|Heinrich Pette Institute|Robitaille|Germany

>Spike|hCoV-19/England/QEUH-9CE1D5/2020|2020-09-15|EPI\_ISL\_590147|Original|hCoV-19^^England|Human|Lighthouse Lab in Glasgow|Wellcome Sanger Institute for the COVID-19 Genomics UK (COG-UK) consortium|Davies|United Kingdom

>Spike|hCoV-19/Wuhan/HB-WH1-140/2020|2020-02-27|EPI\_ISL\_454916|Original|hCoV-19^^Hubei|Human|Wuhan Chain Medical Labs (CMLabs)|State Key Laboratory of Biotherapy of Sichuan University|Tang|China

>Spike|hCoV-19/Scotland/QEUH-A0B6BE/2020|2020-10-03|EPI\_ISL\_599239|Original|hCoV-19^^Scotland|Human|Lighthouse Lab in Glasgow|Wellcome Sanger Institute for the COVID-19 Genomics UK (COG-UK) consortium|Davies|United Kingdom

>Spike|hCoV-19/England/ALDP-A51BBA/2020|2020-10-07|EPI\_ISL\_598165|Original|hCoV-19^^England|Human|Lighthouse Lab in Alderley Park|Wellcome Sanger Institute for the COVID-19 Genomics UK (COG-UK) consortium|Davies|United Kingdom

>Spike|hCoV-19/Japan/PG-1608/2020|2020-04-00|EPI\_ISL\_685214|Original|hCoV-19^^Japan|Human|Pathogen Genomics Center|Pathogen Genomics Center|Sekizuka|Japan

>Spike|hCoV-19/England/CAMC-9C1C77/2020|2020-09-10|EPI\_ISL\_572714|Original|hCoV-19^^England|Human|Oxford Viromics|COVID-19 Genomics UK (COG-UK) Consortium|Golubchik|United Kingdom

>Spike|hCoV-19/England/QEUH-A33468/2020|2020-10-03|EPI\_ISL\_628381|Original|hCoV-19^^England|Human|Virology Department|COVID-19 Genomics UK (COG-UK) Consortium|de Silva|United Kingdom

>Spike|hCoV-19/Denmark/DCGC-8551/2020|2020-10-26|EPI\_ISL\_625904|Original|hCoV-19^^Hovedstaden|Human|Department of Virus and Microbiological Special Diagnostics|Albertsen lab|Michaelsen|Denmark

>Spike|hCoV-19/USA/NY-Wadsworth-282014-01/2020|2020-12-01|EPI\_ISL\_754416|Original|hCoV-19^^New York|Human|Wadsworth Center|Wadsworth Center|Lasek-Nesselquist|USA

>Spike|hCoV-19/India/DL-NCDC2051-CSIR-IGIB/2020|2020-05-18|EPI\_ISL\_482535|Original|hCoV-19^^Delhi|Human|National Centre for Disease control (NCDC)|NCDC/CSIR-IGIB|Pandey|India

>Spike|hCoV-19/USA/TX-HMH-MCoV-14512/2020|2020-10-08|EPI\_ISL\_787797|Original|hCoV-19^^Texas|Human|Houston Methodist Hospital|Houston Methodist Hospital|Long|USA

>Spike|hCoV-19/Luxembourg/LNS0116765/2020|2020-12-02|EPI\_ISL\_771024|Original|hCoV-19^^Luxembourg|Human|Laboratoire national de sant\u00e9|Laboratoire national de sant\u00e9|Wienecke-Baldacchino|Luxembourg

>Spike|hCoV-19/Netherlands/Zeeland\_7/2020|2020-03-22|EPI\_ISL\_461289|Original|hCoV-19^^Zeeland|Human|Dutch COVID-19 response team|Erasmus Medical Center|Oude Munnink|Netherlands

>Spike|hCoV-19/England/CAMB-1AC76A/2020|2020-04-23|EPI\_ISL\_489514|Original|hCoV-19^^England|Human|Department of Pathology|Wellcome Sanger Institute for the COVID-19 Genomics UK (COG-UK) consortium|Davies|United Kingdom

>Spike|hCoV-19/Saudi Arabia/KAIMRC59/2020|2020-03-30|EPI\_ISL\_507024|unknown|hCoV-19^^Saudi Arabia|Human|unknown|Infectious Diseases Research|Submitter|Saudi Arabia

>Spike|hCoV-19/England/EXET-1373D9/2020|2020-03-25|EPI\_ISL\_471972|Original|hCoV-19^^England|Human|University of Exeter|COVID-19 Genomics UK (COG-UK) Consortium|Temperton|United Kingdom

>Spike|hCoV-19/USA/CA-ALSR-4567/2020|2020-07-07|EPI\_ISL\_667011|Original|hCoV-19^^California|Human|San Diego County Public Health Laboratory|Andersen lab at Scripps Research|Gangavarapu|USA

>Spike|hCoV-19/Denmark/DCGC-14242/2020|2020-11-30|EPI\_ISL\_711648|Original|hCoV-19^^Midtjylland|Human|Department of Virus and Microbiological Special Diagnostics|Albertsen Lab|Michaelsen|Denmark

>Spike|hCoV-19/England/QEUEH-B140A4/2020|2020-11-03|EPI\_ISL\_641693|Original|hCoV-19^^England|Human|Lighthouse Lab in Glasgow|Wellcome Sanger Institute for the COVID-19 Genomics UK (COG-UK) Consortium|Davies|United Kingdom

>Spike|hCoV-19/England/QEUEH-AD2577/2020|2020-10-25|EPI\_ISL\_629864|Original|hCoV-19^^England|Human|Lighthouse Lab in Glasgow|Wellcome Sanger Institute for the COVID-19 Genomics UK (COG-UK) consortium|Davies|United Kingdom

>Spike|hCoV-19/France/OCC-31/2020|2020-06-12|EPI\_ISL\_482889|Original|hCoV-19^^Occitanie|Human|CHU Purpan - Laboratoire de Virologie - Institut F\u00e9d\u00e9ratif de Biologie|Laboratoire de virologie - \u00c9cole Nationale V\u00e9t\u00e9rinaire de Toulouse|Croville|France

>Spike|hCoV-19/USA/CA-CZB-14669/2020|2020-11-16|EPI\_ISL\_739410|Original|hCoV-19^^California|Human|Orange County Public Health Lab|Chan-Zuckerberg Biohub|Kamm|USA

>Spike|hCoV-19/England/ALDP-A865FA/2020|2020-10-16|EPI\_ISL\_606177|Original|hCoV-19^^England|Human|Lighthouse Lab in Alderley Park|Wellcome Sanger Institute for the COVID-19 Genomics UK (COG-UK) consortium|Davies|United Kingdom

>Spike|hCoV-19/USA/WA-S2337/2020|2020-06-11|EPI\_ISL\_496969|Original|hCoV-19^^Washington|Human|Washington State Department of Health|Seattle Flu Study|Lee|USA

>Spike|hCoV-19/Denmark/DCGC-18986/2020|2020-12-07|EPI\_ISL\_748182|Original|hCoV-19^^Hovedstaden|Human|Department of Virus and Microbiological Special Diagnostics|Albertsen Lab|Michaelsen|Denmark

>Spike|hCoV-19/England/MILK-993652/2020|2020-08-26|EPI\_ISL\_552138|Original|hCoV-19^^England|Human|Lighthouse Lab in Milton Keynes|Wellcome Sanger Institute for the COVID-19 Genomics UK (COG-UK) consortium|Davies|United Kingdom

>Spike|hCoV-19/England/CAMC-A80F7A/2020|2020-10-14|EPI\_ISL\_610891|Original|hCoV-19^^England|Human|Lighthouse Lab in Cambridge|Wellcome Sanger Institute for the COVID-19 Genomics UK (COG-UK) consortium|Davies|United Kingdom

>Spike|hCoV-19/USA/PR-CDC-S29/2020|2020-07-06|EPI\_ISL\_539495|Original|hCoV-19^^Puerto Rico|Human|Centers for Disease Control and Prevention|Centers for Disease Control and Prevention|Santiago|USA

>Spike|hCoV-19/South Korea/KCDC2178/2020|2020-03-24|EPI\_ISL\_506972|Original|hCoV-19^^South Korea|Human|Division of Viral Diseases|Division of Viral Diseases|Kim|South Korea

>Spike|hCoV-19/England/ALDP-C8CA3F/2020|2020-12-15|EPI\_ISL\_777532|Original|hCoV-19^^England|Human|Lighthouse Lab in Alderley Park|Wellcome Sanger Institute for the COVID-19 Genomics UK (COG-UK) Consortium|Davies|United Kingdom

>Spike|hCoV-19/Denmark/DCGC-20833/2020|2020-12-21|EPI\_ISL\_759392|Original|hCoV-19^^Midtjylland|Human|Department of Virus and Microbiological Special Diagnostics|Albertsen Lab|Michaelsen|Denmark

>Spike|hCoV-19/France/OCC-SC521/2020|2020-05-11|EPI\_ISL\_660708|Original|hCoV-19^^Occitanie|Human|CHU Montpellier|CNR Virus des Infections Respiratoires - France SUD|Bal|France

>Spike|hCoV-19/Australia/QLD993/2020|2020-07-22|EPI\_ISL\_530253|Original|hCoV-19^^Queensland|Human|Queensland Health Forensic and Scientific Services|Public Health Virology Laboratory|Nguyen|Australia

>Spike|hCoV-19/Scotland/CVR317/2020|2020-03-21|EPI\_ISL\_439047|Original|hCoV-19^^Scotland|Human|West of Scotland Specialist Virology Centre|COVID-19 Genomics UK (COG-UK) Consortium|Robertson|United Kingdom

>Spike|hCoV-19/England/CAMC-B22C27/2020|2020-11-02|EPI\_ISL\_647136|Original|hCoV-19^^England|Human|Lighthouse Lab in Cambridge|Wellcome Sanger Institute for the COVID-19 Genomics UK (COG-UK) Consortium|Davies|United Kingdom

>Spike|hCoV-19/India/TG-CDFD-C1495/2020|2020-06-10|EPI\_ISL\_528565|Original|hCoV-19^^Telangana|Human|National Genomics Core-Center for DNA Fingerprinting and Diagnostics|National Genomics Core-Center for DNA Fingerprinting and Diagnostics (NGC-CDFD) - DBT's PAN-INDIA-1000 Genome consortium|Vashisht|India

>Spike|hCoV-19/England/ALDP-B83C60/2020|2020-11-14|EPI\_ISL\_675351|Original|hCoV-19^^England|Human|Lighthouse Lab in Alderley Park|Wellcome Sanger Institute for the COVID-19 Genomics UK (COG-UK) Consortium|Davies|United Kingdom

>Spike|hCoV-19/USA/CA-QDX-269/2020|2020-05-01|EPI\_ISL\_498704|Original|hCoV-19^^California|Human|Quest Diagnostics|Quest Diagnostics|Kagan|USA

>Spike|hCoV-19/USA/TX-HMH-MCoV-18381/2020|2020-11-18|EPI\_ISL\_784729|Original|hCoV-19^^Texas|Human|Houston Methodist Hospital|Houston Methodist Hospital|Long|USA

>Spike|hCoV-19/England/SHEF-D3464/2020|2020-05-13|EPI\_ISL\_462084|Original|hCoV-19^^England|Human|Virology Department|COVID-19 Genomics UK (COG-UK) Consortium|de Silva|United Kingdom

>Spike|hCoV-19/USA/TX-HMH-MCoV-8391/2020|2020-06-30|EPI\_ISL\_783588|Original|hCoV-19^^Texas|Human|Houston Methodist Hospital|Houston Methodist Hospital|Long|USA

>Spike|hCoV-19/England/QEUEH-C34553/2020|2020-12-11|EPI\_ISL\_734127|Original|hCoV-19^^England|Human|Lighthouse Lab in Glasgow|Wellcome Sanger Institute for the COVID-19 Genomics UK (COG-UK) Consortium|Davies|United Kingdom

>Spike|hCoV-19/England/QEUEH-9DDA7E/2020|2020-09-21|EPI\_ISL\_599532|Original|hCoV-19^^England|Human|Lighthouse Lab in Glasgow|Wellcome Sanger Institute for the COVID-19 Genomics UK (COG-UK) consortium|Davies|United Kingdom

>Spike|hCoV-19/England/NORT-289243/2020|2020-03-28|EPI\_ISL\_453499|Original|hCoV-19^^England|Human|Northumbria University / South Tees Hospitals NHS Foundation Trust / North Cumbria Integrated Care NHS Foundation Trust / North Tees and Hartlepool NHS Foundation Trust / Newcastle Hospitals NHS Foundation Trust|COVID-19 Genomics UK (COG-UK) Consortium|Bashton|United Kingdom

>Spike|hCoV-19/USA/CA-CHLA-PLM97612587/2020|2020-12-02|EPI\_ISL\_753576|Original|hCoV-19^^California|Human|Clinical virology Laboratory|Center for Personalized Medicine|Dien Bard|USA

>Spike|hCoV-19/Wales/PHWC-2920B/2020|2020-04-04|EPI\_ISL\_445495|Original|hCoV-19^^Wales|Human|Wales Specialist Virology Centre|Public Health Wales Microbiology Cardiff|Moore|United Kingdom

>Spike|hCoV-19/USA/NY-NYCPHL-000962/2020|2020-09-30|EPI\_ISL\_632995|Original|hCoV-19^^New York|Human|DOHMH Crown Heights|New York City Public Health Laboratory|Wang|USA

>Spike|hCoV-19/Australia/VIC5942/2020|2020-07-18|EPI\_ISL\_518721|Original|hCoV-19^^Victoria|Human|Microbiological Diagnostic Unit - Public Health Laboratory (MDU-PHL)|MDU-PHL|Schultz|Australia

>Spike|hCoV-19/England/ALDP-CB5824/2020|2020-12-17|EPI\_ISL\_761711|Original|hCoV-19^^England|Human|Lighthouse Lab in Alderley Park|Wellcome Sanger Institute for the COVID-19 Genomics UK (COG-UK) Consortium|Davies|United Kingdom

>Spike|hCoV-19/USA/AZ-TG341564/2020|2020-06-01|EPI\_ISL\_694378|Original|hCoV-19^^Arizona|Human|TGen North|TGen North|French|USA

>Spike|hCoV-19/England/LIVE-A6039/2020|2020-03-21|EPI\_ISL\_499677|Original|hCoV-19^^England|Human|Liverpool Clinical Laboratories|COVID-19 Genomics UK (COG-UK) Consortium|Haldenby|United Kingdom

>Spike|hCoV-19/England/LIVE-9A27E/2020|2020-04-18|EPI\_ISL\_439862|Original|hCoV-19^^England|Human|Liverpool Clinical Laboratories|COVID-19 Genomics UK (COG-UK) Consortium|Haldenby|United Kingdom

>Spike|hCoV-19/USA/NY-Wadsworth-282766-01/2020|2020-12-02|EPI\_ISL\_754437|Original|hCoV-19^^New York|Human|Wadsworth Center|Wadsworth Center|Lasek-Nesselquist|USA

>Spike|hCoV-19/England/CAMB-7A07A/2020|2020-04-02|EPI\_ISL\_441261|Original|hCoV-19^^England|Human|Department of Pathology|Wellcome Sanger Institute for the COVID-19 Genomics UK (COG-UK) consortium|Amato|United Kingdom

>Spike|hCoV-19/USA/VA-DCLS-1609/2020|2020-08-20|EPI\_ISL\_614018|Original|hCoV-19^^Virginia|Human|Virginia DCLS|Virginia DCLS|St. Jacques|USA

>Spike|hCoV-19/England/QEUA-54B9FA/2020|2020-05-12|EPI\_ISL\_533429|Original|hCoV-19^^England|Human|Lighthouse Lab in Glasgow|Wellcome Sanger Institute for the COVID-19 Genomics UK (COG-UK) consortium|Davies|United Kingdom

>Spike|hCoV-19/England/CAMB-73105/2020|2020-03-22|EPI\_ISL\_440180|Original|hCoV-19^^England|Human|Department of Pathology|Wellcome Sanger Institute for the COVID-19 Genomics UK (COG-UK) consortium|Amato|United Kingdom

>Spike|hCoV-19/Japan/PG-3253/2020|2020-06-00|EPI\_ISL\_691368|Original|hCoV-19^^Japan|Human|Saitama Prefectural Institute of Public Health|Pathogen Genomics Center|Sekizuka|Japan

>Spike|hCoV-19/South Africa/KRISP-0554/2020|2020-07-14|EPI\_ISL\_498093|Original|hCoV-19^^KwaZulu-Natal|Human|NHL-IALCH|KRISP|de Oliveira|South Africa

>Spike|hCoV-19/England/MILK-B02249/2020|2020-10-24|EPI\_ISL\_642903|Original|hCoV-19^^England|Human|Lighthouse Lab in Milton Keynes|Wellcome Sanger Institute for the COVID-19 Genomics UK (COG-UK) Consortium|Davies|United Kingdom

>Spike|hCoV-19/England/QEUA-B692D7/2020|2020-11-11|EPI\_ISL\_661526|Original|hCoV-19^^England|Human|Lighthouse Lab in Glasgow|Wellcome Sanger Institute for the COVID-19 Genomics UK (COG-UK) Consortium|Davies|United Kingdom

>Spike|hCoV-19/USA/NY-PV09389/2020|2020-03-19|EPI\_ISL\_450071|Original|hCoV-19^^New York|Human|MSHS Clinical Microbiology Laboratories|MSHS Pathogen Surveillance Program|van Bakel|USA

>Spike|hCoV-19/USA/UT-UPHL-2012619534/2020|2020-08-14|EPI\_ISL\_746192|Original|hCoV-19^^Utah|Human|Ginkgo Bioworks Clinical Laboratory|Utah Public Health Laboratory|Young|USA

>Spike|hCoV-19/Portugal/PT1155/2020|2020-04-25|EPI\_ISL\_511702|Original|hCoV-19^^Portugal|Human|Instituto Nacional de Saude (INSA)|Instituto Nacional de Saude (INSA)|Borges|Portugal

>Spike|hCoV-19/Ireland/TA-NVRL-21023/2020|2020-03-06|EPI\_ISL\_418516|Original|hCoV-19^^Tipperary|Human|UCD National Virus Reference Laboratory|UCD National Virus Reference Laboratory|Gonzalez|Ireland

>Spike|hCoV-19/India/MH-ACTREC-288/2020|2020-07-13|EPI\_ISL\_699940|Original|hCoV-19^^Maharashtra|Human|Hematopathology Laboratory|Hematopathology Laboratory|Patkar|India

>Spike|hCoV-19/Scotland/QEUA-98F57A/2020|2020-08-27|EPI\_ISL\_568457|Original|hCoV-19^^Scotland|Human|Lighthouse Lab in Glasgow|Wellcome Sanger Institute for the COVID-19 Genomics UK (COG-UK) consortium|Davies|United Kingdom

>Spike|hCoV-19/Gibraltar/204462849/2020|2020-10-29|EPI\_ISL\_615019|Original|hCoV-19^^Gibraltar|Human|Microbiology|Respiratory Virus Unit|Platt|Gibraltar

>Spike|hCoV-19/Australia/VIC250/2020|2020-03-21|EPI\_ISL\_419945|Original|hCoV-19^^Victoria|Human|Victorian Infectious Diseases Reference Laboratory (VIDRL)|Victorian Infectious Diseases Reference Laboratory and Microbiological Diagnostic Unit Public Health Laboratory|Schultz|Australia

>Spike|hCoV-19/USA/MI-UM-10036852009/2020|2020-11-09|EPI\_ISL\_728492|Original|hCoV-19^^Michigan|Human|University of Michigan Clinical Microbiology Laboratory|Lauring Lab|Valesano|USA

>Spike|hCoV-19/Spain/PV-IBV-98008424/2020|2020-10-20|EPI\_ISL\_654600|Original|hCoV-19^^Basque Country|Human|Servicio de Microbiolog\u00eda. Hospital Universitario Donostia. OSI Donostialdea. \u00c1rea de Enfermedades Infecciosas|SeqCOVID-SPAIN consortium|IBV (CSIC)|Comas|Spain

>Spike|hCoV-19/England/ALDP-C47CB2/2020|2020-12-12|EPI\_ISL\_718719|Original|hCoV-19^^England|Human|Lighthouse Lab in Alderley Park|Wellcome Sanger Institute for the COVID-19 Genomics UK (COG-UK) Consortium|Davies|United Kingdom



>Spike|hCoV-19/England/MILK-BB19AE/2020|2020-11-17|EPI\_ISL\_720306|Original|hCoV-19^^England|Human|Lighthouse Lab in Milton Keynes|Wellcome Sanger Institute for the COVID-19 Genomics UK (COG-UK) Consortium|Davies|United Kingdom

>Spike|hCoV-19/Scotland/EDB10221/2020|2020-11-24|EPI\_ISL\_705734|Original|hCoV-19^^Scotland|Human|Virology Department|COVID-19 Genomics UK (COG-UK) Consortium|McHugh|United Kingdom

>Spike|hCoV-19/England/BRIS-129FC7/2020|2020-04-16|EPI\_ISL\_458405|Original|hCoV-19^^England|Human|PHE South West Regional Laboratory|Wellcome Sanger Institute for the COVID-19 Genomics UK (COG-UK) consortium|Davies|United Kingdom

>Spike|hCoV-19/Switzerland/GE-HUG-0199-2/2020|2020-03-21|EPI\_ISL\_429197|Original|hCoV-19^^Geneve|Human|University Hospitals of Geneva Laboratory of Virology|University Hospitals of Geneva Laboratory of Virology|Cordey|Switzerland

>Spike|hCoV-19/USA/LA-EVTL1094/2020|2020-12-01|EPI\_ISL\_768364|Original|hCoV-19^^Louisiana|Human|LSUHS Emerging Viral Threat Laboratory|Microbial Genome Sequencing Center|Kamil|USA

>Spike|hCoV-19/USA/UT-08666/2020|2020-05-07|EPI\_ISL\_524392|Original|hCoV-19^^Utah|Human|Utah Public Health Laboratory|Utah Public Health Laboratory|Young|USA

>Spike|hCoV-19/England/QEUEH-B80F79/2020|2020-11-14|EPI\_ISL\_667967|Original|hCoV-19^^England|Human|Lighthouse Lab in Glasgow|Wellcome Sanger Institute for the COVID-19 Genomics UK (COG-UK) Consortium|Davies|United Kingdom

>Spike|hCoV-19/Scotland/QEUEH-A1FD3A/2020|2020-10-01|EPI\_ISL\_598940|Original|hCoV-19^^Scotland|Human|Lighthouse Lab in Glasgow|Wellcome Sanger Institute for the COVID-19 Genomics UK (COG-UK) consortium|Davies|United Kingdom

>Spike|hCoV-19/England/MILK-B5A488/2020|2020-11-06|EPI\_ISL\_658185|Original|hCoV-19^^England|Human|Lighthouse Lab in Milton Keynes|Wellcome Sanger Institute for the COVID-19 Genomics UK (COG-UK) Consortium|Davies|United Kingdom

>Spike|hCoV-19/Denmark/DCGC-8370/2020|2020-10-26|EPI\_ISL\_617346|Original|hCoV-19^^Hovedstaden|Human|Department of Virus and Microbiological Special Diagnostics|Albertsen lab|Michaelsen|Denmark

>Spike|hCoV-19/England/ALDP-9E9E0A/2020|2020-09-24|EPI\_ISL\_580179|Original|hCoV-19^^England|Human|Lighthouse Lab in Alderley Park|Wellcome Sanger Institute for the COVID-19 Genomics UK (COG-UK) consortium|Davies|United Kingdom

>Spike|hCoV-19/Ireland/MN-NVRL-20Z06790/2020|2020-04-18|EPI\_ISL\_671361|Original|hCoV-19^^Monaghan|Human|National Virus Reference Laboratory|Irish Coronavirus Sequencing Consortium - Teagasc Moorepark|Walsh|Ireland

>Spike|hCoV-19/Spain/VC-FISABIO-565/2020|2020-03-27|EPI\_ISL\_447497|Original|hCoV-19^^Comunitat Valenciana|Human|Servicio de Microbiología. Hospital Clínico Universitario de Valencia|Sequencing and Bioinformatics Service and Molecular Epidemiology Research Group. FISABIO-Public Health|Gonzalez-Candelas|Spain

>Spike|hCoV-19/England/QEUEH-9DD874/2020|2020-09-21|EPI\_ISL\_599513|Original|hCoV-19^^England|Human|Lighthouse Lab in Glasgow|Wellcome Sanger Institute for the COVID-19 Genomics UK (COG-UK) consortium|Davies|United Kingdom

>Spike|hCoV-19/USA/ME-HETL-J0474/2020|2020-12-11|EPI\_ISL\_755565|Original|hCoV-19^^Maine|Human|Maine Health and Environmental Testing Laboratory|Tewhey Lab|Tewhey|USA

>Spike|hCoV-19/Australia/VIC16999/2020|2020-08-05|EPI\_ISL\_663679|Original|hCoV-19^^Victoria|Human|Microbiological Diagnostic Unit - Public Health Laboratory (MDU-PHL) |MDU-PHL|Schultz|Australia

>Spike|hCoV-19/Italy/LAZ-INMI-39/2020|2020-06-12|EPI\_ISL\_603146|Original|hCoV-19^^Lazio|Human|INMI Lazzaro Spallanzani IRCCS|INMI Lazzaro Spallanzani IRCCS|Gruber|Italy

>Spike|hCoV-19/England/QEUEH-B13D53/2020|2020-11-01|EPI\_ISL\_641900|Original|hCoV-19^^England|Human|Lighthouse Lab in Glasgow|Wellcome Sanger Institute for the COVID-19 Genomics UK (COG-UK) Consortium|Davies|United Kingdom

>Spike|hCoV-19/Canada/Qc-L00241251/2020|2020-03-27|EPI\_ISL\_465701|Original|hCoV-19^^Quebec|Human|H\u00f4pital du Suro\u00eet|Laboratoire de sant\u00e9 publique du Qu\u00e9bec|Moreira|Canada

>Spike|hCoV-19/Hungary/US-57576w/2020|2020-10-01|EPI\_ISL\_677799|Original|hCoV-19^^B\u00e9k\u00e9s county|Human|University of Szeged|National Laboratory of Virology|Kemenesi|Hungary

>Spike|hCoV-19/USA/AZ-TG640936/2020|2020-04-12|EPI\_ISL\_695820|Original|hCoV-19^^Arizona|Human|Sonora Quest Laboratories|TGen North|French|USA

>Spike|hCoV-19/Scotland/EDB5339/2020|2020-05-22|EPI\_ISL\_493958|Original|hCoV-19^^Scotland|Human|Virology Department|COVID-19 Genomics UK (COG-UK) Consortium|Williams|United Kingdom

>Spike|hCoV-19/Germany/HH-hpi-p2450/2020|2020-04-19|EPI\_ISL\_776512|Original|hCoV-19^^Hamburg|Human|University Medical Center Hamburg Eppendorf|Heinrich Pette Institute|Robitaille|Germany

>Spike|hCoV-19/New Zealand/20VR2522/2020|2020-04-15|EPI\_ISL\_456382|Original|hCoV-19^^Auckland|Human|LabPLUS|Institute of Environmental Science and Research (ESR)|de Ligt|New Zealand

>Spike|hCoV-19/USA/TX-HMH-6884/2020|2020-06-25|EPI\_ISL\_546319|Original|hCoV-19^^Texas|Human|Houston Methodist Hospital|Houston Methodist Hospital|Long|USA

>Spike|hCoV-19/Luxembourg/LNS5663351/2020|2020-11-04|EPI\_ISL\_744270|Original|hCoV-19^^Luxembourg|Human|Laboratoire national de sant\u00e9|Laboratoire national de sant\u00e9|Wienecke-Baldacchino|Luxembourg

>Spike|hCoV-19/USA/MA-MGH-02829/2020|2020-10-23|EPI\_ISL\_765653|Original|hCoV-19^^Massachusetts|Human|Massachusetts General Hospital|Infectious Disease Program|Park|USA

>Spike|hCoV-19/Scotland/CVR2728/2020|2020-04-18|EPI\_ISL\_478027|Original|hCoV-19^^Scotland|Human|West of Scotland Specialist Virology Centre|COVID-19 Genomics UK (COG-UK) Consortium|Robertson|United Kingdom

>Spike|hCoV-19/England/ALDP-BC65B1/2020|2020-11-20|EPI\_ISL\_721307|Original|hCoV-19^^England|Human|Lighthouse Lab in Alderley Park|Wellcome Sanger Institute for the COVID-19 Genomics UK (COG-UK) Consortium|Davies|United Kingdom

>Spike|hCoV-19/England/CAMC-AEADFC/2020|2020-10-26|EPI\_ISL\_633270|Original|hCoV-19^^England|Human|Lighthouse Lab in Cambridge|Wellcome Sanger Institute for the COVID-19 Genomics UK (COG-UK) consortium|Davies|United Kingdom

>Spike|hCoV-19/Denmark/DCGC-16991/2020|2020-12-14|EPI\_ISL\_750695|Original|hCoV-19^^Hovedstaden|Human|Department of Virus and Microbiological Special Diagnostics|Albertsen Lab|Michaelsen|Denmark

>Spike|hCoV-19/England/QEUA-A1E8D0/2020|2020-10-01|EPI\_ISL\_587365|Original|hCoV-19^^England|Human|Lighthouse Lab in Glasgow|Wellcome Sanger Institute for the COVID-19 Genomics UK (COG-UK) consortium|Davies|United Kingdom

>Spike|hCoV-19/England/204522829/2020|2020-11-03|EPI\_ISL\_678647|Original|hCoV-19^^England|Human|Respiratory Virus Unit|COVID-19 Genomics UK (COG-UK) Consortium|Platt|United Kingdom

>Spike|hCoV-19/England/ALDP-A51446/2020|2020-10-08|EPI\_ISL\_598017|Original|hCoV-19^^England|Human|Lighthouse Lab in Alderley Park|Wellcome Sanger Institute for the COVID-19 Genomics UK (COG-UK) consortium|Davies|United Kingdom

>Spike|hCoV-19/England/MILK-970DB0/2020|2020-08-18|EPI\_ISL\_553245|Original|hCoV-19^^England|Human|Lighthouse Lab in Milton Keynes|Wellcome Sanger Institute for the COVID-19 Genomics UK (COG-UK) consortium|Davies|United Kingdom

>Spike|hCoV-19/Northern Ireland/NIRE-10110B/2020|2020-04-30|EPI\_ISL\_482142|Original|hCoV-19^^Northern Ireland|Human|Regional Virus Laboratory|Wellcome Sanger Institute for the COVID-19 Genomics UK (COG-UK) consortium|Davies|United Kingdom

>Spike|hCoV-19/USA/WA-S2316/2020|2020-06-11|EPI\_ISL\_496948|Original|hCoV-19^^Washington|Human|Washington State Department of Health|Seattle Flu Study|Lee|USA

>Spike|hCoV-19/Netherlands/NoordBrabant\_113/2020|2020-03-20|EPI\_ISL\_461148|Original|hCoV-19^^Noord Brabant|Human|Dutch COVID-19 response team|Erasmus Medical Center|Oude Munnink|Netherlands

>Spike|hCoV-19/Denmark/DCGC-20227/2020|2020-11-30|EPI\_ISL\_747625|Original|hCoV-19^^Syddanmark|Human|Department of Virus and Microbiological Special Diagnostics|Albertsen Lab|Michaelsen|Denmark

>Spike|hCoV-19/England/CAMB-7286B/2020|2020-03-23|EPI\_ISL\_439931|Original|hCoV-19^^England|Human|Department of Pathology|Wellcome Sanger Institute for the COVID-19 Genomics UK (COG-UK) consortium|Amato|United Kingdom

>Spike|hCoV-19/Wales/PHWC-49BFEB/2020|2020-12-07|EPI\_ISL\_742493|Original|hCoV-19^^Wales|Human|Wales Specialist Virology Centre Sequencing lab|COVID-19 Genomics UK (COG-UK) Consortium|Moore|United Kingdom

>Spike|hCoV-19/England/ALDP-5C6D55/2020|2020-06-19|EPI\_ISL\_558429|Original|hCoV-19^^England|Human|Lighthouse Lab in Alderley Park|Wellcome Sanger Institute for the COVID-19 Genomics UK (COG-UK) consortium|Davies|United Kingdom

>Spike|hCoV-19/Scotland/CVR839/2020|2020-03-27|EPI\_ISL\_439120|Original|hCoV-19^^Scotland|Human|West of Scotland Specialist Virology Centre|COVID-19 Genomics UK (COG-UK) Consortium|Robertson|United Kingdom

>Spike|hCoV-19/England/QEUEH-B6834E/2020|2020-11-11|EPI\_ISL\_661533|Original|hCoV-19^^England|Human|Lighthouse Lab in Glasgow|Wellcome Sanger Institute for the COVID-19 Genomics UK (COG-UK) Consortium|Davies|United Kingdom

>Spike|hCoV-19/DRC/11411/2020|2020-05-25|EPI\_ISL\_527561|Original|hCoV-19^^Kinshasa|Human|Viral Respiratory Lab|Pathogen Sequencing Lab|Lokilo|Democratic Republic of the Congo

>Spike|hCoV-19/Finland/6LS13B1/2020|2020-10-06|EPI\_ISL\_756076|Original|hCoV-19^^Uusimaa|Human|Department of Virology and Immunology|Department of Virology|Smura|Finland

>Spike|hCoV-19/USA/CA-CZB-14849/2020|2020-11-20|EPI\_ISL\_738999|Original|hCoV-19^^California|Human|Humboldt County Public Health Laboratory|Chan-Zuckerberg Biohub|Kamm|USA

>Spike|hCoV-19/England/SHEF-D1624/2020|2020-05-04|EPI\_ISL\_490641|Original|hCoV-19^^England|Human|Virology Department|COVID-19 Genomics UK (COG-UK) Consortium|de Silva|United Kingdom

>Spike|hCoV-19/Ireland/LD-NVRL-20G48731/2020|2020-04-04|EPI\_ISL\_763350|Original|hCoV-19^^Longford|Human|National Virus Reference Laboratory|Irish Coronavirus Sequencing Consortium - Teagasc Moorepark|Walsh|Ireland

>Spike|hCoV-19/Australia/VIC5362/2020|2020-07-18|EPI\_ISL\_520125|Original|hCoV-19^^Victoria|Human|Microbiological Diagnostic Unit - Public Health Laboratory (MDU-PHL) |MDU-PHL|Schultz|Australia

>Spike|hCoV-19/England/ALDP-9BDA74/2020|2020-09-10|EPI\_ISL\_568147|Original|hCoV-19^^England|Human|Lighthouse Lab in Alderley Park|Wellcome Sanger Institute for the COVID-19 Genomics UK (COG-UK) consortium|Davies|United Kingdom

>Spike|hCoV-19/USA/AZ-TG569505/2020|2020-07-10|EPI\_ISL\_695589|Original|hCoV-19^^Arizona|Human|AZ SPHL|TGen North|French|USA

>Spike|hCoV-19/Denmark/DCGC-21788/2020|2020-12-21|EPI\_ISL\_757920|Original|hCoV-19^^Hovedstaden|Human|Department of Virus and Microbiological Special Diagnostics|Albertsen Lab|Michaelsen|Denmark

>Spike|hCoV-19/Australia/VIC11935/2020|2020-08-05|EPI\_ISL\_591898|Original|hCoV-19^^Victoria|Human|Victorian Infectious Diseases Reference Laboratory (VIDRL) |VIDRL and MDU-PHL|Schultz|Australia

>Spike|hCoV-19/Northern Ireland/NIRE-106F93/2020|2020-03-28|EPI\_ISL\_585092|Original|hCoV-19^^Northern Ireland|Human|Regional Virus Laboratory|COVID-19 Genomics UK (COG-UK) Consortium|Fairley|United Kingdom

>Spike|hCoV-19/England/EXET-135A03/2020|2020-04-21|EPI\_ISL\_457125|Original|hCoV-19^^England|Human|University of Exeter|COVID-19 Genomics UK (COG-UK) Consortium|Temperton|United Kingdom

>Spike|hCoV-19/Australia/VIC14839/2020|2020-08-17|EPI\_ISL\_593023|Original|hCoV-19^^Victoria|Human|Microbiological Diagnostic Unit - Public Health Laboratory (MDU-PHL) |MDU-PHL|Schultz|Australia

>Spike|hCoV-19/Japan/PG-2894/2020|2020-03-00|EPI\_ISL\_691020|Original|hCoV-19^^Japan|Human|Pathogen Genomics Center|Pathogen Genomics Center|Sekizuka|Japan

>Spike|hCoV-19/USA/TX-HMH-5911/2020|2020-06-28|EPI\_ISL\_547103|Original|hCoV-19^^Texas|Human|Houston Methodist Hospital|Houston Methodist Hospital|Long|USA

>Spike|hCoV-19/mink/Denmark/mDK-21/2020|2020-10-26|EPI\_ISL\_641414|unknown|hCoV-19^^Denmark|Neovison vison|Department of Virus and Microbiological Special Diagnostics|Albertsen lab|Michaelsen|Denmark

>Spike|hCoV-19/England/OXON-B4AB2/2020|2020-04-30|EPI\_ISL\_534992|Original|hCoV-19^^England|Human|Oxford Viromics|COVID-19 Genomics UK (COG-UK) Consortium|Golubchik|United Kingdom

>Spike|hCoV-19/England/ALDP-B1DF26/2020|2020-11-01|EPI\_ISL\_723548|Original|hCoV-19^^England|Human|Centre for Enzyme Innovation|COVID-19 Genomics UK (COG-UK) Consortium|Robson|United Kingdom

>Spike|hCoV-19/England/LIVE-A26D1/2020|2020-05-20|EPI\_ISL\_500002|Original|hCoV-19^^England|Human|Liverpool Clinical Laboratories|COVID-19 Genomics UK (COG-UK) Consortium|Haldenby|United Kingdom

>Spike|hCoV-19/Chile/RM-ISPCH-22/2020|2020-03-11|EPI\_ISL\_445265|Original|hCoV-19^^Region Metropolitana de Santiago|Human|PONTIFICIA UNIVERSIDAD CATOLICA DE CHILE|Instituto de Salud Publica de Chile|Fernandez|Chile

>Spike|hCoV-19/England/LIVE-9E0F8/2020|2020-04-03|EPI\_ISL\_453269|Original|hCoV-19^^England|Human|Liverpool Clinical Laboratories|COVID-19 Genomics UK (COG-UK) Consortium|Haldenby|United Kingdom

>Spike|hCoV-19/Colombia/CAU-INS-80705/2020|2020-03-17|EPI\_ISL\_456124|Original|hCoV-19^^Cauca|Human|Instituto Nacional de Salud - Unidad de Secuenciación y Análisis Genómico|Instituto Nacional de Salud|Díaz|Colombia

>Spike|hCoV-19/Denmark/DCGC-22656/2020|2020-12-07|EPI\_ISL\_757692|Original|hCoV-19^^Hovedstaden|Human|Department of Virus and Microbiological Special Diagnostics|Albertsen Lab|Michaelsen|Denmark

>Spike|hCoV-19/South Africa/KRISP-K004281-CE1/2020|2020-11-05|EPI\_ISL\_660164|Original|hCoV-19^^KwaZulu-Natal|Human|NHLs-IALCH|KRISP|de Oliveira|South Africa

>Spike|hCoV-19/Netherlands/Gelderland\_2/2020|2020-03-09|EPI\_ISL\_415462|Original|hCoV-19^^Gelderland|Human|Dutch COVID-19 response team|Erasmus Medical Center|Oude Munnink|Netherlands

>Spike|hCoV-19/USA/NY-NYUMC718/2020|2020-03-26|EPI\_ISL\_451433|Original|hCoV-19^^New York|Human|NYU Langone Health|Departments of Pathology and Medicine|Maurano|USA

>Spike|hCoV-19/England/ALDP-A6F4FA/2020|2020-10-14|EPI\_ISL\_607815|Original|hCoV-19^^England|Human|Lighthouse Lab in Alderley Park|Wellcome Sanger Institute for the COVID-19 Genomics UK (COG-UK) consortium|Davies|United Kingdom

>Spike|hCoV-19/USA/TX-HMH-MCoV-13145/2020|2020-08-26|EPI\_ISL\_788296|Original|hCoV-19^^Texas|Human|Houston Methodist Hospital|Houston Methodist Hospital|Long|USA

>Spike|hCoV-19/USA/MI-QDX-1047/2020|2020-03-17|EPI\_ISL\_571723|Original|hCoV-19^^Michigan|Human|Quest Diagnostics|Quest Diagnostics|Kagan|USA

>Spike|hCoV-19/Lithuania/MR-LUHS-Eilnr101/2020|2020-04-19|EPI\_ISL\_541847|Original|hCoV-19^^Marijampoles apskritis|Human|Lithuanian University of Health Sciences Hospital|Lithuanian University of Health Sciences|Zemaitis|Lithuania

>Spike|hCoV-19/Switzerland/ZH-ETHZ-120031/2020|2020-04-18|EPI\_ISL\_468223|Original|hCoV-19^^Zurich|Human|Viollier AG|Department of Biosystems Science and Engineering|Nadeau|Switzerland

>Spike|hCoV-19/France/PAC-IHU-0965/2020|2020-07-13|EPI\_ISL\_569015|Original|hCoV-19^^Provence-Alpes-Côte-d'Azur|Human|MEPHI|MEPHI|Levasseur|France

>Spike|hCoV-19/Denmark/DCGC-15809/2020|2020-11-23|EPI\_ISL\_714034|Original|hCoV-19^^Hovedstaden|Human|Department of Virus and Microbiological Special Diagnostics|Albertsen Lab|Michaelsen|Denmark

>Spike|hCoV-19/England/MILK-BABBED/2020|2020-11-18|EPI\_ISL\_681362|Original|hCoV-19^^England|Human|Lighthouse Lab in Milton Keynes|Wellcome Sanger Institute for the COVID-19 Genomics UK (COG-UK) Consortium|Davies|United Kingdom

>Spike|hCoV-19/USA/TX-HMH-7639/2020|2020-06-26|EPI\_ISL\_546906|Original|hCoV-19^^Texas|Human|Houston Methodist Hospital|Houston Methodist Hospital|Long|USA

>Spike|hCoV-19/Denmark/DCGC-7255/2020|2020-10-12|EPI\_ISL\_619231|Original|hCoV-19^^Midtjylland|Human|Department of Virus and Microbiological Special Diagnostics|Albertsen lab|Michaelsen|Denmark

>Spike|hCoV-19/England/ALDP-A523FD/2020|2020-10-07|EPI\_ISL\_598002|Original|hCoV-19^^England|Human|Lighthouse Lab in Alderley Park|Wellcome Sanger Institute for the COVID-19 Genomics UK (COG-UK) consortium|Davies|United Kingdom

>Spike|hCoV-19/Australia/VIC16652/2020|2020-08-09|EPI\_ISL\_640914|Original|hCoV-19^^Victoria|Human|Microbiological Diagnostic Unit - Public Health Laboratory (MDU-PHL)|MDU-PHL|Schultz|Australia

>Spike|hCoV-19/USA/AZ-TG502386/2020|2020-07-15|EPI\_ISL\_695282|Original|hCoV-19^^Arizona|Human|TGen North|TGen North|French|USA

>Spike|hCoV-19/England/ALDP-B492FB/2020|2020-11-07|EPI\_ISL\_649380|Original|hCoV-19^^England|Human|Lighthouse Lab in Alderley Park|Wellcome Sanger Institute for the COVID-19 Genomics UK (COG-UK) Consortium|Davies|United Kingdom

>Spike|hCoV-19/USA/TX-HMH-MCoV-15459/2020|2020-10-23|EPI\_ISL\_786943|Original|hCoV-19^^Texas|Human|Houston Methodist Hospital|Houston Methodist Hospital|Long|USA

>Spike|hCoV-19/England/20238072204/2020|2020-06-04|EPI\_ISL\_471514|Original|hCoV-19^^England|Human|Respiratory Virus Unit|Respiratory Virus Unit|Platt|United Kingdom

>Spike|hCoV-19/Finland/FIN-25/2020|2020-02-25|EPI\_ISL\_412971|Original|hCoV-19^^Helsinki|Human|HUS Diagnostiikkakeskus|Department of Virology Faculty of Medicine|Smura|Finland

>Spike|hCoV-19/England/ALDP-49B19A/2020|2020-06-12|EPI\_ISL\_559323|Original|hCoV-19^^England|Human|Lighthouse Lab in Alderley Park|Wellcome Sanger Institute for the COVID-19 Genomics UK (COG-UK) consortium|Davies|United Kingdom

>Spike|hCoV-19/USA/TX-HMH-MCoV-13728/2020|2020-08-17|EPI\_ISL\_788821|Original|hCoV-19^^Texas|Human|Houston Methodist Hospital|Houston Methodist Hospital|Long|USA

>Spike|hCoV-19/Luxembourg/LNS2489430/2020|2020-06-30|EPI\_ISL\_740129|Original|hCoV-19^^Luxembourg|Human|Laboratoire national de sant\u00e9|Laboratoire national de sant\u00e9|Wienecke-Baldacchino|Luxembourg

>Spike|hCoV-19/England/CAMB-1AF864/2020|2020-05-01|EPI\_ISL\_459249|Original|hCoV-19^^England|Human|Department of Pathology|Wellcome Sanger Institute for the COVID-19 Genomics UK (COG-UK) consortium|Davies|United Kingdom

>Spike|hCoV-19/USA/TX-DSHS-1873/2020|2020-06-24|EPI\_ISL\_745264|Original|hCoV-19^^Texas|Human|Texas Department of State Health Services|Texas Department of State Health Services|Rahman|USA

>Spike|hCoV-19/England/ALDP-AA0BDA/2020|2020-10-22|EPI\_ISL\_625134|Original|hCoV-19^^England|Human|Lighthouse Lab in Alderley Park|Wellcome Sanger Institute for the COVID-19 Genomics UK (COG-UK) consortium|Davies|United Kingdom

>Spike|hCoV-19/England/ALDP-AA2DD2/2020|2020-10-22|EPI\_ISL\_623923|Original|hCoV-19^^England|Human|Lighthouse Lab in Alderley Park|Wellcome Sanger Institute for the COVID-19 Genomics UK (COG-UK) consortium|Davies|United Kingdom

>Spike|hCoV-19/Scotland/CVR6055/2020|2020-11-30|EPI\_ISL\_705721|Original|hCoV-19^^Scotland|Human|West of Scotland Specialist Virology Centre|COVID-19 Genomics UK (COG-UK) Consortium|Robertson|United Kingdom

>Spike|hCoV-19/England/MILK-995C4F/2020|2020-08-25|EPI\_ISL\_551604|Original|hCoV-19^^England|Human|Lighthouse Lab in Milton Keynes|Wellcome Sanger Institute for the COVID-19 Genomics UK (COG-UK) consortium|Davies|United Kingdom

>Spike|hCoV-19/England/PORT-2D1A9F/2020|2020-04-03|EPI\_ISL\_493642|Original|hCoV-19^^England|Human|Centre for Enzyme Innovation|COVID-19 Genomics UK (COG-UK) Consortium|Robson|United Kingdom

>Spike|hCoV-19/Ireland/D-NVRL-MPF91857/2020|2020-03-19|EPI\_ISL\_767717|Original|hCoV-19^^Dublin|Human|National Virus Reference Laboratory|Irish Coronavirus Sequencing Consortium - Teagasc Moorepark|Walsh|Ireland

>Spike|hCoV-19/Norway/2889/2020|2020-07-14|EPI\_ISL\_549132|Original|hCoV-19^^Oslo|Human|Furst Medical Laboratory|Norwegian Institute of Public Health|Kopperud Riis|Norway

>Spike|hCoV-19/Australia/SAP600/2020|2020-12-30|EPI\_ISL\_755570|Original|hCoV-19^^South Australia|Human|SA Pathology|SA Pathology|Leong|Australia

>Spike|hCoV-19/Scotland/QEUEH-9AE6BE/2020|2020-09-05|EPI\_ISL\_577366|Original|hCoV-19^^Scotland|Human|University of Exeter|COVID-19 Genomics UK (COG-UK) Consortium|Temperton|United Kingdom

>Spike|hCoV-19/England/ALDP-9EDBC3/2020|2020-05-09|EPI\_ISL\_580789|Original|hCoV-19^^England|Human|Lighthouse Lab in Alderley Park|Wellcome Sanger Institute for the COVID-19 Genomics UK (COG-UK) consortium|Davies|United Kingdom

>Spike|hCoV-19/England/MILK-9C40C3/2020|2020-09-10|EPI\_ISL\_566821|Original|hCoV-19^^England|Human|Lighthouse Lab in Milton Keynes|Wellcome Sanger Institute for the COVID-19 Genomics UK (COG-UK) consortium|Davies|United Kingdom

>Spike|hCoV-19/Wales/PHWC-487E8B/2020|2020-10-29|EPI\_ISL\_639316|Original|hCoV-19^^Wales|Human|Wales Specialist Virology Centre Sequencing lab|COVID-19 Genomics UK (COG-UK) Consortium|Moore|United Kingdom

>Spike|hCoV-19/England/ALDP-AC11FF/2020|2020-10-10|EPI\_ISL\_630982|Original|hCoV-19^^England|Human|Lighthouse Lab in Alderley Park|Wellcome Sanger Institute for the COVID-19 Genomics UK (COG-UK) consortium|Davies|United Kingdom

>Spike|hCoV-19/Wales/PHWC-47E9E0/2020|2020-10-10|EPI\_ISL\_595535|Original|hCoV-19^^Wales|Human|Originating lab|COVID-19 Genomics UK (COG-UK) Consortium|Moore|United Kingdom

>Spike|hCoV-19/Wales/PHWC-24E48/2020|2020-03-00|EPI\_ISL\_432101|Original|hCoV-19^^Wales|Human|Wales Specialist Virology Centre|Public Health Wales Microbiology Cardiff|Moore|United Kingdom

>Spike|hCoV-19/USA/TX-DSHS-1123/2020|2020-06-21|EPI\_ISL\_615160|Original|hCoV-19^^Texas|Human|Texas Department of State Health Services|Texas Department of State Health Services|Rahman|USA

>Spike|hCoV-19/England/CAMC-B3251A/2020|2020-11-05|EPI\_ISL\_659416|Original|hCoV-19^^England|Human|Lighthouse Lab in Cambridge|Wellcome Sanger Institute for the COVID-19 Genomics UK (COG-UK) Consortium|Davies|United Kingdom

>Spike|hCoV-19/USA/WI-UW-1721/2020|2020-09-09|EPI\_ISL\_605594|Original|hCoV-19^^Wisconsin|Human|University of Wisconsin-Madison AIDS Vaccine Research Laboratories|University of Wisconsin-Madison AIDS Vaccine Research Laboratories|Baczenas|USA

>Spike|hCoV-19/Scotland/QEUA-9DD470/2020|2020-09-21|EPI\_ISL\_599539|Original|hCoV-19^^Scotland|Human|Lighthouse Lab in Glasgow|Wellcome Sanger Institute for the COVID-19 Genomics UK (COG-UK) consortium|Davies|United Kingdom

>Spike|hCoV-19/England/QEUA-B9E0EE/2020|2020-11-18|EPI\_ISL\_720926|Original|hCoV-19^^England|Human|Lighthouse Lab in Glasgow|Wellcome Sanger Institute for the COVID-19 Genomics UK (COG-UK) Consortium|Davies|United Kingdom

>Spike|hCoV-19/USA/WA-UW-4226/2020|2020-03-31|EPI\_ISL\_430938|Original|hCoV-19^^Washington|Human|UW Virology Lab|UW Virology Lab|Roychoudhury|USA

>Spike|hCoV-19/England/CAMC-B0B34D/2020|2020-10-30|EPI\_ISL\_643429|Original|hCoV-19^^England|Human|Lighthouse Lab in Cambridge|Wellcome Sanger Institute for the COVID-19 Genomics UK (COG-UK) Consortium|Davies|United Kingdom

>Spike|hCoV-19/New Zealand/20VR3173/2020|2020-03-24|EPI\_ISL\_579463|Original|hCoV-19^^Canterbury|Human|Canterbury Health Laboratories|Institute of Environmental Science and Research (ESR)|Wang|New Zealand

>Spike|hCoV-19/Wales/PHWC-48EA9F/2020|2020-11-07|EPI\_ISL\_680956|Original|hCoV-19^^Wales|Human|Wales Specialist Virology Centre Sequencing lab|COVID-19 Genomics UK (COG-UK) Consortium|Moore|United Kingdom

>Spike|hCoV-19/USA/WA-S1330/2020|2020-05-15|EPI\_ISL\_495780|Original|hCoV-19^^Washington|Human|Washington State Department of Health|Seattle Flu Study|Lee|USA

>Spike|hCoV-19/England/ALDP-9E6104/2020|2020-09-24|EPI\_ISL\_580456|Original|hCoV-19^^England|Human|Lighthouse Lab in Alderley Park|Wellcome Sanger Institute for the COVID-19 Genomics UK (COG-UK) consortium|Davies|United Kingdom

>Spike|hCoV-19/England/ALDP-C3A283/2020|2020-12-09|EPI\_ISL\_731181|Original|hCoV-19^^England|Human|Lighthouse Lab in Alderley Park|Wellcome Sanger Institute for the COVID-19 Genomics UK (COG-UK) Consortium|Davies|United Kingdom

>Spike|hCoV-19/Luxembourg/LNS4062347/2020|2020-11-24|EPI\_ISL\_740413|Original|hCoV-19^^Luxembourg|Human|Laboratoire national de sant\u00e9|Laboratoire national de sant\u00e9|Wienecke-Baldacchino|Luxembourg

>Spike|hCoV-19/Scotland/QEUA-B13306/2020|2020-11-03|EPI\_ISL\_649607|Original|hCoV-19^^Scotland|Human|Lighthouse Lab in Glasgow|Wellcome Sanger Institute for the COVID-19 Genomics UK (COG-UK) Consortium|Davies|United Kingdom

>Spike|hCoV-19/Australia/QLD1000/2020|2020-08-22|EPI\_ISL\_530258|Original|hCoV-19^^Queensland|Human|Queensland Health Forensic and Scientific Services|Public Health Virology Laboratory|Nguyen|Australia

>Spike|hCoV-19/England/QEUH-963503/2020|2020-08-10|EPI\_ISL\_531853|Original|hCoV-19^^England|Human|Lighthouse Lab in Glasgow|Wellcome Sanger Institute for the COVID-19 Genomics UK (COG-UK) consortium|Davies|United Kingdom

>Spike|hCoV-19/USA/UT-UPHL-2009045/2020|2020-05-12|EPI\_ISL\_525059|Original|hCoV-19^^Utah|Human|Utah Public Health Laboratory|Utah Public Health Laboratory|Young|USA

>Spike|hCoV-19/England/ALDP-B5CC15/2020|2020-11-09|EPI\_ISL\_655778|Original|hCoV-19^^England|Human|Lighthouse Lab in Alderley Park|Wellcome Sanger Institute for the COVID-19 Genomics UK (COG-UK) Consortium|Davies|United Kingdom

>Spike|hCoV-19/USA/CA-CZB-3800/2020|2020-06-12|EPI\_ISL\_548409|Original|hCoV-19^^California|Human|Ventura County Public Health Lab|Chan-Zuckerberg Biohub|Bhatt|USA

>Spike|hCoV-19/Brazil/CE-L13-CD230/2020|2020-03-21|EPI\_ISL\_476232|Original|hCoV-19^^Cear\u00e1|Human|DB Diagn\u00f3sticos do Brasil|Instituto de Medicina Tropical da Universidade de S\u00e3o Paulo|Faria|Brazil

>Spike|hCoV-19/England/EXET-1375F1/2020|2020-06-03|EPI\_ISL\_471979|Original|hCoV-19^^England|Human|University of Exeter|COVID-19 Genomics UK (COG-UK) Consortium|Temperton|United Kingdom

>Spike|hCoV-19/Canada/ON-PHL-20-02243/2020|2020-09-00|EPI\_ISL\_671513|Original|hCoV-19^^Ontario|Human|Public Health Ontario Laboratory|Public Health Ontario Laboratory|Guthrie|Canada

>Spike|hCoV-19/England/CAMB-72E0F/2020|2020-03-21|EPI\_ISL\_440044|Original|hCoV-19^^England|Human|Department of Pathology|Wellcome Sanger Institute for the COVID-19 Genomics UK (COG-UK) consortium|Amato|United Kingdom

>Spike|hCoV-19/England/20146007804/2020|2020-03-31|EPI\_ISL\_466023|Original|hCoV-19^^England|Human|Respiratory Virus Unit|Respiratory Virus Unit|Platt|United Kingdom

>Spike|hCoV-19/England/NORT-2839BD/2020|2020-04-01|EPI\_ISL\_488643|Original|hCoV-19^^England|Human|NU-OMICS DNA Sequencing research facility|Wellcome Sanger Institute for the COVID-19 Genomics UK (COG-UK) consortium|Davies|United Kingdom

>Spike|hCoV-19/Denmark/DCGC-9848/2020|2020-11-09|EPI\_ISL\_669225|Original|hCoV-19^^Sjælland|Human|Department of Virus and Microbiological Special Diagnostics|Albertsen Lab|Michaelsen|Denmark

>Spike|hCoV-19/England/QEUH-A00868/2020|2020-09-30|EPI\_ISL\_600361|Original|hCoV-19^^England|Human|Lighthouse Lab in Glasgow|Wellcome Sanger Institute for the COVID-19 Genomics UK (COG-UK) consortium|Davies|United Kingdom

>Spike|hCoV-19/Italy/TUS-DBM-10/2020|2020-03-21|EPI\_ISL\_583954|Original|hCoV-19^^Tuscany|Human|UOC Microbiologia e Virologia|Dipartimento di Biotecnologie Mediche|Pinzauti|Italy

>Spike|hCoV-19/Denmark/DCGC-8618/2020|2020-10-26|EPI\_ISL\_625753|Original|hCoV-19^^Nordjylland|Human|Department of Virus and Microbiological Special Diagnostics|Albertsen lab|Michaelsen|Denmark

>Spike|hCoV-19/England/MILK-9A9B69/2020|2020-09-01|EPI\_ISL\_551063|Original|hCoV-19^^England|Human|Lighthouse Lab in Milton Keynes|Wellcome Sanger Institute for the COVID-19 Genomics UK (COG-UK) consortium|Davies|United Kingdom

>Spike|hCoV-19/England/SHEF-10D87DC/2020|2020-12-14|EPI\_ISL\_742114|Original|hCoV-19^^England|Human|Virology Department|COVID-19 Genomics UK (COG-UK) Consortium|de Silva|United Kingdom

>Spike|hCoV-19/England/LIVE-DC27DB/2020|2020-11-23|EPI\_ISL\_703208|Original|hCoV-19^^England|Human|Liverpool Clinical Laboratories|COVID-19 Genomics UK (COG-UK) Consortium|Haldenby|United Kingdom

>Spike|hCoV-19/England/MILK-9A98CC/2020|2020-08-31|EPI\_ISL\_550866|Original|hCoV-19^^England|Human|Lighthouse Lab in Milton Keynes|Wellcome Sanger Institute for the COVID-19 Genomics UK (COG-UK) consortium|Davies|United Kingdom

>Spike|hCoV-19/England/NOTT-1190B8/2020|2020-10-30|EPI\_ISL\_626750|Original|hCoV-19^^England|Human|Queens Medical Centre|COVID-19 Genomics UK (COG-UK) Consortium|Loose|United Kingdom

>Spike|hCoV-19/Russia/OMS-ORINFI-MH10281M/2020|2020-11-11|EPI\_ISL\_733486|Original|hCoV-19^^Omsk|Human|Omsk Research Institute of Natural Focal Infections|WHO National Influenza Centre Russian Federation|Komissarov|Russia

>Spike|hCoV-19/Wales/PHWC-169884/2020|2020-07-20|EPI\_ISL\_512525|Original|hCoV-19^^Wales|Human|Wales Specialist Virology Centre Sequencing lab|COVID-19 Genomics UK (COG-UK) Consortium|Moore|United Kingdom

>Spike|hCoV-19/England/QEUEH-95FBEA/2020|2020-08-05|EPI\_ISL\_531900|Original|hCoV-19^^England|Human|Lighthouse Lab in Glasgow|Wellcome Sanger Institute for the COVID-19 Genomics UK (COG-UK) consortium|Davies|United Kingdom

>Spike|hCoV-19/Belgium/ULG-10580/2020|2020-10-23|EPI\_ISL\_626255|Original|hCoV-19^^Li\u00e8ge|Human|Department of Clinical Microbiology|GIGA Medical Genomics|Durkin|Belgium

>Spike|hCoV-19/Denmark/DCGC-5670/2020|2020-09-28|EPI\_ISL\_619957|Original|hCoV-19^^Hovedstaden|Human|Department of Virus and Microbiological Special Diagnostics|Albertsen lab|Michaelsen|Denmark

>Spike|hCoV-19/England/CAMC-B52C00/2020|2020-11-09|EPI\_ISL\_657427|Original|hCoV-19^^England|Human|Lighthouse Lab in Cambridge|Wellcome Sanger Institute for the COVID-19 Genomics UK (COG-UK) Consortium|Davies|United Kingdom

>Spike|hCoV-19/Australia/VIC11399/2020|2020-08-30|EPI\_ISL\_563357|Original|hCoV-19^^Victoria|Human|Microbiological Diagnostic Unit - Public Health Laboratory (MDU-PHL)|MDU-PHL|Schultz|Australia

>Spike|hCoV-19/England/OXON-B3D50/2020|2020-03-23|EPI\_ISL\_534910|Original|hCoV-19^^England|Human|Oxford Viromics|COVID-19 Genomics UK (COG-UK) Consortium|Golubchik|United Kingdom

>Spike|hCoV-19/England/QEUEH-960EED/2020|2020-08-04|EPI\_ISL\_532107|Original|hCoV-19^^England|Human|Lighthouse Lab in Glasgow|Wellcome Sanger Institute for the COVID-19 Genomics UK (COG-UK) consortium|Davies|United Kingdom

>Spike|hCoV-19/Australia/VIC8824/2020|2020-08-03|EPI\_ISL\_565217|Original|hCoV-19^^Victoria|Human|Victorian Infectious Diseases Reference Laboratory (VIDRL)|VIDRL and MDU-PHL|Schultz|Australia

>Spike|hCoV-19/Denmark/DCGC-4336/2020|2020-09-07|EPI\_ISL\_615536|Original|hCoV-19^^Sjaelland|Human|Department of Virus and Microbiological Special Diagnostics|Albertsen lab|Michaelsen|Denmark

>Spike|hCoV-19/England/QEUEH-B12BD2/2020|2020-11-02|EPI\_ISL\_642626|Original|hCoV-19^^England|Human|Lighthouse Lab in Glasgow|Wellcome Sanger Institute for the COVID-19 Genomics UK (COG-UK) Consortium|Davies|United Kingdom

>Spike|hCoV-19/Denmark/DCGC-4226/2020|2020-09-14|EPI\_ISL\_622119|Original|hCoV-19^^Hovedstaden|Human|Department of Virus and Microbiological Special Diagnostics|Albertsen lab|Michaelsen|Denmark

>Spike|hCoV-19/Scotland/CVR4939/2020|2020-10-02|EPI\_ISL\_594705|Original|hCoV-19^^Scotland|Human|West of Scotland Specialist Virology Centre|COVID-19 Genomics UK (COG-UK) Consortium|Robertson|United Kingdom

>Spike|hCoV-19/USA/CO-CDPHE-2007230810/2020|2020-07-22|EPI\_ISL\_710214|Original|hCoV-19^^Colorado|Human|Colorado Department of Public Health and Environment|Colorado Department of Public Health and Environment|Bankers|USA

>Spike|hCoV-19/SaudiArabia/KAUST-JEDDAH867/2020|2020-05-24|EPI\_ISL\_513021|Original|hCoV-19^^Jeddah|Human|Pathogen Genomics Lab King Abdullah University of Science and Technology(KAUST)|Pathogen Genomics Lab King Abdullah University of Science and Technology(KAUST)|Mohamed Ghazzali|Saudi Arabia

>Spike|hCoV-19/India/GJ-GBRC296a/2020|2020-06-15|EPI\_ISL\_495036|Original|hCoV-19^^Gujarat|Human|GMERS Medical College & Hospital|Gujarat Biotechnology Research Centre|Joshi|India

>Spike|hCoV-19/England/ALDP-B4655F/2020|2020-11-07|EPI\_ISL\_655999|Original|hCoV-19^^England|Human|Lighthouse Lab in Alderley Park|Wellcome Sanger Institute for the COVID-19 Genomics UK (COG-UK) Consortium|Davies|United Kingdom

>Spike|hCoV-19/India/WB-IK13/2020|2020-04-20|EPI\_ISL\_508342|Original|hCoV-19^^West Bengal|Human|Institute of Post Graduate Medical Education & Research|National Institute of Biomedical Genomics|Maitra|India

>Spike|hCoV-19/USA/NY-NYCPHL-001042/2020|2020-09-08|EPI\_ISL\_633054|Original|hCoV-19^^New York|Human|DOHMH PHL|New York City Public Health Laboratory|Wang|USA

>Spike|hCoV-19/South Africa/KRISP-K004634/2020|2020-11-02|EPI\_ISL\_660650|Original|hCoV-19^^KwaZulu-Natal|Human|NHLS-IALCH|KRISP|de Oliveira|South Africa



>Spike|hCoV-19/England/NORT-29EACB/2020|2020-05-12|EPI\_ISL\_488148|Original|hCoV-19^^England|Human|NU-OMICS DNA Sequencing research facility|Wellcome Sanger Institute for the COVID-19 Genomics UK (COG-UK) consortium|Davies|United Kingdom

>Spike|hCoV-19/Wales/PHWC-480C3D/2020|2020-10-16|EPI\_ISL\_612172|Original|hCoV-19^^Wales|Human|Wales Specialist Virology Centre Sequencing lab|COVID-19 Genomics UK (COG-UK) Consortium|Moore|United Kingdom

>Spike|hCoV-19/England/ALDP-B47F14/2020|2020-11-07|EPI\_ISL\_649251|Original|hCoV-19^^England|Human|Lighthouse Lab in Alderley Park|Wellcome Sanger Institute for the COVID-19 Genomics UK (COG-UK) Consortium|Davies|United Kingdom

>Spike|hCoV-19/England/20139047604/2020|2020-03-28|EPI\_ISL\_420695|Original|hCoV-19^^England|Human|Respiratory Virus Unit|Respiratory Virus Unit|Platt|United Kingdom

>Spike|hCoV-19/Scotland/CVR2920/2020|2020-04-21|EPI\_ISL\_461589|Original|hCoV-19^^Scotland|Human|West of Scotland Specialist Virology Centre|COVID-19 Genomics UK (COG-UK) Consortium|Robertson|United Kingdom

>Spike|hCoV-19/Wales/PHWC-49D8B1/2020|2020-11-30|EPI\_ISL\_742843|Original|hCoV-19^^Wales|Human|Wales Specialist Virology Centre Sequencing lab|COVID-19 Genomics UK (COG-UK) Consortium|Moore|United Kingdom

>Spike|hCoV-19/England/ALDP-A87386/2020|2020-10-17|EPI\_ISL\_606092|Original|hCoV-19^^England|Human|Lighthouse Lab in Alderley Park|Wellcome Sanger Institute for the COVID-19 Genomics UK (COG-UK) consortium|Davies|United Kingdom

>Spike|hCoV-19/Denmark/DCGC-14837/2020|2020-11-23|EPI\_ISL\_712018|Original|hCoV-19^^Midtjylland|Human|Department of Virus and Microbiological Special Diagnostics|Albertsen Lab|Michaelsen|Denmark

>Spike|hCoV-19/Belgium/ULG-10236/2020|2020-06-26|EPI\_ISL\_498142|Original|hCoV-19^^Li\u00e8ge|Human|Department of Clinical Microbiology|GIGA Medical Genomics|Durkin|Belgium

>Spike|hCoV-19/England/ALDP-BB563A/2020|2020-11-20|EPI\_ISL\_702012|Original|hCoV-19^^England|Human|Lighthouse Lab in Alderley Park|Wellcome Sanger Institute for the COVID-19 Genomics UK (COG-UK) Consortium|Davies|United Kingdom

>Spike|hCoV-19/Denmark/DCGC-12631/2020|2020-11-16|EPI\_ISL\_682812|Original|hCoV-19^^Sjaelland|Human|Department of Virus and Microbiological Special Diagnostics|Albertsen Lab|Michaelsen|Denmark

>Spike|hCoV-19/Netherlands/GE-RIVM-20292/2020|2020-11-18|EPI\_ISL\_723431|Original|hCoV-19^^Gelderland|Human|Dutch COVID-19 response team|National Institute for Public Health and the Environment (RIVM)|Meijer|Netherlands

>Spike|hCoV-19/Germany/NW-HHU-514/2020|2020-09-19|EPI\_ISL\_770730|Original|hCoV-19^^North Rhine-Westphalia|Human|ZOTZ KLIMAS MVZ D\u00fcsseldorf-Centrum GbR \u00dcBAG f\u00fcr Labormedizin|Center of Medical Microbiology|Wienemann|Germany

>Spike|hCoV-19/England/PORT-2D4962/2020|2020-10-13|EPI\_ISL\_612089|Original|hCoV-19^^England|Human|Centre for Enzyme Innovation|COVID-19 Genomics UK (COG-UK) Consortium|Robson|United Kingdom

>Spike|hCoV-19/Israel/n14294/2020|2020-04-13|EPI\_ISL\_483724|Original|hCoV-19^^Kfar Saba|Human|Israel Central Virology laboratory|Israel Central Virology laboratory|Zuckerman|Israel

>Spike|hCoV-19/Sweden/20-08311/2020|2020-03-21|EPI\_ISL\_475097|Original|hCoV-19^^Halland|Human|Halmstad klinisk mikrobiologi|The Public Health Agency of Sweden|Svartstr\u00f6m|Sweden

>Spike|hCoV-19/England/QEUH-9FA307/2020|2020-09-28|EPI\_ISL\_588239|Original|hCoV-19^^England|Human|Lighthouse Lab in Glasgow|Wellcome Sanger Institute for the COVID-19 Genomics UK (COG-UK) consortium|Davies|United Kingdom

>Spike|hCoV-19/USA/WA-S755/2020|2020-04-14|EPI\_ISL\_449925|Original|hCoV-19^^Washington|Human|Washington State Department of Health|Seattle Flu Study|Bedford|USA

>Spike|hCoV-19/England/SHEF-CEB94/2020|2020-10-13|EPI\_ISL\_596217|Original|hCoV-19^^England|Human|Virology Department|COVID-19 Genomics UK (COG-UK) Consortium|de Silva|United Kingdom

>Spike|hCoV-19/England/MILK-C78535/2020|2020-12-15|EPI\_ISL\_756757|Original|hCoV-19^^England|Human|Lighthouse Lab in Milton Keynes|Wellcome Sanger Institute for the COVID-19 Genomics UK (COG-UK) Consortium|Davies|United Kingdom

>Spike|hCoV-19/England/QEUA-C14BEE/2020|2020-12-06|EPI\_ISL\_709465|Original|hCoV-19^^England|Human|Lighthouse Lab in Glasgow|Wellcome Sanger Institute for the COVID-19 Genomics UK (COG-UK) Consortium|Davies|United Kingdom

>Spike|hCoV-19/USA/MO\_4470/2020|2020-03-06|EPI\_ISL\_424870|Original|hCoV-19^^Missouri|Human|MO State Public Health Laboratory|Pathogen Discovery|Queen|USA

>Spike|hCoV-19/Spain/AN-IBV-98001704/2020|2020-04-12|EPI\_ISL\_538132|Original|hCoV-19^^Andalucia|Human|Servicio de Microbiolog\u00eda y Parasitolog\u00eda cl\u00ednica. UCEIMP. Hospital Universitario Virgen del Roc\u00edo/IBIS/CSIC/US|SeqCOVID-SPAIN consortium/IBV (CSIC) |Comas|Spain

>Spike|hCoV-19/Denmark/DCGC-6307/2020|2020-09-07|EPI\_ISL\_615470|Original|hCoV-19^^Hovedstaden|Human|Department of Virus and Microbiological Special Diagnostics|Albertsen lab|Michaelsen|Denmark

>Spike|hCoV-19/USA/ME-HETL-J0051/2020|2020-03-19|EPI\_ISL\_513462|Original|hCoV-19^^Maine|Human|Maine HETL|Tewhey Lab|Tewhey|USA

>Spike|hCoV-19/Japan/PG-1895/2020|2020-04-00|EPI\_ISL\_685501|Original|hCoV-19^^Japan|Human|Yamagata Prefectural Institute of Public Health|Pathogen Genomics Center|Sekizuka|Japan

>Spike|hCoV-19/England/LOND-124D354/2020|2020-03-20|EPI\_ISL\_507087|Original|hCoV-19^^England|Human|University College London Hospital|COVID-19 Genomics UK (COG-UK) Consortium|Byott|United Kingdom

>Spike|hCoV-19/USA/LA-GBCL-26513032/2020|2020-04-22|EPI\_ISL\_485081|Original|hCoV-19^^Louisiana|Human|River Road Testing Lab|Ginkgo Bioworks Clinical Laboratory|Smith|USA

>Spike|hCoV-19/Scotland/EDB3542/2020|2020-04-13|EPI\_ISL\_487887|Original|hCoV-19^^Scotland|Human|Virology Department|Wellcome Sanger Institute for the COVID-19 Genomics UK (COG-UK) consortium|Davies|United Kingdom

>Spike|hCoV-19/Scotland/CVR3612/2020|2020-05-20|EPI\_ISL\_473732|Original|hCoV-19^^Scotland|Human|West of Scotland Specialist Virology Centre|COVID-19 Genomics UK (COG-UK) Consortium|Robertson|United Kingdom

>Spike|hCoV-19/Spain/MD-IBV-99008752/2020|2020-10-20|EPI\_ISL\_654269|Original|hCoV-19^^Madrid|Human|Hospital General Universitario Gregorio Mara\u00f1\u00f3n|SeqCOVID-SPAIN consortium/IBV (CSIC) |Comas|Spain

>Spike|hCoV-19/USA/VA-DCLS-0118/2020|2020-04-11|EPI\_ISL\_437763|Original|hCoV-19^^Virginia|Human|Virginia DCLS|Virginia DCLS|St. Jacques|USA

>Spike|hCoV-19/Canada/ON\_QGLO-010/2020|2020-03-26|EPI\_ISL\_459869|Original|hCoV-19^^Ontario|Human|Kingston Health Sciences Center|Queen's Genomics Lab at Ongwanada (Q-GLO) |Sjaarda|Canada

>Spike|hCoV-19/USA/UT-UPHL-201222051/2020|2020-04-07|EPI\_ISL\_678525|Original|hCoV-19^^Utah|Human|Utah Public Health Laboratory|Utah Public Health Laboratory|Young|USA

>Spike|hCoV-19/England/CAMC-941820/2020|2020-07-24|EPI\_ISL\_556860|Original|hCoV-19^^England|Human|Lighthouse Lab in Cambridge|Wellcome Sanger Institute for the COVID-19 Genomics UK (COG-UK) consortium|Davies|United Kingdom

>Spike|hCoV-19/USA/LA-GBCL-26791745/2020|2020-04-06|EPI\_ISL\_485361|Original|hCoV-19^^Louisiana|Human|River Road Testing Lab|Ginkgo Bioworks Clinical Laboratory|Smith|USA

>Spike|hCoV-19/Japan/PG-5844/2020|2020-08-00|EPI\_ISL\_688961|Original|hCoV-19^^Japan|Human|Fukuoka Institute of Health and Environmental Sciences|Pathogen Genomics Center|Sekizuka|Japan

>Spike|hCoV-19/France/OCC-18/2020|2020-04-09|EPI\_ISL\_434633|Original|hCoV-19^^Occitanie|Human|CHU Purpan - Laboratoire de Virologie - Institut F\u00e9d\u00e9ratif de Biologie|Laboratoire de virologie - \u00e9cole Nationale V\u00e9t\u00e9rinaire de Toulouse|Crovill\u00e9|France

>Spike|hCoV-19/USA/TX-DSHS-0757/2020|2020-05-20|EPI\_ISL\_584157|Original|hCoV-19^^Texas|Human|Texas Department of State Health Services|Texas Department of State Health Services|Rahman|USA

>Spike|hCoV-19/USA/FL-AJ50/2020|2020-07-04|EPI\_ISL\_513287|Original|hCoV-19^^Florida|Human|University of Miami Immunology and Histocompatibility Laboratory|University of Miami Immunology and Histocompatibility Laboratory|Margolles-Clark|USA

>Spike|hCoV-19/England/ALDP-B84801/2020|2020-11-14|EPI\_ISL\_675719|Original|hCoV-19^^England|Human|Lighthouse Lab in Alderley Park|Wellcome Sanger Institute for the COVID-19 Genomics UK (COG-UK) Consortium|Davies|United Kingdom

>Spike|hCoV-19/England/ALDP-A2FBA6/2020|2020-10-05|EPI\_ISL\_587154|Original|hCoV-19^^England|Human|Lighthouse Lab in Alderley Park|Wellcome Sanger Institute for the COVID-19 Genomics UK (COG-UK) consortium|Davies|United Kingdom

>Spike|hCoV-19/Japan/PG-1551/2020|2020-04-00|EPI\_ISL\_685157|Original|hCoV-19^^Japan|Human|Pathogen Genomics Center|Pathogen Genomics Center|Sekizuka|Japan

>Spike|hCoV-19/Denmark/DCGC-10707/2020|2020-11-02|EPI\_ISL\_670151|Original|hCoV-19^^Hovedstaden|Human|Department of Virus and Microbiological Special Diagnostics|Albertsen Lab|Michaelsen|Denmark

>Spike|hCoV-19/England/QEUH-CADD6C/2020|2020-12-20|EPI\_ISL\_760820|Original|hCoV-19^^England|Human|Lighthouse Lab in Glasgow|Wellcome Sanger Institute for the COVID-19 Genomics UK (COG-UK) Consortium|Davies|United Kingdom

>Spike|hCoV-19/France/PAC-IHU-0611/2020|2020-04-11|EPI\_ISL\_568887|Original|hCoV-19^^Provence-Alpes-C\u00f4te-d\u2019Azur|Human|MEPHI|MEPHI|Levasseur|France

>Spike|hCoV-19/USA/WA-UW-47417/2020|2020-12-11|EPI\_ISL\_776723|Original|hCoV-19^^Washington|Human|UW Virology Lab|UW Virology Lab|Roychoudhury|USA

>Spike|hCoV-19/USA/PA-MGEL-00418/2020|2020-06-28|EPI\_ISL\_682016|Original|hCoV-19^^Pennsylvania|Human|UPMC Clinical Microbiology Laboratory|Microbial Genomic Epidemiology Laboratory|Griffith|USA

>Spike|hCoV-19/South Africa/KRISP-K002694/2020|2020-07-27|EPI\_ISL\_535556|Original|hCoV-19^^KwaZulu-Natal|Human|NHLS-IALCH|KRISP|de Oliveira|South Africa

>Spike|hCoV-19/Spain/VC-IBV-98003633/2020|2020-03-10|EPI\_ISL\_538639|Original|hCoV-19^^Comunitat Valenciana|Human|Servicio de Microbiolog\u00eda. Hospital General Universitario de Castell\u00f3n|SeqCOVID-SPAIN consortium|IBV(CSIC)|Comas|Spain

>Spike|hCoV-19/USA/WI-WSLH-200566/2020|2020-05-31|EPI\_ISL\_578679|Original|hCoV-19^^Wisconsin|Human|Wisconsin State Laboratory of Hygiene Communicable Disease Division|Wisconsin State Laboratory of Hygiene Communicable Disease Division|Florek|USA

>Spike|hCoV-19/Australia/NSW1214/2020|2020-11-19|EPI\_ISL\_672658|Original|hCoV-19^^New South Wales|Human|South Eastern Area Laboratory Services (SEALS)|NSW Health Pathology - Institute of Clinical Pathology and Medical Research; Westmead Hospital; University of Sydney|Gall|Australia

>Spike|hCoV-19/England/ALDP-95A806/2020|2020-06-12|EPI\_ISL\_553394|Original|hCoV-19^^England|Human|Lighthouse Lab in Alderley Park|Wellcome Sanger Institute for the COVID-19 Genomics UK (COG-UK) consortium|Davies|United Kingdom

>Spike|hCoV-19/South Africa/NHLS-UCT-GP-5478/2020|2020-05-06|EPI\_ISL\_700515|Original|hCoV-19^^Western Cape|Human|Hanover Park CHC wc HPH|NHLS/UCT|Iranzadeh|South Africa

>Spike|hCoV-19/Canada/BC-BCCDC-6399/2020|2020-10-00|EPI\_ISL\_740555|Original|hCoV-19^^British Columbia|Human|BCCDC Public Health Laboratory|BCCDC Public Health Laboratory|Prystajecky|Canada

>Spike|hCoV-19/USA/TX-HMH-MCoV-8500/2020|2020-07-01|EPI\_ISL\_780595|Original|hCoV-19^^Texas|Human|Houston Methodist Hospital|Houston Methodist Hospital|Long|USA

>Spike|hCoV-19/USA/WA-S505/2020|2020-03-29|EPI\_ISL\_434265|Original|hCoV-19^^Washington|Human|Washington State Department of Health|Seattle Flu Study|Bedford|USA

>Spike|hCoV-19/Spain/PV-IBV-001605/2020|2020-03-12|EPI\_ISL\_467164|Original|hCoV-19^^Basque Country|Human|Hospital Universitario Araba. Vitoria-Gasteiz|SeqCOVID-SPAIN consortium|IBV(CSIC)|Comas|Spain

>Spike|hCoV-19/Belgium/ULG-10615/2020|2020-08-31|EPI\_ISL\_626240|Original|hCoV-19^^Li\u00e8ge|Human|Department of Clinical Microbiology|GIGA Medical Genomics|Durkin|Belgium

>Spike|hCoV-19/England/CAMB-1AACB8/2020|2020-04-18|EPI\_ISL\_470289|Original|hCoV-19^^England|Human|Department of Pathology|Wellcome Sanger Institute for the COVID-19 Genomics UK (COG-UK) consortium|Davies|United Kingdom

>Spike|hCoV-19/Denmark/DCGC-14342/2020|2020-11-30|EPI\_ISL\_711705|Original|hCoV-19^^Midtjylland|Human|Department of Virus and Microbiological Special Diagnostics|Albertsen Lab|Michaelsen|Denmark

>Spike|hCoV-19/France/PAC-MEPHI-2087/2020|2020-08-29|EPI\_ISL\_644493|Original|hCoV-19^^Provence-Alpes-Cote-d\u2019Azur|Human|MEPHI|MEPHI|Levasseur|France

>Spike|hCoV-19/Denmark/DCGC-5034/2020|2020-09-14|EPI\_ISL\_622754|Original|hCoV-19^^Hovedstaden|Human|Department of Virus and Microbiological Special Diagnostics|Albertsen lab|Michaelsen|Denmark

>Spike|hCoV-19/Wales/PHWC-16D7B0/2020|2020-09-25|EPI\_ISL\_577447|Original|hCoV-19^^Wales|Human|Wales Specialist Virology Centre Sequencing lab|COVID-19 Genomics UK (COG-UK) Consortium|Moore|United Kingdom

>Spike|hCoV-19/England/CAMB-1B9005/2020|2020-00-00|EPI\_ISL\_705505|Original|hCoV-19^^England|Human|Department of Pathology|COVID-19 Genomics UK (COG-UK) Consortium|Goodfellow|United Kingdom

>Spike|hCoV-19/USA/MA-MGH-00277/2020|2020-04-01|EPI\_ISL\_460098|Original|hCoV-19^^Massachusetts|Human|Massachusetts General Hospital|Infectious Disease Program|Lemieux|USA

>Spike|hCoV-19/Ecuador/UEES-7235/2020|2020-00-00|EPI\_ISL\_672000|Original|hCoV-19^^Ecuador|Human|UEES BioLab|Omics Sciences Laboratory|Fernandez Cadena|Ecuador

>Spike|hCoV-19/England/MILK-B94CD5/2020|2020-11-14|EPI\_ISL\_676011|Original|hCoV-19^^England|Human|Lighthouse Lab in Milton Keynes|Wellcome Sanger Institute for the COVID-19 Genomics UK (COG-UK) Consortium|Davies|United Kingdom

>Spike|hCoV-19/Wales/CAMC-A58A5C/2020|2020-10-09|EPI\_ISL\_609159|Original|hCoV-19^^Wales|Human|Lighthouse Lab in Cambridge|Wellcome Sanger Institute for the COVID-19 Genomics UK (COG-UK) consortium|Davies|United Kingdom

>Spike|hCoV-19/USA/TX-DSHS-1313/2020|2020-03-31|EPI\_ISL\_648245|Original|hCoV-19^^Texas|Human|Texas Department of State Health Services|Texas Department of State Health Services|Rahman|USA

>Spike|hCoV-19/England/ALDP-A708CD/2020|2020-10-14|EPI\_ISL\_608205|Original|hCoV-19^^England|Human|Lighthouse Lab in Alderley Park|Wellcome Sanger Institute for the COVID-19 Genomics UK (COG-UK) consortium|Davies|United Kingdom

>Spike|hCoV-19/Denmark/DCGC-18490/2020|2020-12-07|EPI\_ISL\_749999|Original|hCoV-19^^Nordjylland|Human|Department of Virus and Microbiological Special Diagnostics|Albertsen Lab|Michaelsen|Denmark

>Spike|hCoV-19/England/QEUEH-96EA18/2020|2020-08-19|EPI\_ISL\_530546|Original|hCoV-19^^England|Human|Lighthouse Lab in Glasgow|Wellcome Sanger Institute for the COVID-19 Genomics UK (COG-UK) consortium|Davies|United Kingdom

>Spike|hCoV-19/Wuhan/0125-A174/2020|2020-01-25|EPI\_ISL\_493163|Original|hCoV-19^^Hubei|Human|National Virus Resource Center|Computational Virology Group|Liu|China

>Spike|hCoV-19/Japan/PG-5253/2020|2020-08-00|EPI\_ISL\_690356|Original|hCoV-19^^Japan|Human|Pathogen Genomics Center|Pathogen Genomics Center|Sekizuka|Japan

>Spike|hCoV-19/Wales/PHWC-487DBB/2020|2020-10-31|EPI\_ISL\_637608|Original|hCoV-19^^Wales|Human|Wales Specialist Virology Centre Sequencing lab|COVID-19 Genomics UK (COG-UK) Consortium|Moore|United Kingdom

>Spike|hCoV-19/England/BRIS-12D6BF/2020|2020-05-07|EPI\_ISL\_481894|Original|hCoV-19^^England|Human|PHE South West Regional Laboratory|Wellcome Sanger Institute for the COVID-19 Genomics UK (COG-UK) consortium|Davies|United Kingdom

>Spike|hCoV-19/USA/CA-CZB-11856/2020|2020-10-02|EPI\_ISL\_625615|Original|hCoV-19^^California|Human|Alameda County Public Health Lab|Chan-Zuckerberg Biohub|Bhatt|USA

>Spike|hCoV-19/England/BRIS-12F037/2020|2020-04-24|EPI\_ISL\_488375|Original|hCoV-19^^England|Human|PHE South West Regional Laboratory|Wellcome Sanger Institute for the COVID-19 Genomics UK (COG-UK) consortium|Davies|United Kingdom

>Spike|hCoV-19/Wales/PHWC-4A2664/2020|2020-12-15|EPI\_ISL\_743922|Original|hCoV-19^^Wales|Human|Wales Specialist Virology Centre Sequencing lab|COVID-19 Genomics UK (COG-UK) Consortium|Moore|United Kingdom

>Spike|hCoV-19/USA/CA-SR0360/2020|2020-04-29|EPI\_ISL\_458244|Original|hCoV-19^^California|Human|Scripps Medical Laboratory|Andersen lab at Scripps Research|Gangavarapu|USA

>Spike|hCoV-19/Denmark/DCGC-20018/2020|2020-12-07|EPI\_ISL\_747933|Original|hCoV-19^^Syddanmark|Human|Department of Virus and Microbiological Special Diagnostics|Albertsen Lab|Michaelsen|Denmark

>Spike|hCoV-19/England/ALDP-AA37E2/2020|2020-10-22|EPI\_ISL\_625265|Original|hCoV-19^^England|Human|Lighthouse Lab in Alderley Park|Wellcome Sanger Institute for the COVID-19 Genomics UK (COG-UK) consortium|Davies|United Kingdom

>Spike|hCoV-19/USA/NM-NMDOH-2020330167/2020|2020-09-05|EPI\_ISL\_644606|Original|hCoV-19^^New Mexico|Human|New Mexico Department of Health Scientific Laboratory|New Mexico Department of Health Scientific Laboratory|Johnson|USA

>Spike|hCoV-19/Wales/PHWC-49CFFF/2020|2020-12-09|EPI\_ISL\_742691|Original|hCoV-19^^Wales|Human|Wales Specialist Virology Centre Sequencing lab|COVID-19 Genomics UK (COG-UK) Consortium|Moore|United Kingdom

>Spike|hCoV-19/DRC/431/2020|2020-03-26|EPI\_ISL\_420847|Original|hCoV-19^^Democratic Republic of the Congo|Human|Viral Respiratory Lab|Pathogen Sequencing Lab|Pratt|Democratic Republic of the Congo

>Spike|hCoV-19/Vietnam/VNHN\_0418/2020|2020-03-10|EPI\_ISL\_435311|Original|hCoV-19^^Vietnam|Human|National Hospital of Tropical Diseases|Oxford University Clinical Research Unit|Nguyen|Vietnam

>Spike|hCoV-19/Australia/WA171/2020|2020-09-14|EPI\_ISL\_596734|Original|hCoV-19^^Western Australia|Human|PathWest Laboratory Medicine WA|PathWest Laboratory Medicine WA Microbial Surveillance Unit|Sikazwe|Australia

>Spike|hCoV-19/Denmark/DCGC-4605/2020|2020-09-21|EPI\_ISL\_621274|Original|hCoV-19^^Hovedstaden|Human|Department of Virus and Microbiological Special Diagnostics|Albertsen lab|Michaelsen|Denmark

>Spike|hCoV-19/USA/TX-DSHS-1825/2020|2020-06-22|EPI\_ISL\_738191|Original|hCoV-19^^Texas|Human|Texas Department of State Health Services|Texas Department of State Health Services|Rahman|USA

>Spike|hCoV-19/Australia/NSW662/2020|2020-07-13|EPI\_ISL\_498781|Original|hCoV-19^^New South Wales|Human|Sydney South West Pathology Service (SSWPS) - Liverpool Hospital - NSW Health Pathology|NSW Health Pathology - Institute of Clinical Pathology and Medical Research; Westmead Hospital; University of Sydney|Gall|Australia

>Spike|hCoV-19/Scotland/QEUA-B10AE6/2020|2020-11-02|EPI\_ISL\_649569|Original|hCoV-19^^Scotland|Human|Lighthouse Lab in Glasgow|Wellcome Sanger Institute for the COVID-19 Genomics UK (COG-UK) Consortium|Davies|United Kingdom

>Spike|hCoV-19/Wales/PHWC-16CDBF/2020|2020-09-23|EPI\_ISL\_574167|Original|hCoV-19^^Wales|Human|Wales Specialist Virology Centre Sequencing lab|COVID-19 Genomics UK (COG-UK) Consortium|Moore|United Kingdom

>Spike|hCoV-19/USA/TX-HMH-2331/2020|2020-05-25|EPI\_ISL\_545250|Original|hCoV-19^^Texas|Human|Houston Methodist Hospital|Houston Methodist Hospital|Long|USA

>Spike|hCoV-19/Denmark/DCGC-1693/2020|2020-06-22|EPI\_ISL\_618161|Original|hCoV-19^^Nordjylland|Human|Department of Virus and Microbiological Special Diagnostics|Albertsen lab|Michaelsen|Denmark

>Spike|hCoV-19/Gibraltar/205000707/2020|2020-12-00|EPI\_ISL\_710029|Original|hCoV-19^^Gibraltar|Human|Microbiology|Respiratory Virus Unit|Platt|Gibraltar

>Spike|hCoV-19/Luxembourg/LNS9164114/2020|2020-11-06|EPI\_ISL\_744863|Original|hCoV-19^^Luxembourg|Human|Laboratoire national de sant\u00e9|Laboratoire national de sant\u00e9|Wienecke-Baldacchino|Luxembourg

>Spike|hCoV-19/Australia/VIC3910/2020|2020-00-00|EPI\_ISL\_520622|Original|hCoV-19^^Victoria|Human|Microbiological Diagnostic Unit - Public Health Laboratory (MDU-PHL)|MDU-PHL|Schultz|Australia

>Spike|hCoV-19/England/GSTT-5214/2020|2020-03-18|EPI\_ISL\_560662|Original|hCoV-19^^England|Human|Centre for Clinical Infection and Diagnostics Research and Genomics Innovation Unit|Centre for Clinical Infection and Diagnostics Research and Genomics Innovation Unit|Awan|United Kingdom

>Spike|hCoV-19/Denmark/DCGC-14948/2020|2020-11-23|EPI\_ISL\_713299|Original|hCoV-19^^Hovedstaden|Human|Department of Virus and Microbiological Special Diagnostics|Albertsen Lab|Michaelsen|Denmark

>Spike|hCoV-19/England/20182006804/2020|2020-04-27|EPI\_ISL\_465445|Original|hCoV-19^^England|Human|Respiratory Virus Unit|Respiratory Virus Unit|Platt|United Kingdom

>Spike|hCoV-19/USA/CA-QDX-1173/2020|2020-03-28|EPI\_ISL\_571820|Original|hCoV-19^^California|Human|Quest Diagnostics|Quest Diagnostics|Kagan|USA

>Spike|hCoV-19/USA/CA-ALSR-3226/2020|2020-07-14|EPI\_ISL\_635923|Original|hCoV-19^^California|Human|San Diego County Public Health Laboratory|Andersen lab at Scripps Research|Gangavarapu|USA

>Spike|hCoV-19/England/QEUA-C57BA3/2020|2020-12-12|EPI\_ISL\_736313|Original|hCoV-19^^England|Human|Lighthouse Lab in Glasgow|Wellcome Sanger Institute for the COVID-19 Genomics UK (COG-UK) Consortium|Davies|United Kingdom

>Spike|hCoV-19/Denmark/DCGC-21731/2020|2020-12-21|EPI\_ISL\_757770|Original|hCoV-19^^Hovedstaden|Human|Department of Virus and Microbiological Special Diagnostics|Albertsen Lab|Michaelsen|Denmark

>Spike|hCoV-19/Wales/PHWC-485B77/2020|2020-10-20|EPI\_ISL\_628257|Original|hCoV-19^^Wales|Human|Wales Specialist Virology Centre Sequencing lab|COVID-19 Genomics UK (COG-UK) Consortium|Moore|United Kingdom

>Spike|hCoV-19/England/MILK-A79949/2020|2020-10-14|EPI\_ISL\_606818|Original|hCoV-19^^England|Human|Lighthouse Lab in Milton Keynes|Wellcome Sanger Institute for the COVID-19 Genomics UK (COG-UK) consortium|Davies|United Kingdom

>Spike|hCoV-19/Denmark/DCGC-13494/2020|2020-11-30|EPI\_ISL\_712178|Original|hCoV-19^^Hovedstaden|Human|Department of Virus and Microbiological Special Diagnostics|Albertsen Lab|Michaelsen|Denmark

>Spike|hCoV-19/Saudi Arabia/KAUST-MADINAH1274/2020|2020-06-25|EPI\_ISL\_678006|Original|hCoV-19^^Madinah|Human|Pathogen Genomics Lab King Abdullah University of Science and Technology(KAUST)|Pathogen Genomics Lab King Abdullah University of Science and Technology(KAUST)|Mohamed Ghazzali|Saudi Arabia

>Spike|hCoV-19/England/MILK-A44E2A/2020|2020-10-06|EPI\_ISL\_598656|Original|hCoV-19^^England|Human|Lighthouse Lab in Milton Keynes|Wellcome Sanger Institute for the COVID-19 Genomics UK (COG-UK) consortium|Davies|United Kingdom

>Spike|hCoV-19/Switzerland/BE-ETHZ-270054/2020|2020-09-01|EPI\_ISL\_541419|Original|hCoV-19^^Bern|Human|Viollier AG|Department of Biosystems Science and Engineering|Nadeau|Switzerland

>Spike|hCoV-19/Chile/RM-CMM-ADC1858/2020|2020-06-08|EPI\_ISL\_591528|Original|hCoV-19^^Region Metropolitana de Santiago|Human|Medicina Norte U Chile - Servicio Medico Legal|Center for Mathematical Modeling and Center for Genome Regulation. Santiago|Palma V\|Chile

>Spike|hCoV-19/Japan/PG-6713/2020|2020-07-00|EPI\_ISL\_687824|Original|hCoV-19^^Japan|Human|Pathogen Genomics Center|Pathogen Genomics Center|Sekizuka|Japan

>Spike|hCoV-19/Portugal/PT0267/2020|2020-04-04|EPI\_ISL\_453981|Original|hCoV-19^^Portugal|Human|unknown|Instituto Nacional de Saude (INSA)|Borges|Portugal

>Spike|hCoV-19/USA/CA-CZB-10943/2020|2020-09-14|EPI\_ISL\_583030|Original|hCoV-19^^California|Human|Orange County Public Health Lab|Chan-Zuckerberg Biohub|Bhatt|USA

>Spike|hCoV-19/Beijing/DT-travelFR02/2020|2020-03-24|EPI\_ISL\_452337|Original|hCoV-19^^Beijing|Human|Laboratory of Infectious Diseases Center of Beijing Ditan Hospital|Laboratory of Infectious Diseases Center of Beijing Ditan Hospital|Yang|China

>Spike|hCoV-19/USA/TX-HMH037/2020|2020-03-08|EPI\_ISL\_434746|Original|hCoV-19^^Texas|Human|Houston Methodist Hospital|Houston Methodist Hospital|Long|USA

>Spike|hCoV-19/England/ALDP-A92E0F/2020|2020-10-20|EPI\_ISL\_610947|Original|hCoV-19^^England|Human|Lighthouse Lab in Alderley Park|Wellcome Sanger Institute for the COVID-19 Genomics UK (COG-UK) consortium|Davies|United Kingdom

>Spike|hCoV-19/England/MILK-ABB2C8/2020|2020-10-22|EPI\_ISL\_623493|Original|hCoV-19^^England|Human|Lighthouse Lab in Milton Keynes|Wellcome Sanger Institute for the COVID-19 Genomics UK (COG-UK) consortium|Davies|United Kingdom

>Spike|hCoV-19/England/LEED-2A86AC/2020|2020-04-02|EPI\_ISL\_539046|Original|hCoV-19^^England|Human|Leeds Teaching Hospitals NHS Trust and Public Health England|Wellcome Sanger Institute for the COVID-19 Genomics UK (COG-UK) consortium|Davies|United Kingdom

>Spike|hCoV-19/England/CAMB-7B05B/2020|2020-04-11|EPI\_ISL\_433908|Original|hCoV-19^^England|Human|Department of Pathology|COVID-19 Genomics UK (COG-UK) Consortium|Meredith|United Kingdom

>Spike|hCoV-19/England/ALDP-A50474/2020|2020-10-07|EPI\_ISL\_597666|Original|hCoV-19^^England|Human|Lighthouse Lab in Alderley Park|Wellcome Sanger Institute for the COVID-19 Genomics UK (COG-UK) consortium|Davies|United Kingdom

>Spike|hCoV-19/England/ALDP-9FCB2B/2020|2020-10-01|EPI\_ISL\_587797|Original|hCoV-19^^England|Human|Lighthouse Lab in Alderley Park|Wellcome Sanger Institute for the COVID-19 Genomics UK (COG-UK) consortium|Davies|United Kingdom

>Spike|hCoV-19/England/MILK-B3BCD0/2020|2020-11-01|EPI\_ISL\_679803|Original|hCoV-19^^England|Human|Oxford Viromics|COVID-19 Genomics UK (COG-UK) Consortium|Golubchik|United Kingdom

>Spike|hCoV-19/USA/TX-HMH-4600/2020|2020-06-22|EPI\_ISL\_543746|Original|hCoV-19^^Texas|Human|Houston Methodist Hospital|Houston Methodist Hospital|Long|USA

>Spike|hCoV-19/Australia/VIC2940/2020|2020-07-08|EPI\_ISL\_521770|Original|hCoV-19^^Victoria|Human|Microbiological Diagnostic Unit - Public Health Laboratory (MDU-PHL)|MDU-PHL|Schultz|Australia

>Spike|hCoV-19/England/ALDP-B5DFA2/2020|2020-11-09|EPI\_ISL\_723619|Original|hCoV-19^^England|Human|Northumbria University / South Tees Hospitals NHS Foundation Trust / North Cumbria Integrated Care NHS Foundation Trust / North Tees and Hartlepool NHS Foundation Trust / Newcastle Hospitals NHS Foundation Trust|COVID-19 Genomics UK (COG-UK) Consortium|Bashton|United Kingdom

>Spike|hCoV-19/England/MILK-ACC437/2020|2020-10-21|EPI\_ISL\_634423|Original|hCoV-19^^England|Human|Lighthouse Lab in Milton Keynes|Wellcome Sanger Institute for the COVID-19 Genomics UK (COG-UK) consortium|Davies|United Kingdom

>Spike|hCoV-19/USA/WI-UW-796/2020|2020-07-05|EPI\_ISL\_495500|Original|hCoV-19^^Wisconsin|Human|University of Wisconsin-Madison AIDS Vaccine Research Laboratories|University of Wisconsin-Madison AIDS Vaccine Research Laboratories|Baczenas|USA

>Spike|hCoV-19/Japan/PG-1118/2020|2020-04-00|EPI\_ISL\_684728|Original|hCoV-19^^Japan|Human|Tokyo Metropolitan Institute of Public Health|Pathogen Genomics Center|Sekizuka|Japan

>Spike|hCoV-19/England/QEUA-9608A3/2020|2020-08-04|EPI\_ISL\_532134|Original|hCoV-19^^England|Human|Lighthouse Lab in Glasgow|Wellcome Sanger Institute for the COVID-19 Genomics UK (COG-UK) consortium|Davies|United Kingdom

>Spike|hCoV-19/England/CAMB-1BBC1E/2020|2020-11-14|EPI\_ISL\_679209|Original|hCoV-19^^England|Human|Department of Pathology|COVID-19 Genomics UK (COG-UK) Consortium|Goodfellow|United Kingdom

>Spike|hCoV-19/USA/CA-CZB-4091/2020|2020-08-13|EPI\_ISL\_548634|Original|hCoV-19^^California|Human|Orange County Public Health Laboratory|Chan-Zuckerberg Biohub|Bhatt|USA

>Spike|hCoV-19/USA/CA-CZB-14420/2020|2020-07-08|EPI\_ISL\_739323|Original|hCoV-19^^California|Human|Alameda County Public Health Lab|Chan-Zuckerberg Biohub|Kamm|USA

>Spike|hCoV-19/England/20129056804/2020|2020-03-21|EPI\_ISL\_424052|Original|hCoV-19^^England|Human|Respiratory Virus Unit|Respiratory Virus Unit|Platt|United Kingdom

>Spike|hCoV-19/Canada/ON-UHTC\_0047/2020|2020-04-02|EPI\_ISL\_464012|unknown|hCoV-19^^Ontario|Human|Unity Health Toronto|Ontario Institute for Cancer Research|de Borja|Canada

>Spike|hCoV-19/USA/WA-UW-6343/2020|2020-04-02|EPI\_ISL\_570098|Original|hCoV-19^^Washington|Human|UW Virology Lab|UW Virology Lab|Roychoudhury|USA

>Spike|hCoV-19/Denmark/ALAB-SSI166/2020|2020-03-09|EPI\_ISL\_429380|Original|hCoV-19^^Denmark|Human|Department of Virus and Microbiological Special Diagnostics|Albertsen lab|Kirkegaard|Denmark

>Spike|hCoV-19/Denmark/DCGC-5804/2020|2020-09-28|EPI\_ISL\_620991|Original|hCoV-19^^Sjaelland|Human|Department of Virus and Microbiological Special Diagnostics|Albertsen lab|Michaelsen|Denmark

>Spike|hCoV-19/USA/WI-UW-260/2020|2020-04-18|EPI\_ISL\_428936|Original|hCoV-19^^Wisconsin|Human|University of Wisconsin-Madison AIDS Vaccine Research Laboratories|University of Wisconsin-Madison AIDS Vaccine Research Laboratories|Baczenas|USA

>Spike|hCoV-19/Portugal/PT1487/2020|2020-03-19|EPI\_ISL\_511446|Original|hCoV-19^^Portugal|Human|Instituto Nacional de Saude (INSA)|Instituto Nacional de Saude (INSA)|Borges|Portugal

>Spike|hCoV-19/Wales/PHWC-2BEBA/2020|2020-04-10|EPI\_ISL\_445863|Original|hCoV-19^^Wales|Human|Wales Specialist Virology Centre|Public Health Wales Microbiology Cardiff|Moore|United Kingdom

>Spike|hCoV-19/England/QEUA-B43983/2020|2020-11-08|EPI\_ISL\_657111|Original|hCoV-19^^England|Human|Lighthouse Lab in Glasgow|Wellcome Sanger Institute for the COVID-19 Genomics UK (COG-UK) Consortium|Davies|United Kingdom

>Spike|hCoV-19/Denmark/DCGC-5084/2020|2020-09-21|EPI\_ISL\_621622|Original|hCoV-19^^Sjaelland|Human|Department of Virus and Microbiological Special Diagnostics|Albertsen lab|Michaelsen|Denmark

>Spike|hCoV-19/Portugal/PT0601/2020|2020-04-06|EPI\_ISL\_454324|Original|hCoV-19^^Portugal|Human|unknown|Instituto Nacional de Saude (INSA)|Borges|Portugal

>Spike|hCoV-19/Japan/PG-4678/2020|2020-08-00|EPI\_ISL\_689815|Original|hCoV-19^^Japan|Human|Fukuoka Institute of Health and Environmental Sciences|Pathogen Genomics Center|Sekizuka|Japan

>Spike|hCoV-19/England/BRIS-129EBB/2020|2020-04-16|EPI\_ISL\_458317|Original|hCoV-19^^England|Human|PHE South West Regional Laboratory|Wellcome Sanger Institute for the COVID-19 Genomics UK (COG-UK) consortium|Davies|United Kingdom

>Spike|hCoV-19/Japan/PG-5267/2020|2020-08-00|EPI\_ISL\_690370|Original|hCoV-19^^Japan|Human|Pathogen Genomics Center|Pathogen Genomics Center|Sekizuka|Japan

>Spike|hCoV-19/Germany/HH-hpi-p2380/2020|2020-06-04|EPI\_ISL\_776458|Original|hCoV-19^^Hamburg|Human|University Medical Center Hamburg Eppendorf|Heinrich Pette Institute|Robitaille|Germany

>Spike|hCoV-19/USA/UT-UPHL-2009149/2020|2020-05-27|EPI\_ISL\_525139|Original|hCoV-19^^Utah|Human|Utah Public Health Laboratory|Utah Public Health Laboratory|Young|USA

>Spike|hCoV-19/England/NORW-EDA1A/2020|2020-00-00|EPI\_ISL\_490510|Original|hCoV-19^^England|Human|Quadram Institute Bioscience|COVID-19 Genomics UK (COG-UK) Consortium|Alikhan|United Kingdom

>Spike|hCoV-19/USA/CA-ALSR-1338/2020|2020-04-30|EPI\_ISL\_494501|Original|hCoV-19^^California|Human|San Diego County Public Health Laboratory|Andersen lab at Scripps Research|Gangavarapu|USA

>Spike|hCoV-19/England/QEUA-998CB5/2020|2020-08-26|EPI\_ISL\_539911|Original|hCoV-19^^England|Human|Lighthouse Lab in Glasgow|Wellcome Sanger Institute for the COVID-19 Genomics UK (COG-UK) consortium|Davies|United Kingdom

>Spike|hCoV-19/Wales/PHWC-27759/2020|2020-03-31|EPI\_ISL\_432303|Original|hCoV-19^^Wales|Human|Wales Specialist Virology Centre|Public Health Wales Microbiology Cardiff|Moore|United Kingdom

>Spike|hCoV-19/Scotland/EDB2362/2020|2020-04-22|EPI\_ISL\_439191|Original|hCoV-19^^Scotland|Human|Virology Department|COVID-19 Genomics UK (COG-UK) Consortium|Williams|United Kingdom

>Spike|hCoV-19/England/204691655/2020|2020-11-13|EPI\_ISL\_686599|Original|hCoV-19^^England|Human|Respiratory Virus Unit|COVID-19 Genomics UK (COG-UK) Consortium|Platt|United Kingdom

>Spike|hCoV-19/USA/MI-UM-10036756586/2020|2020-11-03|EPI\_ISL\_682176|Original|hCoV-19^^Michigan|Human|University of Michigan Clinical Microbiology Laboratory|Lauring Lab|Valesano|USA

>Spike|hCoV-19/England/ALDP-B47FAB/2020|2020-11-07|EPI\_ISL\_649324|Original|hCoV-19^^England|Human|Lighthouse Lab in Alderley Park|Wellcome Sanger Institute for the COVID-19 Genomics UK (COG-UK) Consortium|Davies|United Kingdom

>Spike|hCoV-19/Japan/PG-8571/2020|2020-08-00|EPI\_ISL\_686167|Original|hCoV-19^^Japan|Human|Pathogen Genomics Center|Pathogen Genomics Center|Sekizuka|Japan

>Spike|hCoV-19/England/ALDP-952112/2020|2020-06-09|EPI\_ISL\_551318|Original|hCoV-19^^England|Human|Lighthouse Lab in Alderley Park|Wellcome Sanger Institute for the COVID-19 Genomics UK (COG-UK) consortium|Davies|United Kingdom

>Spike|hCoV-19/England/MILK-9C3176/2020|2020-09-10|EPI\_ISL\_566737|Original|hCoV-19^^England|Human|Lighthouse Lab in Milton Keynes|Wellcome Sanger Institute for the COVID-19 Genomics UK (COG-UK) consortium|Davies|United Kingdom

>Spike|hCoV-19/Scotland/EDB4249/2020|2020-04-16|EPI\_ISL\_456939|Original|hCoV-19^^Scotland|Human|Virology Department|COVID-19 Genomics UK (COG-UK) Consortium|Williams|United Kingdom



>Spike|hCoV-19/Australia/VIC13054/2020|2020-08-08|EPI\_ISL\_592168|Original|hCoV-19^^Victoria|Human|Victorian Infectious Diseases Reference Laboratory (VIDRL)|VIDRL and MDU-PHL|Schultz|Australia

>Spike|hCoV-19/USA/WA-S545/2020|2020-03-31|EPI\_ISL\_434305|Original|hCoV-19^^Washington|Human|Washington State Department of Health|Seattle Flu Study|Bedford|USA

>Spike|hCoV-19/England/NORW-E8E7D/2020|2020-04-28|EPI\_ISL\_461813|Original|hCoV-19^^England|Human|Quadram Institute Bioscience|COVID-19 Genomics UK (COG-UK) Consortium|Alikhan|United Kingdom

>Spike|hCoV-19/Luxembourg/LNS0351170/2020|2020-10-23|EPI\_ISL\_739760|Original|hCoV-19^^Luxembourg|Human|Laboratoire national de sant\u00e9|Laboratoire national de sant\u00e9|Wienecke-Baldacchino|Luxembourg

>Spike|hCoV-19/Belgium/VT-0325143/2020|2020-03-25|EPI\_ISL\_420400|Original|hCoV-19^^Lummen|Human|KU Leuven|KU Leuven|Maes|Belgium

>Spike|hCoV-19/Iran/K1r-121/2020|2020-05-27|EPI\_ISL\_568508|Original|hCoV-19^^Iran|Human|Virology|Virology|Ranjbar|Iran

>Spike|hCoV-19/England/BRIS-125963/2020|2020-03-30|EPI\_ISL\_443865|Original|hCoV-19^^England|Human|PHE South West Regional Laboratory|Wellcome Sanger Institute for the COVID-19 Genomics UK (COG-UK) consortium|Amato|United Kingdom

>Spike|hCoV-19/England/MILK-970E44/2020|2020-08-18|EPI\_ISL\_553114|Original|hCoV-19^^England|Human|Lighthouse Lab in Milton Keynes|Wellcome Sanger Institute for the COVID-19 Genomics UK (COG-UK) consortium|Davies|United Kingdom

>Spike|hCoV-19/USA/CA-CZB-1909/2020|2020-04-22|EPI\_ISL\_486202|Original|hCoV-19^^California|Human|Orange County Public Health Laboratory|Chan-Zuckerberg Biohub|McGeever|USA

>Spike|hCoV-19/England/QEUEH-B2B9EB/2020|2020-11-02|EPI\_ISL\_646742|Original|hCoV-19^^England|Human|Lighthouse Lab in Glasgow|Wellcome Sanger Institute for the COVID-19 Genomics UK (COG-UK) Consortium|Davies|United Kingdom

>Spike|hCoV-19/England/MILK-A7A1AA/2020|2020-10-15|EPI\_ISL\_606702|Original|hCoV-19^^England|Human|Lighthouse Lab in Milton Keynes|Wellcome Sanger Institute for the COVID-19 Genomics UK (COG-UK) consortium|Davies|United Kingdom

>Spike|hCoV-19/England/LEED-2AA5E9/2020|2020-04-09|EPI\_ISL\_538856|Original|hCoV-19^^England|Human|Leeds Teaching Hospitals NHS Trust and Public Health England|Wellcome Sanger Institute for the COVID-19 Genomics UK (COG-UK) consortium|Davies|United Kingdom

>Spike|hCoV-19/England/MILK-ACDADA/2020|2020-10-21|EPI\_ISL\_630071|Original|hCoV-19^^England|Human|Lighthouse Lab in Milton Keynes|Wellcome Sanger Institute for the COVID-19 Genomics UK (COG-UK) consortium|Davies|United Kingdom

>Spike|hCoV-19/Switzerland/BS-ETHZ-100028/2020|2020-03-10|EPI\_ISL\_466952|Original|hCoV-19^^Basel-Stadt|Human|Viollier AG|Department of Biosystems Science and Engineering|Nadeau|Switzerland

>Spike|hCoV-19/England/MILK-A45797/2020|2020-10-06|EPI\_ISL\_598643|Original|hCoV-19^^England|Human|Lighthouse Lab in Milton Keynes|Wellcome Sanger Institute for the COVID-19 Genomics UK (COG-UK) consortium|Davies|United Kingdom

>Spike|hCoV-19/USA/TX-DSHS-1587/2020|2020-06-22|EPI\_ISL\_700728|Original|hCoV-19^^Texas|Human|Texas Department of State Health Services|Texas Department of State Health Services|Rahman|USA

>Spike|hCoV-19/USA/MI-MDHHS-SC22693/2020|2020-11-19|EPI\_ISL\_737307|Original|hCoV-19^^Michigan|Human|Michigan Department of Health and Human Services|Michigan Department of Health and Human Services|Blankenship|USA

>Spike|hCoV-19/Spain/RI-IBV-99005837/2020|2020-03-22|EPI\_ISL\_537382|Original|hCoV-19^^La Rioja|Human|Centro de Investigaci\u00f3n Biom\u00e9dica de La Rioja - Hospital San Pedro Logro\u00f1o|SeqCOVID-SPAIN consortium|IBV (CSIC)|Comas|Spain

>Spike|hCoV-19/England/QEUEH-C15FF0/2020|2020-12-06|EPI\_ISL\_709456|Original|hCoV-19^^England|Human|Lighthouse Lab in Glasgow|Wellcome Sanger Institute for the COVID-19 Genomics UK (COG-UK) Consortium|Davies|United Kingdom

>Spike|hCoV-19/Scotland/GCVR-17234B/2020|2020-03-30|EPI\_ISL\_470009|Original|hCoV-19^^Scotland|Human|NHSGGC West of Scotland Specialist Virology Centre / MRC - University of Glasgow Centre for Virus Research|Wellcome Sanger Institute for the COVID-19 Genomics UK (COG-UK) consortium|Davies|United Kingdom

>Spike|hCoV-19/France/OCC-69/2020|2020-07-22|EPI\_ISL\_593883|Original|hCoV-19^^Occitanie|Human|CHU Purpan - Laboratoire de Virologie - Institut F\u00e9d\u00e9ratif de Biologie|CHU Purpan - Laboratoire de Virologie - Institut F\u00e9d\u00e9ratif de Biologie|Latour|France

>Spike|hCoV-19/South Korea/KCDC2611/2020|2020-07-01|EPI\_ISL\_515014|Original|hCoV-19^^South Korea|Human|Division of Viral Diseases|Division of Viral Diseases|Kim|South Korea

>Spike|hCoV-19/USA/TX-HMH-MCoV-14866/2020|2020-10-13|EPI\_ISL\_786350|Original|hCoV-19^^Texas|Human|Houston Methodist Hospital|Houston Methodist Hospital|Long|USA

>Spike|hCoV-19/England/ALDP-9FD03A/2020|2020-10-02|EPI\_ISL\_587963|Original|hCoV-19^^England|Human|Lighthouse Lab in Alderley Park|Wellcome Sanger Institute for the COVID-19 Genomics UK (COG-UK) consortium|Davies|United Kingdom

>Spike|hCoV-19/Spain/MD-HLP-LP15-4/2020|2020-03-09|EPI\_ISL\_417978|Original|hCoV-19^^Madrid|Human|Hospital Universitario La Paz|Hospital Universitario La Paz|Viedma|Spain

>Spike|hCoV-19/England/QEUA-AD27BD/2020|2020-10-24|EPI\_ISL\_633876|Original|hCoV-19^^England|Human|Lighthouse Lab in Glasgow|Wellcome Sanger Institute for the COVID-19 Genomics UK (COG-UK) consortium|Davies|United Kingdom

>Spike|hCoV-19/Denmark/DCGC-1214/2020|2020-05-18|EPI\_ISL\_614442|Original|hCoV-19^^Hovedstaden|Human|Department of Virus and Microbiological Special Diagnostics|Albertsen lab|Michaelsen|Denmark

>Spike|hCoV-19/England/ALDP-A688D7/2020|2020-10-12|EPI\_ISL\_608580|Original|hCoV-19^^England|Human|Lighthouse Lab in Alderley Park|Wellcome Sanger Institute for the COVID-19 Genomics UK (COG-UK) consortium|Davies|United Kingdom

>Spike|hCoV-19/Lithuania/ChVir2225/2020|2020-03-00|EPI\_ISL\_450496|Original|hCoV-19^^Lithuania|Human|National Public Health Surveillance Laboratory|Charite Universitaetsmedizin Berlin|Muehlemann|Lithuania

>Spike|hCoV-19/USA/NY-Wadsworth-286122-01/2020|2020-12-10|EPI\_ISL\_754568|Original|hCoV-19^^New York|Human|Wadsworth Center|Wadsworth Center|Lasek-Nesselquist|USA

>Spike|hCoV-19/DRC/11123/2020|2020-05-24|EPI\_ISL\_527496|Original|hCoV-19^^Kinshasa|Human|Viral Respiratory Lab|Pathogen Sequencing Lab|Lokilo|Democratic Republic of the Congo

>Spike|hCoV-19/USA/WI-GMF-20504/2020|2020-09-15|EPI\_ISL\_660798|Original|hCoV-19^^Wisconsin|Human|Gundersen Molecular Diagnostics Laboratory|Kabara Cancer Research Institute|Kenny|USA

>Spike|hCoV-19/USA/UT-02550/2020|2020-04-23|EPI\_ISL\_487203|Original|hCoV-19^^Utah|Human|Utah Public Health Laboratory|Utah Public Health Laboratory|Butz|USA

>Spike|hCoV-19/England/QEUA-9B3B99/2020|2020-09-08|EPI\_ISL\_573536|Original|hCoV-19^^England|Human|Virology Department|COVID-19 Genomics UK (COG-UK) Consortium|de Silva|United Kingdom

>Spike|hCoV-19/England/CAMB-1B78E1/2020|2020-11-24|EPI\_ISL\_705536|Original|hCoV-19^^England|Human|Department of Pathology|COVID-19 Genomics UK (COG-UK) Consortium|Goodfellow|United Kingdom

>Spike|hCoV-19/England/ALDP-A2D6F2/2020|2020-10-06|EPI\_ISL\_586783|Original|hCoV-19^^England|Human|Lighthouse Lab in Alderley Park|Wellcome Sanger Institute for the COVID-19 Genomics UK (COG-UK) consortium|Davies|United Kingdom

>Spike|hCoV-19/South Korea/KDCA0359/2020|2020-10-21|EPI\_ISL\_760144|Original|hCoV-19^^South Korea|Human|Division of Emerging Infectious Diseases|Division of Emerging Infectious Diseases|Park|South Korea

>Spike|hCoV-19/England/QEUA-B412D5/2020|2020-11-08|EPI\_ISL\_658682|Original|hCoV-19^^England|Human|Lighthouse Lab in Glasgow|Wellcome Sanger Institute for the COVID-19 Genomics UK (COG-UK) Consortium|Davies|United Kingdom

>Spike|hCoV-19/Wales/PHWC-322C3/2020|2020-04-08|EPI\_ISL\_446629|Original|hCoV-19^^Wales|Human|Wales Specialist Virology Centre|Public Health Wales Microbiology Cardiff|Moore|United Kingdom

>Spike|hCoV-19/England/QEUA-B67AA4/2020|2020-11-11|EPI\_ISL\_661372|Original|hCoV-19^^England|Human|Lighthouse Lab in Glasgow|Wellcome Sanger Institute for the COVID-19 Genomics UK (COG-UK) Consortium|Davies|United Kingdom

>Spike|hCoV-19/England/LIVE-DB6497/2020|2020-11-07|EPI\_ISL\_651319|Original|hCoV-19^^England|Human|Liverpool Clinical Laboratories|COVID-19 Genomics UK (COG-UK) Consortium|Haldenby|United Kingdom

>Spike|hCoV-19/Denmark/DCGC-19379/2020|2020-12-07|EPI\_ISL\_748916|Original|hCoV-19^^Syddanmark|Human|Department of Virus and Microbiological Special Diagnostics|Albertsen Lab|Michaelsen|Denmark

>Spike|hCoV-19/USA/WI-UW-1397/2020|2020-09-04|EPI\_ISL\_536768|Original|hCoV-19^^Wisconsin|Human|University of Wisconsin-Madison AIDS Vaccine Research Laboratories|University of Wisconsin-Madison AIDS Vaccine Research Laboratories|Baczenas|USA

>Spike|hCoV-19/Iceland/182/2020|2020-03-16|EPI\_ISL\_417724|Original|hCoV-19^^Reykjavik|Human|The National University Hospital of Iceland|deCODE genetics|J\u00f3nsson|Iceland

>Spike|hCoV-19/England/CAMB-7DB0D/2020|2020-04-06|EPI\_ISL\_441768|Original|hCoV-19^^England|Human|Department of Pathology|Wellcome Sanger Institute for the COVID-19 Genomics UK (COG-UK) consortium|Amato|United Kingdom

>Spike|hCoV-19/South Africa/NHLS-UCT-GS-2131/2020|2020-09-23|EPI\_ISL\_700526|Original|hCoV-19^^Western Cape|Human|Knysna CDC wc WLC|NHLS/UCT|Iranzadeh|South Africa

>Spike|hCoV-19/England/CAMB-76B9B/2020|2020-03-31|EPI\_ISL\_438265|Original|hCoV-19^^England|Human|Department of Pathology|Wellcome Sanger Institute for the COVID-19 Genomics UK (COG-UK) consortium|Amato|United Kingdom

>Spike|hCoV-19/Denmark/DCGC-18767/2020|2020-12-07|EPI\_ISL\_748544|Original|hCoV-19^^Nordjylland|Human|Department of Virus and Microbiological Special Diagnostics|Albertsen Lab|Michaelsen|Denmark

>Spike|hCoV-19/Wales/PHWC-31E39/2020|2020-04-07|EPI\_ISL\_446574|Original|hCoV-19^^Wales|Human|Wales Specialist Virology Centre|Public Health Wales Microbiology Cardiff|Moore|United Kingdom

>Spike|hCoV-19/mink/Netherlands/NB02\_06KS/2020|2020-04-29|EPI\_ISL\_447628|Original|hCoV-19^^Netherlands|Mustela lutreola|Virology|Virology|Harders|Netherlands

>Spike|hCoV-19/England/MILK-AB737E/2020|2020-10-18|EPI\_ISL\_623486|Original|hCoV-19^^England|Human|Lighthouse Lab in Milton Keynes|Wellcome Sanger Institute for the COVID-19 Genomics UK (COG-UK) consortium|Davies|United Kingdom

>Spike|hCoV-19/USA/WY-WYPHL-20094896/2020|2020-10-12|EPI\_ISL\_754183|Original|hCoV-19^^Wyoming|Human|Wyoming Public Health Laboratory|Wyoming Public Health Laborator|Hull|USA

>Spike|hCoV-19/England/ALDP-B46364/2020|2020-11-07|EPI\_ISL\_656105|Original|hCoV-19^^England|Human|Lighthouse Lab in Alderley Park|Wellcome Sanger Institute for the COVID-19 Genomics UK (COG-UK) Consortium|Davies|United Kingdom

>Spike|hCoV-19/Wales/CAMC-A64A02/2020|2020-10-10|EPI\_ISL\_608881|Original|hCoV-19^^Wales|Human|Lighthouse Lab in Cambridge|Wellcome Sanger Institute for the COVID-19 Genomics UK (COG-UK) consortium|Davies|United Kingdom

>Spike|hCoV-19/England/LIVE-A59D5/2020|2020-03-17|EPI\_ISL\_499526|Original|hCoV-19^^England|Human|Liverpool Clinical Laboratories|COVID-19 Genomics UK (COG-UK) Consortium|Haldenby|United Kingdom

>Spike|hCoV-19/Canada/ON-PHL-20-01785/2020|2020-07-00|EPI\_ISL\_636935|Original|hCoV-19^^Ontario|Human|Public Health Ontario Laboratory|Public Health Ontario Laboratory|Guthrie|Canada

>Spike|hCoV-19/Australia/VIC8845/2020|2020-07-23|EPI\_ISL\_565231|Original|hCoV-19^^Victoria|Human|Microbiological Diagnostic Unit - Public Health Laboratory (MDU-PHL)|MDU-PHL|Schultz|Australia

>Spike|hCoV-19/Switzerland/Vs-ETHZ-100361/2020|2020-03-19|EPI\_ISL\_574976|Original|hCoV-19^^Valais|Human|Viollier AG|Department of Biosystems Science and Engineering|Nadeau|Switzerland

>Spike|hCoV-19/Turkey/IST-GLAB-238/2020|2020-05-15|EPI\_ISL\_735305|Original|hCoV-19^^Istanbul|Human|Genomic Laboratory (GLAB) (Conjoint lab of Health Directorate of Istanbul and Istanbul Technical University)|Genomic Laboratory (GLAB)|Karacan|Turkey

>Spike|hCoV-19/USA/WA-UW-22216/2020|2020-08-03|EPI\_ISL\_570588|Original|hCoV-19^^Washington|Human|UW Virology Lab|UW Virology Lab|Roychoudhury|USA

>Spike|hCoV-19/Denmark/DCGC-22224/2020|2020-12-14|EPI\_ISL\_757939|Original|hCoV-19^^Midtjylland|Human|Department of Virus and Microbiological Special Diagnostics|Albertsen Lab|Michaelsen|Denmark

>Spike|hCoV-19/England/CAMB-1B7D97/2020|2020-10-14|EPI\_ISL\_637686|Original|hCoV-19^^England|Human|Department of Pathology|COVID-19 Genomics UK (COG-UK) Consortium|Goodfellow|United Kingdom

>Spike|hCoV-19/Australia/VIC6307/2020|2020-07-23|EPI\_ISL\_518295|Original|hCoV-19^^Victoria|Human|Microbiological Diagnostic Unit - Public Health Laboratory (MDU-PHL)|MDU-PHL|Schultz|Australia

>Spike|hCoV-19/England/MILK-BB04BD/2020|2020-11-17|EPI\_ISL\_720186|Original|hCoV-19^^England|Human|Lighthouse Lab in Milton Keynes|Wellcome Sanger Institute for the COVID-19 Genomics UK (COG-UK) Consortium|Davies|United Kingdom

>Spike|hCoV-19/England/ALDP-AA182D/2020|2020-10-22|EPI\_ISL\_624917|Original|hCoV-19^^England|Human|Lighthouse Lab in Alderley Park|Wellcome Sanger Institute for the COVID-19 Genomics UK (COG-UK) consortium|Davies|United Kingdom

>Spike|hCoV-19/England/ALDP-B5D3E2/2020|2020-11-10|EPI\_ISL\_678895|Original|hCoV-19^^England|Human|Department of Pathology|COVID-19 Genomics UK (COG-UK) Consortium|Goodfellow|United Kingdom

>Spike|hCoV-19/Israel/CVL-172-ngs/2020|2020-12-27|EPI\_ISL\_776820|Original|hCoV-19^^Israel|Human|Israel Central Virology laboratory|Israel Central Virology laboratory|Zuckerman|Israel

>Spike|hCoV-19/Spain/GA-IBV-002754/2020|2020-04-13|EPI\_ISL\_467288|Original|hCoV-19^^Galicia|Human|Hospital Cl\u00e9nico Universitario de Santiago de Compostela|SeqCOVID-SPAIN consortium/IBV (CSIC)|Comas|Spain

>Spike|hCoV-19/USA/WA-UW-13207/2020|2020-07-01|EPI\_ISL\_570958|Original|hCoV-19^^Washington|Human|UW Virology Lab|UW Virology Lab|Roychoudhury|USA

>Spike|hCoV-19/Chile/RM-190882/2020|2020-09-25|EPI\_ISL\_746744|Original|hCoV-19^^Region Metropolitana de Santiago|Human|Genética Molecular and Subdepartamento de Virología ISP Chile|Instituto de Salud Pública de Chile|Tognarelli|Chile

>Spike|hCoV-19/USA/TX-HMH-MCoV-14552/2020|2020-10-09|EPI\_ISL\_787837|Original|hCoV-19^^Texas|Human|Houston Methodist Hospital|Houston Methodist Hospital|Long|USA

>Spike|hCoV-19/England/NORW-F2D19/2020|2020-11-10|EPI\_ISL\_650327|Original|hCoV-19^^England|Human|Quadram Institute Bioscience|COVID-19 Genomics UK (COG-UK) Consortium|Alikhan|United Kingdom

>Spike|hCoV-19/Sweden/20-50272/2020|2020-03-09|EPI\_ISL\_455905|Original|hCoV-19^^Uppsala|Human|Klinisk mikrobiologi|The Public Health Agency of Sweden|Svartstr\u00f6m|Sweden

>Spike|hCoV-19/India/MH-IGIB-C2/2020|2020-07-13|EPI\_ISL\_528424|Original|hCoV-19^^Maharashtra|Human|TNMC & BYL NAIR CH. HOSPITAL|Institute of Genomics and Integrative Biology - Council of Scientific and Industrial Research|Pandey|India

>Spike|hCoV-19/Iceland/374/2020|2020-03-19|EPI\_ISL\_424398|Original|hCoV-19^^Reykjavik|Human|The National University Hospital of Iceland|deCODE genetics|J\u00f3nsson|Iceland

>Spike|hCoV-19/England/EXET-13DB17/2020|2020-12-01|EPI\_ISL\_724277|Original|hCoV-19^^England|Human|University of Exeter|COVID-19 Genomics UK (COG-UK) Consortium|Temperton|United Kingdom

>Spike|hCoV-19/England/CAMC-B20DEA/2020|2020-11-02|EPI\_ISL\_647692|Original|hCoV-19^^England|Human|Lighthouse Lab in Cambridge|Wellcome Sanger Institute for the COVID-19 Genomics UK (COG-UK) Consortium|Davies|United Kingdom

>Spike|hCoV-19/Singapore/1186/2020|2020-04-13|EPI\_ISL\_648114|Original|hCoV-19^^Singapore|Human|Department of Laboratory Medicine|Department of Laboratory Medicine|Chen|Singapore

>Spike|hCoV-19/USA/TX-HMH-MCoV-9163/2020|2020-07-02|EPI\_ISL\_780976|Original|hCoV-19^^Texas|Human|Houston Methodist Hospital|Houston Methodist Hospital|Long|USA

>Spike|hCoV-19/USA/TX-DSHS-1480/2020|2020-06-22|EPI\_ISL\_676645|Original|hCoV-19^^Texas|Human|Texas Department of State Health Services|Texas Department of State Health Services|Rahman|USA

>Spike|hCoV-19/Panama/339494/2020|2020-04-11|EPI\_ISL\_496895|Original|hCoV-19^^Colon|Human|Gorgas Memorial Laboratory of Health Studies|Gorgas Memorial Laboratory of Health Studies|Martinez|Panama

>Spike|hCoV-19/Canada/NS-NML-159/2020|2020-04-17|EPI\_ISL\_579529|Original|hCoV-19^^Nova Scotia|Human|QEII Health Sciences Centre|National Microbiology Laboratory (NML)|Majer|Canada

>Spike|hCoV-19/USA/UT-QDX-1851/2020|2020-03-16|EPI\_ISL\_604167|Original|hCoV-19^^Utah|Human|Quest Diagnostics|Quest Diagnostics|Kagan|USA

>Spike|hCoV-19/Netherlands/NA\_498/2020|2020-03-26|EPI\_ISL\_460671|Original|hCoV-19^^Netherlands|Human|Dutch COVID-19 response team|Erasmus Medical Center|Oude Munnink|Netherlands

>Spike|hCoV-19/Wales/ALDP-A675A4/2020|2020-10-08|EPI\_ISL\_634754|Original|hCoV-19^^Wales|Human|Lighthouse Lab in Alderley Park|Wellcome Sanger Institute for the COVID-19 Genomics UK (COG-UK) consortium|Davies|United Kingdom

>Spike|hCoV-19/USA/WI-WSLH-200652/2020|2020-06-17|EPI\_ISL\_631419|Original|hCoV-19^^Wisconsin|Human|Wisconsin State Laboratory of Hygiene Communicable Disease Division|Wisconsin State Laboratory of Hygiene Communicable Disease Division|Florek|USA

>Spike|hCoV-19/Scotland/CVR5253/2020|2020-10-16|EPI\_ISL\_627415|Original|hCoV-19^^Scotland|Human|West of Scotland Specialist Virology Centre|COVID-19 Genomics UK (COG-UK) Consortium|Robertson|United Kingdom

>Spike|hCoV-19/USA/AZ-TG664530/2020|2020-04-20|EPI\_ISL\_696147|Original|hCoV-19^^Arizona|Human|Sonora Quest Laboratories|TGen North|French|USA

>Spike|hCoV-19/USA/MN-MDH-1100/2020|2020-06-03|EPI\_ISL\_470780|Original|hCoV-19^^Minnesota|Human|Minnesota Department of Health|Minnesota Department of Health|Garfin|USA

>Spike|hCoV-19/England/QEUEH-9AE566/2020|2020-09-04|EPI\_ISL\_665956|Original|hCoV-19^^England|Human|University of Exeter|COVID-19 Genomics UK (COG-UK) Consortium|Temperton|United Kingdom

>Spike|hCoV-19/England/QEUEH-AF4982/2020|2020-10-30|EPI\_ISL\_663141|Original|hCoV-19^^England|Human|Lighthouse Lab in Glasgow|Wellcome Sanger Institute for the COVID-19 Genomics UK (COG-UK) Consortium|Davies|United Kingdom

>Spike|hCoV-19/Belgium/GOF-030578/2020|2020-03-05|EPI\_ISL\_420334|Original|hCoV-19^^Berloz|Human|KU Leuven|KU Leuven|Maes|Belgium

>Spike|hCoV-19/New Zealand/20CV0329/2020|2020-04-03|EPI\_ISL\_579091|Original|hCoV-19^^Hawkes Bay|Human|Canterbury Health Laboratories|Institute of Environmental Science and Research (ESR)|Wang|New Zealand

>Spike|hCoV-19/USA/MA-MGH-03176/2020|2020-09-24|EPI\_ISL\_765733|Original|hCoV-19^^Massachusetts|Human|Massachusetts General Hospital|Infectious Disease Program|Park|USA

>Spike|hCoV-19/England/NOTT-1107BC/2020|2020-04-20|EPI\_ISL\_441858|Original|hCoV-19^^England|Human|Queens Medical Centre|COVID-19 Genomics UK (COG-UK) Consortium|Loose|United Kingdom

>Spike|hCoV-19/Australia/VIC16339/2020|2020-08-03|EPI\_ISL\_641137|Original|hCoV-19^^Victoria|Human|Microbiological Diagnostic Unit - Public Health Laboratory (MDU-PHL)|MDU-PHL|Schultz|Australia

>Spike|hCoV-19/Denmark/DCGC-22421/2020|2020-12-14|EPI\_ISL\_757554|Original|hCoV-19^^Hovedstaden|Human|Department of Virus and Microbiological Special Diagnostics|Albertsen Lab|Michaelsen|Denmark

>Spike|hCoV-19/Denmark/DCGC-18898/2020|2020-12-07|EPI\_ISL\_748626|Original|hCoV-19^^Syddanmark|Human|Department of Virus and Microbiological Special Diagnostics|Albertsen Lab|Michaelsen|Denmark

>Spike|hCoV-19/England/LIVE-DCB356/2020|2020-11-25|EPI\_ISL\_724399|Original|hCoV-19^^England|Human|Liverpool Clinical Laboratories|COVID-19 Genomics UK (COG-UK) Consortium|Haldenby|United Kingdom

>Spike|hCoV-19/England/ALDP-6B715A/2020|2020-06-29|EPI\_ISL\_557762|Original|hCoV-19^^England|Human|Lighthouse Lab in Alderley Park|Wellcome Sanger Institute for the COVID-19 Genomics UK (COG-UK) consortium|Davies|United Kingdom

>Spike|hCoV-19/USA/WA-S1274/2020|2020-05-12|EPI\_ISL\_495724|Original|hCoV-19^^Washington|Human|Washington State Department of Health|Seattle Flu Study|Lee|USA

>Spike|hCoV-19/USA/TX-HMH-6332/2020|2020-07-04|EPI\_ISL\_547396|Original|hCoV-19^^Texas|Human|Houston Methodist Hospital|Houston Methodist Hospital|Long|USA

>Spike|hCoV-19/USA/CO-Broad-CMU\_00118/2020|2020-11-10|EPI\_ISL\_765580|Original|hCoV-19^^Colorado|Human|Colorado Mesa University|Infectious Disease Program|Park|USA

>Spike|hCoV-19/Australia/VIC16073/2020|2020-08-03|EPI\_ISL\_640932|Original|hCoV-19^^Victoria|Human|Microbiological Diagnostic Unit - Public Health Laboratory (MDU-PHL)|MDU-PHL|Schultz|Australia

>Spike|hCoV-19/USA/CA-UCLA-260/2020|2020-02-28|EPI\_ISL\_537558|Original|hCoV-19^^California|Human|UCLA Pathology Clinical Microbiology Lab|Kruglyak Lab|Boocock|USA

>Spike|hCoV-19/England/BRIS-130983/2020|2020-03-11|EPI\_ISL\_492665|Original|hCoV-19^^England|Human|PHE South West Regional Laboratory|Wellcome Sanger Institute for the COVID-19 Genomics UK (COG-UK) consortium|Davies|United Kingdom

>Spike|hCoV-19/England/ALDP-B5BDAA/2020|2020-11-09|EPI\_ISL\_655481|Original|hCoV-19^^England|Human|Lighthouse Lab in Alderley Park|Wellcome Sanger Institute for the COVID-19 Genomics UK (COG-UK) Consortium|Davies|United Kingdom

>Spike|hCoV-19/USA/TX-HMH-MCoV-8854/2020|2020-07-02|EPI\_ISL\_780797|Original|hCoV-19^^Texas|Human|Houston Methodist Hospital|Houston Methodist Hospital|Long|USA

>Spike|hCoV-19/England/QEUA-B9F672/2020|2020-11-18|EPI\_ISL\_720982|Original|hCoV-19^^England|Human|Lighthouse Lab in Glasgow|Wellcome Sanger Institute for the COVID-19 Genomics UK (COG-UK) Consortium|Davies|United Kingdom

>Spike|hCoV-19/Finland/11CE3/2020|2020-12-02|EPI\_ISL\_732570|Original|hCoV-19^^Uusimaa|Human|Department of Virology and Immunology|Department of Virology|Smura|Finland

>Spike|hCoV-19/Japan/PG-8609/2020|2020-08-00|EPI\_ISL\_686205|Original|hCoV-19^^Japan|Human|Pathogen Genomics Center|Pathogen Genomics Center|Sekizuka|Japan

>Spike|hCoV-19/USA/MI-MDHHS-SC22527/2020|2020-11-17|EPI\_ISL\_708230|Original|hCoV-19^^Michigan|Human|Michigan Department of Health and Human Services|Michigan Department of Health and Human Services|Jacob|USA

>Spike|hCoV-19/Germany/SH-ChVir9286/2020|2020-10-05|EPI\_ISL\_729613|Original|hCoV-19^^Schleswig-Holstein|Human|A. Krumbholz|Charit\u00e9 Universit\u00e4tsmedizin Berlin|Muehlemann|Germany

>Spike|hCoV-19/Australia/SAP073/2020|2020-03-31|EPI\_ISL\_451110|Original|hCoV-19^^South Australia|Human|SA Pathology|SA Pathology|Leong|Australia

>Spike|hCoV-19/Denmark/DCGC-3980/2020|2020-09-14|EPI\_ISL\_615893|Original|hCoV-19^^Hovedstaden|Human|Department of Virus and Microbiological Special Diagnostics|Albertsen lab|Michaelsen|Denmark

>Spike|hCoV-19/Germany/BB-ChVir-W1052-7250/2020|2020-03-28|EPI\_ISL\_753844|Original|hCoV-19^^Brandenburg|Human|Charit\u00e9 Universit\u00e4tsmedizin Berlin|Charit\u00e9 Universit\u00e4tsmedizin Berlin|Muehlemann|Germany

>Spike|hCoV-19/England/QEUA-AA06BB/2020|2020-10-20|EPI\_ISL\_666002|Original|hCoV-19^^England|Human|Northumbria University / South Tees Hospitals NHS Foundation Trust / North Cumbria Integrated Care NHS Foundation Trust / North Tees and Hartlepool NHS Foundation Trust / Newcastle Hospitals NHS Foundation Trust|COVID-19 Genomics UK (COG-UK) Consortium|Bashton|United Kingdom

>Spike|hCoV-19/USA/CT-UW-5757/2020|2020-04-06|EPI\_ISL\_430921|Original|hCoV-19^^Connecticut|Human|UW Virology Lab|UW Virology Lab|Roychoudhury|USA

>Spike|hCoV-19/England/CAMB-73ADD/2020|2020-03-30|EPI\_ISL\_425277|Original|hCoV-19^^England|Human|Department of Pathology|COVID-19 Genomics UK (COG-UK) Consortium|Meredith|United Kingdom

>Spike|hCoV-19/South Africa/KRISP-K002195/2020|2020-07-10|EPI\_ISL\_515593|Original|hCoV-19^^KwaZulu-Natal|Human|NHLS-IALCH|KRISP|de Oliveira|South Africa

>Spike|hCoV-19/England/QEUA-AAEC51/2020|2020-10-22|EPI\_ISL\_652992|Original|hCoV-19^^England|Human|Oxford Viromics|COVID-19 Genomics UK (COG-UK) Consortium|Golubchik|United Kingdom

>Spike|hCoV-19/Japan/PG-0348/2020|2020-03-27|EPI\_ISL\_480020|Original|hCoV-19^^Kanto|Human|Gunma Prefectural Institute of Public Health and Environmental Sciences|Pathogen Genomics Center|Sekizuka|Japan

>Spike|hCoV-19/England/QEUA-B0E377/2020|2020-11-02|EPI\_ISL\_642189|Original|hCoV-19^^England|Human|Lighthouse Lab in Glasgow|Wellcome Sanger Institute for the COVID-19 Genomics UK (COG-UK) Consortium|Davies|United Kingdom

>Spike|hCoV-19/England/QEUA-B2EC76/2020|2020-11-03|EPI\_ISL\_646872|Original|hCoV-19^^England|Human|Lighthouse Lab in Glasgow|Wellcome Sanger Institute for the COVID-19 Genomics UK (COG-UK) Consortium|Davies|United Kingdom

>Spike|hCoV-19/Portugal/PT0384/2020|2020-03-20|EPI\_ISL\_454100|Original|hCoV-19^^Portugal|Human|unknown|Instituto Nacional de Saude (INSA)|Borges|Portugal

>Spike|hCoV-19/Denmark/DCGC-18363/2020|2020-12-07|EPI\_ISL\_749271|Original|hCoV-19^^Hovedstaden|Human|Department of Virus and Microbiological Special Diagnostics|Albertsen Lab|Michaelsen|Denmark

>Spike|hCoV-19/USA/TX-HMH-MCoV-8909/2020|2020-07-02|EPI\_ISL\_780825|Original|hCoV-19^^Texas|Human|Houston Methodist Hospital|Houston Methodist Hospital|Long|USA

>Spike|hCoV-19/USA/AZ-TG357058/2020|2020-06-08|EPI\_ISL\_694440|Original|hCoV-19^^Arizona|Human|TGen North|TGen North|French|USA

>Spike|hCoV-19/Denmark/DCGC-2332/2020|2020-08-10|EPI\_ISL\_617670|Original|hCoV-19^^Hovedstaden|Human|Department of Virus and Microbiological Special Diagnostics|Albertsen lab|Michaelsen|Denmark

>Spike|hCoV-19/Wales/PHWC-49536D/2020|2020-11-21|EPI\_ISL\_726333|Original|hCoV-19^^Wales|Human|Originating lab|COVID-19 Genomics UK (COG-UK) Consortium|Moore|United Kingdom

>Spike|hCoV-19/England/QEUA-9F3E2B/2020|2020-09-24|EPI\_ISL\_588596|Original|hCoV-19^^England|Human|Lighthouse Lab in Glasgow|Wellcome Sanger Institute for the COVID-19 Genomics UK (COG-UK) consortium|Davies|United Kingdom

>Spike|hCoV-19/England/ALDP-B5B3C6/2020|2020-11-09|EPI\_ISL\_655627|Original|hCoV-19^^England|Human|Lighthouse Lab in Alderley Park|Wellcome Sanger Institute for the COVID-19 Genomics UK (COG-UK) Consortium|Davies|United Kingdom

>Spike|hCoV-19/USA/TX-HMH-3186/2020|2020-06-13|EPI\_ISL\_544060|Original|hCoV-19^^Texas|Human|Houston Methodist Hospital|Houston Methodist Hospital|Long|USA

>Spike|hCoV-19/England/CAMC-B32F3A/2020|2020-11-05|EPI\_ISL\_659311|Original|hCoV-19^^England|Human|Lighthouse Lab in Cambridge|Wellcome Sanger Institute for the COVID-19 Genomics UK (COG-UK) Consortium|Davies|United Kingdom

>Spike|hCoV-19/USA/CA-ALSR-4155/2020|2020-06-25|EPI\_ISL\_648856|Original|hCoV-19^^California|Human|San Diego County Public Health Laboratory|Andersen lab at Scripps Research|Gangavarapu|USA

>Spike|hCoV-19/Scotland/CVR1953/2020|2020-04-08|EPI\_ISL\_448139|Original|hCoV-19^^Scotland|Human|West of Scotland Specialist Virology Centre|COVID-19 Genomics UK (COG-UK) Consortium|Robertson|United Kingdom

>Spike|hCoV-19/USA/FL-BPHL-0180/2020|2020-04-03|EPI\_ISL\_480831|Original|hCoV-19^^Florida|Human|Florida Bureau of Public Health Laboratories|Florida Bureau of Public Health Laboratories|Blanton|USA

>Spike|hCoV-19/Wales/PHWC-36C76/2020|2020-05-01|EPI\_ISL\_474784|Original|hCoV-19^^Wales|Human|Originating lab|COVID-19 Genomics UK (COG-UK) Consortium|Moore|United Kingdom

>Spike|hCoV-19/England/LIVE-A44F3/2020|2020-07-04|EPI\_ISL\_500031|Original|hCoV-19^^England|Human|Liverpool Clinical Laboratories|COVID-19 Genomics UK (COG-UK) Consortium|Haldenby|United Kingdom

>Spike|hCoV-19/USA/OR-OHSU-2975/2020|2020-09-09|EPI\_ISL\_667440|Original|hCoV-19^^Oregon|Human|OHSU Lab Services Molecular Microbiology Lab|Oregon SARS-CoV-2 Genome Sequencing Center|O'Roak|USA

>Spike|hCoV-19/England/QEUA-B0F8FF/2020|2020-11-02|EPI\_ISL\_642072|Original|hCoV-19^^England|Human|Lighthouse Lab in Glasgow|Wellcome Sanger Institute for the COVID-19 Genomics UK (COG-UK) Consortium|Davies|United Kingdom

>Spike|hCoV-19/England/CAMC-A591CF/2020|2020-10-08|EPI\_ISL\_596957|Original|hCoV-19^^England|Human|Lighthouse Lab in Cambridge|Wellcome Sanger Institute for the COVID-19 Genomics UK (COG-UK) consortium|Davies|United Kingdom

>Spike|hCoV-19/England/NOTT-10EE9E/2020|2020-03-29|EPI\_ISL\_432936|Original|hCoV-19^^England|Human|Queens Medical Centre|COVID-19 Genomics UK (COG-UK) Consortium|Loose|United Kingdom

>Spike|hCoV-19/England/204040338/2020|2020-09-28|EPI\_ISL\_622842|Original|hCoV-19^^England|Human|Respiratory Virus Unit|Respiratory Virus Unit|Platt|United Kingdom

>Spike|hCoV-19/Belgium/reg-0411457/2020|2020-04-11|EPI\_ISL\_476967|Original|hCoV-19^^Cherq|Human|KU Leuven|KU Leuven|Maes|Belgium

>Spike|hCoV-19/Wales/PHWC-4849BA/2020|2020-10-20|EPI\_ISL\_628066|Original|hCoV-19^^Wales|Human|Wales Specialist Virology Centre Sequencing lab|COVID-19 Genomics UK (COG-UK) Consortium|Moore|United Kingdom

>Spike|hCoV-19/England/CAMB-7C5A6/2020|2020-04-04|EPI\_ISL\_442317|Original|hCoV-19^^England|Human|Department of Pathology|Wellcome Sanger Institute for the COVID-19 Genomics UK (COG-UK) consortium|Amato|United Kingdom

>Spike|hCoV-19/Australia/VIC16522/2020|2020-08-09|EPI\_ISL\_641122|Original|hCoV-19^^Victoria|Human|Microbiological Diagnostic Unit - Public Health Laboratory (MDU-PHL) |MDU-PHL|Schultz|Australia

>Spike|hCoV-19/England/CAMC-9D7036/2020|2020-09-20|EPI\_ISL\_584340|Original|hCoV-19^^England|Human|Virology Department|COVID-19 Genomics UK (COG-UK) Consortium|de Silva|United Kingdom

>Spike|hCoV-19/England/204700009/2020|2020-11-16|EPI\_ISL\_645133|Original|hCoV-19^^England|Human|Respiratory Virus Unit|COVID-19 Genomics UK (COG-UK) Consortium|Platt|United Kingdom

>Spike|hCoV-19/Australia/VIC14328/2020|2020-08-29|EPI\_ISL\_591816|Original|hCoV-19^^Victoria|Human|Microbiological Diagnostic Unit - Public Health Laboratory (MDU-PHL) |MDU-PHL|Schultz|Australia

>Spike|hCoV-19/South Africa/UFS-VIRO-NGS-9/2020|2020-10-14|EPI\_ISL\_682352|Original|hCoV-19^^Free State|Human|NHLs Universitas Academic|UFS Virology|Bester|South Africa

>Spike|hCoV-19/England/QEUA-962D57/2020|2020-08-11|EPI\_ISL\_531603|Original|hCoV-19^^England|Human|Lighthouse Lab in Glasgow|Wellcome Sanger Institute for the COVID-19 Genomics UK (COG-UK) consortium|Davies|United Kingdom

>Spike|hCoV-19/Denmark/DCGC-21666/2020|2020-12-21|EPI\_ISL\_757913|Original|hCoV-19^^Midtjylland|Human|Department of Virus and Microbiological Special Diagnostics|Albertsen Lab|Michaelsen|Denmark

>Spike|hCoV-19/India/MH-ACTREC-317/2020|2020-07-16|EPI\_ISL\_699966|Original|hCoV-19^^Maharashtra|Human|Hematopathology Laboratory|Hematopathology Laboratory|Patkar|India

>Spike|hCoV-19/Iceland/548/2020|2020-03-28|EPI\_ISL\_424568|Original|hCoV-19^^Reykjavik|Human|deCODE genetics|deCODE genetics|J\u00f3nsson|Iceland

>Spike|hCoV-19/Spain/AN-IBV-002998/2020|2020-04-02|EPI\_ISL\_474836|Original|hCoV-19^^Andalucia|Human|Hospital Universitario Virgen de las Nieves de Granada-SAS|SeqCOVID-SPAIN consortium/IBV(CSIC)|Comas|Spain

>Spike|hCoV-19/Belgium/reg-09181057/2020|2020-09-18|EPI\_ISL\_734999|Original|hCoV-19^^Overijse|Human|UZ Leuven|KU Leuven|Maes|Belgium

>Spike|hCoV-19/Belgium/ULG-10631/2020|2020-10-25|EPI\_ISL\_636610|Original|hCoV-19^^Li\u00e8ge|Human|Department of Clinical Microbiology|GIGA Medical Genomics|Durkin|Belgium

>Spike|hCoV-19/France/ARA-07731/2020|2020-03-11|EPI\_ISL\_508944|Original|hCoV-19^^Auvergne-Rh\u00f4ne-Alpes|Human|Centre Hospitalier de Bourg en Bresse|CNR Virus des Infections Respiratoires - France SUD|Josset|France

>Spike|hCoV-19/Japan/PG-8243/2020|2020-08-00|EPI\_ISL\_687342|Original|hCoV-19^^Japan|Human|Pathogen Genomics Center|Pathogen Genomics Center|Sekizuka|Japan

>Spike|hCoV-19/Kenya/C6288/2020|2020-05-13|EPI\_ISL\_568791|Original|hCoV-19^^Mombasa|Human|KEMRI-Wellcome Trust Research Programme/KEMRI-CGMR-C Kilifi|KEMRI-Wellcome Trust Research Programme/KEMRI-CGMR-C Kilifi|Githinji|Kenya

>Spike|hCoV-19/USA/MI-MDHHS-SC21744/2020|2020-07-30|EPI\_ISL\_529862|Original|hCoV-19^^Michigan|Human|Michigan Department of Health and Human Services|Michigan Department of Health and Human Services|Blankenship|USA

>Spike|hCoV-19/Belgium/HHC-0401376/2020|2020-04-01|EPI\_ISL\_462230|Original|hCoV-19^^Avelgem|Human|KU Leuven|KU Leuven|Maes|Belgium

>Spike|hCoV-19/Luxembourg/LNS1301720/2020|2020-11-03|EPI\_ISL\_739916|Original|hCoV-19^^Luxembourg|Human|Laboratoire national de sant\u00e9|Laboratoire national de sant\u00e9|Wienecke-Baldacchino|Luxembourg



>Spike|hCoV-19/England/MILK-4694C9/2020|2020-05-24|EPI\_ISL\_559746|Original|hCoV-19^^England|Human|Lighthouse Lab in Milton Keynes|Wellcome Sanger Institute for the COVID-19 Genomics UK (COG-UK) consortium|Davies|United Kingdom

>Spike|hCoV-19/England/NOTT-11E156/2020|2020-11-26|EPI\_ISL\_741610|Original|hCoV-19^^England|Human|Queens Medical Centre|COVID-19 Genomics UK (COG-UK) Consortium|Loose|United Kingdom

>Spike|hCoV-19/USA/CA-CZB-3661/2020|2020-07-07|EPI\_ISL\_516736|Original|hCoV-19^^California|Human|UCSF Clinical Microbiology Laboratory|Chan-Zuckerberg Biohub|Kamm|USA

>Spike|hCoV-19/USA/FL-BPHL-0515/2020|2020-06-12|EPI\_ISL\_508718|Original|hCoV-19^^Florida|Human|Florida Bureau of Public Health Laboratories|Florida Bureau of Public Health Laboratories|Blanton|USA

>Spike|hCoV-19/England/PORT-2EAA2A/2020|2020-00-00|EPI\_ISL\_727764|Original|hCoV-19^^England|Human|Centre for Enzyme Innovation|COVID-19 Genomics UK (COG-UK) Consortium|Robson|United Kingdom

>Spike|hCoV-19/England/ALDP-94F3B8/2020|2020-06-19|EPI\_ISL\_555929|Original|hCoV-19^^England|Human|Lighthouse Lab in Alderley Park|Wellcome Sanger Institute for the COVID-19 Genomics UK (COG-UK) consortium|Davies|United Kingdom

>Spike|hCoV-19/Germany/HH-hpi-p1782/2020|2020-03-19|EPI\_ISL\_775739|Original|hCoV-19^^Hamburg|Human|University Medical Center Hamburg Eppendorf|Heinrich Pette Institute|Robitaille|Germany

>Spike|hCoV-19/USA/TX-HMH-6954/2020|2020-06-28|EPI\_ISL\_546382|Original|hCoV-19^^Texas|Human|Houston Methodist Hospital|Houston Methodist Hospital|Long|USA

>Spike|hCoV-19/England/CAMC-B22559/2020|2020-11-02|EPI\_ISL\_647131|Original|hCoV-19^^England|Human|Lighthouse Lab in Cambridge|Wellcome Sanger Institute for the COVID-19 Genomics UK (COG-UK) Consortium|Davies|United Kingdom

>Spike|hCoV-19/Ghana/2666\_S32/2020|2020-03-27|EPI\_ISL\_515083|Original|hCoV-19^^Ghana|Human|Department of Biochemistry|WACCBIP|Amuzu|Ghana

>Spike|hCoV-19/Sweden/20-08158/2020|2020-03-10|EPI\_ISL\_455843|Original|hCoV-19^^Sormland|Human|Skovde/Unilabs|The Public Health Agency of Sweden|Svartstr\u00f6m|Sweden

>Spike|hCoV-19/USA/CT-QDX-2200/2020|2020-03-14|EPI\_ISL\_604524|Original|hCoV-19^^Connecticut|Human|Quest Diagnostics|Quest Diagnostics|Kagan|USA

>Spike|hCoV-19/India/DL-NCDC-02157/2020|2020-03-26|EPI\_ISL\_435073|Original|hCoV-19^^Delhi|Human|National Centre for Disease control (NCDC)|NCDC/CSIR-IGIB|Faruq|India

>Spike|hCoV-19/England/OXON-B1271/2020|2020-00-00|EPI\_ISL\_479000|Original|hCoV-19^^England|Human|Oxford Viromics|COVID-19 Genomics UK (COG-UK) Consortium|Golubchik|United Kingdom

>Spike|hCoV-19/Wales/MILK-9F0EE2/2020|2020-09-24|EPI\_ISL\_589724|Original|hCoV-19^^Wales|Human|Lighthouse Lab in Milton Keynes|Wellcome Sanger Institute for the COVID-19 Genomics UK (COG-UK) consortium|Davies|United Kingdom

>Spike|hCoV-19/USA/LA-EVTL038/2020|2020-04-24|EPI\_ISL\_435576|Original|hCoV-19^^Louisiana|Human|LSUHS Emerging Viral Threat Laboratory|Microbial Genome Sequencing Center|Kamil|USA

>Spike|hCoV-19/England/CAMC-BC1D36/2020|2020-11-22|EPI\_ISL\_705217|Original|hCoV-19^^England|Human|Department of Pathology|COVID-19 Genomics UK (COG-UK) Consortium|Goodfellow|United Kingdom

>Spike|hCoV-19/Wales/PHWC-4A429B/2020|2020-12-16|EPI\_ISL\_764674|Original|hCoV-19^^Wales|Human|Wales Specialist Virology Centre Sequencing lab|COVID-19 Genomics UK (COG-UK) Consortium|Moore|United Kingdom

>Spike|hCoV-19/England/QEUEH-B7CDFE/2020|2020-11-14|EPI\_ISL\_674652|Original|hCoV-19^^England|Human|Lighthouse Lab in Glasgow|Wellcome Sanger Institute for the COVID-19 Genomics UK (COG-UK) Consortium|Davies|United Kingdom

>Spike|hCoV-19/Wales/PHWC-480444/2020|2020-10-11|EPI\_ISL\_611725|Original|hCoV-19^^Wales|Human|Wales Specialist Virology Centre Sequencing lab|COVID-19 Genomics UK (COG-UK) Consortium|Moore|United Kingdom

>Spike|hCoV-19/USA/WA-UW-1799/2020|2020-03-22|EPI\_ISL\_424263|Original|hCoV-19^^Washington|Human|UW Virology Lab|UW Virology Lab|Roychoudhury|USA

>Spike|hCoV-19/USA/WI-GMF-14662/2020|2020-08-10|EPI\_ISL\_547686|Original|hCoV-19^^Wisconsin|Human|Gundersen Molecular Diagnostics Laboratory|Kabara Cancer Research Institute|Kenny|USA

>Spike|hCoV-19/England/MILK-A7CA8F/2020|2020-10-15|EPI\_ISL\_606475|Original|hCoV-19^^England|Human|Lighthouse Lab in Milton Keynes|Wellcome Sanger Institute for the COVID-19 Genomics UK (COG-UK) consortium|Davies|United Kingdom

>Spike|hCoV-19/England/MILK-C538A0/2020|2020-12-09|EPI\_ISL\_769646|Original|hCoV-19^^England|Human|Lighthouse Lab in Milton Keynes|Wellcome Sanger Institute for the COVID-19 Genomics UK (COG-UK) Consortium|Davies|United Kingdom

>Spike|hCoV-19/Denmark/DCGC-14732/2020|2020-11-23|EPI\_ISL\_711940|Original|hCoV-19^^Hovedstaden|Human|Department of Virus and Microbiological Special Diagnostics|Albertsen Lab|Michaelsen|Denmark

>Spike|hCoV-19/England/OXON-F4009C/2020|2020-12-14|EPI\_ISL\_764529|Original|hCoV-19^^England|Human|Oxford Viromics|COVID-19 Genomics UK (COG-UK) Consortium|Golubchik|United Kingdom

>Spike|hCoV-19/England/BRIS-18541D2/2020|2020-04-28|EPI\_ISL\_492375|Original|hCoV-19^^England|Human|PHE South West Regional Laboratory|Wellcome Sanger Institute for the COVID-19 Genomics UK (COG-UK) consortium|Davies|United Kingdom

>Spike|hCoV-19/USA/TX-HMH-MCoV-12652/2020|2020-08-31|EPI\_ISL\_789813|Original|hCoV-19^^Texas|Human|Houston Methodist Hospital|Houston Methodist Hospital|Long|USA

>Spike|hCoV-19/Denmark/DCGC-2233/2020|2020-08-10|EPI\_ISL\_617538|Original|hCoV-19^^Midtjylland|Human|Department of Virus and Microbiological Special Diagnostics|Albertsen lab|Michaelsen|Denmark

>Spike|hCoV-19/Wales/PHWC-163A57/2020|2020-04-22|EPI\_ISL\_474032|Original|hCoV-19^^Wales|Human|Originating lab|COVID-19 Genomics UK (COG-UK) Consortium|Moore|United Kingdom

>Spike|hCoV-19/Netherlands/LI-RIVM-20590/2020|2020-12-14|EPI\_ISL\_790673|Original|hCoV-19^^Limburg|Human|Dutch COVID-19 response team|National Institute for Public Health and the Environment (RIVM)|Meijer|Netherlands

>Spike|hCoV-19/England/MILK-A6A37A/2020|2020-10-08|EPI\_ISL\_626900|Original|hCoV-19^^England|Human|Virology Department|COVID-19 Genomics UK (COG-UK) Consortium|de Silva|United Kingdom

>Spike|hCoV-19/Japan/PG-3330/2020|2020-04-00|EPI\_ISL\_691445|Original|hCoV-19^^Japan|Human|Pathogen Genomics Center|Pathogen Genomics Center|Sekizuka|Japan

>Spike|hCoV-19/Wales/PHWC-4994C0/2020|2020-12-03|EPI\_ISL\_727313|Original|hCoV-19^^Wales|Human|Originating lab|COVID-19 Genomics UK (COG-UK) Consortium|Moore|United Kingdom

>Spike|hCoV-19/England/ALDP-B7536C/2020|2020-11-12|EPI\_ISL\_662174|Original|hCoV-19^^England|Human|Lighthouse Lab in Alderley Park|Wellcome Sanger Institute for the COVID-19 Genomics UK (COG-UK) Consortium|Davies|United Kingdom

>Spike|hCoV-19/Wales/PHWC-1602E9/2020|2020-05-18|EPI\_ISL\_479292|Original|hCoV-19^^Wales|Human|Wales Specialist Virology Centre Sequencing lab|COVID-19 Genomics UK (COG-UK) Consortium|Moore|United Kingdom

>Spike|hCoV-19/England/CAMB-1B8E57/2020|2020-11-02|EPI\_ISL\_650616|Original|hCoV-19^^England|Human|Department of Pathology|COVID-19 Genomics UK (COG-UK) Consortium|Goodfellow|United Kingdom

>Spike|hCoV-19/Germany/BE-ChVir-W1042-8106/2020|2020-03-26|EPI\_ISL\_753923|Original|hCoV-19^^Berlin|Human|Charit\u00e9 Universit\u00e4tsmedizin Berlin|Charit\u00e9 Universit\u00e4tsmedizin Berlin|Muehlemann|Germany

>Spike|hCoV-19/Sweden/20-53850/2020|2020-12-16|EPI\_ISL\_789036|Original|hCoV-19^^Vastra Gotalandsregionen|Human|Klinisk mikrobiologi|The Public Health Agency of Sweden|Svartstr\u00f6m|Sweden

>Spike|hCoV-19/Denmark/DCGC-13897/2020|2020-11-30|EPI\_ISL\_713089|Original|hCoV-19^^Hovedstaden|Human|Department of Virus and Microbiological Special Diagnostics|Albertsen Lab|Michaelsen|Denmark

>Spike|hCoV-19/Scotland/EDB4360/2020|2020-04-24|EPI\_ISL\_453126|Original|hCoV-19^^Scotland|Human|Virology Department|COVID-19 Genomics UK (COG-UK) Consortium|Williams|United Kingdom

>Spike|hCoV-19/England/QEUA-B6A713/2020|2020-11-11|EPI\_ISL\_662471|Original|hCoV-19^^England|Human|Lighthouse Lab in Glasgow|Wellcome Sanger Institute for the COVID-19 Genomics UK (COG-UK) Consortium|Davies|United Kingdom

>Spike|hCoV-19/Wales/PHWC-483924/2020|2020-09-22|EPI\_ISL\_627873|Original|hCoV-19^^Wales|Human|Wales Specialist Virology Centre Sequencing lab|COVID-19 Genomics UK (COG-UK) Consortium|Moore|United Kingdom

>Spike|hCoV-19/Australia/NSW1057/2020|2020-07-13|EPI\_ISL\_593669|Original|hCoV-19^^New South Wales|Human|Pathology West - NSW Health Pathology|NSW Health Pathology - Institute of Clinical Pathology and Medical Research; Westmead Hospital; University of Sydney|Gall|Australia

>Spike|hCoV-19/Switzerland/GE-ETHZ-350012/2020|2020-11-03|EPI\_ISL\_693786|Original|hCoV-19^^Geneva|Human|Viollier AG|Department of Biosystems Science and Engineering|Nadeau|Switzerland

>Spike|hCoV-19/England/NORT-283E45/2020|2020-04-04|EPI\_ISL\_488460|Original|hCoV-19^^England|Human|NU-OMICS DNA Sequencing research facility|Wellcome Sanger Institute for the COVID-19 Genomics UK (COG-UK) consortium|Davies|United Kingdom

>Spike|hCoV-19/Denmark/DCGC-10929/2020|2020-11-02|EPI\_ISL\_670289|Original|hCoV-19^^Hovedstaden|Human|Department of Virus and Microbiological Special Diagnostics|Albertsen Lab|Michaelsen|Denmark

>Spike|hCoV-19/England/ALDP-95ADAD/2020|2020-06-15|EPI\_ISL\_555754|Original|hCoV-19^^England|Human|Lighthouse Lab in Alderley Park|Wellcome Sanger Institute for the COVID-19 Genomics UK (COG-UK) consortium|Davies|United Kingdom

>Spike|hCoV-19/USA/CA-UCLA-138/2020|2020-04-10|EPI\_ISL\_537482|Original|hCoV-19^^California|Human|UCLA Pathology Clinical Microbiology Lab|Kruglyak Lab|Boocock|USA

>Spike|hCoV-19/Denmark/DCGC-4875/2020|2020-09-21|EPI\_ISL\_621561|Original|hCoV-19^^Midtjylland|Human|Department of Virus and Microbiological Special Diagnostics|Albertsen lab|Michaelsen|Denmark

>Spike|hCoV-19/USA/UT-UPHL-201030826/2020|2020-06-20|EPI\_ISL\_602944|Original|hCoV-19^^Utah|Human|Utah Public Health Laboratory|Utah Public Health Laboratory|Young|USA

>Spike|hCoV-19/Wales/PHWC-48FD59/2020|2020-11-11|EPI\_ISL\_681223|Original|hCoV-19^^Wales|Human|Wales Specialist Virology Centre Sequencing lab|COVID-19 Genomics UK (COG-UK) Consortium|Moore|United Kingdom

>Spike|hCoV-19/South Korea/KDCA0035/2020|2020-09-10|EPI\_ISL\_747274|Original|hCoV-19^^South Korea|Human|Division of Emerging Infectious Diseases|Division of Emerging Infectious Diseases|Park|South Korea

>Spike|hCoV-19/England/ALDP-91F542/2020|2020-06-23|EPI\_ISL\_553311|Original|hCoV-19^^England|Human|Lighthouse Lab in Alderley Park|Wellcome Sanger Institute for the COVID-19 Genomics UK (COG-UK) consortium|Davies|United Kingdom

>Spike|hCoV-19/USA/UT-UPHL-2012106527/2020|2020-09-05|EPI\_ISL\_746128|Original|hCoV-19^^Utah|Human|Ginkgo Bioworks Clinical Laboratory|Utah Public Health Laboratory|Young|USA

>Spike|hCoV-19/Netherlands/Friesland\_23/2020|2020-04-06|EPI\_ISL\_460645|Original|hCoV-19^^Friesland|Human|Dutch COVID-19 response team|Erasmus Medical Center|Oude Munnink|Netherlands

>Spike|hCoV-19/South Korea/KCDC2128/2020|2020-03-15|EPI\_ISL\_498029|Original|hCoV-19^^South Korea|Human|Division of Viral Diseases|Division of Viral Diseases|Kim|South Korea

>Spike|hCoV-19/USA/CA-CHLA-PLM27840203/2020|2020-11-15|EPI\_ISL\_753394|Original|hCoV-19^^California|Human|Clinical virology Laboratory|Center for Personalized Medicine|Dien Bard|USA

>Spike|hCoV-19/Denmark/DCGC-8529/2020|2020-10-26|EPI\_ISL\_625922|Original|hCoV-19^^Sjaelland|Human|Department of Virus and Microbiological Special Diagnostics|Albertsen lab|Michaelsen|Denmark

>Spike|hCoV-19/USA/NY-NYUMC49/2020|2020-03-18|EPI\_ISL\_420300|Original|hCoV-19^^New York|Human|NYU Langone Health|Departments of Pathology and Medicine|Maurano|USA

>Spike|hCoV-19/Denmark/DCGC-4461/2020|2020-09-07|EPI\_ISL\_615646|Original|hCoV-19^^Syddanmark|Human|Department of Virus and Microbiological Special Diagnostics|Albertsen lab|Michaelsen|Denmark

>Spike|hCoV-19/England/ALDP-A6EA62/2020|2020-10-15|EPI\_ISL\_607954|Original|hCoV-19^^England|Human|Lighthouse Lab in Alderley Park|Wellcome Sanger Institute for the COVID-19 Genomics UK (COG-UK) consortium|Davies|United Kingdom

>Spike|hCoV-19/Australia/VIC11696/2020|2020-07-24|EPI\_ISL\_591837|Original|hCoV-19^^Victoria|Human|Microbiological Diagnostic Unit - Public Health Laboratory (MDU-PHL)|MDU-PHL|Schultz|Australia

>Spike|hCoV-19/USA/AZ-TG452452/2020|2020-06-29|EPI\_ISL\_695023|Original|hCoV-19^^Arizona|Human|TGen North|TGen North|French|USA

>Spike|hCoV-19/England/GSTT-265D30F/2020|2020-03-18|EPI\_ISL\_483940|Original|hCoV-19^^England|Human|Centre for Clinical Infection and Diagnostics Research and Genomics Innovation Unit|COVID-19 Genomics UK (COG-UK) Consortium|Awan|United Kingdom

>Spike|hCoV-19/Switzerland/BL-ETHZ-250125/2020|2020-08-14|EPI\_ISL\_535633|Original|hCoV-19^^Basel-Landschaft|Human|Viollier AG|Department of Biosystems Science and Engineering|Nadeau|Switzerland

>Spike|hCoV-19/USA/VA-DCLS-1533/2020|2020-08-08|EPI\_ISL\_581529|Original|hCoV-19^^Virginia|Human|Virginia DCLS|Virginia DCLS|St. Jacques|USA

>Spike|hCoV-19/USA/TX-HMH-4142/2020|2020-06-18|EPI\_ISL\_543405|Original|hCoV-19^^Texas|Human|Houston Methodist Hospital|Houston Methodist Hospital|Long|USA

>Spike|hCoV-19/England/ALDP-C3DD8F/2020|2020-12-10|EPI\_ISL\_730914|Original|hCoV-19^^England|Human|Lighthouse Lab in Alderley Park|Wellcome Sanger Institute for the COVID-19 Genomics UK (COG-UK) Consortium|Davies|United Kingdom

>Spike|hCoV-19/England/BIRM-6A09B/2020|2020-11-09|EPI\_ISL\_679019|Original|hCoV-19^^England|Human|University of Birmingham|COVID-19 Genomics UK (COG-UK) Consortium|Loman|United Kingdom

>Spike|hCoV-19/England/QEUH-AF414E/2020|2020-10-30|EPI\_ISL\_663026|Original|hCoV-19^^England|Human|Lighthouse Lab in Glasgow|Wellcome Sanger Institute for the COVID-19 Genomics UK (COG-UK) Consortium|Davies|United Kingdom

>Spike|hCoV-19/USA/TX-HMH-MCoV-8856/2020|2020-07-02|EPI\_ISL\_780443|Original|hCoV-19^^Texas|Human|Houston Methodist Hospital|Houston Methodist Hospital|Long|USA

>Spike|hCoV-19/Senegal/68303/2020|2020-06-17|EPI\_ISL\_477143|Original|hCoV-19^^Dakar|Human|Institut Pasteur Dakar|Institut Pasteur de Dakar|Dia|Senegal

>Spike|hCoV-19/England/MILK-BAB00C/2020|2020-11-17|EPI\_ISL\_681370|Original|hCoV-19^^England|Human|Lighthouse Lab in Milton Keynes|Wellcome Sanger Institute for the COVID-19 Genomics UK (COG-UK) Consortium|Davies|United Kingdom

>Spike|hCoV-19/Denmark/DCGC-15796/2020|2020-11-23|EPI\_ISL\_714026|Original|hCoV-19^^Midtjylland|Human|Department of Virus and Microbiological Special Diagnostics|Albertsen Lab|Michaelsen|Denmark

>Spike|hCoV-19/USA/WA-UW230/2020|2020-03-15|EPI\_ISL\_417379|Original|hCoV-19^^Washington|Human|UW Virology Lab|UW Virology Lab|Roychoudhury|USA

>Spike|hCoV-19/USA/CA-QDX-2374/2020|2020-03-17|EPI\_ISL\_604658|Original|hCoV-19^^California|Human|Quest Diagnostics|Quest Diagnostics|Kagan|USA

>Spike|hCoV-19/Scotland/QEUH-9F43EF/2020|2020-09-25|EPI\_ISL\_600649|Original|hCoV-19^^Scotland|Human|Lighthouse Lab in Glasgow|Wellcome Sanger Institute for the COVID-19 Genomics UK (COG-UK) consortium|Davies|United Kingdom

>Spike|hCoV-19/Australia/VIC8353/2020|2020-08-10|EPI\_ISL\_564962|Original|hCoV-19^^Victoria|Human|Microbiological Diagnostic Unit - Public Health Laboratory (MDU-PHL)|MDU-PHL|Schultz|Australia

>Spike|hCoV-19/Spain/PV-IBV-000864/2020|2020-03-25|EPI\_ISL\_452691|Original|hCoV-19^^Basque Country|Human|Servicio de Microbiolog\u00eda. Hospital Universitario Donostia. OSI Donostialdea. \u00clrea de Enfermedades Infecciosas|SeqCOVID-SPAIN consortium|IBV (CSIC)|Comas|Spain

>Spike|hCoV-19/Luxembourg/LNS8598024/2020|2020-11-11|EPI\_ISL\_744772|Original|hCoV-19^^Luxembourg|Human|Laboratoire national de sant\u00e9|Laboratoire national de sant\u00e9|Wienecke-Baldacchino|Luxembourg

>Spike|hCoV-19/USA/UT-031/2020|2020-03-19|EPI\_ISL\_417973|Original|hCoV-19^^Utah|Human|Utah Public Health Laboratory|Utah Public Health Laboratory|Young|USA

>Spike|hCoV-19/Finland/25LS11CE1/2020|2020-10-25|EPI\_ISL\_759903|Original|hCoV-19^^Uusimaa|Human|Department of Virology and Immunology|Department of Virology|Smura|Finland

>Spike|hCoV-19/England/QEUA-AD15C3/2020|2020-10-23|EPI\_ISL\_633772|Original|hCoV-19^^England|Human|Lighthouse Lab in Glasgow|Wellcome Sanger Institute for the COVID-19 Genomics UK (COG-UK) consortium|Davies|United Kingdom

>Spike|hCoV-19/Belgium/ULG-0186/2020|2020-03-23|EPI\_ISL\_447128|Original|hCoV-19^^Liege|Human|Department of Clinical Microbiology|GIGA Medical Genomics|Durkin|Belgium

>Spike|hCoV-19/USA/WA-S2387/2020|2020-06-13|EPI\_ISL\_497019|Original|hCoV-19^^Washington|Human|Washington State Department of Health|Seattle Flu Study|Lee|USA

>Spike|hCoV-19/Germany/HH-hpi-p2453/2020|2020-04-20|EPI\_ISL\_776515|Original|hCoV-19^^Hamburg|Human|University Medical Center Hamburg Eppendorf|Heinrich Pette Institute|Robitaille|Germany

>Spike|hCoV-19/Japan/TKYE610504/2020|2020-04-00|EPI\_ISL\_479679|unknown|hCoV-19^^Japan|Human|unknown|Contact|Submitter|Japan

>Spike|hCoV-19/Russia/SPE-RII-MH1535S/2020|2020-09-13|EPI\_ISL\_596292|Original|hCoV-19^^Saint Petersburg|Human|HELIX LCC|WHO National Influenza Centre Russian Federation|Komissarov|Russia

>Spike|hCoV-19/England/CAMC-9909E3/2020|2020-08-27|EPI\_ISL\_551919|Original|hCoV-19^^England|Human|Lighthouse Lab in Cambridge|Wellcome Sanger Institute for the COVID-19 Genomics UK (COG-UK) consortium|Davies|United Kingdom

>Spike|hCoV-19/Canada/MB-NML-1005/2020|2020-07-27|EPI\_ISL\_582372|Original|hCoV-19^^Manitoba|Human|Cadham Provincial Laboratory|National Microbiology Laboratory (NML)|Majer|Canada

>Spike|hCoV-19/England/CAMC-A80F98/2020|2020-10-14|EPI\_ISL\_610705|Original|hCoV-19^^England|Human|Lighthouse Lab in Cambridge|Wellcome Sanger Institute for the COVID-19 Genomics UK (COG-UK) consortium|Davies|United Kingdom

>Spike|hCoV-19/Denmark/DCGC-810/2020|2020-04-13|EPI\_ISL\_614714|Original|hCoV-19^^Sjaelland|Human|Department of Virus and Microbiological Special Diagnostics|Albertsen lab|Michaelsen|Denmark

>Spike|hCoV-19/Netherlands/NoordHolland\_22/2020|2020-05-05|EPI\_ISL\_461212|Original|hCoV-19^^Noord Holland|Human|Dutch COVID-19 response team|Erasmus Medical Center|Oude Munnink|Netherlands

>Spike|hCoV-19/Taiwan/TSGH-17/2020|2020-03-19|EPI\_ISL\_436102|Original|hCoV-19^^New Taipei City|Human|TSGH-CP molecular lab|TSGH-CP molecular lab|Shang|Taiwan

>Spike|hCoV-19/USA/NY-Wadsworth-84414-01/2020|2020-05-07|EPI\_ISL\_676722|Original|hCoV-19^^New York|Human|Wadsworth Center|Wadsworth Center|Lasek-Nesselquist|USA

>Spike|hCoV-19/England/205141163/2020|2020-12-16|EPI\_ISL\_756137|Original|hCoV-19^^England|Human|Respiratory Virus Unit|COVID-19 Genomics UK (COG-UK) Consortium|Miah|United Kingdom

>Spike|hCoV-19/Denmark/DCGC-2286/2020|2020-08-10|EPI\_ISL\_617644|Original|hCoV-19^^Nordjylland|Human|Department of Virus and Microbiological Special Diagnostics|Albertsen lab|Michaelsen|Denmark

>Spike|hCoV-19/USA/MA-MASPHL-00198/2020|2020-04-07|EPI\_ISL\_791653|Original|hCoV-19^^Massachusetts|Human|Massachusetts State Public Health Laboratory|Infectious Disease Program|Park|USA

>Spike|hCoV-19/Australia/VIC8558/2020|2020-08-17|EPI\_ISL\_565089|Original|hCoV-19^^Victoria|Human|Microbiological Diagnostic Unit - Public Health Laboratory (MDU-PHL)|MDU-PHL|Schultz|Australia

>Spike|hCoV-19/USA/UT-UPHL-201113629/2020|2020-04-06|EPI\_ISL\_648576|Original|hCoV-19^^Utah|Human|Utah Public Health Laboratory|Utah Public Health Laboratory|Young|USA

>Spike|hCoV-19/England/QEUA-A4B95F/2020|2020-10-05|EPI\_ISL\_741762|Original|hCoV-19^^England|Human|Oxford Viromics|COVID-19 Genomics UK (COG-UK) Consortium|Golubchik|United Kingdom

>Spike|hCoV-19/USA/UT-UPHL-04857/2020|2020-05-23|EPI\_ISL\_575178|Original|hCoV-19^^Utah|Human|Utah Public Health Laboratory|Utah Public Health Laboratory|Young|USA

>Spike|hCoV-19/USA/WA-UW-9229/2020|2020-05-13|EPI\_ISL\_570235|Original|hCoV-19^^Washington|Human|UW Virology Lab|UW Virology Lab|Roychoudhury|USA

>Spike|hCoV-19/Japan/PG-5362/2020|2020-08-00|EPI\_ISL\_690465|Original|hCoV-19^^Japan|Human|Fukuoka Institute of Health and Environmental Sciences|Pathogen Genomics Center|Sekizuka|Japan

>Spike|hCoV-19/Austria/CeMM0856/2020|2020-03-23|EPI\_ISL\_583730|Original|hCoV-19^^Austria|Human|Dr. Gernot Walder GmbH|Bergthaler laboratory|Bergthaler|Austria

>Spike|hCoV-19/England/ALDP-B74075/2020|2020-11-12|EPI\_ISL\_661966|Original|hCoV-19^^England|Human|Lighthouse Lab in Alderley Park|Wellcome Sanger Institute for the COVID-19 Genomics UK (COG-UK) Consortium|Davies|United Kingdom

>Spike|hCoV-19/England/LIVE-A5ED6/2020|2020-03-21|EPI\_ISL\_499665|Original|hCoV-19^^England|Human|Liverpool Clinical Laboratories|COVID-19 Genomics UK (COG-UK) Consortium|Haldenby|United Kingdom

>Spike|hCoV-19/Vietnam/VNHN\_1167/2020|2020-03-18|EPI\_ISL\_455696|Original|hCoV-19^^Hanoi|Human|National Hospital of Tropical Diseases|Oxford University Clinical Research Unit|Nguyen|Vietnam

>Spike|hCoV-19/England/ALDP-B1F8CF/2020|2020-11-01|EPI\_ISL\_646057|Original|hCoV-19^^England|Human|Lighthouse Lab in Alderley Park|Wellcome Sanger Institute for the COVID-19 Genomics UK (COG-UK) Consortium|Davies|United Kingdom

>Spike|hCoV-19/England/EXET-138AF1/2020|2020-10-21|EPI\_ISL\_627434|Original|hCoV-19^^England|Human|University of Exeter|COVID-19 Genomics UK (COG-UK) Consortium|Temperton|United Kingdom

>Spike|hCoV-19/Japan/PG-7043/2020|2020-08-00|EPI\_ISL\_688148|Original|hCoV-19^^Japan|Human|Pathogen Genomics Center|Pathogen Genomics Center|Sekizuka|Japan

>Spike|hCoV-19/Scotland/QEUH-9F392A/2020|2020-09-24|EPI\_ISL\_600800|Original|hCoV-19^^Scotland|Human|Lighthouse Lab in Glasgow|Wellcome Sanger Institute for the COVID-19 Genomics UK (COG-UK) consortium|Davies|United Kingdom

>Spike|hCoV-19/France/IDF-9186/2020|2020-09-01|EPI\_ISL\_594165|Original|hCoV-19^^\u00cele-de-France|Human|hopital|National Reference Center for Viruses of Respiratory Infections|Enouf|France

>Spike|hCoV-19/England/QEUH-B0E3E0/2020|2020-11-02|EPI\_ISL\_642046|Original|hCoV-19^^England|Human|Lighthouse Lab in Glasgow|Wellcome Sanger Institute for the COVID-19 Genomics UK (COG-UK) Consortium|Davies|United Kingdom

>Spike|hCoV-19/England/ALDP-A51FFA/2020|2020-10-07|EPI\_ISL\_598156|Original|hCoV-19^^England|Human|Lighthouse Lab in Alderley Park|Wellcome Sanger Institute for the COVID-19 Genomics UK (COG-UK) consortium|Davies|United Kingdom

>Spike|hCoV-19/USA/VA-DCLS-0002/2020|2020-03-17|EPI\_ISL\_418956|Original|hCoV-19^^Virginia|Human|Virginia DCLS|Virginia DCLS|St. Jacques|USA

>Spike|hCoV-19/USA/UT-UPHL-2012904992/2020|2020-07-25|EPI\_ISL\_745568|Original|hCoV-19^^Utah|Human|Ginkgo Bioworks Clinical Laboratory|Utah Public Health Laboratory|Young|USA

>Spike|hCoV-19/England/MILK-959940/2020|2020-06-07|EPI\_ISL\_554740|Original|hCoV-19^^England|Human|Lighthouse Lab in Milton Keynes|Wellcome Sanger Institute for the COVID-19 Genomics UK (COG-UK) consortium|Davies|United Kingdom

>Spike|hCoV-19/Belgium/reg-0804731/2020|2020-08-04|EPI\_ISL\_734910|Original|hCoV-19^^Deurne|Human|UZ Leuven|KU Leuven|Maes|Belgium

>Spike|hCoV-19/Wales/PHWC-32357/2020|2020-04-08|EPI\_ISL\_446637|Original|hCoV-19^^Wales|Human|Wales Specialist Virology Centre|Public Health Wales Microbiology Cardiff|Moore|United Kingdom

>Spike|hCoV-19/Australia/VIC17192/2020|2020-07-31|EPI\_ISL\_663785|Original|hCoV-19^^Victoria|Human|Microbiological Diagnostic Unit - Public Health Laboratory (MDU-PHL)|MDU-PHL|Schultz|Australia

>Spike|hCoV-19/USA/NY-QDX-872/2020|2020-03-16|EPI\_ISL\_571677|Original|hCoV-19^^New York|Human|Quest Diagnostics|Quest Diagnostics|Kagan|USA

>Spike|hCoV-19/England/BRIS-126D57/2020|2020-04-08|EPI\_ISL\_459040|Original|hCoV-19^^England|Human|PHE South West Regional Laboratory|Wellcome Sanger Institute for the COVID-19 Genomics UK (COG-UK) consortium|Davies|United Kingdom

>Spike|hCoV-19/USA/MA-MGH-03125/2020|2020-11-14|EPI\_ISL\_765712|Original|hCoV-19^^Massachusetts|Human|Massachusetts General Hospital|Infectious Disease Program|Park|USA

>Spike|hCoV-19/USA/WI-UW-973/2020|2020-07-17|EPI\_ISL\_509971|Original|hCoV-19^^Wisconsin|Human|University of Wisconsin-Madison AIDS Vaccine Research Laboratories|University of Wisconsin-Madison AIDS Vaccine Research Laboratories|Baczenas|USA

>Spike|hCoV-19/England/MILK-99D746/2020|2020-08-31|EPI\_ISL\_549931|Original|hCoV-19^^England|Human|Lighthouse Lab in Milton Keynes|Wellcome Sanger Institute for the COVID-19 Genomics UK (COG-UK) consortium|Davies|United Kingdom

>Spike|hCoV-19/Japan/PG-7995/2020|2020-08-00|EPI\_ISL\_687096|Original|hCoV-19^^Japan|Human|Pathogen Genomics Center|Pathogen Genomics Center|Sekizuka|Japan

>Spike|hCoV-19/Canada/ON-S878/2020|2020-04-12|EPI\_ISL\_591175|Original|hCoV-19^^Ontario|Human|Toronto Invasive Bacterial Diseases Network|McMaster University|McArthur|Canada

>Spike|hCoV-19/Wales/PHWC-48C83D/2020|2020-11-07|EPI\_ISL\_666475|Original|hCoV-19^^Wales|Human|Wales Specialist Virology Centre Sequencing lab|COVID-19 Genomics UK (COG-UK) Consortium|Moore|United Kingdom

>Spike|hCoV-19/Wales/PHWC-15C5BA/2020|2020-05-03|EPI\_ISL\_472510|Original|hCoV-19^^Wales|Human|Wales Specialist Virology Centre Sequencing lab|COVID-19 Genomics UK (COG-UK) Consortium|Moore|United Kingdom

>Spike|hCoV-19/USA/MI-MDHHS-SC21627/2020|2020-03-29|EPI\_ISL\_516354|Original|hCoV-19^^Michigan|Human|Michigan Department of Health and Human Services|Michigan Department of Health and Human Services|Blankenship|USA

>Spike|hCoV-19/Iran/SA-Isf-43/2020|2020-06-10|EPI\_ISL\_672595|Original|hCoV-19^^Iran|Human|Infectious Diseases and Tropical Medicine Research Center|Infectious Diseases and Tropical Medicine Research Center|Ahangarzadeh, S.|Iran

>Spike|hCoV-19/USA/PR-B2FH/2020|2020-08-04|EPI\_ISL\_527383|Original|hCoV-19^^Puerto Rico|Human|University of Miami Immunology and Histocompatibility Laboratory|University of Miami Immunology and Histocompatibility Laboratory|Margolles-Clark|USA

>Spike|hCoV-19/England/20129062604/2020|2020-03-21|EPI\_ISL\_424059|Original|hCoV-19^^England|Human|Respiratory Virus Unit|Respiratory Virus Unit|Platt|United Kingdom

>Spike|hCoV-19/England/PORT-2D753E/2020|2020-10-27|EPI\_ISL\_650603|Original|hCoV-19^^England|Human|Centre for Enzyme Innovation|COVID-19 Genomics UK (COG-UK) Consortium|Robson|United Kingdom

>Spike|hCoV-19/Switzerland/UR-ETHZ-100321/2020|2020-03-18|EPI\_ISL\_574968|Original|hCoV-19^^Uri|Human|Viollier AG|Department of Biosystems Science and Engineering|Nadeau|Switzerland

>Spike|hCoV-19/Thailand/UDC301651-3/2020|2020-04-07|EPI\_ISL\_450989|Original|hCoV-19^^Thailand|Human|Center of Excellence in Clinical Virology|Center of Excellence in Clinical Virology|Poovorawan|Thailand

>Spike|hCoV-19/Finland/5LS9C7/2020|2020-10-05|EPI\_ISL\_756071|Original|hCoV-19^^Uusimaa|Human|Department of Virology and Immunology|Department of Virology|Smura|Finland

>Spike|hCoV-19/Belgium/DC-0326350/2020|2020-03-26|EPI\_ISL\_462204|Original|hCoV-19^^Beerst|Human|KU Leuven|KU Leuven|Maes|Belgium

>Spike|hCoV-19/England/CAMB-1ABDA5/2020|2020-04-21|EPI\_ISL\_470219|Original|hCoV-19^^England|Human|Department of Pathology|Wellcome Sanger Institute for the COVID-19 Genomics UK (COG-UK) consortium|Davies|United Kingdom

>Spike|hCoV-19/Netherlands/ZH-EMC-819/2020|2020-10-15|EPI\_ISL\_632330|Original|hCoV-19^^Zuid Holland|Human|Dutch COVID-19 response team|Erasmus Medical Center|Oude Munnink|Netherlands

>Spike|hCoV-19/USA/NY-Wadsworth-44700-01/2020|2020-04-10|EPI\_ISL\_676838|Original|hCoV-19^^New York|Human|Wadsworth Center|Wadsworth Center|Lasek-Nesselquist|USA

>Spike|hCoV-19/Spain/PV-IBV-2158/2020|2020-04-12|EPI\_ISL\_468893|Original|hCoV-19^^Basque Country|Human|Servicio de Microbiolog\u00eda. Hospital Universitario Donostia. OSI Donostialdea. \u00clrea de Enfermedades Infecciosas|SeqCOVID-SPAIN consortium|IBV (CSIC)|Comas|Spain

>Spike|hCoV-19/Northern Ireland/NIRE-10534D/2020|2020-03-31|EPI\_ISL\_472146|Original|hCoV-19^^Northern Ireland|Human|Regional Virus Laboratory|COVID-19 Genomics UK (COG-UK) Consortium|Fairley|United Kingdom

>Spike|hCoV-19/England/MILK-9C345F/2020|2020-09-10|EPI\_ISL\_566826|Original|hCoV-19^^England|Human|Lighthouse Lab in Milton Keynes|Wellcome Sanger Institute for the COVID-19 Genomics UK (COG-UK) consortium|Davies|United Kingdom

>Spike|hCoV-19/Scotland/EDB5987/2020|2020-05-04|EPI\_ISL\_526489|Original|hCoV-19^^Scotland|Human|Virology Department|COVID-19 Genomics UK (COG-UK) Consortium|Williams|United Kingdom

>Spike|hCoV-19/England/QEUH-B68AC1/2020|2020-11-11|EPI\_ISL\_655118|Original|hCoV-19^^England|Human|Lighthouse Lab in Glasgow|Wellcome Sanger Institute for the COVID-19 Genomics UK (COG-UK) Consortium|Davies|United Kingdom

>Spike|hCoV-19/Peru/LIM-UPCH-0119/2020|2020-03-21|EPI\_ISL\_568516|Original|hCoV-19^^Lima|Human|Laboratorio de Referencia Nacional de Virus Respiratorios|Laboratorio de Gen\u00f3mica Microbiana|Tsukayama|Peru

>Spike|hCoV-19/USA/TX-HMH-2983/2020|2020-05-31|EPI\_ISL\_543911|Original|hCoV-19^^Texas|Human|Houston Methodist Hospital|Houston Methodist Hospital|Long|USA

>Spike|hCoV-19/Denmark/DCGC-6744/2020|2020-04-20|EPI\_ISL\_622392|Original|hCoV-19^^Hovedstaden|Human|Department of Virus and Microbiological Special Diagnostics|Albertsen lab|Michaelsen|Denmark

>Spike|hCoV-19/Wales/PHWC-483E25/2020|2020-10-21|EPI\_ISL\_627935|Original|hCoV-19^^Wales|Human|Wales Specialist Virology Centre Sequencing lab|COVID-19 Genomics UK (COG-UK) Consortium|Moore|United Kingdom

>Spike|hCoV-19/Australia/VIC16069/2020|2020-08-03|EPI\_ISL\_640541|Original|hCoV-19^^Victoria|Human|Microbiological Diagnostic Unit - Public Health Laboratory (MDU-PHL)|MDU-PHL|Schultz|Australia

>Spike|hCoV-19/Thailand/SamutSakhon-CONI-0356/2020|2020-12-19|EPI\_ISL\_733550|Original|hCoV-19^^Samut Sakhon|Human|Institute for Urban Disease Control and Prevention|COVID-19 Network Investigations (CONI) Alliance|Batty|Thailand

>Spike|hCoV-19/England/PORT-2EA43B/2020|2020-00-00|EPI\_ISL\_665476|Original|hCoV-19^^England|Human|Centre for Enzyme Innovation|COVID-19 Genomics UK (COG-UK) Consortium|Robson|United Kingdom

>Spike|hCoV-19/England/MILK-A7D532/2020|2020-10-13|EPI\_ISL\_606813|Original|hCoV-19^^England|Human|Lighthouse Lab in Milton Keynes|Wellcome Sanger Institute for the COVID-19 Genomics UK (COG-UK) consortium|Davies|United Kingdom

>Spike|hCoV-19/Chile/BI-ISPCH-2/2020|2020-03-12|EPI\_ISL\_445331|Original|hCoV-19^^Biobio|Human|HOSPITAL HERMINDA MARTIN CHILLAN|Instituto de Salud Publica de Chile|Fernandez|Chile

>Spike|hCoV-19/England/ALDP-A9283E/2020|2020-10-19|EPI\_ISL\_611214|Original|hCoV-19^^England|Human|Lighthouse Lab in Alderley Park|Wellcome Sanger Institute for the COVID-19 Genomics UK (COG-UK) consortium|Davies|United Kingdom

>Spike|hCoV-19/Australia/VIC17802/2020|2020-08-29|EPI\_ISL\_779463|Original|hCoV-19^^Victoria|Human|Microbiological Diagnostic Unit - Public Health Laboratory (MDU-PHL)|MDU-PHL|Beck|Australia

>Spike|hCoV-19/Japan/PG-8199/2020|2020-08-00|EPI\_ISL\_687298|Original|hCoV-19^^Japan|Human|Pathogen Genomics Center|Pathogen Genomics Center|Sekizuka|Japan

>Spike|hCoV-19/Denmark/DCGC-15623/2020|2020-11-23|EPI\_ISL\_713292|Original|hCoV-19^^Syddanmark|Human|Department of Virus and Microbiological Special Diagnostics|Albertsen Lab|Michaelsen|Denmark

>Spike|hCoV-19/Denmark/DCGC-17445/2020|2020-12-14|EPI\_ISL\_750988|Original|hCoV-19^^Midtjylland|Human|Department of Virus and Microbiological Special Diagnostics|Albertsen Lab|Michaelsen|Denmark

>Spike|hCoV-19/England/OXON-B1D52/2020|2020-04-18|EPI\_ISL\_479089|Original|hCoV-19^^England|Human|Oxford Viromics|COVID-19 Genomics UK (COG-UK) Consortium|Golubchik|United Kingdom

>Spike|hCoV-19/Spain/RI-IBV-006023/2020|2020-03-28|EPI\_ISL\_500453|Original|hCoV-19^^La Rioja|Human|Centro de Investigaci\u00f3n Biom\u00e9dica de La Rioja - Hospital San Pedro Logro\u00f1o|SeqCOVID-SPAIN consortium/IBV (CSIC)|Comas|Spain

>Spike|hCoV-19/USA/CA-ALSR-1255/2020|2020-05-06|EPI\_ISL\_494459|Original|hCoV-19^^California|Human|San Diego County Public Health Laboratory|Andersen lab at Scripps Research|Gangavarapu|USA

>Spike|hCoV-19/USA/WA-UW-11909/2020|2020-06-24|EPI\_ISL\_570478|Original|hCoV-19^^Washington|Human|UW Virology Lab|UW Virology Lab|Roychoudhury|USA

>Spike|hCoV-19/Germany/BY-IMB03040/2020|2020-03-29|EPI\_ISL\_732551|Original|hCoV-19^^Bavaria|Human|Bundeswehr Institute of Microbiology|Bundeswehr Institute of Microbiology|Antwerpen|Germany



>Spike|hCoV-19/USA/NY-Wadsworth-50113-01/2020|2020-04-15|EPI\_ISL\_525684|Original|hCoV-19^^New York|Human|Wadsworth Center|Wadsworth Center|Plitnick|USA

>Spike|hCoV-19/Ireland/D-NVRL-AIIDV0402v1/2020|2020-05-12|EPI\_ISL\_644308|Original|hCoV-19^^Dublin|Human|CEPHR / Vincent's Hospital|Irish Coronavirus Sequencing Consortium - National Virus Reference Laboratory|Gonzalez|Ireland

>Spike|hCoV-19/England/QEUEH-B426BA/2020|2020-11-08|EPI\_ISL\_657049|Original|hCoV-19^^England|Human|Lighthouse Lab in Glasgow|Wellcome Sanger Institute for the COVID-19 Genomics UK (COG-UK) Consortium|Davies|United Kingdom

>Spike|hCoV-19/USA/CA-ALSR-4507/2020|2020-10-30|EPI\_ISL\_666974|Original|hCoV-19^^California|Human|San Diego County Public Health Laboratory|Andersen lab at Scripps Research|Gangavarapu|USA

>Spike|hCoV-19/England/QEUEH-AE53FF/2020|2020-10-27|EPI\_ISL\_633262|Original|hCoV-19^^England|Human|Lighthouse Lab in Glasgow|Wellcome Sanger Institute for the COVID-19 Genomics UK (COG-UK) consortium|Davies|United Kingdom

>Spike|hCoV-19/Equatorial Guinea/10468/2020|2020-05-23|EPI\_ISL\_648304|Original|hCoV-19^^Bioko Norte|Human|Laboratorio de Investigaciones de Baney|University Hospital Basel|Hosch|Equatorial Guinea

>Spike|hCoV-19/USA/WA-S1385/2020|2020-05-19|EPI\_ISL\_495835|Original|hCoV-19^^Washington|Human|Washington State Department of Health|Seattle Flu Study|Lee|USA

>Spike|hCoV-19/England/CAMC-B7A437/2020|2020-11-11|EPI\_ISL\_741110|Original|hCoV-19^^England|Human|Oxford Viromics|COVID-19 Genomics UK (COG-UK) Consortium|Golubchik|United Kingdom

>Spike|hCoV-19/USA/MI-UM-10036728634/2020|2020-11-01|EPI\_ISL\_649058|Original|hCoV-19^^Michigan|Human|University of Michigan Clinical Microbiology Laboratory|Lauring Lab|Valesano|USA

>Spike|hCoV-19/England/SHEF-C8CA6/2020|2020-10-01|EPI\_ISL\_596205|Original|hCoV-19^^England|Human|Virology Department|COVID-19 Genomics UK (COG-UK) Consortium|de Silva|United Kingdom

>Spike|hCoV-19/England/20124098502/2020|2020-03-18|EPI\_ISL\_418735|Original|hCoV-19^^England|Human|Respiratory Virus Unit|Respiratory Virus Unit|Platt|United Kingdom

>Spike|hCoV-19/Luxembourg/LNS8537935/2020|2020-10-22|EPI\_ISL\_744758|Original|hCoV-19^^Luxembourg|Human|Laboratoire national de sant\u00e9|Laboratoire national de sant\u00e9|Wienecke-Baldacchino|Luxembourg

>Spike|hCoV-19/USA/GA\_2120/2020|2020-03-00|EPI\_ISL\_424862|Original|hCoV-19^^Georgia|Human|GA Department of Public Health Laboratory|Pathogen Discovery|Queen|USA

>Spike|hCoV-19/Canada/ON-PHL-20-02229/2020|2020-09-00|EPI\_ISL\_671514|Original|hCoV-19^^Ontario|Human|Public Health Ontario Laboratory|Public Health Ontario Laboratory|Guthrie|Canada

>Spike|hCoV-19/USA/OR-OHSU-3917/2020|2020-11-02|EPI\_ISL\_667518|Original|hCoV-19^^Oregon|Human|OHSU Lab Services Molecular Microbiology Lab|Oregon SARS-CoV-2 Genome Sequencing Center|O'Roak|USA

>Spike|hCoV-19/England/QEUEH-AD4223/2020|2020-10-24|EPI\_ISL\_634619|Original|hCoV-19^^England|Human|Lighthouse Lab in Glasgow|Wellcome Sanger Institute for the COVID-19 Genomics UK (COG-UK) consortium|Davies|United Kingdom

>Spike|hCoV-19/England/ALDP-984D04/2020|2020-08-01|EPI\_ISL\_529568|Original|hCoV-19^^England|Human|Quadram Institute Bioscience|COVID-19 Genomics UK (COG-UK) Consortium|Alikhan|United Kingdom

>Spike|hCoV-19/USA/TX-HMH-MCoV-17943/2020|2020-11-16|EPI\_ISL\_786091|Original|hCoV-19^^Texas|Human|Houston Methodist Hospital|Houston Methodist Hospital|Long|USA

>Spike|hCoV-19/Canada/BC-BCCDC-8603/2020|2020-11-00|EPI\_ISL\_740846|Original|hCoV-19^^British Columbia|Human|BCCDC Public Health Laboratory|BCCDC Public Health Laboratory|Prystajek|Canada

>Spike|hCoV-19/England/QEUEH-B6A564/2020|2020-11-11|EPI\_ISL\_662350|Original|hCoV-19^^England|Human|Lighthouse Lab in Glasgow|Wellcome Sanger Institute for the COVID-19 Genomics UK (COG-UK) Consortium|Davies|United Kingdom

>Spike|hCoV-19/Belize/CDC-6846/2020|2020-03-01|EPI\_ISL\_509712|Original|hCoV-19^^Belmopan|Human|Belize Ministry of Health|Pathogen Discovery|Queen|Belize

>Spike|hCoV-19/Wales/PHWC-162C07/2020|2020-05-20|EPI\_ISL\_473178|Original|hCoV-19^^Wales|Human|Wales Specialist Virology Centre Sequencing lab|COVID-19 Genomics UK (COG-UK) Consortium|Moore|United Kingdom

>Spike|hCoV-19/England/QEUA-B3FA2D/2020|2020-11-08|EPI\_ISL\_658410|Original|hCoV-19^^England|Human|Lighthouse Lab in Glasgow|Wellcome Sanger Institute for the COVID-19 Genomics UK (COG-UK) Consortium|Davies|United Kingdom

>Spike|hCoV-19/Scotland/CVR4013/2020|2020-08-29|EPI\_ISL\_535112|Original|hCoV-19^^Scotland|Human|West of Scotland Specialist Virology Centre|COVID-19 Genomics UK (COG-UK) Consortium|Robertson|United Kingdom

>Spike|hCoV-19/Brazil/CE-L16-CD344/2020|2020-03-30|EPI\_ISL\_476288|Original|hCoV-19^^Brazil|Human|DB Diagn\u00f3sticos do Brasil|Instituto de Medicina Tropical da Universidade de S\u00e3o Paulo|Sabino|Brazil

>Spike|hCoV-19/England/201021557/2020|2020-03-03|EPI\_ISL\_464295|Original|hCoV-19^^England|Human|Respiratory Virus Unit|Respiratory Virus Unit|Platt|United Kingdom

>Spike|hCoV-19/Denmark/DCGC-15239/2020|2020-11-23|EPI\_ISL\_713715|Original|hCoV-19^^Midtjylland|Human|Department of Virus and Microbiological Special Diagnostics|Albertsen Lab|Michaelsen|Denmark

>Spike|hCoV-19/England/NOTT-11F35F/2020|2020-11-24|EPI\_ISL\_679964|Original|hCoV-19^^England|Human|Lincolnshire Hospitals and DeepSeq Nottingham|COVID-19 Genomics UK (COG-UK) Consortium|Loose|United Kingdom

>Spike|hCoV-19/USA/LA-EVTL1079/2020|2020-11-27|EPI\_ISL\_768349|Original|hCoV-19^^Louisiana|Human|LSUHS Emerging Viral Threat Laboratory|Microbial Genome Sequencing Center|Kamil|USA

>Spike|hCoV-19/Switzerland/BL-ETHZ-360249/2020|2020-11-09|EPI\_ISL\_729055|Original|hCoV-19^^Basel-Landschaft|Human|Viollier AG|Department of Biosystems Science and Engineering|Nadeau|Switzerland

>Spike|hCoV-19/England/CWAR-24FD85F/2020|2020-04-09|EPI\_ISL\_584440|Original|hCoV-19^^England|Human|UHCW / University of Warwick|COVID-19 Genomics UK (COG-UK) Consortium|Stark|United Kingdom

>Spike|hCoV-19/England/MILK-A45E65/2020|2020-10-06|EPI\_ISL\_598582|Original|hCoV-19^^England|Human|Lighthouse Lab in Milton Keynes|Wellcome Sanger Institute for the COVID-19 Genomics UK (COG-UK) consortium|Davies|United Kingdom

>Spike|hCoV-19/England/EXET-13A9B6/2020|2020-11-09|EPI\_ISL\_664210|Original|hCoV-19^^England|Human|University of Exeter|COVID-19 Genomics UK (COG-UK) Consortium|Temperton|United Kingdom

>Spike|hCoV-19/USA/TX-HMH-MCoV-14390/2020|2020-10-06|EPI\_ISL\_787675|Original|hCoV-19^^Texas|Human|Houston Methodist Hospital|Houston Methodist Hospital|Long|USA

>Spike|hCoV-19/England/LEED-2A876D/2020|2020-03-30|EPI\_ISL\_539121|Original|hCoV-19^^England|Human|Leeds Teaching Hospitals NHS Trust and Public Health England|Wellcome Sanger Institute for the COVID-19 Genomics UK (COG-UK) consortium|Davies|United Kingdom

>Spike|hCoV-19/Wales/PHWC-48EA44/2020|2020-11-14|EPI\_ISL\_680951|Original|hCoV-19^^Wales|Human|Wales Specialist Virology Centre Sequencing lab|COVID-19 Genomics UK (COG-UK) Consortium|Moore|United Kingdom

>Spike|hCoV-19/England/ALDP-A96357/2020|2020-10-20|EPI\_ISL\_624755|Original|hCoV-19^^England|Human|Lighthouse Lab in Alderley Park|Wellcome Sanger Institute for the COVID-19 Genomics UK (COG-UK) consortium|Davies|United Kingdom

>Spike|hCoV-19/USA/NY-WCMP10B11P/2020|2020-03-15|EPI\_ISL\_427560|Original|hCoV-19^^New York|Human|NewYork-Presbyterian & Mason Lab|Mason Lab|Mason|USA

>Spike|hCoV-19/USA/NM-UNM-00578/2020|2020-07-09|EPI\_ISL\_542992|Original|hCoV-19^^New Mexico|Human|TriCore Reference Laboratories|Center for Global Health|Domman|USA

>Spike|hCoV-19/England/MILK-9E1C80/2020|2020-09-20|EPI\_ISL\_581208|Original|hCoV-19^^England|Human|Lighthouse Lab in Milton Keynes|Wellcome Sanger Institute for the COVID-19 Genomics UK (COG-UK) consortium|Davies|United Kingdom

>Spike|hCoV-19/USA/FL-QDX-227/2020|2020-04-16|EPI\_ISL\_498708|Original|hCoV-19^^Florida|Human|Quest Diagnostics|Quest Diagnostics|Kagan|USA

>Spike|hCoV-19/Chile/RM-127666/2020|2020-07-18|EPI\_ISL\_746609|Original|hCoV-19^^Region Metropolitana de Santiago|Human|Genética Molecular and Subdepartamento de Virología ISP Chile|Instituto de Salud Pública de Chile|Tognarelli|Chile

>Spike|hCoV-19/Wales/PHWC-4913DA/2020|2020-11-17|EPI\_ISL\_706649|Original|hCoV-19^^Wales|Human|Originating lab|COVID-19 Genomics UK (COG-UK) Consortium|Moore|United Kingdom

>Spike|hCoV-19/Canada/MB-NML-981/2020|2020-07-17|EPI\_ISL\_582358|Original|hCoV-19^^Manitoba|Human|Cadham Provincial Laboratory|National Microbiology Laboratory (NML)|Majer|Canada

>Spike|hCoV-19/England/BRIS-12DDF6/2020|2020-05-30|EPI\_ISL\_481968|Original|hCoV-19^^England|Human|PHE South West Regional Laboratory|Wellcome Sanger Institute for the COVID-19 Genomics UK (COG-UK) consortium|Davies|United Kingdom

>Spike|hCoV-19/Germany/HH-hpi-p1417/2020|2020-03-09|EPI\_ISL\_775732|Original|hCoV-19^^Hamburg|Human|University Medical Center Hamburg Eppendorf|Heinrich Pette Institute|Robitaille|Germany

>Spike|hCoV-19/Wales/PHWC-35E71/2020|2020-04-28|EPI\_ISL\_474581|Original|hCoV-19^^Wales|Human|Originating lab|COVID-19 Genomics UK (COG-UK) Consortium|Moore|United Kingdom

>Spike|hCoV-19/South Africa/R12684-20/2020|2020-06-16|EPI\_ISL\_504225|Original|hCoV-19^^North West|Human|National Institute for Communicable Diseases of the National Health Laboratory Service|National Institute for Communicable Diseases of the National Health Laboratory Service|Allam|South Africa

>Spike|hCoV-19/England/MILK-ACE74B/2020|2020-10-21|EPI\_ISL\_629569|Original|hCoV-19^^England|Human|Lighthouse Lab in Milton Keynes|Wellcome Sanger Institute for the COVID-19 Genomics UK (COG-UK) consortium|Davies|United Kingdom

>Spike|hCoV-19/SaudiArabia/KAUST-JEDDAH577/2020|2020-04-30|EPI\_ISL\_512970|Original|hCoV-19^^Jeddah|Human|Pathogen Genomics Lab King Abdullah University of Science and Technology(KAUST)|Pathogen Genomics Lab King Abdullah University of Science and Technology(KAUST)|Mohamed Ghazzali|Saudi Arabia

>Spike|hCoV-19/Australia/NSW589/2020|2020-04-01|EPI\_ISL\_478701|Original|hCoV-19^^New South Wales|Human|South Eastern Area Laboratory Services (SEALS)|NSW Health Pathology - Institute of Clinical Pathology and Medical Research; Westmead Hospital; University of Sydney|Gall|Australia

>Spike|hCoV-19/Spain/RI-IBV-98002334/2020|2020-03-25|EPI\_ISL\_537847|Original|hCoV-19^^La Rioja|Human|Centro de Investigaci\u00f3n Biom\u00e9dica de La Rioja - Hospital San Pedro Logro\u00f1o|SeqCOVID-SPAIN consortium|IBV (CSIC)|Comas|Spain

>Spike|hCoV-19/Scotland/QEUH-AD492E/2020|2020-10-26|EPI\_ISL\_649753|Original|hCoV-19^^Scotland|Human|Lighthouse Lab in Glasgow|Wellcome Sanger Institute for the COVID-19 Genomics UK (COG-UK) Consortium|Davies|United Kingdom

>Spike|hCoV-19/France/ARA-SC371/2020|2020-05-14|EPI\_ISL\_660352|Original|hCoV-19^^Auvergne-Rh\u00f4ne-Alpes|Human|CHU de Saint-\u00c9tienne H\u00f4pital Nord|CNR Virus des Infections Respiratoires - France SUD|Bal|France

>Spike|hCoV-19/England/MILK-B889DD/2020|2020-11-14|EPI\_ISL\_675804|Original|hCoV-19^^England|Human|Lighthouse Lab in Milton Keynes|Wellcome Sanger Institute for the COVID-19 Genomics UK (COG-UK) Consortium|Davies|United Kingdom

>Spike|hCoV-19/Wales/PHWC-48A2B9/2020|2020-10-29|EPI\_ISL\_650339|Original|hCoV-19^^Wales|Human|Wales Specialist Virology Centre Sequencing lab|COVID-19 Genomics UK (COG-UK) Consortium|Moore|United Kingdom

>Spike|hCoV-19/Wales/PHWC-48F8C1/2020|2020-11-10|EPI\_ISL\_681154|Original|hCoV-19^^Wales|Human|Wales Specialist Virology Centre Sequencing lab|COVID-19 Genomics UK (COG-UK) Consortium|Moore|United Kingdom

>Spike|hCoV-19/England/MILK-ABBAB1/2020|2020-10-22|EPI\_ISL\_623242|Original|hCoV-19^^England|Human|Lighthouse Lab in Milton Keynes|Wellcome Sanger Institute for the COVID-19 Genomics UK (COG-UK) consortium|Davies|United Kingdom

>Spike|hCoV-19/South Africa/KRISP-K002845/2020|2020-08-31|EPI\_ISL\_602661|Original|hCoV-19^^KwaZulu-Natal|Human|NHLs-IALCH|KRISP|de Oliveira|South Africa

>Spike|hCoV-19/England/ALDP-98DB6B/2020|2020-07-25|EPI\_ISL\_529263|Original|hCoV-19^^England|Human|Liverpool Clinical Laboratories|COVID-19 Genomics UK (COG-UK) Consortium|Haldenby|United Kingdom

>Spike|hCoV-19/Canada/BC\_07788742/2020|2020-04-00|EPI\_ISL\_466820|Original|hCoV-19^^British Columbia|Human|BCCDC Public Health Laboratory|BCCDC Public Health Laboratory|Harrigan|Canada

>Spike|hCoV-19/Brazil/SP-L39-CD1037/2020|2020-05-12|EPI\_ISL\_722074|Original|hCoV-19^^S\u00e3o Paulo|Human|Hospital das Cl\u00ednicas Universidade de S\u00e3o Paulo Medical School|Laborat\u00f3rio de Parasitologia M\u00e9dica - Instituto de Medicina Tropical - Universidade de S\u00e3o Paulo|de Jesus|Brazil

>Spike|hCoV-19/Germany/HH-hpi-p1810/2020|2020-03-22|EPI\_ISL\_776169|Original|hCoV-19^^Hamburg|Human|University Medical Center Hamburg Eppendorf|Heinrich Pette Institute|Robitaille|Germany

>Spike|hCoV-19/England/MILK-9ECBD3/2020|2020-04-26|EPI\_ISL\_589521|Original|hCoV-19^^England|Human|Lighthouse Lab in Milton Keynes|Wellcome Sanger Institute for the COVID-19 Genomics UK (COG-UK) consortium|Davies|United Kingdom

>Spike|hCoV-19/Australia/VIC2126/2020|2020-06-18|EPI\_ISL\_480735|Original|hCoV-19^^Victoria|Human|Victorian Infectious Diseases Reference Laboratory (VIDRL)|VIDRL and MDU-PHL|Schultz|Australia

>Spike|hCoV-19/Netherlands/NB-EMC-187/2020|2020-00-00|EPI\_ISL\_523310|Original|hCoV-19^^Noord Brabant|Human|Dutch COVID-19 response team|Erasmus Medical Center|Oude Munnink|Netherlands

>Spike|hCoV-19/England/CAMB-81d5B/2020|2020-04-13|EPI\_ISL\_442619|Original|hCoV-19^^England|Human|Department of Pathology|Wellcome Sanger Institute for the COVID-19 Genomics UK (COG-UK) consortium|Amato|United Kingdom

>Spike|hCoV-19/USA/MI-UM-10036794181/2020|2020-11-05|EPI\_ISL\_707814|Original|hCoV-19^^Michigan|Human|University of Michigan Clinical Microbiology Laboratory|Lauring Lab|Valesano|USA

>Spike|hCoV-19/Japan/PG-8752/2020|2020-09-00|EPI\_ISL\_686348|Original|hCoV-19^^Japan|Human|Pathogen Genomics Center|Pathogen Genomics Center|Sekizuka|Japan

>Spike|hCoV-19/Japan/PG-7193/2020|2020-07-00|EPI\_ISL\_688297|Original|hCoV-19^^Japan|Human|Saitama Prefectural Institute of Public Health|Pathogen Genomics Center|Sekizuka|Japan

>Spike|hCoV-19/England/QEUEH-B11AB8/2020|2020-11-02|EPI\_ISL\_642399|Original|hCoV-19^^England|Human|Lighthouse Lab in Glasgow|Wellcome Sanger Institute for the COVID-19 Genomics UK (COG-UK) Consortium|Davies|United Kingdom

>Spike|hCoV-19/England/CAMB-7EFC4/2020|2020-04-08|EPI\_ISL\_443040|Original|hCoV-19^^England|Human|Department of Pathology|Wellcome Sanger Institute for the COVID-19 Genomics UK (COG-UK) consortium|Amato|United Kingdom

>Spike|hCoV-19/England/ALDP-BBB3D3/2020|2020-11-21|EPI\_ISL\_702456|Original|hCoV-19^^England|Human|Lighthouse Lab in Alderley Park|Wellcome Sanger Institute for the COVID-19 Genomics UK (COG-UK) Consortium|Davies|United Kingdom

>Spike|hCoV-19/England/NORW-F0C2D/2020|2020-10-13|EPI\_ISL\_595206|Original|hCoV-19^^England|Human|Quadram Institute Bioscience|COVID-19 Genomics UK (COG-UK) Consortium|Alikhan|United Kingdom

>Spike|hCoV-19/England/ALDP-BE9697/2020|2020-12-03|EPI\_ISL\_708977|Original|hCoV-19^^England|Human|Lighthouse Lab in Alderley Park|Wellcome Sanger Institute for the COVID-19 Genomics UK (COG-UK) Consortium|Davies|United Kingdom

>Spike|hCoV-19/USA/WI-WSLH-200638/2020|2020-06-10|EPI\_ISL\_631407|Original|hCoV-19^^Wisconsin|Human|Wisconsin State Laboratory of Hygiene Communicable Disease Division|Wisconsin State Laboratory of Hygiene Communicable Disease Division|Florek|USA

>Spike|hCoV-19/England/MILK-B029DB/2020|2020-10-25|EPI\_ISL\_642993|Original|hCoV-19^^England|Human|Lighthouse Lab in Milton Keynes|Wellcome Sanger Institute for the COVID-19 Genomics UK (COG-UK) Consortium|Davies|United Kingdom

>Spike|hCoV-19/Wales/PHWC-16D871/2020|2020-09-24|EPI\_ISL\_577455|Original|hCoV-19^^Wales|Human|Wales Specialist Virology Centre Sequencing lab|COVID-19 Genomics UK (COG-UK) Consortium|Moore|United Kingdom

>Spike|hCoV-19/England/ALDP-B75690/2020|2020-11-12|EPI\_ISL\_740915|Original|hCoV-19^^England|Human|Oxford Viromics|COVID-19 Genomics UK (COG-UK) Consortium|Golubchik|United Kingdom

>Spike|hCoV-19/Russia/SVE-R11-MH8684S/2020|2020-09-29|EPI\_ISL\_770671|Original|hCoV-19^^Sverdlovsk|Human|UMMC-Health|WHO National Influenza Centre Russian Federation|Komissarov|Russia

>Spike|hCoV-19/England/CAMC-C8390E/2020|2020-12-17|EPI\_ISL\_762797|Original|hCoV-19^^England|Human|Lighthouse Lab in Cambridge|Wellcome Sanger Institute for the COVID-19 Genomics UK (COG-UK) Consortium|Davies|United Kingdom

>Spike|hCoV-19/England/ALDP-672FAC/2020|2020-07-03|EPI\_ISL\_558052|Original|hCoV-19^^England|Human|Lighthouse Lab in Alderley Park|Wellcome Sanger Institute for the COVID-19 Genomics UK (COG-UK) consortium|Davies|United Kingdom

>Spike|hCoV-19/England/LIVE-DB9801/2020|2020-11-10|EPI\_ISL\_664700|Original|hCoV-19^^England|Human|Liverpool Clinical Laboratories|COVID-19 Genomics UK (COG-UK) Consortium|Haldenby|United Kingdom

>Spike|hCoV-19/Australia/VIC10646/2020|2020-09-05|EPI\_ISL\_562712|Original|hCoV-19^^Victoria|Human|Microbiological Diagnostic Unit - Public Health Laboratory (MDU-PHL) |MDU-PHL|Schultz|Australia

>Spike|hCoV-19/Wales/PHWC-48E9DE/2020|2020-11-13|EPI\_ISL\_680944|Original|hCoV-19^^Wales|Human|Wales Specialist Virology Centre Sequencing lab|COVID-19 Genomics UK (COG-UK) Consortium|Moore|United Kingdom

>Spike|hCoV-19/England/QEUEH-C33396/2020|2020-12-11|EPI\_ISL\_733995|Original|hCoV-19^^England|Human|Lighthouse Lab in Glasgow|Wellcome Sanger Institute for the COVID-19 Genomics UK (COG-UK) Consortium|Davies|United Kingdom

>Spike|hCoV-19/England/LOND-124F4E6/2020|2020-09-26|EPI\_ISL\_665159|Original|hCoV-19^^England|Human|University College London Hospital|COVID-19 Genomics UK (COG-UK) Consortium|Byott|United Kingdom

>Spike|hCoV-19/Brazil/SP-L39-CD1045/2020|2020-05-13|EPI\_ISL\_721988|Original|hCoV-19^^S\u00e3o Paulo|Human|Hospital das Cl\u00ednicas Universidade de S\u00e3o Paulo Medical School|Laborat\u00f3rio de Parasitologia M\u00e9dica - Instituto de Medicina Tropical - Universidade de S\u00e3o Paulo|de Jesus|Brazil

>Spike|hCoV-19/England/BRIS-12FDB8/2020|2020-04-10|EPI\_ISL\_492533|Original|hCoV-19^^England|Human|PHE South West Regional Laboratory|Wellcome Sanger Institute for the COVID-19 Genomics UK (COG-UK) consortium|Davies|United Kingdom

>Spike|hCoV-19/USA/TX-HMH-7183/2020|2020-06-28|EPI\_ISL\_546579|Original|hCoV-19^^Texas|Human|Houston Methodist Hospital|Houston Methodist Hospital|Long|USA

>Spike|hCoV-19/England/LIVE-1DE0CE/2020|2020-10-10|EPI\_ISL\_611889|Original|hCoV-19^^England|Human|Liverpool Clinical Laboratories|COVID-19 Genomics UK (COG-UK) Consortium|Haldenby|United Kingdom

>Spike|hCoV-19/Japan/PG-1396/2020|2020-04-00|EPI\_ISL\_685003|Original|hCoV-19^^Japan|Human|Saitama Prefectural Institute of Public Health|Pathogen Genomics Center|Sekizuka|Japan

>Spike|hCoV-19/England/MILK-A47971/2020|2020-10-05|EPI\_ISL\_598372|Original|hCoV-19^^England|Human|Lighthouse Lab in Milton Keynes|Wellcome Sanger Institute for the COVID-19 Genomics UK (COG-UK) consortium|Davies|United Kingdom

>Spike|hCoV-19/England/201300935/2020|2020-03-20|EPI\_ISL\_423684|Original|hCoV-19^^England|Human|Respiratory Virus Unit|Respiratory Virus Unit|Platt|United Kingdom

>Spike|hCoV-19/Wales/PHWC-279CC/2020|2020-04-01|EPI\_ISL\_432429|Original|hCoV-19^^Wales|Human|Wales Specialist Virology Centre|Public Health Wales Microbiology Cardiff|Moore|United Kingdom

>Spike|hCoV-19/USA/TX-HMH-MCoV-18852/2020|2020-11-25|EPI\_ISL\_785169|Original|hCoV-19^^Texas|Human|Houston Methodist Hospital|Houston Methodist Hospital|Long|USA

>Spike|hCoV-19/Scotland/EDB4560/2020|2020-05-06|EPI\_ISL\_461728|Original|hCoV-19^^Scotland|Human|Virology Department|COVID-19 Genomics UK (COG-UK) Consortium|Williams|United Kingdom

>Spike|hCoV-19/England/QEUEH-96064F/2020|2020-08-03|EPI\_ISL\_532046|Original|hCoV-19^^England|Human|Lighthouse Lab in Glasgow|Wellcome Sanger Institute for the COVID-19 Genomics UK (COG-UK) consortium|Davies|United Kingdom

>Spike|hCoV-19/Denmark/DCGC-3699/2020|2020-08-31|EPI\_ISL\_615477|Original|hCoV-19^^Syddanmark|Human|Department of Virus and Microbiological Special Diagnostics|Albertsen lab|Michaelsen|Denmark

>Spike|hCoV-19/Spain/AN-IBV-98001709/2020|2020-04-12|EPI\_ISL\_538135|Original|hCoV-19^^Andalucia|Human|Servicio de Microbiolog\u00eda y Parasitolog\u00eda cl\u00ednica. UCEIMP. Hospital Universitario Virgen del Roc\u00edo/IBIS/CSIC/US|SeqCOVID-SPAIN consortium/IBV (CSIC) |Comas|Spain

>Spike|hCoV-19/England/ALDP-9BEB61/2020|2020-09-09|EPI\_ISL\_568084|Original|hCoV-19^^England|Human|Lighthouse Lab in Alderley Park|Wellcome Sanger Institute for the COVID-19 Genomics UK (COG-UK) consortium|Davies|United Kingdom

>Spike|hCoV-19/Italy/APU-IZSPB-188PT/2020|2020-08-28|EPI\_ISL\_722865|Original|hCoV-19^^Apulia|Human|I.R.C.C.S. \S. De Bellis\ - Ente Ospedaliero|Istituto Zooprofilattico Sperimentale della Puglia e della Basilicata|Parisi|Italy

>Spike|hCoV-19/England/MILK-9588AE/2020|2020-06-15|EPI\_ISL\_554639|Original|hCoV-19^^England|Human|Lighthouse Lab in Milton Keynes|Wellcome Sanger Institute for the COVID-19 Genomics UK (COG-UK) consortium|Davies|United Kingdom

>Spike|hCoV-19/USA/MI-MDHHS-SC21283/2020|2020-04-09|EPI\_ISL\_507538|Original|hCoV-19^^Michigan|Human|Michigan Department of Health and Human Services|Michigan Department of Health and Human Services|Blankenship|USA

>Spike|hCoV-19/England/MILK-B3A345/2020|2020-11-01|EPI\_ISL\_705451|Original|hCoV-19^^England|Human|Oxford Viromics|COVID-19 Genomics UK (COG-UK) Consortium|Golubchik|United Kingdom

>Spike|hCoV-19/Scotland/CVR5624/2020|2020-10-27|EPI\_ISL\_651874|Original|hCoV-19^^Scotland|Human|West of Scotland Specialist Virology Centre|COVID-19 Genomics UK (COG-UK) Consortium|Robertson|United Kingdom

>Spike|hCoV-19/Jordan/AM-ALSR-4040/2020|2020-10-03|EPI\_ISL\_636400|Original|hCoV-19^^Amman|Human|Biolab Diagnostic Laboratories|Andersen lab at Scripps Research|Gangavarapu|Jordan

>Spike|hCoV-19/England/CAMC-B082AD/2020|2020-10-29|EPI\_ISL\_643869|Original|hCoV-19^^England|Human|Lighthouse Lab in Cambridge|Wellcome Sanger Institute for the COVID-19 Genomics UK (COG-UK) Consortium|Davies|United Kingdom

>Spike|hCoV-19/Jordan/AM-ALSR-4999/2020|2020-10-05|EPI\_ISL\_730272|Original|hCoV-19^^Amman|Human|Biolab Diagnostic Laboratories|Andersen lab at Scripps Research|Gangavarapu|Jordan

>Spike|hCoV-19/Wales/PHWC-49C3B1/2020|2020-12-09|EPI\_ISL\_742550|Original|hCoV-19^^Wales|Human|Wales Specialist Virology Centre Sequencing lab|COVID-19 Genomics UK (COG-UK) Consortium|Moore|United Kingdom

>Spike|hCoV-19/USA/TX-HMH-4521/2020|2020-06-19|EPI\_ISL\_543689|Original|hCoV-19^^Texas|Human|Houston Methodist Hospital|Houston Methodist Hospital|Long|USA

>Spike|hCoV-19/India/GJ-GBRC352b/2020|2020-06-18|EPI\_ISL\_514599|Original|hCoV-19^^Gujarat|Human|B.J. Medical College and Civil hospital|Gujarat Biotechnology Research Centre|Joshi|India

>Spike|hCoV-19/England/PORT-2D5785/2020|2020-12-20|EPI\_ISL\_763476|Original|hCoV-19^^England|Human|Centre for Enzyme Innovation|COVID-19 Genomics UK (COG-UK) Consortium|Robson|United Kingdom

>Spike|hCoV-19/England/QEUEH-B3FED6/2020|2020-11-08|EPI\_ISL\_657130|Original|hCoV-19^^England|Human|Lighthouse Lab in Glasgow|Wellcome Sanger Institute for the COVID-19 Genomics UK (COG-UK) Consortium|Davies|United Kingdom

>Spike|hCoV-19/USA/CA-CZB-11852/2020|2020-10-01|EPI\_ISL\_625612|Original|hCoV-19^^California|Human|Alameda County Public Health Lab|Chan-Zuckerberg Biohub|Bhatt|USA

>Spike|hCoV-19/Wales/PHWC-481C78/2020|2020-10-16|EPI\_ISL\_613161|Original|hCoV-19^^Wales|Human|Wales Specialist Virology Centre Sequencing lab|COVID-19 Genomics UK (COG-UK) Consortium|Moore|United Kingdom

>Spike|hCoV-19/USA/WA-S1547/2020|2020-05-26|EPI\_ISL\_495973|Original|hCoV-19^^Washington|Human|Washington State Department of Health|Seattle Flu Study|Lee|USA

>Spike|hCoV-19/Spain/MD-IBV-99009645/2020|2020-10-27|EPI\_ISL\_654380|Original|hCoV-19^^Madrid|Human|Hospital General Universitario Gregorio Mara\u00f1a|SeqCOVID-SPAIN consortium|IBV (CSIC)|Comas|Spain

>Spike|hCoV-19/England/MILK-BB0848/2020|2020-11-18|EPI\_ISL\_720435|Original|hCoV-19^^England|Human|Lighthouse Lab in Milton Keynes|Wellcome Sanger Institute for the COVID-19 Genomics UK (COG-UK) Consortium|Davies|United Kingdom

>Spike|hCoV-19/mink/Denmark/mDK-159/2020|2020-11-05|EPI\_ISL\_683010|Original|hCoV-19^^Denmark|Neovison vison|Department of Virus and Microbiological Special Diagnostics|Albertsen Lab|Michaelsen|Denmark

>Spike|hCoV-19/Netherlands/Gelderland\_76/2020|2020-05-19|EPI\_ISL\_460975|Original|hCoV-19^^Gelderland|Human|Dutch COVID-19 response team|Erasmus Medical Center|Oude Munnink|Netherlands

>Spike|hCoV-19/England/QEUH-C332B7/2020|2020-12-11|EPI\_ISL\_782723|Original|hCoV-19^^England|Human|Lighthouse Lab in Glasgow|Wellcome Sanger Institute for the COVID-19 Genomics UK (COG-UK) Consortium|Davies|United Kingdom

>Spike|hCoV-19/England/CAMB-75482/2020|2020-03-13|EPI\_ISL\_425392|Original|hCoV-19^^England|Human|Department of Pathology|COVID-19 Genomics UK (COG-UK) Consortium|Meredith|United Kingdom

>Spike|hCoV-19/Scotland/QEUH-9DC09B/2020|2020-09-22|EPI\_ISL\_575349|Original|hCoV-19^^Scotland|Human|Lighthouse Lab in Glasgow|Wellcome Sanger Institute for the COVID-19 Genomics UK (COG-UK) consortium|Davies|United Kingdom

>Spike|hCoV-19/Denmark/DCGC-12468/2020|2020-11-16|EPI\_ISL\_682649|Original|hCoV-19^^Syddanmark|Human|Department of Virus and Microbiological Special Diagnostics|Albertsen Lab|Michaelsen|Denmark

>Spike|hCoV-19/Belgium/ULG-11017/2020|2020-11-28|EPI\_ISL\_722936|Original|hCoV-19^^Liege|Human|Department of Clinical Microbiology|GIGA Medical Genomics|Durkin|Belgium

>Spike|hCoV-19/USA/TX-DSHS-2026/2020|2020-07-14|EPI\_ISL\_766668|Original|hCoV-19^^Texas|Human|Texas Department of State Health Services|Texas Department of State Health Services|Rahman|USA

>Spike|hCoV-19/England/QEUH-A0C152/2020|2020-10-03|EPI\_ISL\_584954|Original|hCoV-19^^England|Human|Quadram Institute Bioscience|COVID-19 Genomics UK (COG-UK) Consortium|Alikhan|United Kingdom

>Spike|hCoV-19/USA/VA-DCLS-1612/2020|2020-08-20|EPI\_ISL\_614020|Original|hCoV-19^^Virginia|Human|Virginia DCLS|Virginia DCLS|St. Jacques|USA

>Spike|hCoV-19/India/MH-ACTREC-581/2020|2020-09-02|EPI\_ISL\_723060|Original|hCoV-19^^Maharashtra|Human|Hematopathology Laboratory|Hematopathology Laboratory|Patkar|India

>Spike|hCoV-19/USA/WI-UW-1510/2020|2020-09-16|EPI\_ISL\_541636|Original|hCoV-19^^Wisconsin|Human|University of Wisconsin-Madison AIDS Vaccine Research Laboratories|University of Wisconsin-Madison AIDS Vaccine Research Laboratories|Baczenas|USA

>Spike|hCoV-19/Wales/PHWC-489E4D/2020|2020-11-04|EPI\_ISL\_652498|Original|hCoV-19^^Wales|Human|Wales Specialist Virology Centre Sequencing lab|COVID-19 Genomics UK (COG-UK) Consortium|Moore|United Kingdom

>Spike|hCoV-19/Denmark/DCGC-2729/2020|2020-08-17|EPI\_ISL\_616474|Original|hCoV-19^^Hovedstaden|Human|Department of Virus and Microbiological Special Diagnostics|Albertsen lab|Michaelsen|Denmark

>Spike|hCoV-19/France/PAC-MEPHI-1718/2020|2020-09-17|EPI\_ISL\_644429|Original|hCoV-19^^Provence-Alpes-Cote-d\u2019Azur|Human|MEPHI|MEPHI|Levasseur|France

>Spike|hCoV-19/Wales/PHWC-1635DE/2020|2020-05-10|EPI\_ISL\_473969|Original|hCoV-19^^Wales|Human|Originating lab|COVID-19 Genomics UK (COG-UK) Consortium|Moore|United Kingdom

>Spike|hCoV-19/Wales/PHWC-31BC9/2020|2020-04-12|EPI\_ISL\_446540|Original|hCoV-19^^Wales|Human|Wales Specialist Virology Centre|Public Health Wales Microbiology Cardiff|Moore|United Kingdom

>Spike|hCoV-19/USA/UT-03032/2020|2020-05-01|EPI\_ISL\_522304|Original|hCoV-19^^Utah|Human|Utah Public Health Laboratory|Utah Public Health Laboratory|Young|USA

>Spike|hCoV-19/England/BRIS-126698/2020|2020-04-08|EPI\_ISL\_458981|Original|hCoV-19^^England|Human|PHE South West Regional Laboratory|Wellcome Sanger Institute for the COVID-19 Genomics UK (COG-UK) consortium|Davies|United Kingdom

>Spike|hCoV-19/Norway/5059/2020|2020-10-29|EPI\_ISL\_708035|Original|hCoV-19^^Oslo|Human|Furst Medical Laboratory|Norwegian Institute of Public Health|Kopperud Riis|Norway

>Spike|hCoV-19/England/MILK-9A8AE5/2020|2020-08-31|EPI\_ISL\_550123|Original|hCoV-19^^England|Human|Lighthouse Lab in Milton Keynes|Wellcome Sanger Institute for the COVID-19 Genomics UK (COG-UK) consortium|Davies|United Kingdom

>Spike|hCoV-19/Australia/SAP400/2020|2020-03-20|EPI\_ISL\_492165|Original|hCoV-19^^South Australia|Human|SA Pathology|SA Pathology|Leong|Australia

>Spike|hCoV-19/USA/CA-QDX-2597/2020|2020-03-16|EPI\_ISL\_604886|Original|hCoV-19^^California|Human|Quest Diagnostics|Quest Diagnostics|Kagan|USA

>Spike|hCoV-19/USA/FL-BPHL-0826/2020|2020-06-12|EPI\_ISL\_514172|Original|hCoV-19^^Florida|Human|Florida Bureau of Public Health Laboratories|Florida Bureau of Public Health Laboratories|Blanton|USA

>Spike|hCoV-19/England/ALDP-BC7969/2020|2020-11-22|EPI\_ISL\_721434|Original|hCoV-19^^England|Human|Lighthouse Lab in Alderley Park|Wellcome Sanger Institute for the COVID-19 Genomics UK (COG-UK) Consortium|Davies|United Kingdom

>Spike|hCoV-19/England/ALDP-9FD3E6/2020|2020-10-02|EPI\_ISL\_588030|Original|hCoV-19^^England|Human|Lighthouse Lab in Alderley Park|Wellcome Sanger Institute for the COVID-19 Genomics UK (COG-UK) consortium|Davies|United Kingdom

>Spike|hCoV-19/England/LIVE-9B240/2020|2020-03-27|EPI\_ISL\_449423|Original|hCoV-19^^England|Human|Liverpool Clinical Laboratories|COVID-19 Genomics UK (COG-UK) Consortium|Haldenby|United Kingdom

>Spike|hCoV-19/Canada/BC\_08847743/2020|2020-04-00|EPI\_ISL\_466835|Original|hCoV-19^^British Columbia|Human|BCCDC Public Health Laboratory|BCCDC Public Health Laboratory|Harrigan|Canada

>Spike|hCoV-19/England/QEUA-A1E946/2020|2020-10-01|EPI\_ISL\_587456|Original|hCoV-19^^England|Human|Lighthouse Lab in Glasgow|Wellcome Sanger Institute for the COVID-19 Genomics UK (COG-UK) consortium|Davies|United Kingdom

>Spike|hCoV-19/Scotland/CVR4953/2020|2020-10-05|EPI\_ISL\_594717|Original|hCoV-19^^Scotland|Human|West of Scotland Specialist Virology Centre|COVID-19 Genomics UK (COG-UK) Consortium|Robertson|United Kingdom

>Spike|hCoV-19/Hong Kong/HKU-200723-055/2020|2020-07-10|EPI\_ISL\_497822|Original|hCoV-19^^Hong Kong|Human|Department of Microbiology|Department of Microbiology|Chan|China

>Spike|hCoV-19/Belgium/reg-0413576/2020|2020-04-13|EPI\_ISL\_734568|Original|hCoV-19^^Sint-Amands|Human|UZ Leuven|KU Leuven|Maes|Belgium

>Spike|hCoV-19/USA/TX-HMH-MCoV-12294/2020|2020-09-23|EPI\_ISL\_790286|Original|hCoV-19^^Texas|Human|Houston Methodist Hospital|Houston Methodist Hospital|Long|USA

>Spike|hCoV-19/United Arab Emirates/0956/2020|2020-06-28|EPI\_ISL\_699092|Original|hCoV-19^^Abu Dhabi|Human|Group 42 (G42) Healthcare|G42 Healthcare|Ogrodzki|United Arab Emirates

>Spike|hCoV-19/Denmark/DCGC-2591/2020|2020-08-17|EPI\_ISL\_617827|Original|hCoV-19^^Hovedstaden|Human|Department of Virus and Microbiological Special Diagnostics|Albertsen lab|Michaelsen|Denmark

>Spike|hCoV-19/USA/NY-NYCPHL-001305/2020|2020-11-10|EPI\_ISL\_683910|Original|hCoV-19^^New York|Human|DOHMH Crown Heights|New York City Public Health Laboratory|Wang|USA

>Spike|hCoV-19/Hungary/US-2901w/2020|2020-03-26|EPI\_ISL\_477620|Original|hCoV-19^^B\u00e9k\u00e9s County|Human|University of Szeged|National Laboratory of Virology|Kemenesi|Hungary

>Spike|hCoV-19/USA/TX-HMH-MCoV-8323/2020|2020-07-08|EPI\_ISL\_784331|Original|hCoV-19^^Texas|Human|Houston Methodist Hospital|Houston Methodist Hospital|Long|USA

>Spike|hCoV-19/England/205260410/2020|2020-00-00|EPI\_ISL\_766067|Original|hCoV-19^^England|Human|Respiratory Virus Unit|COVID-19 Genomics UK (COG-UK) Consortium|Platt|United Kingdom

>Spike|hCoV-19/England/CAMB-1AB73E/2020|2020-04-21|EPI\_ISL\_470184|Original|hCoV-19^^England|Human|Department of Pathology|Wellcome Sanger Institute for the COVID-19 Genomics UK (COG-UK) consortium|Davies|United Kingdom

>Spike|hCoV-19/England/SHEF-C6E48/2020|2020-03-26|EPI\_ISL\_442003|Original|hCoV-19^^England|Human|Virology Department|COVID-19 Genomics UK (COG-UK) Consortium|de Silva|United Kingdom

>Spike|hCoV-19/USA/TX-HMH-3832/2020|2020-06-11|EPI\_ISL\_543235|Original|hCoV-19^^Texas|Human|Houston Methodist Hospital|Houston Methodist Hospital|Long|USA

>Spike|hCoV-19/USA/CA-SR0218/2020|2020-04-18|EPI\_ISL\_437580|Original|hCoV-19^^California|Human|Scripps Medical Laboratory|Andersen lab at Scripps Research|Gangavarapu|USA

>Spike|hCoV-19/England/ALDP-94FD8D/2020|2020-06-16|EPI\_ISL\_555239|Original|hCoV-19^^England|Human|Lighthouse Lab in Alderley Park|Wellcome Sanger Institute for the COVID-19 Genomics UK (COG-UK) consortium|Davies|United Kingdom



>Spike|hCoV-19/England/QEUA-A63F13/2020|2020-10-11|EPI\_ISL\_628677|Original|hCoV-19^^England|Human|Oxford Viromics|COVID-19 Genomics UK (COG-UK) Consortium|Golubchik|United Kingdom

>Spike|hCoV-19/England/ALDP-950D10/2020|2020-06-14|EPI\_ISL\_554460|Original|hCoV-19^^England|Human|Lighthouse Lab in Alderley Park|Wellcome Sanger Institute for the COVID-19 Genomics UK (COG-UK) consortium|Davies|United Kingdom

>Spike|hCoV-19/Australia/VIC2979/2020|2020-07-09|EPI\_ISL\_521809|Original|hCoV-19^^Victoria|Human|Microbiological Diagnostic Unit - Public Health Laboratory (MDU-PHL)|MDU-PHL|Schultz|Australia

>Spike|hCoV-19/USA/OR-OHSU-0470/2020|2020-06-10|EPI\_ISL\_525818|Original|hCoV-19^^Oregon|Human|OHSU Lab Services Molecular Microbiology Lab|Ginkgo Bioworks Clinical Laboratory|O'Roak|USA

>Spike|hCoV-19/Norway/3773/2020|2020-09-04|EPI\_ISL\_635151|Original|hCoV-19^^Viken|Human|Ostfold Hospital Trust - Kalnes|Norwegian Institute of Public Health|Vollan|Norway

>Spike|hCoV-19/England/MILK-C6F63E/2020|2020-12-13|EPI\_ISL\_778611|Original|hCoV-19^^England|Human|Lighthouse Lab in Milton Keynes|Wellcome Sanger Institute for the COVID-19 Genomics UK (COG-UK) Consortium|Davies|United Kingdom

>Spike|hCoV-19/South Korea/KCDC2140/2020|2020-03-19|EPI\_ISL\_498041|Original|hCoV-19^^South Korea|Human|Division of Viral Diseases|Division of Viral Diseases|Kim|South Korea

>Spike|hCoV-19/Wales/PHWC-487BA2/2020|2020-10-31|EPI\_ISL\_639282|Original|hCoV-19^^Wales|Human|Wales Specialist Virology Centre Sequencing lab|COVID-19 Genomics UK (COG-UK) Consortium|Moore|United Kingdom

>Spike|hCoV-19/India/TG-CCMB-OM29/2020|2020-09-20|EPI\_ISL\_644723|Original|hCoV-19^^Telangana|Human|Osmania Medical College|CSIR-Centre for Cellular and Molecular Biology|Mukherjee|India

>Spike|hCoV-19/England/CAMC-B2098C/2020|2020-11-02|EPI\_ISL\_647593|Original|hCoV-19^^England|Human|Lighthouse Lab in Cambridge|Wellcome Sanger Institute for the COVID-19 Genomics UK (COG-UK) Consortium|Davies|United Kingdom

>Spike|hCoV-19/England/20129122404/2020|2020-03-13|EPI\_ISL\_424099|Original|hCoV-19^^England|Human|Respiratory Virus Unit|Respiratory Virus Unit|Platt|United Kingdom

>Spike|hCoV-19/USA/NV-NSPHL-A0157/2020|2020-05-14|EPI\_ISL\_515421|Original|hCoV-19^^Nevada|Human|Nevada State Public Health Laboratory|Nevada State Public Health Laboratory|Sevinsky|USA

>Spike|hCoV-19/South Korea/KDCA0341/2020|2020-07-21|EPI\_ISL\_760127|Original|hCoV-19^^South Korea|Human|Division of Emerging Infectious Diseases|Division of Emerging Infectious Diseases|Park|South Korea

>Spike|hCoV-19/Netherlands/NB-RIVM-10300/2020|2020-02-27|EPI\_ISL\_636504|Original|hCoV-19^^NoordBrabant|Human|Dutch COVID-19 response team|National Institute for Public Health and the Environment (RIVM)|Meijer|Netherlands

>Spike|hCoV-19/USA/AZ-TG664244/2020|2020-04-28|EPI\_ISL\_696048|Original|hCoV-19^^Arizona|Human|Sonora Quest Laboratories|TGen North|French|USA

>Spike|hCoV-19/Denmark/DCGC-3776/2020|2020-04-20|EPI\_ISL\_622657|Original|hCoV-19^^Hovedstaden|Human|Department of Virus and Microbiological Special Diagnostics|Albertsen lab|Michaelsen|Denmark

>Spike|hCoV-19/England/MILK-B56923/2020|2020-11-06|EPI\_ISL\_656962|Original|hCoV-19^^England|Human|Lighthouse Lab in Milton Keynes|Wellcome Sanger Institute for the COVID-19 Genomics UK (COG-UK) Consortium|Davies|United Kingdom

>Spike|hCoV-19/Norway/CS-26/2020|2020-04-06|EPI\_ISL\_666606|Original|hCoV-19^^Viken|Human|Dept. of Microbiology and Infection Control|Dept. of Microbiology and Infection Control|Hesselberg L\u00f8vestad|Norway

>Spike|hCoV-19/Netherlands/UT-RIVM-20899/2020|2020-12-15|EPI\_ISL\_790935|Original|hCoV-19^^Utrecht|Human|Dutch COVID-19 response team|National Institute for Public Health and the Environment (RIVM)|Meijer|Netherlands

>Spike|hCoV-19/Chile/BI-199851/2020|2020-10-07|EPI\_ISL\_746516|Original|hCoV-19^^Biobio|Human|Genetica Molecular and Subdepartamento de Virologia ISP Chile|Instituto de Salud Publica de Chile|Tognarelli|Chile

>Spike|hCoV-19/Wales/ALDP-C48871/2020|2020-12-13|EPI\_ISL\_767135|Original|hCoV-19^^Wales|Human|Lighthouse Lab in Alderley Park|Wellcome Sanger Institute for the COVID-19 Genomics UK (COG-UK) Consortium|Davies|United Kingdom

>Spike|hCoV-19/Sweden/20-50170/2020|2020-03-08|EPI\_ISL\_429145|Original|hCoV-19^^Varmland|Human|Klinisk mikrobiologi Orebro|The Public Health Agency of Sweden|Svartstr\u00f6m|Sweden

>Spike|hCoV-19/Denmark/DCGC-11660/2020|2020-10-26|EPI\_ISL\_671053|Original|hCoV-19^^Midtjylland|Human|Department of Virus and Microbiological Special Diagnostics|Albertsen Lab|Michaelsen|Denmark

>Spike|hCoV-19/England/SHEF-C682C/2020|2020-04-20|EPI\_ISL\_493685|Original|hCoV-19^^England|Human|Virology Department|COVID-19 Genomics UK (COG-UK) Consortium|de Silva|United Kingdom

>Spike|hCoV-19/USA/VA-DCLS-0317/2020|2020-05-04|EPI\_ISL\_467930|Original|hCoV-19^^Virginia|Human|Virginia DCLS|Virginia DCLS|St. Jacques|USA

>Spike|hCoV-19/USA/WA-S2266/2020|2020-06-09|EPI\_ISL\_497694|Original|hCoV-19^^Washington|Human|Washington State Department of Health|Seattle Flu Study|Lee|USA

>Spike|hCoV-19/USA/WA-S2146/2020|2020-06-08|EPI\_ISL\_497574|Original|hCoV-19^^Washington|Human|Washington State Department of Health|Seattle Flu Study|Lee|USA

>Spike|hCoV-19/England/MILK-9ECC2B/2020|2020-04-29|EPI\_ISL\_589430|Original|hCoV-19^^England|Human|Lighthouse Lab in Milton Keynes|Wellcome Sanger Institute for the COVID-19 Genomics UK (COG-UK) consortium|Davies|United Kingdom

>Spike|hCoV-19/USA/AZ-TG395897/2020|2020-06-05|EPI\_ISL\_694741|Original|hCoV-19^^Arizona|Human|AZ SPHL|TGen North|French|USA

>Spike|hCoV-19/Japan/PG-2616/2020|2020-03-00|EPI\_ISL\_690750|Original|hCoV-19^^Japan|Human|Pathogen Genomics Center|Pathogen Genomics Center|Sekizuka|Japan

>Spike|hCoV-19/Scotland/QEUA-A7826D/2020|2020-10-14|EPI\_ISL\_638967|Original|hCoV-19^^Scotland|Human|Oxford Viromics|COVID-19 Genomics UK (COG-UK) Consortium|Golubchik|United Kingdom

>Spike|hCoV-19/USA/TX-HMH-MCoV-15802/2020|2020-07-10|EPI\_ISL\_785486|Original|hCoV-19^^Texas|Human|Houston Methodist Hospital|Houston Methodist Hospital|Long|USA

>Spike|hCoV-19/England/QEUA-BA3480/2020|2020-11-18|EPI\_ISL\_720963|Original|hCoV-19^^England|Human|Lighthouse Lab in Glasgow|Wellcome Sanger Institute for the COVID-19 Genomics UK (COG-UK) Consortium|Davies|United Kingdom

>Spike|hCoV-19/South Africa/KRISP-K003382/2020|2020-09-10|EPI\_ISL\_602770|Original|hCoV-19^^KwaZulu-Natal|Human|NHLS-IALCH|KRISP|de Oliveira|South Africa

>Spike|hCoV-19/England/MILK-B85E77/2020|2020-11-13|EPI\_ISL\_674043|Original|hCoV-19^^England|Human|Lighthouse Lab in Milton Keynes|Wellcome Sanger Institute for the COVID-19 Genomics UK (COG-UK) Consortium|Davies|United Kingdom

>Spike|hCoV-19/USA/TX-HMH-3529/2020|2020-06-15|EPI\_ISL\_544227|Original|hCoV-19^^Texas|Human|Houston Methodist Hospital|Houston Methodist Hospital|Long|USA

>Spike|hCoV-19/England/BRIS-18547D0/2020|2020-04-27|EPI\_ISL\_495120|Original|hCoV-19^^England|Human|PHE South West Regional Laboratory|Wellcome Sanger Institute for the COVID-19 Genomics UK (COG-UK) consortium|Davies|United Kingdom

>Spike|hCoV-19/England/MILK-A060F1/2020|2020-10-01|EPI\_ISL\_599993|Original|hCoV-19^^England|Human|Lighthouse Lab in Milton Keynes|Wellcome Sanger Institute for the COVID-19 Genomics UK (COG-UK) consortium|Davies|United Kingdom

>Spike|hCoV-19/Wales/MILK-B04C58/2020|2020-10-24|EPI\_ISL\_650228|Original|hCoV-19^^Wales|Human|Department of Pathology|COVID-19 Genomics UK (COG-UK) Consortium|Goodfellow|United Kingdom

>Spike|hCoV-19/England/NORW-F1FD8/2020|2020-10-22|EPI\_ISL\_627647|Original|hCoV-19^^England|Human|Quadram Institute Bioscience|COVID-19 Genomics UK (COG-UK) Consortium|Alikhan|United Kingdom

>Spike|hCoV-19/Australia/VIC5110/2020|2020-07-19|EPI\_ISL\_519913|Original|hCoV-19^^Victoria|Human|Microbiological Diagnostic Unit - Public Health Laboratory (MDU-PHL)|MDU-PHL|Schultz|Australia

>Spike|hCoV-19/England/ALDP-B2401A/2020|2020-11-04|EPI\_ISL\_646224|Original|hCoV-19^^England|Human|Lighthouse Lab in Alderley Park|Wellcome Sanger Institute for the COVID-19 Genomics UK (COG-UK) Consortium|Davies|United Kingdom

>Spike|hCoV-19/England/MILK-ACC4EC/2020|2020-10-21|EPI\_ISL\_634506|Original|hCoV-19^^England|Human|Lighthouse Lab in Milton Keynes|Wellcome Sanger Institute for the COVID-19 Genomics UK (COG-UK) consortium|Davies|United Kingdom

>Spike|hCoV-19/Netherlands/ZH-EMC-1120/2020|2020-12-14|EPI\_ISL\_763199|Original|hCoV-19^^Zuid Holland|Human|Dutch COVID-19 response team|Erasmus Medical Center|Oude Munnink|Netherlands

>Spike|hCoV-19/England/CAMC-A57088/2020|2020-10-09|EPI\_ISL\_597246|Original|hCoV-19^^England|Human|Lighthouse Lab in Cambridge|Wellcome Sanger Institute for the COVID-19 Genomics UK (COG-UK) consortium|Davies|United Kingdom

>Spike|hCoV-19/Wales/PHWC-489593/2020|2020-10-20|EPI\_ISL\_639589|Original|hCoV-19^^Wales|Human|Wales Specialist Virology Centre Sequencing lab|COVID-19 Genomics UK (COG-UK) Consortium|Moore|United Kingdom

>Spike|hCoV-19/South Africa/R12534-20/2020|2020-06-16|EPI\_ISL\_504187|Original|hCoV-19^^North West|Human|National Institute for Communicable Diseases of the National Health Laboratory Service|National Institute for Communicable Diseases of the National Health Laboratory Service|Allam|South Africa

>Spike|hCoV-19/USA/CA-CZB-1882/2020|2020-04-28|EPI\_ISL\_486181|Original|hCoV-19^^California|Human|Orange County Public Health Laboratory|Chan-Zuckerberg Biohub|McGeever|USA

>Spike|hCoV-19/USA/TX-HMH-MCoV-15500/2020|2020-10-23|EPI\_ISL\_786984|Original|hCoV-19^^Texas|Human|Houston Methodist Hospital|Houston Methodist Hospital|Long|USA

>Spike|hCoV-19/Wales/PHWC-480338/2020|2020-10-22|EPI\_ISL\_612875|Original|hCoV-19^^Wales|Human|Wales Specialist Virology Centre Sequencing lab|COVID-19 Genomics UK (COG-UK) Consortium|Moore|United Kingdom

>Spike|hCoV-19/Netherlands/FR-RIVM-20817/2020|2020-12-22|EPI\_ISL\_790873|Original|hCoV-19^^Friesland|Human|Dutch COVID-19 response team|National Institute for Public Health and the Environment (RIVM)|Meijer|Netherlands

>Spike|hCoV-19/England/201100039/2020|2020-03-07|EPI\_ISL\_464629|Original|hCoV-19^^England|Human|Respiratory Virus Unit|Respiratory Virus Unit|Platt|United Kingdom

>Spike|hCoV-19/Wales/MILK-9E14D3/2020|2020-09-19|EPI\_ISL\_577402|Original|hCoV-19^^Wales|Human|Oxford Viromics|COVID-19 Genomics UK (COG-UK) Consortium|Golubchik|United Kingdom

>Spike|hCoV-19/England/QEUEH-A0C91E/2020|2020-10-03|EPI\_ISL\_599262|Original|hCoV-19^^England|Human|Lighthouse Lab in Glasgow|Wellcome Sanger Institute for the COVID-19 Genomics UK (COG-UK) consortium|Davies|United Kingdom

>Spike|hCoV-19/USA/TX-HMH-MCoV-15936/2020|2020-07-10|EPI\_ISL\_785620|Original|hCoV-19^^Texas|Human|Houston Methodist Hospital|Houston Methodist Hospital|Long|USA

>Spike|hCoV-19/England/MILK-B88797/2020|2020-11-13|EPI\_ISL\_674258|Original|hCoV-19^^England|Human|Lighthouse Lab in Milton Keynes|Wellcome Sanger Institute for the COVID-19 Genomics UK (COG-UK) Consortium|Davies|United Kingdom

>Spike|hCoV-19/England/LEED-2A87A9/2020|2020-04-02|EPI\_ISL\_539098|Original|hCoV-19^^England|Human|Leeds Teaching Hospitals NHS Trust and Public Health England|Wellcome Sanger Institute for the COVID-19 Genomics UK (COG-UK) consortium|Davies|United Kingdom

>Spike|hCoV-19/USA/NY-Wadsworth-248647-01/2020|2020-10-19|EPI\_ISL\_734372|Original|hCoV-19^^New York|Human|Wadsworth Center|Wadsworth Center|Lasek-Nesselquist|USA

>Spike|hCoV-19/England/NORT-296C81/2020|2020-04-28|EPI\_ISL\_484276|Original|hCoV-19^^England|Human|Northumbria University / South Tees Hospitals NHS Foundation Trust / North Cumbria Integrated Care NHS Foundation Trust / North Tees and Hartlepool NHS Foundation Trust / Newcastle Hospitals NHS Foundation Trust|COVID-19 Genomics UK (COG-UK) Consortium|Bashton|United Kingdom

>Spike|hCoV-19/USA/UT-UPHL-201206488/2020|2020-04-01|EPI\_ISL\_672540|Original|hCoV-19^^Utah|Human|Utah Public Health Laboratory|Utah Public Health Laboratory|Young|USA

>Spike|hCoV-19/England/LIVE-A489D/2020|2020-03-13|EPI\_ISL\_499902|Original|hCoV-19^^England|Human|Liverpool Clinical Laboratories|COVID-19 Genomics UK (COG-UK) Consortium|Haldenby|United Kingdom

>Spike|hCoV-19/England/BRIS-12EF77/2020|2020-04-22|EPI\_ISL\_488245|Original|hCoV-19^^England|Human|PHE South West Regional Laboratory|Wellcome Sanger Institute for the COVID-19 Genomics UK (COG-UK) consortium|Davies|United Kingdom

>Spike|hCoV-19/England/20132017704/2020|2020-03-24|EPI\_ISL\_423728|Original|hCoV-19^^England|Human|Respiratory Virus Unit|Respiratory Virus Unit|Platt|United Kingdom

>Spike|hCoV-19/Georgia/Tb-5727/2020|2020-04-25|EPI\_ISL\_481483|Original|hCoV-19^^Tbilisi|Human|Department for Virology|Department for Virology|Tomashvili|Georgia

>Spike|hCoV-19/USA/TX-HMH-MCoV-18273/2020|2020-11-17|EPI\_ISL\_784621|Original|hCoV-19^^Texas|Human|Houston Methodist Hospital|Houston Methodist Hospital|Long|USA

>Spike|hCoV-19/Germany/BE-ChVir-D711-11/2020|2020-03-07|EPI\_ISL\_516639|Original|hCoV-19^^Berlin|Human|Charite\u0301 Universita\u0308tsmedizin Berlin|Charite\u0301 Universita\u0308tsmedizin Berlin|Muehlemann|Germany

>Spike|hCoV-19/Denmark/DCGC-1581/2020|2020-04-13|EPI\_ISL\_618609|Original|hCoV-19^^Nordjylland|Human|Department of Virus and Microbiological Special Diagnostics|Albertsen lab|Michaelsen|Denmark

>Spike|hCoV-19/Denmark/DCGC-17000/2020|2020-12-14|EPI\_ISL\_750701|Original|hCoV-19^^Midtjylland|Human|Department of Virus and Microbiological Special Diagnostics|Albertsen Lab|Michaelsen|Denmark

>Spike|hCoV-19/England/QEUA-9B4A9B/2020|2020-09-03|EPI\_ISL\_590241|Original|hCoV-19^^England|Human|Lighthouse Lab in Glasgow|Wellcome Sanger Institute for the COVID-19 Genomics UK (COG-UK) consortium|Davies|United Kingdom

>Spike|hCoV-19/England/GSTT-265D590/2020|2020-03-23|EPI\_ISL\_483980|Original|hCoV-19^^England|Human|Centre for Clinical Infection and Diagnostics Research and Genomics Innovation Unit|COVID-19 Genomics UK (COG-UK) Consortium|Awan|United Kingdom

>Spike|hCoV-19/England/CAMC-B5108D/2020|2020-11-08|EPI\_ISL\_657825|Original|hCoV-19^^England|Human|Lighthouse Lab in Cambridge|Wellcome Sanger Institute for the COVID-19 Genomics UK (COG-UK) Consortium|Davies|United Kingdom

>Spike|hCoV-19/Denmark/DCGC-16290/2020|2020-11-16|EPI\_ISL\_714255|Original|hCoV-19^^Hovedstaden|Human|Department of Virus and Microbiological Special Diagnostics|Albertsen Lab|Michaelsen|Denmark

>Spike|hCoV-19/USA/TX-HMH-MCoV-13166/2020|2020-08-25|EPI\_ISL\_788317|Original|hCoV-19^^Texas|Human|Houston Methodist Hospital|Houston Methodist Hospital|Long|USA

>Spike|hCoV-19/Japan/PG-7396/2020|2020-07-00|EPI\_ISL\_688498|Original|hCoV-19^^Japan|Human|Pathogen Genomics Center|Pathogen Genomics Center|Sekizuka|Japan

>Spike|hCoV-19/England/EXET-138F01/2020|2020-10-29|EPI\_ISL\_665048|Original|hCoV-19^^England|Human|University of Exeter|COVID-19 Genomics UK (COG-UK) Consortium|Temperton|United Kingdom

>Spike|hCoV-19/Australia/VIC5589/2020|2020-07-19|EPI\_ISL\_518406|Original|hCoV-19^^Victoria|Human|Microbiological Diagnostic Unit - Public Health Laboratory (MDU-PHL)|MDU-PHL|Schultz|Australia

>Spike|hCoV-19/Denmark/DCGC-7440/2020|2020-10-12|EPI\_ISL\_618906|Original|hCoV-19^^Syddanmark|Human|Department of Virus and Microbiological Special Diagnostics|Albertsen lab|Michaelsen|Denmark

>Spike|hCoV-19/USA/TX-HMH-MCoV-15714/2020|2020-07-09|EPI\_ISL\_785398|Original|hCoV-19^^Texas|Human|Houston Methodist Hospital|Houston Methodist Hospital|Long|USA

>Spike|hCoV-19/England/LIVE-DC0A3E/2020|2020-11-04|EPI\_ISL\_705318|Original|hCoV-19^^England|Human|Liverpool Clinical Laboratories|COVID-19 Genomics UK (COG-UK) Consortium|Haldenby|United Kingdom

>Spike|hCoV-19/England/CAMB-77E28/2020|2020-04-01|EPI\_ISL\_440810|Original|hCoV-19^^England|Human|Department of Pathology|Wellcome Sanger Institute for the COVID-19 Genomics UK (COG-UK) consortium|Amato|United Kingdom

>Spike|hCoV-19/England/ALDP-B23716/2020|2020-11-04|EPI\_ISL\_646968|Original|hCoV-19^^England|Human|Lighthouse Lab in Alderley Park|Wellcome Sanger Institute for the COVID-19 Genomics UK (COG-UK) Consortium|Davies|United Kingdom

>Spike|hCoV-19/Switzerland/BS-42220622/2020|2020-04-05|EPI\_ISL\_581855|Original|hCoV-19^^Basel-Stadt|Human|University Hospital Basel|University Hospital Basel|Roloff Handschin|Switzerland

>Spike|hCoV-19/England/ALDP-A2FDBF/2020|2020-10-06|EPI\_ISL\_587042|Original|hCoV-19^^England|Human|Lighthouse Lab in Alderley Park|Wellcome Sanger Institute for the COVID-19 Genomics UK (COG-UK) consortium|Davies|United Kingdom

>Spike|hCoV-19/England/CAMB-7848F/2020|2020-04-04|EPI\_ISL\_433737|Original|hCoV-19^^England|Human|Department of Pathology|COVID-19 Genomics UK (COG-UK) Consortium|Meredith|United Kingdom

>Spike|hCoV-19/Denmark/DCGC-6299/2020|2020-08-31|EPI\_ISL\_616380|Original|hCoV-19^^Hovedstaden|Human|Department of Virus and Microbiological Special Diagnostics|Albertsen lab|Michaelsen|Denmark

>Spike|hCoV-19/Peru/LIM-INS-112/2020|2020-05-04|EPI\_ISL\_536510|Original|hCoV-19^^Lima|Human|Instituto Nacional de Salud|Laboratorio de Infecciones Respiratorias Agudas|Lopez|Peru

>Spike|hCoV-19/Wales/PHWC-48F15D/2020|2020-11-10|EPI\_ISL\_681050|Original|hCoV-19^^Wales|Human|Wales Specialist Virology Centre Sequencing lab|COVID-19 Genomics UK (COG-UK) Consortium|Moore|United Kingdom

>Spike|hCoV-19/Oman/C-8871/2020|2020-04-28|EPI\_ISL\_491124|Original|hCoV-19^^Muscat|Human|Oman-National Influenza Center|Biotechnology & OMICs Laboratory|Al Mahruqi|Oman

>Spike|hCoV-19/England/ALDP-B1AA37/2020|2020-11-01|EPI\_ISL\_647468|Original|hCoV-19^^England|Human|Lighthouse Lab in Alderley Park|Wellcome Sanger Institute for the COVID-19 Genomics UK (COG-UK) Consortium|Davies|United Kingdom

>Spike|hCoV-19/USA/SC\_6370/2020|2020-03-08|EPI\_ISL\_424888|Original|hCoV-19^^South Carolina|Human|SC Dept of Health and Env. Control-Bureau of Laboratories|Pathogen Discovery|Queen|USA

>Spike|hCoV-19/Japan/PG-1008/2020|2020-03-00|EPI\_ISL\_684618|Original|hCoV-19^^Japan|Human|Tokyo Metropolitan Institute of Public Health|Pathogen Genomics Center|Sekizuka|Japan

>Spike|hCoV-19/Spain/CL-IBV-97006203/2020|2020-04-13|EPI\_ISL\_537349|Original|hCoV-19^^Castilla y Leon|Human|Universidad de Le\u00f3n|SeqCOVID-SPAIN consortium|IBV (CSIC) |Comas|Spain

>Spike|hCoV-19/England/QEUH-B9F50C/2020|2020-11-18|EPI\_ISL\_720976|Original|hCoV-19^^England|Human|Lighthouse Lab in Glasgow|Wellcome Sanger Institute for the COVID-19 Genomics UK (COG-UK) Consortium|Davies|United Kingdom

>Spike|hCoV-19/England/CAMB-77A15/2020|2020-04-01|EPI\_ISL\_439519|Original|hCoV-19^^England|Human|Department of Pathology|Wellcome Sanger Institute for the COVID-19 Genomics UK (COG-UK) consortium|Amato|United Kingdom

>Spike|hCoV-19/Wales/PHWC-49DFE9/2020|2020-12-06|EPI\_ISL\_742940|Original|hCoV-19^^Wales|Human|Wales Specialist Virology Centre Sequencing lab|COVID-19 Genomics UK (COG-UK) Consortium|Moore|United Kingdom

>Spike|hCoV-19/Scotland/QEUH-AAD91F/2020|2020-10-22|EPI\_ISL\_637443|Original|hCoV-19^^Scotland|Human|Liverpool Clinical Laboratories|COVID-19 Genomics UK (COG-UK) Consortium|Haldenby|United Kingdom

>Spike|hCoV-19/England/MILK-9E02CB/2020|2020-09-18|EPI\_ISL\_601330|Original|hCoV-19^^England|Human|Lighthouse Lab in Milton Keynes|Wellcome Sanger Institute for the COVID-19 Genomics UK (COG-UK) consortium|Davies|United Kingdom

>Spike|hCoV-19/Wales/PHWC-4A677C/2020|2020-12-17|EPI\_ISL\_765071|Original|hCoV-19^^Wales|Human|Wales Specialist Virology Centre Sequencing lab|COVID-19 Genomics UK (COG-UK) Consortium|Moore|United Kingdom

>Spike|hCoV-19/USA/MI-QDX-371/2020|2020-03-23|EPI\_ISL\_571114|Original|hCoV-19^^Michigan|Human|Quest Diagnostics|Quest Diagnostics|Kagan|USA

>Spike|hCoV-19/Wales/MILK-610878/2020|2020-07-06|EPI\_ISL\_557796|Original|hCoV-19^^Wales|Human|Lighthouse Lab in Milton Keynes|Wellcome Sanger Institute for the COVID-19 Genomics UK (COG-UK) consortium|Davies|United Kingdom

>Spike|hCoV-19/England/20140006304/2020|2020-03-29|EPI\_ISL\_465874|Original|hCoV-19^^England|Human|Respiratory Virus Unit|Respiratory Virus Unit|Platt|United Kingdom

>Spike|hCoV-19/England/CAMC-9EBD65/2020|2020-09-24|EPI\_ISL\_584417|Original|hCoV-19^^England|Human|Queens Medical Centre|COVID-19 Genomics UK (COG-UK) Consortium|Loose|United Kingdom

>Spike|hCoV-19/England/MILK-B974F8/2020|2020-11-14|EPI\_ISL\_675057|Original|hCoV-19^^England|Human|Lighthouse Lab in Milton Keynes|Wellcome Sanger Institute for the COVID-19 Genomics UK (COG-UK) Consortium|Davies|United Kingdom

>Spike|hCoV-19/England/ALDP-B626B4/2020|2020-11-08|EPI\_ISL\_656598|Original|hCoV-19^^England|Human|Lighthouse Lab in Alderley Park|Wellcome Sanger Institute for the COVID-19 Genomics UK (COG-UK) Consortium|Davies|United Kingdom

>Spike|hCoV-19/Singapore/264/2020|2020-05-06|EPI\_ISL\_462382|Original|hCoV-19^^Singapore|Human|National Public Health Laboratory|National Public Health Laboratory|Mak|Singapore

>Spike|hCoV-19/England/ALDP-94999E/2020|2020-06-11|EPI\_ISL\_556477|Original|hCoV-19^^England|Human|Lighthouse Lab in Alderley Park|Wellcome Sanger Institute for the COVID-19 Genomics UK (COG-UK) consortium|Davies|United Kingdom

>Spike|hCoV-19/England/QEUH-95EF76/2020|2020-08-06|EPI\_ISL\_532359|Original|hCoV-19^^England|Human|Lighthouse Lab in Glasgow|Wellcome Sanger Institute for the COVID-19 Genomics UK (COG-UK) consortium|Davies|United Kingdom

>Spike|hCoV-19/England/QEUH-7606E7/2020|2020-07-15|EPI\_ISL\_533005|Original|hCoV-19^^England|Human|Lighthouse Lab in Glasgow|Wellcome Sanger Institute for the COVID-19 Genomics UK (COG-UK) consortium|Davies|United Kingdom

>Spike|hCoV-19/Wales/PHWC-48A6EA/2020|2020-11-03|EPI\_ISL\_652589|Original|hCoV-19^^Wales|Human|Wales Specialist Virology Centre Sequencing lab|COVID-19 Genomics UK (COG-UK) Consortium|Moore|United Kingdom

>Spike|hCoV-19/USA/TX-HMH-6558/2020|2020-06-23|EPI\_ISL\_546083|Original|hCoV-19^^Texas|Human|Houston Methodist Hospital|Houston Methodist Hospital|Long|USA

>Spike|hCoV-19/England/CAMC-C3F60A/2020|2020-12-10|EPI\_ISL\_719334|Original|hCoV-19^^England|Human|Lighthouse Lab in Cambridge|Wellcome Sanger Institute for the COVID-19 Genomics UK (COG-UK) Consortium|Davies|United Kingdom

>Spike|hCoV-19/Denmark/DCGC-19235/2020|2020-12-07|EPI\_ISL\_748833|Original|hCoV-19^^Hovedstaden|Human|Department of Virus and Microbiological Special Diagnostics|Albertsen Lab|Michaelsen|Denmark

>Spike|hCoV-19/England/NORW-EA400/2020|2020-05-13|EPI\_ISL\_457344|Original|hCoV-19^^England|Human|Quadram Institute Bioscience|COVID-19 Genomics UK (COG-UK) Consortium|Alikhan|United Kingdom

>Spike|hCoV-19/USA/TX-HMH-2300/2020|2020-05-01|EPI\_ISL\_545233|Original|hCoV-19^^Texas|Human|Houston Methodist Hospital|Houston Methodist Hospital|Long|USA

>Spike|hCoV-19/United Arab Emirates/0753/2020|2020-05-15|EPI\_ISL\_698182|Original|hCoV-19^^Abu Dhabi|Human|Group 42 (G42) Healthcare|G42 Healthcare|Ogrodzki|United Arab Emirates

>Spike|hCoV-19/England/ALDP-9ECE52/2020|2020-05-05|EPI\_ISL\_589425|Original|hCoV-19^^England|Human|Lighthouse Lab in Alderley Park|Wellcome Sanger Institute for the COVID-19 Genomics UK (COG-UK) consortium|Davies|United Kingdom

>Spike|hCoV-19/England/ALDP-4AD0E3/2020|2020-06-14|EPI\_ISL\_559514|Original|hCoV-19^^England|Human|Lighthouse Lab in Alderley Park|Wellcome Sanger Institute for the COVID-19 Genomics UK (COG-UK) consortium|Davies|United Kingdom

>Spike|hCoV-19/Scotland/QEUH-997FEA/2020|2020-08-27|EPI\_ISL\_534441|Original|hCoV-19^^Scotland|Human|NHSGGC West of Scotland Specialist Virology Centre / MRC-University of Glasgow Centre for Virus Research|Wellcome Sanger Institute for the COVID-19 Genomics UK (COG-UK) consortium|Davies|United Kingdom

>Spike|hCoV-19/England/ALDP-9C59C7/2020|2020-09-10|EPI\_ISL\_567740|Original|hCoV-19^^England|Human|Lighthouse Lab in Alderley Park|Wellcome Sanger Institute for the COVID-19 Genomics UK (COG-UK) consortium|Davies|United Kingdom

>Spike|hCoV-19/USA/MN-CDC-6315/2020|2020-05-14|EPI\_ISL\_527700|Original|hCoV-19^^Minnesota|Human|MN PHL Division|Pathogen Discovery|Queen|USA

>Spike|hCoV-19/India/MH-AFMC-5306/2020|2020-05-21|EPI\_ISL\_496602|Original|hCoV-19^^Maharashtra|Human|Armed Forces Medical College|National Centre For Cell Science|Paul|India

>Spike|hCoV-19/Luxembourg/LNS8376337/2020|2020-11-20|EPI\_ISL\_744730|Original|hCoV-19^^Luxembourg|Human|Laboratoire national de sant\u00e9|Laboratoire national de sant\u00e9|Wienecke-Baldacchino|Luxembourg

>Spike|hCoV-19/Austria/CeMM0180/2020|2020-03-09|EPI\_ISL\_438022|Original|hCoV-19^^Vienna|Human|Center for Virology|Bergthaler laboratory|Bergthaler|Austria

>Spike|hCoV-19/Netherlands/NH-RIVM-10137/2020|2020-04-01|EPI\_ISL\_547505|Original|hCoV-19^^Noord Holland|Human|Dutch COVID-19 response

team|National Institute for Public Health and the Environment  
(RIVM)|Meijer|Netherlands  
>Spike|hCoV-19/Portugal/PT1772/2020|2020-11-09|EPI\_ISL\_732003|Original|hCoV-  
19^^Portugal|Human|Instituto Nacional de Saude (INSA)|Instituto Nacional de Saude  
(INSA)|Borges|Portugal  
>Spike|hCoV-19/Denmark/DCGC-20221/2020|2020-11-30|EPI\_ISL\_747580|Original|hCoV-  
19^^Syddanmark|Human|Department of Virus and Microbiological Special  
Diagnostics|Albertsen Lab|Michaelsen|Denmark  
>Spike|hCoV-19/England/NORT-2847B2/2020|2020-03-23|EPI\_ISL\_478567|Original|hCoV-  
19^^England|Human|Northumbria University / South Tees Hospitals NHS Foundation Trust  
/ North Cumbria Integrated Care NHS Foundation Trust / North Tees and Hartlepool NHS  
Foundation Trust / Newcastle Hospitals NHS Foundation Trust|COVID-19 Genomics UK  
(COG-UK) Consortium|Bashton|United Kingdom  
>Spike|hCoV-19/England/ALDP-C6BABE/2020|2020-12-14|EPI\_ISL\_778488|Original|hCoV-  
19^^England|Human|Lighthouse Lab in Alderley Park|Wellcome Sanger Institute for the  
COVID-19 Genomics UK (COG-UK) Consortium|Davies|United Kingdom  
>Spike|hCoV-19/Australia/VIC15043/2020|2020-07-29|EPI\_ISL\_593120|Original|hCoV-  
19^^Victoria|Human|Microbiological Diagnostic Unit - Public Health Laboratory (MDU-  
PHL)|MDU-PHL|Schultz|Australia  
>Spike|hCoV-19/Australia/VIC1214/2020|2020-04-01|EPI\_ISL\_430505|Original|hCoV-  
19^^Victoria|Human|Victorian Infectious Diseases Reference Laboratory  
(VIDRL)|Microbiological Diagnostic Unit Public Health Laboratory and Victorian  
Infectious Diseases Reference Laboratory|Schultz|Australia  
>Spike|hCoV-19/USA/CA-CZB-1559/2020|2020-03-29|EPI\_ISL\_468496|Original|hCoV-  
19^^California|Human|Ventura County Public Health Lab|Chan-Zuckerberg Biohub|Hao|USA  
>Spike|hCoV-19/Wales/PHWC-49EAE7/2020|2020-12-08|EPI\_ISL\_743094|Original|hCoV-  
19^^Wales|Human|Wales Specialist Virology Centre Sequencing lab|COVID-19 Genomics UK  
(COG-UK) Consortium|Moore|United Kingdom  
>Spike|hCoV-19/England/LIVE-A69D4/2020|2020-03-16|EPI\_ISL\_499761|Original|hCoV-  
19^^England|Human|Liverpool Clinical Laboratories|COVID-19 Genomics UK (COG-UK)  
Consortium|Haldenby|United Kingdom  
>Spike|hCoV-19/Serbia/Pancevo-215572606/2020|2020-06-25|EPI\_ISL\_661188|Original|hCoV-  
19^^Pancevo|Human|Scientific Veterinary Institute Novi Sad|Veterinary Specialized  
Institute \Kraljevo\|Vidanovic|Serbia  
>Spike|hCoV-19/Denmark/DCGC-8385/2020|2020-10-26|EPI\_ISL\_616908|Original|hCoV-  
19^^Sjaelland|Human|Department of Virus and Microbiological Special  
Diagnostics|Albertsen lab|Michaelsen|Denmark  
>Spike|hCoV-19/Denmark/DCGC-18548/2020|2020-12-07|EPI\_ISL\_750035|Original|hCoV-  
19^^Nordjylland|Human|Department of Virus and Microbiological Special  
Diagnostics|Albertsen Lab|Michaelsen|Denmark  
>Spike|hCoV-19/England/CAMB-7F084/2020|2020-04-07|EPI\_ISL\_442890|Original|hCoV-  
19^^England|Human|Department of Pathology|Wellcome Sanger Institute for the COVID-19  
Genomics UK (COG-UK) consortium|Amato|United Kingdom  
>Spike|hCoV-19/England/CAMB-1AFBC5/2020|2020-05-01|EPI\_ISL\_459219|Original|hCoV-  
19^^England|Human|Department of Pathology|Wellcome Sanger Institute for the COVID-19  
Genomics UK (COG-UK) consortium|Davies|United Kingdom  
>Spike|hCoV-19/USA/OR-OHSU-1065/2020|2020-07-09|EPI\_ISL\_525961|Original|hCoV-  
19^^Oregon|Human|OHSU Lab Services Molecular Microbiology Lab|Oregon SARS-CoV-2  
Genome Sequencing Center|O'Roak|USA  
>Spike|hCoV-19/Japan/PG-8093/2020|2020-08-00|EPI\_ISL\_687192|Original|hCoV-  
19^^Japan|Human|Pathogen Genomics Center|Pathogen Genomics Center|Sekizuka|Japan  
>Spike|hCoV-19/USA/CA-CZB-4017/2020|2020-08-01|EPI\_ISL\_548588|Original|hCoV-  
19^^California|Human|County of Santa Clara Public Health Department|Chan-Zuckerberg  
Biohub|Bhatt|USA  
>Spike|hCoV-19/USA/LA-EVTL201/2020|2020-08-11|EPI\_ISL\_574335|Original|hCoV-  
19^^Louisiana|Human|LSUHS Emerging Viral Threat Laboratory|Microbial Genome  
Sequencing Center|Kamil|USA  
>Spike|hCoV-19/Australia/VIC2993/2020|2020-07-11|EPI\_ISL\_521823|Original|hCoV-  
19^^Victoria|Human|Microbiological Diagnostic Unit - Public Health Laboratory (MDU-  
PHL)|MDU-PHL|Schultz|Australia

>Spike|hCoV-19/England/MILK-AB939A/2020|2020-10-22|EPI\_ISL\_623820|Original|hCoV-19^^England|Human|Lighthouse Lab in Milton Keynes|Wellcome Sanger Institute for the COVID-19 Genomics UK (COG-UK) consortium|Davies|United Kingdom

>Spike|hCoV-19/USA/FL-BPHL-1826/2020|2020-04-08|EPI\_ISL\_613744|Original|hCoV-19^^Florida|Human|Florida Bureau of Public Health Laboratories|Florida Bureau of Public Health Laboratories|Blanton|USA

>Spike|hCoV-19/England/ALDP-AA36A9/2020|2020-10-22|EPI\_ISL\_625037|Original|hCoV-19^^England|Human|Lighthouse Lab in Alderley Park|Wellcome Sanger Institute for the COVID-19 Genomics UK (COG-UK) consortium|Davies|United Kingdom

>Spike|hCoV-19/Wales/ALDP-B46EDC/2020|2020-11-07|EPI\_ISL\_710871|Original|hCoV-19^^Wales|Human|Lighthouse Lab in Alderley Park|Wellcome Sanger Institute for the COVID-19 Genomics UK (COG-UK) Consortium|Davies|United Kingdom

>Spike|hCoV-19/Switzerland/BE-ETHZ-190043/2020|2020-07-08|EPI\_ISL\_500905|Original|hCoV-19^^Bern|Human|Viollier AG|Department of Biosystems Science and Engineering|Nadeau|Switzerland

>Spike|hCoV-19/USA/TX-DSHS-0004/2020|2020-05-07|EPI\_ISL\_515253|Original|hCoV-19^^Texas|Human|Texas Department of State Health Services|Texas Department of State Health Services|Rahman|USA

>Spike|hCoV-19/England/QEUA-9DB07E/2020|2020-09-21|EPI\_ISL\_580985|Original|hCoV-19^^England|Human|Lighthouse Lab in Glasgow|Wellcome Sanger Institute for the COVID-19 Genomics UK (COG-UK) consortium|Davies|United Kingdom

>Spike|hCoV-19/Sweden/20-53042/2020|2020-10-01|EPI\_ISL\_648162|Original|hCoV-19^^Sweden|Human|Klinisk mikrobiologi Vasternorrland|The Public Health Agency of Sweden|Svartstr\u00f6m|Sweden

>Spike|hCoV-19/England/LOND-12625DB/2020|2020-10-04|EPI\_ISL\_594865|Original|hCoV-19^^England|Human|University College London|COVID-19 Genomics UK (COG-UK) Consortium|Roy|United Kingdom

>Spike|hCoV-19/South Africa/KRISP-K003728/2020|2020-10-06|EPI\_ISL\_602906|Original|hCoV-19^^KwaZulu-Natal|Human|NHL-IALCH|KRISP|de Oliveira|South Africa

>Spike|hCoV-19/USA/CA-ALSR-4209/2020|2020-10-02|EPI\_ISL\_648888|Original|hCoV-19^^California|Human|San Diego County Public Health Laboratory|Andersen lab at Scripps Research|Gangavarapu|USA

>Spike|hCoV-19/Northern Ireland/QEUA-5FF39D/2020|2020-06-27|EPI\_ISL\_533234|Original|hCoV-19^^Northern Ireland|Human|Lighthouse Lab in Glasgow|Wellcome Sanger Institute for the COVID-19 Genomics UK (COG-UK) consortium|Davies|United Kingdom

>Spike|hCoV-19/USA/UT-UPHL-201109604/2020|2020-10-12|EPI\_ISL\_628952|Original|hCoV-19^^Utah|Human|Utah Public Health Laboratory|Utah Public Health Laboratory|Young|USA

>Spike|hCoV-19/Wales/PHWC-492816/2020|2020-11-29|EPI\_ISL\_725705|Original|hCoV-19^^Wales|Human|Originating lab|COVID-19 Genomics UK (COG-UK) Consortium|Moore|United Kingdom

>Spike|hCoV-19/England/QEUA-B2F8F9/2020|2020-11-03|EPI\_ISL\_659978|Original|hCoV-19^^England|Human|Lighthouse Lab in Glasgow|Wellcome Sanger Institute for the COVID-19 Genomics UK (COG-UK) Consortium|Davies|United Kingdom

>Spike|hCoV-19/England/CAMB-1B6A28/2020|2020-10-05|EPI\_ISL\_584323|Original|hCoV-19^^England|Human|Department of Pathology|COVID-19 Genomics UK (COG-UK) Consortium|Goodfellow|United Kingdom

>Spike|hCoV-19/Japan/PG-6888/2020|2020-00-00|EPI\_ISL\_687996|Original|hCoV-19^^Japan|Human|Pathogen Genomics Center|Pathogen Genomics Center|Sekizuka|Japan

>Spike|hCoV-19/England/MILK-A91820/2020|2020-10-19|EPI\_ISL\_705990|Original|hCoV-19^^England|Human|Oxford Viromics|COVID-19 Genomics UK (COG-UK) Consortium|Golubchik|United Kingdom

>Spike|hCoV-19/England/CAMB-805AF/2020|2020-04-09|EPI\_ISL\_470416|Original|hCoV-19^^England|Human|Department of Pathology|Wellcome Sanger Institute for the COVID-19 Genomics UK (COG-UK) consortium|Davies|United Kingdom

>Spike|hCoV-19/Scotland/CVR3805/2020|2020-05-21|EPI\_ISL\_478131|Original|hCoV-19^^Scotland|Human|West of Scotland Specialist Virology Centre|COVID-19 Genomics UK (COG-UK) Consortium|Robertson|United Kingdom



>Spike|hCoV-19/England/QEUEH-9F2FCF/2020|2020-09-22|EPI\_ISL\_588615|Original|hCoV-19^^England|Human|Lighthouse Lab in Glasgow|Wellcome Sanger Institute for the COVID-19 Genomics UK (COG-UK) consortium|Davies|United Kingdom

>Spike|hCoV-19/USA/TX-HMH-4218/2020|2020-06-19|EPI\_ISL\_543447|Original|hCoV-19^^Texas|Human|Houston Methodist Hospital|Houston Methodist Hospital|Long|USA

>Spike|hCoV-19/USA/AZ-TG379464/2020|2020-06-16|EPI\_ISL\_694638|Original|hCoV-19^^Arizona|Human|TGen North|TGen North|French|USA

>Spike|hCoV-19/Guadeloupe/IPG-7319/2020|2020-03-18|EPI\_ISL\_613419|Original|hCoV-19^^Sainte-Anne|Human|Institut Pasteur de la Guadeloupe|Institut Pasteur de la Guadeloupe|Enouf|Guadeloupe

>Spike|hCoV-19/Australia/VIC14631/2020|2020-07-29|EPI\_ISL\_592925|Original|hCoV-19^^Victoria|Human|Microbiological Diagnostic Unit - Public Health Laboratory (MDU-PHL)|MDU-PHL|Schultz|Australia

>Spike|hCoV-19/Indonesia/JB-WJHL-ITB-A03267/2020|2020-10-23|EPI\_ISL\_747236|original|hCoV-19^^West Java|Human|Sukabumi Public Health|West Java Health Laboratory; School of Life Sciences and Technology|Fibriani|Indonesia

>Spike|hCoV-19/USA/TX-HMH-3117/2020|2020-06-11|EPI\_ISL\_544003|Original|hCoV-19^^Texas|Human|Houston Methodist Hospital|Houston Methodist Hospital|Long|USA

>Spike|hCoV-19/USA/TX-HMH-MCoV-12923/2020|2020-08-18|EPI\_ISL\_788075|Original|hCoV-19^^Texas|Human|Houston Methodist Hospital|Houston Methodist Hospital|Long|USA

>Spike|hCoV-19/England/QEUEH-B7ED29/2020|2020-11-14|EPI\_ISL\_661931|Original|hCoV-19^^England|Human|Lighthouse Lab in Glasgow|Wellcome Sanger Institute for the COVID-19 Genomics UK (COG-UK) Consortium|Davies|United Kingdom

>Spike|hCoV-19/Spain/CT-IBV-97007969/2020|2020-10-02|EPI\_ISL\_654518|Original|hCoV-19^^Catalunya|Human|Servicio de Microbiolog\u00eda|SeqCOVID-SPAIN consortium|IBV (CSIC)|Comas|Spain

>Spike|hCoV-19/Australia/VIC14018/2020|2020-07-23|EPI\_ISL\_563932|Original|hCoV-19^^Victoria|Human|Microbiological Diagnostic Unit - Public Health Laboratory (MDU-PHL)|MDU-PHL|Schultz|Australia

>Spike|hCoV-19/North Macedonia/11602/2020|2020-09-07|EPI\_ISL\_678254|Original|hCoV-19^^Strumica|Human|General Hospital - Strumica|Research Center for Genetic Engineering and Biotechnology \Georgi D. Efremov\u201d|Dimovski|North Macedonia

>Spike|hCoV-19/England/QEUEH-AD5D5E/2020|2020-10-26|EPI\_ISL\_633897|Original|hCoV-19^^England|Human|Lighthouse Lab in Glasgow|Wellcome Sanger Institute for the COVID-19 Genomics UK (COG-UK) consortium|Davies|United Kingdom

>Spike|hCoV-19/Australia/VIC30/2020|2020-03-10|EPI\_ISL\_419749|Original|hCoV-19^^Victoria|Human|Victorian Infectious Diseases Reference Laboratory (VIDRL)|Victorian Infectious Diseases Reference Laboratory and Microbiological Diagnostic Unit Public Health Laboratory|Schultz|Australia

>Spike|hCoV-19/Netherlands/UT-EMC-131/2020|2020-10-23|EPI\_ISL\_632724|Original|hCoV-19^^Utrecht|Human|Dutch COVID-19 response team|Erasmus Medical Center|Oude Munnink|Netherlands

>Spike|hCoV-19/England/NORT-29D965/2020|2020-05-10|EPI\_ISL\_488061|Original|hCoV-19^^England|Human|NU-OMICS DNA Sequencing research facility|Wellcome Sanger Institute for the COVID-19 Genomics UK (COG-UK) consortium|Davies|United Kingdom

>Spike|hCoV-19/USA/CA-CZB-9798/2020|2020-06-05|EPI\_ISL\_672181|Original|hCoV-19^^California|Human|The Ashley Laboratory|Chan-Zuckerberg Biohub|Bhatt|USA

>Spike|hCoV-19/Denmark/DCGC-9214/2020|2020-11-16|EPI\_ISL\_668854|Original|hCoV-19^^Hovedstaden|Human|Department of Virus and Microbiological Special Diagnostics|Albertsen Lab|Michaelsen|Denmark

>Spike|hCoV-19/Russia/Moscow\_PMVL-9/2020|2020-04-08|EPI\_ISL\_470902|Vero E6|hCoV-19^^Moscow|Human|Influenza etiology and epidemiology laboratory|Pathogenic Microorganisms Variability Laboratory|Shchetinin|Russia

>Spike|hCoV-19/Gibraltar/204841765/2020|2020-00-00|EPI\_ISL\_671331|Original|hCoV-19^^Gibraltar|Human|Microbiology|Respiratory Virus Unit|Platt|Gibraltar

>Spike|hCoV-19/USA/CA-ALSR-1949/2020|2020-06-26|EPI\_ISL\_512254|Original|hCoV-19^^California|Human|San Diego County Public Health Laboratory|Andersen lab at Scripps Research|Gangavarapu|USA

>Spike|hCoV-19/India/DL-NCDC-4189/2020|2020-04-13|EPI\_ISL\_436450|Original|hCoV-19^^Delhi|Human|National Centre for Disease control (NCDC)|NCDC/CSIR-IGIB|Singh|India

>Spike|hCoV-19/USA/TX-HMH-MCoV-12325/2020|2020-09-26|EPI\_ISL\_790300|Original|hCoV-19^^Texas|Human|Houston Methodist Hospital|Houston Methodist Hospital|Long|USA

>Spike|hCoV-19/USA/WA-S1886/2020|2020-05-28|EPI\_ISL\_496312|Original|hCoV-19^^Washington|Human|Washington State Department of Health|Seattle Flu Study|Lee|USA

>Spike|hCoV-19/Canada/QC-LSPQ-L00215798/2020|2020-03-12|EPI\_ISL\_535737|Original|hCoV-19^^Quebec|Human|CHUL-LABO MULTI / MICRO|Laboratoire de sant e publique du Qu bec|Moreira|Canada

>Spike|hCoV-19/Japan/IC-0256/2020|2020-10-00|EPI\_ISL\_667685|Original|hCoV-19^^Japan|Human|Pathogen Genomics Center|Pathogen Genomics Center|Sekizuka|Japan

>Spike|hCoV-19/Panama/328941/2020|2020-02-27|EPI\_ISL\_496617|Original|hCoV-19^^Panama|Human|Gorgas Memorial Laboratory of Health Studies|Gorgas Memorial Laboratory of Health Studies|Martinez|Panama

>Spike|hCoV-19/Wales/PHWC-4923CA/2020|2020-11-17|EPI\_ISL\_703321|Original|hCoV-19^^Wales|Human|Originating lab|COVID-19 Genomics UK (COG-UK) Consortium|Moore|United Kingdom

>Spike|hCoV-19/USA/TX-HMH-MCoV-19757/2020|2020-11-25|EPI\_ISL\_784100|Original|hCoV-19^^Texas|Human|Houston Methodist Hospital|Houston Methodist Hospital|Long|USA

>Spike|hCoV-19/England/ALDP-A87B24/2020|2020-10-17|EPI\_ISL\_606106|Original|hCoV-19^^England|Human|Lighthouse Lab in Alderley Park|Wellcome Sanger Institute for the COVID-19 Genomics UK (COG-UK) consortium|Davies|United Kingdom

>Spike|hCoV-19/Wales/PHWC-48ECD5/2020|2020-11-10|EPI\_ISL\_680991|Original|hCoV-19^^Wales|Human|Wales Specialist Virology Centre Sequencing lab|COVID-19 Genomics UK (COG-UK) Consortium|Moore|United Kingdom

>Spike|hCoV-19/England/MILK-B8F675/2020|2020-11-13|EPI\_ISL\_674624|Original|hCoV-19^^England|Human|Lighthouse Lab in Milton Keynes|Wellcome Sanger Institute for the COVID-19 Genomics UK (COG-UK) Consortium|Davies|United Kingdom

>Spike|hCoV-19/Denmark/DCGC-20271/2020|2020-11-30|EPI\_ISL\_747675|Original|hCoV-19^^Syddanmark|Human|Department of Virus and Microbiological Special Diagnostics|Albertsen Lab|Michaelsen|Denmark

>Spike|hCoV-19/Russia/CE-RII-MH2523S/2020|2020-00-00|EPI\_ISL\_602412|Original|hCoV-19^^Chechen|Human|WHO National Influenza Centre Russian Federation|WHO National Influenza Centre Russian Federation|Komissarov|Russia

>Spike|hCoV-19/Denmark/DCGC-10991/2020|2020-11-02|EPI\_ISL\_670330|Original|hCoV-19^^Hovedstaden|Human|Department of Virus and Microbiological Special Diagnostics|Albertsen Lab|Michaelsen|Denmark

>Spike|hCoV-19/England/CAMB-1BA0AA/2020|2020-11-04|EPI\_ISL\_651713|Original|hCoV-19^^England|Human|Department of Pathology|COVID-19 Genomics UK (COG-UK) Consortium|Goodfellow|United Kingdom

>Spike|hCoV-19/USA/TX-HMH-MCoV-16075/2020|2020-10-27|EPI\_ISL\_785759|Original|hCoV-19^^Texas|Human|Houston Methodist Hospital|Houston Methodist Hospital|Long|USA

>Spike|hCoV-19/Australia/VIC2044/2020|2020-06-09|EPI\_ISL\_480748|Original|hCoV-19^^Victoria|Human|Microbiological Diagnostic Unit - Public Health Laboratory (MDU-PHL)|MDU-PHL|Schultz|Australia

>Spike|hCoV-19/Denmark/DCGC-22394/2020|2020-12-14|EPI\_ISL\_757537|Original|hCoV-19^^Hovedstaden|Human|Department of Virus and Microbiological Special Diagnostics|Albertsen Lab|Michaelsen|Denmark

>Spike|hCoV-19/Spain/CT-IBV-005612/2020|2020-03-27|EPI\_ISL\_508680|Original|hCoV-19^^Catalunya|Human|Departamento de Microbiolog eda|SeqCOVID-SPAIN consortium|IBV (CSIC)|Comas|Spain

>Spike|hCoV-19/Canada/BC-BCCDC-7298/2020|2020-11-00|EPI\_ISL\_740667|Original|hCoV-19^^British Columbia|Human|BCCDC Public Health Laboratory|BCCDC Public Health Laboratory|Prystajecky|Canada

>Spike|hCoV-19/England/ALDP-B48F40/2020|2020-11-07|EPI\_ISL\_649473|Original|hCoV-19^^England|Human|Lighthouse Lab in Alderley Park|Wellcome Sanger Institute for the COVID-19 Genomics UK (COG-UK) Consortium|Davies|United Kingdom

>Spike|hCoV-19/Australia/VIC11811/2020|2020-07-31|EPI\_ISL\_591860|Original|hCoV-19^^Victoria|Human|Victorian Infectious Diseases Reference Laboratory (VIDRL)|VIDRL and MDU-PHL|Schultz|Australia

>Spike|hCoV-19/Switzerland/VD-ETHZ-280114/2020|2020-09-08|EPI\_ISL\_560498|Original|hCoV-19^^Vaud|Human|Viollier AG|Department of Biosystems Science and Engineering|Nadeau|Switzerland

>Spike|hCoV-19/Switzerland/BL-ETHZ-360003/2020|2020-11-12|EPI\_ISL\_693863|Original|hCoV-19^^Basel-Landschaft|Human|Viollier AG|Department of Biosystems Science and Engineering|Nadeau|Switzerland

>Spike|hCoV-19/England/QEUIH-9B422A/2020|2020-09-07|EPI\_ISL\_559882|Original|hCoV-19^^England|Human|Oxford Viromics|COVID-19 Genomics UK (COG-UK) Consortium|Golubchik|United Kingdom

>Spike|hCoV-19/England/MILK-A7D7E1/2020|2020-10-13|EPI\_ISL\_606550|Original|hCoV-19^^England|Human|Lighthouse Lab in Milton Keynes|Wellcome Sanger Institute for the COVID-19 Genomics UK (COG-UK) consortium|Davies|United Kingdom

>Spike|hCoV-19/Denmark/DCGC-10882/2020|2020-11-02|EPI\_ISL\_670263|Original|hCoV-19^^Sjaelland|Human|Department of Virus and Microbiological Special Diagnostics|Albertsen Lab|Michaelsen|Denmark

>Spike|hCoV-19/USA/AZ-TG408180/2020|2020-06-16|EPI\_ISL\_694922|Original|hCoV-19^^Arizona|Human|AZ SPHL|TGen North|French|USA

>Spike|hCoV-19/England/ALDP-B24BFB/2020|2020-11-04|EPI\_ISL\_646942|Original|hCoV-19^^England|Human|Lighthouse Lab in Alderley Park|Wellcome Sanger Institute for the COVID-19 Genomics UK (COG-UK) Consortium|Davies|United Kingdom

>Spike|hCoV-19/Finland/7LS3B3/2020|2020-10-07|EPI\_ISL\_756033|Original|hCoV-19^^Uusimaa|Human|Department of Virology and Immunology|Department of Virology|Smura|Finland

>Spike|hCoV-19/USA/AZ-TG517475/2020|2020-06-29|EPI\_ISL\_695329|Original|hCoV-19^^Arizona|Human|AZ SPHL|TGen North|French|USA

>Spike|hCoV-19/Wales/MILK-9E0FF1/2020|2020-09-20|EPI\_ISL\_580990|Original|hCoV-19^^Wales|Human|Lighthouse Lab in Milton Keynes|Wellcome Sanger Institute for the COVID-19 Genomics UK (COG-UK) consortium|Davies|United Kingdom

>Spike|hCoV-19/England/EXET-13895E/2020|2020-10-18|EPI\_ISL\_626797|Original|hCoV-19^^England|Human|University of Exeter|COVID-19 Genomics UK (COG-UK) Consortium|Temperton|United Kingdom

>Spike|hCoV-19/USA/WA-UW-22173/2020|2020-08-06|EPI\_ISL\_570634|Original|hCoV-19^^Washington|Human|UW Virology Lab|UW Virology Lab|Roychoudhury|USA

>Spike|hCoV-19/Ireland/CO-NVRL-75IRL23243/2020|2020-10-06|EPI\_ISL\_671868|Original|hCoV-19^^Cork|Human|National Virus Reference Laboratory|National Virus Reference Laboratory|Gonzalez|Ireland

>Spike|hCoV-19/Portugal/PT1632/2020|2020-04-17|EPI\_ISL\_731942|Original|hCoV-19^^Portugal|Human|Instituto Nacional de Saude (INSA)|Instituto Nacional de Saude (INSA)|Borges|Portugal

>Spike|hCoV-19/USA/CA-CZB-12821/2020|2020-09-30|EPI\_ISL\_648472|Original|hCoV-19^^California|Human|Santa Clara County Public Health Laboratory|Chan-Zuckerberg Biohub|Bhatt|USA

>Spike|hCoV-19/USA/UT-UPHL-2012687578/2020|2020-10-26|EPI\_ISL\_746222|Original|hCoV-19^^Utah|Human|Ginkgo Bioworks Clinical Laboratory|Utah Public Health Laboratory|Young|USA

>Spike|hCoV-19/Japan/PG-0654/2020|2020-04-00|EPI\_ISL\_684264|Original|hCoV-19^^Japan|Human|Gunma Prefectural Institute of Public Health and Environmental Sciences|Pathogen Genomics Center|Sekizuka|Japan

>Spike|hCoV-19/Australia/VIC2908/2020|2020-07-06|EPI\_ISL\_521739|Original|hCoV-19^^Victoria|Human|Microbiological Diagnostic Unit - Public Health Laboratory (MDU-PHL)|MDU-PHL|Schultz|Australia

>Spike|hCoV-19/mink/Netherlands/NB-EMC-35-4/2020|2020-08-18|EPI\_ISL\_577775|Original|hCoV-19^^Noord Brabant|Neovison vison|Dutch COVID-19 response team|Erasmus Medical Center|Oude Munnink|Netherlands

>Spike|hCoV-19/England/CAMC-BD14F2/2020|2020-11-29|EPI\_ISL\_702273|Original|hCoV-19^^England|Human|Lighthouse Lab in Cambridge|Wellcome Sanger Institute for the COVID-19 Genomics UK (COG-UK) Consortium|Davies|United Kingdom

>Spike|hCoV-19/Australia/WA375/2020|2020-04-05|EPI\_ISL\_605852|Original|hCoV-19^^Western Australia|Human|PathWest Laboratory Medicine WA|PathWest Laboratory Medicine WA Microbial Surveillance Unit|Sikazwe|Australia

>Spike|hCoV-19/England/QEUA-B320FB/2020|2020-11-04|EPI\_ISL\_646348|Original|hCoV-19^^England|Human|Lighthouse Lab in Glasgow|Wellcome Sanger Institute for the COVID-19 Genomics UK (COG-UK) Consortium|Davies|United Kingdom

>Spike|hCoV-19/Scotland/QEUA-96F5BC/2020|2020-08-19|EPI\_ISL\_568407|Original|hCoV-19^^Scotland|Human|Lighthouse Lab in Glasgow|Wellcome Sanger Institute for the COVID-19 Genomics UK (COG-UK) consortium|Davies|United Kingdom

>Spike|hCoV-19/USA/CA-ALSR-1456/2020|2020-03-27|EPI\_ISL\_494615|Original|hCoV-19^^California|Human|Scripps Medical Laboratory|Andersen lab at Scripps Research|Gangavarapu|USA

>Spike|hCoV-19/England/NORT-28C79C/2020|2020-05-15|EPI\_ISL\_469334|Original|hCoV-19^^England|Human|NU-OMICS DNA Sequencing research facility|Wellcome Sanger Institute for the COVID-19 Genomics UK (COG-UK) consortium|Davies|United Kingdom

>Spike|hCoV-19/England/204441533/2020|2020-10-19|EPI\_ISL\_622889|Original|hCoV-19^^England|Human|Respiratory Virus Unit|Respiratory Virus Unit|Platt|United Kingdom

>Spike|hCoV-19/Wales/PHWC-16A8CF/2020|2020-09-12|EPI\_ISL\_560120|Original|hCoV-19^^Wales|Human|Wales Specialist Virology Centre Sequencing lab|COVID-19 Genomics UK (COG-UK) Consortium|Moore|United Kingdom

>Spike|hCoV-19/Denmark/ALAB-SSI158/2020|2020-03-09|EPI\_ISL\_429374|Original|hCoV-19^^Denmark|Human|Department of Virus and Microbiological Special Diagnostics|Albertsen lab|Kirkegaard|Denmark

>Spike|hCoV-19/Japan/PG-1151/2020|2020-04-00|EPI\_ISL\_684761|Original|hCoV-19^^Japan|Human|Pathogen Genomics Center|Pathogen Genomics Center|Sekizuka|Japan

>Spike|hCoV-19/England/PORT-2D1200/2020|2020-04-21|EPI\_ISL\_475339|Original|hCoV-19^^England|Human|Centre for Enzyme Innovation|COVID-19 Genomics UK (COG-UK) Consortium|Robson|United Kingdom

>Spike|hCoV-19/France/PAC-SC237/2020|2020-03-29|EPI\_ISL\_641523|Original|hCoV-19^^Provence-Alpes-Cote-d\u2019Azur|Human|CHU de Nice - H\u00f4pital Archet 4|CNR Virus des Infections Respiratoires - France SUD|Bal|France

>Spike|hCoV-19/England/CAMB-1ACF26/2020|2020-04-23|EPI\_ISL\_489544|Original|hCoV-19^^England|Human|Department of Pathology|Wellcome Sanger Institute for the COVID-19 Genomics UK (COG-UK) consortium|Davies|United Kingdom

>Spike|hCoV-19/England/MILK-B05F6D/2020|2020-10-24|EPI\_ISL\_642793|Original|hCoV-19^^England|Human|Lighthouse Lab in Milton Keynes|Wellcome Sanger Institute for the COVID-19 Genomics UK (COG-UK) Consortium|Davies|United Kingdom

>Spike|hCoV-19/Canada/BC-BCCDC-7552/2020|2020-11-00|EPI\_ISL\_740715|Original|hCoV-19^^British Columbia|Human|BCCDC Public Health Laboratory|BCCDC Public Health Laboratory|Prystajek|Canada

>Spike|hCoV-19/Wales/PHWC-16A1C4/2020|2020-09-06|EPI\_ISL\_535213|Original|hCoV-19^^Wales|Human|Wales Specialist Virology Centre Sequencing lab|COVID-19 Genomics UK (COG-UK) Consortium|Moore|United Kingdom

>Spike|hCoV-19/Netherlands/UT-RIVM-10121/2020|2020-03-24|EPI\_ISL\_547531|Original|hCoV-19^^Utrecht|Human|Dutch COVID-19 response team|National Institute for Public Health and the Environment (RIVM)|Meijer|Netherlands

>Spike|hCoV-19/England/CAMB-1ADF61/2020|2020-04-26|EPI\_ISL\_459475|Original|hCoV-19^^England|Human|Department of Pathology|Wellcome Sanger Institute for the COVID-19 Genomics UK (COG-UK) consortium|Davies|United Kingdom

>Spike|hCoV-19/England/205181943/2020|2020-12-17|EPI\_ISL\_766492|Original|hCoV-19^^England|Human|Respiratory Virus Unit|COVID-19 Genomics UK (COG-UK) Consortium|Platt|United Kingdom

>Spike|hCoV-19/Singapore/945/2020|2020-04-05|EPI\_ISL\_538479|Original|hCoV-19^^Singapore|Human|Department of Laboratory Medicine|Department of Laboratory Medicine|Chen|Singapore

>Spike|hCoV-19/England/CAMB-7757E/2020|2020-03-30|EPI\_ISL\_438513|Original|hCoV-19^^England|Human|Department of Pathology|Wellcome Sanger Institute for the COVID-19 Genomics UK (COG-UK) consortium|Amato|United Kingdom

>Spike|hCoV-19/Luxembourg/LNS5203949/2020|2020-10-30|EPI\_ISL\_744201|Original|hCoV-19^^Luxembourg|Human|Laboratoire national de sant\u00e9|Laboratoire national de sant\u00e9|Wienecke-Baldacchino|Luxembourg

>Spike|hCoV-19/USA/TX-HMH-5015/2020|2020-06-22|EPI\_ISL\_544461|Original|hCoV-19^^Texas|Human|Houston Methodist Hospital|Houston Methodist Hospital|Long|USA

>Spike|hCoV-19/England/201620053/2020|2020-04-13|EPI\_ISL\_466398|Original|hCoV-19^^England|Human|Respiratory Virus Unit|Respiratory Virus Unit|Platt|United Kingdom

>Spike|hCoV-19/Northern Ireland/QEUH-962337/2020|2020-08-10|EPI\_ISL\_531808|Original|hCoV-19^^Northern Ireland|Human|Lighthouse Lab in Glasgow|Wellcome Sanger Institute for the COVID-19 Genomics UK (COG-UK) consortium|Davies|United Kingdom

>Spike|hCoV-19/Australia/VIC3334/2020|2020-07-09|EPI\_ISL\_521013|Original|hCoV-19^^Victoria|Human|Microbiological Diagnostic Unit - Public Health Laboratory (MDU-PHL)|MDU-PHL|Schultz|Australia

>Spike|hCoV-19/Spain/RI-IBV-005998/2020|2020-03-20|EPI\_ISL\_500430|Original|hCoV-19^^La Rioja|Human|Centro de Investigaci\u00f3n Biom\u00e9dica de La Rioja - Hospital San Pedro Logro\u00f1o|SeqCOVID-SPAIN consortium/IBV (CSIC)|Comas|Spain

>Spike|hCoV-19/England/SHEF-C052B/2020|2020-03-25|EPI\_ISL\_420225|Original|hCoV-19^^England|Human|Virology Department|Department of Infection|de Silva|United Kingdom

>Spike|hCoV-19/Belgium/UGent-94/2020|2020-03-13|EPI\_ISL\_468742|Original|hCoV-19^^Ghent|Human|Lab voor klinische biologie|Onderzoeksgroep Virologie|Lambrechts|Belgium

>Spike|hCoV-19/England/BRIS-129264/2020|2020-04-18|EPI\_ISL\_458826|Original|hCoV-19^^England|Human|PHE South West Regional Laboratory|Wellcome Sanger Institute for the COVID-19 Genomics UK (COG-UK) consortium|Davies|United Kingdom

>Spike|hCoV-19/Japan/PG-3796/2020|2020-07-00|EPI\_ISL\_692047|Original|hCoV-19^^Japan|Human|Gunma Prefectural Institute of Public Health and Environmental Sciences|Pathogen Genomics Center|Sekizuka|Japan

>Spike|hCoV-19/England/QEUH-B7F784/2020|2020-11-14|EPI\_ISL\_674605|Original|hCoV-19^^England|Human|Lighthouse Lab in Glasgow|Wellcome Sanger Institute for the COVID-19 Genomics UK (COG-UK) Consortium|Davies|United Kingdom

>Spike|hCoV-19/England/CAMB-7A344/2020|2020-04-02|EPI\_ISL\_441343|Original|hCoV-19^^England|Human|Department of Pathology|Wellcome Sanger Institute for the COVID-19 Genomics UK (COG-UK) consortium|Amato|United Kingdom

>Spike|hCoV-19/England/ALDP-A68DAB/2020|2020-10-12|EPI\_ISL\_630654|Original|hCoV-19^^England|Human|Lighthouse Lab in Alderley Park|Wellcome Sanger Institute for the COVID-19 Genomics UK (COG-UK) consortium|Davies|United Kingdom

>Spike|hCoV-19/Spain/PV-IBV-003230/2020|2020-03-15|EPI\_ISL\_480988|Original|hCoV-19^^Basque Country|Human|Servicio de Microbiolog\u00eda. Hospital Universitario Donostia. OSI Donostialdea. \u00clrea de Enfermedades Infecciosas|SeqCOVID-SPAIN consortium/IBV (CSIC)|Comas|Spain

>Spike|hCoV-19/England/204490922/2020|2020-10-30|EPI\_ISL\_660758|Original|hCoV-19^^England|Human|Respiratory Virus Unit|COVID-19 Genomics UK (COG-UK) Consortium|Platt|United Kingdom

>Spike|hCoV-19/England/ALDP-49B9B0/2020|2020-06-11|EPI\_ISL\_559347|Original|hCoV-19^^England|Human|Lighthouse Lab in Alderley Park|Wellcome Sanger Institute for the COVID-19 Genomics UK (COG-UK) consortium|Davies|United Kingdom

>Spike|hCoV-19/England/204291034/2020|2020-10-16|EPI\_ISL\_613623|Original|hCoV-19^^England|Human|Respiratory Virus Unit|Respiratory Virus Unit|Platt|United Kingdom

>Spike|hCoV-19/England/CAMB-1AB4BF/2020|2020-04-20|EPI\_ISL\_470329|Original|hCoV-19^^England|Human|Department of Pathology|Wellcome Sanger Institute for the COVID-19 Genomics UK (COG-UK) consortium|Davies|United Kingdom

>Spike|hCoV-19/South Africa/KRISP-K002239/2020|2020-07-20|EPI\_ISL\_515631|Original|hCoV-19^^KwaZulu-Natal|Human|NHLS-IALCH|KRISP|de Oliveira|South Africa

>Spike|hCoV-19/Spain/VC-IBV-98003502/2020|2020-03-23|EPI\_ISL\_537948|Original|hCoV-19^^Comunitat Valenciana|Human|Servicio de Microbiolog\u00eda. Hospital General Universitario de Castell\u00f3n|SeqCOVID-SPAIN consortium/IBV (CSIC)|Comas|Spain

>Spike|hCoV-19/USA/WY-WYPHL-20009973/2020|2020-04-22|EPI\_ISL\_539798|Original|hCoV-19^^Wyoming|Human|Wyoming Public Health Laboratory|Wyoming Public Health Laboratory|Sevinsky|USA

>Spike|hCoV-19/Japan/PG-0706/2020|2020-04-00|EPI\_ISL\_684316|Original|hCoV-19^^Japan|Human|Pathogen Genomics Center|Pathogen Genomics Center|Sekizuka|Japan

>Spike|hCoV-19/USA/AK-PHL444/2020|2020-06-07|EPI\_ISL\_560557|Original|hCoV-19^^Alaska|Human|Alaska State Virology Laboratory|Alaska State Virology Laboratory|Chen|USA

>Spike|hCoV-19/Australia/TAS00279/2020|2020-08-09|EPI\_ISL\_577607|Original|hCoV-19^^Tasmania|Human|Royal Hobart Hospital|Royal Hobart Hospital|Vanhaeften|Australia

>Spike|hCoV-19/Italy/LAZ-INMI-30/2020|2020-06-06|EPI\_ISL\_603137|Original|hCoV-19^^Lazio|Human|INMI Lazzaro Spallanzani IRCCS|INMI Lazzaro Spallanzani IRCCS|Gruber|Italy

>Spike|hCoV-19/USA/TX-HMH-MCoV-9453/2020|2020-07-03|EPI\_ISL\_781131|Original|hCoV-19^^Texas|Human|Houston Methodist Hospital|Houston Methodist Hospital|Long|USA

>Spike|hCoV-19/England/LIVE-9C467/2020|2020-03-30|EPI\_ISL\_449539|Original|hCoV-19^^England|Human|Liverpool Clinical Laboratories|COVID-19 Genomics UK (COG-UK) Consortium|Haldenby|United Kingdom

>Spike|hCoV-19/USA/CA-ALSR-4830/2020|2020-11-09|EPI\_ISL\_730166|Original|hCoV-19^^California|Human|San Diego County Public Health Laboratory|Andersen lab at Scripps Research|Gangavarapu|USA

>Spike|hCoV-19/England/ALDP-65E28F/2020|2020-07-03|EPI\_ISL\_555591|Original|hCoV-19^^England|Human|Lighthouse Lab in Alderley Park|Wellcome Sanger Institute for the COVID-19 Genomics UK (COG-UK) consortium|Davies|United Kingdom

>Spike|hCoV-19/Iceland/229/2020|2020-03-17|EPI\_ISL\_417557|Original|hCoV-19^^Reykjavik|Human|The National University Hospital of Iceland|deCODE genetics|J\u00f3nsson|Iceland

>Spike|hCoV-19/England/MILK-A7B859/2020|2020-10-15|EPI\_ISL\_607423|Original|hCoV-19^^England|Human|Lighthouse Lab in Milton Keynes|Wellcome Sanger Institute for the COVID-19 Genomics UK (COG-UK) consortium|Davies|United Kingdom

>Spike|hCoV-19/USA/MN-GMF-30812/2020|2020-11-02|EPI\_ISL\_661052|Original|hCoV-19^^Minnesota|Human|Gundersen Molecular Diagnostics Laboratory|Kabara Cancer Research Institute|Kenny|USA

>Spike|hCoV-19/England/NORT-29EE38/2020|2020-05-11|EPI\_ISL\_488113|Original|hCoV-19^^England|Human|NU-OMICS DNA Sequencing research facility|Wellcome Sanger Institute for the COVID-19 Genomics UK (COG-UK) consortium|Davies|United Kingdom

>Spike|hCoV-19/USA/OR-UW-22446/2020|2020-08-03|EPI\_ISL\_570615|Original|hCoV-19^^Oregon|Human|UW Virology Lab|UW Virology Lab|Roychoudhury|USA

>Spike|hCoV-19/England/PORT-2F5673/2020|2020-00-00|EPI\_ISL\_702858|Original|hCoV-19^^England|Human|Centre for Enzyme Innovation|COVID-19 Genomics UK (COG-UK) Consortium|Robson|United Kingdom

>Spike|hCoV-19/England/20149043804/2020|2020-04-02|EPI\_ISL\_466196|Original|hCoV-19^^England|Human|Respiratory Virus Unit|Respiratory Virus Unit|Platt|United Kingdom

>Spike|hCoV-19/Wales/PHWC-48AA2A/2020|2020-10-28|EPI\_ISL\_666113|Original|hCoV-19^^Wales|Human|Wales Specialist Virology Centre Sequencing lab|COVID-19 Genomics UK (COG-UK) Consortium|Moore|United Kingdom

>Spike|hCoV-19/Japan/PG-5649/2020|2020-04-00|EPI\_ISL\_688773|Original|hCoV-19^^Japan|Human|Pathogen Genomics Center|Pathogen Genomics Center|Sekizuka|Japan

>Spike|hCoV-19/England/SHEF-10C7794/2020|2020-12-18|EPI\_ISL\_741948|Original|hCoV-19^^England|Human|Virology Department|COVID-19 Genomics UK (COG-UK) Consortium|de Silva|United Kingdom

>Spike|hCoV-19/USA/WA-S2719/2020|2020-07-02|EPI\_ISL\_525709|Original|hCoV-19^^Washington|Human|Seattle Flu Study|Seattle Flu Study|Lee|USA

>Spike|hCoV-19/USA/TX-HMH-MCoV-16315/2020|2020-11-01|EPI\_ISL\_785999|Original|hCoV-19^^Texas|Human|Houston Methodist Hospital|Houston Methodist Hospital|Long|USA

>Spike|hCoV-19/Senegal/64763/2020|2020-06-13|EPI\_ISL\_476562|Original|hCoV-19^^Dakar|Human|Institut Pasteur Dakar|Institut Pasteur de Dakar|Dia|Senegal

>Spike|hCoV-19/Oman/205038337/2020|2020-05-22|EPI\_ISL\_491996|Original|hCoV-19^^Muscat|Human|Oman-NIC|Department of\u00a0Microbiology\u00a0and Immunology-SQUH|AL Zadjali|Oman

>Spike|hCoV-19/England/ALDP-CF13EF/2020|2020-12-16|EPI\_ISL\_781935|Original|hCoV-19^^England|Human|Lighthouse Lab in Alderley Park|Wellcome Sanger Institute for the COVID-19 Genomics UK (COG-UK) Consortium|Davies|United Kingdom

>Spike|hCoV-19/England/CAMB-80A46/2020|2020-04-10|EPI\_ISL\_470422|Original|hCoV-19^^England|Human|Department of Pathology|Wellcome Sanger Institute for the COVID-19 Genomics UK (COG-UK) consortium|Davies|United Kingdom

>Spike|hCoV-19/USA/SC-DHEC-1133/2020|2020-07-10|EPI\_ISL\_574559|Original|hCoV-19^^South Carolina|Human|Microbiology Division|Microbiology Division|Flores|USA

>Spike|hCoV-19/USA/TX-HMH-MCoV-8429/2020|2020-07-01|EPI\_ISL\_784392|Original|hCoV-19^^Texas|Human|Houston Methodist Hospital|Houston Methodist Hospital|Long|USA

>Spike|hCoV-19/Luxembourg/LNS6079656/2020|2020-11-07|EPI\_ISL\_744352|Original|hCoV-19^^Luxembourg|Human|Laboratoire national de sant\u00e9|Laboratoire national de sant\u00e9|Wienecke-Baldacchino|Luxembourg

>Spike|hCoV-19/Denmark/DCGC-11339/2020|2020-11-02|EPI\_ISL\_670848|Original|hCoV-19^^Midtjylland|Human|Department of Virus and Microbiological Special Diagnostics|Albertsen Lab|Michaelsen|Denmark

>Spike|hCoV-19/Switzerland/BE-ETHZ-260043/2020|2020-08-24|EPI\_ISL\_539373|Original|hCoV-19^^Bern|Human|Viollier AG|Department of Biosystems Science and Engineering|Nadeau|Switzerland

>Spike|hCoV-19/New Zealand/20CV0480/2020|2020-10-22|EPI\_ISL\_622815|Original|hCoV-19^^Auckland|Human|LabPLUS|Institute of Environmental Science and Research (ESR)|Wang|New Zealand

>Spike|hCoV-19/USA/ME-QDX-649/2020|2020-03-18|EPI\_ISL\_571311|Original|hCoV-19^^Maine|Human|Quest Diagnostics|Quest Diagnostics|Kagan|USA

>Spike|hCoV-19/England/MILK-958088/2020|2020-06-10|EPI\_ISL\_554723|Original|hCoV-19^^England|Human|Lighthouse Lab in Milton Keynes|Wellcome Sanger Institute for the COVID-19 Genomics UK (COG-UK) consortium|Davies|United Kingdom

>Spike|hCoV-19/Japan/PG-2785/2020|2020-04-00|EPI\_ISL\_690912|Original|hCoV-19^^Japan|Human|Pathogen Genomics Center|Pathogen Genomics Center|Sekizuka|Japan

>Spike|hCoV-19/England/NORT-294430/2020|2020-07-31|EPI\_ISL\_572744|Original|hCoV-19^^England|Human|Northumbria University / South Tees Hospitals NHS Foundation Trust / North Cumbria Integrated Care NHS Foundation Trust / North Tees and Hartlepool NHS Foundation Trust / Newcastle Hospitals NHS Foundation Trust|COVID-19 Genomics UK (COG-UK) Consortium|Bashton|United Kingdom

>Spike|hCoV-19/USA/TX-HMH-MCoV-12889/2020|2020-08-18|EPI\_ISL\_788041|Original|hCoV-19^^Texas|Human|Houston Methodist Hospital|Houston Methodist Hospital|Long|USA

>Spike|hCoV-19/Australia/VIC14597/2020|2020-08-07|EPI\_ISL\_592911|Original|hCoV-19^^Victoria|Human|Microbiological Diagnostic Unit - Public Health Laboratory (MDU-PHL)|MDU-PHL|Schultz|Australia

>Spike|hCoV-19/England/QEUE-B0E061/2020|2020-11-02|EPI\_ISL\_642025|Original|hCoV-19^^England|Human|Lighthouse Lab in Glasgow|Wellcome Sanger Institute for the COVID-19 Genomics UK (COG-UK) Consortium|Davies|United Kingdom

>Spike|hCoV-19/Canada/BC\_23745918/2020|2020-03-00|EPI\_ISL\_463186|Original|hCoV-19^^British Columbia|Human|BCCDC Public Health Laboratory|BCCDC Public Health Laboratory|Harrigan|Canada

>Spike|hCoV-19/England/ALDP-7210F3/2020|2020-07-01|EPI\_ISL\_557673|Original|hCoV-19^^England|Human|Lighthouse Lab in Alderley Park|Wellcome Sanger Institute for the COVID-19 Genomics UK (COG-UK) consortium|Davies|United Kingdom

>Spike|hCoV-19/England/MILK-C2FA6B/2020|2020-12-07|EPI\_ISL\_733832|Original|hCoV-19^^England|Human|Lighthouse Lab in Milton Keynes|Wellcome Sanger Institute for the COVID-19 Genomics UK (COG-UK) Consortium|Davies|United Kingdom

>Spike|hCoV-19/Estonia/ChVir4261/2020|2020-03-00|EPI\_ISL\_457719|Original|hCoV-19^^Estonia|Human|SYNLAB Eesti OU\u00308|Charite Universit\u00e4tsmedizin Berlin|Muehlemann|Estonia

>Spike|hCoV-19/India/GJ-GBRC27/2020|2020-04-26|EPI\_ISL\_444458|Original|hCoV-19^^Gujarat|Human|B.J. Medical College and Civil hospital|Gujarat Biotechnology Research Centre|Joshi|India

>Spike|hCoV-19/England/SHEF-CC6B3/2020|2020-05-18|EPI\_ISL\_484498|Original|hCoV-19^^England|Human|Virology Department|COVID-19 Genomics UK (COG-UK) Consortium|de Silva|United Kingdom

>Spike|hCoV-19/Wales/MILK-9F032F/2020|2020-09-25|EPI\_ISL\_589766|Original|hCoV-19^^Wales|Human|Lighthouse Lab in Milton Keynes|Wellcome Sanger Institute for the COVID-19 Genomics UK (COG-UK) consortium|Davies|United Kingdom

>Spike|hCoV-19/Scotland/EDB10413/2020|2020-11-29|EPI\_ISL\_705750|Original|hCoV-19^^Scotland|Human|Virology Department|COVID-19 Genomics UK (COG-UK) Consortium|McHugh|United Kingdom

>Spike|hCoV-19/South Africa/KRISP-K004551/2020|2020-10-27|EPI\_ISL\_660248|Original|hCoV-19^^KwaZulu-Natal|Human|NHLS-IALCH|KRISP|de Oliveira|South Africa

>Spike|hCoV-19/United Arab Emirates/1046/2020|2020-06-11|EPI\_ISL\_698121|Original|hCoV-19^^Abu Dhabi|Human|Group 42 (G42) Healthcare|G42 Healthcare|Ogrodzki|United Arab Emirates

>Spike|hCoV-19/South Africa/NHLS-UCT-GS-0031/2020|2020-08-18|EPI\_ISL\_640032|Original|hCoV-19^^Western Cape|Human|Victoria Hospital wc VHW|NHLS/UCT|Iranzadeh|South Africa

>Spike|hCoV-19/USA/TX-HMH-MCoV-8979/2020|2020-07-02|EPI\_ISL\_780872|Original|hCoV-19^^Texas|Human|Houston Methodist Hospital|Houston Methodist Hospital|Long|USA

>Spike|hCoV-19/England/ALDP-A2D5F5/2020|2020-10-06|EPI\_ISL\_586605|Original|hCoV-19^^England|Human|Lighthouse Lab in Alderley Park|Wellcome Sanger Institute for the COVID-19 Genomics UK (COG-UK) consortium|Davies|United Kingdom

>Spike|hCoV-19/England/ALDP-B1D08D/2020|2020-11-01|EPI\_ISL\_664853|Original|hCoV-19^^England|Human|Centre for Enzyme Innovation|COVID-19 Genomics UK (COG-UK) Consortium|Robson|United Kingdom

>Spike|hCoV-19/Switzerland/BS-UHB-42187831/2020|2020-03-12|EPI\_ISL\_528025|Original|hCoV-19^^Basel-Stadt|Human|University Hospital Basel|University Hospital Basel|Roloff Handschin|Switzerland

>Spike|hCoV-19/England/MILK-B56501/2020|2020-11-05|EPI\_ISL\_657587|Original|hCoV-19^^England|Human|Lighthouse Lab in Milton Keynes|Wellcome Sanger Institute for the COVID-19 Genomics UK (COG-UK) Consortium|Davies|United Kingdom

>Spike|hCoV-19/USA/WA-OHSU-0327/2020|2020-05-14|EPI\_ISL\_509103|Original|hCoV-19^^Washington|Human|OHSU Lab Services Molecular Microbiology Lab|Oregon SARS-CoV-2 Genome Sequencing Center|O'Roak|USA

>Spike|hCoV-19/USA/TX-HMH-MCoV-18808/2020|2020-11-23|EPI\_ISL\_785135|Original|hCoV-19^^Texas|Human|Houston Methodist Hospital|Houston Methodist Hospital|Long|USA

>Spike|hCoV-19/Wales/PHWC-49E4BC/2020|2020-12-07|EPI\_ISL\_743008|Original|hCoV-19^^Wales|Human|Wales Specialist Virology Centre Sequencing lab|COVID-19 Genomics UK (COG-UK) Consortium|Moore|United Kingdom

>Spike|hCoV-19/Spain/CL-IBV-97006282/2020|2020-04-21|EPI\_ISL\_537652|Original|hCoV-19^^Castilla y Leon|Human|Universidad de Le\u00f3n|SeqCOVID-SPAIN consortium|IBV (CSIC) |Comas|Spain

>Spike|hCoV-19/USA/AZ-TG491480/2020|2020-06-18|EPI\_ISL\_695113|Original|hCoV-19^^Arizona|Human|AZ SPHL|TGen North|French|USA

>Spike|hCoV-19/Scotland/QEUA-9CF2D1/2020|2020-09-17|EPI\_ISL\_601999|Original|hCoV-19^^Scotland|Human|Lighthouse Lab in Glasgow|Wellcome Sanger Institute for the COVID-19 Genomics UK (COG-UK) consortium|Davies|United Kingdom

>Spike|hCoV-19/USA/MA-MGH-02792/2020|2020-09-24|EPI\_ISL\_765637|Original|hCoV-19^^Massachusetts|Human|Massachusetts General Hospital|Infectious Disease Program|Park|USA

>Spike|hCoV-19/England/QEUA-B2E159/2020|2020-11-03|EPI\_ISL\_646292|Original|hCoV-19^^England|Human|Lighthouse Lab in Glasgow|Wellcome Sanger Institute for the COVID-19 Genomics UK (COG-UK) Consortium|Davies|United Kingdom

>Spike|hCoV-19/England/ALDP-A862F3/2020|2020-10-17|EPI\_ISL\_605988|Original|hCoV-19^^England|Human|Lighthouse Lab in Alderley Park|Wellcome Sanger Institute for the COVID-19 Genomics UK (COG-UK) consortium|Davies|United Kingdom

>Spike|hCoV-19/England/20166067404/2020|2020-04-16|EPI\_ISL\_466568|Original|hCoV-19^^England|Human|Respiratory Virus Unit|Respiratory Virus Unit|Platt|United Kingdom

>Spike|hCoV-19/USA/UT-UPHL-2009343/2020|2020-05-16|EPI\_ISL\_524941|Original|hCoV-19^^Utah|Human|Utah Public Health Laboratory|Utah Public Health Laboratory|Young|USA

>Spike|hCoV-19/Japan/PG-3292/2020|2020-04-00|EPI\_ISL\_691407|Original|hCoV-19^^Japan|Human|Pathogen Genomics Center|Pathogen Genomics Center|Sekizuka|Japan

>Spike|hCoV-19/Denmark/DCGC-3718/2020|2020-08-31|EPI\_ISL\_615496|Original|hCoV-19^^Hovedstaden|Human|Department of Virus and Microbiological Special Diagnostics|Albertsen lab|Michaelsen|Denmark



>Spike|hCoV-19/Wales/PHWC-4A5F57/2020|2020-12-15|EPI\_ISL\_764984|Original|hCoV-19^^Wales|Human|Wales Specialist Virology Centre Sequencing lab|COVID-19 Genomics UK (COG-UK) Consortium|Moore|United Kingdom

>Spike|hCoV-19/USA/CA-ALSR-3708/2020|2020-09-23|EPI\_ISL\_636159|Original|hCoV-19^^California|Human|San Diego County Public Health Laboratory|Andersen lab at Scripps Research|Gangavarapu|USA

>Spike|hCoV-19/New Zealand/20VR3852/2020|2020-00-00|EPI\_ISL\_548142|Original|hCoV-19^^Auckland|Human|LabPLUS|Institute of Environmental Science and Research (ESR)|Wang|New Zealand

>Spike|hCoV-19/Japan/PG-2722/2020|2020-03-00|EPI\_ISL\_690854|Original|hCoV-19^^Japan|Human|Pathogen Genomics Center|Pathogen Genomics Center|Sekizuka|Japan

>Spike|hCoV-19/England/MILK-B05EAC/2020|2020-10-24|EPI\_ISL\_642889|Original|hCoV-19^^England|Human|Lighthouse Lab in Milton Keynes|Wellcome Sanger Institute for the COVID-19 Genomics UK (COG-UK) Consortium|Davies|United Kingdom

>Spike|hCoV-19/England/QEUEH-BA323B/2020|2020-11-18|EPI\_ISL\_721083|Original|hCoV-19^^England|Human|Lighthouse Lab in Glasgow|Wellcome Sanger Institute for the COVID-19 Genomics UK (COG-UK) Consortium|Davies|United Kingdom

>Spike|hCoV-19/USA/CA-ALSR-4644/2020|2020-11-10|EPI\_ISL\_667054|Original|hCoV-19^^California|Human|San Diego County Public Health Laboratory|Andersen lab at Scripps Research|Gangavarapu|USA

>Spike|hCoV-19/Spain/NC-IBV-001389/2020|2020-03-16|EPI\_ISL\_452512|Original|hCoV-19^^Navarra|Human|Cl\u00ednica Universidad de Navarra. Servicio de Enfermedades Infecciosas y Microbiolog\u00eda cl\u00ednica|SeqCOVID-SPAIN consortium/IBV (CSIC)|Comas|Spain

>Spike|hCoV-19/England/ALDP-724FB7/2020|2020-07-01|EPI\_ISL\_557735|Original|hCoV-19^^England|Human|Lighthouse Lab in Alderley Park|Wellcome Sanger Institute for the COVID-19 Genomics UK (COG-UK) consortium|Davies|United Kingdom

>Spike|hCoV-19/England/ALDP-94A836/2020|2020-06-12|EPI\_ISL\_556469|Original|hCoV-19^^England|Human|Lighthouse Lab in Alderley Park|Wellcome Sanger Institute for the COVID-19 Genomics UK (COG-UK) consortium|Davies|United Kingdom

>Spike|hCoV-19/USA/TX-DSHS-1954/2020|2020-06-21|EPI\_ISL\_765938|Original|hCoV-19^^Texas|Human|TXDSHS|TXDSHS|Rahman|USA

>Spike|hCoV-19/Wales/PHWC-48A77E/2020|2020-11-03|EPI\_ISL\_652597|Original|hCoV-19^^Wales|Human|Wales Specialist Virology Centre Sequencing lab|COVID-19 Genomics UK (COG-UK) Consortium|Moore|United Kingdom

>Spike|hCoV-19/USA/TX-HMH-MCoV-14147/2020|2020-10-02|EPI\_ISL\_787432|Original|hCoV-19^^Texas|Human|Houston Methodist Hospital|Houston Methodist Hospital|Long|USA

>Spike|hCoV-19/England/NORW-F687E/2020|2020-11-10|EPI\_ISL\_651091|Original|hCoV-19^^England|Human|Quadram Institute Bioscience|COVID-19 Genomics UK (COG-UK) Consortium|Alikhan|United Kingdom

>Spike|hCoV-19/Iceland/577/2020|2020-03-27|EPI\_ISL\_424597|Original|hCoV-19^^Reykjavik|Human|The National University Hospital of Iceland|deCODE genetics|J\u00f3nsson|Iceland

>Spike|hCoV-19/England/GSTT-265D1D8/2020|2020-03-15|EPI\_ISL\_483923|Original|hCoV-19^^England|Human|Centre for Clinical Infection and Diagnostics Research and Genomics Innovation Unit|COVID-19 Genomics UK (COG-UK) Consortium|Awan|United Kingdom

>Spike|hCoV-19/England/QEUEH-A4BCA1/2020|2020-10-03|EPI\_ISL\_628521|Original|hCoV-19^^England|Human|Oxford Viromics|COVID-19 Genomics UK (COG-UK) Consortium|Golubchik|United Kingdom

>Spike|hCoV-19/England/LEED-2A8606/2020|2020-03-29|EPI\_ISL\_539086|Original|hCoV-19^^England|Human|Leeds Teaching Hospitals NHS Trust and Public Health England|Wellcome Sanger Institute for the COVID-19 Genomics UK (COG-UK) consortium|Davies|United Kingdom

>Spike|hCoV-19/USA/WI-UW-245/2020|2020-03-28|EPI\_ISL\_428341|Original|hCoV-19^^Wisconsin|Human|University of Wisconsin-Madison AIDS Vaccine Research Laboratories|University of Wisconsin-Madison AIDS Vaccine Research Laboratories|Moreno|USA

>Spike|hCoV-19/United Arab Emirates/L2004034578/2020|2020-04-16|EPI\_ISL\_523953|Original|hCoV-19^^United Arab Emirates|Human|Mohammed Bin Rashid

University of Medicine and Health Sciences|Al Jalila Genomics Center|Ramaswamy|United Arab Emirates  
>Spike|hCoV-19/England/CAMB-1B5B35/2020|2020-08-13|EPI\_ISL\_516995|Original|hCoV-19^^England|Human|Department of Pathology|COVID-19 Genomics UK (COG-UK) Consortium|Meredith|United Kingdom  
>Spike|hCoV-19/Scotland/MILK-A6C132/2020|2020-10-09|EPI\_ISL\_608854|Original|hCoV-19^^Scotland|Human|Lighthouse Lab in Milton Keynes|Wellcome Sanger Institute for the COVID-19 Genomics UK (COG-UK) consortium|Davies|United Kingdom  
>Spike|hCoV-19/South Korea/KCDC2476/2020|2020-06-10|EPI\_ISL\_514879|Original|hCoV-19^^South Korea|Human|Division of Viral Diseases|Division of Viral Diseases|Kim|South Korea  
>Spike|hCoV-19/Japan/PG-3850/2020|2020-07-00|EPI\_ISL\_692101|Original|hCoV-19^^Japan|Human|Pathogen Genomics Center|Pathogen Genomics Center|Sekizuka|Japan  
>Spike|hCoV-19/USA/IL-UW353/2020|2020-03-13|EPI\_ISL\_418920|Original|hCoV-19^^Illinois|Human|UW Virology Lab|UW Virology Lab|Roychoudhury|USA  
>Spike|hCoV-19/Sweden/20-53762/2020|2020-12-20|EPI\_ISL\_766634|Original|hCoV-19^^Ostergotland|Human|Klinisk mikrobiologi|The Public Health Agency of Sweden|Svartstr\u00f6m|Sweden  
>Spike|hCoV-19/England/MILK-9AAC83/2020|2020-09-01|EPI\_ISL\_550828|Original|hCoV-19^^England|Human|Lighthouse Lab in Milton Keynes|Wellcome Sanger Institute for the COVID-19 Genomics UK (COG-UK) consortium|Davies|United Kingdom  
>Spike|hCoV-19/England/CAMC-948328/2020|2020-07-20|EPI\_ISL\_556968|Original|hCoV-19^^England|Human|Lighthouse Lab in Cambridge|Wellcome Sanger Institute for the COVID-19 Genomics UK (COG-UK) consortium|Davies|United Kingdom  
>Spike|hCoV-19/England/MILK-B02759/2020|2020-10-24|EPI\_ISL\_642967|Original|hCoV-19^^England|Human|Lighthouse Lab in Milton Keynes|Wellcome Sanger Institute for the COVID-19 Genomics UK (COG-UK) Consortium|Davies|United Kingdom  
>Spike|hCoV-19/England/MILK-4B3378/2020|2020-06-04|EPI\_ISL\_559201|Original|hCoV-19^^England|Human|Lighthouse Lab in Milton Keynes|Wellcome Sanger Institute for the COVID-19 Genomics UK (COG-UK) consortium|Davies|United Kingdom  
>Spike|hCoV-19/England/QEUEH-B7E819/2020|2020-11-14|EPI\_ISL\_668339|Original|hCoV-19^^England|Human|Lighthouse Lab in Glasgow|Wellcome Sanger Institute for the COVID-19 Genomics UK (COG-UK) Consortium|Davies|United Kingdom  
>Spike|hCoV-19/Switzerland/BS-UHB-42201474/2020|2020-03-21|EPI\_ISL\_528296|Original|hCoV-19^^Basel-Stadt|Human|University Hospital Basel|University Hospital Basel|Roloff Handschin|Switzerland  
>Spike|hCoV-19/England/ALDP-B1CE75/2020|2020-11-01|EPI\_ISL\_645729|Original|hCoV-19^^England|Human|Lighthouse Lab in Alderley Park|Wellcome Sanger Institute for the COVID-19 Genomics UK (COG-UK) Consortium|Davies|United Kingdom  
>Spike|hCoV-19/England/MILK-9949C1/2020|2020-08-24|EPI\_ISL\_552373|Original|hCoV-19^^England|Human|Lighthouse Lab in Milton Keynes|Wellcome Sanger Institute for the COVID-19 Genomics UK (COG-UK) consortium|Davies|United Kingdom  
>Spike|hCoV-19/England/ALDP-C3D6FD/2020|2020-12-10|EPI\_ISL\_731679|Original|hCoV-19^^England|Human|Lighthouse Lab in Alderley Park|Wellcome Sanger Institute for the COVID-19 Genomics UK (COG-UK) Consortium|Davies|United Kingdom  
>Spike|hCoV-19/Australia/NSW951/2020|2020-07-28|EPI\_ISL\_545023|Original|hCoV-19^^New South Wales|Human|Sydney South West Pathology Service (SSWPS) - Royal Prince Alfred Hospital - NSW Health Pathology|NSW Health Pathology - Institute of Clinical Pathology and Medical Research; Westmead Hospital; University of Sydney|Gall|Australia  
>Spike|hCoV-19/USA/MI-MDHHS-SC22667/2020|2020-11-19|EPI\_ISL\_737281|Original|hCoV-19^^Michigan|Human|Michigan Department of Health and Human Services|Michigan Department of Health and Human Services|Blankenship|USA  
>Spike|hCoV-19/Spain/M-20166261/2020|2020-05-28|EPI\_ISL\_776877|Original|hCoV-19^^Madrid|Human|Hospital General Universitario Gregorio Mara\u00f1\u00f3n|Hospital General Universitario Gregorio Mara\u00f1\u00f3n|Garc\u00e9 de Viedma|Spain  
>Spike|hCoV-19/USA/OH-ODH-SC35005/2020|2020-04-22|EPI\_ISL\_763321|Original|hCoV-19^^Ohio|Human|Ohio Department of Health Laboratory|Ohio Department of Health Laboratory|Holmes|USA

>Spike|hCoV-19/Russia/OMS-ORINFI-9064S/2020|2020-05-19|EPI\_ISL\_569750|Original|hCoV-19^^Omsk|Human|Omsk Research Institute of Natural Focal Infections|WHO National Influenza Centre Russian Federation|Komissarov|Russia

>Spike|hCoV-19/England/QEUH-B6C8E1/2020|2020-11-11|EPI\_ISL\_655002|Original|hCoV-19^^England|Human|Lighthouse Lab in Glasgow|Wellcome Sanger Institute for the COVID-19 Genomics UK (COG-UK) Consortium|Davies|United Kingdom

>Spike|hCoV-19/USA/TX-HMH-MCoV-9303/2020|2020-07-03|EPI\_ISL\_781048|Original|hCoV-19^^Texas|Human|Houston Methodist Hospital|Houston Methodist Hospital|Long|USA

>Spike|hCoV-19/England/CAMB-1AD14D/2020|2020-04-30|EPI\_ISL\_447970|Original|hCoV-19^^England|Human|Department of Pathology|COVID-19 Genomics UK (COG-UK) Consortium|Meredit|United Kingdom

>Spike|hCoV-19/England/QEUH-9AF2E6/2020|2020-08-30|EPI\_ISL\_559834|Original|hCoV-19^^England|Human|Oxford Viromics|COVID-19 Genomics UK (COG-UK) Consortium|Golubchik|United Kingdom

>Spike|hCoV-19/Australia/VIC2901/2020|2020-07-08|EPI\_ISL\_521732|Original|hCoV-19^^Victoria|Human|Microbiological Diagnostic Unit - Public Health Laboratory (MDU-PHL)|MDU-PHL|Schultz|Australia

>Spike|hCoV-19/Japan/IC-0098/2020|2020-07-00|EPI\_ISL\_591439|Original|hCoV-19^^Japan|Human|Pathogen Genomics Center|Pathogen Genomics Center|Sekizuka|Japan

>Spike|hCoV-19/England/20129020304/2020|2020-03-20|EPI\_ISL\_424010|Original|hCoV-19^^England|Human|Respiratory Virus Unit|Respiratory Virus Unit|Platt|United Kingdom

>Spike|hCoV-19/England/MILK-ACCF81/2020|2020-10-21|EPI\_ISL\_630175|Original|hCoV-19^^England|Human|Lighthouse Lab in Milton Keynes|Wellcome Sanger Institute for the COVID-19 Genomics UK (COG-UK) consortium|Davies|United Kingdom

>Spike|hCoV-19/England/ALDP-9BE9EF/2020|2020-09-10|EPI\_ISL\_568109|Original|hCoV-19^^England|Human|Lighthouse Lab in Alderley Park|Wellcome Sanger Institute for the COVID-19 Genomics UK (COG-UK) consortium|Davies|United Kingdom

>Spike|hCoV-19/USA/UT-UPHL-2009230/2020|2020-05-12|EPI\_ISL\_525226|Original|hCoV-19^^Utah|Human|Utah Public Health Laboratory|Utah Public Health Laboratory|Young|USA

>Spike|hCoV-19/Wales/PHWC-4A536A/2020|2020-12-15|EPI\_ISL\_764855|Original|hCoV-19^^Wales|Human|Wales Specialist Virology Centre Sequencing lab|COVID-19 Genomics UK (COG-UK) Consortium|Moore|United Kingdom

>Spike|hCoV-19/Denmark/DCGC-16443/2020|2020-11-16|EPI\_ISL\_714771|Original|hCoV-19^^Hovedstaden|Human|Department of Virus and Microbiological Special Diagnostics|Albertsen Lab|Michaelsen|Denmark

>Spike|hCoV-19/USA/IA-GMF-M00005/2020|2020-05-26|EPI\_ISL\_455582|Original|hCoV-19^^Iowa|Human|Gundersen Clinical Microbiology Laboratory|Kabara Cancer Research Institute|Kenny|USA

>Spike|hCoV-19/Switzerland/BE-ETHZ-100310/2020|2020-03-19|EPI\_ISL\_574921|Original|hCoV-19^^Bern|Human|Viollier AG|Department of Biosystems Science and Engineering|Nadeau|Switzerland

>Spike|hCoV-19/Wales/PHWC-4925C4/2020|2020-11-18|EPI\_ISL\_706863|Original|hCoV-19^^Wales|Human|Originating lab|COVID-19 Genomics UK (COG-UK) Consortium|Moore|United Kingdom

>Spike|hCoV-19/Japan/PG-1255/2020|2020-00-00|EPI\_ISL\_684865|Original|hCoV-19^^Japan|Human|Pathogen Genomics Center|Pathogen Genomics Center|Sekizuka|Japan

>Spike|hCoV-19/England/20422147204/2020|2020-09-00|EPI\_ISL\_584060|Original|hCoV-19^^England|Human|Respiratory Virus Unit|Respiratory Virus Unit|Platt|United Kingdom

>Spike|hCoV-19/Australia/VIC15490/2020|2020-08-01|EPI\_ISL\_593330|Original|hCoV-19^^Victoria|Human|Microbiological Diagnostic Unit - Public Health Laboratory (MDU-PHL)|MDU-PHL|Schultz|Australia

>Spike|hCoV-19/USA/MI-MDHHS-SC20967/2020|2020-03-26|EPI\_ISL\_507755|Original|hCoV-19^^Michigan|Human|Michigan Department of Health and Human Services|Michigan Department of Health and Human Services|Blankenship|USA

>Spike|hCoV-19/USA/DC-HP00074/2020|2020-03-20|EPI\_ISL\_438232|Original|hCoV-19^^District of Columbia|Human|Johns Hopkins Hospital Department of Pathology|Johns Hopkins Hospital Department of Pathology|Ramakrishnan|USA

>Spike|hCoV-19/Denmark/DCGC-2580/2020|2020-08-17|EPI\_ISL\_616417|Original|hCoV-19^^Sjaelland|Human|Department of Virus and Microbiological Special Diagnostics|Albertsen lab|Michaelsen|Denmark

>Spike|hCoV-19/Denmark/DCGC-6849/2020|2020-10-12|EPI\_ISL\_619694|Original|hCoV-19^^Midtjylland|Human|Department of Virus and Microbiological Special Diagnostics|Albertsen lab|Michaelsen|Denmark

>Spike|hCoV-19/England/ALDP-9FCBB2/2020|2020-10-01|EPI\_ISL\_587768|Original|hCoV-19^^England|Human|Lighthouse Lab in Alderley Park|Wellcome Sanger Institute for the COVID-19 Genomics UK (COG-UK) consortium|Davies|United Kingdom

>Spike|hCoV-19/Wales/PHWC-27522/2020|2020-03-30|EPI\_ISL\_432341|Original|hCoV-19^^Wales|Human|Wales Specialist Virology Centre|Public Health Wales Microbiology Cardiff|Moore|United Kingdom

>Spike|hCoV-19/Switzerland/SO-ETHZ-410851/2020|2020-12-12|EPI\_ISL\_737809|Original|hCoV-19^^Solothurn|Human|Viollier AG|Department of Biosystems Science and Engineering|Nadeau|Switzerland

>Spike|hCoV-19/England/NORW-EE536/2020|2020-00-00|EPI\_ISL\_490552|Original|hCoV-19^^England|Human|Quadram Institute Bioscience|COVID-19 Genomics UK (COG-UK) Consortium|Alikhan|United Kingdom

>Spike|hCoV-19/USA/TX-HMH-5091/2020|2020-06-24|EPI\_ISL\_544518|Original|hCoV-19^^Texas|Human|Houston Methodist Hospital|Houston Methodist Hospital|Long|USA

>Spike|hCoV-19/England/20139007404/2020|2020-03-26|EPI\_ISL\_420659|Original|hCoV-19^^England|Human|Respiratory Virus Unit|Respiratory Virus Unit|Platt|United Kingdom

>Spike|hCoV-19/Scotland/CVR4521/2020|2020-09-21|EPI\_ISL\_585381|Original|hCoV-19^^Scotland|Human|Lighthouse Lab in Glasgow / MRC-University of Glasgow Centre for Virus Research|COVID-19 Genomics UK (COG-UK) Consortium|Robertson|United Kingdom

>Spike|hCoV-19/USA/WA-UW-45138/2020|2020-12-08|EPI\_ISL\_747228|Original|hCoV-19^^Washington|Human|UW Virology Lab|UW Virology Lab|Roychoudhury|USA

>Spike|hCoV-19/Switzerland/BE-ETHZ-220085/2020|2020-07-28|EPI\_ISL\_512051|Original|hCoV-19^^Bern|Human|Viollier AG|Department of Biosystems Science and Engineering|Nadeau|Switzerland

>Spike|hCoV-19/England/ALDP-951ACD/2020|2020-06-10|EPI\_ISL\_555455|Original|hCoV-19^^England|Human|Lighthouse Lab in Alderley Park|Wellcome Sanger Institute for the COVID-19 Genomics UK (COG-UK) consortium|Davies|United Kingdom

>Spike|hCoV-19/New Zealand/20VR2651/2020|2020-00-00|EPI\_ISL\_579319|Original|hCoV-19^^Auckland|Human|LabPLUS|Institute of Environmental Science and Research (ESR)|Wang|New Zealand

>Spike|hCoV-19/USA/CA-CZB-1243/2020|2020-04-14|EPI\_ISL\_454663|Original|hCoV-19^^California|Human|County of Santa Clara Public Health Department|Chan-Zuckerberg Biohub|Hao|USA

>Spike|hCoV-19/USA/MD-MDH-0381/2020|2020-10-27|EPI\_ISL\_660079|Original|hCoV-19^^Maryland|Human|MD PHL|MD PHL|Keller|USA

>Spike|hCoV-19/Denmark/DCGC-6279/2020|2020-10-05|EPI\_ISL\_620039|Original|hCoV-19^^Hovedstaden|Human|Department of Virus and Microbiological Special Diagnostics|Albertsen lab|Michaelsen|Denmark

>Spike|hCoV-19/England/QEUEH-B2EB88/2020|2020-11-04|EPI\_ISL\_659966|Original|hCoV-19^^England|Human|Lighthouse Lab in Glasgow|Wellcome Sanger Institute for the COVID-19 Genomics UK (COG-UK) Consortium|Davies|United Kingdom

>Spike|hCoV-19/England/204221487/2020|2020-00-00|EPI\_ISL\_593987|Original|hCoV-19^^England|Human|Respiratory Virus Unit|Respiratory Virus Unit|Platt|United Kingdom

>Spike|hCoV-19/England/NORT-291D47/2020|2020-05-05|EPI\_ISL\_489138|Original|hCoV-19^^England|Human|NU-OMICS DNA Sequencing research facility|Wellcome Sanger Institute for the COVID-19 Genomics UK (COG-UK) consortium|Davies|United Kingdom

>Spike|hCoV-19/Netherlands/GE-RIVM-10321/2020|2020-03-14|EPI\_ISL\_636530|Original|hCoV-19^^Gelderland|Human|Dutch COVID-19 response team|National Institute for Public Health and the Environment (RIVM)|Meijer|Netherlands

>Spike|hCoV-19/USA/MN-MDH-1161/2020|2020-05-04|EPI\_ISL\_476746|Original|hCoV-19^^Minnesota|Human|Minnesota Department of Health|Minnesota Department of Health|Garfin|USA

>Spike|hCoV-19/India/UT-58369-CSIR-IGIB/2020|2020-08-03|EPI\_ISL\_636783|Original|hCoV-19^^Uttarakhand|Human|National Centre for Disease control (NCDC)|NCDC/CSIR-IGIB|Faruq|India

>Spike|hCoV-19/Scotland/QEUA-A0B2C9/2020|2020-10-03|EPI\_ISL\_599310|Original|hCoV-19^^Scotland|Human|Lighthouse Lab in Glasgow|Wellcome Sanger Institute for the COVID-19 Genomics UK (COG-UK) consortium|Davies|United Kingdom

>Spike|hCoV-19/USA/MI-MDHHS-SC20887/2020|2020-05-18|EPI\_ISL\_471908|Original|hCoV-19^^Michigan|Human|Michigan Department of Health and Human Services|Michigan Department of Health and Human Services|Blankenship|USA

>Spike|hCoV-19/England/CAMC-B23109/2020|2020-11-02|EPI\_ISL\_651718|Original|hCoV-19^^England|Human|Virology Department|COVID-19 Genomics UK (COG-UK) Consortium|de Silva|United Kingdom

>Spike|hCoV-19/USA/WI-UW-85/2020|2020-04-02|EPI\_ISL\_425142|Original|hCoV-19^^Wisconsin|Human|University of Wisconsin-Madison AIDS Vaccine Research Laboratories|University of Wisconsin-Madison AIDS Vaccine Research Laboratories|Baczenas|USA

>Spike|hCoV-19/India/MH-MW38/2020|2020-06-08|EPI\_ISL\_508438|Original|hCoV-19^^Maharashtra|Human|Mahatma Gandhi Institute of Medical Sciences|National Institute of Biomedical Genomics|Maitra|India

>Spike|hCoV-19/USA/FL-BPHL-0706/2020|2020-03-27|EPI\_ISL\_509764|Original|hCoV-19^^Florida|Human|Florida Bureau of Public Health Laboratories|Florida Bureau of Public Health Laboratories|Blanton|USA

>Spike|hCoV-19/England/20166059104/2020|2020-04-14|EPI\_ISL\_466557|Original|hCoV-19^^England|Human|Respiratory Virus Unit|Respiratory Virus Unit|Platt|United Kingdom

>Spike|hCoV-19/Wales/PHWC-2D322/2020|2020-04-04|EPI\_ISL\_445972|Original|hCoV-19^^Wales|Human|Wales Specialist Virology Centre|Public Health Wales Microbiology Cardiff|Moore|United Kingdom

>Spike|hCoV-19/England/LIVE-A2DAF/2020|2020-05-19|EPI\_ISL\_499870|Original|hCoV-19^^England|Human|Liverpool Clinical Laboratories|COVID-19 Genomics UK (COG-UK) Consortium|Haldenby|United Kingdom

>Spike|hCoV-19/USA/CA-QDX-2003/2020|2020-03-18|EPI\_ISL\_604301|Original|hCoV-19^^California|Human|Quest Diagnostics|Quest Diagnostics|Kagan|USA

>Spike|hCoV-19/USA/AZ-TG395940/2020|2020-06-08|EPI\_ISL\_694775|Original|hCoV-19^^Arizona|Human|AZ SPHL|TGen North|French|USA

>Spike|hCoV-19/USA/TX-HMH-1335/2020|2020-04-14|EPI\_ISL\_542656|Original|hCoV-19^^Texas|Human|Houston Methodist Hospital|Houston Methodist Hospital|Long|USA

>Spike|hCoV-19/Wales/PHWC-48D8C3/2020|2020-11-09|EPI\_ISL\_680695|Original|hCoV-19^^Wales|Human|Wales Specialist Virology Centre Sequencing lab|COVID-19 Genomics UK (COG-UK) Consortium|Moore|United Kingdom

>Spike|hCoV-19/Canada/ON-PHL-20-00048/2020|2020-00-00|EPI\_ISL\_548725|Original|hCoV-19^^Ontario|Human|Public Health Ontario Laboratory|Public Health Ontario Laboratory|Guthrie|Canada

>Spike|hCoV-19/USA/MN-MDH-2027/2020|2020-11-03|EPI\_ISL\_654708|Original|hCoV-19^^Minnesota|Human|Minnesota Department of Health|Minnesota Department of Health|Lorentz|USA

>Spike|hCoV-19/England/QEUA-A9E902/2020|2020-10-20|EPI\_ISL\_611405|Original|hCoV-19^^England|Human|Lighthouse Lab in Glasgow|Wellcome Sanger Institute for the COVID-19 Genomics UK (COG-UK) consortium|Davies|United Kingdom

>Spike|hCoV-19/Pakistan/JRCGR-KHI18/2020|2020-07-02|EPI\_ISL\_779272|Original|hCoV-19^^Karachi|Human|Jamil-ur-Rahman Center for Genome Research|Jamil-ur-Rahman Center for Genome Research|Shakeel|Pakistan

>Spike|hCoV-19/Scotland/EDB606/2020|2020-04-02|EPI\_ISL\_433213|Original|hCoV-19^^Scotland|Human|Virology Department|COVID-19 Genomics UK (COG-UK) Consortium|Williams|United Kingdom

>Spike|hCoV-19/Scotland/CVR5109/2020|2020-09-21|EPI\_ISL\_627376|Original|hCoV-19^^Scotland|Human|West of Scotland Specialist Virology Centre|COVID-19 Genomics UK (COG-UK) Consortium|Robertson|United Kingdom

>Spike|hCoV-19/Turkey/KU-001/2020|2020-05-19|EPI\_ISL\_495411|Original|hCoV-19^^Kars Province|Human|Kafkas University|Kafkas University|Karamese|Turkey

>Spike|hCoV-19/England/QEUA-AE4DD4/2020|2020-10-26|EPI\_ISL\_633296|Original|hCoV-19^^England|Human|Lighthouse Lab in Glasgow|Wellcome Sanger Institute for the COVID-19 Genomics UK (COG-UK) consortium|Davies|United Kingdom

>Spike|hCoV-19/Wales/PHWC-4A56DA/2020|2020-12-15|EPI\_ISL\_764906|Original|hCoV-19^^Wales|Human|Wales Specialist Virology Centre Sequencing lab|COVID-19 Genomics UK (COG-UK) Consortium|Moore|United Kingdom

>Spike|hCoV-19/England/ALDP-A500CB/2020|2020-10-07|EPI\_ISL\_597878|Original|hCoV-19^^England|Human|Lighthouse Lab in Alderley Park|Wellcome Sanger Institute for the COVID-19 Genomics UK (COG-UK) consortium|Davies|United Kingdom

>Spike|hCoV-19/Shanghai/SH0011/2020|2020-01-29|EPI\_ISL\_416324|Original|hCoV-19^^Shanghai|Human|Shanghai Public Health Clinical Center|National Research Center for Translational Medicine (Shanghai)|Zhang|China

>Spike|hCoV-19/Guangdong/20SF812/2020|2020-01-28|EPI\_ISL\_428475|Original|hCoV-19^^Guangdong|Human|Guangdong Provincial Center for Diseases Control and Prevention;Guangdong Provincial Institute of Public Health|School of Public Health|Gu|China

>Spike|hCoV-19/England/MILK-99D00F/2020|2020-08-30|EPI\_ISL\_549896|Original|hCoV-19^^England|Human|Lighthouse Lab in Milton Keynes|Wellcome Sanger Institute for the COVID-19 Genomics UK (COG-UK) consortium|Davies|United Kingdom

>Spike|hCoV-19/England/NORT-1B6BF44/2020|2020-09-25|EPI\_ISL\_612555|Original|hCoV-19^^England|Human|Northumbria University / South Tees Hospitals NHS Foundation Trust / North Cumbria Integrated Care NHS Foundation Trust / North Tees and Hartlepool NHS Foundation Trust / Newcastle Hospitals NHS Foundation Trust|COVID-19 Genomics UK (COG-UK) Consortium|Bashton|United Kingdom

>Spike|hCoV-19/Denmark/DCGC-16834/2020|2020-12-14|EPI\_ISL\_750593|Original|hCoV-19^^Midtjylland|Human|Department of Virus and Microbiological Special Diagnostics|Albertsen Lab|Michaelsen|Denmark

>Spike|hCoV-19/Wales/PHWC-48E8C2/2020|2020-11-13|EPI\_ISL\_680927|Original|hCoV-19^^Wales|Human|Wales Specialist Virology Centre Sequencing lab|COVID-19 Genomics UK (COG-UK) Consortium|Moore|United Kingdom

>Spike|hCoV-19/England/204491276/2020|2020-11-01|EPI\_ISL\_660772|Original|hCoV-19^^England|Human|Respiratory Virus Unit|COVID-19 Genomics UK (COG-UK) Consortium|Platt|United Kingdom

>Spike|hCoV-19/New Zealand/20VR3075/2020|2020-00-00|EPI\_ISL\_579412|Original|hCoV-19^^Canterbury|Human|Canterbury Health Laboratories|Institute of Environmental Science and Research (ESR)|Wang|New Zealand

>Spike|hCoV-19/England/CAMB-7EEE5/2020|2020-04-07|EPI\_ISL\_442975|Original|hCoV-19^^England|Human|Department of Pathology|Wellcome Sanger Institute for the COVID-19 Genomics UK (COG-UK) consortium|Amato|United Kingdom

>Spike|hCoV-19/United Arab Emirates/54/2020|2020-05-14|EPI\_ISL\_528704|Original|hCoV-19^^Abu Dhabi|Human|Alsafar - Khalifa University Abu Dhabi|Alsafar - Khalifa University Abu Dhabi|Daw Elbait|United Arab Emirates

>Spike|hCoV-19/England/LOND-DC331/2020|2020-08-26|EPI\_ISL\_627468|Original|hCoV-19^^England|Human|University College London|COVID-19 Genomics UK (COG-UK) Consortium|Roy|United Kingdom

>Spike|hCoV-19/Thailand/CO63-751-3/2020|2020-03-17|EPI\_ISL\_450968|Original|hCoV-19^^Thailand|Human|Center of Excellence in Clinical Virology|Center of Excellence in Clinical Virology|Poovorawan|Thailand

>Spike|hCoV-19/Denmark/DCGC-20224/2020|2020-11-30|EPI\_ISL\_747738|Original|hCoV-19^^Syddanmark|Human|Department of Virus and Microbiological Special Diagnostics|Albertsen Lab|Michaelsen|Denmark

>Spike|hCoV-19/USA/CA-CZB-5687/2020|2020-07-17|EPI\_ISL\_672391|Original|hCoV-19^^California|Human|UCSF Clinical Microbiology Laboratory|Chan-Zuckerberg Biohub|Bhatt|USA

>Spike|hCoV-19/England/NORW-EB760/2020|2020-05-04|EPI\_ISL\_472314|Original|hCoV-19^^England|Human|Quadram Institute Bioscience|COVID-19 Genomics UK (COG-UK) Consortium|Alikhan|United Kingdom

>Spike|hCoV-19/England/SHEF-CA4BB/2020|2020-04-21|EPI\_ISL\_453737|Original|hCoV-19^^England|Human|Virology Department|COVID-19 Genomics UK (COG-UK) Consortium|de Silva|United Kingdom

>Spike|hCoV-19/England/QEUH-9E5080/2020|2020-09-23|EPI\_ISL\_579906|Original|hCoV-19^^England|Human|Lighthouse Lab in Glasgow|Wellcome Sanger Institute for the COVID-19 Genomics UK (COG-UK) consortium|Davies|United Kingdom

>Spike|hCoV-19/Netherlands/Limburg\_70/2020|2020-00-00|EPI\_ISL\_461055|Original|hCoV-19^^Limburg|Human|Dutch COVID-19 response team|Erasmus Medical Center|Oude Munnink|Netherlands

>Spike|hCoV-19/USA/PA-MGEL91/2020|2020-03-31|EPI\_ISL\_454373|Original|hCoV-19^^Pennsylvania|Human|UPMC Clinical Microbiology Laboratory|Microbial Genome Sequencing Center|Mustapha|USA

>Spike|hCoV-19/England/LIVE-9943D/2020|2020-04-08|EPI\_ISL\_439723|Original|hCoV-19^^England|Human|Liverpool Clinical Laboratories|COVID-19 Genomics UK (COG-UK) Consortium|Haldenby|United Kingdom

>Spike|hCoV-19/Norway/3079/2020|2020-08-04|EPI\_ISL\_549087|Original|hCoV-19^^Viken|Human|Vestfold Hospital|Norwegian Institute of Public Health|Kopperud Riis|Norway

>Spike|hCoV-19/USA/TX-DSHS-1570/2020|2020-06-24|EPI\_ISL\_681860|Original|hCoV-19^^Texas|Human|Texas Department of State Health Services|Texas Department of State Health Services|Rahman|USA

>Spike|hCoV-19/Scotland/QEUEH-96CF48/2020|2020-08-21|EPI\_ISL\_534526|Original|hCoV-19^^Scotland|Human|NHSGGC West of Scotland Specialist Virology Centre / MRC-University of Glasgow Centre for Virus Research|Wellcome Sanger Institute for the COVID-19 Genomics UK (COG-UK) consortium|Davies|United Kingdom

>Spike|hCoV-19/England/MILK-A6BAFC/2020|2020-10-09|EPI\_ISL\_608771|Original|hCoV-19^^England|Human|Lighthouse Lab in Milton Keynes|Wellcome Sanger Institute for the COVID-19 Genomics UK (COG-UK) consortium|Davies|United Kingdom

>Spike|hCoV-19/Slovenia/V0-440/2020|2020-03-27|EPI\_ISL\_635290|Original|hCoV-19^^Slovenia|Human|Institute of Microbiology and Immunology|Institute of Microbiology and Immunology|Zakotnik|Slovenia

>Spike|hCoV-19/England/CAMC-C84EE0/2020|2020-12-17|EPI\_ISL\_756675|Original|hCoV-19^^England|Human|Lighthouse Lab in Cambridge|Wellcome Sanger Institute for the COVID-19 Genomics UK (COG-UK) Consortium|Davies|United Kingdom

>Spike|hCoV-19/Australia/VPRL005/2020|2020-04-02|EPI\_ISL\_455597|Original|hCoV-19^^South Australia|Human|SA Pathology|VPRL|Leong|Australia

>Spike|hCoV-19/Brazil/SP-L39-CD1052/2020|2020-05-14|EPI\_ISL\_722017|Original|hCoV-19^^S\u00e3o Paulo|Human|Hospital das Cl\u00ednicas Universidade de S\u00e3o Paulo Medical School|Laborat\u00f3rio de Parasitologia M\u00e9dica - Instituto de Medicina Tropical - Universidade de S\u00e3o Paulo|de Jesus|Brazil

>Spike|hCoV-19/USA/NY-Wadsworth-102997-01/2020|2020-05-15|EPI\_ISL\_676937|Original|hCoV-19^^New York|Human|Wadsworth Center|Wadsworth Center|Lasek-Nesselquist|USA

>Spike|hCoV-19/England/BIRM-5F14B/2020|2020-05-03|EPI\_ISL\_473315|Original|hCoV-19^^England|Human|University of Birmingham|COVID-19 Genomics UK (COG-UK) Consortium|Loman|United Kingdom

>Spike|hCoV-19/Japan/PG-7591/2020|2020-07-00|EPI\_ISL\_686693|Original|hCoV-19^^Japan|Human|Chiba Prefectural Institute of Public Health|Pathogen Genomics Center|Sekizuka|Japan

>Spike|hCoV-19/Netherlands/ZH-EMC-748/2020|2020-09-14|EPI\_ISL\_632589|Original|hCoV-19^^Zuid Holland|Human|Dutch COVID-19 response team|Erasmus Medical Center|Oude Munnink|Netherlands

>Spike|hCoV-19/England/CAMC-B99906/2020|2020-11-15|EPI\_ISL\_673695|Original|hCoV-19^^England|Human|Lighthouse Lab in Cambridge|Wellcome Sanger Institute for the COVID-19 Genomics UK (COG-UK) Consortium|Davies|United Kingdom

>Spike|hCoV-19/USA/WA-UW-23379/2020|2020-08-10|EPI\_ISL\_576437|Original|hCoV-19^^Washington|Human|UW Virology Lab|UW Virology Lab|Roychoudhury|USA

>Spike|hCoV-19/USA/MI-MDHHS-SC21581/2020|2020-03-23|EPI\_ISL\_516308|Original|hCoV-19^^Michigan|Human|Michigan Department of Health and Human Services|Michigan Department of Health and Human Services|Blankenship|USA

>Spike|hCoV-19/Wales/PHWC-169E28/2020|2020-08-20|EPI\_ISL\_529705|Original|hCoV-19^^Wales|Human|Wales Specialist Virology Centre Sequencing lab|COVID-19 Genomics UK (COG-UK) Consortium|Moore|United Kingdom

>Spike|hCoV-19/USA/TX-HMH-4551/2020|2020-06-20|EPI\_ISL\_543711|Original|hCoV-19^^Texas|Human|Houston Methodist Hospital|Houston Methodist Hospital|Long|USA

>Spike|hCoV-19/Wales/PHWC-49D74B/2020|2020-12-13|EPI\_ISL\_742827|Original|hCoV-19^^Wales|Human|Wales Specialist Virology Centre Sequencing lab|COVID-19 Genomics UK (COG-UK) Consortium|Moore|United Kingdom

>Spike|hCoV-19/Northern Ireland/NIRE-FC25C/2020|2020-04-13|EPI\_ISL\_459341|Original|hCoV-19^^Northern Ireland|Human|Regional Virus Laboratory|Wellcome Sanger Institute for the COVID-19 Genomics UK (COG-UK) consortium|Davies|United Kingdom

>Spike|hCoV-19/USA/LA-GBCL-26629267/2020|2020-04-21|EPI\_ISL\_485243|Original|hCoV-19^^Louisiana|Human|River Road Testing Lab|Ginkgo Bioworks Clinical Laboratory|Smith|USA

>Spike|hCoV-19/Guangdong/20SF273/2020|2020-01-23|EPI\_ISL\_428460|Original|hCoV-19^^Guangdong|Human|Guangdong Provincial Center for Diseases Control and Prevention;Guangdong Provincial Institute of Public Health|School of Public Health|Gu|China

>Spike|hCoV-19/England/CAMC-9B21E3/2020|2020-09-04|EPI\_ISL\_566495|Original|hCoV-19^^England|Human|Lighthouse Lab in Cambridge|Wellcome Sanger Institute for the COVID-19 Genomics UK (COG-UK) consortium|Davies|United Kingdom

>Spike|hCoV-19/Denmark/DCGC-14804/2020|2020-11-23|EPI\_ISL\_711995|Original|hCoV-19^^Hovedstaden|Human|Department of Virus and Microbiological Special Diagnostics|Albertsen Lab|Michaelsen|Denmark

>Spike|hCoV-19/England/OXON-B2F2E/2020|2020-03-20|EPI\_ISL\_534827|Original|hCoV-19^^England|Human|Oxford Viromics|COVID-19 Genomics UK (COG-UK) Consortium|Golubchik|United Kingdom

>Spike|hCoV-19/India/UT-65137-CSIR-IGIB/2020|2020-08-07|EPI\_ISL\_636824|Original|hCoV-19^^Uttarakhand|Human|National Centre for Disease control (NCDC)|NCDC/CSIR-IGIB|Faruq|India

>Spike|hCoV-19/Sweden/20-52426/2020|2020-07-17|EPI\_ISL\_560987|Original|hCoV-19^^Norrbotten|Human|Kliniskt mikrobiologiska laboratoriet|The Public Health Agency of Sweden|Svartstr\u00f6m|Sweden

>Spike|hCoV-19/Spain/AN-IBV-004078/2020|2020-04-14|EPI\_ISL\_510046|Original|hCoV-19^^Andalucia|Human|Servicio de Microbiolog\u00eda. HRU de M\u00e9llaga. Servicio Andaluz de Salud|SeqCOVID-SPAIN consortium|IBV(CSIC)|Comas|Spain

>Spike|hCoV-19/England/QEUI-B107D0/2020|2020-11-02|EPI\_ISL\_641641|Original|hCoV-19^^England|Human|Lighthouse Lab in Glasgow|Wellcome Sanger Institute for the COVID-19 Genomics UK (COG-UK) Consortium|Davies|United Kingdom

>Spike|hCoV-19/England/MILK-9D452B/2020|2020-09-18|EPI\_ISL\_601601|Original|hCoV-19^^England|Human|Lighthouse Lab in Milton Keynes|Wellcome Sanger Institute for the COVID-19 Genomics UK (COG-UK) consortium|Davies|United Kingdom

>Spike|hCoV-19/USA/NY-NYCPHL-000504/2020|2020-03-27|EPI\_ISL\_631965|Original|hCoV-19^^New York|Human|Richmond University Medical Center|New York City Public Health Laboratory|Wang|USA

>Spike|hCoV-19/Wales/PHWC-48413A/2020|2020-10-23|EPI\_ISL\_627969|Original|hCoV-19^^Wales|Human|Wales Specialist Virology Centre Sequencing lab|COVID-19 Genomics UK (COG-UK) Consortium|Moore|United Kingdom

>Spike|hCoV-19/South Africa/NHLS-UCT-GS-1382/2020|2020-11-13|EPI\_ISL\_700437|Original|hCoV-19^^Western Cape|Human|Kwanokuthula CDC wc KWA|NHLS/UCT|Iranzadeh|South Africa

>Spike|hCoV-19/Scotland/CVR2062/2020|2020-04-09|EPI\_ISL\_484549|Original|hCoV-19^^Scotland|Human|West of Scotland Specialist Virology Centre|COVID-19 Genomics UK (COG-UK) Consortium|Robertson|United Kingdom

>Spike|hCoV-19/USA/MI-MDHHS-SC21676/2020|2020-07-13|EPI\_ISL\_516403|Original|hCoV-19^^Michigan|Human|Michigan Department of Health and Human Services|Michigan Department of Health and Human Services|Blankenship|USA

>Spike|hCoV-19/Scotland/EDB6265/2020|2020-04-08|EPI\_ISL\_487744|Original|hCoV-19^^Scotland|Human|Virology Department|Wellcome Sanger Institute for the COVID-19 Genomics UK (COG-UK) consortium|Davies|United Kingdom

>Spike|hCoV-19/England/QEUI-8A6514/2020|2020-07-24|EPI\_ISL\_532668|Original|hCoV-19^^England|Human|Lighthouse Lab in Glasgow|Wellcome Sanger Institute for the COVID-19 Genomics UK (COG-UK) consortium|Davies|United Kingdom



>Spike|hCoV-19/USA/MN-MDH-1168/2020|2020-05-14|EPI\_ISL\_476753|Original|hCoV-19^^Minnesota|Human|Minnesota Department of Health|Minnesota Department of Health|Garfin|USA

>Spike|hCoV-19/USA/AZ-TG280843/2020|2020-04-21|EPI\_ISL\_694185|Original|hCoV-19^^Arizona|Human|AZ SPHL|TGen North|French|USA

>Spike|hCoV-19/USA/MI-UM-10033774911/2020|2020-03-25|EPI\_ISL\_578103|Original|hCoV-19^^Michigan|Human|University of Michigan Clinical Microbiology Laboratory|Lauring Lab|Valesano|USA

>Spike|hCoV-19/USA/CA-CZB-9533/2020|2020-04-09|EPI\_ISL\_672122|Original|hCoV-19^^California|Human|The Ashley Laboratory|Chan-Zuckerberg Biohub|Bhatt|USA

>Spike|hCoV-19/England/NORT-2A497A/2020|2020-09-13|EPI\_ISL\_573391|Original|hCoV-19^^England|Human|Northumbria University / South Tees Hospitals NHS Foundation Trust / North Cumbria Integrated Care NHS Foundation Trust / North Tees and Hartlepool NHS Foundation Trust / Newcastle Hospitals NHS Foundation Trust|COVID-19 Genomics UK (COG-UK) Consortium|Bashton|United Kingdom

>Spike|hCoV-19/Denmark/DCGC-13405/2020|2020-11-30|EPI\_ISL\_712777|Original|hCoV-19^^Sjaelland|Human|Department of Virus and Microbiological Special Diagnostics|Albertsen Lab|Michaelsen|Denmark

>Spike|hCoV-19/England/QEUA-C93A44/2020|2020-12-16|EPI\_ISL\_777305|Original|hCoV-19^^England|Human|Lighthouse Lab in Glasgow|Wellcome Sanger Institute for the COVID-19 Genomics UK (COG-UK) Consortium|Davies|United Kingdom

>Spike|hCoV-19/Netherlands/NB-EMC-468/2020|2020-07-29|EPI\_ISL\_722813|Original|hCoV-19^^Noord Brabant|Human|Dutch COVID-19 response team|Erasmus Medical Center|Oude Munnink|Netherlands

>Spike|hCoV-19/England/ALDP-9FD173/2020|2020-10-02|EPI\_ISL\_587921|Original|hCoV-19^^England|Human|Lighthouse Lab in Alderley Park|Wellcome Sanger Institute for the COVID-19 Genomics UK (COG-UK) consortium|Davies|United Kingdom

>Spike|hCoV-19/USA/WA-UW-47079/2020|2020-12-14|EPI\_ISL\_756223|Original|hCoV-19^^Washington|Human|UW Virology Lab|UW Virology Lab|Roychoudhury|USA

>Spike|hCoV-19/USA/ME-HETL-J0438/2020|2020-12-17|EPI\_ISL\_755538|Original|hCoV-19^^Maine|Human|Maine Health and Environmental Testing Laboratory|Tewhey Lab|Tewhey|USA

>Spike|hCoV-19/Denmark/DCGC-9224/2020|2020-11-16|EPI\_ISL\_668859|Original|hCoV-19^^Hovedstaden|Human|Department of Virus and Microbiological Special Diagnostics|Albertsen Lab|Michaelsen|Denmark

>Spike|hCoV-19/USA/HI-H200240/2020|2020-08-13|EPI\_ISL\_752799|Original|hCoV-19^^Hawaii|Human|State Laboratories Division|State Laboratories Division|Sultana|USA

>Spike|hCoV-19/England/QEUA-BA1297/2020|2020-11-18|EPI\_ISL\_672866|Original|hCoV-19^^England|Human|Lighthouse Lab in Glasgow|Wellcome Sanger Institute for the COVID-19 Genomics UK (COG-UK) Consortium|Davies|United Kingdom

>Spike|hCoV-19/England/MILK-A4713D/2020|2020-10-06|EPI\_ISL\_598317|Original|hCoV-19^^England|Human|Lighthouse Lab in Milton Keynes|Wellcome Sanger Institute for the COVID-19 Genomics UK (COG-UK) consortium|Davies|United Kingdom

>Spike|hCoV-19/England/BRIS-1854785/2020|2020-04-27|EPI\_ISL\_495112|Original|hCoV-19^^England|Human|PHE South West Regional Laboratory|Wellcome Sanger Institute for the COVID-19 Genomics UK (COG-UK) consortium|Davies|United Kingdom

>Spike|hCoV-19/Sweden/20-53396/2020|2020-11-05|EPI\_ISL\_676498|Original|hCoV-19^^Vastra Gotaland|Human|Klinisk Mikrobiologi|The Public Health Agency of Sweden|Svartstr\u00f6m|Sweden

>Spike|hCoV-19/USA/FL-BPHL-1803/2020|2020-08-03|EPI\_ISL\_613900|Original|hCoV-19^^Florida|Human|Florida Bureau of Public Health Laboratories|Florida Bureau of Public Health Laboratories|Blanton|USA

>Spike|hCoV-19/Denmark/DCGC-18209/2020|2020-12-14|EPI\_ISL\_749815|Original|hCoV-19^^Nordjylland|Human|Department of Virus and Microbiological Special Diagnostics|Albertsen Lab|Michaelsen|Denmark

>Spike|hCoV-19/Denmark/DCGC-1861/2020|2020-04-20|EPI\_ISL\_622538|Original|hCoV-19^^Hovedstaden|Human|Department of Virus and Microbiological Special Diagnostics|Albertsen lab|Michaelsen|Denmark

>Spike|hCoV-19/England/QEUA-C320DC/2020|2020-12-11|EPI\_ISL\_782548|Original|hCoV-19^^England|Human|Lighthouse Lab in Glasgow|Wellcome Sanger Institute for the COVID-19 Genomics UK (COG-UK) Consortium|Davies|United Kingdom

>Spike|hCoV-19/Northern Ireland/NIRE-FF523/2020|2020-04-24|EPI\_ISL\_469860|Original|hCoV-19^^Northern Ireland|Human|Regional Virus Laboratory|Wellcome Sanger Institute for the COVID-19 Genomics UK (COG-UK) consortium|Davies|United Kingdom

>Spike|hCoV-19/Finland/22A98S8/2020|2020-04-22|EPI\_ISL\_481617|Original|hCoV-19^^Uusimaa|Human|Department of Virology and Immunology|Department of Virology|Smura|Finland

>Spike|hCoV-19/Northern Ireland/NIRE-1000B4/2020|2020-05-02|EPI\_ISL\_489330|Original|hCoV-19^^Northern Ireland|Human|Regional Virus Laboratory|Wellcome Sanger Institute for the COVID-19 Genomics UK (COG-UK) consortium|Davies|United Kingdom

>Spike|hCoV-19/Scotland/CVR4395/2020|2020-09-22|EPI\_ISL\_585269|Original|hCoV-19^^Scotland|Human|West of Scotland Specialist Virology Centre|COVID-19 Genomics UK (COG-UK) Consortium|Robertson|United Kingdom

>Spike|hCoV-19/England/ALDP-A95E84/2020|2020-10-19|EPI\_ISL\_624725|Original|hCoV-19^^England|Human|Lighthouse Lab in Alderley Park|Wellcome Sanger Institute for the COVID-19 Genomics UK (COG-UK) consortium|Davies|United Kingdom

>Spike|hCoV-19/India/MH-ACTREC-473/2020|2020-08-11|EPI\_ISL\_700121|Original|hCoV-19^^Maharashtra|Human|Hematopathology Laboratory|Hematopathology Laboratory|Patkar|India

>Spike|hCoV-19/England/QEUA-AEFBB1/2020|2020-10-29|EPI\_ISL\_662698|Original|hCoV-19^^England|Human|Lighthouse Lab in Glasgow|Wellcome Sanger Institute for the COVID-19 Genomics UK (COG-UK) Consortium|Davies|United Kingdom

>Spike|hCoV-19/USA/UT-UPHL-2012152791/2020|2020-12-03|EPI\_ISL\_746976|Original|hCoV-19^^Utah|Human|Utah Public Health Laboratory|Utah Public Health Laboratory|Gallagher|USA

>Spike|hCoV-19/USA/LA-GBCL-26684493/2020|2020-04-10|EPI\_ISL\_485303|Original|hCoV-19^^Louisiana|Human|River Road Testing Lab|Ginkgo Bioworks Clinical Laboratory|Smith|USA

>Spike|hCoV-19/USA/HI-H200699/2020|2020-12-01|EPI\_ISL\_753220|Original|hCoV-19^^Hawaii|Human|State Laboratories Division|State Laboratories Division|Sultana|USA

>Spike|hCoV-19/Senegal/6751/2020|2020-04-21|EPI\_ISL\_486859|Original|hCoV-19^^Dakar|Human|Institut Pasteur Dakar|Institut Pasteur de Dakar|Dia|Senegal

>Spike|hCoV-19/USA/ME-HETL-J0180/2020|2020-09-16|EPI\_ISL\_755360|Original|hCoV-19^^Maine|Human|Maine Health and Environmental Testing Laboratory|Tewhey Lab|Tewhey|USA

>Spike|hCoV-19/Wales/PHWC-488E3F/2020|2020-10-30|EPI\_ISL\_639506|Original|hCoV-19^^Wales|Human|Wales Specialist Virology Centre Sequencing lab|COVID-19 Genomics UK (COG-UK) Consortium|Moore|United Kingdom

>Spike|hCoV-19/Wales/PHWC-499D98/2020|2020-11-24|EPI\_ISL\_727442|Original|hCoV-19^^Wales|Human|Originating lab|COVID-19 Genomics UK (COG-UK) Consortium|Moore|United Kingdom

>Spike|hCoV-19/Denmark/DCGC-3781/2020|2020-04-20|EPI\_ISL\_622665|Original|hCoV-19^^Hovedstaden|Human|Department of Virus and Microbiological Special Diagnostics|Albertsen lab|Michaelsen|Denmark

>Spike|hCoV-19/France/PAC-IHU-0504/2020|2020-04-06|EPI\_ISL\_569558|Original|hCoV-19^^Provence-Alpes-C\u00f4te-d\u0027Azur|Human|MEPHI|MEPHI|Levasseur|France

>Spike|hCoV-19/England/ALDP-51D645/2020|2020-06-02|EPI\_ISL\_558960|Original|hCoV-19^^England|Human|Lighthouse Lab in Alderley Park|Wellcome Sanger Institute for the COVID-19 Genomics UK (COG-UK) consortium|Davies|United Kingdom

>Spike|hCoV-19/South Africa/KRISP-0582/2020|2020-07-09|EPI\_ISL\_498120|Original|hCoV-19^^KwaZulu-Natal|Human|NHLS-IALCH|KRISP|de Oliveira|South Africa

>Spike|hCoV-19/England/LIVE-A41CF/2020|2020-06-17|EPI\_ISL\_490407|Original|hCoV-19^^England|Human|Liverpool Clinical Laboratories|COVID-19 Genomics UK (COG-UK) Consortium|Haldenby|United Kingdom

>Spike|hCoV-19/Wales/PHWC-273CE/2020|2020-03-31|EPI\_ISL\_432214|Original|hCoV-19^^Wales|Human|Wales Specialist Virology Centre|Public Health Wales Microbiology Cardiff|Moore|United Kingdom

>Spike|hCoV-19/England/QEUH-AD28AB/2020|2020-10-26|EPI\_ISL\_633728|Original|hCoV-19^^England|Human|Lighthouse Lab in Glasgow|Wellcome Sanger Institute for the COVID-19 Genomics UK (COG-UK) consortium|Davies|United Kingdom

>Spike|hCoV-19/USA/MI-MDHHS-SC20201/2020|2020-03-30|EPI\_ISL\_447172|Original|hCoV-19^^Michigan|Human|Michigan Department of Health and Human Services|Michigan Department of Health and Human Services|Blankenship|USA

>Spike|hCoV-19/Australia/VIC3873/2020|2020-07-13|EPI\_ISL\_520586|Original|hCoV-19^^Victoria|Human|Microbiological Diagnostic Unit - Public Health Laboratory (MDU-PHL)|MDU-PHL|Schultz|Australia

>Spike|hCoV-19/England/CAMB-1B82B5/2020|2020-10-19|EPI\_ISL\_637739|Original|hCoV-19^^England|Human|Department of Pathology|COVID-19 Genomics UK (COG-UK) Consortium|Goodfellow|United Kingdom

>Spike|hCoV-19/England/ALDP-B5CE3D/2020|2020-11-10|EPI\_ISL\_655800|Original|hCoV-19^^England|Human|Lighthouse Lab in Alderley Park|Wellcome Sanger Institute for the COVID-19 Genomics UK (COG-UK) Consortium|Davies|United Kingdom

>Spike|hCoV-19/England/CAMB-72A74/2020|2020-03-24|EPI\_ISL\_439663|Original|hCoV-19^^England|Human|Department of Pathology|Wellcome Sanger Institute for the COVID-19 Genomics UK (COG-UK) consortium|Amato|United Kingdom

>Spike|hCoV-19/Ireland/LS-NVRL-20G44005/2020|2020-03-31|EPI\_ISL\_681920|Original|hCoV-19^^Laois|Human|National Virus Reference Laboratory|Irish Coronavirus Sequencing Consortium - Teagasc Moorepark|Walsh|Ireland

>Spike|hCoV-19/England/PORT-2D0FBF/2020|2020-04-23|EPI\_ISL\_475315|Original|hCoV-19^^England|Human|Centre for Enzyme Innovation|COVID-19 Genomics UK (COG-UK) Consortium|Robson|United Kingdom

>Spike|hCoV-19/Belgium/ULG-11108/2020|2020-12-16|EPI\_ISL\_737356|Original|hCoV-19^^Li\u00e8ge|Human|Department of Clinical Microbiology|GIGA Medical Genomics|Durkin|Belgium

>Spike|hCoV-19/England/SHEF-C179D/2020|2020-04-25|EPI\_ISL\_457586|Original|hCoV-19^^England|Human|Virology Department|COVID-19 Genomics UK (COG-UK) Consortium|de Silva|United Kingdom

>Spike|hCoV-19/USA/MN-MDH-1576/2020|2020-08-03|EPI\_ISL\_530172|Original|hCoV-19^^Minnesota|Human|Minnesota Department of Health|Minnesota Department of Health|Garfin|USA

>Spike|hCoV-19/USA/TX-HMH-MCoV-10804/2020|2020-07-05|EPI\_ISL\_789634|Original|hCoV-19^^Texas|Human|Houston Methodist Hospital|Houston Methodist Hospital|Long|USA

>Spike|hCoV-19/Wales/PHWC-49BDC3/2020|2020-12-06|EPI\_ISL\_742466|Original|hCoV-19^^Wales|Human|Wales Specialist Virology Centre Sequencing lab|COVID-19 Genomics UK (COG-UK) Consortium|Moore|United Kingdom

>Spike|hCoV-19/England/ALDP-949882/2020|2020-06-12|EPI\_ISL\_556503|Original|hCoV-19^^England|Human|Lighthouse Lab in Alderley Park|Wellcome Sanger Institute for the COVID-19 Genomics UK (COG-UK) consortium|Davies|United Kingdom

>Spike|hCoV-19/England/QEUH-99C02E/2020|2020-08-30|EPI\_ISL\_559780|Original|hCoV-19^^England|Human|Oxford Viromics|COVID-19 Genomics UK (COG-UK) Consortium|Golubchik|United Kingdom

>Spike|hCoV-19/India/GJ-GBRC43/2020|2020-04-29|EPI\_ISL\_444474|Original|hCoV-19^^Gujarat|Human|B.J. Medical College and Civil hospital|Gujarat Biotechnology Research Centre|Joshi|India

>Spike|hCoV-19/France/PDL-1643/2020|2020-02-26|EPI\_ISL\_414625|Original|hCoV-19^^Pays-de-la-Loire|Human|Centre Hospitalier R\u00e9gional Universitaire de Nantes Laboratoire de Virologie|National Reference Center for Viruses of Respiratory Infections|Enouf|France

>Spike|hCoV-19/Denmark/DCGC-13186/2020|2020-11-30|EPI\_ISL\_712637|Original|hCoV-19^^Midtjylland|Human|Department of Virus and Microbiological Special Diagnostics|Albertsen Lab|Michaelsen|Denmark

>Spike|hCoV-19/England/MILK-BB1BD5/2020|2020-11-18|EPI\_ISL\_720155|Original|hCoV-19^^England|Human|Lighthouse Lab in Milton Keynes|Wellcome Sanger Institute for the COVID-19 Genomics UK (COG-UK) Consortium|Davies|United Kingdom

>Spike|hCoV-19/England/NORW-222E39/2020|2020-12-19|EPI\_ISL\_741536|Original|hCoV-19^^England|Human|Quadram Institute Bioscience|COVID-19 Genomics UK (COG-UK) Consortium|Alikhan|United Kingdom

>Spike|hCoV-19/England/BIRM-6633C/2020|2020-10-07|EPI\_ISL\_612258|Original|hCoV-19^^England|Human|University of Birmingham|COVID-19 Genomics UK (COG-UK) Consortium|Loman|United Kingdom

>Spike|hCoV-19/USA/UT-UPHL-201220800/2020|2020-04-15|EPI\_ISL\_672567|Original|hCoV-19^^Utah|Human|Utah Public Health Laboratory|Utah Public Health Laboratory|Young|USA

>Spike|hCoV-19/England/ALDP-94E243/2020|2020-06-17|EPI\_ISL\_555156|Original|hCoV-19^^England|Human|Lighthouse Lab in Alderley Park|Wellcome Sanger Institute for the COVID-19 Genomics UK (COG-UK) consortium|Davies|United Kingdom

>Spike|hCoV-19/USA/MI-QDX-934/2020|2020-03-22|EPI\_ISL\_571638|Original|hCoV-19^^Michigan|Human|Quest Diagnostics|Quest Diagnostics|Kagan|USA

>Spike|hCoV-19/England/QEUEH-9D05D4/2020|2020-09-14|EPI\_ISL\_589903|Original|hCoV-19^^England|Human|Lighthouse Lab in Glasgow|Wellcome Sanger Institute for the COVID-19 Genomics UK (COG-UK) consortium|Davies|United Kingdom

>Spike|hCoV-19/Brazil/RJ-00544/2020|2020-10-27|EPI\_ISL\_717928|Original|hCoV-19^^Rio de Janeiro|Human|Laboratorio de Virologia Molecular / UFRJ|Bioinformatics Laboratory / LNCC|Almeida|Brazil

>Spike|hCoV-19/South Africa/KRISP-K001356/2020|2020-07-16|EPI\_ISL\_515841|Original|hCoV-19^^KwaZulu-Natal|Human|Medical Disagnostics Services (MDS)|KRISP|de Oliveira|South Africa

>Spike|hCoV-19/USA/MA-MASPHL-00410/2020|2020-04-26|EPI\_ISL\_693139|Original|hCoV-19^^Massachusetts|Human|Massachusetts State Public Health Laboratory|Massachusetts State Public Health Laboratory|Lang|USA

>Spike|hCoV-19/Japan/PG-4024/2020|2020-07-00|EPI\_ISL\_692265|Original|hCoV-19^^Japan|Human|Pathogen Genomics Center|Pathogen Genomics Center|Sekizuka|Japan

>Spike|hCoV-19/Wales/PHWC-495F69/2020|2020-11-24|EPI\_ISL\_726510|Original|hCoV-19^^Wales|Human|Originating lab|COVID-19 Genomics UK (COG-UK) Consortium|Moore|United Kingdom

>Spike|hCoV-19/England/CAMC-9EB9CB/2020|2020-09-24|EPI\_ISL\_584386|Original|hCoV-19^^England|Human|Queens Medical Centre|COVID-19 Genomics UK (COG-UK) Consortium|Loose|United Kingdom

>Spike|hCoV-19/England/ALDP-9C61EC/2020|2020-09-10|EPI\_ISL\_567689|Original|hCoV-19^^England|Human|Lighthouse Lab in Alderley Park|Wellcome Sanger Institute for the COVID-19 Genomics UK (COG-UK) consortium|Davies|United Kingdom

>Spike|hCoV-19/Germany/HE-FFM4/2020|2020-03-02|EPI\_ISL\_452220|Caco-2|hCoV-19^^Hesse|Human|Goethe University Hospital Frankfurt|Institute for Medical Virology|Toptan Grabmair|Germany

>Spike|hCoV-19/England/CAMC-B99D37/2020|2020-11-15|EPI\_ISL\_673383|Original|hCoV-19^^England|Human|Lighthouse Lab in Cambridge|Wellcome Sanger Institute for the COVID-19 Genomics UK (COG-UK) Consortium|Davies|United Kingdom

>Spike|hCoV-19/England/QEUEH-BCC18A/2020|2020-11-27|EPI\_ISL\_704686|Original|hCoV-19^^England|Human|Lighthouse Lab in Glasgow|Wellcome Sanger Institute for the COVID-19 Genomics UK (COG-UK) Consortium|Davies|United Kingdom

>Spike|hCoV-19/France/PDL-SC632/2020|2020-04-02|EPI\_ISL\_663272|Original|hCoV-19^^Pays-de-la-Loire|Human|CHU Nantes|CNR Virus des Infections Respiratoires - France SUD|Bal|France

>Spike|hCoV-19/USA/CO-CDPHE-2004220698/2020|2020-04-21|EPI\_ISL\_710183|Original|hCoV-19^^Colorado|Human|Colorado Department of Public Health and Environment|Colorado Department of Public Health and Environment|Bankers|USA

>Spike|hCoV-19/USA/WA-S922/2020|2020-04-26|EPI\_ISL\_463412|Original|hCoV-19^^Washington|Human|Washington State Department of Health|Seattle Flu Study|Bedford|USA

>Spike|hCoV-19/Wales/PHWC-16DB78/2020|2020-09-22|EPI\_ISL\_577498|Original|hCoV-19^^Wales|Human|Wales Specialist Virology Centre Sequencing lab|COVID-19 Genomics UK (COG-UK) Consortium|Moore|United Kingdom

>Spike|hCoV-19/USA/CA-CZB-14638/2020|2020-11-16|EPI\_ISL\_739582|Original|hCoV-19^^California|Human|Orange County Public Health Lab|Chan-Zuckerberg Biohub|Kamm|USA

>Spike|hCoV-19/Israel/CVL1808/2020|2020-07-05|EPI\_ISL\_516911|Original|hCoV-19^^Haifa District|Human|Israel Central Virology laboratory|Israel Central Virology laboratory|Zuckerman|Israel

>Spike|hCoV-19/Canada/NB\_246/2020|2020-03-31|EPI\_ISL\_481744|Original|hCoV-19^^New Brunswick|Human|Dr. Georges-L.-Dumont University Hospital Centre|National Microbiology Laboratory|Grudeski|Canada

>Spike|hCoV-19/Wales/ALDP-9BCED3/2020|2020-09-09|EPI\_ISL\_573866|Original|hCoV-19^^Wales|Human|Oxford Viromics|COVID-19 Genomics UK (COG-UK) Consortium|Golubchik|United Kingdom

>Spike|hCoV-19/England/20128017504/2020|2020-03-19|EPI\_ISL\_423946|Original|hCoV-19^^England|Human|Respiratory Virus Unit|Respiratory Virus Unit|Platt|United Kingdom

>Spike|hCoV-19/Japan/PG-7442/2020|2020-07-00|EPI\_ISL\_688544|Original|hCoV-19^^Japan|Human|Pathogen Genomics Center|Pathogen Genomics Center|Sekizuka|Japan

>Spike|hCoV-19/England/QEUEH-9F6E19/2020|2020-09-27|EPI\_ISL\_595635|Original|hCoV-19^^England|Human|Oxford Viromics|COVID-19 Genomics UK (COG-UK) Consortium|Golubchik|United Kingdom

>Spike|hCoV-19/Hong Kong/VM20063264/2020|2020-07-20|EPI\_ISL\_539813|Original|hCoV-19^^Hong Kong|Human|Prince of Wales Hospital|Hong Kong Department of Health|Tsang|China

>Spike|hCoV-19/Mexico/BCN-ALSR-4899/2020|2020-07-08|EPI\_ISL\_730202|Original|hCoV-19^^Baja California|Human|Genomica Lab Molecular|Andersen lab at Scripps Research|Gangavarapu|Mexico

>Spike|hCoV-19/England/CAMB-72485/2020|2020-03-24|EPI\_ISL\_439596|Original|hCoV-19^^England|Human|Department of Pathology|Wellcome Sanger Institute for the COVID-19 Genomics UK (COG-UK) consortium|Amato|United Kingdom

>Spike|hCoV-19/South Korea/KDCA0133/2020|2020-10-11|EPI\_ISL\_747368|Original|hCoV-19^^South Korea|Human|Division of Emerging Infectious Diseases|Division of Emerging Infectious Diseases|Park|South Korea

>Spike|hCoV-19/Greece/22565\_HPI/2020|2020-05-08|EPI\_ISL\_501250|Original|hCoV-19^^Athens|Human|Hellenic Pasteur Institute|Hellenic Pasteur Institute|Kosyvakis|Greece

>Spike|hCoV-19/England/QEUEH-B2C179/2020|2020-11-04|EPI\_ISL\_680063|Original|hCoV-19^^England|Human|Department of Pathology|COVID-19 Genomics UK (COG-UK) Consortium|Goodfellow|United Kingdom

>Spike|hCoV-19/England/MILK-B946E6/2020|2020-11-13|EPI\_ISL\_676135|Original|hCoV-19^^England|Human|Lighthouse Lab in Milton Keynes|Wellcome Sanger Institute for the COVID-19 Genomics UK (COG-UK) Consortium|Davies|United Kingdom

>Spike|hCoV-19/Bulgaria/34/2020|2020-04-25|EPI\_ISL\_480306|Original|hCoV-19^^Vidin|Human|National Reference Laboratory \Influenza and acute respiratory diseases\|NRL-HIV|Ivanov|Bulgaria

>Spike|hCoV-19/England/ALDP-B8329B/2020|2020-11-14|EPI\_ISL\_675680|Original|hCoV-19^^England|Human|Lighthouse Lab in Alderley Park|Wellcome Sanger Institute for the COVID-19 Genomics UK (COG-UK) Consortium|Davies|United Kingdom

>Spike|hCoV-19/England/LIVE-98F6A/2020|2020-04-07|EPI\_ISL\_439676|Original|hCoV-19^^England|Human|Liverpool Clinical Laboratories|COVID-19 Genomics UK (COG-UK) Consortium|Haldenby|United Kingdom

>Spike|hCoV-19/England/SHEF-C2F94/2020|2020-09-14|EPI\_ISL\_573692|Original|hCoV-19^^England|Human|Virology Department|COVID-19 Genomics UK (COG-UK) Consortium|de Silva|United Kingdom

>Spike|hCoV-19/USA/IN-CDC-2-3693654/2020|2020-11-06|EPI\_ISL\_747088|Original|hCoV-19^^Indiana|Human|Respiratory Viruses Branch|Respiratory Viruses Branch|Queen|USA

>Spike|hCoV-19/USA/TX-HMH-MCoV-9414/2020|2020-07-03|EPI\_ISL\_781108|Original|hCoV-19^^Texas|Human|Houston Methodist Hospital|Houston Methodist Hospital|Long|USA

>Spike|hCoV-19/Netherlands/UT-RIVM-20369/2020|2020-12-07|EPI\_ISL\_728589|Original|hCoV-19^^Utrecht|Human|Dutch COVID-19 response team|National Institute for Public Health and the Environment (RIVM)|Meijer|Netherlands

>Spike|hCoV-19/England/QEUEH-9B7E23/2020|2020-09-07|EPI\_ISL\_590625|Original|hCoV-19^^England|Human|Lighthouse Lab in Glasgow|Wellcome Sanger Institute for the COVID-19 Genomics UK (COG-UK) consortium|Davies|United Kingdom

>Spike|hCoV-19/Australia/VIC660/2020|2020-03-28|EPI\_ISL\_426956|Original|hCoV-19^^Victoria|Human|Victorian Infectious Diseases Reference Laboratory (VIDRL)|Microbiological Diagnostic Unit Public Health Laboratory and Victorian Infectious Diseases Reference Laboratory|Schultz|Australia

>Spike|hCoV-19/England/QEUH-A2162B/2020|2020-10-01|EPI\_ISL\_587575|Original|hCoV-19^^England|Human|Lighthouse Lab in Glasgow|Wellcome Sanger Institute for the COVID-19 Genomics UK (COG-UK) consortium|Davies|United Kingdom

>Spike|hCoV-19/Wales/PHWC-4946A1/2020|2020-11-20|EPI\_ISL\_726153|Original|hCoV-19^^Wales|Human|Originating lab|COVID-19 Genomics UK (COG-UK) Consortium|Moore|United Kingdom

>Spike|hCoV-19/England/MILK-B94E57/2020|2020-11-14|EPI\_ISL\_676188|Original|hCoV-19^^England|Human|Lighthouse Lab in Milton Keynes|Wellcome Sanger Institute for the COVID-19 Genomics UK (COG-UK) Consortium|Davies|United Kingdom

>Spike|hCoV-19/India/UT-AR54/2020|2020-06-04|EPI\_ISL\_508193|Original|hCoV-19^^Uttarakhand|Human|All india institute of Medical Sciences Rishikesh|National Institute of Biomedical Genomics|Maitra|India

>Spike|hCoV-19/England/20168038304/2020|2020-04-13|EPI\_ISL\_466619|Original|hCoV-19^^England|Human|Respiratory Virus Unit|Respiratory Virus Unit|Platt|United Kingdom

>Spike|hCoV-19/Netherlands/Limburg\_9/2020|2020-03-20|EPI\_ISL\_422648|Original|hCoV-19^^Limburg|Human|Dutch COVID-19 response team|Erasmus Medical Center|Oude Munnink|Netherlands

>Spike|hCoV-19/England/NORT-2972AC/2020|2020-04-27|EPI\_ISL\_488079|Original|hCoV-19^^England|Human|NU-OMICS DNA Sequencing research facility|Wellcome Sanger Institute for the COVID-19 Genomics UK (COG-UK) consortium|Davies|United Kingdom

>Spike|hCoV-19/Australia/VIC2534/2020|2020-07-02|EPI\_ISL\_522227|Original|hCoV-19^^Victoria|Human|Microbiological Diagnostic Unit - Public Health Laboratory (MDU-PHL)|MDU-PHL|Schultz|Australia

>Spike|hCoV-19/England/QEUH-A49872/2020|2020-10-05|EPI\_ISL\_627085|Original|hCoV-19^^England|Human|Oxford Viromics|COVID-19 Genomics UK (COG-UK) Consortium|Golubchik|United Kingdom

>Spike|hCoV-19/Denmark/DCGC-8885/2020|2020-11-02|EPI\_ISL\_625883|Original|hCoV-19^^Hovedstaden|Human|Department of Virus and Microbiological Special Diagnostics|Albertsen lab|Michaelsen|Denmark

>Spike|hCoV-19/England/ALDP-ABD2B7/2020|2020-10-04|EPI\_ISL\_631089|Original|hCoV-19^^England|Human|Lighthouse Lab in Alderley Park|Wellcome Sanger Institute for the COVID-19 Genomics UK (COG-UK) consortium|Davies|United Kingdom

>Spike|hCoV-19/Switzerland/BS-42208514/2020|2020-03-27|EPI\_ISL\_581768|Original|hCoV-19^^Basel-Stadt|Human|University Hospital Basel|University Hospital Basel|Roloff Handschin|Switzerland

>Spike|hCoV-19/England/201380069/2020|2020-03-25|EPI\_ISL\_421817|Original|hCoV-19^^England|Human|Respiratory Virus Unit|Respiratory Virus Unit|Platt|United Kingdom

>Spike|hCoV-19/Japan/PG-2091/2020|2020-03-00|EPI\_ISL\_685696|Original|hCoV-19^^Japan|Human|Pathogen Genomics Center|Pathogen Genomics Center|Sekizuka|Japan

>Spike|hCoV-19/Turkey/ETLKVET3/2020|2020-03-00|EPI\_ISL\_636971|P5|hCoV-19^^Ankara|Human|Etlik Veterinary Control Central Research Institute|Etlik Veterinary Control Central Research Institute|Hacioglu|Turkey

>Spike|hCoV-19/Australia/VIC3206/2020|2020-07-05|EPI\_ISL\_520892|Original|hCoV-19^^Victoria|Human|Victorian Infectious Diseases Reference Laboratory (VIDRL)|VIDRL and MDU-PHL|Schultz|Australia

>Spike|hCoV-19/USA/CA-CZB-14950/2020|2020-09-04|EPI\_ISL\_739372|Original|hCoV-19^^California|Human|Monterey County Public Health Lab|Chan-Zuckerberg Biohub|Kamm|USA

>Spike|hCoV-19/Spain/MD-HLP-93/2020|2020-05-06|EPI\_ISL\_530089|Original|hCoV-19^^Madrid|Human|Hospital Universitario La Paz|Hospital Universitario La Paz|Viedma|Spain

>Spike|hCoV-19/England/MILK-ACD9FB/2020|2020-10-21|EPI\_ISL\_630166|Original|hCoV-19^^England|Human|Lighthouse Lab in Milton Keynes|Wellcome Sanger Institute for the COVID-19 Genomics UK (COG-UK) consortium|Davies|United Kingdom

>Spike|hCoV-19/Spain/PV-IBV-000766/2020|2020-03-07|EPI\_ISL\_452730|Original|hCoV-19^^Basque Country|Human|Hospital Universitario Araba. Vitoria-Gasteiz,|SeqCOVID-SPAIN consortium/IBV (CSIC)|Comas|Spain

>Spike|hCoV-19/USA/UT-08386/2020|2020-05-20|EPI\_ISL\_524169|Original|hCoV-19^^Utah|Human|Utah Public Health Laboratory|Utah Public Health Laboratory|Young|USA

>Spike|hCoV-19/England/QEUEH-9B4BC5/2020|2020-09-03|EPI\_ISL\_590273|Original|hCoV-19^^England|Human|Lighthouse Lab in Glasgow|Wellcome Sanger Institute for the COVID-19 Genomics UK (COG-UK) consortium|Davies|United Kingdom

>Spike|hCoV-19/Japan/PG-6000/2020|2020-07-00|EPI\_ISL\_689113|Original|hCoV-19^^Japan|Human|Pathogen Genomics Center|Pathogen Genomics Center|Sekizuka|Japan

>Spike|hCoV-19/England/EXET-135ECB/2020|2020-04-18|EPI\_ISL\_457178|Original|hCoV-19^^England|Human|University of Exeter|COVID-19 Genomics UK (COG-UK) Consortium|Temperton|United Kingdom

>Spike|hCoV-19/England/ALDP-B85545/2020|2020-11-14|EPI\_ISL\_674432|Original|hCoV-19^^England|Human|Lighthouse Lab in Alderley Park|Wellcome Sanger Institute for the COVID-19 Genomics UK (COG-UK) Consortium|Davies|United Kingdom

>Spike|hCoV-19/England/CAMC-9EBA7D/2020|2020-09-24|EPI\_ISL\_584393|Original|hCoV-19^^England|Human|Queens Medical Centre|COVID-19 Genomics UK (COG-UK) Consortium|Loose|United Kingdom

>Spike|hCoV-19/USA/TX-HMH-2847/2020|2020-06-07|EPI\_ISL\_543818|Original|hCoV-19^^Texas|Human|Houston Methodist Hospital|Houston Methodist Hospital|Long|USA

>Spike|hCoV-19/Wales/PHWC-49F1C3/2020|2020-12-08|EPI\_ISL\_743177|Original|hCoV-19^^Wales|Human|Wales Specialist Virology Centre Sequencing lab|COVID-19 Genomics UK (COG-UK) Consortium|Moore|United Kingdom

>Spike|hCoV-19/Luxembourg/LNS9324837/2020|2020-03-12|EPI\_ISL\_419602|Original|hCoV-19^^Luxembourg|Human|Laboratoire National de Sant\u00e9|Laboratoire National de Sant\u00e9|Wienecke-Baldacchino|Luxembourg

>Spike|hCoV-19/USA/CA-CHLA-PLM42701908/2020|2020-12-10|EPI\_ISL\_753663|Original|hCoV-19^^California|Human|Clinical virology Laboratory|Center for Personalized Medicine|Dien Bard|USA

>Spike|hCoV-19/Scotland/EDB252/2020|2020-03-27|EPI\_ISL\_425955|Original|hCoV-19^^Scotland|Human|Virology Department|COVID-19 Genomics UK (COG-UK) Consortium|Williams|United Kingdom

>Spike|hCoV-19/England/ALDP-9BE78B/2020|2020-09-09|EPI\_ISL\_567993|Original|hCoV-19^^England|Human|Lighthouse Lab in Alderley Park|Wellcome Sanger Institute for the COVID-19 Genomics UK (COG-UK) consortium|Davies|United Kingdom

>Spike|hCoV-19/England/CAMC-9EC353/2020|2020-09-23|EPI\_ISL\_580567|Original|hCoV-19^^England|Human|Lighthouse Lab in Cambridge|Wellcome Sanger Institute for the COVID-19 Genomics UK (COG-UK) consortium|Davies|United Kingdom

>Spike|hCoV-19/USA/CA-CZB-15183/2020|2020-11-23|EPI\_ISL\_739597|Original|hCoV-19^^California|Human|Santa Clara County Public Health Laboratory|Chan-Zuckerberg Biohub|Kamm|USA

>Spike|hCoV-19/England/CAMB-7F39A/2020|2020-04-08|EPI\_ISL\_442973|Original|hCoV-19^^England|Human|Department of Pathology|Wellcome Sanger Institute for the COVID-19 Genomics UK (COG-UK) consortium|Amato|United Kingdom

>Spike|hCoV-19/England/CAMB-7BC48/2020|2020-04-05|EPI\_ISL\_442099|Original|hCoV-19^^England|Human|Department of Pathology|Wellcome Sanger Institute for the COVID-19 Genomics UK (COG-UK) consortium|Amato|United Kingdom

>Spike|hCoV-19/Japan/PG-6582/2020|2020-09-00|EPI\_ISL\_687694|Original|hCoV-19^^Japan|Human|Pathogen Genomics Center|Pathogen Genomics Center|Sekizuka|Japan

>Spike|hCoV-19/England/ALDP-A851CA/2020|2020-10-16|EPI\_ISL\_610544|Original|hCoV-19^^England|Human|Lighthouse Lab in Alderley Park|Wellcome Sanger Institute for the COVID-19 Genomics UK (COG-UK) consortium|Davies|United Kingdom

>Spike|hCoV-19/USA/AZ-TG618047/2020|2020-07-20|EPI\_ISL\_695689|Original|hCoV-19^^Arizona|Human|AZ SPHL|TGen North|French|USA

>Spike|hCoV-19/England/ALDP-B5BDD7/2020|2020-11-09|EPI\_ISL\_655649|Original|hCoV-19^^England|Human|Lighthouse Lab in Alderley Park|Wellcome Sanger Institute for the COVID-19 Genomics UK (COG-UK) Consortium|Davies|United Kingdom

>Spike|hCoV-19/England/ALDP-BB9584/2020|2020-11-20|EPI\_ISL\_702433|Original|hCoV-19^^England|Human|Lighthouse Lab in Alderley Park|Wellcome Sanger Institute for the COVID-19 Genomics UK (COG-UK) Consortium|Davies|United Kingdom

>Spike|hCoV-19/USA/NY-NYCPHL-000256/2020|2020-04-25|EPI\_ISL\_631782|Original|hCoV-19^^New York|Human|St Barnabas Hospital|New York City Public Health Laboratory|Wang|USA

>Spike|hCoV-19/USA/LA-GBCL-26544536/2020|2020-04-18|EPI\_ISL\_485118|Original|hCoV-19^^Louisiana|Human|River Road Testing Lab|Ginkgo Bioworks Clinical Laboratory|Smith|USA

>Spike|hCoV-19/England/ALDP-CB6A2D/2020|2020-12-19|EPI\_ISL\_761759|Original|hCoV-19^^England|Human|Lighthouse Lab in Alderley Park|Wellcome Sanger Institute for the COVID-19 Genomics UK (COG-UK) Consortium|Davies|United Kingdom

>Spike|hCoV-19/USA/TX-DSHS-1314/2020|2020-03-31|EPI\_ISL\_648232|Original|hCoV-19^^Texas|Human|Texas Department of State Health Services|Texas Department of State Health Services|Rahman|USA

>Spike|hCoV-19/Norway/2959/2020|2020-07-29|EPI\_ISL\_549081|Original|hCoV-19^^Vestlandet|Human|Medical Microbiology Unit|Norwegian Institute of Public Health|Kopperud Riis|Norway

>Spike|hCoV-19/Ghana/84162\_S45/2020|2020-04-25|EPI\_ISL\_515103|Original|hCoV-19^^Ghana|Human|Department of Biochemistry|WACCBIP|Amuzu|Ghana

>Spike|hCoV-19/Australia/VIC13806/2020|2020-08-17|EPI\_ISL\_592322|Original|hCoV-19^^Victoria|Human|Microbiological Diagnostic Unit - Public Health Laboratory (MDU-PHL)|MDU-PHL|Schultz|Australia

>Spike|hCoV-19/England/QEUAH-9DB0C9/2020|2020-09-21|EPI\_ISL\_581063|Original|hCoV-19^^England|Human|Lighthouse Lab in Glasgow|Wellcome Sanger Institute for the COVID-19 Genomics UK (COG-UK) consortium|Davies|United Kingdom

>Spike|hCoV-19/England/CAMB-796E2/2020|2020-04-03|EPI\_ISL\_441823|Original|hCoV-19^^England|Human|Department of Pathology|Wellcome Sanger Institute for the COVID-19 Genomics UK (COG-UK) consortium|Amato|United Kingdom

>Spike|hCoV-19/USA/WA-S1972/2020|2020-06-03|EPI\_ISL\_497400|Original|hCoV-19^^Washington|Human|Washington State Department of Health|Seattle Flu Study|Lee|USA

>Spike|hCoV-19/England/MILK-ACE453/2020|2020-10-21|EPI\_ISL\_629354|Original|hCoV-19^^England|Human|Lighthouse Lab in Milton Keynes|Wellcome Sanger Institute for the COVID-19 Genomics UK (COG-UK) consortium|Davies|United Kingdom

>Spike|hCoV-19/Denmark/DCGC-17879/2020|2020-12-14|EPI\_ISL\_749501|Original|hCoV-19^^Hovedstaden|Human|Department of Virus and Microbiological Special Diagnostics|Albertsen Lab|Michaelsen|Denmark

>Spike|hCoV-19/USA/NM-DOH-2020616912/2020|2020-12-12|EPI\_ISL\_751802|Original|hCoV-19^^New Mexico|Human|New Mexico Department of Health Scientific Laboratory|New Mexico Department of Health Scientific Laboratory|Malone|USA

>Spike|hCoV-19/Scotland/EDB6888/2020|2020-04-30|EPI\_ISL\_526502|Original|hCoV-19^^Scotland|Human|Virology Department|COVID-19 Genomics UK (COG-UK) Consortium|Williams|United Kingdom

>Spike|hCoV-19/Denmark/DCGC-3476/2020|2020-08-31|EPI\_ISL\_616263|Original|hCoV-19^^Hovedstaden|Human|Department of Virus and Microbiological Special Diagnostics|Albertsen lab|Michaelsen|Denmark

>Spike|hCoV-19/England/MILK-B0644F/2020|2020-10-24|EPI\_ISL\_652232|Original|hCoV-19^^England|Human|Quadram Institute Bioscience|COVID-19 Genomics UK (COG-UK) Consortium|Alikhan|United Kingdom

>Spike|hCoV-19/England/ALDP-A6DACD/2020|2020-10-14|EPI\_ISL\_607924|Original|hCoV-19^^England|Human|Lighthouse Lab in Alderley Park|Wellcome Sanger Institute for the COVID-19 Genomics UK (COG-UK) consortium|Davies|United Kingdom

>Spike|hCoV-19/England/ALDP-BC66AF/2020|2020-11-21|EPI\_ISL\_721223|Original|hCoV-19^^England|Human|Lighthouse Lab in Alderley Park|Wellcome Sanger Institute for the COVID-19 Genomics UK (COG-UK) Consortium|Davies|United Kingdom

>Spike|hCoV-19/Norway/6298/2020|2020-11-29|EPI\_ISL\_775383|Original|hCoV-19^^Nordland|Human|Nordland Hospital - Bodo|Norwegian Institute of Public Health|Vollan|Norway



>Spike|hCoV-19/USA/CA-ALSR-3422/2020|2020-07-07|EPI\_ISL\_636019|Original|hCoV-19^^California|Human|San Diego County Public Health Laboratory|Andersen lab at Scripps Research|Gangavarapu|USA

>Spike|hCoV-19/England/201100019/2020|2020-03-08|EPI\_ISL\_464624|Original|hCoV-19^^England|Human|Respiratory Virus Unit|Respiratory Virus Unit|Platt|United Kingdom

>Spike|hCoV-19/England/QEUEH-9CF73C/2020|2020-09-15|EPI\_ISL\_590111|Original|hCoV-19^^England|Human|Lighthouse Lab in Glasgow|Wellcome Sanger Institute for the COVID-19 Genomics UK (COG-UK) consortium|Davies|United Kingdom

>Spike|hCoV-19/USA/MN-MDH-1854/2020|2020-10-06|EPI\_ISL\_602989|Original|hCoV-19^^Minnesota|Human|Minnesota Department of Health|Minnesota Department of Health|Garfin|USA

>Spike|hCoV-19/England/QEUEH-98F5C5/2020|2020-08-27|EPI\_ISL\_540020|Original|hCoV-19^^England|Human|Lighthouse Lab in Glasgow|Wellcome Sanger Institute for the COVID-19 Genomics UK (COG-UK) consortium|Davies|United Kingdom

>Spike|hCoV-19/Austria/CeMM0449/2020|2020-03-05|EPI\_ISL\_475866|Original|hCoV-19^^Austria|Human|Austrian Agency for Health and Food Safety (AGES)|Bergthaler laboratory|Bergthaler|Austria

>Spike|hCoV-19/Ireland/CN-NVRL-20IRL82667/2020|2020-10-05|EPI\_ISL\_639890|Original|hCoV-19^^Cavan|Human|National Virus Reference Laboratory|National Virus Reference Laboratory|Gonzalez|Ireland

>Spike|hCoV-19/Wales/PHWC-484AC6/2020|2020-10-19|EPI\_ISL\_627154|Original|hCoV-19^^Wales|Human|Wales Specialist Virology Centre Sequencing lab|COVID-19 Genomics UK (COG-UK) Consortium|Moore|United Kingdom

>Spike|hCoV-19/USA/MI-MDHHS-SC20856/2020|2020-04-29|EPI\_ISL\_471877|Original|hCoV-19^^Michigan|Human|Michigan Department of Health and Human Services|Michigan Department of Health and Human Services|Blankenship|USA

>Spike|hCoV-19/England/NOTT-10F659/2020|2020-04-03|EPI\_ISL\_433031|Original|hCoV-19^^England|Human|Queens Medical Centre|COVID-19 Genomics UK (COG-UK) Consortium|Loose|United Kingdom

>Spike|hCoV-19/USA/CA-CZB-14547/2020|2020-11-11|EPI\_ISL\_739010|Original|hCoV-19^^California|Human|Santa Clara County Public Health Laboratory|Chan-Zuckerberg Biohub|Kamm|USA

>Spike|hCoV-19/USA/WI-WSLH-200163/2020|2020-03-31|EPI\_ISL\_578389|Original|hCoV-19^^Wisconsin|Human|Wisconsin State Laboratory of Hygiene Communicable Disease Division|Wisconsin State Laboratory of Hygiene Communicable Disease Division|Florek|USA

>Spike|hCoV-19/England/CAMC-AB1981/2020|2020-10-23|EPI\_ISL\_623812|Original|hCoV-19^^England|Human|Lighthouse Lab in Cambridge|Wellcome Sanger Institute for the COVID-19 Genomics UK (COG-UK) consortium|Davies|United Kingdom

>Spike|hCoV-19/England/ALDP-AA365E/2020|2020-10-22|EPI\_ISL\_625005|Original|hCoV-19^^England|Human|Lighthouse Lab in Alderley Park|Wellcome Sanger Institute for the COVID-19 Genomics UK (COG-UK) consortium|Davies|United Kingdom

>Spike|hCoV-19/USA/WI-WSLH-200490/2020|2020-05-20|EPI\_ISL\_578631|Original|hCoV-19^^Wisconsin|Human|Wisconsin State Laboratory of Hygiene Communicable Disease Division|Wisconsin State Laboratory of Hygiene Communicable Disease Division|Florek|USA

>Spike|hCoV-19/USA/NY-NYUMC172/2020|2020-04-01|EPI\_ISL\_427469|Original|hCoV-19^^New York|Human|NYU Langone Health|Departments of Pathology and Medicine|Maurano|USA

>Spike|hCoV-19/England/ALDP-95A7CD/2020|2020-06-14|EPI\_ISL\_554897|Original|hCoV-19^^England|Human|Lighthouse Lab in Alderley Park|Wellcome Sanger Institute for the COVID-19 Genomics UK (COG-UK) consortium|Davies|United Kingdom

>Spike|hCoV-19/Japan/PG-5651/2020|2020-04-00|EPI\_ISL\_688775|Original|hCoV-19^^Japan|Human|Pathogen Genomics Center|Pathogen Genomics Center|Sekizuka|Japan

>Spike|hCoV-19/Zimbabwe/ZW-1114/2020|2020-04-01|EPI\_ISL\_644786|Original|hCoV-19^^Zimbabwe|Human|National Microbiology Reference Laboratory|Quadram Institute Bioscience|Alikhan|Zimbabwe

>Spike|hCoV-19/USA/CA-ALSR-1510/2020|2020-04-02|EPI\_ISL\_494632|Original|hCoV-19^^California|Human|San Diego County Public Health Laboratory|Andersen lab at Scripps Research|Gangavarapu|USA

>Spike|hCoV-19/Wales/PHWC-16A7E0/2020|2020-09-10|EPI\_ISL\_560107|Original|hCoV-19^^Wales|Human|Wales Specialist Virology Centre Sequencing lab|COVID-19 Genomics UK (COG-UK) Consortium|Moore|United Kingdom

>Spike|hCoV-19/Australia/VIC5384/2020|2020-07-17|EPI\_ISL\_520147|Original|hCoV-19^^Victoria|Human|Microbiological Diagnostic Unit - Public Health Laboratory (MDU-PHL)|MDU-PHL|Schultz|Australia

>Spike|hCoV-19/Scotland/QEUEH-9D0E42/2020|2020-09-16|EPI\_ISL\_601864|Original|hCoV-19^^Scotland|Human|Lighthouse Lab in Glasgow|Wellcome Sanger Institute for the COVID-19 Genomics UK (COG-UK) consortium|Davies|United Kingdom

>Spike|hCoV-19/USA/TX-HMH-MCoV-8320/2020|2020-07-07|EPI\_ISL\_784329|Original|hCoV-19^^Texas|Human|Houston Methodist Hospital|Houston Methodist Hospital|Long|USA

>Spike|hCoV-19/Jordan/AM-ALSR-5300/2020|2020-11-06|EPI\_ISL\_730536|Original|hCoV-19^^Amman|Human|Biolab Diagnostic Laboratories|Andersen lab at Scripps Research|Gangavarapu|Jordan

>Spike|hCoV-19/South Africa/KRISP-0275/2020|2020-06-18|EPI\_ISL\_482862|Original|hCoV-19^^KwaZulu-Natal|Human|Molecular Diagnostics Services (MDS)|KRISP|de Oliveira|South Africa

>Spike|hCoV-19/England/LOND-DA88F/2020|2020-11-09|EPI\_ISL\_724665|Original|hCoV-19^^England|Human|University College London|COVID-19 Genomics UK (COG-UK) Consortium|Roy|United Kingdom

>Spike|hCoV-19/Scotland/CVR5382/2020|2020-10-06|EPI\_ISL\_651789|Original|hCoV-19^^Scotland|Human|West of Scotland Specialist Virology Centre|COVID-19 Genomics UK (COG-UK) Consortium|Robertson|United Kingdom

>Spike|hCoV-19/England/MILK-ACECA6/2020|2020-10-21|EPI\_ISL\_629165|Original|hCoV-19^^England|Human|Lighthouse Lab in Milton Keynes|Wellcome Sanger Institute for the COVID-19 Genomics UK (COG-UK) consortium|Davies|United Kingdom

>Spike|hCoV-19/USA/TX-HMH-8008/2020|2020-07-07|EPI\_ISL\_545786|Original|hCoV-19^^Texas|Human|Houston Methodist Hospital|Houston Methodist Hospital|Long|USA

>Spike|hCoV-19/Denmark/DCGC-21809/2020|2020-12-21|EPI\_ISL\_758378|Original|hCoV-19^^Syddanmark|Human|Department of Virus and Microbiological Special Diagnostics|Albertsen Lab|Michaelsen|Denmark

>Spike|hCoV-19/Ireland/D-NVRL-MPU91828/2020|2020-04-13|EPI\_ISL\_767775|Original|hCoV-19^^Dublin|Human|National Virus Reference Laboratory|Irish Coronavirus Sequencing Consortium - Teagasc Moorepark|Walsh|Ireland

>Spike|hCoV-19/England/ALDP-B7600A/2020|2020-11-12|EPI\_ISL\_723724|Original|hCoV-19^^England|Human|Oxford Viromics|COVID-19 Genomics UK (COG-UK) Consortium|Golubchik|United Kingdom

>Spike|hCoV-19/Denmark/DCGC-18831/2020|2020-12-07|EPI\_ISL\_748289|Original|hCoV-19^^Midtjylland|Human|Department of Virus and Microbiological Special Diagnostics|Albertsen Lab|Michaelsen|Denmark

>Spike|hCoV-19/USA/MN-MDH-2043/2020|2020-11-02|EPI\_ISL\_654724|Original|hCoV-19^^Minnesota|Human|Minnesota Department of Health|Minnesota Department of Health|Lorentz|USA

>Spike|hCoV-19/France/OCC-38/2020|2020-06-12|EPI\_ISL\_591546|Original|hCoV-19^^Occitanie|Human|CHU Purpan - Laboratoire de Virologie - Institut F\u00e9d\u00e9ratif de Biologie|CHU Purpan - Laboratoire de Virologie - Institut F\u00e9d\u00e9ratif de Biologie|Latour|France

>Spike|hCoV-19/USA/ID-UW-6461/2020|2020-04-02|EPI\_ISL\_570118|Original|hCoV-19^^Idaho|Human|UW Virology Lab|UW Virology Lab|Roychoudhury|USA

>Spike|hCoV-19/USA/CA-CHLA-PLM90989138/2020|2020-11-30|EPI\_ISL\_753452|Original|hCoV-19^^California|Human|Clinical virology Laboratory|Center for Personalized Medicine|Dien Bard|USA

>Spike|hCoV-19/England/QEUEH-CB115A/2020|2020-12-07|EPI\_ISL\_760986|Original|hCoV-19^^England|Human|Lighthouse Lab in Glasgow|Wellcome Sanger Institute for the COVID-19 Genomics UK (COG-UK) Consortium|Davies|United Kingdom

>Spike|hCoV-19/Wales/MILK-9D50B0/2020|2020-09-18|EPI\_ISL\_601565|Original|hCoV-19^^Wales|Human|Lighthouse Lab in Milton Keynes|Wellcome Sanger Institute for the COVID-19 Genomics UK (COG-UK) consortium|Davies|United Kingdom

>Spike|hCoV-19/England/EXET-138E8C/2020|2020-10-30|EPI\_ISL\_664117|Original|hCoV-19^^England|Human|University of Exeter|COVID-19 Genomics UK (COG-UK) Consortium|Temperton|United Kingdom

>Spike|hCoV-19/England/ALDP-9CD2E2/2020|2020-09-16|EPI\_ISL\_566411|Original|hCoV-19^^England|Human|Lighthouse Lab in Alderley Park|Wellcome Sanger Institute for the COVID-19 Genomics UK (COG-UK) consortium|Davies|United Kingdom

>Spike|hCoV-19/USA/MN-QDX-1015/2020|2020-03-14|EPI\_ISL\_571741|Original|hCoV-19^^Minnesota|Human|Quest Diagnostics|Quest Diagnostics|Kagan|USA

>Spike|hCoV-19/England/BIRM-653E2/2020|2020-09-30|EPI\_ISL\_594556|Original|hCoV-19^^England|Human|University of Birmingham|COVID-19 Genomics UK (COG-UK) Consortium|Loman|United Kingdom

>Spike|hCoV-19/England/QEUH-C345CC/2020|2020-12-11|EPI\_ISL\_733967|Original|hCoV-19^^England|Human|Lighthouse Lab in Glasgow|Wellcome Sanger Institute for the COVID-19 Genomics UK (COG-UK) Consortium|Davies|United Kingdom

>Spike|hCoV-19/Luxembourg/LNS7219474/2020|2020-12-28|EPI\_ISL\_771121|Original|hCoV-19^^Luxembourg|Human|Laboratoire national de sant\u00e9|Laboratoire national de sant\u00e9|Wienecke-Baldacchino|Luxembourg

>Spike|hCoV-19/England/ALDP-B63AB7/2020|2020-11-09|EPI\_ISL\_656595|Original|hCoV-19^^England|Human|Lighthouse Lab in Alderley Park|Wellcome Sanger Institute for the COVID-19 Genomics UK (COG-UK) Consortium|Davies|United Kingdom

>Spike|hCoV-19/USA/CA-CZB-13984/2020|2020-06-16|EPI\_ISL\_739446|Original|hCoV-19^^California|Human|Alameda County Public Health Lab|Chan-Zuckerberg Biohub|Kamm|USA

>Spike|hCoV-19/USA/FL-BPHL-0282/2020|2020-05-13|EPI\_ISL\_480933|Original|hCoV-19^^Florida|Human|Florida Bureau of Public Health Laboratories|Florida Bureau of Public Health Laboratories|Blanton|USA

>Spike|hCoV-19/Sweden/20-22281/2020|2020-09-17|EPI\_ISL\_654896|Original|hCoV-19^^Skane|Human|Klinisk mikrobiologi|The Public Health Agency of Sweden|Svartstr\u00f6m|Sweden

>Spike|hCoV-19/England/LIVE-A9115/2020|2020-03-25|EPI\_ISL\_517263|Original|hCoV-19^^England|Human|Liverpool Clinical Laboratories|COVID-19 Genomics UK (COG-UK) Consortium|Haldenby|United Kingdom

>Spike|hCoV-19/England/ALDP-C3B677/2020|2020-12-09|EPI\_ISL\_730738|Original|hCoV-19^^England|Human|Lighthouse Lab in Alderley Park|Wellcome Sanger Institute for the COVID-19 Genomics UK (COG-UK) Consortium|Davies|United Kingdom

>Spike|hCoV-19/Japan/PG-1705/2020|2020-05-00|EPI\_ISL\_685311|Original|hCoV-19^^Japan|Human|Pathogen Genomics Center|Pathogen Genomics Center|Sekizuka|Japan

>Spike|hCoV-19/England/LOND-DAE9C/2020|2020-11-09|EPI\_ISL\_724723|Original|hCoV-19^^England|Human|University College London|COVID-19 Genomics UK (COG-UK) Consortium|Roy|United Kingdom

>Spike|hCoV-19/Spain/MD-IBV-006424/2020|2020-04-16|EPI\_ISL\_510139|Original|hCoV-19^^Madrid|Human|Hospital General Universitario Gregorio Mara\u00f1a|SeqCOVID-SPAIN consortium/IBV (CSIC)|Comas|Spain

>Spike|hCoV-19/USA/CA-QDX-2157/2020|2020-03-22|EPI\_ISL\_604433|Original|hCoV-19^^California|Human|Quest Diagnostics|Quest Diagnostics|Kagan|USA

>Spike|hCoV-19/England/201060061/2020|2020-03-04|EPI\_ISL\_464389|Original|hCoV-19^^England|Human|Respiratory Virus Unit|Respiratory Virus Unit|Platt|United Kingdom

>Spike|hCoV-19/England/CAMC-BBCABF/2020|2020-11-21|EPI\_ISL\_705605|Original|hCoV-19^^England|Human|Quadram Institute Bioscience|COVID-19 Genomics UK (COG-UK) Consortium|Alikhan|United Kingdom

>Spike|hCoV-19/USA/MI-MDHHS-SC21087/2020|2020-04-01|EPI\_ISL\_507863|Original|hCoV-19^^Michigan|Human|Michigan Department of Health and Human Services|Michigan Department of Health and Human Services|Blankenship|USA

>Spike|hCoV-19/Wales/PHWC-15C954/2020|2020-05-07|EPI\_ISL\_472560|Original|hCoV-19^^Wales|Human|Wales Specialist Virology Centre Sequencing lab|COVID-19 Genomics UK (COG-UK) Consortium|Moore|United Kingdom

>Spike|hCoV-19/Germany/BY-MVP-0155/2020|2020-04-01|EPI\_ISL\_451945|Original|hCoV-19^^Bavaria|Human|Max von Pettenkofer Institute|Laboratory for Functional Genome Analysis|Graf|Germany

>Spike|hCoV-19/England/CAMC-C40DF2/2020|2020-12-10|EPI\_ISL\_719122|Original|hCoV-19^^England|Human|Lighthouse Lab in Cambridge|Wellcome Sanger Institute for the COVID-19 Genomics UK (COG-UK) Consortium|Davies|United Kingdom

>Spike|hCoV-19/England/QEUH-B13B3B/2020|2020-11-02|EPI\_ISL\_641831|Original|hCoV-19^^England|Human|Lighthouse Lab in Glasgow|Wellcome Sanger Institute for the COVID-19 Genomics UK (COG-UK) Consortium|Davies|United Kingdom

>Spike|hCoV-19/England/EXET-135C94/2020|2020-00-00|EPI\_ISL\_457152|Original|hCoV-19^^England|Human|University of Exeter|COVID-19 Genomics UK (COG-UK) Consortium|Temperton|United Kingdom

>Spike|hCoV-19/USA/TX-HMH-MCoV-9346/2020|2020-07-03|EPI\_ISL\_781071|Original|hCoV-19^^Texas|Human|Houston Methodist Hospital|Houston Methodist Hospital|Long|USA

>Spike|hCoV-19/USA/WA-S1568/2020|2020-05-26|EPI\_ISL\_495994|Original|hCoV-19^^Washington|Human|Washington State Department of Health|Seattle Flu Study|Lee|USA

>Spike|hCoV-19/England/MILK-9753C8/2020|2020-08-21|EPI\_ISL\_552670|Original|hCoV-19^^England|Human|Lighthouse Lab in Milton Keynes|Wellcome Sanger Institute for the COVID-19 Genomics UK (COG-UK) consortium|Davies|United Kingdom

>Spike|hCoV-19/England/20149034604/2020|2020-04-03|EPI\_ISL\_466185|Original|hCoV-19^^England|Human|Respiratory Virus Unit|Respiratory Virus Unit|Platt|United Kingdom

>Spike|hCoV-19/USA/UT-08360/2020|2020-05-13|EPI\_ISL\_524143|Original|hCoV-19^^Utah|Human|Utah Public Health Laboratory|Utah Public Health Laboratory|Young|USA

>Spike|hCoV-19/Denmark/DCGC-8883/2020|2020-10-26|EPI\_ISL\_626140|Original|hCoV-19^^Nordjylland|Human|Department of Virus and Microbiological Special Diagnostics|Albertsen lab|Michaelsen|Denmark

>Spike|hCoV-19/Wales/PHWC-16042F/2020|2020-05-21|EPI\_ISL\_472932|Original|hCoV-19^^Wales|Human|Wales Specialist Virology Centre Sequencing lab|COVID-19 Genomics UK (COG-UK) Consortium|Moore|United Kingdom

>Spike|hCoV-19/England/ALDP-94CDAE/2020|2020-06-15|EPI\_ISL\_555883|Original|hCoV-19^^England|Human|Lighthouse Lab in Alderley Park|Wellcome Sanger Institute for the COVID-19 Genomics UK (COG-UK) consortium|Davies|United Kingdom

>Spike|hCoV-19/England/MILK-BAB41F/2020|2020-11-18|EPI\_ISL\_783120|Original|hCoV-19^^England|Human|Lighthouse Lab in Milton Keynes|Wellcome Sanger Institute for the COVID-19 Genomics UK (COG-UK) Consortium|Davies|United Kingdom

>Spike|hCoV-19/USA/TX-HMH-6400/2020|2020-07-06|EPI\_ISL\_545972|Original|hCoV-19^^Texas|Human|Houston Methodist Hospital|Houston Methodist Hospital|Long|USA

>Spike|hCoV-19/Denmark/DCGC-14586/2020|2020-11-23|EPI\_ISL\_711857|Original|hCoV-19^^Hovedstaden|Human|Department of Virus and Microbiological Special Diagnostics|Albertsen Lab|Michaelsen|Denmark

>Spike|hCoV-19/England/ALDP-A68B1A/2020|2020-10-12|EPI\_ISL\_609104|Original|hCoV-19^^England|Human|Lighthouse Lab in Alderley Park|Wellcome Sanger Institute for the COVID-19 Genomics UK (COG-UK) consortium|Davies|United Kingdom

>Spike|hCoV-19/Luxembourg/LNS8566339/2020|2020-12-23|EPI\_ISL\_771067|Original|hCoV-19^^Luxembourg|Human|Laboratoire national de sant\u00e9|Laboratoire national de sant\u00e9|Wienecke-Baldacchino|Luxembourg

>Spike|hCoV-19/England/MILK-CA41A5/2020|2020-12-16|EPI\_ISL\_762326|Original|hCoV-19^^England|Human|Lighthouse Lab in Milton Keynes|Wellcome Sanger Institute for the COVID-19 Genomics UK (COG-UK) Consortium|Davies|United Kingdom

>Spike|hCoV-19/Wales/PHWC-4A1656/2020|2020-12-10|EPI\_ISL\_743705|Original|hCoV-19^^Wales|Human|Wales Specialist Virology Centre Sequencing lab|COVID-19 Genomics UK (COG-UK) Consortium|Moore|United Kingdom

>Spike|hCoV-19/Brazil/RJ-3021/2020|2020-04-30|EPI\_ISL\_541369|Original|hCoV-19^^Rio de Janeiro|Human|Laboratory of Respiratory Viruses and Measles|Laboratory of Respiratory Viruses and Measles|Silva|Brazil

>Spike|hCoV-19/USA/HI-H200402/2020|2020-09-23|EPI\_ISL\_752947|Original|hCoV-19^^Hawaii|Human|State Laboratories Division|State Laboratories Division|Sultana|USA

>Spike|hCoV-19/USA/WA-S1767/2020|2020-06-01|EPI\_ISL\_496193|Original|hCoV-19^^Washington|Human|Washington State Department of Health|Seattle Flu Study|Lee|USA

>Spike|hCoV-19/Canada/ON-S908/2020|2020-04-13|EPI\_ISL\_591258|Original|hCoV-19^^Ontario|Human|Toronto Invasive Bacterial Diseases Network|McMaster University|McArthur|Canada

>Spike|hCoV-19/Sweden/20-52652/2020|2020-05-25|EPI\_ISL\_660416|Original|hCoV-19^^Orebro|Human|Klinisk mikrobiologi|The Public Health Agency of Sweden|Svartstr\u00f6m|Sweden

>Spike|hCoV-19/England/ALDP-A682AC/2020|2020-10-12|EPI\_ISL\_609057|Original|hCoV-19^^England|Human|Lighthouse Lab in Alderley Park|Wellcome Sanger Institute for the COVID-19 Genomics UK (COG-UK) consortium|Davies|United Kingdom

>Spike|hCoV-19/England/SHEF-CD175/2020|2020-07-03|EPI\_ISL\_526444|Original|hCoV-19^^England|Human|Virology Department|COVID-19 Genomics UK (COG-UK) Consortium|de Silva|United Kingdom

>Spike|hCoV-19/Luxembourg/LNS5279966/2020|2020-11-13|EPI\_ISL\_744212|Original|hCoV-19^^Luxembourg|Human|Laboratoire national de sant\u00e9|Laboratoire national de sant\u00e9|Wienecke-Baldacchino|Luxembourg

>Spike|hCoV-19/USA/CA-CZB-13895/2020|2020-08-10|EPI\_ISL\_738800|Original|hCoV-19^^California|Human|Alameda County Public Health Lab|Chan-Zuckerberg Biohub|Kamm|USA

>Spike|hCoV-19/Netherlands/NB-RIVM-20550/2020|2020-12-15|EPI\_ISL\_790637|Original|hCoV-19^^Noord-Brabant|Human|Dutch COVID-19 response team|National Institute for Public Health and the Environment (RIVM)|Meijer|Netherlands

>Spike|hCoV-19/England/EXET-138912/2020|2020-10-05|EPI\_ISL\_626944|Original|hCoV-19^^England|Human|University of Exeter|COVID-19 Genomics UK (COG-UK) Consortium|Temperton|United Kingdom

>Spike|hCoV-19/England/ALDP-5A6A63/2020|2020-06-13|EPI\_ISL\_558650|Original|hCoV-19^^England|Human|Lighthouse Lab in Alderley Park|Wellcome Sanger Institute for the COVID-19 Genomics UK (COG-UK) consortium|Davies|United Kingdom

>Spike|hCoV-19/USA/MI-MDHHS-SC20153/2020|2020-03-21|EPI\_ISL\_436830|Original|hCoV-19^^Michigan|Human|Michigan Department of Health and Human Services|Michigan Department of Health and Human Services|Blankenship|USA

>Spike|hCoV-19/Switzerland/BE-ETHZ-100059/2020|2020-03-12|EPI\_ISL\_466981|Original|hCoV-19^^Bern|Human|Viollier AG|Department of Biosystems Science and Engineering|Nadeau|Switzerland

>Spike|hCoV-19/USA/MN-MDH-1404/2020|2020-06-25|EPI\_ISL\_514623|Original|hCoV-19^^Minnesota|Human|Mayo Clinic & Mayo Clinic Laboratories|Minnesota Department of Health|Garfin|USA

>Spike|hCoV-19/Denmark/DCGC-3712/2020|2020-08-31|EPI\_ISL\_615490|Original|hCoV-19^^Syddanmark|Human|Department of Virus and Microbiological Special Diagnostics|Albertsen lab|Michaelsen|Denmark

>Spike|hCoV-19/Japan/PG-2720/2020|2020-03-00|EPI\_ISL\_690852|Original|hCoV-19^^Japan|Human|Pathogen Genomics Center|Pathogen Genomics Center|Sekizuka|Japan

>Spike|hCoV-19/England/CAMB-7E331/2020|2020-04-16|EPI\_ISL\_433472|Original|hCoV-19^^England|Human|Department of Pathology|COVID-19 Genomics UK (COG-UK) Consortium|Meredith|United Kingdom

>Spike|hCoV-19/England/QEUEH-9CE57F/2020|2020-09-12|EPI\_ISL\_590057|Original|hCoV-19^^England|Human|Lighthouse Lab in Glasgow|Wellcome Sanger Institute for the COVID-19 Genomics UK (COG-UK) consortium|Davies|United Kingdom

>Spike|hCoV-19/Wales/PHWC-32AF8/2020|2020-04-14|EPI\_ISL\_474396|Original|hCoV-19^^Wales|Human|Originating lab|COVID-19 Genomics UK (COG-UK) Consortium|Moore|United Kingdom

>Spike|hCoV-19/Belgium/ULG-10296/2020|2020-07-24|EPI\_ISL\_540463|Original|hCoV-19^^Anvers|Human|University of Li\u00e8ge COVID-19 testing center|GIGA Medical Genomics|Durkin|Belgium

>Spike|hCoV-19/England/MILK-AC7320/2020|2020-10-22|EPI\_ISL\_630342|Original|hCoV-19^^England|Human|Lighthouse Lab in Milton Keynes|Wellcome Sanger Institute for the COVID-19 Genomics UK (COG-UK) consortium|Davies|United Kingdom

>Spike|hCoV-19/USA/CA-CZB-14209/2020|2020-11-10|EPI\_ISL\_739156|Original|hCoV-19^^California|Human|Orange County Public Health Lab|Chan-Zuckerberg Biohub|Kamm|USA

>Spike|hCoV-19/Wales/PHWC-27EAF/2020|2020-03-24|EPI\_ISL\_431971|Original|hCoV-19^^Wales|Human|Wales Specialist Virology Centre|Public Health Wales Microbiology Cardiff|Moore|United Kingdom

>Spike|hCoV-19/USA/DE-DHSS-F1018204/2020|2020-11-04|EPI\_ISL\_708439|Original|hCoV-19^^Delaware|Human|Delaware Public Health Lab|Delaware Public Health Lab|Bajwa|USA

>Spike|hCoV-19/England/BRIS-125040/2020|2020-03-26|EPI\_ISL\_443704|Original|hCoV-19^^England|Human|PHE South West Regional Laboratory|Wellcome Sanger Institute for the COVID-19 Genomics UK (COG-UK) consortium|Amato|United Kingdom

>Spike|hCoV-19/USA/CA-IGI-0208/2020|2020-07-10|EPI\_ISL\_569935|Original|hCoV-19^^California|Human|Innovative Genomics Institute|Innovative Genomics Institute|Wyman|USA

>Spike|hCoV-19/USA/CA-ALSR-3316/2020|2020-09-22|EPI\_ISL\_635958|Original|hCoV-19^^California|Human|San Diego County Public Health Laboratory|Andersen lab at Scripps Research|Gangavarapu|USA

>Spike|hCoV-19/Wales/PHWC-1695D8/2020|2020-07-25|EPI\_ISL\_512483|Original|hCoV-19^^Wales|Human|Wales Specialist Virology Centre Sequencing lab|COVID-19 Genomics UK (COG-UK) Consortium|Moore|United Kingdom

>Spike|hCoV-19/England/NORT-29EDD1/2020|2020-05-11|EPI\_ISL\_490485|Original|hCoV-19^^England|Human|Northumbria University / South Tees Hospitals NHS Foundation Trust / North Cumbria Integrated Care NHS Foundation Trust / North Tees and Hartlepool NHS Foundation Trust / Newcastle Hospitals NHS Foundation Trust|COVID-19 Genomics UK (COG-UK) Consortium|Bashton|United Kingdom

>Spike|hCoV-19/USA/TX-HMH-1103/2020|2020-04-18|EPI\_ISL\_542532|Original|hCoV-19^^Texas|Human|Houston Methodist Hospital|Houston Methodist Hospital|Long|USA

>Spike|hCoV-19/USA/AZ-TG351979/2020|2020-05-26|EPI\_ISL\_694411|Original|hCoV-19^^Arizona|Human|AZ SPHL|TGen North|French|USA

>Spike|hCoV-19/South Africa/KRISP-K002226/2020|2020-07-21|EPI\_ISL\_515622|Original|hCoV-19^^KwaZulu-Natal|Human|NHLs-IALCH|KRISP|de Oliveira|South Africa

>Spike|hCoV-19/Sweden/20-52440/2020|2020-07-22|EPI\_ISL\_539884|Original|hCoV-19^^Vastra Gotaland|Human|Omtanken Grimmered|The Public Health Agency of Sweden|Svartstr\u00f6m|Sweden

>Spike|hCoV-19/Scotland/CVR2164/2020|2020-04-11|EPI\_ISL\_484565|Original|hCoV-19^^Scotland|Human|West of Scotland Specialist Virology Centre|COVID-19 Genomics UK (COG-UK) Consortium|Robertson|United Kingdom

>Spike|hCoV-19/England/LOND-12F1BB1/2020|2020-12-17|EPI\_ISL\_763491|Original|hCoV-19^^England|Human|University College London|COVID-19 Genomics UK (COG-UK) Consortium|Roy|United Kingdom

>Spike|hCoV-19/Netherlands/DR-RIVM-20423/2020|2020-11-30|EPI\_ISL\_728643|Original|hCoV-19^^Drenthe|Human|Dutch COVID-19 response team|National Institute for Public Health and the Environment (RIVM)|Meijer|Netherlands

>Spike|hCoV-19/USA/WA-UW-23196/2020|2020-08-06|EPI\_ISL\_570755|Original|hCoV-19^^Washington|Human|UW Virology Lab|UW Virology Lab|Roychoudhury|USA

>Spike|hCoV-19/Scotland/CVR6103/2020|2020-12-03|EPI\_ISL\_705253|Original|hCoV-19^^Scotland|Human|West of Scotland Specialist Virology Centre|COVID-19 Genomics UK (COG-UK) Consortium|Robertson|United Kingdom

>Spike|hCoV-19/Hong Kong/HKPU-1296/2020|2020-07-07|EPI\_ISL\_610185|Original|hCoV-19^^Hong Kong|Human|Department of Health Technology and Informatics|Department of Health Technology and Informatics|Leung|China

>Spike|hCoV-19/USA/TX-HMH-6480/2020|2020-06-27|EPI\_ISL\_546026|Original|hCoV-19^^Texas|Human|Houston Methodist Hospital|Houston Methodist Hospital|Long|USA

>Spike|hCoV-19/Spain/AR-ISCI-201778/2020|2020-03-08|EPI\_ISL\_578192|Original|hCoV-19^^Aragon|Human|Hospital Universitario Miguel Servet|Instituto de Salud Carlos III|Caballero|Spain

>Spike|hCoV-19/Chile/RM-146538/2020|2020-08-10|EPI\_ISL\_746646|Original|hCoV-19^^Region Metropolitana de Santiago|Human|Genetica Molecular and Subdepartamento de Virologia ISP Chile|Instituto de Salud Publica de Chile|Tognarelli|Chile

>Spike|hCoV-19/USA/CA-ALSR-0935-SAN/2020|2020-03-29|EPI\_ISL\_483424|Original|hCoV-19^^California|Human|UC San Diego Center for Advanced Laboratory Medicine|Andersen lab at Scripps Research|Gangavarapu|USA

>Spike|hCoV-19/England/ALDP-95AEC8/2020|2020-06-10|EPI\_ISL\_555582|Original|hCoV-19^^England|Human|Lighthouse Lab in Alderley Park|Wellcome Sanger Institute for the COVID-19 Genomics UK (COG-UK) consortium|Davies|United Kingdom

>Spike|hCoV-19/England/CAMC-B54970/2020|2020-11-09|EPI\_ISL\_658207|Original|hCoV-19^^England|Human|Lighthouse Lab in Cambridge|Wellcome Sanger Institute for the COVID-19 Genomics UK (COG-UK) Consortium|Davies|United Kingdom

>Spike|hCoV-19/England/ALDP-B85B8F/2020|2020-11-14|EPI\_ISL\_675617|Original|hCoV-19^^England|Human|Lighthouse Lab in Alderley Park|Wellcome Sanger Institute for the COVID-19 Genomics UK (COG-UK) Consortium|Davies|United Kingdom

>Spike|hCoV-19/Australia/SAP519/2020|2020-10-24|EPI\_ISL\_603124|Original|hCoV-19^^South Australia|Human|SA Pathology|SA Pathology|Leong|Australia

>Spike|hCoV-19/USA/TX-HMH-MCoV-9436/2020|2020-07-03|EPI\_ISL\_781122|Original|hCoV-19^^Texas|Human|Houston Methodist Hospital|Houston Methodist Hospital|Long|USA

>Spike|hCoV-19/England/MILK-BAAE8B/2020|2020-11-18|EPI\_ISL\_783101|Original|hCoV-19^^England|Human|Lighthouse Lab in Milton Keynes|Wellcome Sanger Institute for the COVID-19 Genomics UK (COG-UK) Consortium|Davies|United Kingdom

>Spike|hCoV-19/England/CAMC-B98819/2020|2020-11-15|EPI\_ISL\_673625|Original|hCoV-19^^England|Human|Lighthouse Lab in Cambridge|Wellcome Sanger Institute for the COVID-19 Genomics UK (COG-UK) Consortium|Davies|United Kingdom

>Spike|hCoV-19/USA/WI-CDC-6233/2020|2020-03-26|EPI\_ISL\_576182|Original|hCoV-19^^Wisconsin|Human|WI State Laboratory of Hygiene|Pathogen Discovery|Queen|USA

>Spike|hCoV-19/USA/MI-QDX-571/2020|2020-03-19|EPI\_ISL\_571323|Original|hCoV-19^^Michigan|Human|Quest Diagnostics|Quest Diagnostics|Kagan|USA

>Spike|hCoV-19/England/QEUEH-A1EBD7/2020|2020-09-29|EPI\_ISL\_587490|Original|hCoV-19^^England|Human|Lighthouse Lab in Glasgow|Wellcome Sanger Institute for the COVID-19 Genomics UK (COG-UK) consortium|Davies|United Kingdom

>Spike|hCoV-19/USA/OR-OHSU-1809/2020|2020-07-27|EPI\_ISL\_526033|Original|hCoV-19^^Oregon|Human|OHSU Lab Services Molecular Microbiology Lab|Oregon SARS-CoV-2 Genome Sequencing Center|O'Roak|USA

>Spike|hCoV-19/England/203590010/2020|2020-08-27|EPI\_ISL\_566073|Original|hCoV-19^^England|Human|Respiratory Virus Unit|Respiratory Virus Unit|Platt|United Kingdom

>Spike|hCoV-19/England/QEUEH-964432/2020|2020-08-11|EPI\_ISL\_536828|Original|hCoV-19^^England|Human|Lighthouse Lab in Glasgow|Wellcome Sanger Institute for the COVID-19 Genomics UK (COG-UK) consortium|Davies|United Kingdom

>Spike|hCoV-19/USA/NY-Wadsworth-159719-01/2020|2020-07-01|EPI\_ISL\_676987|Original|hCoV-19^^New York|Human|Wadsworth Center|Wadsworth Center|Lasek-Nesselquist|USA

>Spike|hCoV-19/Australia/VIC2301/2020|2020-06-25|EPI\_ISL\_522022|Original|hCoV-19^^Victoria|Human|Microbiological Diagnostic Unit - Public Health Laboratory (MDU-PHL)|MDU-PHL|Schultz|Australia

>Spike|hCoV-19/England/CAMC-B33F84/2020|2020-11-05|EPI\_ISL\_659374|Original|hCoV-19^^England|Human|Lighthouse Lab in Cambridge|Wellcome Sanger Institute for the COVID-19 Genomics UK (COG-UK) Consortium|Davies|United Kingdom

>Spike|hCoV-19/Brazil/RJ-1798/2020|2020-04-06|EPI\_ISL\_541348|Original|hCoV-19^^Rio de Janeiro|Human|Laboratory of Respiratory Viruses and Measles|Laboratory of Respiratory Viruses and Measles|Silva|Brazil

>Spike|hCoV-19/Mexico/NLE-INDRE-59/2020|2020-08-14|EPI\_ISL\_576262|Original|hCoV-19^^Nuevo Leon|Human|Instituto de Diagnostico y Referencia Epidemiologicos (INDRE)|Instituto de Diagnostico y Referencia Epidemiologicos (INDRE)|Rodriguez|Mexico

>Spike|hCoV-19/Australia/VIC6380/2020|2020-07-24|EPI\_ISL\_521172|Original|hCoV-19^^Victoria|Human|Microbiological Diagnostic Unit - Public Health Laboratory (MDU-PHL)|MDU-PHL|Schultz|Australia

>Spike|hCoV-19/Wales/PHWC-31F27/2020|2020-04-07|EPI\_ISL\_446586|Original|hCoV-19^^Wales|Human|Wales Specialist Virology Centre|Public Health Wales Microbiology Cardiff|Moore|United Kingdom

>Spike|hCoV-19/Canada/BC-BCCDC-6444/2020|2020-10-00|EPI\_ISL\_740594|Original|hCoV-19^^British Columbia|Human|BCCDC Public Health Laboratory|BCCDC Public Health Laboratory|Prystajecky|Canada

>Spike|hCoV-19/England/CAMB-7DB3A/2020|2020-04-06|EPI\_ISL\_441727|Original|hCoV-19^^England|Human|Department of Pathology|Wellcome Sanger Institute for the COVID-19 Genomics UK (COG-UK) consortium|Amato|United Kingdom

>Spike|hCoV-19/Belgium/reg-12111325/2020|2020-12-11|EPI\_ISL\_738378|Original|hCoV-19^^Mol|Human|UZ Leuven|KU Leuven|Maes|Belgium

>Spike|hCoV-19/Scotland/CVR5962/2020|2020-11-24|EPI\_ISL\_705699|Original|hCoV-19^^Scotland|Human|West of Scotland Specialist Virology Centre|COVID-19 Genomics UK (COG-UK) Consortium|Robertson|United Kingdom

>Spike|hCoV-19/USA/CA-CZB-11179/2020|2020-09-15|EPI\_ISL\_625534|Original|hCoV-19^^California|Human|Alameda County Public Health Lab|Chan-Zuckerberg Biohub|Bhatt|USA

>Spike|hCoV-19/Canada/NS-NML-910/2020|2020-03-22|EPI\_ISL\_579559|Original|hCoV-19^^Nova Scotia|Human|QEII Health Sciences Centre|National Microbiology Laboratory (NML)|Majer|Canada

>Spike|hCoV-19/USA/CA-SEARCH-5554/2020|2020-11-18|EPI\_ISL\_755290|Original|hCoV-19^^California|Human|San Diego County Public Health Laboratory|Andersen lab at Scripps Research|Gangavarapu|USA

>Spike|hCoV-19/Crimea/RII-MH9362S/2020|2020-10-14|EPI\_ISL\_733452|Original|hCoV-19^^Novofedorovka|Human|HELIX LLC|WHO National Influenza Centre Russian Federation|Komissarov|Crimea

>Spike|hCoV-19/England/ALDP-A2D4BC/2020|2020-10-06|EPI\_ISL\_586771|Original|hCoV-19^^England|Human|Lighthouse Lab in Alderley Park|Wellcome Sanger Institute for the COVID-19 Genomics UK (COG-UK) consortium|Davies|United Kingdom

>Spike|hCoV-19/Switzerland/BL-ETHZ-310483/2020|2020-10-08|EPI\_ISL\_603553|Original|hCoV-19^^Basel-Landschaft|Human|Viollier AG|Department of Biosystems Science and Engineering|Nadeau|Switzerland

>Spike|hCoV-19/Scotland/CVR4331/2020|2020-09-09|EPI\_ISL\_573777|Original|hCoV-19^^Scotland|Human|West of Scotland Specialist Virology Centre|COVID-19 Genomics UK (COG-UK) Consortium|Robertson|United Kingdom

>Spike|hCoV-19/Denmark/DCGC-17711/2020|2020-12-14|EPI\_ISL\_751161|Original|hCoV-19^^Midtjylland|Human|Department of Virus and Microbiological Special Diagnostics|Albertsen Lab|Michaelsen|Denmark

>Spike|hCoV-19/USA/CA-ALSR-2892/2020|2020-07-11|EPI\_ISL\_635725|Original|hCoV-19^^California|Human|San Diego County Public Health Laboratory|Andersen lab at Scripps Research|Gangavarapu|USA

>Spike|hCoV-19/Denmark/DCGC-18426/2020|2020-12-07|EPI\_ISL\_749958|Original|hCoV-19^^Hovedstaden|Human|Department of Virus and Microbiological Special Diagnostics|Albertsen Lab|Michaelsen|Denmark

>Spike|hCoV-19/Denmark/DCGC-20432/2020|2020-12-21|EPI\_ISL\_759143|Original|hCoV-19^^Hovedstaden|Human|Department of Virus and Microbiological Special Diagnostics|Albertsen Lab|Michaelsen|Denmark

>Spike|hCoV-19/England/ALDP-B1B571/2020|2020-11-01|EPI\_ISL\_645801|Original|hCoV-19^^England|Human|Lighthouse Lab in Alderley Park|Wellcome Sanger Institute for the COVID-19 Genomics UK (COG-UK) Consortium|Davies|United Kingdom

>Spike|hCoV-19/Luxembourg/LNS9326809/2020|2020-11-20|EPI\_ISL\_744884|Original|hCoV-19^^Luxembourg|Human|Laboratoire national de sant\u00e9|Laboratoire national de sant\u00e9|Wienecke-Baldacchino|Luxembourg

>Spike|hCoV-19/England/QEUIH-95DD31/2020|2020-08-07|EPI\_ISL\_537090|Original|hCoV-19^^England|Human|Lighthouse Lab in Glasgow|Wellcome Sanger Institute for the COVID-19 Genomics UK (COG-UK) consortium|Davies|United Kingdom

>Spike|hCoV-19/USA/WI-UW-192/2020|2020-03-23|EPI\_ISL\_428288|Original|hCoV-19^^Wisconsin|Human|University of Wisconsin-Madison AIDS Vaccine Research Laboratories|University of Wisconsin-Madison AIDS Vaccine Research Laboratories|Moreno|USA

>Spike|hCoV-19/USA/CT-Yale-270/2020|2020-04-02|EPI\_ISL\_469194|Original|hCoV-19^^Connecticut|Human|Yale Clinical Virology Laboratory|Grubaugh Lab - Yale School of Public Health|Grubaugh|USA

>Spike|hCoV-19/England/NORT-287FE4/2020|2020-11-16|EPI\_ISL\_725008|Original|hCoV-19^^England|Human|Northumbria University / South Tees Hospitals NHS Foundation Trust / North Cumbria Integrated Care NHS Foundation Trust / North Tees and Hartlepool NHS Foundation Trust / Newcastle Hospitals NHS Foundation Trust|COVID-19 Genomics UK (COG-UK) Consortium|Bashton|United Kingdom



>Spike|hCoV-19/USA/TX-HMH-2168/2020|2020-05-22|EPI\_ISL\_545157|Original|hCoV-19^^Texas|Human|Houston Methodist Hospital|Houston Methodist Hospital|Long|USA

>Spike|hCoV-19/England/NORT-1B71DC9/2020|2020-11-19|EPI\_ISL\_706322|Original|hCoV-19^^England|Human|Northumbria University / South Tees Hospitals NHS Foundation Trust / North Cumbria Integrated Care NHS Foundation Trust / North Tees and Hartlepool NHS Foundation Trust / Newcastle Hospitals NHS Foundation Trust|COVID-19 Genomics UK (COG-UK) Consortium|Bashton|United Kingdom

>Spike|hCoV-19/Canada/ON-S1276/2020|2020-04-28|EPI\_ISL\_586327|Original|hCoV-19^^Ontario|Human|Toronto Invasive Bacterial Diseases Network|McMaster University|McArthur|Canada

>Spike|hCoV-19/Russia/CRIE7249896/2020|2020-08-25|EPI\_ISL\_610244|Original|hCoV-19^^Moscow|Human|Molecular diagnostic laboratory of Federal Budget Institution of Science \Central Research Institute of Epidemiology\ of The Federal Service on Customers' Rights Protection and Human Well-being Surveillance|Group of Genomics and Postgenomic Technologies of Central Research Institute of Epidemiology|Samoilov|Russia

>Spike|hCoV-19/England/QEUEH-B6B062/2020|2020-11-11|EPI\_ISL\_662566|Original|hCoV-19^^England|Human|Lighthouse Lab in Glasgow|Wellcome Sanger Institute for the COVID-19 Genomics UK (COG-UK) Consortium|Davies|United Kingdom

>Spike|hCoV-19/India/MP-NCDC-3961/2020|2020-04-09|EPI\_ISL\_436443|Original|hCoV-19^^Madhya Pradesh|Human|National Centre for Disease control (NCDC)|NCDC/CSIR-IGIB|Singh|India

>Spike|hCoV-19/USA/SC-20-1273-T07/2020|2020-06-30|EPI\_ISL\_516753|Original|hCoV-19^^South Carolina|Human|van Bakel Laboratory|van Bakel Laboratory|van Bakel|USA

>Spike|hCoV-19/Wales/PHWC-4946FC/2020|2020-11-20|EPI\_ISL\_726158|Original|hCoV-19^^Wales|Human|Originating lab|COVID-19 Genomics UK (COG-UK) Consortium|Moore|United Kingdom

>Spike|hCoV-19/Scotland/EDB9298/2020|2020-11-05|EPI\_ISL\_666072|Original|hCoV-19^^Scotland|Human|Virology Department|COVID-19 Genomics UK (COG-UK) Consortium|McHugh|United Kingdom

>Spike|hCoV-19/Denmark/DCGC-5907/2020|2020-10-05|EPI\_ISL\_620172|Original|hCoV-19^^Hovedstaden|Human|Department of Virus and Microbiological Special Diagnostics|Albertsen lab|Michaelsen|Denmark

>Spike|hCoV-19/Wales/PHWC-164A47/2020|2020-06-08|EPI\_ISL\_479338|Original|hCoV-19^^Wales|Human|Wales Specialist Virology Centre Sequencing lab|COVID-19 Genomics UK (COG-UK) Consortium|Moore|United Kingdom

>Spike|hCoV-19/Wales/PHWC-243EF/2020|2020-03-16|EPI\_ISL\_419407|Original|hCoV-19^^Wales|Human|Wales Specialist Virology Centre|Public Health Wales Microbiology Cardiff|Moore|United Kingdom

>Spike|hCoV-19/Japan/PG-0789/2020|2020-04-00|EPI\_ISL\_684399|Original|hCoV-19^^Japan|Human|Pathogen Genomics Center|Pathogen Genomics Center|Sekizuka|Japan

>Spike|hCoV-19/USA/CA-CZB-3352/2020|2020-07-13|EPI\_ISL\_548285|Original|hCoV-19^^California|Human|Orange County Public Health Laboratory|Chan-Zuckerberg Biohub|Bhatt|USA

>Spike|hCoV-19/England/ALDP-C48B78/2020|2020-12-12|EPI\_ISL\_736511|Original|hCoV-19^^England|Human|Lighthouse Lab in Alderley Park|Wellcome Sanger Institute for the COVID-19 Genomics UK (COG-UK) Consortium|Davies|United Kingdom

>Spike|hCoV-19/USA/MI-QDX-455/2020|2020-03-21|EPI\_ISL\_571190|Original|hCoV-19^^Michigan|Human|Quest Diagnostics|Quest Diagnostics|Kagan|USA

>Spike|hCoV-19/USA/CA-CZB-3737/2020|2020-07-22|EPI\_ISL\_548460|Original|hCoV-19^^California|Human|Orange County Public Health Laboratory|Chan-Zuckerberg Biohub|Bhatt|USA

>Spike|hCoV-19/England/ALDP-9D7E2D/2020|2020-09-17|EPI\_ISL\_576634|Original|hCoV-19^^England|Human|Oxford Viromics|COVID-19 Genomics UK (COG-UK) Consortium|Golubchik|United Kingdom

>Spike|hCoV-19/Canada/BC\_8896915/2020|2020-03-11|EPI\_ISL\_418854|Original|hCoV-19^^British Columbia|Human|BCCDC Public Health Laboratory|BCCDC Public Health Laboratory|Harrigan|Canada

>Spike|hCoV-19/Japan/PG-1719/2020|2020-04-00|EPI\_ISL\_685325|Original|hCoV-19^^Japan|Human|Pathogen Genomics Center|Pathogen Genomics Center|Sekizuka|Japan

>Spike|hCoV-19/USA/TX-HMH-3372/2020|2020-06-13|EPI\_ISL\_544156|Original|hCoV-19^^Texas|Human|Houston Methodist Hospital|Houston Methodist Hospital|Long|USA

>Spike|hCoV-19/England/LOND-126032E/2020|2020-03-15|EPI\_ISL\_524669|Original|hCoV-19^^England|Human|North West London Pathology|Wellcome Sanger Institute for the COVID-19 Genomics UK (COG-UK) consortium|Davies|United Kingdom

>Spike|hCoV-19/Denmark/DCGC-5323/2020|2020-09-14|EPI\_ISL\_615254|Original|hCoV-19^^Syddanmark|Human|Department of Virus and Microbiological Special Diagnostics|Albertsen lab|Michaelsen|Denmark

>Spike|hCoV-19/South Africa/KRISP-K000628/2020|2020-07-12|EPI\_ISL\_509279|Original|hCoV-19^^KwaZulu-Natal|Human|NHL5-IALCH|KRISP|de Oliveira|South Africa

>Spike|hCoV-19/Australia/VIC11759/2020|2020-07-17|EPI\_ISL\_563488|Original|hCoV-19^^Victoria|Human|Microbiological Diagnostic Unit - Public Health Laboratory (MDU-PHL)|MDU-PHL|Schultz|Australia

>Spike|hCoV-19/USA/CA-CZB-13867/2020|2020-08-20|EPI\_ISL\_739472|Original|hCoV-19^^California|Human|Alameda County Public Health Lab|Chan-Zuckerberg Biohub|Kamm|USA

>Spike|hCoV-19/Northern Ireland/NIRE-108B06/2020|2020-10-09|EPI\_ISL\_627536|Original|hCoV-19^^Northern Ireland|Human|Regional Virus Laboratory|COVID-19 Genomics UK (COG-UK) Consortium|Fairley|United Kingdom

>Spike|hCoV-19/Denmark/DCGC-13062/2020|2020-11-30|EPI\_ISL\_712561|Original|hCoV-19^^Hovedstaden|Human|Department of Virus and Microbiological Special Diagnostics|Albertsen Lab|Michaelsen|Denmark

>Spike|hCoV-19/USA/TX-HMH-7025/2020|2020-06-28|EPI\_ISL\_546444|Original|hCoV-19^^Texas|Human|Houston Methodist Hospital|Houston Methodist Hospital|Long|USA

>Spike|hCoV-19/USA/MD-HP00154/2020|2020-03-29|EPI\_ISL\_457783|Original|hCoV-19^^Maryland|Human|Johns Hopkins Hospital Department of Pathology|Johns Hopkins Hospital Department of Pathology|Ramakrishnan|USA

>Spike|hCoV-19/South Korea/KDCA0459/2020|2020-11-17|EPI\_ISL\_760243|Original|hCoV-19^^South Korea|Human|Division of Emerging Infectious Diseases|Division of Emerging Infectious Diseases|Park|South Korea

>Spike|hCoV-19/Guangzhou/GZMU0045/2020|2020-02-08|EPI\_ISL\_429092|Original|hCoV-19^^Guangzhou|Human|The First Affiliated Hospital of Guangzhou Medical University|BGI-shenzhen & The First Affiliated Hospital of Guangzhou Medical University|Ji|China

>Spike|hCoV-19/England/CAMC-9EC317/2020|2020-09-23|EPI\_ISL\_580579|Original|hCoV-19^^England|Human|Lighthouse Lab in Cambridge|Wellcome Sanger Institute for the COVID-19 Genomics UK (COG-UK) consortium|Davies|United Kingdom

>Spike|hCoV-19/USA/TX-HMH-MCoV-14567/2020|2020-10-09|EPI\_ISL\_787852|Original|hCoV-19^^Texas|Human|Houston Methodist Hospital|Houston Methodist Hospital|Long|USA

>Spike|hCoV-19/Australia/VIC13365/2020|2020-07-28|EPI\_ISL\_563693|Original|hCoV-19^^Victoria|Human|Microbiological Diagnostic Unit - Public Health Laboratory (MDU-PHL)|MDU-PHL|Schultz|Australia

>Spike|hCoV-19/USA/WA-S73/2020|2020-03-05|EPI\_ISL\_417126|Original|hCoV-19^^Washington|Human|Washington State Department of Health|Seattle Flu Study|Bedford|USA

>Spike|hCoV-19/Denmark/DCGC-1989/2020|2020-07-20|EPI\_ISL\_618320|Original|hCoV-19^^Hovedstaden|Human|Department of Virus and Microbiological Special Diagnostics|Albertsen lab|Michaelsen|Denmark

>Spike|hCoV-19/Brazil/RS-6187/2020|2020-05-09|EPI\_ISL\_729798|Original|hCoV-19^^Rio Grande do Sul|Human|Laboratorio Central de Saude Publica do Estado do Rio Grande do Sul (LACEN-RS)|Laboratory of Respiratory Viruses and Measles|Silva|Brazil

>Spike|hCoV-19/Spain/AN-IBV-003011/2020|2020-04-01|EPI\_ISL\_474846|Original|hCoV-19^^Andalucia|Human|Hospital Universitario Virgen de las Nieves de Granada-SAS|SeqCOVID-SPAIN consortium|IBV(CSIC)|Comas|Spain

>Spike|hCoV-19/USA/WI-GMF-25355/2020|2020-10-12|EPI\_ISL\_660923|Original|hCoV-19^^Wisconsin|Human|Gundersen Molecular Diagnostics Laboratory|Kabara Cancer Research Institute|Kenny|USA

>Spike|hCoV-19/Northern Ireland/NIRE-101E9B/2020|2020-03-24|EPI\_ISL\_453472|Original|hCoV-19^^Northern Ireland|Human|Regional Virus Laboratory|COVID-19 Genomics UK (COG-UK) Consortium|Fairley|United Kingdom

>Spike|hCoV-19/England/ALDP-AA5416/2020|2020-10-21|EPI\_ISL\_624972|Original|hCoV-19^^England|Human|Lighthouse Lab in Alderley Park|Wellcome Sanger Institute for the COVID-19 Genomics UK (COG-UK) consortium|Davies|United Kingdom

>Spike|hCoV-19/USA/TX-HMH-4240/2020|2020-06-18|EPI\_ISL\_543454|Original|hCoV-19^^Texas|Human|Houston Methodist Hospital|Houston Methodist Hospital|Long|USA

>Spike|hCoV-19/Germany/NW-UBI-45/2020|2020-06-09|EPI\_ISL\_631299|Original|hCoV-19^^North Rhine-Westphalia|Human|MVZ DIAMEDIS Diagnostische Medizin Sennestadt GmbH|Bielefeld University|Brandt|Germany

>Spike|hCoV-19/England/ALDP-C3C746/2020|2020-12-10|EPI\_ISL\_730945|Original|hCoV-19^^England|Human|Lighthouse Lab in Alderley Park|Wellcome Sanger Institute for the COVID-19 Genomics UK (COG-UK) Consortium|Davies|United Kingdom

>Spike|hCoV-19/Belgium/ULG-10472/2020|2020-09-22|EPI\_ISL\_581578|Original|hCoV-19^^Li\u00e8ge|Human|Department of Clinical Microbiology|GIGA Medical Genomics|Durkin|Belgium

>Spike|hCoV-19/USA/WI-UW-1915/2020|2020-10-27|EPI\_ISL\_677324|Original|hCoV-19^^Wisconsin|Human|University of Wisconsin-Madison AIDS Vaccine Research Laboratories|University of Wisconsin-Madison AIDS Vaccine Research Laboratories|Baczenas|USA

>Spike|hCoV-19/Wales/PHWC-163FA3/2020|2020-05-02|EPI\_ISL\_474111|Original|hCoV-19^^Wales|Human|Originating lab|COVID-19 Genomics UK (COG-UK) Consortium|Moore|United Kingdom

>Spike|hCoV-19/England/CAMC-B98EDB/2020|2020-11-15|EPI\_ISL\_673335|Original|hCoV-19^^England|Human|Lighthouse Lab in Cambridge|Wellcome Sanger Institute for the COVID-19 Genomics UK (COG-UK) Consortium|Davies|United Kingdom

>Spike|hCoV-19/England/LOND-124D48E/2020|2020-04-30|EPI\_ISL\_507100|Original|hCoV-19^^England|Human|University College London Hospital|COVID-19 Genomics UK (COG-UK) Consortium|Byott|United Kingdom

>Spike|hCoV-19/England/BRIS-1853AD8/2020|2020-04-17|EPI\_ISL\_492256|Original|hCoV-19^^England|Human|PHE South West Regional Laboratory|Wellcome Sanger Institute for the COVID-19 Genomics UK (COG-UK) consortium|Davies|United Kingdom

>Spike|hCoV-19/England/ALDP-CB444F/2020|2020-12-19|EPI\_ISL\_761747|Original|hCoV-19^^England|Human|Lighthouse Lab in Alderley Park|Wellcome Sanger Institute for the COVID-19 Genomics UK (COG-UK) Consortium|Davies|United Kingdom

>Spike|hCoV-19/Australia/NSW497/2020|2020-04-07|EPI\_ISL\_455037|Original|hCoV-19^^New South Wales|Human|Pathology Sydney South West - NSW Health Pathology|NSW Health Pathology - Institute of Clinical Pathology and Medical Research; Westmead Hospital; University of Sydney|Gall|Australia

>Spike|hCoV-19/USA/LA-EVTL1405/2020|2020-12-11|EPI\_ISL\_779071|Original|hCoV-19^^Louisiana|Human|LSUHS Emerging Viral Threat Laboratory|Microbial Genome Sequencing Center|Kamil|USA

>Spike|hCoV-19/Wales/PHWC-48B6DA/2020|2020-11-05|EPI\_ISL\_666269|Original|hCoV-19^^Wales|Human|Wales Specialist Virology Centre Sequencing lab|COVID-19 Genomics UK (COG-UK) Consortium|Moore|United Kingdom

>Spike|hCoV-19/Mexico/MIC-INDRE-74/2020|2020-08-20|EPI\_ISL\_576277|Original|hCoV-19^^Michoacan|Human|Instituto de Diagnostico y Referencia Epidemiologicos (INDRE)|Instituto de Diagnostico y Referencia Epidemiologicos (INDRE)|Rodriguez|Mexico

>Spike|hCoV-19/Belgium/ULG-10337/2020|2020-07-30|EPI\_ISL\_540504|Original|hCoV-19^^Li\u00e8ge|Human|Department of Clinical Microbiology|GIGA Medical Genomics|Durkin|Belgium

>Spike|hCoV-19/England/CAMC-BD4398/2020|2020-11-27|EPI\_ISL\_702128|Original|hCoV-19^^England|Human|Lighthouse Lab in Cambridge|Wellcome Sanger Institute for the COVID-19 Genomics UK (COG-UK) Consortium|Davies|United Kingdom

>Spike|hCoV-19/USA/CA-CZB-1142/2020|2020-04-03|EPI\_ISL\_447893|Original|hCoV-19^^California|Human|University of California|Chan-Zuckerberg Biohub|Hao|USA

>Spike|hCoV-19/Spain/VC-IBV-98004445/2020|2020-03-24|EPI\_ISL\_583928|Original|hCoV-19^^Comunitat\_Valenciana|Human|Servicio de Microbiolog\u00eda. Hospital General Universitario de Castell\u00f3n|SeqCOVID-SPAIN consortium|IBV(CSIC)|Comas|Spain

>Spike|hCoV-19/Netherlands/NA\_360/2020|2020-03-20|EPI\_ISL\_455164|Original|hCoV-19^^Netherlands|Human|Dutch COVID-19 response team|Erasmus Medical Center|Oude Munnink|Netherlands

>Spike|hCoV-19/USA/UT-UPHL-2012442845/2020|2020-08-12|EPI\_ISL\_745890|Original|hCoV-19^^Utah|Human|Ginkgo Bioworks Clinical Laboratory|Utah Public Health Laboratory|Young|USA

>Spike|hCoV-19/USA/MN-MDH-1398/2020|2020-04-30|EPI\_ISL\_514617|Original|hCoV-19^^Minnesota|Human|Minnesota Department of Health|Minnesota Department of Health|Garfin|USA

>Spike|hCoV-19/Wales/PHWC-4A0E04/2020|2020-12-11|EPI\_ISL\_743582|Original|hCoV-19^^Wales|Human|Wales Specialist Virology Centre Sequencing lab|COVID-19 Genomics UK (COG-UK) Consortium|Moore|United Kingdom

>Spike|hCoV-19/England/LIVE-A8FB2/2020|2020-03-25|EPI\_ISL\_517242|Original|hCoV-19^^England|Human|Liverpool Clinical Laboratories|COVID-19 Genomics UK (COG-UK) Consortium|Haldenby|United Kingdom

>Spike|hCoV-19/England/CAMB-1ACAE9/2020|2020-04-22|EPI\_ISL\_489386|Original|hCoV-19^^England|Human|Department of Pathology|Wellcome Sanger Institute for the COVID-19 Genomics UK (COG-UK) consortium|Davies|United Kingdom

>Spike|hCoV-19/USA/CA-ALSR-4666/2020|2020-11-11|EPI\_ISL\_667066|Original|hCoV-19^^California|Human|San Diego County Public Health Laboratory|Andersen lab at Scripps Research|Gangavarapu|USA

>Spike|hCoV-19/Denmark/DCGC-16070/2020|2020-11-16|EPI\_ISL\_714572|Original|hCoV-19^^Hovedstaden|Human|Department of Virus and Microbiological Special Diagnostics|Albertsen Lab|Michaelsen|Denmark

>Spike|hCoV-19/Denmark/DCGC-10241/2020|2020-11-09|EPI\_ISL\_669853|Original|hCoV-19^^Nordjylland|Human|Department of Virus and Microbiological Special Diagnostics|Albertsen Lab|Michaelsen|Denmark

>Spike|hCoV-19/USA/IL-NM0106/2020|2020-03-20|EPI\_ISL\_444591|Original|hCoV-19^^Illinois|Human|Northwestern Memorial Hospital|Ozer Lab|Ozer|USA

>Spike|hCoV-19/England/EXET-13E67F/2020|2020-00-00|EPI\_ISL\_724341|Original|hCoV-19^^England|Human|University of Exeter|COVID-19 Genomics UK (COG-UK) Consortium|Temperton|United Kingdom

>Spike|hCoV-19/USA/MS-CDC-6570/2020|2020-03-11|EPI\_ISL\_648022|Original|hCoV-19^^Mississippi|Human|MS Public Health Laboratory|Pathogen Discovery|Queen|USA

>Spike|hCoV-19/USA/LA-EVTL337/2020|2020-05-21|EPI\_ISL\_578743|Original|hCoV-19^^Louisiana|Human|LSUHS Emerging Viral Threat Laboratory|Microbial Genome Sequencing Center|Kamil|USA

>Spike|hCoV-19/Australia/VIC4947/2020|2020-07-15|EPI\_ISL\_519320|Original|hCoV-19^^Victoria|Human|Victorian Infectious Diseases Reference Laboratory (VIDRL)|VIDRL and MDU-PHL|Schultz|Australia

>Spike|hCoV-19/France/ARA93756/2020|2020-10-24|EPI\_ISL\_640000|Original|hCoV-19^^Auvergne-Rhone-Alpes|Human|CNR Virus des Infections Respiratoires - France SUD|CNR Virus des Infections Respiratoires - France SUD|Josset|France

>Spike|hCoV-19/England/NORT-29EAF8/2020|2020-05-11|EPI\_ISL\_488067|Original|hCoV-19^^England|Human|NU-OMICS DNA Sequencing research facility|Wellcome Sanger Institute for the COVID-19 Genomics UK (COG-UK) consortium|Davies|United Kingdom

>Spike|hCoV-19/Switzerland/BL-ETHZ-300468/2020|2020-09-30|EPI\_ISL\_603415|Original|hCoV-19^^Basel-Landschaft|Human|Viollier AG|Department of Biosystems Science and Engineering|Nadeau|Switzerland

>Spike|hCoV-19/Switzerland/BE-42342962/2020|2020-07-07|EPI\_ISL\_581879|Original|hCoV-19^^Bern|Human|University Hospital Basel|University Hospital Basel|Roloff Handschin|Switzerland

>Spike|hCoV-19/Scotland/CVR177/2020|2020-03-17|EPI\_ISL\_425717|Original|hCoV-19^^Scotland|Human|West of Scotland Specialist Virology Centre|COVID-19 Genomics UK (COG-UK) Consortium|Robertson|United Kingdom

>Spike|hCoV-19/USA/CA-CZB-1488/2020|2020-03-19|EPI\_ISL\_468438|Original|hCoV-19^^California|Human|Humboldt County Public Health Laboratory|Chan-Zuckerberg Biohub|Hao|USA

>Spike|hCoV-19/USA/MI-MDHHS-SC21128/2020|2020-04-01|EPI\_ISL\_507904|Original|hCoV-19^^Michigan|Human|Michigan Department of Health and Human Services|Michigan Department of Health and Human Services|Blankenship|USA

>Spike|hCoV-19/Scotland/QEUH-A1FBA9/2020|2020-10-01|EPI\_ISL\_599040|Original|hCoV-19^^Scotland|Human|Lighthouse Lab in Glasgow|Wellcome Sanger Institute for the COVID-19 Genomics UK (COG-UK) consortium|Davies|United Kingdom

>Spike|hCoV-19/England/SHEF-C07E9/2020|2020-03-27|EPI\_ISL\_420160|Original|hCoV-19^^England|Human|Virology Department|Department of Infection|de Silva|United Kingdom

>Spike|hCoV-19/Wales/PHWC-1693A1/2020|2020-07-13|EPI\_ISL\_499410|Original|hCoV-19^^Wales|Human|Wales Specialist Virology Centre Sequencing lab|COVID-19 Genomics UK (COG-UK) Consortium|Moore|United Kingdom

>Spike|hCoV-19/USA/TX-HMH-5372/2020|2020-06-24|EPI\_ISL\_544724|Original|hCoV-19^^Texas|Human|Houston Methodist Hospital|Houston Methodist Hospital|Long|USA

>Spike|hCoV-19/Saudi Arabia/KAUST-Madinah249/2020|2020-03-31|EPI\_ISL\_437735|Original|hCoV-19^^Madinah|Human|Pathogen Genomics Lab King Abdullah University of Science and Technology(KAUST)|Pathogen Genomics Lab King Abdullah University of Science and Technology(KAUST)|Mohamed Ghazzali|Saudi Arabia

>Spike|hCoV-19/Australia/VIC16858/2020|2020-08-20|EPI\_ISL\_663610|Original|hCoV-19^^Victoria|Human|Microbiological Diagnostic Unit - Public Health Laboratory (MDU-PHL)|MDU-PHL|Schultz|Australia

>Spike|hCoV-19/England/MILK-BB09EB/2020|2020-11-17|EPI\_ISL\_719990|Original|hCoV-19^^England|Human|Lighthouse Lab in Milton Keynes|Wellcome Sanger Institute for the COVID-19 Genomics UK (COG-UK) Consortium|Davies|United Kingdom

>Spike|hCoV-19/Singapore/493/2020|2020-04-26|EPI\_ISL\_477190|Original|hCoV-19^^Singapore|Human|Department of Laboratory Medicine Tan Tock Seng Hospital|Department of Laboratory Medicine Tan Tock Seng Hospital|Chen|Singapore

>Spike|hCoV-19/England/MILK-C52E45/2020|2020-12-11|EPI\_ISL\_736363|Original|hCoV-19^^England|Human|Lighthouse Lab in Milton Keynes|Wellcome Sanger Institute for the COVID-19 Genomics UK (COG-UK) Consortium|Davies|United Kingdom

>Spike|hCoV-19/Switzerland/VD-ETHZ-100128/2020|2020-03-16|EPI\_ISL\_451712|Original|hCoV-19^^Vaud|Human|Viollier AG|Department of Biosystems Science and Engineering|Nadeau|Switzerland

>Spike|hCoV-19/Switzerland/BS-42206374/2020|2020-03-25|EPI\_ISL\_581749|Original|hCoV-19^^Basel-Stadt|Human|University Hospital Basel|University Hospital Basel|Roloff Handschin|Switzerland

>Spike|hCoV-19/England/NORW-EA94D/2020|2020-05-19|EPI\_ISL\_461876|Original|hCoV-19^^England|Human|Quadram Institute Bioscience|COVID-19 Genomics UK (COG-UK) Consortium|Alikhan|United Kingdom

>Spike|hCoV-19/USA/LA-EVTL056/2020|2020-05-02|EPI\_ISL\_451217|Original|hCoV-19^^Louisiana|Human|LSUHS Emerging Viral Threat Laboratory|Microbial Genome Sequencing Center|Kamil|USA

>Spike|hCoV-19/England/20139062104/2020|2020-03-27|EPI\_ISL\_420738|Original|hCoV-19^^England|Human|Respiratory Virus Unit|Respiratory Virus Unit|Platt|United Kingdom

>Spike|hCoV-19/England/20180031404/2020|2020-04-23|EPI\_ISL\_465435|Original|hCoV-19^^England|Human|Respiratory Virus Unit|Respiratory Virus Unit|Platt|United Kingdom

>Spike|hCoV-19/Canada/BC-BCCDC-8440/2020|2020-11-00|EPI\_ISL\_740802|Original|hCoV-19^^British Columbia|Human|BCCDC Public Health Laboratory|BCCDC Public Health Laboratory|Prystajecky|Canada

>Spike|hCoV-19/USA/MD-HP12053/2020|2020-11-24|EPI\_ISL\_791385|Original|hCoV-19^^Maryland|Human|Johns Hopkins Hospital Department of Pathology|Johns Hopkins Hospital Department of Pathology|Morris|USA

>Spike|hCoV-19/USA/UT-UPHL-2012291116/2020|2020-08-13|EPI\_ISL\_746015|Original|hCoV-19^^Utah|Human|Ginkgo Bioworks Clinical Laboratory|Utah Public Health Laboratory|Young|USA

>Spike|hCoV-19/USA/UT-07024/2020|2020-06-22|EPI\_ISL\_487266|Original|hCoV-19^^Utah|Human|Utah Public Health Laboratory|Utah Public Health Laboratory|Butz|USA

>Spike|hCoV-19/England/CAMC-B99933/2020|2020-11-15|EPI\_ISL\_673853|Original|hCoV-19^^England|Human|Lighthouse Lab in Cambridge|Wellcome Sanger Institute for the COVID-19 Genomics UK (COG-UK) Consortium|Davies|United Kingdom

>Spike|hCoV-19/Brazil/SP-L15-CD280/2020|2020-03-30|EPI\_ISL\_476271|Original|hCoV-19^^S\u00e3o Paulo|Human|Hospital da Cl\u00e9nicas da Faculdade de Medicina da Universidade de S\u00e3o Paulo|Instituto de Medicina Tropical da Univesidade de S\u00e3o Paulo|Faria|Brazil

>Spike|hCoV-19/England/LOND-124C7FF/2020|2020-00-00|EPI\_ISL\_490433|Original|hCoV-19^^England|Human|University College London Hospital|COVID-19 Genomics UK (COG-UK) Consortium|Byott|United Kingdom

>Spike|hCoV-19/Australia/VIC16078/2020|2020-08-01|EPI\_ISL\_640587|Original|hCoV-19^^Victoria|Human|Microbiological Diagnostic Unit - Public Health Laboratory (MDU-PHL) |MDU-PHL|Schultz|Australia

>Spike|hCoV-19/USA/TX-HMH-MCoV-14698/2020|2020-10-12|EPI\_ISL\_787983|Original|hCoV-19^^Texas|Human|Houston Methodist Hospital|Houston Methodist Hospital|Long|USA

>Spike|hCoV-19/Scotland/QEUH-96E17D/2020|2020-08-20|EPI\_ISL\_534452|Original|hCoV-19^^Scotland|Human|NHSGGC West of Scotland Specialist Virology Centre / MRC-University of Glasgow Centre for Virus Research|Wellcome Sanger Institute for the COVID-19 Genomics UK (COG-UK) consortium|Davies|United Kingdom

>Spike|hCoV-19/Australia/VIC13540/2020|2020-08-04|EPI\_ISL\_563742|Original|hCoV-19^^Victoria|Human|Microbiological Diagnostic Unit - Public Health Laboratory (MDU-PHL) |MDU-PHL|Schultz|Australia

>Spike|hCoV-19/England/ALDP-52A627/2020|2020-06-01|EPI\_ISL\_559002|Original|hCoV-19^^England|Human|Lighthouse Lab in Alderley Park|Wellcome Sanger Institute for the COVID-19 Genomics UK (COG-UK) consortium|Davies|United Kingdom

>Spike|hCoV-19/Scotland/EDB3289/2020|2020-04-08|EPI\_ISL\_489059|Original|hCoV-19^^Scotland|Human|Virology Department|Wellcome Sanger Institute for the COVID-19 Genomics UK (COG-UK) consortium|Davies|United Kingdom

>Spike|hCoV-19/USA/CA-ALSR-0518-SAN/2020|2020-04-01|EPI\_ISL\_483197|Original|hCoV-19^^California|Human|UC San Diego Center for Advanced Laboratory Medicine|Andersen lab at Scripps Research|Gangavarapu|USA

>Spike|hCoV-19/England/CAMB-1B6466/2020|2020-09-22|EPI\_ISL\_576911|Original|hCoV-19^^England|Human|Department of Pathology|COVID-19 Genomics UK (COG-UK) Consortium|Goodfellow|United Kingdom

>Spike|hCoV-19/England/ALDP-A6838B/2020|2020-10-12|EPI\_ISL\_608605|Original|hCoV-19^^England|Human|Lighthouse Lab in Alderley Park|Wellcome Sanger Institute for the COVID-19 Genomics UK (COG-UK) consortium|Davies|United Kingdom

>Spike|hCoV-19/USA/CA-ALSR-1061-SAN/2020|2020-06-20|EPI\_ISL\_483492|Original|hCoV-19^^California|Human|UC San Diego Center for Advanced Laboratory Medicine|Andersen lab at Scripps Research|Gangavarapu|USA

>Spike|hCoV-19/USA/UT-0525/2020|2020-04-03|EPI\_ISL\_435361|Original|hCoV-19^^Utah|Human|Utah Public Health Laboratory|Utah Public Health Laboratory|Young|USA

>Spike|hCoV-19/Wales/CAMC-94AFE6/2020|2020-07-18|EPI\_ISL\_556784|Original|hCoV-19^^Wales|Human|Lighthouse Lab in Cambridge|Wellcome Sanger Institute for the COVID-19 Genomics UK (COG-UK) consortium|Davies|United Kingdom

>Spike|hCoV-19/USA/TX-HMH-5473/2020|2020-06-25|EPI\_ISL\_544799|Original|hCoV-19^^Texas|Human|Houston Methodist Hospital|Houston Methodist Hospital|Long|USA

>Spike|hCoV-19/USA/WI-UW-359/2020|2020-04-18|EPI\_ISL\_450713|Original|hCoV-19^^Wisconsin|Human|University of Wisconsin-Madison AIDS Vaccine Research Laboratories|University of Wisconsin-Madison AIDS Vaccine Research Laboratories|Baczenas|USA

>Spike|hCoV-19/England/QEUH-B12CDF/2020|2020-11-01|EPI\_ISL\_641788|Original|hCoV-19^^England|Human|Lighthouse Lab in Glasgow|Wellcome Sanger Institute for the COVID-19 Genomics UK (COG-UK) Consortium|Davies|United Kingdom

>Spike|hCoV-19/USA/UT-UPHL-2009160/2020|2020-05-23|EPI\_ISL\_525149|Original|hCoV-19^^Utah|Human|Utah Public Health Laboratory|Utah Public Health Laboratory|Young|USA

>Spike|hCoV-19/England/QEUH-BEB48C/2020|2020-12-03|EPI\_ISL\_708933|Original|hCoV-19^^England|Human|Lighthouse Lab in Glasgow|Wellcome Sanger Institute for the COVID-19 Genomics UK (COG-UK) Consortium|Davies|United Kingdom

>Spike|hCoV-19/England/BRIS-12174F/2020|2020-03-02|EPI\_ISL\_440154|Original|hCoV-19^^England|Human|PHE South West Regional Laboratory|Wellcome Sanger Institute for the COVID-19 Genomics UK (COG-UK) consortium|Amato|United Kingdom

>Spike|hCoV-19/Wales/PHWC-49A2E3/2020|2020-12-01|EPI\_ISL\_727525|Original|hCoV-19^^Wales|Human|Originating lab|COVID-19 Genomics UK (COG-UK) Consortium|Moore|United Kingdom

>Spike|hCoV-19/Australia/VIC530/2020|2020-03-23|EPI\_ISL\_426796|Original|hCoV-19^^Victoria|Human|Victorian Infectious Diseases Reference Laboratory (VIDRL)|Microbiological Diagnostic Unit Public Health Laboratory and Victorian Infectious Diseases Reference Laboratory|Schultz|Australia

>Spike|hCoV-19/England/NORW-22259E/2020|2020-12-19|EPI\_ISL\_741502|Original|hCoV-19^^England|Human|Quadram Institute Bioscience|COVID-19 Genomics UK (COG-UK) Consortium|Alikhan|United Kingdom

>Spike|hCoV-19/USA/CA-CZB-14855/2020|2020-11-20|EPI\_ISL\_738958|Original|hCoV-19^^California|Human|Humboldt County Public Health Laboratory|Chan-Zuckerberg Biohub|Kamm|USA

>Spike|hCoV-19/England/QEUEH-C343C2/2020|2020-12-10|EPI\_ISL\_734081|Original|hCoV-19^^England|Human|Lighthouse Lab in Glasgow|Wellcome Sanger Institute for the COVID-19 Genomics UK (COG-UK) Consortium|Davies|United Kingdom

>Spike|hCoV-19/Switzerland/BE-ETHZ-410561/2020|2020-11-26|EPI\_ISL\_737734|Original|hCoV-19^^Bern|Human|Viollier AG|Department of Biosystems Science and Engineering|Nadeau|Switzerland

>Spike|hCoV-19/England/CAMB-71DB8/2020|2020-03-30|EPI\_ISL\_438458|Original|hCoV-19^^England|Human|Department of Pathology|Wellcome Sanger Institute for the COVID-19 Genomics UK (COG-UK) consortium|Amato|United Kingdom

>Spike|hCoV-19/Northern Ireland/NIRE-23549B/2020|2020-11-02|EPI\_ISL\_764435|Original|hCoV-19^^Northern Ireland|Human|Regional Virus Laboratory|COVID-19 Genomics UK (COG-UK) Consortium|Fairley|United Kingdom

>Spike|hCoV-19/Uruguay/UY-1/2020|2020-03-16|EPI\_ISL\_426476|Original|hCoV-19^^Montevideo|Human|Microbial Genomics Laboratory|Microbial Genomics Laboratory|Iraola|Uruguay

>Spike|hCoV-19/Australia/WA04/2020|2020-03-15|EPI\_ISL\_420536|Original|hCoV-19^^Western Australia|Human|Department of Microbiology|Department of Microbiology|Sikazwe|Australia

>Spike|hCoV-19/England/CAMB-79099/2020|2020-04-04|EPI\_ISL\_441155|Original|hCoV-19^^England|Human|Department of Pathology|Wellcome Sanger Institute for the COVID-19 Genomics UK (COG-UK) consortium|Amato|United Kingdom

>Spike|hCoV-19/India/MH-ACTREC-277/2020|2020-07-10|EPI\_ISL\_699929|Original|hCoV-19^^Maharashtra|Human|Hematopathology Laboratory|Hematopathology Laboratory|Patkar|India

>Spike|hCoV-19/Iceland/505/2020|2020-03-21|EPI\_ISL\_424527|Original|hCoV-19^^Reykjavik|Human|The National University Hospital of Iceland|deCODE genetics|J\u00f3nsson|Iceland

>Spike|hCoV-19/England/SHEF-10C803E/2020|2020-12-18|EPI\_ISL\_741950|Original|hCoV-19^^England|Human|Virology Department|COVID-19 Genomics UK (COG-UK) Consortium|de Silva|United Kingdom

>Spike|hCoV-19/USA/TX-HMH-MCoV-16297/2020|2020-10-27|EPI\_ISL\_785981|Original|hCoV-19^^Texas|Human|Houston Methodist Hospital|Houston Methodist Hospital|Long|USA

>Spike|hCoV-19/Denmark/DCGC-16969/2020|2020-12-14|EPI\_ISL\_750217|Original|hCoV-19^^Midtjylland|Human|Department of Virus and Microbiological Special Diagnostics|Albertsen Lab|Michaelsen|Denmark

>Spike|hCoV-19/USA/OR-OHSU-2579/2020|2020-08-20|EPI\_ISL\_667257|Original|hCoV-19^^Oregon|Human|OHSU Lab Services Molecular Microbiology Lab|Oregon SARS-CoV-2 Genome Sequencing Center|O'Roak|USA

>Spike|hCoV-19/Australia/WA51/2020|2020-03-20|EPI\_ISL\_470868|Original|hCoV-19^^Western Australia|Human|PathWest Laboratory Medicine WA|PathWest Laboratory Medicine WA|Sikazwe|Australia

>Spike|hCoV-19/USA/TX-HMH-MCoV-18284/2020|2020-11-17|EPI\_ISL\_784632|Original|hCoV-19^^Texas|Human|Houston Methodist Hospital|Houston Methodist Hospital|Long|USA

>Spike|hCoV-19/Denmark/DCGC-20463/2020|2020-12-21|EPI\_ISL\_758730|Original|hCoV-19^^Hovedstaden|Human|Department of Virus and Microbiological Special Diagnostics|Albertsen Lab|Michaelsen|Denmark

>Spike|hCoV-19/DRC/241/2020|2020-03-22|EPI\_ISL\_420033|Original|hCoV-19^^Kinshasa|Human|Viral Respiratory Lab|Pathogen Sequencing Lab|Pratt|Democratic Republic of the Congo

>Spike|hCoV-19/USA/UT-08365/2020|2020-05-19|EPI\_ISL\_524148|Original|hCoV-19^^Utah|Human|Utah Public Health Laboratory|Utah Public Health Laboratory|Young|USA

>Spike|hCoV-19/Australia/VIC16663/2020|2020-08-03|EPI\_ISL\_640789|Original|hCoV-19^^Victoria|Human|Microbiological Diagnostic Unit - Public Health Laboratory (MDU-PHL)|MDU-PHL|Schultz|Australia

>Spike|hCoV-19/Denmark/DCGC-2198/2020|2020-08-10|EPI\_ISL\_617499|Original|hCoV-19^^Syddanmark|Human|Department of Virus and Microbiological Special Diagnostics|Albertsen lab|Michaelsen|Denmark

>Spike|hCoV-19/England/SHEF-10B2E6A/2020|2020-05-16|EPI\_ISL\_537209|Original|hCoV-19^^England|Human|Virology Department|Wellcome Sanger Institute for the COVID-19 Genomics UK (COG-UK) consortium|Davies|United Kingdom

>Spike|hCoV-19/Denmark/DCGC-9962/2020|2020-11-09|EPI\_ISL\_668631|Original|hCoV-19^^Hovedstaden|Human|Department of Virus and Microbiological Special Diagnostics|Albertsen Lab|Michaelsen|Denmark

>Spike|hCoV-19/England/ALDP-B48E07/2020|2020-11-07|EPI\_ISL\_649212|Original|hCoV-19^^England|Human|Lighthouse Lab in Alderley Park|Wellcome Sanger Institute for the COVID-19 Genomics UK (COG-UK) Consortium|Davies|United Kingdom

>Spike|hCoV-19/England/ALDP-C483CB/2020|2020-12-12|EPI\_ISL\_736735|Original|hCoV-19^^England|Human|Lighthouse Lab in Alderley Park|Wellcome Sanger Institute for the COVID-19 Genomics UK (COG-UK) Consortium|Davies|United Kingdom

>Spike|hCoV-19/Wales/PHWC-49A7C6/2020|2020-12-02|EPI\_ISL\_727598|Original|hCoV-19^^Wales|Human|Originating lab|COVID-19 Genomics UK (COG-UK) Consortium|Moore|United Kingdom

>Spike|hCoV-19/England/BRIS-1229FD/2020|2020-04-03|EPI\_ISL\_440803|Original|hCoV-19^^England|Human|PHE South West Regional Laboratory|Wellcome Sanger Institute for the COVID-19 Genomics UK (COG-UK) consortium|Amato|United Kingdom

>Spike|hCoV-19/Denmark/DCGC-22582/2020|2020-12-14|EPI\_ISL\_757653|Original|hCoV-19^^Nordjylland|Human|Department of Virus and Microbiological Special Diagnostics|Albertsen Lab|Michaelsen|Denmark

>Spike|hCoV-19/England/ALDP-B637FC/2020|2020-11-09|EPI\_ISL\_656465|Original|hCoV-19^^England|Human|Lighthouse Lab in Alderley Park|Wellcome Sanger Institute for the COVID-19 Genomics UK (COG-UK) Consortium|Davies|United Kingdom

>Spike|hCoV-19/Wales/PHWC-32A70/2020|2020-04-14|EPI\_ISL\_474388|Original|hCoV-19^^Wales|Human|Originating lab|COVID-19 Genomics UK (COG-UK) Consortium|Moore|United Kingdom

>Spike|hCoV-19/USA/CA-ALSR-1207/2020|2020-04-24|EPI\_ISL\_494437|Original|hCoV-19^^California|Human|San Diego County Public Health Laboratory|Andersen lab at Scripps Research|Gangavarapu|USA

>Spike|hCoV-19/England/MILK-9733F7/2020|2020-08-19|EPI\_ISL\_575854|Original|hCoV-19^^England|Human|Lighthouse Lab in Milton Keynes|Wellcome Sanger Institute for the COVID-19 Genomics UK (COG-UK) consortium|Davies|United Kingdom

>Spike|hCoV-19/Scotland/EDB6023/2020|2020-05-06|EPI\_ISL\_487776|Original|hCoV-19^^Scotland|Human|Virology Department|Wellcome Sanger Institute for the COVID-19 Genomics UK (COG-UK) consortium|Davies|United Kingdom

>Spike|hCoV-19/Chile/AR-208477/2020|2020-10-16|EPI\_ISL\_746505|Original|hCoV-19^^La Araucania|Human|Genetica Molecular and Subdepartamento de Virologia ISP Chile|Instituto de Salud Publica de Chile|Tognarelli|Chile

>Spike|hCoV-19/Spain/VC-IBV-98004329/2020|2020-03-24|EPI\_ISL\_654472|Original|hCoV-19^^Comunitat\_Valenciana|Human|Servicio de Microbiolog\u00eda. Hospital General Universitario de Castell\u00f3n|SeqCOVID-SPAIN consortium|IBV(CSIC)|Comas|Spain

>Spike|hCoV-19/Wales/PHWC-48B9E0/2020|2020-11-02|EPI\_ISL\_666310|Original|hCoV-19^^Wales|Human|Wales Specialist Virology Centre Sequencing lab|COVID-19 Genomics UK (COG-UK) Consortium|Moore|United Kingdom

>Spike|hCoV-19/Luxembourg/LNS8756036/2020|2020-11-01|EPI\_ISL\_744806|Original|hCoV-19^^Luxembourg|Human|Laboratoire national de sant\u00e9|Laboratoire national de sant\u00e9|Wienecke-Baldacchino|Luxembourg



>Spike|hCoV-19/USA/FL-BPHL-0287/2020|2020-05-15|EPI\_ISL\_480938|Original|hCoV-19^^Florida|Human|Florida Bureau of Public Health Laboratories|Florida Bureau of Public Health Laboratories|Blanton|USA

>Spike|hCoV-19/Wales/PHWC-163CCA/2020|2020-05-01|EPI\_ISL\_474068|Original|hCoV-19^^Wales|Human|Originating lab|COVID-19 Genomics UK (COG-UK) Consortium|Moore|United Kingdom

>Spike|hCoV-19/Russia/SPE-RII-MH1042S/2020|2020-09-06|EPI\_ISL\_596254|Original|hCoV-19^^Saint Petersburg|Human|HELIX LCC|WHO National Influenza Centre Russian Federation|Komissarov|Russia

>Spike|hCoV-19/SaudiArabia/KAUST-MADINAH896/2020|2020-05-26|EPI\_ISL\_513199|Original|hCoV-19^^Madinah|Human|Pathogen Genomics Lab King Abdullah University of Science and Technology(KAUST)|Pathogen Genomics Lab King Abdullah University of Science and Technology(KAUST)|Mohamed Ghazzali|Saudi Arabia

>Spike|hCoV-19/Germany/BY-ChVir-1289/2020|2020-02-01|EPI\_ISL\_450203|Original|hCoV-19^^Bavaria|Human|Department of Virology|Department of Virology|B\u00f6hmer|Germany

>Spike|hCoV-19/USA/FL-QDX-2018/2020|2020-03-16|EPI\_ISL\_604326|Original|hCoV-19^^Florida|Human|Quest Diagnostics|Quest Diagnostics|Kagan|USA

>Spike|hCoV-19/Belgium/ULG-10257/2020|2020-07-17|EPI\_ISL\_515064|Original|hCoV-19^^Liege|Human|Department of Clinical Microbiology|GIGA Medical Genomics|Durkin|Belgium

>Spike|hCoV-19/USA/MO-WUSTL042/2020|2020-06-19|EPI\_ISL\_493073|Original|hCoV-19^^Missouri|Human|Washington University in St. Louis|Washington University in St. Louis|Tahan|USA

>Spike|hCoV-19/USA/CA-CZB-2468/2020|2020-05-19|EPI\_ISL\_513873|Original|hCoV-19^^California|Human|San Francisco Public Health Laboratory|Chan-Zuckerberg Biohub|Kamm|USA

>Spike|hCoV-19/England/QEUA-B2DFE7/2020|2020-11-04|EPI\_ISL\_659812|Original|hCoV-19^^England|Human|Lighthouse Lab in Glasgow|Wellcome Sanger Institute for the COVID-19 Genomics UK (COG-UK) Consortium|Davies|United Kingdom

>Spike|hCoV-19/Denmark/DCGC-13811/2020|2020-11-30|EPI\_ISL\_712240|Original|hCoV-19^^Nordjylland|Human|Department of Virus and Microbiological Special Diagnostics|Albertsen Lab|Michaelsen|Denmark

>Spike|hCoV-19/Denmark/DCGC-18760/2020|2020-12-07|EPI\_ISL\_748282|Original|hCoV-19^^Midtjylland|Human|Department of Virus and Microbiological Special Diagnostics|Albertsen Lab|Michaelsen|Denmark

>Spike|hCoV-19/USA/NY-NYCPHL-001241/2020|2020-11-06|EPI\_ISL\_683850|Original|hCoV-19^^New York|Human|DOHMH Jamaica|New York City Public Health Laboratory|Wang|USA

>Spike|hCoV-19/Japan/PG-1440/2020|2020-04-00|EPI\_ISL\_685047|Original|hCoV-19^^Japan|Human|Saitama Prefectural Institute of Public Health|Pathogen Genomics Center|Sekizuka|Japan

>Spike|hCoV-19/SaudiArabia/KAUST-MADINAH280/2020|2020-04-01|EPI\_ISL\_513124|Original|hCoV-19^^Madinah|Human|Pathogen Genomics Lab King Abdullah University of Science and Technology(KAUST)|Pathogen Genomics Lab King Abdullah University of Science and Technology(KAUST)|Mohamed Ghazzali|Saudi Arabia

>Spike|hCoV-19/Japan/PG-7224/2020|2020-08-00|EPI\_ISL\_688328|Original|hCoV-19^^Japan|Human|Saitama Prefectural Institute of Public Health|Pathogen Genomics Center|Sekizuka|Japan

>Spike|hCoV-19/USA/IL-NM-1219/2020|2020-06-22|EPI\_ISL\_626508|Original|hCoV-19^^Illinois|Human|Northwestern Memorial Hospital|Ozer Lab|Ozer|USA

>Spike|hCoV-19/Luxembourg/LNS0100665/2020|2020-11-16|EPI\_ISL\_739710|Original|hCoV-19^^Luxembourg|Human|Laboratoire national de sant\u00e9|Laboratoire national de sant\u00e9|Wienecke-Baldacchino|Luxembourg

>Spike|hCoV-19/Denmark/DCGC-14069/2020|2020-11-30|EPI\_ISL\_711548|Original|hCoV-19^^Sjaelland|Human|Department of Virus and Microbiological Special Diagnostics|Albertsen Lab|Michaelsen|Denmark

>Spike|hCoV-19/Scotland/QEUA-9CA3A6/2020|2020-09-09|EPI\_ISL\_576053|Original|hCoV-19^^Scotland|Human|Lighthouse Lab in Glasgow|Wellcome Sanger Institute for the COVID-19 Genomics UK (COG-UK) consortium|Davies|United Kingdom

>Spike|hCoV-19/USA/WI-GMF-01992/2020|2020-04-28|EPI\_ISL\_436893|Original|hCoV-19^^Wisconsin|Human|Gundersen Molecular Diagnostics Laboratory|Kabara Cancer Research Institute|Kenny|USA

>Spike|hCoV-19/Germany/BY-MVP-0289/2020|2020-05-25|EPI\_ISL\_466922|Original|hCoV-19^^Bavaria|Human|Max von Pettenkofer Institute|Laboratory for Functional Genome Analysis|Graf|Germany

>Spike|hCoV-19/South Korea/KCDC2198/2020|2020-04-04|EPI\_ISL\_506992|Original|hCoV-19^^South Korea|Human|Division of Viral Diseases|Division of Viral Diseases|Kim|South Korea

>Spike|hCoV-19/Netherlands/ZH-EMC-844/2020|2020-10-08|EPI\_ISL\_632708|Original|hCoV-19^^Zuid Holland|Human|Dutch COVID-19 response team|Erasmus Medical Center|Oude Munnink|Netherlands

>Spike|hCoV-19/England/NORT-28C7C9/2020|2020-05-16|EPI\_ISL\_478603|Original|hCoV-19^^England|Human|Northumbria University / South Tees Hospitals NHS Foundation Trust / North Cumbria Integrated Care NHS Foundation Trust / North Tees and Hartlepool NHS Foundation Trust / Newcastle Hospitals NHS Foundation Trust|COVID-19 Genomics UK (COG-UK) Consortium|Bashton|United Kingdom

>Spike|hCoV-19/USA/NM-DOH-2020308708/2020|2020-08-24|EPI\_ISL\_602186|Original|hCoV-19^^New Mexico|Human|New Mexico Department of Health Scientific Laboratory|New Mexico Department of Health Scientific Laboratory|Johnson|USA

>Spike|hCoV-19/USA/NY-Wadsworth-215499-01/2020|2020-09-11|EPI\_ISL\_677100|Original|hCoV-19^^New York|Human|Wadsworth Center|Wadsworth Center|Lasek-Nesselquist|USA

>Spike|hCoV-19/Bangladesh/BCSIR-NILMRC-160/2020|2020-06-18|EPI\_ISL\_482486|Original|hCoV-19^^Rajshahi|Human|National Institute of Laboratory Medicine and Referral Center|Genomic Research Lab|Khan|Bangladesh

>Spike|hCoV-19/USA/TX-HMH-MCoV-14339/2020|2020-10-06|EPI\_ISL\_787624|Original|hCoV-19^^Texas|Human|Houston Methodist Hospital|Houston Methodist Hospital|Long|USA

>Spike|hCoV-19/Netherlands/UT-EMC-89/2020|2020-08-30|EPI\_ISL\_577905|Original|hCoV-19^^Utrecht|Human|Dutch COVID-19 response team|Erasmus Medical Center|Oude Munnink|Netherlands

>Spike|hCoV-19/England/QEUEH-B7F6E1/2020|2020-11-14|EPI\_ISL\_668272|Original|hCoV-19^^England|Human|Lighthouse Lab in Glasgow|Wellcome Sanger Institute for the COVID-19 Genomics UK (COG-UK) Consortium|Davies|United Kingdom

>Spike|hCoV-19/Germany/NW-HHU-209/2020|2020-04-12|EPI\_ISL\_602483|Original|hCoV-19^^North Rhine-Westphalia|Human|Institute for Virology|Center of Medical Microbiology|Wienemann|Germany

>Spike|hCoV-19/Switzerland/BS-ETHZ-100199/2020|2020-03-17|EPI\_ISL\_574906|Original|hCoV-19^^Basel-Stadt|Human|Viollier AG|Department of Biosystems Science and Engineering|Nadeau|Switzerland

>Spike|hCoV-19/England/201090487/2020|2020-03-07|EPI\_ISL\_464572|Original|hCoV-19^^England|Human|Respiratory Virus Unit|Respiratory Virus Unit|Platt|United Kingdom

>Spike|hCoV-19/USA/LA-SR0296/2020|2020-04-07|EPI\_ISL\_445151|Original|hCoV-19^^Louisiana|Human|Robert Garry lab|Andersen lab at Scripps Research|Gangavarapu|USA

>Spike|hCoV-19/USA/FL-BPHL-1766/2020|2020-10-02|EPI\_ISL\_613872|Original|hCoV-19^^Florida|Human|Florida Bureau of Public Health Laboratories|Florida Bureau of Public Health Laboratories|Blanton|USA

>Spike|hCoV-19/Scotland/QEUEH-A4C9B8/2020|2020-10-05|EPI\_ISL\_628584|Original|hCoV-19^^Scotland|Human|Oxford Viromics|COVID-19 Genomics UK (COG-UK) Consortium|Golubchik|United Kingdom

>Spike|hCoV-19/England/QEUEH-9F4D96/2020|2020-09-24|EPI\_ISL\_588394|Original|hCoV-19^^England|Human|Lighthouse Lab in Glasgow|Wellcome Sanger Institute for the COVID-19 Genomics UK (COG-UK) consortium|Davies|United Kingdom

>Spike|hCoV-19/Wales/MILK-A46F16/2020|2020-10-06|EPI\_ISL\_598480|Original|hCoV-19^^Wales|Human|Lighthouse Lab in Milton Keynes|Wellcome Sanger Institute for the COVID-19 Genomics UK (COG-UK) consortium|Davies|United Kingdom

>Spike|hCoV-19/USA/NY-NYCPHL-000278/2020|2020-03-20|EPI\_ISL\_631804|Original|hCoV-19^^New York|Human|Bellevue Hospital Center|New York City Public Health Laboratory|Wang|USA

>Spike|hCoV-19/Denmark/DCGC-6443/2020|2020-10-12|EPI\_ISL\_620343|Original|hCoV-19^^Syddanmark|Human|Department of Virus and Microbiological Special Diagnostics|Albertsen lab|Michaelsen|Denmark

>Spike|hCoV-19/USA/MI-QDX-297/2020|2020-03-21|EPI\_ISL\_571041|Original|hCoV-19^^Michigan|Human|Quest Diagnostics|Quest Diagnostics|Kagan|USA

>Spike|hCoV-19/England/BRIS-1853B02/2020|2020-04-17|EPI\_ISL\_492424|Original|hCoV-19^^England|Human|PHE South West Regional Laboratory|Wellcome Sanger Institute for the COVID-19 Genomics UK (COG-UK) consortium|Davies|United Kingdom

>Spike|hCoV-19/South Africa/NHLS-UCT-GS-0636/2020|2020-10-19|EPI\_ISL\_700556|Original|hCoV-19^^Western Cape|Human|Conville CDC wc CVC|NHLS/UCT|Iranzadeh|South Africa

>Spike|hCoV-19/South Africa/KRISP-EC-K004565/2020|2020-11-12|EPI\_ISL\_660606|Original|hCoV-19^^Eastern Cape|Human|NHLS-IALCH|KRISP|de Oliveira|South Africa

>Spike|hCoV-19/USA/MN-MDH-1092/2020|2020-06-03|EPI\_ISL\_470772|Original|hCoV-19^^Minnesota|Human|Minnesota Department of Health|Minnesota Department of Health|Garfin|USA

>Spike|hCoV-19/USA/MI-QDX-827/2020|2020-03-23|EPI\_ISL\_571544|Original|hCoV-19^^Michigan|Human|Quest Diagnostics|Quest Diagnostics|Kagan|USA

>Spike|hCoV-19/Scotland/CVR1430/2020|2020-04-01|EPI\_ISL\_433582|Original|hCoV-19^^Scotland|Human|West of Scotland Specialist Virology Centre|COVID-19 Genomics UK (COG-UK) Consortium|Robertson|United Kingdom

>Spike|hCoV-19/United Arab Emirates/L3300061831/2020|2020-06-07|EPI\_ISL\_520714|Original|hCoV-19^^United Arab Emirates|Human|Mohammed Bin Rashid University of Medicine and Health Sciences|Al Jalila Genomics Center|Ramaswamy|United Arab Emirates

>Spike|hCoV-19/Denmark/DCGC-3426/2020|2020-08-31|EPI\_ISL\_616188|Original|hCoV-19^^Hovedstaden|Human|Department of Virus and Microbiological Special Diagnostics|Albertsen lab|Michaelsen|Denmark

>Spike|hCoV-19/Singapore/620/2020|2020-05-08|EPI\_ISL\_490070|Original|hCoV-19^^Singapore|Human|National Public Health Laboratory|National Public Health Laboratory|Mak|Singapore

>Spike|hCoV-19/England/QEUEH-B0E66F/2020|2020-11-02|EPI\_ISL\_642028|Original|hCoV-19^^England|Human|Lighthouse Lab in Glasgow|Wellcome Sanger Institute for the COVID-19 Genomics UK (COG-UK) Consortium|Davies|United Kingdom

>Spike|hCoV-19/Scotland/QEUEH-9B4AE6/2020|2020-09-07|EPI\_ISL\_602068|Original|hCoV-19^^Scotland|Human|Lighthouse Lab in Glasgow|Wellcome Sanger Institute for the COVID-19 Genomics UK (COG-UK) consortium|Davies|United Kingdom

>Spike|hCoV-19/Hungary/SRC-2135/2020|2020-10-12|EPI\_ISL\_671416|Original|hCoV-19^^Somogy county|Human|National Laboratory of Virology|National Laboratory of Virology|Kemenesi|Hungary

>Spike|hCoV-19/England/QEUEH-AABDCA/2020|2020-10-21|EPI\_ISL\_652833|Original|hCoV-19^^England|Human|Oxford Viromics|COVID-19 Genomics UK (COG-UK) Consortium|Golubchik|United Kingdom

>Spike|hCoV-19/USA/UT-08422/2020|2020-05-26|EPI\_ISL\_524200|Original|hCoV-19^^Utah|Human|Utah Public Health Laboratory|Utah Public Health Laboratory|Young|USA

>Spike|hCoV-19/England/MILK-976628/2020|2020-08-20|EPI\_ISL\_575907|Original|hCoV-19^^England|Human|Lighthouse Lab in Milton Keynes|Wellcome Sanger Institute for the COVID-19 Genomics UK (COG-UK) consortium|Davies|United Kingdom

>Spike|hCoV-19/Wales/PHWC-16B169/2020|2020-09-15|EPI\_ISL\_560251|Original|hCoV-19^^Wales|Human|Wales Specialist Virology Centre Sequencing lab|COVID-19 Genomics UK (COG-UK) Consortium|Moore|United Kingdom

>Spike|hCoV-19/Romania/USAFSAM-S573/2020|2020-11-28|EPI\_ISL\_738347|Original|hCoV-19^^Romania|Human|Landstuhl Regional Medical Center|United States Air Force School of Aerospace Medicine|Fries|Romania

>Spike|hCoV-19/England/ALDP-CB40D2/2020|2020-12-19|EPI\_ISL\_761188|Original|hCoV-19^^England|Human|Lighthouse Lab in Alderley Park|Wellcome Sanger Institute for the COVID-19 Genomics UK (COG-UK) Consortium|Davies|United Kingdom

>Spike|hCoV-19/Scotland/QEUH-9B84F3/2020|2020-09-10|EPI\_ISL\_568273|Original|hCoV-19^^Scotland|Human|Lighthouse Lab in Glasgow|Wellcome Sanger Institute for the COVID-19 Genomics UK (COG-UK) consortium|Davies|United Kingdom

>Spike|hCoV-19/England/QEUH-9F9BC4/2020|2020-09-25|EPI\_ISL\_595752|Original|hCoV-19^^England|Human|Oxford Viromics|COVID-19 Genomics UK (COG-UK) Consortium|Golubchik|United Kingdom

>Spike|hCoV-19/Serbia/Sabac-000533004/2020|2020-04-29|EPI\_ISL\_678488|Original|hCoV-19^^Sabac|Human|Veterinary Specialized Institute \Sabac\|Veterinary Specialized Institute \Kraljevo\|Vidanovic|Serbia

>Spike|hCoV-19/Australia/VIC6268/2020|2020-07-26|EPI\_ISL\_518258|Original|hCoV-19^^Victoria|Human|Microbiological Diagnostic Unit - Public Health Laboratory (MDU-PHL)|MDU-PHL|Schultz|Australia

>Spike|hCoV-19/England/ALDP-9FC8CA/2020|2020-10-01|EPI\_ISL\_587840|Original|hCoV-19^^England|Human|Lighthouse Lab in Alderley Park|Wellcome Sanger Institute for the COVID-19 Genomics UK (COG-UK) consortium|Davies|United Kingdom

>Spike|hCoV-19/Thailand/Bangkok-0058/2020|2020-03-28|EPI\_ISL\_447000|Original|hCoV-19^^Bangkok|Human|Ramathibodi Hospital|COVID-19 Network Investigations (CONI) Alliance|Batty|Thailand

>Spike|hCoV-19/England/QEUH-A8BC87/2020|2020-10-15|EPI\_ISL\_643094|Original|hCoV-19^^England|Human|Lighthouse Lab in Glasgow|Wellcome Sanger Institute for the COVID-19 Genomics UK (COG-UK) Consortium|Davies|United Kingdom

>Spike|hCoV-19/Denmark/DCGC-2251/2020|2020-08-10|EPI\_ISL\_617431|Original|hCoV-19^^Hovedstaden|Human|Department of Virus and Microbiological Special Diagnostics|Albertsen lab|Michaelsen|Denmark

>Spike|hCoV-19/Germany/HH-hpi-p1764/2020|2020-03-19|EPI\_ISL\_776138|Original|hCoV-19^^Hamburg|Human|University Medical Center Hamburg Eppendorf|Heinrich Pette Institute|Robitaille|Germany

>Spike|hCoV-19/Japan/PG-8441/2020|2020-09-00|EPI\_ISL\_687540|Original|hCoV-19^^Japan|Human|Fukuoka Institute of Health and Environmental Sciences|Pathogen Genomics Center|Sekizuka|Japan

>Spike|hCoV-19/England/BRIS-1310AB/2020|2020-03-27|EPI\_ISL\_501585|Original|hCoV-19^^England|Human|PHE South West Regional Laboratory|Wellcome Sanger Institute for the COVID-19 Genomics UK (COG-UK) consortium|Davies|United Kingdom

>Spike|hCoV-19/Zimbabwe/ZW-9951/2020|2020-06-01|EPI\_ISL\_644767|Original|hCoV-19^^Zimbabwe|Human|National Microbiology Reference Laboratory|Quadram Institute Bioscience|Alikhan|Zimbabwe

>Spike|hCoV-19/England/NORW-222E84/2020|2020-12-19|EPI\_ISL\_741540|Original|hCoV-19^^England|Human|Quadram Institute Bioscience|COVID-19 Genomics UK (COG-UK) Consortium|Alikhan|United Kingdom

>Spike|hCoV-19/England/MILK-C7A76A/2020|2020-12-15|EPI\_ISL\_762965|Original|hCoV-19^^England|Human|Lighthouse Lab in Milton Keynes|Wellcome Sanger Institute for the COVID-19 Genomics UK (COG-UK) Consortium|Davies|United Kingdom

>Spike|hCoV-19/USA/MN-MDH-2015/2020|2020-09-28|EPI\_ISL\_654696|Original|hCoV-19^^Minnesota|Human|Essentia Health-St. Mary's Medical Center|Minnesota Department of Health|Lorentz|USA

>Spike|hCoV-19/Scotland/EDB4028/2020|2020-04-15|EPI\_ISL\_487672|Original|hCoV-19^^Scotland|Human|Virology Department|Wellcome Sanger Institute for the COVID-19 Genomics UK (COG-UK) consortium|Davies|United Kingdom

>Spike|hCoV-19/England/LIVE-9A126/2020|2020-04-17|EPI\_ISL\_439849|Original|hCoV-19^^England|Human|Liverpool Clinical Laboratories|COVID-19 Genomics UK (COG-UK) Consortium|Haldenby|United Kingdom

>Spike|hCoV-19/USA/TX-HMH-2474/2020|2020-05-28|EPI\_ISL\_545331|Original|hCoV-19^^Texas|Human|Houston Methodist Hospital|Houston Methodist Hospital|Long|USA

>Spike|hCoV-19/Spain/MD-IBV-99008510/2020|2020-09-10|EPI\_ISL\_654073|Original|hCoV-19^^Madrid|Human|Hospital General Universitario Gregorio Mara\u00f1a|SeqCOVID-SPAIN consortium|IBV (CSIC)|Comas|Spain

>Spike|hCoV-19/Kenya/C4083/2020|2020-05-05|EPI\_ISL\_568721|Original|hCoV-19^^Mombasa|Human|KEMRI-Wellcome Trust Research Programme/KEMRI-CGMR-C Kilifi|KEMRI-Wellcome Trust Research Programme/KEMRI-CGMR-C Kilifi|Githinji|Kenya

>Spike|hCoV-19/USA/CA-ALSR-2285/2020|2020-07-08|EPI\_ISL\_635410|Original|hCoV-19^^California|Human|San Diego County Public Health Laboratory|Andersen lab at Scripps Research|Gangavarapu|USA

>Spike|hCoV-19/Wales/PHWC-342FE/2020|2020-04-14|EPI\_ISL\_446901|Original|hCoV-19^^Wales|Human|Wales Specialist Virology Centre|Public Health Wales Microbiology Cardiff|Moore|United Kingdom

>Spike|hCoV-19/England/ALDP-9FD89C/2020|2020-10-02|EPI\_ISL\_588023|Original|hCoV-19^^England|Human|Lighthouse Lab in Alderley Park|Wellcome Sanger Institute for the COVID-19 Genomics UK (COG-UK) consortium|Davies|United Kingdom

>Spike|hCoV-19/Senegal/5766/2020|2020-04-17|EPI\_ISL\_481237|Original|hCoV-19^^Dakar|Human|Institut Pasteur Dakar|Institut Pasteur de Dakar|Dia|Senegal

>Spike|hCoV-19/South Africa/KRISP-K002678/2020|2020-08-03|EPI\_ISL\_535542|Original|hCoV-19^^KwaZulu-Natal|Human|NHLS-IALCH|KRISP|de Oliveira|South Africa

>Spike|hCoV-19/England/MILK-957292/2020|2020-06-13|EPI\_ISL\_554121|Original|hCoV-19^^England|Human|Lighthouse Lab in Milton Keynes|Wellcome Sanger Institute for the COVID-19 Genomics UK (COG-UK) consortium|Davies|United Kingdom

>Spike|hCoV-19/Spain/MD-IBV-005284/2020|2020-03-13|EPI\_ISL\_510170|Original|hCoV-19^^Madrid|Human|Hospital General Universitario Gregorio Mara\u00f1\u00f3n|SeqCOVID-SPAIN consortium/IBV (CSIC)|Comas|Spain

>Spike|hCoV-19/England/CAMC-B09093/2020|2020-10-29|EPI\_ISL\_673015|Original|hCoV-19^^England|Human|Lighthouse Lab in Cambridge|Wellcome Sanger Institute for the COVID-19 Genomics UK (COG-UK) Consortium|Davies|United Kingdom

>Spike|hCoV-19/England/MILK-977566/2020|2020-07-24|EPI\_ISL\_550435|Original|hCoV-19^^England|Human|Lighthouse Lab in Milton Keynes|Wellcome Sanger Institute for the COVID-19 Genomics UK (COG-UK) consortium|Davies|United Kingdom

>Spike|hCoV-19/England/CAMC-BC1404/2020|2020-11-22|EPI\_ISL\_704510|Original|hCoV-19^^England|Human|Department of Pathology|COVID-19 Genomics UK (COG-UK) Consortium|Goodfellow|United Kingdom

>Spike|hCoV-19/Luxembourg/LNS7312611/2020|2020-11-07|EPI\_ISL\_744550|Original|hCoV-19^^Luxembourg|Human|Laboratoire national de sant\u00e9|Laboratoire national de sant\u00e9|Wienecke-Baldacchino|Luxembourg

>Spike|hCoV-19/USA/SC-DHEC-0179/2020|2020-05-05|EPI\_ISL\_529185|Original|hCoV-19^^South Carolina|Human|South Carolina Department of Health and Environmental Control|South Carolina Department of Health and Environmental Control|Flores|USA

>Spike|hCoV-19/Scotland/CVR4648/2020|2020-09-26|EPI\_ISL\_612293|Original|hCoV-19^^Scotland|Human|West of Scotland Specialist Virology Centre|COVID-19 Genomics UK (COG-UK) Consortium|Robertson|United Kingdom

>Spike|hCoV-19/Switzerland/SZ-ETHZ-100211/2020|2020-03-18|EPI\_ISL\_574951|Original|hCoV-19^^Schwyz|Human|Viollier AG|Department of Biosystems Science and Engineering|Nadeau|Switzerland

>Spike|hCoV-19/Denmark/DCGC-18984/2020|2020-12-07|EPI\_ISL\_748683|Original|hCoV-19^^Syddanmark|Human|Department of Virus and Microbiological Special Diagnostics|Albertsen Lab|Michaelsen|Denmark

>Spike|hCoV-19/USA/TX-HMH-MCoV-8629/2020|2020-05-15|EPI\_ISL\_780661|Original|hCoV-19^^Texas|Human|Houston Methodist Hospital|Houston Methodist Hospital|Long|USA

>Spike|hCoV-19/Canada/BC\_07986535/2020|2020-04-00|EPI\_ISL\_466826|Original|hCoV-19^^British Columbia|Human|BCCDC Public Health Laboratory|BCCDC Public Health Laboratory|Harrigan|Canada

>Spike|hCoV-19/Netherlands/NB-RIVM-10057/2020|2020-03-27|EPI\_ISL\_547485|Original|hCoV-19^^Noord Brabant|Human|Dutch COVID-19 response team|National Institute for Public Health and the Environment (RIVM)|Meijer|Netherlands

>Spike|hCoV-19/Greece/208\_33922/2020|2020-03-14|EPI\_ISL\_437878|Original|hCoV-19^^Athens|Human|Laboratory of Microbiology|Laboratory of Biology|Karakasiliotis|Greece

>Spike|hCoV-19/USA/WA-S562/2020|2020-03-24|EPI\_ISL\_434322|Original|hCoV-19^^Washington|Human|Washington State Department of Health|Seattle Flu Study|Bedford|USA

>Spike|hCoV-19/USA/VA-DCLS-2135/2020|2020-10-28|EPI\_ISL\_677157|Original|hCoV-19^^Virginia|Human|Virginia Division of Consolidated Laboratory Services|Virginia Division of Consolidated Laboratory Services|St. Jacques|USA

>Spike|hCoV-19/England/QEUH-9F524B/2020|2020-09-25|EPI\_ISL\_588475|Original|hCoV-19^^England|Human|Lighthouse Lab in Glasgow|Wellcome Sanger Institute for the COVID-19 Genomics UK (COG-UK) consortium|Davies|United Kingdom

>Spike|hCoV-19/France/PAC-IHU-1250/2020|2020-08-17|EPI\_ISL\_569096|Original|hCoV-19^^Provence-Alpes-C\u00f4te-d\u2019Azur|Human|MEPHI|MEPHI|Levasseur|France

>Spike|hCoV-19/England/CAMB-75ABD/2020|2020-03-29|EPI\_ISL\_438311|Original|hCoV-19^^England|Human|Department of Pathology|Wellcome Sanger Institute for the COVID-19 Genomics UK (COG-UK) consortium|Amato|United Kingdom

>Spike|hCoV-19/Denmark/ALAB-SSI-782/2020|2020-03-30|EPI\_ISL\_444903|Original|hCoV-19^^Denmark|Human|Department of Virus and Microbiological Special Diagnostics|Albertsen lab|Kirkegaard|Denmark

>Spike|hCoV-19/USA/CA-CZB-11012/2020|2020-09-10|EPI\_ISL\_582954|Original|hCoV-19^^California|Human|County of Santa Clara Public Health Department|Chan-Zuckerberg Biohub|Bhatt|USA

>Spike|hCoV-19/England/LIVE-9AB91/2020|2020-04-01|EPI\_ISL\_449386|Original|hCoV-19^^England|Human|Liverpool Clinical Laboratories|COVID-19 Genomics UK (COG-UK) Consortium|Haldenby|United Kingdom

>Spike|hCoV-19/England/CAMC-9425EC/2020|2020-07-23|EPI\_ISL\_556874|Original|hCoV-19^^England|Human|Lighthouse Lab in Cambridge|Wellcome Sanger Institute for the COVID-19 Genomics UK (COG-UK) consortium|Davies|United Kingdom

>Spike|hCoV-19/England/QEUH-9FA835/2020|2020-09-26|EPI\_ISL\_588170|Original|hCoV-19^^England|Human|Lighthouse Lab in Glasgow|Wellcome Sanger Institute for the COVID-19 Genomics UK (COG-UK) consortium|Davies|United Kingdom

>Spike|hCoV-19/Belgium/ULG-10138/2020|2020-04-08|EPI\_ISL\_427383|Original|hCoV-19^^Liege|Human|Department of Clinical Microbiology|GIGA Medical Genomics|Durkin|Belgium

>Spike|hCoV-19/USA/WI-UW-756/2020|2020-07-05|EPI\_ISL\_495461|Original|hCoV-19^^Wisconsin|Human|University of Wisconsin-Madison AIDS Vaccine Research Laboratories|University of Wisconsin-Madison AIDS Vaccine Research Laboratories|Baczenas|USA

>Spike|hCoV-19/England/LIVE-AA554/2020|2020-05-25|EPI\_ISL\_517467|Original|hCoV-19^^England|Human|Liverpool Clinical Laboratories|COVID-19 Genomics UK (COG-UK) Consortium|Haldenby|United Kingdom

>Spike|hCoV-19/England/MILK-AC9476/2020|2020-10-21|EPI\_ISL\_630056|Original|hCoV-19^^England|Human|Lighthouse Lab in Milton Keynes|Wellcome Sanger Institute for the COVID-19 Genomics UK (COG-UK) consortium|Davies|United Kingdom

>Spike|hCoV-19/Denmark/DCGC-803/2020|2020-04-20|EPI\_ISL\_614738|Original|hCoV-19^^Hovedstaden|Human|Department of Virus and Microbiological Special Diagnostics|Albertsen lab|Michaelsen|Denmark

>Spike|hCoV-19/USA/NY-NYCPHL-001442/2020|2020-11-23|EPI\_ISL\_683807|Original|hCoV-19^^New York|Human|DOHMH Chelsea|New York City Public Health Laboratory|Wang|USA

>Spike|hCoV-19/Wales/PHWC-1683FD/2020|2020-04-02|EPI\_ISL\_494238|Original|hCoV-19^^Wales|Human|Originating lab|COVID-19 Genomics UK (COG-UK) Consortium|Moore|United Kingdom

>Spike|hCoV-19/USA/UT-UPHL-2012671868/2020|2020-08-10|EPI\_ISL\_745850|Original|hCoV-19^^Utah|Human|Ginkgo Bioworks Clinical Laboratory|Utah Public Health Laboratory|Young|USA

>Spike|hCoV-19/Japan/PG-4099/2020|2020-07-00|EPI\_ISL\_692340|Original|hCoV-19^^Japan|Human|Pathogen Genomics Center|Pathogen Genomics Center|Sekizuka|Japan

>Spike|hCoV-19/USA/TX-HMH-MCoV-8139/2020|2020-06-30|EPI\_ISL\_784226|Original|hCoV-19^^Texas|Human|Houston Methodist Hospital|Houston Methodist Hospital|Long|USA

>Spike|hCoV-19/Scotland/CVR5613/2020|2020-11-01|EPI\_ISL\_651867|Original|hCoV-19^^Scotland|Human|West of Scotland Specialist Virology Centre|COVID-19 Genomics UK (COG-UK) Consortium|Robertson|United Kingdom

>Spike|hCoV-19/England/ALDP-9FCA2E/2020|2020-10-01|EPI\_ISL\_587944|Original|hCoV-19^^England|Human|Lighthouse Lab in Alderley Park|Wellcome Sanger Institute for the COVID-19 Genomics UK (COG-UK) consortium|Davies|United Kingdom

>Spike|hCoV-19/England/QEUA-AD260B/2020|2020-10-24|EPI\_ISL\_629761|Original|hCoV-19^^England|Human|Lighthouse Lab in Glasgow|Wellcome Sanger Institute for the COVID-19 Genomics UK (COG-UK) consortium|Davies|United Kingdom

>Spike|hCoV-19/USA/TX-HMH-1973/2020|2020-05-18|EPI\_ISL\_542929|Original|hCoV-19^^Texas|Human|Houston Methodist Hospital|Houston Methodist Hospital|Long|USA

>Spike|hCoV-19/England/QEUA-C7CA8D/2020|2020-12-16|EPI\_ISL\_762739|Original|hCoV-19^^England|Human|Lighthouse Lab in Glasgow|Wellcome Sanger Institute for the COVID-19 Genomics UK (COG-UK) Consortium|Davies|United Kingdom

>Spike|hCoV-19/England/ALDP-A691EA/2020|2020-10-13|EPI\_ISL\_608948|Original|hCoV-19^^England|Human|Lighthouse Lab in Alderley Park|Wellcome Sanger Institute for the COVID-19 Genomics UK (COG-UK) consortium|Davies|United Kingdom

>Spike|hCoV-19/England/GSTT-265DCF5/2020|2020-03-19|EPI\_ISL\_484094|Original|hCoV-19^^England|Human|Centre for Clinical Infection and Diagnostics Research and Genomics Innovation Unit|COVID-19 Genomics UK (COG-UK) Consortium|Awan|United Kingdom

>Spike|hCoV-19/USA/NY-NYCPHL-000058/2020|2020-03-17|EPI\_ISL\_631552|Original|hCoV-19^^New York|Human|Brookdale University Hospital Medical Center|New York City Public Health Laboratory|Wang|USA

>Spike|hCoV-19/Hong Kong/HKPU-0440/2020|2020-03-26|EPI\_ISL\_610171|Original|hCoV-19^^Hong Kong|Human|Department of Health Technology and Informatics|Department of Health Technology and Informatics|Leung|China

>Spike|hCoV-19/India/TG-CDFD-N5453/2020|2020-06-01|EPI\_ISL\_528632|Original|hCoV-19^^Telangana|Human|National Genomics Core-Center for DNA Fingerprinting and Diagnostics|National Genomics Core-Center for DNA Fingerprinting and Diagnostics (NGC-CDFD)- DBT's PAN-INDIA-1000 Genome consortium|Vashisht|India

>Spike|hCoV-19/England/ALDP-94DF6B/2020|2020-06-16|EPI\_ISL\_555393|Original|hCoV-19^^England|Human|Lighthouse Lab in Alderley Park|Wellcome Sanger Institute for the COVID-19 Genomics UK (COG-UK) consortium|Davies|United Kingdom

>Spike|hCoV-19/Wales/PHWC-4907B1/2020|2020-11-13|EPI\_ISL\_706512|Original|hCoV-19^^Wales|Human|Originating lab|COVID-19 Genomics UK (COG-UK) Consortium|Moore|United Kingdom

>Spike|hCoV-19/Brazil/PE-IAM620/2020|2020-04-22|EPI\_ISL\_572348|Original|hCoV-19^^Pernambuco|Human|LACEN/PE|WallauLab|Wallau|Brazil

>Spike|hCoV-19/England/CAMC-B0748A/2020|2020-10-30|EPI\_ISL\_643775|Original|hCoV-19^^England|Human|Lighthouse Lab in Cambridge|Wellcome Sanger Institute for the COVID-19 Genomics UK (COG-UK) Consortium|Davies|United Kingdom

>Spike|hCoV-19/England/LIVE-DB61CD/2020|2020-11-06|EPI\_ISL\_650434|Original|hCoV-19^^England|Human|Liverpool Clinical Laboratories|COVID-19 Genomics UK (COG-UK) Consortium|Haldenby|United Kingdom

>Spike|hCoV-19/Japan/PG-8957/2020|2020-09-00|EPI\_ISL\_686503|Original|hCoV-19^^Japan|Human|Pathogen Genomics Center|Pathogen Genomics Center|Sekizuka|Japan

>Spike|hCoV-19/England/SHEF-10CDEB7/2020|2020-12-08|EPI\_ISL\_727920|Original|hCoV-19^^England|Human|Virology Department|COVID-19 Genomics UK (COG-UK) Consortium|de Silva|United Kingdom

>Spike|hCoV-19/Scotland/EDB6095/2020|2020-05-12|EPI\_ISL\_478217|Original|hCoV-19^^Scotland|Human|Virology Department|COVID-19 Genomics UK (COG-UK) Consortium|Williams|United Kingdom

>Spike|hCoV-19/Switzerland/SO-ETHZ-420722/2020|2020-12-24|EPI\_ISL\_768209|Original|hCoV-19^^Solothurn|Human|Viollier AG|Department of Biosystems Science and Engineering|Nadeau|Switzerland

>Spike|hCoV-19/England/MILK-A18DF5/2020|2020-10-01|EPI\_ISL\_612463|Original|hCoV-19^^England|Human|Wales Specialist Virology Centre Sequencing lab|COVID-19 Genomics UK (COG-UK) Consortium|Moore|United Kingdom

>Spike|hCoV-19/Gambia/1264/2020|2020-05-07|EPI\_ISL\_471169|Original|hCoV-19^^Kombo|Human|MRCG at LSHTM Genomics lab|MRCG at LSHTM Genomics lab|Sesay|Gambia

>Spike|hCoV-19/Spain/MD-IBV-005279/2020|2020-03-09|EPI\_ISL\_510165|Original|hCoV-19^^Madrid|Human|Hospital General Universitario Gregorio Mara\u00f1a|SeqCOVID-SPAIN consortium|IBV (CSIC)|Comas|Spain

>Spike|hCoV-19/England/ALDP-A6CCD7/2020|2020-10-14|EPI\_ISL\_608159|Original|hCoV-19^^England|Human|Lighthouse Lab in Alderley Park|Wellcome Sanger Institute for the COVID-19 Genomics UK (COG-UK) consortium|Davies|United Kingdom

>Spike|hCoV-19/USA/TX-HMH-2576/2020|2020-06-01|EPI\_ISL\_545399|Original|hCoV-19^^Texas|Human|Houston Methodist Hospital|Houston Methodist Hospital|Long|USA

>Spike|hCoV-19/Sichuan/SC-GA-062/2020|2020-01-26|EPI\_ISL\_451313|Original|hCoV-19^^Sichuan|Human|West China Hospital of Sichuan University|State Key Laboratory of Biotherapy of Sichuan University|Tang|China

>Spike|hCoV-19/England/ALDP-A928F2/2020|2020-10-20|EPI\_ISL\_610960|Original|hCoV-19^^England|Human|Lighthouse Lab in Alderley Park|Wellcome Sanger Institute for the COVID-19 Genomics UK (COG-UK) consortium|Davies|United Kingdom

>Spike|hCoV-19/Scotland/QEUEH-9DEDFC/2020|2020-09-21|EPI\_ISL\_601227|Original|hCoV-19^^Scotland|Human|Lighthouse Lab in Glasgow|Wellcome Sanger Institute for the COVID-19 Genomics UK (COG-UK) consortium|Davies|United Kingdom

>Spike|hCoV-19/Canada/ON-UHTC\_0024/2020|2020-04-01|EPI\_ISL\_464035|unknown|hCoV-19^^Ontario|Human|Unity Health Toronto|Ontario Institute for Cancer Research|de Borja|Canada

>Spike|hCoV-19/England/NORT-289119/2020|2020-03-27|EPI\_ISL\_458688|Original|hCoV-19^^England|Human|NU-OMICS DNA Sequencing research facility|Wellcome Sanger Institute for the COVID-19 Genomics UK (COG-UK) consortium|Davies|United Kingdom

>Spike|hCoV-19/USA/OR-OHSU-2411/2020|2020-08-13|EPI\_ISL\_667200|Original|hCoV-19^^Oregon|Human|OHSU Lab Services Molecular Microbiology Lab|Oregon SARS-CoV-2 Genome Sequencing Center|O'Roak|USA

>Spike|hCoV-19/USA/CA-CZB-4083/2020|2020-08-11|EPI\_ISL\_548613|Original|hCoV-19^^California|Human|Orange County Public Health Laboratory|Chan-Zuckerberg Biohub|Bhatt|USA

>Spike|hCoV-19/South Korea/KCDC2388/2020|2020-05-31|EPI\_ISL\_514791|Original|hCoV-19^^South Korea|Human|Division of Viral Diseases|Division of Viral Diseases|Kim|South Korea

>Spike|hCoV-19/Scotland/EDB6746/2020|2020-04-16|EPI\_ISL\_491536|Original|hCoV-19^^Scotland|Human|Virology Department|Wellcome Sanger Institute for the COVID-19 Genomics UK (COG-UK) consortium|Davies|United Kingdom

>Spike|hCoV-19/England/ALDP-95CB92/2020|2020-06-19|EPI\_ISL\_553570|Original|hCoV-19^^England|Human|Lighthouse Lab in Alderley Park|Wellcome Sanger Institute for the COVID-19 Genomics UK (COG-UK) consortium|Davies|United Kingdom

>Spike|hCoV-19/England/ALDP-71D91D/2020|2020-07-01|EPI\_ISL\_557561|Original|hCoV-19^^England|Human|Lighthouse Lab in Alderley Park|Wellcome Sanger Institute for the COVID-19 Genomics UK (COG-UK) consortium|Davies|United Kingdom

>Spike|hCoV-19/Turkey/IST-GLAB-293/2020|2020-05-23|EPI\_ISL\_735337|Original|hCoV-19^^Istanbul|Human|Genomic Laboratory (GLAB) (Conjoint lab of Health Directorate of Istanbul and Istanbul Technical University)|Genomic Laboratory (GLAB)|Karacan|Turkey

>Spike|hCoV-19/USA/MI-MDHHS-SC22102/2020|2020-05-01|EPI\_ISL\_594214|Original|hCoV-19^^Michigan|Human|Michigan Department of Health and Human Services|Michigan Department of Health and Human Services|Jacob|USA

>Spike|hCoV-19/England/QEUEH-9AF5DE/2020|2020-08-31|EPI\_ISL\_559851|Original|hCoV-19^^England|Human|Oxford Viromics|COVID-19 Genomics UK (COG-UK) Consortium|Golubchik|United Kingdom

>Spike|hCoV-19/Wales/PHWC-482E17/2020|2020-10-21|EPI\_ISL\_627745|Original|hCoV-19^^Wales|Human|Wales Specialist Virology Centre Sequencing lab|COVID-19 Genomics UK (COG-UK) Consortium|Moore|United Kingdom

>Spike|hCoV-19/Scotland/QEUEH-9CE9CE/2020|2020-09-17|EPI\_ISL\_601890|Original|hCoV-19^^Scotland|Human|Lighthouse Lab in Glasgow|Wellcome Sanger Institute for the COVID-19 Genomics UK (COG-UK) consortium|Davies|United Kingdom

>Spike|hCoV-19/Denmark/DCGC-19878/2020|2020-12-07|EPI\_ISL\_747847|Original|hCoV-19^^Hovedstaden|Human|Department of Virus and Microbiological Special Diagnostics|Albertsen Lab|Michaelsen|Denmark

>Spike|hCoV-19/England/QEUEH-B408B6/2020|2020-11-08|EPI\_ISL\_657136|Original|hCoV-19^^England|Human|Lighthouse Lab in Glasgow|Wellcome Sanger Institute for the COVID-19 Genomics UK (COG-UK) Consortium|Davies|United Kingdom

>Spike|hCoV-19/Wales/PHWC-49AE1C/2020|2020-12-03|EPI\_ISL\_727692|Original|hCoV-19^^Wales|Human|Originating lab|COVID-19 Genomics UK (COG-UK) Consortium|Moore|United Kingdom



>Spike|hCoV-19/England/BIRM-67B51/2020|2020-11-03|EPI\_ISL\_650692|Original|hCoV-19^^England|Human|University of Birmingham|COVID-19 Genomics UK (COG-UK) Consortium|Loman|United Kingdom

>Spike|hCoV-19/Switzerland/BE-ETHZ-310525/2020|2020-10-08|EPI\_ISL\_603593|Original|hCoV-19^^Bern|Human|Viollier AG|Department of Biosystems Science and Engineering|Nadeau|Switzerland

>Spike|hCoV-19/England/QEUEH-C14B84/2020|2020-12-06|EPI\_ISL\_709537|Original|hCoV-19^^England|Human|Lighthouse Lab in Glasgow|Wellcome Sanger Institute for the COVID-19 Genomics UK (COG-UK) Consortium|Davies|United Kingdom

>Spike|hCoV-19/USA/TX-HMH-MCoV-15677/2020|2020-07-09|EPI\_ISL\_785361|Original|hCoV-19^^Texas|Human|Houston Methodist Hospital|Houston Methodist Hospital|Long|USA

>Spike|hCoV-19/England/LOND-12637A7/2020|2020-11-01|EPI\_ISL\_679476|Original|hCoV-19^^England|Human|University College London|COVID-19 Genomics UK (COG-UK) Consortium|Roy|United Kingdom

>Spike|hCoV-19/India/GJ-GBRC-386a/2020|2020-07-11|EPI\_ISL\_524747|Original|hCoV-19^^Gujarat|Human|Sir M P Shah Government Medical College|Gujarat Biotechnology Research Centre|Joshi|India

>Spike|hCoV-19/England/LIVE-A4499/2020|2020-06-30|EPI\_ISL\_500029|Original|hCoV-19^^England|Human|Liverpool Clinical Laboratories|COVID-19 Genomics UK (COG-UK) Consortium|Haldenby|United Kingdom

>Spike|hCoV-19/USA/MA-MGH-00303/2020|2020-04-01|EPI\_ISL\_460379|Original|hCoV-19^^Massachusetts|Human|Massachusetts General Hospital|Infectious Disease Program|Lemieux|USA

>Spike|hCoV-19/Switzerland/BS-UHB-42200131/2020|2020-03-20|EPI\_ISL\_528271|Original|hCoV-19^^Basel-Stadt|Human|University Hospital Basel|University Hospital Basel|Roloff Handschin|Switzerland

>Spike|hCoV-19/Denmark/DCGC-936/2020|2020-03-30|EPI\_ISL\_614523|Original|hCoV-19^^Syddanmark|Human|Department of Virus and Microbiological Special Diagnostics|Albertsen lab|Michaelsen|Denmark

>Spike|hCoV-19/England/QEUEH-AD62F4/2020|2020-10-24|EPI\_ISL\_629928|Original|hCoV-19^^England|Human|Lighthouse Lab in Glasgow|Wellcome Sanger Institute for the COVID-19 Genomics UK (COG-UK) consortium|Davies|United Kingdom

>Spike|hCoV-19/Singapore/63/2020|2020-04-08|EPI\_ISL\_428842|Original|hCoV-19^^Singapore|Human|National Public Health Laboratory|National Public Health Laboratory|Mak|Singapore

>Spike|hCoV-19/England/QEUEH-C16496/2020|2020-12-03|EPI\_ISL\_709464|Original|hCoV-19^^England|Human|Lighthouse Lab in Glasgow|Wellcome Sanger Institute for the COVID-19 Genomics UK (COG-UK) Consortium|Davies|United Kingdom

>Spike|hCoV-19/England/20146018302/2020|2020-04-02|EPI\_ISL\_466037|Original|hCoV-19^^England|Human|Respiratory Virus Unit|Respiratory Virus Unit|Platt|United Kingdom

>Spike|hCoV-19/USA/MI-UM-10034240230/2020|2020-05-18|EPI\_ISL\_578173|Original|hCoV-19^^Michigan|Human|University of Michigan Clinical Microbiology Laboratory|Lauring Lab|Valesano|USA

>Spike|hCoV-19/USA/MI-MDHHS-SC22292/2020|2020-10-30|EPI\_ISL\_666958|Original|hCoV-19^^Michigan|Human|Michigan Department of Health and Human Services|Michigan Department of Health and Human Services|Jacob|USA

>Spike|hCoV-19/Japan/PG-3035/2020|2020-04-00|EPI\_ISL\_691158|Original|hCoV-19^^Japan|Human|Pathogen Genomics Center|Pathogen Genomics Center|Sekizuka|Japan

>Spike|hCoV-19/Denmark/DCGC-19990/2020|2020-12-07|EPI\_ISL\_747914|Original|hCoV-19^^Hovedstaden|Human|Department of Virus and Microbiological Special Diagnostics|Albertsen Lab|Michaelsen|Denmark

>Spike|hCoV-19/Jordan/AQ-ALSR-5253/2020|2020-10-05|EPI\_ISL\_730491|Original|hCoV-19^^Aqaba|Human|Biolab Diagnostic Laboratories|Andersen lab at Scripps Research|Gangavarapu|Jordan

>Spike|hCoV-19/USA/MI-MDHHS-SC20314/2020|2020-03-12|EPI\_ISL\_447111|Original|hCoV-19^^Michigan|Human|Michigan Department of Health and Human Services|Michigan Department of Health and Human Services|Blankenship|USA

>Spike|hCoV-19/USA/CA-SR0431/2020|2020-03-19|EPI\_ISL\_467961|Original|hCoV-19^^California|Human|San Diego County Public Health Laboratory|Andersen lab at Scripps Research|Gangavarapu|USA

>Spike|hCoV-19/England/20128010104/2020|2020-03-19|EPI\_ISL\_423930|Original|hCoV-19^^England|Human|Respiratory Virus Unit|Respiratory Virus Unit|Platt|United Kingdom

>Spike|hCoV-19/Wales/PHWC-48662A/2020|2020-11-01|EPI\_ISL\_639060|Original|hCoV-19^^Wales|Human|Wales Specialist Virology Centre Sequencing lab|COVID-19 Genomics UK (COG-UK) Consortium|Moore|United Kingdom

>Spike|hCoV-19/Singapore/405/2020|2020-04-17|EPI\_ISL\_469154|Original|hCoV-19^^Singapore|Human|National Public Health Laboratory|National Public Health Laboratory|Mak|Singapore

>Spike|hCoV-19/USA/CA-CZB-14124/2020|2020-05-27|EPI\_ISL\_738753|Original|hCoV-19^^California|Human|Alameda County Public Health Lab|Chan-Zuckerberg Biohub|Kamm|USA

>Spike|hCoV-19/France/IDF-8844/2020|2020-07-19|EPI\_ISL\_560645|Original|hCoV-19^^\u00cele-de-France|Human|Hospital|National Reference Center for Viruses of Respiratory Infections|Enouf|France

>Spike|hCoV-19/Denmark/DCGC-13452/2020|2020-11-30|EPI\_ISL\_712808|Original|hCoV-19^^Hovedstaden|Human|Department of Virus and Microbiological Special Diagnostics|Albertsen Lab|Michaelsen|Denmark

>Spike|hCoV-19/England/NORW-F9116/2020|2020-11-26|EPI\_ISL\_702944|Original|hCoV-19^^England|Human|Quadram Institute Bioscience|COVID-19 Genomics UK (COG-UK) Consortium|Alikhan|United Kingdom

>Spike|hCoV-19/Hong Kong/HKPU48-0202/2020|2020-02-11|EPI\_ISL\_419222|Original|hCoV-19^^Hong Kong|Human|Department of Pathology|Department of Health Technology and Informatics|Leung|China

>Spike|hCoV-19/England/LIVE-1DDD13/2020|2020-10-09|EPI\_ISL\_612035|Original|hCoV-19^^England|Human|Liverpool Clinical Laboratories|COVID-19 Genomics UK (COG-UK) Consortium|Haldenby|United Kingdom

>Spike|hCoV-19/England/ALDP-B2626D/2020|2020-11-04|EPI\_ISL\_646490|Original|hCoV-19^^England|Human|Lighthouse Lab in Alderley Park|Wellcome Sanger Institute for the COVID-19 Genomics UK (COG-UK) Consortium|Davies|United Kingdom

>Spike|hCoV-19/England/NORW-21FEA8/2020|2020-12-11|EPI\_ISL\_725075|Original|hCoV-19^^England|Human|Quadram Institute Bioscience|COVID-19 Genomics UK (COG-UK) Consortium|Alikhan|United Kingdom

>Spike|hCoV-19/mink/Canada/D/2020|2020-12-04|EPI\_ISL\_717717|Original|hCoV-19^^British Columbia|Mink|Animal Health Centre|National Centre for Foreign Animal Disease|Kruczkiewicz|Canada

>Spike|hCoV-19/England/205041398/2020|2020-12-07|EPI\_ISL\_766285|Original|hCoV-19^^England|Human|Respiratory Virus Unit|COVID-19 Genomics UK (COG-UK) Consortium|Platt|United Kingdom

>Spike|hCoV-19/England/MILK-9D4EA8/2020|2020-09-17|EPI\_ISL\_601671|Original|hCoV-19^^England|Human|Lighthouse Lab in Milton Keynes|Wellcome Sanger Institute for the COVID-19 Genomics UK (COG-UK) consortium|Davies|United Kingdom

>Spike|hCoV-19/USA/TX-HMH-MCoV-8150/2020|2020-06-29|EPI\_ISL\_784233|Original|hCoV-19^^Texas|Human|Houston Methodist Hospital|Houston Methodist Hospital|Long|USA

>Spike|hCoV-19/USA/NY-Wadsworth-17364-01/2020|2020-03-16|EPI\_ISL\_525615|Original|hCoV-19^^New York|Human|Wadsworth Center|Wadsworth Center|Plitnick|USA

>Spike|hCoV-19/India/TG-CCMB-L1931/2020|2020-06-04|EPI\_ISL\_495171|Original|hCoV-19^^Telangana|Human|CSIR-Centre for Cellular and Molecular Biology|CSIR-Centre for Cellular and Molecular Biology|Banu|India

>Spike|hCoV-19/England/QEUEH-9D0DFA/2020|2020-09-14|EPI\_ISL\_589833|Original|hCoV-19^^England|Human|Lighthouse Lab in Glasgow|Wellcome Sanger Institute for the COVID-19 Genomics UK (COG-UK) consortium|Davies|United Kingdom

>Spike|hCoV-19/England/CAMC-C7488B/2020|2020-12-15|EPI\_ISL\_768950|Original|hCoV-19^^England|Human|Lighthouse Lab in Cambridge|Wellcome Sanger Institute for the COVID-19 Genomics UK (COG-UK) Consortium|Davies|United Kingdom

>Spike|hCoV-19/Wales/PHWC-48555B/2020|2020-10-24|EPI\_ISL\_628190|Original|hCoV-19^^Wales|Human|Wales Specialist Virology Centre Sequencing lab|COVID-19 Genomics UK (COG-UK) Consortium|Moore|United Kingdom

>Spike|hCoV-19/USA/TX-HMH-MCoV-18388/2020|2020-11-18|EPI\_ISL\_784736|Original|hCoV-19^^Texas|Human|Houston Methodist Hospital|Houston Methodist Hospital|Long|USA

>Spike|hCoV-19/USA/TX-HMH-MCoV-10411/2020|2020-07-08|EPI\_ISL\_789459|Original|hCoV-19^^Texas|Human|Houston Methodist Hospital|Houston Methodist Hospital|Long|USA

>Spike|hCoV-19/Wales/PHWC-15FFE6/2020|2020-05-25|EPI\_ISL\_472880|Original|hCoV-19^^Wales|Human|Wales Specialist Virology Centre Sequencing lab|COVID-19 Genomics UK (COG-UK) Consortium|Moore|United Kingdom

>Spike|hCoV-19/Wales/ALDP-C062BD/2020|2020-12-05|EPI\_ISL\_710656|Original|hCoV-19^^Wales|Human|Lighthouse Lab in Alderley Park|Wellcome Sanger Institute for the COVID-19 Genomics UK (COG-UK) Consortium|Davies|United Kingdom

>Spike|hCoV-19/USA/MD-MDH-0233/2020|2020-09-28|EPI\_ISL\_591035|Original|hCoV-19^^Maryland|Human|MD PHL|MD PHL|Keller|USA

>Spike|hCoV-19/England/QEUH-9D188F/2020|2020-09-16|EPI\_ISL\_573666|Original|hCoV-19^^England|Human|University College London|COVID-19 Genomics UK (COG-UK) Consortium|Roy|United Kingdom

>Spike|hCoV-19/England/CAMB-1B6581/2020|2020-09-30|EPI\_ISL\_584289|Original|hCoV-19^^England|Human|Department of Pathology|COVID-19 Genomics UK (COG-UK) Consortium|Goodfellow|United Kingdom

>Spike|hCoV-19/Chile/RM-CMM-27991/2020|2020-03-15|EPI\_ISL\_459857|Original|hCoV-19^^Region Metropolitana de Santiago|Human|Center for Genome Regulation (CRG)|Center for Mathematical Modeling and Center for Genome Regulation. Santiago|Palma V\u00e9jares|Chile

>Spike|hCoV-19/USA/MI-MDHHS-SC20223/2020|2020-03-22|EPI\_ISL\_447193|Original|hCoV-19^^Michigan|Human|Michigan Department of Health and Human Services|Michigan Department of Health and Human Services|Blankenship|USA

>Spike|hCoV-19/USA/MA-MASPHL-00550/2020|2020-05-08|EPI\_ISL\_693036|Original|hCoV-19^^Massachusetts|Human|Massachusetts State Public Health Laboratory|Massachusetts State Public Health Laboratory|Lang|USA

>Spike|hCoV-19/USA/TX-HMH-MCoV-8718/2020|2020-07-01|EPI\_ISL\_780718|Original|hCoV-19^^Texas|Human|Houston Methodist Hospital|Houston Methodist Hospital|Long|USA

>Spike|hCoV-19/Wales/PHWC-487D42/2020|2020-10-29|EPI\_ISL\_639302|Original|hCoV-19^^Wales|Human|Wales Specialist Virology Centre Sequencing lab|COVID-19 Genomics UK (COG-UK) Consortium|Moore|United Kingdom

>Spike|hCoV-19/Australia/VIC10212/2020|2020-08-27|EPI\_ISL\_562824|Original|hCoV-19^^Victoria|Human|Microbiological Diagnostic Unit - Public Health Laboratory (MDU-PHL)|MDU-PHL|Schultz|Australia

>Spike|hCoV-19/England/OXON-ADB13/2020|2020-00-00|EPI\_ISL\_448615|Original|hCoV-19^^England|Human|Oxford Viromics|COVID-19 Genomics UK (COG-UK) Consortium|Golubchik|United Kingdom

>Spike|hCoV-19/Portugal/PT1396/2020|2020-03-27|EPI\_ISL\_511355|Original|hCoV-19^^Portugal|Human|Instituto Nacional de Saude (INSA)|Instituto Nacional de Saude (INSA)|Borges|Portugal

>Spike|hCoV-19/England/CAMC-A410CD/2020|2020-10-06|EPI\_ISL\_609369|Original|hCoV-19^^England|Human|Lighthouse Lab in Cambridge|Wellcome Sanger Institute for the COVID-19 Genomics UK (COG-UK) consortium|Davies|United Kingdom

>Spike|hCoV-19/Denmark/DCGC-18491/2020|2020-12-07|EPI\_ISL\_749243|Original|hCoV-19^^Hovedstaden|Human|Department of Virus and Microbiological Special Diagnostics|Albertsen Lab|Michaelsen|Denmark

>Spike|hCoV-19/USA/CA-IGI-0810/2020|2020-07-17|EPI\_ISL\_677897|Original|hCoV-19^^California|Human|Innovative Genomics Institute|Innovative Genomics Institute|Wyman|USA

>Spike|hCoV-19/Scotland/EDB4950/2020|2020-05-14|EPI\_ISL\_473803|Original|hCoV-19^^Scotland|Human|Virology Department|COVID-19 Genomics UK (COG-UK) Consortium|Williams|United Kingdom

>Spike|hCoV-19/Japan/PG-0973/2020|2020-04-00|EPI\_ISL\_684583|Original|hCoV-19^^Japan|Human|Pathogen Genomics Center|Pathogen Genomics Center|Sekizuka|Japan

>Spike|hCoV-19/Scotland/EDB1677/2020|2020-04-15|EPI\_ISL\_433114|Original|hCoV-19^^Scotland|Human|Virology Department|COVID-19 Genomics UK (COG-UK) Consortium|Williams|United Kingdom

>Spike|hCoV-19/England/204520109/2020|2020-11-02|EPI\_ISL\_637180|Original|hCoV-19^^England|Human|Respiratory Virus Unit|COVID-19 Genomics UK (COG-UK) Consortium|Platt|United Kingdom

>Spike|hCoV-19/Denmark/DCGC-16000/2020|2020-11-23|EPI\_ISL\_714525|Original|hCoV-19^^Sjaelland|Human|Department of Virus and Microbiological Special Diagnostics|Albertsen Lab|Michaelsen|Denmark

>Spike|hCoV-19/USA/MD-CDC-2-3714081/2020|2020-12-03|EPI\_ISL\_751628|Original|hCoV-19^^Maryland|Human|MD DOH Laboratories Administration|Genomics and Discovery|Queen|USA

>Spike|hCoV-19/Australia/VIC10120/2020|2020-08-27|EPI\_ISL\_562796|Original|hCoV-19^^Victoria|Human|Microbiological Diagnostic Unit - Public Health Laboratory (MDU-PHL)|MDU-PHL|Schultz|Australia

>Spike|hCoV-19/England/CAMB-1B1B1B/2020|2020-05-16|EPI\_ISL\_452998|Original|hCoV-19^^England|Human|Department of Pathology|COVID-19 Genomics UK (COG-UK) Consortium|Meredith|United Kingdom

>Spike|hCoV-19/England/NORT-28C310/2020|2020-05-13|EPI\_ISL\_492958|Original|hCoV-19^^England|Human|NU-OMICS DNA Sequencing research facility|Wellcome Sanger Institute for the COVID-19 Genomics UK (COG-UK) consortium|Davies|United Kingdom

>Spike|hCoV-19/USA/WA-S2317/2020|2020-06-11|EPI\_ISL\_496949|Original|hCoV-19^^Washington|Human|Washington State Department of Health|Seattle Flu Study|Lee|USA

>Spike|hCoV-19/England/BRIS-1302D3/2020|2020-04-11|EPI\_ISL\_492657|Original|hCoV-19^^England|Human|PHE South West Regional Laboratory|Wellcome Sanger Institute for the COVID-19 Genomics UK (COG-UK) consortium|Davies|United Kingdom

>Spike|hCoV-19/Denmark/DCGC-14996/2020|2020-11-23|EPI\_ISL\_713464|Original|hCoV-19^^Hovedstaden|Human|Department of Virus and Microbiological Special Diagnostics|Albertsen Lab|Michaelsen|Denmark

>Spike|hCoV-19/England/ALDP-B1CEEE/2020|2020-11-01|EPI\_ISL\_645542|Original|hCoV-19^^England|Human|Lighthouse Lab in Alderley Park|Wellcome Sanger Institute for the COVID-19 Genomics UK (COG-UK) Consortium|Davies|United Kingdom

>Spike|hCoV-19/USA/AZ-TG491575/2020|2020-06-22|EPI\_ISL\_695176|Original|hCoV-19^^Arizona|Human|AZ SPHL|TGen North|French|USA

>Spike|hCoV-19/England/QEUEH-9FA325/2020|2020-09-28|EPI\_ISL\_588207|Original|hCoV-19^^England|Human|Lighthouse Lab in Glasgow|Wellcome Sanger Institute for the COVID-19 Genomics UK (COG-UK) consortium|Davies|United Kingdom

>Spike|hCoV-19/USA/TX-HMH-MCoV-12527/2020|2020-09-29|EPI\_ISL\_789834|Original|hCoV-19^^Texas|Human|Houston Methodist Hospital|Houston Methodist Hospital|Long|USA

>Spike|hCoV-19/France/ARA-121153/2020|2020-12-17|EPI\_ISL\_779790|Original|hCoV-19^^Auvergne-Rh\u00f4ne-Alpes|Human|CNR Virus des Infections Respiratoires - France SUD|CNR Virus des Infections Respiratoires - France SUD|Bal|France

>Spike|hCoV-19/Australia/VIC2855/2020|2020-07-02|EPI\_ISL\_521686|Original|hCoV-19^^Victoria|Human|Microbiological Diagnostic Unit - Public Health Laboratory (MDU-PHL)|MDU-PHL|Schultz|Australia

>Spike|hCoV-19/England/20130033304/2020|2020-03-21|EPI\_ISL\_423600|Original|hCoV-19^^England|Human|Respiratory Virus Unit|Respiratory Virus Unit|Platt|United Kingdom

>Spike|hCoV-19/England/CAMB-7D2F9/2020|2020-04-05|EPI\_ISL\_442263|Original|hCoV-19^^England|Human|Department of Pathology|Wellcome Sanger Institute for the COVID-19 Genomics UK (COG-UK) consortium|Amato|United Kingdom

>Spike|hCoV-19/Finland/25LS11CH3/2020|2020-10-25|EPI\_ISL\_759905|Original|hCoV-19^^Uusimaa|Human|Department of Virology and Immunology|Department of Virology|Smura|Finland

>Spike|hCoV-19/Iceland/592/2020|2020-03-27|EPI\_ISL\_424612|Original|hCoV-19^^Reykjavik|Human|The National University Hospital of Iceland|deCODE genetics|J\u00f0nsson|Iceland

>Spike|hCoV-19/England/MILK-B3A257/2020|2020-11-01|EPI\_ISL\_658980|Original|hCoV-19^^England|Human|Lighthouse Lab in Milton Keynes|Wellcome Sanger Institute for the COVID-19 Genomics UK (COG-UK) Consortium|Davies|United Kingdom

>Spike|hCoV-19/England/ALDP-B1AE4A/2020|2020-11-01|EPI\_ISL\_646044|Original|hCoV-19^^England|Human|Lighthouse Lab in Alderley Park|Wellcome Sanger Institute for the COVID-19 Genomics UK (COG-UK) Consortium|Davies|United Kingdom

>Spike|hCoV-19/USA/TX-HMH-MCoV-19638/2020|2020-11-19|EPI\_ISL\_784002|Original|hCoV-19^^Texas|Human|Houston Methodist Hospital|Houston Methodist Hospital|Long|USA

>Spike|hCoV-19/England/LIVE-A2EE8/2020|2020-05-20|EPI\_ISL\_500016|Original|hCoV-19^^England|Human|Liverpool Clinical Laboratories|COVID-19 Genomics UK (COG-UK) Consortium|Haldenby|United Kingdom

>Spike|hCoV-19/England/QEUA-5470EA/2020|2020-05-14|EPI\_ISL\_533428|Original|hCoV-19^^England|Human|Lighthouse Lab in Glasgow|Wellcome Sanger Institute for the COVID-19 Genomics UK (COG-UK) consortium|Davies|United Kingdom

>Spike|hCoV-19/Denmark/DCGC-21851/2020|2020-12-21|EPI\_ISL\_758405|Original|hCoV-19^^Hovedstaden|Human|Department of Virus and Microbiological Special Diagnostics|Albertsen Lab|Michaelsen|Denmark

>Spike|hCoV-19/Australia/VIC1428/2020|2020-04-17|EPI\_ISL\_456435|Original|hCoV-19^^Victoria|Human|Victorian Infectious Diseases Reference Laboratory (VIDRL)|Microbiological Diagnostic Unit Public Health Laboratory and Victorian Infectious Diseases Reference Laboratory|Schultz|Australia

>Spike|hCoV-19/Jordan/SR-032/2020|2020-03-22|EPI\_ISL\_429992|Original|hCoV-19^^Amman|Human|Biolab Diagnostic Laboratories|Andersen lab at Scripps Research|Gangavarapu|Jordan

>Spike|hCoV-19/South Africa/NHLS-UCT-GS-1920/2020|2020-08-25|EPI\_ISL\_700596|Original|hCoV-19^^Western Cape|Human|Victoria Hospital wv VHW|NHLS/UCT|Iranzadeh|South Africa

>Spike|hCoV-19/Switzerland/BS-UHB-42176560/2020|2020-03-04|EPI\_ISL\_527927|Original|hCoV-19^^Basel-Stadt|Human|University Hospital Basel|University Hospital Basel|Roloff Handschin|Switzerland

>Spike|hCoV-19/England/NORW-ED9A4/2020|2020-00-00|EPI\_ISL\_490508|Original|hCoV-19^^England|Human|Quadram Institute Bioscience|COVID-19 Genomics UK (COG-UK) Consortium|Alikhan|United Kingdom

>Spike|hCoV-19/England/MILK-B8C775/2020|2020-11-13|EPI\_ISL\_675895|Original|hCoV-19^^England|Human|Lighthouse Lab in Milton Keynes|Wellcome Sanger Institute for the COVID-19 Genomics UK (COG-UK) Consortium|Davies|United Kingdom

>Spike|hCoV-19/Northern Ireland/QEUA-96208B/2020|2020-08-10|EPI\_ISL\_531624|Original|hCoV-19^^Northern Ireland|Human|Lighthouse Lab in Glasgow|Wellcome Sanger Institute for the COVID-19 Genomics UK (COG-UK) consortium|Davies|United Kingdom

>Spike|hCoV-19/USA/FL-BPHL-0870/2020|2020-07-07|EPI\_ISL\_514216|Original|hCoV-19^^Florida|Human|Florida Bureau of Public Health Laboratories|Florida Bureau of Public Health Laboratories|Blanton|USA

>Spike|hCoV-19/Denmark/DCGC-9534/2020|2020-11-09|EPI\_ISL\_668504|Original|hCoV-19^^Syddanmark|Human|Department of Virus and Microbiological Special Diagnostics|Albertsen Lab|Michaelsen|Denmark

>Spike|hCoV-19/England/ALDP-A95EA2/2020|2020-10-19|EPI\_ISL\_624577|Original|hCoV-19^^England|Human|Lighthouse Lab in Alderley Park|Wellcome Sanger Institute for the COVID-19 Genomics UK (COG-UK) consortium|Davies|United Kingdom

>Spike|hCoV-19/England/QEUA-B437E3/2020|2020-11-08|EPI\_ISL\_657109|Original|hCoV-19^^England|Human|Lighthouse Lab in Glasgow|Wellcome Sanger Institute for the COVID-19 Genomics UK (COG-UK) Consortium|Davies|United Kingdom

>Spike|hCoV-19/Scotland/QEUA-9DC4EA/2020|2020-09-22|EPI\_ISL\_601145|Original|hCoV-19^^Scotland|Human|Lighthouse Lab in Glasgow|Wellcome Sanger Institute for the COVID-19 Genomics UK (COG-UK) consortium|Davies|United Kingdom

>Spike|hCoV-19/England/MILK-C51611/2020|2020-12-11|EPI\_ISL\_769732|Original|hCoV-19^^England|Human|Lighthouse Lab in Milton Keynes|Wellcome Sanger Institute for the COVID-19 Genomics UK (COG-UK) Consortium|Davies|United Kingdom

>Spike|hCoV-19/Denmark/DCGC-22443/2020|2020-12-14|EPI\_ISL\_757566|Original|hCoV-19^^Sjaelland|Human|Department of Virus and Microbiological Special Diagnostics|Albertsen Lab|Michaelsen|Denmark

>Spike|hCoV-19/England/ALDP-AA5777/2020|2020-10-22|EPI\_ISL\_624998|Original|hCoV-19^^England|Human|Lighthouse Lab in Alderley Park|Wellcome Sanger Institute for the COVID-19 Genomics UK (COG-UK) consortium|Davies|United Kingdom

>Spike|hCoV-19/USA/WI-GMF-02381/2020|2020-05-04|EPI\_ISL\_436900|Original|hCoV-19^^Iowa|Human|Gundersen Molecular Diagnostics Laboratory|Kabara Cancer Research Institute|Kenny|USA

>Spike|hCoV-19/USA/MN-MDH-1995/2020|2020-10-28|EPI\_ISL\_634869|Original|hCoV-19^^Minnesota|Human|Minnesota Department of Health|Minnesota Department of Health|Lorentz|USA

>Spike|hCoV-19/USA/MI-MDHHS-SC20349/2020|2020-03-29|EPI\_ISL\_450628|Original|hCoV-19^^Michigan|Human|Michigan Department of Health and Human Services|Michigan Department of Health and Human Services|Blankenship|USA

>Spike|hCoV-19/Switzerland/BE-ETHZ-310437/2020|2020-10-08|EPI\_ISL\_603511|Original|hCoV-19^^Bern|Human|Viollier AG|Department of Biosystems Science and Engineering|Nadeau|Switzerland

>Spike|hCoV-19/USA/CA-CZB0157/2020|2020-04-08|EPI\_ISL\_428993|Original|hCoV-19^^California|Human|UCSF Clinical Microbiology Laboratory|Chan-Zuckerberg Biohub|Kamm|USA

>Spike|hCoV-19/Scotland/QEUH-A0273C/2020|2020-09-28|EPI\_ISL\_585583|Original|hCoV-19^^Scotland|Human|Quadram Institute Bioscience|COVID-19 Genomics UK (COG-UK) Consortium|Alikhan|United Kingdom

>Spike|hCoV-19/USA/WA-UW-22056/2020|2020-08-03|EPI\_ISL\_570585|Original|hCoV-19^^Washington|Human|UW Virology Lab|UW Virology Lab|Roychoudhury|USA

>Spike|hCoV-19/England/ALDP-A51B6F/2020|2020-10-07|EPI\_ISL\_597971|Original|hCoV-19^^England|Human|Lighthouse Lab in Alderley Park|Wellcome Sanger Institute for the COVID-19 Genomics UK (COG-UK) consortium|Davies|United Kingdom

>Spike|hCoV-19/England/ALDP-A51BF6/2020|2020-10-07|EPI\_ISL\_598218|Original|hCoV-19^^England|Human|Lighthouse Lab in Alderley Park|Wellcome Sanger Institute for the COVID-19 Genomics UK (COG-UK) consortium|Davies|United Kingdom

>Spike|hCoV-19/England/CAMC-BD45DE/2020|2020-11-27|EPI\_ISL\_702222|Original|hCoV-19^^England|Human|Lighthouse Lab in Cambridge|Wellcome Sanger Institute for the COVID-19 Genomics UK (COG-UK) Consortium|Davies|United Kingdom

>Spike|hCoV-19/England/QEUH-9608B2/2020|2020-08-02|EPI\_ISL\_531996|Original|hCoV-19^^England|Human|Lighthouse Lab in Glasgow|Wellcome Sanger Institute for the COVID-19 Genomics UK (COG-UK) consortium|Davies|United Kingdom

>Spike|hCoV-19/USA/TX-HMH-MCoV-14972/2020|2020-10-15|EPI\_ISL\_786456|Original|hCoV-19^^Texas|Human|Houston Methodist Hospital|Houston Methodist Hospital|Long|USA

>Spike|hCoV-19/USA/MI-MDHHS-SC20364/2020|2020-03-14|EPI\_ISL\_450575|Original|hCoV-19^^Michigan|Human|Michigan Department of Health and Human Services|Michigan Department of Health and Human Services|Blankenship|USA

>Spike|hCoV-19/England/QEUH-9981B6/2020|2020-08-26|EPI\_ISL\_537181|Original|hCoV-19^^England|Human|Lighthouse Lab in Glasgow|Wellcome Sanger Institute for the COVID-19 Genomics UK (COG-UK) consortium|Davies|United Kingdom

>Spike|hCoV-19/Greece/251\_32400/2020|2020-03-11|EPI\_ISL\_437901|Original|hCoV-19^^Athens|Human|Laboratory of Microbiology|Laboratory of Biology|Karakasiliotis|Greece

>Spike|hCoV-19/England/ALDP-B46355/2020|2020-11-07|EPI\_ISL\_656108|Original|hCoV-19^^England|Human|Lighthouse Lab in Alderley Park|Wellcome Sanger Institute for the COVID-19 Genomics UK (COG-UK) Consortium|Davies|United Kingdom

>Spike|hCoV-19/USA/NY-NYUMC253/2020|2020-04-05|EPI\_ISL\_428767|Original|hCoV-19^^New York|Human|NYU Langone Health|Departments of Pathology and Medicine|Maurano|USA

>Spike|hCoV-19/Scotland/EDB4381/2020|2020-05-04|EPI\_ISL\_449304|Original|hCoV-19^^Scotland|Human|Virology Department|COVID-19 Genomics UK (COG-UK) Consortium|Williams|United Kingdom

>Spike|hCoV-19/USA/CA-ALSR-4285/2020|2020-10-05|EPI\_ISL\_648937|Original|hCoV-19^^California|Human|San Diego County Public Health Laboratory|Andersen lab at Scripps Research|Gangavarapu|USA

>Spike|hCoV-19/USA/UT-UPHL-2012944794/2020|2020-08-17|EPI\_ISL\_746068|Original|hCoV-19^^Utah|Human|Ginkgo Bioworks Clinical Laboratory|Utah Public Health Laboratory|Young|USA

>Spike|hCoV-19/Wales/PHWC-3176B/2020|2020-04-13|EPI\_ISL\_446482|Original|hCoV-19^^Wales|Human|Wales Specialist Virology Centre|Public Health Wales Microbiology Cardiff|Moore|United Kingdom

>Spike|hCoV-19/England/MILK-ABC31F/2020|2020-10-22|EPI\_ISL\_631068|Original|hCoV-19^^England|Human|Lighthouse Lab in Milton Keynes|Wellcome Sanger Institute for the COVID-19 Genomics UK (COG-UK) consortium|Davies|United Kingdom

>Spike|hCoV-19/Wales/PHWC-48BFEE/2020|2020-11-08|EPI\_ISL\_666378|Original|hCoV-19^^Wales|Human|Wales Specialist Virology Centre Sequencing lab|COVID-19 Genomics UK (COG-UK) Consortium|Moore|United Kingdom

>Spike|hCoV-19/USA/CA-ALSR-4588/2020|2020-07-11|EPI\_ISL\_667024|Original|hCoV-19^^California|Human|San Diego County Public Health Laboratory|Andersen lab at Scripps Research|Gangavarapu|USA

>Spike|hCoV-19/Denmark/DCGC-4269/2020|2020-09-07|EPI\_ISL\_615706|Original|hCoV-19^^Hovedstaden|Human|Department of Virus and Microbiological Special Diagnostics|Albertsen lab|Michaelsen|Denmark

>Spike|hCoV-19/England/MILK-B882E1/2020|2020-11-14|EPI\_ISL\_674365|Original|hCoV-19^^England|Human|Lighthouse Lab in Milton Keynes|Wellcome Sanger Institute for the COVID-19 Genomics UK (COG-UK) Consortium|Davies|United Kingdom

>Spike|hCoV-19/Canada/NS-NML-1320/2020|2020-04-10|EPI\_ISL\_579700|Original|hCoV-19^^Nova Scotia|Human|QEII Health Sciences Centre|National Microbiology Laboratory (NML)|Majer|Canada

>Spike|hCoV-19/England/ALDP-9D7722/2020|2020-09-18|EPI\_ISL\_576583|Original|hCoV-19^^England|Human|Oxford Viromics|COVID-19 Genomics UK (COG-UK) Consortium|Golubchik|United Kingdom

>Spike|hCoV-19/Switzerland/BS-42351014/2020|2020-07-13|EPI\_ISL\_581886|Original|hCoV-19^^Basel-Stadt|Human|University Hospital Basel|University Hospital Basel|Roloff Handschin|Switzerland

>Spike|hCoV-19/England/MILK-9EE97D/2020|2020-09-23|EPI\_ISL\_580735|Original|hCoV-19^^England|Human|Lighthouse Lab in Milton Keynes|Wellcome Sanger Institute for the COVID-19 Genomics UK (COG-UK) consortium|Davies|United Kingdom

>Spike|hCoV-19/England/CAMC-9D2253/2020|2020-09-19|EPI\_ISL\_601506|Original|hCoV-19^^England|Human|Lighthouse Lab in Cambridge|Wellcome Sanger Institute for the COVID-19 Genomics UK (COG-UK) consortium|Davies|United Kingdom

>Spike|hCoV-19/England/ALDP-5AE245/2020|2020-06-17|EPI\_ISL\_558626|Original|hCoV-19^^England|Human|Lighthouse Lab in Alderley Park|Wellcome Sanger Institute for the COVID-19 Genomics UK (COG-UK) consortium|Davies|United Kingdom

>Spike|hCoV-19/Australia/NSW795/2020|2020-07-24|EPI\_ISL\_526137|Original|hCoV-19^^New South Wales|Human|Sydney South West Pathology Service (SSWPS) - Royal Prince Alfred Hospital - NSW Health Pathology|NSW Health Pathology - Institute of Clinical Pathology and Medical Research; Westmead Hospital; University of Sydney|Gall|Australia

>Spike|hCoV-19/England/QEUIH-B9FC07/2020|2020-11-18|EPI\_ISL\_720918|Original|hCoV-19^^England|Human|Lighthouse Lab in Glasgow|Wellcome Sanger Institute for the COVID-19 Genomics UK (COG-UK) Consortium|Davies|United Kingdom

>Spike|hCoV-19/USA/TX-HMH-5415/2020|2020-06-29|EPI\_ISL\_544759|Original|hCoV-19^^Texas|Human|Houston Methodist Hospital|Houston Methodist Hospital|Long|USA

>Spike|hCoV-19/Wales/ALDP-C3A4F6/2020|2020-12-08|EPI\_ISL\_767213|Original|hCoV-19^^Wales|Human|Lighthouse Lab in Alderley Park|Wellcome Sanger Institute for the COVID-19 Genomics UK (COG-UK) Consortium|Davies|United Kingdom

>Spike|hCoV-19/England/CAMB-1BB1A6/2020|2020-11-10|EPI\_ISL\_664823|Original|hCoV-19^^England|Human|Department of Pathology|COVID-19 Genomics UK (COG-UK) Consortium|Goodfellow|United Kingdom

>Spike|hCoV-19/England/NORW-F6726/2020|2020-12-01|EPI\_ISL\_706375|Original|hCoV-19^^England|Human|Quadram Institute Bioscience|COVID-19 Genomics UK (COG-UK) Consortium|Alikhan|United Kingdom

>Spike|hCoV-19/Australia/VIC45/2020|2020-03-11|EPI\_ISL\_419802|Original|hCoV-19^^Victoria|Human|Victorian Infectious Diseases Reference Laboratory (VIDRL)|Victorian Infectious Diseases Reference Laboratory and Microbiological Diagnostic Unit Public Health Laboratory|Schultz|Australia

>Spike|hCoV-19/USA/CA-Q RTP-Donor10/2020|2020-04-01|EPI\_ISL\_490216|Original|hCoV-19^^California|Human|Quest Diagnostics|Q Squared Solutions - Q RTP facility|Weigman|USA

>Spike|hCoV-19/USA/CT-UW-3125/2020|2020-03-27|EPI\_ISL\_485940|Original|hCoV-19^^Connecticut|Human|UW Virology Lab|UW Virology Lab|Roychoudhury|USA

>Spike|hCoV-19/Iceland/385/2020|2020-03-19|EPI\_ISL\_424409|Original|hCoV-19^^Reykjavik|Human|The National University Hospital of Iceland|deCODE genetics|J\u00f3nsson|Iceland

>Spike|hCoV-19/USA/CA-ALSR-2670/2020|2020-07-12|EPI\_ISL\_635621|Original|hCoV-19^^California|Human|San Diego County Public Health Laboratory|Andersen lab at Scripps Research|Gangavarapu|USA

>Spike|hCoV-19/India/TG-CDFD-C1139/2020|2020-05-30|EPI\_ISL\_528550|Original|hCoV-19^^Telangana|Human|National Genomics Core-Center for DNA Fingerprinting and Diagnostics|National Genomics Core-Center for DNA Fingerprinting and Diagnostics (NGC-CDFD)- DBT's PAN-INDIA-1000 Genome consortium|Vashisht|India

>Spike|hCoV-19/Brazil/SP-L8-CD107/2020|2020-03-23|EPI\_ISL\_476454|Original|hCoV-19^^S\u00e3o Paulo|Human|Hospital da Cl\u00ednicas da Faculdade de Medicina da Universidade de S\u00e3o Paulo|Instituto de Medicina Tropical da Univesidade de S\u00e3o Paulo|Sabino|Brazil

>Spike|hCoV-19/USA/MA-MASPHL-00180/2020|2020-04-06|EPI\_ISL\_791640|Original|hCoV-19^^Massachusetts|Human|Massachusetts State Public Health Laboratory|Infectious Disease Program|Park|USA

>Spike|hCoV-19/USA/LA-EVTL08/2020|2020-04-15|EPI\_ISL\_435041|Original|hCoV-19^^Louisiana|Human|LSUHS Emerging Viral Threat Laboratory|Microbial Genome Sequencing Center|Kamil|USA

>Spike|hCoV-19/Russia/MOW-RII-MH2884S/2020|2020-09-23|EPI\_ISL\_733053|Original|hCoV-19^^Moscow|Human|HELIX LLC|WHO National Influenza Centre Russian Federation|Komissarov|Russia

>Spike|hCoV-19/England/PORT-2CF469/2020|2020-04-27|EPI\_ISL\_453683|Original|hCoV-19^^England|Human|Centre for Enzyme Innovation|COVID-19 Genomics UK (COG-UK) Consortium|Robson|United Kingdom

>Spike|hCoV-19/England/CAMB-A98391/2020|2020-12-22|EPI\_ISL\_764343|Original|hCoV-19^^England|Human|Department of Pathology|COVID-19 Genomics UK (COG-UK) Consortium|Goodfellow|United Kingdom

>Spike|hCoV-19/Japan/PG-6614/2020|2020-07-00|EPI\_ISL\_687726|Original|hCoV-19^^Japan|Human|Pathogen Genomics Center|Pathogen Genomics Center|Sekizuka|Japan

>Spike|hCoV-19/Denmark/DCGC-12703/2020|2020-11-16|EPI\_ISL\_682884|Original|hCoV-19^^Hovedstaden|Human|Department of Virus and Microbiological Special Diagnostics|Albertsen Lab|Michaelsen|Denmark

>Spike|hCoV-19/Norway/3824/2020|2020-09-23|EPI\_ISL\_590976|original|hCoV-19^^Rogaland|Human|Dept. of Medical Microbiology|Norwegian Institute of Public Health|Vollan|Norway

>Spike|hCoV-19/USA/AZ-TG280811/2020|2020-04-20|EPI\_ISL\_694162|Original|hCoV-19^^Arizona|Human|AZ SPHL|TGen North|French|USA

>Spike|hCoV-19/USA/CA-CZB-15091/2020|2020-11-20|EPI\_ISL\_739498|Original|hCoV-19^^California|Human|Santa Clara County Public Health Laboratory|Chan-Zuckerberg Biohub|Kamm|USA

>Spike|hCoV-19/England/QEUA-5F4E4C/2020|2020-06-24|EPI\_ISL\_533265|Original|hCoV-19^^England|Human|Lighthouse Lab in Glasgow|Wellcome Sanger Institute for the COVID-19 Genomics UK (COG-UK) consortium|Davies|United Kingdom

>Spike|hCoV-19/USA/MN-MDH-1822/2020|2020-08-19|EPI\_ISL\_602957|Original|hCoV-19^^Minnesota|Human|Minnesota Department of Health|Minnesota Department of Health|Garfin|USA

>Spike|hCoV-19/Belgium/ULG-10644/2020|2020-10-26|EPI\_ISL\_636622|Original|hCoV-19^^Li\u00e8ge|Human|Department of Clinical Microbiology|GIGA Medical Genomics|Durkin|Belgium

>Spike|hCoV-19/England/CAMB-1BD951/2020|2020-12-07|EPI\_ISL\_740991|Original|hCoV-19^^England|Human|Department of Pathology|COVID-19 Genomics UK (COG-UK) Consortium|Goodfellow|United Kingdom

>Spike|hCoV-19/USA/WA-UW-22370/2020|2020-08-08|EPI\_ISL\_570670|Original|hCoV-19^^Washington|Human|UW Virology Lab|UW Virology Lab|Roychoudhury|USA

>Spike|hCoV-19/Portugal/PT0022/2020|2020-03-13|EPI\_ISL\_418007|Original|hCoV-19^^Portugal|Human|H Braga|Instituto Nacional de Sa\u00fade (INSA)|Borges|Portugal



>Spike|hCoV-19/France/ARA-SC718/2020|2020-12-01|EPI\_ISL\_745336|Original|hCoV-19^^Auvergne-Rh\u00f4ne-Alpes|Human|CHU Clermont-Ferrand|CNR Virus des Infections Respiratoires - France SUD|Bal|France

>Spike|hCoV-19/England/ALDP-9ED04C/2020|2020-05-05|EPI\_ISL\_589340|Original|hCoV-19^^England|Human|Lighthouse Lab in Alderley Park|Wellcome Sanger Institute for the COVID-19 Genomics UK (COG-UK) consortium|Davies|United Kingdom

>Spike|hCoV-19/England/ALDP-B62748/2020|2020-11-08|EPI\_ISL\_656418|Original|hCoV-19^^England|Human|Lighthouse Lab in Alderley Park|Wellcome Sanger Institute for the COVID-19 Genomics UK (COG-UK) Consortium|Davies|United Kingdom

>Spike|hCoV-19/England/20149054104/2020|2020-04-04|EPI\_ISL\_466213|Original|hCoV-19^^England|Human|Respiratory Virus Unit|Respiratory Virus Unit|Platt|United Kingdom

>Spike|hCoV-19/South Korea/KDCA0417/2020|2020-10-26|EPI\_ISL\_760201|Original|hCoV-19^^South Korea|Human|Division of Emerging Infectious Diseases|Division of Emerging Infectious Diseases|Park|South Korea

>Spike|hCoV-19/USA/AZ-TG371275/2020|2020-05-16|EPI\_ISL\_694534|Original|hCoV-19^^Arizona|Human|AZ SPHL|TGen North|French|USA

>Spike|hCoV-19/USA/FL-QDX-278/2020|2020-03-19|EPI\_ISL\_571029|Original|hCoV-19^^Florida|Human|Quest Diagnostics|Quest Diagnostics|Kagan|USA

>Spike|hCoV-19/England/MILK-ABBE2E/2020|2020-10-22|EPI\_ISL\_631186|Original|hCoV-19^^England|Human|Lighthouse Lab in Milton Keynes|Wellcome Sanger Institute for the COVID-19 Genomics UK (COG-UK) consortium|Davies|United Kingdom

>Spike|hCoV-19/England/ALDP-9CD2C4/2020|2020-09-16|EPI\_ISL\_566379|Original|hCoV-19^^England|Human|Lighthouse Lab in Alderley Park|Wellcome Sanger Institute for the COVID-19 Genomics UK (COG-UK) consortium|Davies|United Kingdom

>Spike|hCoV-19/Denmark/DCGC-13006/2020|2020-12-07|EPI\_ISL\_712523|Original|hCoV-19^^Hovedstaden|Human|Department of Virus and Microbiological Special Diagnostics|Albertsen Lab|Michaelsen|Denmark

>Spike|hCoV-19/England/NOTT-1144EE/2020|2020-10-07|EPI\_ISL\_577169|Original|hCoV-19^^England|Human|Queens Medical Centre|COVID-19 Genomics UK (COG-UK) Consortium|Loose|United Kingdom

>Spike|hCoV-19/England/QEUEH-AD189D/2020|2020-10-24|EPI\_ISL\_629902|Original|hCoV-19^^England|Human|Lighthouse Lab in Glasgow|Wellcome Sanger Institute for the COVID-19 Genomics UK (COG-UK) consortium|Davies|United Kingdom

>Spike|hCoV-19/USA/FL-BPHL-0383/2020|2020-04-23|EPI\_ISL\_489792|Original|hCoV-19^^Florida|Human|Florida Bureau of Public Health Laboratories|Florida Bureau of Public Health Laboratories|Blanton|USA

>Spike|hCoV-19/Denmark/DCGC-10817/2020|2020-11-02|EPI\_ISL\_670227|Original|hCoV-19^^Syddanmark|Human|Department of Virus and Microbiological Special Diagnostics|Albertsen Lab|Michaelsen|Denmark

>Spike|hCoV-19/England/ALDP-C3B89F/2020|2020-12-11|EPI\_ISL\_731554|Original|hCoV-19^^England|Human|Lighthouse Lab in Alderley Park|Wellcome Sanger Institute for the COVID-19 Genomics UK (COG-UK) Consortium|Davies|United Kingdom

>Spike|hCoV-19/England/MILK-A69CAD/2020|2020-10-09|EPI\_ISL\_608824|Original|hCoV-19^^England|Human|Lighthouse Lab in Milton Keynes|Wellcome Sanger Institute for the COVID-19 Genomics UK (COG-UK) consortium|Davies|United Kingdom

>Spike|hCoV-19/Scotland/CVR2579/2020|2020-04-16|EPI\_ISL\_473517|Original|hCoV-19^^Scotland|Human|West of Scotland Specialist Virology Centre|COVID-19 Genomics UK (COG-UK) Consortium|Robertson|United Kingdom

>Spike|hCoV-19/India/MH-ACTREC-437/2020|2020-08-05|EPI\_ISL\_700086|Original|hCoV-19^^Maharashtra|Human|Hematopathology Laboratory|Hematopathology Laboratory|Patkar|India

>Spike|hCoV-19/England/QEUEH-9DCA42/2020|2020-09-21|EPI\_ISL\_580969|Original|hCoV-19^^England|Human|Lighthouse Lab in Glasgow|Wellcome Sanger Institute for the COVID-19 Genomics UK (COG-UK) consortium|Davies|United Kingdom

>Spike|hCoV-19/Zimbabwe/ZW-6972/2020|2020-05-01|EPI\_ISL\_644758|Original|hCoV-19^^Zimbabwe|Human|National Microbiology Reference Laboratory|Quadram Institute Bioscience|Alikhan|Zimbabwe

>Spike|hCoV-19/England/CAMC-B373DF/2020|2020-11-05|EPI\_ISL\_645404|Original|hCoV-19^^England|Human|Lighthouse Lab in Cambridge|Wellcome Sanger Institute for the COVID-19 Genomics UK (COG-UK) Consortium|Davies|United Kingdom

>Spike|hCoV-19/USA/UT-08410/2020|2020-05-26|EPI\_ISL\_524188|Original|hCoV-19^^Utah|Human|Utah Public Health Laboratory|Utah Public Health Laboratory|Young|USA

>Spike|hCoV-19/England/QEUEH-AEFDE8/2020|2020-10-29|EPI\_ISL\_662830|Original|hCoV-19^^England|Human|Lighthouse Lab in Glasgow|Wellcome Sanger Institute for the COVID-19 Genomics UK (COG-UK) Consortium|Davies|United Kingdom

>Spike|hCoV-19/Spain/MD-HLP-65/2020|2020-04-18|EPI\_ISL\_530068|Original|hCoV-19^^Madrid|Human|Hospital Universitario La Paz|Hospital Universitario La Paz|Viedma|Spain

>Spike|hCoV-19/Australia/VIC3186/2020|2020-07-02|EPI\_ISL\_520873|Original|hCoV-19^^Victoria|Human|Victorian Infectious Diseases Reference Laboratory (VIDRL)|VIDRL and MDU-PHL|Schultz|Australia

>Spike|hCoV-19/England/CAMC-BFB42F/2020|2020-12-04|EPI\_ISL\_709018|Original|hCoV-19^^England|Human|Lighthouse Lab in Cambridge|Wellcome Sanger Institute for the COVID-19 Genomics UK (COG-UK) Consortium|Davies|United Kingdom

>Spike|hCoV-19/Wales/PHWC-30BD9/2020|2020-04-10|EPI\_ISL\_446334|Original|hCoV-19^^Wales|Human|Wales Specialist Virology Centre|Public Health Wales Microbiology Cardiff|Moore|United Kingdom

>Spike|hCoV-19/England/QEUEH-9DD62F/2020|2020-09-21|EPI\_ISL\_599806|Original|hCoV-19^^England|Human|Lighthouse Lab in Glasgow|Wellcome Sanger Institute for the COVID-19 Genomics UK (COG-UK) consortium|Davies|United Kingdom

>Spike|hCoV-19/USA/AZ-TG640916/2020|2020-04-10|EPI\_ISL\_695815|Original|hCoV-19^^Arizona|Human|Sonora Quest Laboratories|TGen North|French|USA

>Spike|hCoV-19/India/MH-NIV-212454/2020|2020-09-15|EPI\_ISL\_577643|Original|hCoV-19^^Maharashtra|Human|NIV Influenza|NIV Influenza|Potdar|India

>Spike|hCoV-19/Denmark/DCGC-21292/2020|2020-12-21|EPI\_ISL\_759066|Original|hCoV-19^^Hovedstaden|Human|Department of Virus and Microbiological Special Diagnostics|Albertsen Lab|Michaelsen|Denmark

>Spike|hCoV-19/Scotland/CVR46/2020|2020-03-13|EPI\_ISL\_425774|Original|hCoV-19^^Scotland|Human|West of Scotland Specialist Virology Centre|COVID-19 Genomics UK (COG-UK) Consortium|Robertson|United Kingdom

>Spike|hCoV-19/England/MILK-99E02C/2020|2020-08-30|EPI\_ISL\_550698|Original|hCoV-19^^England|Human|Lighthouse Lab in Milton Keynes|Wellcome Sanger Institute for the COVID-19 Genomics UK (COG-UK) consortium|Davies|United Kingdom

>Spike|hCoV-19/USA/TX-HMH-MCoV-14082/2020|2020-08-14|EPI\_ISL\_787368|Original|hCoV-19^^Texas|Human|Houston Methodist Hospital|Houston Methodist Hospital|Long|USA

>Spike|hCoV-19/England/MILK-B02926/2020|2020-10-24|EPI\_ISL\_642865|Original|hCoV-19^^England|Human|Lighthouse Lab in Milton Keynes|Wellcome Sanger Institute for the COVID-19 Genomics UK (COG-UK) Consortium|Davies|United Kingdom

>Spike|hCoV-19/England/QEUEH-B404B2/2020|2020-11-08|EPI\_ISL\_657333|Original|hCoV-19^^England|Human|Lighthouse Lab in Glasgow|Wellcome Sanger Institute for the COVID-19 Genomics UK (COG-UK) Consortium|Davies|United Kingdom

>Spike|hCoV-19/Denmark/DCGC-6065/2020|2020-10-05|EPI\_ISL\_620259|Original|hCoV-19^^Syddanmark|Human|Department of Virus and Microbiological Special Diagnostics|Albertsen lab|Michaelsen|Denmark

>Spike|hCoV-19/Scotland/CVR4884/2020|2020-10-06|EPI\_ISL\_650497|Original|hCoV-19^^Scotland|Human|West of Scotland Specialist Virology Centre|COVID-19 Genomics UK (COG-UK) Consortium|Robertson|United Kingdom

>Spike|hCoV-19/Wales/PHWC-4A0F89/2020|2020-12-13|EPI\_ISL\_743601|Original|hCoV-19^^Wales|Human|Wales Specialist Virology Centre Sequencing lab|COVID-19 Genomics UK (COG-UK) Consortium|Moore|United Kingdom

>Spike|hCoV-19/Japan/PG-4276/2020|2020-07-00|EPI\_ISL\_692506|Original|hCoV-19^^Japan|Human|Pathogen Genomics Center|Pathogen Genomics Center|Sekizuka|Japan

>Spike|hCoV-19/Belgium/ULG-10575/2020|2020-10-23|EPI\_ISL\_626319|Original|hCoV-19^^Li\u00e8ge|Human|Department of Clinical Microbiology|GIGA Medical Genomics|Durkin|Belgium

>Spike|hCoV-19/England/QEUEH-A5E3C4/2020|2020-10-12|EPI\_ISL\_597444|Original|hCoV-19^^England|Human|Lighthouse Lab in Glasgow|Wellcome Sanger Institute for the COVID-19 Genomics UK (COG-UK) consortium|Davies|United Kingdom

>Spike|hCoV-19/Norway/2875/2020|2020-07-10|EPI\_ISL\_500794|Original|hCoV-19^^Norway|Human|Akershus University Hospital|Norwegian Institute of Public Health|Kopperud Riis|Norway

>Spike|hCoV-19/England/ALDP-6FD70B/2020|2020-06-29|EPI\_ISL\_557484|Original|hCoV-19^^England|Human|Lighthouse Lab in Alderley Park|Wellcome Sanger Institute for the COVID-19 Genomics UK (COG-UK) consortium|Davies|United Kingdom

>Spike|hCoV-19/Scotland/CVR2664/2020|2020-04-17|EPI\_ISL\_478012|Original|hCoV-19^^Scotland|Human|West of Scotland Specialist Virology Centre|COVID-19 Genomics UK (COG-UK) Consortium|Robertson|United Kingdom

>Spike|hCoV-19/Denmark/DCGC-22331/2020|2020-12-14|EPI\_ISL\_758682|Original|hCoV-19^^Midtjylland|Human|Department of Virus and Microbiological Special Diagnostics|Albertsen Lab|Michaelsen|Denmark

>Spike|hCoV-19/Japan/PG-6480/2020|2020-08-00|EPI\_ISL\_689585|Original|hCoV-19^^Japan|Human|Pathogen Genomics Center|Pathogen Genomics Center|Sekizuka|Japan

>Spike|hCoV-19/Canada/BC-BCCDC-8360/2020|2020-11-00|EPI\_ISL\_740751|Original|hCoV-19^^British Columbia|Human|BCCDC Public Health Laboratory|BCCDC Public Health Laboratory|Prystajacky|Canada

>Spike|hCoV-19/England/20102000506/2020|2020-03-01|EPI\_ISL\_415147|Original|hCoV-19^^England|Human|Respiratory Virus Unit|Respiratory Virus Unit|Platt|United Kingdom

>Spike|hCoV-19/USA/MN-QDX-2727/2020|2020-03-14|EPI\_ISL\_605033|Original|hCoV-19^^Minnesota|Human|Quest Diagnostics|Quest Diagnostics|Kagan|USA

>Spike|hCoV-19/Australia/VIC9220/2020|2020-08-21|EPI\_ISL\_565450|Original|hCoV-19^^Victoria|Human|Microbiological Diagnostic Unit - Public Health Laboratory (MDU-PHL)|MDU-PHL|Schultz|Australia

>Spike|hCoV-19/USA/NY-NYUMC201/2020|2020-04-01|EPI\_ISL\_427496|Original|hCoV-19^^New York|Human|NYU Langone Health|Departments of Pathology and Medicine|Maurano|USA

>Spike|hCoV-19/Denmark/DCGC-4510/2020|2020-09-14|EPI\_ISL\_615371|Original|hCoV-19^^Midtjylland|Human|Department of Virus and Microbiological Special Diagnostics|Albertsen lab|Michaelsen|Denmark

>Spike|hCoV-19/England/CAMB-72DC6/2020|2020-03-21|EPI\_ISL\_440108|Original|hCoV-19^^England|Human|Department of Pathology|Wellcome Sanger Institute for the COVID-19 Genomics UK (COG-UK) consortium|Amato|United Kingdom

>Spike|hCoV-19/England/ALDP-BC6162/2020|2020-11-22|EPI\_ISL\_721484|Original|hCoV-19^^England|Human|Lighthouse Lab in Alderley Park|Wellcome Sanger Institute for the COVID-19 Genomics UK (COG-UK) Consortium|Davies|United Kingdom

>Spike|hCoV-19/Tunisia/63686/2020|2020-12-01|EPI\_ISL\_733499|Original|hCoV-19^^Nabeul|Human|1-Laboratory of Microbiology|1-Clinical and Experimental Pharmacology Lab|Boutiba-Ben Boubaker|Tunisia

>Spike|hCoV-19/England/201120060/2020|2020-03-09|EPI\_ISL\_464666|Original|hCoV-19^^England|Human|Respiratory Virus Unit|Respiratory Virus Unit|Platt|United Kingdom

>Spike|hCoV-19/England/CAMB-7C148/2020|2020-04-13|EPI\_ISL\_433999|Original|hCoV-19^^England|Human|Department of Pathology|COVID-19 Genomics UK (COG-UK) Consortium|Meredith|United Kingdom

>Spike|hCoV-19/USA/CA-CZB-3909/2020|2020-07-22|EPI\_ISL\_548545|Original|hCoV-19^^California|Human|Contra Costa Public Health Lab|Chan-Zuckerberg Biohub|Bhatt|USA

>Spike|hCoV-19/England/NORW-F2441/2020|2020-11-03|EPI\_ISL\_637602|Original|hCoV-19^^England|Human|Quadram Institute Bioscience|COVID-19 Genomics UK (COG-UK) Consortium|Alikhan|United Kingdom

>Spike|hCoV-19/Wales/PHWC-1643E2/2020|2020-05-07|EPI\_ISL\_474172|Original|hCoV-19^^Wales|Human|Originating lab|COVID-19 Genomics UK (COG-UK) Consortium|Moore|United Kingdom

>Spike|hCoV-19/England/MILK-C2FE41/2020|2020-12-07|EPI\_ISL\_782793|Original|hCoV-19^^England|Human|Lighthouse Lab in Milton Keynes|Wellcome Sanger Institute for the COVID-19 Genomics UK (COG-UK) Consortium|Davies|United Kingdom

>Spike|hCoV-19/England/CAMC-B3706F/2020|2020-11-05|EPI\_ISL\_645498|Original|hCoV-19^^England|Human|Lighthouse Lab in Cambridge|Wellcome Sanger Institute for the COVID-19 Genomics UK (COG-UK) Consortium|Davies|United Kingdom

>Spike|hCoV-19/Switzerland/ZH-ETHZ-310453/2020|2020-10-07|EPI\_ISL\_603525|Original|hCoV-19^^Zurich|Human|Viollier AG|Department of Biosystems Science and Engineering|Nadeau|Switzerland

>Spike|hCoV-19/England/ALDP-A2D3CE/2020|2020-10-05|EPI\_ISL\_586707|Original|hCoV-19^^England|Human|Lighthouse Lab in Alderley Park|Wellcome Sanger Institute for the COVID-19 Genomics UK (COG-UK) consortium|Davies|United Kingdom

>Spike|hCoV-19/Australia/VIC7499/2020|2020-07-21|EPI\_ISL\_564451|Original|hCoV-19^^Victoria|Human|Microbiological Diagnostic Unit - Public Health Laboratory (MDU-PHL)|MDU-PHL|Schultz|Australia

>Spike|hCoV-19/England/204380383/2020|2020-10-22|EPI\_ISL\_649844|Original|hCoV-19^^England|Human|Respiratory Virus Unit|COVID-19 Genomics UK (COG-UK) Consortium|Platt|United Kingdom

>Spike|hCoV-19/Switzerland/BE-ETHZ-280159/2020|2020-09-08|EPI\_ISL\_560440|Original|hCoV-19^^Bern|Human|Viollier AG|Department of Biosystems Science and Engineering|Nadeau|Switzerland

>Spike|hCoV-19/England/BRIS-127E62/2020|2020-04-17|EPI\_ISL\_469654|Original|hCoV-19^^England|Human|PHE South West Regional Laboratory|Wellcome Sanger Institute for the COVID-19 Genomics UK (COG-UK) consortium|Davies|United Kingdom

>Spike|hCoV-19/England/ALDP-A6FBAA/2020|2020-10-15|EPI\_ISL\_607031|Original|hCoV-19^^England|Human|Lighthouse Lab in Alderley Park|Wellcome Sanger Institute for the COVID-19 Genomics UK (COG-UK) consortium|Davies|United Kingdom

>Spike|hCoV-19/England/MILK-9F20EA/2020|2020-09-24|EPI\_ISL\_589081|Original|hCoV-19^^England|Human|Lighthouse Lab in Milton Keynes|Wellcome Sanger Institute for the COVID-19 Genomics UK (COG-UK) consortium|Davies|United Kingdom

>Spike|hCoV-19/Palestine/31/2020|2020-03-31|EPI\_ISL\_596516|Original|hCoV-19^^Jerusalem|Human|Palestinian Ministry of Health|Molecular Genetics Lab|van Dorp|Palestine

>Spike|hCoV-19/Shanghai/SH01/2020|2020-02-02|EPI\_ISL\_414510|Vero|hCoV-19^^Shanghai|Human|Key Laboratory of Medical Molecular Virology (MOE/NHC/CAMS)|Key Laboratory of Medical Molecular Virology (MOE/NHC/CAMS)|Submitter|China

>Spike|hCoV-19/England/CAMC-B77EB4/2020|2020-11-12|EPI\_ISL\_668368|Original|hCoV-19^^England|Human|Lighthouse Lab in Cambridge|Wellcome Sanger Institute for the COVID-19 Genomics UK (COG-UK) Consortium|Davies|United Kingdom

>Spike|hCoV-19/Belgium/reg-0429665/2020|2020-04-29|EPI\_ISL\_734685|Original|hCoV-19^^Baal|Human|UZ Leuven|KU Leuven|Maes|Belgium

>Spike|hCoV-19/South Africa/KRISP-045/2020|2020-03-27|EPI\_ISL\_436686|Original|hCoV-19^^KwaZulu-Natal|Human|KRISP|KRISP|de Oliveira|South Africa

>Spike|hCoV-19/Wales/PHWC-4A4802/2020|2020-12-17|EPI\_ISL\_764734|Original|hCoV-19^^Wales|Human|Wales Specialist Virology Centre Sequencing lab|COVID-19 Genomics UK (COG-UK) Consortium|Moore|United Kingdom

>Spike|hCoV-19/England/ALDP-A66D52/2020|2020-10-12|EPI\_ISL\_630605|Original|hCoV-19^^England|Human|Lighthouse Lab in Alderley Park|Wellcome Sanger Institute for the COVID-19 Genomics UK (COG-UK) consortium|Davies|United Kingdom

>Spike|hCoV-19/Wales/PHWC-16F7BE/2020|2020-10-05|EPI\_ISL\_586019|Original|hCoV-19^^Wales|Human|Wales Specialist Virology Centre Sequencing lab|COVID-19 Genomics UK (COG-UK) Consortium|Moore|United Kingdom

>Spike|hCoV-19/Japan/IC-0003/2020|2020-03-00|EPI\_ISL\_591349|Original|hCoV-19^^Japan|Human|Pathogen Genomics Center|Pathogen Genomics Center|Sekizuka|Japan

>Spike|hCoV-19/England/ALDP-9D8C31/2020|2020-09-18|EPI\_ISL\_576657|Original|hCoV-19^^England|Human|Oxford Viromics|COVID-19 Genomics UK (COG-UK) Consortium|Golubchik|United Kingdom

>Spike|hCoV-19/South Korea/KCDC2252/2020|2020-05-12|EPI\_ISL\_510590|Original|hCoV-19^^South Korea|Human|Division of Viral Diseases|Division of Viral Diseases|Kim|South Korea

>Spike|hCoV-19/Wales/PHWC-2A6C2/2020|2020-04-05|EPI\_ISL\_445606|Original|hCoV-19^^Wales|Human|Wales Specialist Virology Centre|Public Health Wales Microbiology Cardiff|Moore|United Kingdom

>Spike|hCoV-19/Saudi Arabia/KAIMRC60/2020|2020-03-31|EPI\_ISL\_507025|unknown|hCoV-19^^Saudi Arabia|Human|unknown|Infectious Diseases Research|Submitter|Saudi Arabia

>Spike|hCoV-19/Portugal/PT0189/2020|2020-03-29|EPI\_ISL\_453905|Original|hCoV-19^^Portugal|Human|unknown|Instituto Nacional de Saude (INSA)|Borges|Portugal

>Spike|hCoV-19/Belgium/reg-0802749/2020|2020-08-02|EPI\_ISL\_734871|Original|hCoV-19^^Antwerpen|Human|UZ Leuven|KU Leuven|Maes|Belgium

>Spike|hCoV-19/Panama/330553/2020|2020-03-19|EPI\_ISL\_496667|Original|hCoV-19^^Panama West|Human|Gorgas Memorial Laboratory of Health Studies|Gorgas Memorial Laboratory of Health Studies|Martinez|Panama

>Spike|hCoV-19/South Korea/KCDC2334/2020|2020-05-26|EPI\_ISL\_510670|Original|hCoV-19^^South Korea|Human|Division of Viral Diseases|Division of Viral Diseases|Kim|South Korea

>Spike|hCoV-19/Saudi Arabia/KAUST-MAKKAH117/2020|2020-03-24|EPI\_ISL\_678082|Original|hCoV-19^^Makkah|Human|Pathogen Genomics Lab King Abdullah University of Science and Technology(KAUST)|Pathogen Genomics Lab King Abdullah University of Science and Technology(KAUST)|Mohamed Ghazzali|Saudi Arabia

>Spike|hCoV-19/England/CAMC-B0B4D1/2020|2020-10-29|EPI\_ISL\_643423|Original|hCoV-19^^England|Human|Lighthouse Lab in Cambridge|Wellcome Sanger Institute for the COVID-19 Genomics UK (COG-UK) Consortium|Davies|United Kingdom

>Spike|hCoV-19/USA/TX-HMH-MCoV-8409/2020|2020-07-07|EPI\_ISL\_783589|Original|hCoV-19^^Texas|Human|Houston Methodist Hospital|Houston Methodist Hospital|Long|USA

>Spike|hCoV-19/England/201360184/2020|2020-03-24|EPI\_ISL\_421770|Original|hCoV-19^^England|Human|Respiratory Virus Unit|Respiratory Virus Unit|Platt|United Kingdom

>Spike|hCoV-19/England/20168001304/2020|2020-04-15|EPI\_ISL\_466591|Original|hCoV-19^^England|Human|Respiratory Virus Unit|Respiratory Virus Unit|Platt|United Kingdom

>Spike|hCoV-19/England/LIVE-A84A4/2020|2020-03-26|EPI\_ISL\_517169|Original|hCoV-19^^England|Human|Liverpool Clinical Laboratories|COVID-19 Genomics UK (COG-UK) Consortium|Haldenby|United Kingdom

>Spike|hCoV-19/Denmark/DCGC-3967/2020|2020-09-14|EPI\_ISL\_615880|Original|hCoV-19^^Hovedstaden|Human|Department of Virus and Microbiological Special Diagnostics|Albertsen lab|Michaelsen|Denmark

>Spike|hCoV-19/England/ALDP-AA36C7/2020|2020-10-22|EPI\_ISL\_625101|Original|hCoV-19^^England|Human|Lighthouse Lab in Alderley Park|Wellcome Sanger Institute for the COVID-19 Genomics UK (COG-UK) consortium|Davies|United Kingdom

>Spike|hCoV-19/Singapore/247/2020|2020-04-07|EPI\_ISL\_462365|Original|hCoV-19^^Singapore|Human|National Public Health Laboratory|National Public Health Laboratory|Mak|Singapore

>Spike|hCoV-19/Scotland/CVR1905/2020|2020-04-08|EPI\_ISL\_477833|Original|hCoV-19^^Scotland|Human|West of Scotland Specialist Virology Centre|COVID-19 Genomics UK (COG-UK) Consortium|Robertson|United Kingdom

>Spike|hCoV-19/England/ALDP-CBE4DC/2020|2020-12-19|EPI\_ISL\_760663|Original|hCoV-19^^England|Human|Lighthouse Lab in Alderley Park|Wellcome Sanger Institute for the COVID-19 Genomics UK (COG-UK) Consortium|Davies|United Kingdom

>Spike|hCoV-19/USA/MA-MASPHL-00731/2020|2020-09-21|EPI\_ISL\_692941|Original|hCoV-19^^Massachusetts|Human|Massachusetts State Public Health Laboratory|Massachusetts State Public Health Laboratory|Lang|USA

>Spike|hCoV-19/Denmark/DCGC-18735/2020|2020-12-07|EPI\_ISL\_749262|Original|hCoV-19^^Sjælland|Human|Department of Virus and Microbiological Special Diagnostics|Albertsen Lab|Michaelsen|Denmark

>Spike|hCoV-19/Australia/VIC3963/2020|2020-07-15|EPI\_ISL\_519356|Original|hCoV-19^^Victoria|Human|Microbiological Diagnostic Unit - Public Health Laboratory (MDU-PHL)|MDU-PHL|Schultz|Australia

>Spike|hCoV-19/England/LOND-12F08AC/2020|2020-11-19|EPI\_ISL\_679586|Original|hCoV-19^^England|Human|University College London|COVID-19 Genomics UK (COG-UK) Consortium|Roy|United Kingdom

>Spike|hCoV-19/England/ALDP-A5118B/2020|2020-10-07|EPI\_ISL\_597950|Original|hCoV-19^^England|Human|Lighthouse Lab in Alderley Park|Wellcome Sanger Institute for the COVID-19 Genomics UK (COG-UK) consortium|Davies|United Kingdom

>Spike|hCoV-19/Brazil/RJ-00571/2020|2020-11-05|EPI\_ISL\_717955|Original|hCoV-19^^Rio de Janeiro|Human|Laboratorio de Virologia Molecular / UFRJ|Bioinformatics Laboratory / LNCC|Almeida|Brazil

>Spike|hCoV-19/England/LIVE-9EE76/2020|2020-04-10|EPI\_ISL\_453404|Original|hCoV-19^^England|Human|Liverpool Clinical Laboratories|COVID-19 Genomics UK (COG-UK) Consortium|Haldenby|United Kingdom

>Spike|hCoV-19/England/BRIS-124560/2020|2020-04-08|EPI\_ISL\_492798|Original|hCoV-19^^England|Human|PHE South West Regional Laboratory|Wellcome Sanger Institute for the COVID-19 Genomics UK (COG-UK) consortium|Davies|United Kingdom

>Spike|hCoV-19/USA/WI-UW-1160/2020|2020-08-06|EPI\_ISL\_522916|Original|hCoV-19^^Wisconsin|Human|University of Wisconsin-Madison AIDS Vaccine Research Laboratories|University of Wisconsin-Madison AIDS Vaccine Research Laboratories|Baczenas|USA

>Spike|hCoV-19/Netherlands/ZH-EMC-771/2020|2020-10-04|EPI\_ISL\_632607|Original|hCoV-19^^Zuid Holland|Human|Dutch COVID-19 response team|Erasmus Medical Center|Oude Munnink|Netherlands

>Spike|hCoV-19/Spain/VC-IBV-98003609/2020|2020-03-16|EPI\_ISL\_538626|Original|hCoV-19^^Comunitat Valenciana|Human|Servicio de Microbiolog\u00eda. Hospital General Universitario de Castell\u00f3n|SeqCOVID-SPAIN consortium/IBV(CSIC)|Comas|Spain

>Spike|hCoV-19/Netherlands/NA\_239/2020|2020-03-27|EPI\_ISL\_422773|Original|hCoV-19^^Netherlands|Human|Dutch COVID-19 response team|Erasmus Medical Center|Oude Munnink|Netherlands

>Spike|hCoV-19/England/CAMB-7B1EF/2020|2020-04-12|EPI\_ISL\_433931|Original|hCoV-19^^England|Human|Department of Pathology|COVID-19 Genomics UK (COG-UK) Consortium|Meredith|United Kingdom

>Spike|hCoV-19/Australia/NSW347/2020|2020-03-27|EPI\_ISL\_451608|Original|hCoV-19^^New South Wales|Human|Pathology Sydney South West - NSW Health Pathology|NSW Health Pathology - Institute of Clinical Pathology and Medical Research; Westmead Hospital; University of Sydney|Gall|Australia

>Spike|hCoV-19/USA/TX-HMH-7886/2020|2020-07-01|EPI\_ISL\_545682|Original|hCoV-19^^Texas|Human|Houston Methodist Hospital|Houston Methodist Hospital|Long|USA

>Spike|hCoV-19/Australia/VIC1372/2020|2020-04-14|EPI\_ISL\_456414|Original|hCoV-19^^Victoria|Human|Victorian Infectious Diseases Reference Laboratory (VIDRL)|Microbiological Diagnostic Unit Public Health Laboratory and Victorian Infectious Diseases Reference Laboratory|Schultz|Australia

>Spike|hCoV-19/England/ALDP-6E9ADC/2020|2020-06-29|EPI\_ISL\_557622|Original|hCoV-19^^England|Human|Lighthouse Lab in Alderley Park|Wellcome Sanger Institute for the COVID-19 Genomics UK (COG-UK) consortium|Davies|United Kingdom

>Spike|hCoV-19/England/CAMC-CB9ED3/2020|2020-12-18|EPI\_ISL\_777832|Original|hCoV-19^^England|Human|Lighthouse Lab in Cambridge|Wellcome Sanger Institute for the COVID-19 Genomics UK (COG-UK) Consortium|Davies|United Kingdom

>Spike|hCoV-19/Australia/VIC3445/2020|2020-07-06|EPI\_ISL\_521111|Original|hCoV-19^^Victoria|Human|Victorian Infectious Diseases Reference Laboratory (VIDRL)|VIDRL and MDU-PHL|Schultz|Australia

>Spike|hCoV-19/Wales/PHWC-4983E2/2020|2020-12-01|EPI\_ISL\_727069|Original|hCoV-19^^Wales|Human|Originating lab|COVID-19 Genomics UK (COG-UK) Consortium|Moore|United Kingdom

>Spike|hCoV-19/Saudi Arabia/KAUST-MAKKAH185/2020|2020-04-06|EPI\_ISL\_678231|Original|hCoV-19^^Makkah|Human|Pathogen Genomics Lab King Abdullah University of Science and Technology(KAUST)|Pathogen Genomics Lab King Abdullah University of Science and Technology(KAUST)|Mohamed Ghazzali|Saudi Arabia

>Spike|hCoV-19/Netherlands/FL-RIVM-20860/2020|2020-12-21|EPI\_ISL\_790829|Original|hCoV-19^^Flevoland|Human|Dutch COVID-19 response team|National Institute for Public Health and the Environment (RIVM)|Meijer|Netherlands

>Spike|hCoV-19/Denmark/DCGC-11068/2020|2020-11-02|EPI\_ISL\_669599|Original|hCoV-19^^Nordjylland|Human|Department of Virus and Microbiological Special Diagnostics|Albertsen Lab|Michaelsen|Denmark

>Spike|hCoV-19/USA/UT-UPHL-2009618/2020|2020-07-19|EPI\_ISL\_605295|Original|hCoV-19^^Utah|Human|Utah Public Health Laboratory|Utah Public Health Laboratory|Young|USA

>Spike|hCoV-19/Wales/PHWC-496751/2020|2020-11-20|EPI\_ISL\_726630|Original|hCoV-19^^Wales|Human|Originating lab|COVID-19 Genomics UK (COG-UK) Consortium|Moore|United Kingdom

>Spike|hCoV-19/England/PORT-2F5752/2020|2020-00-00|EPI\_ISL\_613299|Original|hCoV-19^^England|Human|Centre for Enzyme Innovation|COVID-19 Genomics UK (COG-UK) Consortium|Robson|United Kingdom

>Spike|hCoV-19/England/MILK-A6BA47/2020|2020-10-09|EPI\_ISL\_608810|Original|hCoV-19^^England|Human|Lighthouse Lab in Milton Keynes|Wellcome Sanger Institute for the COVID-19 Genomics UK (COG-UK) consortium|Davies|United Kingdom

>Spike|hCoV-19/Wales/PHWC-16D8AE/2020|2020-09-25|EPI\_ISL\_577458|Original|hCoV-19^^Wales|Human|Wales Specialist Virology Centre Sequencing lab|COVID-19 Genomics UK (COG-UK) Consortium|Moore|United Kingdom

>Spike|hCoV-19/Scotland/EDB1078/2020|2020-04-07|EPI\_ISL\_433386|Original|hCoV-19^^Scotland|Human|Virology Department|COVID-19 Genomics UK (COG-UK) Consortium|Williams|United Kingdom

>Spike|hCoV-19/England/QEUIH-AE4DB6/2020|2020-10-27|EPI\_ISL\_633303|Original|hCoV-19^^England|Human|Lighthouse Lab in Glasgow|Wellcome Sanger Institute for the COVID-19 Genomics UK (COG-UK) consortium|Davies|United Kingdom

>Spike|hCoV-19/Canada/BC\_26584470/2020|2020-03-00|EPI\_ISL\_463237|Original|hCoV-19^^British Columbia|Human|BCCDC Public Health Laboratory|BCCDC Public Health Laboratory|Harrigan|Canada

>Spike|hCoV-19/England/BRIS-185381A/2020|2020-04-14|EPI\_ISL\_492220|Original|hCoV-19^^England|Human|PHE South West Regional Laboratory|Wellcome Sanger Institute for the COVID-19 Genomics UK (COG-UK) consortium|Davies|United Kingdom

>Spike|hCoV-19/Japan/PG-8749/2020|2020-09-00|EPI\_ISL\_686345|Original|hCoV-19^^Japan|Human|Pathogen Genomics Center|Pathogen Genomics Center|Sekizuka|Japan

>Spike|hCoV-19/Wales/PHWC-356E2/2020|2020-04-24|EPI\_ISL\_474462|Original|hCoV-19^^Wales|Human|Originating lab|COVID-19 Genomics UK (COG-UK) Consortium|Moore|United Kingdom

>Spike|hCoV-19/South Africa/KRISP-K001398/2020|2020-07-18|EPI\_ISL\_515881|Original|hCoV-19^^KwaZulu-Natal|Human|Medical Disagnostics Services (MDS)|KRISP|de Oliveira|South Africa

>Spike|hCoV-19/Canada/BC-BCCDC-7236/2020|2020-11-00|EPI\_ISL\_740628|Original|hCoV-19^^British Columbia|Human|BCCDC Public Health Laboratory|BCCDC Public Health Laboratory|Prystajecky|Canada

>Spike|hCoV-19/England/ALDP-C89276/2020|2020-12-16|EPI\_ISL\_762951|Original|hCoV-19^^England|Human|Lighthouse Lab in Alderley Park|Wellcome Sanger Institute for the COVID-19 Genomics UK (COG-UK) Consortium|Davies|United Kingdom

>Spike|hCoV-19/Wales/PHWC-24D87/2020|2020-03-20|EPI\_ISL\_419508|Original|hCoV-19^^Wales|Human|Wales Specialist Virology Centre|Public Health Wales Microbiology Cardiff|Moore|United Kingdom

>Spike|hCoV-19/USA/UT-UPHL-2008853/2020|2020-05-23|EPI\_ISL\_524869|Original|hCoV-19^^Utah|Human|Utah Public Health Laboratory|Utah Public Health Laboratory|Young|USA

>Spike|hCoV-19/England/CAMB-82956/2020|2020-04-14|EPI\_ISL\_443577|Original|hCoV-19^^England|Human|Department of Pathology|Wellcome Sanger Institute for the COVID-19 Genomics UK (COG-UK) consortium|Amato|United Kingdom

>Spike|hCoV-19/Belgium/reg-0423300/2020|2020-04-23|EPI\_ISL\_462154|Original|hCoV-19^^La Calamine|Human|KU Leuven|KU Leuven|Maes|Belgium

>Spike|hCoV-19/Italy/VEN-IZSVE-20RS2165-7/2020|2020-11-25|EPI\_ISL\_747489|Original|hCoV-19^^Veneto|Human|ULSS 5 Polesana|Istituto Zooprofilattico Sperimentale delle Venezie|Quaranta|Italy

>Spike|hCoV-19/England/MILK-AD012A/2020|2020-10-22|EPI\_ISL\_634498|Original|hCoV-19^^England|Human|Lighthouse Lab in Milton Keynes|Wellcome Sanger Institute for the COVID-19 Genomics UK (COG-UK) consortium|Davies|United Kingdom

>Spike|hCoV-19/Canada/NS-NML-1270/2020|2020-04-07|EPI\_ISL\_579658|Original|hCoV-19^^Nova Scotia|Human|QEII Health Sciences Centre|National Microbiology Laboratory (NML)|Majer|Canada

>Spike|hCoV-19/England/201041471/2020|2020-03-02|EPI\_ISL\_464349|Original|hCoV-19^^England|Human|Respiratory Virus Unit|Respiratory Virus Unit|Platt|United Kingdom

>Spike|hCoV-19/England/QEUIH-78A2E3/2020|2020-07-15|EPI\_ISL\_533133|Original|hCoV-19^^England|Human|Lighthouse Lab in Glasgow|Wellcome Sanger Institute for the COVID-19 Genomics UK (COG-UK) consortium|Davies|United Kingdom

>Spike|hCoV-19/USA/AR-CDC-2-3714000/2020|2020-09-02|EPI\_ISL\_751765|Original|hCoV-19^^Arkansas|Human|AR Dept. of Health-Public Health Lab|Genomics and Discovery|Queen|USA

>Spike|hCoV-19/USA/CA-ALSR-5035/2020|2020-11-15|EPI\_ISL\_730306|Original|hCoV-19^^California|Human|San Diego County Public Health Laboratory|Andersen lab at Scripps Research|Gangavarapu|USA

>Spike|hCoV-19/USA/TX-HMH-MCoV-10897/2020|2020-07-09|EPI\_ISL\_789676|Original|hCoV-19^^Texas|Human|Houston Methodist Hospital|Houston Methodist Hospital|Long|USA

>Spike|hCoV-19/England/MILK-A7BA80/2020|2020-10-15|EPI\_ISL\_607346|Original|hCoV-19^^England|Human|Lighthouse Lab in Milton Keynes|Wellcome Sanger Institute for the COVID-19 Genomics UK (COG-UK) consortium|Davies|United Kingdom

>Spike|hCoV-19/England/MILK-829D4E/2020|2020-07-18|EPI\_ISL\_557318|Original|hCoV-19^^England|Human|Lighthouse Lab in Milton Keynes|Wellcome Sanger Institute for the COVID-19 Genomics UK (COG-UK) consortium|Davies|United Kingdom

>Spike|hCoV-19/Denmark/DCGC-8476/2020|2020-06-08|EPI\_ISL\_618034|Original|hCoV-19^^Nordjylland|Human|Department of Virus and Microbiological Special Diagnostics|Albertsen lab|Michaelsen|Denmark

>Spike|hCoV-19/England/MILK-B3C941/2020|2020-11-02|EPI\_ISL\_706170|Original|hCoV-19^^England|Human|Oxford Viromics|COVID-19 Genomics UK (COG-UK) Consortium|Golubchik|United Kingdom

>Spike|hCoV-19/England/MILK-9AA236/2020|2020-09-01|EPI\_ISL\_550853|Original|hCoV-19^^England|Human|Lighthouse Lab in Milton Keynes|Wellcome Sanger Institute for the COVID-19 Genomics UK (COG-UK) consortium|Davies|United Kingdom

>Spike|hCoV-19/England/NOTT-115CB8/2020|2020-10-17|EPI\_ISL\_595289|Original|hCoV-19^^England|Human|Queens Medical Centre|COVID-19 Genomics UK (COG-UK) Consortium|Loose|United Kingdom

>Spike|hCoV-19/USA/WA-UW-47280/2020|2020-12-07|EPI\_ISL\_776703|Original|hCoV-19^^Washington|Human|UW Virology Lab|UW Virology Lab|Roychoudhury|USA

>Spike|hCoV-19/USA/AZ-TG519183/2020|2020-07-01|EPI\_ISL\_695366|Original|hCoV-19^^Arizona|Human|AZ SPHL|TGen North|French|USA

>Spike|hCoV-19/England/CAMB-1AF6C4/2020|2020-05-01|EPI\_ISL\_459310|Original|hCoV-19^^England|Human|Department of Pathology|Wellcome Sanger Institute for the COVID-19 Genomics UK (COG-UK) consortium|Davies|United Kingdom

>Spike|hCoV-19/Wales/PHWC-348A1/2020|2020-04-20|EPI\_ISL\_446988|Original|hCoV-19^^Wales|Human|Wales Specialist Virology Centre|Public Health Wales Microbiology Cardiff|Moore|United Kingdom

>Spike|hCoV-19/Japan/PG-1691/2020|2020-03-00|EPI\_ISL\_685297|Original|hCoV-19^^Japan|Human|Niigata Prefectural Institute of Public Health and Environmental Sciences|Pathogen Genomics Center|Sekizuka|Japan

>Spike|hCoV-19/New Zealand/20VR3491/2020|2020-04-23|EPI\_ISL\_579505|Original|hCoV-19^^Canterbury|Human|Canterbury Health Laboratories|Institute of Environmental Science and Research (ESR)|Wang|New Zealand

>Spike|hCoV-19/Denmark/DCGC-4176/2020|2020-09-21|EPI\_ISL\_621996|Original|hCoV-19^^Hovedstaden|Human|Department of Virus and Microbiological Special Diagnostics|Albertsen lab|Michaelsen|Denmark

>Spike|hCoV-19/Scotland/EDB118/2020|2020-03-23|EPI\_ISL\_425902|Original|hCoV-19^^Scotland|Human|Virology Department|COVID-19 Genomics UK (COG-UK) Consortium|Williams|United Kingdom

>Spike|hCoV-19/England/QEUA-B14165/2020|2020-11-03|EPI\_ISL\_641743|Original|hCoV-19^^England|Human|Lighthouse Lab in Glasgow|Wellcome Sanger Institute for the COVID-19 Genomics UK (COG-UK) Consortium|Davies|United Kingdom

>Spike|hCoV-19/USA/CT-Yale-062/2020|2020-03-31|EPI\_ISL\_428387|Original|hCoV-19^^Connecticut|Human|Yale COVID-19 Biorepository|Grubaugh Lab - Yale School of Public Health|Grubaugh|USA

>Spike|hCoV-19/Iceland/530/2020|2020-03-25|EPI\_ISL\_424551|Original|hCoV-19^^Reykjavik|Human|deCODE genetics|deCODE genetics|J\u00f3nsson|Iceland

>Spike|hCoV-19/Luxembourg/LNS6200431/2020|2020-11-01|EPI\_ISL\_744381|Original|hCoV-19^^Luxembourg|Human|Laboratoire national de sant\u00e9|Laboratoire national de sant\u00e9|Wienecke-Baldacchino|Luxembourg

>Spike|hCoV-19/Wales/PHWC-47DA48/2020|2020-10-09|EPI\_ISL\_586228|Original|hCoV-19^^Wales|Human|Wales Specialist Virology Centre Sequencing lab|COVID-19 Genomics UK (COG-UK) Consortium|Moore|United Kingdom



>Spike|hCoV-19/Scotland/QEUH-98F352/2020|2020-08-29|EPI\_ISL\_568448|Original|hCoV-19^^Scotland|Human|Lighthouse Lab in Glasgow|Wellcome Sanger Institute for the COVID-19 Genomics UK (COG-UK) consortium|Davies|United Kingdom

>Spike|hCoV-19/Jordan/MA-ALSR-2581/2020|2020-06-01|EPI\_ISL\_635779|Original|hCoV-19^^Mafrag|Human|Biolab Diagnostic Laboratories|Andersen lab at Scripps Research|Gangavarapu|Jordan

>Spike|hCoV-19/England/ALDP-94D3AB/2020|2020-06-15|EPI\_ISL\_556319|Original|hCoV-19^^England|Human|Lighthouse Lab in Alderley Park|Wellcome Sanger Institute for the COVID-19 Genomics UK (COG-UK) consortium|Davies|United Kingdom

>Spike|hCoV-19/England/QEUH-9DCA9D/2020|2020-09-21|EPI\_ISL\_581089|Original|hCoV-19^^England|Human|Lighthouse Lab in Glasgow|Wellcome Sanger Institute for the COVID-19 Genomics UK (COG-UK) consortium|Davies|United Kingdom

>Spike|hCoV-19/England/BIRM-637D9/2020|2020-08-19|EPI\_ISL\_529251|Original|hCoV-19^^England|Human|University of Birmingham|COVID-19 Genomics UK (COG-UK) Consortium|Loman|United Kingdom

>Spike|hCoV-19/DRC/7864/2020|2020-05-15|EPI\_ISL\_496505|Original|hCoV-19^^Kinshasa|Human|Viral Respiratory Lab|Pathogen Sequencing Lab|Lokilo|Democratic Republic of the Congo

>Spike|hCoV-19/USA/CA-CZB-3787/2020|2020-06-04|EPI\_ISL\_548481|Original|hCoV-19^^California|Human|Ventura County Public Health Lab|Chan-Zuckerberg Biohub|Bhatt|USA

>Spike|hCoV-19/England/BIRM-657C8/2020|2020-10-04|EPI\_ISL\_594583|Original|hCoV-19^^England|Human|University of Birmingham|COVID-19 Genomics UK (COG-UK) Consortium|Loman|United Kingdom

>Spike|hCoV-19/England/QEUH-BCD66C/2020|2020-11-26|EPI\_ISL\_704477|Original|hCoV-19^^England|Human|Lighthouse Lab in Glasgow|Wellcome Sanger Institute for the COVID-19 Genomics UK (COG-UK) Consortium|Davies|United Kingdom

>Spike|hCoV-19/England/NORT-29C2F2/2020|2020-06-24|EPI\_ISL\_499786|Original|hCoV-19^^England|Human|Northumbria University / South Tees Hospitals NHS Foundation Trust / North Cumbria Integrated Care NHS Foundation Trust / North Tees and Hartlepool NHS Foundation Trust / Newcastle Hospitals NHS Foundation Trust|COVID-19 Genomics UK (COG-UK) Consortium|Bashton|United Kingdom

>Spike|hCoV-19/England/QEUH-9B811A/2020|2020-09-04|EPI\_ISL\_590592|Original|hCoV-19^^England|Human|Lighthouse Lab in Glasgow|Wellcome Sanger Institute for the COVID-19 Genomics UK (COG-UK) consortium|Davies|United Kingdom

>Spike|hCoV-19/Australia/VIC16818/2020|2020-08-12|EPI\_ISL\_663586|Original|hCoV-19^^Victoria|Human|Microbiological Diagnostic Unit - Public Health Laboratory (MDU-PHL)|MDU-PHL|Schultz|Australia

>Spike|hCoV-19/Indonesia/YO-UGM-202449/2020|2020-06-22|EPI\_ISL\_516800|Original|hCoV-19^^Special Region of Yogyakarta|Human|Rumah Sakit Akademik Universitas Gadjah Mada|Genetics Working Group (Pokja Genetik) Faculty of Medicine|Gunadi|Indonesia

>Spike|hCoV-19/England/QEUH-895DF2/2020|2020-07-26|EPI\_ISL\_532684|Original|hCoV-19^^England|Human|Lighthouse Lab in Glasgow|Wellcome Sanger Institute for the COVID-19 Genomics UK (COG-UK) consortium|Davies|United Kingdom

>Spike|hCoV-19/South Africa/Tygerberg\_36/2020|2020-04-03|EPI\_ISL\_464147|Original|hCoV-19^^Western Cape|Human|National Health Laboratory Service (NHLs)|Division of Medical Virology|Engelbrecht|South Africa

>Spike|hCoV-19/England/20129142004/2020|2020-03-12|EPI\_ISL\_424107|Original|hCoV-19^^England|Human|Respiratory Virus Unit|Respiratory Virus Unit|Platt|United Kingdom

>Spike|hCoV-19/USA/OR-OHSU-2869/2020|2020-09-03|EPI\_ISL\_667372|Original|hCoV-19^^Oregon|Human|OHSU Lab Services Molecular Microbiology Lab|Oregon SARS-CoV-2 Genome Sequencing Center|O'Roak|USA

>Spike|hCoV-19/USA/LA-EVTL399/2020|2020-06-01|EPI\_ISL\_578805|Original|hCoV-19^^Louisiana|Human|LSUHS Emerging Viral Threat Laboratory|Microbial Genome Sequencing Center|Kamil|USA

>Spike|hCoV-19/Wales/PHWC-165730/2020|2020-06-16|EPI\_ISL\_490718|Original|hCoV-19^^Wales|Human|Wales Specialist Virology Centre Sequencing lab|COVID-19 Genomics UK (COG-UK) Consortium|Moore|United Kingdom

>Spike|hCoV-19/Spain/VC-FISABIO-546/2020|2020-03-26|EPI\_ISL\_447488|Original|hCoV-19^^Comunitat Valenciana|Human|Servicio de Microbiología. Hospital Clínico

Universitario de Valencia|Sequencing and Bioinformatics Service and Molecular Epidemiology Research Group. FISABIO-Public Health|Gonzalez-Candelas|Spain  
>Spike|hCoV-19/Shanghai/SH0052/2020|2020-02-01|EPI\_ISL\_416360|Original|hCoV-19^^Shanghai|Human|Shanghai Public Health Clinical Center|National Research Center for Translational Medicine (Shanghai)|Zhang|China  
>Spike|hCoV-19/Wales/PHWC-16EBOE/2020|2020-10-02|EPI\_ISL\_585821|Original|hCoV-19^^Wales|Human|Wales Specialist Virology Centre Sequencing lab|COVID-19 Genomics UK (COG-UK) Consortium|Moore|United Kingdom  
>Spike|hCoV-19/USA/NY-NYCPHL-001477/2020|2020-11-27|EPI\_ISL\_683833|Original|hCoV-19^^New York|Human|DOHMH Corona|New York City Public Health Laboratory|Wang|USA  
>Spike|hCoV-19/USA/WI-UW-890/2020|2020-07-12|EPI\_ISL\_509892|Original|hCoV-19^^Wisconsin|Human|University of Wisconsin-Madison AIDS Vaccine Research Laboratories|University of Wisconsin-Madison AIDS Vaccine Research Laboratories|Baczenas|USA  
>Spike|hCoV-19/Northern Ireland/NIRE-234317/2020|2020-10-15|EPI\_ISL\_680369|Original|hCoV-19^^Northern Ireland|Human|Regional Virus Laboratory|COVID-19 Genomics UK (COG-UK) Consortium|Fairley|United Kingdom  
>Spike|hCoV-19/Australia/VIC7612/2020|2020-07-23|EPI\_ISL\_564528|Original|hCoV-19^^Victoria|Human|Microbiological Diagnostic Unit - Public Health Laboratory (MDU-PHL)|MDU-PHL|Schultz|Australia  
>Spike|hCoV-19/Denmark/DCGC-15440/2020|2020-11-23|EPI\_ISL\_713828|Original|hCoV-19^^Nordjylland|Human|Department of Virus and Microbiological Special Diagnostics|Albertsen Lab|Michaelsen|Denmark  
>Spike|hCoV-19/Scotland/QEUAH-AF5BB8/2020|2020-10-30|EPI\_ISL\_676467|Original|hCoV-19^^Scotland|Human|Lighthouse Lab in Glasgow|Wellcome Sanger Institute for the COVID-19 Genomics UK (COG-UK) Consortium|Davies|United Kingdom  
>Spike|hCoV-19/Scotland/QEUAH-9E4801/2020|2020-09-23|EPI\_ISL\_601008|Original|hCoV-19^^Scotland|Human|Lighthouse Lab in Glasgow|Wellcome Sanger Institute for the COVID-19 Genomics UK (COG-UK) consortium|Davies|United Kingdom  
>Spike|hCoV-19/mink/Netherlands/NB-EMC-62-4/2020|2020-10-05|EPI\_ISL\_632436|Original|hCoV-19^^Noord Brabant|Neovison vison|Dutch COVID-19 response team|Erasmus Medical Center|Oude Munnink|Netherlands  
>Spike|hCoV-19/England/NORT-1B6329E/2020|2020-12-05|EPI\_ISL\_741427|Original|hCoV-19^^England|Human|Northumbria University / South Tees Hospitals NHS Foundation Trust / North Cumbria Integrated Care NHS Foundation Trust / North Tees and Hartlepool NHS Foundation Trust / Newcastle Hospitals NHS Foundation Trust|COVID-19 Genomics UK (COG-UK) Consortium|Bashton|United Kingdom  
>Spike|hCoV-19/Netherlands/NA\_12/2020|2020-03-10|EPI\_ISL\_415468|Original|hCoV-19^^Netherlands|Human|Dutch COVID-19 response team|Erasmus Medical Center|Oude Munnink|Netherlands  
>Spike|hCoV-19/England/CAMB-83490/2020|2020-04-15|EPI\_ISL\_443424|Original|hCoV-19^^England|Human|Department of Pathology|Wellcome Sanger Institute for the COVID-19 Genomics UK (COG-UK) consortium|Amato|United Kingdom  
>Spike|hCoV-19/England/NORT-295D9E/2020|2020-05-17|EPI\_ISL\_488676|Original|hCoV-19^^England|Human|NU-OMICS DNA Sequencing research facility|Wellcome Sanger Institute for the COVID-19 Genomics UK (COG-UK) consortium|Davies|United Kingdom  
>Spike|hCoV-19/USA/WA-UW-27499/2020|2020-09-03|EPI\_ISL\_570795|Original|hCoV-19^^Washington|Human|UW Virology Lab|UW Virology Lab|Roychoudhury|USA  
>Spike|hCoV-19/Japan/PG-1773/2020|2020-04-00|EPI\_ISL\_685379|Original|hCoV-19^^Japan|Human|Pathogen Genomics Center|Pathogen Genomics Center|Sekizuka|Japan  
>Spike|hCoV-19/New Zealand/20VR0275/2020|2020-03-15|EPI\_ISL\_416538|Original|hCoV-19^^Wellington|Human|Wellington Hospital|Institute of Environmental Science and Research (ESR)|de Ligt|New Zealand  
>Spike|hCoV-19/Wales/PHWC-275F5/2020|2020-04-01|EPI\_ISL\_432256|Original|hCoV-19^^Wales|Human|Wales Specialist Virology Centre|Public Health Wales Microbiology Cardiff|Moore|United Kingdom  
>Spike|hCoV-19/USA/VA-DCLS-0340/2020|2020-05-19|EPI\_ISL\_467940|Original|hCoV-19^^Virginia|Human|Virginia DCLS|Virginia DCLS|St. Jacques|USA

>Spike|hCoV-19/Australia/VIC7381/2020|2020-07-29|EPI\_ISL\_564370|Original|hCoV-19^^Victoria|Human|Victorian Infectious Diseases Reference Laboratory (VIDRL)|VIDRL and MDU-PHL|Schultz|Australia

>Spike|hCoV-19/England/MILK-4862AE/2020|2020-05-15|EPI\_ISL\_559691|Original|hCoV-19^^England|Human|Lighthouse Lab in Milton Keynes|Wellcome Sanger Institute for the COVID-19 Genomics UK (COG-UK) consortium|Davies|United Kingdom

>Spike|hCoV-19/USA/MN-MDH-2164/2020|2020-12-04|EPI\_ISL\_708502|Original|hCoV-19^^Minnesota|Human|Minnesota Department of Health|Minnesota Department of Health|Lorentz|USA

>Spike|hCoV-19/USA/TX-HMH-MCoV-13447/2020|2020-08-22|EPI\_ISL\_788582|Original|hCoV-19^^Texas|Human|Houston Methodist Hospital|Houston Methodist Hospital|Long|USA

>Spike|hCoV-19/Denmark/DCGC-22548/2020|2020-12-14|EPI\_ISL\_757630|Original|hCoV-19^^Hovedstaden|Human|Department of Virus and Microbiological Special Diagnostics|Albertsen Lab|Michaelsen|Denmark

>Spike|hCoV-19/Denmark/DCGC-4163/2020|2020-09-21|EPI\_ISL\_621983|Original|hCoV-19^^Hovedstaden|Human|Department of Virus and Microbiological Special Diagnostics|Albertsen lab|Michaelsen|Denmark

>Spike|hCoV-19/Wales/PHWC-2E251/2020|2020-04-07|EPI\_ISL\_446077|Original|hCoV-19^^Wales|Human|Wales Specialist Virology Centre|Public Health Wales Microbiology Cardiff|Moore|United Kingdom

>Spike|hCoV-19/Denmark/DCGC-3384/2020|2020-08-31|EPI\_ISL\_616143|Original|hCoV-19^^Hovedstaden|Human|Department of Virus and Microbiological Special Diagnostics|Albertsen lab|Michaelsen|Denmark

>Spike|hCoV-19/England/ALDP-BC6487/2020|2020-11-20|EPI\_ISL\_721406|Original|hCoV-19^^England|Human|Lighthouse Lab in Alderley Park|Wellcome Sanger Institute for the COVID-19 Genomics UK (COG-UK) Consortium|Davies|United Kingdom

>Spike|hCoV-19/England/MILK-A45A34/2020|2020-10-06|EPI\_ISL\_598716|Original|hCoV-19^^England|Human|Lighthouse Lab in Milton Keynes|Wellcome Sanger Institute for the COVID-19 Genomics UK (COG-UK) consortium|Davies|United Kingdom

>Spike|hCoV-19/Switzerland/Vs-ETHZ-100187/2020|2020-03-16|EPI\_ISL\_574970|Original|hCoV-19^^Valais|Human|Viollier AG|Department of Biosystems Science and Engineering|Nadeau|Switzerland

>Spike|hCoV-19/Denmark/DCGC-8930/2020|2020-10-26|EPI\_ISL\_626128|Original|hCoV-19^^Hovedstaden|Human|Department of Virus and Microbiological Special Diagnostics|Albertsen lab|Michaelsen|Denmark

>Spike|hCoV-19/USA/OR-OHSU-2513/2020|2020-08-17|EPI\_ISL\_667234|Original|hCoV-19^^Oregon|Human|OHSU Lab Services Molecular Microbiology Lab|Oregon SARS-CoV-2 Genome Sequencing Center|O'Roak|USA

>Spike|hCoV-19/Wales/PHWC-28C4A/2020|2020-04-02|EPI\_ISL\_445422|Original|hCoV-19^^Wales|Human|Wales Specialist Virology Centre|Public Health Wales Microbiology Cardiff|Moore|United Kingdom

>Spike|hCoV-19/Netherlands/NB-EMC-353/2020|2020-10-27|EPI\_ISL\_722556|Original|hCoV-19^^Noord Brabant|Human|Dutch COVID-19 response team|Erasmus Medical Center|Oude Munnink|Netherlands

>Spike|hCoV-19/USA/CO-CDPHE-2009163959/2020|2020-09-16|EPI\_ISL\_710234|Original|hCoV-19^^Colorado|Human|Colorado Department of Public Health and Environment|Colorado Department of Public Health and Environment|Bankers|USA

>Spike|hCoV-19/Gibraltar/205000663/2020|2020-12-00|EPI\_ISL\_709951|Original|hCoV-19^^Gibraltar|Human|Microbiology|Respiratory Virus Unit|Platt|Gibraltar

>Spike|hCoV-19/England/QEUEH-B121FE/2020|2020-11-02|EPI\_ISL\_642303|Original|hCoV-19^^England|Human|Lighthouse Lab in Glasgow|Wellcome Sanger Institute for the COVID-19 Genomics UK (COG-UK) Consortium|Davies|United Kingdom

>Spike|hCoV-19/England/NORT-1B62BA3/2020|2020-11-29|EPI\_ISL\_706285|Original|hCoV-19^^England|Human|Northumbria University / South Tees Hospitals NHS Foundation Trust / North Cumbria Integrated Care NHS Foundation Trust / North Tees and Hartlepool NHS Foundation Trust / Newcastle Hospitals NHS Foundation Trust|COVID-19 Genomics UK (COG-UK) Consortium|Bashton|United Kingdom

>Spike|hCoV-19/USA/HI-H200548/2020|2020-11-07|EPI\_ISL\_753079|Original|hCoV-19^^Hawaii|Human|State Laboratories Division|State Laboratories Division|Sultana|USA

>Spike|hCoV-19/England/ALDP-952947/2020|2020-06-12|EPI\_ISL\_553916|Original|hCoV-19^^England|Human|Lighthouse Lab in Alderley Park|Wellcome Sanger Institute for the COVID-19 Genomics UK (COG-UK) consortium|Davies|United Kingdom

>Spike|hCoV-19/Belgium/ULG-8664/2020|2020-03-19|EPI\_ISL\_418641|Original|hCoV-19^^Li\u00e8ge|Human|Department of Clinical Microbiology|GIGA Medical Genomics|Durkin|Belgium

>Spike|hCoV-19/England/ALDP-9ED097/2020|2020-05-05|EPI\_ISL\_589506|Original|hCoV-19^^England|Human|Lighthouse Lab in Alderley Park|Wellcome Sanger Institute for the COVID-19 Genomics UK (COG-UK) consortium|Davies|United Kingdom

>Spike|hCoV-19/USA/NY-Wadsworth-289759-01/2020|2020-12-21|EPI\_ISL\_767506|Original|hCoV-19^^New York|Human|Wadsworth Center|Wadsworth Center|Lasèk-Nesselquist|USA

>Spike|hCoV-19/England/ALDP-B1DFDB/2020|2020-11-01|EPI\_ISL\_723557|Original|hCoV-19^^England|Human|Centre for Enzyme Innovation|COVID-19 Genomics UK (COG-UK) Consortium|Robson|United Kingdom

>Spike|hCoV-19/Canada/ON-S793/2020|2020-04-00|EPI\_ISL\_591230|Original|hCoV-19^^Ontario|Human|Toronto Invasive Bacterial Diseases Network|McMaster University|McArthur|Canada

>Spike|hCoV-19/USA/TX-DSHS-0867/2020|2020-06-16|EPI\_ISL\_610003|Original|hCoV-19^^Texas|Human|Texas Department of State Health Services|Texas Department of State Health Services|Rahman|USA

>Spike|hCoV-19/England/BIRM-5F54F/2020|2020-00-00|EPI\_ISL\_461514|Original|hCoV-19^^England|Human|University of Birmingham|COVID-19 Genomics UK (COG-UK) Consortium|Loman|United Kingdom

>Spike|hCoV-19/Malaysia/MGI-M64/2020|2020-04-02|EPI\_ISL\_528740|Original|hCoV-19^^Selangor|Human|Malaysia Genome Institute|Malaysia Genome Institute|Mat Isa|Malaysia

>Spike|hCoV-19/England/QEUA-9DCA51/2020|2020-09-21|EPI\_ISL\_580977|Original|hCoV-19^^England|Human|Lighthouse Lab in Glasgow|Wellcome Sanger Institute for the COVID-19 Genomics UK (COG-UK) consortium|Davies|United Kingdom

>Spike|hCoV-19/Kenya/C569/2020|2020-04-12|EPI\_ISL\_568700|Original|hCoV-19^^Mombasa|Human|KEMRI-Wellcome Trust Research Programme/KEMRI-CGMR-C Kilifi|KEMRI-Wellcome Trust Research Programme/KEMRI-CGMR-C Kilifi|Githinji|Kenya

>Spike|hCoV-19/England/MILK-975577/2020|2020-08-21|EPI\_ISL\_552545|Original|hCoV-19^^England|Human|Lighthouse Lab in Milton Keynes|Wellcome Sanger Institute for the COVID-19 Genomics UK (COG-UK) consortium|Davies|United Kingdom

>Spike|hCoV-19/Wales/PHWC-498230/2020|2020-12-01|EPI\_ISL\_727043|Original|hCoV-19^^Wales|Human|Originating lab|COVID-19 Genomics UK (COG-UK) Consortium|Moore|United Kingdom

>Spike|hCoV-19/USA/IN-CDC-2-3714078/2020|2020-12-04|EPI\_ISL\_751770|Original|hCoV-19^^Indiana|Human|IN State Department of Health Laboratory Services|Genomics and Discovery|Queen|USA

>Spike|hCoV-19/Denmark/DCGC-7612/2020|2020-10-19|EPI\_ISL\_618524|Original|hCoV-19^^Hovedstaden|Human|Department of Virus and Microbiological Special Diagnostics|Albertsen lab|Michaelsen|Denmark

>Spike|hCoV-19/Wales/ALDP-AA4918/2020|2020-10-21|EPI\_ISL\_624399|Original|hCoV-19^^Wales|Human|Lighthouse Lab in Alderley Park|Wellcome Sanger Institute for the COVID-19 Genomics UK (COG-UK) consortium|Davies|United Kingdom

>Spike|hCoV-19/Switzerland/BS-UHB-42199724/2020|2020-03-20|EPI\_ISL\_528245|Original|hCoV-19^^Basel-Stadt|Human|University Hospital Basel|University Hospital Basel|Roloff Handschin|Switzerland

>Spike|hCoV-19/England/QEUA-C3193C/2020|2020-12-11|EPI\_ISL\_782642|Original|hCoV-19^^England|Human|Lighthouse Lab in Glasgow|Wellcome Sanger Institute for the COVID-19 Genomics UK (COG-UK) Consortium|Davies|United Kingdom

>Spike|hCoV-19/USA/MN-MDH-305/2020|2020-03-20|EPI\_ISL\_450770|Original|hCoV-19^^Minnesota|Human|Minnesota Department of Health|Minnesota Department of Health|Garfin|USA

>Spike|hCoV-19/Ireland/OY-NVRL-72IRL00274/2020|2020-08-05|EPI\_ISL\_525399|Original|hCoV-19^^Offaly|Human|National Virus Reference Laboratory|National Virus Reference Laboratory|Gonzalez|Ireland

>Spike|hCoV-19/USA/NY-NYCPHL-000745/2020|2020-03-19|EPI\_ISL\_632126|Original|hCoV-19^^New York|Human|Flushing Hospital Medical Center|New York City Public Health Laboratory|Wang|USA

>Spike|hCoV-19/USA/WA-S2768/2020|2020-05-19|EPI\_ISL\_530125|Original|hCoV-19^^Washington|Human|Seattle Flu Study|Seattle Flu Study|Lee|USA

>Spike|hCoV-19/Japan/PG-3633/2020|2020-04-00|EPI\_ISL\_691886|Original|hCoV-19^^Japan|Human|Pathogen Genomics Center|Pathogen Genomics Center|Sekizuka|Japan

>Spike|hCoV-19/USA/WI-WSLH-200222/2020|2020-04-11|EPI\_ISL\_578442|Original|hCoV-19^^Wisconsin|Human|Wisconsin State Laboratory of Hygiene Communicable Disease Division|Wisconsin State Laboratory of Hygiene Communicable Disease Division|Florek|USA

>Spike|hCoV-19/England/QEUEH-A4C578/2020|2020-10-07|EPI\_ISL\_595978|Original|hCoV-19^^England|Human|Quadram Institute Bioscience|COVID-19 Genomics UK (COG-UK) Consortium|Alikhan|United Kingdom

>Spike|hCoV-19/Japan/PG-5121/2020|2020-08-00|EPI\_ISL\_690230|Original|hCoV-19^^Japan|Human|Gunma Prefectural Institute of Public Health and Environmental Sciences|Pathogen Genomics Center|Sekizuka|Japan

>Spike|hCoV-19/England/QEUEH-B2D48E/2020|2020-11-04|EPI\_ISL\_659864|Original|hCoV-19^^England|Human|Lighthouse Lab in Glasgow|Wellcome Sanger Institute for the COVID-19 Genomics UK (COG-UK) Consortium|Davies|United Kingdom

>Spike|hCoV-19/Wales/PHWC-490A8B/2020|2020-11-15|EPI\_ISL\_706533|Original|hCoV-19^^Wales|Human|Originating lab|COVID-19 Genomics UK (COG-UK) Consortium|Moore|United Kingdom

>Spike|hCoV-19/Israel/n14285/2020|2020-03-30|EPI\_ISL\_483711|Original|hCoV-19^^Kfar Saba|Human|Israel Central Virology laboratory|Israel Central Virology laboratory|Zuckerman|Israel

>Spike|hCoV-19/Australia/VIC2251/2020|2020-06-23|EPI\_ISL\_521982|Original|hCoV-19^^Victoria|Human|Victorian Infectious Diseases Reference Laboratory (VIDRL)|VIDRL and MDU-PHL|Schultz|Australia

>Spike|hCoV-19/USA/ME-HETL-J0145/2020|2020-09-11|EPI\_ISL\_755337|Original|hCoV-19^^Maine|Human|Maine Health and Environmental Testing Laboratory|Tewhey Lab|Tewhey|USA

>Spike|hCoV-19/USA/NY-Wadsworth-287397-01/2020|2020-12-15|EPI\_ISL\_767455|Original|hCoV-19^^New York|Human|Wadsworth Center|Wadsworth Center|Lasek-Nesselquist|USA

>Spike|hCoV-19/England/ALDP-B82B55/2020|2020-11-14|EPI\_ISL\_675522|Original|hCoV-19^^England|Human|Lighthouse Lab in Alderley Park|Wellcome Sanger Institute for the COVID-19 Genomics UK (COG-UK) Consortium|Davies|United Kingdom

>Spike|hCoV-19/Italy/CAM-TIGEM-574/2020|2020-04-10|EPI\_ISL\_778727|Original|hCoV-19^^Campania|Human|Istituto Zooprofilattico Sperimentale del Mezzogiorno|TIGEM|Grimaldi|Italy

>Spike|hCoV-19/Belgium/UGent-288/2020|2020-11-19|EPI\_ISL\_718018|Original|hCoV-19^^Ghent|Human|Lab voor klinische biologie|Onderzoeksgroep Virologie|Lambrechts|Belgium

>Spike|hCoV-19/England/SHEF-C2626/2020|2020-03-30|EPI\_ISL\_432746|Original|hCoV-19^^England|Human|Virology Department|COVID-19 Genomics UK (COG-UK) Consortium|de Silva|United Kingdom

>Spike|hCoV-19/Australia/VIC7088/2020|2020-08-01|EPI\_ISL\_561590|Original|hCoV-19^^Victoria|Human|Victorian Infectious Diseases Reference Laboratory (VIDRL)|VIDRL and MDU-PHL|Schultz|Australia

>Spike|hCoV-19/Denmark/DCGC-20324/2020|2020-11-16|EPI\_ISL\_748114|Original|hCoV-19^^Hovedstaden|Human|Department of Virus and Microbiological Special Diagnostics|Albertsen Lab|Michaelsen|Denmark

>Spike|hCoV-19/Japan/PG-2755/2020|2020-04-00|EPI\_ISL\_690887|Original|hCoV-19^^Japan|Human|Pathogen Genomics Center|Pathogen Genomics Center|Sekizuka|Japan

>Spike|hCoV-19/England/LIVE-1DD9C4/2020|2020-09-29|EPI\_ISL\_612001|Original|hCoV-19^^England|Human|Liverpool Clinical Laboratories|COVID-19 Genomics UK (COG-UK) Consortium|Haldenby|United Kingdom

>Spike|hCoV-19/Scotland/CVR4183/2020|2020-08-30|EPI\_ISL\_540859|Original|hCoV-19^^Scotland|Human|Lighthouse Lab in Glasgow / MRC-University of Glasgow Centre for Virus Research|COVID-19 Genomics UK (COG-UK) Consortium|Robertson|United Kingdom

>Spike|hCoV-19/South Africa/KRISP-K002562/2020|2020-07-30|EPI\_ISL\_535430|Original|hCoV-19^^KwaZulu-Natal|Human|NHLS-IALCH|KRISP|de Oliveira|South Africa

>Spike|hCoV-19/Northern Ireland/QEUH-96AE10/2020|2020-08-17|EPI\_ISL\_531421|Original|hCoV-19^^Northern Ireland|Human|Lighthouse Lab in Glasgow|Wellcome Sanger Institute for the COVID-19 Genomics UK (COG-UK) consortium|Davies|United Kingdom

>Spike|hCoV-19/France/OCC-116/2020|2020-10-22|EPI\_ISL\_671961|Original|hCoV-19^^Occitanie|Human|CHU Purpan - Laboratoire de Virologie - Institut F\u00e9d\u00e9ratif de Biologie|CHU Purpan - Laboratoire de Virologie - Institut F\u00e9d\u00e9ratif de Biologie|Latour|France

>Spike|hCoV-19/England/ALDP-9E622F/2020|2020-09-24|EPI\_ISL\_580476|Original|hCoV-19^^England|Human|Lighthouse Lab in Alderley Park|Wellcome Sanger Institute for the COVID-19 Genomics UK (COG-UK) consortium|Davies|United Kingdom

>Spike|hCoV-19/England/LCST-24D718D/2020|2020-06-11|EPI\_ISL\_478370|Original|hCoV-19^^England|Human|University Hospitals Of Leicester NHS Trust and DeepSeq Nottingham|COVID-19 Genomics UK (COG-UK) Consortium|Loose|United Kingdom

>Spike|hCoV-19/England/CAMC-B0C661/2020|2020-10-29|EPI\_ISL\_649627|Original|hCoV-19^^England|Human|Lighthouse Lab in Cambridge|Wellcome Sanger Institute for the COVID-19 Genomics UK (COG-UK) Consortium|Davies|United Kingdom

>Spike|hCoV-19/England/NORT-291E53/2020|2020-05-05|EPI\_ISL\_489087|Original|hCoV-19^^England|Human|NU-OMICS DNA Sequencing research facility|Wellcome Sanger Institute for the COVID-19 Genomics UK (COG-UK) consortium|Davies|United Kingdom

>Spike|hCoV-19/England/MILK-CA4758/2020|2020-12-16|EPI\_ISL\_762445|Original|hCoV-19^^England|Human|Lighthouse Lab in Milton Keynes|Wellcome Sanger Institute for the COVID-19 Genomics UK (COG-UK) Consortium|Davies|United Kingdom

>Spike|hCoV-19/Scotland/CVR2798/2020|2020-04-20|EPI\_ISL\_453078|Original|hCoV-19^^Scotland|Human|West of Scotland Specialist Virology Centre|COVID-19 Genomics UK (COG-UK) Consortium|Robertson|United Kingdom

>Spike|hCoV-19/Australia/VIC5211/2020|2020-07-16|EPI\_ISL\_519976|Original|hCoV-19^^Victoria|Human|Microbiological Diagnostic Unit - Public Health Laboratory (MDU-PHL) |MDU-PHL|Schultz|Australia

>Spike|hCoV-19/Japan/PG-8685/2020|2020-09-00|EPI\_ISL\_686281|Original|hCoV-19^^Japan|Human|Pathogen Genomics Center|Pathogen Genomics Center|Sekizuka|Japan

>Spike|hCoV-19/England/CAMC-AB1D94/2020|2020-10-23|EPI\_ISL\_623633|Original|hCoV-19^^England|Human|Lighthouse Lab in Cambridge|Wellcome Sanger Institute for the COVID-19 Genomics UK (COG-UK) consortium|Davies|United Kingdom

>Spike|hCoV-19/Japan/PG-7682/2020|2020-08-00|EPI\_ISL\_686784|Original|hCoV-19^^Japan|Human|Chiba Prefectural Institute of Public Health|Pathogen Genomics Center|Sekizuka|Japan

>Spike|hCoV-19/England/QEUH-BA1D0F/2020|2020-11-18|EPI\_ISL\_672831|Original|hCoV-19^^England|Human|Lighthouse Lab in Glasgow|Wellcome Sanger Institute for the COVID-19 Genomics UK (COG-UK) Consortium|Davies|United Kingdom

>Spike|hCoV-19/Netherlands/ZH-EMC-786/2020|2020-10-02|EPI\_ISL\_632371|Original|hCoV-19^^Zuid Holland|Human|Dutch COVID-19 response team|Erasmus Medical Center|Oude Munnink|Netherlands

>Spike|hCoV-19/Wales/PHWC-4904E7/2020|2020-11-06|EPI\_ISL\_706484|Original|hCoV-19^^Wales|Human|Originating lab|COVID-19 Genomics UK (COG-UK) Consortium|Moore|United Kingdom

>Spike|hCoV-19/Canada/ON-S1789/2020|2020-11-15|EPI\_ISL\_755785|Original|hCoV-19^^Ontario|Human|Toronto Invasive Bacterial Diseases Network|McMaster University|McArthur|Canada

>Spike|hCoV-19/Wales/PHWC-256E5/2020|2020-03-24|EPI\_ISL\_422205|Original|hCoV-19^^Wales|Human|Wales Specialist Virology Centre|Public Health Wales Microbiology Cardiff|Moore|United Kingdom

>Spike|hCoV-19/USA/OR-OHSU-0490/2020|2020-06-12|EPI\_ISL\_525824|Original|hCoV-19^^Oregon|Human|OHSU Lab Services Molecular Microbiology Lab|Ginkgo Bioworks Clinical Laboratory|O'Roak|USA

>Spike|hCoV-19/England/QEUA-AE2A66/2020|2020-10-27|EPI\_ISL\_633528|Original|hCoV-19^^England|Human|Lighthouse Lab in Glasgow|Wellcome Sanger Institute for the COVID-19 Genomics UK (COG-UK) consortium|Davies|United Kingdom

>Spike|hCoV-19/Bahrein/BAH-05/2020|2020-03-15|EPI\_ISL\_483546|Original|hCoV-19^^Bahrain|Human|Kingdom of Bahrein Ministry of Health|Erasmus Medical Center|Oude Munnink|Bahrain

>Spike|hCoV-19/USA/TX-DSHS-0139/2020|2020-06-11|EPI\_ISL\_522965|Original|hCoV-19^^Texas|Human|Texas Department of State Health Services|Texas Department of State Health Services|Rahman|USA

>Spike|hCoV-19/USA/CA-ALSR-1460/2020|2020-03-20|EPI\_ISL\_494616|Original|hCoV-19^^California|Human|Scripps Medical Laboratory|Andersen lab at Scripps Research|Gangavarapu|USA

>Spike|hCoV-19/England/LOND-D664D/2020|2020-04-23|EPI\_ISL\_487557|Original|hCoV-19^^England|Human|University College London|Wellcome Sanger Institute for the COVID-19 Genomics UK (COG-UK) consortium|Davies|United Kingdom

>Spike|hCoV-19/Germany/BY-MVP-0001/2020|2020-03-14|EPI\_ISL\_437359|Original|hCoV-19^^Bavaria|Human|Max von Pettenkofer Institute|Laboratory for Functional Genome Analysis|Graf|Germany

>Spike|hCoV-19/Slovenia/6456/2020|2020-03-12|EPI\_ISL\_635230|Original|hCoV-19^^Slovenia|Human|Institute of Microbiology and Immunology|Institute of Microbiology and Immunology|Zakotnik|Slovenia

>Spike|hCoV-19/Singapore/1304/2020|2020-05-15|EPI\_ISL\_648791|Original|hCoV-19^^Singapore|Human|Department of Laboratory Medicine|Department of Laboratory Medicine|Chen|Singapore

>Spike|hCoV-19/England/ALDP-AA0C8C/2020|2020-10-22|EPI\_ISL\_624977|Original|hCoV-19^^England|Human|Lighthouse Lab in Alderley Park|Wellcome Sanger Institute for the COVID-19 Genomics UK (COG-UK) consortium|Davies|United Kingdom

>Spike|hCoV-19/England/ALDP-A85230/2020|2020-10-17|EPI\_ISL\_610602|Original|hCoV-19^^England|Human|Lighthouse Lab in Alderley Park|Wellcome Sanger Institute for the COVID-19 Genomics UK (COG-UK) consortium|Davies|United Kingdom

>Spike|hCoV-19/Scotland/CVR3302/2020|2020-05-01|EPI\_ISL\_493858|Original|hCoV-19^^Scotland|Human|West of Scotland Specialist Virology Centre|COVID-19 Genomics UK (COG-UK) Consortium|Robertson|United Kingdom

>Spike|hCoV-19/USA/MI-MDHHS-SC21076/2020|2020-03-29|EPI\_ISL\_507852|Original|hCoV-19^^Michigan|Human|Michigan Department of Health and Human Services|Michigan Department of Health and Human Services|Blankenship|USA

>Spike|hCoV-19/USA/VA-DCLS-0553/2020|2020-03-12|EPI\_ISL\_485854|Original|hCoV-19^^Virginia|Human|Virginia DCLS|Virginia DCLS|St. Jacques|USA

>Spike|hCoV-19/Jordan/AQ-ALSR-5274/2020|2020-10-07|EPI\_ISL\_730512|Original|hCoV-19^^Aqaba|Human|Biolab Diagnostic Laboratories|Andersen lab at Scripps Research|Gangavarapu|Jordan

>Spike|hCoV-19/USA/NY-NYCPHL-000189/2020|2020-04-13|EPI\_ISL\_631724|Original|hCoV-19^^New York|Human|Flushing Hospital Medical Center|New York City Public Health Laboratory|Wang|USA

>Spike|hCoV-19/Ireland/LK-NVRL-72IRL07430/2020|2020-08-09|EPI\_ISL\_528444|Original|hCoV-19^^Limerick|Human|National Virus Reference Laboratory|National Virus Reference Laboratory|Gonzalez|Ireland

>Spike|hCoV-19/England/BRIS-12531A/2020|2020-03-27|EPI\_ISL\_443969|Original|hCoV-19^^England|Human|PHE South West Regional Laboratory|Wellcome Sanger Institute for the COVID-19 Genomics UK (COG-UK) consortium|Amato|United Kingdom

>Spike|hCoV-19/England/MILK-AC7900/2020|2020-10-21|EPI\_ISL\_634469|Original|hCoV-19^^England|Human|Lighthouse Lab in Milton Keynes|Wellcome Sanger Institute for the COVID-19 Genomics UK (COG-UK) consortium|Davies|United Kingdom

>Spike|hCoV-19/Wales/QEUA-AD577E/2020|2020-10-26|EPI\_ISL\_647940|Original|hCoV-19^^Wales|Human|Lighthouse Lab in Glasgow|Wellcome Sanger Institute for the COVID-19 Genomics UK (COG-UK) Consortium|Davies|United Kingdom

>Spike|hCoV-19/Australia/VIC6289/2020|2020-07-21|EPI\_ISL\_518277|Original|hCoV-19^^Victoria|Human|Microbiological Diagnostic Unit - Public Health Laboratory (MDU-PHL)|MDU-PHL|Schultz|Australia

>Spike|hCoV-19/England/QEUA-AE2B45/2020|2020-10-27|EPI\_ISL\_633675|Original|hCoV-19^^England|Human|Lighthouse Lab in Glasgow|Wellcome Sanger Institute for the COVID-19 Genomics UK (COG-UK) consortium|Davies|United Kingdom

>Spike|hCoV-19/Germany/HH-hpi-p2183/2020|2020-03-28|EPI\_ISL\_776412|Original|hCoV-19^^Hamburg|Human|University Medical Center Hamburg Eppendorf|Heinrich Pette Institute|Robitaille|Germany

>Spike|hCoV-19/Wales/CVR4791/2020|2020-09-20|EPI\_ISL\_626826|Original|hCoV-19^^Wales|Human|West of Scotland Specialist Virology Centre|COVID-19 Genomics UK (COG-UK) Consortium|Robertson|United Kingdom

>Spike|hCoV-19/England/NORW-222E66/2020|2020-12-19|EPI\_ISL\_741538|Original|hCoV-19^^England|Human|Quadram Institute Bioscience|COVID-19 Genomics UK (COG-UK) Consortium|Alikhan|United Kingdom

>Spike|hCoV-19/England/QEUA-A5DF49/2020|2020-10-12|EPI\_ISL\_597394|Original|hCoV-19^^England|Human|Lighthouse Lab in Glasgow|Wellcome Sanger Institute for the COVID-19 Genomics UK (COG-UK) consortium|Davies|United Kingdom

>Spike|hCoV-19/Denmark/ALAB-SSI-767/2020|2020-03-20|EPI\_ISL\_444895|Original|hCoV-19^^Denmark|Human|Department of Virus and Microbiological Special Diagnostics|Albertsen lab|Kirkegaard|Denmark

>Spike|hCoV-19/England/CAMB-78E54/2020|2020-04-02|EPI\_ISL\_441232|Original|hCoV-19^^England|Human|Department of Pathology|Wellcome Sanger Institute for the COVID-19 Genomics UK (COG-UK) consortium|Amato|United Kingdom

>Spike|hCoV-19/Luxembourg/LNS2213321/2020|2020-10-18|EPI\_ISL\_740081|Original|hCoV-19^^Luxembourg|Human|Laboratoire national de sant\u00e9|Laboratoire national de sant\u00e9|Wienecke-Baldacchino|Luxembourg

>Spike|hCoV-19/USA/TX-HMH-MCoV-19696/2020|2020-11-23|EPI\_ISL\_784050|Original|hCoV-19^^Texas|Human|Houston Methodist Hospital|Houston Methodist Hospital|Long|USA

>Spike|hCoV-19/Chile/NB-196349/2020|2020-10-02|EPI\_ISL\_746479|Original|hCoV-19^^\u00d1uble|Human|Genetica Molecular and Subdepartamento de Virologia ISP Chile|Instituto de Salud Publica de Chile|Tognarelli|Chile

>Spike|hCoV-19/Switzerland/BS-UHB-42184544/2020|2020-03-10|EPI\_ISL\_527975|Original|hCoV-19^^Basel-Stadt|Human|University Hospital Basel|University Hospital Basel|Roloff Handschin|Switzerland

>Spike|hCoV-19/Spain/GA-USC-006/2020|2020-05-10|EPI\_ISL\_468336|Original|hCoV-19^^Galicia|Human|Microbiology Service|Genomes & Disease|Garcia-Souto|Spain

>Spike|hCoV-19/England/CAMC-9D2217/2020|2020-09-19|EPI\_ISL\_601541|Original|hCoV-19^^England|Human|Lighthouse Lab in Cambridge|Wellcome Sanger Institute for the COVID-19 Genomics UK (COG-UK) consortium|Davies|United Kingdom

>Spike|hCoV-19/USA/WA-UW156/2020|2020-03-13|EPI\_ISL\_416694|Original|hCoV-19^^Washington|Human|UW Virology Lab|UW Virology Lab|Roychoudhury|USA

>Spike|hCoV-19/India/GJ-GBRC361b/2020|2020-06-05|EPI\_ISL\_514612|Original|hCoV-19^^Gujarat|Human|GMERS Medical College and Hospital|Gujarat Biotechnology Research Centre|Joshi|India

>Spike|hCoV-19/England/MILK-B56BF0/2020|2020-11-05|EPI\_ISL\_657008|Original|hCoV-19^^England|Human|Lighthouse Lab in Milton Keynes|Wellcome Sanger Institute for the COVID-19 Genomics UK (COG-UK) Consortium|Davies|United Kingdom

>Spike|hCoV-19/Hungary/US-57376w/2020|2020-10-01|EPI\_ISL\_677777|Original|hCoV-19^^B\u00e9cs-Kiskun county|Human|University of Szeged|National Laboratory of Virology|Kemenesi|Hungary

>Spike|hCoV-19/USA/TX-HMH-MCoV-12331/2020|2020-09-25|EPI\_ISL\_790303|Original|hCoV-19^^Texas|Human|Houston Methodist Hospital|Houston Methodist Hospital|Long|USA

>Spike|hCoV-19/Australia/VIC4690/2020|2020-07-17|EPI\_ISL\_519078|Original|hCoV-19^^Victoria|Human|Microbiological Diagnostic Unit - Public Health Laboratory (MDU-PHL)|MDU-PHL|Schultz|Australia

>Spike|hCoV-19/England/LIVE-A497C/2020|2020-03-10|EPI\_ISL\_499878|Original|hCoV-19^^England|Human|Liverpool Clinical Laboratories|COVID-19 Genomics UK (COG-UK) Consortium|Haldenby|United Kingdom



>Spike|hCoV-19/England/QEUA-AD5AFD/2020|2020-10-26|EPI\_ISL\_634587|Original|hCoV-19^England|Human|Lighthouse Lab in Glasgow|Wellcome Sanger Institute for the COVID-19 Genomics UK (COG-UK) consortium|Davies|United Kingdom

>Spike|hCoV-19/Wales/PHWC-4A2A2C/2020|2020-12-13|EPI\_ISL\_743968|Original|hCoV-19^Wales|Human|Wales Specialist Virology Centre Sequencing lab|COVID-19 Genomics UK (COG-UK) Consortium|Moore|United Kingdom

>Spike|hCoV-19/Germany/HH-hpi-p2484/2020|2020-06-16|EPI\_ISL\_776541|Original|hCoV-19^Hamburg|Human|University Medical Center Hamburg Eppendorf|Heinrich Pette Institute|Robitaille|Germany

>Spike|hCoV-19/Switzerland/BE-ETHZ-400030/2020|2020-12-04|EPI\_ISL\_729096|Original|hCoV-19^Bern|Human|Viollier AG|Department of Biosystems Science and Engineering|Nadeau|Switzerland

>Spike|hCoV-19/USA/TX-DSHS-0668/2020|2020-07-19|EPI\_ISL\_576321|Original|hCoV-19^Texas|Human|Texas Department of State Health Services|Texas Department of State Health Services|Rahman|USA

>Spike|hCoV-19/England/QEUA-95F18E/2020|2020-08-07|EPI\_ISL\_532370|Original|hCoV-19^England|Human|Lighthouse Lab in Glasgow|Wellcome Sanger Institute for the COVID-19 Genomics UK (COG-UK) consortium|Davies|United Kingdom

>Spike|hCoV-19/USA/OH-ODH-SC35270/2020|2020-04-24|EPI\_ISL\_780417|Original|hCoV-19^Ohio|Human|Ohio Department of Health Laboratory|Ohio Department of Health Laboratory|Holmes|USA

>Spike|hCoV-19/Scotland/QEUA-A4B55B/2020|2020-10-08|EPI\_ISL\_637838|Original|hCoV-19^Scotland|Human|Department of Pathology|COVID-19 Genomics UK (COG-UK) Consortium|Goodfellow|United Kingdom

>Spike|hCoV-19/England/20100010304/2020|2020-03-01|EPI\_ISL\_464256|Original|hCoV-19^England|Human|Respiratory Virus Unit|Respiratory Virus Unit|Platt|United Kingdom

>Spike|hCoV-19/Scotland/CVR579/2020|2020-03-24|EPI\_ISL\_439088|Original|hCoV-19^Scotland|Human|West of Scotland Specialist Virology Centre|COVID-19 Genomics UK (COG-UK) Consortium|Robertson|United Kingdom

>Spike|hCoV-19/USA/CA-UCLA-232/2020|2020-06-08|EPI\_ISL\_537538|Original|hCoV-19^California|Human|UCLA Pathology Clinical Microbiology Lab|Kruglyak Lab|Boocock|USA

>Spike|hCoV-19/USA/AZ-TG664273/2020|2020-04-28|EPI\_ISL\_696074|Original|hCoV-19^Arizona|Human|Sonora Quest Laboratories|TGen North|French|USA

>Spike|hCoV-19/England/CAMC-A4143A/2020|2020-10-06|EPI\_ISL\_609386|Original|hCoV-19^England|Human|Lighthouse Lab in Cambridge|Wellcome Sanger Institute for the COVID-19 Genomics UK (COG-UK) consortium|Davies|United Kingdom

>Spike|hCoV-19/India/GJ-GBRC23/2020|2020-04-26|EPI\_ISL\_437452|Original|hCoV-19^Gujarat|Human|B.J. Medical College and Civil hospital|Gujarat Biotechnology Research Centre|Joshi|India

>Spike|hCoV-19/USA/CA-CZB-13833/2020|2020-08-17|EPI\_ISL\_738783|Original|hCoV-19^California|Human|Alameda County Public Health Lab|Chan-Zuckerberg Biohub|Kamm|USA

>Spike|hCoV-19/USA/NY-NYCPHL-000105/2020|2020-03-26|EPI\_ISL\_631597|Original|hCoV-19^New York|Human|Jamaica Hospital Medical Center|New York City Public Health Laboratory|Wang|USA

>Spike|hCoV-19/England/LIVE-1D272F/2020|2020-08-20|EPI\_ISL\_534735|Original|hCoV-19^England|Human|Liverpool Clinical Laboratories|COVID-19 Genomics UK (COG-UK) Consortium|Haldenby|United Kingdom

>Spike|hCoV-19/Scotland/CVR2079/2020|2020-04-10|EPI\_ISL\_484554|Original|hCoV-19^Scotland|Human|West of Scotland Specialist Virology Centre|COVID-19 Genomics UK (COG-UK) Consortium|Robertson|United Kingdom

>Spike|hCoV-19/USA/NY-Wadsworth-281379-01/2020|2020-10-15|EPI\_ISL\_734450|Original|hCoV-19^New York|Human|Masonic Medical Research Institute|Wadsworth Center|Lasek-Nesselquist|USA

>Spike|hCoV-19/England/QEUA-B7D003/2020|2020-11-14|EPI\_ISL\_741839|Original|hCoV-19^England|Human|Oxford Viromics|COVID-19 Genomics UK (COG-UK) Consortium|Golubchik|United Kingdom

>Spike|hCoV-19/Canada/QC-LSPQ-L00219066/2020|2020-03-14|EPI\_ISL\_535789|Original|hCoV-19^Quebec|Human|CHUM - Microbiologie - H\u00f4pital Saint-Luc|Laboratoire de sant\u00e9 publique du Qu\u00e9bec|Moreira|Canada

>Spike|hCoV-19/Scotland/EDB5466/2020|2020-04-25|EPI\_ISL\_461743|Original|hCoV-19^^Scotland|Human|Virology Department|COVID-19 Genomics UK (COG-UK) Consortium|Williams|United Kingdom

>Spike|hCoV-19/USA/MA-MGH-01232/2020|2020-05-04|EPI\_ISL\_791908|Original|hCoV-19^^Massachusetts|Human|Massachusetts General Hospital|Infectious Disease Program|Park|USA

>Spike|hCoV-19/Wales/PHWC-498E0F/2020|2020-11-29|EPI\_ISL\_727214|Original|hCoV-19^^Wales|Human|Originating lab|COVID-19 Genomics UK (COG-UK) Consortium|Moore|United Kingdom

>Spike|hCoV-19/USA/CA-ALSR-1688/2020|2020-04-20|EPI\_ISL\_494745|Original|hCoV-19^^California|Human|San Diego County Public Health Laboratory|Andersen lab at Scripps Research|Gangavarapu|USA

>Spike|hCoV-19/USA/WI-UW-1925/2020|2020-10-30|EPI\_ISL\_677334|Original|hCoV-19^^Wisconsin|Human|University of Wisconsin-Madison AIDS Vaccine Research Laboratories|University of Wisconsin-Madison AIDS Vaccine Research Laboratories|Baczenas|USA

>Spike|hCoV-19/Portugal/PT0114/2020|2020-03-25|EPI\_ISL\_453830|Original|hCoV-19^^Portugal|Human|unknown|Instituto Nacional de Saude (INSA)|Borges|Portugal

>Spike|hCoV-19/England/CAMB-75CE4/2020|2020-03-29|EPI\_ISL\_438292|Original|hCoV-19^^England|Human|Department of Pathology|Wellcome Sanger Institute for the COVID-19 Genomics UK (COG-UK) consortium|Amato|United Kingdom

>Spike|hCoV-19/Ireland/TA-UHL2/2020|2020-04-01|EPI\_ISL\_681767|Original|hCoV-19^^Tipperary|Human|University Hospital Limerick|Irish Coronavirus Sequencing Consortium - Teagasc Moorepark|Walsh|Ireland

>Spike|hCoV-19/England/ALDP-A4FDC8/2020|2020-10-07|EPI\_ISL\_597684|Original|hCoV-19^^England|Human|Lighthouse Lab in Alderley Park|Wellcome Sanger Institute for the COVID-19 Genomics UK (COG-UK) consortium|Davies|United Kingdom

>Spike|hCoV-19/USA/TX-HMH-MCoV-15359/2020|2020-10-22|EPI\_ISL\_786843|Original|hCoV-19^^Texas|Human|Houston Methodist Hospital|Houston Methodist Hospital|Long|USA

>Spike|hCoV-19/England/20189148201/2020|2020-05-01|EPI\_ISL\_465549|Original|hCoV-19^^England|Human|Respiratory Virus Unit|Respiratory Virus Unit|Platt|United Kingdom

>Spike|hCoV-19/Scotland/QEUEH-96305D/2020|2020-08-11|EPI\_ISL\_531583|Original|hCoV-19^^Scotland|Human|NHSGGC West of Scotland Specialist Virology Centre / MRC-University of Glasgow Centre for Virus Research|Wellcome Sanger Institute for the COVID-19 Genomics UK (COG-UK) consortium|Davies|United Kingdom

>Spike|hCoV-19/England/MILK-C3043C/2020|2020-12-07|EPI\_ISL\_782852|Original|hCoV-19^^England|Human|Lighthouse Lab in Milton Keynes|Wellcome Sanger Institute for the COVID-19 Genomics UK (COG-UK) Consortium|Davies|United Kingdom

>Spike|hCoV-19/Scotland/QEUEH-9B5089/2020|2020-09-07|EPI\_ISL\_602052|Original|hCoV-19^^Scotland|Human|Lighthouse Lab in Glasgow|Wellcome Sanger Institute for the COVID-19 Genomics UK (COG-UK) consortium|Davies|United Kingdom

>Spike|hCoV-19/Scotland/QEUEH-9F682A/2020|2020-09-27|EPI\_ISL\_600854|Original|hCoV-19^^Scotland|Human|Lighthouse Lab in Glasgow|Wellcome Sanger Institute for the COVID-19 Genomics UK (COG-UK) consortium|Davies|United Kingdom

>Spike|hCoV-19/England/ALDP-982304/2020|2020-08-06|EPI\_ISL\_529450|Original|hCoV-19^^England|Human|Queens Medical Centre|COVID-19 Genomics UK (COG-UK) Consortium|Loose|United Kingdom

>Spike|hCoV-19/New Zealand/20CV0159/2020|2020-08-23|EPI\_ISL\_548033|Original|hCoV-19^^Auckland|Human|Middlemore Hospital|Institute of Environmental Science and Research (ESR)|Wang|New Zealand

>Spike|hCoV-19/England/204781084/2020|2020-11-19|EPI\_ISL\_678752|Original|hCoV-19^^England|Human|Respiratory Virus Unit|COVID-19 Genomics UK (COG-UK) Consortium|Platt|United Kingdom

>Spike|hCoV-19/England/ALDP-B1D0D8/2020|2020-11-01|EPI\_ISL\_664690|Original|hCoV-19^^England|Human|Centre for Enzyme Innovation|COVID-19 Genomics UK (COG-UK) Consortium|Robson|United Kingdom

>Spike|hCoV-19/England/QEUEH-9AE144/2020|2020-09-01|EPI\_ISL\_637591|Original|hCoV-19^^England|Human|Department of Pathology|COVID-19 Genomics UK (COG-UK) Consortium|Goodfellow|United Kingdom

>Spike|hCoV-19/Finland/21KS4F3/2020|2020-06-21|EPI\_ISL\_757379|Original|hCoV-19^^Uusimaa|Human|Department of Virology and Immunology|Department of Virology|Smura|Finland

>Spike|hCoV-19/England/MILK-4BE1DD/2020|2020-06-04|EPI\_ISL\_559223|Original|hCoV-19^^England|Human|Lighthouse Lab in Milton Keynes|Wellcome Sanger Institute for the COVID-19 Genomics UK (COG-UK) consortium|Davies|United Kingdom

>Spike|hCoV-19/USA/TX-HMH-MCoV-18564/2020|2020-11-19|EPI\_ISL\_784912|Original|hCoV-19^^Texas|Human|Houston Methodist Hospital|Houston Methodist Hospital|Long|USA

>Spike|hCoV-19/USA/NY-PV09349/2020|2020-03-24|EPI\_ISL\_450037|Original|hCoV-19^^New York|Human|MSHS Clinical Microbiology Laboratories|MSHS Pathogen Surveillance Program|van Bakel|USA

>Spike|hCoV-19/USA/MI-UM-10036535783/2020|2020-10-20|EPI\_ISL\_640143|Original|hCoV-19^^Michigan|Human|University of Michigan Clinical Microbiology Laboratory|Lauring Lab|Valesano|USA

>Spike|hCoV-19/Denmark/ALAB-SSI522/2020|2020-03-26|EPI\_ISL\_429587|Original|hCoV-19^^Denmark|Human|Department of Virus and Microbiological Special Diagnostics|Albertsen lab|Kirkegaard|Denmark

>Spike|hCoV-19/Portugal/PT1649/2020|2020-11-07|EPI\_ISL\_731954|Original|hCoV-19^^Portugal|Human|Instituto Nacional de Saude (INSA)|Instituto Nacional de Saude (INSA)|Borges|Portugal

>Spike|hCoV-19/Canada/ON-OICR-SLB2817/2020|2020-04-02|EPI\_ISL\_538345|Original|hCoV-19^^Ontario|Human|Kingston Health Sciences Centre / Queen's University|Ontario Institute for Cancer Research|de Borja|Canada

>Spike|hCoV-19/England/20152068004/2020|2020-04-06|EPI\_ISL\_466241|Original|hCoV-19^^England|Human|Respiratory Virus Unit|Respiratory Virus Unit|Platt|United Kingdom

>Spike|hCoV-19/Luxembourg/LNS1686784/2020|2020-11-20|EPI\_ISL\_739976|Original|hCoV-19^^Luxembourg|Human|Laboratoire national de sant\u00e9|Laboratoire national de sant\u00e9|Wienecke-Baldacchino|Luxembourg

>Spike|hCoV-19/USA/CA-CZB-13047/2020|2020-05-15|EPI\_ISL\_672324|Original|hCoV-19^^California|Human|Alameda County Public Health Lab|Chan-Zuckerberg Biohub|Bhatt|USA

>Spike|hCoV-19/Scotland/CVR2950/2020|2020-04-22|EPI\_ISL\_461605|Original|hCoV-19^^Scotland|Human|West of Scotland Specialist Virology Centre|COVID-19 Genomics UK (COG-UK) Consortium|Robertson|United Kingdom

>Spike|hCoV-19/England/20194104301/2020|2020-05-04|EPI\_ISL\_465614|Original|hCoV-19^^England|Human|Respiratory Virus Unit|Respiratory Virus Unit|Platt|United Kingdom

>Spike|hCoV-19/Japan/PG-5289/2020|2020-08-00|EPI\_ISL\_690392|Original|hCoV-19^^Japan|Human|Pathogen Genomics Center|Pathogen Genomics Center|Sekizuka|Japan

>Spike|hCoV-19/USA/MI-MDHHS-SC21573/2020|2020-03-23|EPI\_ISL\_516300|Original|hCoV-19^^Michigan|Human|Michigan Department of Health and Human Services|Michigan Department of Health and Human Services|Blankenship|USA

>Spike|hCoV-19/England/QEUH-9CFC97/2020|2020-09-15|EPI\_ISL\_589918|Original|hCoV-19^^England|Human|Lighthouse Lab in Glasgow|Wellcome Sanger Institute for the COVID-19 Genomics UK (COG-UK) consortium|Davies|United Kingdom

>Spike|hCoV-19/USA/AZ-TG383072/2020|2020-06-17|EPI\_ISL\_694686|Original|hCoV-19^^Arizona|Human|TGen North|TGen North|French|USA

>Spike|hCoV-19/USA/TX-HMH-5292/2020|2020-06-22|EPI\_ISL\_544658|Original|hCoV-19^^Texas|Human|Houston Methodist Hospital|Houston Methodist Hospital|Long|USA

>Spike|hCoV-19/England/BRIS-130DD2/2020|2020-03-23|EPI\_ISL\_501555|Original|hCoV-19^^England|Human|PHE South West Regional Laboratory|Wellcome Sanger Institute for the COVID-19 Genomics UK (COG-UK) consortium|Davies|United Kingdom

>Spike|hCoV-19/Scotland/QEUH-9F756E/2020|2020-09-27|EPI\_ISL\_595686|Original|hCoV-19^^Scotland|Human|Oxford Viromics|COVID-19 Genomics UK (COG-UK) Consortium|Golubchik|United Kingdom

>Spike|hCoV-19/Canada/QC-LSPQ-L00229410/2020|2020-03-20|EPI\_ISL\_535893|Original|hCoV-19^^Quebec|Human|H\u00f4pital Pierre-Le Gardeur|Laboratoire de sant\u00e9 publique du Qu\u00e9bec|Moreira|Canada

>Spike|hCoV-19/Botswana/BOT2283/2020|2020-04-07|EPI\_ISL\_560385|Original|hCoV-19^^Gaborone|Human|National Health Laboratory|Botswana Institute for Technology Research and Innovation|Tumedi|Botswana

>Spike|hCoV-19/England/QEUA-B13B59/2020|2020-10-31|EPI\_ISL\_641649|Original|hCoV-19^^England|Human|Lighthouse Lab in Glasgow|Wellcome Sanger Institute for the COVID-19 Genomics UK (COG-UK) Consortium|Davies|United Kingdom

>Spike|hCoV-19/Scotland/EDB5103/2020|2020-03-30|EPI\_ISL\_456973|Original|hCoV-19^^Scotland|Human|Virology Department|COVID-19 Genomics UK (COG-UK) Consortium|Williams|United Kingdom

>Spike|hCoV-19/USA/CA-ALSR-2179/2020|2020-06-04|EPI\_ISL\_635376|Original|hCoV-19^^California|Human|San Diego County Public Health Laboratory|Andersen lab at Scripps Research|Gangavarapu|USA

>Spike|hCoV-19/Denmark/DCGC-784/2020|2020-03-16|EPI\_ISL\_614755|Original|hCoV-19^^Sjaelland|Human|Department of Virus and Microbiological Special Diagnostics|Albertsen lab|Michaelsen|Denmark

>Spike|hCoV-19/India/HR-IMT-BZ124/2020|2020-08-25|EPI\_ISL\_561339|Original|hCoV-19^^Haryana|Human|Civil Hospital|CSIR-Institute of Microbial Technology|Patil|India

>Spike|hCoV-19/Denmark/DCGC-1930/2020|2020-05-04|EPI\_ISL\_622523|Original|hCoV-19^^Hovedstaden|Human|Department of Virus and Microbiological Special Diagnostics|Albertsen lab|Michaelsen|Denmark

>Spike|hCoV-19/Netherlands/ZH-EMC-452/2020|2020-08-12|EPI\_ISL\_523790|Original|hCoV-19^^Zuid Holland|Human|Dutch COVID-19 response team|Erasmus Medical Center|Oude Munnink|Netherlands

>Spike|hCoV-19/Japan/PG-3624/2020|2020-04-00|EPI\_ISL\_691877|Original|hCoV-19^^Japan|Human|Pathogen Genomics Center|Pathogen Genomics Center|Sekizuka|Japan

>Spike|hCoV-19/England/MILK-B5A831/2020|2020-11-06|EPI\_ISL\_658223|Original|hCoV-19^^England|Human|Lighthouse Lab in Milton Keynes|Wellcome Sanger Institute for the COVID-19 Genomics UK (COG-UK) Consortium|Davies|United Kingdom

>Spike|hCoV-19/Wales/PHWC-308C3/2020|2020-04-08|EPI\_ISL\_446288|Original|hCoV-19^^Wales|Human|Wales Specialist Virology Centre|Public Health Wales Microbiology Cardiff|Moore|United Kingdom

>Spike|hCoV-19/England/BRIS-12EAB2/2020|2020-04-23|EPI\_ISL\_488397|Original|hCoV-19^^England|Human|PHE South West Regional Laboratory|Wellcome Sanger Institute for the COVID-19 Genomics UK (COG-UK) consortium|Davies|United Kingdom

>Spike|hCoV-19/USA/MN-QDX-971/2020|2020-03-14|EPI\_ISL\_571770|Original|hCoV-19^^Minnesota|Human|Quest Diagnostics|Quest Diagnostics|Kagan|USA

>Spike|hCoV-19/Colombia/un-CIAT-01/2020|2020-04-02|EPI\_ISL\_445085|unknown|hCoV-19^^Colombia|Human|Virology Unit|Virology Unit|Submitter|Colombia

>Spike|hCoV-19/USA/TX-DSHS-1742/2020|2020-06-13|EPI\_ISL\_710396|Original|hCoV-19^^Texas|Human|Texas Department of State Health Services|Texas Department of State Health Services|Rahman|USA

>Spike|hCoV-19/Poland/PL\_MCB\_1/2020|2020-04-23|EPI\_ISL\_645000|Original|hCoV-19^^Poland|Human|Human Genome Variation Research Group|Human Genome Variation Research Group|Poland

>Spike|hCoV-19/Canada/BC-BCCDC-7560/2020|2020-11-00|EPI\_ISL\_740722|Original|hCoV-19^^British Columbia|Human|BCCDC Public Health Laboratory|BCCDC Public Health Laboratory|Prystajecky|Canada

>Spike|hCoV-19/Austria/CeMM0178/2020|2020-03-08|EPI\_ISL\_438021|Original|hCoV-19^^Vienna|Human|Center for Virology|Bergthaler laboratory|Bergthaler|Austria

>Spike|hCoV-19/England/MILK-ACD919/2020|2020-10-22|EPI\_ISL\_630086|Original|hCoV-19^^England|Human|Lighthouse Lab in Milton Keynes|Wellcome Sanger Institute for the COVID-19 Genomics UK (COG-UK) consortium|Davies|United Kingdom

>Spike|hCoV-19/Wales/PHWC-163BBE/2020|2020-04-26|EPI\_ISL\_474052|Original|hCoV-19^^Wales|Human|Originating lab|COVID-19 Genomics UK (COG-UK) Consortium|Moore|United Kingdom

>Spike|hCoV-19/Netherlands/Friesland\_43/2020|2020-05-04|EPI\_ISL\_460858|Original|hCoV-19^^Friesland|Human|Dutch COVID-19 response team|Erasmus Medical Center|Oude Munnink|Netherlands

>Spike|hCoV-19/England/LEED-2A8E2C/2020|2020-03-30|EPI\_ISL\_539217|Original|hCoV-19^^England|Human|Leeds Teaching Hospitals NHS Trust and Public Health England|Wellcome Sanger Institute for the COVID-19 Genomics UK (COG-UK) consortium|Davies|United Kingdom

>Spike|hCoV-19/Scotland/QEUH-9F7540/2020|2020-09-27|EPI\_ISL\_600907|Original|hCoV-19^^Scotland|Human|Lighthouse Lab in Glasgow|Wellcome Sanger Institute for the COVID-19 Genomics UK (COG-UK) consortium|Davies|United Kingdom

>Spike|hCoV-19/Australia/WA321/2020|2020-03-09|EPI\_ISL\_596864|Original|hCoV-19^^Western Australia|Human|PathWest Laboratory Medicine WA|PathWest Laboratory Medicine WA Microbial Surveillance Unit|Sikazwe|Australia

>Spike|hCoV-19/England/QEUH-BC3E22/2020|2020-11-25|EPI\_ISL\_704196|Original|hCoV-19^^England|Human|Lighthouse Lab in Glasgow|Wellcome Sanger Institute for the COVID-19 Genomics UK (COG-UK) Consortium|Davies|United Kingdom

>Spike|hCoV-19/Japan/PG-8594/2020|2020-08-00|EPI\_ISL\_686190|Original|hCoV-19^^Japan|Human|Pathogen Genomics Center|Pathogen Genomics Center|Sekizuka|Japan

>Spike|hCoV-19/England/QEUH-880149/2020|2020-07-26|EPI\_ISL\_532660|Original|hCoV-19^^England|Human|Lighthouse Lab in Glasgow|Wellcome Sanger Institute for the COVID-19 Genomics UK (COG-UK) consortium|Davies|United Kingdom

>Spike|hCoV-19/Nigeria/OS-CV288/2020|2020-06-30|EPI\_ISL\_729969|Original|hCoV-19^^Osun State|Human|Nigeria Centre for Disease Control (NCDC)|African Centre of Excellence for Genomics of Infectious Diseases (ACEGID)|Oluniyi|Nigeria

>Spike|hCoV-19/England/CAMC-B0860B/2020|2020-10-29|EPI\_ISL\_643718|Original|hCoV-19^^England|Human|Lighthouse Lab in Cambridge|Wellcome Sanger Institute for the COVID-19 Genomics UK (COG-UK) Consortium|Davies|United Kingdom

>Spike|hCoV-19/USA/TX-DSHS-0331/2020|2020-06-13|EPI\_ISL\_534298|Original|hCoV-19^^Texas|Human|Texas Department of State Health Services|Texas Department of State Health Services|Rahman|USA

>Spike|hCoV-19/England/20128018804/2020|2020-03-18|EPI\_ISL\_423948|Original|hCoV-19^^England|Human|Respiratory Virus Unit|Respiratory Virus Unit|Platt|United Kingdom

>Spike|hCoV-19/Latvia/027/2020|2020-05-09|EPI\_ISL\_486410|Original|hCoV-19^^Riga|Human|Centrāla laboratorija|Latvian Biomedical Research and Study Centre|Zrelavs|Latvia

>Spike|hCoV-19/England/QEUH-79202A/2020|2020-07-15|EPI\_ISL\_533039|Original|hCoV-19^^England|Human|Lighthouse Lab in Glasgow|Wellcome Sanger Institute for the COVID-19 Genomics UK (COG-UK) consortium|Davies|United Kingdom

>Spike|hCoV-19/England/ALDP-7000BE/2020|2020-06-29|EPI\_ISL\_557717|Original|hCoV-19^^England|Human|Lighthouse Lab in Alderley Park|Wellcome Sanger Institute for the COVID-19 Genomics UK (COG-UK) consortium|Davies|United Kingdom

>Spike|hCoV-19/England/BRIS-12505F/2020|2020-03-27|EPI\_ISL\_444006|Original|hCoV-19^^England|Human|PHE South West Regional Laboratory|Wellcome Sanger Institute for the COVID-19 Genomics UK (COG-UK) consortium|Amato|United Kingdom

>Spike|hCoV-19/USA/CA-CZB-16171/2020|2020-11-25|EPI\_ISL\_738714|Original|hCoV-19^^California|Human|Renegade|Chan-Zuckerberg Biohub|Kamm|USA

>Spike|hCoV-19/Wales/PHWC-16813F/2020|2020-06-08|EPI\_ISL\_540897|Original|hCoV-19^^Wales|Human|Wales Specialist Virology Centre Sequencing lab|COVID-19 Genomics UK (COG-UK) Consortium|Moore|United Kingdom

>Spike|hCoV-19/USA/NY-Wadsworth-224529-01/2020|2020-09-22|EPI\_ISL\_767426|Original|hCoV-19^^New York|Human|Wadsworth Center|Wadsworth Center|Lasek-Nesselquist|USA

>Spike|hCoV-19/England/SHEF-CE727/2020|2020-10-11|EPI\_ISL\_613393|Original|hCoV-19^^England|Human|Virology Department|COVID-19 Genomics UK (COG-UK) Consortium|de Silva|United Kingdom

>Spike|hCoV-19/Canada/BC-BCCDC-8548/2020|2020-11-00|EPI\_ISL\_740812|Original|hCoV-19^^British Columbia|Human|BCCDC Public Health Laboratory|BCCDC Public Health Laboratory|Prystajecky|Canada

>Spike|hCoV-19/England/ALDP-B851C9/2020|2020-11-15|EPI\_ISL\_674308|Original|hCoV-19^^England|Human|Lighthouse Lab in Alderley Park|Wellcome Sanger Institute for the COVID-19 Genomics UK (COG-UK) Consortium|Davies|United Kingdom

>Spike|hCoV-19/USA/WA-S2254/2020|2020-06-09|EPI\_ISL\_497682|Original|hCoV-19^^Washington|Human|Washington State Department of Health|Seattle Flu Study|Lee|USA

>Spike|hCoV-19/Sweden/20-50180/2020|2020-03-08|EPI\_ISL\_429153|Original|hCoV-19^^Varmland|Human|Klinisk mikrobiologi Orebro|The Public Health Agency of Sweden|Svartstr\u00f6m|Sweden

>Spike|hCoV-19/Netherlands/NB-EMC-474/2020|2020-11-12|EPI\_ISL\_763132|Original|hCoV-19^^Noord Brabant|Human|Dutch COVID-19 response team|Erasmus Medical Center|Oude Munnink|Netherlands

>Spike|hCoV-19/USA/MA-MASPHL-00248/2020|2020-04-17|EPI\_ISL\_791690|Original|hCoV-19^^Massachusetts|Human|Massachusetts State Public Health Laboratory|Infectious Disease Program|Park|USA

>Spike|hCoV-19/USA/WA-S1411/2020|2020-05-19|EPI\_ISL\_495861|Original|hCoV-19^^Washington|Human|Washington State Department of Health|Seattle Flu Study|Lee|USA

>Spike|hCoV-19/Spain/MD-IBV-99008715/2020|2020-10-11|EPI\_ISL\_654292|Original|hCoV-19^^Madrid|Human|Hospital General Universitario Gregorio Mara\u00f1a|SeqCOVID-SPAIN consortium/IBV (CSIC)|Comas|Spain

>Spike|hCoV-19/USA/CA-CSMC24/2020|2020-03-25|EPI\_ISL\_475634|Original|hCoV-19^^California|Human|Cedars-Sinai Medical Center|Cedars-Sinai Medical Center|Zhang|USA

>Spike|hCoV-19/USA/TX-HMH-MCoV-12402/2020|2020-09-28|EPI\_ISL\_790329|Original|hCoV-19^^Texas|Human|Houston Methodist Hospital|Houston Methodist Hospital|Long|USA

>Spike|hCoV-19/England/BIRM-601ED/2020|2020-00-00|EPI\_ISL\_499852|Original|hCoV-19^^England|Human|University of Birmingham|COVID-19 Genomics UK (COG-UK) Consortium|Loman|United Kingdom

>Spike|hCoV-19/Australia/VIC13442/2020|2020-09-06|EPI\_ISL\_592240|Original|hCoV-19^^Victoria|Human|Microbiological Diagnostic Unit - Public Health Laboratory (MDU-PHL)|MDU-PHL|Schultz|Australia

>Spike|hCoV-19/Japan/PG-2612/2020|2020-03-00|EPI\_ISL\_690746|Original|hCoV-19^^Japan|Human|Pathogen Genomics Center|Pathogen Genomics Center|Sekizuka|Japan

>Spike|hCoV-19/England/CAMC-CB211D/2020|2020-12-08|EPI\_ISL\_760988|Original|hCoV-19^^England|Human|Lighthouse Lab in Cambridge|Wellcome Sanger Institute for the COVID-19 Genomics UK (COG-UK) Consortium|Davies|United Kingdom

>Spike|hCoV-19/USA/WA-UW-1306/2020|2020-03-17|EPI\_ISL\_422976|Original|hCoV-19^^Washington|Human|UW Virology Lab|UW Virology Lab|Roychoudhury|USA

>Spike|hCoV-19/England/SHEF-D2553/2020|2020-09-13|EPI\_ISL\_559945|Original|hCoV-19^^England|Human|Virology Department|COVID-19 Genomics UK (COG-UK) Consortium|de Silva|United Kingdom

>Spike|hCoV-19/England/204420852/2020|2020-10-23|EPI\_ISL\_653964|Original|hCoV-19^^England|Human|Respiratory Virus Unit|COVID-19 Genomics UK (COG-UK) Consortium|Platt|United Kingdom

>Spike|hCoV-19/USA/CA-CZB-1456/2020|2020-04-11|EPI\_ISL\_468417|Original|hCoV-19^^California|Human|County of San Luis Obispo Public Health Laboratory|Chan-Zuckerberg Biohub|Hao|USA

>Spike|hCoV-19/England/MILK-A9132F/2020|2020-10-16|EPI\_ISL\_638523|Original|hCoV-19^^England|Human|Oxford Viromics|COVID-19 Genomics UK (COG-UK) Consortium|Golubchik|United Kingdom

>Spike|hCoV-19/Wales/QEUA-AF093B/2020|2020-10-28|EPI\_ISL\_711048|Original|hCoV-19^^Wales|Human|Lighthouse Lab in Glasgow|Wellcome Sanger Institute for the COVID-19 Genomics UK (COG-UK) Consortium|Davies|United Kingdom

>Spike|hCoV-19/USA/TX-HMH-4505/2020|2020-06-19|EPI\_ISL\_543675|Original|hCoV-19^^Texas|Human|Houston Methodist Hospital|Houston Methodist Hospital|Long|USA

>Spike|hCoV-19/USA/MI-QDX-374/2020|2020-03-23|EPI\_ISL\_571117|Original|hCoV-19^^Michigan|Human|Quest Diagnostics|Quest Diagnostics|Kagan|USA

>Spike|hCoV-19/Scotland/GCVR-17037A/2020|2020-03-21|EPI\_ISL\_459720|Original|hCoV-19^^Scotland|Human|NHSGGC West of Scotland Specialist Virology Centre / MRC-University of Glasgow Centre for Virus Research|Wellcome Sanger Institute for the COVID-19 Genomics UK (COG-UK) consortium|Davies|United Kingdom

>Spike|hCoV-19/USA/WI-UW-1063/2020|2020-07-29|EPI\_ISL\_516489|Original|hCoV-19^^Wisconsin|Human|University of Wisconsin-Madison AIDS Vaccine Research Laboratories|University of Wisconsin-Madison AIDS Vaccine Research Laboratories|Baczenas|USA

>Spike|hCoV-19/USA/DE-DHSS-F981528/2020|2020-08-28|EPI\_ISL\_708422|Original|hCoV-19^^Delaware|Human|Delaware Public Health Lab|Delaware Public Health Lab|Bajwa|USA

>Spike|hCoV-19/Wales/PHWC-325BB/2020|2020-04-15|EPI\_ISL\_474330|Original|hCoV-19^^Wales|Human|Originating lab|COVID-19 Genomics UK (COG-UK) Consortium|Moore|United Kingdom

>Spike|hCoV-19/Wales/PHWC-16E658/2020|2020-10-02|EPI\_ISL\_585748|Original|hCoV-19^^Wales|Human|Wales Specialist Virology Centre Sequencing lab|COVID-19 Genomics UK (COG-UK) Consortium|Moore|United Kingdom

>Spike|hCoV-19/Japan/PG-1306/2020|2020-04-00|EPI\_ISL\_684914|Original|hCoV-19^^Japan|Human|Saitama Prefectural Institute of Public Health|Pathogen Genomics Center|Sekizuka|Japan

>Spike|hCoV-19/Japan/PG-6280/2020|2020-08-00|EPI\_ISL\_689391|Original|hCoV-19^^Japan|Human|Pathogen Genomics Center|Pathogen Genomics Center|Sekizuka|Japan

>Spike|hCoV-19/Scotland/EDB9006/2020|2020-11-01|EPI\_ISL\_652032|Original|hCoV-19^^Scotland|Human|Virology Department|COVID-19 Genomics UK (COG-UK) Consortium|McHugh|United Kingdom

>Spike|hCoV-19/England/ALDP-A67A3C/2020|2020-10-12|EPI\_ISL\_630452|Original|hCoV-19^^England|Human|Lighthouse Lab in Alderley Park|Wellcome Sanger Institute for the COVID-19 Genomics UK (COG-UK) consortium|Davies|United Kingdom

>Spike|hCoV-19/England/MILK-AB8D15/2020|2020-10-22|EPI\_ISL\_623713|Original|hCoV-19^^England|Human|Lighthouse Lab in Milton Keynes|Wellcome Sanger Institute for the COVID-19 Genomics UK (COG-UK) consortium|Davies|United Kingdom

>Spike|hCoV-19/Wales/PHWC-496117/2020|2020-11-26|EPI\_ISL\_726534|Original|hCoV-19^^Wales|Human|Originating lab|COVID-19 Genomics UK (COG-UK) Consortium|Moore|United Kingdom

>Spike|hCoV-19/England/SHEF-10D55A8/2020|2020-12-17|EPI\_ISL\_763639|Original|hCoV-19^^England|Human|Virology Department|COVID-19 Genomics UK (COG-UK) Consortium|de Silva|United Kingdom

>Spike|hCoV-19/Australia/SAP200/2020|2020-03-22|EPI\_ISL\_483069|Original|hCoV-19^^South Australia|Human|SA Pathology|SA Pathology|Leong|Australia

>Spike|hCoV-19/USA/WY-WPHL-20094982/2020|2020-12-12|EPI\_ISL\_754216|Original|hCoV-19^^Wyoming|Human|Wyoming Public Health Laboratory|Wyoming Public Health Laboratory|Hull|USA

>Spike|hCoV-19/USA/TX-HMH0129/2020|2020-03-21|EPI\_ISL\_434829|Original|hCoV-19^^Texas|Human|Houston Methodist Hospital|Houston Methodist Hospital|Long|USA

>Spike|hCoV-19/England/LIVE-DC4153/2020|2020-11-13|EPI\_ISL\_703403|Original|hCoV-19^^England|Human|Liverpool Clinical Laboratories|COVID-19 Genomics UK (COG-UK) Consortium|Haldenby|United Kingdom

>Spike|hCoV-19/USA/UT-08375/2020|2020-05-19|EPI\_ISL\_524158|Original|hCoV-19^^Utah|Human|Utah Public Health Laboratory|Utah Public Health Laboratory|Young|USA

>Spike|hCoV-19/Brazil/RJ-INCA-I37/2020|2020-05-04|EPI\_ISL\_513577|Original|hCoV-19^^Rio de Janeiro|Human|Programa de Oncovirologia|Programa de Oncovirologia|Ramos Goes|Brazil

>Spike|hCoV-19/England/ALDP-CC07ED/2020|2020-12-19|EPI\_ISL\_760769|Original|hCoV-19^^England|Human|Lighthouse Lab in Alderley Park|Wellcome Sanger Institute for the COVID-19 Genomics UK (COG-UK) Consortium|Davies|United Kingdom

>Spike|hCoV-19/Moldova/ICGEB\_MD4/2020|2020-06-18|EPI\_ISL\_516935|Original|hCoV-19^^Balti|Human|Nicolae Testemitanu State University of Medicine and Pharmacy|International Centre for Genetic Engineering and Biotechnology (ICGEB) and ARGO Open Lab Platform for Genome Sequencing|Ulinici|Moldova

>Spike|hCoV-19/USA/WA-S657/2020|2020-04-21|EPI\_ISL\_438210|Original|hCoV-19^^Washington|Human|Washington State Department of Health|Seattle Flu Study|Bedford|USA

>Spike|hCoV-19/Australia/QLD1099/2020|2020-09-17|EPI\_ISL\_593617|Original|hCoV-19^^Australia|Human|unknown|Public Health Virology Laboratory|Nguyen|Australia

>Spike|hCoV-19/England/NORW-EBF1D/2020|2020-05-25|EPI\_ISL\_472323|Original|hCoV-19^^England|Human|Quadram Institute Bioscience|COVID-19 Genomics UK (COG-UK) Consortium|Alikhan|United Kingdom

>Spike|hCoV-19/England/QEUH-C9615B/2020|2020-12-17|EPI\_ISL\_777484|Original|hCoV-19^^England|Human|Lighthouse Lab in Glasgow|Wellcome Sanger Institute for the COVID-19 Genomics UK (COG-UK) Consortium|Davies|United Kingdom

>Spike|hCoV-19/South Africa/KRISP-0441/2020|2020-06-30|EPI\_ISL\_498057|Original|hCoV-19^^KwaZulu-Natal|Human|NHLs-IALCH|KRISP|de Oliveira|South Africa

>Spike|hCoV-19/Wales/PHWC-15CE37/2020|2020-04-20|EPI\_ISL\_472626|Original|hCoV-19^^Wales|Human|Wales Specialist Virology Centre Sequencing lab|COVID-19 Genomics UK (COG-UK) Consortium|Moore|United Kingdom

>Spike|hCoV-19/Belgium/reg-0429621/2020|2020-04-29|EPI\_ISL\_734674|Original|hCoV-19^^Estaimpuis|Human|UZ Leuven|KU Leuven|Maes|Belgium

>Spike|hCoV-19/United Arab Emirates/L3300054450/2020|2020-06-05|EPI\_ISL\_520711|Original|hCoV-19^^United Arab Emirates|Human|Mohammed Bin Rashid University of Medicine and Health Sciences|Al Jalila Genomics Center|Ramaswamy|United Arab Emirates

>Spike|hCoV-19/England/CAMC-948CC3/2020|2020-07-25|EPI\_ISL\_556022|Original|hCoV-19^^England|Human|Lighthouse Lab in Cambridge|Wellcome Sanger Institute for the COVID-19 Genomics UK (COG-UK) consortium|Davies|United Kingdom

>Spike|hCoV-19/USA/TX-HMH-MCoV-18048/2020|2020-11-13|EPI\_ISL\_786196|Original|hCoV-19^^Texas|Human|Houston Methodist Hospital|Houston Methodist Hospital|Long|USA

>Spike|hCoV-19/England/NORW-222CA8/2020|2020-12-19|EPI\_ISL\_741512|Original|hCoV-19^^England|Human|Quadram Institute Bioscience|COVID-19 Genomics UK (COG-UK) Consortium|Alikhan|United Kingdom

>Spike|hCoV-19/Australia/VIC2297/2020|2020-06-17|EPI\_ISL\_522018|Original|hCoV-19^^Victoria|Human|Microbiological Diagnostic Unit - Public Health Laboratory (MDU-PHL)|MDU-PHL|Schultz|Australia

>Spike|hCoV-19/Finland/13LS14AH1/2020|2020-10-13|EPI\_ISL\_737221|Original|hCoV-19^^Uusimaa|Human|Department of Virology and Immunology|Department of Virology|Smura|Finland

>Spike|hCoV-19/England/CAMB-1B9120/2020|2020-00-00|EPI\_ISL\_705543|Original|hCoV-19^^England|Human|Department of Pathology|COVID-19 Genomics UK (COG-UK) Consortium|Goodfellow|United Kingdom

>Spike|hCoV-19/USA/WA-UW-4127/2020|2020-03-31|EPI\_ISL\_570045|Original|hCoV-19^^Washington|Human|UW Virology Lab|UW Virology Lab|Roychoudhury|USA

>Spike|hCoV-19/England/QEUH-AAAC91/2020|2020-10-21|EPI\_ISL\_652739|Original|hCoV-19^^England|Human|Oxford Viromics|COVID-19 Genomics UK (COG-UK) Consortium|Golubchik|United Kingdom

>Spike|hCoV-19/USA/UT-UPHL-2012795207/2020|2020-11-27|EPI\_ISL\_747011|Original|hCoV-19^^Utah|Human|Utah Public Health Laboratory|Utah Public Health Laboratory|Gallagher|USA

>Spike|hCoV-19/England/MILK-A46C6A/2020|2020-10-06|EPI\_ISL\_598326|Original|hCoV-19^^England|Human|Lighthouse Lab in Milton Keynes|Wellcome Sanger Institute for the COVID-19 Genomics UK (COG-UK) consortium|Davies|United Kingdom

>Spike|hCoV-19/Luxembourg/LNS0042548/2020|2020-06-24|EPI\_ISL\_739700|Original|hCoV-19^^Luxembourg|Human|Laboratoire national de sant\u00e9|Laboratoire national de sant\u00e9|Wienecke-Baldacchino|Luxembourg

>Spike|hCoV-19/USA/NM-NMDOH-2020321223/2020|2020-09-03|EPI\_ISL\_569634|Original|hCoV-19^^New Mexico|Human|New Mexico Department of Health Scientific Laboratory|New Mexico Department of Health Scientific Laboratory|Johnson|USA

>Spike|hCoV-19/USA/CA-CZB-10963/2020|2020-09-19|EPI\_ISL\_583045|Original|hCoV-19^^California|Human|Orange County Public Health Lab|Chan-Zuckerberg Biohub|Bhatt|USA

>Spike|hCoV-19/Japan/NGY-NNH-013/2020|2020-07-22|EPI\_ISL\_568568|Original|hCoV-19^^Aichi|Human|Department of Infectious Diseases and Immunology|Clinical Research Center|Iwatani|Japan

>Spike|hCoV-19/England/ALDP-B5AF2D/2020|2020-11-09|EPI\_ISL\_655463|Original|hCoV-19^^England|Human|Lighthouse Lab in Alderley Park|Wellcome Sanger Institute for the COVID-19 Genomics UK (COG-UK) Consortium|Davies|United Kingdom

>Spike|hCoV-19/USA/MA-MGH-00562/2020|2020-03-22|EPI\_ISL\_460125|Original|hCoV-19^^Massachusetts|Human|Massachusetts General Hospital|Infectious Disease Program|Lemieux|USA

>Spike|hCoV-19/England/ALDP-B74E8A/2020|2020-11-12|EPI\_ISL\_678999|Original|hCoV-19^^England|Human|Queens Medical Centre|COVID-19 Genomics UK (COG-UK) Consortium|Loose|United Kingdom



>Spike|hCoV-19/Spain/PV-IBV-000924/2020|2020-03-27|EPI\_ISL\_452647|Original|hCoV-19^^Basque Country|Human|Servicio de Microbiolog\u00eda. Hospital Universitario Donostia. OSI Donostialdea. \u00c1rea de Enfermedades Infecciosas|SeqCOVID-SPAIN consortium/IBV (CSIC) |Comas|Spain

>Spike|hCoV-19/Germany/SH-ChVir2123/2020|2020-03-16|EPI\_ISL\_729511|Original|hCoV-19^^Schleswig-Holstein|Human|A. Krumbholz|Charit\u00e9 Universit\u00e4tsmedizin Berlin|Muehlemann|Germany

>Spike|hCoV-19/Brazil/RJ-0265/2020|2020-04-14|EPI\_ISL\_470631|Original|hCoV-19^^Rio de Janeiro|Human|Laboratorio de Virologia Molecular / UFRJ|Bioinformatics Laboratory / LNCC|Almeida|Brazil

>Spike|hCoV-19/Wales/MILK-A46848/2020|2020-10-06|EPI\_ISL\_609304|Original|hCoV-19^^Wales|Human|Lighthouse Lab in Milton Keynes|Wellcome Sanger Institute for the COVID-19 Genomics UK (COG-UK) consortium|Davies|United Kingdom

>Spike|hCoV-19/Portugal/PT1379/2020|2020-03-26|EPI\_ISL\_511338|Original|hCoV-19^^Portugal|Human|Instituto Nacional de Saude (INSA)|Instituto Nacional de Saude (INSA) |Borges|Portugal

>Spike|hCoV-19/Wales/PHWC-4950B1/2020|2020-11-25|EPI\_ISL\_726297|Original|hCoV-19^^Wales|Human|Originating lab|COVID-19 Genomics UK (COG-UK) Consortium|Moore|United Kingdom

>Spike|hCoV-19/USA/NY-NYCPHL-000480/2020|2020-05-06|EPI\_ISL\_631947|Original|hCoV-19^^New York|Human|St Barnabas Hospital|New York City Public Health Laboratory|Wang|USA

>Spike|hCoV-19/England/QEUEH-B142CC/2020|2020-11-03|EPI\_ISL\_641663|Original|hCoV-19^^England|Human|Lighthouse Lab in Glasgow|Wellcome Sanger Institute for the COVID-19 Genomics UK (COG-UK) Consortium|Davies|United Kingdom

>Spike|hCoV-19/England/CAMB-76621/2020|2020-03-29|EPI\_ISL\_438356|Original|hCoV-19^^England|Human|Department of Pathology|Wellcome Sanger Institute for the COVID-19 Genomics UK (COG-UK) consortium|Amato|United Kingdom

>Spike|hCoV-19/USA/UT-UPHL-2012266098/2020|2020-07-25|EPI\_ISL\_745718|Original|hCoV-19^^Utah|Human|Ginkgo Bioworks Clinical Laboratory|Utah Public Health Laboratory|Young|USA

>Spike|hCoV-19/Wales/PHWC-162C8F/2020|2020-05-27|EPI\_ISL\_473184|Original|hCoV-19^^Wales|Human|Wales Specialist Virology Centre Sequencing lab|COVID-19 Genomics UK (COG-UK) Consortium|Moore|United Kingdom

>Spike|hCoV-19/England/ALDP-C8B195/2020|2020-12-16|EPI\_ISL\_756459|Original|hCoV-19^^England|Human|Lighthouse Lab in Alderley Park|Wellcome Sanger Institute for the COVID-19 Genomics UK (COG-UK) Consortium|Davies|United Kingdom

>Spike|hCoV-19/Denmark/DCGC-17350/2020|2020-12-14|EPI\_ISL\_750519|Original|hCoV-19^^Midtjylland|Human|Department of Virus and Microbiological Special Diagnostics|Albertsen Lab|Michaelsen|Denmark

>Spike|hCoV-19/USA/WA-UW-32754/2020|2020-10-19|EPI\_ISL\_737087|Original|hCoV-19^^Washington|Human|UW Virology Lab|UW Virology Lab|Roychoudhury|USA

>Spike|hCoV-19/Nigeria/LA-CV259/2020|2020-04-25|EPI\_ISL\_729943|Original|hCoV-19^^Lagos State|Human|Nigeria Centre for Disease Control (NCDC)|African Centre of Excellence for Genomics of Infectious Diseases (ACEGID)|Oluniyi|Nigeria

>Spike|hCoV-19/South Africa/KRISP-K004017/2020|2020-10-14|EPI\_ISL\_635001|Original|hCoV-19^^KwaZulu-Natal|Human|National Health Laboratory Service - Inkosi Albert Luthuli Central Hospital (NHLS-IALCH)|KRISP|de Oliveira|South Africa

>Spike|hCoV-19/England/QEUEH-B2C012/2020|2020-11-04|EPI\_ISL\_680047|Original|hCoV-19^^England|Human|Department of Pathology|COVID-19 Genomics UK (COG-UK) Consortium|Goodfellow|United Kingdom

>Spike|hCoV-19/USA/AK-PHL426/2020|2020-06-05|EPI\_ISL\_512135|Original|hCoV-19^^Alaska|Human|Alaska State Virology Laboratory|Alaska State Virology Laboratory|Drown|USA

>Spike|hCoV-19/England/LOND-1260B17/2020|2020-04-04|EPI\_ISL\_524646|Original|hCoV-19^^England|Human|North West London Pathology|Wellcome Sanger Institute for the COVID-19 Genomics UK (COG-UK) consortium|Davies|United Kingdom

>Spike|hCoV-19/England/QEUA-AD4C52/2020|2020-10-24|EPI\_ISL\_634658|Original|hCoV-19^^England|Human|Lighthouse Lab in Glasgow|Wellcome Sanger Institute for the COVID-19 Genomics UK (COG-UK) consortium|Davies|United Kingdom

>Spike|hCoV-19/England/ALDP-BE8FF7/2020|2020-12-03|EPI\_ISL\_708865|Original|hCoV-19^^England|Human|Lighthouse Lab in Alderley Park|Wellcome Sanger Institute for the COVID-19 Genomics UK (COG-UK) Consortium|Davies|United Kingdom

>Spike|hCoV-19/England/ALDP-B7352C/2020|2020-11-12|EPI\_ISL\_662614|Original|hCoV-19^^England|Human|Lighthouse Lab in Alderley Park|Wellcome Sanger Institute for the COVID-19 Genomics UK (COG-UK) Consortium|Davies|United Kingdom

>Spike|hCoV-19/Denmark/DCGC-20786/2020|2020-12-21|EPI\_ISL\_759362|Original|hCoV-19^^Nordjylland|Human|Department of Virus and Microbiological Special Diagnostics|Albertsen Lab|Michaelsen|Denmark

>Spike|hCoV-19/Wales/PHWC-15DAF6/2020|2020-05-13|EPI\_ISL\_472760|Original|hCoV-19^^Wales|Human|Wales Specialist Virology Centre Sequencing lab|COVID-19 Genomics UK (COG-UK) Consortium|Moore|United Kingdom

>Spike|hCoV-19/Wales/PHWC-163D7C/2020|2020-05-12|EPI\_ISL\_474078|Original|hCoV-19^^Wales|Human|Originating lab|COVID-19 Genomics UK (COG-UK) Consortium|Moore|United Kingdom

>Spike|hCoV-19/Scotland/QEUA-9F5A8F/2020|2020-09-27|EPI\_ISL\_600622|Original|hCoV-19^^Scotland|Human|Lighthouse Lab in Glasgow|Wellcome Sanger Institute for the COVID-19 Genomics UK (COG-UK) consortium|Davies|United Kingdom

>Spike|hCoV-19/USA/TX-DSHS-1155/2020|2020-07-03|EPI\_ISL\_634957|Original|hCoV-19^^Texas|Human|Texas Department of State Health Services|Texas Department of State Health Services|Rahman|USA

>Spike|hCoV-19/England/MILK-B96A9D/2020|2020-11-13|EPI\_ISL\_676111|Original|hCoV-19^^England|Human|Lighthouse Lab in Milton Keynes|Wellcome Sanger Institute for the COVID-19 Genomics UK (COG-UK) Consortium|Davies|United Kingdom

>Spike|hCoV-19/Switzerland/ZH-ETHZ-310418/2020|2020-10-08|EPI\_ISL\_603492|Original|hCoV-19^^Zurich|Human|Viollier AG|Department of Biosystems Science and Engineering|Nadeau|Switzerland

>Spike|hCoV-19/England/QEUA-9643F9/2020|2020-08-11|EPI\_ISL\_536954|Original|hCoV-19^^England|Human|Lighthouse Lab in Glasgow|Wellcome Sanger Institute for the COVID-19 Genomics UK (COG-UK) consortium|Davies|United Kingdom

>Spike|hCoV-19/USA/MA-MGH-00445/2020|2020-04-01|EPI\_ISL\_460198|Original|hCoV-19^^Massachusetts|Human|Massachusetts General Hospital|Infectious Disease Program|Lemieux|USA

>Spike|hCoV-19/Australia/VIC8227/2020|2020-08-11|EPI\_ISL\_564909|Original|hCoV-19^^Victoria|Human|Microbiological Diagnostic Unit - Public Health Laboratory (MDU-PHL)|MDU-PHL|Schultz|Australia

>Spike|hCoV-19/USA/HI-H200152/2020|2020-07-18|EPI\_ISL\_752715|Original|hCoV-19^^Hawaii|Human|State Laboratories Division|State Laboratories Division|Sultana|USA

>Spike|hCoV-19/Japan/PG-2619/2020|2020-04-00|EPI\_ISL\_690753|Original|hCoV-19^^Japan|Human|Pathogen Genomics Center|Pathogen Genomics Center|Sekizuka|Japan

>Spike|hCoV-19/England/205260865/2020|2020-12-18|EPI\_ISL\_766860|Original|hCoV-19^^England|Human|Respiratory Virus Unit|COVID-19 Genomics UK (COG-UK) Consortium|Platt|United Kingdom

>Spike|hCoV-19/England/QEUA-BA1C4E/2020|2020-11-18|EPI\_ISL\_719928|Original|hCoV-19^^England|Human|Lighthouse Lab in Glasgow|Wellcome Sanger Institute for the COVID-19 Genomics UK (COG-UK) Consortium|Davies|United Kingdom

>Spike|hCoV-19/Netherlands/ZE-RIVM-21046/2020|2020-12-30|EPI\_ISL\_791060|Original|hCoV-19^^Zeeland|Human|Dutch COVID-19 response team|National Institute for Public Health and the Environment (RIVM)|Meijer|Netherlands

>Spike|hCoV-19/USA/LA-QDX-1997/2020|2020-03-16|EPI\_ISL\_604336|Original|hCoV-19^^Louisiana|Human|Quest Diagnostics|Quest Diagnostics|Kagan|USA

>Spike|hCoV-19/USA/WI-WSLH-200201/2020|2020-03-17|EPI\_ISL\_578424|Original|hCoV-19^^Wisconsin|Human|Wisconsin State Laboratory of Hygiene Communicable Disease Division|Wisconsin State Laboratory of Hygiene Communicable Disease Division|Florek|USA

>Spike|hCoV-19/USA/CA-CSMC142/2020|2020-04-06|EPI\_ISL\_475621|Original|hCoV-19^^California|Human|Cedars-Sinai Medical Center|Cedars-Sinai Medical Center|Zhang|USA

>Spike|hCoV-19/USA/TX-HMH-MCoV-18864/2020|2020-11-25|EPI\_ISL\_785180|Original|hCoV-19^^Texas|Human|Houston Methodist Hospital|Houston Methodist Hospital|Long|USA

>Spike|hCoV-19/Spain/MD-IBV-99008709/2020|2020-10-08|EPI\_ISL\_654287|Original|hCoV-19^^Madrid|Human|Hospital General Universitario Gregorio Mara\u00f1\u00f3n|SeqCOVID-SPAIN consortium/IBV (CSIC)|Comas|Spain

>Spike|hCoV-19/USA/TX-HMH-MCoV-18035/2020|2020-11-16|EPI\_ISL\_786183|Original|hCoV-19^^Texas|Human|Houston Methodist Hospital|Houston Methodist Hospital|Long|USA

>Spike|hCoV-19/England/204821908/2020|2020-11-24|EPI\_ISL\_678778|Original|hCoV-19^^England|Human|Respiratory Virus Unit|COVID-19 Genomics UK (COG-UK) Consortium|Platt|United Kingdom

>Spike|hCoV-19/England/WSFT-25C0D55/2020|2020-05-02|EPI\_ISL\_492866|Original|hCoV-19^^England|Human|Department of Medical Microbiology|Wellcome Sanger Institute for the COVID-19 Genomics UK (COG-UK) consortium|Davies|United Kingdom

>Spike|hCoV-19/South Africa/KRISP-K001043/2020|2020-07-02|EPI\_ISL\_509305|Original|hCoV-19^^KwaZulu-Natal|Human|NHLS-IALCH|KRISP|de Oliveira|South Africa

>Spike|hCoV-19/USA/NY-Wadsworth-16080-01/2020|2020-03-14|EPI\_ISL\_426296|Original|hCoV-19^^New York|Human|Wadsworth Center|Wadsworth Center|Lasek-Nesselquist|USA

>Spike|hCoV-19/Norway/3776/2020|2020-09-08|EPI\_ISL\_635152|Original|hCoV-19^^Viken|Human|Ostfold Hospital Trust - Kalnes|Norwegian Institute of Public Health|Vollan|Norway

>Spike|hCoV-19/England/MILK-BB14BC/2020|2020-11-18|EPI\_ISL\_720284|Original|hCoV-19^^England|Human|Lighthouse Lab in Milton Keynes|Wellcome Sanger Institute for the COVID-19 Genomics UK (COG-UK) Consortium|Davies|United Kingdom

>Spike|hCoV-19/Japan/PG-4724/2020|2020-07-00|EPI\_ISL\_689860|Original|hCoV-19^^Japan|Human|Pathogen Genomics Center|Pathogen Genomics Center|Sekizuka|Japan

>Spike|hCoV-19/Scotland/QEUIH-9DB005/2020|2020-09-22|EPI\_ISL\_601128|Original|hCoV-19^^Scotland|Human|Lighthouse Lab in Glasgow|Wellcome Sanger Institute for the COVID-19 Genomics UK (COG-UK) consortium|Davies|United Kingdom

>Spike|hCoV-19/USA/MI-MDHHS-SC21670/2020|2020-07-14|EPI\_ISL\_516397|Original|hCoV-19^^Michigan|Human|Michigan Department of Health and Human Services|Michigan Department of Health and Human Services|Blankenship|USA

>Spike|hCoV-19/USA/TX-HMH-MCoV-16255/2020|2020-10-30|EPI\_ISL\_785939|Original|hCoV-19^^Texas|Human|Houston Methodist Hospital|Houston Methodist Hospital|Long|USA

>Spike|hCoV-19/Hong Kong/VM20127342/2020|2020-09-30|EPI\_ISL\_730590|Original|hCoV-19^^Hong Kong|Human|Prince of Wales Hospital|Hong Kong Department of Health|Mak|China

>Spike|hCoV-19/England/ALDP-68C2A6/2020|2020-07-02|EPI\_ISL\_558208|Original|hCoV-19^^England|Human|Lighthouse Lab in Alderley Park|Wellcome Sanger Institute for the COVID-19 Genomics UK (COG-UK) consortium|Davies|United Kingdom

>Spike|hCoV-19/England/LIVE-A2404/2020|2020-05-20|EPI\_ISL\_490380|Original|hCoV-19^^England|Human|Liverpool Clinical Laboratories|COVID-19 Genomics UK (COG-UK) Consortium|Haldenby|United Kingdom

>Spike|hCoV-19/England/SHEF-CD087/2020|2020-09-18|EPI\_ISL\_585056|Original|hCoV-19^^England|Human|Virology Department|COVID-19 Genomics UK (COG-UK) Consortium|de Silva|United Kingdom

>Spike|hCoV-19/Luxembourg/LNS9933159/2020|2020-07-29|EPI\_ISL\_745013|Original|hCoV-19^^Luxembourg|Human|Laboratoire national de sant\u00e9|Laboratoire national de sant\u00e9|Wienecke-Baldacchino|Luxembourg

>Spike|hCoV-19/England/QEUIH-C3375E/2020|2020-12-11|EPI\_ISL\_734084|Original|hCoV-19^^England|Human|Lighthouse Lab in Glasgow|Wellcome Sanger Institute for the COVID-19 Genomics UK (COG-UK) Consortium|Davies|United Kingdom

>Spike|hCoV-19/New Zealand/20VR3029/2020|2020-00-00|EPI\_ISL\_579393|Original|hCoV-19^^Combined Wellington|Human|Wellington SCL (WN)|Institute of Environmental Science and Research (ESR)|Wang|New Zealand

>Spike|hCoV-19/Wales/PHWC-4A53D3/2020|2020-12-15|EPI\_ISL\_764862|Original|hCoV-19^^Wales|Human|Wales Specialist Virology Centre Sequencing lab|COVID-19 Genomics UK (COG-UK) Consortium|Moore|United Kingdom

>Spike|hCoV-19/Australia/VIC6408/2020|2020-07-23|EPI\_ISL\_521200|Original|hCoV-19^^Victoria|Human|Microbiological Diagnostic Unit - Public Health Laboratory (MDU-PHL) |MDU-PHL|Schultz|Australia

>Spike|hCoV-19/Scotland/EDB1040/2020|2020-04-06|EPI\_ISL\_433377|Original|hCoV-19^^Scotland|Human|Virology Department|COVID-19 Genomics UK (COG-UK) Consortium|Williams|United Kingdom

>Spike|hCoV-19/Belgium/MA-0406273/2020|2020-04-06|EPI\_ISL\_464067|Original|hCoV-19^^Ukkel|Human|KU Leuven|KU Leuven|Maes|Belgium

>Spike|hCoV-19/Switzerland/AG-ETHZ-400026/2020|2020-12-04|EPI\_ISL\_728811|Original|hCoV-19^^Aargau|Human|Viollier AG|Department of Biosystems Science and Engineering|Nadeau|Switzerland

>Spike|hCoV-19/Morocco/6891/2020|2020-03-20|EPI\_ISL\_459969|Original|hCoV-19^^Morocco|Human|Institut Pasteur du Maroc|Institut Pasteur du Maroc|Enouf|Morocco

>Spike|hCoV-19/USA/TX-HMH-4854/2020|2020-06-21|EPI\_ISL\_544377|Original|hCoV-19^^Texas|Human|Houston Methodist Hospital|Houston Methodist Hospital|Long|USA

>Spike|hCoV-19/Singapore/741/2020|2020-07-06|EPI\_ISL\_524448|Original|hCoV-19^^Singapore|Human|Singapore General Hospital|Department of Microbiology|Abdul Rahman|Singapore

>Spike|hCoV-19/India/KA-IB26/2020|2020-06-17|EPI\_ISL\_508304|Original|hCoV-19^^Karnataka|Human|Indian Institute of Science|National Institute of Biomedical Genomics|Maitra|India

>Spike|hCoV-19/England/MILK-AC7C25/2020|2020-10-22|EPI\_ISL\_634456|Original|hCoV-19^^England|Human|Lighthouse Lab in Milton Keynes|Wellcome Sanger Institute for the COVID-19 Genomics UK (COG-UK) consortium|Davies|United Kingdom

>Spike|hCoV-19/England/CAMB-1AC269/2020|2020-04-30|EPI\_ISL\_447947|Original|hCoV-19^^England|Human|Department of Pathology|COVID-19 Genomics UK (COG-UK) Consortium|Meredith|United Kingdom

>Spike|hCoV-19/England/CAMB-73BBC/2020|2020-04-03|EPI\_ISL\_433672|Original|hCoV-19^^England|Human|Department of Pathology|COVID-19 Genomics UK (COG-UK) Consortium|Meredith|United Kingdom

>Spike|hCoV-19/Belgium/regal-10081227/2020|2020-10-08|EPI\_ISL\_735085|Original|hCoV-19^^Etterbeek|Human|UZ Leuven|KU Leuven|Maes|Belgium

>Spike|hCoV-19/Denmark/DCGC-17981/2020|2020-12-14|EPI\_ISL\_749678|Original|hCoV-19^^Midtjylland|Human|Department of Virus and Microbiological Special Diagnostics|Albertsen Lab|Michaelsen|Denmark

>Spike|hCoV-19/USA/VA-DCLS-0366/2020|2020-04-30|EPI\_ISL\_463126|Original|hCoV-19^^Virginia|Human|Virginia DCLS|Virginia DCLS|St. Jacques|USA

>Spike|hCoV-19/Greece/250\_32267/2020|2020-03-10|EPI\_ISL\_447648|unknown|hCoV-19^^Athens|Human|unknown|Department of Medicine|Submitter|Greece

>Spike|hCoV-19/Denmark/DCGC-22588/2020|2020-12-14|EPI\_ISL\_757656|Original|hCoV-19^^Nordjylland|Human|Department of Virus and Microbiological Special Diagnostics|Albertsen Lab|Michaelsen|Denmark

>Spike|hCoV-19/Scotland/QEUA-AD4EA7/2020|2020-10-26|EPI\_ISL\_649712|Original|hCoV-19^^Scotland|Human|Lighthouse Lab in Glasgow|Wellcome Sanger Institute for the COVID-19 Genomics UK (COG-UK) Consortium|Davies|United Kingdom

>Spike|hCoV-19/England/ALDP-A2DFD9/2020|2020-10-05|EPI\_ISL\_586851|Original|hCoV-19^^England|Human|Lighthouse Lab in Alderley Park|Wellcome Sanger Institute for the COVID-19 Genomics UK (COG-UK) consortium|Davies|United Kingdom

>Spike|hCoV-19/England/ALDP-C3B8DB/2020|2020-12-10|EPI\_ISL\_731591|Original|hCoV-19^^England|Human|Lighthouse Lab in Alderley Park|Wellcome Sanger Institute for the COVID-19 Genomics UK (COG-UK) Consortium|Davies|United Kingdom

>Spike|hCoV-19/Scotland/EDB4310/2020|2020-04-23|EPI\_ISL\_449292|Original|hCoV-19^^Scotland|Human|Virology Department|COVID-19 Genomics UK (COG-UK) Consortium|Williams|United Kingdom

>Spike|hCoV-19/Scotland/QEUA-9FFE10/2020|2020-10-02|EPI\_ISL\_600129|Original|hCoV-19^^Scotland|Human|Lighthouse Lab in Glasgow|Wellcome Sanger Institute for the COVID-19 Genomics UK (COG-UK) consortium|Davies|United Kingdom

>Spike|hCoV-19/Wales/PHWC-4A2D6F/2020|2020-12-14|EPI\_ISL\_744012|Original|hCoV-19^^Wales|Human|Wales Specialist Virology Centre Sequencing lab|COVID-19 Genomics UK (COG-UK) Consortium|Moore|United Kingdom

>Spike|hCoV-19/England/CAMC-B33C50/2020|2020-11-05|EPI\_ISL\_659229|Original|hCoV-19^^England|Human|Lighthouse Lab in Cambridge|Wellcome Sanger Institute for the COVID-19 Genomics UK (COG-UK) Consortium|Davies|United Kingdom

>Spike|hCoV-19/Australia/VIC7749/2020|2020-07-24|EPI\_ISL\_564627|Original|hCoV-19^^Victoria|Human|Microbiological Diagnostic Unit - Public Health Laboratory (MDU-PHL)|MDU-PHL|Schultz|Australia

>Spike|hCoV-19/Scotland/QEUH-A0B7AC/2020|2020-10-03|EPI\_ISL\_599306|Original|hCoV-19^^Scotland|Human|Lighthouse Lab in Glasgow|Wellcome Sanger Institute for the COVID-19 Genomics UK (COG-UK) consortium|Davies|United Kingdom

>Spike|hCoV-19/England/QEUH-9CE73D/2020|2020-09-17|EPI\_ISL\_590078|Original|hCoV-19^^England|Human|Lighthouse Lab in Glasgow|Wellcome Sanger Institute for the COVID-19 Genomics UK (COG-UK) consortium|Davies|United Kingdom

>Spike|hCoV-19/England/BRIS-121D3E/2020|2020-03-20|EPI\_ISL\_440023|Original|hCoV-19^^England|Human|PHE South West Regional Laboratory|Wellcome Sanger Institute for the COVID-19 Genomics UK (COG-UK) consortium|Amato|United Kingdom

>Spike|hCoV-19/USA/NM-UNM-00660/2020|2020-07-02|EPI\_ISL\_560333|Original|hCoV-19^^New Mexico|Human|TriCore Reference Laboratories|Center for Global Health|Domman|USA

>Spike|hCoV-19/Colombia/VAC-GVI-93535/2020|2020-04-03|EPI\_ISL\_447787|Original|hCoV-19^^Valle del Cauca|Human|Instituto Nacional de Salud|Grupo de Investigaciones Microbiol\u00f3gicas-UR (GIMUR)|Ram\u00e9dez|Colombia

>Spike|hCoV-19/England/CAMB-84BC7/2020|2020-03-11|EPI\_ISL\_440526|Original|hCoV-19^^England|Human|Department of Pathology|Wellcome Sanger Institute for the COVID-19 Genomics UK (COG-UK) consortium|Amato|United Kingdom

>Spike|hCoV-19/England/20128015604/2020|2020-03-19|EPI\_ISL\_423943|Original|hCoV-19^^England|Human|Respiratory Virus Unit|Respiratory Virus Unit|Platt|United Kingdom

>Spike|hCoV-19/England/QEUH-9E4A92/2020|2020-09-22|EPI\_ISL\_579759|Original|hCoV-19^^England|Human|Lighthouse Lab in Glasgow|Wellcome Sanger Institute for the COVID-19 Genomics UK (COG-UK) consortium|Davies|United Kingdom

>Spike|hCoV-19/England/ALDP-954A60/2020|2020-06-13|EPI\_ISL\_553802|Original|hCoV-19^^England|Human|Lighthouse Lab in Alderley Park|Wellcome Sanger Institute for the COVID-19 Genomics UK (COG-UK) consortium|Davies|United Kingdom

>Spike|hCoV-19/USA/MA-MASPHL-00040/2020|2020-04-02|EPI\_ISL\_791544|Original|hCoV-19^^Massachusetts|Human|Massachusetts State Public Health Laboratory|Infectious Disease Program|Park|USA

>Spike|hCoV-19/England/QEUH-9CA528/2020|2020-09-10|EPI\_ISL\_567272|Original|hCoV-19^^England|Human|Lighthouse Lab in Glasgow|Wellcome Sanger Institute for the COVID-19 Genomics UK (COG-UK) consortium|Davies|United Kingdom

>Spike|hCoV-19/Wales/PHWC-491237/2020|2020-11-14|EPI\_ISL\_706629|Original|hCoV-19^^Wales|Human|Originating lab|COVID-19 Genomics UK (COG-UK) Consortium|Moore|United Kingdom

>Spike|hCoV-19/USA/MD-MDH-0092/2020|2020-05-25|EPI\_ISL\_522828|Original|hCoV-19^^Maryland|Human|Maryland Department of Health|Maryland Department of Health|Keller|USA

>Spike|hCoV-19/USA/CA-CZB-13679/2020|2020-11-04|EPI\_ISL\_739224|Original|hCoV-19^^California|Human|Santa Clara County Public Health Laboratory|Chan-Zuckerberg Biohub|Kamm|USA

>Spike|hCoV-19/England/MILK-993A1A/2020|2020-08-26|EPI\_ISL\_552209|Original|hCoV-19^^England|Human|Lighthouse Lab in Milton Keynes|Wellcome Sanger Institute for the COVID-19 Genomics UK (COG-UK) consortium|Davies|United Kingdom

>Spike|hCoV-19/Wales/PHWC-307F3/2020|2020-04-08|EPI\_ISL\_446283|Original|hCoV-19^^Wales|Human|Wales Specialist Virology Centre|Public Health Wales Microbiology Cardiff|Moore|United Kingdom

>Spike|hCoV-19/England/CAMB-823D0/2020|2020-04-13|EPI\_ISL\_591079|Original|hCoV-19^^England|Human|Department of Pathology|Wellcome Sanger Institute for the COVID-19 Genomics UK (COG-UK) consortium|Davies|United Kingdom

>Spike|hCoV-19/Australia/VIC5764/2020|2020-07-21|EPI\_ISL\_518562|Original|hCoV-19^^Victoria|Human|Microbiological Diagnostic Unit - Public Health Laboratory (MDU-PHL)|MDU-PHL|Schultz|Australia

>Spike|hCoV-19/Wales/PHWC-315DA/2020|2020-04-12|EPI\_ISL\_446466|Original|hCoV-19^^Wales|Human|Wales Specialist Virology Centre|Public Health Wales Microbiology Cardiff|Moore|United Kingdom

>Spike|hCoV-19/England/QEUA-AE5465/2020|2020-10-27|EPI\_ISL\_633160|Original|hCoV-19^^England|Human|Lighthouse Lab in Glasgow|Wellcome Sanger Institute for the COVID-19 Genomics UK (COG-UK) consortium|Davies|United Kingdom

>Spike|hCoV-19/Wuhan/HBCDC-HB-01/2019|2019-12-30|EPI\_ISL\_402132|Original|hCoV-19^^Hubei|Human|Wuhan Jinyintan Hospital|Hubei Provincial Center for Disease Control and Prevention|Fang|China

>Spike|hCoV-19/England/ALDP-B46425/2020|2020-11-07|EPI\_ISL\_656017|Original|hCoV-19^^England|Human|Lighthouse Lab in Alderley Park|Wellcome Sanger Institute for the COVID-19 Genomics UK (COG-UK) Consortium|Davies|United Kingdom

>Spike|hCoV-19/Singapore/1413/2020|2020-11-11|EPI\_ISL\_654811|Original|hCoV-19^^Singapore|Human|National Public Health Laboratory|National Public Health Laboratory|Mak|Singapore

>Spike|hCoV-19/England/CAMB-7DDAD/2020|2020-04-07|EPI\_ISL\_442172|Original|hCoV-19^^England|Human|Department of Pathology|Wellcome Sanger Institute for the COVID-19 Genomics UK (COG-UK) consortium|Amato|United Kingdom

>Spike|hCoV-19/England/QEUA-C7FEF7/2020|2020-12-16|EPI\_ISL\_756897|Original|hCoV-19^^England|Human|Lighthouse Lab in Glasgow|Wellcome Sanger Institute for the COVID-19 Genomics UK (COG-UK) Consortium|Davies|United Kingdom

>Spike|hCoV-19/Denmark/DCGC-11672/2020|2020-10-26|EPI\_ISL\_670695|Original|hCoV-19^^Midtjylland|Human|Department of Virus and Microbiological Special Diagnostics|Albertsen Lab|Michaelsen|Denmark

>Spike|hCoV-19/Denmark/DCGC-15627/2020|2020-11-23|EPI\_ISL\_713929|Original|hCoV-19^^Midtjylland|Human|Department of Virus and Microbiological Special Diagnostics|Albertsen Lab|Michaelsen|Denmark

>Spike|hCoV-19/mink/Netherlands/NB-EMC-34-2/2020|2020-08-18|EPI\_ISL\_577768|Original|hCoV-19^^Limburg|Neovison vison|Dutch COVID-19 response team|Erasmus Medical Center|Oude Munnink|Netherlands

>Spike|hCoV-19/Wales/PHWC-482D74/2020|2020-10-20|EPI\_ISL\_627736|Original|hCoV-19^^Wales|Human|Wales Specialist Virology Centre Sequencing lab|COVID-19 Genomics UK (COG-UK) Consortium|Moore|United Kingdom

>Spike|hCoV-19/England/MILK-B02E18/2020|2020-10-24|EPI\_ISL\_643018|Original|hCoV-19^^England|Human|Lighthouse Lab in Milton Keynes|Wellcome Sanger Institute for the COVID-19 Genomics UK (COG-UK) Consortium|Davies|United Kingdom

>Spike|hCoV-19/England/MILK-74A9EA/2020|2020-06-30|EPI\_ISL\_557512|Original|hCoV-19^^England|Human|Lighthouse Lab in Milton Keynes|Wellcome Sanger Institute for the COVID-19 Genomics UK (COG-UK) consortium|Davies|United Kingdom

>Spike|hCoV-19/USA/MN-QDX-1331/2020|2020-03-15|EPI\_ISL\_572120|Original|hCoV-19^^Minnesota|Human|Quest Diagnostics|Quest Diagnostics|Kagan|USA

>Spike|hCoV-19/Latvia/214/2020|2020-09-13|EPI\_ISL\_770049|Original|hCoV-19^^Latvia|Human|Centr\u0101\u0101 Laboratorija|Latvian Biomedical Research and Study Centre|Zrelavs|Latvia

>Spike|hCoV-19/Scotland/EDB4690/2020|2020-05-08|EPI\_ISL\_478184|Original|hCoV-19^^Scotland|Human|Virology Department|COVID-19 Genomics UK (COG-UK) Consortium|Williams|United Kingdom

>Spike|hCoV-19/USA/TX-HMH-MCoV-18268/2020|2020-11-12|EPI\_ISL\_784616|Original|hCoV-19^^Texas|Human|Houston Methodist Hospital|Houston Methodist Hospital|Long|USA

>Spike|hCoV-19/Canada/BC\_17670489/2020|2020-04-00|EPI\_ISL\_468690|Original|hCoV-19^^British Columbia|Human|BCCDC Public Health Laboratory|BCCDC Public Health Laboratory|Harrigan|Canada

>Spike|hCoV-19/Japan/PG-2867/2020|2020-04-00|EPI\_ISL\_690993|Original|hCoV-19^^Japan|Human|Pathogen Genomics Center|Pathogen Genomics Center|Sekizuka|Japan

>Spike|hCoV-19/Japan/PG-3946/2020|2020-07-00|EPI\_ISL\_692195|Original|hCoV-19^^Japan|Human|Pathogen Genomics Center|Pathogen Genomics Center|Sekizuka|Japan

>Spike|hCoV-19/USA/FL-BPHL-2056/2020|2020-07-13|EPI\_ISL\_653209|Original|hCoV-19^^Florida|Human|Florida Bureau of Public Health Laboratories|Florida Bureau of Public Health Laboratories|Blanton|USA

>Spike|hCoV-19/England/ALDP-B487EE/2020|2020-11-07|EPI\_ISL\_649236|Original|hCoV-19^^England|Human|Lighthouse Lab in Alderley Park|Wellcome Sanger Institute for the COVID-19 Genomics UK (COG-UK) Consortium|Davies|United Kingdom

>Spike|hCoV-19/England/CAMB-71B63/2020|2020-03-30|EPI\_ISL\_439892|Original|hCoV-19^^England|Human|Department of Pathology|Wellcome Sanger Institute for the COVID-19 Genomics UK (COG-UK) consortium|Amato|United Kingdom

>Spike|hCoV-19/England/MILK-ACD15D/2020|2020-10-21|EPI\_ISL\_630283|Original|hCoV-19^^England|Human|Lighthouse Lab in Milton Keynes|Wellcome Sanger Institute for the COVID-19 Genomics UK (COG-UK) consortium|Davies|United Kingdom

>Spike|hCoV-19/England/OXON-AC507/2020|2020-04-07|EPI\_ISL\_448457|Original|hCoV-19^^England|Human|Oxford Viromics|COVID-19 Genomics UK (COG-UK) Consortium|Golubchik|United Kingdom

>Spike|hCoV-19/England/NOTT-114008/2020|2020-10-02|EPI\_ISL\_577130|Original|hCoV-19^^England|Human|Queens Medical Centre|COVID-19 Genomics UK (COG-UK) Consortium|Loose|United Kingdom

>Spike|hCoV-19/Scotland/CAMC-B524EA/2020|2020-11-08|EPI\_ISL\_676383|Original|hCoV-19^^Scotland|Human|Lighthouse Lab in Cambridge|Wellcome Sanger Institute for the COVID-19 Genomics UK (COG-UK) Consortium|Davies|United Kingdom

>Spike|hCoV-19/Japan/PG-6579/2020|2020-09-00|EPI\_ISL\_687691|Original|hCoV-19^^Japan|Human|Pathogen Genomics Center|Pathogen Genomics Center|Sekizuka|Japan

>Spike|hCoV-19/mink/Netherlands/NB-EMC-2-8/2020|2020-04-27|EPI\_ISL\_523090|Original|hCoV-19^^Noord Brabant|Neovison vison|Dutch COVID-19 response team|Erasmus Medical Center|Oude Munnink|Netherlands

>Spike|hCoV-19/USA/TX-HMH-MCoV-10098/2020|2020-07-06|EPI\_ISL\_789321|Original|hCoV-19^^Texas|Human|Houston Methodist Hospital|Houston Methodist Hospital|Long|USA

>Spike|hCoV-19/England/ALDP-9D98E1/2020|2020-09-18|EPI\_ISL\_576769|Original|hCoV-19^^England|Human|Oxford Viromics|COVID-19 Genomics UK (COG-UK) Consortium|Golubchik|United Kingdom

>Spike|hCoV-19/Spain/CL-IBV-97006142/2020|2020-04-01|EPI\_ISL\_537290|Original|hCoV-19^^Castilla y Leon|Human|Universidad de Le\u00f3n|SeqCOVID-SPAIN consortium/IBV (CSIC) |Comas|Spain

>Spike|hCoV-19/Germany/HH-hpi-p1729/2020|2020-03-15|EPI\_ISL\_776109|Original|hCoV-19^^Hamburg|Human|University Medical Center Hamburg Eppendorf|Heinrich Pette Institute|Robitaille|Germany

>Spike|hCoV-19/Luxembourg/LNS6274573/2020|2020-04-06|EPI\_ISL\_428962|Original|hCoV-19^^Luxembourg|Human|Laboratoire National de Sante|Laboratoire National de Sante|Wienecke-Baldacchino|Luxembourg

>Spike|hCoV-19/England/QEUH-C5B87B/2020|2020-12-14|EPI\_ISL\_736149|Original|hCoV-19^^England|Human|Lighthouse Lab in Glasgow|Wellcome Sanger Institute for the COVID-19 Genomics UK (COG-UK) Consortium|Davies|United Kingdom

>Spike|hCoV-19/England/SHEF-D0E1E/2020|2020-09-24|EPI\_ISL\_585077|Original|hCoV-19^^England|Human|Virology Department|COVID-19 Genomics UK (COG-UK) Consortium|de Silva|United Kingdom

>Spike|hCoV-19/Wales/PHWC-48180B/2020|2020-10-02|EPI\_ISL\_613114|Original|hCoV-19^^Wales|Human|Wales Specialist Virology Centre Sequencing lab|COVID-19 Genomics UK (COG-UK) Consortium|Moore|United Kingdom

>Spike|hCoV-19/Denmark/DCGC-5643/2020|2020-09-28|EPI\_ISL\_619930|Original|hCoV-19^^Midtjylland|Human|Department of Virus and Microbiological Special Diagnostics|Albertsen lab|Michaelsen|Denmark

>Spike|hCoV-19/Denmark/DCGC-14628/2020|2020-11-23|EPI\_ISL\_711878|Original|hCoV-19^^Hovedstaden|Human|Department of Virus and Microbiological Special Diagnostics|Albertsen Lab|Michaelsen|Denmark

>Spike|hCoV-19/England/ALDP-C22F3C/2020|2020-12-06|EPI\_ISL\_733701|Original|hCoV-19^^England|Human|Lighthouse Lab in Alderley Park|Wellcome Sanger Institute for the COVID-19 Genomics UK (COG-UK) Consortium|Davies|United Kingdom

>Spike|hCoV-19/Ghana/84218\_S47/2020|2020-05-25|EPI\_ISL\_515106|Original|hCoV-19^^Ghana|Human|Department of Biochemistry|WACCBIP|Amuzu|Ghana

>Spike|hCoV-19/England/LOND-1264454/2020|2020-11-18|EPI\_ISL\_703865|Original|hCoV-19^^England|Human|University College London|COVID-19 Genomics UK (COG-UK) Consortium|Roy|United Kingdom

>Spike|hCoV-19/Norway/3069/2020|2020-08-10|EPI\_ISL\_549084|Original|hCoV-19^^Oslo|Human|Akershus University Hospital|Norwegian Institute of Public Health|Kopperud Riis|Norway

>Spike|hCoV-19/England/ALDP-A5223C/2020|2020-10-07|EPI\_ISL\_597980|Original|hCoV-19^^England|Human|Lighthouse Lab in Alderley Park|Wellcome Sanger Institute for the COVID-19 Genomics UK (COG-UK) consortium|Davies|United Kingdom

>Spike|hCoV-19/England/201061047/2020|2020-03-03|EPI\_ISL\_464405|Original|hCoV-19^^England|Human|Respiratory Virus Unit|Respiratory Virus Unit|Platt|United Kingdom

>Spike|hCoV-19/USA/MA-MGH-00689/2020|2020-04-06|EPI\_ISL\_460414|Original|hCoV-19^^Massachusetts|Human|Massachusetts General Hospital|Infectious Disease Program|Lemieux|USA

>Spike|hCoV-19/England/QEUEH-B7CF16/2020|2020-11-14|EPI\_ISL\_741832|Original|hCoV-19^^England|Human|Oxford Viromics|COVID-19 Genomics UK (COG-UK) Consortium|Golubchik|United Kingdom

>Spike|hCoV-19/Canada/BC-BCCDC-8409/2020|2020-10-00|EPI\_ISL\_740781|Original|hCoV-19^^British Columbia|Human|BCCDC Public Health Laboratory|BCCDC Public Health Laboratory|Prystajecky|Canada

>Spike|hCoV-19/Scotland/QEUEH-B1055E/2020|2020-11-02|EPI\_ISL\_649595|Original|hCoV-19^^Scotland|Human|Lighthouse Lab in Glasgow|Wellcome Sanger Institute for the COVID-19 Genomics UK (COG-UK) Consortium|Davies|United Kingdom

>Spike|hCoV-19/Wales/PHWC-163125/2020|2020-05-27|EPI\_ISL\_473250|Original|hCoV-19^^Wales|Human|Wales Specialist Virology Centre Sequencing lab|COVID-19 Genomics UK (COG-UK) Consortium|Moore|United Kingdom

>Spike|hCoV-19/England/LIVE-DC4760/2020|2020-11-10|EPI\_ISL\_702922|Original|hCoV-19^^England|Human|Liverpool Clinical Laboratories|COVID-19 Genomics UK (COG-UK) Consortium|Haldenby|United Kingdom

>Spike|hCoV-19/Australia/TAS58/2020|2020-04-04|EPI\_ISL\_522732|Original|hCoV-19^^Tasmania|Human|Royal Hobart Hospital Microbiology Department|MDU-PHL|Schultz|Australia

>Spike|hCoV-19/England/NORW-FA5DD/2020|2020-12-06|EPI\_ISL\_725516|Original|hCoV-19^^England|Human|Quadram Institute Bioscience|COVID-19 Genomics UK (COG-UK) Consortium|Alikhan|United Kingdom

>Spike|hCoV-19/Japan/PG-8537/2020|2020-07-00|EPI\_ISL\_686133|Original|hCoV-19^^Japan|Human|Pathogen Genomics Center|Pathogen Genomics Center|Sekizuka|Japan

>Spike|hCoV-19/USA/WI-UW-2014/2020|2020-09-10|EPI\_ISL\_677421|Original|hCoV-19^^Wisconsin|Human|University of Wisconsin-Madison AIDS Vaccine Research Laboratories|University of Wisconsin-Madison AIDS Vaccine Research Laboratories|Baczenas|USA

>Spike|hCoV-19/Australia/VIC6031/2020|2020-07-24|EPI\_ISL\_518072|Original|hCoV-19^^Victoria|Human|Microbiological Diagnostic Unit - Public Health Laboratory (MDU-PHL)|MDU-PHL|Schultz|Australia

>Spike|hCoV-19/Japan/PG-3510/2020|2020-06-00|EPI\_ISL\_691766|Original|hCoV-19^^Japan|Human|Saitama Prefectural Institute of Public Health|Pathogen Genomics Center|Sekizuka|Japan

>Spike|hCoV-19/England/MILK-B59B57/2020|2020-11-04|EPI\_ISL\_679911|Original|hCoV-19^^England|Human|Virology Department|COVID-19 Genomics UK (COG-UK) Consortium|de Silva|United Kingdom

>Spike|hCoV-19/India/WB-S97/2020|2020-06-11|EPI\_ISL\_508486|Original|hCoV-19^^West Bengal|Human|ICMR-National Institute of Cholera and Enteric Diseases|National Institute of Biomedical Genomics|Maitra|India

>Spike|hCoV-19/Australia/VIC14294/2020|2020-08-01|EPI\_ISL\_592439|Original|hCoV-19^^Victoria|Human|Microbiological Diagnostic Unit - Public Health Laboratory (MDU-PHL)|MDU-PHL|Schultz|Australia

>Spike|hCoV-19/England/CAMB-1ABBD8/2020|2020-04-20|EPI\_ISL\_470300|Original|hCoV-19^^England|Human|Department of Pathology|Wellcome Sanger Institute for the COVID-19 Genomics UK (COG-UK) consortium|Davies|United Kingdom



>Spike|hCoV-19/England/QEUA-AE4CF5/2020|2020-10-27|EPI\_ISL\_633175|Original|hCoV-19^^England|Human|Lighthouse Lab in Glasgow|Wellcome Sanger Institute for the COVID-19 Genomics UK (COG-UK) consortium|Davies|United Kingdom

>Spike|hCoV-19/USA/UT-UPHL-2012022396/2020|2020-08-09|EPI\_ISL\_745791|Original|hCoV-19^^Utah|Human|Ginkgo Bioworks Clinical Laboratory|Utah Public Health Laboratory|Young|USA

>Spike|hCoV-19/Italy/ABR-IZSGC-TE18513/2020|2020-04-17|EPI\_ISL\_529018|Original|hCoV-19^^Abruzzo|Human|Ospedale \Giuseppe Mazzini\ -Teramo|Istititoto Zooprofilattico Sperimentale dell'Abruzzo e Molise \G.Caporale\|Lorusso|Italy

>Spike|hCoV-19/England/BRIS-122052/2020|2020-03-21|EPI\_ISL\_440036|Original|hCoV-19^^England|Human|PHE South West Regional Laboratory|Wellcome Sanger Institute for the COVID-19 Genomics UK (COG-UK) consortium|Amato|United Kingdom

>Spike|hCoV-19/Netherlands/NA\_585/2020|2020-00-00|EPI\_ISL\_460749|Original|hCoV-19^^Netherlands|Human|Dutch COVID-19 response team|Erasmus Medical Center|Oude Munnink|Netherlands

>Spike|hCoV-19/USA/CA-QDX-2646/2020|2020-03-16|EPI\_ISL\_604908|Original|hCoV-19^^California|Human|Quest Diagnostics|Quest Diagnostics|Kagan|USA

>Spike|hCoV-19/England/PORT-2D1DB4/2020|2020-04-02|EPI\_ISL\_499279|Original|hCoV-19^^England|Human|Centre for Enzyme Innovation|COVID-19 Genomics UK (COG-UK) Consortium|Robson|United Kingdom

>Spike|hCoV-19/England/QEUA-9E36F9/2020|2020-09-24|EPI\_ISL\_584867|Original|hCoV-19^^England|Human|Northumbria University / South Tees Hospitals NHS Foundation Trust / North Cumbria Integrated Care NHS Foundation Trust / North Tees and Hartlepool NHS Foundation Trust / Newcastle Hospitals NHS Foundation Trust|COVID-19 Genomics UK (COG-UK) Consortium|Bashton|United Kingdom

>Spike|hCoV-19/England/CAMB-1AD81B/2020|2020-00-00|EPI\_ISL\_448014|Original|hCoV-19^^England|Human|Department of Pathology|COVID-19 Genomics UK (COG-UK) Consortium|Meredith|United Kingdom

>Spike|hCoV-19/England/MILK-B3858D/2020|2020-11-01|EPI\_ISL\_658785|Original|hCoV-19^^England|Human|Lighthouse Lab in Milton Keynes|Wellcome Sanger Institute for the COVID-19 Genomics UK (COG-UK) Consortium|Davies|United Kingdom

>Spike|hCoV-19/Australia/VIC5234/2020|2020-07-18|EPI\_ISL\_519999|Original|hCoV-19^^Victoria|Human|Microbiological Diagnostic Unit - Public Health Laboratory (MDU-PHL)|MDU-PHL|Schultz|Australia

>Spike|hCoV-19/Japan/PG-0772/2020|2020-03-00|EPI\_ISL\_684382|Original|hCoV-19^^Japan|Human|Pathogen Genomics Center|Pathogen Genomics Center|Sekizuka|Japan

>Spike|hCoV-19/Denmark/DCGC-5192/2020|2020-09-21|EPI\_ISL\_621730|Original|hCoV-19^^Syddanmark|Human|Department of Virus and Microbiological Special Diagnostics|Albertsen lab|Michaelsen|Denmark

>Spike|hCoV-19/Australia/VIC12105/2020|2020-07-23|EPI\_ISL\_640353|Original|hCoV-19^^Victoria|Human|Microbiological Diagnostic Unit - Public Health Laboratory (MDU-PHL)|MDU-PHL|Schultz|Australia

>Spike|hCoV-19/England/QEUA-A028FD/2020|2020-09-29|EPI\_ISL\_584934|Original|hCoV-19^^England|Human|Quadram Institute Bioscience|COVID-19 Genomics UK (COG-UK) Consortium|Alikhan|United Kingdom

>Spike|hCoV-19/Netherlands/ZH-EMC-238/2020|2020-00-00|EPI\_ISL\_523580|Original|hCoV-19^^Zuid Holland|Human|Dutch COVID-19 response team|Erasmus Medical Center|Oude Munnink|Netherlands

>Spike|hCoV-19/USA/CA-IGI-0388/2020|2020-07-20|EPI\_ISL\_754880|Original|hCoV-19^^California|Human|Innovative Genomics Institute|Innovative Genomics Institute|Wyman|USA

>Spike|hCoV-19/Wales/PHWC-2E9F2/2020|2020-04-07|EPI\_ISL\_446098|Original|hCoV-19^^Wales|Human|Wales Specialist Virology Centre|Public Health Wales Microbiology Cardiff|Moore|United Kingdom

>Spike|hCoV-19/USA/MN-MDH-2066/2020|2020-11-04|EPI\_ISL\_683695|Original|hCoV-19^^Minnesota|Human|Mayo Clinic & Mayo Clinic Laboratories|Minnesota Department of Health|Garfin|USA

>Spike|hCoV-19/USA/AZ-TG670250/2020|2020-03-26|EPI\_ISL\_696429|Original|hCoV-19^^Arizona|Human|Sonora Quest Laboratories|TGen North|French|USA

>Spike|hCoV-19/USA/WI-UW-1121/2020|2020-07-23|EPI\_ISL\_516546|Original|hCoV-19^^Wisconsin|Human|University of Wisconsin-Madison AIDS Vaccine Research Laboratories|University of Wisconsin-Madison AIDS Vaccine Research Laboratories|Baczenas|USA

>Spike|hCoV-19/New Zealand/20VR1863/2020|2020-03-30|EPI\_ISL\_456289|Original|hCoV-19^^Southern|Human|Southern Community Labs Dunedin|Institute of Environmental Science and Research (ESR)|de Ligt|New Zealand

>Spike|hCoV-19/USA/CA-CZB-2536/2020|2020-05-20|EPI\_ISL\_513904|Original|hCoV-19^^California|Human|UCSF Clinical Microbiology Laboratory|Chan-Zuckerberg Biohub|Kamm|USA

>Spike|hCoV-19/USA/HI-H200109/2020|2020-05-28|EPI\_ISL\_752672|Original|hCoV-19^^Hawaii|Human|State Laboratories Division|State Laboratories Division|Sultana|USA

>Spike|hCoV-19/England/ALDP-B5CFE/2020|2020-11-09|EPI\_ISL\_678843|Original|hCoV-19^^England|Human|Department of Pathology|COVID-19 Genomics UK (COG-UK) Consortium|Goodfellow|United Kingdom

>Spike|hCoV-19/USA/WA-UW-523/2020|2020-03-12|EPI\_ISL\_570064|Original|hCoV-19^^Washington|Human|UW Virology Lab|UW Virology Lab|Roychoudhury|USA

>Spike|hCoV-19/Australia/VIC2139/2020|2020-06-20|EPI\_ISL\_480740|Original|hCoV-19^^Victoria|Human|Victorian Infectious Diseases Reference Laboratory (VIDRL)|VIDRL and MDU-PHL|Schultz|Australia

>Spike|hCoV-19/Denmark/DCGC-7777/2020|2020-10-19|EPI\_ISL\_618696|Original|hCoV-19^^Nordjylland|Human|Department of Virus and Microbiological Special Diagnostics|Albertsen lab|Michaelsen|Denmark

>Spike|hCoV-19/USA/NY-NYCPHL-000568/2020|2020-03-30|EPI\_ISL\_632027|Original|hCoV-19^^New York|Human|Flushing Hospital Medical Center|New York City Public Health Laboratory|Wang|USA

>Spike|hCoV-19/Wales/PHWC-257C4/2020|2020-03-24|EPI\_ISL\_422153|Original|hCoV-19^^Wales|Human|Wales Specialist Virology Centre|Public Health Wales Microbiology Cardiff|Moore|United Kingdom

>Spike|hCoV-19/England/MILK-B96DEF/2020|2020-11-14|EPI\_ISL\_674870|Original|hCoV-19^^England|Human|Lighthouse Lab in Milton Keynes|Wellcome Sanger Institute for the COVID-19 Genomics UK (COG-UK) Consortium|Davies|United Kingdom

>Spike|hCoV-19/USA/MN-MDH-1761/2020|2020-04-11|EPI\_ISL\_590766|Original|hCoV-19^^Minnesota|Human|Minnesota Department of Health|Minnesota Department of Health|Lorentz|USA

>Spike|hCoV-19/England/QEUA-B12370/2020|2020-11-02|EPI\_ISL\_642654|Original|hCoV-19^^England|Human|Lighthouse Lab in Glasgow|Wellcome Sanger Institute for the COVID-19 Genomics UK (COG-UK) Consortium|Davies|United Kingdom

>Spike|hCoV-19/Wales/PHWC-48DF19/2020|2020-11-09|EPI\_ISL\_680778|Original|hCoV-19^^Wales|Human|Wales Specialist Virology Centre Sequencing lab|COVID-19 Genomics UK (COG-UK) Consortium|Moore|United Kingdom

>Spike|hCoV-19/England/CAMC-B51269/2020|2020-11-08|EPI\_ISL\_657807|Original|hCoV-19^^England|Human|Lighthouse Lab in Cambridge|Wellcome Sanger Institute for the COVID-19 Genomics UK (COG-UK) Consortium|Davies|United Kingdom

>Spike|hCoV-19/England/20109039004/2020|2020-03-06|EPI\_ISL\_464556|Original|hCoV-19^^England|Human|Respiratory Virus Unit|Respiratory Virus Unit|Platt|United Kingdom

>Spike|hCoV-19/Romania/ROSV\_1837/2020|2020-04-11|EPI\_ISL\_491055|Original|hCoV-19^^Suceava|Human|Suceava County Emergency Hospital|\Stefan cel Mare\ University Metagenomics Lab|Lobiuc|Romania

>Spike|hCoV-19/England/QEUA-B7C031/2020|2020-11-14|EPI\_ISL\_668305|Original|hCoV-19^^England|Human|Lighthouse Lab in Glasgow|Wellcome Sanger Institute for the COVID-19 Genomics UK (COG-UK) Consortium|Davies|United Kingdom

>Spike|hCoV-19/Scotland/GCVR-17225D/2020|2020-03-30|EPI\_ISL\_469936|Original|hCoV-19^^Scotland|Human|NHSGGC West of Scotland Specialist Virology Centre / MRC-University of Glasgow Centre for Virus Research|Wellcome Sanger Institute for the COVID-19 Genomics UK (COG-UK) consortium|Davies|United Kingdom

>Spike|hCoV-19/England/LIVE-A9485/2020|2020-07-21|EPI\_ISL\_526375|Original|hCoV-19^^England|Human|Liverpool Clinical Laboratories|COVID-19 Genomics UK (COG-UK) Consortium|Haldenby|United Kingdom

>Spike|hCoV-19/England/QEUA-9FFBA0/2020|2020-10-02|EPI\_ISL\_600418|Original|hCoV-19^^England|Human|Lighthouse Lab in Glasgow|Wellcome Sanger Institute for the COVID-19 Genomics UK (COG-UK) consortium|Davies|United Kingdom

>Spike|hCoV-19/Switzerland/TI-ETHZ-100077/2020|2020-03-12|EPI\_ISL\_451670|Original|hCoV-19^^Ticino|Human|Viollier AG|Department of Biosystems Science and Engineering|Nadeau|Switzerland

>Spike|hCoV-19/Japan/PG-8507/2020|2020-09-00|EPI\_ISL\_687606|Original|hCoV-19^^Japan|Human|Pathogen Genomics Center|Pathogen Genomics Center|Sekizuka|Japan

>Spike|hCoV-19/England/OXON-B2094/2020|2020-04-13|EPI\_ISL\_479112|Original|hCoV-19^^England|Human|Oxford Viromics|COVID-19 Genomics UK (COG-UK) Consortium|Golubchik|United Kingdom

>Spike|hCoV-19/USA/TX-HMH-5215/2020|2020-06-18|EPI\_ISL\_544599|Original|hCoV-19^^Texas|Human|Houston Methodist Hospital|Houston Methodist Hospital|Long|USA

>Spike|hCoV-19/England/ALDP-8E57E6/2020|2020-06-25|EPI\_ISL\_556584|Original|hCoV-19^^England|Human|Lighthouse Lab in Alderley Park|Wellcome Sanger Institute for the COVID-19 Genomics UK (COG-UK) consortium|Davies|United Kingdom

>Spike|hCoV-19/Netherlands/NA\_525/2020|2020-03-18|EPI\_ISL\_460698|Original|hCoV-19^^Netherlands|Human|Dutch COVID-19 response team|Erasmus Medical Center|Oude Munnink|Netherlands

>Spike|hCoV-19/Canada/BC\_20432317/2020|2020-03-00|EPI\_ISL\_462774|Original|hCoV-19^^British Columbia|Human|BCCDC Public Health Laboratory|BCCDC Public Health Laboratory|Harrigan|Canada

>Spike|hCoV-19/USA/MI-UM-10036075143/2020|2020-09-22|EPI\_ISL\_583418|Original|hCoV-19^^Michigan|Human|University of Michigan Clinical Microbiology Laboratory|Lauring Lab|Valesano|USA

>Spike|hCoV-19/France/OCC-SC571/2020|2020-05-26|EPI\_ISL\_663248|Original|hCoV-19^^Occitanie|Human|CHU N\u00eemes|CNR Virus des Infections Respiratoires - France SUD|Bal|France

>Spike|hCoV-19/USA/OH-ODH-SC35519/2020|2020-04-26|EPI\_ISL\_776874|Original|hCoV-19^^Ohio|Human|Ohio Department of Health Laboratory|Ohio Department of Health Laboratory|Holmes|USA

>Spike|hCoV-19/England/QEUA-C34043/2020|2020-12-11|EPI\_ISL\_734032|Original|hCoV-19^^England|Human|Lighthouse Lab in Glasgow|Wellcome Sanger Institute for the COVID-19 Genomics UK (COG-UK) Consortium|Davies|United Kingdom

>Spike|hCoV-19/England/QEUA-79301A/2020|2020-07-15|EPI\_ISL\_533216|Original|hCoV-19^^England|Human|Lighthouse Lab in Glasgow|Wellcome Sanger Institute for the COVID-19 Genomics UK (COG-UK) consortium|Davies|United Kingdom

>Spike|hCoV-19/Wales/PHWC-48C18D/2020|2020-11-07|EPI\_ISL\_666400|Original|hCoV-19^^Wales|Human|Wales Specialist Virology Centre Sequencing lab|COVID-19 Genomics UK (COG-UK) Consortium|Moore|United Kingdom

>Spike|hCoV-19/USA/AK-PHL647/2020|2020-06-26|EPI\_ISL\_586250|Original|hCoV-19^^Alaska|Human|Alaska State Virology Laboratory|Alaska State Virology Laboratory|Chen|USA

>Spike|hCoV-19/Scotland/QEUA-9CEAAD/2020|2020-09-17|EPI\_ISL\_601874|Original|hCoV-19^^Scotland|Human|Lighthouse Lab in Glasgow|Wellcome Sanger Institute for the COVID-19 Genomics UK (COG-UK) consortium|Davies|United Kingdom

>Spike|hCoV-19/Switzerland/SO-ETHZ-410058/2020|2020-12-17|EPI\_ISL\_737787|Original|hCoV-19^^Solothurn|Human|Viollier AG|Department of Biosystems Science and Engineering|Nadeau|Switzerland

>Spike|hCoV-19/England/CAMB-7316F/2020|2020-03-21|EPI\_ISL\_440207|Original|hCoV-19^^England|Human|Department of Pathology|Wellcome Sanger Institute for the COVID-19 Genomics UK (COG-UK) consortium|Amato|United Kingdom

>Spike|hCoV-19/Latvia/104/2020|2020-08-05|EPI\_ISL\_515191|Original|hCoV-19^^Latvia|Human|E. Gulbja Laboratorija|Latvian Biomedical Research and Study Centre|Zrelavs|Latvia

>Spike|hCoV-19/United Arab Emirates/0205/2020|2020-05-17|EPI\_ISL\_698391|Original|hCoV-19^^Abu Dhabi|Human|Group 42 (G42) Healthcare|G42 Healthcare|Ogrodzki|United Arab Emirates

>Spike|hCoV-19/Australia/VIC227/2020|2020-03-20|EPI\_ISL\_419922|Original|hCoV-19^^Victoria|Human|Victorian Infectious Diseases Reference Laboratory

(VIDRL)|Victorian Infectious Diseases Reference Laboratory and Microbiological Diagnostic Unit Public Health Laboratory|Schultz|Australia  
>Spike|hCoV-19/Denmark/DCGC-21754/2020|2020-12-21|EPI\_ISL\_757952|Original|hCoV-19^^Hovedstaden|Human|Department of Virus and Microbiological Special Diagnostics|Albertsen Lab|Michaelsen|Denmark  
>Spike|hCoV-19/USA/AZ-TG648730/2020|2020-04-13|EPI\_ISL\_695914|Original|hCoV-19^^Arizona|Human|Sonora Quest Laboratories|TGen North|French|USA  
>Spike|hCoV-19/India/KA-nimh-11122/2020|2020-05-04|EPI\_ISL\_486387|Original|hCoV-19^^Karnataka|Human|DH|Department of Neurovirology|Pattabiraman|India  
>Spike|hCoV-19/Ireland/D-NVRL-20G35651/2020|2020-03-19|EPI\_ISL\_605132|Original|hCoV-19^^Dublin|Human|National Virus Reference Laboratory|Irish Coronavirus Sequencing Consortium - Helixworks|Chalapati|Ireland  
>Spike|hCoV-19/Australia/VIC14897/2020|2020-08-31|EPI\_ISL\_593051|Original|hCoV-19^^Victoria|Human|Microbiological Diagnostic Unit - Public Health Laboratory (MDU-PHL)|MDU-PHL|Schultz|Australia  
>Spike|hCoV-19/England/ALDP-B46BE4/2020|2020-11-06|EPI\_ISL\_656233|Original|hCoV-19^^England|Human|Lighthouse Lab in Alderley Park|Wellcome Sanger Institute for the COVID-19 Genomics UK (COG-UK) Consortium|Davies|United Kingdom  
>Spike|hCoV-19/Denmark/DCGC-22641/2020|2020-12-14|EPI\_ISL\_757500|Original|hCoV-19^^Hovedstaden|Human|Department of Virus and Microbiological Special Diagnostics|Albertsen Lab|Michaelsen|Denmark  
>Spike|hCoV-19/England/204621528/2020|2020-11-10|EPI\_ISL\_700610|Original|hCoV-19^^England|Human|Respiratory Virus Unit|COVID-19 Genomics UK (COG-UK) Consortium|Platt|United Kingdom  
>Spike|hCoV-19/England/MILK-A7D07D/2020|2020-10-13|EPI\_ISL\_606687|Original|hCoV-19^^England|Human|Lighthouse Lab in Milton Keynes|Wellcome Sanger Institute for the COVID-19 Genomics UK (COG-UK) consortium|Davies|United Kingdom  
>Spike|hCoV-19/England/QEUH-B2CD48/2020|2020-11-03|EPI\_ISL\_660045|Original|hCoV-19^^England|Human|Lighthouse Lab in Glasgow|Wellcome Sanger Institute for the COVID-19 Genomics UK (COG-UK) Consortium|Davies|United Kingdom  
>Spike|hCoV-19/India/TG-CCMB-GC9/2020|2020-05-23|EPI\_ISL\_528822|Original|hCoV-19^^Telangana|Human|Department of Medicine|CSIR-Centre for Cellular and Molecular Biology|Banu|India  
>Spike|hCoV-19/Australia/NSW247/2020|2020-03-28|EPI\_ISL\_451512|Original|hCoV-19^^New South Wales|Human|Pathology West - NSW Health Pathology|NSW Health Pathology - Institute of Clinical Pathology and Medical Research; Westmead Hospital; University of Sydney|Gall|Australia  
>Spike|hCoV-19/England/C200045610/2020|2020-11-10|EPI\_ISL\_664054|Original|hCoV-19^^England|Human|Respiratory Virus Unit|COVID-19 Genomics UK (COG-UK) Consortium|Platt|United Kingdom  
>Spike|hCoV-19/USA/NY-NYCPHL-000559/2020|2020-03-27|EPI\_ISL\_632018|Original|hCoV-19^^New York|Human|Flushing Hospital Medical Center|New York City Public Health Laboratory|Wang|USA  
>Spike|hCoV-19/New Zealand/20CV0126/2020|2020-08-19|EPI\_ISL\_548012|Original|hCoV-19^^Auckland|Human|Middlemore Hospital|Institute of Environmental Science and Research (ESR)|Wang|New Zealand  
>Spike|hCoV-19/England/HECH-259A0D3/2020|2020-05-19|EPI\_ISL\_488852|Original|hCoV-19^^England|Human|Microbiology Department|Wellcome Sanger Institute for the COVID-19 Genomics UK (COG-UK) consortium|Davies|United Kingdom  
>Spike|hCoV-19/Denmark/DCGC-11380/2020|2020-11-02|EPI\_ISL\_670751|Original|hCoV-19^^Hovedstaden|Human|Department of Virus and Microbiological Special Diagnostics|Albertsen Lab|Michaelsen|Denmark  
>Spike|hCoV-19/South Korea/KCDC2148/2020|2020-03-22|EPI\_ISL\_498049|Original|hCoV-19^^South Korea|Human|Division of Viral Diseases|Division of Viral Diseases|Kim|South Korea  
>Spike|hCoV-19/USA/TX-HMH076/2020|2020-03-19|EPI\_ISL\_434785|Original|hCoV-19^^Texas|Human|Houston Methodist Hospital|Houston Methodist Hospital|Long|USA  
>Spike|hCoV-19/Australia/NSW688/2020|2020-07-18|EPI\_ISL\_513331|Original|hCoV-19^^New South Wales|Human|Australian Clinical Labs|NSW Health Pathology - Institute of

Clinical Pathology and Medical Research; Westmead Hospital; University of Sydney|Gall|Australia  
>Spike|hCoV-19/Japan/PG-4627/2020|2020-07-00|EPI\_ISL\_689764|Original|hCoV-19^^Japan|Human|Fukuoka Institute of Health and Environmental Sciences|Pathogen Genomics Center|Sekizuka|Japan  
>Spike|hCoV-19/England/QEUA-B7FD73/2020|2020-11-13|EPI\_ISL\_668387|Original|hCoV-19^^England|Human|Lighthouse Lab in Glasgow|Wellcome Sanger Institute for the COVID-19 Genomics UK (COG-UK) Consortium|Davies|United Kingdom  
>Spike|hCoV-19/Belgium/reg-09231025/2020|2020-09-23|EPI\_ISL\_735033|Original|hCoV-19^^Werchter|Human|UZ Leuven|KU Leuven|Maes|Belgium  
>Spike|hCoV-19/USA/MN-MDH-1737/2020|2020-09-16|EPI\_ISL\_576246|Original|hCoV-19^^Minnesota|Human|Minnesota Department of Health|Minnesota Department of Health|Garfin|USA  
>Spike|hCoV-19/England/NORW-F8C52/2020|2020-11-28|EPI\_ISL\_725371|Original|hCoV-19^^England|Human|Quadram Institute Bioscience|COVID-19 Genomics UK (COG-UK) Consortium|Alikhan|United Kingdom  
>Spike|hCoV-19/USA/TX-DSHS-1504/2020|2020-06-22|EPI\_ISL\_683419|Original|hCoV-19^^Texas|Human|Texas Department of State Health Services|Texas Department of State Health Services|Rahman|USA  
>Spike|hCoV-19/Germany/HH-hpi-p1616/2020|2020-03-17|EPI\_ISL\_776070|Original|hCoV-19^^Hamburg|Human|University Medical Center Hamburg Eppendorf|Heinrich Pette Institute|Robitaille|Germany  
>Spike|hCoV-19/Wales/PHWC-163D21/2020|2020-05-09|EPI\_ISL\_474073|Original|hCoV-19^^Wales|Human|Originating lab|COVID-19 Genomics UK (COG-UK) Consortium|Moore|United Kingdom  
>Spike|hCoV-19/Denmark/DCGC-18330/2020|2020-12-07|EPI\_ISL\_749892|Original|hCoV-19^^Midtjylland|Human|Department of Virus and Microbiological Special Diagnostics|Albertsen Lab|Michaelsen|Denmark  
>Spike|hCoV-19/England/CAMB-71AC0/2020|2020-03-31|EPI\_ISL\_439659|Original|hCoV-19^^England|Human|Department of Pathology|Wellcome Sanger Institute for the COVID-19 Genomics UK (COG-UK) consortium|Amato|United Kingdom  
>Spike|hCoV-19/England/MILK-BAAE6D/2020|2020-11-18|EPI\_ISL\_783076|Original|hCoV-19^^England|Human|Lighthouse Lab in Milton Keynes|Wellcome Sanger Institute for the COVID-19 Genomics UK (COG-UK) Consortium|Davies|United Kingdom  
>Spike|hCoV-19/Australia/VIC11961/2020|2020-07-28|EPI\_ISL\_591904|Original|hCoV-19^^Victoria|Human|Victorian Infectious Diseases Reference Laboratory (VIDRL)|VIDRL and MDU-PHL|Schultz|Australia  
>Spike|hCoV-19/Denmark/DCGC-10257/2020|2020-11-09|EPI\_ISL\_669862|Original|hCoV-19^^Hovedstaden|Human|Department of Virus and Microbiological Special Diagnostics|Albertsen Lab|Michaelsen|Denmark  
>Spike|hCoV-19/England/CAMB-1B7BCA/2020|2020-10-24|EPI\_ISL\_638365|Original|hCoV-19^^England|Human|Department of Pathology|COVID-19 Genomics UK (COG-UK) Consortium|Goodfellow|United Kingdom  
>Spike|hCoV-19/England/ALDP-91D68D/2020|2020-06-23|EPI\_ISL\_552894|Original|hCoV-19^^England|Human|Lighthouse Lab in Alderley Park|Wellcome Sanger Institute for the COVID-19 Genomics UK (COG-UK) consortium|Davies|United Kingdom  
>Spike|hCoV-19/England/ALDP-9564AC/2020|2020-06-08|EPI\_ISL\_554083|Original|hCoV-19^^England|Human|Lighthouse Lab in Alderley Park|Wellcome Sanger Institute for the COVID-19 Genomics UK (COG-UK) consortium|Davies|United Kingdom  
>Spike|hCoV-19/England/ALDP-959E32/2020|2020-06-12|EPI\_ISL\_554969|Original|hCoV-19^^England|Human|Lighthouse Lab in Alderley Park|Wellcome Sanger Institute for the COVID-19 Genomics UK (COG-UK) consortium|Davies|United Kingdom  
>Spike|hCoV-19/England/MILK-80F591/2020|2020-07-16|EPI\_ISL\_557233|Original|hCoV-19^^England|Human|Lighthouse Lab in Milton Keynes|Wellcome Sanger Institute for the COVID-19 Genomics UK (COG-UK) consortium|Davies|United Kingdom  
>Spike|hCoV-19/USA/TX-HMH-MCoV-13760/2020|2020-08-17|EPI\_ISL\_788853|Original|hCoV-19^^Texas|Human|Houston Methodist Hospital|Houston Methodist Hospital|Long|USA  
>Spike|hCoV-19/USA/WA-S2692/2020|2020-06-22|EPI\_ISL\_497324|Original|hCoV-19^^Washington|Human|Washington State Department of Health|Seattle Flu Study|Lee|USA

>Spike|hCoV-19/USA/MI-MDHHS-SC22140/2020|2020-10-06|EPI\_ISL\_614191|Original|hCoV-19^^Michigan|Human|Michigan Department of Health and Human Services|Michigan Department of Health and Human Services|Jacob|USA

>Spike|hCoV-19/USA/NY-Wadsworth-288788-01/2020|2020-12-18|EPI\_ISL\_767485|Original|hCoV-19^^New York|Human|Wadsworth Center|Wadsworth Center|Lasek-Nesselquist|USA

>Spike|hCoV-19/England/QEUH-B2DB98/2020|2020-11-03|EPI\_ISL\_646826|Original|hCoV-19^^England|Human|Lighthouse Lab in Glasgow|Wellcome Sanger Institute for the COVID-19 Genomics UK (COG-UK) Consortium|Davies|United Kingdom

>Spike|hCoV-19/Netherlands/ZH-EMC-1100/2020|2020-12-03|EPI\_ISL\_722788|Original|hCoV-19^^Zuid Holland|Human|Dutch COVID-19 response team|Erasmus Medical Center|Oude Munnink|Netherlands

>Spike|hCoV-19/Denmark/DCGC-18919/2020|2020-12-07|EPI\_ISL\_748179|Original|hCoV-19^^Hovedstaden|Human|Department of Virus and Microbiological Special Diagnostics|Albertsen Lab|Michaelsen|Denmark

>Spike|hCoV-19/Scotland/MILK-993C8D/2020|2020-08-25|EPI\_ISL\_568386|Original|hCoV-19^^Scotland|Human|Lighthouse Lab in Milton Keynes|Wellcome Sanger Institute for the COVID-19 Genomics UK (COG-UK) consortium|Davies|United Kingdom

>Spike|hCoV-19/Scotland/QEUH-9FB46D/2020|2020-09-29|EPI\_ISL\_600574|Original|hCoV-19^^Scotland|Human|Lighthouse Lab in Glasgow|Wellcome Sanger Institute for the COVID-19 Genomics UK (COG-UK) consortium|Davies|United Kingdom

>Spike|hCoV-19/England/MILK-B96A42/2020|2020-11-13|EPI\_ISL\_676247|Original|hCoV-19^^England|Human|Lighthouse Lab in Milton Keynes|Wellcome Sanger Institute for the COVID-19 Genomics UK (COG-UK) Consortium|Davies|United Kingdom

>Spike|hCoV-19/USA/CA-CZB-10198/2020|2020-05-12|EPI\_ISL\_672256|Original|hCoV-19^^California|Human|The Ashley Laboratory|Chan-Zuckerberg Biohub|Bhatt|USA

>Spike|hCoV-19/USA/LA-EVTL984/2020|2020-08-18|EPI\_ISL\_653675|Original|hCoV-19^^Louisiana|Human|LSUHS Emerging Viral Threat Laboratory|Microbial Genome Sequencing Center|Kamil|USA

>Spike|hCoV-19/England/ALDP-95A790/2020|2020-06-14|EPI\_ISL\_555082|Original|hCoV-19^^England|Human|Lighthouse Lab in Alderley Park|Wellcome Sanger Institute for the COVID-19 Genomics UK (COG-UK) consortium|Davies|United Kingdom

>Spike|hCoV-19/England/QEUH-A8B4BC/2020|2020-10-16|EPI\_ISL\_643161|Original|hCoV-19^^England|Human|Lighthouse Lab in Glasgow|Wellcome Sanger Institute for the COVID-19 Genomics UK (COG-UK) Consortium|Davies|United Kingdom

>Spike|hCoV-19/Canada/ON-S1229/2020|2020-04-08|EPI\_ISL\_586303|Original|hCoV-19^^Ontario|Human|Toronto Invasive Bacterial Diseases Network|McMaster University|McArthur|Canada

>Spike|hCoV-19/England/ALDP-B5C723/2020|2020-11-08|EPI\_ISL\_655887|Original|hCoV-19^^England|Human|Lighthouse Lab in Alderley Park|Wellcome Sanger Institute for the COVID-19 Genomics UK (COG-UK) Consortium|Davies|United Kingdom

>Spike|hCoV-19/USA/TX-QDX-261/2020|2020-05-01|EPI\_ISL\_498742|Original|hCoV-19^^Texas|Human|Quest Diagnostics|Quest Diagnostics|Kagan|USA

>Spike|hCoV-19/Wales/PHWC-47EAA1/2020|2020-10-11|EPI\_ISL\_595547|Original|hCoV-19^^Wales|Human|Originating lab|COVID-19 Genomics UK (COG-UK) Consortium|Moore|United Kingdom

>Spike|hCoV-19/England/ALDP-9ED64A/2020|2020-05-18|EPI\_ISL\_589485|Original|hCoV-19^^England|Human|Lighthouse Lab in Alderley Park|Wellcome Sanger Institute for the COVID-19 Genomics UK (COG-UK) consortium|Davies|United Kingdom

>Spike|hCoV-19/Chile/RM-134067/2020|2020-07-27|EPI\_ISL\_746643|Original|hCoV-19^^Region Metropolitana de Santiago|Human|Genetica Molecular and Subdepartamento de Virologia ISP Chile|Instituto de Salud Publica de Chile|Tognarelli|Chile

>Spike|hCoV-19/England/QEUH-AF0054/2020|2020-10-27|EPI\_ISL\_662856|Original|hCoV-19^^England|Human|Lighthouse Lab in Glasgow|Wellcome Sanger Institute for the COVID-19 Genomics UK (COG-UK) Consortium|Davies|United Kingdom

>Spike|hCoV-19/Denmark/ALAB-SSI-570/2020|2020-03-28|EPI\_ISL\_436973|Original|hCoV-19^^Denmark|Human|Department of Virus and Microbiological Special Diagnostics|Albertsen lab|Kirkegaard|Denmark

>Spike|hCoV-19/Denmark/DCGC-21094/2020|2020-12-21|EPI\_ISL\_758796|Original|hCoV-19^^Hovedstaden|Human|Department of Virus and Microbiological Special Diagnostics|Albertsen Lab|Michaelsen|Denmark

>Spike|hCoV-19/USA/NM-DOH-2020327022/2020|2020-09-03|EPI\_ISL\_575303|Original|hCoV-19^^New Mexico|Human|Molecular Biology|Molecular Biology|Johnson|USA

>Spike|hCoV-19/Germany/HH-hpi-p2300/2020|2020-03-12|EPI\_ISL\_776433|Original|hCoV-19^^Hamburg|Human|University Medical Center Hamburg Eppendorf|Heinrich Pette Institute|Robitaille|Germany

>Spike|hCoV-19/Wales/PHWC-4929E6/2020|2020-11-22|EPI\_ISL\_725732|Original|hCoV-19^^Wales|Human|Originating lab|COVID-19 Genomics UK (COG-UK) Consortium|Moore|United Kingdom

>Spike|hCoV-19/USA/TX-HMH-MCoV-8427/2020|2020-07-01|EPI\_ISL\_784391|Original|hCoV-19^^Texas|Human|Houston Methodist Hospital|Houston Methodist Hospital|Long|USA

>Spike|hCoV-19/Wales/PHWC-2569A/2020|2020-03-24|EPI\_ISL\_422299|Original|hCoV-19^^Wales|Human|Wales Specialist Virology Centre|Public Health Wales Microbiology Cardiff|Moore|United Kingdom

>Spike|hCoV-19/USA/TX-DSHS-1774/2020|2020-06-20|EPI\_ISL\_710414|Original|hCoV-19^^Texas|Human|Texas Department of State Health Services|Texas Department of State Health Services|Rahman|USA

>Spike|hCoV-19/USA/ID-UW-2195/2020|2020-03-20|EPI\_ISL\_529161|Original|hCoV-19^^Idaho|Human|University of Washington|University of Washington|Roychoudhury|USA

>Spike|hCoV-19/Wales/PHWC-16244B/2020|2020-06-02|EPI\_ISL\_473074|Original|hCoV-19^^Wales|Human|Wales Specialist Virology Centre Sequencing lab|COVID-19 Genomics UK (COG-UK) Consortium|Moore|United Kingdom

>Spike|hCoV-19/Japan/PG-3866/2020|2020-07-00|EPI\_ISL\_692117|Original|hCoV-19^^Japan|Human|Pathogen Genomics Center|Pathogen Genomics Center|Sekizuka|Japan

>Spike|hCoV-19/England/MILK-C63AD4/2020|2020-12-13|EPI\_ISL\_735523|Original|hCoV-19^^England|Human|Lighthouse Lab in Milton Keynes|Wellcome Sanger Institute for the COVID-19 Genomics UK (COG-UK) Consortium|Davies|United Kingdom

>Spike|hCoV-19/Wales/PHWC-47D26E/2020|2020-10-07|EPI\_ISL\_586118|Original|hCoV-19^^Wales|Human|Wales Specialist Virology Centre Sequencing lab|COVID-19 Genomics UK (COG-UK) Consortium|Moore|United Kingdom

>Spike|hCoV-19/England/ALDP-A2F7EE/2020|2020-10-05|EPI\_ISL\_587244|Original|hCoV-19^^England|Human|Lighthouse Lab in Alderley Park|Wellcome Sanger Institute for the COVID-19 Genomics UK (COG-UK) consortium|Davies|United Kingdom

>Spike|hCoV-19/England/WSFT-25C1AF3/2020|2020-05-10|EPI\_ISL\_488847|Original|hCoV-19^^England|Human|Department of Medical Microbiology|Wellcome Sanger Institute for the COVID-19 Genomics UK (COG-UK) consortium|Davies|United Kingdom

>Spike|hCoV-19/Japan/PG-7023/2020|2020-08-00|EPI\_ISL\_688128|Original|hCoV-19^^Japan|Human|Pathogen Genomics Center|Pathogen Genomics Center|Sekizuka|Japan

>Spike|hCoV-19/Canada/NS-NML-928/2020|2020-03-24|EPI\_ISL\_579568|Original|hCoV-19^^Nova Scotia|Human|QEII Health Sciences Centre|National Microbiology Laboratory (NML)|Majer|Canada

>Spike|hCoV-19/Russia/AMU-RII-MH10159S/2020|2020-11-23|EPI\_ISL\_733463|Original|hCoV-19^^Amur|Human|WHO National Influenza Centre Russian Federation|WHO National Influenza Centre Russian Federation|Komissarov|Russia

>Spike|hCoV-19/Russia/StPetersburg-RII17574S/2020|2020-05-26|EPI\_ISL\_507279|Original|hCoV-19^^Saint Petersburg|Human|WHO National Influenza Centre Russian Federation|WHO National Influenza Centre Russian Federation|Komissarov|Russia

>Spike|hCoV-19/England/MILK-ACF276/2020|2020-10-22|EPI\_ISL\_629536|Original|hCoV-19^^England|Human|Lighthouse Lab in Milton Keynes|Wellcome Sanger Institute for the COVID-19 Genomics UK (COG-UK) consortium|Davies|United Kingdom

>Spike|hCoV-19/Indonesia/JK-EIJK19/2020|2020-04-09|EPI\_ISL\_574607|Original|hCoV-19^^Jakarta|Human|RS Husada|Eijkman Institute for Molecular Biology|Soebandrio|Indonesia

>Spike|hCoV-19/USA/FL-BPHL-0340/2020|2020-04-19|EPI\_ISL\_489749|Original|hCoV-19^^Florida|Human|Florida Bureau of Public Health Laboratories|Florida Bureau of Public Health Laboratories|Blanton|USA

>Spike|hCoV-19/USA/WA-UW-10455/2020|2020-06-06|EPI\_ISL\_570313|Original|hCoV-19^^Washington|Human|UW Virology Lab|UW Virology Lab|Roychoudhury|USA

>Spike|hCoV-19/Spain/AR-IBV-005032/2020|2020-04-20|EPI\_ISL\_500338|Original|hCoV-19^^Aragon|Human|Servicio de Microbiolog\u00eda|SeqCOVID-SPAIN consortium/IBV (CSIC) |Comas|Spain

>Spike|hCoV-19/Wales/PHWC-48205D/2020|2020-10-21|EPI\_ISL\_613196|Original|hCoV-19^^Wales|Human|Wales Specialist Virology Centre Sequencing lab|COVID-19 Genomics UK (COG-UK) Consortium|Moore|United Kingdom

>Spike|hCoV-19/England/MILK-AB7851/2020|2020-10-20|EPI\_ISL\_709929|Original|hCoV-19^^England|Human|Lighthouse Lab in Milton Keynes|Wellcome Sanger Institute for the COVID-19 Genomics UK (COG-UK) Consortium|Davies|United Kingdom

>Spike|hCoV-19/India/UN-1621/2020|2020-03-12|EPI\_ISL\_421671|Original|hCoV-19^^India|Human|National Influenza Center|Indian Council of Medical Research-National Institute of Virology|Yadav|India

>Spike|hCoV-19/Scotland/CVR115/2020|2020-03-13|EPI\_ISL\_425660|Original|hCoV-19^^Scotland|Human|West of Scotland Specialist Virology Centre|COVID-19 Genomics UK (COG-UK) Consortium|Robertson|United Kingdom

>Spike|hCoV-19/Wales/PHWC-491B3C/2020|2020-11-10|EPI\_ISL\_706745|Original|hCoV-19^^Wales|Human|Originating lab|COVID-19 Genomics UK (COG-UK) Consortium|Moore|United Kingdom

>Spike|hCoV-19/England/ALDP-B83680/2020|2020-11-15|EPI\_ISL\_675251|Original|hCoV-19^^England|Human|Lighthouse Lab in Alderley Park|Wellcome Sanger Institute for the COVID-19 Genomics UK (COG-UK) Consortium|Davies|United Kingdom

>Spike|hCoV-19/Wales/PHWC-484000/2020|2020-10-19|EPI\_ISL\_627955|Original|hCoV-19^^Wales|Human|Wales Specialist Virology Centre Sequencing lab|COVID-19 Genomics UK (COG-UK) Consortium|Moore|United Kingdom

>Spike|hCoV-19/Luxembourg/LNS0655598/2020|2020-11-19|EPI\_ISL\_739811|Original|hCoV-19^^Luxembourg|Human|Laboratoire national de sant\u00e9|Laboratoire national de sant\u00e9|Wienecke-Baldacchino|Luxembourg

>Spike|hCoV-19/Germany/ST-MD037/2020|2020-04-16|EPI\_ISL\_728356|Original|hCoV-19^^Saxony-Anhalt|Human|Institute of medical Microbiology and hospital Hygiene|Institute of medical Microbiology and hospital Hygiene|Tersteegen|Germany

>Spike|hCoV-19/Northern Ireland/NIRE-FB8D3/2020|2020-03-31|EPI\_ISL\_585246|Original|hCoV-19^^Northern Ireland|Human|Regional Virus Laboratory|COVID-19 Genomics UK (COG-UK) Consortium|Fairley|United Kingdom

>Spike|hCoV-19/USA/TX-HMH-2399/2020|2020-05-25|EPI\_ISL\_545286|Original|hCoV-19^^Texas|Human|Houston Methodist Hospital|Houston Methodist Hospital|Long|USA

>Spike|hCoV-19/USA/NV-NSPHL-A0055/2020|2020-03-28|EPI\_ISL\_515337|Original|hCoV-19^^Nevada|Human|Nevada State Public Health Laboratory|Nevada State Public Health Laboratory|Sevinsky|USA

>Spike|hCoV-19/England/LOND-DA737/2020|2020-11-03|EPI\_ISL\_724660|Original|hCoV-19^^England|Human|University College London|COVID-19 Genomics UK (COG-UK) Consortium|Roy|United Kingdom

>Spike|hCoV-19/USA/TX-HMH-MCoV-15515/2020|2020-10-23|EPI\_ISL\_786999|Original|hCoV-19^^Texas|Human|Houston Methodist Hospital|Houston Methodist Hospital|Long|USA

>Spike|hCoV-19/England/MILK-9C3C39/2020|2020-09-07|EPI\_ISL\_566749|Original|hCoV-19^^England|Human|Lighthouse Lab in Milton Keynes|Wellcome Sanger Institute for the COVID-19 Genomics UK (COG-UK) consortium|Davies|United Kingdom

>Spike|hCoV-19/Germany/NW-MPP-35/2020|2020-06-17|EPI\_ISL\_487425|Original|hCoV-19^^North Rhine-Westphalia|Human|Labor Knei\u00dfler GmbH & Co. KG|Heinrich Pette Institute|G\u00f6ttingen|Germany

>Spike|hCoV-19/Wales/PHWC-498F75/2020|2020-12-01|EPI\_ISL\_727235|Original|hCoV-19^^Wales|Human|Originating lab|COVID-19 Genomics UK (COG-UK) Consortium|Moore|United Kingdom

>Spike|hCoV-19/England/NORW-EBE10/2020|2020-05-06|EPI\_ISL\_457514|Original|hCoV-19^^England|Human|Quadram Institute Bioscience|COVID-19 Genomics UK (COG-UK) Consortium|Alikhan|United Kingdom

>Spike|hCoV-19/Denmark/DCGC-759/2020|2020-03-09|EPI\_ISL\_614761|Original|hCoV-19^^Syddanmark|Human|Department of Virus and Microbiological Special Diagnostics|Albertsen lab|Michaelsen|Denmark



>Spike|hCoV-19/India/DL-65025-CSIR-IGIB/2020|2020-08-11|EPI\_ISL\_636818|Original|hCoV-19^^Delhi|Human|National Centre for Disease control (NCDC)|NCDC/CSIR-IGIB|Faruq|India

>Spike|hCoV-19/England/LIVE-A06D3/2020|2020-05-28|EPI\_ISL\_472126|Original|hCoV-19^^England|Human|Liverpool Clinical Laboratories|COVID-19 Genomics UK (COG-UK) Consortium|Haldenby|United Kingdom

>Spike|hCoV-19/England/NORT-1B71A95/2020|2020-11-16|EPI\_ISL\_706313|Original|hCoV-19^^England|Human|Northumbria University / South Tees Hospitals NHS Foundation Trust / North Cumbria Integrated Care NHS Foundation Trust / North Tees and Hartlepool NHS Foundation Trust / Newcastle Hospitals NHS Foundation Trust|COVID-19 Genomics UK (COG-UK) Consortium|Bashton|United Kingdom

>Spike|hCoV-19/England/MILK-A46E73/2020|2020-10-06|EPI\_ISL\_598338|Original|hCoV-19^^England|Human|Lighthouse Lab in Milton Keynes|Wellcome Sanger Institute for the COVID-19 Genomics UK (COG-UK) consortium|Davies|United Kingdom

>Spike|hCoV-19/USA/MI-MDHHS-SC21144/2020|2020-03-31|EPI\_ISL\_507920|Original|hCoV-19^^Michigan|Human|Michigan Department of Health and Human Services|Michigan Department of Health and Human Services|Blankenship|USA

>Spike|hCoV-19/Denmark/DCGC-15476/2020|2020-11-23|EPI\_ISL\_713845|Original|hCoV-19^^Hovedstaden|Human|Department of Virus and Microbiological Special Diagnostics|Albertsen Lab|Michaelsen|Denmark

>Spike|hCoV-19/USA/CA-CDPH137/2020|2020-08-11|EPI\_ISL\_755012|Original|hCoV-19^^California|Human|California Department of Public Health|California Department of Public Health|Bell|USA

>Spike|hCoV-19/India/MH-ACTREC-207/2020|2020-06-26|EPI\_ISL\_699861|Original|hCoV-19^^Maharashtra|Human|Hematopathology Laboratory|Hematopathology Laboratory|Patkar|India

>Spike|hCoV-19/Scotland/EDB5373/2020|2020-03-30|EPI\_ISL\_457011|Original|hCoV-19^^Scotland|Human|Virology Department|COVID-19 Genomics UK (COG-UK) Consortium|Williams|United Kingdom

>Spike|hCoV-19/Australia/VIC1025/2020|2020-04-02|EPI\_ISL\_430532|Original|hCoV-19^^Victoria|Human|Victorian Infectious Diseases Reference Laboratory (VIDRL)|Microbiological Diagnostic Unit Public Health Laboratory and Victorian Infectious Diseases Reference Laboratory|Schultz|Australia

>Spike|hCoV-19/England/MILK-B3A907/2020|2020-11-01|EPI\_ISL\_679689|Original|hCoV-19^^England|Human|Oxford Viromics|COVID-19 Genomics UK (COG-UK) Consortium|Golubchik|United Kingdom

>Spike|hCoV-19/Denmark/DCGC-8098/2020|2020-10-26|EPI\_ISL\_617069|Original|hCoV-19^^Syddanmark|Human|Department of Virus and Microbiological Special Diagnostics|Albertsen lab|Michaelsen|Denmark

>Spike|hCoV-19/England/204191511/2020|2020-10-09|EPI\_ISL\_603189|Original|hCoV-19^^England|Human|Respiratory Virus Unit|Respiratory Virus Unit|Platt|United Kingdom

>Spike|hCoV-19/Denmark/DCGC-5254/2020|2020-09-14|EPI\_ISL\_615185|Original|hCoV-19^^Hovedstaden|Human|Department of Virus and Microbiological Special Diagnostics|Albertsen lab|Michaelsen|Denmark

>Spike|hCoV-19/England/ALDP-5A484D/2020|2020-06-13|EPI\_ISL\_558640|Original|hCoV-19^^England|Human|Lighthouse Lab in Alderley Park|Wellcome Sanger Institute for the COVID-19 Genomics UK (COG-UK) consortium|Davies|United Kingdom

>Spike|hCoV-19/England/ALDP-BC61CC/2020|2020-11-22|EPI\_ISL\_721375|Original|hCoV-19^^England|Human|Lighthouse Lab in Alderley Park|Wellcome Sanger Institute for the COVID-19 Genomics UK (COG-UK) Consortium|Davies|United Kingdom

>Spike|hCoV-19/USA/TX-HMH-4314/2020|2020-06-18|EPI\_ISL\_543523|Original|hCoV-19^^Texas|Human|Houston Methodist Hospital|Houston Methodist Hospital|Long|USA

>Spike|hCoV-19/USA/WI-UW-1273/2020|2020-08-22|EPI\_ISL\_536645|Original|hCoV-19^^Wisconsin|Human|University of Wisconsin-Madison AIDS Vaccine Research Laboratories|University of Wisconsin-Madison AIDS Vaccine Research Laboratories|Baczenas|USA

>Spike|hCoV-19/USA/HI-H200245/2020|2020-08-17|EPI\_ISL\_752804|Original|hCoV-19^^Hawaii|Human|State Laboratories Division|State Laboratories Division|Sultana|USA

>Spike|hCoV-19/Spain/MD-IBV-99008695/2020|2020-10-09|EPI\_ISL\_654179|Original|hCoV-19^^Madrid|Human|Hospital General Universitario Gregorio Mara\u00f1a|SeqCOVID-SPAIN consortium/IBV (CSIC)|Comas|Spain

>Spike|hCoV-19/England/CAMB-1AFA5F/2020|2020-05-02|EPI\_ISL\_459293|Original|hCoV-19^^England|Human|Department of Pathology|Wellcome Sanger Institute for the COVID-19 Genomics UK (COG-UK) consortium|Davies|United Kingdom

>Spike|hCoV-19/Scotland/EDB2051/2020|2020-04-18|EPI\_ISL\_433167|Original|hCoV-19^^Scotland|Human|Virology Department|COVID-19 Genomics UK (COG-UK) Consortium|Williams|United Kingdom

>Spike|hCoV-19/Finland/5A40S4A10/2020|2020-04-05|EPI\_ISL\_481685|Original|hCoV-19^^Uusimaa|Human|Department of Virology and Immunology|Department of Virology|Smura|Finland

>Spike|hCoV-19/USA/NY-NYUMC353/2020|2020-04-08|EPI\_ISL\_430380|Original|hCoV-19^^New York|Human|NYU Langone Health|Departments of Pathology and Medicine|Maurano|USA

>Spike|hCoV-19/England/ALDP-AC1247/2020|2020-10-10|EPI\_ISL\_631059|Original|hCoV-19^^England|Human|Lighthouse Lab in Alderley Park|Wellcome Sanger Institute for the COVID-19 Genomics UK (COG-UK) consortium|Davies|United Kingdom

>Spike|hCoV-19/Denmark/DCGC-13462/2020|2020-11-30|EPI\_ISL\_712813|Original|hCoV-19^^Sjaelland|Human|Department of Virus and Microbiological Special Diagnostics|Albertsen Lab|Michaelsen|Denmark

>Spike|hCoV-19/England/MILK-C2F755/2020|2020-12-07|EPI\_ISL\_782962|Original|hCoV-19^^England|Human|Lighthouse Lab in Milton Keynes|Wellcome Sanger Institute for the COVID-19 Genomics UK (COG-UK) Consortium|Davies|United Kingdom

>Spike|hCoV-19/Belgium/ULG-10735/2020|2020-09-18|EPI\_ISL\_641577|Original|hCoV-19^^Li\u00e8ge|Human|Department of Clinical Microbiology|GIGA Medical Genomics|Durkin|Belgium

>Spike|hCoV-19/USA/WI-UW-1652/2020|2020-09-10|EPI\_ISL\_605526|Original|hCoV-19^^Wisconsin|Human|University of Wisconsin-Madison AIDS Vaccine Research Laboratories|University of Wisconsin-Madison AIDS Vaccine Research Laboratories|Baczenas|USA

>Spike|hCoV-19/South Africa/KRISP-K003399/2020|2020-09-11|EPI\_ISL\_602787|Original|hCoV-19^^KwaZulu-Natal|Human|NHLs-IALCH|KRISP|de Oliveira|South Africa

>Spike|hCoV-19/Spain/AR-IBV-2444/2020|2020-03-24|EPI\_ISL\_468819|Original|hCoV-19^^Aragon|Human|Servicio de Microbiolog\u00eda|SeqCOVID-SPAIN consortium|IBV (CSIC)|Comas|Spain

>Spike|hCoV-19/England/ALDP-97E480/2020|2020-07-24|EPI\_ISL\_529385|Original|hCoV-19^^England|Human|Queens Medical Centre|COVID-19 Genomics UK (COG-UK) Consortium|Loose|United Kingdom

>Spike|hCoV-19/USA/MI-MDHHS-SC21270/2020|2020-04-02|EPI\_ISL\_507525|Original|hCoV-19^^Michigan|Human|Michigan Department of Health and Human Services|Michigan Department of Health and Human Services|Blankenship|USA

>Spike|hCoV-19/England/MILK-A79C8C/2020|2020-10-14|EPI\_ISL\_606796|Original|hCoV-19^^England|Human|Lighthouse Lab in Milton Keynes|Wellcome Sanger Institute for the COVID-19 Genomics UK (COG-UK) consortium|Davies|United Kingdom

>Spike|hCoV-19/England/ALDP-AA3ADA/2020|2020-10-22|EPI\_ISL\_624400|Original|hCoV-19^^England|Human|Lighthouse Lab in Alderley Park|Wellcome Sanger Institute for the COVID-19 Genomics UK (COG-UK) consortium|Davies|United Kingdom

>Spike|hCoV-19/Denmark/DCGC-3927/2020|2020-09-14|EPI\_ISL\_615838|Original|hCoV-19^^Hovedstaden|Human|Department of Virus and Microbiological Special Diagnostics|Albertsen lab|Michaelsen|Denmark

>Spike|hCoV-19/England/QEUEH-CCA358/2020|2020-12-23|EPI\_ISL\_782368|Original|hCoV-19^^England|Human|Lighthouse Lab in Glasgow|Wellcome Sanger Institute for the COVID-19 Genomics UK (COG-UK) Consortium|Davies|United Kingdom

>Spike|hCoV-19/England/ALDP-A877E4/2020|2020-10-17|EPI\_ISL\_606293|Original|hCoV-19^^England|Human|Lighthouse Lab in Alderley Park|Wellcome Sanger Institute for the COVID-19 Genomics UK (COG-UK) consortium|Davies|United Kingdom

>Spike|hCoV-19/England/CAMB-1AD848/2020|2020-05-01|EPI\_ISL\_477784|Original|hCoV-19^^England|Human|Department of Pathology|COVID-19 Genomics UK (COG-UK) Consortium|Meredith|United Kingdom

>Spike|hCoV-19/Germany/BB-ChVir-W1144-7244/2020|2020-04-08|EPI\_ISL\_753852|Original|hCoV-19^^Brandenburg|Human|Charit\u00e9

Universit\u00e4tsmedizin Berlin|Charit\u00e9 Universit\u00e4tsmedizin  
Berlin|Muehleemann|Germany  
>Spike|hCoV-19/Japan/PG-3558/2020|2020-06-00|EPI\_ISL\_691814|Original|hCoV-  
19^^Japan|Human|Pathogen Genomics Center|Pathogen Genomics Center|Sekizuka|Japan  
>Spike|hCoV-19/USA/CA-ALSR-1894/2020|2020-04-22|EPI\_ISL\_512221|Original|hCoV-  
19^^California|Human|San Diego County Public Health Laboratory|Andersen lab at  
Scripps Research|Gangavarapu|USA  
>Spike|hCoV-19/USA/NY-NYCPHL-001445/2020|2020-11-12|EPI\_ISL\_683809|Original|hCoV-  
19^^New York|Human|DOHMH Corona|New York City Public Health Laboratory|Wang|USA  
>Spike|hCoV-19/England/MILK-C2F99B/2020|2020-12-07|EPI\_ISL\_733687|Original|hCoV-  
19^^England|Human|Lighthouse Lab in Milton Keynes|Wellcome Sanger Institute for the  
COVID-19 Genomics UK (COG-UK) Consortium|Davies|United Kingdom  
>Spike|hCoV-19/Belgium/ULG-10273/2020|2020-07-09|EPI\_ISL\_515080|Original|hCoV-  
19^^Liege|Human|Department of Clinical Microbiology|GIGA Medical  
Genomics|Durkin|Belgium  
>Spike|hCoV-19/Norway/2994/2020|2020-07-22|EPI\_ISL\_549102|Original|hCoV-  
19^^Viken|Human|Ostfold Hospital Trust - Kalnes|Norwegian Institute of Public  
Health|Kopperud Riis|Norway  
>Spike|hCoV-19/USA/CA-CZB-3660/2020|2020-07-07|EPI\_ISL\_516735|Original|hCoV-  
19^^California|Human|UCSF Clinical Microbiology Laboratory|Chan-Zuckerberg  
Biohub|Kamm|USA  
>Spike|hCoV-19/England/CAMC-946DB3/2020|2020-07-14|EPI\_ISL\_556775|Original|hCoV-  
19^^England|Human|Lighthouse Lab in Cambridge|Wellcome Sanger Institute for the  
COVID-19 Genomics UK (COG-UK) consortium|Davies|United Kingdom  
>Spike|hCoV-19/Scotland/CVR3982/2020|2020-08-30|EPI\_ISL\_540779|Original|hCoV-  
19^^Scotland|Human|West of Scotland Specialist Virology Centre|COVID-19 Genomics UK  
(COG-UK) Consortium|Robertson|United Kingdom  
>Spike|hCoV-19/England/NORT-2945A6/2020|2020-08-03|EPI\_ISL\_573347|Original|hCoV-  
19^^England|Human|Northumbria University / South Tees Hospitals NHS Foundation Trust  
/ North Cumbria Integrated Care NHS Foundation Trust / North Tees and Hartlepool NHS  
Foundation Trust / Newcastle Hospitals NHS Foundation Trust|COVID-19 Genomics UK  
(COG-UK) Consortium|Bashton|United Kingdom  
>Spike|hCoV-19/Denmark/DCGC-14004/2020|2020-11-30|EPI\_ISL\_711511|Original|hCoV-  
19^^Midtjylland|Human|Department of Virus and Microbiological Special  
Diagnostics|Albertsen Lab|Michaelsen|Denmark  
>Spike|hCoV-19/Wales/PHWC-483793/2020|2020-10-06|EPI\_ISL\_627308|Original|hCoV-  
19^^Wales|Human|Wales Specialist Virology Centre Sequencing lab|COVID-19 Genomics UK  
(COG-UK) Consortium|Moore|United Kingdom  
>Spike|hCoV-19/Australia/VIC1355/2020|2020-04-09|EPI\_ISL\_430638|Original|hCoV-  
19^^Victoria|Human|Victorian Infectious Diseases Reference Laboratory  
(VIDRL)|Microbiological Diagnostic Unit Public Health Laboratory and Victorian  
Infectious Diseases Reference Laboratory|Schultz|Australia  
>Spike|hCoV-19/Brazil/SP-L25-CD647/2020|2020-04-11|EPI\_ISL\_672711|Original|hCoV-  
19^^S\u00e3o Paulo|Human|Institute of Tropical Medicine at the University of S\u00e3o  
Paulo (IMT-USP)|Laborat\u00f3rio de Parasitologia M\u00e9dica - Instituto de Medicina  
Tropical - Universidade de S\u00e3o Paulo|de Jesus|Brazil  
>Spike|hCoV-19/Oman/205027556/2020|2020-04-08|EPI\_ISL\_458125|Original|hCoV-  
19^^Muscat|Human|Oman National Influenza Centre|Department  
of\u00a0Microbiology\u00a0and Immunology-SQUH|AL Zadjali|Oman  
>Spike|hCoV-19/USA/LA-EVTL946/2020|2020-08-13|EPI\_ISL\_653637|Original|hCoV-  
19^^Louisiana|Human|LSUHS Emerging Viral Threat Laboratory|Microbial Genome  
Sequencing Center|Kamil|USA  
>Spike|hCoV-19/England/ALDP-AA32E1/2020|2020-10-22|EPI\_ISL\_623913|Original|hCoV-  
19^^England|Human|Lighthouse Lab in Alderley Park|Wellcome Sanger Institute for the  
COVID-19 Genomics UK (COG-UK) consortium|Davies|United Kingdom  
>Spike|hCoV-19/Morocco/FMP-14/2020|2020-11-00|EPI\_ISL\_728301|Original|hCoV-  
19^^Rabat|Human|Laboratoire Biolife|Laboratoire de Biotechnologie|Ouahghiri|Morocco  
>Spike|hCoV-19/USA/CA-QDX-1538/2020|2020-03-18|EPI\_ISL\_603786|Original|hCoV-  
19^^California|Human|Quest Diagnostics|Quest Diagnostics|Kagan|USA

>Spike|hCoV-19/Australia/VIC2075/2020|2020-04-01|EPI\_ISL\_521910|Original|hCoV-19^^Victoria|Human|Microbiological Diagnostic Unit - Public Health Laboratory (MDU-PHL)|MDU-PHL|Schultz|Australia

>Spike|hCoV-19/England/CAMC-B36103/2020|2020-11-05|EPI\_ISL\_645488|Original|hCoV-19^^England|Human|Lighthouse Lab in Cambridge|Wellcome Sanger Institute for the COVID-19 Genomics UK (COG-UK) Consortium|Davies|United Kingdom

>Spike|hCoV-19/England/QEUH-C34289/2020|2020-12-11|EPI\_ISL\_734070|Original|hCoV-19^^England|Human|Lighthouse Lab in Glasgow|Wellcome Sanger Institute for the COVID-19 Genomics UK (COG-UK) Consortium|Davies|United Kingdom

>Spike|hCoV-19/Scotland/QEUH-A0B5B1/2020|2020-10-03|EPI\_ISL\_599160|Original|hCoV-19^^Scotland|Human|Lighthouse Lab in Glasgow|Wellcome Sanger Institute for the COVID-19 Genomics UK (COG-UK) consortium|Davies|United Kingdom

>Spike|hCoV-19/England/ALDP-C3C0E1/2020|2020-12-10|EPI\_ISL\_731638|Original|hCoV-19^^England|Human|Lighthouse Lab in Alderley Park|Wellcome Sanger Institute for the COVID-19 Genomics UK (COG-UK) Consortium|Davies|United Kingdom

>Spike|hCoV-19/England/LIVE-DCC05E/2020|2020-11-23|EPI\_ISL\_724484|Original|hCoV-19^^England|Human|Liverpool Clinical Laboratories|COVID-19 Genomics UK (COG-UK) Consortium|Haldenby|United Kingdom

>Spike|hCoV-19/USA/IL-NM-0423/2020|2020-04-13|EPI\_ISL\_626402|Original|hCoV-19^^Illinois|Human|Northwestern Memorial Hospital|Ozer Lab|Ozer|USA

>Spike|hCoV-19/Scotland/CVR2538/2020|2020-04-15|EPI\_ISL\_477965|Original|hCoV-19^^Scotland|Human|West of Scotland Specialist Virology Centre|COVID-19 Genomics UK (COG-UK) Consortium|Robertson|United Kingdom

>Spike|hCoV-19/Wales/PHWC-26C2E/2020|2020-03-28|EPI\_ISL\_422273|Original|hCoV-19^^Wales|Human|Wales Specialist Virology Centre|Public Health Wales Microbiology Cardiff|Moore|United Kingdom

>Spike|hCoV-19/England/ALDP-CB4209/2020|2020-12-20|EPI\_ISL\_767091|Original|hCoV-19^^England|Human|Lighthouse Lab in Alderley Park|Wellcome Sanger Institute for the COVID-19 Genomics UK (COG-UK) Consortium|Davies|United Kingdom

>Spike|hCoV-19/USA/MA-MASPHL-00315/2020|2020-04-18|EPI\_ISL\_791722|Original|hCoV-19^^Massachusetts|Human|Massachusetts State Public Health Laboratory|Infectious Disease Program|Park|USA

>Spike|hCoV-19/England/QEUH-A3228D/2020|2020-10-07|EPI\_ISL\_628338|Original|hCoV-19^^England|Human|Oxford Viromics|COVID-19 Genomics UK (COG-UK) Consortium|Golubchik|United Kingdom

>Spike|hCoV-19/England/SHEF-CF0C1/2020|2020-05-14|EPI\_ISL\_493721|Original|hCoV-19^^England|Human|Virology Department|COVID-19 Genomics UK (COG-UK) Consortium|de Silva|United Kingdom

>Spike|hCoV-19/England/ALDP-C49913/2020|2020-12-13|EPI\_ISL\_718833|Original|hCoV-19^^England|Human|Lighthouse Lab in Alderley Park|Wellcome Sanger Institute for the COVID-19 Genomics UK (COG-UK) Consortium|Davies|United Kingdom

>Spike|hCoV-19/USA/FL-BPHL-2108/2020|2020-03-08|EPI\_ISL\_653261|Original|hCoV-19^^Florida|Human|Florida Bureau of Public Health Laboratories|Florida Bureau of Public Health Laboratories|Blanton|USA

>Spike|hCoV-19/USA/WA-UW-4752/2020|2020-03-28|EPI\_ISL\_486098|Original|hCoV-19^^Washington|Human|UW Virology Lab|UW Virology Lab|Roychoudhury|USA

>Spike|hCoV-19/South Korea/KCDC2482/2020|2020-06-11|EPI\_ISL\_514885|Original|hCoV-19^^South Korea|Human|Division of Viral Diseases|Division of Viral Diseases|Kim|South Korea

>Spike|hCoV-19/Spain/RI-IBV-99010930/2020|2020-09-07|EPI\_ISL\_732768|Original|hCoV-19^^La Rioja|Human|Centro de Investigaci\u00f3n Biom\u00e9dica de La Rioja - Hospital San Pedro Logro\u00f1o|SeqCOVID-SPAIN consortium/IBV (CSIC)|Comas|Spain

>Spike|hCoV-19/England/GSTT-265E24D/2020|2020-03-30|EPI\_ISL\_484174|Original|hCoV-19^^England|Human|Centre for Clinical Infection and Diagnostics Research and Genomics Innovation Unit|COVID-19 Genomics UK (COG-UK) Consortium|Awan|United Kingdom

>Spike|hCoV-19/Netherlands/NB-EMC-429/2020|2020-11-12|EPI\_ISL\_722624|Original|hCoV-19^^Noord Brabant|Human|Dutch COVID-19 response team|Erasmus Medical Center|Oude Munnink|Netherlands

>Spike|hCoV-19/Wales/PHWC-168E65/2020|2020-07-03|EPI\_ISL\_499357|Original|hCoV-19^^Wales|Human|Originating lab|COVID-19 Genomics UK (COG-UK) Consortium|Moore|United Kingdom

>Spike|hCoV-19/Netherlands/NA\_494/2020|2020-03-18|EPI\_ISL\_460667|Original|hCoV-19^^Netherlands|Human|Dutch COVID-19 response team|Erasmus Medical Center|Oude Munnink|Netherlands

>Spike|hCoV-19/England/QEUA-9DCF8F/2020|2020-09-21|EPI\_ISL\_599738|Original|hCoV-19^^England|Human|Lighthouse Lab in Glasgow|Wellcome Sanger Institute for the COVID-19 Genomics UK (COG-UK) consortium|Davies|United Kingdom

>Spike|hCoV-19/England/ALDP-A6EFEB/2020|2020-10-15|EPI\_ISL\_607679|Original|hCoV-19^^England|Human|Lighthouse Lab in Alderley Park|Wellcome Sanger Institute for the COVID-19 Genomics UK (COG-UK) consortium|Davies|United Kingdom

>Spike|hCoV-19/England/BIRM-65CD8/2020|2020-10-09|EPI\_ISL\_612220|Original|hCoV-19^^England|Human|University of Birmingham|COVID-19 Genomics UK (COG-UK) Consortium|Loman|United Kingdom

>Spike|hCoV-19/Turkey/IST-GLAB-062/2020|2020-04-22|EPI\_ISL\_480238|Original|hCoV-19^^Istanbul|Human|Genomic Laboratory (GLAB) (Conjoint lab of Health Directorate of Istanbul and Istanbul Technical University)|Genomic Laboratory (GLAB)|Karacan|Turkey

>Spike|hCoV-19/England/CAMC-A64598/2020|2020-10-10|EPI\_ISL\_609143|Original|hCoV-19^^England|Human|Lighthouse Lab in Cambridge|Wellcome Sanger Institute for the COVID-19 Genomics UK (COG-UK) consortium|Davies|United Kingdom

>Spike|hCoV-19/England/ALDP-C2326F/2020|2020-12-06|EPI\_ISL\_733769|Original|hCoV-19^^England|Human|Lighthouse Lab in Alderley Park|Wellcome Sanger Institute for the COVID-19 Genomics UK (COG-UK) Consortium|Davies|United Kingdom

>Spike|hCoV-19/England/QEUA-9625B9/2020|2020-08-10|EPI\_ISL\_531600|Original|hCoV-19^^England|Human|Lighthouse Lab in Glasgow|Wellcome Sanger Institute for the COVID-19 Genomics UK (COG-UK) consortium|Davies|United Kingdom

>Spike|hCoV-19/England/CAMC-B36965/2020|2020-11-05|EPI\_ISL\_645435|Original|hCoV-19^^England|Human|Lighthouse Lab in Cambridge|Wellcome Sanger Institute for the COVID-19 Genomics UK (COG-UK) Consortium|Davies|United Kingdom

>Spike|hCoV-19/USA/UT-QDX-2415/2020|2020-03-16|EPI\_ISL\_604729|Original|hCoV-19^^Utah|Human|Quest Diagnostics|Quest Diagnostics|Kagan|USA

>Spike|hCoV-19/England/LOND-D9B2D/2020|2020-10-13|EPI\_ISL\_611595|Original|hCoV-19^^England|Human|University College London|COVID-19 Genomics UK (COG-UK) Consortium|Roy|United Kingdom

>Spike|hCoV-19/England/ALDP-9BE9C1/2020|2020-09-09|EPI\_ISL\_568031|Original|hCoV-19^^England|Human|Lighthouse Lab in Alderley Park|Wellcome Sanger Institute for the COVID-19 Genomics UK (COG-UK) consortium|Davies|United Kingdom

>Spike|hCoV-19/Japan/PG-5536/2020|2020-08-00|EPI\_ISL\_688661|Original|hCoV-19^^Japan|Human|Pathogen Genomics Center|Pathogen Genomics Center|Sekizuka|Japan

>Spike|hCoV-19/Switzerland/SZ-ETHZ-310399/2020|2020-10-08|EPI\_ISL\_603473|Original|hCoV-19^^Schwyz|Human|Viollier AG|Department of Biosystems Science and Engineering|Nadeau|Switzerland

>Spike|hCoV-19/Denmark/DCGC-17872/2020|2020-12-14|EPI\_ISL\_749192|Original|hCoV-19^^Hovedstaden|Human|Department of Virus and Microbiological Special Diagnostics|Albertsen Lab|Michaelsen|Denmark

>Spike|hCoV-19/USA/TX-HMH-MCoV-10326/2020|2020-07-08|EPI\_ISL\_789152|Original|hCoV-19^^Texas|Human|Houston Methodist Hospital|Houston Methodist Hospital|Long|USA

>Spike|hCoV-19/Scotland/GCVR-171B35/2020|2020-03-29|EPI\_ISL\_524547|Original|hCoV-19^^Scotland|Human|NHSGGC West of Scotland Specialist Virology Centre / MRC-University of Glasgow Centre for Virus Research|Wellcome Sanger Institute for the COVID-19 Genomics UK (COG-UK) consortium|Davies|United Kingdom

>Spike|hCoV-19/Denmark/DCGC-15227/2020|2020-11-23|EPI\_ISL\_713708|Original|hCoV-19^^Midtjylland|Human|Department of Virus and Microbiological Special Diagnostics|Albertsen Lab|Michaelsen|Denmark

>Spike|hCoV-19/England/ALDP-AA5276/2020|2020-10-22|EPI\_ISL\_623906|Original|hCoV-19^^England|Human|Lighthouse Lab in Alderley Park|Wellcome Sanger Institute for the COVID-19 Genomics UK (COG-UK) consortium|Davies|United Kingdom

>Spike|hCoV-19/USA/LA-EVTL931/2020|2020-08-11|EPI\_ISL\_653622|Original|hCoV-19^^Louisiana|Human|LSUHS Emerging Viral Threat Laboratory|Microbial Genome Sequencing Center|Kamil|USA

>Spike|hCoV-19/England/MILK-AC7CE9/2020|2020-10-21|EPI\_ISL\_629427|Original|hCoV-19^^England|Human|Lighthouse Lab in Milton Keynes|Wellcome Sanger Institute for the COVID-19 Genomics UK (COG-UK) consortium|Davies|United Kingdom

>Spike|hCoV-19/USA/MN-MDH-2208/2020|2020-11-16|EPI\_ISL\_770782|Original|hCoV-19^^Minnesota|Human|Minnesota Department of Health|Minnesota Department of Health|Lorentz|USA

>Spike|hCoV-19/England/CAMB-1BADB2/2020|2020-11-12|EPI\_ISL\_664708|Original|hCoV-19^^England|Human|Department of Pathology|COVID-19 Genomics UK (COG-UK) Consortium|Goodfellow|United Kingdom

>Spike|hCoV-19/USA/TX-HMH-MCoV-8911/2020|2020-07-02|EPI\_ISL\_780826|Original|hCoV-19^^Texas|Human|Houston Methodist Hospital|Houston Methodist Hospital|Long|USA

>Spike|hCoV-19/England/MILK-9EF7DC/2020|2020-09-23|EPI\_ISL\_594943|Original|hCoV-19^^England|Human|Queens Medical Centre|COVID-19 Genomics UK (COG-UK) Consortium|Loose|United Kingdom

>Spike|hCoV-19/England/MILK-B05237/2020|2020-10-24|EPI\_ISL\_637409|Original|hCoV-19^^England|Human|Virology Department|COVID-19 Genomics UK (COG-UK) Consortium|de Silva|United Kingdom

>Spike|hCoV-19/Wales/PHWC-33F9E/2020|2020-04-18|EPI\_ISL\_446849|Original|hCoV-19^^Wales|Human|Wales Specialist Virology Centre|Public Health Wales Microbiology Cardiff|Moore|United Kingdom

>Spike|hCoV-19/England/ALDP-A67AF0/2020|2020-10-12|EPI\_ISL\_630615|Original|hCoV-19^^England|Human|Lighthouse Lab in Alderley Park|Wellcome Sanger Institute for the COVID-19 Genomics UK (COG-UK) consortium|Davies|United Kingdom

>Spike|hCoV-19/Denmark/ALAB-HH-174/2020|2020-04-14|EPI\_ISL\_452043|Original|hCoV-19^^Denmark|Human|Department of Clinical Microbiology|Albertsen lab|Kirkegaard|Denmark

>Spike|hCoV-19/USA/NM-DOH-2020308298/2020|2020-08-24|EPI\_ISL\_602177|Original|hCoV-19^^New Mexico|Human|New Mexico Department of Health Scientific Laboratory|New Mexico Department of Health Scientific Laboratory|Johnson|USA

>Spike|hCoV-19/USA/CA-CZB-1854/2020|2020-04-27|EPI\_ISL\_486163|Original|hCoV-19^^California|Human|Orange County Public Health Laboratory|Chan-Zuckerberg Biohub|McGeever|USA

>Spike|hCoV-19/Scotland/CVR5352/2020|2020-10-26|EPI\_ISL\_651773|Original|hCoV-19^^Scotland|Human|West of Scotland Specialist Virology Centre|COVID-19 Genomics UK (COG-UK) Consortium|Robertson|United Kingdom

>Spike|hCoV-19/USA/TX-HMH-5868/2020|2020-06-28|EPI\_ISL\_547075|Original|hCoV-19^^Texas|Human|Houston Methodist Hospital|Houston Methodist Hospital|Long|USA

>Spike|hCoV-19/Finland/11CH4/2020|2020-10-31|EPI\_ISL\_732573|Original|hCoV-19^^Uusimaa|Human|Department of Virology and Immunology|Department of Virology|Smura|Finland

>Spike|hCoV-19/England/20100122106/2020|2020-03-02|EPI\_ISL\_415142|Original|hCoV-19^^England|Human|Respiratory Virus Unit|Respiratory Virus Unit|Platt|United Kingdom

>Spike|hCoV-19/United Arab Emirates/0018/2020|2020-05-07|EPI\_ISL\_698228|Original|hCoV-19^^Abu Dhabi|Human|Group 42 (G42) Healthcare|G42 Healthcare|Ogrodzki|United Arab Emirates

>Spike|hCoV-19/India/TG-CCMB-AB229/2020|2020-08-14|EPI\_ISL\_539764|Original|hCoV-19^^Telangana|Human|CSIR-Centre for Cellular and Molecular Biology|CSIR-Centre for Cellular and Molecular Biology|Mukherjee|India

>Spike|hCoV-19/England/ALDP-B74B74/2020|2020-11-12|EPI\_ISL\_678978|Original|hCoV-19^^England|Human|Queens Medical Centre|COVID-19 Genomics UK (COG-UK) Consortium|Loose|United Kingdom

>Spike|hCoV-19/England/ALDP-B5B28D/2020|2020-11-08|EPI\_ISL\_655482|Original|hCoV-19^^England|Human|Lighthouse Lab in Alderley Park|Wellcome Sanger Institute for the COVID-19 Genomics UK (COG-UK) Consortium|Davies|United Kingdom

>Spike|hCoV-19/Wales/PHWC-484E9D/2020|2020-10-24|EPI\_ISL\_628123|Original|hCoV-19^^Wales|Human|Wales Specialist Virology Centre Sequencing lab|COVID-19 Genomics UK (COG-UK) Consortium|Moore|United Kingdom

>Spike|hCoV-19/Wales/PHWC-1639C3/2020|2020-05-10|EPI\_ISL\_474024|Original|hCoV-19^^Wales|Human|Originating lab|COVID-19 Genomics UK (COG-UK) Consortium|Moore|United Kingdom

>Spike|hCoV-19/Finland/23LS17B5/2020|2020-10-23|EPI\_ISL\_759768|Original|hCoV-19^^Uusimaa|Human|Department of Virology and Immunology|Department of Virology|Smura|Finland

>Spike|hCoV-19/Russia/AST-RII-MH4458S/2020|2020-08-15|EPI\_ISL\_733199|Original|hCoV-19^^Astrakhan|Human|Pathogenic Microorganisms Variability Laboratory|WHO National Influenza Centre Russian Federation|Komissarov|Russia

>Spike|hCoV-19/Australia/VIC3431/2020|2020-07-13|EPI\_ISL\_521101|Original|hCoV-19^^Victoria|Human|Microbiological Diagnostic Unit - Public Health Laboratory (MDU-PHL)|MDU-PHL|Schultz|Australia

>Spike|hCoV-19/Spain/MD-IBV-99008499/2020|2020-09-10|EPI\_ISL\_654068|Original|hCoV-19^^Madrid|Human|Hospital General Universitario Gregorio Mara\u00f1a|SeqCOVID-SPAIN consortium/IBV (CSIC)|Comas|Spain

>Spike|hCoV-19/USA/TX-DSHS-0903/2020|2020-06-16|EPI\_ISL\_610039|Original|hCoV-19^^Texas|Human|Texas Department of State Health Services|Texas Department of State Health Services|Rahman|USA

>Spike|hCoV-19/England/MILK-93F2BE/2020|2020-06-21|EPI\_ISL\_552990|Original|hCoV-19^^England|Human|Lighthouse Lab in Milton Keynes|Wellcome Sanger Institute for the COVID-19 Genomics UK (COG-UK) consortium|Davies|United Kingdom

>Spike|hCoV-19/England/ALDP-A2F6E1/2020|2020-10-05|EPI\_ISL\_587206|Original|hCoV-19^^England|Human|Lighthouse Lab in Alderley Park|Wellcome Sanger Institute for the COVID-19 Genomics UK (COG-UK) consortium|Davies|United Kingdom

>Spike|hCoV-19/England/SHEF-C7D68/2020|2020-11-23|EPI\_ISL\_680148|Original|hCoV-19^^England|Human|Virology Department|COVID-19 Genomics UK (COG-UK) Consortium|de Silva|United Kingdom

>Spike|hCoV-19/USA/NY-NYUMC198/2020|2020-04-01|EPI\_ISL\_427493|Original|hCoV-19^^New York|Human|NYU Langone Health|Departments of Pathology and Medicine|Maurano|USA

>Spike|hCoV-19/USA/WA-S2050/2020|2020-06-05|EPI\_ISL\_497478|Original|hCoV-19^^Washington|Human|Washington State Department of Health|Seattle Flu Study|Lee|USA

>Spike|hCoV-19/France/PAC-IHU-0064/2020|2020-03-19|EPI\_ISL\_569283|Original|hCoV-19^^Provence-Alpes-C\u00f4te-d\u2019Azur|Human|MEPHI|MEPHI|Levasseur|France

>Spike|hCoV-19/Japan/PG-7548/2020|2020-08-00|EPI\_ISL\_686650|Original|hCoV-19^^Japan|Human|Pathogen Genomics Center|Pathogen Genomics Center|Sekizuka|Japan

>Spike|hCoV-19/USA/MI-MDHHS-SC21206/2020|2020-04-01|EPI\_ISL\_507463|Original|hCoV-19^^Michigan|Human|Michigan Department of Health and Human Services|Michigan Department of Health and Human Services|Blankenship|USA

>Spike|hCoV-19/England/MILK-9EE53D/2020|2020-09-23|EPI\_ISL\_580642|Original|hCoV-19^^England|Human|Lighthouse Lab in Milton Keynes|Wellcome Sanger Institute for the COVID-19 Genomics UK (COG-UK) consortium|Davies|United Kingdom

>Spike|hCoV-19/USA/CA-CZB-1271/2020|2020-03-19|EPI\_ISL\_454608|Original|hCoV-19^^California|Human|Alameda County Public Health Lab|Chan-Zuckerberg Biohub|Hao|USA

>Spike|hCoV-19/Denmark/DCGC-17807/2020|2020-12-14|EPI\_ISL\_749579|Original|hCoV-19^^Sjælland|Human|Department of Virus and Microbiological Special Diagnostics|Albertsen Lab|Michaelsen|Denmark

>Spike|hCoV-19/England/ALDP-AA3937/2020|2020-10-22|EPI\_ISL\_630849|Original|hCoV-19^^England|Human|Lighthouse Lab in Alderley Park|Wellcome Sanger Institute for the COVID-19 Genomics UK (COG-UK) consortium|Davies|United Kingdom

>Spike|hCoV-19/England/CAMC-AEAFE7/2020|2020-10-25|EPI\_ISL\_633313|Original|hCoV-19^^England|Human|Lighthouse Lab in Cambridge|Wellcome Sanger Institute for the COVID-19 Genomics UK (COG-UK) consortium|Davies|United Kingdom

>Spike|hCoV-19/USA/NM-DOH-2020617173/2020|2020-12-11|EPI\_ISL\_751845|Original|hCoV-19^^New Mexico|Human|New Mexico Department of Health Scientific Laboratory|New Mexico Department of Health Scientific Laboratory|Malone|USA

>Spike|hCoV-19/England/MILK-A05890/2020|2020-10-01|EPI\_ISL\_599822|Original|hCoV-19^^England|Human|Lighthouse Lab in Milton Keynes|Wellcome Sanger Institute for the COVID-19 Genomics UK (COG-UK) consortium|Davies|United Kingdom

>Spike|hCoV-19/Lithuania/MR-LUHS-Eilnr69/2020|2020-04-13|EPI\_ISL\_603098|Original|hCoV-19^^Marijampoles apskritis|Human|Lithuanian

University of Health Sciences Hospital|Lithuanian University of Health Sciences|Zemaitis|Lithuania

>Spike|hCoV-19/England/MILK-956952/2020|2020-06-07|EPI\_ISL\_554267|Original|hCoV-19^^England|Human|Lighthouse Lab in Milton Keynes|Wellcome Sanger Institute for the COVID-19 Genomics UK (COG-UK) consortium|Davies|United Kingdom

>Spike|hCoV-19/England/ALDP-AA3BF5/2020|2020-10-22|EPI\_ISL\_624546|Original|hCoV-19^^England|Human|Lighthouse Lab in Alderley Park|Wellcome Sanger Institute for the COVID-19 Genomics UK (COG-UK) consortium|Davies|United Kingdom

>Spike|hCoV-19/England/MILK-58FF34/2020|2020-06-11|EPI\_ISL\_558254|Original|hCoV-19^^England|Human|Lighthouse Lab in Milton Keynes|Wellcome Sanger Institute for the COVID-19 Genomics UK (COG-UK) consortium|Davies|United Kingdom

>Spike|hCoV-19/United Arab Emirates/0889/2020|2020-06-25|EPI\_ISL\_699027|Original|hCoV-19^^Abu Dhabi|Human|Group 42 (G42) Healthcare|G42 Healthcare|Ogrodzki|United Arab Emirates

>Spike|hCoV-19/England/QEUEH-C4B726/2020|2020-12-13|EPI\_ISL\_769703|Original|hCoV-19^^England|Human|Lighthouse Lab in Glasgow|Wellcome Sanger Institute for the COVID-19 Genomics UK (COG-UK) Consortium|Davies|United Kingdom

>Spike|hCoV-19/Wales/PHWC-35785/2020|2020-04-25|EPI\_ISL\_474472|Original|hCoV-19^^Wales|Human|Originating lab|COVID-19 Genomics UK (COG-UK) Consortium|Moore|United Kingdom

>Spike|hCoV-19/England/ALDP-956433/2020|2020-06-08|EPI\_ISL\_553991|Original|hCoV-19^^England|Human|Lighthouse Lab in Alderley Park|Wellcome Sanger Institute for the COVID-19 Genomics UK (COG-UK) consortium|Davies|United Kingdom

>Spike|hCoV-19/England/ALDP-94DC73/2020|2020-06-19|EPI\_ISL\_555186|Original|hCoV-19^^England|Human|Lighthouse Lab in Alderley Park|Wellcome Sanger Institute for the COVID-19 Genomics UK (COG-UK) consortium|Davies|United Kingdom

>Spike|hCoV-19/USA/CA-ALSR-2966/2020|2020-09-01|EPI\_ISL\_635756|Original|hCoV-19^^California|Human|San Diego County Public Health Laboratory|Andersen lab at Scripps Research|Gangavarapu|USA

>Spike|hCoV-19/England/QEUEH-95EE79/2020|2020-08-06|EPI\_ISL\_532418|Original|hCoV-19^^England|Human|Lighthouse Lab in Glasgow|Wellcome Sanger Institute for the COVID-19 Genomics UK (COG-UK) consortium|Davies|United Kingdom

>Spike|hCoV-19/Scotland/QEUEH-B7DE54/2020|2020-11-12|EPI\_ISL\_742253|Original|hCoV-19^^Scotland|Human|Oxford Viromics|COVID-19 Genomics UK (COG-UK) Consortium|Golubchik|United Kingdom

>Spike|hCoV-19/Wales/PHWC-48F876/2020|2020-11-10|EPI\_ISL\_681149|Original|hCoV-19^^Wales|Human|Wales Specialist Virology Centre Sequencing lab|COVID-19 Genomics UK (COG-UK) Consortium|Moore|United Kingdom

>Spike|hCoV-19/Netherlands/ZuidHolland\_204/2020|2020-05-04|EPI\_ISL\_461376|Original|hCoV-19^^Zuid Holland|Human|Dutch COVID-19 response team|Erasmus Medical Center|Oude Munnink|Netherlands

>Spike|hCoV-19/Wales/PHWC-26B4F/2020|2020-03-29|EPI\_ISL\_422186|Original|hCoV-19^^Wales|Human|Wales Specialist Virology Centre|Public Health Wales Microbiology Cardiff|Moore|United Kingdom

>Spike|hCoV-19/USA/VA-DCLS-0883/2020|2020-04-30|EPI\_ISL\_516673|Original|hCoV-19^^Virginia|Human|Virginia DCLS|Virginia DCLS|St. Jacques|USA

>Spike|hCoV-19/USA/CA-ALSR-1587/2020|2020-04-27|EPI\_ISL\_494675|Original|hCoV-19^^California|Human|Scripps Medical Laboratory|Andersen lab at Scripps Research|Gangavarapu|USA

>Spike|hCoV-19/USA/MI-UM-10033798803/2020|2020-03-28|EPI\_ISL\_578093|Original|hCoV-19^^Michigan|Human|University of Michigan Clinical Microbiology Laboratory|Lauring Lab|Valesano|USA

>Spike|hCoV-19/USA/WA-S2588/2020|2020-06-18|EPI\_ISL\_497220|Original|hCoV-19^^Washington|Human|Washington State Department of Health|Seattle Flu Study|Lee|USA

>Spike|hCoV-19/England/ALDP-B4667A/2020|2020-11-07|EPI\_ISL\_656139|Original|hCoV-19^^England|Human|Lighthouse Lab in Alderley Park|Wellcome Sanger Institute for the COVID-19 Genomics UK (COG-UK) Consortium|Davies|United Kingdom

>Spike|hCoV-19/Scotland/CVR3448/2020|2020-05-09|EPI\_ISL\_456856|Original|hCoV-19^^Scotland|Human|West of Scotland Specialist Virology Centre|COVID-19 Genomics UK (COG-UK) Consortium|Robertson|United Kingdom



>Spike|hCoV-19/Wales/PHWC-4A3B19/2020|2020-12-13|EPI\_ISL\_764234|Original|hCoV-19^^Wales|Human|Wales Specialist Virology Centre Sequencing lab|COVID-19 Genomics UK (COG-UK) Consortium|Moore|United Kingdom

>Spike|hCoV-19/Luxembourg/LNS3188133/2020|2020-12-24|EPI\_ISL\_771088|Original|hCoV-19^^Luxembourg|Human|Laboratoire national de sant\u00e9|Laboratoire national de sant\u00e9|Wienecke-Baldacchino|Luxembourg

>Spike|hCoV-19/USA/NY-Wadsworth-251314-01/2020|2020-10-20|EPI\_ISL\_734385|Original|hCoV-19^^New York|Human|Wadsworth Center|Wadsworth Center|Lasek-Nesselquist|USA

>Spike|hCoV-19/Denmark/DCGC-17888/2020|2020-12-14|EPI\_ISL\_749624|Original|hCoV-19^^Sjaelland|Human|Department of Virus and Microbiological Special Diagnostics|Albertsen Lab|Michaelsen|Denmark

>Spike|hCoV-19/USA/WA-S1717/2020|2020-06-01|EPI\_ISL\_496143|Original|hCoV-19^^Washington|Human|Washington State Department of Health|Seattle Flu Study|Lee|USA

>Spike|hCoV-19/England/CAMB-81201/2020|2020-04-10|EPI\_ISL\_442989|Original|hCoV-19^^England|Human|Department of Pathology|Wellcome Sanger Institute for the COVID-19 Genomics UK (COG-UK) consortium|Amato|United Kingdom

>Spike|hCoV-19/England/ALDP-9CCD4C/2020|2020-09-16|EPI\_ISL\_566362|Original|hCoV-19^^England|Human|Lighthouse Lab in Alderley Park|Wellcome Sanger Institute for the COVID-19 Genomics UK (COG-UK) consortium|Davies|United Kingdom

>Spike|hCoV-19/USA/TX-HMH-MCoV-14419/2020|2020-10-07|EPI\_ISL\_787704|Original|hCoV-19^^Texas|Human|Houston Methodist Hospital|Houston Methodist Hospital|Long|USA

>Spike|hCoV-19/USA/WA-S206/2020|2020-03-20|EPI\_ISL\_430244|Original|hCoV-19^^Washington|Human|Washington State Department of Health|Seattle Flu Study|Bedford|USA

>Spike|hCoV-19/Australia/VIC854/2020|2020-04-04|EPI\_ISL\_427114|Original|hCoV-19^^Victoria|Human|Victorian Infectious Diseases Reference Laboratory (VIDRL)|Microbiological Diagnostic Unit Public Health Laboratory and Victorian Infectious Diseases Reference Laboratory|Schultz|Australia

>Spike|hCoV-19/Gibraltar/205000664/2020|2020-12-00|EPI\_ISL\_709954|Original|hCoV-19^^Gibraltar|Human|Microbiology|Respiratory Virus Unit|Platt|Gibraltar

>Spike|hCoV-19/Denmark/DCGC-14642/2020|2020-11-23|EPI\_ISL\_711887|Original|hCoV-19^^Hovedstaden|Human|Department of Virus and Microbiological Special Diagnostics|Albertsen Lab|Michaelsen|Denmark

>Spike|hCoV-19/England/ALDP-94C4A9/2020|2020-06-15|EPI\_ISL\_555853|Original|hCoV-19^^England|Human|Lighthouse Lab in Alderley Park|Wellcome Sanger Institute for the COVID-19 Genomics UK (COG-UK) consortium|Davies|United Kingdom

>Spike|hCoV-19/Japan/PG-6853/2020|2020-09-00|EPI\_ISL\_687961|Original|hCoV-19^^Japan|Human|Pathogen Genomics Center|Pathogen Genomics Center|Sekizuka|Japan

>Spike|hCoV-19/England/MILK-B39373/2020|2020-11-01|EPI\_ISL\_659065|Original|hCoV-19^^England|Human|Lighthouse Lab in Milton Keynes|Wellcome Sanger Institute for the COVID-19 Genomics UK (COG-UK) Consortium|Davies|United Kingdom

>Spike|hCoV-19/Australia/NSW976/2020|2020-09-12|EPI\_ISL\_545048|Original|hCoV-19^^New South Wales|Human|South Eastern Area Laboratory Services (SEALS)|NSW Health Pathology - Institute of Clinical Pathology and Medical Research; Westmead Hospital; University of Sydney|Gall|Australia

>Spike|hCoV-19/USA/TX-HMH-MCoV-8600/2020|2020-07-01|EPI\_ISL\_780645|Original|hCoV-19^^Texas|Human|Houston Methodist Hospital|Houston Methodist Hospital|Long|USA

>Spike|hCoV-19/USA/WI-UW-51/2020|2020-03-20|EPI\_ISL\_421309|Original|hCoV-19^^Wisconsin|Human|University of Wisconsin-Madison AIDS Vaccine Research Laboratories|University of Wisconsin-Madison AIDS Vaccine Research Laboratories|Baczenas|USA

>Spike|hCoV-19/Spain/CT-IBV-005629/2020|2020-04-24|EPI\_ISL\_508662|Original|hCoV-19^^Catalunya|Human|Departamento de Microbiolog\u00eda|SeqCOVID-SPAIN consortium|IBV (CSIC)|Comas|Spain

>Spike|hCoV-19/England/QEUH-A8A884/2020|2020-10-16|EPI\_ISL\_638854|Original|hCoV-19^^England|Human|Oxford Viromics|COVID-19 Genomics UK (COG-UK) Consortium|Golubchik|United Kingdom

>Spike|hCoV-19/Denmark/DCGC-11319/2020|2020-11-02|EPI\_ISL\_670836|Original|hCoV-19^^Sjaelland|Human|Department of Virus and Microbiological Special Diagnostics|Albertsen Lab|Michaelsen|Denmark

>Spike|hCoV-19/England/MILK-BAC41E/2020|2020-11-18|EPI\_ISL\_720402|Original|hCoV-19^^England|Human|Lighthouse Lab in Milton Keynes|Wellcome Sanger Institute for the COVID-19 Genomics UK (COG-UK) Consortium|Davies|United Kingdom

>Spike|hCoV-19/England/CAMB-1AD70F/2020|2020-05-01|EPI\_ISL\_447999|Original|hCoV-19^^England|Human|Department of Pathology|COVID-19 Genomics UK (COG-UK) Consortium|Meredith|United Kingdom

>Spike|hCoV-19/Japan/PG-7935/2020|2020-07-00|EPI\_ISL\_687036|Original|hCoV-19^^Japan|Human|Pathogen Genomics Center|Pathogen Genomics Center|Sekizuka|Japan

>Spike|hCoV-19/England/QEUEH-9FFC9E/2020|2020-09-30|EPI\_ISL\_600217|Original|hCoV-19^^England|Human|Lighthouse Lab in Glasgow|Wellcome Sanger Institute for the COVID-19 Genomics UK (COG-UK) consortium|Davies|United Kingdom

>Spike|hCoV-19/England/ALDP-CEC2F9/2020|2020-12-21|EPI\_ISL\_782211|Original|hCoV-19^^England|Human|Lighthouse Lab in Alderley Park|Wellcome Sanger Institute for the COVID-19 Genomics UK (COG-UK) Consortium|Davies|United Kingdom

>Spike|hCoV-19/USA/CA-QDX-1926/2020|2020-03-16|EPI\_ISL\_604206|Original|hCoV-19^^California|Human|Quest Diagnostics|Quest Diagnostics|Kagan|USA

>Spike|hCoV-19/Japan/PG-7348/2020|2020-08-00|EPI\_ISL\_688450|Original|hCoV-19^^Japan|Human|Pathogen Genomics Center|Pathogen Genomics Center|Sekizuka|Japan

>Spike|hCoV-19/England/QEUEH-B67F96/2020|2020-11-11|EPI\_ISL\_662221|Original|hCoV-19^^England|Human|Lighthouse Lab in Glasgow|Wellcome Sanger Institute for the COVID-19 Genomics UK (COG-UK) Consortium|Davies|United Kingdom

>Spike|hCoV-19/England/ALDP-A85FEE/2020|2020-10-17|EPI\_ISL\_610503|Original|hCoV-19^^England|Human|Lighthouse Lab in Alderley Park|Wellcome Sanger Institute for the COVID-19 Genomics UK (COG-UK) Consortium|Davies|United Kingdom

>Spike|hCoV-19/Wales/PHWC-2B2EB/2020|2020-04-07|EPI\_ISL\_432315|Original|hCoV-19^^Wales|Human|Wales Specialist Virology Centre|Public Health Wales Microbiology Cardiff|Moore|United Kingdom

>Spike|hCoV-19/England/QEUEH-7897D6/2020|2020-07-15|EPI\_ISL\_533123|Original|hCoV-19^^England|Human|Lighthouse Lab in Glasgow|Wellcome Sanger Institute for the COVID-19 Genomics UK (COG-UK) consortium|Davies|United Kingdom

>Spike|hCoV-19/Denmark/DCGC-19774/2020|2020-12-07|EPI\_ISL\_747779|Original|hCoV-19^^Hovedstaden|Human|Department of Virus and Microbiological Special Diagnostics|Albertsen Lab|Michaelsen|Denmark

>Spike|hCoV-19/England/CAMB-1B981C/2020|2020-11-05|EPI\_ISL\_679142|Original|hCoV-19^^England|Human|Department of Pathology|COVID-19 Genomics UK (COG-UK) Consortium|Goodfellow|United Kingdom

>Spike|hCoV-19/Wales/PHWC-486A4C/2020|2020-10-27|EPI\_ISL\_639102|Original|hCoV-19^^Wales|Human|Wales Specialist Virology Centre Sequencing lab|COVID-19 Genomics UK (COG-UK) Consortium|Moore|United Kingdom

>Spike|hCoV-19/England/CAMC-B54187/2020|2020-11-08|EPI\_ISL\_656851|Original|hCoV-19^^England|Human|Lighthouse Lab in Cambridge|Wellcome Sanger Institute for the COVID-19 Genomics UK (COG-UK) Consortium|Davies|United Kingdom

>Spike|hCoV-19/South Africa/KRISP-K001123/2020|2020-07-15|EPI\_ISL\_509366|Original|hCoV-19^^KwaZulu-Natal|Human|NHLS-IALCH|KRISP|de Oliveira|South Africa

>Spike|hCoV-19/England/QEUEH-9F8D0B/2020|2020-09-27|EPI\_ISL\_588950|Original|hCoV-19^^England|Human|Lighthouse Lab in Glasgow|Wellcome Sanger Institute for the COVID-19 Genomics UK (COG-UK) consortium|Davies|United Kingdom

>Spike|hCoV-19/England/QEUEH-96F130/2020|2020-08-16|EPI\_ISL\_530425|Original|hCoV-19^^England|Human|Lighthouse Lab in Glasgow|Wellcome Sanger Institute for the COVID-19 Genomics UK (COG-UK) consortium|Davies|United Kingdom

>Spike|hCoV-19/USA/UT-UPHL-2012514374/2020|2020-06-18|EPI\_ISL\_746393|Original|hCoV-19^^Utah|Human|Utah Public Health Laboratory|Utah Public Health Laboratory|Gallagher|USA

>Spike|hCoV-19/Spain/CL-IBV-97006328/2020|2020-05-08|EPI\_ISL\_537684|Original|hCoV-19^^Castilla y Leon|Human|Universidad de Le\u00f3n|SeqCOVID-SPAIN consortium/IBV (CSIC) |Comas|Spain

>Spike|hCoV-19/England/BRIS-128F31/2020|2020-04-18|EPI\_ISL\_458757|Original|hCoV-19^^England|Human|PHE South West Regional Laboratory|Wellcome Sanger Institute for the COVID-19 Genomics UK (COG-UK) consortium|Davies|United Kingdom

>Spike|hCoV-19/USA/MN-MDH-317/2020|2020-03-30|EPI\_ISL\_450775|Original|hCoV-19^^Minnesota|Human|Minnesota Department of Health|Minnesota Department of Health|Garfin|USA

>Spike|hCoV-19/Scotland/EDB7983/2020|2020-09-28|EPI\_ISL\_585463|Original|hCoV-19^^Scotland|Human|Virology Department|COVID-19 Genomics UK (COG-UK) Consortium|McHugh|United Kingdom

>Spike|hCoV-19/USA/TX-HMH-MCoV-13793/2020|2020-08-18|EPI\_ISL\_788886|Original|hCoV-19^^Texas|Human|Houston Methodist Hospital|Houston Methodist Hospital|Long|USA

>Spike|hCoV-19/England/CAMC-B54406/2020|2020-11-08|EPI\_ISL\_656902|Original|hCoV-19^^England|Human|Lighthouse Lab in Cambridge|Wellcome Sanger Institute for the COVID-19 Genomics UK (COG-UK) Consortium|Davies|United Kingdom

>Spike|hCoV-19/Wales/PHWC-480963/2020|2020-10-22|EPI\_ISL\_612953|Original|hCoV-19^^Wales|Human|Wales Specialist Virology Centre Sequencing lab|COVID-19 Genomics UK (COG-UK) Consortium|Moore|United Kingdom

>Spike|hCoV-19/USA/TX-HMH-MCoV-15475/2020|2020-10-23|EPI\_ISL\_786959|Original|hCoV-19^^Texas|Human|Houston Methodist Hospital|Houston Methodist Hospital|Long|USA

>Spike|hCoV-19/Australia/ACT0010/2020|2020-03-25|EPI\_ISL\_498477|Original|hCoV-19^^Australian Capital Territory|Human|ACT Pathology|Schwessinger Lab|Hall|Australia

>Spike|hCoV-19/Scotland/EDB10622/2020|2020-12-01|EPI\_ISL\_705786|Original|hCoV-19^^Scotland|Human|Virology Department|COVID-19 Genomics UK (COG-UK) Consortium|McHugh|United Kingdom

>Spike|hCoV-19/USA/WA-UW-10213/2020|2020-05-31|EPI\_ISL\_570280|Original|hCoV-19^^Washington|Human|UW Virology Lab|UW Virology Lab|Roychoudhury|USA

>Spike|hCoV-19/England/SHEF-C930A/2020|2020-04-24|EPI\_ISL\_457634|Original|hCoV-19^^England|Human|Virology Department|COVID-19 Genomics UK (COG-UK) Consortium|de Silva|United Kingdom

>Spike|hCoV-19/USA/WI-UW-183/2020|2020-03-22|EPI\_ISL\_428279|Original|hCoV-19^^Wisconsin|Human|University of Wisconsin-Madison AIDS Vaccine Research Laboratories|University of Wisconsin-Madison AIDS Vaccine Research Laboratories|Moreno|USA

>Spike|hCoV-19/Israel/n14287/2020|2020-04-03|EPI\_ISL\_483714|Original|hCoV-19^^Kfar Saba|Human|Israel Central Virology laboratory|Israel Central Virology laboratory|Zuckerman|Israel

>Spike|hCoV-19/England/NORW-21F734/2020|2020-12-07|EPI\_ISL\_725044|Original|hCoV-19^^England|Human|Quadram Institute Bioscience|COVID-19 Genomics UK (COG-UK) Consortium|Alikhan|United Kingdom

>Spike|hCoV-19/England/NOTT-11F173/2020|2020-11-23|EPI\_ISL\_679946|Original|hCoV-19^^England|Human|Lincolnshire Hospitals and DeepSeq Nottingham|COVID-19 Genomics UK (COG-UK) Consortium|Loose|United Kingdom

>Spike|hCoV-19/France/OCC-119/2020|2020-09-12|EPI\_ISL\_671964|Original|hCoV-19^^Occitanie|Human|CHU Purpan - Laboratoire de Virologie - Institut F\u00e9d\u00e9ratif de Biologie|CHU Purpan - Laboratoire de Virologie - Institut F\u00e9d\u00e9ratif de Biologie|Latour|France

>Spike|hCoV-19/Wales/PHWC-4A152C/2020|2020-12-10|EPI\_ISL\_743686|Original|hCoV-19^^Wales|Human|Wales Specialist Virology Centre Sequencing lab|COVID-19 Genomics UK (COG-UK) Consortium|Moore|United Kingdom

>Spike|hCoV-19/Ireland/KE-NVRL-73IRL55350/2020|2020-09-11|EPI\_ISL\_596890|Original|hCoV-19^^Kildare|Human|National Virus Reference Laboratory|National Virus Reference Laboratory|Gonzalez|Ireland

>Spike|hCoV-19/England/MILK-ACC75C/2020|2020-10-21|EPI\_ISL\_629418|Original|hCoV-19^^England|Human|Lighthouse Lab in Milton Keynes|Wellcome Sanger Institute for the COVID-19 Genomics UK (COG-UK) consortium|Davies|United Kingdom

>Spike|hCoV-19/Wales/PHWC-36274/2020|2020-04-29|EPI\_ISL\_474643|Original|hCoV-19^^Wales|Human|Originating lab|COVID-19 Genomics UK (COG-UK) Consortium|Moore|United Kingdom

>Spike|hCoV-19/USA/MA-MGH-00683/2020|2020-03-21|EPI\_ISL\_460146|Original|hCoV-19^^Massachusetts|Human|Massachusetts General Hospital|Infectious Disease Program|Lemieux|USA

>Spike|hCoV-19/England/NORW-EC8B7/2020|2020-05-17|EPI\_ISL\_457569|Original|hCoV-19^^England|Human|Quadram Institute Bioscience|COVID-19 Genomics UK (COG-UK) Consortium|Alikhan|United Kingdom

>Spike|hCoV-19/England/ALDP-B74400/2020|2020-11-12|EPI\_ISL\_664838|Original|hCoV-19^^England|Human|Quadram Institute Bioscience|COVID-19 Genomics UK (COG-UK) Consortium|Alikhan|United Kingdom

>Spike|hCoV-19/Denmark/DCGC-16894/2020|2020-12-14|EPI\_ISL\_750627|Original|hCoV-19^^Midtjylland|Human|Department of Virus and Microbiological Special Diagnostics|Albertsen Lab|Michaelsen|Denmark

>Spike|hCoV-19/England/PORT-2D754D/2020|2020-10-27|EPI\_ISL\_650248|Original|hCoV-19^^England|Human|Centre for Enzyme Innovation|COVID-19 Genomics UK (COG-UK) Consortium|Robson|United Kingdom

>Spike|hCoV-19/England/201080064/2020|2020-03-03|EPI\_ISL\_464452|Original|hCoV-19^^England|Human|Respiratory Virus Unit|Respiratory Virus Unit|Platt|United Kingdom

>Spike|hCoV-19/Australia/VIC16996/2020|2020-08-07|EPI\_ISL\_663676|Original|hCoV-19^^Victoria|Human|Microbiological Diagnostic Unit - Public Health Laboratory (MDU-PHL)|MDU-PHL|Schultz|Australia

>Spike|hCoV-19/Germany/BE-ChVir-D1942-4496/2020|2020-10-02|EPI\_ISL\_753878|Original|hCoV-19^^Berlin|Human|Charit\u00e9 Universit\u00e4tsmedizin Berlin|Charit\u00e9 Universit\u00e4tsmedizin Berlin|Muehlemann|Germany

>Spike|hCoV-19/USA/CA-IGI-0118/2020|2020-06-19|EPI\_ISL\_495140|Original|hCoV-19^^California|Human|Innovative Genomics Institute|Innovative Genomics Institute|Shivram|USA

>Spike|hCoV-19/Germany/BE-ChVir-W1652-8241/2020|2020-07-20|EPI\_ISL\_753983|Original|hCoV-19^^Berlin|Human|Charit\u00e9 Universit\u00e4tsmedizin Berlin|Charit\u00e9 Universit\u00e4tsmedizin Berlin|Muehlemann|Germany

>Spike|hCoV-19/England/MILK-B55FB9/2020|2020-11-04|EPI\_ISL\_658391|Original|hCoV-19^^England|Human|Lighthouse Lab in Milton Keynes|Wellcome Sanger Institute for the COVID-19 Genomics UK (COG-UK) Consortium|Davies|United Kingdom

>Spike|hCoV-19/USA/LA-EVTL1206/2020|2020-12-14|EPI\_ISL\_768475|Original|hCoV-19^^Louisiana|Human|LSUHS Emerging Viral Threat Laboratory|Microbial Genome Sequencing Center|Kamil|USA

>Spike|hCoV-19/Switzerland/ZH-ETHZ-350178/2020|2020-11-04|EPI\_ISL\_693829|Original|hCoV-19^^Zurich|Human|Viollier AG|Department of Biosystems Science and Engineering|Nadeau|Switzerland

>Spike|hCoV-19/USA/WI-WSLH-200045/2020|2020-03-30|EPI\_ISL\_471210|Original|hCoV-19^^Wisconsin|Human|Wisconsin State Laboratory of Hygiene Communicable Disease Division|Wisconsin State Laboratory of Hygiene Communicable Disease Division|Florek|USA

>Spike|hCoV-19/England/ALDP-8FB3DA/2020|2020-06-24|EPI\_ISL\_551405|Original|hCoV-19^^England|Human|Lighthouse Lab in Alderley Park|Wellcome Sanger Institute for the COVID-19 Genomics UK (COG-UK) consortium|Davies|United Kingdom

>Spike|hCoV-19/Denmark/DCGC-16621/2020|2020-11-16|EPI\_ISL\_714168|Original|hCoV-19^^Hovedstaden|Human|Department of Virus and Microbiological Special Diagnostics|Albertsen Lab|Michaelsen|Denmark

>Spike|hCoV-19/England/LIVE-DC187F/2020|2020-11-19|EPI\_ISL\_704973|Original|hCoV-19^^England|Human|Liverpool Clinical Laboratories|COVID-19 Genomics UK (COG-UK) Consortium|Haldenby|United Kingdom

>Spike|hCoV-19/Singapore/763/2020|2020-06-19|EPI\_ISL\_509373|Original|hCoV-19^^Singapore|Human|Singapore General Hospital|Department of Microbiology|Abdul Rahman|Singapore

>Spike|hCoV-19/Indonesia/JB-TFRIC19-R49542/2020|2020-07-25|EPI\_ISL\_528750|Original|hCoV-19^^West Java|Human|Santo Borromeus Hospital|School of Life Sciences and Technology & School of Pharmacy-Institut Teknologi Bandung;

Molecular Genetics Laboratory-Faculty of Medicine-Universitas Padjadjaran;  
Laboratorium Kesehatan Provinsi Jawa Barat|Tan|Indonesia  
>Spike|hCoV-19/USA/CA-CZB-15411/2020|2020-12-02|EPI\_ISL\_738624|Original|hCoV-19^^California|Human|Orange County Public Health Lab|Chan-Zuckerberg Biohub|Kamm|USA  
>Spike|hCoV-19/Australia/VIC4983/2020|2020-07-13|EPI\_ISL\_519787|Original|hCoV-19^^Victoria|Human|Microbiological Diagnostic Unit - Public Health Laboratory (MDU-PHL)|MDU-PHL|Schultz|Australia  
>Spike|hCoV-19/Switzerland/SG-ETHZ-380372/2020|2020-11-22|EPI\_ISL\_721844|Original|hCoV-19^^St Gallen|Human|Viollier AG|Department of Biosystems Science and Engineering|Nadeau|Switzerland  
>Spike|hCoV-19/USA/UT-UPHL-2012475809/2020|2020-07-25|EPI\_ISL\_745680|Original|hCoV-19^^Utah|Human|Ginkgo Bioworks Clinical Laboratory|Utah Public Health Laboratory|Young|USA  
>Spike|hCoV-19/Denmark/DCGC-7701/2020|2020-10-19|EPI\_ISL\_618589|Original|hCoV-19^^Midtjylland|Human|Department of Virus and Microbiological Special Diagnostics|Albertsen lab|Michaelsen|Denmark  
>Spike|hCoV-19/USA/LA-EVTL601/2020|2020-06-30|EPI\_ISL\_579005|Original|hCoV-19^^Louisiana|Human|LSUHS Emerging Viral Threat Laboratory|Microbial Genome Sequencing Center|Kamil|USA  
>Spike|hCoV-19/Scotland/EDB125/2020|2020-03-23|EPI\_ISL\_425907|Original|hCoV-19^^Scotland|Human|Virology Department|COVID-19 Genomics UK (COG-UK) Consortium|Williams|United Kingdom  
>Spike|hCoV-19/France/ARA-SC406/2020|2020-04-21|EPI\_ISL\_660365|Original|hCoV-19^^Auvergne-Rh\u00f4ne-Alpes|Human|CHU Clermont-Ferrand|CNR Virus des Infections Respiratoires - France SUD|Bal|France  
>Spike|hCoV-19/USA/TX-HMH-6984/2020|2020-06-28|EPI\_ISL\_546408|Original|hCoV-19^^Texas|Human|Houston Methodist Hospital|Houston Methodist Hospital|Long|USA  
>Spike|hCoV-19/USA/AZ-TG618010/2020|2020-07-17|EPI\_ISL\_695666|Original|hCoV-19^^Arizona|Human|AZ SPHL|TGen North|French|USA  
>Spike|hCoV-19/Thailand/EID-1/2020|2020-11-09|EPI\_ISL\_635199|Original|hCoV-19^^Thailand|Human|Bamrasnaradura Infectious Disease Institute|Molecular HIV and Emerging Infectious Diseases Laboratory|Uttayamakul|Thailand  
>Spike|hCoV-19/England/QEUH-AE2D21/2020|2020-10-26|EPI\_ISL\_633561|Original|hCoV-19^^England|Human|Lighthouse Lab in Glasgow|Wellcome Sanger Institute for the COVID-19 Genomics UK (COG-UK) consortium|Davies|United Kingdom  
>Spike|hCoV-19/USA/UT-03816/2020|2020-04-03|EPI\_ISL\_470714|Original|hCoV-19^^Utah|Human|Utah Public Health Laboratory|Utah Public Health Laboratory|Young|USA  
>Spike|hCoV-19/USA/TX-HMH-3837/2020|2020-06-16|EPI\_ISL\_543240|Original|hCoV-19^^Texas|Human|Houston Methodist Hospital|Houston Methodist Hospital|Long|USA  
>Spike|hCoV-19/England/ALDP-9FDAD2/2020|2020-10-01|EPI\_ISL\_588012|Original|hCoV-19^^England|Human|Lighthouse Lab in Alderley Park|Wellcome Sanger Institute for the COVID-19 Genomics UK (COG-UK) consortium|Davies|United Kingdom  
>Spike|hCoV-19/Denmark/DCGC-7758/2020|2020-10-19|EPI\_ISL\_618669|Original|hCoV-19^^Hovedstaden|Human|Department of Virus and Microbiological Special Diagnostics|Albertsen lab|Michaelsen|Denmark  
>Spike|hCoV-19/USA/CO-CDPHE-2100036488/2020|2020-11-24|EPI\_ISL\_771342|Original|hCoV-19^^Colorado|Human|Colorado Department of Public Health and Environment|Colorado Department of Public Health and Environment|Bankers|USA  
>Spike|hCoV-19/Denmark/DCGC-3726/2020|2020-08-31|EPI\_ISL\_615506|Original|hCoV-19^^Midtjylland|Human|Department of Virus and Microbiological Special Diagnostics|Albertsen lab|Michaelsen|Denmark  
>Spike|hCoV-19/England/QEUH-96299F/2020|2020-08-10|EPI\_ISL\_531682|Original|hCoV-19^^England|Human|Lighthouse Lab in Glasgow|Wellcome Sanger Institute for the COVID-19 Genomics UK (COG-UK) consortium|Davies|United Kingdom  
>Spike|hCoV-19/USA/CA-CZB-14641/2020|2020-11-16|EPI\_ISL\_739625|Original|hCoV-19^^California|Human|Orange County Public Health Lab|Chan-Zuckerberg Biohub|Kamm|USA  
>Spike|hCoV-19/Singapore/1109/2020|2020-10-19|EPI\_ISL\_605818|Original|hCoV-19^^Singapore|Human|National Public Health Laboratory|National Public Health Laboratory|Mak|Singapore

>Spike|hCoV-19/Switzerland/BS-42398551/2020|2020-08-17|EPI\_ISL\_581966|Original|hCoV-19^^Basel-Stadt|Human|University Hospital Basel|University Hospital Basel|Roloff Handschin|Switzerland

>Spike|hCoV-19/USA/TX-HMH-MCoV-9961/2020|2020-07-06|EPI\_ISL\_780355|Original|hCoV-19^^Texas|Human|Houston Methodist Hospital|Houston Methodist Hospital|Long|USA

>Spike|hCoV-19/Thailand/SI202620-NT/2020|2020-02-22|EPI\_ISL\_437615|unknown|hCoV-19^^Thailand|Human|unknown|Faculty of Medicine|Submitter|Thailand

>Spike|hCoV-19/Japan/PG-2765/2020|2020-04-00|EPI\_ISL\_690897|Original|hCoV-19^^Japan|Human|Pathogen Genomics Center|Pathogen Genomics Center|Sekizuka|Japan

>Spike|hCoV-19/Wales/PHWC-2EC80/2020|2020-04-06|EPI\_ISL\_446134|Original|hCoV-19^^Wales|Human|Wales Specialist Virology Centre|Public Health Wales Microbiology Cardiff|Moore|United Kingdom

>Spike|hCoV-19/Norway/5706/2020|2020-11-09|EPI\_ISL\_708144|Original|hCoV-19^^Tr\u00f8ndelag|Human|Department of Medical Microbiology|Norwegian Institute of Public Health|Kopperud Riis|Norway

>Spike|hCoV-19/England/201790379/2020|2020-04-25|EPI\_ISL\_526761|Original|hCoV-19^^England|Human|Respiratory Virus Unit|Respiratory Virus Unit|Miah|United Kingdom

>Spike|hCoV-19/USA/MI-QDX-738/2020|2020-03-22|EPI\_ISL\_571471|Original|hCoV-19^^Michigan|Human|Quest Diagnostics|Quest Diagnostics|Kagan|USA

>Spike|hCoV-19/Australia/VIC13923/2020|2020-09-09|EPI\_ISL\_563883|Original|hCoV-19^^Victoria|Human|Microbiological Diagnostic Unit - Public Health Laboratory (MDU-PHL) |MDU-PHL|Schultz|Australia

>Spike|hCoV-19/Australia/VIC10959/2020|2020-00-00|EPI\_ISL\_563169|Original|hCoV-19^^Victoria|Human|Microbiological Diagnostic Unit - Public Health Laboratory (MDU-PHL) |MDU-PHL|Schultz|Australia

>Spike|hCoV-19/England/NORW-21F7E9/2020|2020-12-08|EPI\_ISL\_725051|Original|hCoV-19^^England|Human|Quadram Institute Bioscience|COVID-19 Genomics UK (COG-UK) Consortium|Alikhan|United Kingdom

>Spike|hCoV-19/England/QEUH-9C9204/2020|2020-09-10|EPI\_ISL\_567178|Original|hCoV-19^^England|Human|Lighthouse Lab in Glasgow|Wellcome Sanger Institute for the COVID-19 Genomics UK (COG-UK) consortium|Davies|United Kingdom

>Spike|hCoV-19/Canada/ON-UHTC\_0116/2020|2020-05-20|EPI\_ISL\_526264|Original|hCoV-19^^Ontario|Human|Unity Health Toronto|Ontario Institute for Cancer Research|de Borja|Canada

>Spike|hCoV-19/Denmark/DCGC-15981/2020|2020-11-23|EPI\_ISL\_714366|Original|hCoV-19^^Midtjylland|Human|Department of Virus and Microbiological Special Diagnostics|Albertsen Lab|Michaelsen|Denmark

>Spike|hCoV-19/USA/WA-UW-2270/2020|2020-03-31|EPI\_ISL\_477706|Original|hCoV-19^^Washington|Human|UW Virology Lab|UW Virology Lab|Roychoudhury|USA

>Spike|hCoV-19/England/MILK-9744B7/2020|2020-08-20|EPI\_ISL\_575780|Original|hCoV-19^^England|Human|Lighthouse Lab in Milton Keynes|Wellcome Sanger Institute for the COVID-19 Genomics UK (COG-UK) consortium|Davies|United Kingdom

>Spike|hCoV-19/USA/FL-BPHL-1871/2020|2020-04-09|EPI\_ISL\_613947|Original|hCoV-19^^Florida|Human|Florida Bureau of Public Health Laboratories|Florida Bureau of Public Health Laboratories|Blanton|USA

>Spike|hCoV-19/England/NORT-2A4691/2020|2020-09-06|EPI\_ISL\_573378|Original|hCoV-19^^England|Human|Northumbria University / South Tees Hospitals NHS Foundation Trust / North Cumbria Integrated Care NHS Foundation Trust / North Tees and Hartlepool NHS Foundation Trust / Newcastle Hospitals NHS Foundation Trust|COVID-19 Genomics UK (COG-UK) Consortium|Bashton|United Kingdom

>Spike|hCoV-19/Spain/CL-IBV-97006183/2020|2020-04-13|EPI\_ISL\_537329|Original|hCoV-19^^Castilla y Leon|Human|Universidad de Le\u00f3n|SeqCOVID-SPAIN consortium/IBV (CSIC) |Comas|Spain

>Spike|hCoV-19/USA/CA-CHLA-PLM53657240/2020|2020-11-30|EPI\_ISL\_753482|Original|hCoV-19^^California|Human|Clinical virology Laboratory|Center for Personalized Medicine|Dien Bard|USA

>Spike|hCoV-19/England/QEUH-B10C1D/2020|2020-11-02|EPI\_ISL\_642745|Original|hCoV-19^^England|Human|Lighthouse Lab in Glasgow|Wellcome Sanger Institute for the COVID-19 Genomics UK (COG-UK) Consortium|Davies|United Kingdom

>Spike|hCoV-19/USA/TX-HMH-MCoV-8691/2020|2020-07-01|EPI\_ISL\_780703|Original|hCoV-19^^Texas|Human|Houston Methodist Hospital|Houston Methodist Hospital|Long|USA

>Spike|hCoV-19/France/IDF-0372-is1/2020|2020-01-23|EPI\_ISL\_410720|Vero E6 P2|hCoV-19^^\u00cele-de-France|Human|Department of Infectious and Tropical Diseases|National Reference Center for Viruses of Respiratory Infections|Enouf|France

>Spike|hCoV-19/USA/WI-UW-2297/2020|2020-11-20|EPI\_ISL\_728063|Original|hCoV-19^^Wisconsin|Human|University of Wisconsin-Madison AIDS Vaccine Research Laboratories|University of Wisconsin-Madison AIDS Vaccine Research Laboratories|Baczenas|USA

>Spike|hCoV-19/Germany/NW-HHU-253/2020|2020-09-27|EPI\_ISL\_631386|Orginal|hCoV-19^^North Rhine-Westphalia|Human|University Hospital Cologne|Center of Medical Microbiology|Wienemann|Germany

>Spike|hCoV-19/USA/TX-DSHS-1827/2020|2020-06-24|EPI\_ISL\_738192|Original|hCoV-19^^Texas|Human|Texas Department of State Health Services|Texas Department of State Health Services|Rahman|USA

>Spike|hCoV-19/England/LIVE-1D52D0/2020|2020-09-18|EPI\_ISL\_576962|Original|hCoV-19^^England|Human|Liverpool Clinical Laboratories|COVID-19 Genomics UK (COG-UK) Consortium|Haldenby|United Kingdom

>Spike|hCoV-19/Italy/TUS-DBM-9/2020|2020-03-21|EPI\_ISL\_583964|Original|hCoV-19^^Tuscany|Human|UOC Microbiologia e Virologia|Dipartimento di Biotechnologie Mediche|Pinzauti|Italy

>Spike|hCoV-19/Australia/SAP134/2020|2020-03-25|EPI\_ISL\_451139|Original|hCoV-19^^South Australia|Human|SA Pathology|SA Pathology|Leong|Australia

>Spike|hCoV-19/Wales/ALDP-B1CB6F/2020|2020-11-01|EPI\_ISL\_665723|Original|hCoV-19^^Wales|Human|Centre for Enzyme Innovation|COVID-19 Genomics UK (COG-UK) Consortium|Robson|United Kingdom

>Spike|hCoV-19/England/CAMB-811B9/2020|2020-04-20|EPI\_ISL\_438578|Original|hCoV-19^^England|Human|Department of Pathology|COVID-19 Genomics UK (COG-UK) Consortium|Meredith|United Kingdom

>Spike|hCoV-19/England/SHEF-C7AE9/2020|2020-05-04|EPI\_ISL\_457621|Original|hCoV-19^^England|Human|Virology Department|COVID-19 Genomics UK (COG-UK) Consortium|de Silva|United Kingdom

>Spike|hCoV-19/USA/NM-DOH-2020315014/2020|2020-08-25|EPI\_ISL\_574284|Original|hCoV-19^^New Mexico|Human|New Mexico Department of Health Scientific Laboratory|New Mexico Department of Health Scientific Laboratory|Johnson|USA

>Spike|hCoV-19/Scotland/QEUEH-969743/2020|2020-08-14|EPI\_ISL\_531189|Original|hCoV-19^^Scotland|Human|NHSGGC West of Scotland Specialist Virology Centre / MRC-University of Glasgow Centre for Virus Research|Wellcome Sanger Institute for the COVID-19 Genomics UK (COG-UK) consortium|Davies|United Kingdom

>Spike|hCoV-19/England/MILK-993494/2020|2020-08-26|EPI\_ISL\_552103|Original|hCoV-19^^England|Human|Lighthouse Lab in Milton Keynes|Wellcome Sanger Institute for the COVID-19 Genomics UK (COG-UK) consortium|Davies|United Kingdom

>Spike|hCoV-19/England/ALDP-C39B4D/2020|2020-12-09|EPI\_ISL\_730755|Original|hCoV-19^^England|Human|Lighthouse Lab in Alderley Park|Wellcome Sanger Institute for the COVID-19 Genomics UK (COG-UK) Consortium|Davies|United Kingdom

>Spike|hCoV-19/Australia/VIC7805/2020|2020-08-02|EPI\_ISL\_564670|Original|hCoV-19^^Victoria|Human|Microbiological Diagnostic Unit - Public Health Laboratory (MDU-PHL)|MDU-PHL|Schultz|Australia

>Spike|hCoV-19/France/ARA-14951/2020|2020-03-27|EPI\_ISL\_508896|Original|hCoV-19^^Auvergne-Rh\u00f4ne-Alpes|Human|Institut des Agents Infectieux (IAI)|CNR Virus des Infections Respiratoires - France SUD|Josset|France

>Spike|hCoV-19/England/QEUEH-963D38/2020|2020-08-11|EPI\_ISL\_531543|Original|hCoV-19^^England|Human|Lighthouse Lab in Glasgow|Wellcome Sanger Institute for the COVID-19 Genomics UK (COG-UK) consortium|Davies|United Kingdom

>Spike|hCoV-19/England/LIVE-DC4E3E/2020|2020-11-11|EPI\_ISL\_705359|Original|hCoV-19^^England|Human|Liverpool Clinical Laboratories|COVID-19 Genomics UK (COG-UK) Consortium|Haldenby|United Kingdom

>Spike|hCoV-19/England/20139045004/2020|2020-03-27|EPI\_ISL\_420684|Original|hCoV-19^^England|Human|Respiratory Virus Unit|Respiratory Virus Unit|Platt|United Kingdom

>Spike|hCoV-19/England/ALDP-9CACAB/2020|2020-09-16|EPI\_ISL\_575512|Original|hCoV-19^^England|Human|Lighthouse Lab in Alderley Park|Wellcome Sanger Institute for the COVID-19 Genomics UK (COG-UK) consortium|Davies|United Kingdom

>Spike|hCoV-19/USA/NY-NYCPHL-000319/2020|2020-04-30|EPI\_ISL\_631843|Original|hCoV-19^^New York|Human|OCME Office Of Chief Medical Examiner|New York City Public Health Laboratory|Wang|USA

>Spike|hCoV-19/USA/NY-NYCPHL-001029/2020|2020-09-29|EPI\_ISL\_633045|Original|hCoV-19^^New York|Human|DOHMH PHL|New York City Public Health Laboratory|Wang|USA

>Spike|hCoV-19/England/QEUEH-BCE391/2020|2020-11-26|EPI\_ISL\_704500|Original|hCoV-19^^England|Human|Lighthouse Lab in Glasgow|Wellcome Sanger Institute for the COVID-19 Genomics UK (COG-UK) Consortium|Davies|United Kingdom

>Spike|hCoV-19/England/ALDP-9CD19A/2020|2020-09-16|EPI\_ISL\_566356|Original|hCoV-19^^England|Human|Lighthouse Lab in Alderley Park|Wellcome Sanger Institute for the COVID-19 Genomics UK (COG-UK) consortium|Davies|United Kingdom

>Spike|hCoV-19/USA/OR-PROV-109/2020|2020-04-24|EPI\_ISL\_482377|Original|hCoV-19^^Oregon|Human|Providence St. Joseph Health Molecular Genomics Laboratory|Providence St. Joseph Health Molecular Genomics Laboratory|Dowdell|USA

>Spike|hCoV-19/Scotland/EDB10482/2020|2020-10-19|EPI\_ISL\_703144|Original|hCoV-19^^Scotland|Human|Virology Department|COVID-19 Genomics UK (COG-UK) Consortium|McHugh|United Kingdom

>Spike|hCoV-19/England/CAMC-9DF8BE/2020|2020-09-21|EPI\_ISL\_638432|Original|hCoV-19^^England|Human|Department of Pathology|COVID-19 Genomics UK (COG-UK) Consortium|Goodfellow|United Kingdom

>Spike|hCoV-19/USA/TX-HMH-MCoV-14804/2020|2020-10-13|EPI\_ISL\_786289|Original|hCoV-19^^Texas|Human|Houston Methodist Hospital|Houston Methodist Hospital|Long|USA

>Spike|hCoV-19/England/MILK-9704CA/2020|2020-08-18|EPI\_ISL\_553070|Original|hCoV-19^^England|Human|Lighthouse Lab in Milton Keynes|Wellcome Sanger Institute for the COVID-19 Genomics UK (COG-UK) consortium|Davies|United Kingdom

>Spike|hCoV-19/England/LOND-1251BBF/2020|2020-11-27|EPI\_ISL\_705953|Original|hCoV-19^^England|Human|University College London Hospital|COVID-19 Genomics UK (COG-UK) Consortium|Byott|United Kingdom

>Spike|hCoV-19/USA/MI-CDC-2-3693459/2020|2020-10-20|EPI\_ISL\_747115|Original|hCoV-19^^Michigan|Human|Respiratory Viruses Branch|Respiratory Viruses Branch|Queen|USA

>Spike|hCoV-19/England/MILK-C50797/2020|2020-12-11|EPI\_ISL\_736487|Original|hCoV-19^^England|Human|Lighthouse Lab in Milton Keynes|Wellcome Sanger Institute for the COVID-19 Genomics UK (COG-UK) Consortium|Davies|United Kingdom

>Spike|hCoV-19/Australia/VIC17057/2020|2020-08-05|EPI\_ISL\_663711|Original|hCoV-19^^Victoria|Human|Microbiological Diagnostic Unit - Public Health Laboratory (MDU-PHL) |MDU-PHL|Schultz|Australia

>Spike|hCoV-19/USA/CA-CZB-10912/2020|2020-08-27|EPI\_ISL\_583141|Original|hCoV-19^^California|Human|Humboldt County Public Health Laboratory|Chan-Zuckerberg Biohub|Bhatt|USA

>Spike|hCoV-19/England/ALDP-A67AB4/2020|2020-10-12|EPI\_ISL\_630410|Original|hCoV-19^^England|Human|Lighthouse Lab in Alderley Park|Wellcome Sanger Institute for the COVID-19 Genomics UK (COG-UK) consortium|Davies|United Kingdom

>Spike|hCoV-19/USA/FL-BPHL-1901/2020|2020-07-17|EPI\_ISL\_613835|Original|hCoV-19^^Florida|Human|Florida Bureau of Public Health Laboratories|Florida Bureau of Public Health Laboratories|Blanton|USA

>Spike|hCoV-19/England/PORT-2D3338/2020|2020-04-11|EPI\_ISL\_517524|Original|hCoV-19^^England|Human|Centre for Enzyme Innovation|COVID-19 Genomics UK (COG-UK) Consortium|Robson|United Kingdom

>Spike|hCoV-19/Luxembourg/LNS5228153/2020|2020-03-14|EPI\_ISL\_419591|Original|hCoV-19^^Luxembourg|Human|Laboratoire National de Sant\u00e9|Laboratoire National de Sant\u00e9|Wienecke-Baldacchino|Luxembourg

>Spike|hCoV-19/England/MILK-ACDF71/2020|2020-10-20|EPI\_ISL\_630115|Original|hCoV-19^^England|Human|Lighthouse Lab in Milton Keynes|Wellcome Sanger Institute for the COVID-19 Genomics UK (COG-UK) consortium|Davies|United Kingdom

>Spike|hCoV-19/Portugal/PT1968/2020|2020-11-24|EPI\_ISL\_732193|Original|hCoV-19^^Portugal|Human|Instituto Nacional de Saude (INSA) and Instituto Gulbenkian de



Ciencia (IGC)|Instituto Nacional de Saude (INSA) and Instituto Gulbenkian de Ciencia (IGC)|Borges|Portugal

>Spike|hCoV-19/England/QEUA-AD0D62/2020|2020-10-26|EPI\_ISL\_634104|Original|hCoV-19^^England|Human|Lighthouse Lab in Glasgow|Wellcome Sanger Institute for the COVID-19 Genomics UK (COG-UK) consortium|Davies|United Kingdom

>Spike|hCoV-19/England/ALDP-B5B1F9/2020|2020-11-08|EPI\_ISL\_655567|Original|hCoV-19^^England|Human|Lighthouse Lab in Alderley Park|Wellcome Sanger Institute for the COVID-19 Genomics UK (COG-UK) Consortium|Davies|United Kingdom

>Spike|hCoV-19/Japan/PG-6354/2020|2020-08-00|EPI\_ISL\_689465|Original|hCoV-19^^Japan|Human|Fukuoka Institute of Health and Environmental Sciences|Pathogen Genomics Center|Sekizuka|Japan

>Spike|hCoV-19/USA/NY-NYCPHL-000586/2020|2020-03-09|EPI\_ISL\_632044|Original|hCoV-19^^New York|Human|NYU Langone Health|New York City Public Health Laboratory|Wang|USA

>Spike|hCoV-19/USA/WA-UW-2232/2020|2020-03-25|EPI\_ISL\_426121|Original|hCoV-19^^Washington|Human|UW Virology Lab|UW Virology Lab|Roychoudhury|USA

>Spike|hCoV-19/Scotland/QEUA-9E34B3/2020|2020-09-22|EPI\_ISL\_585504|Original|hCoV-19^^Scotland|Human|Northumbria University / South Tees Hospitals NHS Foundation Trust / North Cumbria Integrated Care NHS Foundation Trust / North Tees and Hartlepool NHS Foundation Trust / Newcastle Hospitals NHS Foundation Trust|COVID-19 Genomics UK (COG-UK) Consortium|Bashton|United Kingdom

>Spike|hCoV-19/Australia/VIC13242/2020|2020-07-25|EPI\_ISL\_640766|Original|hCoV-19^^Victoria|Human|Microbiological Diagnostic Unit - Public Health Laboratory (MDU-PHL)|MDU-PHL|Schultz|Australia

>Spike|hCoV-19/USA/TX-HMH-7448/2020|2020-06-26|EPI\_ISL\_546774|Original|hCoV-19^^Texas|Human|Houston Methodist Hospital|Houston Methodist Hospital|Long|USA

>Spike|hCoV-19/Switzerland/BE-ETHZ-310528/2020|2020-10-08|EPI\_ISL\_603596|Original|hCoV-19^^Bern|Human|Viollier AG|Department of Biosystems Science and Engineering|Nadeau|Switzerland

>Spike|hCoV-19/Denmark/DCGC-8078/2020|2020-10-26|EPI\_ISL\_617173|Original|hCoV-19^^Sjaelland|Human|Department of Virus and Microbiological Special Diagnostics|Albertsen lab|Michaelsen|Denmark

>Spike|hCoV-19/Wales/PHWC-2BD53/2020|2020-04-07|EPI\_ISL\_445841|Original|hCoV-19^^Wales|Human|Wales Specialist Virology Centre|Public Health Wales Microbiology Cardiff|Moore|United Kingdom

>Spike|hCoV-19/USA/FL-BPHL-1786/2020|2020-07-30|EPI\_ISL\_613888|Original|hCoV-19^^Florida|Human|Florida Bureau of Public Health Laboratories|Florida Bureau of Public Health Laboratories|Blanton|USA

>Spike|hCoV-19/Denmark/DCGC-2526/2020|2020-08-17|EPI\_ISL\_617796|Original|hCoV-19^^Hovedstaden|Human|Department of Virus and Microbiological Special Diagnostics|Albertsen lab|Michaelsen|Denmark

>Spike|hCoV-19/USA/DE-DHSS-F972766/2020|2020-07-07|EPI\_ISL\_693707|Original|hCoV-19^^Delaware|Human|Delaware Public Health Laboratory|Delaware Public Health Laboratory|Bajwa|USA

>Spike|hCoV-19/Spain/PV-IBV-98008323/2020|2020-10-08|EPI\_ISL\_654566|Original|hCoV-19^^Basque Country|Human|Servicio de Microbiolog\u00eda. Hospital Universitario Donostia. OSI Donostialdea. \u00c1rea de Enfermedades Infecciosas|SeqCOVID-SPAIN consortium|IBV (CSIC)|Comas|Spain

>Spike|hCoV-19/England/20144004904/2020|2020-03-31|EPI\_ISL\_423489|Original|hCoV-19^^England|Human|Respiratory Virus Unit|Respiratory Virus Unit|Platt|United Kingdom

>Spike|hCoV-19/USA/CA-CZB-14870/2020|2020-11-20|EPI\_ISL\_739559|Original|hCoV-19^^California|Human|Orange County Public Health Lab|Chan-Zuckerberg Biohub|Kamm|USA

>Spike|hCoV-19/England/20189051801/2020|2020-05-01|EPI\_ISL\_465534|Original|hCoV-19^^England|Human|Respiratory Virus Unit|Respiratory Virus Unit|Platt|United Kingdom

>Spike|hCoV-19/USA/TX-DSHS-0896/2020|2020-06-16|EPI\_ISL\_610032|Original|hCoV-19^^Texas|Human|Texas Department of State Health Services|Texas Department of State Health Services|Rahman|USA

>Spike|hCoV-19/South Korea/KCDC2114/2020|2020-03-12|EPI\_ISL\_498015|Original|hCoV-19^^South Korea|Human|Division of Viral Diseases|Division of Viral Diseases|Kim|South Korea

>Spike|hCoV-19/USA/WA-S2664/2020|2020-06-20|EPI\_ISL\_497296|Original|hCoV-19^^Washington|Human|Washington State Department of Health|Seattle Flu Study|Lee|USA

>Spike|hCoV-19/Australia/VIC13175/2020|2020-07-28|EPI\_ISL\_592202|Original|hCoV-19^^Victoria|Human|Microbiological Diagnostic Unit - Public Health Laboratory (MDU-PHL)|MDU-PHL|Schultz|Australia

>Spike|hCoV-19/Denmark/DCGC-19707/2020|2020-12-07|EPI\_ISL\_749124|Original|hCoV-19^^Hovedstaden|Human|Department of Virus and Microbiological Special Diagnostics|Albertsen Lab|Michaelsen|Denmark

>Spike|hCoV-19/England/ALDP-B1A3B4/2020|2020-11-01|EPI\_ISL\_645997|Original|hCoV-19^^England|Human|Lighthouse Lab in Alderley Park|Wellcome Sanger Institute for the COVID-19 Genomics UK (COG-UK) Consortium|Davies|United Kingdom

>Spike|hCoV-19/England/NORT-283B11/2020|2020-00-00|EPI\_ISL\_478519|Original|hCoV-19^^England|Human|Northumbria University / South Tees Hospitals NHS Foundation Trust / North Cumbria Integrated Care NHS Foundation Trust / North Tees and Hartlepool NHS Foundation Trust / Newcastle Hospitals NHS Foundation Trust|COVID-19 Genomics UK (COG-UK) Consortium|Bashton|United Kingdom

>Spike|hCoV-19/USA/NM-UNM-00855/2020|2020-05-04|EPI\_ISL\_610281|Original|hCoV-19^^New Mexico|Human|New Mexico Department of Health Scientific Laboratory Division|Center for Global Health|Domman|USA

>Spike|hCoV-19/USA/PA-MGSC38-05/2020|2020-03-26|EPI\_ISL\_436486|Original|hCoV-19^^Pennsylvania|Human|UPMC Clinical Laboratory|Microbial Genome Sequencing Center|Cooper|USA

>Spike|hCoV-19/Wales/PHWC-4A250D/2020|2020-12-14|EPI\_ISL\_743900|Original|hCoV-19^^Wales|Human|Wales Specialist Virology Centre Sequencing lab|COVID-19 Genomics UK (COG-UK) Consortium|Moore|United Kingdom

>Spike|hCoV-19/USA/AZ-TG547253/2020|2020-07-03|EPI\_ISL\_695449|Original|hCoV-19^^Arizona|Human|AZ SPHL|TGen North|French|USA

>Spike|hCoV-19/Scotland/EDB3628/2020|2020-04-27|EPI\_ISL\_439300|Original|hCoV-19^^Scotland|Human|Virology Department|COVID-19 Genomics UK (COG-UK) Consortium|Williams|United Kingdom

>Spike|hCoV-19/USA/MI-QDX-474/2020|2020-03-23|EPI\_ISL\_571208|Original|hCoV-19^^Michigan|Human|Quest Diagnostics|Quest Diagnostics|Kagan|USA

>Spike|hCoV-19/England/CAMC-B20E14/2020|2020-11-02|EPI\_ISL\_647494|Original|hCoV-19^^England|Human|Lighthouse Lab in Cambridge|Wellcome Sanger Institute for the COVID-19 Genomics UK (COG-UK) Consortium|Davies|United Kingdom

>Spike|hCoV-19/Malaysia/8454/2020|2020-03-18|EPI\_ISL\_501223|Original|hCoV-19^^Kuala Lumpur|Human|Department of Medical Microbiology|Department of Medical Microbiology|Chan|Malaysia

>Spike|hCoV-19/South Africa/KRISP-K003716/2020|2020-10-07|EPI\_ISL\_602896|Original|hCoV-19^^KwaZulu-Natal|Human|NHLS-IALCH|KRISP|de Oliveira|South Africa

>Spike|hCoV-19/England/LOND-D66F2/2020|2020-04-22|EPI\_ISL\_482179|Original|hCoV-19^^England|Human|University College London|Wellcome Sanger Institute for the COVID-19 Genomics UK (COG-UK) consortium|Davies|United Kingdom

>Spike|hCoV-19/England/CAMC-A645D4/2020|2020-10-11|EPI\_ISL\_608958|Original|hCoV-19^^England|Human|Lighthouse Lab in Cambridge|Wellcome Sanger Institute for the COVID-19 Genomics UK (COG-UK) consortium|Davies|United Kingdom

>Spike|hCoV-19/USA/MN-QDX-1744/2020|2020-03-17|EPI\_ISL\_604081|Original|hCoV-19^^Minnesota|Human|Quest Diagnostics|Quest Diagnostics|Kagan|USA

>Spike|hCoV-19/USA/CA-ALSR-1743/2020|2020-05-11|EPI\_ISL\_512162|Original|hCoV-19^^California|Human|San Diego County Public Health Laboratory|Andersen lab at Scripps Research|Gangavarapu|USA

>Spike|hCoV-19/USA/MI-MDHHS-SC22119/2020|2020-10-14|EPI\_ISL\_614170|Original|hCoV-19^^Michigan|Human|Michigan Department of Health and Human Services|Michigan Department of Health and Human Services|Jacob|USA

>Spike|hCoV-19/Wales/PHWC-4936DF/2020|2020-11-29|EPI\_ISL\_725927|Original|hCoV-19^^Wales|Human|Originating lab|COVID-19 Genomics UK (COG-UK) Consortium|Moore|United Kingdom

>Spike|hCoV-19/USA/TX-HMH-7997/2020|2020-07-01|EPI\_ISL\_545777|Original|hCoV-19^^Texas|Human|Houston Methodist Hospital|Houston Methodist Hospital|Long|USA

>Spike|hCoV-19/Wales/PHWC-48BDB7/2020|2020-11-06|EPI\_ISL\_666357|Original|hCoV-19^^Wales|Human|Wales Specialist Virology Centre Sequencing lab|COVID-19 Genomics UK (COG-UK) Consortium|Moore|United Kingdom

>Spike|hCoV-19/England/ALDP-A6E74D/2020|2020-10-15|EPI\_ISL\_607734|Original|hCoV-19^^England|Human|Lighthouse Lab in Alderley Park|Wellcome Sanger Institute for the COVID-19 Genomics UK (COG-UK) consortium|Davies|United Kingdom

>Spike|hCoV-19/Japan/PG-7435/2020|2020-07-00|EPI\_ISL\_688537|Original|hCoV-19^^Japan|Human|Pathogen Genomics Center|Pathogen Genomics Center|Sekizuka|Japan

>Spike|hCoV-19/USA/TX-HMH-MCoV-12800/2020|2020-08-19|EPI\_ISL\_790533|Original|hCoV-19^^Texas|Human|Houston Methodist Hospital|Houston Methodist Hospital|Long|USA

>Spike|hCoV-19/Uganda/UG076/2020|2020-08-26|EPI\_ISL\_737987|Original|hCoV-19^^Uganda|Human|Uganda Central Public Health Lab and Uganda Virus Research Institute|MRC/UVRI & LSHTM Uganda Research Unit|Cotten|Uganda

>Spike|hCoV-19/Denmark/DCGC-21595/2020|2020-12-21|EPI\_ISL\_757752|Original|hCoV-19^^Sjaelland|Human|Department of Virus and Microbiological Special Diagnostics|Albertsen Lab|Michaelsen|Denmark

>Spike|hCoV-19/USA/CA-ALSR-0681-IPL/2020|2020-05-16|EPI\_ISL\_483298|Original|hCoV-19^^California|Human|UC San Diego Center for Advanced Laboratory Medicine|Andersen lab at Scripps Research|Gangavarapu|USA

>Spike|hCoV-19/England/CAMC-A58904/2020|2020-10-08|EPI\_ISL\_597212|Original|hCoV-19^^England|Human|Lighthouse Lab in Cambridge|Wellcome Sanger Institute for the COVID-19 Genomics UK (COG-UK) consortium|Davies|United Kingdom

>Spike|hCoV-19/USA/NM-UNM-00079/2020|2020-03-26|EPI\_ISL\_467536|Original|hCoV-19^^New Mexico|Human|New Mexico Department of Health Scientific Laboratory Division|Center for Global Health|Domman|USA

>Spike|hCoV-19/USA/NY-PV09442/2020|2020-03-08|EPI\_ISL\_450119|Original|hCoV-19^^New York|Human|MSHS Clinical Microbiology Laboratories|MSHS Pathogen Surveillance Program|van Bakel|USA

>Spike|hCoV-19/England/MILK-9A8AD6/2020|2020-08-31|EPI\_ISL\_550073|Original|hCoV-19^^England|Human|Lighthouse Lab in Milton Keynes|Wellcome Sanger Institute for the COVID-19 Genomics UK (COG-UK) consortium|Davies|United Kingdom

>Spike|hCoV-19/England/CAMB-1AFA9B/2020|2020-05-01|EPI\_ISL\_459267|Original|hCoV-19^^England|Human|Department of Pathology|Wellcome Sanger Institute for the COVID-19 Genomics UK (COG-UK) consortium|Davies|United Kingdom

>Spike|hCoV-19/Finland/S10CB1/2020|2020-10-30|EPI\_ISL\_732625|Original|hCoV-19^^Uusimaa|Human|Department of Virology and Immunology|Department of Virology|Smura|Finland

>Spike|hCoV-19/USA/TX-HMH-6221/2020|2020-06-19|EPI\_ISL\_547323|Original|hCoV-19^^Texas|Human|Houston Methodist Hospital|Houston Methodist Hospital|Long|USA

>Spike|hCoV-19/England/QEUEH-9DE2FD/2020|2020-09-21|EPI\_ISL\_599528|Original|hCoV-19^^England|Human|Lighthouse Lab in Glasgow|Wellcome Sanger Institute for the COVID-19 Genomics UK (COG-UK) consortium|Davies|United Kingdom

>Spike|hCoV-19/Wales/PHWC-494489/2020|2020-11-20|EPI\_ISL\_726120|Original|hCoV-19^^Wales|Human|Originating lab|COVID-19 Genomics UK (COG-UK) Consortium|Moore|United Kingdom

>Spike|hCoV-19/England/CAMC-B0B35C/2020|2020-10-30|EPI\_ISL\_643438|Original|hCoV-19^^England|Human|Lighthouse Lab in Cambridge|Wellcome Sanger Institute for the COVID-19 Genomics UK (COG-UK) Consortium|Davies|United Kingdom

>Spike|hCoV-19/Denmark/DCGC-826/2020|2020-04-20|EPI\_ISL\_614728|Original|hCoV-19^^Nordjylland|Human|Department of Virus and Microbiological Special Diagnostics|Albertsen lab|Michaelsen|Denmark

>Spike|hCoV-19/Bangladesh/BCSIR-NILMRC-064/2020|2020-05-31|EPI\_ISL\_464163|Original|hCoV-19^^Dhaka|Human|National Institute of Laboratory Medicine and Referral Center|Genomic Research Lab|Khan|Bangladesh

>Spike|hCoV-19/Denmark/DCGC-10484/2020|2020-11-02|EPI\_ISL\_670006|Original|hCoV-19^^Syddanmark|Human|Department of Virus and Microbiological Special Diagnostics|Albertsen Lab|Michaelsen|Denmark

>Spike|hCoV-19/England/CAMC-A82549/2020|2020-10-12|EPI\_ISL\_610739|Original|hCoV-19^^England|Human|Lighthouse Lab in Cambridge|Wellcome Sanger Institute for the COVID-19 Genomics UK (COG-UK) consortium|Davies|United Kingdom

>Spike|hCoV-19/Norway/6131/2020|2020-11-28|EPI\_ISL\_759982|Original|hCoV-19^^Oslo|Human|Oslo University Hospital|Norwegian Institute of Public Health|Kopperud Riis|Norway

>Spike|hCoV-19/Scotland/EDB9335/2020|2020-11-06|EPI\_ISL\_705800|Original|hCoV-19^^Scotland|Human|Virology Department|COVID-19 Genomics UK (COG-UK) Consortium|McHugh|United Kingdom

>Spike|hCoV-19/Belgium/ULG-6670/2020|2020-03-14|EPI\_ISL\_417018|Original|hCoV-19^^Li\u00e8ge|Human|Department of Clinical Microbiology|GIGA Medical Genomics|Durkin|Belgium

>Spike|hCoV-19/USA/TX-HMH-MCoV-9690/2020|2020-07-04|EPI\_ISL\_780227|Original|hCoV-19^^Texas|Human|Houston Methodist Hospital|Houston Methodist Hospital|Long|USA

>Spike|hCoV-19/England/MILK-999E90/2020|2020-08-29|EPI\_ISL\_550268|Original|hCoV-19^^England|Human|Lighthouse Lab in Milton Keynes|Wellcome Sanger Institute for the COVID-19 Genomics UK (COG-UK) consortium|Davies|United Kingdom

>Spike|hCoV-19/England/LIVE-DCB848/2020|2020-11-24|EPI\_ISL\_724432|Original|hCoV-19^^England|Human|Liverpool Clinical Laboratories|COVID-19 Genomics UK (COG-UK) Consortium|Haldenby|United Kingdom

>Spike|hCoV-19/Japan/PG-5244/2020|2020-08-00|EPI\_ISL\_690347|Original|hCoV-19^^Japan|Human|Pathogen Genomics Center|Pathogen Genomics Center|Sekizuka|Japan

>Spike|hCoV-19/England/LCST-24D6BAE/2020|2020-06-08|EPI\_ISL\_484222|Original|hCoV-19^^England|Human|University Hospitals Of Leicester NHS Trust and DeepSeq Nottingham|COVID-19 Genomics UK (COG-UK) Consortium|Loose|United Kingdom

>Spike|hCoV-19/USA/TX-HMH-MCoV-18753/2020|2020-11-21|EPI\_ISL\_785091|Original|hCoV-19^^Texas|Human|Houston Methodist Hospital|Houston Methodist Hospital|Long|USA

>Spike|hCoV-19/Russia/OMS-ORINFI-4370S/2020|2020-07-08|EPI\_ISL\_569798|Original|hCoV-19^^Omsk|Human|Omsk Research Institute of Natural Focal Infections|WHO National Influenza Centre Russian Federation|Komissarov|Russia

>Spike|hCoV-19/Scotland/QEUI-9CF8B1/2020|2020-09-17|EPI\_ISL\_601880|Original|hCoV-19^^Scotland|Human|Lighthouse Lab in Glasgow|Wellcome Sanger Institute for the COVID-19 Genomics UK (COG-UK) consortium|Davies|United Kingdom

>Spike|hCoV-19/Wales/PHWC-481E36/2020|2020-09-24|EPI\_ISL\_613177|Original|hCoV-19^^Wales|Human|Wales Specialist Virology Centre Sequencing lab|COVID-19 Genomics UK (COG-UK) Consortium|Moore|United Kingdom

>Spike|hCoV-19/England/QEUI-B82724/2020|2020-11-14|EPI\_ISL\_661655|Original|hCoV-19^^England|Human|Lighthouse Lab in Glasgow|Wellcome Sanger Institute for the COVID-19 Genomics UK (COG-UK) Consortium|Davies|United Kingdom

>Spike|hCoV-19/Italy/LOM-INMI-9491/2020|2020-02-26|EPI\_ISL\_460089|Original|hCoV-19^^Lombardy|Human|Molecular Virology Unit|Laboratory of Virology|Gruber|Italy

>Spike|hCoV-19/England/CAMC-B5323A/2020|2020-11-08|EPI\_ISL\_657423|Original|hCoV-19^^England|Human|Lighthouse Lab in Cambridge|Wellcome Sanger Institute for the COVID-19 Genomics UK (COG-UK) Consortium|Davies|United Kingdom

>Spike|hCoV-19/England/CAMC-B0CE1E/2020|2020-10-30|EPI\_ISL\_643326|Original|hCoV-19^^England|Human|Lighthouse Lab in Cambridge|Wellcome Sanger Institute for the COVID-19 Genomics UK (COG-UK) Consortium|Davies|United Kingdom

>Spike|hCoV-19/England/QEUI-A029DC/2020|2020-09-29|EPI\_ISL\_584942|Original|hCoV-19^^England|Human|Quadram Institute Bioscience|COVID-19 Genomics UK (COG-UK) Consortium|Alikhan|United Kingdom

>Spike|hCoV-19/Wales/PHWC-488761/2020|2020-10-30|EPI\_ISL\_639426|Original|hCoV-19^^Wales|Human|Wales Specialist Virology Centre Sequencing lab|COVID-19 Genomics UK (COG-UK) Consortium|Moore|United Kingdom

>Spike|hCoV-19/USA/TX-HMH-MCoV-18180/2020|2020-11-15|EPI\_ISL\_784528|Original|hCoV-19^^Texas|Human|Houston Methodist Hospital|Houston Methodist Hospital|Long|USA

>Spike|hCoV-19/England/LIVE-A5D24/2020|2020-03-19|EPI\_ISL\_499659|Original|hCoV-19^^England|Human|Liverpool Clinical Laboratories|COVID-19 Genomics UK (COG-UK) Consortium|Haldenby|United Kingdom

>Spike|hCoV-19/England/QEUI-BA1983/2020|2020-11-18|EPI\_ISL\_719736|Original|hCoV-19^^England|Human|Lighthouse Lab in Glasgow|Wellcome Sanger Institute for the COVID-19 Genomics UK (COG-UK) Consortium|Davies|United Kingdom

>Spike|hCoV-19/England/201060042/2020|2020-03-05|EPI\_ISL\_464378|Original|hCoV-19^^England|Human|Respiratory Virus Unit|Respiratory Virus Unit|Platt|United Kingdom

>Spike|hCoV-19/England/20119009104/2020|2020-03-12|EPI\_ISL\_465024|Original|hCoV-19^^England|Human|Respiratory Virus Unit|Respiratory Virus Unit|Platt|United Kingdom

>Spike|hCoV-19/Iceland/199/2020|2020-03-16|EPI\_ISL\_417706|Original|hCoV-19^^Reykjavik|Human|The National University Hospital of Iceland|deCODE genetics|J\|u00f3nsson|Iceland

>Spike|hCoV-19/Belgium/ULG-10992/2020|2020-11-14|EPI\_ISL\_707718|Original|hCoV-19^^Li\|u00e8ge|Human|Department of Clinical Microbiology|GIGA Medical Genomics|Durkin|Belgium

>Spike|hCoV-19/USA/WI-UW-1105/2020|2020-07-24|EPI\_ISL\_516530|Original|hCoV-19^^Wisconsin|Human|University of Wisconsin-Madison AIDS Vaccine Research Laboratories|University of Wisconsin-Madison AIDS Vaccine Research Laboratories|Baczenas|USA

>Spike|hCoV-19/England/ALDP-9CD051/2020|2020-09-16|EPI\_ISL\_566343|Original|hCoV-19^^England|Human|Lighthouse Lab in Alderley Park|Wellcome Sanger Institute for the COVID-19 Genomics UK (COG-UK) consortium|Davies|United Kingdom

>Spike|hCoV-19/Scotland/QEUH-AD2164/2020|2020-10-27|EPI\_ISL\_649750|Original|hCoV-19^^Scotland|Human|Lighthouse Lab in Glasgow|Wellcome Sanger Institute for the COVID-19 Genomics UK (COG-UK) Consortium|Davies|United Kingdom

>Spike|hCoV-19/England/ALDP-9537F1/2020|2020-06-08|EPI\_ISL\_554421|Original|hCoV-19^^England|Human|Lighthouse Lab in Alderley Park|Wellcome Sanger Institute for the COVID-19 Genomics UK (COG-UK) consortium|Davies|United Kingdom

>Spike|hCoV-19/USA/TX-HMH-MCoV-14995/2020|2020-10-15|EPI\_ISL\_786479|Original|hCoV-19^^Texas|Human|Houston Methodist Hospital|Houston Methodist Hospital|Long|USA

>Spike|hCoV-19/Denmark/DCGC-6411/2020|2020-10-12|EPI\_ISL\_620311|Original|hCoV-19^^Nordjylland|Human|Department of Virus and Microbiological Special Diagnostics|Albertsen lab|Michaelsen|Denmark

>Spike|hCoV-19/England/CAMC-CB6B93/2020|2020-12-19|EPI\_ISL\_777881|Original|hCoV-19^^England|Human|Lighthouse Lab in Cambridge|Wellcome Sanger Institute for the COVID-19 Genomics UK (COG-UK) Consortium|Davies|United Kingdom

>Spike|hCoV-19/USA/WA-S1736/2020|2020-06-01|EPI\_ISL\_496162|Original|hCoV-19^^Washington|Human|Washington State Department of Health|Seattle Flu Study|Lee|USA

>Spike|hCoV-19/Japan/PG-1200/2020|2020-04-00|EPI\_ISL\_684810|Original|hCoV-19^^Japan|Human|Yamagata Prefectural Institute of Public Health|Pathogen Genomics Center|Sekizuka|Japan

>Spike|hCoV-19/Malaysia/IIUM316/2020|2020-04-09|EPI\_ISL\_455312|Original|hCoV-19^^Pahang|Human|Microbiology Unit|SEA Microbiome Unit|Ahmad|Malaysia

>Spike|hCoV-19/Netherlands/ZH-EMC-1043/2020|2020-11-26|EPI\_ISL\_722692|Original|hCoV-19^^Zuid Holland|Human|Dutch COVID-19 response team|Erasmus Medical Center|Oude Munnink|Netherlands

>Spike|hCoV-19/Panama/338872/2020|2020-04-10|EPI\_ISL\_496888|Original|hCoV-19^^Panama Center|Human|Gorgas Memorial Laboratory of Health Studies|Gorgas Memorial Laboratory of Health Studies|Martinez|Panama

>Spike|hCoV-19/England/ALDP-68C965/2020|2020-07-02|EPI\_ISL\_558117|Original|hCoV-19^^England|Human|Lighthouse Lab in Alderley Park|Wellcome Sanger Institute for the COVID-19 Genomics UK (COG-UK) consortium|Davies|United Kingdom

>Spike|hCoV-19/Italy/LAZ-INMI5-N/2020|2020-03-04|EPI\_ISL\_451303|Original|hCoV-19^^Lazio|Human|Laboratory of Virology|Laboratory of Virology|Gruber|Italy

>Spike|hCoV-19/Netherlands/NB-EMC-328/2020|2020-10-04|EPI\_ISL\_632609|Original|hCoV-19^^Noord Brabant|Human|Dutch COVID-19 response team|Erasmus Medical Center|Oude Munnink|Netherlands

>Spike|hCoV-19/England/QEUH-B81664/2020|2020-11-14|EPI\_ISL\_668093|Original|hCoV-19^^England|Human|Lighthouse Lab in Glasgow|Wellcome Sanger Institute for the COVID-19 Genomics UK (COG-UK) Consortium|Davies|United Kingdom

>Spike|hCoV-19/England/ALDP-C58CAF/2020|2020-12-13|EPI\_ISL\_736197|Original|hCoV-19^^England|Human|Lighthouse Lab in Alderley Park|Wellcome Sanger Institute for the COVID-19 Genomics UK (COG-UK) Consortium|Davies|United Kingdom

>Spike|hCoV-19/England/CAMC-B09752/2020|2020-10-31|EPI\_ISL\_672946|Original|hCoV-19^^England|Human|Lighthouse Lab in Cambridge|Wellcome Sanger Institute for the COVID-19 Genomics UK (COG-UK) Consortium|Davies|United Kingdom

>Spike|hCoV-19/USA/OR-OHSU-2445/2020|2020-08-14|EPI\_ISL\_667210|Original|hCoV-19^^Oregon|Human|OHSU Lab Services Molecular Microbiology Lab|Oregon SARS-CoV-2 Genome Sequencing Center|O'Roak|USA

>Spike|hCoV-19/USA/LA-EVTL563/2020|2020-06-30|EPI\_ISL\_578967|Original|hCoV-19^^Louisiana|Human|LSUHS Emerging Viral Threat Laboratory|Microbial Genome Sequencing Center|Kamil|USA

>Spike|hCoV-19/Wales/PHWC-49199C/2020|2020-11-09|EPI\_ISL\_706719|Original|hCoV-19^^Wales|Human|Originating lab|COVID-19 Genomics UK (COG-UK) Consortium|Moore|United Kingdom

>Spike|hCoV-19/Japan/PG-4490/2020|2020-07-00|EPI\_ISL\_692713|Original|hCoV-19^^Japan|Human|Pathogen Genomics Center|Pathogen Genomics Center|Sekizuka|Japan

>Spike|hCoV-19/USA/TX-HMH-MCoV-8395/2020|2020-06-26|EPI\_ISL\_784370|Original|hCoV-19^^Texas|Human|Houston Methodist Hospital|Houston Methodist Hospital|Long|USA

>Spike|hCoV-19/USA/MA-MGH-00937/2020|2020-05-02|EPI\_ISL\_791826|Original|hCoV-19^^Massachusetts|Human|Massachusetts General Hospital|Infectious Disease Program|Park|USA

>Spike|hCoV-19/Thailand/Bangkok-CONI-0116/2020|2020-03-12|EPI\_ISL\_455918|Original|hCoV-19^^Bangkok|Human|Ramathibodi Hospital|COVID-19 Network Investigations (CONI) Alliance|Batty|Thailand

>Spike|hCoV-19/England/QEUH-95E6EA/2020|2020-08-06|EPI\_ISL\_532406|Original|hCoV-19^^England|Human|Lighthouse Lab in Glasgow|Wellcome Sanger Institute for the COVID-19 Genomics UK (COG-UK) consortium|Davies|United Kingdom

>Spike|hCoV-19/England/BRIS-12DBA1/2020|2020-06-01|EPI\_ISL\_481838|Original|hCoV-19^^England|Human|PHE South West Regional Laboratory|Wellcome Sanger Institute for the COVID-19 Genomics UK (COG-UK) consortium|Davies|United Kingdom

>Spike|hCoV-19/England/LIVE-A7539/2020|2020-03-28|EPI\_ISL\_517034|Original|hCoV-19^^England|Human|Liverpool Clinical Laboratories|COVID-19 Genomics UK (COG-UK) Consortium|Haldenby|United Kingdom

>Spike|hCoV-19/Singapore/876/2020|2020-08-28|EPI\_ISL\_536417|Original|hCoV-19^^Singapore|Human|National Public Health Laboratory|National Public Health Laboratory|Mak|Singapore

>Spike|hCoV-19/England/LIVE-DB7F77/2020|2020-11-02|EPI\_ISL\_650189|Original|hCoV-19^^England|Human|Liverpool Clinical Laboratories|COVID-19 Genomics UK (COG-UK) Consortium|Haldenby|United Kingdom

>Spike|hCoV-19/England/LIVE-9BDA9/2020|2020-04-20|EPI\_ISL\_440917|Original|hCoV-19^^England|Human|Liverpool Clinical Laboratories|COVID-19 Genomics UK (COG-UK) Consortium|Haldenby|United Kingdom

>Spike|hCoV-19/Norway/5782/2020|2020-11-19|EPI\_ISL\_708170|Original|hCoV-19^^Oslo|Human|Norwegian Institute of Public Health|Norwegian Institute of Public Health|Kopperud Riis|Norway

>Spike|hCoV-19/Finland/S22AB1/2020|2020-10-11|EPI\_ISL\_737078|Original|hCoV-19^^Uusimaa|Human|Department of Virology and Immunology|Department of Virology|Smura|Finland

>Spike|hCoV-19/France/PAC-IHU-1229/2020|2020-08-17|EPI\_ISL\_569093|Original|hCoV-19^^Provence-Alpes-C\u00f4te-d\u2019Azur|Human|MEPHI|MEPHI|Levasseur|France

>Spike|hCoV-19/Australia/VIC18/2020|2020-03-07|EPI\_ISL\_419737|Original|hCoV-19^^Victoria|Human|Victorian Infectious Diseases Reference Laboratory (VIDRL)|Victorian Infectious Diseases Reference Laboratory and Microbiological Diagnostic Unit Public Health Laboratory|Schultz|Australia

>Spike|hCoV-19/Switzerland/BE-HUG-2536/2020|2020-03-04|EPI\_ISL\_415704|Original|hCoV-19^^Bern|Human|University Hospitals of Geneva Laboratory of Virology|University Hospitals of Geneva Laboratory of Virology|Cordey|Switzerland

>Spike|hCoV-19/England/MILK-BDBF24/2020|2020-11-26|EPI\_ISL\_709729|Original|hCoV-19^^England|Human|Lighthouse Lab in Milton Keynes|Wellcome Sanger Institute for the COVID-19 Genomics UK (COG-UK) Consortium|Davies|United Kingdom

>Spike|hCoV-19/Wales/MILK-9D4C71/2020|2020-09-19|EPI\_ISL\_601661|Original|hCoV-19^^Wales|Human|Lighthouse Lab in Milton Keynes|Wellcome Sanger Institute for the COVID-19 Genomics UK (COG-UK) consortium|Davies|United Kingdom

>Spike|hCoV-19/England/LOND-D51D4/2020|2020-04-15|EPI\_ISL\_449686|Original|hCoV-19^^England|Human|University College London|COVID-19 Genomics UK (COG-UK) Consortium|Roy|United Kingdom

>Spike|hCoV-19/Lebanon/LAU3-53451/2020|2020-08-14|EPI\_ISL\_637112|Original|hCoV-19^^Beirut|Human|Rafik Hariri University Hospital|Microbial Pathogenomics Lab|Merhi|Lebanon

>Spike|hCoV-19/USA/WI-UW-1798/2020|2020-09-15|EPI\_ISL\_605670|Original|hCoV-19^^Wisconsin|Human|University of Wisconsin-Madison AIDS Vaccine Research Laboratories|University of Wisconsin-Madison AIDS Vaccine Research Laboratories|Baczenas|USA

>Spike|hCoV-19/England/20136031904/2020|2020-03-25|EPI\_ISL\_465820|Original|hCoV-19^^England|Human|Respiratory Virus Unit|Respiratory Virus Unit|Platt|United Kingdom

>Spike|hCoV-19/Russia/CRIE4973936/2020|2020-07-15|EPI\_ISL\_610229|Original|hCoV-19^^Moscow|Human|Molecular diagnostic laboratory of Federal Budget Institution of Science \Central Research Institute of Epidemiology\ of The Federal Service on Customers' Rights Protection and Human Well-being Surveillance|Group of Genomics and Postgenomic Technologies of Central Research Institute of Epidemiology|Samoilov|Russia

>Spike|hCoV-19/Luxembourg/LNS0247915/2020|2020-11-29|EPI\_ISL\_739742|Original|hCoV-19^^Luxembourg|Human|Laboratoire national de sant\u00e9|Laboratoire national de sant\u00e9|Wienecke-Baldacchino|Luxembourg

>Spike|hCoV-19/Wales/QEUH-A89C5C/2020|2020-10-16|EPI\_ISL\_639628|Original|hCoV-19^^Wales|Human|Oxford Viromics|COVID-19 Genomics UK (COG-UK) Consortium|Golubchik|United Kingdom

>Spike|hCoV-19/Brazil/SP-393/2020|2020-06-21|EPI\_ISL\_583502|Original|hCoV-19^^S\u00e3o Paulo|Human|Serv de Vig Sanitaria Epidemio e CTRL de Zoonoses Guaruj\u00e1|Instituto Adolfo Lutz|Sacchi|Brazil

>Spike|hCoV-19/USA/CA-ALSR-4783/2020|2020-05-04|EPI\_ISL\_730139|Original|hCoV-19^^California|Human|Scripps Medical Laboratory|Andersen lab at Scripps Research|Gangavarapu|USA

>Spike|hCoV-19/Philippines/PH-RITM-0021/2020|2020-06-25|EPI\_ISL\_491475|Original|hCoV-19^^NCR|Human|Protacio Hospital|Research Institute for Tropical Medicine|Polotan|Philippines

>Spike|hCoV-19/USA/TX-HMH-2694/2020|2020-06-05|EPI\_ISL\_545482|Original|hCoV-19^^Texas|Human|Houston Methodist Hospital|Houston Methodist Hospital|Long|USA

>Spike|hCoV-19/France/PAC-IHU-0820/2020|2020-05-13|EPI\_ISL\_568978|Original|hCoV-19^^Provence-Alpes-C\u00f4te-d\u00e0z|Human|MEPHI|MEPHI|Levasseur|France

>Spike|hCoV-19/Northern Ireland/NIRE-10534D/2020|2020-03-31|EPI\_ISL\_461783|Original|hCoV-19^^Northern Ireland|Human|Regional Virus Laboratory|COVID-19 Genomics UK (COG-UK) Consortium|Fairley|United Kingdom

>Spike|hCoV-19/Denmark/DCGC-3922/2020|2020-09-14|EPI\_ISL\_615833|Original|hCoV-19^^Hovedstaden|Human|Department of Virus and Microbiological Special Diagnostics|Albertsen lab|Michaelsen|Denmark

>Spike|hCoV-19/England/ALDP-9FDE9A/2020|2020-10-01|EPI\_ISL\_587941|Original|hCoV-19^^England|Human|Lighthouse Lab in Alderley Park|Wellcome Sanger Institute for the COVID-19 Genomics UK (COG-UK) consortium|Davies|United Kingdom

>Spike|hCoV-19/England/MILK-B961D4/2020|2020-11-13|EPI\_ISL\_675003|Original|hCoV-19^^England|Human|Lighthouse Lab in Milton Keynes|Wellcome Sanger Institute for the COVID-19 Genomics UK (COG-UK) Consortium|Davies|United Kingdom

>Spike|hCoV-19/Denmark/DCGC-896/2020|2020-05-11|EPI\_ISL\_614460|Original|hCoV-19^^Hovedstaden|Human|Department of Virus and Microbiological Special Diagnostics|Albertsen lab|Michaelsen|Denmark

>Spike|hCoV-19/USA/LA-EVTL990/2020|2020-08-18|EPI\_ISL\_653681|Original|hCoV-19^^Louisiana|Human|LSUHS Emerging Viral Threat Laboratory|Microbial Genome Sequencing Center|Kamil|USA

>Spike|hCoV-19/England/ALDP-92AEFE/2020|2020-06-22|EPI\_ISL\_551387|Original|hCoV-19^^England|Human|Lighthouse Lab in Alderley Park|Wellcome Sanger Institute for the COVID-19 Genomics UK (COG-UK) consortium|Davies|United Kingdom

>Spike|hCoV-19/England/QEUA-B0F868/2020|2020-11-02|EPI\_ISL\_642129|Original|hCoV-19^^England|Human|Lighthouse Lab in Glasgow|Wellcome Sanger Institute for the COVID-19 Genomics UK (COG-UK) Consortium|Davies|United Kingdom

>Spike|hCoV-19/Austria/CeMM0706/2020|2020-04-19|EPI\_ISL\_583660|Original|hCoV-19^^Austria|Human|Austrian Agency for Health and Food Safety (AGES)|Bergthaler laboratory|Bergthaler|Austria

>Spike|hCoV-19/Russia/BRY-RII-MH2790S/2020|2020-09-17|EPI\_ISL\_602453|Original|hCoV-19^^Bryansk|Human|HELIX LLC|WHO National Influenza Centre Russian Federation|Komissarov|Russia

>Spike|hCoV-19/England/QEUA-B2EC3A/2020|2020-11-04|EPI\_ISL\_659770|Original|hCoV-19^^England|Human|Lighthouse Lab in Glasgow|Wellcome Sanger Institute for the COVID-19 Genomics UK (COG-UK) Consortium|Davies|United Kingdom

>Spike|hCoV-19/Wales/PHWC-49E3CE/2020|2020-12-07|EPI\_ISL\_742996|Original|hCoV-19^^Wales|Human|Wales Specialist Virology Centre Sequencing lab|COVID-19 Genomics UK (COG-UK) Consortium|Moore|United Kingdom

>Spike|hCoV-19/Denmark/DCGC-5275/2020|2020-09-14|EPI\_ISL\_615206|Original|hCoV-19^^Sjaelland|Human|Department of Virus and Microbiological Special Diagnostics|Albertsen lab|Michaelsen|Denmark

>Spike|hCoV-19/England/MILK-9C3C1B/2020|2020-09-07|EPI\_ISL\_566797|Original|hCoV-19^^England|Human|Lighthouse Lab in Milton Keynes|Wellcome Sanger Institute for the COVID-19 Genomics UK (COG-UK) consortium|Davies|United Kingdom

>Spike|hCoV-19/England/QEUA-990206/2020|2020-08-30|EPI\_ISL\_540115|Original|hCoV-19^^England|Human|Lighthouse Lab in Glasgow|Wellcome Sanger Institute for the COVID-19 Genomics UK (COG-UK) consortium|Davies|United Kingdom

>Spike|hCoV-19/USA/UT-0506/2020|2020-04-02|EPI\_ISL\_430054|Original|hCoV-19^^Utah|Human|Utah Public Health Laboratory|Utah Public Health Laboratory|Young|USA

>Spike|hCoV-19/Scotland/CVR2601/2020|2020-04-16|EPI\_ISL\_453063|Original|hCoV-19^^Scotland|Human|West of Scotland Specialist Virology Centre|COVID-19 Genomics UK (COG-UK) Consortium|Robertson|United Kingdom

>Spike|hCoV-19/Switzerland/BL-UHB-42189772/2020|2020-03-13|EPI\_ISL\_528050|Original|hCoV-19^^Basel-Land|Human|University Hospital Basel|University Hospital Basel|Roloff Handschin|Switzerland

>Spike|hCoV-19/Northern Ireland/QEUA-961BC7/2020|2020-08-02|EPI\_ISL\_536994|Original|hCoV-19^^Northern Ireland|Human|Lighthouse Lab in Glasgow|Wellcome Sanger Institute for the COVID-19 Genomics UK (COG-UK) consortium|Davies|United Kingdom

>Spike|hCoV-19/Japan/PG-2661/2020|2020-04-00|EPI\_ISL\_690793|Original|hCoV-19^^Japan|Human|Tokyo Metropolitan Institute of Public Health|Pathogen Genomics Center|Sekizuka|Japan

>Spike|hCoV-19/Netherlands/ZH-EMC-1128/2020|2020-12-18|EPI\_ISL\_763207|Original|hCoV-19^^Zuid Holland|Human|Dutch COVID-19 response team|Erasmus Medical Center|Oude Munnink|Netherlands

>Spike|hCoV-19/USA/TX-HMH-2577/2020|2020-06-02|EPI\_ISL\_545400|Original|hCoV-19^^Texas|Human|Houston Methodist Hospital|Houston Methodist Hospital|Long|USA

>Spike|hCoV-19/England/ALDP-CBF5C9/2020|2020-12-20|EPI\_ISL\_760652|Original|hCoV-19^^England|Human|Lighthouse Lab in Alderley Park|Wellcome Sanger Institute for the COVID-19 Genomics UK (COG-UK) Consortium|Davies|United Kingdom

>Spike|hCoV-19/Wales/PHWC-165F65/2020|2020-05-14|EPI\_ISL\_490819|Original|hCoV-19^^Wales|Human|Wales Specialist Virology Centre Sequencing lab|COVID-19 Genomics UK (COG-UK) Consortium|Moore|United Kingdom

>Spike|hCoV-19/England/NORT-2982D8/2020|2020-04-28|EPI\_ISL\_488020|Original|hCoV-19^^England|Human|NU-OMICS DNA Sequencing research facility|Wellcome Sanger Institute for the COVID-19 Genomics UK (COG-UK) consortium|Davies|United Kingdom

>Spike|hCoV-19/England/QEUA-B2CF24/2020|2020-11-04|EPI\_ISL\_680087|Original|hCoV-19^^England|Human|Department of Pathology|COVID-19 Genomics UK (COG-UK) Consortium|Goodfellow|United Kingdom

>Spike|hCoV-19/Denmark/ALAB-SSI383/2020|2020-03-24|EPI\_ISL\_429483|Original|hCoV-19^^Denmark|Human|Department of Virus and Microbiological Special Diagnostics|Albertsen lab|Kirkegaard|Denmark



>Spike|hCoV-19/England/QEUA-B69750/2020|2020-11-11|EPI\_ISL\_661464|Original|hCoV-19^^England|Human|Lighthouse Lab in Glasgow|Wellcome Sanger Institute for the COVID-19 Genomics UK (COG-UK) Consortium|Davies|United Kingdom

>Spike|hCoV-19/Denmark/ALAB-SSI-848/2020|2020-03-30|EPI\_ISL\_444939|Original|hCoV-19^^Denmark|Human|Department of Virus and Microbiological Special Diagnostics|Albertsen lab|Kirkegaard|Denmark

>Spike|hCoV-19/USA/WA-UW-8872/2020|2020-05-09|EPI\_ISL\_570223|Original|hCoV-19^^Washington|Human|UW Virology Lab|UW Virology Lab|Roychoudhury|USA

>Spike|hCoV-19/England/BRIS-12A870/2020|2020-04-29|EPI\_ISL\_458414|Original|hCoV-19^^England|Human|PHE South West Regional Laboratory|Wellcome Sanger Institute for the COVID-19 Genomics UK (COG-UK) consortium|Davies|United Kingdom

>Spike|hCoV-19/USA/CA-CZB-14862/2020|2020-11-22|EPI\_ISL\_739198|Original|hCoV-19^^California|Human|Humboldt County Public Health Laboratory|Chan-Zuckerberg Biohub|Kamm|USA

>Spike|hCoV-19/Canada/ON-SLB3140/2020|2020-04-25|EPI\_ISL\_717738|Original|hCoV-19^^Ontario|Human|Kingston Health Sciences Centre and Queen's University|Ontario Institute for Cancer Research|de Borja|Canada

>Spike|hCoV-19/USA/CA-IGI-0769/2020|2020-07-31|EPI\_ISL\_677887|Original|hCoV-19^^California|Human|Innovative Genomics Institute|Innovative Genomics Institute|Wyman|USA

>Spike|hCoV-19/England/ALDP-94484B/2020|2020-06-07|EPI\_ISL\_555611|Original|hCoV-19^^England|Human|Lighthouse Lab in Alderley Park|Wellcome Sanger Institute for the COVID-19 Genomics UK (COG-UK) consortium|Davies|United Kingdom

>Spike|hCoV-19/England/MILK-BDB74A/2020|2020-11-26|EPI\_ISL\_709716|Original|hCoV-19^^England|Human|Lighthouse Lab in Milton Keynes|Wellcome Sanger Institute for the COVID-19 Genomics UK (COG-UK) Consortium|Davies|United Kingdom

>Spike|hCoV-19/Bangladesh/G-171/2020|2020-07-01|EPI\_ISL\_600502|Original|hCoV-19^^Chattogram|Human|Institute of Epidemiology Disease Control And Research|Institute for Developing Science and Health Initiatives|Cowley|Bangladesh

>Spike|hCoV-19/Wales/PHWC-4A15E0/2020|2020-12-10|EPI\_ISL\_743698|Original|hCoV-19^^Wales|Human|Wales Specialist Virology Centre Sequencing lab|COVID-19 Genomics UK (COG-UK) Consortium|Moore|United Kingdom

>Spike|hCoV-19/England/MILK-B95D1D/2020|2020-11-13|EPI\_ISL\_676231|Original|hCoV-19^^England|Human|Lighthouse Lab in Milton Keynes|Wellcome Sanger Institute for the COVID-19 Genomics UK (COG-UK) Consortium|Davies|United Kingdom

>Spike|hCoV-19/England/MILK-A7C6A9/2020|2020-10-15|EPI\_ISL\_607510|Original|hCoV-19^^England|Human|Lighthouse Lab in Milton Keynes|Wellcome Sanger Institute for the COVID-19 Genomics UK (COG-UK) consortium|Davies|United Kingdom

>Spike|hCoV-19/Switzerland/BE-ETHZ-310427/2020|2020-10-08|EPI\_ISL\_603501|Original|hCoV-19^^Bern|Human|Viollier AG|Department of Biosystems Science and Engineering|Nadeau|Switzerland

>Spike|hCoV-19/USA/IL-NM-0505/2020|2020-04-25|EPI\_ISL\_626436|Original|hCoV-19^^Illinois|Human|Northwestern Memorial Hospital|Ozer Lab|Ozer|USA

>Spike|hCoV-19/USA/AZ-TG666157/2020|2020-05-02|EPI\_ISL\_696238|Original|hCoV-19^^Arizona|Human|Sonora Quest Laboratories|TGen North|French|USA

>Spike|hCoV-19/USA/NY-Wadsworth-292275-01/2020|2020-12-02|EPI\_ISL\_767640|Original|hCoV-19^^New York|Human|MEMORIAL SLOAN KETTERING CANCER CENTER|Wadsworth Center|Lasek-Nesselquist|USA

>Spike|hCoV-19/England/CAMB-1B18E7/2020|2020-05-07|EPI\_ISL\_458547|Original|hCoV-19^^England|Human|Department of Pathology|Wellcome Sanger Institute for the COVID-19 Genomics UK (COG-UK) consortium|Davies|United Kingdom

>Spike|hCoV-19/Portugal/PT1167/2020|2020-04-05|EPI\_ISL\_511713|Original|hCoV-19^^Portugal|Human|Instituto Nacional de Saude (INSA)|Instituto Nacional de Saude (INSA)|Borges|Portugal

>Spike|hCoV-19/Japan/PG-6556/2020|2020-09-00|EPI\_ISL\_687670|Original|hCoV-19^^Japan|Human|Pathogen Genomics Center|Pathogen Genomics Center|Sekizuka|Japan

>Spike|hCoV-19/Denmark/DCGC-5963/2020|2020-09-28|EPI\_ISL\_621072|Original|hCoV-19^^Midtjylland|Human|Department of Virus and Microbiological Special Diagnostics|Albertsen lab|Michaelsen|Denmark

>Spike|hCoV-19/Australia/VIC4435/2020|2020-07-18|EPI\_ISL\_519731|Original|hCoV-19^^Victoria|Human|Microbiological Diagnostic Unit - Public Health Laboratory (MDU-PHL)|MDU-PHL|Schultz|Australia

>Spike|hCoV-19/England/QEUH-9CA7F5/2020|2020-09-10|EPI\_ISL\_567525|Original|hCoV-19^^England|Human|Lighthouse Lab in Glasgow|Wellcome Sanger Institute for the COVID-19 Genomics UK (COG-UK) consortium|Davies|United Kingdom

>Spike|hCoV-19/Japan/PG-8276/2020|2020-08-00|EPI\_ISL\_687375|Original|hCoV-19^^Japan|Human|Pathogen Genomics Center|Pathogen Genomics Center|Sekizuka|Japan

>Spike|hCoV-19/USA/CA-IGI-0350/2020|2020-07-17|EPI\_ISL\_754874|Original|hCoV-19^^California|Human|Innovative Genomics Institute|Innovative Genomics Institute|Wyman|USA

>Spike|hCoV-19/USA/MN-MDH-1818/2020|2020-04-15|EPI\_ISL\_590820|Original|hCoV-19^^Minnesota|Human|Minnesota Department of Health|Minnesota Department of Health|Lorentz|USA

>Spike|hCoV-19/South Korea/KCDC2027/2020|2020-02-19|EPI\_ISL\_471443|Original|hCoV-19^^South Korea|Human|Division of Viral Diseases|Division of Viral Diseases|Kim|South Korea

>Spike|hCoV-19/Canada/BC\_02051350/2020|2020-04-00|EPI\_ISL\_466713|Original|hCoV-19^^British Columbia|Human|BCCDC Public Health Laboratory|BCCDC Public Health Laboratory|Harrigan|Canada

>Spike|hCoV-19/Denmark/DCGC-21037/2020|2020-12-21|EPI\_ISL\_758847|Original|hCoV-19^^Hovedstaden|Human|Department of Virus and Microbiological Special Diagnostics|Albertsen Lab|Michaelsen|Denmark

>Spike|hCoV-19/United Arab Emirates/0811/2020|2020-05-19|EPI\_ISL\_698950|Original|hCoV-19^^Abu Dhabi|Human|Group 42 (G42) Healthcare|G42 Healthcare|Ogrodzki|United Arab Emirates

>Spike|hCoV-19/USA/MI-UM-10036638082/2020|2020-10-27|EPI\_ISL\_650058|Original|hCoV-19^^Michigan|Human|University of Michigan Clinical Microbiology Laboratory|Lauring Lab|Valesano|USA

>Spike|hCoV-19/Scotland/QEUH-9CF3A1/2020|2020-09-17|EPI\_ISL\_602005|Original|hCoV-19^^Scotland|Human|Lighthouse Lab in Glasgow|Wellcome Sanger Institute for the COVID-19 Genomics UK (COG-UK) consortium|Davies|United Kingdom

>Spike|hCoV-19/Colombia/DC-INS-79190/2020|2020-03-12|EPI\_ISL\_456120|Original|hCoV-19^^Bogota|Human|Instituto Nacional de Salud - Unidad de Secuenciación y Análisis Genómico|Instituto Nacional de Salud|Díaz|Colombia

>Spike|hCoV-19/USA/WI-UW-1405/2020|2020-09-09|EPI\_ISL\_536775|Original|hCoV-19^^Wisconsin|Human|University of Wisconsin-Madison AIDS Vaccine Research Laboratories|University of Wisconsin-Madison AIDS Vaccine Research Laboratories|Baczenas|USA

>Spike|hCoV-19/Spain/RI-IBV-99005887/2020|2020-03-11|EPI\_ISL\_537429|Original|hCoV-19^^La Rioja|Human|Centro de Investigación Biomédica de La Rioja - Hospital San Pedro Logroño|SeqCOVID-SPAIN consortium|IBV (CSIC)|Comas|Spain

>Spike|hCoV-19/USA/WI-UW-2182/2020|2020-10-21|EPI\_ISL\_677586|Original|hCoV-19^^Wisconsin|Human|University of Wisconsin-Madison AIDS Vaccine Research Laboratories|University of Wisconsin-Madison AIDS Vaccine Research Laboratories|Baczenas|USA

>Spike|hCoV-19/USA/MD-HP00149/2020|2020-03-23|EPI\_ISL\_457779|Original|hCoV-19^^Maryland|Human|Johns Hopkins Hospital Department of Pathology|Johns Hopkins Hospital Department of Pathology|Ramakrishnan|USA

>Spike|hCoV-19/USA/TX-DSHS-0107/2020|2020-05-28|EPI\_ISL\_522390|Original|hCoV-19^^Texas|Human|Texas Department of State Health Services|Texas Department of State Health Services|Rahman|USA

>Spike|hCoV-19/Bangladesh/DNAS\_DRICM\_isl\_R-6/2020|2020-07-17|EPI\_ISL\_775005|Original|hCoV-19^^Dhaka|Human|Designated Reference Institute for Chemical Measurements (DRICM)|DNA SOLUTION LTD.|Rabbi|Bangladesh

>Spike|hCoV-19/USA/CA-CZB-3713/2020|2020-07-21|EPI\_ISL\_548384|Original|hCoV-19^^California|Human|County of Santa Clara Public Health Department|Chan-Zuckerberg Biohub|Bhatt|USA

>Spike|hCoV-19/USA/FL-BPHL-0860/2020|2020-06-29|EPI\_ISL\_514206|Original|hCoV-19^^Florida|Human|Florida Bureau of Public Health Laboratories|Florida Bureau of Public Health Laboratories|Blanton|USA

>Spike|hCoV-19/England/CAMB-7A62D/2020|2020-04-02|EPI\_ISL\_441190|Original|hCoV-19^^England|Human|Department of Pathology|Wellcome Sanger Institute for the COVID-19 Genomics UK (COG-UK) consortium|Amato|United Kingdom

>Spike|hCoV-19/Japan/PG-3407/2020|2020-04-00|EPI\_ISL\_691521|Original|hCoV-19^^Japan|Human|Sakai City Institute of Public Health|Pathogen Genomics Center|Sekizuka|Japan

>Spike|hCoV-19/Portugal/PT1767/2020|2020-11-15|EPI\_ISL\_765214|Original|hCoV-19^^Portugal|Human|Instituto Nacional de Saude (INSA)|Instituto Nacional de Saude (INSA)|Borges|Portugal

>Spike|hCoV-19/Scotland/QEUH-BCCCD4/2020|2020-11-26|EPI\_ISL\_710797|Original|hCoV-19^^Scotland|Human|Lighthouse Lab in Glasgow|Wellcome Sanger Institute for the COVID-19 Genomics UK (COG-UK) Consortium|Davies|United Kingdom

>Spike|hCoV-19/Wales/PHWC-1604C5/2020|2020-05-20|EPI\_ISL\_472941|Original|hCoV-19^^Wales|Human|Wales Specialist Virology Centre Sequencing lab|COVID-19 Genomics UK (COG-UK) Consortium|Moore|United Kingdom

>Spike|hCoV-19/England/NOTT-1150DA/2020|2020-10-13|EPI\_ISL\_584789|Original|hCoV-19^^England|Human|Queens Medical Centre|COVID-19 Genomics UK (COG-UK) Consortium|Loose|United Kingdom

>Spike|hCoV-19/England/CAMC-B9A8CC/2020|2020-11-15|EPI\_ISL\_673289|Original|hCoV-19^^England|Human|Lighthouse Lab in Cambridge|Wellcome Sanger Institute for the COVID-19 Genomics UK (COG-UK) Consortium|Davies|United Kingdom

>Spike|hCoV-19/Wales/ALDP-A95631/2020|2020-10-20|EPI\_ISL\_624873|Original|hCoV-19^^Wales|Human|Lighthouse Lab in Alderley Park|Wellcome Sanger Institute for the COVID-19 Genomics UK (COG-UK) consortium|Davies|United Kingdom

>Spike|hCoV-19/England/20169015604/2020|2020-04-17|EPI\_ISL\_465200|Original|hCoV-19^^England|Human|Respiratory Virus Unit|Respiratory Virus Unit|Platt|United Kingdom

>Spike|hCoV-19/Sweden/20-08360/2020|2020-03-24|EPI\_ISL\_476141|Original|hCoV-19^^Vastmanland|Human|Klinisk Mikrobiologi|The Public Health Agency of Sweden|Svartstr\u00f6m|Sweden

>Spike|hCoV-19/England/MILK-95D8A9/2020|2020-06-21|EPI\_ISL\_556251|Original|hCoV-19^^England|Human|Lighthouse Lab in Milton Keynes|Wellcome Sanger Institute for the COVID-19 Genomics UK (COG-UK) consortium|Davies|United Kingdom

>Spike|hCoV-19/USA/WA-UW-13356/2020|2020-07-01|EPI\_ISL\_501141|Original|hCoV-19^^Washington|Human|University of Washington Virology Lab|University of Washington Virology Lab|Roychoudhury|USA

>Spike|hCoV-19/Scotland/EDB4517/2020|2020-05-06|EPI\_ISL\_461714|Original|hCoV-19^^Scotland|Human|Virology Department|COVID-19 Genomics UK (COG-UK) Consortium|Williams|United Kingdom

>Spike|hCoV-19/England/MILK-A18162/2020|2020-10-01|EPI\_ISL\_595021|Original|hCoV-19^^England|Human|Northumbria University / South Tees Hospitals NHS Foundation Trust / North Cumbria Integrated Care NHS Foundation Trust / North Tees and Hartlepool NHS Foundation Trust / Newcastle Hospitals NHS Foundation Trust|COVID-19 Genomics UK (COG-UK) Consortium|Bashton|United Kingdom

>Spike|hCoV-19/France/ARA-SC733/2020|2020-11-16|EPI\_ISL\_779827|Original|hCoV-19^^Auvergne-Rh\u00f4ne-Alpes|Human|Laboratoire de virologie|CNR Virus des Infections Respiratoires - France SUD|Bal|France

>Spike|hCoV-19/England/QEUH-AF5480/2020|2020-10-30|EPI\_ISL\_663098|Original|hCoV-19^^England|Human|Lighthouse Lab in Glasgow|Wellcome Sanger Institute for the COVID-19 Genomics UK (COG-UK) Consortium|Davies|United Kingdom

>Spike|hCoV-19/USA/CA-IGI-0799/2020|2020-06-30|EPI\_ISL\_677892|Original|hCoV-19^^California|Human|Innovative Genomics Institute|Innovative Genomics Institute|Wyman|USA

>Spike|hCoV-19/England/ALDP-A2D66B/2020|2020-10-06|EPI\_ISL\_586585|Original|hCoV-19^^England|Human|Lighthouse Lab in Alderley Park|Wellcome Sanger Institute for the COVID-19 Genomics UK (COG-UK) consortium|Davies|United Kingdom

>Spike|hCoV-19/South Korea/KDCA0165/2020|2020-11-21|EPI\_ISL\_747399|Original|hCoV-19^^South Korea|Human|Division of Emerging Infectious Diseases|Division of Emerging Infectious Diseases|Park|South Korea

>Spike|hCoV-19/England/QEUH-B2CFBB/2020|2020-11-04|EPI\_ISL\_680092|Original|hCoV-19^^England|Human|Department of Pathology|COVID-19 Genomics UK (COG-UK) Consortium|Goodfellow|United Kingdom

>Spike|hCoV-19/England/CAMB-71C8E/2020|2020-03-30|EPI\_ISL\_439567|Original|hCoV-19^^England|Human|Department of Pathology|Wellcome Sanger Institute for the COVID-19 Genomics UK (COG-UK) consortium|Amato|United Kingdom

>Spike|hCoV-19/Australia/VIC11726/2020|2020-07-22|EPI\_ISL\_563472|Original|hCoV-19^^Victoria|Human|Microbiological Diagnostic Unit - Public Health Laboratory (MDU-PHL) |MDU-PHL|Schultz|Australia

>Spike|hCoV-19/England/BRIS-128B4C/2020|2020-04-14|EPI\_ISL\_458853|Original|hCoV-19^^England|Human|PHE South West Regional Laboratory|Wellcome Sanger Institute for the COVID-19 Genomics UK (COG-UK) consortium|Davies|United Kingdom

>Spike|hCoV-19/USA/AZ-TG396369/2020|2020-06-12|EPI\_ISL\_694825|Original|hCoV-19^^Arizona|Human|AZ SPHL|TGen North|French|USA

>Spike|hCoV-19/England/ALDP-A87B7F/2020|2020-10-17|EPI\_ISL\_606152|Original|hCoV-19^^England|Human|Lighthouse Lab in Alderley Park|Wellcome Sanger Institute for the COVID-19 Genomics UK (COG-UK) consortium|Davies|United Kingdom

>Spike|hCoV-19/Australia/VIC17820/2020|2020-07-28|EPI\_ISL\_779475|Original|hCoV-19^^Victoria|Human|Microbiological Diagnostic Unit - Public Health Laboratory (MDU-PHL) |MDU-PHL|Beck|Australia

>Spike|hCoV-19/USA/MN-MDH-1134/2020|2020-04-26|EPI\_ISL\_476719|Original|hCoV-19^^Minnesota|Human|Minnesota Department of Health|Minnesota Department of Health|Garfin|USA

>Spike|hCoV-19/Wales/PHWC-49E2EF/2020|2020-12-07|EPI\_ISL\_742983|Original|hCoV-19^^Wales|Human|Wales Specialist Virology Centre Sequencing lab|COVID-19 Genomics UK (COG-UK) Consortium|Moore|United Kingdom

>Spike|hCoV-19/USA/WA-S1263/2020|2020-05-13|EPI\_ISL\_495713|Original|hCoV-19^^Washington|Human|Washington State Department of Health|Seattle Flu Study|Lee|USA

>Spike|hCoV-19/Japan/PG-2062/2020|2020-04-00|EPI\_ISL\_685667|Original|hCoV-19^^Japan|Human|Tokyo Metropolitan Institute of Public Health|Pathogen Genomics Center|Sekizuka|Japan

>Spike|hCoV-19/Australia/VIC2852/2020|2020-07-03|EPI\_ISL\_521683|Original|hCoV-19^^Victoria|Human|Microbiological Diagnostic Unit - Public Health Laboratory (MDU-PHL) |MDU-PHL|Schultz|Australia

>Spike|hCoV-19/Poland/PL\_MCB\_43/2020|2020-04-07|EPI\_ISL\_645042|Original|hCoV-19^^Poland|Human|Human Genome Variation Research Group|Human Genome Variation Research Group||Poland

>Spike|hCoV-19/Japan/IC-0364/2020|2020-11-00|EPI\_ISL\_721606|Original|hCoV-19^^Japan|Human|Pathogen Genomics Center|Pathogen Genomics Center|Sekizuka|Japan

>Spike|hCoV-19/USA/CA-CZB-9759/2020|2020-06-03|EPI\_ISL\_672168|Original|hCoV-19^^California|Human|The Ashley Laboratory|Chan-Zuckerberg Biohub|Bhatt|USA

>Spike|hCoV-19/England/ALDP-B1B34A/2020|2020-11-01|EPI\_ISL\_645547|Original|hCoV-19^^England|Human|Lighthouse Lab in Alderley Park|Wellcome Sanger Institute for the COVID-19 Genomics UK (COG-UK) Consortium|Davies|United Kingdom

>Spike|hCoV-19/USA/WA-S850/2020|2020-04-23|EPI\_ISL\_463340|Original|hCoV-19^^Washington|Human|Washington State Department of Health|Seattle Flu Study|Bedford|USA

>Spike|hCoV-19/USA/MI-MDHHS-SC20148/2020|2020-03-24|EPI\_ISL\_436856|Original|hCoV-19^^Michigan|Human|Michigan Department of Health and Human Services|Michigan Department of Health and Human Services|Blankenship|USA

>Spike|hCoV-19/England/ALDP-92A0CB/2020|2020-06-22|EPI\_ISL\_551548|Original|hCoV-19^^England|Human|Lighthouse Lab in Alderley Park|Wellcome Sanger Institute for the COVID-19 Genomics UK (COG-UK) consortium|Davies|United Kingdom

>Spike|hCoV-19/USA/MN-MDH-2230/2020|2020-12-02|EPI\_ISL\_770804|Original|hCoV-19^^Minnesota|Human|Vault Health|Minnesota Department of Health|Lorentz|USA

>Spike|hCoV-19/USA/TX-DSHS-0528/2020|2020-06-23|EPI\_ISL\_560970|Original|hCoV-19^^Texas|Human|Texas Department of State Health Services|Texas Department of State Health Services|Rahman|USA

>Spike|hCoV-19/Japan/PG-4226/2020|2020-07-00|EPI\_ISL\_692464|Original|hCoV-19^^Japan|Human|Fukuoka Institute of Health and Environmental Sciences|Pathogen Genomics Center|Sekizuka|Japan

>Spike|hCoV-19/England/CAMC-9C006D/2020|2020-09-08|EPI\_ISL\_573168|Original|hCoV-19^^England|Human|Oxford Viromics|COVID-19 Genomics UK (COG-UK) Consortium|Golubchik|United Kingdom

>Spike|hCoV-19/Switzerland/Vs-ETHZ-350316/2020|2020-11-03|EPI\_ISL\_729192|Original|hCoV-19^^Valais|Human|Viollier AG|Department of Biosystems Science and Engineering|Nadeau|Switzerland

>Spike|hCoV-19/Canada/QC-LSPQ-L00240158/2020|2020-03-26|EPI\_ISL\_536265|Original|hCoV-19^^Quebec|Human|H\u00f4pital de Chandler|Laboratoire de sant\u00e9 publique du Qu\u00e9bec|Moreira|Canada

>Spike|hCoV-19/Ireland/LK-UHL124/2020|2020-04-07|EPI\_ISL\_681725|Original|hCoV-19^^Limerick|Human|University Hospital Limerick|Irish Coronavirus Sequencing Consortium - Teagasc Moorepark|Walsh|Ireland

>Spike|hCoV-19/Denmark/DCGC-4460/2020|2020-09-07|EPI\_ISL\_615645|Original|hCoV-19^^Syddanmark|Human|Department of Virus and Microbiological Special Diagnostics|Albertsen lab|Michaelsen|Denmark

>Spike|hCoV-19/USA/AR-CDC-4198/2020|2020-07-10|EPI\_ISL\_509668|Original|hCoV-19^^Arkansas|Human|AR Dept. of Health-Public Health Lab|Pathogen Discovery|Queen|USA

>Spike|hCoV-19/France/PAC-IHU-1419/2020|2020-08-10|EPI\_ISL\_569157|Original|hCoV-19^^Provence-Alpes-C\u00f4te-d\u00e0z|Human|MEPHI|MEPHI|Levasseur|France

>Spike|hCoV-19/Czech Republic/NRL-8609/2020|2020-09-04|EPI\_ISL\_584082|Original|hCoV-19^^Central Bohemia Region|Human|The National Institute of Public Health|State Veterinary Institute Prague|Nagy|Czech Republic

>Spike|hCoV-19/Japan/PG-2840/2020|2020-04-00|EPI\_ISL\_690967|Original|hCoV-19^^Japan|Human|Pathogen Genomics Center|Pathogen Genomics Center|Sekizuka|Japan

>Spike|hCoV-19/England/PORT-2E9D9B/2020|2020-00-00|EPI\_ISL\_706881|Original|hCoV-19^^England|Human|Centre for Enzyme Innovation|COVID-19 Genomics UK (COG-UK) Consortium|Robson|United Kingdom

>Spike|hCoV-19/England/MILK-B3A5C7/2020|2020-11-02|EPI\_ISL\_658985|Original|hCoV-19^^England|Human|Lighthouse Lab in Milton Keynes|Wellcome Sanger Institute for the COVID-19 Genomics UK (COG-UK) Consortium|Davies|United Kingdom

>Spike|hCoV-19/Australia/VIC8073/2020|2020-08-17|EPI\_ISL\_564832|Original|hCoV-19^^Victoria|Human|Microbiological Diagnostic Unit - Public Health Laboratory (MDU-PHL)|MDU-PHL|Schultz|Australia

>Spike|hCoV-19/USA/OR-OHSU-1935/2020|2020-07-29|EPI\_ISL\_526074|Original|hCoV-19^^Oregon|Human|OHSU Lab Services Molecular Microbiology Lab|Oregon SARS-CoV-2 Genome Sequencing Center|O'Roak|USA

>Spike|hCoV-19/England/NORW-F52CC/2020|2020-11-19|EPI\_ISL\_725241|Original|hCoV-19^^England|Human|Quadram Institute Bioscience|COVID-19 Genomics UK (COG-UK) Consortium|Alikhan|United Kingdom

>Spike|hCoV-19/USA/UT-UPHL-2009388/2020|2020-05-29|EPI\_ISL\_605151|Original|hCoV-19^^Utah|Human|Utah Public Health Laboratory|Utah Public Health Laboratory|Young|USA

>Spike|hCoV-19/Kenya/C1499/2020|2020-04-20|EPI\_ISL\_457863|Original|hCoV-19^^Kenya|Human|KEMRI-CGMR-C|KEMRI-Wellcome Trust Research Programme|KEMRI-CGMR-C Kilifi|Githinji|Kenya

>Spike|hCoV-19/England/ALDP-9561D2/2020|2020-06-11|EPI\_ISL\_553918|Original|hCoV-19^^England|Human|Lighthouse Lab in Alderley Park|Wellcome Sanger Institute for the COVID-19 Genomics UK (COG-UK) consortium|Davies|United Kingdom

>Spike|hCoV-19/England/GSTT-265E4B0/2020|2020-03-31|EPI\_ISL\_484208|Original|hCoV-19^^England|Human|Centre for Clinical Infection and Diagnostics Research and Genomics Innovation Unit|COVID-19 Genomics UK (COG-UK) Consortium|Awan|United Kingdom

>Spike|hCoV-19/USA/FL-BPHL-1085/2020|2020-05-22|EPI\_ISL\_526571|Original|hCoV-19^^Florida|Human|Florida Bureau of Public Health Laboratories|Florida Bureau of Public Health Laboratories|Blanton|USA

>Spike|hCoV-19/England/MILK-B3D7CE/2020|2020-11-01|EPI\_ISL\_706236|Original|hCoV-19^^England|Human|Oxford Viromics|COVID-19 Genomics UK (COG-UK) Consortium|Golubchik|United Kingdom

>Spike|hCoV-19/Switzerland/BS-ETHZ-280117/2020|2020-09-08|EPI\_ISL\_560471|Original|hCoV-19^^Basel-Stadt|Human|Viollier AG|Department of Biosystems Science and Engineering|Nadeau|Switzerland

>Spike|hCoV-19/England/BRIS-12CF1F/2020|2020-04-24|EPI\_ISL\_481812|Original|hCoV-19^^England|Human|PHE South West Regional Laboratory|Wellcome Sanger Institute for the COVID-19 Genomics UK (COG-UK) consortium|Davies|United Kingdom

>Spike|hCoV-19/Serbia/Novi Sad-196221606/2020|2020-06-15|EPI\_ISL\_676592|Original|hCoV-19^^Novi Sad|Human|Scientific Veterinary Institute Novi Sad|Veterinary Specialized Institute \Kraljevo\|Vidanovic|Serbia

>Spike|hCoV-19/India/MH-ACTREC-292/2020|2020-07-14|EPI\_ISL\_699944|Original|hCoV-19^^Maharashtra|Human|Hematopathology Laboratory|Hematopathology Laboratory|Patkar|India

>Spike|hCoV-19/USA/WY-UNM-WY00106/2020|2020-07-28|EPI\_ISL\_582222|Original|hCoV-19^^Wyoming|Human|Wyoming Public Health Laboratory|Center for Global Health|Domman|USA

>Spike|hCoV-19/USA/DC-CDC-8704/2020|2020-04-21|EPI\_ISL\_576178|Original|hCoV-19^^District of Columbia|Human|DC Public Health Lab/ Dept. of Forensic Sciences|Pathogen Discovery|Queen|USA

>Spike|hCoV-19/England/ALDP-BB2E35/2020|2020-11-20|EPI\_ISL\_702722|Original|hCoV-19^^England|Human|Lighthouse Lab in Alderley Park|Wellcome Sanger Institute for the COVID-19 Genomics UK (COG-UK) Consortium|Davies|United Kingdom

>Spike|hCoV-19/Netherlands/NA\_99/2020|2020-03-17|EPI\_ISL\_422858|Original|hCoV-19^^Netherlands|Human|Dutch COVID-19 response team|Erasmus Medical Center|Oude Munnink|Netherlands

>Spike|hCoV-19/Wales/PHWC-48212D/2020|2020-10-20|EPI\_ISL\_613200|Original|hCoV-19^^Wales|Human|Wales Specialist Virology Centre Sequencing lab|COVID-19 Genomics UK (COG-UK) Consortium|Moore|United Kingdom

>Spike|hCoV-19/Denmark/DCGC-20875/2020|2020-12-21|EPI\_ISL\_758852|Original|hCoV-19^^Nordjylland|Human|Department of Virus and Microbiological Special Diagnostics|Albertsen Lab|Michaelsen|Denmark

>Spike|hCoV-19/Wales/PHWC-2E28E/2020|2020-04-07|EPI\_ISL\_446079|Original|hCoV-19^^Wales|Human|Wales Specialist Virology Centre|Public Health Wales Microbiology Cardiff|Moore|United Kingdom

>Spike|hCoV-19/SaudiArabia/KAUST-JEDDAH558/2020|2020-04-21|EPI\_ISL\_512959|Original|hCoV-19^^Jeddah|Human|Pathogen Genomics Lab King Abdullah University of Science and Technology(KAUST)|Pathogen Genomics Lab King Abdullah University of Science and Technology(KAUST)|Mohamed Ghazzali|Saudi Arabia

>Spike|hCoV-19/England/MILK-A18DB9/2020|2020-10-01|EPI\_ISL\_612459|Original|hCoV-19^^England|Human|Wales Specialist Virology Centre Sequencing lab|COVID-19 Genomics UK (COG-UK) Consortium|Moore|United Kingdom

>Spike|hCoV-19/England/QEUA-99809B/2020|2020-08-27|EPI\_ISL\_537184|Original|hCoV-19^^England|Human|Lighthouse Lab in Glasgow|Wellcome Sanger Institute for the COVID-19 Genomics UK (COG-UK) consortium|Davies|United Kingdom

>Spike|hCoV-19/Sweden/20-50482/2020|2020-03-26|EPI\_ISL\_475142|Original|hCoV-19^^Stockholm|Human|Karolinska Universitetslaboratoriet|The Public Health Agency of Sweden|Svartstr\u00f6m|Sweden

>Spike|hCoV-19/Australia/VIC6396/2020|2020-07-24|EPI\_ISL\_521188|Original|hCoV-19^^Victoria|Human|Microbiological Diagnostic Unit - Public Health Laboratory (MDU-PHL)|MDU-PHL|Schultz|Australia

>Spike|hCoV-19/USA/AZ-TG618034/2020|2020-07-20|EPI\_ISL\_695678|Original|hCoV-19^^Arizona|Human|AZ SPHL|TGen North|French|USA

>Spike|hCoV-19/Denmark/DCGC-13707/2020|2020-11-30|EPI\_ISL\_712972|Original|hCoV-19^^Midtjylland|Human|Department of Virus and Microbiological Special Diagnostics|Albertsen Lab|Michaelsen|Denmark

>Spike|hCoV-19/Australia/VIC9257/2020|2020-08-21|EPI\_ISL\_565472|Original|hCoV-19^^Victoria|Human|Microbiological Diagnostic Unit - Public Health Laboratory (MDU-PHL)|MDU-PHL|Schultz|Australia

>Spike|hCoV-19/USA/CA-CZB-14266/2020|2020-08-24|EPI\_ISL\_739575|Original|hCoV-19^^California|Human|Alameda County Public Health Lab|Chan-Zuckerberg Biohub|Kamm|USA

>Spike|hCoV-19/Australia/VIC14081/2020|2020-09-16|EPI\_ISL\_563960|Original|hCoV-19^^Victoria|Human|Microbiological Diagnostic Unit - Public Health Laboratory (MDU-PHL)|MDU-PHL|Schultz|Australia

>Spike|hCoV-19/USA/CA-CZB-1360/2020|2020-04-12|EPI\_ISL\_468372|Original|hCoV-19^^California|Human|Alameda County Public Health Lab|Chan-Zuckerberg Biohub|Hao|USA

>Spike|hCoV-19/Wales/PHWC-495109/2020|2020-11-25|EPI\_ISL\_726302|Original|hCoV-19^^Wales|Human|Originating lab|COVID-19 Genomics UK (COG-UK) Consortium|Moore|United Kingdom

>Spike|hCoV-19/England/ALDP-B82F0E/2020|2020-11-14|EPI\_ISL\_675169|Original|hCoV-19^^England|Human|Lighthouse Lab in Alderley Park|Wellcome Sanger Institute for the COVID-19 Genomics UK (COG-UK) Consortium|Davies|United Kingdom

>Spike|hCoV-19/England/ALDP-9FDD8E/2020|2020-10-01|EPI\_ISL\_587724|Original|hCoV-19^^England|Human|Lighthouse Lab in Alderley Park|Wellcome Sanger Institute for the COVID-19 Genomics UK (COG-UK) consortium|Davies|United Kingdom

>Spike|hCoV-19/England/QEUA-A7636C/2020|2020-10-11|EPI\_ISL\_665972|Original|hCoV-19^^England|Human|Queens Medical Centre|COVID-19 Genomics UK (COG-UK) Consortium|Loose|United Kingdom

>Spike|hCoV-19/Ecuador/USFQ-230/2020|2020-10-01|EPI\_ISL\_660530|Original|hCoV-19^^Tungurahua|Human|Institute of Microbiology|Institute of Microbiology|Cardenas|Ecuador

>Spike|hCoV-19/USA/CO-CDPHE-2009170196/2020|2020-09-16|EPI\_ISL\_710294|Original|hCoV-19^^Colorado|Human|Colorado Department of Public Health and Environment|Colorado Department of Public Health and Environment|Bankers|USA

>Spike|hCoV-19/Wales/PHWC-30C03/2020|2020-04-10|EPI\_ISL\_446337|Original|hCoV-19^^Wales|Human|Wales Specialist Virology Centre|Public Health Wales Microbiology Cardiff|Moore|United Kingdom

>Spike|hCoV-19/India/OR-ILSCV32465/2020|2020-05-30|EPI\_ISL\_481156|Original|hCoV-19^^Odisha|Human|Immunogenomics lab|Immunogenomics lab|Raghav|India

>Spike|hCoV-19/Spain/MD-IBV-005333/2020|2020-03-17|EPI\_ISL\_510211|Original|hCoV-19^^Madrid|Human|Hospital General Universitario Gregorio Mara\u00f1a|SeqCOVID-SPAIN consortium/IBV (CSIC)|Comas|Spain

>Spike|hCoV-19/Denmark/DCGC-6682/2020|2020-10-12|EPI\_ISL\_619585|Original|hCoV-19^^Syddanmark|Human|Department of Virus and Microbiological Special Diagnostics|Albertsen lab|Michaelsen|Denmark

>Spike|hCoV-19/England/MILK-9582BF/2020|2020-06-12|EPI\_ISL\_554745|Original|hCoV-19^^England|Human|Lighthouse Lab in Milton Keynes|Wellcome Sanger Institute for the COVID-19 Genomics UK (COG-UK) consortium|Davies|United Kingdom

>Spike|hCoV-19/Papua New Guinea/6/2020|2020-07-20|EPI\_ISL\_693476|Original|hCoV-19^^Papua New Guinea|Human|Central Public Health Laboratory|National Public Health Laboratory|Mak|Papua New Guinea

>Spike|hCoV-19/Wales/PHWC-48DBCA/2020|2020-11-02|EPI\_ISL\_680737|Original|hCoV-19^^Wales|Human|Wales Specialist Virology Centre Sequencing lab|COVID-19 Genomics UK (COG-UK) Consortium|Moore|United Kingdom

>Spike|hCoV-19/USA/WA-OHSU-2501/2020|2020-08-17|EPI\_ISL\_667229|Original|hCoV-19^^Washington|Human|OHSU Lab Services Molecular Microbiology Lab|Oregon SARS-CoV-2 Genome Sequencing Center|O'Roak|USA

>Spike|hCoV-19/USA/WI-GMF-26767/2020|2020-10-20|EPI\_ISL\_660962|Original|hCoV-19^^Wisconsin|Human|Gundersen Molecular Diagnostics Laboratory|Kabara Cancer Research Institute|Kenny|USA

>Spike|hCoV-19/England/BRIS-122517/2020|2020-04-04|EPI\_ISL\_440772|Original|hCoV-19^^England|Human|PHE South West Regional Laboratory|Wellcome Sanger Institute for the COVID-19 Genomics UK (COG-UK) consortium|Amato|United Kingdom

>Spike|hCoV-19/Wales/PHWC-49AF37/2020|2020-12-05|EPI\_ISL\_742274|Original|hCoV-19^^Wales|Human|Wales Specialist Virology Centre Sequencing lab|COVID-19 Genomics UK (COG-UK) Consortium|Moore|United Kingdom

>Spike|hCoV-19/USA/TX-HMH-2878/2020|2020-06-09|EPI\_ISL\_543847|Original|hCoV-19^^Texas|Human|Houston Methodist Hospital|Houston Methodist Hospital|Long|USA

>Spike|hCoV-19/Northern Ireland/NIRE-106BCC/2020|2020-05-19|EPI\_ISL\_501001|Original|hCoV-19^^Northern Ireland|Human|Regional Virus Laboratory|Wellcome Sanger Institute for the COVID-19 Genomics UK (COG-UK) consortium|Davies|United Kingdom

>Spike|hCoV-19/England/ALDP-A6CFCF/2020|2020-10-14|EPI\_ISL\_608290|Original|hCoV-19^^England|Human|Lighthouse Lab in Alderley Park|Wellcome Sanger Institute for the COVID-19 Genomics UK (COG-UK) consortium|Davies|United Kingdom

>Spike|hCoV-19/Cote d'Ivoire/BKE0042/2020|2020-06-04|EPI\_ISL\_614352|Original|hCoV-19^^Boauk\u00e9|Human|Molecular diagnostic unit for viral haemorrhagic fevers and emerging viruses|Project group Epidemiology of Highly Pathogenic Microorganisms|Calvignac-Spencer|C\u00f4te d'Ivoire

>Spike|hCoV-19/Scotland/QEUH-9CFCE2/2020|2020-09-16|EPI\_ISL\_601804|Original|hCoV-19^^Scotland|Human|Lighthouse Lab in Glasgow|Wellcome Sanger Institute for the COVID-19 Genomics UK (COG-UK) consortium|Davies|United Kingdom

>Spike|hCoV-19/Wales/PHWC-48C7E5/2020|2020-11-01|EPI\_ISL\_666470|Original|hCoV-19^^Wales|Human|Wales Specialist Virology Centre Sequencing lab|COVID-19 Genomics UK (COG-UK) Consortium|Moore|United Kingdom

>Spike|hCoV-19/Scotland/QEUH-9FF7D9/2020|2020-10-02|EPI\_ISL\_600457|Original|hCoV-19^^Scotland|Human|Lighthouse Lab in Glasgow|Wellcome Sanger Institute for the COVID-19 Genomics UK (COG-UK) consortium|Davies|United Kingdom

>Spike|hCoV-19/USA/WI-WSLH-200125/2020|2020-04-17|EPI\_ISL\_578354|Original|hCoV-19^^Wisconsin|Human|Wisconsin State Laboratory of Hygiene Communicable Disease Division|Wisconsin State Laboratory of Hygiene Communicable Disease Division|Florek|USA

>Spike|hCoV-19/Scotland/EDB6356/2020|2020-06-05|EPI\_ISL\_473946|Original|hCoV-19^^Scotland|Human|Virology Department|COVID-19 Genomics UK (COG-UK) Consortium|Williams|United Kingdom

>Spike|hCoV-19/Ireland/LD-NVRL-78IRL72811/2020|2020-11-23|EPI\_ISL\_752560|Original|hCoV-19^^Longford|Human|National Virus Reference Laboratory|National Virus Reference Laboratory|Gonzalez|Ireland

>Spike|hCoV-19/USA/UT-01898/2020|2020-04-13|EPI\_ISL\_470719|Original|hCoV-19^^Utah|Human|Utah Public Health Laboratory|Utah Public Health Laboratory|Butz|USA

>Spike|hCoV-19/USA/WA-S968/2020|2020-05-01|EPI\_ISL\_463458|Original|hCoV-19^^Washington|Human|Washington State Department of Health|Seattle Flu Study|Bedford|USA

>Spike|hCoV-19/Scotland/EDB11033/2020|2020-12-14|EPI\_ISL\_742194|Original|hCoV-19^^Scotland|Human|Virology Department|COVID-19 Genomics UK (COG-UK) Consortium|McHugh|United Kingdom

>Spike|hCoV-19/USA/TX-HMH-MCoV-9120/2020|2020-07-02|EPI\_ISL\_780952|Original|hCoV-19^^Texas|Human|Houston Methodist Hospital|Houston Methodist Hospital|Long|USA

>Spike|hCoV-19/England/ALDP-C06DDA/2020|2020-12-06|EPI\_ISL\_709346|Original|hCoV-19^^England|Human|Lighthouse Lab in Alderley Park|Wellcome Sanger Institute for the COVID-19 Genomics UK (COG-UK) Consortium|Davies|United Kingdom

>Spike|hCoV-19/Australia/VIC4693/2020|2020-07-17|EPI\_ISL\_519081|Original|hCoV-19^^Victoria|Human|Microbiological Diagnostic Unit - Public Health Laboratory (MDU-PHL)|MDU-PHL|Schultz|Australia

>Spike|hCoV-19/England/ALDP-B1BD00/2020|2020-11-01|EPI\_ISL\_645906|Original|hCoV-19^^England|Human|Lighthouse Lab in Alderley Park|Wellcome Sanger Institute for the COVID-19 Genomics UK (COG-UK) Consortium|Davies|United Kingdom

>Spike|hCoV-19/Norway/3106/2020|2020-08-04|EPI\_ISL\_549130|Original|hCoV-19^^Viken|Human|Ostfold Hospital Trust - Kalnes|Norwegian Institute of Public Health|Kopperud Riis|Norway

>Spike|hCoV-19/Italy/ABR-CAST-CH360/2020|2020-12-22|EPI\_ISL\_755572|Original|hCoV-19^^Abruzzo|Human|Center of Advanced Studies and Technology|Center of Advanced Studies and Technology|Ferrante,R.|Italy

>Spike|hCoV-19/Japan/IC-0409/2020|2020-12-00|EPI\_ISL\_736917|Original|hCoV-19^^Japan|Human|Pathogen Genomics Center|Pathogen Genomics Center|Sekizuka|Japan

>Spike|hCoV-19/Brazil/SP-L1-CAMPI10/2020|2020-04-06|EPI\_ISL\_476152|Original|hCoV-19^^S\u00e3o Paulo|Human|Laborat\u00f3rio de Patologia Cl\u00ednica - UNICAMP|Laborat\u00f3rio de Estudos de V\u00edrus Emergentes - UNICAMP|Faria|Brazil



>Spike|hCoV-19/Denmark/DCGC-21083/2020|2020-12-21|EPI\_ISL\_759541|Original|hCoV-19^^Syddanmark|Human|Department of Virus and Microbiological Special Diagnostics|Albertsen Lab|Michaelsen|Denmark

>Spike|hCoV-19/USA/NY-NYUMC513/2020|2020-03-30|EPI\_ISL\_444630|Original|hCoV-19^^New York|Human|NYU Langone Health|Departments of Pathology and Medicine|Maurano|USA

>Spike|hCoV-19/England/CAMB-7D1ED/2020|2020-04-06|EPI\_ISL\_442128|Original|hCoV-19^^England|Human|Department of Pathology|Wellcome Sanger Institute for the COVID-19 Genomics UK (COG-UK) consortium|Amato|United Kingdom

>Spike|hCoV-19/Israel/990300724/2020|2020-04-01|EPI\_ISL\_447265|Original|hCoV-19^^South Coast District|Human|Microbiology laboratory|Stern Lab|Miller|Israel

>Spike|hCoV-19/Netherlands/ZH-EMC-884/2020|2020-09-16|EPI\_ISL\_632763|Original|hCoV-19^^Zuid Holland|Human|Dutch COVID-19 response team|Erasmus Medical Center|Oude Munnink|Netherlands

>Spike|hCoV-19/England/ALDP-A2EAE6/2020|2020-10-05|EPI\_ISL\_586979|Original|hCoV-19^^England|Human|Lighthouse Lab in Alderley Park|Wellcome Sanger Institute for the COVID-19 Genomics UK (COG-UK) consortium|Davies|United Kingdom

>Spike|hCoV-19/USA/CO-CSU-D1057-3/2020|2020-04-22|EPI\_ISL\_527430|Original|hCoV-19^^Colorado|Human|Colorado State University - Ebel Lab|Colorado State University - Ebel Lab|Cline|USA

>Spike|hCoV-19/Wales/PHWC-28A31/2020|2020-04-02|EPI\_ISL\_445389|Original|hCoV-19^^Wales|Human|Wales Specialist Virology Centre|Public Health Wales Microbiology Cardiff|Moore|United Kingdom

>Spike|hCoV-19/Scotland/EDB055/2020|2020-03-19|EPI\_ISL\_425859|Original|hCoV-19^^Scotland|Human|Virology Department|COVID-19 Genomics UK (COG-UK) Consortium|Williams|United Kingdom

>Spike|hCoV-19/USA/UT-08656/2020|2020-05-08|EPI\_ISL\_524385|Original|hCoV-19^^Utah|Human|Utah Public Health Laboratory|Utah Public Health Laboratory|Young|USA

>Spike|hCoV-19/England/MILK-BDCA40/2020|2020-11-26|EPI\_ISL\_709710|Original|hCoV-19^^England|Human|Lighthouse Lab in Milton Keynes|Wellcome Sanger Institute for the COVID-19 Genomics UK (COG-UK) Consortium|Davies|United Kingdom

>Spike|hCoV-19/Canada/ON-S1978/2020|2020-11-24|EPI\_ISL\_755692|Original|hCoV-19^^Ontario|Human|Toronto Invasive Bacterial Diseases Network|McMaster University|McArthur|Canada

>Spike|hCoV-19/England/ALDP-A2D522/2020|2020-10-06|EPI\_ISL\_586596|Original|hCoV-19^^England|Human|Lighthouse Lab in Alderley Park|Wellcome Sanger Institute for the COVID-19 Genomics UK (COG-UK) consortium|Davies|United Kingdom

>Spike|hCoV-19/England/EXET-13A95C/2020|2020-11-09|EPI\_ISL\_664297|Original|hCoV-19^^England|Human|University of Exeter|COVID-19 Genomics UK (COG-UK) Consortium|Temperton|United Kingdom

>Spike|hCoV-19/Netherlands/GE-EMC-217/2020|2020-03-05|EPI\_ISL\_523199|Original|hCoV-19^^Gelderland|Human|Dutch COVID-19 response team|Erasmus Medical Center|Oude Munnink|Netherlands

>Spike|hCoV-19/South Korea/KCDC2556/2020|2020-06-23|EPI\_ISL\_514959|Original|hCoV-19^^South Korea|Human|Division of Viral Diseases|Division of Viral Diseases|Kim|South Korea

>Spike|hCoV-19/New Zealand/20VR3747/2020|2020-00-00|EPI\_ISL\_548131|Original|hCoV-19^^Auckland|Human|LabPLUS|Institute of Environmental Science and Research (ESR)|Wang|New Zealand

>Spike|hCoV-19/England/NORW-EA154/2020|2020-05-13|EPI\_ISL\_457329|Original|hCoV-19^^England|Human|Quadram Institute Bioscience|COVID-19 Genomics UK (COG-UK) Consortium|Alikhan|United Kingdom

>Spike|hCoV-19/Scotland/QEUA-9CA34C/2020|2020-09-13|EPI\_ISL\_576085|Original|hCoV-19^^Scotland|Human|Lighthouse Lab in Glasgow|Wellcome Sanger Institute for the COVID-19 Genomics UK (COG-UK) consortium|Davies|United Kingdom

>Spike|hCoV-19/England/QEUA-BC4207/2020|2020-11-24|EPI\_ISL\_703583|Original|hCoV-19^^England|Human|Lighthouse Lab in Glasgow|Wellcome Sanger Institute for the COVID-19 Genomics UK (COG-UK) Consortium|Davies|United Kingdom

>Spike|hCoV-19/USA/WI-UW-1640/2020|2020-09-11|EPI\_ISL\_605514|Original|hCoV-19^^Wisconsin|Human|University of Wisconsin-Madison AIDS Vaccine Research

Laboratories|University of Wisconsin-Madison AIDS Vaccine Research  
Laboratories|Baczenas|USA  
>Spike|hCoV-19/England/MILK-AB82AD/2020|2020-10-21|EPI\_ISL\_623396|Original|hCoV-19^^England|Human|Lighthouse Lab in Milton Keynes|Wellcome Sanger Institute for the COVID-19 Genomics UK (COG-UK) consortium|Davies|United Kingdom  
>Spike|hCoV-19/England/QEUA-BAD1E/2020|2020-11-18|EPI\_ISL\_672891|Original|hCoV-19^^England|Human|Lighthouse Lab in Glasgow|Wellcome Sanger Institute for the COVID-19 Genomics UK (COG-UK) Consortium|Davies|United Kingdom  
>Spike|hCoV-19/USA/WA-S2781/2020|2020-08-10|EPI\_ISL\_530138|Original|hCoV-19^^Washington|Human|Seattle Flu Study|Seattle Flu Study|Lee|USA  
>Spike|hCoV-19/Poland/PL\_MCB\_52/2020|2020-05-10|EPI\_ISL\_645051|Original|hCoV-19^^Poland|Human|Human Genome Variation Research Group|Human Genome Variation Research Group||Poland  
>Spike|hCoV-19/USA/NY-NYCPHL-001195/2020|2020-10-30|EPI\_ISL\_683886|Original|hCoV-19^^New York|Human|DOHMH Morrisania|New York City Public Health Laboratory|Wang|USA  
>Spike|hCoV-19/Japan/PG-8625/2020|2020-09-00|EPI\_ISL\_686221|Original|hCoV-19^^Japan|Human|Pathogen Genomics Center|Pathogen Genomics Center|Sekizuka|Japan  
>Spike|hCoV-19/England/NOTT-121865/2020|2020-12-23|EPI\_ISL\_764518|Original|hCoV-19^^England|Human|Queens Medical Centre|COVID-19 Genomics UK (COG-UK) Consortium|Loose|United Kingdom  
>Spike|hCoV-19/England/MILK-BAC37B/2020|2020-11-18|EPI\_ISL\_720549|Original|hCoV-19^^England|Human|Lighthouse Lab in Milton Keynes|Wellcome Sanger Institute for the COVID-19 Genomics UK (COG-UK) Consortium|Davies|United Kingdom  
>Spike|hCoV-19/India/MH-ACTREC-598/2020|2020-09-07|EPI\_ISL\_700236|Original|hCoV-19^^Maharashtra|Human|Hematopathology Laboratory|Hematopathology Laboratory|Patkar|India  
>Spike|hCoV-19/Wales/MILK-956855/2020|2020-06-05|EPI\_ISL\_554313|Original|hCoV-19^^Wales|Human|Lighthouse Lab in Milton Keynes|Wellcome Sanger Institute for the COVID-19 Genomics UK (COG-UK) consortium|Davies|United Kingdom  
>Spike|hCoV-19/Wales/PHWC-15C514/2020|2020-04-19|EPI\_ISL\_472500|Original|hCoV-19^^Wales|Human|Wales Specialist Virology Centre Sequencing lab|COVID-19 Genomics UK (COG-UK) Consortium|Moore|United Kingdom  
>Spike|hCoV-19/Canada/ON-S813/2020|2020-04-10|EPI\_ISL\_591165|Original|hCoV-19^^Ontario|Human|Toronto Invasive Bacterial Diseases Network|McMaster University|McArthur|Canada  
>Spike|hCoV-19/Japan/IC-0119/2020|2020-08-00|EPI\_ISL\_591460|Original|hCoV-19^^Japan|Human|Pathogen Genomics Center|Pathogen Genomics Center|Sekizuka|Japan  
>Spike|hCoV-19/England/OXON-AE9FA/2020|2020-00-00|EPI\_ISL\_448745|Original|hCoV-19^^England|Human|Oxford Viromics|COVID-19 Genomics UK (COG-UK) Consortium|Golubchik|United Kingdom  
>Spike|hCoV-19/USA/CA-ALSR-1533/2020|2020-05-13|EPI\_ISL\_494647|Original|hCoV-19^^California|Human|Scripps Medical Laboratory|Andersen lab at Scripps Research|Gangavarapu|USA  
>Spike|hCoV-19/England/OXON-B41F9/2020|2020-03-29|EPI\_ISL\_534938|Original|hCoV-19^^England|Human|Oxford Viromics|COVID-19 Genomics UK (COG-UK) Consortium|Golubchik|United Kingdom  
>Spike|hCoV-19/USA/CA-CZB-11899/2020|2020-10-02|EPI\_ISL\_672080|Original|hCoV-19^^California|Human|Santa Clara County Public Health Laboratory|Chan-Zuckerberg Biohub|Bhatt|USA  
>Spike|hCoV-19/Wales/PHWC-499509/2020|2020-12-03|EPI\_ISL\_727316|Original|hCoV-19^^Wales|Human|Originating lab|COVID-19 Genomics UK (COG-UK) Consortium|Moore|United Kingdom  
>Spike|hCoV-19/England/CAMB-7EE6D/2020|2020-04-07|EPI\_ISL\_442984|Original|hCoV-19^^England|Human|Department of Pathology|Wellcome Sanger Institute for the COVID-19 Genomics UK (COG-UK) consortium|Amato|United Kingdom  
>Spike|hCoV-19/Russia/Novosibirsk-RII27315S/2020|2020-04-29|EPI\_ISL\_507209|Original|hCoV-19^^Novosibirsk|Human|Department of Experimental Modeling and Pathogenesis of Infectious Diseases|WHO National Influenza Centre Russian Federation|Komissarov|Russia

>Spike|hCoV-19/Switzerland/AG-UZH-IMV11/2020|2020-05-04|EPI\_ISL\_590833|Vero P2|hCoV-19^^Aargau|Human|Institute of Medical Virology|Institute of Medical Virology|Kufner|Switzerland

>Spike|hCoV-19/England/CAMB-7B0A6/2020|2020-04-11|EPI\_ISL\_433913|Original|hCoV-19^^England|Human|Department of Pathology|COVID-19 Genomics UK (COG-UK) Consortium|Meredith|United Kingdom

>Spike|hCoV-19/Scotland/CVR2445/2020|2020-04-14|EPI\_ISL\_477942|Original|hCoV-19^^Scotland|Human|West of Scotland Specialist Virology Centre|COVID-19 Genomics UK (COG-UK) Consortium|Robertson|United Kingdom

>Spike|hCoV-19/USA/LA-EVTL1359/2020|2020-12-11|EPI\_ISL\_779025|Original|hCoV-19^^Louisiana|Human|LSUHS Emerging Viral Threat Laboratory|Microbial Genome Sequencing Center|Kamil|USA

>Spike|hCoV-19/England/LIVE-A601B/2020|2020-06-30|EPI\_ISL\_499675|Original|hCoV-19^^England|Human|Liverpool Clinical Laboratories|COVID-19 Genomics UK (COG-UK) Consortium|Haldenby|United Kingdom

>Spike|hCoV-19/Saudi Arabia/KAUST-RIYADH1241/2020|2020-08-11|EPI\_ISL\_678213|Original|hCoV-19^^Riyadh|Human|Pathogen Genomics Lab King Abdullah University of Science and Technology(KAUST)|Pathogen Genomics Lab King Abdullah University of Science and Technology(KAUST)|Mohamed Ghazzali|Saudi Arabia

>Spike|hCoV-19/England/ALDP-5D78BA/2020|2020-06-19|EPI\_ISL\_558483|Original|hCoV-19^^England|Human|Lighthouse Lab in Alderley Park|Wellcome Sanger Institute for the COVID-19 Genomics UK (COG-UK) consortium|Davies|United Kingdom

>Spike|hCoV-19/Netherlands/GE-EMC-393/2020|2020-11-17|EPI\_ISL\_722306|Original|hCoV-19^^Gelderland|Human|Dutch COVID-19 response team|Erasmus Medical Center|Oude Munnink|Netherlands

>Spike|hCoV-19/Belgium/regA-10061035/2020|2020-10-06|EPI\_ISL\_735056|Original|hCoV-19^^Hoeilaart|Human|UZ Leuven|KU Leuven|Maes|Belgium

>Spike|hCoV-19/USA/CA-CHLA-PLM02369650/2020|2020-11-19|EPI\_ISL\_753391|Original|hCoV-19^^California|Human|Clinical virology Laboratory|Center for Personalized Medicine|Dien Bard|USA

>Spike|hCoV-19/Denmark/DCGC-2072/2020|2020-06-01|EPI\_ISL\_618029|Original|hCoV-19^^Hovedstaden|Human|Department of Virus and Microbiological Special Diagnostics|Albertsen lab|Michaelsen|Denmark

>Spike|hCoV-19/England/ALDP-9D9F73/2020|2020-09-18|EPI\_ISL\_576829|Original|hCoV-19^^England|Human|Oxford Viromics|COVID-19 Genomics UK (COG-UK) Consortium|Golubchik|United Kingdom

>Spike|hCoV-19/India/TG-CCMB-X112/2020|2020-07-15|EPI\_ISL\_528847|Original|hCoV-19^^Telangana|Human|CSIR-Centre for Cellular and Molecular Biology|CSIR-Centre for Cellular and Molecular Biology|Banu|India

>Spike|hCoV-19/Wales/PHWC-266F3/2020|2020-03-27|EPI\_ISL\_422109|Original|hCoV-19^^Wales|Human|Wales Specialist Virology Centre|Public Health Wales Microbiology Cardiff|Moore|United Kingdom

>Spike|hCoV-19/England/204900594/2020|2020-11-30|EPI\_ISL\_747494|Original|hCoV-19^^England|Human|Respiratory Virus Unit|COVID-19 Genomics UK (COG-UK) Consortium|Miah|United Kingdom

>Spike|hCoV-19/Luxembourg/LNS5908909/2020|2020-11-13|EPI\_ISL\_744321|Original|hCoV-19^^Luxembourg|Human|Laboratoire national de sant\u00e9|Laboratoire national de sant\u00e9|Wienecke-Baldacchino|Luxembourg

>Spike|hCoV-19/USA/WA-S1523/2020|2020-05-23|EPI\_ISL\_495949|Original|hCoV-19^^Washington|Human|Washington State Department of Health|Seattle Flu Study|Lee|USA

>Spike|hCoV-19/England/MILK-957AB8/2020|2020-06-09|EPI\_ISL\_554255|Original|hCoV-19^^England|Human|Lighthouse Lab in Milton Keynes|Wellcome Sanger Institute for the COVID-19 Genomics UK (COG-UK) consortium|Davies|United Kingdom

>Spike|hCoV-19/United Arab Emirates/0162/2020|2020-05-18|EPI\_ISL\_698349|Original|hCoV-19^^Abu Dhabi|Human|Group 42 (G42) Healthcare|G42 Healthcare|Ogrodzki|United Arab Emirates

>Spike|hCoV-19/USA/UT-UPHL-2012376464/2020|2020-12-02|EPI\_ISL\_746994|Original|hCoV-19^^Utah|Human|Utah Public Health Laboratory|Utah Public Health Laboratory|Gallagher|USA

>Spike|hCoV-19/England/20140039104/2020|2020-03-25|EPI\_ISL\_420753|Original|hCoV-19^^England|Human|Respiratory Virus Unit|Respiratory Virus Unit|Platt|United Kingdom

>Spike|hCoV-19/Northern Ireland/QEUIH-9438E2/2020|2020-07-11|EPI\_ISL\_532624|Original|hCoV-19^^Northern Ireland|Human|Lighthouse Lab in Glasgow|Wellcome Sanger Institute for the COVID-19 Genomics UK (COG-UK) consortium|Davies|United Kingdom

>Spike|hCoV-19/Wales/PHWC-496E98/2020|2020-11-24|EPI\_ISL\_726741|Original|hCoV-19^^Wales|Human|Originating lab|COVID-19 Genomics UK (COG-UK) Consortium|Moore|United Kingdom

>Spike|hCoV-19/Denmark/DCGC-18599/2020|2020-12-07|EPI\_ISL\_750072|Original|hCoV-19^^Hovedstaden|Human|Department of Virus and Microbiological Special Diagnostics|Albertsen Lab|Michaelsen|Denmark

>Spike|hCoV-19/England/OXON-B1EAA/2020|2020-05-02|EPI\_ISL\_479099|Original|hCoV-19^^England|Human|Oxford Viromics|COVID-19 Genomics UK (COG-UK) Consortium|Golubchik|United Kingdom

>Spike|hCoV-19/Wales/ALDP-C39961/2020|2020-12-08|EPI\_ISL\_767158|Original|hCoV-19^^Wales|Human|Lighthouse Lab in Alderley Park|Wellcome Sanger Institute for the COVID-19 Genomics UK (COG-UK) Consortium|Davies|United Kingdom

>Spike|hCoV-19/Australia/VIC13431/2020|2020-08-06|EPI\_ISL\_563729|Original|hCoV-19^^Victoria|Human|Microbiological Diagnostic Unit - Public Health Laboratory (MDU-PHL)|MDU-PHL|Schultz|Australia

>Spike|hCoV-19/England/ALDP-B5D7E6/2020|2020-11-09|EPI\_ISL\_703093|Original|hCoV-19^^England|Human|Department of Pathology|COVID-19 Genomics UK (COG-UK) Consortium|Goodfellow|United Kingdom

>Spike|hCoV-19/USA/NY-QDX-1985/2020|2020-03-18|EPI\_ISL\_604358|Original|hCoV-19^^New York|Human|Quest Diagnostics|Quest Diagnostics|Kagan|USA

>Spike|hCoV-19/Japan/PG-7629/2020|2020-08-00|EPI\_ISL\_686731|Original|hCoV-19^^Japan|Human|Chiba Prefectural Institute of Public Health|Pathogen Genomics Center|Sekizuka|Japan

>Spike|hCoV-19/England/CAMC-A41A29/2020|2020-10-06|EPI\_ISL\_609532|Original|hCoV-19^^England|Human|Lighthouse Lab in Cambridge|Wellcome Sanger Institute for the COVID-19 Genomics UK (COG-UK) consortium|Davies|United Kingdom

>Spike|hCoV-19/USA/NY-Wadsworth-76305-01/2020|2020-05-01|EPI\_ISL\_676895|Original|hCoV-19^^New York|Human|Wadsworth Center|Wadsworth Center|Lasek-Nesselquist|USA

>Spike|hCoV-19/Scotland/QEUIH-B129BA/2020|2020-11-02|EPI\_ISL\_649572|Original|hCoV-19^^Scotland|Human|Lighthouse Lab in Glasgow|Wellcome Sanger Institute for the COVID-19 Genomics UK (COG-UK) Consortium|Davies|United Kingdom

>Spike|hCoV-19/Wales/PHWC-15E275/2020|2020-05-11|EPI\_ISL\_472801|Original|hCoV-19^^Wales|Human|Wales Specialist Virology Centre Sequencing lab|COVID-19 Genomics UK (COG-UK) Consortium|Moore|United Kingdom

>Spike|hCoV-19/England/ALDP-AA28D1/2020|2020-10-21|EPI\_ISL\_630928|Original|hCoV-19^^England|Human|Lighthouse Lab in Alderley Park|Wellcome Sanger Institute for the COVID-19 Genomics UK (COG-UK) consortium|Davies|United Kingdom

>Spike|hCoV-19/Netherlands/ZH-EMC-1137/2020|2020-12-19|EPI\_ISL\_763214|Original|hCoV-19^^Zuid Holland|Human|Dutch COVID-19 response team|Erasmus Medical Center|Oude Munnink|Netherlands

>Spike|hCoV-19/USA/ME-HETL-J0480/2020|2020-12-15|EPI\_ISL\_755567|Original|hCoV-19^^Maine|Human|Maine Health and Environmental Testing Laboratory|Tewhey Lab|Tewhey|USA

>Spike|hCoV-19/England/ALDP-B1A299/2020|2020-11-01|EPI\_ISL\_645913|Original|hCoV-19^^England|Human|Lighthouse Lab in Alderley Park|Wellcome Sanger Institute for the COVID-19 Genomics UK (COG-UK) Consortium|Davies|United Kingdom

>Spike|hCoV-19/Japan/PG-5182/2020|2020-08-00|EPI\_ISL\_690285|Original|hCoV-19^^Japan|Human|Pathogen Genomics Center|Pathogen Genomics Center|Sekizuka|Japan

>Spike|hCoV-19/USA/MN-QDX-991/2020|2020-03-15|EPI\_ISL\_571789|Original|hCoV-19^^Minnesota|Human|Quest Diagnostics|Quest Diagnostics|Kagan|USA

>Spike|hCoV-19/Australia/VIC2191/2020|2020-00-00|EPI\_ISL\_521937|Original|hCoV-19^^Victoria|Human|Microbiological Diagnostic Unit - Public Health Laboratory (MDU-PHL)|MDU-PHL|Schultz|Australia

>Spike|hCoV-19/England/PORT-2D1B7E/2020|2020-04-03|EPI\_ISL\_493655|Original|hCoV-19^^England|Human|Centre for Enzyme Innovation|COVID-19 Genomics UK (COG-UK) Consortium|Robson|United Kingdom

>Spike|hCoV-19/USA/TX-HMH-7145/2020|2020-06-29|EPI\_ISL\_546543|Original|hCoV-19^^Texas|Human|Houston Methodist Hospital|Houston Methodist Hospital|Long|USA

>Spike|hCoV-19/England/BRIS-124DE0/2020|2020-03-26|EPI\_ISL\_443764|Original|hCoV-19^^England|Human|PHE South West Regional Laboratory|Wellcome Sanger Institute for the COVID-19 Genomics UK (COG-UK) consortium|Amato|United Kingdom

>Spike|hCoV-19/United Arab Emirates/0261/2020|2020-05-17|EPI\_ISL\_698442|Original|hCoV-19^^Abu Dhabi|Human|Group 42 (G42) Healthcare|G42 Healthcare|Ogrodzki|United Arab Emirates

>Spike|hCoV-19/Gibraltar/204421189/2020|2020-10-27|EPI\_ISL\_613650|Original|hCoV-19^^Gibraltar|Human|Microbiology|Respiratory Virus Unit|Platt|Gibraltar

>Spike|hCoV-19/Canada/ON-PHL-20-02478/2020|2020-09-00|EPI\_ISL\_671586|Original|hCoV-19^^Ontario|Human|Public Health Ontario Laboratory|Public Health Ontario Laboratory|Guthrie|Canada

>Spike|hCoV-19/England/ALDP-B83529/2020|2020-11-14|EPI\_ISL\_675597|Original|hCoV-19^^England|Human|Lighthouse Lab in Alderley Park|Wellcome Sanger Institute for the COVID-19 Genomics UK (COG-UK) Consortium|Davies|United Kingdom

>Spike|hCoV-19/Belgium/ULG-10009/2020|2020-03-30|EPI\_ISL\_421188|Original|hCoV-19^^Li\u00e8ge|Human|Department of Clinical Microbiology|GIGA Medical Genomics|Durkin|Belgium

>Spike|hCoV-19/England/MILK-A44DB4/2020|2020-10-06|EPI\_ISL\_598592|Original|hCoV-19^^England|Human|Lighthouse Lab in Milton Keynes|Wellcome Sanger Institute for the COVID-19 Genomics UK (COG-UK) consortium|Davies|United Kingdom

>Spike|hCoV-19/USA/TX-HMH-MCoV-15055/2020|2020-10-15|EPI\_ISL\_786539|Original|hCoV-19^^Texas|Human|Houston Methodist Hospital|Houston Methodist Hospital|Long|USA

>Spike|hCoV-19/England/ALDP-64C22A/2020|2020-07-04|EPI\_ISL\_558057|Original|hCoV-19^^England|Human|Lighthouse Lab in Alderley Park|Wellcome Sanger Institute for the COVID-19 Genomics UK (COG-UK) consortium|Davies|United Kingdom

>Spike|hCoV-19/England/CAMB-1AE012/2020|2020-04-27|EPI\_ISL\_459484|Original|hCoV-19^^England|Human|Department of Pathology|Wellcome Sanger Institute for the COVID-19 Genomics UK (COG-UK) consortium|Davies|United Kingdom

>Spike|hCoV-19/England/20129163304/2020|2020-03-11|EPI\_ISL\_424125|Original|hCoV-19^^England|Human|Respiratory Virus Unit|Respiratory Virus Unit|Platt|United Kingdom

>Spike|hCoV-19/England/ALDP-B2640D/2020|2020-11-04|EPI\_ISL\_646773|Original|hCoV-19^^England|Human|Lighthouse Lab in Alderley Park|Wellcome Sanger Institute for the COVID-19 Genomics UK (COG-UK) Consortium|Davies|United Kingdom

>Spike|hCoV-19/England/ALDP-BB56B2/2020|2020-11-20|EPI\_ISL\_702648|Original|hCoV-19^^England|Human|Lighthouse Lab in Alderley Park|Wellcome Sanger Institute for the COVID-19 Genomics UK (COG-UK) Consortium|Davies|United Kingdom

>Spike|hCoV-19/Australia/VIC10187/2020|2020-08-27|EPI\_ISL\_562818|Original|hCoV-19^^Victoria|Human|Microbiological Diagnostic Unit - Public Health Laboratory (MDU-PHL)|MDU-PHL|Schultz|Australia

>Spike|hCoV-19/USA/ME-HETL-J0049/2020|2020-03-19|EPI\_ISL\_513460|Original|hCoV-19^^Maine|Human|Maine HETL|Tewhey Lab|Tewhey|USA

>Spike|hCoV-19/England/ALDP-A2FCD0/2020|2020-10-05|EPI\_ISL\_587005|Original|hCoV-19^^England|Human|Lighthouse Lab in Alderley Park|Wellcome Sanger Institute for the COVID-19 Genomics UK (COG-UK) consortium|Davies|United Kingdom

>Spike|hCoV-19/Belgium/AGR-0324174/2020|2020-03-24|EPI\_ISL\_420431|Original|hCoV-19^^Saint-Saulve|Human|KU Leuven|KU Leuven|Maes|Belgium

>Spike|hCoV-19/South Africa/R12707-20/2020|2020-06-16|EPI\_ISL\_504235|Original|hCoV-19^^North West|Human|National Institute for Communicable Diseases of the National Health Laboratory Service|National Institute for Communicable Diseases of the National Health Laboratory Service|Allam|South Africa

>Spike|hCoV-19/England/LIVE-DB98E3/2020|2020-11-10|EPI\_ISL\_705806|Original|hCoV-19^^England|Human|Liverpool Clinical Laboratories|COVID-19 Genomics UK (COG-UK) Consortium|Haldenby|United Kingdom

>Spike|hCoV-19/Scotland/QEUA-9E41F7/2020|2020-09-23|EPI\_ISL\_601097|Original|hCoV-19^^Scotland|Human|Lighthouse Lab in Glasgow|Wellcome Sanger Institute for the COVID-19 Genomics UK (COG-UK) consortium|Davies|United Kingdom

>Spike|hCoV-19/Wales/PHWC-49E7FF/2020|2020-12-08|EPI\_ISL\_743051|Original|hCoV-19^^Wales|Human|Wales Specialist Virology Centre Sequencing lab|COVID-19 Genomics UK (COG-UK) Consortium|Moore|United Kingdom

>Spike|hCoV-19/Japan/PG-8056/2020|2020-08-00|EPI\_ISL\_687157|Original|hCoV-19^^Japan|Human|Pathogen Genomics Center|Pathogen Genomics Center|Sekizuka|Japan

>Spike|hCoV-19/England/ALDP-9557B3/2020|2020-06-12|EPI\_ISL\_554339|Original|hCoV-19^^England|Human|Lighthouse Lab in Alderley Park|Wellcome Sanger Institute for the COVID-19 Genomics UK (COG-UK) consortium|Davies|United Kingdom

>Spike|hCoV-19/Netherlands/GE-RIVM-21014/2020|2020-12-23|EPI\_ISL\_791031|Original|hCoV-19^^Gelderland|Human|Dutch COVID-19 response team|National Institute for Public Health and the Environment (RIVM)|Meijer|Netherlands

>Spike|hCoV-19/England/SHEF-C1047/2020|2020-04-11|EPI\_ISL\_441905|Original|hCoV-19^^England|Human|Virology Department|COVID-19 Genomics UK (COG-UK) Consortium|de Silva|United Kingdom

>Spike|hCoV-19/Wales/PHWC-29E43/2020|2020-04-04|EPI\_ISL\_432194|Original|hCoV-19^^Wales|Human|Wales Specialist Virology Centre|Public Health Wales Microbiology Cardiff|Moore|United Kingdom

>Spike|hCoV-19/Scotland/QEUA-9DD3CE/2020|2020-09-22|EPI\_ISL\_599593|Original|hCoV-19^^Scotland|Human|Lighthouse Lab in Glasgow|Wellcome Sanger Institute for the COVID-19 Genomics UK (COG-UK) consortium|Davies|United Kingdom

>Spike|hCoV-19/Denmark/DCGC-8025/2020|2020-10-26|EPI\_ISL\_616970|Original|hCoV-19^^Hovedstaden|Human|Department of Virus and Microbiological Special Diagnostics|Albertsen lab|Michaelsen|Denmark

>Spike|hCoV-19/Denmark/DCGC-19307/2020|2020-12-07|EPI\_ISL\_748874|Original|hCoV-19^^Syddanmark|Human|Department of Virus and Microbiological Special Diagnostics|Albertsen Lab|Michaelsen|Denmark

>Spike|hCoV-19/USA/TX-HMH-MCoV-18539/2020|2020-11-19|EPI\_ISL\_784887|Original|hCoV-19^^Texas|Human|Houston Methodist Hospital|Houston Methodist Hospital|Long|USA

>Spike|hCoV-19/England/QEUA-B9EC62/2020|2020-11-18|EPI\_ISL\_719676|Original|hCoV-19^^England|Human|Lighthouse Lab in Glasgow|Wellcome Sanger Institute for the COVID-19 Genomics UK (COG-UK) Consortium|Davies|United Kingdom

>Spike|hCoV-19/Denmark/DCGC-14249/2020|2020-11-30|EPI\_ISL\_711654|Original|hCoV-19^^Hovedstaden|Human|Department of Virus and Microbiological Special Diagnostics|Albertsen Lab|Michaelsen|Denmark

>Spike|hCoV-19/USA/LA-EVTL1001/2020|2020-08-20|EPI\_ISL\_653692|Original|hCoV-19^^Louisiana|Human|LSUHS Emerging Viral Threat Laboratory|Microbial Genome Sequencing Center|Kamil|USA

>Spike|hCoV-19/Netherlands/un-EMC-823/2020|2020-12-08|EPI\_ISL\_763176|Original|hCoV-19^^Netherlands|Human|Dutch COVID-19 response team|Erasmus Medical Center|Oude Munnink|Netherlands

>Spike|hCoV-19/USA/NY-PV08428/2020|2020-03-19|EPI\_ISL\_421386|Original|hCoV-19^^New York|Human|MSHS Clinical Microbiology Laboratories|MSHS Pathogen Surveillance Program|van Bakel|USA

>Spike|hCoV-19/Switzerland/ZH-ETHZ-140042/2020|2020-05-27|EPI\_ISL\_476096|Original|hCoV-19^^Zurich|Human|Viollier AG|Department of Biosystems Science and Engineering|Nadeau|Switzerland

>Spike|hCoV-19/Japan/PG-5658/2020|2020-04-00|EPI\_ISL\_688782|Original|hCoV-19^^Japan|Human|Pathogen Genomics Center|Pathogen Genomics Center|Sekizuka|Japan

>Spike|hCoV-19/Australia/NSW284/2020|2020-04-02|EPI\_ISL\_451548|Original|hCoV-19^^New South Wales|Human|Childrens Hospital Westmead|NSW Health Pathology - Institute of Clinical Pathology and Medical Research; Westmead Hospital; University of Sydney|Gall|Australia

>Spike|hCoV-19/England/CAMC-94C209/2020|2020-07-20|EPI\_ISL\_556683|Original|hCoV-19^^England|Human|Lighthouse Lab in Cambridge|Wellcome Sanger Institute for the COVID-19 Genomics UK (COG-UK) consortium|Davies|United Kingdom

>Spike|hCoV-19/USA/MN124-MDH124/2020|2020-03-15|EPI\_ISL\_421683|Original|hCoV-19^^Minnesota|Human|Minnesota Department of Health|Minnesota Department of Health|Wang|USA

>Spike|hCoV-19/England/20198253004/2020|2020-05-07|EPI\_ISL\_526548|Original|hCoV-19^^England|Human|Respiratory Virus Unit|Respiratory Virus Unit|Ledesma|United Kingdom

>Spike|hCoV-19/Russia/MOW-RII-MH2004S/2020|2020-05-27|EPI\_ISL\_596346|Original|hCoV-19^^Moscow|Human|Pathogenic Microorganisms Variability Laboratory|WHO National Influenza Centre Russian Federation|Komissarov|Russia

>Spike|hCoV-19/Netherlands/Limburg\_38/2020|2020-04-22|EPI\_ISL\_461026|Original|hCoV-19^^Limburg|Human|Dutch COVID-19 response team|Erasmus Medical Center|Oude Munnink|Netherlands

>Spike|hCoV-19/Canada/QC-LSPQ-L00229943/2020|2020-03-19|EPI\_ISL\_535906|Original|hCoV-19^^Quebec|Human|H\u00f4pital de Chicoutimi|Laboratoire de sant\u00e9 publique du Qu\u00e9bec|Moreira|Canada

>Spike|hCoV-19/Switzerland/SH-ETHZ-380219/2020|2020-11-23|EPI\_ISL\_721863|Original|hCoV-19^^Schaffhausen|Human|Viollier AG|Department of Biosystems Science and Engineering|Nadeau|Switzerland

>Spike|hCoV-19/USA/WA-S1229/2020|2020-05-09|EPI\_ISL\_495679|Original|hCoV-19^^Washington|Human|Washington State Department of Health|Seattle Flu Study|Lee|USA

>Spike|hCoV-19/USA/WI-UW-222/2020|2020-03-25|EPI\_ISL\_428318|Original|hCoV-19^^Wisconsin|Human|University of Wisconsin-Madison AIDS Vaccine Research Laboratories|University of Wisconsin-Madison AIDS Vaccine Research Laboratories|Moreno|USA

>Spike|hCoV-19/USA/TX-HMH-6727/2020|2020-06-25|EPI\_ISL\_546197|Original|hCoV-19^^Texas|Human|Houston Methodist Hospital|Houston Methodist Hospital|Long|USA

>Spike|hCoV-19/England/NORW-F0D57/2020|2020-00-00|EPI\_ISL\_595216|Original|hCoV-19^^England|Human|Quadram Institute Bioscience|COVID-19 Genomics UK (COG-UK) Consortium|Alikhan|United Kingdom

>Spike|hCoV-19/USA/UT-UPHL-2009610/2020|2020-07-19|EPI\_ISL\_605288|Original|hCoV-19^^Utah|Human|Utah Public Health Laboratory|Utah Public Health Laboratory|Young|USA

>Spike|hCoV-19/England/QEUH-889CA9/2020|2020-07-23|EPI\_ISL\_532748|Original|hCoV-19^^England|Human|Lighthouse Lab in Glasgow|Wellcome Sanger Institute for the COVID-19 Genomics UK (COG-UK) consortium|Davies|United Kingdom

>Spike|hCoV-19/England/QEUH-9F81E1/2020|2020-09-27|EPI\_ISL\_588962|Original|hCoV-19^^England|Human|Lighthouse Lab in Glasgow|Wellcome Sanger Institute for the COVID-19 Genomics UK (COG-UK) Consortium|Davies|United Kingdom

>Spike|hCoV-19/Denmark/DCGC-18326/2020|2020-12-07|EPI\_ISL\_749391|Original|hCoV-19^^Syddanmark|Human|Department of Virus and Microbiological Special Diagnostics|Albertsen Lab|Michaelsen|Denmark

>Spike|hCoV-19/Luxembourg/LNS2067807/2020|2020-10-23|EPI\_ISL\_740052|Original|hCoV-19^^Luxembourg|Human|Laboratoire national de sant\u00e9|Laboratoire national de sant\u00e9|Wienecke-Baldacchino|Luxembourg

>Spike|hCoV-19/Wales/PHWC-496B37/2020|2020-11-24|EPI\_ISL\_726690|Original|hCoV-19^^Wales|Human|Originating lab|COVID-19 Genomics UK (COG-UK) Consortium|Moore|United Kingdom

>Spike|hCoV-19/England/ALDP-A96481/2020|2020-10-20|EPI\_ISL\_624616|Original|hCoV-19^^England|Human|Lighthouse Lab in Alderley Park|Wellcome Sanger Institute for the COVID-19 Genomics UK (COG-UK) consortium|Davies|United Kingdom

>Spike|hCoV-19/England/ALDP-B46E18/2020|2020-11-07|EPI\_ISL\_656134|Original|hCoV-19^^England|Human|Lighthouse Lab in Alderley Park|Wellcome Sanger Institute for the COVID-19 Genomics UK (COG-UK) Consortium|Davies|United Kingdom

>Spike|hCoV-19/Norway/4602/2020|2020-10-15|EPI\_ISL\_708030|Original|hCoV-19^^Innlandet|Human|Innlandet Hospital Trust|Norwegian Institute of Public Health|Kopperud Riis|Norway

>Spike|hCoV-19/England/ALDP-CB3C48/2020|2020-12-18|EPI\_ISL\_761174|Original|hCoV-19^^England|Human|Lighthouse Lab in Alderley Park|Wellcome Sanger Institute for the COVID-19 Genomics UK (COG-UK) Consortium|Davies|United Kingdom

>Spike|hCoV-19/USA/SC-DHEC-0207/2020|2020-05-18|EPI\_ISL\_529193|Original|hCoV-19^^South Carolina|Human|South Carolina Department of Health and Environmental Control|South Carolina Department of Health and Environmental Control|Flores|USA

>Spike|hCoV-19/England/SHEF-10CDFD2/2020|2020-12-09|EPI\_ISL\_727923|Original|hCoV-19^^England|Human|Virology Department|COVID-19 Genomics UK (COG-UK) Consortium|de Silva|United Kingdom

>Spike|hCoV-19/England/SHEF-D33D0/2020|2020-05-21|EPI\_ISL\_493739|Original|hCoV-19^^England|Human|Virology Department|COVID-19 Genomics UK (COG-UK) Consortium|de Silva|United Kingdom

>Spike|hCoV-19/England/MILK-BDC66A/2020|2020-11-27|EPI\_ISL\_709669|Original|hCoV-19^^England|Human|Lighthouse Lab in Milton Keynes|Wellcome Sanger Institute for the COVID-19 Genomics UK (COG-UK) Consortium|Davies|United Kingdom

>Spike|hCoV-19/Russia/OMS-ORINFI-5819S/2020|2020-05-08|EPI\_ISL\_569736|Original|hCoV-19^^Omsk|Human|Omsk Research Institute of Natural Focal Infections|WHO National Influenza Centre Russian Federation|Komissarov|Russia

>Spike|hCoV-19/England/ALDP-B83E3D/2020|2020-11-14|EPI\_ISL\_674447|Original|hCoV-19^^England|Human|Lighthouse Lab in Alderley Park|Wellcome Sanger Institute for the COVID-19 Genomics UK (COG-UK) Consortium|Davies|United Kingdom

>Spike|hCoV-19/England/ALDP-A85E2D/2020|2020-10-17|EPI\_ISL\_610369|Original|hCoV-19^^England|Human|Lighthouse Lab in Alderley Park|Wellcome Sanger Institute for the COVID-19 Genomics UK (COG-UK) consortium|Davies|United Kingdom

>Spike|hCoV-19/Iceland/553/2020|2020-03-27|EPI\_ISL\_424573|Original|hCoV-19^^Reykjavik|Human|The National University Hospital of Iceland|deCODE genetics|J\u00f3nsson|Iceland

>Spike|hCoV-19/Australia/VIC5008/2020|2020-07-17|EPI\_ISL\_519812|Original|hCoV-19^^Victoria|Human|Microbiological Diagnostic Unit - Public Health Laboratory (MDU-PHL)|MDU-PHL|Schultz|Australia

>Spike|hCoV-19/Scotland/CVR1576/2020|2020-04-05|EPI\_ISL\_433623|Original|hCoV-19^^Scotland|Human|West of Scotland Specialist Virology Centre|COVID-19 Genomics UK (COG-UK) Consortium|Robertson|United Kingdom

>Spike|hCoV-19/Denmark/DCGC-15680/2020|2020-11-23|EPI\_ISL\_713959|Original|hCoV-19^^Hovedstaden|Human|Department of Virus and Microbiological Special Diagnostics|Albertsen Lab|Michaelsen|Denmark

>Spike|hCoV-19/England/MILK-A7CF80/2020|2020-10-12|EPI\_ISL\_606660|Original|hCoV-19^^England|Human|Lighthouse Lab in Milton Keynes|Wellcome Sanger Institute for the COVID-19 Genomics UK (COG-UK) consortium|Davies|United Kingdom

>Spike|hCoV-19/Italy/LOM-AMVRC-9/2020|2020-03-03|EPI\_ISL\_486665|Original|hCoV-19^^Lombardy|Human|Microbiology|Microbiology|Comandatore|Italy

>Spike|hCoV-19/England/ALDP-C3A7B1/2020|2020-12-09|EPI\_ISL\_731325|Original|hCoV-19^^England|Human|Lighthouse Lab in Alderley Park|Wellcome Sanger Institute for the COVID-19 Genomics UK (COG-UK) Consortium|Davies|United Kingdom

>Spike|hCoV-19/England/BRIS-12B718/2020|2020-05-19|EPI\_ISL\_487539|Original|hCoV-19^^England|Human|PHE South West Regional Laboratory|Wellcome Sanger Institute for the COVID-19 Genomics UK (COG-UK) consortium|Davies|United Kingdom

>Spike|hCoV-19/Wales/ALDP-BB4F12/2020|2020-11-20|EPI\_ISL\_710706|Original|hCoV-19^^Wales|Human|Lighthouse Lab in Alderley Park|Wellcome Sanger Institute for the COVID-19 Genomics UK (COG-UK) Consortium|Davies|United Kingdom

>Spike|hCoV-19/Australia/VIC4134/2020|2020-07-14|EPI\_ISL\_519506|Original|hCoV-19^^Victoria|Human|Microbiological Diagnostic Unit - Public Health Laboratory (MDU-PHL)|MDU-PHL|Schultz|Australia

>Spike|hCoV-19/England/ALDP-746984/2020|2020-06-29|EPI\_ISL\_557499|Original|hCoV-19^^England|Human|Lighthouse Lab in Alderley Park|Wellcome Sanger Institute for the COVID-19 Genomics UK (COG-UK) consortium|Davies|United Kingdom

>Spike|hCoV-19/England/CAMB-1AA438/2020|2020-04-17|EPI\_ISL\_443413|Original|hCoV-19^^England|Human|Department of Pathology|Wellcome Sanger Institute for the COVID-19 Genomics UK (COG-UK) consortium|Amato|United Kingdom

>Spike|hCoV-19/Italy/FVG-ICGEB-S18/2020|2020-03-30|EPI\_ISL\_428854|Vero E6 P1|hCoV-19^^Friuli Venezia Giulia|Human|Laboratory of Molecular Virology International Center for Genetic Engineering and Biotechnology (ICGEB)|ARGO Open Lab Platform for Genome sequencing|Marcello|Italy



>Spike|hCoV-19/England/MILK-9E2D6E/2020|2020-09-21|EPI\_ISL\_581150|Original|hCoV-19^^England|Human|Lighthouse Lab in Milton Keynes|Wellcome Sanger Institute for the COVID-19 Genomics UK (COG-UK) consortium|Davies|United Kingdom

>Spike|hCoV-19/England/QEUEH-9D0E7F/2020|2020-09-14|EPI\_ISL\_589898|Original|hCoV-19^^England|Human|Lighthouse Lab in Glasgow|Wellcome Sanger Institute for the COVID-19 Genomics UK (COG-UK) consortium|Davies|United Kingdom

>Spike|hCoV-19/England/QEUEH-A00006/2020|2020-10-02|EPI\_ISL\_600363|Original|hCoV-19^^England|Human|Lighthouse Lab in Glasgow|Wellcome Sanger Institute for the COVID-19 Genomics UK (COG-UK) consortium|Davies|United Kingdom

>Spike|hCoV-19/England/SHEF-C334C/2020|2020-10-29|EPI\_ISL\_653062|Original|hCoV-19^^England|Human|Virology Department|COVID-19 Genomics UK (COG-UK) Consortium|de Silva|United Kingdom

>Spike|hCoV-19/Australia/VIC4602/2020|2020-07-12|EPI\_ISL\_519003|Original|hCoV-19^^Victoria|Human|Victorian Infectious Diseases Reference Laboratory (VIDRL)|VIDRL and MDU-PHL|Schultz|Australia

>Spike|hCoV-19/England/MILK-B55441/2020|2020-11-05|EPI\_ISL\_657999|Original|hCoV-19^^England|Human|Lighthouse Lab in Milton Keynes|Wellcome Sanger Institute for the COVID-19 Genomics UK (COG-UK) Consortium|Davies|United Kingdom

>Spike|hCoV-19/USA/WA-S1380/2020|2020-05-19|EPI\_ISL\_495830|Original|hCoV-19^^Washington|Human|Washington State Department of Health|Seattle Flu Study|Lee|USA

>Spike|hCoV-19/England/MILK-9F22B7/2020|2020-09-24|EPI\_ISL\_589172|Original|hCoV-19^^England|Human|Lighthouse Lab in Milton Keynes|Wellcome Sanger Institute for the COVID-19 Genomics UK (COG-UK) consortium|Davies|United Kingdom

>Spike|hCoV-19/Denmark/DCGC-19975/2020|2020-12-07|EPI\_ISL\_747902|Original|hCoV-19^^Hovedstaden|Human|Department of Virus and Microbiological Special Diagnostics|Albertsen Lab|Michaelsen|Denmark

>Spike|hCoV-19/England/MILK-B55A6D/2020|2020-11-06|EPI\_ISL\_657696|Original|hCoV-19^^England|Human|Lighthouse Lab in Milton Keynes|Wellcome Sanger Institute for the COVID-19 Genomics UK (COG-UK) Consortium|Davies|United Kingdom

>Spike|hCoV-19/England/QEUEH-B419EF/2020|2020-11-08|EPI\_ISL\_658415|Original|hCoV-19^^England|Human|Lighthouse Lab in Glasgow|Wellcome Sanger Institute for the COVID-19 Genomics UK (COG-UK) Consortium|Davies|United Kingdom

>Spike|hCoV-19/Portugal/PT1720/2020|2020-08-24|EPI\_ISL\_693647|Original|hCoV-19^^Portugal|Human|Hospital Vila Franca de Xira|Instituto Nacional de Saude (INSA)|Borges|Portugal

>Spike|hCoV-19/England/QEUEH-788E69/2020|2020-07-15|EPI\_ISL\_533057|Original|hCoV-19^^England|Human|Lighthouse Lab in Glasgow|Wellcome Sanger Institute for the COVID-19 Genomics UK (COG-UK) consortium|Davies|United Kingdom

>Spike|hCoV-19/England/CAMB-72106/2020|2020-03-28|EPI\_ISL\_439919|Original|hCoV-19^^England|Human|Department of Pathology|Wellcome Sanger Institute for the COVID-19 Genomics UK (COG-UK) consortium|Amato|United Kingdom

>Spike|hCoV-19/USA/CA-CZB-2178/2020|2020-05-24|EPI\_ISL\_513728|Original|hCoV-19^^California|Human|Orange County Public Health Lab|Chan-Zuckerberg Biohub|Kamm|USA

>Spike|hCoV-19/England/SHEF-C69FC/2020|2020-05-11|EPI\_ISL\_457613|Original|hCoV-19^^England|Human|Virology Department|COVID-19 Genomics UK (COG-UK) Consortium|de Silva|United Kingdom

>Spike|hCoV-19/England/QEUEH-AF3E84/2020|2020-10-30|EPI\_ISL\_663009|Original|hCoV-19^^England|Human|Lighthouse Lab in Glasgow|Wellcome Sanger Institute for the COVID-19 Genomics UK (COG-UK) Consortium|Davies|United Kingdom

>Spike|hCoV-19/USA/NY-Wadsworth-292778-01/2020|2020-12-26|EPI\_ISL\_769947|Original|hCoV-19^^New York|Human|Albany Medical Center Hospital Clinical Laboratories|Wadsworth Center|Lasek-Nesselquist|USA

>Spike|hCoV-19/Scotland/QEUEH-9F7021/2020|2020-09-27|EPI\_ISL\_595655|Original|hCoV-19^^Scotland|Human|Oxford Viromics|COVID-19 Genomics UK (COG-UK) Consortium|Golubchik|United Kingdom

>Spike|hCoV-19/England/QEUEH-AD38F5/2020|2020-10-26|EPI\_ISL\_633852|Original|hCoV-19^^England|Human|Lighthouse Lab in Glasgow|Wellcome Sanger Institute for the COVID-19 Genomics UK (COG-UK) consortium|Davies|United Kingdom

>Spike|hCoV-19/Luxembourg/LNS9100060/2020|2020-10-23|EPI\_ISL\_744852|Original|hCoV-19^^Luxembourg|Human|Laboratoire national de sant\u00e9|Laboratoire national de sant\u00e9|Wienecke-Baldacchino|Luxembourg

>Spike|hCoV-19/England/MILK-992617/2020|2020-08-27|EPI\_ISL\_552131|Original|hCoV-19^^England|Human|Lighthouse Lab in Milton Keynes|Wellcome Sanger Institute for the COVID-19 Genomics UK (COG-UK) consortium|Davies|United Kingdom

>Spike|hCoV-19/England/QEUA-A0BB82/2020|2020-10-01|EPI\_ISL\_599363|Original|hCoV-19^^England|Human|Lighthouse Lab in Glasgow|Wellcome Sanger Institute for the COVID-19 Genomics UK (COG-UK) consortium|Davies|United Kingdom

>Spike|hCoV-19/Netherlands/GE-RIVM-20287/2020|2020-11-14|EPI\_ISL\_723426|Original|hCoV-19^^Gelderland|Human|Dutch COVID-19 response team|National Institute for Public Health and the Environment (RIVM)|Meijer|Netherlands

>Spike|hCoV-19/England/LOND-DAA89/2020|2020-11-06|EPI\_ISL\_724687|Original|hCoV-19^^England|Human|University College London|COVID-19 Genomics UK (COG-UK) Consortium|Roy|United Kingdom

>Spike|hCoV-19/England/LIVE-DB6233/2020|2020-11-07|EPI\_ISL\_650132|Original|hCoV-19^^England|Human|Liverpool Clinical Laboratories|COVID-19 Genomics UK (COG-UK) Consortium|Haldenby|United Kingdom

>Spike|hCoV-19/Northern Ireland/NIRE-103497/2020|2020-04-17|EPI\_ISL\_489345|Original|hCoV-19^^Northern Ireland|Human|Regional Virus Laboratory|Wellcome Sanger Institute for the COVID-19 Genomics UK (COG-UK) consortium|Davies|United Kingdom

>Spike|hCoV-19/USA/TX-HMH-4044/2020|2020-06-17|EPI\_ISL\_543321|Original|hCoV-19^^Texas|Human|Houston Methodist Hospital|Houston Methodist Hospital|Long|USA

>Spike|hCoV-19/South Africa/KRISP-K002542/2020|2020-07-30|EPI\_ISL\_535412|Original|hCoV-19^^KwaZulu-Natal|Human|NHL-IALCH|KRISP|de Oliveira|South Africa

>Spike|hCoV-19/Switzerland/SZ-HUG-1417/2020|2020-03-02|EPI\_ISL\_415702|Original|hCoV-19^^Schwyz|Human|University Hospitals of Geneva Laboratory of Virology|University Hospitals of Geneva Laboratory of Virology|Cordey|Switzerland

>Spike|hCoV-19/USA/UT-UPHL-04528/2020|2020-05-21|EPI\_ISL\_575157|Original|hCoV-19^^Utah|Human|Utah Public Health Laboratory|Utah Public Health Laboratory|Young|USA

>Spike|hCoV-19/England/QEUA-9D01D0/2020|2020-09-16|EPI\_ISL\_589825|Original|hCoV-19^^England|Human|Lighthouse Lab in Glasgow|Wellcome Sanger Institute for the COVID-19 Genomics UK (COG-UK) consortium|Davies|United Kingdom

>Spike|hCoV-19/Denmark/DCGC-17545/2020|2020-12-14|EPI\_ISL\_751059|Original|hCoV-19^^Midtjylland|Human|Department of Virus and Microbiological Special Diagnostics|Albertsen Lab|Michaelsen|Denmark

>Spike|hCoV-19/England/NORT-286A5D/2020|2020-10-14|EPI\_ISL\_638572|Original|hCoV-19^^England|Human|Northumbria University / South Tees Hospitals NHS Foundation Trust / North Cumbria Integrated Care NHS Foundation Trust / North Tees and Hartlepool NHS Foundation Trust / Newcastle Hospitals NHS Foundation Trust|COVID-19 Genomics UK (COG-UK) Consortium|Bashton|United Kingdom

>Spike|hCoV-19/England/QEUA-AD5E00/2020|2020-10-25|EPI\_ISL\_634541|Original|hCoV-19^^England|Human|Lighthouse Lab in Glasgow|Wellcome Sanger Institute for the COVID-19 Genomics UK (COG-UK) consortium|Davies|United Kingdom

>Spike|hCoV-19/England/MILK-999D84/2020|2020-08-29|EPI\_ISL\_550380|Original|hCoV-19^^England|Human|Lighthouse Lab in Milton Keynes|Wellcome Sanger Institute for the COVID-19 Genomics UK (COG-UK) consortium|Davies|United Kingdom

>Spike|hCoV-19/England/ALDP-95C88C/2020|2020-06-16|EPI\_ISL\_553435|Original|hCoV-19^^England|Human|Lighthouse Lab in Alderley Park|Wellcome Sanger Institute for the COVID-19 Genomics UK (COG-UK) consortium|Davies|United Kingdom

>Spike|hCoV-19/Denmark/DCGC-6554/2020|2020-10-05|EPI\_ISL\_619454|Original|hCoV-19^^Midtjylland|Human|Department of Virus and Microbiological Special Diagnostics|Albertsen lab|Michaelsen|Denmark

>Spike|hCoV-19/USA/TX-HMH-MCoV-14305/2020|2020-10-06|EPI\_ISL\_787590|Original|hCoV-19^^Texas|Human|Houston Methodist Hospital|Houston Methodist Hospital|Long|USA

>Spike|hCoV-19/England/QEUA-9F5F08/2020|2020-09-25|EPI\_ISL\_588796|Original|hCoV-19^^England|Human|Lighthouse Lab in Glasgow|Wellcome Sanger Institute for the COVID-19 Genomics UK (COG-UK) consortium|Davies|United Kingdom

>Spike|hCoV-19/Spain/MD-IBV-99012335/2020|2020-11-20|EPI\_ISL\_779958|Original|hCoV-19^^Madrid|Human|Hospital General Universitario Gregorio Mara\u00f1\u00f3n|SeqCOVID-SPAIN consortium/IBV (CSIC) |Comas|Spain

>Spike|hCoV-19/England/ALDP-A50CA9/2020|2020-10-07|EPI\_ISL\_597657|Original|hCoV-19^^England|Human|Lighthouse Lab in Alderley Park|Wellcome Sanger Institute for the COVID-19 Genomics UK (COG-UK) consortium|Davies|United Kingdom

>Spike|hCoV-19/England/ALDP-9E65EA/2020|2020-09-24|EPI\_ISL\_580507|Original|hCoV-19^^England|Human|Lighthouse Lab in Alderley Park|Wellcome Sanger Institute for the COVID-19 Genomics UK (COG-UK) consortium|Davies|United Kingdom

>Spike|hCoV-19/England/20134023104/2020|2020-03-24|EPI\_ISL\_423122|Original|hCoV-19^^England|Human|Respiratory Virus Unit|Respiratory Virus Unit|Platt|United Kingdom

>Spike|hCoV-19/Denmark/DCGC-2686/2020|2020-08-10|EPI\_ISL\_617738|Original|hCoV-19^^Nordjylland|Human|Department of Virus and Microbiological Special Diagnostics|Albertsen lab|Michaelsen|Denmark

>Spike|hCoV-19/USA/TX-HMH-MCoV-18245/2020|2020-11-17|EPI\_ISL\_784593|Original|hCoV-19^^Texas|Human|Houston Methodist Hospital|Houston Methodist Hospital|Long|USA

>Spike|hCoV-19/USA/NY-QDX-35/2020|2020-03-15|EPI\_ISL\_467899|Original|hCoV-19^^New York|Human|Quest Diagnostics|Quest Diagnostics|Kagan|USA

>Spike|hCoV-19/USA/TX-HMH-MCoV-8473/2020|2020-07-01|EPI\_ISL\_780582|Original|hCoV-19^^Texas|Human|Houston Methodist Hospital|Houston Methodist Hospital|Long|USA

>Spike|hCoV-19/Wales/PHWC-166B8E/2020|2020-06-27|EPI\_ISL\_494088|Original|hCoV-19^^Wales|Human|Originating lab|COVID-19 Genomics UK (COG-UK) Consortium|Moore|United Kingdom

>Spike|hCoV-19/USA/TX-DSHS-1346/2020|2020-04-07|EPI\_ISL\_654927|Original|hCoV-19^^Texas|Human|Texas Department of State Health Services|Texas Department of State Health Services|Rahman|USA

>Spike|hCoV-19/England/CAMC-B9A89F/2020|2020-11-15|EPI\_ISL\_673513|Original|hCoV-19^^England|Human|Lighthouse Lab in Cambridge|Wellcome Sanger Institute for the COVID-19 Genomics UK (COG-UK) Consortium|Davies|United Kingdom

>Spike|hCoV-19/Luxembourg/LNS2048899/2020|2020-11-02|EPI\_ISL\_740047|Original|hCoV-19^^Luxembourg|Human|Laboratoire national de sant\u00e9|Laboratoire national de sant\u00e9|Wienecke-Baldacchino|Luxembourg

>Spike|hCoV-19/England/MILK-9A8432/2020|2020-09-01|EPI\_ISL\_550133|Original|hCoV-19^^England|Human|Lighthouse Lab in Milton Keynes|Wellcome Sanger Institute for the COVID-19 Genomics UK (COG-UK) consortium|Davies|United Kingdom

>Spike|hCoV-19/Spain/RI-IBV-99010926/2020|2020-09-22|EPI\_ISL\_732765|Original|hCoV-19^^La Rioja|Human|Centro de Investigaci\u00f3n Biom\u00e9dica de La Rioja - Hospital San Pedro Logro\u00f1o|SeqCOVID-SPAIN consortium/IBV (CSIC) |Comas|Spain

>Spike|hCoV-19/USA/WA-S432/2020|2020-03-28|EPI\_ISL\_434192|Original|hCoV-19^^Washington|Human|Washington State Department of Health|Seattle Flu Study|Bedford|USA

>Spike|hCoV-19/Australia/VIC5355/2020|2020-07-19|EPI\_ISL\_520118|Original|hCoV-19^^Victoria|Human|Microbiological Diagnostic Unit - Public Health Laboratory (MDU-PHL) |MDU-PHL|Schultz|Australia

>Spike|hCoV-19/USA/DE-DHSS-F917912/2020|2020-03-25|EPI\_ISL\_576154|Original|hCoV-19^^Delaware|Human|Delaware Public Health Lab|Delaware Public Health Lab|Bajwa|USA

>Spike|hCoV-19/Japan/PG-6365/2020|2020-08-00|EPI\_ISL\_689476|Original|hCoV-19^^Japan|Human|Fukuoka Institute of Health and Environmental Sciences|Pathogen Genomics Center|Sekizuka|Japan

>Spike|hCoV-19/Spain/AS-IBV-98006659/2020|2020-05-06|EPI\_ISL\_654628|Original|hCoV-19^^Asturias|Human|Servicio de Microbiolog\u00eda|SeqCOVID-SPAIN consortium/IBV (CSIC) |Comas|Spain

>Spike|hCoV-19/Canada/BC\_07943734/2020|2020-04-00|EPI\_ISL\_466825|Original|hCoV-19^^British Columbia|Human|BCCDC Public Health Laboratory|BCCDC Public Health Laboratory|Harrigan|Canada

>Spike|hCoV-19/Switzerland/BL-ETHZ-210064/2020|2020-07-21|EPI\_ISL\_510796|Original|hCoV-19^^Basel-Landschaft|Human|Viollier AG|Department of Biosystems Science and Engineering|Nadeau|Switzerland

>Spike|hCoV-19/Canada/ON-UHTC\_0346/2020|2020-09-12|EPI\_ISL\_609819|Original|hCoV-19^^Ontario|Human|Unity Health Toronto|Ontario Institute for Cancer Research|de Borja|Canada

>Spike|hCoV-19/Wales/PHWC-482EEA/2020|2020-10-19|EPI\_ISL\_627753|Original|hCoV-19^^Wales|Human|Wales Specialist Virology Centre Sequencing lab|COVID-19 Genomics UK (COG-UK) Consortium|Moore|United Kingdom

>Spike|hCoV-19/Japan/IC-0284/2020|2020-11-00|EPI\_ISL\_667713|Original|hCoV-19^^Japan|Human|Pathogen Genomics Center|Pathogen Genomics Center|Sekizuka|Japan

>Spike|hCoV-19/South Africa/KRISP-K001406/2020|2020-07-17|EPI\_ISL\_515889|Original|hCoV-19^^KwaZulu-Natal|Human|Medical Disagnostics Services (MDS)|KRISP|de Oliveira|South Africa

>Spike|hCoV-19/USA/TX-HMH-MCoV-14606/2020|2020-10-11|EPI\_ISL\_787891|Original|hCoV-19^^Texas|Human|Houston Methodist Hospital|Houston Methodist Hospital|Long|USA

>Spike|hCoV-19/Malaysia/IMR-CV138523/2020|2020-09-01|EPI\_ISL\_718289|Original|hCoV-19^^Malaysia|Human|Institute for Medical Research|Institute for Medical Research|Suppiah|Malaysia

>Spike|hCoV-19/USA/WA-S1813/2020|2020-06-02|EPI\_ISL\_496239|Original|hCoV-19^^Washington|Human|Washington State Department of Health|Seattle Flu Study|Lee|USA

>Spike|hCoV-19/England/QEUEH-CC3B84/2020|2020-12-21|EPI\_ISL\_760465|Original|hCoV-19^^England|Human|Lighthouse Lab in Glasgow|Wellcome Sanger Institute for the COVID-19 Genomics UK (COG-UK) Consortium|Davies|United Kingdom

>Spike|hCoV-19/USA/MD-HP12166/2020|2020-12-30|EPI\_ISL\_791472|Original|hCoV-19^^Maryland|Human|Johns Hopkins Hospital Department of Pathology|Johns Hopkins Hospital Department of Pathology|Morris|USA

>Spike|hCoV-19/England/ALDP-5ACB6A/2020|2020-06-18|EPI\_ISL\_558749|Original|hCoV-19^^England|Human|Lighthouse Lab in Alderley Park|Wellcome Sanger Institute for the COVID-19 Genomics UK (COG-UK) consortium|Davies|United Kingdom

>Spike|hCoV-19/Denmark/DCGC-3871/2020|2020-09-07|EPI\_ISL\_615589|Original|hCoV-19^^Hovedstaden|Human|Department of Virus and Microbiological Special Diagnostics|Albertsen lab|Michaelsen|Denmark

>Spike|hCoV-19/USA/TX-HMH-1529/2020|2020-04-07|EPI\_ISL\_542776|Original|hCoV-19^^Texas|Human|Houston Methodist Hospital|Houston Methodist Hospital|Long|USA

>Spike|hCoV-19/Switzerland/SG-ETHZ-220042/2020|2020-07-30|EPI\_ISL\_512022|Original|hCoV-19^^Sankt Gallen|Human|Viollier AG|Department of Biosystems Science and Engineering|Nadeau|Switzerland

>Spike|hCoV-19/England/ALDP-B858A6/2020|2020-11-14|EPI\_ISL\_675453|Original|hCoV-19^^England|Human|Lighthouse Lab in Alderley Park|Wellcome Sanger Institute for the COVID-19 Genomics UK (COG-UK) Consortium|Davies|United Kingdom

>Spike|hCoV-19/Denmark/DCGC-14350/2020|2020-11-30|EPI\_ISL\_711712|Original|hCoV-19^^Hovedstaden|Human|Department of Virus and Microbiological Special Diagnostics|Albertsen Lab|Michaelsen|Denmark

>Spike|hCoV-19/USA/UT-UPHL-2009108/2020|2020-05-13|EPI\_ISL\_525108|Original|hCoV-19^^Utah|Human|Utah Public Health Laboratory|Utah Public Health Laboratory|Young|USA

>Spike|hCoV-19/Canada/MB-NML-1121/2020|2020-08-04|EPI\_ISL\_582456|Original|hCoV-19^^Manitoba|Human|Cadham Provincial Laboratory|National Microbiology Laboratory (NML)|Majer|Canada

>Spike|hCoV-19/USA/MI-MDHHS-SC22617/2020|2020-11-10|EPI\_ISL\_737190|Original|hCoV-19^^Michigan|Human|Michigan Department of Health and Human Services|Michigan Department of Health and Human Services|Blankenship|USA

>Spike|hCoV-19/Wales/PHWC-16E5A6/2020|2020-09-30|EPI\_ISL\_585738|Original|hCoV-19^^Wales|Human|Wales Specialist Virology Centre Sequencing lab|COVID-19 Genomics UK (COG-UK) Consortium|Moore|United Kingdom

>Spike|hCoV-19/USA/CA-CZB-10161/2020|2020-06-22|EPI\_ISL\_672238|Original|hCoV-19^^California|Human|The Ashley Laboratory|Chan-Zuckerberg Biohub|Bhatt|USA

>Spike|hCoV-19/Bahrain/340859913\_S11/2020|2020-10-14|EPI\_ISL\_632278|Original|hCoV-19^^Bahrain|Human|Communicable Disease Laboratory|Communicable Disease Laboratory|Altaif|Bahrain

>Spike|hCoV-19/Australia/VIC13950/2020|2020-07-17|EPI\_ISL\_563890|Original|hCoV-19^^Victoria|Human|Microbiological Diagnostic Unit - Public Health Laboratory (MDU-PHL)|MDU-PHL|Schultz|Australia

>Spike|hCoV-19/England/ALDP-9E6A63/2020|2020-09-24|EPI\_ISL\_580475|Original|hCoV-19^^England|Human|Lighthouse Lab in Alderley Park|Wellcome Sanger Institute for the COVID-19 Genomics UK (COG-UK) consortium|Davies|United Kingdom

>Spike|hCoV-19/USA/IL-NM-0417/2020|2020-04-13|EPI\_ISL\_626398|Original|hCoV-19^^Illinois|Human|Northwestern Memorial Hospital|Ozer Lab|Ozer|USA

>Spike|hCoV-19/England/NORT-29CD1F/2020|2020-05-01|EPI\_ISL\_499790|Original|hCoV-19^^England|Human|Northumbria University / South Tees Hospitals NHS Foundation Trust / North Cumbria Integrated Care NHS Foundation Trust / North Tees and Hartlepool NHS Foundation Trust / Newcastle Hospitals NHS Foundation Trust|COVID-19 Genomics UK (COG-UK) Consortium|Bashton|United Kingdom

>Spike|hCoV-19/England/ALDP-B46689/2020|2020-11-07|EPI\_ISL\_656053|Original|hCoV-19^^England|Human|Lighthouse Lab in Alderley Park|Wellcome Sanger Institute for the COVID-19 Genomics UK (COG-UK) Consortium|Davies|United Kingdom

>Spike|hCoV-19/USA/MI-UM-10036761214/2020|2020-11-03|EPI\_ISL\_682173|Original|hCoV-19^^Michigan|Human|University of Michigan Clinical Microbiology Laboratory|Lauring Lab|Valesano|USA

>Spike|hCoV-19/England/ALDP-74592B/2020|2020-06-29|EPI\_ISL\_557405|Original|hCoV-19^^England|Human|Lighthouse Lab in Alderley Park|Wellcome Sanger Institute for the COVID-19 Genomics UK (COG-UK) consortium|Davies|United Kingdom

>Spike|hCoV-19/England/ALDP-5A376F/2020|2020-06-14|EPI\_ISL\_558686|Original|hCoV-19^^England|Human|Lighthouse Lab in Alderley Park|Wellcome Sanger Institute for the COVID-19 Genomics UK (COG-UK) consortium|Davies|United Kingdom

>Spike|hCoV-19/Japan/PG-7685/2020|2020-08-00|EPI\_ISL\_686787|Original|hCoV-19^^Japan|Human|Chiba Prefectural Institute of Public Health|Pathogen Genomics Center|Sekizuka|Japan

>Spike|hCoV-19/USA/CA-CDPH213/2020|2020-11-15|EPI\_ISL\_755069|Original|hCoV-19^^California|Human|California Department of Public Health|California Department of Public Health|Bell|USA

>Spike|hCoV-19/Denmark/DCGC-13939/2020|2020-11-30|EPI\_ISL\_711085|Original|hCoV-19^^Hovedstaden|Human|Department of Virus and Microbiological Special Diagnostics|Albertsen Lab|Michaelsen|Denmark

>Spike|hCoV-19/USA/TX-HMH-MCoV-14871/2020|2020-10-13|EPI\_ISL\_786355|Original|hCoV-19^^Texas|Human|Houston Methodist Hospital|Houston Methodist Hospital|Long|USA

>Spike|hCoV-19/Denmark/DCGC-4040/2020|2020-09-14|EPI\_ISL\_615814|Original|hCoV-19^^Hovedstaden|Human|Department of Virus and Microbiological Special Diagnostics|Albertsen lab|Michaelsen|Denmark

>Spike|hCoV-19/France/ARA-123003/2020|2020-12-21|EPI\_ISL\_779798|Original|hCoV-19^^Auvergne-Rh\u00f4ne-Alpes|Human|CNR Virus des Infections Respiratoires - France SUD|CNR Virus des Infections Respiratoires - France SUD|Bal|France

>Spike|hCoV-19/England/CAMC-A653CA/2020|2020-10-10|EPI\_ISL\_608360|Original|hCoV-19^^England|Human|Lighthouse Lab in Cambridge|Wellcome Sanger Institute for the COVID-19 Genomics UK (COG-UK) consortium|Davies|United Kingdom

>Spike|hCoV-19/South Korea/KCDC2608/2020|2020-07-01|EPI\_ISL\_515011|Original|hCoV-19^^South Korea|Human|Division of Viral Diseases|Division of Viral Diseases|Kim|South Korea

>Spike|hCoV-19/Netherlands/Overijssel\_28/2020|2020-03-16|EPI\_ISL\_460817|Original|hCoV-19^^Overijssel|Human|Dutch COVID-19 response team|Erasmus Medical Center|Oude Munnink|Netherlands

>Spike|hCoV-19/Australia/VIC10363/2020|2020-08-14|EPI\_ISL\_562891|Original|hCoV-19^^Victoria|Human|Microbiological Diagnostic Unit - Public Health Laboratory (MDU-PHL)|MDU-PHL|Schultz|Australia

>Spike|hCoV-19/England/QEUA-A209C9/2020|2020-10-01|EPI\_ISL\_587589|Original|hCoV-19^^England|Human|Lighthouse Lab in Glasgow|Wellcome Sanger Institute for the COVID-19 Genomics UK (COG-UK) consortium|Davies|United Kingdom

>Spike|hCoV-19/USA/AZ-TG396374/2020|2020-06-11|EPI\_ISL\_694828|Original|hCoV-19^^Arizona|Human|AZ SPHL|TGen North|French|USA

>Spike|hCoV-19/Scotland/EDB11321/2020|2020-12-24|EPI\_ISL\_763447|Original|hCoV-19^^Scotland|Human|Virology Department|COVID-19 Genomics UK (COG-UK) Consortium|McHugh|United Kingdom

>Spike|hCoV-19/USA/CA-CZB-11678/2020|2020-09-24|EPI\_ISL\_625490|Original|hCoV-19^^California|Human|Santa Clara County Public Health Laboratory|Chan-Zuckerberg Biohub|Bhatt|USA

>Spike|hCoV-19/Bahrain/341033460/2020|2020-11-15|EPI\_ISL\_684033|Original|hCoV-19^^Bahrain|Human|Communicable Disease Laboratory|Communicable Disease Laboratory|Altaif|Bahrain

>Spike|hCoV-19/USA/VA-DCLS-2199/2020|2020-11-04|EPI\_ISL\_734252|Original|hCoV-19^^Virginia|Human|Virginia Division of Consolidated Laboratory Services (DCLS)|Virginia Division of Consolidated Laboratory Services (DCLS)|St. Jacques|USA

>Spike|hCoV-19/Denmark/DCGC-11057/2020|2020-11-02|EPI\_ISL\_670369|Original|hCoV-19^^Syddanmark|Human|Department of Virus and Microbiological Special Diagnostics|Albertsen Lab|Michaelsen|Denmark

>Spike|hCoV-19/USA/TX-HMH-MCoV-16016/2020|2020-07-10|EPI\_ISL\_785700|Original|hCoV-19^^Texas|Human|Houston Methodist Hospital|Houston Methodist Hospital|Long|USA

>Spike|hCoV-19/Scotland/QEUH-998374/2020|2020-08-26|EPI\_ISL\_568355|Original|hCoV-19^^Scotland|Human|Lighthouse Lab in Glasgow|Wellcome Sanger Institute for the COVID-19 Genomics UK (COG-UK) consortium|Davies|United Kingdom

>Spike|hCoV-19/Netherlands/GE-EMC-205/2020|2020-05-26|EPI\_ISL\_523187|Original|hCoV-19^^Gelderland|Human|Dutch COVID-19 response team|Erasmus Medical Center|Oude Munnink|Netherlands

>Spike|hCoV-19/England/MILK-9C7190/2020|2020-09-08|EPI\_ISL\_573285|Original|hCoV-19^^England|Human|Northumbria University / South Tees Hospitals NHS Foundation Trust / North Cumbria Integrated Care NHS Foundation Trust / North Tees and Hartlepool NHS Foundation Trust / Newcastle Hospitals NHS Foundation Trust|COVID-19 Genomics UK (COG-UK) Consortium|Bashton|United Kingdom

>Spike|hCoV-19/Belgium/ULG-10212/2020|2020-06-09|EPI\_ISL\_484700|Original|hCoV-19^^Belgium|Human|Department of Clinical Microbiology|GIGA Medical Genomics|Durkin|Belgium

>Spike|hCoV-19/England/SHEF-C674D/2020|2020-05-20|EPI\_ISL\_479221|Original|hCoV-19^^England|Human|Virology Department|COVID-19 Genomics UK (COG-UK) Consortium|de Silva|United Kingdom

>Spike|hCoV-19/Germany/BW-MVZ-LS-34/2020|2020-04-08|EPI\_ISL\_640251|Original|hCoV-19^^Baden-W\u00fcrtemberg|Human|MVZ Labor\u00e4rzte Singen|MVZ Labor\u00e4rzte Singen|Schmidt|Germany

>Spike|hCoV-19/Scotland/CVR5695/2020|2020-11-09|EPI\_ISL\_651916|Original|hCoV-19^^Scotland|Human|West of Scotland Specialist Virology Centre|COVID-19 Genomics UK (COG-UK) Consortium|Robertson|United Kingdom

>Spike|hCoV-19/USA/CA-QDX-1915/2020|2020-03-16|EPI\_ISL\_604200|Original|hCoV-19^^California|Human|Quest Diagnostics|Quest Diagnostics|Kagan|USA

>Spike|hCoV-19/Wales/PHWC-4A21FA/2020|2020-12-14|EPI\_ISL\_743861|Original|hCoV-19^^Wales|Human|Wales Specialist Virology Centre Sequencing lab|COVID-19 Genomics UK (COG-UK) Consortium|Moore|United Kingdom

>Spike|hCoV-19/Scotland/QEUH-96C79B/2020|2020-08-21|EPI\_ISL\_534561|Original|hCoV-19^^Scotland|Human|NHSGGC West of Scotland Specialist Virology Centre / MRC-University of Glasgow Centre for Virus Research|Wellcome Sanger Institute for the COVID-19 Genomics UK (COG-UK) consortium|Davies|United Kingdom

>Spike|hCoV-19/USA/WA-S2512/2020|2020-06-17|EPI\_ISL\_497144|Original|hCoV-19^^Washington|Human|Washington State Department of Health|Seattle Flu Study|Lee|USA

>Spike|hCoV-19/Australia/VIC3509/2020|2020-07-07|EPI\_ISL\_520264|Original|hCoV-19^^Victoria|Human|Victorian Infectious Diseases Reference Laboratory (VIDRL)|VIDRL and MDU-PHL|Schultz|Australia

>Spike|hCoV-19/India/MH-ACTREC-311/2020|2020-07-15|EPI\_ISL\_723051|Original|hCoV-19^^Maharashtra|Human|Hematopathology Laboratory|Hematopathology Laboratory|Patkar|India

>Spike|hCoV-19/Denmark/DCGC-1474/2020|2020-06-22|EPI\_ISL\_622267|Original|hCoV-19^^Nordjylland|Human|Department of Virus and Microbiological Special Diagnostics|Albertsen lab|Michaelsen|Denmark

>Spike|hCoV-19/Japan/PG-7354/2020|2020-08-00|EPI\_ISL\_688456|Original|hCoV-19^^Japan|Human|Pathogen Genomics Center|Pathogen Genomics Center|Sekizuka|Japan

>Spike|hCoV-19/England/ALDP-9EA416/2020|2020-09-24|EPI\_ISL\_579941|Original|hCoV-19^^England|Human|Lighthouse Lab in Alderley Park|Wellcome Sanger Institute for the COVID-19 Genomics UK (COG-UK) consortium|Davies|United Kingdom

>Spike|hCoV-19/England/QEUH-9983DE/2020|2020-08-25|EPI\_ISL\_539901|Original|hCoV-19^^England|Human|Lighthouse Lab in Glasgow|Wellcome Sanger Institute for the COVID-19 Genomics UK (COG-UK) consortium|Davies|United Kingdom

>Spike|hCoV-19/Wales/PHWC-4884F1/2020|2020-10-29|EPI\_ISL\_639401|Original|hCoV-19^^Wales|Human|Wales Specialist Virology Centre Sequencing lab|COVID-19 Genomics UK (COG-UK) Consortium|Moore|United Kingdom

>Spike|hCoV-19/Hungary/UD-90381/2020|2020-10-03|EPI\_ISL\_671463|Original|hCoV-19^^Veszpr\u00e9m county|Human|University of Debrecen|National Laboratory of Virology|Kemenesi|Hungary

>Spike|hCoV-19/USA/WI-UW-313/2020|2020-04-16|EPI\_ISL\_436607|Original|hCoV-19^^Wisconsin|Human|University of Wisconsin-Madison AIDS Vaccine Research Laboratories|University of Wisconsin-Madison AIDS Vaccine Research Laboratories|Baczenas|USA

>Spike|hCoV-19/USA/AZ-TG276146/2020|2020-04-09|EPI\_ISL\_694091|Original|hCoV-19^^Arizona|Human|AZ SPHL|TGen North|French|USA

>Spike|hCoV-19/USA/UT-UPHL-2009520/2020|2020-07-19|EPI\_ISL\_605201|Original|hCoV-19^^Utah|Human|Utah Public Health Laboratory|Utah Public Health Laboratory|Young|USA

>Spike|hCoV-19/USA/TX-HMH-MCoV-12932/2020|2020-08-18|EPI\_ISL\_788084|Original|hCoV-19^^Texas|Human|Houston Methodist Hospital|Houston Methodist Hospital|Long|USA

>Spike|hCoV-19/Northern Ireland/NIRE-103C44/2020|2020-04-16|EPI\_ISL\_489237|Original|hCoV-19^^Northern Ireland|Human|Regional Virus Laboratory|Wellcome Sanger Institute for the COVID-19 Genomics UK (COG-UK) consortium|Davies|United Kingdom

>Spike|hCoV-19/Japan/PG-1227/2020|2020-04-00|EPI\_ISL\_684837|Original|hCoV-19^^Japan|Human|Yamagata Prefectural Institute of Public Health|Pathogen Genomics Center|Sekizuka|Japan

>Spike|hCoV-19/USA/AZ-TG519200/2020|2020-07-01|EPI\_ISL\_695370|Original|hCoV-19^^Arizona|Human|AZ SPHL|TGen North|French|USA

>Spike|hCoV-19/Australia/TAS18/2020|2020-04-13|EPI\_ISL\_522630|Original|hCoV-19^^Tasmania|Human|Royal Hobart Hospital Microbiology Department|MDU-PHL|Schultz|Australia

>Spike|hCoV-19/Luxembourg/LNS2137806/2020|2020-11-06|EPI\_ISL\_740066|Original|hCoV-19^^Luxembourg|Human|Laboratoire national de sant\u00e9|Laboratoire national de sant\u00e9|Wienecke-Baldacchino|Luxembourg

>Spike|hCoV-19/England/ALDP-9CB712/2020|2020-09-16|EPI\_ISL\_575520|Original|hCoV-19^^England|Human|Lighthouse Lab in Alderley Park|Wellcome Sanger Institute for the COVID-19 Genomics UK (COG-UK) consortium|Davies|United Kingdom

>Spike|hCoV-19/England/ALDP-9E6553/2020|2020-09-25|EPI\_ISL\_580526|Original|hCoV-19^^England|Human|Lighthouse Lab in Alderley Park|Wellcome Sanger Institute for the COVID-19 Genomics UK (COG-UK) consortium|Davies|United Kingdom

>Spike|hCoV-19/England/CAMB-1B59A4/2020|2020-07-29|EPI\_ISL\_514446|Original|hCoV-19^^England|Human|Department of Pathology|COVID-19 Genomics UK (COG-UK) Consortium|Meredith|United Kingdom

>Spike|hCoV-19/USA/MD-MDH-0267/2020|2020-10-13|EPI\_ISL\_629048|Original|hCoV-19^^Maryland|Human|Maryland Public Health Laboratory|Maryland Public Health Laboratory|Keller|USA

>Spike|hCoV-19/England/NORW-EFC9A/2020|2020-12-05|EPI\_ISL\_725111|Original|hCoV-19^^England|Human|Quadram Institute Bioscience|COVID-19 Genomics UK (COG-UK) Consortium|Alikhan|United Kingdom

>Spike|hCoV-19/England/ALDP-9FDE8B/2020|2020-10-01|EPI\_ISL\_587787|Original|hCoV-19^^England|Human|Lighthouse Lab in Alderley Park|Wellcome Sanger Institute for the COVID-19 Genomics UK (COG-UK) consortium|Davies|United Kingdom

>Spike|hCoV-19/Scotland/QEUH-A314C4/2020|2020-10-05|EPI\_ISL\_595895|Original|hCoV-19^^Scotland|Human|Quadram Institute Bioscience|COVID-19 Genomics UK (COG-UK) Consortium|Alikhan|United Kingdom

>Spike|hCoV-19/Australia/VIC14959/2020|2020-08-18|EPI\_ISL\_593082|Original|hCoV-19^^Victoria|Human|Microbiological Diagnostic Unit - Public Health Laboratory (MDU-PHL)|MDU-PHL|Schultz|Australia

>Spike|hCoV-19/Belgium/ULG-10898/2020|2020-11-14|EPI\_ISL\_678440|Original|hCoV-19^^Li\u00e8ge|Human|Department of Clinical Microbiology|GIGA Medical Genomics|Durkin|Belgium

>Spike|hCoV-19/England/QEUH-9B55D5/2020|2020-09-03|EPI\_ISL\_590232|Original|hCoV-19^^England|Human|Lighthouse Lab in Glasgow|Wellcome Sanger Institute for the COVID-19 Genomics UK (COG-UK) consortium|Davies|United Kingdom

>Spike|hCoV-19/Belgium/ULG-10846/2020|2020-10-28|EPI\_ISL\_666881|Original|hCoV-19^^Li\u00e8ge|Human|Department of Clinical Microbiology|GIGA Medical Genomics|Durkin|Belgium

>Spike|hCoV-19/England/PORT-2D2C01/2020|2020-04-04|EPI\_ISL\_517516|Original|hCoV-19^^England|Human|Centre for Enzyme Innovation|COVID-19 Genomics UK (COG-UK) Consortium|Robson|United Kingdom

>Spike|hCoV-19/USA/AZ-TG569513/2020|2020-07-11|EPI\_ISL\_695595|Original|hCoV-19^^Arizona|Human|AZ SPHL|TGen North|French|USA

>Spike|hCoV-19/England/CAMB-1AE601/2020|2020-04-30|EPI\_ISL\_459418|Original|hCoV-19^^England|Human|Department of Pathology|Wellcome Sanger Institute for the COVID-19 Genomics UK (COG-UK) consortium|Davies|United Kingdom

>Spike|hCoV-19/England/QEUH-C7FEBB/2020|2020-12-16|EPI\_ISL\_762801|Original|hCoV-19^^England|Human|Lighthouse Lab in Glasgow|Wellcome Sanger Institute for the COVID-19 Genomics UK (COG-UK) Consortium|Davies|United Kingdom

>Spike|hCoV-19/England/201161147/2020|2020-03-11|EPI\_ISL\_464813|Original|hCoV-19^^England|Human|Respiratory Virus Unit|Respiratory Virus Unit|Platt|United Kingdom

>Spike|hCoV-19/England/CAMB-74F82/2020|2020-03-17|EPI\_ISL\_440392|Original|hCoV-19^^England|Human|Department of Pathology|Wellcome Sanger Institute for the COVID-19 Genomics UK (COG-UK) consortium|Amato|United Kingdom

>Spike|hCoV-19/France/OCC-85/2020|2020-09-30|EPI\_ISL\_593893|Original|hCoV-19^^Occitanie|Human|CHU Purpan - Laboratoire de Virologie - Institut F\u00e9d\u00e9ratif de Biologie|CHU Purpan - Laboratoire de Virologie - Institut F\u00e9d\u00e9ratif de Biologie|Latour|France

>Spike|hCoV-19/England/MILK-9AAE14/2020|2020-08-26|EPI\_ISL\_551055|Original|hCoV-19^^England|Human|Lighthouse Lab in Milton Keynes|Wellcome Sanger Institute for the COVID-19 Genomics UK (COG-UK) consortium|Davies|United Kingdom

>Spike|hCoV-19/England/CAMC-B77B44/2020|2020-11-10|EPI\_ISL\_661734|Original|hCoV-19^^England|Human|Lighthouse Lab in Cambridge|Wellcome Sanger Institute for the COVID-19 Genomics UK (COG-UK) Consortium|Davies|United Kingdom

>Spike|hCoV-19/England/LOND-124F52F/2020|2020-10-02|EPI\_ISL\_664479|Original|hCoV-19^^England|Human|University College London Hospital|COVID-19 Genomics UK (COG-UK) Consortium|Byott|United Kingdom

>Spike|hCoV-19/USA/TX-HMH-MCoV-14856/2020|2020-10-13|EPI\_ISL\_786340|Original|hCoV-19^^Texas|Human|Houston Methodist Hospital|Houston Methodist Hospital|Long|USA

>Spike|hCoV-19/England/QEUH-B9EAE0/2020|2020-11-18|EPI\_ISL\_719958|Original|hCoV-19^^England|Human|Lighthouse Lab in Glasgow|Wellcome Sanger Institute for the COVID-19 Genomics UK (COG-UK) Consortium|Davies|United Kingdom

>Spike|hCoV-19/Wales/PHWC-48BF1B/2020|2020-11-08|EPI\_ISL\_666370|Original|hCoV-19^^Wales|Human|Wales Specialist Virology Centre Sequencing lab|COVID-19 Genomics UK (COG-UK) Consortium|Moore|United Kingdom

>Spike|hCoV-19/England/PORT-2EA7AB/2020|2020-00-00|EPI\_ISL\_703668|Original|hCoV-19^^England|Human|Centre for Enzyme Innovation|COVID-19 Genomics UK (COG-UK) Consortium|Robson|United Kingdom

>Spike|hCoV-19/USA/CT-Yale-248/2020|2020-04-01|EPI\_ISL\_469176|Original|hCoV-19^^Connecticut|Human|Yale Clinical Virology Laboratory|Grubaugh Lab - Yale School of Public Health|Grubaugh|USA

>Spike|hCoV-19/Japan/PG-0913/2020|2020-04-00|EPI\_ISL\_684523|Original|hCoV-19^^Japan|Human|Pathogen Genomics Center|Pathogen Genomics Center|Sekizuka|Japan

>Spike|hCoV-19/England/ALDP-9B6659/2020|2020-08-28|EPI\_ISL\_573023|Original|hCoV-19^^England|Human|Oxford Viromics|COVID-19 Genomics UK (COG-UK) Consortium|Golubchik|United Kingdom



>Spike|hCoV-19/Chile/RM-110750/2020|2020-06-25|EPI\_ISL\_746565|Original|hCoV-19^^Region Metropolitana de Santiago|Human|Genetica Molecular and Subdepartamento de Virologia ISP Chile|Instituto de Salud Publica de Chile|Tognarelli|Chile

>Spike|hCoV-19/USA/MO-CDC-2-3714099/2020|2020-11-09|EPI\_ISL\_751635|Original|hCoV-19^^Missouri|Human|MO State Public Health Laboratory|Genomics and Discovery|Queen|USA

>Spike|hCoV-19/Wales/PHWC-4891CC/2020|2020-11-01|EPI\_ISL\_639547|Original|hCoV-19^^Wales|Human|Wales Specialist Virology Centre Sequencing lab|COVID-19 Genomics UK (COG-UK) Consortium|Moore|United Kingdom

>Spike|hCoV-19/England/CAMC-B517C4/2020|2020-11-05|EPI\_ISL\_658124|Original|hCoV-19^^England|Human|Lighthouse Lab in Cambridge|Wellcome Sanger Institute for the COVID-19 Genomics UK (COG-UK) Consortium|Davies|United Kingdom

>Spike|hCoV-19/England/CAMB-1ADCF1/2020|2020-05-05|EPI\_ISL\_448050|Original|hCoV-19^^England|Human|Department of Pathology|COVID-19 Genomics UK (COG-UK) Consortium|Meredit|United Kingdom

>Spike|hCoV-19/USA/WA-S2322/2020|2020-06-11|EPI\_ISL\_496954|Original|hCoV-19^^Washington|Human|Washington State Department of Health|Seattle Flu Study|Lee|USA

>Spike|hCoV-19/England/LIVE-A877E/2020|2020-03-26|EPI\_ISL\_517208|Original|hCoV-19^^England|Human|Liverpool Clinical Laboratories|COVID-19 Genomics UK (COG-UK) Consortium|Haldenby|United Kingdom

>Spike|hCoV-19/England/NORT-295E5F/2020|2020-03-31|EPI\_ISL\_478663|Original|hCoV-19^^England|Human|Northumbria University / South Tees Hospitals NHS Foundation Trust / North Cumbria Integrated Care NHS Foundation Trust / North Tees and Hartlepool NHS Foundation Trust / Newcastle Hospitals NHS Foundation Trust|COVID-19 Genomics UK (COG-UK) Consortium|Bashton|United Kingdom

>Spike|hCoV-19/England/QEUEH-9F665D/2020|2020-09-25|EPI\_ISL\_588442|Original|hCoV-19^^England|Human|Lighthouse Lab in Glasgow|Wellcome Sanger Institute for the COVID-19 Genomics UK (COG-UK) consortium|Davies|United Kingdom

>Spike|hCoV-19/USA/UT-UPHL-04539/2020|2020-05-22|EPI\_ISL\_575163|Original|hCoV-19^^Utah|Human|Utah Public Health Laboratory|Utah Public Health Laboratory|Young|USA

>Spike|hCoV-19/Northern Ireland/NIRE-FA79B/2020|2020-03-30|EPI\_ISL\_441696|Original|hCoV-19^^Northern Ireland|Human|Regional Virus Laboratory|Wellcome Sanger Institute for the COVID-19 Genomics UK (COG-UK) consortium|Amato|United Kingdom

>Spike|hCoV-19/England/BRIS-129CA2/2020|2020-04-15|EPI\_ISL\_458419|Original|hCoV-19^^England|Human|PHE South West Regional Laboratory|Wellcome Sanger Institute for the COVID-19 Genomics UK (COG-UK) consortium|Davies|United Kingdom

>Spike|hCoV-19/England/QEUEH-B7E2C0/2020|2020-11-14|EPI\_ISL\_727851|Original|hCoV-19^^England|Human|Oxford Viromics|COVID-19 Genomics UK (COG-UK) Consortium|Golubchik|United Kingdom

>Spike|hCoV-19/England/MILK-B89A06/2020|2020-11-13|EPI\_ISL\_675966|Original|hCoV-19^^England|Human|Lighthouse Lab in Milton Keynes|Wellcome Sanger Institute for the COVID-19 Genomics UK (COG-UK) Consortium|Davies|United Kingdom

>Spike|hCoV-19/England/ALDP-9E724C/2020|2020-09-24|EPI\_ISL\_580460|Original|hCoV-19^^England|Human|Lighthouse Lab in Alderley Park|Wellcome Sanger Institute for the COVID-19 Genomics UK (COG-UK) consortium|Davies|United Kingdom

>Spike|hCoV-19/England/204361198/2020|2020-10-22|EPI\_ISL\_637120|Original|hCoV-19^^England|Human|Respiratory Virus Unit|COVID-19 Genomics UK (COG-UK) Consortium|Platt|United Kingdom

>Spike|hCoV-19/USA/WI-UW-1770/2020|2020-09-16|EPI\_ISL\_605642|Original|hCoV-19^^Wisconsin|Human|University of Wisconsin-Madison AIDS Vaccine Research Laboratories|University of Wisconsin-Madison AIDS Vaccine Research Laboratories|Baczenas|USA

>Spike|hCoV-19/Wales/PHWC-48CCD7/2020|2020-11-08|EPI\_ISL\_666528|Original|hCoV-19^^Wales|Human|Wales Specialist Virology Centre Sequencing lab|COVID-19 Genomics UK (COG-UK) Consortium|Moore|United Kingdom

>Spike|hCoV-19/Scotland/EDB5973/2020|2020-05-04|EPI\_ISL\_526487|Original|hCoV-19^^Scotland|Human|Virology Department|COVID-19 Genomics UK (COG-UK) Consortium|Williams|United Kingdom

>Spike|hCoV-19/USA/WI-UW-1203/2020|2020-08-06|EPI\_ISL\_536576|Original|hCoV-19^^Wisconsin|Human|University of Wisconsin-Madison AIDS Vaccine Research

Laboratories|University of Wisconsin-Madison AIDS Vaccine Research  
Laboratories|Baczenas|USA  
>Spike|hCoV-19/Netherlands/GE-RIVM-10329/2020|2020-03-22|EPI\_ISL\_636499|Original|hCoV-19^^Gelderland|Human|Dutch COVID-19 response team|National Institute for Public Health and the Environment (RIVM)|Meijer|Netherlands  
>Spike|hCoV-19/Wales/ALDP-AA4927/2020|2020-10-21|EPI\_ISL\_624484|Original|hCoV-19^^Wales|Human|Lighthouse Lab in Alderley Park|Wellcome Sanger Institute for the COVID-19 Genomics UK (COG-UK) consortium|Davies|United Kingdom  
>Spike|hCoV-19/Spain/PV-IBV-000935/2020|2020-03-27|EPI\_ISL\_452637|Original|hCoV-19^^Basque Country|Human|Servicio de Microbiolog\u00eda. Hospital Universitario Donostia. OSI Donostialdea. \u00c1rea de Enfermedades Infecciosas|SeqCOVID-SPAIN consortium/IBV (CSIC)|Comas|Spain  
>Spike|hCoV-19/Denmark/DCGC-3678/2020|2020-09-07|EPI\_ISL\_615453|Original|hCoV-19^^Sjaelland|Human|Department of Virus and Microbiological Special Diagnostics|Albertsen lab|Michaelsen|Denmark  
>Spike|hCoV-19/USA/NY-QDX-1258/2020|2020-03-16|EPI\_ISL\_572022|Original|hCoV-19^^New York|Human|Quest Diagnostics|Quest Diagnostics|Kagan|USA  
>Spike|hCoV-19/Denmark/DCGC-15178/2020|2020-11-23|EPI\_ISL\_713677|Original|hCoV-19^^Hovedstaden|Human|Department of Virus and Microbiological Special Diagnostics|Albertsen Lab|Michaelsen|Denmark  
>Spike|hCoV-19/Iceland/136/2020|2020-03-12|EPI\_ISL\_417789|Original|hCoV-19^^Reykjavik|Human|The National University Hospital of Iceland|deCODE genetics|J\u00f3nsson|Iceland  
>Spike|hCoV-19/England/CAMC-B34044/2020|2020-11-05|EPI\_ISL\_659693|Original|hCoV-19^^England|Human|Lighthouse Lab in Cambridge|Wellcome Sanger Institute for the COVID-19 Genomics UK (COG-UK) Consortium|Davies|United Kingdom  
>Spike|hCoV-19/India/MH-ACTREC-384/2020|2020-07-27|EPI\_ISL\_700033|Original|hCoV-19^^Maharashtra|Human|Hematopathology Laboratory|Hematopathology Laboratory|Patkar|India  
>Spike|hCoV-19/Italy/VEN-IZSve-10-41/2020|2020-03-22|EPI\_ISL\_452181|Original|hCoV-19^^Veneto|Human|ULSS9 Distretto di Bussolengo|Istituto Zooprofilattico Sperimentale delle Venezie|Quaranta|Italy  
>Spike|hCoV-19/Japan/PG-1212/2020|2020-04-00|EPI\_ISL\_684822|Original|hCoV-19^^Japan|Human|Yamagata Prefectural Institute of Public Health|Pathogen Genomics Center|Sekizuka|Japan  
>Spike|hCoV-19/Australia/SAP376/2020|2020-03-21|EPI\_ISL\_492141|Original|hCoV-19^^South Australia|Human|SA Pathology|SA Pathology|Leong|Australia  
>Spike|hCoV-19/Japan/PG-1688/2020|2020-05-00|EPI\_ISL\_685294|Original|hCoV-19^^Japan|Human|Pathogen Genomics Center|Pathogen Genomics Center|Sekizuka|Japan  
>Spike|hCoV-19/England/CAMC-B36543/2020|2020-11-05|EPI\_ISL\_649482|Original|hCoV-19^^England|Human|Lighthouse Lab in Cambridge|Wellcome Sanger Institute for the COVID-19 Genomics UK (COG-UK) Consortium|Davies|United Kingdom  
>Spike|hCoV-19/Scotland/CVR4969/2020|2020-10-01|EPI\_ISL\_594733|Original|hCoV-19^^Scotland|Human|West of Scotland Specialist Virology Centre|COVID-19 Genomics UK (COG-UK) Consortium|Robertson|United Kingdom  
>Spike|hCoV-19/USA/WA-UW-23752/2020|2020-08-10|EPI\_ISL\_570598|Original|hCoV-19^^Washington|Human|UW Virology Lab|UW Virology Lab|Roychoudhury|USA  
>Spike|hCoV-19/USA/VA-DCLS-0437/2020|2020-05-02|EPI\_ISL\_477653|Original|hCoV-19^^Virginia|Human|Virginia DCLS|Virginia DCLS|St. Jacques|USA  
>Spike|hCoV-19/England/ALDP-4FFC66/2020|2020-06-24|EPI\_ISL\_559199|Original|hCoV-19^^England|Human|Lighthouse Lab in Alderley Park|Wellcome Sanger Institute for the COVID-19 Genomics UK (COG-UK) consortium|Davies|United Kingdom  
>Spike|hCoV-19/England/ALDP-BB5764/2020|2020-11-20|EPI\_ISL\_703163|Original|hCoV-19^^England|Human|Lighthouse Lab in Alderley Park|Wellcome Sanger Institute for the COVID-19 Genomics UK (COG-UK) Consortium|Davies|United Kingdom  
>Spike|hCoV-19/USA/NY-NYCPHL-001312/2020|2020-11-10|EPI\_ISL\_683963|Original|hCoV-19^^New York|Human|DOHMH Fort Greene|New York City Public Health Laboratory|Wang|USA  
>Spike|hCoV-19/USA/TX-HMH-6806/2020|2020-06-24|EPI\_ISL\_546256|Original|hCoV-19^^Texas|Human|Houston Methodist Hospital|Houston Methodist Hospital|Long|USA

>Spike|hCoV-19/Switzerland/BE-ETHZ-250120/2020|2020-08-14|EPI\_ISL\_535628|Original|hCoV-19^^Bern|Human|Viollier AG|Department of Biosystems Science and Engineering|Nadeau|Switzerland

>Spike|hCoV-19/Ireland/WW-NVRL-AIIDV0379v2/2020|2020-05-08|EPI\_ISL\_644255|Original|hCoV-19^^Wicklow|Human|CEPHR / Vincent's Hospital|Irish Coronavirus Sequencing Consortium - National Virus Reference Laboratory|Gonzalez|Ireland

>Spike|hCoV-19/Wales/ALDP-CB3BD2/2020|2020-12-17|EPI\_ISL\_761208|Original|hCoV-19^^Wales|Human|Lighthouse Lab in Alderley Park|Wellcome Sanger Institute for the COVID-19 Genomics UK (COG-UK) Consortium|Davies|United Kingdom

>Spike|hCoV-19/USA/MA-MASPHL-00807/2020|2020-05-26|EPI\_ISL\_692893|Original|hCoV-19^^Massachusetts|Human|Massachusetts State Public Health Laboratory|Massachusetts State Public Health Laboratory|Lang|USA

>Spike|hCoV-19/Wales/PHWC-15CF43/2020|2020-05-04|EPI\_ISL\_472643|Original|hCoV-19^^Wales|Human|Wales Specialist Virology Centre Sequencing lab|COVID-19 Genomics UK (COG-UK) Consortium|Moore|United Kingdom

>Spike|hCoV-19/Australia/VIC9277/2020|2020-00-00|EPI\_ISL\_565479|Original|hCoV-19^^Victoria|Human|Microbiological Diagnostic Unit - Public Health Laboratory (MDU-PHL) |MDU-PHL|Schultz|Australia

>Spike|hCoV-19/Denmark/DCGC-8479/2020|2020-06-08|EPI\_ISL\_618037|Original|hCoV-19^^Nordjylland|Human|Department of Virus and Microbiological Special Diagnostics|Albertsen lab|Michaelsen|Denmark

>Spike|hCoV-19/Canada/ON-S898/2020|2020-04-12|EPI\_ISL\_586473|Original|hCoV-19^^Ontario|Human|Toronto Invasive Bacterial Diseases Network|McMaster University|McArthur|Canada

>Spike|hCoV-19/USA/AZ-TG371337/2020|2020-05-22|EPI\_ISL\_694581|Original|hCoV-19^^Arizona|Human|AZ SPHL|TGen North|French|USA

>Spike|hCoV-19/Gibraltar/205121223/2020|2020-00-00|EPI\_ISL\_766349|Original|hCoV-19^^Gibraltar|Human|Microbiology|Respiratory Virus Unit|Platt|Gibraltar

>Spike|hCoV-19/Canada/QC-LSPQ-L00230666/2020|2020-03-21|EPI\_ISL\_535927|Original|hCoV-19^^Quebec|Human|H\u00f4pital Charles-LeMoine|Laboratoire de sant\u00e9 publique du Qu\u00e9bec|Moreira|Canada

>Spike|hCoV-19/England/ALDP-B1DB5F/2020|2020-11-01|EPI\_ISL\_646066|Original|hCoV-19^^England|Human|Lighthouse Lab in Alderley Park|Wellcome Sanger Institute for the COVID-19 Genomics UK (COG-UK) Consortium|Davies|United Kingdom

>Spike|hCoV-19/France/ARA-1307/2020|2020-03-24|EPI\_ISL\_420621|Original|hCoV-19^^Auvergne-Rh\u00f4ne-Alpes|Human|Institut des Agents Infectieux (IAI)|CNR Virus des Infections Respiratoires - France SUD|Josset|France

>Spike|hCoV-19/England/ALDP-8E036F/2020|2020-06-23|EPI\_ISL\_556992|Original|hCoV-19^^England|Human|Lighthouse Lab in Alderley Park|Wellcome Sanger Institute for the COVID-19 Genomics UK (COG-UK) consortium|Davies|United Kingdom

>Spike|hCoV-19/England/QEUA-AF24ED/2020|2020-10-30|EPI\_ISL\_662708|Original|hCoV-19^^England|Human|Lighthouse Lab in Glasgow|Wellcome Sanger Institute for the COVID-19 Genomics UK (COG-UK) Consortium|Davies|United Kingdom

>Spike|hCoV-19/Japan/PG-2813/2020|2020-04-00|EPI\_ISL\_690940|Original|hCoV-19^^Japan|Human|Pathogen Genomics Center|Pathogen Genomics Center|Sekizuka|Japan

>Spike|hCoV-19/USA/WI-UW-450/2020|2020-06-17|EPI\_ISL\_484825|Original|hCoV-19^^Wisconsin|Human|University of Wisconsin-Madison AIDS Vaccine Research Laboratories|University of Wisconsin-Madison AIDS Vaccine Research Laboratories|Baczenas|USA

>Spike|hCoV-19/England/CAMC-C44D49/2020|2020-12-10|EPI\_ISL\_718467|Original|hCoV-19^^England|Human|Lighthouse Lab in Cambridge|Wellcome Sanger Institute for the COVID-19 Genomics UK (COG-UK) Consortium|Davies|United Kingdom

>Spike|hCoV-19/England/NOTT-110F5A/2020|2020-04-21|EPI\_ISL\_448439|Original|hCoV-19^^England|Human|Queens Medical Centre|COVID-19 Genomics UK (COG-UK) Consortium|Loose|United Kingdom

>Spike|hCoV-19/Canada/ON-SB-09/2020|2020-10-23|EPI\_ISL\_755748|Original|hCoV-19^^Ontario|Human|Toronto Invasive Bacterial Diseases Network|McMaster University|McArthur|Canada

>Spike|hCoV-19/Switzerland/VS-ETHZ-410899/2020|2020-11-30|EPI\_ISL\_737871|Original|hCoV-19^^Valais|Human|Viollier AG|Department of Biosystems Science and Engineering|Nadeau|Switzerland

>Spike|hCoV-19/USA/WA-UW-3832/2020|2020-03-26|EPI\_ISL\_427185|Original|hCoV-19^^Washington|Human|UW Virology Lab|UW Virology Lab|Roychoudhury|USA

>Spike|hCoV-19/England/MILK-956925/2020|2020-06-06|EPI\_ISL\_554274|Original|hCoV-19^^England|Human|Lighthouse Lab in Milton Keynes|Wellcome Sanger Institute for the COVID-19 Genomics UK (COG-UK) consortium|Davies|United Kingdom

>Spike|hCoV-19/England/QEUA-962012/2020|2020-08-10|EPI\_ISL\_531606|Original|hCoV-19^^England|Human|Lighthouse Lab in Glasgow|Wellcome Sanger Institute for the COVID-19 Genomics UK (COG-UK) consortium|Davies|United Kingdom

>Spike|hCoV-19/England/CAMC-9EC71B/2020|2020-09-24|EPI\_ISL\_580354|Original|hCoV-19^^England|Human|Lighthouse Lab in Cambridge|Wellcome Sanger Institute for the COVID-19 Genomics UK (COG-UK) consortium|Davies|United Kingdom

>Spike|hCoV-19/Australia/NSW502/2020|2020-03-20|EPI\_ISL\_455042|Original|hCoV-19^^New South Wales|Human|ACT Pathology|NSW Health Pathology - Institute of Clinical Pathology and Medical Research; Westmead Hospital; University of Sydney|Gall|Australia

>Spike|hCoV-19/Australia/VIC6206/2020|2020-07-23|EPI\_ISL\_518207|Original|hCoV-19^^Victoria|Human|Victorian Infectious Diseases Reference Laboratory (VIDRL)|VIDRL and MDU-PHL|Schultz|Australia

>Spike|hCoV-19/USA/MI-MDHHS-SC21962/2020|2020-06-23|EPI\_ISL\_566013|Original|hCoV-19^^Michigan|Human|Michigan Department of Health and Human Services|Michigan Department of Health and Human Services|Blankenship|USA

>Spike|hCoV-19/Germany/HH-hpi-p1799/2020|2020-03-20|EPI\_ISL\_776167|Original|hCoV-19^^Hamburg|Human|University Medical Center Hamburg Eppendorf|Heinrich Pette Institute|Robitaille|Germany

>Spike|hCoV-19/England/QEUA-AAAFB6/2020|2020-10-20|EPI\_ISL\_652763|Original|hCoV-19^^England|Human|Oxford Viromics|COVID-19 Genomics UK (COG-UK) Consortium|Golubchik|United Kingdom

>Spike|hCoV-19/Netherlands/ZuidHolland\_193/2020|2020-04-28|EPI\_ISL\_461365|Original|hCoV-19^^Zuid Holland|Human|Dutch COVID-19 response team|Erasmus Medical Center|Oude Munnink|Netherlands

>Spike|hCoV-19/USA/TX-HMH-MCoV-8640/2020|2020-07-01|EPI\_ISL\_780669|Original|hCoV-19^^Texas|Human|Houston Methodist Hospital|Houston Methodist Hospital|Long|USA

>Spike|hCoV-19/Scotland/CVR1560/2020|2020-04-04|EPI\_ISL\_438840|Original|hCoV-19^^Scotland|Human|West of Scotland Specialist Virology Centre|COVID-19 Genomics UK (COG-UK) Consortium|Robertson|United Kingdom

>Spike|hCoV-19/Denmark/DCGC-18394/2020|2020-12-07|EPI\_ISL\_749938|Original|hCoV-19^^Midtjylland|Human|Department of Virus and Microbiological Special Diagnostics|Albertsen Lab|Michaelsen|Denmark

>Spike|hCoV-19/USA/FL-BPHL-0408/2020|2020-05-14|EPI\_ISL\_489817|Original|hCoV-19^^Florida|Human|Florida Bureau of Public Health Laboratories|Florida Bureau of Public Health Laboratories|Blanton|USA

>Spike|hCoV-19/England/BRIS-12D260/2020|2020-05-04|EPI\_ISL\_481835|Original|hCoV-19^^England|Human|PHE South West Regional Laboratory|Wellcome Sanger Institute for the COVID-19 Genomics UK (COG-UK) consortium|Davies|United Kingdom

>Spike|hCoV-19/Canada/ON-UHTC\_0340/2020|2020-09-10|EPI\_ISL\_609812|Original|hCoV-19^^Ontario|Human|Unity Health Toronto|Ontario Institute for Cancer Research|de Borja|Canada

>Spike|hCoV-19/England/NOTT-121871/2020|2020-12-23|EPI\_ISL\_763663|Original|hCoV-19^^England|Human|Queens Medical Centre|COVID-19 Genomics UK (COG-UK) Consortium|Loose|United Kingdom

>Spike|hCoV-19/Wales/MILK-993A29/2020|2020-08-26|EPI\_ISL\_552334|Original|hCoV-19^^Wales|Human|Lighthouse Lab in Milton Keynes|Wellcome Sanger Institute for the COVID-19 Genomics UK (COG-UK) consortium|Davies|United Kingdom

>Spike|hCoV-19/Ireland/G-NVRL-78IRL71368/2020|2020-11-23|EPI\_ISL\_752554|Original|hCoV-19^^Galway|Human|National Virus Reference Laboratory|National Virus Reference Laboratory|Gonzalez|Ireland

>Spike|hCoV-19/Japan/PG-5409/2020|2020-08-00|EPI\_ISL\_690512|Original|hCoV-19^^Japan|Human|Fukuoka Institute of Health and Environmental Sciences|Pathogen Genomics Center|Sekizuka|Japan

>Spike|hCoV-19/USA/TX-HMH-MCoV-14990/2020|2020-10-16|EPI\_ISL\_786474|Original|hCoV-19^^Texas|Human|Houston Methodist Hospital|Houston Methodist Hospital|Long|USA

>Spike|hCoV-19/Wales/PHWC-16534B/2020|2020-05-03|EPI\_ISL\_479453|Original|hCoV-19^^Wales|Human|Wales Specialist Virology Centre Sequencing lab|COVID-19 Genomics UK (COG-UK) Consortium|Moore|United Kingdom

>Spike|hCoV-19/Australia/VIC15523/2020|2020-09-30|EPI\_ISL\_593348|Original|hCoV-19^^Victoria|Human|Microbiological Diagnostic Unit - Public Health Laboratory (MDU-PHL)|MDU-PHL|Schultz|Australia

>Spike|hCoV-19/USA/FL-BPHL-0238/2020|2020-04-26|EPI\_ISL\_480889|Original|hCoV-19^^Florida|Human|Florida Bureau of Public Health Laboratories|Florida Bureau of Public Health Laboratories|Blanton|USA

>Spike|hCoV-19/England/CAMB-77CB5/2020|2020-04-01|EPI\_ISL\_440849|Original|hCoV-19^^England|Human|Department of Pathology|Wellcome Sanger Institute for the COVID-19 Genomics UK (COG-UK) consortium|Amato|United Kingdom

>Spike|hCoV-19/England/CAMC-C438A3/2020|2020-12-10|EPI\_ISL\_719030|Original|hCoV-19^^England|Human|Lighthouse Lab in Cambridge|Wellcome Sanger Institute for the COVID-19 Genomics UK (COG-UK) Consortium|Davies|United Kingdom

>Spike|hCoV-19/Scotland/QEUA-9CF505/2020|2020-09-17|EPI\_ISL\_601963|Original|hCoV-19^^Scotland|Human|Lighthouse Lab in Glasgow|Wellcome Sanger Institute for the COVID-19 Genomics UK (COG-UK) consortium|Davies|United Kingdom

>Spike|hCoV-19/United Arab Emirates/0094/2020|2020-05-19|EPI\_ISL\_698286|Original|hCoV-19^^Abu Dhabi|Human|Group 42 (G42) Healthcare|G42 Healthcare|Ogrodzki|United Arab Emirates

>Spike|hCoV-19/Australia/VIC3832/2020|2020-07-13|EPI\_ISL\_520545|Original|hCoV-19^^Victoria|Human|Microbiological Diagnostic Unit - Public Health Laboratory (MDU-PHL)|MDU-PHL|Schultz|Australia

>Spike|hCoV-19/Netherlands/Utrecht\_38/2020|2020-04-12|EPI\_ISL\_461236|Original|hCoV-19^^Utrecht|Human|Dutch COVID-19 response team|Erasmus Medical Center|Oude Munnink|Netherlands

>Spike|hCoV-19/USA/LA-EVTL433/2020|2020-06-11|EPI\_ISL\_578839|Original|hCoV-19^^Louisiana|Human|LSUHS Emerging Viral Threat Laboratory|Microbial Genome Sequencing Center|Kamil|USA

>Spike|hCoV-19/England/ALDP-C3A6F0/2020|2020-12-09|EPI\_ISL\_731268|Original|hCoV-19^^England|Human|Lighthouse Lab in Alderley Park|Wellcome Sanger Institute for the COVID-19 Genomics UK (COG-UK) Consortium|Davies|United Kingdom

>Spike|hCoV-19/France/ARA-77679/2020|2020-09-24|EPI\_ISL\_693511|Original|hCoV-19^^Auvergne-Rh\u00f4ne-Alpes|Human|CNR Virus des Infections Respiratoires - France SUD|CNR Virus des Infections Respiratoires - France SUD|Bal|France

>Spike|hCoV-19/USA/CO-CDPHE-2005060769/2020|2020-05-05|EPI\_ISL\_771228|Original|hCoV-19^^Colorado|Human|Colorado Department of Public Health and Environment|Colorado Department of Public Health and Environment|Bankers|USA

>Spike|hCoV-19/Wales/PHWC-4945B3/2020|2020-11-20|EPI\_ISL\_726138|Original|hCoV-19^^Wales|Human|Originating lab|COVID-19 Genomics UK (COG-UK) Consortium|Moore|United Kingdom

>Spike|hCoV-19/England/QEUA-B0E395/2020|2020-11-02|EPI\_ISL\_642199|Original|hCoV-19^^England|Human|Lighthouse Lab in Glasgow|Wellcome Sanger Institute for the COVID-19 Genomics UK (COG-UK) Consortium|Davies|United Kingdom

>Spike|hCoV-19/Thailand/SamutSakhon-CONI-0367/2020|2020-12-19|EPI\_ISL\_733561|Original|hCoV-19^^Samut Sakhon|Human|Institute for Urban Disease Control and Prevention|COVID-19 Network Investigations (CONI) Alliance|Batty|Thailand

>Spike|hCoV-19/Canada/ON-PHL-20-01230/2020|2020-06-00|EPI\_ISL\_548852|Original|hCoV-19^^Ontario|Human|Public Health Ontario Laboratory|Public Health Ontario Laboratory|Guthrie|Canada

>Spike|hCoV-19/Taiwan/TSGH-04/2020|2020-03-17|EPI\_ISL\_426632|Original|hCoV-19^^New Taipei City|Human|TSGH-CP molecular lab|TSGH-CP molecular lab|Shang|Taiwan

>Spike|hCoV-19/England/CAMB-75AF9/2020|2020-03-29|EPI\_ISL\_438319|Original|hCoV-19^^England|Human|Department of Pathology|Wellcome Sanger Institute for the COVID-19 Genomics UK (COG-UK) consortium|Amato|United Kingdom

>Spike|hCoV-19/USA/WI-GMF-32540/2020|2020-11-09|EPI\_ISL\_661153|Original|hCoV-19^^Wisconsin|Human|Gundersen Molecular Diagnostics Laboratory|Kabara Cancer Research Institute|Kenny|USA

>Spike|hCoV-19/USA/WA-S1339/2020|2020-05-13|EPI\_ISL\_495789|Original|hCoV-19^^Washington|Human|Washington State Department of Health|Seattle Flu Study|Lee|USA

>Spike|hCoV-19/England/CAMB-7D3C9/2020|2020-04-06|EPI\_ISL\_441614|Original|hCoV-19^^England|Human|Department of Pathology|Wellcome Sanger Institute for the COVID-19 Genomics UK (COG-UK) consortium|Amato|United Kingdom

>Spike|hCoV-19/Japan/PG-4535/2020|2020-07-00|EPI\_ISL\_689673|Original|hCoV-19^^Japan|Human|Pathogen Genomics Center|Pathogen Genomics Center|Sekizuka|Japan

>Spike|hCoV-19/Australia/VIC8436/2020|2020-07-28|EPI\_ISL\_565010|Original|hCoV-19^^Victoria|Human|Microbiological Diagnostic Unit - Public Health Laboratory (MDU-PHL)|MDU-PHL|Schultz|Australia

>Spike|hCoV-19/England/204980417/2020|2020-00-00|EPI\_ISL\_710516|Original|hCoV-19^^England|Human|Respiratory Virus Unit|COVID-19 Genomics UK (COG-UK) Consortium|Platt|United Kingdom

>Spike|hCoV-19/England/QEUH-BC461A/2020|2020-11-25|EPI\_ISL\_703657|Original|hCoV-19^^England|Human|Lighthouse Lab in Glasgow|Wellcome Sanger Institute for the COVID-19 Genomics UK (COG-UK) Consortium|Davies|United Kingdom

>Spike|hCoV-19/Switzerland/ZH-ETHZ-410541/2020|2020-11-26|EPI\_ISL\_737922|Original|hCoV-19^^Zurich|Human|Viollier AG|Department of Biosystems Science and Engineering|Nadeau|Switzerland

>Spike|hCoV-19/England/ALDP-9ED5C5/2020|2020-05-08|EPI\_ISL\_589299|Original|hCoV-19^^England|Human|Lighthouse Lab in Alderley Park|Wellcome Sanger Institute for the COVID-19 Genomics UK (COG-UK) consortium|Davies|United Kingdom

>Spike|hCoV-19/England/ALDP-A929D1/2020|2020-10-19|EPI\_ISL\_611225|Original|hCoV-19^^England|Human|Lighthouse Lab in Alderley Park|Wellcome Sanger Institute for the COVID-19 Genomics UK (COG-UK) consortium|Davies|United Kingdom

>Spike|hCoV-19/England/ALDP-9D8BBC/2020|2020-09-18|EPI\_ISL\_576654|Original|hCoV-19^^England|Human|Oxford Viromics|COVID-19 Genomics UK (COG-UK) Consortium|Golubchik|United Kingdom

>Spike|hCoV-19/USA/TX-HMH-MCoV-11717/2020|2020-09-02|EPI\_ISL\_790093|Original|hCoV-19^^Texas|Human|Houston Methodist Hospital|Houston Methodist Hospital|Long|USA

>Spike|hCoV-19/England/BRIS-130B32/2020|2020-03-13|EPI\_ISL\_492675|Original|hCoV-19^^England|Human|PHE South West Regional Laboratory|Wellcome Sanger Institute for the COVID-19 Genomics UK (COG-UK) consortium|Davies|United Kingdom

>Spike|hCoV-19/Australia/VIC-CBA6/2020|2020-04-08|EPI\_ISL\_430066|Original|hCoV-19^^Victoria|Human|Geelong Centre for Emerging Infectious Diseases|Geelong Centre for Emerging Infectious Diseases|Alexandersen|Australia

>Spike|hCoV-19/USA/WI-UW-1646/2020|2020-09-09|EPI\_ISL\_605520|Original|hCoV-19^^Wisconsin|Human|University of Wisconsin-Madison AIDS Vaccine Research Laboratories|University of Wisconsin-Madison AIDS Vaccine Research Laboratories|Baczenas|USA

>Spike|hCoV-19/Saudi Arabia/KAIMRC62/2020|2020-04-01|EPI\_ISL\_507026|unknown|hCoV-19^^Saudi Arabia|Human|unknown|Infectious Diseases Research|Submitter|Saudi Arabia

>Spike|hCoV-19/USA/MA-MGH-02979/2020|2020-07-10|EPI\_ISL\_765670|Original|hCoV-19^^Massachusetts|Human|Massachusetts General Hospital|Infectious Disease Program|Park|USA

>Spike|hCoV-19/England/BRIS-1853D75/2020|2020-04-27|EPI\_ISL\_492370|Original|hCoV-19^^England|Human|PHE South West Regional Laboratory|Wellcome Sanger Institute for the COVID-19 Genomics UK (COG-UK) consortium|Davies|United Kingdom

>Spike|hCoV-19/USA/TX-HMH-3624/2020|2020-06-15|EPI\_ISL\_543077|Original|hCoV-19^^Texas|Human|Houston Methodist Hospital|Houston Methodist Hospital|Long|USA

>Spike|hCoV-19/England/CAMC-B51F35/2020|2020-11-08|EPI\_ISL\_657992|Original|hCoV-19^^England|Human|Lighthouse Lab in Cambridge|Wellcome Sanger Institute for the COVID-19 Genomics UK (COG-UK) Consortium|Davies|United Kingdom

>Spike|hCoV-19/England/CAMB-1BB73B/2020|2020-11-19|EPI\_ISL\_664446|Original|hCoV-19^England|Human|Department of Pathology|COVID-19 Genomics UK (COG-UK) Consortium|Goodfellow|United Kingdom

>Spike|hCoV-19/England/CAMB-805CD/2020|2020-04-09|EPI\_ISL\_470523|Original|hCoV-19^England|Human|Department of Pathology|Wellcome Sanger Institute for the COVID-19 Genomics UK (COG-UK) consortium|Davies|United Kingdom

>Spike|hCoV-19/Australia/VIC16061/2020|2020-08-04|EPI\_ISL\_641074|Original|hCoV-19^Victoria|Human|Microbiological Diagnostic Unit - Public Health Laboratory (MDU-PHL) |MDU-PHL|Schultz|Australia

>Spike|hCoV-19/Denmark/DCGC-14657/2020|2020-11-23|EPI\_ISL\_711154|Original|hCoV-19^Hovedstaden|Human|Department of Virus and Microbiological Special Diagnostics|Albertsen Lab|Michaelsen|Denmark

>Spike|hCoV-19/Denmark/DCGC-17633/2020|2020-12-14|EPI\_ISL\_751114|Original|hCoV-19^Nordjylland|Human|Department of Virus and Microbiological Special Diagnostics|Albertsen Lab|Michaelsen|Denmark

>Spike|hCoV-19/Japan/PG-6850/2020|2020-09-00|EPI\_ISL\_687958|Original|hCoV-19^Japan|Human|Pathogen Genomics Center|Pathogen Genomics Center|Sekizuka|Japan

>Spike|hCoV-19/Denmark/DCGC-20418/2020|2020-12-21|EPI\_ISL\_759136|Original|hCoV-19^Hovedstaden|Human|Department of Virus and Microbiological Special Diagnostics|Albertsen Lab|Michaelsen|Denmark

>Spike|hCoV-19/England/ALDP-658A7E/2020|2020-07-03|EPI\_ISL\_557986|Original|hCoV-19^England|Human|Lighthouse Lab in Alderley Park|Wellcome Sanger Institute for the COVID-19 Genomics UK (COG-UK) consortium|Davies|United Kingdom

>Spike|hCoV-19/Switzerland/ZH-ETHZ-260064/2020|2020-08-23|EPI\_ISL\_539389|Original|hCoV-19^Zurich|Human|Viollier AG|Department of Biosystems Science and Engineering|Nadeau|Switzerland

>Spike|hCoV-19/USA/TX-HMH0191/2020|2020-03-23|EPI\_ISL\_434866|Original|hCoV-19^Texas|Human|Houston Methodist Hospital|Houston Methodist Hospital|Long|USA

>Spike|hCoV-19/Netherlands/GE-RIVM-20529/2020|2020-12-04|EPI\_ISL\_728744|Original|hCoV-19^Gelderland|Human|Dutch COVID-19 response team|National Institute for Public Health and the Environment (RIVM)|Meijer|Netherlands

>Spike|hCoV-19/England/QEUH-C145B3/2020|2020-12-06|EPI\_ISL\_709367|Original|hCoV-19^England|Human|Lighthouse Lab in Glasgow|Wellcome Sanger Institute for the COVID-19 Genomics UK (COG-UK) Consortium|Davies|United Kingdom

>Spike|hCoV-19/Denmark/DCGC-16524/2020|2020-11-16|EPI\_ISL\_714813|Original|hCoV-19^Sjaelland|Human|Department of Virus and Microbiological Special Diagnostics|Albertsen Lab|Michaelsen|Denmark

>Spike|hCoV-19/Gambia/0528/2020|2020-04-30|EPI\_ISL\_471161|Original|hCoV-19^Kombo|Human|MRCG at LSHTM Genomics lab|MRCG at LSHTM Genomics lab|Sesay|Gambia

>Spike|hCoV-19/Palestine/30/2020|2020-03-31|EPI\_ISL\_596515|Original|hCoV-19^Bethlehem|Human|Palestinian Ministry of Health|Molecular Genetics Lab|van Dorp|Palestine

>Spike|hCoV-19/England/EXET-13DA0B/2020|2020-00-00|EPI\_ISL\_724272|Original|hCoV-19^England|Human|University of Exeter|COVID-19 Genomics UK (COG-UK) Consortium|Temperton|United Kingdom

>Spike|hCoV-19/England/NORW-F9E00/2020|2020-12-14|EPI\_ISL\_741600|Original|hCoV-19^England|Human|Quadram Institute Bioscience|COVID-19 Genomics UK (COG-UK) Consortium|Alikhan|United Kingdom

>Spike|hCoV-19/Denmark/DCGC-6596/2020|2020-10-12|EPI\_ISL\_619644|Original|hCoV-19^Hovedstaden|Human|Department of Virus and Microbiological Special Diagnostics|Albertsen lab|Michaelsen|Denmark

>Spike|hCoV-19/Canada/ON-PHL-20-03811/2020|2020-11-00|EPI\_ISL\_775022|Original|hCoV-19^Ontario|Human|Public Health Ontario Laboratory|Public Health Ontario Laboratory|Guthrie|Canada

>Spike|hCoV-19/Canada/QC-LSPQ-L00239865/2020|2020-03-26|EPI\_ISL\_536257|Original|hCoV-19^Quebec|Human|H\u00f4pital du Suro\u00eet|Laboratoire de sant\u00e9 publique du Qu\u00e9bec|Moreira|Canada

>Spike|hCoV-19/Denmark/DCGC-21887/2020|2020-12-21|EPI\_ISL\_758432|Original|hCoV-19^^Midtjylland|Human|Department of Virus and Microbiological Special Diagnostics|Albertsen Lab|Michaelsen|Denmark

>Spike|hCoV-19/Germany/HH-hpi-p1969/2020|2020-03-25|EPI\_ISL\_776292|Original|hCoV-19^^Hamburg|Human|University Medical Center Hamburg Eppendorf|Heinrich Pette Institute|Robitaille|Germany

>Spike|hCoV-19/England/CAMC-A58D53/2020|2020-10-08|EPI\_ISL\_596947|Original|hCoV-19^^England|Human|Lighthouse Lab in Cambridge|Wellcome Sanger Institute for the COVID-19 Genomics UK (COG-UK) consortium|Davies|United Kingdom

>Spike|hCoV-19/USA/VA-DCLS-1791/2020|2020-09-16|EPI\_ISL\_644875|Original|hCoV-19^^Virginia|Human|Virginia DCLS|Virginia DCLS|St. Jacques|USA

>Spike|hCoV-19/England/LIVE-9BF3A/2020|2020-03-26|EPI\_ISL\_449490|Original|hCoV-19^^England|Human|Liverpool Clinical Laboratories|COVID-19 Genomics UK (COG-UK) Consortium|Haldenby|United Kingdom

>Spike|hCoV-19/England/CAMB-81C03/2020|2020-04-13|EPI\_ISL\_442602|Original|hCoV-19^^England|Human|Department of Pathology|Wellcome Sanger Institute for the COVID-19 Genomics UK (COG-UK) consortium|Amato|United Kingdom

>Spike|hCoV-19/Ecuador/UEES-A001/2020|2020-00-00|EPI\_ISL\_672009|Original|hCoV-19^^Ecuador|Human|UEES BioLab|Omics Sciences Laboratory|Fernandez Cadena|Ecuador

>Spike|hCoV-19/Denmark/DCGC-22417/2020|2020-12-14|EPI\_ISL\_757551|Original|hCoV-19^^Hovedstaden|Human|Department of Virus and Microbiological Special Diagnostics|Albertsen Lab|Michaelsen|Denmark

>Spike|hCoV-19/Japan/PG-7554/2020|2020-09-00|EPI\_ISL\_686656|Original|hCoV-19^^Japan|Human|Pathogen Genomics Center|Pathogen Genomics Center|Sekizuka|Japan

>Spike|hCoV-19/England/QEUEH-96AA3A/2020|2020-08-17|EPI\_ISL\_531316|Original|hCoV-19^^England|Human|Lighthouse Lab in Glasgow|Wellcome Sanger Institute for the COVID-19 Genomics UK (COG-UK) consortium|Davies|United Kingdom

>Spike|hCoV-19/Portugal/PT0124/2020|2020-03-23|EPI\_ISL\_453840|Original|hCoV-19^^Portugal|Human|unknown|Instituto Nacional de Saude (INSA)|Borges|Portugal

>Spike|hCoV-19/England/MILK-563A62/2020|2020-06-10|EPI\_ISL\_558252|Original|hCoV-19^^England|Human|Lighthouse Lab in Milton Keynes|Wellcome Sanger Institute for the COVID-19 Genomics UK (COG-UK) consortium|Davies|United Kingdom

>Spike|hCoV-19/USA/MI-UM-10036825929/2020|2020-11-06|EPI\_ISL\_728419|Original|hCoV-19^^Michigan|Human|University of Michigan Clinical Microbiology Laboratory|Lauring Lab|Valesano|USA

>Spike|hCoV-19/Wales/PHWC-15CB8B/2020|2020-04-21|EPI\_ISL\_472589|Original|hCoV-19^^Wales|Human|Wales Specialist Virology Centre Sequencing lab|COVID-19 Genomics UK (COG-UK) Consortium|Moore|United Kingdom

>Spike|hCoV-19/USA/TX-HMH-3714/2020|2020-06-16|EPI\_ISL\_543131|Original|hCoV-19^^Texas|Human|Houston Methodist Hospital|Houston Methodist Hospital|Long|USA

>Spike|hCoV-19/Netherlands/GE-RIVM-20299/2020|2020-11-12|EPI\_ISL\_723438|Original|hCoV-19^^Gelderland|Human|Dutch COVID-19 response team|National Institute for Public Health and the Environment (RIVM)|Meijer|Netherlands

>Spike|hCoV-19/England/GSTT-265DC9B/2020|2020-03-21|EPI\_ISL\_484089|Original|hCoV-19^^England|Human|Centre for Clinical Infection and Diagnostics Research and Genomics Innovation Unit|COVID-19 Genomics UK (COG-UK) Consortium|Awan|United Kingdom

>Spike|hCoV-19/Chile/RM-ISPCH-36/2020|2020-03-19|EPI\_ISL\_445315|Original|hCoV-19^^Region Metropolitana de Santiago|Human|CLINICA UC SAN CARLOS DE APOQUINDO|Instituto de Salud Publica de Chile|Fernandez|Chile

>Spike|hCoV-19/England/QEUEH-AD0658/2020|2020-10-24|EPI\_ISL\_629873|Original|hCoV-19^^England|Human|Lighthouse Lab in Glasgow|Wellcome Sanger Institute for the COVID-19 Genomics UK (COG-UK) consortium|Davies|United Kingdom

>Spike|hCoV-19/England/MILK-C52CD2/2020|2020-12-12|EPI\_ISL\_736381|Original|hCoV-19^^England|Human|Lighthouse Lab in Milton Keynes|Wellcome Sanger Institute for the COVID-19 Genomics UK (COG-UK) Consortium|Davies|United Kingdom

>Spike|hCoV-19/Wales/PHWC-162B0A/2020|2020-05-29|EPI\_ISL\_473163|Original|hCoV-19^^Wales|Human|Wales Specialist Virology Centre Sequencing lab|COVID-19 Genomics UK (COG-UK) Consortium|Moore|United Kingdom

>Spike|hCoV-19/USA/TX-HMH-3090/2020|2020-06-09|EPI\_ISL\_543988|Original|hCoV-19^^Texas|Human|Houston Methodist Hospital|Houston Methodist Hospital|Long|USA



>Spike|hCoV-19/DRC/80/2020|2020-03-18|EPI\_ISL\_417942|Original|hCoV-19^^Kinshasa|Human|Viral Respiratory Lab|Pathogen Sequencing Lab|Pratt|Democratic Republic of the Congo

>Spike|hCoV-19/England/MILK-626C28/2020|2020-07-05|EPI\_ISL\_557868|Original|hCoV-19^^England|Human|Lighthouse Lab in Milton Keynes|Wellcome Sanger Institute for the COVID-19 Genomics UK (COG-UK) consortium|Davies|United Kingdom

>Spike|hCoV-19/USA/NV\_0052/2020|2020-03-09|EPI\_ISL\_424879|Original|hCoV-19^^Nevada|Human|NV-Southern Nevada Public Health Laboratory|Pathogen Discovery|Queen|USA

>Spike|hCoV-19/England/CAMC-B784B1/2020|2020-11-11|EPI\_ISL\_783522|Original|hCoV-19^^England|Human|Lighthouse Lab in Cambridge|Wellcome Sanger Institute for the COVID-19 Genomics UK (COG-UK) Consortium|Davies|United Kingdom

>Spike|hCoV-19/England/BRIS-130D4B/2020|2020-03-23|EPI\_ISL\_492660|Original|hCoV-19^^England|Human|PHE South West Regional Laboratory|Wellcome Sanger Institute for the COVID-19 Genomics UK (COG-UK) consortium|Davies|United Kingdom

>Spike|hCoV-19/Denmark/DCGC-7739/2020|2020-10-19|EPI\_ISL\_618716|Original|hCoV-19^^Sjaelland|Human|Department of Virus and Microbiological Special Diagnostics|Albertsen lab|Michaelsen|Denmark

>Spike|hCoV-19/USA/CA-ALSR-1658/2020|2020-04-01|EPI\_ISL\_494720|Original|hCoV-19^^California|Human|San Diego County Public Health Laboratory|Andersen lab at Scripps Research|Gangavarapu|USA

>Spike|hCoV-19/Denmark/DCGC-21115/2020|2020-12-21|EPI\_ISL\_759560|Original|hCoV-19^^Hovedstaden|Human|Department of Virus and Microbiological Special Diagnostics|Albertsen Lab|Michaelsen|Denmark

>Spike|hCoV-19/England/CAMC-A81234/2020|2020-10-14|EPI\_ISL\_610734|Original|hCoV-19^^England|Human|Lighthouse Lab in Cambridge|Wellcome Sanger Institute for the COVID-19 Genomics UK (COG-UK) consortium|Davies|United Kingdom

>Spike|hCoV-19/USA/FL-BPHL-0505/2020|2020-06-10|EPI\_ISL\_508708|Original|hCoV-19^^Florida|Human|Florida Bureau of Public Health Laboratories|Florida Bureau of Public Health Laboratories|Blanton|USA

>Spike|hCoV-19/Denmark/DCGC-6328/2020|2020-09-14|EPI\_ISL\_615896|Original|hCoV-19^^Hovedstaden|Human|Department of Virus and Microbiological Special Diagnostics|Albertsen lab|Michaelsen|Denmark

>Spike|hCoV-19/Brazil/SP-L9-CD127/2020|2020-03-24|EPI\_ISL\_476476|Original|hCoV-19^^S\u00e3o Paulo|Human|Hospital da Cl\u00ednicas da Faculdade de Medicina da Universidade de S\u00e3o Paulo|Instituto de Medicina Tropical da Univesidade de S\u00e3o Paulo|Sabino|Brazil

>Spike|hCoV-19/England/CAMC-B220A3/2020|2020-11-02|EPI\_ISL\_645927|Original|hCoV-19^^England|Human|Lighthouse Lab in Cambridge|Wellcome Sanger Institute for the COVID-19 Genomics UK (COG-UK) Consortium|Davies|United Kingdom

>Spike|hCoV-19/Denmark/DCGC-5997/2020|2020-09-28|EPI\_ISL\_621106|Original|hCoV-19^^Midtjylland|Human|Department of Virus and Microbiological Special Diagnostics|Albertsen lab|Michaelsen|Denmark

>Spike|hCoV-19/England/NORT-283B4E/2020|2020-04-03|EPI\_ISL\_488502|Original|hCoV-19^^England|Human|NU-OMICS DNA Sequencing research facility|Wellcome Sanger Institute for the COVID-19 Genomics UK (COG-UK) consortium|Davies|United Kingdom

>Spike|hCoV-19/England/ALDP-B62371/2020|2020-11-09|EPI\_ISL\_656569|Original|hCoV-19^^England|Human|Lighthouse Lab in Alderley Park|Wellcome Sanger Institute for the COVID-19 Genomics UK (COG-UK) Consortium|Davies|United Kingdom

>Spike|hCoV-19/USA/CA-QDX-1548/2020|2020-03-18|EPI\_ISL\_603795|Original|hCoV-19^^California|Human|Quest Diagnostics|Quest Diagnostics|Kagan|USA

>Spike|hCoV-19/Denmark/DCGC-21051/2020|2020-12-21|EPI\_ISL\_758933|Original|hCoV-19^^Syddanmark|Human|Department of Virus and Microbiological Special Diagnostics|Albertsen Lab|Michaelsen|Denmark

>Spike|hCoV-19/USA/LA-BIE-096/2020|2020-04-06|EPI\_ISL\_426627|Original|hCoV-19^^Louisiana|Human|Ochsner Health|BioInfoExperts|Cross|USA

>Spike|hCoV-19/England/QEUH-CC2A00/2020|2020-12-21|EPI\_ISL\_760675|Original|hCoV-19^^England|Human|Lighthouse Lab in Glasgow|Wellcome Sanger Institute for the COVID-19 Genomics UK (COG-UK) Consortium|Davies|United Kingdom

>Spike|hCoV-19/England/CAMB-1B0B67/2020|2020-05-15|EPI\_ISL\_452945|Original|hCoV-19^^England|Human|Department of Pathology|COVID-19 Genomics UK (COG-UK) Consortium|Meredith|United Kingdom

>Spike|hCoV-19/Denmark/DCGC-17384/2020|2020-12-14|EPI\_ISL\_750946|Original|hCoV-19^^Nordjylland|Human|Department of Virus and Microbiological Special Diagnostics|Albertsen Lab|Michaelsen|Denmark

>Spike|hCoV-19/Wales/PHWC-480B9A/2020|2020-10-16|EPI\_ISL\_612980|Original|hCoV-19^^Wales|Human|Wales Specialist Virology Centre Sequencing lab|COVID-19 Genomics UK (COG-UK) Consortium|Moore|United Kingdom

>Spike|hCoV-19/England/CAMC-A40ED3/2020|2020-10-07|EPI\_ISL\_609309|Original|hCoV-19^^England|Human|Lighthouse Lab in Cambridge|Wellcome Sanger Institute for the COVID-19 Genomics UK (COG-UK) consortium|Davies|United Kingdom

>Spike|hCoV-19/Belgium/UGent-114/2020|2020-03-21|EPI\_ISL\_475074|Original|hCoV-19^^Ghent|Human|Lab voor klinische biologie|Onderzoeksgroep Virologie|Lambrechts|Belgium

>Spike|hCoV-19/England/MILK-BDC64C/2020|2020-11-27|EPI\_ISL\_709766|Original|hCoV-19^^England|Human|Lighthouse Lab in Milton Keynes|Wellcome Sanger Institute for the COVID-19 Genomics UK (COG-UK) Consortium|Davies|United Kingdom

>Spike|hCoV-19/England/204291982/2020|2020-10-09|EPI\_ISL\_613633|Original|hCoV-19^^England|Human|Respiratory Virus Unit|Respiratory Virus Unit|Platt|United Kingdom

>Spike|hCoV-19/USA/WY-WPHL-20167581/2020|2020-12-17|EPI\_ISL\_765980|Original|hCoV-19^^Wyoming|Human|Wyoming Public Health Laboratory|Wyoming Public Health Laboratory|Hull|USA

>Spike|hCoV-19/Spain/AN-IBV-001920/2020|2020-03-17|EPI\_ISL\_467069|Original|hCoV-19^^Andalucia|Human|Hospital Universitario Puerta del Mar de C\u00e1diz - INIBICA|SeqCOVID-SPAIN consortium|IBV (CSIC)|Comas|Spain

>Spike|hCoV-19/England/ALDP-4A9A9E/2020|2020-06-10|EPI\_ISL\_559652|Original|hCoV-19^^England|Human|Lighthouse Lab in Alderley Park|Wellcome Sanger Institute for the COVID-19 Genomics UK (COG-UK) consortium|Davies|United Kingdom

>Spike|hCoV-19/Netherlands/ZH-EMC-488/2020|2020-00-00|EPI\_ISL\_577918|Original|hCoV-19^^Zuid Holland|Human|Dutch COVID-19 response team|Erasmus Medical Center|Oude Munnink|Netherlands

>Spike|hCoV-19/USA/NY-Wadsworth-281393-01/2020|2020-10-26|EPI\_ISL\_734462|Original|hCoV-19^^New York|Human|Masonic Medical Research Institute|Wadsworth Center|Lasek-Nesselquist|USA

>Spike|hCoV-19/USA/TX-HMH-3056/2020|2020-04-16|EPI\_ISL\_543962|Original|hCoV-19^^Texas|Human|Houston Methodist Hospital|Houston Methodist Hospital|Long|USA

>Spike|hCoV-19/Scotland/CVR5659/2020|2020-11-04|EPI\_ISL\_651890|Original|hCoV-19^^Scotland|Human|West of Scotland Specialist Virology Centre|COVID-19 Genomics UK (COG-UK) Consortium|Robertson|United Kingdom

>Spike|hCoV-19/USA/CA-ALSR-1962/2020|2020-06-26|EPI\_ISL\_512265|Original|hCoV-19^^California|Human|San Diego County Public Health Laboratory|Andersen lab at Scripps Research|Gangavarapu|USA

>Spike|hCoV-19/USA/MT-RML-8/2020|2020-07-19|EPI\_ISL\_591055|Original|hCoV-19^^Montana|Human|Virus Ecology|Virus Ecology|Martens|USA

>Spike|hCoV-19/USA/NY-NYUMC896/2020|2020-04-28|EPI\_ISL\_467389|Original|hCoV-19^^New York|Human|NYU Langone Health|Departments of Pathology and Medicine|Maurano|USA

>Spike|hCoV-19/Denmark/DCGC-9238/2020|2020-11-16|EPI\_ISL\_668865|Original|hCoV-19^^Sjaelland|Human|Department of Virus and Microbiological Special Diagnostics|Albertsen Lab|Michaelsen|Denmark

>Spike|hCoV-19/USA/TX-HMH0371/2020|2020-03-25|EPI\_ISL\_434962|Original|hCoV-19^^Texas|Human|Houston Methodist Hospital|Houston Methodist Hospital|Long|USA

>Spike|hCoV-19/England/MILK-9D46BF/2020|2020-09-19|EPI\_ISL\_601573|Original|hCoV-19^^England|Human|Lighthouse Lab in Milton Keynes|Wellcome Sanger Institute for the COVID-19 Genomics UK (COG-UK) consortium|Davies|United Kingdom

>Spike|hCoV-19/England/LIVE-1D6F8D/2020|2020-09-17|EPI\_ISL\_572908|Original|hCoV-19^^England|Human|Liverpool Clinical Laboratories|COVID-19 Genomics UK (COG-UK) Consortium|Haldenby|United Kingdom

>Spike|hCoV-19/England/QEUA-B7FD91/2020|2020-11-14|EPI\_ISL\_668132|Original|hCoV-19^^England|Human|Lighthouse Lab in Glasgow|Wellcome Sanger Institute for the COVID-19 Genomics UK (COG-UK) Consortium|Davies|United Kingdom

>Spike|hCoV-19/England/MILK-562C7C/2020|2020-06-10|EPI\_ISL\_558356|Original|hCoV-19^^England|Human|Lighthouse Lab in Milton Keynes|Wellcome Sanger Institute for the COVID-19 Genomics UK (COG-UK) consortium|Davies|United Kingdom

>Spike|hCoV-19/England/LOND-1251162/2020|2020-11-14|EPI\_ISL\_665758|Original|hCoV-19^^England|Human|University College London Hospital|COVID-19 Genomics UK (COG-UK) Consortium|Byott|United Kingdom

>Spike|hCoV-19/Luxembourg/LNS5264460/2020|2020-12-18|EPI\_ISL\_744211|Original|hCoV-19^^Luxembourg|Human|Laboratoire national de sant\u00e9|Laboratoire national de sant\u00e9|Wienecke-Baldacchino|Luxembourg

>Spike|hCoV-19/Canada/ON-PHL-20-03619/2020|2020-11-00|EPI\_ISL\_775126|Original|hCoV-19^^Ontario|Human|Public Health Ontario Laboratory|Public Health Ontario Laboratory|Guthrie|Canada

>Spike|hCoV-19/England/20134015504/2020|2020-03-25|EPI\_ISL\_423085|Original|hCoV-19^^England|Human|Respiratory Virus Unit|Respiratory Virus Unit|Platt|United Kingdom

>Spike|hCoV-19/Australia/VIC8496/2020|2020-08-19|EPI\_ISL\_565052|Original|hCoV-19^^Victoria|Human|Microbiological Diagnostic Unit - Public Health Laboratory (MDU-PHL)|MDU-PHL|Schultz|Australia

>Spike|hCoV-19/Wales/PHWC-485C83/2020|2020-10-25|EPI\_ISL\_627011|Original|hCoV-19^^Wales|Human|Wales Specialist Virology Centre Sequencing lab|COVID-19 Genomics UK (COG-UK) Consortium|Moore|United Kingdom

>Spike|hCoV-19/USA/NY-WCMP11D01N/2020|2020-03-16|EPI\_ISL\_427591|Original|hCoV-19^^New York|Human|NewYork-Presbyterian & Mason Lab|Mason Lab|Mason|USA

>Spike|hCoV-19/South Korea/KDCA0105/2020|2020-09-19|EPI\_ISL\_747341|Original|hCoV-19^^South Korea|Human|Division of Emerging Infectious Diseases|Division of Emerging Infectious Diseases|Park|South Korea

>Spike|hCoV-19/USA/TX-HMH-MCoV-19794/2020|2020-11-23|EPI\_ISL\_784131|Original|hCoV-19^^Texas|Human|Houston Methodist Hospital|Houston Methodist Hospital|Long|USA

>Spike|hCoV-19/USA/GA-QDX-2571/2020|2020-03-14|EPI\_ISL\_604931|Original|hCoV-19^^Georgia|Human|Quest Diagnostics|Quest Diagnostics|Kagan|USA

>Spike|hCoV-19/Japan/IC-0336/2020|2020-11-00|EPI\_ISL\_721583|Original|hCoV-19^^Japan|Human|Pathogen Genomics Center|Pathogen Genomics Center|Sekizuka|Japan

>Spike|hCoV-19/Japan/PG-5205/2020|2020-08-00|EPI\_ISL\_690308|Original|hCoV-19^^Japan|Human|Pathogen Genomics Center|Pathogen Genomics Center|Sekizuka|Japan

>Spike|hCoV-19/USA/MA-MGH-03257/2020|2020-10-16|EPI\_ISL\_765761|Original|hCoV-19^^Massachusetts|Human|Massachusetts General Hospital|Infectious Disease Program|Park|USA

>Spike|hCoV-19/USA/AZ-TG311191/2020|2020-05-14|EPI\_ISL\_694319|Original|hCoV-19^^Arizona|Human|TGen North|TGen North|French|USA

>Spike|hCoV-19/England/QEUA-A4BD17/2020|2020-10-05|EPI\_ISL\_628524|Original|hCoV-19^^England|Human|Oxford Viromics|COVID-19 Genomics UK (COG-UK) Consortium|Golubchik|United Kingdom

>Spike|hCoV-19/England/MILK-956A7D/2020|2020-06-05|EPI\_ISL\_554236|Original|hCoV-19^^England|Human|Lighthouse Lab in Milton Keynes|Wellcome Sanger Institute for the COVID-19 Genomics UK (COG-UK) consortium|Davies|United Kingdom

>Spike|hCoV-19/Norway/6573/2020|2020-12-06|EPI\_ISL\_775395|Original|hCoV-19^^Viken|Human|Medical Microbiology Unit|Norwegian Institute of Public Health|Vollan|Norway

>Spike|hCoV-19/Scotland/CVR2376/2020|2020-04-13|EPI\_ISL\_490688|Original|hCoV-19^^Scotland|Human|West of Scotland Specialist Virology Centre|COVID-19 Genomics UK (COG-UK) Consortium|Robertson|United Kingdom

>Spike|hCoV-19/Australia/VIC8114/2020|2020-08-12|EPI\_ISL\_564857|Original|hCoV-19^^Victoria|Human|Microbiological Diagnostic Unit - Public Health Laboratory (MDU-PHL)|MDU-PHL|Schultz|Australia

>Spike|hCoV-19/USA/AZ-TG408161/2020|2020-06-15|EPI\_ISL\_694913|Original|hCoV-19^^Arizona|Human|AZ SPHL|TGen North|French|USA

>Spike|hCoV-19/USA/WA-S1003/2020|2020-04-29|EPI\_ISL\_463493|Original|hCoV-19^^Washington|Human|Washington State Department of Health|Seattle Flu Study|Bedford|USA

>Spike|hCoV-19/England/ALDP-A936AC/2020|2020-10-20|EPI\_ISL\_610982|Original|hCoV-19^^England|Human|Lighthouse Lab in Alderley Park|Wellcome Sanger Institute for the COVID-19 Genomics UK (COG-UK) consortium|Davies|United Kingdom

>Spike|hCoV-19/USA/TX-HMH-3999/2020|2020-06-17|EPI\_ISL\_543286|Original|hCoV-19^^Texas|Human|Houston Methodist Hospital|Houston Methodist Hospital|Long|USA

>Spike|hCoV-19/England/ALDP-A86D5C/2020|2020-10-17|EPI\_ISL\_606064|Original|hCoV-19^^England|Human|Lighthouse Lab in Alderley Park|Wellcome Sanger Institute for the COVID-19 Genomics UK (COG-UK) consortium|Davies|United Kingdom

>Spike|hCoV-19/Belgium/ULG-10366/2020|2020-08-07|EPI\_ISL\_540533|Original|hCoV-19^^Li\u00e8ge|Human|Department of Clinical Microbiology|GIGA Medical Genomics|Durkin|Belgium

>Spike|hCoV-19/England/MILK-ACDBF5/2020|2020-10-21|EPI\_ISL\_630212|Original|hCoV-19^^England|Human|Lighthouse Lab in Milton Keynes|Wellcome Sanger Institute for the COVID-19 Genomics UK (COG-UK) consortium|Davies|United Kingdom

>Spike|hCoV-19/USA/MI-MDHHS-SC22467/2020|2020-11-03|EPI\_ISL\_708569|Original|hCoV-19^^Michigan|Human|Michigan Department of Health and Human Services|Michigan Department of Health and Human Services|Jacob|USA

>Spike|hCoV-19/England/BRIS-12EBA0/2020|2020-04-25|EPI\_ISL\_488406|Original|hCoV-19^^England|Human|PHE South West Regional Laboratory|Wellcome Sanger Institute for the COVID-19 Genomics UK (COG-UK) consortium|Davies|United Kingdom

>Spike|hCoV-19/England/20126008506/2020|2020-03-18|EPI\_ISL\_423881|Original|hCoV-19^^England|Human|Respiratory Virus Unit|Respiratory Virus Unit|Platt|United Kingdom

>Spike|hCoV-19/Denmark/DCGC-8236/2020|2020-10-26|EPI\_ISL\_617274|Original|hCoV-19^^Nordjylland|Human|Department of Virus and Microbiological Special Diagnostics|Albertsen lab|Michaelsen|Denmark

>Spike|hCoV-19/Netherlands/NA\_197/2020|2020-03-25|EPI\_ISL\_422732|Original|hCoV-19^^Netherlands|Human|Dutch COVID-19 response team|Erasmus Medical Center|Oude Munnink|Netherlands

>Spike|hCoV-19/England/QEUA-B421C8/2020|2020-11-08|EPI\_ISL\_657234|Original|hCoV-19^^England|Human|Lighthouse Lab in Glasgow|Wellcome Sanger Institute for the COVID-19 Genomics UK (COG-UK) Consortium|Davies|United Kingdom

>Spike|hCoV-19/USA/TX-HMH-MCoV-17985/2020|2020-11-16|EPI\_ISL\_786133|Original|hCoV-19^^Texas|Human|Houston Methodist Hospital|Houston Methodist Hospital|Long|USA

>Spike|hCoV-19/USA/TX-DSHS-0781/2020|2020-05-21|EPI\_ISL\_590850|Original|hCoV-19^^Texas|Human|Texas Department of State Health Services|Texas Department of State Health Services|Rahman|USA

>Spike|hCoV-19/USA/WI-WSLH-200486/2020|2020-05-20|EPI\_ISL\_578627|Original|hCoV-19^^Wisconsin|Human|Wisconsin State Laboratory of Hygiene Communicable Disease Division|Wisconsin State Laboratory of Hygiene Communicable Disease Division|Florek|USA

>Spike|hCoV-19/USA/WA-S2639/2020|2020-06-20|EPI\_ISL\_497271|Original|hCoV-19^^Washington|Human|Washington State Department of Health|Seattle Flu Study|Lee|USA

>Spike|hCoV-19/Scotland/QEUA-A2154C/2020|2020-10-01|EPI\_ISL\_598872|Original|hCoV-19^^Scotland|Human|Lighthouse Lab in Glasgow|Wellcome Sanger Institute for the COVID-19 Genomics UK (COG-UK) consortium|Davies|United Kingdom

>Spike|hCoV-19/USA/NE-004-17/2020|2020-09-26|EPI\_ISL\_732823|Original|hCoV-19^^Nebraska|Human|Nebraska Public Health Laboratory|UNMC COVID-19 Response Team|Pratt|USA

>Spike|hCoV-19/England/MILK-9A7FBA/2020|2020-09-02|EPI\_ISL\_573250|Original|hCoV-19^^England|Human|Virology Department|COVID-19 Genomics UK (COG-UK) Consortium|Williams|United Kingdom

>Spike|hCoV-19/Spain/PV-IBV-98005238/2020|2020-03-29|EPI\_ISL\_582742|Original|hCoV-19^^Basque Country|Human|Servicio de Microbiolog\u00eda|SeqCOVID-SPAIN consortium|IBV (CSIC) |Comas|Spain

>Spike|hCoV-19/USA/NY-NYUMC598/2020|2020-04-03|EPI\_ISL\_444715|Original|hCoV-19^^New York|Human|NYU Langone Health|Departments of Pathology and Medicine|Maurano|USA

>Spike|hCoV-19/USA/UT-UPHL-2009505/2020|2020-07-18|EPI\_ISL\_605189|Original|hCoV-19^^Utah|Human|Utah Public Health Laboratory|Utah Public Health Laboratory|Young|USA

>Spike|hCoV-19/Australia/VIC2877/2020|2020-07-04|EPI\_ISL\_521708|Original|hCoV-19^^Victoria|Human|Microbiological Diagnostic Unit - Public Health Laboratory (MDU-PHL) |MDU-PHL|Schultz|Australia

>Spike|hCoV-19/USA/TX-HMH-6860/2020|2020-06-25|EPI\_ISL\_546296|Original|hCoV-19^^Texas|Human|Houston Methodist Hospital|Houston Methodist Hospital|Long|USA

>Spike|hCoV-19/Australia/WA387/2020|2020-10-16|EPI\_ISL\_605863|Original|hCoV-19^^Western Australia|Human|PathWest Laboratory Medicine WA|PathWest Laboratory Medicine WA Microbial Surveillance Unit|Sikazwe|Australia

>Spike|hCoV-19/England/BRIS-121ABF/2020|2020-03-17|EPI\_ISL\_440201|Original|hCoV-19^^England|Human|PHE South West Regional Laboratory|Wellcome Sanger Institute for the COVID-19 Genomics UK (COG-UK) consortium|Amato|United Kingdom

>Spike|hCoV-19/England/205181951/2020|2020-12-17|EPI\_ISL\_766497|Original|hCoV-19^^England|Human|Respiratory Virus Unit|COVID-19 Genomics UK (COG-UK) Consortium|Platt|United Kingdom

>Spike|hCoV-19/USA/AZ-TG532076/2020|2020-07-02|EPI\_ISL\_695406|Original|hCoV-19^^Arizona|Human|AZ SPHL|TGen North|French|USA

>Spike|hCoV-19/England/20098007304/2020|2020-02-26|EPI\_ISL\_464191|Original|hCoV-19^^England|Human|Respiratory Virus Unit|Respiratory Virus Unit|Platt|United Kingdom

>Spike|hCoV-19/Japan/PG-7645/2020|2020-08-00|EPI\_ISL\_686747|Original|hCoV-19^^Japan|Human|Chiba Prefectural Institute of Public Health|Pathogen Genomics Center|Sekizuka|Japan

>Spike|hCoV-19/Poland/PL\_P30/2020|2020-04-01|EPI\_ISL\_455443|Original|hCoV-19^^Malopolska|Human|1. ViroGenetics - BSL3 Laboratory of Virology|1. ViroGenetics - BSL3 Laboratory of Virology|Pyrz|Poland

>Spike|hCoV-19/USA/ME-HETL-J0084/2020|2020-03-20|EPI\_ISL\_513494|Original|hCoV-19^^Maine|Human|Maine HETL|Tewhey Lab|Tewhey|USA

>Spike|hCoV-19/England/201160007/2020|2020-03-11|EPI\_ISL\_464774|Original|hCoV-19^^England|Human|Respiratory Virus Unit|Respiratory Virus Unit|Platt|United Kingdom

>Spike|hCoV-19/USA/FL-QDX-2588/2020|2020-03-14|EPI\_ISL\_604924|Original|hCoV-19^^Florida|Human|Quest Diagnostics|Quest Diagnostics|Kagan|USA

>Spike|hCoV-19/England/QEUEH-89A847/2020|2020-07-19|EPI\_ISL\_532652|Original|hCoV-19^^England|Human|Lighthouse Lab in Glasgow|Wellcome Sanger Institute for the COVID-19 Genomics UK (COG-UK) consortium|Davies|United Kingdom

>Spike|hCoV-19/England/ALDP-B23A0E/2020|2020-11-04|EPI\_ISL\_646888|Original|hCoV-19^^England|Human|Lighthouse Lab in Alderley Park|Wellcome Sanger Institute for the COVID-19 Genomics UK (COG-UK) Consortium|Davies|United Kingdom

>Spike|hCoV-19/England/MILK-A7C409/2020|2020-10-15|EPI\_ISL\_606427|Original|hCoV-19^^England|Human|Lighthouse Lab in Milton Keynes|Wellcome Sanger Institute for the COVID-19 Genomics UK (COG-UK) consortium|Davies|United Kingdom

>Spike|hCoV-19/Denmark/DCGC-11650/2020|2020-10-26|EPI\_ISL\_671048|Original|hCoV-19^^Hovedstaden|Human|Department of Virus and Microbiological Special Diagnostics|Albertsen Lab|Michaelsen|Denmark

>Spike|hCoV-19/Austria/CeMM0639/2020|2020-05-07|EPI\_ISL\_475936|Original|hCoV-19^^Austria|Human|Universitaetsklinik f\u00fcr Innere Medizin II Innsbruck|Bergthaler laboratory|Bergthaler|Austria

>Spike|hCoV-19/USA/TX-DSHS-1933/2020|2020-06-21|EPI\_ISL\_765928|Original|hCoV-19^^Texas|Human|TXDSHS|TXDSHS|Rahman|USA

>Spike|hCoV-19/USA/TX-HMH-MCoV-19193/2020|2020-11-24|EPI\_ISL\_783680|Original|hCoV-19^^Texas|Human|Houston Methodist Hospital|Houston Methodist Hospital|Long|USA

>Spike|hCoV-19/England/QEUEH-9C86BE/2020|2020-09-11|EPI\_ISL\_567116|Original|hCoV-19^^England|Human|Lighthouse Lab in Glasgow|Wellcome Sanger Institute for the COVID-19 Genomics UK (COG-UK) consortium|Davies|United Kingdom

>Spike|hCoV-19/Wales/ALDP-B76F1C/2020|2020-11-12|EPI\_ISL\_723828|Original|hCoV-19^^Wales|Human|Oxford Viromics|COVID-19 Genomics UK (COG-UK) Consortium|Golubchik|United Kingdom

>Spike|hCoV-19/Spain/VC-FISABIO-196/2020|2020-03-16|EPI\_ISL\_436291|Original|hCoV-19^^Comunitat Valenciana|Human|Servicio de Microbiología. Hospital Clínico

Universitario de Valencia|Sequencing and Bioinformatics Service and Molecular Epidemiology Research Group. FISABIO-Public Health|Gonzalez-Candelas|Spain  
>Spike|hCoV-19/USA/TX-HMH-MCoV-13747/2020|2020-08-17|EPI\_ISL\_788840|Original|hCoV-19^^Texas|Human|Houston Methodist Hospital|Houston Methodist Hospital|Long|USA  
>Spike|hCoV-19/Denmark/DCGC-17393/2020|2020-12-14|EPI\_ISL\_750953|Original|hCoV-19^^Midtjylland|Human|Department of Virus and Microbiological Special Diagnostics|Albertsen Lab|Michaelsen|Denmark  
>Spike|hCoV-19/England/LIVE-DC67B9/2020|2020-11-30|EPI\_ISL\_705245|Original|hCoV-19^^England|Human|Liverpool Clinical Laboratories|COVID-19 Genomics UK (COG-UK) Consortium|Haldenby|United Kingdom  
>Spike|hCoV-19/USA/FL-BPHL-0641/2020|2020-04-06|EPI\_ISL\_508845|Original|hCoV-19^^Florida|Human|Florida Bureau of Public Health Laboratories|Florida Bureau of Public Health Laboratories|Blanton|USA  
>Spike|hCoV-19/USA/TX-HMH-2388/2020|2020-04-24|EPI\_ISL\_545280|Original|hCoV-19^^Texas|Human|Houston Methodist Hospital|Houston Methodist Hospital|Long|USA  
>Spike|hCoV-19/Gibraltar/204841748/2020|2020-00-00|EPI\_ISL\_671315|Original|hCoV-19^^Gibraltar|Human|Microbiology|Respiratory Virus Unit|Platt|Gibraltar  
>Spike|hCoV-19/England/ALDP-A2D2FE/2020|2020-10-06|EPI\_ISL\_586615|Original|hCoV-19^^England|Human|Lighthouse Lab in Alderley Park|Wellcome Sanger Institute for the COVID-19 Genomics UK (COG-UK) consortium|Davies|United Kingdom  
>Spike|hCoV-19/England/CAMC-B229B7/2020|2020-11-02|EPI\_ISL\_647466|Original|hCoV-19^^England|Human|Lighthouse Lab in Cambridge|Wellcome Sanger Institute for the COVID-19 Genomics UK (COG-UK) Consortium|Davies|United Kingdom  
>Spike|hCoV-19/Japan/PG-1006/2020|2020-02-00|EPI\_ISL\_684616|Original|hCoV-19^^Japan|Human|Tokyo Metropolitan Institute of Public Health|Pathogen Genomics Center|Sekizuka|Japan  
>Spike|hCoV-19/Scotland/CVR205/2020|2020-03-19|EPI\_ISL\_425735|Original|hCoV-19^^Scotland|Human|West of Scotland Specialist Virology Centre|COVID-19 Genomics UK (COG-UK) Consortium|Robertson|United Kingdom  
>Spike|hCoV-19/Jordan/IR-ALSR-5228/2020|2020-10-05|EPI\_ISL\_730466|Original|hCoV-19^^Irbid|Human|Biolab Diagnostic Laboratories|Andersen lab at Scripps Research|Gangavarapu|Jordan  
>Spike|hCoV-19/Australia/VIC165/2020|2020-03-18|EPI\_ISL\_419862|Original|hCoV-19^^Victoria|Human|Victorian Infectious Diseases Reference Laboratory (VIDRL)|Victorian Infectious Diseases Reference Laboratory and Microbiological Diagnostic Unit Public Health Laboratory|Schultz|Australia  
>Spike|hCoV-19/USA/CA-CSMC7/2020|2020-03-27|EPI\_ISL\_475684|Original|hCoV-19^^California|Human|Cedars-Sinai Medical Center|Cedars-Sinai Medical Center|Zhang|USA  
>Spike|hCoV-19/England/QEUEH-9D0F6D/2020|2020-09-14|EPI\_ISL\_589879|Original|hCoV-19^^England|Human|Lighthouse Lab in Glasgow|Wellcome Sanger Institute for the COVID-19 Genomics UK (COG-UK) consortium|Davies|United Kingdom  
>Spike|hCoV-19/England/QEUEH-B424B0/2020|2020-11-08|EPI\_ISL\_657092|Original|hCoV-19^^England|Human|Lighthouse Lab in Glasgow|Wellcome Sanger Institute for the COVID-19 Genomics UK (COG-UK) Consortium|Davies|United Kingdom  
>Spike|hCoV-19/Scotland/QEUEH-B7F344/2020|2020-11-14|EPI\_ISL\_710840|Original|hCoV-19^^Scotland|Human|Lighthouse Lab in Glasgow|Wellcome Sanger Institute for the COVID-19 Genomics UK (COG-UK) Consortium|Davies|United Kingdom  
>Spike|hCoV-19/Netherlands/un-EMC-755/2020|2020-07-08|EPI\_ISL\_523511|Original|hCoV-19^^Netherlands|Human|Dutch COVID-19 response team|Erasmus Medical Center|Oude Munnink|Netherlands  
>Spike|hCoV-19/USA/UT-UPHL-201030368/2020|2020-06-19|EPI\_ISL\_602937|Original|hCoV-19^^Utah|Human|Utah Public Health Laboratory|Utah Public Health Laboratory|Young|USA  
>Spike|hCoV-19/England/QEUEH-9C8B46/2020|2020-09-11|EPI\_ISL\_567045|Original|hCoV-19^^England|Human|Lighthouse Lab in Glasgow|Wellcome Sanger Institute for the COVID-19 Genomics UK (COG-UK) consortium|Davies|United Kingdom  
>Spike|hCoV-19/USA/MA-MGH-00809/2020|2020-04-13|EPI\_ISL\_791773|Original|hCoV-19^^Massachusetts|Human|Massachusetts General Hospital|Infectious Disease Program|Park|USA

>Spike|hCoV-19/England/QEUA-A9F224/2020|2020-10-20|EPI\_ISL\_650360|Original|hCoV-19^^England|Human|University of Exeter|COVID-19 Genomics UK (COG-UK) Consortium|Temperton|United Kingdom

>Spike|hCoV-19/USA/TX-HMH-2762/2020|2020-06-04|EPI\_ISL\_545536|Original|hCoV-19^^Texas|Human|Houston Methodist Hospital|Houston Methodist Hospital|Long|USA

>Spike|hCoV-19/USA/TX-HMH-MCoV-10573/2020|2020-07-09|EPI\_ISL\_789540|Original|hCoV-19^^Texas|Human|Houston Methodist Hospital|Houston Methodist Hospital|Long|USA

>Spike|hCoV-19/USA/WA-UW-558/2020|2020-03-13|EPI\_ISL\_430888|Original|hCoV-19^^Washington|Human|UW Virology Lab|UW Virology Lab|Roychoudhury|USA

>Spike|hCoV-19/Netherlands/GR-RIVM-10081/2020|2020-00-00|EPI\_ISL\_547467|Original|hCoV-19^^Groningen|Human|Dutch COVID-19 response team|National Institute for Public Health and the Environment (RIVM)|Meijer|Netherlands

>Spike|hCoV-19/USA/WA-UW-3994/2020|2020-03-28|EPI\_ISL\_427232|Original|hCoV-19^^Washington|Human|UW Virology Lab|UW Virology Lab|Roychoudhury|USA

>Spike|hCoV-19/Canada/BC\_27279444/2020|2020-03-00|EPI\_ISL\_463263|Original|hCoV-19^^British Columbia|Human|BCCDC Public Health Laboratory|BCCDC Public Health Laboratory|Harrigan|Canada

>Spike|hCoV-19/Denmark/DCGC-14566/2020|2020-11-30|EPI\_ISL\_711841|Original|hCoV-19^^Hovedstaden|Human|Department of Virus and Microbiological Special Diagnostics|Albertsen Lab|Michaelsen|Denmark

>Spike|hCoV-19/England/MILK-9A6A50/2020|2020-09-02|EPI\_ISL\_550232|Original|hCoV-19^^England|Human|Lighthouse Lab in Milton Keynes|Wellcome Sanger Institute for the COVID-19 Genomics UK (COG-UK) consortium|Davies|United Kingdom

>Spike|hCoV-19/England/QEUA-9CFBD6/2020|2020-09-16|EPI\_ISL\_589997|Original|hCoV-19^^England|Human|Lighthouse Lab in Glasgow|Wellcome Sanger Institute for the COVID-19 Genomics UK (COG-UK) consortium|Davies|United Kingdom

>Spike|hCoV-19/Austria/CeMM1036/2020|2020-04-08|EPI\_ISL\_583859|Original|hCoV-19^^Austria|Human|Institute for Laboratory Diagnostics and Microbiology|Bergthaler laboratory|Bergthaler|Austria

>Spike|hCoV-19/England/ALDP-67654C/2020|2020-07-03|EPI\_ISL\_558210|Original|hCoV-19^^England|Human|Lighthouse Lab in Alderley Park|Wellcome Sanger Institute for the COVID-19 Genomics UK (COG-UK) consortium|Davies|United Kingdom

>Spike|hCoV-19/England/CAMC-9907DA/2020|2020-08-26|EPI\_ISL\_551884|Original|hCoV-19^^England|Human|Lighthouse Lab in Cambridge|Wellcome Sanger Institute for the COVID-19 Genomics UK (COG-UK) consortium|Davies|United Kingdom

>Spike|hCoV-19/USA/LA-EVTL1387/2020|2020-12-11|EPI\_ISL\_779053|Original|hCoV-19^^Louisiana|Human|LSUHS Emerging Viral Threat Laboratory|Microbial Genome Sequencing Center|Kamil|USA

>Spike|hCoV-19/England/SHEF-10D3971/2020|2020-12-21|EPI\_ISL\_765191|Original|hCoV-19^^England|Human|Virology Department|COVID-19 Genomics UK (COG-UK) Consortium|de Silva|United Kingdom

>Spike|hCoV-19/England/QEUA-A0264E/2020|2020-09-29|EPI\_ISL\_584918|Original|hCoV-19^^England|Human|Quadram Institute Bioscience|COVID-19 Genomics UK (COG-UK) Consortium|Alikhan|United Kingdom

>Spike|hCoV-19/Portugal/IGC00009/2020|2020-03-18|EPI\_ISL\_419386|Original|hCoV-19^^Lisbon|Human|Hospital Prof. Doutor Fernando Fonseca|Instituto Gulbenkian de Ci\u00eancia|Leite|Portugal

>Spike|hCoV-19/Wuhan/HB-WH3-182/2020|2020-03-02|EPI\_ISL\_454943|Original|hCoV-19^^Hubei|Human|Wuhan Chain Medical Labs (CMLabs)|State Key Laboratory of Biotherapy of Sichuan University|Tang|China

>Spike|hCoV-19/England/ALDP-A92968/2020|2020-10-19|EPI\_ISL\_610997|Original|hCoV-19^^England|Human|Lighthouse Lab in Alderley Park|Wellcome Sanger Institute for the COVID-19 Genomics UK (COG-UK) consortium|Davies|United Kingdom

>Spike|hCoV-19/Japan/PG-1635/2020|2020-03-00|EPI\_ISL\_685241|Original|hCoV-19^^Japan|Human|Pathogen Genomics Center|Pathogen Genomics Center|Sekizuka|Japan

>Spike|hCoV-19/Scotland/CVR5500/2020|2020-10-30|EPI\_ISL\_650507|Original|hCoV-19^^Scotland|Human|West of Scotland Specialist Virology Centre|COVID-19 Genomics UK (COG-UK) Consortium|Robertson|United Kingdom

>Spike|hCoV-19/England/SHEF-C8C4C/2020|2020-04-22|EPI\_ISL\_453732|Original|hCoV-19^^England|Human|Virology Department|COVID-19 Genomics UK (COG-UK) Consortium|de Silva|United Kingdom

>Spike|hCoV-19/Scotland/EDB1067/2020|2020-04-06|EPI\_ISL\_456890|Original|hCoV-19^^Scotland|Human|Virology Department|COVID-19 Genomics UK (COG-UK) Consortium|Williams|United Kingdom

>Spike|hCoV-19/Australia/VIC7961/2020|2020-08-06|EPI\_ISL\_564772|Original|hCoV-19^^Victoria|Human|Microbiological Diagnostic Unit - Public Health Laboratory (MDU-PHL)|MDU-PHL|Schultz|Australia

>Spike|hCoV-19/England/CAMC-A41054/2020|2020-10-06|EPI\_ISL\_609428|Original|hCoV-19^^England|Human|Lighthouse Lab in Cambridge|Wellcome Sanger Institute for the COVID-19 Genomics UK (COG-UK) consortium|Davies|United Kingdom

>Spike|hCoV-19/England/MILK-99E29F/2020|2020-08-31|EPI\_ISL\_550708|Original|hCoV-19^^England|Human|Lighthouse Lab in Milton Keynes|Wellcome Sanger Institute for the COVID-19 Genomics UK (COG-UK) consortium|Davies|United Kingdom

>Spike|hCoV-19/USA/CA-CZB-1253/2020|2020-04-12|EPI\_ISL\_454673|Original|hCoV-19^^California|Human|County of Santa Clara Public Health Department|Chan-Zuckerberg Biohub|Hao|USA

>Spike|hCoV-19/USA/WA-S2474/2020|2020-06-16|EPI\_ISL\_497106|Original|hCoV-19^^Washington|Human|Washington State Department of Health|Seattle Flu Study|Lee|USA

>Spike|hCoV-19/USA/CA-CZB-11959/2020|2020-10-07|EPI\_ISL\_625661|Original|hCoV-19^^California|Human|UCSF Clinical Microbiology Laboratory|Chan-Zuckerberg Biohub|Bhatt|USA

>Spike|hCoV-19/Netherlands/UT-EMC-106/2020|2020-09-28|EPI\_ISL\_632531|Original|hCoV-19^^Utrecht|Human|Dutch COVID-19 response team|Erasmus Medical Center|Oude Munnink|Netherlands

>Spike|hCoV-19/Wales/PHWC-34971/2020|2020-04-17|EPI\_ISL\_474409|Original|hCoV-19^^Wales|Human|Originating lab|COVID-19 Genomics UK (COG-UK) Consortium|Moore|United Kingdom

>Spike|hCoV-19/England/QEUH-A008A4/2020|2020-10-02|EPI\_ISL\_600253|Original|hCoV-19^^England|Human|Lighthouse Lab in Glasgow|Wellcome Sanger Institute for the COVID-19 Genomics UK (COG-UK) consortium|Davies|United Kingdom

>Spike|hCoV-19/Denmark/DCGC-7925/2020|2020-10-26|EPI\_ISL\_617103|Original|hCoV-19^^Hovedstaden|Human|Department of Virus and Microbiological Special Diagnostics|Albertsen lab|Michaelsen|Denmark

>Spike|hCoV-19/England/QEUH-9AD2E8/2020|2020-09-05|EPI\_ISL\_559824|Original|hCoV-19^^England|Human|Oxford Viromics|COVID-19 Genomics UK (COG-UK) Consortium|Golubchik|United Kingdom

>Spike|hCoV-19/USA/TX-HMH-MCoV-11399/2020|2020-09-06|EPI\_ISL\_789990|Original|hCoV-19^^Texas|Human|Houston Methodist Hospital|Houston Methodist Hospital|Long|USA

>Spike|hCoV-19/USA/MI-MDHHS-SC20506/2020|2020-05-08|EPI\_ISL\_460554|Original|hCoV-19^^Michigan|Human|Michigan Department of Health and Human Services|Michigan Department of Health and Human Services|Blankenship|USA

>Spike|hCoV-19/USA/NY-QDX-100/2020|2020-03-12|EPI\_ISL\_468576|Original|hCoV-19^^New York|Human|Quest Diagnostics|Quest Diagnostics|Kagan|USA

>Spike|hCoV-19/Spain/RI-IBV-99010986/2020|2020-08-18|EPI\_ISL\_732809|Original|hCoV-19^^La Rioja|Human|Centro de Investigaci\u00f3n Biom\u00e9dica de La Rioja - Hospital San Pedro Logro\u00f1o|SeqCOVID-SPAIN consortium|IBV (CSIC)|Comas|Spain

>Spike|hCoV-19/England/OXON-B0236/2020|2020-04-19|EPI\_ISL\_478868|Original|hCoV-19^^England|Human|Oxford Viromics|COVID-19 Genomics UK (COG-UK) Consortium|Golubchik|United Kingdom

>Spike|hCoV-19/USA/CA-CHLA-PLM92201540/2020|2020-11-17|EPI\_ISL\_753365|Original|hCoV-19^^California|Human|Clinical virology Laboratory|Center for Personalized Medicine|Dien Bard|USA

>Spike|hCoV-19/USA/WA-S914/2020|2020-04-27|EPI\_ISL\_463404|Original|hCoV-19^^Washington|Human|Washington State Department of Health|Seattle Flu Study|Bedford|USA

>Spike|hCoV-19/Romania/Buzau-293197/2020|2020-06-03|EPI\_ISL\_471419|Original|hCoV-19^^Buzau|Human|Laboratory for Respiratory Viruses|Cantacuzino Institute|Lazar|Romania



>Spike|hCoV-19/England/NORW-F3A5D/2020|2020-12-06|EPI\_ISL\_725153|Original|hCoV-19^^England|Human|Quadram Institute Bioscience|COVID-19 Genomics UK (COG-UK) Consortium|Alikhan|United Kingdom

>Spike|hCoV-19/England/ALDP-B74CAE/2020|2020-11-12|EPI\_ISL\_661982|Original|hCoV-19^^England|Human|Lighthouse Lab in Alderley Park|Wellcome Sanger Institute for the COVID-19 Genomics UK (COG-UK) Consortium|Davies|United Kingdom

>Spike|hCoV-19/USA/TX-DSHS-0387/2020|2020-05-31|EPI\_ISL\_542448|Original|hCoV-19^^Texas|Human|Texas Department of State Health Services|Texas Department of State Health Services|Rahman|USA

>Spike|hCoV-19/Canada/ON-OICR-SLB2820/2020|2020-04-02|EPI\_ISL\_538348|Original|hCoV-19^^Ontario|Human|Kingston Health Sciences Centre / Queen's University|Ontario Institute for Cancer Research|de Borja|Canada

>Spike|hCoV-19/Ireland/CO-NVRL-75IRL33101/2020|2020-10-07|EPI\_ISL\_671873|Original|hCoV-19^^Cork|Human|National Virus Reference Laboratory|National Virus Reference Laboratory|Gonzalez|Ireland

>Spike|hCoV-19/USA/TX-HMH-MCoV-18395/2020|2020-11-18|EPI\_ISL\_784743|Original|hCoV-19^^Texas|Human|Houston Methodist Hospital|Houston Methodist Hospital|Long|USA

>Spike|hCoV-19/Canada/ON-PHL-20-00059/2020|2020-00-00|EPI\_ISL\_548735|Original|hCoV-19^^Ontario|Human|Public Health Ontario Laboratory|Public Health Ontario Laboratory|Guthrie|Canada

>Spike|hCoV-19/England/MILK-A45B31/2020|2020-10-06|EPI\_ISL\_598604|Original|hCoV-19^^England|Human|Lighthouse Lab in Milton Keynes|Wellcome Sanger Institute for the COVID-19 Genomics UK (COG-UK) consortium|Davies|United Kingdom

>Spike|hCoV-19/USA/TX-HMH-MCoV-9758/2020|2020-07-06|EPI\_ISL\_780257|Original|hCoV-19^^Texas|Human|Houston Methodist Hospital|Houston Methodist Hospital|Long|USA

>Spike|hCoV-19/England/CAMB-7DFA7/2020|2020-04-07|EPI\_ISL\_442294|Original|hCoV-19^^England|Human|Department of Pathology|Wellcome Sanger Institute for the COVID-19 Genomics UK (COG-UK) consortium|Amato|United Kingdom

>Spike|hCoV-19/USA/TX-HMH-MCoV-13124/2020|2020-08-27|EPI\_ISL\_788275|Original|hCoV-19^^Texas|Human|Houston Methodist Hospital|Houston Methodist Hospital|Long|USA

>Spike|hCoV-19/Germany/NI-HCRI-BrZK-1/2020|2020-04-27|EPI\_ISL\_491115|Vero|hCoV-19^^Lower Saxony|Human|Cicin-Sain Lab|Cicin-Sain Lab|Chaudhry|Germany

>Spike|hCoV-19/England/ALDP-9FC815/2020|2020-10-01|EPI\_ISL\_587999|Original|hCoV-19^^England|Human|Lighthouse Lab in Alderley Park|Wellcome Sanger Institute for the COVID-19 Genomics UK (COG-UK) consortium|Davies|United Kingdom

>Spike|hCoV-19/Scotland/CVR4084/2020|2020-08-31|EPI\_ISL\_535174|Original|hCoV-19^^Scotland|Human|West of Scotland Specialist Virology Centre|COVID-19 Genomics UK (COG-UK) Consortium|Robertson|United Kingdom

>Spike|hCoV-19/Wales/PHWC-31552/2020|2020-04-12|EPI\_ISL\_446460|Original|hCoV-19^^Wales|Human|Wales Specialist Virology Centre|Public Health Wales Microbiology Cardiff|Moore|United Kingdom

>Spike|hCoV-19/England/MILK-48548B/2020|2020-05-10|EPI\_ISL\_559678|Original|hCoV-19^^England|Human|Lighthouse Lab in Milton Keynes|Wellcome Sanger Institute for the COVID-19 Genomics UK (COG-UK) consortium|Davies|United Kingdom

>Spike|hCoV-19/Wales/MILK-9A572D/2020|2020-09-03|EPI\_ISL\_550003|Original|hCoV-19^^Wales|Human|Lighthouse Lab in Milton Keynes|Wellcome Sanger Institute for the COVID-19 Genomics UK (COG-UK) consortium|Davies|United Kingdom

>Spike|hCoV-19/Scotland/EDB2974/2020|2020-04-02|EPI\_ISL\_488990|Original|hCoV-19^^Scotland|Human|Virology Department|Wellcome Sanger Institute for the COVID-19 Genomics UK (COG-UK) consortium|Davies|United Kingdom

>Spike|hCoV-19/India/UT-AR46/2020|2020-05-23|EPI\_ISL\_508190|Original|hCoV-19^^Uttarakhand|Human|All india institute of Medical Sciences Rishikesh|National Institute of Biomedical Genomics|Maitra|India

>Spike|hCoV-19/USA/CA-CZB-7152/2020|2020-09-09|EPI\_ISL\_582934|Original|hCoV-19^^California|Human|County of Santa Clara Public Health Department|Chan-Zuckerberg Biohub|Bhatt|USA

>Spike|hCoV-19/England/QEUA-A60B5E/2020|2020-10-12|EPI\_ISL\_665492|Original|hCoV-19^^England|Human|Northumbria University / South Tees Hospitals NHS Foundation Trust / North Cumbria Integrated Care NHS Foundation Trust / North Tees and Hartlepool NHS

Foundation Trust / Newcastle Hospitals NHS Foundation Trust|COVID-19 Genomics UK (COG-UK) Consortium|Bashton|United Kingdom

>Spike|hCoV-19/Austria/CeMM0558/2020|2020-03-16|EPI\_ISL\_475909|Original|hCoV-19^^Austria|Human|Zentralinstitut für medizinische und chemische Labordiagnostik|Bergthaler laboratory|Bergthaler|Austria

>Spike|hCoV-19/Iceland/301/2020|2020-03-18|EPI\_ISL\_417630|Original|hCoV-19^^Reykjavik|Human|The National University Hospital of Iceland|deCODE genetics|Jónsson|Iceland

>Spike|hCoV-19/USA/IL-NM021/2020|2020-03-15|EPI\_ISL\_444531|Original|hCoV-19^^Illinois|Human|Northwestern Memorial Hospital|Ozer Lab|Ozer|USA

>Spike|hCoV-19/USA/MI-QDX-463/2020|2020-03-22|EPI\_ISL\_571198|Original|hCoV-19^^Michigan|Human|Quest Diagnostics|Quest Diagnostics|Kagan|USA

>Spike|hCoV-19/England/OXON-ACA08/2020|2020-04-07|EPI\_ISL\_448502|Original|hCoV-19^^England|Human|Oxford Viromics|COVID-19 Genomics UK (COG-UK) Consortium|Golubchik|United Kingdom

>Spike|hCoV-19/England/ALDP-9BCD6D/2020|2020-09-09|EPI\_ISL\_573074|Original|hCoV-19^^England|Human|Oxford Viromics|COVID-19 Genomics UK (COG-UK) Consortium|Golubchik|United Kingdom

>Spike|hCoV-19/Wales/PHWC-493903/2020|2020-11-30|EPI\_ISL\_725957|Original|hCoV-19^^Wales|Human|Originating lab|COVID-19 Genomics UK (COG-UK) Consortium|Moore|United Kingdom

>Spike|hCoV-19/Canada/MB-NML-1017/2020|2020-07-16|EPI\_ISL\_582383|Original|hCoV-19^^Manitoba|Human|Cadham Provincial Laboratory|National Microbiology Laboratory (NML)|Majer|Canada

>Spike|hCoV-19/Japan/PG-8020/2020|2020-08-00|EPI\_ISL\_687121|Original|hCoV-19^^Japan|Human|Pathogen Genomics Center|Pathogen Genomics Center|Sekizuka|Japan

>Spike|hCoV-19/India/MH-NIV-229468/2020|2020-09-28|EPI\_ISL\_577680|Original|hCoV-19^^Maharashtra|Human|NIV Influenza|NIV Influenza|Potdar|India

>Spike|hCoV-19/Singapore/916/2020|2020-03-21|EPI\_ISL\_538443|Original|hCoV-19^^Singapore|Human|Department of Laboratory Medicine|Department of Laboratory Medicine|Chen|Singapore

>Spike|hCoV-19/Wales/PHWC-164995/2020|2020-06-10|EPI\_ISL\_479330|Original|hCoV-19^^Wales|Human|Wales Specialist Virology Centre Sequencing lab|COVID-19 Genomics UK (COG-UK) Consortium|Moore|United Kingdom

>Spike|hCoV-19/England/ALDP-A2E1E1/2020|2020-10-06|EPI\_ISL\_586697|Original|hCoV-19^^England|Human|Lighthouse Lab in Alderley Park|Wellcome Sanger Institute for the COVID-19 Genomics UK (COG-UK) consortium|Davies|United Kingdom

>Spike|hCoV-19/Scotland/QEUA-9FB49A/2020|2020-09-29|EPI\_ISL\_600605|Original|hCoV-19^^Scotland|Human|Lighthouse Lab in Glasgow|Wellcome Sanger Institute for the COVID-19 Genomics UK (COG-UK) consortium|Davies|United Kingdom

>Spike|hCoV-19/USA/CA-CHLA-PLM45843117/2020|2020-12-03|EPI\_ISL\_753595|Original|hCoV-19^^California|Human|Clinical virology Laboratory|Center for Personalized Medicine|Dien Bard|USA

>Spike|hCoV-19/England/204961142/2020|2020-12-03|EPI\_ISL\_700694|Original|hCoV-19^^England|Human|Respiratory Virus Unit|COVID-19 Genomics UK (COG-UK) Consortium|Platt|United Kingdom

>Spike|hCoV-19/USA/NY-PV08136/2020|2020-03-17|EPI\_ISL\_421358|Original|hCoV-19^^New York|Human|MSHS Clinical Microbiology Laboratories|MSHS Pathogen Surveillance Program|van Bakel|USA

>Spike|hCoV-19/England/ALDP-BBA79C/2020|2020-11-19|EPI\_ISL\_701927|Original|hCoV-19^^England|Human|Lighthouse Lab in Alderley Park|Wellcome Sanger Institute for the COVID-19 Genomics UK (COG-UK) Consortium|Davies|United Kingdom

>Spike|hCoV-19/England/MILK-69E4C9/2020|2020-07-02|EPI\_ISL\_551813|Original|hCoV-19^^England|Human|Lighthouse Lab in Milton Keynes|Wellcome Sanger Institute for the COVID-19 Genomics UK (COG-UK) consortium|Davies|United Kingdom

>Spike|hCoV-19/Belgium/SB-0407394/2020|2020-04-07|EPI\_ISL\_462248|Original|hCoV-19^^Berg|Human|KU Leuven|KU Leuven|Maes|Belgium

>Spike|hCoV-19/Australia/QLD1213/2020|2020-03-22|EPI\_ISL\_639804|Original|hCoV-19^^Australia|Human|unknown|Public Health Virology Laboratory|Nguyen|Australia

>Spike|hCoV-19/Netherlands/ZH-EMC-800/2020|2020-10-14|EPI\_ISL\_632679|Original|hCoV-19^^Zuid Holland|Human|Dutch COVID-19 response team|Erasmus Medical Center|Oude Munnink|Netherlands

>Spike|hCoV-19/USA/WI-QDX-780/2020|2020-03-19|EPI\_ISL\_571566|Original|hCoV-19^^Wisconsin|Human|Quest Diagnostics|Quest Diagnostics|Kagan|USA

>Spike|hCoV-19/Japan/PG-3218/2020|2020-04-00|EPI\_ISL\_691336|Original|hCoV-19^^Japan|Human|Pathogen Genomics Center|Pathogen Genomics Center|Sekizuka|Japan

>Spike|hCoV-19/USA/NM-DOH-2020315682/2020|2020-08-27|EPI\_ISL\_732713|Original|hCoV-19^^New Mexico|Human|New Mexico Department of Health Scientific Laboratory|New Mexico Department of Health Scientific Laboratory|Johnson|USA

>Spike|hCoV-19/England/MILK-B38417/2020|2020-11-01|EPI\_ISL\_658962|Original|hCoV-19^^England|Human|Lighthouse Lab in Milton Keynes|Wellcome Sanger Institute for the COVID-19 Genomics UK (COG-UK) Consortium|Davies|United Kingdom

>Spike|hCoV-19/England/WSFT-25C10C4/2020|2020-05-09|EPI\_ISL\_492854|Original|hCoV-19^^England|Human|Department of Medical Microbiology|Wellcome Sanger Institute for the COVID-19 Genomics UK (COG-UK) consortium|Davies|United Kingdom

>Spike|hCoV-19/England/BRIS-127C3B/2020|2020-04-17|EPI\_ISL\_469562|Original|hCoV-19^^England|Human|PHE South West Regional Laboratory|Wellcome Sanger Institute for the COVID-19 Genomics UK (COG-UK) consortium|Davies|United Kingdom

>Spike|hCoV-19/Spain/RI-IBV-99005931/2020|2020-03-28|EPI\_ISL\_537466|Original|hCoV-19^^La Rioja|Human|Centro de Investigaci\u00f3n Biom\u00e9dica de La Rioja - Hospital San Pedro Logro\u00f1o|SeqCOVID-SPAIN consortium|IBV (CSIC)|Comas|Spain

>Spike|hCoV-19/Japan/PG-8288/2020|2020-08-00|EPI\_ISL\_687387|Original|hCoV-19^^Japan|Human|Pathogen Genomics Center|Pathogen Genomics Center|Sekizuka|Japan

>Spike|hCoV-19/England/CAMC-C4380D/2020|2020-12-10|EPI\_ISL\_719243|Original|hCoV-19^^England|Human|Lighthouse Lab in Cambridge|Wellcome Sanger Institute for the COVID-19 Genomics UK (COG-UK) Consortium|Davies|United Kingdom

>Spike|hCoV-19/England/CAMC-B522E0/2020|2020-11-08|EPI\_ISL\_656800|Original|hCoV-19^^England|Human|Lighthouse Lab in Cambridge|Wellcome Sanger Institute for the COVID-19 Genomics UK (COG-UK) Consortium|Davies|United Kingdom

>Spike|hCoV-19/Slovakia/UKBA-607/2020|2020-11-30|EPI\_ISL\_788984|Original|hCoV-19^^Bratislava|Human|Institute of Virology|Faculty of Natural Sciences|Vinar|Slovakia

>Spike|hCoV-19/United Arab Emirates/H2/2020|2020-04-26|EPI\_ISL\_528714|Original|hCoV-19^^Abu Dhabi|Human|Alsafar - Khalifa University Abu Dhabi|Alsafar - Khalifa University Abu Dhabi|Daw Elbait|United Arab Emirates

>Spike|hCoV-19/France/PAC-IHU-0248/2020|2020-03-30|EPI\_ISL\_569408|Original|hCoV-19^^Provence-Alpes-C\u00f4te-d\u2019Azur|Human|MEPHI|MEPHI|Levasseur|France

>Spike|hCoV-19/Wales/PHWC-4A18AB/2020|2020-12-11|EPI\_ISL\_743739|Original|hCoV-19^^Wales|Human|Wales Specialist Virology Centre Sequencing lab|COVID-19 Genomics UK (COG-UK) Consortium|Moore|United Kingdom

>Spike|hCoV-19/England/BRIS-130F81/2020|2020-03-24|EPI\_ISL\_501610|Original|hCoV-19^^England|Human|PHE South West Regional Laboratory|Wellcome Sanger Institute for the COVID-19 Genomics UK (COG-UK) consortium|Davies|United Kingdom

>Spike|hCoV-19/Wales/PHWC-16B318/2020|2020-09-16|EPI\_ISL\_560273|Original|hCoV-19^^Wales|Human|Wales Specialist Virology Centre Sequencing lab|COVID-19 Genomics UK (COG-UK) Consortium|Moore|United Kingdom

>Spike|hCoV-19/England/ALDP-A68F96/2020|2020-10-12|EPI\_ISL\_608481|Original|hCoV-19^^England|Human|Lighthouse Lab in Alderley Park|Wellcome Sanger Institute for the COVID-19 Genomics UK (COG-UK) consortium|Davies|United Kingdom

>Spike|hCoV-19/USA/MA-MASPHL-00331/2020|2020-05-04|EPI\_ISL\_693187|Original|hCoV-19^^Massachusetts|Human|Massachusetts State Public Health Laboratory|Massachusetts State Public Health Laboratory|Lang|USA

>Spike|hCoV-19/Australia/VIC7544/2020|2020-07-23|EPI\_ISL\_564487|Original|hCoV-19^^Victoria|Human|Microbiological Diagnostic Unit - Public Health Laboratory (MDU-PHL)|MDU-PHL|Schultz|Australia

>Spike|hCoV-19/England/201620058/2020|2020-04-12|EPI\_ISL\_466401|Original|hCoV-19^^England|Human|Respiratory Virus Unit|Respiratory Virus Unit|Platt|United Kingdom

>Spike|hCoV-19/England/GSTT-265D18D/2020|2020-03-14|EPI\_ISL\_483919|Original|hCoV-19^^England|Human|Centre for Clinical Infection and Diagnostics Research and Genomics Innovation Unit|COVID-19 Genomics UK (COG-UK) Consortium|Awan|United Kingdom

>Spike|hCoV-19/England/ALDP-A6C879/2020|2020-10-15|EPI\_ISL\_608264|Original|hCoV-19^^England|Human|Lighthouse Lab in Alderley Park|Wellcome Sanger Institute for the COVID-19 Genomics UK (COG-UK) consortium|Davies|United Kingdom

>Spike|hCoV-19/Scotland/QEUA-96D484/2020|2020-08-20|EPI\_ISL\_534536|Original|hCoV-19^^Scotland|Human|NHSGCC West of Scotland Specialist Virology Centre / MRC-University of Glasgow Centre for Virus Research|Wellcome Sanger Institute for the COVID-19 Genomics UK (COG-UK) consortium|Davies|United Kingdom

>Spike|hCoV-19/Denmark/DCGC-13702/2020|2020-11-30|EPI\_ISL\_712331|Original|hCoV-19^^Syddanmark|Human|Department of Virus and Microbiological Special Diagnostics|Albertsen Lab|Michaelsen|Denmark

>Spike|hCoV-19/USA/NY-NYUMC135/2020|2020-04-01|EPI\_ISL\_424942|Original|hCoV-19^^New York|Human|NYU Langone Health|Departments of Pathology and Medicine|Maurano|USA

>Spike|hCoV-19/England/MILK-9C43F7/2020|2020-09-09|EPI\_ISL\_566984|Original|hCoV-19^^England|Human|Lighthouse Lab in Milton Keynes|Wellcome Sanger Institute for the COVID-19 Genomics UK (COG-UK) consortium|Davies|United Kingdom

>Spike|hCoV-19/USA/WA9-UW6/2020|2020-03-01|EPI\_ISL\_413487|Original|hCoV-19^^Washington|Human|Harborview Medical Center|University of Washington Virology Lab|Roychoudhury|USA

>Spike|hCoV-19/England/ALDP-94E42F/2020|2020-06-17|EPI\_ISL\_555450|Original|hCoV-19^^England|Human|Lighthouse Lab in Alderley Park|Wellcome Sanger Institute for the COVID-19 Genomics UK (COG-UK) consortium|Davies|United Kingdom

>Spike|hCoV-19/Scotland/QEUA-A79457/2020|2020-10-14|EPI\_ISL\_639000|Original|hCoV-19^^Scotland|Human|Oxford Viromics|COVID-19 Genomics UK (COG-UK) Consortium|Golubchik|United Kingdom

>Spike|hCoV-19/India/MH-NIV-152698/2020|2020-08-06|EPI\_ISL\_541703|Original|hCoV-19^^Maharashtra|Human|National Institute of Virology|National Institute of Virology|Potdar|India

>Spike|hCoV-19/England/MILK-9E1303/2020|2020-09-21|EPI\_ISL\_577070|Original|hCoV-19^^England|Human|Oxford Viromics|COVID-19 Genomics UK (COG-UK) Consortium|Golubchik|United Kingdom

>Spike|hCoV-19/England/QEUA-AD14E4/2020|2020-10-26|EPI\_ISL\_633824|Original|hCoV-19^^England|Human|Lighthouse Lab in Glasgow|Wellcome Sanger Institute for the COVID-19 Genomics UK (COG-UK) consortium|Davies|United Kingdom

>Spike|hCoV-19/England/QEUA-B699A5/2020|2020-11-11|EPI\_ISL\_661496|Original|hCoV-19^^England|Human|Lighthouse Lab in Glasgow|Wellcome Sanger Institute for the COVID-19 Genomics UK (COG-UK) Consortium|Davies|United Kingdom

>Spike|hCoV-19/Japan/PG-3817/2020|2020-06-00|EPI\_ISL\_692068|Original|hCoV-19^^Japan|Human|Pathogen Genomics Center|Pathogen Genomics Center|Sekizuka|Japan

>Spike|hCoV-19/Mexico/BCN-ALSR-2533/2020|2020-06-23|EPI\_ISL\_635536|Original|hCoV-19^^Baja California|Human|Centro de Diagn\u00f3stico COVID-19 UABC Tijuana|Andersen lab at Scripps Research|Gangavarapu|Mexico

>Spike|hCoV-19/Northern Ireland/QEUA-96DC6E/2020|2020-08-20|EPI\_ISL\_530794|Original|hCoV-19^^Northern Ireland|Human|Lighthouse Lab in Glasgow|Wellcome Sanger Institute for the COVID-19 Genomics UK (COG-UK) consortium|Davies|United Kingdom

>Spike|hCoV-19/USA/WI-UW-1128/2020|2020-08-13|EPI\_ISL\_522886|Original|hCoV-19^^Wisconsin|Human|University of Wisconsin-Madison AIDS Vaccine Research Laboratories|University of Wisconsin-Madison AIDS Vaccine Research Laboratories|Baczenas|USA

>Spike|hCoV-19/Scotland/QEUA-9FA932/2020|2020-09-29|EPI\_ISL\_600610|Original|hCoV-19^^Scotland|Human|Lighthouse Lab in Glasgow|Wellcome Sanger Institute for the COVID-19 Genomics UK (COG-UK) consortium|Davies|United Kingdom

>Spike|hCoV-19/USA/IL-UW-2258/2020|2020-10-07|EPI\_ISL\_728027|Original|hCoV-19^^Illinois|Human|University of Wisconsin-Madison AIDS Vaccine Research Laboratories|University of Wisconsin-Madison AIDS Vaccine Research Laboratories|Baczenas|USA

>Spike|hCoV-19/USA/TX-HMH-MCoV-15123/2020|2020-10-18|EPI\_ISL\_786607|Original|hCoV-19^^Texas|Human|Houston Methodist Hospital|Houston Methodist Hospital|Long|USA

>Spike|hCoV-19/France/BRE-BR9062/2020|2020-09-02|EPI\_ISL\_613551|Original|hCoV-19^^Bretagne|Human|CHRU Pontchaillou - Laboratoire de Virologie\n2|National Reference Center for Viruses of Respiratory Infections|Enouf|France

>Spike|hCoV-19/England/ALDP-CB38AE/2020|2020-12-17|EPI\_ISL\_761319|Original|hCoV-19^^England|Human|Lighthouse Lab in Alderley Park|Wellcome Sanger Institute for the COVID-19 Genomics UK (COG-UK) Consortium|Davies|United Kingdom

>Spike|hCoV-19/England/QEUA-9D1C83/2020|2020-09-14|EPI\_ISL\_573684|Original|hCoV-19^^England|Human|University College London|COVID-19 Genomics UK (COG-UK) Consortium|Roy|United Kingdom

>Spike|hCoV-19/England/MILK-567D0B/2020|2020-06-11|EPI\_ISL\_558369|Original|hCoV-19^^England|Human|Lighthouse Lab in Milton Keynes|Wellcome Sanger Institute for the COVID-19 Genomics UK (COG-UK) consortium|Davies|United Kingdom

>Spike|hCoV-19/USA/CA-CSMC135/2020|2020-03-26|EPI\_ISL\_475613|Original|hCoV-19^^California|Human|Cedars-Sinai Medical Center|Cedars-Sinai Medical Center|Zhang|USA

>Spike|hCoV-19/England/MILK-974666/2020|2020-08-17|EPI\_ISL\_575779|Original|hCoV-19^^England|Human|Lighthouse Lab in Milton Keynes|Wellcome Sanger Institute for the COVID-19 Genomics UK (COG-UK) consortium|Davies|United Kingdom

>Spike|hCoV-19/England/MILK-992723/2020|2020-08-27|EPI\_ISL\_551940|Original|hCoV-19^^England|Human|Lighthouse Lab in Milton Keynes|Wellcome Sanger Institute for the COVID-19 Genomics UK (COG-UK) consortium|Davies|United Kingdom

>Spike|hCoV-19/England/205140701/2020|2020-12-14|EPI\_ISL\_766400|Original|hCoV-19^^England|Human|Respiratory Virus Unit|COVID-19 Genomics UK (COG-UK) Consortium|Platt|United Kingdom

>Spike|hCoV-19/Japan/IC-0207/2020|2020-07-00|EPI\_ISL\_667636|Original|hCoV-19^^Japan|Human|Pathogen Genomics Center|Pathogen Genomics Center|Sekizuka|Japan

>Spike|hCoV-19/Spain/MD-IBV-97010099/2020|2020-03-23|EPI\_ISL\_779772|Original|hCoV-19^^Madrid|Human|IdISSC/Hospital Cl\u00e9nico San Carlos de Madrid\u200b|SeqCOVID-SPAIN consortium/IBV (CSIC)|Comas|Spain

>Spike|hCoV-19/USA/FL-BPHL-1807/2020|2020-08-03|EPI\_ISL\_613903|Original|hCoV-19^^Florida|Human|Florida Bureau of Public Health Laboratories|Florida Bureau of Public Health Laboratories|Blanton|USA

>Spike|hCoV-19/England/MILK-B39A9C/2020|2020-11-02|EPI\_ISL\_650219|Original|hCoV-19^^England|Human|University of Exeter|COVID-19 Genomics UK (COG-UK) Consortium|Temperton|United Kingdom

>Spike|hCoV-19/England/QEUA-A8C1E1/2020|2020-10-17|EPI\_ISL\_643158|Original|hCoV-19^^England|Human|Lighthouse Lab in Glasgow|Wellcome Sanger Institute for the COVID-19 Genomics UK (COG-UK) Consortium|Davies|United Kingdom

>Spike|hCoV-19/Israel/CVL-n2440/2020|2020-03-07|EPI\_ISL\_649096|Original|hCoV-19^^Rishon-Letsion|Human|Israel Central Virology laboratory|Israel Central Virology laboratory|Zuckerman|Israel

>Spike|hCoV-19/Netherlands/NA\_5/2020|2020-00-00|EPI\_ISL\_415494|Original|hCoV-19^^Netherlands|Human|Dutch COVID-19 response team|Erasmus Medical Center|Oude Munnink|Netherlands

>Spike|hCoV-19/Wales/PHWC-4A56AD/2020|2020-12-15|EPI\_ISL\_764903|Original|hCoV-19^^Wales|Human|Wales Specialist Virology Centre Sequencing lab|COVID-19 Genomics UK (COG-UK) Consortium|Moore|United Kingdom

>Spike|hCoV-19/Jamaica/JM-CDC-7286/2020|2020-03-17|EPI\_ISL\_450799|Original|hCoV-19^^Jamaica|Human|Jamaica Ministry of Health and Wellness|Pathogen Discovery|Queen|Jamaica

>Spike|hCoV-19/Australia/VIC955/2020|2020-03-26|EPI\_ISL\_430643|Original|hCoV-19^^Victoria|Human|Microbiological Diagnostic Unit Public Health Laboratory|Microbiological Diagnostic Unit Public Health Laboratory|Schultz|Australia

>Spike|hCoV-19/England/QEUA-A1DCA8/2020|2020-09-29|EPI\_ISL\_587386|Original|hCoV-19^^England|Human|Lighthouse Lab in Glasgow|Wellcome Sanger Institute for the COVID-19 Genomics UK (COG-UK) Consortium|Davies|United Kingdom

>Spike|hCoV-19/Japan/PG-1325/2020|2020-04-00|EPI\_ISL\_684933|Original|hCoV-19^^Japan|Human|Saitama Prefectural Institute of Public Health|Pathogen Genomics Center|Sekizuka|Japan

>Spike|hCoV-19/Australia/VIC3402/2020|2020-07-10|EPI\_ISL\_521081|Original|hCoV-19^^Victoria|Human|Microbiological Diagnostic Unit - Public Health Laboratory (MDU-PHL)|MDU-PHL|Schultz|Australia

>Spike|hCoV-19/England/QEUEH-B0F0BB/2020|2020-11-02|EPI\_ISL\_641651|Original|hCoV-19^^England|Human|Lighthouse Lab in Glasgow|Wellcome Sanger Institute for the COVID-19 Genomics UK (COG-UK) Consortium|Davies|United Kingdom

>Spike|hCoV-19/Mexico/NLE-UANL-036/2020|2020-12-05|EPI\_ISL\_779197|Original|hCoV-19^^Nuevo Leon|Human|Laboratorio Estatal de Salud P\u00fablica de Nuevo Le\u00f3n|Laboratorio de Infectolog\u00eda Molecular|Gal\u00e9n|Mexico

>Spike|hCoV-19/England/MILK-978732/2020|2020-07-31|EPI\_ISL\_550513|Original|hCoV-19^^England|Human|Lighthouse Lab in Milton Keynes|Wellcome Sanger Institute for the COVID-19 Genomics UK (COG-UK) consortium|Davies|United Kingdom

>Spike|hCoV-19/Wales/PHWC-493077/2020|2020-11-28|EPI\_ISL\_725830|Original|hCoV-19^^Wales|Human|Originating lab|COVID-19 Genomics UK (COG-UK) Consortium|Moore|United Kingdom

>Spike|hCoV-19/England/NOTT-11277E/2020|2020-04-17|EPI\_ISL\_490576|Original|hCoV-19^^England|Human|Lincolnshire Hospitals and DeepSeq Nottingham|COVID-19 Genomics UK (COG-UK) Consortium|Loose|United Kingdom

>Spike|hCoV-19/England/ALDP-9E9B12/2020|2020-09-24|EPI\_ISL\_579937|Original|hCoV-19^^England|Human|Lighthouse Lab in Alderley Park|Wellcome Sanger Institute for the COVID-19 Genomics UK (COG-UK) consortium|Davies|United Kingdom

>Spike|hCoV-19/England/EXET-13DCC9/2020|2020-12-02|EPI\_ISL\_724286|Original|hCoV-19^^England|Human|University of Exeter|COVID-19 Genomics UK (COG-UK) Consortium|Temperton|United Kingdom

>Spike|hCoV-19/England/QEUEH-AD5969/2020|2020-10-26|EPI\_ISL\_633956|Original|hCoV-19^^England|Human|Lighthouse Lab in Glasgow|Wellcome Sanger Institute for the COVID-19 Genomics UK (COG-UK) consortium|Davies|United Kingdom

>Spike|hCoV-19/Iceland/345/2020|2020-03-00|EPI\_ISL\_424369|Original|hCoV-19^^Reykjavik|Human|The National University Hospital of Iceland|deCODE genetics|J\u00f3nsson|Iceland

>Spike|hCoV-19/USA/FL-BPHL-2133/2020|2020-05-07|EPI\_ISL\_653286|Original|hCoV-19^^Florida|Human|Florida Bureau of Public Health Laboratories|Florida Bureau of Public Health Laboratories|Blanton|USA

>Spike|hCoV-19/Denmark/DCGC-7337/2020|2020-10-12|EPI\_ISL\_619308|Original|hCoV-19^^Hovedstaden|Human|Department of Virus and Microbiological Special Diagnostics|Albertsen lab|Michaelsen|Denmark

>Spike|hCoV-19/England/QEUEH-B7D6F2/2020|2020-11-14|EPI\_ISL\_674758|Original|hCoV-19^^England|Human|Lighthouse Lab in Glasgow|Wellcome Sanger Institute for the COVID-19 Genomics UK (COG-UK) Consortium|Davies|United Kingdom

>Spike|hCoV-19/England/QEUEH-AD579C/2020|2020-10-24|EPI\_ISL\_634718|Original|hCoV-19^^England|Human|Lighthouse Lab in Glasgow|Wellcome Sanger Institute for the COVID-19 Genomics UK (COG-UK) consortium|Davies|United Kingdom

>Spike|hCoV-19/USA/CA-CZB-1030/2020|2020-04-18|EPI\_ISL\_436671|Original|hCoV-19^^California|Human|County of Santa Clara Public Health Department|Chan-Zuckerberg Biohub|Hao|USA

>Spike|hCoV-19/USA/UT-UPHL-201007651/2020|2020-04-18|EPI\_ISL\_594108|Original|hCoV-19^^Utah|Human|Utah Public Health Laboratory|Utah Public Health Laboratory|Young|USA

>Spike|hCoV-19/USA/CA-CZB-15417/2020|2020-12-02|EPI\_ISL\_738641|Original|hCoV-19^^California|Human|Orange County Public Health Lab|Chan-Zuckerberg Biohub|Kamm|USA

>Spike|hCoV-19/USA/WI-WSLH-200698/2020|2020-09-18|EPI\_ISL\_631455|Original|hCoV-19^^Wisconsin|Human|Wisconsin State Laboratory of Hygiene Communicable Disease Division|Wisconsin State Laboratory of Hygiene Communicable Disease Division|Florek|USA

>Spike|hCoV-19/England/CAMB-1AC506/2020|2020-04-22|EPI\_ISL\_489419|Original|hCoV-19^^England|Human|Department of Pathology|Wellcome Sanger Institute for the COVID-19 Genomics UK (COG-UK) consortium|Davies|United Kingdom

>Spike|hCoV-19/Poland/76087/2020|2020-11-00|EPI\_ISL\_732880|Original|hCoV-19^^Poland|Human|genXone SA|genXone SA|Kaszuba|Poland

>Spike|hCoV-19/Denmark/DCGC-1051/2020|2020-03-16|EPI\_ISL\_614682|Original|hCoV-19^^Nordjylland|Human|Department of Virus and Microbiological Special Diagnostics|Albertsen lab|Michaelsen|Denmark

>Spike|hCoV-19/England/CAMC-B21208/2020|2020-11-03|EPI\_ISL\_647583|Original|hCoV-19^^England|Human|Lighthouse Lab in Cambridge|Wellcome Sanger Institute for the COVID-19 Genomics UK (COG-UK) Consortium|Davies|United Kingdom

>Spike|hCoV-19/USA/MI-UM-10036802363/2020|2020-11-05|EPI\_ISL\_707846|Original|hCoV-19^^Michigan|Human|University of Michigan Clinical Microbiology Laboratory|Lauring Lab|Valesano|USA

>Spike|hCoV-19/Israel/CVL-n25794/2020|2020-07-19|EPI\_ISL\_514268|Original|hCoV-19^^Jerusalem District|Human|Israel Central Virology laboratory|Israel Central Virology laboratory|Zuckerman|Israel

>Spike|hCoV-19/USA/TX-HMH-MCoV-13899/2020|2020-08-17|EPI\_ISL\_787191|Original|hCoV-19^^Texas|Human|Houston Methodist Hospital|Houston Methodist Hospital|Long|USA

>Spike|hCoV-19/USA/DE-DHSS-F1016592/2020|2020-10-14|EPI\_ISL\_708392|Original|hCoV-19^^Delaware|Human|Delaware Public Health Lab|Delaware Public Health Lab|Bajwa|USA

>Spike|hCoV-19/England/BRIS-126A9C/2020|2020-04-10|EPI\_ISL\_459090|Original|hCoV-19^^England|Human|PHE South West Regional Laboratory|Wellcome Sanger Institute for the COVID-19 Genomics UK (COG-UK) consortium|Davies|United Kingdom

>Spike|hCoV-19/England/20136015502/2020|2020-03-24|EPI\_ISL\_420520|Original|hCoV-19^^England|Human|Respiratory Virus Unit|Respiratory Virus Unit|Platt|United Kingdom

>Spike|hCoV-19/England/MILK-BAAAC3/2020|2020-11-17|EPI\_ISL\_681403|Original|hCoV-19^^England|Human|Lighthouse Lab in Milton Keynes|Wellcome Sanger Institute for the COVID-19 Genomics UK (COG-UK) Consortium|Davies|United Kingdom

>Spike|hCoV-19/India/DL-NCDC7516-CSIR-IGIB/2020|2020-05-28|EPI\_ISL\_482636|Original|hCoV-19^^Delhi|Human|National Centre for Disease control (NCDC)|NCDC/CSIR-IGIB|Singh|India

>Spike|hCoV-19/Australia/VIC6422/2020|2020-07-23|EPI\_ISL\_521213|Original|hCoV-19^^Victoria|Human|Microbiological Diagnostic Unit - Public Health Laboratory (MDU-PHL)|MDU-PHL|Schultz|Australia

>Spike|hCoV-19/Wales/PHWC-491B69/2020|2020-11-11|EPI\_ISL\_706748|Original|hCoV-19^^Wales|Human|Originating lab|COVID-19 Genomics UK (COG-UK) Consortium|Moore|United Kingdom

>Spike|hCoV-19/USA/WI-UW-1622/2020|2020-09-24|EPI\_ISL\_605492|Original|hCoV-19^^Wisconsin|Human|University of Wisconsin-Madison AIDS Vaccine Research Laboratories|University of Wisconsin-Madison AIDS Vaccine Research Laboratories|Baczenas|USA

>Spike|hCoV-19/England/MILK-B8D71A/2020|2020-11-13|EPI\_ISL\_674100|Original|hCoV-19^^England|Human|Lighthouse Lab in Milton Keynes|Wellcome Sanger Institute for the COVID-19 Genomics UK (COG-UK) Consortium|Davies|United Kingdom

>Spike|hCoV-19/England/ALDP-B250CE/2020|2020-11-04|EPI\_ISL\_646662|Original|hCoV-19^^England|Human|Lighthouse Lab in Alderley Park|Wellcome Sanger Institute for the COVID-19 Genomics UK (COG-UK) Consortium|Davies|United Kingdom

>Spike|hCoV-19/England/CAMC-B373A2/2020|2020-11-05|EPI\_ISL\_645237|Original|hCoV-19^^England|Human|Lighthouse Lab in Cambridge|Wellcome Sanger Institute for the COVID-19 Genomics UK (COG-UK) Consortium|Davies|United Kingdom

>Spike|hCoV-19/Japan/PG-1231/2020|2020-04-00|EPI\_ISL\_684841|Original|hCoV-19^^Japan|Human|Yamagata Prefectural Institute of Public Health|Pathogen Genomics Center|Sekizuka|Japan

>Spike|hCoV-19/England/BRIS-12E663/2020|2020-04-20|EPI\_ISL\_488418|Original|hCoV-19^^England|Human|PHE South West Regional Laboratory|Wellcome Sanger Institute for the COVID-19 Genomics UK (COG-UK) consortium|Davies|United Kingdom

>Spike|hCoV-19/England/MILK-9D48C8/2020|2020-09-18|EPI\_ISL\_601763|Original|hCoV-19^^England|Human|Lighthouse Lab in Milton Keynes|Wellcome Sanger Institute for the COVID-19 Genomics UK (COG-UK) consortium|Davies|United Kingdom

>Spike|hCoV-19/Switzerland/VD-ETHZ-320415/2020|2020-10-12|EPI\_ISL\_737890|Original|hCoV-19^^Vaud|Human|Viollier AG|Department of Biosystems Science and Engineering|Nadeau|Switzerland

>Spike|hCoV-19/England/SHEF-10D2FAD/2020|2020-12-16|EPI\_ISL\_727961|Original|hCoV-19^^England|Human|Virology Department|COVID-19 Genomics UK (COG-UK) Consortium|de Silva|United Kingdom

>Spike|hCoV-19/England/NOTT-111D04/2020|2020-06-05|EPI\_ISL\_472398|Original|hCoV-19^^England|Human|Queens Medical Centre|COVID-19 Genomics UK (COG-UK) Consortium|Loose|United Kingdom

>Spike|hCoV-19/England/ALDP-9CDF90/2020|2020-09-16|EPI\_ISL\_566312|Original|hCoV-19^^England|Human|Lighthouse Lab in Alderley Park|Wellcome Sanger Institute for the COVID-19 Genomics UK (COG-UK) consortium|Davies|United Kingdom

>Spike|hCoV-19/Serbia/UE06-28-04/2020|2020-04-27|EPI\_ISL\_514430|Original|hCoV-19^^Serbia|Human|Laboratory Diagnostic|Laboratory Diagnostic|Submitter|Serbia

>Spike|hCoV-19/USA/MA-MGH-00468/2020|2020-04-04|EPI\_ISL\_460385|Original|hCoV-19^^Massachusetts|Human|Massachusetts General Hospital|Infectious Disease Program|Lemieux|USA

>Spike|hCoV-19/Denmark/DCGC-7482/2020|2020-10-12|EPI\_ISL\_619403|Original|hCoV-19^^Midtjylland|Human|Department of Virus and Microbiological Special Diagnostics|Albertsen lab|Michaelsen|Denmark

>Spike|hCoV-19/Wales/PHWC-4A57D7/2020|2020-12-16|EPI\_ISL\_764922|Original|hCoV-19^^Wales|Human|Wales Specialist Virology Centre Sequencing lab|COVID-19 Genomics UK (COG-UK) Consortium|Moore|United Kingdom

>Spike|hCoV-19/England/MILK-BAAA1E/2020|2020-11-17|EPI\_ISL\_681550|Original|hCoV-19^^England|Human|Lighthouse Lab in Milton Keynes|Wellcome Sanger Institute for the COVID-19 Genomics UK (COG-UK) Consortium|Davies|United Kingdom

>Spike|hCoV-19/USA/CA-CZB-14920/2020|2020-11-27|EPI\_ISL\_739216|Original|hCoV-19^^California|Human|Orange County Public Health Lab|Chan-Zuckerberg Biohub|Kamm|USA

>Spike|hCoV-19/England/BRIS-122DB5/2020|2020-04-03|EPI\_ISL\_440649|Original|hCoV-19^^England|Human|PHE South West Regional Laboratory|Wellcome Sanger Institute for the COVID-19 Genomics UK (COG-UK) consortium|Amato|United Kingdom

>Spike|hCoV-19/USA/NY-Wadsworth-47399-01/2020|2020-04-14|EPI\_ISL\_676855|Original|hCoV-19^^New York|Human|Wadsworth Center|Wadsworth Center|Lasek-Nesselquist|USA

>Spike|hCoV-19/Australia/VIC3802/2020|2020-07-13|EPI\_ISL\_520519|Original|hCoV-19^^Victoria|Human|Microbiological Diagnostic Unit - Public Health Laboratory (MDU-PHL) |MDU-PHL|Schultz|Australia

>Spike|hCoV-19/England/QEUEH-9BAA3B/2020|2020-09-07|EPI\_ISL\_573618|Original|hCoV-19^^England|Human|Oxford Viromics|COVID-19 Genomics UK (COG-UK) Consortium|Golubchik|United Kingdom

>Spike|hCoV-19/Oman/8556/2020|2020-04-02|EPI\_ISL\_491121|Original|hCoV-19^^Muscat|Human|Oman-National Influenza Center|Biotechnology & OMICs Laboratory|Al Mahruqi|Oman

>Spike|hCoV-19/England/MILK-B39786/2020|2020-10-31|EPI\_ISL\_679639|Original|hCoV-19^^England|Human|Oxford Viromics|COVID-19 Genomics UK (COG-UK) Consortium|Golubchik|United Kingdom

>Spike|hCoV-19/England/QEUEH-A8C275/2020|2020-10-17|EPI\_ISL\_643179|Original|hCoV-19^^England|Human|Lighthouse Lab in Glasgow|Wellcome Sanger Institute for the COVID-19 Genomics UK (COG-UK) Consortium|Davies|United Kingdom

>Spike|hCoV-19/England/NORW-ED801/2020|2020-00-00|EPI\_ISL\_490498|Original|hCoV-19^^England|Human|Quadram Institute Bioscience|COVID-19 Genomics UK (COG-UK) Consortium|Alikhan|United Kingdom

>Spike|hCoV-19/USA/TX-HMH-MCoV-11640/2020|2020-09-08|EPI\_ISL\_790072|Original|hCoV-19^^Texas|Human|Houston Methodist Hospital|Houston Methodist Hospital|Long|USA

>Spike|hCoV-19/USA/CA-CZB-6965/2020|2020-09-02|EPI\_ISL\_582900|Original|hCoV-19^^California|Human|County of Santa Clara Public Health Department|Chan-Zuckerberg Biohub|Bhatt|USA

>Spike|hCoV-19/Japan/PG-5803/2020|2020-08-00|EPI\_ISL\_688921|Original|hCoV-19^^Japan|Human|Fukuoka Institute of Health and Environmental Sciences|Pathogen Genomics Center|Sekizuka|Japan

>Spike|hCoV-19/Norway/4760/2020|2020-10-21|EPI\_ISL\_775480|Original|hCoV-19^^Nordland|Human|Nordland Hospital - Bodo|Norwegian Institute of Public Health|Vollan|Norway



>Spike|hCoV-19/USA/CA-QDX-695/2020|2020-03-20|EPI\_ISL\_571414|Original|hCoV-19^^California|Human|Quest Diagnostics|Quest Diagnostics|Kagan|USA

>Spike|hCoV-19/Poland/PL\_P46/2020|2020-04-16|EPI\_ISL\_492071|Original|hCoV-19^^Mazowieckie|Human|1. ViroGenetics - BSL3 Laboratory of Virology|1. ViroGenetics - BSL3 Laboratory of Virology|Pyrz|Poland

>Spike|hCoV-19/Denmark/DCGC-16678/2020|2020-11-09|EPI\_ISL\_714909|Original|hCoV-19^^Syddanmark|Human|Department of Virus and Microbiological Special Diagnostics|Albertsen Lab|Michaelsen|Denmark

>Spike|hCoV-19/USA/TX-HMH-MCoV-9612/2020|2020-06-30|EPI\_ISL\_780183|Original|hCoV-19^^Texas|Human|Houston Methodist Hospital|Houston Methodist Hospital|Long|USA

>Spike|hCoV-19/Germany/NW-HHU-295/2020|2020-10-01|EPI\_ISL\_770770|Original|hCoV-19^^North Rhine-Westphalia|Human|ZOTZ KLIMAS MVZ D\u00f0fcsseldorf-Centrum GbR \u00dcBAG f\u00fcr Labormedizin|Center of Medical Microbiology|Wienemann|Germany

>Spike|hCoV-19/England/BRIS-129774/2020|2020-03-31|EPI\_ISL\_458828|Original|hCoV-19^^England|Human|PHE South West Regional Laboratory|Wellcome Sanger Institute for the COVID-19 Genomics UK (COG-UK) consortium|Davies|United Kingdom

>Spike|hCoV-19/England/ALDP-B45AF7/2020|2020-11-07|EPI\_ISL\_656098|Original|hCoV-19^^England|Human|Lighthouse Lab in Alderley Park|Wellcome Sanger Institute for the COVID-19 Genomics UK (COG-UK) Consortium|Davies|United Kingdom

>Spike|hCoV-19/England/NOTT-10DEBD/2020|2020-03-07|EPI\_ISL\_425463|Original|hCoV-19^^England|Human|Queens Medical Centre|COVID-19 Genomics UK (COG-UK) Consortium|Loose|United Kingdom

>Spike|hCoV-19/England/ALDP-9EDA3F/2020|2020-05-05|EPI\_ISL\_580851|Original|hCoV-19^^England|Human|Lighthouse Lab in Alderley Park|Wellcome Sanger Institute for the COVID-19 Genomics UK (COG-UK) consortium|Davies|United Kingdom

>Spike|hCoV-19/USA/MA-MASPHL-00261/2020|2020-04-17|EPI\_ISL\_791696|Original|hCoV-19^^Massachusetts|Human|Massachusetts State Public Health Laboratory|Infectious Disease Program|Park|USA

>Spike|hCoV-19/USA/FL-BPHL-0682/2020|2020-03-26|EPI\_ISL\_509740|Original|hCoV-19^^Florida|Human|Florida Bureau of Public Health Laboratories|Florida Bureau of Public Health Laboratories|Blanton|USA

>Spike|hCoV-19/South Africa/KRISP-K004031/2020|2020-10-12|EPI\_ISL\_635012|Original|hCoV-19^^KwaZulu-Natal|Human|National Health Laboratory Service - Inkosi Albert Luthuli Central Hospital (NHLS-IALCH)|KRISP|de Oliveira|South Africa

>Spike|hCoV-19/Jordan/AM-ALSR-4087/2020|2020-10-03|EPI\_ISL\_636447|Original|hCoV-19^^Amman|Human|Biolab Diagnostic Laboratories|Andersen lab at Scripps Research|Gangavarapu|Jordan

>Spike|hCoV-19/Scotland/QEUH-B317F7/2020|2020-11-04|EPI\_ISL\_676407|Original|hCoV-19^^Scotland|Human|Lighthouse Lab in Glasgow|Wellcome Sanger Institute for the COVID-19 Genomics UK (COG-UK) Consortium|Davies|United Kingdom

>Spike|hCoV-19/India/TG-CCMB-L1693/2020|2020-05-29|EPI\_ISL\_471623|Original|hCoV-19^^Telangana|Human|CSIR-Centre for Cellular and Molecular Biology|CSIR-Centre for Cellular and Molecular Biology|Banu|India

>Spike|hCoV-19/England/ALDP-519D17/2020|2020-06-02|EPI\_ISL\_559014|Original|hCoV-19^^England|Human|Lighthouse Lab in Alderley Park|Wellcome Sanger Institute for the COVID-19 Genomics UK (COG-UK) consortium|Davies|United Kingdom

>Spike|hCoV-19/Australia/VIC6320/2020|2020-07-26|EPI\_ISL\_518308|Original|hCoV-19^^Victoria|Human|Microbiological Diagnostic Unit - Public Health Laboratory (MDU-PHL)|MDU-PHL|Schultz|Australia

>Spike|hCoV-19/South Korea/KCDC2666/2020|2020-05-27|EPI\_ISL\_522448|Original|hCoV-19^^South Korea|Human|Center for Laboratory Control of Infectious Diseases|Center for Laboratory Control of Infectious Diseases|Kim|South Korea

>Spike|hCoV-19/England/CAMC-B7A7D4/2020|2020-11-12|EPI\_ISL\_741142|Original|hCoV-19^^England|Human|Oxford Viromics|COVID-19 Genomics UK (COG-UK) Consortium|Golubchik|United Kingdom

>Spike|hCoV-19/Wales/PHWC-32F17/2020|2020-04-14|EPI\_ISL\_446709|Original|hCoV-19^^Wales|Human|Wales Specialist Virology Centre|Public Health Wales Microbiology Cardiff|Moore|United Kingdom

>Spike|hCoV-19/Spain/AN-IBV-98001109/2020|2020-03-29|EPI\_ISL\_538172|Original|hCoV-19^^Andalucia|Human|Servicio de Microbiolog\u00eda y Parasitolog\u00eda cl\u00ednica. UCEIMP. Hospital Universitario Virgen del Roc\u00edo/IBIS/CSIC/US|SeqCOVID-SPAIN consortium/IBV (CSIC) |Comas|Spain

>Spike|hCoV-19/Netherlands/Gelderland\_100/2020|2020-05-21|EPI\_ISL\_460861|Original|hCoV-19^^Gelderland|Human|Dutch COVID-19 response team|Erasmus Medical Center|Oude Munnink|Netherlands

>Spike|hCoV-19/England/ALDP-90C7AC/2020|2020-06-22|EPI\_ISL\_551533|Original|hCoV-19^^England|Human|Lighthouse Lab in Alderley Park|Wellcome Sanger Institute for the COVID-19 Genomics UK (COG-UK) consortium|Davies|United Kingdom

>Spike|hCoV-19/Netherlands/OV-EMC-102/2020|2020-09-17|EPI\_ISL\_722822|Original|hCoV-19^^Overijssel|Human|Dutch COVID-19 response team|Erasmus Medical Center|Oude Munnink|Netherlands

>Spike|hCoV-19/USA/AZ-TG395907/2020|2020-06-08|EPI\_ISL\_694751|Original|hCoV-19^^Arizona|Human|AZ SPHL|TGen North|French|USA

>Spike|hCoV-19/Australia/VIC567/2020|2020-03-25|EPI\_ISL\_426827|Original|hCoV-19^^Victoria|Human|Victorian Infectious Diseases Reference Laboratory (VIDRL)|Microbiological Diagnostic Unit Public Health Laboratory and Victorian Infectious Diseases Reference Laboratory|Schultz|Australia

>Spike|hCoV-19/Wales/ALDP-B1CACC/2020|2020-11-01|EPI\_ISL\_666108|Original|hCoV-19^^Wales|Human|Centre for Enzyme Innovation|COVID-19 Genomics UK (COG-UK) Consortium|Robson|United Kingdom

>Spike|hCoV-19/Canada/ON-PHL-20-01809/2020|2020-06-00|EPI\_ISL\_636953|Original|hCoV-19^^Ontario|Human|Public Health Ontario Laboratory|Public Health Ontario Laboratory|Guthrie|Canada

>Spike|hCoV-19/Scotland/QEUH-9CE964/2020|2020-09-17|EPI\_ISL\_601879|Original|hCoV-19^^Scotland|Human|Lighthouse Lab in Glasgow|Wellcome Sanger Institute for the COVID-19 Genomics UK (COG-UK) consortium|Davies|United Kingdom

>Spike|hCoV-19/England/ALDP-CB6744/2020|2020-12-18|EPI\_ISL\_761123|Original|hCoV-19^^England|Human|Lighthouse Lab in Alderley Park|Wellcome Sanger Institute for the COVID-19 Genomics UK (COG-UK) Consortium|Davies|United Kingdom

>Spike|hCoV-19/England/QEUH-9F3E3A/2020|2020-09-24|EPI\_ISL\_588567|Original|hCoV-19^^England|Human|Lighthouse Lab in Glasgow|Wellcome Sanger Institute for the COVID-19 Genomics UK (COG-UK) consortium|Davies|United Kingdom

>Spike|hCoV-19/Portugal/PT2001/2020|2020-11-12|EPI\_ISL\_732222|Original|hCoV-19^^Portugal|Human|Instituto Nacional de Saude (INSA) and Instituto Gulbenkian de Ciencia (IGC)|Instituto Nacional de Saude (INSA) and Instituto Gulbenkian de Ciencia (IGC) |Borges|Portugal

>Spike|hCoV-19/USA/TX-HMH-6083/2020|2020-07-04|EPI\_ISL\_547221|Original|hCoV-19^^Texas|Human|Houston Methodist Hospital|Houston Methodist Hospital|Long|USA

>Spike|hCoV-19/Wales/PHWC-2D717/2020|2020-04-05|EPI\_ISL\_446017|Original|hCoV-19^^Wales|Human|Wales Specialist Virology Centre|Public Health Wales Microbiology Cardiff|Moore|United Kingdom

>Spike|hCoV-19/USA/CA-CZB-13837/2020|2020-08-14|EPI\_ISL\_738654|Original|hCoV-19^^California|Human|Alameda County Public Health Lab|Chan-Zuckerberg Biohub|Kamm|USA

>Spike|hCoV-19/Scotland/CVR2791/2020|2020-04-17|EPI\_ISL\_473569|Original|hCoV-19^^Scotland|Human|West of Scotland Specialist Virology Centre|COVID-19 Genomics UK (COG-UK) Consortium|Robertson|United Kingdom

>Spike|hCoV-19/Denmark/DCGC-3804/2020|2020-08-31|EPI\_ISL\_622701|Original|hCoV-19^^Hovedstaden|Human|Department of Virus and Microbiological Special Diagnostics|Albertsen lab|Michaelsen|Denmark

>Spike|hCoV-19/USA/DE-DHSS-F917632/2020|2020-03-22|EPI\_ISL\_560742|Original|hCoV-19^^Delaware|Human|Delaware Public Health Lab|Delaware Public Health Lab|Bajwa|USA

>Spike|hCoV-19/USA/TX-HMH-4664/2020|2020-06-22|EPI\_ISL\_543788|Original|hCoV-19^^Texas|Human|Houston Methodist Hospital|Houston Methodist Hospital|Long|USA

>Spike|hCoV-19/England/QEUH-9B8BEF/2020|2020-09-07|EPI\_ISL\_549646|Original|hCoV-19^^England|Human|Lighthouse Lab in Glasgow|Wellcome Sanger Institute for the COVID-19 Genomics UK (COG-UK) consortium|Davies|United Kingdom

>Spike|hCoV-19/England/CAMB-80ED1/2020|2020-04-17|EPI\_ISL\_444443|Original|hCoV-19^^England|Human|Department of Pathology|COVID-19 Genomics UK (COG-UK) Consortium|Meredith|United Kingdom

>Spike|hCoV-19/England/LOND-D666B/2020|2020-04-23|EPI\_ISL\_487633|Original|hCoV-19^^England|Human|University College London|Wellcome Sanger Institute for the COVID-19 Genomics UK (COG-UK) consortium|Davies|United Kingdom

>Spike|hCoV-19/Iran/K1r-79/2020|2020-04-25|EPI\_ISL\_568480|Original|hCoV-19^^Iran|Human|Virology|Virology|Ranjbar|Iran

>Spike|hCoV-19/Luxembourg/LNS6067075/2020|2020-11-17|EPI\_ISL\_744349|Original|hCoV-19^^Luxembourg|Human|Laboratoire national de sant\u00e9|Laboratoire national de sant\u00e9|Wienecke-Baldacchino|Luxembourg

>Spike|hCoV-19/USA/AR-CDC-4265/2020|2020-07-15|EPI\_ISL\_527643|Original|hCoV-19^^Arkansas|Human|AR Dept. of Health-Public Health Lab|Pathogen Discovery|Queen|USA

>Spike|hCoV-19/USA/PA-MGEL68/2020|2020-03-30|EPI\_ISL\_454357|Original|hCoV-19^^Pennsylvania|Human|UPMC Clinical Microbiology Laboratory|Microbial Genome Sequencing Center|Mustapha|USA

>Spike|hCoV-19/England/PORT-2F5804/2020|2020-00-00|EPI\_ISL\_611935|Original|hCoV-19^^England|Human|Centre for Enzyme Innovation|COVID-19 Genomics UK (COG-UK) Consortium|Robson|United Kingdom

>Spike|hCoV-19/USA/CA-ALSR-4705/2020|2020-10-30|EPI\_ISL\_730093|Original|hCoV-19^^California|Human|San Diego County Public Health Laboratory|Andersen lab at Scripps Research|Gangavarapu|USA

>Spike|hCoV-19/England/QEUEH-9DCF52/2020|2020-09-21|EPI\_ISL\_599497|Original|hCoV-19^^England|Human|Lighthouse Lab in Glasgow|Wellcome Sanger Institute for the COVID-19 Genomics UK (COG-UK) consortium|Davies|United Kingdom

>Spike|hCoV-19/Denmark/DCGC-2466/2020|2020-06-22|EPI\_ISL\_617427|Original|hCoV-19^^Sjaelland|Human|Department of Virus and Microbiological Special Diagnostics|Albertsen lab|Michaelsen|Denmark

>Spike|hCoV-19/England/20119093904/2020|2020-03-15|EPI\_ISL\_465133|Original|hCoV-19^^England|Human|Respiratory Virus Unit|Respiratory Virus Unit|Platt|United Kingdom

>Spike|hCoV-19/England/ALDP-B26045/2020|2020-11-04|EPI\_ISL\_646479|Original|hCoV-19^^England|Human|Lighthouse Lab in Alderley Park|Wellcome Sanger Institute for the COVID-19 Genomics UK (COG-UK) Consortium|Davies|United Kingdom

>Spike|hCoV-19/Wales/PHWC-286C4/2020|2020-00-00|EPI\_ISL\_431979|Original|hCoV-19^^Wales|Human|Wales Specialist Virology Centre|Public Health Wales Microbiology Cardiff|Moore|United Kingdom

>Spike|hCoV-19/England/NORW-EAB38/2020|2020-05-09|EPI\_ISL\_457354|Original|hCoV-19^^England|Human|Quadram Institute Bioscience|COVID-19 Genomics UK (COG-UK) Consortium|Alikhan|United Kingdom

>Spike|hCoV-19/USA/NY-NYUMC771/2020|2020-03-27|EPI\_ISL\_456008|Original|hCoV-19^^New York|Human|NYU Langone Health|Departments of Pathology and Medicine|Maurano|USA

>Spike|hCoV-19/Australia/VIC4506/2020|2020-07-14|EPI\_ISL\_518917|Original|hCoV-19^^Victoria|Human|Microbiological Diagnostic Unit - Public Health Laboratory (MDU-PHL) |MDU-PHL|Schultz|Australia

>Spike|hCoV-19/England/SHEF-C9A9C/2020|2020-10-06|EPI\_ISL\_613380|Original|hCoV-19^^England|Human|Virology Department|COVID-19 Genomics UK (COG-UK) Consortium|de Silva|United Kingdom

>Spike|hCoV-19/Singapore/1230/2020|2020-04-25|EPI\_ISL\_648646|Original|hCoV-19^^Singapore|Human|Department of Laboratory Medicine|Department of Laboratory Medicine|Chen|Singapore

>Spike|hCoV-19/Netherlands/GE-EMC-222/2020|2020-05-14|EPI\_ISL\_523204|Original|hCoV-19^^Gelderland|Human|Dutch COVID-19 response team|Erasmus Medical Center|Oude Munnink|Netherlands

>Spike|hCoV-19/Japan/PG-3294/2020|2020-04-00|EPI\_ISL\_691409|Original|hCoV-19^^Japan|Human|Pathogen Genomics Center|Pathogen Genomics Center|Sekizuka|Japan

>Spike|hCoV-19/Scotland/EDB565/2020|2020-03-31|EPI\_ISL\_426023|Original|hCoV-19^^Scotland|Human|Virology Department|COVID-19 Genomics UK (COG-UK) Consortium|Williams|United Kingdom

>Spike|hCoV-19/England/CAMC-B3715D/2020|2020-11-05|EPI\_ISL\_645529|Original|hCoV-19^^England|Human|Lighthouse Lab in Cambridge|Wellcome Sanger Institute for the COVID-19 Genomics UK (COG-UK) Consortium|Davies|United Kingdom

>Spike|hCoV-19/USA/TX-HMH-8063/2020|2020-07-01|EPI\_ISL\_545829|Original|hCoV-19^^Texas|Human|Houston Methodist Hospital|Houston Methodist Hospital|Long|USA

>Spike|hCoV-19/USA/TX-HMH-6945/2020|2020-06-28|EPI\_ISL\_546373|Original|hCoV-19^^Texas|Human|Houston Methodist Hospital|Houston Methodist Hospital|Long|USA

>Spike|hCoV-19/England/ALDP-9C52EA/2020|2020-09-10|EPI\_ISL\_567750|Original|hCoV-19^^England|Human|Lighthouse Lab in Alderley Park|Wellcome Sanger Institute for the COVID-19 Genomics UK (COG-UK) consortium|Davies|United Kingdom

>Spike|hCoV-19/England/ALDP-6BD479/2020|2020-07-01|EPI\_ISL\_557834|Original|hCoV-19^^England|Human|Lighthouse Lab in Alderley Park|Wellcome Sanger Institute for the COVID-19 Genomics UK (COG-UK) consortium|Davies|United Kingdom

>Spike|hCoV-19/Belgium/ULG-10148/2020|2020-04-18|EPI\_ISL\_447145|Original|hCoV-19^^Liege|Human|Department of Clinical Microbiology|GIGA Medical Genomics|Durkin|Belgium

>Spike|hCoV-19/Wales/PHWC-2CA97/2020|2020-04-01|EPI\_ISL\_445943|Original|hCoV-19^^Wales|Human|Wales Specialist Virology Centre|Public Health Wales Microbiology Cardiff|Moore|United Kingdom

>Spike|hCoV-19/England/SHEF-C3B62/2020|2020-04-08|EPI\_ISL\_441952|Original|hCoV-19^^England|Human|Virology Department|COVID-19 Genomics UK (COG-UK) Consortium|de Silva|United Kingdom

>Spike|hCoV-19/Jordan/AM-ALSR-4092/2020|2020-10-03|EPI\_ISL\_636452|Original|hCoV-19^^Amman|Human|Biolab Diagnostic Laboratories|Andersen lab at Scripps Research|Gangavarapu|Jordan

>Spike|hCoV-19/Colombia/CUN-GVI-98087/2020|2020-04-05|EPI\_ISL\_447812|Original|hCoV-19^^Cundinamarca|Human|Instituto Nacional de Salud|Grupo de Investigaciones Microbiol\u00f3gicas-UR (GIMUR)|Ram\u00e9dez|Colombia

>Spike|hCoV-19/India/MH-GA72/2020|2020-06-18|EPI\_ISL\_511934|Original|hCoV-19^^Maharashtra|Human|Government Medical College|National Institute of Biomedical Genomics -\u00a0DBT's PAN-INDIA 1000 SARS--CoV-2 RNA Genome Sequencing Consortium|Maitra|India

>Spike|hCoV-19/England/LIVE-DC2E9A/2020|2020-11-25|EPI\_ISL\_705851|Original|hCoV-19^^England|Human|Liverpool Clinical Laboratories|COVID-19 Genomics UK (COG-UK) Consortium|Haldenby|United Kingdom

>Spike|hCoV-19/England/MILK-BAA841/2020|2020-11-17|EPI\_ISL\_681545|Original|hCoV-19^^England|Human|Lighthouse Lab in Milton Keynes|Wellcome Sanger Institute for the COVID-19 Genomics UK (COG-UK) Consortium|Davies|United Kingdom

>Spike|hCoV-19/England/QEUH-9D3243/2020|2020-09-20|EPI\_ISL\_577319|Original|hCoV-19^^England|Human|Centre for Enzyme Innovation|COVID-19 Genomics UK (COG-UK) Consortium|Robson|United Kingdom

>Spike|hCoV-19/England/CAMC-B356F6/2020|2020-11-05|EPI\_ISL\_659456|Original|hCoV-19^^England|Human|Lighthouse Lab in Cambridge|Wellcome Sanger Institute for the COVID-19 Genomics UK (COG-UK) Consortium|Davies|United Kingdom

>Spike|hCoV-19/USA/AR-QDX-1315/2020|2020-03-15|EPI\_ISL\_572054|Original|hCoV-19^^Arkansas|Human|Quest Diagnostics|Quest Diagnostics|Kagan|USA

>Spike|hCoV-19/Switzerland/ZH-ETHZ-190013/2020|2020-07-06|EPI\_ISL\_500879|Original|hCoV-19^^Zurich|Human|Viollier AG|Department of Biosystems Science and Engineering|Nadeau|Switzerland

>Spike|hCoV-19/Scotland/QEUH-A35EFF/2020|2020-10-04|EPI\_ISL\_706901|Original|hCoV-19^^Scotland|Human|Oxford Viromics|COVID-19 Genomics UK (COG-UK) Consortium|Golubchik|United Kingdom

>Spike|hCoV-19/England/CAMB-7BDDC/2020|2020-04-04|EPI\_ISL\_442155|Original|hCoV-19^^England|Human|Department of Pathology|Wellcome Sanger Institute for the COVID-19 Genomics UK (COG-UK) consortium|Amato|United Kingdom

>Spike|hCoV-19/Denmark/DCGC-18366/2020|2020-12-07|EPI\_ISL\_749228|Original|hCoV-19^^Hovedstaden|Human|Department of Virus and Microbiological Special Diagnostics|Albertsen Lab|Michaelsen|Denmark

>Spike|hCoV-19/Spain/PV-IBV-003240/2020|2020-03-15|EPI\_ISL\_480993|Original|hCoV-19^^Basque Country|Human|Servicio de Microbiolog\u00eda. Hospital Universitario

Donostia. OSI Donostialdea. \u00clrea de Enfermedades Infecciosas|SeqCOVID-SPAIN consortium/IBV (CSIC) |Comas|Spain  
>Spike|hCoV-19/USA/WI-GMF-14053/2020|2020-08-06|EPI\_ISL\_547677|Original|hCoV-19^^Wisconsin|Human|Gundersen Molecular Diagnostics Laboratory|Kabara Cancer Research Institute|Kenny|USA  
>Spike|hCoV-19/Japan/PG-3586/2020|2020-07-00|EPI\_ISL\_691754|Original|hCoV-19^^Japan|Human|Pathogen Genomics Center|Pathogen Genomics Center|Sekizuka|Japan  
>Spike|hCoV-19/Luxembourg/LNS6619182/2020|2020-10-23|EPI\_ISL\_744442|Original|hCoV-19^^Luxembourg|Human|Laboratoire national de sant\u00e9|Laboratoire national de sant\u00e9|Wienecke-Baldacchino|Luxembourg  
>Spike|hCoV-19/Denmark/DCGC-12234/2020|2020-11-16|EPI\_ISL\_682415|Original|hCoV-19^^Hovedstaden|Human|Department of Virus and Microbiological Special Diagnostics|Albertsen Lab|Michaelsen|Denmark  
>Spike|hCoV-19/USA/LA-EVTL987/2020|2020-08-18|EPI\_ISL\_653678|Original|hCoV-19^^Louisiana|Human|LSUHS Emerging Viral Threat Laboratory|Microbial Genome Sequencing Center|Kamil|USA  
>Spike|hCoV-19/England/CAMC-C7203A/2020|2020-12-15|EPI\_ISL\_769052|Original|hCoV-19^^England|Human|Lighthouse Lab in Cambridge|Wellcome Sanger Institute for the COVID-19 Genomics UK (COG-UK) Consortium|Davies|United Kingdom  
>Spike|hCoV-19/England/CAMB-71B81/2020|2020-03-31|EPI\_ISL\_439536|Original|hCoV-19^^England|Human|Department of Pathology|Wellcome Sanger Institute for the COVID-19 Genomics UK (COG-UK) consortium|Amato|United Kingdom  
>Spike|hCoV-19/England/GSTT-265DA82/2020|2020-03-26|EPI\_ISL\_484057|Original|hCoV-19^^England|Human|Centre for Clinical Infection and Diagnostics Research and Genomics Innovation Unit|COVID-19 Genomics UK (COG-UK) Consortium|Awan|United Kingdom  
>Spike|hCoV-19/Australia/VIC4950/2020|2020-06-24|EPI\_ISL\_519323|Original|hCoV-19^^Victoria|Human|Victorian Infectious Diseases Reference Laboratory (VIDRL)|VIDRL and MDU-PHL|Schultz|Australia  
>Spike|hCoV-19/Scotland/QEUH-AD02AF/2020|2020-10-26|EPI\_ISL\_644012|Original|hCoV-19^^Scotland|Human|Lighthouse Lab in Glasgow|Wellcome Sanger Institute for the COVID-19 Genomics UK (COG-UK) Consortium|Davies|United Kingdom  
>Spike|hCoV-19/Sweden/20-04850/2020|2020-02-28|EPI\_ISL\_475545|Original|hCoV-19^^Stockholm|Human|Karolinska Universitetslaboratoriet|The Public Health Agency of Sweden|Svartstr\u00f6m|Sweden  
>Spike|hCoV-19/USA/TX-HMH-4485/2020|2020-06-19|EPI\_ISL\_543659|Original|hCoV-19^^Texas|Human|Houston Methodist Hospital|Houston Methodist Hospital|Long|USA  
>Spike|hCoV-19/Scotland/EDB10445/2020|2020-10-06|EPI\_ISL\_705761|Original|hCoV-19^^Scotland|Human|Virology Department|COVID-19 Genomics UK (COG-UK) Consortium|McHugh|United Kingdom  
>Spike|hCoV-19/USA/TX-HMH0416/2020|2020-04-01|EPI\_ISL\_435000|Original|hCoV-19^^Texas|Human|Houston Methodist Hospital|Houston Methodist Hospital|Long|USA  
>Spike|hCoV-19/USA/MI-UM-10036779751/2020|2020-11-04|EPI\_ISL\_728371|Original|hCoV-19^^Michigan|Human|University of Michigan Clinical Microbiology Laboratory|Lauring Lab|Valesano|USA  
>Spike|hCoV-19/Wales/PHWC-25E38/2020|2020-03-25|EPI\_ISL\_422350|Original|hCoV-19^^Wales|Human|Wales Specialist Virology Centre|Public Health Wales Microbiology Cardiff|Moore|United Kingdom  
>Spike|hCoV-19/England/MILK-A1D67D/2020|2020-10-03|EPI\_ISL\_595070|Original|hCoV-19^^England|Human|Queens Medical Centre|COVID-19 Genomics UK (COG-UK) Consortium|Loose|United Kingdom  
>Spike|hCoV-19/Spain/AR-IBV-97010746/2020|2020-10-03|EPI\_ISL\_779779|Original|hCoV-19^^Aragon|Human|Servicio de Microbiolog\u00eda|SeqCOVID-SPAIN consortium/IBV (CSIC) |Comas|Spain  
>Spike|hCoV-19/USA/NY-NYCPHL-001293/2020|2020-11-09|EPI\_ISL\_683879|Original|hCoV-19^^New York|Human|DOHMH Morrisania|New York City Public Health Laboratory|Wang|USA  
>Spike|hCoV-19/USA/CA-ALSR-1946/2020|2020-07-08|EPI\_ISL\_512251|Original|hCoV-19^^California|Human|San Diego County Public Health Laboratory|Andersen lab at Scripps Research|Gangavarapu|USA

>Spike|hCoV-19/USA/CO-CDPHE-2009170073/2020|2020-09-16|EPI\_ISL\_710338|Original|hCoV-19^^Colorado|Human|Colorado Department of Public Health and Environment|Colorado Department of Public Health and Environment|Bankers|USA

>Spike|hCoV-19/England/CAMC-B22A2D/2020|2020-11-02|EPI\_ISL\_647447|Original|hCoV-19^^England|Human|Lighthouse Lab in Cambridge|Wellcome Sanger Institute for the COVID-19 Genomics UK (COG-UK) Consortium|Davies|United Kingdom

>Spike|hCoV-19/Japan/PG-6453/2020|2020-08-00|EPI\_ISL\_689558|Original|hCoV-19^^Japan|Human|Pathogen Genomics Center|Pathogen Genomics Center|Sekizuka|Japan

>Spike|hCoV-19/USA/MN-MDH-2025/2020|2020-11-03|EPI\_ISL\_654706|Original|hCoV-19^^Minnesota|Human|Minnesota Department of Health|Minnesota Department of Health|Lorentz|USA

>Spike|hCoV-19/Switzerland/BS-UHB-42186648/2020|2020-03-11|EPI\_ISL\_528014|Original|hCoV-19^^Basel-Stadt|Human|University Hospital Basel|University Hospital Basel|Roloff Handschin|Switzerland

>Spike|hCoV-19/England/ALDP-A68567/2020|2020-10-12|EPI\_ISL\_608684|Original|hCoV-19^^England|Human|Lighthouse Lab in Alderley Park|Wellcome Sanger Institute for the COVID-19 Genomics UK (COG-UK) consortium|Davies|United Kingdom

>Spike|hCoV-19/Denmark/DCGC-4616/2020|2020-09-21|EPI\_ISL\_621285|Original|hCoV-19^^Hovedstaden|Human|Department of Virus and Microbiological Special Diagnostics|Albertsen lab|Michaelsen|Denmark

>Spike|hCoV-19/Scotland/QEUH-9B4512/2020|2020-09-08|EPI\_ISL\_560076|Original|hCoV-19^^Scotland|Human|Oxford Viromics|COVID-19 Genomics UK (COG-UK) Consortium|Golubchik|United Kingdom

>Spike|hCoV-19/USA/WI-UW-2325/2020|2020-11-14|EPI\_ISL\_728091|Original|hCoV-19^^Wisconsin|Human|University of Wisconsin-Madison AIDS Vaccine Research Laboratories|University of Wisconsin-Madison AIDS Vaccine Research Laboratories|Baczenas|USA

>Spike|hCoV-19/England/QEUH-B9F706/2020|2020-11-18|EPI\_ISL\_720959|Original|hCoV-19^^England|Human|Lighthouse Lab in Glasgow|Wellcome Sanger Institute for the COVID-19 Genomics UK (COG-UK) Consortium|Davies|United Kingdom

>Spike|hCoV-19/England/NORT-2844CA/2020|2020-03-21|EPI\_ISL\_488681|Original|hCoV-19^^England|Human|NU-OMICS DNA Sequencing research facility|Wellcome Sanger Institute for the COVID-19 Genomics UK (COG-UK) consortium|Davies|United Kingdom

>Spike|hCoV-19/Ireland/WW-NVRL-20Z06456/2020|2020-04-17|EPI\_ISL\_671389|Original|hCoV-19^^Wicklow|Human|National Virus Reference Laboratory|Irish Coronavirus Sequencing Consortium - Teagasc Moorepark|Walsh|Ireland

>Spike|hCoV-19/USA/UT-UPHL-2009378/2020|2020-05-18|EPI\_ISL\_524970|Original|hCoV-19^^Utah|Human|Utah Public Health Laboratory|Utah Public Health Laboratory|Young|USA

>Spike|hCoV-19/England/ALDP-95AF7A/2020|2020-06-15|EPI\_ISL\_555508|Original|hCoV-19^^England|Human|Lighthouse Lab in Alderley Park|Wellcome Sanger Institute for the COVID-19 Genomics UK (COG-UK) consortium|Davies|United Kingdom

>Spike|hCoV-19/Brazil/SP-634/2020|2020-03-20|EPI\_ISL\_515548|Original|hCoV-19^^S\u00e3o Paulo|Human|Hospital Municipal Dr. Jose Soares Hungria|Instituto Adolfo Lutz|Sacchi|Brazil

>Spike|hCoV-19/England/CAMC-A5853D/2020|2020-10-08|EPI\_ISL\_597121|Original|hCoV-19^^England|Human|Lighthouse Lab in Cambridge|Wellcome Sanger Institute for the COVID-19 Genomics UK (COG-UK) consortium|Davies|United Kingdom

>Spike|hCoV-19/England/ALDP-B62951/2020|2020-11-09|EPI\_ISL\_656352|Original|hCoV-19^^England|Human|Lighthouse Lab in Alderley Park|Wellcome Sanger Institute for the COVID-19 Genomics UK (COG-UK) Consortium|Davies|United Kingdom

>Spike|hCoV-19/England/NORT-28CEA6/2020|2020-10-03|EPI\_ISL\_652343|Original|hCoV-19^^England|Human|Northumbria University / South Tees Hospitals NHS Foundation Trust / North Cumbria Integrated Care NHS Foundation Trust / North Tees and Hartlepool NHS Foundation Trust / Newcastle Hospitals NHS Foundation Trust|COVID-19 Genomics UK (COG-UK) Consortium|Bashton|United Kingdom

>Spike|hCoV-19/England/ALDP-B5C40E/2020|2020-11-10|EPI\_ISL\_655707|Original|hCoV-19^^England|Human|Lighthouse Lab in Alderley Park|Wellcome Sanger Institute for the COVID-19 Genomics UK (COG-UK) Consortium|Davies|United Kingdom

>Spike|hCoV-19/Denmark/DCGC-4411/2020|2020-09-21|EPI\_ISL\_621832|Original|hCoV-19^^Syddanmark|Human|Department of Virus and Microbiological Special Diagnostics|Albertsen lab|Michaelsen|Denmark

>Spike|hCoV-19/Denmark/DCGC-6737/2020|2020-10-05|EPI\_ISL\_622368|Original|hCoV-19^^Hovedstaden|Human|Department of Virus and Microbiological Special Diagnostics|Albertsen lab|Michaelsen|Denmark

>Spike|hCoV-19/Scotland/GCVR-17079C/2020|2020-03-25|EPI\_ISL\_489680|Original|hCoV-19^^Scotland|Human|NHSGGC West of Scotland Specialist Virology Centre / MRC-University of Glasgow Centre for Virus Research|Wellcome Sanger Institute for the COVID-19 Genomics UK (COG-UK) consortium|Davies|United Kingdom

>Spike|hCoV-19/USA/CA-CZB-2207/2020|2020-05-27|EPI\_ISL\_513755|Original|hCoV-19^^California|Human|Orange County Public Health Lab|Chan-Zuckerberg Biohub|Kamm|USA

>Spike|hCoV-19/England/ALDP-A924EF/2020|2020-10-19|EPI\_ISL\_611253|Original|hCoV-19^^England|Human|Lighthouse Lab in Alderley Park|Wellcome Sanger Institute for the COVID-19 Genomics UK (COG-UK) consortium|Davies|United Kingdom

>Spike|hCoV-19/Northern Ireland/NIRE-10201C/2020|2020-03-23|EPI\_ISL\_441367|Original|hCoV-19^^Northern Ireland|Human|Regional Virus Laboratory|COVID-19 Genomics UK (COG-UK) Consortium|Fairley|United Kingdom

>Spike|hCoV-19/England/MILK-9707D0/2020|2020-08-17|EPI\_ISL\_553210|Original|hCoV-19^^England|Human|Lighthouse Lab in Milton Keynes|Wellcome Sanger Institute for the COVID-19 Genomics UK (COG-UK) consortium|Davies|United Kingdom

>Spike|hCoV-19/Wales/PHWC-16F578/2020|2020-09-30|EPI\_ISL\_585985|Original|hCoV-19^^Wales|Human|Wales Specialist Virology Centre Sequencing lab|COVID-19 Genomics UK (COG-UK) Consortium|Moore|United Kingdom

>Spike|hCoV-19/Denmark/DCGC-11386/2020|2020-11-02|EPI\_ISL\_670483|Original|hCoV-19^^Midtjylland|Human|Department of Virus and Microbiological Special Diagnostics|Albertsen Lab|Michaelsen|Denmark

>Spike|hCoV-19/Denmark/DCGC-14589/2020|2020-11-23|EPI\_ISL\_711860|Original|hCoV-19^^Hovedstaden|Human|Department of Virus and Microbiological Special Diagnostics|Albertsen Lab|Michaelsen|Denmark

>Spike|hCoV-19/Denmark/DCGC-13859/2020|2020-11-30|EPI\_ISL\_713066|Original|hCoV-19^^Hovedstaden|Human|Department of Virus and Microbiological Special Diagnostics|Albertsen Lab|Michaelsen|Denmark

>Spike|hCoV-19/Luxembourg/LNS3733630/2020|2020-11-17|EPI\_ISL\_740367|Original|hCoV-19^^Luxembourg|Human|Laboratoire national de sant\u00e9|Laboratoire national de sant\u00e9|Wienecke-Baldacchino|Luxembourg

>Spike|hCoV-19/Thailand/Bangkok-0089/2020|2020-04-07|EPI\_ISL\_447029|Original|hCoV-19^^Bangkok|Human|Ramathibodi Hospital|COVID-19 Network Investigations (CONI) Alliance|Batty|Thailand

>Spike|hCoV-19/USA/UN-UW-5255/2020|2020-04-08|EPI\_ISL\_576491|Original|hCoV-19^^USA|Human|UW Virology Lab|UW Virology Lab|Roychoudhury|USA

>Spike|hCoV-19/England/ALDP-C3C4E5/2020|2020-12-10|EPI\_ISL\_730946|Original|hCoV-19^^England|Human|Lighthouse Lab in Alderley Park|Wellcome Sanger Institute for the COVID-19 Genomics UK (COG-UK) Consortium|Davies|United Kingdom

>Spike|hCoV-19/Indonesia/BT-MRINUPH-200625-367/2020|2020-06-24|EPI\_ISL\_779392|Original|hCoV-19^^Banten|Human|Siloam Hospital Lippo Village|Mochtar Riady Institute for Nanotechnology-Universitas Pelita Harapan|Suriapranata|Indonesia

>Spike|hCoV-19/Australia/VIC16555/2020|2020-07-24|EPI\_ISL\_640708|Original|hCoV-19^^Victoria|Human|Microbiological Diagnostic Unit - Public Health Laboratory (MDU-PHL)|MDU-PHL|Schultz|Australia

>Spike|hCoV-19/Wales/PHWC-1601DD/2020|2020-05-26|EPI\_ISL\_472905|Original|hCoV-19^^Wales|Human|Wales Specialist Virology Centre Sequencing lab|COVID-19 Genomics UK (COG-UK) Consortium|Moore|United Kingdom

>Spike|hCoV-19/New Zealand/20CV0140/2020|2020-08-21|EPI\_ISL\_548020|Original|hCoV-19^^Auckland|Human|North Shore Hospital|Institute of Environmental Science and Research (ESR)|Wang|New Zealand

>Spike|hCoV-19/Austria/CeMM0414/2020|2020-03-09|EPI\_ISL\_475844|Original|hCoV-19^^Austria|Human|Austrian Agency for Health and Food Safety (AGES)|Bergthaler laboratory|Bergthaler|Austria

>Spike|hCoV-19/USA/MI-QDX-324/2020|2020-03-21|EPI\_ISL\_571068|Original|hCoV-19^^Michigan|Human|Quest Diagnostics|Quest Diagnostics|Kagan|USA

>Spike|hCoV-19/England/MILK-BB16F2/2020|2020-11-18|EPI\_ISL\_720200|Original|hCoV-19^^England|Human|Lighthouse Lab in Milton Keynes|Wellcome Sanger Institute for the COVID-19 Genomics UK (COG-UK) Consortium|Davies|United Kingdom

>Spike|hCoV-19/England/ALDP-C8CC84/2020|2020-12-15|EPI\_ISL\_777110|Original|hCoV-19^^England|Human|Lighthouse Lab in Alderley Park|Wellcome Sanger Institute for the COVID-19 Genomics UK (COG-UK) Consortium|Davies|United Kingdom

>Spike|hCoV-19/Northern Ireland/QEUIH-95EB54/2020|2020-08-09|EPI\_ISL\_532298|Original|hCoV-19^^Northern Ireland|Human|Lighthouse Lab in Glasgow|Wellcome Sanger Institute for the COVID-19 Genomics UK (COG-UK) consortium|Davies|United Kingdom

>Spike|hCoV-19/USA/UT-08533/2020|2020-05-19|EPI\_ISL\_524294|Original|hCoV-19^^Utah|Human|Utah Public Health Laboratory|Utah Public Health Laboratory|Young|USA

>Spike|hCoV-19/USA/CA-QDX-2092/2020|2020-03-19|EPI\_ISL\_604404|Original|hCoV-19^^California|Human|Quest Diagnostics|Quest Diagnostics|Kagan|USA

>Spike|hCoV-19/Jordan/AM-ALSR-4003/2020|2020-10-02|EPI\_ISL\_636366|Original|hCoV-19^^Amman|Human|Biolab Diagnostic Laboratories|Andersen lab at Scripps Research|Gangavarapu|Jordan

>Spike|hCoV-19/Scotland/CVR2356/2020|2020-04-14|EPI\_ISL\_477915|Original|hCoV-19^^Scotland|Human|West of Scotland Specialist Virology Centre|COVID-19 Genomics UK (COG-UK) Consortium|Robertson|United Kingdom

>Spike|hCoV-19/Italy/ABR-IZSGC-TE14297/2020|2020-04-09|EPI\_ISL\_435153|Original|hCoV-19^^Abruzzo|Human|SERVIZIO DI IGIENE E SANIT\u00c0 PUBBLICA ASL Teramo|Istituto Zooprofilattico Sperimentale dell'Abruzzo e Molise \G.Caporale\|Lorusso|Italy

>Spike|hCoV-19/USA/WA-UW261/2020|2020-03-16|EPI\_ISL\_418046|Original|hCoV-19^^Washington|Human|UW Virology Lab|UW Virology Lab|Roychoudhury|USA

>Spike|hCoV-19/Denmark/DCGC-18626/2020|2020-12-07|EPI\_ISL\_749344|Original|hCoV-19^^Midtjylland|Human|Department of Virus and Microbiological Special Diagnostics|Albertsen Lab|Michaelsen|Denmark

>Spike|hCoV-19/Ireland/D-NVRL-AIIDV1088v1/2020|2020-09-10|EPI\_ISL\_768767|Original|hCoV-19^^Dublin|Human|AIID|Irish Coronavirus Sequencing Consortium - National Virus Reference Laboratory|Gonzalez|Ireland

>Spike|hCoV-19/Denmark/DCGC-20155/2020|2020-12-07|EPI\_ISL\_748018|Original|hCoV-19^^Syddanmark|Human|Department of Virus and Microbiological Special Diagnostics|Albertsen Lab|Michaelsen|Denmark

>Spike|hCoV-19/Scotland/CVR4468/2020|2020-09-20|EPI\_ISL\_585332|Original|hCoV-19^^Scotland|Human|Lighthouse Lab in Glasgow / MRC-University of Glasgow Centre for Virus Research|COVID-19 Genomics UK (COG-UK) Consortium|Robertson|United Kingdom

>Spike|hCoV-19/England/BRIS-122C21/2020|2020-04-02|EPI\_ISL\_440730|Original|hCoV-19^^England|Human|PHE South West Regional Laboratory|Wellcome Sanger Institute for the COVID-19 Genomics UK (COG-UK) consortium|Amato|United Kingdom

>Spike|hCoV-19/USA/CA-ALSR-3566/2020|2020-06-19|EPI\_ISL\_636086|Original|hCoV-19^^California|Human|San Diego County Public Health Laboratory|Andersen lab at Scripps Research|Gangavarapu|USA

>Spike|hCoV-19/Japan/PG-1832/2020|2020-04-00|EPI\_ISL\_685438|Original|hCoV-19^^Japan|Human|Tokyo Metropolitan Institute of Public Health|Pathogen Genomics Center|Sekizuka|Japan

>Spike|hCoV-19/France/OCC-152/2020|2020-11-25|EPI\_ISL\_751472|Original|hCoV-19^^Occitanie|Human|CHU Purpan - Laboratoire de Virologie - Institut F\u00e9d\u00e9ratif de Biologie|CHU Purpan - Laboratoire de Virologie - Institut F\u00e9d\u00e9ratif de Biologie|Latour|France

>Spike|hCoV-19/Nigeria/BO-CV346/2020|2020-05-16|EPI\_ISL\_730011|Original|hCoV-19^^Borno State|Human|Nigeria Centre for Disease Control (NCDC)|African Centre of Excellence for Genomics of Infectious Diseases (ACEGID)|Oluniyi|Nigeria

>Spike|hCoV-19/USA/AK-PHL737/2020|2020-06-30|EPI\_ISL\_586262|Original|hCoV-19^^Alaska|Human|Alaska State Virology Laboratory|Alaska State Virology Laboratory|Chen|USA



>Spike|hCoV-19/USA/NY-NYCPHL-000187/2020|2020-04-12|EPI\_ISL\_631722|Original|hCoV-19^^New York|Human|Jamaica Hospital Medical Center|New York City Public Health Laboratory|Wang|USA

>Spike|hCoV-19/Denmark/DCGC-1429/2020|2020-04-27|EPI\_ISL\_622463|Original|hCoV-19^^Midtjylland|Human|Department of Virus and Microbiological Special Diagnostics|Albertsen lab|Michaelsen|Denmark

>Spike|hCoV-19/India/DL-MaxCov0048-CSIR-IGIB/2020|2020-05-01|EPI\_ISL\_459950|Original|hCoV-19^^Delhi|Human|Devki Devi Foundation|CSIR-IGIB/Max|Pandey|India

>Spike|hCoV-19/USA/MI-MDHHS-SC22410/2020|2020-10-31|EPI\_ISL\_708243|Original|hCoV-19^^Michigan|Human|Michigan Department of Health and Human Services|Michigan Department of Health and Human Services|Jacob|USA

>Spike|hCoV-19/England/NORT-29247E/2020|2020-05-04|EPI\_ISL\_489070|Original|hCoV-19^^England|Human|NU-OMICS DNA Sequencing research facility|Wellcome Sanger Institute for the COVID-19 Genomics UK (COG-UK) consortium|Davies|United Kingdom

>Spike|hCoV-19/Denmark/DCGC-3516/2020|2020-08-31|EPI\_ISL\_616307|Original|hCoV-19^^Hovedstaden|Human|Department of Virus and Microbiological Special Diagnostics|Albertsen lab|Michaelsen|Denmark

>Spike|hCoV-19/England/CAMB-76418/2020|2020-03-29|EPI\_ISL\_438522|Original|hCoV-19^^England|Human|Department of Pathology|Wellcome Sanger Institute for the COVID-19 Genomics UK (COG-UK) consortium|Amato|United Kingdom

>Spike|hCoV-19/South Korea/KCDC2697/2020|2020-07-04|EPI\_ISL\_522477|Original|hCoV-19^^South Korea|Human|Division of Viral Diseases|Division of Viral Diseases|Kim|South Korea

>Spike|hCoV-19/India/MH-ACTREC-626/2020|2020-09-11|EPI\_ISL\_700261|Original|hCoV-19^^Maharashtra|Human|Hematopathology Laboratory|Hematopathology Laboratory|Patkar|India

>Spike|hCoV-19/Belgium/ULG-10251/2020|2020-07-10|EPI\_ISL\_515058|Original|hCoV-19^^Liege|Human|Department of Clinical Microbiology|GIGA Medical Genomics|Durkin|Belgium

>Spike|hCoV-19/USA/WI-UW-1141/2020|2020-08-13|EPI\_ISL\_522898|Original|hCoV-19^^Wisconsin|Human|University of Wisconsin-Madison AIDS Vaccine Research Laboratories|University of Wisconsin-Madison AIDS Vaccine Research Laboratories|Baczenas|USA

>Spike|hCoV-19/USA/VA-DCLS-0775/2020|2020-07-01|EPI\_ISL\_526889|Original|hCoV-19^^Virginia|Human|Virginia DCLS|Virginia DCLS|St. Jacques|USA

>Spike|hCoV-19/England/QEUEH-961DC1/2020|2020-07-28|EPI\_ISL\_536978|Original|hCoV-19^^England|Human|Lighthouse Lab in Glasgow|Wellcome Sanger Institute for the COVID-19 Genomics UK (COG-UK) consortium|Davies|United Kingdom

>Spike|hCoV-19/Netherlands/Utrecht\_24/2020|2020-03-12|EPI\_ISL\_455292|Original|hCoV-19^^Utrecht|Human|Dutch COVID-19 response team|Erasmus Medical Center|Oude Munnink|Netherlands

>Spike|hCoV-19/Japan/PG-2738/2020|2020-03-00|EPI\_ISL\_690870|Original|hCoV-19^^Japan|Human|Pathogen Genomics Center|Pathogen Genomics Center|Sekizuka|Japan

>Spike|hCoV-19/England/ALDP-A2FE25/2020|2020-10-06|EPI\_ISL\_586993|Original|hCoV-19^^England|Human|Lighthouse Lab in Alderley Park|Wellcome Sanger Institute for the COVID-19 Genomics UK (COG-UK) consortium|Davies|United Kingdom

>Spike|hCoV-19/England/QEUEH-B0DC13/2020|2020-11-02|EPI\_ISL\_642147|Original|hCoV-19^^England|Human|Lighthouse Lab in Glasgow|Wellcome Sanger Institute for the COVID-19 Genomics UK (COG-UK) Consortium|Davies|United Kingdom

>Spike|hCoV-19/England/ALDP-C3BB96/2020|2020-12-11|EPI\_ISL\_731156|Original|hCoV-19^^England|Human|Lighthouse Lab in Alderley Park|Wellcome Sanger Institute for the COVID-19 Genomics UK (COG-UK) Consortium|Davies|United Kingdom

>Spike|hCoV-19/Denmark/DCGC-17573/2020|2020-12-14|EPI\_ISL\_750535|Original|hCoV-19^^Hovedstaden|Human|Department of Virus and Microbiological Special Diagnostics|Albertsen Lab|Michaelsen|Denmark

>Spike|hCoV-19/England/QEUEH-C33624/2020|2020-12-11|EPI\_ISL\_782555|Original|hCoV-19^^England|Human|Lighthouse Lab in Glasgow|Wellcome Sanger Institute for the COVID-19 Genomics UK (COG-UK) Consortium|Davies|United Kingdom

>Spike|hCoV-19/Scotland/GCVR-171704/2020|2020-03-28|EPI\_ISL\_489628|Original|hCoV-19^^Scotland|Human|NHSGGC West of Scotland Specialist Virology Centre / MRC-University of Glasgow Centre for Virus Research|Wellcome Sanger Institute for the COVID-19 Genomics UK (COG-UK) consortium|Davies|United Kingdom

>Spike|hCoV-19/Netherlands/ZH-EMC-852/2020|2020-10-02|EPI\_ISL\_632734|Original|hCoV-19^^Zuid Holland|Human|Dutch COVID-19 response team|Erasmus Medical Center|Oude Munnink|Netherlands

>Spike|hCoV-19/USA/TX-HMH-MCoV-18499/2020|2020-11-18|EPI\_ISL\_784847|Original|hCoV-19^^Texas|Human|Houston Methodist Hospital|Houston Methodist Hospital|Long|USA

>Spike|hCoV-19/England/ALDP-9545C9/2020|2020-06-09|EPI\_ISL\_555345|Original|hCoV-19^^England|Human|Lighthouse Lab in Alderley Park|Wellcome Sanger Institute for the COVID-19 Genomics UK (COG-UK) consortium|Davies|United Kingdom

>Spike|hCoV-19/England/MILK-BAC5C0/2020|2020-11-18|EPI\_ISL\_720643|Original|hCoV-19^^England|Human|Lighthouse Lab in Milton Keynes|Wellcome Sanger Institute for the COVID-19 Genomics UK (COG-UK) Consortium|Davies|United Kingdom

>Spike|hCoV-19/Vietnam/HCMC-05009/2020|2020-03-21|EPI\_ISL\_498180|unknown|hCoV-19^^Ho Chi Minh City|Human|OUCRU|OUCRU|Nguyen|Vietnam

>Spike|hCoV-19/mink/Poland/Pomorskie\_46/2020|2020-11-17|EPI\_ISL\_732951|Original|hCoV-19^^Pomorskie|Neovison vison|Department of Tropical Parasitology|Laboratory of Recombinant Vaccines|Rabalski|Poland

>Spike|hCoV-19/USA/TX-DSHS-1777/2020|2020-07-15|EPI\_ISL\_751534|Original|hCoV-19^^Texas|Human|Texas Department of State Health Services|Texas Department of State Health Services|Rahman|USA

>Spike|hCoV-19/Scotland/CAMC-A822CA/2020|2020-10-11|EPI\_ISL\_625281|Original|hCoV-19^^Scotland|Human|Lighthouse Lab in Cambridge|Wellcome Sanger Institute for the COVID-19 Genomics UK (COG-UK) consortium|Davies|United Kingdom

>Spike|hCoV-19/Japan/PG-7509/2020|2020-07-00|EPI\_ISL\_688611|Original|hCoV-19^^Japan|Human|Pathogen Genomics Center|Pathogen Genomics Center|Sekizuka|Japan

>Spike|hCoV-19/USA/TX-HMH0349/2020|2020-04-01|EPI\_ISL\_434943|Original|hCoV-19^^Texas|Human|Houston Methodist Hospital|Houston Methodist Hospital|Long|USA

>Spike|hCoV-19/Denmark/DCGC-8698/2020|2020-10-26|EPI\_ISL\_626031|Original|hCoV-19^^NA|Human|Department of Virus and Microbiological Special Diagnostics|Albertsen lab|Michaelson|Denmark

>Spike|hCoV-19/USA/NY-NYUMC550/2020|2020-03-30|EPI\_ISL\_444667|Original|hCoV-19^^New York|Human|NYU Langone Health|Departments of Pathology and Medicine|Maurano|USA

>Spike|hCoV-19/England/ALDP-9B6264/2020|2020-08-28|EPI\_ISL\_572994|Original|hCoV-19^^England|Human|Oxford Viromics|COVID-19 Genomics UK (COG-UK) Consortium|Golubchik|United Kingdom

>Spike|hCoV-19/Ireland/D-NVRL-MPS81200/2020|2020-04-09|EPI\_ISL\_767742|Original|hCoV-19^^Dublin|Human|National Virus Reference Laboratory|Irish Coronavirus Sequencing Consortium - Teagasc Moorepark|Walsh|Ireland

>Spike|hCoV-19/England/ALDP-9FCAB5/2020|2020-10-01|EPI\_ISL\_587992|Original|hCoV-19^^England|Human|Lighthouse Lab in Alderley Park|Wellcome Sanger Institute for the COVID-19 Genomics UK (COG-UK) consortium|Davies|United Kingdom

>Spike|hCoV-19/Latvia/149/2020|2020-09-23|EPI\_ISL\_639646|Original|hCoV-19^^Latvia|Human|E. Gulbja Laboratorija|Latvian Biomedical Research and Study Centre|Zrelavs|Latvia

>Spike|hCoV-19/England/MILK-9E24C3/2020|2020-09-20|EPI\_ISL\_581185|Original|hCoV-19^^England|Human|Lighthouse Lab in Milton Keynes|Wellcome Sanger Institute for the COVID-19 Genomics UK (COG-UK) consortium|Davies|United Kingdom

>Spike|hCoV-19/Netherlands/FR-RIVM-20361/2020|2020-12-07|EPI\_ISL\_728581|Original|hCoV-19^^Friesland|Human|Dutch COVID-19 response team|National Institute for Public Health and the Environment (RIVM)|Meijer|Netherlands

>Spike|hCoV-19/England/ALDP-A6F74C/2020|2020-10-14|EPI\_ISL\_607117|Original|hCoV-19^^England|Human|Lighthouse Lab in Alderley Park|Wellcome Sanger Institute for the COVID-19 Genomics UK (COG-UK) consortium|Davies|United Kingdom

>Spike|hCoV-19/USA/PA-MGEL-00240/2020|2020-04-16|EPI\_ISL\_681980|Original|hCoV-19^^Pennsylvania|Human|UPMC Clinical Microbiology Laboratory|Microbial Genomic Epidemiology Laboratory|Griffith|USA

>Spike|hCoV-19/Denmark/DCGC-16605/2020|2020-11-16|EPI\_ISL\_714865|Original|hCoV-19^^Hovedstaden|Human|Department of Virus and Microbiological Special Diagnostics|Albertsen Lab|Michaelsen|Denmark

>Spike|hCoV-19/Sweden/20-53191/2020|2020-10-20|EPI\_ISL\_648167|Original|hCoV-19^^Sweden|Human|Eskilstuna|The Public Health Agency of Sweden|Svartstr\u00f6m|Sweden

>Spike|hCoV-19/England/QEUH-BA321D/2020|2020-11-18|EPI\_ISL\_721149|Original|hCoV-19^^England|Human|Lighthouse Lab in Glasgow|Wellcome Sanger Institute for the COVID-19 Genomics UK (COG-UK) Consortium|Davies|United Kingdom

>Spike|hCoV-19/Peru/LIM-UPCH-0176/2020|2020-10-14|EPI\_ISL\_729881|Original|hCoV-19^^Lima|Human|Laboratorio de Referencia Nacional de Virus Respiratorios|Laboratorio de Gen\u00f3mica Microbiana|Tsukayama|Peru

>Spike|hCoV-19/England/CAMC-BBCDB6/2020|2020-11-18|EPI\_ISL\_724204|Original|hCoV-19^^England|Human|Quadram Institute Bioscience|COVID-19 Genomics UK (COG-UK) Consortium|Alikhan|United Kingdom

>Spike|hCoV-19/England/MILK-B8E6D0/2020|2020-11-13|EPI\_ISL\_673994|Original|hCoV-19^^England|Human|Lighthouse Lab in Milton Keynes|Wellcome Sanger Institute for the COVID-19 Genomics UK (COG-UK) Consortium|Davies|United Kingdom

>Spike|hCoV-19/Japan/PG-7142/2020|2020-08-00|EPI\_ISL\_688247|Original|hCoV-19^^Japan|Human|Pathogen Genomics Center|Pathogen Genomics Center|Sekizuka|Japan

>Spike|hCoV-19/Denmark/DCGC-1440/2020|2020-04-27|EPI\_ISL\_622476|Original|hCoV-19^^Hovedstaden|Human|Department of Virus and Microbiological Special Diagnostics|Albertsen lab|Michaelsen|Denmark

>Spike|hCoV-19/Gibraltar/204462895/2020|2020-10-29|EPI\_ISL\_615059|Original|hCoV-19^^Gibraltar|Human|Microbiology|Respiratory Virus Unit|Platt|Gibraltar

>Spike|hCoV-19/Wales/PHWC-48C3F0/2020|2020-11-08|EPI\_ISL\_666427|Original|hCoV-19^^Wales|Human|Wales Specialist Virology Centre Sequencing lab|COVID-19 Genomics UK (COG-UK) Consortium|Moore|United Kingdom

>Spike|hCoV-19/USA/CA-CZB-14277/2020|2020-08-27|EPI\_ISL\_738523|Original|hCoV-19^^California|Human|Alameda County Public Health Lab|Chan-Zuckerberg Biohub|Kamm|USA

>Spike|hCoV-19/USA/NY-NYCPHL-000203/2020|2020-04-17|EPI\_ISL\_631737|Original|hCoV-19^^New York|Human|Jamaica Hospital Medical Center|New York City Public Health Laboratory|Wang|USA

>Spike|hCoV-19/USA/LA-EVTL505/2020|2020-06-24|EPI\_ISL\_578909|Original|hCoV-19^^Louisiana|Human|LSUHS Emerging Viral Threat Laboratory|Microbial Genome Sequencing Center|Kamil|USA

>Spike|hCoV-19/Australia/WA23/2020|2020-03-30|EPI\_ISL\_470841|Original|hCoV-19^^Western Australia|Human|PathWest Laboratory Medicine WA|PathWest Laboratory Medicine WA|Sikazwe|Australia

>Spike|hCoV-19/USA/AZ-TG382196/2020|2020-06-15|EPI\_ISL\_694680|Original|hCoV-19^^Arizona|Human|TGen North|TGen North|French|USA

>Spike|hCoV-19/Switzerland/BL-ETHZ-310480/2020|2020-10-08|EPI\_ISL\_603550|Original|hCoV-19^^Basel-Landschaft|Human|Viollier AG|Department of Biosystems Science and Engineering|Nadeau|Switzerland

>Spike|hCoV-19/Denmark/DCGC-18944/2020|2020-12-07|EPI\_ISL\_748655|Original|hCoV-19^^Hovedstaden|Human|Department of Virus and Microbiological Special Diagnostics|Albertsen Lab|Michaelsen|Denmark

>Spike|hCoV-19/Spain/PV-IBV-000665/2020|2020-03-06|EPI\_ISL\_452785|Original|hCoV-19^^Basque Country|Human|Hospital Universitario Araba. Vitoria-Gasteiz,|SeqCOVID-SPAIN consortium|IBV (CSIC)|Comas|Spain

>Spike|hCoV-19/England/MILK-9A51D4/2020|2020-09-02|EPI\_ISL\_549963|Original|hCoV-19^^England|Human|Lighthouse Lab in Milton Keynes|Wellcome Sanger Institute for the COVID-19 Genomics UK (COG-UK) consortium|Davies|United Kingdom

>Spike|hCoV-19/United Arab Emirates/0919/2020|2020-06-26|EPI\_ISL\_699057|Original|hCoV-19^^Abu Dhabi|Human|Group 42 (G42) Healthcare|G42 Healthcare|Ogrodzki|United Arab Emirates

>Spike|hCoV-19/Ireland/D-NVRL-20G35462/2020|2020-03-20|EPI\_ISL\_605115|Original|hCoV-19^^Dublin|Human|National Virus Reference Laboratory|Irish Coronavirus Sequencing Consortium - Helixworks|Chalapati|Ireland

>Spike|hCoV-19/Japan/PG-8729/2020|2020-08-00|EPI\_ISL\_686325|Original|hCoV-19^^Japan|Human|Pathogen Genomics Center|Pathogen Genomics Center|Sekizuka|Japan

>Spike|hCoV-19/Ireland/D-NVRL-20IRL77307/2020|2020-11-05|EPI\_ISL\_732450|Original|hCoV-19^^Dublin|Human|National Virus Reference Laboratory|National Virus Reference Laboratory|Gonzalez|Ireland

>Spike|hCoV-19/Mexico/AGU-INdRE-58/2020|2020-08-07|EPI\_ISL\_576261|Original|hCoV-19^^Aguascalientes|Human|Instituto de Diagnostico y Referencia Epidemiologicos (INDRE)|Instituto de Diagnostico y Referencia Epidemiologicos (INDRE)|Rodriguez|Mexico

>Spike|hCoV-19/England/LOND-1264436/2020|2020-11-17|EPI\_ISL\_703767|Original|hCoV-19^^England|Human|University College London|COVID-19 Genomics UK (COG-UK) Consortium|Roy|United Kingdom

>Spike|hCoV-19/USA/MA-MGH-00664/2020|2020-04-04|EPI\_ISL\_460307|Original|hCoV-19^^Massachusetts|Human|Massachusetts General Hospital|Infectious Disease Program|Lemieux|USA

>Spike|hCoV-19/England/ALDP-9CDABD/2020|2020-09-16|EPI\_ISL\_566390|Original|hCoV-19^^England|Human|Lighthouse Lab in Alderley Park|Wellcome Sanger Institute for the COVID-19 Genomics UK (COG-UK) consortium|Davies|United Kingdom

>Spike|hCoV-19/England/CAMB-76B8C/2020|2020-03-29|EPI\_ISL\_438294|Original|hCoV-19^^England|Human|Department of Pathology|Wellcome Sanger Institute for the COVID-19 Genomics UK (COG-UK) consortium|Amato|United Kingdom

>Spike|hCoV-19/England/ALDP-97E14D/2020|2020-07-24|EPI\_ISL\_529456|Original|hCoV-19^^England|Human|Queens Medical Centre|COVID-19 Genomics UK (COG-UK) Consortium|Loose|United Kingdom

>Spike|hCoV-19/England/CAMB-1AF679/2020|2020-05-01|EPI\_ISL\_459287|Original|hCoV-19^^England|Human|Department of Pathology|Wellcome Sanger Institute for the COVID-19 Genomics UK (COG-UK) consortium|Davies|United Kingdom

>Spike|hCoV-19/England/QEUA-B687BB/2020|2020-11-11|EPI\_ISL\_655231|Original|hCoV-19^^England|Human|Lighthouse Lab in Glasgow|Wellcome Sanger Institute for the COVID-19 Genomics UK (COG-UK) Consortium|Davies|United Kingdom

>Spike|hCoV-19/England/MILK-9AADF9/2020|2020-09-01|EPI\_ISL\_550979|Original|hCoV-19^^England|Human|Lighthouse Lab in Milton Keynes|Wellcome Sanger Institute for the COVID-19 Genomics UK (COG-UK) consortium|Davies|United Kingdom

>Spike|hCoV-19/Denmark/DCGC-15830/2020|2020-11-23|EPI\_ISL\_714047|Original|hCoV-19^^Nordjylland|Human|Department of Virus and Microbiological Special Diagnostics|Albertsen Lab|Michaelsen|Denmark

>Spike|hCoV-19/Denmark/DCGC-1108/2020|2020-03-09|EPI\_ISL\_614428|Original|hCoV-19^^Syddanmark|Human|Department of Virus and Microbiological Special Diagnostics|Albertsen lab|Michaelsen|Denmark

>Spike|hCoV-19/England/MILK-ACC446/2020|2020-10-21|EPI\_ISL\_634357|Original|hCoV-19^^England|Human|Lighthouse Lab in Milton Keynes|Wellcome Sanger Institute for the COVID-19 Genomics UK (COG-UK) consortium|Davies|United Kingdom

>Spike|hCoV-19/Denmark/DCGC-4003/2020|2020-09-14|EPI\_ISL\_615774|Original|hCoV-19^^Midtjylland|Human|Department of Virus and Microbiological Special Diagnostics|Albertsen lab|Michaelsen|Denmark

>Spike|hCoV-19/England/CAMB-7BA4E/2020|2020-04-04|EPI\_ISL\_441651|Original|hCoV-19^^England|Human|Department of Pathology|Wellcome Sanger Institute for the COVID-19 Genomics UK (COG-UK) consortium|Amato|United Kingdom

>Spike|hCoV-19/USA/WY-WPHL-20044665/2020|2020-07-16|EPI\_ISL\_769909|Original|hCoV-19^^Wyoming|Human|Wyoming Public Health Laboratory|Wyoming Public Health Laboratory|Hull|USA

>Spike|hCoV-19/England/QEUA-B1164B/2020|2020-11-02|EPI\_ISL\_642464|Original|hCoV-19^^England|Human|Lighthouse Lab in Glasgow|Wellcome Sanger Institute for the COVID-19 Genomics UK (COG-UK) Consortium|Davies|United Kingdom

>Spike|hCoV-19/USA/NY-Wadsworth-280476-01/2020|2020-11-29|EPI\_ISL\_754502|Original|hCoV-19^^New York|Human|Wadsworth Center|Wadsworth Center|Lasek-Nesselquist|USA

>Spike|hCoV-19/Wales/MILK-9D4FC3/2020|2020-09-17|EPI\_ISL\_601694|Original|hCoV-19^^Wales|Human|Lighthouse Lab in Milton Keynes|Wellcome Sanger Institute for the COVID-19 Genomics UK (COG-UK) consortium|Davies|United Kingdom

>Spike|hCoV-19/Finland/9LS16AE12/2020|2020-10-09|EPI\_ISL\_755951|Original|hCoV-19^^Uusimaa|Human|Department of Virology and Immunology|Department of Virology|Smura|Finland

>Spike|hCoV-19/USA/MN-QDX-1024/2020|2020-03-15|EPI\_ISL\_571750|Original|hCoV-19^^Minnesota|Human|Quest Diagnostics|Quest Diagnostics|Kagan|USA

>Spike|hCoV-19/Japan/PG-8654/2020|2020-09-00|EPI\_ISL\_686250|Original|hCoV-19^^Japan|Human|Pathogen Genomics Center|Pathogen Genomics Center|Sekizuka|Japan

>Spike|hCoV-19/Spain/AR-IBV-005024/2020|2020-04-19|EPI\_ISL\_510333|Original|hCoV-19^^Aragon|Human|Servicio de Microbiolog\u00eda|SeqCOVID-SPAIN consortium|IBV (CSIC) |Comas|Spain

>Spike|hCoV-19/England/NORW-E7F4E/2020|2020-05-06|EPI\_ISL\_449096|Original|hCoV-19^^England|Human|Quadram Institute Bioscience|COVID-19 Genomics UK (COG-UK) Consortium|Alikhan|United Kingdom

>Spike|hCoV-19/SaudiArabia/KAUST-MADINAH710/2020|2020-04-01|EPI\_ISL\_513183|Original|hCoV-19^^Madinah|Human|Pathogen Genomics Lab King Abdullah University of Science and Technology(KAUST)|Pathogen Genomics Lab King Abdullah University of Science and Technology(KAUST)|Mohamed Ghazzali|Saudi Arabia

>Spike|hCoV-19/England/CAMC-BC19C9/2020|2020-11-22|EPI\_ISL\_704753|Original|hCoV-19^^England|Human|Lighthouse Lab in Cambridge|Wellcome Sanger Institute for the COVID-19 Genomics UK (COG-UK) Consortium|Davies|United Kingdom

>Spike|hCoV-19/USA/WA-S2792/2020|2020-08-14|EPI\_ISL\_530149|Original|hCoV-19^^Washington|Human|Seattle Flu Study|Seattle Flu Study|Lee|USA

>Spike|hCoV-19/England/CAMC-B52C2E/2020|2020-11-09|EPI\_ISL\_657538|Original|hCoV-19^^England|Human|Lighthouse Lab in Cambridge|Wellcome Sanger Institute for the COVID-19 Genomics UK (COG-UK) Consortium|Davies|United Kingdom

>Spike|hCoV-19/England/CAMB-7C360/2020|2020-04-14|EPI\_ISL\_434032|Original|hCoV-19^^England|Human|Department of Pathology|COVID-19 Genomics UK (COG-UK) Consortium|Meredith|United Kingdom

>Spike|hCoV-19/Denmark/DCGC-5475/2020|2020-09-28|EPI\_ISL\_620800|Original|hCoV-19^^Syddanmark|Human|Department of Virus and Microbiological Special Diagnostics|Albertsen lab|Michaelsen|Denmark

>Spike|hCoV-19/England/MILK-9AB596/2020|2020-08-31|EPI\_ISL\_549444|Original|hCoV-19^^England|Human|Oxford Viromics|COVID-19 Genomics UK (COG-UK) Consortium|Golubchik|United Kingdom

>Spike|hCoV-19/Russia/SPE-R11-17291V/2020|2020-05-25|EPI\_ISL\_524014|Vero P1|hCoV-19^^Saint Petersburg|Human|WHO National Influenza Centre Russian Federation|WHO National Influenza Centre Russian Federation|Komissarov|Russia

>Spike|hCoV-19/USA/VA\_6389/2020|2020-03-08|EPI\_ISL\_424894|Original|hCoV-19^^Virginia|Human|VA-Division of Consolidated Laboratory Services|Pathogen Discovery|Queen|USA

>Spike|hCoV-19/Australia/VIC6597/2020|2020-07-18|EPI\_ISL\_521359|Original|hCoV-19^^Victoria|Human|Victorian Infectious Diseases Reference Laboratory (VIDRL)|VIDRL and MDU-PHL|Schultz|Australia

>Spike|hCoV-19/Wales/PHWC-15C0E6/2020|2020-05-04|EPI\_ISL\_472437|Original|hCoV-19^^Wales|Human|Wales Specialist Virology Centre Sequencing lab|COVID-19 Genomics UK (COG-UK) Consortium|Moore|United Kingdom

>Spike|hCoV-19/Netherlands/NA\_275/2020|2020-03-30|EPI\_ISL\_422586|Original|hCoV-19^^Netherlands|Human|Dutch COVID-19 response team|Erasmus Medical Center|Oude Munnink|Netherlands

>Spike|hCoV-19/USA/OH-ODH-SC34332/2020|2020-04-20|EPI\_ISL\_789104|Original|hCoV-19^^Ohio|Human|Ohio Department of Health Laboratory|Ohio Department of Health Laboratory|Holmes|USA

>Spike|hCoV-19/England/BRIS-12D60A/2020|2020-05-06|EPI\_ISL\_481923|Original|hCoV-19^^England|Human|PHE South West Regional Laboratory|Wellcome Sanger Institute for the COVID-19 Genomics UK (COG-UK) consortium|Davies|United Kingdom

>Spike|hCoV-19/USA/FL-BPHL-1240/2020|2020-06-01|EPI\_ISL\_541163|Original|hCoV-19^^Florida|Human|Florida Bureau of Public Health Laboratories|Florida Bureau of Public Health Laboratories|Blanton|USA

>Spike|hCoV-19/Scotland/QEUA-A1FF9E/2020|2020-10-01|EPI\_ISL\_599070|Original|hCoV-19^^Scotland|Human|Lighthouse Lab in Glasgow|Wellcome Sanger Institute for the COVID-19 Genomics UK (COG-UK) consortium|Davies|United Kingdom

>Spike|hCoV-19/England/QEUA-9F49B0/2020|2020-09-24|EPI\_ISL\_588438|Original|hCoV-19^^England|Human|Lighthouse Lab in Glasgow|Wellcome Sanger Institute for the COVID-19 Genomics UK (COG-UK) consortium|Davies|United Kingdom

>Spike|hCoV-19/Canada/ON-UHTC\_0078/2020|2020-04-17|EPI\_ISL\_463995|unknown|hCoV-19^^Ontario|Human|Unity Health Toronto|Ontario Institute for Cancer Research|de Borja|Canada

>Spike|hCoV-19/Japan/PG-3781/2020|2020-04-00|EPI\_ISL\_691758|Original|hCoV-19^^Japan|Human|Pathogen Genomics Center|Pathogen Genomics Center|Sekizuka|Japan

>Spike|hCoV-19/USA/ID-UW-6466/2020|2020-04-02|EPI\_ISL\_437835|Original|hCoV-19^^Idaho|Human|UW Virology Lab|UW Virology Lab|Roychoudhury|USA

>Spike|hCoV-19/Wales/ALDP-B49273/2020|2020-11-07|EPI\_ISL\_710901|Original|hCoV-19^^Wales|Human|Lighthouse Lab in Alderley Park|Wellcome Sanger Institute for the COVID-19 Genomics UK (COG-UK) Consortium|Davies|United Kingdom

>Spike|hCoV-19/Scotland/CVR4150/2020|2020-08-29|EPI\_ISL\_540835|Original|hCoV-19^^Scotland|Human|Lighthouse Lab in Glasgow / MRC-University of Glasgow Centre for Virus Research|COVID-19 Genomics UK (COG-UK) Consortium|Robertson|United Kingdom

>Spike|hCoV-19/USA/NY-Wadsworth-288783-01/2020|2020-12-18|EPI\_ISL\_767484|Original|hCoV-19^^New York|Human|Wadsworth Center|Wadsworth Center|Lasek-Nesselquist|USA

>Spike|hCoV-19/USA/CA-CZB-6992/2020|2020-09-04|EPI\_ISL\_582919|Original|hCoV-19^^California|Human|County of Santa Clara Public Health Department|Chan-Zuckerberg Biohub|Bhatt|USA

>Spike|hCoV-19/England/CAMB-73C31/2020|2020-04-02|EPI\_ISL\_433678|Original|hCoV-19^^England|Human|Department of Pathology|COVID-19 Genomics UK (COG-UK) Consortium|Meredith|United Kingdom

>Spike|hCoV-19/Japan/PG-7156/2020|2020-09-00|EPI\_ISL\_688261|Original|hCoV-19^^Japan|Human|Pathogen Genomics Center|Pathogen Genomics Center|Sekizuka|Japan

>Spike|hCoV-19/Denmark/DCGC-1405/2020|2020-03-23|EPI\_ISL\_622450|Original|hCoV-19^^Hovedstaden|Human|Department of Virus and Microbiological Special Diagnostics|Albertsen lab|Michaelsen|Denmark

>Spike|hCoV-19/England/ALDP-B75047/2020|2020-11-12|EPI\_ISL\_662115|Original|hCoV-19^^England|Human|Lighthouse Lab in Alderley Park|Wellcome Sanger Institute for the COVID-19 Genomics UK (COG-UK) Consortium|Davies|United Kingdom

>Spike|hCoV-19/England/QEUA-CAD0AF/2020|2020-12-20|EPI\_ISL\_760879|Original|hCoV-19^^England|Human|Lighthouse Lab in Glasgow|Wellcome Sanger Institute for the COVID-19 Genomics UK (COG-UK) Consortium|Davies|United Kingdom

>Spike|hCoV-19/England/NORT-28B1F9/2020|2020-04-18|EPI\_ISL\_469302|Original|hCoV-19^^England|Human|NU-OMICS DNA Sequencing research facility|Wellcome Sanger Institute for the COVID-19 Genomics UK (COG-UK) consortium|Davies|United Kingdom

>Spike|hCoV-19/New Zealand/20VR3039/2020|2020-00-00|EPI\_ISL\_579399|Original|hCoV-19^^Combined Wellington|Human|Wellington SCL (WN)|Institute of Environmental Science and Research (ESR)|Wang|New Zealand

>Spike|hCoV-19/England/QEUA-BCBCE4/2020|2020-11-26|EPI\_ISL\_704058|Original|hCoV-19^^England|Human|Lighthouse Lab in Glasgow|Wellcome Sanger Institute for the COVID-19 Genomics UK (COG-UK) Consortium|Davies|United Kingdom

>Spike|hCoV-19/England/MILK-BAA708/2020|2020-11-17|EPI\_ISL\_783279|Original|hCoV-19^^England|Human|Lighthouse Lab in Milton Keynes|Wellcome Sanger Institute for the COVID-19 Genomics UK (COG-UK) Consortium|Davies|United Kingdom

>Spike|hCoV-19/USA/TX-DSHS-0789/2020|2020-05-22|EPI\_ISL\_590857|Original|hCoV-19^^Texas|Human|Texas Department of State Health Services|Texas Department of State Health Services|Rahman|USA

>Spike|hCoV-19/England/ALDP-A6E130/2020|2020-10-14|EPI\_ISL\_606934|Original|hCoV-19^^England|Human|Lighthouse Lab in Alderley Park|Wellcome Sanger Institute for the COVID-19 Genomics UK (COG-UK) consortium|Davies|United Kingdom

>Spike|hCoV-19/Ireland/KE-NVRL-77IRL65598/2020|2020-11-05|EPI\_ISL\_752511|Original|hCoV-19^^Kildare|Human|National Virus Reference Laboratory|National Virus Reference Laboratory|Gonzalez|Ireland

>Spike|hCoV-19/USA/TX-HMH-MCoV-14947/2020|2020-10-14|EPI\_ISL\_786431|Original|hCoV-19^^Texas|Human|Houston Methodist Hospital|Houston Methodist Hospital|Long|USA

>Spike|hCoV-19/Scotland/EDB6044/2020|2020-05-08|EPI\_ISL\_487682|Original|hCoV-19^^Scotland|Human|Virology Department|Wellcome Sanger Institute for the COVID-19 Genomics UK (COG-UK) consortium|Davies|United Kingdom

>Spike|hCoV-19/USA/NY-Wadsworth-200214-01/2020|2020-06-17|EPI\_ISL\_677049|Original|hCoV-19^^New York|Human|Masonic Medical Research Institute|Wadsworth Center|Lasek-Nesselquist|USA

>Spike|hCoV-19/Canada/ON-S41/2020|2020-03-17|EPI\_ISL\_586409|Original|hCoV-19^^Ontario|Human|Toronto Invasive Bacterial Diseases Network|McMaster University|McArthur|Canada

>Spike|hCoV-19/USA/TX-HMH-MCoV-12717/2020|2020-08-30|EPI\_ISL\_790480|Original|hCoV-19^^Texas|Human|Houston Methodist Hospital|Houston Methodist Hospital|Long|USA

>Spike|hCoV-19/Gambia/GC192576/2020|2020-07-21|EPI\_ISL\_561117|Original|hCoV-19^^Kombo|Human|MRCG at LSHTM Genomics lab|MRCG at LSHTM Genomics lab|Sesay|Gambia

>Spike|hCoV-19/Canada/BC\_24044059/2020|2020-03-00|EPI\_ISL\_463191|Original|hCoV-19^^British Columbia|Human|BCCDC Public Health Laboratory|BCCDC Public Health Laboratory|Harrigan|Canada

>Spike|hCoV-19/Switzerland/NE-ETHZ-390327/2020|2020-11-29|EPI\_ISL\_721838|Original|hCoV-19^^Neuch\u00e2tel|Human|Viollier AG|Department of Biosystems Science and Engineering|Nadeau|Switzerland

>Spike|hCoV-19/Denmark/DCGC-3246/2020|2020-08-31|EPI\_ISL\_616878|Original|hCoV-19^^NA|Human|Department of Virus and Microbiological Special Diagnostics|Albertsen lab|Michaelson|Denmark

>Spike|hCoV-19/USA/CT-Yale-341/2020|2020-04-29|EPI\_ISL\_452146|Original|hCoV-19^^Connecticut|Human|Yale COVID-19 Biorepository|Grubaugh Lab - Yale School of Public Health|Grubaugh|USA

>Spike|hCoV-19/Luxembourg/LNS0078676/2020|2020-04-03|EPI\_ISL\_428949|Original|hCoV-19^^Luxembourg|Human|Laboratoire National de Sante|Laboratoire National de Sante|Wienecke-Baldacchino|Luxembourg

>Spike|hCoV-19/England/QEUEH-9F3720/2020|2020-09-24|EPI\_ISL\_588636|Original|hCoV-19^^England|Human|Lighthouse Lab in Glasgow|Wellcome Sanger Institute for the COVID-19 Genomics UK (COG-UK) consortium|Davies|United Kingdom

>Spike|hCoV-19/USA/ID-QDX-650/2020|2020-03-18|EPI\_ISL\_571306|Original|hCoV-19^^Idaho|Human|Quest Diagnostics|Quest Diagnostics|Kagan|USA

>Spike|hCoV-19/USA/WA-UW-674/2020|2020-03-12|EPI\_ISL\_476927|Original|hCoV-19^^Washington|Human|UW Virology Lab|UW Virology Lab|Roychoudhury|USA

>Spike|hCoV-19/England/ALDP-A510CA/2020|2020-10-07|EPI\_ISL\_597544|Original|hCoV-19^^England|Human|Lighthouse Lab in Alderley Park|Wellcome Sanger Institute for the COVID-19 Genomics UK (COG-UK) consortium|Davies|United Kingdom

>Spike|hCoV-19/Netherlands/ZH-EMC-650/2020|2020-09-27|EPI\_ISL\_578078|Original|hCoV-19^^Zuid Holland|Human|Dutch COVID-19 response team|Erasmus Medical Center|Oude Munnink|Netherlands

>Spike|hCoV-19/India/MH-ACTREC-689/2020|2020-09-24|EPI\_ISL\_700314|Original|hCoV-19^^Maharashtra|Human|Hematopathology Laboratory|Hematopathology Laboratory|Patkar|India

>Spike|hCoV-19/USA/TX-DSHS-1539/2020|2020-06-08|EPI\_ISL\_681848|Original|hCoV-19^^Texas|Human|Texas Department of State Health Services|Texas Department of State Health Services|Rahman|USA

>Spike|hCoV-19/South Africa/KRISP-K002796/2020|2020-08-24|EPI\_ISL\_529790|Original|hCoV-19^^KwaZulu-Natal|Human|NHLS-IALCH|KRISP|de Oliveira|South Africa

>Spike|hCoV-19/USA/TX-HMH-3750/2020|2020-06-16|EPI\_ISL\_543161|Original|hCoV-19^^Texas|Human|Houston Methodist Hospital|Houston Methodist Hospital|Long|USA

>Spike|hCoV-19/England/ALDP-AA3A16/2020|2020-10-22|EPI\_ISL\_624510|Original|hCoV-19^^England|Human|Lighthouse Lab in Alderley Park|Wellcome Sanger Institute for the COVID-19 Genomics UK (COG-UK) consortium|Davies|United Kingdom

>Spike|hCoV-19/Australia/VIC6249/2020|2020-07-31|EPI\_ISL\_518242|Original|hCoV-19^^Victoria|Human|Microbiological Diagnostic Unit - Public Health Laboratory (MDU-PHL)|MDU-PHL|Schultz|Australia

>Spike|hCoV-19/Wales/ALDP-B1A90D/2020|2020-11-01|EPI\_ISL\_711042|Original|hCoV-19^^Wales|Human|Lighthouse Lab in Alderley Park|Wellcome Sanger Institute for the COVID-19 Genomics UK (COG-UK) Consortium|Davies|United Kingdom

>Spike|hCoV-19/England/MILK-A915CF/2020|2020-10-16|EPI\_ISL\_638529|Original|hCoV-19^^England|Human|Oxford Viromics|COVID-19 Genomics UK (COG-UK) Consortium|Golubchik|United Kingdom

>Spike|hCoV-19/England/MILK-B396D4/2020|2020-10-31|EPI\_ISL\_679635|Original|hCoV-19^^England|Human|Oxford Viromics|COVID-19 Genomics UK (COG-UK) Consortium|Golubchik|United Kingdom

>Spike|hCoV-19/Denmark/DCGC-17468/2020|2020-12-14|EPI\_ISL\_751002|Original|hCoV-19^^Midtjylland|Human|Department of Virus and Microbiological Special Diagnostics|Albertsen Lab|Michaelsen|Denmark

>Spike|hCoV-19/England/MILK-9A9431/2020|2020-09-01|EPI\_ISL\_551087|Original|hCoV-19^^England|Human|Lighthouse Lab in Milton Keynes|Wellcome Sanger Institute for the COVID-19 Genomics UK (COG-UK) consortium|Davies|United Kingdom

>Spike|hCoV-19/England/ALDP-A8724D/2020|2020-10-14|EPI\_ISL\_606278|Original|hCoV-19^^England|Human|Lighthouse Lab in Alderley Park|Wellcome Sanger Institute for the COVID-19 Genomics UK (COG-UK) consortium|Davies|United Kingdom

>Spike|hCoV-19/Switzerland/BL-ETHZ-101140/2020|2020-03-31|EPI\_ISL\_451807|Original|hCoV-19^^Basel-Landschaft|Human|Viollier AG|Department of Biosystems Science and Engineering|Nadeau|Switzerland

>Spike|hCoV-19/Wales/PHWC-491158/2020|2020-11-11|EPI\_ISL\_706617|Original|hCoV-19^^Wales|Human|Originating lab|COVID-19 Genomics UK (COG-UK) Consortium|Moore|United Kingdom

>Spike|hCoV-19/Denmark/DCGC-5490/2020|2020-09-21|EPI\_ISL\_620815|Original|hCoV-19^^Syddanmark|Human|Department of Virus and Microbiological Special Diagnostics|Albertsen lab|Michaelsen|Denmark

>Spike|hCoV-19/England/ALDP-C49BD1/2020|2020-12-12|EPI\_ISL\_718639|Original|hCoV-19^^England|Human|Lighthouse Lab in Alderley Park|Wellcome Sanger Institute for the COVID-19 Genomics UK (COG-UK) Consortium|Davies|United Kingdom

>Spike|hCoV-19/USA/FL-BPHL-0638/2020|2020-04-06|EPI\_ISL\_508842|Original|hCoV-19^^Florida|Human|Florida Bureau of Public Health Laboratories|Florida Bureau of Public Health Laboratories|Blanton|USA

>Spike|hCoV-19/Denmark/DCGC-3315/2020|2020-08-31|EPI\_ISL\_616069|Original|hCoV-19^^Syddanmark|Human|Department of Virus and Microbiological Special Diagnostics|Albertsen lab|Michaelsen|Denmark

>Spike|hCoV-19/England/QEUA-B69996/2020|2020-11-11|EPI\_ISL\_661406|Original|hCoV-19^^England|Human|Lighthouse Lab in Glasgow|Wellcome Sanger Institute for the COVID-19 Genomics UK (COG-UK) Consortium|Davies|United Kingdom

>Spike|hCoV-19/South Africa/NHLS-UCT-GS-0024/2020|2020-08-14|EPI\_ISL\_640025|Original|hCoV-19^^Western Cape|Human|Mitchells Plain CHC w/ MHC|NHLS/UCT|Iranzadeh|South Africa

>Spike|hCoV-19/England/MILK-A79C7D/2020|2020-10-15|EPI\_ISL\_606872|Original|hCoV-19^^England|Human|Lighthouse Lab in Milton Keynes|Wellcome Sanger Institute for the COVID-19 Genomics UK (COG-UK) consortium|Davies|United Kingdom

>Spike|hCoV-19/USA/LA-EVTL360/2020|2020-05-28|EPI\_ISL\_578766|Original|hCoV-19^^Louisiana|Human|LSUHS Emerging Viral Threat Laboratory|Microbial Genome Sequencing Center|Kamil|USA

>Spike|hCoV-19/USA/NM-DOH-2020308923/2020|2020-08-24|EPI\_ISL\_602189|Original|hCoV-19^^New Mexico|Human|New Mexico Department of Health Scientific Laboratory|New Mexico Department of Health Scientific Laboratory|Johnson|USA

>Spike|hCoV-19/England/20188012604/2020|2020-04-29|EPI\_ISL\_465492|Original|hCoV-19^^England|Human|Respiratory Virus Unit|Respiratory Virus Unit|Platt|United Kingdom

>Spike|hCoV-19/England/QEUA-A367A8/2020|2020-10-04|EPI\_ISL\_706918|Original|hCoV-19^^England|Human|Oxford Viromics|COVID-19 Genomics UK (COG-UK) Consortium|Golubchik|United Kingdom

>Spike|hCoV-19/Japan/PG-5001/2020|2020-08-00|EPI\_ISL\_690114|Original|hCoV-19^^Japan|Human|Pathogen Genomics Center|Pathogen Genomics Center|Sekizuka|Japan



>Spike|hCoV-19/Australia/VIC4272/2020|2020-07-13|EPI\_ISL\_519600|Original|hCoV-19^^Victoria|Human|Microbiological Diagnostic Unit - Public Health Laboratory (MDU-PHL)|MDU-PHL|Schultz|Australia

>Spike|hCoV-19/England/QEUEH-9C7B74/2020|2020-09-11|EPI\_ISL\_567111|Original|hCoV-19^^England|Human|Lighthouse Lab in Glasgow|Wellcome Sanger Institute for the COVID-19 Genomics UK (COG-UK) consortium|Davies|United Kingdom

>Spike|hCoV-19/England/LOND-124C777/2020|2020-00-00|EPI\_ISL\_490429|Original|hCoV-19^^England|Human|University College London Hospital|COVID-19 Genomics UK (COG-UK) Consortium|Byott|United Kingdom

>Spike|hCoV-19/USA/TX-HMH-MCoV-11249/2020|2020-09-03|EPI\_ISL\_789749|Original|hCoV-19^^Texas|Human|Houston Methodist Hospital|Houston Methodist Hospital|Long|USA

>Spike|hCoV-19/Uganda/UG055/2020|2020-07-21|EPI\_ISL\_737972|Original|hCoV-19^^Uganda|Human|Uganda Central Public Health Lab and Uganda Virus Research Institute|MRC/UVRI & LSHTM Uganda Research Unit|Cotten|Uganda

>Spike|hCoV-19/Japan/PG-2711/2020|2020-05-00|EPI\_ISL\_690843|Original|hCoV-19^^Japan|Human|Sakai City Institute of Public Health|Pathogen Genomics Center|Sekizuka|Japan

>Spike|hCoV-19/England/LOND-12616E8/2020|2020-03-28|EPI\_ISL\_524659|Original|hCoV-19^^England|Human|North West London Pathology|Wellcome Sanger Institute for the COVID-19 Genomics UK (COG-UK) consortium|Davies|United Kingdom

>Spike|hCoV-19/England/LIVE-DB436F/2020|2020-10-20|EPI\_ISL\_652085|Original|hCoV-19^^England|Human|Liverpool Clinical Laboratories|COVID-19 Genomics UK (COG-UK) Consortium|Haldenby|United Kingdom

>Spike|hCoV-19/USA/NY-NYUMC774/2020|2020-03-27|EPI\_ISL\_456011|Original|hCoV-19^^New York|Human|NYU Langone Health|Departments of Pathology and Medicine|Maurano|USA

>Spike|hCoV-19/Turkey/IST-GLAB-227/2020|2020-05-14|EPI\_ISL\_735294|Original|hCoV-19^^Istanbul|Human|Genomic Laboratory (GLAB) (Conjoint lab of Health Directorate of Istanbul and Istanbul Technical University)|Genomic Laboratory (GLAB)|Karacan|Turkey

>Spike|hCoV-19/South Africa/N00059/2020|2020-08-11|EPI\_ISL\_622944|Original|hCoV-19^^Eastern Cape|Human|National Health Laboratory Service|National Institute for Communicable Diseases of the National Health Laboratory Service|Allam|South Africa

>Spike|hCoV-19/Denmark/DCGC-19484/2020|2020-12-07|EPI\_ISL\_748230|Original|hCoV-19^^Hovedstaden|Human|Department of Virus and Microbiological Special Diagnostics|Albertsen Lab|Michaelsen|Denmark

>Spike|hCoV-19/Japan/PG-8649/2020|2020-09-00|EPI\_ISL\_686245|Original|hCoV-19^^Japan|Human|Pathogen Genomics Center|Pathogen Genomics Center|Sekizuka|Japan

>Spike|hCoV-19/England/QEUEH-A370D9/2020|2020-10-04|EPI\_ISL\_638727|Original|hCoV-19^^England|Human|Wales Specialist Virology Centre Sequencing lab|COVID-19 Genomics UK (COG-UK) Consortium|Moore|United Kingdom

>Spike|hCoV-19/Wales/PHWC-47D28C/2020|2020-10-07|EPI\_ISL\_586119|Original|hCoV-19^^Wales|Human|Wales Specialist Virology Centre Sequencing lab|COVID-19 Genomics UK (COG-UK) Consortium|Moore|United Kingdom

>Spike|hCoV-19/SaudiArabia/KAUST-JEDDAH743/2020|2020-04-01|EPI\_ISL\_512993|Original|hCoV-19^^Jeddah|Human|Pathogen Genomics Lab King Abdullah University of Science and Technology(KAUST)|Pathogen Genomics Lab King Abdullah University of Science and Technology(KAUST)|Mohamed Ghazzali|Saudi Arabia

>Spike|hCoV-19/England/ALDP-B82D7D/2020|2020-11-14|EPI\_ISL\_675408|Original|hCoV-19^^England|Human|Lighthouse Lab in Alderley Park|Wellcome Sanger Institute for the COVID-19 Genomics UK (COG-UK) Consortium|Davies|United Kingdom

>Spike|hCoV-19/Kenya/C5902/2020|2020-05-12|EPI\_ISL\_568779|Original|hCoV-19^^Mombasa|Human|KEMRI-Wellcome Trust Research Programme/KEMRI-CGMR-C Kilifi|KEMRI-Wellcome Trust Research Programme/KEMRI-CGMR-C Kilifi|Githinji|Kenya

>Spike|hCoV-19/Gambia/GC19-3854/2020|2020-07-27|EPI\_ISL\_561102|Original|hCoV-19^^Kombo|Human|MRCG at LSHTM Genomics lab|MRCG at LSHTM Genomics lab|Sesay|Gambia

>Spike|hCoV-19/England/CAMC-CB7DE7/2020|2020-12-18|EPI\_ISL\_777861|Original|hCoV-19^^England|Human|Lighthouse Lab in Cambridge|Wellcome Sanger Institute for the COVID-19 Genomics UK (COG-UK) Consortium|Davies|United Kingdom

>Spike|hCoV-19/England/QEUEH-CADE2D/2020|2020-12-20|EPI\_ISL\_761187|Original|hCoV-19^^England|Human|Lighthouse Lab in Glasgow|Wellcome Sanger Institute for the COVID-19 Genomics UK (COG-UK) Consortium|Davies|United Kingdom

>Spike|hCoV-19/Wales/PHWC-16245A/2020|2020-05-20|EPI\_ISL\_473075|Original|hCoV-19^^Wales|Human|Wales Specialist Virology Centre Sequencing lab|COVID-19 Genomics UK (COG-UK) Consortium|Moore|United Kingdom

>Spike|hCoV-19/England/SHEF-10D49AD/2020|2020-12-21|EPI\_ISL\_765196|Original|hCoV-19^^England|Human|Virology Department|COVID-19 Genomics UK (COG-UK) Consortium|de Silva|United Kingdom

>Spike|hCoV-19/Switzerland/VD-ETHZ-250145/2020|2020-08-17|EPI\_ISL\_535647|Original|hCoV-19^^Vaud|Human|Viollier AG|Department of Biosystems Science and Engineering|Nadeau|Switzerland

>Spike|hCoV-19/Switzerland/NE-ETHZ-350457/2020|2020-11-03|EPI\_ISL\_729205|Original|hCoV-19^^Neuch\u00e2tel|Human|Viollier AG|Department of Biosystems Science and Engineering|Nadeau|Switzerland

>Spike|hCoV-19/USA/HI-H200092/2020|2020-06-21|EPI\_ISL\_752659|Original|hCoV-19^^Hawaii|Human|State Laboratories Division|State Laboratories Division|Sultana|USA

>Spike|hCoV-19/USA/WA-S594/2020|2020-04-12|EPI\_ISL\_438147|Original|hCoV-19^^Washington|Human|Seattle Flu Study|Seattle Flu Study|Bedford|USA

>Spike|hCoV-19/Canada/BC-BCCDC-7259/2020|2020-11-00|EPI\_ISL\_740644|Original|hCoV-19^^British Columbia|Human|BCCDC Public Health Laboratory|BCCDC Public Health Laboratory|Prystajacky|Canada

>Spike|hCoV-19/England/NORT-29B660/2020|2020-06-02|EPI\_ISL\_493497|Original|hCoV-19^^England|Human|Northumbria University / South Tees Hospitals NHS Foundation Trust / North Cumbria Integrated Care NHS Foundation Trust / North Tees and Hartlepool NHS Foundation Trust / Newcastle Hospitals NHS Foundation Trust|COVID-19 Genomics UK (COG-UK) Consortium|Bashton|United Kingdom

>Spike|hCoV-19/England/CAMC-B0801C/2020|2020-10-30|EPI\_ISL\_643523|Original|hCoV-19^^England|Human|Lighthouse Lab in Cambridge|Wellcome Sanger Institute for the COVID-19 Genomics UK (COG-UK) Consortium|Davies|United Kingdom

>Spike|hCoV-19/Canada/NS-NML-1308/2020|2020-04-09|EPI\_ISL\_579689|Original|hCoV-19^^Nova Scotia|Human|QEII Health Sciences Centre|National Microbiology Laboratory (NML)|Majer|Canada

>Spike|hCoV-19/Wales/PHWC-49AC03/2020|2020-12-03|EPI\_ISL\_727662|Original|hCoV-19^^Wales|Human|Originating lab|COVID-19 Genomics UK (COG-UK) Consortium|Moore|United Kingdom

>Spike|hCoV-19/England/EXET-135BC4/2020|2020-04-10|EPI\_ISL\_457143|Original|hCoV-19^^England|Human|University of Exeter|COVID-19 Genomics UK (COG-UK) Consortium|Temperton|United Kingdom

>Spike|hCoV-19/USA/TX-DSHS-0052/2020|2020-05-09|EPI\_ISL\_517983|Original|hCoV-19^^Texas|Human|Texas Department of State Health Services|Texas Department of State Health Services|Rahman|USA

>Spike|hCoV-19/England/MILK-B8882B/2020|2020-11-13|EPI\_ISL\_675755|Original|hCoV-19^^England|Human|Lighthouse Lab in Milton Keynes|Wellcome Sanger Institute for the COVID-19 Genomics UK (COG-UK) Consortium|Davies|United Kingdom

>Spike|hCoV-19/Wales/PHWC-2C059/2020|2020-04-04|EPI\_ISL\_474269|Original|hCoV-19^^Wales|Human|Originating lab|COVID-19 Genomics UK (COG-UK) Consortium|Moore|United Kingdom

>Spike|hCoV-19/Australia/VIC11993/2020|2020-08-12|EPI\_ISL\_640473|Original|hCoV-19^^Victoria|Human|Microbiological Diagnostic Unit - Public Health Laboratory (MDU-PHL)|MDU-PHL|Schultz|Australia

>Spike|hCoV-19/USA/ID-UW-4100/2020|2020-03-29|EPI\_ISL\_427168|Original|hCoV-19^^Idaho|Human|UW Virology Lab|UW Virology Lab|Roychoudhury|USA

>Spike|hCoV-19/Australia/VIC4457/2020|2020-07-15|EPI\_ISL\_519753|Original|hCoV-19^^Victoria|Human|Microbiological Diagnostic Unit - Public Health Laboratory (MDU-PHL)|MDU-PHL|Schultz|Australia

>Spike|hCoV-19/Japan/PG-5439/2020|2020-08-00|EPI\_ISL\_690542|Original|hCoV-19^^Japan|Human|Pathogen Genomics Center|Pathogen Genomics Center|Sekizuka|Japan

>Spike|hCoV-19/England/ALDP-A96111/2020|2020-10-19|EPI\_ISL\_624658|Original|hCoV-19^^England|Human|Lighthouse Lab in Alderley Park|Wellcome Sanger Institute for the COVID-19 Genomics UK (COG-UK) consortium|Davies|United Kingdom

>Spike|hCoV-19/Canada/NS-NML-929/2020|2020-03-24|EPI\_ISL\_579569|Original|hCoV-19^^Nova Scotia|Human|QEII Health Sciences Centre|National Microbiology Laboratory (NML)|Majer|Canada

>Spike|hCoV-19/USA/MI-UM-10036561341/2020|2020-10-21|EPI\_ISL\_640176|Original|hCoV-19^^Michigan|Human|University of Michigan Clinical Microbiology Laboratory|Lauring Lab|Valesano|USA

>Spike|hCoV-19/USA/NY-NYUMC881/2020|2020-03-18|EPI\_ISL\_458020|Original|hCoV-19^^New York|Human|NYU Langone Health|Departments of Pathology and Medicine|Maurano|USA

>Spike|hCoV-19/USA/AZ-TG273342/2020|2020-04-02|EPI\_ISL\_694056|Original|hCoV-19^^Arizona|Human|AZ SPHL|TGen North|French|USA

>Spike|hCoV-19/Scotland/EDB6584/2020|2020-05-12|EPI\_ISL\_478265|Original|hCoV-19^^Scotland|Human|Virology Department|COVID-19 Genomics UK (COG-UK) Consortium|Williams|United Kingdom

>Spike|hCoV-19/England/BRIS-18531C4/2020|2020-04-01|EPI\_ISL\_492414|Original|hCoV-19^^England|Human|PHE South West Regional Laboratory|Wellcome Sanger Institute for the COVID-19 Genomics UK (COG-UK) consortium|Davies|United Kingdom

>Spike|hCoV-19/England/MILK-B596DE/2020|2020-11-06|EPI\_ISL\_679856|Original|hCoV-19^^England|Human|Virology Department|COVID-19 Genomics UK (COG-UK) Consortium|de Silva|United Kingdom

>Spike|hCoV-19/England/QEUEH-AF3E39/2020|2020-10-30|EPI\_ISL\_663183|Original|hCoV-19^^England|Human|Lighthouse Lab in Glasgow|Wellcome Sanger Institute for the COVID-19 Genomics UK (COG-UK) Consortium|Davies|United Kingdom

>Spike|hCoV-19/USA/WI-UW-2162/2020|2020-10-15|EPI\_ISL\_677566|Original|hCoV-19^^Wisconsin|Human|University of Wisconsin-Madison AIDS Vaccine Research Laboratories|University of Wisconsin-Madison AIDS Vaccine Research Laboratories|Baczenas|USA

>Spike|hCoV-19/Brazil/SP-815/2020|2020-04-17|EPI\_ISL\_776750|Original|hCoV-19^^S\u00e3o Paulo|Human|Instituto Adolfo Lutz - Central|Instituto Adolfo Lutz|Sacchi|Brazil

>Spike|hCoV-19/England/ALDP-9FCF4D/2020|2020-10-01|EPI\_ISL\_588044|Original|hCoV-19^^England|Human|Lighthouse Lab in Alderley Park|Wellcome Sanger Institute for the COVID-19 Genomics UK (COG-UK) consortium|Davies|United Kingdom

>Spike|hCoV-19/England/LIVE-DC4E2F/2020|2020-11-11|EPI\_ISL\_702865|Original|hCoV-19^^England|Human|Liverpool Clinical Laboratories|COVID-19 Genomics UK (COG-UK) Consortium|Haldenby|United Kingdom

>Spike|hCoV-19/New Zealand/20CV0262/2020|2020-09-10|EPI\_ISL\_548084|Original|hCoV-19^^Auckland|Human|LabPLUS|Institute of Environmental Science and Research (ESR)|Wang|New Zealand

>Spike|hCoV-19/England/ALDP-BC6232/2020|2020-11-23|EPI\_ISL\_721440|Original|hCoV-19^^England|Human|Lighthouse Lab in Alderley Park|Wellcome Sanger Institute for the COVID-19 Genomics UK (COG-UK) Consortium|Davies|United Kingdom

>Spike|hCoV-19/DRC/10057/2020|2020-05-22|EPI\_ISL\_527538|Original|hCoV-19^^Kongo Central|Human|Viral Respiratory Lab|Pathogen Sequencing Lab|Lokilo|Democratic Republic of the Congo

>Spike|hCoV-19/Australia/SAP123/2020|2020-03-21|EPI\_ISL\_492111|Original|hCoV-19^^South Australia|Human|SA Pathology|SA Pathology|Leong|Australia

>Spike|hCoV-19/England/CAMC-A6654B/2020|2020-10-11|EPI\_ISL\_626884|Original|hCoV-19^^England|Human|University of Exeter|COVID-19 Genomics UK (COG-UK) Consortium|Temperton|United Kingdom

>Spike|hCoV-19/USA/MN-MDH-156/2020|2020-03-23|EPI\_ISL\_460056|Original|hCoV-19^^Minnesota|Human|Minnesota Department of Health|Minnesota Department of Health|Garfin|USA

>Spike|hCoV-19/USA/CA-CZB-15023/2020|2020-11-18|EPI\_ISL\_739376|Original|hCoV-19^^California|Human|Santa Clara County Public Health Laboratory|Chan-Zuckerberg Biohub|Kamm|USA

>Spike|hCoV-19/India/TG-NGC-CDFD-03/2020|2020-05-10|EPI\_ISL\_466841|Original|hCoV-19^^Telangana|Human|National Genomics Core-Center for DNA Fingerprinting and Diagnostics|National Genomics Core-Center for DNA Fingerprinting and Diagnostics (NGC-CDFD)- DBT's PAN-INDIA-1000 Genome consortium|Vashisht|India

>Spike|hCoV-19/USA/NY-NYCPHL-000898/2020|2020-07-10|EPI\_ISL\_632964|Original|hCoV-19^^New York|Human|Department of Homeless Services|New York City Public Health Laboratory|Wang|USA

>Spike|hCoV-19/England/BIRM-5F169/2020|2020-05-03|EPI\_ISL\_473317|Original|hCoV-19^^England|Human|University of Birmingham|COVID-19 Genomics UK (COG-UK) Consortium|Loman|United Kingdom

>Spike|hCoV-19/England/ALDP-B26115/2020|2020-11-04|EPI\_ISL\_646651|Original|hCoV-19^^England|Human|Lighthouse Lab in Alderley Park|Wellcome Sanger Institute for the COVID-19 Genomics UK (COG-UK) Consortium|Davies|United Kingdom

>Spike|hCoV-19/USA/TX-HMH-4825/2020|2020-06-22|EPI\_ISL\_544357|Original|hCoV-19^^Texas|Human|Houston Methodist Hospital|Houston Methodist Hospital|Long|USA

>Spike|hCoV-19/mink/Netherlands/NB-EMC-34-3/2020|2020-08-18|EPI\_ISL\_577769|Original|hCoV-19^^Limburg|Neovison vison|Dutch COVID-19 response team|Erasmus Medical Center|Oude Munnink|Netherlands

>Spike|hCoV-19/Australia/NSW1172/2020|2020-08-31|EPI\_ISL\_667777|Original|hCoV-19^^New South Wales|Human|Pathology West - NSW Health Pathology|NSW Health Pathology - Institute of Clinical Pathology and Medical Research; Westmead Hospital; University of Sydney|Gall|Australia

>Spike|hCoV-19/Australia/VIC7555/2020|2020-07-24|EPI\_ISL\_564495|Original|hCoV-19^^Victoria|Human|Microbiological Diagnostic Unit - Public Health Laboratory (MDU-PHL) |MDU-PHL|Schultz|Australia

>Spike|hCoV-19/France/ARA-27109/2020|2020-04-17|EPI\_ISL\_676567|Original|hCoV-19^^Auvergne-Rh\u00f4ne-Alpes|Human|CNR Virus des Infections Respiratoires - France SUD|CNR Virus des Infections Respiratoires - France SUD|Bal|France

>Spike|hCoV-19/England/CAMB-78D1B/2020|2020-04-02|EPI\_ISL\_441827|Original|hCoV-19^^England|Human|Department of Pathology|Wellcome Sanger Institute for the COVID-19 Genomics UK (COG-UK) consortium|Amato|United Kingdom

>Spike|hCoV-19/Wales/PHWC-49B0BB/2020|2020-12-07|EPI\_ISL\_742292|Original|hCoV-19^^Wales|Human|Wales Specialist Virology Centre Sequencing lab|COVID-19 Genomics UK (COG-UK) Consortium|Moore|United Kingdom

>Spike|hCoV-19/USA/NM-DOH-2020617051/2020|2020-12-12|EPI\_ISL\_751839|Original|hCoV-19^^New Mexico|Human|New Mexico Department of Health Scientific Laboratory|New Mexico Department of Health Scientific Laboratory|Malone|USA

>Spike|hCoV-19/Scotland/QEUH-96CEF0/2020|2020-08-21|EPI\_ISL\_534524|Original|hCoV-19^^Scotland|Human|NHSGGC West of Scotland Specialist Virology Centre / MRC-University of Glasgow Centre for Virus Research|Wellcome Sanger Institute for the COVID-19 Genomics UK (COG-UK) consortium|Davies|United Kingdom

>Spike|hCoV-19/England/ALDP-C068D9/2020|2020-12-04|EPI\_ISL\_709545|Original|hCoV-19^^England|Human|Lighthouse Lab in Alderley Park|Wellcome Sanger Institute for the COVID-19 Genomics UK (COG-UK) Consortium|Davies|United Kingdom

>Spike|hCoV-19/India/AP-CCMB-GC41/2020|2020-05-29|EPI\_ISL\_528809|Original|hCoV-19^^Andhra Pradesh|Human|Department of Medicine|CSIR-Centre for Cellular and Molecular Biology|Banu|India

>Spike|hCoV-19/Australia/NSW988/2020|2020-09-17|EPI\_ISL\_591493|Original|hCoV-19^^New South Wales|Human|Pathology North - Royal North Shore Hospital - NSW Health Pathology|NSW Health Pathology - Institute of Clinical Pathology and Medical Research; Westmead Hospital; University of Sydney|Gall|Australia

>Spike|hCoV-19/England/QEUH-7EDA7D/2020|2020-07-19|EPI\_ISL\_532836|Original|hCoV-19^^England|Human|Lighthouse Lab in Glasgow|Wellcome Sanger Institute for the COVID-19 Genomics UK (COG-UK) consortium|Davies|United Kingdom

>Spike|hCoV-19/USA/NY-NYUMC668/2020|2020-03-17|EPI\_ISL\_444785|Original|hCoV-19^^New York|Human|NYU Langone Health|Departments of Pathology and Medicine|Maurano|USA

>Spike|hCoV-19/Wales/PHWC-166878/2020|2020-06-11|EPI\_ISL\_494051|Original|hCoV-19^^Wales|Human|Originating lab|COVID-19 Genomics UK (COG-UK) Consortium|Moore|United Kingdom

>Spike|hCoV-19/Australia/VIC6183/2020|2020-07-22|EPI\_ISL\_518188|Original|hCoV-19^^Victoria|Human|Victorian Infectious Diseases Reference Laboratory (VIDRL) |VIDRL and MDU-PHL|Schultz|Australia

>Spike|hCoV-19/New Zealand/20CV0167/2020|2020-08-19|EPI\_ISL\_548039|Original|hCoV-19^^Auckland|Human|Middlemore Hospital|Institute of Environmental Science and Research (ESR)|Wang|New Zealand

>Spike|hCoV-19/United Arab Emirates/56/2020|2020-05-14|EPI\_ISL\_528706|Original|hCoV-19^^Abu Dhabi|Human|Alsafar - Khalifa University Abu Dhabi|Alsafar - Khalifa University Abu Dhabi|Daw Elbait|United Arab Emirates

>Spike|hCoV-19/England/CAMB-1B30ED/2020|2020-05-25|EPI\_ISL\_461552|Original|hCoV-19^^England|Human|Department of Pathology|COVID-19 Genomics UK (COG-UK) Consortium|Meredith|United Kingdom

>Spike|hCoV-19/France/IDF-3324/2020|2020-03-23|EPI\_ISL\_421512|Original|hCoV-19^^\u00cele-de-France|Human|Service de Biologie M\u00e9dicale - BP 125|National Reference Center for Viruses of Respiratory Infections|Enouf|France

>Spike|hCoV-19/Wales/PHWC-15CD49/2020|2020-04-08|EPI\_ISL\_472613|Original|hCoV-19^^Wales|Human|Wales Specialist Virology Centre Sequencing lab|COVID-19 Genomics UK (COG-UK) Consortium|Moore|United Kingdom

>Spike|hCoV-19/USA/MD-MDH-0343/2020|2020-10-16|EPI\_ISL\_666776|Original|hCoV-19^^Maryland|Human|Maryland Public Health Laboratory|Maryland Public Health Laboratory|Keller|USA

>Spike|hCoV-19/Canada/ON-A3/2020|2020-11-24|EPI\_ISL\_755727|Original|hCoV-19^^Ontario|Human|Toronto Invasive Bacterial Diseases Network|McMaster University|McArthur|Canada

>Spike|hCoV-19/England/WSFT-25C15F2/2020|2020-04-20|EPI\_ISL\_501602|Original|hCoV-19^^England|Human|Department of Medical Microbiology|Wellcome Sanger Institute for the COVID-19 Genomics UK (COG-UK) consortium|Davies|United Kingdom

>Spike|hCoV-19/England/NOTT-11D3D9/2020|2020-11-22|EPI\_ISL\_665929|Original|hCoV-19^^England|Human|Queens Medical Centre|COVID-19 Genomics UK (COG-UK) Consortium|Loose|United Kingdom

>Spike|hCoV-19/Canada/ON-S61/2020|2020-03-19|EPI\_ISL\_586423|Original|hCoV-19^^Ontario|Human|Toronto Invasive Bacterial Diseases Network|McMaster University|McArthur|Canada

>Spike|hCoV-19/USA/LA-EVTL247/2020|2020-08-22|EPI\_ISL\_574381|Original|hCoV-19^^Louisiana|Human|LSUHS Emerging Viral Threat Laboratory|Microbial Genome Sequencing Center|Kamil|USA

>Spike|hCoV-19/USA/NY-NYCPHL-000780/2020|2020-03-20|EPI\_ISL\_632160|Original|hCoV-19^^New York|Human|SUNY Downstate Medical Center|New York City Public Health Laboratory|Wang|USA

>Spike|hCoV-19/Denmark/DCGC-2247/2020|2020-08-10|EPI\_ISL\_617552|Original|hCoV-19^^Midtjylland|Human|Department of Virus and Microbiological Special Diagnostics|Albertsen lab|Michaelsen|Denmark

>Spike|hCoV-19/Wales/PHWC-16CAC7/2020|2020-09-08|EPI\_ISL\_574132|Original|hCoV-19^^Wales|Human|Wales Specialist Virology Centre Sequencing lab|COVID-19 Genomics UK (COG-UK) Consortium|Moore|United Kingdom

>Spike|hCoV-19/USA/CA-CSMC124/2020|2020-04-05|EPI\_ISL\_475601|Original|hCoV-19^^California|Human|Cedars-Sinai Medical Center|Cedars-Sinai Medical Center|Zhang|USA

>Spike|hCoV-19/India/TG-CCMB-L1494/2020|2020-05-25|EPI\_ISL\_471610|Original|hCoV-19^^Telangana|Human|CSIR-Centre for Cellular and Molecular Biology|CSIR-Centre for Cellular and Molecular Biology|Banu|India

>Spike|hCoV-19/USA/TX-HMH-3556/2020|2020-06-15|EPI\_ISL\_543018|Original|hCoV-19^^Texas|Human|Houston Methodist Hospital|Houston Methodist Hospital|Long|USA

>Spike|hCoV-19/England/CAMC-B7AD1E/2020|2020-11-13|EPI\_ISL\_741171|Original|hCoV-19^^England|Human|Oxford Viromics|COVID-19 Genomics UK (COG-UK) Consortium|Golubchik|United Kingdom

>Spike|hCoV-19/England/BRIS-125D0D/2020|2020-03-30|EPI\_ISL\_443898|Original|hCoV-19^^England|Human|PHE South West Regional Laboratory|Wellcome Sanger Institute for the COVID-19 Genomics UK (COG-UK) consortium|Amato|United Kingdom

>Spike|hCoV-19/USA/NY-NYCPHL-001112/2020|2020-10-20|EPI\_ISL\_671695|Original|hCoV-19^^New York|Human|DOHMH Corona|New York City Public Health Laboratory|Wang|USA

>Spike|hCoV-19/Wales/MILK-9A970B/2020|2020-09-01|EPI\_ISL\_551005|Original|hCoV-19^^Wales|Human|Lighthouse Lab in Milton Keynes|Wellcome Sanger Institute for the COVID-19 Genomics UK (COG-UK) consortium|Davies|United Kingdom

>Spike|hCoV-19/USA/CA-LACPHL-AE00031/2020|2020-07-09|EPI\_ISL\_707926|Original|hCoV-19^^California|Human|Los Angeles County Public Health Laboratory|Los Angeles County Public Health Laboratory|Hemarajata|USA

>Spike|hCoV-19/England/20119085304/2020|2020-03-15|EPI\_ISL\_465115|Original|hCoV-19^^England|Human|Respiratory Virus Unit|Respiratory Virus Unit|Platt|United Kingdom

>Spike|hCoV-19/Australia/VIC13137/2020|2020-08-02|EPI\_ISL\_592195|Original|hCoV-19^^Victoria|Human|Victorian Infectious Diseases Reference Laboratory (VIDRL)|VIDRL and MDU-PHL|Schultz|Australia

>Spike|hCoV-19/Scotland/QEUEH-A63B4C/2020|2020-10-09|EPI\_ISL\_596184|Original|hCoV-19^^Scotland|Human|Quadram Institute Bioscience|COVID-19 Genomics UK (COG-UK) Consortium|Alikhan|United Kingdom

>Spike|hCoV-19/USA/TX-HMH-MCoV-18944/2020|2020-11-25|EPI\_ISL\_785240|Original|hCoV-19^^Texas|Human|Houston Methodist Hospital|Houston Methodist Hospital|Long|USA

>Spike|hCoV-19/England/CAMB-71F1C/2020|2020-03-29|EPI\_ISL\_439592|Original|hCoV-19^^England|Human|Department of Pathology|Wellcome Sanger Institute for the COVID-19 Genomics UK (COG-UK) consortium|Amato|United Kingdom

>Spike|hCoV-19/USA/NY-NYUMC206/2020|2020-04-01|EPI\_ISL\_427501|Original|hCoV-19^^New York|Human|NYU Langone Health|Departments of Pathology and Medicine|Maurano|USA

>Spike|hCoV-19/Denmark/DCGC-4941/2020|2020-09-21|EPI\_ISL\_621479|Original|hCoV-19^^Midtjylland|Human|Department of Virus and Microbiological Special Diagnostics|Albertsen lab|Michaelsen|Denmark

>Spike|hCoV-19/USA/LA-EVTL1058/2020|2020-11-27|EPI\_ISL\_768328|Original|hCoV-19^^Louisiana|Human|LSUHS Emerging Viral Threat Laboratory|Microbial Genome Sequencing Center|Kamil|USA

>Spike|hCoV-19/Scotland/GCVR-16FE40/2020|2020-03-23|EPI\_ISL\_489624|Original|hCoV-19^^Scotland|Human|NHSGGC West of Scotland Specialist Virology Centre / MRC-University of Glasgow Centre for Virus Research|Wellcome Sanger Institute for the COVID-19 Genomics UK (COG-UK) consortium|Davies|United Kingdom

>Spike|hCoV-19/England/201380061/2020|2020-03-25|EPI\_ISL\_421813|Original|hCoV-19^^England|Human|Respiratory Virus Unit|Respiratory Virus Unit|Platt|United Kingdom

>Spike|hCoV-19/England/QEUEH-B2D5C7/2020|2020-11-04|EPI\_ISL\_659790|Original|hCoV-19^^England|Human|Lighthouse Lab in Glasgow|Wellcome Sanger Institute for the COVID-19 Genomics UK (COG-UK) Consortium|Davies|United Kingdom

>Spike|hCoV-19/England/ALDP-C8B55D/2020|2020-12-17|EPI\_ISL\_756479|Original|hCoV-19^^England|Human|Lighthouse Lab in Alderley Park|Wellcome Sanger Institute for the COVID-19 Genomics UK (COG-UK) Consortium|Davies|United Kingdom

>Spike|hCoV-19/Japan/IC-0195/2020|2020-07-00|EPI\_ISL\_667624|Original|hCoV-19^^Japan|Human|Pathogen Genomics Center|Pathogen Genomics Center|Sekizuka|Japan

>Spike|hCoV-19/England/ALDP-748B8C/2020|2020-06-29|EPI\_ISL\_557440|Original|hCoV-19^^England|Human|Lighthouse Lab in Alderley Park|Wellcome Sanger Institute for the COVID-19 Genomics UK (COG-UK) consortium|Davies|United Kingdom

>Spike|hCoV-19/Denmark/DCGC-22270/2020|2020-12-14|EPI\_ISL\_758646|Original|hCoV-19^^Hovedstaden|Human|Department of Virus and Microbiological Special Diagnostics|Albertsen Lab|Michaelsen|Denmark

>Spike|hCoV-19/England/MILK-B86887/2020|2020-11-13|EPI\_ISL\_674060|Original|hCoV-19^^England|Human|Lighthouse Lab in Milton Keynes|Wellcome Sanger Institute for the COVID-19 Genomics UK (COG-UK) Consortium|Davies|United Kingdom

>Spike|hCoV-19/Germany/NW-UBI-42/2020|2020-06-17|EPI\_ISL\_631296|Original|hCoV-19^^North Rhine-Westphalia|Human|MVZ DIAMEDIS Diagnostische Medizin Sennestadt GmbH|Bielefeld University|Brandt|Germany

>Spike|hCoV-19/England/QEUEH-5D9FE0/2020|2020-06-17|EPI\_ISL\_533295|Original|hCoV-19^^England|Human|Lighthouse Lab in Glasgow|Wellcome Sanger Institute for the COVID-19 Genomics UK (COG-UK) consortium|Davies|United Kingdom

>Spike|hCoV-19/England/SHEF-D27B7/2020|2020-10-09|EPI\_ISL\_613405|Original|hCoV-19^^England|Human|Virology Department|COVID-19 Genomics UK (COG-UK) Consortium|de Silva|United Kingdom

>Spike|hCoV-19/Russia/MOW-RII-MH1974S/2020|2020-05-21|EPI\_ISL\_596322|Original|hCoV-19^^Moscow|Human|Pathogenic Microorganisms Variability Laboratory|WHO National Influenza Centre Russian Federation|Komissarov|Russia

>Spike|hCoV-19/Australia/VIC7536/2020|2020-07-21|EPI\_ISL\_564480|Original|hCoV-19^^Victoria|Human|Microbiological Diagnostic Unit - Public Health Laboratory (MDU-PHL)|MDU-PHL|Schultz|Australia

>Spike|hCoV-19/Denmark/DCGC-15718/2020|2020-11-23|EPI\_ISL\_713980|Original|hCoV-19^^Hovedstaden|Human|Department of Virus and Microbiological Special Diagnostics|Albertsen Lab|Michaelsen|Denmark

>Spike|hCoV-19/England/20119037604/2020|2020-03-14|EPI\_ISL\_465053|Original|hCoV-19^^England|Human|Respiratory Virus Unit|Respiratory Virus Unit|Platt|United Kingdom

>Spike|hCoV-19/Serbia/KM-0560707/2020|2020-07-06|EPI\_ISL\_541657|Original|hCoV-19^^Kosovska Mitrovica|Human|Laboratory Diagnostic|Laboratory Diagnostic|Vidanovic|Serbia

>Spike|hCoV-19/USA/CA-CZB0721/2020|2020-03-31|EPI\_ISL\_429020|Original|hCoV-19^^California|Human|UCSF Clinical Microbiology Laboratory|Chan-Zuckerberg Biohub|Kamm|USA

>Spike|hCoV-19/Wales/PHWC-49A24D/2020|2020-12-01|EPI\_ISL\_727515|Original|hCoV-19^^Wales|Human|Originating lab|COVID-19 Genomics UK (COG-UK) Consortium|Moore|United Kingdom

>Spike|hCoV-19/England/MILK-9AA904/2020|2020-08-31|EPI\_ISL\_550815|Original|hCoV-19^^England|Human|Lighthouse Lab in Milton Keynes|Wellcome Sanger Institute for the COVID-19 Genomics UK (COG-UK) consortium|Davies|United Kingdom

>Spike|hCoV-19/Netherlands/ZH-EMC-1026/2020|2020-11-16|EPI\_ISL\_722658|Original|hCoV-19^^Zuid Holland|Human|Dutch COVID-19 response team|Erasmus Medical Center|Oude Munnink|Netherlands

>Spike|hCoV-19/England/CAMB-840D7/2020|2020-04-26|EPI\_ISL\_438735|Original|hCoV-19^^England|Human|Department of Pathology|COVID-19 Genomics UK (COG-UK) Consortium|Meredith|United Kingdom

>Spike|hCoV-19/England/ALDP-BC7547/2020|2020-11-22|EPI\_ISL\_721455|Original|hCoV-19^^England|Human|Lighthouse Lab in Alderley Park|Wellcome Sanger Institute for the COVID-19 Genomics UK (COG-UK) Consortium|Davies|United Kingdom

>Spike|hCoV-19/USA/MN-MDH-1077/2020|2020-06-03|EPI\_ISL\_470757|Original|hCoV-19^^Minnesota|Human|Minnesota Department of Health|Minnesota Department of Health|Garfin|USA

>Spike|hCoV-19/England/CAMC-B99A9A/2020|2020-11-15|EPI\_ISL\_673562|Original|hCoV-19^^England|Human|Lighthouse Lab in Cambridge|Wellcome Sanger Institute for the COVID-19 Genomics UK (COG-UK) Consortium|Davies|United Kingdom

>Spike|hCoV-19/England/ALDP-9BDB80/2020|2020-09-09|EPI\_ISL\_567982|Original|hCoV-19^^England|Human|Lighthouse Lab in Alderley Park|Wellcome Sanger Institute for the COVID-19 Genomics UK (COG-UK) consortium|Davies|United Kingdom

>Spike|hCoV-19/Scotland/CVR1669/2020|2020-04-05|EPI\_ISL\_433647|Original|hCoV-19^^Scotland|Human|West of Scotland Specialist Virology Centre|COVID-19 Genomics UK (COG-UK) Consortium|Robertson|United Kingdom

>Spike|hCoV-19/England/NORT-283452/2020|2020-03-30|EPI\_ISL\_478495|Original|hCoV-19^^England|Human|Northumbria University / South Tees Hospitals NHS Foundation Trust / North Cumbria Integrated Care NHS Foundation Trust / North Tees and Hartlepool NHS Foundation Trust / Newcastle Hospitals NHS Foundation Trust|COVID-19 Genomics UK (COG-UK) Consortium|Bashton|United Kingdom

>Spike|hCoV-19/England/QEUEH-98EF9B/2020|2020-08-28|EPI\_ISL\_540353|Original|hCoV-19^^England|Human|Lighthouse Lab in Glasgow|Wellcome Sanger Institute for the COVID-19 Genomics UK (COG-UK) consortium|Davies|United Kingdom

>Spike|hCoV-19/USA/CA-QDX-83/2020|2020-03-13|EPI\_ISL\_468564|Original|hCoV-19^^California|Human|Quest Diagnostics|Quest Diagnostics|Kagan|USA

>Spike|hCoV-19/England/204200112/2020|2020-10-10|EPI\_ISL\_609868|Original|hCoV-19^^England|Human|Respiratory Virus Unit|Respiratory Virus Unit|Platt|United Kingdom

>Spike|hCoV-19/England/QEUEH-9CA2E5/2020|2020-09-13|EPI\_ISL\_567388|Original|hCoV-19^^England|Human|Lighthouse Lab in Glasgow|Wellcome Sanger Institute for the COVID-19 Genomics UK (COG-UK) consortium|Davies|United Kingdom

>Spike|hCoV-19/England/MILK-A7B428/2020|2020-10-14|EPI\_ISL\_607558|Original|hCoV-19^^England|Human|Lighthouse Lab in Milton Keynes|Wellcome Sanger Institute for the COVID-19 Genomics UK (COG-UK) consortium|Davies|United Kingdom

>Spike|hCoV-19/DRC/2938/2020|2020-04-17|EPI\_ISL\_437353|Original|hCoV-19^^Kinshasa|Human|Viral Respiratory Lab|Pathogen Sequencing Lab|Amuri|Democratic Republic of the Congo

>Spike|hCoV-19/USA/NY-Wadsworth-250294-01/2020|2020-00-00|EPI\_ISL\_754733|Original|hCoV-19^^New York|Human|Wadsworth Center|Wadsworth Center|Lasek-Nesselquist|USA

>Spike|hCoV-19/Denmark/DCGC-6183/2020|2020-10-05|EPI\_ISL\_620086|Original|hCoV-19^^Hovedstaden|Human|Department of Virus and Microbiological Special Diagnostics|Albertsen lab|Michaelsen|Denmark

>Spike|hCoV-19/Australia/VIC6457/2020|2020-07-23|EPI\_ISL\_521235|Original|hCoV-19^^Victoria|Human|Microbiological Diagnostic Unit - Public Health Laboratory (MDU-PHL)|MDU-PHL|Schultz|Australia

>Spike|hCoV-19/Russia/SPE-RII-MH971S/2020|2020-09-04|EPI\_ISL\_639950|Original|hCoV-19^^Saint Petersburg|Human|HELIX LLC|WHO National Influenza Centre Russian Federation|Komissarov|Russia

>Spike|hCoV-19/England/ALDP-9CDAAE/2020|2020-09-16|EPI\_ISL\_566267|Original|hCoV-19^^England|Human|Lighthouse Lab in Alderley Park|Wellcome Sanger Institute for the COVID-19 Genomics UK (COG-UK) consortium|Davies|United Kingdom

>Spike|hCoV-19/England/QEUA-A20765/2020|2020-10-01|EPI\_ISL\_587684|Original|hCoV-19^^England|Human|Lighthouse Lab in Glasgow|Wellcome Sanger Institute for the COVID-19 Genomics UK (COG-UK) consortium|Davies|United Kingdom

>Spike|hCoV-19/England/QEUA-B7C71E/2020|2020-11-14|EPI\_ISL\_727814|Original|hCoV-19^^England|Human|Oxford Viromics|COVID-19 Genomics UK (COG-UK) Consortium|Golubchik|United Kingdom

>Spike|hCoV-19/Netherlands/ZH-EMC-490/2020|2020-00-00|EPI\_ISL\_577920|Original|hCoV-19^^Zuid Holland|Human|Dutch COVID-19 response team|Erasmus Medical Center|Oude Munnink|Netherlands

>Spike|hCoV-19/USA/NY-NYCPHL-000851/2020|2020-03-29|EPI\_ISL\_632228|Original|hCoV-19^^New York|Human|Jamaica Hospital Medical Center|New York City Public Health Laboratory|Wang|USA

>Spike|hCoV-19/USA/NY-NYCPHL-000511/2020|2020-03-25|EPI\_ISL\_631972|Original|hCoV-19^^New York|Human|Richmond University Medical Center|New York City Public Health Laboratory|Wang|USA

>Spike|hCoV-19/India/GJ-GBRC182a/2020|2020-06-03|EPI\_ISL\_467051|Original|hCoV-19^^Gujarat|Human|B.J. Medical College and Civil hospital|Gujarat Biotechnology Research Centre|Joshi|India

>Spike|hCoV-19/Australia/VIC3407/2020|2020-07-07|EPI\_ISL\_521086|Original|hCoV-19^^Victoria|Human|Microbiological Diagnostic Unit - Public Health Laboratory (MDU-PHL)|MDU-PHL|Schultz|Australia

>Spike|hCoV-19/Sweden/20-50104/2020|2020-03-03|EPI\_ISL\_454880|Original|hCoV-19^^Stockholm|Human|Karolinska Universitetslaboratoriet|The Public Health Agency of Sweden|Svartstr\u00f6m|Sweden

>Spike|hCoV-19/Wales/PHWC-166201/2020|2020-06-12|EPI\_ISL\_490851|Original|hCoV-19^^Wales|Human|Wales Specialist Virology Centre Sequencing lab|COVID-19 Genomics UK (COG-UK) Consortium|Moore|United Kingdom

>Spike|hCoV-19/England/MILK-9C38AE/2020|2020-09-10|EPI\_ISL\_566762|Original|hCoV-19^^England|Human|Lighthouse Lab in Milton Keynes|Wellcome Sanger Institute for the COVID-19 Genomics UK (COG-UK) consortium|Davies|United Kingdom

>Spike|hCoV-19/Netherlands/OV-RIVM-20463/2020|2020-11-18|EPI\_ISL\_728678|Original|hCoV-19^^Overijssel|Human|Dutch COVID-19 response team|National Institute for Public Health and the Environment (RIVM)|Meijer|Netherlands

>Spike|hCoV-19/USA/LA-EVTL066/2020|2020-05-02|EPI\_ISL\_451227|Original|hCoV-19^^Louisiana|Human|LSUHS Emerging Viral Threat Laboratory|Microbial Genome Sequencing Center|Kamil|USA



>Spike|hCoV-19/USA/MA-MGH-00485/2020|2020-03-27|EPI\_ISL\_460110|Original|hCoV-19^^Massachusetts|Human|Massachusetts General Hospital|Infectious Disease Program|Lemieux|USA

>Spike|hCoV-19/USA/SC-20-0946-T07/2020|2020-06-17|EPI\_ISL\_516749|Original|hCoV-19^^South Carolina|Human|van Bakel Laboratory|van Bakel Laboratory|van Bakel|USA

>Spike|hCoV-19/Canada/QC-LSPQ-L00233714/2020|2020-03-23|EPI\_ISL\_536036|Original|hCoV-19^^Quebec|Human|Centre de SSS de Trois-Rivières|Laboratoire de santé publique du Québec|Moreira|Canada

>Spike|hCoV-19/England/204394029/2020|2020-10-25|EPI\_ISL\_653944|Original|hCoV-19^^England|Human|Respiratory Virus Unit|COVID-19 Genomics UK (COG-UK) Consortium|Platt|United Kingdom

>Spike|hCoV-19/Wales/PHWC-16EDF9/2020|2020-10-01|EPI\_ISL\_585867|Original|hCoV-19^^Wales|Human|Wales Specialist Virology Centre Sequencing lab|COVID-19 Genomics UK (COG-UK) Consortium|Moore|United Kingdom

>Spike|hCoV-19/England/NOTT-111DE6/2020|2020-05-01|EPI\_ISL\_472408|Original|hCoV-19^^England|Human|Queens Medical Centre|COVID-19 Genomics UK (COG-UK) Consortium|Loose|United Kingdom

>Spike|hCoV-19/England/ALDP-A8723E/2020|2020-10-14|EPI\_ISL\_606252|Original|hCoV-19^^England|Human|Lighthouse Lab in Alderley Park|Wellcome Sanger Institute for the COVID-19 Genomics UK (COG-UK) consortium|Davies|United Kingdom

>Spike|hCoV-19/England/205260454/2020|2020-12-18|EPI\_ISL\_754365|Original|hCoV-19^^England|Human|Respiratory Virus Unit|COVID-19 Genomics UK (COG-UK) Consortium|Platt|United Kingdom

>Spike|hCoV-19/England/QEUA-B2D530/2020|2020-11-04|EPI\_ISL\_659837|Original|hCoV-19^^England|Human|Lighthouse Lab in Glasgow|Wellcome Sanger Institute for the COVID-19 Genomics UK (COG-UK) Consortium|Davies|United Kingdom

>Spike|hCoV-19/England/LIVE-DCC55F/2020|2020-11-25|EPI\_ISL\_724516|Original|hCoV-19^^England|Human|Liverpool Clinical Laboratories|COVID-19 Genomics UK (COG-UK) Consortium|Haldenby|United Kingdom

>Spike|hCoV-19/Switzerland/ZH-ETHZ-180047/2020|2020-06-29|EPI\_ISL\_489983|Original|hCoV-19^^Zurich|Human|Viollier AG|Department of Biosystems Science and Engineering|Nadeau|Switzerland

>Spike|hCoV-19/Australia/VIC1222/2020|2020-04-01|EPI\_ISL\_430519|Original|hCoV-19^^Victoria|Human|Victorian Infectious Diseases Reference Laboratory (VIDRL)|Microbiological Diagnostic Unit Public Health Laboratory and Victorian Infectious Diseases Reference Laboratory|Schultz|Australia

>Spike|hCoV-19/USA/CA-QDX-2006/2020|2020-03-17|EPI\_ISL\_604303|Original|hCoV-19^^California|Human|Quest Diagnostics|Quest Diagnostics|Kagan|USA

>Spike|hCoV-19/USA/MS-CDC-2-3693773/2020|2020-10-30|EPI\_ISL\_747099|Original|hCoV-19^^Mississippi|Human|Respiratory Viruses Branch|Respiratory Viruses Branch|Queen|USA

>Spike|hCoV-19/Denmark/DCGC-3933/2020|2020-09-14|EPI\_ISL\_615844|Original|hCoV-19^^Midtjylland|Human|Department of Virus and Microbiological Special Diagnostics|Albertsen lab|Michaelsen|Denmark

>Spike|hCoV-19/England/SHEF-D078C/2020|2020-09-18|EPI\_ISL\_572930|Original|hCoV-19^^England|Human|Virology Department|COVID-19 Genomics UK (COG-UK) Consortium|de Silva|United Kingdom

>Spike|hCoV-19/India/GJ-GBRC-406a/2020|2020-06-25|EPI\_ISL\_590689|Original|hCoV-19^^Gujarat|Human|B.J. Medical College and Civil hospital|Gujarat Biotechnology Research Centre|Joshi|India

>Spike|hCoV-19/England/MILK-9EE728/2020|2020-09-23|EPI\_ISL\_580778|Original|hCoV-19^^England|Human|Lighthouse Lab in Milton Keynes|Wellcome Sanger Institute for the COVID-19 Genomics UK (COG-UK) consortium|Davies|United Kingdom

>Spike|hCoV-19/England/QEUA-C14674/2020|2020-12-06|EPI\_ISL\_709403|Original|hCoV-19^^England|Human|Lighthouse Lab in Glasgow|Wellcome Sanger Institute for the COVID-19 Genomics UK (COG-UK) Consortium|Davies|United Kingdom

>Spike|hCoV-19/England/PORT-2D0F73/2020|2020-04-23|EPI\_ISL\_475311|Original|hCoV-19^^England|Human|Centre for Enzyme Innovation|COVID-19 Genomics UK (COG-UK) Consortium|Robson|United Kingdom

>Spike|hCoV-19/England/NOTT-116B05/2020|2020-10-15|EPI\_ISL\_595321|Original|hCoV-19^^England|Human|Queens Medical Centre|COVID-19 Genomics UK (COG-UK) Consortium|Loose|United Kingdom

>Spike|hCoV-19/England/ALDP-B830CE/2020|2020-11-14|EPI\_ISL\_675571|Original|hCoV-19^^England|Human|Lighthouse Lab in Alderley Park|Wellcome Sanger Institute for the COVID-19 Genomics UK (COG-UK) Consortium|Davies|United Kingdom

>Spike|hCoV-19/Mexico/BCN-ALSR-2527/2020|2020-06-17|EPI\_ISL\_635531|Original|hCoV-19^^Baja California|Human|Centro de Diagn\u221a\u2265tico COVID-19 UABC Tijuana|Andersen lab at Scripps Research|Gangavarapu|Mexico

>Spike|hCoV-19/England/201141521/2020|2020-03-10|EPI\_ISL\_464759|Original|hCoV-19^^England|Human|Respiratory Virus Unit|Respiratory Virus Unit|Platt|United Kingdom

>Spike|hCoV-19/Netherlands/GE-RIVM-20323/2020|2020-12-03|EPI\_ISL\_723457|Original|hCoV-19^^Gelderland|Human|Dutch COVID-19 response team|National Institute for Public Health and the Environment (RIVM)|Meijer|Netherlands

>Spike|hCoV-19/Netherlands/NA\_676/2020|2020-03-10|EPI\_ISL\_461111|Original|hCoV-19^^Netherlands|Human|Dutch COVID-19 response team|Erasmus Medical Center|Oude Munnink|Netherlands

>Spike|hCoV-19/Japan/PG-0956/2020|2020-04-00|EPI\_ISL\_684566|Original|hCoV-19^^Japan|Human|Gunma Prefectural Institute of Public Health and Environmental Sciences|Pathogen Genomics Center|Sekizuka|Japan

>Spike|hCoV-19/Denmark/DCGC-6932/2020|2020-10-12|EPI\_ISL\_619778|Original|hCoV-19^^Hovedstaden|Human|Department of Virus and Microbiological Special Diagnostics|Albertsen lab|Michaelsen|Denmark

>Spike|hCoV-19/England/QEUEH-990655/2020|2020-08-26|EPI\_ISL\_530359|Original|hCoV-19^^England|Human|Lighthouse Lab in Glasgow|Wellcome Sanger Institute for the COVID-19 Genomics UK (COG-UK) consortium|Davies|United Kingdom

>Spike|hCoV-19/USA/TX-HMH-4575/2020|2020-06-20|EPI\_ISL\_543727|Original|hCoV-19^^Texas|Human|Houston Methodist Hospital|Houston Methodist Hospital|Long|USA

>Spike|hCoV-19/Denmark/DCGC-12373/2020|2020-11-16|EPI\_ISL\_682554|Original|hCoV-19^^Hovedstaden|Human|Department of Virus and Microbiological Special Diagnostics|Albertsen Lab|Michaelsen|Denmark

>Spike|hCoV-19/USA/TX-HMH-5191/2020|2020-06-21|EPI\_ISL\_544586|Original|hCoV-19^^Texas|Human|Houston Methodist Hospital|Houston Methodist Hospital|Long|USA

>Spike|hCoV-19/USA/NY-NYCPHL-000274/2020|2020-03-18|EPI\_ISL\_631800|Original|hCoV-19^^New York|Human|Brookdale University Hospital Medical Center|New York City Public Health Laboratory|Wang|USA

>Spike|hCoV-19/Scotland/CVR2429/2020|2020-04-14|EPI\_ISL\_477938|Original|hCoV-19^^Scotland|Human|West of Scotland Specialist Virology Centre|COVID-19 Genomics UK (COG-UK) Consortium|Robertson|United Kingdom

>Spike|hCoV-19/USA/FL-BPHL-0334/2020|2020-04-15|EPI\_ISL\_489743|Original|hCoV-19^^Florida|Human|Florida Bureau of Public Health Laboratories|Florida Bureau of Public Health Laboratories|Blanton|USA

>Spike|hCoV-19/England/CAMC-9EC57B/2020|2020-09-24|EPI\_ISL\_580557|Original|hCoV-19^^England|Human|Lighthouse Lab in Cambridge|Wellcome Sanger Institute for the COVID-19 Genomics UK (COG-UK) consortium|Davies|United Kingdom

>Spike|hCoV-19/England/OXON-AF5D7/2020|2020-04-14|EPI\_ISL\_478754|Original|hCoV-19^^England|Human|Oxford Viromics|COVID-19 Genomics UK (COG-UK) Consortium|Golubchik|United Kingdom

>Spike|hCoV-19/Scotland/CVR1437/2020|2020-04-01|EPI\_ISL\_433586|Original|hCoV-19^^Scotland|Human|West of Scotland Specialist Virology Centre|COVID-19 Genomics UK (COG-UK) Consortium|Robertson|United Kingdom

>Spike|hCoV-19/Japan/PG-3190/2020|2020-04-00|EPI\_ISL\_691310|Original|hCoV-19^^Japan|Human|Pathogen Genomics Center|Pathogen Genomics Center|Sekizuka|Japan

>Spike|hCoV-19/USA/CA-CZB-2746/2020|2020-06-27|EPI\_ISL\_582854|Original|hCoV-19^^California|Human|County of Santa Clara Public Health Department|Chan-Zuckerberg Biohub|Bhatt|USA

>Spike|hCoV-19/Israel/2089866/2020|2020-04-01|EPI\_ISL\_447359|Original|hCoV-19^^Jerusalem District|Human|Clinical Virology Unit|Stern Lab|Miller|Israel

>Spike|hCoV-19/Sichuan/SC-PHCC1-034/2020|2020-02-12|EPI\_ISL\_451355|Original|hCoV-19^^Sichuan|Human|West China Hospital of Sichuan University|State Key Laboratory of Biotherapy of Sichuan University|Tang|China

>Spike|hCoV-19/USA/MI-MDHHS-SC21241/2020|2020-04-07|EPI\_ISL\_507496|Original|hCoV-19^^Michigan|Human|Michigan Department of Health and Human Services|Michigan Department of Health and Human Services|Blankenship|USA

>Spike|hCoV-19/Wales/ALDP-BB9D8C/2020|2020-11-20|EPI\_ISL\_710743|Original|hCoV-19^^Wales|Human|Lighthouse Lab in Alderley Park|Wellcome Sanger Institute for the COVID-19 Genomics UK (COG-UK) Consortium|Davies|United Kingdom

>Spike|hCoV-19/Wales/PHWC-16093F/2020|2020-05-22|EPI\_ISL\_472995|Original|hCoV-19^^Wales|Human|Wales Specialist Virology Centre Sequencing lab|COVID-19 Genomics UK (COG-UK) Consortium|Moore|United Kingdom

>Spike|hCoV-19/England/ALDP-A66833/2020|2020-10-12|EPI\_ISL\_630453|Original|hCoV-19^^England|Human|Lighthouse Lab in Alderley Park|Wellcome Sanger Institute for the COVID-19 Genomics UK (COG-UK) consortium|Davies|United Kingdom

>Spike|hCoV-19/Scotland/EDB5582/2020|2020-03-30|EPI\_ISL\_487993|Original|hCoV-19^^Scotland|Human|Virology Department|Wellcome Sanger Institute for the COVID-19 Genomics UK (COG-UK) consortium|Davies|United Kingdom

>Spike|hCoV-19/South Africa/KRISP-K002735/2020|2020-08-16|EPI\_ISL\_529733|Original|hCoV-19^^KwaZulu-Natal|Human|NHLS-IALCH|KRISP|de Oliveira|South Africa

>Spike|hCoV-19/England/ALDP-A528C1/2020|2020-10-07|EPI\_ISL\_597908|Original|hCoV-19^^England|Human|Lighthouse Lab in Alderley Park|Wellcome Sanger Institute for the COVID-19 Genomics UK (COG-UK) consortium|Davies|United Kingdom

>Spike|hCoV-19/England/MILK-B387A5/2020|2020-11-01|EPI\_ISL\_659012|Original|hCoV-19^^England|Human|Lighthouse Lab in Milton Keynes|Wellcome Sanger Institute for the COVID-19 Genomics UK (COG-UK) Consortium|Davies|United Kingdom

>Spike|hCoV-19/USA/TX-HMH-2858/2020|2020-06-07|EPI\_ISL\_543828|Original|hCoV-19^^Texas|Human|Houston Methodist Hospital|Houston Methodist Hospital|Long|USA

>Spike|hCoV-19/England/QEUEH-B2D767/2020|2020-11-03|EPI\_ISL\_647081|Original|hCoV-19^^England|Human|Lighthouse Lab in Glasgow|Wellcome Sanger Institute for the COVID-19 Genomics UK (COG-UK) Consortium|Davies|United Kingdom

>Spike|hCoV-19/USA/UT-06243/2020|2020-04-22|EPI\_ISL\_493124|Original|hCoV-19^^Utah|Human|Utah Public Health Laboratory|Utah Public Health Laboratory|Butz|USA

>Spike|hCoV-19/England/QEUEH-B13C56/2020|2020-11-02|EPI\_ISL\_641896|Original|hCoV-19^^England|Human|Lighthouse Lab in Glasgow|Wellcome Sanger Institute for the COVID-19 Genomics UK (COG-UK) Consortium|Davies|United Kingdom

>Spike|hCoV-19/USA/SC-DHEC-0543/2020|2020-06-19|EPI\_ISL\_574550|Original|hCoV-19^^South Carolina|Human|Microbiology Division|Microbiology Division|Flores|USA

>Spike|hCoV-19/England/ALDP-6C270F/2020|2020-07-01|EPI\_ISL\_557975|Original|hCoV-19^^England|Human|Lighthouse Lab in Alderley Park|Wellcome Sanger Institute for the COVID-19 Genomics UK (COG-UK) consortium|Davies|United Kingdom

>Spike|hCoV-19/Scotland/EDB8586/2020|2020-10-22|EPI\_ISL\_651967|Original|hCoV-19^^Scotland|Human|Virology Department|COVID-19 Genomics UK (COG-UK) Consortium|McHugh|United Kingdom

>Spike|hCoV-19/Singapore/1356/2020|2020-06-18|EPI\_ISL\_648707|Original|hCoV-19^^Singapore|Human|Department of Laboratory Medicine|Department of Laboratory Medicine|Chen|Singapore

>Spike|hCoV-19/England/QEUEH-9CA1CA/2020|2020-09-10|EPI\_ISL\_567314|Original|hCoV-19^^England|Human|Lighthouse Lab in Glasgow|Wellcome Sanger Institute for the COVID-19 Genomics UK (COG-UK) consortium|Davies|United Kingdom

>Spike|hCoV-19/India/TG-CCMB-OM40/2020|2020-05-26|EPI\_ISL\_644734|Original|hCoV-19^^Telangana|Human|Osmania Medical College|CSIR-Centre for Cellular and Molecular Biology|Mukherjee|India

>Spike|hCoV-19/USA/MI-UM-10036647686/2020|2020-10-27|EPI\_ISL\_650031|Original|hCoV-19^^Michigan|Human|University of Michigan Clinical Microbiology Laboratory|Lauring Lab|Valesano|USA

>Spike|hCoV-19/USA/NY-Wadsworth-213917-01/2020|2020-09-08|EPI\_ISL\_765498|Original|hCoV-19^^New York|Human|Wadsworth Center|Wadsworth Center|Lasek-Nesselquist|USA

>Spike|hCoV-19/Brazil/SE-6530/2020|2020-03-20|EPI\_ISL\_541373|Original|hCoV-19^^Sergipe|Human|LACEN/SE|Laboratory of Respiratory Viruses and Measles|Silva|Brazil

>Spike|hCoV-19/Wales/MILK-9D55FD/2020|2020-09-19|EPI\_ISL\_577400|Original|hCoV-19^^Wales|Human|Centre for Enzyme Innovation|COVID-19 Genomics UK (COG-UK) Consortium|Robson|United Kingdom

>Spike|hCoV-19/Wales/PHWC-49A377/2020|2020-12-01|EPI\_ISL\_727534|Original|hCoV-19^^Wales|Human|Originating lab|COVID-19 Genomics UK (COG-UK) Consortium|Moore|United Kingdom

>Spike|hCoV-19/Sweden/20-52903/2020|2020-09-15|EPI\_ISL\_766628|Original|hCoV-19^^Stockholm|Human|Klinisk mikrobiologi|The Public Health Agency of Sweden|Svartstr\u00f6m|Sweden

>Spike|hCoV-19/England/QEUH-9B9164/2020|2020-09-07|EPI\_ISL\_549654|Original|hCoV-19^^England|Human|Lighthouse Lab in Glasgow|Wellcome Sanger Institute for the COVID-19 Genomics UK (COG-UK) consortium|Davies|United Kingdom

>Spike|hCoV-19/USA/VA-DCLS-1308/2020|2020-07-22|EPI\_ISL\_572248|Original|hCoV-19^^Virginia|Human|Virginia DCLS|Virginia DCLS|St. Jacques|USA

>Spike|hCoV-19/England/ALDP-BB938A/2020|2020-11-20|EPI\_ISL\_702403|Original|hCoV-19^^England|Human|Lighthouse Lab in Alderley Park|Wellcome Sanger Institute for the COVID-19 Genomics UK (COG-UK) Consortium|Davies|United Kingdom

>Spike|hCoV-19/England/MILK-975E12/2020|2020-08-20|EPI\_ISL\_552784|Original|hCoV-19^^England|Human|Lighthouse Lab in Milton Keynes|Wellcome Sanger Institute for the COVID-19 Genomics UK (COG-UK) consortium|Davies|United Kingdom

>Spike|hCoV-19/England/CAMC-B7A80E/2020|2020-11-12|EPI\_ISL\_741145|Original|hCoV-19^^England|Human|Oxford Viromics|COVID-19 Genomics UK (COG-UK) Consortium|Golubchik|United Kingdom

>Spike|hCoV-19/USA/WI-UW-841/2020|2020-05-07|EPI\_ISL\_509848|Original|hCoV-19^^Wisconsin|Human|University of Wisconsin-Madison AIDS Vaccine Research Laboratories|University of Wisconsin-Madison AIDS Vaccine Research Laboratories|Baczenas|USA

>Spike|hCoV-19/Australia/NSW174/2020|2020-03-21|EPI\_ISL\_427668|Original|hCoV-19^^New South Wales|Human|Centre for Infectious Diseases and Microbiology Public Health|NSW Health Pathology - Institute of Clinical Pathology and Medical Research; Westmead Hospital; University of Sydney|Gall|Australia

>Spike|hCoV-19/USA/WA-QDX-62/2020|2020-03-13|EPI\_ISL\_467927|Original|hCoV-19^^Washington|Human|Quest Diagnostics|Quest Diagnostics|Kagan|USA

>Spike|hCoV-19/USA/IL-UW-1009/2020|2020-07-20|EPI\_ISL\_516435|Original|hCoV-19^^Illinois|Human|University of Wisconsin-Madison AIDS Vaccine Research Laboratories|University of Wisconsin-Madison AIDS Vaccine Research Laboratories|Baczenas|USA

>Spike|hCoV-19/Denmark/DCGC-6913/2020|2020-10-12|EPI\_ISL\_619759|Original|hCoV-19^^Hovedstaden|Human|Department of Virus and Microbiological Special Diagnostics|Albertsen lab|Michaelsen|Denmark

>Spike|hCoV-19/England/QEUH-B3F708/2020|2020-11-08|EPI\_ISL\_658445|Original|hCoV-19^^England|Human|Lighthouse Lab in Glasgow|Wellcome Sanger Institute for the COVID-19 Genomics UK (COG-UK) Consortium|Davies|United Kingdom

>Spike|hCoV-19/Wales/MILK-9EEFC/2020|2020-09-24|EPI\_ISL\_580856|Original|hCoV-19^^Wales|Human|Lighthouse Lab in Milton Keynes|Wellcome Sanger Institute for the COVID-19 Genomics UK (COG-UK) consortium|Davies|United Kingdom

>Spike|hCoV-19/Scotland/QEUH-9E4300/2020|2020-09-23|EPI\_ISL\_600939|Original|hCoV-19^^Scotland|Human|Lighthouse Lab in Glasgow|Wellcome Sanger Institute for the COVID-19 Genomics UK (COG-UK) consortium|Davies|United Kingdom

>Spike|hCoV-19/Wales/PHWC-499F29/2020|2020-11-25|EPI\_ISL\_727467|Original|hCoV-19^^Wales|Human|Originating lab|COVID-19 Genomics UK (COG-UK) Consortium|Moore|United Kingdom

>Spike|hCoV-19/England/LOND-1260C8D/2020|2020-03-17|EPI\_ISL\_524652|Original|hCoV-19^^England|Human|North West London Pathology|Wellcome Sanger Institute for the COVID-19 Genomics UK (COG-UK) consortium|Davies|United Kingdom

>Spike|hCoV-19/England/CAMC-B7779B/2020|2020-11-12|EPI\_ISL\_783389|Original|hCoV-19^^England|Human|Lighthouse Lab in Cambridge|Wellcome Sanger Institute for the COVID-19 Genomics UK (COG-UK) Consortium|Davies|United Kingdom

>Spike|hCoV-19/England/CAMB-1B4AFD/2020|2020-06-10|EPI\_ISL\_473495|Original|hCoV-19^^England|Human|Department of Pathology|COVID-19 Genomics UK (COG-UK) Consortium|Meredith|United Kingdom

>Spike|hCoV-19/Japan/PG-8517/2020|2020-07-00|EPI\_ISL\_686113|Original|hCoV-19^^Japan|Human|Pathogen Genomics Center|Pathogen Genomics Center|Sekizuka|Japan

>Spike|hCoV-19/Northern Ireland/NIRE-FB69D/2020|2020-03-26|EPI\_ISL\_448963|Original|hCoV-19^^Northern Ireland|Human|Regional Virus Laboratory|COVID-19 Genomics UK (COG-UK) Consortium|Fairley|United Kingdom

>Spike|hCoV-19/England/ALDP-6461AB/2020|2020-07-03|EPI\_ISL\_558012|Original|hCoV-19^^England|Human|Lighthouse Lab in Alderley Park|Wellcome Sanger Institute for the COVID-19 Genomics UK (COG-UK) consortium|Davies|United Kingdom

>Spike|hCoV-19/Canada/ON-PHL-20-01187/2020|2020-06-00|EPI\_ISL\_548809|Original|hCoV-19^^Ontario|Human|Public Health Ontario Laboratory|Public Health Ontario Laboratory|Guthrie|Canada

>Spike|hCoV-19/England/CAMB-7CA2F/2020|2020-04-05|EPI\_ISL\_442147|Original|hCoV-19^^England|Human|Department of Pathology|Wellcome Sanger Institute for the COVID-19 Genomics UK (COG-UK) consortium|Amato|United Kingdom

>Spike|hCoV-19/Russia/SVE-RII-MH2829S/2020|2020-09-24|EPI\_ISL\_639971|Original|hCoV-19^^Sverdlovsk|Human|HELIX LLC|WHO National Influenza Centre Russian Federation|Komissarov|Russia

>Spike|hCoV-19/England/LEED-2A8581/2020|2020-03-18|EPI\_ISL\_539174|Original|hCoV-19^^England|Human|Leeds Teaching Hospitals NHS Trust and Public Health England|Wellcome Sanger Institute for the COVID-19 Genomics UK (COG-UK) consortium|Davies|United Kingdom

>Spike|hCoV-19/Australia/VIC16843/2020|2020-08-06|EPI\_ISL\_663601|Original|hCoV-19^^Victoria|Human|Microbiological Diagnostic Unit - Public Health Laboratory (MDU-PHL)|MDU-PHL|Schultz|Australia

>Spike|hCoV-19/USA/PA-MGSC25-05/2020|2020-03-24|EPI\_ISL\_436478|Original|hCoV-19^^Pennsylvania|Human|UPMC Clinical Laboratory|Microbial Genome Sequencing Center|Cooper|USA

>Spike|hCoV-19/England/QEUH-B0DC9B/2020|2020-11-02|EPI\_ISL\_641978|Original|hCoV-19^^England|Human|Lighthouse Lab in Glasgow|Wellcome Sanger Institute for the COVID-19 Genomics UK (COG-UK) Consortium|Davies|United Kingdom

>Spike|hCoV-19/England/ALDP-CB60C1/2020|2020-12-20|EPI\_ISL\_761687|Original|hCoV-19^^England|Human|Lighthouse Lab in Alderley Park|Wellcome Sanger Institute for the COVID-19 Genomics UK (COG-UK) Consortium|Davies|United Kingdom

>Spike|hCoV-19/England/20128034002/2020|2020-03-18|EPI\_ISL\_420474|Original|hCoV-19^^England|Human|Respiratory Virus Unit|Respiratory Virus Unit|Platt|United Kingdom

>Spike|hCoV-19/Beijing/DT-travelUK03/2020|2020-03-21|EPI\_ISL\_452356|Original|hCoV-19^^Beijing|Human|Laboratory of Infectious Diseases Center of Beijing Ditan Hospital|Laboratory of Infectious Diseases Center of Beijing Ditan Hospital|Yang|China

>Spike|hCoV-19/France/ARA-12260/2020|2020-03-22|EPI\_ISL\_419184|Original|hCoV-19^^Auvergne-Rh\u00f4ne-Alpes|Human|Institut des Agents Infectieux (IAI)|CNR Virus des Infections Respiratoires - France SUD|Josset|France

>Spike|hCoV-19/Luxembourg/LNS0108329/2020|2020-12-18|EPI\_ISL\_739714|Original|hCoV-19^^Luxembourg|Human|Laboratoire national de sant\u00e9|Laboratoire national de sant\u00e9|Wienecke-Baldacchino|Luxembourg

>Spike|hCoV-19/Colombia/CUN-GVI-97718/2020|2020-04-04|EPI\_ISL\_447800|Original|hCoV-19^^Cundinamarca|Human|Instituto Nacional de Salud|Grupo de Investigaciones Microbiol\u00f3gicas-UR (GIMUR)|Ram\u00e9dez|Colombia

>Spike|hCoV-19/USA/MA-MGH-03057/2020|2020-08-05|EPI\_ISL\_765696|Original|hCoV-19^^Massachusetts|Human|Massachusetts General Hospital|Infectious Disease Program|Park|USA

>Spike|hCoV-19/Scotland/CVR5854/2020|2020-11-16|EPI\_ISL\_666049|Original|hCoV-19^^Scotland|Human|West of Scotland Specialist Virology Centre|COVID-19 Genomics UK (COG-UK) Consortium|Robertson|United Kingdom

>Spike|hCoV-19/Japan/PG-4389/2020|2020-07-00|EPI\_ISL\_692616|Original|hCoV-19^^Japan|Human|Pathogen Genomics Center|Pathogen Genomics Center|Sekizuka|Japan

>Spike|hCoV-19/England/OXON-B2D33/2020|2020-04-05|EPI\_ISL\_534811|Original|hCoV-19^^England|Human|Oxford Viromics|COVID-19 Genomics UK (COG-UK) Consortium|Golubchik|United Kingdom

>Spike|hCoV-19/England/QEUH-B9FA76/2020|2020-11-18|EPI\_ISL\_720974|Original|hCoV-19^^England|Human|Lighthouse Lab in Glasgow|Wellcome Sanger Institute for the COVID-19 Genomics UK (COG-UK) Consortium|Davies|United Kingdom

>Spike|hCoV-19/USA/TX-HMH-MCoV-15283/2020|2020-10-19|EPI\_ISL\_786767|Original|hCoV-19^^Texas|Human|Houston Methodist Hospital|Houston Methodist Hospital|Long|USA

>Spike|hCoV-19/England/PORT-2D0D2E/2020|2020-04-28|EPI\_ISL\_475276|Original|hCoV-19^^England|Human|Centre for Enzyme Innovation|COVID-19 Genomics UK (COG-UK) Consortium|Robson|United Kingdom

>Spike|hCoV-19/England/CAMB-1BCA13/2020|2020-11-23|EPI\_ISL\_705557|Original|hCoV-19^^England|Human|Department of Pathology|COVID-19 Genomics UK (COG-UK) Consortium|Goodfellow|United Kingdom

>Spike|hCoV-19/England/QEUH-A8B56E/2020|2020-10-16|EPI\_ISL\_643085|Original|hCoV-19^^England|Human|Lighthouse Lab in Glasgow|Wellcome Sanger Institute for the COVID-19 Genomics UK (COG-UK) Consortium|Davies|United Kingdom

>Spike|hCoV-19/USA/TX-DSHS-1562/2020|2020-06-23|EPI\_ISL\_681843|Original|hCoV-19^^Texas|Human|Texas Department of State Health Services|Texas Department of State Health Services|Rahman|USA

>Spike|hCoV-19/Japan/PG-2247/2020|2020-04-00|EPI\_ISL\_685852|Original|hCoV-19^^Japan|Human|Pathogen Genomics Center|Pathogen Genomics Center|Sekizuka|Japan

>Spike|hCoV-19/England/MILK-9AB217/2020|2020-08-31|EPI\_ISL\_551177|Original|hCoV-19^^England|Human|Lighthouse Lab in Milton Keynes|Wellcome Sanger Institute for the COVID-19 Genomics UK (COG-UK) consortium|Davies|United Kingdom

>Spike|hCoV-19/Portugal/PT0878/2020|2020-03-28|EPI\_ISL\_511137|Original|hCoV-19^^Portugal|Human|Instituto Nacional de Saude (INSA)|Instituto Nacional de Saude (INSA)|Borges|Portugal

>Spike|hCoV-19/Brazil/SP-141/2020|2020-03-23|EPI\_ISL\_468308|Original|hCoV-19^^S\u00e3o Paulo|Human|Hospital Municipal do Tatuape Carmino Caricchio|Instituto Adolfo Lutz|Sacchi|Brazil

>Spike|hCoV-19/Denmark/DCGC-18853/2020|2020-12-07|EPI\_ISL\_748598|Original|hCoV-19^^Syddanmark|Human|Department of Virus and Microbiological Special Diagnostics|Albertsen Lab|Michaelsen|Denmark

>Spike|hCoV-19/England/BIRM-6B0B8/2020|2020-11-14|EPI\_ISL\_679120|Original|hCoV-19^^England|Human|University of Birmingham|COVID-19 Genomics UK (COG-UK) Consortium|Loman|United Kingdom

>Spike|hCoV-19/England/20132096304/2020|2020-03-23|EPI\_ISL\_423830|Original|hCoV-19^^England|Human|Respiratory Virus Unit|Respiratory Virus Unit|Platt|United Kingdom

>Spike|hCoV-19/England/ALDP-A858C5/2020|2020-10-17|EPI\_ISL\_610561|Original|hCoV-19^^England|Human|Lighthouse Lab in Alderley Park|Wellcome Sanger Institute for the COVID-19 Genomics UK (COG-UK) consortium|Davies|United Kingdom

>Spike|hCoV-19/England/CAMC-B20C83/2020|2020-11-01|EPI\_ISL\_647671|Original|hCoV-19^^England|Human|Lighthouse Lab in Cambridge|Wellcome Sanger Institute for the COVID-19 Genomics UK (COG-UK) Consortium|Davies|United Kingdom

>Spike|hCoV-19/Singapore/611/2020|2020-05-08|EPI\_ISL\_490061|Original|hCoV-19^^Singapore|Human|National Public Health Laboratory|National Public Health Laboratory|Mak|Singapore

>Spike|hCoV-19/England/QEUH-9FFCCB/2020|2020-10-02|EPI\_ISL\_600195|Original|hCoV-19^^England|Human|Lighthouse Lab in Glasgow|Wellcome Sanger Institute for the COVID-19 Genomics UK (COG-UK) consortium|Davies|United Kingdom

>Spike|hCoV-19/Brazil/RJ-2951/2020|2020-04-29|EPI\_ISL\_541366|Original|hCoV-19^^Rio de Janeiro|Human|Laboratory of Respiratory Viruses and Measles|Laboratory of Respiratory Viruses and Measles|Silva|Brazil

>Spike|hCoV-19/England/LIVE-9D572/2020|2020-04-15|EPI\_ISL\_453211|Original|hCoV-19^^England|Human|Liverpool Clinical Laboratories|COVID-19 Genomics UK (COG-UK) Consortium|Haldenby|United Kingdom

>Spike|hCoV-19/USA/CA-CZB-1022/2020|2020-04-11|EPI\_ISL\_436663|Original|hCoV-19^^California|Human|County of Santa Clara Public Health Department|Chan-Zuckerberg Biohub|Hao|USA

>Spike|hCoV-19/England/QEUEH-9DBE56/2020|2020-09-21|EPI\_ISL\_601274|Original|hCoV-19^^England|Human|Lighthouse Lab in Glasgow|Wellcome Sanger Institute for the COVID-19 Genomics UK (COG-UK) consortium|Davies|United Kingdom

>Spike|hCoV-19/Wales/MILK-9C257B/2020|2020-09-09|EPI\_ISL\_566605|Original|hCoV-19^^Wales|Human|Lighthouse Lab in Milton Keynes|Wellcome Sanger Institute for the COVID-19 Genomics UK (COG-UK) consortium|Davies|United Kingdom

>Spike|hCoV-19/Scotland/CVR1468/2020|2020-04-01|EPI\_ISL\_433593|Original|hCoV-19^^Scotland|Human|West of Scotland Specialist Virology Centre|COVID-19 Genomics UK (COG-UK) Consortium|Robertson|United Kingdom

>Spike|hCoV-19/USA/NY-Wadsworth-199731-01/2020|2020-08-17|EPI\_ISL\_677042|Original|hCoV-19^^New York|Human|Wadsworth Center|Wadsworth Center|Lasèk-Nesselquist|USA

>Spike|hCoV-19/Spain/PV-IBV-001585/2020|2020-03-13|EPI\_ISL\_467136|Original|hCoV-19^^Basque Country|Human|Hospital Universitario Araba. Vitoria-Gasteiz|SeqCOVID-SPAIN consortium|IBV (CSIC) |Comas|Spain

>Spike|hCoV-19/USA/TX-HMH-MCoV-12642/2020|2020-08-31|EPI\_ISL\_790436|Original|hCoV-19^^Texas|Human|Houston Methodist Hospital|Houston Methodist Hospital|Long|USA

>Spike|hCoV-19/England/204590229/2020|2020-11-06|EPI\_ISL\_686550|Original|hCoV-19^^England|Human|Respiratory Virus Unit|COVID-19 Genomics UK (COG-UK) Consortium|Platt|United Kingdom

>Spike|hCoV-19/Australia/NSW1367/2020|2020-12-31|EPI\_ISL\_767933|Original|hCoV-19^^New South Wales|Human|Pathology West - NSW Health Pathology|NSW Health Pathology - Institute of Clinical Pathology and Medical Research; Westmead Hospital; University of Sydney|Gall|Australia

>Spike|hCoV-19/Luxembourg/LNS7115373/2020|2020-10-21|EPI\_ISL\_744516|Original|hCoV-19^^Luxembourg|Human|Laboratoire national de sant\u00e9|Laboratoire national de sant\u00e9|Wienecke-Baldacchino|Luxembourg

>Spike|hCoV-19/Russia/OMS-ORINFI-4143S/2020|2020-05-28|EPI\_ISL\_569766|Original|hCoV-19^^Omsk|Human|Omsk Research Institute of Natural Focal Infections|WHO National Influenza Centre Russian Federation|Komissarov|Russia

>Spike|hCoV-19/England/ALDP-A2EEEA/2020|2020-10-05|EPI\_ISL\_587106|Original|hCoV-19^^England|Human|Lighthouse Lab in Alderley Park|Wellcome Sanger Institute for the COVID-19 Genomics UK (COG-UK) consortium|Davies|United Kingdom

>Spike|hCoV-19/England/MILK-99A433/2020|2020-08-29|EPI\_ISL\_550296|Original|hCoV-19^^England|Human|Lighthouse Lab in Milton Keynes|Wellcome Sanger Institute for the COVID-19 Genomics UK (COG-UK) consortium|Davies|United Kingdom

>Spike|hCoV-19/India/MH-NIV-7830/2020|2020-04-06|EPI\_ISL\_452210|Original|hCoV-19^^Maharashtra|Human|NIV Influenza|NIV Influenza|Potdar|India

>Spike|hCoV-19/Wales/PHWC-493DBC/2020|2020-11-19|EPI\_ISL\_726025|Original|hCoV-19^^Wales|Human|Originating lab|COVID-19 Genomics UK (COG-UK) Consortium|Moore|United Kingdom

>Spike|hCoV-19/Denmark/DCGC-16405/2020|2020-11-16|EPI\_ISL\_714747|Original|hCoV-19^^Syddanmark|Human|Department of Virus and Microbiological Special Diagnostics|Albertsen Lab|Michaelsen|Denmark

>Spike|hCoV-19/England/LEED-2AA77A/2020|2020-04-09|EPI\_ISL\_538964|Original|hCoV-19^^England|Human|Leeds Teaching Hospitals NHS Trust and Public Health England|Wellcome Sanger Institute for the COVID-19 Genomics UK (COG-UK) consortium|Davies|United Kingdom

>Spike|hCoV-19/Australia/VIC559/2020|2020-03-24|EPI\_ISL\_426820|Original|hCoV-19^^Victoria|Human|Victorian Infectious Diseases Reference Laboratory (VIDRL)|Microbiological Diagnostic Unit Public Health Laboratory and Victorian Infectious Diseases Reference Laboratory|Schultz|Australia

>Spike|hCoV-19/England/NORT-1B6C0E6/2020|2020-10-01|EPI\_ISL\_612563|Original|hCoV-19^^England|Human|Northumbria University / South Tees Hospitals NHS Foundation Trust / North Cumbria Integrated Care NHS Foundation Trust / North Tees and Hartlepool NHS Foundation Trust / Newcastle Hospitals NHS Foundation Trust|COVID-19 Genomics UK (COG-UK) Consortium|Bashton|United Kingdom

>Spike|hCoV-19/England/OXON-AD858/2020|2020-00-00|EPI\_ISL\_448599|Original|hCoV-19^^England|Human|Oxford Viromics|COVID-19 Genomics UK (COG-UK) Consortium|Golubchik|United Kingdom

>Spike|hCoV-19/Wales/PHWC-27470/2020|2020-03-31|EPI\_ISL\_432299|Original|hCoV-19^^Wales|Human|Wales Specialist Virology Centre|Public Health Wales Microbiology Cardiff|Moore|United Kingdom

>Spike|hCoV-19/England/ALDP-A9466F/2020|2020-10-19|EPI\_ISL\_624715|Original|hCoV-19^^England|Human|Lighthouse Lab in Alderley Park|Wellcome Sanger Institute for the COVID-19 Genomics UK (COG-UK) consortium|Davies|United Kingdom

>Spike|hCoV-19/USA/CA-CZB-1884/2020|2020-04-29|EPI\_ISL\_486183|Original|hCoV-19^^California|Human|Orange County Public Health Laboratory|Chan-Zuckerberg Biohub|McGeever|USA

>Spike|hCoV-19/England/NOTT-11BA7C/2020|2020-11-12|EPI\_ISL\_650820|Original|hCoV-19^^England|Human|Queens Medical Centre|COVID-19 Genomics UK (COG-UK) Consortium|Loose|United Kingdom

>Spike|hCoV-19/England/CAMC-B99B00/2020|2020-11-15|EPI\_ISL\_673405|Original|hCoV-19^^England|Human|Lighthouse Lab in Cambridge|Wellcome Sanger Institute for the COVID-19 Genomics UK (COG-UK) Consortium|Davies|United Kingdom

>Spike|hCoV-19/England/NORT-294C83/2020|2020-03-28|EPI\_ISL\_478612|Original|hCoV-19^^England|Human|Northumbria University / South Tees Hospitals NHS Foundation Trust / North Cumbria Integrated Care NHS Foundation Trust / North Tees and Hartlepool NHS Foundation Trust / Newcastle Hospitals NHS Foundation Trust|COVID-19 Genomics UK (COG-UK) Consortium|Bashton|United Kingdom

>Spike|hCoV-19/Switzerland/BE-UNIBE-206-7951/2020|2020-03-31|EPI\_ISL\_574844|Original|hCoV-19^^Bern|Human|Institute for Infectious Diseases|Institute for Infectious Diseases|Koch|Switzerland

>Spike|hCoV-19/England/SHEF-C7436/2020|2020-05-08|EPI\_ISL\_475398|Original|hCoV-19^^England|Human|Virology Department|COVID-19 Genomics UK (COG-UK) Consortium|de Silva|United Kingdom

>Spike|hCoV-19/Denmark/DCGC-22307/2020|2020-12-14|EPI\_ISL\_758667|Original|hCoV-19^^Hovedstaden|Human|Department of Virus and Microbiological Special Diagnostics|Albertsen Lab|Michaelsen|Denmark

>Spike|hCoV-19/England/LEED-2A9A63/2020|2020-04-14|EPI\_ISL\_538837|Original|hCoV-19^^England|Human|Leeds Teaching Hospitals NHS Trust and Public Health England|Wellcome Sanger Institute for the COVID-19 Genomics UK (COG-UK) consortium|Davies|United Kingdom

>Spike|hCoV-19/Ecuador/USFQ-209/2020|2020-08-19|EPI\_ISL\_539784|Original|hCoV-19^^Napo|Human|Universidad Regional Amazonica IKIAM|Institute of Microbiology|Cardenas|Ecuador

>Spike|hCoV-19/SaudiArabia/KAUST-MADINAH355/2020|2020-04-23|EPI\_ISL\_513135|Original|hCoV-19^^Madinah|Human|Pathogen Genomics Lab King Abdullah University of Science and Technology(KAUST)|Pathogen Genomics Lab King Abdullah University of Science and Technology(KAUST)|Mohamed Ghazzali|Saudi Arabia

>Spike|hCoV-19/USA/TX-HMH-MCoV-12528/2020|2020-09-30|EPI\_ISL\_790380|Original|hCoV-19^^Texas|Human|Houston Methodist Hospital|Houston Methodist Hospital|Long|USA

>Spike|hCoV-19/USA/WA-UW-13274/2020|2020-06-30|EPI\_ISL\_501128|Original|hCoV-19^^Washington|Human|University of Washington Virology Lab|University of Washington Virology Lab|Roychoudhury|USA

>Spike|hCoV-19/England/ALDP-BB987C/2020|2020-11-20|EPI\_ISL\_703041|Original|hCoV-19^^England|Human|Lighthouse Lab in Alderley Park|Wellcome Sanger Institute for the COVID-19 Genomics UK (COG-UK) Consortium|Davies|United Kingdom

>Spike|hCoV-19/Scotland/CVR3694/2020|2020-05-24|EPI\_ISL\_473760|Original|hCoV-19^^Scotland|Human|West of Scotland Specialist Virology Centre|COVID-19 Genomics UK (COG-UK) Consortium|Robertson|United Kingdom

>Spike|hCoV-19/England/QEUEH-9B56B4/2020|2020-09-03|EPI\_ISL\_590305|Original|hCoV-19^^England|Human|Lighthouse Lab in Glasgow|Wellcome Sanger Institute for the COVID-19 Genomics UK (COG-UK) consortium|Davies|United Kingdom

>Spike|hCoV-19/USA/TX-HMH-5900/2020|2020-06-30|EPI\_ISL\_547095|Original|hCoV-19^^Texas|Human|Houston Methodist Hospital|Houston Methodist Hospital|Long|USA

>Spike|hCoV-19/USA/TX-HMH-876/2020|2020-04-15|EPI\_ISL\_545893|Original|hCoV-19^^Texas|Human|Houston Methodist Hospital|Houston Methodist Hospital|Long|USA



>Spike|hCoV-19/USA/FL-BPHL-1850/2020|2020-04-09|EPI\_ISL\_613930|Original|hCoV-19^^Florida|Human|Florida Bureau of Public Health Laboratories|Florida Bureau of Public Health Laboratories|Blanton|USA

>Spike|hCoV-19/USA/MD-MDH-0254/2020|2020-10-05|EPI\_ISL\_602277|Original|hCoV-19^^Maryland|Human|MD PHL|MD PHL|Keller|USA

>Spike|hCoV-19/USA/TX-HMH-MCoV-9777/2020|2020-07-04|EPI\_ISL\_780271|Original|hCoV-19^^Texas|Human|Houston Methodist Hospital|Houston Methodist Hospital|Long|USA

>Spike|hCoV-19/England/QEUA-B7CF25/2020|2020-11-14|EPI\_ISL\_674544|Original|hCoV-19^^England|Human|Lighthouse Lab in Glasgow|Wellcome Sanger Institute for the COVID-19 Genomics UK (COG-UK) Consortium|Davies|United Kingdom

>Spike|hCoV-19/England/20116078703/2020|2020-03-10|EPI\_ISL\_420461|Original|hCoV-19^^England|Human|Respiratory Virus Unit|Respiratory Virus Unit|Platt|United Kingdom

>Spike|hCoV-19/England/ALDP-5276A2/2020|2020-06-02|EPI\_ISL\_559006|Original|hCoV-19^^England|Human|Lighthouse Lab in Alderley Park|Wellcome Sanger Institute for the COVID-19 Genomics UK (COG-UK) consortium|Davies|United Kingdom

>Spike|hCoV-19/England/MILK-99A7EF/2020|2020-08-29|EPI\_ISL\_550378|Original|hCoV-19^^England|Human|Lighthouse Lab in Milton Keynes|Wellcome Sanger Institute for the COVID-19 Genomics UK (COG-UK) consortium|Davies|United Kingdom

>Spike|hCoV-19/England/ALDP-9544DB/2020|2020-06-12|EPI\_ISL\_553822|Original|hCoV-19^^England|Human|Lighthouse Lab in Alderley Park|Wellcome Sanger Institute for the COVID-19 Genomics UK (COG-UK) consortium|Davies|United Kingdom

>Spike|hCoV-19/USA/FL-ABAN/2020|2020-06-23|EPI\_ISL\_513268|Original|hCoV-19^^Florida|Human|University of Miami Immunology and Histocompatibility Laboratory|University of Miami Immunology and Histocompatibility Laboratory|Margolles-Clark|USA

>Spike|hCoV-19/England/MILK-9AA62B/2020|2020-08-29|EPI\_ISL\_550972|Original|hCoV-19^^England|Human|Lighthouse Lab in Milton Keynes|Wellcome Sanger Institute for the COVID-19 Genomics UK (COG-UK) consortium|Davies|United Kingdom

>Spike|hCoV-19/Japan/PG-7749/2020|2020-04-00|EPI\_ISL\_686851|Original|hCoV-19^^Japan|Human|Pathogen Genomics Center|Pathogen Genomics Center|Sekizuka|Japan

>Spike|hCoV-19/England/NORT-28B056/2020|2020-04-17|EPI\_ISL\_492934|Original|hCoV-19^^England|Human|NU-OMICS DNA Sequencing research facility|Wellcome Sanger Institute for the COVID-19 Genomics UK (COG-UK) consortium|Davies|United Kingdom

>Spike|hCoV-19/England/LOND-12F07AF/2020|2020-11-16|EPI\_ISL\_679576|Original|hCoV-19^^England|Human|University College London|COVID-19 Genomics UK (COG-UK) Consortium|Roy|United Kingdom

>Spike|hCoV-19/USA/OR-OHSU-2985/2020|2020-09-10|EPI\_ISL\_667558|Original|hCoV-19^^Oregon|Human|OHSU Lab Services Molecular Microbiology Lab|Oregon SARS-CoV-2 Genome Sequencing Center|O'Roak|USA

>Spike|hCoV-19/Wales/PHWC-32B22/2020|2020-04-13|EPI\_ISL\_474399|Original|hCoV-19^^Wales|Human|Originating lab|COVID-19 Genomics UK (COG-UK) Consortium|Moore|United Kingdom

>Spike|hCoV-19/India/GJ-GBRC-422a/2020|2020-07-14|EPI\_ISL\_586551|Original|hCoV-19^^Gujarat|Human|Government Hospital, Veraval|Gujarat Biotechnology Research Centre|Joshi|India

>Spike|hCoV-19/USA/CA-ALSR-4325/2020|2020-10-06|EPI\_ISL\_648971|Original|hCoV-19^^California|Human|San Diego County Public Health Laboratory|Andersen lab at Scripps Research|Gangavarapu|USA

>Spike|hCoV-19/Germany/BY-ChVir-W1128-5741/2020|2020-03-27|EPI\_ISL\_754033|Original|hCoV-19^^Bavaria|Human|Charit\u00e9 Universit\u00e4tsmedizin Berlin|Charit\u00e9 Universit\u00e4tsmedizin Berlin|Muehlemann|Germany

>Spike|hCoV-19/Japan/PG-6195/2020|2020-08-00|EPI\_ISL\_689307|Original|hCoV-19^^Japan|Human|Pathogen Genomics Center|Pathogen Genomics Center|Sekizuka|Japan

>Spike|hCoV-19/Switzerland/BL-ETHZ-400031/2020|2020-12-04|EPI\_ISL\_729097|Original|hCoV-19^^Basel-Landschaft|Human|Viollier AG|Department of Biosystems Science and Engineering|Nadeau|Switzerland

>Spike|hCoV-19/Wales/PHWC-49EA23/2020|2020-12-08|EPI\_ISL\_743083|Original|hCoV-19^^Wales|Human|Wales Specialist Virology Centre Sequencing lab|COVID-19 Genomics UK (COG-UK) Consortium|Moore|United Kingdom

>Spike|hCoV-19/England/CAMB-7CEC9/2020|2020-04-06|EPI\_ISL\_442230|Original|hCoV-19^^England|Human|Department of Pathology|Wellcome Sanger Institute for the COVID-19 Genomics UK (COG-UK) consortium|Amato|United Kingdom

>Spike|hCoV-19/England/QEUEH-A48CFF/2020|2020-10-04|EPI\_ISL\_595920|Original|hCoV-19^^England|Human|Quadram Institute Bioscience|COVID-19 Genomics UK (COG-UK) Consortium|Alikhan|United Kingdom

>Spike|hCoV-19/England/QEUEH-AD1129/2020|2020-10-26|EPI\_ISL\_633727|Original|hCoV-19^^England|Human|Lighthouse Lab in Glasgow|Wellcome Sanger Institute for the COVID-19 Genomics UK (COG-UK) consortium|Davies|United Kingdom

>Spike|hCoV-19/England/ALDP-9E9945/2020|2020-09-24|EPI\_ISL\_584267|Original|hCoV-19^^England|Human|Virology Department|COVID-19 Genomics UK (COG-UK) Consortium|de Silva|United Kingdom

>Spike|hCoV-19/United Arab Emirates/0982/2020|2020-06-14|EPI\_ISL\_699116|Original|hCoV-19^^Abu Dhabi|Human|Group 42 (G42) Healthcare|G42 Healthcare|Ogrodzki|United Arab Emirates

>Spike|hCoV-19/USA/CA-CZB-3325/2020|2020-07-21|EPI\_ISL\_548294|Original|hCoV-19^^California|Human|County of San Luis Obispo Public Health Laboratory|Chan-Zuckerberg Biohub|Bhatt|USA

>Spike|hCoV-19/India/MH-NCCS-NR-11843/2020|2020-07-15|EPI\_ISL\_721650|Original|hCoV-19^^Maharashtra|Human|National Centre For Cell Science|National Centre For Cell Science|Paul|India

>Spike|hCoV-19/England/QEUEH-96E5BD/2020|2020-08-17|EPI\_ISL\_530478|Original|hCoV-19^^England|Human|Lighthouse Lab in Glasgow|Wellcome Sanger Institute for the COVID-19 Genomics UK (COG-UK) consortium|Davies|United Kingdom

>Spike|hCoV-19/Japan/PG-4458/2020|2020-07-00|EPI\_ISL\_692681|Original|hCoV-19^^Japan|Human|Pathogen Genomics Center|Pathogen Genomics Center|Sekizuka|Japan

>Spike|hCoV-19/England/QEUEH-AF5189/2020|2020-10-30|EPI\_ISL\_662925|Original|hCoV-19^^England|Human|Lighthouse Lab in Glasgow|Wellcome Sanger Institute for the COVID-19 Genomics UK (COG-UK) Consortium|Davies|United Kingdom

>Spike|hCoV-19/USA/TX-HMH-MCoV-10465/2020|2020-07-09|EPI\_ISL\_789488|Original|hCoV-19^^Texas|Human|Houston Methodist Hospital|Houston Methodist Hospital|Long|USA

>Spike|hCoV-19/England/CAMB-7D341/2020|2020-04-05|EPI\_ISL\_441585|Original|hCoV-19^^England|Human|Department of Pathology|Wellcome Sanger Institute for the COVID-19 Genomics UK (COG-UK) consortium|Amato|United Kingdom

>Spike|hCoV-19/Japan/Donner18/2020|2020-04-13|EPI\_ISL\_438962|Original|hCoV-19^^Kanto|Human|Keio University School of Medicine|Keio University School of Medicine|Kosaki|Japan

>Spike|hCoV-19/Wales/PHWC-165A37/2020|2020-06-13|EPI\_ISL\_490755|Original|hCoV-19^^Wales|Human|Wales Specialist Virology Centre Sequencing lab|COVID-19 Genomics UK (COG-UK) Consortium|Moore|United Kingdom

>Spike|hCoV-19/Jamaica/JM-CDC-5836/2020|2020-03-14|EPI\_ISL\_450795|Original|hCoV-19^^Jamaica|Human|Jamaica Ministry of Health and Wellness|Pathogen Discovery|Queen|Jamaica

>Spike|hCoV-19/USA/VA-DCLS-0609/2020|2020-03-28|EPI\_ISL\_526826|Original|hCoV-19^^Virginia|Human|Virginia DCLS|Virginia DCLS|St. Jacques|USA

>Spike|hCoV-19/Australia/VIC6794/2020|2020-07-21|EPI\_ISL\_564060|Original|hCoV-19^^Victoria|Human|Victorian Infectious Diseases Reference Laboratory (VIDRL)|VIDRL and MDU-PHL|Schultz|Australia

>Spike|hCoV-19/England/ALDP-BB5719/2020|2020-11-20|EPI\_ISL\_702627|Original|hCoV-19^^England|Human|Lighthouse Lab in Alderley Park|Wellcome Sanger Institute for the COVID-19 Genomics UK (COG-UK) Consortium|Davies|United Kingdom

>Spike|hCoV-19/Scotland/QEUEH-9B40D5/2020|2020-09-07|EPI\_ISL\_560071|Original|hCoV-19^^Scotland|Human|Oxford Viromics|COVID-19 Genomics UK (COG-UK) Consortium|Golubchik|United Kingdom

>Spike|hCoV-19/Wales/PHWC-164ED2/2020|2020-05-28|EPI\_ISL\_479394|Original|hCoV-19^^Wales|Human|Wales Specialist Virology Centre Sequencing lab|COVID-19 Genomics UK (COG-UK) Consortium|Moore|United Kingdom

>Spike|hCoV-19/England/CAMC-B2247A/2020|2020-11-03|EPI\_ISL\_647440|Original|hCoV-19^^England|Human|Lighthouse Lab in Cambridge|Wellcome Sanger Institute for the COVID-19 Genomics UK (COG-UK) Consortium|Davies|United Kingdom

>Spike|hCoV-19/Egypt/CUNCI-HGC3I025/2020|2020-06-02|EPI\_ISL\_479691|Original|hCoV-19^^Egypt|Human|Egyptian National Cancer Institute (ENCI)|Egyptian National Cancer Institute (ENCI)|Zekri|Egypt

>Spike|hCoV-19/Canada/QC-LSPQ-L00229212/2020|2020-03-20|EPI\_ISL\_535887|Original|hCoV-19^^Quebec|Human|H\u00f4pital de Hull|Laboratoire de sant\u00e9 publique du Qu\u00e9bec|Moreira|Canada

>Spike|hCoV-19/Lithuania/C20-05-R10/2020|2020-05-20|EPI\_ISL\_560391|Original|hCoV-19^^Vilnius r.|Human|Vilnius University Hospital Santaros Klinikos|Institute of Biotechnology|Timinskas|Lithuania

>Spike|hCoV-19/England/CAMC-B78E77/2020|2020-11-12|EPI\_ISL\_667935|Original|hCoV-19^^England|Human|Lighthouse Lab in Cambridge|Wellcome Sanger Institute for the COVID-19 Genomics UK (COG-UK) Consortium|Davies|United Kingdom

>Spike|hCoV-19/England/ALDP-AA380D/2020|2020-10-22|EPI\_ISL\_625173|Original|hCoV-19^^England|Human|Lighthouse Lab in Alderley Park|Wellcome Sanger Institute for the COVID-19 Genomics UK (COG-UK) consortium|Davies|United Kingdom

>Spike|hCoV-19/England/NOTT-112C8E/2020|2020-04-17|EPI\_ISL\_493605|Original|hCoV-19^^England|Human|Lincolnshire Hospitals and DeepSeq Nottingham|COVID-19 Genomics UK (COG-UK) Consortium|Loose|United Kingdom

>Spike|hCoV-19/England/ALDP-AC5E12/2020|2020-10-14|EPI\_ISL\_631093|Original|hCoV-19^^England|Human|Lighthouse Lab in Alderley Park|Wellcome Sanger Institute for the COVID-19 Genomics UK (COG-UK) consortium|Davies|United Kingdom

>Spike|hCoV-19/England/ALDP-C3D99A/2020|2020-12-10|EPI\_ISL\_731813|Original|hCoV-19^^England|Human|Lighthouse Lab in Alderley Park|Wellcome Sanger Institute for the COVID-19 Genomics UK (COG-UK) Consortium|Davies|United Kingdom

>Spike|hCoV-19/Japan/PG-5327/2020|2020-08-00|EPI\_ISL\_690430|Original|hCoV-19^^Japan|Human|Pathogen Genomics Center|Pathogen Genomics Center|Sekizuka|Japan

>Spike|hCoV-19/England/QEUA-A6365A/2020|2020-10-12|EPI\_ISL\_596127|Original|hCoV-19^^England|Human|Quadram Institute Bioscience|COVID-19 Genomics UK (COG-UK) Consortium|Alikhan|United Kingdom

>Spike|hCoV-19/Madagascar/IP-01861/2020|2020-03-22|EPI\_ISL\_508863|Original|hCoV-19^^Analamanga|Human|Virology Unit|Virology Unit|Heraud|Madagascar

>Spike|hCoV-19/Denmark/DCGC-8263/2020|2020-10-26|EPI\_ISL\_617314|Original|hCoV-19^^Nordjylland|Human|Department of Virus and Microbiological Special Diagnostics|Albertsen lab|Michaelsen|Denmark

>Spike|hCoV-19/England/QEUA-9C94E0/2020|2020-09-09|EPI\_ISL\_567435|Original|hCoV-19^^England|Human|Lighthouse Lab in Glasgow|Wellcome Sanger Institute for the COVID-19 Genomics UK (COG-UK) consortium|Davies|United Kingdom

>Spike|hCoV-19/England/QEUA-A61E36/2020|2020-10-12|EPI\_ISL\_706939|Original|hCoV-19^^England|Human|Oxford Viromics|COVID-19 Genomics UK (COG-UK) Consortium|Golubchik|United Kingdom

>Spike|hCoV-19/England/ALDP-A6FB13/2020|2020-10-15|EPI\_ISL\_608066|Original|hCoV-19^^England|Human|Lighthouse Lab in Alderley Park|Wellcome Sanger Institute for the COVID-19 Genomics UK (COG-UK) consortium|Davies|United Kingdom

>Spike|hCoV-19/Germany/BE-ChVir-W1639-6740/2020|2020-08-03|EPI\_ISL\_753976|Original|hCoV-19^^Berlin|Human|Charit\u00e9 Universit\u00e4tsmedizin Berlin|Charit\u00e9 Universit\u00e4tsmedizin Berlin|Muehlemann|Germany

>Spike|hCoV-19/Netherlands/ZE-RIVM-10295/2020|2020-10-12|EPI\_ISL\_636584|Original|hCoV-19^^Zeeland|Human|Dutch COVID-19 response team|National Institute for Public Health and the Environment (RIVM)|Meijer|Netherlands

>Spike|hCoV-19/Scotland/QEUA-9D0422/2020|2020-09-16|EPI\_ISL\_601841|Original|hCoV-19^^Scotland|Human|Lighthouse Lab in Glasgow|Wellcome Sanger Institute for the COVID-19 Genomics UK (COG-UK) consortium|Davies|United Kingdom

>Spike|hCoV-19/England/CAMC-B0C4D0/2020|2020-10-30|EPI\_ISL\_643502|Original|hCoV-19^^England|Human|Lighthouse Lab in Cambridge|Wellcome Sanger Institute for the COVID-19 Genomics UK (COG-UK) Consortium|Davies|United Kingdom

>Spike|hCoV-19/England/MILK-A06219/2020|2020-10-01|EPI\_ISL\_600117|Original|hCoV-19^^England|Human|Lighthouse Lab in Milton Keynes|Wellcome Sanger Institute for the COVID-19 Genomics UK (COG-UK) consortium|Davies|United Kingdom

>Spike|hCoV-19/Denmark/DCGC-21139/2020|2020-12-21|EPI\_ISL\_758804|Original|hCoV-19^^Hovedstaden|Human|Department of Virus and Microbiological Special Diagnostics|Albertsen Lab|Michaelsen|Denmark

>Spike|hCoV-19/Canada/BC\_03471188/2020|2020-04-00|EPI\_ISL\_466750|Original|hCoV-19^^British Columbia|Human|BCCDC Public Health Laboratory|BCCDC Public Health Laboratory|Harrigan|Canada

>Spike|hCoV-19/England/CAMC-B54600/2020|2020-11-08|EPI\_ISL\_658084|Original|hCoV-19^^England|Human|Lighthouse Lab in Cambridge|Wellcome Sanger Institute for the COVID-19 Genomics UK (COG-UK) Consortium|Davies|United Kingdom

>Spike|hCoV-19/England/ALDP-A955BC/2020|2020-10-20|EPI\_ISL\_624679|Original|hCoV-19^^England|Human|Lighthouse Lab in Alderley Park|Wellcome Sanger Institute for the COVID-19 Genomics UK (COG-UK) consortium|Davies|United Kingdom

>Spike|hCoV-19/USA/CT-UW256/2020|2020-03-14|EPI\_ISL\_418041|Original|hCoV-19^^Connecticut|Human|UW Virology Lab|UW Virology Lab|Roychoudhury|USA

>Spike|hCoV-19/USA/CA-QDX-2091/2020|2020-03-18|EPI\_ISL\_604403|Original|hCoV-19^^California|Human|Quest Diagnostics|Quest Diagnostics|Kagan|USA

>Spike|hCoV-19/France/IDF-10050RA/2020|2020-03-00|EPI\_ISL\_447676|Original|hCoV-19^^France|Human|H\u00f4pital Henri-Mondor Ap-Hp|H\u00f4pital Henri-Mondor Ap-Hp|Rodriguez|France

>Spike|hCoV-19/Australia/VIC6696/2020|2020-07-20|EPI\_ISL\_563998|Original|hCoV-19^^Victoria|Human|Victorian Infectious Diseases Reference Laboratory (VIDRL)|VIDRL and MDU-PHL|Schultz|Australia

>Spike|hCoV-19/England/NOTT-114730/2020|2020-10-06|EPI\_ISL\_577192|Original|hCoV-19^^England|Human|Queens Medical Centre|COVID-19 Genomics UK (COG-UK) Consortium|Loose|United Kingdom

>Spike|hCoV-19/USA/WA-UW-10552/2020|2020-06-11|EPI\_ISL\_570333|Original|hCoV-19^^Washington|Human|UW Virology Lab|UW Virology Lab|Roychoudhury|USA

>Spike|hCoV-19/England/MILK-B8D677/2020|2020-11-13|EPI\_ISL\_673986|Original|hCoV-19^^England|Human|Lighthouse Lab in Milton Keynes|Wellcome Sanger Institute for the COVID-19 Genomics UK (COG-UK) Consortium|Davies|United Kingdom

>Spike|hCoV-19/England/BRIS-12A8BC/2020|2020-04-29|EPI\_ISL\_458504|Original|hCoV-19^^England|Human|PHE South West Regional Laboratory|Wellcome Sanger Institute for the COVID-19 Genomics UK (COG-UK) consortium|Davies|United Kingdom

>Spike|hCoV-19/USA/AZ-TG371322/2020|2020-05-21|EPI\_ISL\_694572|Original|hCoV-19^^Arizona|Human|AZ SPHL|TGen North|French|USA

>Spike|hCoV-19/Spain/CT-IBV-97010120/2020|2020-07-22|EPI\_ISL\_683622|Original|hCoV-19^^Catalunya|Human|Servicio de Microbiolog\u00eda|SeqCOVID-SPAIN consortium|IBV (CSIC)|Comas|Spain

>Spike|hCoV-19/Canada/MB-NML-1170/2020|2020-08-03|EPI\_ISL\_582491|Original|hCoV-19^^Manitoba|Human|Cadham Provincial Laboratory|National Microbiology Laboratory (NML)|Majer|Canada

>Spike|hCoV-19/Wales/PHWC-49544C/2020|2020-11-21|EPI\_ISL\_726347|Original|hCoV-19^^Wales|Human|Originating lab|COVID-19 Genomics UK (COG-UK) Consortium|Moore|United Kingdom

>Spike|hCoV-19/Sweden/20-22293/2020|2020-03-27|EPI\_ISL\_660390|Original|hCoV-19^^Ostergotland|Human|Klinsisk mikrobiologi Linkoping|The Public Health Agency of Sweden|Svartstr\u00f6m|Sweden

>Spike|hCoV-19/USA/TX-HMH-MCoV-12910/2020|2020-08-18|EPI\_ISL\_788062|Original|hCoV-19^^Texas|Human|Houston Methodist Hospital|Houston Methodist Hospital|Long|USA

>Spike|hCoV-19/England/CAMB-7DE6E/2020|2020-04-06|EPI\_ISL\_442083|Original|hCoV-19^^England|Human|Department of Pathology|Wellcome Sanger Institute for the COVID-19 Genomics UK (COG-UK) consortium|Amato|United Kingdom

>Spike|hCoV-19/USA/CA-CZB-11876/2020|2020-04-08|EPI\_ISL\_625598|Original|hCoV-19^^California|Human|Santa Clara County Public Health Laboratory|Chan-Zuckerberg Biohub|Bhatt|USA

>Spike|hCoV-19/USA/WA-UW-2928/2020|2020-03-29|EPI\_ISL\_486052|Original|hCoV-19^^Washington|Human|UW Virology Lab|UW Virology Lab|Roychoudhury|USA

>Spike|hCoV-19/USA/CA-UW-710/2020|2020-06-30|EPI\_ISL\_491302|Original|hCoV-19^^California|Human|University of Wisconsin-Madison AIDS Vaccine Research

Laboratories|University of Wisconsin-Madison AIDS Vaccine Research  
Laboratories|Baczenas|USA  
>Spike|hCoV-19/England/ALDP-923095/2020|2020-06-23|EPI\_ISL\_553344|Original|hCoV-19^^England|Human|Lighthouse Lab in Alderley Park|Wellcome Sanger Institute for the COVID-19 Genomics UK (COG-UK) consortium|Davies|United Kingdom  
>Spike|hCoV-19/USA/OR-OHSU-2965/2020|2020-08-24|EPI\_ISL\_667434|Original|hCoV-19^^Oregon|Human|OHSU Lab Services Molecular Microbiology Lab|Oregon SARS-CoV-2 Genome Sequencing Center|O'Roak|USA  
>Spike|hCoV-19/Australia/VIC14647/2020|2020-08-11|EPI\_ISL\_592932|Original|hCoV-19^^Victoria|Human|Microbiological Diagnostic Unit - Public Health Laboratory (MDU-PHL)|MDU-PHL|Schultz|Australia  
>Spike|hCoV-19/Hungary/UD-57951/2020|2020-09-02|EPI\_ISL\_671438|Original|hCoV-19^^Gy\u0151r-Moson-Sopron county|Human|University of Debrecen|National Laboratory of Virology|Kemenesi|Hungary  
>Spike|hCoV-19/England/PORT-2F527F/2020|2020-00-00|EPI\_ISL\_703495|Original|hCoV-19^^England|Human|Centre for Enzyme Innovation|COVID-19 Genomics UK (COG-UK) Consortium|Robson|United Kingdom  
>Spike|hCoV-19/England/LOND-D89BB/2020|2020-04-14|EPI\_ISL\_492757|Original|hCoV-19^^England|Human|University College London|Wellcome Sanger Institute for the COVID-19 Genomics UK (COG-UK) consortium|Davies|United Kingdom  
>Spike|hCoV-19/Denmark/DCGC-13188/2020|2020-11-30|EPI\_ISL\_712638|Original|hCoV-19^^Hovedstaden|Human|Department of Virus and Microbiological Special Diagnostics|Albertsen Lab|Michaelsen|Denmark  
>Spike|hCoV-19/India/TG-CCMB-AA669/2020|2020-08-12|EPI\_ISL\_539655|Original|hCoV-19^^Telangana|Human|CSIR-Centre for Cellular and Molecular Biology|CSIR-Centre for Cellular and Molecular Biology|Mukherjee|India  
>Spike|hCoV-19/England/CAMB-7F7F8/2020|2020-04-09|EPI\_ISL\_470401|Original|hCoV-19^^England|Human|Department of Pathology|Wellcome Sanger Institute for the COVID-19 Genomics UK (COG-UK) consortium|Davies|United Kingdom  
>Spike|hCoV-19/Malaysia/IMR\_WC1097/2020|2020-02-29|EPI\_ISL\_430441|Vero E6|hCoV-19^^Malaysia|Human|Institute for Medical Research|Institute for Medical Research|Suppiah|Malaysia  
>Spike|hCoV-19/England/QEUE-9AE2F6/2020|2020-09-02|EPI\_ISL\_637665|Original|hCoV-19^^England|Human|Department of Pathology|COVID-19 Genomics UK (COG-UK) Consortium|Goodfellow|United Kingdom  
>Spike|hCoV-19/England/MILK-9A8B6A/2020|2020-09-01|EPI\_ISL\_549971|Original|hCoV-19^^England|Human|Lighthouse Lab in Milton Keynes|Wellcome Sanger Institute for the COVID-19 Genomics UK (COG-UK) consortium|Davies|United Kingdom  
>Spike|hCoV-19/Wales/PHWC-49288F/2020|2020-11-29|EPI\_ISL\_725712|Original|hCoV-19^^Wales|Human|Originating lab|COVID-19 Genomics UK (COG-UK) Consortium|Moore|United Kingdom  
>Spike|hCoV-19/England/ALDP-A6D73F/2020|2020-10-15|EPI\_ISL\_608268|Original|hCoV-19^^England|Human|Lighthouse Lab in Alderley Park|Wellcome Sanger Institute for the COVID-19 Genomics UK (COG-UK) consortium|Davies|United Kingdom  
>Spike|hCoV-19/Scotland/CVR2258/2020|2020-04-12|EPI\_ISL\_453035|Original|hCoV-19^^Scotland|Human|West of Scotland Specialist Virology Centre|COVID-19 Genomics UK (COG-UK) Consortium|Robertson|United Kingdom  
>Spike|hCoV-19/Netherlands/ZH-EMC-453/2020|2020-08-12|EPI\_ISL\_523791|Original|hCoV-19^^Zuid Holland|Human|Dutch COVID-19 response team|Erasmus Medical Center|Oude Munnink|Netherlands  
>Spike|hCoV-19/Wales/PHWC-495C35/2020|2020-11-25|EPI\_ISL\_726459|Original|hCoV-19^^Wales|Human|Originating lab|COVID-19 Genomics UK (COG-UK) Consortium|Moore|United Kingdom  
>Spike|hCoV-19/England/NORW-E9C45/2020|2020-04-29|EPI\_ISL\_448356|Original|hCoV-19^^England|Human|Quadram Institute Bioscience|COVID-19 Genomics UK (COG-UK) Consortium|Alikhan|United Kingdom  
>Spike|hCoV-19/England/CAMB-7D3D8/2020|2020-04-05|EPI\_ISL\_442298|Original|hCoV-19^^England|Human|Department of Pathology|Wellcome Sanger Institute for the COVID-19 Genomics UK (COG-UK) consortium|Amato|United Kingdom

>Spike|hCoV-19/England/QEUEH-9DE7D0/2020|2020-09-21|EPI\_ISL\_581182|Original|hCoV-19^^England|Human|Lighthouse Lab in Glasgow|Wellcome Sanger Institute for the COVID-19 Genomics UK (COG-UK) consortium|Davies|United Kingdom

>Spike|hCoV-19/Czech Republic/NRL\_6849-10/2020|2020-05-14|EPI\_ISL\_577631|Original|hCoV-19^^Central Bohemia Region|Human|The National Institute of Public Health|State Veterinary Institute Prague|Nagy|Czech Republic

>Spike|hCoV-19/South Africa/KRISP-K003367/2020|2020-09-04|EPI\_ISL\_602758|Original|hCoV-19^^KwaZulu-Natal|Human|NHLS-IALCH|KRISP|de Oliveira|South Africa

>Spike|hCoV-19/Australia/VIC5259/2020|2020-07-19|EPI\_ISL\_520024|Original|hCoV-19^^Victoria|Human|Microbiological Diagnostic Unit - Public Health Laboratory (MDU-PHL)|MDU-PHL|Schultz|Australia

>Spike|hCoV-19/Denmark/DCGC-4628/2020|2020-09-21|EPI\_ISL\_621297|Original|hCoV-19^^Sjaelland|Human|Department of Virus and Microbiological Special Diagnostics|Albertsen lab|Michaelsen|Denmark

>Spike|hCoV-19/England/ALDP-982B66/2020|2020-08-10|EPI\_ISL\_552706|Original|hCoV-19^^England|Human|Lighthouse Lab in Alderley Park|Wellcome Sanger Institute for the COVID-19 Genomics UK (COG-UK) consortium|Davies|United Kingdom

>Spike|hCoV-19/Wales/PHWC-4911C1/2020|2020-11-16|EPI\_ISL\_706623|Original|hCoV-19^^Wales|Human|Originating lab|COVID-19 Genomics UK (COG-UK) Consortium|Moore|United Kingdom

>Spike|hCoV-19/England/OXON-B0B0E/2020|2020-04-27|EPI\_ISL\_478937|Original|hCoV-19^^England|Human|Oxford Viromics|COVID-19 Genomics UK (COG-UK) Consortium|Golubchik|United Kingdom

>Spike|hCoV-19/Denmark/DCGC-18053/2020|2020-12-14|EPI\_ISL\_749205|Original|hCoV-19^^Sjaelland|Human|Department of Virus and Microbiological Special Diagnostics|Albertsen Lab|Michaelsen|Denmark

>Spike|hCoV-19/Netherlands/NA\_426/2020|2020-04-06|EPI\_ISL\_455228|Original|hCoV-19^^Netherlands|Human|Dutch COVID-19 response team|Erasmus Medical Center|Oude Munnink|Netherlands

>Spike|hCoV-19/France/ARA97193/2020|2020-10-29|EPI\_ISL\_640011|Original|hCoV-19^^Auvergne-Rhone-Alpes|Human|CNR Virus des Infections Respiratoires - France SUD|CNR Virus des Infections Respiratoires - France SUD|Josset|France

>Spike|hCoV-19/England/ALDP-A69083/2020|2020-10-12|EPI\_ISL\_608999|Original|hCoV-19^^England|Human|Lighthouse Lab in Alderley Park|Wellcome Sanger Institute for the COVID-19 Genomics UK (COG-UK) consortium|Davies|United Kingdom

>Spike|hCoV-19/Netherlands/Limburg\_8/2020|2020-03-19|EPI\_ISL\_422647|Original|hCoV-19^^Limburg|Human|Dutch COVID-19 response team|Erasmus Medical Center|Oude Munnink|Netherlands

>Spike|hCoV-19/USA/MI-QDX-1712/2020|2020-03-18|EPI\_ISL\_604040|Original|hCoV-19^^Michigan|Human|Quest Diagnostics|Quest Diagnostics|Kagan|USA

>Spike|hCoV-19/Japan/PG-8883/2020|2020-08-00|EPI\_ISL\_686429|Original|hCoV-19^^Japan|Human|Pathogen Genomics Center|Pathogen Genomics Center|Sekizuka|Japan

>Spike|hCoV-19/USA/WA-S2173/2020|2020-06-08|EPI\_ISL\_497601|Original|hCoV-19^^Washington|Human|Washington State Department of Health|Seattle Flu Study|Lee|USA

>Spike|hCoV-19/USA/NY-NYCPHL-000860/2020|2020-03-26|EPI\_ISL\_632236|Original|hCoV-19^^New York|Human|Flushing Hospital Medical Center|New York City Public Health Laboratory|Wang|USA

>Spike|hCoV-19/England/QEUEH-960348/2020|2020-08-04|EPI\_ISL\_531883|Original|hCoV-19^^England|Human|Lighthouse Lab in Glasgow|Wellcome Sanger Institute for the COVID-19 Genomics UK (COG-UK) consortium|Davies|United Kingdom

>Spike|hCoV-19/England/204291000/2020|2020-10-16|EPI\_ISL\_613615|Original|hCoV-19^^England|Human|Respiratory Virus Unit|Respiratory Virus Unit|Platt|United Kingdom

>Spike|hCoV-19/Wales/PHWC-16E834/2020|2020-10-07|EPI\_ISL\_585776|Original|hCoV-19^^Wales|Human|Wales Specialist Virology Centre Sequencing lab|COVID-19 Genomics UK (COG-UK) Consortium|Moore|United Kingdom

>Spike|hCoV-19/Morocco/FMP-30/2020|2020-12-00|EPI\_ISL\_728363|Original|hCoV-19^^Rabat|Human|Laboratoire Biolife|Laboratoire de Biotechnologie|Oudghiri|Morocco

>Spike|hCoV-19/USA/AZ-TG366730/2020|2020-06-02|EPI\_ISL\_694489|Original|hCoV-19^^Arizona|Human|AZ SPHL|TGen North|French|USA

>Spike|hCoV-19/Gambia/GC19-3374/2020|2020-07-27|EPI\_ISL\_561065|Original|hCoV-19^^Kombo|Human|MRCG at LSHTM Genomics lab|MRCG at LSHTM Genomics lab|Sesay|Gambia

>Spike|hCoV-19/France/PAC-IHU-0485/2020|2020-04-03|EPI\_ISL\_569542|Original|hCoV-19^^Provence-Alpes-C\u00f4te-d\u2019Azur|Human|MEPHI|MEPHI|Levasseur|France

>Spike|hCoV-19/Hong Kong/VM20009654/2020|2020-04-05|EPI\_ISL\_444038|Original|hCoV-19^^Hong Kong|Human|Princess Margaret Hospital|Hong Kong Department of Health|Mak|China

>Spike|hCoV-19/Australia/NSW573/2020|2020-03-20|EPI\_ISL\_478685|Original|hCoV-19^^New South Wales|Human|South Eastern Area Laboratory Services (SEALS)|NSW Health Pathology - Institute of Clinical Pathology and Medical Research; Westmead Hospital; University of Sydney|Gall|Australia

>Spike|hCoV-19/England/CAMB-71D7C/2020|2020-03-31|EPI\_ISL\_439599|Original|hCoV-19^^England|Human|Department of Pathology|Wellcome Sanger Institute for the COVID-19 Genomics UK (COG-UK) consortium|Amato|United Kingdom

>Spike|hCoV-19/England/ALDP-A674A7/2020|2020-10-12|EPI\_ISL\_630662|Original|hCoV-19^^England|Human|Lighthouse Lab in Alderley Park|Wellcome Sanger Institute for the COVID-19 Genomics UK (COG-UK) consortium|Davies|United Kingdom

>Spike|hCoV-19/Japan/PG-1715/2020|2020-04-00|EPI\_ISL\_685321|Original|hCoV-19^^Japan|Human|Pathogen Genomics Center|Pathogen Genomics Center|Sekizuka|Japan

>Spike|hCoV-19/SaudiArabia/KAUST-MAKKAH772/2020|2020-04-18|EPI\_ISL\_513242|Original|hCoV-19^^Makkah|Human|Pathogen Genomics Lab King Abdullah University of Science and Technology(KAUST)|Pathogen Genomics Lab King Abdullah University of Science and Technology(KAUST)|Mohamed Ghazzali|Saudi Arabia

>Spike|hCoV-19/USA/TX-HMH-5702/2020|2020-06-25|EPI\_ISL\_546954|Original|hCoV-19^^Texas|Human|Houston Methodist Hospital|Houston Methodist Hospital|Long|USA

>Spike|hCoV-19/Australia/VIC3294/2020|2020-07-05|EPI\_ISL\_520973|Original|hCoV-19^^Victoria|Human|Microbiological Diagnostic Unit - Public Health Laboratory (MDU-PHL)|MDU-PHL|Schultz|Australia

>Spike|hCoV-19/England/QEUA-9CA6CB/2020|2020-09-10|EPI\_ISL\_567278|Original|hCoV-19^^England|Human|Lighthouse Lab in Glasgow|Wellcome Sanger Institute for the COVID-19 Genomics UK (COG-UK) consortium|Davies|United Kingdom

>Spike|hCoV-19/England/ALDP-5A5563/2020|2020-06-15|EPI\_ISL\_558675|Original|hCoV-19^^England|Human|Lighthouse Lab in Alderley Park|Wellcome Sanger Institute for the COVID-19 Genomics UK (COG-UK) consortium|Davies|United Kingdom

>Spike|hCoV-19/Japan/PG-1088/2020|2020-04-00|EPI\_ISL\_684698|Original|hCoV-19^^Japan|Human|Pathogen Genomics Center|Pathogen Genomics Center|Sekizuka|Japan

>Spike|hCoV-19/Wales/PHWC-3308C/2020|2020-04-14|EPI\_ISL\_446731|Original|hCoV-19^^Wales|Human|Wales Specialist Virology Centre|Public Health Wales Microbiology Cardiff|Moore|United Kingdom

>Spike|hCoV-19/Belgium/ULG-10101/2020|2020-04-06|EPI\_ISL\_427352|Original|hCoV-19^^Liege|Human|Department of Clinical Microbiology|GIGA Medical Genomics|Durkin|Belgium

>Spike|hCoV-19/USA/MA-MGH-02749/2020|2020-09-24|EPI\_ISL\_765614|Original|hCoV-19^^Massachusetts|Human|Massachusetts General Hospital|Infectious Disease Program|Park|USA

>Spike|hCoV-19/England/ALDP-A67814/2020|2020-10-12|EPI\_ISL\_630582|Original|hCoV-19^^England|Human|Lighthouse Lab in Alderley Park|Wellcome Sanger Institute for the COVID-19 Genomics UK (COG-UK) consortium|Davies|United Kingdom

>Spike|hCoV-19/USA/NY-QDX-2696/2020|2020-03-14|EPI\_ISL\_605041|Original|hCoV-19^^New York|Human|Quest Diagnostics|Quest Diagnostics|Kagan|USA

>Spike|hCoV-19/Thailand/WU15-3/2020|2020-03-17|EPI\_ISL\_450961|Original|hCoV-19^^Thailand|Human|Center of Excellence in Clinical Virology|Center of Excellence in Clinical Virology|Poovorawan|Thailand

>Spike|hCoV-19/Wales/PHWC-4800AA/2020|2020-10-22|EPI\_ISL\_612848|Original|hCoV-19^^Wales|Human|Wales Specialist Virology Centre Sequencing lab|COVID-19 Genomics UK (COG-UK) Consortium|Moore|United Kingdom

>Spike|hCoV-19/Australia/NSW1226/2020|2020-11-29|EPI\_ISL\_710124|Original|hCoV-19^^New South Wales|Human|South Eastern Area Laboratory Services (SEALS)|CIDM-PH et al.|Gall|Australia

>Spike|hCoV-19/USA/WA-UW-2909/2020|2020-03-28|EPI\_ISL\_486047|Original|hCoV-19^^Washington|Human|UW Virology Lab|UW Virology Lab|Roychoudhury|USA

>Spike|hCoV-19/USA/MA-UW-673/2020|2020-06-26|EPI\_ISL\_491317|Original|hCoV-19^^Massachusetts|Human|University of Wisconsin-Madison AIDS Vaccine Research Laboratories|University of Wisconsin-Madison AIDS Vaccine Research Laboratories|Baczenas|USA

>Spike|hCoV-19/England/ALDP-6E492F/2020|2020-06-30|EPI\_ISL\_557645|Original|hCoV-19^^England|Human|Lighthouse Lab in Alderley Park|Wellcome Sanger Institute for the COVID-19 Genomics UK (COG-UK) consortium|Davies|United Kingdom

>Spike|hCoV-19/USA/LA-GBCL-26544535/2020|2020-04-18|EPI\_ISL\_485117|Original|hCoV-19^^Louisiana|Human|River Road Testing Lab|Ginkgo Bioworks Clinical Laboratory|Smith|USA

>Spike|hCoV-19/Japan/PG-3745/2020|2020-04-00|EPI\_ISL\_691998|Original|hCoV-19^^Japan|Human|Pathogen Genomics Center|Pathogen Genomics Center|Sekizuka|Japan

>Spike|hCoV-19/Netherlands/OV-RIVM-20671/2020|2020-12-12|EPI\_ISL\_790741|Original|hCoV-19^^Overijssel|Human|Dutch COVID-19 response team|National Institute for Public Health and the Environment (RIVM)|Meijer|Netherlands

>Spike|hCoV-19/England/QEUA-AF0FA2/2020|2020-10-30|EPI\_ISL\_662863|Original|hCoV-19^^England|Human|Lighthouse Lab in Glasgow|Wellcome Sanger Institute for the COVID-19 Genomics UK (COG-UK) Consortium|Davies|United Kingdom

>Spike|hCoV-19/Denmark/DCGC-10676/2020|2020-11-02|EPI\_ISL\_670129|Original|hCoV-19^^Midtjylland|Human|Department of Virus and Microbiological Special Diagnostics|Albertsen Lab|Michaelsen|Denmark

>Spike|hCoV-19/Japan/PG-5620/2020|2020-08-00|EPI\_ISL\_688745|Original|hCoV-19^^Japan|Human|Pathogen Genomics Center|Pathogen Genomics Center|Sekizuka|Japan

>Spike|hCoV-19/England/CAMC-BBDDC4/2020|2020-11-21|EPI\_ISL\_702761|Original|hCoV-19^^England|Human|Virology Department|COVID-19 Genomics UK (COG-UK) Consortium|de Silva|United Kingdom

>Spike|hCoV-19/England/CAMC-CB2BD3/2020|2020-12-01|EPI\_ISL\_760858|Original|hCoV-19^^England|Human|Lighthouse Lab in Cambridge|Wellcome Sanger Institute for the COVID-19 Genomics UK (COG-UK) Consortium|Davies|United Kingdom

>Spike|hCoV-19/England/CAMB-82446/2020|2020-04-12|EPI\_ISL\_443592|Original|hCoV-19^^England|Human|Department of Pathology|Wellcome Sanger Institute for the COVID-19 Genomics UK (COG-UK) consortium|Amato|United Kingdom

>Spike|hCoV-19/Scotland/QEUA-96FF81/2020|2020-08-18|EPI\_ISL\_568410|Original|hCoV-19^^Scotland|Human|Lighthouse Lab in Glasgow|Wellcome Sanger Institute for the COVID-19 Genomics UK (COG-UK) consortium|Davies|United Kingdom

>Spike|hCoV-19/USA/CT-Yale-326/2020|2020-04-01|EPI\_ISL\_476554|Original|hCoV-19^^Connecticut|Human|Yale Clinical Virology Laboratory|Grubaugh Lab - Yale School of Public Health|Grubaugh|USA

>Spike|hCoV-19/USA/MI-MDHHS-SC22584/2020|2020-11-23|EPI\_ISL\_737142|Original|hCoV-19^^Michigan|Human|Michigan Department of Health and Human Services|Michigan Department of Health and Human Services|Blankenship|USA

>Spike|hCoV-19/mink/Netherlands/NB-EMC-15-8/2020|2020-06-21|EPI\_ISL\_523027|Original|hCoV-19^^Noord Brabant|Neovison vison|Dutch COVID-19 response team|Erasmus Medical Center|Oude Munnink|Netherlands

>Spike|hCoV-19/USA/LA-EVTL203/2020|2020-08-11|EPI\_ISL\_574337|Original|hCoV-19^^Louisiana|Human|LSUHS Emerging Viral Threat Laboratory|Microbial Genome Sequencing Center|Kamil|USA

>Spike|hCoV-19/USA/OR-OHSU-0516/2020|2020-06-05|EPI\_ISL\_525830|Original|hCoV-19^^Oregon|Human|OHSU Lab Services Molecular Microbiology Lab|Ginkgo Bioworks Clinical Laboratory|O'Roak|USA

>Spike|hCoV-19/Hong Kong/VM20104573/2020|2020-08-11|EPI\_ISL\_637028|Original|hCoV-19^^Hong Kong|Human|Queen Mary Hospital|Hong Kong Department of Health|Mak|China

>Spike|hCoV-19/France/IDF-10030NV/2020|2020-03-00|EPI\_ISL\_447663|Original|hCoV-19^^France|Human|H\u00f4pital Henri-Mondor Ap-Hp|H\u00f4pital Henri-Mondor Ap-Hp|Rodriguez|France

>Spike|hCoV-19/Scotland/QEUA-96AAD0/2020|2020-08-17|EPI\_ISL\_534672|Original|hCoV-19^^Scotland|Human|NHSGGC West of Scotland Specialist Virology Centre / MRC-



University of Glasgow Centre for Virus Research|Wellcome Sanger Institute for the COVID-19 Genomics UK (COG-UK) consortium|Davies|United Kingdom  
>Spike|hCoV-19/USA/AK-PHL193/2020|2020-04-09|EPI\_ISL\_435444|Original|hCoV-19^^Alaska|Human|Alaska State Virology Laboratory|Alaska State Virology Laboratory|Chen|USA  
>Spike|hCoV-19/England/MILK-9C2C76/2020|2020-09-10|EPI\_ISL\_566678|Original|hCoV-19^^England|Human|Lighthouse Lab in Milton Keynes|Wellcome Sanger Institute for the COVID-19 Genomics UK (COG-UK) consortium|Davies|United Kingdom  
>Spike|hCoV-19/Mexico/BCN-ALSR-2485/2020|2020-05-26|EPI\_ISL\_635496|Original|hCoV-19^^Baja California|Human|Centro de Diagn\u221a\u2265tico COVID-19 UABC Tijuana|Andersen lab at Scripps Research|Gangavarapu|Mexico  
>Spike|hCoV-19/USA/UT-QDX-1825/2020|2020-03-14|EPI\_ISL\_604144|Original|hCoV-19^^Utah|Human|Quest Diagnostics|Quest Diagnostics|Kagan|USA  
>Spike|hCoV-19/Netherlands/UT-EMC-114/2020|2020-10-12|EPI\_ISL\_632637|Original|hCoV-19^^Utrecht|Human|Dutch COVID-19 response team|Erasmus Medical Center|Oude Munnink|Netherlands  
>Spike|hCoV-19/Scotland/CVR3484/2020|2020-05-12|EPI\_ISL\_456876|Original|hCoV-19^^Scotland|Human|West of Scotland Specialist Virology Centre|COVID-19 Genomics UK (COG-UK) Consortium|Robertson|United Kingdom  
>Spike|hCoV-19/England/CAMC-A64D18/2020|2020-10-11|EPI\_ISL\_608472|Original|hCoV-19^^England|Human|Lighthouse Lab in Cambridge|Wellcome Sanger Institute for the COVID-19 Genomics UK (COG-UK) consortium|Davies|United Kingdom  
>Spike|hCoV-19/England/CAMB-75992/2020|2020-03-31|EPI\_ISL\_438279|Original|hCoV-19^^England|Human|Department of Pathology|Wellcome Sanger Institute for the COVID-19 Genomics UK (COG-UK) consortium|Amato|United Kingdom  
>Spike|hCoV-19/Spain/NC-IBV-001413/2020|2020-03-20|EPI\_ISL\_452488|Original|hCoV-19^^Navarra|Human|Cl\u00ednica Universidad de Navarra. Servicio de Enfermedades Infecciosas y Microbiolog\u00eda cl\u00ednica|SeqCOVID-SPAIN consortium/IBV (CSIC) |Comas|Spain  
>Spike|hCoV-19/USA/AZ-TG486581/2020|2020-07-08|EPI\_ISL\_695089|Original|hCoV-19^^Arizona|Human|TGen North|TGen North|French|USA  
>Spike|hCoV-19/England/QEUA-A8B328/2020|2020-10-16|EPI\_ISL\_643045|Original|hCoV-19^^England|Human|Lighthouse Lab in Glasgow|Wellcome Sanger Institute for the COVID-19 Genomics UK (COG-UK) Consortium|Davies|United Kingdom  
>Spike|hCoV-19/England/QEUA-B2DE71/2020|2020-11-03|EPI\_ISL\_646308|Original|hCoV-19^^England|Human|Lighthouse Lab in Glasgow|Wellcome Sanger Institute for the COVID-19 Genomics UK (COG-UK) Consortium|Davies|United Kingdom  
>Spike|hCoV-19/Germany/BE-ChVir-W1082-8115/2020|2020-04-05|EPI\_ISL\_753934|Original|hCoV-19^^Berlin|Human|Charit\u00e9 Universit\u00e4tsmedizin Berlin|Charit\u00e9 Universit\u00e4tsmedizin Berlin|Muehlemann|Germany  
>Spike|hCoV-19/Japan/PG-0614/2020|2020-04-00|EPI\_ISL\_684224|Original|hCoV-19^^Japan|Human|Gunma Prefectural Institute of Public Health and Environmental Sciences|Pathogen Genomics Center|Sekizuka|Japan  
>Spike|hCoV-19/Scotland/QEUA-95E5A1/2020|2020-08-09|EPI\_ISL\_532438|Original|hCoV-19^^Scotland|Human|NHSGGC West of Scotland Specialist Virology Centre / MRC-University of Glasgow Centre for Virus Research|Wellcome Sanger Institute for the COVID-19 Genomics UK (COG-UK) consortium|Davies|United Kingdom  
>Spike|hCoV-19/USA/WI-UW-58/2020|2020-03-23|EPI\_ISL\_421316|Original|hCoV-19^^Wisconsin|Human|University of Wisconsin-Madison AIDS Vaccine Research Laboratories|University of Wisconsin-Madison AIDS Vaccine Research Laboratories|Baczenas|USA  
>Spike|hCoV-19/Spain/PV-IBV-98008447/2020|2020-10-23|EPI\_ISL\_654610|Original|hCoV-19^^Basque Country|Human|Servicio de Microbiolog\u00eda. Hospital Universitario Donostia. OSI Donostialdea. \u00c1rea de Enfermedades Infecciosas|SeqCOVID-SPAIN consortium/IBV (CSIC) |Comas|Spain  
>Spike|hCoV-19/England/QEUA-9B937D/2020|2020-09-07|EPI\_ISL\_549561|Original|hCoV-19^^England|Human|Lighthouse Lab in Glasgow|Wellcome Sanger Institute for the COVID-19 Genomics UK (COG-UK) consortium|Davies|United Kingdom

>Spike|hCoV-19/Switzerland/SO-UHB-42191589/2020|2020-03-15|EPI\_ISL\_528102|Original|hCoV-19^^Solothurn|Human|University Hospital Basel|University Hospital Basel|Roloff Handschin|Switzerland

>Spike|hCoV-19/Denmark/DCGC-5600/2020|2020-09-28|EPI\_ISL\_620925|Original|hCoV-19^^Sjaelland|Human|Department of Virus and Microbiological Special Diagnostics|Albertsen lab|Michaelsen|Denmark

>Spike|hCoV-19/Wales/PHWC-494049/2020|2020-11-14|EPI\_ISL\_726058|Original|hCoV-19^^Wales|Human|Originating lab|COVID-19 Genomics UK (COG-UK) Consortium|Moore|United Kingdom

>Spike|hCoV-19/Denmark/DCGC-11405/2020|2020-11-02|EPI\_ISL\_670894|Original|hCoV-19^^Hovedstaden|Human|Department of Virus and Microbiological Special Diagnostics|Albertsen Lab|Michaelsen|Denmark

>Spike|hCoV-19/Brazil/SP-L34-CD883/2020|2020-04-23|EPI\_ISL\_722049|Original|hCoV-19^^S\u00e3o Paulo|Human|Hospital das Cl\u00ednicas Universidade de S\u00e3o Paulo Medical School|Laborat\u00f3rio de Parasitologia M\u00e9dica - Instituto de Medicina Tropical - Universidade de S\u00e3o Paulo|de Jesus|Brazil

>Spike|hCoV-19/USA/CA-ALSR-1546/2020|2020-05-11|EPI\_ISL\_494655|Original|hCoV-19^^California|Human|Scripps Medical Laboratory|Andersen lab at Scripps Research|Gangavarapu|USA

>Spike|hCoV-19/Scotland/EDB3520/2020|2020-04-13|EPI\_ISL\_439278|Original|hCoV-19^^Scotland|Human|Virology Department|COVID-19 Genomics UK (COG-UK) Consortium|Williams|United Kingdom

>Spike|hCoV-19/Bangladesh/DNAS\_DRCIM\_isl\_Hafiz Riad/2020|2020-06-28|EPI\_ISL\_774952|Original|hCoV-19^^Dhaka|Human|Designated Reference Institute for Chemical Measurements (DRICM)|DNA SOLUTION LTD.|Rabbi|Bangladesh

>Spike|hCoV-19/England/ALDP-BC7DB8/2020|2020-11-23|EPI\_ISL\_721244|Original|hCoV-19^^England|Human|Lighthouse Lab in Alderley Park|Wellcome Sanger Institute for the COVID-19 Genomics UK (COG-UK) Consortium|Davies|United Kingdom

>Spike|hCoV-19/Netherlands/LI-RIVM-20643/2020|2020-12-14|EPI\_ISL\_790716|Original|hCoV-19^^Limburg|Human|Dutch COVID-19 response team|National Institute for Public Health and the Environment (RIVM)|Meijer|Netherlands

>Spike|hCoV-19/Denmark/DCGC-16470/2020|2020-11-16|EPI\_ISL\_714787|Original|hCoV-19^^Nordjylland|Human|Department of Virus and Microbiological Special Diagnostics|Albertsen Lab|Michaelsen|Denmark

>Spike|hCoV-19/England/QEUEH-AEFBC0/2020|2020-10-29|EPI\_ISL\_662834|Original|hCoV-19^^England|Human|Lighthouse Lab in Glasgow|Wellcome Sanger Institute for the COVID-19 Genomics UK (COG-UK) Consortium|Davies|United Kingdom

>Spike|hCoV-19/England/CAMB-82D87/2020|2020-04-13|EPI\_ISL\_443578|Original|hCoV-19^^England|Human|Department of Pathology|Wellcome Sanger Institute for the COVID-19 Genomics UK (COG-UK) consortium|Amato|United Kingdom

>Spike|hCoV-19/USA/WA-S1775/2020|2020-06-01|EPI\_ISL\_496201|Original|hCoV-19^^Washington|Human|Washington State Department of Health|Seattle Flu Study|Lee|USA

>Spike|hCoV-19/England/CAMB-766D6/2020|2020-03-30|EPI\_ISL\_438421|Original|hCoV-19^^England|Human|Department of Pathology|Wellcome Sanger Institute for the COVID-19 Genomics UK (COG-UK) consortium|Amato|United Kingdom

>Spike|hCoV-19/Northern Ireland/NIRE-102E30/2020|2020-04-20|EPI\_ISL\_489173|Original|hCoV-19^^Northern Ireland|Human|Regional Virus Laboratory|Wellcome Sanger Institute for the COVID-19 Genomics UK (COG-UK) consortium|Davies|United Kingdom

>Spike|hCoV-19/England/CAMC-B08137/2020|2020-10-29|EPI\_ISL\_643912|Original|hCoV-19^^England|Human|Lighthouse Lab in Cambridge|Wellcome Sanger Institute for the COVID-19 Genomics UK (COG-UK) Consortium|Davies|United Kingdom

>Spike|hCoV-19/Australia/NSW208/2020|2020-03-20|EPI\_ISL\_427753|Original|hCoV-19^^New South Wales|Human|Centre for Infectious Diseases and Microbiology Public Health|NSW Health Pathology - Institute of Clinical Pathology and Medical Research; Westmead Hospital; University of Sydney|Gall|Australia

>Spike|hCoV-19/USA/NJ-NYUMC376/2020|2020-04-10|EPI\_ISL\_430403|Original|hCoV-19^^New York|Human|NYU Langone Health|Departments of Pathology and Medicine|Maurano|USA

>Spike|hCoV-19/England/ALDP-B7437C/2020|2020-11-12|EPI\_ISL\_661964|Original|hCoV-19^^England|Human|Lighthouse Lab in Alderley Park|Wellcome Sanger Institute for the COVID-19 Genomics UK (COG-UK) Consortium|Davies|United Kingdom

>Spike|hCoV-19/England/QEUH-A76BCE/2020|2020-10-13|EPI\_ISL\_665975|Original|hCoV-19^^England|Human|Queens Medical Centre|COVID-19 Genomics UK (COG-UK) Consortium|Loose|United Kingdom

>Spike|hCoV-19/USA/WI-UW-2474/2020|2020-12-28|EPI\_ISL\_759748|Original|hCoV-19^^Wisconsin|Human|University of Wisconsin-Madison AIDS Vaccine Research Laboratories|University of Wisconsin-Madison AIDS Vaccine Research Laboratories|Moreno|USA

>Spike|hCoV-19/Netherlands/NB-EMC-432/2020|2020-11-08|EPI\_ISL\_722314|Original|hCoV-19^^Noord Brabant|Human|Dutch COVID-19 response team|Erasmus Medical Center|Oude Munnink|Netherlands

>Spike|hCoV-19/USA/UT-02756/2020|2020-04-29|EPI\_ISL\_513643|Original|hCoV-19^^Utah|Human|Utah Public Health Laboratory|Utah Public Health Laboratory|Butz|USA

>Spike|hCoV-19/Shenzhen/SZTH-004/2020|2020-01-16|EPI\_ISL\_406595|Original|hCoV-19^^Guangdong|Human|Shenzhen Key Laboratory of Pathogen and Immunity|Shenzhen Key Laboratory of Pathogen and Immunity|Chenguang|China

>Spike|hCoV-19/USA/TX-DSHS-0883/2020|2020-06-16|EPI\_ISL\_610019|Original|hCoV-19^^Texas|Human|Texas Department of State Health Services|Texas Department of State Health Services|Rahman|USA

>Spike|hCoV-19/Netherlands/Gelderland\_16/2020|2020-04-03|EPI\_ISL\_460652|Original|hCoV-19^^Gelderland|Human|Dutch COVID-19 response team|Erasmus Medical Center|Oude Munnink|Netherlands

>Spike|hCoV-19/England/MILK-C309B5/2020|2020-12-07|EPI\_ISL\_782804|Original|hCoV-19^^England|Human|Lighthouse Lab in Milton Keynes|Wellcome Sanger Institute for the COVID-19 Genomics UK (COG-UK) Consortium|Davies|United Kingdom

>Spike|hCoV-19/USA/HI-H200604/2020|2020-11-23|EPI\_ISL\_753130|Original|hCoV-19^^Hawaii|Human|State Laboratories Division|State Laboratories Division|Sultana|USA

>Spike|hCoV-19/England/QEUH-B9EB38/2020|2020-11-18|EPI\_ISL\_719954|Original|hCoV-19^^England|Human|Lighthouse Lab in Glasgow|Wellcome Sanger Institute for the COVID-19 Genomics UK (COG-UK) Consortium|Davies|United Kingdom

>Spike|hCoV-19/England/MILK-B85D7A/2020|2020-11-13|EPI\_ISL\_674081|Original|hCoV-19^^England|Human|Lighthouse Lab in Milton Keynes|Wellcome Sanger Institute for the COVID-19 Genomics UK (COG-UK) Consortium|Davies|United Kingdom

>Spike|hCoV-19/Scotland/QEUH-9F4F36/2020|2020-09-27|EPI\_ISL\_638918|Original|hCoV-19^^Scotland|Human|Department of Pathology|COVID-19 Genomics UK (COG-UK) Consortium|Goodfellow|United Kingdom

>Spike|hCoV-19/Scotland/QEUH-9CA1F7/2020|2020-09-09|EPI\_ISL\_576082|Original|hCoV-19^^Scotland|Human|Lighthouse Lab in Glasgow|Wellcome Sanger Institute for the COVID-19 Genomics UK (COG-UK) consortium|Davies|United Kingdom

>Spike|hCoV-19/England/CAMC-B09048/2020|2020-10-29|EPI\_ISL\_673220|Original|hCoV-19^^England|Human|Lighthouse Lab in Cambridge|Wellcome Sanger Institute for the COVID-19 Genomics UK (COG-UK) Consortium|Davies|United Kingdom

>Spike|hCoV-19/England/QEUH-B0EA27/2020|2020-11-02|EPI\_ISL\_642117|Original|hCoV-19^^England|Human|Lighthouse Lab in Glasgow|Wellcome Sanger Institute for the COVID-19 Genomics UK (COG-UK) Consortium|Davies|United Kingdom

>Spike|hCoV-19/USA/TX-HMH-MCoV-9623/2020|2020-07-03|EPI\_ISL\_780151|Original|hCoV-19^^Texas|Human|Houston Methodist Hospital|Houston Methodist Hospital|Long|USA

>Spike|hCoV-19/Luxembourg/LNS2776427/2020|2020-10-21|EPI\_ISL\_740191|Original|hCoV-19^^Luxembourg|Human|Laboratoire national de sant\u00e9|Laboratoire national de sant\u00e9|Wienecke-Baldacchino|Luxembourg

>Spike|hCoV-19/Wales/PHWC-49E3DD/2020|2020-12-07|EPI\_ISL\_742997|Original|hCoV-19^^Wales|Human|Wales Specialist Virology Centre Sequencing lab|COVID-19 Genomics UK (COG-UK) Consortium|Moore|United Kingdom

>Spike|hCoV-19/England/ALDP-A6795D/2020|2020-10-12|EPI\_ISL\_630635|Original|hCoV-19^^England|Human|Lighthouse Lab in Alderley Park|Wellcome Sanger Institute for the COVID-19 Genomics UK (COG-UK) consortium|Davies|United Kingdom

>Spike|hCoV-19/Australia/VIC9371/2020|2020-08-20|EPI\_ISL\_565526|Original|hCoV-19^^Victoria|Human|Microbiological Diagnostic Unit - Public Health Laboratory (MDU-PHL)|MDU-PHL|Schultz|Australia

>Spike|hCoV-19/England/20099069504/2020|2020-02-29|EPI\_ISL\_464215|Original|hCoV-19^^England|Human|Respiratory Virus Unit|Respiratory Virus Unit|Platt|United Kingdom

>Spike|hCoV-19/Wales/PHWC-29DFB/2020|2020-04-04|EPI\_ISL\_432259|Original|hCoV-19^^Wales|Human|Wales Specialist Virology Centre|Public Health Wales Microbiology Cardiff|Moore|United Kingdom

>Spike|hCoV-19/England/CAMB-72582/2020|2020-03-23|EPI\_ISL\_439921|Original|hCoV-19^^England|Human|Department of Pathology|Wellcome Sanger Institute for the COVID-19 Genomics UK (COG-UK) consortium|Amato|United Kingdom

>Spike|hCoV-19/Peru/LIM-010/2020|2020-03-10|EPI\_ISL\_415787|Original|hCoV-19^^Lima|Human|Laboratorio de Referencia Nacional de Virus Respiratorio. Instituto Nacional de Salud. Peru|Laboratorio de Referencia Nacional de Biotecnologia y Biologia Molecular.Instituto Nacional de Salud.Peru|Padilla Rojas|Peru

>Spike|hCoV-19/England/ALDP-A504CF/2020|2020-10-07|EPI\_ISL\_597781|Original|hCoV-19^^England|Human|Lighthouse Lab in Alderley Park|Wellcome Sanger Institute for the COVID-19 Genomics UK (COG-UK) consortium|Davies|United Kingdom

>Spike|hCoV-19/Australia/VIC3393/2020|2020-07-07|EPI\_ISL\_521072|Original|hCoV-19^^Victoria|Human|Microbiological Diagnostic Unit - Public Health Laboratory (MDU-PHL)|MDU-PHL|Schultz|Australia

>Spike|hCoV-19/England/20156055104/2020|2020-04-07|EPI\_ISL\_466344|Original|hCoV-19^^England|Human|Respiratory Virus Unit|Respiratory Virus Unit|Platt|United Kingdom

>Spike|hCoV-19/England/QEUA-9C99A5/2020|2020-09-10|EPI\_ISL\_567477|Original|hCoV-19^^England|Human|Lighthouse Lab in Glasgow|Wellcome Sanger Institute for the COVID-19 Genomics UK (COG-UK) consortium|Davies|United Kingdom

>Spike|hCoV-19/Wales/PHWC-49C9A0/2020|2020-11-19|EPI\_ISL\_742625|Original|hCoV-19^^Wales|Human|Wales Specialist Virology Centre Sequencing lab|COVID-19 Genomics UK (COG-UK) Consortium|Moore|United Kingdom

>Spike|hCoV-19/South Africa/KRISP-K004011/2020|2020-10-12|EPI\_ISL\_634996|Original|hCoV-19^^KwaZulu-Natal|Human|National Health Laboratory Service - Inkosi Albert Luthuli Central Hospital (NHLS-IALCH)|KRISP|de Oliveira|South Africa

>Spike|hCoV-19/England/MILK-B38EBF/2020|2020-11-01|EPI\_ISL\_658770|Original|hCoV-19^^England|Human|Lighthouse Lab in Milton Keynes|Wellcome Sanger Institute for the COVID-19 Genomics UK (COG-UK) Consortium|Davies|United Kingdom

>Spike|hCoV-19/England/204221455/2020|2020-00-00|EPI\_ISL\_593822|Original|hCoV-19^^England|Human|Respiratory Virus Unit|Respiratory Virus Unit|Platt|United Kingdom

>Spike|hCoV-19/England/BIRM-61D7F/2020|2020-03-26|EPI\_ISL\_529608|Original|hCoV-19^^England|Human|University of Birmingham|COVID-19 Genomics UK (COG-UK) Consortium|Loman|United Kingdom

>Spike|hCoV-19/Denmark/DCGC-1829/2020|2020-05-04|EPI\_ISL\_622575|Original|hCoV-19^^Hovedstaden|Human|Department of Virus and Microbiological Special Diagnostics|Albertsen lab|Michaelsen|Denmark

>Spike|hCoV-19/Scotland/GCVR-171DA8/2020|2020-03-27|EPI\_ISL\_524567|Original|hCoV-19^^Scotland|Human|NHSGGC West of Scotland Specialist Virology Centre / MRC-University of Glasgow Centre for Virus Research|Wellcome Sanger Institute for the COVID-19 Genomics UK (COG-UK) consortium|Davies|United Kingdom

>Spike|hCoV-19/Australia/VIC4698/2020|2020-07-18|EPI\_ISL\_519086|Original|hCoV-19^^Victoria|Human|Microbiological Diagnostic Unit - Public Health Laboratory (MDU-PHL)|MDU-PHL|Schultz|Australia

>Spike|hCoV-19/England/EXET-13E949/2020|2020-12-13|EPI\_ISL\_763703|Original|hCoV-19^^England|Human|University of Exeter|COVID-19 Genomics UK (COG-UK) Consortium|Temperton|United Kingdom

>Spike|hCoV-19/England/BRIS-12CAE1/2020|2020-04-18|EPI\_ISL\_481955|Original|hCoV-19^^England|Human|PHE South West Regional Laboratory|Wellcome Sanger Institute for the COVID-19 Genomics UK (COG-UK) consortium|Davies|United Kingdom

>Spike|hCoV-19/USA/TX-HMH-MCoV-16266/2020|2020-10-30|EPI\_ISL\_785950|Original|hCoV-19^^Texas|Human|Houston Methodist Hospital|Houston Methodist Hospital|Long|USA

>Spike|hCoV-19/England/ALDP-A9530D/2020|2020-10-20|EPI\_ISL\_624573|Original|hCoV-19^^England|Human|Lighthouse Lab in Alderley Park|Wellcome Sanger Institute for the COVID-19 Genomics UK (COG-UK) consortium|Davies|United Kingdom

>Spike|hCoV-19/USA/NY-NYUMC389/2020|2020-04-13|EPI\_ISL\_430416|Original|hCoV-19^^New York|Human|NYU Langone Health|Departments of Pathology and Medicine|Maurano|USA

>Spike|hCoV-19/Denmark/DCGC-19596/2020|2020-12-07|EPI\_ISL\_749049|Original|hCoV-19^^Hovedstaden|Human|Department of Virus and Microbiological Special Diagnostics|Albertsen Lab|Michaelsen|Denmark

>Spike|hCoV-19/USA/MI-QDX-1570/2020|2020-03-18|EPI\_ISL\_603947|Original|hCoV-19^^Michigan|Human|Quest Diagnostics|Quest Diagnostics|Kagan|USA

>Spike|hCoV-19/England/ALDP-9CC08F/2020|2020-09-17|EPI\_ISL\_575671|Original|hCoV-19^^England|Human|Lighthouse Lab in Alderley Park|Wellcome Sanger Institute for the COVID-19 Genomics UK (COG-UK) consortium|Davies|United Kingdom

>Spike|hCoV-19/England/QEUEH-C53F8D/2020|2020-12-12|EPI\_ISL\_736404|Original|hCoV-19^^England|Human|Lighthouse Lab in Glasgow|Wellcome Sanger Institute for the COVID-19 Genomics UK (COG-UK) Consortium|Davies|United Kingdom

>Spike|hCoV-19/Scotland/QEUEH-9F4CD5/2020|2020-09-27|EPI\_ISL\_600718|Original|hCoV-19^^Scotland|Human|Lighthouse Lab in Glasgow|Wellcome Sanger Institute for the COVID-19 Genomics UK (COG-UK) consortium|Davies|United Kingdom

>Spike|hCoV-19/USA/WA-UW-4118/2020|2020-03-31|EPI\_ISL\_427243|Original|hCoV-19^^Washington|Human|UW Virology Lab|UW Virology Lab|Roychoudhury|USA

>Spike|hCoV-19/England/CAMB-A98364/2020|2020-12-26|EPI\_ISL\_763518|Original|hCoV-19^^England|Human|Department of Pathology|COVID-19 Genomics UK (COG-UK) Consortium|Goodfellow|United Kingdom

>Spike|hCoV-19/England/LIVE-A296F/2020|2020-06-09|EPI\_ISL\_500012|Original|hCoV-19^^England|Human|Liverpool Clinical Laboratories|COVID-19 Genomics UK (COG-UK) Consortium|Haldenby|United Kingdom

>Spike|hCoV-19/Wuhan/HB-WH3-190/2020|2020-03-16|EPI\_ISL\_455384|Original|hCoV-19^^Hubei|Human|Wuhan Chain Medical Labs (CMLabs)|State Key Laboratory of Biotherapy of Sichuan University|Tang|China

>Spike|hCoV-19/Norway/3401/2020|2020-09-10|EPI\_ISL\_590889|Original|hCoV-19^^Viken|Human|Akershus University Hospital|Norwegian Institute of Public Health|Vollan|Norway

>Spike|hCoV-19/USA/CA-SR0255/2020|2020-03-30|EPI\_ISL\_437557|Original|hCoV-19^^California|Human|Scripps Medical Laboratory|Andersen lab at Scripps Research|Gangavarapu|USA

>Spike|hCoV-19/United Arab Emirates/0805/2020|2020-05-19|EPI\_ISL\_698944|Original|hCoV-19^^Abu Dhabi|Human|Group 42 (G42) Healthcare|G42 Healthcare|Ogrodzki|United Arab Emirates

>Spike|hCoV-19/England/ALDP-A2E8EC/2020|2020-10-05|EPI\_ISL\_587233|Original|hCoV-19^^England|Human|Lighthouse Lab in Alderley Park|Wellcome Sanger Institute for the COVID-19 Genomics UK (COG-UK) consortium|Davies|United Kingdom

>Spike|hCoV-19/Scotland/CVR5373/2020|2020-10-22|EPI\_ISL\_651310|Original|hCoV-19^^Scotland|Human|West of Scotland Specialist Virology Centre|COVID-19 Genomics UK (COG-UK) Consortium|Robertson|United Kingdom

>Spike|hCoV-19/England/MILK-B39461/2020|2020-11-01|EPI\_ISL\_658984|Original|hCoV-19^^England|Human|Lighthouse Lab in Milton Keynes|Wellcome Sanger Institute for the COVID-19 Genomics UK (COG-UK) Consortium|Davies|United Kingdom

>Spike|hCoV-19/Gibraltar/205121224/2020|2020-00-00|EPI\_ISL\_766350|Original|hCoV-19^^Gibraltar|Human|Microbiology|Respiratory Virus Unit|Platt|Gibraltar

>Spike|hCoV-19/Denmark/DCGC-6487/2020|2020-10-05|EPI\_ISL\_620387|Original|hCoV-19^^Midtjylland|Human|Department of Virus and Microbiological Special Diagnostics|Albertsen lab|Michaelsen|Denmark

>Spike|hCoV-19/USA/SD-UW-MAYO73/2020|2020-04-02|EPI\_ISL\_500517|Original|hCoV-19^^South Dakota|Human|Mayo Clinic Laboratories|University of Washington Virology Lab|Roychoudhury|USA

>Spike|hCoV-19/USA/TX-HMH-MCoV-13387/2020|2020-08-24|EPI\_ISL\_788530|Original|hCoV-19^^Texas|Human|Houston Methodist Hospital|Houston Methodist Hospital|Long|USA

>Spike|hCoV-19/South Africa/NHLS-UCT-GP-5840/2020|2020-05-21|EPI\_ISL\_700592|Original|hCoV-19^^Western Cape|Human|Dr Abdurahman CDC wc DAC|NHLS/UCT|Iranzadeh|South Africa

>Spike|hCoV-19/Taiwan/NTU27/2020|2020-04-13|EPI\_ISL\_447621|Vero E6|hCoV-19^^Taipei|Human|Department of Laboratory Medicine|Microbial Genomics Core Lab|Lin|Taiwan

>Spike|hCoV-19/Scotland/QEUH-B68C25/2020|2020-11-11|EPI\_ISL\_676376|Original|hCoV-19^^Scotland|Human|Lighthouse Lab in Glasgow|Wellcome Sanger Institute for the COVID-19 Genomics UK (COG-UK) Consortium|Davies|United Kingdom

>Spike|hCoV-19/Australia/VIC12674/2020|2020-08-03|EPI\_ISL\_640405|Original|hCoV-19^^Victoria|Human|Microbiological Diagnostic Unit - Public Health Laboratory (MDU-PHL)|MDU-PHL|Schultz|Australia

>Spike|hCoV-19/Spain/MD-IBV-99007345/2020|2020-08-28|EPI\_ISL\_582829|Original|hCoV-19^^Madrid|Human|Hospital General Universitario Gregorio Mara\u00f1\u00f3n|SeqCOVID-SPAIN consortium/IBV (CSIC)|Comas|Spain

>Spike|hCoV-19/England/ALDP-B24CDA/2020|2020-11-04|EPI\_ISL\_646917|Original|hCoV-19^^England|Human|Lighthouse Lab in Alderley Park|Wellcome Sanger Institute for the COVID-19 Genomics UK (COG-UK) Consortium|Davies|United Kingdom

>Spike|hCoV-19/Scotland/QEUH-96D572/2020|2020-08-19|EPI\_ISL\_534630|Original|hCoV-19^^Scotland|Human|NHSGGC West of Scotland Specialist Virology Centre / MRC-University of Glasgow Centre for Virus Research|Wellcome Sanger Institute for the COVID-19 Genomics UK (COG-UK) consortium|Davies|United Kingdom

>Spike|hCoV-19/USA/WI-UW-1178/2020|2020-08-09|EPI\_ISL\_522933|Original|hCoV-19^^Wisconsin|Human|University of Wisconsin-Madison AIDS Vaccine Research Laboratories|University of Wisconsin-Madison AIDS Vaccine Research Laboratories|Baczenas|USA

>Spike|hCoV-19/Singapore/1456/2020|2020-12-11|EPI\_ISL\_728192|Original|hCoV-19^^Singapore|Human|National Public Health Laboratory|National Public Health Laboratory|Mak|Singapore

>Spike|hCoV-19/Spain/CT-IBV-005636/2020|2020-04-22|EPI\_ISL\_508668|Original|hCoV-19^^Catalunya|Human|Departamento de Microbiolog\u00eda|SeqCOVID-SPAIN consortium/IBV (CSIC)|Comas|Spain

>Spike|hCoV-19/England/BIRM-63E98/2020|2020-09-04|EPI\_ISL\_576893|Original|hCoV-19^^England|Human|University of Birmingham|COVID-19 Genomics UK (COG-UK) Consortium|Loman|United Kingdom

>Spike|hCoV-19/Japan/PG-8485/2020|2020-06-00|EPI\_ISL\_687584|Original|hCoV-19^^Japan|Human|Pathogen Genomics Center|Pathogen Genomics Center|Sekizuka|Japan

>Spike|hCoV-19/England/MILK-A79B52/2020|2020-10-15|EPI\_ISL\_606658|Original|hCoV-19^^England|Human|Lighthouse Lab in Milton Keynes|Wellcome Sanger Institute for the COVID-19 Genomics UK (COG-UK) consortium|Davies|United Kingdom

>Spike|hCoV-19/Australia/VIC245/2020|2020-03-21|EPI\_ISL\_419940|Original|hCoV-19^^Victoria|Human|Victorian Infectious Diseases Reference Laboratory (VIDRL)|Victorian Infectious Diseases Reference Laboratory and Microbiological Diagnostic Unit Public Health Laboratory|Schultz|Australia

>Spike|hCoV-19/USA/CA-CZB-1609/2020|2020-04-07|EPI\_ISL\_468538|Original|hCoV-19^^California|Human|San Joaquin County Public Health Lab|Chan-Zuckerberg Biohub|Hao|USA

>Spike|hCoV-19/USA/TX-HMH-MCoV-13217/2020|2020-08-26|EPI\_ISL\_788368|Original|hCoV-19^^Texas|Human|Houston Methodist Hospital|Houston Methodist Hospital|Long|USA

>Spike|hCoV-19/England/ALDP-B23628/2020|2020-11-04|EPI\_ISL\_647041|Original|hCoV-19^^England|Human|Lighthouse Lab in Alderley Park|Wellcome Sanger Institute for the COVID-19 Genomics UK (COG-UK) Consortium|Davies|United Kingdom

>Spike|hCoV-19/England/QEUH-A8C187/2020|2020-10-16|EPI\_ISL\_643050|Original|hCoV-19^^England|Human|Lighthouse Lab in Glasgow|Wellcome Sanger Institute for the COVID-19 Genomics UK (COG-UK) Consortium|Davies|United Kingdom

>Spike|hCoV-19/USA/TX-HMH-MCoV-14072/2020|2020-08-14|EPI\_ISL\_787358|Original|hCoV-19^^Texas|Human|Houston Methodist Hospital|Houston Methodist Hospital|Long|USA

>Spike|hCoV-19/England/MILK-A7A69C/2020|2020-10-15|EPI\_ISL\_606804|Original|hCoV-19^^England|Human|Lighthouse Lab in Milton Keynes|Wellcome Sanger Institute for the COVID-19 Genomics UK (COG-UK) consortium|Davies|United Kingdom

>Spike|hCoV-19/Australia/VIC1109/2020|2020-04-07|EPI\_ISL\_430618|Original|hCoV-19^^Victoria|Human|Victorian Infectious Diseases Reference Laboratory (VIDRL)|Microbiological Diagnostic Unit Public Health Laboratory and Victorian Infectious Diseases Reference Laboratory|Schultz|Australia

>Spike|hCoV-19/South Africa/KRISP-K000631/2020|2020-07-04|EPI\_ISL\_509282|Original|hCoV-19^^KwaZulu-Natal|Human|NHLs-IALCH|KRISP|de Oliveira|South Africa

>Spike|hCoV-19/England/QEUEH-B81B47/2020|2020-11-14|EPI\_ISL\_667962|Original|hCoV-19^^England|Human|Lighthouse Lab in Glasgow|Wellcome Sanger Institute for the COVID-19 Genomics UK (COG-UK) Consortium|Davies|United Kingdom

>Spike|hCoV-19/England/LEED-2A8A64/2020|2020-03-25|EPI\_ISL\_539109|Original|hCoV-19^^England|Human|Leeds Teaching Hospitals NHS Trust and Public Health England|Wellcome Sanger Institute for the COVID-19 Genomics UK (COG-UK) consortium|Davies|United Kingdom

>Spike|hCoV-19/USA/MN-MDH-2097/2020|2020-10-20|EPI\_ISL\_683726|Original|hCoV-19^^Minnesota|Human|Mayo Clinic & Mayo Clinic Laboratories|Minnesota Department of Health|Garfin|USA

>Spike|hCoV-19/USA/FL-BPHL-0729/2020|2020-07-14|EPI\_ISL\_509787|Original|hCoV-19^^Florida|Human|Florida Bureau of Public Health Laboratories|Florida Bureau of Public Health Laboratories|Blanton|USA

>Spike|hCoV-19/USA/WI-GMF-10889/2020|2020-07-15|EPI\_ISL\_547618|Original|hCoV-19^^Wisconsin|Human|Gundersen Molecular Diagnostics Laboratory|Kabara Cancer Research Institute|Kenny|USA

>Spike|hCoV-19/England/ALDP-A2D3DD/2020|2020-10-05|EPI\_ISL\_586584|Original|hCoV-19^^England|Human|Lighthouse Lab in Alderley Park|Wellcome Sanger Institute for the COVID-19 Genomics UK (COG-UK) consortium|Davies|United Kingdom

>Spike|hCoV-19/Spain/PV-IBV-004226/2020|2020-04-04|EPI\_ISL\_510508|Original|hCoV-19^^Basque Country|Human|Servicio de Microbiolog\u00eda. Hospital Universitario Donostia. OSI Donostialdea. \u00c1rea de Enfermedades Infecciosas|SeqCOVID-SPAIN consortium|IBV (CSIC)|Comas|Spain

>Spike|hCoV-19/Northern Ireland/NIRE-234353/2020|2020-10-15|EPI\_ISL\_680373|Original|hCoV-19^^Northern Ireland|Human|Regional Virus Laboratory|COVID-19 Genomics UK (COG-UK) Consortium|Fairley|United Kingdom

>Spike|hCoV-19/Australia/VIC3850/2020|2020-07-12|EPI\_ISL\_520563|Original|hCoV-19^^Victoria|Human|Microbiological Diagnostic Unit - Public Health Laboratory (MDU-PHL)|MDU-PHL|Schultz|Australia

>Spike|hCoV-19/Denmark/DCGC-15452/2020|2020-11-23|EPI\_ISL\_713832|Original|hCoV-19^^Midtjylland|Human|Department of Virus and Microbiological Special Diagnostics|Albertsen Lab|Michaelsen|Denmark

>Spike|hCoV-19/Australia/VIC4268/2020|2020-07-15|EPI\_ISL\_519596|Original|hCoV-19^^Victoria|Human|Microbiological Diagnostic Unit - Public Health Laboratory (MDU-PHL)|MDU-PHL|Schultz|Australia

>Spike|hCoV-19/Denmark/DCGC-13411/2020|2020-11-30|EPI\_ISL\_712781|Original|hCoV-19^^Hovedstaden|Human|Department of Virus and Microbiological Special Diagnostics|Albertsen Lab|Michaelsen|Denmark

>Spike|hCoV-19/Scotland/CVR5559/2020|2020-10-26|EPI\_ISL\_650747|Original|hCoV-19^^Scotland|Human|West of Scotland Specialist Virology Centre|COVID-19 Genomics UK (COG-UK) Consortium|Robertson|United Kingdom

>Spike|hCoV-19/Denmark/DCGC-4109/2020|2020-09-14|EPI\_ISL\_622065|Original|hCoV-19^^Sjælland|Human|Department of Virus and Microbiological Special Diagnostics|Albertsen lab|Michaelsen|Denmark

>Spike|hCoV-19/USA/CA-ALSR-3667/2020|2020-06-03|EPI\_ISL\_636138|Original|hCoV-19^^California|Human|San Diego County Public Health Laboratory|Andersen lab at Scripps Research|Gangavarapu|USA

>Spike|hCoV-19/South Korea/KCDC2319/2020|2020-05-26|EPI\_ISL\_510655|Original|hCoV-19^^South Korea|Human|Division of Viral Diseases|Division of Viral Diseases|Kim|South Korea

>Spike|hCoV-19/England/CAMC-BC0186/2020|2020-11-22|EPI\_ISL\_704730|Original|hCoV-19^^England|Human|Lighthouse Lab in Cambridge|Wellcome Sanger Institute for the COVID-19 Genomics UK (COG-UK) Consortium|Davies|United Kingdom

>Spike|hCoV-19/USA/UT-UPHL-05574/2020|2020-06-01|EPI\_ISL\_575227|Original|hCoV-19^^Utah|Human|Utah Public Health Laboratory|Utah Public Health Laboratory|Young|USA

>Spike|hCoV-19/Australia/VIC3251/2020|2020-07-09|EPI\_ISL\_520931|Original|hCoV-19^^Victoria|Human|Microbiological Diagnostic Unit - Public Health Laboratory (MDU-PHL)|MDU-PHL|Schultz|Australia

>Spike|hCoV-19/USA/CA-CSMC37/2020|2020-04-03|EPI\_ISL\_475648|Original|hCoV-19^^California|Human|Cedars-Sinai Medical Center|Cedars-Sinai Medical Center|Zhang|USA

>Spike|hCoV-19/England/CAMB-7D2CC/2020|2020-04-06|EPI\_ISL\_442267|Original|hCoV-19^^England|Human|Department of Pathology|Wellcome Sanger Institute for the COVID-19 Genomics UK (COG-UK) consortium|Amato|United Kingdom

>Spike|hCoV-19/England/ALDP-C488F9/2020|2020-12-12|EPI\_ISL\_736557|Original|hCoV-19^^England|Human|Lighthouse Lab in Alderley Park|Wellcome Sanger Institute for the COVID-19 Genomics UK (COG-UK) Consortium|Davies|United Kingdom

>Spike|hCoV-19/Japan/PG-0297/2020|2020-03-28|EPI\_ISL\_479974|Original|hCoV-19^^HokurikuShinsyu|Human|Fukui Prefectural Institute of Public Health and Environmental Science|Pathogen Genomics Center|Sekizuka|Japan

>Spike|hCoV-19/England/QEUEH-B10F50/2020|2020-11-02|EPI\_ISL\_642407|Original|hCoV-19^^England|Human|Lighthouse Lab in Glasgow|Wellcome Sanger Institute for the COVID-19 Genomics UK (COG-UK) Consortium|Davies|United Kingdom

>Spike|hCoV-19/Russia/STA-RII-MH2782S/2020|2020-09-23|EPI\_ISL\_602447|Original|hCoV-19^^Stavropol|Human|HELIX LLC|WHO National Influenza Centre Russian Federation|Komissarov|Russia

>Spike|hCoV-19/England/QEUEH-B6B150/2020|2020-11-11|EPI\_ISL\_662378|Original|hCoV-19^^England|Human|Lighthouse Lab in Glasgow|Wellcome Sanger Institute for the COVID-19 Genomics UK (COG-UK) Consortium|Davies|United Kingdom

>Spike|hCoV-19/England/ALDP-C3A511/2020|2020-12-06|EPI\_ISL\_731416|Original|hCoV-19^^England|Human|Lighthouse Lab in Alderley Park|Wellcome Sanger Institute for the COVID-19 Genomics UK (COG-UK) Consortium|Davies|United Kingdom

>Spike|hCoV-19/England/CAMB-1B3F1D/2020|2020-06-07|EPI\_ISL\_473455|Original|hCoV-19^^England|Human|Department of Pathology|COVID-19 Genomics UK (COG-UK) Consortium|Meredith|United Kingdom

>Spike|hCoV-19/England/QEUEH-AD41DB/2020|2020-10-24|EPI\_ISL\_634631|Original|hCoV-19^^England|Human|Lighthouse Lab in Glasgow|Wellcome Sanger Institute for the COVID-19 Genomics UK (COG-UK) consortium|Davies|United Kingdom

>Spike|hCoV-19/Wales/PHWC-167EFD/2020|2020-06-08|EPI\_ISL\_494174|Original|hCoV-19^^Wales|Human|Originating lab|COVID-19 Genomics UK (COG-UK) Consortium|Moore|United Kingdom

>Spike|hCoV-19/Wales/PHWC-480AAC/2020|2020-10-18|EPI\_ISL\_612966|Original|hCoV-19^^Wales|Human|Wales Specialist Virology Centre Sequencing lab|COVID-19 Genomics UK (COG-UK) Consortium|Moore|United Kingdom

>Spike|hCoV-19/Netherlands/Overijssel\_5/2020|2020-04-05|EPI\_ISL\_460824|Original|hCoV-19^^Overijssel|Human|Dutch COVID-19 response team|Erasmus Medical Center|Oude Munnink|Netherlands

>Spike|hCoV-19/Switzerland/VD-ETHZ-270113/2020|2020-09-03|EPI\_ISL\_541487|Original|hCoV-19^^Vaud|Human|Viollier AG|Department of Biosystems Science and Engineering|Nadeau|Switzerland

>Spike|hCoV-19/Wales/PHWC-165BF8/2020|2020-04-16|EPI\_ISL\_490780|Original|hCoV-19^^Wales|Human|Wales Specialist Virology Centre Sequencing lab|COVID-19 Genomics UK (COG-UK) Consortium|Moore|United Kingdom

>Spike|hCoV-19/USA/CA-CZB-9707/2020|2020-03-24|EPI\_ISL\_672156|Original|hCoV-19^^California|Human|The Ashley Laboratory|Chan-Zuckerberg Biohub|Bhatt|USA

>Spike|hCoV-19/Denmark/DCGC-874/2020|2020-05-04|EPI\_ISL\_614794|Original|hCoV-19^^Hovedstaden|Human|Department of Virus and Microbiological Special Diagnostics|Albertsen lab|Michaelsen|Denmark

>Spike|hCoV-19/England/CAMC-B776CB/2020|2020-11-12|EPI\_ISL\_668169|Original|hCoV-19^^England|Human|Lighthouse Lab in Cambridge|Wellcome Sanger Institute for the COVID-19 Genomics UK (COG-UK) Consortium|Davies|United Kingdom



>Spike|hCoV-19/USA/NY-NYCPHL-001479/2020|2020-11-27|EPI\_ISL\_745413|Original|hCoV-19^^New York|Human|DOHMH Central Harlem|New York City Public Health Laboratory|Wang|USA

>Spike|hCoV-19/England/LIVE-DB3C29/2020|2020-10-21|EPI\_ISL\_651499|Original|hCoV-19^^England|Human|Liverpool Clinical Laboratories|COVID-19 Genomics UK (COG-UK) Consortium|Haldenby|United Kingdom

>Spike|hCoV-19/Wales/PHWC-2C7EB/2020|2020-03-31|EPI\_ISL\_445913|Original|hCoV-19^^Wales|Human|Wales Specialist Virology Centre|Public Health Wales Microbiology Cardiff|Moore|United Kingdom

>Spike|hCoV-19/USA/CA-CZB-13377/2020|2020-05-13|EPI\_ISL\_672453|Original|hCoV-19^^California|Human|Alameda County Public Health Lab|Chan-Zuckerberg Biohub|Bhatt|USA

>Spike|hCoV-19/England/CAMC-B7794A/2020|2020-11-11|EPI\_ISL\_661712|Original|hCoV-19^^England|Human|Lighthouse Lab in Cambridge|Wellcome Sanger Institute for the COVID-19 Genomics UK (COG-UK) Consortium|Davies|United Kingdom

>Spike|hCoV-19/England/NOTT-1205A0/2020|2020-12-08|EPI\_ISL\_725629|Original|hCoV-19^^England|Human|Queens Medical Centre|COVID-19 Genomics UK (COG-UK) Consortium|Loose|United Kingdom

>Spike|hCoV-19/Denmark/DCGC-19985/2020|2020-12-07|EPI\_ISL\_747910|Original|hCoV-19^^Hovedstaden|Human|Department of Virus and Microbiological Special Diagnostics|Albertsen Lab|Michaelsen|Denmark

>Spike|hCoV-19/Japan/PG-8049/2020|2020-09-00|EPI\_ISL\_687150|Original|hCoV-19^^Japan|Human|Pathogen Genomics Center|Pathogen Genomics Center|Sekizuka|Japan

>Spike|hCoV-19/England/MILK-9F285B/2020|2020-09-25|EPI\_ISL\_589160|Original|hCoV-19^^England|Human|Lighthouse Lab in Milton Keynes|Wellcome Sanger Institute for the COVID-19 Genomics UK (COG-UK) consortium|Davies|United Kingdom

>Spike|hCoV-19/Scotland/QEUA-A9D2F9/2020|2020-10-20|EPI\_ISL\_727778|Original|hCoV-19^^Scotland|Human|Centre for Enzyme Innovation|COVID-19 Genomics UK (COG-UK) Consortium|Robson|United Kingdom

>Spike|hCoV-19/USA/CA-ALSR-0494-SAN/2020|2020-03-31|EPI\_ISL\_483179|Original|hCoV-19^^California|Human|UC San Diego Center for Advanced Laboratory Medicine|Andersen lab at Scripps Research|Gangavarapu|USA

>Spike|hCoV-19/USA/NY-Wadsworth-269636-01/2020|2020-11-10|EPI\_ISL\_734439|Original|hCoV-19^^New York|Human|Wadsworth Center|Wadsworth Center|Lasek-Nesselquist|USA

>Spike|hCoV-19/Denmark/DCGC-21735/2020|2020-12-21|EPI\_ISL\_758335|Original|hCoV-19^^Hovedstaden|Human|Department of Virus and Microbiological Special Diagnostics|Albertsen Lab|Michaelsen|Denmark

>Spike|hCoV-19/England/CAMB-7881A/2020|2020-04-07|EPI\_ISL\_433777|Original|hCoV-19^^England|Human|Department of Pathology|COVID-19 Genomics UK (COG-UK) Consortium|Meredith|United Kingdom

>Spike|hCoV-19/Morocco/FMP-44/2020|2020-12-15|EPI\_ISL\_775220|Original|hCoV-19^^Temara|Human|Laboratoire Biolife|Laboratoire de Biotechnologie|Ouahdghiri|Morocco

>Spike|hCoV-19/Australia/VIC6717/2020|2020-07-25|EPI\_ISL\_564008|Original|hCoV-19^^Victoria|Human|Victorian Infectious Diseases Reference Laboratory (VIDRL)|VIDRL and MDU-PHL|Schultz|Australia

>Spike|hCoV-19/England/QEUA-9DD71D/2020|2020-09-21|EPI\_ISL\_599529|Original|hCoV-19^^England|Human|Lighthouse Lab in Glasgow|Wellcome Sanger Institute for the COVID-19 Genomics UK (COG-UK) consortium|Davies|United Kingdom

>Spike|hCoV-19/Lithuania/MR-LUHS-Eilnr230/2020|2020-08-05|EPI\_ISL\_636850|Original|hCoV-19^^Kauno apskritis|Human|Lithuanian University of Health Sciences Hospital|Lithuanian University of Health Sciences|Zemaitis|Lithuania

>Spike|hCoV-19/England/ALDP-9E9CE2/2020|2020-09-24|EPI\_ISL\_580143|Original|hCoV-19^^England|Human|Lighthouse Lab in Alderley Park|Wellcome Sanger Institute for the COVID-19 Genomics UK (COG-UK) consortium|Davies|United Kingdom

>Spike|hCoV-19/England/MILK-9E043E/2020|2020-09-20|EPI\_ISL\_601370|Original|hCoV-19^^England|Human|Lighthouse Lab in Milton Keynes|Wellcome Sanger Institute for the COVID-19 Genomics UK (COG-UK) consortium|Davies|United Kingdom

>Spike|hCoV-19/DRC/3837/2020|2020-04-25|EPI\_ISL\_447248|Original|hCoV-19^^Kinshasa|Human|Viral Respiratory Lab|Pathogen Sequencing Lab|Amuri|Democratic Republic of the Congo

>Spike|hCoV-19/USA/NY-WCMP10G06P/2020|2020-03-15|EPI\_ISL\_427577|Original|hCoV-19^^New York|Human|NewYork-Presbyterian & Mason Lab|Mason Lab|Mason|USA

>Spike|hCoV-19/Singapore/825/2020|2020-08-11|EPI\_ISL\_516825|Original|hCoV-19^^Singapore|Human|National Public Health Laboratory|National Public Health Laboratory|Mak|Singapore

>Spike|hCoV-19/Hong Kong/CM20000427/2020|2020-12-08|EPI\_ISL\_733578|Original|hCoV-19^^Hong Kong|Human|Temporary Specimen Collection Centre|Hong Kong Department of Health|Tsang|China

>Spike|hCoV-19/England/CAMB-1B822E/2020|2020-10-22|EPI\_ISL\_638385|Original|hCoV-19^^England|Human|Department of Pathology|COVID-19 Genomics UK (COG-UK) Consortium|Goodfellow|United Kingdom

>Spike|hCoV-19/Denmark/DCGC-10296/2020|2020-11-02|EPI\_ISL\_669882|Original|hCoV-19^^Hovedstaden|Human|Department of Virus and Microbiological Special Diagnostics|Albertsen Lab|Michaelsen|Denmark

>Spike|hCoV-19/Scotland/GCVR-1714C1/2020|2020-03-28|EPI\_ISL\_489652|Original|hCoV-19^^Scotland|Human|NHSGGC West of Scotland Specialist Virology Centre / MRC-University of Glasgow Centre for Virus Research|Wellcome Sanger Institute for the COVID-19 Genomics UK (COG-UK) consortium|Davies|United Kingdom

>Spike|hCoV-19/USA/AZ-TG359461/2020|2020-06-05|EPI\_ISL\_694449|Original|hCoV-19^^Arizona|Human|TGen North|TGen North|French|USA

>Spike|hCoV-19/Australia/VIC8805/2020|2020-07-31|EPI\_ISL\_565207|Original|hCoV-19^^Victoria|Human|Victorian Infectious Diseases Reference Laboratory (VIDRL)|VIDRL and MDU-PHL|Schultz|Australia

>Spike|hCoV-19/France/PAC-IHU-1625/2020|2020-09-10|EPI\_ISL\_569234|Original|hCoV-19^^Provence-Alpes-C\u00f4te-d\u2019Azur|Human|MEPHI|MEPHI|Levasseur|France

>Spike|hCoV-19/USA/WA-UW175/2020|2020-03-15|EPI\_ISL\_416713|Original|hCoV-19^^Washington|Human|UW Virology Lab|UW Virology Lab|Roychoudhury|USA

>Spike|hCoV-19/Belgium/rega-0917993/2020|2020-09-17|EPI\_ISL\_734985|Original|hCoV-19^^Sint-Stevens-Woluwe|Human|UZ Leuven|KU Leuven|Maes|Belgium

>Spike|hCoV-19/USA/WA-UW-23394/2020|2020-08-11|EPI\_ISL\_576443|Original|hCoV-19^^Washington|Human|UW Virology Lab|UW Virology Lab|Roychoudhury|USA

>Spike|hCoV-19/USA/CA-CZB-3356/2020|2020-07-14|EPI\_ISL\_548312|Original|hCoV-19^^California|Human|Orange County Public Health Laboratory|Chan-Zuckerberg Biohub|Bhatt|USA

>Spike|hCoV-19/Belgium/ULG-10484/2020|2020-09-23|EPI\_ISL\_581649|Original|hCoV-19^^Li\u00e8ge|Human|Department of Clinical Microbiology|GIGA Medical Genomics|Durkin|Belgium

>Spike|hCoV-19/Scotland/GCVR-1718F2/2020|2020-03-28|EPI\_ISL\_489701|Original|hCoV-19^^Scotland|Human|NHSGGC West of Scotland Specialist Virology Centre / MRC-University of Glasgow Centre for Virus Research|Wellcome Sanger Institute for the COVID-19 Genomics UK (COG-UK) consortium|Davies|United Kingdom

>Spike|hCoV-19/England/MILK-6A5966/2020|2020-07-02|EPI\_ISL\_551778|Original|hCoV-19^^England|Human|Lighthouse Lab in Milton Keynes|Wellcome Sanger Institute for the COVID-19 Genomics UK (COG-UK) consortium|Davies|United Kingdom

>Spike|hCoV-19/USA/TX-HMH-7009/2020|2020-06-28|EPI\_ISL\_546428|Original|hCoV-19^^Texas|Human|Houston Methodist Hospital|Houston Methodist Hospital|Long|USA

>Spike|hCoV-19/USA/UT-02132/2020|2020-04-14|EPI\_ISL\_470734|Original|hCoV-19^^Utah|Human|Utah Public Health Laboratory|Utah Public Health Laboratory|Butz|USA

>Spike|hCoV-19/USA/TX-HMH-MCoV-12005/2020|2020-09-15|EPI\_ISL\_790164|Original|hCoV-19^^Texas|Human|Houston Methodist Hospital|Houston Methodist Hospital|Long|USA

>Spike|hCoV-19/England/CAMC-A57A5D/2020|2020-10-09|EPI\_ISL\_597340|Original|hCoV-19^^England|Human|Lighthouse Lab in Cambridge|Wellcome Sanger Institute for the COVID-19 Genomics UK (COG-UK) consortium|Davies|United Kingdom

>Spike|hCoV-19/USA/TX-HMH-6149/2020|2020-06-23|EPI\_ISL\_547271|Original|hCoV-19^^Texas|Human|Houston Methodist Hospital|Houston Methodist Hospital|Long|USA

>Spike|hCoV-19/England/QEUA-963E62/2020|2020-08-07|EPI\_ISL\_531542|Original|hCoV-19^^England|Human|Lighthouse Lab in Glasgow|Wellcome Sanger Institute for the COVID-19 Genomics UK (COG-UK) consortium|Davies|United Kingdom

>Spike|hCoV-19/England/ALDP-C3D305/2020|2020-12-10|EPI\_ISL\_736766|Original|hCoV-19^^England|Human|Lighthouse Lab in Alderley Park|Wellcome Sanger Institute for the COVID-19 Genomics UK (COG-UK) Consortium|Davies|United Kingdom

>Spike|hCoV-19/USA/WA-S1750/2020|2020-06-01|EPI\_ISL\_496176|Original|hCoV-19^^Washington|Human|Washington State Department of Health|Seattle Flu Study|Lee|USA

>Spike|hCoV-19/Denmark/DCGC-1337/2020|2020-06-01|EPI\_ISL\_618011|Original|hCoV-19^^Hovedstaden|Human|Department of Virus and Microbiological Special Diagnostics|Albertsen lab|Michaelsen|Denmark

>Spike|hCoV-19/Wales/PHWC-16D765/2020|2020-09-25|EPI\_ISL\_577442|Original|hCoV-19^^Wales|Human|Wales Specialist Virology Centre Sequencing lab|COVID-19 Genomics UK (COG-UK) Consortium|Moore|United Kingdom

>Spike|hCoV-19/Canada/BC\_21146111/2020|2020-03-00|EPI\_ISL\_462794|Original|hCoV-19^^British Columbia|Human|BCCDC Public Health Laboratory|BCCDC Public Health Laboratory|Harrigan|Canada

>Spike|hCoV-19/England/QEUA-9F805D/2020|2020-09-27|EPI\_ISL\_588965|Original|hCoV-19^^England|Human|Lighthouse Lab in Glasgow|Wellcome Sanger Institute for the COVID-19 Genomics UK (COG-UK) consortium|Davies|United Kingdom

>Spike|hCoV-19/England/SHEF-CE9B8/2020|2020-04-07|EPI\_ISL\_499348|Original|hCoV-19^^England|Human|Virology Department|COVID-19 Genomics UK (COG-UK) Consortium|de Silva|United Kingdom

>Spike|hCoV-19/New Zealand/20CV0346/2020|2020-09-15|EPI\_ISL\_579098|Original|hCoV-19^^Auckland|Human|LabPLUS|Institute of Environmental Science and Research (ESR)|Wang|New Zealand

>Spike|hCoV-19/USA/MA-MGH-00823/2020|2020-04-13|EPI\_ISL\_791780|Original|hCoV-19^^Massachusetts|Human|Massachusetts General Hospital|Infectious Disease Program|Park|USA

>Spike|hCoV-19/South Africa/KRISP-K002437/2020|2020-07-30|EPI\_ISL\_515794|Original|hCoV-19^^KwaZulu-Natal|Human|NHLs-IALCH|KRISP|de Oliveira|South Africa

>Spike|hCoV-19/England/ALDP-B5CA2A/2020|2020-11-08|EPI\_ISL\_655934|Original|hCoV-19^^England|Human|Lighthouse Lab in Alderley Park|Wellcome Sanger Institute for the COVID-19 Genomics UK (COG-UK) Consortium|Davies|United Kingdom

>Spike|hCoV-19/England/ALDP-9FD79F/2020|2020-10-01|EPI\_ISL\_587806|Original|hCoV-19^^England|Human|Lighthouse Lab in Alderley Park|Wellcome Sanger Institute for the COVID-19 Genomics UK (COG-UK) consortium|Davies|United Kingdom

>Spike|hCoV-19/Wales/QEUA-AD42C9/2020|2020-10-26|EPI\_ISL\_647929|Original|hCoV-19^^Wales|Human|Lighthouse Lab in Glasgow|Wellcome Sanger Institute for the COVID-19 Genomics UK (COG-UK) Consortium|Davies|United Kingdom

>Spike|hCoV-19/England/CAMB-80A0A/2020|2020-04-10|EPI\_ISL\_470469|Original|hCoV-19^^England|Human|Department of Pathology|Wellcome Sanger Institute for the COVID-19 Genomics UK (COG-UK) consortium|Davies|United Kingdom

>Spike|hCoV-19/USA/MI-UM-2006S000883/2020|2020-03-24|EPI\_ISL\_484733|Original|hCoV-19^^Michigan|Human|University of Michigan Clinical Microbiology Laboratory|Lauring Lab|Valesano|USA

>Spike|hCoV-19/Canada/ON-UHTC-0262/2020|2020-06-16|EPI\_ISL\_570006|Original|hCoV-19^^Ontario|Human|Unity Health Toronto|Ontario Institute for Cancer Research|de Borja|Canada

>Spike|hCoV-19/England/QEUA-7F31BB/2020|2020-07-19|EPI\_ISL\_532840|Original|hCoV-19^^England|Human|Lighthouse Lab in Glasgow|Wellcome Sanger Institute for the COVID-19 Genomics UK (COG-UK) consortium|Davies|United Kingdom

>Spike|hCoV-19/Germany/BY-MVP-0082/2020|2020-03-30|EPI\_ISL\_437276|Original|hCoV-19^^Bavaria|Human|Max von Pettenkofer Institute|Laboratory for Functional Genome Analysis|Graf|Germany

>Spike|hCoV-19/Finland/17A73S13/2020|2020-04-17|EPI\_ISL\_481585|Original|hCoV-19^^Uusimaa|Human|Department of Virology and Immunology|Department of Virology|Smura|Finland

>Spike|hCoV-19/England/ALDP-6FCBD3/2020|2020-06-29|EPI\_ISL\_557423|Original|hCoV-19^^England|Human|Lighthouse Lab in Alderley Park|Wellcome Sanger Institute for the COVID-19 Genomics UK (COG-UK) consortium|Davies|United Kingdom

>Spike|hCoV-19/Denmark/DCGC-11982/2020|2020-09-07|EPI\_ISL\_670517|Original|hCoV-19^^Nordjylland|Human|Department of Virus and Microbiological Special Diagnostics|Albertsen Lab|Michaelsen|Denmark

>Spike|hCoV-19/Denmark/DCGC-8271/2020|2020-10-26|EPI\_ISL\_617089|Original|hCoV-19^^Hovedstaden|Human|Department of Virus and Microbiological Special Diagnostics|Albertsen lab|Michaelsen|Denmark

>Spike|hCoV-19/Wales/PHWC-495A59/2020|2020-11-25|EPI\_ISL\_726431|Original|hCoV-19^^Wales|Human|Originating lab|COVID-19 Genomics UK (COG-UK) Consortium|Moore|United Kingdom

>Spike|hCoV-19/Wales/QEUA-A89C6B/2020|2020-10-16|EPI\_ISL\_639629|Original|hCoV-19^^Wales|Human|Oxford Viromics|COVID-19 Genomics UK (COG-UK) Consortium|Golubchik|United Kingdom

>Spike|hCoV-19/England/LOND-D51E3/2020|2020-04-15|EPI\_ISL\_449687|Original|hCoV-19^^England|Human|University College London|COVID-19 Genomics UK (COG-UK) Consortium|Roy|United Kingdom

>Spike|hCoV-19/Denmark/DCGC-2554/2020|2020-08-17|EPI\_ISL\_616530|Original|hCoV-19^^Hovedstaden|Human|Department of Virus and Microbiological Special Diagnostics|Albertsen lab|Michaelsen|Denmark

>Spike|hCoV-19/England/CAMB-1AF1D2/2020|2020-04-29|EPI\_ISL\_459273|Original|hCoV-19^^England|Human|Department of Pathology|Wellcome Sanger Institute for the COVID-19 Genomics UK (COG-UK) consortium|Davies|United Kingdom

>Spike|hCoV-19/USA/LA-GBCL-26791756/2020|2020-04-06|EPI\_ISL\_485371|Original|hCoV-19^^Louisiana|Human|River Road Testing Lab|Ginkgo Bioworks Clinical Laboratory|Smith|USA

>Spike|hCoV-19/England/CAMB-1BAC5B/2020|2020-11-12|EPI\_ISL\_664717|Original|hCoV-19^^England|Human|Department of Pathology|COVID-19 Genomics UK (COG-UK) Consortium|Goodfellow|United Kingdom

>Spike|hCoV-19/USA/ID-QDX-1719/2020|2020-03-16|EPI\_ISL\_604028|Original|hCoV-19^^Idaho|Human|Quest Diagnostics|Quest Diagnostics|Kagan|USA

>Spike|hCoV-19/Czech Republic/NRL\_9743/2020|2020-10-07|EPI\_ISL\_626606|Original|hCoV-19^^Central Bohemian Region|Human|The National Institute of Public Health|State Veterinary Institute Prague|Nagy|Czech Republic

>Spike|hCoV-19/England/CAMC-C984AB/2020|2020-12-18|EPI\_ISL\_777581|Original|hCoV-19^^England|Human|Lighthouse Lab in Cambridge|Wellcome Sanger Institute for the COVID-19 Genomics UK (COG-UK) Consortium|Davies|United Kingdom

>Spike|hCoV-19/USA/FL-BPHL-1578/2020|2020-09-16|EPI\_ISL\_568676|Original|hCoV-19^^Florida|Human|Florida Bureau of Public Health Laboratories|Florida Bureau of Public Health Laboratories|Blanton|USA

>Spike|hCoV-19/England/MILK-9EE55B/2020|2020-09-23|EPI\_ISL\_580801|Original|hCoV-19^^England|Human|Lighthouse Lab in Milton Keynes|Wellcome Sanger Institute for the COVID-19 Genomics UK (COG-UK) consortium|Davies|United Kingdom

>Spike|hCoV-19/USA/HI-H200300/2020|2020-08-11|EPI\_ISL\_752859|Original|hCoV-19^^Hawaii|Human|State Laboratories Division|State Laboratories Division|Sultana|USA

>Spike|hCoV-19/USA/FL-BPHL-1339/2020|2020-07-14|EPI\_ISL\_541277|Original|hCoV-19^^Florida|Human|Florida Bureau of Public Health Laboratories|Florida Bureau of Public Health Laboratories|Blanton|USA

>Spike|hCoV-19/Australia/VIC3902/2020|2020-07-13|EPI\_ISL\_520614|Original|hCoV-19^^Victoria|Human|Microbiological Diagnostic Unit - Public Health Laboratory (MDU-PHL) |MDU-PHL|Schultz|Australia

>Spike|hCoV-19/USA/CA-UCLA-238/2020|2020-06-15|EPI\_ISL\_537544|Original|hCoV-19^^California|Human|UCLA Pathology Clinical Microbiology Lab|Kruglyak Lab|Boocock|USA

>Spike|hCoV-19/England/QEUA-C54520/2020|2020-12-12|EPI\_ISL\_736398|Original|hCoV-19^^England|Human|Lighthouse Lab in Glasgow|Wellcome Sanger Institute for the COVID-19 Genomics UK (COG-UK) Consortium|Davies|United Kingdom

>Spike|hCoV-19/Switzerland/VS-ETHZ-120022/2020|2020-04-17|EPI\_ISL\_468219|Original|hCoV-19^^Valais|Human|Viollier AG|Department of Biosystems Science and Engineering|Nadeau|Switzerland

>Spike|hCoV-19/England/MILK-9C2827/2020|2020-09-10|EPI\_ISL\_566449|Original|hCoV-19^^England|Human|Lighthouse Lab in Milton Keynes|Wellcome Sanger Institute for the COVID-19 Genomics UK (COG-UK) consortium|Davies|United Kingdom

>Spike|hCoV-19/Portugal/PT0517/2020|2020-03-21|EPI\_ISL\_454241|Original|hCoV-19^^Portugal|Human|unknown|Instituto Nacional de Saude (INSA)|Borges|Portugal

>Spike|hCoV-19/Jordan/AM-ALSR-4057/2020|2020-10-03|EPI\_ISL\_636417|Original|hCoV-19^^Amman|Human|Biolab Diagnostic Laboratories|Andersen lab at Scripps Research|Gangavarapu|Jordan

>Spike|hCoV-19/USA/TX-HMH-MCoV-14889/2020|2020-10-14|EPI\_ISL\_786373|Original|hCoV-19^^Texas|Human|Houston Methodist Hospital|Houston Methodist Hospital|Long|USA

>Spike|hCoV-19/England/QEUH-964238/2020|2020-08-11|EPI\_ISL\_536917|Original|hCoV-19^^England|Human|Lighthouse Lab in Glasgow|Wellcome Sanger Institute for the COVID-19 Genomics UK (COG-UK) consortium|Davies|United Kingdom

>Spike|hCoV-19/Italy/FVG-ICGEB-S14/2020|2020-03-30|EPI\_ISL\_428853|Vero E6 P1|hCoV-19^^Friuli Venezia Giulia|Human|Laboratory of Molecular Virology International Center for Genetic Engineering and Biotechnology (ICGEB)|ARGO Open Lab Platform for Genome Sequencing|Marcello|Italy

>Spike|hCoV-19/England/ALDP-9ED02E/2020|2020-05-04|EPI\_ISL\_589470|Original|hCoV-19^^England|Human|Lighthouse Lab in Alderley Park|Wellcome Sanger Institute for the COVID-19 Genomics UK (COG-UK) consortium|Davies|United Kingdom

>Spike|hCoV-19/United Arab Emirates/0574/2020|2020-05-16|EPI\_ISL\_698732|Original|hCoV-19^^Abu Dhabi|Human|Group 42 (G42) Healthcare|G42 Healthcare|Ogrodzki|United Arab Emirates

>Spike|hCoV-19/England/MILK-B5563C/2020|2020-11-05|EPI\_ISL\_657571|Original|hCoV-19^^England|Human|Lighthouse Lab in Milton Keynes|Wellcome Sanger Institute for the COVID-19 Genomics UK (COG-UK) Consortium|Davies|United Kingdom

>Spike|hCoV-19/USA/CA-LACPHL-AE00037/2020|2020-10-02|EPI\_ISL\_708729|Original|hCoV-19^^California|Human|Los Angeles County Public Health Laboratory|Los Angeles County Public Health Laboratory|Hemarajata|USA

>Spike|hCoV-19/Belgium/ULG-10608/2020|2020-09-04|EPI\_ISL\_626250|Original|hCoV-19^^Li\u00e8ge|Human|Department of Clinical Microbiology|GIGA Medical Genomics|Durkin|Belgium

>Spike|hCoV-19/England/ALDP-95118C/2020|2020-06-13|EPI\_ISL\_554198|Original|hCoV-19^^England|Human|Lighthouse Lab in Alderley Park|Wellcome Sanger Institute for the COVID-19 Genomics UK (COG-UK) consortium|Davies|United Kingdom

>Spike|hCoV-19/South Korea/KCDC2100/2020|2020-03-04|EPI\_ISL\_498001|Original|hCoV-19^^South Korea|Human|Division of Viral Diseases|Division of Viral Diseases|Kim|South Korea

>Spike|hCoV-19/England/EXET-13F201/2020|2020-12-15|EPI\_ISL\_763532|Original|hCoV-19^^England|Human|University of Exeter|COVID-19 Genomics UK (COG-UK) Consortium|Temperton|United Kingdom

>Spike|hCoV-19/USA/FL-BPHL-1387/2020|2020-07-22|EPI\_ISL\_541324|Original|hCoV-19^^Florida|Human|Florida Bureau of Public Health Laboratories|Florida Bureau of Public Health Laboratories|Blanton|USA

>Spike|hCoV-19/England/MILK-A6B388/2020|2020-10-08|EPI\_ISL\_608710|Original|hCoV-19^^England|Human|Lighthouse Lab in Milton Keynes|Wellcome Sanger Institute for the COVID-19 Genomics UK (COG-UK) consortium|Davies|United Kingdom

>Spike|hCoV-19/England/MILK-BB1328/2020|2020-11-17|EPI\_ISL\_720127|Original|hCoV-19^^England|Human|Lighthouse Lab in Milton Keynes|Wellcome Sanger Institute for the COVID-19 Genomics UK (COG-UK) Consortium|Davies|United Kingdom

>Spike|hCoV-19/USA/WI-UW-2339/2020|2020-11-13|EPI\_ISL\_728105|Original|hCoV-19^^Wisconsin|Human|University of Wisconsin-Madison AIDS Vaccine Research Laboratories|University of Wisconsin-Madison AIDS Vaccine Research Laboratories|Baczenas|USA

>Spike|hCoV-19/USA/CA-ALSR-3464/2020|2020-09-15|EPI\_ISL\_636041|Original|hCoV-19^^California|Human|San Diego County Public Health Laboratory|Andersen lab at Scripps Research|Gangavarapu|USA

>Spike|hCoV-19/Spain/MD-IBV-003694/2020|2020-04-02|EPI\_ISL\_467229|Original|hCoV-19^^Madrid|Human|Hospital General Universitario Gregorio Mara\u00f1\u00f3n|SeqCOVID-SPAIN consortium/IBV (CSIC)|Comas|Spain

>Spike|hCoV-19/England/QEUH-A9CE9C/2020|2020-10-20|EPI\_ISL\_650386|Original|hCoV-19^^England|Human|Queens Medical Centre|COVID-19 Genomics UK (COG-UK) Consortium|Loose|United Kingdom

>Spike|hCoV-19/USA/GA-CDC-7671/2020|2020-10-27|EPI\_ISL\_681801|Original|hCoV-19^^Georgia|Human|GA Department of Public Health Laboratory|Pathogen Discovery|Queen|USA

>Spike|hCoV-19/England/CAMC-B99F04/2020|2020-11-15|EPI\_ISL\_673649|Original|hCoV-19^^England|Human|Lighthouse Lab in Cambridge|Wellcome Sanger Institute for the COVID-19 Genomics UK (COG-UK) Consortium|Davies|United Kingdom

>Spike|hCoV-19/Iceland/165/2020|2020-03-15|EPI\_ISL\_417808|Original|hCoV-19^^Reykjavik|Human|The National University Hospital of Iceland|deCODE genetics|J\u00f3nsson|Iceland

>Spike|hCoV-19/Denmark/DCGC-1281/2020|2020-06-01|EPI\_ISL\_622419|Original|hCoV-19^^Hovedstaden|Human|Department of Virus and Microbiological Special Diagnostics|Albertsen lab|Michaelsen|Denmark

>Spike|hCoV-19/USA/TX-HMH-4791/2020|2020-06-22|EPI\_ISL\_544334|Original|hCoV-19^^Texas|Human|Houston Methodist Hospital|Houston Methodist Hospital|Long|USA

>Spike|hCoV-19/Wales/ALDP-94F3A9/2020|2020-06-19|EPI\_ISL\_555873|Original|hCoV-19^^Wales|Human|Lighthouse Lab in Alderley Park|Wellcome Sanger Institute for the COVID-19 Genomics UK (COG-UK) consortium|Davies|United Kingdom

>Spike|hCoV-19/USA/MI-MDHHS-SC20497/2020|2020-05-07|EPI\_ISL\_460035|Original|hCoV-19^^Michigan|Human|Michigan Department of Health and Human Services|Michigan Department of Health and Human Services|Blankenship|USA

>Spike|hCoV-19/USA/NY-SURV0985/2020|2020-03-19|EPI\_ISL\_436079|Original|hCoV-19^^New York|Human|NYC Department of Health and Mental Hygiene|Pathogen Discovery|Queen|USA

>Spike|hCoV-19/Scotland/EDB2120/2020|2020-04-20|EPI\_ISL\_491527|Original|hCoV-19^^Scotland|Human|Virology Department|Wellcome Sanger Institute for the COVID-19 Genomics UK (COG-UK) consortium|Davies|United Kingdom

>Spike|hCoV-19/Japan/PG-4489/2020|2020-07-00|EPI\_ISL\_692712|Original|hCoV-19^^Japan|Human|Pathogen Genomics Center|Pathogen Genomics Center|Sekizuka|Japan

>Spike|hCoV-19/India/UP-NBRI-N34-TDV641/2020|2020-05-15|EPI\_ISL\_516963|Original|hCoV-19^^Uttar Pradesh|Human|King Georges Medical University|CSIR-National Botanical Research Institute|Bag|India

>Spike|hCoV-19/England/CAMC-947A15/2020|2020-07-22|EPI\_ISL\_556923|Original|hCoV-19^^England|Human|Lighthouse Lab in Cambridge|Wellcome Sanger Institute for the COVID-19 Genomics UK (COG-UK) consortium|Davies|United Kingdom

>Spike|hCoV-19/USA/TX-HMH-6133/2020|2020-07-04|EPI\_ISL\_547264|Original|hCoV-19^^Texas|Human|Houston Methodist Hospital|Houston Methodist Hospital|Long|USA

>Spike|hCoV-19/England/LIVE-A4D52/2020|2020-03-02|EPI\_ISL\_500085|Original|hCoV-19^^England|Human|Liverpool Clinical Laboratories|COVID-19 Genomics UK (COG-UK) Consortium|Haldenby|United Kingdom

>Spike|hCoV-19/Australia/VIC6145/2020|2020-07-22|EPI\_ISL\_518156|Original|hCoV-19^^Victoria|Human|Victorian Infectious Diseases Reference Laboratory (VIDRL)|VIDRL and MDU-PHL|Schultz|Australia

>Spike|hCoV-19/Spain/VC-IBV-98003614/2020|2020-03-17|EPI\_ISL\_538629|Original|hCoV-19^^Comunitat Valenciana|Human|Servicio de Microbiolog\u00eda. Hospital General Universitario de Castell\u00f3n|SeqCOVID-SPAIN consortium/IBV (CSIC)|Comas|Spain

>Spike|hCoV-19/Luxembourg/LNS4787447/2020|2020-11-15|EPI\_ISL\_740545|Original|hCoV-19^^Luxembourg|Human|Laboratoire national de sant\u00e9|Laboratoire national de sant\u00e9|Wienecke-Baldacchino|Luxembourg

>Spike|hCoV-19/Brazil/SC-L12-CD218/2020|2020-03-20|EPI\_ISL\_476216|Original|hCoV-19^^Santa Catarina|Human|DB Diagn\u00f3sticos do Brasil|Instituto de Medicina Tropical da Univesidade de S\u00e3o Paulo|Sabino|Brazil

>Spike|hCoV-19/USA/NM-DOH-2020315509/2020|2020-08-27|EPI\_ISL\_574290|Original|hCoV-19^^New Mexico|Human|New Mexico Department of Health Scientific Laboratory|New Mexico Department of Health Scientific Laboratory|Johnson|USA

>Spike|hCoV-19/England/BIRM-69FBD/2020|2020-11-09|EPI\_ISL\_679010|Original|hCoV-19^^England|Human|University of Birmingham|COVID-19 Genomics UK (COG-UK) Consortium|Loman|United Kingdom

>Spike|hCoV-19/England/QEUA-961857/2020|2020-08-02|EPI\_ISL\_537060|Original|hCoV-19^^England|Human|Lighthouse Lab in Glasgow|Wellcome Sanger Institute for the COVID-19 Genomics UK (COG-UK) consortium|Davies|United Kingdom

>Spike|hCoV-19/India/TG-CDFD-N4893/2020|2020-05-28|EPI\_ISL\_528617|Original|hCoV-19^^Telangana|Human|National Genomics Core-Center for DNA Fingerprinting and Diagnostics|National Genomics Core-Center for DNA Fingerprinting and Diagnostics (NGC-CDFD) - DBT's PAN-INDIA-1000 Genome consortium|Vashisht|India

>Spike|hCoV-19/Mexico/BCN-ALSR-2563/2020|2020-07-06|EPI\_ISL\_635566|Original|hCoV-19^^Baja California|Human|Centro de Diagn\u00f3stico COVID-19 UABC Tijuana|Andersen lab at Scripps Research|Gangavarapu|Mexico

>Spike|hCoV-19/Wales/PHWC-16F8F7/2020|2020-10-05|EPI\_ISL\_586037|Original|hCoV-19^^Wales|Human|Wales Specialist Virology Centre Sequencing lab|COVID-19 Genomics UK (COG-UK) Consortium|Moore|United Kingdom

>Spike|hCoV-19/Finland/10A1S14/2020|2020-04-10|EPI\_ISL\_481519|Original|hCoV-19^^Uusimaa|Human|Department of Virology and Immunology|Department of Virology|Smura|Finland

>Spike|hCoV-19/England/MILK-B56316/2020|2020-11-05|EPI\_ISL\_657550|Original|hCoV-19^^England|Human|Lighthouse Lab in Milton Keynes|Wellcome Sanger Institute for the COVID-19 Genomics UK (COG-UK) Consortium|Davies|United Kingdom

>Spike|hCoV-19/USA/NY-NYCPHL-000161/2020|2020-04-08|EPI\_ISL\_631697|Original|hCoV-19^^New York|Human|Jamaica Hospital Medical Center|New York City Public Health Laboratory|Wang|USA

>Spike|hCoV-19/England/ALDP-9CAFBI/2020|2020-09-16|EPI\_ISL\_575729|Original|hCoV-19^^England|Human|Lighthouse Lab in Alderley Park|Wellcome Sanger Institute for the COVID-19 Genomics UK (COG-UK) consortium|Davies|United Kingdom

>Spike|hCoV-19/USA/WA-S37/2020|2020-03-04|EPI\_ISL\_417090|Original|hCoV-19^^Washington|Human|Washington State Department of Health|Seattle Flu Study|Bedford|USA

>Spike|hCoV-19/USA/WA-UW-2320/2020|2020-03-30|EPI\_ISL\_477712|Original|hCoV-19^^Washington|Human|UW Virology Lab|UW Virology Lab|Roychoudhury|USA

>Spike|hCoV-19/Spain/MD-IBV-99008745/2020|2020-10-16|EPI\_ISL\_654258|Original|hCoV-19^^Madrid|Human|Hospital General Universitario Gregorio Mara\u00f1a|SeqCOVID-SPAIN consortium/IBV (CSIC)|Comas|Spain

>Spike|hCoV-19/Wales/PHWC-489706/2020|2020-10-28|EPI\_ISL\_639608|Original|hCoV-19^^Wales|Human|Wales Specialist Virology Centre Sequencing lab|COVID-19 Genomics UK (COG-UK) Consortium|Moore|United Kingdom

>Spike|hCoV-19/India/KA-IB60/2020|2020-06-19|EPI\_ISL\_511950|Original|hCoV-19^^Karnataka|Human|Indian Institute of Science|National Institute of Biomedical Genomics -\u00a0DBT's PAN-INDIA 1000 SARS-CoV-2 RNA Genome Sequencing Consortium|Maitra|India

>Spike|hCoV-19/England/204881129/2020|2020-11-25|EPI\_ISL\_754332|Original|hCoV-19^^England|Human|Respiratory Virus Unit|COVID-19 Genomics UK (COG-UK) Consortium|Platt|United Kingdom

>Spike|hCoV-19/USA/NM-DOH-2020321219/2020|2020-09-03|EPI\_ISL\_575291|Original|hCoV-19^^New Mexico|Human|Molecular Biology|Molecular Biology|Johnson|USA

>Spike|hCoV-19/England/20129147804/2020|2020-03-21|EPI\_ISL\_424116|Original|hCoV-19^^England|Human|Respiratory Virus Unit|Respiratory Virus Unit|Platt|United Kingdom

>Spike|hCoV-19/USA/UT-UPHL-2008882/2020|2020-05-26|EPI\_ISL\_524996|Original|hCoV-19^^Utah|Human|Utah Public Health Laboratory|Utah Public Health Laboratory|Young|USA

>Spike|hCoV-19/Spain/CN-IBV-97006522/2020|2020-04-06|EPI\_ISL\_561371|Original|hCoV-19^^Canary Islands|Human|Hospital Universitario de Gran Canaria Dr. Negr\u00e9|SeqCOVID-SPAIN consortium/IBV (CSIC)|Comas|Spain

>Spike|hCoV-19/England/ALDP-C3CED8/2020|2020-12-10|EPI\_ISL\_731245|Original|hCoV-19^^England|Human|Lighthouse Lab in Alderley Park|Wellcome Sanger Institute for the COVID-19 Genomics UK (COG-UK) Consortium|Davies|United Kingdom

>Spike|hCoV-19/USA/AZ-TG280836/2020|2020-04-22|EPI\_ISL\_694178|Original|hCoV-19^^Arizona|Human|AZ SPHL|TGen North|French|USA

>Spike|hCoV-19/England/CAMC-A415EC/2020|2020-10-03|EPI\_ISL\_609366|Original|hCoV-19^^England|Human|Lighthouse Lab in Cambridge|Wellcome Sanger Institute for the COVID-19 Genomics UK (COG-UK) consortium|Davies|United Kingdom

>Spike|hCoV-19/Denmark/DCGC-5442/2020|2020-09-21|EPI\_ISL\_620767|Original|hCoV-19^^Syddanmark|Human|Department of Virus and Microbiological Special Diagnostics|Albertsen lab|Michaelsen|Denmark

>Spike|hCoV-19/England/QEUEH-C5CACF/2020|2020-12-14|EPI\_ISL\_769533|Original|hCoV-19^^England|Human|Lighthouse Lab in Glasgow|Wellcome Sanger Institute for the COVID-19 Genomics UK (COG-UK) Consortium|Davies|United Kingdom

>Spike|hCoV-19/England/QEUEH-B408A7/2020|2020-11-08|EPI\_ISL\_657308|Original|hCoV-19^^England|Human|Lighthouse Lab in Glasgow|Wellcome Sanger Institute for the COVID-19 Genomics UK (COG-UK) Consortium|Davies|United Kingdom

>Spike|hCoV-19/Scotland/EDB11089/2020|2020-12-10|EPI\_ISL\_764359|Original|hCoV-19^^Scotland|Human|Virology Department|COVID-19 Genomics UK (COG-UK) Consortium|McHugh|United Kingdom

>Spike|hCoV-19/Spain/MD-ISCIII-2015114/2020|2020-09-09|EPI\_ISL\_691730|Original|hCoV-19^^Madrid|Human|Hospital Universitario Severo Ochoa|Instituto de Salud Carlos III|Caballero|Spain

>Spike|hCoV-19/England/CAMB-1BC169/2020|2020-11-23|EPI\_ISL\_723852|Original|hCoV-19^^England|Human|Department of Pathology|COVID-19 Genomics UK (COG-UK) Consortium|Goodfellow|United Kingdom

>Spike|hCoV-19/England/ALDP-B62511/2020|2020-11-08|EPI\_ISL\_656551|Original|hCoV-19^^England|Human|Lighthouse Lab in Alderley Park|Wellcome Sanger Institute for the COVID-19 Genomics UK (COG-UK) Consortium|Davies|United Kingdom

>Spike|hCoV-19/England/ALDP-AA374C/2020|2020-10-22|EPI\_ISL\_623938|Original|hCoV-19^^England|Human|Lighthouse Lab in Alderley Park|Wellcome Sanger Institute for the COVID-19 Genomics UK (COG-UK) consortium|Davies|United Kingdom

>Spike|hCoV-19/Denmark/DCGC-20664/2020|2020-12-21|EPI\_ISL\_758757|Original|hCoV-19^^Hovedstaden|Human|Department of Virus and Microbiological Special Diagnostics|Albertsen Lab|Michaelsen|Denmark

>Spike|hCoV-19/Switzerland/FR-ETHZ-350297/2020|2020-10-30|EPI\_ISL\_728873|Original|hCoV-19^^Fribourg|Human|Viollier AG|Department of Biosystems Science and Engineering|Nadeau|Switzerland

>Spike|hCoV-19/Denmark/DCGC-3732/2020|2020-08-31|EPI\_ISL\_615512|Original|hCoV-19^^Hovedstaden|Human|Department of Virus and Microbiological Special Diagnostics|Albertsen lab|Michaelsen|Denmark

>Spike|hCoV-19/Belgium/ULG-10851/2020|2020-11-06|EPI\_ISL\_666886|Original|hCoV-19^^Li\u00e8ge|Human|Department of Clinical Microbiology|GIGA Medical Genomics|Durkin|Belgium

>Spike|hCoV-19/England/QEUEH-96C160/2020|2020-08-15|EPI\_ISL\_530925|Original|hCoV-19^^England|Human|Lighthouse Lab in Glasgow|Wellcome Sanger Institute for the COVID-19 Genomics UK (COG-UK) consortium|Davies|United Kingdom

>Spike|hCoV-19/England/ALDP-A4FC07/2020|2020-10-07|EPI\_ISL\_597591|Original|hCoV-19^^England|Human|Lighthouse Lab in Alderley Park|Wellcome Sanger Institute for the COVID-19 Genomics UK (COG-UK) consortium|Davies|United Kingdom

>Spike|hCoV-19/England/BRIS-123385/2020|2020-04-06|EPI\_ISL\_442687|Original|hCoV-19^^England|Human|PHE South West Regional Laboratory|Wellcome Sanger Institute for the COVID-19 Genomics UK (COG-UK) consortium|Amato|United Kingdom

>Spike|hCoV-19/England/OXON-B4162/2020|2020-03-27|EPI\_ISL\_534934|Original|hCoV-19^^England|Human|Oxford Viromics|COVID-19 Genomics UK (COG-UK) Consortium|Golubchik|United Kingdom

>Spike|hCoV-19/England/ALDP-B73920/2020|2020-11-12|EPI\_ISL\_662478|Original|hCoV-19^^England|Human|Lighthouse Lab in Alderley Park|Wellcome Sanger Institute for the COVID-19 Genomics UK (COG-UK) Consortium|Davies|United Kingdom

>Spike|hCoV-19/USA/CA-CZB-13871/2020|2020-08-17|EPI\_ISL\_739631|Original|hCoV-19^^California|Human|Alameda County Public Health Lab|Chan-Zuckerberg Biohub|Kamm|USA

>Spike|hCoV-19/England/MILK-99382F/2020|2020-08-26|EPI\_ISL\_552319|Original|hCoV-19^^England|Human|Lighthouse Lab in Milton Keynes|Wellcome Sanger Institute for the COVID-19 Genomics UK (COG-UK) consortium|Davies|United Kingdom



>Spike|hCoV-19/Canada/QC-LSPQ-L00232511/2020|2020-03-22|EPI\_ISL\_535988|Original|hCoV-19^^Quebec|Human|H\u00f4pital du Suro\u00eet|Laboratoire de sant\u00e9 publique du Qu\u00e9bec|Moreira|Canada

>Spike|hCoV-19/USA/CA-ALSR-3135/2020|2020-08-24|EPI\_ISL\_635867|Original|hCoV-19^^California|Human|San Diego County Public Health Laboratory|Andersen lab at Scripps Research|Gangavarapu|USA

>Spike|hCoV-19/Foshan/20SF211/2020|2020-01-22|EPI\_ISL\_406536|Original|hCoV-19^^Guangdong|Human|Guangdong Provincial Center for Diseases Control and Prevention; Guangdong Provincial Public Health|Guangdong Provincial Center for Diseases Control and Prevention|Lu|China

>Spike|hCoV-19/England/LIVE-9E17D/2020|2020-04-03|EPI\_ISL\_453272|Original|hCoV-19^^England|Human|Liverpool Clinical Laboratories|COVID-19 Genomics UK (COG-UK) Consortium|Haldenby|United Kingdom

>Spike|hCoV-19/Australia/VIC12803/2020|2020-09-10|EPI\_ISL\_563596|Original|hCoV-19^^Victoria|Human|Microbiological Diagnostic Unit - Public Health Laboratory (MDU-PHL) |MDU-PHL|Schultz|Australia

>Spike|hCoV-19/England/CAMB-750F7/2020|2020-03-16|EPI\_ISL\_440436|Original|hCoV-19^^England|Human|Department of Pathology|Wellcome Sanger Institute for the COVID-19 Genomics UK (COG-UK) consortium|Amato|United Kingdom

>Spike|hCoV-19/USA/CA-CZB-1059/2020|2020-04-08|EPI\_ISL\_437059|Original|hCoV-19^^California|Human|County of Santa Clara Public Health|Chan-Zuckerberg Biohub|Hao|USA

>Spike|hCoV-19/England/MILK-97361C/2020|2020-08-20|EPI\_ISL\_575975|Original|hCoV-19^^England|Human|Lighthouse Lab in Milton Keynes|Wellcome Sanger Institute for the COVID-19 Genomics UK (COG-UK) consortium|Davies|United Kingdom

>Spike|hCoV-19/Belgium/ULG-10959/2020|2020-09-07|EPI\_ISL\_707738|Original|hCoV-19^^Li\u00e8ge|Human|Department of Clinical Microbiology|GIGA Medical Genomics|Durkin|Belgium

>Spike|hCoV-19/Switzerland/GE-ETHZ-320595/2020|2020-10-12|EPI\_ISL\_737753|Original|hCoV-19^^Geneva|Human|Viollier AG|Department of Biosystems Science and Engineering|Nadeau|Switzerland

>Spike|hCoV-19/Scotland/QEUEH-96D6D9/2020|2020-08-20|EPI\_ISL\_534566|Original|hCoV-19^^Scotland|Human|NHSGGC West of Scotland Specialist Virology Centre / MRC-University of Glasgow Centre for Virus Research|Wellcome Sanger Institute for the COVID-19 Genomics UK (COG-UK) consortium|Davies|United Kingdom

>Spike|hCoV-19/England/BRIS-12A676/2020|2020-05-01|EPI\_ISL\_458300|Original|hCoV-19^^England|Human|PHE South West Regional Laboratory|Wellcome Sanger Institute for the COVID-19 Genomics UK (COG-UK) consortium|Davies|United Kingdom

>Spike|hCoV-19/Denmark/DCGC-19937/2020|2020-12-07|EPI\_ISL\_747877|Original|hCoV-19^^Sjælland|Human|Department of Virus and Microbiological Special Diagnostics|Albertsen Lab|Michaelsen|Denmark

>Spike|hCoV-19/England/CAMB-1AD6F3/2020|2020-05-01|EPI\_ISL\_447998|Original|hCoV-19^^England|Human|Department of Pathology|COVID-19 Genomics UK (COG-UK) Consortium|Meredith|United Kingdom

>Spike|hCoV-19/USA/FL-BPHL-1964/2020|2020-04-10|EPI\_ISL\_653117|Original|hCoV-19^^Florida|Human|Florida Bureau of Public Health Laboratories|Florida Bureau of Public Health Laboratories|Blanton|USA

>Spike|hCoV-19/England/NORT-1B62AE2/2020|2020-11-28|EPI\_ISL\_706281|Original|hCoV-19^^England|Human|Northumbria University / South Tees Hospitals NHS Foundation Trust / North Cumbria Integrated Care NHS Foundation Trust / North Tees and Hartlepool NHS Foundation Trust / Newcastle Hospitals NHS Foundation Trust|COVID-19 Genomics UK (COG-UK) Consortium|Bashton|United Kingdom

>Spike|hCoV-19/Scotland/CVR5690/2020|2020-11-08|EPI\_ISL\_651911|Original|hCoV-19^^Scotland|Human|West of Scotland Specialist Virology Centre|COVID-19 Genomics UK (COG-UK) Consortium|Robertson|United Kingdom

>Spike|hCoV-19/Portugal/PT1492/2020|2020-03-31|EPI\_ISL\_511451|Original|hCoV-19^^Portugal|Human|Instituto Nacional de Saude (INSA)|Instituto Nacional de Saude (INSA)|Borges|Portugal

>Spike|hCoV-19/Denmark/DCGC-10037/2020|2020-11-09|EPI\_ISL\_669352|Original|hCoV-19^^Syddanmark|Human|Department of Virus and Microbiological Special Diagnostics|Albertsen Lab|Michaelsen|Denmark

>Spike|hCoV-19/USA/NV-NSPHL-A0183/2020|2020-05-19|EPI\_ISL\_515440|Original|hCoV-19^^Nevada|Human|Nevada State Public Health Laboratory|Nevada State Public Health Laboratory|Sevinsky|USA

>Spike|hCoV-19/USA/MD-MDH-0216/2020|2020-09-17|EPI\_ISL\_560829|Original|hCoV-19^^Maryland|Human|Maryland Public Health Laboratory|Maryland Public Health Laboratory|Keller|USA

>Spike|hCoV-19/England/PORT-2EA8D5/2020|2020-00-00|EPI\_ISL\_702795|Original|hCoV-19^^England|Human|Centre for Enzyme Innovation|COVID-19 Genomics UK (COG-UK) Consortium|Robson|United Kingdom

>Spike|hCoV-19/USA/TX-HMH-MCoV-10682/2020|2020-07-09|EPI\_ISL\_789587|Original|hCoV-19^^Texas|Human|Houston Methodist Hospital|Houston Methodist Hospital|Long|USA

>Spike|hCoV-19/USA/ME-HETL-J0034/2020|2020-03-17|EPI\_ISL\_513446|Original|hCoV-19^^Maine|Human|Maine HETL|Tewhey Lab|Tewhey|USA

>Spike|hCoV-19/Denmark/DCGC-6771/2020|2020-10-12|EPI\_ISL\_619467|Original|hCoV-19^^Midtjylland|Human|Department of Virus and Microbiological Special Diagnostics|Albertsen lab|Michaelsen|Denmark

>Spike|hCoV-19/Portugal/PT1557/2020|2020-06-26|EPI\_ISL\_693529|Original|hCoV-19^^Portugal|Human|Instituto Nacional de Saude (INSA)|Instituto Nacional de Saude (INSA)|Borges|Portugal

>Spike|hCoV-19/Denmark/DCGC-16246/2020|2020-11-16|EPI\_ISL\_714662|Original|hCoV-19^^Midtjylland|Human|Department of Virus and Microbiological Special Diagnostics|Albertsen Lab|Michaelsen|Denmark

>Spike|hCoV-19/England/ALDP-B7625F/2020|2020-11-12|EPI\_ISL\_723748|Original|hCoV-19^^England|Human|Oxford Viromics|COVID-19 Genomics UK (COG-UK) Consortium|Golubchik|United Kingdom

>Spike|hCoV-19/USA/NY-Wadsworth-28157-01/2020|2020-03-24|EPI\_ISL\_525630|Original|hCoV-19^^New York|Human|Wadsworth Center|Wadsworth Center|Plitnick|USA

>Spike|hCoV-19/England/CAMB-1B6606/2020|2020-00-00|EPI\_ISL\_584293|Original|hCoV-19^^England|Human|Department of Pathology|COVID-19 Genomics UK (COG-UK) Consortium|Goodfellow|United Kingdom

>Spike|hCoV-19/Wales/PHWC-49585F/2020|2020-11-24|EPI\_ISL\_726405|Original|hCoV-19^^Wales|Human|Originating lab|COVID-19 Genomics UK (COG-UK) Consortium|Moore|United Kingdom

>Spike|hCoV-19/England/CAMC-B51551/2020|2020-11-08|EPI\_ISL\_657917|Original|hCoV-19^^England|Human|Lighthouse Lab in Cambridge|Wellcome Sanger Institute for the COVID-19 Genomics UK (COG-UK) Consortium|Davies|United Kingdom

>Spike|hCoV-19/England/QEUEH-BCE20D/2020|2020-11-26|EPI\_ISL\_704296|Original|hCoV-19^^England|Human|Lighthouse Lab in Glasgow|Wellcome Sanger Institute for the COVID-19 Genomics UK (COG-UK) Consortium|Davies|United Kingdom

>Spike|hCoV-19/England/ALDP-5CF220/2020|2020-06-15|EPI\_ISL\_558574|Original|hCoV-19^^England|Human|Lighthouse Lab in Alderley Park|Wellcome Sanger Institute for the COVID-19 Genomics UK (COG-UK) consortium|Davies|United Kingdom

>Spike|hCoV-19/Scotland/EDB5437/2020|2020-04-11|EPI\_ISL\_473819|Original|hCoV-19^^Scotland|Human|Virology Department|COVID-19 Genomics UK (COG-UK) Consortium|Williams|United Kingdom

>Spike|hCoV-19/England/NORW-21F7CB/2020|2020-12-08|EPI\_ISL\_725050|Original|hCoV-19^^England|Human|Quadram Institute Bioscience|COVID-19 Genomics UK (COG-UK) Consortium|Alikhan|United Kingdom

>Spike|hCoV-19/England/ALDP-A66B85/2020|2020-10-12|EPI\_ISL\_630386|Original|hCoV-19^^England|Human|Lighthouse Lab in Alderley Park|Wellcome Sanger Institute for the COVID-19 Genomics UK (COG-UK) consortium|Davies|United Kingdom

>Spike|hCoV-19/England/ALDP-66B128/2020|2020-07-03|EPI\_ISL\_558071|Original|hCoV-19^^England|Human|Lighthouse Lab in Alderley Park|Wellcome Sanger Institute for the COVID-19 Genomics UK (COG-UK) consortium|Davies|United Kingdom

>Spike|hCoV-19/England/CAMB-7CA4D/2020|2020-04-05|EPI\_ISL\_442199|Original|hCoV-19^^England|Human|Department of Pathology|Wellcome Sanger Institute for the COVID-19 Genomics UK (COG-UK) consortium|Amato|United Kingdom

>Spike|hCoV-19/England/MILK-976585/2020|2020-08-20|EPI\_ISL\_575833|Original|hCoV-19^^England|Human|Lighthouse Lab in Milton Keynes|Wellcome Sanger Institute for the COVID-19 Genomics UK (COG-UK) consortium|Davies|United Kingdom

>Spike|hCoV-19/Iceland/331/2020|2020-03-14|EPI\_ISL\_417660|Original|hCoV-19^^Reykjavik|Human|deCODE genetics|deCODE genetics|J\u00f3nsson|Iceland

>Spike|hCoV-19/Wales/PHWC-48BFDF/2020|2020-11-02|EPI\_ISL\_666377|Original|hCoV-19^^Wales|Human|Wales Specialist Virology Centre Sequencing lab|COVID-19 Genomics UK (COG-UK) Consortium|Moore|United Kingdom

>Spike|hCoV-19/England/ALDP-9CD974/2020|2020-09-16|EPI\_ISL\_566298|Original|hCoV-19^^England|Human|Lighthouse Lab in Alderley Park|Wellcome Sanger Institute for the COVID-19 Genomics UK (COG-UK) consortium|Davies|United Kingdom

>Spike|hCoV-19/England/ALDP-A6E72F/2020|2020-10-15|EPI\_ISL\_607714|Original|hCoV-19^^England|Human|Lighthouse Lab in Alderley Park|Wellcome Sanger Institute for the COVID-19 Genomics UK (COG-UK) consortium|Davies|United Kingdom

>Spike|hCoV-19/USA/CA-CZB-13449/2020|2020-09-09|EPI\_ISL\_672472|Original|hCoV-19^^California|Human|Alameda County Public Health Lab|Chan-Zuckerberg Biohub|Bhatt|USA

>Spike|hCoV-19/Ireland/WW-NVRL-AIIDV0351v1/2020|2020-05-02|EPI\_ISL\_644301|Original|hCoV-19^^Wicklow|Human|CEPHR / Vincent's Hospital|Irish Coronavirus Sequencing Consortium - National Virus Reference Laboratory|Gonzalez|Ireland

>Spike|hCoV-19/England/ALDP-A68479/2020|2020-10-12|EPI\_ISL\_608372|Original|hCoV-19^^England|Human|Lighthouse Lab in Alderley Park|Wellcome Sanger Institute for the COVID-19 Genomics UK (COG-UK) consortium|Davies|United Kingdom

>Spike|hCoV-19/Switzerland/BS-42356724/2020|2020-07-17|EPI\_ISL\_581889|Original|hCoV-19^^Basel-Stadt|Human|University Hospital Basel|University Hospital Basel|Roloff Handschin|Switzerland

>Spike|hCoV-19/England/LOND-1264CA7/2020|2020-11-23|EPI\_ISL\_724554|Original|hCoV-19^^England|Human|University College London|COVID-19 Genomics UK (COG-UK) Consortium|Roy|United Kingdom

>Spike|hCoV-19/England/CAMB-81984/2020|2020-04-12|EPI\_ISL\_591092|Original|hCoV-19^^England|Human|Department of Pathology|Wellcome Sanger Institute for the COVID-19 Genomics UK (COG-UK) consortium|Davies|United Kingdom

>Spike|hCoV-19/Wales/PHWC-48A88A/2020|2020-10-29|EPI\_ISL\_652608|Original|hCoV-19^^Wales|Human|Wales Specialist Virology Centre Sequencing lab|COVID-19 Genomics UK (COG-UK) Consortium|Moore|United Kingdom

>Spike|hCoV-19/Netherlands/Overijssel\_16/2020|2020-04-13|EPI\_ISL\_460805|Original|hCoV-19^^Overijssel|Human|Dutch COVID-19 response team|Erasmus Medical Center|Oude Munnink|Netherlands

>Spike|hCoV-19/USA/TX-HMH-1257/2020|2020-04-02|EPI\_ISL\_542616|Original|hCoV-19^^Texas|Human|Houston Methodist Hospital|Houston Methodist Hospital|Long|USA

>Spike|hCoV-19/England/EXET-13AD7E/2020|2020-11-10|EPI\_ISL\_665094|Original|hCoV-19^^England|Human|University of Exeter|COVID-19 Genomics UK (COG-UK) Consortium|Temperton|United Kingdom

>Spike|hCoV-19/England/CAMB-1BA505/2020|2020-11-14|EPI\_ISL\_679156|Original|hCoV-19^^England|Human|Department of Pathology|COVID-19 Genomics UK (COG-UK) Consortium|Goodfellow|United Kingdom

>Spike|hCoV-19/Jordan/AM-ALSR-4035/2020|2020-10-03|EPI\_ISL\_636395|Original|hCoV-19^^Amman|Human|Biolab Diagnostic Laboratories|Andersen lab at Scripps Research|Gangavarapu|Jordan

>Spike|hCoV-19/Germany/TH-RKI-NP-0048/2020|2020-12-11|EPI\_ISL\_763003|Original|hCoV-19^^Thuringia|Human|Unit 17|Project group Epidemiology of Highly Pathogenic Microorganisms|Schubert|Germany

>Spike|hCoV-19/England/QEUH-961C00/2020|2020-08-01|EPI\_ISL\_537126|Original|hCoV-19^^England|Human|Lighthouse Lab in Glasgow|Wellcome Sanger Institute for the COVID-19 Genomics UK (COG-UK) consortium|Davies|United Kingdom

>Spike|hCoV-19/England/20119004204/2020|2020-03-12|EPI\_ISL\_465011|Original|hCoV-19^^England|Human|Respiratory Virus Unit|Respiratory Virus Unit|Platt|United Kingdom

>Spike|hCoV-19/England/CAMC-B21235/2020|2020-11-02|EPI\_ISL\_647607|Original|hCoV-19^^England|Human|Lighthouse Lab in Cambridge|Wellcome Sanger Institute for the COVID-19 Genomics UK (COG-UK) Consortium|Davies|United Kingdom

>Spike|hCoV-19/USA/CA-LACPHL-AF00054/2020|2020-12-18|EPI\_ISL\_754129|Original|hCoV-19^^California|Human|USC Clinical Lab|Los Angeles County PHL|Hemarajata|USA

>Spike|hCoV-19/Australia/VIC3066/2020|2020-07-09|EPI\_ISL\_520773|Original|hCoV-19^^Victoria|Human|Microbiological Diagnostic Unit - Public Health Laboratory (MDU-PHL) |MDU-PHL|Schultz|Australia

>Spike|hCoV-19/Wales/PHWC-168F35/2020|2020-04-01|EPI\_ISL\_499369|Original|hCoV-19^^Wales|Human|Originating lab|COVID-19 Genomics UK (COG-UK) Consortium|Moore|United Kingdom

>Spike|hCoV-19/Netherlands/Gelderland\_57/2020|2020-05-18|EPI\_ISL\_460956|Original|hCoV-19^^Gelderland|Human|Dutch COVID-19 response team|Erasmus Medical Center|Oude Munnink|Netherlands

>Spike|hCoV-19/Australia/VIC4777/2020|2020-07-18|EPI\_ISL\_519163|Original|hCoV-19^^Victoria|Human|Microbiological Diagnostic Unit - Public Health Laboratory (MDU-PHL) |MDU-PHL|Schultz|Australia

>Spike|hCoV-19/Japan/PG-4680/2020|2020-08-00|EPI\_ISL\_689817|Original|hCoV-19^^Japan|Human|Fukuoka Institute of Health and Environmental Sciences|Pathogen Genomics Center|Sekizuka|Japan

>Spike|hCoV-19/Japan/PG-5269/2020|2020-08-00|EPI\_ISL\_690372|Original|hCoV-19^^Japan|Human|Pathogen Genomics Center|Pathogen Genomics Center|Sekizuka|Japan

>Spike|hCoV-19/USA/AZ-TG333885/2020|2020-05-28|EPI\_ISL\_694363|Original|hCoV-19^^Arizona|Human|TGen North|TGen North|French|USA

>Spike|hCoV-19/USA/TX-HMH-MCoV-13225/2020|2020-08-25|EPI\_ISL\_788376|Original|hCoV-19^^Texas|Human|Houston Methodist Hospital|Houston Methodist Hospital|Long|USA

>Spike|hCoV-19/England/QEUH-A3143D/2020|2020-10-05|EPI\_ISL\_595887|Original|hCoV-19^^England|Human|Quadram Institute Bioscience|COVID-19 Genomics UK (COG-UK) Consortium|Alikhan|United Kingdom

>Spike|hCoV-19/USA/AZ-TG654313/2020|2020-04-13|EPI\_ISL\_695968|Original|hCoV-19^^Arizona|Human|Sonora Quest Laboratories|TGen North|French|USA

>Spike|hCoV-19/Wales/PHWC-16F4E4/2020|2020-10-03|EPI\_ISL\_585976|Original|hCoV-19^^Wales|Human|Wales Specialist Virology Centre Sequencing lab|COVID-19 Genomics UK (COG-UK) Consortium|Moore|United Kingdom

>Spike|hCoV-19/Japan/IC-0291/2020|2020-11-00|EPI\_ISL\_667720|Original|hCoV-19^^Japan|Human|Pathogen Genomics Center|Pathogen Genomics Center|Sekizuka|Japan

>Spike|hCoV-19/USA/CA-CZB-3283/2020|2020-07-17|EPI\_ISL\_548333|Original|hCoV-19^^California|Human|County of Santa Clara Public Health Department|Chan-Zuckerberg Biohub|Bhatt|USA

>Spike|hCoV-19/USA/VA-DCLS-0438/2020|2020-05-02|EPI\_ISL\_477654|Original|hCoV-19^^Virginia|Human|Virginia DCLS|Virginia DCLS|St. Jacques|USA

>Spike|hCoV-19/England/C200045997/2020|2020-11-11|EPI\_ISL\_664095|Original|hCoV-19^^England|Human|Respiratory Virus Unit|COVID-19 Genomics UK (COG-UK) Consortium|Platt|United Kingdom

>Spike|hCoV-19/Australia/VIC8837/2020|2020-07-23|EPI\_ISL\_565226|Original|hCoV-19^^Victoria|Human|Microbiological Diagnostic Unit - Public Health Laboratory (MDU-PHL) |MDU-PHL|Schultz|Australia

>Spike|hCoV-19/England/NORT-1B72144/2020|2020-11-24|EPI\_ISL\_724855|Original|hCoV-19^^England|Human|Northumbria University / South Tees Hospitals NHS Foundation Trust / North Cumbria Integrated Care NHS Foundation Trust / North Tees and Hartlepool NHS Foundation Trust / Newcastle Hospitals NHS Foundation Trust|COVID-19 Genomics UK (COG-UK) Consortium|Bashton|United Kingdom

>Spike|hCoV-19/Scotland/QEUH-A0BDAA/2020|2020-10-03|EPI\_ISL\_585599|Original|hCoV-19^^Scotland|Human|Quadram Institute Bioscience|COVID-19 Genomics UK (COG-UK) Consortium|Alikhan|United Kingdom

>Spike|hCoV-19/Canada/BC-BCCDC-7522/2020|2020-11-00|EPI\_ISL\_740691|Original|hCoV-19^^British Columbia|Human|BCCDC Public Health Laboratory|BCCDC Public Health Laboratory|Prystajacky|Canada

>Spike|hCoV-19/England/ALDP-B1F883/2020|2020-11-01|EPI\_ISL\_649485|Original|hCoV-19^^England|Human|Lighthouse Lab in Alderley Park|Wellcome Sanger Institute for the COVID-19 Genomics UK (COG-UK) Consortium|Davies|United Kingdom

>Spike|hCoV-19/USA/WA-S964/2020|2020-05-01|EPI\_ISL\_463454|Original|hCoV-19^^Washington|Human|Washington State Department of Health|Seattle Flu Study|Bedford|USA

>Spike|hCoV-19/South Korea/KCDC2043/2020|2020-02-19|EPI\_ISL\_471449|Original|hCoV-19^^South Korea|Human|Division of Viral Diseases|Division of Viral Diseases|Kim|South Korea

>Spike|hCoV-19/England/SHEF-CC96F/2020|2020-05-26|EPI\_ISL\_535077|Original|hCoV-19^^England|Human|Virology Department|COVID-19 Genomics UK (COG-UK) Consortium|de Silva|United Kingdom

>Spike|hCoV-19/Canada/ON-PHL-20-01303/2020|2020-06-00|EPI\_ISL\_548906|Original|hCoV-19^^Ontario|Human|Public Health Ontario Laboratory|Public Health Ontario Laboratory|Guthrie|Canada

>Spike|hCoV-19/Belgium/ULG-10633/2020|2020-10-26|EPI\_ISL\_636612|Original|hCoV-19^^Li\u00e8ge|Human|Department of Clinical Microbiology|GIGA Medical Genomics|Durkin|Belgium

>Spike|hCoV-19/Scotland/QEUH-A4C7FA/2020|2020-10-08|EPI\_ISL\_596002|Original|hCoV-19^^Scotland|Human|Quadram Institute Bioscience|COVID-19 Genomics UK (COG-UK) Consortium|Alikhan|United Kingdom

>Spike|hCoV-19/India/UP-NBRI-N39-TDV163/2020|2020-05-15|EPI\_ISL\_516968|Original|hCoV-19^^Uttar Pradesh|Human|King Georges Medical University|CSIR-National Botanical Research Institute|Bag|India

>Spike|hCoV-19/England/ALDP-CC05E3/2020|2020-12-19|EPI\_ISL\_760734|Original|hCoV-19^^England|Human|Lighthouse Lab in Alderley Park|Wellcome Sanger Institute for the COVID-19 Genomics UK (COG-UK) Consortium|Davies|United Kingdom

>Spike|hCoV-19/Northern Ireland/NIRE-1069B3/2020|2020-05-16|EPI\_ISL\_500964|Original|hCoV-19^^Northern Ireland|Human|Regional Virus Laboratory|Wellcome Sanger Institute for the COVID-19 Genomics UK (COG-UK) consortium|Davies|United Kingdom

>Spike|hCoV-19/England/CAMC-AB2610/2020|2020-10-23|EPI\_ISL\_623841|Original|hCoV-19^^England|Human|Lighthouse Lab in Cambridge|Wellcome Sanger Institute for the COVID-19 Genomics UK (COG-UK) consortium|Davies|United Kingdom

>Spike|hCoV-19/England/MILK-9D4910/2020|2020-09-19|EPI\_ISL\_601738|Original|hCoV-19^^England|Human|Lighthouse Lab in Milton Keynes|Wellcome Sanger Institute for the COVID-19 Genomics UK (COG-UK) consortium|Davies|United Kingdom

>Spike|hCoV-19/USA/CA-ALSR-1393/2020|2020-05-07|EPI\_ISL\_494581|Original|hCoV-19^^California|Human|San Diego County Public Health Laboratory|Andersen lab at Scripps Research|Gangavarapu|USA

>Spike|hCoV-19/England/ALDP-5C998B/2020|2020-06-19|EPI\_ISL\_558418|Original|hCoV-19^^England|Human|Lighthouse Lab in Alderley Park|Wellcome Sanger Institute for the COVID-19 Genomics UK (COG-UK) consortium|Davies|United Kingdom

>Spike|hCoV-19/USA/CA-CZB-13089/2020|2020-05-08|EPI\_ISL\_672346|Original|hCoV-19^^California|Human|Alameda County Public Health Lab|Chan-Zuckerberg Biohub|Bhatt|USA

>Spike|hCoV-19/Luxembourg/LNS1290799/2020|2020-10-29|EPI\_ISL\_739914|Original|hCoV-19^^Luxembourg|Human|Laboratoire national de sant\u00e9|Laboratoire national de sant\u00e9|Wienecke-Baldacchino|Luxembourg

>Spike|hCoV-19/England/SHEF-C7876/2020|2020-06-15|EPI\_ISL\_484470|Original|hCoV-19^^England|Human|Virology Department|COVID-19 Genomics UK (COG-UK) Consortium|de Silva|United Kingdom

>Spike|hCoV-19/Scotland/QEUH-B7CDA3/2020|2020-11-14|EPI\_ISL\_742247|Original|hCoV-19^^Scotland|Human|Oxford Viromics|COVID-19 Genomics UK (COG-UK) Consortium|Golubchik|United Kingdom

>Spike|hCoV-19/India/DL-MaxCov0019-CSIR-IGIB/2020|2020-05-08|EPI\_ISL\_459921|Original|hCoV-19^^Delhi|Human|Devki Devi Foundation|CSIR-IGIB|Max|Pandey|India

>Spike|hCoV-19/USA/WI-UW-283/2020|2020-04-06|EPI\_ISL\_436577|Original|hCoV-19^^Wisconsin|Human|University of Wisconsin-Madison AIDS Vaccine Research

Laboratories|University of Wisconsin-Madison AIDS Vaccine Research  
Laboratories|Baczenas|USA  
>Spike|hCoV-19/USA/CA-ALSR-1560/2020|2020-05-11|EPI\_ISL\_494661|Original|hCoV-19^^California|Human|Scripps Medical Laboratory|Andersen lab at Scripps Research|Gangavarapu|USA  
>Spike|hCoV-19/USA/MI-UM-2006S001011/2020|2020-04-07|EPI\_ISL\_484790|Original|hCoV-19^^Michigan|Human|University of Michigan Clinical Microbiology Laboratory|Lauring Lab|Valesano|USA  
>Spike|hCoV-19/Denmark/DCGC-1170/2020|2020-03-16|EPI\_ISL\_614664|Original|hCoV-19^^Hovedstaden|Human|Department of Virus and Microbiological Special Diagnostics|Albertsen lab|Michaelsen|Denmark  
>Spike|hCoV-19/Netherlands/LI-RIVM-20649/2020|2020-12-16|EPI\_ISL\_790722|Original|hCoV-19^^Limburg|Human|Dutch COVID-19 response team|National Institute for Public Health and the Environment (RIVM)|Meijer|Netherlands  
>Spike|hCoV-19/USA/MN-MDH-1948/2020|2020-09-18|EPI\_ISL\_613478|Original|hCoV-19^^Minnesota|Human|Public Health Laboratory - Infectious Disease Lab|Minnesota Department of Health|Lorentz|USA  
>Spike|hCoV-19/England/LOND-124DD29/2020|2020-00-00|EPI\_ISL\_584647|Original|hCoV-19^^England|Human|University College London Hospital|COVID-19 Genomics UK (COG-UK) Consortium|Byott|United Kingdom  
>Spike|hCoV-19/Australia/VIC4077/2020|2020-07-09|EPI\_ISL\_519459|Original|hCoV-19^^Victoria|Human|Microbiological Diagnostic Unit - Public Health Laboratory (MDU-PHL)|MDU-PHL|Schultz|Australia  
>Spike|hCoV-19/Canada/ON-E39/2020|2020-05-26|EPI\_ISL\_593517|Original|hCoV-19^^Ontario|Human|Eastern Ontario Regional Laboratory Association|McMaster University|McArthur|Canada  
>Spike|hCoV-19/Scotland/EDB1072/2020|2020-04-06|EPI\_ISL\_433382|Original|hCoV-19^^Scotland|Human|Virology Department|COVID-19 Genomics UK (COG-UK) Consortium|Williams|United Kingdom  
>Spike|hCoV-19/Scotland/QEUH-A01384/2020|2020-10-02|EPI\_ISL\_595805|Original|hCoV-19^^Scotland|Human|Virology Department|COVID-19 Genomics UK (COG-UK) Consortium|de Silva|United Kingdom  
>Spike|hCoV-19/USA/MI-MDHHS-SC22394/2020|2020-11-12|EPI\_ISL\_708374|Original|hCoV-19^^Michigan|Human|Michigan Department of Health and Human Services|Michigan Department of Health and Human Services|Jacob|USA  
>Spike|hCoV-19/Wales/QEUH-AD5899/2020|2020-10-26|EPI\_ISL\_647937|Original|hCoV-19^^Wales|Human|Lighthouse Lab in Glasgow|Wellcome Sanger Institute for the COVID-19 Genomics UK (COG-UK) Consortium|Davies|United Kingdom  
>Spike|hCoV-19/Australia/VIC6198/2020|2020-07-23|EPI\_ISL\_518200|Original|hCoV-19^^Victoria|Human|Victorian Infectious Diseases Reference Laboratory (VIDRL)|VIDRL and MDU-PHL|Schultz|Australia  
>Spike|hCoV-19/England/BIRM-65D20/2020|2020-10-09|EPI\_ISL\_612221|Original|hCoV-19^^England|Human|University of Birmingham|COVID-19 Genomics UK (COG-UK) Consortium|Loman|United Kingdom  
>Spike|hCoV-19/Czech Republic/NRL\_4105/2020|2020-03-20|EPI\_ISL\_491094|Original|hCoV-19^^Plze\u0148|Human|The National Institute of Public Health|The National Institute of Public Health and State Veterinary Institute Prague|Nagy|Czech Republic  
>Spike|hCoV-19/Saudi Arabia/KAUST-Makkah156/2020|2020-04-06|EPI\_ISL\_437696|Original|hCoV-19^^Makkah|Human|Pathogen Genomics Lab King Abdullah University of Science and Technology(KAUST)|Pathogen Genomics Lab King Abdullah University of Science and Technology(KAUST)|Mohamed Ghazzali|Saudi Arabia  
>Spike|hCoV-19/USA/OR-OHSU-1595/2020|2020-07-21|EPI\_ISL\_526551|Original|hCoV-19^^Oregon|Human|OHSU Lab Services Molecular Microbiology Lab|Oregon SARS-CoV-2 Genome Sequencing Center|O'Roak|USA  
>Spike|hCoV-19/England/ALDP-B629AC/2020|2020-11-09|EPI\_ISL\_656495|Original|hCoV-19^^England|Human|Lighthouse Lab in Alderley Park|Wellcome Sanger Institute for the COVID-19 Genomics UK (COG-UK) Consortium|Davies|United Kingdom

>Spike|hCoV-19/Switzerland/VS-ETHZ-411027/2020|2020-12-03|EPI\_ISL\_737876|Original|hCoV-19^^Valais|Human|Viollier AG|Department of Biosystems Science and Engineering|Nadeau|Switzerland

>Spike|hCoV-19/England/MILK-ACD788/2020|2020-10-21|EPI\_ISL\_630257|Original|hCoV-19^^England|Human|Lighthouse Lab in Milton Keynes|Wellcome Sanger Institute for the COVID-19 Genomics UK (COG-UK) consortium|Davies|United Kingdom

>Spike|hCoV-19/England/ALDP-B1A85B/2020|2020-11-01|EPI\_ISL\_647638|Original|hCoV-19^^England|Human|Lighthouse Lab in Alderley Park|Wellcome Sanger Institute for the COVID-19 Genomics UK (COG-UK) Consortium|Davies|United Kingdom

>Spike|hCoV-19/England/ALDP-C3D930/2020|2020-12-10|EPI\_ISL\_731564|Original|hCoV-19^^England|Human|Lighthouse Lab in Alderley Park|Wellcome Sanger Institute for the COVID-19 Genomics UK (COG-UK) Consortium|Davies|United Kingdom

>Spike|hCoV-19/Bangladesh/BCSIR-NILMRC-234/2020|2020-07-06|EPI\_ISL\_487378|Original|hCoV-19^^Barisal|Human|National Institute of Laboratory Medicine and Referral Center|Genomic Research Lab|Khan|Bangladesh

>Spike|hCoV-19/England/ALDP-A51EEE/2020|2020-10-07|EPI\_ISL\_598160|Original|hCoV-19^^England|Human|Lighthouse Lab in Alderley Park|Wellcome Sanger Institute for the COVID-19 Genomics UK (COG-UK) consortium|Davies|United Kingdom

>Spike|hCoV-19/USA/CA-ALSR-0802-IPL/2020|2020-04-03|EPI\_ISL\_483369|Original|hCoV-19^^California|Human|UC San Diego Center for Advanced Laboratory Medicine|Andersen lab at Scripps Research|Gangavarapu|USA

>Spike|hCoV-19/USA/TX-HMH-1842/2020|2020-05-01|EPI\_ISL\_542875|Original|hCoV-19^^Texas|Human|Houston Methodist Hospital|Houston Methodist Hospital|Long|USA

>Spike|hCoV-19/Scotland/CVR5233/2020|2020-10-18|EPI\_ISL\_627402|Original|hCoV-19^^Scotland|Human|West of Scotland Specialist Virology Centre|COVID-19 Genomics UK (COG-UK) Consortium|Robertson|United Kingdom

>Spike|hCoV-19/USA/CA-SR0224/2020|2020-04-02|EPI\_ISL\_437576|Original|hCoV-19^^California|Human|Scripps Medical Laboratory|Andersen lab at Scripps Research|Gangavarapu|USA

>Spike|hCoV-19/England/QEUH-9C7F1E/2020|2020-09-14|EPI\_ISL\_602030|Original|hCoV-19^^England|Human|Lighthouse Lab in Glasgow|Wellcome Sanger Institute for the COVID-19 Genomics UK (COG-UK) consortium|Davies|United Kingdom

>Spike|hCoV-19/USA/NY-NYUMC235/2020|2020-04-06|EPI\_ISL\_427634|Original|hCoV-19^^New York|Human|NYU Langone Health|Departments of Pathology and Medicine|Maurano|USA

>Spike|hCoV-19/United Arab Emirates/1028/2020|2020-06-11|EPI\_ISL\_699160|Original|hCoV-19^^Abu Dhabi|Human|Group 42 (G42) Healthcare|G42 Healthcare|Ogrodzki|United Arab Emirates

>Spike|hCoV-19/Australia/VIC1078/2020|2020-04-06|EPI\_ISL\_430564|Original|hCoV-19^^Victoria|Human|Victorian Infectious Diseases Reference Laboratory (VIDRL)|Microbiological Diagnostic Unit Public Health Laboratory and Victorian Infectious Diseases Reference Laboratory|Schultz|Australia

>Spike|hCoV-19/England/MILK-99CFF4/2020|2020-08-30|EPI\_ISL\_549854|Original|hCoV-19^^England|Human|Lighthouse Lab in Milton Keynes|Wellcome Sanger Institute for the COVID-19 Genomics UK (COG-UK) consortium|Davies|United Kingdom

>Spike|hCoV-19/USA/MA-QDX-1499/2020|2020-03-17|EPI\_ISL\_603835|Original|hCoV-19^^Massachusetts|Human|Quest Diagnostics|Quest Diagnostics|Kagan|USA

>Spike|hCoV-19/Greece/AUTH\_7/2020|2020-03-01|EPI\_ISL\_476836|Original|hCoV-19^^Thessaloniki|Human|National Influenza Centre for Northern Greece|National Influenza Centre for Northern Greece|Christoforidi|Greece

>Spike|hCoV-19/Canada/BC-BCCDC-7593/2020|2020-11-00|EPI\_ISL\_740740|Original|hCoV-19^^British Columbia|Human|BCCDC Public Health Laboratory|BCCDC Public Health Laboratory|Prystajek|Canada

>Spike|hCoV-19/Wales/PHWC-16A3FB/2020|2020-09-05|EPI\_ISL\_535246|Original|hCoV-19^^Wales|Human|Wales Specialist Virology Centre Sequencing lab|COVID-19 Genomics UK (COG-UK) Consortium|Moore|United Kingdom

>Spike|hCoV-19/Wales/PHWC-48502D/2020|2020-10-25|EPI\_ISL\_628137|Original|hCoV-19^^Wales|Human|Wales Specialist Virology Centre Sequencing lab|COVID-19 Genomics UK (COG-UK) Consortium|Moore|United Kingdom

>Spike|hCoV-19/Japan/PG-7615/2020|2020-08-00|EPI\_ISL\_686717|Original|hCoV-19^^Japan|Human|Chiba Prefectural Institute of Public Health|Pathogen Genomics Center|Sekizuka|Japan

>Spike|hCoV-19/USA/WI-UW-1240/2020|2020-08-17|EPI\_ISL\_536613|Original|hCoV-19^^Wisconsin|Human|University of Wisconsin-Madison AIDS Vaccine Research Laboratories|University of Wisconsin-Madison AIDS Vaccine Research Laboratories|Baczenas|USA

>Spike|hCoV-19/Netherlands/NA\_164/2020|2020-03-21|EPI\_ISL\_422699|Original|hCoV-19^^Netherlands|Human|Dutch COVID-19 response team|Erasmus Medical Center|Oude Munnink|Netherlands

>Spike|hCoV-19/England/MILK-C7824D/2020|2020-12-15|EPI\_ISL\_756843|Original|hCoV-19^^England|Human|Lighthouse Lab in Milton Keynes|Wellcome Sanger Institute for the COVID-19 Genomics UK (COG-UK) Consortium|Davies|United Kingdom

>Spike|hCoV-19/England/LOND-D3B50/2020|2020-04-04|EPI\_ISL\_449631|Original|hCoV-19^^England|Human|University College London|COVID-19 Genomics UK (COG-UK) Consortium|Roy|United Kingdom

>Spike|hCoV-19/England/QEUEH-B13E32/2020|2020-10-30|EPI\_ISL\_641696|Original|hCoV-19^^England|Human|Lighthouse Lab in Glasgow|Wellcome Sanger Institute for the COVID-19 Genomics UK (COG-UK) Consortium|Davies|United Kingdom

>Spike|hCoV-19/Switzerland/BS-UHB-42202805/2020|2020-03-20|EPI\_ISL\_528338|Original|hCoV-19^^Basel-Stadt|Human|University Hospital Basel|University Hospital Basel|Roloff Handschin|Switzerland

>Spike|hCoV-19/England/QEUEH-C3475D/2020|2020-12-11|EPI\_ISL\_733989|Original|hCoV-19^^England|Human|Lighthouse Lab in Glasgow|Wellcome Sanger Institute for the COVID-19 Genomics UK (COG-UK) Consortium|Davies|United Kingdom

>Spike|hCoV-19/England/QEUEH-B9F065/2020|2020-11-18|EPI\_ISL\_728300|Original|hCoV-19^^England|Human|Lighthouse Lab in Glasgow|Wellcome Sanger Institute for the COVID-19 Genomics UK (COG-UK) Consortium|Davies|United Kingdom

>Spike|hCoV-19/England/ALDP-A508B4/2020|2020-10-07|EPI\_ISL\_597708|Original|hCoV-19^^England|Human|Lighthouse Lab in Alderley Park|Wellcome Sanger Institute for the COVID-19 Genomics UK (COG-UK) consortium|Davies|United Kingdom

>Spike|hCoV-19/Denmark/DCGC-21345/2020|2020-12-21|EPI\_ISL\_759692|Original|hCoV-19^^Midtjylland|Human|Department of Virus and Microbiological Special Diagnostics|Albertsen Lab|Michaelsen|Denmark

>Spike|hCoV-19/India/HR-THSTI2010D/2020|2020-04-27|EPI\_ISL\_528385|P4|hCoV-19^^Haryana|Human|Translational Health Science and Technology Institute -ESIC medical college and hospital|THSTI Bioassay laboratory|Medigeshi|India

>Spike|hCoV-19/France/OCC-13/2020|2020-04-07|EPI\_ISL\_434628|Original|hCoV-19^^Occitanie|Human|CHU Purpan - Laboratoire de Virologie - Institut F\u00e9d\u00e9ratif de Biologie|Laboratoire de virologie - \u00c9cole Nationale V\u00e9t\u00e9rinaire de Toulouse|Crouville|France

>Spike|hCoV-19/Netherlands/NA\_315/2020|2020-04-02|EPI\_ISL\_422624|Original|hCoV-19^^Netherlands|Human|Dutch COVID-19 response team|Erasmus Medical Center|Oude Munnink|Netherlands

>Spike|hCoV-19/England/LIVE-1D284A/2020|2020-08-17|EPI\_ISL\_534742|Original|hCoV-19^^England|Human|Liverpool Clinical Laboratories|COVID-19 Genomics UK (COG-UK) Consortium|Haldenby|United Kingdom

>Spike|hCoV-19/USA/CO-CSU-C0363-2/2020|2020-04-15|EPI\_ISL\_527403|Original|hCoV-19^^Colorado|Human|Colorado State University - Ebel Lab|Colorado State University - Ebel Lab|Cline|USA

>Spike|hCoV-19/England/OXON-B0CDE/2020|2020-04-17|EPI\_ISL\_478954|Original|hCoV-19^^England|Human|Oxford Viromics|COVID-19 Genomics UK (COG-UK) Consortium|Golubchik|United Kingdom

>Spike|hCoV-19/Wales/PHWC-47E7D7/2020|2020-09-27|EPI\_ISL\_595504|Original|hCoV-19^^Wales|Human|Originating lab|COVID-19 Genomics UK (COG-UK) Consortium|Moore|United Kingdom

>Spike|hCoV-19/USA/IL-NM0120/2020|2020-03-21|EPI\_ISL\_444603|Original|hCoV-19^^Illinois|Human|Northwestern Memorial Hospital|Ozer Lab|Ozer|USA

>Spike|hCoV-19/USA/CA-QDX-266/2020|2020-05-01|EPI\_ISL\_498701|Original|hCoV-19^^California|Human|Quest Diagnostics|Quest Diagnostics|Kagan|USA



>Spike|hCoV-19/England/MILK-BABCAE/2020|2020-11-18|EPI\_ISL\_783088|Original|hCoV-19^^England|Human|Lighthouse Lab in Milton Keynes|Wellcome Sanger Institute for the COVID-19 Genomics UK (COG-UK) Consortium|Davies|United Kingdom

>Spike|hCoV-19/USA/TX-HMH-MCoV-9523/2020|2020-07-04|EPI\_ISL\_781164|Original|hCoV-19^^Texas|Human|Houston Methodist Hospital|Houston Methodist Hospital|Long|USA

>Spike|hCoV-19/Japan/PG-7907/2020|2020-08-00|EPI\_ISL\_687008|Original|hCoV-19^^Japan|Human|Pathogen Genomics Center|Pathogen Genomics Center|Sekizuka|Japan

>Spike|hCoV-19/Scotland/QEUA-9DA6B9/2020|2020-09-22|EPI\_ISL\_575340|Original|hCoV-19^^Scotland|Human|Lighthouse Lab in Glasgow|Wellcome Sanger Institute for the COVID-19 Genomics UK (COG-UK) consortium|Davies|United Kingdom

>Spike|hCoV-19/England/CAMC-A41986/2020|2020-10-06|EPI\_ISL\_609452|Original|hCoV-19^^England|Human|Lighthouse Lab in Cambridge|Wellcome Sanger Institute for the COVID-19 Genomics UK (COG-UK) consortium|Davies|United Kingdom

>Spike|hCoV-19/USA/TX-HMH-4202/2020|2020-06-19|EPI\_ISL\_543433|Original|hCoV-19^^Texas|Human|Houston Methodist Hospital|Houston Methodist Hospital|Long|USA

>Spike|hCoV-19/Russia/KDA-RII-MH4871S/2020|2020-10-21|EPI\_ISL\_733278|Original|hCoV-19^^Krasnodar|Human|WHO National Influenza Centre Russian Federation|WHO National Influenza Centre Russian Federation|Komissarov|Russia

>Spike|hCoV-19/England/CAMB-81B7F/2020|2020-04-11|EPI\_ISL\_442605|Original|hCoV-19^^England|Human|Department of Pathology|Wellcome Sanger Institute for the COVID-19 Genomics UK (COG-UK) consortium|Amato|United Kingdom

>Spike|hCoV-19/England/LIVE-DB1308/2020|2020-10-25|EPI\_ISL\_637303|Original|hCoV-19^^England|Human|Liverpool Clinical Laboratories|COVID-19 Genomics UK (COG-UK) Consortium|Haldenby|United Kingdom

>Spike|hCoV-19/USA/WA-S376/2020|2020-03-27|EPI\_ISL\_434136|Original|hCoV-19^^Washington|Human|Washington State Department of Health|Seattle Flu Study|Bedford|USA

>Spike|hCoV-19/England/CAMB-1B7E1C/2020|2020-10-14|EPI\_ISL\_638180|Original|hCoV-19^^England|Human|Department of Pathology|COVID-19 Genomics UK (COG-UK) Consortium|Goodfellow|United Kingdom

>Spike|hCoV-19/England/20130055502/2020|2020-03-19|EPI\_ISL\_420633|Original|hCoV-19^^England|Human|Respiratory Virus Unit|Respiratory Virus Unit|Platt|United Kingdom

>Spike|hCoV-19/England/MILK-9A864B/2020|2020-09-02|EPI\_ISL\_550197|Original|hCoV-19^^England|Human|Lighthouse Lab in Milton Keynes|Wellcome Sanger Institute for the COVID-19 Genomics UK (COG-UK) consortium|Davies|United Kingdom

>Spike|hCoV-19/Denmark/DCGC-16268/2020|2020-11-16|EPI\_ISL\_714143|Original|hCoV-19^^Hovedstaden|Human|Department of Virus and Microbiological Special Diagnostics|Albertsen Lab|Michaelsen|Denmark

>Spike|hCoV-19/Norway/6780/2020|2020-12-09|EPI\_ISL\_775520|Original|hCoV-19^^Agder|Human|Hospital of Southern Norway - Kristiansand|Norwegian Institute of Public Health|Vollan|Norway

>Spike|hCoV-19/England/20144003804/2020|2020-04-01|EPI\_ISL\_423483|Original|hCoV-19^^England|Human|Respiratory Virus Unit|Respiratory Virus Unit|Platt|United Kingdom

>Spike|hCoV-19/England/ALDP-C3AAD6/2020|2020-12-09|EPI\_ISL\_731571|Original|hCoV-19^^England|Human|Lighthouse Lab in Alderley Park|Wellcome Sanger Institute for the COVID-19 Genomics UK (COG-UK) Consortium|Davies|United Kingdom

>Spike|hCoV-19/England/QEUA-B11362/2020|2020-11-02|EPI\_ISL\_642560|Original|hCoV-19^^England|Human|Lighthouse Lab in Glasgow|Wellcome Sanger Institute for the COVID-19 Genomics UK (COG-UK) Consortium|Davies|United Kingdom

>Spike|hCoV-19/Thailand/Bangkok-CONI-0319/2020|2020-11-29|EPI\_ISL\_707707|Original|hCoV-19^^Bangkok|Human|Institute for Urban Disease Control and Prevention|COVID-19 Network Investigations (CONI) Alliance|Batty|Thailand

>Spike|hCoV-19/Scotland/EDB5849/2020|2020-04-28|EPI\_ISL\_487668|Original|hCoV-19^^Scotland|Human|Virology Department|Wellcome Sanger Institute for the COVID-19 Genomics UK (COG-UK) consortium|Davies|United Kingdom

>Spike|hCoV-19/England/CAMC-B35580/2020|2020-11-05|EPI\_ISL\_659603|Original|hCoV-19^^England|Human|Lighthouse Lab in Cambridge|Wellcome Sanger Institute for the COVID-19 Genomics UK (COG-UK) Consortium|Davies|United Kingdom

>Spike|hCoV-19/USA/MI-MDHHS-SC21987/2020|2020-09-26|EPI\_ISL\_576210|Original|hCoV-19^^Michigan|Human|Michigan Department of Health and Human Services|Michigan Department of Health and Human Services|Blankenship|USA

>Spike|hCoV-19/England/ALDP-95AED7/2020|2020-06-10|EPI\_ISL\_555762|Original|hCoV-19^^England|Human|Lighthouse Lab in Alderley Park|Wellcome Sanger Institute for the COVID-19 Genomics UK (COG-UK) consortium|Davies|United Kingdom

>Spike|hCoV-19/Australia/NSW1207/2020|2020-11-07|EPI\_ISL\_667805|Original|hCoV-19^^New South Wales|Human|South Eastern Area Laboratory Services (SEALS)|NSW Health Pathology - Institute of Clinical Pathology and Medical Research; Westmead Hospital; University of Sydney|Gall|Australia

>Spike|hCoV-19/Australia/VIC4415/2020|2020-07-16|EPI\_ISL\_519711|Original|hCoV-19^^Victoria|Human|Microbiological Diagnostic Unit - Public Health Laboratory (MDU-PHL)|MDU-PHL|Schultz|Australia

>Spike|hCoV-19/Denmark/DCGC-17889/2020|2020-12-14|EPI\_ISL\_749625|Original|hCoV-19^^Syddanmark|Human|Department of Virus and Microbiological Special Diagnostics|Albertsen Lab|Michaelsen|Denmark

>Spike|hCoV-19/USA/MI-MDHHS-SC22446/2020|2020-11-08|EPI\_ISL\_708539|Original|hCoV-19^^Michigan|Human|Michigan Department of Health and Human Services|Michigan Department of Health and Human Services|Jacob|USA

>Spike|hCoV-19/Canada/ON-PHL-20-03660/2020|2020-11-00|EPI\_ISL\_775098|Original|hCoV-19^^Ontario|Human|Public Health Ontario Laboratory|Public Health Ontario Laboratory|Guthrie|Canada

>Spike|hCoV-19/France/BRE-IPP11308/2020|2020-12-16|EPI\_ISL\_754854|Original|hCoV-19^^Bretagne|Human|CHU - H\u00f4pital Cavale Blanche - Labo. de Virologie|National Reference Center for Viruses of Respiratory Infections|Enouf|France

>Spike|hCoV-19/England/CAMB-77A51/2020|2020-04-01|EPI\_ISL\_439401|Original|hCoV-19^^England|Human|Department of Pathology|Wellcome Sanger Institute for the COVID-19 Genomics UK (COG-UK) consortium|Amato|United Kingdom

>Spike|hCoV-19/England/MILK-ACFC4B/2020|2020-10-22|EPI\_ISL\_652129|Original|hCoV-19^^England|Human|Oxford Viromics|COVID-19 Genomics UK (COG-UK) Consortium|Golubchik|United Kingdom

>Spike|hCoV-19/England/BRIS-12241A/2020|2020-04-04|EPI\_ISL\_440754|Original|hCoV-19^^England|Human|PHE South West Regional Laboratory|Wellcome Sanger Institute for the COVID-19 Genomics UK (COG-UK) consortium|Amato|United Kingdom

>Spike|hCoV-19/England/OXON-AFBD5/2020|2020-04-15|EPI\_ISL\_478812|Original|hCoV-19^^England|Human|Oxford Viromics|COVID-19 Genomics UK (COG-UK) Consortium|Golubchik|United Kingdom

>Spike|hCoV-19/Wales/PHWC-15C75A/2020|2020-03-31|EPI\_ISL\_472533|Original|hCoV-19^^Wales|Human|Wales Specialist Virology Centre Sequencing lab|COVID-19 Genomics UK (COG-UK) Consortium|Moore|United Kingdom

>Spike|hCoV-19/USA/TX1/2020|2020-02-11|EPI\_ISL\_411956|Original|hCoV-19^^Texas|Human|Texas Department of State Health Services|Pathogen Discovery|Queen|USA

>Spike|hCoV-19/England/EXET-1357EE/2020|2020-03-31|EPI\_ISL\_457101|Original|hCoV-19^^England|Human|University of Exeter|COVID-19 Genomics UK (COG-UK) Consortium|Temperton|United Kingdom

>Spike|hCoV-19/USA/TX-HMH-MCoV-14798/2020|2020-10-13|EPI\_ISL\_786283|Original|hCoV-19^^Texas|Human|Houston Methodist Hospital|Houston Methodist Hospital|Long|USA

>Spike|hCoV-19/Australia/QLD1173/2020|2020-03-24|EPI\_ISL\_639764|Original|hCoV-19^^Australia|Human|unknown|Public Health Virology Laboratory|Nguyen|Australia

>Spike|hCoV-19/England/CAMC-BD227F/2020|2020-11-28|EPI\_ISL\_702212|Original|hCoV-19^^England|Human|Lighthouse Lab in Cambridge|Wellcome Sanger Institute for the COVID-19 Genomics UK (COG-UK) Consortium|Davies|United Kingdom

>Spike|hCoV-19/England/NORW-E8AA6/2020|2020-04-15|EPI\_ISL\_448273|Original|hCoV-19^^England|Human|Quadram Institute Bioscience|COVID-19 Genomics UK (COG-UK) Consortium|Alikhan|United Kingdom

>Spike|hCoV-19/England/LIVE-DB437E/2020|2020-10-20|EPI\_ISL\_650196|Original|hCoV-19^^England|Human|Liverpool Clinical Laboratories|COVID-19 Genomics UK (COG-UK) Consortium|Haldenby|United Kingdom

>Spike|hCoV-19/England/CAMB-72476/2020|2020-03-21|EPI\_ISL\_439552|Original|hCoV-19^^England|Human|Department of Pathology|Wellcome Sanger Institute for the COVID-19 Genomics UK (COG-UK) consortium|Amato|United Kingdom

>Spike|hCoV-19/England/ALDP-BE8FBB/2020|2020-12-02|EPI\_ISL\_708885|Original|hCoV-19^^England|Human|Lighthouse Lab in Alderley Park|Wellcome Sanger Institute for the COVID-19 Genomics UK (COG-UK) Consortium|Davies|United Kingdom

>Spike|hCoV-19/USA/LA-EVTL023/2020|2020-04-24|EPI\_ISL\_435561|Original|hCoV-19^^Louisiana|Human|LSUHS Emerging Viral Threat Laboratory|Microbial Genome Sequencing Center|Kamil|USA

>Spike|hCoV-19/USA/MI-MDHHS-SC20589/2020|2020-04-29|EPI\_ISL\_462671|Original|hCoV-19^^Michigan|Human|Michigan Department of Health and Human Services|Michigan Department of Health and Human Services|Blankenship|USA

>Spike|hCoV-19/Australia/QLD955/2020|2020-03-26|EPI\_ISL\_530243|Original|hCoV-19^^Queensland|Human|Queensland Health Forensic and Scientific Services|Public Health Virology Laboratory|Nguyen|Australia

>Spike|hCoV-19/England/ALDP-A6DFDD/2020|2020-10-14|EPI\_ISL\_607783|Original|hCoV-19^^England|Human|Lighthouse Lab in Alderley Park|Wellcome Sanger Institute for the COVID-19 Genomics UK (COG-UK) consortium|Davies|United Kingdom

>Spike|hCoV-19/USA/TX-HMH-7174/2020|2020-06-29|EPI\_ISL\_546570|Original|hCoV-19^^Texas|Human|Houston Methodist Hospital|Houston Methodist Hospital|Long|USA

>Spike|hCoV-19/England/20134005304/2020|2020-03-23|EPI\_ISL\_423068|Original|hCoV-19^^England|Human|Respiratory Virus Unit|Respiratory Virus Unit|Platt|United Kingdom

>Spike|hCoV-19/USA/LA-EVTL1085/2020|2020-11-23|EPI\_ISL\_768355|Original|hCoV-19^^Louisiana|Human|LSUHS Emerging Viral Threat Laboratory|Microbial Genome Sequencing Center|Kamil|USA

>Spike|hCoV-19/USA/NY-Wadsworth-11191-01/2020|2020-03-06|EPI\_ISL\_426325|Original|hCoV-19^^New York|Human|Wadsworth Center|Wadsworth Center|Lasek-Nesselquist|USA

>Spike|hCoV-19/Luxembourg/LNS0910783/2020|2020-11-14|EPI\_ISL\_739852|Original|hCoV-19^^Luxembourg|Human|Laboratoire national de sant\u00e9|Laboratoire national de sant\u00e9|Wienecke-Baldacchino|Luxembourg

>Spike|hCoV-19/England/CAMC-AB21F1/2020|2020-10-23|EPI\_ISL\_623608|Original|hCoV-19^^England|Human|Lighthouse Lab in Cambridge|Wellcome Sanger Institute for the COVID-19 Genomics UK (COG-UK) consortium|Davies|United Kingdom

>Spike|hCoV-19/Norway/3755/2020|2020-09-07|EPI\_ISL\_591005|Original|hCoV-19^^Viken|Human|Ostfold Hospital Trust - Kalnes|Norwegian Institute of Public Health|Vollan|Norway

>Spike|hCoV-19/England/QEUA-96F859/2020|2020-08-17|EPI\_ISL\_540268|Original|hCoV-19^^England|Human|Lighthouse Lab in Glasgow|Wellcome Sanger Institute for the COVID-19 Genomics UK (COG-UK) consortium|Davies|United Kingdom

>Spike|hCoV-19/Denmark/DCGC-15405/2020|2020-11-23|EPI\_ISL\_713806|Original|hCoV-19^^Hovedstaden|Human|Department of Virus and Microbiological Special Diagnostics|Albertsen Lab|Michaelsen|Denmark

>Spike|hCoV-19/England/QEUA-9E436A/2020|2020-09-23|EPI\_ISL\_579798|Original|hCoV-19^^England|Human|Lighthouse Lab in Glasgow|Wellcome Sanger Institute for the COVID-19 Genomics UK (COG-UK) consortium|Davies|United Kingdom

>Spike|hCoV-19/England/ALDP-A2E433/2020|2020-10-06|EPI\_ISL\_586650|Original|hCoV-19^^England|Human|Lighthouse Lab in Alderley Park|Wellcome Sanger Institute for the COVID-19 Genomics UK (COG-UK) consortium|Davies|United Kingdom

>Spike|hCoV-19/Ireland/LK-NVRL-MPB53836/2020|2020-05-12|EPI\_ISL\_671350|Original|hCoV-19^^Limerick|Human|National Virus Reference Laboratory|Irish Coronavirus Sequencing Consortium - Teagasc Moorepark|Walsh|Ireland

>Spike|hCoV-19/USA/TX-HMH-MCoV-18391/2020|2020-11-18|EPI\_ISL\_784739|Original|hCoV-19^^Texas|Human|Houston Methodist Hospital|Houston Methodist Hospital|Long|USA

>Spike|hCoV-19/England/NORW-E6E33/2020|2020-04-21|EPI\_ISL\_453546|Original|hCoV-19^^England|Human|Quadram Institute Bioscience|COVID-19 Genomics UK (COG-UK) Consortium|Alikhan|United Kingdom

>Spike|hCoV-19/England/NORT-281427/2020|2020-03-15|EPI\_ISL\_472165|Original|hCoV-19^^England|Human|Northumbria University / South Tees Hospitals NHS Foundation Trust / North Cumbria Integrated Care NHS Foundation Trust / North Tees and Hartlepool NHS

Foundation Trust / Newcastle Hospitals NHS Foundation Trust|COVID-19 Genomics UK (COG-UK) Consortium|Bashton|United Kingdom  
>Spike|hCoV-19/Brazil/SP-L10-CD144/2020|2020-03-12|EPI\_ISL\_476174|Original|hCoV-19^^S\u00e3o Paulo|Human|DB Diagn\u00f3sticos do Brasil|Instituto de Medicina Tropical da Univesidade de S\u00e3o Paulo|Sabino|Brazil  
>Spike|hCoV-19/England/QEUEH-5E778D/2020|2020-06-16|EPI\_ISL\_533313|Original|hCoV-19^^England|Human|Lighthouse Lab in Glasgow|Wellcome Sanger Institute for the COVID-19 Genomics UK (COG-UK) consortium|Davies|United Kingdom  
>Spike|hCoV-19/England/204261294/2020|2020-10-15|EPI\_ISL\_613583|Original|hCoV-19^^England|Human|Respiratory Virus Unit|Respiratory Virus Unit|Platt|United Kingdom  
>Spike|hCoV-19/Northern Ireland/NIRE-FC535/2020|2020-04-12|EPI\_ISL\_470089|Original|hCoV-19^^Northern Ireland|Human|Regional Virus Laboratory|Wellcome Sanger Institute for the COVID-19 Genomics UK (COG-UK) consortium|Davies|United Kingdom  
>Spike|hCoV-19/Mali/M002830/2020|2020-04-14|EPI\_ISL\_487466|Original|hCoV-19^^Bamako|Human|CICM-Mali|Bundeswehr Institut of Microbiology|Antwerpen|Mali  
>Spike|hCoV-19/Switzerland/BE-UNIBE-179-2921/2020|2020-03-20|EPI\_ISL\_574818|Original|hCoV-19^^Bern|Human|Institute for Infectious Diseases|Institute for Infectious Diseases|Koch|Switzerland  
>Spike|hCoV-19/Denmark/DCGC-22336/2020|2020-12-14|EPI\_ISL\_758686|Original|hCoV-19^^Midtjylland|Human|Department of Virus and Microbiological Special Diagnostics|Albertsen Lab|Michaelsen|Denmark  
>Spike|hCoV-19/England/QEUEH-C5B76F/2020|2020-12-14|EPI\_ISL\_736066|Original|hCoV-19^^England|Human|Lighthouse Lab in Glasgow|Wellcome Sanger Institute for the COVID-19 Genomics UK (COG-UK) Consortium|Davies|United Kingdom  
>Spike|hCoV-19/Wales/PHWC-16A461/2020|2020-09-04|EPI\_ISL\_535253|Original|hCoV-19^^Wales|Human|Wales Specialist Virology Centre Sequencing lab|COVID-19 Genomics UK (COG-UK) Consortium|Moore|United Kingdom  
>Spike|hCoV-19/England/MILK-B3DF20/2020|2020-11-02|EPI\_ISL\_741409|Original|hCoV-19^^England|Human|Oxford Viromics|COVID-19 Genomics UK (COG-UK) Consortium|Golubchik|United Kingdom  
>Spike|hCoV-19/England/PORT-2F5ED5/2020|2020-10-14|EPI\_ISL\_652622|Original|hCoV-19^^England|Human|Centre for Enzyme Innovation|COVID-19 Genomics UK (COG-UK) Consortium|Robson|United Kingdom  
>Spike|hCoV-19/England/ALDP-9EDDFA/2020|2020-05-06|EPI\_ISL\_580710|Original|hCoV-19^^England|Human|Lighthouse Lab in Alderley Park|Wellcome Sanger Institute for the COVID-19 Genomics UK (COG-UK) consortium|Davies|United Kingdom  
>Spike|hCoV-19/England/NOTT-1204FE/2020|2020-12-08|EPI\_ISL\_725622|Original|hCoV-19^^England|Human|Queens Medical Centre|COVID-19 Genomics UK (COG-UK) Consortium|Loose|United Kingdom  
>Spike|hCoV-19/USA/CA-QDX-1042/2020|2020-03-17|EPI\_ISL\_571707|Original|hCoV-19^^California|Human|Quest Diagnostics|Quest Diagnostics|Kagan|USA  
>Spike|hCoV-19/Australia/VIC12049/2020|2020-07-23|EPI\_ISL\_641066|Original|hCoV-19^^Victoria|Human|Microbiological Diagnostic Unit - Public Health Laboratory (MDU-PHL)|MDU-PHL|Schultz|Australia  
>Spike|hCoV-19/USA/OR-PROV-002/2020|2020-04-01|EPI\_ISL\_482293|Original|hCoV-19^^Oregon|Human|Providence St. Joseph Health Molecular Genomics Laboratory|Providence St. Joseph Health Molecular Genomics Laboratory|Dowdell|USA  
>Spike|hCoV-19/England/CAMC-B9898F/2020|2020-11-15|EPI\_ISL\_673704|Original|hCoV-19^^England|Human|Lighthouse Lab in Cambridge|Wellcome Sanger Institute for the COVID-19 Genomics UK (COG-UK) Consortium|Davies|United Kingdom  
>Spike|hCoV-19/Australia/SAP075/2020|2020-03-31|EPI\_ISL\_451112|Original|hCoV-19^^South Australia|Human|SA Pathology|SA Pathology|Leong|Australia  
>Spike|hCoV-19/Singapore/485/2020|2020-03-22|EPI\_ISL\_477175|Original|hCoV-19^^Singapore|Human|Department of Laboratory Medicine Tan Tock Seng Hospital|Department of Laboratory Medicine Tan Tock Seng Hospital|Chen|Singapore  
>Spike|hCoV-19/Netherlands/NoordBrabant\_144/2020|2020-04-29|EPI\_ISL\_461179|Original|hCoV-19^^Noord Brabant|Human|Dutch COVID-19 response team|Erasmus Medical Center|Oude Munnink|Netherlands

>Spike|hCoV-19/Japan/PG-2047/2020|2020-04-00|EPI\_ISL\_685652|Original|hCoV-19^^Japan|Human|Pathogen Genomics Center|Pathogen Genomics Center|Sekizuka|Japan

>Spike|hCoV-19/England/CAMB-1B41CB/2020|2020-05-31|EPI\_ISL\_473461|Original|hCoV-19^^England|Human|Department of Pathology|COVID-19 Genomics UK (COG-UK) Consortium|Meredith|United Kingdom

>Spike|hCoV-19/Israel/CVL-n18346/2020|2020-06-04|EPI\_ISL\_516893|Original|hCoV-19^^Tel Aviv|Human|Israel Central Virology laboratory|Israel Central Virology laboratory|Zuckerman|Israel

>Spike|hCoV-19/South Korea/KDCA0070/2020|2020-09-24|EPI\_ISL\_747311|Original|hCoV-19^^South Korea|Human|Division of Emerging Infectious Diseases|Division of Emerging Infectious Diseases|Park|South Korea

>Spike|hCoV-19/USA/TX-HMH-MCoV-13001/2020|2020-08-28|EPI\_ISL\_788152|Original|hCoV-19^^Texas|Human|Houston Methodist Hospital|Houston Methodist Hospital|Long|USA

>Spike|hCoV-19/USA/CA-QDX-1528/2020|2020-03-17|EPI\_ISL\_603781|Original|hCoV-19^^California|Human|Quest Diagnostics|Quest Diagnostics|Kagan|USA

>Spike|hCoV-19/Northern Ireland/QEUI-96AF95/2020|2020-08-15|EPI\_ISL\_531409|Original|hCoV-19^^Northern Ireland|Human|Lighthouse Lab in Glasgow|Wellcome Sanger Institute for the COVID-19 Genomics UK (COG-UK) consortium|Davies|United Kingdom

>Spike|hCoV-19/England/NORT-2985EE/2020|2020-04-22|EPI\_ISL\_488013|Original|hCoV-19^^England|Human|NU-OMICS DNA Sequencing research facility|Wellcome Sanger Institute for the COVID-19 Genomics UK (COG-UK) consortium|Davies|United Kingdom

>Spike|hCoV-19/England/QEUI-A36B15/2020|2020-10-04|EPI\_ISL\_638698|Original|hCoV-19^^England|Human|Wales Specialist Virology Centre Sequencing lab|COVID-19 Genomics UK (COG-UK) Consortium|Moore|United Kingdom

>Spike|hCoV-19/Singapore/844/2020|2020-07-18|EPI\_ISL\_518008|Original|hCoV-19^^Singapore|Human|Singapore General Hospital|Department of Microbiology|Abdul Rahman|Singapore

>Spike|hCoV-19/USA/CA-ALSR-2025/2020|2020-05-07|EPI\_ISL\_635312|Original|hCoV-19^^California|Human|San Diego County Public Health Laboratory|Andersen lab at Scripps Research|Gangavarapu|USA

>Spike|hCoV-19/England/MILK-A7BACC/2020|2020-10-15|EPI\_ISL\_607470|Original|hCoV-19^^England|Human|Lighthouse Lab in Milton Keynes|Wellcome Sanger Institute for the COVID-19 Genomics UK (COG-UK) consortium|Davies|United Kingdom

>Spike|hCoV-19/Scotland/EDB7783/2020|2020-09-12|EPI\_ISL\_577351|Original|hCoV-19^^Scotland|Human|Virology Department|COVID-19 Genomics UK (COG-UK) Consortium|Williams|United Kingdom

>Spike|hCoV-19/Wales/ALDP-C3BB87/2020|2020-12-11|EPI\_ISL\_767225|Original|hCoV-19^^Wales|Human|Lighthouse Lab in Alderley Park|Wellcome Sanger Institute for the COVID-19 Genomics UK (COG-UK) Consortium|Davies|United Kingdom

>Spike|hCoV-19/India/MH-GA24/2020|2020-06-16|EPI\_ISL\_508219|Original|hCoV-19^^Maharashtra|Human|Government Medical College|National Institute of Biomedical Genomics|Maitra|India

>Spike|hCoV-19/USA/UT-UPHL-2012191494/2020|2020-08-10|EPI\_ISL\_745859|Original|hCoV-19^^Utah|Human|Ginkgo Bioworks Clinical Laboratory|Utah Public Health Laboratory|Young|USA

>Spike|hCoV-19/England/CAMB-77532/2020|2020-03-31|EPI\_ISL\_438540|Original|hCoV-19^^England|Human|Department of Pathology|Wellcome Sanger Institute for the COVID-19 Genomics UK (COG-UK) consortium|Amato|United Kingdom

>Spike|hCoV-19/Spain/PV-IBV-003212/2020|2020-03-12|EPI\_ISL\_481030|Original|hCoV-19^^Basque Country|Human|Servicio de Microbiolog\u00eda. Hospital Universitario Donostia. OSI Donostialdea. \u00clrea de Enfermedades Infecciosas|SeqCOVID-SPAIN consortium|IBV (CSIC) |Comas|Spain

>Spike|hCoV-19/USA/TX-HMH-MCoV-16140/2020|2020-10-31|EPI\_ISL\_785824|Original|hCoV-19^^Texas|Human|Houston Methodist Hospital|Houston Methodist Hospital|Long|USA

>Spike|hCoV-19/England/MILK-A7993A/2020|2020-10-14|EPI\_ISL\_606791|Original|hCoV-19^^England|Human|Lighthouse Lab in Milton Keynes|Wellcome Sanger Institute for the COVID-19 Genomics UK (COG-UK) consortium|Davies|United Kingdom

>Spike|hCoV-19/USA/WA-S876/2020|2020-04-16|EPI\_ISL\_463366|Original|hCoV-19^^Washington|Human|Washington State Department of Health|Seattle Flu Study|Bedford|USA

>Spike|hCoV-19/Italy/LOM-IZSGC-TE30933/2020|2020-05-02|EPI\_ISL\_528934|Original|hCoV-19^^Lombardy|Human|Agenzia di Tutela della Salute di Bergamo|Istituto Zooprofilattico Sperimentale dell'Abruzzo e Molise \G.Caporale\|Lorusso|Italy

>Spike|hCoV-19/South Africa/R13063-20/2020|2020-06-22|EPI\_ISL\_622915|Original|hCoV-19^^Western Cape|Human|National Institute for Communicable Diseases of the National Health Laboratory Service|National Institute for Communicable Diseases of the National Health Laboratory Service|Allam|South Africa

>Spike|hCoV-19/England/SHEF-C8338/2020|2020-04-01|EPI\_ISL\_432861|Original|hCoV-19^^England|Human|Virology Department|COVID-19 Genomics UK (COG-UK) Consortium|de Silva|United Kingdom

>Spike|hCoV-19/USA/FL-BPHL-1476/2020|2020-06-25|EPI\_ISL\_549258|Original|hCoV-19^^Florida|Human|Florida Bureau of Public Health Laboratories|Florida Bureau of Public Health Laboratories|Blanton|USA

>Spike|hCoV-19/USA/WI-UW-1242/2020|2020-08-18|EPI\_ISL\_536615|Original|hCoV-19^^Wisconsin|Human|University of Wisconsin-Madison AIDS Vaccine Research Laboratories|University of Wisconsin-Madison AIDS Vaccine Research Laboratories|Baczenas|USA

>Spike|hCoV-19/India/GJ-GBRC342b/2020|2020-06-18|EPI\_ISL\_514583|Original|hCoV-19^^Gujarat|Human|B.J. Medical College and Civil hospital|Gujarat Biotechnology Research Centre|Joshi|India

>Spike|hCoV-19/Wales/ALDP-C3D62A/2020|2020-12-10|EPI\_ISL\_767178|Original|hCoV-19^^Wales|Human|Lighthouse Lab in Alderley Park|Wellcome Sanger Institute for the COVID-19 Genomics UK (COG-UK) Consortium|Davies|United Kingdom

>Spike|hCoV-19/USA/NY-NYUMC360/2020|2020-04-08|EPI\_ISL\_430387|Original|hCoV-19^^New York|Human|NYU Langone Health|Departments of Pathology and Medicine|Maurano|USA

>Spike|hCoV-19/USA/LA-CDC-1272/2020|2020-06-10|EPI\_ISL\_535313|Vero Pl|hCoV-19^^Louisiana|Human|LA Office of Public Health Laboratories|Pathogen Discovery|Queen|USA

>Spike|hCoV-19/USA/TX-HMH-MCoV-15244/2020|2020-10-20|EPI\_ISL\_786728|Original|hCoV-19^^Texas|Human|Houston Methodist Hospital|Houston Methodist Hospital|Long|USA

>Spike|hCoV-19/England/CAMC-B362F1/2020|2020-11-05|EPI\_ISL\_645432|Original|hCoV-19^^England|Human|Lighthouse Lab in Cambridge|Wellcome Sanger Institute for the COVID-19 Genomics UK (COG-UK) Consortium|Davies|United Kingdom

>Spike|hCoV-19/England/ALDP-A70809/2020|2020-10-15|EPI\_ISL\_608218|Original|hCoV-19^^England|Human|Lighthouse Lab in Alderley Park|Wellcome Sanger Institute for the COVID-19 Genomics UK (COG-UK) consortium|Davies|United Kingdom

>Spike|hCoV-19/England/MILK-9C2177/2020|2020-09-11|EPI\_ISL\_566517|Original|hCoV-19^^England|Human|Lighthouse Lab in Milton Keynes|Wellcome Sanger Institute for the COVID-19 Genomics UK (COG-UK) consortium|Davies|United Kingdom

>Spike|hCoV-19/USA/HI-H200515/2020|2020-08-18|EPI\_ISL\_753051|Original|hCoV-19^^Hawaii|Human|State Laboratories Division|State Laboratories Division|Sultana|USA

>Spike|hCoV-19/USA/WI-WSLH-200370/2020|2020-04-22|EPI\_ISL\_578539|Original|hCoV-19^^Wisconsin|Human|Wisconsin State Laboratory of Hygiene Communicable Disease Division|Wisconsin State Laboratory of Hygiene Communicable Disease Division|Florek|USA

>Spike|hCoV-19/Germany/HH-hpi-p1961/2020|2020-03-25|EPI\_ISL\_776286|Original|hCoV-19^^Hamburg|Human|University Medical Center Hamburg Eppendorf|Heinrich Pette Institute|Robitaille|Germany

>Spike|hCoV-19/England/QEUH-AD525F/2020|2020-10-26|EPI\_ISL\_634240|Original|hCoV-19^^England|Human|Lighthouse Lab in Glasgow|Wellcome Sanger Institute for the COVID-19 Genomics UK (COG-UK) consortium|Davies|United Kingdom

>Spike|hCoV-19/Wales/PHWC-34364/2020|2020-04-16|EPI\_ISL\_446908|Original|hCoV-19^^Wales|Human|Wales Specialist Virology Centre|Public Health Wales Microbiology Cardiff|Moore|United Kingdom

>Spike|hCoV-19/USA/VA-DCLS-1767/2020|2020-09-09|EPI\_ISL\_644861|Original|hCoV-19^^Virginia|Human|Virginia DCLS|Virginia DCLS|St. Jacques|USA

>Spike|hCoV-19/Denmark/DCGC-5434/2020|2020-09-14|EPI\_ISL\_615366|Original|hCoV-19^^Midtjylland|Human|Department of Virus and Microbiological Special Diagnostics|Albertsen lab|Michaelsen|Denmark

>Spike|hCoV-19/England/QEUH-9FA792/2020|2020-09-28|EPI\_ISL\_588097|Original|hCoV-19^^England|Human|Lighthouse Lab in Glasgow|Wellcome Sanger Institute for the COVID-19 Genomics UK (COG-UK) consortium|Davies|United Kingdom

>Spike|hCoV-19/Ireland/KE-NVRL-72IRL00302/2020|2020-08-05|EPI\_ISL\_525407|Original|hCoV-19^^Kildare|Human|National Virus Reference Laboratory|National Virus Reference Laboratory|Gonzalez|Ireland

>Spike|hCoV-19/Northern Ireland/NIRE-100C65/2020|2020-04-30|EPI\_ISL\_482033|Original|hCoV-19^^Northern Ireland|Human|Regional Virus Laboratory|Wellcome Sanger Institute for the COVID-19 Genomics UK (COG-UK) consortium|Davies|United Kingdom

>Spike|hCoV-19/England/ALDP-B247CA/2020|2020-11-04|EPI\_ISL\_646930|Original|hCoV-19^^England|Human|Lighthouse Lab in Alderley Park|Wellcome Sanger Institute for the COVID-19 Genomics UK (COG-UK) Consortium|Davies|United Kingdom

>Spike|hCoV-19/England/SHEF-CE00E/2020|2020-05-29|EPI\_ISL\_475461|Original|hCoV-19^^England|Human|Virology Department|COVID-19 Genomics UK (COG-UK) Consortium|de Silva|United Kingdom

>Spike|hCoV-19/Brazil/SE-6606/2020|2020-04-20|EPI\_ISL\_541394|Original|hCoV-19^^Sergipe|Human|LACEN/SE|Laboratory of Respiratory Viruses and Measles|Silva|Brazil

>Spike|hCoV-19/France/ARA-07169/2020|2020-03-09|EPI\_ISL\_508940|Original|hCoV-19^^Auvergne-Rh\u00f4ne-Alpes|Human|CNR Virus des Infections Respiratoires - France SUD|CNR Virus des Infections Respiratoires - France SUD|Josset|France

>Spike|hCoV-19/Canada/BC\_02038211/2020|2020-03-00|EPI\_ISL\_477088|Original|hCoV-19^^British Columbia|Human|BCCDC Public Health Laboratory|BCCDC Public Health Laboratory|Harrigan|Canada

>Spike|hCoV-19/England/CAMC-B07BA3/2020|2020-10-29|EPI\_ISL\_643692|Original|hCoV-19^^England|Human|Lighthouse Lab in Cambridge|Wellcome Sanger Institute for the COVID-19 Genomics UK (COG-UK) Consortium|Davies|United Kingdom

>Spike|hCoV-19/Portugal/PT1174/2020|2020-03-22|EPI\_ISL\_511720|Original|hCoV-19^^Portugal|Human|Instituto Nacional de Saude (INSA)|Instituto Nacional de Saude (INSA)|Borges|Portugal

>Spike|hCoV-19/England/EXET-13D0DC/2020|2020-11-27|EPI\_ISL\_724266|Original|hCoV-19^^England|Human|University of Exeter|COVID-19 Genomics UK (COG-UK) Consortium|Temperton|United Kingdom

>Spike|hCoV-19/England/OXON-AC7F2/2020|2020-04-05|EPI\_ISL\_448485|Original|hCoV-19^^England|Human|Oxford Viromics|COVID-19 Genomics UK (COG-UK) Consortium|Golubchik|United Kingdom

>Spike|hCoV-19/USA/TX-HMH-MCoV-19280/2020|2020-11-28|EPI\_ISL\_783738|Original|hCoV-19^^Texas|Human|Houston Methodist Hospital|Houston Methodist Hospital|Long|USA

>Spike|hCoV-19/USA/FL-BPHL-1795/2020|2020-07-31|EPI\_ISL\_613723|Original|hCoV-19^^Florida|Human|Florida Bureau of Public Health Laboratories|Florida Bureau of Public Health Laboratories|Blanton|USA

>Spike|hCoV-19/England/MILK-AB7DE9/2020|2020-10-21|EPI\_ISL\_623748|Original|hCoV-19^^England|Human|Lighthouse Lab in Milton Keynes|Wellcome Sanger Institute for the COVID-19 Genomics UK (COG-UK) consortium|Davies|United Kingdom

>Spike|hCoV-19/USA/TX-HMH-MCoV-18672/2020|2020-11-22|EPI\_ISL\_785020|Original|hCoV-19^^Texas|Human|Houston Methodist Hospital|Houston Methodist Hospital|Long|USA

>Spike|hCoV-19/England/ALDP-A2F775/2020|2020-10-05|EPI\_ISL\_587149|Original|hCoV-19^^England|Human|Lighthouse Lab in Alderley Park|Wellcome Sanger Institute for the COVID-19 Genomics UK (COG-UK) consortium|Davies|United Kingdom

>Spike|hCoV-19/England/20206140604/2020|2020-05-14|EPI\_ISL\_465670|Original|hCoV-19^^England|Human|Respiratory Virus Unit|Respiratory Virus Unit|Platt|United Kingdom

>Spike|hCoV-19/Australia/QLD1186/2020|2020-03-26|EPI\_ISL\_639777|Original|hCoV-19^^Australia|Human|unknown|Public Health Virology Laboratory|Nguyen|Australia

>Spike|hCoV-19/USA/TX-HMH-480/2020|2020-04-07|EPI\_ISL\_544339|Original|hCoV-19^^Texas|Human|Houston Methodist Hospital|Houston Methodist Hospital|Long|USA

>Spike|hCoV-19/England/CAMB-748E1/2020|2020-03-28|EPI\_ISL\_425335|Original|hCoV-19^^England|Human|Department of Pathology|COVID-19 Genomics UK (COG-UK) Consortium|Meredith|United Kingdom

>Spike|hCoV-19/Wales/PHWC-48AC60/2020|2020-10-21|EPI\_ISL\_666140|Original|hCoV-19^^Wales|Human|Wales Specialist Virology Centre Sequencing lab|COVID-19 Genomics UK (COG-UK) Consortium|Moore|United Kingdom

>Spike|hCoV-19/Wales/PHWC-47E3E2/2020|2020-10-09|EPI\_ISL\_595451|Original|hCoV-19^^Wales|Human|Originating lab|COVID-19 Genomics UK (COG-UK) Consortium|Moore|United Kingdom

>Spike|hCoV-19/Japan/PG-1103/2020|2020-04-00|EPI\_ISL\_684713|Original|hCoV-19^^Japan|Human|Pathogen Genomics Center|Pathogen Genomics Center|Sekizuka|Japan

>Spike|hCoV-19/India/WB-IICB-007/2020|2020-09-10|EPI\_ISL\_578081|Original|hCoV-19^^West Bengal|Human|CSIR-Indian Institute of Chemical Biology|CSIR-Indian Institute of Chemical Biology|Bhowmik|India

>Spike|hCoV-19/Denmark/DCGC-13911/2020|2020-11-30|EPI\_ISL\_711445|Original|hCoV-19^^Hovedstaden|Human|Department of Virus and Microbiological Special Diagnostics|Albertsen Lab|Michaelsen|Denmark

>Spike|hCoV-19/England/CAMC-AEA828/2020|2020-10-25|EPI\_ISL\_633247|Original|hCoV-19^^England|Human|Lighthouse Lab in Cambridge|Wellcome Sanger Institute for the COVID-19 Genomics UK (COG-UK) consortium|Davies|United Kingdom

>Spike|hCoV-19/Belgium/ULG-10723/2020|2020-09-15|EPI\_ISL\_641565|Original|hCoV-19^^Li\u00e8ge|Human|Department of Clinical Microbiology|GIGA Medical Genomics|Durkin|Belgium

>Spike|hCoV-19/England/CAMC-B77F75/2020|2020-11-12|EPI\_ISL\_783523|Original|hCoV-19^^England|Human|Lighthouse Lab in Cambridge|Wellcome Sanger Institute for the COVID-19 Genomics UK (COG-UK) Consortium|Davies|United Kingdom

>Spike|hCoV-19/South Korea/KCDC2331/2020|2020-05-27|EPI\_ISL\_510667|Original|hCoV-19^^South Korea|Human|Division of Viral Diseases|Division of Viral Diseases|Kim|South Korea

>Spike|hCoV-19/USA/TX-HMH0402/2020|2020-03-30|EPI\_ISL\_434989|Original|hCoV-19^^Texas|Human|Houston Methodist Hospital|Houston Methodist Hospital|Long|USA

>Spike|hCoV-19/Belgium/reg-03031135/2020|2020-03-03|EPI\_ISL\_734489|Original|hCoV-19^^Bierbeek|Human|UZ Leuven|KU Leuven|Maes|Belgium

>Spike|hCoV-19/Denmark/DCGC-6503/2020|2020-10-05|EPI\_ISL\_620403|Original|hCoV-19^^Midtjylland|Human|Department of Virus and Microbiological Special Diagnostics|Albertsen lab|Michaelsen|Denmark

>Spike|hCoV-19/Wales/PHWC-35AE6/2020|2020-04-24|EPI\_ISL\_474526|Original|hCoV-19^^Wales|Human|Originating lab|COVID-19 Genomics UK (COG-UK) Consortium|Moore|United Kingdom

>Spike|hCoV-19/Sweden/20-51317/2020|2020-05-07|EPI\_ISL\_455105|Original|hCoV-19^^Jonkoping|Human|Wetterhalsan|The Public Health Agency of Sweden|Svartstr\u00f6m|Sweden

>Spike|hCoV-19/England/ALDP-B753A8/2020|2020-11-12|EPI\_ISL\_664452|Original|hCoV-19^^England|Human|Quadram Institute Bioscience|COVID-19 Genomics UK (COG-UK) Consortium|Alikhan|United Kingdom

>Spike|hCoV-19/USA/TX-HMH-MCoV-9830/2020|2020-07-07|EPI\_ISL\_780296|Original|hCoV-19^^Texas|Human|Houston Methodist Hospital|Houston Methodist Hospital|Long|USA

>Spike|hCoV-19/USA/FL-BPHL-0939/2020|2020-07-16|EPI\_ISL\_517829|Original|hCoV-19^^Florida|Human|Florida Bureau of Public Health Laboratories|Florida Bureau of Public Health Laboratories|Blanton|USA

>Spike|hCoV-19/Wales/OXON-F40858/2020|2020-12-09|EPI\_ISL\_764538|Original|hCoV-19^^Wales|Human|Oxford Viromics|COVID-19 Genomics UK (COG-UK) Consortium|Golubchik|United Kingdom

>Spike|hCoV-19/Denmark/DCGC-11095/2020|2020-11-02|EPI\_ISL\_669832|Original|hCoV-19^^Hovedstaden|Human|Department of Virus and Microbiological Special Diagnostics|Albertsen Lab|Michaelsen|Denmark

>Spike|hCoV-19/Canada/ON-PHL-20-03687/2020|2020-11-00|EPI\_ISL\_775170|Original|hCoV-19^^Ontario|Human|Public Health Ontario Laboratory|Public Health Ontario Laboratory|Guthrie|Canada



>Spike|hCoV-19/Australia/VIC13714/2020|2020-09-04|EPI\_ISL\_563813|Original|hCoV-19^^Victoria|Human|Microbiological Diagnostic Unit - Public Health Laboratory (MDU-PHL)|MDU-PHL|Schultz|Australia

>Spike|hCoV-19/Gambia/GC19-0479/2020|2020-04-29|EPI\_ISL\_561015|Original|hCoV-19^^Kombo|Human|MRCG at LSHTM Genomics lab|MRCG at LSHTM Genomics lab|Sesay|Gambia

>Spike|hCoV-19/Wales/PHWC-494F00/2020|2020-11-23|EPI\_ISL\_726271|Original|hCoV-19^^Wales|Human|Originating lab|COVID-19 Genomics UK (COG-UK) Consortium|Moore|United Kingdom

>Spike|hCoV-19/USA/CO-CDPHE-2011193762/2020|2020-11-17|EPI\_ISL\_771161|Original|hCoV-19^^Colorado|Human|Colorado Department of Public Health and Environment|Colorado Department of Public Health and Environment|Bankers|USA

>Spike|hCoV-19/Switzerland/BL-ETHZ-110021/2020|2020-04-01|EPI\_ISL\_486461|Original|hCoV-19^^Basel-Landschaft|Human|Viollier AG|Department of Biosystems Science and Engineering|Nadeau|Switzerland

>Spike|hCoV-19/South Korea/KCDC2249/2020|2020-05-10|EPI\_ISL\_510587|Original|hCoV-19^^South Korea|Human|Division of Viral Diseases|Division of Viral Diseases|Kim|South Korea

>Spike|hCoV-19/Australia/VIC81/2020|2020-03-14|EPI\_ISL\_419793|Original|hCoV-19^^Victoria|Human|Victorian Infectious Diseases Reference Laboratory (VIDRL)|Victorian Infectious Diseases Reference Laboratory and Microbiological Diagnostic Unit Public Health Laboratory|Schultz|Australia

>Spike|hCoV-19/Canada/BC\_3842755/2020|2020-03-09|EPI\_ISL\_418820|Original|hCoV-19^^British Columbia|Human|BCCDC Public Health Laboratory|BCCDC Public Health Laboratory|Harrigan|Canada

>Spike|hCoV-19/England/LOND-D670E/2020|2020-04-23|EPI\_ISL\_482175|Original|hCoV-19^^England|Human|University College London|Wellcome Sanger Institute for the COVID-19 Genomics UK (COG-UK) consortium|Davies|United Kingdom

>Spike|hCoV-19/Denmark/DCGC-15782/2020|2020-11-23|EPI\_ISL\_714016|Original|hCoV-19^^Nordjylland|Human|Department of Virus and Microbiological Special Diagnostics|Albertsen Lab|Michaelsen|Denmark

>Spike|hCoV-19/Switzerland/BL-ETHZ-190036/2020|2020-07-08|EPI\_ISL\_500899|Original|hCoV-19^^Basel-Landschaft|Human|Viollier AG|Department of Biosystems Science and Engineering|Nadeau|Switzerland

>Spike|hCoV-19/England/QEUEH-AD16EE/2020|2020-10-26|EPI\_ISL\_634603|Original|hCoV-19^^England|Human|Lighthouse Lab in Glasgow|Wellcome Sanger Institute for the COVID-19 Genomics UK (COG-UK) consortium|Davies|United Kingdom

>Spike|hCoV-19/USA/CA-ALSR-0675-IPL/2020|2020-04-29|EPI\_ISL\_483294|Original|hCoV-19^^California|Human|UC San Diego Center for Advanced Laboratory Medicine|Andersen lab at Scripps Research|Gangavarapu|USA

>Spike|hCoV-19/England/NOTT-10E0D4/2020|2020-03-19|EPI\_ISL\_425496|Original|hCoV-19^^England|Human|Queens Medical Centre|COVID-19 Genomics UK (COG-UK) Consortium|Loose|United Kingdom

>Spike|hCoV-19/England/CAMB-82006/2020|2020-04-20|EPI\_ISL\_438608|Original|hCoV-19^^England|Human|Department of Pathology|COVID-19 Genomics UK (COG-UK) Consortium|Meredith|United Kingdom

>Spike|hCoV-19/England/LOND-1267187/2020|2020-11-30|EPI\_ISL\_741257|Original|hCoV-19^^England|Human|University College London|COVID-19 Genomics UK (COG-UK) Consortium|Roy|United Kingdom

>Spike|hCoV-19/England/ALDP-B61FE7/2020|2020-11-08|EPI\_ISL\_656568|Original|hCoV-19^^England|Human|Lighthouse Lab in Alderley Park|Wellcome Sanger Institute for the COVID-19 Genomics UK (COG-UK) Consortium|Davies|United Kingdom

>Spike|hCoV-19/England/ALDP-4A8710/2020|2020-06-11|EPI\_ISL\_559604|Original|hCoV-19^^England|Human|Lighthouse Lab in Alderley Park|Wellcome Sanger Institute for the COVID-19 Genomics UK (COG-UK) consortium|Davies|United Kingdom

>Spike|hCoV-19/United Arab Emirates/0298/2020|2020-05-17|EPI\_ISL\_698477|Original|hCoV-19^^Abu Dhabi|Human|Group 42 (G42) Healthcare|G42 Healthcare|Ogrodzki|United Arab Emirates

>Spike|hCoV-19/Gibraltar/204421204/2020|2020-10-27|EPI\_ISL\_613665|Original|hCoV-19^^Gibraltar|Human|Microbiology|Respiratory Virus Unit|Platt|Gibraltar

>Spike|hCoV-19/England/QEUA-B2B4EA/2020|2020-11-03|EPI\_ISL\_646499|Original|hCoV-19^^England|Human|Lighthouse Lab in Glasgow|Wellcome Sanger Institute for the COVID-19 Genomics UK (COG-UK) Consortium|Davies|United Kingdom

>Spike|hCoV-19/England/QEUA-9C87BB/2020|2020-09-12|EPI\_ISL\_567155|Original|hCoV-19^^England|Human|Lighthouse Lab in Glasgow|Wellcome Sanger Institute for the COVID-19 Genomics UK (COG-UK) consortium|Davies|United Kingdom

>Spike|hCoV-19/USA/NY-Wadsworth-269621-01/2020|2020-11-10|EPI\_ISL\_734434|Original|hCoV-19^^New York|Human|Wadsworth Center|Wadsworth Center|Lasek-Nesselquist|USA

>Spike|hCoV-19/USA/FL-BPHL-1004/2020|2020-07-13|EPI\_ISL\_517894|Original|hCoV-19^^Florida|Human|Florida Bureau of Public Health Laboratories|Florida Bureau of Public Health Laboratories|Blanton|USA

>Spike|hCoV-19/USA/VA-DCLS-0667/2020|2020-04-18|EPI\_ISL\_526843|Original|hCoV-19^^Virginia|Human|Virginia DCLS|Virginia DCLS|St. Jacques|USA

>Spike|hCoV-19/England/ALDP-A2E6E2/2020|2020-10-05|EPI\_ISL\_586656|Original|hCoV-19^^England|Human|Lighthouse Lab in Alderley Park|Wellcome Sanger Institute for the COVID-19 Genomics UK (COG-UK) consortium|Davies|United Kingdom

>Spike|hCoV-19/England/QEUA-A9EB84/2020|2020-10-20|EPI\_ISL\_611469|Original|hCoV-19^^England|Human|Lighthouse Lab in Glasgow|Wellcome Sanger Institute for the COVID-19 Genomics UK (COG-UK) consortium|Davies|United Kingdom

>Spike|hCoV-19/England/NORW-EC6DB/2020|2020-05-10|EPI\_ISL\_457551|Original|hCoV-19^^England|Human|Quadram Institute Bioscience|COVID-19 Genomics UK (COG-UK) Consortium|Alikhan|United Kingdom

>Spike|hCoV-19/Belgium/ULG-11137/2020|2020-12-18|EPI\_ISL\_737381|Original|hCoV-19^^Li\u00e8ge|Human|Department of Clinical Microbiology|GIGA Medical Genomics|Durkin|Belgium

>Spike|hCoV-19/England/ALDP-92DBC7/2020|2020-06-22|EPI\_ISL\_553699|Original|hCoV-19^^England|Human|Lighthouse Lab in Alderley Park|Wellcome Sanger Institute for the COVID-19 Genomics UK (COG-UK) consortium|Davies|United Kingdom

>Spike|hCoV-19/Denmark/DCGC-2302/2020|2020-08-10|EPI\_ISL\_617727|Original|hCoV-19^^Midtjylland|Human|Department of Virus and Microbiological Special Diagnostics|Albertsen lab|Michaelsen|Denmark

>Spike|hCoV-19/India/MH-NIV-7966/2020|2020-04-06|EPI\_ISL\_454552|Original|hCoV-19^^Maharashtra|Human|NIV Influenza|NIV Influenza|Potdar|India

>Spike|hCoV-19/USA/MI-MDHHS-SC22644/2020|2020-12-01|EPI\_ISL\_737132|Original|hCoV-19^^Michigan|Human|Michigan Department of Health and Human Services|Michigan Department of Health and Human Services|Blankenship|USA

>Spike|hCoV-19/England/SHEF-CEDCB/2020|2020-03-22|EPI\_ISL\_475474|Original|hCoV-19^^England|Human|Virology Department|COVID-19 Genomics UK (COG-UK) Consortium|de Silva|United Kingdom

>Spike|hCoV-19/Portugal/PT0341/2020|2020-03-18|EPI\_ISL\_454057|Original|hCoV-19^^Portugal|Human|unknown|Instituto Nacional de Saude (INSA)|Borges|Portugal

>Spike|hCoV-19/Panama/339125/2020|2020-04-10|EPI\_ISL\_496891|Original|hCoV-19^^Cocle|Human|Gorgas Memorial Laboratory of Health Studies|Gorgas Memorial Laboratory of Health Studies|Martinez|Panama

>Spike|hCoV-19/Canada/BC\_03069740/2020|2020-04-00|EPI\_ISL\_466735|Original|hCoV-19^^British Columbia|Human|BCCDC Public Health Laboratory|BCCDC Public Health Laboratory|Harrigan|Canada

>Spike|hCoV-19/Singapore/1182/2020|2020-04-12|EPI\_ISL\_648110|Original|hCoV-19^^Singapore|Human|Department of Laboratory Medicine|Department of Laboratory Medicine|Chen|Singapore

>Spike|hCoV-19/USA/WA-UW-22294/2020|2020-08-06|EPI\_ISL\_570653|Original|hCoV-19^^Washington|Human|UW Virology Lab|UW Virology Lab|Roychoudhury|USA

>Spike|hCoV-19/USA/LA-EVTL805/2020|2020-07-24|EPI\_ISL\_653496|Original|hCoV-19^^Louisiana|Human|LSUHS Emerging Viral Threat Laboratory|Microbial Genome Sequencing Center|Kamil|USA

>Spike|hCoV-19/England/ALDP-95D074/2020|2020-06-17|EPI\_ISL\_553579|Original|hCoV-19^^England|Human|Lighthouse Lab in Alderley Park|Wellcome Sanger Institute for the COVID-19 Genomics UK (COG-UK) consortium|Davies|United Kingdom

>Spike|hCoV-19/England/QEUA-5ED3ED/2020|2020-06-16|EPI\_ISL\_533246|Original|hCoV-19^^England|Human|Lighthouse Lab in Glasgow|Wellcome Sanger Institute for the COVID-19 Genomics UK (COG-UK) consortium|Davies|United Kingdom

>Spike|hCoV-19/England/NORT-1B7244B/2020|2020-11-27|EPI\_ISL\_724879|Original|hCoV-19^^England|Human|Northumbria University / South Tees Hospitals NHS Foundation Trust / North Cumbria Integrated Care NHS Foundation Trust / North Tees and Hartlepool NHS Foundation Trust / Newcastle Hospitals NHS Foundation Trust|COVID-19 Genomics UK (COG-UK) Consortium|Bashton|United Kingdom

>Spike|hCoV-19/Australia/NSW2166/2020|2020-03-20|EPI\_ISL\_509506|Original|hCoV-19^^New South Wales|Human|Area of Virology|Area of Virology|Yeang|Australia

>Spike|hCoV-19/South Korea/KCDC2395/2020|2020-06-01|EPI\_ISL\_514798|Original|hCoV-19^^South Korea|Human|Division of Viral Diseases|Division of Viral Diseases|Kim|South Korea

>Spike|hCoV-19/Australia/VIC279/2020|2020-03-22|EPI\_ISL\_419972|Original|hCoV-19^^Victoria|Human|Victorian Infectious Diseases Reference Laboratory (VIDRL)|Victorian Infectious Diseases Reference Laboratory and Microbiological Diagnostic Unit Public Health Laboratory|Schultz|Australia

>Spike|hCoV-19/England/QEUA-B13A4D/2020|2020-10-31|EPI\_ISL\_641864|Original|hCoV-19^^England|Human|Lighthouse Lab in Glasgow|Wellcome Sanger Institute for the COVID-19 Genomics UK (COG-UK) Consortium|Davies|United Kingdom

>Spike|hCoV-19/Cote d'Ivoire/BKE0317/2020|2020-06-24|EPI\_ISL\_614372|Original|hCoV-19^^Boauk\u00e9|Human|Molecular diagnostic unit for viral haemorrhagic fevers and emerging viruses|Project group Epidemiology of Highly Pathogenic Microorganisms|Calvignac-Spencer|C\u00f4te d'Ivoire

>Spike|hCoV-19/SaudiArabia/KAUST-MADINAH1051/2020|2020-06-13|EPI\_ISL\_513081|Original|hCoV-19^^Madinah|Human|Pathogen Genomics Lab King Abdullah University of Science and Technology(KAUST)|Pathogen Genomics Lab King Abdullah University of Science and Technology(KAUST)|Mohamed Ghazzali|Saudi Arabia

>Spike|hCoV-19/USA/WI-UW-2654/2020|2020-12-31|EPI\_ISL\_791168|Original|hCoV-19^^Wisconsin|Human|University of Wisconsin-Madison AIDS Vaccine Research Laboratories|University of Wisconsin-Madison AIDS Vaccine Research Laboratories|Moreno|USA

>Spike|hCoV-19/England/LIVE-DBD199/2020|2020-10-27|EPI\_ISL\_664501|Original|hCoV-19^^England|Human|Liverpool Clinical Laboratories|COVID-19 Genomics UK (COG-UK) Consortium|Haldenby|United Kingdom

>Spike|hCoV-19/Iceland/168/2020|2020-03-13|EPI\_ISL\_417810|Original|hCoV-19^^Reykjavik|Human|The National University Hospital of Iceland|deCODE genetics|J\u00f3nsson|Iceland

>Spike|hCoV-19/England/204761574/2020|2020-00-00|EPI\_ISL\_649111|Original|hCoV-19^^England|Human|Respiratory Virus Unit|COVID-19 Genomics UK (COG-UK) Consortium|Platt|United Kingdom

>Spike|hCoV-19/Northern Ireland/QEUA-96AC61/2020|2020-08-17|EPI\_ISL\_531317|Original|hCoV-19^^Northern Ireland|Human|Lighthouse Lab in Glasgow|Wellcome Sanger Institute for the COVID-19 Genomics UK (COG-UK) consortium|Davies|United Kingdom

>Spike|hCoV-19/England/MILK-A6BB17/2020|2020-10-09|EPI\_ISL\_608807|Original|hCoV-19^^England|Human|Lighthouse Lab in Milton Keynes|Wellcome Sanger Institute for the COVID-19 Genomics UK (COG-UK) consortium|Davies|United Kingdom

>Spike|hCoV-19/Wales/MILK-9E0216/2020|2020-09-19|EPI\_ISL\_601293|Original|hCoV-19^^Wales|Human|Lighthouse Lab in Milton Keynes|Wellcome Sanger Institute for the COVID-19 Genomics UK (COG-UK) consortium|Davies|United Kingdom

>Spike|hCoV-19/Japan/PG-6119/2020|2020-08-00|EPI\_ISL\_689231|Original|hCoV-19^^Japan|Human|Pathogen Genomics Center|Pathogen Genomics Center|Sekizuka|Japan

>Spike|hCoV-19/Scotland/EDB9500/2020|2020-10-25|EPI\_ISL\_651322|Original|hCoV-19^^Scotland|Human|Virology Department|COVID-19 Genomics UK (COG-UK) Consortium|McHugh|United Kingdom

>Spike|hCoV-19/England/MILK-9A567B/2020|2020-09-03|EPI\_ISL\_550191|Original|hCoV-19^^England|Human|Lighthouse Lab in Milton Keynes|Wellcome Sanger Institute for the COVID-19 Genomics UK (COG-UK) consortium|Davies|United Kingdom

>Spike|hCoV-19/Australia/VIC17867/2020|2020-08-27|EPI\_ISL\_779515|Original|hCoV-19^^Victoria|Human|Microbiological Diagnostic Unit - Public Health Laboratory (MDU-PHL)|MDU-PHL|Beck|Australia

>Spike|hCoV-19/England/ALDP-5A4142/2020|2020-06-13|EPI\_ISL\_558859|Original|hCoV-19^^England|Human|Lighthouse Lab in Alderley Park|Wellcome Sanger Institute for the COVID-19 Genomics UK (COG-UK) consortium|Davies|United Kingdom

>Spike|hCoV-19/England/MILK-A47BC6/2020|2020-10-05|EPI\_ISL\_598476|Original|hCoV-19^^England|Human|Lighthouse Lab in Milton Keynes|Wellcome Sanger Institute for the COVID-19 Genomics UK (COG-UK) consortium|Davies|United Kingdom

>Spike|hCoV-19/England/NORW-F410C/2020|2020-11-20|EPI\_ISL\_725192|Original|hCoV-19^^England|Human|Quadram Institute Bioscience|COVID-19 Genomics UK (COG-UK) Consortium|Alikhan|United Kingdom

>Spike|hCoV-19/Canada/BC\_19909443/2020|2020-04-00|EPI\_ISL\_477020|Original|hCoV-19^^British Columbia|Human|BCCDC Public Health Laboratory|BCCDC Public Health Laboratory|Harrigan|Canada

>Spike|hCoV-19/England/CAMC-BC0168/2020|2020-11-22|EPI\_ISL\_704961|Original|hCoV-19^^England|Human|Lighthouse Lab in Cambridge|Wellcome Sanger Institute for the COVID-19 Genomics UK (COG-UK) Consortium|Davies|United Kingdom

>Spike|hCoV-19/USA/WI-UW-677/2020|2020-06-26|EPI\_ISL\_491358|Original|hCoV-19^^Wisconsin|Human|University of Wisconsin-Madison AIDS Vaccine Research Laboratories|University of Wisconsin-Madison AIDS Vaccine Research Laboratories|Baczenas|USA

>Spike|hCoV-19/USA/NY-Wadsworth-251080-01/2020|2020-10-21|EPI\_ISL\_734300|Original|hCoV-19^^New York|Human|Wadsworth Center|Wadsworth Center|Lasek-Nesselquist|USA

>Spike|hCoV-19/Canada/QC-LSPQ-L00240404/2020|2020-03-27|EPI\_ISL\_536269|Original|hCoV-19^^Quebec|Human|H\u00f4pital Charles-LeMoine|Laboratoire de sant\u00e9 publique du Qu\u00e9bec|Moreira|Canada

>Spike|hCoV-19/England/ALDP-9E8858/2020|2020-09-24|EPI\_ISL\_638259|Original|hCoV-19^^England|Human|Department of Pathology|COVID-19 Genomics UK (COG-UK) Consortium|Goodfellow|United Kingdom

>Spike|hCoV-19/Australia/VIC10796/2020|2020-09-06|EPI\_ISL\_563095|Original|hCoV-19^^Victoria|Human|Microbiological Diagnostic Unit - Public Health Laboratory (MDU-PHL)|MDU-PHL|Schultz|Australia

>Spike|hCoV-19/England/20124028706/2020|2020-03-17|EPI\_ISL\_423855|Original|hCoV-19^^England|Human|Respiratory Virus Unit|Respiratory Virus Unit|Platt|United Kingdom

>Spike|hCoV-19/Denmark/DCGC-13102/2020|2020-11-30|EPI\_ISL\_712582|Original|hCoV-19^^Midtjylland|Human|Department of Virus and Microbiological Special Diagnostics|Albertsen Lab|Michaelsen|Denmark

>Spike|hCoV-19/USA/UT-UPHL-2012330509/2020|2020-07-25|EPI\_ISL\_745692|Original|hCoV-19^^Utah|Human|Ginkgo Bioworks Clinical Laboratory|Utah Public Health Laboratory|Young|USA

>Spike|hCoV-19/England/QEUEH-9FF3C6/2020|2020-09-30|EPI\_ISL\_600210|Original|hCoV-19^^England|Human|Lighthouse Lab in Glasgow|Wellcome Sanger Institute for the COVID-19 Genomics UK (COG-UK) consortium|Davies|United Kingdom

>Spike|hCoV-19/USA/WA-S1793/2020|2020-06-02|EPI\_ISL\_496219|Original|hCoV-19^^Washington|Human|Washington State Department of Health|Seattle Flu Study|Lee|USA

>Spike|hCoV-19/Scotland/EDB5133/2020|2020-05-17|EPI\_ISL\_453194|Original|hCoV-19^^Scotland|Human|Virology Department|COVID-19 Genomics UK (COG-UK) Consortium|Williams|United Kingdom

>Spike|hCoV-19/Denmark/DCGC-5688/2020|2020-09-28|EPI\_ISL\_619975|Original|hCoV-19^^Hovedstaden|Human|Department of Virus and Microbiological Special Diagnostics|Albertsen lab|Michaelsen|Denmark

>Spike|hCoV-19/Denmark/ALAB-HH-107/2020|2020-03-09|EPI\_ISL\_451992|Original|hCoV-19^^Denmark|Human|Department of Clinical Microbiology|Albertsen lab|Kirkegaard|Denmark

>Spike|hCoV-19/Zimbabwe/ZW-307/2020|2020-03-01|EPI\_ISL\_644744|Original|hCoV-19^^Zimbabwe|Human|National Microbiology Reference Laboratory|Quadram Institute Bioscience|Alikhan|Zimbabwe

>Spike|hCoV-19/USA/VA-DCLS-1530/2020|2020-08-08|EPI\_ISL\_581526|Original|hCoV-19^^Virginia|Human|Virginia DCLS|Virginia DCLS|St. Jacques|USA

>Spike|hCoV-19/USA/TX-HMH-MCoV-10662/2020|2020-07-08|EPI\_ISL\_789581|Original|hCoV-19^^Texas|Human|Houston Methodist Hospital|Houston Methodist Hospital|Long|USA

>Spike|hCoV-19/England/ALDP-A2DB6C/2020|2020-10-06|EPI\_ISL\_586787|Original|hCoV-19^^England|Human|Lighthouse Lab in Alderley Park|Wellcome Sanger Institute for the COVID-19 Genomics UK (COG-UK) consortium|Davies|United Kingdom

>Spike|hCoV-19/England/ALDP-9D9EA3/2020|2020-09-18|EPI\_ISL\_576823|Original|hCoV-19^^England|Human|Oxford Viromics|COVID-19 Genomics UK (COG-UK) Consortium|Golubchik|United Kingdom

>Spike|hCoV-19/Canada/BC-BCCDC-7319/2020|2020-10-00|EPI\_ISL\_740682|Original|hCoV-19^^British Columbia|Human|BCCDC Public Health Laboratory|BCCDC Public Health Laboratory|Prystajecky|Canada

>Spike|hCoV-19/Spain/PV-IBV-98008441/2020|2020-10-23|EPI\_ISL\_654608|Original|hCoV-19^^Basque Country|Human|Servicio de Microbiolog\u00eda. Hospital Universitario Donostia. OSI Donostialdea. \u00c1rea de Enfermedades Infecciosas|SeqCOVID-SPAIN consortium|IBV (CSIC) |Comas|Spain

>Spike|hCoV-19/USA/CA-CZB-4085/2020|2020-08-10|EPI\_ISL\_548625|Original|hCoV-19^^California|Human|Orange County Public Health Laboratory|Chan-Zuckerberg Biohub|Bhatt|USA

>Spike|hCoV-19/USA/NY-Wadsworth-142766-01/2020|2020-04-10|EPI\_ISL\_676971|Original|hCoV-19^^New York|Human|Wadsworth Center|Wadsworth Center|Lasek-Nesselquist|USA

>Spike|hCoV-19/England/MILK-ABB7E7/2020|2020-10-21|EPI\_ISL\_623267|Original|hCoV-19^^England|Human|Lighthouse Lab in Milton Keynes|Wellcome Sanger Institute for the COVID-19 Genomics UK (COG-UK) consortium|Davies|United Kingdom

>Spike|hCoV-19/USA/WA-UW-4649/2020|2020-04-06|EPI\_ISL\_429629|Original|hCoV-19^^Washington|Human|UW Virology Lab|UW Virology Lab|Roychoudhury|USA

>Spike|hCoV-19/England/CAMB-1BCCD1/2020|2020-12-03|EPI\_ISL\_763648|Original|hCoV-19^^England|Human|Department of Pathology|COVID-19 Genomics UK (COG-UK) Consortium|Goodfellow|United Kingdom

>Spike|hCoV-19/England/CAMB-1BA1D4/2020|2020-00-00|EPI\_ISL\_664583|Original|hCoV-19^^England|Human|Department of Pathology|COVID-19 Genomics UK (COG-UK) Consortium|Goodfellow|United Kingdom

>Spike|hCoV-19/England/LIVE-A1C0D/2020|2020-06-17|EPI\_ISL\_490359|Original|hCoV-19^^England|Human|Liverpool Clinical Laboratories|COVID-19 Genomics UK (COG-UK) Consortium|Haldenby|United Kingdom

>Spike|hCoV-19/Wales/PHWC-4961EA/2020|2020-11-26|EPI\_ISL\_726545|Original|hCoV-19^^Wales|Human|Originating lab|COVID-19 Genomics UK (COG-UK) Consortium|Moore|United Kingdom

>Spike|hCoV-19/Wales/PHWC-48306B/2020|2020-10-20|EPI\_ISL\_627773|Original|hCoV-19^^Wales|Human|Wales Specialist Virology Centre Sequencing lab|COVID-19 Genomics UK (COG-UK) Consortium|Moore|United Kingdom

>Spike|hCoV-19/Scotland/EDB4453/2020|2020-05-05|EPI\_ISL\_453129|Original|hCoV-19^^Scotland|Human|Virology Department|COVID-19 Genomics UK (COG-UK) Consortium|Williams|United Kingdom

>Spike|hCoV-19/England/QEUA-9B894F/2020|2020-09-07|EPI\_ISL\_549699|Original|hCoV-19^^England|Human|Lighthouse Lab in Glasgow|Wellcome Sanger Institute for the COVID-19 Genomics UK (COG-UK) consortium|Davies|United Kingdom

>Spike|hCoV-19/England/QEUA-9F39EE/2020|2020-09-24|EPI\_ISL\_588505|Original|hCoV-19^^England|Human|Lighthouse Lab in Glasgow|Wellcome Sanger Institute for the COVID-19 Genomics UK (COG-UK) consortium|Davies|United Kingdom

>Spike|hCoV-19/Denmark/DCGC-16791/2020|2020-12-14|EPI\_ISL\_750196|Original|hCoV-19^^Hovedstaden|Human|Department of Virus and Microbiological Special Diagnostics|Albertsen Lab|Michaelsen|Denmark

>Spike|hCoV-19/Switzerland/Vs-ETHZ-330060/2020|2020-10-16|EPI\_ISL\_614947|Original|hCoV-19^^Valais|Human|Viollier AG|Department of Biosystems Science and Engineering|Nadeau|Switzerland

>Spike|hCoV-19/England/20109099106/2020|2020-03-08|EPI\_ISL\_417298|Original|hCoV-19^^England|Human|Respiratory Virus Unit|Respiratory Virus Unit|Platt|United Kingdom

>Spike|hCoV-19/Australia/VIC2801/2020|2020-07-01|EPI\_ISL\_521632|Original|hCoV-19^^Victoria|Human|Microbiological Diagnostic Unit - Public Health Laboratory (MDU-PHL)|MDU-PHL|Schultz|Australia

>Spike|hCoV-19/USA/MN-QDX-985/2020|2020-03-15|EPI\_ISL\_571783|Original|hCoV-19^^Minnesota|Human|Quest Diagnostics|Quest Diagnostics|Kagan|USA

>Spike|hCoV-19/Scotland/EDB6837/2020|2020-04-02|EPI\_ISL\_526493|Original|hCoV-19^^Scotland|Human|Virology Department|COVID-19 Genomics UK (COG-UK) Consortium|Williams|United Kingdom

>Spike|hCoV-19/Saudi Arabia/KAUST-MADINAH1375/2020|2020-06-04|EPI\_ISL\_678017|Original|hCoV-19^^Madinah|Human|Pathogen Genomics Lab King Abdullah University of Science and Technology(KAUST)|Pathogen Genomics Lab King Abdullah University of Science and Technology(KAUST)|Mohamed Ghazzali|Saudi Arabia

>Spike|hCoV-19/Scotland/CVR2739/2020|2020-04-18|EPI\_ISL\_438938|Original|hCoV-19^^Scotland|Human|West of Scotland Specialist Virology Centre|COVID-19 Genomics UK (COG-UK) Consortium|Robertson|United Kingdom

>Spike|hCoV-19/England/NOTT-114FCF/2020|2020-10-12|EPI\_ISL\_584785|Original|hCoV-19^^England|Human|Queens Medical Centre|COVID-19 Genomics UK (COG-UK) Consortium|Loose|United Kingdom

>Spike|hCoV-19/England/QEUAH-A1DCC6/2020|2020-09-29|EPI\_ISL\_587535|Original|hCoV-19^^England|Human|Lighthouse Lab in Glasgow|Wellcome Sanger Institute for the COVID-19 Genomics UK (COG-UK) consortium|Davies|United Kingdom

>Spike|hCoV-19/Wales/PHWC-48A36B/2020|2020-11-03|EPI\_ISL\_651416|Original|hCoV-19^^Wales|Human|Wales Specialist Virology Centre Sequencing lab|COVID-19 Genomics UK (COG-UK) Consortium|Moore|United Kingdom

>Spike|hCoV-19/Netherlands/UT-RIVM-20409/2020|2020-12-07|EPI\_ISL\_728629|Original|hCoV-19^^Utrecht|Human|Dutch COVID-19 response team|National Institute for Public Health and the Environment (RIVM)|Meijer|Netherlands

>Spike|hCoV-19/Wales/PHWC-49DF34/2020|2020-12-05|EPI\_ISL\_742932|Original|hCoV-19^^Wales|Human|Wales Specialist Virology Centre Sequencing lab|COVID-19 Genomics UK (COG-UK) Consortium|Moore|United Kingdom

>Spike|hCoV-19/England/QEUAH-AD586C/2020|2020-10-26|EPI\_ISL\_634681|Original|hCoV-19^^England|Human|Lighthouse Lab in Glasgow|Wellcome Sanger Institute for the COVID-19 Genomics UK (COG-UK) consortium|Davies|United Kingdom

>Spike|hCoV-19/Switzerland/GE-SNRCI-7474/2020|2020-03-00|EPI\_ISL\_548193|Original|hCoV-19^^Geneve|Human|Laboratoire de Virologie|Swiss National Reference Centre for Influenza|Gon\u00e7alves Cabecinhas|Switzerland

>Spike|hCoV-19/Ireland/D-NVRL-73IRL76160/2020|2020-09-15|EPI\_ISL\_596897|Original|hCoV-19^^Dublin|Human|National Virus Reference Laboratory|National Virus Reference Laboratory|Gonzalez|Ireland

>Spike|hCoV-19/Wales/PHWC-490D82/2020|2020-11-17|EPI\_ISL\_705239|Original|hCoV-19^^Wales|Human|Originating lab|COVID-19 Genomics UK (COG-UK) Consortium|Moore|United Kingdom

>Spike|hCoV-19/England/MILK-A1936B/2020|2020-10-03|EPI\_ISL\_612506|Original|hCoV-19^^England|Human|Wales Specialist Virology Centre Sequencing lab|COVID-19 Genomics UK (COG-UK) Consortium|Moore|United Kingdom

>Spike|hCoV-19/England/QEUAH-B0F80E/2020|2020-11-02|EPI\_ISL\_641607|Original|hCoV-19^^England|Human|Lighthouse Lab in Glasgow|Wellcome Sanger Institute for the COVID-19 Genomics UK (COG-UK) Consortium|Davies|United Kingdom

>Spike|hCoV-19/Scotland/CVR4040/2020|2020-08-30|EPI\_ISL\_535137|Original|hCoV-19^^Scotland|Human|West of Scotland Specialist Virology Centre|COVID-19 Genomics UK (COG-UK) Consortium|Robertson|United Kingdom

>Spike|hCoV-19/England/ALDP-9B6808/2020|2020-08-28|EPI\_ISL\_573037|Original|hCoV-19^^England|Human|Oxford Viromics|COVID-19 Genomics UK (COG-UK) Consortium|Golubchik|United Kingdom

>Spike|hCoV-19/England/ALDP-94EC72/2020|2020-06-17|EPI\_ISL\_556405|Original|hCoV-19^^England|Human|Lighthouse Lab in Alderley Park|Wellcome Sanger Institute for the COVID-19 Genomics UK (COG-UK) consortium|Davies|United Kingdom

>Spike|hCoV-19/England/QEUA-9B9191/2020|2020-09-07|EPI\_ISL\_549777|Original|hCoV-19^^England|Human|Lighthouse Lab in Glasgow|Wellcome Sanger Institute for the COVID-19 Genomics UK (COG-UK) consortium|Davies|United Kingdom

>Spike|hCoV-19/England/NORT-29DC7B/2020|2020-05-07|EPI\_ISL\_488084|Original|hCoV-19^^England|Human|NU-OMICS DNA Sequencing research facility|Wellcome Sanger Institute for the COVID-19 Genomics UK (COG-UK) consortium|Davies|United Kingdom

>Spike|hCoV-19/Luxembourg/LNS9231319/2020|2020-10-30|EPI\_ISL\_744872|Original|hCoV-19^^Luxembourg|Human|Laboratoire national de sant\u00e9|Laboratoire national de sant\u00e9|Wienecke-Baldacchino|Luxembourg

>Spike|hCoV-19/England/CAMC-B53434/2020|2020-11-08|EPI\_ISL\_656905|Original|hCoV-19^^England|Human|Lighthouse Lab in Cambridge|Wellcome Sanger Institute for the COVID-19 Genomics UK (COG-UK) Consortium|Davies|United Kingdom

>Spike|hCoV-19/France/ARA-SC038/2020|2020-03-29|EPI\_ISL\_666661|Original|hCoV-19^^Auvergne-Rh\u00f4ne-Alpes|Human|Laboratoire du Centre Hospitalier Annecy Genevois|CNR Virus des Infections Respiratoires - France SUD|Bal|France

>Spike|hCoV-19/Singapore/518/2020|2020-04-15|EPI\_ISL\_479596|Original|hCoV-19^^Singapore|Human|National Public Health Laboratory|National Public Health Laboratory|Mak|Singapore

>Spike|hCoV-19/Japan/PG-8183/2020|2020-08-00|EPI\_ISL\_687282|Original|hCoV-19^^Japan|Human|Pathogen Genomics Center|Pathogen Genomics Center|Sekizuka|Japan

>Spike|hCoV-19/England/CAMC-A65922/2020|2020-10-11|EPI\_ISL\_637269|Original|hCoV-19^^England|Human|Department of Pathology|COVID-19 Genomics UK (COG-UK) Consortium|Goodfellow|United Kingdom

>Spike|hCoV-19/Wales/PHWC-16A73B/2020|2020-09-09|EPI\_ISL\_560096|Original|hCoV-19^^Wales|Human|Wales Specialist Virology Centre Sequencing lab|COVID-19 Genomics UK (COG-UK) Consortium|Moore|United Kingdom

>Spike|hCoV-19/Denmark/DCGC-15546/2020|2020-11-23|EPI\_ISL\_713882|Original|hCoV-19^^Hovedstaden|Human|Department of Virus and Microbiological Special Diagnostics|Albertsen Lab|Michaelsen|Denmark

>Spike|hCoV-19/Switzerland/SH-ETHZ-360083/2020|2020-11-09|EPI\_ISL\_693893|Original|hCoV-19^^Schaffhausen|Human|Viollier AG|Department of Biosystems Science and Engineering|Nadeau|Switzerland

>Spike|hCoV-19/Japan/PG-2970/2020|2020-04-00|EPI\_ISL\_691095|Original|hCoV-19^^Japan|Human|Pathogen Genomics Center|Pathogen Genomics Center|Sekizuka|Japan

>Spike|hCoV-19/USA/LA-SR0275/2020|2020-03-31|EPI\_ISL\_445130|Original|hCoV-19^^Louisiana|Human|Robert Garry lab|Andersen lab at Scripps Research|Gangavarapu|USA

>Spike|hCoV-19/England/ALDP-C3D53C/2020|2020-12-10|EPI\_ISL\_731600|Original|hCoV-19^^England|Human|Lighthouse Lab in Alderley Park|Wellcome Sanger Institute for the COVID-19 Genomics UK (COG-UK) Consortium|Davies|United Kingdom

>Spike|hCoV-19/Scotland/CVR2555/2020|2020-04-15|EPI\_ISL\_493816|Original|hCoV-19^^Scotland|Human|West of Scotland Specialist Virology Centre|COVID-19 Genomics UK (COG-UK) Consortium|Robertson|United Kingdom

>Spike|hCoV-19/USA/NY-MSK-9B/2020|2020-03-19|EPI\_ISL\_583462|Original|hCoV-19^^New York|Human|Memorial Sloan Kettering Cancer Center|van Bakel Laboratory|van Bakel|USA

>Spike|hCoV-19/England/ALDP-B5B9D3/2020|2020-11-08|EPI\_ISL\_655541|Original|hCoV-19^^England|Human|Lighthouse Lab in Alderley Park|Wellcome Sanger Institute for the COVID-19 Genomics UK (COG-UK) Consortium|Davies|United Kingdom

>Spike|hCoV-19/England/CAMC-9DF265/2020|2020-09-20|EPI\_ISL\_637392|Original|hCoV-19^^England|Human|Department of Pathology|COVID-19 Genomics UK (COG-UK) Consortium|Goodfellow|United Kingdom

>Spike|hCoV-19/USA/MD-MDH-0385/2020|2020-10-27|EPI\_ISL\_660082|Original|hCoV-19^^Maryland|Human|MD PHL|MD PHL|Keller|USA

>Spike|hCoV-19/England/MILK-9C6F79/2020|2020-09-08|EPI\_ISL\_572795|Original|hCoV-19^^England|Human|Northumbria University / South Tees Hospitals NHS Foundation Trust / North Cumbria Integrated Care NHS Foundation Trust / North Tees and Hartlepool NHS Foundation Trust / Newcastle Hospitals NHS Foundation Trust|COVID-19 Genomics UK (COG-UK) Consortium|Bashton|United Kingdom

>Spike|hCoV-19/England/ALDP-9FD7AE/2020|2020-10-01|EPI\_ISL\_587793|Original|hCoV-19^^England|Human|Lighthouse Lab in Alderley Park|Wellcome Sanger Institute for the COVID-19 Genomics UK (COG-UK) consortium|Davies|United Kingdom

>Spike|hCoV-19/USA/NY-NYCPHL-000361/2020|2020-03-12|EPI\_ISL\_631865|Original|hCoV-19^^New York|Human|NYC HH Elmhurst Hospital Medical Center|New York City Public Health Laboratory|Wang|USA

>Spike|hCoV-19/Australia/NSW526/2020|2020-04-11|EPI\_ISL\_699652|Original|hCoV-19^^New South Wales|Human|Pathology West - NSW Health Pathology|NSW Health Pathology - Institute of Clinical Pathology and Medical Research; Westmead Hospital; University of Sydney|Gall|Australia

>Spike|hCoV-19/Denmark/DCGC-17070/2020|2020-12-14|EPI\_ISL\_750486|Original|hCoV-19^^Midtjylland|Human|Department of Virus and Microbiological Special Diagnostics|Albertsen Lab|Michaelsen|Denmark

>Spike|hCoV-19/Netherlands/NoordBrabant\_29/2020|2020-03-08|EPI\_ISL\_414538|Original|hCoV-19^^Noord Brabant|Human|Dutch COVID-19 response team|Erasmus Medical Center|Oude Munnink|Netherlands

>Spike|hCoV-19/Scotland/QEUA-AADBDD/2020|2020-10-22|EPI\_ISL\_637925|Original|hCoV-19^^Scotland|Human|Liverpool Clinical Laboratories|COVID-19 Genomics UK (COG-UK) Consortium|Haldenby|United Kingdom

>Spike|hCoV-19/England/CAMB-7DBFE/2020|2020-04-06|EPI\_ISL\_441779|Original|hCoV-19^^England|Human|Department of Pathology|Wellcome Sanger Institute for the COVID-19 Genomics UK (COG-UK) consortium|Amato|United Kingdom

>Spike|hCoV-19/England/QEUA-9616F3/2020|2020-08-03|EPI\_ISL\_537120|Original|hCoV-19^^England|Human|Lighthouse Lab in Glasgow|Wellcome Sanger Institute for the COVID-19 Genomics UK (COG-UK) consortium|Davies|United Kingdom

>Spike|hCoV-19/England/ALDP-B5AFF0/2020|2020-11-08|EPI\_ISL\_655319|Original|hCoV-19^^England|Human|Lighthouse Lab in Alderley Park|Wellcome Sanger Institute for the COVID-19 Genomics UK (COG-UK) Consortium|Davies|United Kingdom

>Spike|hCoV-19/Denmark/DCGC-5427/2020|2020-09-14|EPI\_ISL\_615359|Original|hCoV-19^^Syddanmark|Human|Department of Virus and Microbiological Special Diagnostics|Albertsen lab|Michaelsen|Denmark

>Spike|hCoV-19/Spain/MD-IBV-99008505/2020|2020-09-10|EPI\_ISL\_654045|Original|hCoV-19^^Madrid|Human|Hospital General Universitario Gregorio Mara\u00f1a|SeqCOVID-SPAIN consortium/IBV(CSIC)|Comas|Spain

>Spike|hCoV-19/Northern Ireland/NIRE-23564A/2020|2020-10-24|EPI\_ISL\_742123|Original|hCoV-19^^Northern Ireland|Human|Regional Virus Laboratory|COVID-19 Genomics UK (COG-UK) Consortium|Fairley|United Kingdom

>Spike|hCoV-19/Malaysia/MKAK-CL-2020-6430/2020|2020-02-04|EPI\_ISL\_416886|Vero E6|hCoV-19^^Selangor|Human|National Public Health Laboratory|Malaysia Genome Institute|Mat Isa|Malaysia

>Spike|hCoV-19/England/QEUA-9F8A13/2020|2020-09-25|EPI\_ISL\_588942|Original|hCoV-19^^England|Human|Lighthouse Lab in Glasgow|Wellcome Sanger Institute for the COVID-19 Genomics UK (COG-UK) consortium|Davies|United Kingdom

>Spike|hCoV-19/Japan/PG-7871/2020|2020-07-00|EPI\_ISL\_686972|Original|hCoV-19^^Japan|Human|Pathogen Genomics Center|Pathogen Genomics Center|Sekizuka|Japan

>Spike|hCoV-19/England/MILK-992626/2020|2020-08-27|EPI\_ISL\_552057|Original|hCoV-19^^England|Human|Lighthouse Lab in Milton Keynes|Wellcome Sanger Institute for the COVID-19 Genomics UK (COG-UK) consortium|Davies|United Kingdom

>Spike|hCoV-19/Saudi Arabia/671/2020|2020-02-27|EPI\_ISL\_490011|Original|hCoV-19^^Saudi Arabia|Human|King Fahad Medical City|King Fahad Medical City|Naem|Saudi Arabia

>Spike|hCoV-19/Norway/3408/2020|2020-09-11|EPI\_ISL\_590891|Original|hCoV-19^^Viken|Human|Akershus University Hospital|Norwegian Institute of Public Health|Vollan|Norway

>Spike|hCoV-19/USA/AZ-TG381370/2020|2020-06-15|EPI\_ISL\_694660|Original|hCoV-19^^Arizona|Human|TGen North|TGen North|French|USA

>Spike|hCoV-19/USA/CA-LACPHL-AF00010/2020|2020-12-15|EPI\_ISL\_737245|Original|hCoV-19^^California|Human|Los Angeles County PHL|Los Angeles County PHL|Hemarajata|USA

>Spike|hCoV-19/England/ALDP-BC684F/2020|2020-11-22|EPI\_ISL\_721249|Original|hCoV-19^^England|Human|Lighthouse Lab in Alderley Park|Wellcome Sanger Institute for the COVID-19 Genomics UK (COG-UK) Consortium|Davies|United Kingdom



>Spike|hCoV-19/Denmark/DCGC-8965/2020|2020-10-26|EPI\_ISL\_626182|Original|hCoV-19^^Syddanmark|Human|Department of Virus and Microbiological Special Diagnostics|Albertsen lab|Michaelsen|Denmark

>Spike|hCoV-19/England/BRIS-1231D6/2020|2020-04-05|EPI\_ISL\_442629|Original|hCoV-19^^England|Human|PHE South West Regional Laboratory|Wellcome Sanger Institute for the COVID-19 Genomics UK (COG-UK) consortium|Amato|United Kingdom

>Spike|hCoV-19/Belgium/reg-0423302/2020|2020-04-23|EPI\_ISL\_462156|Original|hCoV-19^^Eupen|Human|KU Leuven|KU Leuven|Maes|Belgium

>Spike|hCoV-19/Australia/NSW304/2020|2020-04-02|EPI\_ISL\_451568|Original|hCoV-19^^New South Wales|Human|Pathology West - NSW Health Pathology|NSW Health Pathology - Institute of Clinical Pathology and Medical Research; Westmead Hospital; University of Sydney|Gall|Australia

>Spike|hCoV-19/England/ALDP-B46CD2/2020|2020-11-06|EPI\_ISL\_656249|Original|hCoV-19^^England|Human|Lighthouse Lab in Alderley Park|Wellcome Sanger Institute for the COVID-19 Genomics UK (COG-UK) Consortium|Davies|United Kingdom

>Spike|hCoV-19/Denmark/DCGC-19599/2020|2020-12-07|EPI\_ISL\_749051|Original|hCoV-19^^Syddanmark|Human|Department of Virus and Microbiological Special Diagnostics|Albertsen Lab|Michaelsen|Denmark

>Spike|hCoV-19/England/CAMC-B22E8B/2020|2020-11-02|EPI\_ISL\_647257|Original|hCoV-19^^England|Human|Lighthouse Lab in Cambridge|Wellcome Sanger Institute for the COVID-19 Genomics UK (COG-UK) Consortium|Davies|United Kingdom

>Spike|hCoV-19/Singapore/505/2020|2020-06-06|EPI\_ISL\_479583|Original|hCoV-19^^Singapore|Human|National Public Health Laboratory|National Public Health Laboratory|Mak|Singapore

>Spike|hCoV-19/Japan/PG-6236/2020|2020-08-00|EPI\_ISL\_689348|Original|hCoV-19^^Japan|Human|Pathogen Genomics Center|Pathogen Genomics Center|Sekizuka|Japan

>Spike|hCoV-19/England/CAMB-1B194E/2020|2020-05-13|EPI\_ISL\_452984|Original|hCoV-19^^England|Human|Department of Pathology|COVID-19 Genomics UK (COG-UK) Consortium|Meredith|United Kingdom

>Spike|hCoV-19/England/BRIS-12C87E/2020|2020-05-13|EPI\_ISL\_469472|Original|hCoV-19^^England|Human|PHE South West Regional Laboratory|Wellcome Sanger Institute for the COVID-19 Genomics UK (COG-UK) consortium|Davies|United Kingdom

>Spike|hCoV-19/England/ALDP-BBB230/2020|2020-11-20|EPI\_ISL\_701785|Original|hCoV-19^^England|Human|Lighthouse Lab in Alderley Park|Wellcome Sanger Institute for the COVID-19 Genomics UK (COG-UK) Consortium|Davies|United Kingdom

>Spike|hCoV-19/England/MILK-991C16/2020|2020-08-27|EPI\_ISL\_577033|Original|hCoV-19^^England|Human|Northumbria University / South Tees Hospitals NHS Foundation Trust / North Cumbria Integrated Care NHS Foundation Trust / North Tees and Hartlepool NHS Foundation Trust / Newcastle Hospitals NHS Foundation Trust|COVID-19 Genomics UK (COG-UK) Consortium|Bashton|United Kingdom

>Spike|hCoV-19/Kenya/C942/2020|2020-04-17|EPI\_ISL\_457929|Original|hCoV-19^^Kenya|Human|KEMRI-CGMR-C|KEMRI-Wellcome Trust Research Programme/KEMRI-CGMR-C Kilifi|Githinji|Kenya

>Spike|hCoV-19/USA/NY-NYCPHL-001517/2020|2020-11-30|EPI\_ISL\_745434|Original|hCoV-19^^New York|Human|DOHMH Corona|New York City Public Health Laboratory|Wang|USA

>Spike|hCoV-19/England/MILK-ACCA53/2020|2020-10-21|EPI\_ISL\_629252|Original|hCoV-19^^England|Human|Lighthouse Lab in Milton Keynes|Wellcome Sanger Institute for the COVID-19 Genomics UK (COG-UK) consortium|Davies|United Kingdom

>Spike|hCoV-19/Wales/PHWC-47ECF6/2020|2020-09-25|EPI\_ISL\_595580|Original|hCoV-19^^Wales|Human|Originating lab|COVID-19 Genomics UK (COG-UK) Consortium|Moore|United Kingdom

>Spike|hCoV-19/England/MILK-B9607D/2020|2020-11-14|EPI\_ISL\_676160|Original|hCoV-19^^England|Human|Lighthouse Lab in Milton Keynes|Wellcome Sanger Institute for the COVID-19 Genomics UK (COG-UK) Consortium|Davies|United Kingdom

>Spike|hCoV-19/England/ALDP-B5BDE6/2020|2020-11-09|EPI\_ISL\_655412|Original|hCoV-19^^England|Human|Lighthouse Lab in Alderley Park|Wellcome Sanger Institute for the COVID-19 Genomics UK (COG-UK) Consortium|Davies|United Kingdom

>Spike|hCoV-19/England/ALDP-9557E0/2020|2020-06-12|EPI\_ISL\_553400|Original|hCoV-19^^England|Human|Lighthouse Lab in Alderley Park|Wellcome Sanger Institute for the COVID-19 Genomics UK (COG-UK) consortium|Davies|United Kingdom

>Spike|hCoV-19/Australia/NSW2266/2020|2020-03-22|EPI\_ISL\_500701|Original|hCoV-19^^New South Wales|Human|Area of Virology|Area of Virology|Bull|Australia

>Spike|hCoV-19/England/LIVE-AA41B/2020|2020-03-23|EPI\_ISL\_517451|Original|hCoV-19^^England|Human|Liverpool Clinical Laboratories|COVID-19 Genomics UK (COG-UK) Consortium|Haldenby|United Kingdom

>Spike|hCoV-19/USA/TX-DSHS-1120/2020|2020-06-21|EPI\_ISL\_615157|Original|hCoV-19^^Texas|Human|Texas Department of State Health Services|Texas Department of State Health Services|Rahman|USA

>Spike|hCoV-19/USA/TX-HMH-4684/2020|2020-06-20|EPI\_ISL\_544255|Original|hCoV-19^^Texas|Human|Houston Methodist Hospital|Houston Methodist Hospital|Long|USA

>Spike|hCoV-19/Netherlands/ZH-EMC-536/2020|2020-09-16|EPI\_ISL\_577964|Original|hCoV-19^^Zuid Holland|Human|Dutch COVID-19 response team|Erasmus Medical Center|Oude Munnink|Netherlands

>Spike|hCoV-19/England/NOTT-11F261/2020|2020-11-23|EPI\_ISL\_679954|Original|hCoV-19^^England|Human|Lincolnshire Hospitals and DeepSeq Nottingham|COVID-19 Genomics UK (COG-UK) Consortium|Loose|United Kingdom

>Spike|hCoV-19/Switzerland/ZH-ETHZ-400379/2020|2020-12-09|EPI\_ISL\_729065|Original|hCoV-19^^Zurich|Human|Viollier AG|Department of Biosystems Science and Engineering|Nadeau|Switzerland

>Spike|hCoV-19/Gambia/GC19-3802/2020|2020-07-27|EPI\_ISL\_561082|Original|hCoV-19^^Kombo|Human|MRCG at LSHTM Genomics lab|MRCG at LSHTM Genomics lab|Sesay|Gambia

>Spike|hCoV-19/Japan/PG-8580/2020|2020-08-00|EPI\_ISL\_686176|Original|hCoV-19^^Japan|Human|Pathogen Genomics Center|Pathogen Genomics Center|Sekizuka|Japan

>Spike|hCoV-19/England/ALDP-951FCE/2020|2020-06-09|EPI\_ISL\_551309|Original|hCoV-19^^England|Human|Lighthouse Lab in Alderley Park|Wellcome Sanger Institute for the COVID-19 Genomics UK (COG-UK) consortium|Davies|United Kingdom

>Spike|hCoV-19/Scotland/QEUH-C014AD/2020|2020-12-05|EPI\_ISL\_757271|Original|hCoV-19^^Scotland|Human|Lighthouse Lab in Glasgow|Wellcome Sanger Institute for the COVID-19 Genomics UK (COG-UK) Consortium|Davies|United Kingdom

>Spike|hCoV-19/USA/MD-MDH-0477/2020|2020-11-11|EPI\_ISL\_710090|Original|hCoV-19^^Maryland|Human|Maryland Public Health Laboratory|Maryland Public Health Laboratory|Keller|USA

>Spike|hCoV-19/USA/AZ-TG407779/2020|2020-06-25|EPI\_ISL\_694881|Original|hCoV-19^^Arizona|Human|TGen North|TGen North|French|USA

>Spike|hCoV-19/Suriname/SR-63/2020|2020-07-16|EPI\_ISL\_518812|Original|hCoV-19^^Suriname|Human|Academic Hospital Paramaribo|Erasmus Medical Center|M\u00f0fcnger|Suriname

>Spike|hCoV-19/Kenya/C4714/2020|2020-05-08|EPI\_ISL\_568736|Original|hCoV-19^^Mombasa|Human|KEMRI-Wellcome Trust Research Programme/KEMRI-CGMR-C Kilifi|KEMRI-Wellcome Trust Research Programme/KEMRI-CGMR-C Kilifi|Githinji|Kenya

>Spike|hCoV-19/New Zealand/20CV0181/2020|2020-08-27|EPI\_ISL\_548049|Original|hCoV-19^^Auckland|Human|LabPLUS|Institute of Environmental Science and Research (ESR)|Wang|New Zealand

>Spike|hCoV-19/USA/CA-ALSR-0805-SAN/2020|2020-03-30|EPI\_ISL\_483371|Original|hCoV-19^^California|Human|UC San Diego Center for Advanced Laboratory Medicine|Andersen lab at Scripps Research|Gangavarapu|USA

>Spike|hCoV-19/USA/TX-HMH-MCoV-10169/2020|2020-07-06|EPI\_ISL\_789350|Original|hCoV-19^^Texas|Human|Houston Methodist Hospital|Houston Methodist Hospital|Long|USA

>Spike|hCoV-19/England/CAMC-B1FE45/2020|2020-11-01|EPI\_ISL\_647620|Original|hCoV-19^^England|Human|Lighthouse Lab in Cambridge|Wellcome Sanger Institute for the COVID-19 Genomics UK (COG-UK) Consortium|Davies|United Kingdom

>Spike|hCoV-19/England/QEUH-79824C/2020|2020-07-15|EPI\_ISL\_533110|Original|hCoV-19^^England|Human|Lighthouse Lab in Glasgow|Wellcome Sanger Institute for the COVID-19 Genomics UK (COG-UK) consortium|Davies|United Kingdom

>Spike|hCoV-19/England/ALDP-9FDB57/2020|2020-10-01|EPI\_ISL\_587800|Original|hCoV-19^^England|Human|Lighthouse Lab in Alderley Park|Wellcome Sanger Institute for the COVID-19 Genomics UK (COG-UK) consortium|Davies|United Kingdom

>Spike|hCoV-19/Belgium/BA-0326323/2020|2020-03-26|EPI\_ISL\_462177|Original|hCoV-19^^Chatelet|Human|KU Leuven|KU Leuven|Maes|Belgium

>Spike|hCoV-19/USA/FL-BPHL-0148/2020|2020-03-11|EPI\_ISL\_480799|Original|hCoV-19^^Florida|Human|Florida Bureau of Public Health Laboratories|Florida Bureau of Public Health Laboratories|Blanton|USA

>Spike|hCoV-19/Japan/PG-6351/2020|2020-08-00|EPI\_ISL\_689462|Original|hCoV-19^^Japan|Human|Fukuoka Institute of Health and Environmental Sciences|Pathogen Genomics Center|Sekizuka|Japan

>Spike|hCoV-19/Denmark/DCGC-17082/2020|2020-12-14|EPI\_ISL\_750747|Original|hCoV-19^^Midtjylland|Human|Department of Virus and Microbiological Special Diagnostics|Albertsen Lab|Michaelsen|Denmark

>Spike|hCoV-19/England/QEUEH-CADE5A/2020|2020-12-20|EPI\_ISL\_760823|Original|hCoV-19^^England|Human|Lighthouse Lab in Glasgow|Wellcome Sanger Institute for the COVID-19 Genomics UK (COG-UK) Consortium|Davies|United Kingdom

>Spike|hCoV-19/England/MILK-A06A99/2020|2020-10-01|EPI\_ISL\_599893|Original|hCoV-19^^England|Human|Lighthouse Lab in Milton Keynes|Wellcome Sanger Institute for the COVID-19 Genomics UK (COG-UK) consortium|Davies|United Kingdom

>Spike|hCoV-19/Germany/HH-hpi-p2074/2020|2020-03-20|EPI\_ISL\_775670|Original|hCoV-19^^Hamburg|Human|University Medical Center Hamburg Eppendorf|Heinrich Pette Institute|Robitaille|Germany

>Spike|hCoV-19/Scotland/QEUEH-96F613/2020|2020-08-19|EPI\_ISL\_540336|Original|hCoV-19^^Scotland|Human|Lighthouse Lab in Glasgow|Wellcome Sanger Institute for the COVID-19 Genomics UK (COG-UK) consortium|Davies|United Kingdom

>Spike|hCoV-19/England/SHEF-C6D5A/2020|2020-09-18|EPI\_ISL\_573708|Original|hCoV-19^^England|Human|Virology Department|COVID-19 Genomics UK (COG-UK) Consortium|de Silva|United Kingdom

>Spike|hCoV-19/England/ALDP-A5257F/2020|2020-10-07|EPI\_ISL\_598225|Original|hCoV-19^^England|Human|Lighthouse Lab in Alderley Park|Wellcome Sanger Institute for the COVID-19 Genomics UK (COG-UK) consortium|Davies|United Kingdom

>Spike|hCoV-19/Luxembourg/LNS7293580/2020|2020-10-22|EPI\_ISL\_744547|Original|hCoV-19^^Luxembourg|Human|Laboratoire national de sant\u00e9|Laboratoire national de sant\u00e9|Wienecke-Baldacchino|Luxembourg

>Spike|hCoV-19/England/CAMB-825BC/2020|2020-04-14|EPI\_ISL\_443609|Original|hCoV-19^^England|Human|Department of Pathology|Wellcome Sanger Institute for the COVID-19 Genomics UK (COG-UK) consortium|Amato|United Kingdom

>Spike|hCoV-19/USA/NM-DOH-2020644749/2020|2020-12-28|EPI\_ISL\_767088|Original|hCoV-19^^New Mexico|Human|New Mexico Department of Health Scientific Laboratory|New Mexico Department of Health Scientific Laboratory|Malone|USA

>Spike|hCoV-19/Spain/PV-IBV-001525/2020|2020-03-17|EPI\_ISL\_467167|Original|hCoV-19^^Basque Country|Human|Hospital Universitario Araba. Vitoria-Gasteiz|SeqCOVID-SPAIN consortium/IBV (CSIC) |Comas|Spain

>Spike|hCoV-19/Japan/PG-2399/2020|2020-04-00|EPI\_ISL\_686004|Original|hCoV-19^^Japan|Human|Pathogen Genomics Center|Pathogen Genomics Center|Sekizuka|Japan

>Spike|hCoV-19/Spain/MD-IBV-005281/2020|2020-03-10|EPI\_ISL\_510167|Original|hCoV-19^^Madrid|Human|Hospital General Universitario Gregorio Mara\u00f1\u00f3n|SeqCOVID-SPAIN consortium/IBV (CSIC) |Comas|Spain

>Spike|hCoV-19/England/ALDP-B48FB9/2020|2020-11-07|EPI\_ISL\_649247|Original|hCoV-19^^England|Human|Lighthouse Lab in Alderley Park|Wellcome Sanger Institute for the COVID-19 Genomics UK (COG-UK) Consortium|Davies|United Kingdom

>Spike|hCoV-19/Finland/17MR10cH3/2020|2020-11-17|EPI\_ISL\_757303|Original|hCoV-19^^Uusimaa|Human|Department of Virology and Immunology|Department of Virology|Smura|Finland

>Spike|hCoV-19/England/BRIS-126391/2020|2020-04-10|EPI\_ISL\_458985|Original|hCoV-19^^England|Human|PHE South West Regional Laboratory|Wellcome Sanger Institute for the COVID-19 Genomics UK (COG-UK) consortium|Davies|United Kingdom

>Spike|hCoV-19/Netherlands/ZuidHolland\_111/2020|2020-04-07|EPI\_ISL\_455300|Original|hCoV-19^^Zuid Holland|Human|Dutch COVID-19 response team|Erasmus Medical Center|Oude Munnink|Netherlands

>Spike|hCoV-19/England/NORW-F170D/2020|2020-10-23|EPI\_ISL\_627614|Original|hCoV-19^^England|Human|Quadram Institute Bioscience|COVID-19 Genomics UK (COG-UK) Consortium|Alikhan|United Kingdom

>Spike|hCoV-19/USA/TX-HMH-MCoV-8144/2020|2020-06-30|EPI\_ISL\_784231|Original|hCoV-19^^Texas|Human|Houston Methodist Hospital|Houston Methodist Hospital|Long|USA

>Spike|hCoV-19/Iceland/397/2020|2020-03-19|EPI\_ISL\_424421|Original|hCoV-19^^Reykjavik|Human|The National University Hospital of Iceland|deCODE genetics|J\u00f3nsson|Iceland

>Spike|hCoV-19/USA/NY-CDC-2-3693655/2020|2020-10-05|EPI\_ISL\_747041|Original|hCoV-19^^New York|Human|Respiratory Viruses Branch|Respiratory Viruses Branch|Queen|USA

>Spike|hCoV-19/England/ALDP-94D46C/2020|2020-06-14|EPI\_ISL\_555933|Original|hCoV-19^^England|Human|Lighthouse Lab in Alderley Park|Wellcome Sanger Institute for the COVID-19 Genomics UK (COG-UK) consortium|Davies|United Kingdom

>Spike|hCoV-19/England/20169035604/2020|2020-04-19|EPI\_ISL\_465238|Original|hCoV-19^^England|Human|Respiratory Virus Unit|Respiratory Virus Unit|Platt|United Kingdom

>Spike|hCoV-19/USA/TX-HMH-MCoV-18386/2020|2020-11-18|EPI\_ISL\_784734|Original|hCoV-19^^Texas|Human|Houston Methodist Hospital|Houston Methodist Hospital|Long|USA

>Spike|hCoV-19/Switzerland/BE-UNIBE-175-2461/2020|2020-03-19|EPI\_ISL\_574815|Original|hCoV-19^^Bern|Human|Institute for Infectious Diseases|Institute for Infectious Diseases|Koch|Switzerland

>Spike|hCoV-19/Wales/PHWC-4887CB/2020|2020-11-02|EPI\_ISL\_638063|Original|hCoV-19^^Wales|Human|Wales Specialist Virology Centre Sequencing lab|COVID-19 Genomics UK (COG-UK) Consortium|Moore|United Kingdom

>Spike|hCoV-19/USA/HI-H200720/2020|2020-12-09|EPI\_ISL\_753241|Original|hCoV-19^^Hawaii|Human|State Laboratories Division|State Laboratories Division|Sultana|USA

>Spike|hCoV-19/Denmark/DCGC-20339/2020|2020-11-02|EPI\_ISL\_748122|Original|hCoV-19^^Midtjylland|Human|Department of Virus and Microbiological Special Diagnostics|Albertsen Lab|Michaelsen|Denmark

>Spike|hCoV-19/USA/TX-HMH-MCoV-14075/2020|2020-08-14|EPI\_ISL\_787361|Original|hCoV-19^^Texas|Human|Houston Methodist Hospital|Houston Methodist Hospital|Long|USA

>Spike|hCoV-19/Denmark/DCGC-15221/2020|2020-11-23|EPI\_ISL\_713704|Original|hCoV-19^^Hovedstaden|Human|Department of Virus and Microbiological Special Diagnostics|Albertsen Lab|Michaelsen|Denmark

>Spike|hCoV-19/England/QEUEH-B7C30B/2020|2020-11-13|EPI\_ISL\_668232|Original|hCoV-19^^England|Human|Lighthouse Lab in Glasgow|Wellcome Sanger Institute for the COVID-19 Genomics UK (COG-UK) Consortium|Davies|United Kingdom

>Spike|hCoV-19/Wales/PHWC-311C7/2020|2020-04-11|EPI\_ISL\_446417|Original|hCoV-19^^Wales|Human|Wales Specialist Virology Centre|Public Health Wales Microbiology Cardiff|Moore|United Kingdom

>Spike|hCoV-19/Scotland/EDB075/2020|2020-03-20|EPI\_ISL\_425872|Original|hCoV-19^^Scotland|Human|Virology Department|COVID-19 Genomics UK (COG-UK) Consortium|Williams|United Kingdom

>Spike|hCoV-19/Denmark/DCGC-10299/2020|2020-11-02|EPI\_ISL\_669884|Original|hCoV-19^^Nordjylland|Human|Department of Virus and Microbiological Special Diagnostics|Albertsen Lab|Michaelsen|Denmark

>Spike|hCoV-19/USA/MN-MDH-2129/2020|2020-11-04|EPI\_ISL\_708467|Original|hCoV-19^^Minnesota|Human|Minnesota Department of Health|Minnesota Department of Health|Lorentz|USA

>Spike|hCoV-19/England/NOTT-11101A/2020|2020-05-05|EPI\_ISL\_453616|Original|hCoV-19^^England|Human|Queens Medical Centre|COVID-19 Genomics UK (COG-UK) Consortium|Loose|United Kingdom

>Spike|hCoV-19/England/CAMC-B08A5A/2020|2020-10-30|EPI\_ISL\_643762|Original|hCoV-19^^England|Human|Lighthouse Lab in Cambridge|Wellcome Sanger Institute for the COVID-19 Genomics UK (COG-UK) Consortium|Davies|United Kingdom

>Spike|hCoV-19/Guatemala/CDC-1236/2020|2020-03-21|EPI\_ISL\_509703|Original|hCoV-19^^Guatemala|Human|Guatemala Ministry of Public Health|Pathogen Discovery|Queen|Guatemala

>Spike|hCoV-19/USA/FL-BPHL-1567/2020|2020-09-14|EPI\_ISL\_568665|Original|hCoV-19^^Florida|Human|Florida Bureau of Public Health Laboratories|Florida Bureau of Public Health Laboratories|Blanton|USA

>Spike|hCoV-19/England/QEUEH-A1E964/2020|2020-10-01|EPI\_ISL\_587359|Original|hCoV-19^^England|Human|Lighthouse Lab in Glasgow|Wellcome Sanger Institute for the COVID-19 Genomics UK (COG-UK) consortium|Davies|United Kingdom

>Spike|hCoV-19/England/SHEF-10D2E64/2020|2020-12-03|EPI\_ISL\_742051|Original|hCoV-19^^England|Human|Virology Department|COVID-19 Genomics UK (COG-UK) Consortium|de Silva|United Kingdom

>Spike|hCoV-19/Denmark/DCGC-12630/2020|2020-11-16|EPI\_ISL\_682811|Original|hCoV-19^^Hovedstaden|Human|Department of Virus and Microbiological Special Diagnostics|Albertsen Lab|Michaelsen|Denmark

>Spike|hCoV-19/USA/FL-BPHL-1326/2020|2020-07-14|EPI\_ISL\_541264|Original|hCoV-19^^Florida|Human|Florida Bureau of Public Health Laboratories|Florida Bureau of Public Health Laboratories|Blanton|USA

>Spike|hCoV-19/Belgium/ULG-11088/2020|2020-12-15|EPI\_ISL\_737337|Original|hCoV-19^^Li\u00e8ge|Human|Department of Clinical Microbiology|GIGA Medical Genomics|Durkin|Belgium

>Spike|hCoV-19/Luxembourg/LNS8500912/2020|2020-11-06|EPI\_ISL\_744749|Original|hCoV-19^^Luxembourg|Human|Laboratoire national de sant\u00e9|Laboratoire national de sant\u00e9|Wienecke-Baldacchino|Luxembourg

>Spike|hCoV-19/Russia/StPetersburg-RII4980S/2020|2020-04-10|EPI\_ISL\_430079|Original|hCoV-19^^Saint Petersburg|Human|WHO National Influenza Centre Russian Federation|WHO National Influenza Centre Russian Federation|Komissarov|Russia

>Spike|hCoV-19/Denmark/DCGC-6966/2020|2020-10-12|EPI\_ISL\_619812|Original|hCoV-19^^Midtjylland|Human|Department of Virus and Microbiological Special Diagnostics|Albertsen lab|Michaelsen|Denmark

>Spike|hCoV-19/England/NORT-285423/2020|2020-05-01|EPI\_ISL\_461791|Original|hCoV-19^^England|Human|Northumbria University / South Tees Hospitals NHS Foundation Trust / North Cumbria Integrated Care NHS Foundation Trust / North Tees and Hartlepool NHS Foundation Trust / Newcastle Hospitals NHS Foundation Trust|COVID-19 Genomics UK (COG-UK) Consortium|Bashton|United Kingdom

>Spike|hCoV-19/England/ALDP-9FD5C2/2020|2020-10-01|EPI\_ISL\_587953|Original|hCoV-19^^England|Human|Lighthouse Lab in Alderley Park|Wellcome Sanger Institute for the COVID-19 Genomics UK (COG-UK) consortium|Davies|United Kingdom

>Spike|hCoV-19/USA/TX-HMH-2235/2020|2020-05-24|EPI\_ISL\_545195|Original|hCoV-19^^Texas|Human|Houston Methodist Hospital|Houston Methodist Hospital|Long|USA

>Spike|hCoV-19/Spain/PV-IBV-004234/2020|2020-04-05|EPI\_ISL\_500298|Original|hCoV-19^^Basque Country|Human|Servicio de Microbiolog\u00eda. Hospital Universitario Donostia. OSI Donostialdea. \u00c1rea de Enfermedades Infecciosas|SeqCOVID-SPAIN consortium|IBV (CSIC)|Comas|Spain

>Spike|hCoV-19/Northern Ireland/QEUA-95EAE/2020|2020-08-09|EPI\_ISL\_532401|Original|hCoV-19^^Northern Ireland|Human|Lighthouse Lab in Glasgow|Wellcome Sanger Institute for the COVID-19 Genomics UK (COG-UK) consortium|Davies|United Kingdom

>Spike|hCoV-19/England/MILK-B384EA/2020|2020-11-01|EPI\_ISL\_659043|Original|hCoV-19^^England|Human|Lighthouse Lab in Milton Keynes|Wellcome Sanger Institute for the COVID-19 Genomics UK (COG-UK) Consortium|Davies|United Kingdom

>Spike|hCoV-19/England/ALDP-A2F72A/2020|2020-10-05|EPI\_ISL\_587142|Original|hCoV-19^^England|Human|Lighthouse Lab in Alderley Park|Wellcome Sanger Institute for the COVID-19 Genomics UK (COG-UK) consortium|Davies|United Kingdom

>Spike|hCoV-19/Japan/PG-6060/2020|2020-07-00|EPI\_ISL\_689172|Original|hCoV-19^^Japan|Human|Pathogen Genomics Center|Pathogen Genomics Center|Sekizuka|Japan

>Spike|hCoV-19/India/DL-NCDC7686-CSIR-IGIB/2020|2020-05-28|EPI\_ISL\_482660|Original|hCoV-19^^Delhi|Human|National Centre for Disease control (NCDC)|NCDC/CSIR-IGIB|Singh|India

>Spike|hCoV-19/Australia/SAP022/2020|2020-04-03|EPI\_ISL\_468011|Original|hCoV-19^^South Australia|Human|SA Pathology|SA Pathology|Leong|Australia

>Spike|hCoV-19/England/NORT-1B722D8/2020|2020-11-26|EPI\_ISL\_724867|Original|hCoV-19^^England|Human|Northumbria University / South Tees Hospitals NHS Foundation Trust / North Cumbria Integrated Care NHS Foundation Trust / North Tees and Hartlepool NHS Foundation Trust / Newcastle Hospitals NHS Foundation Trust|COVID-19 Genomics UK (COG-UK) Consortium|Bashton|United Kingdom

>Spike|hCoV-19/England/MILK-9F1C41/2020|2020-09-24|EPI\_ISL\_589598|Original|hCoV-19^^England|Human|Lighthouse Lab in Milton Keynes|Wellcome Sanger Institute for the COVID-19 Genomics UK (COG-UK) consortium|Davies|United Kingdom

>Spike|hCoV-19/France/NAQ-SC252/2020|2020-03-16|EPI\_ISL\_663206|Original|hCoV-19^^Nouvelle-Aquitaine|Human|CHU de Limoges|CNR Virus des Infections Respiratoires - France SUD|Bal|France

>Spike|hCoV-19/England/MILK-A7B4EC/2020|2020-10-15|EPI\_ISL\_607528|Original|hCoV-19^^England|Human|Lighthouse Lab in Milton Keynes|Wellcome Sanger Institute for the COVID-19 Genomics UK (COG-UK) consortium|Davies|United Kingdom

>Spike|hCoV-19/England/QEUH-B2B954/2020|2020-11-02|EPI\_ISL\_646634|Original|hCoV-19^^England|Human|Lighthouse Lab in Glasgow|Wellcome Sanger Institute for the COVID-19 Genomics UK (COG-UK) Consortium|Davies|United Kingdom

>Spike|hCoV-19/England/BRIS-124199/2020|2020-04-07|EPI\_ISL\_492791|Original|hCoV-19^^England|Human|PHE South West Regional Laboratory|Wellcome Sanger Institute for the COVID-19 Genomics UK (COG-UK) consortium|Davies|United Kingdom

>Spike|hCoV-19/Luxembourg/LNS3588186/2020|2020-03-15|EPI\_ISL\_419583|Original|hCoV-19^^Luxembourg|Human|Laboratoire National de Sant\u00e9|Laboratoire National de Sant\u00e9|Wienecke-Baldacchino|Luxembourg

>Spike|hCoV-19/Wales/PHWC-496AD0/2020|2020-11-22|EPI\_ISL\_726684|Original|hCoV-19^^Wales|Human|Originating lab|COVID-19 Genomics UK (COG-UK) Consortium|Moore|United Kingdom

>Spike|hCoV-19/England/ALDP-A926AD/2020|2020-10-19|EPI\_ISL\_610977|Original|hCoV-19^^England|Human|Lighthouse Lab in Alderley Park|Wellcome Sanger Institute for the COVID-19 Genomics UK (COG-UK) consortium|Davies|United Kingdom

>Spike|hCoV-19/Northern Ireland/NIRE-106ADE/2020|2020-05-19|EPI\_ISL\_500969|Original|hCoV-19^^Northern Ireland|Human|Regional Virus Laboratory|Wellcome Sanger Institute for the COVID-19 Genomics UK (COG-UK) consortium|Davies|United Kingdom

>Spike|hCoV-19/Japan/PG-0511/2020|2020-04-02|EPI\_ISL\_480169|Original|hCoV-19^^Kanto|Human|Gunma Prefectural Institute of Public Health and Environmental Sciences|Pathogen Genomics Center|Sekizuka|Japan

>Spike|hCoV-19/Spain/MD-IBV-99012457/2020|2020-11-19|EPI\_ISL\_780086|Original|hCoV-19^^Madrid|Human|Hospital General Universitario Gregorio Mara\u00f1\u00f3n|SeqCOVID-SPAIN consortium|IBV (CSIC)|Comas|Spain

>Spike|hCoV-19/Scotland/EDB191/2020|2020-03-25|EPI\_ISL\_425934|Original|hCoV-19^^Scotland|Human|Virology Department|COVID-19 Genomics UK (COG-UK) Consortium|Williams|United Kingdom

>Spike|hCoV-19/Australia/VIC877/2020|2020-04-05|EPI\_ISL\_427132|Original|hCoV-19^^Victoria|Human|Victorian Infectious Diseases Reference Laboratory (VIDRL)|Microbiological Diagnostic Unit Public Health Laboratory and Victorian Infectious Diseases Reference Laboratory|Schultz|Australia

>Spike|hCoV-19/England/QEUH-B13D17/2020|2020-11-01|EPI\_ISL\_641775|Original|hCoV-19^^England|Human|Lighthouse Lab in Glasgow|Wellcome Sanger Institute for the COVID-19 Genomics UK (COG-UK) Consortium|Davies|United Kingdom

>Spike|hCoV-19/England/CAMB-81571/2020|2020-04-08|EPI\_ISL\_442540|Original|hCoV-19^^England|Human|Department of Pathology|Wellcome Sanger Institute for the COVID-19 Genomics UK (COG-UK) consortium|Amato|United Kingdom

>Spike|hCoV-19/England/20140007302/2020|2020-03-28|EPI\_ISL\_421925|Original|hCoV-19^^England|Human|Respiratory Virus Unit|Respiratory Virus Unit|Platt|United Kingdom

>Spike|hCoV-19/Scotland/QEUH-9BA400/2020|2020-09-09|EPI\_ISL\_573812|Original|hCoV-19^^Scotland|Human|Oxford Viromics|COVID-19 Genomics UK (COG-UK) Consortium|Golubchik|United Kingdom

>Spike|hCoV-19/England/NORT-2994D1/2020|2020-04-24|EPI\_ISL\_492471|Original|hCoV-19^^England|Human|NU-OMICS DNA Sequencing research facility|Wellcome Sanger Institute for the COVID-19 Genomics UK (COG-UK) consortium|Davies|United Kingdom

>Spike|hCoV-19/Belgium/VWJM-0324136/2020|2020-03-24|EPI\_ISL\_420393|Original|hCoV-19^^Bierbeek|Human|KU Leuven|KU Leuven|Maes|Belgium

>Spike|hCoV-19/Denmark/DCGC-14351/2020|2020-11-30|EPI\_ISL\_711713|Original|hCoV-19^^Syddanmark|Human|Department of Virus and Microbiological Special Diagnostics|Albertsen Lab|Michaelsen|Denmark

>Spike|hCoV-19/Denmark/DCGC-7651/2020|2020-10-19|EPI\_ISL\_618507|Original|hCoV-19^^Midtjylland|Human|Department of Virus and Microbiological Special Diagnostics|Albertsen lab|Michaelsen|Denmark

>Spike|hCoV-19/England/MILK-B8680F/2020|2020-11-13|EPI\_ISL\_673940|Original|hCoV-19^^England|Human|Lighthouse Lab in Milton Keynes|Wellcome Sanger Institute for the COVID-19 Genomics UK (COG-UK) Consortium|Davies|United Kingdom

>Spike|hCoV-19/England/ALDP-A6F515/2020|2020-10-14|EPI\_ISL\_607675|Original|hCoV-19^^England|Human|Lighthouse Lab in Alderley Park|Wellcome Sanger Institute for the COVID-19 Genomics UK (COG-UK) consortium|Davies|United Kingdom

>Spike|hCoV-19/England/PORT-2D46C5/2020|2020-10-08|EPI\_ISL\_613290|Original|hCoV-19^^England|Human|Centre for Enzyme Innovation|COVID-19 Genomics UK (COG-UK) Consortium|Robson|United Kingdom

>Spike|hCoV-19/England/CAMB-79D65/2020|2020-04-01|EPI\_ISL\_441248|Original|hCoV-19^^England|Human|Department of Pathology|Wellcome Sanger Institute for the COVID-19 Genomics UK (COG-UK) consortium|Amato|United Kingdom

>Spike|hCoV-19/USA/NY-NYUMC76/2020|2020-03-18|EPI\_ISL\_421577|Original|hCoV-19^^New York|Human|NYU Langone Health|Departments of Pathology and Medicine|Maurano|USA

>Spike|hCoV-19/USA/WA-UW-4616/2020|2020-03-26|EPI\_ISL\_515282|Original|hCoV-19^^Washington|Human|University of Washington Virology Lab|University of Washington Virology Lab|Roychoudhury|USA

>Spike|hCoV-19/Wales/PHWC-24EEE/2020|2020-03-20|EPI\_ISL\_420924|Original|hCoV-19^^Wales|Human|Wales Specialist Virology Centre|Public Health Wales Microbiology Cardiff|Moore|United Kingdom

>Spike|hCoV-19/USA/UT-02231/2020|2020-04-15|EPI\_ISL\_436928|Original|hCoV-19^^Utah|Human|Utah Public Health Laboratory|Utah Public Health Laboratory|Young|USA

>Spike|hCoV-19/Denmark/DCGC-11280/2020|2020-11-02|EPI\_ISL\_670810|Original|hCoV-19^^Hovedstaden|Human|Department of Virus and Microbiological Special Diagnostics|Albertsen Lab|Michaelsen|Denmark

>Spike|hCoV-19/Northern Ireland/QEUIH-96404D/2020|2020-08-12|EPI\_ISL\_536842|Original|hCoV-19^^Northern Ireland|Human|Lighthouse Lab in Glasgow|Wellcome Sanger Institute for the COVID-19 Genomics UK (COG-UK) consortium|Davies|United Kingdom

>Spike|hCoV-19/Australia/VIC2133/2020|2020-06-19|EPI\_ISL\_480731|Original|hCoV-19^^Victoria|Human|Victorian Infectious Diseases Reference Laboratory (VIDRL)|VIDRL and MDU-PHL|Schultz|Australia

>Spike|hCoV-19/USA/AZ-TG547365/2020|2020-07-07|EPI\_ISL\_695508|Original|hCoV-19^^Arizona|Human|AZ SPHL|TGen North|French|USA

>Spike|hCoV-19/Australia/VIC14145/2020|2020-09-03|EPI\_ISL\_591819|Original|hCoV-19^^Victoria|Human|Microbiological Diagnostic Unit - Public Health Laboratory (MDU-PHL)|MDU-PHL|Schultz|Australia

>Spike|hCoV-19/Australia/NSW508/2020|2020-03-24|EPI\_ISL\_455048|Original|hCoV-19^^New South Wales|Human|Laverty Pathology|NSW Health Pathology - Institute of Clinical Pathology and Medical Research; Westmead Hospital; University of Sydney|Gall|Australia

>Spike|hCoV-19/England/BRIS-12F87B/2020|2020-03-26|EPI\_ISL\_488216|Original|hCoV-19^^England|Human|PHE South West Regional Laboratory|Wellcome Sanger Institute for the COVID-19 Genomics UK (COG-UK) consortium|Davies|United Kingdom

>Spike|hCoV-19/England/ALDP-B5C5FC/2020|2020-11-10|EPI\_ISL\_655927|Original|hCoV-19^^England|Human|Lighthouse Lab in Alderley Park|Wellcome Sanger Institute for the COVID-19 Genomics UK (COG-UK) Consortium|Davies|United Kingdom

>Spike|hCoV-19/England/ALDP-9525AD/2020|2020-06-09|EPI\_ISL\_553935|Original|hCoV-19^^England|Human|Lighthouse Lab in Alderley Park|Wellcome Sanger Institute for the COVID-19 Genomics UK (COG-UK) consortium|Davies|United Kingdom

>Spike|hCoV-19/Luxembourg/LNS9101389/2020|2020-11-18|EPI\_ISL\_744853|Original|hCoV-19^^Luxembourg|Human|Laboratoire national de sant\u00e9|Laboratoire national de sant\u00e9|Wienecke-Baldacchino|Luxembourg

>Spike|hCoV-19/USA/CA-ALSR-1761/2020|2020-05-12|EPI\_ISL\_512170|Original|hCoV-19^^California|Human|San Diego County Public Health Laboratory|Andersen lab at Scripps Research|Gangavarapu|USA

>Spike|hCoV-19/USA/CA-ALSR-0581-IPL/2020|2020-05-13|EPI\_ISL\_483237|Original|hCoV-19^^California|Human|UC San Diego Center for Advanced Laboratory Medicine|Andersen lab at Scripps Research|Gangavarapu|USA

>Spike|hCoV-19/England/QEUEH-CC8ED1/2020|2020-12-22|EPI\_ISL\_782084|Original|hCoV-19^^England|Human|Lighthouse Lab in Glasgow|Wellcome Sanger Institute for the COVID-19 Genomics UK (COG-UK) Consortium|Davies|United Kingdom

>Spike|hCoV-19/Denmark/DCGC-20726/2020|2020-12-21|EPI\_ISL\_759327|Original|hCoV-19^^Midtjylland|Human|Department of Virus and Microbiological Special Diagnostics|Albertsen Lab|Michaelsen|Denmark

>Spike|hCoV-19/England/BIRM-6A2D1/2020|2020-11-09|EPI\_ISL\_679037|Original|hCoV-19^^England|Human|University of Birmingham|COVID-19 Genomics UK (COG-UK) Consortium|Loman|United Kingdom

>Spike|hCoV-19/USA/NY-Wadsworth-292775-01/2020|2020-12-27|EPI\_ISL\_769946|Original|hCoV-19^^New York|Human|Albany Medical Center Hospital Clinical Laboratories|Wadsworth Center|Lasek-Nesselquist|USA

>Spike|hCoV-19/Peru/LIM-UPCH-0012/2020|2020-06-17|EPI\_ISL\_529069|Original|hCoV-19^^Lima|Human|Laboratorio de Referencia Nacional de Virus Respiratorios|Laboratorio de Gen\u00f3mica Microbiana|Tsukayama|Peru

>Spike|hCoV-19/Belgium/ULG-10547/2020|2020-10-23|EPI\_ISL\_626305|Original|hCoV-19^^Li\u00e8ge|Human|Department of Clinical Microbiology|GIGA Medical Genomics|Durkin|Belgium

>Spike|hCoV-19/India/GJ-GBRC-399a/2020|2020-06-25|EPI\_ISL\_586515|Original|hCoV-19^^Gujarat|Human|B.J. Medical College and Civil hospital|Gujarat Biotechnology Research Centre|Joshi|India

>Spike|hCoV-19/England/MILK-993E96/2020|2020-08-22|EPI\_ISL\_551685|Original|hCoV-19^^England|Human|Lighthouse Lab in Milton Keynes|Wellcome Sanger Institute for the COVID-19 Genomics UK (COG-UK) consortium|Davies|United Kingdom

>Spike|hCoV-19/South Africa/R10713/2020|2020-06-15|EPI\_ISL\_490296|Original|hCoV-19^^Gauteng|Human|National Institute for Communicable Diseases of the National Health Laboratory Service|National Institute for Communicable Diseases of the National Health Laboratory Service|Allam|South Africa

>Spike|hCoV-19/Australia/NSW1274/2020|2020-12-16|EPI\_ISL\_745105|Original|hCoV-19^^New South Wales|Human|Pathology North - Royal North Shore Hospital - NSW Health Pathology|CIDM-PH|Gall|Australia

>Spike|hCoV-19/Japan/PG-8042/2020|2020-08-00|EPI\_ISL\_687143|Original|hCoV-19^^Japan|Human|Pathogen Genomics Center|Pathogen Genomics Center|Sekizuka|Japan

>Spike|hCoV-19/England/ALDP-955391/2020|2020-06-12|EPI\_ISL\_553489|Original|hCoV-19^^England|Human|Lighthouse Lab in Alderley Park|Wellcome Sanger Institute for the COVID-19 Genomics UK (COG-UK) consortium|Davies|United Kingdom

>Spike|hCoV-19/Australia/VIC-CBA3/2020|2020-03-28|EPI\_ISL\_420877|Original|hCoV-19^^Victoria|Human|Geelong Centre for Emerging Infectious Diseases|Geelong Centre for Emerging Infectious Diseases|Alexandersen|Australia

>Spike|hCoV-19/Wales/PHWC-164B71/2020|2020-05-19|EPI\_ISL\_479352|Original|hCoV-19^^Wales|Human|Wales Specialist Virology Centre Sequencing lab|COVID-19 Genomics UK (COG-UK) Consortium|Moore|United Kingdom

>Spike|hCoV-19/South Korea/KCDC2343/2020|2020-05-27|EPI\_ISL\_510679|Vero E6 P1|hCoV-19^^South Korea|Human|Division of Viral Diseases|Division of Viral Diseases|Kim|South Korea

>Spike|hCoV-19/USA/WI-UW-1724/2020|2020-09-11|EPI\_ISL\_605597|Original|hCoV-19^^Wisconsin|Human|University of Wisconsin-Madison AIDS Vaccine Research Laboratories|University of Wisconsin-Madison AIDS Vaccine Research Laboratories|Baczenas|USA

>Spike|hCoV-19/Saudi Arabia/KAUST-MADINAH663/2020|2020-04-01|EPI\_ISL\_678036|Original|hCoV-19^^Madinah|Human|Pathogen Genomics Lab King Abdullah University of Science and Technology(KAUST)|Pathogen Genomics Lab King Abdullah University of Science and Technology(KAUST)|Mohamed Ghazzali|Saudi Arabia

>Spike|hCoV-19/England/LEED-2AA66E/2020|2020-04-05|EPI\_ISL\_538873|Original|hCoV-19^^England|Human|Leeds Teaching Hospitals NHS Trust and Public Health England|Wellcome Sanger Institute for the COVID-19 Genomics UK (COG-UK) consortium|Davies|United Kingdom



>Spike|hCoV-19/Wales/PHWC-1694EA/2020|2020-06-24|EPI\_ISL\_499450|Original|hCoV-19^^Wales|Human|Wales Specialist Virology Centre Sequencing lab|COVID-19 Genomics UK (COG-UK) Consortium|Moore|United Kingdom

>Spike|hCoV-19/Scotland/CVR4888/2020|2020-09-30|EPI\_ISL\_594655|Original|hCoV-19^^Scotland|Human|West of Scotland Specialist Virology Centre|COVID-19 Genomics UK (COG-UK) Consortium|Robertson|United Kingdom

>Spike|hCoV-19/England/ALDP-CF133A/2020|2020-12-17|EPI\_ISL\_781883|Original|hCoV-19^^England|Human|Lighthouse Lab in Alderley Park|Wellcome Sanger Institute for the COVID-19 Genomics UK (COG-UK) Consortium|Davies|United Kingdom

>Spike|hCoV-19/England/QEUEH-B7D07C/2020|2020-11-14|EPI\_ISL\_741843|Original|hCoV-19^^England|Human|Oxford Viromics|COVID-19 Genomics UK (COG-UK) Consortium|Golubchik|United Kingdom

>Spike|hCoV-19/USA/TX-HMH-MCoV-15610/2020|2020-10-26|EPI\_ISL\_787094|Original|hCoV-19^^Texas|Human|Houston Methodist Hospital|Houston Methodist Hospital|Long|USA

>Spike|hCoV-19/USA/UT-UPHL-201231390/2020|2020-04-06|EPI\_ISL\_678533|Original|hCoV-19^^Utah|Human|Utah Public Health Laboratory|Utah Public Health Laboratory|Young|USA

>Spike|hCoV-19/Scotland/EDB5807/2020|2020-04-27|EPI\_ISL\_487891|Original|hCoV-19^^Scotland|Human|Virology Department|Wellcome Sanger Institute for the COVID-19 Genomics UK (COG-UK) consortium|Davies|United Kingdom

>Spike|hCoV-19/England/20120106104/2020|2020-03-15|EPI\_ISL\_465728|Original|hCoV-19^^England|Human|Respiratory Virus Unit|Respiratory Virus Unit|Platt|United Kingdom

>Spike|hCoV-19/England/ALDP-B62274/2020|2020-11-07|EPI\_ISL\_656576|Original|hCoV-19^^England|Human|Lighthouse Lab in Alderley Park|Wellcome Sanger Institute for the COVID-19 Genomics UK (COG-UK) Consortium|Davies|United Kingdom

>Spike|hCoV-19/USA/TX-HMH-MCoV-12785/2020|2020-08-19|EPI\_ISL\_790521|Original|hCoV-19^^Texas|Human|Houston Methodist Hospital|Houston Methodist Hospital|Long|USA

>Spike|hCoV-19/England/LEED-2A9007/2020|2020-04-07|EPI\_ISL\_539125|Original|hCoV-19^^England|Human|Leeds Teaching Hospitals NHS Trust and Public Health England|Wellcome Sanger Institute for the COVID-19 Genomics UK (COG-UK) consortium|Davies|United Kingdom

>Spike|hCoV-19/Denmark/DCGC-21482/2020|2020-12-21|EPI\_ISL\_757740|Original|hCoV-19^^Syddanmark|Human|Department of Virus and Microbiological Special Diagnostics|Albertsen Lab|Michaelsen|Denmark

>Spike|hCoV-19/Japan/IC-0439/2020|2020-10-00|EPI\_ISL\_768648|Original|hCoV-19^^Japan|Human|Pathogen Genomics Center|Pathogen Genomics Center|Sekizuka|Japan

>Spike|hCoV-19/Denmark/DCGC-1189/2020|2020-05-25|EPI\_ISL\_614835|Original|hCoV-19^^Hovedstaden|Human|Department of Virus and Microbiological Special Diagnostics|Albertsen lab|Michaelsen|Denmark

>Spike|hCoV-19/Wales/PHWC-15E178/2020|2020-05-13|EPI\_ISL\_472798|Original|hCoV-19^^Wales|Human|Wales Specialist Virology Centre Sequencing lab|COVID-19 Genomics UK (COG-UK) Consortium|Moore|United Kingdom

>Spike|hCoV-19/Denmark/DCGC-15515/2020|2020-11-23|EPI\_ISL\_713214|Original|hCoV-19^^Hovedstaden|Human|Department of Virus and Microbiological Special Diagnostics|Albertsen Lab|Michaelsen|Denmark

>Spike|hCoV-19/USA/MA-MASPHL-00715/2020|2020-09-08|EPI\_ISL\_692948|Original|hCoV-19^^Massachusetts|Human|Massachusetts State Public Health Laboratory|Massachusetts State Public Health Laboratory|Lang|USA

>Spike|hCoV-19/USA/MI-QDX-709/2020|2020-03-20|EPI\_ISL\_571442|Original|hCoV-19^^Michigan|Human|Quest Diagnostics|Quest Diagnostics|Kagan|USA

>Spike|hCoV-19/USA/NY-Wadsworth-26856-01/2020|2020-03-21|EPI\_ISL\_426302|Original|hCoV-19^^New York|Human|Wadsworth Center|Wadsworth Center|Lasek-Nesselquist|USA

>Spike|hCoV-19/England/BRIS-125329/2020|2020-03-27|EPI\_ISL\_443770|Original|hCoV-19^^England|Human|PHE South West Regional Laboratory|Wellcome Sanger Institute for the COVID-19 Genomics UK (COG-UK) consortium|Amato|United Kingdom

>Spike|hCoV-19/USA/OR-OHSU-0941/2020|2020-07-02|EPI\_ISL\_525932|Original|hCoV-19^^Oregon|Human|OHSU Lab Services Molecular Microbiology Lab|Oregon SARS-CoV-2 Genome Sequencing Center|O'Roak|USA

>Spike|hCoV-19/USA/CA-IGI-0730/2020|2020-08-03|EPI\_ISL\_677880|Original|hCoV-19^^California|Human|Innovative Genomics Institute|Innovative Genomics Institute|Wyman|USA

>Spike|hCoV-19/England/CAMC-A6501E/2020|2020-10-11|EPI\_ISL\_608527|Original|hCoV-19^^England|Human|Lighthouse Lab in Cambridge|Wellcome Sanger Institute for the COVID-19 Genomics UK (COG-UK) consortium|Davies|United Kingdom

>Spike|hCoV-19/Norway/4027/2020|2020-09-21|EPI\_ISL\_590974|Original|hCoV-19^^Rogaland|Human|Dept. of Medical Microbiology|Norwegian Institute of Public Health|Vollan|Norway

>Spike|hCoV-19/England/MILK-ACC0AC/2020|2020-10-21|EPI\_ISL\_629401|Original|hCoV-19^^England|Human|Lighthouse Lab in Milton Keynes|Wellcome Sanger Institute for the COVID-19 Genomics UK (COG-UK) consortium|Davies|United Kingdom

>Spike|hCoV-19/England/MILK-B3956E/2020|2020-11-02|EPI\_ISL\_658879|Original|hCoV-19^^England|Human|Lighthouse Lab in Milton Keynes|Wellcome Sanger Institute for the COVID-19 Genomics UK (COG-UK) Consortium|Davies|United Kingdom

>Spike|hCoV-19/England/CAMB-821B8/2020|2020-04-21|EPI\_ISL\_438629|Original|hCoV-19^^England|Human|Department of Pathology|COVID-19 Genomics UK (COG-UK) Consortium|Meredith|United Kingdom

>Spike|hCoV-19/England/MILK-976233/2020|2020-08-20|EPI\_ISL\_552757|Original|hCoV-19^^England|Human|Lighthouse Lab in Milton Keynes|Wellcome Sanger Institute for the COVID-19 Genomics UK (COG-UK) consortium|Davies|United Kingdom

>Spike|hCoV-19/Denmark/DCGC-14021/2020|2020-11-30|EPI\_ISL\_711522|Original|hCoV-19^^Midtjylland|Human|Department of Virus and Microbiological Special Diagnostics|Albertsen Lab|Michaelsen|Denmark

>Spike|hCoV-19/England/EXET-139F88/2020|2020-00-00|EPI\_ISL\_679355|Original|hCoV-19^^England|Human|University of Exeter|COVID-19 Genomics UK (COG-UK) Consortium|Temperton|United Kingdom

>Spike|hCoV-19/USA/NM-DOH-2020321213/2020|2020-09-03|EPI\_ISL\_575289|Original|hCoV-19^^New Mexico|Human|Molecular Biology|Molecular Biology|Johnson|USA

>Spike|hCoV-19/Northern Ireland/QEUI-764CB4/2020|2020-07-17|EPI\_ISL\_532982|Original|hCoV-19^^Northern Ireland|Human|Lighthouse Lab in Glasgow|Wellcome Sanger Institute for the COVID-19 Genomics UK (COG-UK) consortium|Davies|United Kingdom

>Spike|hCoV-19/England/ALDP-B25FFE/2020|2020-11-04|EPI\_ISL\_646758|Original|hCoV-19^^England|Human|Lighthouse Lab in Alderley Park|Wellcome Sanger Institute for the COVID-19 Genomics UK (COG-UK) Consortium|Davies|United Kingdom

>Spike|hCoV-19/England/ALDP-B76204/2020|2020-11-12|EPI\_ISL\_723745|Original|hCoV-19^^England|Human|Oxford Viromics|COVID-19 Genomics UK (COG-UK) Consortium|Golubchik|United Kingdom

>Spike|hCoV-19/England/ALDP-A6F81C/2020|2020-10-15|EPI\_ISL\_607141|Original|hCoV-19^^England|Human|Lighthouse Lab in Alderley Park|Wellcome Sanger Institute for the COVID-19 Genomics UK (COG-UK) consortium|Davies|United Kingdom

>Spike|hCoV-19/Denmark/DCGC-1645/2020|2020-04-06|EPI\_ISL\_619885|Original|hCoV-19^^Hovedstaden|Human|Department of Virus and Microbiological Special Diagnostics|Albertsen lab|Michaelsen|Denmark

>Spike|hCoV-19/Belgium/regal-12111373/2020|2020-12-11|EPI\_ISL\_738426|Original|hCoV-19^^Mol|Human|UZ Leuven|KU Leuven|Maes|Belgium

>Spike|hCoV-19/Scotland/CVR28/2020|2020-03-12|EPI\_ISL\_425757|Original|hCoV-19^^Scotland|Human|West of Scotland Specialist Virology Centre|COVID-19 Genomics UK (COG-UK) Consortium|Robertson|United Kingdom

>Spike|hCoV-19/Switzerland/BS-42218824/2020|2020-04-03|EPI\_ISL\_581839|Original|hCoV-19^^Basel-Stadt|Human|University Hospital Basel|University Hospital Basel|Roloff Handschin|Switzerland

>Spike|hCoV-19/England/QEUI-A49BC4/2020|2020-10-05|EPI\_ISL\_595964|Original|hCoV-19^^England|Human|Quadram Institute Bioscience|COVID-19 Genomics UK (COG-UK) Consortium|Alikhan|United Kingdom

>Spike|hCoV-19/USA/CA-QDX-1444/2020|2020-03-17|EPI\_ISL\_572095|Original|hCoV-19^^California|Human|Quest Diagnostics|Quest Diagnostics|Kagan|USA

>Spike|hCoV-19/USA/TX-HMH-1947/2020|2020-04-28|EPI\_ISL\_542914|Original|hCoV-19^^Texas|Human|Houston Methodist Hospital|Houston Methodist Hospital|Long|USA

>Spike|hCoV-19/England/QEUA-943484/2020|2020-07-29|EPI\_ISL\_532630|Original|hCoV-19^^England|Human|Lighthouse Lab in Glasgow|Wellcome Sanger Institute for the COVID-19 Genomics UK (COG-UK) consortium|Davies|United Kingdom

>Spike|hCoV-19/England/NOTT-11B380/2020|2020-11-10|EPI\_ISL\_638611|Original|hCoV-19^^England|Human|Queens Medical Centre|COVID-19 Genomics UK (COG-UK) Consortium|Loose|United Kingdom

>Spike|hCoV-19/Denmark/DCGC-11967/2020|2020-09-14|EPI\_ISL\_670673|Original|hCoV-19^^Nordjylland|Human|Department of Virus and Microbiological Special Diagnostics|Albertsen Lab|Michaelsen|Denmark

>Spike|hCoV-19/England/BIRM-69F71/2020|2020-11-09|EPI\_ISL\_679008|Original|hCoV-19^^England|Human|University of Birmingham|COVID-19 Genomics UK (COG-UK) Consortium|Loman|United Kingdom

>Spike|hCoV-19/Japan/PG-0919/2020|2020-04-00|EPI\_ISL\_684529|Original|hCoV-19^^Japan|Human|Pathogen Genomics Center|Pathogen Genomics Center|Sekizuka|Japan

>Spike|hCoV-19/USA/TX-HMH-MCoV-9051/2020|2020-07-01|EPI\_ISL\_780452|Original|hCoV-19^^Texas|Human|Houston Methodist Hospital|Houston Methodist Hospital|Long|USA

>Spike|hCoV-19/England/ALDP-5A47F5/2020|2020-06-16|EPI\_ISL\_558777|Original|hCoV-19^^England|Human|Lighthouse Lab in Alderley Park|Wellcome Sanger Institute for the COVID-19 Genomics UK (COG-UK) consortium|Davies|United Kingdom

>Spike|hCoV-19/England/CAMB-7DC28/2020|2020-04-07|EPI\_ISL\_442327|Original|hCoV-19^^England|Human|Department of Pathology|Wellcome Sanger Institute for the COVID-19 Genomics UK (COG-UK) consortium|Amato|United Kingdom

>Spike|hCoV-19/Germany/NW-HHU-95/2020|2020-08-19|EPI\_ISL\_539611|Original|hCoV-19^^North Rhine-Westphalia|Human|ZOTZ KLIMAS MVZ D\u00f0fcsseldorf-Centrum GbR \u00dcBAG f\u00fcr Labormedizin|Center of Medical Microbiology|Wienemann|Germany

>Spike|hCoV-19/England/QEUA-C541D1/2020|2020-12-12|EPI\_ISL\_736417|Original|hCoV-19^^England|Human|Lighthouse Lab in Glasgow|Wellcome Sanger Institute for the COVID-19 Genomics UK (COG-UK) Consortium|Davies|United Kingdom

>Spike|hCoV-19/Ireland/LK-UHL18/2020|2020-04-06|EPI\_ISL\_681737|Original|hCoV-19^^Limerick|Human|University Hospital Limerick|Irish Coronavirus Sequencing Consortium - Teagasc Moorepark|Walsh|Ireland

>Spike|hCoV-19/England/EXET-13AE3F/2020|2020-11-10|EPI\_ISL\_665099|Original|hCoV-19^^England|Human|University of Exeter|COVID-19 Genomics UK (COG-UK) Consortium|Temperton|United Kingdom

>Spike|hCoV-19/USA/CA-CZB-3937/2020|2020-07-30|EPI\_ISL\_548566|Original|hCoV-19^^California|Human|Contra Costa Public Health Lab|Chan-Zuckerberg Biohub|Bhatt|USA

>Spike|hCoV-19/England/ALDP-9BC77E/2020|2020-09-10|EPI\_ISL\_568219|Original|hCoV-19^^England|Human|Lighthouse Lab in Alderley Park|Wellcome Sanger Institute for the COVID-19 Genomics UK (COG-UK) consortium|Davies|United Kingdom

>Spike|hCoV-19/Denmark/DCGC-6356/2020|2020-09-21|EPI\_ISL\_622278|Original|hCoV-19^^Hovedstaden|Human|Department of Virus and Microbiological Special Diagnostics|Albertsen lab|Michaelsen|Denmark

>Spike|hCoV-19/England/QEUA-A76760/2020|2020-10-13|EPI\_ISL\_665973|Original|hCoV-19^^England|Human|Queens Medical Centre|COVID-19 Genomics UK (COG-UK) Consortium|Loose|United Kingdom

>Spike|hCoV-19/Wuhan/HB-WH6-244/2020|2020-03-16|EPI\_ISL\_455397|Original|hCoV-19^^Hubei|Human|Wuhan Chain Medical Labs (CMLabs)|State Key Laboratory of Biotherapy of Sichuan University|Tang|China

>Spike|hCoV-19/England/CAMB-1B00FF/2020|2020-05-07|EPI\_ISL\_448109|Original|hCoV-19^^England|Human|Department of Pathology|COVID-19 Genomics UK (COG-UK) Consortium|Meredith|United Kingdom

>Spike|hCoV-19/Israel/2115968/2020|2020-04-16|EPI\_ISL\_447337|Original|hCoV-19^^Tel Aviv District|Human|Clinical Virology Unit|Stern Lab|Miller|Israel

>Spike|hCoV-19/USA/UT-QDX-1822/2020|2020-03-16|EPI\_ISL\_604142|Original|hCoV-19^^Utah|Human|Quest Diagnostics|Quest Diagnostics|Kagan|USA

>Spike|hCoV-19/USA/TX-HMH-MCoV-17996/2020|2020-11-16|EPI\_ISL\_786144|Original|hCoV-19^^Texas|Human|Houston Methodist Hospital|Houston Methodist Hospital|Long|USA

>Spike|hCoV-19/England/ALDP-506409/2020|2020-06-25|EPI\_ISL\_559273|Original|hCoV-19^^England|Human|Lighthouse Lab in Alderley Park|Wellcome Sanger Institute for the COVID-19 Genomics UK (COG-UK) consortium|Davies|United Kingdom

>Spike|hCoV-19/England/CAMB-1AF15A/2020|2020-04-29|EPI\_ISL\_459319|Original|hCoV-19^^England|Human|Department of Pathology|Wellcome Sanger Institute for the COVID-19 Genomics UK (COG-UK) consortium|Davies|United Kingdom

>Spike|hCoV-19/Denmark/DCGC-16553/2020|2020-11-16|EPI\_ISL\_714833|Original|hCoV-19^^Hovedstaden|Human|Department of Virus and Microbiological Special Diagnostics|Albertsen Lab|Michaelsen|Denmark

>Spike|hCoV-19/Netherlands/ZH-EMC-231/2020|2020-05-12|EPI\_ISL\_523573|Original|hCoV-19^^Zuid Holland|Human|Dutch COVID-19 response team|Erasmus Medical Center|Oude Munnink|Netherlands

>Spike|hCoV-19/Ecuador/USFQ-189/2020|2020-08-12|EPI\_ISL\_697786|Original|hCoV-19^^Imbabura|Human|Institute of Microbiology|Institute of Microbiology|Cardenas|Ecuador

>Spike|hCoV-19/England/CAMC-B2300C/2020|2020-11-02|EPI\_ISL\_665024|Original|hCoV-19^^England|Human|Virology Department|COVID-19 Genomics UK (COG-UK) Consortium|de Silva|United Kingdom

>Spike|hCoV-19/England/ALDP-C8C55C/2020|2020-12-12|EPI\_ISL\_777153|Original|hCoV-19^^England|Human|Lighthouse Lab in Alderley Park|Wellcome Sanger Institute for the COVID-19 Genomics UK (COG-UK) Consortium|Davies|United Kingdom

>Spike|hCoV-19/England/NOTT-120F39/2020|2020-12-14|EPI\_ISL\_741620|Original|hCoV-19^^England|Human|Queens Medical Centre|COVID-19 Genomics UK (COG-UK) Consortium|Loose|United Kingdom

>Spike|hCoV-19/USA/LA-EVTL232/2020|2020-08-22|EPI\_ISL\_574366|Original|hCoV-19^^Louisiana|Human|LSUHS Emerging Viral Threat Laboratory|Microbial Genome Sequencing Center|Kamil|USA

>Spike|hCoV-19/England/ALDP-B5DF66/2020|2020-11-09|EPI\_ISL\_723616|Original|hCoV-19^^England|Human|Northumbria University / South Tees Hospitals NHS Foundation Trust / North Cumbria Integrated Care NHS Foundation Trust / North Tees and Hartlepool NHS Foundation Trust / Newcastle Hospitals NHS Foundation Trust|COVID-19 Genomics UK (COG-UK) Consortium|Bashton|United Kingdom

>Spike|hCoV-19/Austria/CeMM1084/2020|2020-07-19|EPI\_ISL\_583886|Original|hCoV-19^^Austria|Human|Austrian Agency for Health and Food Safety (AGES)|Bergthaler laboratory|Bergthaler|Austria

>Spike|hCoV-19/USA/NY-NYCPHL-001334/2020|2020-11-13|EPI\_ISL\_683969|Original|hCoV-19^^New York|Human|DOHMH Morrisania|New York City Public Health Laboratory|Wang|USA

>Spike|hCoV-19/Japan/PG-6870/2020|2020-06-00|EPI\_ISL\_687978|Original|hCoV-19^^Japan|Human|Pathogen Genomics Center|Pathogen Genomics Center|Sekizuka|Japan

>Spike|hCoV-19/USA/TX-HMH-MCoV-9222/2020|2020-07-02|EPI\_ISL\_781005|Original|hCoV-19^^Texas|Human|Houston Methodist Hospital|Houston Methodist Hospital|Long|USA

>Spike|hCoV-19/Iceland/538/2020|2020-03-27|EPI\_ISL\_424558|Original|hCoV-19^^Reykjavik|Human|The National University Hospital of Iceland|deCODE genetics|J\u00f3nsson|Iceland

>Spike|hCoV-19/USA/NY-NYUMC645/2020|2020-04-02|EPI\_ISL\_444762|Original|hCoV-19^^New York|Human|NYU Langone Health|Departments of Pathology and Medicine|Maurano|USA

>Spike|hCoV-19/Switzerland/ZH-ETHZ-310432/2020|2020-10-08|EPI\_ISL\_603506|Original|hCoV-19^^Zurich|Human|Viollier AG|Department of Biosystems Science and Engineering|Nadeau|Switzerland

>Spike|hCoV-19/Spain/AS-IBV-98006580/2020|2020-03-09|EPI\_ISL\_654616|Original|hCoV-19^^Asturias|Human|Servicio de Microbiolog\u00eda|SeqCOVID-SPAIN consortium|IBV (CSIC) |Comas|Spain

>Spike|hCoV-19/USA/UT-UPHL-2009325/2020|2020-05-14|EPI\_ISL\_524926|Original|hCoV-19^^Utah|Human|Utah Public Health Laboratory|Utah Public Health Laboratory|Young|USA

>Spike|hCoV-19/USA/NY-NYUMC582/2020|2020-03-30|EPI\_ISL\_444699|Original|hCoV-19^^New York|Human|NYU Langone Health|Departments of Pathology and Medicine|Maurano|USA

>Spike|hCoV-19/England/BRIS-12269C/2020|2020-04-05|EPI\_ISL\_440688|Original|hCoV-19^^England|Human|PHE South West Regional Laboratory|Wellcome Sanger Institute for the COVID-19 Genomics UK (COG-UK) consortium|Amato|United Kingdom

>Spike|hCoV-19/USA/WI-UW-1626/2020|2020-10-01|EPI\_ISL\_605500|Original|hCoV-19^^Wisconsin|Human|University of Wisconsin-Madison AIDS Vaccine Research Laboratories|University of Wisconsin-Madison AIDS Vaccine Research Laboratories|Baczenas|USA

>Spike|hCoV-19/USA/CA-CZB-14563/2020|2020-11-14|EPI\_ISL\_738861|Original|hCoV-19^^California|Human|Santa Clara County Public Health Laboratory|Chan-Zuckerberg Biohub|Kamm|USA

>Spike|hCoV-19/Japan/IC-0358/2020|2020-11-00|EPI\_ISL\_721601|Original|hCoV-19^^Japan|Human|Pathogen Genomics Center|Pathogen Genomics Center|Sekizuka|Japan

>Spike|hCoV-19/England/MILK-956D92/2020|2020-06-10|EPI\_ISL\_554307|Original|hCoV-19^^England|Human|Lighthouse Lab in Milton Keynes|Wellcome Sanger Institute for the COVID-19 Genomics UK (COG-UK) consortium|Davies|United Kingdom

>Spike|hCoV-19/Scotland/QEUEH-C30C61/2020|2020-12-11|EPI\_ISL\_757132|Original|hCoV-19^^Scotland|Human|Lighthouse Lab in Glasgow|Wellcome Sanger Institute for the COVID-19 Genomics UK (COG-UK) Consortium|Davies|United Kingdom

>Spike|hCoV-19/England/CAMB-81070/2020|2020-04-20|EPI\_ISL\_438561|Original|hCoV-19^^England|Human|Department of Pathology|COVID-19 Genomics UK (COG-UK) Consortium|Meredith|United Kingdom

>Spike|hCoV-19/Japan/PG-5132/2020|2020-08-00|EPI\_ISL\_690239|Original|hCoV-19^^Japan|Human|Gunma Prefectural Institute of Public Health and Environmental Sciences|Pathogen Genomics Center|Sekizuka|Japan

>Spike|hCoV-19/Scotland/QEUEH-A4AAD5/2020|2020-10-08|EPI\_ISL\_595971|Original|hCoV-19^^Scotland|Human|Quadram Institute Bioscience|COVID-19 Genomics UK (COG-UK) Consortium|Alikhan|United Kingdom

>Spike|hCoV-19/USA/TX-HMH-MCoV-16121/2020|2020-10-28|EPI\_ISL\_785805|Original|hCoV-19^^Texas|Human|Houston Methodist Hospital|Houston Methodist Hospital|Long|USA

>Spike|hCoV-19/Singapore/410/2020|2020-04-21|EPI\_ISL\_475941|Original|hCoV-19^^Singapore|Human|National Public Health Laboratory|National Public Health Laboratory|Mak|Singapore

>Spike|hCoV-19/Switzerland/BE-ETHZ-120050/2020|2020-04-20|EPI\_ISL\_468235|Original|hCoV-19^^Bern|Human|Viollier AG|Department of Biosystems Science and Engineering|Nadeau|Switzerland

>Spike|hCoV-19/USA/UT-UPHL-2009058/2020|2020-05-11|EPI\_ISL\_525070|Original|hCoV-19^^Utah|Human|Utah Public Health Laboratory|Utah Public Health Laboratory|Young|USA

>Spike|hCoV-19/South Africa/KRISP-K002621/2020|2020-07-30|EPI\_ISL\_535484|Original|hCoV-19^^KwaZulu-Natal|Human|NHLs-IALCH|KRISP|de Oliveira|South Africa

>Spike|hCoV-19/Japan/PG-1759/2020|2020-04-00|EPI\_ISL\_685365|Original|hCoV-19^^Japan|Human|Pathogen Genomics Center|Pathogen Genomics Center|Sekizuka|Japan

>Spike|hCoV-19/USA/WI-UW-1261/2020|2020-08-25|EPI\_ISL\_536634|Original|hCoV-19^^Wisconsin|Human|University of Wisconsin-Madison AIDS Vaccine Research Laboratories|University of Wisconsin-Madison AIDS Vaccine Research Laboratories|Baczenas|USA

>Spike|hCoV-19/England/QEUEH-9F7BF3/2020|2020-09-27|EPI\_ISL\_589204|Original|hCoV-19^^England|Human|Lighthouse Lab in Glasgow|Wellcome Sanger Institute for the COVID-19 Genomics UK (COG-UK) consortium|Davies|United Kingdom

>Spike|hCoV-19/Wales/PHWC-49DFDA/2020|2020-12-07|EPI\_ISL\_742939|Original|hCoV-19^^Wales|Human|Wales Specialist Virology Centre Sequencing lab|COVID-19 Genomics UK (COG-UK) Consortium|Moore|United Kingdom

>Spike|hCoV-19/Australia/VIC13053/2020|2020-08-04|EPI\_ISL\_592167|Original|hCoV-19^^Victoria|Human|Victorian Infectious Diseases Reference Laboratory (VIDRL)|VIDRL and MDU-PHL|Schultz|Australia

>Spike|hCoV-19/England/MILK-49FFC9/2020|2020-06-01|EPI\_ISL\_559335|Original|hCoV-19^^England|Human|Lighthouse Lab in Milton Keynes|Wellcome Sanger Institute for the COVID-19 Genomics UK (COG-UK) consortium|Davies|United Kingdom

>Spike|hCoV-19/Northern Ireland/NIRE-FB572/2020|2020-08-25|EPI\_ISL\_585237|Original|hCoV-19^^Northern Ireland|Human|Regional Virus Laboratory|COVID-19 Genomics UK (COG-UK) Consortium|Fairley|United Kingdom

>Spike|hCoV-19/India/MH-AFMC-5304/2020|2020-05-21|EPI\_ISL\_496519|Original|hCoV-19^^Maharashtra|Human|Armed Forces Medical College|National Centre For Cell Science|Paul|India

>Spike|hCoV-19/England/MILK-9942B7/2020|2020-08-26|EPI\_ISL\_551612|Original|hCoV-19^^England|Human|Lighthouse Lab in Milton Keynes|Wellcome Sanger Institute for the COVID-19 Genomics UK (COG-UK) consortium|Davies|United Kingdom

>Spike|hCoV-19/England/MILK-9E1831/2020|2020-09-20|EPI\_ISL\_577090|Original|hCoV-19^^England|Human|Oxford Viromics|COVID-19 Genomics UK (COG-UK) Consortium|Golubchik|United Kingdom

>Spike|hCoV-19/USA/WI-GMF-M3001/2020|2020-11-16|EPI\_ISL\_661173|Original|hCoV-19^^Wisconsin|Human|Gundersen Molecular Diagnostics Laboratory|Kabara Cancer Research Institute|Kenny|USA

>Spike|hCoV-19/Wales/PHWC-16E54C/2020|2020-09-30|EPI\_ISL\_585732|Original|hCoV-19^^Wales|Human|Wales Specialist Virology Centre Sequencing lab|COVID-19 Genomics UK (COG-UK) Consortium|Moore|United Kingdom

>Spike|hCoV-19/USA/CA-CZB-12313/2020|2020-10-07|EPI\_ISL\_648397|Original|hCoV-19^^California|Human|Santa Clara County Public Health Laboratory|Chan-Zuckerberg Biohub|Bhatt|USA

>Spike|hCoV-19/Wales/PHWC-15C1F2/2020|2020-04-13|EPI\_ISL\_472452|Original|hCoV-19^^Wales|Human|Wales Specialist Virology Centre Sequencing lab|COVID-19 Genomics UK (COG-UK) Consortium|Moore|United Kingdom

>Spike|hCoV-19/England/NORT-1B613D9/2020|2020-10-23|EPI\_ISL\_638559|Original|hCoV-19^^England|Human|Northumbria University / South Tees Hospitals NHS Foundation Trust / North Cumbria Integrated Care NHS Foundation Trust / North Tees and Hartlepool NHS Foundation Trust / Newcastle Hospitals NHS Foundation Trust|COVID-19 Genomics UK (COG-UK) Consortium|Bashton|United Kingdom

>Spike|hCoV-19/Scotland/QEUA-A20941/2020|2020-10-01|EPI\_ISL\_599015|Original|hCoV-19^^Scotland|Human|Lighthouse Lab in Glasgow|Wellcome Sanger Institute for the COVID-19 Genomics UK (COG-UK) consortium|Davies|United Kingdom

>Spike|hCoV-19/USA/UT-UPHL-2012370082/2020|2020-08-13|EPI\_ISL\_745878|Original|hCoV-19^^Utah|Human|Ginkgo Bioworks Clinical Laboratory|Utah Public Health Laboratory|Young|USA

>Spike|hCoV-19/USA/ID-UNM-IBL154/2020|2020-03-20|EPI\_ISL\_632878|Original|hCoV-19^^Idaho|Human|Idaho Bureau of Laboratories|Center for Global Health|Domman|USA

>Spike|hCoV-19/England/NORT-28118A/2020|2020-03-07|EPI\_ISL\_472157|Original|hCoV-19^^England|Human|Northumbria University / South Tees Hospitals NHS Foundation Trust / North Cumbria Integrated Care NHS Foundation Trust / North Tees and Hartlepool NHS Foundation Trust / Newcastle Hospitals NHS Foundation Trust|COVID-19 Genomics UK (COG-UK) Consortium|Bashton|United Kingdom

>Spike|hCoV-19/USA/CA-ALSR-2069/2020|2020-05-22|EPI\_ISL\_635333|Original|hCoV-19^^California|Human|San Diego County Public Health Laboratory|Andersen lab at Scripps Research|Gangavarapu|USA

>Spike|hCoV-19/Wales/PHWC-499008/2020|2020-12-04|EPI\_ISL\_727244|Original|hCoV-19^^Wales|Human|Originating lab|COVID-19 Genomics UK (COG-UK) Consortium|Moore|United Kingdom

>Spike|hCoV-19/USA/UT-UPHL-2012922693/2020|2020-08-09|EPI\_ISL\_745624|Original|hCoV-19^^Utah|Human|Ginkgo Bioworks Clinical Laboratory|Utah Public Health Laboratory|Young|USA

>Spike|hCoV-19/USA/WI-WSLH-200109/2020|2020-04-03|EPI\_ISL\_578340|Original|hCoV-19^^Wisconsin|Human|Wisconsin State Laboratory of Hygiene Communicable Disease Division|Wisconsin State Laboratory of Hygiene Communicable Disease Division|Florek|USA

>Spike|hCoV-19/France/PAC-MEPHI-1614/2020|2020-09-04|EPI\_ISL\_644412|Original|hCoV-19^^Provence-Alpes-Cote-d\u2019Azur|Human|MEPHI|MEPHI|Levasseur|France

>Spike|hCoV-19/England/GSTT-265E0E9/2020|2020-03-30|EPI\_ISL\_484152|Original|hCoV-19^^England|Human|Centre for Clinical Infection and Diagnostics Research and Genomics Innovation Unit|COVID-19 Genomics UK (COG-UK) Consortium|Awan|United Kingdom

>Spike|hCoV-19/Turkey/HSGM-1049/2020|2020-03-26|EPI\_ISL\_437309|Vero Pl|hCoV-19^^Ankara|Human|Ministry of Health Turkey|Ministry of Health Turkey|Bayrakdar|Turkey

>Spike|hCoV-19/Slovenia/12606/2020|2020-03-24|EPI\_ISL\_635260|Original|hCoV-19^^Slovenia|Human|Institute of Microbiology and Immunology|Institute of Microbiology and Immunology|Zakotnik|Slovenia

>Spike|hCoV-19/England/BIRM-5F9BC/2020|2020-05-14|EPI\_ISL\_473358|Original|hCoV-19^^England|Human|University of Birmingham|COVID-19 Genomics UK (COG-UK) Consortium|Loman|United Kingdom

>Spike|hCoV-19/Japan/IC-0120/2020|2020-08-00|EPI\_ISL\_591461|Original|hCoV-19^^Japan|Human|Pathogen Genomics Center|Pathogen Genomics Center|Sekizuka|Japan

>Spike|hCoV-19/Denmark/DCGC-20850/2020|2020-12-21|EPI\_ISL\_759406|Original|hCoV-19^^Midtjylland|Human|Department of Virus and Microbiological Special Diagnostics|Albertsen Lab|Michaelsen|Denmark

>Spike|hCoV-19/USA/IL-UW-1524/2020|2020-09-14|EPI\_ISL\_541550|Original|hCoV-19^^Illinois|Human|University of Wisconsin-Madison AIDS Vaccine Research Laboratories|University of Wisconsin-Madison AIDS Vaccine Research Laboratories|Baczenas|USA

>Spike|hCoV-19/Denmark/DCGC-11573/2020|2020-11-02|EPI\_ISL\_670468|Original|hCoV-19^^Sjaelland|Human|Department of Virus and Microbiological Special Diagnostics|Albertsen Lab|Michaelsen|Denmark

>Spike|hCoV-19/England/QEUEH-B2EC67/2020|2020-11-04|EPI\_ISL\_659983|Original|hCoV-19^^England|Human|Lighthouse Lab in Glasgow|Wellcome Sanger Institute for the COVID-19 Genomics UK (COG-UK) Consortium|Davies|United Kingdom

>Spike|hCoV-19/Northern Ireland/NIRE-232E27/2020|2020-09-24|EPI\_ISL\_680226|Original|hCoV-19^^Northern Ireland|Human|Regional Virus Laboratory|COVID-19 Genomics UK (COG-UK) Consortium|Fairley|United Kingdom

>Spike|hCoV-19/Serbia/Vrsac-040471604/2020|2020-04-15|EPI\_ISL\_676595|Original|hCoV-19^^Vrsac|Human|Scientific Veterinary Institute Novi Sad|Veterinary Specialized Institute \Kraljevo\|Vidanovic|Serbia

>Spike|hCoV-19/Sweden/20-53835/2020|2020-12-17|EPI\_ISL\_789032|Original|hCoV-19^^Vasterbotten|Human|Klinisk mikrobiologi|The Public Health Agency of Sweden|Svartstr\u00f6m|Sweden

>Spike|hCoV-19/USA/TX-HMH-6796/2020|2020-06-25|EPI\_ISL\_546249|Original|hCoV-19^^Texas|Human|Houston Methodist Hospital|Houston Methodist Hospital|Long|USA

>Spike|hCoV-19/USA/LA-EVTL145/2020|2020-03-25|EPI\_ISL\_455988|Original|hCoV-19^^Louisiana|Human|LSUHS Emerging Viral Threat Laboratory|Microbial Genome Sequencing Center|Kamil|USA

>Spike|hCoV-19/England/ALDP-A6C5DC/2020|2020-10-15|EPI\_ISL\_608239|Original|hCoV-19^^England|Human|Lighthouse Lab in Alderley Park|Wellcome Sanger Institute for the COVID-19 Genomics UK (COG-UK) consortium|Davies|United Kingdom

>Spike|hCoV-19/USA/CO-CDPHE-2009170035/2020|2020-09-16|EPI\_ISL\_710280|Original|hCoV-19^^Colorado|Human|Colorado Department of Public Health and Environment|Colorado Department of Public Health and Environment|Bankers|USA

>Spike|hCoV-19/England/NOTT-110242/2020|2020-04-11|EPI\_ISL\_441487|Original|hCoV-19^^England|Human|Queens Medical Centre|COVID-19 Genomics UK (COG-UK) Consortium|Loose|United Kingdom

>Spike|hCoV-19/England/CAMC-B3615E/2020|2020-11-05|EPI\_ISL\_645413|Original|hCoV-19^^England|Human|Lighthouse Lab in Cambridge|Wellcome Sanger Institute for the COVID-19 Genomics UK (COG-UK) Consortium|Davies|United Kingdom

>Spike|hCoV-19/England/CAMB-7EC72/2020|2020-04-07|EPI\_ISL\_442938|Original|hCoV-19^^England|Human|Department of Pathology|Wellcome Sanger Institute for the COVID-19 Genomics UK (COG-UK) consortium|Amato|United Kingdom

>Spike|hCoV-19/England/ALDP-B62BD3/2020|2020-11-08|EPI\_ISL\_655307|Original|hCoV-19^^England|Human|Lighthouse Lab in Alderley Park|Wellcome Sanger Institute for the COVID-19 Genomics UK (COG-UK) Consortium|Davies|United Kingdom

>Spike|hCoV-19/Romania/USAFSAM-S558/2020|2020-11-28|EPI\_ISL\_738338|Original|hCoV-19^^Romania|Human|Landstuhl Regional Medical Center|United States Air Force School of Aerospace Medicine|Fries|Romania

>Spike|hCoV-19/USA/TX-HMH-MCoV-18157/2020|2020-11-12|EPI\_ISL\_784505|Original|hCoV-19^^Texas|Human|Houston Methodist Hospital|Houston Methodist Hospital|Long|USA

>Spike|hCoV-19/USA/MA-QDX-41/2020|2020-03-15|EPI\_ISL\_467858|Original|hCoV-19^^Massachusetts|Human|Quest Diagnostics|Quest Diagnostics|Kagan|USA

>Spike|hCoV-19/mink/Netherlands/NB-EMC-2-7/2020|2020-04-27|EPI\_ISL\_523089|Original|hCoV-19^^Noord Brabant|Neovison vison|Dutch COVID-19 response team|Erasmus Medical Center|Oude Munnink|Netherlands

>Spike|hCoV-19/USA/MD-MDH-0322/2020|2020-10-19|EPI\_ISL\_633097|Original|hCoV-19^^Maryland|Human|MD PHL|MD PHL|Keller|USA

>Spike|hCoV-19/DRC/4633/2020|2020-04-30|EPI\_ISL\_513607|Original|hCoV-19^^Kinshasa|Human|Viral Respiratory Lab|Pathogen Sequencing Lab|Lokilo|Democratic Republic of the Congo

>Spike|hCoV-19/Netherlands/NB-EMC-438/2020|2020-11-16|EPI\_ISL\_722350|Original|hCoV-19^^Noord Brabant|Human|Dutch COVID-19 response team|Erasmus Medical Center|Oude Munnink|Netherlands

>Spike|hCoV-19/England/MILK-AB7F4D/2020|2020-10-21|EPI\_ISL\_623463|Original|hCoV-19^^England|Human|Lighthouse Lab in Milton Keynes|Wellcome Sanger Institute for the COVID-19 Genomics UK (COG-UK) consortium|Davies|United Kingdom

>Spike|hCoV-19/England/ALDP-AA28C2/2020|2020-10-21|EPI\_ISL\_630722|Original|hCoV-19^^England|Human|Lighthouse Lab in Alderley Park|Wellcome Sanger Institute for the COVID-19 Genomics UK (COG-UK) consortium|Davies|United Kingdom

>Spike|hCoV-19/Northern Ireland/NIRE-1042AB/2020|2020-04-13|EPI\_ISL\_482045|Original|hCoV-19^^Northern Ireland|Human|Regional Virus Laboratory|Wellcome Sanger Institute for the COVID-19 Genomics UK (COG-UK) consortium|Davies|United Kingdom

>Spike|hCoV-19/Portugal/PT0373/2020|2020-03-19|EPI\_ISL\_454089|Original|hCoV-19^^Portugal|Human|unknown|Instituto Nacional de Saude (INSA)|Borges|Portugal

>Spike|hCoV-19/USA/NY-Wadsworth-290732-01/2020|2020-12-22|EPI\_ISL\_767558|Original|hCoV-19^^New York|Human|URMC LABS|Wadsworth Center|Lasek-Nesselquist|USA

>Spike|hCoV-19/Denmark/DCGC-13644/2020|2020-11-30|EPI\_ISL\_712931|Original|hCoV-19^^Hovedstaden|Human|Department of Virus and Microbiological Special Diagnostics|Albertsen Lab|Michaelsen|Denmark

>Spike|hCoV-19/Uruguay/CEL-M116/2020|2020-07-17|EPI\_ISL\_750177|Original|hCoV-19^^Rio Branco|Human|Sanatorio Americano|Institut Pasteur de Montevideo|Spangenberg|Uruguay

>Spike|hCoV-19/USA/UT-UPHL-2008795/2020|2020-05-22|EPI\_ISL\_524822|Original|hCoV-19^^Utah|Human|Utah Public Health Laboratory|Utah Public Health Laboratory|Young|USA

>Spike|hCoV-19/England/203180881/2020|2020-07-29|EPI\_ISL\_566064|Original|hCoV-19^^England|Human|Respiratory Virus Unit|Respiratory Virus Unit|Platt|United Kingdom

>Spike|hCoV-19/USA/UT-UPHL-2009732/2020|2020-07-27|EPI\_ISL\_605404|Original|hCoV-19^^Utah|Human|Utah Public Health Laboratory|Utah Public Health Laboratory|Young|USA

>Spike|hCoV-19/England/CAMB-76AE9/2020|2020-03-30|EPI\_ISL\_438465|Original|hCoV-19^^England|Human|Department of Pathology|Wellcome Sanger Institute for the COVID-19 Genomics UK (COG-UK) consortium|Amato|United Kingdom

>Spike|hCoV-19/Scotland/EDB7185/2020|2020-08-11|EPI\_ISL\_526521|Original|hCoV-19^^Scotland|Human|Virology Department|COVID-19 Genomics UK (COG-UK) Consortium|Williams|United Kingdom

>Spike|hCoV-19/India/WB-IK55/2020|2020-05-06|EPI\_ISL\_508381|Original|hCoV-19^^West Bengal|Human|Institute of Post Graduate Medical Education & Research|National Institute of Biomedical Genomics|Maitra|India

>Spike|hCoV-19/England/NOTT-10EB88/2020|2020-03-12|EPI\_ISL\_425646|Original|hCoV-19^^England|Human|Queens Medical Centre|COVID-19 Genomics UK (COG-UK) Consortium|Loose|United Kingdom

>Spike|hCoV-19/Australia/VIC13355/2020|2020-07-27|EPI\_ISL\_563691|Original|hCoV-19^^Victoria|Human|Microbiological Diagnostic Unit - Public Health Laboratory (MDU-PHL)|MDU-PHL|Schultz|Australia

>Spike|hCoV-19/South Africa/KRISP-K001363/2020|2020-07-17|EPI\_ISL\_515848|Original|hCoV-19^^KwaZulu-Natal|Human|Medical Disagnostics Services (MDS)|KRISP|de Oliveira|South Africa

>Spike|hCoV-19/England/QEUH-996349/2020|2020-08-27|EPI\_ISL\_549525|Original|hCoV-19^^England|Human|Oxford Viromics|COVID-19 Genomics UK (COG-UK) Consortium|Golubchik|United Kingdom

>Spike|hCoV-19/Singapore/1309/2020|2020-05-17|EPI\_ISL\_648796|Original|hCoV-19^^Singapore|Human|Department of Laboratory Medicine|Department of Laboratory Medicine|Chen|Singapore

>Spike|hCoV-19/Scotland/QEUH-A0C301/2020|2020-10-03|EPI\_ISL\_599414|Original|hCoV-19^^Scotland|Human|Lighthouse Lab in Glasgow|Wellcome Sanger Institute for the COVID-19 Genomics UK (COG-UK) consortium|Davies|United Kingdom



>Spike|hCoV-19/USA/TX-HMH-2737/2020|2020-06-06|EPI\_ISL\_545516|Original|hCoV-19^^Texas|Human|Houston Methodist Hospital|Houston Methodist Hospital|Long|USA

>Spike|hCoV-19/England/LOND-D6531/2020|2020-04-22|EPI\_ISL\_487550|Original|hCoV-19^^England|Human|University College London|Wellcome Sanger Institute for the COVID-19 Genomics UK (COG-UK) consortium|Davies|United Kingdom

>Spike|hCoV-19/USA/NY-Wadsworth-251033-01/2020|2020-10-21|EPI\_ISL\_754831|Original|hCoV-19^^New York|Human|Wadsworth Center|Wadsworth Center|Lasek-Nesselquist|USA

>Spike|hCoV-19/England/ALDP-B82FFF/2020|2020-11-14|EPI\_ISL\_675492|Original|hCoV-19^^England|Human|Lighthouse Lab in Alderley Park|Wellcome Sanger Institute for the COVID-19 Genomics UK (COG-UK) Consortium|Davies|United Kingdom

>Spike|hCoV-19/England/ALDP-9C5F2F/2020|2020-09-10|EPI\_ISL\_567560|Original|hCoV-19^^England|Human|Lighthouse Lab in Alderley Park|Wellcome Sanger Institute for the COVID-19 Genomics UK (COG-UK) consortium|Davies|United Kingdom

>Spike|hCoV-19/USA/LA-GBCL-26674735/2020|2020-04-04|EPI\_ISL\_485259|Original|hCoV-19^^Louisiana|Human|River Road Testing Lab|Ginkgo Bioworks Clinical Laboratory|Smith|USA

>Spike|hCoV-19/England/QEUA-A3238A/2020|2020-10-05|EPI\_ISL\_628349|Original|hCoV-19^^England|Human|Oxford Viromics|COVID-19 Genomics UK (COG-UK) Consortium|Golubchik|United Kingdom

>Spike|hCoV-19/USA/CA-CZB-12825/2020|2020-10-18|EPI\_ISL\_648476|Original|hCoV-19^^California|Human|Santa Clara County Public Health Laboratory|Chan-Zuckerberg Biohub|Bhatt|USA

>Spike|hCoV-19/Japan/PG-0875/2020|2020-04-00|EPI\_ISL\_684485|Original|hCoV-19^^Japan|Human|Pathogen Genomics Center|Pathogen Genomics Center|Sekizuka|Japan

>Spike|hCoV-19/France/IDF-10031BS/2020|2020-03-00|EPI\_ISL\_447670|Original|hCoV-19^^France|Human|H\u00f4pital Henri-Mondor Ap-Hp|H\u00f4pital Henri-Mondor Ap-Hp|Rodriguez|France

>Spike|hCoV-19/Scotland/MILK-9C30D3/2020|2020-09-07|EPI\_ISL\_575992|Original|hCoV-19^^Scotland|Human|Lighthouse Lab in Milton Keynes|Wellcome Sanger Institute for the COVID-19 Genomics UK (COG-UK) consortium|Davies|United Kingdom

>Spike|hCoV-19/England/ALDP-A9583B/2020|2020-10-20|EPI\_ISL\_624823|Original|hCoV-19^^England|Human|Lighthouse Lab in Alderley Park|Wellcome Sanger Institute for the COVID-19 Genomics UK (COG-UK) consortium|Davies|United Kingdom

>Spike|hCoV-19/Japan/PG-8387/2020|2020-07-00|EPI\_ISL\_687486|Original|hCoV-19^^Japan|Human|Pathogen Genomics Center|Pathogen Genomics Center|Sekizuka|Japan

>Spike|hCoV-19/Germany/NW-HHU-242/2020|2020-09-15|EPI\_ISL\_631375|Original|hCoV-19^^North Rhine-Westphalia|Human|ZOTZ KLIMAS MVZ D\u00fcsseldorf-Centrum GbR \u00dcBAG f\u00fcr Labormedizin|Center of Medical Microbiology|Wienemann|Germany

>Spike|hCoV-19/England/CAMC-B0C458/2020|2020-10-30|EPI\_ISL\_643457|Original|hCoV-19^^England|Human|Lighthouse Lab in Cambridge|Wellcome Sanger Institute for the COVID-19 Genomics UK (COG-UK) Consortium|Davies|United Kingdom

>Spike|hCoV-19/United Arab Emirates/skmc-001/2020|2020-02-27|EPI\_ISL\_582624|Original|hCoV-19^^United Arab Emirates|Human|Sheikh Khalifa Medical City|Molecular/Surveillance lab\nSheikh Khalifa Medical City|Amirtharaj|United Arab Emirates

>Spike|hCoV-19/Scotland/EDB8168/2020|2020-10-08|EPI\_ISL\_585485|Original|hCoV-19^^Scotland|Human|Virology Department|COVID-19 Genomics UK (COG-UK) Consortium|McHugh|United Kingdom

>Spike|hCoV-19/Scotland/CVR175/2020|2020-03-17|EPI\_ISL\_425715|Original|hCoV-19^^Scotland|Human|West of Scotland Specialist Virology Centre|COVID-19 Genomics UK (COG-UK) Consortium|Robertson|United Kingdom

>Spike|hCoV-19/USA/TX-DSHS-1209/2020|2020-03-18|EPI\_ISL\_631670|Original|hCoV-19^^Texas|Human|Texas Department of State Health Services|Texas Department of State Health Services|Rahman|USA

>Spike|hCoV-19/England/ALDP-B75E01/2020|2020-11-12|EPI\_ISL\_723707|Original|hCoV-19^^England|Human|Oxford Viromics|COVID-19 Genomics UK (COG-UK) Consortium|Golubchik|United Kingdom

>Spike|hCoV-19/England/NORW-E998A/2020|2020-04-23|EPI\_ISL\_448345|Original|hCoV-19^^England|Human|Quadram Institute Bioscience|COVID-19 Genomics UK (COG-UK) Consortium|Alikhan|United Kingdom

>Spike|hCoV-19/England/MILK-995104/2020|2020-08-24|EPI\_ISL\_552210|Original|hCoV-19^^England|Human|Lighthouse Lab in Milton Keynes|Wellcome Sanger Institute for the COVID-19 Genomics UK (COG-UK) consortium|Davies|United Kingdom

>Spike|hCoV-19/England/ALDP-C8B687/2020|2020-12-16|EPI\_ISL\_756461|Original|hCoV-19^^England|Human|Lighthouse Lab in Alderley Park|Wellcome Sanger Institute for the COVID-19 Genomics UK (COG-UK) Consortium|Davies|United Kingdom

>Spike|hCoV-19/England/MILK-B88490/2020|2020-11-13|EPI\_ISL\_674398|Original|hCoV-19^^England|Human|Lighthouse Lab in Milton Keynes|Wellcome Sanger Institute for the COVID-19 Genomics UK (COG-UK) Consortium|Davies|United Kingdom

>Spike|hCoV-19/USA/OR-OHSU-1103/2020|2020-06-26|EPI\_ISL\_525970|Original|hCoV-19^^Oregon|Human|OHSU Lab Services Molecular Microbiology Lab|Oregon SARS-CoV-2 Genome Sequencing Center|O'Roak|USA

>Spike|hCoV-19/USA/UT-UPHL-2012289921/2020|2020-07-27|EPI\_ISL\_745720|Original|hCoV-19^^Utah|Human|Ginkgo Bioworks Clinical Laboratory|Utah Public Health Laboratory|Young|USA

>Spike|hCoV-19/USA/WA-UW-9580/2020|2020-05-20|EPI\_ISL\_570266|Original|hCoV-19^^Washington|Human|UW Virology Lab|UW Virology Lab|Roychoudhury|USA

>Spike|hCoV-19/Canada/QC-LSPQ-L00228950/2020|2020-03-20|EPI\_ISL\_535881|Original|hCoV-19^^Quebec|Human|H\u00f4pital Pierre-Le Gardeur|Laboratoire de sant\u00e9 publique du Qu\u00e9bec|Moreira|Canada

>Spike|hCoV-19/India/MH-ACTREC-092/2020|2020-05-22|EPI\_ISL\_699748|Original|hCoV-19^^Maharashtra|Human|Hematopathology Laboratory|Hematopathology Laboratory|Patkar|India

>Spike|hCoV-19/England/CAMB-1B097C/2020|2020-05-05|EPI\_ISL\_459208|Original|hCoV-19^^England|Human|Department of Pathology|Wellcome Sanger Institute for the COVID-19 Genomics UK (COG-UK) consortium|Davies|United Kingdom

>Spike|hCoV-19/England/CAMB-7285C/2020|2020-03-22|EPI\_ISL\_439537|Original|hCoV-19^^England|Human|Department of Pathology|Wellcome Sanger Institute for the COVID-19 Genomics UK (COG-UK) consortium|Amato|United Kingdom

>Spike|hCoV-19/Wales/MILK-9F2A46/2020|2020-09-25|EPI\_ISL\_589253|Original|hCoV-19^^Wales|Human|Lighthouse Lab in Milton Keynes|Wellcome Sanger Institute for the COVID-19 Genomics UK (COG-UK) consortium|Davies|United Kingdom

>Spike|hCoV-19/Canada/ON-PHL-20-01203/2020|2020-06-00|EPI\_ISL\_548825|Original|hCoV-19^^Ontario|Human|Public Health Ontario Laboratory|Public Health Ontario Laboratory|Guthrie|Canada

>Spike|hCoV-19/Sweden/20-06883/2020|2020-04-03|EPI\_ISL\_434658|Original|hCoV-19^^Skane|Human|Lundens VC|The Public Health Agency of Sweden|Svartstr\u00f6m|Sweden

>Spike|hCoV-19/USA/TX-HMH-MCoV-18975/2020|2020-11-26|EPI\_ISL\_785258|Original|hCoV-19^^Texas|Human|Houston Methodist Hospital|Houston Methodist Hospital|Long|USA

>Spike|hCoV-19/USA/LA-EVTL136/2020|2020-05-07|EPI\_ISL\_451297|Original|hCoV-19^^Louisiana|Human|LSUHS Emerging Viral Threat Laboratory|Microbial Genome Sequencing Center|Kamil|USA

>Spike|hCoV-19/England/QEUH-C30B55/2020|2020-12-11|EPI\_ISL\_731447|Original|hCoV-19^^England|Human|Lighthouse Lab in Glasgow|Wellcome Sanger Institute for the COVID-19 Genomics UK (COG-UK) Consortium|Davies|United Kingdom

>Spike|hCoV-19/Denmark/DCGC-5455/2020|2020-09-21|EPI\_ISL\_620780|Original|hCoV-19^^Midtjylland|Human|Department of Virus and Microbiological Special Diagnostics|Albertsen lab|Michaelsen|Denmark

>Spike|hCoV-19/USA/IL-UW-2085/2020|2020-09-21|EPI\_ISL\_677490|Original|hCoV-19^^Illinois|Human|University of Wisconsin-Madison AIDS Vaccine Research Laboratories|University of Wisconsin-Madison AIDS Vaccine Research Laboratories|Baczenas|USA

>Spike|hCoV-19/Netherlands/ZH-EMC-562/2020|2020-09-20|EPI\_ISL\_577990|Original|hCoV-19^^Zuid Holland|Human|Dutch COVID-19 response team|Erasmus Medical Center|Oude Munnink|Netherlands

>Spike|hCoV-19/England/QEUA-AF50D7/2020|2020-10-30|EPI\_ISL\_663075|Original|hCoV-19^^England|Human|Lighthouse Lab in Glasgow|Wellcome Sanger Institute for the COVID-19 Genomics UK (COG-UK) Consortium|Davies|United Kingdom

>Spike|hCoV-19/Russia/CE-RII-MH2728S/2020|2020-09-11|EPI\_ISL\_602416|Original|hCoV-19^^Chechen|Human|WHO National Influenza Centre Russian Federation|WHO National Influenza Centre Russian Federation|Komissarov|Russia

>Spike|hCoV-19/Gambia/GC19-3776/2020|2020-07-27|EPI\_ISL\_561076|Original|hCoV-19^^Kombo|Human|MRCG at LSHTM Genomics lab|MRCG at LSHTM Genomics lab|Sesay|Gambia

>Spike|hCoV-19/Croatia/Zagreb-17/2020|2020-09-08|EPI\_ISL\_710561|Original|hCoV-19^^Zagreb|Human|University Hospital Dubrava|Ru\u0111er Bo\u0161kovic Institute; Forensic Science Centre Ivan Vu\u010deti\u0107; University of Zagreb Faculty of Science|Karlic|Croatia

>Spike|hCoV-19/England/ALDP-A69539/2020|2020-10-12|EPI\_ISL\_609061|Original|hCoV-19^^England|Human|Lighthouse Lab in Alderley Park|Wellcome Sanger Institute for the COVID-19 Genomics UK (COG-UK) consortium|Davies|United Kingdom

>Spike|hCoV-19/Japan/PG-2333/2020|2020-05-00|EPI\_ISL\_685938|Original|hCoV-19^^Japan|Human|Pathogen Genomics Center|Pathogen Genomics Center|Sekizuka|Japan

>Spike|hCoV-19/England/QEUA-BCB4EC/2020|2020-11-27|EPI\_ISL\_704264|Original|hCoV-19^^England|Human|Lighthouse Lab in Glasgow|Wellcome Sanger Institute for the COVID-19 Genomics UK (COG-UK) Consortium|Davies|United Kingdom

>Spike|hCoV-19/USA/WA-S1125/2020|2020-05-04|EPI\_ISL\_463615|Original|hCoV-19^^Washington|Human|Washington State Department of Health|Seattle Flu Study|Bedford|USA

>Spike|hCoV-19/Wales/PHWC-2F29C/2020|2020-04-07|EPI\_ISL\_446227|Original|hCoV-19^^Wales|Human|Wales Specialist Virology Centre|Public Health Wales Microbiology Cardiff|Moore|United Kingdom

>Spike|hCoV-19/England/ALDP-5B224E/2020|2020-06-17|EPI\_ISL\_558666|Original|hCoV-19^^England|Human|Lighthouse Lab in Alderley Park|Wellcome Sanger Institute for the COVID-19 Genomics UK (COG-UK) consortium|Davies|United Kingdom

>Spike|hCoV-19/France/OCC-146/2020|2020-11-13|EPI\_ISL\_751466|Original|hCoV-19^^Occitanie|Human|CHU Purpan - Laboratoire de Virologie - Institut F\u00e9ratif de Biologie|CHU Purpan - Laboratoire de Virologie - Institut F\u00e9ratif de Biologie|Latour|France

>Spike|hCoV-19/Wales/PHWC-48DE0D/2020|2020-11-09|EPI\_ISL\_680761|Original|hCoV-19^^Wales|Human|Wales Specialist Virology Centre Sequencing lab|COVID-19 Genomics UK (COG-UK) Consortium|Moore|United Kingdom

>Spike|hCoV-19/Turkey/IST-GLAB-319/2020|2020-06-19|EPI\_ISL\_735348|Original|hCoV-19^^Istanbul|Human|Genomic Laboratory (GLAB) (Conjoint lab of Health Directorate of Istanbul and Istanbul Technical University)|Genomic Laboratory (GLAB)|Karacan|Turkey

>Spike|hCoV-19/Uganda/UG120/2020|2020-09-01|EPI\_ISL\_738027|Original|hCoV-19^^Uganda|Human|Uganda Central Public Health Lab and Uganda Virus Research Institute|MRC/UVRI & LSHTM Uganda Research Unit|Cotten|Uganda

>Spike|hCoV-19/England/BRIS-12D804/2020|2020-05-06|EPI\_ISL\_481857|Original|hCoV-19^^England|Human|PHE South West Regional Laboratory|Wellcome Sanger Institute for the COVID-19 Genomics UK (COG-UK) consortium|Davies|United Kingdom

>Spike|hCoV-19/Wales/PHWC-48F7B5/2020|2020-11-10|EPI\_ISL\_681138|Original|hCoV-19^^Wales|Human|Wales Specialist Virology Centre Sequencing lab|COVID-19 Genomics UK (COG-UK) Consortium|Moore|United Kingdom

>Spike|hCoV-19/USA/WA-S2749/2020|2020-07-21|EPI\_ISL\_525739|Original|hCoV-19^^Washington|Human|Seattle Flu Study|Seattle Flu Study|Lee|USA

>Spike|hCoV-19/Brazil/SP-511/2020|2020-04-17|EPI\_ISL\_524465|Original|hCoV-19^^S\u00e3o Paulo|Human|PS Municipal Dr. Caetano Virg\u00e9lio Neto|Instituto Adolfo Lutz|Sacchi|Brazil

>Spike|hCoV-19/Australia/WA366/2020|2020-10-11|EPI\_ISL\_605843|Original|hCoV-19^^Western Australia|Human|PathWest Laboratory Medicine WA|PathWest Laboratory Medicine WA Microbial Surveillance Unit|Sikazwe|Australia

>Spike|hCoV-19/Scotland/QEUA-964344/2020|2020-08-11|EPI\_ISL\_534371|Original|hCoV-19^^Scotland|Human|NHSGGC West of Scotland Specialist Virology Centre / MRC-University of Glasgow Centre for Virus Research|Wellcome Sanger Institute for the COVID-19 Genomics UK (COG-UK) consortium|Davies|United Kingdom

>Spike|hCoV-19/Denmark/DCGC-9560/2020|2020-11-09|EPI\_ISL\_669040|Original|hCoV-19^^Midtjylland|Human|Department of Virus and Microbiological Special Diagnostics|Albertsen Lab|Michaelsen|Denmark

>Spike|hCoV-19/England/QEUA-990682/2020|2020-08-26|EPI\_ISL\_530360|Original|hCoV-19^^England|Human|Lighthouse Lab in Glasgow|Wellcome Sanger Institute for the COVID-19 Genomics UK (COG-UK) consortium|Davies|United Kingdom

>Spike|hCoV-19/Japan/PG-5467/2020|2020-08-00|EPI\_ISL\_690570|Original|hCoV-19^^Japan|Human|Pathogen Genomics Center|Pathogen Genomics Center|Sekizuka|Japan

>Spike|hCoV-19/Denmark/DCGC-13750/2020|2020-11-30|EPI\_ISL\_712999|Original|hCoV-19^^Nordjylland|Human|Department of Virus and Microbiological Special Diagnostics|Albertsen Lab|Michaelsen|Denmark

>Spike|hCoV-19/England/QEUA-B68223/2020|2020-11-11|EPI\_ISL\_661567|Original|hCoV-19^^England|Human|Lighthouse Lab in Glasgow|Wellcome Sanger Institute for the COVID-19 Genomics UK (COG-UK) Consortium|Davies|United Kingdom

>Spike|hCoV-19/England/MILK-A05933/2020|2020-09-29|EPI\_ISL\_600104|Original|hCoV-19^^England|Human|Lighthouse Lab in Milton Keynes|Wellcome Sanger Institute for the COVID-19 Genomics UK (COG-UK) consortium|Davies|United Kingdom

>Spike|hCoV-19/Denmark/DCGC-8231/2020|2020-10-26|EPI\_ISL\_617254|Original|hCoV-19^^Nordjylland|Human|Department of Virus and Microbiological Special Diagnostics|Albertsen lab|Michaelsen|Denmark

>Spike|hCoV-19/Wales/PHWC-16519C/2020|2020-05-17|EPI\_ISL\_479431|Original|hCoV-19^^Wales|Human|Wales Specialist Virology Centre Sequencing lab|COVID-19 Genomics UK (COG-UK) Consortium|Moore|United Kingdom

>Spike|hCoV-19/USA/WA-UW338/2020|2020-03-16|EPI\_ISL\_418905|Original|hCoV-19^^Washington|Human|UW Virology Lab|UW Virology Lab|Roychoudhury|USA

>Spike|hCoV-19/England/204781134/2020|2020-11-19|EPI\_ISL\_678755|Original|hCoV-19^^England|Human|Respiratory Virus Unit|COVID-19 Genomics UK (COG-UK) Consortium|Platt|United Kingdom

>Spike|hCoV-19/England/QEUA-BC3EE6/2020|2020-11-24|EPI\_ISL\_703263|Original|hCoV-19^^England|Human|Lighthouse Lab in Glasgow|Wellcome Sanger Institute for the COVID-19 Genomics UK (COG-UK) Consortium|Davies|United Kingdom

>Spike|hCoV-19/Wales/PHWC-49F4BB/2020|2020-12-07|EPI\_ISL\_743223|Original|hCoV-19^^Wales|Human|Wales Specialist Virology Centre Sequencing lab|COVID-19 Genomics UK (COG-UK) Consortium|Moore|United Kingdom

>Spike|hCoV-19/England/ALDP-A2E749/2020|2020-10-05|EPI\_ISL\_587277|Original|hCoV-19^^England|Human|Lighthouse Lab in Alderley Park|Wellcome Sanger Institute for the COVID-19 Genomics UK (COG-UK) consortium|Davies|United Kingdom

>Spike|hCoV-19/England/NORW-EFB33/2020|2020-00-00|EPI\_ISL\_549368|Original|hCoV-19^^England|Human|Quadram Institute Bioscience|COVID-19 Genomics UK (COG-UK) Consortium|Alikhan|United Kingdom

>Spike|hCoV-19/England/NORW-EECAA/2020|2020-00-00|EPI\_ISL\_529457|Original|hCoV-19^^England|Human|Quadram Institute Bioscience|COVID-19 Genomics UK (COG-UK) Consortium|Alikhan|United Kingdom

>Spike|hCoV-19/Denmark/DCGC-10347/2020|2020-11-02|EPI\_ISL\_669917|Original|hCoV-19^^Syddanmark|Human|Department of Virus and Microbiological Special Diagnostics|Albertsen Lab|Michaelsen|Denmark

>Spike|hCoV-19/England/QEUA-AD2EA9/2020|2020-10-26|EPI\_ISL\_629957|Original|hCoV-19^^England|Human|Lighthouse Lab in Glasgow|Wellcome Sanger Institute for the COVID-19 Genomics UK (COG-UK) consortium|Davies|United Kingdom

>Spike|hCoV-19/USA/NY-NYCPHL-000400/2020|2020-03-23|EPI\_ISL\_631884|Original|hCoV-19^^New York|Human|Brookdale University Hospital Medical Center|New York City Public Health Laboratory|Wang|USA

>Spike|hCoV-19/England/MILK-A46A15/2020|2020-10-06|EPI\_ISL\_598400|Original|hCoV-19^^England|Human|Lighthouse Lab in Milton Keynes|Wellcome Sanger Institute for the COVID-19 Genomics UK (COG-UK) consortium|Davies|United Kingdom

>Spike|hCoV-19/USA/CA-ALSR-0216/2020|2020-04-15|EPI\_ISL\_529152|Original|hCoV-19^^California|Human|Department of Immunology|Andersen lab at Scripps Research|Gangavarapu|USA

>Spike|hCoV-19/Luxembourg/LNS7566407/2020|2020-11-06|EPI\_ISL\_744587|Original|hCoV-19^^Luxembourg|Human|Laboratoire national de sant\u00e9|Laboratoire national de sant\u00e9|Wienecke-Baldacchino|Luxembourg

>Spike|hCoV-19/England/QEUH-AD5019/2020|2020-10-26|EPI\_ISL\_633968|Original|hCoV-19^^England|Human|Lighthouse Lab in Glasgow|Wellcome Sanger Institute for the COVID-19 Genomics UK (COG-UK) consortium|Davies|United Kingdom

>Spike|hCoV-19/USA/AZ-TG480342/2020|2020-07-08|EPI\_ISL\_695065|Original|hCoV-19^^Arizona|Human|TGen North|TGen North|French|USA

>Spike|hCoV-19/Spain/MD-IBV-004983/2020|2020-06-01|EPI\_ISL\_481100|Original|hCoV-19^^Madrid|Human|Hospital General Universitario Gregorio Mara\u00f1\u00f3n|SeqCOVID-SPAIN consortium/IBV (CSIC) |Comas|Spain

>Spike|hCoV-19/England/QEUH-96E632/2020|2020-08-17|EPI\_ISL\_530538|Original|hCoV-19^^England|Human|Lighthouse Lab in Glasgow|Wellcome Sanger Institute for the COVID-19 Genomics UK (COG-UK) consortium|Davies|United Kingdom

>Spike|hCoV-19/USA/UT-UPHL-2008954/2020|2020-05-11|EPI\_ISL\_525281|Original|hCoV-19^^Utah|Human|Utah Public Health Laboratory|Utah Public Health Laboratory|Young|USA

>Spike|hCoV-19/England/BRIS-12BA6A/2020|2020-05-18|EPI\_ISL\_469398|Original|hCoV-19^^England|Human|PHE South West Regional Laboratory|Wellcome Sanger Institute for the COVID-19 Genomics UK (COG-UK) consortium|Davies|United Kingdom

>Spike|hCoV-19/France/ARA-SC168/2020|2020-04-01|EPI\_ISL\_634829|Original|hCoV-19^^Auvergne-Rhone-Alpes|Human|Laboratoire de virologie|CNR Virus des Infections Respiratoires - France SUD|Bal|France

>Spike|hCoV-19/USA/MI-UM-2006S000907/2020|2020-03-28|EPI\_ISL\_484748|Original|hCoV-19^^Michigan|Human|University of Michigan Clinical Microbiology Laboratory|Lauring Lab|Valesano|USA

>Spike|hCoV-19/Scotland/GCVR-16FE31/2020|2020-03-23|EPI\_ISL\_459516|Original|hCoV-19^^Scotland|Human|NHSGGC West of Scotland Specialist Virology Centre / MRC-University of Glasgow Centre for Virus Research|Wellcome Sanger Institute for the COVID-19 Genomics UK (COG-UK) consortium|Davies|United Kingdom

>Spike|hCoV-19/USA/WI-GMF-27773/2020|2020-10-26|EPI\_ISL\_660989|Original|hCoV-19^^Wisconsin|Human|Gundersen Molecular Diagnostics Laboratory|Kabara Cancer Research Institute|Kenny|USA

>Spike|hCoV-19/England/MILK-957CA3/2020|2020-06-13|EPI\_ISL\_554713|Original|hCoV-19^^England|Human|Lighthouse Lab in Milton Keynes|Wellcome Sanger Institute for the COVID-19 Genomics UK (COG-UK) consortium|Davies|United Kingdom

>Spike|hCoV-19/Japan/PG-4344/2020|2020-07-00|EPI\_ISL\_692572|Original|hCoV-19^^Japan|Human|Pathogen Genomics Center|Pathogen Genomics Center|Sekizuka|Japan

>Spike|hCoV-19/England/LIVE-DC0C29/2020|2020-11-03|EPI\_ISL\_702569|Original|hCoV-19^^England|Human|Liverpool Clinical Laboratories|COVID-19 Genomics UK (COG-UK) Consortium|Haldenby|United Kingdom

>Spike|hCoV-19/Canada/ON-S1963/2020|2020-11-24|EPI\_ISL\_755679|Original|hCoV-19^^Ontario|Human|Toronto Invasive Bacterial Diseases Network|McMaster University|McArthur|Canada

>Spike|hCoV-19/England/NORW-F4E9C/2020|2020-10-31|EPI\_ISL\_665877|Original|hCoV-19^^England|Human|Quadram Institute Bioscience|COVID-19 Genomics UK (COG-UK) Consortium|Alikhan|United Kingdom

>Spike|hCoV-19/Norway/6605/2020|2020-12-07|EPI\_ISL\_775403|Original|hCoV-19^^Nordland|Human|Nordland Hospital - Bodo|Norwegian Institute of Public Health|Vollan|Norway

>Spike|hCoV-19/Spain/AR-IBV-2414/2020|2020-03-24|EPI\_ISL\_468772|Original|hCoV-19^^Aragon|Human|Servicio de Microbiolog\u00eda|SeqCOVID-SPAIN consortium/IBV (CSIC) |Comas|Spain

>Spike|hCoV-19/Netherlands/NB-EMC-450/2020|2020-11-30|EPI\_ISL\_722713|Original|hCoV-19^^Noord Brabant|Human|Dutch COVID-19 response team|Erasmus Medical Center|Oude Munnink|Netherlands

>Spike|hCoV-19/USA/IL-UW-2080/2020|2020-10-19|EPI\_ISL\_677485|Original|hCoV-19^^Illinois|Human|University of Wisconsin-Madison AIDS Vaccine Research Laboratories|University of Wisconsin-Madison AIDS Vaccine Research Laboratories|Baczenas|USA

>Spike|hCoV-19/USA/TX-HMH-3370/2020|2020-06-14|EPI\_ISL\_544154|Original|hCoV-19^^Texas|Human|Houston Methodist Hospital|Houston Methodist Hospital|Long|USA

>Spike|hCoV-19/Japan/PG-3826/2020|2020-07-00|EPI\_ISL\_692077|Original|hCoV-19^^Japan|Human|Pathogen Genomics Center|Pathogen Genomics Center|Sekizuka|Japan

>Spike|hCoV-19/Switzerland/GE-SNRCI-3403/2020|2020-03-00|EPI\_ISL\_548167|Original|hCoV-19^^Geneve|Human|Laboratoire de Virologie|Swiss National Reference Centre for Influenza|Gon\u00e7alves Cabecinhas|Switzerland

>Spike|hCoV-19/Germany/NW-HHU-381/2020|2020-11-26|EPI\_ISL\_718053|Orginal|hCoV-19^^North Rhine-Westphalia|Human|ZOTZ KLIMAS MVZ D\u00fcsseldorf-Centrum GbR \u00dcBAG f\u00fcr Labormedizin|Center of Medical Microbiology|Wienemann|Germany

>Spike|hCoV-19/Canada/BC-BCCDC-7564/2020|2020-11-00|EPI\_ISL\_740725|Original|hCoV-19^^British Columbia|Human|BCCDC Public Health Laboratory|BCCDC Public Health Laboratory|Prystajacky|Canada

>Spike|hCoV-19/Wales/PHWC-16A276/2020|2020-09-01|EPI\_ISL\_535223|Original|hCoV-19^^Wales|Human|Wales Specialist Virology Centre Sequencing lab|COVID-19 Genomics UK (COG-UK) Consortium|Moore|United Kingdom

>Spike|hCoV-19/USA/TX-DSHS-0491/2020|2020-06-21|EPI\_ISL\_560935|Original|hCoV-19^^Texas|Human|Texas Department of State Health Services|Texas Department of State Health Services|Rahman|USA

>Spike|hCoV-19/Wales/PHWC-2A598/2020|2020-04-05|EPI\_ISL\_445587|Original|hCoV-19^^Wales|Human|Wales Specialist Virology Centre|Public Health Wales Microbiology Cardiff|Moore|United Kingdom

>Spike|hCoV-19/USA/NY-QDX-2711/2020|2020-03-15|EPI\_ISL\_605047|Original|hCoV-19^^New York|Human|Quest Diagnostics|Quest Diagnostics|Kagan|USA

>Spike|hCoV-19/Denmark/DCGC-19165/2020|2020-12-07|EPI\_ISL\_748202|Original|hCoV-19^^Hovedstaden|Human|Department of Virus and Microbiological Special Diagnostics|Albertsen Lab|Michaelsen|Denmark

>Spike|hCoV-19/Scotland/QEUA-9E4CE7/2020|2020-09-23|EPI\_ISL\_601056|Original|hCoV-19^^Scotland|Human|Lighthouse Lab in Glasgow|Wellcome Sanger Institute for the COVID-19 Genomics UK (COG-UK) consortium|Davies|United Kingdom

>Spike|hCoV-19/Scotland/EDB1762/2020|2020-04-14|EPI\_ISL\_526467|Original|hCoV-19^^Scotland|Human|Virology Department|COVID-19 Genomics UK (COG-UK) Consortium|Williams|United Kingdom

>Spike|hCoV-19/USA/MA-MGH-02747/2020|2020-09-25|EPI\_ISL\_765612|Original|hCoV-19^^Massachusetts|Human|Brigham and Womens Hospital|Infectious Disease Program|Park|USA

>Spike|hCoV-19/England/BRIS-124A43/2020|2020-03-25|EPI\_ISL\_443895|Original|hCoV-19^^England|Human|PHE South West Regional Laboratory|Wellcome Sanger Institute for the COVID-19 Genomics UK (COG-UK) consortium|Amato|United Kingdom

>Spike|hCoV-19/England/QEUA-AD0FF3/2020|2020-10-26|EPI\_ISL\_634595|Original|hCoV-19^^England|Human|Lighthouse Lab in Glasgow|Wellcome Sanger Institute for the COVID-19 Genomics UK (COG-UK) consortium|Davies|United Kingdom

>Spike|hCoV-19/Thailand/Bangkok-CONI-0171/2020|2020-03-28|EPI\_ISL\_498261|Original|hCoV-19^^Bangkok|Human|Hospital for Tropical Diseases|COVID-19 Network Investigations (CONI) Alliance|Batty|Thailand

>Spike|hCoV-19/USA/PA-MGEL-00242/2020|2020-04-16|EPI\_ISL\_681981|Original|hCoV-19^^Pennsylvania|Human|UPMC Clinical Microbiology Laboratory|Microbial Genomic Epidemiology Laboratory|Griffith|USA

>Spike|hCoV-19/Australia/VIC5257/2020|2020-07-21|EPI\_ISL\_520022|Original|hCoV-19^^Victoria|Human|Microbiological Diagnostic Unit - Public Health Laboratory (MDU-PHL)|MDU-PHL|Schultz|Australia

>Spike|hCoV-19/Belgium/ULG-10047/2020|2020-03-30|EPI\_ISL\_421214|Original|hCoV-19^^Li\u00e8ge|Human|Department of Clinical Microbiology|GIGA Medical Genomics|Durkin|Belgium

>Spike|hCoV-19/England/NORT-290E72/2020|2020-05-03|EPI\_ISL\_453536|Original|hCoV-19^^England|Human|Northumbria University / South Tees Hospitals NHS Foundation Trust / North Cumbria Integrated Care NHS Foundation Trust / North Tees and Hartlepool NHS Foundation Trust / Newcastle Hospitals NHS Foundation Trust|COVID-19 Genomics UK (COG-UK) Consortium|Bashton|United Kingdom

>Spike|hCoV-19/England/CAMC-B22B48/2020|2020-11-02|EPI\_ISL\_647453|Original|hCoV-19^^England|Human|Lighthouse Lab in Cambridge|Wellcome Sanger Institute for the COVID-19 Genomics UK (COG-UK) Consortium|Davies|United Kingdom

>Spike|hCoV-19/Denmark/DCGC-21034/2020|2020-12-21|EPI\_ISL\_759517|Original|hCoV-19^^Hovedstaden|Human|Department of Virus and Microbiological Special Diagnostics|Albertsen Lab|Michaelsen|Denmark

>Spike|hCoV-19/Denmark/DCGC-4936/2020|2020-09-21|EPI\_ISL\_621474|Original|hCoV-19^^Nordjylland|Human|Department of Virus and Microbiological Special Diagnostics|Albertsen lab|Michaelsen|Denmark

>Spike|hCoV-19/England/CAMB-1B0D16/2020|2020-05-11|EPI\_ISL\_452965|Original|hCoV-19^^England|Human|Department of Pathology|COVID-19 Genomics UK (COG-UK) Consortium|Meredith|United Kingdom

>Spike|hCoV-19/England/MILK-B8FA2E/2020|2020-11-13|EPI\_ISL\_674688|Original|hCoV-19^^England|Human|Lighthouse Lab in Milton Keynes|Wellcome Sanger Institute for the COVID-19 Genomics UK (COG-UK) Consortium|Davies|United Kingdom

>Spike|hCoV-19/England/QEUB-9F9924/2020|2020-09-26|EPI\_ISL\_589246|Original|hCoV-19^^England|Human|Lighthouse Lab in Glasgow|Wellcome Sanger Institute for the COVID-19 Genomics UK (COG-UK) consortium|Davies|United Kingdom

>Spike|hCoV-19/Ireland/DL-NVRL-20G45155/2020|2020-04-02|EPI\_ISL\_666695|Original|hCoV-19^^Donegal|Human|National Virus Reference Lab (NVRL)|Irish Coronavirus Sequencing Consortium-Teagasc Grange|McCabe|Ireland

>Spike|hCoV-19/England/GSTT-265D9A3/2020|2020-03-26|EPI\_ISL\_484043|Original|hCoV-19^^England|Human|Centre for Clinical Infection and Diagnostics Research and Genomics Innovation Unit|COVID-19 Genomics UK (COG-UK) Consortium|Awan|United Kingdom

>Spike|hCoV-19/USA/MA-MASPHL-00143/2020|2020-04-03|EPI\_ISL\_791615|Original|hCoV-19^^Massachusetts|Human|Massachusetts State Public Health Laboratory|Infectious Disease Program|Park|USA

>Spike|hCoV-19/Spain/VC-IBV-98003556/2020|2020-03-30|EPI\_ISL\_537978|Original|hCoV-19^^Comunitat Valenciana|Human|Servicio de Microbiolog\u00eda. Hospital General Universitario de Castell\u00f3n|SeqCOVID-SPAIN consortium/IBV(CSIC)|Comas|Spain

>Spike|hCoV-19/USA/LA-GBCL-26791694/2020|2020-04-10|EPI\_ISL\_485320|Original|hCoV-19^^Louisiana|Human|River Road Testing Lab|Ginkgo Bioworks Clinical Laboratory|Smith|USA

>Spike|hCoV-19/Australia/TAS37/2020|2020-04-13|EPI\_ISL\_522714|Original|hCoV-19^^Tasmania|Human|Royal Hobart Hospital Microbiology Department|MDU-PHL|Schultz|Australia

>Spike|hCoV-19/Denmark/DCGC-5947/2020|2020-10-05|EPI\_ISL\_620212|Original|hCoV-19^^Hovedstaden|Human|Department of Virus and Microbiological Special Diagnostics|Albertsen lab|Michaelsen|Denmark

>Spike|hCoV-19/Singapore/490/2020|2020-04-26|EPI\_ISL\_477187|Original|hCoV-19^^Singapore|Human|Department of Laboratory Medicine Tan Tock Seng Hospital|Department of Laboratory Medicine Tan Tock Seng Hospital|Chen|Singapore

>Spike|hCoV-19/Spain/VC-IBV-98003501/2020|2020-03-23|EPI\_ISL\_537947|Original|hCoV-19^^Comunitat Valenciana|Human|Servicio de Microbiolog\u00eda. Hospital General Universitario de Castell\u00f3n|SeqCOVID-SPAIN consortium/IBV(CSIC)|Comas|Spain

>Spike|hCoV-19/Wales/PHWC-162D6E/2020|2020-05-27|EPI\_ISL\_473196|Original|hCoV-19^^Wales|Human|Wales Specialist Virology Centre Sequencing lab|COVID-19 Genomics UK (COG-UK) Consortium|Moore|United Kingdom

>Spike|hCoV-19/England/MILK-C63A5C/2020|2020-12-13|EPI\_ISL\_735721|Original|hCoV-19^^England|Human|Lighthouse Lab in Milton Keynes|Wellcome Sanger Institute for the COVID-19 Genomics UK (COG-UK) Consortium|Davies|United Kingdom

>Spike|hCoV-19/England/MILK-ACD6F4/2020|2020-10-21|EPI\_ISL\_634517|Original|hCoV-19^^England|Human|Lighthouse Lab in Milton Keynes|Wellcome Sanger Institute for the COVID-19 Genomics UK (COG-UK) consortium|Davies|United Kingdom

>Spike|hCoV-19/England/CAMC-AB1866/2020|2020-10-23|EPI\_ISL\_623647|Original|hCoV-19^^England|Human|Lighthouse Lab in Cambridge|Wellcome Sanger Institute for the COVID-19 Genomics UK (COG-UK) consortium|Davies|United Kingdom

>Spike|hCoV-19/Denmark/DCGC-7472/2020|2020-10-12|EPI\_ISL\_619402|Original|hCoV-19^^Hovedstaden|Human|Department of Virus and Microbiological Special Diagnostics|Albertsen lab|Michaelsen|Denmark

>Spike|hCoV-19/England/LIVE-DB2E51/2020|2020-10-27|EPI\_ISL\_638021|Original|hCoV-19^^England|Human|Liverpool Clinical Laboratories|COVID-19 Genomics UK (COG-UK) Consortium|Haldenby|United Kingdom

>Spike|hCoV-19/England/BIRM-6386D/2020|2020-08-19|EPI\_ISL\_529363|Original|hCoV-19^^England|Human|University of Birmingham|COVID-19 Genomics UK (COG-UK) Consortium|Loman|United Kingdom

>Spike|hCoV-19/USA/WA-UW-1320/2020|2020-03-17|EPI\_ISL\_422971|Original|hCoV-19^^Washington|Human|UW Virology Lab|UW Virology Lab|Roychoudhury|USA

>Spike|hCoV-19/USA/MI-UM-10033828725/2020|2020-04-01|EPI\_ISL\_578133|Original|hCoV-19^^Michigan|Human|University of Michigan Clinical Microbiology Laboratory|Lauring Lab|Valesano|USA

>Spike|hCoV-19/England/MILK-56D734/2020|2020-06-11|EPI\_ISL\_558349|Original|hCoV-19^^England|Human|Lighthouse Lab in Milton Keynes|Wellcome Sanger Institute for the COVID-19 Genomics UK (COG-UK) consortium|Davies|United Kingdom

>Spike|hCoV-19/England/MILK-A47FF7/2020|2020-10-06|EPI\_ISL\_598389|Original|hCoV-19^^England|Human|Lighthouse Lab in Milton Keynes|Wellcome Sanger Institute for the COVID-19 Genomics UK (COG-UK) consortium|Davies|United Kingdom

>Spike|hCoV-19/USA/WA-S1416/2020|2020-05-19|EPI\_ISL\_495866|Original|hCoV-19^^Washington|Human|Washington State Department of Health|Seattle Flu Study|Lee|USA

>Spike|hCoV-19/Japan/PG-2994/2020|2020-04-00|EPI\_ISL\_691118|Original|hCoV-19^^Japan|Human|Pathogen Genomics Center|Pathogen Genomics Center|Sekizuka|Japan

>Spike|hCoV-19/Denmark/DCGC-7003/2020|2020-10-12|EPI\_ISL\_619850|Original|hCoV-19^^Hovedstaden|Human|Department of Virus and Microbiological Special Diagnostics|Albertsen lab|Michaelsen|Denmark

>Spike|hCoV-19/USA/MO-CDC-2-3714154/2020|2020-11-10|EPI\_ISL\_751657|Original|hCoV-19^^Missouri|Human|MO State Public Health Laboratory|Genomics and Discovery|Queen|USA

>Spike|hCoV-19/Netherlands/NA\_701/2020|2020-04-17|EPI\_ISL\_461136|Original|hCoV-19^^Netherlands|Human|Dutch COVID-19 response team|Erasmus Medical Center|Oude Munnink|Netherlands

>Spike|hCoV-19/USA/AZ-QDX-1556/2020|2020-03-18|EPI\_ISL\_603760|Original|hCoV-19^^Arizona|Human|Quest Diagnostics|Quest Diagnostics|Kagan|USA

>Spike|hCoV-19/England/QEUEH-894B80/2020|2020-07-26|EPI\_ISL\_532658|Original|hCoV-19^^England|Human|Lighthouse Lab in Glasgow|Wellcome Sanger Institute for the COVID-19 Genomics UK (COG-UK) consortium|Davies|United Kingdom

>Spike|hCoV-19/USA/CA-UCLA-208/2020|2020-04-15|EPI\_ISL\_537515|Original|hCoV-19^^California|Human|UCLA Pathology Clinical Microbiology Lab|Kruglyak Lab|Boocock|USA

>Spike|hCoV-19/South Korea/KCDC2527/2020|2020-06-18|EPI\_ISL\_514930|Original|hCoV-19^^South Korea|Human|Division of Viral Diseases|Division of Viral Diseases|Kim|South Korea

>Spike|hCoV-19/Wales/PHWC-4A440E/2020|2020-12-16|EPI\_ISL\_764691|Original|hCoV-19^^Wales|Human|Wales Specialist Virology Centre Sequencing lab|COVID-19 Genomics UK (COG-UK) Consortium|Moore|United Kingdom

>Spike|hCoV-19/USA/FL-BPHL-1422/2020|2020-08-31|EPI\_ISL\_549204|Original|hCoV-19^^Florida|Human|Florida Bureau of Public Health Laboratories|Florida Bureau of Public Health Laboratories|Blanton|USA

>Spike|hCoV-19/Netherlands/ZH-EMC-663/2020|2020-09-17|EPI\_ISL\_632504|Original|hCoV-19^^Zuid Holland|Human|Dutch COVID-19 response team|Erasmus Medical Center|Oude Munnink|Netherlands

>Spike|hCoV-19/France/ARA-25382/2020|2020-04-15|EPI\_ISL\_676555|Original|hCoV-19^^Auvergne-Rh\u00f4ne-Alpes|Human|CNR Virus des Infections Respiratoires - France SUD|CNR Virus des Infections Respiratoires - France SUD|Bal|France

>Spike|hCoV-19/England/CAMC-A65360/2020|2020-10-11|EPI\_ISL\_637649|Original|hCoV-19^^England|Human|Department of Pathology|COVID-19 Genomics UK (COG-UK) Consortium|Goodfellow|United Kingdom

>Spike|hCoV-19/England/CAMC-A58D17/2020|2020-10-08|EPI\_ISL\_597059|Original|hCoV-19^^England|Human|Lighthouse Lab in Cambridge|Wellcome Sanger Institute for the COVID-19 Genomics UK (COG-UK) consortium|Davies|United Kingdom



>Spike|hCoV-19/England/ALDP-95269B/2020|2020-06-09|EPI\_ISL\_553962|Original|hCoV-19^^England|Human|Lighthouse Lab in Alderley Park|Wellcome Sanger Institute for the COVID-19 Genomics UK (COG-UK) consortium|Davies|United Kingdom

>Spike|hCoV-19/England/MILK-BB22B1/2020|2020-11-18|EPI\_ISL\_720473|Original|hCoV-19^^England|Human|Lighthouse Lab in Milton Keynes|Wellcome Sanger Institute for the COVID-19 Genomics UK (COG-UK) Consortium|Davies|United Kingdom

>Spike|hCoV-19/Denmark/DCGC-4543/2020|2020-09-21|EPI\_ISL\_621340|Original|hCoV-19^^Syddanmark|Human|Department of Virus and Microbiological Special Diagnostics|Albertsen lab|Michaelsen|Denmark

>Spike|hCoV-19/England/ALDP-AA512E/2020|2020-10-21|EPI\_ISL\_630807|Original|hCoV-19^^England|Human|Lighthouse Lab in Alderley Park|Wellcome Sanger Institute for the COVID-19 Genomics UK (COG-UK) consortium|Davies|United Kingdom

>Spike|hCoV-19/Singapore/1351/2020|2020-06-13|EPI\_ISL\_648701|Original|hCoV-19^^Singapore|Human|Department of Laboratory Medicine|Department of Laboratory Medicine|Chen|Singapore

>Spike|hCoV-19/Wales/PHWC-16C405/2020|2020-09-06|EPI\_ISL\_574053|Original|hCoV-19^^Wales|Human|Wales Specialist Virology Centre Sequencing lab|COVID-19 Genomics UK (COG-UK) Consortium|Moore|United Kingdom

>Spike|hCoV-19/England/ALDP-95A55A/2020|2020-06-12|EPI\_ISL\_553368|Original|hCoV-19^^England|Human|Lighthouse Lab in Alderley Park|Wellcome Sanger Institute for the COVID-19 Genomics UK (COG-UK) consortium|Davies|United Kingdom

>Spike|hCoV-19/USA/NY-Wadsworth-290753-01/2020|2020-12-21|EPI\_ISL\_767572|Original|hCoV-19^^New York|Human|URMC LABS|Wadsworth Center|Lasek-Nesselquist|USA

>Spike|hCoV-19/England/CAMC-B53874/2020|2020-11-08|EPI\_ISL\_656820|Original|hCoV-19^^England|Human|Lighthouse Lab in Cambridge|Wellcome Sanger Institute for the COVID-19 Genomics UK (COG-UK) Consortium|Davies|United Kingdom

>Spike|hCoV-19/France/PAC-IHU-0281/2020|2020-03-31|EPI\_ISL\_569428|Original|hCoV-19^^Provence-Alpes-C\u00f4te-d\u2019Azur|Human|MEPHI|MEPHI|Levasseur|France

>Spike|hCoV-19/Northern Ireland/ALDP-5C0CF4/2020|2020-06-19|EPI\_ISL\_558810|Original|hCoV-19^^Northern Ireland|Human|Lighthouse Lab in Alderley Park|Wellcome Sanger Institute for the COVID-19 Genomics UK (COG-UK) consortium|Davies|United Kingdom

>Spike|hCoV-19/USA/TX-HMH-MCoV-15637/2020|2020-10-26|EPI\_ISL\_785321|Original|hCoV-19^^Texas|Human|Houston Methodist Hospital|Houston Methodist Hospital|Long|USA

>Spike|hCoV-19/Canada/BC\_23918026/2020|2020-03-00|EPI\_ISL\_463189|Original|hCoV-19^^British Columbia|Human|BCCDC Public Health Laboratory|BCCDC Public Health Laboratory|Harrigan|Canada

>Spike|hCoV-19/England/ALDP-A859C2/2020|2020-10-18|EPI\_ISL\_610572|Original|hCoV-19^^England|Human|Lighthouse Lab in Alderley Park|Wellcome Sanger Institute for the COVID-19 Genomics UK (COG-UK) consortium|Davies|United Kingdom

>Spike|hCoV-19/Denmark/DCGC-11748/2020|2020-10-26|EPI\_ISL\_671111|Original|hCoV-19^^Syddanmark|Human|Department of Virus and Microbiological Special Diagnostics|Albertsen Lab|Michaelsen|Denmark

>Spike|hCoV-19/England/QEUEH-B9EED5/2020|2020-11-18|EPI\_ISL\_719766|Original|hCoV-19^^England|Human|Lighthouse Lab in Glasgow|Wellcome Sanger Institute for the COVID-19 Genomics UK (COG-UK) Consortium|Davies|United Kingdom

>Spike|hCoV-19/Switzerland/VD-ETHZ-321392/2020|2020-10-13|EPI\_ISL\_603633|Original|hCoV-19^^Vaud|Human|Viollier AG|Department of Biosystems Science and Engineering|Nadeau|Switzerland

>Spike|hCoV-19/England/QEUEH-9F9B88/2020|2020-09-25|EPI\_ISL\_595750|Original|hCoV-19^^England|Human|Oxford Viromics|COVID-19 Genomics UK (COG-UK) Consortium|Golubchik|United Kingdom

>Spike|hCoV-19/England/CAMB-1BA972/2020|2020-11-12|EPI\_ISL\_664310|Original|hCoV-19^^England|Human|Department of Pathology|COVID-19 Genomics UK (COG-UK) Consortium|Goodfellow|United Kingdom

>Spike|hCoV-19/USA/VA-DCLS-0378/2020|2020-05-13|EPI\_ISL\_463134|Original|hCoV-19^^Virginia|Human|Virginia DCLS|Virginia DCLS|St. Jacques|USA

>Spike|hCoV-19/USA/WA-S464/2020|2020-04-04|EPI\_ISL\_434224|Original|hCoV-19^^Washington|Human|Washington State Department of Health|Seattle Flu Study|Bedford|USA

>Spike|hCoV-19/Australia/NSW1354/2020|2020-12-28|EPI\_ISL\_767920|Original|hCoV-19^^New South Wales|Human|Pathology North - Hunter - NSW Health Pathology|NSW Health Pathology - Institute of Clinical Pathology and Medical Research; Westmead Hospital; University of Sydney|Gall|Australia

>Spike|hCoV-19/England/PORT-2D56C4/2020|2020-12-20|EPI\_ISL\_765126|Original|hCoV-19^^England|Human|Centre for Enzyme Innovation|COVID-19 Genomics UK (COG-UK) Consortium|Robson|United Kingdom

>Spike|hCoV-19/England/ALDP-B263F1/2020|2020-11-04|EPI\_ISL\_646583|Original|hCoV-19^^England|Human|Lighthouse Lab in Alderley Park|Wellcome Sanger Institute for the COVID-19 Genomics UK (COG-UK) Consortium|Davies|United Kingdom

>Spike|hCoV-19/England/CAMC-A3F727/2020|2020-10-05|EPI\_ISL\_609740|Original|hCoV-19^^England|Human|Lighthouse Lab in Cambridge|Wellcome Sanger Institute for the COVID-19 Genomics UK (COG-UK) consortium|Davies|United Kingdom

>Spike|hCoV-19/Denmark/DCGC-4833/2020|2020-09-21|EPI\_ISL\_621518|Original|hCoV-19^^Sjaelland|Human|Department of Virus and Microbiological Special Diagnostics|Albertsen lab|Michaelsen|Denmark

>Spike|hCoV-19/Denmark/DCGC-3378/2020|2020-08-31|EPI\_ISL\_616137|Original|hCoV-19^^Hovedstaden|Human|Department of Virus and Microbiological Special Diagnostics|Albertsen lab|Michaelsen|Denmark

>Spike|hCoV-19/England/ALDP-A96050/2020|2020-10-20|EPI\_ISL\_624655|Original|hCoV-19^^England|Human|Lighthouse Lab in Alderley Park|Wellcome Sanger Institute for the COVID-19 Genomics UK (COG-UK) consortium|Davies|United Kingdom

>Spike|hCoV-19/England/MILK-A6C25D/2020|2020-10-09|EPI\_ISL\_665549|Original|hCoV-19^^England|Human|University of Exeter|COVID-19 Genomics UK (COG-UK) Consortium|Temperton|United Kingdom

>Spike|hCoV-19/USA/VA-DCLS-0232/2020|2020-04-01|EPI\_ISL\_452809|Original|hCoV-19^^Virginia|Human|Virginia DCLS|Virginia DCLS|St. Jacques|USA

>Spike|hCoV-19/Scotland/CVR4454/2020|2020-09-20|EPI\_ISL\_585319|Original|hCoV-19^^Scotland|Human|Lighthouse Lab in Glasgow / MRC-University of Glasgow Centre for Virus Research|COVID-19 Genomics UK (COG-UK) Consortium|Robertson|United Kingdom

>Spike|hCoV-19/England/QEUEH-9FA686/2020|2020-09-29|EPI\_ISL\_588076|Original|hCoV-19^^England|Human|Lighthouse Lab in Glasgow|Wellcome Sanger Institute for the COVID-19 Genomics UK (COG-UK) consortium|Davies|United Kingdom

>Spike|hCoV-19/England/CAMC-945051/2020|2020-07-15|EPI\_ISL\_556972|Original|hCoV-19^^England|Human|Lighthouse Lab in Cambridge|Wellcome Sanger Institute for the COVID-19 Genomics UK (COG-UK) consortium|Davies|United Kingdom

>Spike|hCoV-19/England/MILK-BFCDD8/2020|2020-12-03|EPI\_ISL\_720821|Original|hCoV-19^^England|Human|Lighthouse Lab in Milton Keynes|Wellcome Sanger Institute for the COVID-19 Genomics UK (COG-UK) Consortium|Davies|United Kingdom

>Spike|hCoV-19/South Korea/KDCA0220/2020|2020-11-11|EPI\_ISL\_747455|Original|hCoV-19^^South Korea|Human|Division of Emerging Infectious Diseases|Division of Emerging Infectious Diseases|Park|South Korea

>Spike|hCoV-19/Chile/RM-170043/2020|2020-09-04|EPI\_ISL\_746709|Original|hCoV-19^^Region Metropolitana de Santiago|Human|Genetica Molecular and Subdepartamento de Virologia ISP Chile|Instituto de Salud Publica de Chile|Tognarelli|Chile

>Spike|hCoV-19/New Zealand/20VR3009/2020|2020-00-00|EPI\_ISL\_579381|Original|hCoV-19^^Combined Wellington|Human|Wellington SCL (WN)|Institute of Environmental Science and Research (ESR)|Wang|New Zealand

>Spike|hCoV-19/Denmark/DCGC-17008/2020|2020-12-14|EPI\_ISL\_750705|Original|hCoV-19^^Hovedstaden|Human|Department of Virus and Microbiological Special Diagnostics|Albertsen Lab|Michaelsen|Denmark

>Spike|hCoV-19/England/MILK-957F04/2020|2020-06-15|EPI\_ISL\_554791|Original|hCoV-19^^England|Human|Lighthouse Lab in Milton Keynes|Wellcome Sanger Institute for the COVID-19 Genomics UK (COG-UK) consortium|Davies|United Kingdom

>Spike|hCoV-19/Netherlands/ZuidHolland\_166/2020|2020-04-16|EPI\_ISL\_461338|Original|hCoV-19^^Zuid Holland|Human|Dutch COVID-19 response team|Erasmus Medical Center|Oude Munnink|Netherlands

>Spike|hCoV-19/Bangladesh/DNAS\_DRICM\_isl\_N-3/2020|2020-07-12|EPI\_ISL\_774981|Original|hCoV-19^^Dhaka|Human|Designated Reference Institute for Chemical Measurements (DRICM)|DNA SOLUTION LTD.|Rabbi|Bangladesh

>Spike|hCoV-19/Denmark/DCGC-20420/2020|2020-12-21|EPI\_ISL\_758727|Original|hCoV-19^^Hovedstaden|Human|Department of Virus and Microbiological Special Diagnostics|Albertsen Lab|Michaelsen|Denmark

>Spike|hCoV-19/USA/CA-CZB-15948/2020|2020-12-02|EPI\_ISL\_739344|Original|hCoV-19^^California|Human|Santa Clara County Public Health Laboratory|Chan-Zuckerberg Biohub|Kamm|USA

>Spike|hCoV-19/Scotland/CVR5191/2020|2020-10-14|EPI\_ISL\_627200|Original|hCoV-19^^Scotland|Human|West of Scotland Specialist Virology Centre|COVID-19 Genomics UK (COG-UK) Consortium|Robertson|United Kingdom

>Spike|hCoV-19/Denmark/DCGC-11145/2020|2020-11-02|EPI\_ISL\_670415|Original|hCoV-19^^Hovedstaden|Human|Department of Virus and Microbiological Special Diagnostics|Albertsen Lab|Michaelsen|Denmark

>Spike|hCoV-19/Switzerland/BL-ETHZ-380349/2020|2020-11-21|EPI\_ISL\_721792|Original|hCoV-19^^Basel-Landschaft|Human|Viollier AG|Department of Biosystems Science and Engineering|Nadeau|Switzerland

>Spike|hCoV-19/USA/MI-MDHHS-SC20513/2020|2020-04-29|EPI\_ISL\_460561|Original|hCoV-19^^Michigan|Human|Michigan Department of Health and Human Services|Michigan Department of Health and Human Services|Blankenship|USA

>Spike|hCoV-19/Wales/PHWC-16A188/2020|2020-09-05|EPI\_ISL\_535209|Original|hCoV-19^^Wales|Human|Wales Specialist Virology Centre Sequencing lab|COVID-19 Genomics UK (COG-UK) Consortium|Moore|United Kingdom

>Spike|hCoV-19/Israel/CVL-n-14266/2020|2020-00-00|EPI\_ISL\_474995|Original|hCoV-19^^Kefar Sava|Human|Israel Central Virology laboratory|Israel Central Virology laboratory|Zuckerman|Israel

>Spike|hCoV-19/England/20148035404/2020|2020-04-01|EPI\_ISL\_466062|Original|hCoV-19^^England|Human|Respiratory Virus Unit|Respiratory Virus Unit|Platt|United Kingdom

>Spike|hCoV-19/England/QEUH-A9F215/2020|2020-10-20|EPI\_ISL\_652678|Original|hCoV-19^^England|Human|University of Exeter|COVID-19 Genomics UK (COG-UK) Consortium|Temperton|United Kingdom

>Spike|hCoV-19/England/SHEF-C6C11/2020|2020-03-30|EPI\_ISL\_432828|Original|hCoV-19^^England|Human|Virology Department|COVID-19 Genomics UK (COG-UK) Consortium|de Silva|United Kingdom

>Spike|hCoV-19/USA/TX-HMH-MCoV-15148/2020|2020-10-16|EPI\_ISL\_786632|Original|hCoV-19^^Texas|Human|Houston Methodist Hospital|Houston Methodist Hospital|Long|USA

>Spike|hCoV-19/Denmark/DCGC-8253/2020|2020-10-26|EPI\_ISL\_616926|Original|hCoV-19^^Sjaelland|Human|Department of Virus and Microbiological Special Diagnostics|Albertsen lab|Michaelsen|Denmark

>Spike|hCoV-19/Wales/PHWC-48082A/2020|2020-10-11|EPI\_ISL\_612937|Original|hCoV-19^^Wales|Human|Wales Specialist Virology Centre Sequencing lab|COVID-19 Genomics UK (COG-UK) Consortium|Moore|United Kingdom

>Spike|hCoV-19/USA/MN-MDH-1337/2020|2020-03-24|EPI\_ISL\_496923|Original|hCoV-19^^Minnesota|Human|Minnesota Department of Health|Minnesota Department of Health|Garfin|USA

>Spike|hCoV-19/USA/MI-MDHHS-SC20614/2020|2020-04-30|EPI\_ISL\_462696|Original|hCoV-19^^Michigan|Human|Michigan Department of Health and Human Services|Michigan Department of Health and Human Services|Blankenship|USA

>Spike|hCoV-19/England/MILK-9928B7/2020|2020-08-27|EPI\_ISL\_552172|Original|hCoV-19^^England|Human|Lighthouse Lab in Milton Keynes|Wellcome Sanger Institute for the COVID-19 Genomics UK (COG-UK) consortium|Davies|United Kingdom

>Spike|hCoV-19/USA/MD-HP12055/2020|2020-11-25|EPI\_ISL\_791387|Original|hCoV-19^^Maryland|Human|Johns Hopkins Hospital Department of Pathology|Johns Hopkins Hospital Department of Pathology|Morris|USA

>Spike|hCoV-19/Denmark/DCGC-21300/2020|2020-12-21|EPI\_ISL\_759660|Original|hCoV-19^^Nordjylland|Human|Department of Virus and Microbiological Special Diagnostics|Albertsen Lab|Michaelsen|Denmark

>Spike|hCoV-19/England/NOTT-1112AB/2020|2020-04-23|EPI\_ISL\_453641|Original|hCoV-19^^England|Human|Queens Medical Centre|COVID-19 Genomics UK (COG-UK) Consortium|Loose|United Kingdom

>Spike|hCoV-19/Mexico/BCN-ALSR-4937/2020|2020-08-31|EPI\_ISL\_730221|Original|hCoV-19^^Baja California|Human|Genomica Lab Molecular|Andersen lab at Scripps Research|Gangavarapu|Mexico

>Spike|hCoV-19/Denmark/DCGC-2356/2020|2020-08-10|EPI\_ISL\_617695|Original|hCoV-19^^Midtjylland|Human|Department of Virus and Microbiological Special Diagnostics|Albertsen lab|Michaelsen|Denmark

>Spike|hCoV-19/England/CAMB-1B9050/2020|2020-00-00|EPI\_ISL\_704403|Original|hCoV-19^^England|Human|Department of Pathology|COVID-19 Genomics UK (COG-UK) Consortium|Goodfellow|United Kingdom

>Spike|hCoV-19/USA/MI-QDX-362/2020|2020-03-23|EPI\_ISL\_571105|Original|hCoV-19^^Michigan|Human|Quest Diagnostics|Quest Diagnostics|Kagan|USA

>Spike|hCoV-19/Canada/NB\_35/2020|2020-03-14|EPI\_ISL\_429816|Original|hCoV-19^^New Brunswick|Human|Dr. Georges-L.-Dumont University Hospital Centre|National Microbiology Laboratory|Majer|Canada

>Spike|hCoV-19/Australia/VIC5743/2020|2020-07-21|EPI\_ISL\_518544|Original|hCoV-19^^Victoria|Human|Microbiological Diagnostic Unit - Public Health Laboratory (MDU-PHL) |MDU-PHL|Schultz|Australia

>Spike|hCoV-19/Australia/VIC745/2020|2020-03-29|EPI\_ISL\_427023|Original|hCoV-19^^Victoria|Human|Victorian Infectious Diseases Reference Laboratory (VIDRL) |Microbiological Diagnostic Unit Public Health Laboratory and Victorian Infectious Diseases Reference Laboratory|Schultz|Australia

>Spike|hCoV-19/England/CAMC-C738C8/2020|2020-12-15|EPI\_ISL\_769053|Original|hCoV-19^^England|Human|Lighthouse Lab in Cambridge|Wellcome Sanger Institute for the COVID-19 Genomics UK (COG-UK) Consortium|Davies|United Kingdom

>Spike|hCoV-19/Denmark/DCGC-2271/2020|2020-08-10|EPI\_ISL\_617628|Original|hCoV-19^^Hovedstaden|Human|Department of Virus and Microbiological Special Diagnostics|Albertsen lab|Michaelsen|Denmark

>Spike|hCoV-19/England/CAMB-76339/2020|2020-03-28|EPI\_ISL\_439508|Original|hCoV-19^^England|Human|Department of Pathology|Wellcome Sanger Institute for the COVID-19 Genomics UK (COG-UK) consortium|Amato|United Kingdom

>Spike|hCoV-19/England/QEUH-B7C23B/2020|2020-11-13|EPI\_ISL\_668185|Original|hCoV-19^^England|Human|Lighthouse Lab in Glasgow|Wellcome Sanger Institute for the COVID-19 Genomics UK (COG-UK) Consortium|Davies|United Kingdom

>Spike|hCoV-19/Denmark/DCGC-1007/2020|2020-04-27|EPI\_ISL\_614778|Original|hCoV-19^^Syddanmark|Human|Department of Virus and Microbiological Special Diagnostics|Albertsen lab|Michaelsen|Denmark

>Spike|hCoV-19/Norway/6039/2020|2020-11-19|EPI\_ISL\_775271|Original|hCoV-19^^Oslo|Human|Furst Medical Laboratory|Norwegian Institute of Public Health|Vollan|Norway

>Spike|hCoV-19/England/OXON-B2C63/2020|2020-04-14|EPI\_ISL\_534802|Original|hCoV-19^^England|Human|Oxford Viromics|COVID-19 Genomics UK (COG-UK) Consortium|Golubchik|United Kingdom

>Spike|hCoV-19/France/PAC-IHU-0823/2020|2020-05-13|EPI\_ISL\_568980|Original|hCoV-19^^Provence-Alpes-C\u00f4te-d\u2019Azur|Human|MEPHI|MEPHI|Levasseur|France

>Spike|hCoV-19/Russia/SPE-RII-18358V/2020|2020-05-28|EPI\_ISL\_524019|Vero P1|hCoV-19^^Saint Petersburg|Human|WHO National Influenza Centre Russian Federation|WHO National Influenza Centre Russian Federation|Komissarov|Russia

>Spike|hCoV-19/Spain/AR-IBV-005116/2020|2020-04-26|EPI\_ISL\_510383|Original|hCoV-19^^Aragon|Human|Servicio de Microbiolog\u00eda|SeqCOVID-SPAIN consortium|IBV (CSIC) |Comas|Spain

>Spike|hCoV-19/Denmark/DCGC-18219/2020|2020-12-14|EPI\_ISL\_749823|Original|hCoV-19^^Syddanmark|Human|Department of Virus and Microbiological Special Diagnostics|Albertsen Lab|Michaelsen|Denmark

>Spike|hCoV-19/USA/MD-HP00037/2020|2020-03-24|EPI\_ISL\_434587|Original|hCoV-19^^Maryland|Human|Johns Hopkins Hospital Department of Pathology|Johns Hopkins Hospital Department of Pathology|Mehoke|USA

>Spike|hCoV-19/Wales/PHWC-15D258/2020|2020-05-07|EPI\_ISL\_472689|Original|hCoV-19^^Wales|Human|Wales Specialist Virology Centre Sequencing lab|COVID-19 Genomics UK (COG-UK) Consortium|Moore|United Kingdom

>Spike|hCoV-19/England/QEUA-BCC5BB/2020|2020-11-27|EPI\_ISL\_704055|Original|hCoV-19^^England|Human|Lighthouse Lab in Glasgow|Wellcome Sanger Institute for the COVID-19 Genomics UK (COG-UK) Consortium|Davies|United Kingdom

>Spike|hCoV-19/England/QEUA-9FA774/2020|2020-09-28|EPI\_ISL\_588063|Original|hCoV-19^^England|Human|Lighthouse Lab in Glasgow|Wellcome Sanger Institute for the COVID-19 Genomics UK (COG-UK) consortium|Davies|United Kingdom

>Spike|hCoV-19/England/QEUA-A79062/2020|2020-10-12|EPI\_ISL\_638782|Original|hCoV-19^^England|Human|Oxford Viromics|COVID-19 Genomics UK (COG-UK) Consortium|Golubchik|United Kingdom

>Spike|hCoV-19/Denmark/DCGC-20171/2020|2020-11-30|EPI\_ISL\_748026|Original|hCoV-19^^Sjaelland|Human|Department of Virus and Microbiological Special Diagnostics|Albertsen Lab|Michaelsen|Denmark

>Spike|hCoV-19/USA/CA-CZB-12793/2020|2020-10-14|EPI\_ISL\_648449|Original|hCoV-19^^California|Human|Santa Clara County Public Health Laboratory|Chan-Zuckerberg Biohub|Bhatt|USA

>Spike|hCoV-19/USA/WI-GMF-16473/2020|2020-08-21|EPI\_ISL\_547725|Original|hCoV-19^^Wisconsin|Human|Gundersen Molecular Diagnostics Laboratory|Kabara Cancer Research Institute|Kenny|USA

>Spike|hCoV-19/England/MILK-B59805/2020|2020-11-06|EPI\_ISL\_679871|Original|hCoV-19^^England|Human|Virology Department|COVID-19 Genomics UK (COG-UK) Consortium|de Silva|United Kingdom

>Spike|hCoV-19/Ireland/WW-NVRL-73IRL23909/2020|2020-09-05|EPI\_ISL\_578328|Original|hCoV-19^^Wicklow|Human|National Virus Reference Laboratory|National Virus Reference Laboratory|Gonzalez|Ireland

>Spike|hCoV-19/Switzerland/BS-42241303/2020|2020-04-22|EPI\_ISL\_581917|Original|hCoV-19^^Basel-Stadt|Human|University Hospital Basel|University Hospital Basel|Roloff Handschin|Switzerland

>Spike|hCoV-19/Denmark/DCGC-2654/2020|2020-08-17|EPI\_ISL\_617874|Original|hCoV-19^^Midtjylland|Human|Department of Virus and Microbiological Special Diagnostics|Albertsen lab|Michaelsen|Denmark

>Spike|hCoV-19/England/ALDP-B23C53/2020|2020-11-04|EPI\_ISL\_646373|Original|hCoV-19^^England|Human|Lighthouse Lab in Alderley Park|Wellcome Sanger Institute for the COVID-19 Genomics UK (COG-UK) Consortium|Davies|United Kingdom

>Spike|hCoV-19/England/SHEF-CC905/2020|2020-03-31|EPI\_ISL\_432529|Original|hCoV-19^^England|Human|Virology Department|COVID-19 Genomics UK (COG-UK) Consortium|de Silva|United Kingdom

>Spike|hCoV-19/England/ALDP-A93F56/2020|2020-10-19|EPI\_ISL\_611063|Original|hCoV-19^^England|Human|Lighthouse Lab in Alderley Park|Wellcome Sanger Institute for the COVID-19 Genomics UK (COG-UK) consortium|Davies|United Kingdom

>Spike|hCoV-19/England/ALDP-8D9DB6/2020|2020-06-24|EPI\_ISL\_557031|Original|hCoV-19^^England|Human|Lighthouse Lab in Alderley Park|Wellcome Sanger Institute for the COVID-19 Genomics UK (COG-UK) consortium|Davies|United Kingdom

>Spike|hCoV-19/Belgium/ULG-10879/2020|2020-11-13|EPI\_ISL\_678422|Original|hCoV-19^^Li\u00e8ge|Human|Department of Clinical Microbiology|GIGA Medical Genomics|Durkin|Belgium

>Spike|hCoV-19/USA/TX-HMH-4844/2020|2020-06-21|EPI\_ISL\_544370|Original|hCoV-19^^Texas|Human|Houston Methodist Hospital|Houston Methodist Hospital|Long|USA

>Spike|hCoV-19/USA/MI-MDHHS-SC21229/2020|2020-04-07|EPI\_ISL\_507485|Original|hCoV-19^^Michigan|Human|Michigan Department of Health and Human Services|Michigan Department of Health and Human Services|Blankenship|USA

>Spike|hCoV-19/Wales/ALDP-B1CB32/2020|2020-11-01|EPI\_ISL\_666109|Original|hCoV-19^^Wales|Human|Centre for Enzyme Innovation|COVID-19 Genomics UK (COG-UK) Consortium|Robson|United Kingdom

>Spike|hCoV-19/Japan/PG-5645/2020|2020-04-00|EPI\_ISL\_688769|Original|hCoV-19^^Japan|Human|Pathogen Genomics Center|Pathogen Genomics Center|Sekizuka|Japan

>Spike|hCoV-19/USA/TX-HMH-1548/2020|2020-04-13|EPI\_ISL\_542788|Original|hCoV-19^^Texas|Human|Houston Methodist Hospital|Houston Methodist Hospital|Long|USA

>Spike|hCoV-19/Wales/PHWC-164537/2020|2020-04-29|EPI\_ISL\_474191|Original|hCoV-19^^Wales|Human|Originating lab|COVID-19 Genomics UK (COG-UK) Consortium|Moore|United Kingdom

>Spike|hCoV-19/England/QEUEH-9CA3D3/2020|2020-09-10|EPI\_ISL\_567307|Original|hCoV-19^^England|Human|Lighthouse Lab in Glasgow|Wellcome Sanger Institute for the COVID-19 Genomics UK (COG-UK) consortium|Davies|United Kingdom

>Spike|hCoV-19/USA/TX-HMH-MCoV-15277/2020|2020-10-22|EPI\_ISL\_786761|Original|hCoV-19^^Texas|Human|Houston Methodist Hospital|Houston Methodist Hospital|Long|USA

>Spike|hCoV-19/Scotland/QEUEH-AAE8F3/2020|2020-10-22|EPI\_ISL\_624018|Original|hCoV-19^^Scotland|Human|Lighthouse Lab in Glasgow|Wellcome Sanger Institute for the COVID-19 Genomics UK (COG-UK) consortium|Davies|United Kingdom

>Spike|hCoV-19/Wales/CAMC-AAFBAE/2020|2020-10-21|EPI\_ISL\_634803|Original|hCoV-19^^Wales|Human|Lighthouse Lab in Cambridge|Wellcome Sanger Institute for the COVID-19 Genomics UK (COG-UK) consortium|Davies|United Kingdom

>Spike|hCoV-19/USA/UT-01573/2020|2020-04-07|EPI\_ISL\_449822|Original|hCoV-19^^Utah|Human|Utah Public Health Laboratory|Utah Public Health Laboratory|Young|USA

>Spike|hCoV-19/England/ALDP-95273E/2020|2020-06-09|EPI\_ISL\_553977|Original|hCoV-19^^England|Human|Lighthouse Lab in Alderley Park|Wellcome Sanger Institute for the COVID-19 Genomics UK (COG-UK) consortium|Davies|United Kingdom

>Spike|hCoV-19/England/BRIS-12F6BD/2020|2020-03-06|EPI\_ISL\_488254|Original|hCoV-19^^England|Human|PHE South West Regional Laboratory|Wellcome Sanger Institute for the COVID-19 Genomics UK (COG-UK) consortium|Davies|United Kingdom

>Spike|hCoV-19/England/LIVE-A3852/2020|2020-05-19|EPI\_ISL\_490387|Original|hCoV-19^^England|Human|Liverpool Clinical Laboratories|COVID-19 Genomics UK (COG-UK) Consortium|Haldenby|United Kingdom

>Spike|hCoV-19/England/CAMB-805EB/2020|2020-04-09|EPI\_ISL\_470438|Original|hCoV-19^^England|Human|Department of Pathology|Wellcome Sanger Institute for the COVID-19 Genomics UK (COG-UK) consortium|Davies|United Kingdom

>Spike|hCoV-19/USA/TX-HMH-2813/2020|2020-06-08|EPI\_ISL\_543789|Original|hCoV-19^^Texas|Human|Houston Methodist Hospital|Houston Methodist Hospital|Long|USA

>Spike|hCoV-19/England/CAMC-B07192/2020|2020-10-30|EPI\_ISL\_643666|Original|hCoV-19^^England|Human|Lighthouse Lab in Cambridge|Wellcome Sanger Institute for the COVID-19 Genomics UK (COG-UK) Consortium|Davies|United Kingdom

>Spike|hCoV-19/England/20119042004/2020|2020-03-12|EPI\_ISL\_465061|Original|hCoV-19^^England|Human|Respiratory Virus Unit|Respiratory Virus Unit|Platt|United Kingdom

>Spike|hCoV-19/Canada/ON-S352/2020|2020-03-30|EPI\_ISL\_586404|Original|hCoV-19^^Ontario|Human|Toronto Invasive Bacterial Diseases Network|McMaster University|McArthur|Canada

>Spike|hCoV-19/England/ALDP-9CC447/2020|2020-09-16|EPI\_ISL\_573107|Original|hCoV-19^^England|Human|Quadram Institute Bioscience|COVID-19 Genomics UK (COG-UK) Consortium|Alikhan|United Kingdom

>Spike|hCoV-19/USA/TX-HMH-MCoV-15650/2020|2020-07-09|EPI\_ISL\_785334|Original|hCoV-19^^Texas|Human|Houston Methodist Hospital|Houston Methodist Hospital|Long|USA

>Spike|hCoV-19/England/MILK-B56C57/2020|2020-11-05|EPI\_ISL\_656835|Original|hCoV-19^^England|Human|Lighthouse Lab in Milton Keynes|Wellcome Sanger Institute for the COVID-19 Genomics UK (COG-UK) Consortium|Davies|United Kingdom

>Spike|hCoV-19/England/ALDP-94FC9F/2020|2020-06-16|EPI\_ISL\_555280|Original|hCoV-19^^England|Human|Lighthouse Lab in Alderley Park|Wellcome Sanger Institute for the COVID-19 Genomics UK (COG-UK) consortium|Davies|United Kingdom

>Spike|hCoV-19/United Arab Emirates/H9/2020|2020-04-24|EPI\_ISL\_528721|Original|hCoV-19^^Abu Dhabi|Human|Alsafar - Khalifa University Abu Dhabi|Alsafar - Khalifa University Abu Dhabi|Daw Elbait|United Arab Emirates

>Spike|hCoV-19/USA/FL-BPHL-2139/2020|2020-06-28|EPI\_ISL\_653292|Original|hCoV-19^^Florida|Human|Florida Bureau of Public Health Laboratories|Florida Bureau of Public Health Laboratories|Blanton|USA

>Spike|hCoV-19/England/LOND-1251690/2020|2020-11-20|EPI\_ISL\_679423|Original|hCoV-19^^England|Human|University College London Hospital|COVID-19 Genomics UK (COG-UK) Consortium|Byott|United Kingdom

>Spike|hCoV-19/Denmark/DCGC-14497/2020|2020-11-30|EPI\_ISL\_711254|Original|hCoV-19^^Midtjylland|Human|Department of Virus and Microbiological Special Diagnostics|Albertsen Lab|Michaelsen|Denmark

>Spike|hCoV-19/USA/UT-QDX-1869/2020|2020-03-15|EPI\_ISL\_604182|Original|hCoV-19^^Utah|Human|Quest Diagnostics|Quest Diagnostics|Kagan|USA

>Spike|hCoV-19/England/CAMB-1AFBA7/2020|2020-05-03|EPI\_ISL\_459216|Original|hCoV-19^^England|Human|Department of Pathology|Wellcome Sanger Institute for the COVID-19 Genomics UK (COG-UK) consortium|Davies|United Kingdom

>Spike|hCoV-19/USA/UT-UPHL-2012119230/2020|2020-11-30|EPI\_ISL\_746961|Original|hCoV-19^^Utah|Human|Utah Public Health Laboratory|Utah Public Health Laboratory|Gallagher|USA

>Spike|hCoV-19/Sweden/20-50227/2020|2020-03-07|EPI\_ISL\_454893|Original|hCoV-19^^Stockholm|Human|Karolinska Universitetslaboratoriet|The Public Health Agency of Sweden|Svartstr\u00f6m|Sweden

>Spike|hCoV-19/Brazil/RJ-0249/2020|2020-03-25|EPI\_ISL\_470617|Original|hCoV-19^^Rio de Janeiro|Human|Laboratorio de Virologia Molecular / UFRJ|Bioinformatics Laboratory / LNCC|Almeida|Brazil

>Spike|hCoV-19/England/LIVE-1D1F82/2020|2020-05-13|EPI\_ISL\_572691|Original|hCoV-19^^England|Human|Liverpool Clinical Laboratories|COVID-19 Genomics UK (COG-UK) Consortium|Haldenby|United Kingdom

>Spike|hCoV-19/England/MILK-CB23CC/2020|2020-12-08|EPI\_ISL\_761050|Original|hCoV-19^^England|Human|Lighthouse Lab in Milton Keynes|Wellcome Sanger Institute for the COVID-19 Genomics UK (COG-UK) Consortium|Davies|United Kingdom

>Spike|hCoV-19/India/MH-BJMC-2192/2020|2020-04-22|EPI\_ISL\_496550|Original|hCoV-19^^Maharashtra|Human|B.J. Govt. Medical College|National Centre For Cell Science|Paul|India

>Spike|hCoV-19/England/CAMC-A3F2EA/2020|2020-10-03|EPI\_ISL\_609627|Original|hCoV-19^^England|Human|Lighthouse Lab in Cambridge|Wellcome Sanger Institute for the COVID-19 Genomics UK (COG-UK) consortium|Davies|United Kingdom

>Spike|hCoV-19/England/ALDP-BCAA45/2020|2020-11-23|EPI\_ISL\_703683|Original|hCoV-19^^England|Human|Lighthouse Lab in Alderley Park|Wellcome Sanger Institute for the COVID-19 Genomics UK (COG-UK) Consortium|Davies|United Kingdom

>Spike|hCoV-19/Japan/PG-2089/2020|2020-04-00|EPI\_ISL\_685694|Original|hCoV-19^^Japan|Human|Tokyo Metropolitan Institute of Public Health|Pathogen Genomics Center|Sekizuka|Japan

>Spike|hCoV-19/England/QEUEH-79A1E3/2020|2020-07-15|EPI\_ISL\_533088|Original|hCoV-19^^England|Human|Lighthouse Lab in Glasgow|Wellcome Sanger Institute for the COVID-19 Genomics UK (COG-UK) consortium|Davies|United Kingdom

>Spike|hCoV-19/USA/MI-QDX-2298/2020|2020-03-14|EPI\_ISL\_604548|Original|hCoV-19^^Michigan|Human|Quest Diagnostics|Quest Diagnostics|Kagan|USA

>Spike|hCoV-19/England/QEUEH-B7F57B/2020|2020-11-14|EPI\_ISL\_674563|Original|hCoV-19^^England|Human|Lighthouse Lab in Glasgow|Wellcome Sanger Institute for the COVID-19 Genomics UK (COG-UK) Consortium|Davies|United Kingdom

>Spike|hCoV-19/India/MH-GA77/2020|2020-06-18|EPI\_ISL\_508271|Original|hCoV-19^^Maharashtra|Human|Government Medical College|National Institute of Biomedical Genomics|Maitra|India

>Spike|hCoV-19/England/QEUEH-9B4BA7/2020|2020-09-03|EPI\_ISL\_590322|Original|hCoV-19^^England|Human|Lighthouse Lab in Glasgow|Wellcome Sanger Institute for the COVID-19 Genomics UK (COG-UK) consortium|Davies|United Kingdom

>Spike|hCoV-19/USA/TX-HMH-MCoV-8176/2020|2020-07-07|EPI\_ISL\_784247|Original|hCoV-19^^Texas|Human|Houston Methodist Hospital|Houston Methodist Hospital|Long|USA

>Spike|hCoV-19/England/QEUEH-962926/2020|2020-08-10|EPI\_ISL\_531781|Original|hCoV-19^^England|Human|Lighthouse Lab in Glasgow|Wellcome Sanger Institute for the COVID-19 Genomics UK (COG-UK) consortium|Davies|United Kingdom

>Spike|hCoV-19/Scotland/QEUEH-A4C657/2020|2020-10-07|EPI\_ISL\_595985|Original|hCoV-19^^Scotland|Human|Quadram Institute Bioscience|COVID-19 Genomics UK (COG-UK) Consortium|Alikhan|United Kingdom

>Spike|hCoV-19/Luxembourg/LNS8661190/2020|2020-10-12|EPI\_ISL\_744782|Original|hCoV-19^^Luxembourg|Human|Laboratoire national de sant\u00e9|Laboratoire national de sant\u00e9|Wienecke-Baldacchino|Luxembourg

>Spike|hCoV-19/England/CAMC-A819F3/2020|2020-10-14|EPI\_ISL\_610748|Original|hCoV-19^^England|Human|Lighthouse Lab in Cambridge|Wellcome Sanger Institute for the COVID-19 Genomics UK (COG-UK) consortium|Davies|United Kingdom

>Spike|hCoV-19/Spain/PV-IBV-000906/2020|2020-03-26|EPI\_ISL\_452661|Original|hCoV-19^^Basque Country|Human|Servicio de Microbiolog\u00eda. Hospital Universitario Donostia. OSI Donostialdea. \u00c1rea de Enfermedades Infecciosas|SeqCOVID-SPAIN consortium/IBV (CSIC) |Comas|Spain

>Spike|hCoV-19/England/QEUA-AE49C1/2020|2020-10-27|EPI\_ISL\_633287|Original|hCoV-19^^England|Human|Lighthouse Lab in Glasgow|Wellcome Sanger Institute for the COVID-19 Genomics UK (COG-UK) consortium|Davies|United Kingdom

>Spike|hCoV-19/England/ALDP-95D1AE/2020|2020-06-18|EPI\_ISL\_553457|Original|hCoV-19^^England|Human|Lighthouse Lab in Alderley Park|Wellcome Sanger Institute for the COVID-19 Genomics UK (COG-UK) consortium|Davies|United Kingdom

>Spike|hCoV-19/England/20126007202/2020|2020-03-16|EPI\_ISL\_418752|Original|hCoV-19^^England|Human|Respiratory Virus Unit|Respiratory Virus Unit|Platt|United Kingdom

>Spike|hCoV-19/England/ALDP-9EE3BB/2020|2020-05-06|EPI\_ISL\_589415|Original|hCoV-19^^England|Human|Lighthouse Lab in Alderley Park|Wellcome Sanger Institute for the COVID-19 Genomics UK (COG-UK) consortium|Davies|United Kingdom

>Spike|hCoV-19/England/SHEF-C2064/2020|2020-05-02|EPI\_ISL\_457591|Original|hCoV-19^^England|Human|Virology Department|COVID-19 Genomics UK (COG-UK) Consortium|de Silva|United Kingdom

>Spike|hCoV-19/England/CAMC-C83CBA/2020|2020-12-17|EPI\_ISL\_762857|Original|hCoV-19^^England|Human|Lighthouse Lab in Cambridge|Wellcome Sanger Institute for the COVID-19 Genomics UK (COG-UK) Consortium|Davies|United Kingdom

>Spike|hCoV-19/Canada/ON-PHL-20-01167/2020|2020-06-00|EPI\_ISL\_548789|Original|hCoV-19^^Ontario|Human|Public Health Ontario Laboratory|Public Health Ontario Laboratory|Guthrie|Canada

>Spike|hCoV-19/England/ALDP-49DE0A/2020|2020-05-19|EPI\_ISL\_559524|Original|hCoV-19^^England|Human|Lighthouse Lab in Alderley Park|Wellcome Sanger Institute for the COVID-19 Genomics UK (COG-UK) consortium|Davies|United Kingdom

>Spike|hCoV-19/England/ALDP-C06684/2020|2020-12-06|EPI\_ISL\_709410|Original|hCoV-19^^England|Human|Lighthouse Lab in Alderley Park|Wellcome Sanger Institute for the COVID-19 Genomics UK (COG-UK) Consortium|Davies|United Kingdom

>Spike|hCoV-19/USA/UT-01896/2020|2020-04-13|EPI\_ISL\_454721|Original|hCoV-19^^Utah|Human|Utah Public Health Laboratory|Utah Public Health Laboratory|Young|USA

>Spike|hCoV-19/Shanghai/SH0091/2020|2020-02-05|EPI\_ISL\_416388|Original|hCoV-19^^Shanghai|Human|Shanghai Public Health Clinical Center|National Research Center for Translational Medicine (Shanghai)|Zhang|China

>Spike|hCoV-19/Portugal/PT0784/2020|2020-03-16|EPI\_ISL\_511043|Original|hCoV-19^^Portugal|Human|Instituto Nacional de Saude (INSA)|Instituto Nacional de Saude (INSA)|Borges|Portugal

>Spike|hCoV-19/England/QEUA-9C9213/2020|2020-09-11|EPI\_ISL\_567195|Original|hCoV-19^^England|Human|Lighthouse Lab in Glasgow|Wellcome Sanger Institute for the COVID-19 Genomics UK (COG-UK) consortium|Davies|United Kingdom

>Spike|hCoV-19/USA/UT-08627/2020|2020-05-21|EPI\_ISL\_524365|Original|hCoV-19^^Utah|Human|Utah Public Health Laboratory|Utah Public Health Laboratory|Young|USA

>Spike|hCoV-19/Australia/NSW2383/2020|2020-03-04|EPI\_ISL\_678308|Original|hCoV-19^^New South Wales|Human|Area of Virology|Virology Research Laboratory; Area of Virology|Foster|Australia

>Spike|hCoV-19/Hong Kong/VM20009307/2020|2020-04-05|EPI\_ISL\_444035|Original|hCoV-19^^Hong Kong|Human|Princess Margaret Hospital|Hong Kong Department of Health|Mak|China

>Spike|hCoV-19/USA/MA-MASPHL-00632/2020|2020-05-12|EPI\_ISL\_692996|Original|hCoV-19^^Massachusetts|Human|Massachusetts State Public Health Laboratory|Massachusetts State Public Health Laboratory|Lang|USA

>Spike|hCoV-19/England/NOTT-10FC84/2020|2020-04-08|EPI\_ISL\_432706|Original|hCoV-19^^England|Human|Queens Medical Centre|COVID-19 Genomics UK (COG-UK) Consortium|Loose|United Kingdom



>Spike|hCoV-19/India/TG-CCMB-M860/2020|2020-06-12|EPI\_ISL\_495258|Original|hCoV-19^^Telangana|Human|CSIR-Centre for Cellular and Molecular Biology|CSIR-Centre for Cellular and Molecular Biology|Banu|India

>Spike|hCoV-19/Scotland/QEUH-A63B2E/2020|2020-10-09|EPI\_ISL\_596182|Original|hCoV-19^^Scotland|Human|Quadram Institute Bioscience|COVID-19 Genomics UK (COG-UK) Consortium|Alikhan|United Kingdom

>Spike|hCoV-19/England/ALDP-C240DD/2020|2020-12-06|EPI\_ISL\_733706|Original|hCoV-19^^England|Human|Lighthouse Lab in Alderley Park|Wellcome Sanger Institute for the COVID-19 Genomics UK (COG-UK) Consortium|Davies|United Kingdom

>Spike|hCoV-19/USA/FL-06-UMTL-A5QM/2020|2020-04-12|EPI\_ISL\_479767|Original|hCoV-19^^Florida|Human|University of Miami Immunology and Histocompatibility Laboratory|University of Miami Immunology and Histocompatibility Laboratory|Margolles-Clark|USA

>Spike|hCoV-19/USA/MI-UM-10036782210/2020|2020-11-04|EPI\_ISL\_707873|Original|hCoV-19^^Michigan|Human|University of Michigan Clinical Microbiology Laboratory|Lauring Lab|Valesano|USA

>Spike|hCoV-19/England/MILK-9A912B/2020|2020-08-31|EPI\_ISL\_551150|Original|hCoV-19^^England|Human|Lighthouse Lab in Milton Keynes|Wellcome Sanger Institute for the COVID-19 Genomics UK (COG-UK) consortium|Davies|United Kingdom

>Spike|hCoV-19/England/QEUH-BCB65F/2020|2020-11-26|EPI\_ISL\_703862|Original|hCoV-19^^England|Human|Lighthouse Lab in Glasgow|Wellcome Sanger Institute for the COVID-19 Genomics UK (COG-UK) Consortium|Davies|United Kingdom

>Spike|hCoV-19/Wales/QEUH-AD336D/2020|2020-10-25|EPI\_ISL\_647959|Original|hCoV-19^^Wales|Human|Lighthouse Lab in Glasgow|Wellcome Sanger Institute for the COVID-19 Genomics UK (COG-UK) Consortium|Davies|United Kingdom

>Spike|hCoV-19/USA/AZ-TG654339/2020|2020-04-13|EPI\_ISL\_695984|Original|hCoV-19^^Arizona|Human|Sonora Quest Laboratories|TGen North|French|USA

>Spike|hCoV-19/England/ALDP-951A45/2020|2020-06-10|EPI\_ISL\_555444|Original|hCoV-19^^England|Human|Lighthouse Lab in Alderley Park|Wellcome Sanger Institute for the COVID-19 Genomics UK (COG-UK) consortium|Davies|United Kingdom

>Spike|hCoV-19/Bangladesh/DNAS\_DRCIM\_isl\_6300/2020|2020-04-29|EPI\_ISL\_774908|Original|hCoV-19^^Dhaka|Human|Designated Reference Institute for Chemical Measurements (DRICM)|DNA SOLUTION LTD.|Rabbi|Bangladesh

>Spike|hCoV-19/Switzerland/SG-ETHZ-200068/2020|2020-07-15|EPI\_ISL\_510749|Original|hCoV-19^^Sankt Gallen|Human|Viollier AG|Department of Biosystems Science and Engineering|Nadeau|Switzerland

>Spike|hCoV-19/England/CAMC-B9805D/2020|2020-11-15|EPI\_ISL\_674862|Original|hCoV-19^^England|Human|Lighthouse Lab in Cambridge|Wellcome Sanger Institute for the COVID-19 Genomics UK (COG-UK) Consortium|Davies|United Kingdom

>Spike|hCoV-19/England/MILK-9EED26/2020|2020-09-24|EPI\_ISL\_580638|Original|hCoV-19^^England|Human|Lighthouse Lab in Milton Keynes|Wellcome Sanger Institute for the COVID-19 Genomics UK (COG-UK) consortium|Davies|United Kingdom

>Spike|hCoV-19/USA/NY-NYCPHL-000576/2020|2020-04-02|EPI\_ISL\_632035|Original|hCoV-19^^New York|Human|Jamaica Hospital Medical Center|New York City Public Health Laboratory|Wang|USA

>Spike|hCoV-19/Australia/VIC7008/2020|2020-07-24|EPI\_ISL\_564196|Original|hCoV-19^^Victoria|Human|Victorian Infectious Diseases Reference Laboratory (VIDRL)|VIDRL and MDU-PHL|Schultz|Australia

>Spike|hCoV-19/Denmark/DCGC-17291/2020|2020-12-14|EPI\_ISL\_750883|Original|hCoV-19^^Midtjylland|Human|Department of Virus and Microbiological Special Diagnostics|Albertsen Lab|Michaelsen|Denmark

>Spike|hCoV-19/England/ALDP-BCA571/2020|2020-11-23|EPI\_ISL\_703268|Original|hCoV-19^^England|Human|Lighthouse Lab in Alderley Park|Wellcome Sanger Institute for the COVID-19 Genomics UK (COG-UK) Consortium|Davies|United Kingdom

>Spike|hCoV-19/USA/TX-HMH-MCoV-10114/2020|2020-07-06|EPI\_ISL\_789326|Original|hCoV-19^^Texas|Human|Houston Methodist Hospital|Houston Methodist Hospital|Long|USA

>Spike|hCoV-19/England/CAMC-BD1C63/2020|2020-11-27|EPI\_ISL\_702134|Original|hCoV-19^^England|Human|Lighthouse Lab in Cambridge|Wellcome Sanger Institute for the COVID-19 Genomics UK (COG-UK) Consortium|Davies|United Kingdom

>Spike|hCoV-19/England/MILK-B85B9E/2020|2020-11-13|EPI\_ISL\_673923|Original|hCoV-19^^England|Human|Lighthouse Lab in Milton Keynes|Wellcome Sanger Institute for the COVID-19 Genomics UK (COG-UK) Consortium|Davies|United Kingdom

>Spike|hCoV-19/Denmark/DCGC-14440/2020|2020-11-30|EPI\_ISL\_711770|Original|hCoV-19^^Hovedstaden|Human|Department of Virus and Microbiological Special Diagnostics|Albertsen Lab|Michaelsen|Denmark

>Spike|hCoV-19/Germany/BB-RKI-NP-0077/2020|2020-12-21|EPI\_ISL\_763052|Original|hCoV-19^^Brandenburg|Human|Unit 17|Project group Epidemiology of Highly Pathogenic Microorganisms|Schubert|Germany

>Spike|hCoV-19/Luxembourg/LNS7194786/2020|2020-09-14|EPI\_ISL\_744531|Original|hCoV-19^^Luxembourg|Human|Laboratoire national de sant\u00e9|Laboratoire national de sant\u00e9|Wienecke-Baldacchino|Luxembourg

>Spike|hCoV-19/Germany/HH-hpi-p1922/2020|2020-03-25|EPI\_ISL\_776253|Original|hCoV-19^^Hamburg|Human|University Medical Center Hamburg Eppendorf|Heinrich Pette Institute|Robitaille|Germany

>Spike|hCoV-19/England/QEUH-AF4032/2020|2020-10-30|EPI\_ISL\_663185|Original|hCoV-19^^England|Human|Lighthouse Lab in Glasgow|Wellcome Sanger Institute for the COVID-19 Genomics UK (COG-UK) Consortium|Davies|United Kingdom

>Spike|hCoV-19/England/QEUH-9F3DC4/2020|2020-09-23|EPI\_ISL\_588547|Original|hCoV-19^^England|Human|Lighthouse Lab in Glasgow|Wellcome Sanger Institute for the COVID-19 Genomics UK (COG-UK) consortium|Davies|United Kingdom

>Spike|hCoV-19/Netherlands/NH-EMC-64/2020|2020-08-27|EPI\_ISL\_577860|Original|hCoV-19^^Noord Holland|Human|Dutch COVID-19 response team|Erasmus Medical Center|Oude Munnink|Netherlands

>Spike|hCoV-19/Italy/LAZ-INMI-125/2020|2020-12-18|EPI\_ISL\_746832|Original|hCoV-19^^Lazio|Human|National Institute for Infectious Diseases|National Institute for Infectious Diseases|Gruber|Italy

>Spike|hCoV-19/Denmark/DCGC-15652/2020|2020-11-23|EPI\_ISL\_713324|Original|hCoV-19^^Syddanmark|Human|Department of Virus and Microbiological Special Diagnostics|Albertsen Lab|Michaelsen|Denmark

>Spike|hCoV-19/Japan/PG-3202/2020|2020-04-00|EPI\_ISL\_691322|Original|hCoV-19^^Japan|Human|Pathogen Genomics Center|Pathogen Genomics Center|Sekizuka|Japan

>Spike|hCoV-19/USA/MN-MDH-125/2020|2020-03-15|EPI\_ISL\_460050|Original|hCoV-19^^Minnesota|Human|Minnesota Department of Health|Minnesota Department of Health|Garfin|USA

>Spike|hCoV-19/England/CAMC-BC1A3F/2020|2020-11-22|EPI\_ISL\_704691|Original|hCoV-19^^England|Human|Lighthouse Lab in Cambridge|Wellcome Sanger Institute for the COVID-19 Genomics UK (COG-UK) Consortium|Davies|United Kingdom

>Spike|hCoV-19/Australia/NSW2026/2020|2020-03-20|EPI\_ISL\_500605|Original|hCoV-19^^New South Wales|Human|Area of Virology|Area of Virology|Bull|Australia

>Spike|hCoV-19/USA/WI-UW-1977/2020|2020-09-29|EPI\_ISL\_677385|Original|hCoV-19^^Wisconsin|Human|University of Wisconsin-Madison AIDS Vaccine Research Laboratories|University of Wisconsin-Madison AIDS Vaccine Research Laboratories|Baczenas|USA

>Spike|hCoV-19/England/20194106801/2020|2020-05-05|EPI\_ISL\_465618|Original|hCoV-19^^England|Human|Respiratory Virus Unit|Respiratory Virus Unit|Platt|United Kingdom

>Spike|hCoV-19/Scotland/QEUH-A5E3B5/2020|2020-10-12|EPI\_ISL\_609191|Original|hCoV-19^^Scotland|Human|Lighthouse Lab in Glasgow|Wellcome Sanger Institute for the COVID-19 Genomics UK (COG-UK) consortium|Davies|United Kingdom

>Spike|hCoV-19/England/CAMC-B51454/2020|2020-11-06|EPI\_ISL\_657815|Original|hCoV-19^^England|Human|Lighthouse Lab in Cambridge|Wellcome Sanger Institute for the COVID-19 Genomics UK (COG-UK) Consortium|Davies|United Kingdom

>Spike|hCoV-19/Canada/ON-S1508/2020|2020-08-30|EPI\_ISL\_755893|Original|hCoV-19^^Ontario|Human|Toronto Invasive Bacterial Diseases Network|McMaster University|McArthur|Canada

>Spike|hCoV-19/USA/AZ-TG668338/2020|2020-05-13|EPI\_ISL\_696263|Original|hCoV-19^^Arizona|Human|Sonora Quest Laboratories|TGen North|French|USA

>Spike|hCoV-19/USA/NY-NYCPHL-001103/2020|2020-10-18|EPI\_ISL\_671686|Original|hCoV-19^^New York|Human|DOHMH Morrisania|New York City Public Health Laboratory|Wang|USA

>Spike|hCoV-19/England/MILK-BB0E82/2020|2020-11-18|EPI\_ISL\_720501|Original|hCoV-19^^England|Human|Lighthouse Lab in Milton Keynes|Wellcome Sanger Institute for the COVID-19 Genomics UK (COG-UK) Consortium|Davies|United Kingdom

>Spike|hCoV-19/Denmark/DCGC-5727/2020|2020-09-21|EPI\_ISL\_621232|Original|hCoV-19^^Hovedstaden|Human|Department of Virus and Microbiological Special Diagnostics|Albertsen lab|Michaelsen|Denmark

>Spike|hCoV-19/England/QEUEH-9618B1/2020|2020-07-31|EPI\_ISL\_536967|Original|hCoV-19^^England|Human|Lighthouse Lab in Glasgow|Wellcome Sanger Institute for the COVID-19 Genomics UK (COG-UK) consortium|Davies|United Kingdom

>Spike|hCoV-19/USA/HI-H200165/2020|2020-07-20|EPI\_ISL\_752726|Original|hCoV-19^^Hawaii|Human|State Laboratories Division|State Laboratories Division|Sultana|USA

>Spike|hCoV-19/England/ALDP-938A08/2020|2020-06-21|EPI\_ISL\_551513|Original|hCoV-19^^England|Human|Lighthouse Lab in Alderley Park|Wellcome Sanger Institute for the COVID-19 Genomics UK (COG-UK) consortium|Davies|United Kingdom

>Spike|hCoV-19/Wales/PHWC-2A659/2020|2020-04-06|EPI\_ISL\_445599|Original|hCoV-19^^Wales|Human|Wales Specialist Virology Centre|Public Health Wales Microbiology Cardiff|Moore|United Kingdom

>Spike|hCoV-19/Wales/PHWC-16493B/2020|2020-05-15|EPI\_ISL\_479324|Original|hCoV-19^^Wales|Human|Wales Specialist Virology Centre Sequencing lab|COVID-19 Genomics UK (COG-UK) Consortium|Moore|United Kingdom

>Spike|hCoV-19/USA/CA-ALSR-0585-SAN/2020|2020-04-15|EPI\_ISL\_483241|Original|hCoV-19^^California|Human|UC San Diego Center for Advanced Laboratory Medicine|Andersen lab at Scripps Research|Gangavarapu|USA

>Spike|hCoV-19/Denmark/DCGC-20766/2020|2020-12-21|EPI\_ISL\_759351|Original|hCoV-19^^Hovedstaden|Human|Department of Virus and Microbiological Special Diagnostics|Albertsen Lab|Michaelsen|Denmark

>Spike|hCoV-19/England/SHEF-BFEF7/2020|2020-03-25|EPI\_ISL\_432713|Original|hCoV-19^^England|Human|Virology Department|COVID-19 Genomics UK (COG-UK) Consortium|de Silva|United Kingdom

>Spike|hCoV-19/England/ALDP-A86F29/2020|2020-10-17|EPI\_ISL\_606109|Original|hCoV-19^^England|Human|Lighthouse Lab in Alderley Park|Wellcome Sanger Institute for the COVID-19 Genomics UK (COG-UK) consortium|Davies|United Kingdom

>Spike|hCoV-19/England/QEUEH-B31D13/2020|2020-11-04|EPI\_ISL\_646149|Original|hCoV-19^^England|Human|Lighthouse Lab in Glasgow|Wellcome Sanger Institute for the COVID-19 Genomics UK (COG-UK) Consortium|Davies|United Kingdom

>Spike|hCoV-19/England/QEUEH-9E4151/2020|2020-09-23|EPI\_ISL\_579844|Original|hCoV-19^^England|Human|Lighthouse Lab in Glasgow|Wellcome Sanger Institute for the COVID-19 Genomics UK (COG-UK) consortium|Davies|United Kingdom

>Spike|hCoV-19/Belgium/reg-09221149/2020|2020-09-22|EPI\_ISL\_738237|Original|hCoV-19^^Haren|Human|UZ Leuven|KU Leuven|Maes|Belgium

>Spike|hCoV-19/Scotland/CVR563/2020|2020-03-23|EPI\_ISL\_439084|Original|hCoV-19^^Scotland|Human|West of Scotland Specialist Virology Centre|COVID-19 Genomics UK (COG-UK) Consortium|Robertson|United Kingdom

>Spike|hCoV-19/Switzerland/SZ-ETHZ-100140/2020|2020-03-16|EPI\_ISL\_451724|Original|hCoV-19^^Schwyz|Human|Viollier AG|Department of Biosystems Science and Engineering|Nadeau|Switzerland

>Spike|hCoV-19/USA/TX-HMH-MCoV-13336/2020|2020-08-24|EPI\_ISL\_788484|Original|hCoV-19^^Texas|Human|Houston Methodist Hospital|Houston Methodist Hospital|Long|USA

>Spike|hCoV-19/USA/DE-DHSS-F1015897/2020|2020-10-12|EPI\_ISL\_708404|Original|hCoV-19^^Delaware|Human|Delaware Public Health Lab|Delaware Public Health Lab|Bajwa|USA

>Spike|hCoV-19/Sweden/20-08098/2020|2020-03-06|EPI\_ISL\_454469|Original|hCoV-19^^Stockholm|Human|Karolinska Universitetslaboratoriet|The Public Health Agency of Sweden|Svartstr\u00f6m|Sweden

>Spike|hCoV-19/Japan/PG-8885/2020|2020-08-00|EPI\_ISL\_686431|Original|hCoV-19^^Japan|Human|Pathogen Genomics Center|Pathogen Genomics Center|Sekizuka|Japan

>Spike|hCoV-19/England/NOTT-112CCA/2020|2020-07-01|EPI\_ISL\_493608|Original|hCoV-19^^England|Human|Queens Medical Centre|COVID-19 Genomics UK (COG-UK) Consortium|Loose|United Kingdom

>Spike|hCoV-19/Japan/PG-3505/2020|2020-07-00|EPI\_ISL\_691761|Original|hCoV-19^^Japan|Human|Pathogen Genomics Center|Pathogen Genomics Center|Sekizuka|Japan

>Spike|hCoV-19/Germany/HH-hpi-p1998/2020|2020-03-27|EPI\_ISL\_776315|Original|hCoV-19^^Hamburg|Human|University Medical Center Hamburg Eppendorf|Heinrich Pette Institute|Robitaille|Germany

>Spike|hCoV-19/USA/MI-QDX-1772/2020|2020-03-17|EPI\_ISL\_604058|Original|hCoV-19^^Michigan|Human|Quest Diagnostics|Quest Diagnostics|Kagan|USA

>Spike|hCoV-19/Australia/TAS63/2020|2020-03-23|EPI\_ISL\_522735|Original|hCoV-19^^Tasmania|Human|Royal Hobart Hospital Microbiology Department|MDU-PHL|Schultz|Australia

>Spike|hCoV-19/USA/TX-DSHS-1035/2020|2020-06-15|EPI\_ISL\_628714|Original|hCoV-19^^Texas|Human|Texas Department of State Health Services|Texas Department of State Health Services|Rahman|USA

>Spike|hCoV-19/USA/MI-UM-10035892209/2020|2020-09-10|EPI\_ISL\_583396|Original|hCoV-19^^Michigan|Human|University of Michigan Clinical Microbiology Laboratory|Lauring Lab|Valesano|USA

>Spike|hCoV-19/England/NORT-294E23/2020|2020-03-29|EPI\_ISL\_478620|Original|hCoV-19^^England|Human|Northumbria University / South Tees Hospitals NHS Foundation Trust / North Cumbria Integrated Care NHS Foundation Trust / North Tees and Hartlepool NHS Foundation Trust / Newcastle Hospitals NHS Foundation Trust|COVID-19 Genomics UK (COG-UK) Consortium|Bashton|United Kingdom

>Spike|hCoV-19/England/QEUEH-B9F77F/2020|2020-11-18|EPI\_ISL\_720953|Original|hCoV-19^^England|Human|Lighthouse Lab in Glasgow|Wellcome Sanger Institute for the COVID-19 Genomics UK (COG-UK) Consortium|Davies|United Kingdom

>Spike|hCoV-19/Denmark/DCGC-16185/2020|2020-11-16|EPI\_ISL\_714626|Original|hCoV-19^^Sjaelland|Human|Department of Virus and Microbiological Special Diagnostics|Albertsen Lab|Michaelsen|Denmark

>Spike|hCoV-19/Wales/PHWC-49461A/2020|2020-11-20|EPI\_ISL\_726144|Original|hCoV-19^^Wales|Human|Originating lab|COVID-19 Genomics UK (COG-UK) Consortium|Moore|United Kingdom

>Spike|hCoV-19/Scotland/QEUEH-BEB1C1/2020|2020-12-04|EPI\_ISL\_710637|Original|hCoV-19^^Scotland|Human|Lighthouse Lab in Glasgow|Wellcome Sanger Institute for the COVID-19 Genomics UK (COG-UK) Consortium|Davies|United Kingdom

>Spike|hCoV-19/Japan/PG-6447/2020|2020-08-00|EPI\_ISL\_689552|Original|hCoV-19^^Japan|Human|Pathogen Genomics Center|Pathogen Genomics Center|Sekizuka|Japan

>Spike|hCoV-19/England/QEUEH-A1DF36/2020|2020-10-01|EPI\_ISL\_587562|Original|hCoV-19^^England|Human|Lighthouse Lab in Glasgow|Wellcome Sanger Institute for the COVID-19 Genomics UK (COG-UK) consortium|Davies|United Kingdom

>Spike|hCoV-19/Japan/PG-6752/2020|2020-08-00|EPI\_ISL\_687862|Original|hCoV-19^^Japan|Human|Pathogen Genomics Center|Pathogen Genomics Center|Sekizuka|Japan

>Spike|hCoV-19/Portugal/PT0011/2020|2020-03-08|EPI\_ISL\_417996|Original|hCoV-19^^Portugal|Human|CHULC - H Curry Cabral|Instituto Nacional de Saude (INSA)|Borges|Portugal

>Spike|hCoV-19/Scotland/CVR3671/2020|2020-05-22|EPI\_ISL\_473752|Original|hCoV-19^^Scotland|Human|West of Scotland Specialist Virology Centre|COVID-19 Genomics UK (COG-UK) Consortium|Robertson|United Kingdom

>Spike|hCoV-19/Luxembourg/LNS3280585/2020|2020-10-22|EPI\_ISL\_740283|Original|hCoV-19^^Luxembourg|Human|Laboratoire national de sant\u00e9|Laboratoire national de sant\u00e9|Wienecke-Baldacchino|Luxembourg

>Spike|hCoV-19/Japan/PG-3936/2020|2020-07-00|EPI\_ISL\_692187|Original|hCoV-19^^Japan|Human|Pathogen Genomics Center|Pathogen Genomics Center|Sekizuka|Japan

>Spike|hCoV-19/England/ALDP-BC7996/2020|2020-11-23|EPI\_ISL\_721453|Original|hCoV-19^^England|Human|Lighthouse Lab in Alderley Park|Wellcome Sanger Institute for the COVID-19 Genomics UK (COG-UK) Consortium|Davies|United Kingdom

>Spike|hCoV-19/Wales/PHWC-48E507/2020|2020-11-12|EPI\_ISL\_680870|Original|hCoV-19^^Wales|Human|Wales Specialist Virology Centre Sequencing lab|COVID-19 Genomics UK (COG-UK) Consortium|Moore|United Kingdom

>Spike|hCoV-19/Australia/TAS237/2020|2020-04-13|EPI\_ISL\_522666|Original|hCoV-19^^Tasmania|Human|Royal Hobart Hospital Microbiology Department|MDU-PHL|Schultz|Australia

>Spike|hCoV-19/USA/TX-HMH-MCoV-19294/2020|2020-11-28|EPI\_ISL\_783745|Original|hCoV-19^^Texas|Human|Houston Methodist Hospital|Houston Methodist Hospital|Long|USA

>Spike|hCoV-19/England/CAMB-1AA5F9/2020|2020-04-17|EPI\_ISL\_470254|Original|hCoV-19^^England|Human|Department of Pathology|Wellcome Sanger Institute for the COVID-19 Genomics UK (COG-UK) consortium|Davies|United Kingdom

>Spike|hCoV-19/Wales/PHWC-49057B/2020|2020-11-06|EPI\_ISL\_706488|Original|hCoV-19^^Wales|Human|Originating lab|COVID-19 Genomics UK (COG-UK) Consortium|Moore|United Kingdom

>Spike|hCoV-19/England/QEUA-BA2DA4/2020|2020-11-18|EPI\_ISL\_721156|Original|hCoV-19^^England|Human|Lighthouse Lab in Glasgow|Wellcome Sanger Institute for the COVID-19 Genomics UK (COG-UK) Consortium|Davies|United Kingdom

>Spike|hCoV-19/Luxembourg/LNS4736675/2020|2020-11-01|EPI\_ISL\_740535|Original|hCoV-19^^Luxembourg|Human|Laboratoire national de sant\u00e9|Laboratoire national de sant\u00e9|Wienecke-Baldacchino|Luxembourg

>Spike|hCoV-19/Australia/QLD1214/2020|2020-03-23|EPI\_ISL\_639805|Original|hCoV-19^^Australia|Human|unknown|Public Health Virology Laboratory|Nguyen|Australia

>Spike|hCoV-19/USA/CA-CHLA-PLM39616724/2020|2020-12-15|EPI\_ISL\_753674|Original|hCoV-19^^California|Human|Clinical virology Laboratory|Center for Personalized Medicine|Dien Bard|USA

>Spike|hCoV-19/Spain/PV-IBV-004285/2020|2020-04-08|EPI\_ISL\_510401|Original|hCoV-19^^Basque Country|Human|Servicio de Microbiolog\u00eda. Hospital Universitario Donostia. OSI Donostialdea. \u00c1rea de Enfermedades Infecciosas|SeqCOVID-SPAIN consortium|IBV (CSIC)|Comas|Spain

>Spike|hCoV-19/India/GJ-GBRC299b/2020|2020-06-15|EPI\_ISL\_495043|Original|hCoV-19^^Gujarat|Human|GMERS Medical College & Hospital|Gujarat Biotechnology Research Centre|Joshi|India

>Spike|hCoV-19/USA/NY-NYCPHL-001326/2020|2020-11-12|EPI\_ISL\_683920|Original|hCoV-19^^New York|Human|DOHMH Jamaica|New York City Public Health Laboratory|Wang|USA

>Spike|hCoV-19/England/ALDP-A5124C/2020|2020-10-07|EPI\_ISL\_598246|Original|hCoV-19^^England|Human|Lighthouse Lab in Alderley Park|Wellcome Sanger Institute for the COVID-19 Genomics UK (COG-UK) consortium|Davies|United Kingdom

>Spike|hCoV-19/England/ALDP-C3C6FE/2020|2020-12-10|EPI\_ISL\_731642|Original|hCoV-19^^England|Human|Lighthouse Lab in Alderley Park|Wellcome Sanger Institute for the COVID-19 Genomics UK (COG-UK) Consortium|Davies|United Kingdom

>Spike|hCoV-19/USA/CA-ALSR-2936/2020|2020-07-16|EPI\_ISL\_635739|Original|hCoV-19^^California|Human|San Diego County Public Health Laboratory|Andersen lab at Scripps Research|Gangavarapu|USA

>Spike|hCoV-19/England/ALDP-AA2B14/2020|2020-10-22|EPI\_ISL\_624091|Original|hCoV-19^^England|Human|Lighthouse Lab in Alderley Park|Wellcome Sanger Institute for the COVID-19 Genomics UK (COG-UK) consortium|Davies|United Kingdom

>Spike|hCoV-19/Wales/PHWC-491CEE/2020|2020-11-12|EPI\_ISL\_706768|Original|hCoV-19^^Wales|Human|Originating lab|COVID-19 Genomics UK (COG-UK) Consortium|Moore|United Kingdom

>Spike|hCoV-19/USA/OR-OHSU-2599/2020|2020-08-21|EPI\_ISL\_667261|Original|hCoV-19^^Oregon|Human|OHSU Lab Services Molecular Microbiology Lab|Oregon SARS-CoV-2 Genome Sequencing Center|O'Roak|USA

>Spike|hCoV-19/England/PORT-2EA34D/2020|2020-00-00|EPI\_ISL\_665330|Original|hCoV-19^^England|Human|Centre for Enzyme Innovation|COVID-19 Genomics UK (COG-UK) Consortium|Robson|United Kingdom

>Spike|hCoV-19/England/SHEF-10B285D/2020|2020-04-28|EPI\_ISL\_537282|Original|hCoV-19^^England|Human|Virology Department|Wellcome Sanger Institute for the COVID-19 Genomics UK (COG-UK) consortium|Davies|United Kingdom

>Spike|hCoV-19/England/QEUA-A4B10C/2020|2020-10-05|EPI\_ISL\_637668|Original|hCoV-19^^England|Human|Department of Pathology|COVID-19 Genomics UK (COG-UK) Consortium|Goodfellow|United Kingdom

>Spike|hCoV-19/Indonesia/JK-NIHRD-MI41613/2020|2020-07-27|EPI\_ISL\_538504|Original|hCoV-19^^Jakarta|Human|National Institute of Health Research and Development|National Institute of Health Research and Development|Setiawati|Indonesia

>Spike|hCoV-19/Canada/QC-LSPQ-L00231814/2020|2020-03-20|EPI\_ISL\_535964|Original|hCoV-19^^Quebec|Human|H\u00f4pital de Chicoutimi|Laboratoire de sant\u00e9 publique du Qu\u00e9bec|Moreira|Canada

>Spike|hCoV-19/England/NOTT-113F1B/2020|2020-10-01|EPI\_ISL\_577122|Original|hCoV-19^^England|Human|Queens Medical Centre|COVID-19 Genomics UK (COG-UK) Consortium|Loose|United Kingdom

>Spike|hCoV-19/Kazakhstan/26475/2020|2020-04-26|EPI\_ISL\_454587|Original|hCoV-19^^Nur-Sultan|Human|Laboratory of virology|Laboratory of molecular-genetic research|Abdaliyev|Kazakhstan

>Spike|hCoV-19/England/NOTT-1201BB/2020|2020-12-07|EPI\_ISL\_706435|Original|hCoV-19^^England|Human|Queens Medical Centre|COVID-19 Genomics UK (COG-UK) Consortium|Loose|United Kingdom

>Spike|hCoV-19/Switzerland/BS-UHB-42184795/2020|2020-03-10|EPI\_ISL\_527979|Original|hCoV-19^^Basel-Stadt|Human|University Hospital Basel|University Hospital Basel|Roloff Handschin|Switzerland

>Spike|hCoV-19/Brazil/RS-6184/2020|2020-05-08|EPI\_ISL\_729823|Original|hCoV-19^^Rio Grande do Sul|Human|Laboratorio Central de Saude Publica do Estado do Rio Grande do Sul (LACEN-RS)|Laboratory of Respiratory Viruses and Measles|Silva|Brazil

>Spike|hCoV-19/Luxembourg/LNS7617595/2020|2020-10-16|EPI\_ISL\_744599|Original|hCoV-19^^Luxembourg|Human|Laboratoire national de sant\u00e9|Laboratoire national de sant\u00e9|Wienecke-Baldacchino|Luxembourg

>Spike|hCoV-19/USA/CA-CZB-11873/2020|2020-04-09|EPI\_ISL\_625595|Original|hCoV-19^^California|Human|Santa Clara County Public Health Laboratory|Chan-Zuckerberg Biohub|Bhatt|USA

>Spike|hCoV-19/England/CAMC-B514DC/2020|2020-11-08|EPI\_ISL\_658034|Original|hCoV-19^^England|Human|Lighthouse Lab in Cambridge|Wellcome Sanger Institute for the COVID-19 Genomics UK (COG-UK) Consortium|Davies|United Kingdom

>Spike|hCoV-19/Scotland/CVR4525/2020|2020-09-22|EPI\_ISL\_585385|Original|hCoV-19^^Scotland|Human|Lighthouse Lab in Glasgow / MRC-University of Glasgow Centre for Virus Research|COVID-19 Genomics UK (COG-UK) Consortium|Robertson|United Kingdom

>Spike|hCoV-19/United Arab Emirates/L920673013/2020|2020-04-17|EPI\_ISL\_520737|Original|hCoV-19^^United Arab Emirates|Human|Mohammed Bin Rashid University of Medicine and Health Sciences|Al Jalila Genomics Center|Ramaswamy|United Arab Emirates

>Spike|hCoV-19/England/LIVE-9D69D/2020|2020-04-10|EPI\_ISL\_453223|Original|hCoV-19^^England|Human|Liverpool Clinical Laboratories|COVID-19 Genomics UK (COG-UK) Consortium|Haldenby|United Kingdom

>Spike|hCoV-19/Wales/PHWC-47D3B6/2020|2020-10-01|EPI\_ISL\_586135|Original|hCoV-19^^Wales|Human|Wales Specialist Virology Centre Sequencing lab|COVID-19 Genomics UK (COG-UK) Consortium|Moore|United Kingdom

>Spike|hCoV-19/England/MILK-AB80EF/2020|2020-10-22|EPI\_ISL\_623468|Original|hCoV-19^^England|Human|Lighthouse Lab in Milton Keynes|Wellcome Sanger Institute for the COVID-19 Genomics UK (COG-UK) consortium|Davies|United Kingdom

>Spike|hCoV-19/France/ARA-68090/2020|2020-09-04|EPI\_ISL\_683397|Original|hCoV-19^^Auvergne-Rh\u00f4ne-Alpes|Human|CNR Virus des Infections Respiratoires - France SUD|CNR Virus des Infections Respiratoires - France SUD|Bal|France

>Spike|hCoV-19/Luxembourg/LNS2400608/2020|2020-12-23|EPI\_ISL\_771065|Original|hCoV-19^^Luxembourg|Human|Laboratoire national de sant\u00e9|Laboratoire national de sant\u00e9|Wienecke-Baldacchino|Luxembourg

>Spike|hCoV-19/USA/TX-HMH-5098/2020|2020-06-21|EPI\_ISL\_544523|Original|hCoV-19^^Texas|Human|Houston Methodist Hospital|Houston Methodist Hospital|Long|USA

>Spike|hCoV-19/England/CAMC-B3287B/2020|2020-11-05|EPI\_ISL\_659652|Original|hCoV-19^^England|Human|Lighthouse Lab in Cambridge|Wellcome Sanger Institute for the COVID-19 Genomics UK (COG-UK) Consortium|Davies|United Kingdom

>Spike|hCoV-19/Australia/VIC8584/2020|2020-08-15|EPI\_ISL\_565100|Original|hCoV-19^^Victoria|Human|Microbiological Diagnostic Unit - Public Health Laboratory (MDU-PHL)|MDU-PHL|Schultz|Australia

>Spike|hCoV-19/USA/CA-CZB-3933/2020|2020-07-29|EPI\_ISL\_548510|Original|hCoV-19^^California|Human|Contra Costa Public Health Lab|Chan-Zuckerberg Biohub|Bhatt|USA

>Spike|hCoV-19/United Arab Emirates/L3290361549/2020|2020-05-30|EPI\_ISL\_520708|Original|hCoV-19^^United Arab Emirates|Human|Mohammed Bin Rashid University of Medicine and Health Sciences|Al Jalila Genomics Center|Ramaswamy|United Arab Emirates

>Spike|hCoV-19/USA/VA-DCLS-0649/2020|2020-04-11|EPI\_ISL\_495321|Original|hCoV-19^^Virginia|Human|Virginia DCLS|Virginia DCLS|St. Jacques|USA

>Spike|hCoV-19/South Africa/KRISP-K001051/2020|2020-07-14|EPI\_ISL\_509309|Original|hCoV-19^^KwaZulu-Natal|Human|NHL-SIALCH|KRISP|de Oliveira|South Africa

>Spike|hCoV-19/England/ALDP-B1BCE5/2020|2020-10-31|EPI\_ISL\_646025|Original|hCoV-19^^England|Human|Lighthouse Lab in Alderley Park|Wellcome Sanger Institute for the COVID-19 Genomics UK (COG-UK) Consortium|Davies|United Kingdom

>Spike|hCoV-19/England/CAMB-1ABC11/2020|2020-04-20|EPI\_ISL\_470136|Original|hCoV-19^^England|Human|Department of Pathology|Wellcome Sanger Institute for the COVID-19 Genomics UK (COG-UK) consortium|Davies|United Kingdom

>Spike|hCoV-19/England/LIVE-1DEB36/2020|2020-10-10|EPI\_ISL\_626815|Original|hCoV-19^^England|Human|Liverpool Clinical Laboratories|COVID-19 Genomics UK (COG-UK) Consortium|Haldenby|United Kingdom

>Spike|hCoV-19/Luxembourg/LNS7878146/2020|2020-10-20|EPI\_ISL\_744646|Original|hCoV-19^^Luxembourg|Human|Laboratoire national de sant\u00e9|Laboratoire national de sant\u00e9|Wienecke-Baldacchino|Luxembourg

>Spike|hCoV-19/England/SHEF-CB64B/2020|2020-04-24|EPI\_ISL\_479248|Original|hCoV-19^^England|Human|Virology Department|COVID-19 Genomics UK (COG-UK) Consortium|de Silva|United Kingdom

>Spike|hCoV-19/USA/CA-CHLA-PLM41636829/2020|2020-11-30|EPI\_ISL\_753516|Original|hCoV-19^^California|Human|Clinical virology Laboratory|Center for Personalized Medicine|Dien Bard|USA

>Spike|hCoV-19/Greece/47/2020|2020-03-23|EPI\_ISL\_434462|Original|hCoV-19^^Athens|Human|Laboratory of Microbiology|Laboratory of Biology|Karakasiliotis|Greece

>Spike|hCoV-19/England/20132018604/2020|2020-03-23|EPI\_ISL\_423732|Original|hCoV-19^^England|Human|Respiratory Virus Unit|Respiratory Virus Unit|Platt|United Kingdom

>Spike|hCoV-19/England/ALDP-B23691/2020|2020-11-04|EPI\_ISL\_647099|Original|hCoV-19^^England|Human|Lighthouse Lab in Alderley Park|Wellcome Sanger Institute for the COVID-19 Genomics UK (COG-UK) Consortium|Davies|United Kingdom

>Spike|hCoV-19/Denmark/DCGC-21642/2020|2020-12-21|EPI\_ISL\_758281|Original|hCoV-19^^Midtjylland|Human|Department of Virus and Microbiological Special Diagnostics|Albertsen Lab|Michaelsen|Denmark

>Spike|hCoV-19/India/OR-ILSCV27713/2020|2020-05-21|EPI\_ISL\_481121|Original|hCoV-19^^Odisha|Human|Immunogenomics lab|Immunogenomics lab|Raghav|India

>Spike|hCoV-19/Spain/IB-IBV-99007233/2020|2020-05-28|EPI\_ISL\_541961|Original|hCoV-19^^Balear Islands|Human|Servicio de Microbiolog\u00eda|SeqCOVID-SPAIN consortium|IBV (CSIC) |Comas|Spain

>Spike|hCoV-19/Luxembourg/LNS3672765/2020|2020-10-28|EPI\_ISL\_740352|Original|hCoV-19^^Luxembourg|Human|Laboratoire national de sant\u00e9|Laboratoire national de sant\u00e9|Wienecke-Baldacchino|Luxembourg

>Spike|hCoV-19/Denmark/DCGC-15576/2020|2020-11-23|EPI\_ISL\_713904|Original|hCoV-19^^Hovedstaden|Human|Department of Virus and Microbiological Special Diagnostics|Albertsen Lab|Michaelsen|Denmark

>Spike|hCoV-19/India/MH-ACTREC-268/2020|2020-07-09|EPI\_ISL\_699920|Original|hCoV-19^^Maharashtra|Human|Hematopathology Laboratory|Hematopathology Laboratory|Patkar|India

>Spike|hCoV-19/England/MILK-A7C0BA/2020|2020-10-15|EPI\_ISL\_606338|Original|hCoV-19^^England|Human|Lighthouse Lab in Milton Keynes|Wellcome Sanger Institute for the COVID-19 Genomics UK (COG-UK) consortium|Davies|United Kingdom

>Spike|hCoV-19/USA/MN-MDH-1945/2020|2020-09-21|EPI\_ISL\_613481|Original|hCoV-19^^Minnesota|Human|Public Health Laboratory - Infectious Disease Lab|Minnesota Department of Health|Lorentz|USA

>Spike|hCoV-19/Germany/HH-hpi-p1848/2020|2020-03-22|EPI\_ISL\_776199|Original|hCoV-19^^Hamburg|Human|University Medical Center Hamburg Eppendorf|Heinrich Pette Institute|Robitaille|Germany

>Spike|hCoV-19/USA/UT-02954/2020|2020-05-01|EPI\_ISL\_509551|Original|hCoV-19^^Utah|Human|Utah Public Health Laboratory|Utah Public Health Laboratory|Butz|USA

>Spike|hCoV-19/England/NORW-F651D/2020|2020-12-12|EPI\_ISL\_725298|Original|hCoV-19^^England|Human|Quadram Institute Bioscience|COVID-19 Genomics UK (COG-UK) Consortium|Alikhan|United Kingdom

>Spike|hCoV-19/Portugal/PT0285/2020|2020-03-09|EPI\_ISL\_454000|Original|hCoV-19^^Portugal|Human|unknown|Instituto Nacional de Saude (INSA)|Borges|Portugal

>Spike|hCoV-19/Iran/SA-Isf-50/2020|2020-08-06|EPI\_ISL\_672607|Original|hCoV-19^^Iran|Human|Infectious Diseases and Tropical Medicine Research Center|Infectious Diseases and Tropical Medicine Research Center|Ahangarzadeh,S.|Iran

>Spike|hCoV-19/USA/LA-EVTL1030/2020|2020-08-25|EPI\_ISL\_653721|Original|hCoV-19^^Louisiana|Human|LSUHS Emerging Viral Threat Laboratory|Microbial Genome Sequencing Center|Kamil|USA

>Spike|hCoV-19/USA/CA-ALSR-3043/2020|2020-07-31|EPI\_ISL\_635809|Original|hCoV-19^^California|Human|San Diego County Public Health Laboratory|Andersen lab at Scripps Research|Gangavarapu|USA

>Spike|hCoV-19/England/CAMC-A65500/2020|2020-10-11|EPI\_ISL\_608402|Original|hCoV-19^^England|Human|Lighthouse Lab in Cambridge|Wellcome Sanger Institute for the COVID-19 Genomics UK (COG-UK) consortium|Davies|United Kingdom

>Spike|hCoV-19/Chile/RM-CMM-0089M/2020|2020-05-01|EPI\_ISL\_629021|Original|hCoV-19^^Region Metropolitana de Santiago|Human|Centro de Biotecnolog\u00eda Vegetal|Center for Mathematical Modeling and Center for Genome Regulation. Santiago|Palma V\u00e9jares|Chile

>Spike|hCoV-19/Wales/PHWC-498EE1/2020|2020-11-30|EPI\_ISL\_727227|Original|hCoV-19^^Wales|Human|Originating lab|COVID-19 Genomics UK (COG-UK) Consortium|Moore|United Kingdom

>Spike|hCoV-19/England/LIVE-9C2F4/2020|2020-03-30|EPI\_ISL\_449528|Original|hCoV-19^^England|Human|Liverpool Clinical Laboratories|COVID-19 Genomics UK (COG-UK) Consortium|Haldenby|United Kingdom

>Spike|hCoV-19/Spain/AN-IBV-002841/2020|2020-03-09|EPI\_ISL\_474923|Original|hCoV-19^^Andalucia|Human|Hospital Universitario Virgen de las Nieves de Granada-SAS|SeqCOVID-SPAIN consortium/IBV(CSIC)|Comas|Spain

>Spike|hCoV-19/USA/CA-CSMC75/2020|2020-04-03|EPI\_ISL\_475690|Original|hCoV-19^^California|Human|Cedars-Sinai Medical Center|Cedars-Sinai Medical Center|Zhang|USA

>Spike|hCoV-19/France/ARA-SC303/2020|2020-03-21|EPI\_ISL\_649942|Original|hCoV-19^^Auvergne-Rh\u00f4ne-Alpes|Human|CHU de Saint-\u00c9tienne H\u00f4pital Nord|CNR Virus des Infections Respiratoires - France SUD|Bal|France

>Spike|hCoV-19/England/204380928/2020|2020-10-17|EPI\_ISL\_609902|Original|hCoV-19^^England|Human|Respiratory Virus Unit|Respiratory Virus Unit|Platt|United Kingdom

>Spike|hCoV-19/USA/WI-WSLH-200314/2020|2020-04-20|EPI\_ISL\_578495|Original|hCoV-19^^Wisconsin|Human|Wisconsin State Laboratory of Hygiene Communicable Disease Division|Wisconsin State Laboratory of Hygiene Communicable Disease Division|Florek|USA

>Spike|hCoV-19/England/SHEF-D3200/2020|2020-10-05|EPI\_ISL\_653097|Original|hCoV-19^^England|Human|Virology Department|COVID-19 Genomics UK (COG-UK) Consortium|de Silva|United Kingdom

>Spike|hCoV-19/Wales/PHWC-32560/2020|2020-04-07|EPI\_ISL\_474329|Original|hCoV-19^^Wales|Human|Originating lab|COVID-19 Genomics UK (COG-UK) Consortium|Moore|United Kingdom

>Spike|hCoV-19/Switzerland/ZH-ETHZ-420695/2020|2020-12-24|EPI\_ISL\_768304|Original|hCoV-19^^Zurich|Human|Viollier AG|Department of Biosystems Science and Engineering|Nadeau|Switzerland

>Spike|hCoV-19/England/ALDP-CBDD2D/2020|2020-12-18|EPI\_ISL\_760326|Original|hCoV-19^^England|Human|Lighthouse Lab in Alderley Park|Wellcome Sanger Institute for the COVID-19 Genomics UK (COG-UK) Consortium|Davies|United Kingdom

>Spike|hCoV-19/England/PORT-2D182C/2020|2020-04-13|EPI\_ISL\_493637|Original|hCoV-19^^England|Human|Centre for Enzyme Innovation|COVID-19 Genomics UK (COG-UK) Consortium|Robson|United Kingdom

>Spike|hCoV-19/Australia/VIC57/2020|2020-03-12|EPI\_ISL\_419779|Original|hCoV-19^^Victoria|Human|Victorian Infectious Diseases Reference Laboratory



(VIDRL)|Victorian Infectious Diseases Reference Laboratory and Microbiological Diagnostic Unit Public Health Laboratory|Schultz|Australia  
>Spike|hCoV-19/USA/WA-S2363/2020|2020-06-10|EPI\_ISL\_496995|Original|hCoV-19^^Washington|Human|Washington State Department of Health|Seattle Flu Study|Lee|USA  
>Spike|hCoV-19/England/CAMC-B78B43/2020|2020-11-12|EPI\_ISL\_783391|Original|hCoV-19^^England|Human|Lighthouse Lab in Cambridge|Wellcome Sanger Institute for the COVID-19 Genomics UK (COG-UK) Consortium|Davies|United Kingdom  
>Spike|hCoV-19/Netherlands/NA\_693/2020|2020-03-31|EPI\_ISL\_461128|Original|hCoV-19^^Netherlands|Human|Dutch COVID-19 response team|Erasmus Medical Center|Oude Munnink|Netherlands  
>Spike|hCoV-19/England/LIVE-A67F8/2020|2020-03-19|EPI\_ISL\_499744|Original|hCoV-19^^England|Human|Liverpool Clinical Laboratories|COVID-19 Genomics UK (COG-UK) Consortium|Haldenby|United Kingdom  
>Spike|hCoV-19/Spain/VC-FISABIO-55/2020|2020-03-10|EPI\_ISL\_425179|Original|hCoV-19^^Comunitat Valenciana|Human|Servicio de Microbiolog\u00eda. Consorcio Hospital General Universitario de Valencia|Sequencing and Bioinformatics Service and Molecular Epidemiology Research Group. FISABIO-Public Health|Gonzalez-Candelas|Spain  
>Spike|hCoV-19/Sweden/20-22324/2020|2020-04-10|EPI\_ISL\_660414|Original|hCoV-19^^Ostergotland|Human|Klinsisk mikrobiologi Linkoping|The Public Health Agency of Sweden|Svartstr\u00f6m|Sweden  
>Spike|hCoV-19/Australia/NSW178/2020|2020-03-21|EPI\_ISL\_427670|Original|hCoV-19^^New South Wales|Human|Centre for Infectious Diseases and Microbiology Public Health|NSW Health Pathology - Institute of Clinical Pathology and Medical Research; Westmead Hospital; University of Sydney|Gall|Australia  
>Spike|hCoV-19/Netherlands/ZH-EMC-889/2020|2020-10-30|EPI\_ISL\_632449|Original|hCoV-19^^Zuid Holland|Human|Dutch COVID-19 response team|Erasmus Medical Center|Oude Munnink|Netherlands  
>Spike|hCoV-19/Switzerland/ZH-ETHZ-400334/2020|2020-12-08|EPI\_ISL\_728808|Original|hCoV-19^^Zurich|Human|Viollier AG|Department of Biosystems Science and Engineering|Nadeau|Switzerland  
>Spike|hCoV-19/Denmark/DCGC-4366/2020|2020-08-31|EPI\_ISL\_615569|Original|hCoV-19^^Syddanmark|Human|Department of Virus and Microbiological Special Diagnostics|Albertsen lab|Michaelsen|Denmark  
>Spike|hCoV-19/England/QEUH-AAB3C8/2020|2020-10-21|EPI\_ISL\_652788|Original|hCoV-19^^England|Human|Oxford Viromics|COVID-19 Genomics UK (COG-UK) Consortium|Golubchik|United Kingdom  
>Spike|hCoV-19/Canada/QC-LSPQ-L00236787/2020|2020-03-25|EPI\_ISL\_536149|Original|hCoV-19^^Quebec|Human|H\u00f4pital Charles-LeMoine|Laboratoire de sant\u00e9 publique du Qu\u00e9bec|Moreira|Canada  
>Spike|hCoV-19/Scotland/QEUH-96FD3C/2020|2020-08-18|EPI\_ISL\_568422|Original|hCoV-19^^Scotland|Human|Lighthouse Lab in Glasgow|Wellcome Sanger Institute for the COVID-19 Genomics UK (COG-UK) consortium|Davies|United Kingdom  
>Spike|hCoV-19/USA/TX-HMH-MCoV-9337/2020|2020-07-03|EPI\_ISL\_781066|Original|hCoV-19^^Texas|Human|Houston Methodist Hospital|Houston Methodist Hospital|Long|USA  
>Spike|hCoV-19/Japan/PG-0631/2020|2020-04-00|EPI\_ISL\_684241|Original|hCoV-19^^Japan|Human|Gunma Prefectural Institute of Public Health and Environmental Sciences|Pathogen Genomics Center|Sekizuka|Japan  
>Spike|hCoV-19/USA/NY-Wadsworth-292064-01/2020|2020-12-20|EPI\_ISL\_767624|Original|hCoV-19^^New York|Human|WHITE PLAINS HOSPITAL CENTER LABORATORY|Wadsworth Center|Lasek-Nesselquist|USA  
>Spike|hCoV-19/Wales/PHWC-481FD9/2020|2020-10-20|EPI\_ISL\_613191|Original|hCoV-19^^Wales|Human|Wales Specialist Virology Centre Sequencing lab|COVID-19 Genomics UK (COG-UK) Consortium|Moore|United Kingdom  
>Spike|hCoV-19/England/QEUH-A3293D/2020|2020-10-06|EPI\_ISL\_628368|Original|hCoV-19^^England|Human|Oxford Viromics|COVID-19 Genomics UK (COG-UK) Consortium|Golubchik|United Kingdom  
>Spike|hCoV-19/Spain/PV-IBV-98008417/2020|2020-10-27|EPI\_ISL\_654595|Original|hCoV-19^^Basque Country|Human|Servicio de Microbiolog\u00eda. Hospital Universitario Donostia. OSI Donostialdea. \u00c1rea de Enfermedades Infecciosas|SeqCOVID-SPAIN consortium/IBV (CSIC)|Comas|Spain

>Spike|hCoV-19/Wales/PHWC-267E1/2020|2020-03-26|EPI\_ISL\_422223|Original|hCoV-19^^Wales|Human|Wales Specialist Virology Centre|Public Health Wales Microbiology Cardiff|Moore|United Kingdom

>Spike|hCoV-19/England/20146011904/2020|2020-03-31|EPI\_ISL\_421979|Original|hCoV-19^^England|Human|Respiratory Virus Unit|Respiratory Virus Unit|Platt|United Kingdom

>Spike|hCoV-19/Luxembourg/LNS1491016/2020|2020-11-14|EPI\_ISL\_739945|Original|hCoV-19^^Luxembourg|Human|Laboratoire national de sant\u00e9|Laboratoire national de sant\u00e9|Wienecke-Baldacchino|Luxembourg

>Spike|hCoV-19/Scotland/QEUEH-B7F380/2020|2020-11-14|EPI\_ISL\_710841|Original|hCoV-19^^Scotland|Human|Lighthouse Lab in Glasgow|Wellcome Sanger Institute for the COVID-19 Genomics UK (COG-UK) Consortium|Davies|United Kingdom

>Spike|hCoV-19/Australia/VIC440/2020|2020-03-26|EPI\_ISL\_426737|Original|hCoV-19^^Victoria|Human|Victorian Infectious Diseases Reference Laboratory (VIDRL)|Microbiological Diagnostic Unit Public Health Laboratory and Victorian Infectious Diseases Reference Laboratory|Schultz|Australia

>Spike|hCoV-19/England/MILK-9AAB86/2020|2020-09-01|EPI\_ISL\_550884|Original|hCoV-19^^England|Human|Lighthouse Lab in Milton Keynes|Wellcome Sanger Institute for the COVID-19 Genomics UK (COG-UK) consortium|Davies|United Kingdom

>Spike|hCoV-19/England/CAMB-83BAA/2020|2020-04-16|EPI\_ISL\_443345|Original|hCoV-19^^England|Human|Department of Pathology|Wellcome Sanger Institute for the COVID-19 Genomics UK (COG-UK) consortium|Amato|United Kingdom

>Spike|hCoV-19/USA/NY-NYUMC409/2020|2020-03-30|EPI\_ISL\_435476|Original|hCoV-19^^New York|Human|NYU Langone Health|Departments of Pathology and Medicine|Maurano|USA

>Spike|hCoV-19/USA/ID-UW-3204/2020|2020-03-26|EPI\_ISL\_490993|Original|hCoV-19^^Idaho|Human|UW Virology Lab|UW Virology Lab|Roychoudhury|USA

>Spike|hCoV-19/England/BRIS-121C8C/2020|2020-03-18|EPI\_ISL\_440148|Original|hCoV-19^^England|Human|PHE South West Regional Laboratory|Wellcome Sanger Institute for the COVID-19 Genomics UK (COG-UK) consortium|Amato|United Kingdom

>Spike|hCoV-19/Denmark/DCGC-7323/2020|2020-10-12|EPI\_ISL\_619302|Original|hCoV-19^^Hovedstaden|Human|Department of Virus and Microbiological Special Diagnostics|Albertsen lab|Michaelsen|Denmark

>Spike|hCoV-19/England/BRIS-12667A/2020|2020-04-09|EPI\_ISL\_458971|Original|hCoV-19^^England|Human|PHE South West Regional Laboratory|Wellcome Sanger Institute for the COVID-19 Genomics UK (COG-UK) consortium|Davies|United Kingdom

>Spike|hCoV-19/England/QEUEH-998AD9/2020|2020-08-27|EPI\_ISL\_540022|Original|hCoV-19^^England|Human|Lighthouse Lab in Glasgow|Wellcome Sanger Institute for the COVID-19 Genomics UK (COG-UK) consortium|Davies|United Kingdom

>Spike|hCoV-19/France/BRE-IPP10855/2020|2020-12-03|EPI\_ISL\_754147|Original|hCoV-19^^Bretagne|Human|Laboratoire de Microbiologie|National Reference Center for Viruses of Respiratory Infections|Enouf|France

>Spike|hCoV-19/England/LIVE-A9BAE/2020|2020-03-25|EPI\_ISL\_517332|Original|hCoV-19^^England|Human|Liverpool Clinical Laboratories|COVID-19 Genomics UK (COG-UK) Consortium|Haldenby|United Kingdom

>Spike|hCoV-19/England/NOTT-11CFB8/2020|2020-11-20|EPI\_ISL\_665910|Original|hCoV-19^^England|Human|Queens Medical Centre|COVID-19 Genomics UK (COG-UK) Consortium|Loose|United Kingdom

>Spike|hCoV-19/England/QEUEH-9B4C2C/2020|2020-09-03|EPI\_ISL\_590416|Original|hCoV-19^^England|Human|Lighthouse Lab in Glasgow|Wellcome Sanger Institute for the COVID-19 Genomics UK (COG-UK) consortium|Davies|United Kingdom

>Spike|hCoV-19/Scotland/QEUEH-9FF663/2020|2020-10-02|EPI\_ISL\_600488|Original|hCoV-19^^Scotland|Human|Lighthouse Lab in Glasgow|Wellcome Sanger Institute for the COVID-19 Genomics UK (COG-UK) consortium|Davies|United Kingdom

>Spike|hCoV-19/India/DL-NCDC2338-CSIR-IGIB/2020|2020-05-19|EPI\_ISL\_482561|Original|hCoV-19^^Delhi|Human|National Centre for Disease control (NCDC)|NCDC/CSIR-IGIB|Pandey|India

>Spike|hCoV-19/Gibraltar/205121190/2020|2020-00-00|EPI\_ISL\_766320|Original|hCoV-19^^Gibraltar|Human|Microbiology|Respiratory Virus Unit|Platt|Gibraltar

>Spike|hCoV-19/England/ALDP-B1CDF0/2020|2020-11-01|EPI\_ISL\_645785|Original|hCoV-19^^England|Human|Lighthouse Lab in Alderley Park|Wellcome Sanger Institute for the COVID-19 Genomics UK (COG-UK) Consortium|Davies|United Kingdom

>Spike|hCoV-19/Canada/ON-S2027/2020|2020-10-13|EPI\_ISL\_755811|Original|hCoV-19^^Ontario|Human|Toronto Invasive Bacterial Diseases Network|McMaster University|McArthur|Canada

>Spike|hCoV-19/England/CAMC-B9AE7F/2020|2020-11-15|EPI\_ISL\_673613|Original|hCoV-19^^England|Human|Lighthouse Lab in Cambridge|Wellcome Sanger Institute for the COVID-19 Genomics UK (COG-UK) Consortium|Davies|United Kingdom

>Spike|hCoV-19/England/CAMC-A81A1E/2020|2020-10-14|EPI\_ISL\_610699|Original|hCoV-19^^England|Human|Lighthouse Lab in Cambridge|Wellcome Sanger Institute for the COVID-19 Genomics UK (COG-UK) consortium|Davies|United Kingdom

>Spike|hCoV-19/Luxembourg/LNS0000001/2020|2020-02-29|EPI\_ISL\_419562|Original|hCoV-19^^Luxembourg|Human|Laboratoire National de Sant\u00e9|Laboratoire National de Sant\u00e9|Wienecke-Baldacchino|Luxembourg

>Spike|hCoV-19/Denmark/DCGC-14952/2020|2020-11-23|EPI\_ISL\_713543|Original|hCoV-19^^Syddanmark|Human|Department of Virus and Microbiological Special Diagnostics|Albertsen Lab|Michaelsen|Denmark

>Spike|hCoV-19/England/CAMC-B20DF9/2020|2020-11-02|EPI\_ISL\_647589|Original|hCoV-19^^England|Human|Lighthouse Lab in Cambridge|Wellcome Sanger Institute for the COVID-19 Genomics UK (COG-UK) Consortium|Davies|United Kingdom

>Spike|hCoV-19/England/20118057904/2020|2020-03-12|EPI\_ISL\_464929|Original|hCoV-19^^England|Human|Respiratory Virus Unit|Respiratory Virus Unit|Platt|United Kingdom

>Spike|hCoV-19/Wales/PHWC-4941BF/2020|2020-11-16|EPI\_ISL\_726080|Original|hCoV-19^^Wales|Human|Originating lab|COVID-19 Genomics UK (COG-UK) Consortium|Moore|United Kingdom

>Spike|hCoV-19/USA/WA-S126/2020|2020-03-13|EPI\_ISL\_430163|Original|hCoV-19^^Washington|Human|Washington State Department of Health|Seattle Flu Study|Bedford|USA

>Spike|hCoV-19/England/C200045558/2020|2020-00-00|EPI\_ISL\_664046|Original|hCoV-19^^England|Human|Respiratory Virus Unit|COVID-19 Genomics UK (COG-UK) Consortium|Platt|United Kingdom

>Spike|hCoV-19/Switzerland/BS-ETHZ-260049/2020|2020-08-24|EPI\_ISL\_539377|Original|hCoV-19^^Basel-Stadt|Human|Viollier AG|Department of Biosystems Science and Engineering|Nadeau|Switzerland

>Spike|hCoV-19/England/ALDP-B250FB/2020|2020-11-04|EPI\_ISL\_646466|Original|hCoV-19^^England|Human|Lighthouse Lab in Alderley Park|Wellcome Sanger Institute for the COVID-19 Genomics UK (COG-UK) Consortium|Davies|United Kingdom

>Spike|hCoV-19/USA/CA-ALSR-4625/2020|2020-10-21|EPI\_ISL\_667045|Original|hCoV-19^^California|Human|San Diego County Public Health Laboratory|Andersen lab at Scripps Research|Gangavarapu|USA

>Spike|hCoV-19/Bangladesh/CHRF-0020/2020|2020-05-30|EPI\_ISL\_477131|Original|hCoV-19^^Bangladesh|Human|Child Health Research Foundation|Child Health Research Foundation|Saha|Bangladesh

>Spike|hCoV-19/England/QEUA-9F3DF1/2020|2020-09-25|EPI\_ISL\_588496|Original|hCoV-19^^England|Human|Lighthouse Lab in Glasgow|Wellcome Sanger Institute for the COVID-19 Genomics UK (COG-UK) Consortium|Davies|United Kingdom

>Spike|hCoV-19/England/MILK-B8C450/2020|2020-11-13|EPI\_ISL\_674304|Original|hCoV-19^^England|Human|Lighthouse Lab in Milton Keynes|Wellcome Sanger Institute for the COVID-19 Genomics UK (COG-UK) Consortium|Davies|United Kingdom

>Spike|hCoV-19/USA/MN-MDH-2155/2020|2020-11-30|EPI\_ISL\_708493|Original|hCoV-19^^Minnesota|Human|Minnesota Department of Health|Minnesota Department of Health|Lorentz|USA

>Spike|hCoV-19/Scotland/EDB3073/2020|2020-04-04|EPI\_ISL\_488913|Original|hCoV-19^^Scotland|Human|Virology Department|Wellcome Sanger Institute for the COVID-19 Genomics UK (COG-UK) consortium|Davies|United Kingdom

>Spike|hCoV-19/England/CAMB-7A687/2020|2020-04-02|EPI\_ISL\_441347|Original|hCoV-19^^England|Human|Department of Pathology|Wellcome Sanger Institute for the COVID-19 Genomics UK (COG-UK) consortium|Amato|United Kingdom

>Spike|hCoV-19/Scotland/QEUA-AAE301/2020|2020-10-22|EPI\_ISL\_652969|Original|hCoV-19^^Scotland|Human|Oxford Viromics|COVID-19 Genomics UK (COG-UK) Consortium|Golubchik|United Kingdom

>Spike|hCoV-19/Germany/BE-ChVir-W1727-8260/2020|2020-08-19|EPI\_ISL\_754014|Original|hCoV-19^^Berlin|Human|Charit\u00e9 Universit\u00e4tsmedizin Berlin|Charit\u00e9 Universit\u00e4tsmedizin Berlin|Muehlemann|Germany

>Spike|hCoV-19/New Zealand/20VR3195/2020|2020-03-27|EPI\_ISL\_579481|Original|hCoV-19^^Canterbury|Human|Canterbury Health Laboratories|Institute of Environmental Science and Research (ESR)|Wang|New Zealand

>Spike|hCoV-19/Wales/PHWC-16A21C/2020|2020-09-02|EPI\_ISL\_535217|Original|hCoV-19^^Wales|Human|Wales Specialist Virology Centre Sequencing lab|COVID-19 Genomics UK (COG-UK) Consortium|Moore|United Kingdom

>Spike|hCoV-19/Panama/329546/2020|2020-03-13|EPI\_ISL\_496632|Original|hCoV-19^^Panama West|Human|Gorgas Memorial Laboratory of Health Studies|Gorgas Memorial Laboratory of Health Studies|Martinez|Panama

>Spike|hCoV-19/USA/CA-ALSR-3686/2020|2020-09-23|EPI\_ISL\_636148|Original|hCoV-19^^California|Human|San Diego County Public Health Laboratory|Andersen lab at Scripps Research|Gangavarapu|USA

>Spike|hCoV-19/USA/TX-HMH-MCoV-18889/2020|2020-11-26|EPI\_ISL\_785199|Original|hCoV-19^^Texas|Human|Houston Methodist Hospital|Houston Methodist Hospital|Long|USA

>Spike|hCoV-19/USA/TX-DSHS-0578/2020|2020-06-02|EPI\_ISL\_569690|Original|hCoV-19^^Texas|Human|Texas Department of State Health Services|Texas Department of State Health Services|Rahman|USA

>Spike|hCoV-19/USA/CA-ALSR-4387/2020|2020-07-27|EPI\_ISL\_649000|Original|hCoV-19^^California|Human|San Diego County Public Health Laboratory|Andersen lab at Scripps Research|Gangavarapu|USA

>Spike|hCoV-19/England/NORW-F7EE4/2020|2020-11-04|EPI\_ISL\_652363|Original|hCoV-19^^England|Human|Quadram Institute Bioscience|COVID-19 Genomics UK (COG-UK) Consortium|Alikhan|United Kingdom

>Spike|hCoV-19/USA/TX-HMH-MCoV-16189/2020|2020-10-29|EPI\_ISL\_785873|Original|hCoV-19^^Texas|Human|Houston Methodist Hospital|Houston Methodist Hospital|Long|USA

>Spike|hCoV-19/Ireland/MO-NVRL-20G31886/2020|2020-03-18|EPI\_ISL\_605073|Original|hCoV-19^^Mayo|Human|National Virus Reference Laboratory|Irish Coronavirus Sequencing Consortium - Helixworks|Chalapathi|Ireland

>Spike|hCoV-19/England/QEUEH-9E3EF1/2020|2020-09-24|EPI\_ISL\_579761|Original|hCoV-19^^England|Human|Lighthouse Lab in Glasgow|Wellcome Sanger Institute for the COVID-19 Genomics UK (COG-UK) consortium|Davies|United Kingdom

>Spike|hCoV-19/India/TG-CCMB-M152/2020|2020-06-06|EPI\_ISL\_495187|Original|hCoV-19^^Telangana|Human|CSIR-Centre for Cellular and Molecular Biology|CSIR-Centre for Cellular and Molecular Biology|Banu|India

>Spike|hCoV-19/England/CAMC-B07648/2020|2020-10-30|EPI\_ISL\_643824|Original|hCoV-19^^England|Human|Lighthouse Lab in Cambridge|Wellcome Sanger Institute for the COVID-19 Genomics UK (COG-UK) Consortium|Davies|United Kingdom

>Spike|hCoV-19/Wales/PHWC-35D65/2020|2020-04-26|EPI\_ISL\_474564|Original|hCoV-19^^Wales|Human|Originating lab|COVID-19 Genomics UK (COG-UK) Consortium|Moore|United Kingdom

>Spike|hCoV-19/Scotland/EDB763/2020|2020-04-02|EPI\_ISL\_457016|Original|hCoV-19^^Scotland|Human|Virology Department|COVID-19 Genomics UK (COG-UK) Consortium|Williams|United Kingdom

>Spike|hCoV-19/England/QEUEH-B0F2E2/2020|2020-11-02|EPI\_ISL\_641975|Original|hCoV-19^^England|Human|Lighthouse Lab in Glasgow|Wellcome Sanger Institute for the COVID-19 Genomics UK (COG-UK) Consortium|Davies|United Kingdom

>Spike|hCoV-19/USA/WI-WSLH-200295/2020|2020-04-17|EPI\_ISL\_578480|Original|hCoV-19^^Wisconsin|Human|Wisconsin State Laboratory of Hygiene Communicable Disease Division|Wisconsin State Laboratory of Hygiene Communicable Disease Division|Florek|USA

>Spike|hCoV-19/Latvia/176/2020|2020-09-29|EPI\_ISL\_639673|Original|hCoV-19^^Latvia|Human|E. Gulbja Laboratorija|Latvian Biomedical Research and Study Centre|Zrelavs|Latvia

>Spike|hCoV-19/USA/NY-Wadsworth-281411-01/2020|2020-11-05|EPI\_ISL\_734476|Original|hCoV-19^^New York|Human|Masonic Medical Research Institute|Wadsworth Center|Lasek-Nesselquist|USA

>Spike|hCoV-19/England/QEUA-AD236E/2020|2020-10-24|EPI\_ISL\_634019|Original|hCoV-19^^England|Human|Lighthouse Lab in Glasgow|Wellcome Sanger Institute for the COVID-19 Genomics UK (COG-UK) consortium|Davies|United Kingdom

>Spike|hCoV-19/Japan/PG-6473/2020|2020-08-00|EPI\_ISL\_689578|Original|hCoV-19^^Japan|Human|Pathogen Genomics Center|Pathogen Genomics Center|Sekizuka|Japan

>Spike|hCoV-19/Denmark/DCGC-14059/2020|2020-11-30|EPI\_ISL\_711541|Original|hCoV-19^^Hovedstaden|Human|Department of Virus and Microbiological Special Diagnostics|Albertsen Lab|Michaelsen|Denmark

>Spike|hCoV-19/USA/TX-HMH-5388/2020|2020-06-26|EPI\_ISL\_544738|Original|hCoV-19^^Texas|Human|Houston Methodist Hospital|Houston Methodist Hospital|Long|USA

>Spike|hCoV-19/Wales/PHWC-23FEC/2020|2020-03-15|EPI\_ISL\_418135|Original|hCoV-19^^Wales|Human|Wales Specialist Virology Centre|Public Health Wales Microbiology Cardiff|Moore|United Kingdom

>Spike|hCoV-19/USA/NY-Wadsworth-22514-01/2020|2020-03-19|EPI\_ISL\_676750|Original|hCoV-19^^New York|Human|Wadsworth Center|Wadsworth Center|Lasek-Nesselquist|USA

>Spike|hCoV-19/Ireland/WX-NVRL-AIIDW002v1/2020|2020-12-11|EPI\_ISL\_791324|Original|hCoV-19^^Wexford|Human|National Virus Reference Laboratory|Irish Coronavirus Sequencing Consortium - Teagasc Moorepark|Walsh|Ireland

>Spike|hCoV-19/USA/AZ-TG351924/2020|2020-05-22|EPI\_ISL\_694406|Original|hCoV-19^^Arizona|Human|AZ SPHL|TGen North|French|USA

>Spike|hCoV-19/Wales/PHWC-4869A9/2020|2020-10-28|EPI\_ISL\_639096|Original|hCoV-19^^Wales|Human|Wales Specialist Virology Centre Sequencing lab|COVID-19 Genomics UK (COG-UK) Consortium|Moore|United Kingdom

>Spike|hCoV-19/Turkey/HSGM-1432/2020|2020-03-19|EPI\_ISL\_437326|Vero Pl|hCoV-19^^Istanbul|Human|Ministry of Health Turkey|Ministry of Health Turkey|Bayrakdar|Turkey

>Spike|hCoV-19/England/OXON-B3EC6/2020|2020-03-23|EPI\_ISL\_534916|Original|hCoV-19^^England|Human|Oxford Viromics|COVID-19 Genomics UK (COG-UK) Consortium|Golubchik|United Kingdom

>Spike|hCoV-19/Denmark/DCGC-17099/2020|2020-12-14|EPI\_ISL\_750757|Original|hCoV-19^^Sjaelland|Human|Department of Virus and Microbiological Special Diagnostics|Albertsen Lab|Michaelsen|Denmark

>Spike|hCoV-19/USA/MN-QDX-1352/2020|2020-03-14|EPI\_ISL\_572141|Original|hCoV-19^^Minnesota|Human|Quest Diagnostics|Quest Diagnostics|Kagan|USA

>Spike|hCoV-19/Japan/IC-0288/2020|2020-11-00|EPI\_ISL\_667717|Original|hCoV-19^^Japan|Human|Pathogen Genomics Center|Pathogen Genomics Center|Sekizuka|Japan

>Spike|hCoV-19/USA/UT-UPHL-2012010851/2020|2020-08-12|EPI\_ISL\_745904|Original|hCoV-19^^Utah|Human|Ginkgo Bioworks Clinical Laboratory|Utah Public Health Laboratory|Young|USA

>Spike|hCoV-19/England/QEUA-B7DCE1/2020|2020-11-14|EPI\_ISL\_741915|Original|hCoV-19^^England|Human|Oxford Viromics|COVID-19 Genomics UK (COG-UK) Consortium|Golubchik|United Kingdom

>Spike|hCoV-19/England/SHEF-C913D/2020|2020-06-14|EPI\_ISL\_484478|Original|hCoV-19^^England|Human|Virology Department|COVID-19 Genomics UK (COG-UK) Consortium|de Silva|United Kingdom

>Spike|hCoV-19/England/CAMB-1B8C20/2020|2020-10-28|EPI\_ISL\_651681|Original|hCoV-19^^England|Human|Department of Pathology|COVID-19 Genomics UK (COG-UK) Consortium|Goodfellow|United Kingdom

>Spike|hCoV-19/Germany/HH-hpi-p1895/2020|2020-03-24|EPI\_ISL\_776235|Original|hCoV-19^^Hamburg|Human|University Medical Center Hamburg Eppendorf|Heinrich Pette Institute|Robitaille|Germany

>Spike|hCoV-19/Wales/PHWC-4A30ED/2020|2020-12-14|EPI\_ISL\_744052|Original|hCoV-19^^Wales|Human|Wales Specialist Virology Centre Sequencing lab|COVID-19 Genomics UK (COG-UK) Consortium|Moore|United Kingdom

>Spike|hCoV-19/Netherlands/ZH-RIVM-20843/2020|2020-12-18|EPI\_ISL\_790898|Original|hCoV-19^^Zuid-holland|Human|Dutch COVID-19 response team|National Institute for Public Health and the Environment (RIVM)|Meijer|Netherlands

>Spike|hCoV-19/England/ALDP-A87544/2020|2020-10-17|EPI\_ISL\_606094|Original|hCoV-19^^England|Human|Lighthouse Lab in Alderley Park|Wellcome Sanger Institute for the COVID-19 Genomics UK (COG-UK) consortium|Davies|United Kingdom

>Spike|hCoV-19/England/CAMB-1BB012/2020|2020-11-11|EPI\_ISL\_664647|Original|hCoV-19^^England|Human|Department of Pathology|COVID-19 Genomics UK (COG-UK) Consortium|Goodfellow|United Kingdom

>Spike|hCoV-19/Italy/LAZ-INMI2-B/2020|2020-02-03|EPI\_ISL\_451301|Original|hCoV-19^^Lazio|Human|Laboratory of Virology|Laboratory of Virology|Gruber|Italy

>Spike|hCoV-19/England/ALDP-BE91D2/2020|2020-12-03|EPI\_ISL\_708976|Original|hCoV-19^^England|Human|Lighthouse Lab in Alderley Park|Wellcome Sanger Institute for the COVID-19 Genomics UK (COG-UK) Consortium|Davies|United Kingdom

>Spike|hCoV-19/Peru/LIM-UPCH-0114/2020|2020-06-15|EPI\_ISL\_540991|Original|hCoV-19^^Lima|Human|Laboratorio de Referencia Nacional de Virus Respiratorios|Laboratorio de Gen\u00f3mica Microbiana|Tsukayama|Peru

>Spike|hCoV-19/USA/TX-HMH-6709/2020|2020-06-24|EPI\_ISL\_546186|Original|hCoV-19^^Texas|Human|Houston Methodist Hospital|Houston Methodist Hospital|Long|USA

>Spike|hCoV-19/England/SHEF-10D8208/2020|2020-12-17|EPI\_ISL\_742112|Original|hCoV-19^^England|Human|Virology Department|COVID-19 Genomics UK (COG-UK) Consortium|de Silva|United Kingdom

>Spike|hCoV-19/England/SHEF-C86E4/2020|2020-11-20|EPI\_ISL\_680154|Original|hCoV-19^^England|Human|Virology Department|COVID-19 Genomics UK (COG-UK) Consortium|de Silva|United Kingdom

>Spike|hCoV-19/Wales/PHWC-16D862/2020|2020-09-25|EPI\_ISL\_577454|Original|hCoV-19^^Wales|Human|Wales Specialist Virology Centre Sequencing lab|COVID-19 Genomics UK (COG-UK) Consortium|Moore|United Kingdom

>Spike|hCoV-19/England/NOTT-11391D/2020|2020-09-15|EPI\_ISL\_573445|Original|hCoV-19^^England|Human|Lincolnshire Hospitals and DeepSeq Nottingham|COVID-19 Genomics UK (COG-UK) Consortium|Loose|United Kingdom

>Spike|hCoV-19/England/PORT-2D47D1/2020|2020-10-11|EPI\_ISL\_613295|Original|hCoV-19^^England|Human|Centre for Enzyme Innovation|COVID-19 Genomics UK (COG-UK) Consortium|Robson|United Kingdom

>Spike|hCoV-19/England/ALDP-9EAEEB/2020|2020-09-24|EPI\_ISL\_579964|Original|hCoV-19^^England|Human|Lighthouse Lab in Alderley Park|Wellcome Sanger Institute for the COVID-19 Genomics UK (COG-UK) consortium|Davies|United Kingdom

>Spike|hCoV-19/Switzerland/BS-UHB-42200029/2020|2020-03-20|EPI\_ISL\_528263|Original|hCoV-19^^Basel-Stadt|Human|University Hospital Basel|University Hospital Basel|Roloff Handschin|Switzerland

>Spike|hCoV-19/USA/MA-MGH-00853/2020|2020-04-13|EPI\_ISL\_791796|Original|hCoV-19^^Massachusetts|Human|Massachusetts General Hospital|Infectious Disease Program|Park|USA

>Spike|hCoV-19/South Africa/R07601/2020|2020-03-30|EPI\_ISL\_450300|Original|hCoV-19^^Limpopo|Human|National Institute for Communicable Diseases of the National Health Laboratory Service|National Institute for Communicable Diseases of the National Health Laboratory Service|Allam|South Africa

>Spike|hCoV-19/England/CAMB-1B90D8/2020|2020-00-00|EPI\_ISL\_705516|Original|hCoV-19^^England|Human|Department of Pathology|COVID-19 Genomics UK (COG-UK) Consortium|Goodfellow|United Kingdom

>Spike|hCoV-19/England/QEUH-B7D67A/2020|2020-11-14|EPI\_ISL\_674804|Original|hCoV-19^^England|Human|Lighthouse Lab in Glasgow|Wellcome Sanger Institute for the COVID-19 Genomics UK (COG-UK) Consortium|Davies|United Kingdom

>Spike|hCoV-19/Wales/PHWC-4999C1/2020|2020-12-04|EPI\_ISL\_727385|Original|hCoV-19^^Wales|Human|Originating lab|COVID-19 Genomics UK (COG-UK) Consortium|Moore|United Kingdom

>Spike|hCoV-19/Scotland/QEUH-9A476A/2020|2020-09-01|EPI\_ISL\_568370|Original|hCoV-19^^Scotland|Human|Lighthouse Lab in Glasgow|Wellcome Sanger Institute for the COVID-19 Genomics UK (COG-UK) consortium|Davies|United Kingdom

>Spike|hCoV-19/Brazil/SP-282/2020|2020-04-21|EPI\_ISL\_527859|Original|hCoV-19^^S\u00e3o Paulo|Human|Hospital Municipal Vereador Jose Storopolli|Instituto Adolfo Lutz|Sacchi|Brazil

>Spike|hCoV-19/Wales/PHWC-16F763/2020|2020-10-03|EPI\_ISL\_586015|Original|hCoV-19^^Wales|Human|Wales Specialist Virology Centre Sequencing lab|COVID-19 Genomics UK (COG-UK) Consortium|Moore|United Kingdom

>Spike|hCoV-19/Japan/TK-YE613035/2020|2020-04-00|EPI\_ISL\_486895|Original|hCoV-19^^Tokyo|Human|Tokyo Metropolitan Institute of Public Health|Tokyo Metropolitan Institute of Public Health|Nagashima|Japan

>Spike|hCoV-19/Wales/QEUH-A0B29C/2020|2020-10-01|EPI\_ISL\_599367|Original|hCoV-19^^Wales|Human|Lighthouse Lab in Glasgow|Wellcome Sanger Institute for the COVID-19 Genomics UK (COG-UK) consortium|Davies|United Kingdom

>Spike|hCoV-19/England/NORT-29E72E/2020|2020-05-02|EPI\_ISL\_493526|Original|hCoV-19^^England|Human|Northumbria University / South Tees Hospitals NHS Foundation Trust / North Cumbria Integrated Care NHS Foundation Trust / North Tees and Hartlepool NHS Foundation Trust / Newcastle Hospitals NHS Foundation Trust|COVID-19 Genomics UK (COG-UK) Consortium|Bashton|United Kingdom

>Spike|hCoV-19/USA/TX-HMH-1271/2020|2020-04-12|EPI\_ISL\_542621|Original|hCoV-19^^Texas|Human|Houston Methodist Hospital|Houston Methodist Hospital|Long|USA

>Spike|hCoV-19/USA/TX-DSHS-0515/2020|2020-06-21|EPI\_ISL\_560958|Original|hCoV-19^^Texas|Human|Texas Department of State Health Services|Texas Department of State Health Services|Rahman|USA

>Spike|hCoV-19/England/LOND-125042E/2020|2020-10-19|EPI\_ISL\_665210|Original|hCoV-19^^England|Human|University College London Hospital|COVID-19 Genomics UK (COG-UK) Consortium|Byott|United Kingdom

>Spike|hCoV-19/Netherlands/GR-RIVM-20596/2020|2020-12-10|EPI\_ISL\_790679|Original|hCoV-19^^Groningen|Human|Dutch COVID-19 response team|National Institute for Public Health and the Environment (RIVM)|Meijer|Netherlands

>Spike|hCoV-19/Netherlands/ZH-EMC-407/2020|2020-08-10|EPI\_ISL\_523747|Original|hCoV-19^^Zuid Holland|Human|Dutch COVID-19 response team|Erasmus Medical Center|Oude Munnink|Netherlands

>Spike|hCoV-19/USA/CA-CZB-2394/2020|2020-05-19|EPI\_ISL\_513823|Original|hCoV-19^^California|Human|Orange County Public Health Laboratory|Chan-Zuckerberg Biohub|Kamm|USA

>Spike|hCoV-19/England/NORT-2A0413/2020|2020-04-25|EPI\_ISL\_499807|Original|hCoV-19^^England|Human|Northumbria University / South Tees Hospitals NHS Foundation Trust / North Cumbria Integrated Care NHS Foundation Trust / North Tees and Hartlepool NHS Foundation Trust / Newcastle Hospitals NHS Foundation Trust|COVID-19 Genomics UK (COG-UK) Consortium|Bashton|United Kingdom

>Spike|hCoV-19/England/LOND-DA078/2020|2020-11-07|EPI\_ISL\_665715|Original|hCoV-19^^England|Human|University College London|COVID-19 Genomics UK (COG-UK) Consortium|Roy|United Kingdom

>Spike|hCoV-19/England/MILK-999DFD/2020|2020-08-29|EPI\_ISL\_550384|Original|hCoV-19^^England|Human|Lighthouse Lab in Milton Keynes|Wellcome Sanger Institute for the COVID-19 Genomics UK (COG-UK) consortium|Davies|United Kingdom

>Spike|hCoV-19/Scotland/QEUH-9E523F/2020|2020-09-23|EPI\_ISL\_601086|Original|hCoV-19^^Scotland|Human|Lighthouse Lab in Glasgow|Wellcome Sanger Institute for the COVID-19 Genomics UK (COG-UK) consortium|Davies|United Kingdom

>Spike|hCoV-19/Indonesia/JI-NIHRD-PME2054/2020|2020-00-00|EPI\_ISL\_538499|Original|hCoV-19^^East Java|Human|RS Lavallete Malang East Java|National Institute of Health Research and Development|Setiawati|Indonesia

>Spike|hCoV-19/USA/PA-CDC-2-3693774/2020|2020-11-09|EPI\_ISL\_747051|Original|hCoV-19^^Pennsylvania|Human|Respiratory Viruses Branch|Respiratory Viruses Branch|Queen|USA

>Spike|hCoV-19/Japan/PG-1410/2020|2020-04-00|EPI\_ISL\_685017|Original|hCoV-19^^Japan|Human|Saitama Prefectural Institute of Public Health|Pathogen Genomics Center|Sekizuka|Japan

>Spike|hCoV-19/England/CAMB-1AE9DB/2020|2020-04-28|EPI\_ISL\_459495|Original|hCoV-19^^England|Human|Department of Pathology|Wellcome Sanger Institute for the COVID-19 Genomics UK (COG-UK) consortium|Davies|United Kingdom

>Spike|hCoV-19/Denmark/DCGC-22227/2020|2020-12-14|EPI\_ISL\_758626|Original|hCoV-19^^Hovedstaden|Human|Department of Virus and Microbiological Special Diagnostics|Albertsen Lab|Michaelsen|Denmark

>Spike|hCoV-19/England/BIRM-636CD/2020|2020-08-13|EPI\_ISL\_529331|Original|hCoV-19^^England|Human|University of Birmingham|COVID-19 Genomics UK (COG-UK) Consortium|Loman|United Kingdom

>Spike|hCoV-19/England/QEUA-AD66BC/2020|2020-10-26|EPI\_ISL\_634040|Original|hCoV-19^^England|Human|Lighthouse Lab in Glasgow|Wellcome Sanger Institute for the COVID-19 Genomics UK (COG-UK) consortium|Davies|United Kingdom

>Spike|hCoV-19/England/MILK-ABB6AE/2020|2020-10-21|EPI\_ISL\_623310|Original|hCoV-19^^England|Human|Lighthouse Lab in Milton Keynes|Wellcome Sanger Institute for the COVID-19 Genomics UK (COG-UK) consortium|Davies|United Kingdom

>Spike|hCoV-19/England/20149004004/2020|2020-04-02|EPI\_ISL\_466098|Original|hCoV-19^^England|Human|Respiratory Virus Unit|Respiratory Virus Unit|Platt|United Kingdom

>Spike|hCoV-19/Scotland/CVR5976/2020|2020-11-19|EPI\_ISL\_702659|Original|hCoV-19^^Scotland|Human|West of Scotland Specialist Virology Centre|COVID-19 Genomics UK (COG-UK) Consortium|Robertson|United Kingdom

>Spike|hCoV-19/Romania/Bucuresti-12292/2020|2020-04-11|EPI\_ISL\_468147|Original|hCoV-19^^Bucuresti|Human|[Romania|[Romania|Paraschiv|Romania

>Spike|hCoV-19/Denmark/DCGC-16234/2020|2020-11-16|EPI\_ISL\_714655|Original|hCoV-19^^Sjaelland|Human|Department of Virus and Microbiological Special Diagnostics|Albertsen Lab|Michaelsen|Denmark

>Spike|hCoV-19/Japan/PG-8551/2020|2020-08-00|EPI\_ISL\_686147|Original|hCoV-19^^Japan|Human|Pathogen Genomics Center|Pathogen Genomics Center|Sekizuka|Japan

>Spike|hCoV-19/Wales/ALDP-A95F63/2020|2020-10-19|EPI\_ISL\_624754|Original|hCoV-19^^Wales|Human|Lighthouse Lab in Alderley Park|Wellcome Sanger Institute for the COVID-19 Genomics UK (COG-UK) consortium|Davies|United Kingdom

>Spike|hCoV-19/Singapore/842/2020|2020-07-19|EPI\_ISL\_518006|Original|hCoV-19^^Singapore|Human|Singapore General Hospital|Department of Microbiology|Abdul Rahman|Singapore

>Spike|hCoV-19/England/CAMC-B776AD/2020|2020-11-12|EPI\_ISL\_668222|Original|hCoV-19^^England|Human|Lighthouse Lab in Cambridge|Wellcome Sanger Institute for the COVID-19 Genomics UK (COG-UK) Consortium|Davies|United Kingdom

>Spike|hCoV-19/Ireland/MN-NVRL-MPB47480/2020|2020-04-10|EPI\_ISL\_767821|Original|hCoV-19^^Monaghan|Human|National Virus Reference Laboratory|Irish Coronavirus Sequencing Consortium - Teagasc Moorepark|Walsh|Ireland

>Spike|hCoV-19/India/TN-NCDC-02318/2020|2020-03-29|EPI\_ISL\_435079|Original|hCoV-19^^Tamil Nadu|Human|National Centre for Disease control (NCDC)|NCDC/CSIR-IGIB|Faruq|India

>Spike|hCoV-19/Australia/VIC789/2020|2020-03-31|EPI\_ISL\_427064|Original|hCoV-19^^Victoria|Human|Microbiological Diagnostic Unit Public Health Laboratory|Microbiological Diagnostic Unit Public Health Laboratory|Schultz|Australia

>Spike|hCoV-19/Wales/PHWC-49339C/2020|2020-11-28|EPI\_ISL\_725876|Original|hCoV-19^^Wales|Human|Originating lab|COVID-19 Genomics UK (COG-UK) Consortium|Moore|United Kingdom

>Spike|hCoV-19/England/MILK-A47F06/2020|2020-10-05|EPI\_ISL\_598478|Original|hCoV-19^^England|Human|Lighthouse Lab in Milton Keynes|Wellcome Sanger Institute for the COVID-19 Genomics UK (COG-UK) consortium|Davies|United Kingdom

>Spike|hCoV-19/USA/TX-HMH-7769/2020|2020-06-26|EPI\_ISL\_545626|Original|hCoV-19^^Texas|Human|Houston Methodist Hospital|Houston Methodist Hospital|Long|USA

>Spike|hCoV-19/South Africa/KRISP-K002441/2020|2020-07-30|EPI\_ISL\_515797|Original|hCoV-19^^KwaZulu-Natal|Human|NHLS-IALCH|KRISP|de Oliveira|South Africa

>Spike|hCoV-19/Scotland/QEUA-A33671/2020|2020-10-07|EPI\_ISL\_628399|Original|hCoV-19^^Scotland|Human|Virology Department|COVID-19 Genomics UK (COG-UK) Consortium|de Silva|United Kingdom

>Spike|hCoV-19/England/20119019304/2020|2020-03-14|EPI\_ISL\_465033|Original|hCoV-19^^England|Human|Respiratory Virus Unit|Respiratory Virus Unit|Platt|United Kingdom



>Spike|hCoV-19/USA/MI-UM-10036555954/2020|2020-10-21|EPI\_ISL\_640181|Original|hCoV-19^^Michigan|Human|University of Michigan Clinical Microbiology Laboratory|Lauring Lab|Valesano|USA

>Spike|hCoV-19/Jordan/SEARCH-5477/2020|2020-09-11|EPI\_ISL\_755257|Original|hCoV-19^^Amman|Human|Biolab Diagnostic Laboratories|Andersen lab at Scripps Research|Gangavarapu|Jordan

>Spike|hCoV-19/Peru/ANC-UPCH-0106/2020|2020-06-16|EPI\_ISL\_540984|Original|hCoV-19^^Ancash|Human|Laboratorio de Referencia Nacional de Virus Respiratorios|Laboratorio de Gen\u00f3mica Microbiana|Tsukayama|Peru

>Spike|hCoV-19/USA/WI-WSLH-200068/2020|2020-03-29|EPI\_ISL\_471233|Original|hCoV-19^^Wisconsin|Human|Wisconsin State Laboratory of Hygiene Communicable Disease Division|Wisconsin State Laboratory of Hygiene Communicable Disease Division|Florek|USA

>Spike|hCoV-19/Wales/PHWC-24C7B/2020|2020-03-21|EPI\_ISL\_420934|Original|hCoV-19^^Wales|Human|Wales Specialist Virology Centre|Public Health Wales Microbiology Cardiff|Moore|United Kingdom

>Spike|hCoV-19/England/CAMC-B52918/2020|2020-11-08|EPI\_ISL\_657434|Original|hCoV-19^^England|Human|Lighthouse Lab in Cambridge|Wellcome Sanger Institute for the COVID-19 Genomics UK (COG-UK) Consortium|Davies|United Kingdom

>Spike|hCoV-19/USA/WA-UW-11089/2020|2020-06-18|EPI\_ISL\_501092|Original|hCoV-19^^Washington|Human|University of Washington Virology Lab|University of Washington Virology Lab|Roychoudhury|USA

>Spike|hCoV-19/India/GJ-GBRC68/2020|2020-05-03|EPI\_ISL\_447045|Original|hCoV-19^^Gujarat|Human|B.J. Medical College and Civil hospital|Gujarat Biotechnology Research Centre|Joshi|India

>Spike|hCoV-19/England/LIVE-99743/2020|2020-04-09|EPI\_ISL\_439754|Original|hCoV-19^^England|Human|Liverpool Clinical Laboratories|COVID-19 Genomics UK (COG-UK) Consortium|Haldenby|United Kingdom

>Spike|hCoV-19/Wales/PHWC-16F38D/2020|2020-10-06|EPI\_ISL\_585954|Original|hCoV-19^^Wales|Human|Wales Specialist Virology Centre Sequencing lab|COVID-19 Genomics UK (COG-UK) Consortium|Moore|United Kingdom

>Spike|hCoV-19/Wales/PHWC-482DED/2020|2020-10-20|EPI\_ISL\_627742|Original|hCoV-19^^Wales|Human|Wales Specialist Virology Centre Sequencing lab|COVID-19 Genomics UK (COG-UK) Consortium|Moore|United Kingdom

>Spike|hCoV-19/Japan/IC-0273/2020|2020-11-00|EPI\_ISL\_667702|Original|hCoV-19^^Japan|Human|Pathogen Genomics Center|Pathogen Genomics Center|Sekizuka|Japan

>Spike|hCoV-19/Japan/PG-4481/2020|2020-07-00|EPI\_ISL\_692704|Original|hCoV-19^^Japan|Human|Pathogen Genomics Center|Pathogen Genomics Center|Sekizuka|Japan

>Spike|hCoV-19/South Korea/KDCA0178/2020|2020-11-14|EPI\_ISL\_747412|Original|hCoV-19^^South Korea|Human|Division of Emerging Infectious Diseases|Division of Emerging Infectious Diseases|Park|South Korea

>Spike|hCoV-19/England/ALDP-6E9052/2020|2020-06-30|EPI\_ISL\_557566|Original|hCoV-19^^England|Human|Lighthouse Lab in Alderley Park|Wellcome Sanger Institute for the COVID-19 Genomics UK (COG-UK) consortium|Davies|United Kingdom

>Spike|hCoV-19/England/ALDP-95A815/2020|2020-06-12|EPI\_ISL\_553392|Original|hCoV-19^^England|Human|Lighthouse Lab in Alderley Park|Wellcome Sanger Institute for the COVID-19 Genomics UK (COG-UK) consortium|Davies|United Kingdom

>Spike|hCoV-19/Portugal/PT0343/2020|2020-03-17|EPI\_ISL\_454059|Original|hCoV-19^^Portugal|Human|unknown|Instituto Nacional de Saude (INSA)|Borges|Portugal

>Spike|hCoV-19/England/MILK-9C205C/2020|2020-09-10|EPI\_ISL\_566651|Original|hCoV-19^^England|Human|Lighthouse Lab in Milton Keynes|Wellcome Sanger Institute for the COVID-19 Genomics UK (COG-UK) consortium|Davies|United Kingdom

>Spike|hCoV-19/England/ALDP-B84B62/2020|2020-11-14|EPI\_ISL\_675810|Original|hCoV-19^^England|Human|Lighthouse Lab in Alderley Park|Wellcome Sanger Institute for the COVID-19 Genomics UK (COG-UK) Consortium|Davies|United Kingdom

>Spike|hCoV-19/Australia/NSW350/2020|2020-03-24|EPI\_ISL\_451611|Original|hCoV-19^^New South Wales|Human|Laverty Pathology|NSW Health Pathology - Institute of Clinical Pathology and Medical Research; Westmead Hospital; University of Sydney|Gall|Australia

>Spike|hCoV-19/Australia/VIC5634/2020|2020-07-16|EPI\_ISL\_518445|Original|hCoV-19^^Victoria|Human|Victorian Infectious Diseases Reference Laboratory (VIDRL)|VIDRL and MDU-PHL|Schultz|Australia

>Spike|hCoV-19/USA/NY-NYCPHL-001032/2020|2020-09-29|EPI\_ISL\_633047|Original|hCoV-19^^New York|Human|DOHMH Chelsea|New York City Public Health Laboratory|Wang|USA

>Spike|hCoV-19/Denmark/DCGC-15137/2020|2020-11-23|EPI\_ISL\_713652|Original|hCoV-19^^Sjaelland|Human|Department of Virus and Microbiological Special Diagnostics|Albertsen Lab|Michaelsen|Denmark

>Spike|hCoV-19/England/MILK-BACDB9/2020|2020-11-17|EPI\_ISL\_681516|Original|hCoV-19^^England|Human|Lighthouse Lab in Milton Keynes|Wellcome Sanger Institute for the COVID-19 Genomics UK (COG-UK) Consortium|Davies|United Kingdom

>Spike|hCoV-19/USA/TX-HMH-2614/2020|2020-06-04|EPI\_ISL\_545428|Original|hCoV-19^^Texas|Human|Houston Methodist Hospital|Houston Methodist Hospital|Long|USA

>Spike|hCoV-19/Germany/HH-hpi-p1678/2020|2020-03-18|EPI\_ISL\_776093|Original|hCoV-19^^Hamburg|Human|University Medical Center Hamburg Eppendorf|Heinrich Pette Institute|Robitaille|Germany

>Spike|hCoV-19/Denmark/DCGC-8770/2020|2020-10-26|EPI\_ISL\_626048|Original|hCoV-19^^Midtjylland|Human|Department of Virus and Microbiological Special Diagnostics|Albertsen lab|Michaelsen|Denmark

>Spike|hCoV-19/England/CAMC-B32301/2020|2020-11-05|EPI\_ISL\_659100|Original|hCoV-19^^England|Human|Lighthouse Lab in Cambridge|Wellcome Sanger Institute for the COVID-19 Genomics UK (COG-UK) Consortium|Davies|United Kingdom

>Spike|hCoV-19/England/NOTT-11BEDA/2020|2020-11-14|EPI\_ISL\_652392|Original|hCoV-19^^England|Human|Queens Medical Centre|COVID-19 Genomics UK (COG-UK) Consortium|Loose|United Kingdom

>Spike|hCoV-19/England/LIVE-1D15DB/2020|2020-05-13|EPI\_ISL\_572502|Original|hCoV-19^^England|Human|Liverpool Clinical Laboratories|COVID-19 Genomics UK (COG-UK) Consortium|Haldenby|United Kingdom

>Spike|hCoV-19/USA/CA-CDPH152/2020|2020-09-27|EPI\_ISL\_755059|Original|hCoV-19^^California|Human|California Department of Public Health|California Department of Public Health|Bell|USA

>Spike|hCoV-19/England/ALDP-A871C8/2020|2020-10-17|EPI\_ISL\_605968|Original|hCoV-19^^England|Human|Lighthouse Lab in Alderley Park|Wellcome Sanger Institute for the COVID-19 Genomics UK (COG-UK) consortium|Davies|United Kingdom

>Spike|hCoV-19/England/LOND-124D2EE/2020|2020-04-03|EPI\_ISL\_507081|Original|hCoV-19^^England|Human|University College London Hospital|COVID-19 Genomics UK (COG-UK) Consortium|Byott|United Kingdom

>Spike|hCoV-19/Australia/NSW1052/2020|2020-07-12|EPI\_ISL\_593704|Original|hCoV-19^^New South Wales|Human|South Eastern Area Laboratory Services (SEALS)|NSW Health Pathology - Institute of Clinical Pathology and Medical Research; Westmead Hospital; University of Sydney|Gall|Australia

>Spike|hCoV-19/India/OR-ILSCV13678/2020|2020-05-09|EPI\_ISL\_463020|Original|hCoV-19^^Odisha|Human|Institute of Life Sciences|Immunogenomics lab|Raghav|India

>Spike|hCoV-19/England/MILK-B95D86/2020|2020-11-13|EPI\_ISL\_676219|Original|hCoV-19^^England|Human|Lighthouse Lab in Milton Keynes|Wellcome Sanger Institute for the COVID-19 Genomics UK (COG-UK) Consortium|Davies|United Kingdom

>Spike|hCoV-19/USA/VA-DCLS-2111/2020|2020-10-15|EPI\_ISL\_677145|Original|hCoV-19^^Virginia|Human|Virginia Division of Consolidated Laboratory Services|Virginia Division of Consolidated Laboratory Services|St. Jacques|USA

>Spike|hCoV-19/England/MILK-99D8F8/2020|2020-08-30|EPI\_ISL\_550574|Original|hCoV-19^^England|Human|Lighthouse Lab in Milton Keynes|Wellcome Sanger Institute for the COVID-19 Genomics UK (COG-UK) consortium|Davies|United Kingdom

>Spike|hCoV-19/Wales/PHWC-2AF4F/2020|2020-04-07|EPI\_ISL\_431997|Original|hCoV-19^^Wales|Human|Wales Specialist Virology Centre|Public Health Wales Microbiology Cardiff|Moore|United Kingdom

>Spike|hCoV-19/USA/CA-CZB-10972/2020|2020-09-16|EPI\_ISL\_582946|Original|hCoV-19^^California|Human|County of Santa Clara Public Health Department|Chan-Zuckerberg Biohub|Bhatt|USA

>Spike|hCoV-19/England/ALDP-673BD4/2020|2020-07-03|EPI\_ISL\_558053|Original|hCoV-19^^England|Human|Lighthouse Lab in Alderley Park|Wellcome Sanger Institute for the COVID-19 Genomics UK (COG-UK) consortium|Davies|United Kingdom

>Spike|hCoV-19/England/QEUEH-AE30FA/2020|2020-10-27|EPI\_ISL\_633411|Original|hCoV-19^^England|Human|Lighthouse Lab in Glasgow|Wellcome Sanger Institute for the COVID-19 Genomics UK (COG-UK) consortium|Davies|United Kingdom

>Spike|hCoV-19/Scotland/QEUEH-C01470/2020|2020-12-05|EPI\_ISL\_757255|Original|hCoV-19^^Scotland|Human|Lighthouse Lab in Glasgow|Wellcome Sanger Institute for the COVID-19 Genomics UK (COG-UK) Consortium|Davies|United Kingdom

>Spike|hCoV-19/South Korea/KCDC2056/2020|2020-02-20|EPI\_ISL\_481376|Original|hCoV-19^^South Korea|Human|Division of Viral Diseases|Division of Viral Diseases|Kim|South Korea

>Spike|hCoV-19/England/QEUEH-B2E06B/2020|2020-11-02|EPI\_ISL\_646192|Original|hCoV-19^^England|Human|Lighthouse Lab in Glasgow|Wellcome Sanger Institute for the COVID-19 Genomics UK (COG-UK) Consortium|Davies|United Kingdom

>Spike|hCoV-19/United Arab Emirates/0747/2020|2020-05-15|EPI\_ISL\_698896|Original|hCoV-19^^Abu Dhabi|Human|Group 42 (G42) Healthcare|G42 Healthcare|Ogrodzki|United Arab Emirates

>Spike|hCoV-19/England/ALDP-94E911/2020|2020-06-20|EPI\_ISL\_554937|Original|hCoV-19^^England|Human|Lighthouse Lab in Alderley Park|Wellcome Sanger Institute for the COVID-19 Genomics UK (COG-UK) consortium|Davies|United Kingdom

>Spike|hCoV-19/Denmark/DCGC-15787/2020|2020-11-23|EPI\_ISL\_714018|Original|hCoV-19^^Syddanmark|Human|Department of Virus and Microbiological Special Diagnostics|Albertsen Lab|Michaelsen|Denmark

>Spike|hCoV-19/Belgium/reg-0617848/2020|2020-06-17|EPI\_ISL\_734767|Original|hCoV-19^^Harelbeke|Human|UZ Leuven|KU Leuven|Maes|Belgium

>Spike|hCoV-19/Scotland/EDB4713/2020|2020-04-27|EPI\_ISL\_449329|Original|hCoV-19^^Scotland|Human|Virology Department|COVID-19 Genomics UK (COG-UK) Consortium|Williams|United Kingdom

>Spike|hCoV-19/Luxembourg/LNS9074543/2020|2020-03-22|EPI\_ISL\_744843|Original|hCoV-19^^Luxembourg|Human|Laboratoire national de sant\u00e9|Laboratoire national de sant\u00e9|Wienecke-Baldacchino|Luxembourg

>Spike|hCoV-19/USA/TX-HMH-2374/2020|2020-05-28|EPI\_ISL\_545270|Original|hCoV-19^^Texas|Human|Houston Methodist Hospital|Houston Methodist Hospital|Long|USA

>Spike|hCoV-19/United Arab Emirates/0450/2020|2020-05-18|EPI\_ISL\_708830|Original|hCoV-19^^Abu Dhabi|Human|Group 42 (G42) Healthcare|G42 Healthcare|Ogrodzki|United Arab Emirates

>Spike|hCoV-19/USA/WA-UW198/2020|2020-03-12|EPI\_ISL\_417347|Original|hCoV-19^^Washington|Human|UW Virology Lab|UW Virology Lab|Roychoudhury|USA

>Spike|hCoV-19/USA/OH-CDC-2-3714352/2020|2020-11-16|EPI\_ISL\_751610|Original|hCoV-19^^Ohio|Human|OH Department of Health Laboratory|Genomics and Discovery|Queen|USA

>Spike|hCoV-19/England/QEUEH-C33F56/2020|2020-12-11|EPI\_ISL\_733929|Original|hCoV-19^^England|Human|Lighthouse Lab in Glasgow|Wellcome Sanger Institute for the COVID-19 Genomics UK (COG-UK) Consortium|Davies|United Kingdom

>Spike|hCoV-19/Wales/ALDP-C39BA7/2020|2020-12-08|EPI\_ISL\_767163|Original|hCoV-19^^Wales|Human|Lighthouse Lab in Alderley Park|Wellcome Sanger Institute for the COVID-19 Genomics UK (COG-UK) Consortium|Davies|United Kingdom

>Spike|hCoV-19/England/QEUEH-AD5D03/2020|2020-10-26|EPI\_ISL\_633843|Original|hCoV-19^^England|Human|Lighthouse Lab in Glasgow|Wellcome Sanger Institute for the COVID-19 Genomics UK (COG-UK) consortium|Davies|United Kingdom

>Spike|hCoV-19/USA/CA-SR0439/2020|2020-03-30|EPI\_ISL\_467966|Original|hCoV-19^^California|Human|San Diego County Public Health Laboratory|Andersen lab at Scripps Research|Gangavarapu|USA

>Spike|hCoV-19/England/ALDP-A84FD0/2020|2020-10-18|EPI\_ISL\_610466|Original|hCoV-19^^England|Human|Lighthouse Lab in Alderley Park|Wellcome Sanger Institute for the COVID-19 Genomics UK (COG-UK) consortium|Davies|United Kingdom

>Spike|hCoV-19/Japan/PG-7433/2020|2020-07-00|EPI\_ISL\_688535|Original|hCoV-19^^Japan|Human|Pathogen Genomics Center|Pathogen Genomics Center|Sekizuka|Japan

>Spike|hCoV-19/Austria/CeMM0691/2020|2020-03-31|EPI\_ISL\_583648|Original|hCoV-19^^Austria|Human|Austrian Agency for Health and Food Safety (AGES)|Bergthaler laboratory|Bergthaler|Austria

>Spike|hCoV-19/Wales/PHWC-4810B8/2020|2020-10-16|EPI\_ISL\_613033|Original|hCoV-19^^Wales|Human|Wales Specialist Virology Centre Sequencing lab|COVID-19 Genomics UK (COG-UK) Consortium|Moore|United Kingdom

>Spike|hCoV-19/France/ARA-111219/2020|2020-11-23|EPI\_ISL\_728545|Original|hCoV-19^^Auvergne-Rh\u00f4ne-Alpes|Human|CNR Virus des Infections Respiratoires - France SUD|CNR Virus des Infections Respiratoires - France SUD|Bal|France

>Spike|hCoV-19/England/MILK-A0549C/2020|2020-09-30|EPI\_ISL\_599978|Original|hCoV-19^^England|Human|Lighthouse Lab in Milton Keynes|Wellcome Sanger Institute for the COVID-19 Genomics UK (COG-UK) consortium|Davies|United Kingdom

>Spike|hCoV-19/England/QEUE-96E2E3/2020|2020-08-20|EPI\_ISL\_530413|Original|hCoV-19^^England|Human|Lighthouse Lab in Glasgow|Wellcome Sanger Institute for the COVID-19 Genomics UK (COG-UK) consortium|Davies|United Kingdom

>Spike|hCoV-19/England/204481882/2020|2020-10-28|EPI\_ISL\_653999|Original|hCoV-19^^England|Human|Respiratory Virus Unit|COVID-19 Genomics UK (COG-UK) Consortium|Platt|United Kingdom

>Spike|hCoV-19/England/NOTT-1122D7/2020|2020-05-02|EPI\_ISL\_484366|Original|hCoV-19^^England|Human|Lincolnshire Hospitals and DeepSeq Nottingham|COVID-19 Genomics UK (COG-UK) Consortium|Loose|United Kingdom

>Spike|hCoV-19/Singapore/66/2020|2020-04-08|EPI\_ISL\_428845|Original|hCoV-19^^Singapore|Human|National Public Health Laboratory|National Public Health Laboratory|Mak|Singapore

>Spike|hCoV-19/Northern Ireland/QEUE-964001/2020|2020-08-12|EPI\_ISL\_536901|Original|hCoV-19^^Northern Ireland|Human|Lighthouse Lab in Glasgow|Wellcome Sanger Institute for the COVID-19 Genomics UK (COG-UK) consortium|Davies|United Kingdom

>Spike|hCoV-19/USA/HI-H200180/2020|2020-07-29|EPI\_ISL\_752740|Original|hCoV-19^^Hawaii|Human|State Laboratories Division|State Laboratories Division|Sultana|USA

>Spike|hCoV-19/England/CAMC-B085C2/2020|2020-10-29|EPI\_ISL\_643857|Original|hCoV-19^^England|Human|Lighthouse Lab in Cambridge|Wellcome Sanger Institute for the COVID-19 Genomics UK (COG-UK) Consortium|Davies|United Kingdom

>Spike|hCoV-19/Australia/VIC2850/2020|2020-07-03|EPI\_ISL\_521681|Original|hCoV-19^^Victoria|Human|Microbiological Diagnostic Unit - Public Health Laboratory (MDU-PHL)|MDU-PHL|Schultz|Australia

>Spike|hCoV-19/Portugal/PT0209/2020|2020-03-30|EPI\_ISL\_453923|Original|hCoV-19^^Portugal|Human|unknown|Instituto Nacional de Saude (INSA)|Borges|Portugal

>Spike|hCoV-19/England/MILK-957186/2020|2020-06-13|EPI\_ISL\_554302|Original|hCoV-19^^England|Human|Lighthouse Lab in Milton Keynes|Wellcome Sanger Institute for the COVID-19 Genomics UK (COG-UK) consortium|Davies|United Kingdom

>Spike|hCoV-19/England/MILK-9C24BA/2020|2020-09-08|EPI\_ISL\_566460|Original|hCoV-19^^England|Human|Lighthouse Lab in Milton Keynes|Wellcome Sanger Institute for the COVID-19 Genomics UK (COG-UK) consortium|Davies|United Kingdom

>Spike|hCoV-19/England/CAMC-B34721/2020|2020-11-05|EPI\_ISL\_659487|Original|hCoV-19^^England|Human|Lighthouse Lab in Cambridge|Wellcome Sanger Institute for the COVID-19 Genomics UK (COG-UK) Consortium|Davies|United Kingdom

>Spike|hCoV-19/Canada/ON-S1908/2020|2020-11-24|EPI\_ISL\_729323|Original|hCoV-19^^Ontario|Human|Toronto Invasive Bacterial Diseases Network|McMaster University|McArthur|Canada

>Spike|hCoV-19/Netherlands/NA\_15/2020|2020-03-11|EPI\_ISL\_415471|Original|hCoV-19^^Netherlands|Human|Dutch COVID-19 response team|Erasmus Medical Center|Oude Munnink|Netherlands

>Spike|hCoV-19/Luxembourg/LNS8598511/2020|2020-11-04|EPI\_ISL\_744773|Original|hCoV-19^^Luxembourg|Human|Laboratoire national de sant\u00e9|Laboratoire national de sant\u00e9|Wienecke-Baldacchino|Luxembourg

>Spike|hCoV-19/South Korea/KDCA0087/2020|2020-09-01|EPI\_ISL\_747326|Original|hCoV-19^^South Korea|Human|Division of Emerging Infectious Diseases|Division of Emerging Infectious Diseases|Park|South Korea

>Spike|hCoV-19/Japan/PG-1754/2020|2020-04-00|EPI\_ISL\_685360|Original|hCoV-19^^Japan|Human|Pathogen Genomics Center|Pathogen Genomics Center|Sekizuka|Japan

>Spike|hCoV-19/Australia/VIC9377/2020|2020-08-21|EPI\_ISL\_565530|Original|hCoV-19^^Victoria|Human|Microbiological Diagnostic Unit - Public Health Laboratory (MDU-PHL)|MDU-PHL|Schultz|Australia

>Spike|hCoV-19/South Korea/KCDC2545/2020|2020-06-21|EPI\_ISL\_514948|Original|hCoV-19^^South Korea|Human|Division of Viral Diseases|Division of Viral Diseases|Kim|South Korea

>Spike|hCoV-19/Japan/PG-3160/2020|2020-06-00|EPI\_ISL\_691280|Original|hCoV-19^^Japan|Human|Pathogen Genomics Center|Pathogen Genomics Center|Sekizuka|Japan

>Spike|hCoV-19/England/ALDP-B480C5/2020|2020-11-07|EPI\_ISL\_649393|Original|hCoV-19^^England|Human|Lighthouse Lab in Alderley Park|Wellcome Sanger Institute for the COVID-19 Genomics UK (COG-UK) Consortium|Davies|United Kingdom

>Spike|hCoV-19/Japan/PG-0301/2020|2020-03-29|EPI\_ISL\_479977|Original|hCoV-19^^HokurikuShinsyu|Human|Fukui Prefectural Institute of Public Health and Environmental Science|Pathogen Genomics Center|Sekizuka|Japan

>Spike|hCoV-19/England/CAMB-72A65/2020|2020-03-24|EPI\_ISL\_439937|Original|hCoV-19^^England|Human|Department of Pathology|Wellcome Sanger Institute for the COVID-19 Genomics UK (COG-UK) consortium|Amato|United Kingdom

>Spike|hCoV-19/England/QEUEH-9B8CEC/2020|2020-09-08|EPI\_ISL\_549779|Original|hCoV-19^^England|Human|Lighthouse Lab in Glasgow|Wellcome Sanger Institute for the COVID-19 Genomics UK (COG-UK) consortium|Davies|United Kingdom

>Spike|hCoV-19/Denmark/DCGC-4277/2020|2020-09-07|EPI\_ISL\_615714|Original|hCoV-19^^Nordjylland|Human|Department of Virus and Microbiological Special Diagnostics|Albertsen lab|Michaelsen|Denmark

>Spike|hCoV-19/England/EXET-137218/2020|2020-04-17|EPI\_ISL\_471955|Original|hCoV-19^^England|Human|University of Exeter|COVID-19 Genomics UK (COG-UK) Consortium|Temperton|United Kingdom

>Spike|hCoV-19/USA/TX-HMH-MCoV-18105/2020|2020-11-12|EPI\_ISL\_784453|Original|hCoV-19^^Texas|Human|Houston Methodist Hospital|Houston Methodist Hospital|Long|USA

>Spike|hCoV-19/Australia/VIC17651/2020|2020-08-05|EPI\_ISL\_663970|Original|hCoV-19^^Victoria|Human|Microbiological Diagnostic Unit - Public Health Laboratory (MDU-PHL)|MDU-PHL|Schultz|Australia

>Spike|hCoV-19/Wales/PHWC-490EBC/2020|2020-11-18|EPI\_ISL\_706582|Original|hCoV-19^^Wales|Human|Originating lab|COVID-19 Genomics UK (COG-UK) Consortium|Moore|United Kingdom

>Spike|hCoV-19/England/QEUEH-B417D6/2020|2020-11-08|EPI\_ISL\_658486|Original|hCoV-19^^England|Human|Lighthouse Lab in Glasgow|Wellcome Sanger Institute for the COVID-19 Genomics UK (COG-UK) Consortium|Davies|United Kingdom

>Spike|hCoV-19/England/QEUEH-A4BB86/2020|2020-10-05|EPI\_ISL\_741763|Original|hCoV-19^^England|Human|Oxford Viromics|COVID-19 Genomics UK (COG-UK) Consortium|Golubchik|United Kingdom

>Spike|hCoV-19/Germany/HH-hpi-pl354/2020|2020-03-27|EPI\_ISL\_775816|Original|hCoV-19^^Hamburg|Human|University Medical Center Hamburg Eppendorf|Heinrich Pette Institute|Robitaille|Germany

>Spike|hCoV-19/England/MILK-9959A2/2020|2020-08-23|EPI\_ISL\_551617|Original|hCoV-19^^England|Human|Lighthouse Lab in Milton Keynes|Wellcome Sanger Institute for the COVID-19 Genomics UK (COG-UK) consortium|Davies|United Kingdom

>Spike|hCoV-19/England/PORT-2D1B23/2020|2020-04-02|EPI\_ISL\_493651|Original|hCoV-19^^England|Human|Centre for Enzyme Innovation|COVID-19 Genomics UK (COG-UK) Consortium|Robson|United Kingdom

>Spike|hCoV-19/Italy/VEN-UniVR-89/2020|2020-03-24|EPI\_ISL\_751397|Original|hCoV-19^^Veneto|Human|IRCCS Sacro Cuore Don Calabria Hospital|University of Verona|Mori|Italy

>Spike|hCoV-19/Israel/990059232/2020|2020-03-25|EPI\_ISL\_447274|Original|hCoV-19^^South Coast District|Human|Microbiology laboratory|Stern Lab|Miller|Israel

>Spike|hCoV-19/England/NORT-2960D0/2020|2020-05-18|EPI\_ISL\_488037|Original|hCoV-19^^England|Human|NU-OMICS DNA Sequencing research facility|Wellcome Sanger Institute for the COVID-19 Genomics UK (COG-UK) consortium|Davies|United Kingdom

>Spike|hCoV-19/England/QEUEH-B433EF/2020|2020-11-08|EPI\_ISL\_657300|Original|hCoV-19^^England|Human|Lighthouse Lab in Glasgow|Wellcome Sanger Institute for the COVID-19 Genomics UK (COG-UK) Consortium|Davies|United Kingdom

>Spike|hCoV-19/Singapore/1154/2020|2020-03-05|EPI\_ISL\_648072|Original|hCoV-19^^Singapore|Human|Department of Laboratory Medicine|Department of Laboratory Medicine|Chen|Singapore

>Spike|hCoV-19/Denmark/DCGC-10204/2020|2020-11-09|EPI\_ISL\_669451|Original|hCoV-19^^Nordjylland|Human|Department of Virus and Microbiological Special Diagnostics|Albertsen Lab|Michaelsen|Denmark

>Spike|hCoV-19/Japan/PG-1054/2020|2020-04-00|EPI\_ISL\_684664|Original|hCoV-19^^Japan|Human|Fukuoka Institute of Health and Environmental Sciences|Pathogen Genomics Center|Sekizuka|Japan

>Spike|hCoV-19/Scotland/QEUEH-9D1078/2020|2020-09-16|EPI\_ISL\_577375|Original|hCoV-19^^Scotland|Human|University of Exeter|COVID-19 Genomics UK (COG-UK) Consortium|Temperton|United Kingdom

>Spike|hCoV-19/USA/GA-QDX-577/2020|2020-03-18|EPI\_ISL\_571288|Original|hCoV-19^^Georgia|Human|Quest Diagnostics|Quest Diagnostics|Kagan|USA

>Spike|hCoV-19/Denmark/DCGC-21093/2020|2020-12-21|EPI\_ISL\_759550|Original|hCoV-19^^Hovedstaden|Human|Department of Virus and Microbiological Special Diagnostics|Albertsen Lab|Michaelsen|Denmark

>Spike|hCoV-19/Taiwan/CGMH-CGU-07/2020|2020-03-09|EPI\_ISL\_417520|Original|hCoV-19^^Taoyuan|Human|Laboratory Medicine|Department of Laboratory Medicine|Yi Chun|Taiwan

>Spike|hCoV-19/England/NORW-E94F2/2020|2020-04-23|EPI\_ISL\_448317|Original|hCoV-19^^England|Human|Quadram Institute Bioscience|COVID-19 Genomics UK (COG-UK) Consortium|Alikhan|United Kingdom

>Spike|hCoV-19/USA/CA-IGI-0127/2020|2020-06-03|EPI\_ISL\_495149|Original|hCoV-19^^California|Human|Innovative Genomics Institute|Innovative Genomics Institute|Shivram|USA

>Spike|hCoV-19/Australia/VIC98/2020|2020-03-16|EPI\_ISL\_419810|Original|hCoV-19^^Victoria|Human|Victorian Infectious Diseases Reference Laboratory (VIDRL)|Victorian Infectious Diseases Reference Laboratory and Microbiological Diagnostic Unit Public Health Laboratory|Schultz|Australia

>Spike|hCoV-19/Scotland/QEUEH-96EF28/2020|2020-08-18|EPI\_ISL\_534480|Original|hCoV-19^^Scotland|Human|NHSGGC West of Scotland Specialist Virology Centre / MRC-University of Glasgow Centre for Virus Research|Wellcome Sanger Institute for the COVID-19 Genomics UK (COG-UK) consortium|Davies|United Kingdom

>Spike|hCoV-19/England/ALDP-9C4DEA/2020|2020-09-10|EPI\_ISL\_567781|Original|hCoV-19^^England|Human|Lighthouse Lab in Alderley Park|Wellcome Sanger Institute for the COVID-19 Genomics UK (COG-UK) consortium|Davies|United Kingdom

>Spike|hCoV-19/England/MILK-C6CA35/2020|2020-12-13|EPI\_ISL\_778476|Original|hCoV-19^^England|Human|Lighthouse Lab in Milton Keynes|Wellcome Sanger Institute for the COVID-19 Genomics UK (COG-UK) Consortium|Davies|United Kingdom

>Spike|hCoV-19/USA/NY-PV09396/2020|2020-03-19|EPI\_ISL\_450077|Original|hCoV-19^^New York|Human|MSSS Clinical Microbiology Laboratories|MSSS Pathogen Surveillance Program|van Bakel|USA

>Spike|hCoV-19/Denmark/DCGC-16536/2020|2020-11-16|EPI\_ISL\_714823|Original|hCoV-19^^Hovedstaden|Human|Department of Virus and Microbiological Special Diagnostics|Albertsen Lab|Michaelsen|Denmark

>Spike|hCoV-19/USA/WI-GMF-06001/2020|2020-06-12|EPI\_ISL\_471151|Original|hCoV-19^^Wisconsin|Human|Gundersen Molecular Diagnostics Laboratory|Kabara Cancer Research Institute|Kenny|USA

>Spike|hCoV-19/Spain/MD-IBV-99012318/2020|2020-11-19|EPI\_ISL\_779976|Original|hCoV-19^^Madrid|Human|Hospital General Universitario Gregorio Mara\u00f1a|SeqCOVID-SPAIN consortium|IBV (CSIC)|Comas|Spain

>Spike|hCoV-19/England/ALDP-C8A62E/2020|2020-12-17|EPI\_ISL\_756560|Original|hCoV-19^^England|Human|Lighthouse Lab in Alderley Park|Wellcome Sanger Institute for the COVID-19 Genomics UK (COG-UK) Consortium|Davies|United Kingdom

>Spike|hCoV-19/Jordan/AM-ALSR-5311/2020|2020-10-31|EPI\_ISL\_730547|Original|hCoV-19^^Amman|Human|Biolab Diagnostic Laboratories|Andersen lab at Scripps Research|Gangavarapu|Jordan

>Spike|hCoV-19/Belgium/reg-0409566/2020|2020-04-09|EPI\_ISL\_734556|Original|hCoV-19^^Lubbeek|Human|UZ Leuven|KU Leuven|Maes|Belgium

>Spike|hCoV-19/Wales/PHWC-47DA75/2020|2020-10-10|EPI\_ISL\_586231|Original|hCoV-19^^Wales|Human|Wales Specialist Virology Centre Sequencing lab|COVID-19 Genomics UK (COG-UK) Consortium|Moore|United Kingdom

>Spike|hCoV-19/USA/ME-HETL-J0287/2020|2020-10-05|EPI\_ISL\_755430|Original|hCoV-19^^Maine|Human|Maine Health and Environmental Testing Laboratory|Tewhey Lab|Tewhey|USA

>Spike|hCoV-19/Italy/VEN-UniVR-121/2020|2020-03-30|EPI\_ISL\_751421|Original|hCoV-19^^Veneto|Human|IRCCS Sacro Cuore Don Calabria Hospital|University of Verona|Mori|Italy

>Spike|hCoV-19/USA/TX-DSHS-0849/2020|2020-06-09|EPI\_ISL\_593588|Original|hCoV-19^^Texas|Human|Texas Department of State Health Services|Texas Department of State Health Services|Rahman|USA

>Spike|hCoV-19/Wales/PHWC-4A4FEF/2020|2020-12-11|EPI\_ISL\_764808|Original|hCoV-19^^Wales|Human|Wales Specialist Virology Centre Sequencing lab|COVID-19 Genomics UK (COG-UK) Consortium|Moore|United Kingdom

>Spike|hCoV-19/England/ALDP-B751CC/2020|2020-11-12|EPI\_ISL\_662175|Original|hCoV-19^^England|Human|Lighthouse Lab in Alderley Park|Wellcome Sanger Institute for the COVID-19 Genomics UK (COG-UK) Consortium|Davies|United Kingdom

>Spike|hCoV-19/Denmark/DCGC-10731/2020|2020-11-02|EPI\_ISL\_670168|Original|hCoV-19^^Nordjylland|Human|Department of Virus and Microbiological Special Diagnostics|Albertsen Lab|Michaelsen|Denmark

>Spike|hCoV-19/England/CAMC-AAF76E/2020|2020-10-23|EPI\_ISL\_631274|Original|hCoV-19^^England|Human|Lighthouse Lab in Cambridge|Wellcome Sanger Institute for the COVID-19 Genomics UK (COG-UK) consortium|Davies|United Kingdom

>Spike|hCoV-19/England/MILK-C61432/2020|2020-12-13|EPI\_ISL\_769230|Original|hCoV-19^^England|Human|Lighthouse Lab in Milton Keynes|Wellcome Sanger Institute for the COVID-19 Genomics UK (COG-UK) Consortium|Davies|United Kingdom

>Spike|hCoV-19/Spain/MD-IBV-003684/2020|2020-04-02|EPI\_ISL\_467200|Original|hCoV-19^^Madrid|Human|Hospital General Universitario Gregorio Mara\u00f1a|SeqCOVID-SPAIN consortium|IBV (CSIC)|Comas|Spain

>Spike|hCoV-19/Russia/StPetersburg-RII6065S/2020|2020-04-15|EPI\_ISL\_430110|Original|hCoV-19^^Saint Petersburg|Human|WHO National Influenza Centre Russian Federation|WHO National Influenza Centre Russian Federation|Komissarov|Russia

>Spike|hCoV-19/Denmark/DCGC-14932/2020|2020-11-23|EPI\_ISL\_713530|Original|hCoV-19^^Midtjylland|Human|Department of Virus and Microbiological Special Diagnostics|Albertsen Lab|Michaelsen|Denmark

>Spike|hCoV-19/Australia/TAS07/2020|2020-04-13|EPI\_ISL\_522562|Original|hCoV-19^^Tasmania|Human|Royal Hobart Hospital Microbiology Department|MDU-PHL|Schultz|Australia

>Spike|hCoV-19/England/ALDP-5CC487/2020|2020-06-19|EPI\_ISL\_558487|Original|hCoV-19^^England|Human|Lighthouse Lab in Alderley Park|Wellcome Sanger Institute for the COVID-19 Genomics UK (COG-UK) consortium|Davies|United Kingdom

>Spike|hCoV-19/England/CAMC-B344DF/2020|2020-11-05|EPI\_ISL\_659634|Original|hCoV-19^^England|Human|Lighthouse Lab in Cambridge|Wellcome Sanger Institute for the COVID-19 Genomics UK (COG-UK) Consortium|Davies|United Kingdom

>Spike|hCoV-19/Denmark/DCGC-10408/2020|2020-11-02|EPI\_ISL\_669950|Original|hCoV-19^^Syddanmark|Human|Department of Virus and Microbiological Special Diagnostics|Albertsen Lab|Michaelsen|Denmark

>Spike|hCoV-19/Wuhan/HB-WH2-164/2020|2020-02-10|EPI\_ISL\_454931|Original|hCoV-19^^Hubei|Human|Wuhan Chain Medical Labs (CMLabs)|State Key Laboratory of Biotherapy of Sichuan University|Tang|China

>Spike|hCoV-19/England/ALDP-97E471/2020|2020-07-24|EPI\_ISL\_529410|Original|hCoV-19^^England|Human|Queens Medical Centre|COVID-19 Genomics UK (COG-UK) Consortium|Loose|United Kingdom

>Spike|hCoV-19/USA/MA-MASPHL-00811/2020|2020-05-26|EPI\_ISL\_692889|Original|hCoV-19^^Massachusetts|Human|Massachusetts State Public Health Laboratory|Massachusetts State Public Health Laboratory|Lang|USA

>Spike|hCoV-19/USA/NC-CDC-0034/2020|2020-03-08|EPI\_ISL\_452126|Original|hCoV-19^^North Carolina|Human|NC State Laboratory of Public Health|Pathogen Discovery|Queen|USA

>Spike|hCoV-19/Denmark/DCGC-3828/2020|2020-08-31|EPI\_ISL\_622696|Original|hCoV-19^^Hovedstaden|Human|Department of Virus and Microbiological Special Diagnostics|Albertsen lab|Michaelsen|Denmark

>Spike|hCoV-19/South Africa/KRISP-K000650/2020|2020-07-13|EPI\_ISL\_509294|Original|hCoV-19^^KwaZulu-Natal|Human|NHLS-IALCH|KRISP|de Oliveira|South Africa

>Spike|hCoV-19/England/MILK-9E2FD1/2020|2020-09-21|EPI\_ISL\_581236|Original|hCoV-19^^England|Human|Lighthouse Lab in Milton Keynes|Wellcome Sanger Institute for the COVID-19 Genomics UK (COG-UK) consortium|Davies|United Kingdom

>Spike|hCoV-19/England/BRIS-12FD12/2020|2020-04-09|EPI\_ISL\_492518|Original|hCoV-19^^England|Human|PHE South West Regional Laboratory|Wellcome Sanger Institute for the COVID-19 Genomics UK (COG-UK) consortium|Davies|United Kingdom

>Spike|hCoV-19/USA/TX-DSHS-0302/2020|2020-06-13|EPI\_ISL\_534270|Original|hCoV-19^^Texas|Human|Texas Department of State Health Services|Texas Department of State Health Services|Rahman|USA

>Spike|hCoV-19/England/201580028/2020|2020-04-08|EPI\_ISL\_466347|Original|hCoV-19^^England|Human|Respiratory Virus Unit|Respiratory Virus Unit|Platt|United Kingdom

>Spike|hCoV-19/Scotland/EDB4965/2020|2020-05-14|EPI\_ISL\_473811|Original|hCoV-19^^Scotland|Human|Virology Department|COVID-19 Genomics UK (COG-UK) Consortium|Williams|United Kingdom

>Spike|hCoV-19/Senegal/9819/2020|2020-04-25|EPI\_ISL\_498233|Original|hCoV-19^^Dakar|Human|Institut Pasteur de Dakar|Institut Pasteur de Dakar|Dia|Senegal

>Spike|hCoV-19/USA/MA-MASPHL-00577/2020|2020-05-08|EPI\_ISL\_693024|Original|hCoV-19^^Massachusetts|Human|Massachusetts State Public Health Laboratory|Massachusetts State Public Health Laboratory|Lang|USA

>Spike|hCoV-19/England/CAMC-B51A70/2020|2020-11-08|EPI\_ISL\_658276|Original|hCoV-19^^England|Human|Lighthouse Lab in Cambridge|Wellcome Sanger Institute for the COVID-19 Genomics UK (COG-UK) Consortium|Davies|United Kingdom

>Spike|hCoV-19/Wales/PHWC-2D45C/2020|2020-04-04|EPI\_ISL\_445987|Original|hCoV-19^^Wales|Human|Wales Specialist Virology Centre|Public Health Wales Microbiology Cardiff|Moore|United Kingdom

>Spike|hCoV-19/USA/CA-ALSR-1880/2020|2020-05-20|EPI\_ISL\_512217|Original|hCoV-19^^California|Human|San Diego County Public Health Laboratory|Andersen lab at Scripps Research|Gangavarapu|USA

>Spike|hCoV-19/England/QEUEH-75F40F/2020|2020-07-14|EPI\_ISL\_532987|Original|hCoV-19^^England|Human|Lighthouse Lab in Glasgow|Wellcome Sanger Institute for the COVID-19 Genomics UK (COG-UK) consortium|Davies|United Kingdom

>Spike|hCoV-19/England/CAMC-B22E12/2020|2020-11-02|EPI\_ISL\_647401|Original|hCoV-19^^England|Human|Lighthouse Lab in Cambridge|Wellcome Sanger Institute for the COVID-19 Genomics UK (COG-UK) Consortium|Davies|United Kingdom

>Spike|hCoV-19/England/QEUEH-C930D9/2020|2020-12-17|EPI\_ISL\_762159|Original|hCoV-19^^England|Human|Lighthouse Lab in Glasgow|Wellcome Sanger Institute for the COVID-19 Genomics UK (COG-UK) Consortium|Davies|United Kingdom

>Spike|hCoV-19/Japan/IC-0404/2020|2020-12-00|EPI\_ISL\_736913|Original|hCoV-19^^Japan|Human|Pathogen Genomics Center|Pathogen Genomics Center|Sekizuka|Japan

>Spike|hCoV-19/England/QEUEH-9DDCD2/2020|2020-09-21|EPI\_ISL\_599500|Original|hCoV-19^^England|Human|Lighthouse Lab in Glasgow|Wellcome Sanger Institute for the COVID-19 Genomics UK (COG-UK) consortium|Davies|United Kingdom

>Spike|hCoV-19/USA/TX-HMH-2579/2020|2020-06-06|EPI\_ISL\_545402|Original|hCoV-19^^Texas|Human|Houston Methodist Hospital|Houston Methodist Hospital|Long|USA

>Spike|hCoV-19/Australia/VIC4252/2020|2020-07-14|EPI\_ISL\_519580|Original|hCoV-19^^Victoria|Human|Microbiological Diagnostic Unit - Public Health Laboratory (MDU-PHL)|MDU-PHL|Schultz|Australia



>Spike|hCoV-19/England/CAMC-A57880/2020|2020-10-07|EPI\_ISL\_597462|Original|hCoV-19^^England|Human|Lighthouse Lab in Cambridge|Wellcome Sanger Institute for the COVID-19 Genomics UK (COG-UK) consortium|Davies|United Kingdom

>Spike|hCoV-19/England/MILK-BAA8C9/2020|2020-11-18|EPI\_ISL\_681581|Original|hCoV-19^^England|Human|Lighthouse Lab in Milton Keynes|Wellcome Sanger Institute for the COVID-19 Genomics UK (COG-UK) Consortium|Davies|United Kingdom

>Spike|hCoV-19/USA/NY-NYUMC720/2020|2020-03-20|EPI\_ISL\_451435|Original|hCoV-19^^New York|Human|NYU Langone Health|Departments of Pathology and Medicine|Maurano|USA

>Spike|hCoV-19/England/NOTT-118990/2020|2020-10-28|EPI\_ISL\_627686|Original|hCoV-19^^England|Human|Queens Medical Centre|COVID-19 Genomics UK (COG-UK) Consortium|Loose|United Kingdom

>Spike|hCoV-19/USA/TX-HMH-MCoV-15529/2020|2020-10-23|EPI\_ISL\_787013|Original|hCoV-19^^Texas|Human|Houston Methodist Hospital|Houston Methodist Hospital|Long|USA

>Spike|hCoV-19/Denmark/DCGC-18764/2020|2020-12-07|EPI\_ISL\_748250|Original|hCoV-19^^Hovedstaden|Human|Department of Virus and Microbiological Special Diagnostics|Albertsen Lab|Michaelsen|Denmark

>Spike|hCoV-19/USA/TX-HMH-MCoV-18098/2020|2020-11-17|EPI\_ISL\_784446|Original|hCoV-19^^Texas|Human|Houston Methodist Hospital|Houston Methodist Hospital|Long|USA

>Spike|hCoV-19/USA/IL-NM074/2020|2020-03-16|EPI\_ISL\_444569|Original|hCoV-19^^Illinois|Human|Northwestern Memorial Hospital|Ozer Lab|Ozer|USA

>Spike|hCoV-19/USA/WA-UW-1774/2020|2020-03-22|EPI\_ISL\_424256|Original|hCoV-19^^Washington|Human|UW Virology Lab|UW Virology Lab|Roychoudhury|USA

>Spike|hCoV-19/England/CAMC-B7884C/2020|2020-11-11|EPI\_ISL\_661834|Original|hCoV-19^^England|Human|Lighthouse Lab in Cambridge|Wellcome Sanger Institute for the COVID-19 Genomics UK (COG-UK) Consortium|Davies|United Kingdom

>Spike|hCoV-19/USA/TX-HMH-4884/2020|2020-06-22|EPI\_ISL\_544403|Original|hCoV-19^^Texas|Human|Houston Methodist Hospital|Houston Methodist Hospital|Long|USA

>Spike|hCoV-19/USA/CA-CZB-2163/2020|2020-05-22|EPI\_ISL\_513713|Original|hCoV-19^^California|Human|Orange County Public Health Lab|Chan-Zuckerberg Biohub|Kamm|USA

>Spike|hCoV-19/USA/MI-UM-10035986675/2020|2020-09-16|EPI\_ISL\_583367|Original|hCoV-19^^Michigan|Human|University of Michigan Clinical Microbiology Laboratory|Lauring Lab|Valesano|USA

>Spike|hCoV-19/Netherlands/OV-RIVM-20921/2020|2020-12-23|EPI\_ISL\_790949|Original|hCoV-19^^Overijssel|Human|Dutch COVID-19 response team|National Institute for Public Health and the Environment (RIVM)|Meijer|Netherlands

>Spike|hCoV-19/Denmark/DCGC-7927/2020|2020-10-26|EPI\_ISL\_618881|Original|hCoV-19^^Midtjylland|Human|Department of Virus and Microbiological Special Diagnostics|Albertsen lab|Michaelsen|Denmark

>Spike|hCoV-19/USA/MO-QDX-2582/2020|2020-03-15|EPI\_ISL\_604943|Original|hCoV-19^^Missouri|Human|Quest Diagnostics|Quest Diagnostics|Kagan|USA

>Spike|hCoV-19/England/LIVE-A876F/2020|2020-03-26|EPI\_ISL\_517207|Original|hCoV-19^^England|Human|Liverpool Clinical Laboratories|COVID-19 Genomics UK (COG-UK) Consortium|Haldenby|United Kingdom

>Spike|hCoV-19/England/QEUEH-B2BF34/2020|2020-11-04|EPI\_ISL\_680038|Original|hCoV-19^^England|Human|Department of Pathology|COVID-19 Genomics UK (COG-UK) Consortium|Goodfellow|United Kingdom

>Spike|hCoV-19/Denmark/DCGC-18587/2020|2020-12-07|EPI\_ISL\_750063|Original|hCoV-19^^Sjaelland|Human|Department of Virus and Microbiological Special Diagnostics|Albertsen Lab|Michaelsen|Denmark

>Spike|hCoV-19/England/ALDP-499AFB/2020|2020-05-26|EPI\_ISL\_559398|Original|hCoV-19^^England|Human|Lighthouse Lab in Alderley Park|Wellcome Sanger Institute for the COVID-19 Genomics UK (COG-UK) consortium|Davies|United Kingdom

>Spike|hCoV-19/Northern Ireland/QEUEH-962980/2020|2020-08-08|EPI\_ISL\_531636|Original|hCoV-19^^Northern Ireland|Human|Lighthouse Lab in Glasgow|Wellcome Sanger Institute for the COVID-19 Genomics UK (COG-UK) consortium|Davies|United Kingdom

>Spike|hCoV-19/Spain/AR-IBV-97009511/2020|2020-07-24|EPI\_ISL\_671799|Original|hCoV-19^^Aragon|Human|Hospital Cl\u00e9nico Universitario Lozano Blesa de Zaragoza (Espa\u00f1a)|SeqCOVID-SPAIN consortium/IBV(CSIC)|Comas|Spain

>Spike|hCoV-19/Japan/PG-8787/2020|2020-08-00|EPI\_ISL\_686376|Original|hCoV-19^^Japan|Human|Pathogen Genomics Center|Pathogen Genomics Center|Sekizuka|Japan

>Spike|hCoV-19/England/MILK-BAAB1B/2020|2020-11-18|EPI\_ISL\_783151|Original|hCoV-19^^England|Human|Lighthouse Lab in Milton Keynes|Wellcome Sanger Institute for the COVID-19 Genomics UK (COG-UK) Consortium|Davies|United Kingdom

>Spike|hCoV-19/Australia/VIC9947/2020|2020-07-22|EPI\_ISL\_565796|Original|hCoV-19^^Victoria|Human|Microbiological Diagnostic Unit - Public Health Laboratory (MDU-PHL)|MDU-PHL|Schultz|Australia

>Spike|hCoV-19/England/LOND-1250057/2020|2020-04-07|EPI\_ISL\_664525|Original|hCoV-19^^England|Human|University College London Hospital|COVID-19 Genomics UK (COG-UK) Consortium|Byott|United Kingdom

>Spike|hCoV-19/USA/TX-HMH-MCoV-12127/2020|2020-09-20|EPI\_ISL\_790210|Original|hCoV-19^^Texas|Human|Houston Methodist Hospital|Houston Methodist Hospital|Long|USA

>Spike|hCoV-19/England/QEUH-AE2398/2020|2020-10-27|EPI\_ISL\_633635|Original|hCoV-19^^England|Human|Lighthouse Lab in Glasgow|Wellcome Sanger Institute for the COVID-19 Genomics UK (COG-UK) consortium|Davies|United Kingdom

>Spike|hCoV-19/Belgium/ULG-9719/2020|2020-03-22|EPI\_ISL\_418658|Original|hCoV-19^^Li\u00e8ge|Human|Department of Clinical Microbiology|GIGA Medical Genomics|Durkin|Belgium

>Spike|hCoV-19/USA/HI-H200054/2020|2020-04-23|EPI\_ISL\_752639|Original|hCoV-19^^Hawaii|Human|State Laboratories Division|State Laboratories Division|Sultana|USA

>Spike|hCoV-19/England/204600295/2020|2020-11-06|EPI\_ISL\_700664|Original|hCoV-19^^England|Human|Respiratory Virus Unit|COVID-19 Genomics UK (COG-UK) Consortium|Platt|United Kingdom

>Spike|hCoV-19/Germany/HH-hpi-p1786/2020|2020-03-19|EPI\_ISL\_776157|Original|hCoV-19^^Hamburg|Human|University Medical Center Hamburg Eppendorf|Heinrich Pette Institute|Robitaille|Germany

>Spike|hCoV-19/USA/CA-CZB-13686/2020|2020-11-05|EPI\_ISL\_738922|Original|hCoV-19^^California|Human|Santa Clara County Public Health Laboratory|Chan-Zuckerberg Biohub|Kamm|USA

>Spike|hCoV-19/New Zealand/20VR2920/2020|2020-00-00|EPI\_ISL\_579351|Original|hCoV-19^^Auckland|Human|LabPLUS|Institute of Environmental Science and Research (ESR)|Wang|New Zealand

>Spike|hCoV-19/Belgium/reg-0411442/2020|2020-04-11|EPI\_ISL\_476952|Original|hCoV-19^^Tubize|Human|KU Leuven|KU Leuven|Maes|Belgium

>Spike|hCoV-19/England/ALDP-9D9535/2020|2020-09-18|EPI\_ISL\_576737|Original|hCoV-19^^England|Human|Oxford Viromics|COVID-19 Genomics UK (COG-UK) Consortium|Golubchik|United Kingdom

>Spike|hCoV-19/England/CAMC-A3E5E2/2020|2020-10-05|EPI\_ISL\_609790|Original|hCoV-19^^England|Human|Lighthouse Lab in Cambridge|Wellcome Sanger Institute for the COVID-19 Genomics UK (COG-UK) consortium|Davies|United Kingdom

>Spike|hCoV-19/England/MILK-A475E6/2020|2020-10-06|EPI\_ISL\_598452|Original|hCoV-19^^England|Human|Lighthouse Lab in Milton Keynes|Wellcome Sanger Institute for the COVID-19 Genomics UK (COG-UK) consortium|Davies|United Kingdom

>Spike|hCoV-19/England/ALDP-C3C342/2020|2020-12-10|EPI\_ISL\_731056|Original|hCoV-19^^England|Human|Lighthouse Lab in Alderley Park|Wellcome Sanger Institute for the COVID-19 Genomics UK (COG-UK) Consortium|Davies|United Kingdom

>Spike|hCoV-19/Australia/VIC1825/2020|2020-05-29|EPI\_ISL\_521875|Original|hCoV-19^^Victoria|Human|Victorian Infectious Diseases Reference Laboratory (VIDRL)|VIDRL and MDU-PHL|Schultz|Australia

>Spike|hCoV-19/Denmark/DCGC-13008/2020|2020-12-07|EPI\_ISL\_712524|Original|hCoV-19^^Hovedstaden|Human|Department of Virus and Microbiological Special Diagnostics|Albertsen Lab|Michaelsen|Denmark

>Spike|hCoV-19/England/CAMC-AAF810/2020|2020-10-21|EPI\_ISL\_631181|Original|hCoV-19^^England|Human|Lighthouse Lab in Cambridge|Wellcome Sanger Institute for the COVID-19 Genomics UK (COG-UK) consortium|Davies|United Kingdom

>Spike|hCoV-19/England/20134022104/2020|2020-03-25|EPI\_ISL\_423119|Original|hCoV-19^^England|Human|Respiratory Virus Unit|Respiratory Virus Unit|Platt|United Kingdom

>Spike|hCoV-19/France/ARA-118288/2020|2020-12-10|EPI\_ISL\_745331|Original|hCoV-19^^Auvergne-Rh\u00f4ne-Alpes|Human|CNR Virus des Infections Respiratoires - France SUD|CNR Virus des Infections Respiratoires - France SUD|Bal|France

>Spike|hCoV-19/USA/WA-UW-22407/2020|2020-08-08|EPI\_ISL\_570677|Original|hCoV-19^^Washington|Human|UW Virology Lab|UW Virology Lab|Roychoudhury|USA

>Spike|hCoV-19/England/SHEF-CCF8B/2020|2020-04-29|EPI\_ISL\_475450|Original|hCoV-19^^England|Human|Virology Department|COVID-19 Genomics UK (COG-UK) Consortium|de Silva|United Kingdom

>Spike|hCoV-19/Denmark/DCGC-20866/2020|2020-12-21|EPI\_ISL\_759416|Original|hCoV-19^^Nordjylland|Human|Department of Virus and Microbiological Special Diagnostics|Albertsen Lab|Michaelsen|Denmark

>Spike|hCoV-19/USA/VI-CDC-1999/2020|2020-03-21|EPI\_ISL\_436045|Original|hCoV-19^^Virgin Islands|Human|US VI Department of Health|Pathogen Discovery|Queen|USA

>Spike|hCoV-19/Wales/PHWC-487805/2020|2020-10-29|EPI\_ISL\_639243|Original|hCoV-19^^Wales|Human|Wales Specialist Virology Centre Sequencing lab|COVID-19 Genomics UK (COG-UK) Consortium|Moore|United Kingdom

>Spike|hCoV-19/England/MILK-975C63/2020|2020-08-21|EPI\_ISL\_552601|Original|hCoV-19^^England|Human|Lighthouse Lab in Milton Keynes|Wellcome Sanger Institute for the COVID-19 Genomics UK (COG-UK) consortium|Davies|United Kingdom

>Spike|hCoV-19/Canada/ON-S873/2020|2020-04-00|EPI\_ISL\_591174|Original|hCoV-19^^Ontario|Human|Toronto Invasive Bacterial Diseases Network|McMaster University|McArthur|Canada

>Spike|hCoV-19/England/ALDP-94D37E/2020|2020-06-15|EPI\_ISL\_556315|Original|hCoV-19^^England|Human|Lighthouse Lab in Alderley Park|Wellcome Sanger Institute for the COVID-19 Genomics UK (COG-UK) consortium|Davies|United Kingdom

>Spike|hCoV-19/Austria/CeMM1077/2020|2020-06-30|EPI\_ISL\_583883|Original|hCoV-19^^Austria|Human|Austrian Agency for Health and Food Safety (AGES)|Bergthaler laboratory|Bergthaler|Austria

>Spike|hCoV-19/Japan/PG-0617/2020|2020-04-00|EPI\_ISL\_684227|Original|hCoV-19^^Japan|Human|Gunma Prefectural Institute of Public Health and Environmental Sciences|Pathogen Genomics Center|Sekizuka|Japan

>Spike|hCoV-19/USA/MA-MASPHL-00355/2020|2020-05-13|EPI\_ISL\_693177|Original|hCoV-19^^Massachusetts|Human|Massachusetts State Public Health Laboratory|Massachusetts State Public Health Laboratory|Lang|USA

>Spike|hCoV-19/Spain/PV-IBV-003199/2020|2020-03-11|EPI\_ISL\_481020|Original|hCoV-19^^Basque Country|Human|Servicio de Microbiolog\u00eda. Hospital Universitario Donostia. OSI Donostialdea. \u00clrea de Enfermedades Infecciosas|SeqCOVID-SPAIN consortium|IBV (CSIC) |Comas|Spain

>Spike|hCoV-19/USA/WA-S758/2020|2020-04-13|EPI\_ISL\_449928|Original|hCoV-19^^Washington|Human|Washington State Department of Health|Seattle Flu Study|Bedford|USA

>Spike|hCoV-19/Finland/11CF3/2020|2020-10-31|EPI\_ISL\_732571|Original|hCoV-19^^Uusimaa|Human|Department of Virology and Immunology|Department of Virology|Smura|Finland

>Spike|hCoV-19/England/ALDP-9C635F/2020|2020-09-10|EPI\_ISL\_567708|Original|hCoV-19^^England|Human|Lighthouse Lab in Alderley Park|Wellcome Sanger Institute for the COVID-19 Genomics UK (COG-UK) consortium|Davies|United Kingdom

>Spike|hCoV-19/England/QEUEH-96E30E/2020|2020-08-18|EPI\_ISL\_530418|Original|hCoV-19^^England|Human|Lighthouse Lab in Glasgow|Wellcome Sanger Institute for the COVID-19 Genomics UK (COG-UK) consortium|Davies|United Kingdom

>Spike|hCoV-19/Scotland/QEUEH-A48F6F/2020|2020-10-08|EPI\_ISL\_595940|Original|hCoV-19^^Scotland|Human|Quadram Institute Bioscience|COVID-19 Genomics UK (COG-UK) Consortium|Alikhan|United Kingdom

>Spike|hCoV-19/India/TG-CCMB-AB249/2020|2020-08-14|EPI\_ISL\_539766|Original|hCoV-19^^Telangana|Human|CSIR-Centre for Cellular and Molecular Biology|CSIR-Centre for Cellular and Molecular Biology|Mukherjee|India

>Spike|hCoV-19/USA/TX-HMH-MCoV-18439/2020|2020-11-18|EPI\_ISL\_784787|Original|hCoV-19^^Texas|Human|Houston Methodist Hospital|Houston Methodist Hospital|Long|USA

>Spike|hCoV-19/Scotland/QEUH-AAEEF1/2020|2020-10-22|EPI\_ISL\_624112|Original|hCoV-19^^Scotland|Human|Lighthouse Lab in Glasgow|Wellcome Sanger Institute for the COVID-19 Genomics UK (COG-UK) consortium|Davies|United Kingdom

>Spike|hCoV-19/Australia/VIC5846/2020|2020-07-19|EPI\_ISL\_518640|Original|hCoV-19^^Victoria|Human|Microbiological Diagnostic Unit - Public Health Laboratory (MDU-PHL)|MDU-PHL|Schultz|Australia

>Spike|hCoV-19/England/MILK-863DDF/2020|2020-07-17|EPI\_ISL\_557483|Original|hCoV-19^^England|Human|Lighthouse Lab in Milton Keynes|Wellcome Sanger Institute for the COVID-19 Genomics UK (COG-UK) consortium|Davies|United Kingdom

>Spike|hCoV-19/England/ALDP-A6F83A/2020|2020-10-15|EPI\_ISL\_607238|Original|hCoV-19^^England|Human|Lighthouse Lab in Alderley Park|Wellcome Sanger Institute for the COVID-19 Genomics UK (COG-UK) consortium|Davies|United Kingdom

>Spike|hCoV-19/England/ALDP-A686BF/2020|2020-10-12|EPI\_ISL\_630617|Original|hCoV-19^^England|Human|Lighthouse Lab in Alderley Park|Wellcome Sanger Institute for the COVID-19 Genomics UK (COG-UK) consortium|Davies|United Kingdom

>Spike|hCoV-19/Australia/VIC9319/2020|2020-08-24|EPI\_ISL\_565504|Original|hCoV-19^^Victoria|Human|Microbiological Diagnostic Unit - Public Health Laboratory (MDU-PHL)|MDU-PHL|Schultz|Australia

>Spike|hCoV-19/Brazil/SP-793/2020|2020-07-01|EPI\_ISL\_735430|Original|hCoV-19^^S\u00e3o Paulo|Human|Instituto Adolfo Lutz - Regional de Santos|Instituto Adolfo Lutz|Sacchi|Brazil

>Spike|hCoV-19/USA/LA-BIE-001/2020|2020-04-06|EPI\_ISL\_468701|Original|hCoV-19^^Louisiana|Human|Ochsner Health|Bioinfoexperts|Cross|USA

>Spike|hCoV-19/India/GJ-GBRC349/2020|2020-06-18|EPI\_ISL\_514593|Original|hCoV-19^^Gujarat|Human|B.J. Medical College and Civil hospital|Gujarat Biotechnology Research Centre|Joshi|India

>Spike|hCoV-19/England/QEUH-A202DD/2020|2020-10-01|EPI\_ISL\_587652|Original|hCoV-19^^England|Human|Lighthouse Lab in Glasgow|Wellcome Sanger Institute for the COVID-19 Genomics UK (COG-UK) consortium|Davies|United Kingdom

>Spike|hCoV-19/South Korea/KCDC2244/2020|2020-05-10|EPI\_ISL\_510582|Original|hCoV-19^^South Korea|Human|Division of Viral Diseases|Division of Viral Diseases|Kim|South Korea

>Spike|hCoV-19/Spain/AN-IBV-001329/2020|2020-03-23|EPI\_ISL\_452544|Original|hCoV-19^^Andalucia|Human|Servicio de Microbiolog\u00eda y Parasitolog\u00eda cl\u00ednica. UCEIMP. Hospital Universitario Virgen del Roc\u00e9do/IBIS/CSIC/US.|SeqCOVID-SPAIN consortium|IBV (CSIC)|Comas|Spain

>Spike|hCoV-19/England/NORW-EB223/2020|2020-05-03|EPI\_ISL\_461890|Original|hCoV-19^^England|Human|Quadram Institute Bioscience|COVID-19 Genomics UK (COG-UK) Consortium|Alikhan|United Kingdom

>Spike|hCoV-19/Brazil/PE-IAM711/2020|2020-04-26|EPI\_ISL\_572351|Original|hCoV-19^^Pernambuco|Human|LACEN/PE|WallauLab|Wallau|Brazil

>Spike|hCoV-19/England/CAMB-1B775D/2020|2020-10-24|EPI\_ISL\_638330|Original|hCoV-19^^England|Human|Department of Pathology|COVID-19 Genomics UK (COG-UK) Consortium|Goodfellow|United Kingdom

>Spike|hCoV-19/Denmark/DCGC-16762/2020|2020-12-14|EPI\_ISL\_750547|Original|hCoV-19^^Hovedstaden|Human|Department of Virus and Microbiological Special Diagnostics|Albertsen Lab|Michaelsen|Denmark

>Spike|hCoV-19/Germany/HH-hpi-p1545/2020|2020-03-15|EPI\_ISL\_775822|Original|hCoV-19^^Hamburg|Human|University Medical Center Hamburg Eppendorf|Heinrich Pette Institute|Robitaille|Germany

>Spike|hCoV-19/Australia/VIC2046/2020|2020-06-12|EPI\_ISL\_521907|Original|hCoV-19^^Victoria|Human|Microbiological Diagnostic Unit - Public Health Laboratory (MDU-PHL)|MDU-PHL|Schultz|Australia

>Spike|hCoV-19/Switzerland/BL-42236095/2020|2020-04-17|EPI\_ISL\_581712|Original|hCoV-19^^Basel-Land|Human|University Hospital Basel|University Hospital Basel|Roloff Handschin|Switzerland

>Spike|hCoV-19/Scotland/EDB5672/2020|2020-04-12|EPI\_ISL\_473830|Original|hCoV-19^^Scotland|Human|Virology Department|COVID-19 Genomics UK (COG-UK) Consortium|Williams|United Kingdom

>Spike|hCoV-19/England/CAMB-7229A/2020|2020-03-27|EPI\_ISL\_439551|Original|hCoV-19^^England|Human|Department of Pathology|Wellcome Sanger Institute for the COVID-19 Genomics UK (COG-UK) consortium|Amato|United Kingdom

>Spike|hCoV-19/England/MILK-BAFCD7/2020|2020-11-17|EPI\_ISL\_720631|Original|hCoV-19^^England|Human|Lighthouse Lab in Milton Keynes|Wellcome Sanger Institute for the COVID-19 Genomics UK (COG-UK) Consortium|Davies|United Kingdom

>Spike|hCoV-19/England/LIVE-A983E/2020|2020-06-26|EPI\_ISL\_534754|Original|hCoV-19^^England|Human|Liverpool Clinical Laboratories|COVID-19 Genomics UK (COG-UK) Consortium|Haldenby|United Kingdom

>Spike|hCoV-19/England/ALDP-C47D46/2020|2020-12-12|EPI\_ISL\_718977|Original|hCoV-19^^England|Human|Lighthouse Lab in Alderley Park|Wellcome Sanger Institute for the COVID-19 Genomics UK (COG-UK) Consortium|Davies|United Kingdom

>Spike|hCoV-19/India/DL-69826-CSIR-IGIB/2020|2020-08-14|EPI\_ISL\_636757|Original|hCoV-19^^Delhi|Human|National Centre for Disease control (NCDC)|NCDC/CSIR-IGIB|Faruq|India

>Spike|hCoV-19/USA/MD-MDH-0046/2020|2020-04-08|EPI\_ISL\_509450|Original|hCoV-19^^Maryland|Human|Maryland Department of Health|Maryland Department of Health|Keller|USA

>Spike|hCoV-19/England/ALDP-9BE114/2020|2020-09-09|EPI\_ISL\_568033|Original|hCoV-19^^England|Human|Lighthouse Lab in Alderley Park|Wellcome Sanger Institute for the COVID-19 Genomics UK (COG-UK) consortium|Davies|United Kingdom

>Spike|hCoV-19/England/ALDP-C3A775/2020|2020-12-09|EPI\_ISL\_731279|Original|hCoV-19^^England|Human|Lighthouse Lab in Alderley Park|Wellcome Sanger Institute for the COVID-19 Genomics UK (COG-UK) Consortium|Davies|United Kingdom

>Spike|hCoV-19/USA/IL-NM-1719/2020|2020-07-26|EPI\_ISL\_626546|Original|hCoV-19^^Illinois|Human|Northwestern Memorial Hospital|Ozer Lab|Ozer|USA

>Spike|hCoV-19/Wales/PHWC-1682A5/2020|2020-05-29|EPI\_ISL\_494221|Original|hCoV-19^^Wales|Human|Originating lab|COVID-19 Genomics UK (COG-UK) Consortium|Moore|United Kingdom

>Spike|hCoV-19/Netherlands/NH-RIVM-21076/2020|2020-12-14|EPI\_ISL\_791083|Original|hCoV-19^^Noord-Holland|Human|Dutch COVID-19 response team|National Institute for Public Health and the Environment (RIVM)|Meijer|Netherlands

>Spike|hCoV-19/Scotland/CVR4702/2020|2020-09-27|EPI\_ISL\_611883|Original|hCoV-19^^Scotland|Human|West of Scotland Specialist Virology Centre|COVID-19 Genomics UK (COG-UK) Consortium|Robertson|United Kingdom

>Spike|hCoV-19/Singapore/1187/2020|2020-04-13|EPI\_ISL\_648115|Original|hCoV-19^^Singapore|Human|Department of Laboratory Medicine|Department of Laboratory Medicine|Chen|Singapore

>Spike|hCoV-19/Russia/MOS-RII-MH9264S/2020|2020-10-14|EPI\_ISL\_733423|Original|hCoV-19^^Moscow Region|Human|HELIX LLC|WHO National Influenza Centre Russian Federation|Komissarov|Russia

>Spike|hCoV-19/France/ARA-12282/2020|2020-03-22|EPI\_ISL\_508950|Original|hCoV-19^^Auvergne-Rh\u00f4ne-Alpes|Human|Centre Hospitalier de Macon|CNR Virus des Infections Respiratoires - France SUD|Josset|France

>Spike|hCoV-19/Spain/ML-ISCIII-2013688/2020|2020-08-01|EPI\_ISL\_539568|Original|hCoV-19^^Melilla|Human|Hospital Comarcal de Melilla|Instituto de Salud Carlos III|Caballero|Spain

>Spike|hCoV-19/Denmark/DCGC-21157/2020|2020-12-21|EPI\_ISL\_758864|Original|hCoV-19^^Syddanmark|Human|Department of Virus and Microbiological Special Diagnostics|Albertsen Lab|Michaelsen|Denmark

>Spike|hCoV-19/Gambia/0548/2020|2020-04-30|EPI\_ISL\_471165|Original|hCoV-19^^Kombo|Human|MRCG at LSHTM Genomics lab|MRCG at LSHTM Genomics lab|Sesay|Gambia

>Spike|hCoV-19/USA/WI-WSLH-200144/2020|2020-03-11|EPI\_ISL\_578371|Original|hCoV-19^^Wisconsin|Human|Wisconsin State Laboratory of Hygiene Communicable Disease Division|Wisconsin State Laboratory of Hygiene Communicable Disease Division|Florek|USA

>Spike|hCoV-19/Austria/CeMM0045/2020|2020-02-24|EPI\_ISL\_437932|Original|hCoV-19^^Ischgl|Human|Institut f\u00fcr Virologie am Department f\u00fcr Hygiene|Bergthaler laboratory|Bergthaler|Austria

>Spike|hCoV-19/India/MH-NIV-9154/2020|2020-04-13|EPI\_ISL\_454557|Original|hCoV-19^^Maharashtra|Human|NIV Influenza|NIV Influenza|Potdar|India

>Spike|hCoV-19/Northern Ireland/NIRE-106B44/2020|2020-05-19|EPI\_ISL\_501024|Original|hCoV-19^^Northern Ireland|Human|Regional Virus Laboratory|Wellcome Sanger Institute for the COVID-19 Genomics UK (COG-UK) consortium|Davies|United Kingdom

>Spike|hCoV-19/England/ALDP-94D1A1/2020|2020-06-14|EPI\_ISL\_556334|Original|hCoV-19^^England|Human|Lighthouse Lab in Alderley Park|Wellcome Sanger Institute for the COVID-19 Genomics UK (COG-UK) consortium|Davies|United Kingdom

>Spike|hCoV-19/England/ALDP-C8CC93/2020|2020-12-15|EPI\_ISL\_777297|Original|hCoV-19^^England|Human|Lighthouse Lab in Alderley Park|Wellcome Sanger Institute for the COVID-19 Genomics UK (COG-UK) Consortium|Davies|United Kingdom

>Spike|hCoV-19/USA/WI-GMF-26151/2020|2020-10-16|EPI\_ISL\_660947|Original|hCoV-19^^Wisconsin|Human|Gundersen Molecular Diagnostics Laboratory|Kabara Cancer Research Institute|Kenny|USA

>Spike|hCoV-19/England/ALDP-90CEB6/2020|2020-06-22|EPI\_ISL\_551490|Original|hCoV-19^^England|Human|Lighthouse Lab in Alderley Park|Wellcome Sanger Institute for the COVID-19 Genomics UK (COG-UK) consortium|Davies|United Kingdom

>Spike|hCoV-19/Wales/PHWC-251D5/2020|2020-03-23|EPI\_ISL\_420982|Original|hCoV-19^^Wales|Human|Wales Specialist Virology Centre|Public Health Wales Microbiology Cardiff|Moore|United Kingdom

>Spike|hCoV-19/England/MILK-C309C4/2020|2020-12-07|EPI\_ISL\_782794|Original|hCoV-19^^England|Human|Lighthouse Lab in Milton Keynes|Wellcome Sanger Institute for the COVID-19 Genomics UK (COG-UK) Consortium|Davies|United Kingdom

>Spike|hCoV-19/Australia/VIC6936/2020|2020-07-23|EPI\_ISL\_564153|Original|hCoV-19^^Victoria|Human|Microbiological Diagnostic Unit - Public Health Laboratory (MDU-PHL)|MDU-PHL|Schultz|Australia

>Spike|hCoV-19/England/20149022404/2020|2020-04-03|EPI\_ISL\_466168|Original|hCoV-19^^England|Human|Respiratory Virus Unit|Respiratory Virus Unit|Platt|United Kingdom

>Spike|hCoV-19/Portugal/PT0911/2020|2020-03-28|EPI\_ISL\_511168|Original|hCoV-19^^Portugal|Human|Instituto Nacional de Saude (INSA)|Instituto Nacional de Saude (INSA)|Borges|Portugal

>Spike|hCoV-19/England/CAMC-9D7221/2020|2020-09-18|EPI\_ISL\_584354|Original|hCoV-19^^England|Human|Virology Department|COVID-19 Genomics UK (COG-UK) Consortium|de Silva|United Kingdom

>Spike|hCoV-19/USA/WI-UW-952/2020|2020-05-19|EPI\_ISL\_509951|Original|hCoV-19^^Wisconsin|Human|University of Wisconsin-Madison AIDS Vaccine Research Laboratories|University of Wisconsin-Madison AIDS Vaccine Research Laboratories|Baczenas|USA

>Spike|hCoV-19/England/ALDP-BC879B/2020|2020-11-23|EPI\_ISL\_721186|Original|hCoV-19^^England|Human|Lighthouse Lab in Alderley Park|Wellcome Sanger Institute for the COVID-19 Genomics UK (COG-UK) Consortium|Davies|United Kingdom

>Spike|hCoV-19/Japan/PG-0046/2020|2020-02-00|EPI\_ISL\_479810|Original|hCoV-19^^Kanto|Human|Chiba Prefectural Institute of Public Health|Pathogen Genomics Center|Sekizuka|Japan

>Spike|hCoV-19/England/204961133/2020|2020-12-03|EPI\_ISL\_707704|Original|hCoV-19^^England|Human|Respiratory Virus Unit|COVID-19 Genomics UK (COG-UK) Consortium|Platt|United Kingdom

>Spike|hCoV-19/England/ALDP-B5D7D7/2020|2020-11-09|EPI\_ISL\_703715|Original|hCoV-19^^England|Human|Department of Pathology|COVID-19 Genomics UK (COG-UK) Consortium|Goodfellow|United Kingdom

>Spike|hCoV-19/Wales/PHWC-47D547/2020|2020-10-07|EPI\_ISL\_586158|Original|hCoV-19^^Wales|Human|Wales Specialist Virology Centre Sequencing lab|COVID-19 Genomics UK (COG-UK) Consortium|Moore|United Kingdom

>Spike|hCoV-19/Australia/VIC14685/2020|2020-07-28|EPI\_ISL\_592952|Original|hCoV-19^^Victoria|Human|Microbiological Diagnostic Unit - Public Health Laboratory (MDU-PHL)|MDU-PHL|Schultz|Australia

>Spike|hCoV-19/Indonesia/JB-WJHL-ITB-R120975/2020|2020-10-15|EPI\_ISL\_747241|Original|hCoV-19^^West Java|Human|Subang Public Health Office|West Java Health Laboratory; School of Life Sciences and Technology|Fibriani|Indonesia

>Spike|hCoV-19/United Arab Emirates/1088/2020|2020-05-16|EPI\_ISL\_698162|Original|hCoV-19^^Abu Dhabi|Human|Group 42 (G42) Healthcare|G42 Healthcare|Ogrodzki|United Arab Emirates

>Spike|hCoV-19/South Africa/KRISP-0312/2020|2020-06-24|EPI\_ISL\_487295|Original|hCoV-19^^KwaZulu-Natal|Human|NHLs-IALCH|KRISP|de Oliveira|South Africa

>Spike|hCoV-19/Switzerland/GR-ETHZ-300249/2020|2020-09-30|EPI\_ISL\_603281|Original|hCoV-19^^Graubunden|Human|Viollier AG|Department of Biosystems Science and Engineering|Nadeau|Switzerland

>Spike|hCoV-19/England/LOND-12649FB/2020|2020-11-20|EPI\_ISL\_705216|Original|hCoV-19^^England|Human|University College London|COVID-19 Genomics UK (COG-UK) Consortium|Roy|United Kingdom

>Spike|hCoV-19/England/ALDP-A702DE/2020|2020-10-15|EPI\_ISL\_607795|Original|hCoV-19^^England|Human|Lighthouse Lab in Alderley Park|Wellcome Sanger Institute for the COVID-19 Genomics UK (COG-UK) consortium|Davies|United Kingdom

>Spike|hCoV-19/mink/Netherlands/NB-EMC-8-14/2020|2020-06-01|EPI\_ISL\_523114|Original|hCoV-19^^Limburg|Neovison vison|Dutch COVID-19 response team|Erasmus Medical Center|Oude Munnink|Netherlands

>Spike|hCoV-19/Denmark/DCGC-12277/2020|2020-11-16|EPI\_ISL\_682458|Original|hCoV-19^^Nordjylland|Human|Department of Virus and Microbiological Special Diagnostics|Albertsen Lab|Michaelsen|Denmark

>Spike|hCoV-19/Switzerland/BE-ETHZ-340098/2020|2020-10-26|EPI\_ISL\_721698|Original|hCoV-19^^Bern|Human|Viollier AG|Department of Biosystems Science and Engineering|Nadeau|Switzerland

>Spike|hCoV-19/Scotland/QEUH-9ACC45/2020|2020-09-05|EPI\_ISL\_560004|Original|hCoV-19^^Scotland|Human|Oxford Viromics|COVID-19 Genomics UK (COG-UK) Consortium|Golubchik|United Kingdom

>Spike|hCoV-19/England/MILK-9C46C1/2020|2020-09-09|EPI\_ISL\_566813|Original|hCoV-19^^England|Human|Lighthouse Lab in Milton Keynes|Wellcome Sanger Institute for the COVID-19 Genomics UK (COG-UK) consortium|Davies|United Kingdom

>Spike|hCoV-19/England/QEUH-9DE521/2020|2020-09-21|EPI\_ISL\_599534|Original|hCoV-19^^England|Human|Lighthouse Lab in Glasgow|Wellcome Sanger Institute for the COVID-19 Genomics UK (COG-UK) consortium|Davies|United Kingdom

>Spike|hCoV-19/Wales/QEUH-A9F9A7/2020|2020-10-19|EPI\_ISL\_652689|Original|hCoV-19^^Wales|Human|University of Exeter|COVID-19 Genomics UK (COG-UK) Consortium|Temperton|United Kingdom

>Spike|hCoV-19/Denmark/DCGC-4091/2020|2020-09-14|EPI\_ISL\_622047|Original|hCoV-19^^Hovedstaden|Human|Department of Virus and Microbiological Special Diagnostics|Albertsen lab|Michaelsen|Denmark

>Spike|hCoV-19/England/MILK-A7B006/2020|2020-10-14|EPI\_ISL\_607475|Original|hCoV-19^^England|Human|Lighthouse Lab in Milton Keynes|Wellcome Sanger Institute for the COVID-19 Genomics UK (COG-UK) consortium|Davies|United Kingdom

>Spike|hCoV-19/USA/MN-MDH-1447/2020|2020-03-26|EPI\_ISL\_514666|Original|hCoV-19^^Minnesota|Human|Minnesota Department of Health|Minnesota Department of Health|Garfin|USA

>Spike|hCoV-19/Portugal/PT0186/2020|2020-03-29|EPI\_ISL\_453902|Original|hCoV-19^^Portugal|Human|unknown|Instituto Nacional de Saude (INSA)|Borges|Portugal

>Spike|hCoV-19/Finland/25SS6C12/2020|2020-09-25|EPI\_ISL\_759923|Original|hCoV-19^^Uusimaa|Human|Department of Virology and Immunology|Department of Virology|Smura|Finland

>Spike|hCoV-19/Japan/PG-4856/2020|2020-07-00|EPI\_ISL\_689978|Original|hCoV-19^^Japan|Human|Pathogen Genomics Center|Pathogen Genomics Center|Sekizuka|Japan

>Spike|hCoV-19/England/CAMC-B078F7/2020|2020-10-30|EPI\_ISL\_643876|Original|hCoV-19^^England|Human|Lighthouse Lab in Cambridge|Wellcome Sanger Institute for the COVID-19 Genomics UK (COG-UK) Consortium|Davies|United Kingdom

>Spike|hCoV-19/England/PORT-2E9047/2020|2020-00-00|EPI\_ISL\_763789|Original|hCoV-19^^England|Human|Centre for Enzyme Innovation|COVID-19 Genomics UK (COG-UK) Consortium|Robson|United Kingdom

>Spike|hCoV-19/USA/NM-LANL-2020016419/2020|2020-04-07|EPI\_ISL\_602280|Original|hCoV-19^^New Mexico|Human|New Mexico Department of Health Scientific Laboratory Division|Los Alamos National Laboratory Bioscience Division|Lo|USA

>Spike|hCoV-19/England/ALDP-CB6304/2020|2020-12-18|EPI\_ISL\_761665|Original|hCoV-19^^England|Human|Lighthouse Lab in Alderley Park|Wellcome Sanger Institute for the COVID-19 Genomics UK (COG-UK) Consortium|Davies|United Kingdom

>Spike|hCoV-19/Netherlands/NB-RIVM-20658/2020|2020-12-15|EPI\_ISL\_790592|Original|hCoV-19^^Noord-Brabant|Human|Dutch COVID-19 response team|National Institute for Public Health and the Environment (RIVM)|Meijer|Netherlands

>Spike|hCoV-19/England/ALDP-A854D0/2020|2020-10-18|EPI\_ISL\_610478|Original|hCoV-19^^England|Human|Lighthouse Lab in Alderley Park|Wellcome Sanger Institute for the COVID-19 Genomics UK (COG-UK) consortium|Davies|United Kingdom

>Spike|hCoV-19/Wales/PHWC-29E70/2020|2020-04-05|EPI\_ISL\_431934|Original|hCoV-19^^Wales|Human|Wales Specialist Virology Centre|Public Health Wales Microbiology Cardiff|Moore|United Kingdom

>Spike|hCoV-19/Norway/3898/2020|2020-09-30|EPI\_ISL\_775465|Original|hCoV-19^^Trondelag|Human|Department of Medical Microbiology|Norwegian Institute of Public Health|Vollan|Norway

>Spike|hCoV-19/England/MILK-AB843E/2020|2020-10-21|EPI\_ISL\_623543|Original|hCoV-19^^England|Human|Lighthouse Lab in Milton Keynes|Wellcome Sanger Institute for the COVID-19 Genomics UK (COG-UK) consortium|Davies|United Kingdom

>Spike|hCoV-19/England/LIVE-A786D/2020|2020-03-27|EPI\_ISL\_517080|Original|hCoV-19^^England|Human|Liverpool Clinical Laboratories|COVID-19 Genomics UK (COG-UK) Consortium|Haldenby|United Kingdom

>Spike|hCoV-19/USA/MI-MDHHS-SC22397/2020|2020-11-09|EPI\_ISL\_708377|Original|hCoV-19^^Michigan|Human|Michigan Department of Health and Human Services|Michigan Department of Health and Human Services|Jacob|USA

>Spike|hCoV-19/England/CAMC-B99ECB/2020|2020-11-15|EPI\_ISL\_673641|Original|hCoV-19^^England|Human|Lighthouse Lab in Cambridge|Wellcome Sanger Institute for the COVID-19 Genomics UK (COG-UK) Consortium|Davies|United Kingdom

>Spike|hCoV-19/England/ALDP-A67E8B/2020|2020-10-10|EPI\_ISL\_609141|Original|hCoV-19^^England|Human|Lighthouse Lab in Alderley Park|Wellcome Sanger Institute for the COVID-19 Genomics UK (COG-UK) consortium|Davies|United Kingdom

>Spike|hCoV-19/USA/AZ-TG445255/2020|2020-06-25|EPI\_ISL\_695003|Original|hCoV-19^^Arizona|Human|TGen North|TGen North|French|USA

>Spike|hCoV-19/England/CAMB-73CC8/2020|2020-04-01|EPI\_ISL\_433684|Original|hCoV-19^^England|Human|Department of Pathology|COVID-19 Genomics UK (COG-UK) Consortium|Meredith|United Kingdom

>Spike|hCoV-19/England/CAMB-1AA975/2020|2020-04-18|EPI\_ISL\_470171|Original|hCoV-19^^England|Human|Department of Pathology|Wellcome Sanger Institute for the COVID-19 Genomics UK (COG-UK) consortium|Davies|United Kingdom

>Spike|hCoV-19/England/ALDP-AA2F09/2020|2020-10-22|EPI\_ISL\_624054|Original|hCoV-19^^England|Human|Lighthouse Lab in Alderley Park|Wellcome Sanger Institute for the COVID-19 Genomics UK (COG-UK) consortium|Davies|United Kingdom

>Spike|hCoV-19/USA/TX-HMH-4191/2020|2020-06-19|EPI\_ISL\_543425|Original|hCoV-19^^Texas|Human|Houston Methodist Hospital|Houston Methodist Hospital|Long|USA

>Spike|hCoV-19/England/CAMC-A422C6/2020|2020-10-05|EPI\_ISL\_609444|Original|hCoV-19^^England|Human|Lighthouse Lab in Cambridge|Wellcome Sanger Institute for the COVID-19 Genomics UK (COG-UK) consortium|Davies|United Kingdom

>Spike|hCoV-19/Japan/PG-3891/2020|2020-07-00|EPI\_ISL\_692142|Original|hCoV-19^^Japan|Human|Pathogen Genomics Center|Pathogen Genomics Center|Sekizuka|Japan

>Spike|hCoV-19/USA/UT-UPHL-2009614/2020|2020-07-18|EPI\_ISL\_605292|Original|hCoV-19^^Utah|Human|Utah Public Health Laboratory|Utah Public Health Laboratory|Young|USA

>Spike|hCoV-19/USA/TX-HMH-MCoV-15694/2020|2020-07-09|EPI\_ISL\_785378|Original|hCoV-19^^Texas|Human|Houston Methodist Hospital|Houston Methodist Hospital|Long|USA

>Spike|hCoV-19/England/ALDP-BC7723/2020|2020-11-21|EPI\_ISL\_721496|Original|hCoV-19^^England|Human|Lighthouse Lab in Alderley Park|Wellcome Sanger Institute for the COVID-19 Genomics UK (COG-UK) Consortium|Davies|United Kingdom

>Spike|hCoV-19/England/QEUH-A63FD7/2020|2020-10-12|EPI\_ISL\_628682|Original|hCoV-19^^England|Human|Oxford Viromics|COVID-19 Genomics UK (COG-UK) Consortium|Golubchik|United Kingdom



>Spike|hCoV-19/England/QEUA-9C932F/2020|2020-09-11|EPI\_ISL\_602033|Original|hCoV-19^^England|Human|Lighthouse Lab in Glasgow|Wellcome Sanger Institute for the COVID-19 Genomics UK (COG-UK) consortium|Davies|United Kingdom

>Spike|hCoV-19/England/ALDP-B62C76/2020|2020-11-08|EPI\_ISL\_655626|Original|hCoV-19^^England|Human|Lighthouse Lab in Alderley Park|Wellcome Sanger Institute for the COVID-19 Genomics UK (COG-UK) Consortium|Davies|United Kingdom

>Spike|hCoV-19/Switzerland/BS-UHB-42200093/2020|2020-03-20|EPI\_ISL\_528268|Original|hCoV-19^^Basel-Stadt|Human|University Hospital Basel|University Hospital Basel|Roloff Handschin|Switzerland

>Spike|hCoV-19/England/MILK-B55520/2020|2020-11-05|EPI\_ISL\_657777|Original|hCoV-19^^England|Human|Lighthouse Lab in Milton Keynes|Wellcome Sanger Institute for the COVID-19 Genomics UK (COG-UK) Consortium|Davies|United Kingdom

>Spike|hCoV-19/France/ARA-SC386/2020|2020-03-17|EPI\_ISL\_660358|Original|hCoV-19^^Auvergne-Rhône-Alpes|Human|CHU Clermont-Ferrand|CNR Virus des Infections Respiratoires - France SUD|Bal|France

>Spike|hCoV-19/England/CAMB-7B2A0/2020|2020-04-10|EPI\_ISL\_433936|Original|hCoV-19^^England|Human|Department of Pathology|COVID-19 Genomics UK (COG-UK) Consortium|Meredith|United Kingdom

>Spike|hCoV-19/England/QEUA-998550/2020|2020-08-24|EPI\_ISL\_539992|Original|hCoV-19^^England|Human|Lighthouse Lab in Glasgow|Wellcome Sanger Institute for the COVID-19 Genomics UK (COG-UK) consortium|Davies|United Kingdom

>Spike|hCoV-19/USA/OR-OHSU-0618/2020|2020-06-13|EPI\_ISL\_525850|Original|hCoV-19^^Oregon|Human|OHSU Lab Services Molecular Microbiology Lab|Ginkgo Bioworks Clinical Laboratory|O'Roak|USA

>Spike|hCoV-19/Wales/PHWC-2781A/2020|2020-04-01|EPI\_ISL\_432380|Original|hCoV-19^^Wales|Human|Wales Specialist Virology Centre|Public Health Wales Microbiology Cardiff|Moore|United Kingdom

>Spike|hCoV-19/Wales/PHWC-3698E/2020|2020-04-24|EPI\_ISL\_474738|Original|hCoV-19^^Wales|Human|Originating lab|COVID-19 Genomics UK (COG-UK) Consortium|Moore|United Kingdom

>Spike|hCoV-19/Canada/QC\_AV5/2020|2020-04-02|EPI\_ISL\_515231|Original|hCoV-19^^Quebec|Human|Laboratoire de microbiologie|Smith Laboratory|Smith|Canada

>Spike|hCoV-19/USA/WI-UW-1155/2020|2020-08-11|EPI\_ISL\_522911|Original|hCoV-19^^Wisconsin|Human|University of Wisconsin-Madison AIDS Vaccine Research Laboratories|University of Wisconsin-Madison AIDS Vaccine Research Laboratories|Baczenas|USA

>Spike|hCoV-19/Wales/PHWC-48ACCA/2020|2020-11-05|EPI\_ISL\_666145|Original|hCoV-19^^Wales|Human|Wales Specialist Virology Centre Sequencing lab|COVID-19 Genomics UK (COG-UK) Consortium|Moore|United Kingdom

>Spike|hCoV-19/USA/MI-MDHHS-SC21050/2020|2020-04-01|EPI\_ISL\_507826|Original|hCoV-19^^Michigan|Human|Michigan Department of Health and Human Services|Michigan Department of Health and Human Services|Blankenship|USA

>Spike|hCoV-19/Thailand/Bangkok-CONI-0108/2020|2020-03-11|EPI\_ISL\_455911|Original|hCoV-19^^Bangkok|Human|Ramathibodi Hospital|COVID-19 Network Investigations (CONI) Alliance|Batty|Thailand

>Spike|hCoV-19/USA/WI-UW-280/2020|2020-04-03|EPI\_ISL\_436574|Original|hCoV-19^^Wisconsin|Human|University of Wisconsin-Madison AIDS Vaccine Research Laboratories|University of Wisconsin-Madison AIDS Vaccine Research Laboratories|Baczenas|USA

>Spike|hCoV-19/Wales/PHWC-15C6D5/2020|2020-03-26|EPI\_ISL\_472525|Original|hCoV-19^^Wales|Human|Wales Specialist Virology Centre Sequencing lab|COVID-19 Genomics UK (COG-UK) Consortium|Moore|United Kingdom

>Spike|hCoV-19/Switzerland/BL-ETHZ-110489/2020|2020-04-07|EPI\_ISL\_451900|Original|hCoV-19^^Basel-Landschaft|Human|Viollier AG|Department of Biosystems Science and Engineering|Nadeau|Switzerland

>Spike|hCoV-19/Wales/PHWC-47D92D/2020|2020-10-07|EPI\_ISL\_586210|Original|hCoV-19^^Wales|Human|Wales Specialist Virology Centre Sequencing lab|COVID-19 Genomics UK (COG-UK) Consortium|Moore|United Kingdom

>Spike|hCoV-19/England/MILK-85025E/2020|2020-07-15|EPI\_ISL\_557547|Original|hCoV-19^^England|Human|Lighthouse Lab in Milton Keynes|Wellcome Sanger Institute for the COVID-19 Genomics UK (COG-UK) consortium|Davies|United Kingdom

>Spike|hCoV-19/USA/GA-EHC-417C/2020|2020-11-30|EPI\_ISL\_754772|Original|hCoV-19^^Georgia|Human|Emory Molecular Diagnostics Laboratory|Piantadosi Lab|Piantadosi|USA

>Spike|hCoV-19/Wales/PHWC-16C748/2020|2020-06-14|EPI\_ISL\_574088|Original|hCoV-19^^Wales|Human|Wales Specialist Virology Centre Sequencing lab|COVID-19 Genomics UK (COG-UK) Consortium|Moore|United Kingdom

>Spike|hCoV-19/South Africa/KRISP-K002490/2020|2020-08-07|EPI\_ISL\_535394|Original|hCoV-19^^KwaZulu-Natal|Human|NHLS-IALCH|KRISP|de Oliveira|South Africa

>Spike|hCoV-19/USA/ID-UW-6348/2020|2020-04-01|EPI\_ISL\_570099|Original|hCoV-19^^Idaho|Human|UW Virology Lab|UW Virology Lab|Roychoudhury|USA

>Spike|hCoV-19/Sweden/20-08717/2020|2020-04-02|EPI\_ISL\_430859|Original|hCoV-19^^Norrbotten|Human|Laboratoriemedicin|The Public Health Agency of Sweden|Svartstr\u00f6m|Sweden

>Spike|hCoV-19/Jordan/AM-ALSR-5323/2020|2020-11-07|EPI\_ISL\_730559|Original|hCoV-19^^Amman|Human|Biolab Diagnostic Laboratories|Andersen lab at Scripps Research|Gangavarapu|Jordan

>Spike|hCoV-19/England/NORW-E80D1/2020|2020-00-00|EPI\_ISL\_449106|Original|hCoV-19^^England|Human|Quadram Institute Bioscience|COVID-19 Genomics UK (COG-UK) Consortium|Alikhan|United Kingdom

>Spike|hCoV-19/USA/DE-DHSS-F952974/2020|2020-04-05|EPI\_ISL\_593979|Original|hCoV-19^^Delaware|Human|Delaware Public Health Lab|Delaware Public Health Lab|Bajwa|USA

>Spike|hCoV-19/Wales/PHWC-482F8D/2020|2020-10-22|EPI\_ISL\_627763|Original|hCoV-19^^Wales|Human|Wales Specialist Virology Centre Sequencing lab|COVID-19 Genomics UK (COG-UK) Consortium|Moore|United Kingdom

>Spike|hCoV-19/India/MH-ACTREC-307/2020|2020-07-15|EPI\_ISL\_699958|Original|hCoV-19^^Maharashtra|Human|Hematopathology Laboratory|Hematopathology Laboratory|Patkar|India

>Spike|hCoV-19/Denmark/DCGC-11755/2020|2020-10-26|EPI\_ISL\_670473|Original|hCoV-19^^Nordjylland|Human|Department of Virus and Microbiological Special Diagnostics|Albertsen Lab|Michaelsen|Denmark

>Spike|hCoV-19/England/EXET-135A30/2020|2020-03-26|EPI\_ISL\_457128|Original|hCoV-19^^England|Human|University of Exeter|COVID-19 Genomics UK (COG-UK) Consortium|Temperton|United Kingdom

>Spike|hCoV-19/England/ALDP-B839F0/2020|2020-11-14|EPI\_ISL\_674462|Original|hCoV-19^^England|Human|Lighthouse Lab in Alderley Park|Wellcome Sanger Institute for the COVID-19 Genomics UK (COG-UK) Consortium|Davies|United Kingdom

>Spike|hCoV-19/England/NOTT-11C38F/2020|2020-11-16|EPI\_ISL\_652405|Original|hCoV-19^^England|Human|Queens Medical Centre|COVID-19 Genomics UK (COG-UK) Consortium|Loose|United Kingdom

>Spike|hCoV-19/USA/WI-UW-1843/2020|2020-09-10|EPI\_ISL\_605715|Original|hCoV-19^^Wisconsin|Human|University of Wisconsin-Madison AIDS Vaccine Research Laboratories|University of Wisconsin-Madison AIDS Vaccine Research Laboratories|Baczenas|USA

>Spike|hCoV-19/USA/MI-MDHHS-SC21462/2020|2020-03-21|EPI\_ISL\_507716|Original|hCoV-19^^Michigan|Human|Michigan Department of Health and Human Services|Michigan Department of Health and Human Services|Blankenship|USA

>Spike|hCoV-19/Denmark/DCGC-17996/2020|2020-12-14|EPI\_ISL\_749309|Original|hCoV-19^^Midtjylland|Human|Department of Virus and Microbiological Special Diagnostics|Albertsen Lab|Michaelsen|Denmark

>Spike|hCoV-19/England/ALDP-9E814E/2020|2020-09-24|EPI\_ISL\_637572|Original|hCoV-19^^England|Human|Department of Pathology|COVID-19 Genomics UK (COG-UK) Consortium|Goodfellow|United Kingdom

>Spike|hCoV-19/Sweden/20-51886/2020|2020-05-29|EPI\_ISL\_582834|Original|hCoV-19^^Gavleborg|Human|Gavle klinisk mikrobiologi|The Public Health Agency of Sweden|Svartstr\u00f6m|Sweden

>Spike|hCoV-19/Sichuan/SC-NC-076/2020|2020-01-29|EPI\_ISL\_451335|Original|hCoV-19^^Sichuan|Human|West China Hospital of Sichuan University|State Key Laboratory of Biotherapy of Sichuan University|Tang|China

>Spike|hCoV-19/New Zealand/20VR3486/2020|2020-04-15|EPI\_ISL\_579502|Original|hCoV-19^^Canterbury|Human|Canterbury Health Laboratories|Institute of Environmental Science and Research (ESR)|Wang|New Zealand

>Spike|hCoV-19/England/ALDP-A92DD5/2020|2020-10-20|EPI\_ISL\_610946|Original|hCoV-19^^England|Human|Lighthouse Lab in Alderley Park|Wellcome Sanger Institute for the COVID-19 Genomics UK (COG-UK) consortium|Davies|United Kingdom

>Spike|hCoV-19/USA/WA-S2576/2020|2020-06-18|EPI\_ISL\_497208|Original|hCoV-19^^Washington|Human|Washington State Department of Health|Seattle Flu Study|Lee|USA

>Spike|hCoV-19/USA/MI-UM-10035703434/2020|2020-08-28|EPI\_ISL\_583282|Original|hCoV-19^^Michigan|Human|University of Michigan Clinical Microbiology Laboratory|Lauring Lab|Valesano|USA

>Spike|hCoV-19/England/CAMB-772A4/2020|2020-03-31|EPI\_ISL\_439428|Original|hCoV-19^^England|Human|Department of Pathology|Wellcome Sanger Institute for the COVID-19 Genomics UK (COG-UK) consortium|Amato|United Kingdom

>Spike|hCoV-19/England/BRIS-123C99/2020|2020-04-07|EPI\_ISL\_492812|Original|hCoV-19^^England|Human|PHE South West Regional Laboratory|Wellcome Sanger Institute for the COVID-19 Genomics UK (COG-UK) consortium|Davies|United Kingdom

>Spike|hCoV-19/Japan/PG-7037/2020|2020-08-00|EPI\_ISL\_688142|Original|hCoV-19^^Japan|Human|Pathogen Genomics Center|Pathogen Genomics Center|Sekizuka|Japan

>Spike|hCoV-19/England/NOTT-114BF8/2020|2020-10-10|EPI\_ISL\_595233|Original|hCoV-19^^England|Human|Queens Medical Centre|COVID-19 Genomics UK (COG-UK) Consortium|Loose|United Kingdom

>Spike|hCoV-19/USA/CA-ALSR-5030/2020|2020-11-12|EPI\_ISL\_730301|Original|hCoV-19^^California|Human|San Diego County Public Health Laboratory|Andersen lab at Scripps Research|Gangavarapu|USA

>Spike|hCoV-19/England/EXET-13ADC9/2020|2020-11-10|EPI\_ISL\_665097|Original|hCoV-19^^England|Human|University of Exeter|COVID-19 Genomics UK (COG-UK) Consortium|Temperton|United Kingdom

>Spike|hCoV-19/England/QEUEH-9DD8DE/2020|2020-09-21|EPI\_ISL\_599705|Original|hCoV-19^^England|Human|Lighthouse Lab in Glasgow|Wellcome Sanger Institute for the COVID-19 Genomics UK (COG-UK) consortium|Davies|United Kingdom

>Spike|hCoV-19/USA/CA-ALSR-1337/2020|2020-05-04|EPI\_ISL\_494500|Original|hCoV-19^^California|Human|San Diego County Public Health Laboratory|Andersen lab at Scripps Research|Gangavarapu|USA

>Spike|hCoV-19/USA/MI-MDHHS-SC21849/2020|2020-04-27|EPI\_ISL\_565892|Original|hCoV-19^^Michigan|Human|Michigan Department of Health and Human Services|Michigan Department of Health and Human Services|Blankenship|USA

>Spike|hCoV-19/England/QEUEH-AD3585/2020|2020-10-26|EPI\_ISL\_633931|Original|hCoV-19^^England|Human|Lighthouse Lab in Glasgow|Wellcome Sanger Institute for the COVID-19 Genomics UK (COG-UK) consortium|Davies|United Kingdom

>Spike|hCoV-19/England/LIVE-A2D54/2020|2020-05-19|EPI\_ISL\_499960|Original|hCoV-19^^England|Human|Liverpool Clinical Laboratories|COVID-19 Genomics UK (COG-UK) Consortium|Haldenby|United Kingdom

>Spike|hCoV-19/Denmark/DCGC-8036/2020|2020-10-26|EPI\_ISL\_617150|Original|hCoV-19^^Midtjylland|Human|Department of Virus and Microbiological Special Diagnostics|Albertsen lab|Michaelsen|Denmark

>Spike|hCoV-19/England/QEUEH-A008D1/2020|2020-09-30|EPI\_ISL\_600200|Original|hCoV-19^^England|Human|Lighthouse Lab in Glasgow|Wellcome Sanger Institute for the COVID-19 Genomics UK (COG-UK) consortium|Davies|United Kingdom

>Spike|hCoV-19/Israel/CVL-46317/2020|2020-12-13|EPI\_ISL\_745067|Original|hCoV-19^^Tel Aviv|Human|Israel Central Virology laboratory|Israel Central Virology laboratory|Zuckerman|Israel

>Spike|hCoV-19/England/MILK-ACEEFB/2020|2020-10-22|EPI\_ISL\_629601|Original|hCoV-19^^England|Human|Lighthouse Lab in Milton Keynes|Wellcome Sanger Institute for the COVID-19 Genomics UK (COG-UK) consortium|Davies|United Kingdom

>Spike|hCoV-19/USA/NE-11288/2020|2020-05-04|EPI\_ISL\_475203|Original|hCoV-19^^Nebraska|Human|Nebraska Public Health Laboratory|UNMC COVID-19 Response Team|Pratt|USA

>Spike|hCoV-19/England/ALDP-BB27FE/2020|2020-11-20|EPI\_ISL\_702783|Original|hCoV-19^^England|Human|Lighthouse Lab in Alderley Park|Wellcome Sanger Institute for the COVID-19 Genomics UK (COG-UK) Consortium|Davies|United Kingdom

>Spike|hCoV-19/Egypt/EGY-027/2020|2020-08-14|EPI\_ISL\_526982|Original|hCoV-19^^Egypt|Human|Biological prevention|Biological prevention|Seadawy|Egypt

>Spike|hCoV-19/Japan/PG-1184/2020|2020-04-00|EPI\_ISL\_684794|Original|hCoV-19^^Japan|Human|Pathogen Genomics Center|Pathogen Genomics Center|Sekizuka|Japan

>Spike|hCoV-19/USA/CA-CZB-14847/2020|2020-11-20|EPI\_ISL\_738929|Original|hCoV-19^^California|Human|Humboldt County Public Health Laboratory|Chan-Zuckerberg Biohub|Kamm|USA

>Spike|hCoV-19/USA/WA-S2022/2020|2020-06-05|EPI\_ISL\_497450|Original|hCoV-19^^Washington|Human|Washington State Department of Health|Seattle Flu Study|Lee|USA

>Spike|hCoV-19/USA/TX-QDX-219/2020|2020-04-10|EPI\_ISL\_500459|Original|hCoV-19^^Texas|Human|Quest Diagnostics|Quest Diagnostics|Kagan|USA

>Spike|hCoV-19/Australia/VIC3577/2020|2020-07-08|EPI\_ISL\_520326|Original|hCoV-19^^Victoria|Human|Victorian Infectious Diseases Reference Laboratory (VIDRL)|VIDRL and MDU-PHL|Schultz|Australia

>Spike|hCoV-19/Iceland/334/2020|2020-03-14|EPI\_ISL\_417663|Original|hCoV-19^^Reykjavik|Human|deCODE genetics|deCODE genetics|J\u00f3nsson|Iceland

>Spike|hCoV-19/England/SHEF-C7B6E/2020|2020-05-02|EPI\_ISL\_457623|Original|hCoV-19^^England|Human|Virology Department|COVID-19 Genomics UK (COG-UK) Consortium|de Silva|United Kingdom

>Spike|hCoV-19/India/GJ-GBRC-404a/2020|2020-06-25|EPI\_ISL\_586524|Original|hCoV-19^^Gujarat|Human|B.J. Medical College and Civil hospital|Gujarat Biotechnology Research Centre|Joshi|India

>Spike|hCoV-19/USA/IL-NM067/2020|2020-03-18|EPI\_ISL\_444562|Original|hCoV-19^^Illinois|Human|Northwestern Memorial Hospital|Ozer Lab|Ozer|USA

>Spike|hCoV-19/USA/TX-HMH-MCoV-16027/2020|2020-10-29|EPI\_ISL\_785711|Original|hCoV-19^^Texas|Human|Houston Methodist Hospital|Houston Methodist Hospital|Long|USA

>Spike|hCoV-19/England/LOND-12612F3/2020|2020-04-02|EPI\_ISL\_524632|Original|hCoV-19^^England|Human|North West London Pathology|Wellcome Sanger Institute for the COVID-19 Genomics UK (COG-UK) consortium|Davies|United Kingdom

>Spike|hCoV-19/Australia/VIC7811/2020|2020-08-02|EPI\_ISL\_564672|Original|hCoV-19^^Victoria|Human|Microbiological Diagnostic Unit - Public Health Laboratory (MDU-PHL)|MDU-PHL|Schultz|Australia

>Spike|hCoV-19/Malaysia/3097/2020|2020-05-04|EPI\_ISL\_501200|Original|hCoV-19^^Kuala Lumpur|Human|Department of Medical Microbiology|Department of Medical Microbiology|Chan|Malaysia

>Spike|hCoV-19/USA/CA-CZB-1109/2020|2020-04-30|EPI\_ISL\_444067|Original|hCoV-19^^California|Human|UCSF Clinical Microbiology Laboratory|Chan-Zuckerberg Biohub|Hao|USA

>Spike|hCoV-19/England/CAMB-7F0DF/2020|2020-04-08|EPI\_ISL\_442870|Original|hCoV-19^^England|Human|Department of Pathology|Wellcome Sanger Institute for the COVID-19 Genomics UK (COG-UK) consortium|Amato|United Kingdom

>Spike|hCoV-19/England/CAMC-B5249F/2020|2020-11-08|EPI\_ISL\_656915|Original|hCoV-19^^England|Human|Lighthouse Lab in Cambridge|Wellcome Sanger Institute for the COVID-19 Genomics UK (COG-UK) Consortium|Davies|United Kingdom

>Spike|hCoV-19/Netherlands/NB-EMC-284/2020|2020-00-00|EPI\_ISL\_574783|Original|hCoV-19^^Noord Brabant|Human|Dutch COVID-19 response team|Erasmus Medical Center|Oude Munnink|Netherlands

>Spike|hCoV-19/Australia/VIC6853/2020|2020-07-25|EPI\_ISL\_564097|Original|hCoV-19^^Victoria|Human|Victorian Infectious Diseases Reference Laboratory (VIDRL)|VIDRL and MDU-PHL|Schultz|Australia

>Spike|hCoV-19/USA/CA-QDX-2346/2020|2020-03-16|EPI\_ISL\_604647|Original|hCoV-19^^California|Human|Quest Diagnostics|Quest Diagnostics|Kagan|USA

>Spike|hCoV-19/Wales/PHWC-26D1C/2020|2020-03-30|EPI\_ISL\_422040|Original|hCoV-19^^Wales|Human|Wales Specialist Virology Centre|Public Health Wales Microbiology Cardiff|Moore|United Kingdom

>Spike|hCoV-19/Japan/Donner34/2020|2020-05-07|EPI\_ISL\_469292|Original|hCoV-19^^Kanto|Human|Keio University Hospital|Keio University Hospital|Kosaki|Japan

>Spike|hCoV-19/South Korea/KDCA0238/2020|2020-08-28|EPI\_ISL\_760003|Original|hCoV-19^^South Korea|Human|Division of Emerging Infectious Diseases|Division of Emerging Infectious Diseases|Park|South Korea

>Spike|hCoV-19/France/GES-8509/2020|2020-03-31|EPI\_ISL\_560583|Original|hCoV-19^^Grand-Est|Human|Hopital|National Reference Center for Viruses of Respiratory Infections|Enouf|France

>Spike|hCoV-19/USA/WI-UW-821/2020|2020-05-29|EPI\_ISL\_509828|Original|hCoV-19^^Wisconsin|Human|University of Wisconsin-Madison AIDS Vaccine Research Laboratories|University of Wisconsin-Madison AIDS Vaccine Research Laboratories|Baczenas|USA

>Spike|hCoV-19/Wales/PHWC-49B877/2020|2020-12-05|EPI\_ISL\_742395|Original|hCoV-19^^Wales|Human|Wales Specialist Virology Centre Sequencing lab|COVID-19 Genomics UK (COG-UK) Consortium|Moore|United Kingdom

>Spike|hCoV-19/India/MH-ACTREC-601/2020|2020-09-08|EPI\_ISL\_700239|Original|hCoV-19^^Maharashtra|Human|Hematopathology Laboratory|Hematopathology Laboratory|Patkar|India

>Spike|hCoV-19/England/QEUEH-CC7625/2020|2020-12-22|EPI\_ISL\_760506|Original|hCoV-19^^England|Human|Lighthouse Lab in Glasgow|Wellcome Sanger Institute for the COVID-19 Genomics UK (COG-UK) Consortium|Davies|United Kingdom

>Spike|hCoV-19/mink/Netherlands/NB-EMC-67-2/2020|2020-10-21|EPI\_ISL\_722417|Original|hCoV-19^^Limburg|Neovison vison|Dutch COVID-19 response team|Erasmus Medical Center|Oude Munnink|Netherlands

>Spike|hCoV-19/England/ALDP-94CBE0/2020|2020-06-15|EPI\_ISL\_555917|Original|hCoV-19^^England|Human|Lighthouse Lab in Alderley Park|Wellcome Sanger Institute for the COVID-19 Genomics UK (COG-UK) consortium|Davies|United Kingdom

>Spike|hCoV-19/Wales/PHWC-49B3B2/2020|2020-11-13|EPI\_ISL\_742328|Original|hCoV-19^^Wales|Human|Wales Specialist Virology Centre Sequencing lab|COVID-19 Genomics UK (COG-UK) Consortium|Moore|United Kingdom

>Spike|hCoV-19/England/MILK-970BC5/2020|2020-08-18|EPI\_ISL\_553100|Original|hCoV-19^^England|Human|Lighthouse Lab in Milton Keynes|Wellcome Sanger Institute for the COVID-19 Genomics UK (COG-UK) consortium|Davies|United Kingdom

>Spike|hCoV-19/England/QEUEH-9B4BE3/2020|2020-09-02|EPI\_ISL\_590370|Original|hCoV-19^^England|Human|Lighthouse Lab in Glasgow|Wellcome Sanger Institute for the COVID-19 Genomics UK (COG-UK) consortium|Davies|United Kingdom

>Spike|hCoV-19/USA/TX-HMH-MCoV-18828/2020|2020-11-25|EPI\_ISL\_785149|Original|hCoV-19^^Texas|Human|Houston Methodist Hospital|Houston Methodist Hospital|Long|USA

>Spike|hCoV-19/Wales/PHWC-4A59C2/2020|2020-12-15|EPI\_ISL\_764945|Original|hCoV-19^^Wales|Human|Wales Specialist Virology Centre Sequencing lab|COVID-19 Genomics UK (COG-UK) Consortium|Moore|United Kingdom

>Spike|hCoV-19/England/MILK-A7AC5E/2020|2020-10-16|EPI\_ISL\_606819|Original|hCoV-19^^England|Human|Lighthouse Lab in Milton Keynes|Wellcome Sanger Institute for the COVID-19 Genomics UK (COG-UK) consortium|Davies|United Kingdom

>Spike|hCoV-19/Japan/PG-2763/2020|2020-04-00|EPI\_ISL\_690895|Original|hCoV-19^^Japan|Human|Pathogen Genomics Center|Pathogen Genomics Center|Sekizuka|Japan

>Spike|hCoV-19/England/20240010904/2020|2020-06-05|EPI\_ISL\_471519|Original|hCoV-19^^England|Human|Respiratory Virus Unit|Respiratory Virus Unit|Platt|United Kingdom

>Spike|hCoV-19/USA/UT-UPHL-2009668/2020|2020-07-26|EPI\_ISL\_605343|Original|hCoV-19^^Utah|Human|Utah Public Health Laboratory|Utah Public Health Laboratory|Young|USA

>Spike|hCoV-19/Netherlands/NA\_475/2020|2020-04-14|EPI\_ISL\_455277|Original|hCoV-19^^Netherlands|Human|Dutch COVID-19 response team|Erasmus Medical Center|Oude Munnink|Netherlands

>Spike|hCoV-19/England/QEUEH-CC96C9/2020|2020-12-23|EPI\_ISL\_782008|Original|hCoV-19^^England|Human|Lighthouse Lab in Glasgow|Wellcome Sanger Institute for the COVID-19 Genomics UK (COG-UK) Consortium|Davies|United Kingdom

>Spike|hCoV-19/England/ALDP-A66D9E/2020|2020-10-12|EPI\_ISL\_630680|Original|hCoV-19^^England|Human|Lighthouse Lab in Alderley Park|Wellcome Sanger Institute for the COVID-19 Genomics UK (COG-UK) consortium|Davies|United Kingdom

>Spike|hCoV-19/Wales/PHWC-48A468/2020|2020-10-31|EPI\_ISL\_652556|Original|hCoV-19^^Wales|Human|Wales Specialist Virology Centre Sequencing lab|COVID-19 Genomics UK (COG-UK) Consortium|Moore|United Kingdom

>Spike|hCoV-19/Japan/DP0191/2020|2020-02-15|EPI\_ISL\_416582|Original|hCoV-19^^Japan|Human|Japanese Quarantine Stations|Pathogen Genomics Center|Sekizuka|Japan

>Spike|hCoV-19/USA/IL-NM-0399/2020|2020-04-14|EPI\_ISL\_626389|Original|hCoV-19^^Illinois|Human|Northwestern Memorial Hospital|Ozer Lab|Ozer|USA

>Spike|hCoV-19/USA/NY-NYUMC40/2020|2020-03-18|EPI\_ISL\_419701|Original|hCoV-19^^New York|Human|NYU Langone Health|Departments of Pathology and Medicine|Maurano|USA

>Spike|hCoV-19/Peru/AMZ-UPCH-0277/2020|2020-09-16|EPI\_ISL\_729871|Original|hCoV-19^^Amazonas|Human|Instituto de Medicina Tropical|Laboratorio de Gen\u00f3mica Microbiana|Tsukayama|Peru

>Spike|hCoV-19/Spain/AN-IBV-001951/2020|2020-03-13|EPI\_ISL\_452428|Original|hCoV-19^^Andalucia|Human|Servicio de Microbiolog\u00eda. HRU de M\u00e9llaga. Servicio Andaluz de Salud|SeqCOVID-SPAIN consortium|IBV(CSIC)|Comas|Spain

>Spike|hCoV-19/Denmark/DCGC-13109/2020|2020-11-30|EPI\_ISL\_712587|Original|hCoV-19^^Denmark|Human|Department of Virus and Microbiological Special Diagnostics|Albertsen Lab|Michaelsen|Denmark

>Spike|hCoV-19/Belgium/ULG-10554/2020|2020-10-23|EPI\_ISL\_626272|Original|hCoV-19^^Li\u00e8ge|Human|Department of Clinical Microbiology|GIGA Medical Genomics|Durkin|Belgium

>Spike|hCoV-19/Netherlands/UT-EMC-170/2020|2020-11-04|EPI\_ISL\_722309|Original|hCoV-19^^Utrecht|Human|Dutch COVID-19 response team|Erasmus Medical Center|Oude Munnink|Netherlands

>Spike|hCoV-19/Kenya/C1099/2020|2020-04-19|EPI\_ISL\_568707|Original|hCoV-19^^Mombasa|Human|KEMRI-Wellcome Trust Research Programme/KEMRI-CGMR-C Kilifi|KEMRI-Wellcome Trust Research Programme/KEMRI-CGMR-C Kilifi|Githinji|Kenya

>Spike|hCoV-19/USA/VA-DCLS-1605/2020|2020-08-19|EPI\_ISL\_614015|Original|hCoV-19^^Virginia|Human|Virginia DCLS|Virginia DCLS|St. Jacques|USA

>Spike|hCoV-19/England/NORT-288ED7/2020|2020-03-25|EPI\_ISL\_453494|Original|hCoV-19^^England|Human|Northumbria University / South Tees Hospitals NHS Foundation Trust / North Cumbria Integrated Care NHS Foundation Trust / North Tees and Hartlepool NHS Foundation Trust / Newcastle Hospitals NHS Foundation Trust|COVID-19 Genomics UK (COG-UK) Consortium|Bashton|United Kingdom

>Spike|hCoV-19/England/ALDP-A2E7A3/2020|2020-10-05|EPI\_ISL\_586782|Original|hCoV-19^^England|Human|Lighthouse Lab in Alderley Park|Wellcome Sanger Institute for the COVID-19 Genomics UK (COG-UK) consortium|Davies|United Kingdom

>Spike|hCoV-19/Scotland/QEUH-9E39B4/2020|2020-09-24|EPI\_ISL\_585532|Original|hCoV-19^^Scotland|Human|Northumbria University / South Tees Hospitals NHS Foundation Trust / North Cumbria Integrated Care NHS Foundation Trust / North Tees and Hartlepool NHS Foundation Trust / Newcastle Hospitals NHS Foundation Trust|COVID-19 Genomics UK (COG-UK) Consortium|Bashton|United Kingdom

>Spike|hCoV-19/USA/TX-HMH-MCoV-10669/2020|2020-07-06|EPI\_ISL\_789584|Original|hCoV-19^^Texas|Human|Houston Methodist Hospital|Houston Methodist Hospital|Long|USA

>Spike|hCoV-19/England/MILK-AB751E/2020|2020-10-21|EPI\_ISL\_623767|Original|hCoV-19^^England|Human|Lighthouse Lab in Milton Keynes|Wellcome Sanger Institute for the COVID-19 Genomics UK (COG-UK) consortium|Davies|United Kingdom

>Spike|hCoV-19/Switzerland/BS-42400666/2020|2020-08-18|EPI\_ISL\_581971|Original|hCoV-19^^Basel-Stadt|Human|University Hospital Basel|University Hospital Basel|Roloff Handschin|Switzerland

>Spike|hCoV-19/England/QEUH-B321AD/2020|2020-11-04|EPI\_ISL\_646315|Original|hCoV-19^^England|Human|Lighthouse Lab in Glasgow|Wellcome Sanger Institute for the COVID-19 Genomics UK (COG-UK) Consortium|Davies|United Kingdom

>Spike|hCoV-19/Switzerland/GR-ETHZ-280126/2020|2020-09-07|EPI\_ISL\_560478|Original|hCoV-19^^Graub\u00fcnden|Human|Viollier AG|Department of Biosystems Science and Engineering|Nadeau|Switzerland

>Spike|hCoV-19/England/MILK-CA4D56/2020|2020-12-16|EPI\_ISL\_762511|Original|hCoV-19^^England|Human|Lighthouse Lab in Milton Keynes|Wellcome Sanger Institute for the COVID-19 Genomics UK (COG-UK) Consortium|Davies|United Kingdom

>Spike|hCoV-19/Switzerland/BE-ETHZ-350267/2020|2020-10-30|EPI\_ISL\_728870|Original|hCoV-19^^Bern|Human|Viollier AG|Department of Biosystems Science and Engineering|Nadeau|Switzerland

>Spike|hCoV-19/England/OXON-B41EA/2020|2020-05-20|EPI\_ISL\_534937|Original|hCoV-19^^England|Human|Oxford Viromics|COVID-19 Genomics UK (COG-UK) Consortium|Golubchik|United Kingdom

>Spike|hCoV-19/England/CAMC-942555/2020|2020-07-21|EPI\_ISL\_556901|Original|hCoV-19^^England|Human|Lighthouse Lab in Cambridge|Wellcome Sanger Institute for the COVID-19 Genomics UK (COG-UK) consortium|Davies|United Kingdom

>Spike|hCoV-19/Australia/VIC6168/2020|2020-07-23|EPI\_ISL\_518174|Original|hCoV-19^^Victoria|Human|Victorian Infectious Diseases Reference Laboratory (VIDRL)|VIDRL and MDU-PHL|Schultz|Australia

>Spike|hCoV-19/Denmark/DCGC-16768/2020|2020-12-14|EPI\_ISL\_750193|Original|hCoV-19^^Hovedstaden|Human|Department of Virus and Microbiological Special Diagnostics|Albertsen Lab|Michaelsen|Denmark

>Spike|hCoV-19/USA/WI-UW-2122/2020|2020-09-22|EPI\_ISL\_677527|Original|hCoV-19^^Wisconsin|Human|University of Wisconsin-Madison AIDS Vaccine Research Laboratories|University of Wisconsin-Madison AIDS Vaccine Research Laboratories|Baczenas|USA

>Spike|hCoV-19/South Korea/KDCA0434/2020|2020-10-26|EPI\_ISL\_760218|Original|hCoV-19^^South Korea|Human|Division of Emerging Infectious Diseases|Division of Emerging Infectious Diseases|Park|South Korea

>Spike|hCoV-19/mink/Netherlands/NB-EMC-53-16/2020|2020-09-16|EPI\_ISL\_577827|Original|hCoV-19^^Limburg|Neovison vison|Dutch COVID-19 response team|Erasmus Medical Center|Oude Munnink|Netherlands

>Spike|hCoV-19/Scotland/GCVR-1720DB/2020|2020-03-30|EPI\_ISL\_469963|Original|hCoV-19^^Scotland|Human|NHSGGC West of Scotland Specialist Virology Centre / MRC-University of Glasgow Centre for Virus Research|Wellcome Sanger Institute for the COVID-19 Genomics UK (COG-UK) consortium|Davies|United Kingdom

>Spike|hCoV-19/Scotland/QEUH-9BAC44/2020|2020-09-07|EPI\_ISL\_573836|Original|hCoV-19^^Scotland|Human|Oxford Viromics|COVID-19 Genomics UK (COG-UK) Consortium|Golubchik|United Kingdom

>Spike|hCoV-19/Scotland/EDB6103/2020|2020-05-12|EPI\_ISL\_478224|Original|hCoV-19^^Scotland|Human|Virology Department|COVID-19 Genomics UK (COG-UK) Consortium|Williams|United Kingdom

>Spike|hCoV-19/England/QEUH-969497/2020|2020-08-12|EPI\_ISL\_531070|Original|hCoV-19^^England|Human|Lighthouse Lab in Glasgow|Wellcome Sanger Institute for the COVID-19 Genomics UK (COG-UK) consortium|Davies|United Kingdom

>Spike|hCoV-19/England/MILK-B3C589/2020|2020-11-01|EPI\_ISL\_679817|Original|hCoV-19^^England|Human|Oxford Viromics|COVID-19 Genomics UK (COG-UK) Consortium|Golubchik|United Kingdom

>Spike|hCoV-19/England/ALDP-B6348C/2020|2020-11-09|EPI\_ISL\_656401|Original|hCoV-19^^England|Human|Lighthouse Lab in Alderley Park|Wellcome Sanger Institute for the COVID-19 Genomics UK (COG-UK) Consortium|Davies|United Kingdom

>Spike|hCoV-19/Singapore/335/2020|2020-04-14|EPI\_ISL\_469089|Original|hCoV-19^^Singapore|Human|National Public Health Laboratory|National Public Health Laboratory|Mak|Singapore

>Spike|hCoV-19/Denmark/DCGC-6432/2020|2020-10-12|EPI\_ISL\_620332|Original|hCoV-19^^Hovedstaden|Human|Department of Virus and Microbiological Special Diagnostics|Albertsen lab|Michaelsen|Denmark

>Spike|hCoV-19/England/ALDP-AA3D3B/2020|2020-10-21|EPI\_ISL\_624323|Original|hCoV-19^^England|Human|Lighthouse Lab in Alderley Park|Wellcome Sanger Institute for the COVID-19 Genomics UK (COG-UK) consortium|Davies|United Kingdom

>Spike|hCoV-19/Singapore/27/2020|2020-03-05|EPI\_ISL\_420104|Vero P1|hCoV-19^^Singapore|Human|National Centre for Infectious Diseases|Programme in Emerging Infectious Diseases|Smith|Singapore

>Spike|hCoV-19/Japan/PG-4440/2020|2020-07-00|EPI\_ISL\_692663|Original|hCoV-19^^Japan|Human|Sakai City Institute of Public Health|Pathogen Genomics Center|Sekizuka|Japan

>Spike|hCoV-19/USA/NY-NYCPHL-000138/2020|2020-04-02|EPI\_ISL\_631629|Original|hCoV-19^^New York|Human|Richmond University Medical Center|New York City Public Health Laboratory|Wang|USA

>Spike|hCoV-19/Canada/ON-UHTC-0367/2020|2020-10-02|EPI\_ISL\_671669|Original|hCoV-19^^Ontario|Human|Unity Health Toronto|Ontario Institute for Cancer Research|de Borja|Canada

>Spike|hCoV-19/Denmark/DCGC-17022/2020|2020-12-14|EPI\_ISL\_750320|Original|hCoV-19^^Sjaelland|Human|Department of Virus and Microbiological Special Diagnostics|Albertsen Lab|Michaelsen|Denmark

>Spike|hCoV-19/USA/CA-IGI-0338/2020|2020-07-16|EPI\_ISL\_576527|Original|hCoV-19^^California|Human|Innovative Genomics Institute|Innovative Genomics Institute|Wyman|USA

>Spike|hCoV-19/Wales/MILK-9D4C26/2020|2020-09-19|EPI\_ISL\_589800|Original|hCoV-19^^Wales|Human|Lighthouse Lab in Milton Keynes|Wellcome Sanger Institute for the COVID-19 Genomics UK (COG-UK) consortium|Davies|United Kingdom

>Spike|hCoV-19/Wales/PHWC-4A616F/2020|2020-12-16|EPI\_ISL\_765006|Original|hCoV-19^^Wales|Human|Wales Specialist Virology Centre Sequencing lab|COVID-19 Genomics UK (COG-UK) Consortium|Moore|United Kingdom

>Spike|hCoV-19/England/QEUA-AD5C60/2020|2020-10-26|EPI\_ISL\_634684|Original|hCoV-19^^England|Human|Lighthouse Lab in Glasgow|Wellcome Sanger Institute for the COVID-19 Genomics UK (COG-UK) consortium|Davies|United Kingdom

>Spike|hCoV-19/Australia/TAS97/2020|2020-04-05|EPI\_ISL\_522767|Original|hCoV-19^^Tasmania|Human|Royal Hobart Hospital Microbiology Department|MDU-PHL|Schultz|Australia

>Spike|hCoV-19/England/NOTT-11F577/2020|2020-11-25|EPI\_ISL\_725543|Original|hCoV-19^^England|Human|Lincolnshire Hospitals and DeepSeq Nottingham|COVID-19 Genomics UK (COG-UK) Consortium|Loose|United Kingdom

>Spike|hCoV-19/USA/WA-S1021/2020|2020-04-30|EPI\_ISL\_463511|Original|hCoV-19^^Washington|Human|Washington State Department of Health|Seattle Flu Study|Bedford|USA

>Spike|hCoV-19/Northern Ireland/NIRE-FB590/2020|2020-08-25|EPI\_ISL\_585239|Original|hCoV-19^^Northern Ireland|Human|Regional Virus Laboratory|COVID-19 Genomics UK (COG-UK) Consortium|Fairley|United Kingdom

>Spike|hCoV-19/Japan/PG-3835/2020|2020-07-00|EPI\_ISL\_692086|Original|hCoV-19^^Japan|Human|Pathogen Genomics Center|Pathogen Genomics Center|Sekizuka|Japan

>Spike|hCoV-19/Mexico/BCN-ALSR-2562/2020|2020-07-06|EPI\_ISL\_635565|Original|hCoV-19^^Baja California|Human|Centro de Diagn\u00f3stico COVID-19 UABC Tijuana|Andersen lab at Scripps Research|Gangavarapu|Mexico

>Spike|hCoV-19/Denmark/DCGC-17459/2020|2020-12-14|EPI\_ISL\_750997|Original|hCoV-19^^Midtjylland|Human|Department of Virus and Microbiological Special Diagnostics|Albertsen Lab|Michaelsen|Denmark

>Spike|hCoV-19/Czech Republic/NRL\_10178/2020|2020-10-20|EPI\_ISL\_626624|Original|hCoV-19^^Prague|Human|The National Institute of Public Health|State Veterinary Institute Prague|Nagy|Czech Republic

>Spike|hCoV-19/England/LIVE-A579F/2020|2020-03-20|EPI\_ISL\_500149|Original|hCoV-19^^England|Human|Liverpool Clinical Laboratories|COVID-19 Genomics UK (COG-UK) Consortium|Haldenby|United Kingdom

>Spike|hCoV-19/Netherlands/NB-RIVM-20476/2020|2020-12-03|EPI\_ISL\_728691|Original|hCoV-19^^Noord-Brabant|Human|Dutch COVID-19 response team|National Institute for Public Health and the Environment (RIVM)|Meijer|Netherlands

>Spike|hCoV-19/England/QEUA-AE317F/2020|2020-10-27|EPI\_ISL\_633498|Original|hCoV-19^^England|Human|Lighthouse Lab in Glasgow|Wellcome Sanger Institute for the COVID-19 Genomics UK (COG-UK) consortium|Davies|United Kingdom

>Spike|hCoV-19/England/MILK-9AAD08/2020|2020-09-01|EPI\_ISL\_550912|Original|hCoV-19^^England|Human|Lighthouse Lab in Milton Keynes|Wellcome Sanger Institute for the COVID-19 Genomics UK (COG-UK) consortium|Davies|United Kingdom



>Spike|hCoV-19/England/MILK-B3A749/2020|2020-11-01|EPI\_ISL\_706031|Original|hCoV-19^^England|Human|Oxford Viromics|COVID-19 Genomics UK (COG-UK) Consortium|Golubchik|United Kingdom

>Spike|hCoV-19/Scotland/CVR5549/2020|2020-10-26|EPI\_ISL\_650412|Original|hCoV-19^^Scotland|Human|West of Scotland Specialist Virology Centre|COVID-19 Genomics UK (COG-UK) Consortium|Robertson|United Kingdom

>Spike|hCoV-19/Denmark/DCGC-11622/2020|2020-11-02|EPI\_ISL\_671031|Original|hCoV-19^^Hovedstaden|Human|Department of Virus and Microbiological Special Diagnostics|Albertsen Lab|Michaelsen|Denmark

>Spike|hCoV-19/England/ALDP-CC07CF/2020|2020-12-20|EPI\_ISL\_778225|Original|hCoV-19^^England|Human|Lighthouse Lab in Alderley Park|Wellcome Sanger Institute for the COVID-19 Genomics UK (COG-UK) Consortium|Davies|United Kingdom

>Spike|hCoV-19/England/NOTT-1110CF/2020|2020-05-03|EPI\_ISL\_453627|Original|hCoV-19^^England|Human|Queens Medical Centre|COVID-19 Genomics UK (COG-UK) Consortium|Loose|United Kingdom

>Spike|hCoV-19/England/NORT-29496E/2020|2020-03-27|EPI\_ISL\_490457|Original|hCoV-19^^England|Human|Northumbria University / South Tees Hospitals NHS Foundation Trust / North Cumbria Integrated Care NHS Foundation Trust / North Tees and Hartlepool NHS Foundation Trust / Newcastle Hospitals NHS Foundation Trust|COVID-19 Genomics UK (COG-UK) Consortium|Bashton|United Kingdom

>Spike|hCoV-19/England/MILK-483283/2020|2020-04-29|EPI\_ISL\_559683|Original|hCoV-19^^England|Human|Lighthouse Lab in Milton Keynes|Wellcome Sanger Institute for the COVID-19 Genomics UK (COG-UK) consortium|Davies|United Kingdom

>Spike|hCoV-19/England/NOTT-118E73/2020|2020-10-29|EPI\_ISL\_627698|Original|hCoV-19^^England|Human|Queens Medical Centre|COVID-19 Genomics UK (COG-UK) Consortium|Loose|United Kingdom

>Spike|hCoV-19/USA/CA-SR0367/2020|2020-04-05|EPI\_ISL\_458250|Original|hCoV-19^^California|Human|Scripps Medical Laboratory|Andersen lab at Scripps Research|Gangavarapu|USA

>Spike|hCoV-19/USA/AZ-TG283819/2020|2020-05-01|EPI\_ISL\_694226|Original|hCoV-19^^Arizona|Human|TGen North|TGen North|French|USA

>Spike|hCoV-19/USA/WA-S40/2020|2020-02-28|EPI\_ISL\_417093|Original|hCoV-19^^Washington|Human|Washington State Department of Health|Seattle Flu Study|Bedford|USA

>Spike|hCoV-19/USA/FL-BPHL-0923/2020|2020-07-13|EPI\_ISL\_517813|Original|hCoV-19^^Florida|Human|Florida Bureau of Public Health Laboratories|Florida Bureau of Public Health Laboratories|Blanton|USA

>Spike|hCoV-19/England/20166002204/2020|2020-04-16|EPI\_ISL\_466501|Original|hCoV-19^^England|Human|Respiratory Virus Unit|Respiratory Virus Unit|Platt|United Kingdom

>Spike|hCoV-19/Hungary/US-30275w/2020|2020-08-27|EPI\_ISL\_677729|Original|hCoV-19^^Csongr\u00e9ld county|Human|University of Szeged|National Laboratory of Virology|Kemenesi|Hungary

>Spike|hCoV-19/USA/TX-DSHS-1818/2020|2020-06-22|EPI\_ISL\_738185|Original|hCoV-19^^Texas|Human|Texas Department of State Health Services|Texas Department of State Health Services|Rahman|USA

>Spike|hCoV-19/Belgium/ULG-11103/2020|2020-12-16|EPI\_ISL\_737351|Original|hCoV-19^^Li\u00e8ge|Human|Department of Clinical Microbiology|GIGA Medical Genomics|Durkin|Belgium

>Spike|hCoV-19/England/CAMC-A64DFA/2020|2020-10-11|EPI\_ISL\_608636|Original|hCoV-19^^England|Human|Lighthouse Lab in Cambridge|Wellcome Sanger Institute for the COVID-19 Genomics UK (COG-UK) consortium|Davies|United Kingdom

>Spike|hCoV-19/USA/HI-H200162/2020|2020-07-24|EPI\_ISL\_752723|Original|hCoV-19^^Hawaii|Human|State Laboratories Division|State Laboratories Division|Sultana|USA

>Spike|hCoV-19/Japan/PG-3324/2020|2020-04-00|EPI\_ISL\_691439|Original|hCoV-19^^Japan|Human|Pathogen Genomics Center|Pathogen Genomics Center|Sekizuka|Japan

>Spike|hCoV-19/England/SHEF-CDC29/2020|2020-04-17|EPI\_ISL\_457661|Original|hCoV-19^^England|Human|Virology Department|COVID-19 Genomics UK (COG-UK) Consortium|de Silva|United Kingdom

>Spike|hCoV-19/Denmark/DCGC-12317/2020|2020-11-16|EPI\_ISL\_682498|Original|hCoV-19^^Hovedstaden|Human|Department of Virus and Microbiological Special Diagnostics|Albertsen Lab|Michaelsen|Denmark

>Spike|hCoV-19/Australia/VIC8519/2020|2020-07-29|EPI\_ISL\_565069|Original|hCoV-19^^Victoria|Human|Microbiological Diagnostic Unit - Public Health Laboratory (MDU-PHL)|MDU-PHL|Schultz|Australia

>Spike|hCoV-19/USA/AZ-TG280850/2020|2020-04-21|EPI\_ISL\_694191|Original|hCoV-19^^Arizona|Human|AZ SPHL|TGen North|French|USA

>Spike|hCoV-19/Wales/PHWC-15DA41/2020|2020-04-06|EPI\_ISL\_472756|Original|hCoV-19^^Wales|Human|Wales Specialist Virology Centre Sequencing lab|COVID-19 Genomics UK (COG-UK) Consortium|Moore|United Kingdom

>Spike|hCoV-19/USA/TX-HMH-MCoV-10578/2020|2020-07-08|EPI\_ISL\_789265|Original|hCoV-19^^Texas|Human|Houston Methodist Hospital|Houston Methodist Hospital|Long|USA

>Spike|hCoV-19/England/CAMC-BBFF44/2020|2020-11-22|EPI\_ISL\_704860|Original|hCoV-19^^England|Human|Lighthouse Lab in Cambridge|Wellcome Sanger Institute for the COVID-19 Genomics UK (COG-UK) Consortium|Davies|United Kingdom

>Spike|hCoV-19/Japan/PG-3139/2020|2020-06-00|EPI\_ISL\_691261|Original|hCoV-19^^Japan|Human|Pathogen Genomics Center|Pathogen Genomics Center|Sekizuka|Japan

>Spike|hCoV-19/Denmark/DCGC-18225/2020|2020-12-14|EPI\_ISL\_749218|Original|hCoV-19^^Hovedstaden|Human|Department of Virus and Microbiological Special Diagnostics|Albertsen Lab|Michaelsen|Denmark

>Spike|hCoV-19/England/BRIS-12C60B/2020|2020-05-13|EPI\_ISL\_469488|Original|hCoV-19^^England|Human|PHE South West Regional Laboratory|Wellcome Sanger Institute for the COVID-19 Genomics UK (COG-UK) consortium|Davies|United Kingdom

>Spike|hCoV-19/Wuhan/Hu-1/2019|2019-12-31|EPI\_ISL\_402125|unknown|hCoV-19^^China|Human|National Institute for Communicable Disease Control and Prevention (ICDC) Chinese Center for Disease Control and Prevention (China CDC)|National Institute for Communicable Disease Control and Prevention (ICDC) Chinese Center for Disease Control and Prevention (China CDC)|Data Submitter|China

>Spike|hCoV-19/Spain/CT-HUVH-VH6819/2020|2020-04-05|EPI\_ISL\_444972|Original|hCoV-19^^Catalunya|Human|Hospital Universitari Vall d'Hebron - Vall d'Hebron Institut de Recerca|Hospital Universitari Vall d'Hebron|Anton|Spain

>Spike|hCoV-19/New Zealand/20CV0387/2020|2020-10-04|EPI\_ISL\_579116|Original|hCoV-19^^Auckland|Human|LabPLUS|Institute of Environmental Science and Research (ESR)|Wang|New Zealand

>Spike|hCoV-19/England/ALDP-A5025C/2020|2020-10-07|EPI\_ISL\_597776|Original|hCoV-19^^England|Human|Lighthouse Lab in Alderley Park|Wellcome Sanger Institute for the COVID-19 Genomics UK (COG-UK) consortium|Davies|United Kingdom

>Spike|hCoV-19/India/MH-GA67/2020|2020-06-18|EPI\_ISL\_508261|Original|hCoV-19^^Maharashtra|Human|Government Medical College|National Institute of Biomedical Genomics|Maitra|India

>Spike|hCoV-19/England/CAMC-B334D0/2020|2020-11-03|EPI\_ISL\_659163|Original|hCoV-19^^England|Human|Lighthouse Lab in Cambridge|Wellcome Sanger Institute for the COVID-19 Genomics UK (COG-UK) Consortium|Davies|United Kingdom

>Spike|hCoV-19/Germany/HH-hpi-p2301/2020|2020-03-12|EPI\_ISL\_775745|Original|hCoV-19^^Hamburg|Human|University Medical Center Hamburg Eppendorf|Heinrich Pette Institute|Robitaille|Germany

>Spike|hCoV-19/USA/MI-UM-10036596238/2020|2020-10-23|EPI\_ISL\_649978|Original|hCoV-19^^Michigan|Human|University of Michigan Clinical Microbiology Laboratory|Lauring Lab|Valesano|USA

>Spike|hCoV-19/England/QEUEH-9B761C/2020|2020-09-04|EPI\_ISL\_590637|Original|hCoV-19^^England|Human|Lighthouse Lab in Glasgow|Wellcome Sanger Institute for the COVID-19 Genomics UK (COG-UK) consortium|Davies|United Kingdom

>Spike|hCoV-19/England/ALDP-A687CB/2020|2020-10-12|EPI\_ISL\_608438|Original|hCoV-19^^England|Human|Lighthouse Lab in Alderley Park|Wellcome Sanger Institute for the COVID-19 Genomics UK (COG-UK) consortium|Davies|United Kingdom

>Spike|hCoV-19/England/QEUEH-963B98/2020|2020-08-12|EPI\_ISL\_531522|Original|hCoV-19^^England|Human|Lighthouse Lab in Glasgow|Wellcome Sanger Institute for the COVID-19 Genomics UK (COG-UK) consortium|Davies|United Kingdom

>Spike|hCoV-19/USA/MA-MASPHL-00835/2020|2020-10-08|EPI\_ISL\_692868|Original|hCoV-19^^Massachusetts|Human|Massachusetts State Public Health Laboratory|Massachusetts State Public Health Laboratory|Lang|USA

>Spike|hCoV-19/England/MILK-9C271B/2020|2020-09-10|EPI\_ISL\_566632|Original|hCoV-19^^England|Human|Lighthouse Lab in Milton Keynes|Wellcome Sanger Institute for the COVID-19 Genomics UK (COG-UK) consortium|Davies|United Kingdom

>Spike|hCoV-19/England/MILK-CA6FF4/2020|2020-12-18|EPI\_ISL\_761416|Original|hCoV-19^^England|Human|Lighthouse Lab in Milton Keynes|Wellcome Sanger Institute for the COVID-19 Genomics UK (COG-UK) Consortium|Davies|United Kingdom

>Spike|hCoV-19/Wales/PHWC-2DE21/2020|2020-04-14|EPI\_ISL\_446027|Original|hCoV-19^^Wales|Human|Wales Specialist Virology Centre|Public Health Wales Microbiology Cardiff|Moore|United Kingdom

>Spike|hCoV-19/USA/WI-UW-1413/2020|2020-09-03|EPI\_ISL\_536783|Original|hCoV-19^^Wisconsin|Human|University of Wisconsin-Madison AIDS Vaccine Research Laboratories|University of Wisconsin-Madison AIDS Vaccine Research Laboratories|Baczenas|USA

>Spike|hCoV-19/Denmark/DCGC-22472/2020|2020-12-14|EPI\_ISL\_757580|Original|hCoV-19^^Hovedstaden|Human|Department of Virus and Microbiological Special Diagnostics|Albertsen Lab|Michaelsen|Denmark

>Spike|hCoV-19/Australia/VIC309/2020|2020-03-23|EPI\_ISL\_420000|Original|hCoV-19^^Victoria|Human|Microbiological Diagnostic Unit Public Health Laboratory|Microbiological Diagnostic Unit Public Health Laboratory|Schultz|Australia

>Spike|hCoV-19/England/ALDP-A94061/2020|2020-10-19|EPI\_ISL\_611052|Original|hCoV-19^^England|Human|Lighthouse Lab in Alderley Park|Wellcome Sanger Institute for the COVID-19 Genomics UK (COG-UK) consortium|Davies|United Kingdom

>Spike|hCoV-19/England/SHEF-10C9282/2020|2020-12-02|EPI\_ISL\_741963|Original|hCoV-19^^England|Human|Virology Department|COVID-19 Genomics UK (COG-UK) Consortium|de Silva|United Kingdom

>Spike|hCoV-19/USA/SC-DHEC-1118/2020|2020-07-10|EPI\_ISL\_574572|Original|hCoV-19^^South Carolina|Human|Microbiology Division|Microbiology Division|Flores|USA

>Spike|hCoV-19/England/BRIS-1272C0/2020|2020-04-23|EPI\_ISL\_469686|Original|hCoV-19^^England|Human|PHE South West Regional Laboratory|Wellcome Sanger Institute for the COVID-19 Genomics UK (COG-UK) consortium|Davies|United Kingdom

>Spike|hCoV-19/Japan/PG-3732/2020|2020-04-00|EPI\_ISL\_691985|Original|hCoV-19^^Japan|Human|Pathogen Genomics Center|Pathogen Genomics Center|Sekizuka|Japan

>Spike|hCoV-19/Luxembourg/LNS7445177/2020|2020-11-30|EPI\_ISL\_770909|Original|hCoV-19^^Luxembourg|Human|Laboratoire national de sant\u00e9|Laboratoire national de sant\u00e9|Wienecke-Baldacchino|Luxembourg

>Spike|hCoV-19/England/QEUA-AADC8F/2020|2020-10-22|EPI\_ISL\_624029|Original|hCoV-19^^England|Human|Lighthouse Lab in Glasgow|Wellcome Sanger Institute for the COVID-19 Genomics UK (COG-UK) consortium|Davies|United Kingdom

>Spike|hCoV-19/England/PORT-2D3F43/2020|2020-04-23|EPI\_ISL\_499328|Original|hCoV-19^^England|Human|Centre for Enzyme Innovation|COVID-19 Genomics UK (COG-UK) Consortium|Robson|United Kingdom

>Spike|hCoV-19/Wales/PHWC-15CCB5/2020|2020-04-17|EPI\_ISL\_472605|Original|hCoV-19^^Wales|Human|Wales Specialist Virology Centre Sequencing lab|COVID-19 Genomics UK (COG-UK) Consortium|Moore|United Kingdom

>Spike|hCoV-19/Denmark/DCGC-19431/2020|2020-12-07|EPI\_ISL\_748940|Original|hCoV-19^^Hovedstaden|Human|Department of Virus and Microbiological Special Diagnostics|Albertsen Lab|Michaelsen|Denmark

>Spike|hCoV-19/Brazil/RS-00663/2020|2020-11-26|EPI\_ISL\_770606|Original|hCoV-19^^Rio Grande do Sul|Human|Laborat\u00f3rio de Microbiologia Molecular - Universidade FEEVALE|Bioinformatics Laboratory / LNCC|Almeida|Brazil

>Spike|hCoV-19/Wales/PHWC-4889B6/2020|2020-11-01|EPI\_ISL\_639452|Original|hCoV-19^^Wales|Human|Wales Specialist Virology Centre Sequencing lab|COVID-19 Genomics UK (COG-UK) Consortium|Moore|United Kingdom

>Spike|hCoV-19/England/CAMB-1BD247/2020|2020-12-05|EPI\_ISL\_740962|Original|hCoV-19^^England|Human|Department of Pathology|COVID-19 Genomics UK (COG-UK) Consortium|Goodfellow|United Kingdom

>Spike|hCoV-19/England/QEUA-AF5004/2020|2020-10-30|EPI\_ISL\_663128|Original|hCoV-19^^England|Human|Lighthouse Lab in Glasgow|Wellcome Sanger Institute for the COVID-19 Genomics UK (COG-UK) Consortium|Davies|United Kingdom

>Spike|hCoV-19/Wales/PHWC-492F8A/2020|2020-11-28|EPI\_ISL\_725815|Original|hCoV-19^^Wales|Human|Originating lab|COVID-19 Genomics UK (COG-UK) Consortium|Moore|United Kingdom

>Spike|hCoV-19/England/ALDP-B629D9/2020|2020-11-09|EPI\_ISL\_656510|Original|hCoV-19^^England|Human|Lighthouse Lab in Alderley Park|Wellcome Sanger Institute for the COVID-19 Genomics UK (COG-UK) Consortium|Davies|United Kingdom

>Spike|hCoV-19/USA/NY-Wadsworth-11538-01/2020|2020-03-07|EPI\_ISL\_525584|Original|hCoV-19^^New York|Human|Wadsworth Center|Wadsworth Center|Plitnick|USA

>Spike|hCoV-19/England/ALDP-C48E7F/2020|2020-12-12|EPI\_ISL\_736640|Original|hCoV-19^^England|Human|Lighthouse Lab in Alderley Park|Wellcome Sanger Institute for the COVID-19 Genomics UK (COG-UK) Consortium|Davies|United Kingdom

>Spike|hCoV-19/USA/FL-BPHL-0499/2020|2020-06-03|EPI\_ISL\_495405|Original|hCoV-19^^Florida|Human|Florida Bureau of Public Health Laboratories|Florida Bureau of Public Health Laboratories|Blanton|USA

>Spike|hCoV-19/England/OXON-B2F1F/2020|2020-05-22|EPI\_ISL\_534826|Original|hCoV-19^^England|Human|Oxford Viromics|COVID-19 Genomics UK (COG-UK) Consortium|Golubchik|United Kingdom

>Spike|hCoV-19/Wales/PHWC-169392/2020|2020-06-28|EPI\_ISL\_499436|Original|hCoV-19^^Wales|Human|Wales Specialist Virology Centre Sequencing lab|COVID-19 Genomics UK (COG-UK) Consortium|Moore|United Kingdom

>Spike|hCoV-19/England/MILK-A7ACA9/2020|2020-10-15|EPI\_ISL\_606741|Original|hCoV-19^^England|Human|Lighthouse Lab in Milton Keynes|Wellcome Sanger Institute for the COVID-19 Genomics UK (COG-UK) consortium|Davies|United Kingdom

>Spike|hCoV-19/Netherlands/Nieuwendijk\_1363582/2020|2020-03-01|EPI\_ISL\_413578|Original|hCoV-19^^Nieuwendijk|Human|ErasmusMC|Erasmus Medical Center|Oude Munnink|Netherlands

>Spike|hCoV-19/England/ALDP-9CD18B/2020|2020-09-16|EPI\_ISL\_566191|Original|hCoV-19^^England|Human|Lighthouse Lab in Alderley Park|Wellcome Sanger Institute for the COVID-19 Genomics UK (COG-UK) consortium|Davies|United Kingdom

>Spike|hCoV-19/Denmark/DCGC-4402/2020|2020-09-07|EPI\_ISL\_615400|Original|hCoV-19^^Midtjylland|Human|Department of Virus and Microbiological Special Diagnostics|Albertsen lab|Michaelsen|Denmark

>Spike|hCoV-19/South Africa/KRISP-K003359/2020|2020-09-03|EPI\_ISL\_602750|Original|hCoV-19^^KwaZulu-Natal|Human|NHLs-IALCH|KRISP|de Oliveira|South Africa

>Spike|hCoV-19/Guangdong/20SF316/2020|2020-01-24|EPI\_ISL\_428461|Original|hCoV-19^^Guangdong|Human|Guangdong Provincial Center for Diseases Control and Prevention;Guangdong Provincial Institute of Public Health|School of Public Health|Gu|China

>Spike|hCoV-19/Denmark/DCGC-17623/2020|2020-12-14|EPI\_ISL\_750362|Original|hCoV-19^^Syddanmark|Human|Department of Virus and Microbiological Special Diagnostics|Albertsen Lab|Michaelsen|Denmark

>Spike|hCoV-19/England/MILK-A9125F/2020|2020-10-16|EPI\_ISL\_638515|Original|hCoV-19^^England|Human|Oxford Viromics|COVID-19 Genomics UK (COG-UK) Consortium|Golubchik|United Kingdom

>Spike|hCoV-19/Lithuania/MR-LUHS-Eilnr98/2020|2020-04-19|EPI\_ISL\_603109|Original|hCoV-19^^Marijampoles apskritis|Human|Lithuanian University of Health Sciences Hospital|Lithuanian University of Health Sciences|Zemaitis|Lithuania

>Spike|hCoV-19/USA/MA-MGH-00694/2020|2020-04-06|EPI\_ISL\_460403|Original|hCoV-19^^Massachusetts|Human|Massachusetts General Hospital|Infectious Disease Program|Lemieux|USA

>Spike|hCoV-19/Singapore/1005/2020|2020-03-23|EPI\_ISL\_574489|VeroE6 P1|hCoV-19^^Singapore|Human|Programme in Emerging Infectious Diseases|National Public Health Laboratory|Mak|Singapore

>Spike|hCoV-19/England/ALDP-B23DF6/2020|2020-11-04|EPI\_ISL\_646204|Original|hCoV-19^^England|Human|Lighthouse Lab in Alderley Park|Wellcome Sanger Institute for the COVID-19 Genomics UK (COG-UK) Consortium|Davies|United Kingdom

>Spike|hCoV-19/Uruguay/TYT-M54/2020|2020-06-18|EPI\_ISL\_749150|Original|hCoV-19^^Treinta y Tres|Human|Sanatorio Americano|Institut Pasteur de Montevideo|Spangenberg|Uruguay

>Spike|hCoV-19/Belgium/Rega-0329242/2020|2020-03-29|EPI\_ISL\_458212|Original|hCoV-19^^Grand-Leez|Human|KU Leuven|KU Leuven|Maes|Belgium

>Spike|hCoV-19/Japan/PG-3005/2020|2020-04-00|EPI\_ISL\_691129|Original|hCoV-19^^Japan|Human|Pathogen Genomics Center|Pathogen Genomics Center|Sekizuka|Japan

>Spike|hCoV-19/USA/MI-MDHHS-SC22263/2020|2020-10-22|EPI\_ISL\_666929|Original|hCoV-19^^Michigan|Human|Michigan Department of Health and Human Services|Michigan Department of Health and Human Services|Jacob|USA

>Spike|hCoV-19/England/NORT-28942F/2020|2020-03-29|EPI\_ISL\_458717|Original|hCoV-19^^England|Human|NU-OMICS DNA Sequencing research facility|Wellcome Sanger Institute for the COVID-19 Genomics UK (COG-UK) consortium|Davies|United Kingdom

>Spike|hCoV-19/Japan/PG-8321/2020|2020-08-00|EPI\_ISL\_687420|Original|hCoV-19^^Japan|Human|Pathogen Genomics Center|Pathogen Genomics Center|Sekizuka|Japan

>Spike|hCoV-19/England/MILK-992A93/2020|2020-08-27|EPI\_ISL\_552156|Original|hCoV-19^^England|Human|Lighthouse Lab in Milton Keynes|Wellcome Sanger Institute for the COVID-19 Genomics UK (COG-UK) consortium|Davies|United Kingdom

>Spike|hCoV-19/England/MILK-BAA5E0/2020|2020-11-18|EPI\_ISL\_681338|Original|hCoV-19^^England|Human|Lighthouse Lab in Milton Keynes|Wellcome Sanger Institute for the COVID-19 Genomics UK (COG-UK) Consortium|Davies|United Kingdom

>Spike|hCoV-19/England/QEUA-9F82C0/2020|2020-09-27|EPI\_ISL\_588843|Original|hCoV-19^^England|Human|Lighthouse Lab in Glasgow|Wellcome Sanger Institute for the COVID-19 Genomics UK (COG-UK) consortium|Davies|United Kingdom

>Spike|hCoV-19/England/SHEF-CA98F/2020|2020-11-25|EPI\_ISL\_706999|Original|hCoV-19^^England|Human|Virology Department|COVID-19 Genomics UK (COG-UK) Consortium|de Silva|United Kingdom

>Spike|hCoV-19/England/ALDP-BB314A/2020|2020-11-19|EPI\_ISL\_702988|Original|hCoV-19^^England|Human|Lighthouse Lab in Alderley Park|Wellcome Sanger Institute for the COVID-19 Genomics UK (COG-UK) Consortium|Davies|United Kingdom

>Spike|hCoV-19/USA/WA-UW-29740/2020|2020-09-28|EPI\_ISL\_603254|Original|hCoV-19^^Washington|Human|UW Virology Lab|UW Virology Lab|Roychoudhury|USA

>Spike|hCoV-19/Wales/MILK-973157/2020|2020-08-20|EPI\_ISL\_575867|Original|hCoV-19^^Wales|Human|Lighthouse Lab in Milton Keynes|Wellcome Sanger Institute for the COVID-19 Genomics UK (COG-UK) consortium|Davies|United Kingdom

>Spike|hCoV-19/England/ALDP-94D235/2020|2020-06-14|EPI\_ISL\_556442|Original|hCoV-19^^England|Human|Lighthouse Lab in Alderley Park|Wellcome Sanger Institute for the COVID-19 Genomics UK (COG-UK) consortium|Davies|United Kingdom

>Spike|hCoV-19/England/QEUA-B7FEE9/2020|2020-11-14|EPI\_ISL\_661868|Original|hCoV-19^^England|Human|Lighthouse Lab in Glasgow|Wellcome Sanger Institute for the COVID-19 Genomics UK (COG-UK) Consortium|Davies|United Kingdom

>Spike|hCoV-19/England/ALDP-A70317/2020|2020-10-15|EPI\_ISL\_607740|Original|hCoV-19^^England|Human|Lighthouse Lab in Alderley Park|Wellcome Sanger Institute for the COVID-19 Genomics UK (COG-UK) consortium|Davies|United Kingdom

>Spike|hCoV-19/USA/MD-HP12097/2020|2020-12-29|EPI\_ISL\_791415|Original|hCoV-19^^Maryland|Human|Johns Hopkins Hospital Department of Pathology|Johns Hopkins Hospital Department of Pathology|Morris|USA

>Spike|hCoV-19/USA/NY-NYCPHL-000571/2020|2020-03-30|EPI\_ISL\_632030|Original|hCoV-19^^New York|Human|Richmond University Medical Center|New York City Public Health Laboratory|Wang|USA

>Spike|hCoV-19/Portugal/PT1451/2020|2020-03-26|EPI\_ISL\_511410|Original|hCoV-19^^Portugal|Human|Instituto Nacional de Saude (INSA)|Instituto Nacional de Saude (INSA)|Borges|Portugal

>Spike|hCoV-19/Denmark/DCGC-5136/2020|2020-09-21|EPI\_ISL\_621674|Original|hCoV-19^^Syddanmark|Human|Department of Virus and Microbiological Special Diagnostics|Albertsen lab|Michaelsen|Denmark

>Spike|hCoV-19/Singapore/283/2020|2020-03-17|EPI\_ISL\_462401|Original|hCoV-19^^Singapore|Human|National Public Health Laboratory|National Public Health Laboratory|Mak|Singapore

>Spike|hCoV-19/Denmark/DCGC-5230/2020|2020-09-14|EPI\_ISL\_615901|Original|hCoV-19^^Nordjylland|Human|Department of Virus and Microbiological Special Diagnostics|Albertsen lab|Michaelsen|Denmark

>Spike|hCoV-19/Japan/PG-5223/2020|2020-08-00|EPI\_ISL\_690326|Original|hCoV-19^^Japan|Human|Pathogen Genomics Center|Pathogen Genomics Center|Sekizuka|Japan

>Spike|hCoV-19/England/MILK-95798E/2020|2020-06-10|EPI\_ISL\_554218|Original|hCoV-19^^England|Human|Lighthouse Lab in Milton Keynes|Wellcome Sanger Institute for the COVID-19 Genomics UK (COG-UK) consortium|Davies|United Kingdom

>Spike|hCoV-19/USA/CA-CZB-6117/2020|2020-05-01|EPI\_ISL\_583188|Original|hCoV-19^^California|Human|San Bernardino County Public Health Lab|Chan-Zuckerberg Biohub|Bhatt|USA

>Spike|hCoV-19/USA/TX-DSHS-1269/2020|2020-03-26|EPI\_ISL\_648235|Original|hCoV-19^^Texas|Human|Texas Department of State Health Services|Texas Department of State Health Services|Rahman|USA

>Spike|hCoV-19/England/ALDP-94DC82/2020|2020-06-19|EPI\_ISL\_555144|Original|hCoV-19^^England|Human|Lighthouse Lab in Alderley Park|Wellcome Sanger Institute for the COVID-19 Genomics UK (COG-UK) consortium|Davies|United Kingdom

>Spike|hCoV-19/Wales/PHWC-497FA3/2020|2020-11-30|EPI\_ISL\_727006|Original|hCoV-19^^Wales|Human|Originating lab|COVID-19 Genomics UK (COG-UK) Consortium|Moore|United Kingdom

>Spike|hCoV-19/Australia/VIC7192/2020|2020-07-13|EPI\_ISL\_564273|Original|hCoV-19^^Victoria|Human|Microbiological Diagnostic Unit - Public Health Laboratory (MDU-PHL)|MDU-PHL|Schultz|Australia

>Spike|hCoV-19/Spain/CT-IBV-97007947/2020|2020-09-24|EPI\_ISL\_654512|Original|hCoV-19^^Catalunya|Human|Servicio de Microbiolog\u00eda|SeqCOVID-SPAIN consortium|IBV (CSIC)|Comas|Spain

>Spike|hCoV-19/England/CAMC-A64D36/2020|2020-10-11|EPI\_ISL\_608490|Original|hCoV-19^^England|Human|Lighthouse Lab in Cambridge|Wellcome Sanger Institute for the COVID-19 Genomics UK (COG-UK) consortium|Davies|United Kingdom

>Spike|hCoV-19/USA/NY-PV09402/2020|2020-03-19|EPI\_ISL\_450083|Original|hCoV-19^^New York|Human|MSSH Clinical Microbiology Laboratories|MSSH Pathogen Surveillance Program|van Bakel|USA

>Spike|hCoV-19/South Africa/KRISP-0356/2020|2020-06-25|EPI\_ISL\_487313|Original|hCoV-19^^KwaZulu-Natal|Human|NHLs-IALCH|KRISP|de Oliveira|South Africa

>Spike|hCoV-19/USA/CA-CZB-11510/2020|2020-08-02|EPI\_ISL\_625585|Original|hCoV-19^^California|Human|NaN|Chan-Zuckerberg Biohub|Bhatt|USA

>Spike|hCoV-19/Wales/PHWC-49A18C/2020|2020-12-01|EPI\_ISL\_727503|Original|hCoV-19^^Wales|Human|Originating lab|COVID-19 Genomics UK (COG-UK) Consortium|Moore|United Kingdom

>Spike|hCoV-19/Japan/PG-7010/2020|2020-08-00|EPI\_ISL\_688115|Original|hCoV-19^^Japan|Human|Pathogen Genomics Center|Pathogen Genomics Center|Sekizuka|Japan

>Spike|hCoV-19/Wales/PHWC-15CD0D/2020|2020-05-08|EPI\_ISL\_472610|Original|hCoV-19^^Wales|Human|Wales Specialist Virology Centre Sequencing lab|COVID-19 Genomics UK (COG-UK) Consortium|Moore|United Kingdom

>Spike|hCoV-19/USA/MN-MDH-1467/2020|2020-03-19|EPI\_ISL\_518861|Original|hCoV-19^^Minnesota|Human|Mayo Clinic & Mayo Clinic Laboratories|Minnesota Department of Health|Garfin|USA

>Spike|hCoV-19/USA/NY-NYUMC918/2020|2020-03-18|EPI\_ISL\_467411|Original|hCoV-19^^New York|Human|NYU Langone Health|Departments of Pathology and Medicine|Maurano|USA

>Spike|hCoV-19/England/CAMB-1BA954/2020|2020-11-12|EPI\_ISL\_664321|Original|hCoV-19^^England|Human|Department of Pathology|COVID-19 Genomics UK (COG-UK) Consortium|Goodfellow|United Kingdom

>Spike|hCoV-19/Scotland/EDB234/2020|2020-03-27|EPI\_ISL\_425952|Original|hCoV-19^^Scotland|Human|Virology Department|COVID-19 Genomics UK (COG-UK) Consortium|Williams|United Kingdom

>Spike|hCoV-19/USA/NY-NYCPHL-000310/2020|2020-03-15|EPI\_ISL\_631837|Original|hCoV-19^^New York|Human|Richmond University Medical Center|New York City Public Health Laboratory|Wang|USA

>Spike|hCoV-19/England/CAMC-9EBA8C/2020|2020-09-24|EPI\_ISL\_584394|Original|hCoV-19^^England|Human|Queens Medical Centre|COVID-19 Genomics UK (COG-UK) Consortium|Loose|United Kingdom

>Spike|hCoV-19/Denmark/DCGC-7282/2020|2020-10-12|EPI\_ISL\_619065|Original|hCoV-19^^Midtjylland|Human|Department of Virus and Microbiological Special Diagnostics|Albertsen lab|Michaelsen|Denmark

>Spike|hCoV-19/USA/NY-NYCPHL-000205/2020|2020-04-18|EPI\_ISL\_631738|Original|hCoV-19^^New York|Human|Jamaica Hospital Medical Center|New York City Public Health Laboratory|Wang|USA

>Spike|hCoV-19/England/ALDP-A2FDEC/2020|2020-10-06|EPI\_ISL\_587124|Original|hCoV-19^^England|Human|Lighthouse Lab in Alderley Park|Wellcome Sanger Institute for the COVID-19 Genomics UK (COG-UK) consortium|Davies|United Kingdom

>Spike|hCoV-19/Denmark/DCGC-18417/2020|2020-12-07|EPI\_ISL\_749954|Original|hCoV-19^^Midtjylland|Human|Department of Virus and Microbiological Special Diagnostics|Albertsen Lab|Michaelsen|Denmark

>Spike|hCoV-19/Northern Ireland/MILK-ACBEA3/2020|2020-10-19|EPI\_ISL\_709914|Original|hCoV-19^^Northern Ireland|Human|Lighthouse Lab in Milton Keynes|Wellcome Sanger Institute for the COVID-19 Genomics UK (COG-UK) Consortium|Davies|United Kingdom

>Spike|hCoV-19/USA/TX-HMH-MCoV-13498/2020|2020-08-22|EPI\_ISL\_788627|Original|hCoV-19^^Texas|Human|Houston Methodist Hospital|Houston Methodist Hospital|Long|USA

>Spike|hCoV-19/USA/CO-CDPHE-2100015900/2020|2020-11-20|EPI\_ISL\_771317|Original|hCoV-19^^Colorado|Human|Colorado Department of Public Health and Environment|Colorado Department of Public Health and Environment|Bankers|USA

>Spike|hCoV-19/Italy/VEN-IZSve-20RS2160-35/2020|2020-11-30|EPI\_ISL\_747464|Original|hCoV-19^^Veneto|Human|Ospedale San Bonifacio|Istituto Zooprofilattico Sperimentale delle Venezie|Quaranta|Italy

>Spike|hCoV-19/England/ALDP-954C6A/2020|2020-06-13|EPI\_ISL\_553501|Original|hCoV-19^^England|Human|Lighthouse Lab in Alderley Park|Wellcome Sanger Institute for the COVID-19 Genomics UK (COG-UK) consortium|Davies|United Kingdom

>Spike|hCoV-19/Netherlands/ZuidHolland\_136/2020|2020-05-07|EPI\_ISL\_461309|Original|hCoV-19^^Zuid Holland|Human|Dutch COVID-19 response team|Erasmus Medical Center|Oude Munnink|Netherlands

>Spike|hCoV-19/Spain/CT-IBV-005563/2020|2020-03-18|EPI\_ISL\_508622|Original|hCoV-19^^Catalunya|Human|Departamento de Microbiolog\u00eda|SeqCOVID-SPAIN consortium/IBV (CSIC) |Comas|Spain

>Spike|hCoV-19/USA/NY-PV08120/2020|2020-03-17|EPI\_ISL\_421349|Original|hCoV-19^^New York|Human|MHS Clinical Microbiology Laboratories|MHS Pathogen Surveillance Program|van Bakel|USA

>Spike|hCoV-19/USA/CA-CHLA-PLM07126518/2020|2020-12-02|EPI\_ISL\_753584|Original|hCoV-19^^California|Human|Clinical virology Laboratory|Center for Personalized Medicine|Dien Bard|USA

>Spike|hCoV-19/Scotland/QEUH-9D097E/2020|2020-09-16|EPI\_ISL\_601863|Original|hCoV-19^^Scotland|Human|Lighthouse Lab in Glasgow|Wellcome Sanger Institute for the COVID-19 Genomics UK (COG-UK) consortium|Davies|United Kingdom

>Spike|hCoV-19/England/ALDP-A92519/2020|2020-10-19|EPI\_ISL\_611078|Original|hCoV-19^^England|Human|Lighthouse Lab in Alderley Park|Wellcome Sanger Institute for the COVID-19 Genomics UK (COG-UK) consortium|Davies|United Kingdom

>Spike|hCoV-19/England/MILK-9C3C2A/2020|2020-09-07|EPI\_ISL\_566917|Original|hCoV-19^^England|Human|Lighthouse Lab in Milton Keynes|Wellcome Sanger Institute for the COVID-19 Genomics UK (COG-UK) consortium|Davies|United Kingdom

>Spike|hCoV-19/England/BRIS-12B596/2020|2020-05-22|EPI\_ISL\_487574|Original|hCoV-19^^England|Human|PHE South West Regional Laboratory|Wellcome Sanger Institute for the COVID-19 Genomics UK (COG-UK) consortium|Davies|United Kingdom

>Spike|hCoV-19/England/LIVE-DC4803/2020|2020-11-10|EPI\_ISL\_702756|Original|hCoV-19^^England|Human|Liverpool Clinical Laboratories|COVID-19 Genomics UK (COG-UK) Consortium|Haldenby|United Kingdom

>Spike|hCoV-19/England/CAMC-B1FD39/2020|2020-11-01|EPI\_ISL\_647531|Original|hCoV-19^^England|Human|Lighthouse Lab in Cambridge|Wellcome Sanger Institute for the COVID-19 Genomics UK (COG-UK) Consortium|Davies|United Kingdom

>Spike|hCoV-19/Denmark/DCGC-20959/2020|2020-12-21|EPI\_ISL\_759475|Original|hCoV-19^^Nordjylland|Human|Department of Virus and Microbiological Special Diagnostics|Albertsen Lab|Michaelsen|Denmark

>Spike|hCoV-19/England/NOTT-10FE24/2020|2020-04-09|EPI\_ISL\_441449|Original|hCoV-19^^England|Human|Queens Medical Centre|COVID-19 Genomics UK (COG-UK) Consortium|Loose|United Kingdom

>Spike|hCoV-19/Israel/2107137/2020|2020-04-14|EPI\_ISL\_447351|Original|hCoV-19^^Jerusalem District|Human|Clinical Virology Unit|Stern Lab|Miller|Israel

>Spike|hCoV-19/Belgium/RT-030460/2020|2020-03-04|EPI\_ISL\_418989|Original|hCoV-19^^Vorst|Human|KU Leuven|KU Leuven|Maes|Belgium

>Spike|hCoV-19/Germany/NW-HHU-457/2020|2020-12-11|EPI\_ISL\_770691|Original|hCoV-19^^North Rhine-Westphalia|Human|ZOTZ KLIMAS MVZ D\u00fcsseldorf-Centrum GbR \u00dcBAG f\u00fcr Labormedizin|Center of Medical Microbiology|Wienemann|Germany

>Spike|hCoV-19/England/QEUH-A4CDBC/2020|2020-10-05|EPI\_ISL\_596056|Original|hCoV-19^^England|Human|Quadram Institute Bioscience|COVID-19 Genomics UK (COG-UK) Consortium|Alikhan|United Kingdom

>Spike|hCoV-19/England/QEUH-963BC5/2020|2020-08-11|EPI\_ISL\_531508|Original|hCoV-19^^England|Human|Lighthouse Lab in Glasgow|Wellcome Sanger Institute for the COVID-19 Genomics UK (COG-UK) consortium|Davies|United Kingdom

>Spike|hCoV-19/England/NOTT-10E6D2/2020|2020-03-24|EPI\_ISL\_425582|Original|hCoV-19^^England|Human|Queens Medical Centre|COVID-19 Genomics UK (COG-UK) Consortium|Loose|United Kingdom

>Spike|hCoV-19/Germany/BW-UKT-b003/2020|2020-03-24|EPI\_ISL\_723095|Original|hCoV-19^^Baden-Wuerttemberg|Human|Institute of Medical Genetics and Applied Genomics|Institute of Medical Genetics and Applied Genomics|Gross|Germany

>Spike|hCoV-19/USA/TX-DSHS-0414/2020|2020-06-16|EPI\_ISL\_542473|Original|hCoV-19^^Texas|Human|Texas Department of State Health Services|Texas Department of State Health Services|Rahman|USA

>Spike|hCoV-19/France/IDF-2251/2020|2020-03-11|EPI\_ISL\_428355|Original|hCoV-19^^\u00cele-de-France|Human|Institut M\u00e9dico l\u00e9gal- Hop R. Poincar\u00e9|National Reference Center for Viruses of Respiratory Infections|Enouf|France

>Spike|hCoV-19/USA/TX-HMH-MCoV-12739/2020|2020-08-30|EPI\_ISL\_790496|Original|hCoV-19^^Texas|Human|Houston Methodist Hospital|Houston Methodist Hospital|Long|USA

>Spike|hCoV-19/USA/TX-HMH-5112/2020|2020-06-23|EPI\_ISL\_544533|Original|hCoV-19^^Texas|Human|Houston Methodist Hospital|Houston Methodist Hospital|Long|USA

>Spike|hCoV-19/Iceland/164/2020|2020-03-14|EPI\_ISL\_417758|Original|hCoV-19^^Reykjavik|Human|The National University Hospital of Iceland|deCODE genetics|J\u00f3nsson|Iceland

>Spike|hCoV-19/England/QEUH-A3707F/2020|2020-10-05|EPI\_ISL\_638724|Original|hCoV-19^^England|Human|Wales Specialist Virology Centre Sequencing lab|COVID-19 Genomics UK (COG-UK) Consortium|Moore|United Kingdom

>Spike|hCoV-19/Germany/NW-HHU-81/2020|2020-08-17|EPI\_ISL\_539597|Original|hCoV-19^^North Rhine-Westphalia|Human|ZOTZ KLIMAS MVZ D\u00fcsseldorf-Centrum GbR \u00dcBAG f\u00fcr Labormedizin|Center of Medical Microbiology|Wienemann|Germany

>Spike|hCoV-19/Luxembourg/LNS9651738/2020|2020-11-21|EPI\_ISL\_744959|Original|hCoV-19^^Luxembourg|Human|Laboratoire national de sant\u00e9|Laboratoire national de sant\u00e9|Wienecke-Baldacchino|Luxembourg

>Spike|hCoV-19/Wales/PHWC-32B5F/2020|2020-04-14|EPI\_ISL\_446655|Original|hCoV-19^^Wales|Human|Wales Specialist Virology Centre|Public Health Wales Microbiology Cardiff|Moore|United Kingdom

>Spike|hCoV-19/Luxembourg/LNS0716877/2020|2020-03-15|EPI\_ISL\_419567|Original|hCoV-19^^Luxembourg|Human|Laboratoire National de Sant\u00e9|Laboratoire National de Sant\u00e9|Wienecke-Baldacchino|Luxembourg

>Spike|hCoV-19/Bangladesh/DNAS\_DRCIM\_isl\_R-36/2020|2020-06-30|EPI\_ISL\_774932|Original|hCoV-19^^Dhaka|Human|Designated Reference Institute for Chemical Measurements (DRICM)|DNA SOLUTION LTD.|Rabbi|Bangladesh



>Spike|hCoV-19/England/CAMC-A58D08/2020|2020-10-08|EPI\_ISL\_597057|Original|hCoV-19^^England|Human|Lighthouse Lab in Cambridge|Wellcome Sanger Institute for the COVID-19 Genomics UK (COG-UK) consortium|Davies|United Kingdom

>Spike|hCoV-19/Australia/QLD1207/2020|2020-03-20|EPI\_ISL\_639798|Original|hCoV-19^^Australia|Human|unknown|Public Health Virology Laboratory|Nguyen|Australia

>Spike|hCoV-19/Wales/PHWC-481980/2020|2020-10-17|EPI\_ISL\_613129|Original|hCoV-19^^Wales|Human|Wales Specialist Virology Centre Sequencing lab|COVID-19 Genomics UK (COG-UK) Consortium|Moore|United Kingdom

>Spike|hCoV-19/Equatorial Guinea/12779/2020|2020-05-30|EPI\_ISL\_649156|Original|hCoV-19^^Bioko Norte|Human|Laboratorio de Investigaciones de Baney|University Hospital Basel|Hosch|Equatorial Guinea

>Spike|hCoV-19/Scotland/QEUAH-96D581/2020|2020-08-20|EPI\_ISL\_534518|Original|hCoV-19^^Scotland|Human|NHSGGC West of Scotland Specialist Virology Centre / MRC-University of Glasgow Centre for Virus Research|Wellcome Sanger Institute for the COVID-19 Genomics UK (COG-UK) consortium|Davies|United Kingdom

>Spike|hCoV-19/USA/UT-01848/2020|2020-04-13|EPI\_ISL\_470690|Original|hCoV-19^^Utah|Human|Utah Public Health Laboratory|Utah Public Health Laboratory|Young|USA

>Spike|hCoV-19/USA/TX-HMH-3405/2020|2020-06-12|EPI\_ISL\_544165|Original|hCoV-19^^Texas|Human|Houston Methodist Hospital|Houston Methodist Hospital|Long|USA

>Spike|hCoV-19/England/MILK-B8F4F3/2020|2020-11-13|EPI\_ISL\_674604|Original|hCoV-19^^England|Human|Lighthouse Lab in Milton Keynes|Wellcome Sanger Institute for the COVID-19 Genomics UK (COG-UK) Consortium|Davies|United Kingdom

>Spike|hCoV-19/USA/NY-NYUMC775/2020|2020-03-25|EPI\_ISL\_456012|Original|hCoV-19^^New York|Human|NYU Langone Health|Departments of Pathology and Medicine|Maurano|USA

>Spike|hCoV-19/United Arab Emirates/0711/2020|2020-05-19|EPI\_ISL\_698862|Original|hCoV-19^^Abu Dhabi|Human|Group 42 (G42) Healthcare|G42 Healthcare|Ogrodzki|United Arab Emirates

>Spike|hCoV-19/Scotland/EDB1470/2020|2020-04-11|EPI\_ISL\_433460|Original|hCoV-19^^Scotland|Human|Virology Department|COVID-19 Genomics UK (COG-UK) Consortium|Williams|United Kingdom

>Spike|hCoV-19/Luxembourg/LNS6262482/2020|2020-12-27|EPI\_ISL\_771126|Original|hCoV-19^^Luxembourg|Human|Laboratoire national de sant\u00e9|Laboratoire national de sant\u00e9|Wienecke-Baldacchino|Luxembourg

>Spike|hCoV-19/USA/MI-QDX-1099/2020|2020-03-20|EPI\_ISL\_571849|Original|hCoV-19^^Michigan|Human|Quest Diagnostics|Quest Diagnostics|Kagan|USA

>Spike|hCoV-19/USA/CA-CZB-13115/2020|2020-10-27|EPI\_ISL\_672419|Original|hCoV-19^^California|Human|Madera County Department of Public Health|Chan-Zuckerberg Biohub|Bhatt|USA

>Spike|hCoV-19/England/MILK-567A31/2020|2020-06-10|EPI\_ISL\_558347|Original|hCoV-19^^England|Human|Lighthouse Lab in Milton Keynes|Wellcome Sanger Institute for the COVID-19 Genomics UK (COG-UK) consortium|Davies|United Kingdom

>Spike|hCoV-19/England/ALDP-AA2358/2020|2020-10-22|EPI\_ISL\_624455|Original|hCoV-19^^England|Human|Lighthouse Lab in Alderley Park|Wellcome Sanger Institute for the COVID-19 Genomics UK (COG-UK) consortium|Davies|United Kingdom

>Spike|hCoV-19/Jordan/AM-ALSR-4088/2020|2020-10-03|EPI\_ISL\_636448|Original|hCoV-19^^Amman|Human|Biolab Diagnostic Laboratories|Andersen lab at Scripps Research|Gangavarapu|Jordan

>Spike|hCoV-19/England/QEUAH-9DC796/2020|2020-09-21|EPI\_ISL\_581108|Original|hCoV-19^^England|Human|Lighthouse Lab in Glasgow|Wellcome Sanger Institute for the COVID-19 Genomics UK (COG-UK) consortium|Davies|United Kingdom

>Spike|hCoV-19/England/MILK-C5017B/2020|2020-12-11|EPI\_ISL\_769610|Original|hCoV-19^^England|Human|Lighthouse Lab in Milton Keynes|Wellcome Sanger Institute for the COVID-19 Genomics UK (COG-UK) Consortium|Davies|United Kingdom

>Spike|hCoV-19/USA/UT-0545/2020|2020-04-02|EPI\_ISL\_435378|Original|hCoV-19^^Utah|Human|Utah Public Health Laboratory|Utah Public Health Laboratory|Young|USA

>Spike|hCoV-19/USA/MD-MDH-0378/2020|2020-10-26|EPI\_ISL\_660101|Original|hCoV-19^^Maryland|Human|MD PHL|MD PHL|Keller|USA

>Spike|hCoV-19/Turkey/IST-GLAB-230/2020|2020-05-15|EPI\_ISL\_735297|Original|hCoV-19^^Istanbul|Human|Genomic Laboratory (GLAB) (Conjoint lab of Health Directorate of Istanbul and Istanbul Technical University)|Genomic Laboratory (GLAB)|Karacan|Turkey

>Spike|hCoV-19/USA/WA-S844/2020|2020-04-22|EPI\_ISL\_463334|Original|hCoV-19^^Washington|Human|Washington State Department of Health|Seattle Flu Study|Bedford|USA

>Spike|hCoV-19/USA/TX-HMH-5443/2020|2020-06-24|EPI\_ISL\_544780|Original|hCoV-19^^Texas|Human|Houston Methodist Hospital|Houston Methodist Hospital|Long|USA

>Spike|hCoV-19/USA/TX-HMH-MCoV-14290/2020|2020-10-05|EPI\_ISL\_787575|Original|hCoV-19^^Texas|Human|Houston Methodist Hospital|Houston Methodist Hospital|Long|USA

>Spike|hCoV-19/USA/MA-MASPHL-00094/2020|2020-04-03|EPI\_ISL\_791579|Original|hCoV-19^^Massachusetts|Human|Massachusetts State Public Health Laboratory|Infectious Disease Program|Park|USA

>Spike|hCoV-19/Wales/PHWC-49CAF8/2020|2020-12-04|EPI\_ISL\_742645|Original|hCoV-19^^Wales|Human|Wales Specialist Virology Centre Sequencing lab|COVID-19 Genomics UK (COG-UK) Consortium|Moore|United Kingdom

>Spike|hCoV-19/Wales/PHWC-49112B/2020|2020-11-06|EPI\_ISL\_706614|Original|hCoV-19^^Wales|Human|Originating lab|COVID-19 Genomics UK (COG-UK) Consortium|Moore|United Kingdom

>Spike|hCoV-19/Wales/ALDP-C3CFE4/2020|2020-12-10|EPI\_ISL\_767277|Original|hCoV-19^^Wales|Human|Lighthouse Lab in Alderley Park|Wellcome Sanger Institute for the COVID-19 Genomics UK (COG-UK) Consortium|Davies|United Kingdom

>Spike|hCoV-19/England/BRIS-128FF5/2020|2020-04-19|EPI\_ISL\_458795|Original|hCoV-19^^England|Human|PHE South West Regional Laboratory|Wellcome Sanger Institute for the COVID-19 Genomics UK (COG-UK) consortium|Davies|United Kingdom

>Spike|hCoV-19/USA/TX-HMH-MCoV-15740/2020|2020-07-09|EPI\_ISL\_785424|Original|hCoV-19^^Texas|Human|Houston Methodist Hospital|Houston Methodist Hospital|Long|USA

>Spike|hCoV-19/Wales/PHWC-163310/2020|2020-06-03|EPI\_ISL\_473278|Original|hCoV-19^^Wales|Human|Wales Specialist Virology Centre Sequencing lab|COVID-19 Genomics UK (COG-UK) Consortium|Moore|United Kingdom

>Spike|hCoV-19/England/SHEF-CE53C/2020|2020-10-05|EPI\_ISL\_653087|Original|hCoV-19^^England|Human|Virology Department|COVID-19 Genomics UK (COG-UK) Consortium|de Silva|United Kingdom

>Spike|hCoV-19/USA/TX-HMH-MCoV-14642/2020|2020-10-11|EPI\_ISL\_787927|Original|hCoV-19^^Texas|Human|Houston Methodist Hospital|Houston Methodist Hospital|Long|USA

>Spike|hCoV-19/England/ALDP-A673F5/2020|2020-10-12|EPI\_ISL\_630508|Original|hCoV-19^^England|Human|Lighthouse Lab in Alderley Park|Wellcome Sanger Institute for the COVID-19 Genomics UK (COG-UK) consortium|Davies|United Kingdom

>Spike|hCoV-19/USA/CA-LACPHL-AF00044/2020|2020-12-20|EPI\_ISL\_765991|Original|hCoV-19^^California|Human|UCLA Clinical Micro Lab|Los Angeles County PHL|Hemarajata|USA

>Spike|hCoV-19/USA/NY-NYCPHL-001413/2020|2020-11-19|EPI\_ISL\_683753|Original|hCoV-19^^New York|Human|DOHMH Corona|New York City Public Health Laboratory|Wang|USA

>Spike|hCoV-19/England/ALDP-C8A22A/2020|2020-12-16|EPI\_ISL\_756445|Original|hCoV-19^^England|Human|Lighthouse Lab in Alderley Park|Wellcome Sanger Institute for the COVID-19 Genomics UK (COG-UK) Consortium|Davies|United Kingdom

>Spike|hCoV-19/England/CAMC-B08C90/2020|2020-10-29|EPI\_ISL\_643793|Original|hCoV-19^^England|Human|Lighthouse Lab in Cambridge|Wellcome Sanger Institute for the COVID-19 Genomics UK (COG-UK) Consortium|Davies|United Kingdom

>Spike|hCoV-19/Norway/3281/2020|2020-09-02|EPI\_ISL\_590912|Original|hCoV-19^^Oslo|Human|Furst Medical Laboratory|Norwegian Institute of Public Health|Vollan|Norway

>Spike|hCoV-19/England/CAMB-1B0C46/2020|2020-05-12|EPI\_ISL\_452954|Original|hCoV-19^^England|Human|Department of Pathology|COVID-19 Genomics UK (COG-UK) Consortium|Meredith|United Kingdom

>Spike|hCoV-19/England/CAMC-B990D4/2020|2020-11-15|EPI\_ISL\_673418|Original|hCoV-19^^England|Human|Lighthouse Lab in Cambridge|Wellcome Sanger Institute for the COVID-19 Genomics UK (COG-UK) Consortium|Davies|United Kingdom

>Spike|hCoV-19/USA/LA-EVTL675/2020|2020-07-13|EPI\_ISL\_653367|Original|hCoV-19^^Louisiana|Human|LSUHS Emerging Viral Threat Laboratory|Microbial Genome Sequencing Center|Kamil|USA

>Spike|hCoV-19/USA/AZ-TG276490/2020|2020-04-13|EPI\_ISL\_694106|Original|hCoV-19^^Arizona|Human|AZ SPHL|TGen North|French|USA

>Spike|hCoV-19/Japan/PG-5004/2020|2020-08-00|EPI\_ISL\_690117|Original|hCoV-19^^Japan|Human|Pathogen Genomics Center|Pathogen Genomics Center|Sekizuka|Japan

>Spike|hCoV-19/England/MILK-9A5620/2020|2020-09-03|EPI\_ISL\_550038|Original|hCoV-19^^England|Human|Lighthouse Lab in Milton Keynes|Wellcome Sanger Institute for the COVID-19 Genomics UK (COG-UK) consortium|Davies|United Kingdom

>Spike|hCoV-19/USA/AZ-TG408166/2020|2020-06-16|EPI\_ISL\_694917|Original|hCoV-19^^Arizona|Human|AZ SPHL|TGen North|French|USA

>Spike|hCoV-19/England/MILK-C61256/2020|2020-12-13|EPI\_ISL\_735534|Original|hCoV-19^^England|Human|Lighthouse Lab in Milton Keynes|Wellcome Sanger Institute for the COVID-19 Genomics UK (COG-UK) Consortium|Davies|United Kingdom

>Spike|hCoV-19/England/LIVE-A9AFC/2020|2020-03-25|EPI\_ISL\_517322|Original|hCoV-19^^England|Human|Liverpool Clinical Laboratories|COVID-19 Genomics UK (COG-UK) Consortium|Haldenby|United Kingdom

>Spike|hCoV-19/England/QEUEH-A4B02D/2020|2020-10-04|EPI\_ISL\_638731|Original|hCoV-19^^England|Human|Department of Pathology|COVID-19 Genomics UK (COG-UK) Consortium|Goodfellow|United Kingdom

>Spike|hCoV-19/Denmark/DCGC-5631/2020|2020-09-28|EPI\_ISL\_619918|Original|hCoV-19^^Hovedstaden|Human|Department of Virus and Microbiological Special Diagnostics|Albertsen lab|Michaelsen|Denmark

>Spike|hCoV-19/Thailand/MUMT-4/2020|2020-03-03|EPI\_ISL\_493139|Vero P3|hCoV-19^^Bangkok|Human|Center for Research and Innovation|Center for Research and Innovation|Sangsiriwut|Thailand

>Spike|hCoV-19/England/LOND-D6BD5/2020|2020-03-27|EPI\_ISL\_478414|Original|hCoV-19^^England|Human|University College London|COVID-19 Genomics UK (COG-UK) Consortium|Roy|United Kingdom

>Spike|hCoV-19/USA/TX-HMH-MCoV-12445/2020|2020-09-29|EPI\_ISL\_789903|Original|hCoV-19^^Texas|Human|Houston Methodist Hospital|Houston Methodist Hospital|Long|USA

>Spike|hCoV-19/Australia/VIC1016/2020|2020-04-01|EPI\_ISL\_430476|Original|hCoV-19^^Victoria|Human|Victorian Infectious Diseases Reference Laboratory (VIDRL)|Microbiological Diagnostic Unit Public Health Laboratory and Victorian Infectious Diseases Reference Laboratory|Schultz|Australia

>Spike|hCoV-19/England/LIVE-A3904/2020|2020-06-09|EPI\_ISL\_490389|Original|hCoV-19^^England|Human|Liverpool Clinical Laboratories|COVID-19 Genomics UK (COG-UK) Consortium|Haldenby|United Kingdom

>Spike|hCoV-19/England/CAMB-1B676D/2020|2020-00-00|EPI\_ISL\_584303|Original|hCoV-19^^England|Human|Department of Pathology|COVID-19 Genomics UK (COG-UK) Consortium|Goodfellow|United Kingdom

>Spike|hCoV-19/Belgium/reg-0416496/2020|2020-04-16|EPI\_ISL\_734588|Original|hCoV-19^^Temse|Human|UZ Leuven|KU Leuven|Maes|Belgium

>Spike|hCoV-19/England/204621311/2020|2020-11-10|EPI\_ISL\_700612|Original|hCoV-19^^England|Human|Respiratory Virus Unit|COVID-19 Genomics UK (COG-UK) Consortium|Platt|United Kingdom

>Spike|hCoV-19/Belgium/reg-0916977/2020|2020-09-16|EPI\_ISL\_734967|Original|hCoV-19^^Hoeilaart|Human|UZ Leuven|KU Leuven|Maes|Belgium

>Spike|hCoV-19/Denmark/DCGC-14966/2020|2020-11-23|EPI\_ISL\_713553|Original|hCoV-19^^Hovedstaden|Human|Department of Virus and Microbiological Special Diagnostics|Albertsen Lab|Michaelsen|Denmark

>Spike|hCoV-19/Norway/6456/2020|2020-12-03|EPI\_ISL\_775391|Original|hCoV-19^^Oslo|Human|Oslo University Hospital|Norwegian Institute of Public Health|Vollan|Norway

>Spike|hCoV-19/USA/WA-UW-669/2020|2020-03-12|EPI\_ISL\_476924|Original|hCoV-19^^Washington|Human|UW Virology Lab|UW Virology Lab|Roychoudhury|USA

>Spike|hCoV-19/England/QEUEH-AAA9B8/2020|2020-10-21|EPI\_ISL\_652725|Original|hCoV-19^^England|Human|Oxford Viromics|COVID-19 Genomics UK (COG-UK) Consortium|Golubchik|United Kingdom

>Spike|hCoV-19/Wales/PHWC-323B1/2020|2020-04-08|EPI\_ISL\_446640|Original|hCoV-19^^Wales|Human|Wales Specialist Virology Centre|Public Health Wales Microbiology Cardiff|Moore|United Kingdom

>Spike|hCoV-19/USA/NY-PV08143/2020|2020-03-17|EPI\_ISL\_421363|Original|hCoV-19^^New York|Human|MSHS Clinical Microbiology Laboratories|MSHS Pathogen Surveillance Program|van Bakel|USA

>Spike|hCoV-19/Wales/PHWC-484CEE/2020|2020-10-21|EPI\_ISL\_628098|Original|hCoV-19^^Wales|Human|Wales Specialist Virology Centre Sequencing lab|COVID-19 Genomics UK (COG-UK) Consortium|Moore|United Kingdom

>Spike|hCoV-19/USA/WA-S2062/2020|2020-06-05|EPI\_ISL\_497490|Original|hCoV-19^^Washington|Human|Washington State Department of Health|Seattle Flu Study|Lee|USA

>Spike|hCoV-19/England/20172009004/2020|2020-04-20|EPI\_ISL\_465332|Original|hCoV-19^^England|Human|Respiratory Virus Unit|Respiratory Virus Unit|Platt|United Kingdom

>Spike|hCoV-19/Switzerland/ZH-ETHZ-270198/2020|2020-08-31|EPI\_ISL\_541536|Original|hCoV-19^^Zurich|Human|Viollier AG|Department of Biosystems Science and Engineering|Nadeau|Switzerland

>Spike|hCoV-19/Australia/VIC12570/2020|2020-07-29|EPI\_ISL\_640785|Original|hCoV-19^^Victoria|Human|Microbiological Diagnostic Unit - Public Health Laboratory (MDU-PHL)|MDU-PHL|Schultz|Australia

>Spike|hCoV-19/Belgium/regal-0503483/2020|2020-05-03|EPI\_ISL\_476999|Original|hCoV-19^^Holsbeek|Human|KU Leuven|KU Leuven|Maes|Belgium

>Spike|hCoV-19/Malta/BAL-Sliema-3/2020|2020-08-14|EPI\_ISL\_576119|Original|hCoV-19^^Malta|Human|Laboratory|Laboratory|Biazzo,M.|Malta

>Spike|hCoV-19/England/BRIS-12B4F3/2020|2020-05-22|EPI\_ISL\_487561|Original|hCoV-19^^England|Human|PHE South West Regional Laboratory|Wellcome Sanger Institute for the COVID-19 Genomics UK (COG-UK) consortium|Davies|United Kingdom

>Spike|hCoV-19/Scotland/CVR1427/2020|2020-04-02|EPI\_ISL\_438806|Original|hCoV-19^^Scotland|Human|West of Scotland Specialist Virology Centre|COVID-19 Genomics UK (COG-UK) Consortium|Robertson|United Kingdom

>Spike|hCoV-19/England/MILK-9C4755/2020|2020-09-07|EPI\_ISL\_573254|Original|hCoV-19^^England|Human|Centre for Enzyme Innovation|COVID-19 Genomics UK (COG-UK) Consortium|Robson|United Kingdom

>Spike|hCoV-19/USA/WA-S2563/2020|2020-06-17|EPI\_ISL\_497195|Original|hCoV-19^^Washington|Human|Washington State Department of Health|Seattle Flu Study|Lee|USA

>Spike|hCoV-19/USA/WA-S62/2020|2020-03-03|EPI\_ISL\_417115|Original|hCoV-19^^Washington|Human|Washington State Department of Health|Seattle Flu Study|Bedford|USA

>Spike|hCoV-19/Denmark/DCGC-15570/2020|2020-11-23|EPI\_ISL\_713901|Original|hCoV-19^^Hovedstaden|Human|Department of Virus and Microbiological Special Diagnostics|Albertsen Lab|Michaelsen|Denmark

>Spike|hCoV-19/USA/CA-SEARCH-5339/2020|2020-12-09|EPI\_ISL\_755156|Original|hCoV-19^^California|Human|UCSD EXCITE lab|Andersen lab at Scripps Research|Gangavarapu|USA

>Spike|hCoV-19/England/BRIS-12846F/2020|2020-04-16|EPI\_ISL\_469604|Original|hCoV-19^^England|Human|PHE South West Regional Laboratory|Wellcome Sanger Institute for the COVID-19 Genomics UK (COG-UK) consortium|Davies|United Kingdom

>Spike|hCoV-19/England/ALDP-9EA1C4/2020|2020-09-24|EPI\_ISL\_579990|Original|hCoV-19^^England|Human|Lighthouse Lab in Alderley Park|Wellcome Sanger Institute for the COVID-19 Genomics UK (COG-UK) consortium|Davies|United Kingdom

>Spike|hCoV-19/Wales/MILK-B04A8B/2020|2020-10-24|EPI\_ISL\_650594|Original|hCoV-19^^Wales|Human|Department of Pathology|COVID-19 Genomics UK (COG-UK) Consortium|Goodfellow|United Kingdom

>Spike|hCoV-19/England/QEUEH-96520A/2020|2020-08-12|EPI\_ISL\_531018|Original|hCoV-19^^England|Human|Lighthouse Lab in Glasgow|Wellcome Sanger Institute for the COVID-19 Genomics UK (COG-UK) consortium|Davies|United Kingdom

>Spike|hCoV-19/Denmark/DCGC-9606/2020|2020-11-09|EPI\_ISL\_669064|Original|hCoV-19^^Denmark|Human|Department of Virus and Microbiological Special Diagnostics|Albertsen Lab|Michaelsen|Denmark

>Spike|hCoV-19/Netherlands/ZH-EMC-698/2020|2020-09-18|EPI\_ISL\_632347|Original|hCoV-19^^Zuid Holland|Human|Dutch COVID-19 response team|Erasmus Medical Center|Oude Munnink|Netherlands

>Spike|hCoV-19/England/20154075604/2020|2020-04-07|EPI\_ISL\_466262|Original|hCoV-19^^England|Human|Respiratory Virus Unit|Respiratory Virus Unit|Platt|United Kingdom

>Spike|hCoV-19/DRC/2120/2020|2020-04-12|EPI\_ISL\_435163|Original|hCoV-19^^Kinshasa|Human|Viral Respiratory Lab|Pathogen Sequencing Lab|Pratt|Democratic Republic of the Congo

>Spike|hCoV-19/England/MILK-CA5D64/2020|2020-12-18|EPI\_ISL\_761429|Original|hCoV-19^^England|Human|Lighthouse Lab in Milton Keynes|Wellcome Sanger Institute for the COVID-19 Genomics UK (COG-UK) Consortium|Davies|United Kingdom

>Spike|hCoV-19/Wales/MILK-95DA58/2020|2020-06-19|EPI\_ISL\_556083|Original|hCoV-19^^Wales|Human|Lighthouse Lab in Milton Keynes|Wellcome Sanger Institute for the COVID-19 Genomics UK (COG-UK) consortium|Davies|United Kingdom

>Spike|hCoV-19/England/QEUEH-B697AB/2020|2020-11-11|EPI\_ISL\_661543|Original|hCoV-19^^England|Human|Lighthouse Lab in Glasgow|Wellcome Sanger Institute for the COVID-19 Genomics UK (COG-UK) Consortium|Davies|United Kingdom

>Spike|hCoV-19/Bangladesh/BCSIR-NILMRC-244/2020|2020-07-06|EPI\_ISL\_487384|Original|hCoV-19^^Barisal|Human|National Institute of Laboratory Medicine and Referral Center|Genomic Research Lab|Khan|Bangladesh

>Spike|hCoV-19/England/QEUEH-B2DC77/2020|2020-11-03|EPI\_ISL\_646977|Original|hCoV-19^^England|Human|Lighthouse Lab in Glasgow|Wellcome Sanger Institute for the COVID-19 Genomics UK (COG-UK) Consortium|Davies|United Kingdom

>Spike|hCoV-19/England/QEUEH-B6B035/2020|2020-11-11|EPI\_ISL\_662540|Original|hCoV-19^^England|Human|Lighthouse Lab in Glasgow|Wellcome Sanger Institute for the COVID-19 Genomics UK (COG-UK) Consortium|Davies|United Kingdom

>Spike|hCoV-19/Japan/PG-7227/2020|2020-07-00|EPI\_ISL\_688331|Original|hCoV-19^^Japan|Human|Saitama Prefectural Institute of Public Health|Pathogen Genomics Center|Sekizuka|Japan

>Spike|hCoV-19/USA/TX-HMH-MCoV-9446/2020|2020-07-03|EPI\_ISL\_781125|Original|hCoV-19^^Texas|Human|Houston Methodist Hospital|Houston Methodist Hospital|Long|USA

>Spike|hCoV-19/Switzerland/BE-ETHZ-101144/2020|2020-03-31|EPI\_ISL\_451811|Original|hCoV-19^^Bern|Human|Viollier AG|Department of Biosystems Science and Engineering|Nadeau|Switzerland

>Spike|hCoV-19/India/MH-ACTREC-222/2020|2020-06-30|EPI\_ISL\_699876|Original|hCoV-19^^Maharashtra|Human|Hematopathology Laboratory|Hematopathology Laboratory|Patkar|India

>Spike|hCoV-19/England/ALDP-6D68D8/2020|2020-06-30|EPI\_ISL\_556230|Original|hCoV-19^^England|Human|Lighthouse Lab in Alderley Park|Wellcome Sanger Institute for the COVID-19 Genomics UK (COG-UK) consortium|Davies|United Kingdom

>Spike|hCoV-19/USA/MA-MASPHL-00526/2020|2020-05-05|EPI\_ISL\_693052|Original|hCoV-19^^Massachusetts|Human|Massachusetts State Public Health Laboratory|Massachusetts State Public Health Laboratory|Lang|USA

>Spike|hCoV-19/South Africa/R10305/2020|2020-05-29|EPI\_ISL\_490267|Original|hCoV-19^^Western Cape|Human|National Institute for Communicable Diseases of the National Health Laboratory Service|National Institute for Communicable Diseases of the National Health Laboratory Service|Allam|South Africa

>Spike|hCoV-19/England/20170000404/2020|2020-04-19|EPI\_ISL\_465261|Original|hCoV-19^^England|Human|Respiratory Virus Unit|Respiratory Virus Unit|Platt|United Kingdom

>Spike|hCoV-19/England/MILK-ACCA35/2020|2020-10-21|EPI\_ISL\_629297|Original|hCoV-19^^England|Human|Lighthouse Lab in Milton Keynes|Wellcome Sanger Institute for the COVID-19 Genomics UK (COG-UK) consortium|Davies|United Kingdom

>Spike|hCoV-19/USA/CA-ALSR-2118/2020|2020-05-21|EPI\_ISL\_635355|Original|hCoV-19^^California|Human|San Diego County Public Health Laboratory|Andersen lab at Scripps Research|Gangavarapu|USA

>Spike|hCoV-19/Italy/BAS-IZSPB-384PT/2020|2020-10-20|EPI\_ISL\_722885|Original|hCoV-19^^Basilicata|Human|Istituto Zooprofilattico Sperimentale della Puglia e della Basilicata|Istituto Zooprofilattico Sperimentale della Puglia e della Basilicata|Parisi|Italy

>Spike|hCoV-19/England/CAMC-B34DB6/2020|2020-11-05|EPI\_ISL\_659459|Original|hCoV-19^^England|Human|Lighthouse Lab in Cambridge|Wellcome Sanger Institute for the COVID-19 Genomics UK (COG-UK) Consortium|Davies|United Kingdom

>Spike|hCoV-19/Japan/PG-4989/2020|2020-08-00|EPI\_ISL\_690102|Original|hCoV-19^^Japan|Human|Pathogen Genomics Center|Pathogen Genomics Center|Sekizuka|Japan

>Spike|hCoV-19/Portugal/PT1372/2020|2020-03-25|EPI\_ISL\_511331|Original|hCoV-19^^Portugal|Human|Instituto Nacional de Saude (INSA)|Instituto Nacional de Saude (INSA)|Borges|Portugal

>Spike|hCoV-19/USA/WA-UW-23164/2020|2020-08-03|EPI\_ISL\_570752|Original|hCoV-19^^Washington|Human|UW Virology Lab|UW Virology Lab|Roychoudhury|USA

>Spike|hCoV-19/England/LOND-DA9C8/2020|2020-11-05|EPI\_ISL\_724677|Original|hCoV-19^^England|Human|University College London|COVID-19 Genomics UK (COG-UK) Consortium|Roy|United Kingdom

>Spike|hCoV-19/Denmark/DCGC-16684/2020|2020-11-09|EPI\_ISL\_714913|Original|hCoV-19^^Hovedstaden|Human|Department of Virus and Microbiological Special Diagnostics|Albertsen Lab|Michaelsen|Denmark

>Spike|hCoV-19/Australia/VIC12893/2020|2020-07-27|EPI\_ISL\_592101|Original|hCoV-19^^Victoria|Human|Microbiological Diagnostic Unit - Public Health Laboratory (MDU-PHL)|MDU-PHL|Schultz|Australia

>Spike|hCoV-19/Wales/CAMC-A4179B/2020|2020-10-07|EPI\_ISL\_625441|Original|hCoV-19^^Wales|Human|Lighthouse Lab in Cambridge|Wellcome Sanger Institute for the COVID-19 Genomics UK (COG-UK) consortium|Davies|United Kingdom

>Spike|hCoV-19/Australia/VIC4939/2020|2020-07-14|EPI\_ISL\_519313|Original|hCoV-19^^Victoria|Human|Victorian Infectious Diseases Reference Laboratory (VIDRL)|VIDRL and MDU-PHL|Schultz|Australia

>Spike|hCoV-19/USA/CA-ALSR-1783/2020|2020-05-16|EPI\_ISL\_512181|Original|hCoV-19^^California|Human|San Diego County Public Health Laboratory|Andersen lab at Scripps Research|Gangavarapu|USA

>Spike|hCoV-19/USA/NY-Wadsworth-16217-02/2020|2020-03-15|EPI\_ISL\_676740|Original|hCoV-19^^New York|Human|Wadsworth Center|Wadsworth Center|Lasek-Nesselquist|USA

>Spike|hCoV-19/Netherlands/NoordBrabant\_155/2020|2020-00-00|EPI\_ISL\_461190|Original|hCoV-19^^Noord Brabant|Human|Dutch COVID-19 response team|Erasmus Medical Center|Oude Munnink|Netherlands

>Spike|hCoV-19/England/MILK-B95F26/2020|2020-11-13|EPI\_ISL\_676245|Original|hCoV-19^^England|Human|Lighthouse Lab in Milton Keynes|Wellcome Sanger Institute for the COVID-19 Genomics UK (COG-UK) Consortium|Davies|United Kingdom

>Spike|hCoV-19/England/MILK-619095/2020|2020-07-05|EPI\_ISL\_557789|Original|hCoV-19^^England|Human|Lighthouse Lab in Milton Keynes|Wellcome Sanger Institute for the COVID-19 Genomics UK (COG-UK) consortium|Davies|United Kingdom

>Spike|hCoV-19/Australia/VIC14231/2020|2020-09-01|EPI\_ISL\_592404|Original|hCoV-19^^Victoria|Human|Microbiological Diagnostic Unit - Public Health Laboratory (MDU-PHL)|MDU-PHL|Schultz|Australia

>Spike|hCoV-19/Scotland/EDB5892/2020|2020-04-29|EPI\_ISL\_473867|Original|hCoV-19^^Scotland|Human|Virology Department|COVID-19 Genomics UK (COG-UK) Consortium|Williams|United Kingdom

>Spike|hCoV-19/England/CAMB-7C3F7/2020|2020-04-04|EPI\_ISL\_441652|Original|hCoV-19^^England|Human|Department of Pathology|Wellcome Sanger Institute for the COVID-19 Genomics UK (COG-UK) consortium|Amato|United Kingdom

>Spike|hCoV-19/USA/TX-HMH-7208/2020|2020-06-29|EPI\_ISL\_546599|Original|hCoV-19^^Texas|Human|Houston Methodist Hospital|Houston Methodist Hospital|Long|USA

>Spike|hCoV-19/England/CAMB-1B7C12/2020|2020-10-25|EPI\_ISL\_638367|Original|hCoV-19^^England|Human|Department of Pathology|COVID-19 Genomics UK (COG-UK) Consortium|Goodfellow|United Kingdom

>Spike|hCoV-19/England/ALDP-9C4ED8/2020|2020-09-10|EPI\_ISL\_567850|Original|hCoV-19^^England|Human|Lighthouse Lab in Alderley Park|Wellcome Sanger Institute for the COVID-19 Genomics UK (COG-UK) consortium|Davies|United Kingdom

>Spike|hCoV-19/England/QEUH-AAEA39/2020|2020-10-20|EPI\_ISL\_652979|Original|hCoV-19^^England|Human|Oxford Viromics|COVID-19 Genomics UK (COG-UK) Consortium|Golubchik|United Kingdom

>Spike|hCoV-19/England/MILK-A6A51A/2020|2020-10-09|EPI\_ISL\_627510|Original|hCoV-19^^England|Human|Virology Department|COVID-19 Genomics UK (COG-UK) Consortium|de Silva|United Kingdom

>Spike|hCoV-19/Netherlands/GE-EMC-364/2020|2020-11-07|EPI\_ISL\_722737|Original|hCoV-19^^Gelderland|Human|Dutch COVID-19 response team|Erasmus Medical Center|Oude Munnink|Netherlands

>Spike|hCoV-19/USA/NM-UNM-00546/2020|2020-05-12|EPI\_ISL\_542967|Original|hCoV-19^^New Mexico|Human|TriCore Reference Laboratories|Center for Global Health|Domman|USA

>Spike|hCoV-19/England/MILK-A461B6/2020|2020-10-06|EPI\_ISL\_598697|Original|hCoV-19^^England|Human|Lighthouse Lab in Milton Keynes|Wellcome Sanger Institute for the COVID-19 Genomics UK (COG-UK) consortium|Davies|United Kingdom

>Spike|hCoV-19/England/NOTT-1148D3/2020|2020-10-08|EPI\_ISL\_584755|Original|hCoV-19^^England|Human|Queens Medical Centre|COVID-19 Genomics UK (COG-UK) Consortium|Loose|United Kingdom

>Spike|hCoV-19/Scotland/QEUH-A4B6FE/2020|2020-10-08|EPI\_ISL\_628473|Original|hCoV-19^^Scotland|Human|Oxford Viromics|COVID-19 Genomics UK (COG-UK) Consortium|Golubchik|United Kingdom

>Spike|hCoV-19/USA/CA-CDC-4731/2020|2020-06-16|EPI\_ISL\_535702|Original|hCoV-19^^California|Human|CDPH|Pathogen Discovery|Queen|USA

>Spike|hCoV-19/USA/TX-HMH-MCoV-18874/2020|2020-11-26|EPI\_ISL\_785189|Original|hCoV-19^^Texas|Human|Houston Methodist Hospital|Houston Methodist Hospital|Long|USA

>Spike|hCoV-19/USA/WA-S1134/2020|2020-05-04|EPI\_ISL\_463624|Original|hCoV-19^^Washington|Human|Washington State Department of Health|Seattle Flu Study|Bedford|USA

>Spike|hCoV-19/USA/TX-HMH-MCoV-12415/2020|2020-09-28|EPI\_ISL\_790335|Original|hCoV-19^^Texas|Human|Houston Methodist Hospital|Houston Methodist Hospital|Long|USA

>Spike|hCoV-19/Poland/PL\_MCB\_24/2020|2020-03-28|EPI\_ISL\_645023|Original|hCoV-19^^Poland|Human|Human Genome Variation Research Group|Human Genome Variation Research Group||Poland

>Spike|hCoV-19/Wales/MILK-B02B3F/2020|2020-10-24|EPI\_ISL\_647825|Original|hCoV-19^^Wales|Human|Lighthouse Lab in Milton Keynes|Wellcome Sanger Institute for the COVID-19 Genomics UK (COG-UK) Consortium|Davies|United Kingdom

>Spike|hCoV-19/Slovakia/UKBA-410/2020|2020-11-19|EPI\_ISL\_718258|Original|hCoV-19^^Nitra|Human|Institute of Virology|Faculty of Natural Sciences|Vinar|Slovakia

>Spike|hCoV-19/Netherlands/ZH-EMC-742/2020|2020-09-12|EPI\_ISL\_632583|Original|hCoV-19^^Zuid Holland|Human|Dutch COVID-19 response team|Erasmus Medical Center|Oude Munnink|Netherlands

>Spike|hCoV-19/Wales/PHWC-47E300/2020|2020-10-08|EPI\_ISL\_595437|Original|hCoV-19^^Wales|Human|Originating lab|COVID-19 Genomics UK (COG-UK) Consortium|Moore|United Kingdom

>Spike|hCoV-19/Hungary/UD-94020/2020|2020-10-08|EPI\_ISL\_671493|Original|hCoV-19^^Borsod-Aba\u00faj-Zempl\u00e9n county|Human|University of Debrecen|National Laboratory of Virology|Kemenesi|Hungary

>Spike|hCoV-19/Japan/PG-0439/2020|2020-03-13|EPI\_ISL\_480104|Original|hCoV-19^^Kanto|Human|Koshigaya City Public Health Center|Pathogen Genomics Center|Sekizuka|Japan

>Spike|hCoV-19/USA/NY-PV09347/2020|2020-03-24|EPI\_ISL\_450035|Original|hCoV-19^^New York|Human|MSSS Clinical Microbiology Laboratories|MSSS Pathogen Surveillance Program|van Bakel|USA

>Spike|hCoV-19/Denmark/DCGC-4837/2020|2020-09-21|EPI\_ISL\_621522|Original|hCoV-19^^Hovedstaden|Human|Department of Virus and Microbiological Special Diagnostics|Albertsen lab|Michaelsen|Denmark

>Spike|hCoV-19/Wuhan/HB-WH3-178/2020|2020-03-13|EPI\_ISL\_455378|Original|hCoV-19^^Hubei|Human|Wuhan Chain Medical Labs (CMLabs)|State Key Laboratory of Biotherapy of Sichuan University|Tang|China

>Spike|hCoV-19/Guatemala/CDC-1227/2020|2020-03-13|EPI\_ISL\_509695|Original|hCoV-19^^Guatemala|Human|Guatemala Ministry of Public Health|Pathogen Discovery|Queen|Guatemala

>Spike|hCoV-19/Belgium/ULG-10540/2020|2020-10-23|EPI\_ISL\_626286|Original|hCoV-19^^Li\u00e8ge|Human|Department of Clinical Microbiology|GIGA Medical Genomics|Durkin|Belgium

>Spike|hCoV-19/United Arab Emirates/0382/2020|2020-05-15|EPI\_ISL\_698557|Original|hCoV-19^^Abu Dhabi|Human|Group 42 (G42) Healthcare|G42 Healthcare|Ogrodzki|United Arab Emirates

>Spike|hCoV-19/Canada/ON-OICR-SLB2819/2020|2020-04-02|EPI\_ISL\_538347|Original|hCoV-19^^Ontario|Human|Kingston Health Sciences Centre / Queen's University|Ontario Institute for Cancer Research|de Borja|Canada

>Spike|hCoV-19/Spain/AN-IBV-001887/2020|2020-03-12|EPI\_ISL\_452461|Original|hCoV-19^^Andalucia|Human|Hospital Universitario Puerta del Mar de C\u00e9ldiz - INIBICA|SeqCOVID-SPAIN consortium/IBV (CSIC)|Comas|Spain

>Spike|hCoV-19/Wales/PHWC-2B5B5/2020|2020-04-10|EPI\_ISL\_445731|Original|hCoV-19^^Wales|Human|Wales Specialist Virology Centre|Public Health Wales Microbiology Cardiff|Moore|United Kingdom

>Spike|hCoV-19/Mexico/CAM-INdRE-62/2020|2020-08-21|EPI\_ISL\_576265|Original|hCoV-19^^Campeche|Human|Instituto de Diagnostico y Referencia Epidemiologicos (INDRE)|Instituto de Diagnostico y Referencia Epidemiologicos (INDRE)|Rodriguez|Mexico

>Spike|hCoV-19/Australia/VIC7201/2020|2020-07-11|EPI\_ISL\_564278|Original|hCoV-19^^Victoria|Human|Microbiological Diagnostic Unit - Public Health Laboratory (MDU-PHL)|MDU-PHL|Schultz|Australia

>Spike|hCoV-19/Sweden/20-07571/2020|2020-04-20|EPI\_ISL\_445234|Original|hCoV-19^^Vastra Gotaland|Human|Wasterlakarna|The Public Health Agency of Sweden|Svartstr\u00f6m|Sweden

>Spike|hCoV-19/Denmark/DCGC-5369/2020|2020-09-14|EPI\_ISL\_615300|Original|hCoV-19^^Syddanmark|Human|Department of Virus and Microbiological Special Diagnostics|Albertsen lab|Michaelsen|Denmark

>Spike|hCoV-19/England/EXET-136686/2020|2020-05-01|EPI\_ISL\_457229|Original|hCoV-19^^England|Human|University of Exeter|COVID-19 Genomics UK (COG-UK) Consortium|Temperton|United Kingdom

>Spike|hCoV-19/USA/TX-HMH-1755/2020|2020-05-12|EPI\_ISL\_542815|Original|hCoV-19^^Texas|Human|Houston Methodist Hospital|Houston Methodist Hospital|Long|USA

>Spike|hCoV-19/USA/MI-QDX-576/2020|2020-03-18|EPI\_ISL\_571324|Original|hCoV-19^^Michigan|Human|Quest Diagnostics|Quest Diagnostics|Kagan|USA

>Spike|hCoV-19/USA/AZ-TG379485/2020|2020-06-16|EPI\_ISL\_694639|Original|hCoV-19^^Arizona|Human|TGen North|TGen North|French|USA

>Spike|hCoV-19/Belgium/reg-0915956/2020|2020-09-15|EPI\_ISL\_734946|Original|hCoV-19^^Berg|Human|UZ Leuven|KU Leuven|Maes|Belgium

>Spike|hCoV-19/New Zealand/20CV0488/2020|2020-10-25|EPI\_ISL\_622820|Original|hCoV-19^^Auckland|Human|Middlemore Hospital|Institute of Environmental Science and Research (ESR)|Wang|New Zealand

>Spike|hCoV-19/USA/LA-BIE-077/2020|2020-04-06|EPI\_ISL\_436945|Original|hCoV-19^^Louisiana|Human|Ochsner Health|Bioinfoexperts|Cross|USA

>Spike|hCoV-19/USA/WI-UW-1927/2020|2020-10-05|EPI\_ISL\_677336|Original|hCoV-19^^Wisconsin|Human|University of Wisconsin-Madison AIDS Vaccine Research Laboratories|University of Wisconsin-Madison AIDS Vaccine Research Laboratories|Baczenas|USA

>Spike|hCoV-19/USA/WA-S1829/2020|2020-05-27|EPI\_ISL\_496255|Original|hCoV-19^^Washington|Human|Washington State Department of Health|Seattle Flu Study|Lee|USA

>Spike|hCoV-19/Luxembourg/LNS3786534/2020|2020-11-23|EPI\_ISL\_740376|Original|hCoV-19^^Luxembourg|Human|Laboratoire national de sant\u00e9|Laboratoire national de sant\u00e9|Wienecke-Baldacchino|Luxembourg

>Spike|hCoV-19/USA/MA-MGH-03202/2020|2020-09-30|EPI\_ISL\_765744|Original|hCoV-19^^Massachusetts|Human|Massachusetts General Hospital|Infectious Disease Program|Park|USA

>Spike|hCoV-19/England/LOND-D6DDF/2020|2020-04-02|EPI\_ISL\_478435|Original|hCoV-19^^England|Human|University College London|COVID-19 Genomics UK (COG-UK) Consortium|Roy|United Kingdom

>Spike|hCoV-19/Wales/PHWC-48311D/2020|2020-10-21|EPI\_ISL\_627782|Original|hCoV-19^^Wales|Human|Wales Specialist Virology Centre Sequencing lab|COVID-19 Genomics UK (COG-UK) Consortium|Moore|United Kingdom



>Spike|hCoV-19/England/ALDP-B463BF/2020|2020-11-07|EPI\_ISL\_656210|Original|hCoV-19^^England|Human|Lighthouse Lab in Alderley Park|Wellcome Sanger Institute for the COVID-19 Genomics UK (COG-UK) Consortium|Davies|United Kingdom

>Spike|hCoV-19/Japan/PG-4711/2020|2020-08-00|EPI\_ISL\_689848|Original|hCoV-19^^Japan|Human|Pathogen Genomics Center|Pathogen Genomics Center|Sekizuka|Japan

>Spike|hCoV-19/USA/CT-Yale-496/2020|2020-10-12|EPI\_ISL\_729737|Original|hCoV-19^^Connecticut|Human|Grubaugh Lab - Yale School of Public Health|Grubaugh Lab - Yale School of Public Health|Grubaugh|USA

>Spike|hCoV-19/England/LIVE-9A618/2020|2020-03-29|EPI\_ISL\_449354|Original|hCoV-19^^England|Human|Liverpool Clinical Laboratories|COVID-19 Genomics UK (COG-UK) Consortium|Haldenby|United Kingdom

>Spike|hCoV-19/England/NORT-1B6BF53/2020|2020-09-27|EPI\_ISL\_611747|Original|hCoV-19^^England|Human|Northumbria University / South Tees Hospitals NHS Foundation Trust / North Cumbria Integrated Care NHS Foundation Trust / North Tees and Hartlepool NHS Foundation Trust / Newcastle Hospitals NHS Foundation Trust|COVID-19 Genomics UK (COG-UK) Consortium|Bashton|United Kingdom

>Spike|hCoV-19/USA/WA-UW-1659/2020|2020-03-20|EPI\_ISL\_424201|Original|hCoV-19^^Washington|Human|UW Virology Lab|UW Virology Lab|Roychoudhury|USA

>Spike|hCoV-19/England/QEUEH-9B6F6D/2020|2020-09-04|EPI\_ISL\_590574|Original|hCoV-19^^England|Human|Lighthouse Lab in Glasgow|Wellcome Sanger Institute for the COVID-19 Genomics UK (COG-UK) consortium|Davies|United Kingdom

>Spike|hCoV-19/England/MILK-B88515/2020|2020-11-13|EPI\_ISL\_674335|Original|hCoV-19^^England|Human|Lighthouse Lab in Milton Keynes|Wellcome Sanger Institute for the COVID-19 Genomics UK (COG-UK) Consortium|Davies|United Kingdom

>Spike|hCoV-19/Canada/QC-LSPQ-L00214023/2020|2020-03-10|EPI\_ISL\_535723|Original|hCoV-19^^Quebec|Human|H\u00f4pital de Verdun|Laboratoire de sant\u00e9 publique du Qu\u00e9bec|Moreira|Canada

>Spike|hCoV-19/USA/CA-ALSR-4439/2020|2020-10-21|EPI\_ISL\_649031|Original|hCoV-19^^California|Human|San Diego County Public Health Laboratory|Andersen lab at Scripps Research|Gangavarapu|USA

>Spike|hCoV-19/Wales/QEUEH-B0DF1A/2020|2020-10-31|EPI\_ISL\_647804|Original|hCoV-19^^Wales|Human|Lighthouse Lab in Glasgow|Wellcome Sanger Institute for the COVID-19 Genomics UK (COG-UK) Consortium|Davies|United Kingdom

>Spike|hCoV-19/Brazil/GO-0106/2020|2020-03-13|EPI\_ISL\_417930|Original|hCoV-19^^Goi\u00e9s|Human|Laborat\u00f3rio Hermes Pardini|Bioinformatics Laboratory - LNCC|Almeida|Brazil

>Spike|hCoV-19/England/QEUEH-B7DABA/2020|2020-11-14|EPI\_ISL\_741893|Original|hCoV-19^^England|Human|Oxford Viromics|COVID-19 Genomics UK (COG-UK) Consortium|Golubchik|United Kingdom

>Spike|hCoV-19/Scotland/QEUEH-B10FAB/2020|2020-11-03|EPI\_ISL\_649534|Original|hCoV-19^^Scotland|Human|Lighthouse Lab in Glasgow|Wellcome Sanger Institute for the COVID-19 Genomics UK (COG-UK) Consortium|Davies|United Kingdom

>Spike|hCoV-19/Australia/NSW825/2020|2020-08-07|EPI\_ISL\_526167|Original|hCoV-19^^New South Wales|Human|Austech Medical Laboratories|NSW Health Pathology - Institute of Clinical Pathology and Medical Research; Westmead Hospital; University of Sydney|Gall|Australia

>Spike|hCoV-19/England/CAMC-A57A99/2020|2020-10-07|EPI\_ISL\_597435|Original|hCoV-19^^England|Human|Lighthouse Lab in Cambridge|Wellcome Sanger Institute for the COVID-19 Genomics UK (COG-UK) consortium|Davies|United Kingdom

>Spike|hCoV-19/Japan/PG-4474/2020|2020-07-00|EPI\_ISL\_692697|Original|hCoV-19^^Japan|Human|Pathogen Genomics Center|Pathogen Genomics Center|Sekizuka|Japan

>Spike|hCoV-19/Australia/NSW642/2020|2020-07-10|EPI\_ISL\_498761|Original|hCoV-19^^New South Wales|Human|Pathology West - NSW Health Pathology|NSW Health Pathology - Institute of Clinical Pathology and Medical Research; Westmead Hospital; University of Sydney|Gall|Australia

>Spike|hCoV-19/Wales/ALDP-C22FD2/2020|2020-12-06|EPI\_ISL\_767243|Original|hCoV-19^^Wales|Human|Lighthouse Lab in Alderley Park|Wellcome Sanger Institute for the COVID-19 Genomics UK (COG-UK) Consortium|Davies|United Kingdom

>Spike|hCoV-19/USA/PA-MGEL-00248/2020|2020-04-19|EPI\_ISL\_681984|Original|hCoV-19^^Pennsylvania|Human|UPMC Clinical Microbiology Laboratory|Microbial Genomic Epidemiology Laboratory|Griffith|USA

>Spike|hCoV-19/USA/MA-MGH-00282/2020|2020-04-01|EPI\_ISL\_460408|Original|hCoV-19^^Massachusetts|Human|Massachusetts General Hospital|Infectious Disease Program|Lemieux|USA

>Spike|hCoV-19/Belgium/GSA-030454/2020|2020-03-04|EPI\_ISL\_420448|Original|hCoV-19^^Lubbeek|Human|KU Leuven|KU Leuven|Maes|Belgium

>Spike|hCoV-19/England/MILK-B550E3/2020|2020-11-06|EPI\_ISL\_657948|Original|hCoV-19^^England|Human|Lighthouse Lab in Milton Keynes|Wellcome Sanger Institute for the COVID-19 Genomics UK (COG-UK) Consortium|Davies|United Kingdom

>Spike|hCoV-19/Japan/PG-7206/2020|2020-07-00|EPI\_ISL\_688310|Original|hCoV-19^^Japan|Human|Saitama Prefectural Institute of Public Health|Pathogen Genomics Center|Sekizuka|Japan

>Spike|hCoV-19/Northern Ireland/NIRE-108438/2020|2020-09-09|EPI\_ISL\_585190|Original|hCoV-19^^Northern Ireland|Human|Regional Virus Laboratory|COVID-19 Genomics UK (COG-UK) Consortium|Fairley|United Kingdom

>Spike|hCoV-19/England/QEUH-9BAB47/2020|2020-09-07|EPI\_ISL\_573623|Original|hCoV-19^^England|Human|Oxford Viromics|COVID-19 Genomics UK (COG-UK) Consortium|Golubchik|United Kingdom

>Spike|hCoV-19/Jordan/IR-ALSR-5218/2020|2020-10-08|EPI\_ISL\_730456|Original|hCoV-19^^Irbid|Human|Biolab Diagnostic Laboratories|Andersen lab at Scripps Research|Gangavarapu|Jordan

>Spike|hCoV-19/USA/TX-HMH-2158/2020|2020-05-19|EPI\_ISL\_545150|Original|hCoV-19^^Texas|Human|Houston Methodist Hospital|Houston Methodist Hospital|Long|USA

>Spike|hCoV-19/England/CAMC-BD1B2A/2020|2020-11-27|EPI\_ISL\_702334|Original|hCoV-19^^England|Human|Lighthouse Lab in Cambridge|Wellcome Sanger Institute for the COVID-19 Genomics UK (COG-UK) Consortium|Davies|United Kingdom

>Spike|hCoV-19/Weifang/WF0003/2020|2020-01-00|EPI\_ISL\_413693|Original|hCoV-19^^Weifang|Human|Weifang Center for Disease Control and Prevention|Weifang Center for Disease Control and Prevention & BGI-Shenzhen|Li|China

>Spike|hCoV-19/England/QEUH-CC7A56/2020|2020-12-21|EPI\_ISL\_760302|Original|hCoV-19^^England|Human|Lighthouse Lab in Glasgow|Wellcome Sanger Institute for the COVID-19 Genomics UK (COG-UK) Consortium|Davies|United Kingdom

>Spike|hCoV-19/England/ALDP-A6853A/2020|2020-10-12|EPI\_ISL\_608575|Original|hCoV-19^^England|Human|Lighthouse Lab in Alderley Park|Wellcome Sanger Institute for the COVID-19 Genomics UK (COG-UK) consortium|Davies|United Kingdom

>Spike|hCoV-19/England/ALDP-AA2CB7/2020|2020-10-21|EPI\_ISL\_625165|Original|hCoV-19^^England|Human|Lighthouse Lab in Alderley Park|Wellcome Sanger Institute for the COVID-19 Genomics UK (COG-UK) consortium|Davies|United Kingdom

>Spike|hCoV-19/Australia/VIC4341/2020|2020-07-13|EPI\_ISL\_519637|Original|hCoV-19^^Victoria|Human|Microbiological Diagnostic Unit - Public Health Laboratory (MDU-PHL)|MDU-PHL|Schultz|Australia

>Spike|hCoV-19/USA/CA-CZB-1214/2020|2020-03-23|EPI\_ISL\_450463|Original|hCoV-19^^California|Human|Stanford clinical virology lab|Chan-Zuckerberg Biohub|Hao|USA

>Spike|hCoV-19/Botswana/BOT2624/2020|2020-04-05|EPI\_ISL\_560387|Original|hCoV-19^^Gaborone|Human|National Health Laboratory|Botswana Institute for Technology Research and Innovation|Tumedi|Botswana

>Spike|hCoV-19/USA/CA-ALSR-2620/2020|2020-07-10|EPI\_ISL\_635591|Original|hCoV-19^^California|Human|San Diego County Public Health Laboratory|Andersen lab at Scripps Research|Gangavarapu|USA

>Spike|hCoV-19/USA/NV-NSPHL-A0014/2020|2020-03-15|EPI\_ISL\_515301|Original|hCoV-19^^Nevada|Human|Nevada State Public Health Laboratory|Nevada State Public Health Laboratory|Sevinsky|USA

>Spike|hCoV-19/England/MILK-A05739/2020|2020-09-30|EPI\_ISL\_600052|Original|hCoV-19^^England|Human|Lighthouse Lab in Milton Keynes|Wellcome Sanger Institute for the COVID-19 Genomics UK (COG-UK) consortium|Davies|United Kingdom

>Spike|hCoV-19/USA/CA-CZB-1696/2020|2020-04-02|EPI\_ISL\_468631|Original|hCoV-19^^California|Human|Contra Costa Public Health Lab|Chan-Zuckerberg Biohub|McGeever|USA

>Spike|hCoV-19/Wales/QEUA-AD17EB/2020|2020-10-24|EPI\_ISL\_634736|Original|hCoV-19^^Wales|Human|Lighthouse Lab in Glasgow|Wellcome Sanger Institute for the COVID-19 Genomics UK (COG-UK) consortium|Davies|United Kingdom

>Spike|hCoV-19/South Africa/KRISP-K001085/2020|2020-07-13|EPI\_ISL\_509338|Original|hCoV-19^^KwaZulu-Natal|Human|NHLS-IALCH|KRISP|de Oliveira|South Africa

>Spike|hCoV-19/United Arab Emirates/0766/2020|2020-05-19|EPI\_ISL\_698910|Original|hCoV-19^^Abu Dhabi|Human|Group 42 (G42) Healthcare|G42 Healthcare|Ogrodzki|United Arab Emirates

>Spike|hCoV-19/Belgium/ULG-10077/2020|2020-04-04|EPI\_ISL\_424642|Original|hCoV-19^^Li\u00e8ge|Human|Department of Clinical Microbiology|GIGA Medical Genomics|Durkin|Belgium

>Spike|hCoV-19/Denmark/DCGC-21407/2020|2020-12-21|EPI\_ISL\_758150|Original|hCoV-19^^Midtjylland|Human|Department of Virus and Microbiological Special Diagnostics|Albertsen Lab|Michaelsen|Denmark

>Spike|hCoV-19/England/CAMC-B21E6E/2020|2020-11-02|EPI\_ISL\_646014|Original|hCoV-19^^England|Human|Lighthouse Lab in Cambridge|Wellcome Sanger Institute for the COVID-19 Genomics UK (COG-UK) Consortium|Davies|United Kingdom

>Spike|hCoV-19/Zimbabwe/ZW-9494/2020|2020-06-01|EPI\_ISL\_644812|Original|hCoV-19^^Zimbabwe|Human|National Microbiology Reference Laboratory|Quadram Institute Bioscience|Alikhan|Zimbabwe

>Spike|hCoV-19/England/ALDP-9BE19C/2020|2020-09-09|EPI\_ISL\_567937|Original|hCoV-19^^England|Human|Lighthouse Lab in Alderley Park|Wellcome Sanger Institute for the COVID-19 Genomics UK (COG-UK) consortium|Davies|United Kingdom

>Spike|hCoV-19/Wales/PHWC-31FBE/2020|2020-04-14|EPI\_ISL\_446594|Original|hCoV-19^^Wales|Human|Wales Specialist Virology Centre|Public Health Wales Microbiology Cardiff|Moore|United Kingdom

>Spike|hCoV-19/USA/MD-MDH-0316/2020|2020-10-19|EPI\_ISL\_633092|Original|hCoV-19^^Maryland|Human|MD PHL|MD PHL|Keller|USA

>Spike|hCoV-19/Gambia/GC192602/2020|2020-07-21|EPI\_ISL\_561120|Original|hCoV-19^^Kombo|Human|MRCG at LSHTM Genomics lab|MRCG at LSHTM Genomics lab|Sesay|Gambia

>Spike|hCoV-19/USA/MN-MDH-1316/2020|2020-03-25|EPI\_ISL\_495615|Original|hCoV-19^^Minnesota|Human|Minnesota Department of Health|Minnesota Department of Health|Garfin|USA

>Spike|hCoV-19/England/QEUA-AAD609/2020|2020-10-22|EPI\_ISL\_637969|Original|hCoV-19^^England|Human|Liverpool Clinical Laboratories|COVID-19 Genomics UK (COG-UK) Consortium|Haldenby|United Kingdom

>Spike|hCoV-19/Japan/PG-1578/2020|2020-04-00|EPI\_ISL\_685184|Original|hCoV-19^^Japan|Human|Pathogen Genomics Center|Pathogen Genomics Center|Sekizuka|Japan

>Spike|hCoV-19/England/CAMC-9D6F49/2020|2020-09-20|EPI\_ISL\_584337|Original|hCoV-19^^England|Human|Virology Department|COVID-19 Genomics UK (COG-UK) Consortium|de Silva|United Kingdom

>Spike|hCoV-19/Belgium/UGent-259/2020|2020-11-05|EPI\_ISL\_717999|Original|hCoV-19^^Ghent|Human|Lab voor klinische biologie|Onderzoeksgroep Virologie|Lambrechts|Belgium

>Spike|hCoV-19/USA/MI-QDX-930/2020|2020-03-22|EPI\_ISL\_571634|Original|hCoV-19^^Michigan|Human|Quest Diagnostics|Quest Diagnostics|Kagan|USA

>Spike|hCoV-19/Singapore/2/2020|2020-01-25|EPI\_ISL\_407987|Vero P3|hCoV-19^^Singapore|Human|Singapore General Hospital|Programme in Emerging Infectious Diseases|Smith|Singapore

>Spike|hCoV-19/USA/CA-CZB-10590/2020|2020-09-07|EPI\_ISL\_583196|Original|hCoV-19^^California|Human|San Francisco Public Health Laboratory|Chan-Zuckerberg Biohub|Bhatt|USA

>Spike|hCoV-19/England/QEUA-9F4A9F/2020|2020-09-27|EPI\_ISL\_588304|Original|hCoV-19^^England|Human|Lighthouse Lab in Glasgow|Wellcome Sanger Institute for the COVID-19 Genomics UK (COG-UK) consortium|Davies|United Kingdom

>Spike|hCoV-19/England/204040292/2020|2020-09-29|EPI\_ISL\_622835|Original|hCoV-19^^England|Human|Respiratory Virus Unit|Respiratory Virus Unit|Platt|United Kingdom

>Spike|hCoV-19/Australia/VIC6506/2020|2020-07-26|EPI\_ISL\_521280|Original|hCoV-19^^Victoria|Human|Microbiological Diagnostic Unit - Public Health Laboratory (MDU-PHL)|MDU-PHL|Schultz|Australia

>Spike|hCoV-19/USA/WI-UW-1914/2020|2020-10-26|EPI\_ISL\_677323|Original|hCoV-19^^Wisconsin|Human|University of Wisconsin-Madison AIDS Vaccine Research Laboratories|University of Wisconsin-Madison AIDS Vaccine Research Laboratories|Baczenas|USA

>Spike|hCoV-19/England/LOND-124DA22/2020|2020-00-00|EPI\_ISL\_584632|Original|hCoV-19^^England|Human|University College London Hospital|COVID-19 Genomics UK (COG-UK) Consortium|Byott|United Kingdom

>Spike|hCoV-19/USA/NM-DOH-2020328525/2020|2020-09-04|EPI\_ISL\_575320|Original|hCoV-19^^New Mexico|Human|Molecular Biology|Molecular Biology|Johnson|USA

>Spike|hCoV-19/England/CAMC-B0A4D2/2020|2020-10-29|EPI\_ISL\_672984|Original|hCoV-19^^England|Human|Lighthouse Lab in Cambridge|Wellcome Sanger Institute for the COVID-19 Genomics UK (COG-UK) Consortium|Davies|United Kingdom

>Spike|hCoV-19/Wales/PHWC-49D12F/2020|2020-12-10|EPI\_ISL\_742737|Original|hCoV-19^^Wales|Human|Wales Specialist Virology Centre Sequencing lab|COVID-19 Genomics UK (COG-UK) Consortium|Moore|United Kingdom

>Spike|hCoV-19/Switzerland/VD-ETHZ-270188/2020|2020-08-30|EPI\_ISL\_541502|Original|hCoV-19^^Vaud|Human|Viollier AG|Department of Biosystems Science and Engineering|Nadeau|Switzerland

>Spike|hCoV-19/England/QEUEH-B41071/2020|2020-11-08|EPI\_ISL\_658662|Original|hCoV-19^^England|Human|Lighthouse Lab in Glasgow|Wellcome Sanger Institute for the COVID-19 Genomics UK (COG-UK) Consortium|Davies|United Kingdom

>Spike|hCoV-19/Spain/RI-IBV-99010990/2020|2020-10-18|EPI\_ISL\_732813|Original|hCoV-19^^La Rioja|Human|Centro de Investigaci\u00f3n Biom\u00e9dica de La Rioja - Hospital San Pedro Logro\u00f1o|SeqCOVID-SPAIN consortium/IBV (CSIC)|Comas|Spain

>Spike|hCoV-19/England/QEUEH-CC260C/2020|2020-12-21|EPI\_ISL\_778077|Original|hCoV-19^^England|Human|Lighthouse Lab in Glasgow|Wellcome Sanger Institute for the COVID-19 Genomics UK (COG-UK) Consortium|Davies|United Kingdom

>Spike|hCoV-19/Japan/PG-3680/2020|2020-04-00|EPI\_ISL\_691933|Original|hCoV-19^^Japan|Human|Pathogen Genomics Center|Pathogen Genomics Center|Sekizuka|Japan

>Spike|hCoV-19/England/ALDP-A5225A/2020|2020-10-07|EPI\_ISL\_598248|Original|hCoV-19^^England|Human|Lighthouse Lab in Alderley Park|Wellcome Sanger Institute for the COVID-19 Genomics UK (COG-UK) consortium|Davies|United Kingdom

>Spike|hCoV-19/England/BRIS-127D38/2020|2020-04-17|EPI\_ISL\_469630|Original|hCoV-19^^England|Human|PHE South West Regional Laboratory|Wellcome Sanger Institute for the COVID-19 Genomics UK (COG-UK) consortium|Davies|United Kingdom

>Spike|hCoV-19/USA/IL-NM-0793/2020|2020-05-16|EPI\_ISL\_626476|Original|hCoV-19^^Illinois|Human|Northwestern Memorial Hospital|Ozer Lab|Ozer|USA

>Spike|hCoV-19/France/PAC-MEPHI-1746/2020|2020-09-18|EPI\_ISL\_644440|Original|hCoV-19^^Provence-Alpes-Cote-d\u2019Azur|Human|MEPHI|MEPHI|Levasseur|France

>Spike|hCoV-19/Switzerland/ZH-ETHZ-420656/2020|2020-12-23|EPI\_ISL\_768266|Original|hCoV-19^^Zurich|Human|Viollier AG|Department of Biosystems Science and Engineering|Nadeau|Switzerland

>Spike|hCoV-19/Canada/ON-S1792/2020|2020-11-15|EPI\_ISL\_755787|Original|hCoV-19^^Ontario|Human|Toronto Invasive Bacterial Diseases Network|McMaster University|McArthur|Canada

>Spike|hCoV-19/India/MH-NIV-4622/2020|2020-03-24|EPI\_ISL\_454534|Original|hCoV-19^^Maharashtra|Human|NIV Influenza|NIV Influenza|Potdar|India

>Spike|hCoV-19/Scotland/CVR5761/2020|2020-11-09|EPI\_ISL\_705636|Original|hCoV-19^^Scotland|Human|West of Scotland Specialist Virology Centre|COVID-19 Genomics UK (COG-UK) Consortium|Robertson|United Kingdom

>Spike|hCoV-19/Canada/MB-NML-1171/2020|2020-08-03|EPI\_ISL\_582492|Original|hCoV-19^^Manitoba|Human|Cadham Provincial Laboratory|National Microbiology Laboratory (NML)|Majer|Canada

>Spike|hCoV-19/England/SHEF-C8CF1/2020|2020-05-11|EPI\_ISL\_475412|Original|hCoV-19^^England|Human|Virology Department|COVID-19 Genomics UK (COG-UK) Consortium|de Silva|United Kingdom

>Spike|hCoV-19/Denmark/DCGC-3361/2020|2020-08-31|EPI\_ISL\_616118|Original|hCoV-19^^Hovedstaden|Human|Department of Virus and Microbiological Special Diagnostics|Albertsen lab|Michaelsen|Denmark

>Spike|hCoV-19/USA/TX-HMH-MCoV-18557/2020|2020-11-19|EPI\_ISL\_784905|Original|hCoV-19^^Texas|Human|Houston Methodist Hospital|Houston Methodist Hospital|Long|USA

>Spike|hCoV-19/Canada/BC\_03489776/2020|2020-04-00|EPI\_ISL\_466753|Original|hCoV-19^^British Columbia|Human|BCCDC Public Health Laboratory|BCCDC Public Health Laboratory|Harrigan|Canada

>Spike|hCoV-19/Australia/TAS240/2020|2020-04-15|EPI\_ISL\_522668|Original|hCoV-19^^Tasmania|Human|Royal Hobart Hospital Microbiology Department|MDU-PHL|Schultz|Australia

>Spike|hCoV-19/England/ALDP-521EEC/2020|2020-06-02|EPI\_ISL\_559087|Original|hCoV-19^^England|Human|Lighthouse Lab in Alderley Park|Wellcome Sanger Institute for the COVID-19 Genomics UK (COG-UK) consortium|Davies|United Kingdom

>Spike|hCoV-19/USA/CA-ALSR-2761/2020|2020-07-15|EPI\_ISL\_635664|Original|hCoV-19^^California|Human|San Diego County Public Health Laboratory|Andersen lab at Scripps Research|Gangavarapu|USA

>Spike|hCoV-19/England/QEUA-B6A652/2020|2020-11-11|EPI\_ISL\_662574|Original|hCoV-19^^England|Human|Lighthouse Lab in Glasgow|Wellcome Sanger Institute for the COVID-19 Genomics UK (COG-UK) Consortium|Davies|United Kingdom

>Spike|hCoV-19/England/ALDP-B1ACB9/2020|2020-11-01|EPI\_ISL\_645940|Original|hCoV-19^^England|Human|Lighthouse Lab in Alderley Park|Wellcome Sanger Institute for the COVID-19 Genomics UK (COG-UK) Consortium|Davies|United Kingdom

>Spike|hCoV-19/Russia/SPE-RII-19109V/2020|2020-06-01|EPI\_ISL\_524023|Vero P1|hCoV-19^^Saint Petersburg|Human|WHO National Influenza Centre Russian Federation|WHO National Influenza Centre Russian Federation|Komissarov|Russia

>Spike|hCoV-19/Wales/PHWC-498E2D/2020|2020-11-28|EPI\_ISL\_727216|Original|hCoV-19^^Wales|Human|Originating lab|COVID-19 Genomics UK (COG-UK) Consortium|Moore|United Kingdom

>Spike|hCoV-19/Denmark/DCGC-11544/2020|2020-11-02|EPI\_ISL\_670986|Original|hCoV-19^^Syddanmark|Human|Department of Virus and Microbiological Special Diagnostics|Albertsen Lab|Michaelsen|Denmark

>Spike|hCoV-19/USA/TX-HMH-MCoV-15721/2020|2020-07-09|EPI\_ISL\_785405|Original|hCoV-19^^Texas|Human|Houston Methodist Hospital|Houston Methodist Hospital|Long|USA

>Spike|hCoV-19/USA/NY-NYUMC559/2020|2020-03-31|EPI\_ISL\_444676|Original|hCoV-19^^New York|Human|NYU Langone Health|Departments of Pathology and Medicine|Maurano|USA

>Spike|hCoV-19/Japan/PG-8384/2020|2020-07-00|EPI\_ISL\_687483|Original|hCoV-19^^Japan|Human|Pathogen Genomics Center|Pathogen Genomics Center|Sekizuka|Japan

>Spike|hCoV-19/USA/WI-GMF-23602/2020|2020-10-02|EPI\_ISL\_660877|Original|hCoV-19^^Wisconsin|Human|Gundersen Clinical Microbiology Laboratory|Kabara Cancer Research Institute|Kenny|USA

>Spike|hCoV-19/Wales/MILK-9A53CF/2020|2020-09-03|EPI\_ISL\_550019|Original|hCoV-19^^Wales|Human|Lighthouse Lab in Milton Keynes|Wellcome Sanger Institute for the COVID-19 Genomics UK (COG-UK) consortium|Davies|United Kingdom

>Spike|hCoV-19/Vietnam/HCMC-35030/2020|2020-03-31|EPI\_ISL\_498191|unknown|hCoV-19^^Ho Chi Minh City|Human|OUCRU|OUCRU|Nguyen|Vietnam

>Spike|hCoV-19/England/ALDP-95615A/2020|2020-06-08|EPI\_ISL\_554008|Original|hCoV-19^^England|Human|Lighthouse Lab in Alderley Park|Wellcome Sanger Institute for the COVID-19 Genomics UK (COG-UK) consortium|Davies|United Kingdom

>Spike|hCoV-19/Switzerland/BL-ETHZ-240046/2020|2020-08-12|EPI\_ISL\_523888|Original|hCoV-19^^Basel-Landschaft|Human|Viollier AG|Department of Biosystems Science and Engineering|Nadeau|Switzerland

>Spike|hCoV-19/USA/MI-UM-10036825013/2020|2020-11-06|EPI\_ISL\_728375|Original|hCoV-19^^Michigan|Human|University of Michigan Clinical Microbiology Laboratory|Lauring Lab|Valesano|USA

>Spike|hCoV-19/Scotland/QEUA-9FA5B6/2020|2020-09-29|EPI\_ISL\_600542|Original|hCoV-19^^Scotland|Human|Lighthouse Lab in Glasgow|Wellcome Sanger Institute for the COVID-19 Genomics UK (COG-UK) consortium|Davies|United Kingdom

>Spike|hCoV-19/England/CAMB-1ABACC/2020|2020-04-20|EPI\_ISL\_470309|Original|hCoV-19^^England|Human|Department of Pathology|Wellcome Sanger Institute for the COVID-19 Genomics UK (COG-UK) consortium|Davies|United Kingdom

>Spike|hCoV-19/Spain/VC-IBV-98003541/2020|2020-03-28|EPI\_ISL\_537968|Original|hCoV-19^^Comunitat Valenciana|Human|Servicio de Microbiolog\u00eda. Hospital General Universitario de Castell\u00f3n|SeqCOVID-SPAIN consortium/IBV(CSIC)|Comas|Spain

>Spike|hCoV-19/Japan/PG-5330/2020|2020-08-00|EPI\_ISL\_690433|Original|hCoV-19^^Japan|Human|Fukuoka Institute of Health and Environmental Sciences|Pathogen Genomics Center|Sekizuka|Japan

>Spike|hCoV-19/Mexico/NLE-UANL-037/2020|2020-11-21|EPI\_ISL\_779198|Original|hCoV-19^^Nuevo Leon|Human|Laboratorio Estatal de Salud P\u00fablica de Nuevo Le\u00f3n|Laboratorio de Infectolog\u00eda Molecular|Gal\u00e9n|Mexico

>Spike|hCoV-19/USA/UT-UPHL-2012061461/2020|2020-08-03|EPI\_ISL\_745725|Original|hCoV-19^^Utah|Human|Ginkgo Bioworks Clinical Laboratory|Utah Public Health Laboratory|Young|USA

>Spike|hCoV-19/India/OR-RMRC90/2020|2020-05-04|EPI\_ISL\_455786|Original|hCoV-19^^Odisha|Human|REGIONAL VRDL, ICMR-RMRC BBSR|Immunogenomics lab|Raghav|India

>Spike|hCoV-19/Canada/ON-S1949/2020|2020-11-24|EPI\_ISL\_755669|Original|hCoV-19^^Ontario|Human|Toronto Invasive Bacterial Diseases Network|McMaster University|McArthur|Canada

>Spike|hCoV-19/England/ALDP-5D67EB/2020|2020-06-19|EPI\_ISL\_558583|Original|hCoV-19^^England|Human|Lighthouse Lab in Alderley Park|Wellcome Sanger Institute for the COVID-19 Genomics UK (COG-UK) consortium|Davies|United Kingdom

>Spike|hCoV-19/England/BIRM-655FB/2020|2020-10-05|EPI\_ISL\_594570|Original|hCoV-19^^England|Human|University of Birmingham|COVID-19 Genomics UK (COG-UK) Consortium|Loman|United Kingdom

>Spike|hCoV-19/USA/LA-EVTL1459/2020|2020-12-17|EPI\_ISL\_779125|Original|hCoV-19^^Louisiana|Human|LSUHS Emerging Viral Threat Laboratory|Microbial Genome Sequencing Center|Kamil|USA

>Spike|hCoV-19/England/CAMC-B3318E/2020|2020-11-05|EPI\_ISL\_659235|Original|hCoV-19^^England|Human|Lighthouse Lab in Cambridge|Wellcome Sanger Institute for the COVID-19 Genomics UK (COG-UK) Consortium|Davies|United Kingdom

>Spike|hCoV-19/England/MILK-BAA54A/2020|2020-11-18|EPI\_ISL\_681326|Original|hCoV-19^^England|Human|Lighthouse Lab in Milton Keynes|Wellcome Sanger Institute for the COVID-19 Genomics UK (COG-UK) Consortium|Davies|United Kingdom

>Spike|hCoV-19/England/ALDP-A8783C/2020|2020-10-17|EPI\_ISL\_606107|Original|hCoV-19^^England|Human|Lighthouse Lab in Alderley Park|Wellcome Sanger Institute for the COVID-19 Genomics UK (COG-UK) consortium|Davies|United Kingdom

>Spike|hCoV-19/Denmark/DCGC-20031/2020|2020-12-07|EPI\_ISL\_747594|Original|hCoV-19^^Hovedstaden|Human|Department of Virus and Microbiological Special Diagnostics|Albertsen Lab|Michaelsen|Denmark

>Spike|hCoV-19/England/20139065604/2020|2020-03-29|EPI\_ISL\_423355|Original|hCoV-19^^England|Human|Respiratory Virus Unit|Respiratory Virus Unit|Platt|United Kingdom

>Spike|hCoV-19/Denmark/DCGC-19044/2020|2020-12-07|EPI\_ISL\_748717|Original|hCoV-19^^Midtjylland|Human|Department of Virus and Microbiological Special Diagnostics|Albertsen Lab|Michaelsen|Denmark

>Spike|hCoV-19/England/NORT-2A102D/2020|2020-00-00|EPI\_ISL\_652347|Original|hCoV-19^^England|Human|Northumbria University / South Tees Hospitals NHS Foundation Trust / North Cumbria Integrated Care NHS Foundation Trust / North Tees and Hartlepool NHS Foundation Trust / Newcastle Hospitals NHS Foundation Trust|COVID-19 Genomics UK (COG-UK) Consortium|Bashton|United Kingdom

>Spike|hCoV-19/England/CAMB-77101/2020|2020-04-01|EPI\_ISL\_438533|Original|hCoV-19^^England|Human|Department of Pathology|Wellcome Sanger Institute for the COVID-19 Genomics UK (COG-UK) consortium|Amato|United Kingdom

>Spike|hCoV-19/Scotland/GCVR-173C03/2020|2020-04-03|EPI\_ISL\_459150|Original|hCoV-19^^Scotland|Human|NHSGGC West of Scotland Specialist Virology Centre / MRC-University of Glasgow Centre for Virus Research|Wellcome Sanger Institute for the COVID-19 Genomics UK (COG-UK) consortium|Davies|United Kingdom

>Spike|hCoV-19/USA/WI-UW-2248/2020|2020-10-08|EPI\_ISL\_728017|Original|hCoV-19^^Wisconsin|Human|University of Wisconsin-Madison AIDS Vaccine Research

Laboratories|University of Wisconsin-Madison AIDS Vaccine Research  
Laboratories|Baczenas|USA  
>Spike|hCoV-19/USA/NY-NYCPHL-000762/2020|2020-03-20|EPI\_ISL\_632142|Original|hCoV-19^^New York|Human|Brookdale University Hospital Medical Center|New York City Public Health Laboratory|Wang|USA  
>Spike|hCoV-19/England/LIVE-DBD16C/2020|2020-10-27|EPI\_ISL\_679390|Original|hCoV-19^^England|Human|Liverpool Clinical Laboratories|COVID-19 Genomics UK (COG-UK) Consortium|Haldenby|United Kingdom  
>Spike|hCoV-19/USA/WI-UW-28/2020|2020-03-25|EPI\_ISL\_421286|Original|hCoV-19^^Wisconsin|Human|University of Wisconsin-Madison AIDS Vaccine Research Laboratories|University of Wisconsin-Madison AIDS Vaccine Research Laboratories|Baczenas|USA  
>Spike|hCoV-19/Scotland/CVR2674/2020|2020-04-17|EPI\_ISL\_484634|Original|hCoV-19^^Scotland|Human|West of Scotland Specialist Virology Centre|COVID-19 Genomics UK (COG-UK) Consortium|Robertson|United Kingdom  
>Spike|hCoV-19/Russia/NGR-RII-MH6296S/2020|2020-11-10|EPI\_ISL\_733374|Original|hCoV-19^^Novgorod|Human|HELIX LLC|WHO National Influenza Centre Russian Federation|Komissarov|Russia  
>Spike|hCoV-19/USA/TX-DSHS-0345/2020|2020-06-13|EPI\_ISL\_538283|Original|hCoV-19^^Texas|Human|Texas Department of State Health Services|Texas Department of State Health Services|Rahman|USA  
>Spike|hCoV-19/England/CAMC-BD1586/2020|2020-11-29|EPI\_ISL\_702043|Original|hCoV-19^^England|Human|Lighthouse Lab in Cambridge|Wellcome Sanger Institute for the COVID-19 Genomics UK (COG-UK) Consortium|Davies|United Kingdom  
>Spike|hCoV-19/USA/CA-UCLA-17/2020|2020-04-30|EPI\_ISL\_537505|Original|hCoV-19^^California|Human|UCLA Pathology Clinical Microbiology Lab|Kruglyak Lab|Boocock|USA  
>Spike|hCoV-19/South Korea/KCDC2517/2020|2020-06-17|EPI\_ISL\_514920|Original|hCoV-19^^South Korea|Human|Division of Viral Diseases|Division of Viral Diseases|Kim|South Korea  
>Spike|hCoV-19/USA/UT-05782/2020|2020-06-04|EPI\_ISL\_487261|Original|hCoV-19^^Utah|Human|Utah Public Health Laboratory|Utah Public Health Laboratory|Butz|USA  
>Spike|hCoV-19/Netherlands/ZH-EMC-1109/2020|2020-12-15|EPI\_ISL\_722781|Original|hCoV-19^^Zuid Holland|Human|Dutch COVID-19 response team|Erasmus Medical Center|Oude Munnink|Netherlands  
>Spike|hCoV-19/England/MILK-BAA270/2020|2020-11-17|EPI\_ISL\_783322|Original|hCoV-19^^England|Human|Lighthouse Lab in Milton Keynes|Wellcome Sanger Institute for the COVID-19 Genomics UK (COG-UK) Consortium|Davies|United Kingdom  
>Spike|hCoV-19/India/MH-ACTREC-464/2020|2020-08-10|EPI\_ISL\_700112|Original|hCoV-19^^Maharashtra|Human|Hematopathology Laboratory|Hematopathology Laboratory|Patkar|India  
>Spike|hCoV-19/USA/CA-CDPH108/2020|2020-09-16|EPI\_ISL\_754958|Original|hCoV-19^^California|Human|California Department of Public Health|California Department of Public Health|Bell|USA  
>Spike|hCoV-19/Luxembourg/LNS4834565/2020|2020-11-25|EPI\_ISL\_744143|Original|hCoV-19^^Luxembourg|Human|Laboratoire national de sant\u00e9|Laboratoire national de sant\u00e9|Wienecke-Baldacchino|Luxembourg  
>Spike|hCoV-19/South Africa/KRISP-K004545/2020|2020-10-27|EPI\_ISL\_660242|Original|hCoV-19^^KwaZulu-Natal|Human|NHLS-IALCH|KRISP|de Oliveira|South Africa  
>Spike|hCoV-19/Denmark/DCGC-2876/2020|2020-08-24|EPI\_ISL\_616571|Original|hCoV-19^^Syddanmark|Human|Department of Virus and Microbiological Special Diagnostics|Albertsen lab|Michaelsen|Denmark  
>Spike|hCoV-19/Netherlands/ZH-EMC-1033/2020|2020-11-18|EPI\_ISL\_722284|Original|hCoV-19^^Zuid Holland|Human|Dutch COVID-19 response team|Erasmus Medical Center|Oude Munnink|Netherlands  
>Spike|hCoV-19/USA/WA-UW-1919/2020|2020-03-23|EPI\_ISL\_424296|Original|hCoV-19^^Washington|Human|UW Virology Lab|UW Virology Lab|Roychoudhury|USA

>Spike|hCoV-19/Denmark/DCGC-22146/2020|2020-12-14|EPI\_ISL\_758584|Original|hCoV-19^^Hovedstaden|Human|Department of Virus and Microbiological Special Diagnostics|Albertsen Lab|Michaelsen|Denmark

>Spike|hCoV-19/Italy/BAS-UniMI-3725/2020|2020-04-03|EPI\_ISL\_477197|Original|hCoV-19^^Basilicata|Human|Istituto Zooprofilattico Sperimentale Puglia e Basilicata;|Beaconlab (Bioinformatics|Chiara|Italy

>Spike|hCoV-19/England/205161120/2020|2020-12-17|EPI\_ISL\_766430|Original|hCoV-19^^England|Human|Respiratory Virus Unit|COVID-19 Genomics UK (COG-UK) Consortium|Platt|United Kingdom

>Spike|hCoV-19/England/MILK-B0505B/2020|2020-10-24|EPI\_ISL\_638534|Original|hCoV-19^^England|Human|Virology Department|COVID-19 Genomics UK (COG-UK) Consortium|de Silva|United Kingdom

>Spike|hCoV-19/Luxembourg/LNS0043293/2020|2020-10-26|EPI\_ISL\_739702|Original|hCoV-19^^Luxembourg|Human|Laboratoire national de sant\u00e9|Laboratoire national de sant\u00e9|Wienecke-Baldacchino|Luxembourg

>Spike|hCoV-19/England/ALDP-CB6AD2/2020|2020-12-19|EPI\_ISL\_761691|Original|hCoV-19^^England|Human|Lighthouse Lab in Alderley Park|Wellcome Sanger Institute for the COVID-19 Genomics UK (COG-UK) Consortium|Davies|United Kingdom

>Spike|hCoV-19/England/CAMC-AB1DB2/2020|2020-10-23|EPI\_ISL\_623657|Original|hCoV-19^^England|Human|Lighthouse Lab in Cambridge|Wellcome Sanger Institute for the COVID-19 Genomics UK (COG-UK) consortium|Davies|United Kingdom

>Spike|hCoV-19/England/SHEF-C5896/2020|2020-09-09|EPI\_ISL\_540732|Original|hCoV-19^^England|Human|Virology Department|COVID-19 Genomics UK (COG-UK) Consortium|de Silva|United Kingdom

>Spike|hCoV-19/Australia/VIC2086/2020|2020-06-13|EPI\_ISL\_480698|Original|hCoV-19^^Victoria|Human|Victorian Infectious Diseases Reference Laboratory (VIDRL)|VIDRL and MDU-PHL|Schultz|Australia

>Spike|hCoV-19/England/SHEF-10D4A04/2020|2020-12-03|EPI\_ISL\_727970|Original|hCoV-19^^England|Human|Virology Department|COVID-19 Genomics UK (COG-UK) Consortium|de Silva|United Kingdom

>Spike|hCoV-19/England/20422146704/2020|2020-09-00|EPI\_ISL\_584055|Original|hCoV-19^^England|Human|Respiratory Virus Unit|Respiratory Virus Unit|Platt|United Kingdom

>Spike|hCoV-19/Italy/SIC-IZSBM193-88/2020|2020-06-00|EPI\_ISL\_582842|Original|hCoV-19^^Sicily|Human|Laboratorio di Riferimento Regionale della Sicilia Occidentale per l'Emergenza COVID-19|Istituto Zooprofilattico Sperimentale della Sicilia|Reale|Italy

>Spike|hCoV-19/USA/TX-DSHS-1485/2020|2020-06-22|EPI\_ISL\_676618|Original|hCoV-19^^Texas|Human|Texas Department of State Health Services|Texas Department of State Health Services|Rahman|USA

>Spike|hCoV-19/Denmark/DCGC-3370/2020|2020-08-31|EPI\_ISL\_616127|Original|hCoV-19^^Hovedstaden|Human|Department of Virus and Microbiological Special Diagnostics|Albertsen lab|Michaelsen|Denmark

>Spike|hCoV-19/Spain/MD-IBV-006420/2020|2020-04-05|EPI\_ISL\_510135|Original|hCoV-19^^Madrid|Human|Hospital General Universitario Gregorio Mara\u00f1\u00f3n|SeqCOVID-SPAIN consortium|IBV (CSIC)|Comas|Spain

>Spike|hCoV-19/Wales/ALDP-91D40B/2020|2020-06-23|EPI\_ISL\_552973|Original|hCoV-19^^Wales|Human|Lighthouse Lab in Alderley Park|Wellcome Sanger Institute for the COVID-19 Genomics UK (COG-UK) Consortium|Davies|United Kingdom

>Spike|hCoV-19/England/MILK-99C817/2020|2020-08-30|EPI\_ISL\_550790|Original|hCoV-19^^England|Human|Lighthouse Lab in Milton Keynes|Wellcome Sanger Institute for the COVID-19 Genomics UK (COG-UK) consortium|Davies|United Kingdom

>Spike|hCoV-19/England/20132047204/2020|2020-03-23|EPI\_ISL\_423781|Original|hCoV-19^^England|Human|Respiratory Virus Unit|Respiratory Virus Unit|Platt|United Kingdom

>Spike|hCoV-19/England/MILK-B391E2/2020|2020-11-01|EPI\_ISL\_652296|Original|hCoV-19^^England|Human|University of Exeter|COVID-19 Genomics UK (COG-UK) Consortium|Temperton|United Kingdom

>Spike|hCoV-19/England/BRIS-12FA48/2020|2020-04-03|EPI\_ISL\_488251|Original|hCoV-19^^England|Human|PHE South West Regional Laboratory|Wellcome Sanger Institute for the COVID-19 Genomics UK (COG-UK) consortium|Davies|United Kingdom



>Spike|hCoV-19/USA/DC-HP00116/2020|2020-03-26|EPI\_ISL\_457809|Original|hCoV-19^^District of Columbia|Human|Johns Hopkins Hospital Department of Pathology|Johns Hopkins Hospital Department of Pathology|Ramakrishnan|USA

>Spike|hCoV-19/England/SHEF-CB168/2020|2020-06-16|EPI\_ISL\_479246|Original|hCoV-19^^England|Human|Virology Department|COVID-19 Genomics UK (COG-UK) Consortium|de Silva|United Kingdom

>Spike|hCoV-19/England/ALDP-925FC3/2020|2020-06-23|EPI\_ISL\_551471|Original|hCoV-19^^England|Human|Lighthouse Lab in Alderley Park|Wellcome Sanger Institute for the COVID-19 Genomics UK (COG-UK) consortium|Davies|United Kingdom

>Spike|hCoV-19/USA/CA-LACPHL-AF00001/2020|2020-11-26|EPI\_ISL\_737236|Original|hCoV-19^^California|Human|Los Angeles County PHL|Los Angeles County PHL|Hemarajata|USA

>Spike|hCoV-19/England/MILK-BB249D/2020|2020-11-18|EPI\_ISL\_720166|Original|hCoV-19^^England|Human|Lighthouse Lab in Milton Keynes|Wellcome Sanger Institute for the COVID-19 Genomics UK (COG-UK) Consortium|Davies|United Kingdom

>Spike|hCoV-19/Belgium/ULG-11050/2020|2020-12-01|EPI\_ISL\_722960|Original|hCoV-19^^Liege|Human|Department of Clinical Microbiology|GIGA Medical Genomics|Durkin|Belgium

>Spike|hCoV-19/USA/MN-MDH-1659/2020|2020-04-02|EPI\_ISL\_560746|Original|hCoV-19^^Minnesota|Human|Minnesota Department of Health|Minnesota Department of Health|Garfin|USA

>Spike|hCoV-19/England/QEUEH-9FF96A/2020|2020-09-30|EPI\_ISL\_600196|Original|hCoV-19^^England|Human|Lighthouse Lab in Glasgow|Wellcome Sanger Institute for the COVID-19 Genomics UK (COG-UK) consortium|Davies|United Kingdom

>Spike|hCoV-19/USA/WA-OHSU-2909/2020|2020-09-04|EPI\_ISL\_667408|Original|hCoV-19^^Washington|Human|OHSU Lab Services Molecular Microbiology Lab|Oregon SARS-CoV-2 Genome Sequencing Center|O'Roak|USA

>Spike|hCoV-19/Wuhan/HB-WH4-210/2020|2020-03-19|EPI\_ISL\_454959|Original|hCoV-19^^Hubei|Human|Wuhan Chain Medical Labs (CMLabs)|State Key Laboratory of Biotherapy of Sichuan University|Tang|China

>Spike|hCoV-19/USA/NY-Wadsworth-248016-01/2020|2020-10-18|EPI\_ISL\_734366|Original|hCoV-19^^New York|Human|Wadsworth Center|Wadsworth Center|Lasek-Nesselquist|USA

>Spike|hCoV-19/Scotland/CVR5907/2020|2020-11-17|EPI\_ISL\_703749|Original|hCoV-19^^Scotland|Human|West of Scotland Specialist Virology Centre|COVID-19 Genomics UK (COG-UK) Consortium|Robertson|United Kingdom

>Spike|hCoV-19/England/CAMC-B0893F/2020|2020-10-29|EPI\_ISL\_643663|Original|hCoV-19^^England|Human|Lighthouse Lab in Cambridge|Wellcome Sanger Institute for the COVID-19 Genomics UK (COG-UK) Consortium|Davies|United Kingdom

>Spike|hCoV-19/England/QEUEH-C93992/2020|2020-12-19|EPI\_ISL\_777196|Original|hCoV-19^^England|Human|Lighthouse Lab in Glasgow|Wellcome Sanger Institute for the COVID-19 Genomics UK (COG-UK) Consortium|Davies|United Kingdom

>Spike|hCoV-19/England/NORW-ECB18/2020|2020-06-04|EPI\_ISL\_472334|Original|hCoV-19^^England|Human|Quadram Institute Bioscience|COVID-19 Genomics UK (COG-UK) Consortium|Alikhan|United Kingdom

>Spike|hCoV-19/USA/TX-HMH-MCoV-18145/2020|2020-11-11|EPI\_ISL\_784493|Original|hCoV-19^^Texas|Human|Houston Methodist Hospital|Houston Methodist Hospital|Long|USA

>Spike|hCoV-19/England/ALDP-9CDEC0/2020|2020-09-16|EPI\_ISL\_566245|Original|hCoV-19^^England|Human|Lighthouse Lab in Alderley Park|Wellcome Sanger Institute for the COVID-19 Genomics UK (COG-UK) consortium|Davies|United Kingdom

>Spike|hCoV-19/Wales/PHWC-16B8BF/2020|2020-09-21|EPI\_ISL\_573913|Original|hCoV-19^^Wales|Human|Wales Specialist Virology Centre Sequencing lab|COVID-19 Genomics UK (COG-UK) Consortium|Moore|United Kingdom

>Spike|hCoV-19/New Zealand/20VR1812/2020|2020-03-28|EPI\_ISL\_579137|Original|hCoV-19^^Southern|Human|Southern Community Labs Dunedin|Institute of Environmental Science and Research (ESR)|Wang|New Zealand

>Spike|hCoV-19/Wales/PHWC-31473/2020|2020-04-11|EPI\_ISL\_446450|Original|hCoV-19^^Wales|Human|Wales Specialist Virology Centre|Public Health Wales Microbiology Cardiff|Moore|United Kingdom

>Spike|hCoV-19/England/MILK-B38884/2020|2020-11-01|EPI\_ISL\_658814|Original|hCoV-19^^England|Human|Lighthouse Lab in Milton Keynes|Wellcome Sanger Institute for the COVID-19 Genomics UK (COG-UK) Consortium|Davies|United Kingdom

>Spike|hCoV-19/USA/TX-HMH-MCoV-11655/2020|2020-09-11|EPI\_ISL\_790076|Original|hCoV-19^^Texas|Human|Houston Methodist Hospital|Houston Methodist Hospital|Long|USA

>Spike|hCoV-19/USA/LA-EVTL044/2020|2020-05-01|EPI\_ISL\_451205|Original|hCoV-19^^Louisiana|Human|LSUHS Emerging Viral Threat Laboratory|Microbial Genome Sequencing Center|Kamil|USA

>Spike|hCoV-19/France/PAC-IHU-0130/2020|2020-03-12|EPI\_ISL\_569326|Original|hCoV-19^^Provence-Alpes-C\u00f4te-d\u2019Azur|Human|MEPHI|MEPHI|Levasseur|France

>Spike|hCoV-19/England/OXON-B2D42/2020|2020-04-08|EPI\_ISL\_534812|Original|hCoV-19^^England|Human|Oxford Viromics|COVID-19 Genomics UK (COG-UK) Consortium|Golubchik|United Kingdom

>Spike|hCoV-19/USA/MD-MDH-0238/2020|2020-09-28|EPI\_ISL\_602261|Original|hCoV-19^^Maryland|Human|MD PHL|MD PHL|Keller|USA

>Spike|hCoV-19/Spain/MD-IBV-97010062/2020|2020-03-27|EPI\_ISL\_779757|Original|hCoV-19^^Madrid|Human|IdISSC/Hospital Cl\u00e9nico San Carlos de Madrid\u200b|SeqCOVID-SPAIN consortium/IBV (CSIC)|Comas|Spain

>Spike|hCoV-19/SaudiArabia/KAUST-MADINAH276/2020|2020-04-01|EPI\_ISL\_513123|Original|hCoV-19^^Madinah|Human|Pathogen Genomics Lab King Abdullah University of Science and Technology(KAUST)|Pathogen Genomics Lab King Abdullah University of Science and Technology(KAUST)|Mohamed Ghazzali|Saudi Arabia

>Spike|hCoV-19/USA/UT-UPHL-2012190289/2020|2020-08-08|EPI\_ISL\_745800|Original|hCoV-19^^Utah|Human|Ginkgo Bioworks Clinical Laboratory|Utah Public Health Laboratory|Young|USA

>Spike|hCoV-19/England/MILK-992978/2020|2020-08-27|EPI\_ISL\_551965|Original|hCoV-19^^England|Human|Lighthouse Lab in Milton Keynes|Wellcome Sanger Institute for the COVID-19 Genomics UK (COG-UK) consortium|Davies|United Kingdom

>Spike|hCoV-19/Denmark/DCGC-7406/2020|2020-10-12|EPI\_ISL\_619102|Original|hCoV-19^^Hovedstaden|Human|Department of Virus and Microbiological Special Diagnostics|Albertsen lab|Michaelsen|Denmark

>Spike|hCoV-19/Netherlands/ZH-EMC-370/2020|2020-08-02|EPI\_ISL\_523710|Original|hCoV-19^^Zuid Holland|Human|Dutch COVID-19 response team|Erasmus Medical Center|Oude Munnink|Netherlands

>Spike|hCoV-19/Switzerland/BE-ETHZ-380384/2020|2020-11-23|EPI\_ISL\_721679|Original|hCoV-19^^Bern|Human|Viollier AG|Department of Biosystems Science and Engineering|Nadeau|Switzerland

>Spike|hCoV-19/England/NOTT-1129C3/2020|2020-04-22|EPI\_ISL\_493571|Original|hCoV-19^^England|Human|Lincolnshire Hospitals and DeepSeq Nottingham|COVID-19 Genomics UK (COG-UK) Consortium|Loose|United Kingdom

>Spike|hCoV-19/USA/OH-ODH-SC35158/2020|2020-04-23|EPI\_ISL\_778859|Original|hCoV-19^^Ohio|Human|Ohio Department of Health Laboratory|Ohio Department of Health Laboratory|Holmes|USA

>Spike|hCoV-19/England/CAMB-83366/2020|2020-04-11|EPI\_ISL\_443440|Original|hCoV-19^^England|Human|Department of Pathology|Wellcome Sanger Institute for the COVID-19 Genomics UK (COG-UK) consortium|Amato|United Kingdom

>Spike|hCoV-19/USA/TX-HMH-MCoV-19004/2020|2020-11-25|EPI\_ISL\_785277|Original|hCoV-19^^Texas|Human|Houston Methodist Hospital|Houston Methodist Hospital|Long|USA

>Spike|hCoV-19/USA/CA-CZB-13661/2020|2020-11-04|EPI\_ISL\_738716|Original|hCoV-19^^California|Human|Santa Clara County Public Health Laboratory|Chan-Zuckerberg Biohub|Kamm|USA

>Spike|hCoV-19/USA/MN-MDH-1181/2020|2020-06-03|EPI\_ISL\_476766|Original|hCoV-19^^Minnesota|Human|Minnesota Department of Health|Minnesota Department of Health|Garfin|USA

>Spike|hCoV-19/Italy/VEN-UniVR-47/2020|2020-03-12|EPI\_ISL\_751357|Original|hCoV-19^^Veneto|Human|IRCCS Sacro Cuore Don Calabria Hospital|University of Verona|Mori|Italy

>Spike|hCoV-19/Belgium/regA-0512549/2020|2020-05-12|EPI\_ISL\_734725|Original|hCoV-19^^Blaton|Human|UZ Leuven|KU Leuven|Maes|Belgium

>Spike|hCoV-19/Scotland/QEUH-9901CD/2020|2020-08-26|EPI\_ISL\_568327|Original|hCoV-19^^Scotland|Human|Lighthouse Lab in Glasgow|Wellcome Sanger Institute for the COVID-19 Genomics UK (COG-UK) consortium|Davies|United Kingdom

>Spike|hCoV-19/Denmark/DCGC-3999/2020|2020-09-14|EPI\_ISL\_615769|Original|hCoV-19^^Nordjylland|Human|Department of Virus and Microbiological Special Diagnostics|Albertsen lab|Michaelsen|Denmark

>Spike|hCoV-19/USA/UT-QDX-77/2020|2020-03-13|EPI\_ISL\_467924|Original|hCoV-19^^Utah|Human|Quest Diagnostics|Quest Diagnostics|Kagan|USA

>Spike|hCoV-19/England/MILK-A45885/2020|2020-10-06|EPI\_ISL\_598569|Original|hCoV-19^^England|Human|Lighthouse Lab in Milton Keynes|Wellcome Sanger Institute for the COVID-19 Genomics UK (COG-UK) consortium|Davies|United Kingdom

>Spike|hCoV-19/Belgium/regA-0917987/2020|2020-09-17|EPI\_ISL\_734979|Original|hCoV-19^^Deurne|Human|UZ Leuven|KU Leuven|Maes|Belgium

>Spike|hCoV-19/England/QEUH-9C9310/2020|2020-09-13|EPI\_ISL\_567317|Original|hCoV-19^^England|Human|Lighthouse Lab in Glasgow|Wellcome Sanger Institute for the COVID-19 Genomics UK (COG-UK) consortium|Davies|United Kingdom

>Spike|hCoV-19/USA/TX-HMH-MCoV-15287/2020|2020-10-22|EPI\_ISL\_786771|Original|hCoV-19^^Texas|Human|Houston Methodist Hospital|Houston Methodist Hospital|Long|USA

>Spike|hCoV-19/England/ALDP-C23241/2020|2020-12-06|EPI\_ISL\_733737|Original|hCoV-19^^England|Human|Lighthouse Lab in Alderley Park|Wellcome Sanger Institute for the COVID-19 Genomics UK (COG-UK) Consortium|Davies|United Kingdom

>Spike|hCoV-19/England/NORT-296CBE/2020|2020-04-28|EPI\_ISL\_484277|Original|hCoV-19^^England|Human|Northumbria University / South Tees Hospitals NHS Foundation Trust / North Cumbria Integrated Care NHS Foundation Trust / North Tees and Hartlepool NHS Foundation Trust / Newcastle Hospitals NHS Foundation Trust|COVID-19 Genomics UK (COG-UK) Consortium|Bashton|United Kingdom

>Spike|hCoV-19/USA/AR-CDC-4374/2020|2020-07-03|EPI\_ISL\_527652|Original|hCoV-19^^Arkansas|Human|AR Dept. of Health-Public Health Lab|Pathogen Discovery|Queen|USA

>Spike|hCoV-19/Iran/K1r-108/2020|2020-03-20|EPI\_ISL\_568491|Original|hCoV-19^^Iran|Human|Virology|Virology|Ranjbar|Iran

>Spike|hCoV-19/Scotland/EDB8583/2020|2020-10-21|EPI\_ISL\_651964|Original|hCoV-19^^Scotland|Human|Virology Department|COVID-19 Genomics UK (COG-UK) Consortium|McHugh|United Kingdom

>Spike|hCoV-19/Hong Kong/VM20127340/2020|2020-09-30|EPI\_ISL\_730587|Original|hCoV-19^^Hong Kong|Human|Pamela Youde Nethersole Eastern Hospital|Hong Kong Department of Health|Mak|China

>Spike|hCoV-19/England/NORT-292520/2020|2020-05-11|EPI\_ISL\_489118|Original|hCoV-19^^England|Human|NU-OMICS DNA Sequencing research facility|Wellcome Sanger Institute for the COVID-19 Genomics UK (COG-UK) consortium|Davies|United Kingdom

>Spike|hCoV-19/England/20132017804/2020|2020-03-22|EPI\_ISL\_423729|Original|hCoV-19^^England|Human|Respiratory Virus Unit|Respiratory Virus Unit|Platt|United Kingdom

>Spike|hCoV-19/England/QEUH-BA0447/2020|2020-11-18|EPI\_ISL\_719763|Original|hCoV-19^^England|Human|Lighthouse Lab in Glasgow|Wellcome Sanger Institute for the COVID-19 Genomics UK (COG-UK) Consortium|Davies|United Kingdom

>Spike|hCoV-19/England/MILK-957C94/2020|2020-06-13|EPI\_ISL\_554826|Original|hCoV-19^^England|Human|Lighthouse Lab in Milton Keynes|Wellcome Sanger Institute for the COVID-19 Genomics UK (COG-UK) consortium|Davies|United Kingdom

>Spike|hCoV-19/Wales/PHWC-48E3FE/2020|2020-11-11|EPI\_ISL\_680854|Original|hCoV-19^^Wales|Human|Wales Specialist Virology Centre Sequencing lab|COVID-19 Genomics UK (COG-UK) Consortium|Moore|United Kingdom

>Spike|hCoV-19/USA/FL-BPHL-1167/2020|2020-08-19|EPI\_ISL\_526653|Original|hCoV-19^^Florida|Human|Florida Bureau of Public Health Laboratories|Florida Bureau of Public Health Laboratories|Blanton|USA

>Spike|hCoV-19/SaudiArabia/KAUST-JEDDAH471/2020|2020-08-04|EPI\_ISL\_512926|Original|hCoV-19^^Jeddah|Human|Pathogen Genomics Lab King Abdullah University of Science and Technology(KAUST)|Pathogen Genomics Lab King Abdullah University of Science and Technology(KAUST)|Mohamed Ghazzali|Saudi Arabia

>Spike|hCoV-19/USA/CA-CHLA-PLM97776917/2020|2020-11-29|EPI\_ISL\_753650|Original|hCoV-19^^California|Human|Clinical virology Laboratory|Center for Personalized Medicine|Dien Bard|USA

>Spike|hCoV-19/England/CAMC-A3F6DF/2020|2020-10-04|EPI\_ISL\_609745|Original|hCoV-19^^England|Human|Lighthouse Lab in Cambridge|Wellcome Sanger Institute for the COVID-19 Genomics UK (COG-UK) consortium|Davies|United Kingdom

>Spike|hCoV-19/Spain/PV-IBV-001540/2020|2020-03-18|EPI\_ISL\_467120|Original|hCoV-19^^Basque Country|Human|Hospital Universitario Araba. Vitoria-Gasteiz|SeqCOVID-SPAIN consortium/IBV (CSIC) |Comas|Spain

>Spike|hCoV-19/England/20142018404/2020|2020-03-28|EPI\_ISL\_465926|Original|hCoV-19^^England|Human|Respiratory Virus Unit|Respiratory Virus Unit|Platt|United Kingdom

>Spike|hCoV-19/England/ALDP-C3A441/2020|2020-12-09|EPI\_ISL\_731083|Original|hCoV-19^^England|Human|Lighthouse Lab in Alderley Park|Wellcome Sanger Institute for the COVID-19 Genomics UK (COG-UK) Consortium|Davies|United Kingdom

>Spike|hCoV-19/USA/WA-S192/2020|2020-03-20|EPI\_ISL\_430230|Original|hCoV-19^^Washington|Human|Washington State Department of Health|Seattle Flu Study|Bedford|USA

>Spike|hCoV-19/Scotland/CVR2911/2020|2020-04-22|EPI\_ISL\_473625|Original|hCoV-19^^Scotland|Human|West of Scotland Specialist Virology Centre|COVID-19 Genomics UK (COG-UK) Consortium|Robertson|United Kingdom

>Spike|hCoV-19/England/SHEF-CD05A/2020|2020-03-27|EPI\_ISL\_432539|Original|hCoV-19^^England|Human|Virology Department|COVID-19 Genomics UK (COG-UK) Consortium|de Silva|United Kingdom

>Spike|hCoV-19/Wales/PHWC-15CAD9/2020|2020-03-27|EPI\_ISL\_472579|Original|hCoV-19^^Wales|Human|Wales Specialist Virology Centre Sequencing lab|COVID-19 Genomics UK (COG-UK) Consortium|Moore|United Kingdom

>Spike|hCoV-19/Japan/PG-3666/2020|2020-04-00|EPI\_ISL\_691919|Original|hCoV-19^^Japan|Human|Pathogen Genomics Center|Pathogen Genomics Center|Sekizuka|Japan

>Spike|hCoV-19/Denmark/DCGC-17709/2020|2020-12-14|EPI\_ISL\_751159|Original|hCoV-19^^Syddanmark|Human|Department of Virus and Microbiological Special Diagnostics|Albertsen Lab|Michaelsen|Denmark

>Spike|hCoV-19/USA/OK-CDC-2-3693599/2020|2020-11-17|EPI\_ISL\_747155|Original|hCoV-19^^Oklahoma|Human|Respiratory Viruses Branch|Respiratory Viruses Branch|Queen|USA

>Spike|hCoV-19/England/QEUH-CC93D1/2020|2020-12-19|EPI\_ISL\_781982|Original|hCoV-19^^England|Human|Lighthouse Lab in Glasgow|Wellcome Sanger Institute for the COVID-19 Genomics UK (COG-UK) Consortium|Davies|United Kingdom

>Spike|hCoV-19/USA/CA-CZB-1617/2020|2020-04-17|EPI\_ISL\_468546|Original|hCoV-19^^California|Human|San Joaquin County Public Health Lab|Chan-Zuckerberg Biohub|Hao|USA

>Spike|hCoV-19/Denmark/DCGC-3166/2020|2020-08-31|EPI\_ISL\_615988|Original|hCoV-19^^Hovedstaden|Human|Department of Virus and Microbiological Special Diagnostics|Albertsen lab|Michaelsen|Denmark

>Spike|hCoV-19/England/ALDP-8B4249/2020|2020-06-29|EPI\_ISL\_557021|Original|hCoV-19^^England|Human|Lighthouse Lab in Alderley Park|Wellcome Sanger Institute for the COVID-19 Genomics UK (COG-UK) consortium|Davies|United Kingdom

>Spike|hCoV-19/Canada/ON-PHL-20-01792/2020|2020-07-00|EPI\_ISL\_636942|Original|hCoV-19^^Ontario|Human|Public Health Ontario Laboratory|Public Health Ontario Laboratory|Guthrie|Canada

>Spike|hCoV-19/Switzerland/BL-UHB-42194939/2020|2020-03-17|EPI\_ISL\_528169|Original|hCoV-19^^Basel-Land|Human|University Hospital Basel|University Hospital Basel|Roloff Handschin|Switzerland

>Spike|hCoV-19/England/ALDP-BC87C8/2020|2020-11-23|EPI\_ISL\_721292|Original|hCoV-19^^England|Human|Lighthouse Lab in Alderley Park|Wellcome Sanger Institute for the COVID-19 Genomics UK (COG-UK) Consortium|Davies|United Kingdom

>Spike|hCoV-19/England/ALDP-B5B2AB/2020|2020-11-08|EPI\_ISL\_655527|Original|hCoV-19^^England|Human|Lighthouse Lab in Alderley Park|Wellcome Sanger Institute for the COVID-19 Genomics UK (COG-UK) Consortium|Davies|United Kingdom

>Spike|hCoV-19/USA/TX-HMH-MCoV-8569/2020|2020-07-01|EPI\_ISL\_780631|Original|hCoV-19^^Texas|Human|Houston Methodist Hospital|Houston Methodist Hospital|Long|USA

>Spike|hCoV-19/Scotland/CVR5582/2020|2020-10-28|EPI\_ISL\_651536|Original|hCoV-19^^Scotland|Human|West of Scotland Specialist Virology Centre|COVID-19 Genomics UK (COG-UK) Consortium|Robertson|United Kingdom

>Spike|hCoV-19/England/ALDP-B24FA4/2020|2020-11-04|EPI\_ISL\_646666|Original|hCoV-19^^England|Human|Lighthouse Lab in Alderley Park|Wellcome Sanger Institute for the COVID-19 Genomics UK (COG-UK) Consortium|Davies|United Kingdom

>Spike|hCoV-19/Germany/BE-ChVir-D710-10/2020|2020-03-07|EPI\_ISL\_516638|Original|hCoV-19^^Berlin|Human|Charite\u0301 Universita\u0301tsmedizin Berlin|Charite\u0301 Universita\u0301tsmedizin Berlin|Muehlemann|Germany

>Spike|hCoV-19/England/BRIS-1853768/2020|2020-04-13|EPI\_ISL\_492268|Original|hCoV-19^^England|Human|PHE South West Regional Laboratory|Wellcome Sanger Institute for the COVID-19 Genomics UK (COG-UK) consortium|Davies|United Kingdom

>Spike|hCoV-19/USA/NY-Wadsworth-292446-01/2020|2020-12-04|EPI\_ISL\_767684|Original|hCoV-19^^New York|Human|MEMORIAL SLOAN KETTERING CANCER CENTER|Wadsworth Center|Lasek-Nesselquist|USA

>Spike|hCoV-19/Spain/MD-H12-85/2020|2020-04-15|EPI\_ISL\_530014|Original|hCoV-19^^Madrid|Human|Hospital Universitario 12 de Octubre|Hospital Universitario 12 de Octubre|Viedma|Spain

>Spike|hCoV-19/England/ALDP-9BEA55/2020|2020-09-10|EPI\_ISL\_568187|Original|hCoV-19^^England|Human|Lighthouse Lab in Alderley Park|Wellcome Sanger Institute for the COVID-19 Genomics UK (COG-UK) consortium|Davies|United Kingdom

>Spike|hCoV-19/England/GSTT-265E2F2/2020|2020-03-12|EPI\_ISL\_484184|Original|hCoV-19^^England|Human|Centre for Clinical Infection and Diagnostics Research and Genomics Innovation Unit|COVID-19 Genomics UK (COG-UK) Consortium|Awan|United Kingdom

>Spike|hCoV-19/Spain/RI-IBV-99010970/2020|2020-11-09|EPI\_ISL\_732798|Original|hCoV-19^^La Rioja|Human|Centro de Investigaci\u00f3n Biom\u00e9dica de La Rioja - Hospital San Pedro Logro\u00f1o|SeqCOVID-SPAIN consortium/IBV (CSIC)|Comas|Spain

>Spike|hCoV-19/Saudi Arabia/KAUST-JEDDAH632/2020|2020-04-29|EPI\_ISL\_512988|Original|hCoV-19^^Jeddah|Human|Pathogen Genomics Lab King Abdullah University of Science and Technology(KAUST)|Pathogen Genomics Lab King Abdullah University of Science and Technology(KAUST)|Mohamed Ghazzali|Saudi Arabia

>Spike|hCoV-19/USA/MI-UM-10036619785/2020|2020-10-26|EPI\_ISL\_650021|Original|hCoV-19^^Michigan|Human|University of Michigan Clinical Microbiology Laboratory|Lauring Lab|Valesano|USA

>Spike|hCoV-19/England/QEUA-AF27F3/2020|2020-10-30|EPI\_ISL\_662743|Original|hCoV-19^^England|Human|Lighthouse Lab in Glasgow|Wellcome Sanger Institute for the COVID-19 Genomics UK (COG-UK) Consortium|Davies|United Kingdom

>Spike|hCoV-19/South Africa/KRISP-K001035/2020|2020-07-17|EPI\_ISL\_509301|Original|hCoV-19^^KwaZulu-Natal|Human|NHLs-IALCH|KRISP|de Oliveira|South Africa

>Spike|hCoV-19/USA/UT-UPHL-2012441898/2020|2020-10-02|EPI\_ISL\_746147|Original|hCoV-19^^Utah|Human|Ginkgo Bioworks Clinical Laboratory|Utah Public Health Laboratory|Young|USA

>Spike|hCoV-19/England/QEUA-C16029/2020|2020-12-06|EPI\_ISL\_709384|Original|hCoV-19^^England|Human|Lighthouse Lab in Glasgow|Wellcome Sanger Institute for the COVID-19 Genomics UK (COG-UK) Consortium|Davies|United Kingdom

>Spike|hCoV-19/Japan/PG-7334/2020|2020-08-00|EPI\_ISL\_688437|Original|hCoV-19^^Japan|Human|Pathogen Genomics Center|Pathogen Genomics Center|Sekizuka|Japan

>Spike|hCoV-19/USA/MI-MDHHS-SC21773/2020|2020-08-13|EPI\_ISL\_529891|Original|hCoV-19^^Michigan|Human|Michigan Department of Health and Human Services|Michigan Department of Health and Human Services|Blankenship|USA

>Spike|hCoV-19/USA/WA-UW-10442/2020|2020-06-05|EPI\_ISL\_570309|Original|hCoV-19^^Washington|Human|UW Virology Lab|UW Virology Lab|Roychoudhury|USA

>Spike|hCoV-19/Wales/PHWC-2C0B3/2020|2020-04-04|EPI\_ISL\_474272|Original|hCoV-19^^Wales|Human|Originating lab|COVID-19 Genomics UK (COG-UK) Consortium|Moore|United Kingdom

>Spike|hCoV-19/Spain/CT-IBV-99009921/2020|2020-08-11|EPI\_ISL\_660317|Original|hCoV-19^^Catalunya|Human|Servicio de Microbiolog\u00eda|SeqCOVID-SPAIN consortium/IBV (CSIC)|Comas|Spain

>Spike|hCoV-19/Japan/NGY-NNH-041/2020|2020-08-05|EPI\_ISL\_637007|Original|hCoV-19^^Aichi|Human|Department of Infectious Diseases and Immunology|Clinical Research Center|Iwatani|Japan

>Spike|hCoV-19/England/LEED-2A8BDA/2020|2020-04-03|EPI\_ISL\_539037|Original|hCoV-19^^England|Human|Leeds Teaching Hospitals NHS Trust and Public Health England|Wellcome Sanger Institute for the COVID-19 Genomics UK (COG-UK) consortium|Davies|United Kingdom

>Spike|hCoV-19/England/LOND-DAF02/2020|2020-11-15|EPI\_ISL\_724729|Original|hCoV-19^^England|Human|University College London|COVID-19 Genomics UK (COG-UK) Consortium|Roy|United Kingdom

>Spike|hCoV-19/USA/WA-S2646/2020|2020-06-20|EPI\_ISL\_497278|Original|hCoV-19^^Washington|Human|Washington State Department of Health|Seattle Flu Study|Lee|USA

>Spike|hCoV-19/England/ALDP-BC8A0B/2020|2020-11-22|EPI\_ISL\_721464|Original|hCoV-19^^England|Human|Lighthouse Lab in Alderley Park|Wellcome Sanger Institute for the COVID-19 Genomics UK (COG-UK) Consortium|Davies|United Kingdom

>Spike|hCoV-19/Wales/PHWC-49D58D/2020|2020-12-11|EPI\_ISL\_742801|Original|hCoV-19^^Wales|Human|Wales Specialist Virology Centre Sequencing lab|COVID-19 Genomics UK (COG-UK) Consortium|Moore|United Kingdom

>Spike|hCoV-19/England/ALDP-C3C88F/2020|2020-12-10|EPI\_ISL\_731595|Original|hCoV-19^^England|Human|Lighthouse Lab in Alderley Park|Wellcome Sanger Institute for the COVID-19 Genomics UK (COG-UK) Consortium|Davies|United Kingdom

>Spike|hCoV-19/USA/MN-MDH-1086/2020|2020-06-03|EPI\_ISL\_470766|Original|hCoV-19^^Minnesota|Human|Minnesota Department of Health|Minnesota Department of Health|Garfin|USA

>Spike|hCoV-19/Denmark/DCGC-20170/2020|2020-11-30|EPI\_ISL\_748025|Original|hCoV-19^^Sjaelland|Human|Department of Virus and Microbiological Special Diagnostics|Albertsen Lab|Michaelsen|Denmark

>Spike|hCoV-19/England/MILK-9AADB/2020|2020-09-01|EPI\_ISL\_550796|Original|hCoV-19^^England|Human|Lighthouse Lab in Milton Keynes|Wellcome Sanger Institute for the COVID-19 Genomics UK (COG-UK) consortium|Davies|United Kingdom

>Spike|hCoV-19/Wales/PHWC-484CA2/2020|2020-10-21|EPI\_ISL\_628095|Original|hCoV-19^^Wales|Human|Wales Specialist Virology Centre Sequencing lab|COVID-19 Genomics UK (COG-UK) Consortium|Moore|United Kingdom

>Spike|hCoV-19/Norway/4881/2020|2020-10-25|EPI\_ISL\_775321|Original|hCoV-19^^Nordland|Human|Nordland Hospital - Bodo|Norwegian Institute of Public Health|Vollan|Norway

>Spike|hCoV-19/USA/AZ-TG666160/2020|2020-05-01|EPI\_ISL\_696241|Original|hCoV-19^^Arizona|Human|Sonora Quest Laboratories|TGen North|French|USA

>Spike|hCoV-19/Russia/MOS-CRIE-13669866/2020|2020-11-09|EPI\_ISL\_754207|Original|hCoV-19^^Moscow|Human|Molecular diagnostic laboratory of Federal Budget Institution of Science \Central Research Institute of Epidemiology\ of The Federal Service on Customers' Rights Protection and Human Well-being Surveillance|Group of Genomics and Postgenomic Technologies of Central Research Institute of Epidemiology

>y|Korneenko|Russia

>Spike|hCoV-19/USA/WA-S1651/2020|2020-05-29|EPI\_ISL\_496077|Original|hCoV-19^^Washington|Human|Washington State Department of Health|Seattle Flu Study|Lee|USA

>Spike|hCoV-19/England/NOTT-11E323/2020|2020-11-27|EPI\_ISL\_725526|Original|hCoV-19^^England|Human|Queens Medical Centre|COVID-19 Genomics UK (COG-UK) Consortium|Loose|United Kingdom

>Spike|hCoV-19/England/NORT-294DF9/2020|2020-03-29|EPI\_ISL\_478617|Original|hCoV-19^^England|Human|Northumbria University / South Tees Hospitals NHS Foundation Trust / North Cumbria Integrated Care NHS Foundation Trust / North Tees and Hartlepool NHS Foundation Trust / Newcastle Hospitals NHS Foundation Trust|COVID-19 Genomics UK (COG-UK) Consortium|Bashton|United Kingdom

>Spike|hCoV-19/England/QEUA-96AE89/2020|2020-08-14|EPI\_ISL\_531443|Original|hCoV-19^^England|Human|Lighthouse Lab in Glasgow|Wellcome Sanger Institute for the COVID-19 Genomics UK (COG-UK) consortium|Davies|United Kingdom

>Spike|hCoV-19/USA/NY-NYUMC473/2020|2020-04-20|EPI\_ISL\_435538|Original|hCoV-19^^New York|Human|NYU Langone Health|Departments of Pathology and Medicine|Maurano|USA

>Spike|hCoV-19/Netherlands/NH-RIVM-20429/2020|2020-12-08|EPI\_ISL\_728649|Original|hCoV-19^^Noord-Holland|Human|Dutch COVID-19 response team|National Institute for Public Health and the Environment (RIVM)|Meijer|Netherlands

>Spike|hCoV-19/England/CAMB-7CC92/2020|2020-04-05|EPI\_ISL\_442157|Original|hCoV-19^^England|Human|Department of Pathology|Wellcome Sanger Institute for the COVID-19 Genomics UK (COG-UK) consortium|Amato|United Kingdom

>Spike|hCoV-19/England/ALDP-A9616C/2020|2020-10-19|EPI\_ISL\_624710|Original|hCoV-19^^England|Human|Lighthouse Lab in Alderley Park|Wellcome Sanger Institute for the COVID-19 Genomics UK (COG-UK) consortium|Davies|United Kingdom

>Spike|hCoV-19/England/CAMB-75F72/2020|2020-03-28|EPI\_ISL\_438352|Original|hCoV-19^^England|Human|Department of Pathology|Wellcome Sanger Institute for the COVID-19 Genomics UK (COG-UK) consortium|Amato|United Kingdom

>Spike|hCoV-19/Japan/PG-4229/2020|2020-07-00|EPI\_ISL\_691756|Original|hCoV-19^^Japan|Human|Fukuoka Institute of Health and Environmental Sciences|Pathogen Genomics Center|Sekizuka|Japan

>Spike|hCoV-19/England/MILK-C6204C/2020|2020-12-13|EPI\_ISL\_735838|Original|hCoV-19^^England|Human|Lighthouse Lab in Milton Keynes|Wellcome Sanger Institute for the COVID-19 Genomics UK (COG-UK) Consortium|Davies|United Kingdom

>Spike|hCoV-19/USA/TX-HMH-MCoV-12838/2020|2020-08-19|EPI\_ISL\_790560|Original|hCoV-19^^Texas|Human|Houston Methodist Hospital|Houston Methodist Hospital|Long|USA

>Spike|hCoV-19/Romania/ROSV-10281/2020|2020-04-25|EPI\_ISL\_678397|Original|hCoV-19^^Suceava|Human|Suceava County Emergency Hospital|\Stefan cel Mare\ University Metagenomics Lab|Lobiuc|Romania

>Spike|hCoV-19/England/ALDP-B1CCE4/2020|2020-11-01|EPI\_ISL\_645676|Original|hCoV-19^^England|Human|Lighthouse Lab in Alderley Park|Wellcome Sanger Institute for the COVID-19 Genomics UK (COG-UK) Consortium|Davies|United Kingdom

>Spike|hCoV-19/USA/CA-ALSR-3801/2020|2020-05-27|EPI\_ISL\_636208|Original|hCoV-19^^California|Human|San Diego County Public Health Laboratory|Andersen lab at Scripps Research|Gangavarapu|USA

>Spike|hCoV-19/Wales/PHWC-30EFE/2020|2020-04-09|EPI\_ISL\_474321|Original|hCoV-19^^Wales|Human|Originating lab|COVID-19 Genomics UK (COG-UK) Consortium|Moore|United Kingdom

>Spike|hCoV-19/England/ALDP-9B5960/2020|2020-08-28|EPI\_ISL\_590300|Original|hCoV-19^^England|Human|Lighthouse Lab in Alderley Park|Wellcome Sanger Institute for the COVID-19 Genomics UK (COG-UK) consortium|Davies|United Kingdom

>Spike|hCoV-19/Spain/MD-IBV-99007113/2020|2020-07-21|EPI\_ISL\_541887|Original|hCoV-19^^Madrid|Human|Hospital General Universitario Gregorio Mara\u00f1\u00f3n|SeqCOVID-SPAIN consortium/IBV (CSIC)|Comas|Spain

>Spike|hCoV-19/England/BRIS-1249A0/2020|2020-03-25|EPI\_ISL\_443801|Original|hCoV-19^^England|Human|PHE South West Regional Laboratory|Wellcome Sanger Institute for the COVID-19 Genomics UK (COG-UK) consortium|Amato|United Kingdom

>Spike|hCoV-19/Japan/PG-4062/2020|2020-07-00|EPI\_ISL\_692303|Original|hCoV-19^^Japan|Human|Sakai City Institute of Public Health|Pathogen Genomics Center|Sekizuka|Japan

>Spike|hCoV-19/Japan/PG-6745/2020|2020-08-00|EPI\_ISL\_687855|Original|hCoV-19^^Japan|Human|Pathogen Genomics Center|Pathogen Genomics Center|Sekizuka|Japan

>Spike|hCoV-19/England/ALDP-9011F4/2020|2020-06-24|EPI\_ISL\_557161|Original|hCoV-19^^England|Human|Lighthouse Lab in Alderley Park|Wellcome Sanger Institute for the COVID-19 Genomics UK (COG-UK) consortium|Davies|United Kingdom

>Spike|hCoV-19/USA/CA-IGI-0105/2020|2020-06-03|EPI\_ISL\_495127|Original|hCoV-19^^California|Human|Innovative Genomics Institute|Innovative Genomics Institute|Shivram|USA

>Spike|hCoV-19/England/MILK-B8F0C2/2020|2020-11-13|EPI\_ISL\_675318|Original|hCoV-19^^England|Human|Lighthouse Lab in Milton Keynes|Wellcome Sanger Institute for the COVID-19 Genomics UK (COG-UK) Consortium|Davies|United Kingdom

>Spike|hCoV-19/England/CAMC-949FD8/2020|2020-07-17|EPI\_ISL\_556738|Original|hCoV-19^^England|Human|Lighthouse Lab in Cambridge|Wellcome Sanger Institute for the COVID-19 Genomics UK (COG-UK) consortium|Davies|United Kingdom

>Spike|hCoV-19/Denmark/DCGC-19174/2020|2020-12-07|EPI\_ISL\_748793|Original|hCoV-19^^Hovedstaden|Human|Department of Virus and Microbiological Special Diagnostics|Albertsen Lab|Michaelsen|Denmark

>Spike|hCoV-19/USA/CO-CDPHE-2008170687/2020|2020-08-17|EPI\_ISL\_677249|Original|hCoV-19^^Colorado|Human|Colorado Department of Public Health and Environment|Colorado Department of Public Health and Environment|Bankers|USA

>Spike|hCoV-19/England/MILK-9EEC29/2020|2020-09-24|EPI\_ISL\_580749|Original|hCoV-19^^England|Human|Lighthouse Lab in Milton Keynes|Wellcome Sanger Institute for the COVID-19 Genomics UK (COG-UK) consortium|Davies|United Kingdom

>Spike|hCoV-19/England/ALDP-A6DF82/2020|2020-10-14|EPI\_ISL\_607868|Original|hCoV-19^^England|Human|Lighthouse Lab in Alderley Park|Wellcome Sanger Institute for the COVID-19 Genomics UK (COG-UK) consortium|Davies|United Kingdom

>Spike|hCoV-19/England/ALDP-B7694B/2020|2020-11-12|EPI\_ISL\_723786|Original|hCoV-19^^England|Human|Oxford Viromics|COVID-19 Genomics UK (COG-UK) Consortium|Golubchik|United Kingdom

>Spike|hCoV-19/USA/TX-HMH-7203/2020|2020-06-29|EPI\_ISL\_546594|Original|hCoV-19^^Texas|Human|Houston Methodist Hospital|Houston Methodist Hospital|Long|USA

>Spike|hCoV-19/USA/MN-MDH-1639/2020|2020-05-21|EPI\_ISL\_539833|Original|hCoV-19^^Minnesota|Human|Minnesota Department of Health|Minnesota Department of Health|Garfin|USA

>Spike|hCoV-19/England/CAMB-84BE5/2020|2020-03-12|EPI\_ISL\_440503|Original|hCoV-19^^England|Human|Department of Pathology|Wellcome Sanger Institute for the COVID-19 Genomics UK (COG-UK) consortium|Amato|United Kingdom

>Spike|hCoV-19/England/OXON-ACC5D/2020|2020-04-05|EPI\_ISL\_448521|Original|hCoV-19^^England|Human|Oxford Viromics|COVID-19 Genomics UK (COG-UK) Consortium|Golubchik|United Kingdom

>Spike|hCoV-19/Uganda/UG052/2020|2020-05-07|EPI\_ISL\_737969|Original|hCoV-19^^Uganda|Human|Uganda Central Public Health Lab and Uganda Virus Research Institute|MRC/UVRI & LSHTM Uganda Research Unit|Cotten|Uganda

>Spike|hCoV-19/USA/TX-HMH-MCoV-11262/2020|2020-09-03|EPI\_ISL\_789752|Original|hCoV-19^^Texas|Human|Houston Methodist Hospital|Houston Methodist Hospital|Long|USA

>Spike|hCoV-19/USA/CA-ALSR-1187/2020|2020-04-28|EPI\_ISL\_494423|Original|hCoV-19^^California|Human|San Diego County Public Health Laboratory|Andersen lab at Scripps Research|Gangavarapu|USA

>Spike|hCoV-19/England/BRIS-123ABD/2020|2020-04-07|EPI\_ISL\_442800|Original|hCoV-19^^England|Human|PHE South West Regional Laboratory|Wellcome Sanger Institute for the COVID-19 Genomics UK (COG-UK) consortium|Amato|United Kingdom

>Spike|hCoV-19/USA/MI-MDHHS-SC20613/2020|2020-04-30|EPI\_ISL\_462695|Original|hCoV-19^^Michigan|Human|Michigan Department of Health and Human Services|Michigan Department of Health and Human Services|Blankenship|USA

>Spike|hCoV-19/England/SHEF-CA336/2020|2020-10-15|EPI\_ISL\_613382|Original|hCoV-19^^England|Human|Virology Department|COVID-19 Genomics UK (COG-UK) Consortium|de Silva|United Kingdom

>Spike|hCoV-19/Germany/NW-HHU-292/2020|2020-09-30|EPI\_ISL\_770767|Original|hCoV-19^^North Rhine-Westphalia|Human|ZOTZ KLIMAS MVZ D\u00f0fcsseldorf-Centrum GbR \u00dcBAG f\u00f0fcr Labormedizin|Center of Medical Microbiology|Wienemann|Germany

>Spike|hCoV-19/Northern Ireland/NIRE-103BED/2020|2020-04-16|EPI\_ISL\_489243|Original|hCoV-19^^Northern Ireland|Human|Regional Virus Laboratory|Wellcome Sanger Institute for the COVID-19 Genomics UK (COG-UK) consortium|Davies|United Kingdom

>Spike|hCoV-19/Switzerland/BE-ETHZ-332178/2020|2020-10-22|EPI\_ISL\_614932|Original|hCoV-19^^Bern|Human|Viollier AG|Department of Biosystems Science and Engineering|Nadeau|Switzerland

>Spike|hCoV-19/Denmark/DCGC-3375/2020|2020-08-31|EPI\_ISL\_616134|Original|hCoV-19^^Hovedstaden|Human|Department of Virus and Microbiological Special Diagnostics|Albertsen lab|Michaelsen|Denmark

>Spike|hCoV-19/Scotland/EDB4216/2020|2020-04-21|EPI\_ISL\_449283|Original|hCoV-19^^Scotland|Human|Virology Department|COVID-19 Genomics UK (COG-UK) Consortium|Williams|United Kingdom

>Spike|hCoV-19/USA/AZ-TG512081/2020|2020-07-17|EPI\_ISL\_695304|Original|hCoV-19^^Arizona|Human|TGen North|TGen North|French|USA

>Spike|hCoV-19/Japan/PG-8220/2020|2020-08-00|EPI\_ISL\_687319|Original|hCoV-19^^Japan|Human|Pathogen Genomics Center|Pathogen Genomics Center|Sekizuka|Japan



>Spike|hCoV-19/Scotland/CVR1431/2020|2020-04-02|EPI\_ISL\_433583|Original|hCoV-19^^Scotland|Human|West of Scotland Specialist Virology Centre|COVID-19 Genomics UK (COG-UK) Consortium|Robertson|United Kingdom

>Spike|hCoV-19/Japan/PG-4929/2020|2020-07-00|EPI\_ISL\_690049|Original|hCoV-19^^Japan|Human|Pathogen Genomics Center|Pathogen Genomics Center|Sekizuka|Japan

>Spike|hCoV-19/Lebanon/S2\_759/2020|2020-03-15|EPI\_ISL\_450509|Original|hCoV-19^^Beirut|Human|Rafik Hariri University Hospital|Rafik Hariri University Hospital|Feghali|Lebanon

>Spike|hCoV-19/England/ALDP-9E6FA0/2020|2020-09-24|EPI\_ISL\_580552|Original|hCoV-19^^England|Human|Lighthouse Lab in Alderley Park|Wellcome Sanger Institute for the COVID-19 Genomics UK (COG-UK) consortium|Davies|United Kingdom

>Spike|hCoV-19/England/NOTT-11184F/2020|2020-05-21|EPI\_ISL\_461931|Original|hCoV-19^^England|Human|Queens Medical Centre|COVID-19 Genomics UK (COG-UK) Consortium|Loose|United Kingdom

>Spike|hCoV-19/England/MILK-B5979F/2020|2020-11-06|EPI\_ISL\_679867|Original|hCoV-19^^England|Human|Virology Department|COVID-19 Genomics UK (COG-UK) Consortium|de Silva|United Kingdom

>Spike|hCoV-19/Morocco/6900/2020|2020-04-20|EPI\_ISL\_459978|Original|hCoV-19^^Morocco|Human|Institut Pasteur du Maroc|Institut Pasteur du Maroc|Enouf|Morocco

>Spike|hCoV-19/USA/MD-HP00554/2020|2020-03-25|EPI\_ISL\_511870|Original|hCoV-19^^Maryland|Human|Johns Hopkins Hospital Department of Pathology|Johns Hopkins Hospital Department of Pathology|Ramakrishnan|USA

>Spike|hCoV-19/USA/NV-CDC-2-3693578/2020|2020-11-10|EPI\_ISL\_747153|Original|hCoV-19^^Nevada|Human|Respiratory Viruses Branch|Respiratory Viruses Branch|Queen|USA

>Spike|hCoV-19/Canada/NS-NML-1306/2020|2020-04-09|EPI\_ISL\_579687|Original|hCoV-19^^Nova Scotia|Human|QEII Health Sciences Centre|National Microbiology Laboratory (NML)|Majer|Canada

>Spike|hCoV-19/USA/NY-NYCPHL-001285/2020|2020-11-09|EPI\_ISL\_683902|Original|hCoV-19^^New York|Human|DOHMH Riverside|New York City Public Health Laboratory|Wang|USA

>Spike|hCoV-19/England/ALDP-B460C7/2020|2020-11-07|EPI\_ISL\_656294|Original|hCoV-19^^England|Human|Lighthouse Lab in Alderley Park|Wellcome Sanger Institute for the COVID-19 Genomics UK (COG-UK) Consortium|Davies|United Kingdom

>Spike|hCoV-19/Scotland/CVR2901/2020|2020-04-22|EPI\_ISL\_473623|Original|hCoV-19^^Scotland|Human|West of Scotland Specialist Virology Centre|COVID-19 Genomics UK (COG-UK) Consortium|Robertson|United Kingdom

>Spike|hCoV-19/England/NOTT-1190A9/2020|2020-10-30|EPI\_ISL\_627706|Original|hCoV-19^^England|Human|Queens Medical Centre|COVID-19 Genomics UK (COG-UK) Consortium|Loose|United Kingdom

>Spike|hCoV-19/India/MH-NIV-12024/2020|2020-04-20|EPI\_ISL\_452200|Original|hCoV-19^^Maharashtra|Human|NIV Influenza|NIV Influenza|Potdar|India

>Spike|hCoV-19/Scotland/CVR1935/2020|2020-04-08|EPI\_ISL\_433663|Original|hCoV-19^^Scotland|Human|West of Scotland Specialist Virology Centre|COVID-19 Genomics UK (COG-UK) Consortium|Robertson|United Kingdom

>Spike|hCoV-19/USA/TX-HMH-MCoV-19484/2020|2020-11-30|EPI\_ISL\_783868|Original|hCoV-19^^Texas|Human|Houston Methodist Hospital|Houston Methodist Hospital|Long|USA

>Spike|hCoV-19/England/MILK-99232F/2020|2020-08-27|EPI\_ISL\_540672|Original|hCoV-19^^England|Human|Queens Medical Centre|COVID-19 Genomics UK (COG-UK) Consortium|Loose|United Kingdom

>Spike|hCoV-19/Canada/QC-LSPQ-L00236595/2020|2020-03-25|EPI\_ISL\_536141|Original|hCoV-19^^Quebec|Human|Centre hospitalier Anna-Laberge|Laboratoire de sant\u00e9 publique du Qu\u00e9bec|Moreira|Canada

>Spike|hCoV-19/Saudi Arabia/KAUST-MAKKAH1630/2020|2020-04-26|EPI\_ISL\_678131|Original|hCoV-19^^Makkah|Human|Pathogen Genomics Lab King Abdullah University of Science and Technology(KAUST)|Pathogen Genomics Lab King Abdullah University of Science and Technology(KAUST)|Mohamed Ghazzali|Saudi Arabia

>Spike|hCoV-19/England/ALDP-95D153/2020|2020-06-18|EPI\_ISL\_553533|Original|hCoV-19^^England|Human|Lighthouse Lab in Alderley Park|Wellcome Sanger Institute for the COVID-19 Genomics UK (COG-UK) consortium|Davies|United Kingdom

>Spike|hCoV-19/USA/CA-CZB-4031/2020|2020-08-08|EPI\_ISL\_548650|Original|hCoV-19^^California|Human|County of Santa Clara Public Health Department|Chan-Zuckerberg Biohub|Bhatt|USA

>Spike|hCoV-19/Wales/PHWC-25120/2020|2020-03-22|EPI\_ISL\_420970|Original|hCoV-19^^Wales|Human|Wales Specialist Virology Centre|Public Health Wales Microbiology Cardiff|Moore|United Kingdom

>Spike|hCoV-19/England/20174037704/2020|2020-04-13|EPI\_ISL\_465397|Original|hCoV-19^^England|Human|Respiratory Virus Unit|Respiratory Virus Unit|Platt|United Kingdom

>Spike|hCoV-19/Japan/PG-8442/2020|2020-09-00|EPI\_ISL\_687541|Original|hCoV-19^^Japan|Human|Fukuoka Institute of Health and Environmental Sciences|Pathogen Genomics Center|Sekizuka|Japan

>Spike|hCoV-19/Hong Kong/VM20139199/2020|2020-10-28|EPI\_ISL\_730581|Original|hCoV-19^^Hong Kong|Human|Home Quarantine Taskforce|Hong Kong Department of Health|Mak|China

>Spike|hCoV-19/Northern Ireland/QEUI-7A4ACD/2020|2020-07-14|EPI\_ISL\_533151|Original|hCoV-19^^Northern Ireland|Human|Lighthouse Lab in Glasgow|Wellcome Sanger Institute for the COVID-19 Genomics UK (COG-UK) consortium|Davies|United Kingdom

>Spike|hCoV-19/Bangladesh/BCSIR-NILMRC-193/2020|2020-06-17|EPI\_ISL\_483635|Original|hCoV-19^^Chittagong|Human|National Institute of Laboratory Medicine and Referral Center|Genomic Research Lab|Khan|Bangladesh

>Spike|hCoV-19/Romania/USAFSAM-S572/2020|2020-11-28|EPI\_ISL\_738346|Original|hCoV-19^^Romania|Human|Landstuhl Regional Medical Center|United States Air Force School of Aerospace Medicine|Fries|Romania

>Spike|hCoV-19/England/QEUI-AD1253/2020|2020-10-26|EPI\_ISL\_633954|Original|hCoV-19^^England|Human|Lighthouse Lab in Glasgow|Wellcome Sanger Institute for the COVID-19 Genomics UK (COG-UK) consortium|Davies|United Kingdom

>Spike|hCoV-19/USA/WA-UW372/2020|2020-03-17|EPI\_ISL\_418939|Original|hCoV-19^^Washington|Human|UW Virology Lab|UW Virology Lab|Roychoudhury|USA

>Spike|hCoV-19/Denmark/DCGC-5407/2020|2020-09-14|EPI\_ISL\_615339|Original|hCoV-19^^Nordjylland|Human|Department of Virus and Microbiological Special Diagnostics|Albertsen lab|Michaelsen|Denmark

>Spike|hCoV-19/England/BRIS-12DF1E/2020|2020-06-04|EPI\_ISL\_481985|Original|hCoV-19^^England|Human|PHE South West Regional Laboratory|Wellcome Sanger Institute for the COVID-19 Genomics UK (COG-UK) consortium|Davies|United Kingdom

>Spike|hCoV-19/India/TG-CDFD-C2901/2020|2020-06-19|EPI\_ISL\_528584|Original|hCoV-19^^Telangana|Human|National Genomics Core-Center for DNA Fingerprinting and Diagnostics|National Genomics Core-Center for DNA Fingerprinting and Diagnostics (NGC-CDFD)- DBT's PAN-INDIA-1000 Genome consortium|Vashisht|India

>Spike|hCoV-19/Australia/VIC4225/2020|2020-07-18|EPI\_ISL\_519553|Original|hCoV-19^^Victoria|Human|Microbiological Diagnostic Unit - Public Health Laboratory (MDU-PHL)|MDU-PHL|Schultz|Australia

>Spike|hCoV-19/Australia/VIC16498/2020|2020-08-09|EPI\_ISL\_640673|Original|hCoV-19^^Victoria|Human|Microbiological Diagnostic Unit - Public Health Laboratory (MDU-PHL)|MDU-PHL|Schultz|Australia

>Spike|hCoV-19/England/QEUI-A0AC62/2020|2020-10-01|EPI\_ISL\_599336|Original|hCoV-19^^England|Human|Lighthouse Lab in Glasgow|Wellcome Sanger Institute for the COVID-19 Genomics UK (COG-UK) consortium|Davies|United Kingdom

>Spike|hCoV-19/Wales/PHWC-166F64/2020|2020-06-27|EPI\_ISL\_494133|Original|hCoV-19^^Wales|Human|Originating lab|COVID-19 Genomics UK (COG-UK) Consortium|Moore|United Kingdom

>Spike|hCoV-19/Netherlands/ZH-RIVM-20889/2020|2020-10-01|EPI\_ISL\_790927|Original|hCoV-19^^Zuid-holland|Human|Dutch COVID-19 response team|National Institute for Public Health and the Environment (RIVM)|Meijer|Netherlands

>Spike|hCoV-19/USA/CA-CZB-14962/2020|2020-11-18|EPI\_ISL\_738710|Original|hCoV-19^^California|Human|Santa Clara County Public Health Laboratory|Chan-Zuckerberg Biohub|Kamm|USA

>Spike|hCoV-19/USA/NV-NSPHL-A0114/2020|2020-04-18|EPI\_ISL\_515385|Original|hCoV-19^^Nevada|Human|Nevada State Public Health Laboratory|Nevada State Public Health Laboratory|Sevinsky|USA

>Spike|hCoV-19/England/BIRM-6A4BD/2020|2020-11-09|EPI\_ISL\_679063|Original|hCoV-19^^England|Human|University of Birmingham|COVID-19 Genomics UK (COG-UK) Consortium|Loman|United Kingdom

>Spike|hCoV-19/Northern Ireland/QEUA-9622FE/2020|2020-08-10|EPI\_ISL\_531804|Original|hCoV-19^^Northern Ireland|Human|Lighthouse Lab in Glasgow|Wellcome Sanger Institute for the COVID-19 Genomics UK (COG-UK) consortium|Davies|United Kingdom

>Spike|hCoV-19/England/QEUA-9DDF7F/2020|2020-09-21|EPI\_ISL\_599633|Original|hCoV-19^^England|Human|Lighthouse Lab in Glasgow|Wellcome Sanger Institute for the COVID-19 Genomics UK (COG-UK) consortium|Davies|United Kingdom

>Spike|hCoV-19/Bangladesh/CHRF-0030/2020|2020-06-11|EPI\_ISL\_477139|Original|hCoV-19^^Bangladesh|Human|Child Health Research Foundation|Child Health Research Foundation|Saha|Bangladesh

>Spike|hCoV-19/USA/WI-UW-107/2020|2020-03-31|EPI\_ISL\_425164|Original|hCoV-19^^Wisconsin|Human|University of Wisconsin-Madison AIDS Vaccine Research Laboratories|University of Wisconsin-Madison AIDS Vaccine Research Laboratories|Baczenas|USA

>Spike|hCoV-19/Denmark/DCGC-21738/2020|2020-12-21|EPI\_ISL\_757714|Original|hCoV-19^^Hovedstaden|Human|Department of Virus and Microbiological Special Diagnostics|Albertsen Lab|Michaelsen|Denmark

>Spike|hCoV-19/England/NORW-21F646/2020|2020-12-09|EPI\_ISL\_725036|Original|hCoV-19^^England|Human|Quadram Institute Bioscience|COVID-19 Genomics UK (COG-UK) Consortium|Alikhan|United Kingdom

>Spike|hCoV-19/Switzerland/BL-UHB-42202622/2020|2020-03-22|EPI\_ISL\_418438|Original|hCoV-19^^Basel|Human|University Hospital Basel|University Hospital Basel|Roloff Handschin|Switzerland

>Spike|hCoV-19/Japan/PG-4393/2020|2020-07-00|EPI\_ISL\_691743|Original|hCoV-19^^Japan|Human|Pathogen Genomics Center|Pathogen Genomics Center|Sekizuka|Japan

>Spike|hCoV-19/England/ALDP-A2E70D/2020|2020-10-05|EPI\_ISL\_586913|Original|hCoV-19^^England|Human|Lighthouse Lab in Alderley Park|Wellcome Sanger Institute for the COVID-19 Genomics UK (COG-UK) consortium|Davies|United Kingdom

>Spike|hCoV-19/England/MILK-9E1D8D/2020|2020-09-20|EPI\_ISL\_581258|Original|hCoV-19^^England|Human|Lighthouse Lab in Milton Keynes|Wellcome Sanger Institute for the COVID-19 Genomics UK (COG-UK) consortium|Davies|United Kingdom

>Spike|hCoV-19/USA/HI-H200677/2020|2020-11-30|EPI\_ISL\_753200|Original|hCoV-19^^Hawaii|Human|State Laboratories Division|State Laboratories Division|Sultana|USA

>Spike|hCoV-19/Denmark/DCGC-21916/2020|2020-12-21|EPI\_ISL\_758092|Original|hCoV-19^^Syddanmark|Human|Department of Virus and Microbiological Special Diagnostics|Albertsen Lab|Michaelsen|Denmark

>Spike|hCoV-19/Wales/PHWC-491176/2020|2020-11-12|EPI\_ISL\_706619|Original|hCoV-19^^Wales|Human|Originating lab|COVID-19 Genomics UK (COG-UK) Consortium|Moore|United Kingdom

>Spike|hCoV-19/Wales/PHWC-49CB31/2020|2020-12-10|EPI\_ISL\_742648|Original|hCoV-19^^Wales|Human|Wales Specialist Virology Centre Sequencing lab|COVID-19 Genomics UK (COG-UK) Consortium|Moore|United Kingdom

>Spike|hCoV-19/England/ALDP-C588BA/2020|2020-12-14|EPI\_ISL\_736097|Original|hCoV-19^^England|Human|Lighthouse Lab in Alderley Park|Wellcome Sanger Institute for the COVID-19 Genomics UK (COG-UK) Consortium|Davies|United Kingdom

>Spike|hCoV-19/England/QEUA-9D0880/2020|2020-09-16|EPI\_ISL\_589870|Original|hCoV-19^^England|Human|Lighthouse Lab in Glasgow|Wellcome Sanger Institute for the COVID-19 Genomics UK (COG-UK) consortium|Davies|United Kingdom

>Spike|hCoV-19/USA/AZ-TG668404/2020|2020-04-20|EPI\_ISL\_696307|Original|hCoV-19^^Arizona|Human|Sonora Quest Laboratories|TGen North|French|USA

>Spike|hCoV-19/USA/TX-HMH-MCoV-12557/2020|2020-09-29|EPI\_ISL\_790390|Original|hCoV-19^^Texas|Human|Houston Methodist Hospital|Houston Methodist Hospital|Long|USA

>Spike|hCoV-19/England/MILK-A1D455/2020|2020-10-03|EPI\_ISL\_595058|Original|hCoV-19^^England|Human|Queens Medical Centre|COVID-19 Genomics UK (COG-UK) Consortium|Loose|United Kingdom

>Spike|hCoV-19/Scotland/CVR3732/2020|2020-05-09|EPI\_ISL\_473770|Original|hCoV-19^^Scotland|Human|West of Scotland Specialist Virology Centre|COVID-19 Genomics UK (COG-UK) Consortium|Robertson|United Kingdom

>Spike|hCoV-19/Wales/PHWC-16EC65/2020|2020-10-03|EPI\_ISL\_585843|Original|hCoV-19^^Wales|Human|Wales Specialist Virology Centre Sequencing lab|COVID-19 Genomics UK (COG-UK) Consortium|Moore|United Kingdom

>Spike|hCoV-19/Denmark/DCGC-4623/2020|2020-09-21|EPI\_ISL\_621292|Original|hCoV-19^^Sjaelland|Human|Department of Virus and Microbiological Special Diagnostics|Albertsen lab|Michaelsen|Denmark

>Spike|hCoV-19/USA/CA-CZB-10028/2020|2020-05-15|EPI\_ISL\_672193|Original|hCoV-19^^California|Human|The Ashley Laboratory|Chan-Zuckerberg Biohub|Bhatt|USA

>Spike|hCoV-19/Wales/PHWC-498D6C/2020|2020-12-03|EPI\_ISL\_727205|Original|hCoV-19^^Wales|Human|Originating lab|COVID-19 Genomics UK (COG-UK) Consortium|Moore|United Kingdom

>Spike|hCoV-19/USA/WI-GMF-22921/2020|2020-09-28|EPI\_ISL\_660864|Original|hCoV-19^^Wisconsin|Human|Gundersen Molecular Diagnostics Laboratory|Kabara Cancer Research Institute|Kenny|USA

>Spike|hCoV-19/Denmark/DCGC-22273/2020|2020-12-14|EPI\_ISL\_758648|Original|hCoV-19^^Hovedstaden|Human|Department of Virus and Microbiological Special Diagnostics|Albertsen Lab|Michaelsen|Denmark

>Spike|hCoV-19/Denmark/DCGC-14166/2020|2020-11-30|EPI\_ISL\_711073|Original|hCoV-19^^Hovedstaden|Human|Department of Virus and Microbiological Special Diagnostics|Albertsen Lab|Michaelsen|Denmark

>Spike|hCoV-19/Scotland/QEUH-A20D90/2020|2020-10-01|EPI\_ISL\_599054|Original|hCoV-19^^Scotland|Human|Lighthouse Lab in Glasgow|Wellcome Sanger Institute for the COVID-19 Genomics UK (COG-UK) consortium|Davies|United Kingdom

>Spike|hCoV-19/Peru/JUN-INS-131/2020|2020-04-01|EPI\_ISL\_536528|Original|hCoV-19^^Junin|Human|Instituto Nacional de Salud|Laboratorio de Infecciones Respiratorias Agudas|Lopez|Peru

>Spike|hCoV-19/England/20122018002/2020|2020-03-16|EPI\_ISL\_465743|Original|hCoV-19^^England|Human|Respiratory Virus Unit|Respiratory Virus Unit|Platt|United Kingdom

>Spike|hCoV-19/England/LCST-24D6C8D/2020|2020-06-09|EPI\_ISL\_478338|Original|hCoV-19^^England|Human|University Hospitals Of Leicester NHS Trust and DeepSeq Nottingham|COVID-19 Genomics UK (COG-UK) Consortium|Loose|United Kingdom

>Spike|hCoV-19/Finland/21A20S7/2020|2020-04-21|EPI\_ISL\_481608|Original|hCoV-19^^Uusimaa|Human|Department of Virology and Immunology|Department of Virology|Smura|Finland

>Spike|hCoV-19/South Africa/KRISP-K002614/2020|2020-07-30|EPI\_ISL\_535478|Original|hCoV-19^^KwaZulu-Natal|Human|NHLS-IALCH|KRISP|de Oliveira|South Africa

>Spike|hCoV-19/England/ALDP-9D7E3C/2020|2020-09-17|EPI\_ISL\_576635|Original|hCoV-19^^England|Human|Oxford Viromics|COVID-19 Genomics UK (COG-UK) Consortium|Golubchik|United Kingdom

>Spike|hCoV-19/Canada/BC-BCCDC-8579/2020|2020-00-00|EPI\_ISL\_740829|Original|hCoV-19^^British Columbia|Human|BCCDC Public Health Laboratory|BCCDC Public Health Laboratory|Prystajecky|Canada

>Spike|hCoV-19/USA/TX-HMH-MCoV-12969/2020|2020-08-28|EPI\_ISL\_788121|Original|hCoV-19^^Texas|Human|Houston Methodist Hospital|Houston Methodist Hospital|Long|USA

>Spike|hCoV-19/USA/IL-UW-542/2020|2020-06-23|EPI\_ISL\_484917|Original|hCoV-19^^Illinois|Human|University of Wisconsin-Madison AIDS Vaccine Research Laboratories|University of Wisconsin-Madison AIDS Vaccine Research Laboratories|Baczenas|USA

>Spike|hCoV-19/Uganda/UG074/2020|2020-08-24|EPI\_ISL\_737943|Original|hCoV-19^^Uganda|Human|Uganda Central Public Health Lab and Uganda Virus Research Institute|MRC/UVRI & LSHTM Uganda Research Unit|Cotten|Uganda

>Spike|hCoV-19/Scotland/GCVR-171546/2020|2020-03-27|EPI\_ISL\_489697|Original|hCoV-19^^Scotland|Human|NHSGGC West of Scotland Specialist Virology Centre / MRC-

University of Glasgow Centre for Virus Research|Wellcome Sanger Institute for the COVID-19 Genomics UK (COG-UK) consortium|Davies|United Kingdom  
>Spike|hCoV-19/England/20099079106/2020|2020-03-01|EPI\_ISL\_415130|Original|hCoV-19^^England|Human|Respiratory Virus Unit|Respiratory Virus Unit|Platt|United Kingdom  
>Spike|hCoV-19/Japan/PG-8027/2020|2020-08-00|EPI\_ISL\_687128|Original|hCoV-19^^Japan|Human|Pathogen Genomics Center|Pathogen Genomics Center|Sekizuka|Japan  
>Spike|hCoV-19/USA/TX-HMH-5776/2020|2020-06-30|EPI\_ISL\_547007|Original|hCoV-19^^Texas|Human|Houston Methodist Hospital|Houston Methodist Hospital|Long|USA  
>Spike|hCoV-19/USA/CA-ALSR-4451/2020|2020-07-08|EPI\_ISL\_649037|Original|hCoV-19^^California|Human|San Diego County Public Health Laboratory|Andersen lab at Scripps Research|Gangavarapu|USA  
>Spike|hCoV-19/South Africa/Tygerberg\_325\_CC2/2020|2020-10-09|EPI\_ISL\_660133|Original|hCoV-19^^Western Cape|Human|Lancet|National Health Laboratory Service (NHLS)|de Oliveira|South Africa  
>Spike|hCoV-19/England/QEUA-AE4F83/2020|2020-10-27|EPI\_ISL\_633232|Original|hCoV-19^^England|Human|Lighthouse Lab in Glasgow|Wellcome Sanger Institute for the COVID-19 Genomics UK (COG-UK) consortium|Davies|United Kingdom  
>Spike|hCoV-19/Wales/PHWC-485148/2020|2020-10-23|EPI\_ISL\_628151|Original|hCoV-19^^Wales|Human|Wales Specialist Virology Centre Sequencing lab|COVID-19 Genomics UK (COG-UK) Consortium|Moore|United Kingdom  
>Spike|hCoV-19/Scotland/QEUA-B0DB07/2020|2020-11-02|EPI\_ISL\_649532|Original|hCoV-19^^Scotland|Human|Lighthouse Lab in Glasgow|Wellcome Sanger Institute for the COVID-19 Genomics UK (COG-UK) Consortium|Davies|United Kingdom  
>Spike|hCoV-19/USA/UT-UPHL-03123/2020|2020-05-06|EPI\_ISL\_575260|Original|hCoV-19^^Utah|Human|Utah Public Health Laboratory|Utah Public Health Laboratory|Young|USA  
>Spike|hCoV-19/Wales/PHWC-164A65/2020|2020-05-19|EPI\_ISL\_479339|Original|hCoV-19^^Wales|Human|Wales Specialist Virology Centre Sequencing lab|COVID-19 Genomics UK (COG-UK) Consortium|Moore|United Kingdom  
>Spike|hCoV-19/Luxembourg/LNS6357507/2020|2020-12-26|EPI\_ISL\_771047|Original|hCoV-19^^Luxembourg|Human|Laboratoire national de sant\u00e9|Laboratoire national de sant\u00e9|Wienecke-Baldacchino|Luxembourg  
>Spike|hCoV-19/England/ALDP-BB9DD7/2020|2020-11-20|EPI\_ISL\_701689|Original|hCoV-19^^England|Human|Lighthouse Lab in Alderley Park|Wellcome Sanger Institute for the COVID-19 Genomics UK (COG-UK) Consortium|Davies|United Kingdom  
>Spike|hCoV-19/Australia/VIC1511/2020|2020-05-01|EPI\_ISL\_456476|Original|hCoV-19^^Victoria|Human|Victorian Infectious Diseases Reference Laboratory (VIDRL)|Microbiological Diagnostic Unit Public Health Laboratory and Victorian Infectious Diseases Reference Laboratory|Schultz|Australia  
>Spike|hCoV-19/Luxembourg/LNS7532467/2020|2020-10-25|EPI\_ISL\_744584|Original|hCoV-19^^Luxembourg|Human|Laboratoire national de sant\u00e9|Laboratoire national de sant\u00e9|Wienecke-Baldacchino|Luxembourg  
>Spike|hCoV-19/Spain/CE-ISCI-2016511/2020|2020-10-14|EPI\_ISL\_691692|Original|hCoV-19^^Ceuta|Human|Hospital Universitario de Ceuta|Instituto de Salud Carlos III|Caballero|Spain  
>Spike|hCoV-19/USA/OR-OHSU-2123/2020|2020-08-04|EPI\_ISL\_667121|Original|hCoV-19^^Oregon|Human|OHSU Lab Services Molecular Microbiology Lab|Oregon SARS-CoV-2 Genome Sequencing Center|O'Roak|USA  
>Spike|hCoV-19/USA/WI-UW-1355/2020|2020-09-09|EPI\_ISL\_536726|Original|hCoV-19^^Wisconsin|Human|University of Wisconsin-Madison AIDS Vaccine Research Laboratories|University of Wisconsin-Madison AIDS Vaccine Research Laboratories|Baczenas|USA  
>Spike|hCoV-19/England/ALDP-9D98A5/2020|2020-09-18|EPI\_ISL\_576766|Original|hCoV-19^^England|Human|Oxford Viromics|COVID-19 Genomics UK (COG-UK) Consortium|Golubchik|United Kingdom  
>Spike|hCoV-19/USA/WA-UW-114/2020|2020-03-06|EPI\_ISL\_476903|Original|hCoV-19^^Washington|Human|UW Virology Lab|UW Virology Lab|Roychoudhury|USA  
>Spike|hCoV-19/USA/LA-BIE-075/2020|2020-04-04|EPI\_ISL\_436943|Original|hCoV-19^^Louisiana|Human|Ochsner Health|Bioinfoexperts|Cross|USA

>Spike|hCoV-19/Switzerland/BL-ETHZ-360267/2020|2020-11-08|EPI\_ISL\_729234|Original|hCoV-19^^Basel-Landschaft|Human|Viollier AG|Department of Biosystems Science and Engineering|Nadeau|Switzerland

>Spike|hCoV-19/England/NORT-292854/2020|2020-05-30|EPI\_ISL\_489121|Original|hCoV-19^^England|Human|NU-OMICS DNA Sequencing research facility|Wellcome Sanger Institute for the COVID-19 Genomics UK (COG-UK) consortium|Davies|United Kingdom

>Spike|hCoV-19/England/MILK-9C2BD3/2020|2020-09-10|EPI\_ISL\_566577|Original|hCoV-19^^England|Human|Lighthouse Lab in Milton Keynes|Wellcome Sanger Institute for the COVID-19 Genomics UK (COG-UK) consortium|Davies|United Kingdom

>Spike|hCoV-19/USA/NM-DOH-2020617022/2020|2020-12-12|EPI\_ISL\_751837|Original|hCoV-19^^New Mexico|Human|New Mexico Department of Health Scientific Laboratory|New Mexico Department of Health Scientific Laboratory|Malone|USA

>Spike|hCoV-19/mink/Netherlands/NB-EMC-33-5/2020|2020-08-17|EPI\_ISL\_577767|Original|hCoV-19^^Noord Brabant|Neovison vison|Dutch COVID-19 response team|Erasmus Medical Center|Oude Munnink|Netherlands

>Spike|hCoV-19/Brazil/SP-262/2020|2020-04-22|EPI\_ISL\_524466|Original|hCoV-19^^S\u00e3o Paulo|Human|PS Municipal Dr Lauro Ribas Braga|Instituto Adolfo Lutz|Sacchi|Brazil

>Spike|hCoV-19/Wales/PHWC-491D63/2020|2020-11-12|EPI\_ISL\_706775|Original|hCoV-19^^Wales|Human|Originating lab|COVID-19 Genomics UK (COG-UK) Consortium|Moore|United Kingdom

>Spike|hCoV-19/England/QEUEH-C33EE0/2020|2020-12-11|EPI\_ISL\_734017|Original|hCoV-19^^England|Human|Lighthouse Lab in Glasgow|Wellcome Sanger Institute for the COVID-19 Genomics UK (COG-UK) Consortium|Davies|United Kingdom

>Spike|hCoV-19/England/NORT-28C7D8/2020|2020-05-16|EPI\_ISL\_469326|Original|hCoV-19^^England|Human|NU-OMICS DNA Sequencing research facility|Wellcome Sanger Institute for the COVID-19 Genomics UK (COG-UK) consortium|Davies|United Kingdom

>Spike|hCoV-19/USA/TX-HMH-MCoV-15861/2020|2020-07-10|EPI\_ISL\_785545|Original|hCoV-19^^Texas|Human|Houston Methodist Hospital|Houston Methodist Hospital|Long|USA

>Spike|hCoV-19/USA/TX-HMH-MCoV-17962/2020|2020-11-16|EPI\_ISL\_786110|Original|hCoV-19^^Texas|Human|Houston Methodist Hospital|Houston Methodist Hospital|Long|USA

>Spike|hCoV-19/England/LOND-DAD08/2020|2020-11-14|EPI\_ISL\_724703|Original|hCoV-19^^England|Human|University College London|COVID-19 Genomics UK (COG-UK) Consortium|Roy|United Kingdom

>Spike|hCoV-19/Denmark/DCGC-5834/2020|2020-09-28|EPI\_ISL\_621021|Original|hCoV-19^^Syddanmark|Human|Department of Virus and Microbiological Special Diagnostics|Albertsen lab|Michaelsen|Denmark

>Spike|hCoV-19/Wales/PHWC-26F61/2020|2020-03-28|EPI\_ISL\_422214|Original|hCoV-19^^Wales|Human|Wales Specialist Virology Centre|Public Health Wales Microbiology Cardiff|Moore|United Kingdom

>Spike|hCoV-19/England/QEUEH-B3FBB1/2020|2020-11-08|EPI\_ISL\_658591|Original|hCoV-19^^England|Human|Lighthouse Lab in Glasgow|Wellcome Sanger Institute for the COVID-19 Genomics UK (COG-UK) Consortium|Davies|United Kingdom

>Spike|hCoV-19/Luxembourg/LNS4701723/2020|2020-11-12|EPI\_ISL\_740528|Original|hCoV-19^^Luxembourg|Human|Laboratoire national de sant\u00e9|Laboratoire national de sant\u00e9|Wienecke-Baldacchino|Luxembourg

>Spike|hCoV-19/Denmark/DCGC-11872/2020|2020-10-26|EPI\_ISL\_671190|Original|hCoV-19^^Nordjylland|Human|Department of Virus and Microbiological Special Diagnostics|Albertsen Lab|Michaelsen|Denmark

>Spike|hCoV-19/Luxembourg/LNS7228271/2020|2020-11-04|EPI\_ISL\_744539|Original|hCoV-19^^Luxembourg|Human|Laboratoire national de sant\u00e9|Laboratoire national de sant\u00e9|Wienecke-Baldacchino|Luxembourg

>Spike|hCoV-19/USA/CA-CZB-13885/2020|2020-08-11|EPI\_ISL\_739163|Original|hCoV-19^^California|Human|Alameda County Public Health Lab|Chan-Zuckerberg Biohub|Kamm|USA

>Spike|hCoV-19/USA/NM-UNM-00661/2020|2020-06-29|EPI\_ISL\_560329|Original|hCoV-19^^New Mexico|Human|TriCore Reference Laboratories|Center for Global Health|Domman|USA

>Spike|hCoV-19/England/ALDP-9E6939/2020|2020-09-24|EPI\_ISL\_580496|Original|hCoV-19^^England|Human|Lighthouse Lab in Alderley Park|Wellcome Sanger Institute for the COVID-19 Genomics UK (COG-UK) consortium|Davies|United Kingdom

>Spike|hCoV-19/England/BIRM-6A3A1/2020|2020-11-09|EPI\_ISL\_679049|Original|hCoV-19^^England|Human|University of Birmingham|COVID-19 Genomics UK (COG-UK) Consortium|Loman|United Kingdom

>Spike|hCoV-19/Japan/PG-0230/2020|2020-03-14|EPI\_ISL\_479926|Original|hCoV-19^^Kansai|Human|Sakai City Institute of Public Health|Pathogen Genomics Center|Sekizuka|Japan

>Spike|hCoV-19/Ecuador/UEES-HE134/2020|2020-00-00|EPI\_ISL\_671981|Original|hCoV-19^^Ecuador|Human|UEES BioLab|Omics Sciences Laboratory|Fernandez Cadena|Ecuador

>Spike|hCoV-19/USA/CA-CHLA-PLM32957810/2020|2020-11-09|EPI\_ISL\_753297|Original|hCoV-19^^California|Human|Clinical virology Laboratory|Center for Personalized Medicine|Dien Bard|USA

>Spike|hCoV-19/England/ALDP-6761B1/2020|2020-07-03|EPI\_ISL\_558080|Original|hCoV-19^^England|Human|Lighthouse Lab in Alderley Park|Wellcome Sanger Institute for the COVID-19 Genomics UK (COG-UK) consortium|Davies|United Kingdom

>Spike|hCoV-19/USA/UT-UPHL-2009380/2020|2020-05-14|EPI\_ISL\_524972|Original|hCoV-19^^Utah|Human|Utah Public Health Laboratory|Utah Public Health Laboratory|Young|USA

>Spike|hCoV-19/Scotland/CVR3467/2020|2020-05-11|EPI\_ISL\_478070|Original|hCoV-19^^Scotland|Human|West of Scotland Specialist Virology Centre|COVID-19 Genomics UK (COG-UK) Consortium|Robertson|United Kingdom

>Spike|hCoV-19/USA/WI-UW-1681/2020|2020-09-11|EPI\_ISL\_605554|Original|hCoV-19^^Wisconsin|Human|University of Wisconsin-Madison AIDS Vaccine Research Laboratories|University of Wisconsin-Madison AIDS Vaccine Research Laboratories|Baczenas|USA

>Spike|hCoV-19/USA/UT-08301/2020|2020-05-19|EPI\_ISL\_524098|Original|hCoV-19^^Utah|Human|Utah Public Health Laboratory|Utah Public Health Laboratory|Young|USA

>Spike|hCoV-19/England/MILK-C60F50/2020|2020-12-13|EPI\_ISL\_769332|Original|hCoV-19^^England|Human|Lighthouse Lab in Milton Keynes|Wellcome Sanger Institute for the COVID-19 Genomics UK (COG-UK) Consortium|Davies|United Kingdom

>Spike|hCoV-19/Canada/QC-LSPQ-L00214634/2020|2020-03-12|EPI\_ISL\_535730|Original|hCoV-19^^Quebec|Human|CHUM - Microbiologie - H\u00f4pital Saint-Luc|Laboratoire de sant\u00e9 publique du Qu\u00e9bec|Moreira|Canada

>Spike|hCoV-19/Finland/9LS7BD8/2020|2020-10-09|EPI\_ISL\_755960|Original|hCoV-19^^Uusimaa|Human|Department of Virology and Immunology|Department of Virology|Smura|Finland

>Spike|hCoV-19/England/NORT-29DB41/2020|2020-05-07|EPI\_ISL\_484308|Original|hCoV-19^^England|Human|Northumbria University / South Tees Hospitals NHS Foundation Trust / North Cumbria Integrated Care NHS Foundation Trust / North Tees and Hartlepool NHS Foundation Trust / Newcastle Hospitals NHS Foundation Trust|COVID-19 Genomics UK (COG-UK) Consortium|Bashton|United Kingdom

>Spike|hCoV-19/Japan/PG-3007/2020|2020-04-00|EPI\_ISL\_691131|Original|hCoV-19^^Japan|Human|Pathogen Genomics Center|Pathogen Genomics Center|Sekizuka|Japan

>Spike|hCoV-19/England/CAMC-B08692/2020|2020-10-29|EPI\_ISL\_643806|Original|hCoV-19^^England|Human|Lighthouse Lab in Cambridge|Wellcome Sanger Institute for the COVID-19 Genomics UK (COG-UK) Consortium|Davies|United Kingdom

>Spike|hCoV-19/England/QEUEH-AD5987/2020|2020-10-26|EPI\_ISL\_633722|Original|hCoV-19^^England|Human|Lighthouse Lab in Glasgow|Wellcome Sanger Institute for the COVID-19 Genomics UK (COG-UK) consortium|Davies|United Kingdom

>Spike|hCoV-19/Australia/VIC12225/2020|2020-07-22|EPI\_ISL\_591934|Original|hCoV-19^^Victoria|Human|Microbiological Diagnostic Unit - Public Health Laboratory (MDU-PHL)|MDU-PHL|Schultz|Australia

>Spike|hCoV-19/USA/WA-UW-11919/2020|2020-06-24|EPI\_ISL\_570480|Original|hCoV-19^^Washington|Human|UW Virology Lab|UW Virology Lab|Roychoudhury|USA

>Spike|hCoV-19/England/ALDP-B75DB9/2020|2020-11-12|EPI\_ISL\_723704|Original|hCoV-19^^England|Human|Oxford Viromics|COVID-19 Genomics UK (COG-UK) Consortium|Golubchik|United Kingdom

>Spike|hCoV-19/Japan/PG-8386/2020|2020-07-00|EPI\_ISL\_687485|Original|hCoV-19^^Japan|Human|Pathogen Genomics Center|Pathogen Genomics Center|Sekizuka|Japan

>Spike|hCoV-19/England/204590444/2020|2020-11-06|EPI\_ISL\_683494|Original|hCoV-19^^England|Human|Respiratory Virus Unit|COVID-19 Genomics UK (COG-UK) Consortium|Platt|United Kingdom

>Spike|hCoV-19/USA/WY-WYPHL-00025/2020|2020-03-24|EPI\_ISL\_462918|Original|hCoV-19^^Wyoming|Human|Wyoming Public Health Laboratory|Center for Global Health|Domman|USA

>Spike|hCoV-19/Denmark/DCGC-5506/2020|2020-09-21|EPI\_ISL\_620831|Original|hCoV-19^^Hovedstaden|Human|Department of Virus and Microbiological Special Diagnostics|Albertsen lab|Michaelsen|Denmark

>Spike|hCoV-19/Spain/CN-IBV-002598/2020|2020-03-15|EPI\_ISL\_474914|Original|hCoV-19^^Canary Islands|Human|Hospital Universitario de Gran Canaria Dr. Negr\u00ededn|SeqCOVID-SPAIN consortium|IBV(CSIC)|Comas|Spain

>Spike|hCoV-19/India/GJ-GBRC101/2020|2020-04-28|EPI\_ISL\_450790|Original|hCoV-19^^Gujarat|Human|Pandit Deendayal Upadhyay Government Medical College|Gujarat Biotechnology Research Centre|Joshi|India

>Spike|hCoV-19/England/QEUEH-9D3304/2020|2020-09-18|EPI\_ISL\_577324|Original|hCoV-19^^England|Human|Centre for Enzyme Innovation|COVID-19 Genomics UK (COG-UK) Consortium|Robson|United Kingdom

>Spike|hCoV-19/Australia/NSW36/2020|2020-03-10|EPI\_ISL\_417394|Original|hCoV-19^^New South Wales|Human|Centre for Infectious Diseases and Microbiology Public Health|NSW Health Pathology - Institute of Clinical Pathology and Medical Research; Westmead Hospital; University of Sydney|Eden|Australia

>Spike|hCoV-19/England/CAMC-94956D/2020|2020-07-16|EPI\_ISL\_556808|Original|hCoV-19^^England|Human|Lighthouse Lab in Cambridge|Wellcome Sanger Institute for the COVID-19 Genomics UK (COG-UK) consortium|Davies|United Kingdom

>Spike|hCoV-19/France/ARA97293/2020|2020-10-29|EPI\_ISL\_640001|Original|hCoV-19^^Auvergne-Rhone-Alpes|Human|CNR Virus des Infections Respiratoires - France SUD|CNR Virus des Infections Respiratoires - France SUD|Josset|France

>Spike|hCoV-19/Scotland/EDB5070/2020|2020-04-24|EPI\_ISL\_456962|Original|hCoV-19^^Scotland|Human|Virology Department|COVID-19 Genomics UK (COG-UK) Consortium|Williams|United Kingdom

>Spike|hCoV-19/Portugal/PT0440/2020|2020-03-23|EPI\_ISL\_454164|Original|hCoV-19^^Portugal|Human|unknown|Instituto Nacional de Saude (INSA)|Borges|Portugal

>Spike|hCoV-19/Denmark/DCGC-8308/2020|2020-10-26|EPI\_ISL\_617311|Original|hCoV-19^^Sjaelland|Human|Department of Virus and Microbiological Special Diagnostics|Albertsen lab|Michaelsen|Denmark

>Spike|hCoV-19/Wales/MILK-9E1E4E/2020|2020-09-20|EPI\_ISL\_581272|Original|hCoV-19^^Wales|Human|Lighthouse Lab in Milton Keynes|Wellcome Sanger Institute for the COVID-19 Genomics UK (COG-UK) consortium|Davies|United Kingdom

>Spike|hCoV-19/Sweden/20-52284/2020|2020-07-02|EPI\_ISL\_534234|Original|hCoV-19^^Stockholm|Human|Karolinska universitetslaboratoriet SOLNA|The Public Health Agency of Sweden|Svartstr\u00f6m|Sweden

>Spike|hCoV-19/Norway/5060/2020|2020-10-29|EPI\_ISL\_635087|Original|hCoV-19^^Oslo|Human|Furst Medical Laboratory|Norwegian Institute of Public Health|Vollan|Norway

>Spike|hCoV-19/USA/MI-MDHHS-SC21872/2020|2020-04-14|EPI\_ISL\_565933|Original|hCoV-19^^Michigan|Human|Michigan Department of Health and Human Services|Michigan Department of Health and Human Services|Blankenship|USA

>Spike|hCoV-19/Wales/PHWC-49C612/2020|2020-12-10|EPI\_ISL\_742582|Original|hCoV-19^^Wales|Human|Wales Specialist Virology Centre Sequencing lab|COVID-19 Genomics UK (COG-UK) Consortium|Moore|United Kingdom

>Spike|hCoV-19/England/MILK-4887DA/2020|2020-05-13|EPI\_ISL\_559664|Original|hCoV-19^^England|Human|Lighthouse Lab in Milton Keynes|Wellcome Sanger Institute for the COVID-19 Genomics UK (COG-UK) consortium|Davies|United Kingdom

>Spike|hCoV-19/Denmark/DCGC-5775/2020|2020-09-28|EPI\_ISL\_620962|Original|hCoV-19^^Nordjylland|Human|Department of Virus and Microbiological Special Diagnostics|Albertsen lab|Michaelsen|Denmark

>Spike|hCoV-19/England/CAMC-A41090/2020|2020-10-06|EPI\_ISL\_609489|Original|hCoV-19^^England|Human|Lighthouse Lab in Cambridge|Wellcome Sanger Institute for the COVID-19 Genomics UK (COG-UK) consortium|Davies|United Kingdom

>Spike|hCoV-19/USA/NY-NYUMC606/2020|2020-04-03|EPI\_ISL\_444723|Original|hCoV-19^^New York|Human|NYU Langone Health|Departments of Pathology and Medicine|Maurano|USA



>Spike|hCoV-19/England/MILK-871433/2020|2020-07-17|EPI\_ISL\_557508|Original|hCoV-19^^England|Human|Lighthouse Lab in Milton Keynes|Wellcome Sanger Institute for the COVID-19 Genomics UK (COG-UK) consortium|Davies|United Kingdom

>Spike|hCoV-19/Belgium/UGent-165/2020|2020-10-12|EPI\_ISL\_634882|Original|hCoV-19^^Ghent|Human|Lab voor klinische biologie|Onderzoeksgroep Virologie|Lambrechts|Belgium

>Spike|hCoV-19/USA/WI-UW-1990/2020|2020-09-22|EPI\_ISL\_677398|Original|hCoV-19^^Wisconsin|Human|University of Wisconsin-Madison AIDS Vaccine Research Laboratories|University of Wisconsin-Madison AIDS Vaccine Research Laboratories|Baczenas|USA

>Spike|hCoV-19/England/ALDP-B1BBE8/2020|2020-11-01|EPI\_ISL\_645815|Original|hCoV-19^^England|Human|Lighthouse Lab in Alderley Park|Wellcome Sanger Institute for the COVID-19 Genomics UK (COG-UK) Consortium|Davies|United Kingdom

>Spike|hCoV-19/USA/CA-ALSR-2909/2020|2020-08-03|EPI\_ISL\_635731|Original|hCoV-19^^California|Human|San Diego County Public Health Laboratory|Andersen lab at Scripps Research|Gangavarapu|USA

>Spike|hCoV-19/Poland/1154951/2020|2020-06-07|EPI\_ISL\_512300|Original|hCoV-19^^Pomorskie|Human|Hematology Laboratory|Department of Virology|Smura|Poland

>Spike|hCoV-19/England/NOTT-1109B6/2020|2020-04-30|EPI\_ISL\_441881|Original|hCoV-19^^England|Human|Queens Medical Centre|COVID-19 Genomics UK (COG-UK) Consortium|Loose|United Kingdom

>Spike|hCoV-19/Scotland/CVR2975/2020|2020-04-22|EPI\_ISL\_448215|Original|hCoV-19^^Scotland|Human|West of Scotland Specialist Virology Centre|COVID-19 Genomics UK (COG-UK) Consortium|Robertson|United Kingdom

>Spike|hCoV-19/Denmark/DCGC-13061/2020|2020-11-30|EPI\_ISL\_712560|Original|hCoV-19^^Hovedstaden|Human|Department of Virus and Microbiological Special Diagnostics|Albertsen Lab|Michaelsen|Denmark

>Spike|hCoV-19/England/ALDP-C582DA/2020|2020-12-13|EPI\_ISL\_735954|Original|hCoV-19^^England|Human|Lighthouse Lab in Alderley Park|Wellcome Sanger Institute for the COVID-19 Genomics UK (COG-UK) Consortium|Davies|United Kingdom

>Spike|hCoV-19/USA/LA-EVTL193/2020|2020-07-27|EPI\_ISL\_574327|Original|hCoV-19^^Louisiana|Human|LSUHS Emerging Viral Threat Laboratory|Microbial Genome Sequencing Center|Kamil|USA

>Spike|hCoV-19/Scotland/QEUAH-AD668F/2020|2020-10-26|EPI\_ISL\_649729|Original|hCoV-19^^Scotland|Human|Lighthouse Lab in Glasgow|Wellcome Sanger Institute for the COVID-19 Genomics UK (COG-UK) Consortium|Davies|United Kingdom

>Spike|hCoV-19/England/ALDP-A68E8A/2020|2020-10-12|EPI\_ISL\_608435|Original|hCoV-19^^England|Human|Lighthouse Lab in Alderley Park|Wellcome Sanger Institute for the COVID-19 Genomics UK (COG-UK) consortium|Davies|United Kingdom

>Spike|hCoV-19/USA/MN-MDH-1385/2020|2020-05-12|EPI\_ISL\_509686|Original|hCoV-19^^Minnesota|Human|M Health Fairview|Minnesota Department of Health|Garfin|USA

>Spike|hCoV-19/USA/FL-BPHL-1707/2020|2020-09-30|EPI\_ISL\_613756|Original|hCoV-19^^Florida|Human|Florida Bureau of Public Health Laboratories|Florida Bureau of Public Health Laboratories|Blanton|USA

>Spike|hCoV-19/Switzerland/ZH-ETHZ-420165/2020|2020-12-18|EPI\_ISL\_768260|Original|hCoV-19^^Zurich|Human|Viollier AG|Department of Biosystems Science and Engineering|Nadeau|Switzerland

>Spike|hCoV-19/Australia/VIC16178/2020|2020-08-03|EPI\_ISL\_640457|Original|hCoV-19^^Victoria|Human|Microbiological Diagnostic Unit - Public Health Laboratory (MDU-PHL)|MDU-PHL|Schultz|Australia

>Spike|hCoV-19/Portugal/PT0321/2020|2020-03-15|EPI\_ISL\_454037|Original|hCoV-19^^Portugal|Human|unknown|Instituto Nacional de Saude (INSA)|Borges|Portugal

>Spike|hCoV-19/Thailand/NIH-2982-2/2020|2020-03-18|EPI\_ISL\_434708|Original|hCoV-19^^Thailand|Human|unknown|National Institute of Health. Department of medical Sciences|Okada|Thailand

>Spike|hCoV-19/Denmark/DCGC-5382/2020|2020-09-14|EPI\_ISL\_615313|Original|hCoV-19^^Syddanmark|Human|Department of Virus and Microbiological Special Diagnostics|Albertsen lab|Michaelsen|Denmark

>Spike|hCoV-19/Belgium/ULG-10086/2020|2020-04-04|EPI\_ISL\_424644|Original|hCoV-19^^Li\u00e8ge|Human|Department of Clinical Microbiology|GIGA Medical Genomics|Durkin|Belgium

>Spike|hCoV-19/USA/CA-CZB-14883/2020|2020-11-24|EPI\_ISL\_738669|Original|hCoV-19^^California|Human|Orange County Public Health Lab|Chan-Zuckerberg Biohub|Kamm|USA

>Spike|hCoV-19/USA/FL-BPHL-0189/2020|2020-04-03|EPI\_ISL\_480840|Original|hCoV-19^^Florida|Human|Florida Bureau of Public Health Laboratories|Florida Bureau of Public Health Laboratories|Blanton|USA

>Spike|hCoV-19/Canada/MB-NML-1077/2020|2020-08-04|EPI\_ISL\_582429|Original|hCoV-19^^Manitoba|Human|Cadham Provincial Laboratory|National Microbiology Laboratory (NML)|Majer|Canada

>Spike|hCoV-19/USA/CA-CZB-5710/2020|2020-07-27|EPI\_ISL\_672388|Original|hCoV-19^^California|Human|UCSF Clinical Microbiology Laboratory|Chan-Zuckerberg Biohub|Bhatt|USA

>Spike|hCoV-19/England/QEUA-540C83/2020|2020-05-13|EPI\_ISL\_532227|Original|hCoV-19^^England|Human|Lighthouse Lab in Glasgow|Wellcome Sanger Institute for the COVID-19 Genomics UK (COG-UK) consortium|Davies|United Kingdom

>Spike|hCoV-19/USA/UT-UPHL-2009194/2020|2020-05-31|EPI\_ISL\_525177|Original|hCoV-19^^Utah|Human|Utah Public Health Laboratory|Utah Public Health Laboratory|Young|USA

>Spike|hCoV-19/England/CAMB-81429/2020|2020-04-10|EPI\_ISL\_442583|Original|hCoV-19^^England|Human|Department of Pathology|Wellcome Sanger Institute for the COVID-19 Genomics UK (COG-UK) consortium|Amato|United Kingdom

>Spike|hCoV-19/Switzerland/BL-42229815/2020|2020-04-13|EPI\_ISL\_581699|Original|hCoV-19^^Basel-Land|Human|University Hospital Basel|University Hospital Basel|Roloff Handschin|Switzerland

>Spike|hCoV-19/Spain/GA-USC-002/2020|2020-05-11|EPI\_ISL\_468332|Original|hCoV-19^^Galicia|Human|Microbiology Service|Genomes & Disease|Garcia-Souto|Spain

>Spike|hCoV-19/USA/TX-HMH-5980/2020|2020-06-30|EPI\_ISL\_547141|Original|hCoV-19^^Texas|Human|Houston Methodist Hospital|Houston Methodist Hospital|Long|USA

>Spike|hCoV-19/Spain/IB-IBV-99007209/2020|2020-05-28|EPI\_ISL\_541956|Original|hCoV-19^^Balear Islands|Human|Servicio de Microbiolog\u00eda|SeqCOVID-SPAIN consortium|IBV (CSIC)|Comas|Spain

>Spike|hCoV-19/England/CAMC-A649F6/2020|2020-10-10|EPI\_ISL\_609131|Original|hCoV-19^^England|Human|Lighthouse Lab in Cambridge|Wellcome Sanger Institute for the COVID-19 Genomics UK (COG-UK) consortium|Davies|United Kingdom

>Spike|hCoV-19/USA/MI-MDHHS-SC20737/2020|2020-04-29|EPI\_ISL\_471758|Original|hCoV-19^^Michigan|Human|Michigan Department of Health and Human Services|Michigan Department of Health and Human Services|Blankenship|USA

>Spike|hCoV-19/England/CAMC-A58218/2020|2020-10-09|EPI\_ISL\_597070|Original|hCoV-19^^England|Human|Lighthouse Lab in Cambridge|Wellcome Sanger Institute for the COVID-19 Genomics UK (COG-UK) consortium|Davies|United Kingdom

>Spike|hCoV-19/Singapore/301/2020|2020-04-06|EPI\_ISL\_462419|Original|hCoV-19^^Singapore|Human|National Public Health Laboratory|National Public Health Laboratory|Mak|Singapore

>Spike|hCoV-19/USA/TX-HMH-1415/2020|2020-04-16|EPI\_ISL\_542709|Original|hCoV-19^^Texas|Human|Houston Methodist Hospital|Houston Methodist Hospital|Long|USA

>Spike|hCoV-19/Denmark/DCGC-18924/2020|2020-12-07|EPI\_ISL\_748642|Original|hCoV-19^^Hovedstaden|Human|Department of Virus and Microbiological Special Diagnostics|Albertsen Lab|Michaelsen|Denmark

>Spike|hCoV-19/USA/CT-UW-651/2020|2020-03-13|EPI\_ISL\_476916|Original|hCoV-19^^Connecticut|Human|UW Virology Lab|UW Virology Lab|Roychoudhury|USA

>Spike|hCoV-19/England/NOTT-10EF6E/2020|2020-03-30|EPI\_ISL\_432947|Original|hCoV-19^^England|Human|Queens Medical Centre|COVID-19 Genomics UK (COG-UK) Consortium|Loose|United Kingdom

>Spike|hCoV-19/England/ALDP-AA3472/2020|2020-10-22|EPI\_ISL\_624024|Original|hCoV-19^^England|Human|Lighthouse Lab in Alderley Park|Wellcome Sanger Institute for the COVID-19 Genomics UK (COG-UK) consortium|Davies|United Kingdom

>Spike|hCoV-19/USA/UN-UW-1292/2020|2020-03-16|EPI\_ISL\_422979|Original|hCoV-19^^USA|Human|UW Virology Lab|UW Virology Lab|Roychoudhury|USA

>Spike|hCoV-19/England/ALDP-9BDFEE/2020|2020-09-10|EPI\_ISL\_568077|Original|hCoV-19^^England|Human|Lighthouse Lab in Alderley Park|Wellcome Sanger Institute for the COVID-19 Genomics UK (COG-UK) consortium|Davies|United Kingdom

>Spike|hCoV-19/Hangzhou/HZCDC0167/2020|2020-01-23|EPI\_ISL\_421223|Original|hCoV-19^^Hangzhou|Human|Hangzhou Center for Diseases Control and Prevention|Hangzhou Center for Diseases Control and Prevention|Li|China

>Spike|hCoV-19/USA/VA-DCLS-2399/2020|2020-11-16|EPI\_ISL\_734170|Original|hCoV-19^^Virginia|Human|Virginia Division of Consolidated Laboratory Services (DCLS)|Virginia Division of Consolidated Laboratory Services (DCLS)|St. Jacques|USA

>Spike|hCoV-19/England/ALDP-B1C349/2020|2020-11-01|EPI\_ISL\_645588|Original|hCoV-19^^England|Human|Lighthouse Lab in Alderley Park|Wellcome Sanger Institute for the COVID-19 Genomics UK (COG-UK) Consortium|Davies|United Kingdom

>Spike|hCoV-19/USA/TX-HMH-2673/2020|2020-06-01|EPI\_ISL\_545467|Original|hCoV-19^^Texas|Human|Houston Methodist Hospital|Houston Methodist Hospital|Long|USA

>Spike|hCoV-19/England/204221523/2020|2020-00-00|EPI\_ISL\_593844|Original|hCoV-19^^England|Human|Respiratory Virus Unit|Respiratory Virus Unit|Platt|United Kingdom

>Spike|hCoV-19/Scotland/QEUH-A20E51/2020|2020-10-01|EPI\_ISL\_599060|Original|hCoV-19^^Scotland|Human|Lighthouse Lab in Glasgow|Wellcome Sanger Institute for the COVID-19 Genomics UK (COG-UK) consortium|Davies|United Kingdom

>Spike|hCoV-19/USA/TX-HMH-MCoV-14913/2020|2020-10-14|EPI\_ISL\_786397|Original|hCoV-19^^Texas|Human|Houston Methodist Hospital|Houston Methodist Hospital|Long|USA

>Spike|hCoV-19/Portugal/PT1080/2020|2020-03-27|EPI\_ISL\_511627|Original|hCoV-19^^Portugal|Human|Instituto Nacional de Saude (INSA)|Instituto Nacional de Saude (INSA)|Borges|Portugal

>Spike|hCoV-19/Germany/HH-hpi-p1302/2020|2020-03-20|EPI\_ISL\_775866|Original|hCoV-19^^Hamburg|Human|University Medical Center Hamburg Eppendorf|Heinrich Pette Institute|Robitaille|Germany

>Spike|hCoV-19/England/MILK-BB1DC0/2020|2020-11-18|EPI\_ISL\_720370|Original|hCoV-19^^England|Human|Lighthouse Lab in Milton Keynes|Wellcome Sanger Institute for the COVID-19 Genomics UK (COG-UK) Consortium|Davies|United Kingdom

>Spike|hCoV-19/Scotland/EDB032/2020|2020-03-12|EPI\_ISL\_425838|Original|hCoV-19^^Scotland|Human|Virology Department|COVID-19 Genomics UK (COG-UK) Consortium|Williams|United Kingdom

>Spike|hCoV-19/Denmark/DCGC-6112/2020|2020-08-31|EPI\_ISL\_621146|Original|hCoV-19^^Midtjylland|Human|Department of Virus and Microbiological Special Diagnostics|Albertsen lab|Michaelsen|Denmark

>Spike|hCoV-19/Denmark/DCGC-19325/2020|2020-12-07|EPI\_ISL\_748882|Original|hCoV-19^^Syddanmark|Human|Department of Virus and Microbiological Special Diagnostics|Albertsen Lab|Michaelsen|Denmark

>Spike|hCoV-19/USA/WA-UW-22978/2020|2020-08-10|EPI\_ISL\_570741|Original|hCoV-19^^Washington|Human|UW Virology Lab|UW Virology Lab|Roychoudhury|USA

>Spike|hCoV-19/Wales/ALDP-B1A1E7/2020|2020-11-01|EPI\_ISL\_710911|Original|hCoV-19^^Wales|Human|Lighthouse Lab in Alderley Park|Wellcome Sanger Institute for the COVID-19 Genomics UK (COG-UK) Consortium|Davies|United Kingdom

>Spike|hCoV-19/Latvia/057/2020|2020-07-07|EPI\_ISL\_492992|Original|hCoV-19^^Latvia|Human|Centr\u0101l\u0101 laboratorija|Latvian Biomedical Research and Study Centre|Zrelavs|Latvia

>Spike|hCoV-19/Wales/PHWC-2EE02/2020|2020-04-07|EPI\_ISL\_446158|Original|hCoV-19^^Wales|Human|Wales Specialist Virology Centre|Public Health Wales Microbiology Cardiff|Moore|United Kingdom

>Spike|hCoV-19/England/205082082/2020|2020-12-08|EPI\_ISL\_733589|Original|hCoV-19^^England|Human|Respiratory Virus Unit|COVID-19 Genomics UK (COG-UK) Consortium|Lackenby|United Kingdom

>Spike|hCoV-19/Sweden/20-22282/2020|2020-09-17|EPI\_ISL\_654897|Original|hCoV-19^^Skane|Human|Klinisk mikrobiologi|The Public Health Agency of Sweden|Svartstr\u00f6m|Sweden

>Spike|hCoV-19/England/ALDP-BCAB9D/2020|2020-11-23|EPI\_ISL\_703307|Original|hCoV-19^^England|Human|Lighthouse Lab in Alderley Park|Wellcome Sanger Institute for the COVID-19 Genomics UK (COG-UK) Consortium|Davies|United Kingdom

>Spike|hCoV-19/England/CAMC-B20AA7/2020|2020-11-01|EPI\_ISL\_647739|Original|hCoV-19^^England|Human|Lighthouse Lab in Cambridge|Wellcome Sanger Institute for the COVID-19 Genomics UK (COG-UK) Consortium|Davies|United Kingdom

>Spike|hCoV-19/England/QEUA-B2CAE7/2020|2020-11-02|EPI\_ISL\_646465|Original|hCoV-19^^England|Human|Lighthouse Lab in Glasgow|Wellcome Sanger Institute for the COVID-19 Genomics UK (COG-UK) Consortium|Davies|United Kingdom

>Spike|hCoV-19/Austria/CeMM0635/2020|2020-04-06|EPI\_ISL\_475934|Original|hCoV-19^^Austria|Human|Universitaetsklinik f\u00fcr Innere Medizin II Innsbruck|Bergthaler laboratory|Bergthaler|Austria

>Spike|hCoV-19/Russia/ALT-RII-MH2761S/2020|2020-09-22|EPI\_ISL\_602434|Original|hCoV-19^^Altai K|Human|HELIX LLC|WHO National Influenza Centre Russian Federation|Komissarov|Russia

>Spike|hCoV-19/England/CAMB-71CBB/2020|2020-03-30|EPI\_ISL\_439947|Original|hCoV-19^^England|Human|Department of Pathology|Wellcome Sanger Institute for the COVID-19 Genomics UK (COG-UK) consortium|Amato|United Kingdom

>Spike|hCoV-19/Denmark/DCGC-6911/2020|2020-10-12|EPI\_ISL\_619757|Original|hCoV-19^^Hovedstaden|Human|Department of Virus and Microbiological Special Diagnostics|Albertsen lab|Michaelsen|Denmark

>Spike|hCoV-19/Wales/PHWC-4A1243/2020|2020-12-08|EPI\_ISL\_743642|Original|hCoV-19^^Wales|Human|Wales Specialist Virology Centre Sequencing lab|COVID-19 Genomics UK (COG-UK) Consortium|Moore|United Kingdom

>Spike|hCoV-19/Belgium/reg-10191260/2020|2020-10-19|EPI\_ISL\_735171|Original|hCoV-19^^Oostende|Human|UZ Leuven|KU Leuven|Maes|Belgium

>Spike|hCoV-19/England/BRIS-18544AC/2020|2020-04-29|EPI\_ISL\_492325|Original|hCoV-19^^England|Human|PHE South West Regional Laboratory|Wellcome Sanger Institute for the COVID-19 Genomics UK (COG-UK) consortium|Davies|United Kingdom

>Spike|hCoV-19/South Korea/KCDC2658/2020|2020-05-05|EPI\_ISL\_522441|Original|hCoV-19^^South Korea|Human|Center for Laboratory Control of Infectious Diseases|Center for Laboratory Control of Infectious Diseases|Kim|South Korea

>Spike|hCoV-19/England/QEUA-9FAE9D/2020|2020-09-28|EPI\_ISL\_588270|Original|hCoV-19^^England|Human|Lighthouse Lab in Glasgow|Wellcome Sanger Institute for the COVID-19 Genomics UK (COG-UK) consortium|Davies|United Kingdom

>Spike|hCoV-19/England/QEUA-9993EC/2020|2020-08-24|EPI\_ISL\_541824|Original|hCoV-19^^England|Human|Lighthouse Lab in Glasgow|Wellcome Sanger Institute for the COVID-19 Genomics UK (COG-UK) consortium|Davies|United Kingdom

>Spike|hCoV-19/England/205181947/2020|2020-12-17|EPI\_ISL\_766495|Original|hCoV-19^^England|Human|Respiratory Virus Unit|COVID-19 Genomics UK (COG-UK) Consortium|Platt|United Kingdom

>Spike|hCoV-19/Scotland/CVR5607/2020|2020-11-02|EPI\_ISL\_650789|Original|hCoV-19^^Scotland|Human|West of Scotland Specialist Virology Centre|COVID-19 Genomics UK (COG-UK) Consortium|Robertson|United Kingdom

>Spike|hCoV-19/England/BRIS-1233D0/2020|2020-04-06|EPI\_ISL\_442711|Original|hCoV-19^^England|Human|PHE South West Regional Laboratory|Wellcome Sanger Institute for the COVID-19 Genomics UK (COG-UK) consortium|Amato|United Kingdom

>Spike|hCoV-19/Wales/PHWC-15FF6E/2020|2020-05-25|EPI\_ISL\_472875|Original|hCoV-19^^Wales|Human|Wales Specialist Virology Centre Sequencing lab|COVID-19 Genomics UK (COG-UK) Consortium|Moore|United Kingdom

>Spike|hCoV-19/USA/WI-GMF-18791/2020|2020-09-04|EPI\_ISL\_547785|Original|hCoV-19^^Wisconsin|Human|Gundersen Molecular Diagnostics Laboratory|Kabara Cancer Research Institute|Kenny|USA

>Spike|hCoV-19/Spain/AN-IBV-001895/2020|2020-03-15|EPI\_ISL\_452453|Original|hCoV-19^^Andalucia|Human|Hospital Universitario Puerta del Mar de C\u00e1diz - INIBICA|SeqCOVID-SPAIN consortium|IBV (CSIC)|Comas|Spain

>Spike|hCoV-19/Denmark/DCGC-2742/2020|2020-08-17|EPI\_ISL\_616487|Original|hCoV-19^^Hovedstaden|Human|Department of Virus and Microbiological Special Diagnostics|Albertsen lab|Michaelsen|Denmark

>Spike|hCoV-19/Switzerland/LU-ETHZ-380328/2020|2020-11-26|EPI\_ISL\_721828|Original|hCoV-19^^Lucerne|Human|Viollier AG|Department of Biosystems Science and Engineering|Nadeau|Switzerland

>Spike|hCoV-19/Belgium/ULG-10063/2020|2020-04-05|EPI\_ISL\_424665|Original|hCoV-19^^Li\u00e8ge|Human|Department of Clinical Microbiology|GIGA Medical Genomics|Durkin|Belgium

>Spike|hCoV-19/United Arab Emirates/0797/2020|2020-05-19|EPI\_ISL\_698937|Original|hCoV-19^^Abu Dhabi|Human|Group 42 (G42) Healthcare|G42 Healthcare|Ogrodzki|United Arab Emirates

>Spike|hCoV-19/England/CAMB-797C1/2020|2020-04-02|EPI\_ISL\_441217|Original|hCoV-19^^England|Human|Department of Pathology|Wellcome Sanger Institute for the COVID-19 Genomics UK (COG-UK) consortium|Amato|United Kingdom

>Spike|hCoV-19/USA/WI-UW-632/2020|2020-06-28|EPI\_ISL\_491326|Original|hCoV-19^^Wisconsin|Human|University of Wisconsin-Madison AIDS Vaccine Research Laboratories|University of Wisconsin-Madison AIDS Vaccine Research Laboratories|Baczenas|USA

>Spike|hCoV-19/Japan/PG-1637/2020|2020-03-00|EPI\_ISL\_685243|Original|hCoV-19^^Japan|Human|Pathogen Genomics Center|Pathogen Genomics Center|Sekizuka|Japan

>Spike|hCoV-19/England/TBSD-2488E48/2020|2020-04-26|EPI\_ISL\_482067|Original|hCoV-19^^England|Human|The Department of Microbiology|Wellcome Sanger Institute for the COVID-19 Genomics UK (COG-UK) consortium|Davies|United Kingdom

>Spike|hCoV-19/USA/AZ-TG408151/2020|2020-06-15|EPI\_ISL\_694904|Original|hCoV-19^^Arizona|Human|AZ SPHL|TGen North|French|USA

>Spike|hCoV-19/Denmark/DCGC-18955/2020|2020-12-07|EPI\_ISL\_748663|Original|hCoV-19^^Sjaelland|Human|Department of Virus and Microbiological Special Diagnostics|Albertsen Lab|Michaelsen|Denmark

>Spike|hCoV-19/Canada/BC\_27180562/2020|2020-03-00|EPI\_ISL\_463261|Original|hCoV-19^^British Columbia|Human|BCCDC Public Health Laboratory|BCCDC Public Health Laboratory|Harrigan|Canada

>Spike|hCoV-19/England/204742181/2020|2020-00-00|EPI\_ISL\_660551|Original|hCoV-19^^England|Human|Respiratory Virus Unit|COVID-19 Genomics UK (COG-UK) Consortium|Platt|United Kingdom

>Spike|hCoV-19/Germany/HH-hpi-p2448/2020|2020-04-19|EPI\_ISL\_775687|Original|hCoV-19^^Hamburg|Human|University Medical Center Hamburg Eppendorf|Heinrich Pette Institute|Robitaille|Germany

>Spike|hCoV-19/England/MILK-97080A/2020|2020-08-17|EPI\_ISL\_553080|Original|hCoV-19^^England|Human|Lighthouse Lab in Milton Keynes|Wellcome Sanger Institute for the COVID-19 Genomics UK (COG-UK) consortium|Davies|United Kingdom

>Spike|hCoV-19/Denmark/DCGC-1416/2020|2020-03-30|EPI\_ISL\_622440|Original|hCoV-19^^Hovedstaden|Human|Department of Virus and Microbiological Special Diagnostics|Albertsen lab|Michaelsen|Denmark

>Spike|hCoV-19/USA/CA-ALSR-2844/2020|2020-07-24|EPI\_ISL\_635710|Original|hCoV-19^^California|Human|San Diego County Public Health Laboratory|Andersen lab at Scripps Research|Gangavarapu|USA

>Spike|hCoV-19/England/NOTT-121805/2020|2020-12-21|EPI\_ISL\_764497|Original|hCoV-19^^England|Human|Queens Medical Centre|COVID-19 Genomics UK (COG-UK) Consortium|Loose|United Kingdom

>Spike|hCoV-19/USA/FL-BPHL-1773/2020|2020-07-29|EPI\_ISL\_613878|Original|hCoV-19^^Florida|Human|Florida Bureau of Public Health Laboratories|Florida Bureau of Public Health Laboratories|Blanton|USA

>Spike|hCoV-19/USA/MI-MDHHS-SC21603/2020|2020-03-27|EPI\_ISL\_516330|Original|hCoV-19^^Michigan|Human|Michigan Department of Health and Human Services|Michigan Department of Health and Human Services|Blankenship|USA

>Spike|hCoV-19/USA/NY-NYCPHL-001304/2020|2020-11-10|EPI\_ISL\_683909|Original|hCoV-19^^New York|Human|DOHMH Corona|New York City Public Health Laboratory|Wang|USA

>Spike|hCoV-19/England/MILK-99C6C2/2020|2020-08-30|EPI\_ISL\_550788|Original|hCoV-19^^England|Human|Lighthouse Lab in Milton Keynes|Wellcome Sanger Institute for the COVID-19 Genomics UK (COG-UK) consortium|Davies|United Kingdom

>Spike|hCoV-19/England/MILK-B38E19/2020|2020-11-02|EPI\_ISL\_650667|Original|hCoV-19^^England|Human|University of Exeter|COVID-19 Genomics UK (COG-UK) Consortium|Temperton|United Kingdom

>Spike|hCoV-19/England/CAMC-B20209/2020|2020-11-03|EPI\_ISL\_647537|Original|hCoV-19^^England|Human|Lighthouse Lab in Cambridge|Wellcome Sanger Institute for the COVID-19 Genomics UK (COG-UK) Consortium|Davies|United Kingdom

>Spike|hCoV-19/USA/MI-MDHHS-SC21243/2020|2020-04-04|EPI\_ISL\_507498|Original|hCoV-19^^Michigan|Human|Michigan Department of Health and Human Services|Michigan Department of Health and Human Services|Blankenship|USA

>Spike|hCoV-19/USA/OR-OHSU-2551/2020|2020-08-19|EPI\_ISL\_667248|Original|hCoV-19^^Oregon|Human|OHSU Lab Services Molecular Microbiology Lab|Oregon SARS-CoV-2 Genome Sequencing Center|O'Roak|USA

>Spike|hCoV-19/France/PDL-SC613/2020|2020-03-26|EPI\_ISL\_663259|Original|hCoV-19^^Pays-de-la-Loire|Human|CHU Nantes|CNR Virus des Infections Respiratoires - France SUD|Bal|France

>Spike|hCoV-19/USA/TX-HMH-5307/2020|2020-06-25|EPI\_ISL\_544668|Original|hCoV-19^^Texas|Human|Houston Methodist Hospital|Houston Methodist Hospital|Long|USA

>Spike|hCoV-19/Australia/VIC12352/2020|2020-09-13|EPI\_ISL\_563553|Original|hCoV-19^^Victoria|Human|Microbiological Diagnostic Unit - Public Health Laboratory (MDU-PHL)|MDU-PHL|Schultz|Australia

>Spike|hCoV-19/England/ALDP-4FA3DF/2020|2020-06-24|EPI\_ISL\_559213|Original|hCoV-19^^England|Human|Lighthouse Lab in Alderley Park|Wellcome Sanger Institute for the COVID-19 Genomics UK (COG-UK) Consortium|Davies|United Kingdom

>Spike|hCoV-19/Denmark/DCGC-18239/2020|2020-12-14|EPI\_ISL\_749367|Original|hCoV-19^^Hovedstaden|Human|Department of Virus and Microbiological Special Diagnostics|Albertsen Lab|Michaelsen|Denmark

>Spike|hCoV-19/England/ALDP-A67EC7/2020|2020-10-12|EPI\_ISL\_608414|Original|hCoV-19^^England|Human|Lighthouse Lab in Alderley Park|Wellcome Sanger Institute for the COVID-19 Genomics UK (COG-UK) consortium|Davies|United Kingdom

>Spike|hCoV-19/Scotland/CVR2111/2020|2020-04-10|EPI\_ISL\_493772|Original|hCoV-19^^Scotland|Human|West of Scotland Specialist Virology Centre|COVID-19 Genomics UK (COG-UK) Consortium|Robertson|United Kingdom

>Spike|hCoV-19/Japan/NGY-NNH-053/2020|2020-10-12|EPI\_ISL\_637019|Original|hCoV-19^^Aichi|Human|Department of Infectious Diseases and Immunology|Clinical Research Center|Iwatani|Japan

>Spike|hCoV-19/USA/CA-CZB-13034/2020|2020-05-14|EPI\_ISL\_672314|Original|hCoV-19^^California|Human|Alameda County Public Health Lab|Chan-Zuckerberg Biohub|Bhatt|USA

>Spike|hCoV-19/USA/UT-02949/2020|2020-04-30|EPI\_ISL\_513698|Original|hCoV-19^^Utah|Human|Utah Public Health Laboratory|Utah Public Health Laboratory|Butz|USA

>Spike|hCoV-19/Spain/RI-IBV-005988/2020|2020-03-24|EPI\_ISL\_500422|Original|hCoV-19^^La Rioja|Human|Centro de Investigaci\u00f3n Biom\u00e9dica de La Rioja - Hospital San Pedro Logro\u00f1o|SeqCOVID-SPAIN consortium|IBV (CSIC)|Comas|Spain

>Spike|hCoV-19/England/CAMC-B3290F/2020|2020-11-05|EPI\_ISL\_659702|Original|hCoV-19^^England|Human|Lighthouse Lab in Cambridge|Wellcome Sanger Institute for the COVID-19 Genomics UK (COG-UK) Consortium|Davies|United Kingdom

>Spike|hCoV-19/England/CAMB-7B6E0/2020|2020-04-03|EPI\_ISL\_441654|Original|hCoV-19^^England|Human|Department of Pathology|Wellcome Sanger Institute for the COVID-19 Genomics UK (COG-UK) consortium|Amato|United Kingdom

>Spike|hCoV-19/England/QEUEH-AD31CD/2020|2020-10-26|EPI\_ISL\_633819|Original|hCoV-19^^England|Human|Lighthouse Lab in Glasgow|Wellcome Sanger Institute for the COVID-19 Genomics UK (COG-UK) consortium|Davies|United Kingdom

>Spike|hCoV-19/England/QEUEH-9B6F4F/2020|2020-09-04|EPI\_ISL\_590553|Original|hCoV-19^^England|Human|Lighthouse Lab in Glasgow|Wellcome Sanger Institute for the COVID-19 Genomics UK (COG-UK) consortium|Davies|United Kingdom

>Spike|hCoV-19/England/QEUEH-9A4023/2020|2020-09-01|EPI\_ISL\_540167|Original|hCoV-19^^England|Human|Lighthouse Lab in Glasgow|Wellcome Sanger Institute for the COVID-19 Genomics UK (COG-UK) consortium|Davies|United Kingdom

>Spike|hCoV-19/Saudi Arabia/KAUST-Makkah06/2020|2020-03-23|EPI\_ISL\_437462|Original|hCoV-19^^Makkah|Human|Pathogen Genomics Lab King Abdullah University of Science and Technology(KAUST)|Pathogen Genomics Lab King Abdullah University of Science and Technology(KAUST)|Mohamed Ghazzali|Saudi Arabia

>Spike|hCoV-19/England/NORW-EEBBC/2020|2020-00-00|EPI\_ISL\_529526|Original|hCoV-19^^England|Human|Quadram Institute Bioscience|COVID-19 Genomics UK (COG-UK) Consortium|Alikhan|United Kingdom

>Spike|hCoV-19/Netherlands/NH-RIVM-20549/2020|2020-12-14|EPI\_ISL\_790636|Original|hCoV-19^^Noord-Holland|Human|Dutch COVID-19 response team|National Institute for Public Health and the Environment (RIVM)|Meijer|Netherlands

>Spike|hCoV-19/Denmark/DCGC-2786/2020|2020-08-24|EPI\_ISL\_616621|Original|hCoV-19^^Midtjylland|Human|Department of Virus and Microbiological Special Diagnostics|Albertsen lab|Michaelsen|Denmark

>Spike|hCoV-19/Denmark/DCGC-22562/2020|2020-12-14|EPI\_ISL\_757457|Original|hCoV-19^^Syddanmark|Human|Department of Virus and Microbiological Special Diagnostics|Albertsen Lab|Michaelsen|Denmark

>Spike|hCoV-19/Germany/BY-MVP-0095/2020|2020-04-03|EPI\_ISL\_437287|Original|hCoV-19^^Bavaria|Human|Max von Pettenkofer Institute|Laboratory for Functional Genome Analysis|Graf|Germany

>Spike|hCoV-19/Wales/PHWC-35DED/2020|2020-04-27|EPI\_ISL\_474572|Original|hCoV-19^^Wales|Human|Originating lab|COVID-19 Genomics UK (COG-UK) Consortium|Moore|United Kingdom

>Spike|hCoV-19/Uruguay/UY-NYUMC861/2020|2020-03-25|EPI\_ISL\_457957|Original|hCoV-19^^Montevideo|Human|Laboratorio de Biología Molecular Asociada Espaflora Primera en Salud|Departments of Pathology and Medicine|Maurano|Uruguay

>Spike|hCoV-19/Australia/VIC11943/2020|2020-08-04|EPI\_ISL\_591900|Original|hCoV-19^^Victoria|Human|Victorian Infectious Diseases Reference Laboratory (VIDRL)|VIDRL and MDU-PHL|Schultz|Australia

>Spike|hCoV-19/USA/VA-DCLS-0144/2020|2020-04-17|EPI\_ISL\_437782|Original|hCoV-19^^Virginia|Human|Virginia DCLS|Virginia DCLS|St. Jacques|USA

>Spike|hCoV-19/England/QEUEH-B7CBB8/2020|2020-11-14|EPI\_ISL\_741809|Original|hCoV-19^^England|Human|Oxford Viromics|COVID-19 Genomics UK (COG-UK) Consortium|Golubchik|United Kingdom

>Spike|hCoV-19/Germany/BB-ChVir-D935-7207/2020|2020-03-13|EPI\_ISL\_753814|Original|hCoV-19^^Brandenburg|Human|Charit Universit Medizin Berlin|Charit Universit Medizin Berlin|Muehlemann|Germany

>Spike|hCoV-19/New Zealand/20CV0057/2020|2020-08-14|EPI\_ISL\_547971|Original|hCoV-19^^Auckland|Human|LabTests|Institute of Environmental Science and Research (ESR)|Wang|New Zealand

>Spike|hCoV-19/Spain/AR-ISCI-201781/2020|2020-03-08|EPI\_ISL\_578193|Original|hCoV-19^^Aragon|Human|Hospital Universitario Miguel Servet|Instituto de Salud Carlos III|Caballero|Spain

>Spike|hCoV-19/England/QEUEH-5EA18C/2020|2020-06-16|EPI\_ISL\_533341|Original|hCoV-19^^England|Human|Lighthouse Lab in Glasgow|Wellcome Sanger Institute for the COVID-19 Genomics UK (COG-UK) consortium|Davies|United Kingdom

>Spike|hCoV-19/Australia/VIC10263/2020|2020-08-28|EPI\_ISL\_562846|Original|hCoV-19^^Victoria|Human|Microbiological Diagnostic Unit - Public Health Laboratory (MDU-PHL)|MDU-PHL|Schultz|Australia

>Spike|hCoV-19/USA/TX-HMH-MCoV-13656/2020|2020-08-20|EPI\_ISL\_788758|Original|hCoV-19^^Texas|Human|Houston Methodist Hospital|Houston Methodist Hospital|Long|USA

>Spike|hCoV-19/USA/CA-ALSR-1791/2020|2020-05-13|EPI\_ISL\_512187|Original|hCoV-19^^California|Human|San Diego County Public Health Laboratory|Andersen lab at Scripps Research|Gangavarapu|USA

>Spike|hCoV-19/Portugal/PT0722/2020|2020-03-27|EPI\_ISL\_510981|Original|hCoV-19^^Portugal|Human|Instituto Nacional de Saude (INSA)|Instituto Nacional de Saude (INSA)|Borges|Portugal

>Spike|hCoV-19/South Africa/KRISP-K003691/2020|2020-10-03|EPI\_ISL\_602873|Original|hCoV-19^^KwaZulu-Natal|Human|NHLS-IALCH|KRISP|de Oliveira|South Africa

>Spike|hCoV-19/England/CAMB-1AFFAB/2020|2020-05-07|EPI\_ISL\_448092|Original|hCoV-19^^England|Human|Department of Pathology|COVID-19 Genomics UK (COG-UK) Consortium|Meredith|United Kingdom

>Spike|hCoV-19/Netherlands/LI-RIVM-20960/2020|2020-12-28|EPI\_ISL\_790984|Original|hCoV-19^^Limburg|Human|Dutch COVID-19 response team|National Institute for Public Health and the Environment (RIVM)|Meijer|Netherlands

>Spike|hCoV-19/Scotland/CVR2187/2020|2020-04-11|EPI\_ISL\_477870|Original|hCoV-19^^Scotland|Human|West of Scotland Specialist Virology Centre|COVID-19 Genomics UK (COG-UK) Consortium|Robertson|United Kingdom

>Spike|hCoV-19/USA/DE-DHSS-F1019125/2020|2020-10-29|EPI\_ISL\_708438|Original|hCoV-19^^Delaware|Human|Delaware Public Health Lab|Delaware Public Health Lab|Bajwa|USA

>Spike|hCoV-19/Ireland/D-NVRL-73IRL37632/2020|2020-09-16|EPI\_ISL\_578273|Original|hCoV-19^^Dublin|Human|National Virus Reference Laboratory|National Virus Reference Laboratory|Gonzalez|Ireland

>Spike|hCoV-19/Wales/PHWC-31455/2020|2020-04-12|EPI\_ISL\_446448|Original|hCoV-19^^Wales|Human|Wales Specialist Virology Centre|Public Health Wales Microbiology Cardiff|Moore|United Kingdom

>Spike|hCoV-19/England/QEUA-9DE424/2020|2020-09-21|EPI\_ISL\_599690|Original|hCoV-19^^England|Human|Lighthouse Lab in Glasgow|Wellcome Sanger Institute for the COVID-19 Genomics UK (COG-UK) consortium|Davies|United Kingdom

>Spike|hCoV-19/England/ALDP-BB3CC1/2020|2020-11-19|EPI\_ISL\_701746|Original|hCoV-19^^England|Human|Lighthouse Lab in Alderley Park|Wellcome Sanger Institute for the COVID-19 Genomics UK (COG-UK) Consortium|Davies|United Kingdom

>Spike|hCoV-19/England/MILK-CB0364/2020|2020-12-03|EPI\_ISL\_761079|Original|hCoV-19^^England|Human|Lighthouse Lab in Milton Keynes|Wellcome Sanger Institute for the COVID-19 Genomics UK (COG-UK) Consortium|Davies|United Kingdom

>Spike|hCoV-19/South Korea/KDCA0213/2020|2020-11-16|EPI\_ISL\_747448|Original|hCoV-19^^South Korea|Human|Division of Emerging Infectious Diseases|Division of Emerging Infectious Diseases|Park|South Korea

>Spike|hCoV-19/USA/CA-SEARCH-5331/2020|2020-12-07|EPI\_ISL\_755150|Original|hCoV-19^^California|Human|UCSD EXCITE lab|Andersen lab at Scripps Research|Gangavarapu|USA

>Spike|hCoV-19/Spain/PV-IBV-004265/2020|2020-04-07|EPI\_ISL\_500329|Original|hCoV-19^^Basque Country|Human|Servicio de Microbiolog\u00eda. Hospital Universitario Donostia. OSI Donostialdea. \u00clrea de Enfermedades Infecciosas|SeqCOVID-SPAIN consortium/IBV (CSIC)|Comas|Spain

>Spike|hCoV-19/Spain/CN-IBV-97006496/2020|2020-03-27|EPI\_ISL\_537706|Original|hCoV-19^^Canary Islands|Human|Hospital Universitario de Gran Canaria Dr. Negr\u00ede|SeqCOVID-SPAIN consortium/IBV (CSIC)|Comas|Spain

>Spike|hCoV-19/Canada/UN-CRCHUM-PreFreeze-1/2020|2020-09-04|EPI\_ISL\_667758|Original|hCoV-19^^Canada|Human|Microbiology|Microbiology|Benoit, P.|Canada

>Spike|hCoV-19/Oman/205036714/2020|2020-05-17|EPI\_ISL\_491984|Original|hCoV-19^^Muscat|Human|Oman-NIC|Department of \u00a0Microbiology\u00a0and Immunology-SQUH|AL Zadjali|Oman

>Spike|hCoV-19/Finland/13M33/2020|2020-03-13|EPI\_ISL\_418390|Original|hCoV-19^^Finland|Human|Department of Virology and Immunology|Department of Virology|Smura|Finland

>Spike|hCoV-19/England/QEUA-B13A6B/2020|2020-11-02|EPI\_ISL\_641830|Original|hCoV-19^^England|Human|Lighthouse Lab in Glasgow|Wellcome Sanger Institute for the COVID-19 Genomics UK (COG-UK) Consortium|Davies|United Kingdom

>Spike|hCoV-19/Scotland/CVR2097/2020|2020-04-09|EPI\_ISL\_493767|Original|hCoV-19^^Scotland|Human|West of Scotland Specialist Virology Centre|COVID-19 Genomics UK (COG-UK) Consortium|Robertson|United Kingdom

>Spike|hCoV-19/USA/AZ-TG371284/2020|2020-05-16|EPI\_ISL\_694543|Original|hCoV-19^^Arizona|Human|AZ SPHL|TGen North|French|USA

>Spike|hCoV-19/Australia/VIC12237/2020|2020-07-25|EPI\_ISL\_563546|Original|hCoV-19^^Victoria|Human|Microbiological Diagnostic Unit - Public Health Laboratory (MDU-PHL)|MDU-PHL|Schultz|Australia

>Spike|hCoV-19/England/ALDP-9D9605/2020|2020-09-18|EPI\_ISL\_576747|Original|hCoV-19^^England|Human|Oxford Viromics|COVID-19 Genomics UK (COG-UK) Consortium|Golubchik|United Kingdom



>Spike|hCoV-19/South Africa/KRISP-0128/2020|2020-05-13|EPI\_ISL\_467480|Original|hCoV-19^^KwaZulu-Natal|Human|Molecular Diagnostics Services (MDS)|KRISP|de Oliveira|South Africa

>Spike|hCoV-19/USA/TX-HMH-7529/2020|2020-06-25|EPI\_ISL\_546823|Original|hCoV-19^^Texas|Human|Houston Methodist Hospital|Houston Methodist Hospital|Long|USA

>Spike|hCoV-19/USA/TX-HMH-3925/2020|2020-06-16|EPI\_ISL\_543284|Original|hCoV-19^^Texas|Human|Houston Methodist Hospital|Houston Methodist Hospital|Long|USA

>Spike|hCoV-19/USA/WI-WSLH-200024/2020|2020-04-15|EPI\_ISL\_471189|Original|hCoV-19^^Wisconsin|Human|Wisconsin State Laboratory of Hygiene Communicable Disease Division|Wisconsin State Laboratory of Hygiene Communicable Disease Division|Florek|USA

>Spike|hCoV-19/England/OXON-AC72F/2020|2020-04-07|EPI\_ISL\_448479|Original|hCoV-19^^England|Human|Oxford Viromics|COVID-19 Genomics UK (COG-UK) Consortium|Golubchik|United Kingdom

>Spike|hCoV-19/England/QEUEH-B13B0E/2020|2020-11-01|EPI\_ISL\_641782|Original|hCoV-19^^England|Human|Lighthouse Lab in Glasgow|Wellcome Sanger Institute for the COVID-19 Genomics UK (COG-UK) Consortium|Davies|United Kingdom

>Spike|hCoV-19/Canada/BC\_24165067/2020|2020-03-00|EPI\_ISL\_463194|Original|hCoV-19^^British Columbia|Human|BCCDC Public Health Laboratory|BCCDC Public Health Laboratory|Harrigan|Canada

>Spike|hCoV-19/Denmark/DCGC-21943/2020|2020-12-21|EPI\_ISL\_758467|Original|hCoV-19^^Syddanmark|Human|Department of Virus and Microbiological Special Diagnostics|Albertsen Lab|Michaelsen|Denmark

>Spike|hCoV-19/England/ALDP-9FD7BD/2020|2020-10-01|EPI\_ISL\_587750|Original|hCoV-19^^England|Human|Lighthouse Lab in Alderley Park|Wellcome Sanger Institute for the COVID-19 Genomics UK (COG-UK) consortium|Davies|United Kingdom

>Spike|hCoV-19/USA/TX-HMH-McCoV-8462/2020|2020-07-01|EPI\_ISL\_780574|Original|hCoV-19^^Texas|Human|Houston Methodist Hospital|Houston Methodist Hospital|Long|USA

>Spike|hCoV-19/England/QEUEH-B7C3FC/2020|2020-11-13|EPI\_ISL\_668383|Original|hCoV-19^^England|Human|Lighthouse Lab in Glasgow|Wellcome Sanger Institute for the COVID-19 Genomics UK (COG-UK) Consortium|Davies|United Kingdom

>Spike|hCoV-19/England/QEUEH-B9F038/2020|2020-11-18|EPI\_ISL\_719874|Original|hCoV-19^^England|Human|Lighthouse Lab in Glasgow|Wellcome Sanger Institute for the COVID-19 Genomics UK (COG-UK) Consortium|Davies|United Kingdom

>Spike|hCoV-19/England/CAMB-1B6A55/2020|2020-10-08|EPI\_ISL\_612266|Original|hCoV-19^^England|Human|Department of Pathology|COVID-19 Genomics UK (COG-UK) Consortium|Goodfellow|United Kingdom

>Spike|hCoV-19/England/CAMC-A65DCC/2020|2020-10-11|EPI\_ISL\_637654|Original|hCoV-19^^England|Human|Department of Pathology|COVID-19 Genomics UK (COG-UK) Consortium|Goodfellow|United Kingdom

>Spike|hCoV-19/England/QEUEH-B68AFE/2020|2020-11-11|EPI\_ISL\_655087|Original|hCoV-19^^England|Human|Lighthouse Lab in Glasgow|Wellcome Sanger Institute for the COVID-19 Genomics UK (COG-UK) Consortium|Davies|United Kingdom

>Spike|hCoV-19/Spain/IB-IBV-99007240/2020|2020-03-04|EPI\_ISL\_541962|Original|hCoV-19^^Balear Islands|Human|Servicio de Microbiolog\u00eda|SeqCOVID-SPAIN consortium/IBV (CSIC)|Comas|Spain

>Spike|hCoV-19/Norway/6575/2020|2020-12-06|EPI\_ISL\_775397|Original|hCoV-19^^Viken|Human|Medical Microbiology Unit|Norwegian Institute of Public Health|Vollan|Norway

>Spike|hCoV-19/South Africa/KRISP-K002880/2020|2020-09-04|EPI\_ISL\_602692|Original|hCoV-19^^KwaZulu-Natal|Human|NHLS-IALCH|KRISP|de Oliveira|South Africa

>Spike|hCoV-19/England/MILK-A79F38/2020|2020-10-15|EPI\_ISL\_606683|Original|hCoV-19^^England|Human|Lighthouse Lab in Milton Keynes|Wellcome Sanger Institute for the COVID-19 Genomics UK (COG-UK) consortium|Davies|United Kingdom

>Spike|hCoV-19/USA/HI-H200082/2020|2020-06-12|EPI\_ISL\_752649|Original|hCoV-19^^Hawaii|Human|State Laboratories Division|State Laboratories Division|Sultana|USA

>Spike|hCoV-19/Denmark/DCGC-20961/2020|2020-12-21|EPI\_ISL\_758787|Original|hCoV-19^^Hovedstaden|Human|Department of Virus and Microbiological Special Diagnostics|Albertsen Lab|Michaelsen|Denmark

>Spike|hCoV-19/Russia/MOW-RII-MH1982S/2020|2020-05-30|EPI\_ISL\_596327|Original|hCoV-19^^Moscow|Human|Pathogenic Microorganisms Variability Laboratory|WHO National Influenza Centre Russian Federation|Komissarov|Russia

>Spike|hCoV-19/USA/WA\_0440/2020|2020-03-19|EPI\_ISL\_426443|Original|hCoV-19^^Washington|Human|WA State Department of Health|Pathogen Discovery|Queen|USA

>Spike|hCoV-19/Denmark/DCGC-15727/2020|2020-11-23|EPI\_ISL\_713985|Original|hCoV-19^^Hovedstaden|Human|Department of Virus and Microbiological Special Diagnostics|Albertsen Lab|Michaelsen|Denmark

>Spike|hCoV-19/USA/FL-06-UMTL-A6U6/2020|2020-04-15|EPI\_ISL\_479771|Original|hCoV-19^^Florida|Human|University of Miami Immunology and Histocompatibility Laboratory|University of Miami Immunology and Histocompatibility Laboratory|Margolles-Clark|USA

>Spike|hCoV-19/USA/WI-WSLH-200092/2020|2020-03-23|EPI\_ISL\_471256|Original|hCoV-19^^Wisconsin|Human|Wisconsin State Laboratory of Hygiene Communicable Disease Division|Wisconsin State Laboratory of Hygiene Communicable Disease Division|Florek|USA

>Spike|hCoV-19/England/CAMB-1BA4CC/2020|2020-11-13|EPI\_ISL\_664985|Original|hCoV-19^^England|Human|Department of Pathology|COVID-19 Genomics UK (COG-UK) Consortium|Goodfellow|United Kingdom

>Spike|hCoV-19/England/ALDP-92D392/2020|2020-06-21|EPI\_ISL\_551443|Original|hCoV-19^^England|Human|Lighthouse Lab in Alderley Park|Wellcome Sanger Institute for the COVID-19 Genomics UK (COG-UK) consortium|Davies|United Kingdom

>Spike|hCoV-19/England/MILK-AC9555/2020|2020-10-21|EPI\_ISL\_629340|Original|hCoV-19^^England|Human|Lighthouse Lab in Milton Keynes|Wellcome Sanger Institute for the COVID-19 Genomics UK (COG-UK) consortium|Davies|United Kingdom

>Spike|hCoV-19/Wales/PHWC-16C5C6/2020|2020-09-24|EPI\_ISL\_574071|Original|hCoV-19^^Wales|Human|Wales Specialist Virology Centre Sequencing lab|COVID-19 Genomics UK (COG-UK) Consortium|Moore|United Kingdom

>Spike|hCoV-19/France/ARA-104480/2020|2020-11-09|EPI\_ISL\_730640|Original|hCoV-19^^Auvergne-Rh\u00f4ne-Alpes|Human|CNR Virus des Infections Respiratoires - France SUD|CNR Virus des Infections Respiratoires - France SUD|Bal|France

>Spike|hCoV-19/Denmark/DCGC-20523/2020|2020-12-21|EPI\_ISL\_759201|Original|hCoV-19^^Nordjylland|Human|Department of Virus and Microbiological Special Diagnostics|Albertsen Lab|Michaelsen|Denmark

>Spike|hCoV-19/South Africa/KRISP-0526/2020|2020-07-13|EPI\_ISL\_498072|Original|hCoV-19^^KwaZulu-Natal|Human|NHLS-IALCH|KRISP|de Oliveira|South Africa

>Spike|hCoV-19/England/204481947/2020|2020-10-30|EPI\_ISL\_654004|Original|hCoV-19^^England|Human|Respiratory Virus Unit|COVID-19 Genomics UK (COG-UK) Consortium|Platt|United Kingdom

>Spike|hCoV-19/England/QEUEH-997EDE/2020|2020-08-27|EPI\_ISL\_537161|Original|hCoV-19^^England|Human|Lighthouse Lab in Glasgow|Wellcome Sanger Institute for the COVID-19 Genomics UK (COG-UK) consortium|Davies|United Kingdom

>Spike|hCoV-19/Wales/PHWC-498045/2020|2020-11-30|EPI\_ISL\_727015|Original|hCoV-19^^Wales|Human|Originating lab|COVID-19 Genomics UK (COG-UK) Consortium|Moore|United Kingdom

>Spike|hCoV-19/England/QEUEH-9E4379/2020|2020-09-22|EPI\_ISL\_579914|Original|hCoV-19^^England|Human|Lighthouse Lab in Glasgow|Wellcome Sanger Institute for the COVID-19 Genomics UK (COG-UK) consortium|Davies|United Kingdom

>Spike|hCoV-19/USA/OR-OHSU-0773/2020|2020-06-27|EPI\_ISL\_525896|Original|hCoV-19^^Oregon|Human|OHSU Lab Services Molecular Microbiology Lab|Oregon SARS-CoV-2 Genome Sequencing Center|O'Roak|USA

>Spike|hCoV-19/England/QEUEH-BA0034/2020|2020-11-18|EPI\_ISL\_719744|Original|hCoV-19^^England|Human|Lighthouse Lab in Glasgow|Wellcome Sanger Institute for the COVID-19 Genomics UK (COG-UK) Consortium|Davies|United Kingdom

>Spike|hCoV-19/Denmark/DCGC-17926/2020|2020-12-14|EPI\_ISL\_749648|Original|hCoV-19^^Hovedstaden|Human|Department of Virus and Microbiological Special Diagnostics|Albertsen Lab|Michaelsen|Denmark

>Spike|hCoV-19/USA/TX-HMH-MCoV-12581/2020|2020-08-31|EPI\_ISL\_790407|Original|hCoV-19^^Texas|Human|Houston Methodist Hospital|Houston Methodist Hospital|Long|USA

>Spike|hCoV-19/USA/TX-HMH-MCoV-14472/2020|2020-10-08|EPI\_ISL\_787757|Original|hCoV-19^^Texas|Human|Houston Methodist Hospital|Houston Methodist Hospital|Long|USA

>Spike|hCoV-19/Belgium/UGent-240/2020|2020-11-08|EPI\_ISL\_717626|Original|hCoV-19^^Ghent|Human|Lab voor klinische biologie|Onderzoeksgroep Virologie|Lambrechts|Belgium

>Spike|hCoV-19/Portugal/PT1992/2020|2020-11-13|EPI\_ISL\_732214|Original|hCoV-19^^Portugal|Human|Instituto Nacional de Saude (INSA) and Instituto Gulbenkian de Ciencia (IGC)|Instituto Nacional de Saude (INSA) and Instituto Gulbenkian de Ciencia (IGC)|Borges|Portugal

>Spike|hCoV-19/Denmark/ALAB-SSI-1249/2020|2020-03-11|EPI\_ISL\_444827|Original|hCoV-19^^Denmark|Human|Department of Virus and Microbiological Special Diagnostics|Albertsen lab|Kirkegaard|Denmark

>Spike|hCoV-19/Japan/PG-4949/2020|2020-08-00|EPI\_ISL\_690068|Original|hCoV-19^^Japan|Human|Pathogen Genomics Center|Pathogen Genomics Center|Sekizuka|Japan

>Spike|hCoV-19/USA/WA-UW-22186/2020|2020-08-06|EPI\_ISL\_570638|Original|hCoV-19^^Washington|Human|UW Virology Lab|UW Virology Lab|Roychoudhury|USA

>Spike|hCoV-19/Spain/PV-IBV-004252/2020|2020-04-06|EPI\_ISL\_500316|Original|hCoV-19^^Basque Country|Human|Servicio de Microbiolog\u00eda. Hospital Universitario Donostia. OSI Donostialdea. \u00c1rea de Enfermedades Infecciosas|SeqCOVID-SPAIN consortium/IBV (CSIC)|Comas|Spain

>Spike|hCoV-19/Canada/ON-S1496/2020|2020-08-28|EPI\_ISL\_755885|Original|hCoV-19^^Ontario|Human|Toronto Invasive Bacterial Diseases Network|McMaster University|McArthur|Canada

>Spike|hCoV-19/Australia/VIC17165/2020|2020-08-15|EPI\_ISL\_663776|Original|hCoV-19^^Victoria|Human|Microbiological Diagnostic Unit - Public Health Laboratory (MDU-PHL)|MDU-PHL|Schultz|Australia

>Spike|hCoV-19/USA/MA-MGH-01048/2020|2020-05-01|EPI\_ISL\_791854|Original|hCoV-19^^Massachusetts|Human|Massachusetts General Hospital|Infectious Disease Program|Park|USA

>Spike|hCoV-19/England/CAMB-1AD1E3/2020|2020-04-28|EPI\_ISL\_447977|Original|hCoV-19^^England|Human|Department of Pathology|COVID-19 Genomics UK (COG-UK) Consortium|Meredith|United Kingdom

>Spike|hCoV-19/USA/WA-S1050/2020|2020-04-30|EPI\_ISL\_463540|Original|hCoV-19^^Washington|Human|Washington State Department of Health|Seattle Flu Study|Bedford|USA

>Spike|hCoV-19/England/QEUA-B6C517/2020|2020-11-11|EPI\_ISL\_661429|Original|hCoV-19^^England|Human|Lighthouse Lab in Glasgow|Wellcome Sanger Institute for the COVID-19 Genomics UK (COG-UK) Consortium|Davies|United Kingdom

>Spike|hCoV-19/Singapore/1485/2020|2020-12-16|EPI\_ISL\_754080|Original|hCoV-19^^Singapore|Human|National Public Health Laboratory|National Public Health Laboratory|Mak|Singapore

>Spike|hCoV-19/USA/TX-HMH-MCoV-11546/2020|2020-09-11|EPI\_ISL\_790051|Original|hCoV-19^^Texas|Human|Houston Methodist Hospital|Houston Methodist Hospital|Long|USA

>Spike|hCoV-19/England/LOND-1260A47/2020|2020-04-04|EPI\_ISL\_516843|Original|hCoV-19^^England|Human|North West London Pathology|Wellcome Sanger Institute for the COVID-19 Genomics UK (COG-UK) consortium|Davies|United Kingdom

>Spike|hCoV-19/USA/WA-S1617/2020|2020-05-27|EPI\_ISL\_496043|Original|hCoV-19^^Washington|Human|Washington State Department of Health|Seattle Flu Study|Lee|USA

>Spike|hCoV-19/Denmark/DCGC-7074/2020|2020-10-12|EPI\_ISL\_619125|Original|hCoV-19^^Syddanmark|Human|Department of Virus and Microbiological Special Diagnostics|Albertsen lab|Michaelsen|Denmark

>Spike|hCoV-19/USA/CO-CDPHE-2009042404/2020|2020-09-03|EPI\_ISL\_710331|Original|hCoV-19^^Colorado|Human|Colorado Department of Public Health and Environment|Colorado Department of Public Health and Environment|Bankers|USA

>Spike|hCoV-19/England/ALDP-94F558/2020|2020-06-18|EPI\_ISL\_555953|Original|hCoV-19^^England|Human|Lighthouse Lab in Alderley Park|Wellcome Sanger Institute for the COVID-19 Genomics UK (COG-UK) consortium|Davies|United Kingdom

>Spike|hCoV-19/Spain/MD-IBV-97010094/2020|2020-03-26|EPI\_ISL\_779770|Original|hCoV-19^^Madrid|Human|IdISSC/Hospital Cl\u00e9nico San Carlos de Madrid\u00b9|SeqCOVID-SPAIN consortium/IBV (CSIC)|Comas|Spain

>Spike|hCoV-19/Australia/VIC10342/2020|2020-07-30|EPI\_ISL\_562879|Original|hCoV-19^^Victoria|Human|Microbiological Diagnostic Unit - Public Health Laboratory (MDU-PHL)|MDU-PHL|Schultz|Australia

>Spike|hCoV-19/Japan/PG-1956/2020|2020-04-00|EPI\_ISL\_685562|Original|hCoV-19^^Japan|Human|Pathogen Genomics Center|Pathogen Genomics Center|Sekizuka|Japan

>Spike|hCoV-19/USA/NM-NMDOH-2020324222/2020|2020-09-02|EPI\_ISL\_632827|Original|hCoV-19^^New Mexico|Human|New Mexico Department of Health Scientific Laboratory|New Mexico Department of Health Scientific Laboratory|Johnson|USA

>Spike|hCoV-19/Wales/PHWC-48D896/2020|2020-11-09|EPI\_ISL\_680692|Original|hCoV-19^^Wales|Human|Wales Specialist Virology Centre Sequencing lab|COVID-19 Genomics UK (COG-UK) Consortium|Moore|United Kingdom

>Spike|hCoV-19/Canada/BC\_09978786/2020|2020-04-00|EPI\_ISL\_467309|Original|hCoV-19^^British Columbia|Human|BCCDC Public Health Laboratory|BCCDC Public Health Laboratory|Harrigan|Canada

>Spike|hCoV-19/Ireland/MN-NVRL-20G40665/2020|2020-04-01|EPI\_ISL\_671380|Original|hCoV-19^^Monaghan|Human|National Virus Reference Laboratory|Irish Coronavirus Sequencing Consortium - Teagasc Moorepark|Walsh|Ireland

>Spike|hCoV-19/India/TG-CCMB-L1469/2020|2020-05-25|EPI\_ISL\_471600|Original|hCoV-19^^Telangana|Human|CSIR-Centre for Cellular and Molecular Biology|CSIR-Centre for Cellular and Molecular Biology|Banu|India

>Spike|hCoV-19/Australia/VIC15108/2020|2020-08-10|EPI\_ISL\_593139|Original|hCoV-19^^Victoria|Human|Microbiological Diagnostic Unit - Public Health Laboratory (MDU-PHL)|MDU-PHL|Schultz|Australia

>Spike|hCoV-19/England/CAMC-B994C9/2020|2020-11-15|EPI\_ISL\_673769|Original|hCoV-19^^England|Human|Lighthouse Lab in Cambridge|Wellcome Sanger Institute for the COVID-19 Genomics UK (COG-UK) Consortium|Davies|United Kingdom

>Spike|hCoV-19/England/ALDP-C23C8F/2020|2020-12-06|EPI\_ISL\_733643|Original|hCoV-19^^England|Human|Lighthouse Lab in Alderley Park|Wellcome Sanger Institute for the COVID-19 Genomics UK (COG-UK) Consortium|Davies|United Kingdom

>Spike|hCoV-19/England/LIVE-DCC4F8/2020|2020-11-25|EPI\_ISL\_724513|Original|hCoV-19^^England|Human|Liverpool Clinical Laboratories|COVID-19 Genomics UK (COG-UK) Consortium|Haldenby|United Kingdom

>Spike|hCoV-19/England/ALDP-9C599A/2020|2020-09-10|EPI\_ISL\_567869|Original|hCoV-19^^England|Human|Lighthouse Lab in Alderley Park|Wellcome Sanger Institute for the COVID-19 Genomics UK (COG-UK) consortium|Davies|United Kingdom

>Spike|hCoV-19/Denmark/DCGC-11674/2020|2020-10-26|EPI\_ISL\_671060|Original|hCoV-19^^Syddanmark|Human|Department of Virus and Microbiological Special Diagnostics|Albertsen Lab|Michaelsen|Denmark

>Spike|hCoV-19/USA/WI-UW-88/2020|2020-04-05|EPI\_ISL\_425145|Original|hCoV-19^^Wisconsin|Human|University of Wisconsin-Madison AIDS Vaccine Research Laboratories|University of Wisconsin-Madison AIDS Vaccine Research Laboratories|Baczenas|USA

>Spike|hCoV-19/USA/MI-MDHHS-SC21925/2020|2020-04-08|EPI\_ISL\_565985|Original|hCoV-19^^Michigan|Human|Michigan Department of Health and Human Services|Michigan Department of Health and Human Services|Blankenship|USA

>Spike|hCoV-19/Japan/IC-0471/2020|2020-12-00|EPI\_ISL\_768680|Original|hCoV-19^^Japan|Human|Pathogen Genomics Center|Pathogen Genomics Center|Sekizuka|Japan

>Spike|hCoV-19/Wales/PHWC-488E4E/2020|2020-11-02|EPI\_ISL\_639507|Original|hCoV-19^^Wales|Human|Wales Specialist Virology Centre Sequencing lab|COVID-19 Genomics UK (COG-UK) Consortium|Moore|United Kingdom

>Spike|hCoV-19/Norway/3906/2020|2020-09-23|EPI\_ISL\_590983|Original|hCoV-19^^Vestfold og Telemark|Human|Vestfold Hospital|Norwegian Institute of Public Health|Vollan|Norway

>Spike|hCoV-19/USA/VA-DCLS-1186/2020|2020-07-29|EPI\_ISL\_528645|Original|hCoV-19^^Virginia|Human|Virginia DCLS|Virginia DCLS|St. Jacques|USA

>Spike|hCoV-19/South Africa/KRISP-0583/2020|2020-07-09|EPI\_ISL\_498121|Original|hCoV-19^^KwaZulu-Natal|Human|NHLS-IALCH|KRISP|de Oliveira|South Africa

>Spike|hCoV-19/Italy/TUS-UOS-8/2020|2020-03-20|EPI\_ISL\_591335|Original|hCoV-19^^Tuscany|Human|Dipartimento di Biotechnologie Mediche|Dipartimento di Biotechnologie Mediche|Cusi|Italy

>Spike|hCoV-19/England/ALDP-9FDA0F/2020|2020-10-02|EPI\_ISL\_588041|Original|hCoV-19^^England|Human|Lighthouse Lab in Alderley Park|Wellcome Sanger Institute for the COVID-19 Genomics UK (COG-UK) consortium|Davies|United Kingdom

>Spike|hCoV-19/England/QEUEH-BCC0BA/2020|2020-11-27|EPI\_ISL\_704077|Original|hCoV-19^^England|Human|Lighthouse Lab in Glasgow|Wellcome Sanger Institute for the COVID-19 Genomics UK (COG-UK) Consortium|Davies|United Kingdom

>Spike|hCoV-19/SaudiArabia/KAUST-JEDDAH329/2020|2020-04-16|EPI\_ISL\_512914|Original|hCoV-19^^Jeddah|Human|Pathogen Genomics Lab King Abdullah University of Science and Technology(KAUST)|Pathogen Genomics Lab King Abdullah University of Science and Technology(KAUST)|Mohamed Ghazzali|Saudi Arabia

>Spike|hCoV-19/USA/WI-UW-2159/2020|2020-10-15|EPI\_ISL\_677563|Original|hCoV-19^^Wisconsin|Human|University of Wisconsin-Madison AIDS Vaccine Research Laboratories|University of Wisconsin-Madison AIDS Vaccine Research Laboratories|Baczenas|USA

>Spike|hCoV-19/Wales/PHWC-2B913/2020|2020-04-08|EPI\_ISL\_445781|Original|hCoV-19^^Wales|Human|Wales Specialist Virology Centre|Public Health Wales Microbiology Cardiff|Moore|United Kingdom

>Spike|hCoV-19/Luxembourg/LNS7198949/2020|2020-10-07|EPI\_ISL\_744532|Original|hCoV-19^^Luxembourg|Human|Laboratoire national de sant\u00e9|Laboratoire national de sant\u00e9|Wienecke-Baldacchino|Luxembourg

>Spike|hCoV-19/Scotland/EDB6578/2020|2020-05-10|EPI\_ISL\_478260|Original|hCoV-19^^Scotland|Human|Virology Department|COVID-19 Genomics UK (COG-UK) Consortium|Williams|United Kingdom

>Spike|hCoV-19/Luxembourg/LNS4683076/2020|2020-11-21|EPI\_ISL\_740523|Original|hCoV-19^^Luxembourg|Human|Laboratoire national de sant\u00e9|Laboratoire national de sant\u00e9|Wienecke-Baldacchino|Luxembourg

>Spike|hCoV-19/Germany/HH-hpi-p1919/2020|2020-03-25|EPI\_ISL\_776250|Original|hCoV-19^^Hamburg|Human|University Medical Center Hamburg Eppendorf|Heinrich Pette Institute|Robitaille|Germany

>Spike|hCoV-19/Scotland/CVR2339/2020|2020-04-13|EPI\_ISL\_477909|Original|hCoV-19^^Scotland|Human|West of Scotland Specialist Virology Centre|COVID-19 Genomics UK (COG-UK) Consortium|Robertson|United Kingdom

>Spike|hCoV-19/USA/TX-HMH-MCoV-8300/2020|2020-07-07|EPI\_ISL\_784317|Original|hCoV-19^^Texas|Human|Houston Methodist Hospital|Houston Methodist Hospital|Long|USA

>Spike|hCoV-19/USA/CA-SR0310/2020|2020-03-21|EPI\_ISL\_445164|Original|hCoV-19^^California|Human|Scripps Medical Laboratory|Andersen lab at Scripps Research|Gangavarapu|USA

>Spike|hCoV-19/England/EXET-135EDA/2020|2020-04-10|EPI\_ISL\_457179|Original|hCoV-19^^England|Human|University of Exeter|COVID-19 Genomics UK (COG-UK) Consortium|Temperton|United Kingdom

>Spike|hCoV-19/Lithuania/MR-LUHS-Eilnr569/2020|2020-12-00|EPI\_ISL\_770548|Original|hCoV-19^^Jonavos apskritis|Human|Private lab|Lithuanian University of Health Sciences|Zemaitis|Lithuania

>Spike|hCoV-19/Hong Kong/VM20076992/2020|2020-07-24|EPI\_ISL\_602605|Original|hCoV-19^^Hong Kong|Human|Pamela Youde Nethersole Eastern Hospital|Hong Kong Department of Health|Mak|China

>Spike|hCoV-19/Wales/QEUEH-9C9EC4/2020|2020-09-09|EPI\_ISL\_567398|Original|hCoV-19^^Wales|Human|Lighthouse Lab in Glasgow|Wellcome Sanger Institute for the COVID-19 Genomics UK (COG-UK) consortium|Davies|United Kingdom

>Spike|hCoV-19/England/ALDP-5B94F6/2020|2020-06-18|EPI\_ISL\_558795|Original|hCoV-19^^England|Human|Lighthouse Lab in Alderley Park|Wellcome Sanger Institute for the COVID-19 Genomics UK (COG-UK) consortium|Davies|United Kingdom

>Spike|hCoV-19/Japan/PG-8476/2020|2020-08-00|EPI\_ISL\_687575|Original|hCoV-19^^Japan|Human|Pathogen Genomics Center|Pathogen Genomics Center|Sekizuka|Japan

>Spike|hCoV-19/Scotland/EDB2483/2020|2020-04-23|EPI\_ISL\_439221|Original|hCoV-19^^Scotland|Human|Virology Department|COVID-19 Genomics UK (COG-UK) Consortium|Williams|United Kingdom

>Spike|hCoV-19/England/ALDP-4A94AF/2020|2020-06-09|EPI\_ISL\_559474|Original|hCoV-19^^England|Human|Lighthouse Lab in Alderley Park|Wellcome Sanger Institute for the COVID-19 Genomics UK (COG-UK) consortium|Davies|United Kingdom

>Spike|hCoV-19/Wales/PHWC-492852/2020|2020-11-30|EPI\_ISL\_725709|Original|hCoV-19^^Wales|Human|Originating lab|COVID-19 Genomics UK (COG-UK) Consortium|Moore|United Kingdom

>Spike|hCoV-19/USA/WA-S1832/2020|2020-05-27|EPI\_ISL\_496258|Original|hCoV-19^^Washington|Human|Washington State Department of Health|Seattle Flu Study|Lee|USA

>Spike|hCoV-19/Chile/RM-ISPCH-53/2020|2020-04-01|EPI\_ISL\_449800|Original|hCoV-19^^Region Metropolitana de Santiago|Human|HOSPITAL SAN JUAN DE DIOS|Instituto de Salud Publica de Chile|Fernandez|Chile

>Spike|hCoV-19/Netherlands/NH-EMC-86/2020|2020-09-02|EPI\_ISL\_632533|Original|hCoV-19^^Noord Holland|Human|Dutch COVID-19 response team|Erasmus Medical Center|Oude Munnink|Netherlands

>Spike|hCoV-19/England/LIVE-A2E06/2020|2020-05-19|EPI\_ISL\_499931|Original|hCoV-19^^England|Human|Liverpool Clinical Laboratories|COVID-19 Genomics UK (COG-UK) Consortium|Haldenby|United Kingdom

>Spike|hCoV-19/USA/NY-QDX-1885/2020|2020-03-15|EPI\_ISL\_604240|Original|hCoV-19^^New York|Human|Quest Diagnostics|Quest Diagnostics|Kagan|USA

>Spike|hCoV-19/Australia/VIC4743/2020|2020-07-14|EPI\_ISL\_519131|Original|hCoV-19^^Victoria|Human|Microbiological Diagnostic Unit - Public Health Laboratory (MDU-PHL)|MDU-PHL|Schultz|Australia

>Spike|hCoV-19/England/QEUEH-B65FD4/2020|2020-11-10|EPI\_ISL\_655947|Original|hCoV-19^^England|Human|Lighthouse Lab in Glasgow|Wellcome Sanger Institute for the COVID-19 Genomics UK (COG-UK) Consortium|Davies|United Kingdom

>Spike|hCoV-19/USA/CT-Yale-147/2020|2020-03-25|EPI\_ISL\_435717|Original|hCoV-19^^Connecticut|Human|Connecticut State Department of Public Health|Grubaugh Lab - Yale School of Public Health|Grubaugh|USA

>Spike|hCoV-19/Denmark/DCGC-19519/2020|2020-12-07|EPI\_ISL\_749005|Original|hCoV-19^^Hovedstaden|Human|Department of Virus and Microbiological Special Diagnostics|Albertsen Lab|Michaelsen|Denmark

>Spike|hCoV-19/England/MILK-B8D39E/2020|2020-11-13|EPI\_ISL\_673920|Original|hCoV-19^^England|Human|Lighthouse Lab in Milton Keynes|Wellcome Sanger Institute for the COVID-19 Genomics UK (COG-UK) Consortium|Davies|United Kingdom

>Spike|hCoV-19/Wales/PHWC-489056/2020|2020-11-02|EPI\_ISL\_637971|Original|hCoV-19^^Wales|Human|Wales Specialist Virology Centre Sequencing lab|COVID-19 Genomics UK (COG-UK) Consortium|Moore|United Kingdom

>Spike|hCoV-19/England/ALDP-A688AA/2020|2020-10-12|EPI\_ISL\_608496|Original|hCoV-19^^England|Human|Lighthouse Lab in Alderley Park|Wellcome Sanger Institute for the COVID-19 Genomics UK (COG-UK) consortium|Davies|United Kingdom

>Spike|hCoV-19/England/QEUEH-B3F498/2020|2020-11-08|EPI\_ISL\_658527|Original|hCoV-19^^England|Human|Lighthouse Lab in Glasgow|Wellcome Sanger Institute for the COVID-19 Genomics UK (COG-UK) Consortium|Davies|United Kingdom

>Spike|hCoV-19/England/BRIS-12B6C0/2020|2020-05-20|EPI\_ISL\_487610|Original|hCoV-19^^England|Human|PHE South West Regional Laboratory|Wellcome Sanger Institute for the COVID-19 Genomics UK (COG-UK) consortium|Davies|United Kingdom

>Spike|hCoV-19/Wales/PHWC-1699DC/2020|2020-07-18|EPI\_ISL\_512546|Original|hCoV-19^^Wales|Human|Wales Specialist Virology Centre Sequencing lab|COVID-19 Genomics UK (COG-UK) Consortium|Moore|United Kingdom

>Spike|hCoV-19/Canada/ON-A23/2020|2020-11-24|EPI\_ISL\_755722|Original|hCoV-19^^Ontario|Human|Toronto Invasive Bacterial Diseases Network|McMaster University|McArthur|Canada

>Spike|hCoV-19/Kazakhstan/26545/2020|2020-04-26|EPI\_ISL\_454591|Original|hCoV-19^^Nur-Sultan|Human|Laboratory of virology|Laboratory of molecular-genetic research|Abdaliyev|Kazakhstan

>Spike|hCoV-19/Australia/VIC6386/2020|2020-07-24|EPI\_ISL\_521178|Original|hCoV-19^^Victoria|Human|Microbiological Diagnostic Unit - Public Health Laboratory (MDU-PHL)|MDU-PHL|Schultz|Australia

>Spike|hCoV-19/England/20189126801/2020|2020-04-28|EPI\_ISL\_465546|Original|hCoV-19^^England|Human|Respiratory Virus Unit|Respiratory Virus Unit|Platt|United Kingdom

>Spike|hCoV-19/USA/MN-MDH-1674/2020|2020-04-06|EPI\_ISL\_560761|Original|hCoV-19^^Minnesota|Human|Minnesota Department of Health|Minnesota Department of Health|Garfin|USA

>Spike|hCoV-19/USA/TX-HMH-2517/2020|2020-06-07|EPI\_ISL\_545353|Original|hCoV-19^^Texas|Human|Houston Methodist Hospital|Houston Methodist Hospital|Long|USA

>Spike|hCoV-19/USA/AZ-TG305743/2020|2020-04-27|EPI\_ISL\_694262|Original|hCoV-19^^Arizona|Human|AZ SPHL|TGen North|French|USA

>Spike|hCoV-19/USA/PA-MGEL-00446/2020|2020-07-24|EPI\_ISL\_681934|Original|hCoV-19^^Pennsylvania|Human|UPMC Clinical Microbiology Laboratory|Microbial Genomic Epidemiology Laboratory|Griffith|USA

>Spike|hCoV-19/Spain/VC-IBV-98004469/2020|2020-03-24|EPI\_ISL\_583937|Original|hCoV-19^^Comunitat\_Valenciana|Human|Servicio de Microbiolog\u00eda. Hospital General Universitario de Castell\u00f3n|SeqCOVID-SPAIN consortium/IBV(CSIC)|Comas|Spain

>Spike|hCoV-19/India/MH-NIV-229428/2020|2020-09-29|EPI\_ISL\_577682|Original|hCoV-19^^Maharashtra|Human|NIV Influenza|NIV Influenza|Potdar|India

>Spike|hCoV-19/United Arab Emirates/skmc-3904387/2020|2020-09-23|EPI\_ISL\_582684|Original|hCoV-19^^United Arab Emirates|Human|Sheikh Khalifa Medical City|Molecular/Surveillance lab\nSheikh Khalifa Medical City|Amirtharaj|United Arab Emirates

>Spike|hCoV-19/United Arab Emirates/0596/2020|2020-05-15|EPI\_ISL\_698754|Original|hCoV-19^^Abu Dhabi|Human|Group 42 (G42) Healthcare|G42 Healthcare|Ogrodzki|United Arab Emirates

>Spike|hCoV-19/USA/UT-08287/2020|2020-05-21|EPI\_ISL\_524086|Original|hCoV-19^^Utah|Human|Utah Public Health Laboratory|Utah Public Health Laboratory|Young|USA

>Spike|hCoV-19/Wales/QEUEH-9FB500/2020|2020-09-28|EPI\_ISL\_600607|Original|hCoV-19^^Wales|Human|Lighthouse Lab in Glasgow|Wellcome Sanger Institute for the COVID-19 Genomics UK (COG-UK) consortium|Davies|United Kingdom

>Spike|hCoV-19/England/CAMB-72801/2020|2020-03-23|EPI\_ISL\_439597|Original|hCoV-19^^England|Human|Department of Pathology|Wellcome Sanger Institute for the COVID-19 Genomics UK (COG-UK) consortium|Amato|United Kingdom

>Spike|hCoV-19/USA/NY-NYCPHL-000034/2020|2020-03-09|EPI\_ISL\_631530|Original|hCoV-19^^New York|Human|New York Presbyterian Queens|New York City Public Health Laboratory|Wang|USA

>Spike|hCoV-19/Mexico/BCN-ALSR-2516/2020|2020-06-15|EPI\_ISL\_635521|Original|hCoV-19^^Baja California|Human|Centro de Diagn\u00f3stico COVID-19 UABC Tijuana|Andersen lab at Scripps Research|Gangavarapu|Mexico

>Spike|hCoV-19/Denmark/DCGC-1527/2020|2020-06-08|EPI\_ISL\_618131|Original|hCoV-19^^Sjaelland|Human|Department of Virus and Microbiological Special Diagnostics|Albertsen lab|Michaelsen|Denmark

>Spike|hCoV-19/England/CAMC-B518FE/2020|2020-11-08|EPI\_ISL\_658171|Original|hCoV-19^^England|Human|Lighthouse Lab in Cambridge|Wellcome Sanger Institute for the COVID-19 Genomics UK (COG-UK) Consortium|Davies|United Kingdom

>Spike|hCoV-19/England/MILK-9934FE/2020|2020-08-26|EPI\_ISL\_552150|Original|hCoV-19^^England|Human|Lighthouse Lab in Milton Keynes|Wellcome Sanger Institute for the COVID-19 Genomics UK (COG-UK) consortium|Davies|United Kingdom

>Spike|hCoV-19/Germany/BY-ChVir-W1121-5754/2020|2020-03-30|EPI\_ISL\_754028|Original|hCoV-19^^Bavaria|Human|Charit\u00e9 Universit\u00e4tsmedizin Berlin|Charit\u00e9 Universit\u00e4tsmedizin Berlin|Muehleemann|Germany

>Spike|hCoV-19/United Arab Emirates/L2004035019/2020|2020-04-24|EPI\_ISL\_520672|Original|hCoV-19^^United Arab Emirates|Human|Mohammed Bin Rashid University of Medicine and Health Sciences|Al Jalila Genomics Center|Ramaswamy|United Arab Emirates

>Spike|hCoV-19/Switzerland/BS-UHB-42203425/2020|2020-03-23|EPI\_ISL\_528355|Original|hCoV-19^^Basel-Stadt|Human|University Hospital Basel|University Hospital Basel|Roloff Handschin|Switzerland

>Spike|hCoV-19/Japan/PG-0966/2020|2020-04-00|EPI\_ISL\_684576|Original|hCoV-19^^Japan|Human|Gunma Prefectural Institute of Public Health and Environmental Sciences|Pathogen Genomics Center|Sekizuka|Japan

>Spike|hCoV-19/England/QEUEH-C34650/2020|2020-12-11|EPI\_ISL\_733959|Original|hCoV-19^^England|Human|Lighthouse Lab in Glasgow|Wellcome Sanger Institute for the COVID-19 Genomics UK (COG-UK) Consortium|Davies|United Kingdom

>Spike|hCoV-19/Scotland/QEUH-AE4C04/2020|2020-10-28|EPI\_ISL\_649664|Original|hCoV-19^^Scotland|Human|Lighthouse Lab in Glasgow|Wellcome Sanger Institute for the COVID-19 Genomics UK (COG-UK) Consortium|Davies|United Kingdom

>Spike|hCoV-19/England/201380064/2020|2020-03-25|EPI\_ISL\_421816|Original|hCoV-19^^England|Human|Respiratory Virus Unit|Respiratory Virus Unit|Platt|United Kingdom

>Spike|hCoV-19/Denmark/DCGC-11392/2020|2020-11-02|EPI\_ISL\_670691|Original|hCoV-19^^Sjaelland|Human|Department of Virus and Microbiological Special Diagnostics|Albertsen Lab|Michaelsen|Denmark

>Spike|hCoV-19/Denmark/ALAB-HH-249/2020|2020-04-26|EPI\_ISL\_452087|Original|hCoV-19^^Denmark|Human|Department of Clinical Microbiology|Albertsen lab|Kirkegaard|Denmark

>Spike|hCoV-19/Australia/TAS48/2020|2020-04-05|EPI\_ISL\_522723|Original|hCoV-19^^Tasmania|Human|Royal Hobart Hospital Microbiology Department|MDU-PHL|Schultz|Australia

>Spike|hCoV-19/England/ALDP-A2DC2D/2020|2020-10-05|EPI\_ISL\_586927|Original|hCoV-19^^England|Human|Lighthouse Lab in Alderley Park|Wellcome Sanger Institute for the COVID-19 Genomics UK (COG-UK) consortium|Davies|United Kingdom

>Spike|hCoV-19/USA/LA-EVTL076/2020|2020-05-08|EPI\_ISL\_451237|Original|hCoV-19^^Louisiana|Human|LSUHS Emerging Viral Threat Laboratory|Microbial Genome Sequencing Center|Kamil|USA

>Spike|hCoV-19/South Africa/KRISP-K003543/2020|2020-09-25|EPI\_ISL\_602859|Original|hCoV-19^^KwaZulu-Natal|Human|NHLS-IALCH|KRISP|de Oliveira|South Africa

>Spike|hCoV-19/Norway/5545/2020|2020-11-06|EPI\_ISL\_708117|Original|hCoV-19^^Viken|Human|Medical Microbiology Unit|Norwegian Institute of Public Health|Kopperud Riis|Norway

>Spike|hCoV-19/Gibraltar/204841762/2020|2020-00-00|EPI\_ISL\_671328|Original|hCoV-19^^Gibraltar|Human|Microbiology|Respiratory Virus Unit|Platt|Gibraltar

>Spike|hCoV-19/Ireland/D-NVRL-71IRL95850/2020|2020-07-31|EPI\_ISL\_525367|Original|hCoV-19^^Dublin|Human|National Virus Reference Laboratory|National Virus Reference Laboratory|Gonzalez|Ireland

>Spike|hCoV-19/England/NORT-1B7A0C7/2020|2020-11-24|EPI\_ISL\_724954|Original|hCoV-19^^England|Human|Northumbria University / South Tees Hospitals NHS Foundation Trust / North Cumbria Integrated Care NHS Foundation Trust / North Tees and Hartlepool NHS Foundation Trust / Newcastle Hospitals NHS Foundation Trust|COVID-19 Genomics UK (COG-UK) Consortium|Bashton|United Kingdom

>Spike|hCoV-19/South Africa/KRISP-K004306/2020|2020-10-05|EPI\_ISL\_660185|Original|hCoV-19^^KwaZulu-Natal|Human|NHLS-IALCH|KRISP|de Oliveira|South Africa

>Spike|hCoV-19/Canada/QC-LSPQ-L00233527/2020|2020-03-23|EPI\_ISL\_536026|Original|hCoV-19^^Quebec|Human|H\u00f4pital du Suro\u00eet|Laboratoire de sant\u00e9 publique du Qu\u00e9bec|Moreira|Canada

>Spike|hCoV-19/Scotland/QEUH-9C9671/2020|2020-09-14|EPI\_ISL\_576066|Original|hCoV-19^^Scotland|Human|Lighthouse Lab in Glasgow|Wellcome Sanger Institute for the COVID-19 Genomics UK (COG-UK) consortium|Davies|United Kingdom

>Spike|hCoV-19/Iceland/430/2020|2020-03-20|EPI\_ISL\_424454|Original|hCoV-19^^Reykjavik|Human|The National University Hospital of Iceland|deCODE genetics|J\u00f3nsson|Iceland

>Spike|hCoV-19/USA/TX-HMH-MCoV-8173/2020|2020-06-30|EPI\_ISL\_784244|Original|hCoV-19^^Texas|Human|Houston Methodist Hospital|Houston Methodist Hospital|Long|USA

>Spike|hCoV-19/Peru/LAM-INS-125/2020|2020-04-01|EPI\_ISL\_536523|Original|hCoV-19^^Lambayeque|Human|Instituto Nacional de Salud|Laboratorio de Infecciones Respiratorias Agudas|Lopez|Peru

>Spike|hCoV-19/USA/AZ-TG648633/2020|2020-04-27|EPI\_ISL\_695869|Original|hCoV-19^^Arizona|Human|Sonora Quest Laboratories|TGen North|French|USA

>Spike|hCoV-19/Spain/MD-IBV-99008786/2020|2020-10-20|EPI\_ISL\_654248|Original|hCoV-19^^Madrid|Human|Hospital General Universitario Gregorio Marañ\u00f1|SeqCOVID-SPAIN consortium|IBV (CSIC)|Comas|Spain



>Spike|hCoV-19/England/ALDP-9C548A/2020|2020-09-10|EPI\_ISL\_567799|Original|hCoV-19^^England|Human|Lighthouse Lab in Alderley Park|Wellcome Sanger Institute for the COVID-19 Genomics UK (COG-UK) consortium|Davies|United Kingdom

>Spike|hCoV-19/England/SHEF-C8848/2020|2020-09-07|EPI\_ISL\_559922|Original|hCoV-19^^England|Human|Virology Department|COVID-19 Genomics UK (COG-UK) Consortium|de Silva|United Kingdom

>Spike|hCoV-19/Switzerland/VS-ETHZ-280217/2020|2020-09-10|EPI\_ISL\_560538|Original|hCoV-19^^Valais|Human|Viollier AG|Department of Biosystems Science and Engineering|Nadeau|Switzerland

>Spike|hCoV-19/USA/WI-UW-1201/2020|2020-07-28|EPI\_ISL\_536574|Original|hCoV-19^^Wisconsin|Human|University of Wisconsin-Madison AIDS Vaccine Research Laboratories|University of Wisconsin-Madison AIDS Vaccine Research Laboratories|Baczenas|USA

>Spike|hCoV-19/Scotland/GCVR-171E96/2020|2020-03-27|EPI\_ISL\_524569|Original|hCoV-19^^Scotland|Human|NHSGGC West of Scotland Specialist Virology Centre / MRC-University of Glasgow Centre for Virus Research|Wellcome Sanger Institute for the COVID-19 Genomics UK (COG-UK) consortium|Davies|United Kingdom

>Spike|hCoV-19/USA/CA-CHLA-PLM81568971/2020|2020-11-30|EPI\_ISL\_753486|Original|hCoV-19^^California|Human|Clinical virology Laboratory|Center for Personalized Medicine|Dien Bard|USA

>Spike|hCoV-19/England/NORW-E8F7A/2020|2020-04-25|EPI\_ISL\_453569|Original|hCoV-19^^England|Human|Quadram Institute Bioscience|COVID-19 Genomics UK (COG-UK) Consortium|Alikhan|United Kingdom

>Spike|hCoV-19/USA/TX-HMH-MCoV-8696/2020|2020-07-01|EPI\_ISL\_780707|Original|hCoV-19^^Texas|Human|Houston Methodist Hospital|Houston Methodist Hospital|Long|USA

>Spike|hCoV-19/England/CAMC-B99DBF/2020|2020-11-15|EPI\_ISL\_673293|Original|hCoV-19^^England|Human|Lighthouse Lab in Cambridge|Wellcome Sanger Institute for the COVID-19 Genomics UK (COG-UK) Consortium|Davies|United Kingdom

>Spike|hCoV-19/USA/ME-HETL-J0031/2020|2020-03-17|EPI\_ISL\_513443|Original|hCoV-19^^Maine|Human|Maine HETL|Tewhey Lab|Tewhey|USA

>Spike|hCoV-19/USA/CA-CHLA-PLM06076230/2020|2020-11-02|EPI\_ISL\_753263|Original|hCoV-19^^California|Human|Clinical virology Laboratory|Center for Personalized Medicine|Dien Bard|USA

>Spike|hCoV-19/England/QEUEH-BCB491/2020|2020-11-26|EPI\_ISL\_704173|Original|hCoV-19^^England|Human|Lighthouse Lab in Glasgow|Wellcome Sanger Institute for the COVID-19 Genomics UK (COG-UK) Consortium|Davies|United Kingdom

>Spike|hCoV-19/Australia/VIC9543/2020|2020-08-20|EPI\_ISL\_565595|Original|hCoV-19^^Victoria|Human|Microbiological Diagnostic Unit - Public Health Laboratory (MDU-PHL)|MDU-PHL|Schultz|Australia

>Spike|hCoV-19/England/QEUEH-A77FC1/2020|2020-10-14|EPI\_ISL\_613349|Original|hCoV-19^^England|Human|Queens Medical Centre|COVID-19 Genomics UK (COG-UK) Consortium|Loose|United Kingdom

>Spike|hCoV-19/USA/WA-RML-1/2020|2020-04-20|EPI\_ISL\_641314|Original|hCoV-19^^Washington|Human|Rocky Mountain Laboratories|Rocky Mountain Laboratories|Matson|USA

>Spike|hCoV-19/England/LIVE-9C9B3/2020|2020-04-25|EPI\_ISL\_440927|Original|hCoV-19^^England|Human|Liverpool Clinical Laboratories|COVID-19 Genomics UK (COG-UK) Consortium|Haldenby|United Kingdom

>Spike|hCoV-19/USA/TX-HMH-4428/2020|2020-06-17|EPI\_ISL\_543612|Original|hCoV-19^^Texas|Human|Houston Methodist Hospital|Houston Methodist Hospital|Long|USA

>Spike|hCoV-19/England/ALDP-9CDE1B/2020|2020-09-16|EPI\_ISL\_566220|Original|hCoV-19^^England|Human|Lighthouse Lab in Alderley Park|Wellcome Sanger Institute for the COVID-19 Genomics UK (COG-UK) consortium|Davies|United Kingdom

>Spike|hCoV-19/Gambia/GC19-3799/2020|2020-07-27|EPI\_ISL\_561081|Original|hCoV-19^^Kombo|Human|MRCG at LSHTM Genomics lab|MRCG at LSHTM Genomics lab|Sesay|Gambia

>Spike|hCoV-19/Australia/NSW1108/2020|2020-08-11|EPI\_ISL\_593723|Original|hCoV-19^^New South Wales|Human|South Eastern Area Laboratory Services (SEALS)|NSW Health Pathology - Institute of Clinical Pathology and Medical Research; Westmead Hospital; University of Sydney|Gall|Australia

>Spike|hCoV-19/USA/WI-UW-1767/2020|2020-09-14|EPI\_ISL\_605640|Original|hCoV-19^^Wisconsin|Human|University of Wisconsin-Madison AIDS Vaccine Research Laboratories|University of Wisconsin-Madison AIDS Vaccine Research Laboratories|Baczenas|USA

>Spike|hCoV-19/Canada/ON-PHL-20-03675/2020|2020-11-00|EPI\_ISL\_775159|Original|hCoV-19^^Ontario|Human|Public Health Ontario Laboratory|Public Health Ontario Laboratory|Guthrie|Canada

>Spike|hCoV-19/USA/CA-ALSR-1242/2020|2020-05-05|EPI\_ISL\_494455|Original|hCoV-19^^California|Human|San Diego County Public Health Laboratory|Andersen lab at Scripps Research|Gangavarapu|USA

>Spike|hCoV-19/USA/UT-08576/2020|2020-05-26|EPI\_ISL\_524331|Original|hCoV-19^^Utah|Human|Utah Public Health Laboratory|Utah Public Health Laboratory|Young|USA

>Spike|hCoV-19/England/MILK-481FAC/2020|2020-04-30|EPI\_ISL\_559690|Original|hCoV-19^^England|Human|Lighthouse Lab in Milton Keynes|Wellcome Sanger Institute for the COVID-19 Genomics UK (COG-UK) consortium|Davies|United Kingdom

>Spike|hCoV-19/USA/CA-CZB-12975/2020|2020-10-21|EPI\_ISL\_672292|Original|hCoV-19^^California|Human|Santa Clara County Public Health Laboratory|Chan-Zuckerberg Biohub|Bhatt|USA

>Spike|hCoV-19/Australia/VIC9375/2020|2020-08-21|EPI\_ISL\_565528|Original|hCoV-19^^Victoria|Human|Microbiological Diagnostic Unit - Public Health Laboratory (MDU-PHL)|MDU-PHL|Schultz|Australia

>Spike|hCoV-19/Wales/PHWC-16DDCD/2020|2020-09-27|EPI\_ISL\_577535|Original|hCoV-19^^Wales|Human|Wales Specialist Virology Centre Sequencing lab|COVID-19 Genomics UK (COG-UK) Consortium|Moore|United Kingdom

>Spike|hCoV-19/Denmark/DCGC-12652/2020|2020-11-16|EPI\_ISL\_682833|Original|hCoV-19^^Syddanmark|Human|Department of Virus and Microbiological Special Diagnostics|Albertsen Lab|Michaelsen|Denmark

>Spike|hCoV-19/Australia/VIC11068/2020|2020-09-07|EPI\_ISL\_563230|Original|hCoV-19^^Victoria|Human|Microbiological Diagnostic Unit - Public Health Laboratory (MDU-PHL)|MDU-PHL|Schultz|Australia

>Spike|hCoV-19/DRC/299/2020|2020-03-20|EPI\_ISL\_420840|Original|hCoV-19^^Sud Kivu|Human|Viral Respiratory Lab|Pathogen Sequencing Lab|Pratt|Democratic Republic of the Congo

>Spike|hCoV-19/England/MILK-BB1D66/2020|2020-11-18|EPI\_ISL\_720540|Original|hCoV-19^^England|Human|Lighthouse Lab in Milton Keynes|Wellcome Sanger Institute for the COVID-19 Genomics UK (COG-UK) Consortium|Davies|United Kingdom

>Spike|hCoV-19/England/MILK-9C2766/2020|2020-09-10|EPI\_ISL\_566478|Original|hCoV-19^^England|Human|Lighthouse Lab in Milton Keynes|Wellcome Sanger Institute for the COVID-19 Genomics UK (COG-UK) consortium|Davies|United Kingdom

>Spike|hCoV-19/USA/WI-WSLH-200236/2020|2020-04-13|EPI\_ISL\_578456|Original|hCoV-19^^Wisconsin|Human|Wisconsin State Laboratory of Hygiene Communicable Disease Division|Wisconsin State Laboratory of Hygiene Communicable Disease Division|Florek|USA

>Spike|hCoV-19/England/QEUA-9DC875/2020|2020-09-21|EPI\_ISL\_580963|Original|hCoV-19^^England|Human|Lighthouse Lab in Glasgow|Wellcome Sanger Institute for the COVID-19 Genomics UK (COG-UK) consortium|Davies|United Kingdom

>Spike|hCoV-19/England/MILK-B56835/2020|2020-11-05|EPI\_ISL\_656840|Original|hCoV-19^^England|Human|Lighthouse Lab in Milton Keynes|Wellcome Sanger Institute for the COVID-19 Genomics UK (COG-UK) Consortium|Davies|United Kingdom

>Spike|hCoV-19/England/MILK-B8DDFA/2020|2020-11-13|EPI\_ISL\_674739|Original|hCoV-19^^England|Human|Lighthouse Lab in Milton Keynes|Wellcome Sanger Institute for the COVID-19 Genomics UK (COG-UK) Consortium|Davies|United Kingdom

>Spike|hCoV-19/Denmark/DCGC-12779/2020|2020-11-09|EPI\_ISL\_682960|Original|hCoV-19^^Nordjylland|Human|Department of Virus and Microbiological Special Diagnostics|Albertsen Lab|Michaelsen|Denmark

>Spike|hCoV-19/Switzerland/VD-ETHZ-150017plus/2020|2020-06-08|EPI\_ISL\_483656|Original|hCoV-19^^Vaud|Human|Viollier AG|Department of Biosystems Science and Engineering|Nadeau|Switzerland

>Spike|hCoV-19/Japan/PG-7926/2020|2020-07-00|EPI\_ISL\_687027|Original|hCoV-19^^Japan|Human|Pathogen Genomics Center|Pathogen Genomics Center|Sekizuka|Japan

>Spike|hCoV-19/England/MILK-9F26AC/2020|2020-09-25|EPI\_ISL\_589017|Original|hCoV-19^^England|Human|Lighthouse Lab in Milton Keynes|Wellcome Sanger Institute for the COVID-19 Genomics UK (COG-UK) consortium|Davies|United Kingdom

>Spike|hCoV-19/United Arab Emirates/0168/2020|2020-05-18|EPI\_ISL\_698355|Original|hCoV-19^^Abu Dhabi|Human|Group 42 (G42) Healthcare|G42 Healthcare|Ogrodzki|United Arab Emirates

>Spike|hCoV-19/Netherlands/ZH-EMC-717/2020|2020-10-09|EPI\_ISL\_632564|Original|hCoV-19^^Zuid Holland|Human|Dutch COVID-19 response team|Erasmus Medical Center|Oude Munnink|Netherlands

>Spike|hCoV-19/England/MILK-9E0D60/2020|2020-09-19|EPI\_ISL\_581035|Original|hCoV-19^^England|Human|Lighthouse Lab in Milton Keynes|Wellcome Sanger Institute for the COVID-19 Genomics UK (COG-UK) consortium|Davies|United Kingdom

>Spike|hCoV-19/USA/NV-NSPHL-A0196/2020|2020-05-26|EPI\_ISL\_515450|Original|hCoV-19^^Nevada|Human|Nevada State Public Health Laboratory|Nevada State Public Health Laboratory|Sevinsky|USA

>Spike|hCoV-19/England/QEUEH-9C9E3D/2020|2020-09-10|EPI\_ISL\_567372|Original|hCoV-19^^England|Human|Lighthouse Lab in Glasgow|Wellcome Sanger Institute for the COVID-19 Genomics UK (COG-UK) consortium|Davies|United Kingdom

>Spike|hCoV-19/United Arab Emirates/0482/2020|2020-05-17|EPI\_ISL\_698650|Original|hCoV-19^^Abu Dhabi|Human|Group 42 (G42) Healthcare|G42 Healthcare|Ogrodzki|United Arab Emirates

>Spike|hCoV-19/England/20129059304/2020|2020-03-09|EPI\_ISL\_424055|Original|hCoV-19^^England|Human|Respiratory Virus Unit|Respiratory Virus Unit|Platt|United Kingdom

>Spike|hCoV-19/England/QEUEH-960ABC/2020|2020-08-04|EPI\_ISL\_532133|Original|hCoV-19^^England|Human|Lighthouse Lab in Glasgow|Wellcome Sanger Institute for the COVID-19 Genomics UK (COG-UK) consortium|Davies|United Kingdom

>Spike|hCoV-19/England/BRIS-125A51/2020|2020-03-30|EPI\_ISL\_443924|Original|hCoV-19^^England|Human|PHE South West Regional Laboratory|Wellcome Sanger Institute for the COVID-19 Genomics UK (COG-UK) consortium|Amato|United Kingdom

>Spike|hCoV-19/Japan/PG-7114/2020|2020-08-00|EPI\_ISL\_688219|Original|hCoV-19^^Japan|Human|Pathogen Genomics Center|Pathogen Genomics Center|Sekizuka|Japan

>Spike|hCoV-19/Denmark/DCGC-8690/2020|2020-10-26|EPI\_ISL\_625689|Original|hCoV-19^^Sjaelland|Human|Department of Virus and Microbiological Special Diagnostics|Albertsen lab|Michaelsen|Denmark

>Spike|hCoV-19/Denmark/DCGC-5160/2020|2020-09-21|EPI\_ISL\_621698|Original|hCoV-19^^Midtjylland|Human|Department of Virus and Microbiological Special Diagnostics|Albertsen lab|Michaelsen|Denmark

>Spike|hCoV-19/England/SHEF-10CB11A/2020|2020-12-13|EPI\_ISL\_727900|Original|hCoV-19^^England|Human|Virology Department|COVID-19 Genomics UK (COG-UK) Consortium|de Silva|United Kingdom

>Spike|hCoV-19/USA/UT-04225/2020|2020-05-15|EPI\_ISL\_522322|Original|hCoV-19^^Utah|Human|Utah Public Health Laboratory|Utah Public Health Laboratory|Young|USA

>Spike|hCoV-19/USA/LA-EVTL597/2020|2020-06-30|EPI\_ISL\_579001|Original|hCoV-19^^Louisiana|Human|LSUHS Emerging Viral Threat Laboratory|Microbial Genome Sequencing Center|Kamil|USA

>Spike|hCoV-19/Luxembourg/LNS2179748/2020|2020-11-07|EPI\_ISL\_740071|Original|hCoV-19^^Luxembourg|Human|Laboratoire national de sant\u00e9|Laboratoire national de sant\u00e9|Wienecke-Baldacchino|Luxembourg

>Spike|hCoV-19/Germany/SH-ChVir9987/2020|2020-11-03|EPI\_ISL\_729430|Original|hCoV-19^^Schleswig-Holstein|Human|A. Krumbholz|Charit\u00e9 Universit\u00e4tsmedizin Berlin|Muehlemann|Germany

>Spike|hCoV-19/South Africa/KRISP-0033/2020|2020-04-01|EPI\_ISL\_467440|Original|hCoV-19^^KwaZulu-Natal|Human|NHLs-IALCH|KRISP|de Oliveira|South Africa

>Spike|hCoV-19/USA/CA-CZB-1845/2020|2020-04-26|EPI\_ISL\_486158|Original|hCoV-19^^California|Human|Orange County Public Health Laboratory|Chan-Zuckerberg Biohub|McGeever|USA

>Spike|hCoV-19/England/CAMB-81562/2020|2020-04-12|EPI\_ISL\_442863|Original|hCoV-19^^England|Human|Department of Pathology|Wellcome Sanger Institute for the COVID-19 Genomics UK (COG-UK) consortium|Amato|United Kingdom

>Spike|hCoV-19/England/CAMC-C440B9/2020|2020-12-10|EPI\_ISL\_719345|Original|hCoV-19^^England|Human|Lighthouse Lab in Cambridge|Wellcome Sanger Institute for the COVID-19 Genomics UK (COG-UK) Consortium|Davies|United Kingdom

>Spike|hCoV-19/England/QEUH-9DD5C8/2020|2020-09-21|EPI\_ISL\_599645|Original|hCoV-19^^England|Human|Lighthouse Lab in Glasgow|Wellcome Sanger Institute for the COVID-19 Genomics UK (COG-UK) consortium|Davies|United Kingdom

>Spike|hCoV-19/England/BHRT-24B4177/2020|2020-08-24|EPI\_ISL\_541756|Original|hCoV-19^^England|Human|Microbiology Department|Wellcome Sanger Institute for the COVID-19 Genomics UK (COG-UK) consortium|Davies|United Kingdom

>Spike|hCoV-19/Hong Kong/VM20005737-2/2020|2020-03-25|EPI\_ISL\_539850|Original|hCoV-19^^Hong Kong|Human|Pok Oi Hospital|Hong Kong Department of Health|Tsang|China

>Spike|hCoV-19/USA/FL-BPHL-0676/2020|2020-03-24|EPI\_ISL\_509734|Original|hCoV-19^^Florida|Human|Florida Bureau of Public Health Laboratories|Florida Bureau of Public Health Laboratories|Blanton|USA

>Spike|hCoV-19/Scotland/QEUH-AF5110/2020|2020-10-30|EPI\_ISL\_676473|Original|hCoV-19^^Scotland|Human|Lighthouse Lab in Glasgow|Wellcome Sanger Institute for the COVID-19 Genomics UK (COG-UK) Consortium|Davies|United Kingdom

>Spike|hCoV-19/Brazil/RJ-00496/2020|2020-11-03|EPI\_ISL\_717890|Original|hCoV-19^^Rio de Janeiro|Human|Laboratorio de Virologia Molecular / UFRJ|Bioinformatics Laboratory / LNCC|Almeida|Brazil

>Spike|hCoV-19/France/OCC-70/2020|2020-08-02|EPI\_ISL\_593884|Original|hCoV-19^^Occitanie|Human|CHU Purpan - Laboratoire de Virologie - Institut F\u00e9d\u00e9ratif de Biologie|CHU Purpan - Laboratoire de Virologie - Institut F\u00e9d\u00e9ratif de Biologie|Latour|France

>Spike|hCoV-19/Mexico/BCN-ALSR-1485/2020|2020-04-28|EPI\_ISL\_496349|Original|hCoV-19^^Baja California|Human|Infectolab|Andersen lab at Scripps Research|Gangavarapu|Mexico

>Spike|hCoV-19/USA/WA-S741/2020|2020-04-13|EPI\_ISL\_449911|Original|hCoV-19^^Washington|Human|Washington State Department of Health|Seattle Flu Study|Bedford|USA

>Spike|hCoV-19/Belgium/ULG-10717/2020|2020-09-14|EPI\_ISL\_641559|Original|hCoV-19^^Li\u00e8ge|Human|Department of Clinical Microbiology|GIGA Medical Genomics|Durkin|Belgium

>Spike|hCoV-19/Australia/VIC-CBA1/2020|2020-03-23|EPI\_ISL\_420855|Original|hCoV-19^^Victoria|Human|Geelong Centre for Emerging Infectious Diseases|Geelong Centre for Emerging Infectious Diseases|Alexandersen|Australia

>Spike|hCoV-19/Russia/Moscow-71602/2020|2020-03-19|EPI\_ISL\_428877|Vero|hCoV-19^^Moscow Region|Human|State Research Center of Virology and Biotechnology VECTOR|State Research Center of Virology and Biotechnology VECTOR|Shvalov|Russia

>Spike|hCoV-19/Japan/PG-7636/2020|2020-08-00|EPI\_ISL\_686738|Original|hCoV-19^^Japan|Human|Chiba Prefectural Institute of Public Health|Pathogen Genomics Center|Sekizuka|Japan

>Spike|hCoV-19/England/GSTT-4522/2020|2020-03-13|EPI\_ISL\_561374|Original|hCoV-19^^England|Human|Centre for Clinical Infection and Diagnostics Research and Genomics Innovation Unit|Centre for Clinical Infection and Diagnostics Research and Genomics Innovation Unit|Awan|United Kingdom

>Spike|hCoV-19/England/NORT-1B72B91/2020|2020-12-06|EPI\_ISL\_724916|Original|hCoV-19^^England|Human|Northumbria University / South Tees Hospitals NHS Foundation Trust / North Cumbria Integrated Care NHS Foundation Trust / North Tees and Hartlepool NHS Foundation Trust / Newcastle Hospitals NHS Foundation Trust|COVID-19 Genomics UK (COG-UK) Consortium|Bashton|United Kingdom

>Spike|hCoV-19/England/NOTT-114FDE/2020|2020-10-12|EPI\_ISL\_584786|Original|hCoV-19^^England|Human|Queens Medical Centre|COVID-19 Genomics UK (COG-UK) Consortium|Loose|United Kingdom

>Spike|hCoV-19/Australia/NSW224/2020|2020-03-29|EPI\_ISL\_451490|Original|hCoV-19^^New South Wales|Human|Pathology West - NSW Health Pathology|NSW Health Pathology - Institute of Clinical Pathology and Medical Research; Westmead Hospital; University of Sydney|Gall|Australia

>Spike|hCoV-19/USA/CA-CZB-13927/2020|2020-08-05|EPI\_ISL\_739262|Original|hCoV-19^^California|Human|Alameda County Public Health Lab|Chan-Zuckerberg Biohub|Kamm|USA

>Spike|hCoV-19/England/CAMC-A80CBF/2020|2020-10-13|EPI\_ISL\_610709|Original|hCoV-19^^England|Human|Lighthouse Lab in Cambridge|Wellcome Sanger Institute for the COVID-19 Genomics UK (COG-UK) consortium|Davies|United Kingdom

>Spike|hCoV-19/USA/CT-UW-5754/2020|2020-04-05|EPI\_ISL\_430919|Original|hCoV-19^^Connecticut|Human|UW Virology Lab|UW Virology Lab|Roychoudhury|USA

>Spike|hCoV-19/USA/LA-EVTL405/2020|2020-06-04|EPI\_ISL\_578811|Original|hCoV-19^^Louisiana|Human|LSUHS Emerging Viral Threat Laboratory|Microbial Genome Sequencing Center|Kamil|USA

>Spike|hCoV-19/Singapore/96/2020|2020-03-18|EPI\_ISL\_443188|Original|hCoV-19^^Singapore|Human|National Public Health Laboratory|National Public Health Laboratory|Mak|Singapore

>Spike|hCoV-19/England/SHEF-CEF2F/2020|2020-09-04|EPI\_ISL\_559937|Original|hCoV-19^^England|Human|Virology Department|COVID-19 Genomics UK (COG-UK) Consortium|de Silva|United Kingdom

>Spike|hCoV-19/England/NORW-E8F2F/2020|2020-04-28|EPI\_ISL\_461814|Original|hCoV-19^^England|Human|Quadram Institute Bioscience|COVID-19 Genomics UK (COG-UK) Consortium|Alikhan|United Kingdom

>Spike|hCoV-19/England/CAMB-7DCBF/2020|2020-04-06|EPI\_ISL\_441681|Original|hCoV-19^^England|Human|Department of Pathology|Wellcome Sanger Institute for the COVID-19 Genomics UK (COG-UK) consortium|Amato|United Kingdom

>Spike|hCoV-19/Denmark/DCGC-5224/2020|2020-09-21|EPI\_ISL\_620762|Original|hCoV-19^^Midtjylland|Human|Department of Virus and Microbiological Special Diagnostics|Albertsen lab|Michaelsen|Denmark

>Spike|hCoV-19/England/QEUH-9DA5AD/2020|2020-09-22|EPI\_ISL\_601341|Original|hCoV-19^^England|Human|Lighthouse Lab in Glasgow|Wellcome Sanger Institute for the COVID-19 Genomics UK (COG-UK) consortium|Davies|United Kingdom

>Spike|hCoV-19/Denmark/DCGC-20326/2020|2020-11-16|EPI\_ISL\_748115|Original|hCoV-19^^Hovedstaden|Human|Department of Virus and Microbiological Special Diagnostics|Albertsen Lab|Michaelsen|Denmark

>Spike|hCoV-19/England/CAMC-A598CA/2020|2020-10-09|EPI\_ISL\_597222|Original|hCoV-19^^England|Human|Lighthouse Lab in Cambridge|Wellcome Sanger Institute for the COVID-19 Genomics UK (COG-UK) consortium|Davies|United Kingdom

>Spike|hCoV-19/France/BRE-5336/2020|2020-03-18|EPI\_ISL\_443268|Original|hCoV-19^^Bretagne|Human|CHU - H\u00f4pital Cavale Blanche - Labo. de Virologie|National Reference Center for Viruses of Respiratory Infections|Enouf|France

>Spike|hCoV-19/Australia/VIC15282/2020|2020-08-05|EPI\_ISL\_593233|Original|hCoV-19^^Victoria|Human|Microbiological Diagnostic Unit - Public Health Laboratory (MDU-PHL)|MDU-PHL|Schultz|Australia

>Spike|hCoV-19/England/PORT-2D1F27/2020|2020-04-06|EPI\_ISL\_499297|Original|hCoV-19^^England|Human|Centre for Enzyme Innovation|COVID-19 Genomics UK (COG-UK) Consortium|Robson|United Kingdom

>Spike|hCoV-19/England/MILK-B3D88F/2020|2020-11-02|EPI\_ISL\_706239|Original|hCoV-19^^England|Human|Oxford Viromics|COVID-19 Genomics UK (COG-UK) Consortium|Golubchik|United Kingdom

>Spike|hCoV-19/Ireland/LS-NVRL-20Z06375/2020|2020-04-16|EPI\_ISL\_681898|Original|hCoV-19^^Laois|Human|National Virus Reference Laboratory|Irish Coronavirus Sequencing Consortium - Teagasc Moorepark|Walsh|Ireland

>Spike|hCoV-19/USA/LA-SR0271/2020|2020-03-31|EPI\_ISL\_445126|Original|hCoV-19^^Louisiana|Human|Robert Garry lab|Andersen lab at Scripps Research|Gangavarapu|USA

>Spike|hCoV-19/England/ALDP-A2FCEF/2020|2020-10-06|EPI\_ISL\_587160|Original|hCoV-19^^England|Human|Lighthouse Lab in Alderley Park|Wellcome Sanger Institute for the COVID-19 Genomics UK (COG-UK) consortium|Davies|United Kingdom

>Spike|hCoV-19/England/ALDP-B23C26/2020|2020-11-04|EPI\_ISL\_646313|Original|hCoV-19^^England|Human|Lighthouse Lab in Alderley Park|Wellcome Sanger Institute for the COVID-19 Genomics UK (COG-UK) Consortium|Davies|United Kingdom

>Spike|hCoV-19/England/SHEF-CD89E/2020|2020-03-28|EPI\_ISL\_432549|Original|hCoV-19^^England|Human|Virology Department|COVID-19 Genomics UK (COG-UK) Consortium|de Silva|United Kingdom

>Spike|hCoV-19/USA/CA-CZB-11883/2020|2020-09-30|EPI\_ISL\_672089|Original|hCoV-19^^California|Human|Santa Clara County Public Health Laboratory|Chan-Zuckerberg Biohub|Bhatt|USA

>Spike|hCoV-19/England/QEUA-AF4D68/2020|2020-10-30|EPI\_ISL\_662892|Original|hCoV-19^^England|Human|Lighthouse Lab in Glasgow|Wellcome Sanger Institute for the COVID-19 Genomics UK (COG-UK) Consortium|Davies|United Kingdom

>Spike|hCoV-19/USA/TX-HMH-MCoV-13541/2020|2020-08-21|EPI\_ISL\_788663|Original|hCoV-19^^Texas|Human|Houston Methodist Hospital|Houston Methodist Hospital|Long|USA

>Spike|hCoV-19/Luxembourg/LNS8157144/2020|2020-10-21|EPI\_ISL\_744690|Original|hCoV-19^^Luxembourg|Human|Laboratoire national de sant\u00e9|Laboratoire national de sant\u00e9|Wienecke-Baldacchino|Luxembourg

>Spike|hCoV-19/Japan/PG-5584/2020|2020-08-00|EPI\_ISL\_688709|Original|hCoV-19^^Japan|Human|Sakai City Institute of Public Health|Pathogen Genomics Center|Sekizuka|Japan

>Spike|hCoV-19/Canada/BC\_01468719/2020|2020-04-00|EPI\_ISL\_466709|Original|hCoV-19^^British Columbia|Human|BCCDC Public Health Laboratory|BCCDC Public Health Laboratory|Harrigan|Canada

>Spike|hCoV-19/USA/TX-HMH-MCoV-11984/2020|2020-09-15|EPI\_ISL\_790155|Original|hCoV-19^^Texas|Human|Houston Methodist Hospital|Houston Methodist Hospital|Long|USA

>Spike|hCoV-19/England/LIVE-9A3E4/2020|2020-04-16|EPI\_ISL\_440861|Original|hCoV-19^^England|Human|Liverpool Clinical Laboratories|COVID-19 Genomics UK (COG-UK) Consortium|Haldenby|United Kingdom

>Spike|hCoV-19/USA/UT-UPHL-201008983/2020|2020-06-23|EPI\_ISL\_602948|Original|hCoV-19^^Utah|Human|Utah Public Health Laboratory|Utah Public Health Laboratory|Young|USA

>Spike|hCoV-19/England/QEUA-BCBE39/2020|2020-11-27|EPI\_ISL\_704035|Original|hCoV-19^^England|Human|Lighthouse Lab in Glasgow|Wellcome Sanger Institute for the COVID-19 Genomics UK (COG-UK) Consortium|Davies|United Kingdom

>Spike|hCoV-19/USA/FL-BPHL-1137/2020|2020-08-17|EPI\_ISL\_526623|Original|hCoV-19^^Florida|Human|Florida Bureau of Public Health Laboratories|Florida Bureau of Public Health Laboratories|Blanton|USA

>Spike|hCoV-19/England/MILK-B38392/2020|2020-11-01|EPI\_ISL\_658937|Original|hCoV-19^^England|Human|Lighthouse Lab in Milton Keynes|Wellcome Sanger Institute for the COVID-19 Genomics UK (COG-UK) Consortium|Davies|United Kingdom

>Spike|hCoV-19/Wales/PHWC-49DA06/2020|2020-12-07|EPI\_ISL\_742862|Original|hCoV-19^^Wales|Human|Wales Specialist Virology Centre Sequencing lab|COVID-19 Genomics UK (COG-UK) Consortium|Moore|United Kingdom

>Spike|hCoV-19/Wuhan/HB-WH5-240/2020|2020-02-04|EPI\_ISL\_454981|Original|hCoV-19^^Hubei|Human|Wuhan Chain Medical Labs (CMLabs)|State Key Laboratory of Biotherapy of Sichuan University|Tang|China

>Spike|hCoV-19/USA/WI-GMF-30231/2020|2020-10-30|EPI\_ISL\_661028|Original|hCoV-19^^Wisconsin|Human|Gundersen Molecular Diagnostics Laboratory|Kabara Cancer Research Institute|Kenny|USA

>Spike|hCoV-19/England/LEED-2A883D/2020|2020-03-27|EPI\_ISL\_539054|Original|hCoV-19^^England|Human|Leeds Teaching Hospitals NHS Trust and Public Health England|Wellcome Sanger Institute for the COVID-19 Genomics UK (COG-UK) consortium|Davies|United Kingdom

>Spike|hCoV-19/Spain/CT-IBV-97009185/2020|2020-09-16|EPI\_ISL\_671833|Original|hCoV-19^^Catalunya|Human|Hospital de la Santa Creu i Sant Pau. Servicio de Microbiolog\u00eda|SeqCOVID-SPAIN consortium/IBV (CSIC)|Comas|Spain

>Spike|hCoV-19/England/CAMC-A3F9E5/2020|2020-10-06|EPI\_ISL\_609735|Original|hCoV-19^^England|Human|Lighthouse Lab in Cambridge|Wellcome Sanger Institute for the COVID-19 Genomics UK (COG-UK) consortium|Davies|United Kingdom

>Spike|hCoV-19/Portugal/PT2027/2020|2020-11-23|EPI\_ISL\_732243|Original|hCoV-19^^Portugal|Human|Instituto Nacional de Saude (INSA) and Instituto Gulbenkian de Ciencia (IGC)|Instituto Nacional de Saude (INSA) and Instituto Gulbenkian de Ciencia (IGC)|Borges|Portugal

>Spike|hCoV-19/England/CAMB-8383A/2020|2020-04-15|EPI\_ISL\_443683|Original|hCoV-19^^England|Human|Department of Pathology|Wellcome Sanger Institute for the COVID-19 Genomics UK (COG-UK) consortium|Amato|United Kingdom

>Spike|hCoV-19/USA/MI-QDX-1306/2020|2020-03-17|EPI\_ISL\_571961|Original|hCoV-19^^Michigan|Human|Quest Diagnostics|Quest Diagnostics|Kagan|USA

>Spike|hCoV-19/England/CAMB-750D9/2020|2020-03-15|EPI\_ISL\_440433|Original|hCoV-19^^England|Human|Department of Pathology|Wellcome Sanger Institute for the COVID-19 Genomics UK (COG-UK) consortium|Amato|United Kingdom

>Spike|hCoV-19/England/ALDP-A8542B/2020|2020-10-17|EPI\_ISL\_610507|Original|hCoV-19^^England|Human|Lighthouse Lab in Alderley Park|Wellcome Sanger Institute for the COVID-19 Genomics UK (COG-UK) consortium|Davies|United Kingdom

>Spike|hCoV-19/England/CAMB-7FE3F/2020|2020-04-19|EPI\_ISL\_444422|Original|hCoV-19^^England|Human|Department of Pathology|COVID-19 Genomics UK (COG-UK) Consortium|Meredith|United Kingdom

>Spike|hCoV-19/England/QEUH-9C8C34/2020|2020-09-10|EPI\_ISL\_567087|Original|hCoV-19^^England|Human|Lighthouse Lab in Glasgow|Wellcome Sanger Institute for the COVID-19 Genomics UK (COG-UK) consortium|Davies|United Kingdom

>Spike|hCoV-19/Wales/PHWC-48852B/2020|2020-10-30|EPI\_ISL\_639403|Original|hCoV-19^^Wales|Human|Wales Specialist Virology Centre Sequencing lab|COVID-19 Genomics UK (COG-UK) Consortium|Moore|United Kingdom

>Spike|hCoV-19/England/BRIS-123CA8/2020|2020-04-07|EPI\_ISL\_492801|Original|hCoV-19^^England|Human|PHE South West Regional Laboratory|Wellcome Sanger Institute for the COVID-19 Genomics UK (COG-UK) consortium|Davies|United Kingdom

>Spike|hCoV-19/England/ALDP-B1DFCC/2020|2020-11-02|EPI\_ISL\_723556|Original|hCoV-19^^England|Human|Centre for Enzyme Innovation|COVID-19 Genomics UK (COG-UK) Consortium|Robson|United Kingdom

>Spike|hCoV-19/Hungary/UD-90341/2020|2020-10-04|EPI\_ISL\_671461|Original|hCoV-19^^Borsod-Aba\u00faj-Zempl\u00e9n county|Human|University of Debrecen|National Laboratory of Virology|Kemenesi|Hungary

>Spike|hCoV-19/England/LIVE-9F5CB/2020|2020-05-12|EPI\_ISL\_457266|Original|hCoV-19^^England|Human|Liverpool Clinical Laboratories|COVID-19 Genomics UK (COG-UK) Consortium|Haldenby|United Kingdom

>Spike|hCoV-19/France/ARA-12524/2020|2020-03-23|EPI\_ISL\_420609|Original|hCoV-19^^Auvergne-Rh\u00f4ne-Alpes|Human|Institut des Agents Infectieux (IAI)|CNR Virus des Infections Respiratoires - France SUD|Josset|France

>Spike|hCoV-19/India/TG-CCMB-J230/2020|2020-04-01|EPI\_ISL\_447572|Original|hCoV-19^^Telangana|Human|CSIR-Centre for Cellular and Molecular Biology|CSIR-Centre for Cellular and Molecular Biology|Banu|India

>Spike|hCoV-19/England/20149011904/2020|2020-04-03|EPI\_ISL\_466151|Original|hCoV-19^^England|Human|Respiratory Virus Unit|Respiratory Virus Unit|Platt|United Kingdom

>Spike|hCoV-19/England/ALDP-4ACFE7/2020|2020-06-14|EPI\_ISL\_559436|Original|hCoV-19^^England|Human|Lighthouse Lab in Alderley Park|Wellcome Sanger Institute for the COVID-19 Genomics UK (COG-UK) consortium|Davies|United Kingdom

>Spike|hCoV-19/England/20132024904/2020|2020-03-23|EPI\_ISL\_423759|Original|hCoV-19^^England|Human|Respiratory Virus Unit|Respiratory Virus Unit|Platt|United Kingdom

>Spike|hCoV-19/England/ALDP-A6F3C0/2020|2020-10-14|EPI\_ISL\_607958|Original|hCoV-19^^England|Human|Lighthouse Lab in Alderley Park|Wellcome Sanger Institute for the COVID-19 Genomics UK (COG-UK) consortium|Davies|United Kingdom

>Spike|hCoV-19/India/GJ-GBRC1/2020|2020-04-05|EPI\_ISL\_426414|Original|hCoV-19^^Gujarat|Human|Sir M P Shah Government Medical College|Gujarat Biotechnology Research Centre|Joshi|India

>Spike|hCoV-19/France/ARA-SC115/2020|2020-04-13|EPI\_ISL\_700379|Original|hCoV-19^^Auvergne-Rh\u00f4ne-Alpes|Human|Centre hospitalier M\u00e9tropole Savoie|CNR Virus des Infections Respiratoires - France SUD|Bal|France

>Spike|hCoV-19/England/MILK-ACF1C4/2020|2020-10-22|EPI\_ISL\_629612|Original|hCoV-19^^England|Human|Lighthouse Lab in Milton Keynes|Wellcome Sanger Institute for the COVID-19 Genomics UK (COG-UK) consortium|Davies|United Kingdom

>Spike|hCoV-19/England/CAMC-C737CB/2020|2020-12-15|EPI\_ISL\_769202|Original|hCoV-19^^England|Human|Lighthouse Lab in Cambridge|Wellcome Sanger Institute for the COVID-19 Genomics UK (COG-UK) Consortium|Davies|United Kingdom

>Spike|hCoV-19/Scotland/CVR5221/2020|2020-10-17|EPI\_ISL\_626841|Original|hCoV-19^^Scotland|Human|West of Scotland Specialist Virology Centre|COVID-19 Genomics UK (COG-UK) Consortium|Robertson|United Kingdom

>Spike|hCoV-19/England/NOTT-10EDBF/2020|2020-03-28|EPI\_ISL\_432924|Original|hCoV-19^^England|Human|Queens Medical Centre|COVID-19 Genomics UK (COG-UK) Consortium|Loose|United Kingdom

>Spike|hCoV-19/USA/TX-HMH-4205/2020|2020-06-19|EPI\_ISL\_543436|Original|hCoV-19^^Texas|Human|Houston Methodist Hospital|Houston Methodist Hospital|Long|USA

>Spike|hCoV-19/Australia/VIC8012/2020|2020-08-14|EPI\_ISL\_564802|Original|hCoV-19^^Victoria|Human|Microbiological Diagnostic Unit - Public Health Laboratory (MDU-PHL) |MDU-PHL|Schultz|Australia

>Spike|hCoV-19/USA/UT-UPHL-2009477/2020|2020-07-19|EPI\_ISL\_605161|Original|hCoV-19^^Utah|Human|Utah Public Health Laboratory|Utah Public Health Laboratory|Young|USA

>Spike|hCoV-19/England/LCST-24D6DE4/2020|2020-06-11|EPI\_ISL\_484238|Original|hCoV-19^^England|Human|University Hospitals Of Leicester NHS Trust and DeepSeq Nottingham|COVID-19 Genomics UK (COG-UK) Consortium|Loose|United Kingdom

>Spike|hCoV-19/Switzerland/SO-ETHZ-350107/2020|2020-11-02|EPI\_ISL\_693807|Original|hCoV-19^^Solothurn|Human|Viollier AG|Department of Biosystems Science and Engineering|Nadeau|Switzerland

>Spike|hCoV-19/Denmark/DCGC-2675/2020|2020-08-17|EPI\_ISL\_617896|Original|hCoV-19^^Hovedstaden|Human|Department of Virus and Microbiological Special Diagnostics|Albertsen lab|Michaelsen|Denmark

>Spike|hCoV-19/USA/NY-Wadsworth-282089-01/2020|2020-12-01|EPI\_ISL\_754403|Original|hCoV-19^^New York|Human|Wadsworth Center|Wadsworth Center|Lasek-Nesselquist|USA

>Spike|hCoV-19/Gambia/GC192789/2020|2020-07-22|EPI\_ISL\_561145|Original|hCoV-19^^Kombo|Human|MRCG at LSHTM Genomics lab|MRCG at LSHTM Genomics lab|Sesay|Gambia

>Spike|hCoV-19/England/201060017/2020|2020-03-04|EPI\_ISL\_464362|Original|hCoV-19^^England|Human|Respiratory Virus Unit|Respiratory Virus Unit|Platt|United Kingdom

>Spike|hCoV-19/England/CAMB-7D99A/2020|2020-04-07|EPI\_ISL\_441750|Original|hCoV-19^^England|Human|Department of Pathology|Wellcome Sanger Institute for the COVID-19 Genomics UK (COG-UK) consortium|Amato|United Kingdom

>Spike|hCoV-19/England/CAMC-B08CAF/2020|2020-10-30|EPI\_ISL\_643639|Original|hCoV-19^^England|Human|Lighthouse Lab in Cambridge|Wellcome Sanger Institute for the COVID-19 Genomics UK (COG-UK) Consortium|Davies|United Kingdom

>Spike|hCoV-19/England/QEUH-B82548/2020|2020-11-14|EPI\_ISL\_661940|Original|hCoV-19^^England|Human|Lighthouse Lab in Glasgow|Wellcome Sanger Institute for the COVID-19 Genomics UK (COG-UK) Consortium|Davies|United Kingdom

>Spike|hCoV-19/Japan/PG-3900/2020|2020-07-00|EPI\_ISL\_692151|Original|hCoV-19^^Japan|Human|Pathogen Genomics Center|Pathogen Genomics Center|Sekizuka|Japan

>Spike|hCoV-19/Australia/NSW629/2020|2020-07-07|EPI\_ISL\_490038|Original|hCoV-19^^New South Wales|Human|Pathology West - NSW Health Pathology|NSW Health Pathology - Institute of Clinical Pathology and Medical Research; Westmead Hospital; University of Sydney|Gall|Australia

>Spike|hCoV-19/Peru/LIM-UPCH-0112/2020|2020-06-18|EPI\_ISL\_540989|Original|hCoV-19^^Lima|Human|Laboratorio de Referencia Nacional de Virus Respiratorios|Laboratorio de Gen\u00f3mica Microbiana|Tsukayama|Peru

>Spike|hCoV-19/England/20102115303/2020|2020-03-01|EPI\_ISL\_417219|Original|hCoV-19^^England|Human|Respiratory Virus Unit|Respiratory Virus Unit|Platt|United Kingdom

>Spike|hCoV-19/USA/PA-QDX-2437/2020|2020-03-14|EPI\_ISL\_604837|Original|hCoV-19^^Pennsylvania|Human|Quest Diagnostics|Quest Diagnostics|Kagan|USA

>Spike|hCoV-19/Scotland/QEUH-AF15AF/2020|2020-10-28|EPI\_ISL\_665503|Original|hCoV-19^^Scotland|Human|Northumbria University / South Tees Hospitals NHS Foundation Trust / North Cumbria Integrated Care NHS Foundation Trust / North Tees and Hartlepool NHS Foundation Trust / Newcastle Hospitals NHS Foundation Trust|COVID-19 Genomics UK (COG-UK) Consortium|Bashton|United Kingdom

>Spike|hCoV-19/England/ALDP-C3DE6E/2020|2020-12-10|EPI\_ISL\_730695|Original|hCoV-19^^England|Human|Lighthouse Lab in Alderley Park|Wellcome Sanger Institute for the COVID-19 Genomics UK (COG-UK) Consortium|Davies|United Kingdom

>Spike|hCoV-19/England/CAMC-945015/2020|2020-07-12|EPI\_ISL\_556938|Original|hCoV-19^^England|Human|Lighthouse Lab in Cambridge|Wellcome Sanger Institute for the COVID-19 Genomics UK (COG-UK) consortium|Davies|United Kingdom



>Spike|hCoV-19/Italy/APU-PODV-15934816/2020|2020-08-23|EPI\_ISL\_788953|Original|hCoV-19^^Apulia|Human|Ospedale \Di Venere\|Beaconlab (Bioinformatics|Chiara|Italy

>Spike|hCoV-19/Scotland/QEUH-96DE2C/2020|2020-08-21|EPI\_ISL\_534601|Original|hCoV-19^^Scotland|Human|NHSGGC West of Scotland Specialist Virology Centre / MRC-University of Glasgow Centre for Virus Research|Wellcome Sanger Institute for the COVID-19 Genomics UK (COG-UK) consortium|Davies|United Kingdom

>Spike|hCoV-19/Wales/PHWC-1652A8/2020|2020-05-29|EPI\_ISL\_479444|Original|hCoV-19^^Wales|Human|Wales Specialist Virology Centre Sequencing lab|COVID-19 Genomics UK (COG-UK) Consortium|Moore|United Kingdom

>Spike|hCoV-19/Australia/VIC4418/2020|2020-07-17|EPI\_ISL\_519714|Original|hCoV-19^^Victoria|Human|Microbiological Diagnostic Unit - Public Health Laboratory (MDU-PHL) |MDU-PHL|Schultz|Australia

>Spike|hCoV-19/USA/WI-WSLH-200150/2020|2020-03-13|EPI\_ISL\_578377|Original|hCoV-19^^Wisconsin|Human|Wisconsin State Laboratory of Hygiene Communicable Disease Division|Wisconsin State Laboratory of Hygiene Communicable Disease Division|Florek|USA

>Spike|hCoV-19/Bangladesh/BCSIR-NILMRC-109/2020|2020-06-07|EPI\_ISL\_475172|Original|hCoV-19^^Rangpur|Human|National Institute of Laboratory Medicine and Referral Center|Genomic Research Lab|Khan|Bangladesh

>Spike|hCoV-19/Scotland/EDB8783/2020|2020-10-26|EPI\_ISL\_651996|Original|hCoV-19^^Scotland|Human|Virology Department|COVID-19 Genomics UK (COG-UK) Consortium|McHugh|United Kingdom

>Spike|hCoV-19/Denmark/DCGC-14672/2020|2020-11-23|EPI\_ISL\_711156|Original|hCoV-19^^Hovedstaden|Human|Department of Virus and Microbiological Special Diagnostics|Albertsen Lab|Michaelsen|Denmark

>Spike|hCoV-19/England/BRIS-12722A/2020|2020-04-24|EPI\_ISL\_469655|Original|hCoV-19^^England|Human|PHE South West Regional Laboratory|Wellcome Sanger Institute for the COVID-19 Genomics UK (COG-UK) consortium|Davies|United Kingdom

>Spike|hCoV-19/Sweden/20-08127/2020|2020-03-09|EPI\_ISL\_455902|Original|hCoV-19^^Halland|Human|Halmstad klinisk mikrobiologi|The Public Health Agency of Sweden|Svartstr\u00f6m|Sweden

>Spike|hCoV-19/Wales/MILK-A56247/2020|2020-10-09|EPI\_ISL\_595142|Original|hCoV-19^^Wales|Human|Quadram Institute Bioscience|COVID-19 Genomics UK (COG-UK) Consortium|Alikhan|United Kingdom

>Spike|hCoV-19/Italy/VEN-UniVR-109/2020|2020-03-27|EPI\_ISL\_751413|Original|hCoV-19^^Veneto|Human|IRCCS Sacro Cuore Don Calabria Hospital|University of Verona|Mori|Italy

>Spike|hCoV-19/Chile/RM-190581/2020|2020-09-25|EPI\_ISL\_746743|Original|hCoV-19^^Region Metropolitana de Santiago|Human|Genetica Molecular and Subdepartamento de Virologia ISP Chile|Instituto de Salud Publica de Chile|Tognarelli|Chile

>Spike|hCoV-19/England/CAMC-B0AC43/2020|2020-10-30|EPI\_ISL\_643564|Original|hCoV-19^^England|Human|Lighthouse Lab in Cambridge|Wellcome Sanger Institute for the COVID-19 Genomics UK (COG-UK) Consortium|Davies|United Kingdom

>Spike|hCoV-19/England/CAMC-B202DC/2020|2020-11-02|EPI\_ISL\_647575|Original|hCoV-19^^England|Human|Lighthouse Lab in Cambridge|Wellcome Sanger Institute for the COVID-19 Genomics UK (COG-UK) Consortium|Davies|United Kingdom

>Spike|hCoV-19/England/MILK-A8EB5A/2020|2020-10-19|EPI\_ISL\_650625|Original|hCoV-19^^England|Human|Northumbria University / South Tees Hospitals NHS Foundation Trust / North Cumbria Integrated Care NHS Foundation Trust / North Tees and Hartlepool NHS Foundation Trust / Newcastle Hospitals NHS Foundation Trust|COVID-19 Genomics UK (COG-UK) Consortium|Bashton|United Kingdom

>Spike|hCoV-19/Bangladesh/G-194/2020|2020-07-05|EPI\_ISL\_600527|Original|hCoV-19^^Barishal|Human|Institute of Epidemiology Disease Control And Research|Institute for Developing Science and Health Initiatives|Cowley|Bangladesh

>Spike|hCoV-19/Belgium/ULG-10321/2020|2020-07-29|EPI\_ISL\_540488|Original|hCoV-19^^Li\u00e8ge|Human|Department of Clinical Microbiology|GIGA Medical Genomics|Durkin|Belgium

>Spike|hCoV-19/India/DL-NCDC-01537/2020|2020-03-16|EPI\_ISL\_435061|Original|hCoV-19^^Delhi|Human|National Centre for Disease control (NCDC) |NCDC/CSIR-IGIB|Faruq|India

>Spike|hCoV-19/Wales/PHWC-498C6F/2020|2020-11-25|EPI\_ISL\_727193|Original|hCoV-19^^Wales|Human|Originating lab|COVID-19 Genomics UK (COG-UK) Consortium|Moore|United Kingdom

>Spike|hCoV-19/United Arab Emirates/0295/2020|2020-05-17|EPI\_ISL\_698474|Original|hCoV-19^^Abu Dhabi|Human|Group 42 (G42) Healthcare|G42 Healthcare|Ogrodzki|United Arab Emirates

>Spike|hCoV-19/USA/TX-HMH-4461/2020|2020-06-17|EPI\_ISL\_543638|Original|hCoV-19^^Texas|Human|Houston Methodist Hospital|Houston Methodist Hospital|Long|USA

>Spike|hCoV-19/England/BRIS-12B129/2020|2020-05-08|EPI\_ISL\_469809|Original|hCoV-19^^England|Human|PHE South West Regional Laboratory|Wellcome Sanger Institute for the COVID-19 Genomics UK (COG-UK) consortium|Davies|United Kingdom

>Spike|hCoV-19/USA/UT-UPHL-2012861567/2020|2020-08-03|EPI\_ISL\_745740|Original|hCoV-19^^Utah|Human|Ginkgo Bioworks Clinical Laboratory|Utah Public Health Laboratory|Young|USA

>Spike|hCoV-19/England/204261306/2020|2020-10-15|EPI\_ISL\_613586|Original|hCoV-19^^England|Human|Respiratory Virus Unit|Respiratory Virus Unit|Platt|United Kingdom

>Spike|hCoV-19/England/CAMC-948B5D/2020|2020-07-16|EPI\_ISL\_556764|Original|hCoV-19^^England|Human|Lighthouse Lab in Cambridge|Wellcome Sanger Institute for the COVID-19 Genomics UK (COG-UK) consortium|Davies|United Kingdom

>Spike|hCoV-19/England/MILK-AC93F1/2020|2020-10-21|EPI\_ISL\_630049|Original|hCoV-19^^England|Human|Lighthouse Lab in Milton Keynes|Wellcome Sanger Institute for the COVID-19 Genomics UK (COG-UK) consortium|Davies|United Kingdom

>Spike|hCoV-19/USA/MI-MDHHS-SC22061/2020|2020-09-28|EPI\_ISL\_583518|Original|hCoV-19^^Michigan|Human|Michigan Department of Health and Human Services|Michigan Department of Health and Human Services|Blankenship|USA

>Spike|hCoV-19/Israel/CVL-n-6735/2020|2020-04-09|EPI\_ISL\_474977|Original|hCoV-19^^Bat-Yam|Human|Israel Central Virology laboratory|Israel Central Virology laboratory|Zuckerman|Israel

>Spike|hCoV-19/Denmark/DCGC-1887/2020|2020-03-30|EPI\_ISL\_622551|Original|hCoV-19^^Hovedstaden|Human|Department of Virus and Microbiological Special Diagnostics|Albertsen lab|Michaelsen|Denmark

>Spike|hCoV-19/England/CAMC-B22498/2020|2020-11-03|EPI\_ISL\_647123|Original|hCoV-19^^England|Human|Lighthouse Lab in Cambridge|Wellcome Sanger Institute for the COVID-19 Genomics UK (COG-UK) Consortium|Davies|United Kingdom

>Spike|hCoV-19/Russia/CRIE4990266/2020|2020-07-16|EPI\_ISL\_610233|Original|hCoV-19^^Moscow|Human|Molecular diagnostic laboratory of Federal Budget Institution of Science \Central Research Institute of Epidemiology\ of The Federal Service on Customers' Rights Protection and Human Well-being Surveillance|Group of Genomics and Postgenomic Technologies of Central Research Institute of Epidemiology|Samoilov|Russia

>Spike|hCoV-19/USA/IL-UW-979/2020|2020-07-19|EPI\_ISL\_509804|Original|hCoV-19^^Illinois|Human|University of Wisconsin-Madison AIDS Vaccine Research Laboratories|University of Wisconsin-Madison AIDS Vaccine Research Laboratories|Baczenas|USA

>Spike|hCoV-19/USA/OR-PROV-007/2020|2020-04-07|EPI\_ISL\_482296|Original|hCoV-19^^Oregon|Human|Providence St. Joseph Health Molecular Genomics Laboratory|Providence St. Joseph Health Molecular Genomics Laboratory|Dowdell|USA

>Spike|hCoV-19/India/GJ-GBRC239/2020|2020-06-11|EPI\_ISL\_483820|Original|hCoV-19^^Gujarat|Human|GMERS Medical College and Hospital|Gujarat Biotechnology Research Centre|Joshi|India

>Spike|hCoV-19/England/BRIS-18540D5/2020|2020-04-28|EPI\_ISL\_492367|Original|hCoV-19^^England|Human|PHE South West Regional Laboratory|Wellcome Sanger Institute for the COVID-19 Genomics UK (COG-UK) consortium|Davies|United Kingdom

>Spike|hCoV-19/Luxembourg/LNS5509035/2020|2020-11-18|EPI\_ISL\_744244|Original|hCoV-19^^Luxembourg|Human|Laboratoire national de sant\u00e9|Laboratoire national de sant\u00e9|Wienecke-Baldacchino|Luxembourg

>Spike|hCoV-19/Australia/WA156/2020|2020-07-12|EPI\_ISL\_596719|Original|hCoV-19^^Western Australia|Human|PathWest Laboratory Medicine WA|PathWest Laboratory Medicine WA Microbial Surveillance Unit|Sikazwe|Australia

>Spike|hCoV-19/England/MILK-9D4F3C/2020|2020-09-19|EPI\_ISL\_601526|Original|hCoV-19^^England|Human|Lighthouse Lab in Milton Keynes|Wellcome Sanger Institute for the COVID-19 Genomics UK (COG-UK) consortium|Davies|United Kingdom

>Spike|hCoV-19/England/ALDP-B62B00/2020|2020-11-09|EPI\_ISL\_656636|Original|hCoV-19^^England|Human|Lighthouse Lab in Alderley Park|Wellcome Sanger Institute for the COVID-19 Genomics UK (COG-UK) Consortium|Davies|United Kingdom

>Spike|hCoV-19/Austria/CeMM0219/2020|2020-03-16|EPI\_ISL\_438053|Original|hCoV-19^^Vienna|Human|Center for Virology|Bergthaler laboratory|Bergthaler|Austria

>Spike|hCoV-19/Portugal/IGC4228/2020|2020-06-03|EPI\_ISL\_491237|Original|hCoV-19^^Portugal|Human|Instituto Gulbenkian de Ci\u00eancia|Instituto Gulbenkian de Ci\u00eancia|Leite|Portugal

>Spike|hCoV-19/USA/AK-PHL038/2020|2020-03-22|EPI\_ISL\_492087|Original|hCoV-19^^Alaska|Human|Alaska State Virology Laboratory|Alaska State Virology Laboratory|Drown|USA

>Spike|hCoV-19/SaudiArabia/KAUST-JEDDAH1016/2020|2020-06-17|EPI\_ISL\_512887|Original|hCoV-19^^Jeddah|Human|Pathogen Genomics Lab King Abdullah University of Science and Technology(KAUST)|Pathogen Genomics Lab King Abdullah University of Science and Technology(KAUST)|Mohamed Ghazzali|Saudi Arabia

>Spike|hCoV-19/Chile/RM-ISPCH-38/2020|2020-03-17|EPI\_ISL\_445317|Original|hCoV-19^^Region Metropolitana de Santiago|Human|UNIV.DE CHILE HOSP.CLINICO|Instituto de Salud Publica de Chile|Fernandez|Chile

>Spike|hCoV-19/USA/UT-QDX-2580/2020|2020-03-13|EPI\_ISL\_604964|Original|hCoV-19^^Utah|Human|Quest Diagnostics|Quest Diagnostics|Kagan|USA

>Spike|hCoV-19/Wales/QEUAH-9CFF8F/2020|2020-09-14|EPI\_ISL\_590001|Original|hCoV-19^^Wales|Human|Lighthouse Lab in Glasgow|Wellcome Sanger Institute for the COVID-19 Genomics UK (COG-UK) consortium|Davies|United Kingdom

>Spike|hCoV-19/England/CAMB-79CFF/2020|2020-04-02|EPI\_ISL\_441306|Original|hCoV-19^^England|Human|Department of Pathology|Wellcome Sanger Institute for the COVID-19 Genomics UK (COG-UK) consortium|Amato|United Kingdom

>Spike|hCoV-19/Japan/PG-2052/2020|2020-04-00|EPI\_ISL\_685657|Original|hCoV-19^^Japan|Human|Pathogen Genomics Center|Pathogen Genomics Center|Sekizuka|Japan

>Spike|hCoV-19/France/BRE-2351/2020|2020-03-07|EPI\_ISL\_416513|Original|hCoV-19^^Bretagne|Human|CHRU Pontchaillou - Laboratoire de Virologie|National Reference Center for Viruses of Respiratory Infections|Enouf|France

>Spike|hCoV-19/Ireland/D-NVRL-20ILR10860/2020|2020-11-23|EPI\_ISL\_732392|Original|hCoV-19^^Dublin|Human|National Virus Reference Laboratory|National Virus Reference Laboratory|Gonzalez|Ireland

>Spike|hCoV-19/USA/CA-CZB-14016/2020|2020-06-07|EPI\_ISL\_739100|Original|hCoV-19^^California|Human|Alameda County Public Health Lab|Chan-Zuckerberg Biohub|Kamm|USA

>Spike|hCoV-19/Finland/9A800S11A/2020|2020-04-09|EPI\_ISL\_481738|Original|hCoV-19^^Uusimaa|Human|Department of Virology and Immunology|Department of Virology|Smura|Finland

>Spike|hCoV-19/Germany/HH-hpi-p1443/2020|2020-03-11|EPI\_ISL\_775962|Original|hCoV-19^^Hamburg|Human|University Medical Center Hamburg Eppendorf|Heinrich Pette Institute|Robitaille|Germany

>Spike|hCoV-19/Denmark/DCGC-5855/2020|2020-09-28|EPI\_ISL\_621042|Original|hCoV-19^^Midtjylland|Human|Department of Virus and Microbiological Special Diagnostics|Albertsen lab|Michaelsen|Denmark

>Spike|hCoV-19/England/CAMB-7B1D0/2020|2020-04-12|EPI\_ISL\_433930|Original|hCoV-19^^England|Human|Department of Pathology|COVID-19 Genomics UK (COG-UK) Consortium|Meredith|United Kingdom

>Spike|hCoV-19/United Arab Emirates/0357/2020|2020-05-16|EPI\_ISL\_698532|Original|hCoV-19^^Abu Dhabi|Human|Group 42 (G42) Healthcare|G42 Healthcare|Ogrodzki|United Arab Emirates

>Spike|hCoV-19/England/QEUAH-96A5EE/2020|2020-08-13|EPI\_ISL\_531559|Original|hCoV-19^^England|Human|Lighthouse Lab in Glasgow|Wellcome Sanger Institute for the COVID-19 Genomics UK (COG-UK) consortium|Davies|United Kingdom

>Spike|hCoV-19/Portugal/PT1265/2020|2020-03-19|EPI\_ISL\_511226|Original|hCoV-19^^Portugal|Human|Instituto Nacional de Saude (INSA) and Instituto Gulbenkian de

Ciencia (IGC)|Instituto Nacional de Saude (INSA) and Instituto Gulbenkian de Ciencia (IGC)|Borges|Portugal

>Spike|hCoV-19/DRC/11041/2020|2020-05-24|EPI\_ISL\_527555|Original|hCoV-19^^Kinshasa|Human|Viral Respiratory Lab|Pathogen Sequencing Lab|Lokilo|Democratic Republic of the Congo

>Spike|hCoV-19/Scotland/QEUIH-96D0F9/2020|2020-08-20|EPI\_ISL\_534614|Original|hCoV-19^^Scotland|Human|NHSGGC West of Scotland Specialist Virology Centre / MRC-University of Glasgow Centre for Virus Research|Wellcome Sanger Institute for the COVID-19 Genomics UK (COG-UK) consortium|Davies|United Kingdom

>Spike|hCoV-19/England/LOND-12E8494/2020|2020-12-04|EPI\_ISL\_741312|Original|hCoV-19^^England|Human|University College London|COVID-19 Genomics UK (COG-UK) Consortium|Roy|United Kingdom

>Spike|hCoV-19/USA/AZ-TG519155/2020|2020-06-30|EPI\_ISL\_695358|Original|hCoV-19^^Arizona|Human|AZ SPHL|TGen North|French|USA

>Spike|hCoV-19/Netherlands/OV-RIVM-20538/2020|2020-11-17|EPI\_ISL\_728753|Original|hCoV-19^^Overijssel|Human|Dutch COVID-19 response team|National Institute for Public Health and the Environment (RIVM)|Meijer|Netherlands

>Spike|hCoV-19/Japan/IC-0504/2020|2020-12-00|EPI\_ISL\_768713|Original|hCoV-19^^Japan|Human|Pathogen Genomics Center|Pathogen Genomics Center|Sekizuka|Japan

>Spike|hCoV-19/England/ALDP-B1AA0A/2020|2020-11-01|EPI\_ISL\_647560|Original|hCoV-19^^England|Human|Lighthouse Lab in Alderley Park|Wellcome Sanger Institute for the COVID-19 Genomics UK (COG-UK) Consortium|Davies|United Kingdom

>Spike|hCoV-19/Denmark/DCGC-20879/2020|2020-12-21|EPI\_ISL\_759424|Original|hCoV-19^^Hovedstaden|Human|Department of Virus and Microbiological Special Diagnostics|Albertsen Lab|Michaelsen|Denmark

>Spike|hCoV-19/USA/WA-UW240/2020|2020-03-14|EPI\_ISL\_417454|Original|hCoV-19^^Washington|Human|UW Virology Lab|UW Virology Lab|Roychoudhury|USA

>Spike|hCoV-19/England/QEUIH-9B899A/2020|2020-09-07|EPI\_ISL\_549550|Original|hCoV-19^^England|Human|Lighthouse Lab in Glasgow|Wellcome Sanger Institute for the COVID-19 Genomics UK (COG-UK) consortium|Davies|United Kingdom

>Spike|hCoV-19/USA/WI-UW-1440/2020|2020-09-11|EPI\_ISL\_541572|Original|hCoV-19^^Wisconsin|Human|University of Wisconsin-Madison AIDS Vaccine Research Laboratories|University of Wisconsin-Madison AIDS Vaccine Research Laboratories|Baczenas|USA

>Spike|hCoV-19/USA/WA-UW-23467/2020|2020-08-10|EPI\_ISL\_576458|Original|hCoV-19^^Washington|Human|UW Virology Lab|UW Virology Lab|Roychoudhury|USA

>Spike|hCoV-19/Denmark/DCGC-21713/2020|2020-12-21|EPI\_ISL\_757914|Original|hCoV-19^^Sjaelland|Human|Department of Virus and Microbiological Special Diagnostics|Albertsen Lab|Michaelsen|Denmark

>Spike|hCoV-19/Australia/VIC2917/2020|2020-07-07|EPI\_ISL\_521748|Original|hCoV-19^^Victoria|Human|Microbiological Diagnostic Unit - Public Health Laboratory (MDU-PHL)|MDU-PHL|Schultz|Australia

>Spike|hCoV-19/Australia/VIC7492/2020|2020-07-24|EPI\_ISL\_564445|Original|hCoV-19^^Victoria|Human|Microbiological Diagnostic Unit - Public Health Laboratory (MDU-PHL)|MDU-PHL|Schultz|Australia

>Spike|hCoV-19/USA/WI-GMF-20273/2020|2020-09-14|EPI\_ISL\_547860|Original|hCoV-19^^Wisconsin|Human|Gundersen Molecular Diagnostics Laboratory|Kabara Cancer Research Institute|Kenny|USA

>Spike|hCoV-19/England/QEUIH-B119D9/2020|2020-11-02|EPI\_ISL\_642395|Original|hCoV-19^^England|Human|Lighthouse Lab in Glasgow|Wellcome Sanger Institute for the COVID-19 Genomics UK (COG-UK) Consortium|Davies|United Kingdom

>Spike|hCoV-19/England/GSTT-265D4B1/2020|2020-03-19|EPI\_ISL\_483966|Original|hCoV-19^^England|Human|Centre for Clinical Infection and Diagnostics Research and Genomics Innovation Unit|COVID-19 Genomics UK (COG-UK) Consortium|Awan|United Kingdom

>Spike|hCoV-19/Wales/PHWC-4A2127/2020|2020-12-14|EPI\_ISL\_743849|Original|hCoV-19^^Wales|Human|Wales Specialist Virology Centre Sequencing lab|COVID-19 Genomics UK (COG-UK) Consortium|Moore|United Kingdom

>Spike|hCoV-19/USA/MA-MGH-01153/2020|2020-04-29|EPI\_ISL\_791894|Original|hCoV-19^^Massachusetts|Human|Massachusetts General Hospital|Infectious Disease Program|Park|USA

>Spike|hCoV-19/South Africa/KRISP-K001397/2020|2020-07-18|EPI\_ISL\_515880|Original|hCoV-19^^KwaZulu-Natal|Human|Medical Disagnostics Services (MDS)|KRISP|de Oliveira|South Africa

>Spike|hCoV-19/Vietnam/VNHN\_0207/2020|2020-03-08|EPI\_ISL\_511891|Original|hCoV-19^^Hanoi|Human|National Hospital of Tropical Diseases|Oxford University Clinical Research Unit|Nguyen|Vietnam

>Spike|hCoV-19/USA/AZ-TG547354/2020|2020-07-07|EPI\_ISL\_695500|Original|hCoV-19^^Arizona|Human|AZ SPHL|TGen North|French|USA

>Spike|hCoV-19/USA/CA-CZB-13677/2020|2020-11-04|EPI\_ISL\_738910|Original|hCoV-19^^California|Human|Santa Clara County Public Health Laboratory|Chan-Zuckerberg Biohub|Kamm|USA

>Spike|hCoV-19/England/QEUEH-AAAF98/2020|2020-10-19|EPI\_ISL\_652761|Original|hCoV-19^^England|Human|Oxford Viromics|COVID-19 Genomics UK (COG-UK) Consortium|Golubchik|United Kingdom

>Spike|hCoV-19/Scotland/QEUEH-9F848E/2020|2020-09-27|EPI\_ISL\_600833|Original|hCoV-19^^Scotland|Human|Lighthouse Lab in Glasgow|Wellcome Sanger Institute for the COVID-19 Genomics UK (COG-UK) consortium|Davies|United Kingdom

>Spike|hCoV-19/Denmark/DCGC-7390/2020|2020-10-12|EPI\_ISL\_619356|Original|hCoV-19^^Midtjylland|Human|Department of Virus and Microbiological Special Diagnostics|Albertsen lab|Michaelsen|Denmark

>Spike|hCoV-19/USA/WI-UW-692/2020|2020-06-27|EPI\_ISL\_491371|Original|hCoV-19^^Wisconsin|Human|University of Wisconsin-Madison AIDS Vaccine Research Laboratories|University of Wisconsin-Madison AIDS Vaccine Research Laboratories|Baczenas|USA

>Spike|hCoV-19/USA/AZ-TG408707/2020|2020-06-24|EPI\_ISL\_694953|Original|hCoV-19^^Arizona|Human|TGen North|TGen North|French|USA

>Spike|hCoV-19/USA/WI-UW-1374/2020|2020-09-04|EPI\_ISL\_536745|Original|hCoV-19^^Wisconsin|Human|University of Wisconsin-Madison AIDS Vaccine Research Laboratories|University of Wisconsin-Madison AIDS Vaccine Research Laboratories|Baczenas|USA

>Spike|hCoV-19/England/EXET-138860/2020|2020-10-06|EPI\_ISL\_627102|Original|hCoV-19^^England|Human|University of Exeter|COVID-19 Genomics UK (COG-UK) Consortium|Temperton|United Kingdom

>Spike|hCoV-19/England/201360015/2020|2020-03-24|EPI\_ISL\_423196|Original|hCoV-19^^England|Human|Respiratory Virus Unit|Respiratory Virus Unit|Platt|United Kingdom

>Spike|hCoV-19/Japan/PG-2106/2020|2020-04-00|EPI\_ISL\_685711|Original|hCoV-19^^Japan|Human|Pathogen Genomics Center|Pathogen Genomics Center|Sekizuka|Japan

>Spike|hCoV-19/USA/MN-MDH-1195/2020|2020-05-11|EPI\_ISL\_477285|Original|hCoV-19^^Minnesota|Human|M Health Fairview|Minnesota Department of Health|Garfin|USA

>Spike|hCoV-19/Canada/BC-BCCDC-7600/2020|2020-11-00|EPI\_ISL\_740745|Original|hCoV-19^^British Columbia|Human|BCCDC Public Health Laboratory|BCCDC Public Health Laboratory|Prystajecky|Canada

>Spike|hCoV-19/Scotland/CVR2656/2020|2020-04-17|EPI\_ISL\_478006|Original|hCoV-19^^Scotland|Human|West of Scotland Specialist Virology Centre|COVID-19 Genomics UK (COG-UK) Consortium|Robertson|United Kingdom

>Spike|hCoV-19/USA/CO-CDPHE-2100012955/2020|2020-11-19|EPI\_ISL\_771297|Original|hCoV-19^^Colorado|Human|Colorado Department of Public Health and Environment|Colorado Department of Public Health and Environment|Bankers|USA

>Spike|hCoV-19/Wales/PHWC-47F3F0/2020|2020-10-11|EPI\_ISL\_612672|Original|hCoV-19^^Wales|Human|Wales Specialist Virology Centre Sequencing lab|COVID-19 Genomics UK (COG-UK) Consortium|Moore|United Kingdom

>Spike|hCoV-19/England/MILK-99A14B/2020|2020-08-30|EPI\_ISL\_550334|Original|hCoV-19^^England|Human|Lighthouse Lab in Milton Keynes|Wellcome Sanger Institute for the COVID-19 Genomics UK (COG-UK) consortium|Davies|United Kingdom

>Spike|hCoV-19/United Arab Emirates/0030/2020|2020-05-17|EPI\_ISL\_698239|Original|hCoV-19^^Abu Dhabi|Human|Group 42 (G42) Healthcare|G42 Healthcare|Ogrodzki|United Arab Emirates

>Spike|hCoV-19/England/QEUEH-C4BB0C/2020|2020-12-14|EPI\_ISL\_769641|Original|hCoV-19^^England|Human|Lighthouse Lab in Glasgow|Wellcome Sanger Institute for the COVID-19 Genomics UK (COG-UK) Consortium|Davies|United Kingdom

>Spike|hCoV-19/USA/TX-HMH-MCoV-18126/2020|2020-11-16|EPI\_ISL\_784474|Original|hCoV-19^^Texas|Human|Houston Methodist Hospital|Houston Methodist Hospital|Long|USA

>Spike|hCoV-19/England/BRIS-13081D/2020|2020-04-12|EPI\_ISL\_492597|Original|hCoV-19^^England|Human|PHE South West Regional Laboratory|Wellcome Sanger Institute for the COVID-19 Genomics UK (COG-UK) consortium|Davies|United Kingdom

>Spike|hCoV-19/England/BIRM-64635/2020|2020-09-22|EPI\_ISL\_594500|Original|hCoV-19^^England|Human|University of Birmingham|COVID-19 Genomics UK (COG-UK) Consortium|Loman|United Kingdom

>Spike|hCoV-19/USA/TX-HMH-4957/2020|2020-06-20|EPI\_ISL\_544431|Original|hCoV-19^^Texas|Human|Houston Methodist Hospital|Houston Methodist Hospital|Long|USA

>Spike|hCoV-19/Japan/PG-6263/2020|2020-08-00|EPI\_ISL\_689374|Original|hCoV-19^^Japan|Human|Pathogen Genomics Center|Pathogen Genomics Center|Sekizuka|Japan

>Spike|hCoV-19/England/NORW-E6EAC/2020|2020-00-00|EPI\_ISL\_448987|Original|hCoV-19^^England|Human|Quadram Institute Bioscience|COVID-19 Genomics UK (COG-UK) Consortium|Alikhan|United Kingdom

>Spike|hCoV-19/Gibraltar/205000687/2020|2020-12-00|EPI\_ISL\_710011|Original|hCoV-19^^Gibraltar|Human|Microbiology|Respiratory Virus Unit|Platt|Gibraltar

>Spike|hCoV-19/England/CAMC-B33D3F/2020|2020-11-05|EPI\_ISL\_659245|Original|hCoV-19^^England|Human|Lighthouse Lab in Cambridge|Wellcome Sanger Institute for the COVID-19 Genomics UK (COG-UK) Consortium|Davies|United Kingdom

>Spike|hCoV-19/USA/WA-S1934/2020|2020-06-03|EPI\_ISL\_497362|Original|hCoV-19^^Washington|Human|Washington State Department of Health|Seattle Flu Study|Lee|USA

>Spike|hCoV-19/USA/NV-NSPHL-A0087/2020|2020-04-13|EPI\_ISL\_515364|Original|hCoV-19^^Nevada|Human|Nevada State Public Health Laboratory|Nevada State Public Health Laboratory|Sevinsky|USA

>Spike|hCoV-19/USA/WA-UW-22774/2020|2020-08-06|EPI\_ISL\_570716|Original|hCoV-19^^Washington|Human|UW Virology Lab|UW Virology Lab|Roychoudhury|USA

>Spike|hCoV-19/England/MILK-ACD7B5/2020|2020-10-22|EPI\_ISL\_644066|Original|hCoV-19^^England|Human|Lighthouse Lab in Milton Keynes|Wellcome Sanger Institute for the COVID-19 Genomics UK (COG-UK) Consortium|Davies|United Kingdom

>Spike|hCoV-19/Scotland/CVR5555/2020|2020-10-27|EPI\_ISL\_650483|Original|hCoV-19^^Scotland|Human|West of Scotland Specialist Virology Centre|COVID-19 Genomics UK (COG-UK) Consortium|Robertson|United Kingdom

>Spike|hCoV-19/England/EXET-13E615/2020|2020-00-00|EPI\_ISL\_724336|Original|hCoV-19^^England|Human|University of Exeter|COVID-19 Genomics UK (COG-UK) Consortium|Temperton|United Kingdom

>Spike|hCoV-19/Austria/Graz-MUG2/2020|2020-03-27|EPI\_ISL\_437198|Original|hCoV-19^^Styria|Human|Diagnostic- and Research Institute of Pathology|Diagnostic- and Research Institute of Pathology|Kashofer|Austria

>Spike|hCoV-19/USA/CA-QDX-1534/2020|2020-03-18|EPI\_ISL\_603782|Original|hCoV-19^^California|Human|Quest Diagnostics|Quest Diagnostics|Kagan|USA

>Spike|hCoV-19/England/MILK-AB7CFB/2020|2020-10-21|EPI\_ISL\_623618|Original|hCoV-19^^England|Human|Lighthouse Lab in Milton Keynes|Wellcome Sanger Institute for the COVID-19 Genomics UK (COG-UK) consortium|Davies|United Kingdom

>Spike|hCoV-19/Scotland/GCVR-173034/2020|2020-04-06|EPI\_ISL\_524556|Original|hCoV-19^^Scotland|Human|NHSGGC West of Scotland Specialist Virology Centre / MRC-University of Glasgow Centre for Virus Research|Wellcome Sanger Institute for the COVID-19 Genomics UK (COG-UK) consortium|Davies|United Kingdom

>Spike|hCoV-19/Japan/PG-0736/2020|2020-04-00|EPI\_ISL\_684346|Original|hCoV-19^^Japan|Human|Pathogen Genomics Center|Pathogen Genomics Center|Sekizuka|Japan

>Spike|hCoV-19/Canada/ON-QGLO-019/2020|2020-03-27|EPI\_ISL\_459877|Original|hCoV-19^^Ontario|Human|Kingston Health Sciences Center|Queen's Genomics Lab at Ongwanada (Q-GLO)|Sjaarda|Canada

>Spike|hCoV-19/USA/UT-UPHL-2012699605/2020|2020-10-20|EPI\_ISL\_746300|Original|hCoV-19^^Utah|Human|Ginkgo Bioworks Clinical Laboratory|Utah Public Health Laboratory|Young|USA

>Spike|hCoV-19/USA/WI-UW-23/2020|2020-03-17|EPI\_ISL\_417507|Original|hCoV-19^^Wisconsin|Human|University of Wisconsin-Madison AIDS Vaccine Research Laboratories|University of Wisconsin-Madison AIDS Vaccine Research Laboratories|Moreno|USA

>Spike|hCoV-19/England/CAMC-B21657/2020|2020-11-03|EPI\_ISL\_647433|Original|hCoV-19^^England|Human|Lighthouse Lab in Cambridge|Wellcome Sanger Institute for the COVID-19 Genomics UK (COG-UK) Consortium|Davies|United Kingdom

>Spike|hCoV-19/Wales/PHWC-162FC2/2020|2020-05-20|EPI\_ISL\_473229|Original|hCoV-19^^Wales|Human|Wales Specialist Virology Centre Sequencing lab|COVID-19 Genomics UK (COG-UK) Consortium|Moore|United Kingdom

>Spike|hCoV-19/Australia/VIC2340/2020|2020-06-25|EPI\_ISL\_522061|Original|hCoV-19^^Victoria|Human|Victorian Infectious Diseases Reference Laboratory (VIDRL)|VIDRL and MDU-PHL|Schultz|Australia

>Spike|hCoV-19/Australia/VIC3176/2020|2020-07-07|EPI\_ISL\_520867|Original|hCoV-19^^Victoria|Human|Victorian Infectious Diseases Reference Laboratory (VIDRL)|VIDRL and MDU-PHL|Schultz|Australia

>Spike|hCoV-19/Japan/PG-3418/2020|2020-04-00|EPI\_ISL\_691530|Original|hCoV-19^^Japan|Human|Sakai City Institute of Public Health|Pathogen Genomics Center|Sekizuka|Japan

>Spike|hCoV-19/USA/MI-MDHHS-SC21196/2020|2020-03-29|EPI\_ISL\_507453|Original|hCoV-19^^Michigan|Human|Michigan Department of Health and Human Services|Michigan Department of Health and Human Services|Blankenship|USA

>Spike|hCoV-19/USA/OR-OHSU-1917/2020|2020-07-29|EPI\_ISL\_526070|Original|hCoV-19^^Oregon|Human|OHSU Lab Services Molecular Microbiology Lab|Oregon SARS-CoV-2 Genome Sequencing Center|O'Roak|USA

>Spike|hCoV-19/England/NORT-2938BD/2020|2020-07-06|EPI\_ISL\_499597|Original|hCoV-19^^England|Human|Northumbria University / South Tees Hospitals NHS Foundation Trust / North Cumbria Integrated Care NHS Foundation Trust / North Tees and Hartlepool NHS Foundation Trust / Newcastle Hospitals NHS Foundation Trust|COVID-19 Genomics UK (COG-UK) Consortium|Bashton|United Kingdom

>Spike|hCoV-19/Kenya/C6524/2020|2020-05-14|EPI\_ISL\_568805|Original|hCoV-19^^Kwale|Human|KEMRI-Wellcome Trust Research Programme/KEMRI-CGMR-C Kilifi|KEMRI-Wellcome Trust Research Programme/KEMRI-CGMR-C Kilifi|Githinji|Kenya

>Spike|hCoV-19/USA/WA-S1785/2020|2020-06-02|EPI\_ISL\_496211|Original|hCoV-19^^Washington|Human|Washington State Department of Health|Seattle Flu Study|Lee|USA

>Spike|hCoV-19/United Arab Emirates/0879/2020|2020-05-19|EPI\_ISL\_699017|Original|hCoV-19^^Abu Dhabi|Human|Group 42 (G42) Healthcare|G42 Healthcare|Ogrodzki|United Arab Emirates

>Spike|hCoV-19/Wales/PHWC-481C4B/2020|2020-10-16|EPI\_ISL\_613159|Original|hCoV-19^^Wales|Human|Wales Specialist Virology Centre Sequencing lab|COVID-19 Genomics UK (COG-UK) Consortium|Moore|United Kingdom

>Spike|hCoV-19/England/CAMB-7F655/2020|2020-04-09|EPI\_ISL\_470453|Original|hCoV-19^^England|Human|Department of Pathology|Wellcome Sanger Institute for the COVID-19 Genomics UK (COG-UK) consortium|Davies|United Kingdom

>Spike|hCoV-19/USA/MI-MDHHS-SC22370/2020|2020-11-09|EPI\_ISL\_708350|Original|hCoV-19^^Michigan|Human|Michigan Department of Health and Human Services|Michigan Department of Health and Human Services|Jacob|USA

>Spike|hCoV-19/England/CAMB-75015/2020|2020-03-16|EPI\_ISL\_440438|Original|hCoV-19^^England|Human|Department of Pathology|Wellcome Sanger Institute for the COVID-19 Genomics UK (COG-UK) consortium|Amato|United Kingdom

>Spike|hCoV-19/Luxembourg/LNS3014976/2020|2020-12-01|EPI\_ISL\_771005|Original|hCoV-19^^Luxembourg|Human|Laboratoire national de sant\u00e9|Laboratoire national de sant\u00e9|Wienecke-Baldacchino|Luxembourg

>Spike|hCoV-19/USA/UT-UPHL-2009121/2020|2020-05-31|EPI\_ISL\_525120|Original|hCoV-19^^Utah|Human|Utah Public Health Laboratory|Utah Public Health Laboratory|Young|USA

>Spike|hCoV-19/England/ALDP-AA1D88/2020|2020-10-22|EPI\_ISL\_624393|Original|hCoV-19^^England|Human|Lighthouse Lab in Alderley Park|Wellcome Sanger Institute for the COVID-19 Genomics UK (COG-UK) consortium|Davies|United Kingdom

>Spike|hCoV-19/India/GJ-GBRC195a/2020|2020-06-08|EPI\_ISL\_469039|Original|hCoV-19^^Gujarat|Human|GMERS Medical College & Hospital|Gujarat Biotechnology Research Centre|Joshi|India

>Spike|hCoV-19/Canada/QC-LSPQ-L00240029/2020|2020-03-26|EPI\_ISL\_536261|Original|hCoV-19^^Quebec|Human|H\u00f4pital du Suro\u00eet|Laboratoire de sant\u00e9 publique du Qu\u00e9bec|Moreira|Canada

>Spike|hCoV-19/Switzerland/VD-ETHZ-300316/2020|2020-09-25|EPI\_ISL\_603348|Original|hCoV-19^^Vaud|Human|Viollier AG|Department of Biosystems Science and Engineering|Nadeau|Switzerland

>Spike|hCoV-19/Japan/PG-4971/2020|2020-08-00|EPI\_ISL\_690089|Original|hCoV-19^^Japan|Human|Pathogen Genomics Center|Pathogen Genomics Center|Sekizuka|Japan

>Spike|hCoV-19/England/QEUH-883CCD/2020|2020-07-26|EPI\_ISL\_532775|Original|hCoV-19^^England|Human|Lighthouse Lab in Glasgow|Wellcome Sanger Institute for the COVID-19 Genomics UK (COG-UK) consortium|Davies|United Kingdom

>Spike|hCoV-19/England/ALDP-C3A836/2020|2020-12-08|EPI\_ISL\_731540|Original|hCoV-19^^England|Human|Lighthouse Lab in Alderley Park|Wellcome Sanger Institute for the COVID-19 Genomics UK (COG-UK) Consortium|Davies|United Kingdom

>Spike|hCoV-19/Denmark/DCGC-10242/2020|2020-11-09|EPI\_ISL\_669504|Original|hCoV-19^^Hovedstaden|Human|Department of Virus and Microbiological Special Diagnostics|Albertsen Lab|Michaelsen|Denmark

>Spike|hCoV-19/USA/TX-HMH-MCoV-9104/2020|2020-07-03|EPI\_ISL\_780945|Original|hCoV-19^^Texas|Human|Houston Methodist Hospital|Houston Methodist Hospital|Long|USA

>Spike|hCoV-19/USA/TX-HMH-MCoV-18606/2020|2020-11-20|EPI\_ISL\_784954|Original|hCoV-19^^Texas|Human|Houston Methodist Hospital|Houston Methodist Hospital|Long|USA

>Spike|hCoV-19/Scotland/CVR4312/2020|2020-09-13|EPI\_ISL\_572788|Original|hCoV-19^^Scotland|Human|West of Scotland Specialist Virology Centre|COVID-19 Genomics UK (COG-UK) Consortium|Robertson|United Kingdom

>Spike|hCoV-19/Canada/QC\_AA2/2020|2020-04-11|EPI\_ISL\_444494|Original|hCoV-19^^Quebec|Human|Laboratoire de microbiologie|Smith Laboratory|Smith|Canada

>Spike|hCoV-19/USA/GA-QDX-2158/2020|2020-03-14|EPI\_ISL\_604451|Original|hCoV-19^^Georgia|Human|Quest Diagnostics|Quest Diagnostics|Kagan|USA

>Spike|hCoV-19/England/ALDP-B84BBD/2020|2020-11-14|EPI\_ISL\_675829|Original|hCoV-19^^England|Human|Lighthouse Lab in Alderley Park|Wellcome Sanger Institute for the COVID-19 Genomics UK (COG-UK) Consortium|Davies|United Kingdom

>Spike|hCoV-19/USA/CA-LACPHL-AC00002/2020|2020-08-18|EPI\_ISL\_707884|Original|hCoV-19^^California|Human|Los Angeles County Public Health Laboratory|Los Angeles County Public Health Laboratory|Hemarajata|USA

>Spike|hCoV-19/England/NOTT-10E915/2020|2020-03-29|EPI\_ISL\_425612|Original|hCoV-19^^England|Human|Queens Medical Centre|COVID-19 Genomics UK (COG-UK) Consortium|Loose|United Kingdom

>Spike|hCoV-19/Japan/PG-7102/2020|2020-08-00|EPI\_ISL\_688207|Original|hCoV-19^^Japan|Human|Pathogen Genomics Center|Pathogen Genomics Center|Sekizuka|Japan

>Spike|hCoV-19/USA/CA-ALSR-2976/2020|2020-09-02|EPI\_ISL\_635766|Original|hCoV-19^^California|Human|San Diego County Public Health Laboratory|Andersen lab at Scripps Research|Gangavarapu|USA

>Spike|hCoV-19/England/MILK-B8CA03/2020|2020-11-13|EPI\_ISL\_675726|Original|hCoV-19^^England|Human|Lighthouse Lab in Milton Keynes|Wellcome Sanger Institute for the COVID-19 Genomics UK (COG-UK) Consortium|Davies|United Kingdom

>Spike|hCoV-19/England/MILK-B5A770/2020|2020-11-06|EPI\_ISL\_658336|Original|hCoV-19^^England|Human|Lighthouse Lab in Milton Keynes|Wellcome Sanger Institute for the COVID-19 Genomics UK (COG-UK) Consortium|Davies|United Kingdom

>Spike|hCoV-19/Denmark/DCGC-5148/2020|2020-09-21|EPI\_ISL\_621686|Original|hCoV-19^^Syddanmark|Human|Department of Virus and Microbiological Special Diagnostics|Albertsen lab|Michaelsen|Denmark

>Spike|hCoV-19/England/QEUH-9DAFDC/2020|2020-09-22|EPI\_ISL\_581096|Original|hCoV-19^^England|Human|Lighthouse Lab in Glasgow|Wellcome Sanger Institute for the COVID-19 Genomics UK (COG-UK) consortium|Davies|United Kingdom

>Spike|hCoV-19/Wales/PHWC-28CC2/2020|2020-04-02|EPI\_ISL\_445428|Original|hCoV-19^^Wales|Human|Wales Specialist Virology Centre|Public Health Wales Microbiology Cardiff|Moore|United Kingdom



>Spike|hCoV-19/Denmark/DCGC-20849/2020|2020-12-21|EPI\_ISL\_759405|Original|hCoV-19^^Nordjylland|Human|Department of Virus and Microbiological Special Diagnostics|Albertsen Lab|Michaelsen|Denmark

>Spike|hCoV-19/USA/WI-UW-1181/2020|2020-08-07|EPI\_ISL\_522936|Original|hCoV-19^^Wisconsin|Human|University of Wisconsin-Madison AIDS Vaccine Research Laboratories|University of Wisconsin-Madison AIDS Vaccine Research Laboratories|Baczenas|USA

>Spike|hCoV-19/Denmark/DCGC-7788/2020|2020-10-19|EPI\_ISL\_618673|Original|hCoV-19^^Syddanmark|Human|Department of Virus and Microbiological Special Diagnostics|Albertsen lab|Michaelsen|Denmark

>Spike|hCoV-19/Italy/LOM-ASST-21/2020|2020-04-01|EPI\_ISL\_486658|Original|hCoV-19^^Lombardy|Human|Microbiology|Microbiology|Comandatore|Italy

>Spike|hCoV-19/USA/WA-S2218/2020|2020-06-08|EPI\_ISL\_497646|Original|hCoV-19^^Washington|Human|Washington State Department of Health|Seattle Flu Study|Lee|USA

>Spike|hCoV-19/USA/UT-UPHL-201108622/2020|2020-04-06|EPI\_ISL\_648571|Original|hCoV-19^^Utah|Human|Utah Public Health Laboratory|Utah Public Health Laboratory|Young|USA

>Spike|hCoV-19/England/QEUH-9CA977/2020|2020-09-10|EPI\_ISL\_567467|Original|hCoV-19^^England|Human|Lighthouse Lab in Glasgow|Wellcome Sanger Institute for the COVID-19 Genomics UK (COG-UK) consortium|Davies|United Kingdom

>Spike|hCoV-19/USA/MI-MDHHS-SC20558/2020|2020-04-29|EPI\_ISL\_462640|Original|hCoV-19^^Michigan|Human|Michigan Department of Health and Human Services|Michigan Department of Health and Human Services|Blankenship|USA

>Spike|hCoV-19/England/LIVE-9CC05/2020|2020-04-25|EPI\_ISL\_440939|Original|hCoV-19^^England|Human|Liverpool Clinical Laboratories|COVID-19 Genomics UK (COG-UK) Consortium|Haldenby|United Kingdom

>Spike|hCoV-19/Northern Ireland/NIRE-1054C2/2020|2020-03-29|EPI\_ISL\_472154|Original|hCoV-19^^Northern Ireland|Human|Regional Virus Laboratory|COVID-19 Genomics UK (COG-UK) Consortium|Fairley|United Kingdom

>Spike|hCoV-19/Sweden/20-08865/2020|2020-04-09|EPI\_ISL\_476145|Original|hCoV-19^^Jamtland Harjedalen|Human|Ostersund klinisk mikrobiologi|The Public Health Agency of Sweden|Svartstr\u00f6m|Sweden

>Spike|hCoV-19/England/ALDP-B829B5/2020|2020-11-14|EPI\_ISL\_675370|Original|hCoV-19^^England|Human|Lighthouse Lab in Alderley Park|Wellcome Sanger Institute for the COVID-19 Genomics UK (COG-UK) Consortium|Davies|United Kingdom

>Spike|hCoV-19/England/NORW-21FF0F/2020|2020-12-13|EPI\_ISL\_741485|Original|hCoV-19^^England|Human|Quadram Institute Bioscience|COVID-19 Genomics UK (COG-UK) Consortium|Alikhan|United Kingdom

>Spike|hCoV-19/Japan/IC-0389/2020|2020-12-00|EPI\_ISL\_736900|Original|hCoV-19^^Japan|Human|Pathogen Genomics Center|Pathogen Genomics Center|Sekizuka|Japan

>Spike|hCoV-19/England/CAMC-A648F9/2020|2020-10-11|EPI\_ISL\_609088|Original|hCoV-19^^England|Human|Lighthouse Lab in Cambridge|Wellcome Sanger Institute for the COVID-19 Genomics UK (COG-UK) consortium|Davies|United Kingdom

>Spike|hCoV-19/Spain/MD-IBV-99008771/2020|2020-10-20|EPI\_ISL\_654256|Original|hCoV-19^^Madrid|Human|Hospital General Universitario Gregorio Mara\u00f1a|SeqCOVID-SPAIN consortium/IBV (CSIC)|Comas|Spain

>Spike|hCoV-19/USA/CA-ALSR-2692/2020|2020-07-21|EPI\_ISL\_635635|Original|hCoV-19^^California|Human|San Diego County Public Health Laboratory|Andersen lab at Scripps Research|Gangavarapu|USA

>Spike|hCoV-19/Wales/PHWC-49B3D0/2020|2020-11-12|EPI\_ISL\_742330|Original|hCoV-19^^Wales|Human|Wales Specialist Virology Centre Sequencing lab|COVID-19 Genomics UK (COG-UK) Consortium|Moore|United Kingdom

>Spike|hCoV-19/Germany/BE-ChVir-D1941-8263/2020|2020-09-24|EPI\_ISL\_753877|Original|hCoV-19^^Berlin|Human|Charit\u00e9 Universit\u00e4tsmedizin Berlin|Charit\u00e9 Universit\u00e4tsmedizin Berlin|Muehlemann|Germany

>Spike|hCoV-19/Australia/VIC4708/2020|2020-07-16|EPI\_ISL\_519096|Original|hCoV-19^^Victoria|Human|Microbiological Diagnostic Unit - Public Health Laboratory (MDU-PHL)|MDU-PHL|Schultz|Australia

>Spike|hCoV-19/Denmark/DCGC-17561/2020|2020-12-14|EPI\_ISL\_751071|Original|hCoV-19^^Sjaelland|Human|Department of Virus and Microbiological Special Diagnostics|Albertsen Lab|Michaelsen|Denmark

>Spike|hCoV-19/England/MILK-B8DDBE/2020|2020-11-13|EPI\_ISL\_674594|Original|hCoV-19^^England|Human|Lighthouse Lab in Milton Keynes|Wellcome Sanger Institute for the COVID-19 Genomics UK (COG-UK) Consortium|Davies|United Kingdom

>Spike|hCoV-19/Wales/PHWC-16EEF6/2020|2020-10-03|EPI\_ISL\_585883|Original|hCoV-19^^Wales|Human|Wales Specialist Virology Centre Sequencing lab|COVID-19 Genomics UK (COG-UK) Consortium|Moore|United Kingdom

>Spike|hCoV-19/Germany/SH-ChVir9932/2020|2020-11-03|EPI\_ISL\_729620|Original|hCoV-19^^Schleswig-Holstein|Human|A. Krumbholz|Charit\u00e9 Universit\u00e4tsmedizin Berlin|Muehlemann|Germany

>Spike|hCoV-19/USA/WI-UW-823/2020|2020-06-02|EPI\_ISL\_509830|Original|hCoV-19^^Wisconsin|Human|University of Wisconsin-Madison AIDS Vaccine Research Laboratories|University of Wisconsin-Madison AIDS Vaccine Research Laboratories|Baczenas|USA

>Spike|hCoV-19/USA/WI-WSLH-200228/2020|2020-04-13|EPI\_ISL\_578448|Original|hCoV-19^^Wisconsin|Human|Wisconsin State Laboratory of Hygiene Communicable Disease Division|Wisconsin State Laboratory of Hygiene Communicable Disease Division|Florek|USA

>Spike|hCoV-19/India/TG-CCMB-AA315/2020|2020-08-11|EPI\_ISL\_539754|Original|hCoV-19^^Telangana|Human|CSIR-Centre for Cellular and Molecular Biology|CSIR-Centre for Cellular and Molecular Biology|Mukherjee|India

>Spike|hCoV-19/Canada/NS-NML-1335/2020|2020-04-11|EPI\_ISL\_579714|Original|hCoV-19^^Nova Scotia|Human|QEII Health Sciences Centre|National Microbiology Laboratory (NML)|Majer|Canada

>Spike|hCoV-19/Japan/PG-1479/2020|2020-04-00|EPI\_ISL\_685086|Original|hCoV-19^^Japan|Human|Saitama Prefectural Institute of Public Health|Pathogen Genomics Center|Sekizuka|Japan

>Spike|hCoV-19/USA/UT-UPHL-2009324/2020|2020-05-16|EPI\_ISL\_524925|Original|hCoV-19^^Utah|Human|Utah Public Health Laboratory|Utah Public Health Laboratory|Young|USA

>Spike|hCoV-19/Brazil/RJ-2678/2020|2020-04-24|EPI\_ISL\_467355|Original|hCoV-19^^Rio de Janeiro|Human|Laboratory of Respiratory Viruses and Measles|Laboratory of Respiratory Viruses and Measles|Silva|Brazil

>Spike|hCoV-19/England/NORT-2847FE/2020|2020-03-23|EPI\_ISL\_488669|Original|hCoV-19^^England|Human|NU-OMICS DNA Sequencing research facility|Wellcome Sanger Institute for the COVID-19 Genomics UK (COG-UK) consortium|Davies|United Kingdom

>Spike|hCoV-19/Netherlands/NA\_20/2020|2020-03-12|EPI\_ISL\_415477|Original|hCoV-19^^Netherlands|Human|Dutch COVID-19 response team|Erasmus Medical Center|Oude Munnink|Netherlands

>Spike|hCoV-19/USA/VA-DCLS-2009/2020|2020-10-14|EPI\_ISL\_644910|Original|hCoV-19^^Virginia|Human|Virginia DCLS|Virginia DCLS|St. Jacques|USA

>Spike|hCoV-19/Scotland/EDB1151/2020|2020-04-07|EPI\_ISL\_433410|Original|hCoV-19^^Scotland|Human|Virology Department|COVID-19 Genomics UK (COG-UK) Consortium|Williams|United Kingdom

>Spike|hCoV-19/Belgium/UGent-276/2020|2020-11-16|EPI\_ISL\_718012|Original|hCoV-19^^Ghent|Human|Lab voor klinische biologie|Onderzoeksgroep Virologie|Lambrechts|Belgium

>Spike|hCoV-19/Scotland/QEUEH-943ABF/2020|2020-08-01|EPI\_ISL\_532626|Original|hCoV-19^^Scotland|Human|NHSGGC West of Scotland Specialist Virology Centre / MRC-University of Glasgow Centre for Virus Research|Wellcome Sanger Institute for the COVID-19 Genomics UK (COG-UK) consortium|Davies|United Kingdom

>Spike|hCoV-19/Scotland/EDB4426/2020|2020-05-04|EPI\_ISL\_449310|Original|hCoV-19^^Scotland|Human|Virology Department|COVID-19 Genomics UK (COG-UK) Consortium|Williams|United Kingdom

>Spike|hCoV-19/England/QEUEH-BC4270/2020|2020-11-24|EPI\_ISL\_703371|Original|hCoV-19^^England|Human|Lighthouse Lab in Glasgow|Wellcome Sanger Institute for the COVID-19 Genomics UK (COG-UK) Consortium|Davies|United Kingdom

>Spike|hCoV-19/Denmark/DCGC-22111/2020|2020-12-14|EPI\_ISL\_758557|Original|hCoV-19^^Hovedstaden|Human|Department of Virus and Microbiological Special Diagnostics|Albertsen Lab|Michaelsen|Denmark

>Spike|hCoV-19/England/QEUH-AD1824/2020|2020-10-24|EPI\_ISL\_629845|Original|hCoV-19^^England|Human|Lighthouse Lab in Glasgow|Wellcome Sanger Institute for the COVID-19 Genomics UK (COG-UK) consortium|Davies|United Kingdom

>Spike|hCoV-19/Spain/MD-IBV-99012325/2020|2020-11-20|EPI\_ISL\_779965|Original|hCoV-19^^Madrid|Human|Hospital General Universitario Gregorio Mara\u00f1\u00f3n|SeqCOVID-SPAIN consortium/IBV (CSIC)|Comas|Spain

>Spike|hCoV-19/Denmark/DCGC-14483/2020|2020-11-30|EPI\_ISL\_711792|Original|hCoV-19^^Sjaelland|Human|Department of Virus and Microbiological Special Diagnostics|Albertsen Lab|Michaelsen|Denmark

>Spike|hCoV-19/Australia/VIC7226/2020|2020-07-02|EPI\_ISL\_564294|Original|hCoV-19^^Victoria|Human|Microbiological Diagnostic Unit - Public Health Laboratory (MDU-PHL)|MDU-PHL|Schultz|Australia

>Spike|hCoV-19/USA/FL-QDX-273/2020|2020-03-18|EPI\_ISL\_571028|Original|hCoV-19^^Florida|Human|Quest Diagnostics|Quest Diagnostics|Kagan|USA

>Spike|hCoV-19/Weifang/WF0028/2020|2020-02-00|EPI\_ISL\_413791|Original|hCoV-19^^Weifang|Human|Weifang Center for Disease Control and Prevention|Weifang Center for Disease Control and Prevention & BGI-Shenzhen|Li|China

>Spike|hCoV-19/Australia/QLD1296/2020|2020-03-23|EPI\_ISL\_693291|Original|hCoV-19^^Australia|Human|unknown|Public Health Virology Laboratory|Nguyen|Australia

>Spike|hCoV-19/Luxembourg/LNS9779064/2020|2020-11-09|EPI\_ISL\_744981|Original|hCoV-19^^Luxembourg|Human|Laboratoire national de sant\u00e9|Laboratoire national de sant\u00e9|Wienecke-Baldacchino|Luxembourg

>Spike|hCoV-19/India/UP-NBRI-N30-TDV623/2020|2020-05-15|EPI\_ISL\_516959|Original|hCoV-19^^Uttar Pradesh|Human|King Georges Medical University|CSIR-National Botanical Research Institute|Bag|India

>Spike|hCoV-19/USA/UT-UPHL-2009290/2020|2020-05-15|EPI\_ISL\_525268|Original|hCoV-19^^Utah|Human|Utah Public Health Laboratory|Utah Public Health Laboratory|Young|USA

>Spike|hCoV-19/England/SHEF-10B2811/2020|2020-04-28|EPI\_ISL\_537275|Original|hCoV-19^^England|Human|Virology Department|Wellcome Sanger Institute for the COVID-19 Genomics UK (COG-UK) consortium|Davies|United Kingdom

>Spike|hCoV-19/Netherlands/UT-RIVM-20140/2020|2020-11-24|EPI\_ISL\_723310|Original|hCoV-19^^Utrecht|Human|Dutch COVID-19 response team|National Institute for Public Health and the Environment (RIVM)|Meijer|Netherlands

>Spike|hCoV-19/England/MILK-A6A161/2020|2020-10-08|EPI\_ISL\_608797|Original|hCoV-19^^England|Human|Lighthouse Lab in Milton Keynes|Wellcome Sanger Institute for the COVID-19 Genomics UK (COG-UK) consortium|Davies|United Kingdom

>Spike|hCoV-19/Jordan/AM-ALSR-5318/2020|2020-11-02|EPI\_ISL\_730554|Original|hCoV-19^^Amman|Human|Biolab Diagnostic Laboratories|Andersen lab at Scripps Research|Gangavarapu|Jordan

>Spike|hCoV-19/Australia/VIC7527/2020|2020-07-14|EPI\_ISL\_564471|Original|hCoV-19^^Victoria|Human|Microbiological Diagnostic Unit - Public Health Laboratory (MDU-PHL)|MDU-PHL|Schultz|Australia

>Spike|hCoV-19/England/205260320/2020|2020-12-21|EPI\_ISL\_766518|Original|hCoV-19^^England|Human|Respiratory Virus Unit|COVID-19 Genomics UK (COG-UK) Consortium|Platt|United Kingdom

>Spike|hCoV-19/USA/MI-MDHHS-SC22365/2020|2020-11-16|EPI\_ISL\_708345|Original|hCoV-19^^Michigan|Human|Michigan Department of Health and Human Services|Michigan Department of Health and Human Services|Jacob|USA

>Spike|hCoV-19/Ireland/D-NVRL-20G32232/2020|2020-03-18|EPI\_ISL\_605140|Original|hCoV-19^^Dublin|Human|National Virus Reference Laboratory|Irish Coronavirus Sequencing Consortium - Helixworks|Chalapati|Ireland

>Spike|hCoV-19/England/MILK-958DCD/2020|2020-05-31|EPI\_ISL\_554242|Original|hCoV-19^^England|Human|Lighthouse Lab in Milton Keynes|Wellcome Sanger Institute for the COVID-19 Genomics UK (COG-UK) consortium|Davies|United Kingdom

>Spike|hCoV-19/USA/HI-H200534/2020|2020-10-24|EPI\_ISL\_753066|Original|hCoV-19^^Hawaii|Human|State Laboratories Division|State Laboratories Division|Sultana|USA

>Spike|hCoV-19/USA/WI-GMF-03151/2020|2020-05-12|EPI\_ISL\_455571|Original|hCoV-19^^Wisconsin|Human|Gundersen Molecular Diagnostics Laboratory|Kabara Cancer Research Institute|Kenny|USA

>Spike|hCoV-19/Australia/VIC8058/2020|2020-08-17|EPI\_ISL\_564823|Original|hCoV-19^^Victoria|Human|Microbiological Diagnostic Unit - Public Health Laboratory (MDU-PHL)|MDU-PHL|Schultz|Australia

>Spike|hCoV-19/England/BRIS-129325/2020|2020-04-19|EPI\_ISL\_458911|Original|hCoV-19^^England|Human|PHE South West Regional Laboratory|Wellcome Sanger Institute for the COVID-19 Genomics UK (COG-UK) consortium|Davies|United Kingdom

>Spike|hCoV-19/England/ALDP-BB56A3/2020|2020-11-20|EPI\_ISL\_703237|Original|hCoV-19^^England|Human|Lighthouse Lab in Alderley Park|Wellcome Sanger Institute for the COVID-19 Genomics UK (COG-UK) Consortium|Davies|United Kingdom

>Spike|hCoV-19/USA/TX-HMH-MCoV-19657/2020|2020-11-25|EPI\_ISL\_784016|Original|hCoV-19^^Texas|Human|Houston Methodist Hospital|Houston Methodist Hospital|Long|USA

>Spike|hCoV-19/England/SHEF-D0AB0/2020|2020-11-29|EPI\_ISL\_702881|Original|hCoV-19^^England|Human|Virology Department|COVID-19 Genomics UK (COG-UK) Consortium|de Silva|United Kingdom

>Spike|hCoV-19/Belgium/ULG-10971/2020|2020-09-08|EPI\_ISL\_707723|Original|hCoV-19^^Li\u00e8ge|Human|Department of Clinical Microbiology|GIGA Medical Genomics|Durkin|Belgium

>Spike|hCoV-19/USA/VA-DCLS-1380/2020|2020-07-05|EPI\_ISL\_572225|Original|hCoV-19^^Virginia|Human|Virginia DCLS|Virginia DCLS|St. Jacques|USA

>Spike|hCoV-19/Denmark/DCGC-4469/2020|2020-09-14|EPI\_ISL\_615654|Original|hCoV-19^^Nordjylland|Human|Department of Virus and Microbiological Special Diagnostics|Albertsen lab|Michaelsen|Denmark

>Spike|hCoV-19/Netherlands/un-EMC-786/2020|2020-06-13|EPI\_ISL\_577882|Original|hCoV-19^^Netherlands|Human|Dutch COVID-19 response team|Erasmus Medical Center|Oude Munnink|Netherlands

>Spike|hCoV-19/USA/NY-Wadsworth-251059-01/2020|2020-10-21|EPI\_ISL\_754691|Original|hCoV-19^^New York|Human|Wadsworth Center|Wadsworth Center|Lasek-Nesselquist|USA

>Spike|hCoV-19/Wales/PHWC-338DF/2020|2020-04-21|EPI\_ISL\_446763|Original|hCoV-19^^Wales|Human|Wales Specialist Virology Centre|Public Health Wales Microbiology Cardiff|Moore|United Kingdom

>Spike|hCoV-19/England/CAMB-1BAB7C/2020|2020-11-12|EPI\_ISL\_664175|Original|hCoV-19^^England|Human|Department of Pathology|COVID-19 Genomics UK (COG-UK) Consortium|Goodfellow|United Kingdom

>Spike|hCoV-19/USA/TX-DSHS-0519/2020|2020-06-23|EPI\_ISL\_560961|Original|hCoV-19^^Texas|Human|Texas Department of State Health Services|Texas Department of State Health Services|Rahman|USA

>Spike|hCoV-19/USA/TX-HMH-MCoV-16129/2020|2020-10-29|EPI\_ISL\_785813|Original|hCoV-19^^Texas|Human|Houston Methodist Hospital|Houston Methodist Hospital|Long|USA

>Spike|hCoV-19/Japan/PG-6786/2020|2020-08-00|EPI\_ISL\_687895|Original|hCoV-19^^Japan|Human|Pathogen Genomics Center|Pathogen Genomics Center|Sekizuka|Japan

>Spike|hCoV-19/Denmark/DCGC-16007/2020|2020-11-23|EPI\_ISL\_714531|Original|hCoV-19^^Hovedstaden|Human|Department of Virus and Microbiological Special Diagnostics|Albertsen Lab|Michaelsen|Denmark

>Spike|hCoV-19/England/CAMB-1AEBE4/2020|2020-05-04|EPI\_ISL\_448059|Original|hCoV-19^^England|Human|Department of Pathology|COVID-19 Genomics UK (COG-UK) Consortium|Meredith|United Kingdom

>Spike|hCoV-19/USA/TX-HMH-3282/2020|2020-06-11|EPI\_ISL\_544100|Original|hCoV-19^^Texas|Human|Houston Methodist Hospital|Houston Methodist Hospital|Long|USA

>Spike|hCoV-19/Australia/QLDID924/2020|2020-03-18|EPI\_ISL\_418802|Original|hCoV-19^^Queensland|Human|Pathology Queensland|Public Health Virology Laboratory|Warrilow|Australia

>Spike|hCoV-19/England/QEUH-B0EC9A/2020|2020-11-02|EPI\_ISL\_642112|Original|hCoV-19^^England|Human|Lighthouse Lab in Glasgow|Wellcome Sanger Institute for the COVID-19 Genomics UK (COG-UK) Consortium|Davies|United Kingdom

>Spike|hCoV-19/USA/VA-DCLS-2003/2020|2020-10-14|EPI\_ISL\_644905|Original|hCoV-19^^Virginia|Human|Virginia DCLS|Virginia DCLS|St. Jacques|USA

>Spike|hCoV-19/USA/NY-Wadsworth-12437-01/2020|2020-03-07|EPI\_ISL\_676730|Original|hCoV-19^^New York|Human|Wadsworth Center|Wadsworth Center|Lasek-Nesselquist|USA

>Spike|hCoV-19/South Korea/KDCA0154/2020|2020-11-14|EPI\_ISL\_747388|Original|hCoV-19^^South Korea|Human|Division of Emerging Infectious Diseases|Division of Emerging Infectious Diseases|Park|South Korea

>Spike|hCoV-19/England/CAMB-1B0A4C/2020|2020-00-00|EPI\_ISL\_452931|Original|hCoV-19^^England|Human|Department of Pathology|COVID-19 Genomics UK (COG-UK) Consortium|Meredith|United Kingdom

>Spike|hCoV-19/Spain/PV-IBV-98007689/2020|2020-09-14|EPI\_ISL\_582080|Original|hCoV-19^^Basque Country|Human|Servicio de Microbiolog\u00eda. Hospital Universitario Donostia. OSI Donostialdea. \u00clrea de Enfermedades Infecciosas|SeqCOVID-SPAIN consortium/IBV (CSIC) |Comas|Spain

>Spike|hCoV-19/Netherlands/OV-EMC-39/2020|2020-04-17|EPI\_ISL\_523423|Original|hCoV-19^^Overijssel|Human|Dutch COVID-19 response team|Erasmus Medical Center|Oude Munnink|Netherlands

>Spike|hCoV-19/Scotland/QEUH-A1FAAC/2020|2020-10-01|EPI\_ISL\_598955|Original|hCoV-19^^Scotland|Human|Lighthouse Lab in Glasgow|Wellcome Sanger Institute for the COVID-19 Genomics UK (COG-UK) consortium|Davies|United Kingdom

>Spike|hCoV-19/Canada/ON-PHL-20-02413/2020|2020-09-00|EPI\_ISL\_671591|Original|hCoV-19^^Ontario|Human|Public Health Ontario Laboratory|Public Health Ontario Laboratory|Guthrie|Canada

>Spike|hCoV-19/USA/CA-CZB-10130/2020|2020-06-29|EPI\_ISL\_672224|Original|hCoV-19^^California|Human|The Ashley Laboratory|Chan-Zuckerberg Biohub|Bhatt|USA

>Spike|hCoV-19/USA/CA-IGI-0226/2020|2020-06-30|EPI\_ISL\_569942|Original|hCoV-19^^California|Human|Innovative Genomics Institute|Innovative Genomics Institute|Wyman|USA

>Spike|hCoV-19/England/204390077/2020|2020-10-23|EPI\_ISL\_637129|Original|hCoV-19^^England|Human|Respiratory Virus Unit|COVID-19 Genomics UK (COG-UK) Consortium|Platt|United Kingdom

>Spike|hCoV-19/USA/IL-NM-0382/2020|2020-03-28|EPI\_ISL\_626384|Original|hCoV-19^^Illinois|Human|Northwestern Memorial Hospital|Ozer Lab|Ozer|USA

>Spike|hCoV-19/England/ALDP-BB3784/2020|2020-11-20|EPI\_ISL\_701730|Original|hCoV-19^^England|Human|Lighthouse Lab in Alderley Park|Wellcome Sanger Institute for the COVID-19 Genomics UK (COG-UK) Consortium|Davies|United Kingdom

>Spike|hCoV-19/Japan/PG-6717/2020|2020-08-00|EPI\_ISL\_687828|Original|hCoV-19^^Japan|Human|Pathogen Genomics Center|Pathogen Genomics Center|Sekizuka|Japan

>Spike|hCoV-19/USA/NY-NYCPHL-001224/2020|2020-11-04|EPI\_ISL\_683839|Original|hCoV-19^^New York|Human|DOHMH Morrisania|New York City Public Health Laboratory|Wang|USA

>Spike|hCoV-19/England/EXET-13E9FE/2020|2020-12-12|EPI\_ISL\_763706|Original|hCoV-19^^England|Human|University of Exeter|COVID-19 Genomics UK (COG-UK) Consortium|Temperton|United Kingdom

>Spike|hCoV-19/England/NORW-E8D16/2020|2020-04-15|EPI\_ISL\_448304|Original|hCoV-19^^England|Human|Quadram Institute Bioscience|COVID-19 Genomics UK (COG-UK) Consortium|Alikhan|United Kingdom

>Spike|hCoV-19/Scotland/CVR264/2020|2020-03-20|EPI\_ISL\_425754|Original|hCoV-19^^Scotland|Human|West of Scotland Specialist Virology Centre|COVID-19 Genomics UK (COG-UK) Consortium|Robertson|United Kingdom

>Spike|hCoV-19/Japan/PG-5189/2020|2020-08-00|EPI\_ISL\_690292|Original|hCoV-19^^Japan|Human|Pathogen Genomics Center|Pathogen Genomics Center|Sekizuka|Japan

>Spike|hCoV-19/USA/MI-MDHHS-SC22152/2020|2020-10-18|EPI\_ISL\_614203|Original|hCoV-19^^Michigan|Human|Michigan Department of Health and Human Services|Michigan Department of Health and Human Services|Jacob|USA

>Spike|hCoV-19/England/OXON-AD894/2020|2020-00-00|EPI\_ISL\_448601|Original|hCoV-19^^England|Human|Oxford Viromics|COVID-19 Genomics UK (COG-UK) Consortium|Golubchik|United Kingdom

>Spike|hCoV-19/Sweden/20-53002/2020|2020-09-27|EPI\_ISL\_661285|Original|hCoV-19^^Ostergotland|Human|Klinsisk mikrobiologi Link\u00f6ping|The Public Health Agency of Sweden|Svartstr\u00f6m|Sweden

>Spike|hCoV-19/Denmark/ALAB-HH01/2020|2020-03-10|EPI\_ISL\_429262|Original|hCoV-19^^Denmark|Human|Department of Clinical Microbiology|Albertsen lab|Kirkegaard|Denmark

>Spike|hCoV-19/England/CAMC-945B32/2020|2020-07-17|EPI\_ISL\_556745|Original|hCoV-19^^England|Human|Lighthouse Lab in Cambridge|Wellcome Sanger Institute for the COVID-19 Genomics UK (COG-UK) consortium|Davies|United Kingdom

>Spike|hCoV-19/USA/CA-ALSR-1633/2020|2020-05-18|EPI\_ISL\_494703|Original|hCoV-19^^California|Human|Scripps Medical Laboratory|Andersen lab at Scripps Research|Gangavarapu|USA

>Spike|hCoV-19/England/CAMB-8282C/2020|2020-04-13|EPI\_ISL\_443493|Original|hCoV-19^^England|Human|Department of Pathology|Wellcome Sanger Institute for the COVID-19 Genomics UK (COG-UK) consortium|Amato|United Kingdom

>Spike|hCoV-19/England/NORW-220B8F/2020|2020-12-16|EPI\_ISL\_741490|Original|hCoV-19^^England|Human|Quadram Institute Bioscience|COVID-19 Genomics UK (COG-UK) Consortium|Alikhan|United Kingdom

>Spike|hCoV-19/Netherlands/NoordBrabant\_166/2020|2020-00-00|EPI\_ISL\_461200|Original|hCoV-19^^Noord Brabant|Human|Dutch COVID-19 response team|Erasmus Medical Center|Oude Munnink|Netherlands

>Spike|hCoV-19/USA/TX-HMH-MCoV-15757/2020|2020-07-10|EPI\_ISL\_785441|Original|hCoV-19^^Texas|Human|Houston Methodist Hospital|Houston Methodist Hospital|Long|USA

>Spike|hCoV-19/Denmark/DCGC-21085/2020|2020-12-21|EPI\_ISL\_759543|Original|hCoV-19^^Hovedstaden|Human|Department of Virus and Microbiological Special Diagnostics|Albertsen Lab|Michaelsen|Denmark

>Spike|hCoV-19/England/PORT-2EAAA2/2020|2020-00-00|EPI\_ISL\_727768|Original|hCoV-19^^England|Human|Centre for Enzyme Innovation|COVID-19 Genomics UK (COG-UK) Consortium|Robson|United Kingdom

>Spike|hCoV-19/Australia/NSW175/2020|2020-03-18|EPI\_ISL\_427687|Original|hCoV-19^^New South Wales|Human|Centre for Infectious Diseases and Microbiology Public Health|NSW Health Pathology - Institute of Clinical Pathology and Medical Research; Westmead Hospital; University of Sydney|Gall|Australia

>Spike|hCoV-19/USA/NY-QDX-1238/2020|2020-03-17|EPI\_ISL\_572014|Original|hCoV-19^^New York|Human|Quest Diagnostics|Quest Diagnostics|Kagan|USA

>Spike|hCoV-19/Spain/AN-IBV-001085/2020|2020-03-27|EPI\_ISL\_452601|Original|hCoV-19^^Andalucia|Human|Servicio de Microbiolog\u00eda y Parasitolog\u00eda cl\u00ednica. UCEIMP. Hospital Universitario Virgen del Roc\u00edo/IBIS/CSIC/US.|SeqCOVID-SPAIN consortium|IBV (CSIC) |Comas|Spain

>Spike|hCoV-19/England/CAMC-B2246B/2020|2020-11-03|EPI\_ISL\_647438|Original|hCoV-19^^England|Human|Lighthouse Lab in Cambridge|Wellcome Sanger Institute for the COVID-19 Genomics UK (COG-UK) Consortium|Davies|United Kingdom

>Spike|hCoV-19/England/ALDP-BC6539/2020|2020-11-20|EPI\_ISL\_721390|Original|hCoV-19^^England|Human|Lighthouse Lab in Alderley Park|Wellcome Sanger Institute for the COVID-19 Genomics UK (COG-UK) Consortium|Davies|United Kingdom

>Spike|hCoV-19/Scotland/EDB9479/2020|2020-11-03|EPI\_ISL\_652061|Original|hCoV-19^^Scotland|Human|Virology Department|COVID-19 Genomics UK (COG-UK) Consortium|McHugh|United Kingdom

>Spike|hCoV-19/USA/TX-HMH-MCoV-11475/2020|2020-09-06|EPI\_ISL\_790027|Original|hCoV-19^^Texas|Human|Houston Methodist Hospital|Houston Methodist Hospital|Long|USA

>Spike|hCoV-19/England/ALDP-B46461/2020|2020-11-07|EPI\_ISL\_656070|Original|hCoV-19^^England|Human|Lighthouse Lab in Alderley Park|Wellcome Sanger Institute for the COVID-19 Genomics UK (COG-UK) Consortium|Davies|United Kingdom

>Spike|hCoV-19/England/QEUAH-9FAA6C/2020|2020-09-29|EPI\_ISL\_588171|Original|hCoV-19^^England|Human|Lighthouse Lab in Glasgow|Wellcome Sanger Institute for the COVID-19 Genomics UK (COG-UK) consortium|Davies|United Kingdom

>Spike|hCoV-19/India/MH-ACTREC-080/2020|2020-05-20|EPI\_ISL\_699736|Original|hCoV-19^^Maharashtra|Human|Hematopathology Laboratory|Hematopathology Laboratory|Patkar|India

>Spike|hCoV-19/England/QEUAH-CAD4A3/2020|2020-12-20|EPI\_ISL\_761030|Original|hCoV-19^^England|Human|Lighthouse Lab in Glasgow|Wellcome Sanger Institute for the COVID-19 Genomics UK (COG-UK) Consortium|Davies|United Kingdom

>Spike|hCoV-19/England/201021553/2020|2020-03-03|EPI\_ISL\_464292|Original|hCoV-19^^England|Human|Respiratory Virus Unit|Respiratory Virus Unit|Platt|United Kingdom

>Spike|hCoV-19/Wales/PHWC-486718/2020|2020-10-27|EPI\_ISL\_639074|Original|hCoV-19^^Wales|Human|Wales Specialist Virology Centre Sequencing lab|COVID-19 Genomics UK (COG-UK) Consortium|Moore|United Kingdom

>Spike|hCoV-19/Wales/PHWC-16DBA5/2020|2020-09-25|EPI\_ISL\_577501|Original|hCoV-19^^Wales|Human|Wales Specialist Virology Centre Sequencing lab|COVID-19 Genomics UK (COG-UK) Consortium|Moore|United Kingdom

>Spike|hCoV-19/England/ALDP-B82AEF/2020|2020-11-14|EPI\_ISL\_675502|Original|hCoV-19^^England|Human|Lighthouse Lab in Alderley Park|Wellcome Sanger Institute for the COVID-19 Genomics UK (COG-UK) Consortium|Davies|United Kingdom

>Spike|hCoV-19/Scotland/EDB7910/2020|2020-09-24|EPI\_ISL\_585446|Original|hCoV-19^^Scotland|Human|Virology Department|COVID-19 Genomics UK (COG-UK) Consortium|McHugh|United Kingdom

>Spike|hCoV-19/England/CAMC-A810D0/2020|2020-10-13|EPI\_ISL\_610795|Original|hCoV-19^^England|Human|Lighthouse Lab in Cambridge|Wellcome Sanger Institute for the COVID-19 Genomics UK (COG-UK) consortium|Davies|United Kingdom

>Spike|hCoV-19/England/ALDP-9BEB9E/2020|2020-09-09|EPI\_ISL\_568096|Original|hCoV-19^^England|Human|Lighthouse Lab in Alderley Park|Wellcome Sanger Institute for the COVID-19 Genomics UK (COG-UK) consortium|Davies|United Kingdom

>Spike|hCoV-19/England/ALDP-B5C583/2020|2020-11-10|EPI\_ISL\_655877|Original|hCoV-19^^England|Human|Lighthouse Lab in Alderley Park|Wellcome Sanger Institute for the COVID-19 Genomics UK (COG-UK) Consortium|Davies|United Kingdom

>Spike|hCoV-19/Scotland/QEUA-A20DBE/2020|2020-10-01|EPI\_ISL\_599081|Original|hCoV-19^^Scotland|Human|Lighthouse Lab in Glasgow|Wellcome Sanger Institute for the COVID-19 Genomics UK (COG-UK) consortium|Davies|United Kingdom

>Spike|hCoV-19/USA/TX-HMH-MCoV-10152/2020|2020-07-07|EPI\_ISL\_789346|Original|hCoV-19^^Texas|Human|Houston Methodist Hospital|Houston Methodist Hospital|Long|USA

>Spike|hCoV-19/England/MILK-B024AD/2020|2020-10-24|EPI\_ISL\_642994|Original|hCoV-19^^England|Human|Lighthouse Lab in Milton Keynes|Wellcome Sanger Institute for the COVID-19 Genomics UK (COG-UK) Consortium|Davies|United Kingdom

>Spike|hCoV-19/USA/UT-UPHL-2012550958/2020|2020-08-15|EPI\_ISL\_746105|Original|hCoV-19^^Utah|Human|Ginkgo Bioworks Clinical Laboratory|Utah Public Health Laboratory|Young|USA

>Spike|hCoV-19/USA/NY-Wadsworth-290270-01/2020|2020-12-23|EPI\_ISL\_767526|Original|hCoV-19^^New York|Human|Wadsworth Center|Wadsworth Center|Lasek-Nesselquist|USA

>Spike|hCoV-19/Brazil/SP-390/2020|2020-06-18|EPI\_ISL\_693213|Original|hCoV-19^^S\u00e3o Paulo|Human|Hospital E Maternidade Municipal Governador Mario Covas|Instituto Adolfo Lutz|Sacchi|Brazil

>Spike|hCoV-19/USA/WI-UW-330/2020|2020-04-26|EPI\_ISL\_436624|Original|hCoV-19^^Wisconsin|Human|University of Wisconsin-Madison AIDS Vaccine Research Laboratories|University of Wisconsin-Madison AIDS Vaccine Research Laboratories|Baczenas|USA

>Spike|hCoV-19/England/NOTT-10E5A8/2020|2020-03-26|EPI\_ISL\_425565|Original|hCoV-19^^England|Human|Queens Medical Centre|COVID-19 Genomics UK (COG-UK) Consortium|Loose|United Kingdom

>Spike|hCoV-19/Belgium/ULG-10079/2020|2020-04-03|EPI\_ISL\_424639|Original|hCoV-19^^Li\u00e8ge|Human|Department of Clinical Microbiology|GIGA Medical Genomics|Durkin|Belgium

>Spike|hCoV-19/Wales/PHWC-168E74/2020|2020-04-01|EPI\_ISL\_499358|Original|hCoV-19^^Wales|Human|Originating lab|COVID-19 Genomics UK (COG-UK) Consortium|Moore|United Kingdom

>Spike|hCoV-19/USA/ID-CDC-2-3714480/2020|2020-11-13|EPI\_ISL\_751750|Original|hCoV-19^^Idaho|Human|ID Bureau of Laboratories|Genomics and Discovery|Queen|USA

>Spike|hCoV-19/USA/TX-HMH-MCoV-10818/2020|2020-07-05|EPI\_ISL\_789643|Original|hCoV-19^^Texas|Human|Houston Methodist Hospital|Houston Methodist Hospital|Long|USA

>Spike|hCoV-19/England/QEUA-961B12/2020|2020-08-02|EPI\_ISL\_537117|Original|hCoV-19^^England|Human|Lighthouse Lab in Glasgow|Wellcome Sanger Institute for the COVID-19 Genomics UK (COG-UK) consortium|Davies|United Kingdom

>Spike|hCoV-19/England/MILK-977BDD/2020|2020-07-27|EPI\_ISL\_550489|Original|hCoV-19^^England|Human|Lighthouse Lab in Milton Keynes|Wellcome Sanger Institute for the COVID-19 Genomics UK (COG-UK) consortium|Davies|United Kingdom

>Spike|hCoV-19/Scotland/QEUH-9B8930/2020|2020-09-09|EPI\_ISL\_568225|Original|hCoV-19^^Scotland|Human|Lighthouse Lab in Glasgow|Wellcome Sanger Institute for the COVID-19 Genomics UK (COG-UK) consortium|Davies|United Kingdom

>Spike|hCoV-19/USA/WI-UW-2661/2020|2020-12-29|EPI\_ISL\_791175|Original|hCoV-19^^Wisconsin|Human|University of Wisconsin-Madison AIDS Vaccine Research Laboratories|University of Wisconsin-Madison AIDS Vaccine Research Laboratories|Moreno|USA

>Spike|hCoV-19/USA/IN-QDX-1973/2020|2020-03-14|EPI\_ISL\_604223|Original|hCoV-19^^Indiana|Human|Quest Diagnostics|Quest Diagnostics|Kagan|USA

>Spike|hCoV-19/England/BRIS-12D2AC/2020|2020-05-04|EPI\_ISL\_481881|Original|hCoV-19^^England|Human|PHE South West Regional Laboratory|Wellcome Sanger Institute for the COVID-19 Genomics UK (COG-UK) consortium|Davies|United Kingdom

>Spike|hCoV-19/Denmark/DCGC-13779/2020|2020-11-30|EPI\_ISL\_713019|Original|hCoV-19^^Hovedstaden|Human|Department of Virus and Microbiological Special Diagnostics|Albertsen Lab|Michaelsen|Denmark

>Spike|hCoV-19/Lithuania/AL-LUHS-Eilnr1/2020|2020-04-02|EPI\_ISL\_603082|Original|hCoV-19^^Alytaus apskritis|Human|Lithuanian University of Health Sciences Hospital|Lithuanian University of Health Sciences|Zemaitis|Lithuania

>Spike|hCoV-19/USA/TX-HMH-MCoV-19501/2020|2020-11-17|EPI\_ISL\_783882|Original|hCoV-19^^Texas|Human|Houston Methodist Hospital|Houston Methodist Hospital|Long|USA

>Spike|hCoV-19/England/QEUH-B677E9/2020|2020-11-11|EPI\_ISL\_661354|Original|hCoV-19^^England|Human|Lighthouse Lab in Glasgow|Wellcome Sanger Institute for the COVID-19 Genomics UK (COG-UK) Consortium|Davies|United Kingdom

>Spike|hCoV-19/England/ALDP-AA4189/2020|2020-10-21|EPI\_ISL\_624059|Original|hCoV-19^^England|Human|Lighthouse Lab in Alderley Park|Wellcome Sanger Institute for the COVID-19 Genomics UK (COG-UK) consortium|Davies|United Kingdom

>Spike|hCoV-19/USA/WA-UW-2249/2020|2020-03-24|EPI\_ISL\_426130|Original|hCoV-19^^Washington|Human|UW Virology Lab|UW Virology Lab|Roychoudhury|USA

>Spike|hCoV-19/Belgium/reg-0911945/2020|2020-09-11|EPI\_ISL\_734928|Original|hCoV-19^^Hoeilaart|Human|UZ Leuven|KU Leuven|Maes|Belgium

>Spike|hCoV-19/Japan/PG-5671/2020|2020-04-00|EPI\_ISL\_688795|Original|hCoV-19^^Japan|Human|Pathogen Genomics Center|Pathogen Genomics Center|Sekizuka|Japan

>Spike|hCoV-19/Italy/BAS-IZSPB-395PT/2020|2020-10-21|EPI\_ISL\_722924|Original|hCoV-19^^Basilicata|Human|Istituto Zooprofilattico Sperimentale della Puglia e della Basilicata|Istituto Zooprofilattico Sperimentale della Puglia e della Basilicata|Parisi|Italy

>Spike|hCoV-19/Gibraltar/203360724/2020|2020-08-07|EPI\_ISL\_547439|Original|hCoV-19^^Gibraltar|Human|Microbiology|Respiratory Virus Unit|Platt|Gibraltar

>Spike|hCoV-19/USA/MI-UM-10033834090/2020|2020-04-02|EPI\_ISL\_578089|Original|hCoV-19^^Michigan|Human|University of Michigan Clinical Microbiology Laboratory|Lauring Lab|Valesano|USA

>Spike|hCoV-19/England/ALDP-C57CCE/2020|2020-12-14|EPI\_ISL\_736193|Original|hCoV-19^^England|Human|Lighthouse Lab in Alderley Park|Wellcome Sanger Institute for the COVID-19 Genomics UK (COG-UK) Consortium|Davies|United Kingdom

>Spike|hCoV-19/Japan/PG-5603/2020|2020-08-00|EPI\_ISL\_688728|Original|hCoV-19^^Japan|Human|Pathogen Genomics Center|Pathogen Genomics Center|Sekizuka|Japan

>Spike|hCoV-19/USA/TX-HMH-MCoV-18323/2020|2020-11-17|EPI\_ISL\_784671|Original|hCoV-19^^Texas|Human|Houston Methodist Hospital|Houston Methodist Hospital|Long|USA

>Spike|hCoV-19/USA/TX-HMH-4789/2020|2020-06-22|EPI\_ISL\_544331|Original|hCoV-19^^Texas|Human|Houston Methodist Hospital|Houston Methodist Hospital|Long|USA

>Spike|hCoV-19/USA/TX-HMH-MCoV-8401/2020|2020-06-26|EPI\_ISL\_784374|Original|hCoV-19^^Texas|Human|Houston Methodist Hospital|Houston Methodist Hospital|Long|USA

>Spike|hCoV-19/Denmark/DCGC-2599/2020|2020-08-17|EPI\_ISL\_617835|Original|hCoV-19^^NA|Human|Department of Virus and Microbiological Special Diagnostics|Albertsen lab|Michaelsen|Denmark



>Spike|hCoV-19/England/ALDP-95215E/2020|2020-06-09|EPI\_ISL\_553684|Original|hCoV-19^^England|Human|Lighthouse Lab in Alderley Park|Wellcome Sanger Institute for the COVID-19 Genomics UK (COG-UK) consortium|Davies|United Kingdom

>Spike|hCoV-19/England/MILK-978608/2020|2020-07-31|EPI\_ISL\_550434|Original|hCoV-19^^England|Human|Lighthouse Lab in Milton Keynes|Wellcome Sanger Institute for the COVID-19 Genomics UK (COG-UK) consortium|Davies|United Kingdom

>Spike|hCoV-19/USA/MI-MDHHS-SC20876/2020|2020-05-18|EPI\_ISL\_471897|Original|hCoV-19^^Michigan|Human|Michigan Department of Health and Human Services|Michigan Department of Health and Human Services|Blankenship|USA

>Spike|hCoV-19/USA/MN-MDH-1834/2020|2020-09-17|EPI\_ISL\_602969|Original|hCoV-19^^Minnesota|Human|Minnesota Department of Health|Minnesota Department of Health|Garfin|USA

>Spike|hCoV-19/England/CAMC-B370BA/2020|2020-11-05|EPI\_ISL\_645262|Original|hCoV-19^^England|Human|Lighthouse Lab in Cambridge|Wellcome Sanger Institute for the COVID-19 Genomics UK (COG-UK) Consortium|Davies|United Kingdom

>Spike|hCoV-19/Australia/TAS155/2020|2020-04-16|EPI\_ISL\_522613|Original|hCoV-19^^Tasmania|Human|Royal Hobart Hospital Microbiology Department|MDU-PHL|Schultz|Australia

>Spike|hCoV-19/USA/WA-UW-30840/2020|2020-10-13|EPI\_ISL\_736776|Original|hCoV-19^^Washington|Human|UW Virology Lab|UW Virology Lab|Roychoudhury|USA

>Spike|hCoV-19/India/UP-NBRI-N37-TDT658/2020|2020-05-14|EPI\_ISL\_516966|Original|hCoV-19^^Uttar Pradesh|Human|King Georges Medical University|CSIR-National Botanical Research Institute|Bag|India

>Spike|hCoV-19/Bangladesh/BCSIR-NILMRC\_390/2020|2020-07-31|EPI\_ISL\_603224|Original|hCoV-19^^Dhaka|Human|National Institute of Laboratory Medicine and Referral Center|Genomic Research Lab|Khan|Bangladesh

>Spike|hCoV-19/Wales/PHWC-47DC8E/2020|2020-10-12|EPI\_ISL\_595347|Original|hCoV-19^^Wales|Human|Originating lab|COVID-19 Genomics UK (COG-UK) Consortium|Moore|United Kingdom

>Spike|hCoV-19/Netherlands/NH-RIVM-20939/2020|2020-12-21|EPI\_ISL\_790965|Original|hCoV-19^^Noord-Holland|Human|Dutch COVID-19 response team|National Institute for Public Health and the Environment (RIVM)|Meijer|Netherlands

>Spike|hCoV-19/England/MILK-A05511/2020|2020-09-30|EPI\_ISL\_600094|Original|hCoV-19^^England|Human|Lighthouse Lab in Milton Keynes|Wellcome Sanger Institute for the COVID-19 Genomics UK (COG-UK) consortium|Davies|United Kingdom

>Spike|hCoV-19/England/SHEF-10D2F34/2020|2020-12-14|EPI\_ISL\_742052|Original|hCoV-19^^England|Human|Virology Department|COVID-19 Genomics UK (COG-UK) Consortium|de Silva|United Kingdom

>Spike|hCoV-19/Germany/NW-HHU-42/2020|2020-03-18|EPI\_ISL\_425126|Original|hCoV-19^^North Rhine-Westphalia|Human|Center of Medical Microbiology|Center of Medical Microbiology|Wienemann|Germany

>Spike|hCoV-19/England/CAMC-B1FBC6/2020|2020-11-02|EPI\_ISL\_647770|Original|hCoV-19^^England|Human|Lighthouse Lab in Cambridge|Wellcome Sanger Institute for the COVID-19 Genomics UK (COG-UK) Consortium|Davies|United Kingdom

>Spike|hCoV-19/England/BIRM-6A0C8/2020|2020-11-09|EPI\_ISL\_679021|Original|hCoV-19^^England|Human|University of Birmingham|COVID-19 Genomics UK (COG-UK) Consortium|Loman|United Kingdom

>Spike|hCoV-19/Spain/MD-H12-64/2020|2020-04-12|EPI\_ISL\_529995|Original|hCoV-19^^Madrid|Human|Hospital Universitario 12 de Octubre|Hospital Universitario 12 de Octubre|Viedma|Spain

>Spike|hCoV-19/England/CAMC-B221FB/2020|2020-11-02|EPI\_ISL\_645993|Original|hCoV-19^^England|Human|Lighthouse Lab in Cambridge|Wellcome Sanger Institute for the COVID-19 Genomics UK (COG-UK) Consortium|Davies|United Kingdom

>Spike|hCoV-19/Japan/PG-2348/2020|2020-04-00|EPI\_ISL\_685953|Original|hCoV-19^^Japan|Human|Pathogen Genomics Center|Pathogen Genomics Center|Sekizuka|Japan

>Spike|hCoV-19/England/QEUH-AD1E5F/2020|2020-10-25|EPI\_ISL\_629775|Original|hCoV-19^^England|Human|Lighthouse Lab in Glasgow|Wellcome Sanger Institute for the COVID-19 Genomics UK (COG-UK) consortium|Davies|United Kingdom

>Spike|hCoV-19/Japan/PG-4836/2020|2020-07-00|EPI\_ISL\_689960|Original|hCoV-19^^Japan|Human|Pathogen Genomics Center|Pathogen Genomics Center|Sekizuka|Japan  
>Spike|hCoV-19/Japan/PG-8351/2020|2020-08-00|EPI\_ISL\_687450|Original|hCoV-19^^Japan|Human|Pathogen Genomics Center|Pathogen Genomics Center|Sekizuka|Japan  
>Spike|hCoV-19/England/CAMC-B97F7F/2020|2020-11-15|EPI\_ISL\_674944|Original|hCoV-19^^England|Human|Lighthouse Lab in Cambridge|Wellcome Sanger Institute for the COVID-19 Genomics UK (COG-UK) Consortium|Davies|United Kingdom  
>Spike|hCoV-19/Scotland/EDB7926/2020|2020-09-26|EPI\_ISL\_585453|Original|hCoV-19^^Scotland|Human|Virology Department|COVID-19 Genomics UK (COG-UK) Consortium|McHugh|United Kingdom  
>Spike|hCoV-19/USA/TX-HMH-2709/2020|2020-06-05|EPI\_ISL\_545493|Original|hCoV-19^^Texas|Human|Houston Methodist Hospital|Houston Methodist Hospital|Long|USA  
>Spike|hCoV-19/USA/LA-EVTL419/2020|2020-07-28|EPI\_ISL\_578825|Original|hCoV-19^^Louisiana|Human|LSUHS Emerging Viral Threat Laboratory|Microbial Genome Sequencing Center|Kamil|USA  
>Spike|hCoV-19/Denmark/DCGC-16220/2020|2020-11-16|EPI\_ISL\_714646|Original|hCoV-19^^Hovedstaden|Human|Department of Virus and Microbiological Special Diagnostics|Albertsen Lab|Michaelsen|Denmark  
>Spike|hCoV-19/England/QEUEH-B9FDC8/2020|2020-11-18|EPI\_ISL\_720933|Original|hCoV-19^^England|Human|Lighthouse Lab in Glasgow|Wellcome Sanger Institute for the COVID-19 Genomics UK (COG-UK) Consortium|Davies|United Kingdom  
>Spike|hCoV-19/Denmark/DCGC-19851/2020|2020-12-07|EPI\_ISL\_747547|Original|hCoV-19^^Sjaelland|Human|Department of Virus and Microbiological Special Diagnostics|Albertsen Lab|Michaelsen|Denmark  
>Spike|hCoV-19/England/ALDP-954DB2/2020|2020-06-12|EPI\_ISL\_553422|Original|hCoV-19^^England|Human|Lighthouse Lab in Alderley Park|Wellcome Sanger Institute for the COVID-19 Genomics UK (COG-UK) consortium|Davies|United Kingdom  
>Spike|hCoV-19/Russia/CRIE300223/2020|2020-03-31|EPI\_ISL\_610238|Original|hCoV-19^^Moscow|Human|Molecular diagnostic laboratory of Federal Budget Institution of Science \Central Research Institute of Epidemiology\ of The Federal Service on Customers' Rights Protection and Human Well-being Surveillance|Group of Genomics and Postgenomic Technologies of Central Research Institute of Epidemiology|Samoi  
>lov|Russia  
>Spike|hCoV-19/USA/TX-HMH-MCoV-19610/2020|2020-11-18|EPI\_ISL\_783979|Original|hCoV-19^^Texas|Human|Houston Methodist Hospital|Houston Methodist Hospital|Long|USA  
>Spike|hCoV-19/USA/MI-MDHHS-SC22305/2020|2020-11-10|EPI\_ISL\_708281|Original|hCoV-19^^Michigan|Human|Michigan Department of Health and Human Services|Michigan Department of Health and Human Services|Jacob|USA  
>Spike|hCoV-19/England/QEUEH-96F956/2020|2020-08-18|EPI\_ISL\_540266|Original|hCoV-19^^England|Human|Lighthouse Lab in Glasgow|Wellcome Sanger Institute for the COVID-19 Genomics UK (COG-UK) consortium|Davies|United Kingdom  
>Spike|hCoV-19/Luxembourg/LNS6449725/2020|2020-11-05|EPI\_ISL\_744417|Original|hCoV-19^^Luxembourg|Human|Laboratoire national de sant\u00e9|Laboratoire national de sant\u00e9|Wienecke-Baldacchino|Luxembourg  
>Spike|hCoV-19/England/QEUEH-B11B2E/2020|2020-11-02|EPI\_ISL\_642480|Original|hCoV-19^^England|Human|Lighthouse Lab in Glasgow|Wellcome Sanger Institute for the COVID-19 Genomics UK (COG-UK) Consortium|Davies|United Kingdom  
>Spike|hCoV-19/mink/Canada/C/2020|2020-12-04|EPI\_ISL\_717716|Original|hCoV-19^^British Columbia|Mink|Animal Health Centre|National Centre for Foreign Animal Disease|Kruczkiewicz|Canada  
>Spike|hCoV-19/India/MH-ACTREC-495/2020|2020-08-14|EPI\_ISL\_700143|Original|hCoV-19^^Maharashtra|Human|Hematopathology Laboratory|Hematopathology Laboratory|Patkar|India  
>Spike|hCoV-19/USA/AZ-TG280790/2020|2020-04-17|EPI\_ISL\_694149|Original|hCoV-19^^Arizona|Human|AZ SPHL|TGen North|French|USA  
>Spike|hCoV-19/Wales/PHWC-1660F8/2020|2020-06-17|EPI\_ISL\_490837|Original|hCoV-19^^Wales|Human|Wales Specialist Virology Centre Sequencing lab|COVID-19 Genomics UK (COG-UK) Consortium|Moore|United Kingdom  
>Spike|hCoV-19/USA/TX-HMH-6229/2020|2020-06-23|EPI\_ISL\_547327|Original|hCoV-19^^Texas|Human|Houston Methodist Hospital|Houston Methodist Hospital|Long|USA

>Spike|hCoV-19/USA/NM-UNM-00565/2020|2020-05-09|EPI\_ISL\_542980|Original|hCoV-19^^New Mexico|Human|TriCore Reference Laboratories|Center for Global Health|Domman|USA

>Spike|hCoV-19/South Africa/NHLS-UCT-GS-0768/2020|2020-07-23|EPI\_ISL\_640069|Original|hCoV-19^^Western Cape|Human|Guguletu CHC wc GDH|NHLS|UCT|Iranzadeh|South Africa

>Spike|hCoV-19/England/CAMB-7806D/2020|2020-04-01|EPI\_ISL\_441103|Original|hCoV-19^^England|Human|Department of Pathology|Wellcome Sanger Institute for the COVID-19 Genomics UK (COG-UK) consortium|Amato|United Kingdom

>Spike|hCoV-19/Switzerland/AG-42387010/2020|2020-08-09|EPI\_ISL\_581943|Original|hCoV-19^^Aargau|Human|University Hospital Basel|University Hospital Basel|Roloff Handschin|Switzerland

>Spike|hCoV-19/USA/AZ-TG666131/2020|2020-05-01|EPI\_ISL\_696216|Original|hCoV-19^^Arizona|Human|Sonora Quest Laboratories|TGen North|French|USA

>Spike|hCoV-19/England/CAMC-9910A1/2020|2020-08-27|EPI\_ISL\_551872|Original|hCoV-19^^England|Human|Lighthouse Lab in Cambridge|Wellcome Sanger Institute for the COVID-19 Genomics UK (COG-UK) consortium|Davies|United Kingdom

>Spike|hCoV-19/USA/LA-EVTL572/2020|2020-06-30|EPI\_ISL\_578976|Original|hCoV-19^^Louisiana|Human|LSUHS Emerging Viral Threat Laboratory|Microbial Genome Sequencing Center|Kamil|USA

>Spike|hCoV-19/Japan/PG-1846/2020|2020-04-00|EPI\_ISL\_685452|Original|hCoV-19^^Japan|Human|Tokyo Metropolitan Institute of Public Health|Pathogen Genomics Center|Sekizuka|Japan

>Spike|hCoV-19/USA/LA-BIE-047/2020|2020-04-04|EPI\_ISL\_463295|Original|hCoV-19^^Louisiana|Human|Ochsner Health|Bioinfoexperts|Cross|USA

>Spike|hCoV-19/Norway/6284/2020|2020-11-22|EPI\_ISL\_775376|Original|hCoV-19^^Nordland|Human|Nordland Hospital - Bodo|Norwegian Institute of Public Health|Vollan|Norway

>Spike|hCoV-19/Northern Ireland/NIRE-FCBD9/2020|2020-04-22|EPI\_ISL\_459330|Original|hCoV-19^^Northern Ireland|Human|Regional Virus Laboratory|Wellcome Sanger Institute for the COVID-19 Genomics UK (COG-UK) consortium|Davies|United Kingdom

>Spike|hCoV-19/Sweden/20-53870/2020|2020-12-17|EPI\_ISL\_775593|Original|hCoV-19^^Vastra Gotalandsregionen|Human|TATAA Biocenter|The Public Health Agency of Sweden|Svartstr\u00f6m|Sweden

>Spike|hCoV-19/Spain/MD-IBV-99007325/2020|2020-08-17|EPI\_ISL\_582813|Original|hCoV-19^^Madrid|Human|Hospital General Universitario Gregorio Mara\u00f1a|SeqCOVID-SPAIN consortium|IBV (CSIC)|Comas|Spain

>Spike|hCoV-19/Panama/339755/2020|2020-04-12|EPI\_ISL\_496899|Original|hCoV-19^^Colon|Human|Gorgas Memorial Laboratory of Health Studies|Gorgas Memorial Laboratory of Health Studies|Martinez|Panama

>Spike|hCoV-19/England/20119063804/2020|2020-03-12|EPI\_ISL\_465088|Original|hCoV-19^^England|Human|Respiratory Virus Unit|Respiratory Virus Unit|Platt|United Kingdom

>Spike|hCoV-19/Brazil/SP-L22-CD475/2020|2020-04-02|EPI\_ISL\_476374|Original|hCoV-19^^S\u00e3o Paulo|Human|Hospital da Cl\u00ednicas da Faculdade de Medicina da Universidade de S\u00e3o Paulo|Instituto de Medicina Tropical da Univesidade de S\u00e3o Paulo|Sabino|Brazil

>Spike|hCoV-19/Belgium/AC-030982/2020|2020-03-09|EPI\_ISL\_420338|Original|hCoV-19^^Saive|Human|KU Leuven|KU Leuven|Maes|Belgium

>Spike|hCoV-19/USA/CA-QDX-44/2020|2020-03-16|EPI\_ISL\_467833|Original|hCoV-19^^California|Human|Quest Diagnostics|Quest Diagnostics|Kagan|USA

>Spike|hCoV-19/Canada/QC-LSPQ-L00229796/2020|2020-03-20|EPI\_ISL\_535904|Original|hCoV-19^^Quebec|Human|H\u00f4pital-Dieu de Sorel|Laboratoire de sant\u00e9 publique du Qu\u00e9bec|Moreira|Canada

>Spike|hCoV-19/England/QEUH-B414DF/2020|2020-11-08|EPI\_ISL\_658551|Original|hCoV-19^^England|Human|Lighthouse Lab in Glasgow|Wellcome Sanger Institute for the COVID-19 Genomics UK (COG-UK) Consortium|Davies|United Kingdom

>Spike|hCoV-19/USA/CA-ALSR-2271/2020|2020-07-08|EPI\_ISL\_635404|Original|hCoV-19^^California|Human|San Diego County Public Health Laboratory|Andersen lab at Scripps Research|Gangavarapu|USA

>Spike|hCoV-19/England/BIRM-5F63D/2020|2020-00-00|EPI\_ISL\_461521|Original|hCoV-19^^England|Human|University of Birmingham|COVID-19 Genomics UK (COG-UK) Consortium|Loman|United Kingdom

>Spike|hCoV-19/England/MILK-B56BA5/2020|2020-11-06|EPI\_ISL\_656861|Original|hCoV-19^^England|Human|Lighthouse Lab in Milton Keynes|Wellcome Sanger Institute for the COVID-19 Genomics UK (COG-UK) Consortium|Davies|United Kingdom

>Spike|hCoV-19/Brazil/SP-361/2020|2020-06-21|EPI\_ISL\_693206|Original|hCoV-19^^S\u00e3o Paulo|Human|Hospital Municipal Mario Gatti|Instituto Adolfo Lutz|Sacchi|Brazil

>Spike|hCoV-19/USA/TX-DSHS-1255/2020|2020-05-30|EPI\_ISL\_644196|Original|hCoV-19^^Texas|Human|Texas Department of State Health Services|Texas Department of State Health Services|Rahman|USA

>Spike|hCoV-19/USA/UT-UPHL-2012520384/2020|2020-10-23|EPI\_ISL\_745545|Original|hCoV-19^^Utah|Human|Ginkgo Bioworks Clinical Laboratory|Utah Public Health Laboratory|Young|USA

>Spike|hCoV-19/Wales/PHWC-497A2A/2020|2020-11-23|EPI\_ISL\_726920|Original|hCoV-19^^Wales|Human|Originating lab|COVID-19 Genomics UK (COG-UK) Consortium|Moore|United Kingdom

>Spike|hCoV-19/Spain/PV-IBV-2115/2020|2020-04-11|EPI\_ISL\_468950|Original|hCoV-19^^Basque Country|Human|Servicio de Microbiolog\u00eda. Hospital Universitario Donostia. OSI Donostialdea. \u00clrea de Enfermedades Infecciosas|SeqCOVID-SPAIN consortium/IBV (CSIC)|Comas|Spain

>Spike|hCoV-19/Egypt/CUNCI-HGC5I011/2020|2020-06-02|EPI\_ISL\_479712|Original|hCoV-19^^Egypt|Human|Egyptian National Cancer Institute (ENCI)|Egyptian National Cancer Institute (ENCI)|Zekri|Egypt

>Spike|hCoV-19/England/QEUEH-B2EDCE/2020|2020-11-03|EPI\_ISL\_659902|Original|hCoV-19^^England|Human|Lighthouse Lab in Glasgow|Wellcome Sanger Institute for the COVID-19 Genomics UK (COG-UK) Consortium|Davies|United Kingdom

>Spike|hCoV-19/Wales/PHWC-15CAF7/2020|2020-05-07|EPI\_ISL\_472580|Original|hCoV-19^^Wales|Human|Wales Specialist Virology Centre Sequencing lab|COVID-19 Genomics UK (COG-UK) Consortium|Moore|United Kingdom

>Spike|hCoV-19/Singapore/38/2020|2020-03-31|EPI\_ISL\_422431|Original|hCoV-19^^Singapore|Human|National Public Health Laboratory|National Public Health Laboratory|Mak|Singapore

>Spike|hCoV-19/England/20164065904/2020|2020-04-15|EPI\_ISL\_466460|Original|hCoV-19^^England|Human|Respiratory Virus Unit|Respiratory Virus Unit|Platt|United Kingdom

>Spike|hCoV-19/Weifang/WF0029/2020|2020-02-00|EPI\_ISL\_413809|Original|hCoV-19^^Weifang|Human|Weifang Center for Disease Control and Prevention|Weifang Center for Disease Control and Prevention & BGI-Shenzhen|Li|China

>Spike|hCoV-19/Australia/VIC7705/2020|2020-07-31|EPI\_ISL\_564593|Original|hCoV-19^^Victoria|Human|Microbiological Diagnostic Unit - Public Health Laboratory (MDU-PHL)|MDU-PHL|Schultz|Australia

>Spike|hCoV-19/England/LIVE-1DD5DF/2020|2020-09-30|EPI\_ISL\_611815|Original|hCoV-19^^England|Human|Liverpool Clinical Laboratories|COVID-19 Genomics UK (COG-UK) Consortium|Haldenby|United Kingdom

>Spike|hCoV-19/England/201161176/2020|2020-03-11|EPI\_ISL\_464816|Original|hCoV-19^^England|Human|Respiratory Virus Unit|Respiratory Virus Unit|Platt|United Kingdom

>Spike|hCoV-19/England/MILK-9C4306/2020|2020-09-09|EPI\_ISL\_566890|Original|hCoV-19^^England|Human|Lighthouse Lab in Milton Keynes|Wellcome Sanger Institute for the COVID-19 Genomics UK (COG-UK) consortium|Davies|United Kingdom

>Spike|hCoV-19/England/CAMC-B980F3/2020|2020-11-15|EPI\_ISL\_674962|Original|hCoV-19^^England|Human|Lighthouse Lab in Cambridge|Wellcome Sanger Institute for the COVID-19 Genomics UK (COG-UK) Consortium|Davies|United Kingdom

>Spike|hCoV-19/USA/WI-UW-2294/2020|2020-11-12|EPI\_ISL\_728060|Original|hCoV-19^^Wisconsin|Human|University of Wisconsin-Madison AIDS Vaccine Research Laboratories|University of Wisconsin-Madison AIDS Vaccine Research Laboratories|Baczenas|USA

>Spike|hCoV-19/USA/WA-UW-7237/2020|2020-04-13|EPI\_ISL\_570176|Original|hCoV-19^^Washington|Human|UW Virology Lab|UW Virology Lab|Roychoudhury|USA

>Spike|hCoV-19/Wales/PHWC-4975FC/2020|2020-12-01|EPI\_ISL\_726855|Original|hCoV-19^^Wales|Human|Originating lab|COVID-19 Genomics UK (COG-UK) Consortium|Moore|United Kingdom

>Spike|hCoV-19/USA/HI-H200201/2020|2020-08-10|EPI\_ISL\_752760|Original|hCoV-19^^Hawaii|Human|State Laboratories Division|State Laboratories Division|Sultana|USA

>Spike|hCoV-19/USA/MO-QDX-2679/2020|2020-03-14|EPI\_ISL\_604949|Original|hCoV-19^^Missouri|Human|Quest Diagnostics|Quest Diagnostics|Kagan|USA

>Spike|hCoV-19/Gibraltar/204641720/2020|2020-00-00|EPI\_ISL\_637198|Original|hCoV-19^^Gibraltar|Human|Microbiology|Respiratory Virus Unit|Platt|Gibraltar

>Spike|hCoV-19/Switzerland/VD-ETHZ-340113/2020|2020-10-26|EPI\_ISL\_721914|Original|hCoV-19^^Vaud|Human|Viollier AG|Department of Biosystems Science and Engineering|Nadeau|Switzerland

>Spike|hCoV-19/England/ALDP-AA16AB/2020|2020-10-22|EPI\_ISL\_623992|Original|hCoV-19^^England|Human|Lighthouse Lab in Alderley Park|Wellcome Sanger Institute for the COVID-19 Genomics UK (COG-UK) consortium|Davies|United Kingdom

>Spike|hCoV-19/Serbia/Kraljevo-03762507/2020|2020-07-24|EPI\_ISL\_582534|Original|hCoV-19^^Kraljevo|Human|Veterinary Specialized Institute \Kraljevo\|Veterinary Specialized Institute \Kraljevo\|Vidanovic|Serbia

>Spike|hCoV-19/USA/NY-Wadsworth-292832-01/2020|2020-12-27|EPI\_ISL\_769976|Original|hCoV-19^^New York|Human|Albany Medical Center Hospital Clinical Laboratories|Wadsworth Center|Lasek-Nesselquist|USA

>Spike|hCoV-19/England/CAMC-B07851/2020|2020-10-31|EPI\_ISL\_643747|Original|hCoV-19^^England|Human|Lighthouse Lab in Cambridge|Wellcome Sanger Institute for the COVID-19 Genomics UK (COG-UK) Consortium|Davies|United Kingdom

>Spike|hCoV-19/Wales/PHWC-48611A/2020|2020-10-24|EPI\_ISL\_627069|Original|hCoV-19^^Wales|Human|Wales Specialist Virology Centre Sequencing lab|COVID-19 Genomics UK (COG-UK) Consortium|Moore|United Kingdom

>Spike|hCoV-19/England/20138088104/2020|2020-03-24|EPI\_ISL\_421846|Original|hCoV-19^^England|Human|Respiratory Virus Unit|Respiratory Virus Unit|Platt|United Kingdom

>Spike|hCoV-19/Scotland/EDB053/2020|2020-03-17|EPI\_ISL\_425857|Original|hCoV-19^^Scotland|Human|Virology Department|COVID-19 Genomics UK (COG-UK) Consortium|Williams|United Kingdom

>Spike|hCoV-19/South Africa/NHLS-UCT-GS-0662/2020|2020-10-22|EPI\_ISL\_700460|Original|hCoV-19^^Western Cape|Human|Themba lethu CDC wc THC|NHLS/UCT|Iranzadeh|South Africa

>Spike|hCoV-19/England/ALDP-A68840/2020|2020-10-12|EPI\_ISL\_608528|Original|hCoV-19^^England|Human|Lighthouse Lab in Alderley Park|Wellcome Sanger Institute for the COVID-19 Genomics UK (COG-UK) consortium|Davies|United Kingdom

>Spike|hCoV-19/England/QEUA-BCC542/2020|2020-11-27|EPI\_ISL\_704471|Original|hCoV-19^^England|Human|Lighthouse Lab in Glasgow|Wellcome Sanger Institute for the COVID-19 Genomics UK (COG-UK) Consortium|Davies|United Kingdom

>Spike|hCoV-19/England/CAMC-B99CFE/2020|2020-11-15|EPI\_ISL\_673471|Original|hCoV-19^^England|Human|Lighthouse Lab in Cambridge|Wellcome Sanger Institute for the COVID-19 Genomics UK (COG-UK) Consortium|Davies|United Kingdom

>Spike|hCoV-19/England/ALDP-A9526A/2020|2020-10-20|EPI\_ISL\_624761|Original|hCoV-19^^England|Human|Lighthouse Lab in Alderley Park|Wellcome Sanger Institute for the COVID-19 Genomics UK (COG-UK) consortium|Davies|United Kingdom

>Spike|hCoV-19/England/ALDP-658A23/2020|2020-07-03|EPI\_ISL\_558073|Original|hCoV-19^^England|Human|Lighthouse Lab in Alderley Park|Wellcome Sanger Institute for the COVID-19 Genomics UK (COG-UK) consortium|Davies|United Kingdom

>Spike|hCoV-19/Indonesia/YO-UGM-200927/2020|2020-05-16|EPI\_ISL\_516806|Original|hCoV-19^^Special Region of Yogyakarta|Human|Rumah Sakit PKU Gamping|Genetics Working Group (Pokja Genetik) Faculty of Medicine|Gunadi|Indonesia

>Spike|hCoV-19/Northern Ireland/NIRE-1022AD/2020|2020-03-25|EPI\_ISL\_441396|Original|hCoV-19^^Northern Ireland|Human|Regional Virus Laboratory|COVID-19 Genomics UK (COG-UK) Consortium|Fairley|United Kingdom

>Spike|hCoV-19/England/ALDP-B490A6/2020|2020-11-07|EPI\_ISL\_649331|Original|hCoV-19^^England|Human|Lighthouse Lab in Alderley Park|Wellcome Sanger Institute for the COVID-19 Genomics UK (COG-UK) Consortium|Davies|United Kingdom

>Spike|hCoV-19/Germany/SH-ChVir3194/2020|2020-03-22|EPI\_ISL\_729381|Original|hCoV-19^^Schleswig-Holstein|Human|A. Krumbholz|Charit\u00e9 Universit\u00e4tsmedizin Berlin|Muehlemann|Germany

>Spike|hCoV-19/USA/CA-CZB-14055/2020|2020-06-28|EPI\_ISL\_739270|Original|hCoV-19^^California|Human|Alameda County Public Health Lab|Chan-Zuckerberg Biohub|Kamm|USA

>Spike|hCoV-19/England/NORW-F6B66/2020|2020-12-01|EPI\_ISL\_706378|Original|hCoV-19^^England|Human|Quadram Institute Bioscience|COVID-19 Genomics UK (COG-UK) Consortium|Alikhan|United Kingdom

>Spike|hCoV-19/England/MILK-559DB1/2020|2020-06-10|EPI\_ISL\_558393|Original|hCoV-19^^England|Human|Lighthouse Lab in Milton Keynes|Wellcome Sanger Institute for the COVID-19 Genomics UK (COG-UK) consortium|Davies|United Kingdom

>Spike|hCoV-19/Uganda/UG005/2020|2020-03-27|EPI\_ISL\_451187|Original|hCoV-19^^Uganda|Human|Uganda Virus Research Institute|MRC/UVRI & LSHTM Uganda\u00a0Research Unit|Cotten|Uganda

>Spike|hCoV-19/New Zealand/20VR1997/2020|2020-04-01|EPI\_ISL\_456326|Original|hCoV-19^^Combined Wellington|Human|Wellington SCL|Institute of Environmental Science and Research (ESR)|de Ligt|New Zealand

>Spike|hCoV-19/USA/TX-HMH-MCoV-9653/2020|2020-07-04|EPI\_ISL\_780205|Original|hCoV-19^^Texas|Human|Houston Methodist Hospital|Houston Methodist Hospital|Long|USA

>Spike|hCoV-19/England/CAMC-B21E9B/2020|2020-11-02|EPI\_ISL\_645908|Original|hCoV-19^^England|Human|Lighthouse Lab in Cambridge|Wellcome Sanger Institute for the COVID-19 Genomics UK (COG-UK) Consortium|Davies|United Kingdom

>Spike|hCoV-19/England/MILK-C611C2/2020|2020-12-12|EPI\_ISL\_769477|Original|hCoV-19^^England|Human|Lighthouse Lab in Milton Keynes|Wellcome Sanger Institute for the COVID-19 Genomics UK (COG-UK) Consortium|Davies|United Kingdom

>Spike|hCoV-19/Spain/CN-ISCI-201811/2020|2020-03-05|EPI\_ISL\_455325|Original|hCoV-19^^Canary Islands|Human|Hospital Universitario de Canarias|Instituto de Salud Carlos III|Caballero|Spain

>Spike|hCoV-19/England/LIVE-9B723/2020|2020-04-21|EPI\_ISL\_440873|Original|hCoV-19^^England|Human|Liverpool Clinical Laboratories|COVID-19 Genomics UK (COG-UK) Consortium|Haldenby|United Kingdom

>Spike|hCoV-19/New Zealand/20VR3489/2020|2020-04-17|EPI\_ISL\_579503|Original|hCoV-19^^Canterbury|Human|Canterbury Health Laboratories|Institute of Environmental Science and Research (ESR)|Wang|New Zealand

>Spike|hCoV-19/Finland/18MR2cF1/2020|2020-11-18|EPI\_ISL\_757326|Original|hCoV-19^^Uusimaa|Human|Department of Virology and Immunology|Department of Virology|Smura|Finland

>Spike|hCoV-19/USA/FL-BPHL-1145/2020|2020-08-17|EPI\_ISL\_526631|Original|hCoV-19^^Florida|Human|Florida Bureau of Public Health Laboratories|Florida Bureau of Public Health Laboratories|Blanton|USA

>Spike|hCoV-19/Italy/VEN-IZSve-18-48/2020|2020-03-24|EPI\_ISL\_452184|Original|hCoV-19^^Veneto|Human|ULSS9 Distretto di Bussolengo|Istituto Zooprofilattico Sperimentale delle Venezie|Quaranta|Italy

>Spike|hCoV-19/Spain/MD-IBV-99012374/2020|2020-11-18|EPI\_ISL\_779969|Original|hCoV-19^^Madrid|Human|Hospital General Universitario Gregorio Mara\u00f1a\u00f3n|SeqCOVID-SPAIN consortium|IBV (CSIC)|Comas|Spain

>Spike|hCoV-19/Australia/VIC6403/2020|2020-07-21|EPI\_ISL\_521195|Original|hCoV-19^^Victoria|Human|Microbiological Diagnostic Unit - Public Health Laboratory (MDU-PHL)|MDU-PHL|Schultz|Australia

>Spike|hCoV-19/USA/CA-CHLA-PLM76523568/2020|2020-12-04|EPI\_ISL\_753632|Original|hCoV-19^^California|Human|Clinical virology Laboratory|Center for Personalized Medicine|Dien Bard|USA

>Spike|hCoV-19/England/QEUA-96FB23/2020|2020-08-16|EPI\_ISL\_540313|Original|hCoV-19^^England|Human|Lighthouse Lab in Glasgow|Wellcome Sanger Institute for the COVID-19 Genomics UK (COG-UK) consortium|Davies|United Kingdom

>Spike|hCoV-19/Austria/CeMM1093/2020|2020-08-03|EPI\_ISL\_583889|Original|hCoV-19^^St. Wolfgang|Human|Austrian Agency for Health and Food Safety (AGES)|Bergthaler laboratory|Bergthaler|Austria

>Spike|hCoV-19/Wales/PHWC-168D4A/2020|2020-05-22|EPI\_ISL\_494359|Original|hCoV-19^^Wales|Human|Originating lab|COVID-19 Genomics UK (COG-UK) Consortium|Moore|United Kingdom

>Spike|hCoV-19/England/ALDP-94C9F5/2020|2020-06-15|EPI\_ISL\_555845|Original|hCoV-19^^England|Human|Lighthouse Lab in Alderley Park|Wellcome Sanger Institute for the COVID-19 Genomics UK (COG-UK) consortium|Davies|United Kingdom

>Spike|hCoV-19/Denmark/DCGC-13908/2020|2020-11-30|EPI\_ISL\_713097|Original|hCoV-19^^Midtjylland|Human|Department of Virus and Microbiological Special Diagnostics|Albertsen Lab|Michaelsen|Denmark

>Spike|hCoV-19/Denmark/DCGC-14651/2020|2020-11-23|EPI\_ISL\_711891|Original|hCoV-19^^Sjaelland|Human|Department of Virus and Microbiological Special Diagnostics|Albertsen Lab|Michaelsen|Denmark

>Spike|hCoV-19/Gibraltar/204462825/2020|2020-10-29|EPI\_ISL\_615000|Original|hCoV-19^^Gibraltar|Human|Microbiology|Respiratory Virus Unit|Platt|Gibraltar

>Spike|hCoV-19/England/CAMC-B51384/2020|2020-11-06|EPI\_ISL\_657846|Original|hCoV-19^^England|Human|Lighthouse Lab in Cambridge|Wellcome Sanger Institute for the COVID-19 Genomics UK (COG-UK) Consortium|Davies|United Kingdom

>Spike|hCoV-19/England/LIVE-AA7F4/2020|2020-03-24|EPI\_ISL\_517506|Original|hCoV-19^^England|Human|Liverpool Clinical Laboratories|COVID-19 Genomics UK (COG-UK) Consortium|Haldenby|United Kingdom

>Spike|hCoV-19/Brazil/SP-L36-CD952/2020|2020-05-02|EPI\_ISL\_722040|Original|hCoV-19^^S\u00e3o Paulo|Human|Hospital das Cl\u00ednicas Universidade de S\u00e3o Paulo Medical School|Laborat\u00f3rio de Parasitologia M\u00e9dica - Instituto de Medicina Tropical - Universidade de S\u00e3o Paulo|de Jesus|Brazil

>Spike|hCoV-19/Norway/5952/2020|2020-11-17|EPI\_ISL\_775350|Original|hCoV-19^^Vestfold og Telemark|Human|Unilabs Laboratory Medicine|Norwegian Institute of Public Health|Vollan|Norway

>Spike|hCoV-19/Spain/AS-IBV-98006653/2020|2020-04-21|EPI\_ISL\_654619|Original|hCoV-19^^Asturias|Human|Servicio de Microbiolog\u00eda|SeqCOVID-SPAIN consortium|IBV (CSIC) |Comas|Spain

>Spike|hCoV-19/Wales/PHWC-16C775/2020|2020-09-23|EPI\_ISL\_574089|Original|hCoV-19^^Wales|Human|Wales Specialist Virology Centre Sequencing lab|COVID-19 Genomics UK (COG-UK) Consortium|Moore|United Kingdom

>Spike|hCoV-19/Wales/PHWC-28D0B/2020|2020-04-02|EPI\_ISL\_445431|Original|hCoV-19^^Wales|Human|Wales Specialist Virology Centre|Public Health Wales Microbiology Cardiff|Moore|United Kingdom

>Spike|hCoV-19/Spain/PV-IBV-000705/2020|2020-03-03|EPI\_ISL\_452761|Original|hCoV-19^^Basque Country|Human|Hospital Universitario Araba. Vitoria-Gasteiz,|SeqCOVID-SPAIN consortium|IBV (CSIC) |Comas|Spain

>Spike|hCoV-19/Australia/VIC8191/2020|2020-08-13|EPI\_ISL\_564892|Original|hCoV-19^^Victoria|Human|Microbiological Diagnostic Unit - Public Health Laboratory (MDU-PHL) |MDU-PHL|Schultz|Australia

>Spike|hCoV-19/USA/OR-OHSU-2493/2020|2020-08-17|EPI\_ISL\_667227|Original|hCoV-19^^Oregon|Human|OHSU Lab Services Molecular Microbiology Lab|Oregon SARS-CoV-2 Genome Sequencing Center|O'Roak|USA

>Spike|hCoV-19/Canada/QC-LSPQ-L00237886/2020|2020-03-25|EPI\_ISL\_536198|Original|hCoV-19^^Quebec|Human|H\u00f4pital du Suro\u00eet|Laboratoire de sant\u00e9 publique du Qu\u00e9bec|Moreira|Canada

>Spike|hCoV-19/England/MILK-B5571B/2020|2020-11-05|EPI\_ISL\_657414|Original|hCoV-19^^England|Human|Lighthouse Lab in Milton Keynes|Wellcome Sanger Institute for the COVID-19 Genomics UK (COG-UK) Consortium|Davies|United Kingdom

>Spike|hCoV-19/Scotland/QEUH-A9E920/2020|2020-10-20|EPI\_ISL\_625336|Original|hCoV-19^^Scotland|Human|Lighthouse Lab in Glasgow|Wellcome Sanger Institute for the COVID-19 Genomics UK (COG-UK) consortium|Davies|United Kingdom

>Spike|hCoV-19/England/MILK-A69D13/2020|2020-10-09|EPI\_ISL\_608726|Original|hCoV-19^^England|Human|Lighthouse Lab in Milton Keynes|Wellcome Sanger Institute for the COVID-19 Genomics UK (COG-UK) consortium|Davies|United Kingdom

>Spike|hCoV-19/England/20164002704/2020|2020-04-14|EPI\_ISL\_527335|Original|hCoV-19^^England|Human|Respiratory Virus Unit|Respiratory Virus Unit|Ledesma|United Kingdom

>Spike|hCoV-19/England/PORT-2D507B/2020|2020-00-00|EPI\_ISL\_764140|Original|hCoV-19^^England|Human|Centre for Enzyme Innovation|COVID-19 Genomics UK (COG-UK) Consortium|Robson|United Kingdom

>Spike|hCoV-19/Wales/PHWC-49794B/2020|2020-11-22|EPI\_ISL\_726906|Original|hCoV-19^^Wales|Human|Originating lab|COVID-19 Genomics UK (COG-UK) Consortium|Moore|United Kingdom

>Spike|hCoV-19/Scotland/QEUH-A02787/2020|2020-09-28|EPI\_ISL\_595838|Original|hCoV-19^^Scotland|Human|Quadram Institute Bioscience|COVID-19 Genomics UK (COG-UK) Consortium|Alikhan|United Kingdom

>Spike|hCoV-19/England/ALDP-9C5F3E/2020|2020-09-10|EPI\_ISL\_567670|Original|hCoV-19^^England|Human|Lighthouse Lab in Alderley Park|Wellcome Sanger Institute for the COVID-19 Genomics UK (COG-UK) consortium|Davies|United Kingdom

>Spike|hCoV-19/USA/MN-MDH-1565/2020|2020-08-14|EPI\_ISL\_527630|Original|hCoV-19^^Minnesota|Human|Mayo Clinic & Mayo Clinic Laboratories|Minnesota Department of Health|Garfin|USA

>Spike|hCoV-19/Poland/PL\_P22/2020|2020-04-02|EPI\_ISL\_451983|Original|hCoV-19^^Malopolska|Human|1. ViroGenetics - BSL3 Laboratory of Virology|1. ViroGenetics - BSL3 Laboratory of Virology|Pyrz|Poland

>Spike|hCoV-19/Norway/4061/2020|2020-09-29|EPI\_ISL\_635127|Original|hCoV-19^^Vestland|Human|Foerde Hospital|Norwegian Institute of Public Health|Vollan|Norway

>Spike|hCoV-19/England/ALDP-9BE3C3/2020|2020-09-10|EPI\_ISL\_568216|Original|hCoV-19^^England|Human|Lighthouse Lab in Alderley Park|Wellcome Sanger Institute for the COVID-19 Genomics UK (COG-UK) consortium|Davies|United Kingdom

>Spike|hCoV-19/England/BRIS-12C735/2020|2020-05-06|EPI\_ISL\_469525|Original|hCoV-19^^England|Human|PHE South West Regional Laboratory|Wellcome Sanger Institute for the COVID-19 Genomics UK (COG-UK) consortium|Davies|United Kingdom

>Spike|hCoV-19/Australia/VIC3064/2020|2020-07-08|EPI\_ISL\_520771|Original|hCoV-19^^Victoria|Human|Microbiological Diagnostic Unit - Public Health Laboratory (MDU-PHL)|MDU-PHL|Schultz|Australia

>Spike|hCoV-19/Australia/VIC12712/2020|2020-07-26|EPI\_ISL\_563581|Original|hCoV-19^^Victoria|Human|Microbiological Diagnostic Unit - Public Health Laboratory (MDU-PHL)|MDU-PHL|Schultz|Australia

>Spike|hCoV-19/England/ALDP-9C500E/2020|2020-09-10|EPI\_ISL\_567590|Original|hCoV-19^^England|Human|Lighthouse Lab in Alderley Park|Wellcome Sanger Institute for the COVID-19 Genomics UK (COG-UK) consortium|Davies|United Kingdom

>Spike|hCoV-19/Singapore/287nan/2020|2020-03-17|EPI\_ISL\_648078|Original|hCoV-19^^Singapore|Human|Department of Laboratory Medicine|Department of Laboratory Medicine|Chen|Singapore

>Spike|hCoV-19/USA/NY-Wadsworth-214713-01/2020|2020-09-10|EPI\_ISL\_765502|Original|hCoV-19^^New York|Human|Wadsworth Center|Wadsworth Center|Lasek-Nesselquist|USA

>Spike|hCoV-19/Wales/PHWC-165DF2/2020|2020-05-15|EPI\_ISL\_490804|Original|hCoV-19^^Wales|Human|Wales Specialist Virology Centre Sequencing lab|COVID-19 Genomics UK (COG-UK) Consortium|Moore|United Kingdom

>Spike|hCoV-19/Australia/VIC14540/2020|2020-08-07|EPI\_ISL\_592882|Original|hCoV-19^^Victoria|Human|Microbiological Diagnostic Unit - Public Health Laboratory (MDU-PHL)|MDU-PHL|Schultz|Australia

>Spike|hCoV-19/England/CAMB-1B6AEC/2020|2020-10-09|EPI\_ISL\_612007|Original|hCoV-19^^England|Human|Department of Pathology|COVID-19 Genomics UK (COG-UK) Consortium|Goodfellow|United Kingdom

>Spike|hCoV-19/USA/TX-HMH-MCoV-14065/2020|2020-08-15|EPI\_ISL\_787351|Original|hCoV-19^^Texas|Human|Houston Methodist Hospital|Houston Methodist Hospital|Long|USA

>Spike|hCoV-19/England/ALDP-A961B7/2020|2020-10-19|EPI\_ISL\_624774|Original|hCoV-19^^England|Human|Lighthouse Lab in Alderley Park|Wellcome Sanger Institute for the COVID-19 Genomics UK (COG-UK) consortium|Davies|United Kingdom

>Spike|hCoV-19/Ireland/CN-NVRL-20IRL51448/2020|2020-09-30|EPI\_ISL\_639905|Original|hCoV-19^^Cavan|Human|National Virus Reference Laboratory|National Virus Reference Laboratory|Gonzalez|Ireland



>Spike|hCoV-19/USA/MI-MDHHS-SC21907/2020|2020-04-09|EPI\_ISL\_565968|Original|hCoV-19^^Michigan|Human|Michigan Department of Health and Human Services|Michigan Department of Health and Human Services|Blankenship|USA

>Spike|hCoV-19/England/QEUB-B7DA32/2020|2020-11-14|EPI\_ISL\_727841|Original|hCoV-19^^England|Human|Oxford Viromics|COVID-19 Genomics UK (COG-UK) Consortium|Golubchik|United Kingdom

>Spike|hCoV-19/Japan/PG-8916/2020|2020-09-00|EPI\_ISL\_686462|Original|hCoV-19^^Japan|Human|Pathogen Genomics Center|Pathogen Genomics Center|Sekizuka|Japan

>Spike|hCoV-19/Australia/VIC767/2020|2020-03-20|EPI\_ISL\_427044|Original|hCoV-19^^Victoria|Human|Victorian Infectious Diseases Reference Laboratory (VIDRL)|Microbiological Diagnostic Unit Public Health Laboratory and Victorian Infectious Diseases Reference Laboratory|Schultz|Australia

>Spike|hCoV-19/Gambia/GC19-3822/2020|2020-07-27|EPI\_ISL\_561093|Original|hCoV-19^^Kombo|Human|MRCG at LSHTM Genomics lab|MRCG at LSHTM Genomics lab|Sesay|Gambia

>Spike|hCoV-19/England/ALDP-BB929C/2020|2020-11-21|EPI\_ISL\_702599|Original|hCoV-19^^England|Human|Lighthouse Lab in Alderley Park|Wellcome Sanger Institute for the COVID-19 Genomics UK (COG-UK) Consortium|Davies|United Kingdom

>Spike|hCoV-19/USA/MN-QDX-989/2020|2020-03-14|EPI\_ISL\_571787|Original|hCoV-19^^Minnesota|Human|Quest Diagnostics|Quest Diagnostics|Kagan|USA

>Spike|hCoV-19/Wales/PHWC-16EBB3/2020|2020-10-05|EPI\_ISL\_585832|Original|hCoV-19^^Wales|Human|Wales Specialist Virology Centre Sequencing lab|COVID-19 Genomics UK (COG-UK) Consortium|Moore|United Kingdom

>Spike|hCoV-19/England/NORW-F1C1D/2020|2020-10-22|EPI\_ISL\_627624|Original|hCoV-19^^England|Human|Quadram Institute Bioscience|COVID-19 Genomics UK (COG-UK) Consortium|Alikhan|United Kingdom

>Spike|hCoV-19/England/CAMB-791F0/2020|2020-04-03|EPI\_ISL\_441063|Original|hCoV-19^^England|Human|Department of Pathology|Wellcome Sanger Institute for the COVID-19 Genomics UK (COG-UK) consortium|Amato|United Kingdom

>Spike|hCoV-19/Denmark/DCGC-18255/2020|2020-12-14|EPI\_ISL\_749844|Original|hCoV-19^^Nordjylland|Human|Department of Virus and Microbiological Special Diagnostics|Albertsen Lab|Michaelsen|Denmark

>Spike|hCoV-19/Scotland/EDB7827/2020|2020-09-21|EPI\_ISL\_572537|Original|hCoV-19^^Scotland|Human|Virology Department|COVID-19 Genomics UK (COG-UK) Consortium|Williams|United Kingdom

>Spike|hCoV-19/South Africa/R12642-20/2020|2020-06-16|EPI\_ISL\_504204|Original|hCoV-19^^North West|Human|National Institute for Communicable Diseases of the National Health Laboratory Service|National Institute for Communicable Diseases of the National Health Laboratory Service|Allam|South Africa

>Spike|hCoV-19/USA/WA-UW-13401/2020|2020-07-02|EPI\_ISL\_501149|Original|hCoV-19^^Washington|Human|University of Washington Virology Lab|University of Washington Virology Lab|Roychoudhury|USA

>Spike|hCoV-19/England/MILK-C61AC7/2020|2020-12-13|EPI\_ISL\_735753|Original|hCoV-19^^England|Human|Lighthouse Lab in Milton Keynes|Wellcome Sanger Institute for the COVID-19 Genomics UK (COG-UK) Consortium|Davies|United Kingdom

>Spike|hCoV-19/England/NORT-28120F/2020|2020-03-08|EPI\_ISL\_472158|Original|hCoV-19^^England|Human|Northumbria University / South Tees Hospitals NHS Foundation Trust / North Cumbria Integrated Care NHS Foundation Trust / North Tees and Hartlepool NHS Foundation Trust / Newcastle Hospitals NHS Foundation Trust|COVID-19 Genomics UK (COG-UK) Consortium|Bashton|United Kingdom

>Spike|hCoV-19/England/LIVE-9C4EF/2020|2020-03-23|EPI\_ISL\_449544|Original|hCoV-19^^England|Human|Liverpool Clinical Laboratories|COVID-19 Genomics UK (COG-UK) Consortium|Haldenby|United Kingdom

>Spike|hCoV-19/Germany/BW-UKT-055/2020|2020-04-06|EPI\_ISL\_581471|Original|hCoV-19^^Baden-W\u00fcrtemberg|Human|Medizinische Klinik Innere Medizin I|NGS Competence Center T\u00fcbingen|Angelov|Germany

>Spike|hCoV-19/Brazil/RJ-2717/2020|2020-04-24|EPI\_ISL\_467359|Original|hCoV-19^^Rio de Janeiro|Human|Laboratory of Respiratory Viruses and Measles|Laboratory of Respiratory Viruses and Measles|Silva|Brazil

>Spike|hCoV-19/USA/CA-CZB-9724/2020|2020-03-11|EPI\_ISL\_672160|Original|hCoV-19^^California|Human|The Ashley Laboratory|Chan-Zuckerberg Biohub|Bhatt|USA

>Spike|hCoV-19/Denmark/DCGC-6976/2020|2020-10-12|EPI\_ISL\_619822|Original|hCoV-19^^Syddanmark|Human|Department of Virus and Microbiological Special Diagnostics|Albertsen lab|Michaelsen|Denmark

>Spike|hCoV-19/England/NOTT-1121F8/2020|2020-06-22|EPI\_ISL\_484353|Original|hCoV-19^^England|Human|Queens Medical Centre|COVID-19 Genomics UK (COG-UK) Consortium|Loose|United Kingdom

>Spike|hCoV-19/England/ALDP-6BD206/2020|2020-07-02|EPI\_ISL\_557852|Original|hCoV-19^^England|Human|Lighthouse Lab in Alderley Park|Wellcome Sanger Institute for the COVID-19 Genomics UK (COG-UK) Consortium|Davies|United Kingdom

>Spike|hCoV-19/Jordan/AM-ALSR-4074/2020|2020-10-03|EPI\_ISL\_636434|Original|hCoV-19^^Amman|Human|Biolab Diagnostic Laboratories|Andersen lab at Scripps Research|Gangavarapu|Jordan

>Spike|hCoV-19/Scotland/QEUH-AF614C/2020|2020-10-30|EPI\_ISL\_676474|Original|hCoV-19^^Scotland|Human|Lighthouse Lab in Glasgow|Wellcome Sanger Institute for the COVID-19 Genomics UK (COG-UK) Consortium|Davies|United Kingdom

>Spike|hCoV-19/England/MILK-ABBD7C/2020|2020-10-20|EPI\_ISL\_631070|Original|hCoV-19^^England|Human|Lighthouse Lab in Milton Keynes|Wellcome Sanger Institute for the COVID-19 Genomics UK (COG-UK) consortium|Davies|United Kingdom

>Spike|hCoV-19/Japan/PG-7398/2020|2020-07-00|EPI\_ISL\_688500|Original|hCoV-19^^Japan|Human|Pathogen Genomics Center|Pathogen Genomics Center|Sekizuka|Japan

>Spike|hCoV-19/Wales/PHWC-4935B4/2020|2020-11-29|EPI\_ISL\_725910|Original|hCoV-19^^Wales|Human|Originating lab|COVID-19 Genomics UK (COG-UK) Consortium|Moore|United Kingdom

>Spike|hCoV-19/Australia/VIC3584/2020|2020-07-09|EPI\_ISL\_520332|Original|hCoV-19^^Victoria|Human|Victorian Infectious Diseases Reference Laboratory (VIDRL)|VIDRL and MDU-PHL|Schultz|Australia

>Spike|hCoV-19/England/QEUH-A8BECD/2020|2020-10-16|EPI\_ISL\_643257|Original|hCoV-19^^England|Human|Lighthouse Lab in Glasgow|Wellcome Sanger Institute for the COVID-19 Genomics UK (COG-UK) Consortium|Davies|United Kingdom

>Spike|hCoV-19/USA/FL-BPHL-1316/2020|2020-07-13|EPI\_ISL\_541254|Original|hCoV-19^^Florida|Human|Florida Bureau of Public Health Laboratories|Florida Bureau of Public Health Laboratories|Blanton|USA

>Spike|hCoV-19/England/SHEF-10D3A14/2020|2020-12-04|EPI\_ISL\_742061|Original|hCoV-19^^England|Human|Virology Department|COVID-19 Genomics UK (COG-UK) Consortium|de Silva|United Kingdom

>Spike|hCoV-19/Canada/MB-NML-640/2020|2020-03-23|EPI\_ISL\_582297|Original|hCoV-19^^Manitoba|Human|Cadham Provincial Laboratory|National Microbiology Laboratory (NML)|Majer|Canada

>Spike|hCoV-19/Australia/TAS102/2020|2020-03-21|EPI\_ISL\_522568|Original|hCoV-19^^Tasmania|Human|Royal Hobart Hospital Microbiology Department|MDU-PHL|Schultz|Australia

>Spike|hCoV-19/Japan/PG-7934/2020|2020-07-00|EPI\_ISL\_687035|Original|hCoV-19^^Japan|Human|Pathogen Genomics Center|Pathogen Genomics Center|Sekizuka|Japan

>Spike|hCoV-19/Netherlands/NH-RIVM-10357/2020|2020-07-30|EPI\_ISL\_636567|Original|hCoV-19^^NoordHolland|Human|Dutch COVID-19 response team|National Institute for Public Health and the Environment (RIVM)|Meijer|Netherlands

>Spike|hCoV-19/England/20149013504/2020|2020-04-03|EPI\_ISL\_466156|Original|hCoV-19^^England|Human|Respiratory Virus Unit|Respiratory Virus Unit|Platt|United Kingdom

>Spike|hCoV-19/England/20118108504/2020|2020-03-12|EPI\_ISL\_464950|Original|hCoV-19^^England|Human|Respiratory Virus Unit|Respiratory Virus Unit|Platt|United Kingdom

>Spike|hCoV-19/Indonesia/JB-TFRIC19-R47609/2020|2020-07-21|EPI\_ISL\_528746|Original|hCoV-19^^West Java|Human|Immanuel Hospital|Molecular Genetics Laboratory-Faculty of Medicine-Universitas Padjadjaran; School of Life Sciences and Technology & School of Pharmacy-Institut Teknologi Bandung; Laboratorium Kesehatan Provinsi Jawa Barat|Tan|Indonesia

>Spike|hCoV-19/England/LOND-126481C/2020|2020-11-19|EPI\_ISL\_704965|Original|hCoV-19^^England|Human|University College London|COVID-19 Genomics UK (COG-UK) Consortium|Roy|United Kingdom

>Spike|hCoV-19/England/MILK-993573/2020|2020-08-26|EPI\_ISL\_552046|Original|hCoV-19^^England|Human|Lighthouse Lab in Milton Keynes|Wellcome Sanger Institute for the COVID-19 Genomics UK (COG-UK) consortium|Davies|United Kingdom

>Spike|hCoV-19/USA/NY-Wadsworth-289288-01/2020|2020-12-21|EPI\_ISL\_767500|Original|hCoV-19^^New York|Human|Wadsworth Center|Wadsworth Center|Lasek-Nesselquist|USA

>Spike|hCoV-19/Northern Ireland/NIRE-23570B/2020|2020-11-12|EPI\_ISL\_742132|Original|hCoV-19^^Northern Ireland|Human|Regional Virus Laboratory|COVID-19 Genomics UK (COG-UK) Consortium|Fairley|United Kingdom

>Spike|hCoV-19/Spain/PV-IBV-98008460/2020|2020-10-25|EPI\_ISL\_654551|Original|hCoV-19^^Basque Country|Human|Servicio de Microbiolog\u00eda. Hospital Universitario Donostia. OSI Donostialdea. \u00clrea de Enfermedades Infecciosas|SeqCOVID-SPAIN consortium/IBV (CSIC) |Comas|Spain

>Spike|hCoV-19/Denmark/DCGC-21855/2020|2020-12-21|EPI\_ISL\_758408|Original|hCoV-19^^Syddanmark|Human|Department of Virus and Microbiological Special Diagnostics|Albertsen Lab|Michaelsen|Denmark

>Spike|hCoV-19/England/CAMC-C46749/2020|2020-12-10|EPI\_ISL\_718448|Original|hCoV-19^^England|Human|Lighthouse Lab in Cambridge|Wellcome Sanger Institute for the COVID-19 Genomics UK (COG-UK) Consortium|Davies|United Kingdom

>Spike|hCoV-19/England/CAMC-9470D7/2020|2020-07-21|EPI\_ISL\_556552|Original|hCoV-19^^England|Human|Lighthouse Lab in Cambridge|Wellcome Sanger Institute for the COVID-19 Genomics UK (COG-UK) consortium|Davies|United Kingdom

>Spike|hCoV-19/England/QEUH-965862/2020|2020-08-12|EPI\_ISL\_531071|Original|hCoV-19^^England|Human|Lighthouse Lab in Glasgow|Wellcome Sanger Institute for the COVID-19 Genomics UK (COG-UK) consortium|Davies|United Kingdom

>Spike|hCoV-19/Switzerland/BS-UHB-42186189/2020|2020-03-11|EPI\_ISL\_527997|Original|hCoV-19^^Basel-Stadt|Human|University Hospital Basel|University Hospital Basel|Roloff Handschin|Switzerland

>Spike|hCoV-19/England/SHEF-C41BA/2020|2020-04-09|EPI\_ISL\_448844|Original|hCoV-19^^England|Human|Virology Laboratory|COVID-19 Genomics UK (COG-UK) Consortium|de Silva|United Kingdom

>Spike|hCoV-19/South Africa/NHLS-UCT-GS-1774/2020|2020-09-02|EPI\_ISL\_640109|Original|hCoV-19^^Western Cape|Human|Victoria Hospital wc VHW|NHLS/UCT|Iranzadeh|South Africa

>Spike|hCoV-19/England/BIRM-5F9AD/2020|2020-05-06|EPI\_ISL\_473357|Original|hCoV-19^^England|Human|University of Birmingham|COVID-19 Genomics UK (COG-UK) Consortium|Loman|United Kingdom

>Spike|hCoV-19/USA/CA-CZB-4019/2020|2020-08-01|EPI\_ISL\_548621|Original|hCoV-19^^California|Human|County of Santa Clara Public Health Department|Chan-Zuckerberg Biohub|Bhatt|USA

>Spike|hCoV-19/England/CAMC-B985E5/2020|2020-11-15|EPI\_ISL\_674899|Original|hCoV-19^^England|Human|Lighthouse Lab in Cambridge|Wellcome Sanger Institute for the COVID-19 Genomics UK (COG-UK) Consortium|Davies|United Kingdom

>Spike|hCoV-19/USA/CA-CZB-1269/2020|2020-04-27|EPI\_ISL\_454689|Original|hCoV-19^^California|Human|County of Santa Clara Public Health Department|Chan-Zuckerberg Biohub|Hao|USA

>Spike|hCoV-19/England/BRIS-12BD70/2020|2020-05-08|EPI\_ISL\_469368|Original|hCoV-19^^England|Human|PHE South West Regional Laboratory|Wellcome Sanger Institute for the COVID-19 Genomics UK (COG-UK) consortium|Davies|United Kingdom

>Spike|hCoV-19/Denmark/ALAB-HH88/2020|2020-03-15|EPI\_ISL\_429328|Original|hCoV-19^^Denmark|Human|Department of Clinical Microbiology|Albertsen lab|Kirkegaard|Denmark

>Spike|hCoV-19/England/MILK-ACCC20/2020|2020-10-21|EPI\_ISL\_634436|Original|hCoV-19^^England|Human|Lighthouse Lab in Milton Keynes|Wellcome Sanger Institute for the COVID-19 Genomics UK (COG-UK) consortium|Davies|United Kingdom

>Spike|hCoV-19/England/MILK-A7CD4A/2020|2020-10-13|EPI\_ISL\_606354|Original|hCoV-19^^England|Human|Lighthouse Lab in Milton Keynes|Wellcome Sanger Institute for the COVID-19 Genomics UK (COG-UK) consortium|Davies|United Kingdom

>Spike|hCoV-19/Germany/HH-hpi-p2058/2020|2020-03-21|EPI\_ISL\_775640|Original|hCoV-19^^Hamburg|Human|University Medical Center Hamburg Eppendorf|Heinrich Pette Institute|Robitaille|Germany

>Spike|hCoV-19/England/ALDP-5057F2/2020|2020-06-25|EPI\_ISL\_559189|Original|hCoV-19^^England|Human|Lighthouse Lab in Alderley Park|Wellcome Sanger Institute for the COVID-19 Genomics UK (COG-UK) consortium|Davies|United Kingdom

>Spike|hCoV-19/USA/CO-CDPHE-2009163949/2020|2020-09-16|EPI\_ISL\_710232|Original|hCoV-19^^Colorado|Human|Colorado Department of Public Health and Environment|Colorado Department of Public Health and Environment|Bankers|USA

>Spike|hCoV-19/Australia/NSW2143/2020|2020-03-15|EPI\_ISL\_509502|Original|hCoV-19^^New South Wales|Human|Area of Virology|Area of Virology|Yeang|Australia

>Spike|hCoV-19/Canada/ON-UHTC\_0066/2020|2020-04-24|EPI\_ISL\_464038|unknown|hCoV-19^^Ontario|Human|Unity Health Toronto|Ontario Institute for Cancer Research|de Borja|Canada

>Spike|hCoV-19/Luxembourg/LNS8639502/2020|2020-03-16|EPI\_ISL\_419599|Original|hCoV-19^^Luxembourg|Human|Laboratoire National de Sant\u00e9|Laboratoire National de Sant\u00e9|Wienecke-Baldacchino|Luxembourg

>Spike|hCoV-19/England/MILK-A7B974/2020|2020-10-15|EPI\_ISL\_607532|Original|hCoV-19^^England|Human|Lighthouse Lab in Milton Keynes|Wellcome Sanger Institute for the COVID-19 Genomics UK (COG-UK) consortium|Davies|United Kingdom

>Spike|hCoV-19/England/LIVE-9EFEC/2020|2020-04-14|EPI\_ISL\_453417|Original|hCoV-19^^England|Human|Liverpool Clinical Laboratories|COVID-19 Genomics UK (COG-UK) Consortium|Haldenby|United Kingdom

>Spike|hCoV-19/England/OXON-B3CAE/2020|2020-04-21|EPI\_ISL\_534909|Original|hCoV-19^^England|Human|Oxford Viromics|COVID-19 Genomics UK (COG-UK) Consortium|Golubchik|United Kingdom

>Spike|hCoV-19/USA/TX-HMH-MCoV-18683/2020|2020-11-22|EPI\_ISL\_785031|Original|hCoV-19^^Texas|Human|Houston Methodist Hospital|Houston Methodist Hospital|Long|USA

>Spike|hCoV-19/England/BRIS-12A157/2020|2020-04-16|EPI\_ISL\_458380|Original|hCoV-19^^England|Human|PHE South West Regional Laboratory|Wellcome Sanger Institute for the COVID-19 Genomics UK (COG-UK) consortium|Davies|United Kingdom

>Spike|hCoV-19/Cote d'Ivoire/BKE0424/2020|2020-07-02|EPI\_ISL\_614376|Original|hCoV-19^^Yamoussoukro|Human|Molecular diagnostic unit for viral haemorrhagic fevers and emerging viruses|Project group Epidemiology of Highly Pathogenic Microorganisms|Calvignac-Spencer|C\u00f4te d'Ivoire

>Spike|hCoV-19/Norway/3180/2020|2020-08-09|EPI\_ISL\_549047|Original|hCoV-19^^Oslo|Human|Ostfold Hospital Trust - Kalnes|Norwegian Institute of Public Health|Kopperud Riis|Norway

>Spike|hCoV-19/Lithuania/MR-LUHS-Eilnr238418/2020|2020-12-22|EPI\_ISL\_770532|Original|hCoV-19^^Kauno apskritis|Human|Lithuanian University of Health Sciences Hospital|Lithuanian University of Health Sciences|Zemaitis|Lithuania

>Spike|hCoV-19/Australia/VIC7509/2020|2020-00-00|EPI\_ISL\_564457|Original|hCoV-19^^Victoria|Human|Microbiological Diagnostic Unit - Public Health Laboratory (MDU-PHL)|MDU-PHL|Schultz|Australia

>Spike|hCoV-19/Denmark/DCGC-21559/2020|2020-12-21|EPI\_ISL\_757906|Original|hCoV-19^^Sjaelland|Human|Department of Virus and Microbiological Special Diagnostics|Albertsen Lab|Michaelsen|Denmark

>Spike|hCoV-19/England/CAMC-BD2075/2020|2020-11-28|EPI\_ISL\_702210|Original|hCoV-19^^England|Human|Lighthouse Lab in Cambridge|Wellcome Sanger Institute for the COVID-19 Genomics UK (COG-UK) Consortium|Davies|United Kingdom

>Spike|hCoV-19/England/LIVE-A74C3/2020|2020-03-28|EPI\_ISL\_517029|Original|hCoV-19^^England|Human|Liverpool Clinical Laboratories|COVID-19 Genomics UK (COG-UK) Consortium|Haldenby|United Kingdom

>Spike|hCoV-19/India/MH-NIV-206457/2020|2020-09-10|EPI\_ISL\_577716|Original|hCoV-19^^Maharashtra|Human|NIV Influenza|NIV Influenza|Potdar|India

>Spike|hCoV-19/Russia/OMS-ORINFI-106S/2020|2020-05-13|EPI\_ISL\_569837|Original|hCoV-19^^Omsk|Human|Omsk Research Institute of Natural Focal Infections|WHO National Influenza Centre Russian Federation|Komissarov|Russia

>Spike|hCoV-19/England/CAMC-AB1D58/2020|2020-10-21|EPI\_ISL\_623856|Original|hCoV-19^^England|Human|Lighthouse Lab in Cambridge|Wellcome Sanger Institute for the COVID-19 Genomics UK (COG-UK) consortium|Davies|United Kingdom

>Spike|hCoV-19/France/ARA-120965/2020|2020-12-16|EPI\_ISL\_745311|Original|hCoV-19^^Auvergne-Rh\u00f4ne-Alpes|Human|CNR Virus des Infections Respiratoires - France SUD|CNR Virus des Infections Respiratoires - France SUD|Bal|France

>Spike|hCoV-19/Portugal/PT1273/2020|2020-03-21|EPI\_ISL\_511234|Original|hCoV-19^^Portugal|Human|Instituto Nacional de Saude (INSA) and Instituto Gulbenkian de Ciencia (IGC)|Instituto Nacional de Saude (INSA) and Instituto Gulbenkian de Ciencia (IGC)|Borges|Portugal

>Spike|hCoV-19/England/CAMB-1BCC77/2020|2020-12-02|EPI\_ISL\_763593|Original|hCoV-19^^England|Human|Department of Pathology|COVID-19 Genomics UK (COG-UK) Consortium|Goodfellow|United Kingdom

>Spike|hCoV-19/Belgium/ULG-10626/2020|2020-10-26|EPI\_ISL\_636605|Original|hCoV-19^^Li\u00e8ge|Human|Department of Clinical Microbiology|GIGA Medical Genomics|Durkin|Belgium

>Spike|hCoV-19/England/201101382/2020|2020-03-09|EPI\_ISL\_464660|Original|hCoV-19^^England|Human|Respiratory Virus Unit|Respiratory Virus Unit|Platt|United Kingdom

>Spike|hCoV-19/USA/VA-DCLS-1784/2020|2020-09-15|EPI\_ISL\_644870|Original|hCoV-19^^Virginia|Human|Virginia DCLS|Virginia DCLS|St. Jacques|USA

>Spike|hCoV-19/England/ALDP-B45E28/2020|2020-11-07|EPI\_ISL\_656187|Original|hCoV-19^^England|Human|Lighthouse Lab in Alderley Park|Wellcome Sanger Institute for the COVID-19 Genomics UK (COG-UK) Consortium|Davies|United Kingdom

>Spike|hCoV-19/USA/NY-NYUMC195/2020|2020-04-01|EPI\_ISL\_427490|Original|hCoV-19^^New York|Human|NYU Langone Health|Departments of Pathology and Medicine|Maurano|USA

>Spike|hCoV-19/Wales/PHWC-4966EB/2020|2020-11-20|EPI\_ISL\_726623|Original|hCoV-19^^Wales|Human|Originating lab|COVID-19 Genomics UK (COG-UK) Consortium|Moore|United Kingdom

>Spike|hCoV-19/USA/TX-DSHS-2025/2020|2020-07-14|EPI\_ISL\_766663|Original|hCoV-19^^Texas|Human|Texas Department of State Health Services|Texas Department of State Health Services|Rahman|USA

>Spike|hCoV-19/USA/TX-HMH-7586/2020|2020-06-25|EPI\_ISL\_546873|Original|hCoV-19^^Texas|Human|Houston Methodist Hospital|Houston Methodist Hospital|Long|USA

>Spike|hCoV-19/Denmark/DCGC-13680/2020|2020-11-30|EPI\_ISL\_712956|Original|hCoV-19^^Hovedstaden|Human|Department of Virus and Microbiological Special Diagnostics|Albertsen Lab|Michaelsen|Denmark

>Spike|hCoV-19/England/LIVE-A58D8/2020|2020-03-18|EPI\_ISL\_499644|Original|hCoV-19^^England|Human|Liverpool Clinical Laboratories|COVID-19 Genomics UK (COG-UK) Consortium|Haldenby|United Kingdom

>Spike|hCoV-19/Australia/VIC8715/2020|2020-07-27|EPI\_ISL\_565153|Original|hCoV-19^^Victoria|Human|Victorian Infectious Diseases Reference Laboratory (VIDRL)|VIDRL and MDU-PHL|Schultz|Australia

>Spike|hCoV-19/Oman/205035503/2020|2020-05-12|EPI\_ISL\_491969|Original|hCoV-19^^Muscat|Human|Oman-NIC|Department of\u00a0Microbiology\u00a0and Immunology-SQUH|AL Zadjali|Oman

>Spike|hCoV-19/USA/CA-CZB-13520/2020|2020-10-28|EPI\_ISL\_672509|Original|hCoV-19^^California|Human|Madera County Department of Public Health|Chan-Zuckerberg Biohub|Bhatt|USA

>Spike|hCoV-19/Scotland/QEUA-A01409/2020|2020-10-02|EPI\_ISL\_595812|Original|hCoV-19^^Scotland|Human|Virology Department|COVID-19 Genomics UK (COG-UK) Consortium|de Silva|United Kingdom

>Spike|hCoV-19/Australia/VIC2331/2020|2020-06-25|EPI\_ISL\_522052|Original|hCoV-19^^Victoria|Human|Microbiological Diagnostic Unit - Public Health Laboratory (MDU-PHL)|MDU-PHL|Schultz|Australia

>Spike|hCoV-19/England/SHEF-C64A0/2020|2020-10-16|EPI\_ISL\_611583|Original|hCoV-19^^England|Human|Virology Department|COVID-19 Genomics UK (COG-UK) Consortium|de Silva|United Kingdom

>Spike|hCoV-19/USA/WA-S374/2020|2020-03-26|EPI\_ISL\_434134|Original|hCoV-19^^Washington|Human|Washington State Department of Health|Seattle Flu Study|Bedford|USA

>Spike|hCoV-19/USA/TX-HMH-5333/2020|2020-06-24|EPI\_ISL\_544690|Original|hCoV-19^^Texas|Human|Houston Methodist Hospital|Houston Methodist Hospital|Long|USA

>Spike|hCoV-19/Iceland/319/2020|2020-03-18|EPI\_ISL\_417648|Original|hCoV-19^^Reykjavik|Human|The National University Hospital of Iceland|deCODE genetics|J\u00f3nsson|Iceland

>Spike|hCoV-19/Scotland/CVR5347/2020|2020-10-26|EPI\_ISL\_651770|Original|hCoV-19^^Scotland|Human|West of Scotland Specialist Virology Centre|COVID-19 Genomics UK (COG-UK) Consortium|Robertson|United Kingdom

>Spike|hCoV-19/France/ARA-NRC02726/2020|2020-10-05|EPI\_ISL\_639987|Original|hCoV-19^^Auvergne-Rhone-Alpes|Human|CNR Virus des Infections Respiratoires - France SUD|CNR Virus des Infections Respiratoires - France SUD|Josset|France

>Spike|hCoV-19/England/CAMB-1B777B/2020|2020-00-00|EPI\_ISL\_638331|Original|hCoV-19^^England|Human|Department of Pathology|COVID-19 Genomics UK (COG-UK) Consortium|Goodfellow|United Kingdom

>Spike|hCoV-19/England/QEUA-AD45C0/2020|2020-10-26|EPI\_ISL\_634607|Original|hCoV-19^^England|Human|Lighthouse Lab in Glasgow|Wellcome Sanger Institute for the COVID-19 Genomics UK (COG-UK) consortium|Davies|United Kingdom

>Spike|hCoV-19/Japan/PG-2671/2020|2020-06-00|EPI\_ISL\_690803|Original|hCoV-19^^Japan|Human|Tokyo Metropolitan Institute of Public Health|Pathogen Genomics Center|Sekizuka|Japan

>Spike|hCoV-19/Luxembourg/LNS9096216/2020|2020-10-23|EPI\_ISL\_744849|Original|hCoV-19^^Luxembourg|Human|Laboratoire national de sant\u00e9|Laboratoire national de sant\u00e9|Wienecke-Baldacchino|Luxembourg

>Spike|hCoV-19/Australia/VIC3896/2020|2020-07-13|EPI\_ISL\_520608|Original|hCoV-19^^Victoria|Human|Microbiological Diagnostic Unit - Public Health Laboratory (MDU-PHL)|MDU-PHL|Schultz|Australia

>Spike|hCoV-19/England/MILK-83551A/2020|2020-07-16|EPI\_ISL\_557267|Original|hCoV-19^^England|Human|Lighthouse Lab in Milton Keynes|Wellcome Sanger Institute for the COVID-19 Genomics UK (COG-UK) consortium|Davies|United Kingdom

>Spike|hCoV-19/England/ALDP-A6935D/2020|2020-10-10|EPI\_ISL\_608950|Original|hCoV-19^^England|Human|Lighthouse Lab in Alderley Park|Wellcome Sanger Institute for the COVID-19 Genomics UK (COG-UK) consortium|Davies|United Kingdom

>Spike|hCoV-19/England/ALDP-9CD491/2020|2020-09-16|EPI\_ISL\_566150|Original|hCoV-19^^England|Human|Lighthouse Lab in Alderley Park|Wellcome Sanger Institute for the COVID-19 Genomics UK (COG-UK) consortium|Davies|United Kingdom

>Spike|hCoV-19/South Korea/KDCA0263/2020|2020-08-14|EPI\_ISL\_760028|Original|hCoV-19^^South Korea|Human|Division of Emerging Infectious Diseases|Division of Emerging Infectious Diseases|Park|South Korea

>Spike|hCoV-19/England/NORT-287913/2020|2020-11-08|EPI\_ISL\_724993|Original|hCoV-19^^England|Human|Northumbria University / South Tees Hospitals NHS Foundation Trust / North Cumbria Integrated Care NHS Foundation Trust / North Tees and Hartlepool NHS Foundation Trust / Newcastle Hospitals NHS Foundation Trust|COVID-19 Genomics UK (COG-UK) Consortium|Bashton|United Kingdom

>Spike|hCoV-19/Wales/PHWC-33778/2020|2020-04-17|EPI\_ISL\_446745|Original|hCoV-19^^Wales|Human|Wales Specialist Virology Centre|Public Health Wales Microbiology Cardiff|Moore|United Kingdom

>Spike|hCoV-19/Mexico/BCN-ALSR-4894/2020|2020-07-04|EPI\_ISL\_730199|Original|hCoV-19^^Baja California|Human|Genomica Lab Molecular|Andersen lab at Scripps Research|Gangavarapu|Mexico

>Spike|hCoV-19/Saudi Arabia/KAUST-MAKKAH1410/2020|2020-06-25|EPI\_ISL\_678091|Original|hCoV-19^^Makkah|Human|Pathogen Genomics Lab King Abdullah University of Science and Technology(KAUST)|Pathogen Genomics Lab King Abdullah University of Science and Technology(KAUST)|Mohamed Ghazzali|Saudi Arabia

>Spike|hCoV-19/England/QEUA-A5E79B/2020|2020-10-12|EPI\_ISL\_597442|Original|hCoV-19^^England|Human|Lighthouse Lab in Glasgow|Wellcome Sanger Institute for the COVID-19 Genomics UK (COG-UK) consortium|Davies|United Kingdom

>Spike|hCoV-19/USA/TX-HMH-MCoV-9819/2020|2020-07-06|EPI\_ISL\_780292|Original|hCoV-19^^Texas|Human|Houston Methodist Hospital|Houston Methodist Hospital|Long|USA

>Spike|hCoV-19/USA/MI-UM-10036765933/2020|2020-11-03|EPI\_ISL\_682214|Original|hCoV-19^^Michigan|Human|University of Michigan Clinical Microbiology Laboratory|Lauring Lab|Valesano|USA

>Spike|hCoV-19/Scotland/EDB4552/2020|2020-05-06|EPI\_ISL\_461723|Original|hCoV-19^^Scotland|Human|Virology Department|COVID-19 Genomics UK (COG-UK) Consortium|Williams|United Kingdom

>Spike|hCoV-19/Japan/PG-7264/2020|2020-08-00|EPI\_ISL\_688367|Original|hCoV-19^^Japan|Human|Saitama Prefectural Institute of Public Health|Pathogen Genomics Center|Sekizuka|Japan

>Spike|hCoV-19/USA/TX-DSHS-0931/2020|2020-06-15|EPI\_ISL\_602229|Original|hCoV-19^^Texas|Human|Texas Department of State Health Services|Texas Department of State Health Services|Rahman|USA

>Spike|hCoV-19/England/QEUA-A8C178/2020|2020-10-16|EPI\_ISL\_643135|Original|hCoV-19^^England|Human|Lighthouse Lab in Glasgow|Wellcome Sanger Institute for the COVID-19 Genomics UK (COG-UK) Consortium|Davies|United Kingdom

>Spike|hCoV-19/England/20120107804/2020|2020-03-16|EPI\_ISL\_465732|Original|hCoV-19^^England|Human|Respiratory Virus Unit|Respiratory Virus Unit|Platt|United Kingdom

>Spike|hCoV-19/USA/TX-HMH-6971/2020|2020-06-28|EPI\_ISL\_546397|Original|hCoV-19^^Texas|Human|Houston Methodist Hospital|Houston Methodist Hospital|Long|USA

>Spike|hCoV-19/USA/TX-HMH-2113/2020|2020-05-23|EPI\_ISL\_545127|Original|hCoV-19^^Texas|Human|Houston Methodist Hospital|Houston Methodist Hospital|Long|USA

>Spike|hCoV-19/Denmark/DCGC-15400/2020|2020-11-23|EPI\_ISL\_713804|Original|hCoV-19^^Midtjylland|Human|Department of Virus and Microbiological Special Diagnostics|Albertsen Lab|Michaelsen|Denmark

>Spike|hCoV-19/England/CAMC-C47283/2020|2020-12-10|EPI\_ISL\_718679|Original|hCoV-19^^England|Human|Lighthouse Lab in Cambridge|Wellcome Sanger Institute for the COVID-19 Genomics UK (COG-UK) Consortium|Davies|United Kingdom

>Spike|hCoV-19/England/20169035404/2020|2020-04-18|EPI\_ISL\_465237|Original|hCoV-19^^England|Human|Respiratory Virus Unit|Respiratory Virus Unit|Platt|United Kingdom

>Spike|hCoV-19/USA/TX-DSHS-1391/2020|2020-05-16|EPI\_ISL\_654760|Original|hCoV-19^^Texas|Human|Texas Department of State Health Services|Texas Department of State Health Services|Rahman|USA

>Spike|hCoV-19/USA/ME-HETL-J0464/2020|2020-12-15|EPI\_ISL\_755556|Original|hCoV-19^^Maine|Human|Maine Health and Environmental Testing Laboratory|Tewhey Lab|Tewhey|USA

>Spike|hCoV-19/Italy/VEN-IZSve-46-41/2020|2020-04-03|EPI\_ISL\_522856|Original|hCoV-19^^Veneto|Human|ULSS9 Distretto di San Bonifacio|Istituto Zooprofilattico Sperimentale delle Venezie|Quaranta|Italy

>Spike|hCoV-19/England/MILK-BAAA0F/2020|2020-11-17|EPI\_ISL\_705202|Original|hCoV-19^^England|Human|Lighthouse Lab in Milton Keynes|Wellcome Sanger Institute for the COVID-19 Genomics UK (COG-UK) Consortium|Davies|United Kingdom

>Spike|hCoV-19/USA/MI-QDX-725/2020|2020-03-21|EPI\_ISL\_571458|Original|hCoV-19^^Michigan|Human|Quest Diagnostics|Quest Diagnostics|Kagan|USA

>Spike|hCoV-19/Poland/Masovia-13529/2020|2020-09-06|EPI\_ISL\_754905|Original|hCoV-19^^Masovia|Human|Laboratory Diagnostics and Clinical Immunology of Developmental Age|genXone SA|Kaszuba|Poland

>Spike|hCoV-19/Netherlands/ZH-EMC-862/2020|2020-10-17|EPI\_ISL\_632747|Original|hCoV-19^^Zuid Holland|Human|Dutch COVID-19 response team|Erasmus Medical Center|Oude Munnink|Netherlands

>Spike|hCoV-19/DRC/3787/2020|2020-04-24|EPI\_ISL\_447241|Original|hCoV-19^^Kinshasa|Human|Viral Respiratory Lab|Pathogen Sequencing Lab|Amuri|Democratic Republic of the Congo

>Spike|hCoV-19/England/MILK-9E25EE/2020|2020-09-20|EPI\_ISL\_581216|Original|hCoV-19^^England|Human|Lighthouse Lab in Milton Keynes|Wellcome Sanger Institute for the COVID-19 Genomics UK (COG-UK) consortium|Davies|United Kingdom

>Spike|hCoV-19/England/QEUA-9F88A0/2020|2020-09-27|EPI\_ISL\_588882|Original|hCoV-19^^England|Human|Lighthouse Lab in Glasgow|Wellcome Sanger Institute for the COVID-19 Genomics UK (COG-UK) consortium|Davies|United Kingdom

>Spike|hCoV-19/USA/WA-S2247/2020|2020-06-09|EPI\_ISL\_497675|Original|hCoV-19^^Washington|Human|Washington State Department of Health|Seattle Flu Study|Lee|USA

>Spike|hCoV-19/USA/WA-S2912/2020|2020-10-05|EPI\_ISL\_596443|Original|hCoV-19^^Washington|Human|Seattle Flu Study|Seattle Flu Study|Lee|USA

>Spike|hCoV-19/Wales/PHWC-48B2D6/2020|2020-11-05|EPI\_ISL\_666219|Original|hCoV-19^^Wales|Human|Wales Specialist Virology Centre Sequencing lab|COVID-19 Genomics UK (COG-UK) Consortium|Moore|United Kingdom

>Spike|hCoV-19/Denmark/DCGC-18657/2020|2020-12-07|EPI\_ISL\_750105|Original|hCoV-19^^Syddanmark|Human|Department of Virus and Microbiological Special Diagnostics|Albertsen Lab|Michaelsen|Denmark

>Spike|hCoV-19/USA/TX-HMH-7578/2020|2020-06-25|EPI\_ISL\_546866|Original|hCoV-19^^Texas|Human|Houston Methodist Hospital|Houston Methodist Hospital|Long|USA

>Spike|hCoV-19/Russia/StPetersburg-RII21802S/2020|2020-06-06|EPI\_ISL\_507290|Original|hCoV-19^^Saint Petersburg|Human|WHO National Influenza Centre Russian Federation|WHO National Influenza Centre Russian Federation|Komissarov|Russia

>Spike|hCoV-19/England/QEUH-9CE436/2020|2020-09-17|EPI\_ISL\_590140|Original|hCoV-19^^England|Human|Lighthouse Lab in Glasgow|Wellcome Sanger Institute for the COVID-19 Genomics UK (COG-UK) consortium|Davies|United Kingdom

>Spike|hCoV-19/Netherlands/NA\_491/2020|2020-03-29|EPI\_ISL\_460664|Original|hCoV-19^^Netherlands|Human|Dutch COVID-19 response team|Erasmus Medical Center|Oude Munnink|Netherlands

>Spike|hCoV-19/Australia/VIC5928/2020|2020-07-20|EPI\_ISL\_518707|Original|hCoV-19^^Victoria|Human|Microbiological Diagnostic Unit - Public Health Laboratory (MDU-PHL)|MDU-PHL|Schultz|Australia

>Spike|hCoV-19/Ireland/D-SVUH-R6382/2020|2020-04-03|EPI\_ISL\_596658|Original|hCoV-19^^Dublin|Human|St.Vincent's University Hospital|St.Vincent's University Hospital|Gonzalez|Ireland

>Spike|hCoV-19/Switzerland/SO-ETHZ-360216/2020|2020-11-09|EPI\_ISL\_729250|Original|hCoV-19^^Solothurn|Human|Viollier AG|Department of Biosystems Science and Engineering|Nadeau|Switzerland

>Spike|hCoV-19/Scotland/EDB1070/2020|2020-04-06|EPI\_ISL\_433380|Original|hCoV-19^^Scotland|Human|Virology Department|COVID-19 Genomics UK (COG-UK) Consortium|Williams|United Kingdom

>Spike|hCoV-19/England/ALDP-B261CA/2020|2020-11-04|EPI\_ISL\_646686|Original|hCoV-19^^England|Human|Lighthouse Lab in Alderley Park|Wellcome Sanger Institute for the COVID-19 Genomics UK (COG-UK) Consortium|Davies|United Kingdom

>Spike|hCoV-19/Belgium/SA-0409296/2020|2020-04-09|EPI\_ISL\_464090|Original|hCoV-19^^Lillois-witterz\u00e9e|Human|KU Leuven|KU Leuven|Maes|Belgium

>Spike|hCoV-19/USA/DE-DHSS-FLW00406161/2020|2020-12-02|EPI\_ISL\_766979|Original|hCoV-19^^Delaware|Human|Delaware Public Health Laboratory|Delaware Public Health Laboratory|Bajwa|USA

>Spike|hCoV-19/Denmark/DCGC-22399/2020|2020-12-14|EPI\_ISL\_757541|Original|hCoV-19^^Syddanmark|Human|Department of Virus and Microbiological Special Diagnostics|Albertsen Lab|Michaelsen|Denmark

>Spike|hCoV-19/Denmark/DCGC-3869/2020|2020-09-07|EPI\_ISL\_615587|Original|hCoV-19^^Hovedstaden|Human|Department of Virus and Microbiological Special Diagnostics|Albertsen lab|Michaelsen|Denmark

>Spike|hCoV-19/England/LIVE-A787C/2020|2020-03-27|EPI\_ISL\_517081|Original|hCoV-19^^England|Human|Liverpool Clinical Laboratories|COVID-19 Genomics UK (COG-UK) Consortium|Haldenby|United Kingdom

>Spike|hCoV-19/USA/LA-EVTL1180/2020|2020-12-11|EPI\_ISL\_768449|Original|hCoV-19^^Louisiana|Human|LSUHS Emerging Viral Threat Laboratory|Microbial Genome Sequencing Center|Kamil|USA

>Spike|hCoV-19/Wales/QEUH-AD42F6/2020|2020-10-26|EPI\_ISL\_647935|Original|hCoV-19^^Wales|Human|Lighthouse Lab in Glasgow|Wellcome Sanger Institute for the COVID-19 Genomics UK (COG-UK) Consortium|Davies|United Kingdom

>Spike|hCoV-19/England/GSTT-265D466/2020|2020-03-30|EPI\_ISL\_483961|Original|hCoV-19^^England|Human|Centre for Clinical Infection and Diagnostics Research and Genomics Innovation Unit|COVID-19 Genomics UK (COG-UK) Consortium|Awan|United Kingdom



>Spike|hCoV-19/Canada/ON-PHL-3458/2020|2020-03-00|EPI\_ISL\_418368|Original|hCoV-19^^Ontario|Human|Public Health Ontario Laboratories|Public Health Ontario Laboratories|Eshaghi|Canada

>Spike|hCoV-19/Sweden/20-53782/2020|2020-12-16|EPI\_ISL\_789017|Original|hCoV-19^^Vastmanland|Human|Klinisk Mikrobiologi|The Public Health Agency of Sweden|Svartstr\u00f6m|Sweden

>Spike|hCoV-19/Canada/ON-UHTC\_0336/2020|2020-09-09|EPI\_ISL\_609817|Original|hCoV-19^^Ontario|Human|Unity Health Toronto|Ontario Institute for Cancer Research|de Borja|Canada

>Spike|hCoV-19/Japan/PG-3691/2020|2020-04-00|EPI\_ISL\_691944|Original|hCoV-19^^Japan|Human|Pathogen Genomics Center|Pathogen Genomics Center|Sekizuka|Japan

>Spike|hCoV-19/England/MILK-B3D02D/2020|2020-11-02|EPI\_ISL\_706214|Original|hCoV-19^^England|Human|Oxford Viromics|COVID-19 Genomics UK (COG-UK) Consortium|Golubchik|United Kingdom

>Spike|hCoV-19/Scotland/MILK-95D9E2/2020|2020-06-20|EPI\_ISL\_568471|Original|hCoV-19^^Scotland|Human|Lighthouse Lab in Milton Keynes|Wellcome Sanger Institute for the COVID-19 Genomics UK (COG-UK) consortium|Davies|United Kingdom

>Spike|hCoV-19/USA/TX-HMH-MCoV-14537/2020|2020-10-08|EPI\_ISL\_787822|Original|hCoV-19^^Texas|Human|Houston Methodist Hospital|Houston Methodist Hospital|Long|USA

>Spike|hCoV-19/Canada/ON-S707/2020|2020-04-09|EPI\_ISL\_591141|Original|hCoV-19^^Ontario|Human|Toronto Invasive Bacterial Diseases Network|McMaster University|McArthur|Canada

>Spike|hCoV-19/England/ALDP-B239A7/2020|2020-11-04|EPI\_ISL\_647062|Original|hCoV-19^^England|Human|Lighthouse Lab in Alderley Park|Wellcome Sanger Institute for the COVID-19 Genomics UK (COG-UK) Consortium|Davies|United Kingdom

>Spike|hCoV-19/USA/LA-EVTL796/2020|2020-07-23|EPI\_ISL\_653487|Original|hCoV-19^^Louisiana|Human|LSUHS Emerging Viral Threat Laboratory|Microbial Genome Sequencing Center|Kamil|USA

>Spike|hCoV-19/Scotland/CVR1692/2020|2020-04-05|EPI\_ISL\_438845|Original|hCoV-19^^Scotland|Human|West of Scotland Specialist Virology Centre|COVID-19 Genomics UK (COG-UK) Consortium|Robertson|United Kingdom

>Spike|hCoV-19/Israel/CVL-293-ngs/2020|2020-12-27|EPI\_ISL\_776835|Original|hCoV-19^^Israel|Human|Israel Central Virology laboratory|Israel Central Virology laboratory|Zuckerman|Israel

>Spike|hCoV-19/England/CAMC-CB8AEF/2020|2020-12-18|EPI\_ISL\_778000|Original|hCoV-19^^England|Human|Lighthouse Lab in Cambridge|Wellcome Sanger Institute for the COVID-19 Genomics UK (COG-UK) Consortium|Davies|United Kingdom

>Spike|hCoV-19/USA/WI-UW-62/2020|2020-03-25|EPI\_ISL\_421320|Original|hCoV-19^^Wisconsin|Human|University of Wisconsin-Madison AIDS Vaccine Research Laboratories|University of Wisconsin-Madison AIDS Vaccine Research Laboratories|Baczenas|USA

>Spike|hCoV-19/Australia/VIC12496/2020|2020-07-24|EPI\_ISL\_592011|Original|hCoV-19^^Victoria|Human|Microbiological Diagnostic Unit - Public Health Laboratory (MDU-PHL)|MDU-PHL|Schultz|Australia

>Spike|hCoV-19/Wales/ALDP-C39934/2020|2020-12-08|EPI\_ISL\_730687|Original|hCoV-19^^Wales|Human|Lighthouse Lab in Alderley Park|Wellcome Sanger Institute for the COVID-19 Genomics UK (COG-UK) Consortium|Davies|United Kingdom

>Spike|hCoV-19/USA/TX-HMH-MCoV-9138/2020|2020-07-02|EPI\_ISL\_780963|Original|hCoV-19^^Texas|Human|Houston Methodist Hospital|Houston Methodist Hospital|Long|USA

>Spike|hCoV-19/Netherlands/OV-RIVM-20539/2020|2020-11-17|EPI\_ISL\_728754|Original|hCoV-19^^Overijssel|Human|Dutch COVID-19 response team|National Institute for Public Health and the Environment (RIVM)|Meijer|Netherlands

>Spike|hCoV-19/England/MILK-BAAC63/2020|2020-11-18|EPI\_ISL\_783239|Original|hCoV-19^^England|Human|Lighthouse Lab in Milton Keynes|Wellcome Sanger Institute for the COVID-19 Genomics UK (COG-UK) Consortium|Davies|United Kingdom

>Spike|hCoV-19/Brazil/SE-6591/2020|2020-04-29|EPI\_ISL\_541390|Original|hCoV-19^^Sergipe|Human|LACEN/SE|Laboratory of Respiratory Viruses and Measles|Silva|Brazil

>Spike|hCoV-19/England/PORT-2E90B0/2020|2020-00-00|EPI\_ISL\_763586|Original|hCoV-19^^England|Human|Centre for Enzyme Innovation|COVID-19 Genomics UK (COG-UK) Consortium|Robson|United Kingdom

>Spike|hCoV-19/Wales/PHWC-165387/2020|2020-05-26|EPI\_ISL\_479456|Original|hCoV-19^^Wales|Human|Wales Specialist Virology Centre Sequencing lab|COVID-19 Genomics UK (COG-UK) Consortium|Moore|United Kingdom

>Spike|hCoV-19/England/LOND-DB44E/2020|2020-11-14|EPI\_ISL\_724767|Original|hCoV-19^^England|Human|University College London|COVID-19 Genomics UK (COG-UK) Consortium|Roy|United Kingdom

>Spike|hCoV-19/Scotland/QEUEH-9F5FAE/2020|2020-09-27|EPI\_ISL\_600889|Original|hCoV-19^^Scotland|Human|Lighthouse Lab in Glasgow|Wellcome Sanger Institute for the COVID-19 Genomics UK (COG-UK) consortium|Davies|United Kingdom

>Spike|hCoV-19/USA/WA-S2811/2020|2020-09-02|EPI\_ISL\_574653|Original|hCoV-19^^Washington|Human|Seattle Flu Study|Seattle Flu Study|Lee|USA

>Spike|hCoV-19/USA/UT-03697/2020|2020-04-07|EPI\_ISL\_450552|Original|hCoV-19^^Utah|Human|Utah Public Health Laboratory|Utah Public Health Laboratory|Young|USA

>Spike|hCoV-19/Netherlands/NA\_645/2020|2020-03-31|EPI\_ISL\_461080|Original|hCoV-19^^Netherlands|Human|Dutch COVID-19 response team|Erasmus Medical Center|Oude Munnink|Netherlands

>Spike|hCoV-19/USA/AZ-TG366758/2020|2020-06-04|EPI\_ISL\_694506|Original|hCoV-19^^Arizona|Human|AZ SPHL|TGen North|French|USA

>Spike|hCoV-19/Spain/PV-IBV-004191/2020|2020-04-02|EPI\_ISL\_510478|Original|hCoV-19^^Basque Country|Human|Servicio de Microbiolog\u00eda. Hospital Universitario Donostia. OSI Donostialdea. \u00c1rea de Enfermedades Infecciosas|SeqCOVID-SPAIN consortium|IBV (CSIC) |Comas|Spain

>Spike|hCoV-19/Wales/PHWC-48D632/2020|2020-11-15|EPI\_ISL\_680655|Original|hCoV-19^^Wales|Human|Wales Specialist Virology Centre Sequencing lab|COVID-19 Genomics UK (COG-UK) Consortium|Moore|United Kingdom

>Spike|hCoV-19/England/204280143/2020|2020-10-15|EPI\_ISL\_613594|Original|hCoV-19^^England|Human|Respiratory Virus Unit|Respiratory Virus Unit|Platt|United Kingdom

>Spike|hCoV-19/Japan/PG-5552/2020|2020-08-00|EPI\_ISL\_688677|Original|hCoV-19^^Japan|Human|Pathogen Genomics Center|Pathogen Genomics Center|Sekizuka|Japan

>Spike|hCoV-19/Switzerland/BS-UHB-42190292/2020|2020-03-13|EPI\_ISL\_528067|Original|hCoV-19^^Basel-Stadt|Human|University Hospital Basel|University Hospital Basel|Roloff Handschin|Switzerland

>Spike|hCoV-19/Denmark/DCGC-21129/2020|2020-12-21|EPI\_ISL\_759570|Original|hCoV-19^^Hovedstaden|Human|Department of Virus and Microbiological Special Diagnostics|Albertsen Lab|Michaelsen|Denmark

>Spike|hCoV-19/Ireland/TA-NVRL-MPO65745/2020|2020-05-07|EPI\_ISL\_671347|Original|hCoV-19^^Tipperary|Human|National Virus Reference Laboratory|Irish Coronavirus Sequencing Consortium - Teagasc Moorepark|Walsh|Ireland

>Spike|hCoV-19/USA/UT-UPHL-2012563035/2020|2020-10-24|EPI\_ISL\_746307|Original|hCoV-19^^Utah|Human|Ginkgo Bioworks Clinical Laboratory|Utah Public Health Laboratory|Young|USA

>Spike|hCoV-19/Wales/PHWC-4815D7/2020|2020-10-19|EPI\_ISL\_613091|Original|hCoV-19^^Wales|Human|Wales Specialist Virology Centre Sequencing lab|COVID-19 Genomics UK (COG-UK) Consortium|Moore|United Kingdom

>Spike|hCoV-19/Scotland/QEUEH-A20D45/2020|2020-10-01|EPI\_ISL\_599030|Original|hCoV-19^^Scotland|Human|Lighthouse Lab in Glasgow|Wellcome Sanger Institute for the COVID-19 Genomics UK (COG-UK) consortium|Davies|United Kingdom

>Spike|hCoV-19/Wales/ALDP-B246BE/2020|2020-11-04|EPI\_ISL\_711017|Original|hCoV-19^^Wales|Human|Lighthouse Lab in Alderley Park|Wellcome Sanger Institute for the COVID-19 Genomics UK (COG-UK) Consortium|Davies|United Kingdom

>Spike|hCoV-19/Wales/PHWC-27B99/2020|2020-04-01|EPI\_ISL\_432437|Original|hCoV-19^^Wales|Human|Wales Specialist Virology Centre|Public Health Wales Microbiology Cardiff|Moore|United Kingdom

>Spike|hCoV-19/Shanghai/SH0051/2020|2020-02-06|EPI\_ISL\_416359|Original|hCoV-19^^Shanghai|Human|Shanghai Public Health Clinical Center|National Research Center for Translational Medicine (Shanghai)|Zhang|China

>Spike|hCoV-19/Brazil/SP-L8-CD89/2020|2020-03-23|EPI\_ISL\_476466|Original|hCoV-19^^S\u00e3o Paulo|Human|Hospital da Cl\u00e9nicas da Faculdade de Medicina da Universidade de S\u00e3o Paulo|Instituto de Medicina Tropical da Univesidade de S\u00e3o Paulo|Sabino|Brazil

>Spike|hCoV-19/Wales/PHWC-483B88/2020|2020-10-23|EPI\_ISL\_627901|Original|hCoV-19^^Wales|Human|Wales Specialist Virology Centre Sequencing lab|COVID-19 Genomics UK (COG-UK) Consortium|Moore|United Kingdom

>Spike|hCoV-19/Greece/152\_33705/2020|2020-03-14|EPI\_ISL\_437875|Original|hCoV-19^^Athens|Human|Laboratory of Microbiology|Laboratory of Biology|Karakasiliotis|Greece

>Spike|hCoV-19/England/QEUH-B12C84/2020|2020-11-02|EPI\_ISL\_641629|Original|hCoV-19^^England|Human|Lighthouse Lab in Glasgow|Wellcome Sanger Institute for the COVID-19 Genomics UK (COG-UK) Consortium|Davies|United Kingdom

>Spike|hCoV-19/Singapore/245/2020|2020-04-07|EPI\_ISL\_462363|Original|hCoV-19^^Singapore|Human|National Public Health Laboratory|National Public Health Laboratory|Mak|Singapore

>Spike|hCoV-19/USA/AZ-TG363375/2020|2020-06-10|EPI\_ISL\_694455|Original|hCoV-19^^Arizona|Human|TGen North|TGen North|French|USA

>Spike|hCoV-19/England/MILK-AC82E6/2020|2020-10-21|EPI\_ISL\_629134|Original|hCoV-19^^England|Human|Lighthouse Lab in Milton Keynes|Wellcome Sanger Institute for the COVID-19 Genomics UK (COG-UK) consortium|Davies|United Kingdom

>Spike|hCoV-19/Sweden/20-52425/2020|2020-07-14|EPI\_ISL\_534245|Original|hCoV-19^^Norrbotten|Human|Kliniskt mikrobiologiska laboratoriet|The Public Health Agency of Sweden|Svartstr\u00f6m|Sweden

>Spike|hCoV-19/England/QEUH-B6C66F/2020|2020-11-10|EPI\_ISL\_661453|Original|hCoV-19^^England|Human|Lighthouse Lab in Glasgow|Wellcome Sanger Institute for the COVID-19 Genomics UK (COG-UK) Consortium|Davies|United Kingdom

>Spike|hCoV-19/Portugal/PT0395b/2020|2020-04-19|EPI\_ISL\_454115|Original|hCoV-19^^Portugal|Human|unknown|Instituto Nacional de Saude (INSA)|Borges|Portugal

>Spike|hCoV-19/Japan/PG-6987/2020|2020-07-00|EPI\_ISL\_688092|Original|hCoV-19^^Japan|Human|Pathogen Genomics Center|Pathogen Genomics Center|Sekizuka|Japan

>Spike|hCoV-19/Denmark/DCGC-15763/2020|2020-11-23|EPI\_ISL\_714007|Original|hCoV-19^^Hovedstaden|Human|Department of Virus and Microbiological Special Diagnostics|Albertsen Lab|Michaelsen|Denmark

>Spike|hCoV-19/Netherlands/ZH-EMC-1101/2020|2020-12-13|EPI\_ISL\_722774|Original|hCoV-19^^Zuid Holland|Human|Dutch COVID-19 response team|Erasmus Medical Center|Oude Munnink|Netherlands

>Spike|hCoV-19/England/LIVE-A8F0D/2020|2020-03-26|EPI\_ISL\_517232|Original|hCoV-19^^England|Human|Liverpool Clinical Laboratories|COVID-19 Genomics UK (COG-UK) Consortium|Haldenby|United Kingdom

>Spike|hCoV-19/Czech Republic/NRL-8118-1/2020|2020-08-05|EPI\_ISL\_546935|Original|hCoV-19^^\u00dast\u00ed nad Labem Region|Human|The National Institute of Public Health|State Veterinary Institute Prague|Nagy|Czech Republic

>Spike|hCoV-19/England/20142063404/2020|2020-03-27|EPI\_ISL\_420777|Original|hCoV-19^^England|Human|Respiratory Virus Unit|Respiratory Virus Unit|Platt|United Kingdom

>Spike|hCoV-19/Israel/CVL-n17051/2020|2020-06-01|EPI\_ISL\_516884|Original|hCoV-19^^Tel Aviv|Human|Israel Central Virology laboratory|Israel Central Virology laboratory|Zuckerman|Israel

>Spike|hCoV-19/England/201140353/2020|2020-03-09|EPI\_ISL\_464726|Original|hCoV-19^^England|Human|Respiratory Virus Unit|Respiratory Virus Unit|Platt|United Kingdom

>Spike|hCoV-19/England/ALDP-953C2F/2020|2020-06-08|EPI\_ISL\_553766|Original|hCoV-19^^England|Human|Lighthouse Lab in Alderley Park|Wellcome Sanger Institute for the COVID-19 Genomics UK (COG-UK) consortium|Davies|United Kingdom

>Spike|hCoV-19/USA/TX-DSHS-0711/2020|2020-09-08|EPI\_ISL\_576354|Original|hCoV-19^^Texas|Human|Texas Department of State Health Services|Texas Department of State Health Services|Rahman|USA

>Spike|hCoV-19/Peru/AMZ-UPCH-0263/2020|2020-09-21|EPI\_ISL\_729909|Original|hCoV-19^^Amazonas|Human|Instituto de Medicina Tropical|Laboratorio de Gen\u00f3mica Microbiana|Tsukayama|Peru

>Spike|hCoV-19/Australia/VIC5516/2020|2020-07-21|EPI\_ISL\_518351|Original|hCoV-19^^Victoria|Human|Microbiological Diagnostic Unit - Public Health Laboratory (MDU-PHL)|MDU-PHL|Schultz|Australia

>Spike|hCoV-19/England/QEUEH-AD0E6F/2020|2020-10-26|EPI\_ISL\_633753|Original|hCoV-19^^England|Human|Lighthouse Lab in Glasgow|Wellcome Sanger Institute for the COVID-19 Genomics UK (COG-UK) consortium|Davies|United Kingdom

>Spike|hCoV-19/Wales/PHWC-4A529A/2020|2020-12-15|EPI\_ISL\_763788|Original|hCoV-19^^Wales|Human|Wales Specialist Virology Centre Sequencing lab|COVID-19 Genomics UK (COG-UK) Consortium|Moore|United Kingdom

>Spike|hCoV-19/USA/LA-GBCL-26492442/2020|2020-04-28|EPI\_ISL\_485025|Original|hCoV-19^^Louisiana|Human|River Road Testing Lab|Ginkgo Bioworks Clinical Laboratory|Smith|USA

>Spike|hCoV-19/Luxembourg/LNS3108529/2020|2020-10-28|EPI\_ISL\_740247|Original|hCoV-19^^Luxembourg|Human|Laboratoire national de sant\u00e9|Laboratoire national de sant\u00e9|Wienecke-Baldacchino|Luxembourg

>Spike|hCoV-19/USA/MI-UM-10036754004/2020|2020-11-03|EPI\_ISL\_682201|Original|hCoV-19^^Michigan|Human|University of Michigan Clinical Microbiology Laboratory|Lauring Lab|Valesano|USA

>Spike|hCoV-19/England/ALDP-9CCCC7/2020|2020-09-16|EPI\_ISL\_575701|Original|hCoV-19^^England|Human|Lighthouse Lab in Alderley Park|Wellcome Sanger Institute for the COVID-19 Genomics UK (COG-UK) consortium|Davies|United Kingdom

>Spike|hCoV-19/Netherlands/Flevoland\_15/2020|2020-04-28|EPI\_ISL\_460838|Original|hCoV-19^^Flevoland|Human|Dutch COVID-19 response team|Erasmus Medical Center|Oude Munnink|Netherlands

>Spike|hCoV-19/USA/MD\_0026/2020|2020-03-04|EPI\_ISL\_424869|Original|hCoV-19^^Maryland|Human|MD DOH Laboratories Administration|Pathogen Discovery|Queen|USA

>Spike|hCoV-19/Wales/PHWC-16A3CE/2020|2020-09-03|EPI\_ISL\_535244|Original|hCoV-19^^Wales|Human|Wales Specialist Virology Centre Sequencing lab|COVID-19 Genomics UK (COG-UK) Consortium|Moore|United Kingdom

>Spike|hCoV-19/USA/WA-UW-1322/2020|2020-03-18|EPI\_ISL\_422994|Original|hCoV-19^^Washington|Human|UW Virology Lab|UW Virology Lab|Roychoudhury|USA

>Spike|hCoV-19/USA/TX-HMH-4383/2020|2020-06-17|EPI\_ISL\_543577|Original|hCoV-19^^Texas|Human|Houston Methodist Hospital|Houston Methodist Hospital|Long|USA

>Spike|hCoV-19/Australia/VIC8328/2020|2020-08-12|EPI\_ISL\_564943|Original|hCoV-19^^Victoria|Human|Microbiological Diagnostic Unit - Public Health Laboratory (MDU-PHL)|MDU-PHL|Schultz|Australia

>Spike|hCoV-19/England/MILK-A6BBEA/2020|2020-10-12|EPI\_ISL\_608785|Original|hCoV-19^^England|Human|Lighthouse Lab in Milton Keynes|Wellcome Sanger Institute for the COVID-19 Genomics UK (COG-UK) consortium|Davies|United Kingdom

>Spike|hCoV-19/Denmark/DCGC-1397/2020|2020-04-27|EPI\_ISL\_622431|Original|hCoV-19^^Hovedstaden|Human|Department of Virus and Microbiological Special Diagnostics|Albertsen lab|Michaelsen|Denmark

>Spike|hCoV-19/Senegal/63742/2020|2020-06-12|EPI\_ISL\_476514|Original|hCoV-19^^Dakar|Human|Institut Pasteur Dakar|Institut Pasteur de Dakar|Dia|Senegal

>Spike|hCoV-19/Thailand/SI204713-NT/2020|2020-03-13|EPI\_ISL\_437608|unknown|hCoV-19^^Thailand|Human|unknown|Faculty of Medicine|Submitter|Thailand

>Spike|hCoV-19/England/ALDP-A524DC/2020|2020-10-07|EPI\_ISL\_597977|Original|hCoV-19^^England|Human|Lighthouse Lab in Alderley Park|Wellcome Sanger Institute for the COVID-19 Genomics UK (COG-UK) consortium|Davies|United Kingdom

>Spike|hCoV-19/England/QEUEH-99B168/2020|2020-08-30|EPI\_ISL\_559767|Original|hCoV-19^^England|Human|Oxford Viromics|COVID-19 Genomics UK (COG-UK) Consortium|Golubchik|United Kingdom

>Spike|hCoV-19/USA/WI-WSLH-200113/2020|2020-04-06|EPI\_ISL\_578344|Original|hCoV-19^^Wisconsin|Human|Wisconsin State Laboratory of Hygiene Communicable Disease Division|Wisconsin State Laboratory of Hygiene Communicable Disease Division|Florek|USA

>Spike|hCoV-19/Scotland/CVR5902/2020|2020-11-17|EPI\_ISL\_705660|Original|hCoV-19^^Scotland|Human|West of Scotland Specialist Virology Centre|COVID-19 Genomics UK (COG-UK) Consortium|Robertson|United Kingdom

>Spike|hCoV-19/Luxembourg/LNS9811488/2020|2020-10-02|EPI\_ISL\_744993|Original|hCoV-19^^Luxembourg|Human|Laboratoire national de sant\u00e9|Laboratoire national de sant\u00e9|Wienecke-Baldacchino|Luxembourg

>Spike|hCoV-19/USA/CA-CZB-11542/2020|2020-07-24|EPI\_ISL\_625570|Original|hCoV-19^^California|Human|NaN|Chan-Zuckerberg Biohub|Bhatt|USA

>Spike|hCoV-19/Japan/PG-8264/2020|2020-08-00|EPI\_ISL\_687363|Original|hCoV-19^^Japan|Human|Pathogen Genomics Center|Pathogen Genomics Center|Sekizuka|Japan

>Spike|hCoV-19/USA/TX-HMH-563/2020|2020-04-08|EPI\_ISL\_544916|Original|hCoV-19^^Texas|Human|Houston Methodist Hospital|Houston Methodist Hospital|Long|USA

>Spike|hCoV-19/Denmark/DCGC-7461/2020|2020-10-12|EPI\_ISL\_619370|Original|hCoV-19^^Hovedstaden|Human|Department of Virus and Microbiological Special Diagnostics|Albertsen lab|Michaelsen|Denmark

>Spike|hCoV-19/England/ALDP-A526B8/2020|2020-10-07|EPI\_ISL\_598143|Original|hCoV-19^^England|Human|Lighthouse Lab in Alderley Park|Wellcome Sanger Institute for the COVID-19 Genomics UK (COG-UK) consortium|Davies|United Kingdom

>Spike|hCoV-19/Switzerland/BS-UHB-42199747/2020|2020-03-20|EPI\_ISL\_528248|Original|hCoV-19^^Basel-Stadt|Human|University Hospital Basel|University Hospital Basel|Roloff Handschin|Switzerland

>Spike|hCoV-19/Australia/NSW72/2020|2020-03-22|EPI\_ISL\_427744|Original|hCoV-19^^New South Wales|Human|Centre for Infectious Diseases and Microbiology Public Health|NSW Health Pathology - Institute of Clinical Pathology and Medical Research; Westmead Hospital; University of Sydney|Gall|Australia

>Spike|hCoV-19/England/NORT-1B70683/2020|2020-11-08|EPI\_ISL\_706288|Original|hCoV-19^^England|Human|Northumbria University / South Tees Hospitals NHS Foundation Trust / North Cumbria Integrated Care NHS Foundation Trust / North Tees and Hartlepool NHS Foundation Trust / Newcastle Hospitals NHS Foundation Trust|COVID-19 Genomics UK (COG-UK) Consortium|Bashton|United Kingdom

>Spike|hCoV-19/England/ALDP-B46F06/2020|2020-11-07|EPI\_ISL\_656253|Original|hCoV-19^^England|Human|Lighthouse Lab in Alderley Park|Wellcome Sanger Institute for the COVID-19 Genomics UK (COG-UK) Consortium|Davies|United Kingdom

>Spike|hCoV-19/England/MILK-99CF21/2020|2020-08-30|EPI\_ISL\_549924|Original|hCoV-19^^England|Human|Lighthouse Lab in Milton Keynes|Wellcome Sanger Institute for the COVID-19 Genomics UK (COG-UK) consortium|Davies|United Kingdom

>Spike|hCoV-19/England/CAMB-78BD5/2020|2020-04-03|EPI\_ISL\_441186|Original|hCoV-19^^England|Human|Department of Pathology|Wellcome Sanger Institute for the COVID-19 Genomics UK (COG-UK) consortium|Amato|United Kingdom

>Spike|hCoV-19/USA/WI-UW-1967/2020|2020-09-28|EPI\_ISL\_677375|Original|hCoV-19^^Wisconsin|Human|University of Wisconsin-Madison AIDS Vaccine Research Laboratories|University of Wisconsin-Madison AIDS Vaccine Research Laboratories|Baczenas|USA

>Spike|hCoV-19/England/QEUA-964C0D/2020|2020-08-13|EPI\_ISL\_530991|Original|hCoV-19^^England|Human|Lighthouse Lab in Glasgow|Wellcome Sanger Institute for the COVID-19 Genomics UK (COG-UK) consortium|Davies|United Kingdom

>Spike|hCoV-19/Scotland/QEUA-A9E7EA/2020|2020-10-20|EPI\_ISL\_625328|Original|hCoV-19^^Scotland|Human|Lighthouse Lab in Glasgow|Wellcome Sanger Institute for the COVID-19 Genomics UK (COG-UK) consortium|Davies|United Kingdom

>Spike|hCoV-19/Australia/VIC8932/2020|2020-07-23|EPI\_ISL\_565287|Original|hCoV-19^^Victoria|Human|Microbiological Diagnostic Unit - Public Health Laboratory (MDU-PHL)|MDU-PHL|Schultz|Australia

>Spike|hCoV-19/USA/NY-NYCPHL-000956/2020|2020-10-05|EPI\_ISL\_632992|Original|hCoV-19^^New York|Human|DOHMH Corona|New York City Public Health Laboratory|Wang|USA

>Spike|hCoV-19/USA/WI-UW-175/2020|2020-03-20|EPI\_ISL\_428271|Original|hCoV-19^^Wisconsin|Human|University of Wisconsin-Madison AIDS Vaccine Research Laboratories|University of Wisconsin-Madison AIDS Vaccine Research Laboratories|Moreno|USA

>Spike|hCoV-19/Australia/VIC3593/2020|2020-07-09|EPI\_ISL\_520339|Original|hCoV-19^^Victoria|Human|Victorian Infectious Diseases Reference Laboratory (VIDRL)|VIDRL and MDU-PHL|Schultz|Australia

>Spike|hCoV-19/Scotland/QEUH-98F3CB/2020|2020-08-29|EPI\_ISL\_540406|Original|hCoV-19^^Scotland|Human|Lighthouse Lab in Glasgow|Wellcome Sanger Institute for the COVID-19 Genomics UK (COG-UK) consortium|Davies|United Kingdom

>Spike|hCoV-19/Denmark/DCGC-16798/2020|2020-12-14|EPI\_ISL\_750572|Original|hCoV-19^^Sjaelland|Human|Department of Virus and Microbiological Special Diagnostics|Albertsen Lab|Michaelsen|Denmark

>Spike|hCoV-19/USA/CO-CDPHE-2011020286/2020|2020-11-01|EPI\_ISL\_771151|Original|hCoV-19^^Colorado|Human|Colorado Department of Public Health and Environment|Colorado Department of Public Health and Environment|Bankers|USA

>Spike|hCoV-19/Switzerland/ZH-ETHZ-321509/2020|2020-10-15|EPI\_ISL\_603719|Original|hCoV-19^^Zurich|Human|Viollier AG|Department of Biosystems Science and Engineering|Nadeau|Switzerland

>Spike|hCoV-19/USA/AZ-TG640852/2020|2020-04-27|EPI\_ISL\_695795|Original|hCoV-19^^Arizona|Human|Sonora Quest Laboratories|TGen North|French|USA

>Spike|hCoV-19/Northern Ireland/NIRE-101569/2020|2020-04-29|EPI\_ISL\_469887|Original|hCoV-19^^Northern Ireland|Human|Regional Virus Laboratory|Wellcome Sanger Institute for the COVID-19 Genomics UK (COG-UK) consortium|Davies|United Kingdom

>Spike|hCoV-19/Denmark/DCGC-4278/2020|2020-09-07|EPI\_ISL\_615715|Original|hCoV-19^^Hovedstaden|Human|Department of Virus and Microbiological Special Diagnostics|Albertsen lab|Michaelsen|Denmark

>Spike|hCoV-19/Spain/AN-IBV-001168/2020|2020-03-26|EPI\_ISL\_452571|Original|hCoV-19^^Andalucia|Human|Servicio de Microbiolog\u00eda y Parasitolog\u00eda cl\u00ednica. UCEIMP. Hospital Universitario Virgen del Roc\u00edo/IBIS/CSIC/US.|SeqCOVID-SPAIN consortium/IBV (CSIC) |Comas|Spain

>Spike|hCoV-19/Australia/VIC15394/2020|2020-08-05|EPI\_ISL\_593282|Original|hCoV-19^^Victoria|Human|Microbiological Diagnostic Unit - Public Health Laboratory (MDU-PHL) |MDU-PHL|Schultz|Australia

>Spike|hCoV-19/England/CAMB-1B4055/2020|2020-06-12|EPI\_ISL\_473457|Original|hCoV-19^^England|Human|Department of Pathology|COVID-19 Genomics UK (COG-UK) Consortium|Meredith|United Kingdom

>Spike|hCoV-19/Denmark/DCGC-7959/2020|2020-10-26|EPI\_ISL\_618895|Original|hCoV-19^^Hovedstaden|Human|Department of Virus and Microbiological Special Diagnostics|Albertsen lab|Michaelsen|Denmark

>Spike|hCoV-19/Wales/PHWC-15E318/2020|2020-05-14|EPI\_ISL\_472804|Original|hCoV-19^^Wales|Human|Wales Specialist Virology Centre Sequencing lab|COVID-19 Genomics UK (COG-UK) Consortium|Moore|United Kingdom

>Spike|hCoV-19/France/PAC-IHU-0731/2020|2020-04-21|EPI\_ISL\_568951|Original|hCoV-19^^Provence-Alpes-C\u00f4te-d\u2019Azur|Human|MEPHI|MEPHI|Levasseur|France

>Spike|hCoV-19/Switzerland/BL-ETHZ-100342/2020|2020-03-19|EPI\_ISL\_574893|Original|hCoV-19^^Basel-Landschaft|Human|Viollier AG|Department of Biosystems Science and Engineering|Nadeau|Switzerland

>Spike|hCoV-19/England/QEUH-9C842D/2020|2020-09-10|EPI\_ISL\_567238|Original|hCoV-19^^England|Human|Lighthouse Lab in Glasgow|Wellcome Sanger Institute for the COVID-19 Genomics UK (COG-UK) consortium|Davies|United Kingdom

>Spike|hCoV-19/England/CAMC-BC060F/2020|2020-11-22|EPI\_ISL\_704732|Original|hCoV-19^^England|Human|Lighthouse Lab in Cambridge|Wellcome Sanger Institute for the COVID-19 Genomics UK (COG-UK) Consortium|Davies|United Kingdom

>Spike|hCoV-19/England/ALDP-9E5BDA/2020|2020-09-24|EPI\_ISL\_589458|Original|hCoV-19^^England|Human|Lighthouse Lab in Alderley Park|Wellcome Sanger Institute for the COVID-19 Genomics UK (COG-UK) consortium|Davies|United Kingdom

>Spike|hCoV-19/USA/NY-Wadsworth-73244-01/2020|2020-04-29|EPI\_ISL\_676890|Original|hCoV-19^^New York|Human|Wadsworth Center|Wadsworth Center|Lasek-Nesselquist|USA

>Spike|hCoV-19/England/204180136/2020|2020-10-03|EPI\_ISL\_583979|Original|hCoV-19^^England|Human|Respiratory Virus Unit|Respiratory Virus Unit|Platt|United Kingdom

>Spike|hCoV-19/England/ALDP-B73B48/2020|2020-11-12|EPI\_ISL\_664462|Original|hCoV-19^^England|Human|Quadram Institute Bioscience|COVID-19 Genomics UK (COG-UK) Consortium|Alikhan|United Kingdom

>Spike|hCoV-19/England/NORT-283EFA/2020|2020-04-05|EPI\_ISL\_478525|Original|hCoV-19^^England|Human|Northumbria University / South Tees Hospitals NHS Foundation Trust / North Cumbria Integrated Care NHS Foundation Trust / North Tees and Hartlepool NHS Foundation Trust / Newcastle Hospitals NHS Foundation Trust|COVID-19 Genomics UK (COG-UK) Consortium|Bashton|United Kingdom

>Spike|hCoV-19/USA/UT-03268/2020|2020-05-08|EPI\_ISL\_493008|Original|hCoV-19^^Utah|Human|Utah Public Health Laboratory|Utah Public Health Laboratory|Butz|USA

>Spike|hCoV-19/England/MILK-9785CF/2020|2020-07-31|EPI\_ISL\_526421|Original|hCoV-19^^England|Human|Queens Medical Centre|COVID-19 Genomics UK (COG-UK) Consortium|Loose|United Kingdom

>Spike|hCoV-19/Germany/BY-MGZ-01/2020|2020-04-19|EPI\_ISL\_490205|Original|hCoV-19^^Bavaria|Human|M\u00fcrchen Klinik Schwabing|MGZ Medical Genetics Center|Wolf|Germany

>Spike|hCoV-19/Japan/PG-7250/2020|2020-08-00|EPI\_ISL\_688353|Original|hCoV-19^^Japan|Human|Saitama Prefectural Institute of Public Health|Pathogen Genomics Center|Sekizuka|Japan

>Spike|hCoV-19/Canada/NL\_88/2020|2020-03-21|EPI\_ISL\_469230|Original|hCoV-19^^Newfoundland and Labrador|Human|Public Health Laboratory|National Microbiology Laboratory|Majer|Canada

>Spike|hCoV-19/Japan/PG-7687/2020|2020-08-00|EPI\_ISL\_686789|Original|hCoV-19^^Japan|Human|Chiba Prefectural Institute of Public Health|Pathogen Genomics Center|Sekizuka|Japan

>Spike|hCoV-19/England/QEUA-9CA3F1/2020|2020-09-10|EPI\_ISL\_567285|Original|hCoV-19^^England|Human|Lighthouse Lab in Glasgow|Wellcome Sanger Institute for the COVID-19 Genomics UK (COG-UK) consortium|Davies|United Kingdom

>Spike|hCoV-19/United Arab Emirates/skmc-3820378/2020|2020-09-20|EPI\_ISL\_582677|Original|hCoV-19^^United Arab Emirates|Human|Sheikh Khalifa Medical City|Molecular/Surveillance lab\nSheikh Khalifa Medical City|Amirtharaj|United Arab Emirates

>Spike|hCoV-19/England/ALDP-9BEA91/2020|2020-09-09|EPI\_ISL\_568006|Original|hCoV-19^^England|Human|Lighthouse Lab in Alderley Park|Wellcome Sanger Institute for the COVID-19 Genomics UK (COG-UK) consortium|Davies|United Kingdom

>Spike|hCoV-19/Australia/VIC13044/2020|2020-08-03|EPI\_ISL\_592163|Original|hCoV-19^^Victoria|Human|Victorian Infectious Diseases Reference Laboratory (VIDRL)|VIDRL and MDU-PHL|Schultz|Australia

>Spike|hCoV-19/USA/FL-BPHL-2157/2020|2020-04-24|EPI\_ISL\_653310|Original|hCoV-19^^Florida|Human|Florida Bureau of Public Health Laboratories|Florida Bureau of Public Health Laboratories|Blanton|USA

>Spike|hCoV-19/Spain/AR-IBV-2405/2020|2020-03-23|EPI\_ISL\_468789|Original|hCoV-19^^Aragon|Human|Servicio de Microbiolog\u00eda|SeqCOVID-SPAIN consortium|IBV (CSIC) |Comas|Spain

>Spike|hCoV-19/Scotland/QEUA-A6399D/2020|2020-10-09|EPI\_ISL\_596172|Original|hCoV-19^^Scotland|Human|Quadram Institute Bioscience|COVID-19 Genomics UK (COG-UK) Consortium|Alikhan|United Kingdom

>Spike|hCoV-19/Wales/MILK-9E3213/2020|2020-09-21|EPI\_ISL\_581222|Original|hCoV-19^^Wales|Human|Lighthouse Lab in Milton Keynes|Wellcome Sanger Institute for the COVID-19 Genomics UK (COG-UK) consortium|Davies|United Kingdom

>Spike|hCoV-19/England/LOND-DA166/2020|2020-11-03|EPI\_ISL\_705236|Original|hCoV-19^^England|Human|University College London|COVID-19 Genomics UK (COG-UK) Consortium|Roy|United Kingdom

>Spike|hCoV-19/England/ALDP-A6CB8F/2020|2020-10-15|EPI\_ISL\_608033|Original|hCoV-19^^England|Human|Lighthouse Lab in Alderley Park|Wellcome Sanger Institute for the COVID-19 Genomics UK (COG-UK) consortium|Davies|United Kingdom

>Spike|hCoV-19/India/GJ-GBRC5/2020|2020-04-13|EPI\_ISL\_435052|Original|hCoV-19^^Gujarat|Human|B.J. Medical College and Civil hospital|Gujarat Biotechnology Research Centre|Joshi|India

>Spike|hCoV-19/England/CAMB-A9857D/2020|2020-12-24|EPI\_ISL\_764350|Original|hCoV-19^^England|Human|Department of Pathology|COVID-19 Genomics UK (COG-UK) Consortium|Goodfellow|United Kingdom

>Spike|hCoV-19/USA/TX-DSHS-0110/2020|2020-05-28|EPI\_ISL\_522393|Original|hCoV-19^^Texas|Human|Texas Department of State Health Services|Texas Department of State Health Services|Rahman|USA

>Spike|hCoV-19/England/EXET-1364F5/2020|2020-04-07|EPI\_ISL\_478286|Original|hCoV-19^^England|Human|University of Exeter|COVID-19 Genomics UK (COG-UK) Consortium|Temperton|United Kingdom

>Spike|hCoV-19/Denmark/DCGC-10807/2020|2020-11-02|EPI\_ISL\_670221|Original|hCoV-19^^Syddanmark|Human|Department of Virus and Microbiological Special Diagnostics|Albertsen Lab|Michaelsen|Denmark

>Spike|hCoV-19/Ireland/D-NVRL-75IRL86079/2020|2020-10-14|EPI\_ISL\_671897|Original|hCoV-19^^Dublin|Human|National Virus Reference Laboratory|National Virus Reference Laboratory|Gonzalez|Ireland

>Spike|hCoV-19/England/ALDP-C39F9C/2020|2020-12-08|EPI\_ISL\_731057|Original|hCoV-19^^England|Human|Lighthouse Lab in Alderley Park|Wellcome Sanger Institute for the COVID-19 Genomics UK (COG-UK) Consortium|Davies|United Kingdom

>Spike|hCoV-19/Switzerland/BS-UHB-42177585/2020|2020-03-05|EPI\_ISL\_527934|Original|hCoV-19^^Basel-Stadt|Human|University Hospital Basel|University Hospital Basel|Roloff Handschin|Switzerland

>Spike|hCoV-19/Scotland/CVR1356/2020|2020-03-31|EPI\_ISL\_433551|Original|hCoV-19^^Scotland|Human|West of Scotland Specialist Virology Centre|COVID-19 Genomics UK (COG-UK) Consortium|Robertson|United Kingdom

>Spike|hCoV-19/Chile/RM-ISPCH-19/2020|2020-03-11|EPI\_ISL\_445262|Original|hCoV-19^^Region Metropolitana de Santiago|Human|CLINICA TABANCURA|Instituto de Salud Publica de Chile|Fernandez|Chile

>Spike|hCoV-19/USA/WI-WSLH-200681/2020|2020-08-24|EPI\_ISL\_631438|Original|hCoV-19^^Wisconsin|Human|Wisconsin State Laboratory of Hygiene Communicable Disease Division|Wisconsin State Laboratory of Hygiene Communicable Disease Division|Florek|USA

>Spike|hCoV-19/Denmark/DCGC-19366/2020|2020-12-07|EPI\_ISL\_748908|Original|hCoV-19^^Syddanmark|Human|Department of Virus and Microbiological Special Diagnostics|Albertsen Lab|Michaelsen|Denmark

>Spike|hCoV-19/England/MILK-B5610D/2020|2020-11-04|EPI\_ISL\_658079|Original|hCoV-19^^England|Human|Lighthouse Lab in Milton Keynes|Wellcome Sanger Institute for the COVID-19 Genomics UK (COG-UK) Consortium|Davies|United Kingdom

>Spike|hCoV-19/Scotland/CVR3243/2020|2020-04-27|EPI\_ISL\_449251|Original|hCoV-19^^Scotland|Human|West of Scotland Specialist Virology Centre|COVID-19 Genomics UK (COG-UK) Consortium|Robertson|United Kingdom

>Spike|hCoV-19/England/BRIS-12E108/2020|2020-04-19|EPI\_ISL\_482003|Original|hCoV-19^^England|Human|PHE South West Regional Laboratory|Wellcome Sanger Institute for the COVID-19 Genomics UK (COG-UK) consortium|Davies|United Kingdom

>Spike|hCoV-19/England/MILK-ACCF72/2020|2020-10-21|EPI\_ISL\_630181|Original|hCoV-19^^England|Human|Lighthouse Lab in Milton Keynes|Wellcome Sanger Institute for the COVID-19 Genomics UK (COG-UK) consortium|Davies|United Kingdom

>Spike|hCoV-19/Japan/NGY-NNH-030/2020|2020-07-22|EPI\_ISL\_636996|Original|hCoV-19^^Aichi|Human|Department of Infectious Diseases and Immunology|Clinical Research Center|Iwatani|Japan

>Spike|hCoV-19/USA/WA-UW-4290/2020|2020-03-31|EPI\_ISL\_427254|Original|hCoV-19^^Washington|Human|UW Virology Lab|UW Virology Lab|Roychoudhury|USA

>Spike|hCoV-19/USA/MA-MASPHL-01016/2020|2020-11-06|EPI\_ISL\_692792|Original|hCoV-19^^Massachusetts|Human|Massachusetts State Public Health Laboratory|Massachusetts State Public Health Laboratory|Lang|USA

>Spike|hCoV-19/Canada/BC\_24245374/2020|2020-03-00|EPI\_ISL\_463205|Original|hCoV-19^^British Columbia|Human|BCCDC Public Health Laboratory|BCCDC Public Health Laboratory|Harrigan|Canada

>Spike|hCoV-19/England/OXON-B4B46/2020|2020-04-26|EPI\_ISL\_534995|Original|hCoV-19^^England|Human|Oxford Viromics|COVID-19 Genomics UK (COG-UK) Consortium|Golubchik|United Kingdom

>Spike|hCoV-19/Wales/PHWC-26C5B/2020|2020-03-27|EPI\_ISL\_422119|Original|hCoV-19^^Wales|Human|Wales Specialist Virology Centre|Public Health Wales Microbiology Cardiff|Moore|United Kingdom



>Spike|hCoV-19/Germany/HH-hpi-p2365/2020|2020-03-25|EPI\_ISL\_776453|Original|hCoV-19^^Hamburg|Human|University Medical Center Hamburg Eppendorf|Heinrich Pette Institute|Robitaille|Germany

>Spike|hCoV-19/England/SHEF-C70C9/2020|2020-10-04|EPI\_ISL\_585028|Original|hCoV-19^^England|Human|Virology Department|COVID-19 Genomics UK (COG-UK) Consortium|de Silva|United Kingdom

>Spike|hCoV-19/USA/TX-DSHS-0609/2020|2020-06-04|EPI\_ISL\_569719|Original|hCoV-19^^Texas|Human|Texas Department of State Health Services|Texas Department of State Health Services|Rahman|USA

>Spike|hCoV-19/England/ALDP-A70933/2020|2020-10-14|EPI\_ISL\_608295|Original|hCoV-19^^England|Human|Lighthouse Lab in Alderley Park|Wellcome Sanger Institute for the COVID-19 Genomics UK (COG-UK) consortium|Davies|United Kingdom

>Spike|hCoV-19/England/QEUH-A8B8ED/2020|2020-10-16|EPI\_ISL\_643047|Original|hCoV-19^^England|Human|Lighthouse Lab in Glasgow|Wellcome Sanger Institute for the COVID-19 Genomics UK (COG-UK) Consortium|Davies|United Kingdom

>Spike|hCoV-19/India/DL-ILBS-4871T/2020|2020-04-06|EPI\_ISL\_605810|Original|hCoV-19^^Delhi|Human|Clinical Virology Laboratory|ILBS - IGIB|Rooge|India

>Spike|hCoV-19/Hong Kong/HKU-200723-041/2020|2020-03-22|EPI\_ISL\_497808|Original|hCoV-19^^Hong Kong|Human|Department of Microbiology|Department of Microbiology|Chan|China

>Spike|hCoV-19/Luxembourg/LNS8152962/2020|2020-11-23|EPI\_ISL\_744689|Original|hCoV-19^^Luxembourg|Human|Laboratoire national de sant\u00e9|Laboratoire national de sant\u00e9|Wienecke-Baldacchino|Luxembourg

>Spike|hCoV-19/Netherlands/NB-EMC-270/2020|2020-00-00|EPI\_ISL\_523392|Original|hCoV-19^^Noord Brabant|Human|Dutch COVID-19 response team|Erasmus Medical Center|Oude Munnink|Netherlands

>Spike|hCoV-19/Denmark/DCGC-5602/2020|2020-09-28|EPI\_ISL\_620927|Original|hCoV-19^^Sjaelland|Human|Department of Virus and Microbiological Special Diagnostics|Albertsen lab|Michaelsen|Denmark

>Spike|hCoV-19/Scotland/CVR1992/2020|2020-04-09|EPI\_ISL\_490646|Original|hCoV-19^^Scotland|Human|West of Scotland Specialist Virology Centre|COVID-19 Genomics UK (COG-UK) Consortium|Robertson|United Kingdom

>Spike|hCoV-19/USA/MA-MASPHL-00942/2020|2020-10-26|EPI\_ISL\_692820|Original|hCoV-19^^Massachusetts|Human|Massachusetts State Public Health Laboratory|Massachusetts State Public Health Laboratory|Lang|USA

>Spike|hCoV-19/Japan/PG-0493/2020|2020-04-06|EPI\_ISL\_480152|Original|hCoV-19^^HokurikuShinsyu|Human|Fukui Prefectural Institute of Public Health and Environmental Science|Pathogen Genomics Center|Sekizuka|Japan

>Spike|hCoV-19/USA/UT-UPHL-2012214394/2020|2020-08-17|EPI\_ISL\_746180|Original|hCoV-19^^Utah|Human|Ginkgo Bioworks Clinical Laboratory|Utah Public Health Laboratory|Young|USA

>Spike|hCoV-19/USA/WI-WSLH-200513/2020|2020-05-25|EPI\_ISL\_578654|Original|hCoV-19^^Wisconsin|Human|Wisconsin State Laboratory of Hygiene Communicable Disease Division|Wisconsin State Laboratory of Hygiene Communicable Disease Division|Florek|USA

>Spike|hCoV-19/Scotland/EDB11012/2020|2020-12-13|EPI\_ISL\_742191|Original|hCoV-19^^Scotland|Human|Virology Department|COVID-19 Genomics UK (COG-UK) Consortium|McHugh|United Kingdom

>Spike|hCoV-19/England/CAMC-AAF555/2020|2020-10-21|EPI\_ISL\_631180|Original|hCoV-19^^England|Human|Lighthouse Lab in Cambridge|Wellcome Sanger Institute for the COVID-19 Genomics UK (COG-UK) consortium|Davies|United Kingdom

>Spike|hCoV-19/USA/TX-HMH0283/2020|2020-03-27|EPI\_ISL\_434911|Original|hCoV-19^^Texas|Human|Houston Methodist Hospital|Houston Methodist Hospital|Long|USA

>Spike|hCoV-19/South Korea/KCDC2719/2020|2020-07-12|EPI\_ISL\_522498|Original|hCoV-19^^South Korea|Human|Division of Viral Diseases|Division of Viral Diseases|Kim|South Korea

>Spike|hCoV-19/Australia/VIC9730/2020|2020-08-25|EPI\_ISL\_565679|Original|hCoV-19^^Victoria|Human|Microbiological Diagnostic Unit - Public Health Laboratory (MDU-PHL)|MDU-PHL|Schultz|Australia

>Spike|hCoV-19/Germany/BE-ChVir-D1919-4432/2020|2020-10-04|EPI\_ISL\_753865|Original|hCoV-19^^Berlin|Human|Charit\u00e9

Universit\u00e4tsmedizin Berlin|Charit\u00e9 Universit\u00e4tsmedizin  
Berlin|Muehleemann|Germany  
>Spike|hCoV-19/Denmark/DCGC-15433/2020|2020-11-23|EPI\_ISL\_713825|Original|hCoV-  
19^^Hovedstaden|Human|Department of Virus and Microbiological Special  
Diagnostics|Albertsen Lab|Michaelsen|Denmark  
>Spike|hCoV-19/USA/TX-DSHS-0304/2020|2020-06-13|EPI\_ISL\_534271|Original|hCoV-  
19^^Texas|Human|Texas Department of State Health Services|Texas Department of State  
Health Services|Rahman|USA  
>Spike|hCoV-19/England/QEUEH-B3F7EA/2020|2020-11-08|EPI\_ISL\_658492|Original|hCoV-  
19^^England|Human|Lighthouse Lab in Glasgow|Wellcome Sanger Institute for the COVID-  
19 Genomics UK (COG-UK) Consortium|Davies|United Kingdom  
>Spike|hCoV-19/USA/FL-UF-30/2020|2020-10-02|EPI\_ISL\_641318|Original|hCoV-  
19^^Florida|Human|Environmental and Global Health|Environmental and Global  
Health|Elbadry|USA  
>Spike|hCoV-19/Netherlands/NA\_303/2020|2020-04-01|EPI\_ISL\_422612|Original|hCoV-  
19^^Netherlands|Human|Dutch COVID-19 response team|Erasmus Medical Center|Oude  
Munnink|Netherlands  
>Spike|hCoV-19/USA/AZ-TG502713/2020|2020-07-15|EPI\_ISL\_695285|Original|hCoV-  
19^^Arizona|Human|TGen North|TGen North|French|USA  
>Spike|hCoV-19/England/204262885/2020|2020-10-14|EPI\_ISL\_603209|Original|hCoV-  
19^^England|Human|Respiratory Virus Unit|Respiratory Virus Unit|Platt|United Kingdom  
>Spike|hCoV-19/Japan/PG-3174/2020|2020-03-00|EPI\_ISL\_691294|Original|hCoV-  
19^^Japan|Human|Pathogen Genomics Center|Pathogen Genomics Center|Sekizuka|Japan  
>Spike|hCoV-19/Denmark/DCGC-13485/2020|2020-11-30|EPI\_ISL\_712824|Original|hCoV-  
19^^Hovedstaden|Human|Department of Virus and Microbiological Special  
Diagnostics|Albertsen Lab|Michaelsen|Denmark  
>Spike|hCoV-19/England/NOTT-11127E/2020|2020-04-23|EPI\_ISL\_453638|Original|hCoV-  
19^^England|Human|Queens Medical Centre|COVID-19 Genomics UK (COG-UK)  
Consortium|Loose|United Kingdom  
>Spike|hCoV-19/Wales/PHWC-2A8F9/2020|2020-04-08|EPI\_ISL\_445634|Original|hCoV-  
19^^Wales|Human|Wales Specialist Virology Centre|Public Health Wales Microbiology  
Cardiff|Moore|United Kingdom  
>Spike|hCoV-19/Brazil/RS-00678/2020|2020-11-27|EPI\_ISL\_779166|Original|hCoV-19^^Rio  
Grande do Sul|Human|Laborat\u00f3rio de Microbiologia Molecular - Universidade  
FEEVALE|Bioinformatics Laboratory / LNCC|Almeida|Brazil  
>Spike|hCoV-19/Singapore/419/2020|2020-03-18|EPI\_ISL\_475950|Original|hCoV-  
19^^Singapore|Human|National Public Health Laboratory|National Public Health  
Laboratory|Mak|Singapore  
>Spike|hCoV-19/USA/NY-NYCPHL-000523/2020|2020-03-19|EPI\_ISL\_631984|Original|hCoV-  
19^^New York|Human|Brookdale University Hospital Medical Center|New York City Public  
Health Laboratory|Wang|USA  
>Spike|hCoV-19/England/CAMC-C73804/2020|2020-12-15|EPI\_ISL\_769097|Original|hCoV-  
19^^England|Human|Lighthouse Lab in Cambridge|Wellcome Sanger Institute for the  
COVID-19 Genomics UK (COG-UK) Consortium|Davies|United Kingdom  
>Spike|hCoV-19/USA/LA-GBCL-26159761/2020|2020-04-11|EPI\_ISL\_485011|Original|hCoV-  
19^^Louisiana|Human|River Road Testing Lab|Ginkgo Bioworks Clinical  
Laboratory|Smith|USA  
>Spike|hCoV-19/Denmark/DCGC-12549/2020|2020-11-16|EPI\_ISL\_682730|Original|hCoV-  
19^^Hovedstaden|Human|Department of Virus and Microbiological Special  
Diagnostics|Albertsen Lab|Michaelsen|Denmark  
>Spike|hCoV-19/England/CAMC-B7BD95/2020|2020-11-12|EPI\_ISL\_724058|Original|hCoV-  
19^^England|Human|Oxford Viromics|COVID-19 Genomics UK (COG-UK)  
Consortium|Golubchik|United Kingdom  
>Spike|hCoV-19/USA/TX-HMH-MCoV-14232/2020|2020-10-05|EPI\_ISL\_787517|Original|hCoV-  
19^^Texas|Human|Houston Methodist Hospital|Houston Methodist Hospital|Long|USA  
>Spike|hCoV-19/Wales/PHWC-47F1BA/2020|2020-10-11|EPI\_ISL\_612641|Original|hCoV-  
19^^Wales|Human|Wales Specialist Virology Centre Sequencing lab|COVID-19 Genomics UK  
(COG-UK) Consortium|Moore|United Kingdom  
>Spike|hCoV-19/Israel/13077413/2020|2020-04-03|EPI\_ISL\_447438|Original|hCoV-19^^Tel  
Aviv District|Human|Clinical Microbiology Laboratory|Stern Lab|Miller|Israel

>Spike|hCoV-19/Denmark/DCGC-19982/2020|2020-12-07|EPI\_ISL\_747907|Original|hCoV-19^^Hovedstaden|Human|Department of Virus and Microbiological Special Diagnostics|Albertsen Lab|Michaelsen|Denmark

>Spike|hCoV-19/USA/CA-CZB-13349/2020|2020-04-30|EPI\_ISL\_672444|Original|hCoV-19^^California|Human|Alameda County Public Health Lab|Chan-Zuckerberg Biohub|Bhatt|USA

>Spike|hCoV-19/England/ALDP-95AE13/2020|2020-06-15|EPI\_ISL\_555570|Original|hCoV-19^^England|Human|Lighthouse Lab in Alderley Park|Wellcome Sanger Institute for the COVID-19 Genomics UK (COG-UK) consortium|Davies|United Kingdom

>Spike|hCoV-19/England/MILK-B89E46/2020|2020-11-13|EPI\_ISL\_675505|Original|hCoV-19^^England|Human|Lighthouse Lab in Milton Keynes|Wellcome Sanger Institute for the COVID-19 Genomics UK (COG-UK) Consortium|Davies|United Kingdom

>Spike|hCoV-19/Spain/MD-IBV-99008586/2020|2020-09-21|EPI\_ISL\_654126|Original|hCoV-19^^Madrid|Human|Hospital General Universitario Gregorio Mara\u00f1\u00f3n|SeqCOVID-SPAIN consortium/IBV (CSIC)|Comas|Spain

>Spike|hCoV-19/Saudi Arabia/KAUST-MAKKAH726/2020|2020-04-16|EPI\_ISL\_513228|Original|hCoV-19^^Makkah|Human|Pathogen Genomics Lab King Abdullah University of Science and Technology(KAUST)|Pathogen Genomics Lab King Abdullah University of Science and Technology(KAUST)|Mohamed Ghazzali|Saudi Arabia

>Spike|hCoV-19/England/MILK-B56291/2020|2020-11-05|EPI\_ISL\_657396|Original|hCoV-19^^England|Human|Lighthouse Lab in Milton Keynes|Wellcome Sanger Institute for the COVID-19 Genomics UK (COG-UK) Consortium|Davies|United Kingdom

>Spike|hCoV-19/England/MILK-9765A3/2020|2020-08-17|EPI\_ISL\_575805|Original|hCoV-19^^England|Human|Lighthouse Lab in Milton Keynes|Wellcome Sanger Institute for the COVID-19 Genomics UK (COG-UK) consortium|Davies|United Kingdom

>Spike|hCoV-19/Ireland/G-NVRL-73IRL28112/2020|2020-09-16|EPI\_ISL\_578280|Original|hCoV-19^^Galway|Human|National Virus Reference Laboratory|National Virus Reference Laboratory|Gonzalez|Ireland

>Spike|hCoV-19/Scotland/CVR3928/2020|2020-06-05|EPI\_ISL\_512471|Original|hCoV-19^^Scotland|Human|West of Scotland Specialist Virology Centre|COVID-19 Genomics UK (COG-UK) Consortium|Robertson|United Kingdom

>Spike|hCoV-19/England/BRIS-1303C1/2020|2020-04-11|EPI\_ISL\_492526|Original|hCoV-19^^England|Human|PHE South West Regional Laboratory|Wellcome Sanger Institute for the COVID-19 Genomics UK (COG-UK) consortium|Davies|United Kingdom

>Spike|hCoV-19/France/OCC-100/2020|2020-10-22|EPI\_ISL\_671946|Original|hCoV-19^^Occitanie|Human|CHU Purpan - Laboratoire de Virologie - Institut F\u00e9d\u00e9ratif de Biologie|CHU Purpan - Laboratoire de Virologie - Institut F\u00e9d\u00e9ratif de Biologie|Latour|France

>Spike|hCoV-19/Finland/S12CF9/2020|2020-10-31|EPI\_ISL\_732633|Original|hCoV-19^^Uusimaa|Human|Department of Virology and Immunology|Department of Virology|Smura|Finland

>Spike|hCoV-19/USA/UT-UPHL-2012598726/2020|2020-11-30|EPI\_ISL\_746906|Original|hCoV-19^^Utah|Human|Utah Public Health Laboratory|Utah Public Health Laboratory|Gallagher|USA

>Spike|hCoV-19/Japan/PG-6994/2020|2020-08-00|EPI\_ISL\_688099|Original|hCoV-19^^Japan|Human|Pathogen Genomics Center|Pathogen Genomics Center|Sekizuka|Japan

>Spike|hCoV-19/England/ALDP-9CB81F/2020|2020-09-16|EPI\_ISL\_575457|Original|hCoV-19^^England|Human|Lighthouse Lab in Alderley Park|Wellcome Sanger Institute for the COVID-19 Genomics UK (COG-UK) consortium|Davies|United Kingdom

>Spike|hCoV-19/South Africa/KRISP-K002547/2020|2020-07-30|EPI\_ISL\_535417|Original|hCoV-19^^KwaZulu-Natal|Human|NHLS-IALCH|KRISP|de Oliveira|South Africa

>Spike|hCoV-19/England/ALDP-9E8445/2020|2020-09-24|EPI\_ISL\_637414|Original|hCoV-19^^England|Human|Department of Pathology|COVID-19 Genomics UK (COG-UK) Consortium|Goodfellow|United Kingdom

>Spike|hCoV-19/England/NORW-F10D5/2020|2020-10-16|EPI\_ISL\_627300|Original|hCoV-19^^England|Human|Quadram Institute Bioscience|COVID-19 Genomics UK (COG-UK) Consortium|Alikhan|United Kingdom

>Spike|hCoV-19/USA/LA-EVTL431/2020|2020-06-11|EPI\_ISL\_578837|Original|hCoV-19^^Louisiana|Human|LSUHS Emerging Viral Threat Laboratory|Microbial Genome Sequencing Center|Kamil|USA

>Spike|hCoV-19/England/BIRM-629C5/2020|2020-08-27|EPI\_ISL\_529635|Original|hCoV-19^^England|Human|University of Birmingham|COVID-19 Genomics UK (COG-UK) Consortium|Loman|United Kingdom

>Spike|hCoV-19/Belgium/ML-0324164/2020|2020-03-24|EPI\_ISL\_420421|Original|hCoV-19^^Zoutleeuw|Human|KU Leuven|KU Leuven|Maes|Belgium

>Spike|hCoV-19/Luxembourg/LNS0225895/2020|2020-11-17|EPI\_ISL\_739741|Original|hCoV-19^^Luxembourg|Human|Laboratoire national de sant\u00e9|Laboratoire national de sant\u00e9|Wienecke-Baldacchino|Luxembourg

>Spike|hCoV-19/England/CAMC-9452A6/2020|2020-07-14|EPI\_ISL\_556921|Original|hCoV-19^^England|Human|Lighthouse Lab in Cambridge|Wellcome Sanger Institute for the COVID-19 Genomics UK (COG-UK) consortium|Davies|United Kingdom

>Spike|hCoV-19/USA/FL-BPHL-1119/2020|2020-08-10|EPI\_ISL\_526605|Original|hCoV-19^^Florida|Human|Florida Bureau of Public Health Laboratories|Florida Bureau of Public Health Laboratories|Blanton|USA

>Spike|hCoV-19/England/QEUEH-B401AC/2020|2020-11-08|EPI\_ISL\_657278|Original|hCoV-19^^England|Human|Lighthouse Lab in Glasgow|Wellcome Sanger Institute for the COVID-19 Genomics UK (COG-UK) Consortium|Davies|United Kingdom

>Spike|hCoV-19/Italy/LAZ-INMI1-N/2020|2020-02-03|EPI\_ISL\_451300|Original|hCoV-19^^Lazio|Human|Laboratory of Virology|Laboratory of Virology|Gruber|Italy

>Spike|hCoV-19/England/ALDP-647EFE/2020|2020-07-04|EPI\_ISL\_558114|Original|hCoV-19^^England|Human|Lighthouse Lab in Alderley Park|Wellcome Sanger Institute for the COVID-19 Genomics UK (COG-UK) consortium|Davies|United Kingdom

>Spike|hCoV-19/England/MILK-BB03FC/2020|2020-11-17|EPI\_ISL\_720278|Original|hCoV-19^^England|Human|Lighthouse Lab in Milton Keynes|Wellcome Sanger Institute for the COVID-19 Genomics UK (COG-UK) Consortium|Davies|United Kingdom

>Spike|hCoV-19/France/ARA-SC369/2020|2020-05-01|EPI\_ISL\_645185|Original|hCoV-19^^Auvergne-Rhone-Alpes|Human|CHU de Saint-\u00c9tienne H\u00f4pital Nord|CNR Virus des Infections Respiratoires - France SUD|Bal|France

>Spike|hCoV-19/Singapore/873/2020|2020-04-05|EPI\_ISL\_536414|Original|hCoV-19^^Singapore|Human|National Public Health Laboratory|National Public Health Laboratory|Mak|Singapore

>Spike|hCoV-19/USA/MI-MDHHS-SC20499/2020|2020-05-11|EPI\_ISL\_460037|Original|hCoV-19^^Michigan|Human|Michigan Department of Health and Human Services|Michigan Department of Health and Human Services|Blankenship|USA

>Spike|hCoV-19/USA/MI-UM-2006S001054/2020|2020-04-04|EPI\_ISL\_484799|Original|hCoV-19^^Michigan|Human|University of Michigan Clinical Microbiology Laboratory|Lauring Lab|Valesano|USA

>Spike|hCoV-19/India/DL-NCDC7721-CSIR-IGIB/2020|2020-05-28|EPI\_ISL\_482664|Original|hCoV-19^^Delhi|Human|National Centre for Disease control (NCDC)|NCDC/CSIR-IGIB|Singh|India

>Spike|hCoV-19/England/CAMC-BC1844/2020|2020-11-20|EPI\_ISL\_703457|Original|hCoV-19^^England|Human|Department of Pathology|COVID-19 Genomics UK (COG-UK) Consortium|Goodfellow|United Kingdom

>Spike|hCoV-19/England/NOTT-10F246/2020|2020-04-01|EPI\_ISL\_432980|Original|hCoV-19^^England|Human|Queens Medical Centre|COVID-19 Genomics UK (COG-UK) Consortium|Loose|United Kingdom

>Spike|hCoV-19/England/MILK-ACC9FC/2020|2020-10-21|EPI\_ISL\_629331|Original|hCoV-19^^England|Human|Lighthouse Lab in Milton Keynes|Wellcome Sanger Institute for the COVID-19 Genomics UK (COG-UK) consortium|Davies|United Kingdom

>Spike|hCoV-19/South Korea/KDCA0381/2020|2020-11-10|EPI\_ISL\_760165|Original|hCoV-19^^South Korea|Human|Division of Emerging Infectious Diseases|Division of Emerging Infectious Diseases|Park|South Korea

>Spike|hCoV-19/Scotland/CAMC-A82C44/2020|2020-10-12|EPI\_ISL\_625302|Original|hCoV-19^^Scotland|Human|Lighthouse Lab in Cambridge|Wellcome Sanger Institute for the COVID-19 Genomics UK (COG-UK) consortium|Davies|United Kingdom

>Spike|hCoV-19/Portugal/PT0920/2020|2020-03-29|EPI\_ISL\_511177|Original|hCoV-19^^Portugal|Human|Instituto Nacional de Saude (INSA)|Instituto Nacional de Saude (INSA)|Borges|Portugal

>Spike|hCoV-19/England/MILK-B3BA6D/2020|2020-11-02|EPI\_ISL\_679785|Original|hCoV-19^^England|Human|Oxford Viromics|COVID-19 Genomics UK (COG-UK) Consortium|Golubchik|United Kingdom

>Spike|hCoV-19/Hong Kong/HKU-200723-018/2020|2020-07-14|EPI\_ISL\_497785|Original|hCoV-19^^Hong Kong|Human|Department of Microbiology|Department of Microbiology|Chan|China

>Spike|hCoV-19/Wales/PHWC-169857/2020|2020-07-19|EPI\_ISL\_512522|Original|hCoV-19^^Wales|Human|Wales Specialist Virology Centre Sequencing lab|COVID-19 Genomics UK (COG-UK) Consortium|Moore|United Kingdom

>Spike|hCoV-19/England/MILK-973254/2020|2020-08-20|EPI\_ISL\_575956|Original|hCoV-19^^England|Human|Lighthouse Lab in Milton Keynes|Wellcome Sanger Institute for the COVID-19 Genomics UK (COG-UK) consortium|Davies|United Kingdom

>Spike|hCoV-19/England/QEUA-96173C/2020|2020-08-01|EPI\_ISL\_537110|Original|hCoV-19^^England|Human|Lighthouse Lab in Glasgow|Wellcome Sanger Institute for the COVID-19 Genomics UK (COG-UK) consortium|Davies|United Kingdom

>Spike|hCoV-19/USA/AZ-TG664542/2020|2020-04-20|EPI\_ISL\_696159|Original|hCoV-19^^Arizona|Human|Sonora Quest Laboratories|TGen North|French|USA

>Spike|hCoV-19/USA/WI-UW-1378/2020|2020-09-08|EPI\_ISL\_536749|Original|hCoV-19^^Wisconsin|Human|University of Wisconsin-Madison AIDS Vaccine Research Laboratories|University of Wisconsin-Madison AIDS Vaccine Research Laboratories|Baczenas|USA

>Spike|hCoV-19/Denmark/DCGC-8259/2020|2020-10-26|EPI\_ISL\_617285|Original|hCoV-19^^Hovedstaden|Human|Department of Virus and Microbiological Special Diagnostics|Albertsen lab|Michaelsen|Denmark

>Spike|hCoV-19/England/EXET-13EFC/2020|2020-12-15|EPI\_ISL\_763530|Original|hCoV-19^^England|Human|University of Exeter|COVID-19 Genomics UK (COG-UK) Consortium|Temperton|United Kingdom

>Spike|hCoV-19/England/ALDP-B45A60/2020|2020-11-07|EPI\_ISL\_656062|Original|hCoV-19^^England|Human|Lighthouse Lab in Alderley Park|Wellcome Sanger Institute for the COVID-19 Genomics UK (COG-UK) Consortium|Davies|United Kingdom

>Spike|hCoV-19/England/CAMC-A4117F/2020|2020-10-06|EPI\_ISL\_609350|Original|hCoV-19^^England|Human|Lighthouse Lab in Cambridge|Wellcome Sanger Institute for the COVID-19 Genomics UK (COG-UK) consortium|Davies|United Kingdom

>Spike|hCoV-19/Denmark/DCGC-15043/2020|2020-11-23|EPI\_ISL\_713205|Original|hCoV-19^^Hovedstaden|Human|Department of Virus and Microbiological Special Diagnostics|Albertsen Lab|Michaelsen|Denmark

>Spike|hCoV-19/England/QEUA-BC3BA3/2020|2020-11-25|EPI\_ISL\_704155|Original|hCoV-19^^England|Human|Lighthouse Lab in Glasgow|Wellcome Sanger Institute for the COVID-19 Genomics UK (COG-UK) Consortium|Davies|United Kingdom

>Spike|hCoV-19/England/ALDP-5C74E6/2020|2020-06-19|EPI\_ISL\_558557|Original|hCoV-19^^England|Human|Lighthouse Lab in Alderley Park|Wellcome Sanger Institute for the COVID-19 Genomics UK (COG-UK) consortium|Davies|United Kingdom

>Spike|hCoV-19/Germany/HH-hpi-p2133/2020|2020-03-21|EPI\_ISL\_776372|Original|hCoV-19^^Hamburg|Human|University Medical Center Hamburg Eppendorf|Heinrich Pette Institute|Robitaille|Germany

>Spike|hCoV-19/England/CAMC-B3390E/2020|2020-11-05|EPI\_ISL\_659101|Original|hCoV-19^^England|Human|Lighthouse Lab in Cambridge|Wellcome Sanger Institute for the COVID-19 Genomics UK (COG-UK) Consortium|Davies|United Kingdom

>Spike|hCoV-19/USA/AZ-TG670131/2020|2020-05-02|EPI\_ISL\_696342|Original|hCoV-19^^Arizona|Human|Sonora Quest Laboratories|TGen North|French|USA

>Spike|hCoV-19/England/NORW-E9753/2020|2020-04-23|EPI\_ISL\_448329|Original|hCoV-19^^England|Human|Quadram Institute Bioscience|COVID-19 Genomics UK (COG-UK) Consortium|Alikhan|United Kingdom

>Spike|hCoV-19/Italy/LOM-UniMI10/2020|2020-03-11|EPI\_ISL\_779714|Original|hCoV-19^^Lombardy|Human|Laboratory of Infectious Diseases|Laboratory of Infectious Diseases|Lai|Italy

>Spike|hCoV-19/USA/WI-UW-767/2020|2020-07-03|EPI\_ISL\_495472|Original|hCoV-19^^Wisconsin|Human|University of Wisconsin-Madison AIDS Vaccine Research

Laboratories|University of Wisconsin-Madison AIDS Vaccine Research  
Laboratories|Baczenas|USA  
>Spike|hCoV-19/USA/TX-HMH-MCoV-14295/2020|2020-10-05|EPI\_ISL\_787580|Original|hCoV-19^^Texas|Human|Houston Methodist Hospital|Houston Methodist Hospital|Long|USA  
>Spike|hCoV-19/Bangladesh/DNAS\_DRCIM\_RAB\_isl\_114\_BGD/2020|2020-04-29|EPI\_ISL\_774894|Original|hCoV-19^^Dhaka|Human|Designated Reference Institute for Chemical Measurements (DRICM)|DNA SOLUTION LTD.|Rabbi|Bangladesh  
>Spike|hCoV-19/England/QEUIH-9B6F8B/2020|2020-09-07|EPI\_ISL\_590655|Original|hCoV-19^^England|Human|Lighthouse Lab in Glasgow|Wellcome Sanger Institute for the COVID-19 Genomics UK (COG-UK) consortium|Davies|United Kingdom  
>Spike|hCoV-19/Wales/PHWC-48839A/2020|2020-10-29|EPI\_ISL\_639386|Original|hCoV-19^^Wales|Human|Wales Specialist Virology Centre Sequencing lab|COVID-19 Genomics UK (COG-UK) Consortium|Moore|United Kingdom  
>Spike|hCoV-19/South Africa/R10571/2020|2020-06-10|EPI\_ISL\_490287|Original|hCoV-19^^Gauteng|Human|National Institute for Communicable Diseases of the National Health Laboratory Service|National Institute for Communicable Diseases of the National Health Laboratory Service|Allam|South Africa  
>Spike|hCoV-19/Australia/VIC197/2020|2020-03-19|EPI\_ISL\_419893|Original|hCoV-19^^Victoria|Human|Victorian Infectious Diseases Reference Laboratory (VIDRL)|Victorian Infectious Diseases Reference Laboratory and Microbiological Diagnostic Unit Public Health Laboratory|Schultz|Australia  
>Spike|hCoV-19/England/MILK-99CC48/2020|2020-08-31|EPI\_ISL\_549848|Original|hCoV-19^^England|Human|Lighthouse Lab in Milton Keynes|Wellcome Sanger Institute for the COVID-19 Genomics UK (COG-UK) consortium|Davies|United Kingdom  
>Spike|hCoV-19/USA/FL-BPHL-1207/2020|2020-07-24|EPI\_ISL\_541180|Original|hCoV-19^^Florida|Human|Florida Bureau of Public Health Laboratories|Florida Bureau of Public Health Laboratories|Blanton|USA  
>Spike|hCoV-19/England/CAMB-7282F/2020|2020-03-22|EPI\_ISL\_439606|Original|hCoV-19^^England|Human|Department of Pathology|Wellcome Sanger Institute for the COVID-19 Genomics UK (COG-UK) consortium|Amato|United Kingdom  
>Spike|hCoV-19/USA/TX-DSHS-0539/2020|2020-05-14|EPI\_ISL\_574443|Original|hCoV-19^^Texas|Human|Texas Department of State Health Services|Texas Department of State Health Services|Rahman|USA  
>Spike|hCoV-19/Japan/PG-0897/2020|2020-03-00|EPI\_ISL\_684507|Original|hCoV-19^^Japan|Human|Tokyo Metropolitan Institute of Public Health|Pathogen Genomics Center|Sekizuka|Japan  
>Spike|hCoV-19/England/MILK-991A58/2020|2020-08-26|EPI\_ISL\_577016|Original|hCoV-19^^England|Human|Northumbria University / South Tees Hospitals NHS Foundation Trust / North Cumbria Integrated Care NHS Foundation Trust / North Tees and Hartlepool NHS Foundation Trust / Newcastle Hospitals NHS Foundation Trust|COVID-19 Genomics UK (COG-UK) Consortium|Bashton|United Kingdom  
>Spike|hCoV-19/Scotland/CVR2389/2020|2020-04-14|EPI\_ISL\_484582|Original|hCoV-19^^Scotland|Human|West of Scotland Specialist Virology Centre|COVID-19 Genomics UK (COG-UK) Consortium|Robertson|United Kingdom  
>Spike|hCoV-19/England/QEUIH-9E4A0B/2020|2020-09-23|EPI\_ISL\_579823|Original|hCoV-19^^England|Human|Lighthouse Lab in Glasgow|Wellcome Sanger Institute for the COVID-19 Genomics UK (COG-UK) consortium|Davies|United Kingdom  
>Spike|hCoV-19/Canada/ON\_MU-S284/2020|2020-03-28|EPI\_ISL\_463976|Original|hCoV-19^^Ontario|Human|Toronto Invasive Bacterial Diseases Network|McMaster University|McArthur|Canada  
>Spike|hCoV-19/England/MILK-B95CD4/2020|2020-11-14|EPI\_ISL\_675015|Original|hCoV-19^^England|Human|Lighthouse Lab in Milton Keynes|Wellcome Sanger Institute for the COVID-19 Genomics UK (COG-UK) Consortium|Davies|United Kingdom  
>Spike|hCoV-19/Netherlands/NA\_145/2020|2020-03-19|EPI\_ISL\_422685|Original|hCoV-19^^Netherlands|Human|Dutch COVID-19 response team|Erasmus Medical Center|Oude Munnink|Netherlands  
>Spike|hCoV-19/USA/TX-HMH-MCoV-18534/2020|2020-11-20|EPI\_ISL\_784882|Original|hCoV-19^^Texas|Human|Houston Methodist Hospital|Houston Methodist Hospital|Long|USA  
>Spike|hCoV-19/USA/TX-HMH-MCoV-9603/2020|2020-07-03|EPI\_ISL\_780179|Original|hCoV-19^^Texas|Human|Houston Methodist Hospital|Houston Methodist Hospital|Long|USA

>Spike|hCoV-19/USA/TX-HMH-MCoV-9397/2020|2020-07-03|EPI\_ISL\_781096|Original|hCoV-19^^Texas|Human|Houston Methodist Hospital|Houston Methodist Hospital|Long|USA

>Spike|hCoV-19/Wales/PHWC-16C14A/2020|2020-09-08|EPI\_ISL\_574015|Original|hCoV-19^^Wales|Human|Wales Specialist Virology Centre Sequencing lab|COVID-19 Genomics UK (COG-UK) Consortium|Moore|United Kingdom

>Spike|hCoV-19/USA/AZ-TG380033/2020|2020-06-16|EPI\_ISL\_694645|Original|hCoV-19^^Arizona|Human|TGen North|TGen North|French|USA

>Spike|hCoV-19/Sweden/20-51697/2020|2020-05-23|EPI\_ISL\_510834|Original|hCoV-19^^Stockholm|Human|Karolinska Universitetslaboratoriet|The Public Health Agency of Sweden|Svartstr\u00f6m|Sweden

>Spike|hCoV-19/USA/TX-HMH-6720/2020|2020-06-24|EPI\_ISL\_546192|Original|hCoV-19^^Texas|Human|Houston Methodist Hospital|Houston Methodist Hospital|Long|USA

>Spike|hCoV-19/England/LIVE-9DEB3/2020|2020-04-05|EPI\_ISL\_453244|Original|hCoV-19^^England|Human|Liverpool Clinical Laboratories|COVID-19 Genomics UK (COG-UK) Consortium|Haldenby|United Kingdom

>Spike|hCoV-19/Spain/MD-IBV-99008477/2020|2020-08-09|EPI\_ISL\_654060|Original|hCoV-19^^Madrid|Human|Hospital General Universitario Gregorio Mara\u00f1\u00f3n|SeqCOVID-SPAIN consortium/IBV (CSIC)|Comas|Spain

>Spike|hCoV-19/England/20146062504/2020|2020-04-02|EPI\_ISL\_421989|Original|hCoV-19^^England|Human|Respiratory Virus Unit|Respiratory Virus Unit|Platt|United Kingdom

>Spike|hCoV-19/England/ALDP-CB6674/2020|2020-12-19|EPI\_ISL\_761826|Original|hCoV-19^^England|Human|Lighthouse Lab in Alderley Park|Wellcome Sanger Institute for the COVID-19 Genomics UK (COG-UK) Consortium|Davies|United Kingdom

>Spike|hCoV-19/Australia/VIC8728/2020|2020-07-27|EPI\_ISL\_565158|Original|hCoV-19^^Victoria|Human|Victorian Infectious Diseases Reference Laboratory (VIDRL)|VIDRL and MDU-PHL|Schultz|Australia

>Spike|hCoV-19/South Africa/KRISP-K002440/2020|2020-07-29|EPI\_ISL\_515796|Original|hCoV-19^^KwaZulu-Natal|Human|NHLs-IALCH|KRISP|de Oliveira|South Africa

>Spike|hCoV-19/Netherlands/Limburg\_35/2020|2020-04-22|EPI\_ISL\_461023|Original|hCoV-19^^Limburg|Human|Dutch COVID-19 response team|Erasmus Medical Center|Oude Munnink|Netherlands

>Spike|hCoV-19/USA/MI-MDHHS-SC20817/2020|2020-05-13|EPI\_ISL\_471838|Original|hCoV-19^^Michigan|Human|Michigan Department of Health and Human Services|Michigan Department of Health and Human Services|Blankenship|USA

>Spike|hCoV-19/Scotland/GCVR-171740/2020|2020-03-28|EPI\_ISL\_489703|Original|hCoV-19^^Scotland|Human|NHSGGC West of Scotland Specialist Virology Centre / MRC-University of Glasgow Centre for Virus Research|Wellcome Sanger Institute for the COVID-19 Genomics UK (COG-UK) consortium|Davies|United Kingdom

>Spike|hCoV-19/USA/TX-HMH-MCoV-14448/2020|2020-10-08|EPI\_ISL\_787733|Original|hCoV-19^^Texas|Human|Houston Methodist Hospital|Houston Methodist Hospital|Long|USA

>Spike|hCoV-19/USA/AZ-TG602415/2020|2020-07-14|EPI\_ISL\_695644|Original|hCoV-19^^Arizona|Human|AZ SPHL|TGen North|French|USA

>Spike|hCoV-19/USA/SC-DHEC-0233/2020|2020-05-29|EPI\_ISL\_529196|Original|hCoV-19^^South Carolina|Human|South Carolina Department of Health and Environmental Control|South Carolina Department of Health and Environmental Control|Flores|USA

>Spike|hCoV-19/Denmark/DCGC-1132/2020|2020-03-09|EPI\_ISL\_614598|Original|hCoV-19^^Syddanmark|Human|Department of Virus and Microbiological Special Diagnostics|Albertsen lab|Michaelsen|Denmark

>Spike|hCoV-19/Ireland/LH-NVRL-73IRL41641/2020|2020-09-09|EPI\_ISL\_639862|Original|hCoV-19^^Louth|Human|National Virus Reference Laboratory|National Virus Reference Laboratory|Gonzalez|Ireland

>Spike|hCoV-19/USA/CA-CHLA-PLM71497073/2020|2020-12-04|EPI\_ISL\_753613|Original|hCoV-19^^California|Human|Clinical virology Laboratory|Center for Personalized Medicine|Dien Bard|USA

>Spike|hCoV-19/Australia/NSW2548/2020|2020-04-04|EPI\_ISL\_527049|Original|hCoV-19^^New South Wales|Human|Area of Virology|Area of Virology|Yeang|Australia

>Spike|hCoV-19/Sichuan/SC-GA-064/2020|2020-01-30|EPI\_ISL\_451315|Original|hCoV-19^^Sichuan|Human|West China Hospital of Sichuan University|State Key Laboratory of Biotherapy of Sichuan University|Tang|China

>Spike|hCoV-19/England/ALDP-C3D851/2020|2020-12-10|EPI\_ISL\_730699|Original|hCoV-19^^England|Human|Lighthouse Lab in Alderley Park|Wellcome Sanger Institute for the COVID-19 Genomics UK (COG-UK) Consortium|Davies|United Kingdom

>Spike|hCoV-19/Netherlands/ZH-EMC-1000/2020|2020-11-21|EPI\_ISL\_722684|Original|hCoV-19^^Zuid Holland|Human|Dutch COVID-19 response team|Erasmus Medical Center|Oude Munnink|Netherlands

>Spike|hCoV-19/Denmark/DCGC-18416/2020|2020-12-07|EPI\_ISL\_749329|Original|hCoV-19^^Midtjylland|Human|Department of Virus and Microbiological Special Diagnostics|Albertsen Lab|Michaelsen|Denmark

>Spike|hCoV-19/England/ALDP-9CBD3E/2020|2020-09-16|EPI\_ISL\_575511|Original|hCoV-19^^England|Human|Lighthouse Lab in Alderley Park|Wellcome Sanger Institute for the COVID-19 Genomics UK (COG-UK) consortium|Davies|United Kingdom

>Spike|hCoV-19/Brazil/RJ-INCA-C28/2020|2020-04-16|EPI\_ISL\_513536|Original|hCoV-19^^Rio de Janeiro|Human|Programa de Oncovirologia|Programa de Oncovirologia|Ramos Goes|Brazil

>Spike|hCoV-19/Spain/PV-IBV-000748/2020|2020-03-07|EPI\_ISL\_452740|Original|hCoV-19^^Basque Country|Human|Hospital Universitario Araba. Vitoria-Gasteiz,|SeqCOVID-SPAIN consortium/IBV (CSIC)|Comas|Spain

>Spike|hCoV-19/USA/WI-UW-2510/2020|2020-12-29|EPI\_ISL\_779342|Original|hCoV-19^^Wisconsin|Human|University of Wisconsin-Madison AIDS Vaccine Research Laboratories|University of Wisconsin-Madison AIDS Vaccine Research Laboratories|Moreno|USA

>Spike|hCoV-19/England/MILK-ACCC6C/2020|2020-10-20|EPI\_ISL\_630116|Original|hCoV-19^^England|Human|Lighthouse Lab in Milton Keynes|Wellcome Sanger Institute for the COVID-19 Genomics UK (COG-UK) consortium|Davies|United Kingdom

>Spike|hCoV-19/England/MILK-ACC2B5/2020|2020-10-21|EPI\_ISL\_629399|Original|hCoV-19^^England|Human|Lighthouse Lab in Milton Keynes|Wellcome Sanger Institute for the COVID-19 Genomics UK (COG-UK) consortium|Davies|United Kingdom

>Spike|hCoV-19/England/QEUH-9B9A4B/2020|2020-09-07|EPI\_ISL\_549549|Original|hCoV-19^^England|Human|Lighthouse Lab in Glasgow|Wellcome Sanger Institute for the COVID-19 Genomics UK (COG-UK) consortium|Davies|United Kingdom

>Spike|hCoV-19/Lithuania/MR-LUHS-Eilnr471/2020|2020-09-12|EPI\_ISL\_636901|Original|hCoV-19^^Kauno apskritis|Human|Lithuanian University of Health Sciences Hospital|Lithuanian University of Health Sciences|Zemaitis|Lithuania

>Spike|hCoV-19/USA/CA-ALSR-1126/2020|2020-04-03|EPI\_ISL\_494378|Original|hCoV-19^^California|Human|San Diego County Public Health Laboratory|Andersen lab at Scripps Research|Gangavarapu|USA

>Spike|hCoV-19/Canada/ON-UHTC\_0328/2020|2020-09-07|EPI\_ISL\_609809|Original|hCoV-19^^Ontario|Human|Unity Health Toronto|Ontario Institute for Cancer Research|de Borja|Canada

>Spike|hCoV-19/Australia/VIC2920/2020|2020-07-08|EPI\_ISL\_521751|Original|hCoV-19^^Victoria|Human|Microbiological Diagnostic Unit - Public Health Laboratory (MDU-PHL)|MDU-PHL|Schultz|Australia

>Spike|hCoV-19/USA/WA-S2750/2020|2020-07-21|EPI\_ISL\_525740|Original|hCoV-19^^Washington|Human|Seattle Flu Study|Seattle Flu Study|Lee|USA

>Spike|hCoV-19/Italy/ABR-IZSGC-TE5780/2020|2020-03-21|EPI\_ISL\_420567|Original|hCoV-19^^Abruzzo|Human|Ospedale Regionale San Salvatore|Istituto Zooprofilattico Sperimentale dell'Abruzzo e Molise \G.Caporale\\Lorusso|Italy

>Spike|hCoV-19/USA/CA-CZB-10913/2020|2020-08-27|EPI\_ISL\_583142|Original|hCoV-19^^California|Human|Humboldt County Public Health Laboratory|Chan-Zuckerberg Biohub|Bhatt|USA

>Spike|hCoV-19/USA/CT-UW-2468/2020|2020-03-30|EPI\_ISL\_477677|Original|hCoV-19^^Connecticut|Human|UW Virology Lab|UW Virology Lab|Roychoudhury|USA

>Spike|hCoV-19/Wales/PHWC-16F39C/2020|2020-09-30|EPI\_ISL\_585955|Original|hCoV-19^^Wales|Human|Wales Specialist Virology Centre Sequencing lab|COVID-19 Genomics UK (COG-UK) Consortium|Moore|United Kingdom

>Spike|hCoV-19/England/LIVE-A7803/2020|2020-03-27|EPI\_ISL\_517075|Original|hCoV-19^^England|Human|Liverpool Clinical Laboratories|COVID-19 Genomics UK (COG-UK) Consortium|Haldenby|United Kingdom



>Spike|hCoV-19/England/MILK-A7DB7C/2020|2020-10-13|EPI\_ISL\_638466|Original|hCoV-19^^England|Human|Oxford Viromics|COVID-19 Genomics UK (COG-UK) Consortium|Golubchik|United Kingdom

>Spike|hCoV-19/Canada/MB-NML-412/2020|2020-04-07|EPI\_ISL\_582249|Original|hCoV-19^^Manitoba|Human|Cadham Provincial Laboratory|National Microbiology Laboratory (NML)|Majer|Canada

>Spike|hCoV-19/USA/CA-CZB-15957/2020|2020-11-30|EPI\_ISL\_739650|Original|hCoV-19^^California|Human|Santa Clara County Public Health Laboratory|Chan-Zuckerberg Biohub|Kamm|USA

>Spike|hCoV-19/Wales/PHWC-492E05/2020|2020-11-27|EPI\_ISL\_725792|Original|hCoV-19^^Wales|Human|Originating lab|COVID-19 Genomics UK (COG-UK) Consortium|Moore|United Kingdom

>Spike|hCoV-19/Scotland/EDB2350/2020|2020-04-22|EPI\_ISL\_491567|Original|hCoV-19^^Scotland|Human|Virology Department|Wellcome Sanger Institute for the COVID-19 Genomics UK (COG-UK) consortium|Davies|United Kingdom

>Spike|hCoV-19/USA/NY-Wadsworth-88095-01/2020|2020-05-09|EPI\_ISL\_676916|Original|hCoV-19^^New York|Human|Wadsworth Center|Wadsworth Center|Lasek-Nesselquist|USA

>Spike|hCoV-19/Spain/CT-ISCI-2012564/2020|2020-05-15|EPI\_ISL\_539535|Original|hCoV-19^^Catalunya|Human|Hospital Cl\u00e0nic|Instituto de Salud Carlos III|Caballero|Spain

>Spike|hCoV-19/England/MILK-BAA6A1/2020|2020-11-17|EPI\_ISL\_783270|Original|hCoV-19^^England|Human|Lighthouse Lab in Milton Keynes|Wellcome Sanger Institute for the COVID-19 Genomics UK (COG-UK) Consortium|Davies|United Kingdom

>Spike|hCoV-19/USA/WI-UW-2141/2020|2020-10-15|EPI\_ISL\_677545|Original|hCoV-19^^Wisconsin|Human|University of Wisconsin-Madison AIDS Vaccine Research Laboratories|University of Wisconsin-Madison AIDS Vaccine Research Laboratories|Baczenas|USA

>Spike|hCoV-19/Russia/StPetersburg-RII15231S/2020|2020-05-12|EPI\_ISL\_507264|Original|hCoV-19^^Saint Petersburg|Human|WHO National Influenza Centre Russian Federation|WHO National Influenza Centre Russian Federation|Komissarov|Russia

>Spike|hCoV-19/India/MH-ACTREC-391/2020|2020-07-29|EPI\_ISL\_700040|Original|hCoV-19^^Maharashtra|Human|Hematopathology Laboratory|Hematopathology Laboratory|Patkar|India

>Spike|hCoV-19/England/NOTT-1117BB/2020|2020-05-20|EPI\_ISL\_461923|Original|hCoV-19^^England|Human|Queens Medical Centre|COVID-19 Genomics UK (COG-UK) Consortium|Loose|United Kingdom

>Spike|hCoV-19/Sweden/20-50299/2020|2020-03-12|EPI\_ISL\_475129|Original|hCoV-19^^Varmland|Human|Orebro klinisk mikrobiologi|The Public Health Agency of Sweden|Svartstr\u00f6m|Sweden

>Spike|hCoV-19/USA/TX-HMH-MCoV-19342/2020|2020-09-08|EPI\_ISL\_783775|Original|hCoV-19^^Texas|Human|Houston Methodist Hospital|Houston Methodist Hospital|Long|USA

>Spike|hCoV-19/England/LIVE-DBD366/2020|2020-10-26|EPI\_ISL\_664301|Original|hCoV-19^^England|Human|Liverpool Clinical Laboratories|COVID-19 Genomics UK (COG-UK) Consortium|Haldenby|United Kingdom

>Spike|hCoV-19/England/QEUH-C57B67/2020|2020-12-12|EPI\_ISL\_736236|Original|hCoV-19^^England|Human|Lighthouse Lab in Glasgow|Wellcome Sanger Institute for the COVID-19 Genomics UK (COG-UK) Consortium|Davies|United Kingdom

>Spike|hCoV-19/Sweden/20-14317/2020|2020-05-05|EPI\_ISL\_469056|Original|hCoV-19^^Ostergotland|Human|Jourcentralen|The Public Health Agency of Sweden|Svartstr\u00f6m|Sweden

>Spike|hCoV-19/England/CAMC-94AC49/2020|2020-07-30|EPI\_ISL\_556531|Original|hCoV-19^^England|Human|Lighthouse Lab in Cambridge|Wellcome Sanger Institute for the COVID-19 Genomics UK (COG-UK) consortium|Davies|United Kingdom

>Spike|hCoV-19/USA/CA-CZB-15153/2020|2020-11-23|EPI\_ISL\_739008|Original|hCoV-19^^California|Human|Santa Clara County Public Health Laboratory|Chan-Zuckerberg Biohub|Kamm|USA

>Spike|hCoV-19/England/ALDP-A85D7B/2020|2020-10-17|EPI\_ISL\_610563|Original|hCoV-19^^England|Human|Lighthouse Lab in Alderley Park|Wellcome Sanger Institute for the COVID-19 Genomics UK (COG-UK) consortium|Davies|United Kingdom

>Spike|hCoV-19/England/EXET-13DE69/2020|2020-12-03|EPI\_ISL\_724296|Original|hCoV-19^^England|Human|University of Exeter|COVID-19 Genomics UK (COG-UK) Consortium|Temperton|United Kingdom

>Spike|hCoV-19/USA/UT-UPHL-2012485866/2020|2020-08-14|EPI\_ISL\_746140|Original|hCoV-19^^Utah|Human|Ginkgo Bioworks Clinical Laboratory|Utah Public Health Laboratory|Young|USA

>Spike|hCoV-19/Germany/NW-HHU-111/2020|2020-08-27|EPI\_ISL\_539588|Original|hCoV-19^^North Rhine-Westphalia|Human|ZOTZ KLIMAS MVZ D\u00f0fcsseldorf-Centrum GbR \u00dcBAG f\u00f0fcr Labormedizin|Center of Medical Microbiology|Wienemann|Germany

>Spike|hCoV-19/England/ALDP-A2F06B/2020|2020-10-05|EPI\_ISL\_587259|Original|hCoV-19^^England|Human|Lighthouse Lab in Alderley Park|Wellcome Sanger Institute for the COVID-19 Genomics UK (COG-UK) consortium|Davies|United Kingdom

>Spike|hCoV-19/England/ALDP-9ED0A6/2020|2020-05-06|EPI\_ISL\_589386|Original|hCoV-19^^England|Human|Lighthouse Lab in Alderley Park|Wellcome Sanger Institute for the COVID-19 Genomics UK (COG-UK) consortium|Davies|United Kingdom

>Spike|hCoV-19/USA/CA-ALSR-4709/2020|2020-06-29|EPI\_ISL\_730096|Original|hCoV-19^^California|Human|San Diego County Public Health Laboratory|Andersen lab at Scripps Research|Gangavarapu|USA

>Spike|hCoV-19/Denmark/DCGC-9468/2020|2020-11-09|EPI\_ISL\_668985|Original|hCoV-19^^Hovedstaden|Human|Department of Virus and Microbiological Special Diagnostics|Albertsen Lab|Michaelsen|Denmark

>Spike|hCoV-19/Spain/PV-IBV-2079/2020|2020-04-10|EPI\_ISL\_468900|Original|hCoV-19^^Basque Country|Human|Servicio de Microbiolog\u00eda. Hospital Universitario Donostia. OSI Donostialdea. \u00c1rea de Enfermedades Infecciosas|SeqCOVID-SPAIN consortium/IBV (CSIC) |Comas|Spain

>Spike|hCoV-19/England/204742478/2020|2020-11-17|EPI\_ISL\_683542|Original|hCoV-19^^England|Human|Respiratory Virus Unit|COVID-19 Genomics UK (COG-UK) Consortium|Platt|United Kingdom

>Spike|hCoV-19/Wales/PHWC-481A05/2020|2020-10-02|EPI\_ISL\_613136|Original|hCoV-19^^Wales|Human|Wales Specialist Virology Centre Sequencing lab|COVID-19 Genomics UK (COG-UK) Consortium|Moore|United Kingdom

>Spike|hCoV-19/USA/MI-MDHHS-SC20739/2020|2020-04-29|EPI\_ISL\_471760|Original|hCoV-19^^Michigan|Human|Michigan Department of Health and Human Services|Michigan Department of Health and Human Services|Blankenship|USA

>Spike|hCoV-19/Wales/PHWC-48C2D5/2020|2020-11-08|EPI\_ISL\_665605|Original|hCoV-19^^Wales|Human|Wales Specialist Virology Centre Sequencing lab|COVID-19 Genomics UK (COG-UK) Consortium|Moore|United Kingdom

>Spike|hCoV-19/England/LIVE-99251/2020|2020-04-07|EPI\_ISL\_439702|Original|hCoV-19^^England|Human|Liverpool Clinical Laboratories|COVID-19 Genomics UK (COG-UK) Consortium|Haldenby|United Kingdom

>Spike|hCoV-19/England/QEUEH-B2F98D/2020|2020-11-03|EPI\_ISL\_659952|Original|hCoV-19^^England|Human|Lighthouse Lab in Glasgow|Wellcome Sanger Institute for the COVID-19 Genomics UK (COG-UK) Consortium|Davies|United Kingdom

>Spike|hCoV-19/Wales/QEUEH-9AE5A2/2020|2020-09-02|EPI\_ISL\_577544|Original|hCoV-19^^Wales|Human|University of Exeter|COVID-19 Genomics UK (COG-UK) Consortium|Temperton|United Kingdom

>Spike|hCoV-19/England/BRIS-128DBF/2020|2020-04-15|EPI\_ISL\_458838|Original|hCoV-19^^England|Human|PHE South West Regional Laboratory|Wellcome Sanger Institute for the COVID-19 Genomics UK (COG-UK) consortium|Davies|United Kingdom

>Spike|hCoV-19/USA/NE-11819/2020|2020-05-05|EPI\_ISL\_466683|Original|hCoV-19^^Nebraska|Human|Nebraska Public Health Laboratory|UNMC COVID-19 Response Team|Pratt|USA

>Spike|hCoV-19/Spain/PV-IBV-98007639/2020|2020-09-08|EPI\_ISL\_582047|Original|hCoV-19^^Basque Country|Human|Servicio de Microbiolog\u00eda. Hospital Universitario Donostia. OSI Donostialdea. \u00c1rea de Enfermedades Infecciosas|SeqCOVID-SPAIN consortium/IBV (CSIC) |Comas|Spain

>Spike|hCoV-19/USA/TX-HMH-MCoV-18981/2020|2020-11-25|EPI\_ISL\_785263|Original|hCoV-19^^Texas|Human|Houston Methodist Hospital|Houston Methodist Hospital|Long|USA

>Spike|hCoV-19/England/ALDP-A87A81/2020|2020-10-17|EPI\_ISL\_606139|Original|hCoV-19^^England|Human|Lighthouse Lab in Alderley Park|Wellcome Sanger Institute for the COVID-19 Genomics UK (COG-UK) consortium|Davies|United Kingdom

>Spike|hCoV-19/USA/NY-NYCPHL-000019/2020|2020-03-10|EPI\_ISL\_631516|Original|hCoV-19^^New York|Human|Jamaica Hospital Medical Center|New York City Public Health Laboratory|Wang|USA

>Spike|hCoV-19/Norway/2815/2020|2020-06-29|EPI\_ISL\_493380|Original|hCoV-19^^Norway|Human|Furst Medical Laboratory|Norwegian Institute of Public Health|Kopperud Riis|Norway

>Spike|hCoV-19/England/LOND-124C81A/2020|2020-00-00|EPI\_ISL\_490435|Original|hCoV-19^^England|Human|University College London Hospital|COVID-19 Genomics UK (COG-UK) Consortium|Byott|United Kingdom

>Spike|hCoV-19/USA/MN-MDH-2151/2020|2020-11-26|EPI\_ISL\_708489|Original|hCoV-19^^Minnesota|Human|Minnesota Department of Health|Minnesota Department of Health|Lorentz|USA

>Spike|hCoV-19/Singapore/217nan/2020|2020-04-01|EPI\_ISL\_538467|Original|hCoV-19^^Singapore|Human|Department of Laboratory Medicine|Department of Laboratory Medicine|Chen|Singapore

>Spike|hCoV-19/Japan/PG-5148/2020|2020-08-00|EPI\_ISL\_690255|Original|hCoV-19^^Japan|Human|Pathogen Genomics Center|Pathogen Genomics Center|Sekizuka|Japan

>Spike|hCoV-19/Japan/PG-2298/2020|2020-04-00|EPI\_ISL\_685903|Original|hCoV-19^^Japan|Human|Pathogen Genomics Center|Pathogen Genomics Center|Sekizuka|Japan

>Spike|hCoV-19/England/204191913/2020|2020-10-11|EPI\_ISL\_603194|Original|hCoV-19^^England|Human|Respiratory Virus Unit|Respiratory Virus Unit|Platt|United Kingdom

>Spike|hCoV-19/England/MILK-CA49DA/2020|2020-12-15|EPI\_ISL\_762198|Original|hCoV-19^^England|Human|Lighthouse Lab in Milton Keynes|Wellcome Sanger Institute for the COVID-19 Genomics UK (COG-UK) Consortium|Davies|United Kingdom

>Spike|hCoV-19/South Africa/N00058/2020|2020-08-12|EPI\_ISL\_622958|Original|hCoV-19^^Eastern Cape|Human|National Health Laboratory Service|National Institute for Communicable Diseases of the National Health Laboratory Service|Allam|South Africa

>Spike|hCoV-19/USA/UT-0533/2020|2020-04-03|EPI\_ISL\_435367|Original|hCoV-19^^Utah|Human|Utah Public Health Laboratory|Utah Public Health Laboratory|Young|USA

>Spike|hCoV-19/England/BRIS-128E8F/2020|2020-04-18|EPI\_ISL\_458737|Original|hCoV-19^^England|Human|PHE South West Regional Laboratory|Wellcome Sanger Institute for the COVID-19 Genomics UK (COG-UK) consortium|Davies|United Kingdom

>Spike|hCoV-19/England/QEUA-9C886D/2020|2020-09-09|EPI\_ISL\_567250|Original|hCoV-19^^England|Human|Lighthouse Lab in Glasgow|Wellcome Sanger Institute for the COVID-19 Genomics UK (COG-UK) consortium|Davies|United Kingdom

>Spike|hCoV-19/Wales/PHWC-165B16/2020|2020-06-04|EPI\_ISL\_490768|Original|hCoV-19^^Wales|Human|Wales Specialist Virology Centre Sequencing lab|COVID-19 Genomics UK (COG-UK) Consortium|Moore|United Kingdom

>Spike|hCoV-19/England/NORW-EBDB9/2020|2020-05-08|EPI\_ISL\_457509|Original|hCoV-19^^England|Human|Quadram Institute Bioscience|COVID-19 Genomics UK (COG-UK) Consortium|Alikhan|United Kingdom

>Spike|hCoV-19/Wales/PHWC-163240/2020|2020-05-11|EPI\_ISL\_473267|Original|hCoV-19^^Wales|Human|Wales Specialist Virology Centre Sequencing lab|COVID-19 Genomics UK (COG-UK) Consortium|Moore|United Kingdom

>Spike|hCoV-19/England/QEUA-BA2E1A/2020|2020-11-18|EPI\_ISL\_672854|Original|hCoV-19^^England|Human|Lighthouse Lab in Glasgow|Wellcome Sanger Institute for the COVID-19 Genomics UK (COG-UK) Consortium|Davies|United Kingdom

>Spike|hCoV-19/South Africa/Tygerberg\_26/2020|2020-04-09|EPI\_ISL\_464137|Original|hCoV-19^^Western Cape|Human|National Health Laboratory Service (NHLS)|Division of Medical Virology|Engelbrecht|South Africa

>Spike|hCoV-19/Japan/PG-1447/2020|2020-04-00|EPI\_ISL\_685054|Original|hCoV-19^^Japan|Human|Saitama Prefectural Institute of Public Health|Pathogen Genomics Center|Sekizuka|Japan

>Spike|hCoV-19/USA/UT-UPHL-2012321043/2020|2020-08-09|EPI\_ISL\_745814|Original|hCoV-19^^Utah|Human|Ginkgo Bioworks Clinical Laboratory|Utah Public Health Laboratory|Young|USA

>Spike|hCoV-19/Denmark/DCGC-7061/2020|2020-10-12|EPI\_ISL\_619116|Original|hCoV-19^^Hovedstaden|Human|Department of Virus and Microbiological Special Diagnostics|Albertsen lab|Michaelsen|Denmark

>Spike|hCoV-19/Japan/PG-4063/2020|2020-07-00|EPI\_ISL\_692304|Original|hCoV-19^^Japan|Human|Sakai City Institute of Public Health|Pathogen Genomics Center|Sekizuka|Japan

>Spike|hCoV-19/England/ALDP-94F691/2020|2020-06-18|EPI\_ISL\_555960|Original|hCoV-19^^England|Human|Lighthouse Lab in Alderley Park|Wellcome Sanger Institute for the COVID-19 Genomics UK (COG-UK) consortium|Davies|United Kingdom

>Spike|hCoV-19/South Africa/LR00094/2020|2020-07-15|EPI\_ISL\_514396|Original|hCoV-19^^Gauteng|Human|National Institute for Communicable Diseases of the National Health Laboratory Service|National Institute for Communicable Diseases of the National Health Laboratory Service|Allam|South Africa

>Spike|hCoV-19/Switzerland/VD-ETHZ-100130/2020|2020-03-16|EPI\_ISL\_451714|Original|hCoV-19^^Vaud|Human|Viollier AG|Department of Biosystems Science and Engineering|Nadeau|Switzerland

>Spike|hCoV-19/USA/WI-UW-1758/2020|2020-09-17|EPI\_ISL\_605631|Original|hCoV-19^^Wisconsin|Human|University of Wisconsin-Madison AIDS Vaccine Research Laboratories|University of Wisconsin-Madison AIDS Vaccine Research Laboratories|Baczenas|USA

>Spike|hCoV-19/England/NORT-1B6C0C8/2020|2020-10-01|EPI\_ISL\_612561|Original|hCoV-19^^England|Human|Northumbria University / South Tees Hospitals NHS Foundation Trust / North Cumbria Integrated Care NHS Foundation Trust / North Tees and Hartlepool NHS Foundation Trust / Newcastle Hospitals NHS Foundation Trust|COVID-19 Genomics UK (COG-UK) Consortium|Bashton|United Kingdom

>Spike|hCoV-19/England/LIVE-DCA6F4/2020|2020-12-03|EPI\_ISL\_724378|Original|hCoV-19^^England|Human|Liverpool Clinical Laboratories|COVID-19 Genomics UK (COG-UK) Consortium|Haldenby|United Kingdom

>Spike|hCoV-19/England/CAMB-A98100/2020|2020-12-14|EPI\_ISL\_764338|Original|hCoV-19^^England|Human|Department of Pathology|COVID-19 Genomics UK (COG-UK) Consortium|Goodfellow|United Kingdom

>Spike|hCoV-19/Germany/HH-hpi-p2021/2020|2020-03-21|EPI\_ISL\_776325|Original|hCoV-19^^Hamburg|Human|University Medical Center Hamburg Eppendorf|Heinrich Pette Institute|Robitaille|Germany

>Spike|hCoV-19/Sweden/20-07025/2020|2020-04-06|EPI\_ISL\_434663|Original|hCoV-19^^Stockholm|Human|Surbrunns VC|The Public Health Agency of Sweden|Svartstr\u00f6m|Sweden

>Spike|hCoV-19/USA/TX-HMH-MCoV-11590/2020|2020-09-11|EPI\_ISL\_790062|Original|hCoV-19^^Texas|Human|Houston Methodist Hospital|Houston Methodist Hospital|Long|USA

>Spike|hCoV-19/USA/MN-QDX-1716/2020|2020-03-16|EPI\_ISL\_604068|Original|hCoV-19^^Minnesota|Human|Quest Diagnostics|Quest Diagnostics|Kagan|USA

>Spike|hCoV-19/Wales/PHWC-48E7D4/2020|2020-11-13|EPI\_ISL\_680913|Original|hCoV-19^^Wales|Human|Wales Specialist Virology Centre Sequencing lab|COVID-19 Genomics UK (COG-UK) Consortium|Moore|United Kingdom

>Spike|hCoV-19/USA/MI-UM-10036396949/2020|2020-10-12|EPI\_ISL\_610073|Original|hCoV-19^^Michigan|Human|University of Michigan Clinical Microbiology Laboratory|Lauring Lab|Valesano|USA

>Spike|hCoV-19/England/ALDP-A85494/2020|2020-10-18|EPI\_ISL\_610576|Original|hCoV-19^^England|Human|Lighthouse Lab in Alderley Park|Wellcome Sanger Institute for the COVID-19 Genomics UK (COG-UK) consortium|Davies|United Kingdom

>Spike|hCoV-19/Spain/PV-IBV-001537/2020|2020-03-16|EPI\_ISL\_509616|Original|hCoV-19^^Basque Country|Human|Hospital Universitario Araba. Vitoria-Gasteiz|SeqCOVID-SPAIN consortium|IBV (CSIC) |Comas|Spain

>Spike|hCoV-19/Iceland/569/2020|2020-03-28|EPI\_ISL\_424589|Original|hCoV-19^^Reykjavik|Human|The National University Hospital of Iceland|deCODE genetics|J\u00f3nsson|Iceland

>Spike|hCoV-19/England/CAMC-B22207/2020|2020-11-02|EPI\_ISL\_645885|Original|hCoV-19^^England|Human|Lighthouse Lab in Cambridge|Wellcome Sanger Institute for the COVID-19 Genomics UK (COG-UK) Consortium|Davies|United Kingdom

>Spike|hCoV-19/Wales/PHWC-2BA7A/2020|2020-03-28|EPI\_ISL\_445800|Original|hCoV-19^^Wales|Human|Wales Specialist Virology Centre|Public Health Wales Microbiology Cardiff|Moore|United Kingdom

>Spike|hCoV-19/USA/TX-HMH-1439/2020|2020-04-13|EPI\_ISL\_542724|Original|hCoV-19^^Texas|Human|Houston Methodist Hospital|Houston Methodist Hospital|Long|USA

>Spike|hCoV-19/England/MILK-A6B1AC/2020|2020-10-09|EPI\_ISL\_608745|Original|hCoV-19^^England|Human|Lighthouse Lab in Milton Keynes|Wellcome Sanger Institute for the COVID-19 Genomics UK (COG-UK) consortium|Davies|United Kingdom

>Spike|hCoV-19/Singapore/1354/2020|2020-06-18|EPI\_ISL\_648705|Original|hCoV-19^^Singapore|Human|Department of Laboratory Medicine|Department of Laboratory Medicine|Chen|Singapore

>Spike|hCoV-19/Japan/PG-8447/2020|2020-09-00|EPI\_ISL\_687546|Original|hCoV-19^^Japan|Human|Fukuoka Institute of Health and Environmental Sciences|Pathogen Genomics Center|Sekizuka|Japan

>Spike|hCoV-19/England/MILK-9C73F4/2020|2020-09-07|EPI\_ISL\_572840|Original|hCoV-19^^England|Human|Northumbria University / South Tees Hospitals NHS Foundation Trust / North Cumbria Integrated Care NHS Foundation Trust / North Tees and Hartlepool NHS Foundation Trust / Newcastle Hospitals NHS Foundation Trust|COVID-19 Genomics UK (COG-UK) Consortium|Bashton|United Kingdom

>Spike|hCoV-19/Portugal/PT1466/2020|2020-03-24|EPI\_ISL\_511425|Original|hCoV-19^^Portugal|Human|Instituto Nacional de Saude (INSA)|Instituto Nacional de Saude (INSA)|Borges|Portugal

>Spike|hCoV-19/Spain/MD-H12-76/2020|2020-04-01|EPI\_ISL\_530006|Original|hCoV-19^^Madrid|Human|Hospital Universitario 12 de Octubre|Hospital Universitario 12 de Octubre|Viedma|Spain

>Spike|hCoV-19/Canada/ON-E76/2020|2020-05-06|EPI\_ISL\_593549|Original|hCoV-19^^Ontario|Human|Eastern Ontario Regional Laboratory Association|McMaster University|McArthur|Canada

>Spike|hCoV-19/Scotland/CVR3140/2020|2020-04-28|EPI\_ISL\_490693|Original|hCoV-19^^Scotland|Human|West of Scotland Specialist Virology Centre|COVID-19 Genomics UK (COG-UK) Consortium|Robertson|United Kingdom

>Spike|hCoV-19/England/20118054004/2020|2020-03-12|EPI\_ISL\_464926|Original|hCoV-19^^England|Human|Respiratory Virus Unit|Respiratory Virus Unit|Platt|United Kingdom

>Spike|hCoV-19/England/QEUEH-A1E72E/2020|2020-09-28|EPI\_ISL\_587414|Original|hCoV-19^^England|Human|Lighthouse Lab in Glasgow|Wellcome Sanger Institute for the COVID-19 Genomics UK (COG-UK) consortium|Davies|United Kingdom

>Spike|hCoV-19/Australia/VIC580/2020|2020-03-25|EPI\_ISL\_426837|Original|hCoV-19^^Victoria|Human|Victorian Infectious Diseases Reference Laboratory (VIDRL)|Microbiological Diagnostic Unit Public Health Laboratory and Victorian Infectious Diseases Reference Laboratory|Schultz|Australia

>Spike|hCoV-19/England/BIRM-5F6D3/2020|2020-05-02|EPI\_ISL\_473321|Original|hCoV-19^^England|Human|University of Birmingham|COVID-19 Genomics UK (COG-UK) Consortium|Loman|United Kingdom

>Spike|hCoV-19/England/QEUEH-9DAF54/2020|2020-09-21|EPI\_ISL\_601486|Original|hCoV-19^^England|Human|Lighthouse Lab in Glasgow|Wellcome Sanger Institute for the COVID-19 Genomics UK (COG-UK) consortium|Davies|United Kingdom

>Spike|hCoV-19/Australia/NSW2157/2020|2020-03-11|EPI\_ISL\_500635|Original|hCoV-19^^New South Wales|Human|Area of Virology|Area of Virology|Bull|Australia

>Spike|hCoV-19/USA/WA-UW-12846/2020|2020-06-29|EPI\_ISL\_570911|Original|hCoV-19^^Washington|Human|UW Virology Lab|UW Virology Lab|Roychoudhury|USA

>Spike|hCoV-19/Australia/VIC8866/2020|2020-07-22|EPI\_ISL\_565247|Original|hCoV-19^^Victoria|Human|Microbiological Diagnostic Unit - Public Health Laboratory (MDU-PHL)|MDU-PHL|Schultz|Australia

>Spike|hCoV-19/Australia/VIC5052/2020|2020-07-18|EPI\_ISL\_519855|Original|hCoV-19^^Victoria|Human|Microbiological Diagnostic Unit - Public Health Laboratory (MDU-PHL)|MDU-PHL|Schultz|Australia

>Spike|hCoV-19/England/ALDP-A67401/2020|2020-10-12|EPI\_ISL\_630451|Original|hCoV-19^^England|Human|Lighthouse Lab in Alderley Park|Wellcome Sanger Institute for the COVID-19 Genomics UK (COG-UK) consortium|Davies|United Kingdom

>Spike|hCoV-19/England/ALDP-A2FA8B/2020|2020-10-05|EPI\_ISL\_587111|Original|hCoV-19^^England|Human|Lighthouse Lab in Alderley Park|Wellcome Sanger Institute for the COVID-19 Genomics UK (COG-UK) consortium|Davies|United Kingdom

>Spike|hCoV-19/Switzerland/BL-ETHZ-380376/2020|2020-11-22|EPI\_ISL\_721796|Original|hCoV-19^^Basel-Landschaft|Human|Viollier AG|Department of Biosystems Science and Engineering|Nadeau|Switzerland

>Spike|hCoV-19/England/QEUEH-B66735/2020|2020-11-10|EPI\_ISL\_655023|Original|hCoV-19^^England|Human|Lighthouse Lab in Glasgow|Wellcome Sanger Institute for the COVID-19 Genomics UK (COG-UK) Consortium|Davies|United Kingdom

>Spike|hCoV-19/Denmark/DCGC-17708/2020|2020-12-14|EPI\_ISL\_751158|Original|hCoV-19^^Midtjylland|Human|Department of Virus and Microbiological Special Diagnostics|Albertsen Lab|Michaelsen|Denmark

>Spike|hCoV-19/England/LIVE-DC4A85/2020|2020-11-11|EPI\_ISL\_705912|Original|hCoV-19^^England|Human|Liverpool Clinical Laboratories|COVID-19 Genomics UK (COG-UK) Consortium|Haldenby|United Kingdom

>Spike|hCoV-19/USA/WY-WPHL-20094903/2020|2020-12-12|EPI\_ISL\_754215|Original|hCoV-19^^Wyoming|Human|Wyoming Public Health Laboratory|Wyoming Public Health Laboratory|Hull|USA

>Spike|hCoV-19/USA/MI-MDHHS-SC20987/2020|2020-05-22|EPI\_ISL\_507774|Original|hCoV-19^^Michigan|Human|Michigan Department of Health and Human Services|Michigan Department of Health and Human Services|Blankenship|USA

>Spike|hCoV-19/USA/TX-HMH-4571/2020|2020-06-21|EPI\_ISL\_543725|Original|hCoV-19^^Texas|Human|Houston Methodist Hospital|Houston Methodist Hospital|Long|USA

>Spike|hCoV-19/England/CAMC-9D1D35/2020|2020-09-19|EPI\_ISL\_601766|Original|hCoV-19^^England|Human|Lighthouse Lab in Cambridge|Wellcome Sanger Institute for the COVID-19 Genomics UK (COG-UK) consortium|Davies|United Kingdom

>Spike|hCoV-19/England/ALDP-B48FD7/2020|2020-11-07|EPI\_ISL\_649201|Original|hCoV-19^^England|Human|Lighthouse Lab in Alderley Park|Wellcome Sanger Institute for the COVID-19 Genomics UK (COG-UK) Consortium|Davies|United Kingdom

>Spike|hCoV-19/England/OXON-AF601/2020|2020-04-09|EPI\_ISL\_478756|Original|hCoV-19^^England|Human|Oxford Viromics|COVID-19 Genomics UK (COG-UK) Consortium|Golubchik|United Kingdom

>Spike|hCoV-19/Norway/5397/2020|2020-11-04|EPI\_ISL\_708077|Original|hCoV-19^^Vestland|Human|Foerde Hospital|Norwegian Institute of Public Health|Kopperud Riis|Norway

>Spike|hCoV-19/Germany/BAV-MVP0295/2020|2020-05-26|EPI\_ISL\_548958|Original|hCoV-19^^Bavaria|Human|Max von Pettenkofer Institute|Laboratory for Functional Genome Analysis|Graf|Germany

>Spike|hCoV-19/USA/WA-S945/2020|2020-04-27|EPI\_ISL\_463435|Original|hCoV-19^^Washington|Human|Washington State Department of Health|Seattle Flu Study|Bedford|USA

>Spike|hCoV-19/England/ALDP-B4613D/2020|2020-11-07|EPI\_ISL\_656173|Original|hCoV-19^^England|Human|Lighthouse Lab in Alderley Park|Wellcome Sanger Institute for the COVID-19 Genomics UK (COG-UK) Consortium|Davies|United Kingdom

>Spike|hCoV-19/England/QEUEH-B66753/2020|2020-11-10|EPI\_ISL\_654975|Original|hCoV-19^^England|Human|Lighthouse Lab in Glasgow|Wellcome Sanger Institute for the COVID-19 Genomics UK (COG-UK) Consortium|Davies|United Kingdom

>Spike|hCoV-19/USA/WI-UW-2146/2020|2020-10-15|EPI\_ISL\_677550|Original|hCoV-19^^Wisconsin|Human|University of Wisconsin-Madison AIDS Vaccine Research Laboratories|University of Wisconsin-Madison AIDS Vaccine Research Laboratories|Baczenas|USA

>Spike|hCoV-19/Japan/PG-6736/2020|2020-08-00|EPI\_ISL\_687847|Original|hCoV-19^^Japan|Human|Pathogen Genomics Center|Pathogen Genomics Center|Sekizuka|Japan

>Spike|hCoV-19/Denmark/DCGC-10550/2020|2020-11-02|EPI\_ISL\_670047|Original|hCoV-19^^Hovedstaden|Human|Department of Virus and Microbiological Special Diagnostics|Albertsen Lab|Michaelsen|Denmark

>Spike|hCoV-19/England/MILK-ACECF1/2020|2020-10-21|EPI\_ISL\_629288|Original|hCoV-19^^England|Human|Lighthouse Lab in Milton Keynes|Wellcome Sanger Institute for the COVID-19 Genomics UK (COG-UK) consortium|Davies|United Kingdom

>Spike|hCoV-19/Gambia/NPHL-295/2020|2020-00-00|EPI\_ISL\_561305|Original|hCoV-19^^Kombo|Human|MRCG at LSHTM Genomics lab|MRCG at LSHTM Genomics lab|Sesay|Gambia

>Spike|hCoV-19/France/PAC-IHU-0921/2020|2020-04-03|EPI\_ISL\_568991|Original|hCoV-19^^Provence-Alpes-C\u00f4te-d\u0201Azur|Human|MEPHI|MEPHI|Levasseur|France

>Spike|hCoV-19/England/LOND-125FF79/2020|2020-03-10|EPI\_ISL\_516865|Original|hCoV-19^^England|Human|North West London Pathology|Wellcome Sanger Institute for the COVID-19 Genomics UK (COG-UK) consortium|Davies|United Kingdom

>Spike|hCoV-19/England/ALDP-68C2D3/2020|2020-07-02|EPI\_ISL\_558010|Original|hCoV-19^^England|Human|Lighthouse Lab in Alderley Park|Wellcome Sanger Institute for the COVID-19 Genomics UK (COG-UK) consortium|Davies|United Kingdom

>Spike|hCoV-19/Canada/ON-SLB3124/2020|2020-04-22|EPI\_ISL\_717753|Original|hCoV-19^^Ontario|Human|Kingston Health Sciences Centre and Queen's University|Ontario Institute for Cancer Research|de Borja|Canada

>Spike|hCoV-19/England/CAMC-B20B3B/2020|2020-11-02|EPI\_ISL\_647788|Original|hCoV-19^^England|Human|Lighthouse Lab in Cambridge|Wellcome Sanger Institute for the COVID-19 Genomics UK (COG-UK) Consortium|Davies|United Kingdom

>Spike|hCoV-19/USA/TX-HMH-MCoV-19113/2020|2020-11-23|EPI\_ISL\_783633|Original|hCoV-19^^Texas|Human|Houston Methodist Hospital|Houston Methodist Hospital|Long|USA

>Spike|hCoV-19/Switzerland/BE-ETHZ-100117/2020|2020-03-16|EPI\_ISL\_451701|Original|hCoV-19^^Bern|Human|Viollier AG|Department of Biosystems Science and Engineering|Nadeau|Switzerland

>Spike|hCoV-19/England/CAMC-B0988C/2020|2020-10-30|EPI\_ISL\_673117|Original|hCoV-19^^England|Human|Lighthouse Lab in Cambridge|Wellcome Sanger Institute for the COVID-19 Genomics UK (COG-UK) Consortium|Davies|United Kingdom

>Spike|hCoV-19/South Africa/KRISP-K004036/2020|2020-10-14|EPI\_ISL\_635017|Original|hCoV-19^^KwaZulu-Natal|Human|National Health Laboratory Service - Inkosi Albert Luthuli Central Hospital (NHLS-IALCH)|KRISP|de Oliveira|South Africa

>Spike|hCoV-19/USA/WA-UW-32824/2020|2020-10-15|EPI\_ISL\_737091|Original|hCoV-19^^Washington|Human|UW Virology Lab|UW Virology Lab|Roychoudhury|USA

>Spike|hCoV-19/Canada/QC-LSPQ-L00243079/2020|2020-03-30|EPI\_ISL\_536348|Original|hCoV-19^^Quebec|Human|Centre hospitalier Anna-Laberge|Laboratoire de sant\u00e9 publique du Qu\u00e9bec|Moreira|Canada

>Spike|hCoV-19/Switzerland/ZH-ETHZ-390418/2020|2020-12-03|EPI\_ISL\_721977|Original|hCoV-19^^Zurich|Human|Viollier AG|Department of Biosystems Science and Engineering|Nadeau|Switzerland

>Spike|hCoV-19/England/MILK-9D4664/2020|2020-09-19|EPI\_ISL\_601688|Original|hCoV-19^^England|Human|Lighthouse Lab in Milton Keynes|Wellcome Sanger Institute for the COVID-19 Genomics UK (COG-UK) consortium|Davies|United Kingdom

>Spike|hCoV-19/England/SHEF-C1E01/2020|2020-04-01|EPI\_ISL\_432736|Original|hCoV-19^^England|Human|Virology Department|COVID-19 Genomics UK (COG-UK) Consortium|de Silva|United Kingdom

>Spike|hCoV-19/England/LOND-125F9F3/2020|2020-04-29|EPI\_ISL\_482138|Original|hCoV-19^^England|Human|North West London Pathology|Wellcome Sanger Institute for the COVID-19 Genomics UK (COG-UK) Consortium|Davies|United Kingdom

>Spike|hCoV-19/Wales/PHWC-166F82/2020|2020-06-11|EPI\_ISL\_494134|Original|hCoV-19^^Wales|Human|Originating lab|COVID-19 Genomics UK (COG-UK) Consortium|Moore|United Kingdom

>Spike|hCoV-19/Scotland/EDB3857/2020|2020-04-30|EPI\_ISL\_439341|Original|hCoV-19^^Scotland|Human|Virology Department|COVID-19 Genomics UK (COG-UK) Consortium|Williams|United Kingdom

>Spike|hCoV-19/Japan/PG-8316/2020|2020-08-00|EPI\_ISL\_687415|Original|hCoV-19^^Japan|Human|Pathogen Genomics Center|Pathogen Genomics Center|Sekizuka|Japan

>Spike|hCoV-19/Australia/NSW817/2020|2020-08-04|EPI\_ISL\_526159|Original|hCoV-19^^New South Wales|Human|Sydney South West Pathology Service (SSWPS) - Liverpool Hospital - NSW Health Pathology|NSW Health Pathology - Institute of Clinical Pathology and Medical Research; Westmead Hospital; University of Sydney|Gall|Australia

>Spike|hCoV-19/England/MILK-B02838/2020|2020-10-24|EPI\_ISL\_642798|Original|hCoV-19^^England|Human|Lighthouse Lab in Milton Keynes|Wellcome Sanger Institute for the COVID-19 Genomics UK (COG-UK) Consortium|Davies|United Kingdom

>Spike|hCoV-19/England/LOND-1250AFF/2020|2020-11-02|EPI\_ISL\_665246|Original|hCoV-19^^England|Human|University College London Hospital|COVID-19 Genomics UK (COG-UK) Consortium|Byott|United Kingdom

>Spike|hCoV-19/USA/WA-S790/2020|2020-04-15|EPI\_ISL\_449960|Original|hCoV-19^^Washington|Human|Washington State Department of Health|Seattle Flu Study|Bedford|USA

>Spike|hCoV-19/England/201380030/2020|2020-03-26|EPI\_ISL\_421797|Original|hCoV-19^^England|Human|Respiratory Virus Unit|Respiratory Virus Unit|Platt|United Kingdom

>Spike|hCoV-19/England/NORT-29F541/2020|2020-04-29|EPI\_ISL\_484325|Original|hCoV-19^^England|Human|Northumbria University / South Tees Hospitals NHS Foundation Trust / North Cumbria Integrated Care NHS Foundation Trust / North Tees and Hartlepool NHS Foundation Trust / Newcastle Hospitals NHS Foundation Trust|COVID-19 Genomics UK (COG-UK) Consortium|Bashton|United Kingdom

>Spike|hCoV-19/England/BRIS-1853B99/2020|2020-04-26|EPI\_ISL\_492329|Original|hCoV-19^^England|Human|PHE South West Regional Laboratory|Wellcome Sanger Institute for the COVID-19 Genomics UK (COG-UK) consortium|Davies|United Kingdom

>Spike|hCoV-19/Russia/SPE-RII-MH1012S/2020|2020-09-05|EPI\_ISL\_596252|Original|hCoV-19^^Saint Petersburg|Human|HELIX LCC|WHO National Influenza Centre Russian Federation|Komissarov|Russia

>Spike|hCoV-19/England/QEUH-AD20B2/2020|2020-10-23|EPI\_ISL\_634094|Original|hCoV-19^^England|Human|Lighthouse Lab in Glasgow|Wellcome Sanger Institute for the COVID-19 Genomics UK (COG-UK) consortium|Davies|United Kingdom

>Spike|hCoV-19/Wales/PHWC-24367/2020|2020-03-17|EPI\_ISL\_419401|Original|hCoV-19^^Wales|Human|Wales Specialist Virology Centre|Public Health Wales Microbiology Cardiff|Moore|United Kingdom

>Spike|hCoV-19/Hong Kong/VM20011215/2020|2020-04-11|EPI\_ISL\_463301|Original|hCoV-19^^Hong Kong|Human|Tuen Mun Hospital|Hong Kong Department of Health|Mak|China

>Spike|hCoV-19/England/NOTT-114E68/2020|2020-10-11|EPI\_ISL\_584775|Original|hCoV-19^^England|Human|Queens Medical Centre|COVID-19 Genomics UK (COG-UK) Consortium|Loose|United Kingdom

>Spike|hCoV-19/Australia/VIC5843/2020|2020-07-20|EPI\_ISL\_518637|Original|hCoV-19^^Victoria|Human|Microbiological Diagnostic Unit - Public Health Laboratory (MDU-PHL) |MDU-PHL|Schultz|Australia

>Spike|hCoV-19/England/MILK-A0548D/2020|2020-09-30|EPI\_ISL\_599904|Original|hCoV-19^^England|Human|Lighthouse Lab in Milton Keynes|Wellcome Sanger Institute for the COVID-19 Genomics UK (COG-UK) consortium|Davies|United Kingdom

>Spike|hCoV-19/South Korea/KCDC2692/2020|2020-07-02|EPI\_ISL\_522472|Original|hCoV-19^^South Korea|Human|Center for Laboratory Control of Infectious Diseases|Center for Laboratory Control of Infectious Diseases|Kim|South Korea

>Spike|hCoV-19/England/QEUH-AD1235/2020|2020-10-26|EPI\_ISL\_633730|Original|hCoV-19^^England|Human|Lighthouse Lab in Glasgow|Wellcome Sanger Institute for the COVID-19 Genomics UK (COG-UK) consortium|Davies|United Kingdom

>Spike|hCoV-19/Scotland/CVR4692/2020|2020-09-30|EPI\_ISL\_612313|Original|hCoV-19^^Scotland|Human|West of Scotland Specialist Virology Centre|COVID-19 Genomics UK (COG-UK) Consortium|Robertson|United Kingdom

>Spike|hCoV-19/USA/NY-PV09149/2020|2020-03-22|EPI\_ISL\_422518|Original|hCoV-19^^New York|Human|MSHS Clinical Microbiology Laboratories|MSHS Pathogen Surveillance Program|van Bakel|USA

>Spike|hCoV-19/England/QEUH-BCBC20/2020|2020-11-27|EPI\_ISL\_704490|Original|hCoV-19^^England|Human|Lighthouse Lab in Glasgow|Wellcome Sanger Institute for the COVID-19 Genomics UK (COG-UK) Consortium|Davies|United Kingdom

>Spike|hCoV-19/England/MILK-A7DBF4/2020|2020-10-13|EPI\_ISL\_606416|Original|hCoV-19^^England|Human|Lighthouse Lab in Milton Keynes|Wellcome Sanger Institute for the COVID-19 Genomics UK (COG-UK) consortium|Davies|United Kingdom

>Spike|hCoV-19/England/CAMB-7D6FD/2020|2020-04-06|EPI\_ISL\_441672|Original|hCoV-19^^England|Human|Department of Pathology|Wellcome Sanger Institute for the COVID-19 Genomics UK (COG-UK) consortium|Amato|United Kingdom



>Spike|hCoV-19/England/CAMC-B0A5EE/2020|2020-10-29|EPI\_ISL\_673195|Original|hCoV-19^^England|Human|Lighthouse Lab in Cambridge|Wellcome Sanger Institute for the COVID-19 Genomics UK (COG-UK) Consortium|Davies|United Kingdom

>Spike|hCoV-19/England/ALDP-9C5D43/2020|2020-09-10|EPI\_ISL\_567870|Original|hCoV-19^^England|Human|Lighthouse Lab in Alderley Park|Wellcome Sanger Institute for the COVID-19 Genomics UK (COG-UK) consortium|Davies|United Kingdom

>Spike|hCoV-19/USA/WA-S1302/2020|2020-05-14|EPI\_ISL\_495752|Original|hCoV-19^^Washington|Human|Washington State Department of Health|Seattle Flu Study|Lee|USA

>Spike|hCoV-19/Australia/SAP432/2020|2020-03-21|EPI\_ISL\_508123|Original|hCoV-19^^South Australia|Human|SA Pathology|SA Pathology|Leong|Australia

>Spike|hCoV-19/England/NOTT-10FCC0/2020|2020-04-08|EPI\_ISL\_432709|Original|hCoV-19^^England|Human|Queens Medical Centre|COVID-19 Genomics UK (COG-UK) Consortium|Loose|United Kingdom

>Spike|hCoV-19/Japan/PG-8597/2020|2020-08-00|EPI\_ISL\_686193|Original|hCoV-19^^Japan|Human|Pathogen Genomics Center|Pathogen Genomics Center|Sekizuka|Japan

>Spike|hCoV-19/England/LIVE-A5058/2020|2020-03-05|EPI\_ISL\_500101|Original|hCoV-19^^England|Human|Liverpool Clinical Laboratories|COVID-19 Genomics UK (COG-UK) Consortium|Haldenby|United Kingdom

>Spike|hCoV-19/Australia/VIC2681/2020|2020-06-29|EPI\_ISL\_521522|Original|hCoV-19^^Victoria|Human|Victorian Infectious Diseases Reference Laboratory (VIDRL)|VIDRL and MDU-PHL|Schultz|Australia

>Spike|hCoV-19/USA/TX-HMH-MCoV-12974/2020|2020-08-28|EPI\_ISL\_788126|Original|hCoV-19^^Texas|Human|Houston Methodist Hospital|Houston Methodist Hospital|Long|USA

>Spike|hCoV-19/USA/TX-HMH-3366/2020|2020-06-12|EPI\_ISL\_544150|Original|hCoV-19^^Texas|Human|Houston Methodist Hospital|Houston Methodist Hospital|Long|USA

>Spike|hCoV-19/Wales/PHWC-48E983/2020|2020-11-13|EPI\_ISL\_680939|Original|hCoV-19^^Wales|Human|Wales Specialist Virology Centre Sequencing lab|COVID-19 Genomics UK (COG-UK) Consortium|Moore|United Kingdom

>Spike|hCoV-19/Denmark/DCGC-16739/2020|2020-06-15|EPI\_ISL\_714933|Original|hCoV-19^^Nordjylland|Human|Department of Virus and Microbiological Special Diagnostics|Albertsen Lab|Michaelsen|Denmark

>Spike|hCoV-19/Denmark/DCGC-15079/2020|2020-11-23|EPI\_ISL\_713278|Original|hCoV-19^^Syddanmark|Human|Department of Virus and Microbiological Special Diagnostics|Albertsen Lab|Michaelsen|Denmark

>Spike|hCoV-19/England/SHEF-10D70D2/2020|2020-12-09|EPI\_ISL\_742095|Original|hCoV-19^^England|Human|Virology Department|COVID-19 Genomics UK (COG-UK) Consortium|de Silva|United Kingdom

>Spike|hCoV-19/England/MILK-BAA0B2/2020|2020-11-18|EPI\_ISL\_783309|Original|hCoV-19^^England|Human|Lighthouse Lab in Milton Keynes|Wellcome Sanger Institute for the COVID-19 Genomics UK (COG-UK) Consortium|Davies|United Kingdom

>Spike|hCoV-19/USA/NY-NYUMC448/2020|2020-04-20|EPI\_ISL\_435515|Original|hCoV-19^^New York|Human|NYU Langone Health|Departments of Pathology and Medicine|Maurano|USA

>Spike|hCoV-19/Australia/ACT0013/2020|2020-03-22|EPI\_ISL\_498480|Original|hCoV-19^^Australian Capital Territory|Human|ACT Pathology|Schwessinger Lab|Hall|Australia

>Spike|hCoV-19/Australia/QLD974/2020|2020-04-05|EPI\_ISL\_530237|Original|hCoV-19^^Queensland|Human|Queensland Health Forensic and Scientific Services|Public Health Virology Laboratory|Nguyen|Australia

>Spike|hCoV-19/England/CAMB-7A46F/2020|2020-04-02|EPI\_ISL\_440593|Original|hCoV-19^^England|Human|Department of Pathology|Wellcome Sanger Institute for the COVID-19 Genomics UK (COG-UK) consortium|Amato|United Kingdom

>Spike|hCoV-19/USA/TX-HMH-MCoV-15057/2020|2020-10-16|EPI\_ISL\_786541|Original|hCoV-19^^Texas|Human|Houston Methodist Hospital|Houston Methodist Hospital|Long|USA

>Spike|hCoV-19/England/204394042/2020|2020-10-25|EPI\_ISL\_653958|Original|hCoV-19^^England|Human|Respiratory Virus Unit|COVID-19 Genomics UK (COG-UK) Consortium|Platt|United Kingdom

>Spike|hCoV-19/Thailand/Bangkok-CONI-0194/2020|2020-03-21|EPI\_ISL\_498265|Original|hCoV-19^^Bangkok|Human|Ramathibodi Hospital|COVID-19 Network Investigations (CONI) Alliance|Batty|Thailand

>Spike|hCoV-19/England/NORT-1B71E3F/2020|2020-11-20|EPI\_ISL\_706324|Original|hCoV-19^^England|Human|Northumbria University / South Tees Hospitals NHS Foundation Trust

/ North Cumbria Integrated Care NHS Foundation Trust / North Tees and Hartlepool NHS Foundation Trust / Newcastle Hospitals NHS Foundation Trust|COVID-19 Genomics UK (COG-UK) Consortium|Bashton|United Kingdom  
>Spike|hCoV-19/England/ALDP-B75F2C/2020|2020-11-12|EPI\_ISL\_723716|Original|hCoV-19^^England|Human|Oxford Viromics|COVID-19 Genomics UK (COG-UK) Consortium|Golubchik|United Kingdom  
>Spike|hCoV-19/Luxembourg/LNS4254328/2020|2020-03-24|EPI\_ISL\_429737|Original|hCoV-19^^Luxembourg|Human|Laboratoire National de Sante|Laboratoire National de Sante|Wienecke-Baldacchino|Luxembourg  
>Spike|hCoV-19/England/ALDP-A6892F/2020|2020-10-12|EPI\_ISL\_608694|Original|hCoV-19^^England|Human|Lighthouse Lab in Alderley Park|Wellcome Sanger Institute for the COVID-19 Genomics UK (COG-UK) consortium|Davies|United Kingdom  
>Spike|hCoV-19/USA/WA-UW-8065/2020|2020-04-24|EPI\_ISL\_570197|Original|hCoV-19^^Washington|Human|UW Virology Lab|UW Virology Lab|Roychoudhury|USA  
>Spike|hCoV-19/Denmark/DCGC-7836/2020|2020-10-19|EPI\_ISL\_618765|Original|hCoV-19^^Hovedstaden|Human|Department of Virus and Microbiological Special Diagnostics|Albertsen lab|Michaelsen|Denmark  
>Spike|hCoV-19/England/OXON-B2234/2020|2020-04-14|EPI\_ISL\_479130|Original|hCoV-19^^England|Human|Oxford Viromics|COVID-19 Genomics UK (COG-UK) Consortium|Golubchik|United Kingdom  
>Spike|hCoV-19/Crimea/RII-MH3437S/2020|2020-10-07|EPI\_ISL\_733151|Original|hCoV-19^^Simpheropol|Human|HELIX LLC|WHO National Influenza Centre Russian Federation|Komissarov|Crimea  
>Spike|hCoV-19/Netherlands/ZuidHolland\_18/2020|2020-03-03|EPI\_ISL\_414560|Original|hCoV-19^^Zuid Holland|Human|Dutch COVID-19 response team|Erasmus Medical Center|Oude Munnink|Netherlands  
>Spike|hCoV-19/Australia/VIC3546/2020|2020-07-07|EPI\_ISL\_520295|Original|hCoV-19^^Victoria|Human|Victorian Infectious Diseases Reference Laboratory (VIDRL)|VIDRL and MDU-PHL|Schultz|Australia  
>Spike|hCoV-19/England/LIVE-9E298/2020|2020-04-03|EPI\_ISL\_453284|Original|hCoV-19^^England|Human|Liverpool Clinical Laboratories|COVID-19 Genomics UK (COG-UK) Consortium|Haldenby|United Kingdom  
>Spike|hCoV-19/India/DL-IGIB11305231/2020|2020-08-00|EPI\_ISL\_751287|Original|hCoV-19^^Delhi|Human|Devki Devi Foundation|CSIR-IGIB/Max|Pandey|India  
>Spike|hCoV-19/Netherlands/NB-EMC-309/2020|2020-10-10|EPI\_ISL\_632662|Original|hCoV-19^^Noord Brabant|Human|Dutch COVID-19 response team|Erasmus Medical Center|Oude Munnink|Netherlands  
>Spike|hCoV-19/USA/WA-OHSU-0462/2020|2020-06-09|EPI\_ISL\_526088|Original|hCoV-19^^Washington|Human|OHSU Lab Services Molecular Microbiology Lab|Ginkgo Bioworks Clinical Laboratory|O'Roak|USA  
>Spike|hCoV-19/Singapore/1300/2020|2020-05-15|EPI\_ISL\_648787|Original|hCoV-19^^Singapore|Human|Department of Laboratory Medicine|Department of Laboratory Medicine|Chen|Singapore  
>Spike|hCoV-19/Switzerland/ZH-ETHZ-310485/2020|2020-10-08|EPI\_ISL\_603555|Original|hCoV-19^^Zurich|Human|Viollier AG|Department of Biosystems Science and Engineering|Nadeau|Switzerland  
>Spike|hCoV-19/USA/NY-NYCPHL-000669/2020|2020-03-18|EPI\_ISL\_632087|Original|hCoV-19^^New York|Human|Flushing Hospital Medical Center|New York City Public Health Laboratory|Wang|USA  
>Spike|hCoV-19/Canada/QC-LSPQ-L00237374/2020|2020-03-25|EPI\_ISL\_536179|Original|hCoV-19^^Quebec|Human|H\u00f4pital Pierre-Boucher|Laboratoire de sant\u00e9 publique du Qu\u00e9bec|Moreira|Canada  
>Spike|hCoV-19/Denmark/ALAB-SSI143/2020|2020-03-09|EPI\_ISL\_429361|Original|hCoV-19^^Denmark|Human|Department of Virus and Microbiological Special Diagnostics|Albertsen lab|Kirkegaard|Denmark  
>Spike|hCoV-19/England/ALDP-A51604/2020|2020-10-07|EPI\_ISL\_597935|Original|hCoV-19^^England|Human|Lighthouse Lab in Alderley Park|Wellcome Sanger Institute for the COVID-19 Genomics UK (COG-UK) consortium|Davies|United Kingdom

>Spike|hCoV-19/Wales/PHWC-495F4B/2020|2020-11-23|EPI\_ISL\_726508|Original|hCoV-19^^Wales|Human|Originating lab|COVID-19 Genomics UK (COG-UK) Consortium|Moore|United Kingdom

>Spike|hCoV-19/USA/CA-IGI-0094/2020|2020-06-05|EPI\_ISL\_511848|Original|hCoV-19^^California|Human|Innovative Genomics Institute|Innovative Genomics Institute|Wyman|USA

>Spike|hCoV-19/England/BRIS-121A19/2020|2020-03-14|EPI\_ISL\_440298|Original|hCoV-19^^England|Human|PHE South West Regional Laboratory|Wellcome Sanger Institute for the COVID-19 Genomics UK (COG-UK) consortium|Amato|United Kingdom

>Spike|hCoV-19/England/ALDP-9515AE/2020|2020-06-13|EPI\_ISL\_554212|Original|hCoV-19^^England|Human|Lighthouse Lab in Alderley Park|Wellcome Sanger Institute for the COVID-19 Genomics UK (COG-UK) consortium|Davies|United Kingdom

>Spike|hCoV-19/USA/UT-UPHL-2008807/2020|2020-05-26|EPI\_ISL\_524833|Original|hCoV-19^^Utah|Human|Utah Public Health Laboratory|Utah Public Health Laboratory|Young|USA

>Spike|hCoV-19/Switzerland/VD-ETHZ-200065/2020|2020-07-14|EPI\_ISL\_510746|Original|hCoV-19^^Vaud|Human|Viollier AG|Department of Biosystems Science and Engineering|Nadeau|Switzerland

>Spike|hCoV-19/England/ALDP-9ED0F1/2020|2020-05-05|EPI\_ISL\_589549|Original|hCoV-19^^England|Human|Lighthouse Lab in Alderley Park|Wellcome Sanger Institute for the COVID-19 Genomics UK (COG-UK) consortium|Davies|United Kingdom

>Spike|hCoV-19/England/204781664/2020|2020-11-20|EPI\_ISL\_683568|Original|hCoV-19^^England|Human|Respiratory Virus Unit|COVID-19 Genomics UK (COG-UK) Consortium|Platt|United Kingdom

>Spike|hCoV-19/England/QEUEH-B2EBC4/2020|2020-11-04|EPI\_ISL\_660067|Original|hCoV-19^^England|Human|Lighthouse Lab in Glasgow|Wellcome Sanger Institute for the COVID-19 Genomics UK (COG-UK) Consortium|Davies|United Kingdom

>Spike|hCoV-19/Australia/VIC17931/2020|2020-08-07|EPI\_ISL\_779567|Original|hCoV-19^^Victoria|Human|Microbiological Diagnostic Unit - Public Health Laboratory (MDU-PHL)|MDU-PHL|Beck|Australia

>Spike|hCoV-19/Belgium/ULG-10054/2020|2020-04-05|EPI\_ISL\_424656|Original|hCoV-19^^Li\u00e8ge|Human|Department of Clinical Microbiology|GIGA Medical Genomics|Durkin|Belgium

>Spike|hCoV-19/Singapore/532/2020|2020-04-26|EPI\_ISL\_479488|Original|hCoV-19^^Singapore|Human|Department of Laboratory Medicine Tan Tock Seng Hospital|Department of Laboratory Medicine Tan Tock Seng Hospital|Chen|Singapore

>Spike|hCoV-19/United Arab Emirates/0756/2020|2020-05-16|EPI\_ISL\_698904|Original|hCoV-19^^Abu Dhabi|Human|Group 42 (G42) Healthcare|G42 Healthcare|Ogrodzki|United Arab Emirates

>Spike|hCoV-19/USA/UT-01975/2020|2020-04-16|EPI\_ISL\_452165|Original|hCoV-19^^Utah|Human|Utah Public Health Laboratory|Utah Public Health Laboratory|Young|USA

>Spike|hCoV-19/England/QEUEH-89EA01/2020|2020-07-21|EPI\_ISL\_532730|Original|hCoV-19^^England|Human|Lighthouse Lab in Glasgow|Wellcome Sanger Institute for the COVID-19 Genomics UK (COG-UK) consortium|Davies|United Kingdom

>Spike|hCoV-19/England/ALDP-A51640/2020|2020-10-07|EPI\_ISL\_598101|Original|hCoV-19^^England|Human|Lighthouse Lab in Alderley Park|Wellcome Sanger Institute for the COVID-19 Genomics UK (COG-UK) consortium|Davies|United Kingdom

>Spike|hCoV-19/Wales/PHWC-4968F4/2020|2020-11-21|EPI\_ISL\_726655|Original|hCoV-19^^Wales|Human|Originating lab|COVID-19 Genomics UK (COG-UK) Consortium|Moore|United Kingdom

>Spike|hCoV-19/England/QEUEH-9697CB/2020|2020-08-14|EPI\_ISL\_531085|Original|hCoV-19^^England|Human|Lighthouse Lab in Glasgow|Wellcome Sanger Institute for the COVID-19 Genomics UK (COG-UK) consortium|Davies|United Kingdom

>Spike|hCoV-19/England/CAMB-1B867D/2020|2020-10-25|EPI\_ISL\_651655|Original|hCoV-19^^England|Human|Department of Pathology|COVID-19 Genomics UK (COG-UK) Consortium|Goodfellow|United Kingdom

>Spike|hCoV-19/Australia/VIC5480/2020|2020-07-20|EPI\_ISL\_520228|Original|hCoV-19^^Victoria|Human|Microbiological Diagnostic Unit - Public Health Laboratory (MDU-PHL)|MDU-PHL|Schultz|Australia

>Spike|hCoV-19/Japan/PG-4186/2020|2020-07-00|EPI\_ISL\_692425|Original|hCoV-19^^Japan|Human|Pathogen Genomics Center|Pathogen Genomics Center|Sekizuka|Japan

>Spike|hCoV-19/USA/WA-UW-29751/2020|2020-09-28|EPI\_ISL\_717779|Original|hCoV-19^^Washington|Human|UW Virology Lab|UW Virology Lab|Roychoudhury|USA

>Spike|hCoV-19/England/ALDP-C8D6D0/2020|2020-12-14|EPI\_ISL\_777046|Original|hCoV-19^^England|Human|Lighthouse Lab in Alderley Park|Wellcome Sanger Institute for the COVID-19 Genomics UK (COG-UK) Consortium|Davies|United Kingdom

>Spike|hCoV-19/Sweden/20-08951/2020|2020-07-31|EPI\_ISL\_534233|Original|hCoV-19^^Stockholm|Human|Capio S|The Public Health Agency of Sweden|Svartstr\u00f6m|Sweden

>Spike|hCoV-19/England/OXON-B1B67/2020|2020-05-03|EPI\_ISL\_479076|Original|hCoV-19^^England|Human|Oxford Viromics|COVID-19 Genomics UK (COG-UK) Consortium|Golubchik|United Kingdom

>Spike|hCoV-19/England/ALDP-B5D83E/2020|2020-11-09|EPI\_ISL\_704438|Original|hCoV-19^^England|Human|Department of Pathology|COVID-19 Genomics UK (COG-UK) Consortium|Goodfellow|United Kingdom

>Spike|hCoV-19/Scotland/QEUA-A75E7B/2020|2020-10-15|EPI\_ISL\_613307|Original|hCoV-19^^Scotland|Human|Queens Medical Centre|COVID-19 Genomics UK (COG-UK) Consortium|Loose|United Kingdom

>Spike|hCoV-19/Switzerland/BE-ETHZ-260167/2020|2020-08-26|EPI\_ISL\_539459|Original|hCoV-19^^Bern|Human|Viollier AG|Department of Biosystems Science and Engineering|Nadeau|Switzerland

>Spike|hCoV-19/USA/FL-BPHL-0657/2020|2020-04-07|EPI\_ISL\_508861|Original|hCoV-19^^Florida|Human|Florida Bureau of Public Health Laboratories|Florida Bureau of Public Health Laboratories|Blanton|USA

>Spike|hCoV-19/Wales/PHWC-1662A7/2020|2020-06-19|EPI\_ISL\_490858|Original|hCoV-19^^Wales|Human|Wales Specialist Virology Centre Sequencing lab|COVID-19 Genomics UK (COG-UK) Consortium|Moore|United Kingdom

>Spike|hCoV-19/England/GSTT-265DA37/2020|2020-03-26|EPI\_ISL\_484052|Original|hCoV-19^^England|Human|Centre for Clinical Infection and Diagnostics Research and Genomics Innovation Unit|COVID-19 Genomics UK (COG-UK) Consortium|Awan|United Kingdom

>Spike|hCoV-19/England/QEUA-B3FD24/2020|2020-11-08|EPI\_ISL\_658730|Original|hCoV-19^^England|Human|Lighthouse Lab in Glasgow|Wellcome Sanger Institute for the COVID-19 Genomics UK (COG-UK) Consortium|Davies|United Kingdom

>Spike|hCoV-19/Portugal/PT1549/2020|2020-06-21|EPI\_ISL\_693562|Original|hCoV-19^^Portugal|Human|Instituto Nacional de Saude (INSA)|Instituto Nacional de Saude (INSA)|Borges|Portugal

>Spike|hCoV-19/England/QEUA-54B8A2/2020|2020-05-12|EPI\_ISL\_533372|Original|hCoV-19^^England|Human|Lighthouse Lab in Glasgow|Wellcome Sanger Institute for the COVID-19 Genomics UK (COG-UK) consortium|Davies|United Kingdom

>Spike|hCoV-19/USA/WI-UW-2328/2020|2020-11-16|EPI\_ISL\_728094|Original|hCoV-19^^Wisconsin|Human|University of Wisconsin-Madison AIDS Vaccine Research Laboratories|University of Wisconsin-Madison AIDS Vaccine Research Laboratories|Baczenas|USA

>Spike|hCoV-19/Switzerland/BL-ETHZ-270134/2020|2020-08-28|EPI\_ISL\_541450|Original|hCoV-19^^Basel-Landschaft|Human|Viollier AG|Department of Biosystems Science and Engineering|Nadeau|Switzerland

>Spike|hCoV-19/Wales/PHWC-4A0AB5/2020|2020-12-10|EPI\_ISL\_743539|Original|hCoV-19^^Wales|Human|Wales Specialist Virology Centre Sequencing lab|COVID-19 Genomics UK (COG-UK) Consortium|Moore|United Kingdom

>Spike|hCoV-19/USA/TX-HMH-MCoV-18410/2020|2020-11-18|EPI\_ISL\_784758|Original|hCoV-19^^Texas|Human|Houston Methodist Hospital|Houston Methodist Hospital|Long|USA

>Spike|hCoV-19/Switzerland/VD-ETHZ-300465/2020|2020-09-30|EPI\_ISL\_603413|Original|hCoV-19^^Vaud|Human|Viollier AG|Department of Biosystems Science and Engineering|Nadeau|Switzerland

>Spike|hCoV-19/England/202822200/2020|2020-06-15|EPI\_ISL\_490252|Original|hCoV-19^^England|Human|Respiratory Virus Unit|Respiratory Virus Unit|Platt|United Kingdom

>Spike|hCoV-19/Australia/VIC7672/2020|2020-07-17|EPI\_ISL\_564567|Original|hCoV-19^^Victoria|Human|Microbiological Diagnostic Unit - Public Health Laboratory (MDU-PHL)|MDU-PHL|Schultz|Australia

>Spike|hCoV-19/Israel/CVL-n1749/2020|2020-03-04|EPI\_ISL\_649098|Original|hCoV-19^^Sdema|Human|Israel Central Virology laboratory|Israel Central Virology laboratory|Zuckerman|Israel

>Spike|hCoV-19/England/QEUEH-AD16FD/2020|2020-10-26|EPI\_ISL\_634539|Original|hCoV-19^^England|Human|Lighthouse Lab in Glasgow|Wellcome Sanger Institute for the COVID-19 Genomics UK (COG-UK) consortium|Davies|United Kingdom

>Spike|hCoV-19/England/ALDP-A2F12C/2020|2020-10-05|EPI\_ISL\_587068|Original|hCoV-19^^England|Human|Lighthouse Lab in Alderley Park|Wellcome Sanger Institute for the COVID-19 Genomics UK (COG-UK) consortium|Davies|United Kingdom

>Spike|hCoV-19/USA/UT-UPHL-201007307/2020|2020-04-03|EPI\_ISL\_594394|Original|hCoV-19^^Utah|Human|Utah Public Health Laboratory|Utah Public Health Laboratory|Young|USA

>Spike|hCoV-19/England/ALDP-A67049/2020|2020-10-12|EPI\_ISL\_630595|Original|hCoV-19^^England|Human|Lighthouse Lab in Alderley Park|Wellcome Sanger Institute for the COVID-19 Genomics UK (COG-UK) consortium|Davies|United Kingdom

>Spike|hCoV-19/Australia/VIC15732/2020|2020-00-00|EPI\_ISL\_593430|Original|hCoV-19^^Victoria|Human|Microbiological Diagnostic Unit - Public Health Laboratory (MDU-PHL)|MDU-PHL|Schultz|Australia

>Spike|hCoV-19/England/LEED-2A84B1/2020|2020-03-24|EPI\_ISL\_539201|Original|hCoV-19^^England|Human|Leeds Teaching Hospitals NHS Trust and Public Health England|Wellcome Sanger Institute for the COVID-19 Genomics UK (COG-UK) consortium|Davies|United Kingdom

>Spike|hCoV-19/England/QEUEH-A5E0BE/2020|2020-10-12|EPI\_ISL\_597421|Original|hCoV-19^^England|Human|Lighthouse Lab in Glasgow|Wellcome Sanger Institute for the COVID-19 Genomics UK (COG-UK) consortium|Davies|United Kingdom

>Spike|hCoV-19/USA/CA-CZB-14959/2020|2020-11-18|EPI\_ISL\_739284|Original|hCoV-19^^California|Human|Santa Clara County Public Health Laboratory|Chan-Zuckerberg Biohub|Kamm|USA

>Spike|hCoV-19/Wales/PHWC-24473/2020|2020-03-17|EPI\_ISL\_419414|Original|hCoV-19^^Wales|Human|Wales Specialist Virology Centre|Public Health Wales Microbiology Cardiff|Moore|United Kingdom

>Spike|hCoV-19/Australia/VIC2456/2020|2020-06-25|EPI\_ISL\_522162|Original|hCoV-19^^Victoria|Human|Victorian Infectious Diseases Reference Laboratory (VIDRL)|VIDRL and MDU-PHL|Schultz|Australia

>Spike|hCoV-19/England/MILK-B5A655/2020|2020-11-06|EPI\_ISL\_658168|Original|hCoV-19^^England|Human|Lighthouse Lab in Milton Keynes|Wellcome Sanger Institute for the COVID-19 Genomics UK (COG-UK) Consortium|Davies|United Kingdom

>Spike|hCoV-19/England/LIVE-A53C8/2020|2020-03-19|EPI\_ISL\_500114|Original|hCoV-19^^England|Human|Liverpool Clinical Laboratories|COVID-19 Genomics UK (COG-UK) Consortium|Haldenby|United Kingdom

>Spike|hCoV-19/England/ALDP-A68A95/2020|2020-10-12|EPI\_ISL\_608933|Original|hCoV-19^^England|Human|Lighthouse Lab in Alderley Park|Wellcome Sanger Institute for the COVID-19 Genomics UK (COG-UK) consortium|Davies|United Kingdom

>Spike|hCoV-19/England/MILK-B387C3/2020|2020-11-01|EPI\_ISL\_658882|Original|hCoV-19^^England|Human|Lighthouse Lab in Milton Keynes|Wellcome Sanger Institute for the COVID-19 Genomics UK (COG-UK) Consortium|Davies|United Kingdom

>Spike|hCoV-19/England/ALDP-A93EB3/2020|2020-10-19|EPI\_ISL\_611256|Original|hCoV-19^^England|Human|Lighthouse Lab in Alderley Park|Wellcome Sanger Institute for the COVID-19 Genomics UK (COG-UK) consortium|Davies|United Kingdom

>Spike|hCoV-19/England/ALDP-BB3A21/2020|2020-11-19|EPI\_ISL\_702997|Original|hCoV-19^^England|Human|Lighthouse Lab in Alderley Park|Wellcome Sanger Institute for the COVID-19 Genomics UK (COG-UK) Consortium|Davies|United Kingdom

>Spike|hCoV-19/Switzerland/GE-SNRCI-6448/2020|2020-03-00|EPI\_ISL\_548176|Original|hCoV-19^^Geneve|Human|Laboratoire de Virologie|Swiss National Reference Centre for Influenza|Gon\u00e7alves Cabecinhas|Switzerland

>Spike|hCoV-19/India/MH-MW3/2020|2020-04-27|EPI\_ISL\_508433|Original|hCoV-19^^Maharashtra|Human|Mahatma Gandhi Institute of Medical Sciences|National Institute of Biomedical Genomics|Maitra|India

>Spike|hCoV-19/Canada/BC\_10600259/2020|2020-04-00|EPI\_ISL\_477114|Original|hCoV-19^^British Columbia|Human|BCCDC Public Health Laboratory|BCCDC Public Health Laboratory|Harrigan|Canada

>Spike|hCoV-19/Switzerland/VD-ETHZ-100230/2020|2020-03-17|EPI\_ISL\_574997|Original|hCoV-19^^Vaud|Human|Viollier AG|Department of Biosystems Science and Engineering|Nadeau|Switzerland

>Spike|hCoV-19/USA/TX-HMH-MCoV-14120/2020|2020-10-02|EPI\_ISL\_787406|Original|hCoV-19^^Texas|Human|Houston Methodist Hospital|Houston Methodist Hospital|Long|USA

>Spike|hCoV-19/England/CAMB-1AA869/2020|2020-04-17|EPI\_ISL\_470106|Original|hCoV-19^^England|Human|Department of Pathology|Wellcome Sanger Institute for the COVID-19 Genomics UK (COG-UK) consortium|Davies|United Kingdom

>Spike|hCoV-19/Panama/333487/2020|2020-03-23|EPI\_ISL\_496744|Original|hCoV-19^^Panama Center|Human|Gorgas Memorial Laboratory of Health Studies|Gorgas Memorial Laboratory of Health Studies|Martinez|Panama

>Spike|hCoV-19/USA/OR-OHSU-1753/2020|2020-07-24|EPI\_ISL\_526020|Original|hCoV-19^^Oregon|Human|OHSU Lab Services Molecular Microbiology Lab|Oregon SARS-CoV-2 Genome Sequencing Center|O'Roak|USA

>Spike|hCoV-19/Australia/VIC8129/2020|2020-08-06|EPI\_ISL\_564866|Original|hCoV-19^^Victoria|Human|Microbiological Diagnostic Unit - Public Health Laboratory (MDU-PHL)|MDU-PHL|Schultz|Australia

>Spike|hCoV-19/Scotland/GCVR-16FFB6/2020|2020-03-24|EPI\_ISL\_459507|Original|hCoV-19^^Scotland|Human|NHSGGC West of Scotland Specialist Virology Centre / MRC-University of Glasgow Centre for Virus Research|Wellcome Sanger Institute for the COVID-19 Genomics UK (COG-UK) consortium|Davies|United Kingdom

>Spike|hCoV-19/Japan/PG-5236/2020|2020-08-00|EPI\_ISL\_690339|Original|hCoV-19^^Japan|Human|Pathogen Genomics Center|Pathogen Genomics Center|Sekizuka|Japan

>Spike|hCoV-19/Denmark/DCGC-14597/2020|2020-11-23|EPI\_ISL\_711865|Original|hCoV-19^^Hovedstaden|Human|Department of Virus and Microbiological Special Diagnostics|Albertsen Lab|Michaelsen|Denmark

>Spike|hCoV-19/Australia/VIC5685/2020|2020-07-20|EPI\_ISL\_518491|Original|hCoV-19^^Victoria|Human|Microbiological Diagnostic Unit - Public Health Laboratory (MDU-PHL)|MDU-PHL|Schultz|Australia

>Spike|hCoV-19/USA/CA-CZB-15964/2020|2020-11-30|EPI\_ISL\_739037|Original|hCoV-19^^California|Human|Santa Clara County Public Health Laboratory|Chan-Zuckerberg Biohub|Kamm|USA

>Spike|hCoV-19/England/QEUEH-B12A5D/2020|2020-11-02|EPI\_ISL\_642501|Original|hCoV-19^^England|Human|Lighthouse Lab in Glasgow|Wellcome Sanger Institute for the COVID-19 Genomics UK (COG-UK) Consortium|Davies|United Kingdom

>Spike|hCoV-19/USA/TX-HMH-MCoV-12908/2020|2020-08-18|EPI\_ISL\_788060|Original|hCoV-19^^Texas|Human|Houston Methodist Hospital|Houston Methodist Hospital|Long|USA

>Spike|hCoV-19/England/CAMC-A570E2/2020|2020-10-09|EPI\_ISL\_597397|Original|hCoV-19^^England|Human|Lighthouse Lab in Cambridge|Wellcome Sanger Institute for the COVID-19 Genomics UK (COG-UK) consortium|Davies|United Kingdom

>Spike|hCoV-19/Uruguay/TYT-M97/2020|2020-06-27|EPI\_ISL\_750173|Original|hCoV-19^^Treinta y Tres|Human|Sanatorio Americano|Institut Pasteur de Montevideo|Spangenberg|Uruguay

>Spike|hCoV-19/Australia/VIC7958/2020|2020-08-06|EPI\_ISL\_564769|Original|hCoV-19^^Victoria|Human|Microbiological Diagnostic Unit - Public Health Laboratory (MDU-PHL)|MDU-PHL|Schultz|Australia

>Spike|hCoV-19/Japan/PG-3270/2020|2020-04-00|EPI\_ISL\_691385|Original|hCoV-19^^Japan|Human|Pathogen Genomics Center|Pathogen Genomics Center|Sekizuka|Japan

>Spike|hCoV-19/Thailand/CO63-1170-3/2020|2020-03-22|EPI\_ISL\_450976|Original|hCoV-19^^Thailand|Human|Center of Excellence in Clinical Virology|Center of Excellence in Clinical Virology|Poovorawan|Thailand

>Spike|hCoV-19/Singapore/963/2020|2020-09-14|EPI\_ISL\_548972|Original|hCoV-19^^Singapore|Human|National Public Health Laboratory|National Public Health Laboratory|Mak|Singapore

>Spike|hCoV-19/Northern Ireland/QEUEH-96DCB9/2020|2020-08-20|EPI\_ISL\_530674|Original|hCoV-19^^Northern Ireland|Human|Lighthouse Lab in Glasgow|Wellcome Sanger Institute for the COVID-19 Genomics UK (COG-UK) consortium|Davies|United Kingdom

>Spike|hCoV-19/Wales/PHWC-4834AB/2020|2020-09-22|EPI\_ISL\_627824|Original|hCoV-19^^Wales|Human|Wales Specialist Virology Centre Sequencing lab|COVID-19 Genomics UK (COG-UK) Consortium|Moore|United Kingdom

>Spike|hCoV-19/Jordan/AM-ALSR-4000/2020|2020-10-03|EPI\_ISL\_636363|Original|hCoV-19^^Amman|Human|Biolab Diagnostic Laboratories|Andersen lab at Scripps Research|Gangavarapu|Jordan

>Spike|hCoV-19/England/MILK-B8965D/2020|2020-11-13|EPI\_ISL\_675879|Original|hCoV-19^^England|Human|Lighthouse Lab in Milton Keynes|Wellcome Sanger Institute for the COVID-19 Genomics UK (COG-UK) Consortium|Davies|United Kingdom

>Spike|hCoV-19/Denmark/DCGC-9587/2020|2020-11-09|EPI\_ISL\_669051|Original|hCoV-19^^Syddanmark|Human|Department of Virus and Microbiological Special Diagnostics|Albertsen Lab|Michaelsen|Denmark

>Spike|hCoV-19/USA/TX-DSHS-0393/2020|2020-05-31|EPI\_ISL\_542453|Original|hCoV-19^^Texas|Human|Texas Department of State Health Services|Texas Department of State Health Services|Rahman|USA

>Spike|hCoV-19/Denmark/DCGC-6400/2020|2020-09-21|EPI\_ISL\_622283|Original|hCoV-19^^Hovedstaden|Human|Department of Virus and Microbiological Special Diagnostics|Albertsen lab|Michaelsen|Denmark

>Spike|hCoV-19/Germany/HH-hpi-p1473/2020|2020-03-13|EPI\_ISL\_775913|Original|hCoV-19^^Hamburg|Human|University Medical Center Hamburg Eppendorf|Heinrich Pette Institute|Robitaille|Germany

>Spike|hCoV-19/mink/Netherlands/NB-EMC-16-10/2020|2020-06-21|EPI\_ISL\_523030|Original|hCoV-19^^Noord Brabant|Neovison vison|Dutch COVID-19 response team|Erasmus Medical Center|Oude Munnink|Netherlands

>Spike|hCoV-19/Brazil/RS-00651/2020|2020-11-25|EPI\_ISL\_770551|Original|hCoV-19^^Rio Grande do Sul|Human|Laborat\u00f3rio de Microbiologia Molecular - Universidade FEEVALE|Bioinformatics Laboratory / LNCC|Almeida|Brazil

>Spike|hCoV-19/USA/LA-EVTL1213/2020|2020-12-14|EPI\_ISL\_768482|Original|hCoV-19^^Louisiana|Human|LSUHS Emerging Viral Threat Laboratory|Microbial Genome Sequencing Center|Kamil|USA

>Spike|hCoV-19/Denmark/DCGC-21948/2020|2020-12-21|EPI\_ISL\_757965|Original|hCoV-19^^Nordjylland|Human|Department of Virus and Microbiological Special Diagnostics|Albertsen Lab|Michaelsen|Denmark

>Spike|hCoV-19/England/204321106/2020|2020-10-17|EPI\_ISL\_649821|Original|hCoV-19^^England|Human|Respiratory Virus Unit|COVID-19 Genomics UK (COG-UK) Consortium|Platt|United Kingdom

>Spike|hCoV-19/USA/CA-SCCPHD-UC199/2020|2020-03-21|EPI\_ISL\_671767|Original|hCoV-19^^California|Human|Santa Clara County Public Health Department|Chiu Laboratory|Chiu|USA

>Spike|hCoV-19/USA/TX-HMH-MCoV-9294/2020|2020-07-03|EPI\_ISL\_781043|Original|hCoV-19^^Texas|Human|Houston Methodist Hospital|Houston Methodist Hospital|Long|USA

>Spike|hCoV-19/Canada/MB-NML-587/2020|2020-03-27|EPI\_ISL\_582276|Original|hCoV-19^^Manitoba|Human|Cadham Provincial Laboratory|National Microbiology Laboratory (NML)|Majer|Canada

>Spike|hCoV-19/USA/ME-HETL-J0338/2020|2020-11-24|EPI\_ISL\_755466|Original|hCoV-19^^Maine|Human|Maine Health and Environmental Testing Laboratory|Tewhey Lab|Tewhey|USA

>Spike|hCoV-19/Brazil/SP-L10-CD176/2020|2020-03-17|EPI\_ISL\_476189|Original|hCoV-19^^S\u00e3o Paulo|Human|DB Diagn\u00f3sticos do Brasil|Instituto de Medicina Tropical da Univesidade de S\u00e3o Paulo|Sabino|Brazil

>Spike|hCoV-19/Australia/VIC2435/2020|2020-06-24|EPI\_ISL\_522143|Original|hCoV-19^^Victoria|Human|Victorian Infectious Diseases Reference Laboratory (VIDRL)|VIDRL and MDU-PHL|Schultz|Australia

>Spike|hCoV-19/Germany/HH-hpi-p1606/2020|2020-03-16|EPI\_ISL\_776066|Original|hCoV-19^^Hamburg|Human|University Medical Center Hamburg Eppendorf|Heinrich Pette Institute|Robitaille|Germany

>Spike|hCoV-19/Northern Ireland/QEUI-96402F/2020|2020-08-12|EPI\_ISL\_536949|Original|hCoV-19^^Northern Ireland|Human|Lighthouse Lab in Glasgow|Wellcome Sanger Institute for the COVID-19 Genomics UK (COG-UK) consortium|Davies|United Kingdom

>Spike|hCoV-19/USA/TX-HMH-MCoV-15814/2020|2020-07-05|EPI\_ISL\_785498|Original|hCoV-19^^Texas|Human|Houston Methodist Hospital|Houston Methodist Hospital|Long|USA

>Spike|hCoV-19/England/ALDP-9E8788/2020|2020-09-24|EPI\_ISL\_637715|Original|hCoV-19^^England|Human|Centre for Enzyme Innovation|COVID-19 Genomics UK (COG-UK) Consortium|Robson|United Kingdom

>Spike|hCoV-19/Japan/PG-8651/2020|2020-09-00|EPI\_ISL\_686247|Original|hCoV-19^^Japan|Human|Pathogen Genomics Center|Pathogen Genomics Center|Sekizuka|Japan

>Spike|hCoV-19/Denmark/DCGC-15624/2020|2020-11-23|EPI\_ISL\_713111|Original|hCoV-19^^Hovedstaden|Human|Department of Virus and Microbiological Special Diagnostics|Albertsen Lab|Michaelsen|Denmark

>Spike|hCoV-19/England/QEUA-B31D8C/2020|2020-11-04|EPI\_ISL\_646287|Original|hCoV-19^^England|Human|Lighthouse Lab in Glasgow|Wellcome Sanger Institute for the COVID-19 Genomics UK (COG-UK) Consortium|Davies|United Kingdom

>Spike|hCoV-19/England/QEUA-B11A5E/2020|2020-11-02|EPI\_ISL\_642296|Original|hCoV-19^^England|Human|Lighthouse Lab in Glasgow|Wellcome Sanger Institute for the COVID-19 Genomics UK (COG-UK) Consortium|Davies|United Kingdom

>Spike|hCoV-19/Spain/AR-IBV-98010625/2020|2020-09-30|EPI\_ISL\_722226|Original|hCoV-19^^Aragon|Human|Servicio de Microbiolog\u00eda|SeqCOVID-SPAIN consortium/IBV (CSIC) |Comas|Spain

>Spike|hCoV-19/England/QEUA-AD1EF5/2020|2020-10-26|EPI\_ISL\_629834|Original|hCoV-19^^England|Human|Lighthouse Lab in Glasgow|Wellcome Sanger Institute for the COVID-19 Genomics UK (COG-UK) consortium|Davies|United Kingdom

>Spike|hCoV-19/USA/MA-MGH-00298/2020|2020-04-01|EPI\_ISL\_460265|Original|hCoV-19^^Massachusetts|Human|Massachusetts General Hospital|Infectious Disease Program|Lemieux|USA

>Spike|hCoV-19/USA/CA-ALSR-4302/2020|2020-10-01|EPI\_ISL\_648952|Original|hCoV-19^^California|Human|San Diego County Public Health Laboratory|Andersen lab at Scripps Research|Gangavarapu|USA

>Spike|hCoV-19/Japan/PG-5877/2020|2020-08-00|EPI\_ISL\_688992|Original|hCoV-19^^Japan|Human|Pathogen Genomics Center|Pathogen Genomics Center|Sekizuka|Japan

>Spike|hCoV-19/USA/MI-UM-10035711854/2020|2020-08-29|EPI\_ISL\_583305|Original|hCoV-19^^Michigan|Human|University of Michigan Clinical Microbiology Laboratory|Lauring Lab|Valesano|USA

>Spike|hCoV-19/England/QEUA-9FB069/2020|2020-09-29|EPI\_ISL\_588197|Original|hCoV-19^^England|Human|Lighthouse Lab in Glasgow|Wellcome Sanger Institute for the COVID-19 Genomics UK (COG-UK) consortium|Davies|United Kingdom

>Spike|hCoV-19/USA/OR-OHSU-4663/2020|2020-11-09|EPI\_ISL\_667544|Original|hCoV-19^^Oregon|Human|OHSU Lab Services Molecular Microbiology Lab|Oregon SARS-CoV-2 Genome Sequencing Center|O'Roak|USA

>Spike|hCoV-19/Denmark/DCGC-4906/2020|2020-09-21|EPI\_ISL\_621444|Original|hCoV-19^^Hovedstaden|Human|Department of Virus and Microbiological Special Diagnostics|Albertsen lab|Michaelsen|Denmark

>Spike|hCoV-19/Denmark/DCGC-19328/2020|2020-12-07|EPI\_ISL\_748885|Original|hCoV-19^^Midtjylland|Human|Department of Virus and Microbiological Special Diagnostics|Albertsen Lab|Michaelsen|Denmark

>Spike|hCoV-19/England/LOND-1266DC0/2020|2020-12-10|EPI\_ISL\_741211|Original|hCoV-19^^England|Human|University College London|COVID-19 Genomics UK (COG-UK) Consortium|Roy|United Kingdom

>Spike|hCoV-19/USA/TX-HMH-6492/2020|2020-06-27|EPI\_ISL\_546035|Original|hCoV-19^^Texas|Human|Houston Methodist Hospital|Houston Methodist Hospital|Long|USA

>Spike|hCoV-19/Spain/AN-IBV-001913/2020|2020-03-16|EPI\_ISL\_467079|Original|hCoV-19^^Andalucia|Human|Hospital Universitario Puerta del Mar de C\u00e0ldiz - INIBICA|SeqCOVID-SPAIN consortium/IBV (CSIC) |Comas|Spain

>Spike|hCoV-19/Switzerland/BS-42206747/2020|2020-03-25|EPI\_ISL\_581751|Original|hCoV-19^^Basel-Stadt|Human|University Hospital Basel|University Hospital Basel|Roloff Handschin|Switzerland

>Spike|hCoV-19/England/OXON-AD515/2020|2020-00-00|EPI\_ISL\_448585|Original|hCoV-19^^England|Human|Oxford Viromics|COVID-19 Genomics UK (COG-UK) Consortium|Golubchik|United Kingdom

>Spike|hCoV-19/Switzerland/BL-UHB-42177430/2020|2020-03-05|EPI\_ISL\_418434|Original|hCoV-19^^Basel|Human|University Hospital Basel|University Hospital Basel|Roloff Handschin|Switzerland



>Spike|hCoV-19/USA/MI-MDHHS-SC20666/2020|2020-04-29|EPI\_ISL\_471690|Original|hCoV-19^^Michigan|Human|Michigan Department of Health and Human Services|Michigan Department of Health and Human Services|Blankenship|USA

>Spike|hCoV-19/USA/NY-NYUMC109/2020|2020-03-17|EPI\_ISL\_421721|Original|hCoV-19^^New York|Human|NYU Langone Health|Departments of Pathology and Medicine|Maurano|USA

>Spike|hCoV-19/Netherlands/NH-RIVM-20621/2020|2020-12-20|EPI\_ISL\_790699|Original|hCoV-19^^Noord-Holland|Human|Dutch COVID-19 response team|National Institute for Public Health and the Environment (RIVM)|Meijer|Netherlands

>Spike|hCoV-19/England/MILK-9C3659/2020|2020-09-10|EPI\_ISL\_566845|Original|hCoV-19^^England|Human|Lighthouse Lab in Milton Keynes|Wellcome Sanger Institute for the COVID-19 Genomics UK (COG-UK) consortium|Davies|United Kingdom

>Spike|hCoV-19/England/MILK-BB208A/2020|2020-11-18|EPI\_ISL\_720097|Original|hCoV-19^^England|Human|Lighthouse Lab in Milton Keynes|Wellcome Sanger Institute for the COVID-19 Genomics UK (COG-UK) Consortium|Davies|United Kingdom

>Spike|hCoV-19/Spain/AN-IBV-003008/2020|2020-04-02|EPI\_ISL\_474932|Original|hCoV-19^^Andalucia|Human|Hospital Universitario Virgen de las Nieves de Granada-SAS|SeqCOVID-SPAIN consortium/IBV(CSIC)|Comas|Spain

>Spike|hCoV-19/Japan/PG-6383/2020|2020-08-00|EPI\_ISL\_688620|Original|hCoV-19^^Japan|Human|Fukuoka Institute of Health and Environmental Sciences|Pathogen Genomics Center|Sekizuka|Japan

>Spike|hCoV-19/Jordan/AM-ALSR-3979/2020|2020-10-02|EPI\_ISL\_636342|Original|hCoV-19^^Amman|Human|Biolab Diagnostic Laboratories|Andersen lab at Scripps Research|Gangavarapu|Jordan

>Spike|hCoV-19/France/IDF-70001GR/2020|2020-03-00|EPI\_ISL\_447655|Original|hCoV-19^^France|Human|H\u00f4pital Henri-Mondor Ap-Hp|H\u00f4pital Henri-Mondor Ap-Hp|Rodriguez|France

>Spike|hCoV-19/USA/CA-CZB-12800/2020|2020-10-15|EPI\_ISL\_648453|Original|hCoV-19^^California|Human|Santa Clara County Public Health Laboratory|Chan-Zuckerberg Biohub|Bhatt|USA

>Spike|hCoV-19/England/QEUA-A9F558/2020|2020-10-20|EPI\_ISL\_611399|Original|hCoV-19^^England|Human|Lighthouse Lab in Glasgow|Wellcome Sanger Institute for the COVID-19 Genomics UK (COG-UK) consortium|Davies|United Kingdom

>Spike|hCoV-19/Peru/LIM-UPCH-0093/2020|2020-06-17|EPI\_ISL\_540971|Original|hCoV-19^^Lima|Human|Laboratorio de Referencia Nacional de Virus Respiratorios|Laboratorio de Gen\u00f3mica Microbiana|Tsukayama|Peru

>Spike|hCoV-19/Norway/5857/2020|2020-11-15|EPI\_ISL\_775338|Original|hCoV-19^^Viken|Human|Ostfold Hospital Trust - Kalnes|Norwegian Institute of Public Health|Vollan|Norway

>Spike|hCoV-19/Israel/CVL-277-ngs/2020|2020-12-27|EPI\_ISL\_776862|Original|hCoV-19^^Israel|Human|Israel Central Virology laboratory|Israel Central Virology laboratory|Zuckerman|Israel

>Spike|hCoV-19/Denmark/DCGC-20429/2020|2020-12-21|EPI\_ISL\_758728|Original|hCoV-19^^Hovedstaden|Human|Department of Virus and Microbiological Special Diagnostics|Albertsen Lab|Michaelsen|Denmark

>Spike|hCoV-19/USA/NY-PV08414/2020|2020-03-16|EPI\_ISL\_421377|Original|hCoV-19^^New York|Human|MSHS Clinical Microbiology Laboratories|MSHS Pathogen Surveillance Program|van Bakel|USA

>Spike|hCoV-19/Belgium/regA-0325871/2020|2020-03-25|EPI\_ISL\_734521|Original|hCoV-19^^Ottignies-Louvain-la-Neuve|Human|UZ Leuven|KU Leuven|Maes|Belgium

>Spike|hCoV-19/England/QEUA-95E608/2020|2020-08-08|EPI\_ISL\_532459|Original|hCoV-19^^England|Human|Lighthouse Lab in Glasgow|Wellcome Sanger Institute for the COVID-19 Genomics UK (COG-UK) consortium|Davies|United Kingdom

>Spike|hCoV-19/Australia/VIC9865/2020|2020-08-13|EPI\_ISL\_565749|Original|hCoV-19^^Victoria|Human|Microbiological Diagnostic Unit - Public Health Laboratory (MDU-PHL)|MDU-PHL|Schultz|Australia

>Spike|hCoV-19/USA/WA-S48/2020|2020-02-29|EPI\_ISL\_417101|Original|hCoV-19^^Washington|Human|Washington State Department of Health|Seattle Flu Study|Bedford|USA

>Spike|hCoV-19/England/ALDP-A51FAF/2020|2020-10-07|EPI\_ISL\_597901|Original|hCoV-19^^England|Human|Lighthouse Lab in Alderley Park|Wellcome Sanger Institute for the COVID-19 Genomics UK (COG-UK) consortium|Davies|United Kingdom

>Spike|hCoV-19/USA/TX-HMH-MCoV-19479/2020|2020-11-30|EPI\_ISL\_783864|Original|hCoV-19^^Texas|Human|Houston Methodist Hospital|Houston Methodist Hospital|Long|USA

>Spike|hCoV-19/England/20196026804/2020|2020-05-05|EPI\_ISL\_465623|Original|hCoV-19^^England|Human|Respiratory Virus Unit|Respiratory Virus Unit|Platt|United Kingdom

>Spike|hCoV-19/Germany/HH-hpi-p1609/2020|2020-03-16|EPI\_ISL\_775680|Original|hCoV-19^^Hamburg|Human|University Medical Center Hamburg Eppendorf|Heinrich Pette Institute|Robitaille|Germany

>Spike|hCoV-19/England/MILK-BAC0A1/2020|2020-11-18|EPI\_ISL\_783133|Original|hCoV-19^^England|Human|Lighthouse Lab in Milton Keynes|Wellcome Sanger Institute for the COVID-19 Genomics UK (COG-UK) Consortium|Davies|United Kingdom

>Spike|hCoV-19/Greece/136/2020|2020-03-11|EPI\_ISL\_434473|Original|hCoV-19^^Athens|Human|Laboratory of Microbiology|Laboratory of Biology|Karakasiliotis|Greece

>Spike|hCoV-19/Belgium/ULG-10946/2020|2020-11-25|EPI\_ISL\_678485|Original|hCoV-19^^Li\u00e8ge|Human|Department of Clinical Microbiology|GIGA Medical Genomics|Durkin|Belgium

>Spike|hCoV-19/Japan/PG-6085/2020|2020-07-00|EPI\_ISL\_689197|Original|hCoV-19^^Japan|Human|Pathogen Genomics Center|Pathogen Genomics Center|Sekizuka|Japan

>Spike|hCoV-19/Scotland/EDB6271/2020|2020-04-07|EPI\_ISL\_487927|Original|hCoV-19^^Scotland|Human|Virology Department|Wellcome Sanger Institute for the COVID-19 Genomics UK (COG-UK) consortium|Davies|United Kingdom

>Spike|hCoV-19/Singapore/537/2020|2020-06-02|EPI\_ISL\_482685|Original|hCoV-19^^Singapore|Human|Singapore General Hospital|Department of Microbiology|Abdul Rahman|Singapore

>Spike|hCoV-19/England/QEUEH-B2D57C/2020|2020-11-04|EPI\_ISL\_660053|Original|hCoV-19^^England|Human|Lighthouse Lab in Glasgow|Wellcome Sanger Institute for the COVID-19 Genomics UK (COG-UK) Consortium|Davies|United Kingdom

>Spike|hCoV-19/USA/MI-MDHHS-SC21165/2020|2020-04-03|EPI\_ISL\_507422|Original|hCoV-19^^Michigan|Human|Michigan Department of Health and Human Services|Michigan Department of Health and Human Services|Blankenship|USA

>Spike|hCoV-19/Singapore/1314/2020|2020-05-19|EPI\_ISL\_648801|Original|hCoV-19^^Singapore|Human|Department of Laboratory Medicine|Department of Laboratory Medicine|Chen|Singapore

>Spike|hCoV-19/Denmark/DCGC-21445/2020|2020-12-21|EPI\_ISL\_758170|Original|hCoV-19^^Sjælland|Human|Department of Virus and Microbiological Special Diagnostics|Albertsen Lab|Michaelsen|Denmark

>Spike|hCoV-19/USA/MN-MDH-1741/2020|2020-09-16|EPI\_ISL\_576250|Original|hCoV-19^^Minnesota|Human|Minnesota Department of Health|Minnesota Department of Health|Garfin|USA

>Spike|hCoV-19/Japan/PG-2136/2020|2020-04-00|EPI\_ISL\_685741|Original|hCoV-19^^Japan|Human|Pathogen Genomics Center|Pathogen Genomics Center|Sekizuka|Japan

>Spike|hCoV-19/England/MILK-A191F8/2020|2020-10-03|EPI\_ISL\_612491|Original|hCoV-19^^England|Human|Wales Specialist Virology Centre Sequencing lab|COVID-19 Genomics UK (COG-UK) Consortium|Moore|United Kingdom

>Spike|hCoV-19/England/LEED-2A8FB0/2020|2020-04-05|EPI\_ISL\_539093|Original|hCoV-19^^England|Human|Leeds Teaching Hospitals NHS Trust and Public Health England|Wellcome Sanger Institute for the COVID-19 Genomics UK (COG-UK) consortium|Davies|United Kingdom

>Spike|hCoV-19/USA/TX-HMH-MCoV-8449/2020|2020-07-01|EPI\_ISL\_780566|Original|hCoV-19^^Texas|Human|Houston Methodist Hospital|Houston Methodist Hospital|Long|USA

>Spike|hCoV-19/USA/CA-CZB-14227/2020|2020-11-13|EPI\_ISL\_739016|Original|hCoV-19^^California|Human|Orange County Public Health Lab|Chan-Zuckerberg Biohub|Kamm|USA

>Spike|hCoV-19/England/ALDP-9EA9AE/2020|2020-09-24|EPI\_ISL\_579939|Original|hCoV-19^^England|Human|Lighthouse Lab in Alderley Park|Wellcome Sanger Institute for the COVID-19 Genomics UK (COG-UK) consortium|Davies|United Kingdom

>Spike|hCoV-19/England/QEUA-990303/2020|2020-08-26|EPI\_ISL\_539979|Original|hCoV-19^^England|Human|Lighthouse Lab in Glasgow|Wellcome Sanger Institute for the COVID-19 Genomics UK (COG-UK) consortium|Davies|United Kingdom

>Spike|hCoV-19/Denmark/DCGC-9737/2020|2020-11-09|EPI\_ISL\_669136|Original|hCoV-19^^Syddanmark|Human|Department of Virus and Microbiological Special Diagnostics|Albertsen Lab|Michaelsen|Denmark

>Spike|hCoV-19/Denmark/DCGC-2270/2020|2020-08-10|EPI\_ISL\_617627|Original|hCoV-19^^Hovedstaden|Human|Department of Virus and Microbiological Special Diagnostics|Albertsen lab|Michaelsen|Denmark

>Spike|hCoV-19/England/QEUA-9992A3/2020|2020-08-24|EPI\_ISL\_541784|Original|hCoV-19^^England|Human|Lighthouse Lab in Glasgow|Wellcome Sanger Institute for the COVID-19 Genomics UK (COG-UK) consortium|Davies|United Kingdom

>Spike|hCoV-19/USA/WI-GMF-31811/2020|2020-11-06|EPI\_ISL\_661114|Original|hCoV-19^^Wisconsin|Human|Gundersen Molecular Diagnostics Laboratory|Kabara Cancer Research Institute|Kenny|USA

>Spike|hCoV-19/England/EXET-13AFB4/2020|2020-11-11|EPI\_ISL\_665105|Original|hCoV-19^^England|Human|University of Exeter|COVID-19 Genomics UK (COG-UK) Consortium|Temperton|United Kingdom

>Spike|hCoV-19/USA/NV-NSPHL-A0036/2020|2020-03-22|EPI\_ISL\_515321|Original|hCoV-19^^Nevada|Human|Nevada State Public Health Laboratory|Nevada State Public Health Laboratory|Sevinsky|USA

>Spike|hCoV-19/India/MH-ACTREC-470/2020|2020-08-11|EPI\_ISL\_700118|Original|hCoV-19^^Maharashtra|Human|Hematopathology Laboratory|Hematopathology Laboratory|Patkar|India

>Spike|hCoV-19/Denmark/DCGC-10169/2020|2020-11-09|EPI\_ISL\_669433|Original|hCoV-19^^Nordjylland|Human|Department of Virus and Microbiological Special Diagnostics|Albertsen Lab|Michaelsen|Denmark

>Spike|hCoV-19/USA/MS-CDC-6557/2020|2020-09-03|EPI\_ISL\_648010|Original|hCoV-19^^Mississippi|Human|MS Public Health Laboratory|Pathogen Discovery|Queen|USA

>Spike|hCoV-19/England/QEUA-A1DBD8/2020|2020-09-29|EPI\_ISL\_587559|Original|hCoV-19^^England|Human|Lighthouse Lab in Glasgow|Wellcome Sanger Institute for the COVID-19 Genomics UK (COG-UK) consortium|Davies|United Kingdom

>Spike|hCoV-19/Scotland/CVR4780/2020|2020-09-20|EPI\_ISL\_627349|Original|hCoV-19^^Scotland|Human|West of Scotland Specialist Virology Centre|COVID-19 Genomics UK (COG-UK) Consortium|Robertson|United Kingdom

>Spike|hCoV-19/Iceland/117/2020|2020-03-17|EPI\_ISL\_417542|Original|hCoV-19^^Reykjavik|Human|deCODE genetics|deCODE genetics|J\u00f3nsson|Iceland

>Spike|hCoV-19/Wales/PHWC-49102E/2020|2020-11-17|EPI\_ISL\_706600|Original|hCoV-19^^Wales|Human|Originating lab|COVID-19 Genomics UK (COG-UK) Consortium|Moore|United Kingdom

>Spike|hCoV-19/Scotland/EDB5358/2020|2020-05-24|EPI\_ISL\_457007|Original|hCoV-19^^Scotland|Human|Virology Department|COVID-19 Genomics UK (COG-UK) Consortium|Williams|United Kingdom

>Spike|hCoV-19/Luxembourg/LNS7970956/2020|2020-03-17|EPI\_ISL\_421734|Original|hCoV-19^^Luxembourg|Human|Laboratoire National de Sante|Laboratoire National de Sante|Wienecke-Baldacchino|Luxembourg

>Spike|hCoV-19/Scotland/CVR4285/2020|2020-09-09|EPI\_ISL\_559958|Original|hCoV-19^^Scotland|Human|Lighthouse Lab in Glasgow / MRC-University of Glasgow Centre for Virus Research|COVID-19 Genomics UK (COG-UK) Consortium|Robertson|United Kingdom

>Spike|hCoV-19/Scotland/CVR5666/2020|2020-11-09|EPI\_ISL\_651895|Original|hCoV-19^^Scotland|Human|West of Scotland Specialist Virology Centre|COVID-19 Genomics UK (COG-UK) Consortium|Robertson|United Kingdom

>Spike|hCoV-19/Norway/4919/2020|2020-10-24|EPI\_ISL\_668432|Original|hCoV-19^^Nordland|Human|Nordland Hospital - Bodo|Norwegian Institute of Public Health|Kopperud Riis|Norway

>Spike|hCoV-19/India/MH-NCCS-NR-9077/2020|2020-06-03|EPI\_ISL\_721666|Original|hCoV-19^^Maharashtra|Human|National Centre For Cell Science|National Centre For Cell Science|Paul|India

>Spike|hCoV-19/USA/CA-ALSR-4405/2020|2020-10-27|EPI\_ISL\_649011|Original|hCoV-19^^California|Human|San Diego County Public Health Laboratory|Andersen lab at Scripps Research|Gangavarapu|USA

>Spike|hCoV-19/Northern Ireland/QEUIH-96221C/2020|2020-08-10|EPI\_ISL\_531712|Original|hCoV-19^^Northern Ireland|Human|Lighthouse Lab in Glasgow|Wellcome Sanger Institute for the COVID-19 Genomics UK (COG-UK) consortium|Davies|United Kingdom

>Spike|hCoV-19/USA/TX-HMH-5795/2020|2020-06-30|EPI\_ISL\_547021|Original|hCoV-19^^Texas|Human|Houston Methodist Hospital|Houston Methodist Hospital|Long|USA

>Spike|hCoV-19/England/LIVE-A8617/2020|2020-03-26|EPI\_ISL\_517190|Original|hCoV-19^^England|Human|Liverpool Clinical Laboratories|COVID-19 Genomics UK (COG-UK) Consortium|Haldenby|United Kingdom

>Spike|hCoV-19/USA/CA-CHLA-PLM47567508/2020|2020-11-30|EPI\_ISL\_753441|Original|hCoV-19^^California|Human|Clinical virology Laboratory|Center for Personalized Medicine|Dien Bard|USA

>Spike|hCoV-19/Scotland/CVR425/2020|2020-03-22|EPI\_ISL\_433291|Original|hCoV-19^^Scotland|Human|West of Scotland Specialist Virology Centre|COVID-19 Genomics UK (COG-UK) Consortium|Robertson|United Kingdom

>Spike|hCoV-19/Finland/17A14S4/2020|2020-04-17|EPI\_ISL\_481573|Original|hCoV-19^^Uusimaa|Human|Department of Virology and Immunology|Department of Virology|Smura|Finland

>Spike|hCoV-19/England/CAMC-A3EA4D/2020|2020-10-05|EPI\_ISL\_609554|Original|hCoV-19^^England|Human|Lighthouse Lab in Cambridge|Wellcome Sanger Institute for the COVID-19 Genomics UK (COG-UK) consortium|Davies|United Kingdom

>Spike|hCoV-19/England/SHEF-C3E96/2020|2020-08-22|EPI\_ISL\_529521|Original|hCoV-19^^England|Human|Virology Department|COVID-19 Genomics UK (COG-UK) Consortium|de Silva|United Kingdom

>Spike|hCoV-19/USA/WA-UW-47248/2020|2020-12-07|EPI\_ISL\_776696|Original|hCoV-19^^Washington|Human|UW Virology Lab|UW Virology Lab|Roychoudhury|USA

>Spike|hCoV-19/England/SHEF-10CE34E/2020|2020-12-10|EPI\_ISL\_742009|Original|hCoV-19^^England|Human|Virology Department|COVID-19 Genomics UK (COG-UK) Consortium|de Silva|United Kingdom

>Spike|hCoV-19/USA/AZ-TG397126/2020|2020-06-22|EPI\_ISL\_694845|Original|hCoV-19^^Arizona|Human|TGen North|TGen North|French|USA

>Spike|hCoV-19/Scotland/QEUIH-9F6BE5/2020|2020-09-27|EPI\_ISL\_595619|Original|hCoV-19^^Scotland|Human|Oxford Viromics|COVID-19 Genomics UK (COG-UK) Consortium|Golubchik|United Kingdom

>Spike|hCoV-19/Germany/HH-hpi-p2163/2020|2020-03-28|EPI\_ISL\_776393|Original|hCoV-19^^Hamburg|Human|University Medical Center Hamburg Eppendorf|Heinrich Pette Institute|Robitaille|Germany

>Spike|hCoV-19/England/MILK-A7C1E4/2020|2020-10-15|EPI\_ISL\_606437|Original|hCoV-19^^England|Human|Lighthouse Lab in Milton Keynes|Wellcome Sanger Institute for the COVID-19 Genomics UK (COG-UK) consortium|Davies|United Kingdom

>Spike|hCoV-19/Spain/RI-IBV-005993/2020|2020-03-26|EPI\_ISL\_500425|Original|hCoV-19^^La Rioja|Human|Centro de Investigaci\u00f3n Biom\u00e9dica de La Rioja - Hospital San Pedro Logro\u00f1o|SeqCOVID-SPAIN consortium/IBV (CSIC)|Comas|Spain

>Spike|hCoV-19/Luxembourg/LNS8720271/2020|2020-12-01|EPI\_ISL\_770937|Original|hCoV-19^^Luxembourg|Human|Laboratoire national de sant\u00e9|Laboratoire national de sant\u00e9|Wienecke-Baldacchino|Luxembourg

>Spike|hCoV-19/Canada/BC\_27303944/2020|2020-03-00|EPI\_ISL\_463273|Original|hCoV-19^^British Columbia|Human|BCCDC Public Health Laboratory|BCCDC Public Health Laboratory|Harrigan|Canada

>Spike|hCoV-19/Denmark/DCGC-21649/2020|2020-12-21|EPI\_ISL\_758285|Original|hCoV-19^^Hovedstaden|Human|Department of Virus and Microbiological Special Diagnostics|Albertsen Lab|Michaelsen|Denmark

>Spike|hCoV-19/USA/MD-HP00061/2020|2020-03-16|EPI\_ISL\_457803|Original|hCoV-19^^Maryland|Human|Johns Hopkins Hospital Department of Pathology|Johns Hopkins Hospital Department of Pathology|Ramakrishnan|USA

>Spike|hCoV-19/England/MILK-99CC93/2020|2020-08-30|EPI\_ISL\_549947|Original|hCoV-19^^England|Human|Lighthouse Lab in Milton Keynes|Wellcome Sanger Institute for the COVID-19 Genomics UK (COG-UK) consortium|Davies|United Kingdom

>Spike|hCoV-19/Brazil/RS-2567/2020|2020-04-06|EPI\_ISL\_729818|Original|hCoV-19^^Rio Grande do Sul|Human|Laboratorio Central de Saude Publica do Estado do Rio Grande do Sul (LACEN-RS)|Laboratory of Respiratory Viruses and Measles|Silva|Brazil

>Spike|hCoV-19/England/ALDP-C3C324/2020|2020-12-10|EPI\_ISL\_731021|Original|hCoV-19^^England|Human|Lighthouse Lab in Alderley Park|Wellcome Sanger Institute for the COVID-19 Genomics UK (COG-UK) Consortium|Davies|United Kingdom

>Spike|hCoV-19/England/MILK-B5520B/2020|2020-11-04|EPI\_ISL\_657789|Original|hCoV-19^^England|Human|Lighthouse Lab in Milton Keynes|Wellcome Sanger Institute for the COVID-19 Genomics UK (COG-UK) Consortium|Davies|United Kingdom

>Spike|hCoV-19/England/QEUEH-A00367/2020|2020-10-02|EPI\_ISL\_600499|Original|hCoV-19^^England|Human|Lighthouse Lab in Glasgow|Wellcome Sanger Institute for the COVID-19 Genomics UK (COG-UK) consortium|Davies|United Kingdom

>Spike|hCoV-19/USA/TX-HMH-3924/2020|2020-06-17|EPI\_ISL\_543283|Original|hCoV-19^^Texas|Human|Houston Methodist Hospital|Houston Methodist Hospital|Long|USA

>Spike|hCoV-19/England/MILK-AB74E4/2020|2020-10-21|EPI\_ISL\_623453|Original|hCoV-19^^England|Human|Lighthouse Lab in Milton Keynes|Wellcome Sanger Institute for the COVID-19 Genomics UK (COG-UK) consortium|Davies|United Kingdom

>Spike|hCoV-19/Scotland/CVR1267/2020|2020-03-31|EPI\_ISL\_433527|Original|hCoV-19^^Scotland|Human|West of Scotland Specialist Virology Centre|COVID-19 Genomics UK (COG-UK) Consortium|Robertson|United Kingdom

>Spike|hCoV-19/United Arab Emirates/0783/2020|2020-05-19|EPI\_ISL\_698925|Original|hCoV-19^^Abu Dhabi|Human|Group 42 (G42) Healthcare|G42 Healthcare|Ogrodzki|United Arab Emirates

>Spike|hCoV-19/England/201100061/2020|2020-03-09|EPI\_ISL\_464637|Original|hCoV-19^^England|Human|Respiratory Virus Unit|Respiratory Virus Unit|Platt|United Kingdom

>Spike|hCoV-19/England/QEUEH-C14E21/2020|2020-12-06|EPI\_ISL\_709388|Original|hCoV-19^^England|Human|Lighthouse Lab in Glasgow|Wellcome Sanger Institute for the COVID-19 Genomics UK (COG-UK) Consortium|Davies|United Kingdom

>Spike|hCoV-19/USA/WA-UW-24322/2020|2020-08-13|EPI\_ISL\_570600|Original|hCoV-19^^Washington|Human|UW Virology Lab|UW Virology Lab|Roychoudhury|USA

>Spike|hCoV-19/USA/TX-HMH-6686/2020|2020-06-24|EPI\_ISL\_546173|Original|hCoV-19^^Texas|Human|Houston Methodist Hospital|Houston Methodist Hospital|Long|USA

>Spike|hCoV-19/England/QEUEH-B42492/2020|2020-11-08|EPI\_ISL\_657231|Original|hCoV-19^^England|Human|Lighthouse Lab in Glasgow|Wellcome Sanger Institute for the COVID-19 Genomics UK (COG-UK) Consortium|Davies|United Kingdom

>Spike|hCoV-19/France/ARA-16220/2020|2020-03-29|EPI\_ISL\_508906|Original|hCoV-19^^Auvergne-Rh\u00f4ne-Alpes|Human|Institut des Agents Infectieux (IAI)|CNR Virus des Infections Respiratoires - France SUD|Josset|France

>Spike|hCoV-19/Scotland/CVR4433/2020|2020-09-15|EPI\_ISL\_585303|Original|hCoV-19^^Scotland|Human|Lighthouse Lab in Glasgow / MRC-University of Glasgow Centre for Virus Research|COVID-19 Genomics UK (COG-UK) Consortium|Robertson|United Kingdom

>Spike|hCoV-19/USA/TX-DSHS-1016/2020|2020-04-21|EPI\_ISL\_644170|Original|hCoV-19^^Texas|Human|Texas Department of State Health Services|Texas Department of State Health Services|Rahman|USA

>Spike|hCoV-19/Scotland/EDB2100/2020|2020-04-19|EPI\_ISL\_439151|Original|hCoV-19^^Scotland|Human|Virology Department|COVID-19 Genomics UK (COG-UK) Consortium|Williams|United Kingdom

>Spike|hCoV-19/Switzerland/Vs-ETHZ-321482/2020|2020-10-15|EPI\_ISL\_603694|Original|hCoV-19^^Valais|Human|Viollier AG|Department of Biosystems Science and Engineering|Nadeau|Switzerland

>Spike|hCoV-19/England/QEUEH-B107A3/2020|2020-11-02|EPI\_ISL\_641837|Original|hCoV-19^^England|Human|Lighthouse Lab in Glasgow|Wellcome Sanger Institute for the COVID-19 Genomics UK (COG-UK) Consortium|Davies|United Kingdom

>Spike|hCoV-19/USA/MD-HP00549/2020|2020-04-06|EPI\_ISL\_511869|Original|hCoV-19^^Maryland|Human|Johns Hopkins Hospital Department of Pathology|Johns Hopkins Hospital Department of Pathology|Ramakrishnan|USA

>Spike|hCoV-19/Denmark/DCGC-14204/2020|2020-11-30|EPI\_ISL\_711106|Original|hCoV-19^^Hovedstaden|Human|Department of Virus and Microbiological Special Diagnostics|Albertsen Lab|Michaelsen|Denmark

>Spike|hCoV-19/England/204180580/2020|2020-10-09|EPI\_ISL\_609855|Original|hCoV-19^^England|Human|Respiratory Virus Unit|Respiratory Virus Unit|Platt|United Kingdom

>Spike|hCoV-19/Wales/PHWC-47E19D/2020|2020-09-25|EPI\_ISL\_595417|Original|hCoV-19^^Wales|Human|Originating lab|COVID-19 Genomics UK (COG-UK) Consortium|Moore|United Kingdom

>Spike|hCoV-19/England/CAMC-94625A/2020|2020-07-13|EPI\_ISL\_556667|Original|hCoV-19^^England|Human|Lighthouse Lab in Cambridge|Wellcome Sanger Institute for the COVID-19 Genomics UK (COG-UK) consortium|Davies|United Kingdom

>Spike|hCoV-19/Denmark/DCGC-2607/2020|2020-08-17|EPI\_ISL\_617844|Original|hCoV-19^^Hovedstaden|Human|Department of Virus and Microbiological Special Diagnostics|Albertsen lab|Michaelsen|Denmark

>Spike|hCoV-19/Wales/PHWC-48F68B/2020|2020-11-10|EPI\_ISL\_681122|Original|hCoV-19^^Wales|Human|Wales Specialist Virology Centre Sequencing lab|COVID-19 Genomics UK (COG-UK) Consortium|Moore|United Kingdom

>Spike|hCoV-19/Denmark/DCGC-14528/2020|2020-11-30|EPI\_ISL\_711139|Original|hCoV-19^^Hovedstaden|Human|Department of Virus and Microbiological Special Diagnostics|Albertsen Lab|Michaelsen|Denmark

>Spike|hCoV-19/Belgium/ULG-10868/2020|2020-11-13|EPI\_ISL\_678412|Original|hCoV-19^^Li\u00e8ge|Human|Department of Clinical Microbiology|GIGA Medical Genomics|Durkin|Belgium

>Spike|hCoV-19/Spain/PV-IBV-000786/2020|2020-03-09|EPI\_ISL\_452723|Original|hCoV-19^^Basque Country|Human|Hospital Universitario Araba. Vitoria-Gasteiz,|SeqCOVID-SPAIN consortium|IBV (CSIC)|Comas|Spain

>Spike|hCoV-19/USA/CA-CZB-4014/2020|2020-08-01|EPI\_ISL\_548676|Original|hCoV-19^^California|Human|County of Santa Clara Public Health Department|Chan-Zuckerberg Biohub|Bhatt|USA

>Spike|hCoV-19/England/MILK-86130C/2020|2020-07-15|EPI\_ISL\_557504|Original|hCoV-19^^England|Human|Lighthouse Lab in Milton Keynes|Wellcome Sanger Institute for the COVID-19 Genomics UK (COG-UK) Consortium|Davies|United Kingdom

>Spike|hCoV-19/Ecuador/USFQ-065/2020|2020-04-17|EPI\_ISL\_481247|Original|hCoV-19^^Los Rios|Human|Hospital IESS Babahoyo|Institute of Microbiology|Cardenas|Ecuador

>Spike|hCoV-19/Finland/7LS4AH5/2020|2020-10-07|EPI\_ISL\_756038|Original|hCoV-19^^Uusimaa|Human|Department of Virology and Immunology|Department of Virology|Smura|Finland

>Spike|hCoV-19/USA/TX-DSHS-0082/2020|2020-05-10|EPI\_ISL\_522367|Original|hCoV-19^^Texas|Human|Texas Department of State Health Services|Texas Department of State Health Services|Rahman|USA

>Spike|hCoV-19/USA/VA-DCLS-0076/2020|2020-03-27|EPI\_ISL\_429975|Original|hCoV-19^^Virginia|Human|Virginia DCLS|Virginia DCLS|St. Jacques|USA

>Spike|hCoV-19/Scotland/QEUAH-AD0870/2020|2020-10-24|EPI\_ISL\_649725|Original|hCoV-19^^Scotland|Human|Lighthouse Lab in Glasgow|Wellcome Sanger Institute for the COVID-19 Genomics UK (COG-UK) Consortium|Davies|United Kingdom

>Spike|hCoV-19/Wales/PHWC-4A6B25/2020|2020-12-17|EPI\_ISL\_765103|Original|hCoV-19^^Wales|Human|Wales Specialist Virology Centre Sequencing lab|COVID-19 Genomics UK (COG-UK) Consortium|Moore|United Kingdom

>Spike|hCoV-19/India/WB-S33/2020|2020-05-02|EPI\_ISL\_455662|Original|hCoV-19^^West Bengal|Human|ICMR-National Institute of Cholera and Enteric Diseases|National Institute of Biomedical Genomics|Maitra|India

>Spike|hCoV-19/USA/CA-CZB-1404/2020|2020-04-20|EPI\_ISL\_468383|Original|hCoV-19^^California|Human|Alameda County Public Health Lab|Chan-Zuckerberg Biohub|Hao|USA

>Spike|hCoV-19/Brazil/RJ-00366/2020|2020-04-24|EPI\_ISL\_623169|Original|hCoV-19^^Rio de Janeiro|Human|Laboratorio de Virologia Molecular / UFRJ|Bioinformatics Laboratory / LNCC|Almeida|Brazil

>Spike|hCoV-19/Taiwan/TSGH-37/2020|2020-02-08|EPI\_ISL\_457733|Original|hCoV-19^^Taipei|Human|TSGH-CP molecular lab|TSGH-CP molecular lab|Shang|Taiwan

>Spike|hCoV-19/Japan/PG-6575/2020|2020-09-00|EPI\_ISL\_687687|Original|hCoV-19^^Japan|Human|Pathogen Genomics Center|Pathogen Genomics Center|Sekizuka|Japan

>Spike|hCoV-19/Denmark/DCGC-10892/2020|2020-11-02|EPI\_ISL\_670268|Original|hCoV-19^^Hovedstaden|Human|Department of Virus and Microbiological Special Diagnostics|Albertsen Lab|Michaelsen|Denmark

>Spike|hCoV-19/New Zealand/20CV0537/2020|2020-11-06|EPI\_ISL\_637089|Original|hCoV-19^^Auckland|Human|LabPLUS|Institute of Environmental Science and Research (ESR)|Wang|New Zealand

>Spike|hCoV-19/Netherlands/NH-RIVM-20793/2020|2020-12-20|EPI\_ISL\_790852|Original|hCoV-19^^Noord-Holland|Human|Dutch COVID-19 response team|National Institute for Public Health and the Environment (RIVM)|Meijer|Netherlands

>Spike|hCoV-19/England/CAMC-B0B0DD/2020|2020-10-29|EPI\_ISL\_643353|Original|hCoV-19^^England|Human|Lighthouse Lab in Cambridge|Wellcome Sanger Institute for the COVID-19 Genomics UK (COG-UK) Consortium|Davies|United Kingdom

>Spike|hCoV-19/Singapore/642/2020|2020-04-21|EPI\_ISL\_493402|Original|hCoV-19^^Singapore|Human|National Public Health Laboratory|National Public Health Laboratory|Mak|Singapore

>Spike|hCoV-19/England/ALDP-944122/2020|2020-06-07|EPI\_ISL\_554709|Original|hCoV-19^^England|Human|Lighthouse Lab in Alderley Park|Wellcome Sanger Institute for the COVID-19 Genomics UK (COG-UK) Consortium|Davies|United Kingdom

>Spike|hCoV-19/Switzerland/BE-ETHZ-260025/2020|2020-08-22|EPI\_ISL\_539359|Original|hCoV-19^^Bern|Human|Viollier AG|Department of Biosystems Science and Engineering|Nadeau|Switzerland

>Spike|hCoV-19/Wales/PHWC-49D417/2020|2020-12-10|EPI\_ISL\_742780|Original|hCoV-19^^Wales|Human|Wales Specialist Virology Centre Sequencing lab|COVID-19 Genomics UK (COG-UK) Consortium|Moore|United Kingdom

>Spike|hCoV-19/England/BRIS-12BE04/2020|2020-05-09|EPI\_ISL\_469382|Original|hCoV-19^^England|Human|PHE South West Regional Laboratory|Wellcome Sanger Institute for the COVID-19 Genomics UK (COG-UK) consortium|Davies|United Kingdom

>Spike|hCoV-19/Denmark/DCGC-13762/2020|2020-11-30|EPI\_ISL\_712334|Original|hCoV-19^^Sjaelland|Human|Department of Virus and Microbiological Special Diagnostics|Albertsen Lab|Michaelsen|Denmark

>Spike|hCoV-19/England/NOTT-116C11/2020|2020-10-19|EPI\_ISL\_595323|Original|hCoV-19^^England|Human|Queens Medical Centre|COVID-19 Genomics UK (COG-UK) Consortium|Loose|United Kingdom

>Spike|hCoV-19/USA/TX-DSHS-1862/2020|2020-06-24|EPI\_ISL\_745297|Original|hCoV-19^^Texas|Human|Texas Department of State Health Services|Texas Department of State Health Services|Rahman|USA

>Spike|hCoV-19/USA/TX-HMH-MCoV-18974/2020|2020-11-26|EPI\_ISL\_785257|Original|hCoV-19^^Texas|Human|Houston Methodist Hospital|Houston Methodist Hospital|Long|USA

>Spike|hCoV-19/Australia/VIC14512/2020|2020-08-13|EPI\_ISL\_592868|Original|hCoV-19^^Victoria|Human|Microbiological Diagnostic Unit - Public Health Laboratory (MDU-PHL)|MDU-PHL|Schultz|Australia

>Spike|hCoV-19/Canada/BC-BCCDC-8581/2020|2020-11-00|EPI\_ISL\_740830|Original|hCoV-19^^British Columbia|Human|BCCDC Public Health Laboratory|BCCDC Public Health Laboratory|Prystajecky|Canada

>Spike|hCoV-19/England/MILK-992A84/2020|2020-08-27|EPI\_ISL\_552142|Original|hCoV-19^^England|Human|Lighthouse Lab in Milton Keynes|Wellcome Sanger Institute for the COVID-19 Genomics UK (COG-UK) consortium|Davies|United Kingdom

>Spike|hCoV-19/Singapore/382/2020|2020-04-17|EPI\_ISL\_469131|Original|hCoV-19^^Singapore|Human|National Public Health Laboratory|National Public Health Laboratory|Mak|Singapore

>Spike|hCoV-19/Canada/MB-NML-1029/2020|2020-07-30|EPI\_ISL\_582393|Original|hCoV-19^^Manitoba|Human|Cadham Provincial Laboratory|National Microbiology Laboratory (NML)|Majer|Canada

>Spike|hCoV-19/USA/LA-EVTL286/2020|2020-08-26|EPI\_ISL\_574420|Original|hCoV-19^^Louisiana|Human|LSUHS Emerging Viral Threat Laboratory|Microbial Genome Sequencing Center|Kamil|USA

>Spike|hCoV-19/Scotland/QEUH-99916A/2020|2020-08-24|EPI\_ISL\_541809|Original|hCoV-19^^Scotland|Human|Lighthouse Lab in Glasgow|Wellcome Sanger Institute for the COVID-19 Genomics UK (COG-UK) consortium|Davies|United Kingdom

>Spike|hCoV-19/Sweden/20-50242/2020|2020-03-07|EPI\_ISL\_455883|Original|hCoV-19^^Stockholm|Human|Karolinska Universitetslaboratoriet|The Public Health Agency of Sweden|Svartstr\u00f6m|Sweden

>Spike|hCoV-19/Japan/PG-0771/2020|2020-03-00|EPI\_ISL\_684381|Original|hCoV-19^^Japan|Human|Pathogen Genomics Center|Pathogen Genomics Center|Sekizuka|Japan

>Spike|hCoV-19/Japan/PG-2632/2020|2020-04-00|EPI\_ISL\_690764|Original|hCoV-19^^Japan|Human|Pathogen Genomics Center|Pathogen Genomics Center|Sekizuka|Japan

>Spike|hCoV-19/Australia/NSW836/2020|2020-08-01|EPI\_ISL\_526178|Original|hCoV-19^^New South Wales|Human|St Vincent's Pathology (SydPath)|NSW Health Pathology - Institute of Clinical Pathology and Medical Research; Westmead Hospital; University of Sydney|Gall|Australia

>Spike|hCoV-19/England/QEUA-9C8A67/2020|2020-09-10|EPI\_ISL\_567264|Original|hCoV-19^^England|Human|Lighthouse Lab in Glasgow|Wellcome Sanger Institute for the COVID-19 Genomics UK (COG-UK) consortium|Davies|United Kingdom

>Spike|hCoV-19/USA/TX-HMH-MCoV-10446/2020|2020-07-08|EPI\_ISL\_789481|Original|hCoV-19^^Texas|Human|Houston Methodist Hospital|Houston Methodist Hospital|Long|USA

>Spike|hCoV-19/United Arab Emirates/0588/2020|2020-05-16|EPI\_ISL\_698746|Original|hCoV-19^^Abu Dhabi|Human|Group 42 (G42) Healthcare|G42 Healthcare|Ogrodzki|United Arab Emirates

>Spike|hCoV-19/England/NOTT-110585/2020|2020-04-24|EPI\_ISL\_441531|Original|hCoV-19^^England|Human|Queens Medical Centre|COVID-19 Genomics UK (COG-UK) Consortium|Loose|United Kingdom

>Spike|hCoV-19/England/QEUA-BA2CF2/2020|2020-11-18|EPI\_ISL\_720957|Original|hCoV-19^^England|Human|Lighthouse Lab in Glasgow|Wellcome Sanger Institute for the COVID-19 Genomics UK (COG-UK) Consortium|Davies|United Kingdom

>Spike|hCoV-19/England/QEUA-961295/2020|2020-08-03|EPI\_ISL\_532025|Original|hCoV-19^^England|Human|Lighthouse Lab in Glasgow|Wellcome Sanger Institute for the COVID-19 Genomics UK (COG-UK) consortium|Davies|United Kingdom

>Spike|hCoV-19/USA/TX-HMH-5362/2020|2020-06-26|EPI\_ISL\_544716|Original|hCoV-19^^Texas|Human|Houston Methodist Hospital|Houston Methodist Hospital|Long|USA

>Spike|hCoV-19/Wales/MILK-9C1F41/2020|2020-09-10|EPI\_ISL\_566480|Original|hCoV-19^^Wales|Human|Lighthouse Lab in Milton Keynes|Wellcome Sanger Institute for the COVID-19 Genomics UK (COG-UK) consortium|Davies|United Kingdom

>Spike|hCoV-19/England/MILK-A91064/2020|2020-10-16|EPI\_ISL\_638501|Original|hCoV-19^^England|Human|Oxford Viromics|COVID-19 Genomics UK (COG-UK) Consortium|Golubchik|United Kingdom

>Spike|hCoV-19/England/LIVE-DC30B1/2020|2020-11-22|EPI\_ISL\_705860|Original|hCoV-19^^England|Human|Liverpool Clinical Laboratories|COVID-19 Genomics UK (COG-UK) Consortium|Haldenby|United Kingdom

>Spike|hCoV-19/Wales/PHWC-49E179/2020|2020-12-07|EPI\_ISL\_742961|Original|hCoV-19^^Wales|Human|Wales Specialist Virology Centre Sequencing lab|COVID-19 Genomics UK (COG-UK) Consortium|Moore|United Kingdom

>Spike|hCoV-19/Wales/PHWC-4A3C34/2020|2020-12-12|EPI\_ISL\_764609|Original|hCoV-19^^Wales|Human|Wales Specialist Virology Centre Sequencing lab|COVID-19 Genomics UK (COG-UK) Consortium|Moore|United Kingdom

>Spike|hCoV-19/Thailand/Bangkok-CONI-0205/2020|2020-03-17|EPI\_ISL\_512855|Original|hCoV-19^^Bangkok|Human|Ramathibodi Hospital|COVID-19 Network Investigations (CONI) Alliance|Batty|Thailand

>Spike|hCoV-19/Scotland/QEUA-96A7AC/2020|2020-08-16|EPI\_ISL\_531470|Original|hCoV-19^^Scotland|Human|NHSGGC West of Scotland Specialist Virology Centre / MRC - University of Glasgow Centre for Virus Research|Wellcome Sanger Institute for the COVID-19 Genomics UK (COG-UK) consortium|Davies|United Kingdom

>Spike|hCoV-19/Australia/VIC951/2020|2020-03-26|EPI\_ISL\_430646|Original|hCoV-19^^Victoria|Human|Microbiological Diagnostic Unit Public Health Laboratory|Microbiological Diagnostic Unit Public Health Laboratory|Schultz|Australia

>Spike|hCoV-19/Brazil/PR-5622/2020|2020-03-28|EPI\_ISL\_541345|Original|hCoV-19^^Paran\u00e1|Human|LACEN/PR|Laboratory of Respiratory Viruses and Measles|Silva|Brazil



>Spike|hCoV-19/Scotland/CVR2173/2020|2020-04-11|EPI\_ISL\_448151|Original|hCoV-19^^Scotland|Human|West of Scotland Specialist Virology Centre|COVID-19 Genomics UK (COG-UK) Consortium|Robertson|United Kingdom

>Spike|hCoV-19/USA/TX-HMH-MCoV-10103/2020|2020-07-06|EPI\_ISL\_789322|Original|hCoV-19^^Texas|Human|Houston Methodist Hospital|Houston Methodist Hospital|Long|USA

>Spike|hCoV-19/England/MILK-8524A1/2020|2020-07-17|EPI\_ISL\_557349|Original|hCoV-19^^England|Human|Lighthouse Lab in Milton Keynes|Wellcome Sanger Institute for the COVID-19 Genomics UK (COG-UK) consortium|Davies|United Kingdom

>Spike|hCoV-19/England/QEUEH-AE1DC8/2020|2020-10-27|EPI\_ISL\_633588|Original|hCoV-19^^England|Human|Lighthouse Lab in Glasgow|Wellcome Sanger Institute for the COVID-19 Genomics UK (COG-UK) consortium|Davies|United Kingdom

>Spike|hCoV-19/England/QEUEH-9DD759/2020|2020-09-21|EPI\_ISL\_599753|Original|hCoV-19^^England|Human|Lighthouse Lab in Glasgow|Wellcome Sanger Institute for the COVID-19 Genomics UK (COG-UK) consortium|Davies|United Kingdom

>Spike|hCoV-19/France/HDF-IPP9631/2020|2020-11-09|EPI\_ISL\_693772|Original|hCoV-19^^Hauts-de-France|Human|General practitioner|National Reference Center for Viruses of Respiratory Infections|Enouf|France

>Spike|hCoV-19/USA/CA-QDX-78/2020|2020-03-16|EPI\_ISL\_467842|Original|hCoV-19^^California|Human|Quest Diagnostics|Quest Diagnostics|Kagan|USA

>Spike|hCoV-19/Norway/4612/2020|2020-10-07|EPI\_ISL\_635170|Original|hCoV-19^^Vestland|Human|Foerde Hospital|Norwegian Institute of Public Health|Vollan|Norway

>Spike|hCoV-19/England/CAMB-1B9955/2020|2020-11-07|EPI\_ISL\_664578|Original|hCoV-19^^England|Human|Department of Pathology|COVID-19 Genomics UK (COG-UK) Consortium|Goodfellow|United Kingdom

>Spike|hCoV-19/USA/AZ-TG654330/2020|2020-04-13|EPI\_ISL\_695980|Original|hCoV-19^^Arizona|Human|Sonora Quest Laboratories|TGen North|French|USA

>Spike|hCoV-19/USA/TX-DSHS-1299/2020|2020-03-31|EPI\_ISL\_648234|Original|hCoV-19^^Texas|Human|Texas Department of State Health Services|Texas Department of State Health Services|Rahman|USA

>Spike|hCoV-19/Equatorial Guinea/39822/2020|2020-07-20|EPI\_ISL\_649168|Original|hCoV-19^^Bioko Norte|Human|Laboratorio de Investigaciones de Baney|University Hospital Basel|Hosch|Equatorial Guinea

>Spike|hCoV-19/Wales/PHWC-4A1E9A/2020|2020-12-14|EPI\_ISL\_743826|Original|hCoV-19^^Wales|Human|Wales Specialist Virology Centre Sequencing lab|COVID-19 Genomics UK (COG-UK) Consortium|Moore|United Kingdom

>Spike|hCoV-19/Canada/BC\_27081621/2020|2020-03-00|EPI\_ISL\_463259|Original|hCoV-19^^British Columbia|Human|BCCDC Public Health Laboratory|BCCDC Public Health Laboratory|Harrigan|Canada

>Spike|hCoV-19/England/CAMC-B97F51/2020|2020-11-13|EPI\_ISL\_674866|Original|hCoV-19^^England|Human|Lighthouse Lab in Cambridge|Wellcome Sanger Institute for the COVID-19 Genomics UK (COG-UK) Consortium|Davies|United Kingdom

>Spike|hCoV-19/England/QEUEH-5E0283/2020|2020-06-17|EPI\_ISL\_533282|Original|hCoV-19^^England|Human|Lighthouse Lab in Glasgow|Wellcome Sanger Institute for the COVID-19 Genomics UK (COG-UK) consortium|Davies|United Kingdom

>Spike|hCoV-19/USA/LA-EVTL761/2020|2020-07-21|EPI\_ISL\_653452|Original|hCoV-19^^Louisiana|Human|LSUHS Emerging Viral Threat Laboratory|Microbial Genome Sequencing Center|Kamil|USA

>Spike|hCoV-19/Scotland/CVR2347/2020|2020-04-13|EPI\_ISL\_438890|Original|hCoV-19^^Scotland|Human|West of Scotland Specialist Virology Centre|COVID-19 Genomics UK (COG-UK) Consortium|Robertson|United Kingdom

>Spike|hCoV-19/Singapore/822nan/2020|2020-07-06|EPI\_ISL\_648731|Original|hCoV-19^^Singapore|Human|Department of Laboratory Medicine|Department of Laboratory Medicine|Chen|Singapore

>Spike|hCoV-19/England/ALDP-951966/2020|2020-06-10|EPI\_ISL\_555440|Original|hCoV-19^^England|Human|Lighthouse Lab in Alderley Park|Wellcome Sanger Institute for the COVID-19 Genomics UK (COG-UK) consortium|Davies|United Kingdom

>Spike|hCoV-19/England/QEUEH-963AC8/2020|2020-08-12|EPI\_ISL\_536825|Original|hCoV-19^^England|Human|Lighthouse Lab in Glasgow|Wellcome Sanger Institute for the COVID-19 Genomics UK (COG-UK) consortium|Davies|United Kingdom

>Spike|hCoV-19/England/NORT-2894A7/2020|2020-03-29|EPI\_ISL\_458645|Original|hCoV-19^^England|Human|NU-OMICS DNA Sequencing research facility|Wellcome Sanger Institute for the COVID-19 Genomics UK (COG-UK) consortium|Davies|United Kingdom

>Spike|hCoV-19/England/MILK-BA9F10/2020|2020-11-18|EPI\_ISL\_681432|Original|hCoV-19^^England|Human|Lighthouse Lab in Milton Keynes|Wellcome Sanger Institute for the COVID-19 Genomics UK (COG-UK) Consortium|Davies|United Kingdom

>Spike|hCoV-19/USA/MN-MDH-1007/2020|2020-04-30|EPI\_ISL\_462852|Original|hCoV-19^^Minnesota|Human|Minnesota Department of Health|Minnesota Department of Health|Garfin|USA

>Spike|hCoV-19/England/205260431/2020|2020-00-00|EPI\_ISL\_766543|Original|hCoV-19^^England|Human|Respiratory Virus Unit|COVID-19 Genomics UK (COG-UK) Consortium|Platt|United Kingdom

>Spike|hCoV-19/Denmark/DCGC-17221/2020|2020-12-14|EPI\_ISL\_750230|Original|hCoV-19^^Sjaelland|Human|Department of Virus and Microbiological Special Diagnostics|Albertsen Lab|Michaelsen|Denmark

>Spike|hCoV-19/Wales/PHWC-49F14B/2020|2020-12-02|EPI\_ISL\_743171|Original|hCoV-19^^Wales|Human|Wales Specialist Virology Centre Sequencing lab|COVID-19 Genomics UK (COG-UK) Consortium|Moore|United Kingdom

>Spike|hCoV-19/England/ALDP-A67489/2020|2020-10-12|EPI\_ISL\_630465|Original|hCoV-19^^England|Human|Lighthouse Lab in Alderley Park|Wellcome Sanger Institute for the COVID-19 Genomics UK (COG-UK) consortium|Davies|United Kingdom

>Spike|hCoV-19/USA/CA-CZB-3624/2020|2020-07-30|EPI\_ISL\_548366|Original|hCoV-19^^California|Human|County of San Luis Obispo Public Health Laboratory|Chan-Zuckerberg Biohub|Bhatt|USA

>Spike|hCoV-19/Belgium/ULG-10190/2020|2020-05-10|EPI\_ISL\_455978|Original|hCoV-19^^Li\u00e8ge|Human|Department of Clinical Microbiology|GIGA Medical Genomics|Durkin|Belgium

>Spike|hCoV-19/Denmark/ALAB-SSI-1327/2020|2020-04-02|EPI\_ISL\_437641|Original|hCoV-19^^Denmark|Human|Department of Virus and Microbiological Special Diagnostics|Albertsen lab|Kirkegaard|Denmark

>Spike|hCoV-19/USA/NY-NYCPHL-000309/2020|2020-03-15|EPI\_ISL\_631836|Original|hCoV-19^^New York|Human|Jamaica Hospital Medical Center|New York City Public Health Laboratory|Wang|USA

>Spike|hCoV-19/Australia/VIC927/2020|2020-03-30|EPI\_ISL\_427155|Original|hCoV-19^^Victoria|Human|Victorian Infectious Diseases Reference Laboratory (VIDRL)|Microbiological Diagnostic Unit Public Health Laboratory and Victorian Infectious Diseases Reference Laboratory|Schultz|Australia

>Spike|hCoV-19/Wales/PHWC-2B97D/2020|2020-03-28|EPI\_ISL\_445786|Original|hCoV-19^^Wales|Human|Wales Specialist Virology Centre|Public Health Wales Microbiology Cardiff|Moore|United Kingdom

>Spike|hCoV-19/USA/MI-QDX-329/2020|2020-03-22|EPI\_ISL\_571073|Original|hCoV-19^^Michigan|Human|Quest Diagnostics|Quest Diagnostics|Kagan|USA

>Spike|hCoV-19/England/204660322/2020|2020-11-11|EPI\_ISL\_686573|Original|hCoV-19^^England|Human|Respiratory Virus Unit|COVID-19 Genomics UK (COG-UK) Consortium|Platt|United Kingdom

>Spike|hCoV-19/Wales/PHWC-36A6D/2020|2020-05-02|EPI\_ISL\_474751|Original|hCoV-19^^Wales|Human|Originating lab|COVID-19 Genomics UK (COG-UK) Consortium|Moore|United Kingdom

>Spike|hCoV-19/England/ALDP-C49AD4/2020|2020-12-12|EPI\_ISL\_718858|Original|hCoV-19^^England|Human|Lighthouse Lab in Alderley Park|Wellcome Sanger Institute for the COVID-19 Genomics UK (COG-UK) Consortium|Davies|United Kingdom

>Spike|hCoV-19/Wales/PHWC-481F60/2020|2020-10-20|EPI\_ISL\_612116|Original|hCoV-19^^Wales|Human|Wales Specialist Virology Centre Sequencing lab|COVID-19 Genomics UK (COG-UK) Consortium|Moore|United Kingdom

>Spike|hCoV-19/USA/TX-HMH-MCoV-11782/2020|2020-09-09|EPI\_ISL\_790110|Original|hCoV-19^^Texas|Human|Houston Methodist Hospital|Houston Methodist Hospital|Long|USA

>Spike|hCoV-19/Scotland/CVR5829/2020|2020-11-14|EPI\_ISL\_665579|Original|hCoV-19^^Scotland|Human|West of Scotland Specialist Virology Centre|COVID-19 Genomics UK (COG-UK) Consortium|Robertson|United Kingdom

>Spike|hCoV-19/New Zealand/20VR3887/2020|2020-00-00|EPI\_ISL\_548086|Original|hCoV-19^^Auckland|Human|LabPLUS|Institute of Environmental Science and Research (ESR)|Wang|New Zealand

>Spike|hCoV-19/England/MILK-C6155D/2020|2020-12-13|EPI\_ISL\_735711|Original|hCoV-19^^England|Human|Lighthouse Lab in Milton Keynes|Wellcome Sanger Institute for the COVID-19 Genomics UK (COG-UK) Consortium|Davies|United Kingdom

>Spike|hCoV-19/Wales/PHWC-495BA1/2020|2020-11-25|EPI\_ISL\_726450|Original|hCoV-19^^Wales|Human|Originating lab|COVID-19 Genomics UK (COG-UK) Consortium|Moore|United Kingdom

>Spike|hCoV-19/Lithuania/MR-LUHS-Eilnr93/2020|2020-04-18|EPI\_ISL\_603108|Original|hCoV-19^^Marijampoles apskritis|Human|Lithuanian University of Health Sciences Hospital|Lithuanian University of Health Sciences|Zemaitis|Lithuania

>Spike|hCoV-19/England/QEUEH-AD43F3/2020|2020-10-26|EPI\_ISL\_634527|Original|hCoV-19^^England|Human|Lighthouse Lab in Glasgow|Wellcome Sanger Institute for the COVID-19 Genomics UK (COG-UK) consortium|Davies|United Kingdom

>Spike|hCoV-19/Beijing/DT-WH01/2020|2020-02-01|EPI\_ISL\_452360|Original|hCoV-19^^Beijing|Human|Laboratory of Infectious Diseases Center of Beijing Ditan Hospital|Laboratory of Infectious Diseases Center of Beijing Ditan Hospital|Yang|China

>Spike|hCoV-19/England/201061455/2020|2020-03-01|EPI\_ISL\_464413|Original|hCoV-19^^England|Human|Respiratory Virus Unit|Respiratory Virus Unit|Platt|United Kingdom

>Spike|hCoV-19/England/PORT-2F52F7/2020|2020-00-00|EPI\_ISL\_703567|Original|hCoV-19^^England|Human|Centre for Enzyme Innovation|COVID-19 Genomics UK (COG-UK) Consortium|Robson|United Kingdom

>Spike|hCoV-19/England/QEUEH-A5E388/2020|2020-10-10|EPI\_ISL\_597482|Original|hCoV-19^^England|Human|Lighthouse Lab in Glasgow|Wellcome Sanger Institute for the COVID-19 Genomics UK (COG-UK) consortium|Davies|United Kingdom

>Spike|hCoV-19/Denmark/DCGC-10590/2020|2020-11-02|EPI\_ISL\_670073|Original|hCoV-19^^Hovedstaden|Human|Department of Virus and Microbiological Special Diagnostics|Albertsen Lab|Michaelsen|Denmark

>Spike|hCoV-19/Denmark/DCGC-4403/2020|2020-09-07|EPI\_ISL\_615401|Original|hCoV-19^^Midtjylland|Human|Department of Virus and Microbiological Special Diagnostics|Albertsen lab|Michaelsen|Denmark

>Spike|hCoV-19/Switzerland/BE-ETHZ-260152/2020|2020-08-26|EPI\_ISL\_539447|Original|hCoV-19^^Bern|Human|Viollier AG|Department of Biosystems Science and Engineering|Nadeau|Switzerland

>Spike|hCoV-19/England/MILK-BABD32/2020|2020-11-18|EPI\_ISL\_783302|Original|hCoV-19^^England|Human|Lighthouse Lab in Milton Keynes|Wellcome Sanger Institute for the COVID-19 Genomics UK (COG-UK) Consortium|Davies|United Kingdom

>Spike|hCoV-19/Denmark/DCGC-8276/2020|2020-10-26|EPI\_ISL\_617308|Original|hCoV-19^^Syddanmark|Human|Department of Virus and Microbiological Special Diagnostics|Albertsen lab|Michaelsen|Denmark

>Spike|hCoV-19/Australia/VIC11628/2020|2020-07-22|EPI\_ISL\_563438|Original|hCoV-19^^Victoria|Human|Microbiological Diagnostic Unit - Public Health Laboratory (MDU-PHL)|MDU-PHL|Schultz|Australia

>Spike|hCoV-19/England/ALDP-9E6878/2020|2020-09-24|EPI\_ISL\_580432|Original|hCoV-19^^England|Human|Lighthouse Lab in Alderley Park|Wellcome Sanger Institute for the COVID-19 Genomics UK (COG-UK) consortium|Davies|United Kingdom

>Spike|hCoV-19/India/HR-TF10/2020|2020-06-17|EPI\_ISL\_508490|Original|hCoV-19^^Haryana|Human|Translational Health Science and Technology Institute|National Institute of Biomedical Genomics|Maitra|India

>Spike|hCoV-19/Scotland/QEUEH-AE4C8C/2020|2020-10-27|EPI\_ISL\_649663|Original|hCoV-19^^Scotland|Human|Lighthouse Lab in Glasgow|Wellcome Sanger Institute for the COVID-19 Genomics UK (COG-UK) Consortium|Davies|United Kingdom

>Spike|hCoV-19/Denmark/DCGC-12250/2020|2020-11-16|EPI\_ISL\_682431|Original|hCoV-19^^Hovedstaden|Human|Department of Virus and Microbiological Special Diagnostics|Albertsen Lab|Michaelsen|Denmark

>Spike|hCoV-19/USA/MI-MDHHS-SC21359/2020|2020-04-01|EPI\_ISL\_507613|Original|hCoV-19^^Michigan|Human|Michigan Department of Health and Human Services|Michigan Department of Health and Human Services|Blankenship|USA

>Spike|hCoV-19/Australia/VIC1621/2020|2020-05-06|EPI\_ISL\_456529|Original|hCoV-19^^Victoria|Human|Victorian Infectious Diseases Reference Laboratory (VIDRL)|Microbiological Diagnostic Unit Public Health Laboratory and Victorian Infectious Diseases Reference Laboratory|Schultz|Australia

>Spike|hCoV-19/Australia/VIC6723/2020|2020-07-26|EPI\_ISL\_561986|Original|hCoV-19^^Victoria|Human|Victorian Infectious Diseases Reference Laboratory (VIDRL)|VIDRL and MDU-PHL|Schultz|Australia

>Spike|hCoV-19/Hong Kong/VM20009617/2020|2020-04-06|EPI\_ISL\_444031|Original|hCoV-19^^Hong Kong|Human|Queen Mary Hospital|Hong Kong Department of Health|Mak|China

>Spike|hCoV-19/England/QEUEH-B0EBBB/2020|2020-11-02|EPI\_ISL\_642149|Original|hCoV-19^^England|Human|Lighthouse Lab in Glasgow|Wellcome Sanger Institute for the COVID-19 Genomics UK (COG-UK) Consortium|Davies|United Kingdom

>Spike|hCoV-19/Japan/PG-6942/2020|2020-09-00|EPI\_ISL\_688047|Original|hCoV-19^^Japan|Human|Pathogen Genomics Center|Pathogen Genomics Center|Sekizuka|Japan

>Spike|hCoV-19/England/NORT-2830F4/2020|2020-03-30|EPI\_ISL\_488627|Original|hCoV-19^^England|Human|NU-OMICS DNA Sequencing research facility|Wellcome Sanger Institute for the COVID-19 Genomics UK (COG-UK) consortium|Davies|United Kingdom

>Spike|hCoV-19/Scotland/CVR2612/2020|2020-04-15|EPI\_ISL\_484614|Original|hCoV-19^^Scotland|Human|West of Scotland Specialist Virology Centre|COVID-19 Genomics UK (COG-UK) Consortium|Robertson|United Kingdom

>Spike|hCoV-19/India/MH-NIV-229542/2020|2020-09-28|EPI\_ISL\_577685|Original|hCoV-19^^Maharashtra|Human|NIV Influenza|NIV Influenza|Potdar|India

>Spike|hCoV-19/Denmark/DCGC-5188/2020|2020-09-21|EPI\_ISL\_621726|Original|hCoV-19^^Syddanmark|Human|Department of Virus and Microbiological Special Diagnostics|Albertsen lab|Michaelsen|Denmark

>Spike|hCoV-19/Denmark/DCGC-10974/2020|2020-11-02|EPI\_ISL\_669744|Original|hCoV-19^^Midtjylland|Human|Department of Virus and Microbiological Special Diagnostics|Albertsen Lab|Michaelsen|Denmark

>Spike|hCoV-19/England/CAMC-9B1A70/2020|2020-09-04|EPI\_ISL\_566428|Original|hCoV-19^^England|Human|Lighthouse Lab in Cambridge|Wellcome Sanger Institute for the COVID-19 Genomics UK (COG-UK) consortium|Davies|United Kingdom

>Spike|hCoV-19/England/QEUEH-B9E51C/2020|2020-11-18|EPI\_ISL\_720951|Original|hCoV-19^^England|Human|Lighthouse Lab in Glasgow|Wellcome Sanger Institute for the COVID-19 Genomics UK (COG-UK) Consortium|Davies|United Kingdom

>Spike|hCoV-19/Scotland/QEUEH-9C92D7/2020|2020-09-14|EPI\_ISL\_576072|Original|hCoV-19^^Scotland|Human|Lighthouse Lab in Glasgow|Wellcome Sanger Institute for the COVID-19 Genomics UK (COG-UK) consortium|Davies|United Kingdom

>Spike|hCoV-19/USA/CA-CZB-14202/2020|2020-11-09|EPI\_ISL\_738882|Original|hCoV-19^^California|Human|Orange County Public Health Lab|Chan-Zuckerberg Biohub|Kamm|USA

>Spike|hCoV-19/USA/WA-UW-12575/2020|2020-06-26|EPI\_ISL\_570865|Original|hCoV-19^^Washington|Human|UW Virology Lab|UW Virology Lab|Roychoudhury|USA

>Spike|hCoV-19/France/PAC-IHU-0084/2020|2020-03-20|EPI\_ISL\_569300|Original|hCoV-19^^Provence-Alpes-C\u00f4te-d\u2019Azur|Human|MEPHI|MEPHI|Levasseur|France

>Spike|hCoV-19/Japan/PG-3368/2020|2020-04-00|EPI\_ISL\_691483|Original|hCoV-19^^Japan|Human|Pathogen Genomics Center|Pathogen Genomics Center|Sekizuka|Japan

>Spike|hCoV-19/Scotland/CVR5094/2020|2020-10-17|EPI\_ISL\_627370|Original|hCoV-19^^Scotland|Human|West of Scotland Specialist Virology Centre|COVID-19 Genomics UK (COG-UK) Consortium|Robertson|United Kingdom

>Spike|hCoV-19/England/MILK-970530/2020|2020-08-18|EPI\_ISL\_553145|Original|hCoV-19^^England|Human|Lighthouse Lab in Milton Keynes|Wellcome Sanger Institute for the COVID-19 Genomics UK (COG-UK) consortium|Davies|United Kingdom

>Spike|hCoV-19/Israel/CVL-n2200/2020|2020-03-06|EPI\_ISL\_649095|Original|hCoV-19^^Rishon-Letsion|Human|Israel Central Virology laboratory|Israel Central Virology laboratory|Zuckerman|Israel

>Spike|hCoV-19/England/BRIS-1256D5/2020|2020-03-28|EPI\_ISL\_443834|Original|hCoV-19^^England|Human|PHE South West Regional Laboratory|Wellcome Sanger Institute for the COVID-19 Genomics UK (COG-UK) consortium|Amato|United Kingdom

>Spike|hCoV-19/Denmark/DCGC-14313/2020|2020-11-30|EPI\_ISL\_711689|Original|hCoV-19^^Hovedstaden|Human|Department of Virus and Microbiological Special Diagnostics|Albertsen Lab|Michaelsen|Denmark

>Spike|hCoV-19/USA/WI-UW-200/2020|2020-03-24|EPI\_ISL\_428296|Original|hCoV-19^^Wisconsin|Human|University of Wisconsin-Madison AIDS Vaccine Research Laboratories|University of Wisconsin-Madison AIDS Vaccine Research Laboratories|Moreno|USA

>Spike|hCoV-19/England/QEUEH-BC48F6/2020|2020-11-25|EPI\_ISL\_703694|Original|hCoV-19^^England|Human|Lighthouse Lab in Glasgow|Wellcome Sanger Institute for the COVID-19 Genomics UK (COG-UK) Consortium|Davies|United Kingdom

>Spike|hCoV-19/USA/OR-OHSU-1565/2020|2020-07-20|EPI\_ISL\_525979|Original|hCoV-19^^Oregon|Human|OHSU Lab Services Molecular Microbiology Lab|Oregon SARS-CoV-2 Genome Sequencing Center|O'Roak|USA

>Spike|hCoV-19/Australia/ACT0031/2020|2020-03-24|EPI\_ISL\_498498|Original|hCoV-19^^Australian Capital Territory|Human|ACT Pathology|Schwessinger Lab|Hall|Australia

>Spike|hCoV-19/Scotland/GCVR-170CF7/2020|2020-03-25|EPI\_ISL\_459704|Original|hCoV-19^^Scotland|Human|NHSGGC West of Scotland Specialist Virology Centre / MRC-University of Glasgow Centre for Virus Research|Wellcome Sanger Institute for the COVID-19 Genomics UK (COG-UK) consortium|Davies|United Kingdom

>Spike|hCoV-19/Denmark/DCGC-4655/2020|2020-09-14|EPI\_ISL\_621887|Original|hCoV-19^^Sjaelland|Human|Department of Virus and Microbiological Special Diagnostics|Albertsen lab|Michaelsen|Denmark

>Spike|hCoV-19/England/CAMC-C477EE/2020|2020-12-10|EPI\_ISL\_718918|Original|hCoV-19^^England|Human|Lighthouse Lab in Cambridge|Wellcome Sanger Institute for the COVID-19 Genomics UK (COG-UK) Consortium|Davies|United Kingdom

>Spike|hCoV-19/England/PORT-2D1561/2020|2020-04-20|EPI\_ISL\_512401|Original|hCoV-19^^England|Human|Centre for Enzyme Innovation|COVID-19 Genomics UK (COG-UK) Consortium|Robson|United Kingdom

>Spike|hCoV-19/USA/TX-HMH-MCoV-11328/2020|2020-09-05|EPI\_ISL\_789767|Original|hCoV-19^^Texas|Human|Houston Methodist Hospital|Houston Methodist Hospital|Long|USA

>Spike|hCoV-19/Jordan/AM-ALSR-3914/2020|2020-09-30|EPI\_ISL\_636280|Original|hCoV-19^^Amman|Human|Biolab Diagnostic Laboratories|Andersen lab at Scripps Research|Gangavarapu|Jordan

>Spike|hCoV-19/England/BRIS-125E64/2020|2020-03-30|EPI\_ISL\_443786|Original|hCoV-19^^England|Human|PHE South West Regional Laboratory|Wellcome Sanger Institute for the COVID-19 Genomics UK (COG-UK) consortium|Amato|United Kingdom

>Spike|hCoV-19/Switzerland/GR-ETHZ-400035/2020|2020-12-04|EPI\_ISL\_729098|Original|hCoV-19^^Graub\u00fcden|Human|Viollier AG|Department of Biosystems Science and Engineering|Nadeau|Switzerland

>Spike|hCoV-19/England/QEUEH-BCD417/2020|2020-11-26|EPI\_ISL\_704488|Original|hCoV-19^^England|Human|Lighthouse Lab in Glasgow|Wellcome Sanger Institute for the COVID-19 Genomics UK (COG-UK) Consortium|Davies|United Kingdom

>Spike|hCoV-19/USA/NY-Wadsworth-292754-01/2020|2020-12-21|EPI\_ISL\_769932|Original|hCoV-19^^New York|Human|Albany Medical Center Hospital Clinical Laboratories|Wadsworth Center|Lasek-Nesselquist|USA

>Spike|hCoV-19/England/LIVE-1DD84F/2020|2020-09-28|EPI\_ISL\_611851|Original|hCoV-19^^England|Human|Liverpool Clinical Laboratories|COVID-19 Genomics UK (COG-UK) Consortium|Haldenby|United Kingdom

>Spike|hCoV-19/USA/TX-HMH-MCoV-10210/2020|2020-07-07|EPI\_ISL\_789182|Original|hCoV-19^^Texas|Human|Houston Methodist Hospital|Houston Methodist Hospital|Long|USA

>Spike|hCoV-19/England/CAMC-B52769/2020|2020-11-06|EPI\_ISL\_657006|Original|hCoV-19^^England|Human|Lighthouse Lab in Cambridge|Wellcome Sanger Institute for the COVID-19 Genomics UK (COG-UK) Consortium|Davies|United Kingdom

>Spike|hCoV-19/France/IDF-2684/2020|2020-03-16|EPI\_ISL\_418240|Original|hCoV-19^^\u00cele-de-France|Human|LABM GH nord Essonne|National Reference Center for Viruses of Respiratory Infections|Enouf|France

>Spike|hCoV-19/England/MILK-B93FCE/2020|2020-11-14|EPI\_ISL\_676120|Original|hCoV-19^^England|Human|Lighthouse Lab in Milton Keynes|Wellcome Sanger Institute for the COVID-19 Genomics UK (COG-UK) Consortium|Davies|United Kingdom

>Spike|hCoV-19/Spain/VC-FISABIO-526/2020|2020-03-29|EPI\_ISL\_447477|Original|hCoV-19^^Comunitat Valenciana|Human|Servicio de Microbiología. Hospital Clínico Universitario de Valencia|Sequencing and Bioinformatics Service and Molecular Epidemiology Research Group. FISABIO-Public Health|Gonzalez-Candelas|Spain

>Spike|hCoV-19/England/201161525/2020|2020-03-12|EPI\_ISL\_464852|Original|hCoV-19^^England|Human|Respiratory Virus Unit|Respiratory Virus Unit|Platt|United Kingdom

>Spike|hCoV-19/England/CAMC-C838E3/2020|2020-12-17|EPI\_ISL\_762840|Original|hCoV-19^^England|Human|Lighthouse Lab in Cambridge|Wellcome Sanger Institute for the COVID-19 Genomics UK (COG-UK) Consortium|Davies|United Kingdom

>Spike|hCoV-19/England/ALDP-9546F3/2020|2020-06-09|EPI\_ISL\_555500|Original|hCoV-19^^England|Human|Lighthouse Lab in Alderley Park|Wellcome Sanger Institute for the COVID-19 Genomics UK (COG-UK) consortium|Davies|United Kingdom

>Spike|hCoV-19/England/CAMC-9C0021/2020|2020-09-09|EPI\_ISL\_572934|Original|hCoV-19^^England|Human|Oxford Viromics|COVID-19 Genomics UK (COG-UK) Consortium|Golubchik|United Kingdom

>Spike|hCoV-19/Sweden/20-19008/2020|2020-05-27|EPI\_ISL\_469064|Original|hCoV-19^^Stockholm|Human|Huddinge VC|The Public Health Agency of Sweden|Svartstr\u00f6m|Sweden

>Spike|hCoV-19/Scotland/QEUH-998A06/2020|2020-08-24|EPI\_ISL\_539955|Original|hCoV-19^^Scotland|Human|Lighthouse Lab in Glasgow|Wellcome Sanger Institute for the COVID-19 Genomics UK (COG-UK) consortium|Davies|United Kingdom

>Spike|hCoV-19/England/QEUH-A0B663/2020|2020-10-01|EPI\_ISL\_599245|Original|hCoV-19^^England|Human|Lighthouse Lab in Glasgow|Wellcome Sanger Institute for the COVID-19 Genomics UK (COG-UK) consortium|Davies|United Kingdom

>Spike|hCoV-19/USA/CA-CZB-11875/2020|2020-04-08|EPI\_ISL\_625597|Original|hCoV-19^^California|Human|Santa Clara County Public Health Laboratory|Chan-Zuckerberg Biohub|Bhatt|USA

>Spike|hCoV-19/USA/CA-ALSR-0699-SAN/2020|2020-03-28|EPI\_ISL\_483310|Original|hCoV-19^^California|Human|UC San Diego Center for Advanced Laboratory Medicine|Andersen lab at Scripps Research|Gangavarapu|USA

>Spike|hCoV-19/England/CAMC-B221BF/2020|2020-11-03|EPI\_ISL\_647344|Original|hCoV-19^^England|Human|Lighthouse Lab in Cambridge|Wellcome Sanger Institute for the COVID-19 Genomics UK (COG-UK) Consortium|Davies|United Kingdom

>Spike|hCoV-19/England/ALDP-B836AE/2020|2020-11-15|EPI\_ISL\_675426|Original|hCoV-19^^England|Human|Lighthouse Lab in Alderley Park|Wellcome Sanger Institute for the COVID-19 Genomics UK (COG-UK) Consortium|Davies|United Kingdom

>Spike|hCoV-19/England/NOTT-115993/2020|2020-10-15|EPI\_ISL\_595276|Original|hCoV-19^^England|Human|Queens Medical Centre|COVID-19 Genomics UK (COG-UK) Consortium|Loose|United Kingdom

>Spike|hCoV-19/Scotland/QEUH-A00C3F/2020|2020-10-02|EPI\_ISL\_585562|Original|hCoV-19^^Scotland|Human|University of Exeter|COVID-19 Genomics UK (COG-UK) Consortium|Temperton|United Kingdom

>Spike|hCoV-19/Wales/PHWC-16AD39/2020|2020-09-08|EPI\_ISL\_560190|Original|hCoV-19^^Wales|Human|Wales Specialist Virology Centre Sequencing lab|COVID-19 Genomics UK (COG-UK) Consortium|Moore|United Kingdom

>Spike|hCoV-19/France/ARA-SC183/2020|2020-03-30|EPI\_ISL\_634835|Original|hCoV-19^^Auvergne-Rhone-Alpes|Human|Laboratoire de virologie|CNR Virus des Infections Respiratoires - France SUD|Bal|France

>Spike|hCoV-19/England/CAMB-82974/2020|2020-04-14|EPI\_ISL\_443535|Original|hCoV-19^^England|Human|Department of Pathology|Wellcome Sanger Institute for the COVID-19 Genomics UK (COG-UK) consortium|Amato|United Kingdom

>Spike|hCoV-19/England/QEUH-A794DF/2020|2020-10-12|EPI\_ISL\_638806|Original|hCoV-19^^England|Human|Oxford Viromics|COVID-19 Genomics UK (COG-UK) Consortium|Golubchik|United Kingdom

>Spike|hCoV-19/England/BRIS-12F6CC/2020|2020-03-06|EPI\_ISL\_488262|Original|hCoV-19^^England|Human|PHE South West Regional Laboratory|Wellcome Sanger Institute for the COVID-19 Genomics UK (COG-UK) consortium|Davies|United Kingdom

>Spike|hCoV-19/England/20162005904/2020|2020-04-13|EPI\_ISL\_466402|Original|hCoV-19^^England|Human|Respiratory Virus Unit|Respiratory Virus Unit|Platt|United Kingdom

>Spike|hCoV-19/Chile/MA-UMAG-Catg-21/2020|2020-09-19|EPI\_ISL\_625677|Original|hCoV-19^^Magallanes|Human|Laboratory of Molecular Medicine|Centro Asistencial Docente y de Investigacion|Navarrete|Chile

>Spike|hCoV-19/USA/TX-DSHS-1271/2020|2020-03-31|EPI\_ISL\_648227|Original|hCoV-19^^Texas|Human|Texas Department of State Health Services|Texas Department of State Health Services|Rahman|USA

>Spike|hCoV-19/Denmark/DCGC-14604/2020|2020-11-23|EPI\_ISL\_711868|Original|hCoV-19^^Hovedstaden|Human|Department of Virus and Microbiological Special Diagnostics|Albertsen Lab|Michaelsen|Denmark

>Spike|hCoV-19/England/NORW-E838D/2020|2020-04-08|EPI\_ISL\_449143|Original|hCoV-19^^England|Human|Quadram Institute Bioscience|COVID-19 Genomics UK (COG-UK) Consortium|Alikhan|United Kingdom

>Spike|hCoV-19/England/SHEF-10C9422/2020|2020-12-20|EPI\_ISL\_741964|Original|hCoV-19^^England|Human|Virology Department|COVID-19 Genomics UK (COG-UK) Consortium|de Silva|United Kingdom

>Spike|hCoV-19/USA/NY-NYCPHL-001328/2020|2020-11-12|EPI\_ISL\_683922|Original|hCoV-19^^New York|Human|DOHMH Fort Greene|New York City Public Health Laboratory|Wang|USA

>Spike|hCoV-19/Japan/PG-6825/2020|2020-06-00|EPI\_ISL\_687933|Original|hCoV-19^^Japan|Human|Pathogen Genomics Center|Pathogen Genomics Center|Sekizuka|Japan

>Spike|hCoV-19/Scotland/QEUH-A20228/2020|2020-10-01|EPI\_ISL\_599118|Original|hCoV-19^^Scotland|Human|Lighthouse Lab in Glasgow|Wellcome Sanger Institute for the COVID-19 Genomics UK (COG-UK) consortium|Davies|United Kingdom

>Spike|hCoV-19/Wales/PHWC-169F8F/2020|2020-08-25|EPI\_ISL\_529716|Original|hCoV-19^^Wales|Human|Wales Specialist Virology Centre Sequencing lab|COVID-19 Genomics UK (COG-UK) Consortium|Moore|United Kingdom

>Spike|hCoV-19/England/QEUH-B6BDF2/2020|2020-11-11|EPI\_ISL\_655004|Original|hCoV-19^^England|Human|Lighthouse Lab in Glasgow|Wellcome Sanger Institute for the COVID-19 Genomics UK (COG-UK) Consortium|Davies|United Kingdom

>Spike|hCoV-19/Japan/PG-8797/2020|2020-08-00|EPI\_ISL\_686385|Original|hCoV-19^^Japan|Human|Pathogen Genomics Center|Pathogen Genomics Center|Sekizuka|Japan

>Spike|hCoV-19/England/ALDP-A86044/2020|2020-10-17|EPI\_ISL\_610309|Original|hCoV-19^^England|Human|Lighthouse Lab in Alderley Park|Wellcome Sanger Institute for the COVID-19 Genomics UK (COG-UK) consortium|Davies|United Kingdom

>Spike|hCoV-19/USA/UT-UPHL-2009577/2020|2020-07-19|EPI\_ISL\_605255|Original|hCoV-19^^Utah|Human|Utah Public Health Laboratory|Utah Public Health Laboratory|Young|USA

>Spike|hCoV-19/England/NORW-F6DE8/2020|2020-11-06|EPI\_ISL\_650943|Original|hCoV-19^^England|Human|Quadram Institute Bioscience|COVID-19 Genomics UK (COG-UK) Consortium|Alikhan|United Kingdom

>Spike|hCoV-19/Northern Ireland/NIRE-100218/2020|2020-05-02|EPI\_ISL\_489263|Original|hCoV-19^^Northern Ireland|Human|Regional Virus Laboratory|Wellcome Sanger Institute for the COVID-19 Genomics UK (COG-UK) consortium|Davies|United Kingdom

>Spike|hCoV-19/England/ALDP-9B5AE5/2020|2020-08-28|EPI\_ISL\_590186|Original|hCoV-19^^England|Human|Lighthouse Lab in Alderley Park|Wellcome Sanger Institute for the COVID-19 Genomics UK (COG-UK) consortium|Davies|United Kingdom

>Spike|hCoV-19/USA/WA-UW-22201/2020|2020-08-03|EPI\_ISL\_570639|Original|hCoV-19^^Washington|Human|UW Virology Lab|UW Virology Lab|Roychoudhury|USA

>Spike|hCoV-19/Wales/PHWC-31ABD/2020|2020-04-11|EPI\_ISL\_446525|Original|hCoV-19^^Wales|Human|Wales Specialist Virology Centre|Public Health Wales Microbiology Cardiff|Moore|United Kingdom

>Spike|hCoV-19/England/ALDP-9BEAFB/2020|2020-09-09|EPI\_ISL\_567986|Original|hCoV-19^^England|Human|Lighthouse Lab in Alderley Park|Wellcome Sanger Institute for the COVID-19 Genomics UK (COG-UK) consortium|Davies|United Kingdom

>Spike|hCoV-19/England/CAMC-A3F860/2020|2020-10-07|EPI\_ISL\_609763|Original|hCoV-19^^England|Human|Lighthouse Lab in Cambridge|Wellcome Sanger Institute for the COVID-19 Genomics UK (COG-UK) consortium|Davies|United Kingdom

>Spike|hCoV-19/England/PORT-2D1552/2020|2020-00-00|EPI\_ISL\_484409|Original|hCoV-19^^England|Human|Centre for Enzyme Innovation|COVID-19 Genomics UK (COG-UK) Consortium|Robson|United Kingdom

>Spike|hCoV-19/England/CWAR-24FDC26/2020|2020-04-30|EPI\_ISL\_584498|Original|hCoV-19^^England|Human|UHCW / University of Warwick|COVID-19 Genomics UK (COG-UK) Consortium|Stark|United Kingdom

>Spike|hCoV-19/Wales/ALDP-B1D59D/2020|2020-11-01|EPI\_ISL\_710992|Original|hCoV-19^^Wales|Human|Lighthouse Lab in Alderley Park|Wellcome Sanger Institute for the COVID-19 Genomics UK (COG-UK) Consortium|Davies|United Kingdom

>Spike|hCoV-19/Japan/Donner53/2020|2020-07-06|EPI\_ISL\_644958|Original|hCoV-19^^Kanto|Human|Department of Infectious Diseases|Center for Medical Genetics|Kosaki|Japan

>Spike|hCoV-19/England/CAMB-1AD778/2020|2020-05-01|EPI\_ISL\_448004|Original|hCoV-19^^England|Human|Department of Pathology|COVID-19 Genomics UK (COG-UK) Consortium|Meredith|United Kingdom

>Spike|hCoV-19/England/ALDP-A94B60/2020|2020-10-20|EPI\_ISL\_624882|Original|hCoV-19^^England|Human|Lighthouse Lab in Alderley Park|Wellcome Sanger Institute for the COVID-19 Genomics UK (COG-UK) consortium|Davies|United Kingdom

>Spike|hCoV-19/USA/CA-CZB-9540/2020|2020-04-06|EPI\_ISL\_672124|Original|hCoV-19^^California|Human|The Ashley Laboratory|Chan-Zuckerberg Biohub|Bhatt|USA

>Spike|hCoV-19/Denmark/DCGC-11441/2020|2020-11-02|EPI\_ISL\_670922|Original|hCoV-19^^Syddanmark|Human|Department of Virus and Microbiological Special Diagnostics|Albertsen Lab|Michaelsen|Denmark

>Spike|hCoV-19/USA/WI-UW-2262/2020|2020-10-11|EPI\_ISL\_728031|Original|hCoV-19^^Wisconsin|Human|University of Wisconsin-Madison AIDS Vaccine Research Laboratories|University of Wisconsin-Madison AIDS Vaccine Research Laboratories|Baczenas|USA

>Spike|hCoV-19/Scotland/CVR5774/2020|2020-11-13|EPI\_ISL\_705124|Original|hCoV-19^^Scotland|Human|West of Scotland Specialist Virology Centre|COVID-19 Genomics UK (COG-UK) Consortium|Robertson|United Kingdom

>Spike|hCoV-19/Russia/SPE-RII-MH1059S/2020|2020-09-06|EPI\_ISL\_596260|Original|hCoV-19^^Saint Petersburg|Human|HELIX LCC|WHO National Influenza Centre Russian Federation|Komissarov|Russia

>Spike|hCoV-19/USA/CA-CDPH268/2020|2020-11-15|EPI\_ISL\_755095|Original|hCoV-19^^California|Human|California Department of Public Health|California Department of Public Health|Bell|USA

>Spike|hCoV-19/India/TG-CCMB-L1499/2020|2020-05-25|EPI\_ISL\_471614|Original|hCoV-19^^Telangana|Human|CSIR-Centre for Cellular and Molecular Biology|CSIR-Centre for Cellular and Molecular Biology|Banu|India

>Spike|hCoV-19/England/ALDP-A939C1/2020|2020-10-20|EPI\_ISL\_611113|Original|hCoV-19^^England|Human|Lighthouse Lab in Alderley Park|Wellcome Sanger Institute for the COVID-19 Genomics UK (COG-UK) consortium|Davies|United Kingdom

>Spike|hCoV-19/England/ALDP-A6750E/2020|2020-10-10|EPI\_ISL\_630530|Original|hCoV-19^^England|Human|Lighthouse Lab in Alderley Park|Wellcome Sanger Institute for the COVID-19 Genomics UK (COG-UK) consortium|Davies|United Kingdom

>Spike|hCoV-19/Denmark/DCGC-14802/2020|2020-11-23|EPI\_ISL\_711993|Original|hCoV-19^^Hovedstaden|Human|Department of Virus and Microbiological Special Diagnostics|Albertsen Lab|Michaelsen|Denmark

>Spike|hCoV-19/Bangladesh/BCSIR-NILMRC-265/2020|2020-07-19|EPI\_ISL\_498268|Original|hCoV-19^^Chittagong|Human|National Institute of Laboratory Medicine and Referral Center|Genomic Research Lab|Khan|Bangladesh

>Spike|hCoV-19/England/NORW-E9C72/2020|2020-04-30|EPI\_ISL\_448359|Original|hCoV-19^^England|Human|Quadram Institute Bioscience|COVID-19 Genomics UK (COG-UK) Consortium|Alikhan|United Kingdom

>Spike|hCoV-19/England/QEUH-A4C684/2020|2020-10-07|EPI\_ISL\_595987|Original|hCoV-19^^England|Human|Quadram Institute Bioscience|COVID-19 Genomics UK (COG-UK) Consortium|Alikhan|United Kingdom

>Spike|hCoV-19/Guangdong/20SF629/2020|2020-01-26|EPI\_ISL\_428466|Original|hCoV-19^^Guangdong|Human|Guangdong Provincial Center for Diseases Control and Prevention|Guangdong Provincial Institute of Public Health|School of Public Health|Gu|China



>Spike|hCoV-19/Denmark/DCGC-17522/2020|2020-12-14|EPI\_ISL\_751039|Original|hCoV-19^^Hovedstaden|Human|Department of Virus and Microbiological Special Diagnostics|Albertsen Lab|Michaelsen|Denmark

>Spike|hCoV-19/USA/CA-ALSR-4534/2020|2020-08-27|EPI\_ISL\_666993|Original|hCoV-19^^California|Human|San Diego County Public Health Laboratory|Andersen lab at Scripps Research|Gangavarapu|USA

>Spike|hCoV-19/Denmark/DCGC-20176/2020|2020-11-30|EPI\_ISL\_747530|Original|hCoV-19^^Sjaelland|Human|Department of Virus and Microbiological Special Diagnostics|Albertsen Lab|Michaelsen|Denmark

>Spike|hCoV-19/England/MILK-A46101/2020|2020-10-06|EPI\_ISL\_598607|Original|hCoV-19^^England|Human|Lighthouse Lab in Milton Keynes|Wellcome Sanger Institute for the COVID-19 Genomics UK (COG-UK) consortium|Davies|United Kingdom

>Spike|hCoV-19/USA/SC-20-1398-T14/2020|2020-07-07|EPI\_ISL\_516758|Original|hCoV-19^^South Carolina|Human|van Bakel Laboratory|van Bakel Laboratory|van Bakel|USA

>Spike|hCoV-19/Luxembourg/LNS4969344/2020|2020-09-23|EPI\_ISL\_744165|Original|hCoV-19^^Luxembourg|Human|Laboratoire national de sant\u00e9|Laboratoire national de sant\u00e9|Wienecke-Baldacchino|Luxembourg

>Spike|hCoV-19/England/NORW-F0346/2020|2020-10-16|EPI\_ISL\_627580|Original|hCoV-19^^England|Human|Quadram Institute Bioscience|COVID-19 Genomics UK (COG-UK) Consortium|Alikhan|United Kingdom

>Spike|hCoV-19/England/MILK-9C452E/2020|2020-09-07|EPI\_ISL\_566773|Original|hCoV-19^^England|Human|Lighthouse Lab in Milton Keynes|Wellcome Sanger Institute for the COVID-19 Genomics UK (COG-UK) consortium|Davies|United Kingdom

>Spike|hCoV-19/USA/MI-UM-10036024406/2020|2020-09-18|EPI\_ISL\_583381|Original|hCoV-19^^Michigan|Human|University of Michigan Clinical Microbiology Laboratory|Lauring Lab|Valesano|USA

>Spike|hCoV-19/England/MILK-AB8D9D/2020|2020-10-22|EPI\_ISL\_623591|Original|hCoV-19^^England|Human|Lighthouse Lab in Milton Keynes|Wellcome Sanger Institute for the COVID-19 Genomics UK (COG-UK) consortium|Davies|United Kingdom

>Spike|hCoV-19/England/CAMC-A3E5D3/2020|2020-10-05|EPI\_ISL\_609625|Original|hCoV-19^^England|Human|Lighthouse Lab in Cambridge|Wellcome Sanger Institute for the COVID-19 Genomics UK (COG-UK) consortium|Davies|United Kingdom

>Spike|hCoV-19/Scotland/CVR76/2020|2020-03-05|EPI\_ISL\_425806|Original|hCoV-19^^Scotland|Human|West of Scotland Specialist Virology Centre|COVID-19 Genomics UK (COG-UK) Consortium|Robertson|United Kingdom

>Spike|hCoV-19/India/MH-ACTREC-098/2020|2020-05-23|EPI\_ISL\_699754|Original|hCoV-19^^Maharashtra|Human|Hematopathology Laboratory|Hematopathology Laboratory|Patkar|India

>Spike|hCoV-19/Wales/PHWC-489F3B/2020|2020-11-04|EPI\_ISL\_652506|Original|hCoV-19^^Wales|Human|Wales Specialist Virology Centre Sequencing lab|COVID-19 Genomics UK (COG-UK) Consortium|Moore|United Kingdom

>Spike|hCoV-19/Japan/PG-0309/2020|2020-03-21|EPI\_ISL\_479984|Original|hCoV-19^^Kyusyu|Human|Oita Prefectural Institute of Public Health and Environmental Science|Pathogen Genomics Center|Sekizuka|Japan

>Spike|hCoV-19/England/CAMC-A41300/2020|2020-10-07|EPI\_ISL\_609496|Original|hCoV-19^^England|Human|Lighthouse Lab in Cambridge|Wellcome Sanger Institute for the COVID-19 Genomics UK (COG-UK) consortium|Davies|United Kingdom

>Spike|hCoV-19/England/LIVE-9B4E0/2020|2020-04-02|EPI\_ISL\_449453|Original|hCoV-19^^England|Human|Liverpool Clinical Laboratories|COVID-19 Genomics UK (COG-UK) Consortium|Haldenby|United Kingdom

>Spike|hCoV-19/England/MILK-A46453/2020|2020-10-05|EPI\_ISL\_598754|Original|hCoV-19^^England|Human|Lighthouse Lab in Milton Keynes|Wellcome Sanger Institute for the COVID-19 Genomics UK (COG-UK) consortium|Davies|United Kingdom

>Spike|hCoV-19/England/MILK-9C70B1/2020|2020-09-08|EPI\_ISL\_573279|Original|hCoV-19^^England|Human|Northumbria University / South Tees Hospitals NHS Foundation Trust / North Cumbria Integrated Care NHS Foundation Trust / North Tees and Hartlepool NHS Foundation Trust / Newcastle Hospitals NHS Foundation Trust|COVID-19 Genomics UK (COG-UK) Consortium|Bashton|United Kingdom

>Spike|hCoV-19/England/ALDP-AA0D89/2020|2020-10-22|EPI\_ISL\_624086|Original|hCoV-19^^England|Human|Lighthouse Lab in Alderley Park|Wellcome Sanger Institute for the COVID-19 Genomics UK (COG-UK) consortium|Davies|United Kingdom

>Spike|hCoV-19/Denmark/DCGC-2620/2020|2020-08-17|EPI\_ISL\_617857|Original|hCoV-19^^Sjaelland|Human|Department of Virus and Microbiological Special Diagnostics|Albertsen lab|Michaelsen|Denmark

>Spike|hCoV-19/England/BRIS-12556F/2020|2020-03-28|EPI\_ISL\_443972|Original|hCoV-19^^England|Human|PHE South West Regional Laboratory|Wellcome Sanger Institute for the COVID-19 Genomics UK (COG-UK) consortium|Amato|United Kingdom

>Spike|hCoV-19/England/QEUA-AF581B/2020|2020-10-30|EPI\_ISL\_663187|Original|hCoV-19^^England|Human|Lighthouse Lab in Glasgow|Wellcome Sanger Institute for the COVID-19 Genomics UK (COG-UK) Consortium|Davies|United Kingdom

>Spike|hCoV-19/Germany/NW-HHU-519/2020|2020-07-03|EPI\_ISL\_779938|Original|hCoV-19^^North Rhine-Westphalia|Human|Center of Medical Microbiology|Center of Medical Microbiology|Wienemann|Germany

>Spike|hCoV-19/Australia/VIC5620/2020|2020-07-16|EPI\_ISL\_518434|Original|hCoV-19^^Victoria|Human|Victorian Infectious Diseases Reference Laboratory (VIDRL)|VIDRL and MDU-PHL|Schultz|Australia

>Spike|hCoV-19/Switzerland/SO-ETHZ-400308/2020|2020-12-07|EPI\_ISL\_729163|Original|hCoV-19^^Solothurn|Human|Viollier AG|Department of Biosystems Science and Engineering|Nadeau|Switzerland

>Spike|hCoV-19/England/ALDP-AA2A17/2020|2020-10-22|EPI\_ISL\_630783|Original|hCoV-19^^England|Human|Lighthouse Lab in Alderley Park|Wellcome Sanger Institute for the COVID-19 Genomics UK (COG-UK) consortium|Davies|United Kingdom

>Spike|hCoV-19/England/MILK-9A512F/2020|2020-09-02|EPI\_ISL\_550153|Original|hCoV-19^^England|Human|Lighthouse Lab in Milton Keynes|Wellcome Sanger Institute for the COVID-19 Genomics UK (COG-UK) consortium|Davies|United Kingdom

>Spike|hCoV-19/England/20142022104/2020|2020-03-29|EPI\_ISL\_423447|Original|hCoV-19^^England|Human|Respiratory Virus Unit|Respiratory Virus Unit|Platt|United Kingdom

>Spike|hCoV-19/USA/NY-PV09351/2020|2020-03-24|EPI\_ISL\_450039|Original|hCoV-19^^New York|Human|MSSS Clinical Microbiology Laboratories|MSSS Pathogen Surveillance Program|van Bakel|USA

>Spike|hCoV-19/Sichuan/SC-PHCC2-045/2020|2020-01-26|EPI\_ISL\_451365|Original|hCoV-19^^Sichuan|Human|West China Hospital of Sichuan University|State Key Laboratory of Biotherapy of Sichuan University|Tang|China

>Spike|hCoV-19/Czech Republic/NRL-6847-2/2020|2020-05-10|EPI\_ISL\_584073|Original|hCoV-19^^Northern Bohemia Region|Human|The National Institute of Public Health|State Veterinary Institute Prague|Nagy|Czech Republic

>Spike|hCoV-19/Denmark/DCGC-17289/2020|2020-12-14|EPI\_ISL\_750881|Original|hCoV-19^^Syddanmark|Human|Department of Virus and Microbiological Special Diagnostics|Albertsen Lab|Michaelsen|Denmark

>Spike|hCoV-19/England/EXET-138D52/2020|2020-00-00|EPI\_ISL\_626732|Original|hCoV-19^^England|Human|University of Exeter|COVID-19 Genomics UK (COG-UK) Consortium|Temperton|United Kingdom

>Spike|hCoV-19/Wales/MILK-9928C6/2020|2020-08-27|EPI\_ISL\_552002|Original|hCoV-19^^Wales|Human|Lighthouse Lab in Milton Keynes|Wellcome Sanger Institute for the COVID-19 Genomics UK (COG-UK) consortium|Davies|United Kingdom

>Spike|hCoV-19/England/QEUA-BA04FC/2020|2020-11-18|EPI\_ISL\_719750|Original|hCoV-19^^England|Human|Lighthouse Lab in Glasgow|Wellcome Sanger Institute for the COVID-19 Genomics UK (COG-UK) Consortium|Davies|United Kingdom

>Spike|hCoV-19/England/QEUA-AD1341/2020|2020-10-26|EPI\_ISL\_633961|Original|hCoV-19^^England|Human|Lighthouse Lab in Glasgow|Wellcome Sanger Institute for the COVID-19 Genomics UK (COG-UK) consortium|Davies|United Kingdom

>Spike|hCoV-19/Australia/VIC7193/2020|2020-07-05|EPI\_ISL\_564274|Original|hCoV-19^^Victoria|Human|Microbiological Diagnostic Unit - Public Health Laboratory (MDU-PHL)|MDU-PHL|Schultz|Australia

>Spike|hCoV-19/USA/UT-02530/2020|2020-04-23|EPI\_ISL\_493114|Original|hCoV-19^^Utah|Human|Utah Public Health Laboratory|Utah Public Health Laboratory|Butz|USA

>Spike|hCoV-19/England/BRIS-1854020/2020|2020-04-28|EPI\_ISL\_492248|Original|hCoV-19^^England|Human|PHE South West Regional Laboratory|Wellcome Sanger Institute for the COVID-19 Genomics UK (COG-UK) consortium|Davies|United Kingdom

>Spike|hCoV-19/USA/WA-S2473/2020|2020-06-16|EPI\_ISL\_497105|Original|hCoV-19^^Washington|Human|Washington State Department of Health|Seattle Flu Study|Lee|USA

>Spike|hCoV-19/England/CAMC-B798B4/2020|2020-11-12|EPI\_ISL\_741026|Original|hCoV-19^^England|Human|Oxford Viromics|COVID-19 Genomics UK (COG-UK) Consortium|Golubchik|United Kingdom

>Spike|hCoV-19/USA/PA-MGEL94/2020|2020-04-02|EPI\_ISL\_454375|Original|hCoV-19^^Pennsylvania|Human|UPMC Clinical Microbiology Laboratory|Microbial Genome Sequencing Center|Mustapha|USA

>Spike|hCoV-19/Singapore/1383/2020|2020-07-18|EPI\_ISL\_648737|Original|hCoV-19^^Singapore|Human|Department of Laboratory Medicine|Department of Laboratory Medicine|Chen|Singapore

>Spike|hCoV-19/Japan/PG-3387/2020|2020-05-00|EPI\_ISL\_690624|Original|hCoV-19^^Japan|Human|Pathogen Genomics Center|Pathogen Genomics Center|Sekizuka|Japan

>Spike|hCoV-19/England/QEUA-96B5FC/2020|2020-08-17|EPI\_ISL\_531368|Original|hCoV-19^^England|Human|Lighthouse Lab in Glasgow|Wellcome Sanger Institute for the COVID-19 Genomics UK (COG-UK) consortium|Davies|United Kingdom

>Spike|hCoV-19/Wales/PHWC-25023/2020|2020-03-21|EPI\_ISL\_420945|Original|hCoV-19^^Wales|Human|Wales Specialist Virology Centre|Public Health Wales Microbiology Cardiff|Moore|United Kingdom

>Spike|hCoV-19/Wales/PHWC-1602F8/2020|2020-05-26|EPI\_ISL\_472918|Original|hCoV-19^^Wales|Human|Wales Specialist Virology Centre Sequencing lab|COVID-19 Genomics UK (COG-UK) Consortium|Moore|United Kingdom

>Spike|hCoV-19/Bermuda/204990915/2020|2020-10-31|EPI\_ISL\_780385|Original|hCoV-19^^Bermuda|Human|Bermuda Government Molecular Diagnostics Laboratory (MDL)|Respiratory Virus Unit|Platt|Bermuda

>Spike|hCoV-19/Gibraltar/205000660/2020|2020-12-00|EPI\_ISL\_709991|Original|hCoV-19^^Gibraltar|Human|Microbiology|Respiratory Virus Unit|Platt|Gibraltar

>Spike|hCoV-19/Iceland/564/2020|2020-03-28|EPI\_ISL\_424584|Original|hCoV-19^^Reykjavik|Human|The National University Hospital of Iceland|deCODE genetics|J\u00f3nsson|Iceland

>Spike|hCoV-19/England/NORT-29BA0A/2020|2020-06-08|EPI\_ISL\_507121|Original|hCoV-19^^England|Human|Northumbria University / South Tees Hospitals NHS Foundation Trust / North Cumbria Integrated Care NHS Foundation Trust / North Tees and Hartlepool NHS Foundation Trust / Newcastle Hospitals NHS Foundation Trust|COVID-19 Genomics UK (COG-UK) Consortium|Bashton|United Kingdom

>Spike|hCoV-19/England/ALDP-B46BD5/2020|2020-11-07|EPI\_ISL\_655979|Original|hCoV-19^^England|Human|Lighthouse Lab in Alderley Park|Wellcome Sanger Institute for the COVID-19 Genomics UK (COG-UK) Consortium|Davies|United Kingdom

>Spike|hCoV-19/England/QEUA-A31048/2020|2020-10-05|EPI\_ISL\_595856|Original|hCoV-19^^England|Human|Quadram Institute Bioscience|COVID-19 Genomics UK (COG-UK) Consortium|Alikhan|United Kingdom

>Spike|hCoV-19/England/MILK-9709BC/2020|2020-08-18|EPI\_ISL\_553081|Original|hCoV-19^^England|Human|Lighthouse Lab in Milton Keynes|Wellcome Sanger Institute for the COVID-19 Genomics UK (COG-UK) consortium|Davies|United Kingdom

>Spike|hCoV-19/Brazil/PB-IEC-161853/2020|2020-03-19|EPI\_ISL\_524801|Original|hCoV-19^^Para\u00edba|Human|\uffe9Evandro Chagas Institute|\uffe9Evandro Chagas Institute|Sousa J\u00fanior|Brazil

>Spike|hCoV-19/England/NORW-F5208/2020|2020-11-22|EPI\_ISL\_725232|Original|hCoV-19^^England|Human|Quadram Institute Bioscience|COVID-19 Genomics UK (COG-UK) Consortium|Alikhan|United Kingdom

>Spike|hCoV-19/England/NOTT-10F12B/2020|2020-03-31|EPI\_ISL\_432967|Original|hCoV-19^^England|Human|Queens Medical Centre|COVID-19 Genomics UK (COG-UK) Consortium|Loose|United Kingdom

>Spike|hCoV-19/Wales/PHWC-47FB61/2020|2020-10-10|EPI\_ISL\_612777|Original|hCoV-19^^Wales|Human|Wales Specialist Virology Centre Sequencing lab|COVID-19 Genomics UK (COG-UK) Consortium|Moore|United Kingdom

>Spike|hCoV-19/England/MILK-B04B3D/2020|2020-10-24|EPI\_ISL\_651362|Original|hCoV-19^^England|Human|Department of Pathology|COVID-19 Genomics UK (COG-UK) Consortium|Goodfellow|United Kingdom

>Spike|hCoV-19/Japan/PG-2787/2020|2020-04-00|EPI\_ISL\_690914|Original|hCoV-19^^Japan|Human|Pathogen Genomics Center|Pathogen Genomics Center|Sekizuka|Japan

>Spike|hCoV-19/England/ALDP-BCA1E6/2020|2020-11-23|EPI\_ISL\_703255|Original|hCoV-19^^England|Human|Lighthouse Lab in Alderley Park|Wellcome Sanger Institute for the COVID-19 Genomics UK (COG-UK) Consortium|Davies|United Kingdom

>Spike|hCoV-19/Denmark/DCGC-4123/2020|2020-09-21|EPI\_ISL\_621943|Original|hCoV-19^^Hovedstaden|Human|Department of Virus and Microbiological Special Diagnostics|Albertsen lab|Michaelsen|Denmark

>Spike|hCoV-19/England/ALDP-B843A6/2020|2020-11-14|EPI\_ISL\_674255|Original|hCoV-19^^England|Human|Lighthouse Lab in Alderley Park|Wellcome Sanger Institute for the COVID-19 Genomics UK (COG-UK) Consortium|Davies|United Kingdom

>Spike|hCoV-19/England/LIVE-AB6E7/2020|2020-07-01|EPI\_ISL\_611627|Original|hCoV-19^^England|Human|Liverpool Clinical Laboratories|COVID-19 Genomics UK (COG-UK) Consortium|Haldenby|United Kingdom

>Spike|hCoV-19/Belgium/ULG-10962/2020|2020-09-08|EPI\_ISL\_707741|Original|hCoV-19^^Li\u00e8ge|Human|Department of Clinical Microbiology|GIGA Medical Genomics|Durkin|Belgium

>Spike|hCoV-19/France/PAC-IHU-1566/2020|2020-09-02|EPI\_ISL\_569199|Original|hCoV-19^^Provence-Alpes-C\u00f4te-d\u2019Azur|Human|MEPHI|MEPHI|Levasseur|France

>Spike|hCoV-19/Switzerland/SO-ETHZ-390340/2020|2020-11-30|EPI\_ISL\_721894|Original|hCoV-19^^Solothurn|Human|Viollier AG|Department of Biosystems Science and Engineering|Nadeau|Switzerland

>Spike|hCoV-19/USA/TX-HMH-MCoV-15711/2020|2020-07-09|EPI\_ISL\_785395|Original|hCoV-19^^Texas|Human|Houston Methodist Hospital|Houston Methodist Hospital|Long|USA

>Spike|hCoV-19/Bangladesh/BCSIR-NILMRC-241/2020|2020-07-06|EPI\_ISL\_487396|Original|hCoV-19^^Barisal|Human|National Institute of Laboratory Medicine and Referral Center|Genomic Research Lab|Khan|Bangladesh

>Spike|hCoV-19/Wales/PHWC-482BE3/2020|2020-10-20|EPI\_ISL\_613273|Original|hCoV-19^^Wales|Human|Wales Specialist Virology Centre Sequencing lab|COVID-19 Genomics UK (COG-UK) Consortium|Moore|United Kingdom

>Spike|hCoV-19/England/LIVE-1E206D/2020|2020-10-02|EPI\_ISL\_594857|Original|hCoV-19^^England|Human|Liverpool Clinical Laboratories|COVID-19 Genomics UK (COG-UK) Consortium|Haldenby|United Kingdom

>Spike|hCoV-19/England/QEUEH-AD2A1E/2020|2020-10-26|EPI\_ISL\_634148|Original|hCoV-19^^England|Human|Lighthouse Lab in Glasgow|Wellcome Sanger Institute for the COVID-19 Genomics UK (COG-UK) consortium|Davies|United Kingdom

>Spike|hCoV-19/England/20149040404/2020|2020-04-04|EPI\_ISL\_466190|Original|hCoV-19^^England|Human|Respiratory Virus Unit|Respiratory Virus Unit|Platt|United Kingdom

>Spike|hCoV-19/Chile/RM-167571/2020|2020-09-02|EPI\_ISL\_746700|Original|hCoV-19^^Region Metropolitana de Santiago|Human|Genetica Molecular and Subdepartamento de Virologia ISP Chile|Instituto de Salud Publica de Chile|Tognarelli|Chile

>Spike|hCoV-19/New Zealand/20VR3019/2020|2020-00-00|EPI\_ISL\_579388|Original|hCoV-19^^Combined Wellington|Human|Wellington SCL (WN)|Institute of Environmental Science and Research (ESR)|Wang|New Zealand

>Spike|hCoV-19/USA/TX-HMH-5308/2020|2020-06-18|EPI\_ISL\_544669|Original|hCoV-19^^Texas|Human|Houston Methodist Hospital|Houston Methodist Hospital|Long|USA

>Spike|hCoV-19/Belgium/HMM-0317327/2020|2020-03-17|EPI\_ISL\_462181|Original|hCoV-19^^Voroux-les-Liers|Human|KU Leuven|KU Leuven|Maes|Belgium

>Spike|hCoV-19/England/ALDP-CB4773/2020|2020-12-18|EPI\_ISL\_760868|Original|hCoV-19^^England|Human|Lighthouse Lab in Alderley Park|Wellcome Sanger Institute for the COVID-19 Genomics UK (COG-UK) Consortium|Davies|United Kingdom

>Spike|hCoV-19/Bahrein/BAH-21/2020|2020-04-05|EPI\_ISL\_483562|Original|hCoV-19^^Bahrain|Human|Kingdom of Bahrein Ministry of Health|Erasmus Medical Center|Oude Munnink|Bahrain

>Spike|hCoV-19/England/MILK-B0262F/2020|2020-10-24|EPI\_ISL\_643022|Original|hCoV-19^^England|Human|Lighthouse Lab in Milton Keynes|Wellcome Sanger Institute for the COVID-19 Genomics UK (COG-UK) Consortium|Davies|United Kingdom

>Spike|hCoV-19/USA/WA-S713/2020|2020-04-08|EPI\_ISL\_449883|Original|hCoV-19^^Washington|Human|Washington State Department of Health|Seattle Flu Study|Bedford|USA

>Spike|hCoV-19/England/ALDP-B85071/2020|2020-11-14|EPI\_ISL\_675751|Original|hCoV-19^^England|Human|Lighthouse Lab in Alderley Park|Wellcome Sanger Institute for the COVID-19 Genomics UK (COG-UK) Consortium|Davies|United Kingdom

>Spike|hCoV-19/England/CAMC-C2CEDB/2020|2020-12-08|EPI\_ISL\_733786|Original|hCoV-19^^England|Human|Lighthouse Lab in Cambridge|Wellcome Sanger Institute for the COVID-19 Genomics UK (COG-UK) Consortium|Davies|United Kingdom

>Spike|hCoV-19/India/MH-ACTREC-285/2020|2020-07-12|EPI\_ISL\_699937|Original|hCoV-19^^Maharashtra|Human|Hematopathology Laboratory|Hematopathology Laboratory|Patkar|India

>Spike|hCoV-19/USA/TX-HMH-2857/2020|2020-06-08|EPI\_ISL\_543827|Original|hCoV-19^^Texas|Human|Houston Methodist Hospital|Houston Methodist Hospital|Long|USA

>Spike|hCoV-19/England/BRIS-12D2E8/2020|2020-05-04|EPI\_ISL\_481861|Original|hCoV-19^^England|Human|PHE South West Regional Laboratory|Wellcome Sanger Institute for the COVID-19 Genomics UK (COG-UK) consortium|Davies|United Kingdom

>Spike|hCoV-19/Denmark/DCGC-8091/2020|2020-10-26|EPI\_ISL\_617182|Original|hCoV-19^^Hovedstaden|Human|Department of Virus and Microbiological Special Diagnostics|Albertsen lab|Michaelsen|Denmark

>Spike|hCoV-19/Sweden/20-53886/2020|2020-12-14|EPI\_ISL\_789046|Original|hCoV-19^^unknown|Human|unknown|The Public Health Agency of Sweden|Svartstr\u00f6m|Sweden

>Spike|hCoV-19/Scotland/QEUH-A1FA9D/2020|2020-10-01|EPI\_ISL\_598937|Original|hCoV-19^^Scotland|Human|Lighthouse Lab in Glasgow|Wellcome Sanger Institute for the COVID-19 Genomics UK (COG-UK) consortium|Davies|United Kingdom

>Spike|hCoV-19/Netherlands/NH-RIVM-20437/2020|2020-12-09|EPI\_ISL\_728656|Original|hCoV-19^^Noord-Holland|Human|Dutch COVID-19 response team|National Institute for Public Health and the Environment (RIVM)|Meijer|Netherlands

>Spike|hCoV-19/Northern Ireland/NIRE-FB606/2020|2020-09-09|EPI\_ISL\_585243|Original|hCoV-19^^Northern Ireland|Human|Regional Virus Laboratory|COVID-19 Genomics UK (COG-UK) Consortium|Fairley|United Kingdom

>Spike|hCoV-19/Wales/CAMC-A3E6A3/2020|2020-10-05|EPI\_ISL\_625453|Original|hCoV-19^^Wales|Human|Lighthouse Lab in Cambridge|Wellcome Sanger Institute for the COVID-19 Genomics UK (COG-UK) consortium|Davies|United Kingdom

>Spike|hCoV-19/USA/LA-EVTL048/2020|2020-05-01|EPI\_ISL\_451209|Original|hCoV-19^^Louisiana|Human|LSUHS Emerging Viral Threat Laboratory|Microbial Genome Sequencing Center|Kamil|USA

>Spike|hCoV-19/Singapore/457/2020|2020-03-19|EPI\_ISL\_475988|Original|hCoV-19^^Singapore|Human|National Public Health Laboratory|National Public Health Laboratory|Mak|Singapore

>Spike|hCoV-19/England/PORT-2EAB72/2020|2020-00-00|EPI\_ISL\_741712|Original|hCoV-19^^England|Human|Centre for Enzyme Innovation|COVID-19 Genomics UK (COG-UK) Consortium|Robson|United Kingdom

>Spike|hCoV-19/Wales/PHWC-48A28C/2020|2020-11-04|EPI\_ISL\_652539|Original|hCoV-19^^Wales|Human|Wales Specialist Virology Centre Sequencing lab|COVID-19 Genomics UK (COG-UK) Consortium|Moore|United Kingdom

>Spike|hCoV-19/Denmark/DCGC-22040/2020|2020-12-14|EPI\_ISL\_757811|Original|hCoV-19^^Hovedstaden|Human|Department of Virus and Microbiological Special Diagnostics|Albertsen Lab|Michaelsen|Denmark

>Spike|hCoV-19/USA/NY-Wadsworth-281408-01/2020|2020-11-03|EPI\_ISL\_734474|Original|hCoV-19^^New York|Human|Masonic Medical Research Institute|Wadsworth Center|Lasek-Nesselquist|USA

>Spike|hCoV-19/England/ALDP-9EDB78/2020|2020-05-06|EPI\_ISL\_589495|Original|hCoV-19^^England|Human|Lighthouse Lab in Alderley Park|Wellcome Sanger Institute for the COVID-19 Genomics UK (COG-UK) consortium|Davies|United Kingdom

>Spike|hCoV-19/England/QEUH-B7C277/2020|2020-11-13|EPI\_ISL\_668199|Original|hCoV-19^^England|Human|Lighthouse Lab in Glasgow|Wellcome Sanger Institute for the COVID-19 Genomics UK (COG-UK) Consortium|Davies|United Kingdom

>Spike|hCoV-19/Wales/PHWC-26857/2020|2020-03-27|EPI\_ISL\_422092|Original|hCoV-19^^Wales|Human|Wales Specialist Virology Centre|Public Health Wales Microbiology Cardiff|Moore|United Kingdom

>Spike|hCoV-19/USA/CA-ALSR-4820/2020|2020-04-03|EPI\_ISL\_730160|Original|hCoV-19^^California|Human|Scripps Medical Laboratory|Andersen lab at Scripps Research|Gangavarapu|USA

>Spike|hCoV-19/Denmark/DCGC-14061/2020|2020-11-30|EPI\_ISL\_711543|Original|hCoV-19^^Midtjylland|Human|Department of Virus and Microbiological Special Diagnostics|Albertsen Lab|Michaelsen|Denmark

>Spike|hCoV-19/Portugal/PT1806/2020|2020-11-11|EPI\_ISL\_732031|Original|hCoV-19^^Portugal|Human|Instituto Nacional de Saude (INSA)|Instituto Nacional de Saude (INSA)|Borges|Portugal

>Spike|hCoV-19/USA/LA-EVTL847/2020|2020-07-28|EPI\_ISL\_653538|Original|hCoV-19^^Louisiana|Human|LSUHS Emerging Viral Threat Laboratory|Microbial Genome Sequencing Center|Kamil|USA

>Spike|hCoV-19/England/QEUEH-962E09/2020|2020-08-11|EPI\_ISL\_531701|Original|hCoV-19^^England|Human|Lighthouse Lab in Glasgow|Wellcome Sanger Institute for the COVID-19 Genomics UK (COG-UK) consortium|Davies|United Kingdom

>Spike|hCoV-19/England/QEUEH-B12835/2020|2020-11-02|EPI\_ISL\_642290|Original|hCoV-19^^England|Human|Lighthouse Lab in Glasgow|Wellcome Sanger Institute for the COVID-19 Genomics UK (COG-UK) Consortium|Davies|United Kingdom

>Spike|hCoV-19/Norway/4889/2020|2020-10-21|EPI\_ISL\_668421|Original|hCoV-19^^Trondelag|Human|Department of Medical Microbiology|Norwegian Institute of Public Health|Kopperud Riis|Norway

>Spike|hCoV-19/USA/TX-HMH-MCoV-15593/2020|2020-10-26|EPI\_ISL\_787077|Original|hCoV-19^^Texas|Human|Houston Methodist Hospital|Houston Methodist Hospital|Long|USA

>Spike|hCoV-19/England/NORW-F7A0E/2020|2020-11-06|EPI\_ISL\_652361|Original|hCoV-19^^England|Human|Quadram Institute Bioscience|COVID-19 Genomics UK (COG-UK) Consortium|Alikhan|United Kingdom

>Spike|hCoV-19/Japan/PG-0938/2020|2020-04-00|EPI\_ISL\_684548|Original|hCoV-19^^Japan|Human|Pathogen Genomics Center|Pathogen Genomics Center|Sekizuka|Japan

>Spike|hCoV-19/England/ALDP-BCA650/2020|2020-11-23|EPI\_ISL\_703603|Original|hCoV-19^^England|Human|Lighthouse Lab in Alderley Park|Wellcome Sanger Institute for the COVID-19 Genomics UK (COG-UK) Consortium|Davies|United Kingdom

>Spike|hCoV-19/USA/TX-HMH-MCoV-9570/2020|2020-07-02|EPI\_ISL\_780136|Original|hCoV-19^^Texas|Human|Houston Methodist Hospital|Houston Methodist Hospital|Long|USA

>Spike|hCoV-19/USA/NC\_200290/2020|2020-04-00|EPI\_ISL\_454813|Original|hCoV-19^^North Carolina|Human|Dirk Dittmer|Dirk Dittmer|Moorad|USA

>Spike|hCoV-19/England/SHEF-10D381A/2020|2020-12-23|EPI\_ISL\_763439|Original|hCoV-19^^England|Human|Virology Department|COVID-19 Genomics UK (COG-UK) Consortium|de Silva|United Kingdom

>Spike|hCoV-19/England/ALDP-B5DCE7/2020|2020-11-09|EPI\_ISL\_723582|Original|hCoV-19^^England|Human|Northumbria University / South Tees Hospitals NHS Foundation Trust / North Cumbria Integrated Care NHS Foundation Trust / North Tees and Hartlepool NHS Foundation Trust / Newcastle Hospitals NHS Foundation Trust|COVID-19 Genomics UK (COG-UK) Consortium|Bashton|United Kingdom

>Spike|hCoV-19/Australia/VIC420/2020|2020-03-25|EPI\_ISL\_426720|Original|hCoV-19^^Victoria|Human|Victorian Infectious Diseases Reference Laboratory (VIDRL)|Microbiological Diagnostic Unit Public Health Laboratory and Victorian Infectious Diseases Reference Laboratory|Schultz|Australia

>Spike|hCoV-19/USA/WA-UW-3816/2020|2020-03-26|EPI\_ISL\_427179|Original|hCoV-19^^Washington|Human|UW Virology Lab|UW Virology Lab|Roychoudhury|USA

>Spike|hCoV-19/USA/TX-HMH-MCoV-14951/2020|2020-10-15|EPI\_ISL\_786435|Original|hCoV-19^^Texas|Human|Houston Methodist Hospital|Houston Methodist Hospital|Long|USA

>Spike|hCoV-19/USA/FL-BPHL-0350/2020|2020-04-13|EPI\_ISL\_489759|Original|hCoV-19^^Florida|Human|Florida Bureau of Public Health Laboratories|Florida Bureau of Public Health Laboratories|Blanton|USA

>Spike|hCoV-19/USA/WI-GMF-30624/2020|2020-11-01|EPI\_ISL\_661041|Original|hCoV-19^^Wisconsin|Human|Gundersen Molecular Diagnostics Laboratory|Kabara Cancer Research Institute|Kenny|USA

>Spike|hCoV-19/Scotland/GCVR-170B90/2020|2020-03-25|EPI\_ISL\_459668|Original|hCoV-19^^Scotland|Human|NHSGGC West of Scotland Specialist Virology Centre / MRC-University of Glasgow Centre for Virus Research|Wellcome Sanger Institute for the COVID-19 Genomics UK (COG-UK) consortium|Davies|United Kingdom

>Spike|hCoV-19/England/QEUA-CC300D/2020|2020-12-20|EPI\_ISL\_760277|Original|hCoV-19^^England|Human|Lighthouse Lab in Glasgow|Wellcome Sanger Institute for the COVID-19 Genomics UK (COG-UK) Consortium|Davies|United Kingdom

>Spike|hCoV-19/England/CAMC-CF4B8A/2020|2020-12-21|EPI\_ISL\_781694|Original|hCoV-19^^England|Human|Lighthouse Lab in Cambridge|Wellcome Sanger Institute for the COVID-19 Genomics UK (COG-UK) Consortium|Davies|United Kingdom

>Spike|hCoV-19/Denmark/DCGC-8095/2020|2020-10-26|EPI\_ISL\_617197|Original|hCoV-19^^Sjaelland|Human|Department of Virus and Microbiological Special Diagnostics|Albertsen lab|Michaelsen|Denmark

>Spike|hCoV-19/USA/IL1/2020|2020-01-21|EPI\_ISL\_404253|Original|hCoV-19^^Illinois|Human|IL Department of Public Health Chicago Laboratory|Pathogen Discovery|Queen|USA

>Spike|hCoV-19/Scotland/QEUA-9CE384/2020|2020-09-16|EPI\_ISL\_601871|Original|hCoV-19^^Scotland|Human|Lighthouse Lab in Glasgow|Wellcome Sanger Institute for the COVID-19 Genomics UK (COG-UK) consortium|Davies|United Kingdom

>Spike|hCoV-19/Denmark/DCGC-1438/2020|2020-04-06|EPI\_ISL\_622454|Original|hCoV-19^^Hovedstaden|Human|Department of Virus and Microbiological Special Diagnostics|Albertsen lab|Michaelsen|Denmark

>Spike|hCoV-19/England/CAMB-734A2/2020|2020-03-22|EPI\_ISL\_440202|Original|hCoV-19^^England|Human|Department of Pathology|Wellcome Sanger Institute for the COVID-19 Genomics UK (COG-UK) consortium|Amato|United Kingdom

>Spike|hCoV-19/South Africa/KRISP-K002731/2020|2020-08-16|EPI\_ISL\_529729|Original|hCoV-19^^KwaZulu-Natal|Human|NHL-IALCH|KRISP|de Oliveira|South Africa

>Spike|hCoV-19/England/QEUA-A0AF4B/2020|2020-10-01|EPI\_ISL\_599422|Original|hCoV-19^^England|Human|Lighthouse Lab in Glasgow|Wellcome Sanger Institute for the COVID-19 Genomics UK (COG-UK) consortium|Davies|United Kingdom

>Spike|hCoV-19/Ukraine/203100351/2020|2020-06-24|EPI\_ISL\_512630|Original|hCoV-19^^Ukraine|Human|National Laboratory for Influenza/Virology reference laboratory|Respiratory Virus Unit|Platt|Ukraine

>Spike|hCoV-19/England/20118153906/2020|2020-03-12|EPI\_ISL\_464983|Original|hCoV-19^^England|Human|Respiratory Virus Unit|Respiratory Virus Unit|Platt|United Kingdom

>Spike|hCoV-19/USA/WA-UW-12835/2020|2020-06-29|EPI\_ISL\_570909|Original|hCoV-19^^Washington|Human|UW Virology Lab|UW Virology Lab|Roychoudhury|USA

>Spike|hCoV-19/USA/CA-CZB-13944/2020|2020-06-22|EPI\_ISL\_739358|Original|hCoV-19^^California|Human|Alameda County Public Health Lab|Chan-Zuckerberg Biohub|Kamm|USA

>Spike|hCoV-19/England/QEUA-B2D460/2020|2020-11-04|EPI\_ISL\_660040|Original|hCoV-19^^England|Human|Lighthouse Lab in Glasgow|Wellcome Sanger Institute for the COVID-19 Genomics UK (COG-UK) Consortium|Davies|United Kingdom

>Spike|hCoV-19/Denmark/DCGC-12432/2020|2020-11-16|EPI\_ISL\_682613|Original|hCoV-19^^Syddanmark|Human|Department of Virus and Microbiological Special Diagnostics|Albertsen Lab|Michaelsen|Denmark

>Spike|hCoV-19/Czech Republic/IAB\_17/2020|2020-03-27|EPI\_ISL\_426892|Original|hCoV-19^^Czech Republic|Human|Motol University Hospital|Institute of Applied Biotechnologies a.s.|Broz|Czech Republic

>Spike|hCoV-19/USA/UT-UPHL-2012105008/2020|2020-08-10|EPI\_ISL\_745518|Original|hCoV-19^^Utah|Human|Ginkgo Bioworks Clinical Laboratory|Utah Public Health Laboratory|Young|USA

>Spike|hCoV-19/England/QEUA-B9EDE7/2020|2020-11-18|EPI\_ISL\_719875|Original|hCoV-19^^England|Human|Lighthouse Lab in Glasgow|Wellcome Sanger Institute for the COVID-19 Genomics UK (COG-UK) Consortium|Davies|United Kingdom

>Spike|hCoV-19/England/QEUA-9633AF/2020|2020-08-10|EPI\_ISL\_531647|Original|hCoV-19^^England|Human|Lighthouse Lab in Glasgow|Wellcome Sanger Institute for the COVID-19 Genomics UK (COG-UK) consortium|Davies|United Kingdom

>Spike|hCoV-19/USA/NE-11118/2020|2020-05-04|EPI\_ISL\_475199|Original|hCoV-19^^Nebraska|Human|Nebraska Public Health Laboratory|UNMC COVID-19 Response Team|Pratt|USA

>Spike|hCoV-19/Denmark/DCGC-3903/2020|2020-09-07|EPI\_ISL\_615623|Original|hCoV-19^^Syddanmark|Human|Department of Virus and Microbiological Special Diagnostics|Albertsen lab|Michaelsen|Denmark

>Spike|hCoV-19/USA/MA-MGH-00262/2020|2020-04-06|EPI\_ISL\_460325|Original|hCoV-19^^Massachusetts|Human|Massachusetts General Hospital|Infectious Disease Program|Lemieux|USA

>Spike|hCoV-19/England/ALDP-B5CAFD/2020|2020-11-08|EPI\_ISL\_655663|Original|hCoV-19^^England|Human|Lighthouse Lab in Alderley Park|Wellcome Sanger Institute for the COVID-19 Genomics UK (COG-UK) Consortium|Davies|United Kingdom

>Spike|hCoV-19/Scotland/QEUH-998523/2020|2020-08-24|EPI\_ISL\_540035|Original|hCoV-19^^Scotland|Human|Lighthouse Lab in Glasgow|Wellcome Sanger Institute for the COVID-19 Genomics UK (COG-UK) consortium|Davies|United Kingdom

>Spike|hCoV-19/England/ALDP-A51D4B/2020|2020-10-07|EPI\_ISL\_598126|Original|hCoV-19^^England|Human|Lighthouse Lab in Alderley Park|Wellcome Sanger Institute for the COVID-19 Genomics UK (COG-UK) consortium|Davies|United Kingdom

>Spike|hCoV-19/USA/NM-UNM-00347/2020|2020-05-09|EPI\_ISL\_508057|Original|hCoV-19^^New Mexico|Human|New Mexico Department of Health Scientific Laboratory Division|Center for Global Health|Domman|USA

>Spike|hCoV-19/England/ALDP-B62BC4/2020|2020-11-08|EPI\_ISL\_655366|Original|hCoV-19^^England|Human|Lighthouse Lab in Alderley Park|Wellcome Sanger Institute for the COVID-19 Genomics UK (COG-UK) Consortium|Davies|United Kingdom

>Spike|hCoV-19/Australia/VIC12414/2020|2020-07-25|EPI\_ISL\_640830|Original|hCoV-19^^Victoria|Human|Microbiological Diagnostic Unit - Public Health Laboratory (MDU-PHL)|MDU-PHL|Schultz|Australia

>Spike|hCoV-19/Japan/PG-6152/2020|2020-08-00|EPI\_ISL\_689264|Original|hCoV-19^^Japan|Human|Pathogen Genomics Center|Pathogen Genomics Center|Sekizuka|Japan

>Spike|hCoV-19/Wales/PHWC-34601/2020|2020-04-21|EPI\_ISL\_446948|Original|hCoV-19^^Wales|Human|Wales Specialist Virology Centre|Public Health Wales Microbiology Cardiff|Moore|United Kingdom

>Spike|hCoV-19/England/ALDP-A874DE/2020|2020-10-17|EPI\_ISL\_606067|Original|hCoV-19^^England|Human|Lighthouse Lab in Alderley Park|Wellcome Sanger Institute for the COVID-19 Genomics UK (COG-UK) consortium|Davies|United Kingdom

>Spike|hCoV-19/England/ALDP-A6F612/2020|2020-10-15|EPI\_ISL\_607862|Original|hCoV-19^^England|Human|Lighthouse Lab in Alderley Park|Wellcome Sanger Institute for the COVID-19 Genomics UK (COG-UK) consortium|Davies|United Kingdom

>Spike|hCoV-19/England/QEUH-9E569D/2020|2020-09-21|EPI\_ISL\_579776|Original|hCoV-19^^England|Human|Lighthouse Lab in Glasgow|Wellcome Sanger Institute for the COVID-19 Genomics UK (COG-UK) consortium|Davies|United Kingdom

>Spike|hCoV-19/England/ALDP-9E9884/2020|2020-09-24|EPI\_ISL\_584257|Original|hCoV-19^^England|Human|Virology Department|COVID-19 Genomics UK (COG-UK) Consortium|de Silva|United Kingdom

>Spike|hCoV-19/USA/TX-HMH-MCoV-12407/2020|2020-09-28|EPI\_ISL\_790332|Original|hCoV-19^^Texas|Human|Houston Methodist Hospital|Houston Methodist Hospital|Long|USA

>Spike|hCoV-19/Spain/MD-IBV-99008711/2020|2020-10-09|EPI\_ISL\_654289|Original|hCoV-19^^Madrid|Human|Hospital General Universitario Gregorio Mara\u00f1a|SeqCOVID-SPAIN consortium|IBV (CSIC)|Comas|Spain

>Spike|hCoV-19/England/MILK-A467D2/2020|2020-10-06|EPI\_ISL\_598690|Original|hCoV-19^^England|Human|Lighthouse Lab in Milton Keynes|Wellcome Sanger Institute for the COVID-19 Genomics UK (COG-UK) consortium|Davies|United Kingdom

>Spike|hCoV-19/USA/GA-CDC-5119/2020|2020-07-03|EPI\_ISL\_566101|Original|hCoV-19^^Georgia|Human|GA Department of Public Health Laboratory|Pathogen Discovery|Queen|USA

>Spike|hCoV-19/Wales/PHWC-485351/2020|2020-10-21|EPI\_ISL\_628171|Original|hCoV-19^^Wales|Human|Wales Specialist Virology Centre Sequencing lab|COVID-19 Genomics UK (COG-UK) Consortium|Moore|United Kingdom



>Spike|hCoV-19/Wales/PHWC-489144/2020|2020-11-03|EPI\_ISL\_639539|Original|hCoV-19^^Wales|Human|Wales Specialist Virology Centre Sequencing lab|COVID-19 Genomics UK (COG-UK) Consortium|Moore|United Kingdom

>Spike|hCoV-19/Chile/RM-CMM-05015/2020|2020-04-29|EPI\_ISL\_468751|Original|hCoV-19^^Region Metropolitana de Santiago|Human|Facultad de Medicina UC|Center for Mathematical Modeling and Center for Genome Regulation. Santiago|Palma V\|u00e9jares|Chile

>Spike|hCoV-19/Norway/7094/2020|2020-11-30|EPI\_ISL\_775420|Original|hCoV-19^^Oslo|Human|Oslo University Hospital|Norwegian Institute of Public Health|Vollan|Norway

>Spike|hCoV-19/England/LOND-D607C/2020|2020-04-20|EPI\_ISL\_441350|Original|hCoV-19^^England|Human|University College London|COVID-19 Genomics UK (COG-UK) Consortium|Roy|United Kingdom

>Spike|hCoV-19/Bangladesh/CHRF-0013/2020|2020-05-09|EPI\_ISL\_477126|Original|hCoV-19^^Bangladesh|Human|Child Health Research Foundation|Child Health Research Foundation|Saha|Bangladesh

>Spike|hCoV-19/USA/WA-UW-1706/2020|2020-03-21|EPI\_ISL\_424227|Original|hCoV-19^^Washington|Human|UW Virology Lab|UW Virology Lab|Roychoudhury|USA

>Spike|hCoV-19/England/MILK-B94A35/2020|2020-11-13|EPI\_ISL\_676242|Original|hCoV-19^^England|Human|Lighthouse Lab in Milton Keynes|Wellcome Sanger Institute for the COVID-19 Genomics UK (COG-UK) Consortium|Davies|United Kingdom

>Spike|hCoV-19/USA/NY-NYCPHL-000483/2020|2020-05-07|EPI\_ISL\_631949|Original|hCoV-19^^New York|Human|St Barnabas Hospital|New York City Public Health Laboratory|Wang|USA

>Spike|hCoV-19/Latvia/112/2020|2020-08-10|EPI\_ISL\_534201|Original|hCoV-19^^Latvia|Human|Centr\u0101l\u0101 laboratorija|Latvian Biomedical Research and Study Centre|Zrelavs|Latvia

>Spike|hCoV-19/Wales/PHWC-16D49B/2020|2020-09-25|EPI\_ISL\_574241|Original|hCoV-19^^Wales|Human|Wales Specialist Virology Centre Sequencing lab|COVID-19 Genomics UK (COG-UK) Consortium|Moore|United Kingdom

>Spike|hCoV-19/India/MH-NCCS-NR2328/2020|2020-05-22|EPI\_ISL\_496578|Original|hCoV-19^^Maharashtra|Human|National Centre For Cell Science|National Centre For Cell Science|Paul|India

>Spike|hCoV-19/England/QEUEH-A76830/2020|2020-10-13|EPI\_ISL\_613335|Original|hCoV-19^^England|Human|Queens Medical Centre|COVID-19 Genomics UK (COG-UK) Consortium|Loose|United Kingdom

>Spike|hCoV-19/Denmark/DCGC-17383/2020|2020-12-14|EPI\_ISL\_750945|Original|hCoV-19^^Nordjylland|Human|Department of Virus and Microbiological Special Diagnostics|Albertsen Lab|Michaelsen|Denmark

>Spike|hCoV-19/South Korea/KCDC2785/2020|2020-07-24|EPI\_ISL\_526719|Original|hCoV-19^^South Korea|Human|Division of Viral Diseases|Division of Viral Diseases|Kim|South Korea

>Spike|hCoV-19/Japan/PG-0402/2020|2020-04-02|EPI\_ISL\_480071|Original|hCoV-19^^Kansai|Human|Sakai City Institute of Public Health|Pathogen Genomics Center|Sekizuka|Japan

>Spike|hCoV-19/England/QEUEH-9FAECA/2020|2020-09-28|EPI\_ISL\_588139|Original|hCoV-19^^England|Human|Lighthouse Lab in Glasgow|Wellcome Sanger Institute for the COVID-19 Genomics UK (COG-UK) consortium|Davies|United Kingdom

>Spike|hCoV-19/USA/LA-EVTL899/2020|2020-08-10|EPI\_ISL\_653590|Original|hCoV-19^^Louisiana|Human|LSUHS Emerging Viral Threat Laboratory|Microbial Genome Sequencing Center|Kamil|USA

>Spike|hCoV-19/USA/ME-HETL-J0395/2020|2020-12-15|EPI\_ISL\_755507|Original|hCoV-19^^Maine|Human|Maine Health and Environmental Testing Laboratory|Tewhey Lab|Tewhey|USA

>Spike|hCoV-19/USA/ID-UW-6349/2020|2020-04-01|EPI\_ISL\_430970|Original|hCoV-19^^Idaho|Human|UW Virology Lab|UW Virology Lab|Roychoudhury|USA

>Spike|hCoV-19/England/BIRM-5EE63/2020|2020-00-00|EPI\_ISL\_456658|Original|hCoV-19^^England|Human|University of Birmingham|COVID-19 Genomics UK (COG-UK) Consortium|Loman|United Kingdom

>Spike|hCoV-19/Italy/BAS-IZSPB-380PT/2020|2020-10-25|EPI\_ISL\_722882|Original|hCoV-19^^Basilicata|Human|Istituto Zooprofilattico Sperimentale della Puglia e della Basilicata|Istituto Zooprofilattico Sperimentale della Puglia e della Basilicata|Parisi|Italy

>Spike|hCoV-19/Denmark/DCGC-1236/2020|2020-05-04|EPI\_ISL\_614771|Original|hCoV-19^^Hovedstaden|Human|Department of Virus and Microbiological Special Diagnostics|Albertsen lab|Michaelsen|Denmark

>Spike|hCoV-19/USA/CA-IGI-0365/2020|2020-06-29|EPI\_ISL\_576548|Original|hCoV-19^^California|Human|Innovative Genomics Institute|Innovative Genomics Institute|Wyman|USA

>Spike|hCoV-19/England/MILK-B05097/2020|2020-10-24|EPI\_ISL\_638538|Original|hCoV-19^^England|Human|Virology Department|COVID-19 Genomics UK (COG-UK) Consortium|de Silva|United Kingdom

>Spike|hCoV-19/India/MH-GA65/2020|2020-06-18|EPI\_ISL\_508259|Original|hCoV-19^^Maharashtra|Human|Government Medical College|National Institute of Biomedical Genomics|Maitra|India

>Spike|hCoV-19/Japan/NGY-NNH-011/2020|2020-07-17|EPI\_ISL\_568566|Original|hCoV-19^^Aichi|Human|Department of Infectious Diseases and Immunology|Clinical Research Center|Iwatani|Japan

>Spike|hCoV-19/England/QEUEH-AD02EB/2020|2020-10-26|EPI\_ISL\_629795|Original|hCoV-19^^England|Human|Lighthouse Lab in Glasgow|Wellcome Sanger Institute for the COVID-19 Genomics UK (COG-UK) consortium|Davies|United Kingdom

>Spike|hCoV-19/Germany/SH-ChVir20828/2020|2020-11-30|EPI\_ISL\_729730|Original|hCoV-19^^Schleswig-Holstein|Human|A. Krumbholz|Charit\u00e9 Universit\u00e4tsmedizin Berlin|Muehlemann|Germany

>Spike|hCoV-19/England/MILK-957274/2020|2020-06-11|EPI\_ISL\_554214|Original|hCoV-19^^England|Human|Lighthouse Lab in Milton Keynes|Wellcome Sanger Institute for the COVID-19 Genomics UK (COG-UK) consortium|Davies|United Kingdom

>Spike|hCoV-19/England/MILK-B3D51F/2020|2020-11-01|EPI\_ISL\_645453|Original|hCoV-19^^England|Human|Lighthouse Lab in Milton Keynes|Wellcome Sanger Institute for the COVID-19 Genomics UK (COG-UK) Consortium|Davies|United Kingdom

>Spike|hCoV-19/Kenya/C7604/2020|2020-05-16|EPI\_ISL\_568846|Original|hCoV-19^^Kwale|Human|KEMRI-Wellcome Trust Research Programme/KEMRI-CGMR-C Kilifi|KEMRI-Wellcome Trust Research Programme/KEMRI-CGMR-C Kilifi|Githinji|Kenya

>Spike|hCoV-19/Switzerland/BL-ETHZ-200056/2020|2020-07-13|EPI\_ISL\_510740|Original|hCoV-19^^Basel-Landschaft|Human|Viollier AG|Department of Biosystems Science and Engineering|Nadeau|Switzerland

>Spike|hCoV-19/England/CAMC-BBBF93/2020|2020-11-21|EPI\_ISL\_705579|Original|hCoV-19^^England|Human|Quadram Institute Bioscience|COVID-19 Genomics UK (COG-UK) Consortium|Alikhan|United Kingdom

>Spike|hCoV-19/Spain/PV-IBV-000664/2020|2020-03-07|EPI\_ISL\_452786|Original|hCoV-19^^Basque Country|Human|Hospital Universitario Araba. Vitoria-Gasteiz,|SeqCOVID-SPAIN consortium|IBV (CSIC)|Comas|Spain

>Spike|hCoV-19/England/CAMB-1B053C/2020|2020-05-11|EPI\_ISL\_452889|Original|hCoV-19^^England|Human|Department of Pathology|COVID-19 Genomics UK (COG-UK) Consortium|Meredith|United Kingdom

>Spike|hCoV-19/Netherlands/GE-EMC-350/2020|2020-11-15|EPI\_ISL\_722642|Original|hCoV-19^^Gelderland|Human|Dutch COVID-19 response team|Erasmus Medical Center|Oude Munnink|Netherlands

>Spike|hCoV-19/env/Qingdao/IVDC-010-10/2020|2020-09-27|EPI\_ISL\_591279|Original|hCoV-19^^Shandong|Environment|National Institute for Viral Disease Control and Prevention|National Institute for Viral Disease Control and Prevention|Chen|China

>Spike|hCoV-19/Scotland/CVR2719/2020|2020-04-18|EPI\_ISL\_473540|Original|hCoV-19^^Scotland|Human|West of Scotland Specialist Virology Centre|COVID-19 Genomics UK (COG-UK) Consortium|Robertson|United Kingdom

>Spike|hCoV-19/England/QEUEH-B0E4ED/2020|2020-11-02|EPI\_ISL\_642017|Original|hCoV-19^^England|Human|Lighthouse Lab in Glasgow|Wellcome Sanger Institute for the COVID-19 Genomics UK (COG-UK) Consortium|Davies|United Kingdom

>Spike|hCoV-19/England/ALDP-A6C7C7/2020|2020-10-15|EPI\_ISL\_608199|Original|hCoV-19^^England|Human|Lighthouse Lab in Alderley Park|Wellcome Sanger Institute for the COVID-19 Genomics UK (COG-UK) consortium|Davies|United Kingdom

>Spike|hCoV-19/France/HDF-4220/2020|2020-03-30|EPI\_ISL\_428366|Original|hCoV-19^^Hauts-de-France|Human|CH Jeanne de Navarre Laboratoire de Biologie|National Reference Center for Viruses of Respiratory Infections|Enouf|France

>Spike|hCoV-19/England/ALDP-952367/2020|2020-06-09|EPI\_ISL\_553650|Original|hCoV-19^^England|Human|Lighthouse Lab in Alderley Park|Wellcome Sanger Institute for the COVID-19 Genomics UK (COG-UK) consortium|Davies|United Kingdom

>Spike|hCoV-19/England/LIVE-1DDFA4/2020|2020-10-10|EPI\_ISL\_611613|Original|hCoV-19^^England|Human|Liverpool Clinical Laboratories|COVID-19 Genomics UK (COG-UK) Consortium|Haldenby|United Kingdom

>Spike|hCoV-19/England/ALDP-9FCBFE/2020|2020-10-01|EPI\_ISL\_587770|Original|hCoV-19^^England|Human|Lighthouse Lab in Alderley Park|Wellcome Sanger Institute for the COVID-19 Genomics UK (COG-UK) consortium|Davies|United Kingdom

>Spike|hCoV-19/Scotland/QEUI-B66E4F/2020|2020-11-11|EPI\_ISL\_676330|Original|hCoV-19^^Scotland|Human|Lighthouse Lab in Glasgow|Wellcome Sanger Institute for the COVID-19 Genomics UK (COG-UK) Consortium|Davies|United Kingdom

>Spike|hCoV-19/England/MILK-A79967/2020|2020-10-14|EPI\_ISL\_606911|Original|hCoV-19^^England|Human|Lighthouse Lab in Milton Keynes|Wellcome Sanger Institute for the COVID-19 Genomics UK (COG-UK) consortium|Davies|United Kingdom

>Spike|hCoV-19/England/ALDP-9EA7FF/2020|2020-09-24|EPI\_ISL\_580069|Original|hCoV-19^^England|Human|Lighthouse Lab in Alderley Park|Wellcome Sanger Institute for the COVID-19 Genomics UK (COG-UK) consortium|Davies|United Kingdom

>Spike|hCoV-19/Denmark/DCGC-8199/2020|2020-10-26|EPI\_ISL\_617256|Original|hCoV-19^^Nordjylland|Human|Department of Virus and Microbiological Special Diagnostics|Albertsen lab|Michaelsen|Denmark

>Spike|hCoV-19/England/MILK-B8BF50/2020|2020-11-13|EPI\_ISL\_675485|Original|hCoV-19^^England|Human|Lighthouse Lab in Milton Keynes|Wellcome Sanger Institute for the COVID-19 Genomics UK (COG-UK) Consortium|Davies|United Kingdom

>Spike|hCoV-19/England/ALDP-AA2FBE/2020|2020-10-22|EPI\_ISL\_630887|Original|hCoV-19^^England|Human|Lighthouse Lab in Alderley Park|Wellcome Sanger Institute for the COVID-19 Genomics UK (COG-UK) consortium|Davies|United Kingdom

>Spike|hCoV-19/Scotland/QEUI-5FDA9A/2020|2020-06-27|EPI\_ISL\_533232|Original|hCoV-19^^Scotland|Human|NHSGGC West of Scotland Specialist Virology Centre / MRC-University of Glasgow Centre for Virus Research|Wellcome Sanger Institute for the COVID-19 Genomics UK (COG-UK) consortium|Davies|United Kingdom

>Spike|hCoV-19/England/SHEF-10B2A0C/2020|2020-05-02|EPI\_ISL\_537223|Original|hCoV-19^^England|Human|Virology Department|Wellcome Sanger Institute for the COVID-19 Genomics UK (COG-UK) consortium|Davies|United Kingdom

>Spike|hCoV-19/USA/UT-01862/2020|2020-04-12|EPI\_ISL\_498635|Original|hCoV-19^^Utah|Human|Utah Public Health Laboratory|Utah Public Health Laboratory|Butz|USA

>Spike|hCoV-19/Japan/PG-5616/2020|2020-08-00|EPI\_ISL\_688741|Original|hCoV-19^^Japan|Human|Pathogen Genomics Center|Pathogen Genomics Center|Sekizuka|Japan

>Spike|hCoV-19/Wales/MILK-97172A/2020|2020-08-18|EPI\_ISL\_553008|Original|hCoV-19^^Wales|Human|Lighthouse Lab in Milton Keynes|Wellcome Sanger Institute for the COVID-19 Genomics UK (COG-UK) consortium|Davies|United Kingdom

>Spike|hCoV-19/Scotland/QEUI-A2252D/2020|2020-10-01|EPI\_ISL\_599106|Original|hCoV-19^^Scotland|Human|Lighthouse Lab in Glasgow|Wellcome Sanger Institute for the COVID-19 Genomics UK (COG-UK) consortium|Davies|United Kingdom

>Spike|hCoV-19/Portugal/PT0172/2020|2020-03-28|EPI\_ISL\_453888|Original|hCoV-19^^Portugal|Human|unknown|Instituto Nacional de Saude (INSA)|Borges|Portugal

>Spike|hCoV-19/Denmark/DCGC-15621/2020|2020-11-23|EPI\_ISL\_713927|Original|hCoV-19^^Sjaelland|Human|Department of Virus and Microbiological Special Diagnostics|Albertsen Lab|Michaelsen|Denmark

>Spike|hCoV-19/Wales/QEUI-A5E4C1/2020|2020-10-12|EPI\_ISL\_609198|Original|hCoV-19^^Wales|Human|Lighthouse Lab in Glasgow|Wellcome Sanger Institute for the COVID-19 Genomics UK (COG-UK) consortium|Davies|United Kingdom

>Spike|hCoV-19/USA/CT-Yale-322/2020|2020-04-01|EPI\_ISL\_476550|Original|hCoV-19^^Connecticut|Human|Yale Clinical Virology Laboratory|Grubaugh Lab - Yale School of Public Health|Grubaugh|USA

>Spike|hCoV-19/USA/IL-NM-0672/2020|2020-03-28|EPI\_ISL\_626464|Original|hCoV-19^^Illinois|Human|Northwestern Memorial Hospital|Ozer Lab|Ozer|USA

>Spike|hCoV-19/Wales/ALDP-CED410/2020|2020-12-16|EPI\_ISL\_782053|Original|hCoV-19^^Wales|Human|Lighthouse Lab in Alderley Park|Wellcome Sanger Institute for the COVID-19 Genomics UK (COG-UK) Consortium|Davies|United Kingdom

>Spike|hCoV-19/Denmark/DCGC-17979/2020|2020-12-14|EPI\_ISL\_749201|Original|hCoV-19^^Syddanmark|Human|Department of Virus and Microbiological Special Diagnostics|Albertsen Lab|Michaelsen|Denmark

>Spike|hCoV-19/France/ARA-07639/2020|2020-03-11|EPI\_ISL\_508872|Original|hCoV-19^^Auvergne-Rh\u00f4ne-Alpes|Human|Institut des Agents Infectieux (IAI)|CNR Virus des Infections Respiratoires - France SUD|Josset|France

>Spike|hCoV-19/England/ALDP-66C4E2/2020|2020-07-03|EPI\_ISL\_558029|Original|hCoV-19^^England|Human|Lighthouse Lab in Alderley Park|Wellcome Sanger Institute for the COVID-19 Genomics UK (COG-UK) consortium|Davies|United Kingdom

>Spike|hCoV-19/Australia/VIC4969/2020|2020-07-13|EPI\_ISL\_519335|Original|hCoV-19^^Victoria|Human|Microbiological Diagnostic Unit - Public Health Laboratory (MDU-PHL)|MDU-PHL|Schultz|Australia

>Spike|hCoV-19/England/QEUA-BA11A9/2020|2020-11-18|EPI\_ISL\_672777|Original|hCoV-19^^England|Human|Lighthouse Lab in Glasgow|Wellcome Sanger Institute for the COVID-19 Genomics UK (COG-UK) Consortium|Davies|United Kingdom

>Spike|hCoV-19/England/QEUA-AEF9D5/2020|2020-10-29|EPI\_ISL\_662686|Original|hCoV-19^^England|Human|Lighthouse Lab in Glasgow|Wellcome Sanger Institute for the COVID-19 Genomics UK (COG-UK) Consortium|Davies|United Kingdom

>Spike|hCoV-19/India/UT-AR61/2020|2020-06-09|EPI\_ISL\_508198|Original|hCoV-19^^Uttarakhand|Human|All india institute of Medical Sciences Rishikesh|National Institute of Biomedical Genomics|Maitra|India

>Spike|hCoV-19/England/CAMB-7F1FA/2020|2020-04-08|EPI\_ISL\_442896|Original|hCoV-19^^England|Human|Department of Pathology|Wellcome Sanger Institute for the COVID-19 Genomics UK (COG-UK) consortium|Amato|United Kingdom

>Spike|hCoV-19/USA/TX-HMH-6454/2020|2020-06-27|EPI\_ISL\_546007|Original|hCoV-19^^Texas|Human|Houston Methodist Hospital|Houston Methodist Hospital|Long|USA

>Spike|hCoV-19/Russia/MOS-CRIE-13594312/2020|2020-11-09|EPI\_ISL\_745232|Original|hCoV-19^^Moscow|Human|Molecular diagnostic laboratory of Federal Budget Institution of Science \Central Research Institute of Epidemiology\ of The Federal Service on Customers' Rights Protection and Human Well-being Surveillance|Group of Genomics and Postgenomic Technologies of Central Research Institute of Epidemilolog

>y|Korneenko|Russia

>Spike|hCoV-19/England/MILK-BB0C5B/2020|2020-11-17|EPI\_ISL\_720345|Original|hCoV-19^^England|Human|Lighthouse Lab in Milton Keynes|Wellcome Sanger Institute for the COVID-19 Genomics UK (COG-UK) Consortium|Davies|United Kingdom

>Spike|hCoV-19/England/QEUA-9F73A0/2020|2020-09-27|EPI\_ISL\_595683|Original|hCoV-19^^England|Human|Oxford Viromics|COVID-19 Genomics UK (COG-UK) Consortium|Golubchik|United Kingdom

>Spike|hCoV-19/Jordan/IR-ALSR-5213/2020|2020-10-12|EPI\_ISL\_730451|Original|hCoV-19^^Irbid|Human|Biolab Diagnostic Laboratories|Andersen lab at Scripps Research|Gangavarapu|Jordan

>Spike|hCoV-19/USA/MI-MDHHS-SC21529/2020|2020-04-03|EPI\_ISL\_516256|Original|hCoV-19^^Michigan|Human|Michigan Department of Health and Human Services|Michigan Department of Health and Human Services|Blankenship|USA

>Spike|hCoV-19/Switzerland/ZH-ETHZ-101174/2020|2020-03-31|EPI\_ISL\_451837|Original|hCoV-19^^Zurich|Human|Viollier AG|Department of Biosystems Science and Engineering|Nadeau|Switzerland

>Spike|hCoV-19/USA/WA-UW-12141/2020|2020-06-26|EPI\_ISL\_570494|Original|hCoV-19^^Washington|Human|UW Virology Lab|UW Virology Lab|Roychoudhury|USA

>Spike|hCoV-19/England/MILK-BA998B/2020|2020-11-17|EPI\_ISL\_705192|Original|hCoV-19^^England|Human|Lighthouse Lab in Milton Keynes|Wellcome Sanger Institute for the COVID-19 Genomics UK (COG-UK) Consortium|Davies|United Kingdom

>Spike|hCoV-19/Lithuania/MR-LUHS-Eilnr88/2020|2020-04-17|EPI\_ISL\_603105|Original|hCoV-19^^Marijampoles apskritis|Human|Lithuanian University of Health Sciences Hospital|Lithuanian University of Health Sciences|Zemaitis|Lithuania

>Spike|hCoV-19/Australia/VIC5255/2020|2020-07-18|EPI\_ISL\_520020|Original|hCoV-19^^Victoria|Human|Microbiological Diagnostic Unit - Public Health Laboratory (MDU-PHL)|MDU-PHL|Schultz|Australia

>Spike|hCoV-19/England/NORT-290D39/2020|2020-05-01|EPI\_ISL\_453534|Original|hCoV-19^^England|Human|Northumbria University / South Tees Hospitals NHS Foundation Trust / North Cumbria Integrated Care NHS Foundation Trust / North Tees and Hartlepool NHS Foundation Trust / Newcastle Hospitals NHS Foundation Trust|COVID-19 Genomics UK (COG-UK) Consortium|Bashton|United Kingdom

>Spike|hCoV-19/USA/TX-HMH-MCoV-8441/2020|2020-07-01|EPI\_ISL\_783557|Original|hCoV-19^^Texas|Human|Houston Methodist Hospital|Houston Methodist Hospital|Long|USA

>Spike|hCoV-19/Panama/328706/2020|2020-03-05|EPI\_ISL\_496604|Original|hCoV-19^^Panama Center|Human|Gorgas Memorial Laboratory of Health Studies|Gorgas Memorial Laboratory of Health Studies|Martinez|Panama

>Spike|hCoV-19/Scotland/CVR2622/2020|2020-04-15|EPI\_ISL\_484619|Original|hCoV-19^^Scotland|Human|West of Scotland Specialist Virology Centre|COVID-19 Genomics UK (COG-UK) Consortium|Robertson|United Kingdom

>Spike|hCoV-19/Netherlands/NH-RIVM-10108/2020|2020-03-16|EPI\_ISL\_547503|Original|hCoV-19^^Noord Holland|Human|Dutch COVID-19 response team|National Institute for Public Health and the Environment (RIVM)|Meijer|Netherlands

>Spike|hCoV-19/Canada/ON-S1491/2020|2020-08-00|EPI\_ISL\_770843|Original|hCoV-19^^Ontario|Human|Toronto Invasive Bacterial Diseases Network|McMaster University|McArthur|Canada

>Spike|hCoV-19/Australia/VIC15069/2020|2020-08-24|EPI\_ISL\_593126|Original|hCoV-19^^Victoria|Human|Victorian Infectious Diseases Reference Laboratory (VIDRL)|VIDRL and MDU-PHL|Schultz|Australia

>Spike|hCoV-19/England/ALDP-B5D467/2020|2020-11-10|EPI\_ISL\_704273|Original|hCoV-19^^England|Human|Department of Pathology|COVID-19 Genomics UK (COG-UK) Consortium|Goodfellow|United Kingdom

>Spike|hCoV-19/England/BRIS-124D0E/2020|2020-03-26|EPI\_ISL\_443897|Original|hCoV-19^^England|Human|PHE South West Regional Laboratory|Wellcome Sanger Institute for the COVID-19 Genomics UK (COG-UK) consortium|Amato|United Kingdom

>Spike|hCoV-19/Switzerland/SZ-ETHZ-390443/2020|2020-11-04|EPI\_ISL\_729086|Original|hCoV-19^^Schwyz|Human|Viollier AG|Department of Biosystems Science and Engineering|Nadeau|Switzerland

>Spike|hCoV-19/USA/TX-HMH-MCoV-11710/2020|2020-09-08|EPI\_ISL\_789779|Original|hCoV-19^^Texas|Human|Houston Methodist Hospital|Houston Methodist Hospital|Long|USA

>Spike|hCoV-19/England/ALDP-BCA6F6/2020|2020-11-23|EPI\_ISL\_703637|Original|hCoV-19^^England|Human|Lighthouse Lab in Alderley Park|Wellcome Sanger Institute for the COVID-19 Genomics UK (COG-UK) Consortium|Davies|United Kingdom

>Spike|hCoV-19/USA/FL-BPHL-1457/2020|2020-04-08|EPI\_ISL\_549239|Original|hCoV-19^^Florida|Human|Florida Bureau of Public Health Laboratories|Florida Bureau of Public Health Laboratories|Blanton|USA

>Spike|hCoV-19/USA/VA-DCLS-0924/2020|2020-05-12|EPI\_ISL\_522794|Original|hCoV-19^^Virginia|Human|Virginia DCLS|Virginia DCLS|St. Jacques|USA

>Spike|hCoV-19/Wales/QEUH-B2E4AB/2020|2020-11-03|EPI\_ISL\_710999|Original|hCoV-19^^Wales|Human|Lighthouse Lab in Glasgow|Wellcome Sanger Institute for the COVID-19 Genomics UK (COG-UK) Consortium|Davies|United Kingdom

>Spike|hCoV-19/Scotland/EDB1452/2020|2020-04-13|EPI\_ISL\_433453|Original|hCoV-19^^Scotland|Human|Virology Department|COVID-19 Genomics UK (COG-UK) Consortium|Williams|United Kingdom

>Spike|hCoV-19/Denmark/DCGC-10811/2020|2020-11-02|EPI\_ISL\_669552|Original|hCoV-19^^Syddanmark|Human|Department of Virus and Microbiological Special Diagnostics|Albertsen Lab|Michaelsen|Denmark

>Spike|hCoV-19/England/GSTT-265DDD4/2020|2020-03-28|EPI\_ISL\_484107|Original|hCoV-19^^England|Human|Centre for Clinical Infection and Diagnostics Research and Genomics Innovation Unit|COVID-19 Genomics UK (COG-UK) Consortium|Awan|United Kingdom

>Spike|hCoV-19/Japan/PG-4943/2020|2020-07-00|EPI\_ISL\_690062|Original|hCoV-19^^Japan|Human|Pathogen Genomics Center|Pathogen Genomics Center|Sekizuka|Japan

>Spike|hCoV-19/Japan/PG-2862/2020|2020-03-00|EPI\_ISL\_690988|Original|hCoV-19^^Japan|Human|Pathogen Genomics Center|Pathogen Genomics Center|Sekizuka|Japan

>Spike|hCoV-19/Ireland/MN-NVRL-77IRL72276/2020|2020-11-05|EPI\_ISL\_752521|Original|hCoV-19^^Monaghan|Human|National Virus Reference Laboratory|National Virus Reference Laboratory|Gonzalez|Ireland

>Spike|hCoV-19/USA/WI-GMF-16189/2020|2020-08-20|EPI\_ISL\_547718|Original|hCoV-19^^Wisconsin|Human|Gundersen Molecular Diagnostics Laboratory|Kabara Cancer Research Institute|Kenny|USA

>Spike|hCoV-19/England/MILK-9941E7/2020|2020-08-24|EPI\_ISL\_551714|Original|hCoV-19^^England|Human|Lighthouse Lab in Milton Keynes|Wellcome Sanger Institute for the COVID-19 Genomics UK (COG-UK) consortium|Davies|United Kingdom

>Spike|hCoV-19/England/BIRM-64608/2020|2020-09-22|EPI\_ISL\_594499|Original|hCoV-19^^England|Human|University of Birmingham|COVID-19 Genomics UK (COG-UK) Consortium|Loman|United Kingdom

>Spike|hCoV-19/Scotland/QEUA-963A7D/2020|2020-08-12|EPI\_ISL\_534366|Original|hCoV-19^^Scotland|Human|NHSGGC West of Scotland Specialist Virology Centre / MRC-University of Glasgow Centre for Virus Research|Wellcome Sanger Institute for the COVID-19 Genomics UK (COG-UK) consortium|Davies|United Kingdom

>Spike|hCoV-19/England/ALDP-955461/2020|2020-06-12|EPI\_ISL\_554459|Original|hCoV-19^^England|Human|Lighthouse Lab in Alderley Park|Wellcome Sanger Institute for the COVID-19 Genomics UK (COG-UK) consortium|Davies|United Kingdom

>Spike|hCoV-19/England/QEUA-B3F762/2020|2020-11-08|EPI\_ISL\_658585|Original|hCoV-19^^England|Human|Lighthouse Lab in Glasgow|Wellcome Sanger Institute for the COVID-19 Genomics UK (COG-UK) Consortium|Davies|United Kingdom

>Spike|hCoV-19/USA/MI-UM-10036287420/2020|2020-10-05|EPI\_ISL\_596575|Original|hCoV-19^^Michigan|Human|University of Michigan Clinical Microbiology Laboratory|Lauring Lab|Valesano|USA

>Spike|hCoV-19/USA/NY-Wadsworth-203545-01/2020|2020-08-25|EPI\_ISL\_677079|Original|hCoV-19^^New York|Human|Wadsworth Center|Wadsworth Center|Lasek-Nesselquist|USA

>Spike|hCoV-19/England/QEUA-BCB5DA/2020|2020-11-27|EPI\_ISL\_704388|Original|hCoV-19^^England|Human|Lighthouse Lab in Glasgow|Wellcome Sanger Institute for the COVID-19 Genomics UK (COG-UK) Consortium|Davies|United Kingdom

>Spike|hCoV-19/USA/FL-BPHL-1738/2020|2020-10-02|EPI\_ISL\_613858|Original|hCoV-19^^Florida|Human|Florida Bureau of Public Health Laboratories|Florida Bureau of Public Health Laboratories|Blanton|USA

>Spike|hCoV-19/England/QEUA-B66B66/2020|2020-11-11|EPI\_ISL\_662420|Original|hCoV-19^^England|Human|Lighthouse Lab in Glasgow|Wellcome Sanger Institute for the COVID-19 Genomics UK (COG-UK) Consortium|Davies|United Kingdom

>Spike|hCoV-19/USA/NY-Wadsworth-291743-01/2020|2020-12-25|EPI\_ISL\_767607|Original|hCoV-19^^New York|Human|SARATOGA HOSPITAL LABORATORY|Wadsworth Center|Lasek-Nesselquist|USA

>Spike|hCoV-19/Wales/PHWC-490502/2020|2020-11-05|EPI\_ISL\_703129|Original|hCoV-19^^Wales|Human|Originating lab|COVID-19 Genomics UK (COG-UK) Consortium|Moore|United Kingdom

>Spike|hCoV-19/USA/MI-MDHHS-SC21583/2020|2020-03-23|EPI\_ISL\_516310|Original|hCoV-19^^Michigan|Human|Michigan Department of Health and Human Services|Michigan Department of Health and Human Services|Blankenship|USA

>Spike|hCoV-19/England/QEUA-B8135E/2020|2020-11-14|EPI\_ISL\_661690|Original|hCoV-19^^England|Human|Lighthouse Lab in Glasgow|Wellcome Sanger Institute for the COVID-19 Genomics UK (COG-UK) Consortium|Davies|United Kingdom

>Spike|hCoV-19/Wales/ALDP-9BEA73/2020|2020-09-09|EPI\_ISL\_568104|Original|hCoV-19^^Wales|Human|Lighthouse Lab in Alderley Park|Wellcome Sanger Institute for the COVID-19 Genomics UK (COG-UK) consortium|Davies|United Kingdom

>Spike|hCoV-19/England/QEUA-964423/2020|2020-08-11|EPI\_ISL\_536880|Original|hCoV-19^^England|Human|Lighthouse Lab in Glasgow|Wellcome Sanger Institute for the COVID-19 Genomics UK (COG-UK) consortium|Davies|United Kingdom

>Spike|hCoV-19/Australia/VIC5403/2020|2020-07-19|EPI\_ISL\_520166|Original|hCoV-19^^Victoria|Human|Microbiological Diagnostic Unit - Public Health Laboratory (MDU-PHL)|MDU-PHL|Schultz|Australia

>Spike|hCoV-19/Switzerland/BL-ETHZ-210007/2020|2020-07-17|EPI\_ISL\_510755|Original|hCoV-19^^Basel-Landschaft|Human|Viollier AG|Department of Biosystems Science and Engineering|Nadeau|Switzerland

>Spike|hCoV-19/Wales/PHWC-497C15/2020|2020-11-25|EPI\_ISL\_726949|Original|hCoV-19^^Wales|Human|Originating lab|COVID-19 Genomics UK (COG-UK) Consortium|Moore|United Kingdom

>Spike|hCoV-19/England/C200045670/2020|2020-11-10|EPI\_ISL\_664065|Original|hCoV-19^^England|Human|Respiratory Virus Unit|COVID-19 Genomics UK (COG-UK) Consortium|Platt|United Kingdom

>Spike|hCoV-19/England/CAMC-B340AE/2020|2020-11-05|EPI\_ISL\_659584|Original|hCoV-19^^England|Human|Lighthouse Lab in Cambridge|Wellcome Sanger Institute for the COVID-19 Genomics UK (COG-UK) Consortium|Davies|United Kingdom

>Spike|hCoV-19/USA/TX-HMH-984/2020|2020-04-10|EPI\_ISL\_545946|Original|hCoV-19^^Texas|Human|Houston Methodist Hospital|Houston Methodist Hospital|Long|USA

>Spike|hCoV-19/Japan/PG-8737/2020|2020-08-00|EPI\_ISL\_686333|Original|hCoV-19^^Japan|Human|Pathogen Genomics Center|Pathogen Genomics Center|Sekizuka|Japan

>Spike|hCoV-19/England/ALDP-9CB1AB/2020|2020-09-16|EPI\_ISL\_575622|Original|hCoV-19^^England|Human|Lighthouse Lab in Alderley Park|Wellcome Sanger Institute for the COVID-19 Genomics UK (COG-UK) consortium|Davies|United Kingdom

>Spike|hCoV-19/England/NORT-29203E/2020|2020-05-07|EPI\_ISL\_489135|Original|hCoV-19^^England|Human|NU-OMICS DNA Sequencing research facility|Wellcome Sanger Institute for the COVID-19 Genomics UK (COG-UK) consortium|Davies|United Kingdom

>Spike|hCoV-19/England/SHEF-D140C/2020|2020-10-19|EPI\_ISL\_611606|Original|hCoV-19^^England|Human|Virology Department|COVID-19 Genomics UK (COG-UK) Consortium|de Silva|United Kingdom

>Spike|hCoV-19/USA/WA-UW-2009/2020|2020-03-24|EPI\_ISL\_424340|Original|hCoV-19^^Washington|Human|UW Virology Lab|UW Virology Lab|Roychoudhury|USA

>Spike|hCoV-19/USA/CA-CZB-3877/2020|2020-07-17|EPI\_ISL\_548526|Original|hCoV-19^^California|Human|County of Santa Clara Public Health Department|Chan-Zuckerberg Biohub|Bhatt|USA

>Spike|hCoV-19/Canada/BC\_02281789/2020|2020-05-00|EPI\_ISL\_477041|Original|hCoV-19^^British Columbia|Human|BCCDC Public Health Laboratory|BCCDC Public Health Laboratory|Harrigan|Canada

>Spike|hCoV-19/Denmark/DCGC-10322/2020|2020-11-02|EPI\_ISL\_669900|Original|hCoV-19^^Hovedstaden|Human|Department of Virus and Microbiological Special Diagnostics|Albertsen Lab|Michaelsen|Denmark

>Spike|hCoV-19/USA/MN-MDH-1313/2020|2020-03-25|EPI\_ISL\_495612|Original|hCoV-19^^Minnesota|Human|Minnesota Department of Health|Minnesota Department of Health|Garfin|USA

>Spike|hCoV-19/England/QEUA-B0E429/2020|2020-11-02|EPI\_ISL\_642002|Original|hCoV-19^^England|Human|Lighthouse Lab in Glasgow|Wellcome Sanger Institute for the COVID-19 Genomics UK (COG-UK) Consortium|Davies|United Kingdom

>Spike|hCoV-19/Denmark/DCGC-3068/2020|2020-08-31|EPI\_ISL\_616848|Original|hCoV-19^^Hovedstaden|Human|Department of Virus and Microbiological Special Diagnostics|Albertsen lab|Michaelsen|Denmark

>Spike|hCoV-19/England/CAMB-78DFD/2020|2020-04-02|EPI\_ISL\_441237|Original|hCoV-19^^England|Human|Department of Pathology|Wellcome Sanger Institute for the COVID-19 Genomics UK (COG-UK) consortium|Amato|United Kingdom

>Spike|hCoV-19/USA/UT-QDX-2504/2020|2020-03-13|EPI\_ISL\_604855|Original|hCoV-19^^Utah|Human|Quest Diagnostics|Quest Diagnostics|Kagan|USA

>Spike|hCoV-19/England/ALDP-A86527/2020|2020-10-17|EPI\_ISL\_606053|Original|hCoV-19^^England|Human|Lighthouse Lab in Alderley Park|Wellcome Sanger Institute for the COVID-19 Genomics UK (COG-UK) consortium|Davies|United Kingdom

>Spike|hCoV-19/France/OCC-SC497/2020|2020-03-30|EPI\_ISL\_660691|Original|hCoV-19^^Occitanie|Human|CHU Montpellier|CNR Virus des Infections Respiratoires - France SUD|Bal|France

>Spike|hCoV-19/England/204761796/2020|2020-11-19|EPI\_ISL\_678742|Original|hCoV-19^^England|Human|Respiratory Virus Unit|COVID-19 Genomics UK (COG-UK) Consortium|Platt|United Kingdom

>Spike|hCoV-19/England/QEUA-AE1DAA/2020|2020-10-27|EPI\_ISL\_633590|Original|hCoV-19^^England|Human|Lighthouse Lab in Glasgow|Wellcome Sanger Institute for the COVID-19 Genomics UK (COG-UK) consortium|Davies|United Kingdom

>Spike|hCoV-19/Spain/MD-IBV-004903/2020|2020-03-09|EPI\_ISL\_481044|Original|hCoV-19^^Madrid|Human|Hospital General Universitario Gregorio Mara\u00f1\u00f3n|SeqCOVID-SPAIN consortium/IBV (CSIC)|Comas|Spain

>Spike|hCoV-19/USA/AZ-TG491490/2020|2020-06-18|EPI\_ISL\_695121|Original|hCoV-19^^Arizona|Human|AZ SPHL|TGen North|French|USA

>Spike|hCoV-19/Ireland/LH-NVRL-20ILR11491/2020|2020-11-26|EPI\_ISL\_732515|Original|hCoV-19^^Louth|Human|National Virus Reference Laboratory|National Virus Reference Laboratory|Gonzalez|Ireland

>Spike|hCoV-19/United Arab Emirates/0977/2020|2020-06-29|EPI\_ISL\_699112|Original|hCoV-19^^Abu Dhabi|Human|Group 42 (G42) Healthcare|G42 Healthcare|Ogrodzki|United Arab Emirates

>Spike|hCoV-19/USA/CA-CHLA-PLM89293334/2020|2020-11-30|EPI\_ISL\_753473|Original|hCoV-19^^California|Human|Clinical virology Laboratory|Center for Personalized Medicine|Dien Bard|USA

>Spike|hCoV-19/Australia/NSW833/2020|2020-08-06|EPI\_ISL\_526175|Original|hCoV-19^^New South Wales|Human|Sydney South West Pathology Service (SSWPS) - Liverpool Hospital - NSW Health Pathology|NSW Health Pathology - Institute of Clinical Pathology and Medical Research; Westmead Hospital; University of Sydney|Gall|Australia

>Spike|hCoV-19/England/QEUA-AD05E2/2020|2020-10-26|EPI\_ISL\_634087|Original|hCoV-19^^England|Human|Lighthouse Lab in Glasgow|Wellcome Sanger Institute for the COVID-19 Genomics UK (COG-UK) consortium|Davies|United Kingdom

>Spike|hCoV-19/Denmark/DCGC-9895/2020|2020-11-09|EPI\_ISL\_669259|Original|hCoV-19^^Sjaelland|Human|Department of Virus and Microbiological Special Diagnostics|Albertsen Lab|Michaelsen|Denmark

>Spike|hCoV-19/Australia/VIC9083/2020|2020-08-06|EPI\_ISL\_565385|Original|hCoV-19^^Victoria|Human|Victorian Infectious Diseases Reference Laboratory (VIDRL)|VIDRL and MDU-PHL|Schultz|Australia

>Spike|hCoV-19/England/CAMC-B9A99C/2020|2020-11-15|EPI\_ISL\_673266|Original|hCoV-19^^England|Human|Lighthouse Lab in Cambridge|Wellcome Sanger Institute for the COVID-19 Genomics UK (COG-UK) Consortium|Davies|United Kingdom

>Spike|hCoV-19/Portugal/PT0648/2020|2020-03-31|EPI\_ISL\_510909|Original|hCoV-19^^Portugal|Human|Instituto Nacional de Saude (INSA)|Instituto Nacional de Saude (INSA)|Borges|Portugal

>Spike|hCoV-19/England/ALDP-A95895/2020|2020-10-19|EPI\_ISL\_624793|Original|hCoV-19^^England|Human|Lighthouse Lab in Alderley Park|Wellcome Sanger Institute for the COVID-19 Genomics UK (COG-UK) consortium|Davies|United Kingdom

>Spike|hCoV-19/England/MILK-A17EF3/2020|2020-10-01|EPI\_ISL\_594998|Original|hCoV-19^^England|Human|Northumbria University / South Tees Hospitals NHS Foundation Trust / North Cumbria Integrated Care NHS Foundation Trust / North Tees and Hartlepool NHS Foundation Trust / Newcastle Hospitals NHS Foundation Trust|COVID-19 Genomics UK (COG-UK) Consortium|Bashton|United Kingdom

>Spike|hCoV-19/Denmark/ALAB-SSI374/2020|2020-03-22|EPI\_ISL\_429479|Original|hCoV-19^^Denmark|Human|Department of Virus and Microbiological Special Diagnostics|Albertsen lab|Kirkegaard|Denmark

>Spike|hCoV-19/Canada/BC\_09035190/2020|2020-04-00|EPI\_ISL\_477112|Original|hCoV-19^^British Columbia|Human|BCCDC Public Health Laboratory|BCCDC Public Health Laboratory|Harrigan|Canada

>Spike|hCoV-19/England/MILK-A7A78A/2020|2020-10-15|EPI\_ISL\_606405|Original|hCoV-19^^England|Human|Lighthouse Lab in Milton Keynes|Wellcome Sanger Institute for the COVID-19 Genomics UK (COG-UK) consortium|Davies|United Kingdom



>Spike|hCoV-19/England/20100005604/2020|2020-02-28|EPI\_ISL\_464253|Original|hCoV-19^^England|Human|Respiratory Virus Unit|Respiratory Virus Unit|Platt|United Kingdom

>Spike|hCoV-19/England/ALDP-A67A0F/2020|2020-10-12|EPI\_ISL\_630376|Original|hCoV-19^^England|Human|Lighthouse Lab in Alderley Park|Wellcome Sanger Institute for the COVID-19 Genomics UK (COG-UK) consortium|Davies|United Kingdom

>Spike|hCoV-19/Scotland/EDB10444/2020|2020-10-08|EPI\_ISL\_703622|Original|hCoV-19^^Scotland|Human|Virology Department|COVID-19 Genomics UK (COG-UK) Consortium|McHugh|United Kingdom

>Spike|hCoV-19/USA/TX-DSHS-0247/2020|2020-04-25|EPI\_ISL\_527823|Original|hCoV-19^^Texas|Human|Texas Department of State Health Services|Texas Department of State Health Services|Rahman|USA

>Spike|hCoV-19/England/QEUA-79A981/2020|2020-07-15|EPI\_ISL\_533029|Original|hCoV-19^^England|Human|Lighthouse Lab in Glasgow|Wellcome Sanger Institute for the COVID-19 Genomics UK (COG-UK) consortium|Davies|United Kingdom

>Spike|hCoV-19/England/ALDP-94DB67/2020|2020-06-17|EPI\_ISL\_555656|Original|hCoV-19^^England|Human|Lighthouse Lab in Alderley Park|Wellcome Sanger Institute for the COVID-19 Genomics UK (COG-UK) consortium|Davies|United Kingdom

>Spike|hCoV-19/Wales/PHWC-2620E/2020|2020-03-26|EPI\_ISL\_422353|Original|hCoV-19^^Wales|Human|Wales Specialist Virology Centre|Public Health Wales Microbiology Cardiff|Moore|United Kingdom

>Spike|hCoV-19/Thailand/Bangkok-CONI-0208/2020|2020-03-18|EPI\_ISL\_512858|Original|hCoV-19^^Bangkok|Human|Ramathibodi Hospital|COVID-19 Network Investigations (CONI) Alliance|Batty|Thailand

>Spike|hCoV-19/Wales/PHWC-47DFEF/2020|2020-10-08|EPI\_ISL\_595393|Original|hCoV-19^^Wales|Human|Originating lab|COVID-19 Genomics UK (COG-UK) Consortium|Moore|United Kingdom

>Spike|hCoV-19/USA/LA-SR0319/2020|2020-04-04|EPI\_ISL\_450174|Original|hCoV-19^^Louisiana|Human|Robert Garry lab|Andersen lab at Scripps Research|Gangavarapu|USA

>Spike|hCoV-19/USA/UT-UPHL-2012609524/2020|2020-10-12|EPI\_ISL\_746097|Original|hCoV-19^^Utah|Human|Ginkgo Bioworks Clinical Laboratory|Utah Public Health Laboratory|Young|USA

>Spike|hCoV-19/Switzerland/LU-ETHZ-140065/2020|2020-04-30|EPI\_ISL\_476113|Original|hCoV-19^^Luzern|Human|Viollier AG|Department of Biosystems Science and Engineering|Nadeau|Switzerland

>Spike|hCoV-19/USA/CA-CZB-10009/2020|2020-07-11|EPI\_ISL\_672187|Original|hCoV-19^^California|Human|The Ashley Laboratory|Chan-Zuckerberg Biohub|Bhatt|USA

>Spike|hCoV-19/Wales/ALDP-C3955E/2020|2020-12-07|EPI\_ISL\_767251|Original|hCoV-19^^Wales|Human|Lighthouse Lab in Alderley Park|Wellcome Sanger Institute for the COVID-19 Genomics UK (COG-UK) Consortium|Davies|United Kingdom

>Spike|hCoV-19/Australia/WA104/2020|2020-04-08|EPI\_ISL\_512757|Original|hCoV-19^^Western Australia|Human|PathWest Laboratory Medicine WA|PathWest Laboratory Medicine WA Microbial Surveillance Unit|Sikazwe|Australia

>Spike|hCoV-19/England/QEUA-B3F8AB/2020|2020-11-08|EPI\_ISL\_658736|Original|hCoV-19^^England|Human|Lighthouse Lab in Glasgow|Wellcome Sanger Institute for the COVID-19 Genomics UK (COG-UK) Consortium|Davies|United Kingdom

>Spike|hCoV-19/England/CAMC-94AA9A/2020|2020-07-18|EPI\_ISL\_556706|Original|hCoV-19^^England|Human|Lighthouse Lab in Cambridge|Wellcome Sanger Institute for the COVID-19 Genomics UK (COG-UK) consortium|Davies|United Kingdom

>Spike|hCoV-19/USA/WI-GMF-08470/2020|2020-06-29|EPI\_ISL\_489931|Original|hCoV-19^^Wisconsin|Human|Gundersen Molecular Diagnostics Laboratory|Kabara Cancer Research Institute|Kenny|USA

>Spike|hCoV-19/Germany/HH-hpi-p1488/2020|2020-03-13|EPI\_ISL\_775749|Original|hCoV-19^^Hamburg|Human|University Medical Center Hamburg Eppendorf|Heinrich Pette Institute|Robitaille|Germany

>Spike|hCoV-19/Wales/PHWC-168481/2020|2020-04-19|EPI\_ISL\_494245|Original|hCoV-19^^Wales|Human|Originating lab|COVID-19 Genomics UK (COG-UK) Consortium|Moore|United Kingdom

>Spike|hCoV-19/USA/CA-CDPH027/2020|2020-05-22|EPI\_ISL\_515919|Original|hCoV-19^^California|Human|California Department of Public Health|California Department of Public Health|Bell|USA

>Spike|hCoV-19/Sweden/20-53008/2020|2020-09-28|EPI\_ISL\_676493|Original|hCoV-19^^Orebro|Human|Orebro klinisk mikrobiologi|The Public Health Agency of Sweden|Svartstr\u00f6m|Sweden

>Spike|hCoV-19/Latvia/153/2020|2020-09-09|EPI\_ISL\_639650|Original|hCoV-19^^Latvia|Human|Centr\u0101l\u0101 Laboratorija|Latvian Biomedical Research and Study Centre|Zrel\u0113vs|Latvia

>Spike|hCoV-19/Wales/PHWC-30975/2020|2020-04-08|EPI\_ISL\_446298|Original|hCoV-19^^Wales|Human|Wales Specialist Virology Centre|Public Health Wales Microbiology Cardiff|Moore|United Kingdom

>Spike|hCoV-19/India/UT-AR26/2020|2020-05-27|EPI\_ISL\_511908|Original|hCoV-19^^Uttarakhand|Human|All india institute of Medical Sciences Rishikesh|National Institute of Biomedical Genomics -\u00a0DBT's PAN-INDIA 1000 SARS--CoV-2 RNA Genome Sequencing Consortium|Maitra|India

>Spike|hCoV-19/Italy/BAS-IZSPB-390PT/2020|2020-10-25|EPI\_ISL\_722889|Original|hCoV-19^^Basilicata|Human|Istituto Zooprofilattico Sperimentale della Puglia e della Basilicata|Istituto Zooprofilattico Sperimentale della Puglia e della Basilicata|Parisi|Italy

>Spike|hCoV-19/USA/MI-MDHHS-SC20664/2020|2020-04-29|EPI\_ISL\_471688|Original|hCoV-19^^Michigan|Human|Michigan Department of Health and Human Services|Michigan Department of Health and Human Services|Blankenship|USA

>Spike|hCoV-19/Wales/PHWC-49E470/2020|2020-12-07|EPI\_ISL\_743005|Original|hCoV-19^^Wales|Human|Wales Specialist Virology Centre Sequencing lab|COVID-19 Genomics UK (COG-UK) Consortium|Moore|United Kingdom

>Spike|hCoV-19/England/ALDP-B5C653/2020|2020-11-09|EPI\_ISL\_655786|Original|hCoV-19^^England|Human|Lighthouse Lab in Alderley Park|Wellcome Sanger Institute for the COVID-19 Genomics UK (COG-UK) Consortium|Davies|United Kingdom

>Spike|hCoV-19/USA/CO-CDPHE-2100015002/2020|2020-11-20|EPI\_ISL\_771182|Original|hCoV-19^^Colorado|Human|Colorado Department of Public Health and Environment|Colorado Department of Public Health and Environment|Bankers|USA

>Spike|hCoV-19/Australia/VIC5747/2020|2020-07-20|EPI\_ISL\_518546|Original|hCoV-19^^Victoria|Human|Microbiological Diagnostic Unit - Public Health Laboratory (MDU-PHL)|MDU-PHL|Schultz|Australia

>Spike|hCoV-19/England/ALDP-6B2A81/2020|2020-06-30|EPI\_ISL\_557785|Original|hCoV-19^^England|Human|Lighthouse Lab in Alderley Park|Wellcome Sanger Institute for the COVID-19 Genomics UK (COG-UK) consortium|Davies|United Kingdom

>Spike|hCoV-19/Canada/ON-PHL-20-03711/2020|2020-11-00|EPI\_ISL\_775193|Original|hCoV-19^^Ontario|Human|Public Health Ontario Laboratory|Public Health Ontario Laboratory|Guthrie|Canada

>Spike|hCoV-19/England/LOND-1266DA2/2020|2020-12-10|EPI\_ISL\_741209|Original|hCoV-19^^England|Human|University College London|COVID-19 Genomics UK (COG-UK) Consortium|Roy|United Kingdom

>Spike|hCoV-19/Wales/PHWC-49E0E5/2020|2020-12-07|EPI\_ISL\_742953|Original|hCoV-19^^Wales|Human|Wales Specialist Virology Centre Sequencing lab|COVID-19 Genomics UK (COG-UK) Consortium|Moore|United Kingdom

>Spike|hCoV-19/Wales/PHWC-480C6A/2020|2020-10-22|EPI\_ISL\_612988|Original|hCoV-19^^Wales|Human|Wales Specialist Virology Centre Sequencing lab|COVID-19 Genomics UK (COG-UK) Consortium|Moore|United Kingdom

>Spike|hCoV-19/England/20186123804/2020|2020-05-29|EPI\_ISL\_465488|Original|hCoV-19^^England|Human|Respiratory Virus Unit|Respiratory Virus Unit|Platt|United Kingdom

>Spike|hCoV-19/USA/CA-CZB-6989/2020|2020-09-01|EPI\_ISL\_582916|Original|hCoV-19^^California|Human|County of Santa Clara Public Health Department|Chan-Zuckerberg Biohub|Bhatt|USA

>Spike|hCoV-19/USA/NM-UNM-00137/2020|2020-04-02|EPI\_ISL\_467564|Original|hCoV-19^^New Mexico|Human|New Mexico Department of Health Scientific Laboratory Division|Center for Global Health|Domman|USA

>Spike|hCoV-19/Denmark/DCGC-10989/2020|2020-11-02|EPI\_ISL\_669483|Original|hCoV-19^^Hovedstaden|Human|Department of Virus and Microbiological Special Diagnostics|Albertsen Lab|Michaelsen|Denmark

>Spike|hCoV-19/Denmark/DCGC-19216/2020|2020-12-07|EPI\_ISL\_748820|Original|hCoV-19^^Syddanmark|Human|Department of Virus and Microbiological Special Diagnostics|Albertsen Lab|Michaelsen|Denmark

>Spike|hCoV-19/Australia/VIC4503/2020|2020-07-12|EPI\_ISL\_518914|Original|hCoV-19^^Victoria|Human|Microbiological Diagnostic Unit - Public Health Laboratory (MDU-PHL)|MDU-PHL|Schultz|Australia

>Spike|hCoV-19/USA/TX-HMH-5605/2020|2020-06-24|EPI\_ISL\_544896|Original|hCoV-19^^Texas|Human|Houston Methodist Hospital|Houston Methodist Hospital|Long|USA

>Spike|hCoV-19/USA/TX-HMH-MCoV-14103/2020|2020-10-01|EPI\_ISL\_787389|Original|hCoV-19^^Texas|Human|Houston Methodist Hospital|Houston Methodist Hospital|Long|USA

>Spike|hCoV-19/Portugal/PT1653/2020|2020-11-08|EPI\_ISL\_731895|Original|hCoV-19^^Portugal|Human|Instituto Nacional de Saude (INSA)|Instituto Nacional de Saude (INSA)|Borges|Portugal

>Spike|hCoV-19/England/20119092004/2020|2020-03-11|EPI\_ISL\_465130|Original|hCoV-19^^England|Human|Respiratory Virus Unit|Respiratory Virus Unit|Platt|United Kingdom

>Spike|hCoV-19/South Africa/KRISP-K004021/2020|2020-10-13|EPI\_ISL\_635004|Original|hCoV-19^^KwaZulu-Natal|Human|National Health Laboratory Service - Inkosi Albert Luthuli Central Hospital (NHLS-IALCH)|KRISP|de Oliveira|South Africa

>Spike|hCoV-19/Portugal/PT1603/2020|2020-07-06|EPI\_ISL\_693606|Original|hCoV-19^^Portugal|Human|Instituto Nacional de Saude (INSA)|Instituto Nacional de Saude (INSA)|Borges|Portugal

>Spike|hCoV-19/England/ALDP-9BCB72/2020|2020-09-09|EPI\_ISL\_573056|Original|hCoV-19^^England|Human|Oxford Viromics|COVID-19 Genomics UK (COG-UK) Consortium|Golubchik|United Kingdom

>Spike|hCoV-19/Scotland/QEUA-789563/2020|2020-07-16|EPI\_ISL\_533016|Original|hCoV-19^^Scotland|Human|NHSGGC West of Scotland Specialist Virology Centre / MRC-University of Glasgow Centre for Virus Research|Wellcome Sanger Institute for the COVID-19 Genomics UK (COG-UK) consortium|Davies|United Kingdom

>Spike|hCoV-19/USA/CA-CZB-2460/2020|2020-05-21|EPI\_ISL\_513866|Original|hCoV-19^^California|Human|San Francisco Public Health Laboratory|Chan-Zuckerberg Biohub|Kamm|USA

>Spike|hCoV-19/Denmark/DCGC-20033/2020|2020-12-07|EPI\_ISL\_747943|Original|hCoV-19^^Sjaelland|Human|Department of Virus and Microbiological Special Diagnostics|Albertsen Lab|Michaelsen|Denmark

>Spike|hCoV-19/Japan/PG-2300/2020|2020-03-00|EPI\_ISL\_685905|Original|hCoV-19^^Japan|Human|Pathogen Genomics Center|Pathogen Genomics Center|Sekizuka|Japan

>Spike|hCoV-19/England/QEUA-AAF43A/2020|2020-10-22|EPI\_ISL\_653023|Original|hCoV-19^^England|Human|Oxford Viromics|COVID-19 Genomics UK (COG-UK) Consortium|Golubchik|United Kingdom

>Spike|hCoV-19/Malaysia/2101/2020|2020-04-01|EPI\_ISL\_501191|Original|hCoV-19^^Kuala Lumpur|Human|Department of Medical Microbiology|Department of Medical Microbiology|Chan|Malaysia

>Spike|hCoV-19/Bangladesh/DNAS\_DRCIM\_CPH\_isl\_485\_BGD/2020|2020-04-29|EPI\_ISL\_774878|Original|hCoV-19^^Dhaka|Human|Designated Reference Institute for Chemical Measurements (DRICM)|DNA SOLUTION LTD.|Rabbi|Bangladesh

>Spike|hCoV-19/Australia/VIC11101/2020|2020-08-12|EPI\_ISL\_563247|Original|hCoV-19^^Victoria|Human|Microbiological Diagnostic Unit - Public Health Laboratory (MDU-PHL)|MDU-PHL|Schultz|Australia

>Spike|hCoV-19/England/ALDP-C05F8A/2020|2020-12-06|EPI\_ISL\_709433|Original|hCoV-19^^England|Human|Lighthouse Lab in Alderley Park|Wellcome Sanger Institute for the COVID-19 Genomics UK (COG-UK) Consortium|Davies|United Kingdom

>Spike|hCoV-19/England/PORT-2CFDB9/2020|2020-00-00|EPI\_ISL\_461998|Original|hCoV-19^^England|Human|Centre for Enzyme Innovation|COVID-19 Genomics UK (COG-UK) Consortium|Robson|United Kingdom

>Spike|hCoV-19/Wales/PHWC-49BC7B/2020|2020-12-06|EPI\_ISL\_742452|Original|hCoV-19^^Wales|Human|Wales Specialist Virology Centre Sequencing lab|COVID-19 Genomics UK (COG-UK) Consortium|Moore|United Kingdom

>Spike|hCoV-19/England/MILK-A191CB/2020|2020-10-03|EPI\_ISL\_612489|Original|hCoV-19^^England|Human|Wales Specialist Virology Centre Sequencing lab|COVID-19 Genomics UK (COG-UK) Consortium|Moore|United Kingdom

>Spike|hCoV-19/USA/CA-ALSR-5129/2020|2020-11-13|EPI\_ISL\_730370|Original|hCoV-19^^California|Human|San Diego County Public Health Laboratory|Andersen lab at Scripps Research|Gangavarapu|USA

>Spike|hCoV-19/England/GSTT-265E30E/2020|2020-03-13|EPI\_ISL\_484185|Original|hCoV-19^^England|Human|Centre for Clinical Infection and Diagnostics Research and Genomics Innovation Unit|COVID-19 Genomics UK (COG-UK) Consortium|Awan|United Kingdom

>Spike|hCoV-19/Wales/PHWC-47D143/2020|2020-10-08|EPI\_ISL\_586103|Original|hCoV-19^^Wales|Human|Wales Specialist Virology Centre Sequencing lab|COVID-19 Genomics UK (COG-UK) Consortium|Moore|United Kingdom

>Spike|hCoV-19/USA/TX-HMH-2543/2020|2020-06-01|EPI\_ISL\_545373|Original|hCoV-19^^Texas|Human|Houston Methodist Hospital|Houston Methodist Hospital|Long|USA

>Spike|hCoV-19/Wales/MILK-9AA0E1/2020|2020-09-01|EPI\_ISL\_550825|Original|hCoV-19^^Wales|Human|Lighthouse Lab in Milton Keynes|Wellcome Sanger Institute for the COVID-19 Genomics UK (COG-UK) consortium|Davies|United Kingdom

>Spike|hCoV-19/England/MILK-993731/2020|2020-08-27|EPI\_ISL\_552023|Original|hCoV-19^^England|Human|Lighthouse Lab in Milton Keynes|Wellcome Sanger Institute for the COVID-19 Genomics UK (COG-UK) consortium|Davies|United Kingdom

>Spike|hCoV-19/Denmark/DCGC-20296/2020|2020-11-23|EPI\_ISL\_748099|Original|hCoV-19^^Syddanmark|Human|Department of Virus and Microbiological Special Diagnostics|Albertsen Lab|Michaelsen|Denmark

>Spike|hCoV-19/South Korea/KCDC2471/2020|2020-06-09|EPI\_ISL\_514874|Original|hCoV-19^^South Korea|Human|Division of Viral Diseases|Division of Viral Diseases|Kim|South Korea

>Spike|hCoV-19/England/204720936/2020|2020-11-16|EPI\_ISL\_686609|Original|hCoV-19^^England|Human|Respiratory Virus Unit|COVID-19 Genomics UK (COG-UK) Consortium|Platt|United Kingdom

>Spike|hCoV-19/Wales/PHWC-2847F/2020|2020-03-31|EPI\_ISL\_432093|Original|hCoV-19^^Wales|Human|Wales Specialist Virology Centre|Public Health Wales Microbiology Cardiff|Moore|United Kingdom

>Spike|hCoV-19/Russia/AST-RII-MH4597S/2020|2020-09-30|EPI\_ISL\_733220|Original|hCoV-19^^Astrakhan|Human|Pathogenic Microorganisms Variability Laboratory|WHO National Influenza Centre Russian Federation|Komissarov|Russia

>Spike|hCoV-19/Denmark/DCGC-12437/2020|2020-11-16|EPI\_ISL\_682618|Original|hCoV-19^^Hovedstaden|Human|Department of Virus and Microbiological Special Diagnostics|Albertsen Lab|Michaelsen|Denmark

>Spike|hCoV-19/USA/NY-SURV1000/2020|2020-03-19|EPI\_ISL\_436082|Original|hCoV-19^^New York|Human|NYC Department of Health and Mental Hygiene|Pathogen Discovery|Queen|USA

>Spike|hCoV-19/Wales/CAMC-AAFD99/2020|2020-10-22|EPI\_ISL\_634801|Original|hCoV-19^^Wales|Human|Lighthouse Lab in Cambridge|Wellcome Sanger Institute for the COVID-19 Genomics UK (COG-UK) consortium|Davies|United Kingdom

>Spike|hCoV-19/England/ALDP-CBFE37/2020|2020-12-20|EPI\_ISL\_760424|Original|hCoV-19^^England|Human|Lighthouse Lab in Alderley Park|Wellcome Sanger Institute for the COVID-19 Genomics UK (COG-UK) Consortium|Davies|United Kingdom

>Spike|hCoV-19/Switzerland/AR-ETHZ-340152/2020|2020-10-28|EPI\_ISL\_721738|Original|hCoV-19^^Appenzell Ausserrhoden|Human|Viollier AG|Department of Biosystems Science and Engineering|Nadeau|Switzerland

>Spike|hCoV-19/USA/MI-UM-10036782370/2020|2020-11-04|EPI\_ISL\_707850|Original|hCoV-19^^Michigan|Human|University of Michigan Clinical Microbiology Laboratory|Lauring Lab|Valesano|USA

>Spike|hCoV-19/New Zealand/20VR1280/2020|2020-03-20|EPI\_ISL\_456205|Original|hCoV-19^^Auckland|Human|LabPLUS|Institute of Environmental Science and Research (ESR)|de Ligt|New Zealand

>Spike|hCoV-19/USA/LA-SR0289/2020|2020-03-31|EPI\_ISL\_445144|Original|hCoV-19^^Louisiana|Human|Robert Garry lab|Andersen lab at Scripps Research|Gangavarapu|USA

>Spike|hCoV-19/England/MILK-B045F3/2020|2020-10-24|EPI\_ISL\_651021|Original|hCoV-19^^England|Human|Department of Pathology|COVID-19 Genomics UK (COG-UK) Consortium|Goodfellow|United Kingdom

>Spike|hCoV-19/England/ALDP-94C412/2020|2020-06-16|EPI\_ISL\_555835|Original|hCoV-19^^England|Human|Lighthouse Lab in Alderley Park|Wellcome Sanger Institute for the COVID-19 Genomics UK (COG-UK) consortium|Davies|United Kingdom

>Spike|hCoV-19/Vietnam/40201/2020|2020-08-00|EPI\_ISL\_759883|Original|hCoV-19^^Vietnam|Human|National Influenza Center|National Influenza Center|Ung|Vietnam

>Spike|hCoV-19/England/CAMB-7F585/2020|2020-04-08|EPI\_ISL\_470487|Original|hCoV-19^^England|Human|Department of Pathology|Wellcome Sanger Institute for the COVID-19 Genomics UK (COG-UK) consortium|Davies|United Kingdom

>Spike|hCoV-19/Wales/PHWC-164555/2020|2020-05-06|EPI\_ISL\_474193|Original|hCoV-19^^Wales|Human|Originating lab|COVID-19 Genomics UK (COG-UK) Consortium|Moore|United Kingdom

>Spike|hCoV-19/England/ALDP-C04B2D/2020|2020-12-04|EPI\_ISL\_720836|Original|hCoV-19^^England|Human|Lighthouse Lab in Alderley Park|Wellcome Sanger Institute for the COVID-19 Genomics UK (COG-UK) Consortium|Davies|United Kingdom

>Spike|hCoV-19/Australia/NSW739/2020|2020-07-29|EPI\_ISL\_513382|Original|hCoV-19^^New South Wales|Human|Sydney South West Pathology Service (SSWPS) - Liverpool Hospital - NSW Health Pathology|NSW Health Pathology - Institute of Clinical Pathology and Medical Research; Westmead Hospital; University of Sydney|Gall|Australia

>Spike|hCoV-19/Switzerland/BE-ETHZ-331452/2020|2020-10-21|EPI\_ISL\_614926|Original|hCoV-19^^Bern|Human|Viollier AG|Department of Biosystems Science and Engineering|Nadeau|Switzerland

>Spike|hCoV-19/Spain/CT-IBV-97010153/2020|2020-11-06|EPI\_ISL\_683619|Original|hCoV-19^^Catalunya|Human|Servicio de Microbiolog\u00eda|SeqCOVID-SPAIN consortium|IBV (CSIC) |Comas|Spain

>Spike|hCoV-19/England/CAMC-A3E51F/2020|2020-10-06|EPI\_ISL\_609757|Original|hCoV-19^^England|Human|Lighthouse Lab in Cambridge|Wellcome Sanger Institute for the COVID-19 Genomics UK (COG-UK) consortium|Davies|United Kingdom

>Spike|hCoV-19/England/ALDP-9BCA57/2020|2020-09-09|EPI\_ISL\_573043|Original|hCoV-19^^England|Human|Oxford Viromics|COVID-19 Genomics UK (COG-UK) Consortium|Golubchik|United Kingdom

>Spike|hCoV-19/Wales/PHWC-499EE0/2020|2020-11-24|EPI\_ISL\_727463|Original|hCoV-19^^Wales|Human|Originating lab|COVID-19 Genomics UK (COG-UK) Consortium|Moore|United Kingdom

>Spike|hCoV-19/England/LOND-12602B8/2020|2020-03-14|EPI\_ISL\_524656|Original|hCoV-19^^England|Human|North West London Pathology|Wellcome Sanger Institute for the COVID-19 Genomics UK (COG-UK) consortium|Davies|United Kingdom

>Spike|hCoV-19/USA/TX-HMH-2305/2020|2020-04-30|EPI\_ISL\_545235|Original|hCoV-19^^Texas|Human|Houston Methodist Hospital|Houston Methodist Hospital|Long|USA

>Spike|hCoV-19/Denmark/DCGC-12670/2020|2020-11-16|EPI\_ISL\_682851|Original|hCoV-19^^Syddanmark|Human|Department of Virus and Microbiological Special Diagnostics|Albertsen Lab|Michaelsen|Denmark

>Spike|hCoV-19/Singapore/633/2020|2020-04-15|EPI\_ISL\_493393|Original|hCoV-19^^Singapore|Human|National Public Health Laboratory|National Public Health Laboratory|Mak|Singapore

>Spike|hCoV-19/Sweden/20-06695/2020|2020-03-31|EPI\_ISL\_450809|Original|hCoV-19^^Stockholm|Human|Kungsholmsdoktorn|The Public Health Agency of Sweden|Svartstr\u00f6m|Sweden

>Spike|hCoV-19/USA/NMDOH-2020324233/2020|2020-09-02|EPI\_ISL\_542094|Original|hCoV-19^^New Mexico|Human|New Mexico Department of Health Scientific Laboratory|New Mexico Department of Health Scientific Laboratory|Johnson|USA

>Spike|hCoV-19/USA/TX-HMH-MCoV-15141/2020|2020-10-17|EPI\_ISL\_786625|Original|hCoV-19^^Texas|Human|Houston Methodist Hospital|Houston Methodist Hospital|Long|USA

>Spike|hCoV-19/USA/CA-CHLA-PLM45816782/2020|2020-11-30|EPI\_ISL\_753459|Original|hCoV-19^^California|Human|Clinical virology Laboratory|Center for Personalized Medicine|Dien Bard|USA

>Spike|hCoV-19/Denmark/DCGC-13353/2020|2020-11-30|EPI\_ISL\_712745|Original|hCoV-19^^Nordjylland|Human|Department of Virus and Microbiological Special Diagnostics|Albertsen Lab|Michaelsen|Denmark

>Spike|hCoV-19/South Korea/KDCA0273/2020|2020-10-22|EPI\_ISL\_760067|Original|hCoV-19^^South Korea|Human|Division of Emerging Infectious Diseases|Division of Emerging Infectious Diseases|Park|South Korea

>Spike|hCoV-19/Thailand/Samut Sakorn\_657/2020|2020-12-20|EPI\_ISL\_768540|Original|hCoV-19^^Samut Sakorn|Human|Regional Medical Sciences Center 5 Samut Songkhram|National Institute of Health|Phuygun|Thailand

>Spike|hCoV-19/USA/CA-ALSR-0497-IPL/2020|2020-04-13|EPI\_ISL\_483182|Original|hCoV-19^^California|Human|UC San Diego Center for Advanced Laboratory Medicine|Andersen lab at Scripps Research|Gangavarapu|USA

>Spike|hCoV-19/United Arab Emirates/1006/2020|2020-06-10|EPI\_ISL\_699138|Original|hCoV-19^^Abu Dhabi|Human|Group 42 (G42) Healthcare|G42 Healthcare|Ogrodzki|United Arab Emirates

>Spike|hCoV-19/England/ALDP-A6D17D/2020|2020-10-14|EPI\_ISL\_608315|Original|hCoV-19^^England|Human|Lighthouse Lab in Alderley Park|Wellcome Sanger Institute for the COVID-19 Genomics UK (COG-UK) consortium|Davies|United Kingdom

>Spike|hCoV-19/USA/WA-S796/2020|2020-04-15|EPI\_ISL\_449966|Original|hCoV-19^^Washington|Human|Washington State Department of Health|Seattle Flu Study|Bedford|USA

>Spike|hCoV-19/Uruguay/UY-162/2020|2020-04-07|EPI\_ISL\_480332|Original|hCoV-19^^Montevideo|Human|Microbial Genomics Laboratory|Microbial Genomics Laboratory|Iraola|Uruguay

>Spike|hCoV-19/England/QEUEH-9F9784/2020|2020-09-25|EPI\_ISL\_589126|Original|hCoV-19^^England|Human|Lighthouse Lab in Glasgow|Wellcome Sanger Institute for the COVID-19 Genomics UK (COG-UK) consortium|Davies|United Kingdom

>Spike|hCoV-19/USA/MN-CDC-6348/2020|2020-05-19|EPI\_ISL\_527706|Original|hCoV-19^^Minnesota|Human|MN PHL Division|Pathogen Discovery|Queen|USA

>Spike|hCoV-19/USA/WA-UW-13330/2020|2020-07-03|EPI\_ISL\_501139|Original|hCoV-19^^Washington|Human|University of Washington Virology Lab|University of Washington Virology Lab|Roychoudhury|USA

>Spike|hCoV-19/USA/TX-HMH-MCoV-13091/2020|2020-08-27|EPI\_ISL\_788242|Original|hCoV-19^^Texas|Human|Houston Methodist Hospital|Houston Methodist Hospital|Long|USA

>Spike|hCoV-19/Denmark/DCGC-7525/2020|2020-10-12|EPI\_ISL\_619105|Original|hCoV-19^^Hovedstaden|Human|Department of Virus and Microbiological Special Diagnostics|Albertsen lab|Michaelsen|Denmark

>Spike|hCoV-19/Denmark/DCGC-1926/2020|2020-06-22|EPI\_ISL\_622519|Original|hCoV-19^^Hovedstaden|Human|Department of Virus and Microbiological Special Diagnostics|Albertsen lab|Michaelsen|Denmark

>Spike|hCoV-19/Wales/PHWC-47F572/2020|2020-10-15|EPI\_ISL\_612692|Original|hCoV-19^^Wales|Human|Wales Specialist Virology Centre Sequencing lab|COVID-19 Genomics UK (COG-UK) Consortium|Moore|United Kingdom

>Spike|hCoV-19/Canada/QC-LSPQ-L00233253/2020|2020-03-23|EPI\_ISL\_536013|Original|hCoV-19^^Quebec|Human|H\u00f4pital Honor\u00e9-Mercier|Laboratoire de sant\u00e9 publique du Qu\u00e9bec|Moreira|Canada

>Spike|hCoV-19/England/CAMC-C475B7/2020|2020-12-11|EPI\_ISL\_718636|Original|hCoV-19^^England|Human|Lighthouse Lab in Cambridge|Wellcome Sanger Institute for the COVID-19 Genomics UK (COG-UK) Consortium|Davies|United Kingdom

>Spike|hCoV-19/England/LEED-2AA552/2020|2020-04-09|EPI\_ISL\_538826|Original|hCoV-19^^England|Human|Leeds Teaching Hospitals NHS Trust and Public Health England|Wellcome Sanger Institute for the COVID-19 Genomics UK (COG-UK) consortium|Davies|United Kingdom

>Spike|hCoV-19/USA/TX-HMH-MCoV-15744/2020|2020-07-10|EPI\_ISL\_785428|Original|hCoV-19^^Texas|Human|Houston Methodist Hospital|Houston Methodist Hospital|Long|USA

>Spike|hCoV-19/England/QEUEH-B2CA32/2020|2020-11-02|EPI\_ISL\_646732|Original|hCoV-19^^England|Human|Lighthouse Lab in Glasgow|Wellcome Sanger Institute for the COVID-19 Genomics UK (COG-UK) Consortium|Davies|United Kingdom

>Spike|hCoV-19/Panama/331540/2020|2020-03-19|EPI\_ISL\_496686|Original|hCoV-19^^Panama Center|Human|Gorgas Memorial Laboratory of Health Studies|Gorgas Memorial Laboratory of Health Studies|Martinez|Panama

>Spike|hCoV-19/England/CAMC-C72191/2020|2020-12-15|EPI\_ISL\_768912|Original|hCoV-19^^England|Human|Lighthouse Lab in Cambridge|Wellcome Sanger Institute for the COVID-19 Genomics UK (COG-UK) Consortium|Davies|United Kingdom

>Spike|hCoV-19/USA/UT-QDX-2681/2020|2020-03-13|EPI\_ISL\_604991|Original|hCoV-19^^Utah|Human|Quest Diagnostics|Quest Diagnostics|Kagan|USA

>Spike|hCoV-19/South Africa/KRISP-0282/2020|2020-06-16|EPI\_ISL\_482869|Original|hCoV-19^^KwaZulu-Natal|Human|Molecular Diagnostics Services (MDS)|KRISP|de Oliveira|South Africa

>Spike|hCoV-19/England/CAMC-9EC70C/2020|2020-09-24|EPI\_ISL\_580400|Original|hCoV-19^^England|Human|Lighthouse Lab in Cambridge|Wellcome Sanger Institute for the COVID-19 Genomics UK (COG-UK) consortium|Davies|United Kingdom

>Spike|hCoV-19/England/20156048204/2020|2020-04-07|EPI\_ISL\_466328|Original|hCoV-19^^England|Human|Respiratory Virus Unit|Respiratory Virus Unit|Platt|United Kingdom

>Spike|hCoV-19/England/CAMC-9EBCA4/2020|2020-09-23|EPI\_ISL\_584411|Original|hCoV-19^^England|Human|Queens Medical Centre|COVID-19 Genomics UK (COG-UK) Consortium|Loose|United Kingdom

>Spike|hCoV-19/England/ALDP-5D7B84/2020|2020-06-19|EPI\_ISL\_558513|Original|hCoV-19^^England|Human|Lighthouse Lab in Alderley Park|Wellcome Sanger Institute for the COVID-19 Genomics UK (COG-UK) consortium|Davies|United Kingdom

>Spike|hCoV-19/Netherlands/NoordBrabant\_154/2020|2020-04-28|EPI\_ISL\_461189|Original|hCoV-19^^Noord Brabant|Human|Dutch COVID-19 response team|Erasmus Medical Center|Oude Munnink|Netherlands

>Spike|hCoV-19/England/QEUA-9F583A/2020|2020-09-24|EPI\_ISL\_588422|Original|hCoV-19^^England|Human|Lighthouse Lab in Glasgow|Wellcome Sanger Institute for the COVID-19 Genomics UK (COG-UK) consortium|Davies|United Kingdom

>Spike|hCoV-19/England/QEUA-B7D908/2020|2020-11-14|EPI\_ISL\_727831|Original|hCoV-19^^England|Human|Oxford Viromics|COVID-19 Genomics UK (COG-UK) Consortium|Golubchik|United Kingdom

>Spike|hCoV-19/Denmark/ALAB-SSI139/2020|2020-03-09|EPI\_ISL\_429358|Original|hCoV-19^^Denmark|Human|Department of Virus and Microbiological Special Diagnostics|Albertsen lab|Kirkegaard|Denmark

>Spike|hCoV-19/New Zealand/20VR3011/2020|2020-00-00|EPI\_ISL\_579383|Original|hCoV-19^^Combined Wellington|Human|Wellington SCL (WN)|Institute of Environmental Science and Research (ESR)|Wang|New Zealand

>Spike|hCoV-19/Bangladesh/DNAS\_DRICM\_isl\_MR-03/2020|2020-07-11|EPI\_ISL\_774983|Original|hCoV-19^^Dhaka|Human|Designated Reference Institute for Chemical Measurements (DRICM)|DNA SOLUTION LTD.|Rabbi|Bangladesh

>Spike|hCoV-19/Canada/ON-PHL-20-01795/2020|2020-07-00|EPI\_ISL\_636945|Original|hCoV-19^^Ontario|Human|Public Health Ontario Laboratory|Public Health Ontario Laboratory|Guthrie|Canada

>Spike|hCoV-19/Scotland/QEUA-95E653/2020|2020-08-09|EPI\_ISL\_532454|Original|hCoV-19^^Scotland|Human|NHSGGC West of Scotland Specialist Virology Centre / MRC-University of Glasgow Centre for Virus Research|Wellcome Sanger Institute for the COVID-19 Genomics UK (COG-UK) consortium|Davies|United Kingdom

>Spike|hCoV-19/Wales/PHWC-4820C6/2020|2020-10-21|EPI\_ISL\_613198|Original|hCoV-19^^Wales|Human|Wales Specialist Virology Centre Sequencing lab|COVID-19 Genomics UK (COG-UK) Consortium|Moore|United Kingdom

>Spike|hCoV-19/USA/TX-HMH-MCoV-14593/2020|2020-10-11|EPI\_ISL\_787878|Original|hCoV-19^^Texas|Human|Houston Methodist Hospital|Houston Methodist Hospital|Long|USA

>Spike|hCoV-19/USA/LA-GBCL-26556561/2020|2020-04-15|EPI\_ISL\_485191|Original|hCoV-19^^Louisiana|Human|River Road Testing Lab|Ginkgo Bioworks Clinical Laboratory|Smith|USA

>Spike|hCoV-19/USA/UT-02917/2020|2020-04-30|EPI\_ISL\_513692|Original|hCoV-19^^Utah|Human|Utah Public Health Laboratory|Utah Public Health Laboratory|Butz|USA

>Spike|hCoV-19/England/ALDP-B859B2/2020|2020-11-11|EPI\_ISL\_675855|Original|hCoV-19^^England|Human|Lighthouse Lab in Alderley Park|Wellcome Sanger Institute for the COVID-19 Genomics UK (COG-UK) Consortium|Davies|United Kingdom

>Spike|hCoV-19/England/OXON-B2058/2020|2020-04-15|EPI\_ISL\_479109|Original|hCoV-19^^England|Human|Oxford Viromics|COVID-19 Genomics UK (COG-UK) Consortium|Golubchik|United Kingdom

>Spike|hCoV-19/England/QEUA-9655D4/2020|2020-08-12|EPI\_ISL\_531001|Original|hCoV-19^^England|Human|Lighthouse Lab in Glasgow|Wellcome Sanger Institute for the COVID-19 Genomics UK (COG-UK) consortium|Davies|United Kingdom

>Spike|hCoV-19/Wales/PHWC-4812A3/2020|2020-10-13|EPI\_ISL\_611691|Original|hCoV-19^^Wales|Human|Wales Specialist Virology Centre Sequencing lab|COVID-19 Genomics UK (COG-UK) Consortium|Moore|United Kingdom

>Spike|hCoV-19/Denmark/DCGC-8241/2020|2020-10-26|EPI\_ISL\_617269|Original|hCoV-19^^Hovedstaden|Human|Department of Virus and Microbiological Special Diagnostics|Albertsen lab|Michaelsen|Denmark

>Spike|hCoV-19/England/QEUA-9DC2D1/2020|2020-09-21|EPI\_ISL\_601265|Original|hCoV-19^^England|Human|Lighthouse Lab in Glasgow|Wellcome Sanger Institute for the COVID-19 Genomics UK (COG-UK) consortium|Davies|United Kingdom

>Spike|hCoV-19/England/ALDP-A93633/2020|2020-10-20|EPI\_ISL\_610922|Original|hCoV-19^^England|Human|Lighthouse Lab in Alderley Park|Wellcome Sanger Institute for the COVID-19 Genomics UK (COG-UK) consortium|Davies|United Kingdom

>Spike|hCoV-19/Finland/1LS10H11/2020|2020-10-01|EPI\_ISL\_757343|Original|hCoV-19^^Uusimaa|Human|Department of Virology and Immunology|Department of Virology|Smura|Finland

>Spike|hCoV-19/England/MILK-9A509B/2020|2020-09-02|EPI\_ISL\_550167|Original|hCoV-19^^England|Human|Lighthouse Lab in Milton Keynes|Wellcome Sanger Institute for the COVID-19 Genomics UK (COG-UK) consortium|Davies|United Kingdom

>Spike|hCoV-19/SaudiArabia/KAUST-JEDDAH466/2020|2020-08-04|EPI\_ISL\_512921|Original|hCoV-19^^Jeddah|Human|Pathogen Genomics Lab King Abdullah University of Science and Technology(KAUST)|Pathogen Genomics Lab King Abdullah University of Science and Technology(KAUST)|Mohamed Ghazzali|Saudi Arabia

>Spike|hCoV-19/USA/VA-DCLS-1956/2020|2020-10-07|EPI\_ISL\_644882|Original|hCoV-19^^Virginia|Human|Virginia DCLS|Virginia DCLS|St. Jacques|USA

>Spike|hCoV-19/Scotland/QEUA-9FFEF2/2020|2020-10-02|EPI\_ISL\_600184|Original|hCoV-19^^Scotland|Human|Lighthouse Lab in Glasgow|Wellcome Sanger Institute for the COVID-19 Genomics UK (COG-UK) consortium|Davies|United Kingdom

>Spike|hCoV-19/Spain/RI-IBV-99005906/2020|2020-03-11|EPI\_ISL\_537444|Original|hCoV-19^^La Rioja|Human|Centro de Investigaci\u00f3n Biom\u00e9dica de La Rioja - Hospital San Pedro Logro\u00f1o|SeqCOVID-SPAIN consortium|IBV(CSIC)|Comas|Spain

>Spike|hCoV-19/Brazil/SP-719/2020|2020-07-02|EPI\_ISL\_693245|Original|hCoV-19^^S\u00e3o Paulo|Human|UPA Santa Isabel|Instituto Adolfo Lutz|Sacchi|Brazil

>Spike|hCoV-19/England/CAMB-1B3575/2020|2020-05-27|EPI\_ISL\_461562|Original|hCoV-19^^England|Human|Department of Pathology|COVID-19 Genomics UK (COG-UK) Consortium|Meredith|United Kingdom

>Spike|hCoV-19/USA/UT-UPHL-2012673507/2020|2020-06-19|EPI\_ISL\_746456|Original|hCoV-19^^Utah|Human|Utah Public Health Laboratory|Utah Public Health Laboratory|Gallagher|USA

>Spike|hCoV-19/Switzerland/BL-ETHZ-230019/2020|2020-08-02|EPI\_ISL\_516562|Original|hCoV-19^^Basel-Landschaft|Human|Viollier AG|Department of Biosystems Science and Engineering|Nadeau|Switzerland

>Spike|hCoV-19/Denmark/DCGC-1362/2020|2020-03-30|EPI\_ISL\_622212|Original|hCoV-19^^Sjælland|Human|Department of Virus and Microbiological Special Diagnostics|Albertsen lab|Michaelsen|Denmark

>Spike|hCoV-19/England/QEUA-A0B092/2020|2020-10-01|EPI\_ISL\_599184|Original|hCoV-19^^England|Human|Lighthouse Lab in Glasgow|Wellcome Sanger Institute for the COVID-19 Genomics UK (COG-UK) consortium|Davies|United Kingdom

>Spike|hCoV-19/Russia/SVE-RII-MH1638S/2020|2020-09-08|EPI\_ISL\_596307|Original|hCoV-19^^Sverdlovsk|Human|HELIX LCC|WHO National Influenza Centre Russian Federation|Komissarov|Russia

>Spike|hCoV-19/England/ALDP-B1B896/2020|2020-11-01|EPI\_ISL\_645883|Original|hCoV-19^^England|Human|Lighthouse Lab in Alderley Park|Wellcome Sanger Institute for the COVID-19 Genomics UK (COG-UK) Consortium|Davies|United Kingdom

>Spike|hCoV-19/USA/NM-DOH-2020616989/2020|2020-12-12|EPI\_ISL\_751809|Original|hCoV-19^^New Mexico|Human|New Mexico Department of Health Scientific Laboratory|New Mexico Department of Health Scientific Laboratory|Malone|USA



>Spike|hCoV-19/England/LIVE-DC287E/2020|2020-11-24|EPI\_ISL\_705043|Original|hCoV-19^^England|Human|Liverpool Clinical Laboratories|COVID-19 Genomics UK (COG-UK) Consortium|Haldenby|United Kingdom

>Spike|hCoV-19/England/ALDP-A85C50/2020|2020-10-17|EPI\_ISL\_610395|Original|hCoV-19^^England|Human|Lighthouse Lab in Alderley Park|Wellcome Sanger Institute for the COVID-19 Genomics UK (COG-UK) consortium|Davies|United Kingdom

>Spike|hCoV-19/Canada/ON-S210/2020|2020-03-26|EPI\_ISL\_755818|Original|hCoV-19^^Ontario|Human|Toronto Invasive Bacterial Diseases Network|McMaster University|McArthur|Canada

>Spike|hCoV-19/England/MILK-A6BACF/2020|2020-10-08|EPI\_ISL\_608743|Original|hCoV-19^^England|Human|Lighthouse Lab in Milton Keynes|Wellcome Sanger Institute for the COVID-19 Genomics UK (COG-UK) consortium|Davies|United Kingdom

>Spike|hCoV-19/England/ALDP-B1A879/2020|2020-11-01|EPI\_ISL\_647580|Original|hCoV-19^^England|Human|Lighthouse Lab in Alderley Park|Wellcome Sanger Institute for the COVID-19 Genomics UK (COG-UK) Consortium|Davies|United Kingdom

>Spike|hCoV-19/India/DL-NCDC-IGIB-C1A/2020|2020-06-12|EPI\_ISL\_581505|Original|hCoV-19^^Delhi|Human|NCDC/IGIB|NCDC/IGIB|Faruq|India

>Spike|hCoV-19/England/ALDP-49A650/2020|2020-06-13|EPI\_ISL\_559416|Original|hCoV-19^^England|Human|Lighthouse Lab in Alderley Park|Wellcome Sanger Institute for the COVID-19 Genomics UK (COG-UK) consortium|Davies|United Kingdom

>Spike|hCoV-19/England/MILK-974F2F/2020|2020-08-19|EPI\_ISL\_552684|Original|hCoV-19^^England|Human|Lighthouse Lab in Milton Keynes|Wellcome Sanger Institute for the COVID-19 Genomics UK (COG-UK) consortium|Davies|United Kingdom

>Spike|hCoV-19/Wales/PHWC-499985/2020|2020-12-04|EPI\_ISL\_727382|Original|hCoV-19^^Wales|Human|Originating lab|COVID-19 Genomics UK (COG-UK) Consortium|Moore|United Kingdom

>Spike|hCoV-19/USA/MN-MDH-1949/2020|2020-09-15|EPI\_ISL\_613477|Original|hCoV-19^^Minnesota|Human|Public Health Laboratory - Infectious Disease Lab|Minnesota Department of Health|Lorentz|USA

>Spike|hCoV-19/England/ALDP-94431D/2020|2020-06-07|EPI\_ISL\_554779|Original|hCoV-19^^England|Human|Lighthouse Lab in Alderley Park|Wellcome Sanger Institute for the COVID-19 Genomics UK (COG-UK) consortium|Davies|United Kingdom

>Spike|hCoV-19/England/MILK-ACC3C1/2020|2020-10-21|EPI\_ISL\_629337|Original|hCoV-19^^England|Human|Lighthouse Lab in Milton Keynes|Wellcome Sanger Institute for the COVID-19 Genomics UK (COG-UK) consortium|Davies|United Kingdom

>Spike|hCoV-19/Japan/PG-2509/2020|2020-04-00|EPI\_ISL\_690647|Original|hCoV-19^^Japan|Human|Saitama Prefectural Institute of Public Health|Pathogen Genomics Center|Sekizuka|Japan

>Spike|hCoV-19/England/CAMB-74E76/2020|2020-03-18|EPI\_ISL\_425381|Original|hCoV-19^^England|Human|Department of Pathology|COVID-19 Genomics UK (COG-UK) Consortium|Meredith|United Kingdom

>Spike|hCoV-19/United Arab Emirates/0173/2020|2020-05-18|EPI\_ISL\_698360|Original|hCoV-19^^Abu Dhabi|Human|Group 42 (G42) Healthcare|G42 Healthcare|Ogrodzki|United Arab Emirates

>Spike|hCoV-19/USA/MI-MDHHS-SC21121/2020|2020-03-24|EPI\_ISL\_507897|Original|hCoV-19^^Michigan|Human|Michigan Department of Health and Human Services|Michigan Department of Health and Human Services|Blankenship|USA

>Spike|hCoV-19/Sweden/20-53399/2020|2020-11-04|EPI\_ISL\_676500|Original|hCoV-19^^Vastra Gotaland|Human|Klinisk Mikrobiologi|The Public Health Agency of Sweden|Svartstr\u00f6m|Sweden

>Spike|hCoV-19/Denmark/DCGC-19625/2020|2020-12-07|EPI\_ISL\_749067|Original|hCoV-19^^Hovedstaden|Human|Department of Virus and Microbiological Special Diagnostics|Albertsen Lab|Michaelsen|Denmark

>Spike|hCoV-19/England/BRIS-126C1E/2020|2020-04-09|EPI\_ISL\_459079|Original|hCoV-19^^England|Human|PHE South West Regional Laboratory|Wellcome Sanger Institute for the COVID-19 Genomics UK (COG-UK) consortium|Davies|United Kingdom

>Spike|hCoV-19/Israel/CVL-45914/2020|2020-12-09|EPI\_ISL\_745054|Original|hCoV-19^^Central|Human|Israel Central Virology laboratory|Israel Central Virology laboratory|Zuckerman|Israel

>Spike|hCoV-19/Japan/PG-5239/2020|2020-08-00|EPI\_ISL\_690342|Original|hCoV-19^^Japan|Human|Pathogen Genomics Center|Pathogen Genomics Center|Sekizuka|Japan

>Spike|hCoV-19/England/CAMC-9490E4/2020|2020-07-25|EPI\_ISL\_556575|Original|hCoV-19^^England|Human|Lighthouse Lab in Cambridge|Wellcome Sanger Institute for the COVID-19 Genomics UK (COG-UK) consortium|Davies|United Kingdom

>Spike|hCoV-19/USA/WI-UW-1110/2020|2020-07-28|EPI\_ISL\_516535|Original|hCoV-19^^Wisconsin|Human|University of Wisconsin-Madison AIDS Vaccine Research Laboratories|University of Wisconsin-Madison AIDS Vaccine Research Laboratories|Baczenas|USA

>Spike|hCoV-19/England/ALDP-A856AD/2020|2020-10-17|EPI\_ISL\_610527|Original|hCoV-19^^England|Human|Lighthouse Lab in Alderley Park|Wellcome Sanger Institute for the COVID-19 Genomics UK (COG-UK) consortium|Davies|United Kingdom

>Spike|hCoV-19/USA/WA-CDC-8384/2020|2020-02-26|EPI\_ISL\_594459|original|hCoV-19^^Washington|Human|Washington State Public Health Laboratories|Pathogen Discovery|Queen|USA

>Spike|hCoV-19/Spain/PV-IBV-98008364/2020|2020-10-13|EPI\_ISL\_654576|Original|hCoV-19^^Basque Country|Human|Servicio de Microbiolog\u00eda. Hospital Universitario Donostia. OSI Donostialdea. \u00c1rea de Enfermedades Infecciosas|SeqCOVID-SPAIN consortium/IBV (CSIC) |Comas|Spain

>Spike|hCoV-19/Spain/PV-IBV-005161/2020|2020-06-23|EPI\_ISL\_509647|Original|hCoV-19^^Basque Country|Human|Servicio de Microbiolog\u00eda. Hospital Universitario Donostia. OSI Donostialdea. \u00c1rea de Enfermedades Infecciosas|SeqCOVID-SPAIN consortium/IBV (CSIC) |Comas|Spain

>Spike|hCoV-19/United Arab Emirates/L9584510/2020|2020-03-19|EPI\_ISL\_520743|Original|hCoV-19^^United Arab Emirates|Human|Mohammed Bin Rashid University of Medicine and Health Sciences|Al Jalila Genomics Center|Ramaswamy|United Arab Emirates

>Spike|hCoV-19/England/CAMB-1B9D0E/2020|2020-11-06|EPI\_ISL\_650988|Original|hCoV-19^^England|Human|Department of Pathology|COVID-19 Genomics UK (COG-UK) Consortium|Goodfellow|United Kingdom

>Spike|hCoV-19/England/CAMC-B54266/2020|2020-11-08|EPI\_ISL\_656875|Original|hCoV-19^^England|Human|Lighthouse Lab in Cambridge|Wellcome Sanger Institute for the COVID-19 Genomics UK (COG-UK) Consortium|Davies|United Kingdom

>Spike|hCoV-19/South Africa/KRISP-0123/2020|2020-05-14|EPI\_ISL\_467475|Original|hCoV-19^^KwaZulu-Natal|Human|Molecular Diagnostics Services (MDS) |KRISP|de Oliveira|South Africa

>Spike|hCoV-19/Australia/NSW595/2020|2020-04-08|EPI\_ISL\_478707|Original|hCoV-19^^New South Wales|Human|Sydney South West Pathology Service (SSWPS) - Liverpool Hospital - NSW Health Pathology|NSW Health Pathology - Institute of Clinical Pathology and Medical Research; Westmead Hospital; University of Sydney|Gall|Australia

>Spike|hCoV-19/SaudiArabia/KAUST-JEDDAH586/2020|2020-04-23|EPI\_ISL\_512976|Original|hCoV-19^^Jeddah|Human|Pathogen Genomics Lab King Abdullah University of Science and Technology(KAUST)|Pathogen Genomics Lab King Abdullah University of Science and Technology(KAUST)|Mohamed Ghazzali|Saudi Arabia

>Spike|hCoV-19/Wales/MILK-9D3A69/2020|2020-09-16|EPI\_ISL\_601737|Original|hCoV-19^^Wales|Human|Lighthouse Lab in Milton Keynes|Wellcome Sanger Institute for the COVID-19 Genomics UK (COG-UK) consortium|Davies|United Kingdom

>Spike|hCoV-19/Japan/PG-4658/2020|2020-08-00|EPI\_ISL\_689795|Original|hCoV-19^^Japan|Human|Fukuoka Institute of Health and Environmental Sciences|Pathogen Genomics Center|Sekizuka|Japan

>Spike|hCoV-19/USA/IL-CDC-2-3693786/2020|2020-11-10|EPI\_ISL\_747105|Original|hCoV-19^^Illinois|Human|Respiratory Viruses Branch|Respiratory Viruses Branch|Queen|USA

>Spike|hCoV-19/England/ALDP-9B5C1C/2020|2020-08-28|EPI\_ISL\_590210|Original|hCoV-19^^England|Human|Lighthouse Lab in Alderley Park|Wellcome Sanger Institute for the COVID-19 Genomics UK (COG-UK) consortium|Davies|United Kingdom

>Spike|hCoV-19/USA/TX-HMH-6034/2020|2020-06-30|EPI\_ISL\_547180|Original|hCoV-19^^Texas|Human|Houston Methodist Hospital|Houston Methodist Hospital|Long|USA

>Spike|hCoV-19/Denmark/DCGC-18381/2020|2020-12-07|EPI\_ISL\_749930|Original|hCoV-19^^Hovedstaden|Human|Department of Virus and Microbiological Special Diagnostics|Albertsen Lab|Michaelsen|Denmark

>Spike|hCoV-19/Canada/ON-PHL-20-01759/2020|2020-07-00|EPI\_ISL\_636912|Original|hCoV-19^^Ontario|Human|Public Health Ontario Laboratory|Public Health Ontario Laboratory|Guthrie|Canada

>Spike|hCoV-19/England/MILK-AB7A88/2020|2020-10-22|EPI\_ISL\_623244|Original|hCoV-19^^England|Human|Lighthouse Lab in Milton Keynes|Wellcome Sanger Institute for the COVID-19 Genomics UK (COG-UK) consortium|Davies|United Kingdom

>Spike|hCoV-19/Japan/IC-0108/2020|2020-07-00|EPI\_ISL\_591449|Original|hCoV-19^^Japan|Human|Pathogen Genomics Center|Pathogen Genomics Center|Sekizuka|Japan

>Spike|hCoV-19/Japan/PG-6607/2020|2020-07-00|EPI\_ISL\_687719|Original|hCoV-19^^Japan|Human|Pathogen Genomics Center|Pathogen Genomics Center|Sekizuka|Japan

>Spike|hCoV-19/England/ALDP-A2F1E0/2020|2020-10-05|EPI\_ISL\_586945|Original|hCoV-19^^England|Human|Lighthouse Lab in Alderley Park|Wellcome Sanger Institute for the COVID-19 Genomics UK (COG-UK) consortium|Davies|United Kingdom

>Spike|hCoV-19/Vietnam/PIHCM-237/2020|2020-03-14|EPI\_ISL\_654877|Vero E6|hCoV-19^^Ho Chi Minh city|Human|Pasteur Institute in Ho Chi Minh city|Department of Microbiology and Immunology - Pasteur Institute in Ho Chi Minh city|Vu|Viet Nam

>Spike|hCoV-19/Bangladesh/CU-CTG-13/2020|2020-11-24|EPI\_ISL\_735494|Original|hCoV-19^^Chittagong|Human|Cox's Bazar Medical College|Central Biological Research Laboratory and Department of Biochemistry and Molecular Biology|Faruque|Bangladesh

>Spike|hCoV-19/USA/UT-UPHL-2012861161/2020|2020-11-30|EPI\_ISL\_746900|Original|hCoV-19^^Utah|Human|Utah Public Health Laboratory|Utah Public Health Laboratory|Gallagher|USA

>Spike|hCoV-19/England/ALDP-BB2864/2020|2020-11-20|EPI\_ISL\_702951|Original|hCoV-19^^England|Human|Lighthouse Lab in Alderley Park|Wellcome Sanger Institute for the COVID-19 Genomics UK (COG-UK) Consortium|Davies|United Kingdom

>Spike|hCoV-19/USA/WA-S1608/2020|2020-05-26|EPI\_ISL\_496034|Original|hCoV-19^^Washington|Human|Washington State Department of Health|Seattle Flu Study|Lee|USA

>Spike|hCoV-19/USA/WA-UW-19539/2020|2020-08-01|EPI\_ISL\_570813|Original|hCoV-19^^Washington|Human|UW Virology Lab|UW Virology Lab|Roychoudhury|USA

>Spike|hCoV-19/England/NORT-29463A/2020|2020-08-03|EPI\_ISL\_573349|Original|hCoV-19^^England|Human|Northumbria University / South Tees Hospitals NHS Foundation Trust / North Cumbria Integrated Care NHS Foundation Trust / North Tees and Hartlepool NHS Foundation Trust / Newcastle Hospitals NHS Foundation Trust|COVID-19 Genomics UK (COG-UK) Consortium|Bashton|United Kingdom

>Spike|hCoV-19/Turkey/IST-GLAB-123/2020|2020-04-29|EPI\_ISL\_735271|Original|hCoV-19^^Istanbul|Human|Genomic Laboratory (GLAB) (Conjoint lab of Health Directorate of Istanbul and Istanbul Technical University)|Genomic Laboratory (GLAB)|Karacan|Turkey

>Spike|hCoV-19/USA/CA-CZB-14820/2020|2020-11-18|EPI\_ISL\_739242|Original|hCoV-19^^California|Human|Humboldt County Public Health Laboratory|Chan-Zuckerberg Biohub|Kamm|USA

>Spike|hCoV-19/England/202822172/2020|2020-05-31|EPI\_ISL\_490229|Original|hCoV-19^^England|Human|Respiratory Virus Unit|Respiratory Virus Unit|Platt|United Kingdom

>Spike|hCoV-19/England/CAMC-B336AD/2020|2020-11-05|EPI\_ISL\_659112|Original|hCoV-19^^England|Human|Lighthouse Lab in Cambridge|Wellcome Sanger Institute for the COVID-19 Genomics UK (COG-UK) Consortium|Davies|United Kingdom

>Spike|hCoV-19/Denmark/DCGC-20633/2020|2020-12-21|EPI\_ISL\_759078|Original|hCoV-19^^Hovedstaden|Human|Department of Virus and Microbiological Special Diagnostics|Albertsen Lab|Michaelsen|Denmark

>Spike|hCoV-19/USA/CA-CSMC53/2020|2020-04-01|EPI\_ISL\_475666|Original|hCoV-19^^California|Human|Cedars-Sinai Medical Center|Cedars-Sinai Medical Center|Zhang|USA

>Spike|hCoV-19/USA/CA-CZB-13345/2020|2020-05-03|EPI\_ISL\_672442|Original|hCoV-19^^California|Human|Alameda County Public Health Lab|Chan-Zuckerberg Biohub|Bhatt|USA

>Spike|hCoV-19/England/ALDP-9C5A79/2020|2020-09-11|EPI\_ISL\_567711|Original|hCoV-19^^England|Human|Lighthouse Lab in Alderley Park|Wellcome Sanger Institute for the COVID-19 Genomics UK (COG-UK) consortium|Davies|United Kingdom

>Spike|hCoV-19/USA/MA-MGH-03006/2020|2020-07-19|EPI\_ISL\_765678|Original|hCoV-19^^Massachusetts|Human|Massachusetts General Hospital|Infectious Disease Program|Park|USA

>Spike|hCoV-19/England/MILK-B56729/2020|2020-11-05|EPI\_ISL\_657575|Original|hCoV-19^^England|Human|Lighthouse Lab in Milton Keynes|Wellcome Sanger Institute for the COVID-19 Genomics UK (COG-UK) Consortium|Davies|United Kingdom

>Spike|hCoV-19/Denmark/DCGC-2230/2020|2020-08-10|EPI\_ISL\_617535|Original|hCoV-19^^Sjaelland|Human|Department of Virus and Microbiological Special Diagnostics|Albertsen lab|Michaelsen|Denmark

>Spike|hCoV-19/Spain/MD-HLP-R56/2020|2020-04-20|EPI\_ISL\_530104|Original|hCoV-19^^Madrid|Human|Hospital Universitario Ram\u00f3n y Cajal|Hospital Universitario La Paz|Viedma|Spain

>Spike|hCoV-19/England/BRIS-128933/2020|2020-04-13|EPI\_ISL\_458773|Original|hCoV-19^^England|Human|PHE South West Regional Laboratory|Wellcome Sanger Institute for the COVID-19 Genomics UK (COG-UK) consortium|Davies|United Kingdom

>Spike|hCoV-19/England/MILK-BB1452/2020|2020-11-18|EPI\_ISL\_720070|Original|hCoV-19^^England|Human|Lighthouse Lab in Milton Keynes|Wellcome Sanger Institute for the COVID-19 Genomics UK (COG-UK) Consortium|Davies|United Kingdom

>Spike|hCoV-19/England/MILK-A7A483/2020|2020-10-16|EPI\_ISL\_606897|Original|hCoV-19^^England|Human|Lighthouse Lab in Milton Keynes|Wellcome Sanger Institute for the COVID-19 Genomics UK (COG-UK) consortium|Davies|United Kingdom

>Spike|hCoV-19/USA/WA-S2331/2020|2020-06-10|EPI\_ISL\_496963|Original|hCoV-19^^Washington|Human|Washington State Department of Health|Seattle Flu Study|Lee|USA

>Spike|hCoV-19/Iran/SA-Isf-18/2020|2020-05-09|EPI\_ISL\_591342|Original|hCoV-19^^Iran|Human|Infectious Diseases and Tropical Medicine Research Center|Infectious Diseases and Tropical Medicine Research Center|Haghjooy Javanmard,S.|Iran

>Spike|hCoV-19/England/CAMC-B21402/2020|2020-11-02|EPI\_ISL\_647261|Original|hCoV-19^^England|Human|Lighthouse Lab in Cambridge|Wellcome Sanger Institute for the COVID-19 Genomics UK (COG-UK) Consortium|Davies|United Kingdom

>Spike|hCoV-19/USA/WA-UW206/2020|2020-03-13|EPI\_ISL\_417355|Original|hCoV-19^^Washington|Human|UW Virology Lab|UW Virology Lab|Roychoudhury|USA

>Spike|hCoV-19/England/QEUEH-95EC33/2020|2020-08-06|EPI\_ISL\_532308|Original|hCoV-19^^England|Human|Lighthouse Lab in Glasgow|Wellcome Sanger Institute for the COVID-19 Genomics UK (COG-UK) consortium|Davies|United Kingdom

>Spike|hCoV-19/USA/WA-UW-21756/2020|2020-08-04|EPI\_ISL\_571003|Original|hCoV-19^^Washington|Human|UW Virology Lab|UW Virology Lab|Roychoudhury|USA

>Spike|hCoV-19/England/20144013504/2020|2020-03-31|EPI\_ISL\_421932|Original|hCoV-19^^England|Human|Respiratory Virus Unit|Respiratory Virus Unit|Platt|United Kingdom

>Spike|hCoV-19/Australia/VIC15545/2020|2020-08-09|EPI\_ISL\_593355|Original|hCoV-19^^Victoria|Human|Microbiological Diagnostic Unit - Public Health Laboratory (MDU-PHL)|MDU-PHL|Schultz|Australia

>Spike|hCoV-19/England/BRIS-126328/2020|2020-04-10|EPI\_ISL\_458987|Original|hCoV-19^^England|Human|PHE South West Regional Laboratory|Wellcome Sanger Institute for the COVID-19 Genomics UK (COG-UK) consortium|Davies|United Kingdom

>Spike|hCoV-19/Denmark/DCGC-3418/2020|2020-08-31|EPI\_ISL\_616177|Original|hCoV-19^^Syddanmark|Human|Department of Virus and Microbiological Special Diagnostics|Albertsen lab|Michaelsen|Denmark

>Spike|hCoV-19/Denmark/DCGC-10705/2020|2020-11-02|EPI\_ISL\_670150|Original|hCoV-19^^Hovedstaden|Human|Department of Virus and Microbiological Special Diagnostics|Albertsen Lab|Michaelsen|Denmark

>Spike|hCoV-19/England/LIVE-9FB05/2020|2020-06-04|EPI\_ISL\_472039|Original|hCoV-19^^England|Human|Liverpool Clinical Laboratories|COVID-19 Genomics UK (COG-UK) Consortium|Haldenby|United Kingdom

>Spike|hCoV-19/Netherlands/NoordBrabant\_103/2020|2020-03-09|EPI\_ISL\_422862|Original|hCoV-19^^Noord Brabant|Human|Dutch COVID-19 response team|Erasmus Medical Center|Oude Munnink|Netherlands

>Spike|hCoV-19/USA/WI-UW-79/2020|2020-03-23|EPI\_ISL\_421338|Original|hCoV-19^^Wisconsin|Human|University of Wisconsin-Madison AIDS Vaccine Research Laboratories|University of Wisconsin-Madison AIDS Vaccine Research Laboratories|Baczenas|USA

>Spike|hCoV-19/England/QEUEH-961338/2020|2020-08-04|EPI\_ISL\_532113|Original|hCoV-19^^England|Human|Lighthouse Lab in Glasgow|Wellcome Sanger Institute for the COVID-19 Genomics UK (COG-UK) consortium|Davies|United Kingdom

>Spike|hCoV-19/Denmark/DCGC-3014/2020|2020-08-24|EPI\_ISL\_616792|Original|hCoV-19^^Hovedstaden|Human|Department of Virus and Microbiological Special Diagnostics|Albertsen lab|Michaelsen|Denmark

>Spike|hCoV-19/England/LIVE-9B27D/2020|2020-03-26|EPI\_ISL\_449425|Original|hCoV-19^^England|Human|Liverpool Clinical Laboratories|COVID-19 Genomics UK (COG-UK) Consortium|Haldenby|United Kingdom

>Spike|hCoV-19/USA/TX-HMH-6434/2020|2020-07-04|EPI\_ISL\_545993|Original|hCoV-19^^Texas|Human|Houston Methodist Hospital|Houston Methodist Hospital|Long|USA

>Spike|hCoV-19/USA/CA-CZB-2141/2020|2020-05-21|EPI\_ISL\_486363|Original|hCoV-19^^California|Human|UCSF Clinical Microbiology Laboratory|Chan-Zuckerberg Biohub|McGeever|USA

>Spike|hCoV-19/USA/WA-S2541/2020|2020-06-16|EPI\_ISL\_497173|Original|hCoV-19^^Washington|Human|Washington State Department of Health|Seattle Flu Study|Lee|USA

>Spike|hCoV-19/England/ALDP-A6C554/2020|2020-10-15|EPI\_ISL\_608204|Original|hCoV-19^^England|Human|Lighthouse Lab in Alderley Park|Wellcome Sanger Institute for the COVID-19 Genomics UK (COG-UK) consortium|Davies|United Kingdom

>Spike|hCoV-19/Bangladesh/BCSIR-NILMRC-351/2020|2020-07-15|EPI\_ISL\_514229|Original|hCoV-19^^Khulna|Human|National Institute of Laboratory Medicine and Referral Center|Genomic Research Lab|Khan|Bangladesh

>Spike|hCoV-19/England/QEUEH-B2F6FF/2020|2020-11-04|EPI\_ISL\_659903|Original|hCoV-19^^England|Human|Lighthouse Lab in Glasgow|Wellcome Sanger Institute for the COVID-19 Genomics UK (COG-UK) Consortium|Davies|United Kingdom

>Spike|hCoV-19/England/ALDP-94ECEB/2020|2020-06-20|EPI\_ISL\_556385|Original|hCoV-19^^England|Human|Lighthouse Lab in Alderley Park|Wellcome Sanger Institute for the COVID-19 Genomics UK (COG-UK) consortium|Davies|United Kingdom

>Spike|hCoV-19/Brazil/RS-00634/2020|2020-11-24|EPI\_ISL\_770582|Original|hCoV-19^^Rio Grande do Sul|Human|Laborat\u00f3rio de Microbiologia Molecular - Universidade FEEVALE|Bioinformatics Laboratory / LNCC|Almeida|Brazil

>Spike|hCoV-19/USA/WI-WSLH-200355/2020|2020-04-21|EPI\_ISL\_578525|Original|hCoV-19^^Wisconsin|Human|Wisconsin State Laboratory of Hygiene Communicable Disease Division|Wisconsin State Laboratory of Hygiene Communicable Disease Division|Florek|USA

>Spike|hCoV-19/India/TG-CCMB-AB300/2020|2020-08-15|EPI\_ISL\_539639|Original|hCoV-19^^Telangana|Human|CSIR-Centre for Cellular and Molecular Biology|CSIR-Centre for Cellular and Molecular Biology|Mukherjee|India

>Spike|hCoV-19/Finland/FIN-266/2020|2020-03-04|EPI\_ISL\_414646|Original|hCoV-19^^Finland|Human|Department of Virology and Immunology|Department of Virology|Smura|Finland

>Spike|hCoV-19/Singapore/573/2020|2020-04-15|EPI\_ISL\_483596|Original|hCoV-19^^Singapore|Human|National Public Health Laboratory|National Public Health Laboratory|Mak|Singapore

>Spike|hCoV-19/Denmark/DCGC-20626/2020|2020-12-21|EPI\_ISL\_759263|Original|hCoV-19^^Hovedstaden|Human|Department of Virus and Microbiological Special Diagnostics|Albertsen Lab|Michaelsen|Denmark

>Spike|hCoV-19/England/NOTT-10E61E/2020|2020-03-23|EPI\_ISL\_425571|Original|hCoV-19^^England|Human|Queens Medical Centre|COVID-19 Genomics UK (COG-UK) Consortium|Loose|United Kingdom

>Spike|hCoV-19/England/CAMC-B21F4D/2020|2020-11-03|EPI\_ISL\_647327|Original|hCoV-19^^England|Human|Lighthouse Lab in Cambridge|Wellcome Sanger Institute for the COVID-19 Genomics UK (COG-UK) Consortium|Davies|United Kingdom

>Spike|hCoV-19/USA/TX-HMH-6724/2020|2020-06-24|EPI\_ISL\_546194|Original|hCoV-19^^Texas|Human|Houston Methodist Hospital|Houston Methodist Hospital|Long|USA

>Spike|hCoV-19/England/MILK-992F67/2020|2020-08-26|EPI\_ISL\_552074|Original|hCoV-19^^England|Human|Lighthouse Lab in Milton Keynes|Wellcome Sanger Institute for the COVID-19 Genomics UK (COG-UK) consortium|Davies|United Kingdom

>Spike|hCoV-19/USA/TX-DSHS-1256/2020|2020-05-30|EPI\_ISL\_644197|Original|hCoV-19^^Texas|Human|Texas Department of State Health Services|Texas Department of State Health Services|Rahman|USA

>Spike|hCoV-19/USA/TX-HMH-3209/2020|2020-06-12|EPI\_ISL\_544078|Original|hCoV-19^^Texas|Human|Houston Methodist Hospital|Houston Methodist Hospital|Long|USA

>Spike|hCoV-19/England/QEUA-99864E/2020|2020-08-22|EPI\_ISL\_540069|Original|hCoV-19^^England|Human|Lighthouse Lab in Glasgow|Wellcome Sanger Institute for the COVID-19 Genomics UK (COG-UK) consortium|Davies|United Kingdom

>Spike|hCoV-19/England/CAMB-752B5/2020|2020-03-18|EPI\_ISL\_440406|Original|hCoV-19^^England|Human|Department of Pathology|Wellcome Sanger Institute for the COVID-19 Genomics UK (COG-UK) consortium|Amato|United Kingdom

>Spike|hCoV-19/Scotland/EDB1544/2020|2020-04-12|EPI\_ISL\_433078|Original|hCoV-19^^Scotland|Human|Virology Department|COVID-19 Genomics UK (COG-UK) Consortium|Williams|United Kingdom

>Spike|hCoV-19/USA/LA-EVTL1353/2020|2020-12-11|EPI\_ISL\_779019|Original|hCoV-19^^Louisiana|Human|LSUHS Emerging Viral Threat Laboratory|Microbial Genome Sequencing Center|Kamil|USA

>Spike|hCoV-19/Wales/PHWC-49B947/2020|2020-12-06|EPI\_ISL\_742405|Original|hCoV-19^^Wales|Human|Wales Specialist Virology Centre Sequencing lab|COVID-19 Genomics UK (COG-UK) Consortium|Moore|United Kingdom

>Spike|hCoV-19/Australia/VIC7034/2020|2020-07-25|EPI\_ISL\_564202|Original|hCoV-19^^Victoria|Human|Victorian Infectious Diseases Reference Laboratory (VIDRL)|VIDRL and MDU-PHL|Schultz|Australia

>Spike|hCoV-19/Portugal/PT0984/2020|2020-03-22|EPI\_ISL\_511532|Original|hCoV-19^^Portugal|Human|Instituto Nacional de Saude (INSA)|Instituto Nacional de Saude (INSA)|Borges|Portugal

>Spike|hCoV-19/England/QEUA-9C85B1/2020|2020-09-11|EPI\_ISL\_567201|Original|hCoV-19^^England|Human|Lighthouse Lab in Glasgow|Wellcome Sanger Institute for the COVID-19 Genomics UK (COG-UK) consortium|Davies|United Kingdom

>Spike|hCoV-19/Switzerland/VD-ETHZ-270097/2020|2020-09-03|EPI\_ISL\_541483|Original|hCoV-19^^Vaud|Human|Viollier AG|Department of Biosystems Science and Engineering|Nadeau|Switzerland

>Spike|hCoV-19/England/ALDP-497F2B/2020|2020-06-03|EPI\_ISL\_559550|Original|hCoV-19^^England|Human|Lighthouse Lab in Alderley Park|Wellcome Sanger Institute for the COVID-19 Genomics UK (COG-UK) consortium|Davies|United Kingdom

>Spike|hCoV-19/England/CAMC-BC0F13/2020|2020-11-22|EPI\_ISL\_705152|Original|hCoV-19^^England|Human|Lighthouse Lab in Cambridge|Wellcome Sanger Institute for the COVID-19 Genomics UK (COG-UK) Consortium|Davies|United Kingdom

>Spike|hCoV-19/USA/WI-WSLH-200289/2020|2020-04-18|EPI\_ISL\_578476|Original|hCoV-19^^Wisconsin|Human|Wisconsin State Laboratory of Hygiene Communicable Disease Division|Wisconsin State Laboratory of Hygiene Communicable Disease Division|Florek|USA

>Spike|hCoV-19/England/ALDP-51DFB3/2020|2020-06-02|EPI\_ISL\_559055|Original|hCoV-19^^England|Human|Lighthouse Lab in Alderley Park|Wellcome Sanger Institute for the COVID-19 Genomics UK (COG-UK) consortium|Davies|United Kingdom

>Spike|hCoV-19/England/QEUA-9FF3F3/2020|2020-09-29|EPI\_ISL\_600375|Original|hCoV-19^^England|Human|Lighthouse Lab in Glasgow|Wellcome Sanger Institute for the COVID-19 Genomics UK (COG-UK) consortium|Davies|United Kingdom

>Spike|hCoV-19/Jordan/AM-ALSR-4046/2020|2020-10-03|EPI\_ISL\_636406|Original|hCoV-19^^Amman|Human|Biolab Diagnostic Laboratories|Andersen lab at Scripps Research|Gangavarapu|Jordan

>Spike|hCoV-19/Denmark/DCGC-21252/2020|2020-12-21|EPI\_ISL\_759635|Original|hCoV-19^^Hovedstaden|Human|Department of Virus and Microbiological Special Diagnostics|Albertsen Lab|Michaelsen|Denmark

>Spike|hCoV-19/Scotland/CVR3914/2020|2020-06-17|EPI\_ISL\_512462|Original|hCoV-19^^Scotland|Human|West of Scotland Specialist Virology Centre|COVID-19 Genomics UK (COG-UK) Consortium|Robertson|United Kingdom

>Spike|hCoV-19/Belgium/reg-10181167/2020|2020-10-18|EPI\_ISL\_735139|Original|hCoV-19^^Huldenberg|Human|UZ Leuven|KU Leuven|Maes|Belgium

>Spike|hCoV-19/England/QEUA-B0EABE/2020|2020-11-02|EPI\_ISL\_642139|Original|hCoV-19^^England|Human|Lighthouse Lab in Glasgow|Wellcome Sanger Institute for the COVID-19 Genomics UK (COG-UK) Consortium|Davies|United Kingdom

>Spike|hCoV-19/England/MILK-511016/2020|2020-06-10|EPI\_ISL\_558903|Original|hCoV-19^^England|Human|Lighthouse Lab in Milton Keynes|Wellcome Sanger Institute for the COVID-19 Genomics UK (COG-UK) consortium|Davies|United Kingdom

>Spike|hCoV-19/England/MILK-A91A0C/2020|2020-10-19|EPI\_ISL\_706002|Original|hCoV-19^^England|Human|Oxford Viromics|COVID-19 Genomics UK (COG-UK) Consortium|Golubchik|United Kingdom

>Spike|hCoV-19/England/MILK-9AAAE3/2020|2020-08-31|EPI\_ISL\_550921|Original|hCoV-19^^England|Human|Lighthouse Lab in Milton Keynes|Wellcome Sanger Institute for the COVID-19 Genomics UK (COG-UK) consortium|Davies|United Kingdom

>Spike|hCoV-19/England/ALDP-A935DC/2020|2020-10-19|EPI\_ISL\_611285|Original|hCoV-19^^England|Human|Lighthouse Lab in Alderley Park|Wellcome Sanger Institute for the COVID-19 Genomics UK (COG-UK) consortium|Davies|United Kingdom

>Spike|hCoV-19/USA/TX-HMH-6226/2020|2020-07-07|EPI\_ISL\_547326|Original|hCoV-19^^Texas|Human|Houston Methodist Hospital|Houston Methodist Hospital|Long|USA

>Spike|hCoV-19/England/QEUH-B406BC/2020|2020-11-08|EPI\_ISL\_657338|Original|hCoV-19^^England|Human|Lighthouse Lab in Glasgow|Wellcome Sanger Institute for the COVID-19 Genomics UK (COG-UK) Consortium|Davies|United Kingdom

>Spike|hCoV-19/USA/TX-HMH-MCoV-8913/2020|2020-07-02|EPI\_ISL\_780828|Original|hCoV-19^^Texas|Human|Houston Methodist Hospital|Houston Methodist Hospital|Long|USA

>Spike|hCoV-19/Canada/ON-UHTC-0199/2020|2020-06-10|EPI\_ISL\_569969|Original|hCoV-19^^Ontario|Human|Unity Health Toronto|Ontario Institute for Cancer Research|de Borja|Canada

>Spike|hCoV-19/England/QEUH-A8B7E0/2020|2020-10-16|EPI\_ISL\_643138|Original|hCoV-19^^England|Human|Lighthouse Lab in Glasgow|Wellcome Sanger Institute for the COVID-19 Genomics UK (COG-UK) Consortium|Davies|United Kingdom

>Spike|hCoV-19/USA/CO-CDPHE-2010135868/2020|2020-10-12|EPI\_ISL\_710353|Original|hCoV-19^^Colorado|Human|Colorado Department of Public Health and Environment|Colorado Department of Public Health and Environment|Bankers|USA

>Spike|hCoV-19/Wales/PHWC-35F23/2020|2020-04-27|EPI\_ISL\_474592|Original|hCoV-19^^Wales|Human|Originating lab|COVID-19 Genomics UK (COG-UK) Consortium|Moore|United Kingdom

>Spike|hCoV-19/USA/WI-GMF-20859/2020|2020-09-17|EPI\_ISL\_660818|Original|hCoV-19^^Wisconsin|Human|Gundersen Molecular Diagnostics Laboratory|Kabara Cancer Research Institute|Kenny|USA

>Spike|hCoV-19/Lithuania/MR-LUHS-Eilnr249/2020|2020-08-07|EPI\_ISL\_636854|Original|hCoV-19^^Kauno apskritis|Human|Lithuanian University of Health Sciences Hospital|Lithuanian University of Health Sciences|Zemaitis|Lithuania

>Spike|hCoV-19/Canada/ON-PHL-20-00064/2020|2020-00-00|EPI\_ISL\_548740|Original|hCoV-19^^Ontario|Human|Public Health Ontario Laboratory|Public Health Ontario Laboratory|Guthrie|Canada

>Spike|hCoV-19/England/QEUH-BA2DD1/2020|2020-11-18|EPI\_ISL\_720932|Original|hCoV-19^^England|Human|Lighthouse Lab in Glasgow|Wellcome Sanger Institute for the COVID-19 Genomics UK (COG-UK) Consortium|Davies|United Kingdom

>Spike|hCoV-19/Wales/PHWC-4944D4/2020|2020-11-19|EPI\_ISL\_726125|Original|hCoV-19^^Wales|Human|Originating lab|COVID-19 Genomics UK (COG-UK) Consortium|Moore|United Kingdom

>Spike|hCoV-19/England/QEUH-AD440F/2020|2020-10-26|EPI\_ISL\_634568|Original|hCoV-19^^England|Human|Lighthouse Lab in Glasgow|Wellcome Sanger Institute for the COVID-19 Genomics UK (COG-UK) consortium|Davies|United Kingdom

>Spike|hCoV-19/USA/TX-HMH-MCoV-9469/2020|2020-07-03|EPI\_ISL\_781141|Original|hCoV-19^^Texas|Human|Houston Methodist Hospital|Houston Methodist Hospital|Long|USA

>Spike|hCoV-19/England/ALDP-6C6E9D/2020|2020-07-01|EPI\_ISL\_556254|Original|hCoV-19^^England|Human|Lighthouse Lab in Alderley Park|Wellcome Sanger Institute for the COVID-19 Genomics UK (COG-UK) consortium|Davies|United Kingdom

>Spike|hCoV-19/USA/CA-ALSR-4738/2020|2020-09-17|EPI\_ISL\_730116|Original|hCoV-19^^California|Human|San Diego County Public Health Laboratory|Andersen lab at Scripps Research|Gangavarapu|USA

>Spike|hCoV-19/USA/CA-ALSR-1653/2020|2020-04-01|EPI\_ISL\_494717|Original|hCoV-19^^California|Human|San Diego County Public Health Laboratory|Andersen lab at Scripps Research|Gangavarapu|USA

>Spike|hCoV-19/England/ALDP-A6700D/2020|2020-10-12|EPI\_ISL\_630699|Original|hCoV-19^^England|Human|Lighthouse Lab in Alderley Park|Wellcome Sanger Institute for the COVID-19 Genomics UK (COG-UK) consortium|Davies|United Kingdom

>Spike|hCoV-19/England/OXON-B046D/2020|2020-04-17|EPI\_ISL\_534767|Original|hCoV-19^^England|Human|Oxford Viromics|COVID-19 Genomics UK (COG-UK) Consortium|Golubchik|United Kingdom

>Spike|hCoV-19/England/QEUH-9F9669/2020|2020-09-26|EPI\_ISL\_589206|Original|hCoV-19^^England|Human|Lighthouse Lab in Glasgow|Wellcome Sanger Institute for the COVID-19 Genomics UK (COG-UK) consortium|Davies|United Kingdom

>Spike|hCoV-19/USA/NMDOH-2020305771/2020|2020-08-21|EPI\_ISL\_542054|Original|hCoV-19^^New Mexico|Human|New Mexico Department of Health Scientific Laboratory|New Mexico Department of Health Scientific Laboratory|Johnson|USA

>Spike|hCoV-19/Bangladesh/BCSIR-NILMRC-085/2020|2020-06-01|EPI\_ISL\_466650|Original|hCoV-19^^Dhaka|Human|National Institute of Laboratory Medicine and Referral Center|Genomic Research Lab|Khan|Bangladesh

>Spike|hCoV-19/England/ALDP-A95F18/2020|2020-10-19|EPI\_ISL\_624779|Original|hCoV-19^^England|Human|Lighthouse Lab in Alderley Park|Wellcome Sanger Institute for the COVID-19 Genomics UK (COG-UK) consortium|Davies|United Kingdom

>Spike|hCoV-19/USA/FL-BPHL-0626/2020|2020-04-06|EPI\_ISL\_508830|Original|hCoV-19^^Florida|Human|Florida Bureau of Public Health Laboratories|Florida Bureau of Public Health Laboratories|Blanton|USA

>Spike|hCoV-19/England/MILK-B973DD/2020|2020-11-14|EPI\_ISL\_675091|Original|hCoV-19^^England|Human|Lighthouse Lab in Milton Keynes|Wellcome Sanger Institute for the COVID-19 Genomics UK (COG-UK) Consortium|Davies|United Kingdom

>Spike|hCoV-19/Israel/CVL-n-5999/2020|2020-03-15|EPI\_ISL\_475014|Original|hCoV-19^^Israel|Human|Israel Central Virology laboratory|Israel Central Virology laboratory|Zuckerman|Israel

>Spike|hCoV-19/USA/WA-S548/2020|2020-03-31|EPI\_ISL\_434308|Original|hCoV-19^^Washington|Human|Washington State Department of Health|Seattle Flu Study|Bedford|USA

>Spike|hCoV-19/Denmark/DCGC-2284/2020|2020-08-10|EPI\_ISL\_617642|Original|hCoV-19^^Nordjylland|Human|Department of Virus and Microbiological Special Diagnostics|Albertsen lab|Michaelsen|Denmark

>Spike|hCoV-19/England/SHEF-C0163/2020|2020-03-25|EPI\_ISL\_420255|Original|hCoV-19^^England|Human|Virology Department|Department of Infection|de Silva|United Kingdom

>Spike|hCoV-19/South Africa/N00040/2020|2020-08-11|EPI\_ISL\_623060|Original|hCoV-19^^Eastern Cape|Human|National Health Laboratory Service|National Institute for Communicable Diseases of the National Health Laboratory Service|Allam|South Africa

>Spike|hCoV-19/Denmark/DCGC-20206/2020|2020-11-30|EPI\_ISL\_747624|Original|hCoV-19^^Midtjylland|Human|Department of Virus and Microbiological Special Diagnostics|Albertsen Lab|Michaelsen|Denmark

>Spike|hCoV-19/USA/TX-HMH-MCoV-15473/2020|2020-10-23|EPI\_ISL\_786957|Original|hCoV-19^^Texas|Human|Houston Methodist Hospital|Houston Methodist Hospital|Long|USA

>Spike|hCoV-19/France/ARA-SC049/2020|2020-04-03|EPI\_ISL\_666668|Original|hCoV-19^^Auvergne-Rhône-Alpes|Human|Laboratoire du Centre Hospitalier Annecy Genevois|CNR Virus des Infections Respiratoires - France SUD|Bal|France

>Spike|hCoV-19/USA/CA-CZB-14753/2020|2020-10-30|EPI\_ISL\_739430|Original|hCoV-19^^California|Human|Humboldt County Public Health Laboratory|Chan-Zuckerberg Biohub|Kamm|USA

>Spike|hCoV-19/England/ALDP-A66C46/2020|2020-10-12|EPI\_ISL\_630624|Original|hCoV-19^^England|Human|Lighthouse Lab in Alderley Park|Wellcome Sanger Institute for the COVID-19 Genomics UK (COG-UK) consortium|Davies|United Kingdom

>Spike|hCoV-19/Japan/PG-6243/2020|2020-08-00|EPI\_ISL\_689354|Original|hCoV-19^^Japan|Human|Pathogen Genomics Center|Pathogen Genomics Center|Sekizuka|Japan

>Spike|hCoV-19/England/ALDP-A6CE1D/2020|2020-10-15|EPI\_ISL\_608088|Original|hCoV-19^^England|Human|Lighthouse Lab in Alderley Park|Wellcome Sanger Institute for the COVID-19 Genomics UK (COG-UK) consortium|Davies|United Kingdom

>Spike|hCoV-19/USA/WI-UW-579/2020|2020-06-23|EPI\_ISL\_484954|Original|hCoV-19^^Wisconsin|Human|University of Wisconsin-Madison AIDS Vaccine Research Laboratories|University of Wisconsin-Madison AIDS Vaccine Research Laboratories|Baczenas|USA

>Spike|hCoV-19/Japan/PG-3786/2020|2020-04-00|EPI\_ISL\_692037|Original|hCoV-19^^Japan|Human|Pathogen Genomics Center|Pathogen Genomics Center|Sekizuka|Japan



>Spike|hCoV-19/England/CAMC-B33B71/2020|2020-11-05|EPI\_ISL\_659265|Original|hCoV-19^^England|Human|Lighthouse Lab in Cambridge|Wellcome Sanger Institute for the COVID-19 Genomics UK (COG-UK) Consortium|Davies|United Kingdom

>Spike|hCoV-19/Scotland/CVR4414/2020|2020-09-21|EPI\_ISL\_585288|Original|hCoV-19^^Scotland|Human|West of Scotland Specialist Virology Centre|COVID-19 Genomics UK (COG-UK) Consortium|Robertson|United Kingdom

>Spike|hCoV-19/USA/TX-HMH-1923/2020|2020-04-14|EPI\_ISL\_542903|Original|hCoV-19^^Texas|Human|Houston Methodist Hospital|Houston Methodist Hospital|Long|USA

>Spike|hCoV-19/Australia/VIC2731/2020|2020-07-05|EPI\_ISL\_521566|Original|hCoV-19^^Victoria|Human|Microbiological Diagnostic Unit - Public Health Laboratory (MDU-PHL)|MDU-PHL|Schultz|Australia

>Spike|hCoV-19/England/BRIS-123A17/2020|2020-04-06|EPI\_ISL\_442766|Original|hCoV-19^^England|Human|PHE South West Regional Laboratory|Wellcome Sanger Institute for the COVID-19 Genomics UK (COG-UK) consortium|Amato|United Kingdom

>Spike|hCoV-19/USA/MI-MDHHS-SC20138/2020|2020-03-24|EPI\_ISL\_436853|Original|hCoV-19^^Michigan|Human|Michigan Department of Health and Human Services|Michigan Department of Health and Human Services|Blankenship|USA

>Spike|hCoV-19/Switzerland/BS-42335263/2020|2020-07-01|EPI\_ISL\_581893|Original|hCoV-19^^Basel-Stadt|Human|University Hospital Basel|University Hospital Basel|Roloff Handschin|Switzerland

>Spike|hCoV-19/USA/TX-HMH-8077/2020|2020-07-04|EPI\_ISL\_545842|Original|hCoV-19^^Texas|Human|Houston Methodist Hospital|Houston Methodist Hospital|Long|USA

>Spike|hCoV-19/Spain/MD-HLP-LP14-3/2020|2020-03-09|EPI\_ISL\_417975|Original|hCoV-19^^Madrid|Human|Hospital Universitario La Paz|Hospital Universitario La Paz|Viedma|Spain

>Spike|hCoV-19/Poland/PL\_MCB\_48/2020|2020-05-10|EPI\_ISL\_645047|Original|hCoV-19^^Poland|Human|Human Genome Variation Research Group|Human Genome Variation Research Group||Poland

>Spike|hCoV-19/USA/TX-HMH-MCoV-12465/2020|2020-09-28|EPI\_ISL\_790351|Original|hCoV-19^^Texas|Human|Houston Methodist Hospital|Houston Methodist Hospital|Long|USA

>Spike|hCoV-19/USA/NM-UNM-00133/2020|2020-04-02|EPI\_ISL\_467651|Original|hCoV-19^^New Mexico|Human|New Mexico Department of Health Scientific Laboratory Division|Center for Global Health|Domman|USA

>Spike|hCoV-19/USA/CA-CZB-7160/2020|2020-08-20|EPI\_ISL\_583226|Original|hCoV-19^^California|Human|UCSF Clinical Microbiology Laboratory|Chan-Zuckerberg Biohub|Bhatt|USA

>Spike|hCoV-19/Canada/BC\_14763711/2020|2020-04-00|EPI\_ISL\_468661|Original|hCoV-19^^British Columbia|Human|BCCDC Public Health Laboratory|BCCDC Public Health Laboratory|Harrigan|Canada

>Spike|hCoV-19/USA/IN-QDX-184/2020|2020-04-28|EPI\_ISL\_494519|Original|hCoV-19^^Indiana|Human|Quest Diagnostics|Quest Diagnostics|Kagan|USA

>Spike|hCoV-19/England/LOND-D72C0/2020|2020-04-11|EPI\_ISL\_478470|Original|hCoV-19^^England|Human|University College London|COVID-19 Genomics UK (COG-UK) Consortium|Roy|United Kingdom

>Spike|hCoV-19/Singapore/1044/2020|2020-03-23|EPI\_ISL\_574529|Original|hCoV-19^^Singapore|Human|National Public Health Laboratory|National Public Health Laboratory|Mak|Singapore

>Spike|hCoV-19/Germany/NW-HHU-90/2020|2020-08-17|EPI\_ISL\_539606|Original|hCoV-19^^North Rhine-Westphalia|Human|ZOTZ KLIMAS MVZ D\u00fcsseldorf-Centrum GbR \u00dcBAG f\u00fcr Labormedizin|Center of Medical Microbiology|Wienemann|Germany

>Spike|hCoV-19/USA/OR-OHSU-1923/2020|2020-07-29|EPI\_ISL\_526071|Original|hCoV-19^^Oregon|Human|OHSU Lab Services Molecular Microbiology Lab|Oregon SARS-CoV-2 Genome Sequencing Center|O'Roak|USA

>Spike|hCoV-19/Denmark/DCGC-16487/2020|2020-11-16|EPI\_ISL\_714796|Original|hCoV-19^^Midtjylland|Human|Department of Virus and Microbiological Special Diagnostics|Albertsen Lab|Michaelsen|Denmark

>Spike|hCoV-19/Denmark/DCGC-18880/2020|2020-12-07|EPI\_ISL\_748614|Original|hCoV-19^^Hovedstaden|Human|Department of Virus and Microbiological Special Diagnostics|Albertsen Lab|Michaelsen|Denmark

>Spike|hCoV-19/England/BRIS-123613/2020|2020-04-06|EPI\_ISL\_442635|Original|hCoV-19^^England|Human|PHE South West Regional Laboratory|Wellcome Sanger Institute for the COVID-19 Genomics UK (COG-UK) consortium|Amato|United Kingdom

>Spike|hCoV-19/England/ALDP-C48000/2020|2020-12-12|EPI\_ISL\_718718|Original|hCoV-19^^England|Human|Lighthouse Lab in Alderley Park|Wellcome Sanger Institute for the COVID-19 Genomics UK (COG-UK) Consortium|Davies|United Kingdom

>Spike|hCoV-19/England/QEUA-B2DC2C/2020|2020-11-03|EPI\_ISL\_647045|Original|hCoV-19^^England|Human|Lighthouse Lab in Glasgow|Wellcome Sanger Institute for the COVID-19 Genomics UK (COG-UK) Consortium|Davies|United Kingdom

>Spike|hCoV-19/Wales/PHWC-48C7A9/2020|2020-11-08|EPI\_ISL\_666466|Original|hCoV-19^^Wales|Human|Wales Specialist Virology Centre Sequencing lab|COVID-19 Genomics UK (COG-UK) Consortium|Moore|United Kingdom

>Spike|hCoV-19/England/20204115604/2020|2020-05-13|EPI\_ISL\_465653|Original|hCoV-19^^England|Human|Respiratory Virus Unit|Respiratory Virus Unit|Platt|United Kingdom

>Spike|hCoV-19/Japan/PG-2278/2020|2020-04-00|EPI\_ISL\_685883|Original|hCoV-19^^Japan|Human|Pathogen Genomics Center|Pathogen Genomics Center|Sekizuka|Japan

>Spike|hCoV-19/USA/NY-PV09032/2020|2020-03-21|EPI\_ISL\_421602|Original|hCoV-19^^New York|Human|MSHS Clinical Microbiology Laboratories|MSHS Pathogen Surveillance Program|van Bakel|USA

>Spike|hCoV-19/USA/MA-MASPHL-00368/2020|2020-05-22|EPI\_ISL\_693165|Original|hCoV-19^^Massachusetts|Human|Massachusetts State Public Health Laboratory|Massachusetts State Public Health Laboratory|Lang|USA

>Spike|hCoV-19/Japan/PG-1563/2020|2020-04-00|EPI\_ISL\_685169|Original|hCoV-19^^Japan|Human|Pathogen Genomics Center|Pathogen Genomics Center|Sekizuka|Japan

>Spike|hCoV-19/Switzerland/BS-ETHZ-280227/2020|2020-09-10|EPI\_ISL\_560474|Original|hCoV-19^^Basel-Stadt|Human|Viollier AG|Department of Biosystems Science and Engineering|Nadeau|Switzerland

>Spike|hCoV-19/Singapore/897/2020|2020-09-06|EPI\_ISL\_536438|Original|hCoV-19^^Singapore|Human|National Public Health Laboratory|National Public Health Laboratory|Mak|Singapore

>Spike|hCoV-19/Denmark/DCGC-13024/2020|2020-11-30|EPI\_ISL\_712536|Original|hCoV-19^^Sjaelland|Human|Department of Virus and Microbiological Special Diagnostics|Albertsen Lab|Michaelsen|Denmark

>Spike|hCoV-19/England/CAMB-7B079/2020|2020-04-11|EPI\_ISL\_433910|Original|hCoV-19^^England|Human|Department of Pathology|COVID-19 Genomics UK (COG-UK) Consortium|Meredith|United Kingdom

>Spike|hCoV-19/Wales/PHWC-16A522/2020|2020-09-06|EPI\_ISL\_540901|Original|hCoV-19^^Wales|Human|Wales Specialist Virology Centre Sequencing lab|COVID-19 Genomics UK (COG-UK) Consortium|Moore|United Kingdom

>Spike|hCoV-19/England/ALDP-9C57FA/2020|2020-09-10|EPI\_ISL\_567535|Original|hCoV-19^^England|Human|Lighthouse Lab in Alderley Park|Wellcome Sanger Institute for the COVID-19 Genomics UK (COG-UK) consortium|Davies|United Kingdom

>Spike|hCoV-19/Scotland/QEUA-9DEAAA/2020|2020-09-21|EPI\_ISL\_601218|Original|hCoV-19^^Scotland|Human|Lighthouse Lab in Glasgow|Wellcome Sanger Institute for the COVID-19 Genomics UK (COG-UK) consortium|Davies|United Kingdom

>Spike|hCoV-19/France/ARA-18212/2020|2020-04-01|EPI\_ISL\_508963|Original|hCoV-19^^Auvergne-Rh\u00f4ne-Alpes|Human|CNR Virus des Infections Respiratoires - France SUD|CNR Virus des Infections Respiratoires - France SUD|Josset|France

>Spike|hCoV-19/England/ALDP-A6CA55/2020|2020-10-15|EPI\_ISL\_606953|Original|hCoV-19^^England|Human|Lighthouse Lab in Alderley Park|Wellcome Sanger Institute for the COVID-19 Genomics UK (COG-UK) consortium|Davies|United Kingdom

>Spike|hCoV-19/Netherlands/UT-EMC-147/2020|2020-10-07|EPI\_ISL\_632626|Original|hCoV-19^^Utrecht|Human|Dutch COVID-19 response team|Erasmus Medical Center|Oude Munnink|Netherlands

>Spike|hCoV-19/Denmark/DCGC-20388/2020|2020-12-21|EPI\_ISL\_758857|Original|hCoV-19^^Syddanmark|Human|Department of Virus and Microbiological Special Diagnostics|Albertsen Lab|Michaelsen|Denmark

>Spike|hCoV-19/South Korea/KDCA0096/2020|2020-09-01|EPI\_ISL\_747334|Original|hCoV-19^^South Korea|Human|Division of Emerging Infectious Diseases|Division of Emerging Infectious Diseases|Park|South Korea

>Spike|hCoV-19/USA/MO-QDX-2587/2020|2020-03-14|EPI\_ISL\_604944|Original|hCoV-19^^Missouri|Human|Quest Diagnostics|Quest Diagnostics|Kagan|USA

>Spike|hCoV-19/Wales/PHWC-494D9D/2020|2020-11-23|EPI\_ISL\_726252|Original|hCoV-19^^Wales|Human|Originating lab|COVID-19 Genomics UK (COG-UK) Consortium|Moore|United Kingdom

>Spike|hCoV-19/Denmark/DCGC-20311/2020|2020-11-23|EPI\_ISL\_747631|Original|hCoV-19^^Syddanmark|Human|Department of Virus and Microbiological Special Diagnostics|Albertsen Lab|Michaelsen|Denmark

>Spike|hCoV-19/England/QEUA-A22420/2020|2020-10-01|EPI\_ISL\_587674|Original|hCoV-19^^England|Human|Lighthouse Lab in Glasgow|Wellcome Sanger Institute for the COVID-19 Genomics UK (COG-UK) consortium|Davies|United Kingdom

>Spike|hCoV-19/England/QEUA-969BB0/2020|2020-08-12|EPI\_ISL\_531187|Original|hCoV-19^^England|Human|Lighthouse Lab in Glasgow|Wellcome Sanger Institute for the COVID-19 Genomics UK (COG-UK) consortium|Davies|United Kingdom

>Spike|hCoV-19/Scotland/QEUA-AD0FD5/2020|2020-10-26|EPI\_ISL\_649684|Original|hCoV-19^^Scotland|Human|Lighthouse Lab in Glasgow|Wellcome Sanger Institute for the COVID-19 Genomics UK (COG-UK) Consortium|Davies|United Kingdom

>Spike|hCoV-19/USA/CA-QDX-2724/2020|2020-03-17|EPI\_ISL\_605012|Original|hCoV-19^^California|Human|Quest Diagnostics|Quest Diagnostics|Kagan|USA

>Spike|hCoV-19/Denmark/DCGC-14077/2020|2020-11-30|EPI\_ISL\_711098|Original|hCoV-19^^Sjaelland|Human|Department of Virus and Microbiological Special Diagnostics|Albertsen Lab|Michaelsen|Denmark

>Spike|hCoV-19/Scotland/CVR5597/2020|2020-10-31|EPI\_ISL\_651858|Original|hCoV-19^^Scotland|Human|West of Scotland Specialist Virology Centre|COVID-19 Genomics UK (COG-UK) Consortium|Robertson|United Kingdom

>Spike|hCoV-19/Australia/VIC12485/2020|2020-07-30|EPI\_ISL\_641043|Original|hCoV-19^^Victoria|Human|Microbiological Diagnostic Unit - Public Health Laboratory (MDU-PHL)|MDU-PHL|Schultz|Australia

>Spike|hCoV-19/England/BRIS-185349E/2020|2020-04-06|EPI\_ISL\_492347|Original|hCoV-19^^England|Human|PHE South West Regional Laboratory|Wellcome Sanger Institute for the COVID-19 Genomics UK (COG-UK) consortium|Davies|United Kingdom

>Spike|hCoV-19/England/ALDP-9CB044/2020|2020-09-16|EPI\_ISL\_575733|Original|hCoV-19^^England|Human|Lighthouse Lab in Alderley Park|Wellcome Sanger Institute for the COVID-19 Genomics UK (COG-UK) consortium|Davies|United Kingdom

>Spike|hCoV-19/Brazil/RJ-477i/2020|2020-03-11|EPI\_ISL\_427301|Vero E6 P1|hCoV-19^^Rio de Janeiro|Human|Instituto Oswaldo Cruz FIOCRUZ - Laboratory of Respiratory Viruses and Measles (LVRS)|Instituto Oswaldo Cruz FIOCRUZ - Laboratory of Respiratory Viruses and Measles (LVRS)|Silva|Brazil

>Spike|hCoV-19/Denmark/DCGC-15450/2020|2020-11-23|EPI\_ISL\_713471|Original|hCoV-19^^Hovedstaden|Human|Department of Virus and Microbiological Special Diagnostics|Albertsen Lab|Michaelsen|Denmark

>Spike|hCoV-19/Denmark/DCGC-5933/2020|2020-10-05|EPI\_ISL\_620198|Original|hCoV-19^^Syddanmark|Human|Department of Virus and Microbiological Special Diagnostics|Albertsen lab|Michaelsen|Denmark

>Spike|hCoV-19/Peru/LIM-UPCH-0028/2020|2020-06-17|EPI\_ISL\_568510|Original|hCoV-19^^Lima|Human|Laboratorio de Referencia Nacional de Virus Respiratorios|Laboratorio de Gen\u00f3mica Microbiana|Tsukayama|Peru

>Spike|hCoV-19/India/WB-NCDC-2502/2020|2020-03-31|EPI\_ISL\_436414|Original|hCoV-19^^West Bengal|Human|National Centre for Disease control (NCDC)|NCDC/CSIR-IGIB|Singh|India

>Spike|hCoV-19/England/CAMB-7AC49/2020|2020-04-08|EPI\_ISL\_433856|Original|hCoV-19^^England|Human|Department of Pathology|COVID-19 Genomics UK (COG-UK) Consortium|Meredith|United Kingdom

>Spike|hCoV-19/USA/LA-EVTL915/2020|2020-07-09|EPI\_ISL\_653606|Original|hCoV-19^^Louisiana|Human|LSUHS Emerging Viral Threat Laboratory|Microbial Genome Sequencing Center|Kamil|USA

>Spike|hCoV-19/USA/NY-Wadsworth-26088-01/2020|2020-03-21|EPI\_ISL\_426300|Original|hCoV-19^^New York|Human|Wadsworth Center|Wadsworth Center|Lasek-Nesselquist|USA

>Spike|hCoV-19/Wales/PHWC-262FF/2020|2020-03-27|EPI\_ISL\_422311|Original|hCoV-19^^Wales|Human|Wales Specialist Virology Centre|Public Health Wales Microbiology Cardiff|Moore|United Kingdom

>Spike|hCoV-19/Australia/VIC10957/2020|2020-07-31|EPI\_ISL\_563167|Original|hCoV-19^^Victoria|Human|Microbiological Diagnostic Unit - Public Health Laboratory (MDU-PHL)|MDU-PHL|Schultz|Australia

>Spike|hCoV-19/England/QEUA-B4369B/2020|2020-11-08|EPI\_ISL\_657312|Original|hCoV-19^^England|Human|Lighthouse Lab in Glasgow|Wellcome Sanger Institute for the COVID-19 Genomics UK (COG-UK) Consortium|Davies|United Kingdom

>Spike|hCoV-19/Denmark/DCGC-867/2020|2020-05-11|EPI\_ISL\_614808|Original|hCoV-19^^Hovedstaden|Human|Department of Virus and Microbiological Special Diagnostics|Albertsen lab|Michaelsen|Denmark

>Spike|hCoV-19/France/BRE-5413/2020|2020-03-28|EPI\_ISL\_443277|Original|hCoV-19^^Bretagne|Human|CHU - H\u00f4pital Cavale Blanche - Labo. de Virologie|National Reference Center for Viruses of Respiratory Infections|Enouf|France

>Spike|hCoV-19/USA/FL-BPHL-0621/2020|2020-04-04|EPI\_ISL\_508825|Original|hCoV-19^^Florida|Human|Florida Bureau of Public Health Laboratories|Florida Bureau of Public Health Laboratories|Blanton|USA

>Spike|hCoV-19/Japan/PG-7793/2020|2020-07-00|EPI\_ISL\_686895|Original|hCoV-19^^Japan|Human|Pathogen Genomics Center|Pathogen Genomics Center|Sekizuka|Japan

>Spike|hCoV-19/Japan/PG-0333/2020|2020-03-29|EPI\_ISL\_480007|Original|hCoV-19^^Kanto|Human|Chiba Prefectural Institute of Public Health|Pathogen Genomics Center|Sekizuka|Japan

>Spike|hCoV-19/England/BRIS-121A28/2020|2020-03-14|EPI\_ISL\_440274|Original|hCoV-19^^England|Human|PHE South West Regional Laboratory|Wellcome Sanger Institute for the COVID-19 Genomics UK (COG-UK) consortium|Amato|United Kingdom

>Spike|hCoV-19/USA/NY-NYCPHL-001140/2020|2020-10-23|EPI\_ISL\_671723|Original|hCoV-19^^New York|Human|DOHMH Jamaica|New York City Public Health Laboratory|Wang|USA

>Spike|hCoV-19/USA/TX-HMH-2791/2020|2020-06-04|EPI\_ISL\_545556|Original|hCoV-19^^Texas|Human|Houston Methodist Hospital|Houston Methodist Hospital|Long|USA

>Spike|hCoV-19/South Korea/KCDC2040/2020|2020-02-19|EPI\_ISL\_471446|Original|hCoV-19^^South Korea|Human|Division of Viral Diseases|Division of Viral Diseases|Kim|South Korea

>Spike|hCoV-19/Denmark/DCGC-14850/2020|2020-11-23|EPI\_ISL\_712026|Original|hCoV-19^^Sjaelland|Human|Department of Virus and Microbiological Special Diagnostics|Albertsen Lab|Michaelsen|Denmark

>Spike|hCoV-19/England/CAMC-BC1D72/2020|2020-11-22|EPI\_ISL\_705376|Original|hCoV-19^^England|Human|Department of Pathology|COVID-19 Genomics UK (COG-UK) Consortium|Goodfellow|United Kingdom

>Spike|hCoV-19/USA/MI-MDHHS-SC21731/2020|2020-08-08|EPI\_ISL\_529850|Original|hCoV-19^^Michigan|Human|Michigan Department of Health and Human Services|Michigan Department of Health and Human Services|Blankenship|USA

>Spike|hCoV-19/Wales/PHWC-16B3CD/2020|2020-09-13|EPI\_ISL\_560284|Original|hCoV-19^^Wales|Human|Wales Specialist Virology Centre Sequencing lab|COVID-19 Genomics UK (COG-UK) Consortium|Moore|United Kingdom

>Spike|hCoV-19/mink/Netherlands/NB02\_13KS/2020|2020-04-29|EPI\_ISL\_447630|Original|hCoV-19^^Netherlands|Mustela lutreola|Virology|Virology|Harders|Netherlands

>Spike|hCoV-19/England/QEUA-791340/2020|2020-07-15|EPI\_ISL\_533185|Original|hCoV-19^^England|Human|Lighthouse Lab in Glasgow|Wellcome Sanger Institute for the COVID-19 Genomics UK (COG-UK) consortium|Davies|United Kingdom

>Spike|hCoV-19/Scotland/CVR5924/2020|2020-11-20|EPI\_ISL\_705673|Original|hCoV-19^^Scotland|Human|West of Scotland Specialist Virology Centre|COVID-19 Genomics UK (COG-UK) Consortium|Robertson|United Kingdom

>Spike|hCoV-19/Australia/NSW2723/2020|2020-08-31|EPI\_ISL\_530335|Original|hCoV-19^^New South Wales|Human|Area of Virology|Area of Virology|Yeang|Australia

>Spike|hCoV-19/Switzerland/UR-ETHZ-240087/2020|2020-08-12|EPI\_ISL\_523923|Original|hCoV-19^^Uri|Human|Viollier AG|Department of Biosystems Science and Engineering|Nadeau|Switzerland

>Spike|hCoV-19/Belgium/reg-09241236/2020|2020-09-24|EPI\_ISL\_735040|Original|hCoV-19^^Oudsbergen|Human|UZ Leuven|KU Leuven|Maes|Belgium

>Spike|hCoV-19/England/ALDP-C3D0A4/2020|2020-12-10|EPI\_ISL\_731051|Original|hCoV-19^^England|Human|Lighthouse Lab in Alderley Park|Wellcome Sanger Institute for the COVID-19 Genomics UK (COG-UK) Consortium|Davies|United Kingdom

>Spike|hCoV-19/England/PORT-2F5594/2020|2020-00-00|EPI\_ISL\_704592|Original|hCoV-19^^England|Human|Centre for Enzyme Innovation|COVID-19 Genomics UK (COG-UK) Consortium|Robson|United Kingdom

>Spike|hCoV-19/England/MILK-9AA53D/2020|2020-09-01|EPI\_ISL\_550858|Original|hCoV-19^^England|Human|Lighthouse Lab in Milton Keynes|Wellcome Sanger Institute for the COVID-19 Genomics UK (COG-UK) consortium|Davies|United Kingdom

>Spike|hCoV-19/England/ALDP-C8870F/2020|2020-12-17|EPI\_ISL\_762655|Original|hCoV-19^^England|Human|Lighthouse Lab in Alderley Park|Wellcome Sanger Institute for the COVID-19 Genomics UK (COG-UK) Consortium|Davies|United Kingdom

>Spike|hCoV-19/Denmark/DCGC-22083/2020|2020-12-14|EPI\_ISL\_758115|Original|hCoV-19^^Hovedstaden|Human|Department of Virus and Microbiological Special Diagnostics|Albertsen Lab|Michaelsen|Denmark

>Spike|hCoV-19/England/LIVE-DC4BA0/2020|2020-11-11|EPI\_ISL\_704097|Original|hCoV-19^^England|Human|Liverpool Clinical Laboratories|COVID-19 Genomics UK (COG-UK) Consortium|Haldenby|United Kingdom

>Spike|hCoV-19/Wales/MILK-9C2F04/2020|2020-09-10|EPI\_ISL\_590172|Original|hCoV-19^^Wales|Human|Lighthouse Lab in Milton Keynes|Wellcome Sanger Institute for the COVID-19 Genomics UK (COG-UK) consortium|Davies|United Kingdom

>Spike|hCoV-19/England/ALDP-B1F80B/2020|2020-11-01|EPI\_ISL\_646051|Original|hCoV-19^^England|Human|Lighthouse Lab in Alderley Park|Wellcome Sanger Institute for the COVID-19 Genomics UK (COG-UK) Consortium|Davies|United Kingdom

>Spike|hCoV-19/France/IDF-9169/2020|2020-08-31|EPI\_ISL\_594163|Original|hCoV-19^^\u00cele-de-France|Human|hopital|National Reference Center for Viruses of Respiratory Infections|Enouf|France

>Spike|hCoV-19/Japan/PG-6100/2020|2020-08-00|EPI\_ISL\_689212|Original|hCoV-19^^Japan|Human|Pathogen Genomics Center|Pathogen Genomics Center|Sekizuka|Japan

>Spike|hCoV-19/Wales/PHWC-483CEF/2020|2020-10-23|EPI\_ISL\_626861|Original|hCoV-19^^Wales|Human|Wales Specialist Virology Centre Sequencing lab|COVID-19 Genomics UK (COG-UK) Consortium|Moore|United Kingdom

>Spike|hCoV-19/Switzerland/ZH-ETHZ-200028/2020|2020-07-14|EPI\_ISL\_510717|Original|hCoV-19^^Zurich|Human|Viollier AG|Department of Biosystems Science and Engineering|Nadeau|Switzerland

>Spike|hCoV-19/England/QEUH-9F3AFA/2020|2020-09-24|EPI\_ISL\_588644|Original|hCoV-19^^England|Human|Lighthouse Lab in Glasgow|Wellcome Sanger Institute for the COVID-19 Genomics UK (COG-UK) consortium|Davies|United Kingdom

>Spike|hCoV-19/Austria/CeMM0995/2020|2020-04-12|EPI\_ISL\_583839|Original|hCoV-19^^Austria|Human|Dr. Gernot Walder GmbH|Bergthaler laboratory|Bergthaler|Austria

>Spike|hCoV-19/USA/WI-UW-981/2020|2020-07-21|EPI\_ISL\_509977|Original|hCoV-19^^Wisconsin|Human|University of Wisconsin-Madison AIDS Vaccine Research Laboratories|University of Wisconsin-Madison AIDS Vaccine Research Laboratories|Baczenas|USA

>Spike|hCoV-19/England/CAMC-A59736/2020|2020-10-09|EPI\_ISL\_597033|Original|hCoV-19^^England|Human|Lighthouse Lab in Cambridge|Wellcome Sanger Institute for the COVID-19 Genomics UK (COG-UK) consortium|Davies|United Kingdom

>Spike|hCoV-19/England/ALDP-A95877/2020|2020-10-19|EPI\_ISL\_624562|Original|hCoV-19^^England|Human|Lighthouse Lab in Alderley Park|Wellcome Sanger Institute for the COVID-19 Genomics UK (COG-UK) consortium|Davies|United Kingdom

>Spike|hCoV-19/England/ALDP-B73F3D/2020|2020-11-12|EPI\_ISL\_664522|Original|hCoV-19^^England|Human|Quadram Institute Bioscience|COVID-19 Genomics UK (COG-UK) Consortium|Alikhan|United Kingdom

>Spike|hCoV-19/Peru/LIM-INS-048/2020|2020-04-12|EPI\_ISL\_517959|Original|hCoV-19^^Lima|Human|Laboratorio de Referencia Nacional de Virus Respiratorio. Centro Nacional de Salud Publica. Instituto Nacional de Salud Peru|Laboratorio de Referencia Nacional de Biotecnolog\u00eda y Biolog\u00eda Molecular. Centro Nacional de Salud Publica. Instituto Nacional de Salud Peru.|Padilla Rojas|Peru

>Spike|hCoV-19/Wales/PHWC-492B59/2020|2020-11-26|EPI\_ISL\_725754|Original|hCoV-19^^Wales|Human|Originating lab|COVID-19 Genomics UK (COG-UK) Consortium|Moore|United Kingdom

>Spike|hCoV-19/Spain/MD-IBV-005334/2020|2020-03-17|EPI\_ISL\_510212|Original|hCoV-19^^Madrid|Human|Hospital General Universitario Gregorio Mara\u00f1\u00f3n|SeqCOVID-SPAIN consortium/IBV (CSIC)|Comas|Spain

>Spike|hCoV-19/USA/CA-ALSR-2634/2020|2020-07-09|EPI\_ISL\_635600|Original|hCoV-19^^California|Human|San Diego County Public Health Laboratory|Andersen lab at Scripps Research|Gangavarapu|USA

>Spike|hCoV-19/Russia/CRIE4991529/2020|2020-07-16|EPI\_ISL\_610232|Original|hCoV-19^^Moscow|Human|Molecular diagnostic laboratory of Federal Budget Institution of Science \Central Research Institute of Epidemiology\ of The Federal Service on Customers' Rights Protection and Human Well-being Surveillance|Group of Genomics and Postgenomic Technologies of Central Research Institute of Epidemiology|Samoilov|Russia

>Spike|hCoV-19/England/OXON-B0BFF/2020|2020-04-17|EPI\_ISL\_478945|Original|hCoV-19^^England|Human|Oxford Viromics|COVID-19 Genomics UK (COG-UK) Consortium|Golubchik|United Kingdom

>Spike|hCoV-19/France/OCC-SC527/2020|2020-03-10|EPI\_ISL\_644697|Original|hCoV-19^^Occitanie|Human|CHU N\u00eemes|CNR Virus des Infections Respiratoires - France SUD|Bal|France

>Spike|hCoV-19/Denmark/DCGC-13993/2020|2020-11-30|EPI\_ISL\_711501|Original|hCoV-19^^Hovedstaden|Human|Department of Virus and Microbiological Special Diagnostics|Albertsen Lab|Michaelsen|Denmark

>Spike|hCoV-19/Netherlands/ZH-EMC-1146/2020|2020-12-19|EPI\_ISL\_763223|Original|hCoV-19^^Zuid Holland|Human|Dutch COVID-19 response team|Erasmus Medical Center|Oude Munnink|Netherlands

>Spike|hCoV-19/England/CAMC-B218E8/2020|2020-11-01|EPI\_ISL\_647427|Original|hCoV-19^^England|Human|Lighthouse Lab in Cambridge|Wellcome Sanger Institute for the COVID-19 Genomics UK (COG-UK) Consortium|Davies|United Kingdom

>Spike|hCoV-19/England/ALDP-B742CA/2020|2020-11-12|EPI\_ISL\_662015|Original|hCoV-19^^England|Human|Lighthouse Lab in Alderley Park|Wellcome Sanger Institute for the COVID-19 Genomics UK (COG-UK) Consortium|Davies|United Kingdom

>Spike|hCoV-19/USA/FL-BPHL-2169/2020|2020-08-10|EPI\_ISL\_653322|Original|hCoV-19^^Florida|Human|Florida Bureau of Public Health Laboratories|Florida Bureau of Public Health Laboratories|Blanton|USA

>Spike|hCoV-19/USA/TX-HMH-MCoV-11513/2020|2020-09-09|EPI\_ISL\_790038|Original|hCoV-19^^Texas|Human|Houston Methodist Hospital|Houston Methodist Hospital|Long|USA

>Spike|hCoV-19/England/GSTT-265D949/2020|2020-03-26|EPI\_ISL\_484037|Original|hCoV-19^^England|Human|Centre for Clinical Infection and Diagnostics Research and Genomics Innovation Unit|COVID-19 Genomics UK (COG-UK) Consortium|Awan|United Kingdom

>Spike|hCoV-19/England/LIVE-DB399B/2020|2020-10-21|EPI\_ISL\_650192|Original|hCoV-19^^England|Human|Liverpool Clinical Laboratories|COVID-19 Genomics UK (COG-UK) Consortium|Haldenby|United Kingdom

>Spike|hCoV-19/Luxembourg/LNS2364456/2020|2020-11-07|EPI\_ISL\_740109|Original|hCoV-19^^Luxembourg|Human|Laboratoire national de sant\u00e9|Laboratoire national de sant\u00e9|Wienecke-Baldacchino|Luxembourg

>Spike|hCoV-19/Australia/NSW1068/2020|2020-08-01|EPI\_ISL\_593708|Original|hCoV-19^^New South Wales|Human|South Eastern Area Laboratory Services (SEALS)|NSW Health Pathology - Institute of Clinical Pathology and Medical Research; Westmead Hospital; University of Sydney|Gall|Australia

>Spike|hCoV-19/New Zealand/20VR1960/2020|2020-04-05|EPI\_ISL\_579179|Original|hCoV-19^^Southern|Human|Southern Community Labs Dunedin|Institute of Environmental Science and Research (ESR)|Wang|New Zealand

>Spike|hCoV-19/Australia/VIC14332/2020|2020-08-01|EPI\_ISL\_592454|Original|hCoV-19^^Victoria|Human|Microbiological Diagnostic Unit - Public Health Laboratory (MDU-PHL)|MDU-PHL|Schultz|Australia

>Spike|hCoV-19/England/CAMB-1BC3DC/2020|2020-11-27|EPI\_ISL\_723869|Original|hCoV-19^^England|Human|Department of Pathology|COVID-19 Genomics UK (COG-UK) Consortium|Goodfellow|United Kingdom

>Spike|hCoV-19/France/PAC-IHU-1212/2020|2020-08-17|EPI\_ISL\_569088|Original|hCoV-19^^Provence-Alpes-C\u00f4te-d\u2019Azur|Human|MEPHI|MEPHI|Levasseur|France

>Spike|hCoV-19/England/SHEF-10C802F/2020|2020-12-11|EPI\_ISL\_727878|Original|hCoV-19^^England|Human|Virology Department|COVID-19 Genomics UK (COG-UK) Consortium|de Silva|United Kingdom

>Spike|hCoV-19/England/MILK-63A605/2020|2020-07-04|EPI\_ISL\_557764|Original|hCoV-19^^England|Human|Lighthouse Lab in Milton Keynes|Wellcome Sanger Institute for the COVID-19 Genomics UK (COG-UK) consortium|Davies|United Kingdom

>Spike|hCoV-19/USA/WA-S1272/2020|2020-05-11|EPI\_ISL\_495722|Original|hCoV-19^^Washington|Human|Washington State Department of Health|Seattle Flu Study|Lee|USA

>Spike|hCoV-19/Australia/VIC8431/2020|2020-00-00|EPI\_ISL\_565006|Original|hCoV-19^^Victoria|Human|Microbiological Diagnostic Unit - Public Health Laboratory (MDU-PHL)|MDU-PHL|Schultz|Australia

>Spike|hCoV-19/England/SHEF-C0725/2020|2020-03-25|EPI\_ISL\_420261|Original|hCoV-19^^England|Human|Virology Department|Department of Infection|de Silva|United Kingdom

>Spike|hCoV-19/Wales/PHWC-2807B/2020|2020-03-25|EPI\_ISL\_431926|Original|hCoV-19^^Wales|Human|Wales Specialist Virology Centre|Public Health Wales Microbiology Cardiff|Moore|United Kingdom

>Spike|hCoV-19/Canada/BC\_3972884/2020|2020-03-10|EPI\_ISL\_418822|Original|hCoV-19^^British Columbia|Human|BCCDC Public Health Laboratory|BCCDC Public Health Laboratory|Harrigan|Canada

>Spike|hCoV-19/South Korea/KCDC2172/2020|2020-03-23|EPI\_ISL\_506966|Original|hCoV-19^^South Korea|Human|Division of Viral Diseases|Division of Viral Diseases|Kim|South Korea

>Spike|hCoV-19/USA/LA-BIE-011/2020|2020-04-08|EPI\_ISL\_468706|Original|hCoV-19^^Louisiana|Human|Ochsner Health|Bioinfoexperts|Cross|USA

>Spike|hCoV-19/England/QEUA-A222EA/2020|2020-10-01|EPI\_ISL\_587350|Original|hCoV-19^^England|Human|Lighthouse Lab in Glasgow|Wellcome Sanger Institute for the COVID-19 Genomics UK (COG-UK) consortium|Davies|United Kingdom

>Spike|hCoV-19/England/20140050604/2020|2020-03-26|EPI\_ISL\_420764|Original|hCoV-19^^England|Human|Respiratory Virus Unit|Respiratory Virus Unit|Platt|United Kingdom

>Spike|hCoV-19/USA/CA-CZB-9717/2020|2020-03-17|EPI\_ISL\_672159|Original|hCoV-19^^California|Human|The Ashley Laboratory|Chan-Zuckerberg Biohub|Bhatt|USA

>Spike|hCoV-19/Canada/ON-S1462/2020|2020-08-00|EPI\_ISL\_770835|Original|hCoV-19^^Ontario|Human|Toronto Invasive Bacterial Diseases Network|McMaster University|McArthur|Canada

>Spike|hCoV-19/Australia/VIC2389/2020|2020-06-29|EPI\_ISL\_522107|Original|hCoV-19^^Victoria|Human|Victorian Infectious Diseases Reference Laboratory (VIDRL)|VIDRL and MDU-PHL|Schultz|Australia

>Spike|hCoV-19/Singapore/70/2020|2020-04-15|EPI\_ISL\_428849|Original|hCoV-19^^Singapore|Human|National Public Health Laboratory|National Public Health Laboratory|Mak|Singapore

>Spike|hCoV-19/USA/TX-HMH-MCoV-8845/2020|2020-07-02|EPI\_ISL\_780791|Original|hCoV-19^^Texas|Human|Houston Methodist Hospital|Houston Methodist Hospital|Long|USA

>Spike|hCoV-19/England/CAMB-7CDBD/2020|2020-04-05|EPI\_ISL\_442257|Original|hCoV-19^^England|Human|Department of Pathology|Wellcome Sanger Institute for the COVID-19 Genomics UK (COG-UK) consortium|Amato|United Kingdom

>Spike|hCoV-19/England/CAMC-BE02E7/2020|2020-11-29|EPI\_ISL\_709880|Original|hCoV-19^^England|Human|Lighthouse Lab in Cambridge|Wellcome Sanger Institute for the COVID-19 Genomics UK (COG-UK) Consortium|Davies|United Kingdom

>Spike|hCoV-19/Germany/HH-hpi-p2468/2020|2020-04-26|EPI\_ISL\_776527|Original|hCoV-19^^Hamburg|Human|University Medical Center Hamburg Eppendorf|Heinrich Pette Institute|Robitaille|Germany

>Spike|hCoV-19/Saudi Arabia/KAIMRC69/2020|2020-04-05|EPI\_ISL\_507030|unknown|hCoV-19^^Saudi Arabia|Human|unknown|Infectious Diseases Research|Submitter|Saudi Arabia

>Spike|hCoV-19/Scotland/QEUA-98F8EA/2020|2020-08-27|EPI\_ISL\_540062|Original|hCoV-19^^Scotland|Human|Lighthouse Lab in Glasgow|Wellcome Sanger Institute for the COVID-19 Genomics UK (COG-UK) consortium|Davies|United Kingdom

>Spike|hCoV-19/Denmark/DCGC-16344/2020|2020-11-16|EPI\_ISL\_714147|Original|hCoV-19^^Hovedstaden|Human|Department of Virus and Microbiological Special Diagnostics|Albertsen Lab|Michaelsen|Denmark

>Spike|hCoV-19/USA/TX-HMH-7590/2020|2020-06-26|EPI\_ISL\_546875|Original|hCoV-19^^Texas|Human|Houston Methodist Hospital|Houston Methodist Hospital|Long|USA

>Spike|hCoV-19/Denmark/DCGC-13674/2020|2020-11-30|EPI\_ISL\_712950|Original|hCoV-19^^Hovedstaden|Human|Department of Virus and Microbiological Special Diagnostics|Albertsen Lab|Michaelsen|Denmark

>Spike|hCoV-19/England/NORW-FA31F/2020|2020-12-11|EPI\_ISL\_725495|Original|hCoV-19^^England|Human|Quadram Institute Bioscience|COVID-19 Genomics UK (COG-UK) Consortium|Alikhan|United Kingdom

>Spike|hCoV-19/England/MILK-9A5523/2020|2020-09-03|EPI\_ISL\_550193|Original|hCoV-19^^England|Human|Lighthouse Lab in Milton Keynes|Wellcome Sanger Institute for the COVID-19 Genomics UK (COG-UK) consortium|Davies|United Kingdom

>Spike|hCoV-19/Ireland/CE-UHL298/2020|2020-04-27|EPI\_ISL\_681714|Original|hCoV-19^^Clare|Human|University Hospital Limerick|Irish Coronavirus Sequencing Consortium - Teagasc Moorepark|Walsh|Ireland

>Spike|hCoV-19/USA/CO-UW-MAYO38/2020|2020-03-20|EPI\_ISL\_500527|Original|hCoV-19^^Colorado|Human|Mayo Clinic Laboratories|University of Washington Virology Lab|Roychoudhury|USA

>Spike|hCoV-19/Belgium/WAM-030676/2020|2020-03-06|EPI\_ISL\_420332|Original|hCoV-19^^Herstal|Human|KU Leuven|KU Leuven|Maes|Belgium

>Spike|hCoV-19/Japan/PG-4702/2020|2020-07-00|EPI\_ISL\_689839|Original|hCoV-19^^Japan|Human|Pathogen Genomics Center|Pathogen Genomics Center|Sekizuka|Japan

>Spike|hCoV-19/Scotland/CVR3162/2020|2020-04-22|EPI\_ISL\_449196|Original|hCoV-19^^Scotland|Human|West of Scotland Specialist Virology Centre|COVID-19 Genomics UK (COG-UK) Consortium|Robertson|United Kingdom

>Spike|hCoV-19/England/CAMC-BF475A/2020|2020-12-05|EPI\_ISL\_709039|Original|hCoV-19^^England|Human|Lighthouse Lab in Cambridge|Wellcome Sanger Institute for the COVID-19 Genomics UK (COG-UK) Consortium|Davies|United Kingdom

>Spike|hCoV-19/England/QEUA-B31144/2020|2020-11-04|EPI\_ISL\_646390|Original|hCoV-19^^England|Human|Lighthouse Lab in Glasgow|Wellcome Sanger Institute for the COVID-19 Genomics UK (COG-UK) Consortium|Davies|United Kingdom

>Spike|hCoV-19/Wales/PHWC-24CC6/2020|2020-03-21|EPI\_ISL\_420938|Original|hCoV-19^^Wales|Human|Wales Specialist Virology Centre|Public Health Wales Microbiology Cardiff|Moore|United Kingdom

>Spike|hCoV-19/Scotland/QEUA-AAB155/2020|2020-10-21|EPI\_ISL\_652775|Original|hCoV-19^^Scotland|Human|Oxford Viromics|COVID-19 Genomics UK (COG-UK) Consortium|Golubchik|United Kingdom

>Spike|hCoV-19/Scotland/QEUA-9DC1C5/2020|2020-09-22|EPI\_ISL\_575344|Original|hCoV-19^^Scotland|Human|Lighthouse Lab in Glasgow|Wellcome Sanger Institute for the COVID-19 Genomics UK (COG-UK) consortium|Davies|United Kingdom

>Spike|hCoV-19/Belgium/reg-0405289/2020|2020-04-05|EPI\_ISL\_464083|Original|hCoV-19^^Edingen|Human|KU Leuven|KU Leuven|Maes|Belgium

>Spike|hCoV-19/Switzerland/BL-ETHZ-200052/2020|2020-07-11|EPI\_ISL\_510736|Original|hCoV-19^^Basel-Landschaft|Human|Viollier AG|Department of Biosystems Science and Engineering|Nadeau|Switzerland

>Spike|hCoV-19/England/MILK-A7B30D/2020|2020-10-14|EPI\_ISL\_607589|Original|hCoV-19^^England|Human|Lighthouse Lab in Milton Keynes|Wellcome Sanger Institute for the COVID-19 Genomics UK (COG-UK) consortium|Davies|United Kingdom

>Spike|hCoV-19/USA/TX-HMH-6372/2020|2020-07-06|EPI\_ISL\_547426|Original|hCoV-19^^Texas|Human|Houston Methodist Hospital|Houston Methodist Hospital|Long|USA

>Spike|hCoV-19/England/CAMB-1BBD39/2020|2020-00-00|EPI\_ISL\_679225|Original|hCoV-19^^England|Human|Department of Pathology|COVID-19 Genomics UK (COG-UK) Consortium|Goodfellow|United Kingdom

>Spike|hCoV-19/England/204691949/2020|2020-11-15|EPI\_ISL\_693454|Original|hCoV-19^^England|Human|Respiratory Virus Unit|COVID-19 Genomics UK (COG-UK) Consortium|Platt|United Kingdom



>Spike|hCoV-19/England/205090693/2020|2020-12-12|EPI\_ISL\_768808|Original|hCoV-19^^England|Human|Respiratory Virus Unit|COVID-19 Genomics UK (COG-UK) Consortium|Platt|United Kingdom

>Spike|hCoV-19/England/205260418/2020|2020-00-00|EPI\_ISL\_766538|Original|hCoV-19^^England|Human|Respiratory Virus Unit|COVID-19 Genomics UK (COG-UK) Consortium|Platt|United Kingdom

>Spike|hCoV-19/USA/UT-UPHL-2012782938/2020|2020-10-26|EPI\_ISL\_746247|Original|hCoV-19^^Utah|Human|Ginkgo Bioworks Clinical Laboratory|Utah Public Health Laboratory|Young|USA

>Spike|hCoV-19/Canada/ON-UHTC\_0345/2020|2020-09-11|EPI\_ISL\_609804|Original|hCoV-19^^Ontario|Human|Unity Health Toronto|Ontario Institute for Cancer Research|de Borja|Canada

>Spike|hCoV-19/England/ALDP-B45F9E/2020|2020-11-07|EPI\_ISL\_655986|Original|hCoV-19^^England|Human|Lighthouse Lab in Alderley Park|Wellcome Sanger Institute for the COVID-19 Genomics UK (COG-UK) Consortium|Davies|United Kingdom

>Spike|hCoV-19/Germany/HH-hpi-p1642/2020|2020-03-17|EPI\_ISL\_775679|Original|hCoV-19^^Hamburg|Human|University Medical Center Hamburg Eppendorf|Heinrich Pette Institute|Robitaille|Germany

>Spike|hCoV-19/Australia/NSW1201/2020|2020-11-08|EPI\_ISL\_667801|Original|hCoV-19^^New South Wales|Human|South Eastern Area Laboratory Services (SEALS)|NSW Health Pathology - Institute of Clinical Pathology and Medical Research; Westmead Hospital; University of Sydney|Gall|Australia

>Spike|hCoV-19/Jordan/AM-ALSR-5152/2020|2020-10-12|EPI\_ISL\_730391|Original|hCoV-19^^Amman|Human|Biolab Diagnostic Laboratories|Andersen lab at Scripps Research|Gangavarapu|Jordan

>Spike|hCoV-19/USA/TX-HMH-MCoV-14978/2020|2020-10-16|EPI\_ISL\_786462|Original|hCoV-19^^Texas|Human|Houston Methodist Hospital|Houston Methodist Hospital|Long|USA

>Spike|hCoV-19/Wales/PHWC-2B02D/2020|2020-04-08|EPI\_ISL\_432392|Original|hCoV-19^^Wales|Human|Wales Specialist Virology Centre|Public Health Wales Microbiology Cardiff|Moore|United Kingdom

>Spike|hCoV-19/Spain/IB-IBV-99010821/2020|2020-08-02|EPI\_ISL\_691658|Original|hCoV-19^^Balear Islands|Human|Servicio de Microbiolog\u00eda|SeqCOVID-SPAIN consortium/IBV (CSIC)|Comas|Spain

>Spike|hCoV-19/England/NORT-29D0BB/2020|2020-05-04|EPI\_ISL\_488157|Original|hCoV-19^^England|Human|NU-OMICS DNA Sequencing research facility|Wellcome Sanger Institute for the COVID-19 Genomics UK (COG-UK) consortium|Davies|United Kingdom

>Spike|hCoV-19/Netherlands/ZH-EMC-775/2020|2020-09-26|EPI\_ISL\_632612|Original|hCoV-19^^Zuid Holland|Human|Dutch COVID-19 response team|Erasmus Medical Center|Oude Munnink|Netherlands

>Spike|hCoV-19/Australia/WA440/2020|2020-09-26|EPI\_ISL\_672652|Original|hCoV-19^^Western Australia|Human|PathWest Laboratory Medicine WA|PathWest Laboratory Medicine WA Microbial Surveillance Unit|Sikazwe|Australia

>Spike|hCoV-19/England/ALDP-9500CC/2020|2020-06-18|EPI\_ISL\_555263|Original|hCoV-19^^England|Human|Lighthouse Lab in Alderley Park|Wellcome Sanger Institute for the COVID-19 Genomics UK (COG-UK) consortium|Davies|United Kingdom

>Spike|hCoV-19/Italy/APU-PODV-15961609/2020|2020-09-03|EPI\_ISL\_788952|Original|hCoV-19^^Apulia|Human|Ospedale \Di Venere\|Beaconlab (Bioinformatics|Chiara|Italy

>Spike|hCoV-19/Japan/PG-6922/2020|2020-09-00|EPI\_ISL\_688029|Original|hCoV-19^^Japan|Human|Pathogen Genomics Center|Pathogen Genomics Center|Sekizuka|Japan

>Spike|hCoV-19/England/QEUEH-B0DB34/2020|2020-11-02|EPI\_ISL\_642127|Original|hCoV-19^^England|Human|Lighthouse Lab in Glasgow|Wellcome Sanger Institute for the COVID-19 Genomics UK (COG-UK) Consortium|Davies|United Kingdom

>Spike|hCoV-19/England/ALDP-6C93E6/2020|2020-07-02|EPI\_ISL\_556128|Original|hCoV-19^^England|Human|Lighthouse Lab in Alderley Park|Wellcome Sanger Institute for the COVID-19 Genomics UK (COG-UK) consortium|Davies|United Kingdom

>Spike|hCoV-19/Canada/BC\_6129127/2020|2020-03-10|EPI\_ISL\_418837|Original|hCoV-19^^British Columbia|Human|BCCDC Public Health Laboratory|BCCDC Public Health Laboratory|Harrigan|Canada

>Spike|hCoV-19/Sweden/20-50336/2020|2020-03-13|EPI\_ISL\_475088|Original|hCoV-19^^Stockholm|Human|Karolinska Universitetslaboratoriet|The Public Health Agency of Sweden|Svartstr\u00f6m|Sweden

>Spike|hCoV-19/England/MILK-BAB43D/2020|2020-11-18|EPI\_ISL\_681652|Original|hCoV-19^^England|Human|Lighthouse Lab in Milton Keynes|Wellcome Sanger Institute for the COVID-19 Genomics UK (COG-UK) Consortium|Davies|United Kingdom

>Spike|hCoV-19/USA/CO-QDX-1055/2020|2020-03-17|EPI\_ISL\_571716|Original|hCoV-19^^Colorado|Human|Quest Diagnostics|Quest Diagnostics|Kagan|USA

>Spike|hCoV-19/Scotland/QEUIH-C4C01B/2020|2020-12-14|EPI\_ISL\_757111|Original|hCoV-19^^Scotland|Human|Lighthouse Lab in Glasgow|Wellcome Sanger Institute for the COVID-19 Genomics UK (COG-UK) Consortium|Davies|United Kingdom

>Spike|hCoV-19/Canada/NS-NML-1357/2020|2020-04-14|EPI\_ISL\_579734|Original|hCoV-19^^Nova Scotia|Human|QEII Health Sciences Centre|National Microbiology Laboratory (NML)|Majer|Canada

>Spike|hCoV-19/England/CAMC-A593D8/2020|2020-10-09|EPI\_ISL\_597154|Original|hCoV-19^^England|Human|Lighthouse Lab in Cambridge|Wellcome Sanger Institute for the COVID-19 Genomics UK (COG-UK) consortium|Davies|United Kingdom

>Spike|hCoV-19/USA/AZ-TG547256/2020|2020-07-03|EPI\_ISL\_695452|Original|hCoV-19^^Arizona|Human|AZ SPHL|TGen North|French|USA

>Spike|hCoV-19/South Africa/KRISP-K002179/2020|2020-07-08|EPI\_ISL\_515580|Original|hCoV-19^^KwaZulu-Natal|Human|NHLS-IALCH|KRISP|de Oliveira|South Africa

>Spike|hCoV-19/USA/TX-HMH-7332/2020|2020-06-29|EPI\_ISL\_546681|Original|hCoV-19^^Texas|Human|Houston Methodist Hospital|Houston Methodist Hospital|Long|USA

>Spike|hCoV-19/USA/TX-HMH-MCoV-18380/2020|2020-11-18|EPI\_ISL\_784728|Original|hCoV-19^^Texas|Human|Houston Methodist Hospital|Houston Methodist Hospital|Long|USA

>Spike|hCoV-19/Scotland/CVR1975/2020|2020-04-08|EPI\_ISL\_433268|Original|hCoV-19^^Scotland|Human|West of Scotland Specialist Virology Centre|COVID-19 Genomics UK (COG-UK) Consortium|Robertson|United Kingdom

>Spike|hCoV-19/USA/FL-BPHL-0993/2020|2020-07-02|EPI\_ISL\_517883|Original|hCoV-19^^Florida|Human|Florida Bureau of Public Health Laboratories|Florida Bureau of Public Health Laboratories|Blanton|USA

>Spike|hCoV-19/Jordan/IR-ALSR-5194/2020|2020-10-08|EPI\_ISL\_730432|Original|hCoV-19^^Irbid|Human|Biolab Diagnostic Laboratories|Andersen lab at Scripps Research|Gangavarapu|Jordan

>Spike|hCoV-19/Scotland/QEUIH-A1F58D/2020|2020-10-01|EPI\_ISL\_599036|Original|hCoV-19^^Scotland|Human|Lighthouse Lab in Glasgow|Wellcome Sanger Institute for the COVID-19 Genomics UK (COG-UK) consortium|Davies|United Kingdom

>Spike|hCoV-19/England/204742188/2020|2020-00-00|EPI\_ISL\_649902|Original|hCoV-19^^England|Human|Respiratory Virus Unit|COVID-19 Genomics UK (COG-UK) Consortium|Platt|United Kingdom

>Spike|hCoV-19/South Korea/KCDC2068/2020|2020-02-19|EPI\_ISL\_497969|Original|hCoV-19^^South Korea|Human|Division of Viral Diseases|Division of Viral Diseases|Kim|South Korea

>Spike|hCoV-19/Wales/PHWC-49B25B/2020|2020-10-30|EPI\_ISL\_742310|Original|hCoV-19^^Wales|Human|Wales Specialist Virology Centre Sequencing lab|COVID-19 Genomics UK (COG-UK) Consortium|Moore|United Kingdom

>Spike|hCoV-19/Wales/PHWC-4A5968/2020|2020-12-15|EPI\_ISL\_763733|Original|hCoV-19^^Wales|Human|Wales Specialist Virology Centre Sequencing lab|COVID-19 Genomics UK (COG-UK) Consortium|Moore|United Kingdom

>Spike|hCoV-19/England/EXET-13EEC2/2020|2020-12-14|EPI\_ISL\_764377|Original|hCoV-19^^England|Human|University of Exeter|COVID-19 Genomics UK (COG-UK) Consortium|Temperton|United Kingdom

>Spike|hCoV-19/England/ALDP-C8C1A3/2020|2020-12-15|EPI\_ISL\_777036|Original|hCoV-19^^England|Human|Lighthouse Lab in Alderley Park|Wellcome Sanger Institute for the COVID-19 Genomics UK (COG-UK) Consortium|Davies|United Kingdom

>Spike|hCoV-19/England/LIVE-DC1262/2020|2020-11-06|EPI\_ISL\_665141|Original|hCoV-19^^England|Human|Liverpool Clinical Laboratories|COVID-19 Genomics UK (COG-UK) Consortium|Haldenby|United Kingdom

>Spike|hCoV-19/Ireland/WX-NVRL-72IRL33041/2020|2020-08-15|EPI\_ISL\_578230|Original|hCoV-19^^Wexford|Human|National Virus Reference Laboratory|National Virus Reference Laboratory|Gonzalez|Ireland

>Spike|hCoV-19/Denmark/DCGC-2326/2020|2020-08-10|EPI\_ISL\_617663|Original|hCoV-19^^Hovedstaden|Human|Department of Virus and Microbiological Special Diagnostics|Albertsen lab|Michaelsen|Denmark

>Spike|hCoV-19/Portugal/PT0087/2020|2020-03-22|EPI\_ISL\_421490|Original|hCoV-19^^Portugal|Human|H Santarem|Instituto Nacional de Saude (INSA)|Borges|Portugal

>Spike|hCoV-19/England/MILK-A7B024/2020|2020-10-14|EPI\_ISL\_607297|Original|hCoV-19^^England|Human|Lighthouse Lab in Milton Keynes|Wellcome Sanger Institute for the COVID-19 Genomics UK (COG-UK) consortium|Davies|United Kingdom

>Spike|hCoV-19/Denmark/DCGC-17324/2020|2020-12-14|EPI\_ISL\_750907|Original|hCoV-19^^Hovedstaden|Human|Department of Virus and Microbiological Special Diagnostics|Albertsen Lab|Michaelsen|Denmark

>Spike|hCoV-19/Wales/ALDP-B1B69C/2020|2020-11-01|EPI\_ISL\_710947|Original|hCoV-19^^Wales|Human|Lighthouse Lab in Alderley Park|Wellcome Sanger Institute for the COVID-19 Genomics UK (COG-UK) Consortium|Davies|United Kingdom

>Spike|hCoV-19/England/CAMC-A5849A/2020|2020-10-08|EPI\_ISL\_597209|Original|hCoV-19^^England|Human|Lighthouse Lab in Cambridge|Wellcome Sanger Institute for the COVID-19 Genomics UK (COG-UK) consortium|Davies|United Kingdom

>Spike|hCoV-19/Switzerland/ZH-ETHZ-260122/2020|2020-08-26|EPI\_ISL\_539429|Original|hCoV-19^^Zurich|Human|Viollier AG|Department of Biosystems Science and Engineering|Nadeau|Switzerland

>Spike|hCoV-19/USA/LA-EVTL329/2020|2020-05-19|EPI\_ISL\_578735|Original|hCoV-19^^Louisiana|Human|LSUHS Emerging Viral Threat Laboratory|Microbial Genome Sequencing Center|Kamil|USA

>Spike|hCoV-19/USA/TX-HMH-MCoV-19429/2020|2020-11-30|EPI\_ISL\_783835|Original|hCoV-19^^Texas|Human|Houston Methodist Hospital|Houston Methodist Hospital|Long|USA

>Spike|hCoV-19/Scotland/EDB3662/2020|2020-04-28|EPI\_ISL\_453101|Original|hCoV-19^^Scotland|Human|Virology Department|COVID-19 Genomics UK (COG-UK) Consortium|Williams|United Kingdom

>Spike|hCoV-19/Wales/PHWC-48C5EB/2020|2020-11-05|EPI\_ISL\_666447|Original|hCoV-19^^Wales|Human|Wales Specialist Virology Centre Sequencing lab|COVID-19 Genomics UK (COG-UK) Consortium|Moore|United Kingdom

>Spike|hCoV-19/England/PORT-2D5C1D/2020|2020-12-19|EPI\_ISL\_763660|Original|hCoV-19^^England|Human|Centre for Enzyme Innovation|COVID-19 Genomics UK (COG-UK) Consortium|Robson|United Kingdom

>Spike|hCoV-19/USA/UT-08683/2020|2020-05-08|EPI\_ISL\_524404|Original|hCoV-19^^Utah|Human|Utah Public Health Laboratory|Utah Public Health Laboratory|Young|USA

>Spike|hCoV-19/USA/CA-QDX-1981/2020|2020-03-17|EPI\_ISL\_604294|Original|hCoV-19^^California|Human|Quest Diagnostics|Quest Diagnostics|Kagan|USA

>Spike|hCoV-19/England/20174000904/2020|2020-04-21|EPI\_ISL\_465377|Original|hCoV-19^^England|Human|Respiratory Virus Unit|Respiratory Virus Unit|Platt|United Kingdom

>Spike|hCoV-19/Wales/PHWC-47E40D/2020|2020-10-13|EPI\_ISL\_595453|Original|hCoV-19^^Wales|Human|Originating lab|COVID-19 Genomics UK (COG-UK) Consortium|Moore|United Kingdom

>Spike|hCoV-19/Netherlands/ZuidHolland\_194/2020|2020-05-11|EPI\_ISL\_461366|Original|hCoV-19^^Zuid Holland|Human|Dutch COVID-19 response team|Erasmus Medical Center|Oude Munnink|Netherlands

>Spike|hCoV-19/Australia/NSW2232/2020|2020-03-20|EPI\_ISL\_509511|Original|hCoV-19^^New South Wales|Human|Area of Virology|Area of Virology|Yeang|Australia

>Spike|hCoV-19/Canada/ON-PHL-20-01766/2020|2020-07-00|EPI\_ISL\_636919|Original|hCoV-19^^Ontario|Human|Public Health Ontario Laboratory|Public Health Ontario Laboratory|Guthrie|Canada

>Spike|hCoV-19/England/204691197/2020|2020-11-14|EPI\_ISL\_693441|Original|hCoV-19^^England|Human|Respiratory Virus Unit|COVID-19 Genomics UK (COG-UK) Consortium|Platt|United Kingdom

>Spike|hCoV-19/England/QEUH-A0B34E/2020|2020-10-01|EPI\_ISL\_599460|Original|hCoV-19^^England|Human|Lighthouse Lab in Glasgow|Wellcome Sanger Institute for the COVID-19 Genomics UK (COG-UK) consortium|Davies|United Kingdom

>Spike|hCoV-19/Scotland/QEUA-A2195F/2020|2020-10-01|EPI\_ISL\_598833|Original|hCoV-19^^Scotland|Human|Lighthouse Lab in Glasgow|Wellcome Sanger Institute for the COVID-19 Genomics UK (COG-UK) consortium|Davies|United Kingdom

>Spike|hCoV-19/England/ALDP-C04A6C/2020|2020-12-04|EPI\_ISL\_720770|Original|hCoV-19^^England|Human|Lighthouse Lab in Alderley Park|Wellcome Sanger Institute for the COVID-19 Genomics UK (COG-UK) Consortium|Davies|United Kingdom

>Spike|hCoV-19/Singapore/1179/2020|2020-04-12|EPI\_ISL\_648107|Original|hCoV-19^^Singapore|Human|Department of Laboratory Medicine|Department of Laboratory Medicine|Chen|Singapore

>Spike|hCoV-19/Denmark/DCGC-19495/2020|2020-12-07|EPI\_ISL\_748987|Original|hCoV-19^^Syddanmark|Human|Department of Virus and Microbiological Special Diagnostics|Albertsen Lab|Michaelsen|Denmark

>Spike|hCoV-19/Australia/VIC470/2020|2020-03-26|EPI\_ISL\_426762|Original|hCoV-19^^Victoria|Human|Victorian Infectious Diseases Reference Laboratory (VIDRL)|Microbiological Diagnostic Unit Public Health Laboratory and Victorian Infectious Diseases Reference Laboratory|Schultz|Australia

>Spike|hCoV-19/Wales/PHWC-481B02/2020|2020-10-18|EPI\_ISL\_612178|Original|hCoV-19^^Wales|Human|Wales Specialist Virology Centre Sequencing lab|COVID-19 Genomics UK (COG-UK) Consortium|Moore|United Kingdom

>Spike|hCoV-19/England/ALDP-B249E2/2020|2020-11-04|EPI\_ISL\_646932|Original|hCoV-19^^England|Human|Lighthouse Lab in Alderley Park|Wellcome Sanger Institute for the COVID-19 Genomics UK (COG-UK) Consortium|Davies|United Kingdom

>Spike|hCoV-19/USA/UT-QDX-1860/2020|2020-03-14|EPI\_ISL\_604174|Original|hCoV-19^^Utah|Human|Quest Diagnostics|Quest Diagnostics|Kagan|USA

>Spike|hCoV-19/England/MILK-9E1F78/2020|2020-09-20|EPI\_ISL\_581356|Original|hCoV-19^^England|Human|Lighthouse Lab in Milton Keynes|Wellcome Sanger Institute for the COVID-19 Genomics UK (COG-UK) consortium|Davies|United Kingdom

>Spike|hCoV-19/England/MILK-B01E37/2020|2020-10-24|EPI\_ISL\_642923|Original|hCoV-19^^England|Human|Lighthouse Lab in Milton Keynes|Wellcome Sanger Institute for the COVID-19 Genomics UK (COG-UK) Consortium|Davies|United Kingdom

>Spike|hCoV-19/Palestine/14/2020|2020-03-10|EPI\_ISL\_596503|Original|hCoV-19^^Bethlehem|Human|Palestinian Ministry of Health|Molecular Genetics Lab|van Dorp|Palestine

>Spike|hCoV-19/England/QEUA-9DD416/2020|2020-09-21|EPI\_ISL\_599780|Original|hCoV-19^^England|Human|Lighthouse Lab in Glasgow|Wellcome Sanger Institute for the COVID-19 Genomics UK (COG-UK) consortium|Davies|United Kingdom

>Spike|hCoV-19/England/CAMC-B7B1D5/2020|2020-11-12|EPI\_ISL\_723992|Original|hCoV-19^^England|Human|Oxford Viromics|COVID-19 Genomics UK (COG-UK) Consortium|Golubchik|United Kingdom

>Spike|hCoV-19/Wales/PHWC-160BC0/2020|2020-05-19|EPI\_ISL\_473026|Original|hCoV-19^^Wales|Human|Wales Specialist Virology Centre Sequencing lab|COVID-19 Genomics UK (COG-UK) Consortium|Moore|United Kingdom

>Spike|hCoV-19/England/ALDP-B2624F/2020|2020-11-04|EPI\_ISL\_646560|Original|hCoV-19^^England|Human|Lighthouse Lab in Alderley Park|Wellcome Sanger Institute for the COVID-19 Genomics UK (COG-UK) Consortium|Davies|United Kingdom

>Spike|hCoV-19/Russia/SPE-R11-9364V/2020|2020-04-23|EPI\_ISL\_507296|Vero P1|hCoV-19^^Saint Petersburg|Human|WHO National Influenza Centre Russian Federation|WHO National Influenza Centre Russian Federation|Komissarov|Russia

>Spike|hCoV-19/USA/TX-DSHS-0893/2020|2020-06-16|EPI\_ISL\_610029|Original|hCoV-19^^Texas|Human|Texas Department of State Health Services|Texas Department of State Health Services|Rahman|USA

>Spike|hCoV-19/England/QEUA-9DBDC2/2020|2020-09-21|EPI\_ISL\_601284|Original|hCoV-19^^England|Human|Lighthouse Lab in Glasgow|Wellcome Sanger Institute for the COVID-19 Genomics UK (COG-UK) consortium|Davies|United Kingdom

>Spike|hCoV-19/Netherlands/GE-EMC-410/2020|2020-11-12|EPI\_ISL\_722621|Original|hCoV-19^^Gelderland|Human|Dutch COVID-19 response team|Erasmus Medical Center|Oude Munnink|Netherlands

>Spike|hCoV-19/England/LEED-2A8369/2020|2020-04-02|EPI\_ISL\_538994|Original|hCoV-19^^England|Human|Leeds Teaching Hospitals NHS Trust and Public Health

England|Wellcome Sanger Institute for the COVID-19 Genomics UK (COG-UK)  
Consortium|Davies|United Kingdom  
>Spike|hCoV-19/USA/VA-DCLS-0181/2020|2020-04-06|EPI\_ISL\_437397|Original|hCoV-19^^Virginia|Human|Virginia DCLS|Virginia DCLS|St. Jacques|USA  
>Spike|hCoV-19/Netherlands/NH-RIVM-20654/2020|2020-12-21|EPI\_ISL\_790726|Original|hCoV-19^^Noord-Holland|Human|Dutch COVID-19 response team|National Institute for Public Health and the Environment (RIVM)|Meijer|Netherlands  
>Spike|hCoV-19/Wales/PHWC-320F6/2020|2020-04-14|EPI\_ISL\_446605|Original|hCoV-19^^Wales|Human|Wales Specialist Virology Centre|Public Health Wales Microbiology Cardiff|Moore|United Kingdom  
>Spike|hCoV-19/Scotland/CVR5267/2020|2020-10-19|EPI\_ISL\_626855|Original|hCoV-19^^Scotland|Human|West of Scotland Specialist Virology Centre|COVID-19 Genomics UK (COG-UK) Consortium|Robertson|United Kingdom  
>Spike|hCoV-19/England/CAMC-A57659/2020|2020-10-09|EPI\_ISL\_597502|Original|hCoV-19^^England|Human|Lighthouse Lab in Cambridge|Wellcome Sanger Institute for the COVID-19 Genomics UK (COG-UK) consortium|Davies|United Kingdom  
>Spike|hCoV-19/Saudi Arabia/KAUST-Makkah126/2020|2020-03-24|EPI\_ISL\_437692|Original|hCoV-19^^Makkah|Human|Pathogen Genomics Lab King Abdullah University of Science and Technology(KAUST)|Pathogen Genomics Lab King Abdullah University of Science and Technology(KAUST)|Mohamed Ghazzali|Saudi Arabia  
>Spike|hCoV-19/USA/TX-HMH-3710/2020|2020-06-15|EPI\_ISL\_543127|Original|hCoV-19^^Texas|Human|Houston Methodist Hospital|Houston Methodist Hospital|Long|USA  
>Spike|hCoV-19/Spain/MD-IBV-005349/2020|2020-03-19|EPI\_ISL\_510226|Original|hCoV-19^^Madrid|Human|Hospital General Universitario Gregorio Mara\u00f1a|SeqCOVID-SPAIN consortium/IBV (CSIC)|Comas|Spain  
>Spike|hCoV-19/England/CAMC-A58FC6/2020|2020-10-09|EPI\_ISL\_597007|Original|hCoV-19^^England|Human|Lighthouse Lab in Cambridge|Wellcome Sanger Institute for the COVID-19 Genomics UK (COG-UK) consortium|Davies|United Kingdom  
>Spike|hCoV-19/England/ALDP-9D9FDD/2020|2020-09-18|EPI\_ISL\_576834|Original|hCoV-19^^England|Human|Oxford Viromics|COVID-19 Genomics UK (COG-UK) Consortium|Golubchik|United Kingdom  
>Spike|hCoV-19/USA/WA-S2029/2020|2020-06-05|EPI\_ISL\_497457|Original|hCoV-19^^Washington|Human|Washington State Department of Health|Seattle Flu Study|Lee|USA  
>Spike|hCoV-19/England/MILK-AC9670/2020|2020-10-21|EPI\_ISL\_629303|Original|hCoV-19^^England|Human|Lighthouse Lab in Milton Keynes|Wellcome Sanger Institute for the COVID-19 Genomics UK (COG-UK) consortium|Davies|United Kingdom  
>Spike|hCoV-19/Australia/VIC2098/2020|2020-06-15|EPI\_ISL\_480707|Original|hCoV-19^^Victoria|Human|Victorian Infectious Diseases Reference Laboratory (VIDRL)|VIDRL and MDU-PHL|Schultz|Australia  
>Spike|hCoV-19/Japan/PG-8424/2020|2020-09-00|EPI\_ISL\_687523|Original|hCoV-19^^Japan|Human|Pathogen Genomics Center|Pathogen Genomics Center|Sekizuka|Japan  
>Spike|hCoV-19/USA/CA-CHLA-PLM21494482/2020|2020-12-01|EPI\_ISL\_753569|Original|hCoV-19^^California|Human|Clinical virology Laboratory|Center for Personalized Medicine|Dien Bard|USA  
>Spike|hCoV-19/Canada/ON-S1924/2020|2020-11-24|EPI\_ISL\_729269|Original|hCoV-19^^Ontario|Human|Toronto Invasive Bacterial Diseases Network|McMaster University|McArthur|Canada  
>Spike|hCoV-19/mink/Netherlands/NB-EMC-1-11/2020|2020-04-28|EPI\_ISL\_522994|Original|hCoV-19^^Noord Brabant|Neovison vison|Dutch COVID-19 response team|Erasmus Medical Center|Oude Munnink|Netherlands  
>Spike|hCoV-19/England/20149009304/2020|2020-03-30|EPI\_ISL\_466145|Original|hCoV-19^^England|Human|Respiratory Virus Unit|Respiratory Virus Unit|Platt|United Kingdom  
>Spike|hCoV-19/USA/LA-EVTL711/2020|2020-07-15|EPI\_ISL\_653403|Original|hCoV-19^^Louisiana|Human|LSUHS Emerging Viral Threat Laboratory|Microbial Genome Sequencing Center|Kamil|USA  
>Spike|hCoV-19/Zimbabwe/ZW-27BY/2020|2020-04-01|EPI\_ISL\_644753|Original|hCoV-19^^Zimbabwe|Human|National Microbiology Reference Laboratory|Quadram Institute Bioscience|Alikhan|Zimbabwe

>Spike|hCoV-19/Japan/PG-0546/2020|2020-04-01|EPI\_ISL\_480202|Original|hCoV-19^^HokurikuShinsyu|Human|Toyama Institute of Health|Pathogen Genomics Center|Sekizuka|Japan

>Spike|hCoV-19/USA/WA-S686/2020|2020-04-08|EPI\_ISL\_449856|Original|hCoV-19^^Washington|Human|Washington State Department of Health|Seattle Flu Study|Bedford|USA

>Spike|hCoV-19/England/EXET-13606A/2020|2020-04-17|EPI\_ISL\_457192|Original|hCoV-19^^England|Human|University of Exeter|COVID-19 Genomics UK (COG-UK) Consortium|Temperton|United Kingdom

>Spike|hCoV-19/England/MILK-A6986D/2020|2020-10-09|EPI\_ISL\_665675|Original|hCoV-19^^England|Human|University of Exeter|COVID-19 Genomics UK (COG-UK) Consortium|Temperton|United Kingdom

>Spike|hCoV-19/England/QEUA-AE27E7/2020|2020-10-27|EPI\_ISL\_633639|Original|hCoV-19^^England|Human|Lighthouse Lab in Glasgow|Wellcome Sanger Institute for the COVID-19 Genomics UK (COG-UK) consortium|Davies|United Kingdom

>Spike|hCoV-19/Hong Kong/VM20002906/2020|2020-02-25|EPI\_ISL\_426400|Original|hCoV-19^^Hong Kong|Human|Pamela Youde Nethersole Eastern Hospital|Hong Kong Department of Health|Mak|China

>Spike|hCoV-19/Scotland/EDB7820/2020|2020-09-22|EPI\_ISL\_573796|Original|hCoV-19^^Scotland|Human|Virology Department|COVID-19 Genomics UK (COG-UK) Consortium|Williams|United Kingdom

>Spike|hCoV-19/England/CAMB-7E920/2020|2020-04-08|EPI\_ISL\_443072|Original|hCoV-19^^England|Human|Department of Pathology|Wellcome Sanger Institute for the COVID-19 Genomics UK (COG-UK) consortium|Amato|United Kingdom

>Spike|hCoV-19/USA/CA-CZB-1048/2020|2020-04-04|EPI\_ISL\_437048|Original|hCoV-19^^California|Human|County of Santa Clara Public Health|Chan-Zuckerberg Biohub|Hao|USA

>Spike|hCoV-19/France/IDF-10076MH/2020|2020-03-00|EPI\_ISL\_447686|Original|hCoV-19^^France|Human|H\u00f4pital Henri-Mondor Ap-Hp|H\u00f4pital Henri-Mondor Ap-Hp|Rodriguez|France

>Spike|hCoV-19/USA/WI-UW-317/2020|2020-04-19|EPI\_ISL\_436611|Original|hCoV-19^^Wisconsin|Human|University of Wisconsin-Madison AIDS Vaccine Research Laboratories|University of Wisconsin-Madison AIDS Vaccine Research Laboratories|Baczenas|USA

>Spike|hCoV-19/England/20188064104/2020|2020-05-01|EPI\_ISL\_465510|Original|hCoV-19^^England|Human|Respiratory Virus Unit|Respiratory Virus Unit|Platt|United Kingdom

>Spike|hCoV-19/England/MILK-95806A/2020|2020-06-14|EPI\_ISL\_554842|Original|hCoV-19^^England|Human|Lighthouse Lab in Milton Keynes|Wellcome Sanger Institute for the COVID-19 Genomics UK (COG-UK) consortium|Davies|United Kingdom

>Spike|hCoV-19/USA/WI-UW-444/2020|2020-06-18|EPI\_ISL\_484819|Original|hCoV-19^^Wisconsin|Human|University of Wisconsin-Madison AIDS Vaccine Research Laboratories|University of Wisconsin-Madison AIDS Vaccine Research Laboratories|Baczenas|USA

>Spike|hCoV-19/England/NOTT-113D11/2020|2020-09-29|EPI\_ISL\_573476|Original|hCoV-19^^England|Human|Queens Medical Centre|COVID-19 Genomics UK (COG-UK) Consortium|Loose|United Kingdom

>Spike|hCoV-19/England/CAMC-942AFC/2020|2020-07-23|EPI\_ISL\_556913|Original|hCoV-19^^England|Human|Lighthouse Lab in Cambridge|Wellcome Sanger Institute for the COVID-19 Genomics UK (COG-UK) consortium|Davies|United Kingdom

>Spike|hCoV-19/Wales/MILK-A47A8D/2020|2020-10-06|EPI\_ISL\_609224|Original|hCoV-19^^Wales|Human|Lighthouse Lab in Milton Keynes|Wellcome Sanger Institute for the COVID-19 Genomics UK (COG-UK) consortium|Davies|United Kingdom

>Spike|hCoV-19/England/ALDP-9FD753/2020|2020-10-01|EPI\_ISL\_588017|Original|hCoV-19^^England|Human|Lighthouse Lab in Alderley Park|Wellcome Sanger Institute for the COVID-19 Genomics UK (COG-UK) consortium|Davies|United Kingdom

>Spike|hCoV-19/USA/TX-HMH-6590/2020|2020-06-24|EPI\_ISL\_546108|Original|hCoV-19^^Texas|Human|Houston Methodist Hospital|Houston Methodist Hospital|Long|USA

>Spike|hCoV-19/England/ALDP-9E9D67/2020|2020-09-24|EPI\_ISL\_580035|Original|hCoV-19^^England|Human|Lighthouse Lab in Alderley Park|Wellcome Sanger Institute for the COVID-19 Genomics UK (COG-UK) consortium|Davies|United Kingdom

>Spike|hCoV-19/England/20140070804/2020|2020-03-30|EPI\_ISL\_423410|Original|hCoV-19^^England|Human|Respiratory Virus Unit|Respiratory Virus Unit|Platt|United Kingdom

>Spike|hCoV-19/England/CAMC-A57264/2020|2020-10-08|EPI\_ISL\_597365|Original|hCoV-19^^England|Human|Lighthouse Lab in Cambridge|Wellcome Sanger Institute for the COVID-19 Genomics UK (COG-UK) consortium|Davies|United Kingdom

>Spike|hCoV-19/Wales/PHWC-2E154/2020|2020-04-09|EPI\_ISL\_446062|Original|hCoV-19^^Wales|Human|Wales Specialist Virology Centre|Public Health Wales Microbiology Cardiff|Moore|United Kingdom

>Spike|hCoV-19/England/MILK-B882F0/2020|2020-11-14|EPI\_ISL\_674280|Original|hCoV-19^^England|Human|Lighthouse Lab in Milton Keynes|Wellcome Sanger Institute for the COVID-19 Genomics UK (COG-UK) Consortium|Davies|United Kingdom

>Spike|hCoV-19/England/CAMC-A3F8D9/2020|2020-10-06|EPI\_ISL\_609721|Original|hCoV-19^^England|Human|Lighthouse Lab in Cambridge|Wellcome Sanger Institute for the COVID-19 Genomics UK (COG-UK) consortium|Davies|United Kingdom

>Spike|hCoV-19/USA/WA-S216/2020|2020-03-20|EPI\_ISL\_430254|Original|hCoV-19^^Washington|Human|Washington State Department of Health|Seattle Flu Study|Bedford|USA

>Spike|hCoV-19/Portugal/PT0202/2020|2020-03-29|EPI\_ISL\_455626|Original|hCoV-19^^Portugal|Human|unknown|Instituto Nacional de Saude (INSA)|Borges|Portugal

>Spike|hCoV-19/England/CAMB-7E665/2020|2020-04-07|EPI\_ISL\_442576|Original|hCoV-19^^England|Human|Department of Pathology|Wellcome Sanger Institute for the COVID-19 Genomics UK (COG-UK) consortium|Amato|United Kingdom

>Spike|hCoV-19/USA/CT-Yale-220/2020|2020-03-31|EPI\_ISL\_463155|Original|hCoV-19^^Connecticut|Human|Yale Clinical Virology Laboratory|Grubaugh Lab - Yale School of Public Health|Grubaugh|USA

>Spike|hCoV-19/India/WB-IK50/2020|2020-05-05|EPI\_ISL\_508377|Original|hCoV-19^^West Bengal|Human|Institute of Post Graduate Medical Education & Research|National Institute of Biomedical Genomics|Maitra|India

>Spike|hCoV-19/USA/AZ-TG666155/2020|2020-05-02|EPI\_ISL\_696236|Original|hCoV-19^^Arizona|Human|Sonora Quest Laboratories|TGen North|French|USA

>Spike|hCoV-19/USA/TX-HMH-MCoV-15834/2020|2020-07-10|EPI\_ISL\_785518|Original|hCoV-19^^Texas|Human|Houston Methodist Hospital|Houston Methodist Hospital|Long|USA

>Spike|hCoV-19/Denmark/DCGC-16383/2020|2020-11-16|EPI\_ISL\_714735|Original|hCoV-19^^Midtjylland|Human|Department of Virus and Microbiological Special Diagnostics|Albertsen Lab|Michaelsen|Denmark

>Spike|hCoV-19/Norway/6016/2020|2020-11-26|EPI\_ISL\_775356|Original|hCoV-19^^Viken|Human|Norwegian Institute of Public Health|Norwegian Institute of Public Health|Vollan|Norway

>Spike|hCoV-19/England/LIVE-DC43C6/2020|2020-11-10|EPI\_ISL\_702739|Original|hCoV-19^^England|Human|Liverpool Clinical Laboratories|COVID-19 Genomics UK (COG-UK) Consortium|Haldenby|United Kingdom

>Spike|hCoV-19/England/ALDP-B5D6E9/2020|2020-11-09|EPI\_ISL\_703465|Original|hCoV-19^^England|Human|Department of Pathology|COVID-19 Genomics UK (COG-UK) Consortium|Goodfellow|United Kingdom

>Spike|hCoV-19/England/MILK-BFCCEA/2020|2020-12-02|EPI\_ISL\_720840|Original|hCoV-19^^England|Human|Lighthouse Lab in Milton Keynes|Wellcome Sanger Institute for the COVID-19 Genomics UK (COG-UK) Consortium|Davies|United Kingdom

>Spike|hCoV-19/USA/CA-CZB-14133/2020|2020-05-23|EPI\_ISL\_739196|Original|hCoV-19^^California|Human|Alameda County Public Health Lab|Chan-Zuckerberg Biohub|Kamm|USA

>Spike|hCoV-19/Japan/PG-5068/2020|2020-08-00|EPI\_ISL\_690178|Original|hCoV-19^^Japan|Human|Pathogen Genomics Center|Pathogen Genomics Center|Sekizuka|Japan

>Spike|hCoV-19/England/PORT-2D1E2A/2020|2020-04-06|EPI\_ISL\_499283|Original|hCoV-19^^England|Human|Centre for Enzyme Innovation|COVID-19 Genomics UK (COG-UK) Consortium|Robson|United Kingdom

>Spike|hCoV-19/Denmark/DCGC-17369/2020|2020-12-14|EPI\_ISL\_750938|Original|hCoV-19^^Midtjylland|Human|Department of Virus and Microbiological Special Diagnostics|Albertsen Lab|Michaelsen|Denmark

>Spike|hCoV-19/Australia/VIC14556/2020|2020-08-07|EPI\_ISL\_592891|Original|hCoV-19^^Victoria|Human|Microbiological Diagnostic Unit - Public Health Laboratory (MDU-PHL)|MDU-PHL|Schultz|Australia

>Spike|hCoV-19/Australia/VIC9541/2020|2020-08-20|EPI\_ISL\_565594|Original|hCoV-19^^Victoria|Human|Microbiological Diagnostic Unit - Public Health Laboratory (MDU-PHL)|MDU-PHL|Schultz|Australia

>Spike|hCoV-19/Norway/5663/2020|2020-10-30|EPI\_ISL\_708141|Original|hCoV-19^^Oslo|Human|Norwegian Institute of Public Health|Norwegian Institute of Public Health|Kopperud Riis|Norway

>Spike|hCoV-19/Spain/VC-FISABIO-31/2020|2020-03-09|EPI\_ISL\_420116|Original|hCoV-19^^Comunitat Valenciana|Human|Servicio de Microbiolog\u00eda. Consorcio Hospital General Universitario de Valencia|Sequencing and Bioinformatics Service and Molecular Epidemiology Research Group. FISABIO-Public Health|Gonzalez-Candelas|Spain

>Spike|hCoV-19/England/MILK-B868D2/2020|2020-11-13|EPI\_ISL\_674033|Original|hCoV-19^^England|Human|Lighthouse Lab in Milton Keynes|Wellcome Sanger Institute for the COVID-19 Genomics UK (COG-UK) Consortium|Davies|United Kingdom

>Spike|hCoV-19/Wales/ALDP-C3B905/2020|2020-12-11|EPI\_ISL\_767218|Original|hCoV-19^^Wales|Human|Lighthouse Lab in Alderley Park|Wellcome Sanger Institute for the COVID-19 Genomics UK (COG-UK) Consortium|Davies|United Kingdom

>Spike|hCoV-19/England/QEUH-B12923/2020|2020-11-02|EPI\_ISL\_642245|Original|hCoV-19^^England|Human|Lighthouse Lab in Glasgow|Wellcome Sanger Institute for the COVID-19 Genomics UK (COG-UK) Consortium|Davies|United Kingdom

>Spike|hCoV-19/Brazil/RJ-00444/2020|2020-04-08|EPI\_ISL\_717839|Original|hCoV-19^^Rio de Janeiro|Human|Laboratorio de Virologia Molecular / UFRJ|Bioinformatics Laboratory / LNCC|Almeida|Brazil

>Spike|hCoV-19/India/KA-nimh-11866/2020|2020-05-06|EPI\_ISL\_515950|Original|hCoV-19^^Karnataka|Human|VICTORIA HOSPITAL|Department of Neurovirology|Pattabiraman|India

>Spike|hCoV-19/India/MH-NIV-209852/2020|2020-09-13|EPI\_ISL\_577669|Original|hCoV-19^^Maharashtra|Human|NIV Influenza|NIV Influenza|Potdar|India

>Spike|hCoV-19/England/MILK-B39A32/2020|2020-11-02|EPI\_ISL\_679659|Original|hCoV-19^^England|Human|Oxford Viromics|COVID-19 Genomics UK (COG-UK) Consortium|Golubchik|United Kingdom

>Spike|hCoV-19/Portugal/PT0273/2020|2020-04-05|EPI\_ISL\_453987|Original|hCoV-19^^Portugal|Human|unknown|Instituto Nacional de Saude (INSA)|Borges|Portugal

>Spike|hCoV-19/Japan/PG-3056/2020|2020-04-00|EPI\_ISL\_691179|Original|hCoV-19^^Japan|Human|Pathogen Genomics Center|Pathogen Genomics Center|Sekizuka|Japan

>Spike|hCoV-19/USA/NY-PV09183/2020|2020-03-19|EPI\_ISL\_422542|Original|hCoV-19^^New York|Human|MSHS Clinical Microbiology Laboratories|MSHS Pathogen Surveillance Program|van Bakel|USA

>Spike|hCoV-19/Russia/SPE-RII-34646S/2020|2020-09-18|EPI\_ISL\_596237|Original|hCoV-19^^Saint Petersburg|Human|WHO National Influenza Centre Russian Federation|WHO National Influenza Centre Russian Federation|Komissarov|Russia

>Spike|hCoV-19/Wales/MILK-5938E7/2020|2020-06-11|EPI\_ISL\_558328|Original|hCoV-19^^Wales|Human|Lighthouse Lab in Milton Keynes|Wellcome Sanger Institute for the COVID-19 Genomics UK (COG-UK) Consortium|Davies|United Kingdom

>Spike|hCoV-19/Wales/PHWC-4975DE/2020|2020-12-01|EPI\_ISL\_726853|Original|hCoV-19^^Wales|Human|Originating lab|COVID-19 Genomics UK (COG-UK) Consortium|Moore|United Kingdom

>Spike|hCoV-19/Iceland/256/2020|2020-03-17|EPI\_ISL\_417584|Original|hCoV-19^^Reykjavik|Human|The National University Hospital of Iceland|deCODE genetics|J\u00f3nsson|Iceland

>Spike|hCoV-19/South Korea/KDCA0239/2020|2020-08-24|EPI\_ISL\_760004|Original|hCoV-19^^South Korea|Human|Division of Emerging Infectious Diseases|Division of Emerging Infectious Diseases|Park|South Korea

>Spike|hCoV-19/Denmark/DCGC-9832/2020|2020-11-09|EPI\_ISL\_669210|Original|hCoV-19^^Denmark|Human|Department of Virus and Microbiological Special Diagnostics|Albertsen Lab|Michaelsen|Denmark

>Spike|hCoV-19/Netherlands/Overijssel\_12/2020|2020-04-08|EPI\_ISL\_460801|Original|hCoV-19^^Overijssel|Human|Dutch COVID-19 response team|Erasmus Medical Center|Oude Munnink|Netherlands

>Spike|hCoV-19/England/ALDP-A6CB07/2020|2020-10-15|EPI\_ISL\_608096|Original|hCoV-19^^England|Human|Lighthouse Lab in Alderley Park|Wellcome Sanger Institute for the COVID-19 Genomics UK (COG-UK) consortium|Davies|United Kingdom



>Spike|hCoV-19/England/QEUEH-BA2B7D/2020|2020-11-18|EPI\_ISL\_672796|Original|hCoV-19^^England|Human|Lighthouse Lab in Glasgow|Wellcome Sanger Institute for the COVID-19 Genomics UK (COG-UK) Consortium|Davies|United Kingdom

>Spike|hCoV-19/Italy/APU-UniMI-5439/2020|2020-04-11|EPI\_ISL\_525569|Original|hCoV-19^^Apulia|Human|Istituto Zooprofilattico Sperimentale Puglia e Basilicata; Dipartimento di Bioscienze|Beaconlab (Bioinformatics|Chiara|Italy

>Spike|hCoV-19/Denmark/DCGC-1700/2020|2020-06-22|EPI\_ISL\_618167|Original|hCoV-19^^Syddanmark|Human|Department of Virus and Microbiological Special Diagnostics|Albertsen lab|Michaelsen|Denmark

>Spike|hCoV-19/USA/AZ-TG664231/2020|2020-04-28|EPI\_ISL\_696038|Original|hCoV-19^^Arizona|Human|Sonora Quest Laboratories|TGen North|French|USA

>Spike|hCoV-19/England/CAMB-7A3CC/2020|2020-04-02|EPI\_ISL\_440574|Original|hCoV-19^^England|Human|Department of Pathology|Wellcome Sanger Institute for the COVID-19 Genomics UK (COG-UK) consortium|Amato|United Kingdom

>Spike|hCoV-19/England/QEUEH-BA1015/2020|2020-11-18|EPI\_ISL\_719654|Original|hCoV-19^^England|Human|Lighthouse Lab in Glasgow|Wellcome Sanger Institute for the COVID-19 Genomics UK (COG-UK) Consortium|Davies|United Kingdom

>Spike|hCoV-19/USA/NM-UNM-00608/2020|2020-05-11|EPI\_ISL\_560361|Original|hCoV-19^^New Mexico|Human|TriCore Reference Laboratories|Center for Global Health|Domman|USA

>Spike|hCoV-19/England/ALDP-9E62F2/2020|2020-09-24|EPI\_ISL\_580525|Original|hCoV-19^^England|Human|Lighthouse Lab in Alderley Park|Wellcome Sanger Institute for the COVID-19 Genomics UK (COG-UK) consortium|Davies|United Kingdom

>Spike|hCoV-19/USA/CT-Yale-202/2020|2020-03-30|EPI\_ISL\_463140|Original|hCoV-19^^Connecticut|Human|Yale Clinical Virology Laboratory|Grubaugh Lab - Yale School of Public Health|Grubaugh|USA

>Spike|hCoV-19/Australia/NSW1019/2020|2020-03-29|EPI\_ISL\_593664|Original|hCoV-19^^New South Wales|Human|Pathology West - NSW Health Pathology|NSW Health Pathology - Institute of Clinical Pathology and Medical Research; Westmead Hospital; University of Sydney|Gall|Australia

>Spike|hCoV-19/England/CAMC-A3F851/2020|2020-10-07|EPI\_ISL\_609734|Original|hCoV-19^^England|Human|Lighthouse Lab in Cambridge|Wellcome Sanger Institute for the COVID-19 Genomics UK (COG-UK) consortium|Davies|United Kingdom

>Spike|hCoV-19/England/PORT-2D322C/2020|2020-04-09|EPI\_ISL\_628317|Original|hCoV-19^^England|Human|Centre for Enzyme Innovation|COVID-19 Genomics UK (COG-UK) Consortium|Robson|United Kingdom

>Spike|hCoV-19/England/QEUEH-964942/2020|2020-08-13|EPI\_ISL\_531077|Original|hCoV-19^^England|Human|Lighthouse Lab in Glasgow|Wellcome Sanger Institute for the COVID-19 Genomics UK (COG-UK) consortium|Davies|United Kingdom

>Spike|hCoV-19/England/ALDP-9FD50E/2020|2020-10-01|EPI\_ISL\_587784|Original|hCoV-19^^England|Human|Lighthouse Lab in Alderley Park|Wellcome Sanger Institute for the COVID-19 Genomics UK (COG-UK) consortium|Davies|United Kingdom

>Spike|hCoV-19/USA/HI-H200449/2020|2020-10-09|EPI\_ISL\_752992|Original|hCoV-19^^Hawaii|Human|State Laboratories Division|State Laboratories Division|Sultana|USA

>Spike|hCoV-19/India/MH-ACTREC-376/2020|2020-07-24|EPI\_ISL\_700025|Original|hCoV-19^^Maharashtra|Human|Hematopathology Laboratory|Hematopathology Laboratory|Patkar|India

>Spike|hCoV-19/USA/WA-S1720/2020|2020-06-01|EPI\_ISL\_496146|Original|hCoV-19^^Washington|Human|Washington State Department of Health|Seattle Flu Study|Lee|USA

>Spike|hCoV-19/England/ALDP-9FDD33/2020|2020-10-01|EPI\_ISL\_588002|Original|hCoV-19^^England|Human|Lighthouse Lab in Alderley Park|Wellcome Sanger Institute for the COVID-19 Genomics UK (COG-UK) consortium|Davies|United Kingdom

>Spike|hCoV-19/South Korea/KDCA0188/2020|2020-11-14|EPI\_ISL\_747421|Original|hCoV-19^^South Korea|Human|Division of Emerging Infectious Diseases|Division of Emerging Infectious Diseases|Park|South Korea

>Spike|hCoV-19/Australia/VIC8165/2020|2020-08-11|EPI\_ISL\_564881|Original|hCoV-19^^Victoria|Human|Microbiological Diagnostic Unit - Public Health Laboratory (MDU-PHL)|MDU-PHL|Schultz|Australia

>Spike|hCoV-19/India/GJ-GBRC279/2020|2020-06-18|EPI\_ISL\_495016|Original|hCoV-19^^Gujarat|Human|B.J. Medical College and Civil hospital|Gujarat Biotechnology Research Centre|Joshi|India

>Spike|hCoV-19/England/CAMC-BD48C6/2020|2020-11-27|EPI\_ISL\_702294|Original|hCoV-19^^England|Human|Lighthouse Lab in Cambridge|Wellcome Sanger Institute for the COVID-19 Genomics UK (COG-UK) Consortium|Davies|United Kingdom

>Spike|hCoV-19/USA/AZ-TG338117/2020|2020-05-30|EPI\_ISL\_694372|Original|hCoV-19^^Arizona|Human|TGen North|TGen North|French|USA

>Spike|hCoV-19/Australia/VIC5095/2020|2020-07-19|EPI\_ISL\_519898|Original|hCoV-19^^Victoria|Human|Microbiological Diagnostic Unit - Public Health Laboratory (MDU-PHL)|MDU-PHL|Schultz|Australia

>Spike|hCoV-19/USA/MD-HP12141/2020|2020-12-26|EPI\_ISL\_791450|Original|hCoV-19^^Maryland|Human|Johns Hopkins Hospital Department of Pathology|Johns Hopkins Hospital Department of Pathology|Morris|USA

>Spike|hCoV-19/England/CAMB-82570/2020|2020-04-13|EPI\_ISL\_443562|Original|hCoV-19^^England|Human|Department of Pathology|Wellcome Sanger Institute for the COVID-19 Genomics UK (COG-UK) consortium|Amato|United Kingdom

>Spike|hCoV-19/Ireland/D-SVUH-R6635/2020|2020-04-05|EPI\_ISL\_596674|Original|hCoV-19^^Dublin|Human|St.Vincent's University Hospital|St.Vincent's University Hospital|Gonzalez|Ireland

>Spike|hCoV-19/England/CAMC-BBBFDF/2020|2020-11-21|EPI\_ISL\_724113|Original|hCoV-19^^England|Human|Northumbria University / South Tees Hospitals NHS Foundation Trust / North Cumbria Integrated Care NHS Foundation Trust / North Tees and Hartlepool NHS Foundation Trust / Newcastle Hospitals NHS Foundation Trust|COVID-19 Genomics UK (COG-UK) Consortium|Bashton|United Kingdom

>Spike|hCoV-19/England/204690096/2020|2020-11-13|EPI\_ISL\_683527|Original|hCoV-19^^England|Human|Respiratory Virus Unit|COVID-19 Genomics UK (COG-UK) Consortium|Platt|United Kingdom

>Spike|hCoV-19/Iceland/599/2020|2020-03-28|EPI\_ISL\_424619|Original|hCoV-19^^Reykjavik|Human|The National University Hospital of Iceland|deCODE genetics|J\u00f3nsson|Iceland

>Spike|hCoV-19/Scotland/CVR5754/2020|2020-11-01|EPI\_ISL\_704089|Original|hCoV-19^^Scotland|Human|West of Scotland Specialist Virology Centre|COVID-19 Genomics UK (COG-UK) Consortium|Robertson|United Kingdom

>Spike|hCoV-19/France/ARA-12499/2020|2020-03-23|EPI\_ISL\_420608|Original|hCoV-19^^Auvergne-Rh\u00f4ne-Alpes|Human|Institut des Agents Infectieux (IAI)|CNR Virus des Infections Respiratoires - France SUD|Josset|France

>Spike|hCoV-19/Spain/VC-FISABIO-206/2020|2020-03-17|EPI\_ISL\_436301|Original|hCoV-19^^Comunitat Valenciana|Human|Servicio de Microbiología. Hospital Clínico Universitario de Valencia|Sequencing and Bioinformatics Service and Molecular Epidemiology Research Group. FISABIO-Public Health|Gonzalez-Candelas|Spain

>Spike|hCoV-19/England/ALDP-9FD234/2020|2020-10-02|EPI\_ISL\_587739|Original|hCoV-19^^England|Human|Lighthouse Lab in Alderley Park|Wellcome Sanger Institute for the COVID-19 Genomics UK (COG-UK) consortium|Davies|United Kingdom

>Spike|hCoV-19/England/QEUH-9C7C53/2020|2020-09-10|EPI\_ISL\_567086|Original|hCoV-19^^England|Human|Lighthouse Lab in Glasgow|Wellcome Sanger Institute for the COVID-19 Genomics UK (COG-UK) consortium|Davies|United Kingdom

>Spike|hCoV-19/Scotland/QEUH-9F6B21/2020|2020-09-27|EPI\_ISL\_600644|Original|hCoV-19^^Scotland|Human|Lighthouse Lab in Glasgow|Wellcome Sanger Institute for the COVID-19 Genomics UK (COG-UK) consortium|Davies|United Kingdom

>Spike|hCoV-19/England/MILK-B96C2E/2020|2020-11-13|EPI\_ISL\_674971|Original|hCoV-19^^England|Human|Lighthouse Lab in Milton Keynes|Wellcome Sanger Institute for the COVID-19 Genomics UK (COG-UK) Consortium|Davies|United Kingdom

>Spike|hCoV-19/England/MILK-B558BE/2020|2020-11-05|EPI\_ISL\_657554|Original|hCoV-19^^England|Human|Lighthouse Lab in Milton Keynes|Wellcome Sanger Institute for the COVID-19 Genomics UK (COG-UK) Consortium|Davies|United Kingdom

>Spike|hCoV-19/Denmark/DCGC-7833/2020|2020-10-19|EPI\_ISL\_618797|Original|hCoV-19^^Midtjylland|Human|Department of Virus and Microbiological Special Diagnostics|Albertsen lab|Michaelsen|Denmark

>Spike|hCoV-19/Scotland/CVR2837/2020|2020-04-21|EPI\_ISL\_438987|Original|hCoV-19^^Scotland|Human|West of Scotland Specialist Virology Centre|COVID-19 Genomics UK (COG-UK) Consortium|Robertson|United Kingdom

>Spike|hCoV-19/Russia/PSK-RII-MH5658S/2020|2020-11-09|EPI\_ISL\_733310|Original|hCoV-19^^Pskov|Human|HELIX LLC|WHO National Influenza Centre Russian Federation|Komissarov|Russia

>Spike|hCoV-19/USA/TX-HMH-7234/2020|2020-06-29|EPI\_ISL\_546616|Original|hCoV-19^^Texas|Human|Houston Methodist Hospital|Houston Methodist Hospital|Long|USA

>Spike|hCoV-19/United Arab Emirates/0979/2020|2020-06-14|EPI\_ISL\_698212|Original|hCoV-19^^Abu Dhabi|Human|Group 42 (G42) Healthcare|G42 Healthcare|Ogrodzki|United Arab Emirates

>Spike|hCoV-19/Denmark/DCGC-20000/2020|2020-12-07|EPI\_ISL\_747920|Original|hCoV-19^^Hovedstaden|Human|Department of Virus and Microbiological Special Diagnostics|Albertsen Lab|Michaelsen|Denmark

>Spike|hCoV-19/Spain/AN-IBV-001994/2020|2020-03-16|EPI\_ISL\_452399|Original|hCoV-19^^Andalucia|Human|Servicio de Microbiolog\u00eda. HRU de M\u00e9llaga. Servicio Andaluz de Salud|SeqCOVID-SPAIN consortium/IBV(CSIC)|Comas|Spain

>Spike|hCoV-19/South Korea/KCDC2609/2020|2020-06-30|EPI\_ISL\_515012|Original|hCoV-19^^South Korea|Human|Division of Viral Diseases|Division of Viral Diseases|Kim|South Korea

>Spike|hCoV-19/England/MILK-62CDD4/2020|2020-07-05|EPI\_ISL\_557854|Original|hCoV-19^^England|Human|Lighthouse Lab in Milton Keynes|Wellcome Sanger Institute for the COVID-19 Genomics UK (COG-UK) consortium|Davies|United Kingdom

>Spike|hCoV-19/England/MILK-A47CE1/2020|2020-10-05|EPI\_ISL\_598518|Original|hCoV-19^^England|Human|Lighthouse Lab in Milton Keynes|Wellcome Sanger Institute for the COVID-19 Genomics UK (COG-UK) consortium|Davies|United Kingdom

>Spike|hCoV-19/Denmark/DCGC-6330/2020|2020-09-07|EPI\_ISL\_621187|Original|hCoV-19^^Midtjylland|Human|Department of Virus and Microbiological Special Diagnostics|Albertsen lab|Michaelsen|Denmark

>Spike|hCoV-19/USA/TX-HMH-MCoV-13018/2020|2020-08-28|EPI\_ISL\_788169|Original|hCoV-19^^Texas|Human|Houston Methodist Hospital|Houston Methodist Hospital|Long|USA

>Spike|hCoV-19/Wales/PHWC-16DCEE/2020|2020-09-25|EPI\_ISL\_577521|Original|hCoV-19^^Wales|Human|Wales Specialist Virology Centre Sequencing lab|COVID-19 Genomics UK (COG-UK) Consortium|Moore|United Kingdom

>Spike|hCoV-19/USA/CA-UCLA-29/2020|2020-05-29|EPI\_ISL\_537561|Original|hCoV-19^^California|Human|UCLA Pathology Clinical Microbiology Lab|Kruglyak Lab|Boocock|USA

>Spike|hCoV-19/England/CAMB-1ADBE5/2020|2020-05-04|EPI\_ISL\_448046|Original|hCoV-19^^England|Human|Department of Pathology|COVID-19 Genomics UK (COG-UK) Consortium|Meredith|United Kingdom

>Spike|hCoV-19/Portugal/PT0460/2020|2020-04-17|EPI\_ISL\_454184|Original|hCoV-19^^Portugal|Human|unknown|Instituto Nacional de Saude (INSA)|Borges|Portugal

>Spike|hCoV-19/USA/TX-HMH-7657/2020|2020-06-26|EPI\_ISL\_546919|Original|hCoV-19^^Texas|Human|Houston Methodist Hospital|Houston Methodist Hospital|Long|USA

>Spike|hCoV-19/England/CAMB-72B44/2020|2020-03-22|EPI\_ISL\_440064|Original|hCoV-19^^England|Human|Department of Pathology|Wellcome Sanger Institute for the COVID-19 Genomics UK (COG-UK) consortium|Amato|United Kingdom

>Spike|hCoV-19/Germany/SH-ChVir8319/2020|2020-07-26|EPI\_ISL\_729577|Original|hCoV-19^^Schleswig-Holstein|Human|A. Krumbholz|Charit\u00e9 Universit\u00e4tsmedizin Berlin|Muehlemann|Germany

>Spike|hCoV-19/USA/CA-CZB-6711/2020|2020-08-17|EPI\_ISL\_582975|Original|hCoV-19^^California|Human|Orange County Public Health Lab|Chan-Zuckerberg Biohub|Bhatt|USA

>Spike|hCoV-19/England/QEUA-AAEFC1/2020|2020-10-21|EPI\_ISL\_721555|Original|hCoV-19^^England|Human|Lighthouse Lab in Glasgow|Wellcome Sanger Institute for the COVID-19 Genomics UK (COG-UK) Consortium|Davies|United Kingdom

>Spike|hCoV-19/Denmark/DCGC-7900/2020|2020-10-26|EPI\_ISL\_618825|Original|hCoV-19^^Nordjylland|Human|Department of Virus and Microbiological Special Diagnostics|Albertsen lab|Michaelsen|Denmark

>Spike|hCoV-19/England/CAMB-82886/2020|2020-04-21|EPI\_ISL\_438635|Original|hCoV-19^^England|Human|Department of Pathology|COVID-19 Genomics UK (COG-UK) Consortium|Meredith|United Kingdom

>Spike|hCoV-19/USA/NY-Wadsworth-216883-01/2020|2020-09-14|EPI\_ISL\_765504|Original|hCoV-19^^New York|Human|Wadsworth Center|Wadsworth Center|Lasek-Nesselquist|USA

>Spike|hCoV-19/England/CAMC-A3F97C/2020|2020-10-07|EPI\_ISL\_609667|Original|hCoV-19^^England|Human|Lighthouse Lab in Cambridge|Wellcome Sanger Institute for the COVID-19 Genomics UK (COG-UK) consortium|Davies|United Kingdom

>Spike|hCoV-19/Netherlands/FR-EMC-47/2020|2020-06-01|EPI\_ISL\_523139|Original|hCoV-19^^Friesland|Human|Dutch COVID-19 response team|Erasmus Medical Center|Oude Munnink|Netherlands

>Spike|hCoV-19/USA/MN-MDH-1370/2020|2020-07-01|EPI\_ISL\_507958|Original|hCoV-19^^Minnesota|Human|Mayo Clinic & Mayo Clinic Laboratories|Minnesota Department of Health|Garfin|USA

>Spike|hCoV-19/South Africa/R12631-20/2020|2020-06-16|EPI\_ISL\_504202|Original|hCoV-19^^North West|Human|National Institute for Communicable Diseases of the National Health Laboratory Service|National Institute for Communicable Diseases of the National Health Laboratory Service|Allam|South Africa

>Spike|hCoV-19/Hungary/US-57557w/2020|2020-10-02|EPI\_ISL\_677793|Original|hCoV-19^^B\u00e9cs-Kiskun county|Human|University of Szeged|National Laboratory of Virology|Kemenesi|Hungary

>Spike|hCoV-19/Scotland/EDB6813/2020|2020-03-28|EPI\_ISL\_526491|Original|hCoV-19^^Scotland|Human|Virology Department|COVID-19 Genomics UK (COG-UK) Consortium|Williams|United Kingdom

>Spike|hCoV-19/England/ALDP-A6793F/2020|2020-10-12|EPI\_ISL\_630572|Original|hCoV-19^^England|Human|Lighthouse Lab in Alderley Park|Wellcome Sanger Institute for the COVID-19 Genomics UK (COG-UK) consortium|Davies|United Kingdom

>Spike|hCoV-19/England/201080072/2020|2020-03-03|EPI\_ISL\_464457|Original|hCoV-19^^England|Human|Respiratory Virus Unit|Respiratory Virus Unit|Platt|United Kingdom

>Spike|hCoV-19/England/ALDP-95A4C6/2020|2020-06-12|EPI\_ISL\_553417|Original|hCoV-19^^England|Human|Lighthouse Lab in Alderley Park|Wellcome Sanger Institute for the COVID-19 Genomics UK (COG-UK) consortium|Davies|United Kingdom

>Spike|hCoV-19/USA/MD-MDH-0064/2020|2020-05-25|EPI\_ISL\_509468|Original|hCoV-19^^Maryland|Human|Maryland Department of Health|Maryland Department of Health|Keller|USA

>Spike|hCoV-19/England/CAMC-B0AF2C/2020|2020-10-30|EPI\_ISL\_643409|Original|hCoV-19^^England|Human|Lighthouse Lab in Cambridge|Wellcome Sanger Institute for the COVID-19 Genomics UK (COG-UK) Consortium|Davies|United Kingdom

>Spike|hCoV-19/USA/MI-UM-10036287673/2020|2020-10-05|EPI\_ISL\_596570|Original|hCoV-19^^Michigan|Human|University of Michigan Clinical Microbiology Laboratory|Lauring Lab|Valesano|USA

>Spike|hCoV-19/Belgium/TMG-0326391/2020|2020-03-26|EPI\_ISL\_462245|Original|hCoV-19^^Grote-Brogel|Human|KU Leuven|KU Leuven|Maes|Belgium

>Spike|hCoV-19/Denmark/DCGC-22610/2020|2020-12-14|EPI\_ISL\_757669|Original|hCoV-19^^Sjælland|Human|Department of Virus and Microbiological Special Diagnostics|Albertsen Lab|Michaelsen|Denmark

>Spike|hCoV-19/USA/TX-DSHS-1242/2020|2020-08-27|EPI\_ISL\_676625|Original|hCoV-19^^Texas|Human|Texas Department of State Health Services|Texas Department of State Health Services|Rahman|USA

>Spike|hCoV-19/USA/TX-HMH-MCoV-10233/2020|2020-07-07|EPI\_ISL\_789382|Original|hCoV-19^^Texas|Human|Houston Methodist Hospital|Houston Methodist Hospital|Long|USA

>Spike|hCoV-19/Ireland/WW-NVRL-AIIDV0063v2/2020|2020-04-08|EPI\_ISL\_768761|Original|hCoV-19^^Wicklow|Human|AIID|Irish Coronavirus Sequencing Consortium - National Virus Reference Laboratory|Gonzalez|Ireland

>Spike|hCoV-19/Denmark/DCGC-9315/2020|2020-11-16|EPI\_ISL\_668904|Original|hCoV-19^^Nordjylland|Human|Department of Virus and Microbiological Special Diagnostics|Albertsen Lab|Michaelsen|Denmark

>Spike|hCoV-19/Italy/VEN-IZSVE-20RS2165-3/2020|2020-11-24|EPI\_ISL\_747478|Original|hCoV-19^^Veneto|Human|ULSS 5 Polesana|Istituto Zooprofilattico Sperimentale delle Venezie|Quaranta|Italy

>Spike|hCoV-19/Wales/PHWC-491C93/2020|2020-11-12|EPI\_ISL\_706764|Original|hCoV-19^^Wales|Human|Originating lab|COVID-19 Genomics UK (COG-UK) Consortium|Moore|United Kingdom

>Spike|hCoV-19/England/NORW-EB9F1/2020|2020-05-09|EPI\_ISL\_457466|Original|hCoV-19^^England|Human|Quadram Institute Bioscience|COVID-19 Genomics UK (COG-UK) Consortium|Alikhan|United Kingdom

>Spike|hCoV-19/Scotland/QEUIH-A1FF8F/2020|2020-10-01|EPI\_ISL\_599116|Original|hCoV-19^^Scotland|Human|Lighthouse Lab in Glasgow|Wellcome Sanger Institute for the COVID-19 Genomics UK (COG-UK) consortium|Davies|United Kingdom

>Spike|hCoV-19/Japan/PG-3678/2020|2020-04-00|EPI\_ISL\_691931|Original|hCoV-19^^Japan|Human|Pathogen Genomics Center|Pathogen Genomics Center|Sekizuka|Japan

>Spike|hCoV-19/England/ALDP-8B9D16/2020|2020-06-28|EPI\_ISL\_557009|Original|hCoV-19^^England|Human|Lighthouse Lab in Alderley Park|Wellcome Sanger Institute for the COVID-19 Genomics UK (COG-UK) consortium|Davies|United Kingdom

>Spike|hCoV-19/Australia/WA374/2020|2020-10-23|EPI\_ISL\_605851|Original|hCoV-19^^Western Australia|Human|PathWest Laboratory Medicine WA|PathWest Laboratory Medicine WA Microbial Surveillance Unit|Sikazwe|Australia

>Spike|hCoV-19/Scotland/CVR2957/2020|2020-04-22|EPI\_ISL\_461610|Original|hCoV-19^^Scotland|Human|West of Scotland Specialist Virology Centre|COVID-19 Genomics UK (COG-UK) Consortium|Robertson|United Kingdom

>Spike|hCoV-19/Netherlands/NH-EMC-83/2020|2020-09-02|EPI\_ISL\_632529|Original|hCoV-19^^Noord Holland|Human|Dutch COVID-19 response team|Erasmus Medical Center|Oude Munnink|Netherlands

>Spike|hCoV-19/Serbia/Novi Sad-091180205/2020|2020-05-01|EPI\_ISL\_676578|Original|hCoV-19^^Novi Sad|Human|Scientific Veterinary Institute Novi Sad|Veterinary Specialized Institute \Kraljevo\|Vidanovic|Serbia

>Spike|hCoV-19/England/MILK-C7B8B1/2020|2020-12-15|EPI\_ISL\_757031|Original|hCoV-19^^England|Human|Lighthouse Lab in Milton Keynes|Wellcome Sanger Institute for the COVID-19 Genomics UK (COG-UK) Consortium|Davies|United Kingdom

>Spike|hCoV-19/France/PDL-SC610/2020|2020-03-23|EPI\_ISL\_649175|Original|hCoV-19^^Pays-de-la-Loire|Human|CHU Nantes|CNR Virus des Infections Respiratoires - France SUD|Bal|France

>Spike|hCoV-19/Switzerland/Vs-ETHZ-390403/2020|2020-12-02|EPI\_ISL\_721702|Original|hCoV-19^^Valais|Human|Viollier AG|Department of Biosystems Science and Engineering|Nadeau|Switzerland

>Spike|hCoV-19/England/ALDP-9CB730/2020|2020-09-16|EPI\_ISL\_575627|Original|hCoV-19^^England|Human|Lighthouse Lab in Alderley Park|Wellcome Sanger Institute for the COVID-19 Genomics UK (COG-UK) consortium|Davies|United Kingdom

>Spike|hCoV-19/England/ALDP-CB4816/2020|2020-12-18|EPI\_ISL\_761742|Original|hCoV-19^^England|Human|Lighthouse Lab in Alderley Park|Wellcome Sanger Institute for the COVID-19 Genomics UK (COG-UK) Consortium|Davies|United Kingdom

>Spike|hCoV-19/England/CAMC-B78606/2020|2020-11-12|EPI\_ISL\_783414|Original|hCoV-19^^England|Human|Lighthouse Lab in Cambridge|Wellcome Sanger Institute for the COVID-19 Genomics UK (COG-UK) Consortium|Davies|United Kingdom

>Spike|hCoV-19/Luxembourg/LNS8064090/2020|2020-11-01|EPI\_ISL\_744675|Original|hCoV-19^^Luxembourg|Human|Laboratoire national de sant\u00e9|Laboratoire national de sant\u00e9|Wienecke-Baldacchino|Luxembourg

>Spike|hCoV-19/England/CAMC-BBBD99/2020|2020-11-21|EPI\_ISL\_705569|Original|hCoV-19^^England|Human|Quadram Institute Bioscience|COVID-19 Genomics UK (COG-UK) Consortium|Alikhan|United Kingdom

>Spike|hCoV-19/Japan/PG-7531/2020|2020-08-00|EPI\_ISL\_686633|Original|hCoV-19^^Japan|Human|Pathogen Genomics Center|Pathogen Genomics Center|Sekizuka|Japan

>Spike|hCoV-19/England/NORT-289692/2020|2020-03-31|EPI\_ISL\_458658|Original|hCoV-19^^England|Human|NU-OMICS DNA Sequencing research facility|Wellcome Sanger Institute for the COVID-19 Genomics UK (COG-UK) consortium|Davies|United Kingdom

>Spike|hCoV-19/Japan/PG-3453/2020|2020-07-00|EPI\_ISL\_691563|Original|hCoV-19^^Japan|Human|Pathogen Genomics Center|Pathogen Genomics Center|Sekizuka|Japan

>Spike|hCoV-19/Denmark/DCGC-14988/2020|2020-11-23|EPI\_ISL\_713565|Original|hCoV-19^^Hovedstaden|Human|Department of Virus and Microbiological Special Diagnostics|Albertsen Lab|Michaelsen|Denmark

>Spike|hCoV-19/England/QEUA-8845FE/2020|2020-07-26|EPI\_ISL\_532726|Original|hCoV-19^^England|Human|Lighthouse Lab in Glasgow|Wellcome Sanger Institute for the COVID-19 Genomics UK (COG-UK) consortium|Davies|United Kingdom

>Spike|hCoV-19/USA/CA-CZB-14814/2020|2020-11-18|EPI\_ISL\_739531|Original|hCoV-19^^California|Human|Humboldt County Public Health Laboratory|Chan-Zuckerberg Biohub|Kamm|USA

>Spike|hCoV-19/England/MILK-97460C/2020|2020-08-21|EPI\_ISL\_575928|Original|hCoV-19^^England|Human|Lighthouse Lab in Milton Keynes|Wellcome Sanger Institute for the COVID-19 Genomics UK (COG-UK) consortium|Davies|United Kingdom

>Spike|hCoV-19/Mexico/CMX-INER-01/2020|2020-03-12|EPI\_ISL\_424345|Original|hCoV-19^^Mexico City|Human|Instituto Nacional de Enfermedades Respiratorias|Instituto Nacional de Enfermedades Respiratorias|Vazquez|Mexico

>Spike|hCoV-19/USA/CA-CZB-14935/2020|2020-11-28|EPI\_ISL\_739034|Original|hCoV-19^^California|Human|Orange County Public Health Lab|Chan-Zuckerberg Biohub|Kamm|USA

>Spike|hCoV-19/Netherlands/Limburg\_62/2020|2020-04-19|EPI\_ISL\_461048|Original|hCoV-19^^Limburg|Human|Dutch COVID-19 response team|Erasmus Medical Center|Oude Munnink|Netherlands

>Spike|hCoV-19/England/QEUA-B80762/2020|2020-11-14|EPI\_ISL\_661927|Original|hCoV-19^^England|Human|Lighthouse Lab in Glasgow|Wellcome Sanger Institute for the COVID-19 Genomics UK (COG-UK) Consortium|Davies|United Kingdom

>Spike|hCoV-19/England/MILK-B97373/2020|2020-11-14|EPI\_ISL\_674928|Original|hCoV-19^^England|Human|Lighthouse Lab in Milton Keynes|Wellcome Sanger Institute for the COVID-19 Genomics UK (COG-UK) Consortium|Davies|United Kingdom

>Spike|hCoV-19/USA/TX-HMH-MCoV-10470/2020|2020-07-08|EPI\_ISL\_789489|Original|hCoV-19^^Texas|Human|Houston Methodist Hospital|Houston Methodist Hospital|Long|USA

>Spike|hCoV-19/England/CAMB-1ADF34/2020|2020-04-26|EPI\_ISL\_459457|Original|hCoV-19^^England|Human|Department of Pathology|Wellcome Sanger Institute for the COVID-19 Genomics UK (COG-UK) consortium|Davies|United Kingdom

>Spike|hCoV-19/Canada/ON-PHL-20-01168/2020|2020-06-00|EPI\_ISL\_548790|Original|hCoV-19^^Ontario|Human|Public Health Ontario Laboratory|Public Health Ontario Laboratory|Guthrie|Canada

>Spike|hCoV-19/Luxembourg/LNS5807524/2020|2020-04-13|EPI\_ISL\_434502|Original|hCoV-19^^Luxembourg|Human|Laboratoire National de Sante|Laboratoire National de Sante|Wienecke-Baldacchino|Luxembourg

>Spike|hCoV-19/Scotland/QEUA-9FFE7A/2020|2020-10-02|EPI\_ISL\_600318|Original|hCoV-19^^Scotland|Human|Lighthouse Lab in Glasgow|Wellcome Sanger Institute for the COVID-19 Genomics UK (COG-UK) consortium|Davies|United Kingdom

>Spike|hCoV-19/Japan/PG-4146/2020|2020-07-00|EPI\_ISL\_692385|Original|hCoV-19^^Japan|Human|Pathogen Genomics Center|Pathogen Genomics Center|Sekizuka|Japan

>Spike|hCoV-19/USA/AZ-TG491494/2020|2020-06-17|EPI\_ISL\_695124|Original|hCoV-19^^Arizona|Human|AZ SPHL|TGen North|French|USA

>Spike|hCoV-19/South Korea/KCDC2683/2020|2020-06-27|EPI\_ISL\_522464|Original|hCoV-19^^South Korea|Human|Center for Laboratory Control of Infectious Diseases|Center for Laboratory Control of Infectious Diseases|Kim|South Korea

>Spike|hCoV-19/USA/AZ-TG305791/2020|2020-04-27|EPI\_ISL\_694278|Original|hCoV-19^^Arizona|Human|AZ SPHL|TGen North|French|USA

>Spike|hCoV-19/England/BRIS-1853E63/2020|2020-04-27|EPI\_ISL\_492300|Original|hCoV-19^^England|Human|PHE South West Regional Laboratory|Wellcome Sanger Institute for the COVID-19 Genomics UK (COG-UK) consortium|Davies|United Kingdom

>Spike|hCoV-19/Spain/RI-IBV-005978/2020|2020-03-11|EPI\_ISL\_500412|Original|hCoV-19^^La Rioja|Human|Centro de Investigaci\u00f3n Biom\u00e9dica de La Rioja - Hospital San Pedro Logro\u00f1o|SeqCOVID-SPAIN consortium|IBV (CSIC)|Comas|Spain

>Spike|hCoV-19/England/MILK-A45C7A/2020|2020-10-06|EPI\_ISL\_598541|Original|hCoV-19^^England|Human|Lighthouse Lab in Milton Keynes|Wellcome Sanger Institute for the COVID-19 Genomics UK (COG-UK) consortium|Davies|United Kingdom

>Spike|hCoV-19/England/QEUA-B11915/2020|2020-11-02|EPI\_ISL\_642451|Original|hCoV-19^^England|Human|Lighthouse Lab in Glasgow|Wellcome Sanger Institute for the COVID-19 Genomics UK (COG-UK) Consortium|Davies|United Kingdom

>Spike|hCoV-19/England/QEUEH-AF6249/2020|2020-10-30|EPI\_ISL\_663072|Original|hCoV-19^^England|Human|Lighthouse Lab in Glasgow|Wellcome Sanger Institute for the COVID-19 Genomics UK (COG-UK) Consortium|Davies|United Kingdom

>Spike|hCoV-19/USA/UT-UPHL-04895/2020|2020-05-26|EPI\_ISL\_575191|Original|hCoV-19^^Utah|Human|Utah Public Health Laboratory|Utah Public Health Laboratory|Young|USA

>Spike|hCoV-19/Denmark/DCGC-22000/2020|2020-12-14|EPI\_ISL\_758504|Original|hCoV-19^^Hovedstaden|Human|Department of Virus and Microbiological Special Diagnostics|Albertsen Lab|Michaelsen|Denmark

>Spike|hCoV-19/England/QEUEH-9CE463/2020|2020-09-17|EPI\_ISL\_590066|Original|hCoV-19^^England|Human|Lighthouse Lab in Glasgow|Wellcome Sanger Institute for the COVID-19 Genomics UK (COG-UK) consortium|Davies|United Kingdom

>Spike|hCoV-19/USA/TX-HMH-MCoV-19760/2020|2020-11-20|EPI\_ISL\_784103|Original|hCoV-19^^Texas|Human|Houston Methodist Hospital|Houston Methodist Hospital|Long|USA

>Spike|hCoV-19/USA/TX-HMH-MCoV-9997/2020|2020-07-06|EPI\_ISL\_780112|Original|hCoV-19^^Texas|Human|Houston Methodist Hospital|Houston Methodist Hospital|Long|USA

>Spike|hCoV-19/Brazil/SP-549/2020|2020-04-01|EPI\_ISL\_471552|Original|hCoV-19^^S\u00e3o Paulo|Human|Hospital Sancta Maggiore|Instituto Adolfo Lutz|Sacchi|Brazil

>Spike|hCoV-19/Germany/NW-HHU-436/2020|2020-10-25|EPI\_ISL\_733511|Original|hCoV-19^^North Rhine-Westphalia|Human|ZOTZ KLIMAS MVZ D\u00fcrseldorf-Centrum GbR \u00dcBAG f\u00fcr Labormedizin|Center of Medical Microbiology|Wienemann|Germany

>Spike|hCoV-19/Scotland/CVR4095/2020|2020-09-04|EPI\_ISL\_540800|Original|hCoV-19^^Scotland|Human|West of Scotland Specialist Virology Centre|COVID-19 Genomics UK (COG-UK) Consortium|Robertson|United Kingdom

>Spike|hCoV-19/England/ALDP-95466C/2020|2020-06-13|EPI\_ISL\_555356|Original|hCoV-19^^England|Human|Lighthouse Lab in Alderley Park|Wellcome Sanger Institute for the COVID-19 Genomics UK (COG-UK) consortium|Davies|United Kingdom

>Spike|hCoV-19/Wales/PHWC-31710/2020|2020-04-13|EPI\_ISL\_446478|Original|hCoV-19^^Wales|Human|Wales Specialist Virology Centre|Public Health Wales Microbiology Cardiff|Moore|United Kingdom

>Spike|hCoV-19/England/EXET-13E8A6/2020|2020-00-00|EPI\_ISL\_724344|Original|hCoV-19^^England|Human|University of Exeter|COVID-19 Genomics UK (COG-UK) Consortium|Temperton|United Kingdom

>Spike|hCoV-19/USA/TX-HMH-3038/2020|2020-05-31|EPI\_ISL\_543950|Original|hCoV-19^^Texas|Human|Houston Methodist Hospital|Houston Methodist Hospital|Long|USA

>Spike|hCoV-19/Denmark/DCGC-2055/2020|2020-07-13|EPI\_ISL\_618276|Original|hCoV-19^^Hovedstaden|Human|Department of Virus and Microbiological Special Diagnostics|Albertsen lab|Michaelsen|Denmark

>Spike|hCoV-19/USA/NM-UNM-00806/2020|2020-05-12|EPI\_ISL\_610254|Original|hCoV-19^^New Mexico|Human|TriCore Reference Laboratories|Center for Global Health|Domman|USA

>Spike|hCoV-19/Belgium/reg-10191306/2020|2020-10-19|EPI\_ISL\_735209|Original|hCoV-19^^Erps-Kwerps|Human|UZ Leuven|KU Leuven|Maes|Belgium

>Spike|hCoV-19/Netherlands/Andel\_1365066/2020|2020-03-01|EPI\_ISL\_413564|Original|hCoV-19^^Andel|Human|MHC West-Brabant|Erasmus Medical Center|Oude Munnink|Netherlands

>Spike|hCoV-19/India/KA-nimh-1596/2020|2020-04-17|EPI\_ISL\_436156|Original|hCoV-19^^Karnataka|Human|District Surveillance Unit|Department of Neurovirology|Pattabiraman|India

>Spike|hCoV-19/Germany/NW-HHU-34/2020|2020-03-16|EPI\_ISL\_419551|Original|hCoV-19^^North Rhine-Westphalia|Human|Center of Medical Microbiology|Center of Medical Microbiology|Wienemann|Germany

>Spike|hCoV-19/Spain/PV-IBV-000669/2020|2020-03-06|EPI\_ISL\_452783|Original|hCoV-19^^Basque Country|Human|Hospital Universitario Araba. Vitoria-Gasteiz,|SeqCOVID-SPAIN consortium|IBV (CSIC)|Comas|Spain

>Spike|hCoV-19/England/QEUEH-CADEC3/2020|2020-12-20|EPI\_ISL\_761252|Original|hCoV-19^^England|Human|Lighthouse Lab in Glasgow|Wellcome Sanger Institute for the COVID-19 Genomics UK (COG-UK) Consortium|Davies|United Kingdom

>Spike|hCoV-19/England/QEUEH-AA00AE/2020|2020-10-20|EPI\_ISL\_652706|Original|hCoV-19^^England|Human|University of Exeter|COVID-19 Genomics UK (COG-UK) Consortium|Temperton|United Kingdom

>Spike|hCoV-19/Scotland/QEUH-AA05DC/2020|2020-10-21|EPI\_ISL\_665329|Original|hCoV-19^^Scotland|Human|Northumbria University / South Tees Hospitals NHS Foundation Trust / North Cumbria Integrated Care NHS Foundation Trust / North Tees and Hartlepool NHS Foundation Trust / Newcastle Hospitals NHS Foundation Trust|COVID-19 Genomics UK (COG-UK) Consortium|Bashton|United Kingdom

>Spike|hCoV-19/USA/TX-HMH-3729/2020|2020-06-16|EPI\_ISL\_543141|Original|hCoV-19^^Texas|Human|Houston Methodist Hospital|Houston Methodist Hospital|Long|USA

>Spike|hCoV-19/Czech Republic/NRL\_7942/2020|2020-07-28|EPI\_ISL\_545956|Original|hCoV-19^^Olomouc Region|Human|The National Institute of Public Health|State Veterinary Institute Prague|Nagy|Czech Republic

>Spike|hCoV-19/England/BRIS-126470/2020|2020-04-10|EPI\_ISL\_459014|Original|hCoV-19^^England|Human|PHE South West Regional Laboratory|Wellcome Sanger Institute for the COVID-19 Genomics UK (COG-UK) consortium|Davies|United Kingdom

>Spike|hCoV-19/Ireland/D-NVRL-20G35041/2020|2020-03-19|EPI\_ISL\_605113|Original|hCoV-19^^Dublin|Human|National Virus Reference Laboratory|Irish Coronavirus Sequencing Consortium - Helixworks|Chalapati|Ireland

>Spike|hCoV-19/Japan/PG-1587/2020|2020-04-00|EPI\_ISL\_685193|Original|hCoV-19^^Japan|Human|Pathogen Genomics Center|Pathogen Genomics Center|Sekizuka|Japan

>Spike|hCoV-19/Denmark/DCGC-4152/2020|2020-09-21|EPI\_ISL\_621972|Original|hCoV-19^^Midtjylland|Human|Department of Virus and Microbiological Special Diagnostics|Albertsen lab|Michaelsen|Denmark

>Spike|hCoV-19/Australia/VIC1499/2020|2020-04-29|EPI\_ISL\_456472|Original|hCoV-19^^Victoria|Human|Victorian Infectious Diseases Reference Laboratory (VIDRL)|Microbiological Diagnostic Unit Public Health Laboratory and Victorian Infectious Diseases Reference Laboratory|Schultz|Australia

>Spike|hCoV-19/USA/MN-MDH-1303/2020|2020-04-09|EPI\_ISL\_495602|Original|hCoV-19^^Minnesota|Human|Mayo Clinic & Mayo Clinic Laboratories|Minnesota Department of Health|Garfin|USA

>Spike|hCoV-19/Canada/ON-PHL-20-03791/2020|2020-11-00|EPI\_ISL\_775052|Original|hCoV-19^^Ontario|Human|Public Health Ontario Laboratory|Public Health Ontario Laboratory|Guthrie|Canada

>Spike|hCoV-19/England/QEUH-B417A9/2020|2020-11-08|EPI\_ISL\_658528|Original|hCoV-19^^England|Human|Lighthouse Lab in Glasgow|Wellcome Sanger Institute for the COVID-19 Genomics UK (COG-UK) Consortium|Davies|United Kingdom

>Spike|hCoV-19/England/ALDP-AA2AAE/2020|2020-10-22|EPI\_ISL\_630730|Original|hCoV-19^^England|Human|Lighthouse Lab in Alderley Park|Wellcome Sanger Institute for the COVID-19 Genomics UK (COG-UK) consortium|Davies|United Kingdom

>Spike|hCoV-19/USA/MN-UW335/2020|2020-03-13|EPI\_ISL\_418902|Original|hCoV-19^^Minnesota|Human|UW Virology Lab|UW Virology Lab|Roychoudhury|USA

>Spike|hCoV-19/USA/TX-HMH-6657/2020|2020-06-24|EPI\_ISL\_546151|Original|hCoV-19^^Texas|Human|Houston Methodist Hospital|Houston Methodist Hospital|Long|USA

>Spike|hCoV-19/Denmark/DCGC-17215/2020|2020-12-14|EPI\_ISL\_750832|Original|hCoV-19^^Midtjylland|Human|Department of Virus and Microbiological Special Diagnostics|Albertsen Lab|Michaelsen|Denmark

>Spike|hCoV-19/England/MILK-B89BC7/2020|2020-11-13|EPI\_ISL\_675480|Original|hCoV-19^^England|Human|Lighthouse Lab in Milton Keynes|Wellcome Sanger Institute for the COVID-19 Genomics UK (COG-UK) Consortium|Davies|United Kingdom

>Spike|hCoV-19/England/ALDP-9ECF40/2020|2020-05-05|EPI\_ISL\_589312|Original|hCoV-19^^England|Human|Lighthouse Lab in Alderley Park|Wellcome Sanger Institute for the COVID-19 Genomics UK (COG-UK) consortium|Davies|United Kingdom

>Spike|hCoV-19/USA/WI-UW-151/2020|2020-04-08|EPI\_ISL\_427458|Original|hCoV-19^^Wisconsin|Human|University of Wisconsin-Madison AIDS Vaccine Research Laboratories|University of Wisconsin-Madison AIDS Vaccine Research Laboratories|Baczenas|USA

>Spike|hCoV-19/USA/WA-S919/2020|2020-04-25|EPI\_ISL\_463409|Original|hCoV-19^^Washington|Human|Washington State Department of Health|Seattle Flu Study|Bedford|USA

>Spike|hCoV-19/Guatemala/CDC-1230/2020|2020-03-15|EPI\_ISL\_509697|Original|hCoV-19^^Guatemala|Human|Guatemala Ministry of Public Health|Pathogen Discovery|Queen|Guatemala



>Spike|hCoV-19/Scotland/CVR2331/2020|2020-04-13|EPI\_ISL\_477906|Original|hCoV-19^^Scotland|Human|West of Scotland Specialist Virology Centre|COVID-19 Genomics UK (COG-UK) Consortium|Robertson|United Kingdom

>Spike|hCoV-19/Japan/PG-0887/2020|2020-04-00|EPI\_ISL\_684497|Original|hCoV-19^^Japan|Human|Pathogen Genomics Center|Pathogen Genomics Center|Sekizuka|Japan

>Spike|hCoV-19/India/MH-ACTREC-254/2020|2020-07-08|EPI\_ISL\_699906|Original|hCoV-19^^Maharashtra|Human|Hematopathology Laboratory|Hematopathology Laboratory|Patkar|India

>Spike|hCoV-19/Scotland/CVR2886/2020|2020-04-21|EPI\_ISL\_473618|Original|hCoV-19^^Scotland|Human|West of Scotland Specialist Virology Centre|COVID-19 Genomics UK (COG-UK) Consortium|Robertson|United Kingdom

>Spike|hCoV-19/England/204200187/2020|2020-10-10|EPI\_ISL\_609877|Original|hCoV-19^^England|Human|Respiratory Virus Unit|Respiratory Virus Unit|Platt|United Kingdom

>Spike|hCoV-19/England/PORT-2EE701/2020|2020-12-21|EPI\_ISL\_763606|Original|hCoV-19^^England|Human|Centre for Enzyme Innovation|COVID-19 Genomics UK (COG-UK) Consortium|Robson|United Kingdom

>Spike|hCoV-19/Northern Ireland/NIRE-2331A5/2020|2020-09-27|EPI\_ISL\_680263|Original|hCoV-19^^Northern Ireland|Human|Regional Virus Laboratory|COVID-19 Genomics UK (COG-UK) Consortium|Fairley|United Kingdom

>Spike|hCoV-19/Northern Ireland/NIRE-102CAF/2020|2020-04-19|EPI\_ISL\_489198|Original|hCoV-19^^Northern Ireland|Human|Regional Virus Laboratory|Wellcome Sanger Institute for the COVID-19 Genomics UK (COG-UK) consortium|Davies|United Kingdom

>Spike|hCoV-19/USA/OR-CDC-2-3693560/2020|2020-11-20|EPI\_ISL\_747168|Original|hCoV-19^^Oregon|Human|Respiratory Viruses Branch|Respiratory Viruses Branch|Queen|USA

>Spike|hCoV-19/Denmark/DCGC-13266/2020|2020-11-30|EPI\_ISL\_712691|Original|hCoV-19^^Hovedstaden|Human|Department of Virus and Microbiological Special Diagnostics|Albertsen Lab|Michaelsen|Denmark

>Spike|hCoV-19/England/BRIS-1228D2/2020|2020-04-03|EPI\_ISL\_440723|Original|hCoV-19^^England|Human|PHE South West Regional Laboratory|Wellcome Sanger Institute for the COVID-19 Genomics UK (COG-UK) consortium|Amato|United Kingdom

>Spike|hCoV-19/England/QEUEH-A60B8B/2020|2020-10-12|EPI\_ISL\_665394|Original|hCoV-19^^England|Human|Northumbria University / South Tees Hospitals NHS Foundation Trust / North Cumbria Integrated Care NHS Foundation Trust / North Tees and Hartlepool NHS Foundation Trust / Newcastle Hospitals NHS Foundation Trust|COVID-19 Genomics UK (COG-UK) Consortium|Bashton|United Kingdom

>Spike|hCoV-19/Nigeria/BO-CV335/2020|2020-04-29|EPI\_ISL\_730002|Original|hCoV-19^^Borno State|Human|Nigeria Centre for Disease Control (NCDC)|African Centre of Excellence for Genomics of Infectious Diseases (ACEGID)|Oluniyi|Nigeria

>Spike|hCoV-19/England/204682424/2020|2020-11-12|EPI\_ISL\_693427|Original|hCoV-19^^England|Human|Respiratory Virus Unit|COVID-19 Genomics UK (COG-UK) Consortium|Platt|United Kingdom

>Spike|hCoV-19/Ukraine/203100335/2020|2020-06-26|EPI\_ISL\_512614|Original|hCoV-19^^Ukraine|Human|National Laboratory for Influenza/Virology reference laboratory|Respiratory Virus Unit|Platt|Ukraine

>Spike|hCoV-19/England/ALDP-95A587/2020|2020-06-12|EPI\_ISL\_553508|Original|hCoV-19^^England|Human|Lighthouse Lab in Alderley Park|Wellcome Sanger Institute for the COVID-19 Genomics UK (COG-UK) consortium|Davies|United Kingdom

>Spike|hCoV-19/Australia/VIC5413/2020|2020-07-07|EPI\_ISL\_520176|Original|hCoV-19^^Victoria|Human|Microbiological Diagnostic Unit - Public Health Laboratory (MDU-PHL)|MDU-PHL|Schultz|Australia

>Spike|hCoV-19/Northern Ireland/QEUEH-964E07/2020|2020-08-13|EPI\_ISL\_531168|Original|hCoV-19^^Northern Ireland|Human|Lighthouse Lab in Glasgow|Wellcome Sanger Institute for the COVID-19 Genomics UK (COG-UK) consortium|Davies|United Kingdom

>Spike|hCoV-19/South Africa/KRISP-K002209/2020|2020-07-24|EPI\_ISL\_515606|Original|hCoV-19^^KwaZulu-Natal|Human|NHLS-IALCH|KRISP|de Oliveira|South Africa

>Spike|hCoV-19/England/QEUEH-7A90F3/2020|2020-07-10|EPI\_ISL\_533084|Original|hCoV-19^^England|Human|Lighthouse Lab in Glasgow|Wellcome Sanger Institute for the COVID-19 Genomics UK (COG-UK) consortium|Davies|United Kingdom

>Spike|hCoV-19/Chile/RM-111211/2020|2020-06-26|EPI\_ISL\_746582|Original|hCoV-19^^Region Metropolitana de Santiago|Human|Genetica Molecular and Subdepartamento de Virologia ISP Chile|Instituto de Salud Publica de Chile|Tognarelli|Chile

>Spike|hCoV-19/England/20138012104/2020|2020-03-26|EPI\_ISL\_421819|Original|hCoV-19^^England|Human|Respiratory Virus Unit|Respiratory Virus Unit|Platt|United Kingdom

>Spike|hCoV-19/England/CAMC-B5316A/2020|2020-11-09|EPI\_ISL\_657645|Original|hCoV-19^^England|Human|Lighthouse Lab in Cambridge|Wellcome Sanger Institute for the COVID-19 Genomics UK (COG-UK) Consortium|Davies|United Kingdom

>Spike|hCoV-19/Wales/PHWC-4A3C8F/2020|2020-12-12|EPI\_ISL\_764614|Original|hCoV-19^^Wales|Human|Wales Specialist Virology Centre Sequencing lab|COVID-19 Genomics UK (COG-UK) Consortium|Moore|United Kingdom

>Spike|hCoV-19/USA/MI-QDX-1723/2020|2020-03-18|EPI\_ISL\_604041|Original|hCoV-19^^Michigan|Human|Quest Diagnostics|Quest Diagnostics|Kagan|USA

>Spike|hCoV-19/Australia/VIC12956/2020|2020-07-29|EPI\_ISL\_592122|Original|hCoV-19^^Victoria|Human|Microbiological Diagnostic Unit - Public Health Laboratory (MDU-PHL)|MDU-PHL|Schultz|Australia

>Spike|hCoV-19/England/20168038104/2020|2020-04-13|EPI\_ISL\_466617|Original|hCoV-19^^England|Human|Respiratory Virus Unit|Respiratory Virus Unit|Platt|United Kingdom

>Spike|hCoV-19/South Africa/KRISP-K003369/2020|2020-09-04|EPI\_ISL\_602759|Original|hCoV-19^^KwaZulu-Natal|Human|NHLs-IALCH|KRISP|de Oliveira|South Africa

>Spike|hCoV-19/England/QEUEH-CC3067/2020|2020-12-21|EPI\_ISL\_778133|Original|hCoV-19^^England|Human|Lighthouse Lab in Glasgow|Wellcome Sanger Institute for the COVID-19 Genomics UK (COG-UK) Consortium|Davies|United Kingdom

>Spike|hCoV-19/Wales/PHWC-49CCC5/2020|2020-12-08|EPI\_ISL\_742673|Original|hCoV-19^^Wales|Human|Wales Specialist Virology Centre Sequencing lab|COVID-19 Genomics UK (COG-UK) Consortium|Moore|United Kingdom

>Spike|hCoV-19/Australia/VIC6617/2020|2020-07-19|EPI\_ISL\_521379|Original|hCoV-19^^Victoria|Human|Victorian Infectious Diseases Reference Laboratory (VIDRL)|VIDRL and MDU-PHL|Schultz|Australia

>Spike|hCoV-19/England/OXON-B0AF2/2020|2020-04-19|EPI\_ISL\_478936|Original|hCoV-19^^England|Human|Oxford Viromics|COVID-19 Genomics UK (COG-UK) Consortium|Golubchik|United Kingdom

>Spike|hCoV-19/Scotland/EDB8246/2020|2020-10-01|EPI\_ISL\_585497|Original|hCoV-19^^Scotland|Human|Virology Department|COVID-19 Genomics UK (COG-UK) Consortium|McHugh|United Kingdom

>Spike|hCoV-19/Portugal/PT1564/2020|2020-06-27|EPI\_ISL\_693574|Original|hCoV-19^^Portugal|Human|Instituto Nacional de Saude (INSA)|Instituto Nacional de Saude (INSA)|Borges|Portugal

>Spike|hCoV-19/Scotland/CVR2257/2020|2020-04-12|EPI\_ISL\_453034|Original|hCoV-19^^Scotland|Human|West of Scotland Specialist Virology Centre|COVID-19 Genomics UK (COG-UK) Consortium|Robertson|United Kingdom

>Spike|hCoV-19/Canada/ON-S1270/2020|2020-05-01|EPI\_ISL\_586322|Original|hCoV-19^^Ontario|Human|Toronto Invasive Bacterial Diseases Network|McMaster University|McArthur|Canada

>Spike|hCoV-19/Shanghai/SH0030/2020|2020-02-03|EPI\_ISL\_416339|Original|hCoV-19^^Shanghai|Human|Shanghai Public Health Clinical Center|National Research Center for Translational Medicine (Shanghai)|Zhang|China

>Spike|hCoV-19/Singapore/52cul/2020|2020-06-05|EPI\_ISL\_574480|VeroE6 P1|hCoV-19^^Singapore|Human|Programme in Emerging Infectious Diseases|National Public Health Laboratory|Mak|Singapore

>Spike|hCoV-19/England/ALDP-520C10/2020|2020-06-02|EPI\_ISL\_559090|Original|hCoV-19^^England|Human|Lighthouse Lab in Alderley Park|Wellcome Sanger Institute for the COVID-19 Genomics UK (COG-UK) consortium|Davies|United Kingdom

>Spike|hCoV-19/Czech Republic/NRL\_6849-7/2020|2020-09-15|EPI\_ISL\_577630|Original|hCoV-19^^Central Bohemia Region|Human|The National Institute of Public Health|State Veterinary Institute Prague|Nagy|Czech Republic

>Spike|hCoV-19/USA/TX-HMH-8033/2020|2020-07-01|EPI\_ISL\_545805|Original|hCoV-19^^Texas|Human|Houston Methodist Hospital|Houston Methodist Hospital|Long|USA

>Spike|hCoV-19/Norway/4810/2020|2020-10-26|EPI\_ISL\_668410|Original|hCoV-19^^Oslo|Human|Norwegian Institute of Public Health|Norwegian Institute of Public Health|Kopperud Riis|Norway

>Spike|hCoV-19/Shanghai/SH0083/2020|2020-02-04|EPI\_ISL\_416384|Original|hCoV-19^^Shanghai|Human|Shanghai Public Health Clinical Center|National Research Center for Translational Medicine (Shanghai)|Zhang|China

>Spike|hCoV-19/Australia/VIC9748/2020|2020-08-23|EPI\_ISL\_565690|Original|hCoV-19^^Victoria|Human|Microbiological Diagnostic Unit - Public Health Laboratory (MDU-PHL)|MDU-PHL|Schultz|Australia

>Spike|hCoV-19/Denmark/DCGC-3512/2020|2020-08-31|EPI\_ISL\_616301|Original|hCoV-19^^Hovedstaden|Human|Department of Virus and Microbiological Special Diagnostics|Albertsen lab|Michaelsen|Denmark

>Spike|hCoV-19/England/ALDP-9EE2AF/2020|2020-05-06|EPI\_ISL\_589419|Original|hCoV-19^^England|Human|Lighthouse Lab in Alderley Park|Wellcome Sanger Institute for the COVID-19 Genomics UK (COG-UK) consortium|Davies|United Kingdom

>Spike|hCoV-19/USA/WA-OHSU-2896/2020|2020-09-04|EPI\_ISL\_667396|Original|hCoV-19^^Washington|Human|OHSU Lab Services Molecular Microbiology Lab|Oregon SARS-CoV-2 Genome Sequencing Center|O'Roak|USA

>Spike|hCoV-19/England/MILK-B564AA/2020|2020-11-05|EPI\_ISL\_657518|Original|hCoV-19^^England|Human|Lighthouse Lab in Milton Keynes|Wellcome Sanger Institute for the COVID-19 Genomics UK (COG-UK) Consortium|Davies|United Kingdom

>Spike|hCoV-19/USA/MI-MDHHS-SC22254/2020|2020-10-30|EPI\_ISL\_666920|Original|hCoV-19^^Michigan|Human|Michigan Department of Health and Human Services|Michigan Department of Health and Human Services|Jacob|USA

>Spike|hCoV-19/England/201141189/2020|2020-03-10|EPI\_ISL\_464746|Original|hCoV-19^^England|Human|Respiratory Virus Unit|Respiratory Virus Unit|Platt|United Kingdom

>Spike|hCoV-19/France/IDF-5851/2020|2020-03-25|EPI\_ISL\_443298|Original|hCoV-19^^\u00cele-de-France|Human|H\u00f4pital Necker - Enfants - Malades\nLaboratoire de Virologie|National Reference Center for Viruses of Respiratory Infections|Enouf|France

>Spike|hCoV-19/USA/TX-HMH-MCoV-10641/2020|2020-07-08|EPI\_ISL\_789279|Original|hCoV-19^^Texas|Human|Houston Methodist Hospital|Houston Methodist Hospital|Long|USA

>Spike|hCoV-19/Norway/6613/2020|2020-12-04|EPI\_ISL\_775404|Original|hCoV-19^^Nordland|Human|Nordland Hospital - Bodo|Norwegian Institute of Public Health|Vollan|Norway

>Spike|hCoV-19/Belgium/regal-0509646/2020|2020-05-09|EPI\_ISL\_734718|Original|hCoV-19^^Hoegaarden|Human|UZ Leuven|KU Leuven|Maes|Belgium

>Spike|hCoV-19/England/CAMC-B338A7/2020|2020-11-05|EPI\_ISL\_659222|Original|hCoV-19^^England|Human|Lighthouse Lab in Cambridge|Wellcome Sanger Institute for the COVID-19 Genomics UK (COG-UK) Consortium|Davies|United Kingdom

>Spike|hCoV-19/USA/TX-HMH-5703/2020|2020-06-18|EPI\_ISL\_546955|Original|hCoV-19^^Texas|Human|Houston Methodist Hospital|Houston Methodist Hospital|Long|USA

>Spike|hCoV-19/Spain/NC-IBV-001371/2020|2020-03-13|EPI\_ISL\_452530|Original|hCoV-19^^Navarra|Human|Cl\u00ednica Universidad de Navarra. Servicio de Enfermedades Infecciosas y Microbiolog\u00eda cl\u00ednica|SeqCOVID-SPAIN consortium|IBV (CSIC)|Comas|Spain

>Spike|hCoV-19/Canada/ON-UHTC\_0159/2020|2020-06-20|EPI\_ISL\_526285|Original|hCoV-19^^Ontario|Human|Unity Health Toronto|Ontario Institute for Cancer Research|de Borja|Canada

>Spike|hCoV-19/Bermuda/205081286/2020|2020-10-29|EPI\_ISL\_780402|Original|hCoV-19^^Bermuda|Human|Bermuda Government Molecular Diagnostics Laboratory (MDL)|Respiratory Virus Unit|Platt|Bermuda

>Spike|hCoV-19/Australia/VIC4392/2020|2020-07-12|EPI\_ISL\_519688|Original|hCoV-19^^Victoria|Human|Microbiological Diagnostic Unit - Public Health Laboratory (MDU-PHL)|MDU-PHL|Schultz|Australia

>Spike|hCoV-19/England/ALDP-5CD170/2020|2020-06-19|EPI\_ISL\_558594|Original|hCoV-19^^England|Human|Lighthouse Lab in Alderley Park|Wellcome Sanger Institute for the COVID-19 Genomics UK (COG-UK) consortium|Davies|United Kingdom

>Spike|hCoV-19/Switzerland/UR-ETHZ-100832/2020|2020-03-25|EPI\_ISL\_451780|Original|hCoV-19^^Uri|Human|Viollier AG|Department of Biosystems Science and Engineering|Nadeau|Switzerland

>Spike|hCoV-19/Wales/PHWC-4949D5/2020|2020-11-22|EPI\_ISL\_726200|Original|hCoV-19^^Wales|Human|Originating lab|COVID-19 Genomics UK (COG-UK) Consortium|Moore|United Kingdom

>Spike|hCoV-19/Netherlands/NA\_605/2020|2020-03-14|EPI\_ISL\_460768|Original|hCoV-19^^Netherlands|Human|Dutch COVID-19 response team|Erasmus Medical Center|Oude Munnink|Netherlands

>Spike|hCoV-19/Spain/MD-IBV-99008612/2020|2020-08-06|EPI\_ISL\_654172|Original|hCoV-19^^Madrid|Human|Hospital General Universitario Gregorio Mara\u00f1a|SeqCOVID-SPAIN consortium/IBV (CSIC)|Comas|Spain

>Spike|hCoV-19/Denmark/DCGC-18506/2020|2020-12-07|EPI\_ISL\_750009|Original|hCoV-19^^Nordjylland|Human|Department of Virus and Microbiological Special Diagnostics|Albertsen Lab|Michaelsen|Denmark

>Spike|hCoV-19/England/QEUEH-B2DB01/2020|2020-11-03|EPI\_ISL\_646885|Original|hCoV-19^^England|Human|Lighthouse Lab in Glasgow|Wellcome Sanger Institute for the COVID-19 Genomics UK (COG-UK) Consortium|Davies|United Kingdom

>Spike|hCoV-19/USA/WA-S2299/2020|2020-06-12|EPI\_ISL\_496931|Original|hCoV-19^^Washington|Human|Washington State Department of Health|Seattle Flu Study|Lee|USA

>Spike|hCoV-19/England/QEUEH-9E4C41/2020|2020-09-22|EPI\_ISL\_579862|Original|hCoV-19^^England|Human|Lighthouse Lab in Glasgow|Wellcome Sanger Institute for the COVID-19 Genomics UK (COG-UK) consortium|Davies|United Kingdom

>Spike|hCoV-19/England/ALDP-A6ED3C/2020|2020-10-15|EPI\_ISL\_607776|Original|hCoV-19^^England|Human|Lighthouse Lab in Alderley Park|Wellcome Sanger Institute for the COVID-19 Genomics UK (COG-UK) consortium|Davies|United Kingdom

>Spike|hCoV-19/England/SHEF-10C9AB7/2020|2020-12-10|EPI\_ISL\_727889|Original|hCoV-19^^England|Human|Virology Department|COVID-19 Genomics UK (COG-UK) Consortium|de Silva|United Kingdom

>Spike|hCoV-19/Denmark/DCGC-11645/2020|2020-10-26|EPI\_ISL\_671045|Original|hCoV-19^^Syddanmark|Human|Department of Virus and Microbiological Special Diagnostics|Albertsen Lab|Michaelsen|Denmark

>Spike|hCoV-19/Brazil/SP-875/2020|2020-12-01|EPI\_ISL\_755641|Original|hCoV-19^^S\u00e3o Paulo|Human|Instituto Adolfo Lutz - Regional de Santo Andre|Instituto Adolfo Lutz|Sacchi|Brazil

>Spike|hCoV-19/USA/CT-Yale-079/2020|2020-03-02|EPI\_ISL\_431080|Original|hCoV-19^^Connecticut|Human|Yale COVID-19 Biorepository|Grubaugh Lab - Yale School of Public Health|Grubaugh|USA

>Spike|hCoV-19/Wales/PHWC-4862AE/2020|2020-10-30|EPI\_ISL\_639027|Original|hCoV-19^^Wales|Human|Wales Specialist Virology Centre Sequencing lab|COVID-19 Genomics UK (COG-UK) Consortium|Moore|United Kingdom

>Spike|hCoV-19/England/ALDP-A87043/2020|2020-10-17|EPI\_ISL\_605995|Original|hCoV-19^^England|Human|Lighthouse Lab in Alderley Park|Wellcome Sanger Institute for the COVID-19 Genomics UK (COG-UK) consortium|Davies|United Kingdom

>Spike|hCoV-19/Australia/VIC4663/2020|2020-07-16|EPI\_ISL\_519052|Original|hCoV-19^^Victoria|Human|Microbiological Diagnostic Unit - Public Health Laboratory (MDU-PHL)|MDU-PHL|Schultz|Australia

>Spike|hCoV-19/USA/MI-MDHHS-SC21324/2020|2020-04-04|EPI\_ISL\_507579|Original|hCoV-19^^Michigan|Human|Michigan Department of Health and Human Services|Michigan Department of Health and Human Services|Blankenship|USA

>Spike|hCoV-19/USA/TX-HMH-7308/2020|2020-06-29|EPI\_ISL\_546665|Original|hCoV-19^^Texas|Human|Houston Methodist Hospital|Houston Methodist Hospital|Long|USA

>Spike|hCoV-19/France/PAC-IHU-0236/2020|2020-03-29|EPI\_ISL\_569399|Original|hCoV-19^^Provence-Alpes-C\u00f4te-d\u00e0z|Human|MEPHI|MEPHI|Levasseur|France

>Spike|hCoV-19/USA/ME-HETL-J0090/2020|2020-03-20|EPI\_ISL\_513499|Original|hCoV-19^^Maine|Human|Maine HETL|Tewhey Lab|Tewhey|USA

>Spike|hCoV-19/England/NORW-F0A6F/2020|2020-10-09|EPI\_ISL\_584749|Original|hCoV-19^^England|Human|Quadram Institute Bioscience|COVID-19 Genomics UK (COG-UK) Consortium|Alikhan|United Kingdom

>Spike|hCoV-19/England/20118000304/2020|2020-03-11|EPI\_ISL\_464876|Original|hCoV-19^^England|Human|Respiratory Virus Unit|Respiratory Virus Unit|Platt|United Kingdom

>Spike|hCoV-19/England/QEUEH-BA2E83/2020|2020-11-18|EPI\_ISL\_672842|Original|hCoV-19^^England|Human|Lighthouse Lab in Glasgow|Wellcome Sanger Institute for the COVID-19 Genomics UK (COG-UK) Consortium|Davies|United Kingdom

>Spike|hCoV-19/England/QEUEH-96D132/2020|2020-08-18|EPI\_ISL\_530801|Original|hCoV-19^^England|Human|Lighthouse Lab in Glasgow|Wellcome Sanger Institute for the COVID-19 Genomics UK (COG-UK) consortium|Davies|United Kingdom

>Spike|hCoV-19/Spain/AR-ISCI-201441/2020|2020-03-04|EPI\_ISL\_578189|Original|hCoV-19^^Aragon|Human|Hospital Universitario Miguel Servet|Instituto de Salud Carlos III|Caballero|Spain

>Spike|hCoV-19/USA/OR-OHSU-0150/2020|2020-05-06|EPI\_ISL\_468112|Original|hCoV-19^^Oregon|Human|OHSU Lab Services Molecular Microbiology Lab|Oregon SARS-CoV-2 Genome Sequencing Center|O'Roak|USA

>Spike|hCoV-19/England/SHEF-C2FA3/2020|2020-08-31|EPI\_ISL\_540725|Original|hCoV-19^^England|Human|Virology Department|COVID-19 Genomics UK (COG-UK) Consortium|de Silva|United Kingdom

>Spike|hCoV-19/England/QEUEH-B11881/2020|2020-11-02|EPI\_ISL\_642223|Original|hCoV-19^^England|Human|Lighthouse Lab in Glasgow|Wellcome Sanger Institute for the COVID-19 Genomics UK (COG-UK) Consortium|Davies|United Kingdom

>Spike|hCoV-19/USA/MA-MGH-03059/2020|2020-08-05|EPI\_ISL\_765697|Original|hCoV-19^^Massachusetts|Human|Massachusetts General Hospital|Infectious Disease Program|Park|USA

>Spike|hCoV-19/England/CAMC-B07C73/2020|2020-10-29|EPI\_ISL\_643895|Original|hCoV-19^^England|Human|Lighthouse Lab in Cambridge|Wellcome Sanger Institute for the COVID-19 Genomics UK (COG-UK) Consortium|Davies|United Kingdom

>Spike|hCoV-19/USA/TX-HMH-MCoV-12564/2020|2020-09-30|EPI\_ISL\_790394|Original|hCoV-19^^Texas|Human|Houston Methodist Hospital|Houston Methodist Hospital|Long|USA

>Spike|hCoV-19/England/MILK-970D92/2020|2020-08-18|EPI\_ISL\_553161|Original|hCoV-19^^England|Human|Lighthouse Lab in Milton Keynes|Wellcome Sanger Institute for the COVID-19 Genomics UK (COG-UK) consortium|Davies|United Kingdom

>Spike|hCoV-19/England/ALDP-95B128/2020|2020-06-10|EPI\_ISL\_555679|Original|hCoV-19^^England|Human|Lighthouse Lab in Alderley Park|Wellcome Sanger Institute for the COVID-19 Genomics UK (COG-UK) consortium|Davies|United Kingdom

>Spike|hCoV-19/England/MILK-61CB28/2020|2020-07-06|EPI\_ISL\_557795|Original|hCoV-19^^England|Human|Lighthouse Lab in Milton Keynes|Wellcome Sanger Institute for the COVID-19 Genomics UK (COG-UK) consortium|Davies|United Kingdom

>Spike|hCoV-19/USA/TX-HMH-MCoV-15508/2020|2020-10-24|EPI\_ISL\_786992|Original|hCoV-19^^Texas|Human|Houston Methodist Hospital|Houston Methodist Hospital|Long|USA

>Spike|hCoV-19/North Macedonia/ChVir7905/2020|2020-06-27|EPI\_ISL\_492077|Original|hCoV-19^^North Macedonia|Human|Institute for Public Health of the Republic of North Macedonia|Charite Universitatsmedizin Berlin|Muehleemann|North Macedonia

>Spike|hCoV-19/USA/LA-EVTL046/2020|2020-05-01|EPI\_ISL\_451207|Original|hCoV-19^^Louisiana|Human|LSUHS Emerging Viral Threat Laboratory|Microbial Genome Sequencing Center|Kamil|USA

>Spike|hCoV-19/England/204380511/2020|2020-10-23|EPI\_ISL\_660750|Original|hCoV-19^^England|Human|Respiratory Virus Unit|COVID-19 Genomics UK (COG-UK) Consortium|Platt|United Kingdom

>Spike|hCoV-19/USA/MN-QDX-1611/2020|2020-03-16|EPI\_ISL\_603986|Original|hCoV-19^^Minnesota|Human|Quest Diagnostics|Quest Diagnostics|Kagan|USA

>Spike|hCoV-19/Scotland/CVR5021/2020|2020-10-11|EPI\_ISL\_594756|Original|hCoV-19^^Scotland|Human|West of Scotland Specialist Virology Centre|COVID-19 Genomics UK (COG-UK) Consortium|Robertson|United Kingdom

>Spike|hCoV-19/Wales/PHWC-485E14/2020|2020-10-26|EPI\_ISL\_627207|Original|hCoV-19^^Wales|Human|Wales Specialist Virology Centre Sequencing lab|COVID-19 Genomics UK (COG-UK) Consortium|Moore|United Kingdom

>Spike|hCoV-19/South Africa/R09085/2020|2020-04-28|EPI\_ISL\_470878|Original|hCoV-19^^North West|Human|National Institute for Communicable Diseases of the National

Health Laboratory Service|National Institute for Communicable Diseases of the National Health Laboratory Service|Allam|South Africa  
>Spike|hCoV-19/England/201060066/2020|2020-03-04|EPI\_ISL\_464392|Original|hCoV-19^^England|Human|Respiratory Virus Unit|Respiratory Virus Unit|Platt|United Kingdom  
>Spike|hCoV-19/USA/UT-UPHL-01408/2020|2020-04-03|EPI\_ISL\_575055|Original|hCoV-19^^Utah|Human|Utah Public Health Laboratory|Utah Public Health Laboratory|Young|USA  
>Spike|hCoV-19/Scotland/QEUH-AD1727/2020|2020-10-26|EPI\_ISL\_649707|Original|hCoV-19^^Scotland|Human|Lighthouse Lab in Glasgow|Wellcome Sanger Institute for the COVID-19 Genomics UK (COG-UK) Consortium|Davies|United Kingdom  
>Spike|hCoV-19/Spain/IB-IBV-99011586/2020|2020-12-18|EPI\_ISL\_779909|Original|hCoV-19^^Balear Islands|Human|Servicio de Microbiolog\u00eda|SeqCOVID-SPAIN consortium/IBV (CSIC) |Comas|Spain  
>Spike|hCoV-19/England/MILK-B8C7EE/2020|2020-11-13|EPI\_ISL\_675850|Original|hCoV-19^^England|Human|Lighthouse Lab in Milton Keynes|Wellcome Sanger Institute for the COVID-19 Genomics UK (COG-UK) Consortium|Davies|United Kingdom  
>Spike|hCoV-19/England/NORT-289182/2020|2020-03-28|EPI\_ISL\_458592|Original|hCoV-19^^England|Human|NU-OMICS DNA Sequencing research facility|Wellcome Sanger Institute for the COVID-19 Genomics UK (COG-UK) consortium|Davies|United Kingdom  
>Spike|hCoV-19/England/ALDP-9CC5BD/2020|2020-09-15|EPI\_ISL\_573115|Original|hCoV-19^^England|Human|Quadram Institute Bioscience|COVID-19 Genomics UK (COG-UK) Consortium|Alikhan|United Kingdom  
>Spike|hCoV-19/England/NOTT-112714/2020|2020-04-16|EPI\_ISL\_490570|Original|hCoV-19^^England|Human|Lincolnshire Hospitals and DeepSeq Nottingham|COVID-19 Genomics UK (COG-UK) Consortium|Loose|United Kingdom  
>Spike|hCoV-19/Denmark/DCGC-14397/2020|2020-11-30|EPI\_ISL\_711743|Original|hCoV-19^^Hovedstaden|Human|Department of Virus and Microbiological Special Diagnostics|Albertsen Lab|Michaelsen|Denmark  
>Spike|hCoV-19/Switzerland/BL-ETHZ-230024/2020|2020-08-03|EPI\_ISL\_516567|Original|hCoV-19^^Basel-Landschaft|Human|Viollier AG|Department of Biosystems Science and Engineering|Nadeau|Switzerland  
>Spike|hCoV-19/Australia/VIC5465/2020|2020-07-15|EPI\_ISL\_520214|Original|hCoV-19^^Victoria|Human|Victorian Infectious Diseases Reference Laboratory (VIDRL)|VIDRL and MDU-PHL|Schultz|Australia  
>Spike|hCoV-19/England/QEUH-AEFD33/2020|2020-10-29|EPI\_ISL\_662752|Original|hCoV-19^^England|Human|Lighthouse Lab in Glasgow|Wellcome Sanger Institute for the COVID-19 Genomics UK (COG-UK) Consortium|Davies|United Kingdom  
>Spike|hCoV-19/Wales/PHWC-488B65/2020|2020-10-26|EPI\_ISL\_639471|Original|hCoV-19^^Wales|Human|Wales Specialist Virology Centre Sequencing lab|COVID-19 Genomics UK (COG-UK) Consortium|Moore|United Kingdom  
>Spike|hCoV-19/USA/NV-NSPHL-A0180/2020|2020-05-19|EPI\_ISL\_515437|Original|hCoV-19^^Nevada|Human|Nevada State Public Health Laboratory|Nevada State Public Health Laboratory|Sevinsky|USA  
>Spike|hCoV-19/England/LIVE-1D222E/2020|2020-05-11|EPI\_ISL\_572843|Original|hCoV-19^^England|Human|Liverpool Clinical Laboratories|COVID-19 Genomics UK (COG-UK) Consortium|Haldenby|United Kingdom  
>Spike|hCoV-19/USA/WA-UW-546/2020|2020-03-12|EPI\_ISL\_430885|Original|hCoV-19^^Washington|Human|UW Virology Lab|UW Virology Lab|Roychoudhury|USA  
>Spike|hCoV-19/England/20179044704/2020|2020-04-24|EPI\_ISL\_527355|Original|hCoV-19^^England|Human|Respiratory Virus Unit|Respiratory Virus Unit|Ledesma|United Kingdom  
>Spike|hCoV-19/USA/LA-EVTL774/2020|2020-07-22|EPI\_ISL\_653465|Original|hCoV-19^^Louisiana|Human|LSUHS Emerging Viral Threat Laboratory|Microbial Genome Sequencing Center|Kamil|USA  
>Spike|hCoV-19/Wales/PHWC-487CAF/2020|2020-10-29|EPI\_ISL\_639294|Original|hCoV-19^^Wales|Human|Wales Specialist Virology Centre Sequencing lab|COVID-19 Genomics UK (COG-UK) Consortium|Moore|United Kingdom  
>Spike|hCoV-19/England/BRIS-1853A9C/2020|2020-04-17|EPI\_ISL\_492279|Original|hCoV-19^^England|Human|PHE South West Regional Laboratory|Wellcome Sanger Institute for the COVID-19 Genomics UK (COG-UK) consortium|Davies|United Kingdom

>Spike|hCoV-19/Netherlands/ZH-EMC-299/2020|2020-07-03|EPI\_ISL\_523641|Original|hCoV-19^^Zuid Holland|Human|Dutch COVID-19 response team|Erasmus Medical Center|Oude Munnink|Netherlands

>Spike|hCoV-19/USA/NY-QDX-1952/2020|2020-03-16|EPI\_ISL\_604270|Original|hCoV-19^^New York|Human|Quest Diagnostics|Quest Diagnostics|Kagan|USA

>Spike|hCoV-19/Portugal/PT0621/2020|2020-03-25|EPI\_ISL\_454344|Original|hCoV-19^^Portugal|Human|unknown|Instituto Nacional de Saude (INSA)|Borges|Portugal

>Spike|hCoV-19/USA/OR-PROV-124/2020|2020-04-28|EPI\_ISL\_482388|Original|hCoV-19^^Oregon|Human|Providence St. Joseph Health Molecular Genomics Laboratory|Providence St. Joseph Health Molecular Genomics Laboratory|Dowdell|USA

>Spike|hCoV-19/Ecuador/USFQ-212/2020|2020-08-04|EPI\_ISL\_539785|Original|hCoV-19^^Azuay|Human|Institute of Microbiology|Institute of Microbiology|Cardenas|Ecuador

>Spike|hCoV-19/Oman/C-6584/2020|2020-04-26|EPI\_ISL\_491132|Original|hCoV-19^^South Batinah|Human|Oman-National Influenza Center|Biotechnology & OMICs Laboratory|Al Mahruqi|Oman

>Spike|hCoV-19/England/ALDP-94CC83/2020|2020-06-15|EPI\_ISL\_555963|Original|hCoV-19^^England|Human|Lighthouse Lab in Alderley Park|Wellcome Sanger Institute for the COVID-19 Genomics UK (COG-UK) consortium|Davies|United Kingdom

>Spike|hCoV-19/England/MILK-CA49F8/2020|2020-12-15|EPI\_ISL\_762423|Original|hCoV-19^^England|Human|Lighthouse Lab in Milton Keynes|Wellcome Sanger Institute for the COVID-19 Genomics UK (COG-UK) Consortium|Davies|United Kingdom

>Spike|hCoV-19/England/CAMB-78355/2020|2020-04-05|EPI\_ISL\_433721|Original|hCoV-19^^England|Human|Department of Pathology|COVID-19 Genomics UK (COG-UK) Consortium|Meredith|United Kingdom

>Spike|hCoV-19/Beijing/DT-travelNO01/2020|2020-03-12|EPI\_ISL\_452342|Original|hCoV-19^^Beijing|Human|Laboratory of Infectious Diseases Center of Beijing Ditan Hospital|Laboratory of Infectious Diseases Center of Beijing Ditan Hospital|Yang|China

>Spike|hCoV-19/England/ALDP-CB5842/2020|2020-12-15|EPI\_ISL\_761693|Original|hCoV-19^^England|Human|Lighthouse Lab in Alderley Park|Wellcome Sanger Institute for the COVID-19 Genomics UK (COG-UK) Consortium|Davies|United Kingdom

>Spike|hCoV-19/Costa Rica/INC-0025/2020|2020-03-07|EPI\_ISL\_491437|Original|hCoV-19^^San Jose|Human|Area de Salud Escazu (Coopesana)|Inciensa|Brenes Porras|Costa Rica

>Spike|hCoV-19/England/MILK-B8D413/2020|2020-11-13|EPI\_ISL\_674040|Original|hCoV-19^^England|Human|Lighthouse Lab in Milton Keynes|Wellcome Sanger Institute for the COVID-19 Genomics UK (COG-UK) Consortium|Davies|United Kingdom

>Spike|hCoV-19/USA/OR-OHSU-2753/2020|2020-08-28|EPI\_ISL\_667301|Original|hCoV-19^^Oregon|Human|OHSU Lab Services Molecular Microbiology Lab|Oregon SARS-CoV-2 Genome Sequencing Center|O'Roak|USA

>Spike|hCoV-19/Bangladesh/BCSIR-NILMRC-343/2020|2020-07-15|EPI\_ISL\_504184|Original|hCoV-19^^Rajshahi|Human|National Institute of Laboratory Medicine and Referral Center|Genomic Research Lab|Khan|Bangladesh

>Spike|hCoV-19/England/ALDP-C480E2/2020|2020-12-12|EPI\_ISL\_718929|Original|hCoV-19^^England|Human|Lighthouse Lab in Alderley Park|Wellcome Sanger Institute for the COVID-19 Genomics UK (COG-UK) Consortium|Davies|United Kingdom

>Spike|hCoV-19/Australia/TAS29/2020|2020-04-12|EPI\_ISL\_522706|Original|hCoV-19^^Tasmania|Human|Royal Hobart Hospital Microbiology Department|MDU-PHL|Schultz|Australia

>Spike|hCoV-19/England/ALDP-A8774E/2020|2020-10-16|EPI\_ISL\_606187|Original|hCoV-19^^England|Human|Lighthouse Lab in Alderley Park|Wellcome Sanger Institute for the COVID-19 Genomics UK (COG-UK) consortium|Davies|United Kingdom

>Spike|hCoV-19/England/ALDP-AA1D2E/2020|2020-10-22|EPI\_ISL\_624211|Original|hCoV-19^^England|Human|Lighthouse Lab in Alderley Park|Wellcome Sanger Institute for the COVID-19 Genomics UK (COG-UK) consortium|Davies|United Kingdom

>Spike|hCoV-19/England/ALDP-B1c4CE/2020|2020-11-01|EPI\_ISL\_645672|Original|hCoV-19^^England|Human|Lighthouse Lab in Alderley Park|Wellcome Sanger Institute for the COVID-19 Genomics UK (COG-UK) Consortium|Davies|United Kingdom

>Spike|hCoV-19/Wales/PHWC-4A6703/2020|2020-12-17|EPI\_ISL\_765067|Original|hCoV-19^^Wales|Human|Wales Specialist Virology Centre Sequencing lab|COVID-19 Genomics UK (COG-UK) Consortium|Moore|United Kingdom

>Spike|hCoV-19/USA/OR-OHSU-1015/2020|2020-07-08|EPI\_ISL\_525948|Original|hCoV-19^^Oregon|Human|OHSU Lab Services Molecular Microbiology Lab|Oregon SARS-CoV-2 Genome Sequencing Center|O'Roak|USA

>Spike|hCoV-19/Spain/VC-FISABIO-194/2020|2020-03-23|EPI\_ISL\_436289|Original|hCoV-19^^Comunitat Valenciana|Human|Servicio de Microbiologia. Hospital Clinico Universitario de Valencia|Sequencing and Bioinformatics Service and Molecular Epidemiology Research Group. FISABIO-Public Health|Gonzalez-Candelas|Spain

>Spike|hCoV-19/England/CAMB-7AF04/2020|2020-04-10|EPI\_ISL\_433893|Original|hCoV-19^^England|Human|Department of Pathology|COVID-19 Genomics UK (COG-UK) Consortium|Meredith|United Kingdom

>Spike|hCoV-19/Croatia/Zagreb-16/2020|2020-09-07|EPI\_ISL\_710559|Original|hCoV-19^^Zagreb|Human|University Hospital Dubrava|Ru\u0111er Bo\u0161kovic Institute; Forensic Science Centre Ivan Vu\u010deti\u0107; University of Zagreb Faculty of Science|Karlic|Croatia

>Spike|hCoV-19/Singapore/351/2020|2020-03-28|EPI\_ISL\_469106|Original|hCoV-19^^Singapore|Human|National Public Health Laboratory|National Public Health Laboratory|Mak|Singapore

>Spike|hCoV-19/Denmark/DCGC-16032/2020|2020-11-23|EPI\_ISL\_714548|Original|hCoV-19^^Hovedstaden|Human|Department of Virus and Microbiological Special Diagnostics|Albertsen Lab|Michaelsen|Denmark

>Spike|hCoV-19/Switzerland/ZH-ETHZ-390218/2020|2020-11-27|EPI\_ISL\_721961|Original|hCoV-19^^Zurich|Human|Viollier AG|Department of Biosystems Science and Engineering|Nadeau|Switzerland

>Spike|hCoV-19/USA/TX-HMH-MCoV-11276/2020|2020-09-03|EPI\_ISL\_789756|Original|hCoV-19^^Texas|Human|Houston Methodist Hospital|Houston Methodist Hospital|Long|USA

>Spike|hCoV-19/England/ALDP-C584F2/2020|2020-12-14|EPI\_ISL\_735881|Original|hCoV-19^^England|Human|Lighthouse Lab in Alderley Park|Wellcome Sanger Institute for the COVID-19 Genomics UK (COG-UK) Consortium|Davies|United Kingdom

>Spike|hCoV-19/Denmark/DCGC-9794/2020|2020-11-09|EPI\_ISL\_669183|Original|hCoV-19^^Nordjylland|Human|Department of Virus and Microbiological Special Diagnostics|Albertsen Lab|Michaelsen|Denmark

>Spike|hCoV-19/USA/ME-HETL-J0169/2020|2020-09-15|EPI\_ISL\_755351|Original|hCoV-19^^Maine|Human|Maine Health and Environmental Testing Laboratory|Tewhey Lab|Tewhey|USA

>Spike|hCoV-19/France/PAC-IHU-0521/2020|2020-04-06|EPI\_ISL\_569569|Original|hCoV-19^^Provence-Alpes-C\u00f4te-d\u0192Azur|Human|MEPHI|MEPHI|Levasseur|France

>Spike|hCoV-19/Mexico/BCN-ALSR-2495/2020|2020-05-30|EPI\_ISL\_635504|Original|hCoV-19^^Baja California|Human|Centro de Diagn\u00f3stico COVID-19 UABC Tijuana|Andersen lab at Scripps Research|Gangavarapu|Mexico

>Spike|hCoV-19/USA/TX-HMH-MCoV-18977/2020|2020-11-25|EPI\_ISL\_785260|Original|hCoV-19^^Texas|Human|Houston Methodist Hospital|Houston Methodist Hospital|Long|USA

>Spike|hCoV-19/Belgium/ULG-10817/2020|2020-11-17|EPI\_ISL\_661241|Original|hCoV-19^^Li\u00e8ge|Human|Department of Clinical Microbiology|GIGA Medical Genomics|Durkin|Belgium

>Spike|hCoV-19/England/CAMB-1AC612/2020|2020-04-24|EPI\_ISL\_489559|Original|hCoV-19^^England|Human|Department of Pathology|Wellcome Sanger Institute for the COVID-19 Genomics UK (COG-UK) consortium|Davies|United Kingdom

>Spike|hCoV-19/England/ALDP-A68233/2020|2020-10-12|EPI\_ISL\_608600|Original|hCoV-19^^England|Human|Lighthouse Lab in Alderley Park|Wellcome Sanger Institute for the COVID-19 Genomics UK (COG-UK) consortium|Davies|United Kingdom

>Spike|hCoV-19/England/ALDP-B74549/2020|2020-11-12|EPI\_ISL\_678924|Original|hCoV-19^^England|Human|Queens Medical Centre|COVID-19 Genomics UK (COG-UK) Consortium|Loose|United Kingdom

>Spike|hCoV-19/Russia/SPE-RII-35178S/2020|2020-09-24|EPI\_ISL\_596244|Original|hCoV-19^^Saint Petersburg|Human|WHO National Influenza Centre Russian Federation|WHO National Influenza Centre Russian Federation|Komissarov|Russia

>Spike|hCoV-19/Japan/PG-1653/2020|2020-04-00|EPI\_ISL\_685259|Original|hCoV-19^^Japan|Human|Pathogen Genomics Center|Pathogen Genomics Center|Sekizuka|Japan



>Spike|hCoV-19/USA/CA-ALSR-0718-SAN/2020|2020-03-27|EPI\_ISL\_483321|Original|hCoV-19^^California|Human|UC San Diego Center for Advanced Laboratory Medicine|Andersen lab at Scripps Research|Gangavarapu|USA

>Spike|hCoV-19/England/MILK-9586FF/2020|2020-06-09|EPI\_ISL\_554831|Original|hCoV-19^^England|Human|Lighthouse Lab in Milton Keynes|Wellcome Sanger Institute for the COVID-19 Genomics UK (COG-UK) consortium|Davies|United Kingdom

>Spike|hCoV-19/USA/MI-UM-10036392191/2020|2020-10-12|EPI\_ISL\_610065|Original|hCoV-19^^Michigan|Human|University of Michigan Clinical Microbiology Laboratory|Lauring Lab|Valesano|USA

>Spike|hCoV-19/England/MILK-BFF5BF/2020|2020-12-02|EPI\_ISL\_720781|Original|hCoV-19^^England|Human|Lighthouse Lab in Milton Keynes|Wellcome Sanger Institute for the COVID-19 Genomics UK (COG-UK) Consortium|Davies|United Kingdom

>Spike|hCoV-19/USA/WI-WSLH-200020/2020|2020-04-09|EPI\_ISL\_471186|Original|hCoV-19^^Wisconsin|Human|Wisconsin State Laboratory of Hygiene Communicable Disease Division|Wisconsin State Laboratory of Hygiene Communicable Disease Division|Florek|USA

>Spike|hCoV-19/USA/TX-HMH-MCoV-15002/2020|2020-10-16|EPI\_ISL\_786486|Original|hCoV-19^^Texas|Human|Houston Methodist Hospital|Houston Methodist Hospital|Long|USA

>Spike|hCoV-19/Belgium/reg-0414583/2020|2020-04-14|EPI\_ISL\_734581|Original|hCoV-19^^Wilsele|Human|UZ Leuven|KU Leuven|Maes|Belgium

>Spike|hCoV-19/England/QEUA-9DCB8B/2020|2020-09-21|EPI\_ISL\_581047|Original|hCoV-19^^England|Human|Lighthouse Lab in Glasgow|Wellcome Sanger Institute for the COVID-19 Genomics UK (COG-UK) consortium|Davies|United Kingdom

>Spike|hCoV-19/Netherlands/NB-RIVM-10317/2020|2020-03-10|EPI\_ISL\_636507|Original|hCoV-19^^NoordBrabant|Human|Dutch COVID-19 response team|National Institute for Public Health and the Environment (RIVM)|Meijer|Netherlands

>Spike|hCoV-19/Australia/VIC6256/2020|2020-07-20|EPI\_ISL\_518248|Original|hCoV-19^^Victoria|Human|Victorian Infectious Diseases Reference Laboratory (VIDRL)|VIDRL and MDU-PHL|Schultz|Australia

>Spike|hCoV-19/England/CAMB-1B6A82/2020|2020-10-08|EPI\_ISL\_612269|Original|hCoV-19^^England|Human|Department of Pathology|COVID-19 Genomics UK (COG-UK) Consortium|Goodfellow|United Kingdom

>Spike|hCoV-19/England/QEUA-A8B99F/2020|2020-10-16|EPI\_ISL\_643084|Original|hCoV-19^^England|Human|Lighthouse Lab in Glasgow|Wellcome Sanger Institute for the COVID-19 Genomics UK (COG-UK) Consortium|Davies|United Kingdom

>Spike|hCoV-19/USA/WI-UW-288/2020|2020-04-08|EPI\_ISL\_436582|Original|hCoV-19^^Wisconsin|Human|University of Wisconsin-Madison AIDS Vaccine Research Laboratories|University of Wisconsin-Madison AIDS Vaccine Research Laboratories|Baczenas|USA

>Spike|hCoV-19/Denmark/DCGC-19829/2020|2020-12-07|EPI\_ISL\_747815|Original|hCoV-19^^Hovedstaden|Human|Department of Virus and Microbiological Special Diagnostics|Albertsen Lab|Michaelsen|Denmark

>Spike|hCoV-19/India/MH-ACTREC-342/2020|2020-07-20|EPI\_ISL\_699991|Original|hCoV-19^^Maharashtra|Human|Hematopathology Laboratory|Hematopathology Laboratory|Patkar|India

>Spike|hCoV-19/Russia/SVE-RII-MH4662S/2020|2020-08-29|EPI\_ISL\_733225|Original|hCoV-19^^Sverdlovsk|Human|UMMC-Health|WHO National Influenza Centre Russian Federation|Komissarov|Russia

>Spike|hCoV-19/England/ALDP-9ED361/2020|2020-05-05|EPI\_ISL\_589560|Original|hCoV-19^^England|Human|Lighthouse Lab in Alderley Park|Wellcome Sanger Institute for the COVID-19 Genomics UK (COG-UK) consortium|Davies|United Kingdom

>Spike|hCoV-19/South Korea/KDCA0212/2020|2020-11-17|EPI\_ISL\_747447|Original|hCoV-19^^South Korea|Human|Division of Emerging Infectious Diseases|Division of Emerging Infectious Diseases|Park|South Korea

>Spike|hCoV-19/USA/TX-HMH-MCoV-18289/2020|2020-11-17|EPI\_ISL\_784637|Original|hCoV-19^^Texas|Human|Houston Methodist Hospital|Houston Methodist Hospital|Long|USA

>Spike|hCoV-19/England/LIVE-9F33A/2020|2020-05-01|EPI\_ISL\_453448|Original|hCoV-19^^England|Human|Liverpool Clinical Laboratories|COVID-19 Genomics UK (COG-UK) Consortium|Haldenby|United Kingdom

>Spike|hCoV-19/England/MILK-BAC7BB/2020|2020-11-18|EPI\_ISL\_783193|Original|hCoV-19^^England|Human|Lighthouse Lab in Milton Keynes|Wellcome Sanger Institute for the COVID-19 Genomics UK (COG-UK) Consortium|Davies|United Kingdom

>Spike|hCoV-19/Ireland/WW-NVRL-AIIDV0486v1/2020|2020-04-26|EPI\_ISL\_644298|Original|hCoV-19^^Wicklow|Human|CEPHR / Vincent's Hospital|Irish Coronavirus Sequencing Consortium - National Virus Reference Laboratory|Gonzalez|Ireland

>Spike|hCoV-19/USA/TX-HMH-MCoV-16300/2020|2020-10-30|EPI\_ISL\_785984|Original|hCoV-19^^Texas|Human|Houston Methodist Hospital|Houston Methodist Hospital|Long|USA

>Spike|hCoV-19/Japan/PG-4013/2020|2020-07-00|EPI\_ISL\_692254|Original|hCoV-19^^Japan|Human|Pathogen Genomics Center|Pathogen Genomics Center|Sekizuka|Japan

>Spike|hCoV-19/Belgium/ULG-10882/2020|2020-11-13|EPI\_ISL\_678425|Original|hCoV-19^^Li\u00e8ge|Human|Department of Clinical Microbiology|GIGA Medical Genomics|Durkin|Belgium

>Spike|hCoV-19/USA/LA-GBCL-26556543/2020|2020-04-15|EPI\_ISL\_485181|Original|hCoV-19^^Louisiana|Human|River Road Testing Lab|Ginkgo Bioworks Clinical Laboratory|Smith|USA

>Spike|hCoV-19/Australia/VIC17338/2020|2020-07-28|EPI\_ISL\_663849|Original|hCoV-19^^Victoria|Human|Microbiological Diagnostic Unit - Public Health Laboratory (MDU-PHL) |MDU-PHL|Schultz|Australia

>Spike|hCoV-19/USA/MI-MDHHS-SC21709/2020|2020-05-19|EPI\_ISL\_529828|Original|hCoV-19^^Michigan|Human|Michigan Department of Health and Human Services|Michigan Department of Health and Human Services|Blankenship|USA

>Spike|hCoV-19/England/CAMB-1AA4A1/2020|2020-04-16|EPI\_ISL\_443659|Original|hCoV-19^^England|Human|Department of Pathology|Wellcome Sanger Institute for the COVID-19 Genomics UK (COG-UK) consortium|Amato|United Kingdom

>Spike|hCoV-19/Wales/PHWC-4985DD/2020|2020-12-04|EPI\_ISL\_727098|Original|hCoV-19^^Wales|Human|Originating lab|COVID-19 Genomics UK (COG-UK) Consortium|Moore|United Kingdom

>Spike|hCoV-19/Australia/VIC4865/2020|2020-07-18|EPI\_ISL\_519249|Original|hCoV-19^^Victoria|Human|Microbiological Diagnostic Unit - Public Health Laboratory (MDU-PHL) |MDU-PHL|Schultz|Australia

>Spike|hCoV-19/Spain/MD-IBV-99008543/2020|2020-09-08|EPI\_ISL\_654089|Original|hCoV-19^^Madrid|Human|Hospital General Universitario Gregorio Mara\u00f1a|SeqCOVID-SPAIN consortium|IBV (CSIC) |Comas|Spain

>Spike|hCoV-19/USA/TX-HMH-MCoV-18945/2020|2020-11-25|EPI\_ISL\_785241|Original|hCoV-19^^Texas|Human|Houston Methodist Hospital|Houston Methodist Hospital|Long|USA

>Spike|hCoV-19/England/ALDP-A6F858/2020|2020-10-15|EPI\_ISL\_607247|Original|hCoV-19^^England|Human|Lighthouse Lab in Alderley Park|Wellcome Sanger Institute for the COVID-19 Genomics UK (COG-UK) consortium|Davies|United Kingdom

>Spike|hCoV-19/USA/MA-MASPHL-00638/2020|2020-05-13|EPI\_ISL\_692991|Original|hCoV-19^^Massachusetts|Human|Massachusetts State Public Health Laboratory|Massachusetts State Public Health Laboratory|Lang|USA

>Spike|hCoV-19/England/MILK-B89EEC/2020|2020-11-13|EPI\_ISL\_675565|Original|hCoV-19^^England|Human|Lighthouse Lab in Milton Keynes|Wellcome Sanger Institute for the COVID-19 Genomics UK (COG-UK) Consortium|Davies|United Kingdom

>Spike|hCoV-19/Canada/ON-S1955/2020|2020-11-24|EPI\_ISL\_755675|Original|hCoV-19^^Ontario|Human|Toronto Invasive Bacterial Diseases Network|McMaster University|McArthur|Canada

>Spike|hCoV-19/England/SHEF-D087A/2020|2020-04-14|EPI\_ISL\_457676|Original|hCoV-19^^England|Human|Virology Department|COVID-19 Genomics UK (COG-UK) Consortium|de Silva|United Kingdom

>Spike|hCoV-19/Northern Ireland/NIRE-10921F/2020|2020-10-22|EPI\_ISL\_650452|Original|hCoV-19^^Northern Ireland|Human|Regional Virus Laboratory|COVID-19 Genomics UK (COG-UK) Consortium|Fairley|United Kingdom

>Spike|hCoV-19/USA/TX-HMH-MCoV-18070/2020|2020-11-14|EPI\_ISL\_784418|Original|hCoV-19^^Texas|Human|Houston Methodist Hospital|Houston Methodist Hospital|Long|USA

>Spike|hCoV-19/USA/FL-BPHL-1700/2020|2020-08-20|EPI\_ISL\_594389|Original|hCoV-19^^Florida|Human|Florida Bureau of Public Health Laboratories|Florida Bureau of Public Health Laboratories|Blanton|USA

>Spike|hCoV-19/Israel/CVL-n14269/2020|2020-03-17|EPI\_ISL\_514309|Original|hCoV-19^^Central District|Human|Israel Central Virology laboratory|Israel Central Virology laboratory|Zuckerman|Israel

>Spike|hCoV-19/Australia/VIC16081/2020|2020-00-00|EPI\_ISL\_640643|Original|hCoV-19^^Victoria|Human|Microbiological Diagnostic Unit - Public Health Laboratory (MDU-PHL)|MDU-PHL|Schultz|Australia

>Spike|hCoV-19/Denmark/DCGC-9870/2020|2020-11-09|EPI\_ISL\_669242|Original|hCoV-19^^Sjaelland|Human|Department of Virus and Microbiological Special Diagnostics|Albertsen Lab|Michaelsen|Denmark

>Spike|hCoV-19/Singapore/52/2020|2020-03-13|EPI\_ISL\_428831|Original|hCoV-19^^Singapore|Human|National Public Health Laboratory|National Public Health Laboratory|Mak|Singapore

>Spike|hCoV-19/Australia/VIC11134/2020|2020-07-25|EPI\_ISL\_563263|Original|hCoV-19^^Victoria|Human|Microbiological Diagnostic Unit - Public Health Laboratory (MDU-PHL)|MDU-PHL|Schultz|Australia

>Spike|hCoV-19/Japan/PG-1967/2020|2020-04-00|EPI\_ISL\_685573|Original|hCoV-19^^Japan|Human|Pathogen Genomics Center|Pathogen Genomics Center|Sekizuka|Japan

>Spike|hCoV-19/Gambia/NPHL-941/2020|2020-00-00|EPI\_ISL\_561332|Original|hCoV-19^^Kombo|Human|MRCG at LSHTM Genomics lab|MRCG at LSHTM Genomics lab|Sesay|Gambia

>Spike|hCoV-19/England/BRIS-123A62/2020|2020-04-07|EPI\_ISL\_442797|Original|hCoV-19^^England|Human|PHE South West Regional Laboratory|Wellcome Sanger Institute for the COVID-19 Genomics UK (COG-UK) consortium|Amato|United Kingdom

>Spike|hCoV-19/England/PORT-2F52D9/2020|2020-00-00|EPI\_ISL\_703564|Original|hCoV-19^^England|Human|Centre for Enzyme Innovation|COVID-19 Genomics UK (COG-UK) Consortium|Robson|United Kingdom

>Spike|hCoV-19/USA/NM-NMDOH-2020135005/2020|2020-06-18|EPI\_ISL\_535292|Original|hCoV-19^^New Mexico|Human|New Mexico Department of Health Scientific Laboratory|New Mexico Department of Health Scientific Laboratory|Johnson|USA

>Spike|hCoV-19/Canada/ON-PHL-20-00056/2020|2020-00-00|EPI\_ISL\_548733|Original|hCoV-19^^Ontario|Human|Public Health Ontario Laboratory|Public Health Ontario Laboratory|Guthrie|Canada

>Spike|hCoV-19/Northern Ireland/NIRE-10875D/2020|2020-09-13|EPI\_ISL\_585199|Original|hCoV-19^^Northern Ireland|Human|Regional Virus Laboratory|COVID-19 Genomics UK (COG-UK) Consortium|Fairley|United Kingdom

>Spike|hCoV-19/Iceland/426/2020|2020-03-20|EPI\_ISL\_424450|Original|hCoV-19^^Reykjavik|Human|The National University Hospital of Iceland|deCODE genetics|J\u00f3nsson|Iceland

>Spike|hCoV-19/Switzerland/BE-ETHZ-370506/2020|2020-11-17|EPI\_ISL\_693990|Original|hCoV-19^^Bern|Human|Viollier AG|Department of Biosystems Science and Engineering|Nadeau|Switzerland

>Spike|hCoV-19/England/ALDP-AA3D68/2020|2020-10-21|EPI\_ISL\_624230|Original|hCoV-19^^England|Human|Lighthouse Lab in Alderley Park|Wellcome Sanger Institute for the COVID-19 Genomics UK (COG-UK) consortium|Davies|United Kingdom

>Spike|hCoV-19/Chile/RM-112760/2020|2020-06-28|EPI\_ISL\_746589|Original|hCoV-19^^Region Metropolitana de Santiago|Human|Genetica Molecular and Subdepartamento de Virologia ISP Chile|Instituto de Salud Publica de Chile|Tognarelli|Chile

>Spike|hCoV-19/England/ALDP-BBA8B7/2020|2020-11-20|EPI\_ISL\_701768|Original|hCoV-19^^England|Human|Lighthouse Lab in Alderley Park|Wellcome Sanger Institute for the COVID-19 Genomics UK (COG-UK) Consortium|Davies|United Kingdom

>Spike|hCoV-19/Finland/14M32/2020|2020-03-14|EPI\_ISL\_418408|Original|hCoV-19^^Helsinki|Human|Department of Virology and Immunology|Department of Virology|Smura|Finland

>Spike|hCoV-19/Scotland/CVR4405/2020|2020-09-21|EPI\_ISL\_585279|Original|hCoV-19^^Scotland|Human|West of Scotland Specialist Virology Centre|COVID-19 Genomics UK (COG-UK) Consortium|Robertson|United Kingdom

>Spike|hCoV-19/Scotland/EDB9252/2020|2020-11-04|EPI\_ISL\_650800|Original|hCoV-19^^Scotland|Human|Virology Department|COVID-19 Genomics UK (COG-UK) Consortium|McHugh|United Kingdom

>Spike|hCoV-19/Scotland/EDB8826/2020|2020-10-26|EPI\_ISL\_652006|Original|hCoV-19^^Scotland|Human|Virology Department|COVID-19 Genomics UK (COG-UK) Consortium|McHugh|United Kingdom

>Spike|hCoV-19/England/CAMC-B9C53C/2020|2020-11-15|EPI\_ISL\_673425|Original|hCoV-19^^England|Human|Lighthouse Lab in Cambridge|Wellcome Sanger Institute for the COVID-19 Genomics UK (COG-UK) Consortium|Davies|United Kingdom

>Spike|hCoV-19/Denmark/DCGC-18613/2020|2020-12-07|EPI\_ISL\_750080|Original|hCoV-19^^Midtjylland|Human|Department of Virus and Microbiological Special Diagnostics|Albertsen Lab|Michaelsen|Denmark

>Spike|hCoV-19/USA/TX-HMH-6270/2020|2020-06-23|EPI\_ISL\_547355|Original|hCoV-19^^Texas|Human|Houston Methodist Hospital|Houston Methodist Hospital|Long|USA

>Spike|hCoV-19/England/ALDP-A6D070/2020|2020-10-14|EPI\_ISL\_608079|Original|hCoV-19^^England|Human|Lighthouse Lab in Alderley Park|Wellcome Sanger Institute for the COVID-19 Genomics UK (COG-UK) consortium|Davies|United Kingdom

>Spike|hCoV-19/England/MILK-B384F9/2020|2020-11-01|EPI\_ISL\_659027|Original|hCoV-19^^England|Human|Lighthouse Lab in Milton Keynes|Wellcome Sanger Institute for the COVID-19 Genomics UK (COG-UK) Consortium|Davies|United Kingdom

>Spike|hCoV-19/Brazil/RJ-00554/2020|2020-10-29|EPI\_ISL\_717938|Original|hCoV-19^^Rio de Janeiro|Human|Laboratorio de Virologia Molecular / UFRJ|Bioinformatics Laboratory / LNCC|Almeida|Brazil

>Spike|hCoV-19/England/QEUEH-9D054D/2020|2020-09-16|EPI\_ISL\_589913|Original|hCoV-19^^England|Human|Lighthouse Lab in Glasgow|Wellcome Sanger Institute for the COVID-19 Genomics UK (COG-UK) consortium|Davies|United Kingdom

>Spike|hCoV-19/England/ALDP-BBAC42/2020|2020-11-21|EPI\_ISL\_701934|Original|hCoV-19^^England|Human|Lighthouse Lab in Alderley Park|Wellcome Sanger Institute for the COVID-19 Genomics UK (COG-UK) Consortium|Davies|United Kingdom

>Spike|hCoV-19/USA/TX-DSHS-1237/2020|2020-05-01|EPI\_ISL\_667776|Original|hCoV-19^^Texas|Human|Texas Department of State Health Services|Texas Department of State Health Services|Rahman|USA

>Spike|hCoV-19/England/NORT-28CB81/2020|2020-05-18|EPI\_ISL\_469329|Original|hCoV-19^^England|Human|NU-OMICS DNA Sequencing research facility|Wellcome Sanger Institute for the COVID-19 Genomics UK (COG-UK) consortium|Davies|United Kingdom

>Spike|hCoV-19/USA/FL-UF5/2020|2020-03-27|EPI\_ISL\_447589|Vero E6|hCoV-19^^Florida|Human|University of Florida|University of Florida|Elbadry|USA

>Spike|hCoV-19/England/QEUEH-AD5161/2020|2020-10-25|EPI\_ISL\_634172|Original|hCoV-19^^England|Human|Lighthouse Lab in Glasgow|Wellcome Sanger Institute for the COVID-19 Genomics UK (COG-UK) consortium|Davies|United Kingdom

>Spike|hCoV-19/USA/AZ-TG412165/2020|2020-06-25|EPI\_ISL\_694982|Original|hCoV-19^^Arizona|Human|TGen North|TGen North|French|USA

>Spike|hCoV-19/Wales/PHWC-2DE5E/2020|2020-04-14|EPI\_ISL\_446030|Original|hCoV-19^^Wales|Human|Wales Specialist Virology Centre|Public Health Wales Microbiology Cardiff|Moore|United Kingdom

>Spike|hCoV-19/Bangladesh/DNAS-Jakir/2020|2020-12-06|EPI\_ISL\_747283|Original|hCoV-19^^Dhaka|Human|DNA SOLUTION LTD.|DNA SOLUTION LTD.|Khan|Bangladesh

>Spike|hCoV-19/DRC/4694/2020|2020-04-30|EPI\_ISL\_514107|Original|hCoV-19^^Kinshasa|Human|Viral Respiratory Lab|Pathogen Sequencing Lab|Lokilo|Democratic Republic of the Congo

>Spike|hCoV-19/USA/CA-ALSR-3065/2020|2020-08-04|EPI\_ISL\_635824|Original|hCoV-19^^California|Human|San Diego County Public Health Laboratory|Andersen lab at Scripps Research|Gangavarapu|USA

>Spike|hCoV-19/Scotland/CVR1937/2020|2020-04-08|EPI\_ISL\_493749|Original|hCoV-19^^Scotland|Human|West of Scotland Specialist Virology Centre|COVID-19 Genomics UK (COG-UK) Consortium|Robertson|United Kingdom

>Spike|hCoV-19/Saudi Arabia/KAUST-MADINAH1130/2020|2020-06-13|EPI\_ISL\_677988|Original|hCoV-19^^Madinah|Human|Pathogen Genomics Lab King Abdullah University of Science and Technology(KAUST)|Pathogen Genomics Lab King Abdullah University of Science and Technology(KAUST)|Mohamed Ghazzali|Saudi Arabia

>Spike|hCoV-19/USA/NY-NYCPHL-000404/2020|2020-03-24|EPI\_ISL\_631888|Original|hCoV-19^^New York|Human|St Barnabas Hospital|New York City Public Health Laboratory|Wang|USA

>Spike|hCoV-19/Wales/PHWC-16D6FF/2020|2020-09-25|EPI\_ISL\_577435|Original|hCoV-19^^Wales|Human|Wales Specialist Virology Centre Sequencing lab|COVID-19 Genomics UK (COG-UK) Consortium|Moore|United Kingdom

>Spike|hCoV-19/Luxembourg/LNS9668214/2020|2020-10-30|EPI\_ISL\_744964|Original|hCoV-19^^Luxembourg|Human|Laboratoire national de sant\u00e9|Laboratoire national de sant\u00e9|Wienecke-Baldacchino|Luxembourg

>Spike|hCoV-19/Japan/PG-3283/2020|2020-04-00|EPI\_ISL\_691398|Original|hCoV-19^^Japan|Human|Pathogen Genomics Center|Pathogen Genomics Center|Sekizuka|Japan

>Spike|hCoV-19/Wales/PHWC-32C3E/2020|2020-04-15|EPI\_ISL\_446668|Original|hCoV-19^^Wales|Human|Wales Specialist Virology Centre|Public Health Wales Microbiology Cardiff|Moore|United Kingdom

>Spike|hCoV-19/England/SHEF-CEB3A/2020|2020-04-26|EPI\_ISL\_479265|Original|hCoV-19^^England|Human|Virology Department|COVID-19 Genomics UK (COG-UK) Consortium|de Silva|United Kingdom

>Spike|hCoV-19/USA/TX-HMH-6740/2020|2020-06-25|EPI\_ISL\_546207|Original|hCoV-19^^Texas|Human|Houston Methodist Hospital|Houston Methodist Hospital|Long|USA

>Spike|hCoV-19/England/NOTT-111DF5/2020|2020-04-14|EPI\_ISL\_472409|Original|hCoV-19^^England|Human|Queens Medical Centre|COVID-19 Genomics UK (COG-UK) Consortium|Loose|United Kingdom

>Spike|hCoV-19/England/NORT-28D35B/2020|2020-11-16|EPI\_ISL\_706339|Original|hCoV-19^^England|Human|Northumbria University / South Tees Hospitals NHS Foundation Trust / North Cumbria Integrated Care NHS Foundation Trust / North Tees and Hartlepool NHS Foundation Trust / Newcastle Hospitals NHS Foundation Trust|COVID-19 Genomics UK (COG-UK) Consortium|Bashton|United Kingdom

>Spike|hCoV-19/Denmark/DCGC-14549/2020|2020-11-30|EPI\_ISL\_711069|Original|hCoV-19^^Hovedstaden|Human|Department of Virus and Microbiological Special Diagnostics|Albertsen Lab|Michaelsen|Denmark

>Spike|hCoV-19/England/BRIS-1333DD/2020|2020-05-20|EPI\_ISL\_495117|Original|hCoV-19^^England|Human|PHE South West Regional Laboratory|Wellcome Sanger Institute for the COVID-19 Genomics UK (COG-UK) consortium|Davies|United Kingdom

>Spike|hCoV-19/England/NORW-E9A96/2020|2020-04-30|EPI\_ISL\_448349|Original|hCoV-19^^England|Human|Quadram Institute Bioscience|COVID-19 Genomics UK (COG-UK) Consortium|Alikhan|United Kingdom

>Spike|hCoV-19/Netherlands/UT-RIVM-20379/2020|2020-12-06|EPI\_ISL\_728599|Original|hCoV-19^^Utrecht|Human|Dutch COVID-19 response team|National Institute for Public Health and the Environment (RIVM)|Meijer|Netherlands

>Spike|hCoV-19/England/PORT-2D35AB/2020|2020-04-15|EPI\_ISL\_529345|Original|hCoV-19^^England|Human|Centre for Enzyme Innovation|COVID-19 Genomics UK (COG-UK) Consortium|Robson|United Kingdom

>Spike|hCoV-19/Austria/CeMM0252/2020|2020-03-21|EPI\_ISL\_438082|Original|hCoV-19^^Vienna|Human|Center for Virology|Bergthaler laboratory|Bergthaler|Austria

>Spike|hCoV-19/Denmark/DCGC-16175/2020|2020-11-16|EPI\_ISL\_714621|Original|hCoV-19^^Sjælland|Human|Department of Virus and Microbiological Special Diagnostics|Albertsen Lab|Michaelsen|Denmark

>Spike|hCoV-19/England/QEUA-AF51E3/2020|2020-10-30|EPI\_ISL\_662992|Original|hCoV-19^^England|Human|Lighthouse Lab in Glasgow|Wellcome Sanger Institute for the COVID-19 Genomics UK (COG-UK) Consortium|Davies|United Kingdom

>Spike|hCoV-19/USA/CO-CDPHE-2011197332/2020|2020-11-18|EPI\_ISL\_771253|Original|hCoV-19^^Colorado|Human|Colorado Department of Public Health and Environment|Colorado Department of Public Health and Environment|Bankers|USA

>Spike|hCoV-19/England/CAMB-1BAEDD/2020|2020-11-11|EPI\_ISL\_664185|Original|hCoV-19^^England|Human|Department of Pathology|COVID-19 Genomics UK (COG-UK) Consortium|Goodfellow|United Kingdom

>Spike|hCoV-19/Japan/PG-1960/2020|2020-04-00|EPI\_ISL\_685566|Original|hCoV-19^^Japan|Human|Pathogen Genomics Center|Pathogen Genomics Center|Sekizuka|Japan

>Spike|hCoV-19/England/LOND-1266FBB/2020|2020-12-11|EPI\_ISL\_741238|Original|hCoV-19^^England|Human|University College London|COVID-19 Genomics UK (COG-UK) Consortium|Roy|United Kingdom

>Spike|hCoV-19/England/MILK-B8974B/2020|2020-11-13|EPI\_ISL\_675922|Original|hCoV-19^^England|Human|Lighthouse Lab in Milton Keynes|Wellcome Sanger Institute for the COVID-19 Genomics UK (COG-UK) Consortium|Davies|United Kingdom

>Spike|hCoV-19/England/NORW-E9BA2/2020|2020-04-30|EPI\_ISL\_461847|Original|hCoV-19^^England|Human|Quadram Institute Bioscience|COVID-19 Genomics UK (COG-UK) Consortium|Alikhan|United Kingdom

>Spike|hCoV-19/England/CAMB-1B8D78/2020|2020-10-31|EPI\_ISL\_650447|Original|hCoV-19^^England|Human|Department of Pathology|COVID-19 Genomics UK (COG-UK) Consortium|Goodfellow|United Kingdom

>Spike|hCoV-19/USA/IL-NM09/2020|2020-03-17|EPI\_ISL\_444522|Original|hCoV-19^^Illinois|Human|Northwestern Memorial Hospital|Ozer Lab|Ozer|USA

>Spike|hCoV-19/USA/UT-UPHL-201128144/2020|2020-05-12|EPI\_ISL\_648594|Original|hCoV-19^^Utah|Human|Utah Public Health Laboratory|Utah Public Health Laboratory|Young|USA

>Spike|hCoV-19/Scotland/QEUH-962EDC/2020|2020-08-11|EPI\_ISL\_531821|Original|hCoV-19^^Scotland|Human|NHSGGC West of Scotland Specialist Virology Centre / MRC-University of Glasgow Centre for Virus Research|Wellcome Sanger Institute for the COVID-19 Genomics UK (COG-UK) consortium|Davies|United Kingdom

>Spike|hCoV-19/Colombia/VAC-GVI-97181/2020|2020-04-03|EPI\_ISL\_447792|Original|hCoV-19^^Valle del Cauca|Human|Instituto Nacional de Salud|Grupo de Investigaciones Microbiol\u00f3gicas-UR (GIMUR)|Ram\u00e9dez|Colombia

>Spike|hCoV-19/USA/TX-HMH-1334/2020|2020-04-16|EPI\_ISL\_542655|Original|hCoV-19^^Texas|Human|Houston Methodist Hospital|Houston Methodist Hospital|Long|USA

>Spike|hCoV-19/England/20124101202/2020|2020-03-18|EPI\_ISL\_418740|Original|hCoV-19^^England|Human|Respiratory Virus Unit|Respiratory Virus Unit|Platt|United Kingdom

>Spike|hCoV-19/England/ALDP-916C46/2020|2020-06-22|EPI\_ISL\_551514|Original|hCoV-19^^England|Human|Lighthouse Lab in Alderley Park|Wellcome Sanger Institute for the COVID-19 Genomics UK (COG-UK) consortium|Davies|United Kingdom

>Spike|hCoV-19/Australia/VIC12629/2020|2020-00-00|EPI\_ISL\_640656|Original|hCoV-19^^Victoria|Human|Microbiological Diagnostic Unit - Public Health Laboratory (MDU-PHL)|MDU-PHL|Schultz|Australia

>Spike|hCoV-19/Japan/PG-5155/2020|2020-08-00|EPI\_ISL\_690262|Original|hCoV-19^^Japan|Human|Pathogen Genomics Center|Pathogen Genomics Center|Sekizuka|Japan

>Spike|hCoV-19/Denmark/DCGC-20086/2020|2020-12-07|EPI\_ISL\_747972|Original|hCoV-19^^Syddanmark|Human|Department of Virus and Microbiological Special Diagnostics|Albertsen Lab|Michaelsen|Denmark

>Spike|hCoV-19/Spain/CM-ISCI-201328/2020|2020-03-01|EPI\_ISL\_418245|Original|hCoV-19^^Castilla La Mancha|Human|Hospital General y Universitario de Guadalajara|Instituto de Salud Carlos III|Caballero|Spain

>Spike|hCoV-19/Scotland/GCVR-173D88/2020|2020-04-07|EPI\_ISL\_459159|Original|hCoV-19^^Scotland|Human|NHSGGC West of Scotland Specialist Virology Centre / MRC-University of Glasgow Centre for Virus Research|Wellcome Sanger Institute for the COVID-19 Genomics UK (COG-UK) consortium|Davies|United Kingdom

>Spike|hCoV-19/Canada/ON-S22/2020|2020-03-16|EPI\_ISL\_586381|Original|hCoV-19^^Ontario|Human|Toronto Invasive Bacterial Diseases Network|McMaster University|McArthur|Canada

>Spike|hCoV-19/Ireland/D-NVRL-20G43510/2020|2020-03-25|EPI\_ISL\_681925|Original|hCoV-19^^Dublin|Human|National Virus Reference Laboratory|Irish Coronavirus Sequencing Consortium - Teagasc Moorepark|Walsh|Ireland

>Spike|hCoV-19/England/MILK-AC8F94/2020|2020-10-22|EPI\_ISL\_629712|Original|hCoV-19^^England|Human|Lighthouse Lab in Milton Keynes|Wellcome Sanger Institute for the COVID-19 Genomics UK (COG-UK) consortium|Davies|United Kingdom

>Spike|hCoV-19/England/NORW-F6F3D/2020|2020-11-24|EPI\_ISL\_706384|Original|hCoV-19^^England|Human|Quadram Institute Bioscience|COVID-19 Genomics UK (COG-UK) Consortium|Alikhan|United Kingdom

>Spike|hCoV-19/England/CAMC-B08076/2020|2020-10-29|EPI\_ISL\_643350|Original|hCoV-19^^England|Human|Lighthouse Lab in Cambridge|Wellcome Sanger Institute for the COVID-19 Genomics UK (COG-UK) Consortium|Davies|United Kingdom

>Spike|hCoV-19/Luxembourg/LNS9705196/2020|2020-10-19|EPI\_ISL\_744971|Original|hCoV-19^^Luxembourg|Human|Laboratoire national de sant\u00e9|Laboratoire national de sant\u00e9|Wienecke-Baldacchino|Luxembourg

>Spike|hCoV-19/England/MILK-B3C370/2020|2020-11-01|EPI\_ISL\_706137|Original|hCoV-19^^England|Human|Oxford Viromics|COVID-19 Genomics UK (COG-UK) Consortium|Golubchik|United Kingdom

>Spike|hCoV-19/Australia/VIC7942/2020|2020-08-18|EPI\_ISL\_564761|Original|hCoV-19^^Victoria|Human|Microbiological Diagnostic Unit - Public Health Laboratory (MDU-PHL)|MDU-PHL|Schultz|Australia

>Spike|hCoV-19/England/MILK-6847FA/2020|2020-07-02|EPI\_ISL\_581393|Original|hCoV-19^^England|Human|Lighthouse Lab in Milton Keynes|Wellcome Sanger Institute for the COVID-19 Genomics UK (COG-UK) consortium|Davies|United Kingdom

>Spike|hCoV-19/Japan/PG-7304/2020|2020-08-00|EPI\_ISL\_688407|Original|hCoV-19^^Japan|Human|Pathogen Genomics Center|Pathogen Genomics Center|Sekizuka|Japan

>Spike|hCoV-19/USA/TX-HMH-MCoV-15918/2020|2020-07-10|EPI\_ISL\_785602|Original|hCoV-19^^Texas|Human|Houston Methodist Hospital|Houston Methodist Hospital|Long|USA

>Spike|hCoV-19/Japan/PG-6572/2020|2020-09-00|EPI\_ISL\_687684|Original|hCoV-19^^Japan|Human|Pathogen Genomics Center|Pathogen Genomics Center|Sekizuka|Japan

>Spike|hCoV-19/England/NOTT-110F87/2020|2020-04-22|EPI\_ISL\_448442|Original|hCoV-19^^England|Human|Queens Medical Centre|COVID-19 Genomics UK (COG-UK) Consortium|Loose|United Kingdom

>Spike|hCoV-19/England/ALDP-AA564D/2020|2020-10-22|EPI\_ISL\_625097|Original|hCoV-19^^England|Human|Lighthouse Lab in Alderley Park|Wellcome Sanger Institute for the COVID-19 Genomics UK (COG-UK) consortium|Davies|United Kingdom

>Spike|hCoV-19/Germany/HH-hpi-p2191/2020|2020-03-21|EPI\_ISL\_776419|Original|hCoV-19^^Hamburg|Human|University Medical Center Hamburg Eppendorf|Heinrich Pette Institute|Robitaille|Germany

>Spike|hCoV-19/England/LIVE-99576/2020|2020-04-08|EPI\_ISL\_439735|Original|hCoV-19^^England|Human|Liverpool Clinical Laboratories|COVID-19 Genomics UK (COG-UK) Consortium|Haldenby|United Kingdom

>Spike|hCoV-19/USA/WI-WSLH-200374/2020|2020-04-22|EPI\_ISL\_578543|Original|hCoV-19^^Wisconsin|Human|Wisconsin State Laboratory of Hygiene Communicable Disease Division|Wisconsin State Laboratory of Hygiene Communicable Disease Division|Florek|USA

>Spike|hCoV-19/England/QEUA-A79484/2020|2020-10-14|EPI\_ISL\_638803|Original|hCoV-19^^England|Human|Oxford Viromics|COVID-19 Genomics UK (COG-UK) Consortium|Golubchik|United Kingdom

>Spike|hCoV-19/Denmark/DCGC-13170/2020|2020-11-30|EPI\_ISL\_712632|Original|hCoV-19^^Midtjylland|Human|Department of Virus and Microbiological Special Diagnostics|Albertsen Lab|Michaelsen|Denmark

>Spike|hCoV-19/Japan/PG-8465/2020|2020-08-00|EPI\_ISL\_687564|Original|hCoV-19^^Japan|Human|Pathogen Genomics Center|Pathogen Genomics Center|Sekizuka|Japan

>Spike|hCoV-19/USA/UT-UPHL-2012957045/2020|2020-09-22|EPI\_ISL\_745522|Original|hCoV-19^^Utah|Human|Ginkgo Bioworks Clinical Laboratory|Utah Public Health Laboratory|Young|USA

>Spike|hCoV-19/Germany/NW-UBI-43/2020|2020-06-17|EPI\_ISL\_631297|Original|hCoV-19^^North Rhine-Westphalia|Human|MVZ DIAMEDIS Diagnostische Medizin Sennestadt GmbH|Bielefeld University|Brandt|Germany

>Spike|hCoV-19/Australia/VIC2318/2020|2020-06-24|EPI\_ISL\_522039|Original|hCoV-19^^Victoria|Human|Microbiological Diagnostic Unit - Public Health Laboratory (MDU-PHL)|MDU-PHL|Schultz|Australia

>Spike|hCoV-19/England/QEUA-96457B/2020|2020-08-11|EPI\_ISL\_536833|Original|hCoV-19^^England|Human|Lighthouse Lab in Glasgow|Wellcome Sanger Institute for the COVID-19 Genomics UK (COG-UK) consortium|Davies|United Kingdom

>Spike|hCoV-19/England/ALDP-951887/2020|2020-06-10|EPI\_ISL\_555456|Original|hCoV-19^^England|Human|Lighthouse Lab in Alderley Park|Wellcome Sanger Institute for the COVID-19 Genomics UK (COG-UK) consortium|Davies|United Kingdom

>Spike|hCoV-19/USA/WI-UW-1530/2020|2020-09-10|EPI\_ISL\_605408|Original|hCoV-19^^Wisconsin|Human|University of Wisconsin-Madison AIDS Vaccine Research Laboratories|University of Wisconsin-Madison AIDS Vaccine Research Laboratories|Baczenas|USA

>Spike|hCoV-19/England/PORT-2D2102/2020|2020-03-21|EPI\_ISL\_611555|Original|hCoV-19^^England|Human|Centre for Enzyme Innovation|COVID-19 Genomics UK (COG-UK) Consortium|Robson|United Kingdom

>Spike|hCoV-19/England/QEUA-A1E481/2020|2020-09-29|EPI\_ISL\_587436|Original|hCoV-19^^England|Human|Lighthouse Lab in Glasgow|Wellcome Sanger Institute for the COVID-19 Genomics UK (COG-UK) consortium|Davies|United Kingdom

>Spike|hCoV-19/USA/OR-OHSU-2623/2020|2020-08-22|EPI\_ISL\_667266|Original|hCoV-19^^Oregon|Human|OHSU Lab Services Molecular Microbiology Lab|Oregon SARS-CoV-2 Genome Sequencing Center|O'Roak|USA

>Spike|hCoV-19/USA/TX-HMH-MCoV-8534/2020|2020-07-01|EPI\_ISL\_780612|Original|hCoV-19^^Texas|Human|Houston Methodist Hospital|Houston Methodist Hospital|Long|USA

>Spike|hCoV-19/Australia/VIC11501/2020|2020-08-31|EPI\_ISL\_563398|Original|hCoV-19^^Victoria|Human|Microbiological Diagnostic Unit - Public Health Laboratory (MDU-PHL)|MDU-PHL|Schultz|Australia

>Spike|hCoV-19/South Africa/KRISP-0417/2020|2020-07-02|EPI\_ISL\_495541|Original|hCoV-19^^KwaZulu-Natal|Human|Medical Disagnostics Services (MDS)|KRISP|de Oliveira|South Africa

>Spike|hCoV-19/England/MILK-B3A5A9/2020|2020-11-02|EPI\_ISL\_659032|Original|hCoV-19^^England|Human|Lighthouse Lab in Milton Keynes|Wellcome Sanger Institute for the COVID-19 Genomics UK (COG-UK) Consortium|Davies|United Kingdom

>Spike|hCoV-19/Wales/PHWC-29B2E/2020|2020-04-02|EPI\_ISL\_474242|Original|hCoV-19^^Wales|Human|Originating lab|COVID-19 Genomics UK (COG-UK) Consortium|Moore|United Kingdom

>Spike|hCoV-19/England/LIVE-DC2BC0/2020|2020-11-25|EPI\_ISL\_702871|Original|hCoV-19^^England|Human|Liverpool Clinical Laboratories|COVID-19 Genomics UK (COG-UK) Consortium|Haldenby|United Kingdom

>Spike|hCoV-19/USA/NY-NYUMC913/2020|2020-05-07|EPI\_ISL\_467406|Original|hCoV-19^^New York|Human|NYU Langone Health|Departments of Pathology and Medicine|Maurano|USA

>Spike|hCoV-19/England/CAMB-83BD7/2020|2020-04-16|EPI\_ISL\_443368|Original|hCoV-19^^England|Human|Department of Pathology|Wellcome Sanger Institute for the COVID-19 Genomics UK (COG-UK) consortium|Amato|United Kingdom

>Spike|hCoV-19/Scotland/EDB10322/2020|2020-11-24|EPI\_ISL\_724223|Original|hCoV-19^^Scotland|Human|Virology Department|COVID-19 Genomics UK (COG-UK) Consortium|McHugh|United Kingdom

>Spike|hCoV-19/England/CAMB-1B135F/2020|2020-05-08|EPI\_ISL\_458531|Original|hCoV-19^^England|Human|Department of Pathology|Wellcome Sanger Institute for the COVID-19 Genomics UK (COG-UK) consortium|Davies|United Kingdom

>Spike|hCoV-19/France/PAC-IHU-1525/2020|2020-08-13|EPI\_ISL\_569189|Original|hCoV-19^^Provence-Alpes-C\u00f4te-d\u2019Azur|Human|MEPHI|MEPHI|Levasseur|France

>Spike|hCoV-19/USA/CA-CZB-12788/2020|2020-10-14|EPI\_ISL\_648445|Original|hCoV-19^^California|Human|Santa Clara County Public Health Laboratory|Chan-Zuckerberg Biohub|Bhatt|USA

>Spike|hCoV-19/Scotland/EDB5960/2020|2020-05-02|EPI\_ISL\_487683|Original|hCoV-19^^Scotland|Human|Virology Department|Wellcome Sanger Institute for the COVID-19 Genomics UK (COG-UK) consortium|Davies|United Kingdom

>Spike|hCoV-19/Australia/VIC4451/2020|2020-07-16|EPI\_ISL\_519747|Original|hCoV-19^^Victoria|Human|Microbiological Diagnostic Unit - Public Health Laboratory (MDU-PHL)|MDU-PHL|Schultz|Australia

>Spike|hCoV-19/England/LIVE-AA967/2020|2020-08-10|EPI\_ISL\_540588|Original|hCoV-19^^England|Human|Liverpool Clinical Laboratories|COVID-19 Genomics UK (COG-UK) Consortium|Haldenby|United Kingdom

>Spike|hCoV-19/England/QEUA-96D976/2020|2020-08-20|EPI\_ISL\_530643|Original|hCoV-19^^England|Human|Lighthouse Lab in Glasgow|Wellcome Sanger Institute for the COVID-19 Genomics UK (COG-UK) consortium|Davies|United Kingdom

>Spike|hCoV-19/Scotland/EDB4366/2020|2020-04-25|EPI\_ISL\_449299|Original|hCoV-19^^Scotland|Human|Virology Department|COVID-19 Genomics UK (COG-UK) Consortium|Williams|United Kingdom

>Spike|hCoV-19/England/CAMB-83C2F/2020|2020-04-16|EPI\_ISL\_443357|Original|hCoV-19^^England|Human|Department of Pathology|Wellcome Sanger Institute for the COVID-19 Genomics UK (COG-UK) consortium|Amato|United Kingdom



>Spike|hCoV-19/USA/CA-CZB-11117/2020|2020-05-29|EPI\_ISL\_625510|Original|hCoV-19^^California|Human|Alameda County Public Health Lab|Chan-Zuckerberg Biohub|Bhatt|USA

>Spike|hCoV-19/USA/VA-DCLS-0233/2020|2020-04-04|EPI\_ISL\_452810|Original|hCoV-19^^Virginia|Human|Virginia DCLS|Virginia DCLS|St. Jacques|USA

>Spike|hCoV-19/England/ALDP-4F5C15/2020|2020-06-24|EPI\_ISL\_559202|Original|hCoV-19^^England|Human|Lighthouse Lab in Alderley Park|Wellcome Sanger Institute for the COVID-19 Genomics UK (COG-UK) consortium|Davies|United Kingdom

>Spike|hCoV-19/Bangladesh/DNAS\_DRICM\_isl\_Ismail/2020|2020-06-28|EPI\_ISL\_774998|Original|hCoV-19^^Dhaka|Human|Designated Reference Institute for Chemical Measurements (DRICM)|DNA SOLUTION LTD.|Rabbi|Bangladesh

>Spike|hCoV-19/England/CAMC-A8101C/2020|2020-10-14|EPI\_ISL\_610636|Original|hCoV-19^^England|Human|Lighthouse Lab in Cambridge|Wellcome Sanger Institute for the COVID-19 Genomics UK (COG-UK) consortium|Davies|United Kingdom

>Spike|hCoV-19/England/ALDP-A6D9C0/2020|2020-10-14|EPI\_ISL\_607063|Original|hCoV-19^^England|Human|Lighthouse Lab in Alderley Park|Wellcome Sanger Institute for the COVID-19 Genomics UK (COG-UK) consortium|Davies|United Kingdom

>Spike|hCoV-19/Australia/WA09/2020|2020-03-14|EPI\_ISL\_420538|Original|hCoV-19^^Western Australia|Human|Department of Microbiology|Department of Microbiology|Sikazwe|Australia

>Spike|hCoV-19/Brazil/RJ-00526/2020|2020-06-02|EPI\_ISL\_717912|Original|hCoV-19^^Rio de Janeiro|Human|LACEN Dr. Francisco Rimolo Neto|Bioinformatics Laboratory / LNCC|Almeida|Brazil

>Spike|hCoV-19/Scotland/EDB5871/2020|2020-04-28|EPI\_ISL\_487931|Original|hCoV-19^^Scotland|Human|Virology Department|Wellcome Sanger Institute for the COVID-19 Genomics UK (COG-UK) consortium|Davies|United Kingdom

>Spike|hCoV-19/England/CAMC-991029/2020|2020-08-27|EPI\_ISL\_551897|Original|hCoV-19^^England|Human|Lighthouse Lab in Cambridge|Wellcome Sanger Institute for the COVID-19 Genomics UK (COG-UK) consortium|Davies|United Kingdom

>Spike|hCoV-19/Denmark/DCGC-3485/2020|2020-08-31|EPI\_ISL\_616273|Original|hCoV-19^^Midtjylland|Human|Department of Virus and Microbiological Special Diagnostics|Albertsen lab|Michaelsen|Denmark

>Spike|hCoV-19/England/QEUEH-9F33A4/2020|2020-09-23|EPI\_ISL\_588637|Original|hCoV-19^^England|Human|Lighthouse Lab in Glasgow|Wellcome Sanger Institute for the COVID-19 Genomics UK (COG-UK) consortium|Davies|United Kingdom

>Spike|hCoV-19/USA/TX-HMH-MCoV-8670/2020|2020-07-01|EPI\_ISL\_780690|Original|hCoV-19^^Texas|Human|Houston Methodist Hospital|Houston Methodist Hospital|Long|USA

>Spike|hCoV-19/England/ALDP-CB355C/2020|2020-12-20|EPI\_ISL\_761273|Original|hCoV-19^^England|Human|Lighthouse Lab in Alderley Park|Wellcome Sanger Institute for the COVID-19 Genomics UK (COG-UK) Consortium|Davies|United Kingdom

>Spike|hCoV-19/Canada/BC-BCCDC-7269/2020|2020-11-00|EPI\_ISL\_740650|Original|hCoV-19^^British Columbia|Human|BCCDC Public Health Laboratory|BCCDC Public Health Laboratory|Prystajecky|Canada

>Spike|hCoV-19/USA/MI-MDHHS-SC21177/2020|2020-07-02|EPI\_ISL\_507434|Original|hCoV-19^^Michigan|Human|Michigan Department of Health and Human Services|Michigan Department of Health and Human Services|Blankenship|USA

>Spike|hCoV-19/USA/UT-UPHL-2008783/2020|2020-06-01|EPI\_ISL\_524811|Original|hCoV-19^^Utah|Human|Utah Public Health Laboratory|Utah Public Health Laboratory|Young|USA

>Spike|hCoV-19/Luxembourg/LNS1234709/2020|2020-03-12|EPI\_ISL\_419570|Original|hCoV-19^^Luxembourg|Human|Laboratoire National de Sant\u00e9|Laboratoire National de Sant\u00e9|Wienecke-Baldacchino|Luxembourg

>Spike|hCoV-19/England/LOND-D8678/2020|2020-04-19|EPI\_ISL\_492762|Original|hCoV-19^^England|Human|University College London|Wellcome Sanger Institute for the COVID-19 Genomics UK (COG-UK) consortium|Davies|United Kingdom

>Spike|hCoV-19/England/ALDP-9551E2/2020|2020-06-12|EPI\_ISL\_553594|Original|hCoV-19^^England|Human|Lighthouse Lab in Alderley Park|Wellcome Sanger Institute for the COVID-19 Genomics UK (COG-UK) consortium|Davies|United Kingdom

>Spike|hCoV-19/Denmark/DCGC-12738/2020|2020-11-16|EPI\_ISL\_682919|Original|hCoV-19^^Sjaelland|Human|Department of Virus and Microbiological Special Diagnostics|Albertsen Lab|Michaelsen|Denmark

>Spike|hCoV-19/England/ALDP-94F813/2020|2020-06-16|EPI\_ISL\_555789|Original|hCoV-19^^England|Human|Lighthouse Lab in Alderley Park|Wellcome Sanger Institute for the COVID-19 Genomics UK (COG-UK) consortium|Davies|United Kingdom

>Spike|hCoV-19/England/MILK-974CDD/2020|2020-08-21|EPI\_ISL\_552528|Original|hCoV-19^^England|Human|Lighthouse Lab in Milton Keynes|Wellcome Sanger Institute for the COVID-19 Genomics UK (COG-UK) consortium|Davies|United Kingdom

>Spike|hCoV-19/Wales/PHWC-49560A/2020|2020-11-23|EPI\_ISL\_726372|Original|hCoV-19^^Wales|Human|Originating lab|COVID-19 Genomics UK (COG-UK) Consortium|Moore|United Kingdom

>Spike|hCoV-19/England/LOND-D57A5/2020|2020-04-17|EPI\_ISL\_449721|Original|hCoV-19^^England|Human|University College London|COVID-19 Genomics UK (COG-UK) Consortium|Roy|United Kingdom

>Spike|hCoV-19/Germany/NW-HHU-79/2020|2020-03-20|EPI\_ISL\_523950|Original|hCoV-19^^North Rhine-Westphalia|Human|Center of Medical Microbiology|Center of Medical Microbiology|Wienemann|Germany

>Spike|hCoV-19/Japan/PG-3289/2020|2020-04-00|EPI\_ISL\_691404|Original|hCoV-19^^Japan|Human|Pathogen Genomics Center|Pathogen Genomics Center|Sekizuka|Japan

>Spike|hCoV-19/Hong Kong/VB20065870/2020|2020-04-08|EPI\_ISL\_463323|Original|hCoV-19^^Hong Kong|Human|Yuen Long JC GOPC|Hong Kong Department of Health|Mak|China

>Spike|hCoV-19/Turkey/IST-GLAB-143/2020|2020-04-30|EPI\_ISL\_735280|Original|hCoV-19^^Istanbul|Human|Genomic Laboratory (GLAB) (Conjoint lab of Health Directorate of Istanbul and Istanbul Technical University)|Genomic Laboratory (GLAB)|Karacan|Turkey

>Spike|hCoV-19/USA/TX-HMH-MCoV-12637/2020|2020-09-01|EPI\_ISL\_789852|Original|hCoV-19^^Texas|Human|Houston Methodist Hospital|Houston Methodist Hospital|Long|USA

>Spike|hCoV-19/England/CAMB-78971/2020|2020-04-07|EPI\_ISL\_433797|Original|hCoV-19^^England|Human|Department of Pathology|COVID-19 Genomics UK (COG-UK) Consortium|Meredith|United Kingdom

>Spike|hCoV-19/England/MILK-99D5B5/2020|2020-08-31|EPI\_ISL\_549817|Original|hCoV-19^^England|Human|Lighthouse Lab in Milton Keynes|Wellcome Sanger Institute for the COVID-19 Genomics UK (COG-UK) consortium|Davies|United Kingdom

>Spike|hCoV-19/Denmark/DCGC-10953/2020|2020-11-02|EPI\_ISL\_670307|Original|hCoV-19^^Hovedstaden|Human|Department of Virus and Microbiological Special Diagnostics|Albertsen Lab|Michaelsen|Denmark

>Spike|hCoV-19/England/QEUH-A1FCC4/2020|2020-10-01|EPI\_ISL\_587607|Original|hCoV-19^^England|Human|Lighthouse Lab in Glasgow|Wellcome Sanger Institute for the COVID-19 Genomics UK (COG-UK) consortium|Davies|United Kingdom

>Spike|hCoV-19/England/MILK-A697BB/2020|2020-10-08|EPI\_ISL\_665851|Original|hCoV-19^^England|Human|University of Exeter|COVID-19 Genomics UK (COG-UK) Consortium|Temperton|United Kingdom

>Spike|hCoV-19/USA/TX-HMH-MCoV-13251/2020|2020-08-25|EPI\_ISL\_788401|Original|hCoV-19^^Texas|Human|Houston Methodist Hospital|Houston Methodist Hospital|Long|USA

>Spike|hCoV-19/Denmark/DCGC-16024/2020|2020-11-23|EPI\_ISL\_714543|Original|hCoV-19^^Nordjylland|Human|Department of Virus and Microbiological Special Diagnostics|Albertsen Lab|Michaelsen|Denmark

>Spike|hCoV-19/Japan/PG-1999/2020|2020-05-00|EPI\_ISL\_685604|Original|hCoV-19^^Japan|Human|Pathogen Genomics Center|Pathogen Genomics Center|Sekizuka|Japan

>Spike|hCoV-19/USA/UT-UPHL-2008901/2020|2020-05-26|EPI\_ISL\_525014|Original|hCoV-19^^Utah|Human|Utah Public Health Laboratory|Utah Public Health Laboratory|Young|USA

>Spike|hCoV-19/New Zealand/20VR1996/2020|2020-00-00|EPI\_ISL\_579196|Original|hCoV-19^^Combined Wellington|Human|Wellington SCL (WN)|Institute of Environmental Science and Research (ESR)|Wang|New Zealand

>Spike|hCoV-19/England/ALDP-A86D2F/2020|2020-10-17|EPI\_ISL\_606131|Original|hCoV-19^^England|Human|Lighthouse Lab in Alderley Park|Wellcome Sanger Institute for the COVID-19 Genomics UK (COG-UK) consortium|Davies|United Kingdom

>Spike|hCoV-19/USA/OR-OHSU-2063/2020|2020-08-03|EPI\_ISL\_667552|Original|hCoV-19^^Oregon|Human|OHSU Lab Services Molecular Microbiology Lab|Oregon SARS-CoV-2 Genome Sequencing Center|O'Roak|USA

>Spike|hCoV-19/Scotland/QEUH-9B770A/2020|2020-09-08|EPI\_ISL\_602120|Original|hCoV-19^^Scotland|Human|Lighthouse Lab in Glasgow|Wellcome Sanger Institute for the COVID-19 Genomics UK (COG-UK) consortium|Davies|United Kingdom

>Spike|hCoV-19/Japan/PG-5869/2020|2020-08-00|EPI\_ISL\_688984|Original|hCoV-19^^Japan|Human|Pathogen Genomics Center|Pathogen Genomics Center|Sekizuka|Japan

>Spike|hCoV-19/Denmark/ALAB-SSI293/2020|2020-03-10|EPI\_ISL\_429448|Original|hCoV-19^^Denmark|Human|Department of Virus and Microbiological Special Diagnostics|Albertsen lab|Kirkegaard|Denmark

>Spike|hCoV-19/USA/TX-HMH-MCoV-10806/2020|2020-07-05|EPI\_ISL\_789258|Original|hCoV-19^^Texas|Human|Houston Methodist Hospital|Houston Methodist Hospital|Long|USA

>Spike|hCoV-19/Bahrain/340844843/2020|2020-10-26|EPI\_ISL\_681310|Original|hCoV-19^^Bahrain|Human|Communicable Disease Laboratory|Communicable Disease Laboratory|Altaif|Bahrain

>Spike|hCoV-19/Netherlands/LI-RIVM-20956/2020|2020-12-22|EPI\_ISL\_790980|Original|hCoV-19^^Limburg|Human|Dutch COVID-19 response team|National Institute for Public Health and the Environment (RIVM)|Meijer|Netherlands

>Spike|hCoV-19/France/ARA-101085/2020|2020-11-04|EPI\_ISL\_732679|Original|hCoV-19^^Auvergne-Rh\u00f4ne-Alpes|Human|CNR Virus des Infections Respiratoires - France SUD|CNR Virus des Infections Respiratoires - France SUD|Bal|France

>Spike|hCoV-19/USA/MD-MDH-0141/2020|2020-07-09|EPI\_ISL\_534701|Original|hCoV-19^^Maryland|Human|MD PHL|MD PHL|Keller|USA

>Spike|hCoV-19/Bangladesh/BCSIR-NILMRC-058/2020|2020-05-10|EPI\_ISL\_466636|Original|hCoV-19^^Dhaka|Human|National Institute of Laboratory Medicine and Referral Center|Genomic Research Lab|Khan|Bangladesh

>Spike|hCoV-19/England/MILK-62A6CC/2020|2020-07-05|EPI\_ISL\_557884|Original|hCoV-19^^England|Human|Lighthouse Lab in Milton Keynes|Wellcome Sanger Institute for the COVID-19 Genomics UK (COG-UK) consortium|Davies|United Kingdom

>Spike|hCoV-19/England/BRIS-1853A23/2020|2020-04-16|EPI\_ISL\_492389|Original|hCoV-19^^England|Human|PHE South West Regional Laboratory|Wellcome Sanger Institute for the COVID-19 Genomics UK (COG-UK) consortium|Davies|United Kingdom

>Spike|hCoV-19/France/ARA-SC307/2020|2020-03-24|EPI\_ISL\_649945|Original|hCoV-19^^Auvergne-Rh\u00f4ne-Alpes|Human|CHU de Saint-\u00c9tienne H\u00f4pital Nord|CNR Virus des Infections Respiratoires - France SUD|Bal|France

>Spike|hCoV-19/England/SHEF-CEEC8/2020|2020-10-29|EPI\_ISL\_653090|Original|hCoV-19^^England|Human|Virology Department|COVID-19 Genomics UK (COG-UK) Consortium|de Silva|United Kingdom

>Spike|hCoV-19/USA/WA-UW-6400/2020|2020-04-03|EPI\_ISL\_430975|Original|hCoV-19^^Washington|Human|UW Virology Lab|UW Virology Lab|Roychoudhury|USA

>Spike|hCoV-19/England/CAMC-BBBB26/2020|2020-11-21|EPI\_ISL\_724090|Original|hCoV-19^^England|Human|Northumbria University / South Tees Hospitals NHS Foundation Trust / North Cumbria Integrated Care NHS Foundation Trust / North Tees and Hartlepool NHS Foundation Trust / Newcastle Hospitals NHS Foundation Trust|COVID-19 Genomics UK (COG-UK) Consortium|Bashton|United Kingdom

>Spike|hCoV-19/South Africa/KRISP-K003390/2020|2020-09-10|EPI\_ISL\_602778|Original|hCoV-19^^KwaZulu-Natal|Human|NHLS-IALCH|KRISP|de Oliveira|South Africa

>Spike|hCoV-19/Italy/BAS-IZSPB-388PT/2020|2020-10-26|EPI\_ISL\_722887|Original|hCoV-19^^Basilicata|Human|Istituto Zooprofilattico Sperimentale della Puglia e della Basilicata|Istituto Zooprofilattico Sperimentale della Puglia e della Basilicata|Parisi|Italy

>Spike|hCoV-19/USA/TX-HMH-MCoV-15294/2020|2020-10-19|EPI\_ISL\_786778|Original|hCoV-19^^Texas|Human|Houston Methodist Hospital|Houston Methodist Hospital|Long|USA

>Spike|hCoV-19/England/201360139/2020|2020-03-24|EPI\_ISL\_423225|Original|hCoV-19^^England|Human|Respiratory Virus Unit|Respiratory Virus Unit|Platt|United Kingdom

>Spike|hCoV-19/tiger/USA/NY-4-040420/2020|2020-04-04|EPI\_ISL\_566042|Original|hCoV-19^^New York|Panthera tigris jacksoni|Wildlife Conservation Society|Diagnostic Virology Laboratory|Mitchell|USA

>Spike|hCoV-19/Australia/VIC8094/2020|2020-08-16|EPI\_ISL\_564844|Original|hCoV-19^^Victoria|Human|Microbiological Diagnostic Unit - Public Health Laboratory (MDU-PHL)|MDU-PHL|Schultz|Australia

>Spike|hCoV-19/USA/LA-CDC-1916/2020|2020-05-07|EPI\_ISL\_535343|Original|hCoV-19^^Louisiana|Human|LA Office of Public Health Laboratories|Pathogen Discovery|Queen|USA

>Spike|hCoV-19/Curacao/CW-RIVM-10364/2020|2020-08-11|EPI\_ISL\_636519|Original|hCoV-19^^Curacao|Human|Dutch COVID-19 response team|National Institute for Public Health and the Environment (RIVM)|Meijer|Curacao

>Spike|hCoV-19/England/MILK-9A523B/2020|2020-09-02|EPI\_ISL\_549951|Original|hCoV-19^^England|Human|Lighthouse Lab in Milton Keynes|Wellcome Sanger Institute for the COVID-19 Genomics UK (COG-UK) consortium|Davies|United Kingdom

>Spike|hCoV-19/Iceland/63/2020|2020-03-07|EPI\_ISL\_417855|Original|hCoV-19^^Reykjavik|Human|The National University Hospital of Iceland|deCODE genetics|J\u00f3nsson|Iceland

>Spike|hCoV-19/England/CAMC-B07305/2020|2020-10-30|EPI\_ISL\_643970|Original|hCoV-19^^England|Human|Lighthouse Lab in Cambridge|Wellcome Sanger Institute for the COVID-19 Genomics UK (COG-UK) Consortium|Davies|United Kingdom

>Spike|hCoV-19/Spain/RI-IBV-005951/2020|2020-03-25|EPI\_ISL\_500385|Original|hCoV-19^^La Rioja|Human|Centro de Investigaci\u00f3n Biom\u00e9dica de La Rioja - Hospital San Pedro Logro\u00f1o|SeqCOVID-SPAIN consortium/IBV (CSIC)|Comas|Spain

>Spike|hCoV-19/England/QEUH-BA231B/2020|2020-11-18|EPI\_ISL\_719865|Original|hCoV-19^^England|Human|Lighthouse Lab in Glasgow|Wellcome Sanger Institute for the COVID-19 Genomics UK (COG-UK) Consortium|Davies|United Kingdom

>Spike|hCoV-19/England/ALDP-AA4417/2020|2020-10-21|EPI\_ISL\_624504|Original|hCoV-19^^England|Human|Lighthouse Lab in Alderley Park|Wellcome Sanger Institute for the COVID-19 Genomics UK (COG-UK) consortium|Davies|United Kingdom

>Spike|hCoV-19/Denmark/DCGC-21660/2020|2020-12-21|EPI\_ISL\_758293|Original|hCoV-19^^Hovedstaden|Human|Department of Virus and Microbiological Special Diagnostics|Albertsen Lab|Michaelsen|Denmark

>Spike|hCoV-19/England/OXON-AC613/2020|2020-04-05|EPI\_ISL\_448468|Original|hCoV-19^^England|Human|Oxford Viromics|COVID-19 Genomics UK (COG-UK) Consortium|Golubchik|United Kingdom

>Spike|hCoV-19/Ireland/LK-UHL45/2020|2020-04-14|EPI\_ISL\_681753|Original|hCoV-19^^Limerick|Human|University Hospital Limerick|Irish Coronavirus Sequencing Consortium - Teagasc Moorepark|Walsh|Ireland

>Spike|hCoV-19/USA/MI-MDHHS-SC20851/2020|2020-04-29|EPI\_ISL\_471872|Original|hCoV-19^^Michigan|Human|Michigan Department of Health and Human Services|Michigan Department of Health and Human Services|Blankenship|USA

>Spike|hCoV-19/Denmark/DCGC-21452/2020|2020-12-21|EPI\_ISL\_758173|Original|hCoV-19^^Sjælland|Human|Department of Virus and Microbiological Special Diagnostics|Albertsen Lab|Michaelsen|Denmark

>Spike|hCoV-19/Malaysia/UNIMAS-M3851/2020|2020-05-11|EPI\_ISL\_718133|Original|hCoV-19^^Sarawak|Human|Ministry of Health Hospitals|Institute of Health and Community Medicine|Jonathan|Malaysia

>Spike|hCoV-19/Japan/PG-6162/2020|2020-08-00|EPI\_ISL\_689274|Original|hCoV-19^^Japan|Human|Pathogen Genomics Center|Pathogen Genomics Center|Sekizuka|Japan

>Spike|hCoV-19/England/LOND-DAF4E/2020|2020-11-14|EPI\_ISL\_724733|Original|hCoV-19^^England|Human|University College London|COVID-19 Genomics UK (COG-UK) Consortium|Roy|United Kingdom

>Spike|hCoV-19/England/MILK-9AB0A4/2020|2020-08-31|EPI\_ISL\_551235|Original|hCoV-19^^England|Human|Lighthouse Lab in Milton Keynes|Wellcome Sanger Institute for the COVID-19 Genomics UK (COG-UK) consortium|Davies|United Kingdom

>Spike|hCoV-19/Australia/VIC12385/2020|2020-09-12|EPI\_ISL\_563557|Original|hCoV-19^^Victoria|Human|Microbiological Diagnostic Unit - Public Health Laboratory (MDU-PHL)|MDU-PHL|Schultz|Australia

>Spike|hCoV-19/Scotland/QEUH-96B7AB/2020|2020-08-16|EPI\_ISL\_534647|Original|hCoV-19^^Scotland|Human|NHSGGC West of Scotland Specialist Virology Centre / MRC - University of Glasgow Centre for Virus Research|Wellcome Sanger Institute for the COVID-19 Genomics UK (COG-UK) consortium|Davies|United Kingdom

>Spike|hCoV-19/Australia/VIC17363/2020|2020-08-21|EPI\_ISL\_663857|Original|hCoV-19^^Victoria|Human|Microbiological Diagnostic Unit - Public Health Laboratory (MDU-PHL)|MDU-PHL|Schultz|Australia

>Spike|hCoV-19/Spain/RI-IBV-98002295/2020|2020-03-05|EPI\_ISL\_537818|Original|hCoV-19^^La Rioja|Human|Centro de Investigaci\u00f3n Biom\u00e9dica de La Rioja - Hospital San Pedro Logro\u00f1o|SeqCOVID-SPAIN consortium/IBV (CSIC)|Comas|Spain

>Spike|hCoV-19/Scotland/GCVR-17129A/2020|2020-03-26|EPI\_ISL\_459678|Original|hCoV-19^^Scotland|Human|NHSGGC West of Scotland Specialist Virology Centre / MRC-University of Glasgow Centre for Virus Research|Wellcome Sanger Institute for the COVID-19 Genomics UK (COG-UK) consortium|Davies|United Kingdom

>Spike|hCoV-19/England/CAMB-A97CC4/2020|2020-12-12|EPI\_ISL\_764276|Original|hCoV-19^^England|Human|Department of Pathology|COVID-19 Genomics UK (COG-UK) Consortium|Goodfellow|United Kingdom

>Spike|hCoV-19/England/ALDP-9EAC5A/2020|2020-09-24|EPI\_ISL\_579987|Original|hCoV-19^^England|Human|Lighthouse Lab in Alderley Park|Wellcome Sanger Institute for the COVID-19 Genomics UK (COG-UK) consortium|Davies|United Kingdom

>Spike|hCoV-19/USA/MI-MDHHS-SC21802/2020|2020-07-06|EPI\_ISL\_565845|Original|hCoV-19^^Michigan|Human|Michigan Department of Health and Human Services|Michigan Department of Health and Human Services|Blankenship|USA

>Spike|hCoV-19/England/LIVE-A778E/2020|2020-03-27|EPI\_ISL\_517068|Original|hCoV-19^^England|Human|Liverpool Clinical Laboratories|COVID-19 Genomics UK (COG-UK) Consortium|Haldenby|United Kingdom

>Spike|hCoV-19/Wales/PHWC-168B22/2020|2020-04-19|EPI\_ISL\_494332|Original|hCoV-19^^Wales|Human|Originating lab|COVID-19 Genomics UK (COG-UK) Consortium|Moore|United Kingdom

>Spike|hCoV-19/Denmark/DCGC-7305/2020|2020-10-12|EPI\_ISL\_619058|Original|hCoV-19^^Syddanmark|Human|Department of Virus and Microbiological Special Diagnostics|Albertsen lab|Michaelsen|Denmark

>Spike|hCoV-19/Denmark/DCGC-20473/2020|2020-12-21|EPI\_ISL\_759172|Original|hCoV-19^^Hovedstaden|Human|Department of Virus and Microbiological Special Diagnostics|Albertsen Lab|Michaelsen|Denmark

>Spike|hCoV-19/Scotland/QEUA-969831/2020|2020-08-14|EPI\_ISL\_530959|Original|hCoV-19^^Scotland|Human|NHSGGC West of Scotland Specialist Virology Centre / MRC-University of Glasgow Centre for Virus Research|Wellcome Sanger Institute for the COVID-19 Genomics UK (COG-UK) consortium|Davies|United Kingdom

>Spike|hCoV-19/Denmark/DCGC-17013/2020|2020-12-14|EPI\_ISL\_750709|Original|hCoV-19^^Midtjylland|Human|Department of Virus and Microbiological Special Diagnostics|Albertsen Lab|Michaelsen|Denmark

>Spike|hCoV-19/Nigeria/LA-CV380/2020|2020-05-16|EPI\_ISL\_730036|Original|hCoV-19^^Lagos State|Human|Nigeria Centre for Disease Control (NCDC)|African Centre of Excellence for Genomics of Infectious Diseases (ACEGID)|Oluniyi|Nigeria

>Spike|hCoV-19/Colombia/NAR-INS-103303-2/2020|2020-04-28|EPI\_ISL\_526955|Original|hCoV-19^^Narino|Human|Instituto Nacional de Salud|Instituto Nacional de Salud|Franco-Mu\u00f1oz|Colombia

>Spike|hCoV-19/Wales/PHWC-48DD5B/2020|2020-11-06|EPI\_ISL\_680752|Original|hCoV-19^^Wales|Human|Wales Specialist Virology Centre Sequencing lab|COVID-19 Genomics UK (COG-UK) Consortium|Moore|United Kingdom

>Spike|hCoV-19/USA/CA-ALSR-1515/2020|2020-05-13|EPI\_ISL\_494637|Original|hCoV-19^^California|Human|Scripps Medical Laboratory|Andersen lab at Scripps Research|Gangavarapu|USA

>Spike|hCoV-19/USA/TX-HMH-1722/2020|2020-04-21|EPI\_ISL\_542791|Original|hCoV-19^^Texas|Human|Houston Methodist Hospital|Houston Methodist Hospital|Long|USA

>Spike|hCoV-19/Wales/PHWC-16967B/2020|2020-03-28|EPI\_ISL\_512493|Original|hCoV-19^^Wales|Human|Wales Specialist Virology Centre Sequencing lab|COVID-19 Genomics UK (COG-UK) Consortium|Moore|United Kingdom

>Spike|hCoV-19/England/QEUA-B9F40F/2020|2020-11-18|EPI\_ISL\_721028|Original|hCoV-19^^England|Human|Lighthouse Lab in Glasgow|Wellcome Sanger Institute for the COVID-19 Genomics UK (COG-UK) Consortium|Davies|United Kingdom

>Spike|hCoV-19/USA/FL-BPHL-0639/2020|2020-04-06|EPI\_ISL\_508843|Original|hCoV-19^^Florida|Human|Florida Bureau of Public Health Laboratories|Florida Bureau of Public Health Laboratories|Blanton|USA

>Spike|hCoV-19/England/CAMB-1AF5A9/2020|2020-05-07|EPI\_ISL\_448083|Original|hCoV-19^^England|Human|Department of Pathology|COVID-19 Genomics UK (COG-UK) Consortium|Meredit|United Kingdom

>Spike|hCoV-19/USA/MI-MDHHS-SC22133/2020|2020-10-13|EPI\_ISL\_614184|Original|hCoV-19^^Michigan|Human|Michigan Department of Health and Human Services|Michigan Department of Health and Human Services|Jacob|USA

>Spike|hCoV-19/Scotland/QEUH-9B0F18/2020|2020-09-03|EPI\_ISL\_560051|Original|hCoV-19^^Scotland|Human|Oxford Viromics|COVID-19 Genomics UK (COG-UK) Consortium|Golubchik|United Kingdom

>Spike|hCoV-19/England/SHEF-C5D2E/2020|2020-04-28|EPI\_ISL\_475387|Original|hCoV-19^^England|Human|Virology Department|COVID-19 Genomics UK (COG-UK) Consortium|de Silva|United Kingdom

>Spike|hCoV-19/Wales/PHWC-48D2B6/2020|2020-11-14|EPI\_ISL\_680601|Original|hCoV-19^^Wales|Human|Wales Specialist Virology Centre Sequencing lab|COVID-19 Genomics UK (COG-UK) Consortium|Moore|United Kingdom

>Spike|hCoV-19/England/CAMB-7379A/2020|2020-03-30|EPI\_ISL\_425236|Original|hCoV-19^^England|Human|Department of Pathology|COVID-19 Genomics UK (COG-UK) Consortium|Meredit|United Kingdom

>Spike|hCoV-19/Wales/PHWC-4A45ED/2020|2020-12-16|EPI\_ISL\_763761|Original|hCoV-19^^Wales|Human|Wales Specialist Virology Centre Sequencing lab|COVID-19 Genomics UK (COG-UK) Consortium|Moore|United Kingdom

>Spike|hCoV-19/Wales/PHWC-1685E8/2020|2020-04-17|EPI\_ISL\_494261|Original|hCoV-19^^Wales|Human|Originating lab|COVID-19 Genomics UK (COG-UK) Consortium|Moore|United Kingdom

>Spike|hCoV-19/England/ALDP-B5C34D/2020|2020-11-10|EPI\_ISL\_655892|Original|hCoV-19^^England|Human|Lighthouse Lab in Alderley Park|Wellcome Sanger Institute for the COVID-19 Genomics UK (COG-UK) Consortium|Davies|United Kingdom

>Spike|hCoV-19/Switzerland/GE-SNRCI-7918/2020|2020-03-00|EPI\_ISL\_548209|Original|hCoV-19^^Geneve|Human|Laboratoire de Virologie|Swiss National Reference Centre for Influenza|Gon\u00e7alves Cabecinhas|Switzerland

>Spike|hCoV-19/Denmark/DCGC-10073/2020|2020-11-09|EPI\_ISL\_668499|Original|hCoV-19^^Hovedstaden|Human|Department of Virus and Microbiological Special Diagnostics|Albertsen Lab|Michaelsen|Denmark

>Spike|hCoV-19/England/CAMC-B9903E/2020|2020-11-15|EPI\_ISL\_673747|Original|hCoV-19^^England|Human|Lighthouse Lab in Cambridge|Wellcome Sanger Institute for the COVID-19 Genomics UK (COG-UK) Consortium|Davies|United Kingdom

>Spike|hCoV-19/Australia/VIC12265/2020|2020-08-12|EPI\_ISL\_640379|Original|hCoV-19^^Victoria|Human|Microbiological Diagnostic Unit - Public Health Laboratory (MDU-PHL)|MDU-PHL|Schultz|Australia

>Spike|hCoV-19/Japan/PG-8017/2020|2020-08-00|EPI\_ISL\_687118|Original|hCoV-19^^Japan|Human|Pathogen Genomics Center|Pathogen Genomics Center|Sekizuka|Japan

>Spike|hCoV-19/Germany/HH-hpi-p1364/2020|2020-03-28|EPI\_ISL\_776560|Original|hCoV-19^^Hamburg|Human|University Medical Center Hamburg Eppendorf|Heinrich Pette Institute|Robitaille|Germany

>Spike|hCoV-19/Poland/PL\_P32/2020|2020-03-13|EPI\_ISL\_455445|Original|hCoV-19^^Mazowieckie|Human|1. ViroGenetics - BSL3 Laboratory of Virology|1. ViroGenetics - BSL3 Laboratory of Virology|Pyrz|Poland

>Spike|hCoV-19/England/CAMB-7C306/2020|2020-04-14|EPI\_ISL\_434026|Original|hCoV-19^^England|Human|Department of Pathology|COVID-19 Genomics UK (COG-UK) Consortium|Meredit|United Kingdom

>Spike|hCoV-19/Wales/PHWC-1647D7/2020|2020-04-22|EPI\_ISL\_479309|Original|hCoV-19^^Wales|Human|Wales Specialist Virology Centre Sequencing lab|COVID-19 Genomics UK (COG-UK) Consortium|Moore|United Kingdom

>Spike|hCoV-19/Japan/PG-3296/2020|2020-04-00|EPI\_ISL\_691411|Original|hCoV-19^^Japan|Human|Pathogen Genomics Center|Pathogen Genomics Center|Sekizuka|Japan

>Spike|hCoV-19/England/CAMC-B788F1/2020|2020-11-09|EPI\_ISL\_783383|Original|hCoV-19^^England|Human|Lighthouse Lab in Cambridge|Wellcome Sanger Institute for the COVID-19 Genomics UK (COG-UK) Consortium|Davies|United Kingdom

>Spike|hCoV-19/New Zealand/20VR3201/2020|2020-03-29|EPI\_ISL\_579486|Original|hCoV-19^^Canterbury|Human|Canterbury Health Laboratories|Institute of Environmental Science and Research (ESR)|Wang|New Zealand

>Spike|hCoV-19/Wales/PHWC-489047/2020|2020-11-01|EPI\_ISL\_639529|Original|hCoV-19^^Wales|Human|Wales Specialist Virology Centre Sequencing lab|COVID-19 Genomics UK (COG-UK) Consortium|Moore|United Kingdom

>Spike|hCoV-19/USA/UT-UPHL-201032758/2020|2020-07-06|EPI\_ISL\_594056|Original|hCoV-19^^Utah|Human|Utah Public Health Laboratory|Utah Public Health Laboratory|Young|USA

>Spike|hCoV-19/USA/NY-NYUMC773/2020|2020-03-27|EPI\_ISL\_456010|Original|hCoV-19^^New York|Human|NYU Langone Health|Departments of Pathology and Medicine|Maurano|USA

>Spike|hCoV-19/England/ALDP-A86053/2020|2020-10-17|EPI\_ISL\_606124|Original|hCoV-19^^England|Human|Lighthouse Lab in Alderley Park|Wellcome Sanger Institute for the COVID-19 Genomics UK (COG-UK) consortium|Davies|United Kingdom

>Spike|hCoV-19/England/CAMB-1B7C5E/2020|2020-10-25|EPI\_ISL\_638370|Original|hCoV-19^^England|Human|Department of Pathology|COVID-19 Genomics UK (COG-UK) Consortium|Goodfellow|United Kingdom

>Spike|hCoV-19/Canada/ON-PHL-20-03629/2020|2020-11-00|EPI\_ISL\_775135|Original|hCoV-19^^Ontario|Human|Public Health Ontario Laboratory|Public Health Ontario Laboratory|Guthrie|Canada

>Spike|hCoV-19/USA/LA-EVTL1440/2020|2020-12-15|EPI\_ISL\_779106|Original|hCoV-19^^Louisiana|Human|LSUHS Emerging Viral Threat Laboratory|Microbial Genome Sequencing Center|Kamil|USA

>Spike|hCoV-19/Wales/PHWC-483FB9/2020|2020-10-18|EPI\_ISL\_627002|Original|hCoV-19^^Wales|Human|Wales Specialist Virology Centre Sequencing lab|COVID-19 Genomics UK (COG-UK) Consortium|Moore|United Kingdom

>Spike|hCoV-19/England/QEUA-9E4C14/2020|2020-09-21|EPI\_ISL\_579869|Original|hCoV-19^^England|Human|Lighthouse Lab in Glasgow|Wellcome Sanger Institute for the COVID-19 Genomics UK (COG-UK) consortium|Davies|United Kingdom

>Spike|hCoV-19/USA/CA-ALSR-4622/2020|2020-11-03|EPI\_ISL\_667042|Original|hCoV-19^^California|Human|San Diego County Public Health Laboratory|Andersen lab at Scripps Research|Gangavarapu|USA

>Spike|hCoV-19/England/ALDP-B1A0EA/2020|2020-11-02|EPI\_ISL\_645686|Original|hCoV-19^^England|Human|Lighthouse Lab in Alderley Park|Wellcome Sanger Institute for the COVID-19 Genomics UK (COG-UK) Consortium|Davies|United Kingdom

>Spike|hCoV-19/Australia/VIC8443/2020|2020-07-28|EPI\_ISL\_565016|Original|hCoV-19^^Victoria|Human|Microbiological Diagnostic Unit - Public Health Laboratory (MDU-PHL)|MDU-PHL|Schultz|Australia

>Spike|hCoV-19/Denmark/DCGC-15950/2020|2020-11-23|EPI\_ISL\_714501|Original|hCoV-19^^Hovedstaden|Human|Department of Virus and Microbiological Special Diagnostics|Albertsen Lab|Michaelsen|Denmark

>Spike|hCoV-19/Ireland/D-NVRL-20ILR10842/2020|2020-11-16|EPI\_ISL\_732383|Original|hCoV-19^^Dublin|Human|National Virus Reference Laboratory|National Virus Reference Laboratory|Gonzalez|Ireland

>Spike|hCoV-19/Netherlands/ZH-EMC-1108/2020|2020-12-13|EPI\_ISL\_722777|Original|hCoV-19^^Zuid Holland|Human|Dutch COVID-19 response team|Erasmus Medical Center|Oude Munnink|Netherlands

>Spike|hCoV-19/USA/CA-CSMC112/2020|2020-04-02|EPI\_ISL\_475588|Original|hCoV-19^^California|Human|Cedars-Sinai Medical Center|Cedars-Sinai Medical Center|Zhang|USA

>Spike|hCoV-19/England/ALDP-522FAC/2020|2020-06-02|EPI\_ISL\_558918|Original|hCoV-19^^England|Human|Lighthouse Lab in Alderley Park|Wellcome Sanger Institute for the COVID-19 Genomics UK (COG-UK) consortium|Davies|United Kingdom

>Spike|hCoV-19/USA/TX-HMH-6307/2020|2020-06-28|EPI\_ISL\_547380|Original|hCoV-19^^Texas|Human|Houston Methodist Hospital|Houston Methodist Hospital|Long|USA

>Spike|hCoV-19/South Africa/R13562-20/2020|2020-07-13|EPI\_ISL\_622912|Original|hCoV-19^^North West|Human|National Institute for Communicable Diseases of the National Health Laboratory Service|National Institute for Communicable Diseases of the National Health Laboratory Service|Allam|South Africa

>Spike|hCoV-19/England/QEUA-B7BFAE/2020|2020-11-14|EPI\_ISL\_668176|Original|hCoV-19^^England|Human|Lighthouse Lab in Glasgow|Wellcome Sanger Institute for the COVID-19 Genomics UK (COG-UK) Consortium|Davies|United Kingdom

>Spike|hCoV-19/USA/AZ-TG273318/2020|2020-04-02|EPI\_ISL\_426569|Original|hCoV-19^^Arizona|Human|AZ SPHL|TGen North|Lemmer|USA

>Spike|hCoV-19/England/ALDP-59985A/2020|2020-06-08|EPI\_ISL\_558312|Original|hCoV-19^^England|Human|Lighthouse Lab in Alderley Park|Wellcome Sanger Institute for the COVID-19 Genomics UK (COG-UK) consortium|Davies|United Kingdom

>Spike|hCoV-19/Scotland/EDB2795/2020|2020-03-30|EPI\_ISL\_489015|Original|hCoV-19^^Scotland|Human|Virology Department|Wellcome Sanger Institute for the COVID-19 Genomics UK (COG-UK) consortium|Davies|United Kingdom

>Spike|hCoV-19/Japan/PG-5975/2020|2020-08-00|EPI\_ISL\_689090|Original|hCoV-19^^Japan|Human|Pathogen Genomics Center|Pathogen Genomics Center|Sekizuka|Japan

>Spike|hCoV-19/England/QEUA-9FB4F4/2020|2020-09-28|EPI\_ISL\_588223|Original|hCoV-19^^England|Human|Lighthouse Lab in Glasgow|Wellcome Sanger Institute for the COVID-19 Genomics UK (COG-UK) consortium|Davies|United Kingdom

>Spike|hCoV-19/Denmark/DCGC-16873/2020|2020-12-14|EPI\_ISL\_750308|Original|hCoV-19^^Midtjylland|Human|Department of Virus and Microbiological Special Diagnostics|Albertsen Lab|Michaelsen|Denmark

>Spike|hCoV-19/Wales/PHWC-15C356/2020|2020-05-04|EPI\_ISL\_472474|Original|hCoV-19^^Wales|Human|Wales Specialist Virology Centre Sequencing lab|COVID-19 Genomics UK (COG-UK) Consortium|Moore|United Kingdom

>Spike|hCoV-19/England/204221446/2020|2020-00-00|EPI\_ISL\_593817|Original|hCoV-19^^England|Human|Respiratory Virus Unit|Respiratory Virus Unit|Platt|United Kingdom

>Spike|hCoV-19/USA/NY-NYCPHL-000109/2020|2020-03-27|EPI\_ISL\_631601|Original|hCoV-19^^New York|Human|Jamaica Hospital Medical Center|New York City Public Health Laboratory|Wang|USA

>Spike|hCoV-19/England/ALDP-A4F9F1/2020|2020-10-07|EPI\_ISL\_597806|Original|hCoV-19^^England|Human|Lighthouse Lab in Alderley Park|Wellcome Sanger Institute for the COVID-19 Genomics UK (COG-UK) consortium|Davies|United Kingdom

>Spike|hCoV-19/Switzerland/BE-ETHZ-270087/2020|2020-09-02|EPI\_ISL\_541425|Original|hCoV-19^^Bern|Human|Viollier AG|Department of Biosystems Science and Engineering|Nadeau|Switzerland

>Spike|hCoV-19/England/QEUA-5E1510/2020|2020-06-17|EPI\_ISL\_533307|Original|hCoV-19^^England|Human|Lighthouse Lab in Glasgow|Wellcome Sanger Institute for the COVID-19 Genomics UK (COG-UK) consortium|Davies|United Kingdom

>Spike|hCoV-19/England/CAMC-B3327C/2020|2020-11-05|EPI\_ISL\_659419|Original|hCoV-19^^England|Human|Lighthouse Lab in Cambridge|Wellcome Sanger Institute for the COVID-19 Genomics UK (COG-UK) Consortium|Davies|United Kingdom

>Spike|hCoV-19/South Korea/KDCA0289/2020|2020-10-25|EPI\_ISL\_760083|Original|hCoV-19^^South Korea|Human|Division of Emerging Infectious Diseases|Division of Emerging Infectious Diseases|Park|South Korea

>Spike|hCoV-19/England/NORW-EC644/2020|2020-05-09|EPI\_ISL\_457543|Original|hCoV-19^^England|Human|Quadram Institute Bioscience|COVID-19 Genomics UK (COG-UK) Consortium|Alikhan|United Kingdom

>Spike|hCoV-19/England/NOTT-11BCB2/2020|2020-11-13|EPI\_ISL\_650767|Original|hCoV-19^^England|Human|Queens Medical Centre|COVID-19 Genomics UK (COG-UK) Consortium|Loose|United Kingdom

>Spike|hCoV-19/Denmark/DCGC-20834/2020|2020-12-21|EPI\_ISL\_758920|Original|hCoV-19^^Hovedstaden|Human|Department of Virus and Microbiological Special Diagnostics|Albertsen Lab|Michaelsen|Denmark

>Spike|hCoV-19/Singapore/1142/2020|2020-04-15|EPI\_ISL\_648051|Original|hCoV-19^^Singapore|Human|Department of Laboratory Medicine|Department of Laboratory Medicine|Chen|Singapore

>Spike|hCoV-19/USA/TX-HMH-5566/2020|2020-06-24|EPI\_ISL\_544867|Original|hCoV-19^^Texas|Human|Houston Methodist Hospital|Houston Methodist Hospital|Long|USA

>Spike|hCoV-19/Denmark/DCGC-13172/2020|2020-11-30|EPI\_ISL\_712144|Original|hCoV-19^^Hovedstaden|Human|Department of Virus and Microbiological Special Diagnostics|Albertsen Lab|Michaelsen|Denmark



>Spike|hCoV-19/Denmark/DCGC-17318/2020|2020-12-14|EPI\_ISL\_750902|Original|hCoV-19^^Nordjylland|Human|Department of Virus and Microbiological Special Diagnostics|Albertsen Lab|Michaelsen|Denmark

>Spike|hCoV-19/Portugal/PT1412/2020|2020-03-25|EPI\_ISL\_511371|Original|hCoV-19^^Portugal|Human|Instituto Nacional de Saude (INSA)|Instituto Nacional de Saude (INSA)|Borges|Portugal

>Spike|hCoV-19/England/MILK-974D9E/2020|2020-08-22|EPI\_ISL\_552484|Original|hCoV-19^^England|Human|Lighthouse Lab in Milton Keynes|Wellcome Sanger Institute for the COVID-19 Genomics UK (COG-UK) consortium|Davies|United Kingdom

>Spike|hCoV-19/USA/LA-EVTL1071/2020|2020-11-27|EPI\_ISL\_768341|Original|hCoV-19^^Louisiana|Human|LSUHS Emerging Viral Threat Laboratory|Microbial Genome Sequencing Center|Kamil|USA

>Spike|hCoV-19/Iran/GRC-9695/2020|2020-06-11|EPI\_ISL\_596455|Original|hCoV-19^^Tehran|Human|Department of Pathology|Genetics Research Center|Najmabadi|Iran

>Spike|hCoV-19/India/DL-NCDC-01710/2020|2020-03-18|EPI\_ISL\_435070|Original|hCoV-19^^Delhi|Human|National Centre for Disease control (NCDC)|NCDC/CSIR-IGIB|Faruq|India

>Spike|hCoV-19/England/ALDP-C3BE24/2020|2020-12-10|EPI\_ISL\_731864|Original|hCoV-19^^England|Human|Lighthouse Lab in Alderley Park|Wellcome Sanger Institute for the COVID-19 Genomics UK (COG-UK) Consortium|Davies|United Kingdom

>Spike|hCoV-19/England/MILK-9F1DD5/2020|2020-09-24|EPI\_ISL\_589727|Original|hCoV-19^^England|Human|Lighthouse Lab in Milton Keynes|Wellcome Sanger Institute for the COVID-19 Genomics UK (COG-UK) consortium|Davies|United Kingdom

>Spike|hCoV-19/England/QEUH-B3FDAC/2020|2020-11-08|EPI\_ISL\_658616|Original|hCoV-19^^England|Human|Lighthouse Lab in Glasgow|Wellcome Sanger Institute for the COVID-19 Genomics UK (COG-UK) Consortium|Davies|United Kingdom

>Spike|hCoV-19/England/LIVE-9F8C2/2020|2020-05-11|EPI\_ISL\_472022|Original|hCoV-19^^England|Human|Liverpool Clinical Laboratories|COVID-19 Genomics UK (COG-UK) Consortium|Haldenby|United Kingdom

>Spike|hCoV-19/Uganda/UG136/2020|2020-10-01|EPI\_ISL\_738043|Original|hCoV-19^^Uganda|Human|Uganda Central Public Health Lab and Uganda Virus Research Institute|MRC/UVRI & LSHTM Uganda Research Unit|Cotten|Uganda

>Spike|hCoV-19/USA/MI-MDHHS-SC20896/2020|2020-04-23|EPI\_ISL\_476033|Original|hCoV-19^^Michigan|Human|Michigan Department of Health and Human Services|Michigan Department of Health and Human Services|Blankenship|USA

>Spike|hCoV-19/England/ALDP-B62CB2/2020|2020-11-08|EPI\_ISL\_655579|Original|hCoV-19^^England|Human|Lighthouse Lab in Alderley Park|Wellcome Sanger Institute for the COVID-19 Genomics UK (COG-UK) Consortium|Davies|United Kingdom

>Spike|hCoV-19/Egypt/MASRI-009/2020|2020-04-30|EPI\_ISL\_483035|Original|hCoV-19^^Cairo|Human|Medical Ain Shams Research Institute (MASRI)|Medical Ain Shams Research Institute (MASRI)|Moustafa|Egypt

>Spike|hCoV-19/Wales/ALDP-CB39F6/2020|2020-12-18|EPI\_ISL\_761789|Original|hCoV-19^^Wales|Human|Lighthouse Lab in Alderley Park|Wellcome Sanger Institute for the COVID-19 Genomics UK (COG-UK) Consortium|Davies|United Kingdom

>Spike|hCoV-19/England/NORT-29CC30/2020|2020-05-01|EPI\_ISL\_484294|Original|hCoV-19^^England|Human|Northumbria University / South Tees Hospitals NHS Foundation Trust / North Cumbria Integrated Care NHS Foundation Trust / North Tees and Hartlepool NHS Foundation Trust / Newcastle Hospitals NHS Foundation Trust|COVID-19 Genomics UK (COG-UK) Consortium|Bashton|United Kingdom

>Spike|hCoV-19/Italy/VEN-IZSVE-20RS2272-38\_PD/2020|2020-12-11|EPI\_ISL\_763080|Original|hCoV-19^^Veneto|Human|Microbiologia e Virologia|Istituto Zooprofilattico Sperimentale delle Venezie|Quaranta|Italy

>Spike|hCoV-19/Denmark/DCGC-2724/2020|2020-08-17|EPI\_ISL\_616469|Original|hCoV-19^^Midtjylland|Human|Department of Virus and Microbiological Special Diagnostics|Albertsen lab|Michaelsen|Denmark

>Spike|hCoV-19/Australia/VIC4409/2020|2020-07-14|EPI\_ISL\_519705|Original|hCoV-19^^Victoria|Human|Microbiological Diagnostic Unit - Public Health Laboratory (MDU-PHL)|MDU-PHL|Schultz|Australia

>Spike|hCoV-19/USA/TX-HMH-7895/2020|2020-06-30|EPI\_ISL\_545687|Original|hCoV-19^^Texas|Human|Houston Methodist Hospital|Houston Methodist Hospital|Long|USA

>Spike|hCoV-19/Scotland/EDB11316/2020|2020-12-24|EPI\_ISL\_764221|Original|hCoV-19^^Scotland|Human|Virology Department|COVID-19 Genomics UK (COG-UK) Consortium|McHugh|United Kingdom

>Spike|hCoV-19/Wales/PHWC-48247F/2020|2020-10-21|EPI\_ISL\_613221|Original|hCoV-19^^Wales|Human|Wales Specialist Virology Centre Sequencing lab|COVID-19 Genomics UK (COG-UK) Consortium|Moore|United Kingdom

>Spike|hCoV-19/Wales/PHWC-488CBD/2020|2020-11-01|EPI\_ISL\_639490|Original|hCoV-19^^Wales|Human|Wales Specialist Virology Centre Sequencing lab|COVID-19 Genomics UK (COG-UK) Consortium|Moore|United Kingdom

>Spike|hCoV-19/Spain/VC-IBV-98003606/2020|2020-03-16|EPI\_ISL\_538623|Original|hCoV-19^^Comunitat Valenciana|Human|Servicio de Microbiolog\u00eda. Hospital General Universitario de Castell\u00f3n|SeqCOVID-SPAIN consortium/IBV(CSIC)|Comas|Spain

>Spike|hCoV-19/Netherlands/GE-RIVM-20542/2020|2020-11-23|EPI\_ISL\_728757|Original|hCoV-19^^Gelderland|Human|Dutch COVID-19 response team|National Institute for Public Health and the Environment (RIVM)|Meijer|Netherlands

>Spike|hCoV-19/USA/MN-MDH-1831/2020|2020-09-17|EPI\_ISL\_602966|Original|hCoV-19^^Minnesota|Human|Minnesota Department of Health|Minnesota Department of Health|Garfin|USA

>Spike|hCoV-19/Denmark/DCGC-21506/2020|2020-12-21|EPI\_ISL\_758199|Original|hCoV-19^^Hovedstaden|Human|Department of Virus and Microbiological Special Diagnostics|Albertsen Lab|Michaelsen|Denmark

>Spike|hCoV-19/USA/TX-HMH-MCoV-12862/2020|2020-08-18|EPI\_ISL\_788015|Original|hCoV-19^^Texas|Human|Houston Methodist Hospital|Houston Methodist Hospital|Long|USA

>Spike|hCoV-19/Chile/RM-ISPCH-12/2020|2020-03-10|EPI\_ISL\_445255|Original|hCoV-19^^Region Metropolitana de Santiago|Human|CLINICA ALEMA\u00f1A DE SANTIAGO S.A.|Instituto de Salud Publica de Chile|Fernandez|Chile

>Spike|hCoV-19/England/ALDP-929080/2020|2020-06-22|EPI\_ISL\_552985|Original|hCoV-19^^England|Human|Lighthouse Lab in Alderley Park|Wellcome Sanger Institute for the COVID-19 Genomics UK (COG-UK) consortium|Davies|United Kingdom

>Spike|hCoV-19/Japan/PG-6111/2020|2020-08-00|EPI\_ISL\_689223|Original|hCoV-19^^Japan|Human|Pathogen Genomics Center|Pathogen Genomics Center|Sekizuka|Japan

>Spike|hCoV-19/France/PAC-IHU-0355/2020|2020-03-21|EPI\_ISL\_569473|Original|hCoV-19^^Provence-Alpes-C\u00f4te-d\u00e0z|Human|MEPHI|MEPHI|Levasseur|France

>Spike|hCoV-19/Australia/VIC3448/2020|2020-07-05|EPI\_ISL\_521114|Original|hCoV-19^^Victoria|Human|Victorian Infectious Diseases Reference Laboratory (VIDRL)|VIDRL and MDU-PHL|Schultz|Australia

>Spike|hCoV-19/USA/MN-UW-MAYO74/2020|2020-03-16|EPI\_ISL\_500537|Original|hCoV-19^^Minnesota|Human|Mayo Clinic Laboratories|University of Washington Virology Lab|Roychoudhury|USA

>Spike|hCoV-19/Belgium/reg-10061197/2020|2020-10-06|EPI\_ISL\_735071|Original|hCoV-19^^Tervuren|Human|UZ Leuven|KU Leuven|Maes|Belgium

>Spike|hCoV-19/England/QEUH-A334C2/2020|2020-10-05|EPI\_ISL\_628385|Original|hCoV-19^^England|Human|Virology Department|COVID-19 Genomics UK (COG-UK) Consortium|de Silva|United Kingdom

>Spike|hCoV-19/England/MILK-A7E4E9/2020|2020-10-16|EPI\_ISL\_638491|Original|hCoV-19^^England|Human|Oxford Viromics|COVID-19 Genomics UK (COG-UK) Consortium|Golubchik|United Kingdom

>Spike|hCoV-19/USA/MI-MDHHS-SC20260/2020|2020-03-15|EPI\_ISL\_447059|Original|hCoV-19^^Michigan|Human|Michigan Department of Health and Human Services|Michigan Department of Health and Human Services|Blankenship|USA

>Spike|hCoV-19/South Korea/KCDC2762/2020|2020-07-21|EPI\_ISL\_522541|Original|hCoV-19^^South Korea|Human|Division of Viral Diseases|Division of Viral Diseases|Kim|South Korea

>Spike|hCoV-19/Luxembourg/LNS3491081/2020|2020-10-19|EPI\_ISL\_740317|Original|hCoV-19^^Luxembourg|Human|Laboratoire national de sant\u00e9|Laboratoire national de sant\u00e9|Wienecke-Baldacchino|Luxembourg

>Spike|hCoV-19/England/ALDP-A93624/2020|2020-10-20|EPI\_ISL\_611090|Original|hCoV-19^^England|Human|Lighthouse Lab in Alderley Park|Wellcome Sanger Institute for the COVID-19 Genomics UK (COG-UK) consortium|Davies|United Kingdom

>Spike|hCoV-19/India/TG-CCMB-X52/2020|2020-07-14|EPI\_ISL\_528860|Original|hCoV-19^^Telangana|Human|CSIR-Centre for Cellular and Molecular Biology|CSIR-Centre for Cellular and Molecular Biology|Banu|India

>Spike|hCoV-19/England/MILK-B56B0F/2020|2020-11-05|EPI\_ISL\_656774|Original|hCoV-19^^England|Human|Lighthouse Lab in Milton Keynes|Wellcome Sanger Institute for the COVID-19 Genomics UK (COG-UK) Consortium|Davies|United Kingdom

>Spike|hCoV-19/Denmark/DCGC-3866/2020|2020-09-07|EPI\_ISL\_615584|Original|hCoV-19^^Hovedstaden|Human|Department of Virus and Microbiological Special Diagnostics|Albertsen lab|Michaelsen|Denmark

>Spike|hCoV-19/Japan/IC-0536/2021|2021-01-00|EPI\_ISL\_779219|Original|hCoV-19^^Japan|Human|Pathogen Genomics Center|Pathogen Genomics Center|Sekizuka|Japan

>Spike|hCoV-19/Australia/NSW1005/2020|2020-10-12|EPI\_ISL\_591501|Original|hCoV-19^^New South Wales|Human|Pathology West - NSW Health Pathology|NSW Health Pathology - Institute of Clinical Pathology and Medical Research; Westmead Hospital; University of Sydney|Gall|Australia

>Spike|hCoV-19/Denmark/DCGC-4094/2020|2020-09-14|EPI\_ISL\_622050|Original|hCoV-19^^Hovedstaden|Human|Department of Virus and Microbiological Special Diagnostics|Albertsen lab|Michaelsen|Denmark

>Spike|hCoV-19/England/QEUEH-5DE507/2020|2020-06-17|EPI\_ISL\_533312|Original|hCoV-19^^England|Human|Lighthouse Lab in Glasgow|Wellcome Sanger Institute for the COVID-19 Genomics UK (COG-UK) consortium|Davies|United Kingdom

>Spike|hCoV-19/Wales/PHWC-487FB5/2020|2020-10-28|EPI\_ISL\_639333|Original|hCoV-19^^Wales|Human|Wales Specialist Virology Centre Sequencing lab|COVID-19 Genomics UK (COG-UK) Consortium|Moore|United Kingdom

>Spike|hCoV-19/Denmark/DCGC-16879/2020|2020-12-14|EPI\_ISL\_750618|Original|hCoV-19^^Midtjylland|Human|Department of Virus and Microbiological Special Diagnostics|Albertsen Lab|Michaelsen|Denmark

>Spike|hCoV-19/USA/TX-HMH-MCoV-10409/2020|2020-07-08|EPI\_ISL\_789457|Original|hCoV-19^^Texas|Human|Houston Methodist Hospital|Houston Methodist Hospital|Long|USA

>Spike|hCoV-19/England/ALDP-BB8C17/2020|2020-11-20|EPI\_ISL\_702645|Original|hCoV-19^^England|Human|Lighthouse Lab in Alderley Park|Wellcome Sanger Institute for the COVID-19 Genomics UK (COG-UK) Consortium|Davies|United Kingdom

>Spike|hCoV-19/USA/FL-BPHL-1660/2020|2020-07-05|EPI\_ISL\_594349|Original|hCoV-19^^Florida|Human|Florida Bureau of Public Health Laboratories|Florida Bureau of Public Health Laboratories|Blanton|USA

>Spike|hCoV-19/England/ALDP-B76477/2020|2020-11-12|EPI\_ISL\_723763|Original|hCoV-19^^England|Human|Oxford Viromics|COVID-19 Genomics UK (COG-UK) Consortium|Golubchik|United Kingdom

>Spike|hCoV-19/Scotland/GCVR-17182F/2020|2020-03-28|EPI\_ISL\_489658|Original|hCoV-19^^Scotland|Human|NHSGGC West of Scotland Specialist Virology Centre / MRC-University of Glasgow Centre for Virus Research|Wellcome Sanger Institute for the COVID-19 Genomics UK (COG-UK) consortium|Davies|United Kingdom

>Spike|hCoV-19/USA/PA-MGEL148/2020|2020-04-08|EPI\_ISL\_454406|Original|hCoV-19^^Pennsylvania|Human|UPMC Clinical Microbiology Laboratory|Microbial Genome Sequencing Center|Mustapha|USA

>Spike|hCoV-19/Wales/PHWC-483C94/2020|2020-10-24|EPI\_ISL\_627917|Original|hCoV-19^^Wales|Human|Wales Specialist Virology Centre Sequencing lab|COVID-19 Genomics UK (COG-UK) Consortium|Moore|United Kingdom

>Spike|hCoV-19/Japan/PG-5046/2020|2020-07-00|EPI\_ISL\_690157|Original|hCoV-19^^Japan|Human|Pathogen Genomics Center|Pathogen Genomics Center|Sekizuka|Japan

>Spike|hCoV-19/England/GSTT-265D8E2/2020|2020-03-26|EPI\_ISL\_484032|Original|hCoV-19^^England|Human|Centre for Clinical Infection and Diagnostics Research and Genomics Innovation Unit|COVID-19 Genomics UK (COG-UK) Consortium|Awan|United Kingdom

>Spike|hCoV-19/Japan/PG-0351/2020|2020-03-27|EPI\_ISL\_480023|Original|hCoV-19^^Kanto|Human|Ibaraki Prefectural Institute of Public Health|Pathogen Genomics Center|Sekizuka|Japan

>Spike|hCoV-19/England/CAMC-BFBA0F/2020|2020-12-04|EPI\_ISL\_709232|Original|hCoV-19^^England|Human|Lighthouse Lab in Cambridge|Wellcome Sanger Institute for the COVID-19 Genomics UK (COG-UK) Consortium|Davies|United Kingdom

>Spike|hCoV-19/Bahrain/04/2020|2020-06-23|EPI\_ISL\_486889|Original|hCoV-19^^Bahrain|Human|National Influenza Center|National Influenza Center|Altaif|Bahrain

>Spike|hCoV-19/USA/LA-BIE-003/2020|2020-04-06|EPI\_ISL\_468703|Original|hCoV-19^^Louisiana|Human|Ochsner Health|Bioinfoexperts|Cross|USA

>Spike|hCoV-19/Brazil/CE-L13-CD208/2020|2020-03-16|EPI\_ISL\_476228|Original|hCoV-19^^Cear\u00e1|Human|DB Diagn\u00f3sticos do Brasil|Instituto de Medicina Tropical da Universidade de S\u00e3o Paulo|Sabino|Brazil

>Spike|hCoV-19/USA/TX-HMH-6895/2020|2020-06-25|EPI\_ISL\_546329|Original|hCoV-19^^Texas|Human|Houston Methodist Hospital|Houston Methodist Hospital|Long|USA

>Spike|hCoV-19/Scotland/QEUH-9E5123/2020|2020-09-24|EPI\_ISL\_601027|Original|hCoV-19^^Scotland|Human|Lighthouse Lab in Glasgow|Wellcome Sanger Institute for the COVID-19 Genomics UK (COG-UK) consortium|Davies|United Kingdom

>Spike|hCoV-19/Wales/PHWC-2C860/2020|2020-04-01|EPI\_ISL\_445919|Original|hCoV-19^^Wales|Human|Wales Specialist Virology Centre|Public Health Wales Microbiology Cardiff|Moore|United Kingdom

>Spike|hCoV-19/Wales/PHWC-49004D/2020|2020-10-27|EPI\_ISL\_705459|Original|hCoV-19^^Wales|Human|Originating lab|COVID-19 Genomics UK (COG-UK) Consortium|Moore|United Kingdom

>Spike|hCoV-19/England/QEUH-96BAA2/2020|2020-08-14|EPI\_ISL\_531243|Original|hCoV-19^^England|Human|Lighthouse Lab in Glasgow|Wellcome Sanger Institute for the COVID-19 Genomics UK (COG-UK) consortium|Davies|United Kingdom

>Spike|hCoV-19/Saudi Arabia/KAUST-MAKKAH1415/2020|2020-06-28|EPI\_ISL\_678092|Original|hCoV-19^^Makkah|Human|Pathogen Genomics Lab King Abdullah University of Science and Technology(KAUST)|Pathogen Genomics Lab King Abdullah University of Science and Technology(KAUST)|Mohamed Ghazzali|Saudi Arabia

>Spike|hCoV-19/Wales/PHWC-15E7FE/2020|2020-05-14|EPI\_ISL\_472833|Original|hCoV-19^^Wales|Human|Wales Specialist Virology Centre Sequencing lab|COVID-19 Genomics UK (COG-UK) Consortium|Moore|United Kingdom

>Spike|hCoV-19/England/NORT-2A5830/2020|2020-09-28|EPI\_ISL\_584700|Original|hCoV-19^^England|Human|Northumbria University / South Tees Hospitals NHS Foundation Trust / North Cumbria Integrated Care NHS Foundation Trust / North Tees and Hartlepool NHS Foundation Trust / Newcastle Hospitals NHS Foundation Trust|COVID-19 Genomics UK (COG-UK) Consortium|Bashton|United Kingdom

>Spike|hCoV-19/England/20139001704/2020|2020-03-27|EPI\_ISL\_423334|Original|hCoV-19^^England|Human|Respiratory Virus Unit|Respiratory Virus Unit|Platt|United Kingdom

>Spike|hCoV-19/England/SHEF-C6D78/2020|2020-05-15|EPI\_ISL\_462028|Original|hCoV-19^^England|Human|Virology Department|COVID-19 Genomics UK (COG-UK) Consortium|de Silva|United Kingdom

>Spike|hCoV-19/Switzerland/BE-ETHZ-170023/2020|2020-06-23|EPI\_ISL\_486535|Original|hCoV-19^^Bern|Human|Viollier AG|Department of Biosystems Science and Engineering|Nadeau|Switzerland

>Spike|hCoV-19/USA/AL-UW-MAYO12/2020|2020-04-16|EPI\_ISL\_500522|Original|hCoV-19^^Alabama|Human|Mayo Clinic Laboratories|University of Washington Virology Lab|Roychoudhury|USA

>Spike|hCoV-19/England/QEUH-A9B61D/2020|2020-10-20|EPI\_ISL\_611365|Original|hCoV-19^^England|Human|Lighthouse Lab in Glasgow|Wellcome Sanger Institute for the COVID-19 Genomics UK (COG-UK) consortium|Davies|United Kingdom

>Spike|hCoV-19/Singapore/1493/2020|2020-12-21|EPI\_ISL\_754102|Original|hCoV-19^^Singapore|Human|National Public Health Laboratory|National Public Health Laboratory|Mak|Singapore

>Spike|hCoV-19/England/MILK-A6B115/2020|2020-10-09|EPI\_ISL\_608800|Original|hCoV-19^^England|Human|Lighthouse Lab in Milton Keynes|Wellcome Sanger Institute for the COVID-19 Genomics UK (COG-UK) consortium|Davies|United Kingdom

>Spike|hCoV-19/USA/CO-CDPHE-2004220709/2020|2020-04-22|EPI\_ISL\_710153|Original|hCoV-19^^Colorado|Human|Colorado Department of Public Health and Environment|Colorado Department of Public Health and Environment|Bankers|USA

>Spike|hCoV-19/USA/CT-Yale-039/2020|2020-03-17|EPI\_ISL\_419527|Original|hCoV-19^^Connecticut|Human|Yale Clinical Virology Laboratory|Grubaugh Lab - Yale School of Public Health|Grubaugh|USA

>Spike|hCoV-19/England/QEUEH-B2B5C9/2020|2020-11-02|EPI\_ISL\_646690|Original|hCoV-19^^England|Human|Lighthouse Lab in Glasgow|Wellcome Sanger Institute for the COVID-19 Genomics UK (COG-UK) Consortium|Davies|United Kingdom

>Spike|hCoV-19/Wales/PHWC-47F81F/2020|2020-10-15|EPI\_ISL\_612730|Original|hCoV-19^^Wales|Human|Wales Specialist Virology Centre Sequencing lab|COVID-19 Genomics UK (COG-UK) Consortium|Moore|United Kingdom

>Spike|hCoV-19/England/QEUEH-AAEED3/2020|2020-10-22|EPI\_ISL\_624043|Original|hCoV-19^^England|Human|Lighthouse Lab in Glasgow|Wellcome Sanger Institute for the COVID-19 Genomics UK (COG-UK) consortium|Davies|United Kingdom

>Spike|hCoV-19/New Zealand/20VR2952/2020|2020-00-00|EPI\_ISL\_579372|Original|hCoV-19^^Auckland|Human|LabPLUS|Institute of Environmental Science and Research (ESR)|Wang|New Zealand

>Spike|hCoV-19/England/QEUEH-B9F029/2020|2020-11-18|EPI\_ISL\_719827|Original|hCoV-19^^England|Human|Lighthouse Lab in Glasgow|Wellcome Sanger Institute for the COVID-19 Genomics UK (COG-UK) Consortium|Davies|United Kingdom

>Spike|hCoV-19/Iceland/19/2020|2020-03-02|EPI\_ISL\_417817|Original|hCoV-19^^Reykjavik|Human|The National University Hospital of Iceland|deCODE genetics|J\u00f3nsson|Iceland

>Spike|hCoV-19/England/LIVE-DB3EE7/2020|2020-10-20|EPI\_ISL\_650324|Original|hCoV-19^^England|Human|Liverpool Clinical Laboratories|COVID-19 Genomics UK (COG-UK) Consortium|Haldenby|United Kingdom

>Spike|hCoV-19/England/ALDP-A9480F/2020|2020-10-19|EPI\_ISL\_611038|Original|hCoV-19^^England|Human|Lighthouse Lab in Alderley Park|Wellcome Sanger Institute for the COVID-19 Genomics UK (COG-UK) consortium|Davies|United Kingdom

>Spike|hCoV-19/USA/IL-NM-0469/2020|2020-04-21|EPI\_ISL\_626417|Original|hCoV-19^^Illinois|Human|Northwestern Memorial Hospital|Ozer Lab|Ozer|USA

>Spike|hCoV-19/England/QEUEH-A8B892/2020|2020-10-16|EPI\_ISL\_643065|Original|hCoV-19^^England|Human|Lighthouse Lab in Glasgow|Wellcome Sanger Institute for the COVID-19 Genomics UK (COG-UK) Consortium|Davies|United Kingdom

>Spike|hCoV-19/England/CAMC-9DFA9A/2020|2020-09-21|EPI\_ISL\_638439|Original|hCoV-19^^England|Human|Department of Pathology|COVID-19 Genomics UK (COG-UK) Consortium|Goodfellow|United Kingdom

>Spike|hCoV-19/Northern Ireland/NIRE-1096AA/2020|2020-10-22|EPI\_ISL\_680215|Original|hCoV-19^^Northern Ireland|Human|Regional Virus Laboratory|COVID-19 Genomics UK (COG-UK) Consortium|Fairley|United Kingdom

>Spike|hCoV-19/Denmark/DCGC-4210/2020|2020-09-14|EPI\_ISL\_622103|Original|hCoV-19^^Sjaelland|Human|Department of Virus and Microbiological Special Diagnostics|Albertsen lab|Michaelsen|Denmark

>Spike|hCoV-19/USA/UT-03341/2020|2020-04-22|EPI\_ISL\_498646|Original|hCoV-19^^Utah|Human|Utah Public Health Laboratory|Utah Public Health Laboratory|Butz|USA

>Spike|hCoV-19/Australia/VIC10525/2020|2020-08-27|EPI\_ISL\_562946|Original|hCoV-19^^Victoria|Human|Victorian Infectious Diseases Reference Laboratory (VIDRL)|VIDRL and MDU-PHL|Schultz|Australia

>Spike|hCoV-19/Wales/PHWC-4918DB/2020|2020-11-07|EPI\_ISL\_706707|Original|hCoV-19^^Wales|Human|Originating lab|COVID-19 Genomics UK (COG-UK) Consortium|Moore|United Kingdom

>Spike|hCoV-19/England/ALDP-9CBB52/2020|2020-09-16|EPI\_ISL\_575519|Original|hCoV-19^^England|Human|Lighthouse Lab in Alderley Park|Wellcome Sanger Institute for the COVID-19 Genomics UK (COG-UK) consortium|Davies|United Kingdom

>Spike|hCoV-19/England/QEUEH-A616F2/2020|2020-10-13|EPI\_ISL\_628628|Original|hCoV-19^^England|Human|Oxford Viromics|COVID-19 Genomics UK (COG-UK) Consortium|Golubchik|United Kingdom

>Spike|hCoV-19/USA/CA-QDX-817/2020|2020-03-23|EPI\_ISL\_571508|Original|hCoV-19^^California|Human|Quest Diagnostics|Quest Diagnostics|Kagan|USA

>Spike|hCoV-19/Belgium/ULG-10627/2020|2020-10-27|EPI\_ISL\_636606|Original|hCoV-19^^Li\u00e8ge|Human|Department of Clinical Microbiology|GIGA Medical Genomics|Durkin|Belgium

>Spike|hCoV-19/England/CAMB-1B1586/2020|2020-05-06|EPI\_ISL\_458566|Original|hCoV-19^^England|Human|Department of Pathology|Wellcome Sanger Institute for the COVID-19 Genomics UK (COG-UK) consortium|Davies|United Kingdom

>Spike|hCoV-19/USA/MD-MDH-0291/2020|2020-10-14|EPI\_ISL\_629071|Original|hCoV-19^^Maryland|Human|Maryland Public Health Laboratory|Maryland Public Health Laboratory|Keller|USA

>Spike|hCoV-19/England/QEUEH-B9FD22/2020|2020-11-18|EPI\_ISL\_721139|Original|hCoV-19^^England|Human|Lighthouse Lab in Glasgow|Wellcome Sanger Institute for the COVID-19 Genomics UK (COG-UK) Consortium|Davies|United Kingdom

>Spike|hCoV-19/USA/FL-BPHL-1829/2020|2020-04-08|EPI\_ISL\_613731|Original|hCoV-19^^Florida|Human|Florida Bureau of Public Health Laboratories|Florida Bureau of Public Health Laboratories|Blanton|USA

>Spike|hCoV-19/Scotland/QEUEH-A003C1/2020|2020-10-02|EPI\_ISL\_600470|Original|hCoV-19^^Scotland|Human|Lighthouse Lab in Glasgow|Wellcome Sanger Institute for the COVID-19 Genomics UK (COG-UK) consortium|Davies|United Kingdom

>Spike|hCoV-19/England/CAMC-B36983/2020|2020-11-05|EPI\_ISL\_645247|Original|hCoV-19^^England|Human|Lighthouse Lab in Cambridge|Wellcome Sanger Institute for the COVID-19 Genomics UK (COG-UK) Consortium|Davies|United Kingdom

>Spike|hCoV-19/England/ALDP-B4611F/2020|2020-11-07|EPI\_ISL\_656106|Original|hCoV-19^^England|Human|Lighthouse Lab in Alderley Park|Wellcome Sanger Institute for the COVID-19 Genomics UK (COG-UK) Consortium|Davies|United Kingdom

>Spike|hCoV-19/England/ALDP-9EA65C/2020|2020-09-24|EPI\_ISL\_580025|Original|hCoV-19^^England|Human|Lighthouse Lab in Alderley Park|Wellcome Sanger Institute for the COVID-19 Genomics UK (COG-UK) consortium|Davies|United Kingdom

>Spike|hCoV-19/England/MILK-C60C2C/2020|2020-12-13|EPI\_ISL\_769461|Original|hCoV-19^^England|Human|Lighthouse Lab in Milton Keynes|Wellcome Sanger Institute for the COVID-19 Genomics UK (COG-UK) Consortium|Davies|United Kingdom

>Spike|hCoV-19/USA/LA-EVTL1429/2020|2020-12-14|EPI\_ISL\_779095|Original|hCoV-19^^Louisiana|Human|LSUHS Emerging Viral Threat Laboratory|Microbial Genome Sequencing Center|Kamil|USA

>Spike|hCoV-19/India/DL-NCDC-01638/2020|2020-03-17|EPI\_ISL\_435109|Original|hCoV-19^^Delhi|Human|National Centre for Disease control (NCDC)|NCDC/CSIR-IGIB|Faruq|India

>Spike|hCoV-19/Denmark/DCGC-2710/2020|2020-08-17|EPI\_ISL\_616443|Original|hCoV-19^^Hovedstaden|Human|Department of Virus and Microbiological Special Diagnostics|Albertsen lab|Michaelsen|Denmark

>Spike|hCoV-19/England/CAMC-B329D2/2020|2020-11-05|EPI\_ISL\_659680|Original|hCoV-19^^England|Human|Lighthouse Lab in Cambridge|Wellcome Sanger Institute for the COVID-19 Genomics UK (COG-UK) Consortium|Davies|United Kingdom

>Spike|hCoV-19/Japan/PG-6042/2020|2020-07-00|EPI\_ISL\_689154|Original|hCoV-19^^Japan|Human|Pathogen Genomics Center|Pathogen Genomics Center|Sekizuka|Japan

>Spike|hCoV-19/Wales/PHWC-47DAEE/2020|2020-10-10|EPI\_ISL\_586238|Original|hCoV-19^^Wales|Human|Wales Specialist Virology Centre Sequencing lab|COVID-19 Genomics UK (COG-UK) Consortium|Moore|United Kingdom

>Spike|hCoV-19/USA/TX-HMH-MCoV-13211/2020|2020-08-25|EPI\_ISL\_788362|Original|hCoV-19^^Texas|Human|Houston Methodist Hospital|Houston Methodist Hospital|Long|USA

>Spike|hCoV-19/England/QEUEH-9D00E2/2020|2020-09-15|EPI\_ISL\_589951|Original|hCoV-19^^England|Human|Lighthouse Lab in Glasgow|Wellcome Sanger Institute for the COVID-19 Genomics UK (COG-UK) consortium|Davies|United Kingdom

>Spike|hCoV-19/England/NORW-EE581/2020|2020-00-00|EPI\_ISL\_529241|Original|hCoV-19^^England|Human|Quadram Institute Bioscience|COVID-19 Genomics UK (COG-UK) Consortium|Alikhan|United Kingdom

>Spike|hCoV-19/Canada/BC-BCCDC-7249/2020|2020-11-00|EPI\_ISL\_740638|Original|hCoV-19^^British Columbia|Human|BCCDC Public Health Laboratory|BCCDC Public Health Laboratory|Prystajecky|Canada

>Spike|hCoV-19/England/MILK-B94ABD/2020|2020-11-13|EPI\_ISL\_676021|Original|hCoV-19^^England|Human|Lighthouse Lab in Milton Keynes|Wellcome Sanger Institute for the COVID-19 Genomics UK (COG-UK) Consortium|Davies|United Kingdom

>Spike|hCoV-19/USA/MD-MDH-0330/2020|2020-10-14|EPI\_ISL\_648275|Original|hCoV-19^^Maryland|Human|MD PHL|MD PHL|Keller|USA

>Spike|hCoV-19/England/PORT-2D4003/2020|2020-00-00|EPI\_ISL\_507159|Original|hCoV-19^^England|Human|Centre for Enzyme Innovation|COVID-19 Genomics UK (COG-UK) Consortium|Robson|United Kingdom

>Spike|hCoV-19/USA/MI-UM-10036822680/2020|2020-11-06|EPI\_ISL\_728420|Original|hCoV-19^^Michigan|Human|University of Michigan Clinical Microbiology Laboratory|Lauring Lab|Valesano|USA

>Spike|hCoV-19/Netherlands/NH-RIVM-10341/2020|2020-04-06|EPI\_ISL\_636564|Original|hCoV-19^^NoordHolland|Human|Dutch COVID-19 response team|National Institute for Public Health and the Environment (RIVM)|Meijer|Netherlands

>Spike|hCoV-19/Northern Ireland/NIRE-1095AD/2020|2020-10-13|EPI\_ISL\_650543|Original|hCoV-19^^Northern Ireland|Human|Regional Virus Laboratory|COVID-19 Genomics UK (COG-UK) Consortium|Fairley|United Kingdom

>Spike|hCoV-19/Switzerland/SG-ETHZ-390384/2020|2020-12-01|EPI\_ISL\_721851|Original|hCoV-19^^St Gallen|Human|Viollier AG|Department of Biosystems Science and Engineering|Nadeau|Switzerland

>Spike|hCoV-19/England/QEUIH-961DB2/2020|2020-07-31|EPI\_ISL\_537132|Original|hCoV-19^^England|Human|Lighthouse Lab in Glasgow|Wellcome Sanger Institute for the COVID-19 Genomics UK (COG-UK) consortium|Davies|United Kingdom

>Spike|hCoV-19/Bangladesh/BCSIR-NILMRC-213/2020|2020-06-14|EPI\_ISL\_483647|Original|hCoV-19^^Sylhet|Human|National Institute of Laboratory Medicine and Referral Center|Genomic Research Lab|Khan|Bangladesh

>Spike|hCoV-19/Luxembourg/LNS1724590/2020|2020-11-14|EPI\_ISL\_739982|Original|hCoV-19^^Luxembourg|Human|Laboratoire national de sant\u00e9|Laboratoire national de sant\u00e9|Wienecke-Baldacchino|Luxembourg

>Spike|hCoV-19/England/NORW-F1309/2020|2020-00-00|EPI\_ISL\_595224|Original|hCoV-19^^England|Human|Quadram Institute Bioscience|COVID-19 Genomics UK (COG-UK) Consortium|Alikhan|United Kingdom

>Spike|hCoV-19/Wales/PHWC-16D9E7/2020|2020-09-21|EPI\_ISL\_577477|Original|hCoV-19^^Wales|Human|Wales Specialist Virology Centre Sequencing lab|COVID-19 Genomics UK (COG-UK) Consortium|Moore|United Kingdom

>Spike|hCoV-19/England/CAMC-C2CFC9/2020|2020-12-08|EPI\_ISL\_733610|Original|hCoV-19^^England|Human|Lighthouse Lab in Cambridge|Wellcome Sanger Institute for the COVID-19 Genomics UK (COG-UK) Consortium|Davies|United Kingdom

>Spike|hCoV-19/USA/AZ-TG281576/2020|2020-04-30|EPI\_ISL\_694224|Original|hCoV-19^^Arizona|Human|TGen North|TGen North|French|USA

>Spike|hCoV-19/Belgium/ULG-6839/2020|2020-03-14|EPI\_ISL\_447120|Original|hCoV-19^^Liege|Human|Department of Clinical Microbiology|GIGA Medical Genomics|Durkin|Belgium

>Spike|hCoV-19/Australia/VIC7696/2020|2020-08-03|EPI\_ISL\_564585|Original|hCoV-19^^Victoria|Human|Microbiological Diagnostic Unit - Public Health Laboratory (MDU-PHL)|MDU-PHL|Schultz|Australia

>Spike|hCoV-19/France/HDF-8242/2020|2020-03-19|EPI\_ISL\_560594|Original|hCoV-19^^Hauts-de-France|Human|hospital|National Reference Center for Viruses of Respiratory Infections|Enouf|France

>Spike|hCoV-19/Finland/10A17S14/2020|2020-04-10|EPI\_ISL\_481518|Original|hCoV-19^^Uusimaa|Human|Department of Virology and Immunology|Department of Virology|Smura|Finland

>Spike|hCoV-19/England/QEUIH-A3678A/2020|2020-10-05|EPI\_ISL\_705466|Original|hCoV-19^^England|Human|Oxford Viromics|COVID-19 Genomics UK (COG-UK) Consortium|Golubchik|United Kingdom

>Spike|hCoV-19/South Africa/R13278-20/2020|2020-06-29|EPI\_ISL\_622938|Original|hCoV-19^^KwaZulu-Natal|Human|National Institute for Communicable Diseases of the National Health Laboratory Service|National Institute for Communicable Diseases of the National Health Laboratory Service|Allam|South Africa

>Spike|hCoV-19/England/20144067704/2020|2020-03-28|EPI\_ISL\_466006|Original|hCoV-19^^England|Human|Respiratory Virus Unit|Respiratory Virus Unit|Platt|United Kingdom

>Spike|hCoV-19/USA/WA-UW-5781/2020|2020-04-06|EPI\_ISL\_461442|Original|hCoV-19^^Washington|Human|UW Virology Lab|UW Virology Lab|Roychoudhury|USA

>Spike|hCoV-19/England/CAMB-72E87/2020|2020-03-21|EPI\_ISL\_440061|Original|hCoV-19^^England|Human|Department of Pathology|Wellcome Sanger Institute for the COVID-19 Genomics UK (COG-UK) consortium|Amato|United Kingdom

>Spike|hCoV-19/Switzerland/BE-UNIBE-153-8040/2020|2020-03-12|EPI\_ISL\_574794|Original|hCoV-19^^Bern|Human|Institute for Infectious Diseases|Institute for Infectious Diseases|Koch|Switzerland

>Spike|hCoV-19/England/ALDP-A6C7B8/2020|2020-10-14|EPI\_ISL\_607205|Original|hCoV-19^^England|Human|Lighthouse Lab in Alderley Park|Wellcome Sanger Institute for the COVID-19 Genomics UK (COG-UK) consortium|Davies|United Kingdom

>Spike|hCoV-19/England/MILK-BAB251/2020|2020-11-18|EPI\_ISL\_681378|Original|hCoV-19^^England|Human|Lighthouse Lab in Milton Keynes|Wellcome Sanger Institute for the COVID-19 Genomics UK (COG-UK) Consortium|Davies|United Kingdom

>Spike|hCoV-19/USA/AZ-TG664219/2020|2020-04-28|EPI\_ISL\_696028|Original|hCoV-19^^Arizona|Human|Sonora Quest Laboratories|TGen North|French|USA

>Spike|hCoV-19/England/QEUEH-9B3B8A/2020|2020-09-08|EPI\_ISL\_573535|Original|hCoV-19^^England|Human|Virology Department|COVID-19 Genomics UK (COG-UK) Consortium|de Silva|United Kingdom

>Spike|hCoV-19/England/NOTT-1110A1/2020|2020-05-09|EPI\_ISL\_453625|Original|hCoV-19^^England|Human|Queens Medical Centre|COVID-19 Genomics UK (COG-UK) Consortium|Loose|United Kingdom

>Spike|hCoV-19/Wales/PHWC-4864E4/2020|2020-10-27|EPI\_ISL\_639051|Original|hCoV-19^^Wales|Human|Wales Specialist Virology Centre Sequencing lab|COVID-19 Genomics UK (COG-UK) Consortium|Moore|United Kingdom

>Spike|hCoV-19/England/QEUEH-95FBAE/2020|2020-08-07|EPI\_ISL\_531876|Original|hCoV-19^^England|Human|Lighthouse Lab in Glasgow|Wellcome Sanger Institute for the COVID-19 Genomics UK (COG-UK) consortium|Davies|United Kingdom

>Spike|hCoV-19/England/MILK-991AFE/2020|2020-08-26|EPI\_ISL\_577021|Original|hCoV-19^^England|Human|Northumbria University / South Tees Hospitals NHS Foundation Trust / North Cumbria Integrated Care NHS Foundation Trust / North Tees and Hartlepool NHS Foundation Trust / Newcastle Hospitals NHS Foundation Trust|COVID-19 Genomics UK (COG-UK) Consortium|Bashton|United Kingdom

>Spike|hCoV-19/England/MILK-B943B2/2020|2020-11-14|EPI\_ISL\_676292|Original|hCoV-19^^England|Human|Lighthouse Lab in Milton Keynes|Wellcome Sanger Institute for the COVID-19 Genomics UK (COG-UK) Consortium|Davies|United Kingdom

>Spike|hCoV-19/USA/MI-MDHHS-SC21398/2020|2020-03-24|EPI\_ISL\_507652|Original|hCoV-19^^Michigan|Human|Michigan Department of Health and Human Services|Michigan Department of Health and Human Services|Blankenship|USA

>Spike|hCoV-19/England/QEUEH-9FABF0/2020|2020-09-28|EPI\_ISL\_588154|Original|hCoV-19^^England|Human|Lighthouse Lab in Glasgow|Wellcome Sanger Institute for the COVID-19 Genomics UK (COG-UK) consortium|Davies|United Kingdom

>Spike|hCoV-19/USA/MI-UM-10036756404/2020|2020-11-03|EPI\_ISL\_682175|Original|hCoV-19^^Michigan|Human|University of Michigan Clinical Microbiology Laboratory|Lauring Lab|Valesano|USA

>Spike|hCoV-19/USA/TX-DSHS-1033/2020|2020-06-15|EPI\_ISL\_628744|Original|hCoV-19^^Texas|Human|Texas Department of State Health Services|Texas Department of State Health Services|Rahman|USA

>Spike|hCoV-19/Wales/PHWC-4A3672/2020|2020-12-15|EPI\_ISL\_744122|Original|hCoV-19^^Wales|Human|Wales Specialist Virology Centre Sequencing lab|COVID-19 Genomics UK (COG-UK) Consortium|Moore|United Kingdom

>Spike|hCoV-19/Oman/205038906/2020|2020-05-26|EPI\_ISL\_492001|Original|hCoV-19^^Muscat|Human|Oman-NIC|Department of Microbiology and Immunology-SQUH|AL Zadjali|Oman

>Spike|hCoV-19/Denmark/DCGC-3192/2020|2020-08-31|EPI\_ISL\_616015|Original|hCoV-19^^Hovedstaden|Human|Department of Virus and Microbiological Special Diagnostics|Albertsen lab|Michaelsen|Denmark

>Spike|hCoV-19/Scotland/QEUEH-AD4AB2/2020|2020-10-27|EPI\_ISL\_644048|Original|hCoV-19^^Scotland|Human|Lighthouse Lab in Glasgow|Wellcome Sanger Institute for the COVID-19 Genomics UK (COG-UK) Consortium|Davies|United Kingdom

>Spike|hCoV-19/Northern Ireland/QEUEH-88B287/2020|2020-07-27|EPI\_ISL\_532694|Original|hCoV-19^^Northern Ireland|Human|Lighthouse Lab in Glasgow|Wellcome Sanger Institute for the COVID-19 Genomics UK (COG-UK) consortium|Davies|United Kingdom



>Spike|hCoV-19/England/CAMC-AAFC32/2020|2020-10-22|EPI\_ISL\_623333|Original|hCoV-19^^England|Human|Lighthouse Lab in Cambridge|Wellcome Sanger Institute for the COVID-19 Genomics UK (COG-UK) consortium|Davies|United Kingdom

>Spike|hCoV-19/England/ALDP-B250BF/2020|2020-11-04|EPI\_ISL\_646741|Original|hCoV-19^^England|Human|Lighthouse Lab in Alderley Park|Wellcome Sanger Institute for the COVID-19 Genomics UK (COG-UK) Consortium|Davies|United Kingdom

>Spike|hCoV-19/Denmark/ALAB-HH20/2020|2020-03-10|EPI\_ISL\_429278|Original|hCoV-19^^Denmark|Human|Department of Clinical Microbiology|Albertsen lab|Kirkegaard|Denmark

>Spike|hCoV-19/England/ALDP-A6FCC5/2020|2020-10-14|EPI\_ISL\_607158|Original|hCoV-19^^England|Human|Lighthouse Lab in Alderley Park|Wellcome Sanger Institute for the COVID-19 Genomics UK (COG-UK) consortium|Davies|United Kingdom

>Spike|hCoV-19/Spain/MD-IBV-97010041/2020|2020-03-12|EPI\_ISL\_779723|Original|hCoV-19^^Madrid|Human|IdISSC/Hospital Cl\u00e9dnico San Carlos de Madrid\u200b|SeqCOVID-SPAIN consortium/IBV (CSIC)|Comas|Spain

>Spike|hCoV-19/England/ALDP-AA4286/2020|2020-10-22|EPI\_ISL\_624497|Original|hCoV-19^^England|Human|Lighthouse Lab in Alderley Park|Wellcome Sanger Institute for the COVID-19 Genomics UK (COG-UK) consortium|Davies|United Kingdom

>Spike|hCoV-19/Australia/VIC9707/2020|2020-08-20|EPI\_ISL\_565664|Original|hCoV-19^^Victoria|Human|Microbiological Diagnostic Unit - Public Health Laboratory (MDU-PHL)|MDU-PHL|Schultz|Australia

>Spike|hCoV-19/USA/CA-QDX-1958/2020|2020-03-16|EPI\_ISL\_604213|Original|hCoV-19^^California|Human|Quest Diagnostics|Quest Diagnostics|Kagan|USA

>Spike|hCoV-19/England/MILK-A22BD0/2020|2020-10-03|EPI\_ISL\_611945|Original|hCoV-19^^England|Human|Northumbria University / South Tees Hospitals NHS Foundation Trust / North Cumbria Integrated Care NHS Foundation Trust / North Tees and Hartlepool NHS Foundation Trust / Newcastle Hospitals NHS Foundation Trust|COVID-19 Genomics UK (COG-UK) Consortium|Bashton|United Kingdom

>Spike|hCoV-19/England/CAMC-BC012C/2020|2020-11-22|EPI\_ISL\_705025|Original|hCoV-19^^England|Human|Lighthouse Lab in Cambridge|Wellcome Sanger Institute for the COVID-19 Genomics UK (COG-UK) Consortium|Davies|United Kingdom

>Spike|hCoV-19/Wales/PHWC-48DFA0/2020|2020-11-09|EPI\_ISL\_680787|Original|hCoV-19^^Wales|Human|Wales Specialist Virology Centre Sequencing lab|COVID-19 Genomics UK (COG-UK) Consortium|Moore|United Kingdom

>Spike|hCoV-19/USA/AZ-TG381597/2020|2020-06-15|EPI\_ISL\_694667|Original|hCoV-19^^Arizona|Human|TGen North|TGen North|French|USA

>Spike|hCoV-19/USA/MN-MDH-1797/2020|2020-04-14|EPI\_ISL\_590799|Original|hCoV-19^^Minnesota|Human|Minnesota Department of Health|Minnesota Department of Health|Lorentz|USA

>Spike|hCoV-19/England/QEUA-A4D01C/2020|2020-10-05|EPI\_ISL\_596081|Original|hCoV-19^^England|Human|Quadram Institute Bioscience|COVID-19 Genomics UK (COG-UK) Consortium|Alikhan|United Kingdom

>Spike|hCoV-19/USA/AZ-TG274800/2020|2020-04-08|EPI\_ISL\_694082|Original|hCoV-19^^Arizona|Human|AZ SPHL|TGen North|French|USA

>Spike|hCoV-19/France/ARA-12915/2020|2020-03-23|EPI\_ISL\_420618|Original|hCoV-19^^Auvergne-Rh\u00f4ne-Alpes|Human|Institut des Agents Infectieux (IAI)|CNR Virus des Infections Respiratoires - France SUD|Josset|France

>Spike|hCoV-19/Wales/PHWC-47D635/2020|2020-09-23|EPI\_ISL\_586170|Original|hCoV-19^^Wales|Human|Wales Specialist Virology Centre Sequencing lab|COVID-19 Genomics UK (COG-UK) Consortium|Moore|United Kingdom

>Spike|hCoV-19/Luxembourg/LNS1819970/2020|2020-11-15|EPI\_ISL\_739997|Original|hCoV-19^^Luxembourg|Human|Laboratoire national de sant\u00e9|Laboratoire national de sant\u00e9|Wienecke-Baldacchino|Luxembourg

>Spike|hCoV-19/USA/NY-Wadsworth-204636-01/2020|2020-08-26|EPI\_ISL\_677088|Original|hCoV-19^^New York|Human|Wadsworth Center|Wadsworth Center|Lasek-Nesselquist|USA

>Spike|hCoV-19/England/MILK-B886B8/2020|2020-11-14|EPI\_ISL\_674238|Original|hCoV-19^^England|Human|Lighthouse Lab in Milton Keynes|Wellcome Sanger Institute for the COVID-19 Genomics UK (COG-UK) Consortium|Davies|United Kingdom

>Spike|hCoV-19/England/LEED-2A8A73/2020|2020-04-02|EPI\_ISL\_539045|Original|hCoV-19^^England|Human|Leeds Teaching Hospitals NHS Trust and Public Health England|Wellcome Sanger Institute for the COVID-19 Genomics UK (COG-UK) consortium|Davies|United Kingdom

>Spike|hCoV-19/England/ALDP-B1CC99/2020|2020-11-02|EPI\_ISL\_664374|Original|hCoV-19^^England|Human|Centre for Enzyme Innovation|COVID-19 Genomics UK (COG-UK) Consortium|Robson|United Kingdom

>Spike|hCoV-19/USA/FL-BPHL-0312/2020|2020-06-02|EPI\_ISL\_489721|Original|hCoV-19^^Florida|Human|Florida Bureau of Public Health Laboratories|Florida Bureau of Public Health Laboratories|Blanton|USA

>Spike|hCoV-19/England/QEUA-9FA13A/2020|2020-09-27|EPI\_ISL\_595789|Original|hCoV-19^^England|Human|Oxford Viromics|COVID-19 Genomics UK (COG-UK) Consortium|Golubchik|United Kingdom

>Spike|hCoV-19/England/CAMB-7C8CB/2020|2020-04-05|EPI\_ISL\_442076|Original|hCoV-19^^England|Human|Department of Pathology|Wellcome Sanger Institute for the COVID-19 Genomics UK (COG-UK) consortium|Amato|United Kingdom

>Spike|hCoV-19/England/QEUA-A5DF85/2020|2020-10-12|EPI\_ISL\_597360|Original|hCoV-19^^England|Human|Lighthouse Lab in Glasgow|Wellcome Sanger Institute for the COVID-19 Genomics UK (COG-UK) consortium|Davies|United Kingdom

>Spike|hCoV-19/Canada/BC\_02169597/2020|2020-04-00|EPI\_ISL\_466718|Original|hCoV-19^^British Columbia|Human|BCCDC Public Health Laboratory|BCCDC Public Health Laboratory|Harrigan|Canada

>Spike|hCoV-19/England/LIVE-DBB571/2020|2020-11-13|EPI\_ISL\_664671|Original|hCoV-19^^England|Human|Liverpool Clinical Laboratories|COVID-19 Genomics UK (COG-UK) Consortium|Haldenby|United Kingdom

>Spike|hCoV-19/England/CAMC-94671F/2020|2020-07-16|EPI\_ISL\_556916|Original|hCoV-19^^England|Human|Lighthouse Lab in Cambridge|Wellcome Sanger Institute for the COVID-19 Genomics UK (COG-UK) consortium|Davies|United Kingdom

>Spike|hCoV-19/Australia/SAP382/2020|2020-03-21|EPI\_ISL\_492147|Original|hCoV-19^^South Australia|Human|SA Pathology|SA Pathology|Leong|Australia

>Spike|hCoV-19/England/QEUA-963BF2/2020|2020-08-12|EPI\_ISL\_531562|Original|hCoV-19^^England|Human|Lighthouse Lab in Glasgow|Wellcome Sanger Institute for the COVID-19 Genomics UK (COG-UK) consortium|Davies|United Kingdom

>Spike|hCoV-19/Denmark/DCGC-14853/2020|2020-11-23|EPI\_ISL\_712028|Original|hCoV-19^^Hovedstaden|Human|Department of Virus and Microbiological Special Diagnostics|Albertsen Lab|Michaelsen|Denmark

>Spike|hCoV-19/USA/DE-DHSS-F917974/2020|2020-03-26|EPI\_ISL\_576166|Original|hCoV-19^^Delaware|Human|Delaware Public Health Lab|Delaware Public Health Lab|Bajwa|USA

>Spike|hCoV-19/England/QEUA-C9332B/2020|2020-12-17|EPI\_ISL\_762003|Original|hCoV-19^^England|Human|Lighthouse Lab in Glasgow|Wellcome Sanger Institute for the COVID-19 Genomics UK (COG-UK) Consortium|Davies|United Kingdom

>Spike|hCoV-19/Denmark/DCGC-6633/2020|2020-10-12|EPI\_ISL\_619535|Original|hCoV-19^^Hovedstaden|Human|Department of Virus and Microbiological Special Diagnostics|Albertsen lab|Michaelsen|Denmark

>Spike|hCoV-19/USA/TX-HMH-2793/2020|2020-06-08|EPI\_ISL\_545558|Original|hCoV-19^^Texas|Human|Houston Methodist Hospital|Houston Methodist Hospital|Long|USA

>Spike|hCoV-19/USA/GA-CDC-5113/2020|2020-06-29|EPI\_ISL\_566097|Original|hCoV-19^^Georgia|Human|GA Department of Public Health Laboratory|Pathogen Discovery|Queen|USA

>Spike|hCoV-19/England/MILK-A91644/2020|2020-10-16|EPI\_ISL\_705972|Original|hCoV-19^^England|Human|Oxford Viromics|COVID-19 Genomics UK (COG-UK) Consortium|Golubchik|United Kingdom

>Spike|hCoV-19/Wales/PHWC-49EDEC/2020|2020-12-01|EPI\_ISL\_743125|Original|hCoV-19^^Wales|Human|Wales Specialist Virology Centre Sequencing lab|COVID-19 Genomics UK (COG-UK) Consortium|Moore|United Kingdom

>Spike|hCoV-19/England/MILK-A7C2A5/2020|2020-10-15|EPI\_ISL\_606342|Original|hCoV-19^^England|Human|Lighthouse Lab in Milton Keynes|Wellcome Sanger Institute for the COVID-19 Genomics UK (COG-UK) consortium|Davies|United Kingdom

>Spike|hCoV-19/South Africa/KRISP-K002755/2020|2020-08-12|EPI\_ISL\_529751|Original|hCoV-19^^KwaZulu-Natal|Human|NHLS-IALCH|KRISP|de Oliveira|South Africa

>Spike|hCoV-19/England/MILK-A7A15F/2020|2020-10-15|EPI\_ISL\_709941|Original|hCoV-19^^England|Human|Lighthouse Lab in Milton Keynes|Wellcome Sanger Institute for the COVID-19 Genomics UK (COG-UK) Consortium|Davies|United Kingdom

>Spike|hCoV-19/Israel/990059252/2020|2020-03-25|EPI\_ISL\_447268|Original|hCoV-19^^South Coast District|Human|Microbiology laboratory|Stern Lab|Miller|Israel

>Spike|hCoV-19/England/LIVE-9ED2E/2020|2020-04-04|EPI\_ISL\_453388|Original|hCoV-19^^England|Human|Liverpool Clinical Laboratories|COVID-19 Genomics UK (COG-UK) Consortium|Haldenby|United Kingdom

>Spike|hCoV-19/Wales/QEUA-A625A9/2020|2020-10-12|EPI\_ISL\_706971|Original|hCoV-19^^Wales|Human|Oxford Viromics|COVID-19 Genomics UK (COG-UK) Consortium|Golubchik|United Kingdom

>Spike|hCoV-19/Switzerland/SO-ETHZ-400296/2020|2020-12-07|EPI\_ISL\_729062|Original|hCoV-19^^Solothurn|Human|Viollier AG|Department of Biosystems Science and Engineering|Nadeau|Switzerland

>Spike|hCoV-19/South Africa/NHLS-UCT-GS-3258/2020|2020-04-29|EPI\_ISL\_700463|Original|hCoV-19^^Western Cape|Human|Hanover Park CHC wc HPH|NHLS/UCT|Iranzadeh|South Africa

>Spike|hCoV-19/England/MILK-9F14FE/2020|2020-09-24|EPI\_ISL\_589718|Original|hCoV-19^^England|Human|Lighthouse Lab in Milton Keynes|Wellcome Sanger Institute for the COVID-19 Genomics UK (COG-UK) consortium|Davies|United Kingdom

>Spike|hCoV-19/Ireland/MH-NVRL-MPF36363/2020|2020-04-08|EPI\_ISL\_767817|Original|hCoV-19^^Meath|Human|National Virus Reference Laboratory|Irish Coronavirus Sequencing Consortium - Teagasc Moorepark|Walsh|Ireland

>Spike|hCoV-19/Hungary/US-57508w/2020|2020-10-02|EPI\_ISL\_677783|Original|hCoV-19^^B\u00e9cs-Kiskun county|Human|University of Szeged|National Laboratory of Virology|Kemenesi|Hungary

>Spike|hCoV-19/USA/MA-MGH-00552/2020|2020-03-20|EPI\_ISL\_460456|Original|hCoV-19^^Massachusetts|Human|Massachusetts General Hospital|Infectious Disease Program|Lemieux|USA

>Spike|hCoV-19/Japan/IC-0243/2020|2020-10-00|EPI\_ISL\_667672|Original|hCoV-19^^Japan|Human|Pathogen Genomics Center|Pathogen Genomics Center|Sekizuka|Japan

>Spike|hCoV-19/England/SHEF-C99EA/2020|2020-09-15|EPI\_ISL\_559926|Original|hCoV-19^^England|Human|Virology Department|COVID-19 Genomics UK (COG-UK) Consortium|de Silva|United Kingdom

>Spike|hCoV-19/England/ALDP-5A1B1A/2020|2020-06-14|EPI\_ISL\_558695|Original|hCoV-19^^England|Human|Lighthouse Lab in Alderley Park|Wellcome Sanger Institute for the COVID-19 Genomics UK (COG-UK) consortium|Davies|United Kingdom

>Spike|hCoV-19/England/OXON-B35FE/2020|2020-04-07|EPI\_ISL\_534873|Original|hCoV-19^^England|Human|Oxford Viromics|COVID-19 Genomics UK (COG-UK) Consortium|Golubchik|United Kingdom

>Spike|hCoV-19/England/MILK-9F0802/2020|2020-09-25|EPI\_ISL\_580786|Original|hCoV-19^^England|Human|Lighthouse Lab in Milton Keynes|Wellcome Sanger Institute for the COVID-19 Genomics UK (COG-UK) consortium|Davies|United Kingdom

>Spike|hCoV-19/England/QEUA-BA2F44/2020|2020-11-18|EPI\_ISL\_672821|Original|hCoV-19^^England|Human|Lighthouse Lab in Glasgow|Wellcome Sanger Institute for the COVID-19 Genomics UK (COG-UK) Consortium|Davies|United Kingdom

>Spike|hCoV-19/England/MILK-9A8A03/2020|2020-09-01|EPI\_ISL\_549438|Original|hCoV-19^^England|Human|Oxford Viromics|COVID-19 Genomics UK (COG-UK) Consortium|Golubchik|United Kingdom

>Spike|hCoV-19/Canada/ON-PHL-20-00171/2020|2020-03-00|EPI\_ISL\_548764|Original|hCoV-19^^Ontario|Human|Public Health Ontario Laboratory|Public Health Ontario Laboratory|Guthrie|Canada

>Spike|hCoV-19/England/20146002104/2020|2020-04-01|EPI\_ISL\_466013|Original|hCoV-19^^England|Human|Respiratory Virus Unit|Respiratory Virus Unit|Platt|United Kingdom

>Spike|hCoV-19/USA/AZ-TG547294/2020|2020-07-06|EPI\_ISL\_695468|Original|hCoV-19^^Arizona|Human|AZ SPHL|TGen North|French|USA

>Spike|hCoV-19/Jordan/AM-ALSR-4062/2020|2020-10-03|EPI\_ISL\_636422|Original|hCoV-19^^Amman|Human|Biolab Diagnostic Laboratories|Andersen lab at Scripps Research|Gangavarapu|Jordan

>Spike|hCoV-19/Australia/VIC4640/2020|2020-07-12|EPI\_ISL\_519031|Original|hCoV-19^^Victoria|Human|Victorian Infectious Diseases Reference Laboratory (VIDRL)|VIDRL and MDU-PHL|Schultz|Australia

>Spike|hCoV-19/England/LIVE-A2CB1/2020|2020-05-19|EPI\_ISL\_499831|Original|hCoV-19^^England|Human|Liverpool Clinical Laboratories|COVID-19 Genomics UK (COG-UK) Consortium|Haldenby|United Kingdom

>Spike|hCoV-19/Wales/PHWC-4A2655/2020|2020-12-15|EPI\_ISL\_743921|Original|hCoV-19^^Wales|Human|Wales Specialist Virology Centre Sequencing lab|COVID-19 Genomics UK (COG-UK) Consortium|Moore|United Kingdom

>Spike|hCoV-19/USA/WA-S31/2020|2020-03-02|EPI\_ISL\_417084|Original|hCoV-19^^Washington|Human|Washington State Department of Health|Seattle Flu Study|Bedford|USA

>Spike|hCoV-19/Israel/n14284/2020|2020-03-29|EPI\_ISL\_483701|Original|hCoV-19^^Kfar Saba|Human|Israel Central Virology laboratory|Israel Central Virology laboratory|Zuckerman|Israel

>Spike|hCoV-19/England/NORT-294F4E/2020|2020-03-29|EPI\_ISL\_488593|Original|hCoV-19^^England|Human|NU-OMICS DNA Sequencing research facility|Wellcome Sanger Institute for the COVID-19 Genomics UK (COG-UK) consortium|Davies|United Kingdom

>Spike|hCoV-19/England/QEUH-B675C1/2020|2020-11-11|EPI\_ISL\_662367|Original|hCoV-19^^England|Human|Lighthouse Lab in Glasgow|Wellcome Sanger Institute for the COVID-19 Genomics UK (COG-UK) Consortium|Davies|United Kingdom

>Spike|hCoV-19/Denmark/DCGC-890/2020|2020-05-18|EPI\_ISL\_614454|Original|hCoV-19^^Hovedstaden|Human|Department of Virus and Microbiological Special Diagnostics|Albertsen lab|Michaelsen|Denmark

>Spike|hCoV-19/Denmark/DCGC-11616/2020|2020-11-02|EPI\_ISL\_671026|Original|hCoV-19^^Midtjylland|Human|Department of Virus and Microbiological Special Diagnostics|Albertsen Lab|Michaelsen|Denmark

>Spike|hCoV-19/Portugal/IGC4000/2020|2020-05-31|EPI\_ISL\_491219|Original|hCoV-19^^Portugal|Human|Instituto Gulbenkian de Ci\u00eancia|Instituto Gulbenkian de Ci\u00eancia|Leite|Portugal

>Spike|hCoV-19/Luxembourg/LNS9146043/2020|2020-10-28|EPI\_ISL\_744860|Original|hCoV-19^^Luxembourg|Human|Laboratoire national de sant\u00e9|Laboratoire national de sant\u00e9|Wienecke-Baldacchino|Luxembourg

>Spike|hCoV-19/England/MILK-6438C7/2020|2020-07-04|EPI\_ISL\_556112|Original|hCoV-19^^England|Human|Lighthouse Lab in Milton Keynes|Wellcome Sanger Institute for the COVID-19 Genomics UK (COG-UK) consortium|Davies|United Kingdom

>Spike|hCoV-19/Scotland/QEUH-AACBFC/2020|2020-10-21|EPI\_ISL\_652906|Original|hCoV-19^^Scotland|Human|Oxford Viromics|COVID-19 Genomics UK (COG-UK) Consortium|Golubchik|United Kingdom

>Spike|hCoV-19/England/CAMB-72EA5/2020|2020-03-23|EPI\_ISL\_440074|Original|hCoV-19^^England|Human|Department of Pathology|Wellcome Sanger Institute for the COVID-19 Genomics UK (COG-UK) consortium|Amato|United Kingdom

>Spike|hCoV-19/Netherlands/un-EMC-736/2020|2020-06-07|EPI\_ISL\_523491|Original|hCoV-19^^Netherlands|Human|Dutch COVID-19 response team|Erasmus Medical Center|Oude Munnink|Netherlands

>Spike|hCoV-19/England/ALDP-A93B9E/2020|2020-10-19|EPI\_ISL\_610965|Original|hCoV-19^^England|Human|Lighthouse Lab in Alderley Park|Wellcome Sanger Institute for the COVID-19 Genomics UK (COG-UK) consortium|Davies|United Kingdom

>Spike|hCoV-19/England/ALDP-A2D70E/2020|2020-10-06|EPI\_ISL\_586806|Original|hCoV-19^^England|Human|Lighthouse Lab in Alderley Park|Wellcome Sanger Institute for the COVID-19 Genomics UK (COG-UK) consortium|Davies|United Kingdom

>Spike|hCoV-19/Denmark/DCGC-20253/2020|2020-11-30|EPI\_ISL\_748076|Original|hCoV-19^^Sjaelland|Human|Department of Virus and Microbiological Special Diagnostics|Albertsen Lab|Michaelsen|Denmark

>Spike|hCoV-19/England/MILK-9C1E26/2020|2020-09-10|EPI\_ISL\_566653|Original|hCoV-19^^England|Human|Lighthouse Lab in Milton Keynes|Wellcome Sanger Institute for the COVID-19 Genomics UK (COG-UK) consortium|Davies|United Kingdom

>Spike|hCoV-19/Australia/NSW605/2020|2020-06-19|EPI\_ISL\_478717|Original|hCoV-19^^New South Wales|Human|Sydney South West Pathology Service (SSWPS) - Concord Repatriation General Hospital - NSW Health Pathology|NSW Health Pathology - Institute of Clinical Pathology and Medical Research; Westmead Hospital; University of Sydney|Gall|Australia

>Spike|hCoV-19/Japan/PG-2398/2020|2020-04-00|EPI\_ISL\_686003|Original|hCoV-19^^Japan|Human|Pathogen Genomics Center|Pathogen Genomics Center|Sekizuka|Japan

>Spike|hCoV-19/France/ARA-115781/2020|2020-12-04|EPI\_ISL\_745319|Original|hCoV-19^^Auvergne-Rhône-Alpes|Human|CNR Virus des Infections Respiratoires - France SUD|CNR Virus des Infections Respiratoires - France SUD|Bal|France

>Spike|hCoV-19/Denmark/DCGC-6404/2020|2020-10-12|EPI\_ISL\_620304|Original|hCoV-19^^Hovedstaden|Human|Department of Virus and Microbiological Special Diagnostics|Albertsen lab|Michaelsen|Denmark

>Spike|hCoV-19/Hong Kong/HKU-200723-054/2020|2020-03-30|EPI\_ISL\_497821|Original|hCoV-19^^Hong Kong|Human|Department of Microbiology|Department of Microbiology|Chan|China

>Spike|hCoV-19/USA/TX-HMH-4773/2020|2020-06-22|EPI\_ISL\_544320|Original|hCoV-19^^Texas|Human|Houston Methodist Hospital|Houston Methodist Hospital|Long|USA

>Spike|hCoV-19/USA/WI-UW-274/2020|2020-03-31|EPI\_ISL\_436568|Original|hCoV-19^^Wisconsin|Human|University of Wisconsin-Madison AIDS Vaccine Research Laboratories|University of Wisconsin-Madison AIDS Vaccine Research Laboratories|Baczenas|USA

>Spike|hCoV-19/USA/LA-BIE-043/2020|2020-04-06|EPI\_ISL\_463291|Original|hCoV-19^^Louisiana|Human|Ochsner Health|Bioinfoexperts|Cross|USA

>Spike|hCoV-19/Northern Ireland/NIRE-102313/2020|2020-03-23|EPI\_ISL\_441402|Original|hCoV-19^^Northern Ireland|Human|Regional Virus Laboratory|COVID-19 Genomics UK (COG-UK) Consortium|Fairley|United Kingdom

>Spike|hCoV-19/Turkey/HSGM-1014/2020|2020-03-25|EPI\_ISL\_437331|Vero Pl|hCoV-19^^Ankara|Human|Ministry of Health Turkey|Ministry of Health Turkey|Bayrakdar|Turkey

>Spike|hCoV-19/Scotland/QEUH-9F670F/2020|2020-09-27|EPI\_ISL\_600726|Original|hCoV-19^^Scotland|Human|Lighthouse Lab in Glasgow|Wellcome Sanger Institute for the COVID-19 Genomics UK (COG-UK) consortium|Davies|United Kingdom

>Spike|hCoV-19/Denmark/DCGC-6156/2020|2020-10-05|EPI\_ISL\_620059|Original|hCoV-19^^Hovedstaden|Human|Department of Virus and Microbiological Special Diagnostics|Albertsen lab|Michaelsen|Denmark

>Spike|hCoV-19/USA/HI-H200015/2020|2020-04-16|EPI\_ISL\_752611|Original|hCoV-19^^Hawaii|Human|State Laboratories Division|State Laboratories Division|Sultana|USA

>Spike|hCoV-19/USA/MI-MDHHS-SC21111/2020|2020-03-25|EPI\_ISL\_507887|Original|hCoV-19^^Michigan|Human|Michigan Department of Health and Human Services|Michigan Department of Health and Human Services|Blankenship|USA

>Spike|hCoV-19/Denmark/DCGC-2678/2020|2020-08-17|EPI\_ISL\_617899|Original|hCoV-19^^Hovedstaden|Human|Department of Virus and Microbiological Special Diagnostics|Albertsen lab|Michaelsen|Denmark

>Spike|hCoV-19/Spain/MD-IBV-99009649/2020|2020-10-27|EPI\_ISL\_654383|Original|hCoV-19^^Madrid|Human|Hospital General Universitario Gregorio Marañón|SeqCOVID-SPAIN consortium/IBV (CSIC)|Comas|Spain

>Spike|hCoV-19/USA/TX-HMH-MCoV-19514/2020|2020-11-17|EPI\_ISL\_783893|Original|hCoV-19^^Texas|Human|Houston Methodist Hospital|Houston Methodist Hospital|Long|USA

>Spike|hCoV-19/England/LIVE-99761/2020|2020-04-10|EPI\_ISL\_439756|Original|hCoV-19^^England|Human|Liverpool Clinical Laboratories|COVID-19 Genomics UK (COG-UK) Consortium|Haldenby|United Kingdom

>Spike|hCoV-19/Japan/PG-7901/2020|2020-07-00|EPI\_ISL\_687002|Original|hCoV-19^^Japan|Human|Pathogen Genomics Center|Pathogen Genomics Center|Sekizuka|Japan

>Spike|hCoV-19/England/BRIS-1265AA/2020|2020-04-10|EPI\_ISL\_459069|Original|hCoV-19^^England|Human|PHE South West Regional Laboratory|Wellcome Sanger Institute for the COVID-19 Genomics UK (COG-UK) consortium|Davies|United Kingdom

>Spike|hCoV-19/Denmark/DCGC-13764/2020|2020-11-30|EPI\_ISL\_713008|Original|hCoV-19^^Hovedstaden|Human|Department of Virus and Microbiological Special Diagnostics|Albertsen Lab|Michaelsen|Denmark

>Spike|hCoV-19/Wales/PHWC-49841C/2020|2020-12-01|EPI\_ISL\_727072|Original|hCoV-19^^Wales|Human|Originating lab|COVID-19 Genomics UK (COG-UK) Consortium|Moore|United Kingdom

>Spike|hCoV-19/England/CAMC-9DF46F/2020|2020-09-21|EPI\_ISL\_637903|Original|hCoV-19^^England|Human|Department of Pathology|COVID-19 Genomics UK (COG-UK) Consortium|Goodfellow|United Kingdom

>Spike|hCoV-19/England/MILK-B8C344/2020|2020-11-13|EPI\_ISL\_674219|Original|hCoV-19^^England|Human|Lighthouse Lab in Milton Keynes|Wellcome Sanger Institute for the COVID-19 Genomics UK (COG-UK) Consortium|Davies|United Kingdom

>Spike|hCoV-19/England/QEUEH-9983FC/2020|2020-08-04|EPI\_ISL\_539933|Original|hCoV-19^^England|Human|Lighthouse Lab in Glasgow|Wellcome Sanger Institute for the COVID-19 Genomics UK (COG-UK) consortium|Davies|United Kingdom

>Spike|hCoV-19/England/CAMC-B21183/2020|2020-11-02|EPI\_ISL\_647627|Original|hCoV-19^^England|Human|Lighthouse Lab in Cambridge|Wellcome Sanger Institute for the COVID-19 Genomics UK (COG-UK) Consortium|Davies|United Kingdom

>Spike|hCoV-19/USA/TX-DSHS-1251/2020|2020-05-30|EPI\_ISL\_644192|Original|hCoV-19^^Texas|Human|Texas Department of State Health Services|Texas Department of State Health Services|Rahman|USA

>Spike|hCoV-19/USA/CA-ALSR-0813-SAN/2020|2020-03-31|EPI\_ISL\_483376|Original|hCoV-19^^California|Human|UC San Diego Center for Advanced Laboratory Medicine|Andersen lab at Scripps Research|Gangavarapu|USA

>Spike|hCoV-19/Suriname/SR-66/2020|2020-07-18|EPI\_ISL\_518815|Original|hCoV-19^^Suriname|Human|Academic Hospital Paramaribo|Erasmus Medical Center|M\u00f0fcnger|Suriname

>Spike|hCoV-19/Scotland/CVR2717/2020|2020-04-17|EPI\_ISL\_473538|Original|hCoV-19^^Scotland|Human|West of Scotland Specialist Virology Centre|COVID-19 Genomics UK (COG-UK) Consortium|Robertson|United Kingdom

>Spike|hCoV-19/Switzerland/ZH-UZH-IMV127/2020|2020-12-14|EPI\_ISL\_733497|Original|hCoV-19^^Zurich|Human|University Hospital Z\u00f0fcrich|Institute of Medical Virology|Huber|Switzerland

>Spike|hCoV-19/USA/FL-BPHL-0935/2020|2020-07-16|EPI\_ISL\_517825|Original|hCoV-19^^Florida|Human|Florida Bureau of Public Health Laboratories|Florida Bureau of Public Health Laboratories|Blanton|USA

>Spike|hCoV-19/England/QEUEH-CC2341/2020|2020-12-21|EPI\_ISL\_760525|Original|hCoV-19^^England|Human|Lighthouse Lab in Glasgow|Wellcome Sanger Institute for the COVID-19 Genomics UK (COG-UK) Consortium|Davies|United Kingdom

>Spike|hCoV-19/Australia/VIC5856/2020|2020-07-18|EPI\_ISL\_518649|Original|hCoV-19^^Victoria|Human|Microbiological Diagnostic Unit - Public Health Laboratory (MDU-PHL) |MDU-PHL|Schultz|Australia

>Spike|hCoV-19/England/CAMB-1AED39/2020|2020-05-07|EPI\_ISL\_448077|Original|hCoV-19^^England|Human|Department of Pathology|COVID-19 Genomics UK (COG-UK) Consortium|Meredith|United Kingdom

>Spike|hCoV-19/South Korea/KCDC2572/2020|2020-06-26|EPI\_ISL\_514975|Original|hCoV-19^^South Korea|Human|Division of Viral Diseases|Division of Viral Diseases|Kim|South Korea

>Spike|hCoV-19/USA/UT-UPHL-2012392041/2020|2020-08-05|EPI\_ISL\_746047|Original|hCoV-19^^Utah|Human|Ginkgo Bioworks Clinical Laboratory|Utah Public Health Laboratory|Young|USA

>Spike|hCoV-19/France/OCC-84/2020|2020-09-30|EPI\_ISL\_603220|Original|hCoV-19^^Occitanie|Human|CHU Purpan - Laboratoire de Virologie - Institut F\u00e9deratif de Biologie|CHU Purpan - Laboratoire de Virologie - Institut F\u00e9deratif de Biologie|Latour|France

>Spike|hCoV-19/Wales/PHWC-486675/2020|2020-10-16|EPI\_ISL\_639065|Original|hCoV-19^^Wales|Human|Wales Specialist Virology Centre Sequencing lab|COVID-19 Genomics UK (COG-UK) Consortium|Moore|United Kingdom

>Spike|hCoV-19/USA/UT-08555/2020|2020-05-18|EPI\_ISL\_524314|Original|hCoV-19^^Utah|Human|Utah Public Health Laboratory|Utah Public Health Laboratory|Young|USA

>Spike|hCoV-19/Germany/NW-HHU-38/2020|2020-03-16|EPI\_ISL\_425122|Original|hCoV-19^^North Rhine-Westphalia|Human|Center of Medical Microbiology|Center of Medical Microbiology|Wienemann|Germany

>Spike|hCoV-19/Scotland/QEUH-999267/2020|2020-08-24|EPI\_ISL\_568367|Original|hCoV-19^^Scotland|Human|Lighthouse Lab in Glasgow|Wellcome Sanger Institute for the COVID-19 Genomics UK (COG-UK) consortium|Davies|United Kingdom

>Spike|hCoV-19/Singapore/448/2020|2020-04-15|EPI\_ISL\_475979|Original|hCoV-19^^Singapore|Human|National Public Health Laboratory|National Public Health Laboratory|Mak|Singapore

>Spike|hCoV-19/Denmark/DCGC-10298/2020|2020-11-02|EPI\_ISL\_669883|Original|hCoV-19^^Nordjylland|Human|Department of Virus and Microbiological Special Diagnostics|Albertsen Lab|Michaelsen|Denmark

>Spike|hCoV-19/Wales/PHWC-27AE7/2020|2020-03-30|EPI\_ISL\_431995|Original|hCoV-19^^Wales|Human|Wales Specialist Virology Centre|Public Health Wales Microbiology Cardiff|Moore|United Kingdom

>Spike|hCoV-19/England/QEUH-B7E460/2020|2020-11-14|EPI\_ISL\_668235|Original|hCoV-19^^England|Human|Lighthouse Lab in Glasgow|Wellcome Sanger Institute for the COVID-19 Genomics UK (COG-UK) Consortium|Davies|United Kingdom

>Spike|hCoV-19/England/ALDP-B48809/2020|2020-11-07|EPI\_ISL\_649313|Original|hCoV-19^^England|Human|Lighthouse Lab in Alderley Park|Wellcome Sanger Institute for the COVID-19 Genomics UK (COG-UK) Consortium|Davies|United Kingdom

>Spike|hCoV-19/France/PAC-IHU-0542/2020|2020-04-07|EPI\_ISL\_569583|Original|hCoV-19^^Provence-Alpes-C\u00f4te-d\u2019Azur|Human|MEPHI|MEPHI|Levasseur|France

>Spike|hCoV-19/USA/NY-Wadsworth-278034-01/2020|2020-11-22|EPI\_ISL\_754602|Original|hCoV-19^^New York|Human|Wadsworth Center|Wadsworth Center|Lasek-Nesselquist|USA

>Spike|hCoV-19/Germany/HH-hpi-p1675/2020|2020-03-18|EPI\_ISL\_776091|Original|hCoV-19^^Hamburg|Human|University Medical Center Hamburg Eppendorf|Heinrich Pette Institute|Robitaille|Germany

>Spike|hCoV-19/England/ALDP-B63C0C/2020|2020-11-08|EPI\_ISL\_655434|Original|hCoV-19^^England|Human|Lighthouse Lab in Alderley Park|Wellcome Sanger Institute for the COVID-19 Genomics UK (COG-UK) Consortium|Davies|United Kingdom

>Spike|hCoV-19/Wales/PHWC-4855A6/2020|2020-10-21|EPI\_ISL\_628195|Original|hCoV-19^^Wales|Human|Wales Specialist Virology Centre Sequencing lab|COVID-19 Genomics UK (COG-UK) Consortium|Moore|United Kingdom

>Spike|hCoV-19/England/MILK-A47030/2020|2020-10-06|EPI\_ISL\_598371|Original|hCoV-19^^England|Human|Lighthouse Lab in Milton Keynes|Wellcome Sanger Institute for the COVID-19 Genomics UK (COG-UK) consortium|Davies|United Kingdom

>Spike|hCoV-19/Japan/PG-1393/2020|2020-04-00|EPI\_ISL\_685000|Original|hCoV-19^^Japan|Human|Saitama Prefectural Institute of Public Health|Pathogen Genomics Center|Sekizuka|Japan

>Spike|hCoV-19/England/NORT-286361/2020|2020-10-09|EPI\_ISL\_638561|Original|hCoV-19^^England|Human|Northumbria University / South Tees Hospitals NHS Foundation Trust / North Cumbria Integrated Care NHS Foundation Trust / North Tees and Hartlepool NHS Foundation Trust / Newcastle Hospitals NHS Foundation Trust|COVID-19 Genomics UK (COG-UK) Consortium|Bashton|United Kingdom

>Spike|hCoV-19/England/ALDP-B6264B/2020|2020-11-08|EPI\_ISL\_656381|Original|hCoV-19^^England|Human|Lighthouse Lab in Alderley Park|Wellcome Sanger Institute for the COVID-19 Genomics UK (COG-UK) Consortium|Davies|United Kingdom

>Spike|hCoV-19/Switzerland/BS-42216366/2020|2020-04-01|EPI\_ISL\_581814|Original|hCoV-19^^Basel-Stadt|Human|University Hospital Basel|University Hospital Basel|Roloff Handschin|Switzerland

>Spike|hCoV-19/Egypt/CUNCI-HGC4I030/2020|2020-06-02|EPI\_ISL\_479703|Original|hCoV-19^^Egypt|Human|Egyptian National Cancer Institute (ENCI)|Egyptian National Cancer Institute (ENCI)|Zekri|Egypt

>Spike|hCoV-19/England/CAMC-B79C12/2020|2020-11-12|EPI\_ISL\_741040|Original|hCoV-19^^England|Human|Oxford Viromics|COVID-19 Genomics UK (COG-UK) Consortium|Golubchik|United Kingdom

>Spike|hCoV-19/USA/MI-MDHHS-SC20697/2020|2020-04-27|EPI\_ISL\_471721|Original|hCoV-19^^Michigan|Human|Michigan Department of Health and Human Services|Michigan Department of Health and Human Services|Blankenship|USA

>Spike|hCoV-19/USA/TX-HMH-4866/2020|2020-06-22|EPI\_ISL\_544388|Original|hCoV-19^^Texas|Human|Houston Methodist Hospital|Houston Methodist Hospital|Long|USA

>Spike|hCoV-19/USA/MI-QDX-1960/2020|2020-03-15|EPI\_ISL\_604227|Original|hCoV-19^^Michigan|Human|Quest Diagnostics|Quest Diagnostics|Kagan|USA

>Spike|hCoV-19/USA/MI-MDHHS-SC21116/2020|2020-03-23|EPI\_ISL\_507892|Original|hCoV-19^^Michigan|Human|Michigan Department of Health and Human Services|Michigan Department of Health and Human Services|Blankenship|USA

>Spike|hCoV-19/England/ALDP-9E59C1/2020|2020-09-24|EPI\_ISL\_589522|Original|hCoV-19^^England|Human|Lighthouse Lab in Alderley Park|Wellcome Sanger Institute for the COVID-19 Genomics UK (COG-UK) consortium|Davies|United Kingdom

>Spike|hCoV-19/USA/WA-S2038/2020|2020-06-05|EPI\_ISL\_497466|Original|hCoV-19^^Washington|Human|Washington State Department of Health|Seattle Flu Study|Lee|USA

>Spike|hCoV-19/Denmark/DCGC-2164/2020|2020-08-10|EPI\_ISL\_617463|Original|hCoV-19^^Midtjylland|Human|Department of Virus and Microbiological Special Diagnostics|Albertsen lab|Michaelsen|Denmark

>Spike|hCoV-19/England/NORT-28454F/2020|2020-03-21|EPI\_ISL\_488714|Original|hCoV-19^^England|Human|NU-OMICS DNA Sequencing research facility|Wellcome Sanger Institute for the COVID-19 Genomics UK (COG-UK) consortium|Davies|United Kingdom

>Spike|hCoV-19/Wales/QEUEH-AD34D3/2020|2020-10-26|EPI\_ISL\_634749|Original|hCoV-19^^Wales|Human|Lighthouse Lab in Glasgow|Wellcome Sanger Institute for the COVID-19 Genomics UK (COG-UK) consortium|Davies|United Kingdom

>Spike|hCoV-19/Portugal/PT1335/2020|2020-03-18|EPI\_ISL\_511294|Original|hCoV-19^^Portugal|Human|Instituto Nacional de Saude (INSA) and Instituto Gulbenkian de Ciencia (IGC)|Instituto Nacional de Saude (INSA) and Instituto Gulbenkian de Ciencia (IGC)|Borges|Portugal

>Spike|hCoV-19/England/CAMC-BD46DB/2020|2020-11-27|EPI\_ISL\_702150|Original|hCoV-19^^England|Human|Lighthouse Lab in Cambridge|Wellcome Sanger Institute for the COVID-19 Genomics UK (COG-UK) Consortium|Davies|United Kingdom

>Spike|hCoV-19/Wales/PHWC-16D880/2020|2020-09-24|EPI\_ISL\_577456|Original|hCoV-19^^Wales|Human|Wales Specialist Virology Centre Sequencing lab|COVID-19 Genomics UK (COG-UK) Consortium|Moore|United Kingdom

>Spike|hCoV-19/Australia/VIC3032/2020|2020-07-01|EPI\_ISL\_520746|Original|hCoV-19^^Victoria|Human|Victorian Infectious Diseases Reference Laboratory (VIDRL)|VIDRL and MDU-PHL|Schultz|Australia

>Spike|hCoV-19/Denmark/DCGC-14873/2020|2020-11-23|EPI\_ISL\_711211|Original|hCoV-19^^Midtjylland|Human|Department of Virus and Microbiological Special Diagnostics|Albertsen Lab|Michaelsen|Denmark

>Spike|hCoV-19/Spain/VC-FISABIO-230/2020|2020-03-26|EPI\_ISL\_436325|Original|hCoV-19^^Comunitat Valenciana|Human|Servicio de Microbiología. Hospital Clínico Universitario de Valencia|Sequencing and Bioinformatics Service and Molecular Epidemiology Research Group. FISABIO-Public Health|Gonzalez-Candelas|Spain

>Spike|hCoV-19/Japan/PG-0832/2020|2020-04-00|EPI\_ISL\_684442|Original|hCoV-19^^Japan|Human|Fukuoka Institute of Health and Environmental Sciences|Pathogen Genomics Center|Sekizuka|Japan

>Spike|hCoV-19/Australia/VIC5497/2020|2020-07-21|EPI\_ISL\_520243|Original|hCoV-19^^Victoria|Human|Microbiological Diagnostic Unit - Public Health Laboratory (MDU-PHL)|MDU-PHL|Schultz|Australia

>Spike|hCoV-19/Scotland/EDB6081/2020|2020-05-11|EPI\_ISL\_478207|Original|hCoV-19^^Scotland|Human|Virology Department|COVID-19 Genomics UK (COG-UK) Consortium|Williams|United Kingdom

>Spike|hCoV-19/Switzerland/SO-ETHZ-400046/2020|2020-12-04|EPI\_ISL\_729105|Original|hCoV-19^^Solothurn|Human|Viollier AG|Department of Biosystems Science and Engineering|Nadeau|Switzerland

>Spike|hCoV-19/England/ALDP-9CB8F1/2020|2020-09-16|EPI\_ISL\_575507|Original|hCoV-19^^England|Human|Lighthouse Lab in Alderley Park|Wellcome Sanger Institute for the COVID-19 Genomics UK (COG-UK) consortium|Davies|United Kingdom

>Spike|hCoV-19/England/BRIS-133C78/2020|2020-08-20|EPI\_ISL\_529485|Original|hCoV-19^^England|Human|University of Birmingham|COVID-19 Genomics UK (COG-UK) Consortium|Loman|United Kingdom

>Spike|hCoV-19/USA/TX-HMH-MCoV-15412/2020|2020-10-21|EPI\_ISL\_786896|Original|hCoV-19^^Texas|Human|Houston Methodist Hospital|Houston Methodist Hospital|Long|USA



>Spike|hCoV-19/Canada/ON-PHL-20-01764/2020|2020-07-00|EPI\_ISL\_636917|Original|hCoV-19^^Ontario|Human|Public Health Ontario Laboratory|Public Health Ontario Laboratory|Guthrie|Canada

>Spike|hCoV-19/USA/CA-CZB-15456/2020|2020-12-04|EPI\_ISL\_739314|Original|hCoV-19^^California|Human|Orange County Public Health Lab|Chan-Zuckerberg Biohub|Kamm|USA

>Spike|hCoV-19/Canada/BC\_07850299/2020|2020-04-00|EPI\_ISL\_466823|Original|hCoV-19^^British Columbia|Human|BCCDC Public Health Laboratory|BCCDC Public Health Laboratory|Harrigan|Canada

>Spike|hCoV-19/England/OXON-AEBF4/2020|2020-00-00|EPI\_ISL\_448769|Original|hCoV-19^^England|Human|Oxford Viromics|COVID-19 Genomics UK (COG-UK) Consortium|Golubchik|United Kingdom

>Spike|hCoV-19/England/PORT-2D0DF1/2020|2020-03-30|EPI\_ISL\_475288|Original|hCoV-19^^England|Human|Centre for Enzyme Innovation|COVID-19 Genomics UK (COG-UK) Consortium|Robson|United Kingdom

>Spike|hCoV-19/Scotland/EDB6731/2020|2020-04-12|EPI\_ISL\_491526|Original|hCoV-19^^Scotland|Human|Virology Department|Wellcome Sanger Institute for the COVID-19 Genomics UK (COG-UK) consortium|Davies|United Kingdom

>Spike|hCoV-19/USA/TX-HMH-5256/2020|2020-06-19|EPI\_ISL\_544630|Original|hCoV-19^^Texas|Human|Houston Methodist Hospital|Houston Methodist Hospital|Long|USA

>Spike|hCoV-19/England/MILK-9951B9/2020|2020-08-24|EPI\_ISL\_552339|Original|hCoV-19^^England|Human|Lighthouse Lab in Milton Keynes|Wellcome Sanger Institute for the COVID-19 Genomics UK (COG-UK) consortium|Davies|United Kingdom

>Spike|hCoV-19/USA/NY-NYCPHL-001257/2020|2020-11-06|EPI\_ISL\_683951|Original|hCoV-19^^New York|Human|DOHMH Jamaica|New York City Public Health Laboratory|Wang|USA

>Spike|hCoV-19/Netherlands/LI-EMC-102/2020|2020-10-30|EPI\_ISL\_722572|Original|hCoV-19^^Limburg|Human|Dutch COVID-19 response team|Erasmus Medical Center|Oude Munnink|Netherlands

>Spike|hCoV-19/England/QEUA-A61F33/2020|2020-10-12|EPI\_ISL\_706945|Original|hCoV-19^^England|Human|Oxford Viromics|COVID-19 Genomics UK (COG-UK) Consortium|Golubchik|United Kingdom

>Spike|hCoV-19/Wales/PHWC-4A34D2/2020|2020-12-15|EPI\_ISL\_744103|Original|hCoV-19^^Wales|Human|Wales Specialist Virology Centre Sequencing lab|COVID-19 Genomics UK (COG-UK) Consortium|Moore|United Kingdom

>Spike|hCoV-19/England/NORT-295B0D/2020|2020-04-03|EPI\_ISL\_478651|Original|hCoV-19^^England|Human|Northumbria University / South Tees Hospitals NHS Foundation Trust / North Cumbria Integrated Care NHS Foundation Trust / North Tees and Hartlepool NHS Foundation Trust / Newcastle Hospitals NHS Foundation Trust|COVID-19 Genomics UK (COG-UK) Consortium|Bashton|United Kingdom

>Spike|hCoV-19/Netherlands/NA\_619/2020|2020-03-24|EPI\_ISL\_460782|Original|hCoV-19^^Netherlands|Human|Dutch COVID-19 response team|Erasmus Medical Center|Oude Munnink|Netherlands

>Spike|hCoV-19/Australia/VIC6885/2020|2020-07-12|EPI\_ISL\_562704|Original|hCoV-19^^Victoria|Human|Microbiological Diagnostic Unit - Public Health Laboratory (MDU-PHL) |MDU-PHL|Schultz|Australia

>Spike|hCoV-19/Scotland/CVR4012/2020|2020-08-29|EPI\_ISL\_535111|Original|hCoV-19^^Scotland|Human|West of Scotland Specialist Virology Centre|COVID-19 Genomics UK (COG-UK) Consortium|Robertson|United Kingdom

>Spike|hCoV-19/Scotland/CVR318/2020|2020-03-21|EPI\_ISL\_439048|Original|hCoV-19^^Scotland|Human|West of Scotland Specialist Virology Centre|COVID-19 Genomics UK (COG-UK) Consortium|Robertson|United Kingdom

>Spike|hCoV-19/Scotland/EDB5511/2020|2020-04-20|EPI\_ISL\_487799|Original|hCoV-19^^Scotland|Human|Virology Department|Wellcome Sanger Institute for the COVID-19 Genomics UK (COG-UK) consortium|Davies|United Kingdom

>Spike|hCoV-19/Norway/2984/2020|2020-07-22|EPI\_ISL\_549109|Original|hCoV-19^^Oslo|Human|Ostfold Hospital Trust - Kalnes|Norwegian Institute of Public Health|Kopperud Riis|Norway

>Spike|hCoV-19/England/LIVE-DB7B55/2020|2020-11-01|EPI\_ISL\_650269|Original|hCoV-19^^England|Human|Liverpool Clinical Laboratories|COVID-19 Genomics UK (COG-UK) Consortium|Haldenby|United Kingdom

>Spike|hCoV-19/England/20131103204/2020|2020-03-23|EPI\_ISL\_423692|Original|hCoV-19^^England|Human|Respiratory Virus Unit|Respiratory Virus Unit|Platt|United Kingdom

>Spike|hCoV-19/India/MH-NIV-223126/2020|2020-09-23|EPI\_ISL\_577658|Original|hCoV-19^^Maharashtra|Human|NIV Influenza|NIV Influenza|Potdar|India

>Spike|hCoV-19/USA/CT-Yale-072/2020|2020-03-30|EPI\_ISL\_428400|Original|hCoV-19^^Connecticut|Human|Yale COVID-19 Biorepository|Grubaugh Lab - Yale School of Public Health|Grubaugh|USA

>Spike|hCoV-19/Germany/BB-ChVir-W2128-8294/2020|2020-10-09|EPI\_ISL\_753859|Original|hCoV-19^^Brandenburg|Human|Charit\u00e9 Universit\u00e4tsmedizin Berlin|Charit\u00e9 Universit\u00e4tsmedizin Berlin|Muehlemann|Germany

>Spike|hCoV-19/England/CAMC-B337E6/2020|2020-11-05|EPI\_ISL\_659117|Original|hCoV-19^^England|Human|Lighthouse Lab in Cambridge|Wellcome Sanger Institute for the COVID-19 Genomics UK (COG-UK) Consortium|Davies|United Kingdom

>Spike|hCoV-19/Denmark/DCGC-7129/2020|2020-10-12|EPI\_ISL\_619157|Original|hCoV-19^^Midtjylland|Human|Department of Virus and Microbiological Special Diagnostics|Albertsen lab|Michaelsen|Denmark

>Spike|hCoV-19/England/LEED-2A9BE8/2020|2020-04-12|EPI\_ISL\_538874|Original|hCoV-19^^England|Human|Leeds Teaching Hospitals NHS Trust and Public Health England|Wellcome Sanger Institute for the COVID-19 Genomics UK (COG-UK) consortium|Davies|United Kingdom

>Spike|hCoV-19/England/NOTT-112C06/2020|2020-04-30|EPI\_ISL\_493599|Original|hCoV-19^^England|Human|Lincolnshire Hospitals and DeepSeq Nottingham|COVID-19 Genomics UK (COG-UK) Consortium|Loose|United Kingdom

>Spike|hCoV-19/Denmark/DCGC-5523/2020|2020-09-21|EPI\_ISL\_620848|Original|hCoV-19^^Hovedstaden|Human|Department of Virus and Microbiological Special Diagnostics|Albertsen lab|Michaelsen|Denmark

>Spike|hCoV-19/USA/WA-S2107/2020|2020-06-07|EPI\_ISL\_497535|Original|hCoV-19^^Washington|Human|Washington State Department of Health|Seattle Flu Study|Lee|USA

>Spike|hCoV-19/Germany/HH-hpi-p1555/2020|2020-03-15|EPI\_ISL\_776039|Original|hCoV-19^^Hamburg|Human|University Medical Center Hamburg Eppendorf|Heinrich Pette Institute|Robitaille|Germany

>Spike|hCoV-19/Denmark/DCGC-11479/2020|2020-11-02|EPI\_ISL\_670944|Original|hCoV-19^^Sjaelland|Human|Department of Virus and Microbiological Special Diagnostics|Albertsen Lab|Michaelsen|Denmark

>Spike|hCoV-19/USA/MN-MDH-283/2020|2020-03-30|EPI\_ISL\_450754|Original|hCoV-19^^Minnesota|Human|Minnesota Department of Health|Minnesota Department of Health|Garfin|USA

>Spike|hCoV-19/England/LOND-12504A6/2020|2020-10-20|EPI\_ISL\_665212|Original|hCoV-19^^England|Human|University College London Hospital|COVID-19 Genomics UK (COG-UK) Consortium|Byott|United Kingdom

>Spike|hCoV-19/USA/MI-UM-10036767679/2020|2020-11-03|EPI\_ISL\_682209|Original|hCoV-19^^Michigan|Human|University of Michigan Clinical Microbiology Laboratory|Lauring Lab|Valesano|USA

>Spike|hCoV-19/USA/TX-DSHS-0551/2020|2020-05-14|EPI\_ISL\_574455|Original|hCoV-19^^Texas|Human|Texas Department of State Health Services|Texas Department of State Health Services|Rahman|USA

>Spike|hCoV-19/England/NOTT-11232F/2020|2020-05-01|EPI\_ISL\_484371|Original|hCoV-19^^England|Human|Lincolnshire Hospitals and DeepSeq Nottingham|COVID-19 Genomics UK (COG-UK) Consortium|Loose|United Kingdom

>Spike|hCoV-19/England/MILK-9E319E/2020|2020-09-21|EPI\_ISL\_581156|Original|hCoV-19^^England|Human|Lighthouse Lab in Milton Keynes|Wellcome Sanger Institute for the COVID-19 Genomics UK (COG-UK) consortium|Davies|United Kingdom

>Spike|hCoV-19/Wales/PHWC-480FDA/2020|2020-10-13|EPI\_ISL\_613024|Original|hCoV-19^^Wales|Human|Wales Specialist Virology Centre Sequencing lab|COVID-19 Genomics UK (COG-UK) Consortium|Moore|United Kingdom

>Spike|hCoV-19/France/BRE-2344/2020|2020-03-06|EPI\_ISL\_416509|Original|hCoV-19^^Bretagne|Human|CHRU Pontchaillou - Laboratoire de Virologie|National Reference Center for Viruses of Respiratory Infections|Enouf|France

>Spike|hCoV-19/England/ALDP-A927C8/2020|2020-10-19|EPI\_ISL\_611228|Original|hCoV-19^^England|Human|Lighthouse Lab in Alderley Park|Wellcome Sanger Institute for the COVID-19 Genomics UK (COG-UK) consortium|Davies|United Kingdom

>Spike|hCoV-19/England/NORT-28ABDE/2020|2020-04-15|EPI\_ISL\_457310|Original|hCoV-19^^England|Human|Northumbria University / South Tees Hospitals NHS Foundation Trust / North Cumbria Integrated Care NHS Foundation Trust / North Tees and Hartlepool NHS Foundation Trust / Newcastle Hospitals NHS Foundation Trust|COVID-19 Genomics UK (COG-UK) Consortium|Bashton|United Kingdom

>Spike|hCoV-19/England/QEUA-9AE1DB/2020|2020-09-04|EPI\_ISL\_638629|Original|hCoV-19^^England|Human|Department of Pathology|COVID-19 Genomics UK (COG-UK) Consortium|Goodfellow|United Kingdom

>Spike|hCoV-19/Denmark/DCGC-2026/2020|2020-06-29|EPI\_ISL\_618156|Original|hCoV-19^^Hovedstaden|Human|Department of Virus and Microbiological Special Diagnostics|Albertsen lab|Michaelsen|Denmark

>Spike|hCoV-19/Australia/VIC375/2020|2020-03-22|EPI\_ISL\_426682|Original|hCoV-19^^Victoria|Human|Victorian Infectious Diseases Reference Laboratory (VIDRL)|Microbiological Diagnostic Unit Public Health Laboratory and Victorian Infectious Diseases Reference Laboratory|Schultz|Australia

>Spike|hCoV-19/England/MILK-A91B81/2020|2020-10-19|EPI\_ISL\_706012|Original|hCoV-19^^England|Human|Oxford Viromics|COVID-19 Genomics UK (COG-UK) Consortium|Golubchik|United Kingdom

>Spike|hCoV-19/England/ALDP-95C38B/2020|2020-06-20|EPI\_ISL\_554920|Original|hCoV-19^^England|Human|Lighthouse Lab in Alderley Park|Wellcome Sanger Institute for the COVID-19 Genomics UK (COG-UK) consortium|Davies|United Kingdom

>Spike|hCoV-19/USA/TX-HMH-MCoV-16034/2020|2020-10-15|EPI\_ISL\_785718|Original|hCoV-19^^Texas|Human|Houston Methodist Hospital|Houston Methodist Hospital|Long|USA

>Spike|hCoV-19/USA/UT-UPHL-01921/2020|2020-04-13|EPI\_ISL\_576363|Original|hCoV-19^^Utah|Human|Utah Public Health Laboratory|Utah Public Health Laboratory|Young|USA

>Spike|hCoV-19/England/QEUA-963D29/2020|2020-08-11|EPI\_ISL\_531487|Original|hCoV-19^^England|Human|Lighthouse Lab in Glasgow|Wellcome Sanger Institute for the COVID-19 Genomics UK (COG-UK) consortium|Davies|United Kingdom

>Spike|hCoV-19/England/MILK-C4FDF3/2020|2020-12-11|EPI\_ISL\_769591|Original|hCoV-19^^England|Human|Lighthouse Lab in Milton Keynes|Wellcome Sanger Institute for the COVID-19 Genomics UK (COG-UK) Consortium|Davies|United Kingdom

>Spike|hCoV-19/England/MILK-B8D46E/2020|2020-11-13|EPI\_ISL\_674080|Original|hCoV-19^^England|Human|Lighthouse Lab in Milton Keynes|Wellcome Sanger Institute for the COVID-19 Genomics UK (COG-UK) Consortium|Davies|United Kingdom

>Spike|hCoV-19/Wales/PHWC-248FF/2020|2020-03-19|EPI\_ISL\_419455|Original|hCoV-19^^Wales|Human|Wales Specialist Virology Centre|Public Health Wales Microbiology Cardiff|Moore|United Kingdom

>Spike|hCoV-19/England/BRIS-12953E/2020|2020-04-15|EPI\_ISL\_458749|Original|hCoV-19^^England|Human|PHE South West Regional Laboratory|Wellcome Sanger Institute for the COVID-19 Genomics UK (COG-UK) consortium|Davies|United Kingdom

>Spike|hCoV-19/Belgium/regA-03031158/2020|2020-03-03|EPI\_ISL\_738199|Original|hCoV-19^^Leuven|Human|UZ Leuven|KU Leuven|Maes|Belgium

>Spike|hCoV-19/USA/UT-UPHL-2009334/2020|2020-05-17|EPI\_ISL\_524934|Original|hCoV-19^^Utah|Human|Utah Public Health Laboratory|Utah Public Health Laboratory|Young|USA

>Spike|hCoV-19/Australia/VIC8382/2020|2020-08-12|EPI\_ISL\_564974|Original|hCoV-19^^Victoria|Human|Microbiological Diagnostic Unit - Public Health Laboratory (MDU-PHL)|MDU-PHL|Schultz|Australia

>Spike|hCoV-19/USA/WA-UW-12728/2020|2020-06-29|EPI\_ISL\_570894|Original|hCoV-19^^Washington|Human|UW Virology Lab|UW Virology Lab|Roychoudhury|USA

>Spike|hCoV-19/England/QEUA-A33732/2020|2020-10-05|EPI\_ISL\_628407|Original|hCoV-19^^England|Human|Virology Department|COVID-19 Genomics UK (COG-UK) Consortium|de Silva|United Kingdom

>Spike|hCoV-19/England/QEUA-B7F71B/2020|2020-11-14|EPI\_ISL\_674585|Original|hCoV-19^^England|Human|Lighthouse Lab in Glasgow|Wellcome Sanger Institute for the COVID-19 Genomics UK (COG-UK) Consortium|Davies|United Kingdom

>Spike|hCoV-19/England/ALDP-BBA87B/2020|2020-11-20|EPI\_ISL\_701886|Original|hCoV-19^^England|Human|Lighthouse Lab in Alderley Park|Wellcome Sanger Institute for the COVID-19 Genomics UK (COG-UK) Consortium|Davies|United Kingdom

>Spike|hCoV-19/England/ALDP-9EA63E/2020|2020-09-24|EPI\_ISL\_580235|Original|hCoV-19^^England|Human|Lighthouse Lab in Alderley Park|Wellcome Sanger Institute for the COVID-19 Genomics UK (COG-UK) consortium|Davies|United Kingdom

>Spike|hCoV-19/England/MILK-B8EB0E/2020|2020-11-13|EPI\_ISL\_674538|Original|hCoV-19^^England|Human|Lighthouse Lab in Milton Keynes|Wellcome Sanger Institute for the COVID-19 Genomics UK (COG-UK) Consortium|Davies|United Kingdom

>Spike|hCoV-19/Japan/PG-0766/2020|2020-03-00|EPI\_ISL\_684376|Original|hCoV-19^^Japan|Human|Pathogen Genomics Center|Pathogen Genomics Center|Sekizuka|Japan

>Spike|hCoV-19/England/CAMC-B32E4C/2020|2020-11-05|EPI\_ISL\_659128|Original|hCoV-19^^England|Human|Lighthouse Lab in Cambridge|Wellcome Sanger Institute for the COVID-19 Genomics UK (COG-UK) Consortium|Davies|United Kingdom

>Spike|hCoV-19/Oman/RESP-20-6701/2020|2020-03-28|EPI\_ISL\_457998|Original|hCoV-19^^South Batinah|Human|Oman-NIC|Oman-NIC|Al Mahruqi|Oman

>Spike|hCoV-19/England/ALDP-B73FE2/2020|2020-11-12|EPI\_ISL\_662031|Original|hCoV-19^^England|Human|Lighthouse Lab in Alderley Park|Wellcome Sanger Institute for the COVID-19 Genomics UK (COG-UK) Consortium|Davies|United Kingdom

>Spike|hCoV-19/England/CAMC-B22647/2020|2020-11-02|EPI\_ISL\_647403|Original|hCoV-19^^England|Human|Lighthouse Lab in Cambridge|Wellcome Sanger Institute for the COVID-19 Genomics UK (COG-UK) Consortium|Davies|United Kingdom

>Spike|hCoV-19/England/NORW-E8F4D/2020|2020-04-24|EPI\_ISL\_453566|Original|hCoV-19^^England|Human|Quadram Institute Bioscience|COVID-19 Genomics UK (COG-UK) Consortium|Alikhan|United Kingdom

>Spike|hCoV-19/Germany/NW-HHU-286/2020|2020-09-30|EPI\_ISL\_631330|Original|hCoV-19^^North Rhine-Westphalia|Human|ZOTZ KLIMAS MVZ D\u00f0fcsseldorf-Centrum GbR \u00dcBAG f\u00fcr Labormedizin|Center of Medical Microbiology|Wienemann|Germany

>Spike|hCoV-19/USA/CA-ALSR-1003-SAN/2020|2020-04-19|EPI\_ISL\_483457|Original|hCoV-19^^California|Human|UC San Diego Center for Advanced Laboratory Medicine|Andersen lab at Scripps Research|Gangavarapu|USA

>Spike|hCoV-19/England/SHEF-C38F2/2020|2020-11-30|EPI\_ISL\_705220|Original|hCoV-19^^England|Human|Virology Department|COVID-19 Genomics UK (COG-UK) Consortium|de Silva|United Kingdom

>Spike|hCoV-19/USA/CO-CSU-D1085-1/2020|2020-04-02|EPI\_ISL\_527436|Original|hCoV-19^^Colorado|Human|Colorado State University - Ebel Lab|Colorado State University - Ebel Lab|Cline|USA

>Spike|hCoV-19/England/ALDP-9E9EBF/2020|2020-09-24|EPI\_ISL\_580168|Original|hCoV-19^^England|Human|Lighthouse Lab in Alderley Park|Wellcome Sanger Institute for the COVID-19 Genomics UK (COG-UK) consortium|Davies|United Kingdom

>Spike|hCoV-19/England/QEUA-AE2037/2020|2020-10-24|EPI\_ISL\_633439|Original|hCoV-19^^England|Human|Lighthouse Lab in Glasgow|Wellcome Sanger Institute for the COVID-19 Genomics UK (COG-UK) consortium|Davies|United Kingdom

>Spike|hCoV-19/USA/FL-BPHL-2153/2020|2020-08-14|EPI\_ISL\_653306|Original|hCoV-19^^Florida|Human|Florida Bureau of Public Health Laboratories|Florida Bureau of Public Health Laboratories|Blanton|USA

>Spike|hCoV-19/Switzerland/VD-ETHZ-260098/2020|2020-08-24|EPI\_ISL\_539418|Original|hCoV-19^^Vaud|Human|Viollier AG|Department of Biosystems Science and Engineering|Nadeau|Switzerland

>Spike|hCoV-19/USA/UT-UPHL-2012250398/2020|2020-08-03|EPI\_ISL\_745765|Original|hCoV-19^^Utah|Human|Ginkgo Bioworks Clinical Laboratory|Utah Public Health Laboratory|Young|USA

>Spike|hCoV-19/England/QEUA-AAE3E3/2020|2020-10-20|EPI\_ISL\_741774|Original|hCoV-19^^England|Human|Oxford Viromics|COVID-19 Genomics UK (COG-UK) Consortium|Golubchik|United Kingdom

>Spike|hCoV-19/Denmark/DCGC-9746/2020|2020-11-09|EPI\_ISL\_669143|Original|hCoV-19^^Hovedstaden|Human|Department of Virus and Microbiological Special Diagnostics|Albertsen Lab|Michaelsen|Denmark

>Spike|hCoV-19/Denmark/DCGC-16109/2020|2020-11-16|EPI\_ISL\_714588|Original|hCoV-19^^Hovedstaden|Human|Department of Virus and Microbiological Special Diagnostics|Albertsen Lab|Michaelsen|Denmark

>Spike|hCoV-19/England/QEUA-9B9CEB/2020|2020-09-07|EPI\_ISL\_549560|Original|hCoV-19^^England|Human|Lighthouse Lab in Glasgow|Wellcome Sanger Institute for the COVID-19 Genomics UK (COG-UK) consortium|Davies|United Kingdom

>Spike|hCoV-19/USA/CA-CZB-9535/2020|2020-04-10|EPI\_ISL\_672093|Original|hCoV-19^^California|Human|The Ashley Laboratory|Chan-Zuckerberg Biohub|Bhatt|USA

>Spike|hCoV-19/England/MILK-9C4649/2020|2020-09-09|EPI\_ISL\_566976|Original|hCoV-19^^England|Human|Lighthouse Lab in Milton Keynes|Wellcome Sanger Institute for the COVID-19 Genomics UK (COG-UK) consortium|Davies|United Kingdom

>Spike|hCoV-19/Australia/VIC5358/2020|2020-07-18|EPI\_ISL\_520121|Original|hCoV-19^^Victoria|Human|Microbiological Diagnostic Unit - Public Health Laboratory (MDU-PHL)|MDU-PHL|Schultz|Australia

>Spike|hCoV-19/England/ALDP-A5133A/2020|2020-10-08|EPI\_ISL\_597961|Original|hCoV-19^^England|Human|Lighthouse Lab in Alderley Park|Wellcome Sanger Institute for the COVID-19 Genomics UK (COG-UK) consortium|Davies|United Kingdom

>Spike|hCoV-19/Australia/VIC2948/2020|2020-07-07|EPI\_ISL\_521778|Original|hCoV-19^^Victoria|Human|Microbiological Diagnostic Unit - Public Health Laboratory (MDU-PHL)|MDU-PHL|Schultz|Australia

>Spike|hCoV-19/Northern Ireland/NIRE-106731/2020|2020-05-14|EPI\_ISL\_501007|Original|hCoV-19^^Northern Ireland|Human|Regional Virus Laboratory|Wellcome Sanger Institute for the COVID-19 Genomics UK (COG-UK) consortium|Davies|United Kingdom

>Spike|hCoV-19/Belgium/ULG-10917/2020|2020-11-24|EPI\_ISL\_678458|Original|hCoV-19^^Li\u00e8ge|Human|Department of Clinical Microbiology|GIGA Medical Genomics|Durkin|Belgium

>Spike|hCoV-19/Denmark/DCGC-9508/2020|2020-11-09|EPI\_ISL\_669010|Original|hCoV-19^^Hovedstaden|Human|Department of Virus and Microbiological Special Diagnostics|Albertsen Lab|Michaelsen|Denmark

>Spike|hCoV-19/USA/CA-CZB-12363/2020|2020-10-12|EPI\_ISL\_648433|Original|hCoV-19^^California|Human|Santa Clara County Public Health Laboratory|Chan-Zuckerberg Biohub|Bhatt|USA

>Spike|hCoV-19/England/EXET-13F438/2020|2020-12-17|EPI\_ISL\_764215|Original|hCoV-19^^England|Human|University of Exeter|COVID-19 Genomics UK (COG-UK) Consortium|Temperton|United Kingdom

>Spike|hCoV-19/USA/TX-HMH-MCoV-14962/2020|2020-10-15|EPI\_ISL\_786446|Original|hCoV-19^^Texas|Human|Houston Methodist Hospital|Houston Methodist Hospital|Long|USA

>Spike|hCoV-19/USA/FL-BPHL-1153/2020|2020-08-18|EPI\_ISL\_526639|Original|hCoV-19^^Florida|Human|Florida Bureau of Public Health Laboratories|Florida Bureau of Public Health Laboratories|Blanton|USA

>Spike|hCoV-19/Spain/VC-IBV-98003600/2020|2020-03-15|EPI\_ISL\_538617|Original|hCoV-19^^Comunitat Valenciana|Human|Servicio de Microbiolog\u00eda. Hospital General Universitario de Castell\u00f3n|SeqCOVID-SPAIN consortium|IBV(CSIC)|Comas|Spain

>Spike|hCoV-19/Japan/PG-1693/2020|2020-04-00|EPI\_ISL\_685299|Original|hCoV-19^^Japan|Human|Niigata Prefectural Institute of Public Health and Environmental Sciences|Pathogen Genomics Center|Sekizuka|Japan

>Spike|hCoV-19/USA/CA-UCLA-155/2020|2020-03-30|EPI\_ISL\_537494|Original|hCoV-19^^California|Human|UCLA Pathology Clinical Microbiology Lab|Kruglyak Lab|Boocock|USA

>Spike|hCoV-19/Wales/ALDP-B487C0/2020|2020-11-07|EPI\_ISL\_710898|Original|hCoV-19^^Wales|Human|Lighthouse Lab in Alderley Park|Wellcome Sanger Institute for the COVID-19 Genomics UK (COG-UK) Consortium|Davies|United Kingdom

>Spike|hCoV-19/England/QEUA-B8097B/2020|2020-11-14|EPI\_ISL\_674736|Original|hCoV-19^^England|Human|Lighthouse Lab in Glasgow|Wellcome Sanger Institute for the COVID-19 Genomics UK (COG-UK) Consortium|Davies|United Kingdom

>Spike|hCoV-19/Luxembourg/LNS9561167/2020|2020-11-05|EPI\_ISL\_744938|Original|hCoV-19^^Luxembourg|Human|Laboratoire national de sant\u00e9|Laboratoire national de sant\u00e9|Wienecke-Baldacchino|Luxembourg

>Spike|hCoV-19/England/QEUA-AF575A/2020|2020-10-30|EPI\_ISL\_663163|Original|hCoV-19^^England|Human|Lighthouse Lab in Glasgow|Wellcome Sanger Institute for the COVID-19 Genomics UK (COG-UK) Consortium|Davies|United Kingdom

>Spike|hCoV-19/Denmark/DCGC-10812/2020|2020-11-02|EPI\_ISL\_670222|Original|hCoV-19^^Hovedstaden|Human|Department of Virus and Microbiological Special Diagnostics|Albertsen Lab|Michaelsen|Denmark

>Spike|hCoV-19/Denmark/DCGC-12184/2020|2020-11-16|EPI\_ISL\_682365|Original|hCoV-19^^Hovedstaden|Human|Department of Virus and Microbiological Special Diagnostics|Albertsen Lab|Michaelsen|Denmark

>Spike|hCoV-19/Australia/VIC13318/2020|2020-07-29|EPI\_ISL\_563669|Original|hCoV-19^^Victoria|Human|Microbiological Diagnostic Unit - Public Health Laboratory (MDU-PHL)|MDU-PHL|Schultz|Australia

>Spike|hCoV-19/Australia/NSW1197/2020|2020-10-17|EPI\_ISL\_667797|Original|hCoV-19^^New South Wales|Human|South Eastern Area Laboratory Services (SEALS)|NSW Health Pathology - Institute of Clinical Pathology and Medical Research; Westmead Hospital; University of Sydney|Gall|Australia

>Spike|hCoV-19/England/QEUA-9B539F/2020|2020-09-03|EPI\_ISL\_590297|Original|hCoV-19^^England|Human|Lighthouse Lab in Glasgow|Wellcome Sanger Institute for the COVID-19 Genomics UK (COG-UK) consortium|Davies|United Kingdom

>Spike|hCoV-19/USA/NY-NYUMC375/2020|2020-04-10|EPI\_ISL\_430402|Original|hCoV-19^^New York|Human|NYU Langone Health|Departments of Pathology and Medicine|Maurano|USA

>Spike|hCoV-19/England/QEUA-555BF7/2020|2020-05-11|EPI\_ISL\_532181|Original|hCoV-19^^England|Human|Lighthouse Lab in Glasgow|Wellcome Sanger Institute for the COVID-19 Genomics UK (COG-UK) consortium|Davies|United Kingdom

>Spike|hCoV-19/England/QEUA-9AE575/2020|2020-09-04|EPI\_ISL\_665285|Original|hCoV-19^^England|Human|University of Exeter|COVID-19 Genomics UK (COG-UK) Consortium|Temperton|United Kingdom

>Spike|hCoV-19/Spain/VC-FISABIO-551/2020|2020-03-26|EPI\_ISL\_447493|Original|hCoV-19^^Comunitat Valenciana|Human|Servicio de Microbiologia. Hospital Clinico Universitario de Valencia|Sequencing and Bioinformatics Service and Molecular Epidemiology Research Group. FISABIO-Public Health|Gonzalez-Candelas|Spain

>Spike|hCoV-19/England/MILK-A7BA44/2020|2020-10-15|EPI\_ISL\_607456|Original|hCoV-19^^England|Human|Lighthouse Lab in Milton Keynes|Wellcome Sanger Institute for the COVID-19 Genomics UK (COG-UK) consortium|Davies|United Kingdom

>Spike|hCoV-19/Scotland/CVR4912/2020|2020-10-06|EPI\_ISL\_594678|Original|hCoV-19^^Scotland|Human|West of Scotland Specialist Virology Centre|COVID-19 Genomics UK (COG-UK) Consortium|Robertson|United Kingdom

>Spike|hCoV-19/Taiwan/TSGH-16/2020|2020-03-19|EPI\_ISL\_436101|Original|hCoV-19^^New Taipei City|Human|TSGH-CP molecular lab|TSGH-CP molecular lab|Shang|Taiwan

>Spike|hCoV-19/Switzerland/BL-UHB-42189451/2020|2020-03-13|EPI\_ISL\_528045|Original|hCoV-19^^Basel-Land|Human|University Hospital Basel|University Hospital Basel|Roloff Handschin|Switzerland

>Spike|hCoV-19/Luxembourg/LNS8726389/2020|2020-03-23|EPI\_ISL\_429776|Original|hCoV-19^^Luxembourg|Human|Laboratoire National de Sante|Laboratoire National de Sante|Wienecke-Baldacchino|Luxembourg

>Spike|hCoV-19/USA/TX-HMH-2081/2020|2020-05-09|EPI\_ISL\_545110|Original|hCoV-19^^Texas|Human|Houston Methodist Hospital|Houston Methodist Hospital|Long|USA

>Spike|hCoV-19/England/CAMB-1AE777/2020|2020-04-29|EPI\_ISL\_524573|Original|hCoV-19^^England|Human|Department of Pathology|Wellcome Sanger Institute for the COVID-19 Genomics UK (COG-UK) consortium|Davies|United Kingdom

>Spike|hCoV-19/USA/LA-EVTL1090/2020|2020-11-30|EPI\_ISL\_768360|Original|hCoV-19^^Louisiana|Human|LSUHS Emerging Viral Threat Laboratory|Microbial Genome Sequencing Center|Kamil|USA

>Spike|hCoV-19/England/ALDP-AA5531/2020|2020-10-21|EPI\_ISL\_625125|Original|hCoV-19^^England|Human|Lighthouse Lab in Alderley Park|Wellcome Sanger Institute for the COVID-19 Genomics UK (COG-UK) consortium|Davies|United Kingdom

>Spike|hCoV-19/Nigeria/BO-CV327/2020|2020-04-24|EPI\_ISL\_729996|Original|hCoV-19^^Borno State|Human|Nigeria Centre for Disease Control (NCDC)|African Centre of Excellence for Genomics of Infectious Diseases (ACEGID)|Oluniyi|Nigeria

>Spike|hCoV-19/England/QEUEH-A4AFF4/2020|2020-10-07|EPI\_ISL\_741761|Original|hCoV-19^^England|Human|Oxford Viromics|COVID-19 Genomics UK (COG-UK) Consortium|Golubchik|United Kingdom

>Spike|hCoV-19/USA/TX-DSHS-1632/2020|2020-06-23|EPI\_ISL\_710089|Original|hCoV-19^^Texas|Human|Texas Department of State Health Services|Texas Department of State Health Services|Rahman|USA

>Spike|hCoV-19/Scotland/QEUEH-AD1C91/2020|2020-10-26|EPI\_ISL\_644043|Original|hCoV-19^^Scotland|Human|Lighthouse Lab in Glasgow|Wellcome Sanger Institute for the COVID-19 Genomics UK (COG-UK) Consortium|Davies|United Kingdom

>Spike|hCoV-19/Northern Ireland/NIRE-103691/2020|2020-04-17|EPI\_ISL\_489369|Original|hCoV-19^^Northern Ireland|Human|Regional Virus Laboratory|Wellcome Sanger Institute for the COVID-19 Genomics UK (COG-UK) consortium|Davies|United Kingdom

>Spike|hCoV-19/USA/MA-MASPHL-00680/2020|2020-04-08|EPI\_ISL\_692965|Original|hCoV-19^^Massachusetts|Human|Massachusetts State Public Health Laboratory|Massachusetts State Public Health Laboratory|Lang|USA

>Spike|hCoV-19/England/QEUEH-9F762F/2020|2020-09-25|EPI\_ISL\_589203|Original|hCoV-19^^England|Human|Lighthouse Lab in Glasgow|Wellcome Sanger Institute for the COVID-19 Genomics UK (COG-UK) consortium|Davies|United Kingdom

>Spike|hCoV-19/Netherlands/OV-EMC-48/2020|2020-04-29|EPI\_ISL\_523432|Original|hCoV-19^^Overijssel|Human|Dutch COVID-19 response team|Erasmus Medical Center|Oude Munnink|Netherlands

>Spike|hCoV-19/Japan/PG-3780/2020|2020-04-00|EPI\_ISL\_692032|Original|hCoV-19^^Japan|Human|Pathogen Genomics Center|Pathogen Genomics Center|Sekizuka|Japan

>Spike|hCoV-19/USA/WI-UW-576/2020|2020-06-19|EPI\_ISL\_484951|Original|hCoV-19^^Wisconsin|Human|University of Wisconsin-Madison AIDS Vaccine Research Laboratories|University of Wisconsin-Madison AIDS Vaccine Research Laboratories|Baczenas|USA

>Spike|hCoV-19/Japan/PG-1756/2020|2020-04-00|EPI\_ISL\_685362|Original|hCoV-19^^Japan|Human|Pathogen Genomics Center|Pathogen Genomics Center|Sekizuka|Japan

>Spike|hCoV-19/USA/FL-BPHL-0289/2020|2020-05-15|EPI\_ISL\_480940|Original|hCoV-19^^Florida|Human|Florida Bureau of Public Health Laboratories|Florida Bureau of Public Health Laboratories|Blanton|USA

>Spike|hCoV-19/England/QEUEH-AD4487/2020|2020-10-26|EPI\_ISL\_634630|Original|hCoV-19^^England|Human|Lighthouse Lab in Glasgow|Wellcome Sanger Institute for the COVID-19 Genomics UK (COG-UK) consortium|Davies|United Kingdom

>Spike|hCoV-19/Switzerland/BS-42209603/2020|2020-03-27|EPI\_ISL\_581799|Original|hCoV-19^^Basel-Stadt|Human|University Hospital Basel|University Hospital Basel|Roloff Handschin|Switzerland

>Spike|hCoV-19/England/QEUEH-AD2A4B/2020|2020-10-26|EPI\_ISL\_629841|Original|hCoV-19^^England|Human|Lighthouse Lab in Glasgow|Wellcome Sanger Institute for the COVID-19 Genomics UK (COG-UK) consortium|Davies|United Kingdom

>Spike|hCoV-19/England/ALDP-A50A90/2020|2020-10-07|EPI\_ISL\_597795|Original|hCoV-19^^England|Human|Lighthouse Lab in Alderley Park|Wellcome Sanger Institute for the COVID-19 Genomics UK (COG-UK) consortium|Davies|United Kingdom

>Spike|hCoV-19/Scotland/QEUEH-95E723/2020|2020-08-09|EPI\_ISL\_532327|Original|hCoV-19^^Scotland|Human|NHSGGC West of Scotland Specialist Virology Centre / MRC-University of Glasgow Centre for Virus Research|Wellcome Sanger Institute for the COVID-19 Genomics UK (COG-UK) consortium|Davies|United Kingdom

>Spike|hCoV-19/Bangladesh/CHRF-0031/2020|2020-06-16|EPI\_ISL\_477140|Original|hCoV-19^^Bangladesh|Human|Child Health Research Foundation|Child Health Research Foundation|Saha|Bangladesh

>Spike|hCoV-19/USA/MI-MDHHS-SC22504/2020|2020-11-16|EPI\_ISL\_708207|Original|hCoV-19^^Michigan|Human|Michigan Department of Health and Human Services|Michigan Department of Health and Human Services|Jacob|USA

>Spike|hCoV-19/USA/TX-HMH-MCoV-15520/2020|2020-10-24|EPI\_ISL\_787004|Original|hCoV-19^^Texas|Human|Houston Methodist Hospital|Houston Methodist Hospital|Long|USA

>Spike|hCoV-19/Scotland/CVR5576/2020|2020-10-29|EPI\_ISL\_651848|Original|hCoV-19^^Scotland|Human|West of Scotland Specialist Virology Centre|COVID-19 Genomics UK (COG-UK) Consortium|Robertson|United Kingdom

>Spike|hCoV-19/USA/TX-HMH-MCoV-12634/2020|2020-08-31|EPI\_ISL\_789831|Original|hCoV-19^^Texas|Human|Houston Methodist Hospital|Houston Methodist Hospital|Long|USA

>Spike|hCoV-19/Mexico/BCN-ALSR-1477/2020|2020-04-28|EPI\_ISL\_496346|Original|hCoV-19^^Baja California|Human|Infectolab|Andersen lab at Scripps Research|Gangavarapu|Mexico

>Spike|hCoV-19/USA/MI-UM-10036762637/2020|2020-11-03|EPI\_ISL\_682223|Original|hCoV-19^^Michigan|Human|University of Michigan Clinical Microbiology Laboratory|Lauring Lab|Valesano|USA

>Spike|hCoV-19/England/QEUEH-B7CF34/2020|2020-11-14|EPI\_ISL\_674590|Original|hCoV-19^^England|Human|Lighthouse Lab in Glasgow|Wellcome Sanger Institute for the COVID-19 Genomics UK (COG-UK) Consortium|Davies|United Kingdom

>Spike|hCoV-19/Denmark/DCGC-13483/2020|2020-11-30|EPI\_ISL\_712238|Original|hCoV-19^^Denmark|Human|Department of Virus and Microbiological Special Diagnostics|Albertsen Lab|Michaelsen|Denmark

>Spike|hCoV-19/Japan/PG-2363/2020|2020-05-00|EPI\_ISL\_685968|Original|hCoV-19^^Japan|Human|Tokyo Metropolitan Institute of Public Health|Pathogen Genomics Center|Sekizuka|Japan

>Spike|hCoV-19/USA/CA-QDX-1435/2020|2020-03-18|EPI\_ISL\_572087|Original|hCoV-19^^California|Human|Quest Diagnostics|Quest Diagnostics|Kagan|USA

>Spike|hCoV-19/France/PAC-IHU-0733/2020|2020-04-22|EPI\_ISL\_568952|Original|hCoV-19^^Provence-Alpes-C\u00f4te-d\u2019Azur|Human|MEPHI|MEPHI|Levasseur|France

>Spike|hCoV-19/Canada/ON-S1905/2020|2020-11-24|EPI\_ISL\_729321|Original|hCoV-19^^Ontario|Human|Toronto Invasive Bacterial Diseases Network|McMaster University|McArthur|Canada

>Spike|hCoV-19/USA/UT-UPHL-2009316/2020|2020-06-22|EPI\_ISL\_524921|Original|hCoV-19^^Utah|Human|Utah Public Health Laboratory|Utah Public Health Laboratory|Young|USA

>Spike|hCoV-19/England/CAMC-A413B5/2020|2020-10-05|EPI\_ISL\_609534|Original|hCoV-19^^England|Human|Lighthouse Lab in Cambridge|Wellcome Sanger Institute for the COVID-19 Genomics UK (COG-UK) Consortium|Davies|United Kingdom

>Spike|hCoV-19/England/ALDP-9BE439/2020|2020-09-10|EPI\_ISL\_567962|Original|hCoV-19^^England|Human|Lighthouse Lab in Alderley Park|Wellcome Sanger Institute for the COVID-19 Genomics UK (COG-UK) consortium|Davies|United Kingdom

>Spike|hCoV-19/Ireland/CO-NVRL-75IRL84314/2020|2020-10-13|EPI\_ISL\_671881|Original|hCoV-19^^Cork|Human|National Virus Reference Laboratory|National Virus Reference Laboratory|Gonzalez|Ireland

>Spike|hCoV-19/USA/TX-DSHS-0102/2020|2020-05-28|EPI\_ISL\_522385|Original|hCoV-19^^Texas|Human|Texas Department of State Health Services|Texas Department of State Health Services|Rahman|USA

>Spike|hCoV-19/England/QEUEH-9B9331/2020|2020-09-07|EPI\_ISL\_549628|Original|hCoV-19^^England|Human|Lighthouse Lab in Glasgow|Wellcome Sanger Institute for the COVID-19 Genomics UK (COG-UK) consortium|Davies|United Kingdom

>Spike|hCoV-19/England/ALDP-BB8E99/2020|2020-11-20|EPI\_ISL\_703226|Original|hCoV-19^^England|Human|Lighthouse Lab in Alderley Park|Wellcome Sanger Institute for the COVID-19 Genomics UK (COG-UK) Consortium|Davies|United Kingdom

>Spike|hCoV-19/USA/TX-HMH-1807/2020|2020-04-20|EPI\_ISL\_542855|Original|hCoV-19^^Texas|Human|Houston Methodist Hospital|Houston Methodist Hospital|Long|USA

>Spike|hCoV-19/Denmark/DCGC-16481/2020|2020-11-16|EPI\_ISL\_714793|Original|hCoV-19^^Syddanmark|Human|Department of Virus and Microbiological Special Diagnostics|Albertsen Lab|Michaelsen|Denmark

>Spike|hCoV-19/Japan/PG-3422/2020|2020-04-00|EPI\_ISL\_691534|Original|hCoV-19^^Japan|Human|Sakai City Institute of Public Health|Pathogen Genomics Center|Sekizuka|Japan

>Spike|hCoV-19/Wales/PHWC-47FF47/2020|2020-10-06|EPI\_ISL\_612201|Original|hCoV-19^^Wales|Human|Wales Specialist Virology Centre Sequencing lab|COVID-19 Genomics UK (COG-UK) Consortium|Moore|United Kingdom

>Spike|hCoV-19/USA/MI-MDHHS-SC22374/2020|2020-11-12|EPI\_ISL\_708354|Original|hCoV-19^^Michigan|Human|Michigan Department of Health and Human Services|Michigan Department of Health and Human Services|Jacob|USA



>Spike|hCoV-19/England/ALDP-A68682/2020|2020-10-12|EPI\_ISL\_630492|Original|hCoV-19^^England|Human|Lighthouse Lab in Alderley Park|Wellcome Sanger Institute for the COVID-19 Genomics UK (COG-UK) consortium|Davies|United Kingdom

>Spike|hCoV-19/England/BRIS-126C87/2020|2020-04-09|EPI\_ISL\_459056|Original|hCoV-19^^England|Human|PHE South West Regional Laboratory|Wellcome Sanger Institute for the COVID-19 Genomics UK (COG-UK) consortium|Davies|United Kingdom

>Spike|hCoV-19/Germany/BE-ChVir-D793-8179/2020|2020-03-13|EPI\_ISL\_753920|Original|hCoV-19^^Berlin|Human|Charit\u00e9 Universit\u00e4tsmedizin Berlin|Charit\u00e9 Universit\u00e4tsmedizin Berlin|Muehlemann|Germany

>Spike|hCoV-19/Denmark/DCGC-5144/2020|2020-09-21|EPI\_ISL\_621682|Original|hCoV-19^^Syddanmark|Human|Department of Virus and Microbiological Special Diagnostics|Albertsen lab|Michaelsen|Denmark

>Spike|hCoV-19/USA/DE-DHSS-F918445/2020|2020-03-30|EPI\_ISL\_593965|Original|hCoV-19^^Delaware|Human|Delaware Public Health Lab|Delaware Public Health Lab|Bajwa|USA

>Spike|hCoV-19/Brazil/SP-559/2020|2020-04-01|EPI\_ISL\_574591|Original|hCoV-19^^S\u00e3o Paulo|Human|Hospital Domingos Leonardo Ceravolo Presidente Prudente|Instituto Adolfo Lutz|Sacchi|Brazil

>Spike|hCoV-19/England/QEUA-A4CB3A/2020|2020-10-03|EPI\_ISL\_596022|Original|hCoV-19^^England|Human|Quadram Institute Bioscience|COVID-19 Genomics UK (COG-UK) Consortium|Alikhan|United Kingdom

>Spike|hCoV-19/Spain/RI-ISCI-201563/2020|2020-03-04|EPI\_ISL\_455338|Original|hCoV-19^^La Rioja|Human|Hospital San Pedro|Instituto de Salud Carlos III|Caballero|Spain

>Spike|hCoV-19/Australia/QLD1279/2020|2020-03-20|EPI\_ISL\_693280|Original|hCoV-19^^Australia|Human|unknown|Public Health Virology Laboratory|Nguyen|Australia

>Spike|hCoV-19/Netherlands/ZE-EMC-62/2020|2020-00-00|EPI\_ISL\_523561|Original|hCoV-19^^Zeeland|Human|Dutch COVID-19 response team|Erasmus Medical Center|Oude Munnink|Netherlands

>Spike|hCoV-19/USA/MA-MASPHL-00271/2020|2020-04-17|EPI\_ISL\_791703|Original|hCoV-19^^Massachusetts|Human|Massachusetts State Public Health Laboratory|Infectious Disease Program|Park|USA

>Spike|hCoV-19/Netherlands/UT-EMC-128/2020|2020-10-22|EPI\_ISL\_632326|Original|hCoV-19^^Utrecht|Human|Dutch COVID-19 response team|Erasmus Medical Center|Oude Munnink|Netherlands

>Spike|hCoV-19/USA/MI-MDHHS-SC21721/2020|2020-07-15|EPI\_ISL\_529840|Original|hCoV-19^^Michigan|Human|Michigan Department of Health and Human Services|Michigan Department of Health and Human Services|Blankenship|USA

>Spike|hCoV-19/Denmark/DCGC-9502/2020|2020-11-09|EPI\_ISL\_669005|Original|hCoV-19^^Hovedstaden|Human|Department of Virus and Microbiological Special Diagnostics|Albertsen Lab|Michaelsen|Denmark

>Spike|hCoV-19/England/QEUA-9FA2BF/2020|2020-09-25|EPI\_ISL\_595797|Original|hCoV-19^^England|Human|Oxford Viromics|COVID-19 Genomics UK (COG-UK) Consortium|Golubchik|United Kingdom

>Spike|hCoV-19/England/204581643/2020|2020-11-05|EPI\_ISL\_678703|Original|hCoV-19^^England|Human|Respiratory Virus Unit|COVID-19 Genomics UK (COG-UK) Consortium|Platt|United Kingdom

>Spike|hCoV-19/USA/FL-BPHL-0149/2020|2020-03-11|EPI\_ISL\_480800|Original|hCoV-19^^Florida|Human|Florida Bureau of Public Health Laboratories|Florida Bureau of Public Health Laboratories|Blanton|USA

>Spike|hCoV-19/Wales/PHWC-48FE0B/2020|2020-11-11|EPI\_ISL\_681233|Original|hCoV-19^^Wales|Human|Wales Specialist Virology Centre Sequencing lab|COVID-19 Genomics UK (COG-UK) Consortium|Moore|United Kingdom

>Spike|hCoV-19/England/QEUA-A35D7A/2020|2020-10-05|EPI\_ISL\_706892|Original|hCoV-19^^England|Human|Oxford Viromics|COVID-19 Genomics UK (COG-UK) Consortium|Golubchik|United Kingdom

>Spike|hCoV-19/Denmark/DCGC-22378/2020|2020-12-14|EPI\_ISL\_757395|Original|hCoV-19^^Hovedstaden|Human|Department of Virus and Microbiological Special Diagnostics|Albertsen Lab|Michaelsen|Denmark

>Spike|hCoV-19/Australia/TAS265/2020|2020-04-09|EPI\_ISL\_522693|Original|hCoV-19^^Tasmania|Human|Royal Hobart Hospital Microbiology Department|MDU-PHL|Schultz|Australia

>Spike|hCoV-19/England/ALDP-6E9A18/2020|2020-06-30|EPI\_ISL\_557615|Original|hCoV-19^^England|Human|Lighthouse Lab in Alderley Park|Wellcome Sanger Institute for the COVID-19 Genomics UK (COG-UK) consortium|Davies|United Kingdom

>Spike|hCoV-19/Switzerland/Vs-ETHZ-410148/2020|2020-12-15|EPI\_ISL\_737845|Original|hCoV-19^^Valais|Human|Viollier AG|Department of Biosystems Science and Engineering|Nadeau|Switzerland

>Spike|hCoV-19/USA/UT-02757/2020|2020-04-29|EPI\_ISL\_513644|Original|hCoV-19^^Utah|Human|Utah Public Health Laboratory|Utah Public Health Laboratory|Butz|USA

>Spike|hCoV-19/USA/CA-CHLA-PLM99533378/2020|2020-12-17|EPI\_ISL\_753681|Original|hCoV-19^^California|Human|Clinical virology Laboratory|Center for Personalized Medicine|Dien Bard|USA

>Spike|hCoV-19/Denmark/DCGC-19409/2020|2020-12-07|EPI\_ISL\_748307|Original|hCoV-19^^Midtjylland|Human|Department of Virus and Microbiological Special Diagnostics|Albertsen Lab|Michaelsen|Denmark

>Spike|hCoV-19/Japan/PG-4051/2020|2020-07-00|EPI\_ISL\_692292|Original|hCoV-19^^Japan|Human|Sakai City Institute of Public Health|Pathogen Genomics Center|Sekizuka|Japan

>Spike|hCoV-19/Northern Ireland/QEuh-95E9F0/2020|2020-08-09|EPI\_ISL\_532482|Original|hCoV-19^^Northern Ireland|Human|Lighthouse Lab in Glasgow|Wellcome Sanger Institute for the COVID-19 Genomics UK (COG-UK) consortium|Davies|United Kingdom

>Spike|hCoV-19/Australia/VIC8943/2020|2020-07-28|EPI\_ISL\_565297|Original|hCoV-19^^Victoria|Human|Microbiological Diagnostic Unit - Public Health Laboratory (MDU-PHL)|MDU-PHL|Schultz|Australia

>Spike|hCoV-19/England/ALDP-AA1465/2020|2020-10-22|EPI\_ISL\_624064|Original|hCoV-19^^England|Human|Lighthouse Lab in Alderley Park|Wellcome Sanger Institute for the COVID-19 Genomics UK (COG-UK) consortium|Davies|United Kingdom

>Spike|hCoV-19/England/QEuh-96B9B4/2020|2020-08-16|EPI\_ISL\_531337|Original|hCoV-19^^England|Human|Lighthouse Lab in Glasgow|Wellcome Sanger Institute for the COVID-19 Genomics UK (COG-UK) consortium|Davies|United Kingdom

>Spike|hCoV-19/Denmark/DCGC-8949/2020|2020-10-26|EPI\_ISL\_626188|Original|hCoV-19^^Hovedstaden|Human|Department of Virus and Microbiological Special Diagnostics|Albertsen lab|Michaelsen|Denmark

>Spike|hCoV-19/USA/TX-HMH-6343/2020|2020-06-22|EPI\_ISL\_547404|Original|hCoV-19^^Texas|Human|Houston Methodist Hospital|Houston Methodist Hospital|Long|USA

>Spike|hCoV-19/USA/OR-OHSU-1911/2020|2020-07-28|EPI\_ISL\_526067|Original|hCoV-19^^Oregon|Human|OHSU Lab Services Molecular Microbiology Lab|Oregon SARS-CoV-2 Genome Sequencing Center|O'Roak|USA

>Spike|hCoV-19/England/ALDP-4A92F0/2020|2020-06-09|EPI\_ISL\_559497|Original|hCoV-19^^England|Human|Lighthouse Lab in Alderley Park|Wellcome Sanger Institute for the COVID-19 Genomics UK (COG-UK) consortium|Davies|United Kingdom

>Spike|hCoV-19/USA/TX-HMH-MCoV-10532/2020|2020-07-08|EPI\_ISL\_789523|Original|hCoV-19^^Texas|Human|Houston Methodist Hospital|Houston Methodist Hospital|Long|USA

>Spike|hCoV-19/Sweden/20-08687/2020|2020-03-22|EPI\_ISL\_430856|Original|hCoV-19^^Norrbotten|Human|Laboratoriemedicin|The Public Health Agency of Sweden|Svartstr\u00f6m|Sweden

>Spike|hCoV-19/England/QEuh-A1E1C6/2020|2020-10-01|EPI\_ISL\_587479|Original|hCoV-19^^England|Human|Lighthouse Lab in Glasgow|Wellcome Sanger Institute for the COVID-19 Genomics UK (COG-UK) consortium|Davies|United Kingdom

>Spike|hCoV-19/Netherlands/ZuidHolland\_179/2020|2020-04-22|EPI\_ISL\_461351|Original|hCoV-19^^Zuid Holland|Human|Dutch COVID-19 response team|Erasmus Medical Center|Oude Munnink|Netherlands

>Spike|hCoV-19/USA/WI-UW-53/2020|2020-03-18|EPI\_ISL\_421311|Original|hCoV-19^^Wisconsin|Human|University of Wisconsin-Madison AIDS Vaccine Research Laboratories|University of Wisconsin-Madison AIDS Vaccine Research Laboratories|Baczenas|USA

>Spike|hCoV-19/England/MILK-9A86B4/2020|2020-09-02|EPI\_ISL\_549989|Original|hCoV-19^^England|Human|Lighthouse Lab in Milton Keynes|Wellcome Sanger Institute for the COVID-19 Genomics UK (COG-UK) consortium|Davies|United Kingdom

>Spike|hCoV-19/USA/MN-MDH-1286/2020|2020-03-22|EPI\_ISL\_483007|Original|hCoV-19^^Minnesota|Human|Minnesota Department of Health|Minnesota Department of Health|Garfin|USA

>Spike|hCoV-19/USA/VA-DCLS-0442/2020|2020-05-04|EPI\_ISL\_477658|Original|hCoV-19^^Virginia|Human|Virginia DCLS|Virginia DCLS|St. Jacques|USA

>Spike|hCoV-19/USA/CA-CZB-14601/2020|2020-10-29|EPI\_ISL\_739628|Original|hCoV-19^^California|Human|Napa-Solano-Yolo- Marin County (NSYM) Public Health Laboratories|Chan-Zuckerberg Biohub|Kamm|USA

>Spike|hCoV-19/India/UP-ACTREC-001/2020|2020-04-23|EPI\_ISL\_699658|Original|hCoV-19^^Uttar Pradesh|Human|Hematopathology Laboratory|Hematopathology Laboratory|Patkar|India

>Spike|hCoV-19/Germany/HH-hpi-p1434/2020|2020-03-09|EPI\_ISL\_775954|Original|hCoV-19^^Hamburg|Human|University Medical Center Hamburg Eppendorf|Heinrich Pette Institute|Robitaille|Germany

>Spike|hCoV-19/Canada/BC\_02083468/2020|2020-04-00|EPI\_ISL\_466715|Original|hCoV-19^^British Columbia|Human|BCCDC Public Health Laboratory|BCCDC Public Health Laboratory|Harrigan|Canada

>Spike|hCoV-19/South Korea/KCDC2029/2020|2020-02-20|EPI\_ISL\_471445|Original|hCoV-19^^South Korea|Human|Division of Viral Diseases|Division of Viral Diseases|Kim|South Korea

>Spike|hCoV-19/Germany/TH-IIMK-CaSe-30/2020|2020-12-00|EPI\_ISL\_768725|Original|hCoV-19^^Thuringia|Human|Jena University Hospital|Institute of infectious medicine & hospital hygiene|Brandt|Germany

>Spike|hCoV-19/USA/TX-HMH-5618/2020|2020-06-23|EPI\_ISL\_544906|Original|hCoV-19^^Texas|Human|Houston Methodist Hospital|Houston Methodist Hospital|Long|USA

>Spike|hCoV-19/Denmark/DCGC-10819/2020|2020-11-02|EPI\_ISL\_669513|Original|hCoV-19^^Midtjylland|Human|Department of Virus and Microbiological Special Diagnostics|Albertsen Lab|Michaelsen|Denmark

>Spike|hCoV-19/England/MILK-BFF5FB/2020|2020-12-02|EPI\_ISL\_720747|Original|hCoV-19^^England|Human|Lighthouse Lab in Milton Keynes|Wellcome Sanger Institute for the COVID-19 Genomics UK (COG-UK) Consortium|Davies|United Kingdom

>Spike|hCoV-19/Australia/VIC12168/2020|2020-07-27|EPI\_ISL\_563532|Original|hCoV-19^^Victoria|Human|Microbiological Diagnostic Unit - Public Health Laboratory (MDU-PHL) |MDU-PHL|Schultz|Australia

>Spike|hCoV-19/USA/MA-MASPHL-00586/2020|2020-05-08|EPI\_ISL\_693020|Original|hCoV-19^^Massachusetts|Human|Massachusetts State Public Health Laboratory|Massachusetts State Public Health Laboratory|Lang|USA

>Spike|hCoV-19/India/KA-IB59/2020|2020-05-19|EPI\_ISL\_511949|Original|hCoV-19^^Karnataka|Human|Indian Institute of Science|National Institute of Biomedical Genomics -\u00a0DBT's PAN-INDIA 1000 SARS--CoV-2 RNA Genome Sequencing Consortium|Maitra|India

>Spike|hCoV-19/England/BIRM-67A18/2020|2020-11-04|EPI\_ISL\_650250|Original|hCoV-19^^England|Human|University of Birmingham|COVID-19 Genomics UK (COG-UK) Consortium|Loman|United Kingdom

>Spike|hCoV-19/Japan/PG-4456/2020|2020-08-00|EPI\_ISL\_692679|Original|hCoV-19^^Japan|Human|Sakai City Institute of Public Health|Pathogen Genomics Center|Sekizuka|Japan

>Spike|hCoV-19/USA/AZ-TG280810/2020|2020-04-20|EPI\_ISL\_694161|Original|hCoV-19^^Arizona|Human|AZ SPHL|TGen North|French|USA

>Spike|hCoV-19/USA/TX-DSHS-1868/2020|2020-06-24|EPI\_ISL\_745266|Original|hCoV-19^^Texas|Human|Texas Department of State Health Services|Texas Department of State Health Services|Rahman|USA

>Spike|hCoV-19/England/20139003004/2020|2020-03-27|EPI\_ISL\_421848|Original|hCoV-19^^England|Human|Respiratory Virus Unit|Respiratory Virus Unit|Platt|United Kingdom

>Spike|hCoV-19/Jordan/AM-ALSR-3911/2020|2020-09-30|EPI\_ISL\_636277|Original|hCoV-19^^Amman|Human|Biolab Diagnostic Laboratories|Andersen lab at Scripps Research|Gangavarapu|Jordan

>Spike|hCoV-19/USA/LA-EVTL1103/2020|2020-12-03|EPI\_ISL\_768373|Original|hCoV-19^^Louisiana|Human|LSUHS Emerging Viral Threat Laboratory|Microbial Genome Sequencing Center|Kamil|USA

>Spike|hCoV-19/England/205041750/2020|2020-00-00|EPI\_ISL\_710522|Original|hCoV-19^^England|Human|Respiratory Virus Unit|COVID-19 Genomics UK (COG-UK) Consortium|Platt|United Kingdom

>Spike|hCoV-19/England/BIRM-64F94/2020|2020-09-28|EPI\_ISL\_594536|Original|hCoV-19^^England|Human|University of Birmingham|COVID-19 Genomics UK (COG-UK) Consortium|Loman|United Kingdom

>Spike|hCoV-19/USA/CA-CZB-1828/2020|2020-04-24|EPI\_ISL\_486144|Original|hCoV-19^^California|Human|Orange County Public Health Laboratory|Chan-Zuckerberg Biohub|McGeever|USA

>Spike|hCoV-19/England/QEUA-A1E74C/2020|2020-09-29|EPI\_ISL\_587372|Original|hCoV-19^^England|Human|Lighthouse Lab in Glasgow|Wellcome Sanger Institute for the COVID-19 Genomics UK (COG-UK) consortium|Davies|United Kingdom

>Spike|hCoV-19/Japan/PG-3171/2020|2020-03-00|EPI\_ISL\_691291|Original|hCoV-19^^Japan|Human|Pathogen Genomics Center|Pathogen Genomics Center|Sekizuka|Japan

>Spike|hCoV-19/England/NORW-EFEB2/2020|2020-10-04|EPI\_ISL\_584727|Original|hCoV-19^^England|Human|Quadram Institute Bioscience|COVID-19 Genomics UK (COG-UK) Consortium|Alikhan|United Kingdom

>Spike|hCoV-19/USA/TX-HMH-4343/2020|2020-06-19|EPI\_ISL\_543546|Original|hCoV-19^^Texas|Human|Houston Methodist Hospital|Houston Methodist Hospital|Long|USA

>Spike|hCoV-19/Canada/BC-BCCDC-8397/2020|2020-11-00|EPI\_ISL\_740773|Original|hCoV-19^^British Columbia|Human|BCCDC Public Health Laboratory|BCCDC Public Health Laboratory|Prystajecky|Canada

>Spike|hCoV-19/England/QEUA-B7F678/2020|2020-11-14|EPI\_ISL\_668144|Original|hCoV-19^^England|Human|Lighthouse Lab in Glasgow|Wellcome Sanger Institute for the COVID-19 Genomics UK (COG-UK) Consortium|Davies|United Kingdom

>Spike|hCoV-19/Japan/PG-2594/2020|2020-04-00|EPI\_ISL\_690728|Original|hCoV-19^^Japan|Human|Pathogen Genomics Center|Pathogen Genomics Center|Sekizuka|Japan

>Spike|hCoV-19/Spain/PV-IBV-000876/2020|2020-03-25|EPI\_ISL\_452681|Original|hCoV-19^^Basque Country|Human|Servicio de Microbiolog\u00eda. Hospital Universitario Donostia. OSI Donostialdea. \u00clrea de Enfermedades Infecciosas|SeqCOVID-SPAIN consortium/IBV (CSIC) |Comas|Spain

>Spike|hCoV-19/Wales/PHWC-48F366/2020|2020-11-09|EPI\_ISL\_681080|Original|hCoV-19^^Wales|Human|Wales Specialist Virology Centre Sequencing lab|COVID-19 Genomics UK (COG-UK) Consortium|Moore|United Kingdom

>Spike|hCoV-19/England/MILK-99D62B/2020|2020-08-31|EPI\_ISL\_549867|Original|hCoV-19^^England|Human|Lighthouse Lab in Milton Keynes|Wellcome Sanger Institute for the COVID-19 Genomics UK (COG-UK) consortium|Davies|United Kingdom

>Spike|hCoV-19/England/BRIS-1853908/2020|2020-04-11|EPI\_ISL\_492344|Original|hCoV-19^^England|Human|PHE South West Regional Laboratory|Wellcome Sanger Institute for the COVID-19 Genomics UK (COG-UK) consortium|Davies|United Kingdom

>Spike|hCoV-19/Spain/AR-IBV-005039/2020|2020-04-19|EPI\_ISL\_510342|Original|hCoV-19^^Aragon|Human|Servicio de Microbiolog\u00eda|SeqCOVID-SPAIN consortium/IBV (CSIC) |Comas|Spain

>Spike|hCoV-19/USA/TX-HMH-MCoV-14521/2020|2020-10-09|EPI\_ISL\_787806|Original|hCoV-19^^Texas|Human|Houston Methodist Hospital|Houston Methodist Hospital|Long|USA

>Spike|hCoV-19/SaudiArabia/KAUST-JEDDAH836/2020|2020-05-24|EPI\_ISL\_513009|Original|hCoV-19^^Jeddah|Human|Pathogen Genomics Lab King Abdullah University of Science and Technology(KAUST)|Pathogen Genomics Lab King Abdullah University of Science and Technology(KAUST)|Mohamed Ghazzali|Saudi Arabia

>Spike|hCoV-19/USA/UT-UPHL-2012682075/2020|2020-08-16|EPI\_ISL\_746270|Original|hCoV-19^^Utah|Human|Ginkgo Bioworks Clinical Laboratory|Utah Public Health Laboratory|Young|USA

>Spike|hCoV-19/Denmark/DCGC-17645/2020|2020-12-14|EPI\_ISL\_751120|Original|hCoV-19^^Midtjylland|Human|Department of Virus and Microbiological Special Diagnostics|Albertsen Lab|Michaelsen|Denmark

>Spike|hCoV-19/England/LIVE-9F0AC/2020|2020-04-05|EPI\_ISL\_453426|Original|hCoV-19^^England|Human|Liverpool Clinical Laboratories|COVID-19 Genomics UK (COG-UK) Consortium|Haldenby|United Kingdom

>Spike|hCoV-19/Taiwan/NTU36/2020|2020-11-27|EPI\_ISL\_738064|Vero cells|hCoV-19^^Taipei|Human|Department of Laboratory Medicine|Microbial Genomics Core Lab|Lin|Taiwan

>Spike|hCoV-19/England/ALDP-BB9A94/2020|2020-11-20|EPI\_ISL\_702724|Original|hCoV-19^^England|Human|Lighthouse Lab in Alderley Park|Wellcome Sanger Institute for the COVID-19 Genomics UK (COG-UK) Consortium|Davies|United Kingdom

>Spike|hCoV-19/Wales/PHWC-4878F6/2020|2020-10-30|EPI\_ISL\_639252|Original|hCoV-19^^Wales|Human|Wales Specialist Virology Centre Sequencing lab|COVID-19 Genomics UK (COG-UK) Consortium|Moore|United Kingdom

>Spike|hCoV-19/Scotland/QEUA-96C6CB/2020|2020-08-07|EPI\_ISL\_530929|Original|hCoV-19^^Scotland|Human|NHSGGC West of Scotland Specialist Virology Centre / MRC-University of Glasgow Centre for Virus Research|Wellcome Sanger Institute for the COVID-19 Genomics UK (COG-UK) consortium|Davies|United Kingdom

>Spike|hCoV-19/England/MILK-AC8FA3/2020|2020-10-22|EPI\_ISL\_629546|Original|hCoV-19^^England|Human|Lighthouse Lab in Milton Keynes|Wellcome Sanger Institute for the COVID-19 Genomics UK (COG-UK) consortium|Davies|United Kingdom

>Spike|hCoV-19/England/ALDP-B491A3/2020|2020-11-07|EPI\_ISL\_649279|Original|hCoV-19^^England|Human|Lighthouse Lab in Alderley Park|Wellcome Sanger Institute for the COVID-19 Genomics UK (COG-UK) Consortium|Davies|United Kingdom

>Spike|hCoV-19/France/ARA-113651/2020|2020-11-28|EPI\_ISL\_745320|Original|hCoV-19^^Auvergne-Rh\u00f4ne-Alpes|Human|CNR Virus des Infections Respiratoires - France SUD|CNR Virus des Infections Respiratoires - France SUD|Bal|France

>Spike|hCoV-19/Japan/PG-4916/2020|2020-07-00|EPI\_ISL\_690036|Original|hCoV-19^^Japan|Human|Pathogen Genomics Center|Pathogen Genomics Center|Sekizuka|Japan

>Spike|hCoV-19/USA/MI-MDHHS-SC20629/2020|2020-04-17|EPI\_ISL\_462711|Original|hCoV-19^^Michigan|Human|Michigan Department of Health and Human Services|Michigan Department of Health and Human Services|Blankenship|USA

>Spike|hCoV-19/South Korea/KCDC2044/2020|2020-02-19|EPI\_ISL\_471450|Original|hCoV-19^^South Korea|Human|Division of Viral Diseases|Division of Viral Diseases|Kim|South Korea

>Spike|hCoV-19/Australia/VIC15580/2020|2020-09-23|EPI\_ISL\_593369|Original|hCoV-19^^Victoria|Human|Microbiological Diagnostic Unit - Public Health Laboratory (MDU-PHL)|MDU-PHL|Schultz|Australia

>Spike|hCoV-19/England/QEUA-9C8593/2020|2020-09-11|EPI\_ISL\_567033|Original|hCoV-19^^England|Human|Lighthouse Lab in Glasgow|Wellcome Sanger Institute for the COVID-19 Genomics UK (COG-UK) consortium|Davies|United Kingdom

>Spike|hCoV-19/Scotland/GCVR-170C60/2020|2020-03-25|EPI\_ISL\_459608|Original|hCoV-19^^Scotland|Human|NHSGGC West of Scotland Specialist Virology Centre / MRC-University of Glasgow Centre for Virus Research|Wellcome Sanger Institute for the COVID-19 Genomics UK (COG-UK) consortium|Davies|United Kingdom

>Spike|hCoV-19/Luxembourg/LNS7496221/2020|2020-10-19|EPI\_ISL\_744579|Original|hCoV-19^^Luxembourg|Human|Laboratoire national de sant\u00e9|Laboratoire national de sant\u00e9|Wienecke-Baldacchino|Luxembourg

>Spike|hCoV-19/Spain/RI-IBV-98002372/2020|2020-03-22|EPI\_ISL\_537868|Original|hCoV-19^^La Rioja|Human|Centro de Investigaci\u00f3n Biom\u00e9dica de La Rioja - Hospital San Pedro Logro\u00f1o|SeqCOVID-SPAIN consortium|IBV (CSIC)|Comas|Spain

>Spike|hCoV-19/Brazil/SP-205/2020|2020-04-21|EPI\_ISL\_523988|Original|hCoV-19^^S\u00e3o Paulo|Human|Hospital Sao Paulo de Ensino da Unifesp|Instituto Adolfo Lutz|Sacchi|Brazil

>Spike|hCoV-19/Wales/PHWC-495251/2020|2020-11-22|EPI\_ISL\_726317|Original|hCoV-19^^Wales|Human|Originating lab|COVID-19 Genomics UK (COG-UK) Consortium|Moore|United Kingdom

>Spike|hCoV-19/USA/NY-QDX-2447/2020|2020-03-14|EPI\_ISL\_604801|Original|hCoV-19^^New York|Human|Quest Diagnostics|Quest Diagnostics|Kagan|USA

>Spike|hCoV-19/Hungary/UD-90448/2020|2020-10-04|EPI\_ISL\_671468|Original|hCoV-19^^Borsod-Aba\u00faj-Zempl\u00e9n county|Human|University of Debrecen|National Laboratory of Virology|Kemenesi|Hungary

>Spike|hCoV-19/USA/CA-LACPHL-AF00055/2020|2020-12-19|EPI\_ISL\_754130|Original|hCoV-19^^California|Human|Los Angeles County PHL|Los Angeles County PHL|Hemarajata|USA

>Spike|hCoV-19/England/MILK-A6A1BC/2020|2020-10-08|EPI\_ISL\_608832|Original|hCoV-19^^England|Human|Lighthouse Lab in Milton Keynes|Wellcome Sanger Institute for the COVID-19 Genomics UK (COG-UK) consortium|Davies|United Kingdom

>Spike|hCoV-19/USA/TX-HMH-2452/2020|2020-05-29|EPI\_ISL\_545318|Original|hCoV-19^^Texas|Human|Houston Methodist Hospital|Houston Methodist Hospital|Long|USA

>Spike|hCoV-19/USA/CO-CDPHE-2004220712/2020|2020-04-22|EPI\_ISL\_710161|Original|hCoV-19^^Colorado|Human|Colorado Department of Public Health and Environment|Colorado Department of Public Health and Environment|Bankers|USA

>Spike|hCoV-19/USA/TX-DSHS-2059/2020|2020-12-04|EPI\_ISL\_766652|Original|hCoV-19^^Texas|Human|Texas Department of State Health Services|Texas Department of State Health Services|Rahman|USA

>Spike|hCoV-19/Australia/VIC3173/2020|2020-07-07|EPI\_ISL\_520865|Original|hCoV-19^^Victoria|Human|Victorian Infectious Diseases Reference Laboratory (VIDRL)|VIDRL and MDU-PHL|Schultz|Australia

>Spike|hCoV-19/England/QEUEH-9F4349/2020|2020-09-24|EPI\_ISL\_588652|Original|hCoV-19^^England|Human|Lighthouse Lab in Glasgow|Wellcome Sanger Institute for the COVID-19 Genomics UK (COG-UK) consortium|Davies|United Kingdom

>Spike|hCoV-19/Wales/MILK-9A53ED/2020|2020-09-03|EPI\_ISL\_550244|Original|hCoV-19^^Wales|Human|Lighthouse Lab in Milton Keynes|Wellcome Sanger Institute for the COVID-19 Genomics UK (COG-UK) consortium|Davies|United Kingdom

>Spike|hCoV-19/England/MILK-C52610/2020|2020-12-11|EPI\_ISL\_736403|Original|hCoV-19^^England|Human|Lighthouse Lab in Milton Keynes|Wellcome Sanger Institute for the COVID-19 Genomics UK (COG-UK) Consortium|Davies|United Kingdom

>Spike|hCoV-19/England/ALDP-9CB5DC/2020|2020-09-16|EPI\_ISL\_575676|Original|hCoV-19^^England|Human|Lighthouse Lab in Alderley Park|Wellcome Sanger Institute for the COVID-19 Genomics UK (COG-UK) consortium|Davies|United Kingdom

>Spike|hCoV-19/USA/FL-QDX-1638/2020|2020-03-18|EPI\_ISL\_603940|Original|hCoV-19^^Florida|Human|Quest Diagnostics|Quest Diagnostics|Kagan|USA

>Spike|hCoV-19/North Macedonia/2052/2020|2020-06-01|EPI\_ISL\_677675|Original|hCoV-19^^Veles|Human|General Hospital - Veles|Research Center for Genetic Engineering and Biotechnology \Georgi D. Efremov\u201d|Dimovski|North Macedonia

>Spike|hCoV-19/England/MILK-B8EDCC/2020|2020-11-13|EPI\_ISL\_674676|Original|hCoV-19^^England|Human|Lighthouse Lab in Milton Keynes|Wellcome Sanger Institute for the COVID-19 Genomics UK (COG-UK) Consortium|Davies|United Kingdom

>Spike|hCoV-19/India/HR-THSTI-BAL-914/2020|2020-04-16|EPI\_ISL\_454866|Original|hCoV-19^^Haryana|Human|Translational Health Science and Technology Institute -ESIC medical college and hospital|THSTI Bioassay laboratory|Medigeshi|India

>Spike|hCoV-19/Wales/PHWC-49FC0E/2020|2020-12-09|EPI\_ISL\_743333|Original|hCoV-19^^Wales|Human|Wales Specialist Virology Centre Sequencing lab|COVID-19 Genomics UK (COG-UK) Consortium|Moore|United Kingdom

>Spike|hCoV-19/England/LOND-D37B6/2020|2020-03-31|EPI\_ISL\_440986|Original|hCoV-19^^England|Human|University College London|COVID-19 Genomics UK (COG-UK) Consortium|Roy|United Kingdom

>Spike|hCoV-19/Scotland/QEUEH-AD53D4/2020|2020-10-24|EPI\_ISL\_649692|Original|hCoV-19^^Scotland|Human|Lighthouse Lab in Glasgow|Wellcome Sanger Institute for the COVID-19 Genomics UK (COG-UK) Consortium|Davies|United Kingdom

>Spike|hCoV-19/England/LIVE-A6646/2020|2020-03-19|EPI\_ISL\_499726|Original|hCoV-19^^England|Human|Liverpool Clinical Laboratories|COVID-19 Genomics UK (COG-UK) Consortium|Haldenby|United Kingdom

>Spike|hCoV-19/Switzerland/BL-ETHZ-120047/2020|2020-04-20|EPI\_ISL\_468234|Original|hCoV-19^^Basel-Landschaft|Human|Viollier AG|Department of Biosystems Science and Engineering|Nadeau|Switzerland

>Spike|hCoV-19/England/MILK-B96FAD/2020|2020-11-13|EPI\_ISL\_681670|Original|hCoV-19^^England|Human|Lighthouse Lab in Milton Keynes|Wellcome Sanger Institute for the COVID-19 Genomics UK (COG-UK) Consortium|Davies|United Kingdom

>Spike|hCoV-19/Wales/PHWC-4843BC/2020|2020-10-23|EPI\_ISL\_627998|Original|hCoV-19^^Wales|Human|Wales Specialist Virology Centre Sequencing lab|COVID-19 Genomics UK (COG-UK) Consortium|Moore|United Kingdom

>Spike|hCoV-19/England/ALDP-C3B99C/2020|2020-12-10|EPI\_ISL\_731114|Original|hCoV-19^^England|Human|Lighthouse Lab in Alderley Park|Wellcome Sanger Institute for the COVID-19 Genomics UK (COG-UK) Consortium|Davies|United Kingdom

>Spike|hCoV-19/England/MILK-AC892D/2020|2020-10-21|EPI\_ISL\_629748|Original|hCoV-19^^England|Human|Lighthouse Lab in Milton Keynes|Wellcome Sanger Institute for the COVID-19 Genomics UK (COG-UK) consortium|Davies|United Kingdom

>Spike|hCoV-19/Scotland/EDB3850/2020|2020-04-30|EPI\_ISL\_439339|Original|hCoV-19^^Scotland|Human|Virology Department|COVID-19 Genomics UK (COG-UK) Consortium|Williams|United Kingdom

>Spike|hCoV-19/Canada/BC-BCCDC-8384/2020|2020-11-00|EPI\_ISL\_740766|Original|hCoV-19^^British Columbia|Human|BCCDC Public Health Laboratory|BCCDC Public Health Laboratory|Prystajecky|Canada

>Spike|hCoV-19/Netherlands/NB-RIVM-20573/2020|2020-12-11|EPI\_ISL\_790657|Original|hCoV-19^^Noord-Brabant|Human|Dutch COVID-19 response team|National Institute for Public Health and the Environment (RIVM)|Meijer|Netherlands

>Spike|hCoV-19/USA/TX-HMH-MCoV-13687/2020|2020-08-20|EPI\_ISL\_788784|Original|hCoV-19^^Texas|Human|Houston Methodist Hospital|Houston Methodist Hospital|Long|USA

>Spike|hCoV-19/England/MILK-ABC27C/2020|2020-10-21|EPI\_ISL\_630995|Original|hCoV-19^^England|Human|Lighthouse Lab in Milton Keynes|Wellcome Sanger Institute for the COVID-19 Genomics UK (COG-UK) consortium|Davies|United Kingdom

>Spike|hCoV-19/Peru/LAM-INS-034/2020|2020-04-01|EPI\_ISL\_491459|Original|hCoV-19^^Lambayeque|Human|Laboratorio de Referencia Nacional de Virus Respiratorio. Instituto Nacional de Salud Per\u00fa|Laboratorio de Referencia Nacional de Biotecnolog\u00eda y Biolog\u00eda Molecular. Instituto Nacional de Salud Per\u00fa|Padilla Rojas|Peru

>Spike|hCoV-19/Portugal/PT1582/2020|2020-07-01|EPI\_ISL\_693530|Original|hCoV-19^^Portugal|Human|Instituto Nacional de Saude (INSA)|Instituto Nacional de Saude (INSA)|Borges|Portugal

>Spike|hCoV-19/USA/TX-HMH-MCoV-13633/2020|2020-08-20|EPI\_ISL\_788739|Original|hCoV-19^^Texas|Human|Houston Methodist Hospital|Houston Methodist Hospital|Long|USA

>Spike|hCoV-19/South Africa/KRISP-K003996/2020|2020-09-28|EPI\_ISL\_634984|Original|hCoV-19^^KwaZulu-Natal|Human|National Health Laboratory Service - Inkosi Albert Luthuli Central Hospital (NHLS-IALCH)|KRISP|de Oliveira|South Africa

>Spike|hCoV-19/USA/TX-HMH-MCoV-14670/2020|2020-10-10|EPI\_ISL\_787955|Original|hCoV-19^^Texas|Human|Houston Methodist Hospital|Houston Methodist Hospital|Long|USA

>Spike|hCoV-19/England/BIRM-67C7C/2020|2020-11-06|EPI\_ISL\_650245|Original|hCoV-19^^England|Human|University of Birmingham|COVID-19 Genomics UK (COG-UK) Consortium|Loman|United Kingdom

>Spike|hCoV-19/Scotland/CVR215/2020|2020-03-18|EPI\_ISL\_425743|Original|hCoV-19^^Scotland|Human|West of Scotland Specialist Virology Centre|COVID-19 Genomics UK (COG-UK) Consortium|Robertson|United Kingdom

>Spike|hCoV-19/Belgium/regal-12141380/2020|2020-12-14|EPI\_ISL\_738432|Original|hCoV-19^^Mol|Human|UZ Leuven|KU Leuven|Maes|Belgium

>Spike|hCoV-19/England/BRIS-127FC9/2020|2020-04-18|EPI\_ISL\_469730|Original|hCoV-19^^England|Human|PHE South West Regional Laboratory|Wellcome Sanger Institute for the COVID-19 Genomics UK (COG-UK) consortium|Davies|United Kingdom

>Spike|hCoV-19/Netherlands/UT-EMC-92/2020|2020-09-10|EPI\_ISL\_632496|Original|hCoV-19^^Utrecht|Human|Dutch COVID-19 response team|Erasmus Medical Center|Oude Munnink|Netherlands

>Spike|hCoV-19/Australia/VIC103/2020|2020-03-17|EPI\_ISL\_419814|Original|hCoV-19^^Victoria|Human|Victorian Infectious Diseases Reference Laboratory (VIDRL)|Victorian Infectious Diseases Reference Laboratory and Microbiological Diagnostic Unit Public Health Laboratory|Schultz|Australia

>Spike|hCoV-19/England/QEUH-A62521/2020|2020-10-12|EPI\_ISL\_741767|Original|hCoV-19^^England|Human|Oxford Viromics|COVID-19 Genomics UK (COG-UK) Consortium|Golubchik|United Kingdom

>Spike|hCoV-19/South Africa/KRISP-K002257/2020|2020-07-19|EPI\_ISL\_515642|Original|hCoV-19^^KwaZulu-Natal|Human|NHLS-IALCH|KRISP|de Oliveira|South Africa

>Spike|hCoV-19/Israel/CVL-n-11594/2020|2020-04-25|EPI\_ISL\_475017|Original|hCoV-19^^Tirat Zvi|Human|Israel Central Virology laboratory|Israel Central Virology laboratory|Zuckerman|Israel

>Spike|hCoV-19/Wales/ALDP-B1B68D/2020|2020-11-01|EPI\_ISL\_710965|Original|hCoV-19^^Wales|Human|Lighthouse Lab in Alderley Park|Wellcome Sanger Institute for the COVID-19 Genomics UK (COG-UK) Consortium|Davies|United Kingdom

>Spike|hCoV-19/USA/NV-NSPHL-A0066/2020|2020-04-06|EPI\_ISL\_515347|Original|hCoV-19^^Nevada|Human|Nevada State Public Health Laboratory|Nevada State Public Health Laboratory|Sevinsky|USA

>Spike|hCoV-19/South Africa/KRISP-K002572/2020|2020-07-30|EPI\_ISL\_535438|Original|hCoV-19^^KwaZulu-Natal|Human|NHLS-IALCH|KRISP|de Oliveira|South Africa

>Spike|hCoV-19/England/MILK-A79B70/2020|2020-10-15|EPI\_ISL\_606803|Original|hCoV-19^^England|Human|Lighthouse Lab in Milton Keynes|Wellcome Sanger Institute for the COVID-19 Genomics UK (COG-UK) consortium|Davies|United Kingdom

>Spike|hCoV-19/USA/MI-MDHHS-SC21898/2020|2020-03-28|EPI\_ISL\_565959|Original|hCoV-19^^Michigan|Human|Michigan Department of Health and Human Services|Michigan Department of Health and Human Services|Blankenship|USA

>Spike|hCoV-19/France/PAC-IHU-1191/2020|2020-08-17|EPI\_ISL\_569080|Original|hCoV-19^^Provence-Alpes-C\u00f4te-d\u2019Azur|Human|MEPHI|MEPHI|Levasseur|France

>Spike|hCoV-19/England/QEUH-C32E69/2020|2020-12-11|EPI\_ISL\_733990|Original|hCoV-19^^England|Human|Lighthouse Lab in Glasgow|Wellcome Sanger Institute for the COVID-19 Genomics UK (COG-UK) Consortium|Davies|United Kingdom

>Spike|hCoV-19/England/QEUH-B14174/2020|2020-11-03|EPI\_ISL\_641632|Original|hCoV-19^^England|Human|Lighthouse Lab in Glasgow|Wellcome Sanger Institute for the COVID-19 Genomics UK (COG-UK) Consortium|Davies|United Kingdom

>Spike|hCoV-19/England/ALDP-9522C4/2020|2020-06-09|EPI\_ISL\_551329|Original|hCoV-19^^England|Human|Lighthouse Lab in Alderley Park|Wellcome Sanger Institute for the COVID-19 Genomics UK (COG-UK) consortium|Davies|United Kingdom

>Spike|hCoV-19/England/QEUH-BC428F/2020|2020-11-24|EPI\_ISL\_703514|Original|hCoV-19^^England|Human|Lighthouse Lab in Glasgow|Wellcome Sanger Institute for the COVID-19 Genomics UK (COG-UK) Consortium|Davies|United Kingdom

>Spike|hCoV-19/Australia/VIC6532/2020|2020-07-22|EPI\_ISL\_521302|Original|hCoV-19^^Victoria|Human|Microbiological Diagnostic Unit - Public Health Laboratory (MDU-PHL)|MDU-PHL|Schultz|Australia

>Spike|hCoV-19/Scotland/QEUH-96C458/2020|2020-08-13|EPI\_ISL\_530845|Original|hCoV-19^^Scotland|Human|NHSGGC West of Scotland Specialist Virology Centre / MRC-University of Glasgow Centre for Virus Research|Wellcome Sanger Institute for the COVID-19 Genomics UK (COG-UK) consortium|Davies|United Kingdom

>Spike|hCoV-19/England/MILK-A46699/2020|2020-10-05|EPI\_ISL\_598672|Original|hCoV-19^^England|Human|Lighthouse Lab in Milton Keynes|Wellcome Sanger Institute for the COVID-19 Genomics UK (COG-UK) consortium|Davies|United Kingdom

>Spike|hCoV-19/England/NORT-1B72C52/2020|2020-12-08|EPI\_ISL\_724920|Original|hCoV-19^^England|Human|Northumbria University / South Tees Hospitals NHS Foundation Trust / North Cumbria Integrated Care NHS Foundation Trust / North Tees and Hartlepool NHS Foundation Trust / Newcastle Hospitals NHS Foundation Trust|COVID-19 Genomics UK (COG-UK) Consortium|Bashton|United Kingdom

>Spike|hCoV-19/Portugal/PT0830/2020|2020-03-21|EPI\_ISL\_511089|Original|hCoV-19^^Portugal|Human|Instituto Nacional de Saude (INSA)|Instituto Nacional de Saude (INSA)|Borges|Portugal

>Spike|hCoV-19/USA/TX-HMH-MCoV-9681/2020|2020-07-04|EPI\_ISL\_780221|Original|hCoV-19^^Texas|Human|Houston Methodist Hospital|Houston Methodist Hospital|Long|USA

>Spike|hCoV-19/England/ALDP-B734C5/2020|2020-11-12|EPI\_ISL\_662518|Original|hCoV-19^^England|Human|Lighthouse Lab in Alderley Park|Wellcome Sanger Institute for the COVID-19 Genomics UK (COG-UK) Consortium|Davies|United Kingdom



>Spike|hCoV-19/England/ALDP-9514FC/2020|2020-06-13|EPI\_ISL\_554384|Original|hCoV-19^^England|Human|Lighthouse Lab in Alderley Park|Wellcome Sanger Institute for the COVID-19 Genomics UK (COG-UK) consortium|Davies|United Kingdom

>Spike|hCoV-19/USA/TX-HMH-MCoV-16202/2020|2020-10-29|EPI\_ISL\_785886|Original|hCoV-19^^Texas|Human|Houston Methodist Hospital|Houston Methodist Hospital|Long|USA

>Spike|hCoV-19/England/MILK-BAC2D8/2020|2020-11-18|EPI\_ISL\_783091|Original|hCoV-19^^England|Human|Lighthouse Lab in Milton Keynes|Wellcome Sanger Institute for the COVID-19 Genomics UK (COG-UK) Consortium|Davies|United Kingdom

>Spike|hCoV-19/Wales/PHWC-48EEA2/2020|2020-11-12|EPI\_ISL\_681017|Original|hCoV-19^^Wales|Human|Wales Specialist Virology Centre Sequencing lab|COVID-19 Genomics UK (COG-UK) Consortium|Moore|United Kingdom

>Spike|hCoV-19/France/HDF-1645/2020|2020-02-28|EPI\_ISL\_418220|Original|hCoV-19^^Hauts-de-France|Human|Centre Hospitalier Compi\ue8gne Laboratoire de Biologie|National Reference Center for Viruses of Respiratory Infections|Enouf|France

>Spike|hCoV-19/England/ALDP-95610F/2020|2020-06-08|EPI\_ISL\_553872|Original|hCoV-19^^England|Human|Lighthouse Lab in Alderley Park|Wellcome Sanger Institute for the COVID-19 Genomics UK (COG-UK) consortium|Davies|United Kingdom

>Spike|hCoV-19/South Africa/R10517/2020|2020-06-09|EPI\_ISL\_490282|Original|hCoV-19^^Gauteng|Human|National Institute for Communicable Diseases of the National Health Laboratory Service|National Institute for Communicable Diseases of the National Health Laboratory Service|Allam|South Africa

>Spike|hCoV-19/Jordan/AM-ALSR-4045/2020|2020-10-03|EPI\_ISL\_636405|Original|hCoV-19^^Amman|Human|Biolab Diagnostic Laboratories|Andersen lab at Scripps Research|Gangavarapu|Jordan

>Spike|hCoV-19/England/SHEF-C3F1B/2020|2020-05-07|EPI\_ISL\_475375|Original|hCoV-19^^England|Human|Virology Department|COVID-19 Genomics UK (COG-UK) Consortium|de Silva|United Kingdom

>Spike|hCoV-19/Wales/PHWC-47DC60/2020|2020-10-12|EPI\_ISL\_595345|Original|hCoV-19^^Wales|Human|Originating lab|COVID-19 Genomics UK (COG-UK) Consortium|Moore|United Kingdom

>Spike|hCoV-19/USA/LA-EVTL389/2020|2020-06-04|EPI\_ISL\_578795|Original|hCoV-19^^Louisiana|Human|LSUHS Emerging Viral Threat Laboratory|Microbial Genome Sequencing Center|Kamil|USA

>Spike|hCoV-19/Peru/AMZ-UPCH-0266/2020|2020-08-26|EPI\_ISL\_729912|Original|hCoV-19^^Amazonas|Human|Instituto de Medicina Tropical|Laboratorio de Gen\uf3mica Microbiana|Tsukayama|Peru

>Spike|hCoV-19/Scotland/EDB2663/2020|2020-04-26|EPI\_ISL\_439255|Original|hCoV-19^^Scotland|Human|Virology Department|COVID-19 Genomics UK (COG-UK) Consortium|Williams|United Kingdom

>Spike|hCoV-19/Denmark/DCGC-13214/2020|2020-11-30|EPI\_ISL\_712657|Original|hCoV-19^^Hovedstaden|Human|Department of Virus and Microbiological Special Diagnostics|Albertsen Lab|Michaelsen|Denmark

>Spike|hCoV-19/USA/WI-WSLH-200072/2020|2020-04-04|EPI\_ISL\_471237|Original|hCoV-19^^Wisconsin|Human|Wisconsin State Laboratory of Hygiene Communicable Disease Division|Wisconsin State Laboratory of Hygiene Communicable Disease Division|Florek|USA

>Spike|hCoV-19/Denmark/DCGC-18901/2020|2020-12-07|EPI\_ISL\_748628|Original|hCoV-19^^Hovedstaden|Human|Department of Virus and Microbiological Special Diagnostics|Albertsen Lab|Michaelsen|Denmark

>Spike|hCoV-19/USA/WA-UW-46995/2020|2020-12-14|EPI\_ISL\_756303|Original|hCoV-19^^Washington|Human|UW Virology Lab|UW Virology Lab|Roychoudhury|USA

>Spike|hCoV-19/Switzerland/ZH-ETHZ-250091/2020|2020-08-19|EPI\_ISL\_535609|Original|hCoV-19^^Zurich|Human|Viollier AG|Department of Biosystems Science and Engineering|Nadeau|Switzerland

>Spike|hCoV-19/Bangladesh/DNAS-CPH-isl-441/2020|2020-04-29|EPI\_ISL\_605882|Original|hCoV-19^^Bangladesh|Human|NGS Lab|NGS Lab|Rabbi|Bangladesh

>Spike|hCoV-19/Portugal/PT0577/2020|2020-03-24|EPI\_ISL\_454300|Original|hCoV-19^^Portugal|Human|unknown|Instituto Nacional de Saude (INSA)|Borges|Portugal

>Spike|hCoV-19/England/CAMB-7EC36/2020|2020-04-07|EPI\_ISL\_443050|Original|hCoV-19^^England|Human|Department of Pathology|Wellcome Sanger Institute for the COVID-19 Genomics UK (COG-UK) consortium|Amato|United Kingdom

>Spike|hCoV-19/USA/NJ-QDX-1974/2020|2020-03-15|EPI\_ISL\_604234|Original|hCoV-19^^New Jersey|Human|Quest Diagnostics|Quest Diagnostics|Kagan|USA

>Spike|hCoV-19/Canada/Qc-L00241168/2020|2020-03-27|EPI\_ISL\_450311|Original|hCoV-19^^Quebec|Human|H\u00f4pital du Suro\u00eet|Laboratoire de sant\u00e9 publique du Qu\u00e9bec|Moreira|Canada

>Spike|hCoV-19/Denmark/DCGC-4584/2020|2020-09-14|EPI\_ISL\_622253|Original|hCoV-19^^Sjaelland|Human|Department of Virus and Microbiological Special Diagnostics|Albertsen lab|Michaelsen|Denmark

>Spike|hCoV-19/England/QEUEH-B8054A/2020|2020-11-14|EPI\_ISL\_661949|Original|hCoV-19^^England|Human|Lighthouse Lab in Glasgow|Wellcome Sanger Institute for the COVID-19 Genomics UK (COG-UK) Consortium|Davies|United Kingdom

>Spike|hCoV-19/USA/CA-CZB0158/2020|2020-04-08|EPI\_ISL\_429044|Original|hCoV-19^^California|Human|UCSF Clinical Microbiology Laboratory|Chan-Zuckerberg Biohub|Kamm|USA

>Spike|hCoV-19/Wales/PHWC-495312/2020|2020-11-21|EPI\_ISL\_726328|Original|hCoV-19^^Wales|Human|Originating lab|COVID-19 Genomics UK (COG-UK) Consortium|Moore|United Kingdom

>Spike|hCoV-19/DRC/10644/2020|2020-05-22|EPI\_ISL\_527549|Original|hCoV-19^^Kinshasa|Human|Viral Respiratory Lab|Pathogen Sequencing Lab|Lokilo|Democratic Republic of the Congo

>Spike|hCoV-19/England/ALDP-9CB527/2020|2020-09-16|EPI\_ISL\_575514|Original|hCoV-19^^England|Human|Lighthouse Lab in Alderley Park|Wellcome Sanger Institute for the COVID-19 Genomics UK (COG-UK) consortium|Davies|United Kingdom

>Spike|hCoV-19/England/MILK-ACFB7B/2020|2020-10-22|EPI\_ISL\_652125|Original|hCoV-19^^England|Human|Oxford Viromics|COVID-19 Genomics UK (COG-UK) Consortium|Golubchik|United Kingdom

>Spike|hCoV-19/USA/UT-UPHL-2009556/2020|2020-07-18|EPI\_ISL\_605235|Original|hCoV-19^^Utah|Human|Utah Public Health Laboratory|Utah Public Health Laboratory|Young|USA

>Spike|hCoV-19/England/QEUEH-B684E1/2020|2020-11-11|EPI\_ISL\_655064|Original|hCoV-19^^England|Human|Lighthouse Lab in Glasgow|Wellcome Sanger Institute for the COVID-19 Genomics UK (COG-UK) Consortium|Davies|United Kingdom

>Spike|hCoV-19/Australia/VIC17071/2020|2020-08-09|EPI\_ISL\_663717|Original|hCoV-19^^Victoria|Human|Microbiological Diagnostic Unit - Public Health Laboratory (MDU-PHL)|MDU-PHL|Schultz|Australia

>Spike|hCoV-19/Scotland/CVR3525/2020|2020-05-14|EPI\_ISL\_473663|Original|hCoV-19^^Scotland|Human|West of Scotland Specialist Virology Centre|COVID-19 Genomics UK (COG-UK) Consortium|Robertson|United Kingdom

>Spike|hCoV-19/England/NORW-E81FC/2020|2020-04-08|EPI\_ISL\_449123|Original|hCoV-19^^England|Human|Quadram Institute Bioscience|COVID-19 Genomics UK (COG-UK) Consortium|Alikhan|United Kingdom

>Spike|hCoV-19/England/QEUEH-B9EFE1/2020|2020-11-18|EPI\_ISL\_719897|Original|hCoV-19^^England|Human|Lighthouse Lab in Glasgow|Wellcome Sanger Institute for the COVID-19 Genomics UK (COG-UK) Consortium|Davies|United Kingdom

>Spike|hCoV-19/England/QEUEH-A0B9E2/2020|2020-10-03|EPI\_ISL\_599178|Original|hCoV-19^^England|Human|Lighthouse Lab in Glasgow|Wellcome Sanger Institute for the COVID-19 Genomics UK (COG-UK) consortium|Davies|United Kingdom

>Spike|hCoV-19/SaudiArabia/KAUST-JEDDAH887/2020|2020-05-24|EPI\_ISL\_513036|Original|hCoV-19^^Jeddah|Human|Pathogen Genomics Lab King Abdullah University of Science and Technology(KAUST)|Pathogen Genomics Lab King Abdullah University of Science and Technology(KAUST)|Mohamed Ghazzali|Saudi Arabia

>Spike|hCoV-19/DRC/2496/2020|2020-04-15|EPI\_ISL\_437337|Original|hCoV-19^^Kinshasa|Human|Viral Respiratory Lab|Pathogen Sequencing Lab|Muyembe|Democratic Republic of the Congo

>Spike|hCoV-19/England/MILK-ABBA93/2020|2020-10-22|EPI\_ISL\_623252|Original|hCoV-19^^England|Human|Lighthouse Lab in Milton Keynes|Wellcome Sanger Institute for the COVID-19 Genomics UK (COG-UK) consortium|Davies|United Kingdom

>Spike|hCoV-19/England/LIVE-9B28C/2020|2020-03-26|EPI\_ISL\_449426|Original|hCoV-19^^England|Human|Liverpool Clinical Laboratories|COVID-19 Genomics UK (COG-UK) Consortium|Haldenby|United Kingdom

>Spike|hCoV-19/Spain/VC-IBV-98003483/2020|2020-04-08|EPI\_ISL\_539279|Original|hCoV-19^^Comunitat Valenciana|Human|Hospital Universitario de La Ribera (Alzira|SeqCOVID-SPAIN consortium/IBV (CSIC)|Comas|Spain

>Spike|hCoV-19/Denmark/DCGC-11477/2020|2020-11-02|EPI\_ISL\_670942|Original|hCoV-19^^Midtjylland|Human|Department of Virus and Microbiological Special Diagnostics|Albertsen Lab|Michaelsen|Denmark

>Spike|hCoV-19/Wales/PHWC-165CE6/2020|2020-05-14|EPI\_ISL\_490792|Original|hCoV-19^^Wales|Human|Wales Specialist Virology Centre Sequencing lab|COVID-19 Genomics UK (COG-UK) Consortium|Moore|United Kingdom

>Spike|hCoV-19/Belgium/ULG-10786/2020|2020-11-16|EPI\_ISL\_661205|Original|hCoV-19^^Li\u00e8ge|Human|Department of Clinical Microbiology|GIGA Medical Genomics|Durkin|Belgium

>Spike|hCoV-19/England/CAMC-A416AD/2020|2020-10-05|EPI\_ISL\_609518|Original|hCoV-19^^England|Human|Lighthouse Lab in Cambridge|Wellcome Sanger Institute for the COVID-19 Genomics UK (COG-UK) consortium|Davies|United Kingdom

>Spike|hCoV-19/Wales/PHWC-4A25D0/2020|2020-12-15|EPI\_ISL\_743913|Original|hCoV-19^^Wales|Human|Wales Specialist Virology Centre Sequencing lab|COVID-19 Genomics UK (COG-UK) Consortium|Moore|United Kingdom

>Spike|hCoV-19/Scotland/QEUA-95E495/2020|2020-08-10|EPI\_ISL\_534413|Original|hCoV-19^^Scotland|Human|NHS GGC West of Scotland Specialist Virology Centre / MRC-University of Glasgow Centre for Virus Research|Wellcome Sanger Institute for the COVID-19 Genomics UK (COG-UK) consortium|Davies|United Kingdom

>Spike|hCoV-19/England/LOND-1264DB3/2020|2020-11-23|EPI\_ISL\_724567|Original|hCoV-19^^England|Human|University College London|COVID-19 Genomics UK (COG-UK) Consortium|Roy|United Kingdom

>Spike|hCoV-19/USA/CA-CZB-2398/2020|2020-05-19|EPI\_ISL\_513827|Original|hCoV-19^^California|Human|Orange County Public Health Laboratory|Chan-Zuckerberg Biohub|Kamm|USA

>Spike|hCoV-19/USA/HI-H200582/2020|2020-10-29|EPI\_ISL\_753108|Original|hCoV-19^^Hawaii|Human|State Laboratories Division|State Laboratories Division|Sultana|USA

>Spike|hCoV-19/England/OXON-AD0C9/2020|2020-04-07|EPI\_ISL\_448561|Original|hCoV-19^^England|Human|Oxford Viromics|COVID-19 Genomics UK (COG-UK) Consortium|Golubchik|United Kingdom

>Spike|hCoV-19/USA/IL-UW-1039/2020|2020-08-01|EPI\_ISL\_516465|Original|hCoV-19^^Illinois|Human|University of Wisconsin-Madison AIDS Vaccine Research Laboratories|University of Wisconsin-Madison AIDS Vaccine Research Laboratories|Baczenas|USA

>Spike|hCoV-19/USA/UT-08547/2020|2020-05-18|EPI\_ISL\_524307|Original|hCoV-19^^Utah|Human|Utah Public Health Laboratory|Utah Public Health Laboratory|Young|USA

>Spike|hCoV-19/Scotland/CVR3931/2020|2020-06-08|EPI\_ISL\_512474|Original|hCoV-19^^Scotland|Human|West of Scotland Specialist Virology Centre|COVID-19 Genomics UK (COG-UK) Consortium|Robertson|United Kingdom

>Spike|hCoV-19/England/QEUA-9DDAAB/2020|2020-09-21|EPI\_ISL\_599666|Original|hCoV-19^^England|Human|Lighthouse Lab in Glasgow|Wellcome Sanger Institute for the COVID-19 Genomics UK (COG-UK) consortium|Davies|United Kingdom

>Spike|hCoV-19/Wales/PHWC-15D49E/2020|2020-05-04|EPI\_ISL\_472724|Original|hCoV-19^^Wales|Human|Wales Specialist Virology Centre Sequencing lab|COVID-19 Genomics UK (COG-UK) Consortium|Moore|United Kingdom

>Spike|hCoV-19/USA/TX-HMH-MCoV-18926/2020|2020-11-26|EPI\_ISL\_785224|Original|hCoV-19^^Texas|Human|Houston Methodist Hospital|Houston Methodist Hospital|Long|USA

>Spike|hCoV-19/USA/MN-MDH-1150/2020|2020-04-30|EPI\_ISL\_476735|Original|hCoV-19^^Minnesota|Human|Minnesota Department of Health|Minnesota Department of Health|Garfin|USA

>Spike|hCoV-19/France/OCC-SC510/2020|2020-04-24|EPI\_ISL\_660701|Original|hCoV-19^^Occitanie|Human|CHU Montpellier|CNR Virus des Infections Respiratoires - France SUD|Bal|France

>Spike|hCoV-19/England/MILK-B02425/2020|2020-10-23|EPI\_ISL\_642878|Original|hCoV-19^^England|Human|Lighthouse Lab in Milton Keynes|Wellcome Sanger Institute for the COVID-19 Genomics UK (COG-UK) Consortium|Davies|United Kingdom

>Spike|hCoV-19/USA/TX-HMH-MCoV-15615/2020|2020-10-23|EPI\_ISL\_785299|Original|hCoV-19^^Texas|Human|Houston Methodist Hospital|Houston Methodist Hospital|Long|USA

>Spike|hCoV-19/Singapore/1068/2020|2020-10-05|EPI\_ISL\_596458|Original|hCoV-19^^Singapore|Human|National Public Health Laboratory|National Public Health Laboratory|Mak|Singapore

>Spike|hCoV-19/England/MILK-9D3D42/2020|2020-09-17|EPI\_ISL\_601667|Original|hCoV-19^^England|Human|Lighthouse Lab in Milton Keynes|Wellcome Sanger Institute for the COVID-19 Genomics UK (COG-UK) Consortium|Davies|United Kingdom

>Spike|hCoV-19/England/MILK-9754D4/2020|2020-08-21|EPI\_ISL\_552489|Original|hCoV-19^^England|Human|Lighthouse Lab in Milton Keynes|Wellcome Sanger Institute for the COVID-19 Genomics UK (COG-UK) consortium|Davies|United Kingdom

>Spike|hCoV-19/Australia/NSW1100/2020|2020-08-29|EPI\_ISL\_593715|Original|hCoV-19^^New South Wales|Human|South Eastern Area Laboratory Services (SEALS)|NSW Health Pathology - Institute of Clinical Pathology and Medical Research; Westmead Hospital; University of Sydney|Gall|Australia

>Spike|hCoV-19/Russia/OMS-ORINFI-2292S/2020|2020-06-30|EPI\_ISL\_639921|Original|hCoV-19^^Omsk|Human|Omsk Research Institute of Natural Focal Infections|WHO National Influenza Centre Russian Federation|Komissarov|Russia

>Spike|hCoV-19/Singapore/93/2020|2020-03-18|EPI\_ISL\_435698|Original|hCoV-19^^Singapore|Human|National Public Health Laboratory|National Public Health Laboratory|Mak|Singapore

>Spike|hCoV-19/England/ALDP-BB53AC/2020|2020-11-21|EPI\_ISL\_701802|Original|hCoV-19^^England|Human|Lighthouse Lab in Alderley Park|Wellcome Sanger Institute for the COVID-19 Genomics UK (COG-UK) Consortium|Davies|United Kingdom

>Spike|hCoV-19/Japan/PG-3563/2020|2020-06-00|EPI\_ISL\_691819|Original|hCoV-19^^Japan|Human|Pathogen Genomics Center|Pathogen Genomics Center|Sekizuka|Japan

>Spike|hCoV-19/Japan/PG-1406/2020|2020-04-00|EPI\_ISL\_685013|Original|hCoV-19^^Japan|Human|Saitama Prefectural Institute of Public Health|Pathogen Genomics Center|Sekizuka|Japan

>Spike|hCoV-19/England/MILK-9C6E03/2020|2020-09-09|EPI\_ISL\_572513|Original|hCoV-19^^England|Human|Northumbria University / South Tees Hospitals NHS Foundation Trust / North Cumbria Integrated Care NHS Foundation Trust / North Tees and Hartlepool NHS Foundation Trust / Newcastle Hospitals NHS Foundation Trust|COVID-19 Genomics UK (COG-UK) Consortium|Bashton|United Kingdom

>Spike|hCoV-19/Scotland/CVR3598/2020|2020-05-19|EPI\_ISL\_473725|Original|hCoV-19^^Scotland|Human|West of Scotland Specialist Virology Centre|COVID-19 Genomics UK (COG-UK) Consortium|Robertson|United Kingdom

>Spike|hCoV-19/Denmark/DCGC-19866/2020|2020-12-07|EPI\_ISL\_747550|Original|hCoV-19^^Syddanmark|Human|Department of Virus and Microbiological Special Diagnostics|Albertsen Lab|Michaelsen|Denmark

>Spike|hCoV-19/Wales/PHWC-4A5DD5/2020|2020-00-00|EPI\_ISL\_764975|Original|hCoV-19^^Wales|Human|Wales Specialist Virology Centre Sequencing lab|COVID-19 Genomics UK (COG-UK) Consortium|Moore|United Kingdom

>Spike|hCoV-19/England/QEUEH-A9F8F5/2020|2020-10-20|EPI\_ISL\_652686|Original|hCoV-19^^England|Human|University of Exeter|COVID-19 Genomics UK (COG-UK) Consortium|Temperton|United Kingdom

>Spike|hCoV-19/England/ALDP-C393CD/2020|2020-12-08|EPI\_ISL\_731263|Original|hCoV-19^^England|Human|Lighthouse Lab in Alderley Park|Wellcome Sanger Institute for the COVID-19 Genomics UK (COG-UK) Consortium|Davies|United Kingdom

>Spike|hCoV-19/England/OXON-B31BE/2020|2020-04-01|EPI\_ISL\_534841|Original|hCoV-19^^England|Human|Oxford Viromics|COVID-19 Genomics UK (COG-UK) Consortium|Golubchik|United Kingdom

>Spike|hCoV-19/South Africa/KRISP-K002189/2020|2020-07-08|EPI\_ISL\_515588|Original|hCoV-19^^KwaZulu-Natal|Human|NHLS-IALCH|KRISP|de Oliveira|South Africa

>Spike|hCoV-19/Japan/PG-6419/2020|2020-07-00|EPI\_ISL\_689525|Original|hCoV-19^^Japan|Human|Pathogen Genomics Center|Pathogen Genomics Center|Sekizuka|Japan

>Spike|hCoV-19/Wales/PHWC-4899C4/2020|2020-10-26|EPI\_ISL\_652435|Original|hCoV-19^^Wales|Human|Wales Specialist Virology Centre Sequencing lab|COVID-19 Genomics UK (COG-UK) Consortium|Moore|United Kingdom

>Spike|hCoV-19/USA/TX-HMH-MCoV-19273/2020|2020-11-27|EPI\_ISL\_783732|Original|hCoV-19^^Texas|Human|Houston Methodist Hospital|Houston Methodist Hospital|Long|USA

>Spike|hCoV-19/Ireland/D-NVRL-71IRL07177/2020|2020-07-07|EPI\_ISL\_500587|Original|hCoV-19^^Dublin|Human|National Virus Reference Laboratory|National Virus Reference Laboratory|Gonzalez|Ireland

>Spike|hCoV-19/USA/MD-MDH-0289/2020|2020-10-12|EPI\_ISL\_629069|Original|hCoV-19^^Maryland|Human|Maryland Public Health Laboratory|Maryland Public Health Laboratory|Keller|USA

>Spike|hCoV-19/England/SHEF-C0FE1/2020|2020-05-27|EPI\_ISL\_535044|Original|hCoV-19^^England|Human|Virology Department|COVID-19 Genomics UK (COG-UK) Consortium|de Silva|United Kingdom

>Spike|hCoV-19/Wales/PHWC-48D9C0/2020|2020-11-12|EPI\_ISL\_680708|Original|hCoV-19^^Wales|Human|Wales Specialist Virology Centre Sequencing lab|COVID-19 Genomics UK (COG-UK) Consortium|Moore|United Kingdom

>Spike|hCoV-19/Denmark/DCGC-6810/2020|2020-10-12|EPI\_ISL\_619507|Original|hCoV-19^^Midtjylland|Human|Department of Virus and Microbiological Special Diagnostics|Albertsen lab|Michaelsen|Denmark

>Spike|hCoV-19/England/CAMB-1B2FA5/2020|2020-05-23|EPI\_ISL\_456741|Original|hCoV-19^^England|Human|Department of Pathology|COVID-19 Genomics UK (COG-UK) Consortium|Meredith|United Kingdom

>Spike|hCoV-19/Canada/BC\_22473210/2020|2020-03-00|EPI\_ISL\_462834|Original|hCoV-19^^British Columbia|Human|BCCDC Public Health Laboratory|BCCDC Public Health Laboratory|Harrigan|Canada

>Spike|hCoV-19/USA/WA-UW-23423/2020|2020-08-09|EPI\_ISL\_576451|Original|hCoV-19^^Washington|Human|UW Virology Lab|UW Virology Lab|Roychoudhury|USA

>Spike|hCoV-19/England/QEUEH-9D0176/2020|2020-09-16|EPI\_ISL\_589976|Original|hCoV-19^^England|Human|Lighthouse Lab in Glasgow|Wellcome Sanger Institute for the COVID-19 Genomics UK (COG-UK) consortium|Davies|United Kingdom

>Spike|hCoV-19/USA/WA-S1858/2020|2020-05-27|EPI\_ISL\_496284|Original|hCoV-19^^Washington|Human|Washington State Department of Health|Seattle Flu Study|Lee|USA

>Spike|hCoV-19/England/QEUEH-B11A6D/2020|2020-11-02|EPI\_ISL\_642321|Original|hCoV-19^^England|Human|Lighthouse Lab in Glasgow|Wellcome Sanger Institute for the COVID-19 Genomics UK (COG-UK) Consortium|Davies|United Kingdom

>Spike|hCoV-19/Kuwait/KU005/2020|2020-03-16|EPI\_ISL\_422426|Original|hCoV-19^^Dasman|Human|JABER AL AHMAD AL SABAH HOSPITAL \u2013 KUWAIT CITY|Dasman Diabetes Institute|Al-Mulla|Kuwait

>Spike|hCoV-19/USA/WA-S1537/2020|2020-05-25|EPI\_ISL\_495963|Original|hCoV-19^^Washington|Human|Washington State Department of Health|Seattle Flu Study|Lee|USA

>Spike|hCoV-19/USA/WI-UW-2336/2020|2020-11-19|EPI\_ISL\_728102|Original|hCoV-19^^Wisconsin|Human|University of Wisconsin-Madison AIDS Vaccine Research Laboratories|University of Wisconsin-Madison AIDS Vaccine Research Laboratories|Baczenas|USA

>Spike|hCoV-19/USA/NY-NYUMC127/2020|2020-04-01|EPI\_ISL\_424934|Original|hCoV-19^^New York|Human|NYU Langone Health|Departments of Pathology and Medicine|Maurano|USA

>Spike|hCoV-19/Singapore/1273/2020|2020-05-05|EPI\_ISL\_648757|Original|hCoV-19^^Singapore|Human|Department of Laboratory Medicine|Department of Laboratory Medicine|Chen|Singapore

>Spike|hCoV-19/Brazil/SP-416/2020|2020-07-06|EPI\_ISL\_693211|Original|hCoV-19^^S\u00e3o Paulo|Human|Santa Casa de Misericordia e Maternidade|Instituto Adolfo Lutz|Sacchi|Brazil

>Spike|hCoV-19/Wales/PHWC-1698A2/2020|2020-07-19|EPI\_ISL\_512527|Original|hCoV-19^^Wales|Human|Wales Specialist Virology Centre Sequencing lab|COVID-19 Genomics UK (COG-UK) Consortium|Moore|United Kingdom

>Spike|hCoV-19/USA/CA-IGI-0210/2020|2020-07-02|EPI\_ISL\_569891|Original|hCoV-19^^California|Human|Innovative Genomics Institute|Innovative Genomics Institute|Wyman|USA

>Spike|hCoV-19/Gambia/GC19-2991/2020|2020-07-24|EPI\_ISL\_561159|Original|hCoV-19^^Kombo|Human|MRCG at LSHTM Genomics lab|MRCG at LSHTM Genomics lab|Sesay|Gambia

>Spike|hCoV-19/Denmark/DCGC-17984/2020|2020-12-14|EPI\_ISL\_749681|Original|hCoV-19^^Hovedstaden|Human|Department of Virus and Microbiological Special Diagnostics|Albertsen Lab|Michaelsen|Denmark

>Spike|hCoV-19/Spain/PV-IBV-98008363/2020|2020-10-13|EPI\_ISL\_654575|Original|hCoV-19^^Basque Country|Human|Servicio de Microbiolog\u00eda. Hospital Universitario Donostia. OSI Donostialdea. \u00c1rea de Enfermedades Infecciosas|SeqCOVID-SPAIN consortium/IBV (CSIC) |Comas|Spain

>Spike|hCoV-19/Iceland/173/2020|2020-03-15|EPI\_ISL\_417700|Original|hCoV-19^^Reykjavik|Human|The National University Hospital of Iceland|deCODE genetics|J\u00f3nsson|Iceland

>Spike|hCoV-19/Denmark/DCGC-4577/2020|2020-09-14|EPI\_ISL\_622246|Original|hCoV-19^^Hovedstaden|Human|Department of Virus and Microbiological Special Diagnostics|Albertsen lab|Michaelsen|Denmark

>Spike|hCoV-19/USA/TX-HMH-7151/2020|2020-06-29|EPI\_ISL\_546548|Original|hCoV-19^^Texas|Human|Houston Methodist Hospital|Houston Methodist Hospital|Long|USA

>Spike|hCoV-19/England/CAMB-76269/2020|2020-03-30|EPI\_ISL\_438333|Original|hCoV-19^^England|Human|Department of Pathology|Wellcome Sanger Institute for the COVID-19 Genomics UK (COG-UK) consortium|Amato|United Kingdom

>Spike|hCoV-19/Denmark/DCGC-12295/2020|2020-11-16|EPI\_ISL\_682476|Original|hCoV-19^^Hovedstaden|Human|Department of Virus and Microbiological Special Diagnostics|Albertsen Lab|Michaelsen|Denmark

>Spike|hCoV-19/Denmark/ALAB-SSI-815/2020|2020-03-30|EPI\_ISL\_444921|Original|hCoV-19^^Denmark|Human|Department of Virus and Microbiological Special Diagnostics|Albertsen lab|Kirkegaard|Denmark

>Spike|hCoV-19/USA/MI-QDX-729/2020|2020-03-21|EPI\_ISL\_571462|Original|hCoV-19^^Michigan|Human|Quest Diagnostics|Quest Diagnostics|Kagan|USA

>Spike|hCoV-19/England/ALDP-926AA3/2020|2020-06-23|EPI\_ISL\_552847|Original|hCoV-19^^England|Human|Lighthouse Lab in Alderley Park|Wellcome Sanger Institute for the COVID-19 Genomics UK (COG-UK) consortium|Davies|United Kingdom

>Spike|hCoV-19/Turkey/KU-033/2020|2020-04-29|EPI\_ISL\_495443|Original|hCoV-19^^Kars Province|Human|Kafkas University|Kafkas University|Karamese|Turkey

>Spike|hCoV-19/Wales/PHWC-4A0C19/2020|2020-12-11|EPI\_ISL\_743560|Original|hCoV-19^^Wales|Human|Wales Specialist Virology Centre Sequencing lab|COVID-19 Genomics UK (COG-UK) Consortium|Moore|United Kingdom

>Spike|hCoV-19/England/MILK-BFF5A0/2020|2020-12-02|EPI\_ISL\_720905|Original|hCoV-19^^England|Human|Lighthouse Lab in Milton Keynes|Wellcome Sanger Institute for the COVID-19 Genomics UK (COG-UK) Consortium|Davies|United Kingdom

>Spike|hCoV-19/England/MILK-BAA9D5/2020|2020-11-17|EPI\_ISL\_681526|Original|hCoV-19^^England|Human|Lighthouse Lab in Milton Keynes|Wellcome Sanger Institute for the COVID-19 Genomics UK (COG-UK) Consortium|Davies|United Kingdom

>Spike|hCoV-19/Scotland/CVR5261/2020|2020-10-14|EPI\_ISL\_626992|Original|hCoV-19^^Scotland|Human|West of Scotland Specialist Virology Centre|COVID-19 Genomics UK (COG-UK) Consortium|Robertson|United Kingdom

>Spike|hCoV-19/Denmark/DCGC-20065/2020|2020-12-07|EPI\_ISL\_747571|Original|hCoV-19^^Syddanmark|Human|Department of Virus and Microbiological Special Diagnostics|Albertsen Lab|Michaelsen|Denmark

>Spike|hCoV-19/Denmark/DCGC-10526/2020|2020-11-02|EPI\_ISL\_670034|Original|hCoV-19^^Midtjylland|Human|Department of Virus and Microbiological Special Diagnostics|Albertsen Lab|Michaelsen|Denmark

>Spike|hCoV-19/England/MILK-9711E0/2020|2020-08-18|EPI\_ISL\_553111|Original|hCoV-19^^England|Human|Lighthouse Lab in Milton Keynes|Wellcome Sanger Institute for the COVID-19 Genomics UK (COG-UK) consortium|Davies|United Kingdom

>Spike|hCoV-19/USA/NY-Wadsworth-22513-01/2020|2020-03-16|EPI\_ISL\_525622|Original|hCoV-19^^New York|Human|Wadsworth Center|Wadsworth Center|Plitnick|USA

>Spike|hCoV-19/Iceland/390/2020|2020-03-19|EPI\_ISL\_424414|Original|hCoV-19^^Reykjavik|Human|The National University Hospital of Iceland|deCODE genetics|J\u00f3nsson|Iceland

>Spike|hCoV-19/USA/MA-MGH-01460/2020|2020-04-28|EPI\_ISL\_791952|Original|hCoV-19^^Massachusetts|Human|Massachusetts General Hospital|Infectious Disease Program|Park|USA

>Spike|hCoV-19/Denmark/DCGC-18247/2020|2020-12-14|EPI\_ISL\_749841|Original|hCoV-19^^Hovedstaden|Human|Department of Virus and Microbiological Special Diagnostics|Albertsen Lab|Michaelsen|Denmark

>Spike|hCoV-19/USA/CA-CZB-2360/2020|2020-05-13|EPI\_ISL\_513806|Original|hCoV-19^^California|Human|Orange County Public Health Laboratory|Chan-Zuckerberg Biohub|Kamm|USA

>Spike|hCoV-19/Scotland/QEUEH-C33C31/2020|2020-12-11|EPI\_ISL\_757138|Original|hCoV-19^^Scotland|Human|Lighthouse Lab in Glasgow|Wellcome Sanger Institute for the COVID-19 Genomics UK (COG-UK) Consortium|Davies|United Kingdom

>Spike|hCoV-19/England/CAMC-B9AAD5/2020|2020-11-15|EPI\_ISL\_673239|Original|hCoV-19^^England|Human|Lighthouse Lab in Cambridge|Wellcome Sanger Institute for the COVID-19 Genomics UK (COG-UK) Consortium|Davies|United Kingdom

>Spike|hCoV-19/USA/MI-UM-10033871564/2020|2020-04-07|EPI\_ISL\_578144|Original|hCoV-19^^Michigan|Human|University of Michigan Clinical Microbiology Laboratory|Lauring Lab|Valesano|USA

>Spike|hCoV-19/Denmark/DCGC-9826/2020|2020-11-09|EPI\_ISL\_669206|Original|hCoV-19^^Midtjylland|Human|Department of Virus and Microbiological Special Diagnostics|Albertsen Lab|Michaelsen|Denmark

>Spike|hCoV-19/USA/NY-NYCPHL-001491/2020|2020-11-30|EPI\_ISL\_745420|Original|hCoV-19^^New York|Human|DOHMH Crown Heights|New York City Public Health Laboratory|Wang|USA

>Spike|hCoV-19/USA/MI-UM-10036709608/2020|2020-10-30|EPI\_ISL\_710039|Original|hCoV-19^^Michigan|Human|University of Michigan Clinical Microbiology Laboratory|Lauring Lab|Valesano|USA

>Spike|hCoV-19/England/CAMC-B518C1/2020|2020-11-08|EPI\_ISL\_658131|Original|hCoV-19^^England|Human|Lighthouse Lab in Cambridge|Wellcome Sanger Institute for the COVID-19 Genomics UK (COG-UK) Consortium|Davies|United Kingdom

>Spike|hCoV-19/South Korea/KDCA0090/2020|2020-09-18|EPI\_ISL\_747329|Original|hCoV-19^^South Korea|Human|Division of Emerging Infectious Diseases|Division of Emerging Infectious Diseases|Park|South Korea

>Spike|hCoV-19/England/204262899/2020|2020-10-09|EPI\_ISL\_603212|Original|hCoV-19^^England|Human|Respiratory Virus Unit|Respiratory Virus Unit|Platt|United Kingdom

>Spike|hCoV-19/Singapore/519/2020|2020-04-15|EPI\_ISL\_479597|Original|hCoV-19^^Singapore|Human|National Public Health Laboratory|National Public Health Laboratory|Mak|Singapore

>Spike|hCoV-19/Wales/PHWC-340E5/2020|2020-04-20|EPI\_ISL\_446870|Original|hCoV-19^^Wales|Human|Wales Specialist Virology Centre|Public Health Wales Microbiology Cardiff|Moore|United Kingdom

>Spike|hCoV-19/USA/CA-CZB-1118/2020|2020-04-30|EPI\_ISL\_444076|Original|hCoV-19^^California|Human|UCSF Clinical Microbiology Laboratory|Chan-Zuckerberg Biohub|Hao|USA

>Spike|hCoV-19/Spain/IB-IBV-99011560/2020|2020-12-15|EPI\_ISL\_779897|Original|hCoV-19^^Balear Islands|Human|Servicio de Microbiolog\u00eda|SeqCOVID-SPAIN consortium|IBV (CSIC) |Comas|Spain

>Spike|hCoV-19/England/QEUEH-78CC4D/2020|2020-07-15|EPI\_ISL\_533076|Original|hCoV-19^^England|Human|Lighthouse Lab in Glasgow|Wellcome Sanger Institute for the COVID-19 Genomics UK (COG-UK) consortium|Davies|United Kingdom

>Spike|hCoV-19/Czech Republic/NRL-10717/2020|2020-11-03|EPI\_ISL\_693666|Original|hCoV-19^^Prague|Human|The National Institute of Public Health|State Veterinary Institute Prague|Nagy|Czech Republic

>Spike|hCoV-19/England/ALDP-94EC36/2020|2020-06-17|EPI\_ISL\_556404|Original|hCoV-19^^England|Human|Lighthouse Lab in Alderley Park|Wellcome Sanger Institute for the COVID-19 Genomics UK (COG-UK) consortium|Davies|United Kingdom

>Spike|hCoV-19/Denmark/DCGC-11627/2020|2020-11-02|EPI\_ISL\_671035|Original|hCoV-19^^Hovedstaden|Human|Department of Virus and Microbiological Special Diagnostics|Albertsen Lab|Michaelsen|Denmark

>Spike|hCoV-19/England/NORT-28217A/2020|2020-03-26|EPI\_ISL\_472200|Original|hCoV-19^^England|Human|Northumbria University / South Tees Hospitals NHS Foundation Trust / North Cumbria Integrated Care NHS Foundation Trust / North Tees and Hartlepool NHS Foundation Trust / Newcastle Hospitals NHS Foundation Trust|COVID-19 Genomics UK (COG-UK) Consortium|Bashton|United Kingdom

>Spike|hCoV-19/Serbia/Kragujevac-00040304/2020|2020-04-02|EPI\_ISL\_582524|Original|hCoV-19^^Kragujevac|Human|Veterinary Specialized Institute \Kraljevo\|Veterinary Specialized Institute \Kraljevo\|Vidanovic|Serbia

>Spike|hCoV-19/Denmark/DCGC-18424/2020|2020-12-07|EPI\_ISL\_749540|Original|hCoV-19^^Hovedstaden|Human|Department of Virus and Microbiological Special Diagnostics|Albertsen Lab|Michaelsen|Denmark

>Spike|hCoV-19/Japan/PG-7567/2020|2020-07-00|EPI\_ISL\_686669|Original|hCoV-19^^Japan|Human|Chiba Prefectural Institute of Public Health|Pathogen Genomics Center|Sekizuka|Japan

>Spike|hCoV-19/England/QEUEH-9F425B/2020|2020-09-25|EPI\_ISL\_588659|Original|hCoV-19^^England|Human|Lighthouse Lab in Glasgow|Wellcome Sanger Institute for the COVID-19 Genomics UK (COG-UK) consortium|Davies|United Kingdom

>Spike|hCoV-19/Switzerland/GE-ETHZ-320596/2020|2020-10-12|EPI\_ISL\_737754|Original|hCoV-19^^Geneva|Human|Viollier AG|Department of Biosystems Science and Engineering|Nadeau|Switzerland

>Spike|hCoV-19/Japan/PG-2231/2020|2020-04-00|EPI\_ISL\_685836|Original|hCoV-19^^Japan|Human|Pathogen Genomics Center|Pathogen Genomics Center|Sekizuka|Japan

>Spike|hCoV-19/Japan/PG-5257/2020|2020-07-00|EPI\_ISL\_690360|Original|hCoV-19^^Japan|Human|Pathogen Genomics Center|Pathogen Genomics Center|Sekizuka|Japan

>Spike|hCoV-19/Australia/VIC3477/2020|2020-07-05|EPI\_ISL\_521138|Original|hCoV-19^^Victoria|Human|Victorian Infectious Diseases Reference Laboratory (VIDRL)|VIDRL and MDU-PHL|Schultz|Australia

>Spike|hCoV-19/USA/TX-HMH-MCoV-10854/2020|2020-07-05|EPI\_ISL\_789660|Original|hCoV-19^^Texas|Human|Houston Methodist Hospital|Houston Methodist Hospital|Long|USA

>Spike|hCoV-19/England/QEUEH-95FFC0/2020|2020-08-07|EPI\_ISL\_531923|Original|hCoV-19^^England|Human|Lighthouse Lab in Glasgow|Wellcome Sanger Institute for the COVID-19 Genomics UK (COG-UK) consortium|Davies|United Kingdom

>Spike|hCoV-19/England/ALDP-9BE6AC/2020|2020-09-09|EPI\_ISL\_568206|Original|hCoV-19^^England|Human|Lighthouse Lab in Alderley Park|Wellcome Sanger Institute for the COVID-19 Genomics UK (COG-UK) consortium|Davies|United Kingdom

>Spike|hCoV-19/Belgium/ULG-10517/2020|2020-10-23|EPI\_ISL\_626276|Original|hCoV-19^^Li\u00e8ge|Human|Department of Clinical Microbiology|GIGA Medical Genomics|Durkin|Belgium

>Spike|hCoV-19/Denmark/DCGC-11839/2020|2020-10-26|EPI\_ISL\_671166|Original|hCoV-19^^Hovedstaden|Human|Department of Virus and Microbiological Special Diagnostics|Albertsen Lab|Michaelsen|Denmark

>Spike|hCoV-19/Romania/USAFSAM-S549/2020|2020-11-28|EPI\_ISL\_738332|Original|hCoV-19^^Romania|Human|Landstuhl Regional Medical Center|United States Air Force School of Aerospace Medicine|Fries|Romania

>Spike|hCoV-19/USA/TX-HMH-2446/2020|2020-04-29|EPI\_ISL\_545313|Original|hCoV-19^^Texas|Human|Houston Methodist Hospital|Houston Methodist Hospital|Long|USA

>Spike|hCoV-19/England/CAMC-B522B3/2020|2020-11-08|EPI\_ISL\_656857|Original|hCoV-19^^England|Human|Lighthouse Lab in Cambridge|Wellcome Sanger Institute for the COVID-19 Genomics UK (COG-UK) Consortium|Davies|United Kingdom

>Spike|hCoV-19/England/MILK-B3DAE3/2020|2020-11-02|EPI\_ISL\_741387|Original|hCoV-19^^England|Human|Oxford Viromics|COVID-19 Genomics UK (COG-UK) Consortium|Golubchik|United Kingdom

>Spike|hCoV-19/Australia/VIC6164/2020|2020-07-23|EPI\_ISL\_518170|Original|hCoV-19^^Victoria|Human|Victorian Infectious Diseases Reference Laboratory (VIDRL)|VIDRL and MDU-PHL|Schultz|Australia

>Spike|hCoV-19/Wales/PHWC-2E224/2020|2020-04-07|EPI\_ISL\_446074|Original|hCoV-19^^Wales|Human|Wales Specialist Virology Centre|Public Health Wales Microbiology Cardiff|Moore|United Kingdom



>Spike|hCoV-19/Denmark/DCGC-18161/2020|2020-12-14|EPI\_ISL\_749318|Original|hCoV-19^^Hovedstaden|Human|Department of Virus and Microbiological Special Diagnostics|Albertsen Lab|Michaelsen|Denmark

>Spike|hCoV-19/New Zealand/20VR1020/2020|2020-03-20|EPI\_ISL\_456185|Original|hCoV-19^^Combined Wellington|Human|Wellington SCL|Institute of Environmental Science and Research (ESR)|de Ligt|New Zealand

>Spike|hCoV-19/USA/PA-MGEL-00439/2020|2020-07-04|EPI\_ISL\_682020|Original|hCoV-19^^Pennsylvania|Human|UPMC Clinical Microbiology Laboratory|Microbial Genomic Epidemiology Laboratory|Griffith|USA

>Spike|hCoV-19/England/ALDP-A50A45/2020|2020-10-07|EPI\_ISL\_597676|Original|hCoV-19^^England|Human|Lighthouse Lab in Alderley Park|Wellcome Sanger Institute for the COVID-19 Genomics UK (COG-UK) consortium|Davies|United Kingdom

>Spike|hCoV-19/USA/TX-HMH-MCoV-19241/2020|2020-11-23|EPI\_ISL\_783713|Original|hCoV-19^^Texas|Human|Houston Methodist Hospital|Houston Methodist Hospital|Long|USA

>Spike|hCoV-19/USA/VA-DCLS-1217/2020|2020-06-23|EPI\_ISL\_572284|Original|hCoV-19^^Virginia|Human|Virginia DCLS|Virginia DCLS|St. Jacques|USA

>Spike|hCoV-19/USA/AZ-TG618028/2020|2020-07-18|EPI\_ISL\_695675|Original|hCoV-19^^Arizona|Human|AZ SPHL|TGen North|French|USA

>Spike|hCoV-19/England/ALDP-9CDE93/2020|2020-09-16|EPI\_ISL\_566364|Original|hCoV-19^^England|Human|Lighthouse Lab in Alderley Park|Wellcome Sanger Institute for the COVID-19 Genomics UK (COG-UK) consortium|Davies|United Kingdom

>Spike|hCoV-19/England/NORW-E8183/2020|2020-04-08|EPI\_ISL\_449117|Original|hCoV-19^^England|Human|Quadram Institute Bioscience|COVID-19 Genomics UK (COG-UK) Consortium|Alikhan|United Kingdom

>Spike|hCoV-19/England/QEUAH-95F6BC/2020|2020-08-06|EPI\_ISL\_532421|Original|hCoV-19^^England|Human|Lighthouse Lab in Glasgow|Wellcome Sanger Institute for the COVID-19 Genomics UK (COG-UK) consortium|Davies|United Kingdom

>Spike|hCoV-19/Wales/PHWC-4961DB/2020|2020-11-25|EPI\_ISL\_726544|Original|hCoV-19^^Wales|Human|Originating lab|COVID-19 Genomics UK (COG-UK) Consortium|Moore|United Kingdom

>Spike|hCoV-19/India/UN-2020c32/2020|2020-00-00|EPI\_ISL\_420556|Vero CCL81 P1|hCoV-19^^India|Human|Indian Council of Medical Research-National Institute of Virology|Indian Council of Medical Research-National Institute of Virology|Yadav|India

>Spike|hCoV-19/England/ALDP-95D065/2020|2020-06-17|EPI\_ISL\_553547|Original|hCoV-19^^England|Human|Lighthouse Lab in Alderley Park|Wellcome Sanger Institute for the COVID-19 Genomics UK (COG-UK) consortium|Davies|United Kingdom

>Spike|hCoV-19/Denmark/DCGC-16362/2020|2020-11-16|EPI\_ISL\_714723|Original|hCoV-19^^Hovedstaden|Human|Department of Virus and Microbiological Special Diagnostics|Albertsen Lab|Michaelsen|Denmark

>Spike|hCoV-19/England/20129038804/2020|2020-03-20|EPI\_ISL\_424042|Original|hCoV-19^^England|Human|Respiratory Virus Unit|Respiratory Virus Unit|Platt|United Kingdom

>Spike|hCoV-19/USA/WA-S627/2020|2020-04-18|EPI\_ISL\_438180|Original|hCoV-19^^Washington|Human|Washington State Department of Health|Seattle Flu Study|Bedford|USA

>Spike|hCoV-19/USA/NY-Wadsworth-142765-01/2020|2020-04-18|EPI\_ISL\_676970|Original|hCoV-19^^New York|Human|Wadsworth Center|Wadsworth Center|Lasek-Nesselquist|USA

>Spike|hCoV-19/Wales/PHWC-24929/2020|2020-03-19|EPI\_ISL\_419458|Original|hCoV-19^^Wales|Human|Wales Specialist Virology Centre|Public Health Wales Microbiology Cardiff|Moore|United Kingdom

>Spike|hCoV-19/Scotland/QEUAH-9F4EFD/2020|2020-09-27|EPI\_ISL\_638914|Original|hCoV-19^^Scotland|Human|Department of Pathology|COVID-19 Genomics UK (COG-UK) Consortium|Goodfellow|United Kingdom

>Spike|hCoV-19/England/LIVE-1D5838/2020|2020-09-19|EPI\_ISL\_576964|Original|hCoV-19^^England|Human|Liverpool Clinical Laboratories|COVID-19 Genomics UK (COG-UK) Consortium|Haldenby|United Kingdom

>Spike|hCoV-19/USA/LA-EVTL1251/2020|2020-12-18|EPI\_ISL\_768520|Original|hCoV-19^^Louisiana|Human|LSUHS Emerging Viral Threat Laboratory|Microbial Genome Sequencing Center|Kamil|USA

>Spike|hCoV-19/France/GES-8536/2020|2020-05-26|EPI\_ISL\_560587|Original|hCoV-19^^Grand-Est|Human|Hopital|National Reference Center for Viruses of Respiratory Infections|Enouf|France

>Spike|hCoV-19/USA/AZ-TG648653/2020|2020-04-29|EPI\_ISL\_695881|Original|hCoV-19^^Arizona|Human|Sonora Quest Laboratories|TGen North|French|USA

>Spike|hCoV-19/USA/UT-UPHL-2012731963/2020|2020-06-16|EPI\_ISL\_746380|Original|hCoV-19^^Utah|Human|Utah Public Health Laboratory|Utah Public Health Laboratory|Gallagher|USA

>Spike|hCoV-19/England/ALDP-9FC9A9/2020|2020-10-01|EPI\_ISL\_587973|Original|hCoV-19^^England|Human|Lighthouse Lab in Alderley Park|Wellcome Sanger Institute for the COVID-19 Genomics UK (COG-UK) consortium|Davies|United Kingdom

>Spike|hCoV-19/USA/MI-MDHHS-SC20031/2020|2020-03-17|EPI\_ISL\_437118|Original|hCoV-19^^Michigan|Human|Michigan Department of Health and Human Services|Michigan Department of Health and Human Services|Blankenship|USA

>Spike|hCoV-19/Denmark/DCGC-15389/2020|2020-11-23|EPI\_ISL\_713799|Original|hCoV-19^^Sjaelland|Human|Department of Virus and Microbiological Special Diagnostics|Albertsen Lab|Michaelsen|Denmark

>Spike|hCoV-19/USA/TX-HMH-MCoV-18101/2020|2020-11-16|EPI\_ISL\_784449|Original|hCoV-19^^Texas|Human|Houston Methodist Hospital|Houston Methodist Hospital|Long|USA

>Spike|hCoV-19/India/MH-NIV-76773/2020|2020-06-23|EPI\_ISL\_541741|Original|hCoV-19^^Maharashtra|Human|National Institute of Virology|National Institute of Virology|Potdar|India

>Spike|hCoV-19/Bangladesh/BCSIR-NILMRC-219/2020|2020-06-24|EPI\_ISL\_483707|Original|hCoV-19^^Sylhet|Human|National Institute of Laboratory Medicine and Referral Center|Genomic Research Lab|Khan|Bangladesh

>Spike|hCoV-19/England/NORT-2948AD/2020|2020-03-27|EPI\_ISL\_490446|Original|hCoV-19^^England|Human|Northumbria University / South Tees Hospitals NHS Foundation Trust / North Cumbria Integrated Care NHS Foundation Trust / North Tees and Hartlepool NHS Foundation Trust / Newcastle Hospitals NHS Foundation Trust|COVID-19 Genomics UK (COG-UK) Consortium|Bashton|United Kingdom

>Spike|hCoV-19/USA/FL-BPHL-1547/2020|2020-09-03|EPI\_ISL\_568645|Original|hCoV-19^^Florida|Human|Florida Bureau of Public Health Laboratories|Florida Bureau of Public Health Laboratories|Blanton|USA

>Spike|hCoV-19/England/LOND-1261299/2020|2020-04-02|EPI\_ISL\_524636|Original|hCoV-19^^England|Human|North West London Pathology|Wellcome Sanger Institute for the COVID-19 Genomics UK (COG-UK) consortium|Davies|United Kingdom

>Spike|hCoV-19/SaudiArabia/KAUST-MAKKAH297/2020|2020-04-21|EPI\_ISL\_513219|Original|hCoV-19^^Makkah|Human|Pathogen Genomics Lab King Abdullah University of Science and Technology(KAUST)|Pathogen Genomics Lab King Abdullah University of Science and Technology(KAUST)|Mohamed Ghazzali|Saudi Arabia

>Spike|hCoV-19/USA/CA-CDC-5/2020|2020-01-29|EPI\_ISL\_408010|Original|hCoV-19^^California|Human|California Department of Health|Pathogen Discovery|Queen|USA

>Spike|hCoV-19/Oman/205040194/2020|2020-05-31|EPI\_ISL\_492012|Original|hCoV-19^^Muscat|Human|Oman-NIC|Department of Microbiology and Immunology-SQUH|AL Zadjali|Oman

>Spike|hCoV-19/Japan/IC-0165/2020|2020-09-00|EPI\_ISL\_667594|Original|hCoV-19^^Japan|Human|Pathogen Genomics Center|Pathogen Genomics Center|Sekizuka|Japan

>Spike|hCoV-19/England/CAMC-9DF4F6/2020|2020-09-20|EPI\_ISL\_637425|Original|hCoV-19^^England|Human|Department of Pathology|COVID-19 Genomics UK (COG-UK) Consortium|Goodfellow|United Kingdom

>Spike|hCoV-19/Spain/MD-ISCI-2014780/2020|2020-08-20|EPI\_ISL\_691722|Original|hCoV-19^^Madrid|Human|Hospital Cl\u00e9nico San Carlos|Instituto de Salud Carlos III|Caballero|Spain

>Spike|hCoV-19/USA/DE-DHSS-F1019092/2020|2020-10-28|EPI\_ISL\_708447|Original|hCoV-19^^Delaware|Human|Delaware Public Health Lab|Delaware Public Health Lab|Bajwa|USA

>Spike|hCoV-19/Wales/PHWC-264CC/2020|2020-03-28|EPI\_ISL\_422319|Original|hCoV-19^^Wales|Human|Wales Specialist Virology Centre|Public Health Wales Microbiology Cardiff|Moore|United Kingdom

>Spike|hCoV-19/Japan/PG-4365/2020|2020-07-00|EPI\_ISL\_692592|Original|hCoV-19^^Japan|Human|Pathogen Genomics Center|Pathogen Genomics Center|Sekizuka|Japan

>Spike|hCoV-19/New Zealand/20VR1851/2020|2020-03-27|EPI\_ISL\_579150|Original|hCoV-19^^Southern|Human|Southern Community Labs Dunedin|Institute of Environmental Science and Research (ESR)|Wang|New Zealand

>Spike|hCoV-19/USA/NM-NMDOH-2020327064/2020|2020-09-03|EPI\_ISL\_569644|Original|hCoV-19^^New Mexico|Human|New Mexico Department of Health Scientific Laboratory|New Mexico Department of Health Scientific Laboratory|Johnson|USA

>Spike|hCoV-19/England/SHEF-C6C20/2020|2020-04-09|EPI\_ISL\_441999|Original|hCoV-19^^England|Human|Virology Department|COVID-19 Genomics UK (COG-UK) Consortium|de Silva|United Kingdom

>Spike|hCoV-19/USA/TN-CDC-2-3693694/2020|2020-11-06|EPI\_ISL\_747061|Original|hCoV-19^^Tennessee|Human|Respiratory Viruses Branch|Respiratory Viruses Branch|Queen|USA

>Spike|hCoV-19/England/MILK-99509E/2020|2020-08-22|EPI\_ISL\_552258|Original|hCoV-19^^England|Human|Lighthouse Lab in Milton Keynes|Wellcome Sanger Institute for the COVID-19 Genomics UK (COG-UK) consortium|Davies|United Kingdom

>Spike|hCoV-19/Belgium/UGent-71/2020|2020-04-15|EPI\_ISL\_451182|Original|hCoV-19^^Ghent|Human|Lab voor klinische biologie|Onderzoeksgroep Virologie|Lambrechts|Belgium

>Spike|hCoV-19/Wales/PHWC-2A422/2020|2020-04-06|EPI\_ISL\_445567|Original|hCoV-19^^Wales|Human|Wales Specialist Virology Centre|Public Health Wales Microbiology Cardiff|Moore|United Kingdom

>Spike|hCoV-19/Australia/NSW2265/2020|2020-03-22|EPI\_ISL\_500700|Original|hCoV-19^^New South Wales|Human|Area of Virology|Area of Virology|Bull|Australia

>Spike|hCoV-19/England/ALDP-9FCFD4/2020|2020-10-01|EPI\_ISL\_587792|Original|hCoV-19^^England|Human|Lighthouse Lab in Alderley Park|Wellcome Sanger Institute for the COVID-19 Genomics UK (COG-UK) consortium|Davies|United Kingdom

>Spike|hCoV-19/England/CAMB-76937/2020|2020-03-30|EPI\_ISL\_438275|Original|hCoV-19^^England|Human|Department of Pathology|Wellcome Sanger Institute for the COVID-19 Genomics UK (COG-UK) consortium|Amato|United Kingdom

>Spike|hCoV-19/Russia/VGG-RII-MH3365S/2020|2020-10-07|EPI\_ISL\_733108|Original|hCoV-19^^Vologograd|Human|HELIX LLC|WHO National Influenza Centre Russian Federation|Komissarov|Russia

>Spike|hCoV-19/England/CAMC-A3F51E/2020|2020-10-06|EPI\_ISL\_609722|Original|hCoV-19^^England|Human|Lighthouse Lab in Cambridge|Wellcome Sanger Institute for the COVID-19 Genomics UK (COG-UK) consortium|Davies|United Kingdom

>Spike|hCoV-19/England/LOND-1263419/2020|2020-10-28|EPI\_ISL\_637999|Original|hCoV-19^^England|Human|University College London|COVID-19 Genomics UK (COG-UK) Consortium|Roy|United Kingdom

>Spike|hCoV-19/Denmark/DCGC-4175/2020|2020-09-14|EPI\_ISL\_621995|Original|hCoV-19^^Sjaelland|Human|Department of Virus and Microbiological Special Diagnostics|Albertsen lab|Michaelsen|Denmark

>Spike|hCoV-19/USA/UT-03911/2020|2020-04-13|EPI\_ISL\_450568|Original|hCoV-19^^Utah|Human|Utah Public Health Laboratory|Utah Public Health Laboratory|Young|USA

>Spike|hCoV-19/Ireland/MO-NVRL-20G46419/2020|2020-04-03|EPI\_ISL\_708514|Original|hCoV-19^^Mayo|Human|National Virus Reference Laboratory|Irish Coronavirus Sequencing Consortium - Teagasc Oakpark|Della Bartola|Ireland

>Spike|hCoV-19/USA/TX-HMH-3843/2020|2020-06-11|EPI\_ISL\_543246|Original|hCoV-19^^Texas|Human|Houston Methodist Hospital|Houston Methodist Hospital|Long|USA

>Spike|hCoV-19/New Zealand/20VR1109/2020|2020-03-03|EPI\_ISL\_456190|Original|hCoV-19^^Waikato|Human|Waikato Hospital|Institute of Environmental Science and Research (ESR)|de Ligt|New Zealand

>Spike|hCoV-19/Wales/MILK-A4780B/2020|2020-10-05|EPI\_ISL\_609227|Original|hCoV-19^^Wales|Human|Lighthouse Lab in Milton Keynes|Wellcome Sanger Institute for the COVID-19 Genomics UK (COG-UK) consortium|Davies|United Kingdom

>Spike|hCoV-19/Scotland/QEUH-96CD20/2020|2020-08-21|EPI\_ISL\_534629|Original|hCoV-19^^Scotland|Human|NHSGGC West of Scotland Specialist Virology Centre / MRC-University of Glasgow Centre for Virus Research|Wellcome Sanger Institute for the COVID-19 Genomics UK (COG-UK) consortium|Davies|United Kingdom

>Spike|hCoV-19/Wales/CAMC-BC0951/2020|2020-11-22|EPI\_ISL\_710828|Original|hCoV-19^^Wales|Human|Lighthouse Lab in Cambridge|Wellcome Sanger Institute for the COVID-19 Genomics UK (COG-UK) Consortium|Davies|United Kingdom

>Spike|hCoV-19/Australia/VIC12862/2020|2020-08-02|EPI\_ISL\_641245|Original|hCoV-19^^Victoria|Human|Microbiological Diagnostic Unit - Public Health Laboratory (MDU-PHL)|MDU-PHL|Schultz|Australia

>Spike|hCoV-19/Spain/MD-IBV-99007346/2020|2020-08-28|EPI\_ISL\_582830|Original|hCoV-19^^Madrid|Human|Hospital General Universitario Gregorio Mara\u00f1a|SeqCOVID-SPAIN consortium/IBV (CSIC)|Comas|Spain

>Spike|hCoV-19/USA/HI-H200441/2020|2020-10-07|EPI\_ISL\_752984|Original|hCoV-19^^Hawaii|Human|State Laboratories Division|State Laboratories Division|Sultana|USA

>Spike|hCoV-19/Wales/MILK-A23F1F/2020|2020-10-04|EPI\_ISL\_652104|Original|hCoV-19^^Wales|Human|Centre for Enzyme Innovation|COVID-19 Genomics UK (COG-UK) Consortium|Robson|United Kingdom

>Spike|hCoV-19/England/ALDP-C49816/2020|2020-12-12|EPI\_ISL\_718705|Original|hCoV-19^^England|Human|Lighthouse Lab in Alderley Park|Wellcome Sanger Institute for the COVID-19 Genomics UK (COG-UK) Consortium|Davies|United Kingdom

>Spike|hCoV-19/England/LEED-2AA33A/2020|2020-03-30|EPI\_ISL\_538915|Original|hCoV-19^^England|Human|Leeds Teaching Hospitals NHS Trust and Public Health England|Wellcome Sanger Institute for the COVID-19 Genomics UK (COG-UK) consortium|Davies|United Kingdom

>Spike|hCoV-19/USA/UT-UPHL-2009280/2020|2020-05-15|EPI\_ISL\_525261|Original|hCoV-19^^Utah|Human|Utah Public Health Laboratory|Utah Public Health Laboratory|Young|USA

>Spike|hCoV-19/France/PDL-SC657/2020|2020-04-25|EPI\_ISL\_649187|Original|hCoV-19^^Pays-de-la-Loire|Human|CHU Nantes|CNR Virus des Infections Respiratoires - France SUD|Bal|France

>Spike|hCoV-19/Singapore/884/2020|2020-08-31|EPI\_ISL\_536425|Original|hCoV-19^^Singapore|Human|National Public Health Laboratory|National Public Health Laboratory|Mak|Singapore

>Spike|hCoV-19/USA/MI-UM-10036767160/2020|2020-11-03|EPI\_ISL\_707825|Original|hCoV-19^^Michigan|Human|University of Michigan Clinical Microbiology Laboratory|Lauring Lab|Valesano|USA

>Spike|hCoV-19/Japan/PG-8791/2020|2020-08-00|EPI\_ISL\_686379|Original|hCoV-19^^Japan|Human|Pathogen Genomics Center|Pathogen Genomics Center|Sekizuka|Japan

>Spike|hCoV-19/Australia/VIC4778/2020|2020-07-18|EPI\_ISL\_519164|Original|hCoV-19^^Victoria|Human|Microbiological Diagnostic Unit - Public Health Laboratory (MDU-PHL)|MDU-PHL|Schultz|Australia

>Spike|hCoV-19/England/QEUEH-B43464/2020|2020-11-08|EPI\_ISL\_657114|Original|hCoV-19^^England|Human|Lighthouse Lab in Glasgow|Wellcome Sanger Institute for the COVID-19 Genomics UK (COG-UK) Consortium|Davies|United Kingdom

>Spike|hCoV-19/mink/Netherlands/NB-EMC-39-3/2020|2020-08-24|EPI\_ISL\_577784|Original|hCoV-19^^Limburg|Neovison vison|Dutch COVID-19 response team|Erasmus Medical Center|Oude Munnink|Netherlands

>Spike|hCoV-19/USA/TX-HMH-1478/2020|2020-04-13|EPI\_ISL\_542742|Original|hCoV-19^^Texas|Human|Houston Methodist Hospital|Houston Methodist Hospital|Long|USA

>Spike|hCoV-19/Panama/332298/2020|2020-03-20|EPI\_ISL\_496708|Original|hCoV-19^^Panama Center|Human|Gorgas Memorial Laboratory of Health Studies|Gorgas Memorial Laboratory of Health Studies|Martinez|Panama

>Spike|hCoV-19/England/MILK-B55915/2020|2020-11-05|EPI\_ISL\_657411|Original|hCoV-19^^England|Human|Lighthouse Lab in Milton Keynes|Wellcome Sanger Institute for the COVID-19 Genomics UK (COG-UK) Consortium|Davies|United Kingdom

>Spike|hCoV-19/England/MILK-9C7224/2020|2020-09-07|EPI\_ISL\_573290|Original|hCoV-19^^England|Human|Northumbria University / South Tees Hospitals NHS Foundation Trust / North Cumbria Integrated Care NHS Foundation Trust / North Tees and Hartlepool NHS Foundation Trust / Newcastle Hospitals NHS Foundation Trust|COVID-19 Genomics UK (COG-UK) Consortium|Bashton|United Kingdom

>Spike|hCoV-19/USA/CA-ALSR-2317/2020|2020-07-10|EPI\_ISL\_635427|Original|hCoV-19^^California|Human|San Diego County Public Health Laboratory|Andersen lab at Scripps Research|Gangavarapu|USA

>Spike|hCoV-19/England/CAMB-72D6C/2020|2020-03-23|EPI\_ISL\_440121|Original|hCoV-19^^England|Human|Department of Pathology|Wellcome Sanger Institute for the COVID-19 Genomics UK (COG-UK) consortium|Amato|United Kingdom

>Spike|hCoV-19/USA/WI-UW-318/2020|2020-04-19|EPI\_ISL\_436612|Original|hCoV-19^^Wisconsin|Human|University of Wisconsin-Madison AIDS Vaccine Research Laboratories|University of Wisconsin-Madison AIDS Vaccine Research Laboratories|Baczenas|USA

>Spike|hCoV-19/England/QEUH-A35EC2/2020|2020-10-04|EPI\_ISL\_706899|Original|hCoV-19^^England|Human|Oxford Viromics|COVID-19 Genomics UK (COG-UK) Consortium|Golubchik|United Kingdom

>Spike|hCoV-19/England/CAMB-83867/2020|2020-04-15|EPI\_ISL\_443391|Original|hCoV-19^^England|Human|Department of Pathology|Wellcome Sanger Institute for the COVID-19 Genomics UK (COG-UK) consortium|Amato|United Kingdom

>Spike|hCoV-19/India/GJ-GBRC-395b/2020|2020-07-06|EPI\_ISL\_524765|Original|hCoV-19^^Gujarat|Human|GMERS Medical College and Hospital|Gujarat Biotechnology Research Centre|Joshi|India

>Spike|hCoV-19/England/QEUH-9C8663/2020|2020-09-11|EPI\_ISL\_567090|Original|hCoV-19^^England|Human|Lighthouse Lab in Glasgow|Wellcome Sanger Institute for the COVID-19 Genomics UK (COG-UK) consortium|Davies|United Kingdom

>Spike|hCoV-19/England/QEUH-98FBD2/2020|2020-08-26|EPI\_ISL\_539914|Original|hCoV-19^^England|Human|Lighthouse Lab in Glasgow|Wellcome Sanger Institute for the COVID-19 Genomics UK (COG-UK) consortium|Davies|United Kingdom

>Spike|hCoV-19/England/CAMB-80E59/2020|2020-04-18|EPI\_ISL\_444435|Original|hCoV-19^^England|Human|Department of Pathology|COVID-19 Genomics UK (COG-UK) Consortium|Meredith|United Kingdom

>Spike|hCoV-19/Scotland/EDB6742/2020|2020-04-13|EPI\_ISL\_491649|Original|hCoV-19^^Scotland|Human|Virology Department|Wellcome Sanger Institute for the COVID-19 Genomics UK (COG-UK) consortium|Davies|United Kingdom

>Spike|hCoV-19/Scotland/QEUH-9DD188/2020|2020-09-22|EPI\_ISL\_599701|Original|hCoV-19^^Scotland|Human|Lighthouse Lab in Glasgow|Wellcome Sanger Institute for the COVID-19 Genomics UK (COG-UK) consortium|Davies|United Kingdom

>Spike|hCoV-19/USA/WI-UW-1480/2020|2020-09-10|EPI\_ISL\_541612|Original|hCoV-19^^Wisconsin|Human|University of Wisconsin-Madison AIDS Vaccine Research Laboratories|University of Wisconsin-Madison AIDS Vaccine Research Laboratories|Baczenas|USA

>Spike|hCoV-19/USA/NY-Wadsworth-234464-01/2020|2020-10-02|EPI\_ISL\_734314|Original|hCoV-19^^New York|Human|Wadsworth Center|Wadsworth Center|Lasek-Nesselquist|USA

>Spike|hCoV-19/France/NAQ-SC300/2020|2020-04-28|EPI\_ISL\_666719|Original|hCoV-19^^Nouvelle-Aquitaine|Human|CHU de Limoges|CNR Virus des Infections Respiratoires - France SUD|Bal|France

>Spike|hCoV-19/New Zealand/20CV0190/2020|2020-08-28|EPI\_ISL\_548056|Original|hCoV-19^^Auckland|Human|Middlemore Hospital|Institute of Environmental Science and Research (ESR)|Wang|New Zealand

>Spike|hCoV-19/England/MILK-C2F676/2020|2020-12-07|EPI\_ISL\_782837|Original|hCoV-19^^England|Human|Lighthouse Lab in Milton Keynes|Wellcome Sanger Institute for the COVID-19 Genomics UK (COG-UK) Consortium|Davies|United Kingdom

>Spike|hCoV-19/England/ALDP-C480F1/2020|2020-12-12|EPI\_ISL\_718888|Original|hCoV-19^^England|Human|Lighthouse Lab in Alderley Park|Wellcome Sanger Institute for the COVID-19 Genomics UK (COG-UK) Consortium|Davies|United Kingdom

>Spike|hCoV-19/South Korea/KDCA0009/2020|2020-09-08|EPI\_ISL\_747250|Original|hCoV-19^^South Korea|Human|Division of Emerging Infectious Diseases|Division of Emerging Infectious Diseases|Park|South Korea

>Spike|hCoV-19/England/MILK-9C4A4D/2020|2020-09-10|EPI\_ISL\_572716|Original|hCoV-19^^England|Human|Centre for Enzyme Innovation|COVID-19 Genomics UK (COG-UK) Consortium|Robson|United Kingdom

>Spike|hCoV-19/USA/CA-LACPHL-AF00028/2020|2020-12-20|EPI\_ISL\_754111|Original|hCoV-19^^California|Human|UCLA Clinical Micro Lab|Los Angeles County PHL|Hemarajata|USA

>Spike|hCoV-19/England/LIVE-A4709/2020|2020-03-13|EPI\_ISL\_500034|Original|hCoV-19^^England|Human|Liverpool Clinical Laboratories|COVID-19 Genomics UK (COG-UK) Consortium|Haldenby|United Kingdom

>Spike|hCoV-19/USA/WA-CDC-8378/2020|2020-03-03|EPI\_ISL\_594451|original|hCoV-19^^Washington|Human|Washington State Public Health Laboratories|Pathogen Discovery|Queen|USA

>Spike|hCoV-19/Northern Ireland/NIRE-FA9C2/2020|2020-04-06|EPI\_ISL\_441747|Original|hCoV-19^^Northern Ireland|Human|Regional Virus Laboratory|Wellcome Sanger Institute for the COVID-19 Genomics UK (COG-UK) consortium|Amato|United Kingdom

>Spike|hCoV-19/USA/MI-MDHHS-SC20802/2020|2020-05-19|EPI\_ISL\_471823|Original|hCoV-19^^Michigan|Human|Michigan Department of Health and Human Services|Michigan Department of Health and Human Services|Blankenship|USA

>Spike|hCoV-19/England/QEUA-A20343/2020|2020-10-01|EPI\_ISL\_587710|Original|hCoV-19^^England|Human|Lighthouse Lab in Glasgow|Wellcome Sanger Institute for the COVID-19 Genomics UK (COG-UK) consortium|Davies|United Kingdom

>Spike|hCoV-19/USA/CT-CDC-2-3713964/2020|2020-11-15|EPI\_ISL\_751759|Original|hCoV-19^^Connecticut|Human|CT-Dr. Katherine A. Kelley State Public Health Lab|Genomics and Discovery|Queen|USA

>Spike|hCoV-19/USA/CO-CDPHE-2009164036/2020|2020-09-16|EPI\_ISL\_677654|Original|hCoV-19^^Colorado|Human|Colorado Department of Public Health and Environment|Colorado Department of Public Health and Environment|Bankers|USA

>Spike|hCoV-19/England/ALDP-A6E868/2020|2020-10-15|EPI\_ISL\_607970|Original|hCoV-19^^England|Human|Lighthouse Lab in Alderley Park|Wellcome Sanger Institute for the COVID-19 Genomics UK (COG-UK) consortium|Davies|United Kingdom

>Spike|hCoV-19/Austria/CeMM0294/2020|2020-03-27|EPI\_ISL\_438117|Original|hCoV-19^^Vienna|Human|Center for Virology|Bergthaler laboratory|Bergthaler|Austria

>Spike|hCoV-19/England/MILK-A44D1E/2020|2020-10-06|EPI\_ISL\_598782|Original|hCoV-19^^England|Human|Lighthouse Lab in Milton Keynes|Wellcome Sanger Institute for the COVID-19 Genomics UK (COG-UK) consortium|Davies|United Kingdom

>Spike|hCoV-19/England/CAMC-AEAF9C/2020|2020-10-25|EPI\_ISL\_633300|Original|hCoV-19^^England|Human|Lighthouse Lab in Cambridge|Wellcome Sanger Institute for the COVID-19 Genomics UK (COG-UK) consortium|Davies|United Kingdom

>Spike|hCoV-19/Belgium/reg-0411452/2020|2020-04-11|EPI\_ISL\_476962|Original|hCoV-19^^Schepensehevel-Zchem|Human|KU Leuven|KU Leuven|Maes|Belgium

>Spike|hCoV-19/USA/MI-MDHHS-SC20501/2020|2020-05-11|EPI\_ISL\_460039|Original|hCoV-19^^Michigan|Human|Michigan Department of Health and Human Services|Michigan Department of Health and Human Services|Blankenship|USA

>Spike|hCoV-19/Australia/NSW2233/2020|2020-03-21|EPI\_ISL\_509512|Original|hCoV-19^^New South Wales|Human|Area of Virology|Area of Virology|Yeang|Australia

>Spike|hCoV-19/Wales/PHWC-487AF0/2020|2020-10-31|EPI\_ISL\_639273|Original|hCoV-19^^Wales|Human|Wales Specialist Virology Centre Sequencing lab|COVID-19 Genomics UK (COG-UK) Consortium|Moore|United Kingdom

>Spike|hCoV-19/USA/UT-UPHL-201131911/2020|2020-09-23|EPI\_ISL\_628934|Original|hCoV-19^^Utah|Human|Utah Public Health Laboratory|Utah Public Health Laboratory|Young|USA

>Spike|hCoV-19/Denmark/ALAB-HH61/2020|2020-03-17|EPI\_ISL\_429307|Original|hCoV-19^^Denmark|Human|Department of Clinical Microbiology|Albertsen lab|Kirkegaard|Denmark

>Spike|hCoV-19/USA/CA-ALSR-2947/2020|2020-07-12|EPI\_ISL\_635745|Original|hCoV-19^^California|Human|San Diego County Public Health Laboratory|Andersen lab at Scripps Research|Gangavarapu|USA

>Spike|hCoV-19/Thailand/Siriraj\_5/2020|2020-00-00|EPI\_ISL\_447908|unknown|hCoV-19^^Bangkok|Human|Siriraj hospital|National Institute of Health. Department of medical Sciences|Okada|Thailand

>Spike|hCoV-19/Denmark/DCGC-21721/2020|2020-12-21|EPI\_ISL\_757916|Original|hCoV-19^^Syddanmark|Human|Department of Virus and Microbiological Special Diagnostics|Albertsen Lab|Michaelsen|Denmark

>Spike|hCoV-19/USA/TX-HMH-2934/2020|2020-06-09|EPI\_ISL\_543873|Original|hCoV-19^^Texas|Human|Houston Methodist Hospital|Houston Methodist Hospital|Long|USA

>Spike|hCoV-19/Belgium/reg-0414490/2020|2020-04-14|EPI\_ISL\_734573|Original|hCoV-19^^Tubize|Human|UZ Leuven|KU Leuven|Maes|Belgium

>Spike|hCoV-19/England/QEUEH-B435BC/2020|2020-11-08|EPI\_ISL\_657196|Original|hCoV-19^^England|Human|Lighthouse Lab in Glasgow|Wellcome Sanger Institute for the COVID-19 Genomics UK (COG-UK) Consortium|Davies|United Kingdom

>Spike|hCoV-19/England/SHEF-10D58AF/2020|2020-12-20|EPI\_ISL\_764227|Original|hCoV-19^^England|Human|Virology Department|COVID-19 Genomics UK (COG-UK) Consortium|de Silva|United Kingdom

>Spike|hCoV-19/Denmark/DCGC-15132/2020|2020-11-23|EPI\_ISL\_713648|Original|hCoV-19^^Midtjylland|Human|Department of Virus and Microbiological Special Diagnostics|Albertsen Lab|Michaelsen|Denmark

>Spike|hCoV-19/USA/NY-Wadsworth-251969-01/2020|2020-10-22|EPI\_ISL\_734396|Original|hCoV-19^^New York|Human|Wadsworth Center|Wadsworth Center|Lasèk-Nesselquist|USA

>Spike|hCoV-19/USA/MA-MASPHL-00960/2020|2020-10-31|EPI\_ISL\_692811|Original|hCoV-19^^Massachusetts|Human|Massachusetts State Public Health Laboratory|Massachusetts State Public Health Laboratory|Lang|USA

>Spike|hCoV-19/England/CAMB-1B3B73/2020|2020-05-27|EPI\_ISL\_461580|Original|hCoV-19^^England|Human|Department of Pathology|COVID-19 Genomics UK (COG-UK) Consortium|Meredith|United Kingdom

>Spike|hCoV-19/England/ALDP-951368/2020|2020-06-13|EPI\_ISL\_554129|Original|hCoV-19^^England|Human|Lighthouse Lab in Alderley Park|Wellcome Sanger Institute for the COVID-19 Genomics UK (COG-UK) consortium|Davies|United Kingdom

>Spike|hCoV-19/England/ALDP-A6F18A/2020|2020-10-15|EPI\_ISL\_606971|Original|hCoV-19^^England|Human|Lighthouse Lab in Alderley Park|Wellcome Sanger Institute for the COVID-19 Genomics UK (COG-UK) consortium|Davies|United Kingdom

>Spike|hCoV-19/Scotland/CVR5070/2020|2020-10-12|EPI\_ISL\_594803|Original|hCoV-19^^Scotland|Human|West of Scotland Specialist Virology Centre|COVID-19 Genomics UK (COG-UK) Consortium|Robertson|United Kingdom

>Spike|hCoV-19/Sweden/20-52650/2020|2020-08-10|EPI\_ISL\_548258|Original|hCoV-19^^Stockholm|Human|Karolinska universitetslaboratoriet|The Public Health Agency of Sweden|Svartstr\u00f6m|Sweden

>Spike|hCoV-19/USA/TX-HMH-1392/2020|2020-04-21|EPI\_ISL\_542693|Original|hCoV-19^^Texas|Human|Houston Methodist Hospital|Houston Methodist Hospital|Long|USA

>Spike|hCoV-19/England/CAMB-7D0E0/2020|2020-04-06|EPI\_ISL\_441549|Original|hCoV-19^^England|Human|Department of Pathology|Wellcome Sanger Institute for the COVID-19 Genomics UK (COG-UK) consortium|Amato|United Kingdom

>Spike|hCoV-19/USA/FL-QDX-225/2020|2020-04-16|EPI\_ISL\_498706|Original|hCoV-19^^Florida|Human|Quest Diagnostics|Quest Diagnostics|Kagan|USA

>Spike|hCoV-19/Denmark/DCGC-17847/2020|2020-12-14|EPI\_ISL\_749484|Original|hCoV-19^^Syddanmark|Human|Department of Virus and Microbiological Special Diagnostics|Albertsen Lab|Michaelsen|Denmark

>Spike|hCoV-19/Denmark/DCGC-10615/2020|2020-11-02|EPI\_ISL\_669474|Original|hCoV-19^^Hovedstaden|Human|Department of Virus and Microbiological Special Diagnostics|Albertsen Lab|Michaelsen|Denmark

>Spike|hCoV-19/USA/NV-NSPHL-A0089/2020|2020-04-13|EPI\_ISL\_515366|Original|hCoV-19^^Nevada|Human|Nevada State Public Health Laboratory|Nevada State Public Health Laboratory|Sevinsky|USA

>Spike|hCoV-19/England/QEUEH-B693E3/2020|2020-11-11|EPI\_ISL\_661456|Original|hCoV-19^^England|Human|Lighthouse Lab in Glasgow|Wellcome Sanger Institute for the COVID-19 Genomics UK (COG-UK) Consortium|Davies|United Kingdom

>Spike|hCoV-19/Norway/3592/2020|2020-08-02|EPI\_ISL\_590941|Original|hCoV-19^^Norway|Human|University Hospital of Northern Norway|Norwegian Institute of Public Health|Vollan|Norway

>Spike|hCoV-19/USA/CA-QDX-1527/2020|2020-03-18|EPI\_ISL\_603780|Original|hCoV-19^^California|Human|Quest Diagnostics|Quest Diagnostics|Kagan|USA

>Spike|hCoV-19/Scotland/EDB5441/2020|2020-04-12|EPI\_ISL\_473821|Original|hCoV-19^^Scotland|Human|Virology Department|COVID-19 Genomics UK (COG-UK) Consortium|Williams|United Kingdom

>Spike|hCoV-19/England/205091056/2020|2020-12-11|EPI\_ISL\_766298|Original|hCoV-19^^England|Human|Respiratory Virus Unit|COVID-19 Genomics UK (COG-UK) Consortium|Platt|United Kingdom

>Spike|hCoV-19/USA/CA-CZB-15291/2020|2020-11-20|EPI\_ISL\_739117|Original|hCoV-19^^California|Human|Santa Clara County Public Health Laboratory|Chan-Zuckerberg Biohub|Kamm|USA

>Spike|hCoV-19/USA/TX-DSHS-0708/2020|2020-09-08|EPI\_ISL\_576351|Original|hCoV-19^^Texas|Human|Texas Department of State Health Services|Texas Department of State Health Services|Rahman|USA

>Spike|hCoV-19/England/QEUA-A8B7D1/2020|2020-10-16|EPI\_ISL\_643278|Original|hCoV-19^^England|Human|Lighthouse Lab in Glasgow|Wellcome Sanger Institute for the COVID-19 Genomics UK (COG-UK) Consortium|Davies|United Kingdom

>Spike|hCoV-19/England/ALDP-B62F5F/2020|2020-11-08|EPI\_ISL\_655274|Original|hCoV-19^^England|Human|Lighthouse Lab in Alderley Park|Wellcome Sanger Institute for the COVID-19 Genomics UK (COG-UK) Consortium|Davies|United Kingdom

>Spike|hCoV-19/USA/UT-QDX-2628/2020|2020-03-13|EPI\_ISL\_604973|Original|hCoV-19^^Utah|Human|Quest Diagnostics|Quest Diagnostics|Kagan|USA

>Spike|hCoV-19/England/CAMC-B22401/2020|2020-11-02|EPI\_ISL\_646135|Original|hCoV-19^^England|Human|Lighthouse Lab in Cambridge|Wellcome Sanger Institute for the COVID-19 Genomics UK (COG-UK) Consortium|Davies|United Kingdom

>Spike|hCoV-19/Norway/5039/2020|2020-10-30|EPI\_ISL\_775461|Original|hCoV-19^^Oslo|Human|Norwegian Institute of Public Health|Norwegian Institute of Public Health|Vollan|Norway

>Spike|hCoV-19/Australia/VIC7777/2020|2020-08-02|EPI\_ISL\_564649|Original|hCoV-19^^Victoria|Human|Microbiological Diagnostic Unit - Public Health Laboratory (MDU-PHL)|MDU-PHL|Schultz|Australia

>Spike|hCoV-19/USA/TX-HMH-7672/2020|2020-06-26|EPI\_ISL\_546930|Original|hCoV-19^^Texas|Human|Houston Methodist Hospital|Houston Methodist Hospital|Long|USA

>Spike|hCoV-19/Germany/HH-hpi-pl543/2020|2020-03-15|EPI\_ISL\_776034|Original|hCoV-19^^Hamburg|Human|University Medical Center Hamburg Eppendorf|Heinrich Pette Institute|Robitaille|Germany

>Spike|hCoV-19/Netherlands/ZH-EMC-1218/2020|2020-12-17|EPI\_ISL\_763288|Original|hCoV-19^^Zuid Holland|Human|Dutch COVID-19 response team|Erasmus Medical Center|Oude Munnink|Netherlands

>Spike|hCoV-19/England/QEUA-BA2D2C/2020|2020-11-18|EPI\_ISL\_720992|Original|hCoV-19^^England|Human|Lighthouse Lab in Glasgow|Wellcome Sanger Institute for the COVID-19 Genomics UK (COG-UK) Consortium|Davies|United Kingdom

>Spike|hCoV-19/Belgium/ULG-10729/2020|2020-09-15|EPI\_ISL\_641571|Original|hCoV-19^^Li\u00e8ge|Human|Department of Clinical Microbiology|GIGA Medical Genomics|Durkin|Belgium

>Spike|hCoV-19/USA/CO-CDPHE-2100010222/2020|2020-11-19|EPI\_ISL\_771295|Original|hCoV-19^^Colorado|Human|Colorado Department of Public Health and Environment|Colorado Department of Public Health and Environment|Bankers|USA

>Spike|hCoV-19/Northern Ireland/NIRE-FB105/2020|2020-04-07|EPI\_ISL\_470026|Original|hCoV-19^^Northern Ireland|Human|Regional Virus Laboratory|Wellcome Sanger Institute for the COVID-19 Genomics UK (COG-UK) consortium|Davies|United Kingdom

>Spike|hCoV-19/Canada/ON-S1555/2020|2020-09-04|EPI\_ISL\_755914|Original|hCoV-19^^Ontario|Human|Toronto Invasive Bacterial Diseases Network|McMaster University|McArthur|Canada

>Spike|hCoV-19/USA/UT-QDX-2004/2020|2020-03-15|EPI\_ISL\_604379|Original|hCoV-19^^Utah|Human|Quest Diagnostics|Quest Diagnostics|Kagan|USA

>Spike|hCoV-19/Australia/SAP061/2020|2020-03-28|EPI\_ISL\_451100|Original|hCoV-19^^South Australia|Human|SA Pathology|SA Pathology|Leong|Australia

>Spike|hCoV-19/USA/TX-HMH-MCoV-12509/2020|2020-09-30|EPI\_ISL\_790373|Original|hCoV-19^^Texas|Human|Houston Methodist Hospital|Houston Methodist Hospital|Long|USA

>Spike|hCoV-19/England/QEUA-AD59D2/2020|2020-10-25|EPI\_ISL\_633756|Original|hCoV-19^^England|Human|Lighthouse Lab in Glasgow|Wellcome Sanger Institute for the COVID-19 Genomics UK (COG-UK) consortium|Davies|United Kingdom

>Spike|hCoV-19/England/QEUA-B9E79E/2020|2020-11-18|EPI\_ISL\_719967|Original|hCoV-19^^England|Human|Lighthouse Lab in Glasgow|Wellcome Sanger Institute for the COVID-19 Genomics UK (COG-UK) Consortium|Davies|United Kingdom



>Spike|hCoV-19/Scotland/EDB8774/2020|2020-10-26|EPI\_ISL\_651994|Original|hCoV-19^^Scotland|Human|Virology Department|COVID-19 Genomics UK (COG-UK) Consortium|McHugh|United Kingdom

>Spike|hCoV-19/Belgium/reg-0411899/2020|2020-04-11|EPI\_ISL\_734566|Original|hCoV-19^^Perwez|Human|UZ Leuven|KU Leuven|Maes|Belgium

>Spike|hCoV-19/Wales/PHWC-48DA45/2020|2020-11-01|EPI\_ISL\_680716|Original|hCoV-19^^Wales|Human|Wales Specialist Virology Centre Sequencing lab|COVID-19 Genomics UK (COG-UK) Consortium|Moore|United Kingdom

>Spike|hCoV-19/England/ALDP-91D80F/2020|2020-06-23|EPI\_ISL\_556635|Original|hCoV-19^^England|Human|Lighthouse Lab in Alderley Park|Wellcome Sanger Institute for the COVID-19 Genomics UK (COG-UK) consortium|Davies|United Kingdom

>Spike|hCoV-19/England/CAMC-9C1846/2020|2020-09-10|EPI\_ISL\_573207|Original|hCoV-19^^England|Human|Oxford Viromics|COVID-19 Genomics UK (COG-UK) Consortium|Golubchik|United Kingdom

>Spike|hCoV-19/England/CAMC-B32987/2020|2020-11-05|EPI\_ISL\_659559|Original|hCoV-19^^England|Human|Lighthouse Lab in Cambridge|Wellcome Sanger Institute for the COVID-19 Genomics UK (COG-UK) Consortium|Davies|United Kingdom

>Spike|hCoV-19/England/MILK-AB86A1/2020|2020-10-21|EPI\_ISL\_623259|Original|hCoV-19^^England|Human|Lighthouse Lab in Milton Keynes|Wellcome Sanger Institute for the COVID-19 Genomics UK (COG-UK) Consortium|Davies|United Kingdom

>Spike|hCoV-19/England/LIVE-9EF37/2020|2020-04-09|EPI\_ISL\_453412|Original|hCoV-19^^England|Human|Liverpool Clinical Laboratories|COVID-19 Genomics UK (COG-UK) Consortium|Haldenby|United Kingdom

>Spike|hCoV-19/USA/TX-HMH060/2020|2020-03-18|EPI\_ISL\_434769|Original|hCoV-19^^Texas|Human|Houston Methodist Hospital|Houston Methodist Hospital|Long|USA

>Spike|hCoV-19/Canada/ON-PHL-20-01311/2020|2020-06-00|EPI\_ISL\_548914|Original|hCoV-19^^Ontario|Human|Public Health Ontario Laboratory|Public Health Ontario Laboratory|Guthrie|Canada

>Spike|hCoV-19/Australia/VIC4829/2020|2020-07-16|EPI\_ISL\_519213|Original|hCoV-19^^Victoria|Human|Microbiological Diagnostic Unit - Public Health Laboratory (MDU-PHL) |MDU-PHL|Schultz|Australia

>Spike|hCoV-19/Scotland/CVR2929/2020|2020-04-21|EPI\_ISL\_461595|Original|hCoV-19^^Scotland|Human|West of Scotland Specialist Virology Centre|COVID-19 Genomics UK (COG-UK) Consortium|Robertson|United Kingdom

>Spike|hCoV-19/USA/NM-DOH-2020643067/2020|2020-12-27|EPI\_ISL\_767082|Original|hCoV-19^^New Mexico|Human|New Mexico Department of Health Scientific Laboratory|New Mexico Department of Health Scientific Laboratory|Malone|USA

>Spike|hCoV-19/USA/MI-QDX-2146/2020|2020-03-16|EPI\_ISL\_604467|Original|hCoV-19^^Michigan|Human|Quest Diagnostics|Quest Diagnostics|Kagan|USA

>Spike|hCoV-19/Wales/PHWC-1635B0/2020|2020-05-11|EPI\_ISL\_473967|Original|hCoV-19^^Wales|Human|Originating lab|COVID-19 Genomics UK (COG-UK) Consortium|Moore|United Kingdom

>Spike|hCoV-19/Jordan/AM-ALSR-5153/2020|2020-10-16|EPI\_ISL\_730392|Original|hCoV-19^^Amman|Human|Biolab Diagnostic Laboratories|Andersen lab at Scripps Research|Gangavarapu|Jordan

>Spike|hCoV-19/England/CAMB-1BB258/2020|2020-11-13|EPI\_ISL\_665004|Original|hCoV-19^^England|Human|Department of Pathology|COVID-19 Genomics UK (COG-UK) Consortium|Goodfellow|United Kingdom

>Spike|hCoV-19/Denmark/DCGC-17885/2020|2020-12-14|EPI\_ISL\_749622|Original|hCoV-19^^Hovedstaden|Human|Department of Virus and Microbiological Special Diagnostics|Albertsen Lab|Michaelsen|Denmark

>Spike|hCoV-19/South Korea/KDCA0439/2020|2020-11-12|EPI\_ISL\_760223|Original|hCoV-19^^South Korea|Human|Division of Emerging Infectious Diseases|Division of Emerging Infectious Diseases|Park|South Korea

>Spike|hCoV-19/England/ALDP-C3B7B0/2020|2020-12-11|EPI\_ISL\_731073|Original|hCoV-19^^England|Human|Lighthouse Lab in Alderley Park|Wellcome Sanger Institute for the COVID-19 Genomics UK (COG-UK) Consortium|Davies|United Kingdom

>Spike|hCoV-19/Australia/VIC14040/2020|2020-09-16|EPI\_ISL\_563941|Original|hCoV-19^^Victoria|Human|Microbiological Diagnostic Unit - Public Health Laboratory (MDU-PHL) |MDU-PHL|Schultz|Australia

>Spike|hCoV-19/England/LIVE-A587E/2020|2020-03-20|EPI\_ISL\_499641|Original|hCoV-19^^England|Human|Liverpool Clinical Laboratories|COVID-19 Genomics UK (COG-UK) Consortium|Haldenby|United Kingdom

>Spike|hCoV-19/Wales/PHWC-482CC2/2020|2020-10-21|EPI\_ISL\_611666|Original|hCoV-19^^Wales|Human|Wales Specialist Virology Centre Sequencing lab|COVID-19 Genomics UK (COG-UK) Consortium|Moore|United Kingdom

>Spike|hCoV-19/England/ALDP-9D926B/2020|2020-09-18|EPI\_ISL\_576712|Original|hCoV-19^^England|Human|Oxford Viromics|COVID-19 Genomics UK (COG-UK) Consortium|Golubchik|United Kingdom

>Spike|hCoV-19/England/SHEF-10D7B77/2020|2020-12-20|EPI\_ISL\_742108|Original|hCoV-19^^England|Human|Virology Department|COVID-19 Genomics UK (COG-UK) Consortium|de Silva|United Kingdom

>Spike|hCoV-19/Wales/PHWC-36D19/2020|2020-05-03|EPI\_ISL\_474794|Original|hCoV-19^^Wales|Human|Originating lab|COVID-19 Genomics UK (COG-UK) Consortium|Moore|United Kingdom

>Spike|hCoV-19/England/ALDP-A5275B/2020|2020-10-07|EPI\_ISL\_598172|Original|hCoV-19^^England|Human|Lighthouse Lab in Alderley Park|Wellcome Sanger Institute for the COVID-19 Genomics UK (COG-UK) consortium|Davies|United Kingdom

>Spike|hCoV-19/England/20130055602/2020|2020-03-20|EPI\_ISL\_420634|Original|hCoV-19^^England|Human|Respiratory Virus Unit|Respiratory Virus Unit|Platt|United Kingdom

>Spike|hCoV-19/USA/NY-NYUMC834/2020|2020-04-25|EPI\_ISL\_456107|Original|hCoV-19^^New York|Human|NYU Langone Health|Departments of Pathology and Medicine|Maurano|USA

>Spike|hCoV-19/USA/LA-GBCL-26684466/2020|2020-04-11|EPI\_ISL\_485286|Original|hCoV-19^^Louisiana|Human|River Road Testing Lab|Ginkgo Bioworks Clinical Laboratory|Smith|USA

>Spike|hCoV-19/USA/MD-MDH-0435/2020|2020-11-10|EPI\_ISL\_666803|Original|hCoV-19^^Maryland|Human|Maryland Public Health Laboratory|Maryland Public Health Laboratory|Keller|USA

>Spike|hCoV-19/Wales/ALDP-94E6B0/2020|2020-06-16|EPI\_ISL\_555438|Original|hCoV-19^^Wales|Human|Lighthouse Lab in Alderley Park|Wellcome Sanger Institute for the COVID-19 Genomics UK (COG-UK) consortium|Davies|United Kingdom

>Spike|hCoV-19/Belgium/ULG-11020/2020|2020-11-28|EPI\_ISL\_722938|Original|hCoV-19^^Liege|Human|Department of Clinical Microbiology|GIGA Medical Genomics|Durkin|Belgium

>Spike|hCoV-19/England/ALDP-923B3A/2020|2020-06-23|EPI\_ISL\_551429|Original|hCoV-19^^England|Human|Lighthouse Lab in Alderley Park|Wellcome Sanger Institute for the COVID-19 Genomics UK (COG-UK) consortium|Davies|United Kingdom

>Spike|hCoV-19/Wales/PHWC-30AAF/2020|2020-04-10|EPI\_ISL\_446316|Original|hCoV-19^^Wales|Human|Wales Specialist Virology Centre|Public Health Wales Microbiology Cardiff|Moore|United Kingdom

>Spike|hCoV-19/USA/MI-MDHHS-SC20715/2020|2020-04-14|EPI\_ISL\_471739|Original|hCoV-19^^Michigan|Human|Michigan Department of Health and Human Services|Michigan Department of Health and Human Services|Blankenship|USA

>Spike|hCoV-19/England/LIVE-A7F1D/2020|2020-03-26|EPI\_ISL\_517091|Original|hCoV-19^^England|Human|Liverpool Clinical Laboratories|COVID-19 Genomics UK (COG-UK) Consortium|Haldenby|United Kingdom

>Spike|hCoV-19/Spain/MD-ISCI-201276/2020|2020-03-06|EPI\_ISL\_462478|Original|hCoV-19^^Madrid|Human|Fundaci\u00f3n Jim\u00e9nez D\u00e9daz|Instituto de Salud Carlos III|Caballero|Spain

>Spike|hCoV-19/England/CAMC-A58D26/2020|2020-10-08|EPI\_ISL\_597011|Original|hCoV-19^^England|Human|Lighthouse Lab in Cambridge|Wellcome Sanger Institute for the COVID-19 Genomics UK (COG-UK) consortium|Davies|United Kingdom

>Spike|hCoV-19/Iceland/17/2020|2020-03-02|EPI\_ISL\_417811|Original|hCoV-19^^Reykjavik|Human|The National University Hospital of Iceland|deCODE genetics|J\u00f3nsson|Iceland

>Spike|hCoV-19/Germany/HH-hpi-p2404/2020|2020-04-23|EPI\_ISL\_776477|Original|hCoV-19^^Hamburg|Human|University Medical Center Hamburg Eppendorf|Heinrich Pette Institute|Robitaille|Germany

>Spike|hCoV-19/England/QEUA-B0F30D/2020|2020-11-02|EPI\_ISL\_642131|Original|hCoV-19^^England|Human|Lighthouse Lab in Glasgow|Wellcome Sanger Institute for the COVID-19 Genomics UK (COG-UK) Consortium|Davies|United Kingdom

>Spike|hCoV-19/England/MILK-AB8744/2020|2020-10-21|EPI\_ISL\_623552|Original|hCoV-19^^England|Human|Lighthouse Lab in Milton Keynes|Wellcome Sanger Institute for the COVID-19 Genomics UK (COG-UK) consortium|Davies|United Kingdom

>Spike|hCoV-19/Gambia/GC19-1572/2020|2020-05-20|EPI\_ISL\_561014|Original|hCoV-19^^Kombo|Human|MRCG at LSHTM Genomics lab|MRCG at LSHTM Genomics lab|Sesay|Gambia

>Spike|hCoV-19/Wales/PHWC-494EF4/2020|2020-11-22|EPI\_ISL\_726270|Original|hCoV-19^^Wales|Human|Originating lab|COVID-19 Genomics UK (COG-UK) Consortium|Moore|United Kingdom

>Spike|hCoV-19/England/QEUA-95F32E/2020|2020-08-06|EPI\_ISL\_532315|Original|hCoV-19^^England|Human|Lighthouse Lab in Glasgow|Wellcome Sanger Institute for the COVID-19 Genomics UK (COG-UK) consortium|Davies|United Kingdom

>Spike|hCoV-19/USA/NY-NYUMC366/2020|2020-04-09|EPI\_ISL\_430393|Original|hCoV-19^^New York|Human|NYU Langone Health|Departments of Pathology and Medicine|Maurano|USA

>Spike|hCoV-19/India/WB-S65/2020|2020-05-24|EPI\_ISL\_508455|Original|hCoV-19^^West Bengal|Human|ICMR-National Institute of Cholera and Enteric Diseases|National Institute of Biomedical Genomics|Maitra|India

>Spike|hCoV-19/England/20100000204/2020|2020-03-01|EPI\_ISL\_464233|Original|hCoV-19^^England|Human|Respiratory Virus Unit|Respiratory Virus Unit|Platt|United Kingdom

>Spike|hCoV-19/Wales/PHWC-4A6888/2020|2020-12-17|EPI\_ISL\_765080|Original|hCoV-19^^Wales|Human|Wales Specialist Virology Centre Sequencing lab|COVID-19 Genomics UK (COG-UK) Consortium|Moore|United Kingdom

>Spike|hCoV-19/Wales/PHWC-2A70B/2020|2020-04-05|EPI\_ISL\_445610|Original|hCoV-19^^Wales|Human|Wales Specialist Virology Centre|Public Health Wales Microbiology Cardiff|Moore|United Kingdom

>Spike|hCoV-19/England/QEUA-9B7A5C/2020|2020-09-04|EPI\_ISL\_590506|Original|hCoV-19^^England|Human|Lighthouse Lab in Glasgow|Wellcome Sanger Institute for the COVID-19 Genomics UK (COG-UK) consortium|Davies|United Kingdom

>Spike|hCoV-19/England/ALDP-B45D2B/2020|2020-11-07|EPI\_ISL\_656331|Original|hCoV-19^^England|Human|Lighthouse Lab in Alderley Park|Wellcome Sanger Institute for the COVID-19 Genomics UK (COG-UK) Consortium|Davies|United Kingdom

>Spike|hCoV-19/USA/CA-CZB-2041/2020|2020-05-15|EPI\_ISL\_486285|Original|hCoV-19^^California|Human|Humboldt County Public Health Laboratory|Chan-Zuckerberg Biohub|McGeever|USA

>Spike|hCoV-19/Scotland/GCVR-172B9E/2020|2020-04-05|EPI\_ISL\_459137|Original|hCoV-19^^Scotland|Human|NHSGGC West of Scotland Specialist Virology Centre / MRC-University of Glasgow Centre for Virus Research|Wellcome Sanger Institute for the COVID-19 Genomics UK (COG-UK) consortium|Davies|United Kingdom

>Spike|hCoV-19/USA/MI-MDHHS-SC20174/2020|2020-03-25|EPI\_ISL\_436864|Original|hCoV-19^^Michigan|Human|Michigan Department of Health and Human Services|Michigan Department of Health and Human Services|Blankenship|USA

>Spike|hCoV-19/USA/UT-UPHL-05540/2020|2020-06-02|EPI\_ISL\_575214|Original|hCoV-19^^Utah|Human|Utah Public Health Laboratory|Utah Public Health Laboratory|Young|USA

>Spike|hCoV-19/England/SHEF-C029D/2020|2020-03-27|EPI\_ISL\_420182|Original|hCoV-19^^England|Human|Virology Department|Department of Infection|de Silva|United Kingdom

>Spike|hCoV-19/Denmark/DCGC-22427/2020|2020-12-14|EPI\_ISL\_757402|Original|hCoV-19^^Hovedstaden|Human|Department of Virus and Microbiological Special Diagnostics|Albertsen Lab|Michaelsen|Denmark

>Spike|hCoV-19/USA/ME-HETL-J0461/2020|2020-12-16|EPI\_ISL\_755553|Original|hCoV-19^^Maine|Human|Maine Health and Environmental Testing Laboratory|Tewhey Lab|Tewhey|USA

>Spike|hCoV-19/Australia/VIC624/2020|2020-03-28|EPI\_ISL\_426928|Original|hCoV-19^^Victoria|Human|Victorian Infectious Diseases Reference Laboratory (VIDRL)|Microbiological Diagnostic Unit Public Health Laboratory and Victorian Infectious Diseases Reference Laboratory|Schultz|Australia

>Spike|hCoV-19/Denmark/DCGC-801/2020|2020-04-13|EPI\_ISL\_614725|Original|hCoV-19^^Syddanmark|Human|Department of Virus and Microbiological Special Diagnostics|Albertsen lab|Michaelsen|Denmark

>Spike|hCoV-19/England/ALDP-B63DCD/2020|2020-11-08|EPI\_ISL\_655439|Original|hCoV-19^^England|Human|Lighthouse Lab in Alderley Park|Wellcome Sanger Institute for the COVID-19 Genomics UK (COG-UK) Consortium|Davies|United Kingdom

>Spike|hCoV-19/Chile/RM-CMM-29192/2020|2020-03-21|EPI\_ISL\_459860|Original|hCoV-19^^Region Metropolitana de Santiago|Human|Center for Genome Regulation (CRG)|Center for Mathematical Modeling and Center for Genome Regulation. Santiago|Palma V\u00e9jares|Chile

>Spike|hCoV-19/USA/CA-ALSR-2637/2020|2020-07-11|EPI\_ISL\_635603|Original|hCoV-19^^California|Human|San Diego County Public Health Laboratory|Andersen lab at Scripps Research|Gangavarapu|USA

>Spike|hCoV-19/USA/CA-CZB-2497/2020|2020-05-22|EPI\_ISL\_513884|Original|hCoV-19^^California|Human|UCSF Clinical Microbiology Laboratory|Chan-Zuckerberg Biohub|Kamm|USA

>Spike|hCoV-19/USA/MI-MDHHS-SC20444/2020|2020-03-16|EPI\_ISL\_452318|Original|hCoV-19^^Michigan|Human|Michigan Department of Health and Human Services|Michigan Department of Health and Human Services|Blankenship|USA

>Spike|hCoV-19/Canada/ON-UHTC-0200/2020|2020-06-10|EPI\_ISL\_569961|Original|hCoV-19^^Ontario|Human|Unity Health Toronto|Ontario Institute for Cancer Research|de Borja|Canada

>Spike|hCoV-19/USA/VA-DCLS-1124/2020|2020-06-18|EPI\_ISL\_529921|Original|hCoV-19^^Virginia|Human|Virginia Division of Consolidated Laboratory Services|Virginia Division of Consolidated Laboratory Services|St. Jacques|USA

>Spike|hCoV-19/England/BIRM-6A893/2020|2020-11-11|EPI\_ISL\_679095|Original|hCoV-19^^England|Human|University of Birmingham|COVID-19 Genomics UK (COG-UK) Consortium|Loman|United Kingdom

>Spike|hCoV-19/Gibraltar/204421203/2020|2020-10-27|EPI\_ISL\_613664|Original|hCoV-19^^Gibraltar|Human|Microbiology|Respiratory Virus Unit|Platt|Gibraltar

>Spike|hCoV-19/Luxembourg/LNS0914893/2020|2020-11-05|EPI\_ISL\_739855|Original|hCoV-19^^Luxembourg|Human|Laboratoire national de sant\u00e9|Laboratoire national de sant\u00e9|Wienecke-Baldacchino|Luxembourg

>Spike|hCoV-19/Sweden/20-52568/2020|2020-08-10|EPI\_ISL\_534255|Original|hCoV-19^^Vasternorrland|Human|Laboratoriemedicin Vasternorrland|The Public Health Agency of Sweden|Svartstr\u00f6m|Sweden

>Spike|hCoV-19/USA/CA-ALSR-0678-IPL/2020|2020-04-29|EPI\_ISL\_483295|Original|hCoV-19^^California|Human|UC San Diego Center for Advanced Laboratory Medicine|Andersen lab at Scripps Research|Gangavarapu|USA

>Spike|hCoV-19/England/MILK-9EF806/2020|2020-09-23|EPI\_ISL\_594945|Original|hCoV-19^^England|Human|Queens Medical Centre|COVID-19 Genomics UK (COG-UK) Consortium|Loose|United Kingdom

>Spike|hCoV-19/England/MILK-B38CF1/2020|2020-11-01|EPI\_ISL\_658859|Original|hCoV-19^^England|Human|Lighthouse Lab in Milton Keynes|Wellcome Sanger Institute for the COVID-19 Genomics UK (COG-UK) Consortium|Davies|United Kingdom

>Spike|hCoV-19/South Korea/KCDC2059/2020|2020-02-24|EPI\_ISL\_481379|Original|hCoV-19^^South Korea|Human|Division of Viral Diseases|Division of Viral Diseases|Kim|South Korea

>Spike|hCoV-19/England/ALDP-A9614E/2020|2020-10-20|EPI\_ISL\_624719|Original|hCoV-19^^England|Human|Lighthouse Lab in Alderley Park|Wellcome Sanger Institute for the COVID-19 Genomics UK (COG-UK) consortium|Davies|United Kingdom

>Spike|hCoV-19/USA/MI-MDHHS-SC20243/2020|2020-03-24|EPI\_ISL\_447213|Original|hCoV-19^^Michigan|Human|Michigan Department of Health and Human Services|Michigan Department of Health and Human Services|Blankenship|USA

>Spike|hCoV-19/England/QEUA-A0AD41/2020|2020-10-03|EPI\_ISL\_599397|Original|hCoV-19^^England|Human|Lighthouse Lab in Glasgow|Wellcome Sanger Institute for the COVID-19 Genomics UK (COG-UK) consortium|Davies|United Kingdom

>Spike|hCoV-19/Brazil/PE-IAM29/2020|2020-04-08|EPI\_ISL\_500872|Original|hCoV-19^^Pernambuco|Human|LACEN/PE|WallauLab|Wallau|Brazil

>Spike|hCoV-19/Scotland/CVR4144/2020|2020-08-31|EPI\_ISL\_540832|Original|hCoV-19^^Scotland|Human|Lighthouse Lab in Glasgow / MRC-University of Glasgow Centre for Virus Research|COVID-19 Genomics UK (COG-UK) Consortium|Robertson|United Kingdom

>Spike|hCoV-19/Denmark/DCGC-10173/2020|2020-11-09|EPI\_ISL\_669436|Original|hCoV-19^^Hovedstaden|Human|Department of Virus and Microbiological Special Diagnostics|Albertsen Lab|Michaelsen|Denmark

>Spike|hCoV-19/Spain/MD-H12-41/2020|2020-04-05|EPI\_ISL\_529976|Original|hCoV-19^^Madrid|Human|Hospital Universitario 12 de Octubre|Hospital Universitario 12 de Octubre|Viedma|Spain

>Spike|hCoV-19/Scotland/QEUH-9FB430/2020|2020-09-29|EPI\_ISL\_600572|Original|hCoV-19^^Scotland|Human|Lighthouse Lab in Glasgow|Wellcome Sanger Institute for the COVID-19 Genomics UK (COG-UK) consortium|Davies|United Kingdom

>Spike|hCoV-19/Wales/ALDP-C3ADFB/2020|2020-12-08|EPI\_ISL\_767186|Original|hCoV-19^^Wales|Human|Lighthouse Lab in Alderley Park|Wellcome Sanger Institute for the COVID-19 Genomics UK (COG-UK) Consortium|Davies|United Kingdom

>Spike|hCoV-19/USA/LA-EVTL982/2020|2020-08-18|EPI\_ISL\_653673|Original|hCoV-19^^Louisiana|Human|LSUHS Emerging Viral Threat Laboratory|Microbial Genome Sequencing Center|Kamil|USA

>Spike|hCoV-19/Wales/PHWC-486815/2020|2020-10-31|EPI\_ISL\_639082|Original|hCoV-19^^Wales|Human|Wales Specialist Virology Centre Sequencing lab|COVID-19 Genomics UK (COG-UK) Consortium|Moore|United Kingdom

>Spike|hCoV-19/England/ALDP-A856F8/2020|2020-10-17|EPI\_ISL\_610483|Original|hCoV-19^^England|Human|Lighthouse Lab in Alderley Park|Wellcome Sanger Institute for the COVID-19 Genomics UK (COG-UK) consortium|Davies|United Kingdom

>Spike|hCoV-19/Scotland/GCVR-172CB9/2020|2020-04-06|EPI\_ISL\_524516|Original|hCoV-19^^Scotland|Human|NHSGGC West of Scotland Specialist Virology Centre / MRC-University of Glasgow Centre for Virus Research|Wellcome Sanger Institute for the COVID-19 Genomics UK (COG-UK) consortium|Davies|United Kingdom

>Spike|hCoV-19/England/SHEF-C665F/2020|2020-05-19|EPI\_ISL\_529679|Original|hCoV-19^^England|Human|Virology Department|COVID-19 Genomics UK (COG-UK) Consortium|de Silva|United Kingdom

>Spike|hCoV-19/England/ALDP-9B5793/2020|2020-08-28|EPI\_ISL\_590309|Original|hCoV-19^^England|Human|Lighthouse Lab in Alderley Park|Wellcome Sanger Institute for the COVID-19 Genomics UK (COG-UK) consortium|Davies|United Kingdom

>Spike|hCoV-19/USA/TX-HMH-MCoV-14651/2020|2020-10-11|EPI\_ISL\_787936|Original|hCoV-19^^Texas|Human|Houston Methodist Hospital|Houston Methodist Hospital|Long|USA

>Spike|hCoV-19/Switzerland/BL-ETHZ-101148/2020|2020-03-31|EPI\_ISL\_451815|Original|hCoV-19^^Basel-Landschaft|Human|Viollier AG|Department of Biosystems Science and Engineering|Nadeau|Switzerland

>Spike|hCoV-19/USA/VA\_6382/2020|2020-03-08|EPI\_ISL\_424893|Original|hCoV-19^^Virginia|Human|VA-Division of Consolidated Laboratory Services|Pathogen Discovery|Queen|USA

>Spike|hCoV-19/New Zealand/20CV0670/2020|2020-12-09|EPI\_ISL\_732970|Original|hCoV-19^^Auckland|Human|Middlemore Hospital|Institute of Environmental Science and Research (ESR)|Wang|New Zealand

>Spike|hCoV-19/England/MILK-9C448B/2020|2020-09-09|EPI\_ISL\_566855|Original|hCoV-19^^England|Human|Lighthouse Lab in Milton Keynes|Wellcome Sanger Institute for the COVID-19 Genomics UK (COG-UK) consortium|Davies|United Kingdom

>Spike|hCoV-19/Scotland/QEUH-9F4428/2020|2020-09-27|EPI\_ISL\_600692|Original|hCoV-19^^Scotland|Human|Lighthouse Lab in Glasgow|Wellcome Sanger Institute for the COVID-19 Genomics UK (COG-UK) consortium|Davies|United Kingdom

>Spike|hCoV-19/USA/TX-DSHS-1815/2020|2020-06-22|EPI\_ISL\_738154|Original|hCoV-19^^Texas|Human|Texas Department of State Health Services|Texas Department of State Health Services|Rahman|USA

>Spike|hCoV-19/Gibraltar/204841733/2020|2020-00-00|EPI\_ISL\_671300|Original|hCoV-19^^Gibraltar|Human|Microbiology|Respiratory Virus Unit|Platt|Gibraltar

>Spike|hCoV-19/USA/WA-UW-1341/2020|2020-03-17|EPI\_ISL\_424179|Original|hCoV-19^^Washington|Human|UW Virology Lab|UW Virology Lab|Roychoudhury|USA

>Spike|hCoV-19/Germany/NW-HHU-296/2020|2020-10-01|EPI\_ISL\_631340|Original|hCoV-19^^North Rhine-Westphalia|Human|ZOTZ KLIMAS MVZ D\u00f0fcsselndorf-Centrum GbR \u00dcBAG f\u00f0fcr Labormedizin|Center of Medical Microbiology|Wienemann|Germany

>Spike|hCoV-19/USA/TX-DSHS-1228/2020|2020-03-14|EPI\_ISL\_654732|Original|hCoV-19^^Texas|Human|Texas Department of State Health Services|Texas Department of State Health Services|Rahman|USA

>Spike|hCoV-19/Spain/VC-IBV-98000405/2020|2020-03-17|EPI\_ISL\_539230|Original|hCoV-19^^Comunitat Valenciana|Human|Servicio de Microbiologia. Hospital Clinico Universitario de Valencia|SeqCOVID-SPAIN consortium/IBV(CSIC)|Comas|Spain

>Spike|hCoV-19/England/QEUH-C335DC/2020|2020-12-11|EPI\_ISL\_782629|Original|hCoV-19^^England|Human|Lighthouse Lab in Glasgow|Wellcome Sanger Institute for the COVID-19 Genomics UK (COG-UK) Consortium|Davies|United Kingdom

>Spike|hCoV-19/Scotland/QEUH-7E6A29/2020|2020-07-22|EPI\_ISL\_532948|Original|hCoV-19^^Scotland|Human|NHSGGC West of Scotland Specialist Virology Centre / MRC-University of Glasgow Centre for Virus Research|Wellcome Sanger Institute for the COVID-19 Genomics UK (COG-UK) consortium|Davies|United Kingdom

>Spike|hCoV-19/India/TG-CCMB-M200/2020|2020-06-07|EPI\_ISL\_495193|Original|hCoV-19^^Telangana|Human|CSIR-Centre for Cellular and Molecular Biology|CSIR-Centre for Cellular and Molecular Biology|Banu|India

>Spike|hCoV-19/England/NORW-E7DF9/2020|2020-05-06|EPI\_ISL\_449091|Original|hCoV-19^^England|Human|Quadram Institute Bioscience|COVID-19 Genomics UK (COG-UK) Consortium|Alikhan|United Kingdom

>Spike|hCoV-19/United Arab Emirates/0992/2020|2020-06-10|EPI\_ISL\_699125|Original|hCoV-19^^Abu Dhabi|Human|Group 42 (G42) Healthcare|G42 Healthcare|Ogrodzki|United Arab Emirates

>Spike|hCoV-19/England/MILK-A47346/2020|2020-10-06|EPI\_ISL\_598396|Original|hCoV-19^^England|Human|Lighthouse Lab in Milton Keynes|Wellcome Sanger Institute for the COVID-19 Genomics UK (COG-UK) consortium|Davies|United Kingdom

>Spike|hCoV-19/England/ALDP-B23CEA/2020|2020-11-04|EPI\_ISL\_646297|Original|hCoV-19^^England|Human|Lighthouse Lab in Alderley Park|Wellcome Sanger Institute for the COVID-19 Genomics UK (COG-UK) Consortium|Davies|United Kingdom

>Spike|hCoV-19/Uganda/UG040/2020|2020-05-07|EPI\_ISL\_737960|Original|hCoV-19^^Uganda|Human|Uganda Central Public Health Lab and Uganda Virus Research Institute|MRC/UVRI & LSHTM Uganda Research Unit|Cotten|Uganda

>Spike|hCoV-19/Canada/QC-LSPQ-L00243284/2020|2020-03-29|EPI\_ISL\_536353|Original|hCoV-19^^Quebec|Human|Centre de sant Inuulitsivik|Laboratoire de sant publique du Qu\u00e9bec|Moreira|Canada

>Spike|hCoV-19/USA/TX-DSHS-0659/2020|2020-07-19|EPI\_ISL\_576313|Original|hCoV-19^^Texas|Human|Texas Department of State Health Services|Texas Department of State Health Services|Rahman|USA

>Spike|hCoV-19/England/MILK-BAC672/2020|2020-11-18|EPI\_ISL\_681613|Original|hCoV-19^^England|Human|Lighthouse Lab in Milton Keynes|Wellcome Sanger Institute for the COVID-19 Genomics UK (COG-UK) Consortium|Davies|United Kingdom

>Spike|hCoV-19/Wales/PHWC-2B281/2020|2020-04-08|EPI\_ISL\_432228|Original|hCoV-19^^Wales|Human|Wales Specialist Virology Centre|Public Health Wales Microbiology Cardiff|Moore|United Kingdom

>Spike|hCoV-19/USA/CA-CZB-14853/2020|2020-11-22|EPI\_ISL\_739155|Original|hCoV-19^^California|Human|Humboldt County Public Health Laboratory|Chan-Zuckerberg Biohub|Kamm|USA

>Spike|hCoV-19/England/20102001104/2020|2020-03-02|EPI\_ISL\_464264|Original|hCoV-19^^England|Human|Respiratory Virus Unit|Respiratory Virus Unit|Platt|United Kingdom

>Spike|hCoV-19/Denmark/DCGC-22070/2020|2020-12-14|EPI\_ISL\_758536|Original|hCoV-19^^Hovedstaden|Human|Department of Virus and Microbiological Special Diagnostics|Albertsen Lab|Michaelsen|Denmark

>Spike|hCoV-19/England/NORT-28ADAB/2020|2020-04-15|EPI\_ISL\_492938|Original|hCoV-19^^England|Human|NU-OMICS DNA Sequencing research facility|Wellcome Sanger Institute for the COVID-19 Genomics UK (COG-UK) consortium|Davies|United Kingdom

>Spike|hCoV-19/England/QEUH-9F5366/2020|2020-09-25|EPI\_ISL\_638666|Original|hCoV-19^^England|Human|Department of Pathology|COVID-19 Genomics UK (COG-UK) Consortium|Goodfellow|United Kingdom

>Spike|hCoV-19/Japan/PG-3806/2020|2020-07-00|EPI\_ISL\_692057|Original|hCoV-19^^Japan|Human|Sakai City Institute of Public Health|Pathogen Genomics Center|Sekizuka|Japan

>Spike|hCoV-19/USA/CA-ALSR-4290/2020|2020-10-09|EPI\_ISL\_648942|Original|hCoV-19^^California|Human|San Diego County Public Health Laboratory|Andersen lab at Scripps Research|Gangavarapu|USA

>Spike|hCoV-19/England/MILK-839121/2020|2020-07-16|EPI\_ISL\_557235|Original|hCoV-19^^England|Human|Lighthouse Lab in Milton Keynes|Wellcome Sanger Institute for the COVID-19 Genomics UK (COG-UK) consortium|Davies|United Kingdom

>Spike|hCoV-19/Australia/VIC17617/2020|2020-07-16|EPI\_ISL\_663545|Original|hCoV-19^^Victoria|Human|Microbiological Diagnostic Unit - Public Health Laboratory (MDU-PHL)|MDU-PHL|Schultz|Australia

>Spike|hCoV-19/England/MILK-BABDF6/2020|2020-11-18|EPI\_ISL\_783123|Original|hCoV-19^^England|Human|Lighthouse Lab in Milton Keynes|Wellcome Sanger Institute for the COVID-19 Genomics UK (COG-UK) Consortium|Davies|United Kingdom

>Spike|hCoV-19/Denmark/DCGC-21641/2020|2020-12-21|EPI\_ISL\_758280|Original|hCoV-19^^Sjaelland|Human|Department of Virus and Microbiological Special Diagnostics|Albertsen Lab|Michaelsen|Denmark

>Spike|hCoV-19/Wales/PHWC-4845D4/2020|2020-10-23|EPI\_ISL\_628021|Original|hCoV-19^^Wales|Human|Wales Specialist Virology Centre Sequencing lab|COVID-19 Genomics UK (COG-UK) Consortium|Moore|United Kingdom

>Spike|hCoV-19/England/CAMC-BBC721/2020|2020-11-21|EPI\_ISL\_724178|Original|hCoV-19^^England|Human|Quadram Institute Bioscience|COVID-19 Genomics UK (COG-UK) Consortium|Alikhan|United Kingdom

>Spike|hCoV-19/USA/TX-HMH-MCoV-18339/2020|2020-11-18|EPI\_ISL\_784687|Original|hCoV-19^^Texas|Human|Houston Methodist Hospital|Houston Methodist Hospital|Long|USA

>Spike|hCoV-19/England/202322095/2020|2020-06-02|EPI\_ISL\_566051|Original|hCoV-19^^England|Human|Respiratory Virus Unit|Respiratory Virus Unit|Platt|United Kingdom

>Spike|hCoV-19/USA/CT-UW-3470/2020|2020-03-26|EPI\_ISL\_490987|Original|hCoV-19^^Connecticut|Human|UW Virology Lab|UW Virology Lab|Roychoudhury|USA

>Spike|hCoV-19/Australia/VIC3490/2020|2020-07-05|EPI\_ISL\_521150|Original|hCoV-19^^Victoria|Human|Victorian Infectious Diseases Reference Laboratory (VIDRL)|VIDRL and MDU-PHL|Schultz|Australia

>Spike|hCoV-19/England/CAMB-1B8947/2020|2020-10-29|EPI\_ISL\_651671|Original|hCoV-19^^England|Human|Department of Pathology|COVID-19 Genomics UK (COG-UK) Consortium|Goodfellow|United Kingdom

>Spike|hCoV-19/Brazil/RJ-00350/2020|2020-04-27|EPI\_ISL\_623153|Original|hCoV-19^^Rio de Janeiro|Human|Laboratorio de Virologia Molecular / UFRJ|Bioinformatics Laboratory / LNCC|Almeida|Brazil

>Spike|hCoV-19/England/QEUA-B122CE/2020|2020-11-02|EPI\_ISL\_642530|Original|hCoV-19^^England|Human|Lighthouse Lab in Glasgow|Wellcome Sanger Institute for the COVID-19 Genomics UK (COG-UK) Consortium|Davies|United Kingdom

>Spike|hCoV-19/Ireland/MH-NVRL-77IRL69686/2020|2020-11-05|EPI\_ISL\_752516|Original|hCoV-19^^Meath|Human|National Virus Reference Laboratory|National Virus Reference Laboratory|Gonzalez|Ireland

>Spike|hCoV-19/Germany/HH-hpi-pl951/2020|2020-03-24|EPI\_ISL\_776278|Original|hCoV-19^^Hamburg|Human|University Medical Center Hamburg Eppendorf|Heinrich Pette Institute|Robitaille|Germany

>Spike|hCoV-19/England/ALDP-A683F4/2020|2020-10-12|EPI\_ISL\_608403|Original|hCoV-19^^England|Human|Lighthouse Lab in Alderley Park|Wellcome Sanger Institute for the COVID-19 Genomics UK (COG-UK) consortium|Davies|United Kingdom

>Spike|hCoV-19/England/ALDP-95AF2F/2020|2020-06-13|EPI\_ISL\_555732|Original|hCoV-19^^England|Human|Lighthouse Lab in Alderley Park|Wellcome Sanger Institute for the COVID-19 Genomics UK (COG-UK) consortium|Davies|United Kingdom

>Spike|hCoV-19/England/MILK-9E1F96/2020|2020-09-20|EPI\_ISL\_581317|Original|hCoV-19^^England|Human|Lighthouse Lab in Milton Keynes|Wellcome Sanger Institute for the COVID-19 Genomics UK (COG-UK) consortium|Davies|United Kingdom

>Spike|hCoV-19/USA/CA-ALSR-0835-SAN/2020|2020-03-14|EPI\_ISL\_483391|Original|hCoV-19^^California|Human|UC San Diego Center for Advanced Laboratory Medicine|Andersen lab at Scripps Research|Gangavarapu|USA

>Spike|hCoV-19/Wales/PHWC-492588/2020|2020-11-18|EPI\_ISL\_706859|Original|hCoV-19^^Wales|Human|Originating lab|COVID-19 Genomics UK (COG-UK) Consortium|Moore|United Kingdom

>Spike|hCoV-19/Israel/CVL-n6268/2020|2020-03-00|EPI\_ISL\_435287|Original|hCoV-19^^Israel|Human|Central Virology Laboratory|Central Virology Laboratory|Zuckerman|Israel

>Spike|hCoV-19/Wales/PHWC-49CF17/2020|2020-12-09|EPI\_ISL\_742707|Original|hCoV-19^^Wales|Human|Wales Specialist Virology Centre Sequencing lab|COVID-19 Genomics UK (COG-UK) Consortium|Moore|United Kingdom

>Spike|hCoV-19/England/20118151404/2020|2020-03-12|EPI\_ISL\_464980|Original|hCoV-19^^England|Human|Respiratory Virus Unit|Respiratory Virus Unit|Platt|United Kingdom

>Spike|hCoV-19/South Korea/KDCA0410/2020|2020-11-12|EPI\_ISL\_760194|Original|hCoV-19^^South Korea|Human|Division of Emerging Infectious Diseases|Division of Emerging Infectious Diseases|Park|South Korea

>Spike|hCoV-19/USA/DE-DHSS-FLW00408180/2020|2020-12-02|EPI\_ISL\_766983|Original|hCoV-19^^Delaware|Human|Delaware Public Health Laboratory|Delaware Public Health Laboratory|Bajwa|USA

>Spike|hCoV-19/England/20172027904/2020|2020-04-17|EPI\_ISL\_465336|Original|hCoV-19^^England|Human|Respiratory Virus Unit|Respiratory Virus Unit|Platt|United Kingdom

>Spike|hCoV-19/Wales/PHWC-481F15/2020|2020-10-21|EPI\_ISL\_613185|Original|hCoV-19^^Wales|Human|Wales Specialist Virology Centre Sequencing lab|COVID-19 Genomics UK (COG-UK) Consortium|Moore|United Kingdom

>Spike|hCoV-19/Japan/PG-3650/2020|2020-04-00|EPI\_ISL\_691903|Original|hCoV-19^^Japan|Human|Pathogen Genomics Center|Pathogen Genomics Center|Sekizuka|Japan

>Spike|hCoV-19/Australia/VIC9878/2020|2020-08-17|EPI\_ISL\_565759|Original|hCoV-19^^Victoria|Human|Microbiological Diagnostic Unit - Public Health Laboratory (MDU-PHL)|MDU-PHL|Schultz|Australia

>Spike|hCoV-19/India/KA-IB30/2020|2020-05-19|EPI\_ISL\_508309|Original|hCoV-19^^Karnataka|Human|Indian Institute of Science|National Institute of Biomedical Genomics|Maitra|India

>Spike|hCoV-19/Brazil/SP-L9-CD90/2020|2020-03-24|EPI\_ISL\_476489|Original|hCoV-19^^S\u00e3o Paulo|Human|Hospital da Cl\u00ednicas da Faculdade de Medicina da Universidade de S\u00e3o Paulo|Instituto de Medicina Tropical da Univesidade de S\u00e3o Paulo|Faria|Brazil

>Spike|hCoV-19/Australia/VIC12110/2020|2020-07-26|EPI\_ISL\_591917|Original|hCoV-19^^Victoria|Human|Victorian Infectious Diseases Reference Laboratory (VIDRL)|VIDRL and MDU-PHL|Schultz|Australia

>Spike|hCoV-19/Germany/SH-ChVir20292/2020|2020-11-12|EPI\_ISL\_729654|Original|hCoV-19^^Schleswig-Holstein|Human|A. Krumbholz|Charit\u00e9 Universit\u00e4tsmedizin Berlin|Muehlemann|Germany

>Spike|hCoV-19/Denmark/DCGC-22614/2020|2020-12-14|EPI\_ISL\_757440|Original|hCoV-19^^Syddanmark|Human|Department of Virus and Microbiological Special Diagnostics|Albertsen Lab|Michaelsen|Denmark

>Spike|hCoV-19/France/PAC-IHU-0231/2020|2020-03-29|EPI\_ISL\_569394|Original|hCoV-19^^Provence-Alpes-C\u00f4te-d\u00e0zur|Human|MEPHI|MEPHI|Levasseur|France

>Spike|hCoV-19/England/ALDP-95AD8F/2020|2020-06-09|EPI\_ISL\_555529|Original|hCoV-19^^England|Human|Lighthouse Lab in Alderley Park|Wellcome Sanger Institute for the COVID-19 Genomics UK (COG-UK) consortium|Davies|United Kingdom

>Spike|hCoV-19/Singapore/1241/2020|2020-04-28|EPI\_ISL\_648658|Original|hCoV-19^^Singapore|Human|Department of Laboratory Medicine|Department of Laboratory Medicine|Chen|Singapore

>Spike|hCoV-19/Luxembourg/LNS8194078/2020|2020-10-31|EPI\_ISL\_744701|Original|hCoV-19^^Luxembourg|Human|Laboratoire national de sant\u00e9|Laboratoire national de sant\u00e9|Wienecke-Baldacchino|Luxembourg

>Spike|hCoV-19/USA/MI-MDHHS-SC20159/2020|2020-03-19|EPI\_ISL\_436826|Original|hCoV-19^^Michigan|Human|Michigan Department of Health and Human Services|Michigan Department of Health and Human Services|Blankenship|USA

>Spike|hCoV-19/England/ALDP-5B0C7F/2020|2020-06-17|EPI\_ISL\_558646|Original|hCoV-19^^England|Human|Lighthouse Lab in Alderley Park|Wellcome Sanger Institute for the COVID-19 Genomics UK (COG-UK) consortium|Davies|United Kingdom

>Spike|hCoV-19/USA/CA-CZB-15427/2020|2020-12-02|EPI\_ISL\_738816|Original|hCoV-19^^California|Human|Orange County Public Health Lab|Chan-Zuckerberg Biohub|Kamm|USA



>Spike|hCoV-19/Japan/IC-0351/2020|2020-11-00|EPI\_ISL\_721596|Original|hCoV-19^^Japan|Human|Pathogen Genomics Center|Pathogen Genomics Center|Sekizuka|Japan

>Spike|hCoV-19/England/20180011204/2020|2020-04-20|EPI\_ISL\_465428|Original|hCoV-19^^England|Human|Respiratory Virus Unit|Respiratory Virus Unit|Platt|United Kingdom

>Spike|hCoV-19/Wales/PHWC-15DE27/2020|2020-05-12|EPI\_ISL\_472778|Original|hCoV-19^^Wales|Human|Wales Specialist Virology Centre Sequencing lab|COVID-19 Genomics UK (COG-UK) Consortium|Moore|United Kingdom

>Spike|hCoV-19/England/LIVE-9A715/2020|2020-03-30|EPI\_ISL\_449364|Original|hCoV-19^^England|Human|Liverpool Clinical Laboratories|COVID-19 Genomics UK (COG-UK) Consortium|Haldenby|United Kingdom

>Spike|hCoV-19/Japan/PG-2712/2020|2020-06-00|EPI\_ISL\_690844|Original|hCoV-19^^Japan|Human|Sakai City Institute of Public Health|Pathogen Genomics Center|Sekizuka|Japan

>Spike|hCoV-19/USA/MI-MDHHS-SC21440/2020|2020-03-22|EPI\_ISL\_507694|Original|hCoV-19^^Michigan|Human|Michigan Department of Health and Human Services|Michigan Department of Health and Human Services|Blankenship|USA

>Spike|hCoV-19/Scotland/EDB097/2020|2020-03-20|EPI\_ISL\_425887|Original|hCoV-19^^Scotland|Human|Virology Department|COVID-19 Genomics UK (COG-UK) Consortium|Williams|United Kingdom

>Spike|hCoV-19/Spain/AR-IBV-98010588/2020|2020-10-03|EPI\_ISL\_722223|Original|hCoV-19^^Aragon|Human|Servicio de Microbiolog\u00eda|SeqCOVID-SPAIN consortium/IBV (CSIC) |Comas|Spain

>Spike|hCoV-19/USA/WA-S2204/2020|2020-06-08|EPI\_ISL\_497632|Original|hCoV-19^^Washington|Human|Washington State Department of Health|Seattle Flu Study|Lee|USA

>Spike|hCoV-19/Netherlands/GE-EMC-164/2020|2020-05-22|EPI\_ISL\_523147|Original|hCoV-19^^Gelderland|Human|Dutch COVID-19 response team|Erasmus Medical Center|Oude Munnink|Netherlands

>Spike|hCoV-19/England/CAMC-B08C36/2020|2020-10-30|EPI\_ISL\_643797|Original|hCoV-19^^England|Human|Lighthouse Lab in Cambridge|Wellcome Sanger Institute for the COVID-19 Genomics UK (COG-UK) Consortium|Davies|United Kingdom

>Spike|hCoV-19/England/LOND-1266DFD/2020|2020-12-10|EPI\_ISL\_741214|Original|hCoV-19^^England|Human|University College London|COVID-19 Genomics UK (COG-UK) Consortium|Roy|United Kingdom

>Spike|hCoV-19/Sweden/20-06523/2020|2020-03-26|EPI\_ISL\_475564|Original|hCoV-19^^Stockholm|Human|Surbrunns VC|The Public Health Agency of Sweden|Svartstr\u00f6m|Sweden

>Spike|hCoV-19/South Korea/KCDC2584/2020|2020-06-27|EPI\_ISL\_514987|Original|hCoV-19^^South Korea|Human|Division of Viral Diseases|Division of Viral Diseases|Kim|South Korea

>Spike|hCoV-19/England/ALDP-4AED45/2020|2020-06-15|EPI\_ISL\_559342|Original|hCoV-19^^England|Human|Lighthouse Lab in Alderley Park|Wellcome Sanger Institute for the COVID-19 Genomics UK (COG-UK) consortium|Davies|United Kingdom

>Spike|hCoV-19/Scotland/CVR5850/2020|2020-11-16|EPI\_ISL\_666045|Original|hCoV-19^^Scotland|Human|West of Scotland Specialist Virology Centre|COVID-19 Genomics UK (COG-UK) Consortium|Robertson|United Kingdom

>Spike|hCoV-19/Spain/MD-IBV-97010069/2020|2020-03-17|EPI\_ISL\_779758|Original|hCoV-19^^Madrid|Human|IdISSC/Hospital Cl\u00e9nico San Carlos de Madrid\u200b|SeqCOVID-SPAIN consortium/IBV (CSIC) |Comas|Spain

>Spike|hCoV-19/England/LOND-12650E6/2020|2020-11-27|EPI\_ISL\_724586|Original|hCoV-19^^England|Human|University College London|COVID-19 Genomics UK (COG-UK) Consortium|Roy|United Kingdom

>Spike|hCoV-19/Japan/NGY-NNH-015/2020|2020-07-27|EPI\_ISL\_568570|Original|hCoV-19^^Aichi|Human|Department of Infectious Diseases and Immunology|Clinical Research Center|Iwatani|Japan

>Spike|hCoV-19/USA/VA-DCLS-0106/2020|2020-04-14|EPI\_ISL\_434598|Original|hCoV-19^^Virginia|Human|Virginia DCLS|Virginia DCLS|St. Jacques|USA

>Spike|hCoV-19/Australia/SAP366/2020|2020-03-24|EPI\_ISL\_483137|Original|hCoV-19^^South Australia|Human|SA Pathology|SA Pathology|Leong|Australia

>Spike|hCoV-19/Wales/PHWC-15D2C1/2020|2020-05-09|EPI\_ISL\_472696|Original|hCoV-19^^Wales|Human|Wales Specialist Virology Centre Sequencing lab|COVID-19 Genomics UK (COG-UK) Consortium|Moore|United Kingdom

>Spike|hCoV-19/Denmark/DCGC-10883/2020|2020-11-02|EPI\_ISL\_669570|Original|hCoV-19^^Hovedstaden|Human|Department of Virus and Microbiological Special Diagnostics|Albertsen Lab|Michaelsen|Denmark

>Spike|hCoV-19/England/MILK-BFCB47/2020|2020-12-02|EPI\_ISL\_720724|Original|hCoV-19^^England|Human|Lighthouse Lab in Milton Keynes|Wellcome Sanger Institute for the COVID-19 Genomics UK (COG-UK) Consortium|Davies|United Kingdom

>Spike|hCoV-19/Australia/VIC4867/2020|2020-07-18|EPI\_ISL\_519251|Original|hCoV-19^^Victoria|Human|Microbiological Diagnostic Unit - Public Health Laboratory (MDU-PHL)|MDU-PHL|Schultz|Australia

>Spike|hCoV-19/England/MILK-B06333/2020|2020-10-24|EPI\_ISL\_642977|Original|hCoV-19^^England|Human|Lighthouse Lab in Milton Keynes|Wellcome Sanger Institute for the COVID-19 Genomics UK (COG-UK) Consortium|Davies|United Kingdom

>Spike|hCoV-19/England/QEUEH-9F5A16/2020|2020-09-25|EPI\_ISL\_588996|Original|hCoV-19^^England|Human|Lighthouse Lab in Glasgow|Wellcome Sanger Institute for the COVID-19 Genomics UK (COG-UK) consortium|Davies|United Kingdom

>Spike|hCoV-19/England/MILK-D0B484/2020|2020-12-20|EPI\_ISL\_782137|Original|hCoV-19^^England|Human|Lighthouse Lab in Milton Keynes|Wellcome Sanger Institute for the COVID-19 Genomics UK (COG-UK) Consortium|Davies|United Kingdom

>Spike|hCoV-19/Austria/CeMM0116/2020|2020-03-10|EPI\_ISL\_437974|Original|hCoV-19^^Ischgl|Human|Institut f\u00fcr Virologie am Department f\u00fcr Hygiene|Bergthaler laboratory|Bergthaler|Austria

>Spike|hCoV-19/Denmark/DCGC-5830/2020|2020-09-28|EPI\_ISL\_621017|Original|hCoV-19^^Syddanmark|Human|Department of Virus and Microbiological Special Diagnostics|Albertsen lab|Michaelsen|Denmark

>Spike|hCoV-19/Italy/PIE-SLL-MS54/2020|2020-03-31|EPI\_ISL\_569870|Original|hCoV-19^^Piedmont|Human|Amedeo di savoia|Crosetto lab|Harbers|Italy

>Spike|hCoV-19/England/ALDP-5C9A88/2020|2020-06-19|EPI\_ISL\_558448|Original|hCoV-19^^England|Human|Lighthouse Lab in Alderley Park|Wellcome Sanger Institute for the COVID-19 Genomics UK (COG-UK) consortium|Davies|United Kingdom

>Spike|hCoV-19/USA/CA-CZB-14520/2020|2020-11-11|EPI\_ISL\_738517|Original|hCoV-19^^California|Human|Santa Clara County Public Health Laboratory|Chan-Zuckerberg Biohub|Kamm|USA

>Spike|hCoV-19/Spain/CN-IBV-97006502/2020|2020-03-28|EPI\_ISL\_537711|Original|hCoV-19^^Canary Islands|Human|Hospital Universitario de Gran Canaria Dr. Negr\u00e9dn|SeqCOVID-SPAIN consortium|IBV(CSIC)|Comas|Spain

>Spike|hCoV-19/England/BRIS-128274/2020|2020-04-15|EPI\_ISL\_469615|Original|hCoV-19^^England|Human|PHE South West Regional Laboratory|Wellcome Sanger Institute for the COVID-19 Genomics UK (COG-UK) consortium|Davies|United Kingdom

>Spike|hCoV-19/Wales/PHWC-49AC30/2020|2020-12-03|EPI\_ISL\_727665|Original|hCoV-19^^Wales|Human|Originating lab|COVID-19 Genomics UK (COG-UK) Consortium|Moore|United Kingdom

>Spike|hCoV-19/USA/NC-UNC-200414/2020|2020-04-00|EPI\_ISL\_524450|Original|hCoV-19^^North Carolina|Human|Microbiology & Immunology|Microbiology & Immunology|Submitter|USA

>Spike|hCoV-19/England/NORT-29B017/2020|2020-05-26|EPI\_ISL\_493490|Original|hCoV-19^^England|Human|Northumbria University / South Tees Hospitals NHS Foundation Trust / North Cumbria Integrated Care NHS Foundation Trust / North Tees and Hartlepool NHS Foundation Trust / Newcastle Hospitals NHS Foundation Trust|COVID-19 Genomics UK (COG-UK) Consortium|Bashton|United Kingdom

>Spike|hCoV-19/England/ALDP-B63D09/2020|2020-11-08|EPI\_ISL\_655528|Original|hCoV-19^^England|Human|Lighthouse Lab in Alderley Park|Wellcome Sanger Institute for the COVID-19 Genomics UK (COG-UK) Consortium|Davies|United Kingdom

>Spike|hCoV-19/England/CAMB-1B7D79/2020|2020-10-14|EPI\_ISL\_638178|Original|hCoV-19^^England|Human|Department of Pathology|COVID-19 Genomics UK (COG-UK) Consortium|Goodfellow|United Kingdom

>Spike|hCoV-19/Chile/RM-168869/2020|2020-09-03|EPI\_ISL\_746703|Original|hCoV-19^^Region Metropolitana de Santiago|Human|Genetica Molecular and Subdepartamento de Virologia ISP Chile|Instituto de Salud Publica de Chile|Tognarelli|Chile

>Spike|hCoV-19/England/ALDP-982D8E/2020|2020-08-10|EPI\_ISL\_552666|Original|hCoV-19^^England|Human|Lighthouse Lab in Alderley Park|Wellcome Sanger Institute for the COVID-19 Genomics UK (COG-UK) consortium|Davies|United Kingdom

>Spike|hCoV-19/Scotland/CVR3745/2020|2020-05-26|EPI\_ISL\_478100|Original|hCoV-19^^Scotland|Human|West of Scotland Specialist Virology Centre|COVID-19 Genomics UK (COG-UK) Consortium|Robertson|United Kingdom

>Spike|hCoV-19/USA/OR-OHSU-1689/2020|2020-07-23|EPI\_ISL\_526004|Original|hCoV-19^^Oregon|Human|OHSU Lab Services Molecular Microbiology Lab|Oregon SARS-CoV-2 Genome Sequencing Center|O'Roak|USA

>Spike|hCoV-19/England/204590753/2020|2020-11-07|EPI\_ISL\_700603|Original|hCoV-19^^England|Human|Respiratory Virus Unit|COVID-19 Genomics UK (COG-UK) Consortium|Platt|United Kingdom

>Spike|hCoV-19/Belgium/reg-0917984/2020|2020-09-17|EPI\_ISL\_734976|Original|hCoV-19^^Steenokkerzeel|Human|UZ Leuven|KU Leuven|Maes|Belgium

>Spike|hCoV-19/USA/AZ-TG565575/2020|2020-07-31|EPI\_ISL\_695555|Original|hCoV-19^^Arizona|Human|TGen North|TGen North|French|USA

>Spike|hCoV-19/Guadeloupe/IPG-7328/2020|2020-03-17|EPI\_ISL\_613428|Original|hCoV-19^^Baie-Mahault|Human|Institut Pasteur de la Guadeloupe|Institut Pasteur de la Guadeloupe|Enouf|Guadeloupe

>Spike|hCoV-19/England/MILK-61C1DB/2020|2020-07-01|EPI\_ISL\_557979|Original|hCoV-19^^England|Human|Lighthouse Lab in Milton Keynes|Wellcome Sanger Institute for the COVID-19 Genomics UK (COG-UK) consortium|Davies|United Kingdom

>Spike|hCoV-19/England/ALDP-B468B0/2020|2020-11-06|EPI\_ISL\_656220|Original|hCoV-19^^England|Human|Lighthouse Lab in Alderley Park|Wellcome Sanger Institute for the COVID-19 Genomics UK (COG-UK) Consortium|Davies|United Kingdom

>Spike|hCoV-19/Brazil/RJ-00343/2020|2020-04-29|EPI\_ISL\_623146|Original|hCoV-19^^Rio de Janeiro|Human|Laboratorio de Virologia Molecular / UFRJ|Bioinformatics Laboratory / LNCC|Almeida|Brazil

>Spike|hCoV-19/England/ALDP-A6DBE8/2020|2020-10-14|EPI\_ISL\_607628|Original|hCoV-19^^England|Human|Lighthouse Lab in Alderley Park|Wellcome Sanger Institute for the COVID-19 Genomics UK (COG-UK) consortium|Davies|United Kingdom

>Spike|hCoV-19/Australia/VIC3484/2020|2020-07-08|EPI\_ISL\_521145|Original|hCoV-19^^Victoria|Human|Victorian Infectious Diseases Reference Laboratory (VIDRL)|VIDRL and MDU-PHL|Schultz|Australia

>Spike|hCoV-19/France/IDF-3509/2020|2020-03-24|EPI\_ISL\_428351|Original|hCoV-19^^\u00cele-de-France|Human|GH Nord Essonne Service de Biologie clinique|National Reference Center for Viruses of Respiratory Infections|Enouf|France

>Spike|hCoV-19/England/QEUEH-55376E/2020|2020-05-12|EPI\_ISL\_532204|Original|hCoV-19^^England|Human|Lighthouse Lab in Glasgow|Wellcome Sanger Institute for the COVID-19 Genomics UK (COG-UK) consortium|Davies|United Kingdom

>Spike|hCoV-19/India/MH-ACTREC-030/2020|2020-05-06|EPI\_ISL\_699686|Original|hCoV-19^^Maharashtra|Human|Hematopathology Laboratory|Hematopathology Laboratory|Patkar|India

>Spike|hCoV-19/Wales/PHWC-495558/2020|2020-11-23|EPI\_ISL\_726361|Original|hCoV-19^^Wales|Human|Originating lab|COVID-19 Genomics UK (COG-UK) Consortium|Moore|United Kingdom

>Spike|hCoV-19/England/LIVE-9D527/2020|2020-04-16|EPI\_ISL\_453208|Original|hCoV-19^^England|Human|Liverpool Clinical Laboratories|COVID-19 Genomics UK (COG-UK) Consortium|Haldenby|United Kingdom

>Spike|hCoV-19/Japan/PG-0531/2020|2020-04-05|EPI\_ISL\_480189|Original|hCoV-19^^Kanto|Human|Ibaraki Prefectural Institute of Public Health|Pathogen Genomics Center|Sekizuka|Japan

>Spike|hCoV-19/England/EXET-136316/2020|2020-04-13|EPI\_ISL\_457219|Original|hCoV-19^^England|Human|University of Exeter|COVID-19 Genomics UK (COG-UK) Consortium|Temperton|United Kingdom

>Spike|hCoV-19/England/ALDP-C3D815/2020|2020-12-10|EPI\_ISL\_730668|Original|hCoV-19^^England|Human|Lighthouse Lab in Alderley Park|Wellcome Sanger Institute for the COVID-19 Genomics UK (COG-UK) Consortium|Davies|United Kingdom

>Spike|hCoV-19/Belgium/reg-0429626/2020|2020-04-29|EPI\_ISL\_734679|Original|hCoV-19^^Peruwelz|Human|UZ Leuven|KU Leuven|Maes|Belgium

>Spike|hCoV-19/England/QE4H-9E4DE4/2020|2020-09-22|EPI\_ISL\_579903|Original|hCoV-19^^England|Human|Lighthouse Lab in Glasgow|Wellcome Sanger Institute for the COVID-19 Genomics UK (COG-UK) consortium|Davies|United Kingdom

>Spike|hCoV-19/Ireland/G-NVRL-78IRL77157/2020|2020-11-23|EPI\_ISL\_752581|Original|hCoV-19^^Galway|Human|National Virus Reference Laboratory|National Virus Reference Laboratory|Gonzalez|Ireland

>Spike|hCoV-19/USA/TX-HMH-MCoV-15927/2020|2020-07-10|EPI\_ISL\_785611|Original|hCoV-19^^Texas|Human|Houston Methodist Hospital|Houston Methodist Hospital|Long|USA

>Spike|hCoV-19/Japan/PG-7311/2020|2020-08-00|EPI\_ISL\_688414|Original|hCoV-19^^Japan|Human|Pathogen Genomics Center|Pathogen Genomics Center|Sekizuka|Japan

>Spike|hCoV-19/Wales/PHWC-492ED8/2020|2020-11-28|EPI\_ISL\_725804|Original|hCoV-19^^Wales|Human|Originating lab|COVID-19 Genomics UK (COG-UK) Consortium|Moore|United Kingdom

>Spike|hCoV-19/Switzerland/BL-ETHZ-350002/2020|2020-11-03|EPI\_ISL\_693777|Original|hCoV-19^^Basel-Landschaft|Human|Viollier AG|Department of Biosystems Science and Engineering|Nadeau|Switzerland

>Spike|hCoV-19/Denmark/DCGC-14443/2020|2020-11-30|EPI\_ISL\_711771|Original|hCoV-19^^Sjaelland|Human|Department of Virus and Microbiological Special Diagnostics|Albertsen Lab|Michaelsen|Denmark

>Spike|hCoV-19/Wales/PHWC-486EE6/2020|2020-10-30|EPI\_ISL\_639146|Original|hCoV-19^^Wales|Human|Wales Specialist Virology Centre Sequencing lab|COVID-19 Genomics UK (COG-UK) Consortium|Moore|United Kingdom

>Spike|hCoV-19/USA/MI-MDHHS-SC20372/2020|2020-03-17|EPI\_ISL\_450582|Original|hCoV-19^^Michigan|Human|Michigan Department of Health and Human Services|Michigan Department of Health and Human Services|Blankenship|USA

>Spike|hCoV-19/Italy/LAZ-INMI-108/2020|2020-12-01|EPI\_ISL\_728281|Original|hCoV-19^^Lazio|Human|National Institute for Infectious Diseases|National Institute for Infectious Diseases|Gruber|Italy

>Spike|hCoV-19/Russia/AST-RII-MH4462S/2020|2020-08-13|EPI\_ISL\_733202|Original|hCoV-19^^Astrakhan|Human|Pathogenic Microorganisms Variability Laboratory|WHO National Influenza Centre Russian Federation|Komissarov|Russia

>Spike|hCoV-19/USA/CA-CZB-9551/2020|2020-04-14|EPI\_ISL\_672074|Original|hCoV-19^^California|Human|The Ashley Laboratory|Chan-Zuckerberg Biohub|Bhatt|USA

>Spike|hCoV-19/USA/MD-HP12087/2020|2020-11-15|EPI\_ISL\_791411|Original|hCoV-19^^Maryland|Human|Johns Hopkins Hospital Department of Pathology|Johns Hopkins Hospital Department of Pathology|Morris|USA

>Spike|hCoV-19/USA/TX-DSHS-0836/2020|2020-06-07|EPI\_ISL\_593578|Original|hCoV-19^^Texas|Human|Texas Department of State Health Services|Texas Department of State Health Services|Rahman|USA

>Spike|hCoV-19/Netherlands/ZH-EMC-627/2020|2020-09-21|EPI\_ISL\_578055|Original|hCoV-19^^Zuid Holland|Human|Dutch COVID-19 response team|Erasmus Medical Center|Oude Munnink|Netherlands

>Spike|hCoV-19/USA/TX-DSHS-1292/2020|2020-03-31|EPI\_ISL\_648231|Original|hCoV-19^^Texas|Human|Texas Department of State Health Services|Texas Department of State Health Services|Rahman|USA

>Spike|hCoV-19/Switzerland/TI-ETHZ-280192/2020|2020-09-09|EPI\_ISL\_560483|Original|hCoV-19^^Ticino|Human|Viollier AG|Department of Biosystems Science and Engineering|Nadeau|Switzerland

>Spike|hCoV-19/Denmark/DCGC-5234/2020|2020-09-14|EPI\_ISL\_615905|Original|hCoV-19^^Nordjylland|Human|Department of Virus and Microbiological Special Diagnostics|Albertsen lab|Michaelsen|Denmark

>Spike|hCoV-19/Singapore/287/2020|2020-03-18|EPI\_ISL\_462405|Original|hCoV-19^^Singapore|Human|National Public Health Laboratory|National Public Health Laboratory|Mak|Singapore

>Spike|hCoV-19/England/NORT-281E65/2020|2020-03-24|EPI\_ISL\_478487|Original|hCoV-19^^England|Human|Northumbria University / South Tees Hospitals NHS Foundation Trust / North Cumbria Integrated Care NHS Foundation Trust / North Tees and Hartlepool NHS Foundation Trust / Newcastle Hospitals NHS Foundation Trust|COVID-19 Genomics UK (COG-UK) Consortium|Bashton|United Kingdom

>Spike|hCoV-19/Wales/QEUA-A5E77D/2020|2020-10-12|EPI\_ISL\_609190|Original|hCoV-19^^Wales|Human|Lighthouse Lab in Glasgow|Wellcome Sanger Institute for the COVID-19 Genomics UK (COG-UK) consortium|Davies|United Kingdom

>Spike|hCoV-19/Japan/PG-5997/2020|2020-07-00|EPI\_ISL\_689110|Original|hCoV-19^^Japan|Human|Pathogen Genomics Center|Pathogen Genomics Center|Sekizuka|Japan

>Spike|hCoV-19/England/ALDP-C3B11C/2020|2020-12-08|EPI\_ISL\_731656|Original|hCoV-19^^England|Human|Lighthouse Lab in Alderley Park|Wellcome Sanger Institute for the COVID-19 Genomics UK (COG-UK) Consortium|Davies|United Kingdom

>Spike|hCoV-19/England/QEUA-B1462A/2020|2020-11-03|EPI\_ISL\_642647|Original|hCoV-19^^England|Human|Lighthouse Lab in Glasgow|Wellcome Sanger Institute for the COVID-19 Genomics UK (COG-UK) Consortium|Davies|United Kingdom

>Spike|hCoV-19/England/QEUA-AD3084/2020|2020-10-26|EPI\_ISL\_634174|Original|hCoV-19^^England|Human|Lighthouse Lab in Glasgow|Wellcome Sanger Institute for the COVID-19 Genomics UK (COG-UK) consortium|Davies|United Kingdom

>Spike|hCoV-19/England/MILK-C614C9/2020|2020-12-13|EPI\_ISL\_769425|Original|hCoV-19^^England|Human|Lighthouse Lab in Milton Keynes|Wellcome Sanger Institute for the COVID-19 Genomics UK (COG-UK) Consortium|Davies|United Kingdom

>Spike|hCoV-19/England/MILK-B3CDEB/2020|2020-11-01|EPI\_ISL\_706199|Original|hCoV-19^^England|Human|Oxford Viromics|COVID-19 Genomics UK (COG-UK) Consortium|Golubchik|United Kingdom

>Spike|hCoV-19/Denmark/DCGC-12386/2020|2020-11-16|EPI\_ISL\_682567|Original|hCoV-19^^Nordjylland|Human|Department of Virus and Microbiological Special Diagnostics|Albertsen Lab|Michaelsen|Denmark

>Spike|hCoV-19/England/QEUA-B414FD/2020|2020-11-08|EPI\_ISL\_658598|Original|hCoV-19^^England|Human|Lighthouse Lab in Glasgow|Wellcome Sanger Institute for the COVID-19 Genomics UK (COG-UK) Consortium|Davies|United Kingdom

>Spike|hCoV-19/USA/VA-DCLS-0298/2020|2020-04-30|EPI\_ISL\_463101|Original|hCoV-19^^Virginia|Human|Virginia DCLS|Virginia DCLS|St. Jacques|USA

>Spike|hCoV-19/England/MILK-9C4843/2020|2020-09-10|EPI\_ISL\_549469|Original|hCoV-19^^England|Human|Centre for Enzyme Innovation|COVID-19 Genomics UK (COG-UK) Consortium|Robson|United Kingdom

>Spike|hCoV-19/England/QEUA-96108C/2020|2020-08-04|EPI\_ISL\_532035|Original|hCoV-19^^England|Human|Lighthouse Lab in Glasgow|Wellcome Sanger Institute for the COVID-19 Genomics UK (COG-UK) consortium|Davies|United Kingdom

>Spike|hCoV-19/England/CAMC-BBD24D/2020|2020-11-16|EPI\_ISL\_679308|Original|hCoV-19^^England|Human|Queens Medical Centre|COVID-19 Genomics UK (COG-UK) Consortium|Loose|United Kingdom

>Spike|hCoV-19/England/ALDP-4A6BCB/2020|2020-06-08|EPI\_ISL\_559598|Original|hCoV-19^^England|Human|Lighthouse Lab in Alderley Park|Wellcome Sanger Institute for the COVID-19 Genomics UK (COG-UK) consortium|Davies|United Kingdom

>Spike|hCoV-19/USA/FL-BPHL-0495/2020|2020-03-25|EPI\_ISL\_495401|Original|hCoV-19^^Florida|Human|Florida Bureau of Public Health Laboratories|Florida Bureau of Public Health Laboratories|Blanton|USA

>Spike|hCoV-19/Luxembourg/LNS3360603/2020|2020-11-17|EPI\_ISL\_740297|Original|hCoV-19^^Luxembourg|Human|Laboratoire national de sant\u00e9|Laboratoire national de sant\u00e9|Wienecke-Baldacchino|Luxembourg

>Spike|hCoV-19/England/CAMB-753B2/2020|2020-03-12|EPI\_ISL\_440378|Original|hCoV-19^^England|Human|Department of Pathology|Wellcome Sanger Institute for the COVID-19 Genomics UK (COG-UK) consortium|Amato|United Kingdom

>Spike|hCoV-19/England/CAMB-1AC0BA/2020|2020-04-28|EPI\_ISL\_444369|Original|hCoV-19^^England|Human|Department of Pathology|COVID-19 Genomics UK (COG-UK) Consortium|Meredith|United Kingdom

>Spike|hCoV-19/England/NORT-2A48C8/2020|2020-09-12|EPI\_ISL\_572570|Original|hCoV-19^^England|Human|Northumbria University / South Tees Hospitals NHS Foundation Trust / North Cumbria Integrated Care NHS Foundation Trust / North Tees and Hartlepool NHS

Foundation Trust / Newcastle Hospitals NHS Foundation Trust|COVID-19 Genomics UK (COG-UK) Consortium|Bashton|United Kingdom  
>Spike|hCoV-19/Denmark/DCGC-9703/2020|2020-11-09|EPI\_ISL\_669119|Original|hCoV-19^^Hovedstaden|Human|Department of Virus and Microbiological Special Diagnostics|Albertsen Lab|Michaelsen|Denmark  
>Spike|hCoV-19/India/DL-TF17/2020|2020-06-17|EPI\_ISL\_508495|Original|hCoV-19^^Delhi|Human|Translational Health Science and Technology Institute|National Institute of Biomedical Genomics|Maitra|India  
>Spike|hCoV-19/Wales/PHWC-483F13/2020|2020-10-24|EPI\_ISL\_627086|Original|hCoV-19^^Wales|Human|Wales Specialist Virology Centre Sequencing lab|COVID-19 Genomics UK (COG-UK) Consortium|Moore|United Kingdom  
>Spike|hCoV-19/India/GJ-GBRC178a/2020|2020-06-03|EPI\_ISL\_467043|Original|hCoV-19^^Gujarat|Human|B.J. Medical College and Civil hospital|Gujarat Biotechnology Research Centre|Joshi|India  
>Spike|hCoV-19/England/NORW-FA449/2020|2020-12-03|EPI\_ISL\_725505|Original|hCoV-19^^England|Human|Quadram Institute Bioscience|COVID-19 Genomics UK (COG-UK) Consortium|Alikhan|United Kingdom  
>Spike|hCoV-19/United Arab Emirates/0708/2020|2020-05-15|EPI\_ISL\_698859|Original|hCoV-19^^Abu Dhabi|Human|Group 42 (G42) Healthcare|G42 Healthcare|Ogrodzki|United Arab Emirates  
>Spike|hCoV-19/USA/FL-BPHL-1514/2020|2020-07-22|EPI\_ISL\_568612|Original|hCoV-19^^Florida|Human|Florida Bureau of Public Health Laboratories|Florida Bureau of Public Health Laboratories|Blanton|USA  
>Spike|hCoV-19/USA/AZ-TG280838/2020|2020-04-21|EPI\_ISL\_694180|Original|hCoV-19^^Arizona|Human|AZ SPHL|TGen North|French|USA  
>Spike|hCoV-19/Netherlands/ZuidHolland\_110/2020|2020-04-07|EPI\_ISL\_455299|Original|hCoV-19^^Zuid Holland|Human|Dutch COVID-19 response team|Erasmus Medical Center|Oude Munnink|Netherlands  
>Spike|hCoV-19/Russia/KO-RII-MH2080S/2020|2020-09-21|EPI\_ISL\_602409|Original|hCoV-19^^Komi|Human|HELIX LLC|WHO National Influenza Centre Russian Federation|Komissarov|Russia  
>Spike|hCoV-19/Hong Kong/VM20059282/2020|2020-07-18|EPI\_ISL\_539810|Original|hCoV-19^^Hong Kong|Human|Asiaworld Expo Command Post|Hong Kong Department of Health|Tsang|China  
>Spike|hCoV-19/England/QEUEH-9E43B5/2020|2020-09-22|EPI\_ISL\_579850|Original|hCoV-19^^England|Human|Lighthouse Lab in Glasgow|Wellcome Sanger Institute for the COVID-19 Genomics UK (COG-UK) consortium|Davies|United Kingdom  
>Spike|hCoV-19/USA/MN-MDH-2189/2020|2020-12-07|EPI\_ISL\_723140|Original|hCoV-19^^Minnesota|Human|Minnesota Department of Health|Minnesota Department of Health|Lorentz|USA  
>Spike|hCoV-19/Denmark/DCGC-7018/2020|2020-10-12|EPI\_ISL\_619865|Original|hCoV-19^^Hovedstaden|Human|Department of Virus and Microbiological Special Diagnostics|Albertsen lab|Michaelsen|Denmark  
>Spike|hCoV-19/Scotland/CVR2890/2020|2020-04-21|EPI\_ISL\_453084|Original|hCoV-19^^Scotland|Human|West of Scotland Specialist Virology Centre|COVID-19 Genomics UK (COG-UK) Consortium|Robertson|United Kingdom  
>Spike|hCoV-19/Scotland/QEUEH-9FF7F7/2020|2020-10-02|EPI\_ISL\_600300|Original|hCoV-19^^Scotland|Human|Lighthouse Lab in Glasgow|Wellcome Sanger Institute for the COVID-19 Genomics UK (COG-UK) consortium|Davies|United Kingdom  
>Spike|hCoV-19/Australia/VIC11136/2020|2020-07-16|EPI\_ISL\_563265|Original|hCoV-19^^Victoria|Human|Microbiological Diagnostic Unit - Public Health Laboratory (MDU-PHL)|MDU-PHL|Schultz|Australia  
>Spike|hCoV-19/Belgium/ITM\_C193/2020|2020-03-31|EPI\_ISL\_450731|Original|hCoV-19^^Antwerp|Human|Hospital AZ Rivierenland|Institute of Tropical Medicine|Selhorst|Belgium  
>Spike|hCoV-19/Denmark/DCGC-2375/2020|2020-08-10|EPI\_ISL\_617555|Original|hCoV-19^^Midtjylland|Human|Department of Virus and Microbiological Special Diagnostics|Albertsen lab|Michaelsen|Denmark

>Spike|hCoV-19/Wales/PHWC-48689D/2020|2020-10-21|EPI\_ISL\_638152|Original|hCoV-19^^Wales|Human|Wales Specialist Virology Centre Sequencing lab|COVID-19 Genomics UK (COG-UK) Consortium|Moore|United Kingdom

>Spike|hCoV-19/Wales/PHWC-4A52F4/2020|2020-12-15|EPI\_ISL\_764850|Original|hCoV-19^^Wales|Human|Wales Specialist Virology Centre Sequencing lab|COVID-19 Genomics UK (COG-UK) Consortium|Moore|United Kingdom

>Spike|hCoV-19/Chile/RM-171329/2020|2020-09-07|EPI\_ISL\_746729|Original|hCoV-19^^Region Metropolitana de Santiago|Human|Genetica Molecular and Subdepartamento de Virologia ISP Chile|Instituto de Salud Publica de Chile|Tognarelli|Chile

>Spike|hCoV-19/England/ALDP-BB2E26/2020|2020-11-20|EPI\_ISL\_702778|Original|hCoV-19^^England|Human|Lighthouse Lab in Alderley Park|Wellcome Sanger Institute for the COVID-19 Genomics UK (COG-UK) Consortium|Davies|United Kingdom

>Spike|hCoV-19/USA/WA-OHSU-0512/2020|2020-06-05|EPI\_ISL\_526093|Original|hCoV-19^^Washington|Human|OHSU Lab Services Molecular Microbiology Lab|Ginkgo Bioworks Clinical Laboratory|O'Roak|USA

>Spike|hCoV-19/Denmark/DCGC-13263/2020|2020-11-30|EPI\_ISL\_712689|Original|hCoV-19^^Syddanmark|Human|Department of Virus and Microbiological Special Diagnostics|Albertsen Lab|Michaelsen|Denmark

>Spike|hCoV-19/Denmark/DCGC-10678/2020|2020-11-02|EPI\_ISL\_670130|Original|hCoV-19^^Hovedstaden|Human|Department of Virus and Microbiological Special Diagnostics|Albertsen Lab|Michaelsen|Denmark

>Spike|hCoV-19/England/ALDP-94A07A/2020|2020-06-11|EPI\_ISL\_556358|Original|hCoV-19^^England|Human|Lighthouse Lab in Alderley Park|Wellcome Sanger Institute for the COVID-19 Genomics UK (COG-UK) consortium|Davies|United Kingdom

>Spike|hCoV-19/England/QEUEH-9D070B/2020|2020-09-16|EPI\_ISL\_589900|Original|hCoV-19^^England|Human|Lighthouse Lab in Glasgow|Wellcome Sanger Institute for the COVID-19 Genomics UK (COG-UK) consortium|Davies|United Kingdom

>Spike|hCoV-19/Belgium/ULG-10874/2020|2020-11-13|EPI\_ISL\_678417|Original|hCoV-19^^Li\u00e8ge|Human|Department of Clinical Microbiology|GIGA Medical Genomics|Durkin|Belgium

>Spike|hCoV-19/Switzerland/BS-42252201/2020|2020-05-01|EPI\_ISL\_581922|Original|hCoV-19^^Basel-Stadt|Human|University Hospital Basel|University Hospital Basel|Roloff Handschin|Switzerland

>Spike|hCoV-19/England/ALDP-A2F669/2020|2020-10-05|EPI\_ISL\_587135|Original|hCoV-19^^England|Human|Lighthouse Lab in Alderley Park|Wellcome Sanger Institute for the COVID-19 Genomics UK (COG-UK) consortium|Davies|United Kingdom

>Spike|hCoV-19/USA/HI-H200562/2020|2020-10-24|EPI\_ISL\_753090|Original|hCoV-19^^Hawaii|Human|State Laboratories Division|State Laboratories Division|Sultana|USA

>Spike|hCoV-19/England/MILK-B88CE3/2020|2020-11-13|EPI\_ISL\_675877|Original|hCoV-19^^England|Human|Lighthouse Lab in Milton Keynes|Wellcome Sanger Institute for the COVID-19 Genomics UK (COG-UK) Consortium|Davies|United Kingdom

>Spike|hCoV-19/England/ALDP-5CF536/2020|2020-06-15|EPI\_ISL\_558462|Original|hCoV-19^^England|Human|Lighthouse Lab in Alderley Park|Wellcome Sanger Institute for the COVID-19 Genomics UK (COG-UK) consortium|Davies|United Kingdom

>Spike|hCoV-19/England/EXET-139067/2020|2020-10-28|EPI\_ISL\_664330|Original|hCoV-19^^England|Human|University of Exeter|COVID-19 Genomics UK (COG-UK) Consortium|Temperton|United Kingdom

>Spike|hCoV-19/England/ALDP-9CD9FC/2020|2020-09-16|EPI\_ISL\_566333|Original|hCoV-19^^England|Human|Lighthouse Lab in Alderley Park|Wellcome Sanger Institute for the COVID-19 Genomics UK (COG-UK) consortium|Davies|United Kingdom

>Spike|hCoV-19/England/ALDP-A2DC4B/2020|2020-10-05|EPI\_ISL\_586863|Original|hCoV-19^^England|Human|Lighthouse Lab in Alderley Park|Wellcome Sanger Institute for the COVID-19 Genomics UK (COG-UK) consortium|Davies|United Kingdom

>Spike|hCoV-19/Denmark/DCGC-15876/2020|2020-11-23|EPI\_ISL\_713330|Original|hCoV-19^^Midtjylland|Human|Department of Virus and Microbiological Special Diagnostics|Albertsen Lab|Michaelsen|Denmark

>Spike|hCoV-19/South Africa/KRISP-K002671/2020|2020-08-02|EPI\_ISL\_535537|Original|hCoV-19^^KwaZulu-Natal|Human|NHLS-IALCH|KRISP|de Oliveira|South Africa

>Spike|hCoV-19/England/OXON-AF179/2020|2020-03-17|EPI\_ISL\_448816|Original|hCoV-19^^England|Human|Oxford Viromics|COVID-19 Genomics UK (COG-UK) Consortium|Golubchik|United Kingdom

>Spike|hCoV-19/Brazil/RS-00659/2020|2020-11-26|EPI\_ISL\_770602|Original|hCoV-19^^Rio Grande do Sul|Human|Laborat\u00f3rio de Microbiologia Molecular - Universidade FEEVALE|Bioinformatics Laboratory / LNCC|Almeida|Brazil

>Spike|hCoV-19/Switzerland/GR-ETHZ-220089/2020|2020-07-28|EPI\_ISL\_512054|Original|hCoV-19^^Graubunden|Human|Viollier AG|Department of Biosystems Science and Engineering|Nadeau|Switzerland

>Spike|hCoV-19/Denmark/ALAB-SSI-773/2020|2020-03-18|EPI\_ISL\_444898|Original|hCoV-19^^Denmark|Human|Department of Virus and Microbiological Special Diagnostics|Albertsen lab|Kirkegaard|Denmark

>Spike|hCoV-19/Scotland/CVR3500/2020|2020-05-10|EPI\_ISL\_456885|Original|hCoV-19^^Scotland|Human|West of Scotland Specialist Virology Centre|COVID-19 Genomics UK (COG-UK) Consortium|Robertson|United Kingdom

>Spike|hCoV-19/USA/FL-BPHL-0198/2020|2020-04-05|EPI\_ISL\_480849|Original|hCoV-19^^Florida|Human|Florida Bureau of Public Health Laboratories|Florida Bureau of Public Health Laboratories|Blanton|USA

>Spike|hCoV-19/England/CAMC-BD2057/2020|2020-11-28|EPI\_ISL\_702120|Original|hCoV-19^^England|Human|Lighthouse Lab in Cambridge|Wellcome Sanger Institute for the COVID-19 Genomics UK (COG-UK) Consortium|Davies|United Kingdom

>Spike|hCoV-19/England/MILK-AB7806/2020|2020-10-21|EPI\_ISL\_623469|Original|hCoV-19^^England|Human|Lighthouse Lab in Milton Keynes|Wellcome Sanger Institute for the COVID-19 Genomics UK (COG-UK) consortium|Davies|United Kingdom

>Spike|hCoV-19/England/QEUEH-9DD2D0/2020|2020-09-21|EPI\_ISL\_580923|Original|hCoV-19^^England|Human|Lighthouse Lab in Glasgow|Wellcome Sanger Institute for the COVID-19 Genomics UK (COG-UK) consortium|Davies|United Kingdom

>Spike|hCoV-19/England/QEUEH-AD39C5/2020|2020-10-24|EPI\_ISL\_629948|Original|hCoV-19^^England|Human|Lighthouse Lab in Glasgow|Wellcome Sanger Institute for the COVID-19 Genomics UK (COG-UK) consortium|Davies|United Kingdom

>Spike|hCoV-19/Wales/PHWC-498063/2020|2020-11-30|EPI\_ISL\_727017|Original|hCoV-19^^Wales|Human|Originating lab|COVID-19 Genomics UK (COG-UK) Consortium|Moore|United Kingdom

>Spike|hCoV-19/England/CAMB-1B5E4B/2020|2020-00-00|EPI\_ISL\_573132|Original|hCoV-19^^England|Human|Department of Pathology|COVID-19 Genomics UK (COG-UK) Consortium|Goodfellow|United Kingdom

>Spike|hCoV-19/Australia/VIC7175/2020|2020-07-23|EPI\_ISL\_564262|Original|hCoV-19^^Victoria|Human|Microbiological Diagnostic Unit - Public Health Laboratory (MDU-PHL) |MDU-PHL|Schultz|Australia

>Spike|hCoV-19/Denmark/DCGC-2132/2020|2020-07-27|EPI\_ISL\_618395|Original|hCoV-19^^Sjaelland|Human|Department of Virus and Microbiological Special Diagnostics|Albertsen lab|Michaelsen|Denmark

>Spike|hCoV-19/England/CAMB-1B95BB/2020|2020-11-04|EPI\_ISL\_664568|Original|hCoV-19^^England|Human|Department of Pathology|COVID-19 Genomics UK (COG-UK) Consortium|Goodfellow|United Kingdom

>Spike|hCoV-19/USA/FL-BPHL-1994/2020|2020-04-16|EPI\_ISL\_653147|Original|hCoV-19^^Florida|Human|Florida Bureau of Public Health Laboratories|Florida Bureau of Public Health Laboratories|Blanton|USA

>Spike|hCoV-19/United Arab Emirates/0125/2020|2020-05-18|EPI\_ISL\_698315|Original|hCoV-19^^Abu Dhabi|Human|Group 42 (G42) Healthcare|G42 Healthcare|Ogrodzki|United Arab Emirates

>Spike|hCoV-19/USA/AZ-TG313687/2020|2020-05-18|EPI\_ISL\_694326|Original|hCoV-19^^Arizona|Human|TGen North|TGen North|French|USA

>Spike|hCoV-19/Wales/PHWC-48C90D/2020|2020-11-07|EPI\_ISL\_666484|Original|hCoV-19^^Wales|Human|Wales Specialist Virology Centre Sequencing lab|COVID-19 Genomics UK (COG-UK) Consortium|Moore|United Kingdom

>Spike|hCoV-19/Spain/MD-IBV-003683/2020|2020-04-02|EPI\_ISL\_467258|Original|hCoV-19^^Madrid|Human|Hospital General Universitario Gregorio Mara\u00f1a|SeqCOVID-SPAIN consortium/IBV (CSIC) |Comas|Spain



>Spike|hCoV-19/France/ARA-SC186/2020|2020-04-01|EPI\_ISL\_634836|Original|hCoV-19^^Auvergne-Rhone-Alpes|Human|Laboratoire de virologie|CNR Virus des Infections Respiratoires - France SUD|Bal|France

>Spike|hCoV-19/England/QEUEH-B66498/2020|2020-11-11|EPI\_ISL\_661320|Original|hCoV-19^^England|Human|Lighthouse Lab in Glasgow|Wellcome Sanger Institute for the COVID-19 Genomics UK (COG-UK) Consortium|Davies|United Kingdom

>Spike|hCoV-19/Denmark/DCGC-13176/2020|2020-11-30|EPI\_ISL\_712634|Original|hCoV-19^^Hovedstaden|Human|Department of Virus and Microbiological Special Diagnostics|Albertsen Lab|Michaelsen|Denmark

>Spike|hCoV-19/England/204820068/2020|2020-11-24|EPI\_ISL\_683573|Original|hCoV-19^^England|Human|Respiratory Virus Unit|COVID-19 Genomics UK (COG-UK) Consortium|Platt|United Kingdom

>Spike|hCoV-19/USA/TX-HMH-1402/2020|2020-05-01|EPI\_ISL\_542700|Original|hCoV-19^^Texas|Human|Houston Methodist Hospital|Houston Methodist Hospital|Long|USA

>Spike|hCoV-19/Netherlands/NB-EMC-240/2020|2020-06-11|EPI\_ISL\_523363|Original|hCoV-19^^Noord Brabant|Human|Dutch COVID-19 response team|Erasmus Medical Center|Oude Munnink|Netherlands

>Spike|hCoV-19/Luxembourg/LNS6774334/2020|2020-12-21|EPI\_ISL\_771108|Original|hCoV-19^^Luxembourg|Human|Laboratoire national de sant\u00e9|Laboratoire national de sant\u00e9|Wienecke-Baldacchino|Luxembourg

>Spike|hCoV-19/USA/OR-PROV-168/2020|2020-05-08|EPI\_ISL\_482419|Original|hCoV-19^^Oregon|Human|Providence St. Joseph Health Molecular Genomics Laboratory|Providence St. Joseph Health Molecular Genomics Laboratory|Dowdell|USA

>Spike|hCoV-19/Canada/ON-S1946/2020|2020-11-24|EPI\_ISL\_755666|Original|hCoV-19^^Ontario|Human|Toronto Invasive Bacterial Diseases Network|McMaster University|McArthur|Canada

>Spike|hCoV-19/England/OXON-ACBE7/2020|2020-04-05|EPI\_ISL\_448517|Original|hCoV-19^^England|Human|Oxford Viromics|COVID-19 Genomics UK (COG-UK) Consortium|Golubchik|United Kingdom

>Spike|hCoV-19/Wales/PHWC-49C2B4/2020|2020-12-07|EPI\_ISL\_742536|Original|hCoV-19^^Wales|Human|Wales Specialist Virology Centre Sequencing lab|COVID-19 Genomics UK (COG-UK) Consortium|Moore|United Kingdom

>Spike|hCoV-19/Denmark/DCGC-11679/2020|2020-10-26|EPI\_ISL\_671062|Original|hCoV-19^^Midtjylland|Human|Department of Virus and Microbiological Special Diagnostics|Albertsen Lab|Michaelsen|Denmark

>Spike|hCoV-19/Japan/DP0158/2020|2020-02-15|EPI\_ISL\_416579|Original|hCoV-19^^Japan|Human|Japanese Quarantine Stations|Pathogen Genomics Center|Sekizuka|Japan

>Spike|hCoV-19/Netherlands/NA\_681/2020|2020-03-16|EPI\_ISL\_461116|Original|hCoV-19^^Netherlands|Human|Dutch COVID-19 response team|Erasmus Medical Center|Oude Munnink|Netherlands

>Spike|hCoV-19/Spain/AR-IBV-98008059/2020|2020-10-01|EPI\_ISL\_654450|Original|hCoV-19^^Aragon|Human|Servicio de Microbiolog\u00eda|SeqCOVID-SPAIN consortium|IBV (CSIC)|Comas|Spain

>Spike|hCoV-19/England/20128031604/2020|2020-03-19|EPI\_ISL\_423950|Original|hCoV-19^^England|Human|Respiratory Virus Unit|Respiratory Virus Unit|Platt|United Kingdom

>Spike|hCoV-19/Australia/VIC4009/2020|2020-07-10|EPI\_ISL\_519395|Original|hCoV-19^^Victoria|Human|Microbiological Diagnostic Unit - Public Health Laboratory (MDU-PHL)|MDU-PHL|Schultz|Australia

>Spike|hCoV-19/France/PAC-IHU-0638/2020|2020-04-13|EPI\_ISL\_568908|Original|hCoV-19^^Provence-Alpes-C\u00f4te-d\u01Azur|Human|MEPHI|MEPHI|Levasseur|France

>Spike|hCoV-19/England/NORW-21FBCF/2020|2020-12-15|EPI\_ISL\_741466|Original|hCoV-19^^England|Human|Quadram Institute Bioscience|COVID-19 Genomics UK (COG-UK) Consortium|Alikhan|United Kingdom

>Spike|hCoV-19/England/LIVE-A2E51/2020|2020-05-20|EPI\_ISL\_499875|Original|hCoV-19^^England|Human|Liverpool Clinical Laboratories|COVID-19 Genomics UK (COG-UK) Consortium|Haldenby|United Kingdom

>Spike|hCoV-19/Northern Ireland/NIRE-2344BA/2020|2020-10-19|EPI\_ISL\_680395|Original|hCoV-19^^Northern Ireland|Human|Regional Virus Laboratory|COVID-19 Genomics UK (COG-UK) Consortium|Fairley|United Kingdom

>Spike|hCoV-19/USA/WA-S1396/2020|2020-05-19|EPI\_ISL\_495846|Original|hCoV-19^^Washington|Human|Washington State Department of Health|Seattle Flu Study|Lee|USA

>Spike|hCoV-19/Germany/BE-ChVir-W2207-8292/2020|2020-11-22|EPI\_ISL\_753829|Original|hCoV-19^^Berlin|Human|Charit\u00e9 Universit\u00e4tsmedizin Berlin|Charit\u00e9 Universit\u00e4tsmedizin Berlin|Muehlemann|Germany

>Spike|hCoV-19/Japan/PG-3062/2020|2020-04-00|EPI\_ISL\_691185|Original|hCoV-19^^Japan|Human|Pathogen Genomics Center|Pathogen Genomics Center|Sekizuka|Japan

>Spike|hCoV-19/Switzerland/BL-65240056/2020|2020-04-04|EPI\_ISL\_581871|Original|hCoV-19^^Basel-Land|Human|University Hospital Basel|University Hospital Basel|Roloff Handschin|Switzerland

>Spike|hCoV-19/Australia/VIC8980/2020|2020-07-28|EPI\_ISL\_565330|Original|hCoV-19^^Victoria|Human|Microbiological Diagnostic Unit - Public Health Laboratory (MDU-PHL)|MDU-PHL|Schultz|Australia

>Spike|hCoV-19/England/BRIS-12273F/2020|2020-04-05|EPI\_ISL\_440668|Original|hCoV-19^^England|Human|PHE South West Regional Laboratory|Wellcome Sanger Institute for the COVID-19 Genomics UK (COG-UK) consortium|Amato|United Kingdom

>Spike|hCoV-19/Austria/CeMM0255/2020|2020-03-22|EPI\_ISL\_438084|Original|hCoV-19^^Vienna|Human|Center for Virology|Bergthaler laboratory|Bergthaler|Austria

>Spike|hCoV-19/Australia/VIC644/2020|2020-03-28|EPI\_ISL\_426940|Original|hCoV-19^^Victoria|Human|Victorian Infectious Diseases Reference Laboratory (VIDRL)|Microbiological Diagnostic Unit Public Health Laboratory and Victorian Infectious Diseases Reference Laboratory|Schultz|Australia

>Spike|hCoV-19/Wales/PHWC-1692B3/2020|2020-06-11|EPI\_ISL\_499427|Original|hCoV-19^^Wales|Human|Wales Specialist Virology Centre Sequencing lab|COVID-19 Genomics UK (COG-UK) Consortium|Moore|United Kingdom

>Spike|hCoV-19/Spain/PV-IBV-000887/2020|2020-03-25|EPI\_ISL\_452675|Original|hCoV-19^^Basque Country|Human|Servicio de Microbiolog\u00eda. Hospital Universitario Donostia. OSI Donostialdea. \u00c1rea de Enfermedades Infecciosas|SeqCOVID-SPAIN consortium|IBV (CSIC)|Comas|Spain

>Spike|hCoV-19/England/GSTT-5651/2020|2020-03-22|EPI\_ISL\_560698|Original|hCoV-19^^England|Human|Centre for Clinical Infection and Diagnostics Research and Genomics Innovation Unit|Centre for Clinical Infection and Diagnostics Research and Genomics Innovation Unit|Awan|United Kingdom

>Spike|hCoV-19/USA/TX-DSHS-0734/2020|2020-05-14|EPI\_ISL\_584136|Original|hCoV-19^^Texas|Human|Texas Department of State Health Services|Texas Department of State Health Services|Rahman|USA

>Spike|hCoV-19/England/ALDP-B47DA1/2020|2020-11-07|EPI\_ISL\_649376|Original|hCoV-19^^England|Human|Lighthouse Lab in Alderley Park|Wellcome Sanger Institute for the COVID-19 Genomics UK (COG-UK) Consortium|Davies|United Kingdom

>Spike|hCoV-19/USA/MI-UM-10036735869/2020|2020-11-02|EPI\_ISL\_682124|Original|hCoV-19^^Michigan|Human|University of Michigan Clinical Microbiology Laboratory|Lauring Lab|Valesano|USA

>Spike|hCoV-19/Northern Ireland/QEUA-96DAA0/2020|2020-08-20|EPI\_ISL\_530729|Original|hCoV-19^^Northern Ireland|Human|Lighthouse Lab in Glasgow|Wellcome Sanger Institute for the COVID-19 Genomics UK (COG-UK) consortium|Davies|United Kingdom

>Spike|hCoV-19/India/MH-ACTREC-086/2020|2020-05-21|EPI\_ISL\_699742|Original|hCoV-19^^Maharashtra|Human|Hematopathology Laboratory|Hematopathology Laboratory|Patkar|India

>Spike|hCoV-19/Sweden/20-22149/2020|2020-06-26|EPI\_ISL\_623082|Original|hCoV-19^^Skane|Human|Klinisk mikrobiologi|The Public Health Agency of Sweden|Svartstr\u00f6m|Sweden

>Spike|hCoV-19/England/ALDP-9BE4C0/2020|2020-09-09|EPI\_ISL\_567919|Original|hCoV-19^^England|Human|Lighthouse Lab in Alderley Park|Wellcome Sanger Institute for the COVID-19 Genomics UK (COG-UK) consortium|Davies|United Kingdom

>Spike|hCoV-19/Switzerland/BL-ETHZ-230018/2020|2020-08-02|EPI\_ISL\_516561|Original|hCoV-19^^Basel-Landschaft|Human|Viollier AG|Department of Biosystems Science and Engineering|Nadeau|Switzerland

>Spike|hCoV-19/India/GJ-GBRC25/2020|2020-04-26|EPI\_ISL\_444456|Original|hCoV-19^^Gujarat|Human|B.J. Medical College and Civil hospital|Gujarat Biotechnology Research Centre|Joshi|India

>Spike|hCoV-19/Jordan/SEARCH-5400/2020|2020-10-11|EPI\_ISL\_755211|Original|hCoV-19^^Amman|Human|Biolab Diagnostic Laboratories|Andersen lab at Scripps Research|Gangavarapu|Jordan

>Spike|hCoV-19/England/NORW-EF896/2020|2020-00-00|EPI\_ISL\_529469|Original|hCoV-19^^England|Human|Quadram Institute Bioscience|COVID-19 Genomics UK (COG-UK) Consortium|Alikhan|United Kingdom

>Spike|hCoV-19/England/NOTT-115650/2020|2020-10-15|EPI\_ISL\_595254|Original|hCoV-19^^England|Human|Queens Medical Centre|COVID-19 Genomics UK (COG-UK) Consortium|Loose|United Kingdom

>Spike|hCoV-19/England/CAMC-B22F79/2020|2020-11-02|EPI\_ISL\_647366|Original|hCoV-19^^England|Human|Lighthouse Lab in Cambridge|Wellcome Sanger Institute for the COVID-19 Genomics UK (COG-UK) Consortium|Davies|United Kingdom

>Spike|hCoV-19/USA/WI-UW-1459/2020|2020-09-11|EPI\_ISL\_541591|Original|hCoV-19^^Wisconsin|Human|University of Wisconsin-Madison AIDS Vaccine Research Laboratories|University of Wisconsin-Madison AIDS Vaccine Research Laboratories|Baczenas|USA

>Spike|hCoV-19/Wales/PHWC-26F70/2020|2020-03-29|EPI\_ISL\_422174|Original|hCoV-19^^Wales|Human|Wales Specialist Virology Centre|Public Health Wales Microbiology Cardiff|Moore|United Kingdom

>Spike|hCoV-19/USA/CA-ALSR-4693/2020|2020-11-11|EPI\_ISL\_730086|Original|hCoV-19^^California|Human|San Diego County Public Health Laboratory|Andersen lab at Scripps Research|Gangavarapu|USA

>Spike|hCoV-19/England/SHEF-CD5F1/2020|2020-06-13|EPI\_ISL\_479257|Original|hCoV-19^^England|Human|Virology Department|COVID-19 Genomics UK (COG-UK) Consortium|de Silva|United Kingdom

>Spike|hCoV-19/Wales/PHWC-481944/2020|2020-10-17|EPI\_ISL\_613126|Original|hCoV-19^^Wales|Human|Wales Specialist Virology Centre Sequencing lab|COVID-19 Genomics UK (COG-UK) Consortium|Moore|United Kingdom

>Spike|hCoV-19/Australia/VIC296/2020|2020-03-23|EPI\_ISL\_419987|Original|hCoV-19^^Victoria|Human|Victorian Infectious Diseases Reference Laboratory (VIDRL)|Victorian Infectious Diseases Reference Laboratory and Microbiological Diagnostic Unit Public Health Laboratory|Schultz|Australia

>Spike|hCoV-19/USA/UT-UPHL-201214342/2020|2020-03-30|EPI\_ISL\_672545|Original|hCoV-19^^Utah|Human|Utah Public Health Laboratory|Utah Public Health Laboratory|Young|USA

>Spike|hCoV-19/Ireland/WD-NVRL-AIIDV0352v1/2020|2020-05-06|EPI\_ISL\_644236|Original|hCoV-19^^Waterford|Human|CEPHR / Vincent's Hospital|Irish Coronavirus Sequencing Consortium - National Virus Reference Laboratory|Gonzalez|Ireland

>Spike|hCoV-19/Canada/NS-NML-1246/2020|2020-04-05|EPI\_ISL\_579638|Original|hCoV-19^^Nova Scotia|Human|QEII Health Sciences Centre|National Microbiology Laboratory (NML)|Majer|Canada

>Spike|hCoV-19/Bangladesh/BCSIR-NILMRC-112/2020|2020-06-07|EPI\_ISL\_475761|Original|hCoV-19^^Rangpur|Human|National Institute of Laboratory Medicine and Referral Center|Genomic Research Lab|Khan|Bangladesh

>Spike|hCoV-19/England/CAMC-A59341/2020|2020-10-08|EPI\_ISL\_597058|Original|hCoV-19^^England|Human|Lighthouse Lab in Cambridge|Wellcome Sanger Institute for the COVID-19 Genomics UK (COG-UK) consortium|Davies|United Kingdom

>Spike|hCoV-19/Portugal/PT0866/2020|2020-03-27|EPI\_ISL\_511125|Original|hCoV-19^^Portugal|Human|Instituto Nacional de Saude (INSA)|Instituto Nacional de Saude (INSA)|Borges|Portugal

>Spike|hCoV-19/USA/WA-UW-12548/2020|2020-06-26|EPI\_ISL\_570546|Original|hCoV-19^^Washington|Human|UW Virology Lab|UW Virology Lab|Roychoudhury|USA

>Spike|hCoV-19/England/CAMC-C439A0/2020|2020-12-10|EPI\_ISL\_719182|Original|hCoV-19^^England|Human|Lighthouse Lab in Cambridge|Wellcome Sanger Institute for the COVID-19 Genomics UK (COG-UK) Consortium|Davies|United Kingdom

>Spike|hCoV-19/Switzerland/BE-ETHZ-410210/2020|2020-12-13|EPI\_ISL\_737722|Original|hCoV-19^^Bern|Human|Viollier AG|Department of Biosystems Science and Engineering|Nadeau|Switzerland

>Spike|hCoV-19/England/MILK-97071C/2020|2020-08-17|EPI\_ISL\_553034|Original|hCoV-19^^England|Human|Lighthouse Lab in Milton Keynes|Wellcome Sanger Institute for the COVID-19 Genomics UK (COG-UK) consortium|Davies|United Kingdom

>Spike|hCoV-19/Japan/PG-1510/2020|2020-04-00|EPI\_ISL\_685117|Original|hCoV-19^^Japan|Human|Saitama Prefectural Institute of Public Health|Pathogen Genomics Center|Sekizuka|Japan

>Spike|hCoV-19/England/QEUA-9D0AE4/2020|2020-09-16|EPI\_ISL\_589921|Original|hCoV-19^^England|Human|Lighthouse Lab in Glasgow|Wellcome Sanger Institute for the COVID-19 Genomics UK (COG-UK) consortium|Davies|United Kingdom

>Spike|hCoV-19/Singapore/905/2020|2020-09-07|EPI\_ISL\_536446|Original|hCoV-19^^Singapore|Human|National Public Health Laboratory|National Public Health Laboratory|Mak|Singapore

>Spike|hCoV-19/England/ALDP-C23AEF/2020|2020-12-06|EPI\_ISL\_760860|Original|hCoV-19^^England|Human|Lighthouse Lab in Alderley Park|Wellcome Sanger Institute for the COVID-19 Genomics UK (COG-UK) Consortium|Davies|United Kingdom

>Spike|hCoV-19/England/ALDP-BC785D/2020|2020-11-22|EPI\_ISL\_721296|Original|hCoV-19^^England|Human|Lighthouse Lab in Alderley Park|Wellcome Sanger Institute for the COVID-19 Genomics UK (COG-UK) Consortium|Davies|United Kingdom

>Spike|hCoV-19/Japan/PG-6310/2020|2020-08-00|EPI\_ISL\_689421|Original|hCoV-19^^Japan|Human|Pathogen Genomics Center|Pathogen Genomics Center|Sekizuka|Japan

>Spike|hCoV-19/England/NORW-F5A1F/2020|2020-10-27|EPI\_ISL\_725287|Original|hCoV-19^^England|Human|Quadram Institute Bioscience|COVID-19 Genomics UK (COG-UK) Consortium|Alikhan|United Kingdom

>Spike|hCoV-19/Scotland/CVR5350/2020|2020-10-26|EPI\_ISL\_651532|Original|hCoV-19^^Scotland|Human|West of Scotland Specialist Virology Centre|COVID-19 Genomics UK (COG-UK) Consortium|Robertson|United Kingdom

>Spike|hCoV-19/USA/TX-HMH-MCoV-18276/2020|2020-11-17|EPI\_ISL\_784624|Original|hCoV-19^^Texas|Human|Houston Methodist Hospital|Houston Methodist Hospital|Long|USA

>Spike|hCoV-19/England/SHEF-C2134/2020|2020-04-17|EPI\_ISL\_448837|Original|hCoV-19^^England|Human|Virology Department|COVID-19 Genomics UK (COG-UK) Consortium|de Silva|United Kingdom

>Spike|hCoV-19/USA/WA-S1707/2020|2020-06-01|EPI\_ISL\_496133|Original|hCoV-19^^Washington|Human|Washington State Department of Health|Seattle Flu Study|Lee|USA

>Spike|hCoV-19/England/201121218/2020|2020-03-09|EPI\_ISL\_464691|Original|hCoV-19^^England|Human|Respiratory Virus Unit|Respiratory Virus Unit|Platt|United Kingdom

>Spike|hCoV-19/Japan/PG-4384/2020|2020-06-00|EPI\_ISL\_692611|Original|hCoV-19^^Japan|Human|Pathogen Genomics Center|Pathogen Genomics Center|Sekizuka|Japan

>Spike|hCoV-19/England/ALDP-954B4F/2020|2020-06-13|EPI\_ISL\_553462|Original|hCoV-19^^England|Human|Lighthouse Lab in Alderley Park|Wellcome Sanger Institute for the COVID-19 Genomics UK (COG-UK) consortium|Davies|United Kingdom

>Spike|hCoV-19/England/OXON-B2DF7/2020|2020-03-27|EPI\_ISL\_534816|Original|hCoV-19^^England|Human|Oxford Viromics|COVID-19 Genomics UK (COG-UK) Consortium|Golubchik|United Kingdom

>Spike|hCoV-19/South Africa/Tygerberg\_16/2020|2020-04-08|EPI\_ISL\_464127|Original|hCoV-19^^Western Cape|Human|National Health Laboratory Service (NHLS)|Division of Medical Virology|Engelbrecht|South Africa

>Spike|hCoV-19/England/QEUA-A1F15C/2020|2020-09-29|EPI\_ISL\_587542|Original|hCoV-19^^England|Human|Lighthouse Lab in Glasgow|Wellcome Sanger Institute for the COVID-19 Genomics UK (COG-UK) consortium|Davies|United Kingdom

>Spike|hCoV-19/Wales/PHWC-48F1B7/2020|2020-11-09|EPI\_ISL\_681055|Original|hCoV-19^^Wales|Human|Wales Specialist Virology Centre Sequencing lab|COVID-19 Genomics UK (COG-UK) Consortium|Moore|United Kingdom

>Spike|hCoV-19/Poland/PL\_MCB\_85/2020|2020-05-10|EPI\_ISL\_645084|Original|hCoV-19^^Poland|Human|Human Genome Variation Research Group|Human Genome Variation Research Group|Poland

>Spike|hCoV-19/Denmark/DCGC-15483/2020|2020-11-23|EPI\_ISL\_713848|Original|hCoV-19^^Midtjylland|Human|Department of Virus and Microbiological Special Diagnostics|Albertsen Lab|Michaelsen|Denmark

>Spike|hCoV-19/USA/NM-NMDOH-2020321224/2020|2020-09-03|EPI\_ISL\_569627|Original|hCoV-19^^New Mexico|Human|New Mexico Department of Health Scientific Laboratory|New Mexico Department of Health Scientific Laboratory|Johnson|USA

>Spike|hCoV-19/Denmark/DCGC-9936/2020|2020-11-09|EPI\_ISL\_668494|Original|hCoV-19^^Hovedstaden|Human|Department of Virus and Microbiological Special Diagnostics|Albertsen Lab|Michaelsen|Denmark

>Spike|hCoV-19/India/MH-GA5/2020|2020-06-17|EPI\_ISL\_508244|Original|hCoV-19^^Maharashtra|Human|Government Medical College|National Institute of Biomedical Genomics|Maitra|India

>Spike|hCoV-19/Denmark/DCGC-18242/2020|2020-12-14|EPI\_ISL\_749837|Original|hCoV-19^^Midtjylland|Human|Department of Virus and Microbiological Special Diagnostics|Albertsen Lab|Michaelsen|Denmark

>Spike|hCoV-19/England/ALDP-9E6DC4/2020|2020-09-24|EPI\_ISL\_580403|Original|hCoV-19^^England|Human|Lighthouse Lab in Alderley Park|Wellcome Sanger Institute for the COVID-19 Genomics UK (COG-UK) consortium|Davies|United Kingdom

>Spike|hCoV-19/Switzerland/JU-ETHZ-100120/2020|2020-03-16|EPI\_ISL\_451704|Original|hCoV-19^^Jura|Human|Viollier AG|Department of Biosystems Science and Engineering|Nadeau|Switzerland

>Spike|hCoV-19/England/CAMB-1AB965/2020|2020-04-21|EPI\_ISL\_470327|Original|hCoV-19^^England|Human|Department of Pathology|Wellcome Sanger Institute for the COVID-19 Genomics UK (COG-UK) consortium|Davies|United Kingdom

>Spike|hCoV-19/England/ALDP-B1BC03/2020|2020-11-01|EPI\_ISL\_645661|Original|hCoV-19^^England|Human|Lighthouse Lab in Alderley Park|Wellcome Sanger Institute for the COVID-19 Genomics UK (COG-UK) Consortium|Davies|United Kingdom

>Spike|hCoV-19/England/CAMC-B09C62/2020|2020-10-30|EPI\_ISL\_673112|Original|hCoV-19^^England|Human|Lighthouse Lab in Cambridge|Wellcome Sanger Institute for the COVID-19 Genomics UK (COG-UK) Consortium|Davies|United Kingdom

>Spike|hCoV-19/Scotland/CVR2373/2020|2020-04-13|EPI\_ISL\_484578|Original|hCoV-19^^Scotland|Human|West of Scotland Specialist Virology Centre|COVID-19 Genomics UK (COG-UK) Consortium|Robertson|United Kingdom

>Spike|hCoV-19/England/QEUEH-A7679D/2020|2020-10-13|EPI\_ISL\_613328|Original|hCoV-19^^England|Human|Queens Medical Centre|COVID-19 Genomics UK (COG-UK) Consortium|Loose|United Kingdom

>Spike|hCoV-19/Scotland/QEUEH-96DD7A/2020|2020-08-21|EPI\_ISL\_530708|Original|hCoV-19^^Scotland|Human|NHSGGC West of Scotland Specialist Virology Centre / MRC - University of Glasgow Centre for Virus Research|Wellcome Sanger Institute for the COVID-19 Genomics UK (COG-UK) consortium|Davies|United Kingdom

>Spike|hCoV-19/England/ALDP-C48DDC/2020|2020-12-12|EPI\_ISL\_736670|Original|hCoV-19^^England|Human|Lighthouse Lab in Alderley Park|Wellcome Sanger Institute for the COVID-19 Genomics UK (COG-UK) Consortium|Davies|United Kingdom

>Spike|hCoV-19/USA/MD-HP12061/2020|2020-11-23|EPI\_ISL\_791393|Original|hCoV-19^^Maryland|Human|Johns Hopkins Hospital Department of Pathology|Johns Hopkins Hospital Department of Pathology|Morris|USA

>Spike|hCoV-19/England/20178051104/2020|2020-04-22|EPI\_ISL\_465423|Original|hCoV-19^^England|Human|Respiratory Virus Unit|Respiratory Virus Unit|Platt|United Kingdom

>Spike|hCoV-19/England/CAMC-B53944/2020|2020-11-08|EPI\_ISL\_656972|Original|hCoV-19^^England|Human|Lighthouse Lab in Cambridge|Wellcome Sanger Institute for the COVID-19 Genomics UK (COG-UK) Consortium|Davies|United Kingdom

>Spike|hCoV-19/USA/WA-S1953/2020|2020-06-03|EPI\_ISL\_497381|Original|hCoV-19^^Washington|Human|Washington State Department of Health|Seattle Flu Study|Lee|USA

>Spike|hCoV-19/USA/WA-S1318/2020|2020-05-15|EPI\_ISL\_495768|Original|hCoV-19^^Washington|Human|Washington State Department of Health|Seattle Flu Study|Lee|USA

>Spike|hCoV-19/Switzerland/UR-ETHZ-120171/2020|2020-04-26|EPI\_ISL\_468249|Original|hCoV-19^^Uri|Human|Viollier AG|Department of Biosystems Science and Engineering|Nadeau|Switzerland

>Spike|hCoV-19/Denmark/DCGC-1106/2020|2020-03-09|EPI\_ISL\_614431|Original|hCoV-19^^Syddanmark|Human|Department of Virus and Microbiological Special Diagnostics|Albertsen lab|Michaelsen|Denmark

>Spike|hCoV-19/Finland/5A4S4A10/2020|2020-04-05|EPI\_ISL\_481688|Original|hCoV-19^^Uusimaa|Human|Department of Virology and Immunology|Department of Virology|Smura|Finland

>Spike|hCoV-19/Germany/HH-hpi-p2156/2020|2020-03-27|EPI\_ISL\_776388|Original|hCoV-19^^Hamburg|Human|University Medical Center Hamburg Eppendorf|Heinrich Pette Institute|Robitaille|Germany

>Spike|hCoV-19/England/ALDP-C3BDEB/2020|2020-12-10|EPI\_ISL\_731883|Original|hCoV-19^^England|Human|Lighthouse Lab in Alderley Park|Wellcome Sanger Institute for the COVID-19 Genomics UK (COG-UK) Consortium|Davies|United Kingdom

>Spike|hCoV-19/USA/WA-S2429/2020|2020-06-14|EPI\_ISL\_497061|Original|hCoV-19^^Washington|Human|Washington State Department of Health|Seattle Flu Study|Lee|USA

>Spike|hCoV-19/Scotland/CVR54/2020|2020-03-13|EPI\_ISL\_425783|Original|hCoV-19^^Scotland|Human|West of Scotland Specialist Virology Centre|COVID-19 Genomics UK (COG-UK) Consortium|Robertson|United Kingdom

>Spike|hCoV-19/England/ALDP-4AC776/2020|2020-06-14|EPI\_ISL\_559511|Original|hCoV-19^^England|Human|Lighthouse Lab in Alderley Park|Wellcome Sanger Institute for the COVID-19 Genomics UK (COG-UK) consortium|Davies|United Kingdom

>Spike|hCoV-19/USA/WI-UW-2236/2020|2020-11-16|EPI\_ISL\_728006|Original|hCoV-19^^Wisconsin|Human|University of Wisconsin-Madison AIDS Vaccine Research Laboratories|University of Wisconsin-Madison AIDS Vaccine Research Laboratories|Baczenas|USA

>Spike|hCoV-19/Russia/MUR-RII-MH6258S/2020|2020-11-13|EPI\_ISL\_733365|Original|hCoV-19^^Murmansk|Human|HELIX LLC|WHO National Influenza Centre Russian Federation|Komissarov|Russia

>Spike|hCoV-19/England/LEED-2A9DA6/2020|2020-03-26|EPI\_ISL\_538963|Original|hCoV-19^^England|Human|Leeds Teaching Hospitals NHS Trust and Public Health England|Wellcome Sanger Institute for the COVID-19 Genomics UK (COG-UK) consortium|Davies|United Kingdom

>Spike|hCoV-19/USA/OR-OHSU-2569/2020|2020-08-20|EPI\_ISL\_667254|Original|hCoV-19^^Oregon|Human|OHSU Lab Services Molecular Microbiology Lab|Oregon SARS-CoV-2 Genome Sequencing Center|O'Roak|USA

>Spike|hCoV-19/Netherlands/NA\_76/2020|2020-03-08|EPI\_ISL\_422836|Original|hCoV-19^^Netherlands|Human|Dutch COVID-19 response team|Erasmus Medical Center|Oude Munnink|Netherlands

>Spike|hCoV-19/France/PAC-IHU-0040/2020|2020-03-18|EPI\_ISL\_569264|Original|hCoV-19^^Provence-Alpes-C\u00f4te-d\u2019Azur|Human|MEPHI|MEPHI|Levasseur|France

>Spike|hCoV-19/Scotland/CVR1440/2020|2020-04-01|EPI\_ISL\_438809|Original|hCoV-19^^Scotland|Human|West of Scotland Specialist Virology Centre|COVID-19 Genomics UK (COG-UK) Consortium|Robertson|United Kingdom

>Spike|hCoV-19/Japan/PG-6019/2020|2020-07-00|EPI\_ISL\_689131|Original|hCoV-19^^Japan|Human|Pathogen Genomics Center|Pathogen Genomics Center|Sekizuka|Japan

>Spike|hCoV-19/Denmark/DCGC-2655/2020|2020-08-17|EPI\_ISL\_617875|Original|hCoV-19^^Syddanmark|Human|Department of Virus and Microbiological Special Diagnostics|Albertsen lab|Michaelsen|Denmark

>Spike|hCoV-19/USA/TX-HMH-MCoV-13156/2020|2020-08-26|EPI\_ISL\_788307|Original|hCoV-19^^Texas|Human|Houston Methodist Hospital|Houston Methodist Hospital|Long|USA

>Spike|hCoV-19/Denmark/DCGC-14232/2020|2020-11-30|EPI\_ISL\_711108|Original|hCoV-19^^Hovedstaden|Human|Department of Virus and Microbiological Special Diagnostics|Albertsen Lab|Michaelsen|Denmark

>Spike|hCoV-19/Belgium/UGent-202/2020|2020-10-22|EPI\_ISL\_717610|Original|hCoV-19^^Ghent|Human|Lab voor klinische biologie|Onderzoeksgroep Virologie|Lambrechts|Belgium

>Spike|hCoV-19/England/ALDP-98054C/2020|2020-08-06|EPI\_ISL\_526347|Original|hCoV-19^^England|Human|Queens Medical Centre|COVID-19 Genomics UK (COG-UK) Consortium|Loose|United Kingdom

>Spike|hCoV-19/England/MILK-C2F904/2020|2020-12-07|EPI\_ISL\_733894|Original|hCoV-19^^England|Human|Lighthouse Lab in Milton Keynes|Wellcome Sanger Institute for the COVID-19 Genomics UK (COG-UK) Consortium|Davies|United Kingdom

>Spike|hCoV-19/England/OXON-AF4F8/2020|2020-04-14|EPI\_ISL\_478746|Original|hCoV-19^^England|Human|Oxford Viromics|COVID-19 Genomics UK (COG-UK) Consortium|Golubchik|United Kingdom

>Spike|hCoV-19/England/ALDP-935D8A/2020|2020-06-21|EPI\_ISL\_552977|Original|hCoV-19^^England|Human|Lighthouse Lab in Alderley Park|Wellcome Sanger Institute for the COVID-19 Genomics UK (COG-UK) consortium|Davies|United Kingdom

>Spike|hCoV-19/Finland/1LS1D7/2020|2020-10-01|EPI\_ISL\_757355|Original|hCoV-19^^Uusimaa|Human|Department of Virology and Immunology|Department of Virology|Smura|Finland

>Spike|hCoV-19/Wales/PHWC-48E358/2020|2020-11-11|EPI\_ISL\_680845|Original|hCoV-19^^Wales|Human|Wales Specialist Virology Centre Sequencing lab|COVID-19 Genomics UK (COG-UK) Consortium|Moore|United Kingdom

>Spike|hCoV-19/DRC/5538/2020|2020-05-05|EPI\_ISL\_514120|Original|hCoV-19^^Kinshasa|Human|Viral Respiratory Lab|Pathogen Sequencing Lab|Lokilo|Democratic Republic of the Congo

>Spike|hCoV-19/USA/TX-HMH-MCoV-13973/2020|2020-08-16|EPI\_ISL\_787264|Original|hCoV-19^^Texas|Human|Houston Methodist Hospital|Houston Methodist Hospital|Long|USA

>Spike|hCoV-19/Wales/PHWC-36BE2/2020|2020-05-01|EPI\_ISL\_474775|Original|hCoV-19^^Wales|Human|Originating lab|COVID-19 Genomics UK (COG-UK) Consortium|Moore|United Kingdom

>Spike|hCoV-19/Netherlands/NH-RIVM-20804/2020|2020-12-22|EPI\_ISL\_790863|Original|hCoV-19^^Noord-Holland|Human|Dutch COVID-19 response team|National Institute for Public Health and the Environment (RIVM)|Meijer|Netherlands

>Spike|hCoV-19/England/QEUA-A0B2BA/2020|2020-09-30|EPI\_ISL\_599272|Original|hCoV-19^^England|Human|Lighthouse Lab in Glasgow|Wellcome Sanger Institute for the COVID-19 Genomics UK (COG-UK) consortium|Davies|United Kingdom

>Spike|hCoV-19/USA/CA-ALSR-0726-IPL/2020|2020-05-14|EPI\_ISL\_483327|Original|hCoV-19^^California|Human|UC San Diego Center for Advanced Laboratory Medicine|Andersen lab at Scripps Research|Gangavarapu|USA

>Spike|hCoV-19/England/20132104104/2020|2020-03-24|EPI\_ISL\_423837|Original|hCoV-19^^England|Human|Respiratory Virus Unit|Respiratory Virus Unit|Platt|United Kingdom

>Spike|hCoV-19/Scotland/QEUA-9B8217/2020|2020-09-10|EPI\_ISL\_568265|Original|hCoV-19^^Scotland|Human|Lighthouse Lab in Glasgow|Wellcome Sanger Institute for the COVID-19 Genomics UK (COG-UK) consortium|Davies|United Kingdom

>Spike|hCoV-19/USA/WI-GMF-19241/2020|2020-09-08|EPI\_ISL\_547799|Original|hCoV-19^^Wisconsin|Human|Gundersen Molecular Diagnostics Laboratory|Kabara Cancer Research Institute|Kenny|USA

>Spike|hCoV-19/Spain/PV-IBV-004204/2020|2020-04-03|EPI\_ISL\_510489|Original|hCoV-19^^Basque Country|Human|Servicio de Microbiolog\u00eda. Hospital Universitario Donostia. OSI Donostialdea. \u00clrea de Enfermedades Infecciosas|SeqCOVID-SPAIN consortium|IBV (CSIC)|Comas|Spain

>Spike|hCoV-19/England/ALDP-9CC438/2020|2020-09-16|EPI\_ISL\_573106|Original|hCoV-19^^England|Human|Quadram Institute Bioscience|COVID-19 Genomics UK (COG-UK) Consortium|Alikhan|United Kingdom

>Spike|hCoV-19/USA/NY-NYUMC72/2020|2020-03-18|EPI\_ISL\_420588|Original|hCoV-19^^New York|Human|NYU Langone Health|Departments of Pathology and Medicine|Maurano|USA

>Spike|hCoV-19/USA/VA\_NIDDL\_3090/2020|2020-04-08|EPI\_ISL\_491930|Original|hCoV-19^^Virginia|Human|Naval Infectious Diseases Diagnostic Laboratory|Naval Medical Research Center Biological Defense Research Directorate|Voegtly|USA

>Spike|hCoV-19/England/LIVE-992AC/2020|2020-04-08|EPI\_ISL\_439707|Original|hCoV-19^^England|Human|Liverpool Clinical Laboratories|COVID-19 Genomics UK (COG-UK) Consortium|Haldenby|United Kingdom

>Spike|hCoV-19/USA/WI-UW-2618/2021|2021-01-03|EPI\_ISL\_791135|Original|hCoV-19^^Wisconsin|Human|University of Wisconsin-Madison AIDS Vaccine Research Laboratories|University of Wisconsin-Madison AIDS Vaccine Research Laboratories|Moreno|USA

>Spike|hCoV-19/Norway/Trondheim-S4/2020|2020-03-25|EPI\_ISL\_450346|Vero|hCoV-19^^Trondheim|Human|St.Olavs hospital/NTNU|Institute of Genomics Core Facility|Ianevski|Norway

>Spike|hCoV-19/Japan/PG-5504/2020|2020-08-00|EPI\_ISL\_690606|Original|hCoV-19^^Japan|Human|Pathogen Genomics Center|Pathogen Genomics Center|Sekizuka|Japan

>Spike|hCoV-19/Japan/PG-8457/2020|2020-09-00|EPI\_ISL\_687556|Original|hCoV-19^^Japan|Human|Fukuoka Institute of Health and Environmental Sciences|Pathogen Genomics Center|Sekizuka|Japan

>Spike|hCoV-19/England/ALDP-49F530/2020|2020-05-22|EPI\_ISL\_559457|Original|hCoV-19^^England|Human|Lighthouse Lab in Alderley Park|Wellcome Sanger Institute for the COVID-19 Genomics UK (COG-UK) consortium|Davies|United Kingdom

>Spike|hCoV-19/England/QEUH-B3037C/2020|2020-11-04|EPI\_ISL\_660048|Original|hCoV-19^^England|Human|Lighthouse Lab in Glasgow|Wellcome Sanger Institute for the COVID-19 Genomics UK (COG-UK) Consortium|Davies|United Kingdom

>Spike|hCoV-19/Denmark/DCGC-4557/2020|2020-09-21|EPI\_ISL\_621354|Original|hCoV-19^^Syddanmark|Human|Department of Virus and Microbiological Special Diagnostics|Albertsen lab|Michaelsen|Denmark

>Spike|hCoV-19/England/CAMC-9EC308/2020|2020-09-23|EPI\_ISL\_580618|Original|hCoV-19^^England|Human|Lighthouse Lab in Cambridge|Wellcome Sanger Institute for the COVID-19 Genomics UK (COG-UK) consortium|Davies|United Kingdom

>Spike|hCoV-19/USA/CA-CZB-3727/2020|2020-07-21|EPI\_ISL\_548449|Original|hCoV-19^^California|Human|Orange County Public Health Laboratory|Chan-Zuckerberg Biohub|Bhatt|USA

>Spike|hCoV-19/Chile/BI-199845/2020|2020-10-07|EPI\_ISL\_746513|Original|hCoV-19^^Biobio|Human|Genetica Molecular and Subdepartamento de Virologia ISP Chile|Instituto de Salud Publica de Chile|Tognarelli|Chile

>Spike|hCoV-19/USA/MI-QDX-1123/2020|2020-03-21|EPI\_ISL\_571853|Original|hCoV-19^^Michigan|Human|Quest Diagnostics|Quest Diagnostics|Kagan|USA

>Spike|hCoV-19/Wales/PHWC-49C08D/2020|2020-12-07|EPI\_ISL\_742502|Original|hCoV-19^^Wales|Human|Wales Specialist Virology Centre Sequencing lab|COVID-19 Genomics UK (COG-UK) Consortium|Moore|United Kingdom

>Spike|hCoV-19/Greece/215\_34644/2020|2020-03-16|EPI\_ISL\_437884|Original|hCoV-19^^Athens|Human|Laboratory of Microbiology|Laboratory of Biology|Karakasiliotis|Greece

>Spike|hCoV-19/Denmark/DCGC-20789/2020|2020-12-21|EPI\_ISL\_759364|Original|hCoV-19^^Nordjylland|Human|Department of Virus and Microbiological Special Diagnostics|Albertsen Lab|Michaelsen|Denmark

>Spike|hCoV-19/England/ALDP-6D6A0F/2020|2020-07-02|EPI\_ISL\_556162|Original|hCoV-19^^England|Human|Lighthouse Lab in Alderley Park|Wellcome Sanger Institute for the COVID-19 Genomics UK (COG-UK) consortium|Davies|United Kingdom

>Spike|hCoV-19/Netherlands/GE-RIVM-20342/2020|2020-12-03|EPI\_ISL\_723464|Original|hCoV-19^^Gelderland|Human|Dutch COVID-19 response team|National Institute for Public Health and the Environment (RIVM)|Meijer|Netherlands

>Spike|hCoV-19/USA/CA-UCLA-162/2020|2020-04-08|EPI\_ISL\_537501|Original|hCoV-19^^California|Human|UCLA Pathology Clinical Microbiology Lab|Kruglyak Lab|Boocock|USA

>Spike|hCoV-19/Luxembourg/LNS8803242/2020|2020-11-12|EPI\_ISL\_744810|Original|hCoV-19^^Luxembourg|Human|Laboratoire national de sant\u00e9|Laboratoire national de sant\u00e9|Wienecke-Baldacchino|Luxembourg

>Spike|hCoV-19/USA/WA-S2143/2020|2020-06-08|EPI\_ISL\_497571|Original|hCoV-19^^Washington|Human|Washington State Department of Health|Seattle Flu Study|Lee|USA

>Spike|hCoV-19/Switzerland/ZH-ETHZ-310420/2020|2020-10-08|EPI\_ISL\_603494|Original|hCoV-19^^Zurich|Human|Viollier AG|Department of Biosystems Science and Engineering|Nadeau|Switzerland

>Spike|hCoV-19/USA/TX-DSHS-1148/2020|2020-07-03|EPI\_ISL\_634951|Original|hCoV-19^^Texas|Human|Texas Department of State Health Services|Texas Department of State Health Services|Rahman|USA

>Spike|hCoV-19/Belgium/ULG-10827/2020|2020-11-13|EPI\_ISL\_661247|Original|hCoV-19^^Li\u00e8ge|Human|Department of Clinical Microbiology|GIGA Medical Genomics|Durkin|Belgium



>Spike|hCoV-19/USA/WI-UW-356/2020|2020-04-14|EPI\_ISL\_450710|Original|hCoV-19^^Wisconsin|Human|University of Wisconsin-Madison AIDS Vaccine Research Laboratories|University of Wisconsin-Madison AIDS Vaccine Research Laboratories|Baczenas|USA

>Spike|hCoV-19/Switzerland/BL-ETHZ-410136/2020|2020-12-17|EPI\_ISL\_737664|Original|hCoV-19^^Basel-Landschaft|Human|Viollier AG|Department of Biosystems Science and Engineering|Nadeau|Switzerland

>Spike|hCoV-19/England/MILK-AC8B81/2020|2020-10-21|EPI\_ISL\_629720|Original|hCoV-19^^England|Human|Lighthouse Lab in Milton Keynes|Wellcome Sanger Institute for the COVID-19 Genomics UK (COG-UK) consortium|Davies|United Kingdom

>Spike|hCoV-19/USA/FL-BPHL-0984/2020|2020-06-08|EPI\_ISL\_517874|Original|hCoV-19^^Florida|Human|Florida Bureau of Public Health Laboratories|Florida Bureau of Public Health Laboratories|Blanton|USA

>Spike|hCoV-19/England/MILK-95D7BB/2020|2020-06-19|EPI\_ISL\_556282|Original|hCoV-19^^England|Human|Lighthouse Lab in Milton Keynes|Wellcome Sanger Institute for the COVID-19 Genomics UK (COG-UK) consortium|Davies|United Kingdom

>Spike|hCoV-19/England/MILK-9573AE/2020|2020-06-12|EPI\_ISL\_553898|Original|hCoV-19^^England|Human|Lighthouse Lab in Milton Keynes|Wellcome Sanger Institute for the COVID-19 Genomics UK (COG-UK) consortium|Davies|United Kingdom

>Spike|hCoV-19/England/CAMC-AB207C/2020|2020-10-23|EPI\_ISL\_623653|Original|hCoV-19^^England|Human|Lighthouse Lab in Cambridge|Wellcome Sanger Institute for the COVID-19 Genomics UK (COG-UK) consortium|Davies|United Kingdom

>Spike|hCoV-19/England/ALDP-C4899C/2020|2020-12-12|EPI\_ISL\_736585|Original|hCoV-19^^England|Human|Lighthouse Lab in Alderley Park|Wellcome Sanger Institute for the COVID-19 Genomics UK (COG-UK) Consortium|Davies|United Kingdom

>Spike|hCoV-19/Scotland/EDB5008/2020|2020-05-15|EPI\_ISL\_493932|Original|hCoV-19^^Scotland|Human|Virology Department|COVID-19 Genomics UK (COG-UK) Consortium|Williams|United Kingdom

>Spike|hCoV-19/England/MILK-BB021D/2020|2020-11-18|EPI\_ISL\_719993|Original|hCoV-19^^England|Human|Lighthouse Lab in Milton Keynes|Wellcome Sanger Institute for the COVID-19 Genomics UK (COG-UK) Consortium|Davies|United Kingdom

>Spike|hCoV-19/Wales/PHWC-4A4653/2020|2020-12-16|EPI\_ISL\_763779|Original|hCoV-19^^Wales|Human|Wales Specialist Virology Centre Sequencing lab|COVID-19 Genomics UK (COG-UK) Consortium|Moore|United Kingdom

>Spike|hCoV-19/England/QEUH-B7C1B6/2020|2020-11-14|EPI\_ISL\_668184|Original|hCoV-19^^England|Human|Lighthouse Lab in Glasgow|Wellcome Sanger Institute for the COVID-19 Genomics UK (COG-UK) Consortium|Davies|United Kingdom

>Spike|hCoV-19/England/BRIS-1300AC/2020|2020-04-11|EPI\_ISL\_492681|Original|hCoV-19^^England|Human|PHE South West Regional Laboratory|Wellcome Sanger Institute for the COVID-19 Genomics UK (COG-UK) consortium|Davies|United Kingdom

>Spike|hCoV-19/Norway/7029/2020|2020-12-11|EPI\_ISL\_775270|Original|hCoV-19^^Viken|Human|Akershus University Hospital|Norwegian Institute of Public Health|Vollan|Norway

>Spike|hCoV-19/England/QEUH-96C1BB/2020|2020-08-13|EPI\_ISL\_530812|Original|hCoV-19^^England|Human|Lighthouse Lab in Glasgow|Wellcome Sanger Institute for the COVID-19 Genomics UK (COG-UK) consortium|Davies|United Kingdom

>Spike|hCoV-19/Wales/MILK-A466E4/2020|2020-10-05|EPI\_ISL\_609302|Original|hCoV-19^^Wales|Human|Lighthouse Lab in Milton Keynes|Wellcome Sanger Institute for the COVID-19 Genomics UK (COG-UK) Consortium|Davies|United Kingdom

>Spike|hCoV-19/Scotland/CVR4154/2020|2020-08-31|EPI\_ISL\_540839|Original|hCoV-19^^Scotland|Human|Lighthouse Lab in Glasgow / MRC-University of Glasgow Centre for Virus Research|COVID-19 Genomics UK (COG-UK) Consortium|Robertson|United Kingdom

>Spike|hCoV-19/England/CAMB-82AAE/2020|2020-00-00|EPI\_ISL\_438655|Original|hCoV-19^^England|Human|Department of Pathology|COVID-19 Genomics UK (COG-UK) Consortium|Meredith|United Kingdom

>Spike|hCoV-19/Spain/AN-IBV-004130/2020|2020-04-30|EPI\_ISL\_510062|Original|hCoV-19^^Andalucia|Human|Servicio de Microbiolog\u00eda. HRU de M\u00e9llaga. Servicio Andaluz de Salud|SeqCOVID-SPAIN consortium|IBV(CSIC)|Comas|Spain

>Spike|hCoV-19/USA/WI-UW-2005/2020|2020-09-10|EPI\_ISL\_677413|Original|hCoV-19^^Wisconsin|Human|University of Wisconsin-Madison AIDS Vaccine Research

Laboratories|University of Wisconsin-Madison AIDS Vaccine Research  
Laboratories|Baczenas|USA  
>Spike|hCoV-19/South Africa/KRISP-K002454/2020|2020-07-13|EPI\_ISL\_518040|Original|hCoV-19^KwaZulu-Natal|Human|NHLS-IALCH|KRISP|de Oliveira|South Africa  
>Spike|hCoV-19/England/MILK-99DB95/2020|2020-08-30|EPI\_ISL\_550527|Original|hCoV-19^England|Human|Lighthouse Lab in Milton Keynes|Wellcome Sanger Institute for the COVID-19 Genomics UK (COG-UK) consortium|Davies|United Kingdom  
>Spike|hCoV-19/England/CAMB-73466/2020|2020-03-23|EPI\_ISL\_440086|Original|hCoV-19^England|Human|Department of Pathology|Wellcome Sanger Institute for the COVID-19 Genomics UK (COG-UK) consortium|Amato|United Kingdom  
>Spike|hCoV-19/England/ALDP-952BBA/2020|2020-06-13|EPI\_ISL\_555350|Original|hCoV-19^England|Human|Lighthouse Lab in Alderley Park|Wellcome Sanger Institute for the COVID-19 Genomics UK (COG-UK) consortium|Davies|United Kingdom  
>Spike|hCoV-19/Brazil/PA-0234/2020|2020-04-03|EPI\_ISL\_470608|Original|hCoV-19^Par\u00e9|Human|Hermes Pardini|Bioinformatics Laboratory / LNCC|Almeida|Brazil  
>Spike|hCoV-19/USA/LA-EVTL334/2020|2020-05-20|EPI\_ISL\_578740|Original|hCoV-19^Louisiana|Human|LSUHS Emerging Viral Threat Laboratory|Microbial Genome Sequencing Center|Kamil|USA  
>Spike|hCoV-19/England/MILK-A064B9/2020|2020-09-30|EPI\_ISL\_600043|Original|hCoV-19^England|Human|Lighthouse Lab in Milton Keynes|Wellcome Sanger Institute for the COVID-19 Genomics UK (COG-UK) consortium|Davies|United Kingdom  
>Spike|hCoV-19/Canada/MB-NML-823/2020|2020-07-14|EPI\_ISL\_582320|Original|hCoV-19^Manitoba|Human|Cadham Provincial Laboratory|National Microbiology Laboratory (NML)|Majer|Canada  
>Spike|hCoV-19/Scotland/EDB5470/2020|2020-04-25|EPI\_ISL\_461745|Original|hCoV-19^Scotland|Human|Virology Department|COVID-19 Genomics UK (COG-UK) Consortium|Williams|United Kingdom  
>Spike|hCoV-19/USA/MI-MDHHS-SC22192/2020|2020-10-18|EPI\_ISL\_614243|Original|hCoV-19^Michigan|Human|Michigan Department of Health and Human Services|Michigan Department of Health and Human Services|Jacob|USA  
>Spike|hCoV-19/England/CAMB-78328/2020|2020-04-04|EPI\_ISL\_433718|Original|hCoV-19^England|Human|Department of Pathology|COVID-19 Genomics UK (COG-UK) Consortium|Meredith|United Kingdom  
>Spike|hCoV-19/USA/TX-HMH-2141/2020|2020-05-21|EPI\_ISL\_545141|Original|hCoV-19^Texas|Human|Houston Methodist Hospital|Houston Methodist Hospital|Long|USA  
>Spike|hCoV-19/England/ALDP-B83A66/2020|2020-11-14|EPI\_ISL\_675325|Original|hCoV-19^England|Human|Lighthouse Lab in Alderley Park|Wellcome Sanger Institute for the COVID-19 Genomics UK (COG-UK) Consortium|Davies|United Kingdom  
>Spike|hCoV-19/Portugal/PT1554/2020|2020-06-26|EPI\_ISL\_693567|Original|hCoV-19^Portugal|Human|Instituto Nacional de Saude (INSA)|Instituto Nacional de Saude (INSA)|Borges|Portugal  
>Spike|hCoV-19/England/CAMC-B3432D/2020|2020-11-05|EPI\_ISL\_659469|Original|hCoV-19^England|Human|Lighthouse Lab in Cambridge|Wellcome Sanger Institute for the COVID-19 Genomics UK (COG-UK) Consortium|Davies|United Kingdom  
>Spike|hCoV-19/Wales/PHWC-2A5F2/2020|2020-04-06|EPI\_ISL\_445593|Original|hCoV-19^Wales|Human|Wales Specialist Virology Centre|Public Health Wales Microbiology Cardiff|Moore|United Kingdom  
>Spike|hCoV-19/Portugal/PT1784/2020|2020-11-13|EPI\_ISL\_732013|Original|hCoV-19^Portugal|Human|Instituto Nacional de Saude (INSA)|Instituto Nacional de Saude (INSA)|Borges|Portugal  
>Spike|hCoV-19/England/QEUEH-B7E5C7/2020|2020-11-14|EPI\_ISL\_668106|Original|hCoV-19^England|Human|Lighthouse Lab in Glasgow|Wellcome Sanger Institute for the COVID-19 Genomics UK (COG-UK) Consortium|Davies|United Kingdom  
>Spike|hCoV-19/England/CAMB-1AC64F/2020|2020-04-22|EPI\_ISL\_489560|Original|hCoV-19^England|Human|Department of Pathology|Wellcome Sanger Institute for the COVID-19 Genomics UK (COG-UK) consortium|Davies|United Kingdom  
>Spike|hCoV-19/England/BRIS-12559C/2020|2020-03-28|EPI\_ISL\_443881|Original|hCoV-19^England|Human|PHE South West Regional Laboratory|Wellcome Sanger Institute for the COVID-19 Genomics UK (COG-UK) consortium|Amato|United Kingdom

>Spike|hCoV-19/Norway/4751/2020|2020-10-22|EPI\_ISL\_668403|Original|hCoV-19^^Oslo|Human|Furst Medical Laboratory|Norwegian Institute of Public Health|Kopperud Riis|Norway

>Spike|hCoV-19/Japan/PG-2334/2020|2020-05-00|EPI\_ISL\_685939|Original|hCoV-19^^Japan|Human|Pathogen Genomics Center|Pathogen Genomics Center|Sekizuka|Japan

>Spike|hCoV-19/USA/WA-S1124/2020|2020-05-04|EPI\_ISL\_463614|Original|hCoV-19^^Washington|Human|Washington State Department of Health|Seattle Flu Study|Bedford|USA

>Spike|hCoV-19/Hungary/US-55426w/2020|2020-10-02|EPI\_ISL\_677771|Original|hCoV-19^^B\u00e9k\u00e9s county|Human|University of Szeged|National Laboratory of Virology|Kemenesi|Hungary

>Spike|hCoV-19/USA/MI-MDHHS-SC20885/2020|2020-05-18|EPI\_ISL\_471906|Original|hCoV-19^^Michigan|Human|Michigan Department of Health and Human Services|Michigan Department of Health and Human Services|Blankenship|USA

>Spike|hCoV-19/USA/TX-DSHS-0674/2020|2020-07-16|EPI\_ISL\_576327|Original|hCoV-19^^Texas|Human|Texas Department of State Health Services|Texas Department of State Health Services|Rahman|USA

>Spike|hCoV-19/Denmark/ALAB-HH-150/2020|2020-03-19|EPI\_ISL\_452026|Original|hCoV-19^^Denmark|Human|Department of Clinical Microbiology|Albertsen lab|Kirkegaard|Denmark

>Spike|hCoV-19/Netherlands/NA\_580/2020|2020-00-00|EPI\_ISL\_460744|Original|hCoV-19^^Netherlands|Human|Dutch COVID-19 response team|Erasmus Medical Center|Oude Munnink|Netherlands

>Spike|hCoV-19/Denmark/DCGC-12697/2020|2020-11-16|EPI\_ISL\_682878|Original|hCoV-19^^Syddanmark|Human|Department of Virus and Microbiological Special Diagnostics|Albertsen Lab|Michaelsen|Denmark

>Spike|hCoV-19/England/ALDP-A2F229/2020|2020-10-05|EPI\_ISL\_587183|Original|hCoV-19^^England|Human|Lighthouse Lab in Alderley Park|Wellcome Sanger Institute for the COVID-19 Genomics UK (COG-UK) consortium|Davies|United Kingdom

>Spike|hCoV-19/England/CAMC-9D6EB5/2020|2020-09-20|EPI\_ISL\_584333|Original|hCoV-19^^England|Human|Virology Department|COVID-19 Genomics UK (COG-UK) Consortium|de Silva|United Kingdom

>Spike|hCoV-19/Denmark/DCGC-3598/2020|2020-08-31|EPI\_ISL\_616241|Original|hCoV-19^^Nordjylland|Human|Department of Virus and Microbiological Special Diagnostics|Albertsen lab|Michaelsen|Denmark

>Spike|hCoV-19/Scotland/QEUIH-9DCF07/2020|2020-09-22|EPI\_ISL\_601111|Original|hCoV-19^^Scotland|Human|Lighthouse Lab in Glasgow|Wellcome Sanger Institute for the COVID-19 Genomics UK (COG-UK) consortium|Davies|United Kingdom

>Spike|hCoV-19/USA/PA-MGEL84/2020|2020-03-31|EPI\_ISL\_454368|Original|hCoV-19^^Pennsylvania|Human|UPMC Clinical Microbiology Laboratory|Microbial Genome Sequencing Center|Mustapha|USA

>Spike|hCoV-19/USA/OR-OHSU-1777/2020|2020-07-25|EPI\_ISL\_526025|Original|hCoV-19^^Oregon|Human|OHSU Lab Services Molecular Microbiology Lab|Oregon SARS-CoV-2 Genome Sequencing Center|O'Roak|USA

>Spike|hCoV-19/USA/WA-UW-195/2020|2020-03-08|EPI\_ISL\_570983|Original|hCoV-19^^Washington|Human|UW Virology Lab|UW Virology Lab|Roychoudhury|USA

>Spike|hCoV-19/Wales/PHWC-49685E/2020|2020-11-20|EPI\_ISL\_726645|Original|hCoV-19^^Wales|Human|Originating lab|COVID-19 Genomics UK (COG-UK) Consortium|Moore|United Kingdom

>Spike|hCoV-19/Denmark/DCGC-13642/2020|2020-11-30|EPI\_ISL\_712930|Original|hCoV-19^^Syddanmark|Human|Department of Virus and Microbiological Special Diagnostics|Albertsen Lab|Michaelsen|Denmark

>Spike|hCoV-19/Spain/CL-ISCIII-2016156/2020|2020-10-09|EPI\_ISL\_691685|Original|hCoV-19^^Castilla y Leon|Human|Hospital de Leon|Instituto de Salud Carlos III|Caballero|Spain

>Spike|hCoV-19/Northern Ireland/QEUIH-969804/2020|2020-08-14|EPI\_ISL\_531095|Original|hCoV-19^^Northern Ireland|Human|Lighthouse Lab in Glasgow|Wellcome Sanger Institute for the COVID-19 Genomics UK (COG-UK) consortium|Davies|United Kingdom

>Spike|hCoV-19/Scotland/CVR6062/2020|2020-11-30|EPI\_ISL\_724211|Original|hCoV-19^^Scotland|Human|West of Scotland Specialist Virology Centre|COVID-19 Genomics UK (COG-UK) Consortium|Robertson|United Kingdom

>Spike|hCoV-19/Australia/NSW2495/2020|2020-06-30|EPI\_ISL\_527024|Original|hCoV-19^^New South Wales|Human|Area of Virology|Area of Virology|Yeang|Australia

>Spike|hCoV-19/USA/CA-CZB-12827/2020|2020-10-18|EPI\_ISL\_648477|Original|hCoV-19^^California|Human|Santa Clara County Public Health Laboratory|Chan-Zuckerberg Biohub|Bhatt|USA

>Spike|hCoV-19/Scotland/EDB10194/2020|2020-10-07|EPI\_ISL\_680495|Original|hCoV-19^^Scotland|Human|Virology Department|COVID-19 Genomics UK (COG-UK) Consortium|McHugh|United Kingdom

>Spike|hCoV-19/Switzerland/SZ-ETHZ-190054/2020|2020-07-09|EPI\_ISL\_500915|Original|hCoV-19^^Schwyz|Human|Viollier AG|Department of Biosystems Science and Engineering|Nadeau|Switzerland

>Spike|hCoV-19/USA/WA-S1693/2020|2020-05-31|EPI\_ISL\_496119|Original|hCoV-19^^Washington|Human|Washington State Department of Health|Seattle Flu Study|Lee|USA

>Spike|hCoV-19/England/ALDP-CC0589/2020|2020-12-19|EPI\_ISL\_760745|Original|hCoV-19^^England|Human|Lighthouse Lab in Alderley Park|Wellcome Sanger Institute for the COVID-19 Genomics UK (COG-UK) Consortium|Davies|United Kingdom

>Spike|hCoV-19/Singapore/771/2020|2020-07-15|EPI\_ISL\_509381|Original|hCoV-19^^Singapore|Human|Singapore General Hospital|Department of Microbiology|Abdul Rahman|Singapore

>Spike|hCoV-19/Japan/TK-YE615178/2020|2020-05-00|EPI\_ISL\_486902|Original|hCoV-19^^Tokyo|Human|Tokyo Metropolitan Institute of Public Health|Tokyo Metropolitan Institute of Public Health|Nagashima|Japan

>Spike|hCoV-19/Singapore/969/2020|2020-03-22|EPI\_ISL\_548977|Original|hCoV-19^^Singapore|Human|National Public Health Laboratory|National Public Health Laboratory|Mak|Singapore

>Spike|hCoV-19/Wales/PHWC-16DAF3/2020|2020-09-18|EPI\_ISL\_577490|Original|hCoV-19^^Wales|Human|Wales Specialist Virology Centre Sequencing lab|COVID-19 Genomics UK (COG-UK) Consortium|Moore|United Kingdom

>Spike|hCoV-19/England/NOTT-11CC0C/2020|2020-11-19|EPI\_ISL\_665562|Original|hCoV-19^^England|Human|Queens Medical Centre|COVID-19 Genomics UK (COG-UK) Consortium|Loose|United Kingdom

>Spike|hCoV-19/England/ALDP-A2DCF0/2020|2020-10-04|EPI\_ISL\_586868|Original|hCoV-19^^England|Human|Lighthouse Lab in Alderley Park|Wellcome Sanger Institute for the COVID-19 Genomics UK (COG-UK) consortium|Davies|United Kingdom

>Spike|hCoV-19/Japan/PG-7886/2020|2020-07-00|EPI\_ISL\_686987|Original|hCoV-19^^Japan|Human|Pathogen Genomics Center|Pathogen Genomics Center|Sekizuka|Japan

>Spike|hCoV-19/Canada/QC-LSPQ-L00237242/2020|2020-03-25|EPI\_ISL\_536169|Original|hCoV-19^^Quebec|Human|H\u00f4pital de Hull|Laboratoire de sant\u00e9 publique du Qu\u00e9bec|Moreira|Canada

>Spike|hCoV-19/Scotland/QEUA-A0B760/2020|2020-10-01|EPI\_ISL\_599415|Original|hCoV-19^^Scotland|Human|Lighthouse Lab in Glasgow|Wellcome Sanger Institute for the COVID-19 Genomics UK (COG-UK) consortium|Davies|United Kingdom

>Spike|hCoV-19/USA/TX-HMH-2738/2020|2020-06-05|EPI\_ISL\_545517|Original|hCoV-19^^Texas|Human|Houston Methodist Hospital|Houston Methodist Hospital|Long|USA

>Spike|hCoV-19/England/ALDP-B23682/2020|2020-11-04|EPI\_ISL\_647011|Original|hCoV-19^^England|Human|Lighthouse Lab in Alderley Park|Wellcome Sanger Institute for the COVID-19 Genomics UK (COG-UK) Consortium|Davies|United Kingdom

>Spike|hCoV-19/Scotland/CVR100/2020|2020-03-14|EPI\_ISL\_425647|Original|hCoV-19^^Scotland|Human|West of Scotland Specialist Virology Centre|COVID-19 Genomics UK (COG-UK) Consortium|Robertson|United Kingdom

>Spike|hCoV-19/England/QEUA-9B47A3/2020|2020-09-04|EPI\_ISL\_590395|Original|hCoV-19^^England|Human|Lighthouse Lab in Glasgow|Wellcome Sanger Institute for the COVID-19 Genomics UK (COG-UK) consortium|Davies|United Kingdom

>Spike|hCoV-19/Romania/284371/2020|2020-05-13|EPI\_ISL\_455477|Original|hCoV-19^^Bucuresti|Human|Laboratory for Respiratory Viruses|Cantacuzino Institute|Lazar|Romania

>Spike|hCoV-19/USA/NY-NYUMC752/2020|2020-03-26|EPI\_ISL\_451466|Original|hCoV-19^^New York|Human|NYU Langone Health|Departments of Pathology and Medicine|Maurano|USA

>Spike|hCoV-19/Canada/BC-BCCDC-7563/2020|2020-11-00|EPI\_ISL\_740724|Original|hCoV-19^^British Columbia|Human|BCCDC Public Health Laboratory|BCCDC Public Health Laboratory|Prystajecky|Canada

>Spike|hCoV-19/USA/UT-UPHL-03127/2020|2020-05-06|EPI\_ISL\_575262|Original|hCoV-19^^Utah|Human|Utah Public Health Laboratory|Utah Public Health Laboratory|Young|USA

>Spike|hCoV-19/Belgium/rega-0721841/2020|2020-07-21|EPI\_ISL\_734811|Original|hCoV-19^^Erpe-mere|Human|UZ Leuven|KU Leuven|Maes|Belgium

>Spike|hCoV-19/Australia/VIC2469/2020|2020-06-28|EPI\_ISL\_522172|Original|hCoV-19^^Victoria|Human|Victorian Infectious Diseases Reference Laboratory (VIDRL)|VIDRL and MDU-PHL|Schultz|Australia

>Spike|hCoV-19/Australia/VIC3295/2020|2020-07-07|EPI\_ISL\_520974|Original|hCoV-19^^Victoria|Human|Microbiological Diagnostic Unit - Public Health Laboratory (MDU-PHL)|MDU-PHL|Schultz|Australia

>Spike|hCoV-19/USA/FL-BPHL-0253/2020|2020-05-04|EPI\_ISL\_480904|Original|hCoV-19^^Florida|Human|Florida Bureau of Public Health Laboratories|Florida Bureau of Public Health Laboratories|Blanton|USA

>Spike|hCoV-19/England/ALDP-9E924A/2020|2020-09-24|EPI\_ISL\_584195|Original|hCoV-19^^England|Human|Centre for Enzyme Innovation|COVID-19 Genomics UK (COG-UK) Consortium|Robson|United Kingdom

>Spike|hCoV-19/Denmark/DCGC-5326/2020|2020-09-14|EPI\_ISL\_615257|Original|hCoV-19^^Syddanmark|Human|Department of Virus and Microbiological Special Diagnostics|Albertsen lab|Michaelsen|Denmark

>Spike|hCoV-19/Wales/PHWC-47CFA4/2020|2020-10-05|EPI\_ISL\_586079|Original|hCoV-19^^Wales|Human|Wales Specialist Virology Centre Sequencing lab|COVID-19 Genomics UK (COG-UK) Consortium|Moore|United Kingdom

>Spike|hCoV-19/England/ALDP-92DE19/2020|2020-06-22|EPI\_ISL\_553700|Original|hCoV-19^^England|Human|Lighthouse Lab in Alderley Park|Wellcome Sanger Institute for the COVID-19 Genomics UK (COG-UK) consortium|Davies|United Kingdom

>Spike|hCoV-19/Germany/BE-ChVir-D1936-8209/2020|2020-09-24|EPI\_ISL\_753785|Original|hCoV-19^^Berlin|Human|Charit\u00e99 Universit\u00e4tsmedizin Berlin|Charit\u00e99 Universit\u00e4tsmedizin Berlin|Muehlemann|Germany

>Spike|hCoV-19/England/MILK-A7AD6A/2020|2020-10-15|EPI\_ISL\_606413|Original|hCoV-19^^England|Human|Lighthouse Lab in Milton Keynes|Wellcome Sanger Institute for the COVID-19 Genomics UK (COG-UK) consortium|Davies|United Kingdom

>Spike|hCoV-19/England/QEUEH-B7E9AD/2020|2020-11-14|EPI\_ISL\_667927|Original|hCoV-19^^England|Human|Lighthouse Lab in Glasgow|Wellcome Sanger Institute for the COVID-19 Genomics UK (COG-UK) Consortium|Davies|United Kingdom

>Spike|hCoV-19/USA/CA-CZB-10245/2020|2020-05-20|EPI\_ISL\_672271|Original|hCoV-19^^California|Human|The Ashley Laboratory|Chan-Zuckerberg Biohub|Bhatt|USA

>Spike|hCoV-19/USA/TX-HMH-MCoV-12821/2020|2020-08-19|EPI\_ISL\_790548|Original|hCoV-19^^Texas|Human|Houston Methodist Hospital|Houston Methodist Hospital|Long|USA

>Spike|hCoV-19/Denmark/DCGC-2421/2020|2020-08-10|EPI\_ISL\_617603|Original|hCoV-19^^Midtjylland|Human|Department of Virus and Microbiological Special Diagnostics|Albertsen lab|Michaelsen|Denmark

>Spike|hCoV-19/Russia/PRI-RII-MH755S/2020|2020-08-09|EPI\_ISL\_733007|Original|hCoV-19^^Primorsky|Human|WHO National Influenza Centre Russian Federation|WHO National Influenza Centre Russian Federation|Komissarov|Russia

>Spike|hCoV-19/Scotland/CVR3085/2020|2020-04-25|EPI\_ISL\_439026|Original|hCoV-19^^Scotland|Human|West of Scotland Specialist Virology Centre|COVID-19 Genomics UK (COG-UK) Consortium|Robertson|United Kingdom

>Spike|hCoV-19/England/ALDP-AC5E4F/2020|2020-10-14|EPI\_ISL\_631081|Original|hCoV-19^^England|Human|Lighthouse Lab in Alderley Park|Wellcome Sanger Institute for the COVID-19 Genomics UK (COG-UK) consortium|Davies|United Kingdom

>Spike|hCoV-19/USA/NY-Wadsworth-30118-01/2020|2020-03-26|EPI\_ISL\_676765|Original|hCoV-19^^New York|Human|Wadsworth Center|Wadsworth Center|Lasek-Nesselquist|USA

>Spike|hCoV-19/England/BRIS-12C7EA/2020|2020-05-12|EPI\_ISL\_469492|Original|hCoV-19^^England|Human|PHE South West Regional Laboratory|Wellcome Sanger Institute for the COVID-19 Genomics UK (COG-UK) consortium|Davies|United Kingdom

>Spike|hCoV-19/New Zealand/20VR3071/2020|2020-00-00|EPI\_ISL\_579409|Original|hCoV-19^^Canterbury|Human|Canterbury Health Laboratories|Institute of Environmental Science and Research (ESR)|Wang|New Zealand

>Spike|hCoV-19/Australia/NSW15/2020|2020-03-03|EPI\_ISL\_417383|Original|hCoV-19^^New South Wales|Human|Centre for Infectious Diseases and Microbiology Public Health|NSW Health Pathology - Institute of Clinical Pathology and Medical Research; Westmead Hospital; University of Sydney|Eden|Australia

>Spike|hCoV-19/USA/CA-CDPH161/2020|2020-06-24|EPI\_ISL\_754976|Original|hCoV-19^^California|Human|California Department of Public Health|California Department of Public Health|Bell|USA

>Spike|hCoV-19/England/MILK-9A5356/2020|2020-09-03|EPI\_ISL\_550008|Original|hCoV-19^^England|Human|Lighthouse Lab in Milton Keynes|Wellcome Sanger Institute for the COVID-19 Genomics UK (COG-UK) consortium|Davies|United Kingdom

>Spike|hCoV-19/USA/CO-CSU-D2575-2/2020|2020-05-06|EPI\_ISL\_527467|Original|hCoV-19^^Colorado|Human|Colorado State University - Ebel Lab|Colorado State University - Ebel Lab|Cline|USA

>Spike|hCoV-19/USA/MA-MASPHL-00774/2020|2020-09-25|EPI\_ISL\_692921|Original|hCoV-19^^Massachusetts|Human|Massachusetts State Public Health Laboratory|Massachusetts State Public Health Laboratory|Lang|USA

>Spike|hCoV-19/USA/TX-HMH-5477/2020|2020-06-25|EPI\_ISL\_544802|Original|hCoV-19^^Texas|Human|Houston Methodist Hospital|Houston Methodist Hospital|Long|USA

>Spike|hCoV-19/USA/SC-20-0946-T10/2020|2020-06-20|EPI\_ISL\_516750|Original|hCoV-19^^South Carolina|Human|van Bakel Laboratory|van Bakel Laboratory|van Bakel|USA

>Spike|hCoV-19/England/ALDP-B744F1/2020|2020-11-12|EPI\_ISL\_662060|Original|hCoV-19^^England|Human|Lighthouse Lab in Alderley Park|Wellcome Sanger Institute for the COVID-19 Genomics UK (COG-UK) Consortium|Davies|United Kingdom

>Spike|hCoV-19/England/ALDP-B846AD/2020|2020-11-15|EPI\_ISL\_675330|Original|hCoV-19^^England|Human|Lighthouse Lab in Alderley Park|Wellcome Sanger Institute for the COVID-19 Genomics UK (COG-UK) Consortium|Davies|United Kingdom

>Spike|hCoV-19/Netherlands/Zeeland\_17/2020|2020-03-24|EPI\_ISL\_461255|Original|hCoV-19^^Zeeland|Human|Dutch COVID-19 response team|Erasmus Medical Center|Oude Munnink|Netherlands

>Spike|hCoV-19/Northern Ireland/NIRE-1086BA/2020|2020-09-10|EPI\_ISL\_585194|Original|hCoV-19^^Northern Ireland|Human|Regional Virus Laboratory|COVID-19 Genomics UK (COG-UK) Consortium|Fairley|United Kingdom

>Spike|hCoV-19/USA/MA-MASPHL-00490/2020|2020-05-02|EPI\_ISL\_693077|Original|hCoV-19^^Massachusetts|Human|Massachusetts State Public Health Laboratory|Massachusetts State Public Health Laboratory|Lang|USA

>Spike|hCoV-19/Japan/IC-0199/2020|2020-07-00|EPI\_ISL\_667628|Original|hCoV-19^^Japan|Human|Pathogen Genomics Center|Pathogen Genomics Center|Sekizuka|Japan

>Spike|hCoV-19/Switzerland/ZH-ETHZ-101171/2020|2020-03-31|EPI\_ISL\_451834|Original|hCoV-19^^Zurich|Human|Viollier AG|Department of Biosystems Science and Engineering|Nadeau|Switzerland

>Spike|hCoV-19/England/QEUIH-BC3736/2020|2020-11-25|EPI\_ISL\_703986|Original|hCoV-19^^England|Human|Lighthouse Lab in Glasgow|Wellcome Sanger Institute for the COVID-19 Genomics UK (COG-UK) Consortium|Davies|United Kingdom

>Spike|hCoV-19/England/QEUIH-AD5C42/2020|2020-10-26|EPI\_ISL\_634529|Original|hCoV-19^^England|Human|Lighthouse Lab in Glasgow|Wellcome Sanger Institute for the COVID-19 Genomics UK (COG-UK) consortium|Davies|United Kingdom

>Spike|hCoV-19/USA/CA-CZB-10819/2020|2020-07-08|EPI\_ISL\_583069|Original|hCoV-19^^California|Human|Humboldt County Public Health Laboratory|Chan-Zuckerberg Biohub|Bhatt|USA

>Spike|hCoV-19/France/OCC-SC562/2020|2020-04-21|EPI\_ISL\_645208|Original|hCoV-19^^Occitanie|Human|CHU N\u00eemes|CNR Virus des Infections Respiratoires - France SUD|Bal|France

>Spike|hCoV-19/Wales/PHWC-4827D0/2020|2020-10-20|EPI\_ISL\_613244|Original|hCoV-19^^Wales|Human|Wales Specialist Virology Centre Sequencing lab|COVID-19 Genomics UK (COG-UK) Consortium|Moore|United Kingdom

>Spike|hCoV-19/Japan/PG-0578/2020|2020-04-00|EPI\_ISL\_684194|Original|hCoV-19^^Japan|Human|Pathogen Genomics Center|Pathogen Genomics Center|Sekizuka|Japan

>Spike|hCoV-19/Australia/VIC3088/2020|2020-07-04|EPI\_ISL\_520795|Original|hCoV-19^^Victoria|Human|Victorian Infectious Diseases Reference Laboratory (VIDRL)|VIDRL and MDU-PHL|Schultz|Australia

>Spike|hCoV-19/USA/TX-HMH-6666/2020|2020-06-24|EPI\_ISL\_546157|Original|hCoV-19^^Texas|Human|Houston Methodist Hospital|Houston Methodist Hospital|Long|USA

>Spike|hCoV-19/England/CAMB-77927/2020|2020-03-31|EPI\_ISL\_439470|Original|hCoV-19^^England|Human|Department of Pathology|Wellcome Sanger Institute for the COVID-19 Genomics UK (COG-UK) consortium|Amato|United Kingdom

>Spike|hCoV-19/Australia/TAS251/2020|2020-04-23|EPI\_ISL\_522679|Original|hCoV-19^^Tasmania|Human|Royal Hobart Hospital Microbiology Department|MDU-PHL|Schultz|Australia

>Spike|hCoV-19/Scotland/MILK-9C412A/2020|2020-09-07|EPI\_ISL\_575986|Original|hCoV-19^^Scotland|Human|Lighthouse Lab in Milton Keynes|Wellcome Sanger Institute for the COVID-19 Genomics UK (COG-UK) consortium|Davies|United Kingdom

>Spike|hCoV-19/Australia/VIC10736/2020|2020-09-03|EPI\_ISL\_563060|Original|hCoV-19^^Victoria|Human|Microbiological Diagnostic Unit - Public Health Laboratory (MDU-PHL)|MDU-PHL|Schultz|Australia

>Spike|hCoV-19/Japan/PG-6914/2020|2020-09-00|EPI\_ISL\_687621|Original|hCoV-19^^Japan|Human|Pathogen Genomics Center|Pathogen Genomics Center|Sekizuka|Japan

>Spike|hCoV-19/England/204200163/2020|2020-10-09|EPI\_ISL\_609871|Original|hCoV-19^^England|Human|Respiratory Virus Unit|Respiratory Virus Unit|Platt|United Kingdom

>Spike|hCoV-19/USA/MI-MDHHS-SC20283/2020|2020-03-27|EPI\_ISL\_447081|Original|hCoV-19^^Michigan|Human|Michigan Department of Health and Human Services|Michigan Department of Health and Human Services|Blankenship|USA

>Spike|hCoV-19/USA/CA-QDX-1033/2020|2020-03-17|EPI\_ISL\_571698|Original|hCoV-19^^California|Human|Quest Diagnostics|Quest Diagnostics|Kagan|USA

>Spike|hCoV-19/England/BRIS-12B44E/2020|2020-05-25|EPI\_ISL\_487544|Original|hCoV-19^^England|Human|PHE South West Regional Laboratory|Wellcome Sanger Institute for the COVID-19 Genomics UK (COG-UK) consortium|Davies|United Kingdom

>Spike|hCoV-19/Nigeria/BO-CV337/2020|2020-05-01|EPI\_ISL\_730004|Original|hCoV-19^^Borno State|Human|Nigeria Centre for Disease Control (NCDC)|African Centre of Excellence for Genomics of Infectious Diseases (ACEGID)|Oluniyi|Nigeria

>Spike|hCoV-19/England/CAMC-A66745/2020|2020-10-11|EPI\_ISL\_626888|Original|hCoV-19^^England|Human|University of Exeter|COVID-19 Genomics UK (COG-UK) Consortium|Temperton|United Kingdom

>Spike|hCoV-19/England/ALDP-A2DA32/2020|2020-10-06|EPI\_ISL\_586772|Original|hCoV-19^^England|Human|Lighthouse Lab in Alderley Park|Wellcome Sanger Institute for the COVID-19 Genomics UK (COG-UK) consortium|Davies|United Kingdom

>Spike|hCoV-19/Slovenia/5716/2020|2020-03-11|EPI\_ISL\_635223|Original|hCoV-19^^Slovenia|Human|Institute of Microbiology and Immunology|Institute of Microbiology and Immunology|Zakotnik|Slovenia

>Spike|hCoV-19/England/NORW-EBAD0/2020|2020-05-06|EPI\_ISL\_457475|Original|hCoV-19^^England|Human|Quadram Institute Bioscience|COVID-19 Genomics UK (COG-UK) Consortium|Alikhan|United Kingdom

>Spike|hCoV-19/New Zealand/20VR2571/2020|2020-03-23|EPI\_ISL\_579302|Original|hCoV-19^^Counties Manukau|Human|Middlemore Hospital|Institute of Environmental Science and Research (ESR)|Wang|New Zealand

>Spike|hCoV-19/USA/WI-UW-1532/2020|2020-09-10|EPI\_ISL\_605410|Original|hCoV-19^^Wisconsin|Human|University of Wisconsin-Madison AIDS Vaccine Research Laboratories|University of Wisconsin-Madison AIDS Vaccine Research Laboratories|Baczenas|USA

>Spike|hCoV-19/Denmark/DCGC-22380/2020|2020-12-14|EPI\_ISL\_757527|Original|hCoV-19^^Hovedstaden|Human|Department of Virus and Microbiological Special Diagnostics|Albertsen Lab|Michaelsen|Denmark

>Spike|hCoV-19/Bangladesh/DNAS\_DRCIM\_isl\_95/2020|2020-04-29|EPI\_ISL\_774902|Original|hCoV-19^^Dhaka|Human|Designated Reference Institute for Chemical Measurements (DRICM)|DNA SOLUTION LTD.|Rabbi|Bangladesh

>Spike|hCoV-19/England/204961127/2020|2020-12-03|EPI\_ISL\_700637|Original|hCoV-19^^England|Human|Respiratory Virus Unit|COVID-19 Genomics UK (COG-UK) Consortium|Platt|United Kingdom

>Spike|hCoV-19/USA/TX-HMH-MCoV-16231/2020|2020-10-28|EPI\_ISL\_785915|Original|hCoV-19^^Texas|Human|Houston Methodist Hospital|Houston Methodist Hospital|Long|USA

>Spike|hCoV-19/England/QEUA-9F7908/2020|2020-09-27|EPI\_ISL\_589049|Original|hCoV-19^^England|Human|Lighthouse Lab in Glasgow|Wellcome Sanger Institute for the COVID-19 Genomics UK (COG-UK) consortium|Davies|United Kingdom

>Spike|hCoV-19/USA/WA-UW-26865/2020|2020-09-02|EPI\_ISL\_570579|Original|hCoV-19^^Washington|Human|UW Virology Lab|UW Virology Lab|Roychoudhury|USA

>Spike|hCoV-19/Switzerland/BS-ETHZ-360014/2020|2020-11-12|EPI\_ISL\_693873|Original|hCoV-19^^Basel-Stadt|Human|Viollier AG|Department of Biosystems Science and Engineering|Nadeau|Switzerland

>Spike|hCoV-19/Japan/PG-2949/2020|2020-04-00|EPI\_ISL\_691075|Original|hCoV-19^^Japan|Human|Pathogen Genomics Center|Pathogen Genomics Center|Sekizuka|Japan

>Spike|hCoV-19/Scotland/EDB3365/2020|2020-04-09|EPI\_ISL\_487916|Original|hCoV-19^^Scotland|Human|Virology Department|Wellcome Sanger Institute for the COVID-19 Genomics UK (COG-UK) consortium|Davies|United Kingdom

>Spike|hCoV-19/England/CAMC-CB7D14/2020|2020-12-18|EPI\_ISL\_777852|Original|hCoV-19^^England|Human|Lighthouse Lab in Cambridge|Wellcome Sanger Institute for the COVID-19 Genomics UK (COG-UK) Consortium|Davies|United Kingdom

>Spike|hCoV-19/Wales/PHWC-483A9A/2020|2020-10-21|EPI\_ISL\_627889|Original|hCoV-19^^Wales|Human|Wales Specialist Virology Centre Sequencing lab|COVID-19 Genomics UK (COG-UK) Consortium|Moore|United Kingdom

>Spike|hCoV-19/USA/VA-DCLS-1709/2020|2020-04-02|EPI\_ISL\_572270|Original|hCoV-19^^Virginia|Human|Virginia DCLS|Virginia DCLS|St. Jacques|USA

>Spike|hCoV-19/England/QEUA-AF5408/2020|2020-10-30|EPI\_ISL\_663132|Original|hCoV-19^^England|Human|Lighthouse Lab in Glasgow|Wellcome Sanger Institute for the COVID-19 Genomics UK (COG-UK) Consortium|Davies|United Kingdom

>Spike|hCoV-19/USA/MI-UM-10036457442/2020|2020-10-15|EPI\_ISL\_610049|Original|hCoV-19^^Michigan|Human|University of Michigan Clinical Microbiology Laboratory|Lauring Lab|Valesano|USA

>Spike|hCoV-19/Tunisia/58412/2020|2020-11-02|EPI\_ISL\_654018|Original|hCoV-19^^Ben Arous|Human|Laboratory of Microbiology|1-Clinical and Experimental Pharmacology Lab|Boutiba-Ben Boubaker|Tunisia

>Spike|hCoV-19/USA/MI-MDHHS-SC20554/2020|2020-03-24|EPI\_ISL\_460602|Original|hCoV-19^^Michigan|Human|Michigan Department of Health and Human Services|Michigan Department of Health and Human Services|Blankenship|USA

>Spike|hCoV-19/Australia/VIC9593/2020|2020-08-23|EPI\_ISL\_562684|Original|hCoV-19^^Victoria|Human|Microbiological Diagnostic Unit - Public Health Laboratory (MDU-PHL)|MDU-PHL|Schultz|Australia

>Spike|hCoV-19/Wales/PHWC-4A43E3/2020|2020-12-16|EPI\_ISL\_764689|Original|hCoV-19^^Wales|Human|Wales Specialist Virology Centre Sequencing lab|COVID-19 Genomics UK (COG-UK) Consortium|Moore|United Kingdom

>Spike|hCoV-19/Belgium/reg-0517554/2020|2020-05-17|EPI\_ISL\_734738|Original|hCoV-19^^Westerlo|Human|UZ Leuven|KU Leuven|Maes|Belgium

>Spike|hCoV-19/Germany/HH-hpi-p2159/2020|2020-03-28|EPI\_ISL\_776391|Original|hCoV-19^^Hamburg|Human|University Medical Center Hamburg Eppendorf|Heinrich Pette Institute|Robitaille|Germany

>Spike|hCoV-19/England/QEUA-AF5268/2020|2020-10-30|EPI\_ISL\_663047|Original|hCoV-19^^England|Human|Lighthouse Lab in Glasgow|Wellcome Sanger Institute for the COVID-19 Genomics UK (COG-UK) Consortium|Davies|United Kingdom

>Spike|hCoV-19/England/QEUA-9B7DAE/2020|2020-09-04|EPI\_ISL\_590556|Original|hCoV-19^^England|Human|Lighthouse Lab in Glasgow|Wellcome Sanger Institute for the COVID-19 Genomics UK (COG-UK) consortium|Davies|United Kingdom



>Spike|hCoV-19/Wales/PHWC-32ABC/2020|2020-04-15|EPI\_ISL\_474392|Original|hCoV-19^^Wales|Human|Originating lab|COVID-19 Genomics UK (COG-UK) Consortium|Moore|United Kingdom

>Spike|hCoV-19/Denmark/DCGC-17374/2020|2020-12-14|EPI\_ISL\_750513|Original|hCoV-19^^Midtjylland|Human|Department of Virus and Microbiological Special Diagnostics|Albertsen Lab|Michaelsen|Denmark

>Spike|hCoV-19/USA/VA-DCLS-0154/2020|2020-04-09|EPI\_ISL\_437787|Original|hCoV-19^^Virginia|Human|Virginia DCLS|Virginia DCLS|St. Jacques|USA

>Spike|hCoV-19/USA/CA-ALSR-4409/2020|2020-10-27|EPI\_ISL\_649013|Original|hCoV-19^^California|Human|San Diego County Public Health Laboratory|Andersen lab at Scripps Research|Gangavarapu|USA

>Spike|hCoV-19/Wales/MILK-A46F9E/2020|2020-10-06|EPI\_ISL\_598391|Original|hCoV-19^^Wales|Human|Lighthouse Lab in Milton Keynes|Wellcome Sanger Institute for the COVID-19 Genomics UK (COG-UK) consortium|Davies|United Kingdom

>Spike|hCoV-19/Denmark/DCGC-3716/2020|2020-08-31|EPI\_ISL\_615494|Original|hCoV-19^^Hovedstaden|Human|Department of Virus and Microbiological Special Diagnostics|Albertsen lab|Michaelsen|Denmark

>Spike|hCoV-19/England/ALDP-944016/2020|2020-06-07|EPI\_ISL\_554667|Original|hCoV-19^^England|Human|Lighthouse Lab in Alderley Park|Wellcome Sanger Institute for the COVID-19 Genomics UK (COG-UK) Consortium|Davies|United Kingdom

>Spike|hCoV-19/England/NOTT-11493A/2020|2020-10-09|EPI\_ISL\_584756|Original|hCoV-19^^England|Human|Queens Medical Centre|COVID-19 Genomics UK (COG-UK) Consortium|Loose|United Kingdom

>Spike|hCoV-19/England/LIVE-DC1F4D/2020|2020-11-20|EPI\_ISL\_679398|Original|hCoV-19^^England|Human|Liverpool Clinical Laboratories|COVID-19 Genomics UK (COG-UK) Consortium|Haldenby|United Kingdom

>Spike|hCoV-19/Australia/VIC12463/2020|2020-07-30|EPI\_ISL\_640668|Original|hCoV-19^^Victoria|Human|Microbiological Diagnostic Unit - Public Health Laboratory (MDU-PHL)|MDU-PHL|Schultz|Australia

>Spike|hCoV-19/USA/UT-UPHL-08762/2020|2020-08-14|EPI\_ISL\_525348|Original|hCoV-19^^Utah|Human|Utah Public Health Laboratory|Utah Public Health Laboratory|Young|USA

>Spike|hCoV-19/Denmark/DCGC-7800/2020|2020-10-19|EPI\_ISL\_618746|Original|hCoV-19^^Midtjylland|Human|Department of Virus and Microbiological Special Diagnostics|Albertsen lab|Michaelsen|Denmark

>Spike|hCoV-19/England/MILK-9C743D/2020|2020-09-08|EPI\_ISL\_573304|Original|hCoV-19^^England|Human|Northumbria University / South Tees Hospitals NHS Foundation Trust / North Cumbria Integrated Care NHS Foundation Trust / North Tees and Hartlepool NHS Foundation Trust / Newcastle Hospitals NHS Foundation Trust|COVID-19 Genomics UK (COG-UK) Consortium|Bashton|United Kingdom

>Spike|hCoV-19/Ireland/D-NVRL-MPT64850/2020|2020-04-05|EPI\_ISL\_767764|Original|hCoV-19^^Dublin|Human|National Virus Reference Laboratory|Irish Coronavirus Sequencing Consortium - Teagasc Moorepark|Walsh|Ireland

>Spike|hCoV-19/England/QEUEH-B82092/2020|2020-11-14|EPI\_ISL\_668268|Original|hCoV-19^^England|Human|Lighthouse Lab in Glasgow|Wellcome Sanger Institute for the COVID-19 Genomics UK (COG-UK) Consortium|Davies|United Kingdom

>Spike|hCoV-19/Northern Ireland/QEUEH-964FC8/2020|2020-08-13|EPI\_ISL\_531148|Original|hCoV-19^^Northern Ireland|Human|Lighthouse Lab in Glasgow|Wellcome Sanger Institute for the COVID-19 Genomics UK (COG-UK) consortium|Davies|United Kingdom

>Spike|hCoV-19/Wales/PHWC-16E6EF/2020|2020-09-29|EPI\_ISL\_585757|Original|hCoV-19^^Wales|Human|Wales Specialist Virology Centre Sequencing lab|COVID-19 Genomics UK (COG-UK) Consortium|Moore|United Kingdom

>Spike|hCoV-19/USA/CA-LACPHL-AF00039/2020|2020-12-20|EPI\_ISL\_765987|Original|hCoV-19^^California|Human|UCLA Clinical Micro Lab|Los Angeles County PHL|Hemarajata|USA

>Spike|hCoV-19/USA/NY-NYCPHL-000840/2020|2020-03-29|EPI\_ISL\_632217|Original|hCoV-19^^New York|Human|Richmond University Medical Center|New York City Public Health Laboratory|Wang|USA

>Spike|hCoV-19/England/LOND-DA96E/2020|2020-11-05|EPI\_ISL\_724674|Original|hCoV-19^^England|Human|University College London|COVID-19 Genomics UK (COG-UK) Consortium|Roy|United Kingdom

>Spike|hCoV-19/Netherlands/NA\_407/2020|2020-03-18|EPI\_ISL\_455209|Original|hCoV-19^^Netherlands|Human|Dutch COVID-19 response team|Erasmus Medical Center|Oude Munnink|Netherlands

>Spike|hCoV-19/Switzerland/SO-ETHZ-410048/2020|2020-12-17|EPI\_ISL\_737786|Original|hCoV-19^^Solothurn|Human|Viollier AG|Department of Biosystems Science and Engineering|Nadeau|Switzerland

>Spike|hCoV-19/England/EXET-135CEF/2020|2020-03-29|EPI\_ISL\_457156|Original|hCoV-19^^England|Human|University of Exeter|COVID-19 Genomics UK (COG-UK) Consortium|Temperton|United Kingdom

>Spike|hCoV-19/Australia/NSW1165/2020|2020-11-02|EPI\_ISL\_639733|Original|hCoV-19^^New South Wales|Human|Laverty Pathology|NSW Health Pathology - Institute of Clinical Pathology and Medical Research; Westmead Hospital; University of Sydney|Gall|Australia

>Spike|hCoV-19/England/MILK-B560E2/2020|2020-11-05|EPI\_ISL\_658350|Original|hCoV-19^^England|Human|Lighthouse Lab in Milton Keynes|Wellcome Sanger Institute for the COVID-19 Genomics UK (COG-UK) Consortium|Davies|United Kingdom

>Spike|hCoV-19/England/205141161/2020|2020-12-16|EPI\_ISL\_762995|Original|hCoV-19^^England|Human|Respiratory Virus Unit|COVID-19 Genomics UK (COG-UK) Consortium|Miah|United Kingdom

>Spike|hCoV-19/England/EXET-13EA73/2020|2020-12-13|EPI\_ISL\_764182|Original|hCoV-19^^England|Human|University of Exeter|COVID-19 Genomics UK (COG-UK) Consortium|Temperton|United Kingdom

>Spike|hCoV-19/Australia/VIC16075/2020|2020-08-03|EPI\_ISL\_640786|Original|hCoV-19^^Victoria|Human|Microbiological Diagnostic Unit - Public Health Laboratory (MDU-PHL)|MDU-PHL|Schultz|Australia

>Spike|hCoV-19/Wales/PHWC-16A883/2020|2020-09-11|EPI\_ISL\_560116|Original|hCoV-19^^Wales|Human|Wales Specialist Virology Centre Sequencing lab|COVID-19 Genomics UK (COG-UK) Consortium|Moore|United Kingdom

>Spike|hCoV-19/England/QEUH-7974DE/2020|2020-07-15|EPI\_ISL\_533217|Original|hCoV-19^^England|Human|Lighthouse Lab in Glasgow|Wellcome Sanger Institute for the COVID-19 Genomics UK (COG-UK) consortium|Davies|United Kingdom

>Spike|hCoV-19/England/ALDP-9C5B1C/2020|2020-09-11|EPI\_ISL\_567552|Original|hCoV-19^^England|Human|Lighthouse Lab in Alderley Park|Wellcome Sanger Institute for the COVID-19 Genomics UK (COG-UK) consortium|Davies|United Kingdom

>Spike|hCoV-19/Denmark/DCGC-15288/2020|2020-11-23|EPI\_ISL\_713308|Original|hCoV-19^^Syddanmark|Human|Department of Virus and Microbiological Special Diagnostics|Albertsen Lab|Michaelsen|Denmark

>Spike|hCoV-19/France/ARA-16170/2020|2020-03-29|EPI\_ISL\_508904|Original|hCoV-19^^Auvergne-Rh\u00f4ne-Alpes|Human|Institut des Agents Infectieux (IAI)|CNR Virus des Infections Respiratoires - France SUD|Josset|France

>Spike|hCoV-19/England/NORT-29D507/2020|2020-05-08|EPI\_ISL\_488104|Original|hCoV-19^^England|Human|NU-OMICS DNA Sequencing research facility|Wellcome Sanger Institute for the COVID-19 Genomics UK (COG-UK) consortium|Davies|United Kingdom

>Spike|hCoV-19/England/20126009504/2020|2020-03-19|EPI\_ISL\_423886|Original|hCoV-19^^England|Human|Respiratory Virus Unit|Respiratory Virus Unit|Platt|United Kingdom

>Spike|hCoV-19/Japan/PG-7382/2020|2020-07-00|EPI\_ISL\_688484|Original|hCoV-19^^Japan|Human|Pathogen Genomics Center|Pathogen Genomics Center|Sekizuka|Japan

>Spike|hCoV-19/England/LEED-2A8150/2020|2020-04-26|EPI\_ISL\_539039|Original|hCoV-19^^England|Human|Leeds Teaching Hospitals NHS Trust and Public Health England|Wellcome Sanger Institute for the COVID-19 Genomics UK (COG-UK) consortium|Davies|United Kingdom

>Spike|hCoV-19/New Zealand/20CV0289/2020|2020-03-26|EPI\_ISL\_579079|Original|hCoV-19^^Canterbury|Human|Canterbury Health Laboratories|Institute of Environmental Science and Research (ESR)|Wang|New Zealand

>Spike|hCoV-19/Lebanon/S5\_762/2020|2020-02-27|EPI\_ISL\_450512|Original|hCoV-19^^Beirut|Human|Rafik Hariri University Hospital|Rafik Hariri University Hospital|Feghali|Lebanon

>Spike|hCoV-19/Germany/NW-HHU-220/2020|2020-04-30|EPI\_ISL\_626219|Original|hCoV-19^^North Rhine-Westphalia|Human|Institute for Virology|Center of Medical Microbiology|Wienemann|Germany

>Spike|hCoV-19/England/MILK-AC94B2/2020|2020-10-21|EPI\_ISL\_630215|Original|hCoV-19^^England|Human|Lighthouse Lab in Milton Keynes|Wellcome Sanger Institute for the COVID-19 Genomics UK (COG-UK) consortium|Davies|United Kingdom

>Spike|hCoV-19/England/CAMB-7D930/2020|2020-04-06|EPI\_ISL\_441702|Original|hCoV-19^^England|Human|Department of Pathology|Wellcome Sanger Institute for the COVID-19 Genomics UK (COG-UK) consortium|Amato|United Kingdom

>Spike|hCoV-19/Australia/VIC13988/2020|2020-07-21|EPI\_ISL\_563911|Original|hCoV-19^^Victoria|Human|Microbiological Diagnostic Unit - Public Health Laboratory (MDU-PHL)|MDU-PHL|Schultz|Australia

>Spike|hCoV-19/England/PORT-2D3BB8/2020|2020-04-19|EPI\_ISL\_499314|Original|hCoV-19^^England|Human|Centre for Enzyme Innovation|COVID-19 Genomics UK (COG-UK) Consortium|Robson|United Kingdom

>Spike|hCoV-19/England/ALDP-9D95AE/2020|2020-09-18|EPI\_ISL\_576742|Original|hCoV-19^^England|Human|Oxford Viromics|COVID-19 Genomics UK (COG-UK) Consortium|Golubchik|United Kingdom

>Spike|hCoV-19/USA/CA-CZB-1663/2020|2020-04-22|EPI\_ISL\_468606|Original|hCoV-19^^California|Human|Orange County Public Health Lab|Chan-Zuckerberg Biohub|McGeever|USA

>Spike|hCoV-19/England/ALDP-951AFA/2020|2020-06-10|EPI\_ISL\_555468|Original|hCoV-19^^England|Human|Lighthouse Lab in Alderley Park|Wellcome Sanger Institute for the COVID-19 Genomics UK (COG-UK) consortium|Davies|United Kingdom

>Spike|hCoV-19/Kenya/C8439/2020|2020-05-20|EPI\_ISL\_568863|Original|hCoV-19^^Kwale|Human|KEMRI-Wellcome Trust Research Programme/KEMRI-CGMR-C Kilifi|KEMRI-Wellcome Trust Research Programme/KEMRI-CGMR-C Kilifi|Githinji|Kenya

>Spike|hCoV-19/Denmark/DCGC-3001/2020|2020-08-24|EPI\_ISL\_616777|Original|hCoV-19^^Midtjylland|Human|Department of Virus and Microbiological Special Diagnostics|Albertsen lab|Michaelsen|Denmark

>Spike|hCoV-19/Finland/24SS4A5/2020|2020-09-24|EPI\_ISL\_759831|Original|hCoV-19^^Uusimaa|Human|Department of Virology and Immunology|Department of Virology|Smura|Finland

>Spike|hCoV-19/England/MILK-971766/2020|2020-08-18|EPI\_ISL\_553090|Original|hCoV-19^^England|Human|Lighthouse Lab in Milton Keynes|Wellcome Sanger Institute for the COVID-19 Genomics UK (COG-UK) consortium|Davies|United Kingdom

>Spike|hCoV-19/USA/MI-MDHHS-SC21145/2020|2020-03-31|EPI\_ISL\_507921|Original|hCoV-19^^Michigan|Human|Michigan Department of Health and Human Services|Michigan Department of Health and Human Services|Blankenship|USA

>Spike|hCoV-19/USA/FL-BPHL-1203/2020|2020-07-22|EPI\_ISL\_541176|Original|hCoV-19^^Florida|Human|Florida Bureau of Public Health Laboratories|Florida Bureau of Public Health Laboratories|Blanton|USA

>Spike|hCoV-19/England/QEUA-9F7AC9/2020|2020-09-27|EPI\_ISL\_589194|Original|hCoV-19^^England|Human|Lighthouse Lab in Glasgow|Wellcome Sanger Institute for the COVID-19 Genomics UK (COG-UK) consortium|Davies|United Kingdom

>Spike|hCoV-19/Wales/PHWC-489609/2020|2020-10-26|EPI\_ISL\_639595|Original|hCoV-19^^Wales|Human|Wales Specialist Virology Centre Sequencing lab|COVID-19 Genomics UK (COG-UK) Consortium|Moore|United Kingdom

>Spike|hCoV-19/USA/WA-S2698/2020|2020-06-22|EPI\_ISL\_497330|Original|hCoV-19^^Washington|Human|Washington State Department of Health|Seattle Flu Study|Lee|USA

>Spike|hCoV-19/USA/TX-HMH-MCoV-15093/2020|2020-10-17|EPI\_ISL\_786577|Original|hCoV-19^^Texas|Human|Houston Methodist Hospital|Houston Methodist Hospital|Long|USA

>Spike|hCoV-19/Wales/PHWC-486912/2020|2020-10-31|EPI\_ISL\_639090|Original|hCoV-19^^Wales|Human|Wales Specialist Virology Centre Sequencing lab|COVID-19 Genomics UK (COG-UK) Consortium|Moore|United Kingdom

>Spike|hCoV-19/Wales/PHWC-16966C/2020|2020-07-24|EPI\_ISL\_512492|Original|hCoV-19^^Wales|Human|Wales Specialist Virology Centre Sequencing lab|COVID-19 Genomics UK (COG-UK) Consortium|Moore|United Kingdom

>Spike|hCoV-19/Russia/SVE-RII-MH2850S/2020|2020-09-24|EPI\_ISL\_733034|Original|hCoV-19^^Sverdlovsk|Human|HELIX LLC|WHO National Influenza Centre Russian Federation|Komissarov|Russia

>Spike|hCoV-19/USA/UT-UPHL-2012343311/2020|2020-07-27|EPI\_ISL\_745707|Original|hCoV-19^^Utah|Human|Ginkgo Bioworks Clinical Laboratory|Utah Public Health Laboratory|Young|USA

>Spike|hCoV-19/USA/VA-DCLS-1443/2020|2020-08-18|EPI\_ISL\_572310|Original|hCoV-19^^Virginia|Human|Virginia DCLS|Virginia DCLS|St. Jacques|USA

>Spike|hCoV-19/England/ALDP-B628DC/2020|2020-11-09|EPI\_ISL\_656591|Original|hCoV-19^^England|Human|Lighthouse Lab in Alderley Park|Wellcome Sanger Institute for the COVID-19 Genomics UK (COG-UK) Consortium|Davies|United Kingdom

>Spike|hCoV-19/USA/TX-HMH-MCoV-13266/2020|2020-08-25|EPI\_ISL\_788415|Original|hCoV-19^^Texas|Human|Houston Methodist Hospital|Houston Methodist Hospital|Long|USA

>Spike|hCoV-19/England/CAMC-B9AED9/2020|2020-11-15|EPI\_ISL\_673849|Original|hCoV-19^^England|Human|Lighthouse Lab in Cambridge|Wellcome Sanger Institute for the COVID-19 Genomics UK (COG-UK) Consortium|Davies|United Kingdom

>Spike|hCoV-19/England/MILK-B8C2CF/2020|2020-11-12|EPI\_ISL\_674302|Original|hCoV-19^^England|Human|Lighthouse Lab in Milton Keynes|Wellcome Sanger Institute for the COVID-19 Genomics UK (COG-UK) Consortium|Davies|United Kingdom

>Spike|hCoV-19/Germany/HH-hpi-p2152/2020|2020-03-27|EPI\_ISL\_776384|Original|hCoV-19^^Hamburg|Human|University Medical Center Hamburg Eppendorf|Heinrich Pette Institute|Robitaille|Germany

>Spike|hCoV-19/Denmark/DCGC-7297/2020|2020-10-12|EPI\_ISL\_619257|Original|hCoV-19^^Nordjylland|Human|Department of Virus and Microbiological Special Diagnostics|Albertsen lab|Michaelsen|Denmark

>Spike|hCoV-19/England/QEUEH-89EB77/2020|2020-07-26|EPI\_ISL\_532655|Original|hCoV-19^^England|Human|Lighthouse Lab in Glasgow|Wellcome Sanger Institute for the COVID-19 Genomics UK (COG-UK) consortium|Davies|United Kingdom

>Spike|hCoV-19/Netherlands/NA\_599/2020|2020-04-18|EPI\_ISL\_460762|Original|hCoV-19^^Netherlands|Human|Dutch COVID-19 response team|Erasmus Medical Center|Oude Munnink|Netherlands

>Spike|hCoV-19/USA/TX-HMH-MCoV-19785/2020|2020-11-18|EPI\_ISL\_784123|Original|hCoV-19^^Texas|Human|Houston Methodist Hospital|Houston Methodist Hospital|Long|USA

>Spike|hCoV-19/England/CAMB-1B0271/2020|2020-05-02|EPI\_ISL\_459292|Original|hCoV-19^^England|Human|Department of Pathology|Wellcome Sanger Institute for the COVID-19 Genomics UK (COG-UK) consortium|Davies|United Kingdom

>Spike|hCoV-19/USA/WA-S847/2020|2020-04-23|EPI\_ISL\_463337|Original|hCoV-19^^Washington|Human|Washington State Department of Health|Seattle Flu Study|Bedford|USA

>Spike|hCoV-19/England/MILK-A458A3/2020|2020-10-05|EPI\_ISL\_598681|Original|hCoV-19^^England|Human|Lighthouse Lab in Milton Keynes|Wellcome Sanger Institute for the COVID-19 Genomics UK (COG-UK) consortium|Davies|United Kingdom

>Spike|hCoV-19/Australia/VIC5806/2020|2020-07-20|EPI\_ISL\_518601|Original|hCoV-19^^Victoria|Human|Microbiological Diagnostic Unit - Public Health Laboratory (MDU-PHL)|MDU-PHL|Schultz|Australia

>Spike|hCoV-19/USA/TX-HMH-5448/2020|2020-06-24|EPI\_ISL\_544783|Original|hCoV-19^^Texas|Human|Houston Methodist Hospital|Houston Methodist Hospital|Long|USA

>Spike|hCoV-19/India/TG-CCMB-AC475/2020|2020-08-19|EPI\_ISL\_539727|Original|hCoV-19^^Telangana|Human|CSIR-Centre for Cellular and Molecular Biology|CSIR-Centre for Cellular and Molecular Biology|Mukherjee|India

>Spike|hCoV-19/England/ALDP-A92D20/2020|2020-10-19|EPI\_ISL\_611195|Original|hCoV-19^^England|Human|Lighthouse Lab in Alderley Park|Wellcome Sanger Institute for the COVID-19 Genomics UK (COG-UK) consortium|Davies|United Kingdom

>Spike|hCoV-19/USA/CA-CDC-4752/2020|2020-06-17|EPI\_ISL\_535714|Original|hCoV-19^^California|Human|CDPH|Pathogen Discovery|Queen|USA

>Spike|hCoV-19/Denmark/DCGC-7344/2020|2020-10-12|EPI\_ISL\_619304|Original|hCoV-19^^Syddanmark|Human|Department of Virus and Microbiological Special Diagnostics|Albertsen lab|Michaelsen|Denmark

>Spike|hCoV-19/Denmark/DCGC-3425/2020|2020-08-31|EPI\_ISL\_616187|Original|hCoV-19^^Hovedstaden|Human|Department of Virus and Microbiological Special Diagnostics|Albertsen lab|Michaelsen|Denmark

>Spike|hCoV-19/USA/WA-QDX-2514/2020|2020-03-16|EPI\_ISL\_604870|Original|hCoV-19^^Washington|Human|Quest Diagnostics|Quest Diagnostics|Kagan|USA

>Spike|hCoV-19/USA/WA-UW-4632/2020|2020-03-28|EPI\_ISL\_460631|Original|hCoV-19^^Washington|Human|UW Virology Lab|UW Virology Lab|Roychoudhury|USA

>Spike|hCoV-19/Denmark/DCGC-2737/2020|2020-08-17|EPI\_ISL\_616482|Original|hCoV-19^^Hovedstaden|Human|Department of Virus and Microbiological Special Diagnostics|Albertsen lab|Michaelsen|Denmark

>Spike|hCoV-19/Denmark/DCGC-14407/2020|2020-11-30|EPI\_ISL\_711749|Original|hCoV-19^^Hovedstaden|Human|Department of Virus and Microbiological Special Diagnostics|Albertsen Lab|Michaelsen|Denmark

>Spike|hCoV-19/USA/TX-HMH-5107/2020|2020-06-29|EPI\_ISL\_544530|Original|hCoV-19^^Texas|Human|Houston Methodist Hospital|Houston Methodist Hospital|Long|USA

>Spike|hCoV-19/England/ALDP-C22F1E/2020|2020-12-06|EPI\_ISL\_733830|Original|hCoV-19^^England|Human|Lighthouse Lab in Alderley Park|Wellcome Sanger Institute for the COVID-19 Genomics UK (COG-UK) Consortium|Davies|United Kingdom

>Spike|hCoV-19/Japan/PG-4633/2020|2020-07-00|EPI\_ISL\_689770|Original|hCoV-19^^Japan|Human|Fukuoka Institute of Health and Environmental Sciences|Pathogen Genomics Center|Sekizuka|Japan

>Spike|hCoV-19/USA/NY-SBU-A58444/2020|2020-04-25|EPI\_ISL\_602562|Original|hCoV-19^^New York|Human|Department of Microbiology and Immunology|Department of Microbiology and Immunology|Nascimento Conde|USA

>Spike|hCoV-19/Netherlands/NB-EMC-387/2020|2020-10-05|EPI\_ISL\_722592|Original|hCoV-19^^Noord Brabant|Human|Dutch COVID-19 response team|Erasmus Medical Center|Oude Munnink|Netherlands

>Spike|hCoV-19/Denmark/DCGC-5110/2020|2020-09-21|EPI\_ISL\_621648|Original|hCoV-19^^Hovedstaden|Human|Department of Virus and Microbiological Special Diagnostics|Albertsen lab|Michaelsen|Denmark

>Spike|hCoV-19/Finland/24LS2A12/2020|2020-10-24|EPI\_ISL\_759824|Original|hCoV-19^^Uusimaa|Human|Department of Virology and Immunology|Department of Virology|Smura|Finland

>Spike|hCoV-19/Netherlands/ZH-EMC-669/2020|2020-09-24|EPI\_ISL\_632509|Original|hCoV-19^^Zuid Holland|Human|Dutch COVID-19 response team|Erasmus Medical Center|Oude Munnink|Netherlands

>Spike|hCoV-19/India/OR-ILSCV29959/2020|2020-05-23|EPI\_ISL\_481132|Original|hCoV-19^^Odisha|Human|Immunogenomics lab|Immunogenomics lab|Raghav|India

>Spike|hCoV-19/USA/VA\_NIDDL\_3089/2020|2020-04-08|EPI\_ISL\_491929|Original|hCoV-19^^Virginia|Human|Naval Infectious Diseases Diagnostic Laboratory|Naval Medical Research Center Biological Defense Research Directorate|Voegtly|USA

>Spike|hCoV-19/USA/MD-MDH-0524/2020|2020-12-01|EPI\_ISL\_778902|Original|hCoV-19^^Maryland|Human|Maryland Public Health Laboratory|Maryland Public Health Laboratory|Keller|USA

>Spike|hCoV-19/New Zealand/20CV0484/2020|2020-10-26|EPI\_ISL\_622817|Original|hCoV-19^^Waitemata|Human|Middlemore Hospital|Institute of Environmental Science and Research (ESR)|Wang|New Zealand

>Spike|hCoV-19/Netherlands/GE-RIVM-10088/2020|2020-03-08|EPI\_ISL\_547460|Original|hCoV-19^^Gelderland|Human|Dutch COVID-19 response team|National Institute for Public Health and the Environment (RIVM)|Meijer|Netherlands

>Spike|hCoV-19/USA/UT-UPHL-2012528694/2020|2020-11-30|EPI\_ISL\_779309|Original|hCoV-19^^Utah|Human|Utah Public Health Laboratory|Utah Public Health Laboratory|Gallagher|USA

>Spike|hCoV-19/England/ALDP-A84F2B/2020|2020-10-17|EPI\_ISL\_610622|Original|hCoV-19^^England|Human|Lighthouse Lab in Alderley Park|Wellcome Sanger Institute for the COVID-19 Genomics UK (COG-UK) consortium|Davies|United Kingdom

>Spike|hCoV-19/England/ALDP-B7534E/2020|2020-11-12|EPI\_ISL\_662100|Original|hCoV-19^^England|Human|Lighthouse Lab in Alderley Park|Wellcome Sanger Institute for the COVID-19 Genomics UK (COG-UK) Consortium|Davies|United Kingdom

>Spike|hCoV-19/USA/TX-HMH-MCoV-8591/2020|2020-07-01|EPI\_ISL\_780639|Original|hCoV-19^^Texas|Human|Houston Methodist Hospital|Houston Methodist Hospital|Long|USA

>Spike|hCoV-19/England/MILK-A23BDF/2020|2020-10-03|EPI\_ISL\_595105|Original|hCoV-19^^England|Human|Centre for Enzyme Innovation|COVID-19 Genomics UK (COG-UK) Consortium|Robson|United Kingdom

>Spike|hCoV-19/Canada/ON-S1479/2020|2020-08-28|EPI\_ISL\_591114|Original|hCoV-19^^Ontario|Human|Toronto Invasive Bacterial Diseases Network|McMaster University|McArthur|Canada

>Spike|hCoV-19/Switzerland/SO-ETHZ-390334/2020|2020-11-30|EPI\_ISL\_721890|Original|hCoV-19^^Solothurn|Human|Viollier AG|Department of Biosystems Science and Engineering|Nadeau|Switzerland

>Spike|hCoV-19/England/CAMB-1BBA6F/2020|2020-11-17|EPI\_ISL\_679183|Original|hCoV-19^^England|Human|Department of Pathology|COVID-19 Genomics UK (COG-UK) Consortium|Goodfellow|United Kingdom

>Spike|hCoV-19/Switzerland/VD-ETHZ-321470/2020|2020-10-14|EPI\_ISL\_603683|Original|hCoV-19^^Vaud|Human|Viollier AG|Department of Biosystems Science and Engineering|Nadeau|Switzerland

>Spike|hCoV-19/mink/Netherlands/NB-EMC-13-16/2020|2020-06-14|EPI\_ISL\_523013|Original|hCoV-19^^Noord Brabant|Neovison vison|Dutch COVID-19 response team|Erasmus Medical Center|Oude Munnink|Netherlands

>Spike|hCoV-19/Denmark/DCGC-21276/2020|2020-12-21|EPI\_ISL\_758825|Original|hCoV-19^^Hovedstaden|Human|Department of Virus and Microbiological Special Diagnostics|Albertsen Lab|Michaelsen|Denmark

>Spike|hCoV-19/England/MILK-9931F7/2020|2020-08-27|EPI\_ISL\_552084|Original|hCoV-19^^England|Human|Lighthouse Lab in Milton Keynes|Wellcome Sanger Institute for the COVID-19 Genomics UK (COG-UK) consortium|Davies|United Kingdom

>Spike|hCoV-19/France/PAC-01926/2020|2020-03-25|EPI\_ISL\_508911|Original|hCoV-19^^Provence-Alpes-C\u00f4te d'Azur|Human|Institut des Agents Infectieux (IAI)|CNR Virus des Infections Respiratoires - France SUD|Josset|France

>Spike|hCoV-19/England/CAMB-83BE6/2020|2020-04-16|EPI\_ISL\_443343|Original|hCoV-19^^England|Human|Department of Pathology|Wellcome Sanger Institute for the COVID-19 Genomics UK (COG-UK) consortium|Amato|United Kingdom

>Spike|hCoV-19/England/MILK-9A8414/2020|2020-09-02|EPI\_ISL\_550168|Original|hCoV-19^^England|Human|Lighthouse Lab in Milton Keynes|Wellcome Sanger Institute for the COVID-19 Genomics UK (COG-UK) consortium|Davies|United Kingdom

>Spike|hCoV-19/Japan/PG-8218/2020|2020-08-00|EPI\_ISL\_687317|Original|hCoV-19^^Japan|Human|Pathogen Genomics Center|Pathogen Genomics Center|Sekizuka|Japan

>Spike|hCoV-19/Sweden/20-53257/2020|2020-10-15|EPI\_ISL\_648154|Original|hCoV-19^^Sweden|Human|Stockholm|The Public Health Agency of Sweden|Svartstr\u00f6m|Sweden

>Spike|hCoV-19/Wales/PHWC-489AD0/2020|2020-10-26|EPI\_ISL\_652451|Original|hCoV-19^^Wales|Human|Wales Specialist Virology Centre Sequencing lab|COVID-19 Genomics UK (COG-UK) Consortium|Moore|United Kingdom

>Spike|hCoV-19/England/ALDP-9BE008/2020|2020-09-09|EPI\_ISL\_567997|Original|hCoV-19^^England|Human|Lighthouse Lab in Alderley Park|Wellcome Sanger Institute for the COVID-19 Genomics UK (COG-UK) consortium|Davies|United Kingdom

>Spike|hCoV-19/Australia/VIC8782/2020|2020-07-30|EPI\_ISL\_565191|Original|hCoV-19^^Victoria|Human|Victorian Infectious Diseases Reference Laboratory (VIDRL)|VIDRL and MDU-PHL|Schultz|Australia

>Spike|hCoV-19/England/MILK-97733F/2020|2020-07-24|EPI\_ISL\_550452|Original|hCoV-19^^England|Human|Lighthouse Lab in Milton Keynes|Wellcome Sanger Institute for the COVID-19 Genomics UK (COG-UK) consortium|Davies|United Kingdom

>Spike|hCoV-19/England/QEUEH-9DC022/2020|2020-09-21|EPI\_ISL\_601255|Original|hCoV-19^^England|Human|Lighthouse Lab in Glasgow|Wellcome Sanger Institute for the COVID-19 Genomics UK (COG-UK) consortium|Davies|United Kingdom

>Spike|hCoV-19/England/LIVE-1DDFC2/2020|2020-10-10|EPI\_ISL\_612114|Original|hCoV-19^^England|Human|Liverpool Clinical Laboratories|COVID-19 Genomics UK (COG-UK) Consortium|Haldenby|United Kingdom

>Spike|hCoV-19/Denmark/DCGC-17224/2020|2020-12-14|EPI\_ISL\_750838|Original|hCoV-19^^Midtjylland|Human|Department of Virus and Microbiological Special Diagnostics|Albertsen Lab|Michaelsen|Denmark

>Spike|hCoV-19/Italy/LAZ-INMI-127/2020|2020-12-18|EPI\_ISL\_746834|Original|hCoV-19^^Lazio|Human|National Institute for Infectious Diseases|National Institute for Infectious Diseases|Gruber|Italy

>Spike|hCoV-19/Northern Ireland/NIRE-FC438/2020|2020-04-12|EPI\_ISL\_459343|Original|hCoV-19^^Northern Ireland|Human|Regional Virus

Laboratory|Wellcome Sanger Institute for the COVID-19 Genomics UK (COG-UK) consortium|Davies|United Kingdom

>Spike|hCoV-19/USA/TX-HMH-MCoV-13495/2020|2020-08-22|EPI\_ISL\_788624|Original|hCoV-19^^Texas|Human|Houston Methodist Hospital|Houston Methodist Hospital|Long|USA

>Spike|hCoV-19/England/QEUH-C92D6A/2020|2020-12-16|EPI\_ISL\_762055|Original|hCoV-19^^England|Human|Lighthouse Lab in Glasgow|Wellcome Sanger Institute for the COVID-19 Genomics UK (COG-UK) Consortium|Davies|United Kingdom

>Spike|hCoV-19/Denmark/DCGC-16437/2020|2020-11-16|EPI\_ISL\_714766|Original|hCoV-19^^Sjaelland|Human|Department of Virus and Microbiological Special Diagnostics|Albertsen Lab|Michaelsen|Denmark

>Spike|hCoV-19/USA/FL-UF4/2020|2020-03-27|EPI\_ISL\_447588|LLC-MK2|hCoV-19^^Florida|Human|Lednicky Lab|Lednicky lab|Elbadry|USA

>Spike|hCoV-19/England/CAMC-B3573F/2020|2020-11-05|EPI\_ISL\_659523|Original|hCoV-19^^England|Human|Lighthouse Lab in Cambridge|Wellcome Sanger Institute for the COVID-19 Genomics UK (COG-UK) Consortium|Davies|United Kingdom

>Spike|hCoV-19/India/DL-MaxCov0047-CSIR-IGIB/2020|2020-04-27|EPI\_ISL\_459949|Original|hCoV-19^^Delhi|Human|Devki Devi Foundation|CSIR-IGIB/Max|Pandey|India

>Spike|hCoV-19/Scotland/CVR1678/2020|2020-04-05|EPI\_ISL\_433652|Original|hCoV-19^^Scotland|Human|West of Scotland Specialist Virology Centre|COVID-19 Genomics UK (COG-UK) Consortium|Robertson|United Kingdom

>Spike|hCoV-19/England/ALDP-A850DC/2020|2020-10-16|EPI\_ISL\_610318|Original|hCoV-19^^England|Human|Lighthouse Lab in Alderley Park|Wellcome Sanger Institute for the COVID-19 Genomics UK (COG-UK) consortium|Davies|United Kingdom

>Spike|hCoV-19/England/ALDP-B5D740/2020|2020-11-09|EPI\_ISL\_704392|Original|hCoV-19^^England|Human|Department of Pathology|COVID-19 Genomics UK (COG-UK) Consortium|Goodfellow|United Kingdom

>Spike|hCoV-19/Australia/VIC13353/2020|2020-07-29|EPI\_ISL\_563689|Original|hCoV-19^^Victoria|Human|Microbiological Diagnostic Unit - Public Health Laboratory (MDU-PHL)|MDU-PHL|Schultz|Australia

>Spike|hCoV-19/United Arab Emirates/0117/2020|2020-05-15|EPI\_ISL\_698307|Original|hCoV-19^^Abu Dhabi|Human|Group 42 (G42) Healthcare|G42 Healthcare|Ogrodzki|United Arab Emirates

>Spike|hCoV-19/Australia/VIC2968/2020|2020-07-07|EPI\_ISL\_521798|Original|hCoV-19^^Victoria|Human|Microbiological Diagnostic Unit - Public Health Laboratory (MDU-PHL)|MDU-PHL|Schultz|Australia

>Spike|hCoV-19/England/MILK-9C1F32/2020|2020-09-07|EPI\_ISL\_566579|Original|hCoV-19^^England|Human|Lighthouse Lab in Milton Keynes|Wellcome Sanger Institute for the COVID-19 Genomics UK (COG-UK) consortium|Davies|United Kingdom

>Spike|hCoV-19/England/MILK-B95A16/2020|2020-11-13|EPI\_ISL\_674864|Original|hCoV-19^^England|Human|Lighthouse Lab in Milton Keynes|Wellcome Sanger Institute for the COVID-19 Genomics UK (COG-UK) Consortium|Davies|United Kingdom

>Spike|hCoV-19/Netherlands/NB-EMC-248/2020|2020-05-16|EPI\_ISL\_523371|Original|hCoV-19^^Noord Brabant|Human|Dutch COVID-19 response team|Erasmus Medical Center|Oude Munnink|Netherlands

>Spike|hCoV-19/Australia/VIC2050/2020|2020-06-13|EPI\_ISL\_480754|Original|hCoV-19^^Victoria|Human|Microbiological Diagnostic Unit - Public Health Laboratory (MDU-PHL)|MDU-PHL|Schultz|Australia

>Spike|hCoV-19/Germany/NW-UBI-29/2020|2020-06-18|EPI\_ISL\_631283|Original|hCoV-19^^North Rhine-Westphalia|Human|MVZ DIAMEDIS Diagnostische Medizin Sennestadt GmbH|Bielefeld University|Brandt|Germany

>Spike|hCoV-19/England/CAMC-BBBF39/2020|2020-11-21|EPI\_ISL\_705576|Original|hCoV-19^^England|Human|Quadram Institute Bioscience|COVID-19 Genomics UK (COG-UK) Consortium|Alikhan|United Kingdom

>Spike|hCoV-19/South Korea/KCDC2448/2020|2020-06-07|EPI\_ISL\_514851|Original|hCoV-19^^South Korea|Human|Division of Viral Diseases|Division of Viral Diseases|Kim|South Korea

>Spike|hCoV-19/Australia/VIC2632/2020|2020-06-30|EPI\_ISL\_521478|Original|hCoV-19^^Victoria|Human|Victorian Infectious Diseases Reference Laboratory (VIDRL)|VIDRL and MDU-PHL|Schultz|Australia

>Spike|hCoV-19/Japan/PG-3878/2020|2020-07-00|EPI\_ISL\_692129|Original|hCoV-19^^Japan|Human|Pathogen Genomics Center|Pathogen Genomics Center|Sekizuka|Japan

>Spike|hCoV-19/Dominican Republic/ICGEB\_UNIBE032.7/2020|2020-05-06|EPI\_ISL\_525469|Original|hCoV-19^^Dominican Republic|Human|Universidad Iberoamericana|International Centre for Genetic Engineering and Biotechnology (ICGEB) and ARGO Open Lab Platform|Paulino-Ramirez|Dominican Republic

>Spike|hCoV-19/England/NOTT-1135DD/2020|2020-09-03|EPI\_ISL\_549365|Original|hCoV-19^^England|Human|Lincolnshire Hospitals and DeepSeq Nottingham|COVID-19 Genomics UK (COG-UK) Consortium|Loose|United Kingdom

>Spike|hCoV-19/Denmark/DCGC-17296/2020|2020-12-14|EPI\_ISL\_750885|Original|hCoV-19^^Midtjylland|Human|Department of Virus and Microbiological Special Diagnostics|Albertsen Lab|Michaelsen|Denmark

>Spike|hCoV-19/USA/TX-HMH-783/2020|2020-04-08|EPI\_ISL\_545653|Original|hCoV-19^^Texas|Human|Houston Methodist Hospital|Houston Methodist Hospital|Long|USA

>Spike|hCoV-19/Gibraltar/205121189/2020|2020-00-00|EPI\_ISL\_766319|Original|hCoV-19^^Gibraltar|Human|Microbiology|Respiratory Virus Unit|Platt|Gibraltar

>Spike|hCoV-19/England/ALDP-AA4C79/2020|2020-10-21|EPI\_ISL\_630966|Original|hCoV-19^^England|Human|Lighthouse Lab in Alderley Park|Wellcome Sanger Institute for the COVID-19 Genomics UK (COG-UK) consortium|Davies|United Kingdom

>Spike|hCoV-19/Wales/PHWC-49725F/2020|2020-11-26|EPI\_ISL\_726800|Original|hCoV-19^^Wales|Human|Originating lab|COVID-19 Genomics UK (COG-UK) Consortium|Moore|United Kingdom

>Spike|hCoV-19/England/QEUEH-95DCDA/2020|2020-08-07|EPI\_ISL\_536974|Original|hCoV-19^^England|Human|Lighthouse Lab in Glasgow|Wellcome Sanger Institute for the COVID-19 Genomics UK (COG-UK) consortium|Davies|United Kingdom

>Spike|hCoV-19/Denmark/DCGC-9873/2020|2020-11-09|EPI\_ISL\_669243|Original|hCoV-19^^Hovedstaden|Human|Department of Virus and Microbiological Special Diagnostics|Albertsen Lab|Michaelsen|Denmark

>Spike|hCoV-19/USA/TX-DSHS-1517/2020|2020-06-22|EPI\_ISL\_683432|Original|hCoV-19^^Texas|Human|Texas Department of State Health Services|Texas Department of State Health Services|Rahman|USA

>Spike|hCoV-19/Russia/NVS-RII-MH1087V/2020|2020-07-22|EPI\_ISL\_596264|Vero|hCoV-19^^Novosibirsk|Human|WHO National Influenza Centre Russian Federation|WHO National Influenza Centre Russian Federation|Komissarov|Russia

>Spike|hCoV-19/England/CAMB-1AE08B/2020|2020-04-27|EPI\_ISL\_524586|Original|hCoV-19^^England|Human|Department of Pathology|Wellcome Sanger Institute for the COVID-19 Genomics UK (COG-UK) consortium|Davies|United Kingdom

>Spike|hCoV-19/Saudi Arabia/477/2020|2020-02-03|EPI\_ISL\_489996|Original|hCoV-19^^Saudi Arabia|Human|King Fahad Medical City|King Fahad Medical City|Naeem|Saudi Arabia

>Spike|hCoV-19/England/MILK-6166F0/2020|2020-07-05|EPI\_ISL\_557812|Original|hCoV-19^^England|Human|Lighthouse Lab in Milton Keynes|Wellcome Sanger Institute for the COVID-19 Genomics UK (COG-UK) consortium|Davies|United Kingdom

>Spike|hCoV-19/Denmark/DCGC-7015/2020|2020-10-12|EPI\_ISL\_619862|Original|hCoV-19^^Sjælland|Human|Department of Virus and Microbiological Special Diagnostics|Albertsen lab|Michaelsen|Denmark

>Spike|hCoV-19/Japan/PG-8025/2020|2020-08-00|EPI\_ISL\_687126|Original|hCoV-19^^Japan|Human|Pathogen Genomics Center|Pathogen Genomics Center|Sekizuka|Japan

>Spike|hCoV-19/Spain/EX-IBV-005010/2020|2020-03-13|EPI\_ISL\_510319|Original|hCoV-19^^Extremadura|Human|Hospital San Pedro de Alc ntara (C lceres)|SeqCOVID-SPAIN consortium|IBV (CSIC)|Comas|Spain

>Spike|hCoV-19/USA/CA-CZB-2422/2020|2020-05-17|EPI\_ISL\_513843|Original|hCoV-19^^California|Human|Humboldt County Public Health Laboratory|Chan-Zuckerberg Biohub|Kamm|USA

>Spike|hCoV-19/USA/MI-QDX-1145/2020|2020-03-23|EPI\_ISL\_571875|Original|hCoV-19^^Michigan|Human|Quest Diagnostics|Quest Diagnostics|Kagan|USA

>Spike|hCoV-19/England/ALDP-9C5763/2020|2020-09-10|EPI\_ISL\_567879|Original|hCoV-19^^England|Human|Lighthouse Lab in Alderley Park|Wellcome Sanger Institute for the COVID-19 Genomics UK (COG-UK) consortium|Davies|United Kingdom



>Spike|hCoV-19/England/QEUA-AD0852/2020|2020-10-26|EPI\_ISL\_633836|Original|hCoV-19^^England|Human|Lighthouse Lab in Glasgow|Wellcome Sanger Institute for the COVID-19 Genomics UK (COG-UK) consortium|Davies|United Kingdom

>Spike|hCoV-19/USA/WA-UW-1765/2020|2020-03-20|EPI\_ISL\_424209|Original|hCoV-19^^Washington|Human|UW Virology Lab|UW Virology Lab|Roychoudhury|USA

>Spike|hCoV-19/Wales/PHWC-48BACF/2020|2020-11-03|EPI\_ISL\_666320|Original|hCoV-19^^Wales|Human|Wales Specialist Virology Centre Sequencing lab|COVID-19 Genomics UK (COG-UK) Consortium|Moore|United Kingdom

>Spike|hCoV-19/Japan/IC-0481/2020|2020-12-00|EPI\_ISL\_768690|Original|hCoV-19^^Japan|Human|Pathogen Genomics Center|Pathogen Genomics Center|Sekizuka|Japan

>Spike|hCoV-19/Denmark/DCGC-5473/2020|2020-09-21|EPI\_ISL\_620798|Original|hCoV-19^^Syddanmark|Human|Department of Virus and Microbiological Special Diagnostics|Albertsen lab|Michaelsen|Denmark

>Spike|hCoV-19/Wales/QEUA-B2E0A7/2020|2020-11-02|EPI\_ISL\_710996|Original|hCoV-19^^Wales|Human|Lighthouse Lab in Glasgow|Wellcome Sanger Institute for the COVID-19 Genomics UK (COG-UK) Consortium|Davies|United Kingdom

>Spike|hCoV-19/Spain/MD-IBV-99008796/2020|2020-09-21|EPI\_ISL\_654147|Original|hCoV-19^^Madrid|Human|Hospital General Universitario Gregorio Mara\u00f1\u00f3n|SeqCOVID-SPAIN consortium/IBV (CSIC)|Comas|Spain

>Spike|hCoV-19/Denmark/DCGC-3573/2020|2020-08-24|EPI\_ISL\_616901|Original|hCoV-19^^Hovedstaden|Human|Department of Virus and Microbiological Special Diagnostics|Albertsen lab|Michaelsen|Denmark

>Spike|hCoV-19/England/CAMC-A652BE/2020|2020-10-11|EPI\_ISL\_637475|Original|hCoV-19^^England|Human|Department of Pathology|COVID-19 Genomics UK (COG-UK) Consortium|Goodfellow|United Kingdom

>Spike|hCoV-19/England/QEUA-9FA8BD/2020|2020-09-28|EPI\_ISL\_588117|Original|hCoV-19^^England|Human|Lighthouse Lab in Glasgow|Wellcome Sanger Institute for the COVID-19 Genomics UK (COG-UK) consortium|Davies|United Kingdom

>Spike|hCoV-19/England/ALDP-A5069C/2020|2020-10-07|EPI\_ISL\_597760|Original|hCoV-19^^England|Human|Lighthouse Lab in Alderley Park|Wellcome Sanger Institute for the COVID-19 Genomics UK (COG-UK) consortium|Davies|United Kingdom

>Spike|hCoV-19/USA/CA-ALSR-3352/2020|2020-09-17|EPI\_ISL\_635976|Original|hCoV-19^^California|Human|San Diego County Public Health Laboratory|Andersen lab at Scripps Research|Gangavarapu|USA

>Spike|hCoV-19/Wales/PHWC-49E5D7/2020|2020-12-07|EPI\_ISL\_743020|Original|hCoV-19^^Wales|Human|Wales Specialist Virology Centre Sequencing lab|COVID-19 Genomics UK (COG-UK) Consortium|Moore|United Kingdom

>Spike|hCoV-19/USA/FL-BPHL-1253/2020|2020-04-13|EPI\_ISL\_541149|Original|hCoV-19^^Florida|Human|Florida Bureau of Public Health Laboratories|Florida Bureau of Public Health Laboratories|Blanton|USA

>Spike|hCoV-19/Japan/PG-4086/2020|2020-08-00|EPI\_ISL\_692327|Original|hCoV-19^^Japan|Human|Gunma Prefectural Institute of Public Health and Environmental Sciences|Pathogen Genomics Center|Sekizuka|Japan

>Spike|hCoV-19/Spain/MD-IBV-97010074/2020|2020-03-18|EPI\_ISL\_779760|Original|hCoV-19^^Madrid|Human|IdISSC/Hospital Cl\u00e9nico San Carlos de Madrid\u200b|SeqCOVID-SPAIN consortium/IBV (CSIC)|Comas|Spain

>Spike|hCoV-19/Denmark/DCGC-14115/2020|2020-11-30|EPI\_ISL\_711578|Original|hCoV-19^^Hovedstaden|Human|Department of Virus and Microbiological Special Diagnostics|Albertsen Lab|Michaelsen|Denmark

>Spike|hCoV-19/Denmark/DCGC-16954/2020|2020-12-14|EPI\_ISL\_750664|Original|hCoV-19^^Nordjylland|Human|Department of Virus and Microbiological Special Diagnostics|Albertsen Lab|Michaelsen|Denmark

>Spike|hCoV-19/England/QEUA-C5CAA1/2020|2020-12-14|EPI\_ISL\_769394|Original|hCoV-19^^England|Human|Lighthouse Lab in Glasgow|Wellcome Sanger Institute for the COVID-19 Genomics UK (COG-UK) Consortium|Davies|United Kingdom

>Spike|hCoV-19/Luxembourg/LNS8675312/2020|2020-10-19|EPI\_ISL\_744784|Original|hCoV-19^^Luxembourg|Human|Laboratoire national de sant\u00e9|Laboratoire national de sant\u00e9|Wienecke-Baldacchino|Luxembourg

>Spike|hCoV-19/South Korea/KDCA0325/2020|2020-10-20|EPI\_ISL\_760111|Original|hCoV-19^^South Korea|Human|Division of Emerging Infectious Diseases|Division of Emerging Infectious Diseases|Park|South Korea

>Spike|hCoV-19/England/BRIS-1229DF/2020|2020-04-03|EPI\_ISL\_440781|Original|hCoV-19^^England|Human|PHE South West Regional Laboratory|Wellcome Sanger Institute for the COVID-19 Genomics UK (COG-UK) consortium|Amato|United Kingdom

>Spike|hCoV-19/England/CAMC-B37533/2020|2020-11-05|EPI\_ISL\_645449|Original|hCoV-19^^England|Human|Lighthouse Lab in Cambridge|Wellcome Sanger Institute for the COVID-19 Genomics UK (COG-UK) Consortium|Davies|United Kingdom

>Spike|hCoV-19/USA/CA-CZB-1241/2020|2020-04-14|EPI\_ISL\_454661|Original|hCoV-19^^California|Human|County of Santa Clara Public Health Department|Chan-Zuckerberg Biohub|Hao|USA

>Spike|hCoV-19/Denmark/DCGC-2454/2020|2020-08-03|EPI\_ISL\_617414|Original|hCoV-19^^Syddanmark|Human|Department of Virus and Microbiological Special Diagnostics|Albertsen lab|Michaelsen|Denmark

>Spike|hCoV-19/England/MILK-62CD98/2020|2020-07-05|EPI\_ISL\_557954|Original|hCoV-19^^England|Human|Lighthouse Lab in Milton Keynes|Wellcome Sanger Institute for the COVID-19 Genomics UK (COG-UK) consortium|Davies|United Kingdom

>Spike|hCoV-19/Norway/2961/2020|2020-08-02|EPI\_ISL\_549090|Original|hCoV-19^^Viken|Human|Akershus University Hospital|Norwegian Institute of Public Health|Kopperud Riis|Norway

>Spike|hCoV-19/Ghana/84484\_S16/2020|2020-05-25|EPI\_ISL\_515112|Original|hCoV-19^^Ghana|Human|Department of Biochemistry|WACCBIP|Amuzu|Ghana

>Spike|hCoV-19/Estonia/ChVir4293/2020|2020-03-00|EPI\_ISL\_457731|Original|hCoV-19^^Estonia|Human|SYNLAB Eesti OU\u0308|Charite Universitatsmedizin Berlin|Muehlemann|Estonia

>Spike|hCoV-19/England/ALDP-BBB0BE/2020|2020-11-20|EPI\_ISL\_701692|Original|hCoV-19^^England|Human|Lighthouse Lab in Alderley Park|Wellcome Sanger Institute for the COVID-19 Genomics UK (COG-UK) Consortium|Davies|United Kingdom

>Spike|hCoV-19/India/GJ-GBRC39/2020|2020-04-29|EPI\_ISL\_444470|Original|hCoV-19^^Gujarat|Human|B.J. Medical College and Civil hospital|Gujarat Biotechnology Research Centre|Joshi|India

>Spike|hCoV-19/England/PORT-2D13B2/2020|2020-03-25|EPI\_ISL\_479191|Original|hCoV-19^^England|Human|Centre for Enzyme Innovation|COVID-19 Genomics UK (COG-UK) Consortium|Robson|United Kingdom

>Spike|hCoV-19/Japan/PG-0825/2020|2020-03-00|EPI\_ISL\_684435|Original|hCoV-19^^Japan|Human|Fukuoka Institute of Health and Environmental Sciences|Pathogen Genomics Center|Sekizuka|Japan

>Spike|hCoV-19/Wales/PHWC-47D37A/2020|2020-10-05|EPI\_ISL\_586133|Original|hCoV-19^^Wales|Human|Wales Specialist Virology Centre Sequencing lab|COVID-19 Genomics UK (COG-UK) Consortium|Moore|United Kingdom

>Spike|hCoV-19/England/MILK-B56C84/2020|2020-11-05|EPI\_ISL\_656807|Original|hCoV-19^^England|Human|Lighthouse Lab in Milton Keynes|Wellcome Sanger Institute for the COVID-19 Genomics UK (COG-UK) Consortium|Davies|United Kingdom

>Spike|hCoV-19/Portugal/PT0368/2020|2020-03-19|EPI\_ISL\_454084|Original|hCoV-19^^Portugal|Human|unknown|Instituto Nacional de Saude (INSA)|Borges|Portugal

>Spike|hCoV-19/United Arab Emirates/L920643384/2020|2020-04-05|EPI\_ISL\_520731|Original|hCoV-19^^United Arab Emirates|Human|Mohammed Bin Rashid University of Medicine and Health Sciences|Al Jalila Genomics Center|Ramaswamy|United Arab Emirates

>Spike|hCoV-19/USA/CA-ALSR-0705-SAN/2020|2020-03-29|EPI\_ISL\_483314|Original|hCoV-19^^California|Human|UC San Diego Center for Advanced Laboratory Medicine|Andersen lab at Scripps Research|Gangavarapu|USA

>Spike|hCoV-19/Russia/StPetersburg-RII11292S/2020|2020-05-01|EPI\_ISL\_507252|Original|hCoV-19^^Saint Petersburg|Human|WHO National Influenza Centre Russian Federation|WHO National Influenza Centre Russian Federation|Komissarov|Russia

>Spike|hCoV-19/England/QEUH-963CC2/2020|2020-08-11|EPI\_ISL\_531521|Original|hCoV-19^^England|Human|Lighthouse Lab in Glasgow|Wellcome Sanger Institute for the COVID-19 Genomics UK (COG-UK) consortium|Davies|United Kingdom

>Spike|hCoV-19/USA/WA-S2617/2020|2020-06-20|EPI\_ISL\_497249|Original|hCoV-19^^Washington|Human|Washington State Department of Health|Seattle Flu Study|Lee|USA

>Spike|hCoV-19/USA/NY-NYUMC914/2020|2020-05-08|EPI\_ISL\_467407|Original|hCoV-19^^New York|Human|NYU Langone Health|Departments of Pathology and Medicine|Maurano|USA

>Spike|hCoV-19/England/CAMB-7EAC3/2020|2020-04-06|EPI\_ISL\_442530|Original|hCoV-19^^England|Human|Department of Pathology|Wellcome Sanger Institute for the COVID-19 Genomics UK (COG-UK) consortium|Amato|United Kingdom

>Spike|hCoV-19/USA/CA-CZB-1401/2020|2020-04-19|EPI\_ISL\_468381|Original|hCoV-19^^California|Human|Alameda County Public Health Lab|Chan-Zuckerberg Biohub|Hao|USA

>Spike|hCoV-19/Wales/PHWC-31A71/2020|2020-04-12|EPI\_ISL\_446521|Original|hCoV-19^^Wales|Human|Wales Specialist Virology Centre|Public Health Wales Microbiology Cardiff|Moore|United Kingdom

>Spike|hCoV-19/England/QEUH-B6852A/2020|2020-11-11|EPI\_ISL\_655000|Original|hCoV-19^^England|Human|Lighthouse Lab in Glasgow|Wellcome Sanger Institute for the COVID-19 Genomics UK (COG-UK) Consortium|Davies|United Kingdom

>Spike|hCoV-19/England/20109040104/2020|2020-03-06|EPI\_ISL\_464557|Original|hCoV-19^^England|Human|Respiratory Virus Unit|Respiratory Virus Unit|Platt|United Kingdom

>Spike|hCoV-19/India/GJ-GBRC300b/2020|2020-06-15|EPI\_ISL\_495045|Original|hCoV-19^^Gujarat|Human|GMERS Medical College & Hospital|Gujarat Biotechnology Research Centre|Joshi|India

>Spike|hCoV-19/Australia/VIC9880/2020|2020-07-14|EPI\_ISL\_565761|Original|hCoV-19^^Victoria|Human|Microbiological Diagnostic Unit - Public Health Laboratory (MDU-PHL)|MDU-PHL|Schultz|Australia

>Spike|hCoV-19/USA/MD-MDH-0127/2020|2020-07-04|EPI\_ISL\_524892|Original|hCoV-19^^Maryland|Human|MD PHL|MD PHL|Keller|USA

>Spike|hCoV-19/Scotland/QEUH-BCC2D2/2020|2020-11-27|EPI\_ISL\_710762|Original|hCoV-19^^Scotland|Human|Lighthouse Lab in Glasgow|Wellcome Sanger Institute for the COVID-19 Genomics UK (COG-UK) Consortium|Davies|United Kingdom

>Spike|hCoV-19/Switzerland/BE-ETHZ-100341/2020|2020-03-19|EPI\_ISL\_574923|Original|hCoV-19^^Bern|Human|Viollier AG|Department of Biosystems Science and Engineering|Nadeau|Switzerland

>Spike|hCoV-19/England/204441524/2020|2020-10-19|EPI\_ISL\_622880|Original|hCoV-19^^England|Human|Respiratory Virus Unit|Respiratory Virus Unit|Platt|United Kingdom

>Spike|hCoV-19/Denmark/DCGC-15317/2020|2020-11-23|EPI\_ISL\_713761|Original|hCoV-19^^Hovedstaden|Human|Department of Virus and Microbiological Special Diagnostics|Albertsen Lab|Michaelsen|Denmark

>Spike|hCoV-19/USA/AZ-TG640820/2020|2020-04-27|EPI\_ISL\_695776|Original|hCoV-19^^Arizona|Human|Sonora Quest Laboratories|TGen North|French|USA

>Spike|hCoV-19/Denmark/DCGC-21426/2020|2020-12-21|EPI\_ISL\_757730|Original|hCoV-19^^Hovedstaden|Human|Department of Virus and Microbiological Special Diagnostics|Albertsen Lab|Michaelsen|Denmark

>Spike|hCoV-19/USA/WA-S1620/2020|2020-05-27|EPI\_ISL\_496046|Original|hCoV-19^^Washington|Human|Washington State Department of Health|Seattle Flu Study|Lee|USA

>Spike|hCoV-19/England/LOND-1263868/2020|2020-11-04|EPI\_ISL\_705268|Original|hCoV-19^^England|Human|University College London|COVID-19 Genomics UK (COG-UK) Consortium|Roy|United Kingdom

>Spike|hCoV-19/Brazil/PA-0230/2020|2020-04-02|EPI\_ISL\_470604|Original|hCoV-19^^Par\u00e1|Human|Hermes Pardini|Bioinformatics Laboratory / LNCC|Almeida|Brazil

>Spike|hCoV-19/England/ALDP-B746FB/2020|2020-11-12|EPI\_ISL\_662079|Original|hCoV-19^^England|Human|Lighthouse Lab in Alderley Park|Wellcome Sanger Institute for the COVID-19 Genomics UK (COG-UK) Consortium|Davies|United Kingdom

>Spike|hCoV-19/England/CAMC-A64F03/2020|2020-10-11|EPI\_ISL\_608688|Original|hCoV-19^^England|Human|Lighthouse Lab in Cambridge|Wellcome Sanger Institute for the COVID-19 Genomics UK (COG-UK) consortium|Davies|United Kingdom

>Spike|hCoV-19/Pakistan/JRCGR-KHI10/2020|2020-06-14|EPI\_ISL\_779270|Original|hCoV-19^^Karachi|Human|Jamil-ur-Rahman Center for Genome Research|Jamil-ur-Rahman Center for Genome Research|Shakeel|Pakistan

>Spike|hCoV-19/USA/CA-CZB-14688/2020|2020-11-16|EPI\_ISL\_739230|Original|hCoV-19^^California|Human|Orange County Public Health Lab|Chan-Zuckerberg Biohub|Kamm|USA

>Spike|hCoV-19/Switzerland/BL-ETHZ-270213/2020|2020-08-30|EPI\_ISL\_541459|Original|hCoV-19^^Basel-Landschaft|Human|Viollier AG|Department of Biosystems Science and Engineering|Nadeau|Switzerland

>Spike|hCoV-19/England/BRIS-12322E/2020|2020-04-05|EPI\_ISL\_442783|Original|hCoV-19^^England|Human|PHE South West Regional Laboratory|Wellcome Sanger Institute for the COVID-19 Genomics UK (COG-UK) consortium|Amato|United Kingdom

>Spike|hCoV-19/England/EXET-13A42E/2020|2020-11-06|EPI\_ISL\_664184|Original|hCoV-19^^England|Human|University of Exeter|COVID-19 Genomics UK (COG-UK) Consortium|Temperton|United Kingdom

>Spike|hCoV-19/England/CAMC-B32D21/2020|2020-11-06|EPI\_ISL\_659465|Original|hCoV-19^^England|Human|Lighthouse Lab in Cambridge|Wellcome Sanger Institute for the COVID-19 Genomics UK (COG-UK) Consortium|Davies|United Kingdom

>Spike|hCoV-19/USA/CO-CDPHE-2011193717/2020|2020-11-18|EPI\_ISL\_771252|Original|hCoV-19^^Colorado|Human|Colorado Department of Public Health and Environment|Colorado Department of Public Health and Environment|Bankers|USA

>Spike|hCoV-19/Japan/PG-1961/2020|2020-04-00|EPI\_ISL\_685567|Original|hCoV-19^^Japan|Human|Pathogen Genomics Center|Pathogen Genomics Center|Sekizuka|Japan

>Spike|hCoV-19/England/OXON-B0A4D/2020|2020-04-16|EPI\_ISL\_478929|Original|hCoV-19^^England|Human|Oxford Viromics|COVID-19 Genomics UK (COG-UK) Consortium|Golubchik|United Kingdom

>Spike|hCoV-19/Japan/PG-3059/2020|2020-04-00|EPI\_ISL\_691182|Original|hCoV-19^^Japan|Human|Pathogen Genomics Center|Pathogen Genomics Center|Sekizuka|Japan

>Spike|hCoV-19/USA/TX-DSHS-0945/2020|2020-07-03|EPI\_ISL\_602243|Original|hCoV-19^^Texas|Human|Texas Department of State Health Services|Texas Department of State Health Services|Rahman|USA

>Spike|hCoV-19/USA/UT-UPHL-2012742622/2020|2020-08-10|EPI\_ISL\_745822|Original|hCoV-19^^Utah|Human|Ginkgo Bioworks Clinical Laboratory|Utah Public Health Laboratory|Young|USA

>Spike|hCoV-19/England/LIVE-A8082/2020|2020-03-26|EPI\_ISL\_517110|Original|hCoV-19^^England|Human|Liverpool Clinical Laboratories|COVID-19 Genomics UK (COG-UK) Consortium|Haldenby|United Kingdom

>Spike|hCoV-19/Australia/VIC2832/2020|2020-07-03|EPI\_ISL\_521663|Original|hCoV-19^^Victoria|Human|Microbiological Diagnostic Unit - Public Health Laboratory (MDU-PHL) |MDU-PHL|Schultz|Australia

>Spike|hCoV-19/Denmark/DCGC-15121/2020|2020-11-23|EPI\_ISL\_713139|Original|hCoV-19^^Hovedstaden|Human|Department of Virus and Microbiological Special Diagnostics|Albertsen Lab|Michaelsen|Denmark

>Spike|hCoV-19/USA/HI-H200656/2020|2020-12-01|EPI\_ISL\_753179|Original|hCoV-19^^Hawaii|Human|State Laboratories Division|State Laboratories Division|Sultana|USA

>Spike|hCoV-19/England/EXET-1356D2/2020|2020-04-12|EPI\_ISL\_457087|Original|hCoV-19^^England|Human|University of Exeter|COVID-19 Genomics UK (COG-UK) Consortium|Temperton|United Kingdom

>Spike|hCoV-19/England/CAMC-B7AB50/2020|2020-11-12|EPI\_ISL\_741164|Original|hCoV-19^^England|Human|Oxford Viromics|COVID-19 Genomics UK (COG-UK) Consortium|Golubchik|United Kingdom

>Spike|hCoV-19/USA/WI-WSLH-200186/2020|2020-04-08|EPI\_ISL\_578411|Original|hCoV-19^^Wisconsin|Human|Wisconsin State Laboratory of Hygiene Communicable Disease Division|Wisconsin State Laboratory of Hygiene Communicable Disease Division|Florek|USA

>Spike|hCoV-19/England/CAMC-9DF9D9/2020|2020-09-21|EPI\_ISL\_576921|Original|hCoV-19^^England|Human|Oxford Viromics|COVID-19 Genomics UK (COG-UK) Consortium|Golubchik|United Kingdom

>Spike|hCoV-19/Spain/PV-IBV-2163/2020|2020-04-12|EPI\_ISL\_468865|Original|hCoV-19^^Basque Country|Human|Servicio de Microbiolog\u00eda. Hospital Universitario Donostia. OSI Donostialdea. \u00clrea de Enfermedades Infecciosas|SeqCOVID-SPAIN consortium|IBV (CSIC) |Comas|Spain

>Spike|hCoV-19/USA/CA-ALSR-3720/2020|2020-06-04|EPI\_ISL\_636164|Original|hCoV-19^^California|Human|San Diego County Public Health Laboratory|Andersen lab at Scripps Research|Gangavarapu|USA

>Spike|hCoV-19/USA/CO-CDPHE-2003100027/2020|2020-03-08|EPI\_ISL\_677278|Original|hCoV-19^^Colorado|Human|Colorado Department of Public Health and Environment|Colorado Department of Public Health and Environment|Bankers|USA

>Spike|hCoV-19/Denmark/DCGC-5729/2020|2020-09-28|EPI\_ISL\_621234|Original|hCoV-19^^Midtjylland|Human|Department of Virus and Microbiological Special Diagnostics|Albertsen lab|Michaelsen|Denmark

>Spike|hCoV-19/England/NORT-2A488C/2020|2020-09-11|EPI\_ISL\_573386|Original|hCoV-19^^England|Human|Northumbria University / South Tees Hospitals NHS Foundation Trust / North Cumbria Integrated Care NHS Foundation Trust / North Tees and Hartlepool NHS Foundation Trust / Newcastle Hospitals NHS Foundation Trust|COVID-19 Genomics UK (COG-UK) Consortium|Bashton|United Kingdom

>Spike|hCoV-19/USA/MA-MASPHL-00050/2020|2020-04-02|EPI\_ISL\_791550|Original|hCoV-19^^Massachusetts|Human|Massachusetts State Public Health Laboratory|Infectious Disease Program|Park|USA

>Spike|hCoV-19/England/NOTT-114D6B/2020|2020-10-11|EPI\_ISL\_584769|Original|hCoV-19^^England|Human|Queens Medical Centre|COVID-19 Genomics UK (COG-UK) Consortium|Loose|United Kingdom

>Spike|hCoV-19/England/ALDP-AA190C/2020|2020-10-21|EPI\_ISL\_624179|Original|hCoV-19^^England|Human|Lighthouse Lab in Alderley Park|Wellcome Sanger Institute for the COVID-19 Genomics UK (COG-UK) consortium|Davies|United Kingdom

>Spike|hCoV-19/USA/MA-MASPHL-00646/2020|2020-05-14|EPI\_ISL\_692985|Original|hCoV-19^^Massachusetts|Human|Massachusetts State Public Health Laboratory|Massachusetts State Public Health Laboratory|Lang|USA

>Spike|hCoV-19/England/QEUA-BA073F/2020|2020-11-18|EPI\_ISL\_719612|Original|hCoV-19^^England|Human|Lighthouse Lab in Glasgow|Wellcome Sanger Institute for the COVID-19 Genomics UK (COG-UK) Consortium|Davies|United Kingdom

>Spike|hCoV-19/USA/WY-WYPHL-20011372/2020|2020-04-30|EPI\_ISL\_539802|Original|hCoV-19^^Wyoming|Human|Wyoming Public Health Laboratory|Wyoming Public Health Laboratory|Sevinsky|USA

>Spike|hCoV-19/USA/IL-NM-0184/2020|2020-03-24|EPI\_ISL\_626375|Original|hCoV-19^^Illinois|Human|Northwestern Memorial Hospital|Ozer Lab|Ozer|USA

>Spike|hCoV-19/Scotland/QEUA-A4B45E/2020|2020-10-08|EPI\_ISL\_637832|Original|hCoV-19^^Scotland|Human|Department of Pathology|COVID-19 Genomics UK (COG-UK) Consortium|Goodfellow|United Kingdom

>Spike|hCoV-19/England/OXON-B4D8C/2020|2020-04-23|EPI\_ISL\_535014|Original|hCoV-19^^England|Human|Oxford Viromics|COVID-19 Genomics UK (COG-UK) Consortium|Golubchik|United Kingdom

>Spike|hCoV-19/England/LEED-2A8F38/2020|2020-04-04|EPI\_ISL\_539027|Original|hCoV-19^^England|Human|Leeds Teaching Hospitals NHS Trust and Public Health England|Wellcome Sanger Institute for the COVID-19 Genomics UK (COG-UK) consortium|Davies|United Kingdom

>Spike|hCoV-19/New Zealand/20CV0274/2020|2020-03-22|EPI\_ISL\_579067|Original|hCoV-19^^Hawkes Bay|Human|Canterbury Health Laboratories|Institute of Environmental Science and Research (ESR)|Wang|New Zealand

>Spike|hCoV-19/England/ALDP-B47EDB/2020|2020-11-07|EPI\_ISL\_649203|Original|hCoV-19^^England|Human|Lighthouse Lab in Alderley Park|Wellcome Sanger Institute for the COVID-19 Genomics UK (COG-UK) Consortium|Davies|United Kingdom

>Spike|hCoV-19/Japan/PG-1236/2020|2020-04-00|EPI\_ISL\_684846|Original|hCoV-19^^Japan|Human|Yamagata Prefectural Institute of Public Health|Pathogen Genomics Center|Sekizuka|Japan

>Spike|hCoV-19/USA/NM-DOH-2020318519/2020|2020-08-29|EPI\_ISL\_732735|Original|hCoV-19^^New Mexico|Human|New Mexico Department of Health Scientific Laboratory|New Mexico Department of Health Scientific Laboratory|Johnson|USA

>Spike|hCoV-19/USA/UT-UPHL-2009592/2020|2020-07-18|EPI\_ISL\_605270|Original|hCoV-19^^Utah|Human|Utah Public Health Laboratory|Utah Public Health Laboratory|Young|USA

>Spike|hCoV-19/Denmark/DCGC-1166/2020|2020-03-16|EPI\_ISL\_614638|Original|hCoV-19^^Hovedstaden|Human|Department of Virus and Microbiological Special Diagnostics|Albertsen lab|Michaelsen|Denmark

>Spike|hCoV-19/England/NORT-2933F8/2020|2020-06-18|EPI\_ISL\_499552|Original|hCoV-19^^England|Human|Northumbria University / South Tees Hospitals NHS Foundation Trust

/ North Cumbria Integrated Care NHS Foundation Trust / North Tees and Hartlepool NHS Foundation Trust / Newcastle Hospitals NHS Foundation Trust|COVID-19 Genomics UK (COG-UK) Consortium|Bashton|United Kingdom  
>Spike|hCoV-19/USA/UT-UPHL-2012332018/2020|2020-11-27|EPI\_ISL\_779302|Original|hCoV-19^^Utah|Human|Utah Public Health Laboratory|Utah Public Health Laboratory|Gallagher|USA  
>Spike|hCoV-19/Denmark/DCGC-10651/2020|2020-11-02|EPI\_ISL\_670116|Original|hCoV-19^^Sjaelland|Human|Department of Virus and Microbiological Special Diagnostics|Albertsen Lab|Michaelsen|Denmark  
>Spike|hCoV-19/USA/TX-HMH-MCoV-13481/2020|2020-08-22|EPI\_ISL\_788610|Original|hCoV-19^^Texas|Human|Houston Methodist Hospital|Houston Methodist Hospital|Long|USA  
>Spike|hCoV-19/India/TG-CDFD-C2603/2020|2020-06-18|EPI\_ISL\_528880|Original|hCoV-19^^Telangana|Human|National Genomics Core-Center for DNA Fingerprinting and Diagnostics|National Genomics Core- Center for DNA Fingerprinting and Diagnostics (NGC-CDFD) - DBT's PAN-INDIA-1000 Genome consortium|Vashisht|India  
>Spike|hCoV-19/England/ALDP-C395F4/2020|2020-12-09|EPI\_ISL\_731360|Original|hCoV-19^^England|Human|Lighthouse Lab in Alderley Park|Wellcome Sanger Institute for the COVID-19 Genomics UK (COG-UK) Consortium|Davies|United Kingdom  
>Spike|hCoV-19/England/CAMC-B34DC5/2020|2020-11-05|EPI\_ISL\_659517|Original|hCoV-19^^England|Human|Lighthouse Lab in Cambridge|Wellcome Sanger Institute for the COVID-19 Genomics UK (COG-UK) Consortium|Davies|United Kingdom  
>Spike|hCoV-19/USA/TX-HMH-MCoV-14208/2020|2020-10-05|EPI\_ISL\_787493|Original|hCoV-19^^Texas|Human|Houston Methodist Hospital|Houston Methodist Hospital|Long|USA  
>Spike|hCoV-19/Japan/PG-6010/2020|2020-07-00|EPI\_ISL\_689123|Original|hCoV-19^^Japan|Human|Pathogen Genomics Center|Pathogen Genomics Center|Sekizuka|Japan  
>Spike|hCoV-19/Denmark/DCGC-13481/2020|2020-11-30|EPI\_ISL\_712317|Original|hCoV-19^^Midtjylland|Human|Department of Virus and Microbiological Special Diagnostics|Albertsen Lab|Michaelsen|Denmark  
>Spike|hCoV-19/India/MH-ACTREC-336/2020|2020-07-19|EPI\_ISL\_699985|Original|hCoV-19^^Maharashtra|Human|Hematopathology Laboratory|Hematopathology Laboratory|Patkar|India  
>Spike|hCoV-19/Japan/PG-7940/2020|2020-07-00|EPI\_ISL\_687041|Original|hCoV-19^^Japan|Human|Pathogen Genomics Center|Pathogen Genomics Center|Sekizuka|Japan  
>Spike|hCoV-19/Denmark/DCGC-19809/2020|2020-12-07|EPI\_ISL\_747801|Original|hCoV-19^^Hovedstaden|Human|Department of Virus and Microbiological Special Diagnostics|Albertsen Lab|Michaelsen|Denmark  
>Spike|hCoV-19/Portugal/PT0863/2020|2020-03-27|EPI\_ISL\_511122|Original|hCoV-19^^Portugal|Human|Instituto Nacional de Saude (INSA)|Instituto Nacional de Saude (INSA)|Borges|Portugal  
>Spike|hCoV-19/Switzerland/BE-ETHZ-410220/2020|2020-12-14|EPI\_ISL\_737725|Original|hCoV-19^^Bern|Human|Viollier AG|Department of Biosystems Science and Engineering|Nadeau|Switzerland  
>Spike|hCoV-19/USA/UT-01590/2020|2020-04-07|EPI\_ISL\_449831|Original|hCoV-19^^Utah|Human|Utah Public Health Laboratory|Utah Public Health Laboratory|Young|USA  
>Spike|hCoV-19/Australia/VIC289/2020|2020-03-22|EPI\_ISL\_419980|Original|hCoV-19^^Victoria|Human|Microbiological Diagnostic Unit Public Health Laboratory|Microbiological Diagnostic Unit Public Health Laboratory|Schultz|Australia  
>Spike|hCoV-19/USA/TX-HMH-2961/2020|2020-06-08|EPI\_ISL\_543895|Original|hCoV-19^^Texas|Human|Houston Methodist Hospital|Houston Methodist Hospital|Long|USA  
>Spike|hCoV-19/USA/CA-ALSR-1140/2020|2020-04-02|EPI\_ISL\_494385|Original|hCoV-19^^California|Human|San Diego County Public Health Laboratory|Andersen lab at Scripps Research|Gangavarapu|USA  
>Spike|hCoV-19/Netherlands/NB-EMC-222/2020|2020-07-03|EPI\_ISL\_523345|Original|hCoV-19^^Noord Brabant|Human|Dutch COVID-19 response team|Erasmus Medical Center|Oude Munnink|Netherlands  
>Spike|hCoV-19/England/CAMC-BBC606/2020|2020-11-21|EPI\_ISL\_724161|Original|hCoV-19^^England|Human|Quadram Institute Bioscience|COVID-19 Genomics UK (COG-UK) Consortium|Alikhan|United Kingdom  
>Spike|hCoV-19/USA/VA-DCLS-1434/2020|2020-07-13|EPI\_ISL\_581556|Original|hCoV-19^^Virginia|Human|Virginia DCLS|Virginia DCLS|St. Jacques|USA

>Spike|hCoV-19/England/CAMC-C26615/2020|2020-12-07|EPI\_ISL\_782763|Original|hCoV-19^^England|Human|Lighthouse Lab in Cambridge|Wellcome Sanger Institute for the COVID-19 Genomics UK (COG-UK) Consortium|Davies|United Kingdom

>Spike|hCoV-19/United Arab Emirates/0466/2020|2020-05-18|EPI\_ISL\_698636|Original|hCoV-19^^Abu Dhabi|Human|Group 42 (G42) Healthcare|G42 Healthcare|Ogrodzki|United Arab Emirates

>Spike|hCoV-19/England/ALDP-AA31B7/2020|2020-10-22|EPI\_ISL\_630801|Original|hCoV-19^^England|Human|Lighthouse Lab in Alderley Park|Wellcome Sanger Institute for the COVID-19 Genomics UK (COG-UK) consortium|Davies|United Kingdom

>Spike|hCoV-19/England/20189182004/2020|2020-05-02|EPI\_ISL\_465577|Original|hCoV-19^^England|Human|Respiratory Virus Unit|Respiratory Virus Unit|Platt|United Kingdom

>Spike|hCoV-19/England/CAMB-1B396A/2020|2020-05-22|EPI\_ISL\_492198|Original|hCoV-19^^England|Human|Department of Pathology|Wellcome Sanger Institute for the COVID-19 Genomics UK (COG-UK) consortium|Davies|United Kingdom

>Spike|hCoV-19/USA/MN-MDH-1851/2020|2020-10-05|EPI\_ISL\_602986|Original|hCoV-19^^Minnesota|Human|Minnesota Department of Health|Minnesota Department of Health|Garfin|USA

>Spike|hCoV-19/USA/CA-SEARCH-5405/2020|2020-11-30|EPI\_ISL\_755216|Original|hCoV-19^^California|Human|UCSD EXCITE lab|Andersen lab at Scripps Research|Gangavarapu|USA

>Spike|hCoV-19/USA/CA-ALSR-0755-IPL/2020|2020-05-13|EPI\_ISL\_483335|Original|hCoV-19^^California|Human|UC San Diego Center for Advanced Laboratory Medicine|Andersen lab at Scripps Research|Gangavarapu|USA

>Spike|hCoV-19/USA/WA-UW-3012/2020|2020-03-27|EPI\_ISL\_486078|Original|hCoV-19^^Washington|Human|UW Virology Lab|UW Virology Lab|Roychoudhury|USA

>Spike|hCoV-19/England/ALDP-B5C680/2020|2020-11-09|EPI\_ISL\_655679|Original|hCoV-19^^England|Human|Lighthouse Lab in Alderley Park|Wellcome Sanger Institute for the COVID-19 Genomics UK (COG-UK) Consortium|Davies|United Kingdom

>Spike|hCoV-19/Spain/VC-FISABIO-278/2020|2020-03-16|EPI\_ISL\_436373|Original|hCoV-19^^Comunitat Valenciana|Human|Servicio de Microbiologia. Hospital Universitario Doctor Peset|Sequencing and Bioinformatics Service and Molecular Epidemiology Research Group. FISABIO-Public Health|Gonzalez-Candelas|Spain

>Spike|hCoV-19/Italy/APU-IZSPB\_265PT/2020|2020-09-22|EPI\_ISL\_653784|Original|hCoV-19^^Apulia|Human|Istituto Zooprofilattico Sperimentale della Puglia e della Basilicata|Istituto Zooprofilattico Sperimentale della Puglia e della Basilicata|Parisi|Italy

>Spike|hCoV-19/USA/CA-ALSR-5115/2020|2020-12-03|EPI\_ISL\_730361|Original|hCoV-19^^California|Human|San Diego County Public Health Laboratory|Andersen lab at Scripps Research|Gangavarapu|USA

>Spike|hCoV-19/Japan/PG-4179/2020|2020-07-00|EPI\_ISL\_692418|Original|hCoV-19^^Japan|Human|Pathogen Genomics Center|Pathogen Genomics Center|Sekizuka|Japan

>Spike|hCoV-19/England/CAMC-9479AF/2020|2020-07-20|EPI\_ISL\_556526|Original|hCoV-19^^England|Human|Lighthouse Lab in Cambridge|Wellcome Sanger Institute for the COVID-19 Genomics UK (COG-UK) consortium|Davies|United Kingdom

>Spike|hCoV-19/USA/MI-MDHHS-SC21763/2020|2020-08-11|EPI\_ISL\_529881|Original|hCoV-19^^Michigan|Human|Michigan Department of Health and Human Services|Michigan Department of Health and Human Services|Blankenship|USA

>Spike|hCoV-19/Netherlands/GE-EMC-237/2020|2020-00-00|EPI\_ISL\_523216|Original|hCoV-19^^Gelderland|Human|Dutch COVID-19 response team|Erasmus Medical Center|Oude Munnink|Netherlands

>Spike|hCoV-19/Denmark/DCGC-9926/2020|2020-11-09|EPI\_ISL\_669277|Original|hCoV-19^^Hovedstaden|Human|Department of Virus and Microbiological Special Diagnostics|Albertsen Lab|Michaelsen|Denmark

>Spike|hCoV-19/England/CAMB-1BAA7F/2020|2020-11-12|EPI\_ISL\_664118|Original|hCoV-19^^England|Human|Department of Pathology|COVID-19 Genomics UK (COG-UK) Consortium|Goodfellow|United Kingdom

>Spike|hCoV-19/England/204261202/2020|2020-10-15|EPI\_ISL\_613577|Original|hCoV-19^^England|Human|Respiratory Virus Unit|Respiratory Virus Unit|Platt|United Kingdom

>Spike|hCoV-19/Brazil/SP-L9-CD138/2020|2020-03-25|EPI\_ISL\_476485|Original|hCoV-19^^S\u00e3o Paulo|Human|Hospital da Cl\u00ednicas da Faculdade de Medicina da

Universidade de São Paulo|Instituto de Medicina Tropical da Universidade de São Paulo|Sabino|Brazil

>Spike|hCoV-19/USA/VA-DCLS-0166/2020|2020-04-08|EPI\_ISL\_437799|Original|hCoV-19^^Virginia|Human|Virginia DCLS|Virginia DCLS|St. Jacques|USA

>Spike|hCoV-19/USA/TX-HMH-MCoV-19616/2020|2020-11-19|EPI\_ISL\_783983|Original|hCoV-19^^Texas|Human|Houston Methodist Hospital|Houston Methodist Hospital|Long|USA

>Spike|hCoV-19/USA/WA-UW-46997/2020|2020-12-11|EPI\_ISL\_756215|Original|hCoV-19^^Washington|Human|UW Virology Lab|UW Virology Lab|Roychoudhury|USA

>Spike|hCoV-19/Scotland/CVR55/2020|2020-03-13|EPI\_ISL\_425784|Original|hCoV-19^^Scotland|Human|West of Scotland Specialist Virology Centre|COVID-19 Genomics UK (COG-UK) Consortium|Robertson|United Kingdom

>Spike|hCoV-19/Brazil/MG-0211/2020|2020-03-14|EPI\_ISL\_470578|Original|hCoV-19^^Minas Gerais|Human|Hermes Pardini|Bioinformatics Laboratory / LNCC|Almeida|Brazil

>Spike|hCoV-19/England/ALDP-524E52/2020|2020-06-02|EPI\_ISL\_559013|Original|hCoV-19^^England|Human|Lighthouse Lab in Alderley Park|Wellcome Sanger Institute for the COVID-19 Genomics UK (COG-UK) consortium|Davies|United Kingdom

>Spike|hCoV-19/Spain/VC-FISABIO-125/2020|2020-03-14|EPI\_ISL\_436220|Original|hCoV-19^^Comunitat Valenciana|Human|Servicio de Microbiología. Consorcio Hospital General Universitario de Valencia|Sequencing and Bioinformatics Service and Molecular Epidemiology Research Group. FISABIO-Public Health|Gonzalez-Candelas|Spain

>Spike|hCoV-19/Hong Kong/VB20175856/2020|2020-08-14|EPI\_ISL\_539823|Original|hCoV-19^^Hong Kong|Human|Communicable Disease Branch|Hong Kong Department of Health|Tsang|China

>Spike|hCoV-19/Australia/VIC4494/2020|2020-00-00|EPI\_ISL\_518905|Original|hCoV-19^^Victoria|Human|Microbiological Diagnostic Unit - Public Health Laboratory (MDU-PHL)|MDU-PHL|Schultz|Australia

>Spike|hCoV-19/USA/VA-DCLS-1242/2020|2020-07-30|EPI\_ISL\_528661|Original|hCoV-19^^Virginia|Human|Virginia DCLS|Virginia DCLS|St. Jacques|USA

>Spike|hCoV-19/Portugal/PT0072/2020|2020-03-21|EPI\_ISL\_421475|Original|hCoV-19^^Portugal|Human|Instituto Nacional de Saude (INSA)|Instituto Nacional de Saude (INSA)|Borges|Portugal

>Spike|hCoV-19/England/MILK-B3AAC8/2020|2020-11-01|EPI\_ISL\_706044|Original|hCoV-19^^England|Human|Oxford Viromics|COVID-19 Genomics UK (COG-UK) Consortium|Golubchik|United Kingdom

>Spike|hCoV-19/USA/UT-01874/2020|2020-04-13|EPI\_ISL\_470698|Original|hCoV-19^^Utah|Human|Utah Public Health Laboratory|Utah Public Health Laboratory|Young|USA

>Spike|hCoV-19/USA/TX-HMH-2296/2020|2020-05-15|EPI\_ISL\_545231|Original|hCoV-19^^Texas|Human|Houston Methodist Hospital|Houston Methodist Hospital|Long|USA

>Spike|hCoV-19/England/20130033104/2020|2020-03-21|EPI\_ISL\_423599|Original|hCoV-19^^England|Human|Respiratory Virus Unit|Respiratory Virus Unit|Platt|United Kingdom

>Spike|hCoV-19/England/MILK-B04B88/2020|2020-10-24|EPI\_ISL\_651283|Original|hCoV-19^^England|Human|Department of Pathology|COVID-19 Genomics UK (COG-UK) Consortium|Goodfellow|United Kingdom

>Spike|hCoV-19/Japan/PG-6279/2020|2020-08-00|EPI\_ISL\_689390|Original|hCoV-19^^Japan|Human|Pathogen Genomics Center|Pathogen Genomics Center|Sekizuka|Japan

>Spike|hCoV-19/USA/WI-UW-615/2020|2020-06-22|EPI\_ISL\_484990|Original|hCoV-19^^Wisconsin|Human|University of Wisconsin-Madison AIDS Vaccine Research Laboratories|University of Wisconsin-Madison AIDS Vaccine Research Laboratories|Baczenas|USA

>Spike|hCoV-19/USA/CA-CZB-1897/2020|2020-04-21|EPI\_ISL\_486196|Original|hCoV-19^^California|Human|Orange County Public Health Laboratory|Chan-Zuckerberg Biohub|McGeever|USA

>Spike|hCoV-19/England/MILK-BAFA73/2020|2020-11-17|EPI\_ISL\_783334|Original|hCoV-19^^England|Human|Lighthouse Lab in Milton Keynes|Wellcome Sanger Institute for the COVID-19 Genomics UK (COG-UK) Consortium|Davies|United Kingdom

>Spike|hCoV-19/England/ALDP-C3CB59/2020|2020-12-10|EPI\_ISL\_731839|Original|hCoV-19^^England|Human|Lighthouse Lab in Alderley Park|Wellcome Sanger Institute for the COVID-19 Genomics UK (COG-UK) Consortium|Davies|United Kingdom

>Spike|hCoV-19/Australia/NSW1133/2020|2020-10-04|EPI\_ISL\_593745|Original|hCoV-19^^New South Wales|Human|South Eastern Area Laboratory Services (SEALS)|NSW Health Pathology



- Institute of Clinical Pathology and Medical Research; Westmead Hospital; University of Sydney|Gall|Australia  
>Spike|hCoV-19/England/CAMB-78461/2020|2020-04-04|EPI\_ISL\_433735|Original|hCoV-19^^England|Human|Department of Pathology|COVID-19 Genomics UK (COG-UK) Consortium|Meredith|United Kingdom  
>Spike|hCoV-19/USA/CA-CDPH073/2020|2020-07-02|EPI\_ISL\_755018|Original|hCoV-19^^California|Human|California Department of Public Health|California Department of Public Health|Bell|USA  
>Spike|hCoV-19/Ecuador/USFQ-222/2020|2020-08-15|EPI\_ISL\_539791|Original|hCoV-19^^Loja|Human|Institute of Microbiology|Institute of Microbiology|Cardenas|Ecuador  
>Spike|hCoV-19/England/205160985/2020|2020-12-17|EPI\_ISL\_766426|Original|hCoV-19^^England|Human|Respiratory Virus Unit|COVID-19 Genomics UK (COG-UK) Consortium|Platt|United Kingdom  
>Spike|hCoV-19/USA/UT-UPHL-2012842708/2020|2020-08-08|EPI\_ISL\_745803|Original|hCoV-19^^Utah|Human|Ginkgo Bioworks Clinical Laboratory|Utah Public Health Laboratory|Young|USA  
>Spike|hCoV-19/England/ALDP-B25F2B/2020|2020-11-04|EPI\_ISL\_646736|Original|hCoV-19^^England|Human|Lighthouse Lab in Alderley Park|Wellcome Sanger Institute for the COVID-19 Genomics UK (COG-UK) Consortium|Davies|United Kingdom  
>Spike|hCoV-19/USA/ME-HETL-J0012/2020|2020-03-14|EPI\_ISL\_513425|Original|hCoV-19^^Maine|Human|Maine HETL|Tewhey Lab|Tewhey|USA  
>Spike|hCoV-19/USA/TX-HMH-5383/2020|2020-06-24|EPI\_ISL\_544735|Original|hCoV-19^^Texas|Human|Houston Methodist Hospital|Houston Methodist Hospital|Long|USA  
>Spike|hCoV-19/Australia/VIC6583/2020|2020-07-17|EPI\_ISL\_521347|Original|hCoV-19^^Victoria|Human|Victorian Infectious Diseases Reference Laboratory (VIDRL)|VIDRL and MDU-PHL|Schultz|Australia  
>Spike|hCoV-19/Australia/VIC2163/2020|2020-00-00|EPI\_ISL\_480775|Original|hCoV-19^^Victoria|Human|Microbiological Diagnostic Unit - Public Health Laboratory (MDU-PHL)|MDU-PHL|Schultz|Australia  
>Spike|hCoV-19/Germany/BW-MVZ-LS-17/2020|2020-04-14|EPI\_ISL\_640235|Original|hCoV-19^^Baden-W\u00fcrtemberg|Human|MVZ Labor\u00e4rzte Singen|MVZ Labor\u00e4rzte Singen|Schmidt|Germany  
>Spike|hCoV-19/Denmark/DCGC-19553/2020|2020-12-07|EPI\_ISL\_749021|Original|hCoV-19^^Syddanmark|Human|Department of Virus and Microbiological Special Diagnostics|Albertsen Lab|Michaelsen|Denmark  
>Spike|hCoV-19/England/NORW-E8C37/2020|2020-04-13|EPI\_ISL\_448292|Original|hCoV-19^^England|Human|Quadram Institute Bioscience|COVID-19 Genomics UK (COG-UK) Consortium|Alikhan|United Kingdom  
>Spike|hCoV-19/Australia/QLD1194/2020|2020-03-26|EPI\_ISL\_639785|Original|hCoV-19^^Australia|Human|unknown|Public Health Virology Laboratory|Nguyen|Australia  
>Spike|hCoV-19/Hong Kong/VM20121503/2020|2020-09-12|EPI\_ISL\_730591|Original|hCoV-19^^Hong Kong|Human|Princess Margaret Hospital|Hong Kong Department of Health|Mak|China  
>Spike|hCoV-19/USA/VA-DCLS-0065/2020|2020-04-03|EPI\_ISL\_426472|Original|hCoV-19^^Virginia|Human|Virginia DCLS|Virginia DCLS|St. Jacques|USA  
>Spike|hCoV-19/Wales/PHWC-4819EA/2020|2020-10-19|EPI\_ISL\_613134|Original|hCoV-19^^Wales|Human|Wales Specialist Virology Centre Sequencing lab|COVID-19 Genomics UK (COG-UK) Consortium|Moore|United Kingdom  
>Spike|hCoV-19/England/ALDP-9CB509/2020|2020-09-16|EPI\_ISL\_575619|Original|hCoV-19^^England|Human|Lighthouse Lab in Alderley Park|Wellcome Sanger Institute for the COVID-19 Genomics UK (COG-UK) consortium|Davies|United Kingdom  
>Spike|hCoV-19/England/MILK-975568/2020|2020-08-21|EPI\_ISL\_552522|Original|hCoV-19^^England|Human|Lighthouse Lab in Milton Keynes|Wellcome Sanger Institute for the COVID-19 Genomics UK (COG-UK) consortium|Davies|United Kingdom  
>Spike|hCoV-19/Denmark/DCGC-8561/2020|2020-10-26|EPI\_ISL\_625948|Original|hCoV-19^^Hovedstaden|Human|Department of Virus and Microbiological Special Diagnostics|Albertsen lab|Michaelsen|Denmark  
>Spike|hCoV-19/South Africa/KRISP-0388/2020|2020-07-01|EPI\_ISL\_487331|Original|hCoV-19^^KwaZulu-Natal|Human|Molecular Diagnostics Services (MDS)|KRISP|de Oliveira|South Africa

>Spike|hCoV-19/Wales/PHWC-49A2A7/2020|2020-12-01|EPI\_ISL\_727521|Original|hCoV-19^^Wales|Human|Originating lab|COVID-19 Genomics UK (COG-UK) Consortium|Moore|United Kingdom

>Spike|hCoV-19/England/NOTT-10F9F6/2020|2020-04-05|EPI\_ISL\_432672|Original|hCoV-19^^England|Human|Queens Medical Centre|COVID-19 Genomics UK (COG-UK) Consortium|Loose|United Kingdom

>Spike|hCoV-19/England/CAMC-B2201C/2020|2020-11-02|EPI\_ISL\_646028|Original|hCoV-19^^England|Human|Lighthouse Lab in Cambridge|Wellcome Sanger Institute for the COVID-19 Genomics UK (COG-UK) Consortium|Davies|United Kingdom

>Spike|hCoV-19/England/MILK-A7B16D/2020|2020-10-15|EPI\_ISL\_607334|Original|hCoV-19^^England|Human|Lighthouse Lab in Milton Keynes|Wellcome Sanger Institute for the COVID-19 Genomics UK (COG-UK) consortium|Davies|United Kingdom

>Spike|hCoV-19/England/MILK-B04CEF/2020|2020-10-24|EPI\_ISL\_652175|Original|hCoV-19^^England|Human|Department of Pathology|COVID-19 Genomics UK (COG-UK) Consortium|Goodfellow|United Kingdom

>Spike|hCoV-19/England/LIVE-DBDB3/2020|2020-10-30|EPI\_ISL\_664606|Original|hCoV-19^^England|Human|Liverpool Clinical Laboratories|COVID-19 Genomics UK (COG-UK) Consortium|Haldenby|United Kingdom

>Spike|hCoV-19/Denmark/DCGC-3367/2020|2020-08-31|EPI\_ISL\_616124|Original|hCoV-19^^Hovedstaden|Human|Department of Virus and Microbiological Special Diagnostics|Albertsen lab|Michaelsen|Denmark

>Spike|hCoV-19/Denmark/DCGC-19167/2020|2020-12-07|EPI\_ISL\_748525|Original|hCoV-19^^Hovedstaden|Human|Department of Virus and Microbiological Special Diagnostics|Albertsen Lab|Michaelsen|Denmark

>Spike|hCoV-19/Denmark/DCGC-10456/2020|2020-11-02|EPI\_ISL\_669986|Original|hCoV-19^^Midtjylland|Human|Department of Virus and Microbiological Special Diagnostics|Albertsen Lab|Michaelsen|Denmark

>Spike|hCoV-19/Spain/CT-IBV-97009558/2020|2020-07-17|EPI\_ISL\_671855|Original|hCoV-19^^Catalunya|Human|Servicio de Microbiolog\u00eda|SeqCOVID-SPAIN consortium|IBV (CSIC) |Comas|Spain

>Spike|hCoV-19/Scotland/EDB6475/2020|2020-06-11|EPI\_ISL\_478244|Original|hCoV-19^^Scotland|Human|Virology Department|COVID-19 Genomics UK (COG-UK) Consortium|Williams|United Kingdom

>Spike|hCoV-19/India/GJ-GBRC315a/2020|2020-06-17|EPI\_ISL\_495071|Original|hCoV-19^^Gujarat|Human|Department of MicroBiology|Gujarat Biotechnology Research Centre|Joshi|India

>Spike|hCoV-19/Scotland/QEUH-9DE794/2020|2020-09-21|EPI\_ISL\_601194|Original|hCoV-19^^Scotland|Human|Lighthouse Lab in Glasgow|Wellcome Sanger Institute for the COVID-19 Genomics UK (COG-UK) consortium|Davies|United Kingdom

>Spike|hCoV-19/USA/MN-QDX-1631/2020|2020-03-17|EPI\_ISL\_603992|Original|hCoV-19^^Minnesota|Human|Quest Diagnostics|Quest Diagnostics|Kagan|USA

>Spike|hCoV-19/Scotland/QEUH-98F7DE/2020|2020-08-28|EPI\_ISL\_540367|Original|hCoV-19^^Scotland|Human|Lighthouse Lab in Glasgow|Wellcome Sanger Institute for the COVID-19 Genomics UK (COG-UK) consortium|Davies|United Kingdom

>Spike|hCoV-19/England/CAMB-78BF3/2020|2020-04-03|EPI\_ISL\_441151|Original|hCoV-19^^England|Human|Department of Pathology|Wellcome Sanger Institute for the COVID-19 Genomics UK (COG-UK) consortium|Amato|United Kingdom

>Spike|hCoV-19/Australia/VIC17125/2020|2020-08-10|EPI\_ISL\_663747|Original|hCoV-19^^Victoria|Human|Microbiological Diagnostic Unit - Public Health Laboratory (MDU-PHL) |MDU-PHL|Schultz|Australia

>Spike|hCoV-19/USA/AK-PHL384/2020|2020-06-01|EPI\_ISL\_576111|Original|hCoV-19^^Alaska|Human|Alaska State Virology Laboratory|Alaska State Virology Laboratory|Chen|USA

>Spike|hCoV-19/USA/TX-HMH-MCoV-18288/2020|2020-11-17|EPI\_ISL\_784636|Original|hCoV-19^^Texas|Human|Houston Methodist Hospital|Houston Methodist Hospital|Long|USA

>Spike|hCoV-19/England/QEUH-BA1200/2020|2020-11-18|EPI\_ISL\_672905|Original|hCoV-19^^England|Human|Lighthouse Lab in Glasgow|Wellcome Sanger Institute for the COVID-19 Genomics UK (COG-UK) Consortium|Davies|United Kingdom

>Spike|hCoV-19/Scotland/EDB8208/2020|2020-10-09|EPI\_ISL\_651520|Original|hCoV-19^^Scotland|Human|Virology Department|COVID-19 Genomics UK (COG-UK) Consortium|McHugh|United Kingdom

>Spike|hCoV-19/England/QEUA-B0F76B/2020|2020-11-02|EPI\_ISL\_641662|Original|hCoV-19^^England|Human|Lighthouse Lab in Glasgow|Wellcome Sanger Institute for the COVID-19 Genomics UK (COG-UK) Consortium|Davies|United Kingdom

>Spike|hCoV-19/England/MILK-BA9E04/2020|2020-11-17|EPI\_ISL\_783321|Original|hCoV-19^^England|Human|Lighthouse Lab in Milton Keynes|Wellcome Sanger Institute for the COVID-19 Genomics UK (COG-UK) Consortium|Davies|United Kingdom

>Spike|hCoV-19/Norway/6196/2020|2020-11-30|EPI\_ISL\_775492|Original|hCoV-19^^Trondelag|Human|Department of Medical Microbiology|Norwegian Institute of Public Health|Vollan|Norway

>Spike|hCoV-19/Israel/CVL-13-ngs/2020|2020-12-24|EPI\_ISL\_776622|Original|hCoV-19^^Israel|Human|Israel Central Virology laboratory|Israel Central Virology laboratory|Zuckerman|Israel

>Spike|hCoV-19/USA/TX-HMH-MCoV-9630/2020|2020-07-05|EPI\_ISL\_780191|Original|hCoV-19^^Texas|Human|Houston Methodist Hospital|Houston Methodist Hospital|Long|USA

>Spike|hCoV-19/USA/NV-NSPHL-A0045/2020|2020-03-24|EPI\_ISL\_515328|Original|hCoV-19^^Nevada|Human|Nevada State Public Health Laboratory|Nevada State Public Health Laboratory|Sevinsky|USA

>Spike|hCoV-19/England/OXON-AE2B3/2020|2020-00-00|EPI\_ISL\_448679|Original|hCoV-19^^England|Human|Oxford Viromics|COVID-19 Genomics UK (COG-UK) Consortium|Golubchik|United Kingdom

>Spike|hCoV-19/USA/WV-QDX-1284/2020|2020-03-17|EPI\_ISL\_572053|Original|hCoV-19^^West Virginia|Human|Quest Diagnostics|Quest Diagnostics|Kagan|USA

>Spike|hCoV-19/USA/TX-DSHS-1913/2020|2020-07-11|EPI\_ISL\_751519|Original|hCoV-19^^Texas|Human|Texas Department of State Health Services|Texas Department of State Health Services|Rahman|USA

>Spike|hCoV-19/USA/VA-DCLS-0602/2020|2020-03-29|EPI\_ISL\_526819|Original|hCoV-19^^Virginia|Human|Virginia DCLS|Virginia DCLS|St. Jacques|USA

>Spike|hCoV-19/England/QEUA-A9E7DB/2020|2020-10-20|EPI\_ISL\_611433|Original|hCoV-19^^England|Human|Lighthouse Lab in Glasgow|Wellcome Sanger Institute for the COVID-19 Genomics UK (COG-UK) consortium|Davies|United Kingdom

>Spike|hCoV-19/USA/TX-HMH-MCoV-15755/2020|2020-07-10|EPI\_ISL\_785439|Original|hCoV-19^^Texas|Human|Houston Methodist Hospital|Houston Methodist Hospital|Long|USA

>Spike|hCoV-19/Scotland/EDB5015/2020|2020-05-15|EPI\_ISL\_493935|Original|hCoV-19^^Scotland|Human|Virology Department|COVID-19 Genomics UK (COG-UK) Consortium|Williams|United Kingdom

>Spike|hCoV-19/Peru/ICA-INS-109/2020|2020-05-04|EPI\_ISL\_536507|Original|hCoV-19^^Ica|Human|Instituto Nacional de Salud|Laboratorio de Infecciones Respiratorias Agudas|Lopez|Peru

>Spike|hCoV-19/Wales/PHWC-49E434/2020|2020-12-07|EPI\_ISL\_743001|Original|hCoV-19^^Wales|Human|Wales Specialist Virology Centre Sequencing lab|COVID-19 Genomics UK (COG-UK) Consortium|Moore|United Kingdom

>Spike|hCoV-19/USA/MI-MDHHS-SC21551/2020|2020-03-19|EPI\_ISL\_516278|Original|hCoV-19^^Michigan|Human|Michigan Department of Health and Human Services|Michigan Department of Health and Human Services|Blankenship|USA

>Spike|hCoV-19/Australia/VIC13478/2020|2020-08-02|EPI\_ISL\_592254|Original|hCoV-19^^Victoria|Human|Microbiological Diagnostic Unit - Public Health Laboratory (MDU-PHL)|MDU-PHL|Schultz|Australia

>Spike|hCoV-19/England/ALDP-9E7DD2/2020|2020-09-24|EPI\_ISL\_637709|Original|hCoV-19^^England|Human|Department of Pathology|COVID-19 Genomics UK (COG-UK) Consortium|Goodfellow|United Kingdom

>Spike|hCoV-19/England/LIVE-A86BD/2020|2020-03-27|EPI\_ISL\_517199|Original|hCoV-19^^England|Human|Liverpool Clinical Laboratories|COVID-19 Genomics UK (COG-UK) Consortium|Haldenby|United Kingdom

>Spike|hCoV-19/USA/CA-SCCPHD-UC181/2020|2020-03-16|EPI\_ISL\_435660|Original|hCoV-19^^California|Human|Santa Clara County Public Health Department|Chiu Laboratory|Chiu|USA

>Spike|hCoV-19/England/LIVE-9CFA2/2020|2020-04-05|EPI\_ISL\_449598|Original|hCoV-19^^England|Human|Liverpool Clinical Laboratories|COVID-19 Genomics UK (COG-UK) Consortium|Haldenby|United Kingdom

>Spike|hCoV-19/England/SHEF-D0959/2020|2020-04-18|EPI\_ISL\_462075|Original|hCoV-19^^England|Human|Virology Department|COVID-19 Genomics UK (COG-UK) Consortium|de Silva|United Kingdom

>Spike|hCoV-19/England/ALDP-CECC91/2020|2020-12-20|EPI\_ISL\_781495|Original|hCoV-19^^England|Human|Lighthouse Lab in Alderley Park|Wellcome Sanger Institute for the COVID-19 Genomics UK (COG-UK) Consortium|Davies|United Kingdom

>Spike|hCoV-19/England/ALDP-6675E4/2020|2020-07-03|EPI\_ISL\_555530|Original|hCoV-19^^England|Human|Lighthouse Lab in Alderley Park|Wellcome Sanger Institute for the COVID-19 Genomics UK (COG-UK) consortium|Davies|United Kingdom

>Spike|hCoV-19/England/NOTT-112969/2020|2020-04-20|EPI\_ISL\_493567|Original|hCoV-19^^England|Human|Lincolnshire Hospitals and DeepSeq Nottingham|COVID-19 Genomics UK (COG-UK) Consortium|Loose|United Kingdom

>Spike|hCoV-19/USA/NY-NYCPHL-001209/2020|2020-11-02|EPI\_ISL\_745444|Original|hCoV-19^^New York|Human|DOHMH Jamaica|New York City Public Health Laboratory|Wang|USA

>Spike|hCoV-19/England/20096051104/2020|2020-02-26|EPI\_ISL\_464188|Original|hCoV-19^^England|Human|Respiratory Virus Unit|Respiratory Virus Unit|Platt|United Kingdom

>Spike|hCoV-19/England/MILK-B023FB/2020|2020-10-23|EPI\_ISL\_642880|Original|hCoV-19^^England|Human|Lighthouse Lab in Milton Keynes|Wellcome Sanger Institute for the COVID-19 Genomics UK (COG-UK) Consortium|Davies|United Kingdom

>Spike|hCoV-19/USA/TX-HMH-2285/2020|2020-05-07|EPI\_ISL\_545224|Original|hCoV-19^^Texas|Human|Houston Methodist Hospital|Houston Methodist Hospital|Long|USA

>Spike|hCoV-19/Denmark/DCGC-19222/2020|2020-12-07|EPI\_ISL\_748824|Original|hCoV-19^^Sjaelland|Human|Department of Virus and Microbiological Special Diagnostics|Albertsen Lab|Michaelsen|Denmark

>Spike|hCoV-19/Norway/2829/2020|2020-06-29|EPI\_ISL\_493382|Original|hCoV-19^^Norway|Human|Medical Microbiology Unit|Norwegian Institute of Public Health|Kopperud Riis|Norway

>Spike|hCoV-19/Portugal/PT1425/2020|2020-03-27|EPI\_ISL\_511384|Original|hCoV-19^^Portugal|Human|Instituto Nacional de Saude (INSA)|Instituto Nacional de Saude (INSA)|Borges|Portugal

>Spike|hCoV-19/Canada/ON-UHTC-0286/2020|2020-07-22|EPI\_ISL\_569987|Original|hCoV-19^^Ontario|Human|Unity Health Toronto|Ontario Institute for Cancer Research|de Borja|Canada

>Spike|hCoV-19/Scotland/EDB2079/2020|2020-04-19|EPI\_ISL\_433178|Original|hCoV-19^^Scotland|Human|Virology Department|COVID-19 Genomics UK (COG-UK) Consortium|Williams|United Kingdom

>Spike|hCoV-19/USA/TX-HMH-MCoV-12980/2020|2020-08-28|EPI\_ISL\_788131|Original|hCoV-19^^Texas|Human|Houston Methodist Hospital|Houston Methodist Hospital|Long|USA

>Spike|hCoV-19/England/ALDP-9EA0F4/2020|2020-09-24|EPI\_ISL\_580196|Original|hCoV-19^^England|Human|Lighthouse Lab in Alderley Park|Wellcome Sanger Institute for the COVID-19 Genomics UK (COG-UK) consortium|Davies|United Kingdom

>Spike|hCoV-19/USA/FL-BPHL-1446/2020|2020-04-08|EPI\_ISL\_549228|Original|hCoV-19^^Florida|Human|Florida Bureau of Public Health Laboratories|Florida Bureau of Public Health Laboratories|Blanton|USA

>Spike|hCoV-19/France/PAC-IHU-0502/2020|2020-04-03|EPI\_ISL\_569557|Original|hCoV-19^^Provence-Alpes-C\u00f4te-d\u2019Azur|Human|MEPHI|MEPHI|Levasseur|France

>Spike|hCoV-19/Australia/VIC11937/2020|2020-09-10|EPI\_ISL\_563499|Original|hCoV-19^^Victoria|Human|Victorian Infectious Diseases Reference Laboratory (VIDRL)|VIDRL and MDU-PHL|Schultz|Australia

>Spike|hCoV-19/Mexico/BCN-ALSR-4929/2020|2020-08-25|EPI\_ISL\_730218|Original|hCoV-19^^Baja California|Human|Genomica Lab Molecular|Andersen lab at Scripps Research|Gangavarapu|Mexico

>Spike|hCoV-19/Iceland/300/2020|2020-03-18|EPI\_ISL\_417629|Original|hCoV-19^^Reykjavik|Human|The National University Hospital of Iceland|deCODE genetics|J\u00f3nsson|Iceland

>Spike|hCoV-19/South Africa/NHLS-UCT-GS-1198/2020|2020-11-03|EPI\_ISL\_700496|Original|hCoV-19^Western Cape|Human|Conville CDC wc CVC|NHLS/UCT|Iranzadeh|South Africa

>Spike|hCoV-19/Australia/VIC3876/2020|2020-07-13|EPI\_ISL\_520589|Original|hCoV-19^Victoria|Human|Microbiological Diagnostic Unit - Public Health Laboratory (MDU-PHL)|MDU-PHL|Schultz|Australia

>Spike|hCoV-19/Sweden/20-52952/2020|2020-08-31|EPI\_ISL\_660426|Original|hCoV-19^Orebro|Human|Orebro klinisk mikrobiologi|The Public Health Agency of Sweden|Svartstr\u00f6m|Sweden

>Spike|hCoV-19/England/LIVE-A49C7/2020|2020-03-13|EPI\_ISL\_499879|Original|hCoV-19^England|Human|Liverpool Clinical Laboratories|COVID-19 Genomics UK (COG-UK) Consortium|Haldenby|United Kingdom

>Spike|hCoV-19/England/ALDP-A66EB9/2020|2020-10-12|EPI\_ISL\_630597|Original|hCoV-19^England|Human|Lighthouse Lab in Alderley Park|Wellcome Sanger Institute for the COVID-19 Genomics UK (COG-UK) consortium|Davies|United Kingdom

>Spike|hCoV-19/England/ALDP-9C6058/2020|2020-09-10|EPI\_ISL\_567768|Original|hCoV-19^England|Human|Lighthouse Lab in Alderley Park|Wellcome Sanger Institute for the COVID-19 Genomics UK (COG-UK) consortium|Davies|United Kingdom

>Spike|hCoV-19/Canada/BC\_09585059/2020|2020-04-00|EPI\_ISL\_467307|Original|hCoV-19^British Columbia|Human|BCCDC Public Health Laboratory|BCCDC Public Health Laboratory|Harrigan|Canada

>Spike|hCoV-19/Denmark/DCGC-11472/2020|2020-11-02|EPI\_ISL\_670938|Original|hCoV-19^Syddanmark|Human|Department of Virus and Microbiological Special Diagnostics|Albertsen Lab|Michaelsen|Denmark

>Spike|hCoV-19/USA/MI-MDHHS-SC21297/2020|2020-04-08|EPI\_ISL\_507552|Original|hCoV-19^Michigan|Human|Michigan Department of Health and Human Services|Michigan Department of Health and Human Services|Blankenship|USA

>Spike|hCoV-19/Canada/BC-BCCDC-7588/2020|2020-11-00|EPI\_ISL\_740736|Original|hCoV-19^British Columbia|Human|BCCDC Public Health Laboratory|BCCDC Public Health Laboratory|Prystajecky|Canada

>Spike|hCoV-19/Wales/PHWC-4880FD/2020|2020-11-01|EPI\_ISL\_639351|Original|hCoV-19^Wales|Human|Wales Specialist Virology Centre Sequencing lab|COVID-19 Genomics UK (COG-UK) Consortium|Moore|United Kingdom

>Spike|hCoV-19/USA/TX-HMH-MCoV-10361/2020|2020-07-08|EPI\_ISL\_789435|Original|hCoV-19^Texas|Human|Houston Methodist Hospital|Houston Methodist Hospital|Long|USA

>Spike|hCoV-19/Wales/PHWC-48D3FF/2020|2020-10-28|EPI\_ISL\_680621|Original|hCoV-19^Wales|Human|Wales Specialist Virology Centre Sequencing lab|COVID-19 Genomics UK (COG-UK) Consortium|Moore|United Kingdom

>Spike|hCoV-19/Romania/Suceava-5710/2020|2020-03-25|EPI\_ISL\_468139|Original|hCoV-19^Suceava|Human|[Romania|[Romania|Paraschiv|Romania

>Spike|hCoV-19/Netherlands/NA\_9/2020|2020-03-09|EPI\_ISL\_415498|Original|hCoV-19^Netherlands|Human|Dutch COVID-19 response team|Erasmus Medical Center|Oude Munnink|Netherlands

>Spike|hCoV-19/England/CAMC-A82C9F/2020|2020-10-12|EPI\_ISL\_610750|Original|hCoV-19^England|Human|Lighthouse Lab in Cambridge|Wellcome Sanger Institute for the COVID-19 Genomics UK (COG-UK) consortium|Davies|United Kingdom

>Spike|hCoV-19/USA/LA-EVTL444/2020|2020-06-19|EPI\_ISL\_578848|Original|hCoV-19^Louisiana|Human|LSUHS Emerging Viral Threat Laboratory|Microbial Genome Sequencing Center|Kamil|USA

>Spike|hCoV-19/Czech Republic/NRL\_7949/2020|2020-07-24|EPI\_ISL\_577624|Original|hCoV-19^Northern Bohemia Region|Human|The National Institute of Public Health|State Veterinary Institute Prague|Nagy|Czech Republic

>Spike|hCoV-19/England/202822194/2020|2020-05-29|EPI\_ISL\_490250|Original|hCoV-19^England|Human|Respiratory Virus Unit|Respiratory Virus Unit|Platt|United Kingdom

>Spike|hCoV-19/USA/CA-ALSR-2766/2020|2020-07-15|EPI\_ISL\_635667|Original|hCoV-19^California|Human|San Diego County Public Health Laboratory|Andersen lab at Scripps Research|Gangavarapu|USA

>Spike|hCoV-19/USA/PA-MGEL-00262/2020|2020-04-18|EPI\_ISL\_681992|Original|hCoV-19^Pennsylvania|Human|UPMC Clinical Microbiology Laboratory|Microbial Genomic Epidemiology Laboratory|Griffith|USA

>Spike|hCoV-19/England/ALDP-A8633C/2020|2020-10-17|EPI\_ISL\_606259|Original|hCoV-19^^England|Human|Lighthouse Lab in Alderley Park|Wellcome Sanger Institute for the COVID-19 Genomics UK (COG-UK) consortium|Davies|United Kingdom

>Spike|hCoV-19/USA/LA-EVTL949/2020|2020-08-13|EPI\_ISL\_653640|Original|hCoV-19^^Louisiana|Human|LSUHS Emerging Viral Threat Laboratory|Microbial Genome Sequencing Center|Kamil|USA

>Spike|hCoV-19/USA/TX-HMH-MCoV-15072/2020|2020-10-18|EPI\_ISL\_786556|Original|hCoV-19^^Texas|Human|Houston Methodist Hospital|Houston Methodist Hospital|Long|USA

>Spike|hCoV-19/England/QEUA-9B898B/2020|2020-09-07|EPI\_ISL\_549790|Original|hCoV-19^^England|Human|Lighthouse Lab in Glasgow|Wellcome Sanger Institute for the COVID-19 Genomics UK (COG-UK) consortium|Davies|United Kingdom

>Spike|hCoV-19/Iceland/3/2020|2020-03-13|EPI\_ISL\_417694|Original|hCoV-19^^Reykjavik|Human|The National University Hospital of Iceland|deCODE genetics|J\u00f3nsson|Iceland

>Spike|hCoV-19/Germany/HH-hpi-p2001/2020|2020-03-20|EPI\_ISL\_776318|Original|hCoV-19^^Hamburg|Human|University Medical Center Hamburg Eppendorf|Heinrich Pette Institute|Robitaille|Germany

>Spike|hCoV-19/England/LCST-24D6AB0/2020|2020-06-05|EPI\_ISL\_478328|Original|hCoV-19^^England|Human|University Hospitals Of Leicester NHS Trust and DeepSeq Nottingham|COVID-19 Genomics UK (COG-UK) Consortium|Loose|United Kingdom

>Spike|hCoV-19/Denmark/DCGC-18128/2020|2020-12-14|EPI\_ISL\_749210|Original|hCoV-19^^Syddanmark|Human|Department of Virus and Microbiological Special Diagnostics|Albertsen Lab|Michaelsen|Denmark

>Spike|hCoV-19/Denmark/DCGC-13046/2020|2020-11-30|EPI\_ISL\_712133|Original|hCoV-19^^Hovedstaden|Human|Department of Virus and Microbiological Special Diagnostics|Albertsen Lab|Michaelsen|Denmark

>Spike|hCoV-19/Denmark/DCGC-17428/2020|2020-12-14|EPI\_ISL\_750975|Original|hCoV-19^^Midtjylland|Human|Department of Virus and Microbiological Special Diagnostics|Albertsen Lab|Michaelsen|Denmark

>Spike|hCoV-19/USA/CA-CZB-14921/2020|2020-11-27|EPI\_ISL\_738782|Original|hCoV-19^^California|Human|Orange County Public Health Lab|Chan-Zuckerberg Biohub|Kamm|USA

>Spike|hCoV-19/Wales/PHWC-2C6B1/2020|2020-03-31|EPI\_ISL\_445895|Original|hCoV-19^^Wales|Human|Wales Specialist Virology Centre|Public Health Wales Microbiology Cardiff|Moore|United Kingdom

>Spike|hCoV-19/England/QEUA-98EF5F/2020|2020-08-25|EPI\_ISL\_540358|Original|hCoV-19^^England|Human|Lighthouse Lab in Glasgow|Wellcome Sanger Institute for the COVID-19 Genomics UK (COG-UK) consortium|Davies|United Kingdom

>Spike|hCoV-19/Australia/WA373/2020|2020-10-20|EPI\_ISL\_605850|Original|hCoV-19^^Western Australia|Human|PathWest Laboratory Medicine WA|PathWest Laboratory Medicine WA Microbial Surveillance Unit|Sikazwe|Australia

>Spike|hCoV-19/England/QEUA-9AEAA3/2020|2020-09-05|EPI\_ISL\_577272|Original|hCoV-19^^England|Human|University of Exeter|COVID-19 Genomics UK (COG-UK) Consortium|Temperton|United Kingdom

>Spike|hCoV-19/Scotland/QEUA-BCC339/2020|2020-11-27|EPI\_ISL\_710769|Original|hCoV-19^^Scotland|Human|Lighthouse Lab in Glasgow|Wellcome Sanger Institute for the COVID-19 Genomics UK (COG-UK) Consortium|Davies|United Kingdom

>Spike|hCoV-19/Denmark/DCGC-22486/2020|2020-12-14|EPI\_ISL\_757588|Original|hCoV-19^^Sjaelland|Human|Department of Virus and Microbiological Special Diagnostics|Albertsen Lab|Michaelsen|Denmark

>Spike|hCoV-19/England/QEUA-9CA458/2020|2020-09-10|EPI\_ISL\_567383|Original|hCoV-19^^England|Human|Lighthouse Lab in Glasgow|Wellcome Sanger Institute for the COVID-19 Genomics UK (COG-UK) consortium|Davies|United Kingdom

>Spike|hCoV-19/Netherlands/ZH-EMC-794/2020|2020-10-14|EPI\_ISL\_632675|Original|hCoV-19^^Zuid Holland|Human|Dutch COVID-19 response team|Erasmus Medical Center|Oude Munnink|Netherlands

>Spike|hCoV-19/USA/VA-DCLS-0251/2020|2020-04-20|EPI\_ISL\_452825|Original|hCoV-19^^Virginia|Human|Virginia DCLS|Virginia DCLS|St. Jacques|USA

>Spike|hCoV-19/DRC/3947/2020|2020-04-25|EPI\_ISL\_471400|Original|hCoV-19^^Kinshasa|Human|Viral Respiratory Lab|Pathogen Sequencing Lab|Lusamaki|Democratic Republic of the Congo

>Spike|hCoV-19/Italy/ABR-IZSGC-TE14162/2020|2020-04-09|EPI\_ISL\_435154|Original|hCoV-19^^Abruzzo|Human|SERVIZIO DI IGIENE E SANIT\u00c0 PUBBLICA ASL Teramo|Istituto Zooprofilattico Sperimentale dell'Abruzzo e Molise \G.Caporale\\Lorusso|Italy

>Spike|hCoV-19/USA/LA-EVTL188/2020|2020-05-21|EPI\_ISL\_574322|Original|hCoV-19^^Louisiana|Human|LSUHS Emerging Viral Threat Laboratory|Microbial Genome Sequencing Center|Kamil|USA

>Spike|hCoV-19/Australia/VIC5687/2020|2020-07-20|EPI\_ISL\_518493|Original|hCoV-19^^Victoria|Human|Microbiological Diagnostic Unit - Public Health Laboratory (MDU-PHL)|MDU-PHL|Schultz|Australia

>Spike|hCoV-19/Mexico/ZAC-INDRE-70/2020|2020-08-21|EPI\_ISL\_576273|Original|hCoV-19^^Zacatecas|Human|Instituto de Diagnostico y Referencia Epidemiologicos (INDRE)|Instituto de Diagnostico y Referencia Epidemiologicos (INDRE)|Rodriguez|Mexico

>Spike|hCoV-19/Denmark/DCGC-15191/2020|2020-11-23|EPI\_ISL\_713684|Original|hCoV-19^^Midtjylland|Human|Department of Virus and Microbiological Special Diagnostics|Albertsen Lab|Michaelsen|Denmark

>Spike|hCoV-19/Netherlands/Limburg\_63/2020|2020-04-19|EPI\_ISL\_461049|Original|hCoV-19^^Limburg|Human|Dutch COVID-19 response team|Erasmus Medical Center|Oude Munnink|Netherlands

>Spike|hCoV-19/Denmark/DCGC-3894/2020|2020-09-07|EPI\_ISL\_615613|Original|hCoV-19^^Syddanmark|Human|Department of Virus and Microbiological Special Diagnostics|Albertsen lab|Michaelsen|Denmark

>Spike|hCoV-19/Denmark/ALAB-SSI-625/2020|2020-03-24|EPI\_ISL\_437005|Original|hCoV-19^^Denmark|Human|Department of Virus and Microbiological Special Diagnostics|Albertsen lab|Kirkegaard|Denmark

>Spike|hCoV-19/Brazil/RS-L19-CD390/2020|2020-04-01|EPI\_ISL\_476319|Original|hCoV-19^^Rio Grande do Sul|Human|DB Diagn\u00f3sticos do Brasil|Instituto de Medicina Tropical da Univesidade de S\u00e3o Paulo|Faria|Brazil

>Spike|hCoV-19/USA/TX-HMH-2512/2020|2020-06-03|EPI\_ISL\_545348|Original|hCoV-19^^Texas|Human|Houston Methodist Hospital|Houston Methodist Hospital|Long|USA

>Spike|hCoV-19/Denmark/ALAB-SSI-765/2020|2020-03-20|EPI\_ISL\_444894|Original|hCoV-19^^Denmark|Human|Department of Virus and Microbiological Special Diagnostics|Albertsen lab|Kirkegaard|Denmark

>Spike|hCoV-19/England/MILK-B8DD27/2020|2020-11-13|EPI\_ISL\_674775|Original|hCoV-19^^England|Human|Lighthouse Lab in Milton Keynes|Wellcome Sanger Institute for the COVID-19 Genomics UK (COG-UK) Consortium|Davies|United Kingdom

>Spike|hCoV-19/Canada/ON-S951/2020|2020-04-14|EPI\_ISL\_591268|Original|hCoV-19^^Ontario|Human|Toronto Invasive Bacterial Diseases Network|McMaster University|McArthur|Canada

>Spike|hCoV-19/USA/UT-01986/2020|2020-04-16|EPI\_ISL\_452172|Original|hCoV-19^^Utah|Human|Utah Public Health Laboratory|Utah Public Health Laboratory|Young|USA

>Spike|hCoV-19/Wales/PHWC-347FF/2020|2020-04-16|EPI\_ISL\_446978|Original|hCoV-19^^Wales|Human|Wales Specialist Virology Centre|Public Health Wales Microbiology Cardiff|Moore|United Kingdom

>Spike|hCoV-19/Switzerland/VD-ETHZ-100220/2020|2020-03-17|EPI\_ISL\_574995|Original|hCoV-19^^Vaud|Human|Viollier AG|Department of Biosystems Science and Engineering|Nadeau|Switzerland

>Spike|hCoV-19/Australia/VIC5998/2020|2020-07-20|EPI\_ISL\_518773|Original|hCoV-19^^Victoria|Human|Microbiological Diagnostic Unit - Public Health Laboratory (MDU-PHL)|MDU-PHL|Schultz|Australia

>Spike|hCoV-19/USA/TX-DSHS-0818/2020|2020-06-03|EPI\_ISL\_593561|Original|hCoV-19^^Texas|Human|Texas Department of State Health Services|Texas Department of State Health Services|Rahman|USA

>Spike|hCoV-19/England/ALDP-CB689C/2020|2020-12-17|EPI\_ISL\_761246|Original|hCoV-19^^England|Human|Lighthouse Lab in Alderley Park|Wellcome Sanger Institute for the COVID-19 Genomics UK (COG-UK) Consortium|Davies|United Kingdom

>Spike|hCoV-19/Netherlands/LI-RIVM-10313/2020|2020-03-13|EPI\_ISL\_636539|Original|hCoV-19^^Limburg|Human|Dutch COVID-19 response team|National Institute for Public Health and the Environment (RIVM)|Meijer|Netherlands

>Spike|hCoV-19/Switzerland/BL-ETHZ-360001/2020|2020-11-12|EPI\_ISL\_693861|Original|hCoV-19^^Basel-Landschaft|Human|Viollier AG|Department of Biosystems Science and Engineering|Nadeau|Switzerland

>Spike|hCoV-19/England/CAMB-1B51F7/2020|2020-06-23|EPI\_ISL\_483915|Original|hCoV-19^^England|Human|Department of Pathology|COVID-19 Genomics UK (COG-UK) Consortium|Meredith|United Kingdom

>Spike|hCoV-19/Ireland/D-NVRL-MPW26026/2020|2020-04-11|EPI\_ISL\_767745|Original|hCoV-19^^Dublin|Human|National Virus Reference Laboratory|Irish Coronavirus Sequencing Consortium - Teagasc Moorepark|Walsh|Ireland

>Spike|hCoV-19/Denmark/DCGC-22158/2020|2020-12-14|EPI\_ISL\_757821|Original|hCoV-19^^Hovedstaden|Human|Department of Virus and Microbiological Special Diagnostics|Albertsen Lab|Michaelsen|Denmark

>Spike|hCoV-19/Australia/SAP326/2020|2020-03-27|EPI\_ISL\_483104|Original|hCoV-19^^South Australia|Human|SA Pathology|SA Pathology|Leong|Australia

>Spike|hCoV-19/Northern Ireland/QEUIH-96AC52/2020|2020-08-17|EPI\_ISL\_531289|Original|hCoV-19^^Northern Ireland|Human|Lighthouse Lab in Glasgow|Wellcome Sanger Institute for the COVID-19 Genomics UK (COG-UK) consortium|Davies|United Kingdom

>Spike|hCoV-19/USA/CA-CZB-10039/2020|2020-06-12|EPI\_ISL\_672196|Original|hCoV-19^^California|Human|The Ashley Laboratory|Chan-Zuckerberg Biohub|Bhatt|USA

>Spike|hCoV-19/England/CAMC-A65D53/2020|2020-10-11|EPI\_ISL\_638018|Original|hCoV-19^^England|Human|Department of Pathology|COVID-19 Genomics UK (COG-UK) Consortium|Goodfellow|United Kingdom

>Spike|hCoV-19/England/CAMC-945868/2020|2020-07-14|EPI\_ISL\_556818|Original|hCoV-19^^England|Human|Lighthouse Lab in Cambridge|Wellcome Sanger Institute for the COVID-19 Genomics UK (COG-UK) consortium|Davies|United Kingdom

>Spike|hCoV-19/England/BRIS-12233B/2020|2020-03-23|EPI\_ISL\_440094|Original|hCoV-19^^England|Human|PHE South West Regional Laboratory|Wellcome Sanger Institute for the COVID-19 Genomics UK (COG-UK) consortium|Amato|United Kingdom

>Spike|hCoV-19/Wales/PHWC-341B5/2020|2020-04-18|EPI\_ISL\_446883|Original|hCoV-19^^Wales|Human|Wales Specialist Virology Centre|Public Health Wales Microbiology Cardiff|Moore|United Kingdom

>Spike|hCoV-19/England/MILK-A05E16/2020|2020-10-01|EPI\_ISL\_600051|Original|hCoV-19^^England|Human|Lighthouse Lab in Milton Keynes|Wellcome Sanger Institute for the COVID-19 Genomics UK (COG-UK) consortium|Davies|United Kingdom

>Spike|hCoV-19/Sweden/20-08840/2020|2020-04-11|EPI\_ISL\_475557|Original|hCoV-19^^Halland|Human|Halmstad klinisk mikrobiologi|The Public Health Agency of Sweden|Svartstr\u00f6m|Sweden

>Spike|hCoV-19/England/MILK-ABBE88/2020|2020-10-22|EPI\_ISL\_631086|Original|hCoV-19^^England|Human|Lighthouse Lab in Milton Keynes|Wellcome Sanger Institute for the COVID-19 Genomics UK (COG-UK) consortium|Davies|United Kingdom

>Spike|hCoV-19/Australia/QLD971/2020|2020-04-11|EPI\_ISL\_530235|Original|hCoV-19^^Queensland|Human|Queensland Health Forensic and Scientific Services|Public Health Virology Laboratory|Nguyen|Australia

>Spike|hCoV-19/Japan/PG-3523/2020|2020-06-00|EPI\_ISL\_691779|Original|hCoV-19^^Japan|Human|Pathogen Genomics Center|Pathogen Genomics Center|Sekizuka|Japan

>Spike|hCoV-19/Australia/VIC2235/2020|2020-06-23|EPI\_ISL\_521972|Original|hCoV-19^^Victoria|Human|Microbiological Diagnostic Unit - Public Health Laboratory (MDU-PHL) |MDU-PHL|Schultz|Australia

>Spike|hCoV-19/USA/MA-MASPHL-00140/2020|2020-04-03|EPI\_ISL\_791613|Original|hCoV-19^^Massachusetts|Human|Massachusetts State Public Health Laboratory|Infectious Disease Program|Park|USA

>Spike|hCoV-19/Wales/PHWC-489F77/2020|2020-11-03|EPI\_ISL\_652509|Original|hCoV-19^^Wales|Human|Wales Specialist Virology Centre Sequencing lab|COVID-19 Genomics UK (COG-UK) Consortium|Moore|United Kingdom

>Spike|hCoV-19/England/NORT-1B610D2/2020|2020-10-08|EPI\_ISL\_612549|Original|hCoV-19^^England|Human|Northumbria University / South Tees Hospitals NHS Foundation Trust / North Cumbria Integrated Care NHS Foundation Trust / North Tees and Hartlepool NHS Foundation Trust / Newcastle Hospitals NHS Foundation Trust|COVID-19 Genomics UK (COG-UK) Consortium|Bashton|United Kingdom



>Spike|hCoV-19/England/MILK-4822C0/2020|2020-04-30|EPI\_ISL\_559674|Original|hCoV-19^^England|Human|Lighthouse Lab in Milton Keynes|Wellcome Sanger Institute for the COVID-19 Genomics UK (COG-UK) consortium|Davies|United Kingdom

>Spike|hCoV-19/Scotland/EDB5724/2020|2020-04-10|EPI\_ISL\_473845|Original|hCoV-19^^Scotland|Human|Virology Department|COVID-19 Genomics UK (COG-UK) Consortium|Williams|United Kingdom

>Spike|hCoV-19/England/ALDP-5CB50D/2020|2020-06-19|EPI\_ISL\_558528|Original|hCoV-19^^England|Human|Lighthouse Lab in Alderley Park|Wellcome Sanger Institute for the COVID-19 Genomics UK (COG-UK) consortium|Davies|United Kingdom

>Spike|hCoV-19/Denmark/DCGC-2429/2020|2020-08-10|EPI\_ISL\_617604|Original|hCoV-19^^Hovedstaden|Human|Department of Virus and Microbiological Special Diagnostics|Albertsen lab|Michaelsen|Denmark

>Spike|hCoV-19/Nigeria/OS-CV287/2020|2020-06-27|EPI\_ISL\_729968|Original|hCoV-19^^Osun State|Human|Nigeria Centre for Disease Control (NCDC)|African Centre of Excellence for Genomics of Infectious Diseases (ACEGID)|Oluniyi|Nigeria

>Spike|hCoV-19/Spain/RI-IBV-005972/2020|2020-03-27|EPI\_ISL\_500406|Original|hCoV-19^^La Rioja|Human|Centro de Investigaci\u00f3n Biom\u00e9dica de La Rioja - Hospital San Pedro Logro\u00f1o|SeqCOVID-SPAIN consortium/IBV (CSIC)|Comas|Spain

>Spike|hCoV-19/England/CAMC-CB753A/2020|2020-12-18|EPI\_ISL\_777906|Original|hCoV-19^^England|Human|Lighthouse Lab in Cambridge|Wellcome Sanger Institute for the COVID-19 Genomics UK (COG-UK) Consortium|Davies|United Kingdom

>Spike|hCoV-19/England/MILK-9E12F7/2020|2020-09-21|EPI\_ISL\_577069|Original|hCoV-19^^England|Human|Oxford Viromics|COVID-19 Genomics UK (COG-UK) Consortium|Golubchik|United Kingdom

>Spike|hCoV-19/USA/TX-DSHS-0682/2020|2020-07-16|EPI\_ISL\_576335|Original|hCoV-19^^Texas|Human|Texas Department of State Health Services|Texas Department of State Health Services|Rahman|USA

>Spike|hCoV-19/USA/WI-UW-1298/2020|2020-08-31|EPI\_ISL\_536670|Original|hCoV-19^^Wisconsin|Human|University of Wisconsin-Madison AIDS Vaccine Research Laboratories|University of Wisconsin-Madison AIDS Vaccine Research Laboratories|Baczenas|USA

>Spike|hCoV-19/USA/TX-DSHS-2007/2020|2020-11-13|EPI\_ISL\_766744|Original|hCoV-19^^Texas|Human|Texas Department of State Health Services|Texas Department of State Health Services|Rahman|USA

>Spike|hCoV-19/England/MILK-9AAD9F/2020|2020-09-01|EPI\_ISL\_550958|Original|hCoV-19^^England|Human|Lighthouse Lab in Milton Keynes|Wellcome Sanger Institute for the COVID-19 Genomics UK (COG-UK) consortium|Davies|United Kingdom

>Spike|hCoV-19/USA/WA-UW142/2020|2020-03-11|EPI\_ISL\_416680|Original|hCoV-19^^Washington|Human|UW Virology Lab|UW Virology Lab|Roychoudhury|USA

>Spike|hCoV-19/England/ALDP-CB5C82/2020|2020-12-17|EPI\_ISL\_761300|Original|hCoV-19^^England|Human|Lighthouse Lab in Alderley Park|Wellcome Sanger Institute for the COVID-19 Genomics UK (COG-UK) Consortium|Davies|United Kingdom

>Spike|hCoV-19/USA/TX-HMH-MCoV-19614/2020|2020-11-18|EPI\_ISL\_783553|Original|hCoV-19^^Texas|Human|Houston Methodist Hospital|Houston Methodist Hospital|Long|USA

>Spike|hCoV-19/England/CAMC-B9A4C8/2020|2020-11-15|EPI\_ISL\_673277|Original|hCoV-19^^England|Human|Lighthouse Lab in Cambridge|Wellcome Sanger Institute for the COVID-19 Genomics UK (COG-UK) Consortium|Davies|United Kingdom

>Spike|hCoV-19/England/QEUH-A49AA9/2020|2020-10-08|EPI\_ISL\_628451|Original|hCoV-19^^England|Human|Oxford Viromics|COVID-19 Genomics UK (COG-UK) Consortium|Golubchik|United Kingdom

>Spike|hCoV-19/England/MILK-BB10D6/2020|2020-11-17|EPI\_ISL\_720519|Original|hCoV-19^^England|Human|Lighthouse Lab in Milton Keynes|Wellcome Sanger Institute for the COVID-19 Genomics UK (COG-UK) Consortium|Davies|United Kingdom

>Spike|hCoV-19/USA/UT-QDX-1471/2020|2020-03-16|EPI\_ISL\_603856|Original|hCoV-19^^Utah|Human|Quest Diagnostics|Quest Diagnostics|Kagan|USA

>Spike|hCoV-19/Scotland/QEUH-A48EAE/2020|2020-10-08|EPI\_ISL\_595935|Original|hCoV-19^^Scotland|Human|Quadram Institute Bioscience|COVID-19 Genomics UK (COG-UK) Consortium|Alikhan|United Kingdom

>Spike|hCoV-19/USA/UT-QDX-2434/2020|2020-03-13|EPI\_ISL\_604844|Original|hCoV-19^^Utah|Human|Quest Diagnostics|Quest Diagnostics|Kagan|USA

>Spike|hCoV-19/England/NOTT-10E1C2/2020|2020-03-20|EPI\_ISL\_425508|Original|hCoV-19^^England|Human|Queens Medical Centre|COVID-19 Genomics UK (COG-UK) Consortium|Loose|United Kingdom

>Spike|hCoV-19/Wales/PHWC-16C827/2020|2020-09-22|EPI\_ISL\_572772|Original|hCoV-19^^Wales|Human|Wales Specialist Virology Centre Sequencing lab|COVID-19 Genomics UK (COG-UK) Consortium|Moore|United Kingdom

>Spike|hCoV-19/Denmark/DCGC-16199/2020|2020-11-16|EPI\_ISL\_714135|Original|hCoV-19^^Sjaelland|Human|Department of Virus and Microbiological Special Diagnostics|Albertsen Lab|Michaelsen|Denmark

>Spike|hCoV-19/France/PAC-IHU-1315/2020|2020-08-18|EPI\_ISL\_569114|Original|hCoV-19^^Provence-Alpes-C\u00f4te-d\u0192Azur|Human|MEPHI|MEPHI|Levasseur|France

>Spike|hCoV-19/USA/CA-CZB-3925/2020|2020-07-25|EPI\_ISL\_548537|Original|hCoV-19^^California|Human|Contra Costa Public Health Lab|Chan-Zuckerberg Biohub|Bhatt|USA

>Spike|hCoV-19/USA/CA-CZB-13139/2020|2020-10-26|EPI\_ISL\_672398|Original|hCoV-19^^California|Human|Madera County Department of Public Health|Chan-Zuckerberg Biohub|Bhatt|USA

>Spike|hCoV-19/Wales/PHWC-31EDF/2020|2020-04-06|EPI\_ISL\_446582|Original|hCoV-19^^Wales|Human|Wales Specialist Virology Centre|Public Health Wales Microbiology Cardiff|Moore|United Kingdom

>Spike|hCoV-19/Denmark/DCGC-13540/2020|2020-11-30|EPI\_ISL\_712328|Original|hCoV-19^^Syddanmark|Human|Department of Virus and Microbiological Special Diagnostics|Albertsen Lab|Michaelsen|Denmark

>Spike|hCoV-19/England/BRIS-12A184/2020|2020-04-15|EPI\_ISL\_458349|Original|hCoV-19^^England|Human|PHE South West Regional Laboratory|Wellcome Sanger Institute for the COVID-19 Genomics UK (COG-UK) consortium|Davies|United Kingdom

>Spike|hCoV-19/Iceland/72/2020|2020-03-08|EPI\_ISL\_417860|Original|hCoV-19^^Reykjavik|Human|The National University Hospital of Iceland|deCODE genetics|J\u00f3nsson|Iceland

>Spike|hCoV-19/England/ALDP-CEC94F/2020|2020-12-20|EPI\_ISL\_782259|Original|hCoV-19^^England|Human|Lighthouse Lab in Alderley Park|Wellcome Sanger Institute for the COVID-19 Genomics UK (COG-UK) Consortium|Davies|United Kingdom

>Spike|hCoV-19/USA/MI-UM-10036835872/2020|2020-11-07|EPI\_ISL\_728468|Original|hCoV-19^^Michigan|Human|University of Michigan Clinical Microbiology Laboratory|Lauring Lab|Valesano|USA

>Spike|hCoV-19/England/NORT-29262D/2020|2020-05-12|EPI\_ISL\_489124|Original|hCoV-19^^England|Human|NU-OMICS DNA Sequencing research facility|Wellcome Sanger Institute for the COVID-19 Genomics UK (COG-UK) consortium|Davies|United Kingdom

>Spike|hCoV-19/USA/MI-QDX-589/2020|2020-03-17|EPI\_ISL\_571327|Original|hCoV-19^^Michigan|Human|Quest Diagnostics|Quest Diagnostics|Kagan|USA

>Spike|hCoV-19/USA/NV-NSPHL-A0144/2020|2020-05-02|EPI\_ISL\_515409|Original|hCoV-19^^Nevada|Human|Nevada State Public Health Laboratory|Nevada State Public Health Laboratory|Sevinsky|USA

>Spike|hCoV-19/Australia/VIC1450/2020|2020-04-20|EPI\_ISL\_562066|Original|hCoV-19^^Victoria|Human|Victorian Infectious Diseases Reference Laboratory (VIDRL)|VIDRL and MDU-PHL|Schultz|Australia

>Spike|hCoV-19/Australia/VIC3113/2020|2020-07-06|EPI\_ISL\_520820|Original|hCoV-19^^Victoria|Human|Victorian Infectious Diseases Reference Laboratory (VIDRL)|VIDRL and MDU-PHL|Schultz|Australia

>Spike|hCoV-19/USA/TX-HMH-1428/2020|2020-05-02|EPI\_ISL\_542719|Original|hCoV-19^^Texas|Human|Houston Methodist Hospital|Houston Methodist Hospital|Long|USA

>Spike|hCoV-19/Denmark/DCGC-17139/2020|2020-12-14|EPI\_ISL\_750781|Original|hCoV-19^^Sjaelland|Human|Department of Virus and Microbiological Special Diagnostics|Albertsen Lab|Michaelsen|Denmark

>Spike|hCoV-19/USA/TX-DSHS-1704/2020|2020-06-15|EPI\_ISL\_708612|Original|hCoV-19^^Texas|Human|Texas Department of State Health Services|Texas Department of State Health Services|Rahman|USA

>Spike|hCoV-19/England/ALDP-B753D5/2020|2020-11-12|EPI\_ISL\_664923|Original|hCoV-19^^England|Human|Quadram Institute Bioscience|COVID-19 Genomics UK (COG-UK) Consortium|Alikhan|United Kingdom

>Spike|hCoV-19/USA/MN-MDH-1776/2020|2020-04-13|EPI\_ISL\_590779|Original|hCoV-19^^Minnesota|Human|Minnesota Department of Health|Minnesota Department of Health|Lorentz|USA

>Spike|hCoV-19/England/QEUA-964247/2020|2020-08-11|EPI\_ISL\_536891|Original|hCoV-19^^England|Human|Lighthouse Lab in Glasgow|Wellcome Sanger Institute for the COVID-19 Genomics UK (COG-UK) consortium|Davies|United Kingdom

>Spike|hCoV-19/England/QEUA-AAF2A9/2020|2020-10-20|EPI\_ISL\_630883|Original|hCoV-19^^England|Human|Lighthouse Lab in Glasgow|Wellcome Sanger Institute for the COVID-19 Genomics UK (COG-UK) consortium|Davies|United Kingdom

>Spike|hCoV-19/England/CAMC-945DD2/2020|2020-07-14|EPI\_ISL\_556644|Original|hCoV-19^^England|Human|Lighthouse Lab in Cambridge|Wellcome Sanger Institute for the COVID-19 Genomics UK (COG-UK) consortium|Davies|United Kingdom

>Spike|hCoV-19/USA/CA-ALSR-2875/2020|2020-08-04|EPI\_ISL\_635721|Original|hCoV-19^^California|Human|San Diego County Public Health Laboratory|Andersen lab at Scripps Research|Gangavarapu|USA

>Spike|hCoV-19/France/ARA-SC124/2020|2020-03-23|EPI\_ISL\_700388|Original|hCoV-19^^Auvergne-Rhône-Alpes|Human|Centre hospitalier M\u00e9tropole Savoie|CNR Virus des Infections Respiratoires - France SUD|Bal|France

>Spike|hCoV-19/Canada/ON-S177/2020|2020-03-24|EPI\_ISL\_591120|Original|hCoV-19^^Ontario|Human|Toronto Invasive Bacterial Diseases Network|McMaster University|McArthur|Canada

>Spike|hCoV-19/USA/VI-CDC-3849/2020|2020-04-01|EPI\_ISL\_451960|Original|hCoV-19^^Virgin Islands|Human|VI-US Virgin Islands Department of Health|Centers for Disease Control and Prevention|Queen|USA

>Spike|hCoV-19/Peru/LIM-INS-017/2020|2020-03-25|EPI\_ISL\_490316|Original|hCoV-19^^Lima|Human|Laboratorio de Referencia Nacional de Virus Respiratorio. Instituto Nacional de Salud Per\u00fa|Laboratorio de Referencia Nacional de Biotecnolog\u00eda y Biolog\u00eda Molecular. Instituto Nacional de Salud Per\u00fa|Padilla Rojas|Peru

>Spike|hCoV-19/Scotland/CVR4322/2020|2020-08-31|EPI\_ISL\_573773|Original|hCoV-19^^Scotland|Human|West of Scotland Specialist Virology Centre|COVID-19 Genomics UK (COG-UK) Consortium|Robertson|United Kingdom

>Spike|hCoV-19/USA/AZ-TG371315/2020|2020-05-20|EPI\_ISL\_694567|Original|hCoV-19^^Arizona|Human|AZ SPHL|TGen North|French|USA

>Spike|hCoV-19/Scotland/QEUA-963F7E/2020|2020-08-12|EPI\_ISL\_534377|Original|hCoV-19^^Scotland|Human|NHSGGC West of Scotland Specialist Virology Centre / MRC-University of Glasgow Centre for Virus Research|Wellcome Sanger Institute for the COVID-19 Genomics UK (COG-UK) consortium|Davies|United Kingdom

>Spike|hCoV-19/England/ALDP-9524EC/2020|2020-06-09|EPI\_ISL\_555714|Original|hCoV-19^^England|Human|Lighthouse Lab in Alderley Park|Wellcome Sanger Institute for the COVID-19 Genomics UK (COG-UK) consortium|Davies|United Kingdom

>Spike|hCoV-19/France/ARA-116523/2020|2020-12-05|EPI\_ISL\_745365|Original|hCoV-19^^Auvergne-Rhône-Alpes|Human|CNR Virus des Infections Respiratoires - France SUD|CNR Virus des Infections Respiratoires - France SUD|Bal|France

>Spike|hCoV-19/Wales/PHWC-16523F/2020|2020-06-09|EPI\_ISL\_479437|Original|hCoV-19^^Wales|Human|Wales Specialist Virology Centre Sequencing lab|COVID-19 Genomics UK (COG-UK) Consortium|Moore|United Kingdom

>Spike|hCoV-19/Scotland/CVR4455/2020|2020-09-20|EPI\_ISL\_585320|Original|hCoV-19^^Scotland|Human|Lighthouse Lab in Glasgow / MRC-University of Glasgow Centre for Virus Research|COVID-19 Genomics UK (COG-UK) Consortium|Robertson|United Kingdom

>Spike|hCoV-19/Israel/2089718/2020|2020-04-01|EPI\_ISL\_447366|Original|hCoV-19^^Jerusalem District|Human|Clinical Virology Unit|Stern Lab|Miller|Israel

>Spike|hCoV-19/Spain/VC-IBV-98003636/2020|2020-03-12|EPI\_ISL\_538641|Original|hCoV-19^^Comunitat Valenciana|Human|Servicio de Microbiolog\u00eda. Hospital General Universitario de Castell\u00f3n|SeqCOVID-SPAIN consortium|IBV(CSIC)|Comas|Spain

>Spike|hCoV-19/Scotland/CVR3394/2020|2020-05-09|EPI\_ISL\_456821|Original|hCoV-19^^Scotland|Human|West of Scotland Specialist Virology Centre|COVID-19 Genomics UK (COG-UK) Consortium|Robertson|United Kingdom

>Spike|hCoV-19/USA/TX-HMH-5610/2020|2020-06-18|EPI\_ISL\_544901|Original|hCoV-19^^Texas|Human|Houston Methodist Hospital|Houston Methodist Hospital|Long|USA

>Spike|hCoV-19/USA/AZ-TG519199/2020|2020-07-01|EPI\_ISL\_695369|Original|hCoV-19^^Arizona|Human|AZ SPHL|TGen North|French|USA

>Spike|hCoV-19/Scotland/EDB3228/2020|2020-04-07|EPI\_ISL\_488898|Original|hCoV-19^^Scotland|Human|Virology Department|Wellcome Sanger Institute for the COVID-19 Genomics UK (COG-UK) consortium|Davies|United Kingdom

>Spike|hCoV-19/Wales/PHWC-48AF0D/2020|2020-11-04|EPI\_ISL\_665527|Original|hCoV-19^^Wales|Human|Wales Specialist Virology Centre Sequencing lab|COVID-19 Genomics UK (COG-UK) Consortium|Moore|United Kingdom

>Spike|hCoV-19/England/MILK-BB167A/2020|2020-11-17|EPI\_ISL\_720245|Original|hCoV-19^^England|Human|Lighthouse Lab in Milton Keynes|Wellcome Sanger Institute for the COVID-19 Genomics UK (COG-UK) Consortium|Davies|United Kingdom

>Spike|hCoV-19/USA/LA-EVTL226/2020|2020-08-22|EPI\_ISL\_574360|Original|hCoV-19^^Louisiana|Human|LSUHS Emerging Viral Threat Laboratory|Microbial Genome Sequencing Center|Kamil|USA

>Spike|hCoV-19/England/PORT-2EE7C5/2020|2020-12-19|EPI\_ISL\_765148|Original|hCoV-19^^England|Human|Centre for Enzyme Innovation|COVID-19 Genomics UK (COG-UK) Consortium|Robson|United Kingdom

>Spike|hCoV-19/Scotland/CVR2473/2020|2020-04-14|EPI\_ISL\_477950|Original|hCoV-19^^Scotland|Human|West of Scotland Specialist Virology Centre|COVID-19 Genomics UK (COG-UK) Consortium|Robertson|United Kingdom

>Spike|hCoV-19/USA/CA-QDX-2174/2020|2020-03-18|EPI\_ISL\_604441|Original|hCoV-19^^California|Human|Quest Diagnostics|Quest Diagnostics|Kagan|USA

>Spike|hCoV-19/Wales/PHWC-48C86A/2020|2020-11-06|EPI\_ISL\_666477|Original|hCoV-19^^Wales|Human|Wales Specialist Virology Centre Sequencing lab|COVID-19 Genomics UK (COG-UK) Consortium|Moore|United Kingdom

>Spike|hCoV-19/England/ALDP-A858E3/2020|2020-10-17|EPI\_ISL\_610344|Original|hCoV-19^^England|Human|Lighthouse Lab in Alderley Park|Wellcome Sanger Institute for the COVID-19 Genomics UK (COG-UK) consortium|Davies|United Kingdom

>Spike|hCoV-19/Denmark/DCGC-20369/2020|2020-12-21|EPI\_ISL\_759110|Original|hCoV-19^^Hovedstaden|Human|Department of Virus and Microbiological Special Diagnostics|Albertsen Lab|Michaelsen|Denmark

>Spike|hCoV-19/England/ALDP-A51525/2020|2020-10-07|EPI\_ISL\_598209|Original|hCoV-19^^England|Human|Lighthouse Lab in Alderley Park|Wellcome Sanger Institute for the COVID-19 Genomics UK (COG-UK) consortium|Davies|United Kingdom

>Spike|hCoV-19/Denmark/DCGC-20602/2020|2020-12-21|EPI\_ISL\_758749|Original|hCoV-19^^Midtjylland|Human|Department of Virus and Microbiological Special Diagnostics|Albertsen Lab|Michaelsen|Denmark

>Spike|hCoV-19/Denmark/DCGC-1153/2020|2020-03-16|EPI\_ISL\_614650|Original|hCoV-19^^Sjaelland|Human|Department of Virus and Microbiological Special Diagnostics|Albertsen lab|Michaelsen|Denmark

>Spike|hCoV-19/USA/TX-HMH0141/2020|2020-03-21|EPI\_ISL\_434840|Original|hCoV-19^^Texas|Human|Houston Methodist Hospital|Houston Methodist Hospital|Long|USA

>Spike|hCoV-19/Scotland/CVR209/2020|2020-03-19|EPI\_ISL\_438873|Original|hCoV-19^^Scotland|Human|West of Scotland Specialist Virology Centre|COVID-19 Genomics UK (COG-UK) Consortium|Robertson|United Kingdom

>Spike|hCoV-19/USA/NY-NYCPHL-000947/2020|2020-09-29|EPI\_ISL\_632985|Original|hCoV-19^^New York|Human|DOHMH Corona|New York City Public Health Laboratory|Wang|USA

>Spike|hCoV-19/Wales/PHWC-484835/2020|2020-10-21|EPI\_ISL\_628050|Original|hCoV-19^^Wales|Human|Wales Specialist Virology Centre Sequencing lab|COVID-19 Genomics UK (COG-UK) Consortium|Moore|United Kingdom

>Spike|hCoV-19/Denmark/DCGC-12480/2020|2020-11-16|EPI\_ISL\_682661|Original|hCoV-19^^Syddanmark|Human|Department of Virus and Microbiological Special Diagnostics|Albertsen Lab|Michaelsen|Denmark

>Spike|hCoV-19/England/LOND-D9A4E/2020|2020-08-26|EPI\_ISL\_584673|Original|hCoV-19^^England|Human|University College London|COVID-19 Genomics UK (COG-UK) Consortium|Roy|United Kingdom

>Spike|hCoV-19/England/CAMC-AEAE9F/2020|2020-10-26|EPI\_ISL\_633333|Original|hCoV-19^^England|Human|Lighthouse Lab in Cambridge|Wellcome Sanger Institute for the COVID-19 Genomics UK (COG-UK) consortium|Davies|United Kingdom

>Spike|hCoV-19/England/NORT-286C48/2020|2020-10-17|EPI\_ISL\_637322|Original|hCoV-19^^England|Human|Northumbria University / South Tees Hospitals NHS Foundation Trust / North Cumbria Integrated Care NHS Foundation Trust / North Tees and Hartlepool NHS Foundation Trust / Newcastle Hospitals NHS Foundation Trust|COVID-19 Genomics UK (COG-UK) Consortium|Bashton|United Kingdom

>Spike|hCoV-19/England/LOND-D71E1/2020|2020-04-11|EPI\_ISL\_478461|Original|hCoV-19^^England|Human|University College London|COVID-19 Genomics UK (COG-UK) Consortium|Roy|United Kingdom

>Spike|hCoV-19/Wales/PHWC-49F2C0/2020|2020-12-07|EPI\_ISL\_743192|Original|hCoV-19^^Wales|Human|Wales Specialist Virology Centre Sequencing lab|COVID-19 Genomics UK (COG-UK) Consortium|Moore|United Kingdom

>Spike|hCoV-19/England/BRIS-13116C/2020|2020-05-20|EPI\_ISL\_467713|Original|hCoV-19^^England|Human|PHE South West Regional Laboratory|Wellcome Sanger Institute for the COVID-19 Genomics UK (COG-UK) consortium|Davies|United Kingdom

>Spike|hCoV-19/Ireland/WW-NVRL-AIIDV0063v2/2020|2020-04-10|EPI\_ISL\_644259|Original|hCoV-19^^Wicklow|Human|CEPHR / Vincent's Hospital|Irish Coronavirus Sequencing Consortium - National Virus Reference Laboratory|Gonzalez|Ireland

>Spike|hCoV-19/Australia/VIC14148/2020|2020-09-02|EPI\_ISL\_591820|Original|hCoV-19^^Victoria|Human|Microbiological Diagnostic Unit - Public Health Laboratory (MDU-PHL) |MDU-PHL|Schultz|Australia

>Spike|hCoV-19/USA/CA-CZB-14363/2020|2020-07-09|EPI\_ISL\_739077|Original|hCoV-19^^California|Human|Alameda County Public Health Lab|Chan-Zuckerberg Biohub|Kamm|USA

>Spike|hCoV-19/Australia/VIC3457/2020|2020-07-06|EPI\_ISL\_521121|Original|hCoV-19^^Victoria|Human|Victorian Infectious Diseases Reference Laboratory (VIDRL) |VIDRL and MDU-PHL|Schultz|Australia

>Spike|hCoV-19/Denmark/DCGC-22292/2020|2020-12-14|EPI\_ISL\_758111|Original|hCoV-19^^Hovedstaden|Human|Department of Virus and Microbiological Special Diagnostics|Albertsen Lab|Michaelsen|Denmark

>Spike|hCoV-19/USA/NY-NYCPHL-000153/2020|2020-04-06|EPI\_ISL\_631689|Original|hCoV-19^^New York|Human|Lincoln Medical Center|New York City Public Health Laboratory|Wang|USA

>Spike|hCoV-19/England/CAMC-AB1C1F/2020|2020-10-21|EPI\_ISL\_623694|Original|hCoV-19^^England|Human|Lighthouse Lab in Cambridge|Wellcome Sanger Institute for the COVID-19 Genomics UK (COG-UK) consortium|Davies|United Kingdom

>Spike|hCoV-19/England/QEUEH-9FB078/2020|2020-09-29|EPI\_ISL\_588216|Original|hCoV-19^^England|Human|Lighthouse Lab in Glasgow|Wellcome Sanger Institute for the COVID-19 Genomics UK (COG-UK) consortium|Davies|United Kingdom

>Spike|hCoV-19/North Macedonia/2175/2020|2020-06-02|EPI\_ISL\_514354|Original|hCoV-19^^Prilep|Human|General Hospital - Prilep|Research Center for Genetic Engineering and Biotechnology \Georgi D. Efremov\u201d|Dimovski|North Macedonia

>Spike|hCoV-19/Finland/25LS6CF3/2020|2020-10-25|EPI\_ISL\_759914|Original|hCoV-19^^Uusimaa|Human|Department of Virology and Immunology|Department of Virology|Smura|Finland

>Spike|hCoV-19/Germany/SH-ChVir20031/2020|2020-11-06|EPI\_ISL\_729630|Original|hCoV-19^^Schleswig-Holstein|Human|A. Krumbholz|Charit\u00e9 Universit\u00e4tsmedizin Berlin|Muehlemann|Germany

>Spike|hCoV-19/England/QEUEH-9F42E2/2020|2020-09-24|EPI\_ISL\_588713|Original|hCoV-19^^England|Human|Lighthouse Lab in Glasgow|Wellcome Sanger Institute for the COVID-19 Genomics UK (COG-UK) consortium|Davies|United Kingdom

>Spike|hCoV-19/USA/CA-CHLA-PLM41237673/2020|2020-11-30|EPI\_ISL\_753435|Original|hCoV-19^^California|Human|Clinical virology Laboratory|Center for Personalized Medicine|Dien Bard|USA

>Spike|hCoV-19/Denmark/DCGC-19096/2020|2020-12-07|EPI\_ISL\_748756|Original|hCoV-19^^Hovedstaden|Human|Department of Virus and Microbiological Special Diagnostics|Albertsen Lab|Michaelsen|Denmark

>Spike|hCoV-19/Wales/PHWC-15E3EB/2020|2020-05-12|EPI\_ISL\_472813|Original|hCoV-19^^Wales|Human|Wales Specialist Virology Centre Sequencing lab|COVID-19 Genomics UK (COG-UK) Consortium|Moore|United Kingdom

>Spike|hCoV-19/England/ALDP-983303/2020|2020-07-20|EPI\_ISL\_529555|Original|hCoV-19^^England|Human|Queens Medical Centre|COVID-19 Genomics UK (COG-UK) Consortium|Loose|United Kingdom

>Spike|hCoV-19/England/QEUEH-9696BF/2020|2020-08-14|EPI\_ISL\_531183|Original|hCoV-19^^England|Human|Lighthouse Lab in Glasgow|Wellcome Sanger Institute for the COVID-19 Genomics UK (COG-UK) consortium|Davies|United Kingdom

>Spike|hCoV-19/India/WB-S84/2020|2020-05-26|EPI\_ISL\_508473|Original|hCoV-19^^West Bengal|Human|ICMR-National Institute of Cholera and Enteric Diseases|National Institute of Biomedical Genomics|Maitra|India

>Spike|hCoV-19/England/QEUEH-95F625/2020|2020-08-06|EPI\_ISL\_532333|Original|hCoV-19^^England|Human|Lighthouse Lab in Glasgow|Wellcome Sanger Institute for the COVID-19 Genomics UK (COG-UK) consortium|Davies|United Kingdom

>Spike|hCoV-19/USA/WA-S1257/2020|2020-05-13|EPI\_ISL\_495707|Original|hCoV-19^^Washington|Human|Washington State Department of Health|Seattle Flu Study|Lee|USA

>Spike|hCoV-19/England/ALDP-A2E284/2020|2020-10-06|EPI\_ISL\_586591|Original|hCoV-19^^England|Human|Lighthouse Lab in Alderley Park|Wellcome Sanger Institute for the COVID-19 Genomics UK (COG-UK) consortium|Davies|United Kingdom

>Spike|hCoV-19/England/ALDP-9BE34B/2020|2020-09-10|EPI\_ISL\_567898|Original|hCoV-19^^England|Human|Lighthouse Lab in Alderley Park|Wellcome Sanger Institute for the COVID-19 Genomics UK (COG-UK) consortium|Davies|United Kingdom

>Spike|hCoV-19/Singapore/237/2020|2020-04-03|EPI\_ISL\_462355|Original|hCoV-19^^Singapore|Human|National Public Health Laboratory|National Public Health Laboratory|Mak|Singapore

>Spike|hCoV-19/Wales/PHWC-47D0A0/2020|2020-10-06|EPI\_ISL\_586094|Original|hCoV-19^^Wales|Human|Wales Specialist Virology Centre Sequencing lab|COVID-19 Genomics UK (COG-UK) Consortium|Moore|United Kingdom

>Spike|hCoV-19/Italy/LAZ-INMI-SPL1/2020|2020-01-29|EPI\_ISL\_412974|Vero|hCoV-19^^Lazio|Human|Department of Infectious Diseases|Virology Laboratory|Florigio Lista|Italy

>Spike|hCoV-19/Ireland/WH-NVRL-20Z06323/2020|2020-04-17|EPI\_ISL\_671371|Original|hCoV-19^^Westmeath|Human|National Virus Reference Laboratory|Irish Coronavirus Sequencing Consortium - Teagasc Moorepark|Walsh|Ireland

>Spike|hCoV-19/Switzerland/AG-ETHZ-270120/2020|2020-09-03|EPI\_ISL\_541410|Original|hCoV-19^^Aargau|Human|Viollier AG|Department of Biosystems Science and Engineering|Nadeau|Switzerland

>Spike|hCoV-19/Senegal/6619/2020|2020-04-21|EPI\_ISL\_498230|Original|hCoV-19^^Dakar|Human|Institut Pasteur de Dakar|Institut Pasteur de Dakar|Dia|Senegal

>Spike|hCoV-19/mink/Netherlands/NB-EMC-63-4/2020|2020-10-06|EPI\_ISL\_632484|Original|hCoV-19^^Noord Brabant|Neovison vison|Dutch COVID-19 response team|Erasmus Medical Center|Oude Munnink|Netherlands

>Spike|hCoV-19/Wales/ALDP-B24C07/2020|2020-11-04|EPI\_ISL\_711021|Original|hCoV-19^^Wales|Human|Lighthouse Lab in Alderley Park|Wellcome Sanger Institute for the COVID-19 Genomics UK (COG-UK) Consortium|Davies|United Kingdom

>Spike|hCoV-19/England/SHEF-C691A/2020|2020-04-02|EPI\_ISL\_441995|Original|hCoV-19^^England|Human|Virology Department|COVID-19 Genomics UK (COG-UK) Consortium|de Silva|United Kingdom

>Spike|hCoV-19/England/MILK-B950AB/2020|2020-11-13|EPI\_ISL\_673663|Original|hCoV-19^^England|Human|Lighthouse Lab in Milton Keynes|Wellcome Sanger Institute for the COVID-19 Genomics UK (COG-UK) Consortium|Davies|United Kingdom

>Spike|hCoV-19/USA/UT-01217/2020|2020-04-06|EPI\_ISL\_436904|Original|hCoV-19^^Utah|Human|Utah Public Health Laboratory|Utah Public Health Laboratory|Young|USA

>Spike|hCoV-19/England/QEUEH-9D1A5C/2020|2020-09-01|EPI\_ISL\_577298|Original|hCoV-19^^England|Human|University of Exeter|COVID-19 Genomics UK (COG-UK) Consortium|Temperton|United Kingdom

>Spike|hCoV-19/Scotland/QEUEH-53102F/2020|2020-05-18|EPI\_ISL\_532195|Original|hCoV-19^^Scotland|Human|NHSGGC West of Scotland Specialist Virology Centre / MRC-University of Glasgow Centre for Virus Research|Wellcome Sanger Institute for the COVID-19 Genomics UK (COG-UK) consortium|Davies|United Kingdom

>Spike|hCoV-19/Canada/BC-BCCDC-7241/2020|2020-11-00|EPI\_ISL\_740632|Original|hCoV-19^^British Columbia|Human|BCCDC Public Health Laboratory|BCCDC Public Health Laboratory|Prystajacky|Canada

>Spike|hCoV-19/England/ALDP-BC75FC/2020|2020-11-23|EPI\_ISL\_721251|Original|hCoV-19^^England|Human|Lighthouse Lab in Alderley Park|Wellcome Sanger Institute for the COVID-19 Genomics UK (COG-UK) Consortium|Davies|United Kingdom

>Spike|hCoV-19/Scotland/CVR3236/2020|2020-04-26|EPI\_ISL\_449246|Original|hCoV-19^^Scotland|Human|West of Scotland Specialist Virology Centre|COVID-19 Genomics UK (COG-UK) Consortium|Robertson|United Kingdom

>Spike|hCoV-19/England/CAMC-BC1880/2020|2020-11-21|EPI\_ISL\_702891|Original|hCoV-19^^England|Human|Department of Pathology|COVID-19 Genomics UK (COG-UK) Consortium|Goodfellow|United Kingdom

>Spike|hCoV-19/USA/GA-CDC-2059/2020|2020-03-07|EPI\_ISL\_452125|Original|hCoV-19^^Georgia|Human|Georgia Department of Health|Pathogen Discovery|Queen|USA

>Spike|hCoV-19/England/CAMB-71FD0/2020|2020-03-27|EPI\_ISL\_439867|Original|hCoV-19^^England|Human|Department of Pathology|Wellcome Sanger Institute for the COVID-19 Genomics UK (COG-UK) consortium|Amato|United Kingdom

>Spike|hCoV-19/England/QEUA-AD04A9/2020|2020-10-23|EPI\_ISL\_629913|Original|hCoV-19^^England|Human|Lighthouse Lab in Glasgow|Wellcome Sanger Institute for the COVID-19 Genomics UK (COG-UK) consortium|Davies|United Kingdom

>Spike|hCoV-19/England/NOTT-1145CD/2020|2020-10-05|EPI\_ISL\_577178|Original|hCoV-19^^England|Human|Queens Medical Centre|COVID-19 Genomics UK (COG-UK) Consortium|Loose|United Kingdom

>Spike|hCoV-19/Wales/PHWC-16B64C/2020|2020-09-15|EPI\_ISL\_573883|Original|hCoV-19^^Wales|Human|Wales Specialist Virology Centre Sequencing lab|COVID-19 Genomics UK (COG-UK) Consortium|Moore|United Kingdom

>Spike|hCoV-19/France/PAC-IHU-1414/2020|2020-08-10|EPI\_ISL\_569156|Original|hCoV-19^^Provence-Alpes-C\u00f4te-d\u2019Azur|Human|MEPHI|MEPHI|Levasseur|France

>Spike|hCoV-19/USA/TX-HMH-MCoV-14968/2020|2020-10-15|EPI\_ISL\_786452|Original|hCoV-19^^Texas|Human|Houston Methodist Hospital|Houston Methodist Hospital|Long|USA

>Spike|hCoV-19/South Africa/KRISP-K002343/2020|2020-07-23|EPI\_ISL\_515716|Original|hCoV-19^^KwaZulu-Natal|Human|NHLs-IALCH|KRISP|de Oliveira|South Africa

>Spike|hCoV-19/England/MILK-B38532/2020|2020-11-01|EPI\_ISL\_658939|Original|hCoV-19^^England|Human|Lighthouse Lab in Milton Keynes|Wellcome Sanger Institute for the COVID-19 Genomics UK (COG-UK) Consortium|Davies|United Kingdom

>Spike|hCoV-19/USA/TX-HMH-6594/2020|2020-06-24|EPI\_ISL\_546112|Original|hCoV-19^^Texas|Human|Houston Methodist Hospital|Houston Methodist Hospital|Long|USA

>Spike|hCoV-19/Chile/RM-208555/2020|2020-10-16|EPI\_ISL\_746772|Original|hCoV-19^^Region Metropolitana de Santiago|Human|Genetica Molecular and Subdepartamento de Virologia ISP Chile|Instituto de Salud Publica de Chile|Tognarelli|Chile

>Spike|hCoV-19/Denmark/DCGC-1151/2020|2020-03-16|EPI\_ISL\_614645|Original|hCoV-19^^Hovedstaden|Human|Department of Virus and Microbiological Special Diagnostics|Albertsen lab|Michaelsen|Denmark

>Spike|hCoV-19/USA/NY-SURV0166/2020|2020-03-09|EPI\_ISL\_436053|Original|hCoV-19^^New York|Human|NYC Department of Health and Mental Hygiene|Pathogen Discovery|Queen|USA

>Spike|hCoV-19/USA/MA-MASPHL-00380/2020|2020-06-04|EPI\_ISL\_693161|Original|hCoV-19^^Massachusetts|Human|Massachusetts State Public Health Laboratory|Massachusetts State Public Health Laboratory|Lang|USA

>Spike|hCoV-19/Denmark/DCGC-8777/2020|2020-10-26|EPI\_ISL\_625692|Original|hCoV-19^^Hovedstaden|Human|Department of Virus and Microbiological Special Diagnostics|Albertsen lab|Michaelsen|Denmark

>Spike|hCoV-19/England/LIVE-A1B5B/2020|2020-06-16|EPI\_ISL\_490354|Original|hCoV-19^^England|Human|Liverpool Clinical Laboratories|COVID-19 Genomics UK (COG-UK) Consortium|Haldenby|United Kingdom

>Spike|hCoV-19/Senegal/64101/2020|2020-06-12|EPI\_ISL\_476516|Original|hCoV-19^^Dakar|Human|Institut Pasteur Dakar|Institut Pasteur de Dakar|Dia|Senegal

>Spike|hCoV-19/Scotland/QEUA-AAE556/2020|2020-10-22|EPI\_ISL\_623933|Original|hCoV-19^^Scotland|Human|Lighthouse Lab in Glasgow|Wellcome Sanger Institute for the COVID-19 Genomics UK (COG-UK) consortium|Davies|United Kingdom

>Spike|hCoV-19/Wales/PHWC-48D26B/2020|2020-11-13|EPI\_ISL\_680596|Original|hCoV-19^^Wales|Human|Wales Specialist Virology Centre Sequencing lab|COVID-19 Genomics UK (COG-UK) Consortium|Moore|United Kingdom

>Spike|hCoV-19/USA/WY-CDC-2-3714476/2020|2020-12-04|EPI\_ISL\_751691|Original|hCoV-19^^Wyoming|Human|WY Public Health Laboratory|Genomics and Discovery|Queen|USA

>Spike|hCoV-19/England/QEUA-C8F5B3/2020|2020-12-08|EPI\_ISL\_777013|Original|hCoV-19^^England|Human|Lighthouse Lab in Glasgow|Wellcome Sanger Institute for the COVID-19 Genomics UK (COG-UK) Consortium|Davies|United Kingdom

>Spike|hCoV-19/England/QEUA-A325FD/2020|2020-10-05|EPI\_ISL\_741760|Original|hCoV-19^^England|Human|Oxford Viromics|COVID-19 Genomics UK (COG-UK) Consortium|Golubchik|United Kingdom

>Spike|hCoV-19/Scotland/CVR6098/2020|2020-11-26|EPI\_ISL\_705731|Original|hCoV-19^^Scotland|Human|West of Scotland Specialist Virology Centre|COVID-19 Genomics UK (COG-UK) Consortium|Robertson|United Kingdom

>Spike|hCoV-19/USA/MN-MDH-1369/2020|2020-06-30|EPI\_ISL\_507957|Original|hCoV-19^^Minnesota|Human|Mayo Clinic & Mayo Clinic Laboratories|Minnesota Department of Health|Garfin|USA

>Spike|hCoV-19/England/CAMC-B7B5E8/2020|2020-11-12|EPI\_ISL\_741185|Original|hCoV-19^^England|Human|Oxford Viromics|COVID-19 Genomics UK (COG-UK) Consortium|Golubchik|United Kingdom

>Spike|hCoV-19/Norway/2866/2020|2020-07-07|EPI\_ISL\_549122|Original|hCoV-19^^Innlandet|Human|Furst Medical Laboratory|Norwegian Institute of Public Health|Kopperud Riis|Norway

>Spike|hCoV-19/USA/WA-UW-2548/2020|2020-03-30|EPI\_ISL\_477719|Original|hCoV-19^^Washington|Human|UW Virology Lab|UW Virology Lab|Roychoudhury|USA

>Spike|hCoV-19/USA/NY-NYCPHL-000130/2020|2020-04-02|EPI\_ISL\_631621|Original|hCoV-19^^New York|Human|Jamaica Hospital Medical Center|New York City Public Health Laboratory|Wang|USA

>Spike|hCoV-19/Japan/PG-5179/2020|2020-08-00|EPI\_ISL\_690282|Original|hCoV-19^^Japan|Human|Pathogen Genomics Center|Pathogen Genomics Center|Sekizuka|Japan

>Spike|hCoV-19/USA/TX-HMH-MCoV-8117/2020|2020-06-30|EPI\_ISL\_784208|Original|hCoV-19^^Texas|Human|Houston Methodist Hospital|Houston Methodist Hospital|Long|USA

>Spike|hCoV-19/England/CAMB-7720E/2020|2020-04-02|EPI\_ISL\_439383|Original|hCoV-19^^England|Human|Department of Pathology|Wellcome Sanger Institute for the COVID-19 Genomics UK (COG-UK) consortium|Amato|United Kingdom

>Spike|hCoV-19/Scotland/EDB7990/2020|2020-09-28|EPI\_ISL\_585469|Original|hCoV-19^^Scotland|Human|Virology Department|COVID-19 Genomics UK (COG-UK) Consortium|McHugh|United Kingdom

>Spike|hCoV-19/USA/CA-CZB-15037/2020|2020-11-18|EPI\_ISL\_738867|Original|hCoV-19^^California|Human|Santa Clara County Public Health Laboratory|Chan-Zuckerberg Biohub|Kamm|USA

>Spike|hCoV-19/England/QEUA-A3378D/2020|2020-10-05|EPI\_ISL\_626923|Original|hCoV-19^^England|Human|Virology Department|COVID-19 Genomics UK (COG-UK) Consortium|de Silva|United Kingdom

>Spike|hCoV-19/Wales/PHWC-1638B7/2020|2020-04-27|EPI\_ISL\_474011|Original|hCoV-19^^Wales|Human|Originating lab|COVID-19 Genomics UK (COG-UK) Consortium|Moore|United Kingdom

>Spike|hCoV-19/Australia/VIC6627/2020|2020-07-18|EPI\_ISL\_521387|Original|hCoV-19^^Victoria|Human|Victorian Infectious Diseases Reference Laboratory (VIDRL)|VIDRL and MDU-PHL|Schultz|Australia

>Spike|hCoV-19/Singapore/1213/2020|2020-04-22|EPI\_ISL\_648629|Original|hCoV-19^^Singapore|Human|Department of Laboratory Medicine|Department of Laboratory Medicine|Chen|Singapore

>Spike|hCoV-19/Germany/SH-ChVir20001/2020|2020-11-04|EPI\_ISL\_729625|Original|hCoV-19^^Schleswig-Holstein|Human|A. Krumbholz|Charit\u00e9 Universit\u00e4tsmedizin Berlin|Muehlemann|Germany

>Spike|hCoV-19/England/QEUA-AD1411/2020|2020-10-26|EPI\_ISL\_633770|Original|hCoV-19^^England|Human|Lighthouse Lab in Glasgow|Wellcome Sanger Institute for the COVID-19 Genomics UK (COG-UK) consortium|Davies|United Kingdom



>Spike|hCoV-19/England/MILK-9C2DCE/2020|2020-09-10|EPI\_ISL\_566463|Original|hCoV-19^^England|Human|Lighthouse Lab in Milton Keynes|Wellcome Sanger Institute for the COVID-19 Genomics UK (COG-UK) consortium|Davies|United Kingdom

>Spike|hCoV-19/Denmark/DCGC-15444/2020|2020-11-23|EPI\_ISL\_713165|Original|hCoV-19^^Hovedstaden|Human|Department of Virus and Microbiological Special Diagnostics|Albertsen Lab|Michaelsen|Denmark

>Spike|hCoV-19/Switzerland/SG-ETHZ-240006/2020|2020-08-07|EPI\_ISL\_523861|Original|hCoV-19^^Sankt Gallen|Human|Viollier AG|Department of Biosystems Science and Engineering|Nadeau|Switzerland

>Spike|hCoV-19/Luxembourg/LNS4497782/2020|2020-11-11|EPI\_ISL\_740481|Original|hCoV-19^^Luxembourg|Human|Laboratoire national de sant\u00e9|Laboratoire national de sant\u00e9|Wienecke-Baldacchino|Luxembourg

>Spike|hCoV-19/England/ALDP-B8435B/2020|2020-11-14|EPI\_ISL\_674374|Original|hCoV-19^^England|Human|Lighthouse Lab in Alderley Park|Wellcome Sanger Institute for the COVID-19 Genomics UK (COG-UK) Consortium|Davies|United Kingdom

>Spike|hCoV-19/USA/OR-OHSU-4154/2020|2020-11-02|EPI\_ISL\_667530|Original|hCoV-19^^Oregon|Human|OHSU Lab Services Molecular Microbiology Lab|Oregon SARS-CoV-2 Genome Sequencing Center|O'Roak|USA

>Spike|hCoV-19/Wales/PHWC-49878C/2020|2020-12-02|EPI\_ISL\_727120|Original|hCoV-19^^Wales|Human|Originating lab|COVID-19 Genomics UK (COG-UK) Consortium|Moore|United Kingdom

>Spike|hCoV-19/Sweden/20-08209/2020|2020-03-16|EPI\_ISL\_475092|Original|hCoV-19^^Vastra Gotaland|Human|Skovde/Unilabs|The Public Health Agency of Sweden|Svartstr\u00f6m|Sweden

>Spike|hCoV-19/Wales/MILK-995BF7/2020|2020-08-25|EPI\_ISL\_551696|Original|hCoV-19^^Wales|Human|Lighthouse Lab in Milton Keynes|Wellcome Sanger Institute for the COVID-19 Genomics UK (COG-UK) consortium|Davies|United Kingdom

>Spike|hCoV-19/South Korea/KCDC2175/2020|2020-03-23|EPI\_ISL\_506969|Original|hCoV-19^^South Korea|Human|Division of Viral Diseases|Division of Viral Diseases|Kim|South Korea

>Spike|hCoV-19/USA/LA-EVTL386/2020|2020-06-04|EPI\_ISL\_578792|Original|hCoV-19^^Louisiana|Human|LSUHS Emerging Viral Threat Laboratory|Microbial Genome Sequencing Center|Kamil|USA

>Spike|hCoV-19/England/QEUH-9AED6E/2020|2020-09-03|EPI\_ISL\_573500|Original|hCoV-19^^England|Human|University College London|COVID-19 Genomics UK (COG-UK) Consortium|Roy|United Kingdom

>Spike|hCoV-19/USA/MN-MDH-1142/2020|2020-04-28|EPI\_ISL\_476727|Original|hCoV-19^^Minnesota|Human|Minnesota Department of Health|Minnesota Department of Health|Garfin|USA

>Spike|hCoV-19/USA/CA-CZB-14210/2020|2020-11-10|EPI\_ISL\_738757|Original|hCoV-19^^California|Human|Orange County Public Health Lab|Chan-Zuckerberg Biohub|Kamm|USA

>Spike|hCoV-19/England/ALDP-91B607/2020|2020-06-22|EPI\_ISL\_551393|Original|hCoV-19^^England|Human|Lighthouse Lab in Alderley Park|Wellcome Sanger Institute for the COVID-19 Genomics UK (COG-UK) consortium|Davies|United Kingdom

>Spike|hCoV-19/England/ALDP-4AC925/2020|2020-06-14|EPI\_ISL\_559554|Original|hCoV-19^^England|Human|Lighthouse Lab in Alderley Park|Wellcome Sanger Institute for the COVID-19 Genomics UK (COG-UK) consortium|Davies|United Kingdom

>Spike|hCoV-19/Portugal/PT0988/2020|2020-03-23|EPI\_ISL\_511536|Original|hCoV-19^^Portugal|Human|Instituto Nacional de Saude (INSA)|Instituto Nacional de Saude (INSA)|Borges|Portugal

>Spike|hCoV-19/Japan/PG-2571/2020|2020-06-00|EPI\_ISL\_690705|Original|hCoV-19^^Japan|Human|Pathogen Genomics Center|Pathogen Genomics Center|Sekizuka|Japan

>Spike|hCoV-19/USA/WI-WSLH-200262/2020|2020-03-19|EPI\_ISL\_578472|Original|hCoV-19^^Wisconsin|Human|Wisconsin State Laboratory of Hygiene Communicable Disease Division|Wisconsin State Laboratory of Hygiene Communicable Disease Division|Florek|USA

>Spike|hCoV-19/USA/TX-HMH-862/2020|2020-04-05|EPI\_ISL\_545879|Original|hCoV-19^^Texas|Human|Houston Methodist Hospital|Houston Methodist Hospital|Long|USA

>Spike|hCoV-19/Australia/NSW167/2020|2020-03-22|EPI\_ISL\_427697|Original|hCoV-19^^New South Wales|Human|Centre for Infectious Diseases and Microbiology Public Health|NSW

Health Pathology - Institute of Clinical Pathology and Medical Research; Westmead Hospital; University of Sydney|Gall|Australia  
>Spike|hCoV-19/Ireland/D-NVRL-20G35301/2020|2020-03-20|EPI\_ISL\_605081|Original|hCoV-19^^Dublin|Human|National Virus Reference Laboratory|Irish Coronavirus Sequencing Consortium - Helixworks|Chalapati|Ireland  
>Spike|hCoV-19/Wales/PHWC-168348/2020|2020-04-18|EPI\_ISL\_494229|Original|hCoV-19^^Wales|Human|Originating lab|COVID-19 Genomics UK (COG-UK) Consortium|Moore|United Kingdom  
>Spike|hCoV-19/England/ALDP-A93C22/2020|2020-10-19|EPI\_ISL\_611161|Original|hCoV-19^^England|Human|Lighthouse Lab in Alderley Park|Wellcome Sanger Institute for the COVID-19 Genomics UK (COG-UK) consortium|Davies|United Kingdom  
>Spike|hCoV-19/Scotland/EDB3323/2020|2020-04-08|EPI\_ISL\_487882|Original|hCoV-19^^Scotland|Human|Virology Department|Wellcome Sanger Institute for the COVID-19 Genomics UK (COG-UK) consortium|Davies|United Kingdom  
>Spike|hCoV-19/USA/MI-MDHHS-SC20440/2020|2020-03-13|EPI\_ISL\_452314|Original|hCoV-19^^Michigan|Human|Michigan Department of Health and Human Services|Michigan Department of Health and Human Services|Blankenship|USA  
>Spike|hCoV-19/USA/FL-BPHL-1654/2020|2020-07-03|EPI\_ISL\_594343|Original|hCoV-19^^Florida|Human|Florida Bureau of Public Health Laboratories|Florida Bureau of Public Health Laboratories|Blanton|USA  
>Spike|hCoV-19/England/BIRM-60833/2020|2020-06-19|EPI\_ISL\_483893|Original|hCoV-19^^England|Human|University of Birmingham|COVID-19 Genomics UK (COG-UK) Consortium|Loman|United Kingdom  
>Spike|hCoV-19/USA/TX-HMH-MCoV-8168/2020|2020-06-30|EPI\_ISL\_783593|Original|hCoV-19^^Texas|Human|Houston Methodist Hospital|Houston Methodist Hospital|Long|USA  
>Spike|hCoV-19/England/ALDP-9E89CE/2020|2020-09-24|EPI\_ISL\_638065|Original|hCoV-19^^England|Human|Centre for Enzyme Innovation|COVID-19 Genomics UK (COG-UK) Consortium|Robson|United Kingdom  
>Spike|hCoV-19/England/QEUA-969CF9/2020|2020-08-11|EPI\_ISL\_530842|Original|hCoV-19^^England|Human|Lighthouse Lab in Glasgow|Wellcome Sanger Institute for the COVID-19 Genomics UK (COG-UK) consortium|Davies|United Kingdom  
>Spike|hCoV-19/England/QEUA-BA0F55/2020|2020-11-18|EPI\_ISL\_672801|Original|hCoV-19^^England|Human|Lighthouse Lab in Glasgow|Wellcome Sanger Institute for the COVID-19 Genomics UK (COG-UK) Consortium|Davies|United Kingdom  
>Spike|hCoV-19/Denmark/DCGC-18045/2020|2020-12-14|EPI\_ISL\_749278|Original|hCoV-19^^Hovedstaden|Human|Department of Virus and Microbiological Special Diagnostics|Albertsen Lab|Michaelsen|Denmark  
>Spike|hCoV-19/USA/WY-WPHL-20168100/2020|2020-12-18|EPI\_ISL\_766784|Original|hCoV-19^^Wyoming|Human|Wyoming Public Health Laboratory|Wyoming Public Health Laboratory|Hull|USA  
>Spike|hCoV-19/USA/TX-HMH-MCoV-14377/2020|2020-10-06|EPI\_ISL\_787662|Original|hCoV-19^^Texas|Human|Houston Methodist Hospital|Houston Methodist Hospital|Long|USA  
>Spike|hCoV-19/England/BIRM-6A909/2020|2020-11-11|EPI\_ISL\_679099|Original|hCoV-19^^England|Human|University of Birmingham|COVID-19 Genomics UK (COG-UK) Consortium|Loman|United Kingdom  
>Spike|hCoV-19/Denmark/DCGC-6062/2020|2020-10-05|EPI\_ISL\_620256|Original|hCoV-19^^Hovedstaden|Human|Department of Virus and Microbiological Special Diagnostics|Albertsen lab|Michaelsen|Denmark  
>Spike|hCoV-19/England/LOND-D523B/2020|2020-04-14|EPI\_ISL\_449692|Original|hCoV-19^^England|Human|University College London|COVID-19 Genomics UK (COG-UK) Consortium|Roy|United Kingdom  
>Spike|hCoV-19/England/20134004704/2020|2020-03-24|EPI\_ISL\_423063|Original|hCoV-19^^England|Human|Respiratory Virus Unit|Respiratory Virus Unit|Platt|United Kingdom  
>Spike|hCoV-19/Scotland/EDB2094/2020|2020-04-18|EPI\_ISL\_433192|Original|hCoV-19^^Scotland|Human|Virology Department|COVID-19 Genomics UK (COG-UK) Consortium|Williams|United Kingdom  
>Spike|hCoV-19/England/QEUA-C579A9/2020|2020-12-12|EPI\_ISL\_736330|Original|hCoV-19^^England|Human|Lighthouse Lab in Glasgow|Wellcome Sanger Institute for the COVID-19 Genomics UK (COG-UK) Consortium|Davies|United Kingdom

>Spike|hCoV-19/Scotland/QEUH-B135D3/2020|2020-11-03|EPI\_ISL\_649617|Original|hCoV-19^^Scotland|Human|Lighthouse Lab in Glasgow|Wellcome Sanger Institute for the COVID-19 Genomics UK (COG-UK) Consortium|Davies|United Kingdom

>Spike|hCoV-19/USA/MN-QDX-1368/2020|2020-03-16|EPI\_ISL\_572157|Original|hCoV-19^^Minnesota|Human|Quest Diagnostics|Quest Diagnostics|Kagan|USA

>Spike|hCoV-19/Ukraine/Kharkiv-705/2020|2020-07-28|EPI\_ISL\_576146|Original|hCoV-19^^Kharkiv|Human|Department of Respiratory & Other Viral Infections of L.V. Gromashevsky Institute of Epidemiology & Infectious Diseases NAMS of Ukraine|Department of Respiratory & Other Viral Infections of L.V. Gromashevsky Institute of Epidemiology & Infectious Diseases NAMS of Ukraine|Mironenko|Ukraine

>Spike|hCoV-19/Denmark/DCGC-20716/2020|2020-12-21|EPI\_ISL\_758763|Original|hCoV-19^^Midtjylland|Human|Department of Virus and Microbiological Special Diagnostics|Albertsen Lab|Michaelsen|Denmark

>Spike|hCoV-19/Switzerland/GR-ETHZ-210045/2020|2020-07-23|EPI\_ISL\_510784|Original|hCoV-19^^Graubunden|Human|Viollier AG|Department of Biosystems Science and Engineering|Nadeau|Switzerland

>Spike|hCoV-19/England/20129080804/2020|2020-03-21|EPI\_ISL\_424071|Original|hCoV-19^^England|Human|Respiratory Virus Unit|Respiratory Virus Unit|Platt|United Kingdom

>Spike|hCoV-19/Denmark/DCGC-4326/2020|2020-08-31|EPI\_ISL\_615526|Original|hCoV-19^^Syddanmark|Human|Department of Virus and Microbiological Special Diagnostics|Albertsen lab|Michaelsen|Denmark

>Spike|hCoV-19/USA/TX-HMH-4273/2020|2020-06-18|EPI\_ISL\_543485|Original|hCoV-19^^Texas|Human|Houston Methodist Hospital|Houston Methodist Hospital|Long|USA

>Spike|hCoV-19/Japan/PG-1546/2020|2020-04-00|EPI\_ISL\_685152|Original|hCoV-19^^Japan|Human|Pathogen Genomics Center|Pathogen Genomics Center|Sekizuka|Japan

>Spike|hCoV-19/South Africa/KRISP-K002776/2020|2020-08-21|EPI\_ISL\_529771|Original|hCoV-19^^KwaZulu-Natal|Human|NHLS-IALCH|KRISP|de Oliveira|South Africa

>Spike|hCoV-19/Belgium/DPG-0325123/2020|2020-03-25|EPI\_ISL\_420380|Original|hCoV-19^^Jemappes|Human|KU Leuven|KU Leuven|Maes|Belgium

>Spike|hCoV-19/Scotland/GCVR-172299/2020|2020-03-30|EPI\_ISL\_469954|Original|hCoV-19^^Scotland|Human|NHSGGC West of Scotland Specialist Virology Centre / MRC-University of Glasgow Centre for Virus Research|Wellcome Sanger Institute for the COVID-19 Genomics UK (COG-UK) consortium|Davies|United Kingdom

>Spike|hCoV-19/USA/WA-UW-47437/2020|2020-12-11|EPI\_ISL\_776726|Original|hCoV-19^^Washington|Human|UW Virology Lab|UW Virology Lab|Roychoudhury|USA

>Spike|hCoV-19/Jordan/SEARCH-5473/2020|2020-08-22|EPI\_ISL\_755254|Original|hCoV-19^^Amman|Human|Biolab Diagnostic Laboratories|Andersen lab at Scripps Research|Gangavarapu|Jordan

>Spike|hCoV-19/Wales/PHWC-34382/2020|2020-04-16|EPI\_ISL\_446910|Original|hCoV-19^^Wales|Human|Wales Specialist Virology Centre|Public Health Wales Microbiology Cardiff|Moore|United Kingdom

>Spike|hCoV-19/Scotland/QEUH-A1EA25/2020|2020-10-01|EPI\_ISL\_598894|Original|hCoV-19^^Scotland|Human|Lighthouse Lab in Glasgow|Wellcome Sanger Institute for the COVID-19 Genomics UK (COG-UK) consortium|Davies|United Kingdom

>Spike|hCoV-19/England/ALDP-5A4494/2020|2020-06-19|EPI\_ISL\_558854|Original|hCoV-19^^England|Human|Lighthouse Lab in Alderley Park|Wellcome Sanger Institute for the COVID-19 Genomics UK (COG-UK) consortium|Davies|United Kingdom

>Spike|hCoV-19/England/NOTT-119689/2020|2020-11-01|EPI\_ISL\_626740|Original|hCoV-19^^England|Human|Queens Medical Centre|COVID-19 Genomics UK (COG-UK) Consortium|Loose|United Kingdom

>Spike|hCoV-19/England/CAMB-734DF/2020|2020-03-21|EPI\_ISL\_440107|Original|hCoV-19^^England|Human|Department of Pathology|Wellcome Sanger Institute for the COVID-19 Genomics UK (COG-UK) consortium|Amato|United Kingdom

>Spike|hCoV-19/Wales/PHWC-486E40/2020|2020-10-27|EPI\_ISL\_639137|Original|hCoV-19^^Wales|Human|Wales Specialist Virology Centre Sequencing lab|COVID-19 Genomics UK (COG-UK) Consortium|Moore|United Kingdom

>Spike|hCoV-19/England/ALDP-C583E6/2020|2020-12-13|EPI\_ISL\_735984|Original|hCoV-19^^England|Human|Lighthouse Lab in Alderley Park|Wellcome Sanger Institute for the COVID-19 Genomics UK (COG-UK) Consortium|Davies|United Kingdom

>Spike|hCoV-19/Scotland/QEUH-9B82BD/2020|2020-09-10|EPI\_ISL\_568235|Original|hCoV-19^^Scotland|Human|Lighthouse Lab in Glasgow|Wellcome Sanger Institute for the COVID-19 Genomics UK (COG-UK) consortium|Davies|United Kingdom

>Spike|hCoV-19/USA/TX-HMH-MCoV-15976/2020|2020-07-10|EPI\_ISL\_785660|Original|hCoV-19^^Texas|Human|Houston Methodist Hospital|Houston Methodist Hospital|Long|USA

>Spike|hCoV-19/England/ALDP-A6F67C/2020|2020-10-15|EPI\_ISL\_607666|Original|hCoV-19^^England|Human|Lighthouse Lab in Alderley Park|Wellcome Sanger Institute for the COVID-19 Genomics UK (COG-UK) consortium|Davies|United Kingdom

>Spike|hCoV-19/USA/CT-Yale-407/2020|2020-04-01|EPI\_ISL\_738301|Original|hCoV-19^^Connecticut|Human|Connecticut Veterans' Affairs Hospital|Grubaugh Lab - Yale School of Public Health|Grubaugh|USA

>Spike|hCoV-19/Denmark/DCGC-11822/2020|2020-10-26|EPI\_ISL\_671155|Original|hCoV-19^^Sjaelland|Human|Department of Virus and Microbiological Special Diagnostics|Albertsen Lab|Michaelsen|Denmark

>Spike|hCoV-19/Australia/NSW169/2020|2020-03-20|EPI\_ISL\_427779|Original|hCoV-19^^New South Wales|Human|Centre for Infectious Diseases and Microbiology Public Health|NSW Health Pathology - Institute of Clinical Pathology and Medical Research; Westmead Hospital; University of Sydney|Gall|Australia

>Spike|hCoV-19/USA/WI-UW-2650/2020|2020-12-31|EPI\_ISL\_791165|Original|hCoV-19^^Wisconsin|Human|University of Wisconsin-Madison AIDS Vaccine Research Laboratories|University of Wisconsin-Madison AIDS Vaccine Research Laboratories|Moreno|USA

>Spike|hCoV-19/Australia/VIC4754/2020|2020-07-17|EPI\_ISL\_519142|Original|hCoV-19^^Victoria|Human|Microbiological Diagnostic Unit - Public Health Laboratory (MDU-PHL)|MDU-PHL|Schultz|Australia

>Spike|hCoV-19/England/NOTT-11D825/2020|2020-11-10|EPI\_ISL\_665650|Original|hCoV-19^^England|Human|Queens Medical Centre|COVID-19 Genomics UK (COG-UK) Consortium|Loose|United Kingdom

>Spike|hCoV-19/England/MILK-9AB192/2020|2020-08-31|EPI\_ISL\_551120|Original|hCoV-19^^England|Human|Lighthouse Lab in Milton Keynes|Wellcome Sanger Institute for the COVID-19 Genomics UK (COG-UK) consortium|Davies|United Kingdom

>Spike|hCoV-19/Japan/PG-5250/2020|2020-07-00|EPI\_ISL\_690353|Original|hCoV-19^^Japan|Human|Pathogen Genomics Center|Pathogen Genomics Center|Sekizuka|Japan

>Spike|hCoV-19/England/QEUH-B2EB00/2020|2020-11-04|EPI\_ISL\_659907|Original|hCoV-19^^England|Human|Lighthouse Lab in Glasgow|Wellcome Sanger Institute for the COVID-19 Genomics UK (COG-UK) Consortium|Davies|United Kingdom

>Spike|hCoV-19/USA/MI-MDHHS-SC20334/2020|2020-03-19|EPI\_ISL\_450613|Original|hCoV-19^^Michigan|Human|Michigan Department of Health and Human Services|Michigan Department of Health and Human Services|Blankenship|USA

>Spike|hCoV-19/Netherlands/ZH-EMC-596/2020|2020-09-18|EPI\_ISL\_578024|Original|hCoV-19^^Zuid Holland|Human|Dutch COVID-19 response team|Erasmus Medical Center|Oude Munnink|Netherlands

>Spike|hCoV-19/England/ALDP-9EDCC0/2020|2020-05-08|EPI\_ISL\_580648|Original|hCoV-19^^England|Human|Lighthouse Lab in Alderley Park|Wellcome Sanger Institute for the COVID-19 Genomics UK (COG-UK) consortium|Davies|United Kingdom

>Spike|hCoV-19/England/QEUH-9D189E/2020|2020-09-16|EPI\_ISL\_572800|Original|hCoV-19^^England|Human|University College London|COVID-19 Genomics UK (COG-UK) Consortium|Roy|United Kingdom

>Spike|hCoV-19/Australia/VIC11371/2020|2020-08-20|EPI\_ISL\_563347|Original|hCoV-19^^Victoria|Human|Microbiological Diagnostic Unit - Public Health Laboratory (MDU-PHL)|MDU-PHL|Schultz|Australia

>Spike|hCoV-19/USA/MI-MDHHS-SC22648/2020|2020-11-12|EPI\_ISL\_737262|Original|hCoV-19^^Michigan|Human|Michigan Department of Health and Human Services|Michigan Department of Health and Human Services|Blankenship|USA

>Spike|hCoV-19/Switzerland/GE-ETHZ-310529/2020|2020-10-08|EPI\_ISL\_603597|Original|hCoV-19^^Geneva|Human|Viollier AG|Department of Biosystems Science and Engineering|Nadeau|Switzerland

>Spike|hCoV-19/Wales/PHWC-162F95/2020|2020-05-20|EPI\_ISL\_473227|Original|hCoV-19^^Wales|Human|Wales Specialist Virology Centre Sequencing lab|COVID-19 Genomics UK (COG-UK) Consortium|Moore|United Kingdom

>Spike|hCoV-19/USA/WI-GMF-20643/2020|2020-09-16|EPI\_ISL\_660809|Original|hCoV-19^^Wisconsin|Human|Gundersen Molecular Diagnostics Laboratory|Kabara Cancer Research Institute|Kenny|USA

>Spike|hCoV-19/England/NOTT-1106BF/2020|2020-04-23|EPI\_ISL\_441545|Original|hCoV-19^^England|Human|Queens Medical Centre|COVID-19 Genomics UK (COG-UK) Consortium|Loose|United Kingdom

>Spike|hCoV-19/Denmark/DCGC-18290/2020|2020-12-07|EPI\_ISL\_749867|Original|hCoV-19^^Hovedstaden|Human|Department of Virus and Microbiological Special Diagnostics|Albertsen Lab|Michaelsen|Denmark

>Spike|hCoV-19/USA/TX-DSHS-0937/2020|2020-06-15|EPI\_ISL\_602235|Original|hCoV-19^^Texas|Human|Texas Department of State Health Services|Texas Department of State Health Services|Rahman|USA

>Spike|hCoV-19/Australia/VIC5188/2020|2020-07-20|EPI\_ISL\_519953|Original|hCoV-19^^Victoria|Human|Microbiological Diagnostic Unit - Public Health Laboratory (MDU-PHL)|MDU-PHL|Schultz|Australia

>Spike|hCoV-19/Scotland/EDB3005/2020|2020-04-03|EPI\_ISL\_487897|Original|hCoV-19^^Scotland|Human|Virology Department|Wellcome Sanger Institute for the COVID-19 Genomics UK (COG-UK) consortium|Davies|United Kingdom

>Spike|hCoV-19/England/CAMB-786A7/2020|2020-04-05|EPI\_ISL\_433762|Original|hCoV-19^^England|Human|Department of Pathology|COVID-19 Genomics UK (COG-UK) Consortium|Meredith|United Kingdom

>Spike|hCoV-19/Canada/ON\_QGLO-023/2020|2020-03-28|EPI\_ISL\_459879|Original|hCoV-19^^Ontario|Human|Kingston Health Sciences Center|Queen's Genomics Lab at Ongwanada (Q-GLO)|Sjaarda|Canada

>Spike|hCoV-19/South Korea/KDCA0231/2020|2020-10-08|EPI\_ISL\_759996|Original|hCoV-19^^South Korea|Human|Division of Emerging Infectious Diseases|Division of Emerging Infectious Diseases|Park|South Korea

>Spike|hCoV-19/England/QEUH-C542B0/2020|2020-12-11|EPI\_ISL\_736325|Original|hCoV-19^^England|Human|Lighthouse Lab in Glasgow|Wellcome Sanger Institute for the COVID-19 Genomics UK (COG-UK) Consortium|Davies|United Kingdom

>Spike|hCoV-19/Australia/NSW3639/2020|2020-12-11|EPI\_ISL\_717706|Original|hCoV-19^^New South Wales|Human|Area of Virology|Virology Research Laboratory; Area of Virology|Foster|Australia

>Spike|hCoV-19/USA/MN-MDH-2136/2020|2020-11-06|EPI\_ISL\_708474|Original|hCoV-19^^Minnesota|Human|Minnesota Department of Health|Minnesota Department of Health|Lorentz|USA

>Spike|hCoV-19/England/CAMB-1B840A/2020|2020-10-19|EPI\_ISL\_638390|Original|hCoV-19^^England|Human|Department of Pathology|COVID-19 Genomics UK (COG-UK) Consortium|Goodfellow|United Kingdom

>Spike|hCoV-19/Australia/VIC5694/2020|2020-07-18|EPI\_ISL\_518500|Original|hCoV-19^^Victoria|Human|Microbiological Diagnostic Unit - Public Health Laboratory (MDU-PHL)|MDU-PHL|Schultz|Australia

>Spike|hCoV-19/England/ALDP-A94483/2020|2020-10-20|EPI\_ISL\_624757|Original|hCoV-19^^England|Human|Lighthouse Lab in Alderley Park|Wellcome Sanger Institute for the COVID-19 Genomics UK (COG-UK) consortium|Davies|United Kingdom

>Spike|hCoV-19/England/CAMC-B22F88/2020|2020-11-02|EPI\_ISL\_647265|Original|hCoV-19^^England|Human|Lighthouse Lab in Cambridge|Wellcome Sanger Institute for the COVID-19 Genomics UK (COG-UK) Consortium|Davies|United Kingdom

>Spike|hCoV-19/Wales/PHWC-480B21/2020|2020-10-18|EPI\_ISL\_612973|Original|hCoV-19^^Wales|Human|Wales Specialist Virology Centre Sequencing lab|COVID-19 Genomics UK (COG-UK) Consortium|Moore|United Kingdom

>Spike|hCoV-19/USA/WA-UW202/2020|2020-03-12|EPI\_ISL\_417351|Original|hCoV-19^^Washington|Human|UW Virology Lab|UW Virology Lab|Roychoudhury|USA

>Spike|hCoV-19/Japan/PG-3766/2020|2020-04-00|EPI\_ISL\_692019|Original|hCoV-19^^Japan|Human|Pathogen Genomics Center|Pathogen Genomics Center|Sekizuka|Japan

>Spike|hCoV-19/Italy/APU-UniMI-4431/2020|2020-04-09|EPI\_ISL\_525559|Original|hCoV-19^^Apulia|Human|Istituto Zooprofilattico Sperimentale Puglia e Basilicata; Dipartimento di Bioscienze|Beaconlab (Bioinformatics)|Chiara|Italy

>Spike|hCoV-19/England/ALDP-C3964C/2020|2020-12-09|EPI\_ISL\_730760|Original|hCoV-19^^England|Human|Lighthouse Lab in Alderley Park|Wellcome Sanger Institute for the COVID-19 Genomics UK (COG-UK) Consortium|Davies|United Kingdom

>Spike|hCoV-19/USA/NY-Wadsworth-287696-01/2020|2020-12-15|EPI\_ISL\_767470|Original|hCoV-19^^New York|Human|Wadsworth Center|Wadsworth Center|Lasek-Nesselquist|USA

>Spike|hCoV-19/USA/TX-HMH-MCoV-8999/2020|2020-07-02|EPI\_ISL\_780884|Original|hCoV-19^^Texas|Human|Houston Methodist Hospital|Houston Methodist Hospital|Long|USA

>Spike|hCoV-19/USA/UT-08539/2020|2020-05-18|EPI\_ISL\_524300|Original|hCoV-19^^Utah|Human|Utah Public Health Laboratory|Utah Public Health Laboratory|Young|USA

>Spike|hCoV-19/Jordan/AM-ALSR-4992/2020|2020-10-04|EPI\_ISL\_730265|Original|hCoV-19^^Amman|Human|Biolab Diagnostic Laboratories|Andersen lab at Scripps Research|Gangavarapu|Jordan

>Spike|hCoV-19/Northern Ireland/NIRE-105310/2020|2020-03-28|EPI\_ISL\_461782|Original|hCoV-19^^Northern Ireland|Human|Regional Virus Laboratory|COVID-19 Genomics UK (COG-UK) Consortium|Fairley|United Kingdom

>Spike|hCoV-19/USA/MI-UM-10036746097/2020|2020-11-02|EPI\_ISL\_682208|Original|hCoV-19^^Michigan|Human|University of Michigan Clinical Microbiology Laboratory|Lauring Lab|Valesano|USA

>Spike|hCoV-19/Wales/PHWC-4A25EF/2020|2020-12-15|EPI\_ISL\_743914|Original|hCoV-19^^Wales|Human|Wales Specialist Virology Centre Sequencing lab|COVID-19 Genomics UK (COG-UK) Consortium|Moore|United Kingdom

>Spike|hCoV-19/England/MILK-A7AD88/2020|2020-10-15|EPI\_ISL\_606299|Original|hCoV-19^^England|Human|Lighthouse Lab in Milton Keynes|Wellcome Sanger Institute for the COVID-19 Genomics UK (COG-UK) consortium|Davies|United Kingdom

>Spike|hCoV-19/Japan/PG-5106/2020|2020-08-00|EPI\_ISL\_690215|Original|hCoV-19^^Japan|Human|Gunma Prefectural Institute of Public Health and Environmental Sciences|Pathogen Genomics Center|Sekizuka|Japan

>Spike|hCoV-19/England/QEUEH-B425F9/2020|2020-11-08|EPI\_ISL\_657074|Original|hCoV-19^^England|Human|Lighthouse Lab in Glasgow|Wellcome Sanger Institute for the COVID-19 Genomics UK (COG-UK) Consortium|Davies|United Kingdom

>Spike|hCoV-19/Australia/VIC13237/2020|2020-07-27|EPI\_ISL\_592216|Original|hCoV-19^^Victoria|Human|Microbiological Diagnostic Unit - Public Health Laboratory (MDU-PHL)|MDU-PHL|Schultz|Australia

>Spike|hCoV-19/USA/NY-NYCPHL-000686/2020|2020-03-14|EPI\_ISL\_632103|Original|hCoV-19^^New York|Human|Flushing Hospital Medical Center|New York City Public Health Laboratory|Wang|USA

>Spike|hCoV-19/USA/MI-UM-10033981968/2020|2020-04-21|EPI\_ISL\_578162|Original|hCoV-19^^Michigan|Human|University of Michigan Clinical Microbiology Laboratory|Lauring Lab|Valesano|USA

>Spike|hCoV-19/Netherlands/ZH-EMC-1214/2020|2020-12-20|EPI\_ISL\_763284|Original|hCoV-19^^Zuid Holland|Human|Dutch COVID-19 response team|Erasmus Medical Center|Oude Munnink|Netherlands

>Spike|hCoV-19/USA/WA-UW-2016/2020|2020-03-24|EPI\_ISL\_424339|Original|hCoV-19^^Washington|Human|UW Virology Lab|UW Virology Lab|Roychoudhury|USA

>Spike|hCoV-19/Scotland/GCVR-170FC1/2020|2020-03-27|EPI\_ISL\_459698|Original|hCoV-19^^Scotland|Human|NHSGGC West of Scotland Specialist Virology Centre / MRC-University of Glasgow Centre for Virus Research|Wellcome Sanger Institute for the COVID-19 Genomics UK (COG-UK) consortium|Davies|United Kingdom

>Spike|hCoV-19/Australia/VIC7066/2020|2020-07-21|EPI\_ISL\_564213|Original|hCoV-19^^Victoria|Human|Victorian Infectious Diseases Reference Laboratory (VIDRL)|VIDRL and MDU-PHL|Schultz|Australia

>Spike|hCoV-19/Wales/PHWC-486CCE/2020|2020-10-31|EPI\_ISL\_639122|Original|hCoV-19^^Wales|Human|Wales Specialist Virology Centre Sequencing lab|COVID-19 Genomics UK (COG-UK) Consortium|Moore|United Kingdom

>Spike|hCoV-19/England/QEUEH-9DAE57/2020|2020-09-22|EPI\_ISL\_580952|Original|hCoV-19^^England|Human|Lighthouse Lab in Glasgow|Wellcome Sanger Institute for the COVID-19 Genomics UK (COG-UK) consortium|Davies|United Kingdom

>Spike|hCoV-19/Australia/NSW902/2020|2020-08-25|EPI\_ISL\_544983|Original|hCoV-19^^New South Wales|Human|South Eastern Area Laboratory Services (SEALS)|NSW Health Pathology

- Institute of Clinical Pathology and Medical Research; Westmead Hospital; University of Sydney|Gall|Australia

>Spike|hCoV-19/USA/CA-ALSR-0794-SAN/2020|2020-04-02|EPI\_ISL\_483362|Original|hCoV-19^^California|Human|UC San Diego Center for Advanced Laboratory Medicine|Andersen lab at Scripps Research|Gangavarapu|USA

>Spike|hCoV-19/England/NORW-222EC0/2020|2020-11-28|EPI\_ISL\_741544|Original|hCoV-19^^England|Human|Quadram Institute Bioscience|COVID-19 Genomics UK (COG-UK) Consortium|Alikhan|United Kingdom

>Spike|hCoV-19/England/ALDP-955A41/2020|2020-06-12|EPI\_ISL\_555421|Original|hCoV-19^^England|Human|Lighthouse Lab in Alderley Park|Wellcome Sanger Institute for the COVID-19 Genomics UK (COG-UK) consortium|Davies|United Kingdom

>Spike|hCoV-19/Scotland/EDB1093/2020|2020-04-07|EPI\_ISL\_433389|Original|hCoV-19^^Scotland|Human|Virology Department|COVID-19 Genomics UK (COG-UK) Consortium|Williams|United Kingdom

>Spike|hCoV-19/Spain/MD-HLP-50/2020|2020-04-20|EPI\_ISL\_530053|Original|hCoV-19^^Madrid|Human|Hospital Universitario La Paz|Hospital Universitario La Paz|Viedma|Spain

>Spike|hCoV-19/England/LIVE-99628/2020|2020-04-08|EPI\_ISL\_439742|Original|hCoV-19^^England|Human|Liverpool Clinical Laboratories|COVID-19 Genomics UK (COG-UK) Consortium|Haldenby|United Kingdom

>Spike|hCoV-19/Scotland/QEUH-96D33C/2020|2020-08-20|EPI\_ISL\_534547|Original|hCoV-19^^Scotland|Human|NHSGGC West of Scotland Specialist Virology Centre / MRC-University of Glasgow Centre for Virus Research|Wellcome Sanger Institute for the COVID-19 Genomics UK (COG-UK) consortium|Davies|United Kingdom

>Spike|hCoV-19/USA/WI-UW-2656/2020|2020-12-31|EPI\_ISL\_791170|Original|hCoV-19^^Wisconsin|Human|University of Wisconsin-Madison AIDS Vaccine Research Laboratories|University of Wisconsin-Madison AIDS Vaccine Research Laboratories|Moreno|USA

>Spike|hCoV-19/Canada/NS-NML-1284/2020|2020-04-07|EPI\_ISL\_579668|Original|hCoV-19^^Nova Scotia|Human|QEII Health Sciences Centre|National Microbiology Laboratory (NML)|Majer|Canada

>Spike|hCoV-19/India/TG-CCMB-AA527/2020|2020-08-12|EPI\_ISL\_539628|Original|hCoV-19^^Telangana|Human|CSIR-Centre for Cellular and Molecular Biology|CSIR-Centre for Cellular and Molecular Biology|Mukherjee|India

>Spike|hCoV-19/England/LIVE-A7EE3/2020|2020-03-26|EPI\_ISL\_517088|Original|hCoV-19^^England|Human|Liverpool Clinical Laboratories|COVID-19 Genomics UK (COG-UK) Consortium|Haldenby|United Kingdom

>Spike|hCoV-19/Gibraltar/205000639/2020|2020-12-00|EPI\_ISL\_709974|Original|hCoV-19^^Gibraltar|Human|Microbiology|Respiratory Virus Unit|Platt|Gibraltar

>Spike|hCoV-19/Switzerland/BS-42394001/2020|2020-08-13|EPI\_ISL\_581953|Original|hCoV-19^^Basel-Stadt|Human|University Hospital Basel|University Hospital Basel|Roloff Handschin|Switzerland

>Spike|hCoV-19/Scotland/CVR752/2020|2020-03-26|EPI\_ISL\_433334|Original|hCoV-19^^Scotland|Human|West of Scotland Specialist Virology Centre|COVID-19 Genomics UK (COG-UK) Consortium|Robertson|United Kingdom

>Spike|hCoV-19/England/NORT-293826/2020|2020-07-06|EPI\_ISL\_499505|Original|hCoV-19^^England|Human|Northumbria University / South Tees Hospitals NHS Foundation Trust / North Cumbria Integrated Care NHS Foundation Trust / North Tees and Hartlepool NHS Foundation Trust / Newcastle Hospitals NHS Foundation Trust|COVID-19 Genomics UK (COG-UK) Consortium|Bashton|United Kingdom

>Spike|hCoV-19/Australia/NSW2199/2020|2020-03-20|EPI\_ISL\_500660|Original|hCoV-19^^New South Wales|Human|Area of Virology|Area of Virology|Bull|Australia

>Spike|hCoV-19/Australia/VIC16545/2020|2020-08-10|EPI\_ISL\_641276|Original|hCoV-19^^Victoria|Human|Microbiological Diagnostic Unit - Public Health Laboratory (MDU-PHL)|MDU-PHL|Schultz|Australia

>Spike|hCoV-19/USA/DE-DHSS-F918060/2020|2020-03-27|EPI\_ISL\_584014|Original|hCoV-19^^Delaware|Human|Delaware Public Health Lab|Delaware Public Health Lab|Bajwa|USA

>Spike|hCoV-19/Netherlands/NB-EMC-327/2020|2020-10-07|EPI\_ISL\_632608|Original|hCoV-19^^Noord Brabant|Human|Dutch COVID-19 response team|Erasmus Medical Center|Oude Munnink|Netherlands

>Spike|hCoV-19/Scotland/CVR5888/2020|2020-11-17|EPI\_ISL\_705648|Original|hCoV-19^^Scotland|Human|West of Scotland Specialist Virology Centre|COVID-19 Genomics UK (COG-UK) Consortium|Robertson|United Kingdom

>Spike|hCoV-19/USA/TX-HMH-4632/2020|2020-06-22|EPI\_ISL\_543770|Original|hCoV-19^^Texas|Human|Houston Methodist Hospital|Houston Methodist Hospital|Long|USA

>Spike|hCoV-19/Luxembourg/LNS2740659/2020|2020-12-29|EPI\_ISL\_771097|Original|hCoV-19^^Luxembourg|Human|Laboratoire national de sant\u00e9|Laboratoire national de sant\u00e9|Wienecke-Baldacchino|Luxembourg

>Spike|hCoV-19/United Arab Emirates/L1758/2020|2020-03-10|EPI\_ISL\_435129|Original|hCoV-19^^United Arab Emirates|Human|Mohammed Bin Rashid University of Medicine and Health Sciences|Al Jalila Genomics Center|Ramaswamy|United Arab Emirates

>Spike|hCoV-19/USA/IL-NM083/2020|2020-03-19|EPI\_ISL\_444574|Original|hCoV-19^^Illinois|Human|Northwestern Memorial Hospital|Ozer Lab|Ozer|USA

>Spike|hCoV-19/USA/WI-UW-1017/2020|2020-07-17|EPI\_ISL\_516443|Original|hCoV-19^^Wisconsin|Human|University of Wisconsin-Madison AIDS Vaccine Research Laboratories|University of Wisconsin-Madison AIDS Vaccine Research Laboratories|Baczenas|USA

>Spike|hCoV-19/Wales/PHWC-49E346/2020|2020-12-07|EPI\_ISL\_742989|Original|hCoV-19^^Wales|Human|Wales Specialist Virology Centre Sequencing lab|COVID-19 Genomics UK (COG-UK) Consortium|Moore|United Kingdom

>Spike|hCoV-19/England/QEUEH-B6C8F0/2020|2020-11-11|EPI\_ISL\_655259|Original|hCoV-19^^England|Human|Lighthouse Lab in Glasgow|Wellcome Sanger Institute for the COVID-19 Genomics UK (COG-UK) Consortium|Davies|United Kingdom

>Spike|hCoV-19/USA/UT-UPHL-2012104383/2020|2020-11-24|EPI\_ISL\_746998|Original|hCoV-19^^Utah|Human|Utah Public Health Laboratory|Utah Public Health Laboratory|Gallagher|USA

>Spike|hCoV-19/Japan/PG-3168/2020|2020-06-00|EPI\_ISL\_691288|Original|hCoV-19^^Japan|Human|Chiba Prefectural Institute of Public Health|Pathogen Genomics Center|Sekizuka|Japan

>Spike|hCoV-19/Japan/PG-3787/2020|2020-04-00|EPI\_ISL\_692038|Original|hCoV-19^^Japan|Human|Pathogen Genomics Center|Pathogen Genomics Center|Sekizuka|Japan

>Spike|hCoV-19/Wales/PHWC-16CDEC/2020|2020-09-23|EPI\_ISL\_574170|Original|hCoV-19^^Wales|Human|Wales Specialist Virology Centre Sequencing lab|COVID-19 Genomics UK (COG-UK) Consortium|Moore|United Kingdom

>Spike|hCoV-19/Netherlands/Rotterdam\_1364740/2020|2020-03-03|EPI\_ISL\_413584|Original|hCoV-19^^Rotterdam|Human|unknown|Erasmus Medical Center|Oude Munnink|Netherlands

>Spike|hCoV-19/USA/TX-DSHS-1819/2020|2020-06-22|EPI\_ISL\_738186|Original|hCoV-19^^Texas|Human|Texas Department of State Health Services|Texas Department of State Health Services|Rahman|USA

>Spike|hCoV-19/Austria/CeMM0239/2020|2020-03-19|EPI\_ISL\_438069|Original|hCoV-19^^Vienna|Human|Center for Virology|Bergthaler laboratory|Bergthaler|Austria

>Spike|hCoV-19/Wales/PHWC-16A6D4/2020|2020-09-12|EPI\_ISL\_560090|Original|hCoV-19^^Wales|Human|Wales Specialist Virology Centre Sequencing lab|COVID-19 Genomics UK (COG-UK) Consortium|Moore|United Kingdom

>Spike|hCoV-19/Wales/PHWC-26CC4/2020|2020-03-28|EPI\_ISL\_422056|Original|hCoV-19^^Wales|Human|Wales Specialist Virology Centre|Public Health Wales Microbiology Cardiff|Moore|United Kingdom

>Spike|hCoV-19/Israel/13077823/2020|2020-04-04|EPI\_ISL\_447424|Original|hCoV-19^^South Coast District|Human|Clinical Microbiology Laboratory|Stern Lab|Miller|Israel

>Spike|hCoV-19/USA/MN-MDH-1925/2020|2020-10-12|EPI\_ISL\_613501|Original|hCoV-19^^Minnesota|Human|Public Health Laboratory - Infectious Disease Lab|Minnesota Department of Health|Lorentz|USA

>Spike|hCoV-19/Senegal/094/2020|2020-03-12|EPI\_ISL\_418213|Original|hCoV-19^^Diourbel|Human|Institut Pasteur Dakar|Institut Pasteur de Dakar|Dia|Senegal

>Spike|hCoV-19/Denmark/DCGC-9997/2020|2020-11-09|EPI\_ISL\_668458|Original|hCoV-19^^Hovedstaden|Human|Department of Virus and Microbiological Special Diagnostics|Albertsen Lab|Michaelsen|Denmark



>Spike|hCoV-19/Denmark/DCGC-3556/2020|2020-08-31|EPI\_ISL\_616349|Original|hCoV-19^^Syddanmark|Human|Department of Virus and Microbiological Special Diagnostics|Albertsen lab|Michaelsen|Denmark

>Spike|hCoV-19/England/ALDP-A8780F/2020|2020-10-17|EPI\_ISL\_606205|Original|hCoV-19^^England|Human|Lighthouse Lab in Alderley Park|Wellcome Sanger Institute for the COVID-19 Genomics UK (COG-UK) consortium|Davies|United Kingdom

>Spike|hCoV-19/USA/AZ-TG305956/2020|2020-04-29|EPI\_ISL\_694298|Original|hCoV-19^^Arizona|Human|AZ SPHL|TGen North|French|USA

>Spike|hCoV-19/USA/TX-DSHS-0916/2020|2020-06-15|EPI\_ISL\_602214|Original|hCoV-19^^Texas|Human|Texas Department of State Health Services|Texas Department of State Health Services|Rahman|USA

>Spike|hCoV-19/England/ALDP-94C61C/2020|2020-06-14|EPI\_ISL\_555901|Original|hCoV-19^^England|Human|Lighthouse Lab in Alderley Park|Wellcome Sanger Institute for the COVID-19 Genomics UK (COG-UK) consortium|Davies|United Kingdom

>Spike|hCoV-19/Netherlands/ZuidHolland\_102/2020|2020-03-18|EPI\_ISL\_422901|Original|hCoV-19^^Zuid Holland|Human|Dutch COVID-19 response team|Erasmus Medical Center|Oude Munnink|Netherlands

>Spike|hCoV-19/England/QEUEH-A1E8EF/2020|2020-10-01|EPI\_ISL\_587533|Original|hCoV-19^^England|Human|Lighthouse Lab in Glasgow|Wellcome Sanger Institute for the COVID-19 Genomics UK (COG-UK) consortium|Davies|United Kingdom

>Spike|hCoV-19/Spain/PV-IBV-000948/2020|2020-03-28|EPI\_ISL\_452625|Original|hCoV-19^^Basque Country|Human|Servicio de Microbiolog\u00eda. Hospital Universitario Donostia. OSI Donostialdea. \u00c1rea de Enfermedades Infecciosas|SeqCOVID-SPAIN consortium|IBV (CSIC)|Comas|Spain

>Spike|hCoV-19/Australia/NSW848/2020|2020-08-05|EPI\_ISL\_526190|Original|hCoV-19^^New South Wales|Human|St Vincent's Pathology (SydPath)|NSW Health Pathology - Institute of Clinical Pathology and Medical Research; Westmead Hospital; University of Sydney|Gall|Australia

>Spike|hCoV-19/England/CAMB-83472/2020|2020-04-15|EPI\_ISL\_443488|Original|hCoV-19^^England|Human|Department of Pathology|Wellcome Sanger Institute for the COVID-19 Genomics UK (COG-UK) consortium|Amato|United Kingdom

>Spike|hCoV-19/Mali/M002703/2020|2020-04-12|EPI\_ISL\_487459|Original|hCoV-19^^Bamako|Human|CICM-Mali|Bundeswehr Institut of Microbiology|Antwerpen|Mali

>Spike|hCoV-19/South Africa/KRISP-K000640/2020|2020-07-13|EPI\_ISL\_509289|Original|hCoV-19^^KwaZulu-Natal|Human|NHLS-IALCH|KRISP|de Oliveira|South Africa

>Spike|hCoV-19/England/CAMB-821E5/2020|2020-04-21|EPI\_ISL\_438631|Original|hCoV-19^^England|Human|Department of Pathology|COVID-19 Genomics UK (COG-UK) Consortium|Meredith|United Kingdom

>Spike|hCoV-19/England/ALDP-B46D84/2020|2020-11-07|EPI\_ISL\_656054|Original|hCoV-19^^England|Human|Lighthouse Lab in Alderley Park|Wellcome Sanger Institute for the COVID-19 Genomics UK (COG-UK) Consortium|Davies|United Kingdom

>Spike|hCoV-19/USA/CA-QDX-435/2020|2020-03-20|EPI\_ISL\_571160|Original|hCoV-19^^California|Human|Quest Diagnostics|Quest Diagnostics|Kagan|USA

>Spike|hCoV-19/England/OXON-B15E1/2020|2020-04-28|EPI\_ISL\_479028|Original|hCoV-19^^England|Human|Oxford Viromics|COVID-19 Genomics UK (COG-UK) Consortium|Golubchik|United Kingdom

>Spike|hCoV-19/Luxembourg/LNS4237810/2020|2020-11-22|EPI\_ISL\_740437|Original|hCoV-19^^Luxembourg|Human|Laboratoire national de sant\u00e9|Laboratoire national de sant\u00e9|Wienecke-Baldacchino|Luxembourg

>Spike|hCoV-19/Northern Ireland/QEUEH-96A9D3/2020|2020-08-17|EPI\_ISL\_531393|Original|hCoV-19^^Northern Ireland|Human|Lighthouse Lab in Glasgow|Wellcome Sanger Institute for the COVID-19 Genomics UK (COG-UK) consortium|Davies|United Kingdom

>Spike|hCoV-19/USA/NY-SURV0186/2020|2020-03-17|EPI\_ISL\_436058|Original|hCoV-19^^New York|Human|NYC Department of Health and Mental Hygiene|Pathogen Discovery|Queen|USA

>Spike|hCoV-19/England/LIVE-9B161/2020|2020-03-25|EPI\_ISL\_449415|Original|hCoV-19^^England|Human|Liverpool Clinical Laboratories|COVID-19 Genomics UK (COG-UK) Consortium|Haldenby|United Kingdom

>Spike|hCoV-19/USA/IL-NM-0489/2020|2020-04-23|EPI\_ISL\_626429|Original|hCoV-19^^Illinois|Human|Northwestern Memorial Hospital|Ozer Lab|Ozer|USA

>Spike|hCoV-19/England/CAMC-B77FDF/2020|2020-11-12|EPI\_ISL\_668353|Original|hCoV-19^^England|Human|Lighthouse Lab in Cambridge|Wellcome Sanger Institute for the COVID-19 Genomics UK (COG-UK) Consortium|Davies|United Kingdom

>Spike|hCoV-19/England/CAMB-76481/2020|2020-03-30|EPI\_ISL\_438267|Original|hCoV-19^^England|Human|Department of Pathology|Wellcome Sanger Institute for the COVID-19 Genomics UK (COG-UK) consortium|Amato|United Kingdom

>Spike|hCoV-19/USA/CA-LACPHL-AD00006/2020|2020-04-17|EPI\_ISL\_708506|Original|hCoV-19^^California|Human|Los Angeles County Public Health Laboratory|Los Angeles County Public Health Laboratory|Hemarajata|USA

>Spike|hCoV-19/England/NOTT-11192E/2020|2020-05-29|EPI\_ISL\_461942|Original|hCoV-19^^England|Human|Queens Medical Centre|COVID-19 Genomics UK (COG-UK) Consortium|Loose|United Kingdom

>Spike|hCoV-19/USA/TX-HMH-MCoV-14975/2020|2020-10-16|EPI\_ISL\_786459|Original|hCoV-19^^Texas|Human|Houston Methodist Hospital|Houston Methodist Hospital|Long|USA

>Spike|hCoV-19/Australia/VIC5662/2020|2020-07-06|EPI\_ISL\_518472|Original|hCoV-19^^Victoria|Human|Microbiological Diagnostic Unit - Public Health Laboratory (MDU-PHL)|MDU-PHL|Schultz|Australia

>Spike|hCoV-19/Wales/PHWC-31E57/2020|2020-04-07|EPI\_ISL\_446576|Original|hCoV-19^^Wales|Human|Wales Specialist Virology Centre|Public Health Wales Microbiology Cardiff|Moore|United Kingdom

>Spike|hCoV-19/Japan/PG-2431/2020|2020-04-00|EPI\_ISL\_686036|Original|hCoV-19^^Japan|Human|Pathogen Genomics Center|Pathogen Genomics Center|Sekizuka|Japan

>Spike|hCoV-19/England/QEUEH-B7D6C5/2020|2020-11-14|EPI\_ISL\_674794|Original|hCoV-19^^England|Human|Lighthouse Lab in Glasgow|Wellcome Sanger Institute for the COVID-19 Genomics UK (COG-UK) Consortium|Davies|United Kingdom

>Spike|hCoV-19/England/NORT-28D5FB/2020|2020-11-18|EPI\_ISL\_702827|Original|hCoV-19^^England|Human|Northumbria University / South Tees Hospitals NHS Foundation Trust / North Cumbria Integrated Care NHS Foundation Trust / North Tees and Hartlepool NHS Foundation Trust / Newcastle Hospitals NHS Foundation Trust|COVID-19 Genomics UK (COG-UK) Consortium|Bashton|United Kingdom

>Spike|hCoV-19/England/ALDP-956309/2020|2020-06-08|EPI\_ISL\_554104|Original|hCoV-19^^England|Human|Lighthouse Lab in Alderley Park|Wellcome Sanger Institute for the COVID-19 Genomics UK (COG-UK) consortium|Davies|United Kingdom

>Spike|hCoV-19/England/ALDP-A9623C/2020|2020-10-19|EPI\_ISL\_624625|Original|hCoV-19^^England|Human|Lighthouse Lab in Alderley Park|Wellcome Sanger Institute for the COVID-19 Genomics UK (COG-UK) consortium|Davies|United Kingdom

>Spike|hCoV-19/USA/WI-WSLH-200507/2020|2020-05-23|EPI\_ISL\_578648|Original|hCoV-19^^Wisconsin|Human|Wisconsin State Laboratory of Hygiene Communicable Disease Division|Wisconsin State Laboratory of Hygiene Communicable Disease Division|Florek|USA

>Spike|hCoV-19/USA/OR-OHSU-3067/2020|2020-09-30|EPI\_ISL\_667468|Original|hCoV-19^^Oregon|Human|OHSU Lab Services Molecular Microbiology Lab|Oregon SARS-CoV-2 Genome Sequencing Center|O'Roak|USA

>Spike|hCoV-19/Japan/PG-4969/2020|2020-08-00|EPI\_ISL\_690087|Original|hCoV-19^^Japan|Human|Pathogen Genomics Center|Pathogen Genomics Center|Sekizuka|Japan

>Spike|hCoV-19/England/C200042671/2020|2020-11-02|EPI\_ISL\_666734|Original|hCoV-19^^England|Human|Respiratory Virus Unit|COVID-19 Genomics UK (COG-UK) Consortium|Platt|United Kingdom

>Spike|hCoV-19/England/NOTT-10E3F9/2020|2020-03-22|EPI\_ISL\_425541|Original|hCoV-19^^England|Human|Queens Medical Centre|COVID-19 Genomics UK (COG-UK) Consortium|Loose|United Kingdom

>Spike|hCoV-19/England/CAMC-B526D5/2020|2020-11-06|EPI\_ISL\_656850|Original|hCoV-19^^England|Human|Lighthouse Lab in Cambridge|Wellcome Sanger Institute for the COVID-19 Genomics UK (COG-UK) Consortium|Davies|United Kingdom

>Spike|hCoV-19/Ireland/D-NVRL-AIIDV1252v1/2020|2020-10-21|EPI\_ISL\_768781|Original|hCoV-19^^Dublin|Human|AIID|Irish Coronavirus Sequencing Consortium - National Virus Reference Laboratory|Gonzalez|Ireland

>Spike|hCoV-19/Wales/PHWC-16B6C4/2020|2020-09-17|EPI\_ISL\_573888|Original|hCoV-19^^Wales|Human|Wales Specialist Virology Centre Sequencing lab|COVID-19 Genomics UK (COG-UK) Consortium|Moore|United Kingdom

>Spike|hCoV-19/England/MILK-B88D3B/2020|2020-11-13|EPI\_ISL\_675795|Original|hCoV-19^^England|Human|Lighthouse Lab in Milton Keynes|Wellcome Sanger Institute for the COVID-19 Genomics UK (COG-UK) Consortium|Davies|United Kingdom

>Spike|hCoV-19/USA/WA-S2511/2020|2020-06-17|EPI\_ISL\_497143|Original|hCoV-19^^Washington|Human|Washington State Department of Health|Seattle Flu Study|Lee|USA

>Spike|hCoV-19/England/MILK-B5A479/2020|2020-11-06|EPI\_ISL\_658385|Original|hCoV-19^^England|Human|Lighthouse Lab in Milton Keynes|Wellcome Sanger Institute for the COVID-19 Genomics UK (COG-UK) Consortium|Davies|United Kingdom

>Spike|hCoV-19/Scotland/GCVR-1704C2/2020|2020-03-23|EPI\_ISL\_459559|Original|hCoV-19^^Scotland|Human|NHSGGC West of Scotland Specialist Virology Centre / MRC-University of Glasgow Centre for Virus Research|Wellcome Sanger Institute for the COVID-19 Genomics UK (COG-UK) consortium|Davies|United Kingdom

>Spike|hCoV-19/Japan/PG-8433/2020|2020-09-00|EPI\_ISL\_687532|Original|hCoV-19^^Japan|Human|Pathogen Genomics Center|Pathogen Genomics Center|Sekizuka|Japan

>Spike|hCoV-19/England/ALDP-AA4E91/2020|2020-10-21|EPI\_ISL\_630877|Original|hCoV-19^^England|Human|Lighthouse Lab in Alderley Park|Wellcome Sanger Institute for the COVID-19 Genomics UK (COG-UK) consortium|Davies|United Kingdom

>Spike|hCoV-19/Denmark/DCGC-17756/2020|2020-12-14|EPI\_ISL\_749547|Original|hCoV-19^^Hovedstaden|Human|Department of Virus and Microbiological Special Diagnostics|Albertsen Lab|Michaelsen|Denmark

>Spike|hCoV-19/USA/WA-S349/2020|2020-04-02|EPI\_ISL\_434109|Original|hCoV-19^^Washington|Human|Washington State Department of Health|Seattle Flu Study|Bedford|USA

>Spike|hCoV-19/England/QEUA-9609EC/2020|2020-07-31|EPI\_ISL\_532065|Original|hCoV-19^^England|Human|Lighthouse Lab in Glasgow|Wellcome Sanger Institute for the COVID-19 Genomics UK (COG-UK) consortium|Davies|United Kingdom

>Spike|hCoV-19/Japan/PG-1919/2020|2020-03-00|EPI\_ISL\_685525|Original|hCoV-19^^Japan|Human|Pathogen Genomics Center|Pathogen Genomics Center|Sekizuka|Japan

>Spike|hCoV-19/France/HDF-rega-0413575/2020|2020-04-13|EPI\_ISL\_735241|Original|hCoV-19^^Hauts-de-France|Human|UZ Leuven|KU Leuven|Maes|France

>Spike|hCoV-19/USA/MN-MDH-1593/2020|2020-05-18|EPI\_ISL\_530189|Original|hCoV-19^^Minnesota|Human|Minnesota Department of Health|Minnesota Department of Health|Garfin|USA

>Spike|hCoV-19/Australia/VIC2496/2020|2020-00-00|EPI\_ISL\_522194|Original|hCoV-19^^Victoria|Human|Microbiological Diagnostic Unit - Public Health Laboratory (MDU-PHL) |MDU-PHL|Schultz|Australia

>Spike|hCoV-19/Japan/PG-6410/2020|2020-08-00|EPI\_ISL\_689516|Original|hCoV-19^^Japan|Human|Pathogen Genomics Center|Pathogen Genomics Center|Sekizuka|Japan

>Spike|hCoV-19/England/QEUA-9700B7/2020|2020-08-17|EPI\_ISL\_540242|Original|hCoV-19^^England|Human|Lighthouse Lab in Glasgow|Wellcome Sanger Institute for the COVID-19 Genomics UK (COG-UK) consortium|Davies|United Kingdom

>Spike|hCoV-19/England/ALDP-BB9979/2020|2020-11-20|EPI\_ISL\_703037|Original|hCoV-19^^England|Human|Lighthouse Lab in Alderley Park|Wellcome Sanger Institute for the COVID-19 Genomics UK (COG-UK) Consortium|Davies|United Kingdom

>Spike|hCoV-19/England/CAMC-990C9F/2020|2020-08-26|EPI\_ISL\_551905|Original|hCoV-19^^England|Human|Lighthouse Lab in Cambridge|Wellcome Sanger Institute for the COVID-19 Genomics UK (COG-UK) consortium|Davies|United Kingdom

>Spike|hCoV-19/England/CAMB-7419B/2020|2020-03-18|EPI\_ISL\_440328|Original|hCoV-19^^England|Human|Department of Pathology|Wellcome Sanger Institute for the COVID-19 Genomics UK (COG-UK) consortium|Amato|United Kingdom

>Spike|hCoV-19/England/NORW-F7EA8/2020|2020-11-04|EPI\_ISL\_651100|Original|hCoV-19^^England|Human|Quadram Institute Bioscience|COVID-19 Genomics UK (COG-UK) Consortium|Alikhan|United Kingdom

>Spike|hCoV-19/England/ALDP-A50C8B/2020|2020-10-07|EPI\_ISL\_597737|Original|hCoV-19^^England|Human|Lighthouse Lab in Alderley Park|Wellcome Sanger Institute for the COVID-19 Genomics UK (COG-UK) consortium|Davies|United Kingdom

>Spike|hCoV-19/England/ALDP-9CC32C/2020|2020-09-16|EPI\_ISL\_573099|Original|hCoV-19^^England|Human|Quadram Institute Bioscience|COVID-19 Genomics UK (COG-UK) Consortium|Alikhan|United Kingdom

>Spike|hCoV-19/Scotland/CVR4025/2020|2020-08-29|EPI\_ISL\_535124|Original|hCoV-19^^Scotland|Human|West of Scotland Specialist Virology Centre|COVID-19 Genomics UK (COG-UK) Consortium|Robertson|United Kingdom

>Spike|hCoV-19/Wales/MILK-9EFA00/2020|2020-09-23|EPI\_ISL\_594968|Original|hCoV-19^^Wales|Human|Queens Medical Centre|COVID-19 Genomics UK (COG-UK) Consortium|Loose|United Kingdom

>Spike|hCoV-19/England/CAMC-A41DA8/2020|2020-10-05|EPI\_ISL\_609373|Original|hCoV-19^^England|Human|Lighthouse Lab in Cambridge|Wellcome Sanger Institute for the COVID-19 Genomics UK (COG-UK) consortium|Davies|United Kingdom

>Spike|hCoV-19/Luxembourg/LNS9151332/2020|2020-09-30|EPI\_ISL\_744861|Original|hCoV-19^^Luxembourg|Human|Laboratoire national de sant\u00e9|Laboratoire national de sant\u00e9|Wienecke-Baldacchino|Luxembourg

>Spike|hCoV-19/USA/CA-CZB-1833/2020|2020-04-24|EPI\_ISL\_486148|Original|hCoV-19^^California|Human|Orange County Public Health Laboratory|Chan-Zuckerberg Biohub|McGeever|USA

>Spike|hCoV-19/Singapore/507/2020|2020-05-15|EPI\_ISL\_479585|Original|hCoV-19^^Singapore|Human|National Public Health Laboratory|National Public Health Laboratory|Mak|Singapore

>Spike|hCoV-19/Australia/VIC4556/2020|2020-07-15|EPI\_ISL\_518966|Original|hCoV-19^^Victoria|Human|Microbiological Diagnostic Unit - Public Health Laboratory (MDU-PHL) |MDU-PHL|Schultz|Australia

>Spike|hCoV-19/England/NORT-292739/2020|2020-05-14|EPI\_ISL\_457325|Original|hCoV-19^^England|Human|Northumbria University / South Tees Hospitals NHS Foundation Trust / North Cumbria Integrated Care NHS Foundation Trust / North Tees and Hartlepool NHS Foundation Trust / Newcastle Hospitals NHS Foundation Trust|COVID-19 Genomics UK (COG-UK) Consortium|Bashton|United Kingdom

>Spike|hCoV-19/Denmark/DCGC-3777/2020|2020-05-04|EPI\_ISL\_622623|Original|hCoV-19^^Hovedstaden|Human|Department of Virus and Microbiological Special Diagnostics|Albertsen lab|Michaelsen|Denmark

>Spike|hCoV-19/Scotland/EDB9447/2020|2020-10-30|EPI\_ISL\_680535|Original|hCoV-19^^Scotland|Human|Virology Department|COVID-19 Genomics UK (COG-UK) Consortium|McHugh|United Kingdom

>Spike|hCoV-19/Australia/NSW2885/2020|2020-03-12|EPI\_ISL\_678359|Original|hCoV-19^^New South Wales|Human|Area of Virology|Virology Research Laboratory; Area of Virology|Foster|Australia

>Spike|hCoV-19/USA/NY-Wadsworth-292826-01/2020|2020-12-27|EPI\_ISL\_769974|Original|hCoV-19^^New York|Human|Albany Medical Center Hospital Clinical Laboratories|Wadsworth Center|Lasek-Nesselquist|USA

>Spike|hCoV-19/Brazil/SP-L11-CD92/2020|2020-03-25|EPI\_ISL\_476203|Original|hCoV-19^^S\u00e3o Paulo|Human|Hospital da Cl\u00ednicas da Faculdade de Medicina da Universidade de S\u00e3o Paulo|Instituto de Medicina Tropical da Univesidade de S\u00e3o Paulo|Faria|Brazil

>Spike|hCoV-19/England/MILK-B94938/2020|2020-11-14|EPI\_ISL\_673821|Original|hCoV-19^^England|Human|Lighthouse Lab in Milton Keynes|Wellcome Sanger Institute for the COVID-19 Genomics UK (COG-UK) Consortium|Davies|United Kingdom

>Spike|hCoV-19/England/MILK-9E2D22/2020|2020-09-21|EPI\_ISL\_581163|Original|hCoV-19^^England|Human|Lighthouse Lab in Milton Keynes|Wellcome Sanger Institute for the COVID-19 Genomics UK (COG-UK) consortium|Davies|United Kingdom

>Spike|hCoV-19/Denmark/DCGC-19687/2020|2020-12-07|EPI\_ISL\_748258|Original|hCoV-19^^Midtjylland|Human|Department of Virus and Microbiological Special Diagnostics|Albertsen Lab|Michaelsen|Denmark

>Spike|hCoV-19/USA/SC-DHEC-0893/2020|2020-06-26|EPI\_ISL\_538413|Original|hCoV-19^^South Carolina|Human|Microbiology Division|Microbiology Division|Flores|USA

>Spike|hCoV-19/Denmark/DCGC-20016/2020|2020-12-07|EPI\_ISL\_747931|Original|hCoV-19^^Hovedstaden|Human|Department of Virus and Microbiological Special Diagnostics|Albertsen Lab|Michaelsen|Denmark

>Spike|hCoV-19/USA/CT-UW-4344/2020|2020-03-30|EPI\_ISL\_426052|Original|hCoV-19^^Connecticut|Human|UW Virology Lab|UW Virology Lab|Roychoudhury|USA

>Spike|hCoV-19/Germany/BW-UKT-038/2020|2020-03-23|EPI\_ISL\_581466|Original|hCoV-19^^Baden-W\u00fcrtemberg|Human|Medizinische Klinik Innere Medizin I|NGS Competence Center T\u00fcbingen|Angelov|Germany

>Spike|hCoV-19/Wales/PHWC-269DC/2020|2020-03-29|EPI\_ISL\_422043|Original|hCoV-19^^Wales|Human|Wales Specialist Virology Centre|Public Health Wales Microbiology Cardiff|Moore|United Kingdom

>Spike|hCoV-19/England/CAMC-B52F16/2020|2020-11-09|EPI\_ISL\_657545|Original|hCoV-19^^England|Human|Lighthouse Lab in Cambridge|Wellcome Sanger Institute for the COVID-19 Genomics UK (COG-UK) Consortium|Davies|United Kingdom

>Spike|hCoV-19/Scotland/QEUH-AA067F/2020|2020-10-21|EPI\_ISL\_666097|Original|hCoV-19^^Scotland|Human|Northumbria University / South Tees Hospitals NHS Foundation Trust / North Cumbria Integrated Care NHS Foundation Trust / North Tees and Hartlepool NHS Foundation Trust / Newcastle Hospitals NHS Foundation Trust|COVID-19 Genomics UK (COG-UK) Consortium|Bashton|United Kingdom

>Spike|hCoV-19/Scotland/EDB3775/2020|2020-04-29|EPI\_ISL\_439320|Original|hCoV-19^^Scotland|Human|Virology Department|COVID-19 Genomics UK (COG-UK) Consortium|Williams|United Kingdom

>Spike|hCoV-19/England/ALDP-B74725/2020|2020-11-12|EPI\_ISL\_662086|Original|hCoV-19^^England|Human|Lighthouse Lab in Alderley Park|Wellcome Sanger Institute for the COVID-19 Genomics UK (COG-UK) Consortium|Davies|United Kingdom

>Spike|hCoV-19/USA/HI-CDC-2-3713972/2020|2020-11-14|EPI\_ISL\_751761|Original|hCoV-19^^Hawaii|Human|HI Dept. of Health|Genomics and Discovery|Queen|USA

>Spike|hCoV-19/USA/TX-HMH-5148/2020|2020-06-29|EPI\_ISL\_544558|Original|hCoV-19^^Texas|Human|Houston Methodist Hospital|Houston Methodist Hospital|Long|USA

>Spike|hCoV-19/USA/AZ-TG274810/2020|2020-04-09|EPI\_ISL\_694083|Original|hCoV-19^^Arizona|Human|AZ SPHL|TGen North|French|USA

>Spike|hCoV-19/Australia/VIC13102/2020|2020-07-29|EPI\_ISL\_640746|Original|hCoV-19^^Victoria|Human|Microbiological Diagnostic Unit - Public Health Laboratory (MDU-PHL)|MDU-PHL|Schultz|Australia

>Spike|hCoV-19/Scotland/QEUH-9E38C6/2020|2020-09-24|EPI\_ISL\_585524|Original|hCoV-19^^Scotland|Human|Northumbria University / South Tees Hospitals NHS Foundation Trust / North Cumbria Integrated Care NHS Foundation Trust / North Tees and Hartlepool NHS Foundation Trust / Newcastle Hospitals NHS Foundation Trust|COVID-19 Genomics UK (COG-UK) Consortium|Bashton|United Kingdom

>Spike|hCoV-19/Gibraltar/204841726/2020|2020-00-00|EPI\_ISL\_671294|Original|hCoV-19^^Gibraltar|Human|Microbiology|Respiratory Virus Unit|Platt|Gibraltar

>Spike|hCoV-19/Scotland/CVR4373/2020|2020-09-15|EPI\_ISL\_573792|Original|hCoV-19^^Scotland|Human|West of Scotland Specialist Virology Centre|COVID-19 Genomics UK (COG-UK) Consortium|Robertson|United Kingdom

>Spike|hCoV-19/USA/MI-QDX-1614/2020|2020-03-17|EPI\_ISL\_603959|Original|hCoV-19^^Michigan|Human|Quest Diagnostics|Quest Diagnostics|Kagan|USA

>Spike|hCoV-19/England/QEUH-9DAC5D/2020|2020-09-21|EPI\_ISL\_581030|Original|hCoV-19^^England|Human|Lighthouse Lab in Glasgow|Wellcome Sanger Institute for the COVID-19 Genomics UK (COG-UK) consortium|Davies|United Kingdom

>Spike|hCoV-19/Bosnia and Herzegovina/ChVir7348/2020|2020-03-20|EPI\_ISL\_462455|Original|hCoV-19^^Sarajevo|Human|Clinical Center|Charite Universitatsmedizin Berlin|Muehlemann|Bosnia and Herzegovina

>Spike|hCoV-19/Denmark/DCGC-5679/2020|2020-09-28|EPI\_ISL\_619966|Original|hCoV-19^^Hovedstaden|Human|Department of Virus and Microbiological Special Diagnostics|Albertsen lab|Michaelsen|Denmark

>Spike|hCoV-19/England/QEUH-BCB3EF/2020|2020-11-26|EPI\_ISL\_703833|Original|hCoV-19^^England|Human|Lighthouse Lab in Glasgow|Wellcome Sanger Institute for the COVID-19 Genomics UK (COG-UK) Consortium|Davies|United Kingdom

>Spike|hCoV-19/England/MILK-CA9D06/2020|2020-12-18|EPI\_ISL\_762507|Original|hCoV-19^^England|Human|Lighthouse Lab in Milton Keynes|Wellcome Sanger Institute for the COVID-19 Genomics UK (COG-UK) Consortium|Davies|United Kingdom

>Spike|hCoV-19/England/20109004404/2020|2020-03-05|EPI\_ISL\_464515|Original|hCoV-19^^England|Human|Respiratory Virus Unit|Respiratory Virus Unit|Platt|United Kingdom

>Spike|hCoV-19/USA/FL-BPHL-1814/2020|2020-04-03|EPI\_ISL\_613815|Original|hCoV-19^^Florida|Human|Florida Bureau of Public Health Laboratories|Florida Bureau of Public Health Laboratories|Blanton|USA

>Spike|hCoV-19/England/MILK-9C1FBA/2020|2020-09-11|EPI\_ISL\_566593|Original|hCoV-19^^England|Human|Lighthouse Lab in Milton Keynes|Wellcome Sanger Institute for the COVID-19 Genomics UK (COG-UK) consortium|Davies|United Kingdom

>Spike|hCoV-19/South Africa/KRISP-K002754/2020|2020-08-16|EPI\_ISL\_529750|Original|hCoV-19^^KwaZulu-Natal|Human|NHLS-IALCH|KRISP|de Oliveira|South Africa

>Spike|hCoV-19/England/QEUEH-B107EF/2020|2020-11-02|EPI\_ISL\_641848|Original|hCoV-19^^England|Human|Lighthouse Lab in Glasgow|Wellcome Sanger Institute for the COVID-19 Genomics UK (COG-UK) Consortium|Davies|United Kingdom

>Spike|hCoV-19/England/QEUEH-C5D606/2020|2020-12-14|EPI\_ISL\_769290|Original|hCoV-19^^England|Human|Lighthouse Lab in Glasgow|Wellcome Sanger Institute for the COVID-19 Genomics UK (COG-UK) Consortium|Davies|United Kingdom

>Spike|hCoV-19/USA/CA-CZB-13497/2020|2020-10-28|EPI\_ISL\_672099|Original|hCoV-19^^California|Human|Madera County Department of Public Health|Chan-Zuckerberg Biohub|Bhatt|USA

>Spike|hCoV-19/USA/CA-CZB-4018/2020|2020-08-01|EPI\_ISL\_548636|Original|hCoV-19^^California|Human|County of Santa Clara Public Health Department|Chan-Zuckerberg Biohub|Bhatt|USA

>Spike|hCoV-19/England/ALDP-B84F75/2020|2020-11-15|EPI\_ISL\_674164|Original|hCoV-19^^England|Human|Lighthouse Lab in Alderley Park|Wellcome Sanger Institute for the COVID-19 Genomics UK (COG-UK) Consortium|Davies|United Kingdom

>Spike|hCoV-19/England/20129050802/2020|2020-03-12|EPI\_ISL\_424050|Original|hCoV-19^^England|Human|Respiratory Virus Unit|Respiratory Virus Unit|Platt|United Kingdom

>Spike|hCoV-19/Luxembourg/LNS8077542/2020|2020-11-02|EPI\_ISL\_744680|Original|hCoV-19^^Luxembourg|Human|Laboratoire national de sant\u00e9|Laboratoire national de sant\u00e9|Wienecke-Baldacchino|Luxembourg

>Spike|hCoV-19/Scotland/EDB11050/2020|2020-12-14|EPI\_ISL\_742198|Original|hCoV-19^^Scotland|Human|Virology Department|COVID-19 Genomics UK (COG-UK) Consortium|McHugh|United Kingdom

>Spike|hCoV-19/England/ALDP-A2DF15/2020|2020-10-06|EPI\_ISL\_586826|Original|hCoV-19^^England|Human|Lighthouse Lab in Alderley Park|Wellcome Sanger Institute for the COVID-19 Genomics UK (COG-UK) consortium|Davies|United Kingdom

>Spike|hCoV-19/Denmark/DCGC-17273/2020|2020-12-14|EPI\_ISL\_750185|Original|hCoV-19^^Sjaelland|Human|Department of Virus and Microbiological Special Diagnostics|Albertsen Lab|Michaelsen|Denmark

>Spike|hCoV-19/USA/AZ-TG519164/2020|2020-06-29|EPI\_ISL\_695362|Original|hCoV-19^^Arizona|Human|AZ SPHL|TGen North|French|USA

>Spike|hCoV-19/England/MILK-A4572E/2020|2020-10-06|EPI\_ISL\_598808|Original|hCoV-19^^England|Human|Lighthouse Lab in Milton Keynes|Wellcome Sanger Institute for the COVID-19 Genomics UK (COG-UK) consortium|Davies|United Kingdom

>Spike|hCoV-19/England/MILK-9C2371/2020|2020-09-09|EPI\_ISL\_566673|Original|hCoV-19^^England|Human|Lighthouse Lab in Milton Keynes|Wellcome Sanger Institute for the COVID-19 Genomics UK (COG-UK) consortium|Davies|United Kingdom

>Spike|hCoV-19/USA/WI-WSLH-200130/2020|2020-04-21|EPI\_ISL\_578358|Original|hCoV-19^^Wisconsin|Human|Wisconsin State Laboratory of Hygiene Communicable Disease Division|Wisconsin State Laboratory of Hygiene Communicable Disease Division|Florek|USA

>Spike|hCoV-19/USA/GA-CDC-7378/2020|2020-10-22|EPI\_ISL\_681787|Original|hCoV-19^^Georgia|Human|GA Department of Public Health Laboratory|Pathogen Discovery|Queen|USA

>Spike|hCoV-19/Scotland/GCVR-17042C/2020|2020-03-23|EPI\_ISL\_459611|Original|hCoV-19^^Scotland|Human|NHSGGC West of Scotland Specialist Virology Centre / MRC-University of Glasgow Centre for Virus Research|Wellcome Sanger Institute for the COVID-19 Genomics UK (COG-UK) consortium|Davies|United Kingdom

>Spike|hCoV-19/England/MILK-99B942/2020|2020-08-30|EPI\_ISL\_550405|Original|hCoV-19^^England|Human|Lighthouse Lab in Milton Keynes|Wellcome Sanger Institute for the COVID-19 Genomics UK (COG-UK) consortium|Davies|United Kingdom

>Spike|hCoV-19/Spain/RI-IBV-98002379/2020|2020-04-02|EPI\_ISL\_537871|Original|hCoV-19^^La Rioja|Human|Centro de Investigaci\u00f3n Biom\u00e9dica de La Rioja - Hospital San Pedro Logro\u00f1o|SeqCOVID-SPAIN consortium/IBV (CSIC)|Comas|Spain

>Spike|hCoV-19/England/QEUH-96E3C2/2020|2020-08-18|EPI\_ISL\_530600|Original|hCoV-19^^England|Human|Lighthouse Lab in Glasgow|Wellcome Sanger Institute for the COVID-19 Genomics UK (COG-UK) consortium|Davies|United Kingdom

>Spike|hCoV-19/England/LOND-DB402/2020|2020-11-12|EPI\_ISL\_724765|Original|hCoV-19^^England|Human|University College London|COVID-19 Genomics UK (COG-UK) Consortium|Roy|United Kingdom

>Spike|hCoV-19/England/NOTT-10FB1E/2020|2020-04-07|EPI\_ISL\_432686|Original|hCoV-19^^England|Human|Queens Medical Centre|COVID-19 Genomics UK (COG-UK) Consortium|Loose|United Kingdom

>Spike|hCoV-19/Denmark/DCGC-3227/2020|2020-08-31|EPI\_ISL\_616887|Original|hCoV-19^^Nordjylland|Human|Department of Virus and Microbiological Special Diagnostics|Albertsen lab|Michaelsen|Denmark

>Spike|hCoV-19/England/QEUH-C93710/2020|2020-12-17|EPI\_ISL\_777161|Original|hCoV-19^^England|Human|Lighthouse Lab in Glasgow|Wellcome Sanger Institute for the COVID-19 Genomics UK (COG-UK) Consortium|Davies|United Kingdom

>Spike|hCoV-19/Scotland/QEUH-9903F4/2020|2020-08-26|EPI\_ISL\_568296|Original|hCoV-19^^Scotland|Human|Lighthouse Lab in Glasgow|Wellcome Sanger Institute for the COVID-19 Genomics UK (COG-UK) consortium|Davies|United Kingdom

>Spike|hCoV-19/England/CAMC-B212DB/2020|2020-11-02|EPI\_ISL\_647685|Original|hCoV-19^^England|Human|Lighthouse Lab in Cambridge|Wellcome Sanger Institute for the COVID-19 Genomics UK (COG-UK) Consortium|Davies|United Kingdom

>Spike|hCoV-19/USA/MI-MDHHS-SC20775/2020|2020-04-16|EPI\_ISL\_471796|Original|hCoV-19^^Michigan|Human|Michigan Department of Health and Human Services|Michigan Department of Health and Human Services|Blankenship|USA

>Spike|hCoV-19/Spain/MD-IBV-99008778/2020|2020-10-20|EPI\_ISL\_654321|Original|hCoV-19^^Madrid|Human|Hospital General Universitario Gregorio Mara\u00f1\u00f3n|SeqCOVID-SPAIN consortium/IBV (CSIC)|Comas|Spain

>Spike|hCoV-19/Brazil/SP-434/2020|2020-07-12|EPI\_ISL\_603031|Original|hCoV-19^^S\u00e3o Paulo|Human|Santa Casa de Presidente Epit\u00e9lcio|Instituto Adolfo Lutz|Sacchi|Brazil

>Spike|hCoV-19/Denmark/DCGC-21637/2020|2020-12-21|EPI\_ISL\_758278|Original|hCoV-19^^Hovedstaden|Human|Department of Virus and Microbiological Special Diagnostics|Albertsen Lab|Michaelsen|Denmark

>Spike|hCoV-19/England/ALDP-A858A7/2020|2020-10-17|EPI\_ISL\_610370|Original|hCoV-19^^England|Human|Lighthouse Lab in Alderley Park|Wellcome Sanger Institute for the COVID-19 Genomics UK (COG-UK) consortium|Davies|United Kingdom

>Spike|hCoV-19/England/ALDP-B24979/2020|2020-11-04|EPI\_ISL\_647060|Original|hCoV-19^^England|Human|Lighthouse Lab in Alderley Park|Wellcome Sanger Institute for the COVID-19 Genomics UK (COG-UK) Consortium|Davies|United Kingdom

>Spike|hCoV-19/Scotland/CVR1706/2020|2020-04-06|EPI\_ISL\_438847|Original|hCoV-19^^Scotland|Human|West of Scotland Specialist Virology Centre|COVID-19 Genomics UK (COG-UK) Consortium|Robertson|United Kingdom

>Spike|hCoV-19/Wales/PHWC-49D189/2020|2020-12-10|EPI\_ISL\_742742|Original|hCoV-19^^Wales|Human|Wales Specialist Virology Centre Sequencing lab|COVID-19 Genomics UK (COG-UK) Consortium|Moore|United Kingdom

>Spike|hCoV-19/England/CAMC-A81A78/2020|2020-10-13|EPI\_ISL\_610675|Original|hCoV-19^^England|Human|Lighthouse Lab in Cambridge|Wellcome Sanger Institute for the COVID-19 Genomics UK (COG-UK) consortium|Davies|United Kingdom

>Spike|hCoV-19/Switzerland/SO-ETHZ-360213/2020|2020-11-09|EPI\_ISL\_729252|Original|hCoV-19^^Solothurn|Human|Viollier AG|Department of Biosystems Science and Engineering|Nadeau|Switzerland

>Spike|hCoV-19/Denmark/DCGC-22403/2020|2020-12-14|EPI\_ISL\_757543|Original|hCoV-19^^Midtjylland|Human|Department of Virus and Microbiological Special Diagnostics|Albertsen Lab|Michaelsen|Denmark

>Spike|hCoV-19/England/CAMC-A5899B/2020|2020-10-08|EPI\_ISL\_597003|Original|hCoV-19^^England|Human|Lighthouse Lab in Cambridge|Wellcome Sanger Institute for the COVID-19 Genomics UK (COG-UK) consortium|Davies|United Kingdom

>Spike|hCoV-19/England/MILK-BB0DC1/2020|2020-11-18|EPI\_ISL\_720429|Original|hCoV-19^^England|Human|Lighthouse Lab in Milton Keynes|Wellcome Sanger Institute for the COVID-19 Genomics UK (COG-UK) Consortium|Davies|United Kingdom

>Spike|hCoV-19/USA/FL-BPHL-1798/2020|2020-07-31|EPI\_ISL\_613897|Original|hCoV-19^^Florida|Human|Florida Bureau of Public Health Laboratories|Florida Bureau of Public Health Laboratories|Blanton|USA

>Spike|hCoV-19/USA/CA-CZB-1073/2020|2020-04-21|EPI\_ISL\_437073|Original|hCoV-19^^California|Human|County of Santa Clara Public Health|Chan-Zuckerberg Biohub|Hao|USA

>Spike|hCoV-19/USA/MI-MDHHS-SC20803/2020|2020-05-18|EPI\_ISL\_471824|Original|hCoV-19^^Michigan|Human|Michigan Department of Health and Human Services|Michigan Department of Health and Human Services|Blankenship|USA

>Spike|hCoV-19/Northern Ireland/NIRE-104117/2020|2020-04-14|EPI\_ISL\_482035|Original|hCoV-19^^Northern Ireland|Human|Regional Virus Laboratory|Wellcome Sanger Institute for the COVID-19 Genomics UK (COG-UK) consortium|Davies|United Kingdom

>Spike|hCoV-19/England/QEUEH-A02B6D/2020|2020-10-01|EPI\_ISL\_584948|Original|hCoV-19^^England|Human|Quadram Institute Bioscience|COVID-19 Genomics UK (COG-UK) Consortium|Alikhan|United Kingdom

>Spike|hCoV-19/Northern Ireland/NIRE-1094DD/2020|2020-10-13|EPI\_ISL\_652332|Original|hCoV-19^^Northern Ireland|Human|Regional Virus Laboratory|COVID-19 Genomics UK (COG-UK) Consortium|Fairley|United Kingdom

>Spike|hCoV-19/USA/CA-QDX-2746/2020|2020-03-16|EPI\_ISL\_605022|Original|hCoV-19^^California|Human|Quest Diagnostics|Quest Diagnostics|Kagan|USA

>Spike|hCoV-19/England/ALDP-A6EF63/2020|2020-10-15|EPI\_ISL\_607824|Original|hCoV-19^^England|Human|Lighthouse Lab in Alderley Park|Wellcome Sanger Institute for the COVID-19 Genomics UK (COG-UK) consortium|Davies|United Kingdom

>Spike|hCoV-19/Netherlands/NA\_268/2020|2020-03-30|EPI\_ISL\_422579|Original|hCoV-19^^Netherlands|Human|Dutch COVID-19 response team|Erasmus Medical Center|Oude Munnink|Netherlands

>Spike|hCoV-19/England/CAMB-1AD63F/2020|2020-04-25|EPI\_ISL\_489511|Original|hCoV-19^^England|Human|Department of Pathology|Wellcome Sanger Institute for the COVID-19 Genomics UK (COG-UK) consortium|Davies|United Kingdom

>Spike|hCoV-19/England/20138063404/2020|2020-03-26|EPI\_ISL\_423320|Original|hCoV-19^^England|Human|Respiratory Virus Unit|Respiratory Virus Unit|Platt|United Kingdom

>Spike|hCoV-19/England/SHEF-C8532/2020|2020-03-30|EPI\_ISL\_432867|Original|hCoV-19^^England|Human|Virology Department|COVID-19 Genomics UK (COG-UK) Consortium|de Silva|United Kingdom

>Spike|hCoV-19/Denmark/DCGC-22412/2020|2020-12-14|EPI\_ISL\_757410|Original|hCoV-19^^Hovedstaden|Human|Department of Virus and Microbiological Special Diagnostics|Albertsen Lab|Michaelsen|Denmark

>Spike|hCoV-19/Japan/PG-3332/2020|2020-04-00|EPI\_ISL\_691447|Original|hCoV-19^^Japan|Human|Pathogen Genomics Center|Pathogen Genomics Center|Sekizuka|Japan

>Spike|hCoV-19/England/ALDP-94F1DC/2020|2020-06-20|EPI\_ISL\_556429|Original|hCoV-19^^England|Human|Lighthouse Lab in Alderley Park|Wellcome Sanger Institute for the COVID-19 Genomics UK (COG-UK) consortium|Davies|United Kingdom

>Spike|hCoV-19/Gibraltar/204421215/2020|2020-10-27|EPI\_ISL\_613676|Original|hCoV-19^^Gibraltar|Human|Microbiology|Respiratory Virus Unit|Platt|Gibraltar

>Spike|hCoV-19/England/ALDP-AA3F80/2020|2020-10-22|EPI\_ISL\_625105|Original|hCoV-19^^England|Human|Lighthouse Lab in Alderley Park|Wellcome Sanger Institute for the COVID-19 Genomics UK (COG-UK) consortium|Davies|United Kingdom

>Spike|hCoV-19/England/BRIS-12A351/2020|2020-04-30|EPI\_ISL\_458421|Original|hCoV-19^^England|Human|PHE South West Regional Laboratory|Wellcome Sanger Institute for the COVID-19 Genomics UK (COG-UK) consortium|Davies|United Kingdom

>Spike|hCoV-19/Australia/VIC10928/2020|2020-09-04|EPI\_ISL\_563157|Original|hCoV-19^^Victoria|Human|Microbiological Diagnostic Unit - Public Health Laboratory (MDU-PHL)|MDU-PHL|Schultz|Australia

>Spike|hCoV-19/Sweden/20-51902/2020|2020-06-04|EPI\_ISL\_475534|Original|hCoV-19^^Vastra Gotaland|Human|Omtanken Grimmered|The Public Health Agency of Sweden|Svartstr\u00f6m|Sweden



>Spike|hCoV-19/USA/TX-HMH-MCoV-18475/2020|2020-11-17|EPI\_ISL\_784823|Original|hCoV-19^^Texas|Human|Houston Methodist Hospital|Houston Methodist Hospital|Long|USA

>Spike|hCoV-19/Switzerland/VD-ETHZ-300250/2020|2020-09-30|EPI\_ISL\_603282|Original|hCoV-19^^Vaud|Human|Viollier AG|Department of Biosystems Science and Engineering|Nadeau|Switzerland

>Spike|hCoV-19/USA/MA-MASPHL-00727/2020|2020-09-19|EPI\_ISL\_692945|Original|hCoV-19^^Massachusetts|Human|Massachusetts State Public Health Laboratory|Massachusetts State Public Health Laboratory|Lang|USA

>Spike|hCoV-19/Denmark/DCGC-2405/2020|2020-08-10|EPI\_ISL\_617587|Original|hCoV-19^^Midtjylland|Human|Department of Virus and Microbiological Special Diagnostics|Albertsen lab|Michaelsen|Denmark

>Spike|hCoV-19/Japan/IC-0418/2020|2020-12-00|EPI\_ISL\_736924|Original|hCoV-19^^Japan|Human|Pathogen Genomics Center|Pathogen Genomics Center|Sekizuka|Japan

>Spike|hCoV-19/Australia/WA72/2020|2020-07-07|EPI\_ISL\_512725|Original|hCoV-19^^Western Australia|Human|PathWest Laboratory Medicine WA|PathWest Laboratory Medicine WA Microbial Surveillance Unit|Sikazwe|Australia

>Spike|hCoV-19/USA/VA-DCLS-0727/2020|2020-07-09|EPI\_ISL\_526850|Original|hCoV-19^^Virginia|Human|Virginia DCLS|Virginia DCLS|St. Jacques|USA

>Spike|hCoV-19/Denmark/DCGC-4088/2020|2020-09-14|EPI\_ISL\_622044|Original|hCoV-19^^Hovedstaden|Human|Department of Virus and Microbiological Special Diagnostics|Albertsen lab|Michaelsen|Denmark

>Spike|hCoV-19/Belgium/ULG-11148/2020|2020-12-19|EPI\_ISL\_737392|Original|hCoV-19^^Li\u00e8ge|Human|Department of Clinical Microbiology|GIGA Medical Genomics|Durkin|Belgium

>Spike|hCoV-19/Denmark/DCGC-10500/2020|2020-11-02|EPI\_ISL\_670019|Original|hCoV-19^^Hovedstaden|Human|Department of Virus and Microbiological Special Diagnostics|Albertsen Lab|Michaelsen|Denmark

>Spike|hCoV-19/USA/TX-HMH-MCoV-15786/2020|2020-07-09|EPI\_ISL\_785470|Original|hCoV-19^^Texas|Human|Houston Methodist Hospital|Houston Methodist Hospital|Long|USA

>Spike|hCoV-19/Portugal/PT0831/2020|2020-03-21|EPI\_ISL\_511090|Original|hCoV-19^^Portugal|Human|Instituto Nacional de Saude (INSA)|Instituto Nacional de Saude (INSA)|Borges|Portugal

>Spike|hCoV-19/England/ALDP-B854DF/2020|2020-11-12|EPI\_ISL\_675651|Original|hCoV-19^^England|Human|Lighthouse Lab in Alderley Park|Wellcome Sanger Institute for the COVID-19 Genomics UK (COG-UK) Consortium|Davies|United Kingdom

>Spike|hCoV-19/England/QEUH-9F4561/2020|2020-09-25|EPI\_ISL\_588364|Original|hCoV-19^^England|Human|Lighthouse Lab in Glasgow|Wellcome Sanger Institute for the COVID-19 Genomics UK (COG-UK) consortium|Davies|United Kingdom

>Spike|hCoV-19/South Africa/UFS-VIRO-NGS-39/2020|2020-10-15|EPI\_ISL\_682345|Original|hCoV-19^^Free State|Human|NHLS Universitas Academic|UFS Virology|Bester|South Africa

>Spike|hCoV-19/Peru/LIM-INS-041/2020|2020-04-11|EPI\_ISL\_514226|Original|hCoV-19^^Lima|Human|Laboratorio de Referencia Nacional de Virus Respiratorio. Instituto Nacional de Salud Per\u00fa|Laboratorio de Referencia Nacional de Biotecnolog\u00eda y Biolog\u00eda Molecular. Instituto Nacional de Salud Per\u00fa|Padilla Rojas|Peru

>Spike|hCoV-19/England/ALDP-A68C17/2020|2020-10-12|EPI\_ISL\_609157|Original|hCoV-19^^England|Human|Lighthouse Lab in Alderley Park|Wellcome Sanger Institute for the COVID-19 Genomics UK (COG-UK) consortium|Davies|United Kingdom

>Spike|hCoV-19/England/ALDP-4FA4AF/2020|2020-06-24|EPI\_ISL\_559109|Original|hCoV-19^^England|Human|Lighthouse Lab in Alderley Park|Wellcome Sanger Institute for the COVID-19 Genomics UK (COG-UK) consortium|Davies|United Kingdom

>Spike|hCoV-19/USA/NM-NMDOH-2020230022/2020|2020-07-20|EPI\_ISL\_535300|Original|hCoV-19^^New Mexico|Human|New Mexico Department of Health Scientific Laboratory|New Mexico Department of Health Scientific Laboratory|Johnson|USA

>Spike|hCoV-19/Canada/BC\_25574199/2020|2020-03-00|EPI\_ISL\_463226|Original|hCoV-19^^British Columbia|Human|BCCDC Public Health Laboratory|BCCDC Public Health Laboratory|Harrigan|Canada

>Spike|hCoV-19/Denmark/DCGC-17806/2020|2020-12-14|EPI\_ISL\_749578|Original|hCoV-19^^Sjaelland|Human|Department of Virus and Microbiological Special Diagnostics|Albertsen Lab|Michaelsen|Denmark

>Spike|hCoV-19/Wales/PHWC-321A8/2020|2020-04-14|EPI\_ISL\_446614|Original|hCoV-19^^Wales|Human|Wales Specialist Virology Centre|Public Health Wales Microbiology Cardiff|Moore|United Kingdom

>Spike|hCoV-19/Netherlands/NA\_500/2020|2020-03-27|EPI\_ISL\_460673|Original|hCoV-19^^Netherlands|Human|Dutch COVID-19 response team|Erasmus Medical Center|Oude Munnink|Netherlands

>Spike|hCoV-19/England/QEUA-A643CB/2020|2020-10-12|EPI\_ISL\_628694|Original|hCoV-19^^England|Human|Oxford Viromics|COVID-19 Genomics UK (COG-UK) Consortium|Golubchik|United Kingdom

>Spike|hCoV-19/USA/VA-DCLS-1624/2020|2020-08-20|EPI\_ISL\_614029|Original|hCoV-19^^Virginia|Human|Virginia DCLS|Virginia DCLS|St. Jacques|USA

>Spike|hCoV-19/England/ALDP-B1B869/2020|2020-11-01|EPI\_ISL\_646074|Original|hCoV-19^^England|Human|Lighthouse Lab in Alderley Park|Wellcome Sanger Institute for the COVID-19 Genomics UK (COG-UK) Consortium|Davies|United Kingdom

>Spike|hCoV-19/USA/TX-DSHS-0902/2020|2020-06-16|EPI\_ISL\_610038|Original|hCoV-19^^Texas|Human|Texas Department of State Health Services|Texas Department of State Health Services|Rahman|USA

>Spike|hCoV-19/England/201101406/2020|2020-03-09|EPI\_ISL\_464662|Original|hCoV-19^^England|Human|Respiratory Virus Unit|Respiratory Virus Unit|Platt|United Kingdom

>Spike|hCoV-19/England/ALDP-B754E1/2020|2020-11-12|EPI\_ISL\_740909|Original|hCoV-19^^England|Human|Oxford Viromics|COVID-19 Genomics UK (COG-UK) Consortium|Golubchik|United Kingdom

>Spike|hCoV-19/USA/TX-HMH-MCoV-13991/2020|2020-08-15|EPI\_ISL\_787282|Original|hCoV-19^^Texas|Human|Houston Methodist Hospital|Houston Methodist Hospital|Long|USA

>Spike|hCoV-19/Japan/PG-2825/2020|2020-04-00|EPI\_ISL\_690952|Original|hCoV-19^^Japan|Human|Pathogen Genomics Center|Pathogen Genomics Center|Sekizuka|Japan

>Spike|hCoV-19/Scotland/GCVR-17027D/2020|2020-03-24|EPI\_ISL\_459686|Original|hCoV-19^^Scotland|Human|NHSGGC West of Scotland Specialist Virology Centre / MRC-University of Glasgow Centre for Virus Research|Wellcome Sanger Institute for the COVID-19 Genomics UK (COG-UK) consortium|Davies|United Kingdom

>Spike|hCoV-19/Scotland/QEUA-9900B1/2020|2020-08-30|EPI\_ISL\_539939|Original|hCoV-19^^Scotland|Human|Lighthouse Lab in Glasgow|Wellcome Sanger Institute for the COVID-19 Genomics UK (COG-UK) consortium|Davies|United Kingdom

>Spike|hCoV-19/France/IDF-IPP9453/2020|2020-10-15|EPI\_ISL\_623103|Original|hCoV-19^^\u00cele-de-France|Human|General practitioner|National Reference Center for Viruses of Respiratory Infections|Enouf|France

>Spike|hCoV-19/England/LIVE-9A171/2020|2020-04-17|EPI\_ISL\_439853|Original|hCoV-19^^England|Human|Liverpool Clinical Laboratories|COVID-19 Genomics UK (COG-UK) Consortium|Haldenby|United Kingdom

>Spike|hCoV-19/England/20134082504/2020|2020-03-22|EPI\_ISL\_423186|Original|hCoV-19^^England|Human|Respiratory Virus Unit|Respiratory Virus Unit|Platt|United Kingdom

>Spike|hCoV-19/England/20119063104/2020|2020-03-13|EPI\_ISL\_465086|Original|hCoV-19^^England|Human|Respiratory Virus Unit|Respiratory Virus Unit|Platt|United Kingdom

>Spike|hCoV-19/England/CAMB-759FC/2020|2020-03-29|EPI\_ISL\_438258|Original|hCoV-19^^England|Human|Department of Pathology|Wellcome Sanger Institute for the COVID-19 Genomics UK (COG-UK) consortium|Amato|United Kingdom

>Spike|hCoV-19/USA/MI-MDHHS-SC22569/2020|2020-11-20|EPI\_ISL\_737134|Original|hCoV-19^^Michigan|Human|Michigan Department of Health and Human Services|Michigan Department of Health and Human Services|Blankenship|USA

>Spike|hCoV-19/England/SHEF-C1D04/2020|2020-04-20|EPI\_ISL\_490585|Original|hCoV-19^^England|Human|Virology Department|COVID-19 Genomics UK (COG-UK) Consortium|de Silva|United Kingdom

>Spike|hCoV-19/United Arab Emirates/L5630/2020|2020-01-29|EPI\_ISL\_435137|Original|hCoV-19^^United Arab Emirates|Human|Mohammed Bin Rashid University of Medicine and Health Sciences|Al Jalila Genomics Center|Ramaswamy|United Arab Emirates

>Spike|hCoV-19/Netherlands/ZH-EMC-998/2020|2020-11-21|EPI\_ISL\_722388|Original|hCoV-19^^Zuid Holland|Human|Dutch COVID-19 response team|Erasmus Medical Center|Oude Munnink|Netherlands

>Spike|hCoV-19/France/ARA-103892/2020|2020-11-09|EPI\_ISL\_683344|Original|hCoV-19^^Auvergne-Rh\u00f4ne-Alpes|Human|CNR Virus des Infections Respiratoires - France SUD|CNR Virus des Infections Respiratoires - France SUD|Bal|France

>Spike|hCoV-19/USA/MN-MDH-1256/2020|2020-06-09|EPI\_ISL\_482977|Original|hCoV-19^^Minnesota|Human|Mayo Clinic & Mayo Clinic Laboratories|Minnesota Department of Health|Garfin|USA

>Spike|hCoV-19/USA/CT-QDX-760/2020|2020-03-18|EPI\_ISL\_571509|Original|hCoV-19^^Connecticut|Human|Quest Diagnostics|Quest Diagnostics|Kagan|USA

>Spike|hCoV-19/Australia/VIC502/2020|2020-03-22|EPI\_ISL\_426773|Original|hCoV-19^^Victoria|Human|Victorian Infectious Diseases Reference Laboratory (VIDRL)|Microbiological Diagnostic Unit Public Health Laboratory and Victorian Infectious Diseases Reference Laboratory|Schultz|Australia

>Spike|hCoV-19/England/ALDP-AA0A37/2020|2020-10-22|EPI\_ISL\_624915|Original|hCoV-19^^England|Human|Lighthouse Lab in Alderley Park|Wellcome Sanger Institute for the COVID-19 Genomics UK (COG-UK) consortium|Davies|United Kingdom

>Spike|hCoV-19/Portugal/PT1976/2020|2020-11-09|EPI\_ISL\_732199|Original|hCoV-19^^Portugal|Human|Instituto Nacional de Saude (INSA) and Instituto Gulbenkian de Ciencia (IGC)|Instituto Nacional de Saude (INSA) and Instituto Gulbenkian de Ciencia (IGC)|Borges|Portugal

>Spike|hCoV-19/England/LIVE-DB60B1/2020|2020-11-07|EPI\_ISL\_650620|Original|hCoV-19^^England|Human|Liverpool Clinical Laboratories|COVID-19 Genomics UK (COG-UK) Consortium|Haldenby|United Kingdom

>Spike|hCoV-19/Wales/PHWC-497ED3/2020|2020-11-30|EPI\_ISL\_726993|Original|hCoV-19^^Wales|Human|Originating lab|COVID-19 Genomics UK (COG-UK) Consortium|Moore|United Kingdom

>Spike|hCoV-19/Netherlands/OV-RIVM-20168/2020|2020-11-30|EPI\_ISL\_723334|Original|hCoV-19^^Overijssel|Human|Dutch COVID-19 response team|National Institute for Public Health and the Environment (RIVM)|Meijer|Netherlands

>Spike|hCoV-19/USA/MA-MASPHL-00389/2020|2020-05-12|EPI\_ISL\_693155|Original|hCoV-19^^Massachusetts|Human|Massachusetts State Public Health Laboratory|Massachusetts State Public Health Laboratory|Lang|USA

>Spike|hCoV-19/England/QEUEH-9FF654/2020|2020-10-02|EPI\_ISL\_600294|Original|hCoV-19^^England|Human|Lighthouse Lab in Glasgow|Wellcome Sanger Institute for the COVID-19 Genomics UK (COG-UK) consortium|Davies|United Kingdom

>Spike|hCoV-19/Japan/PG-0350/2020|2020-03-30|EPI\_ISL\_480022|Original|hCoV-19^^Kanto|Human|Ibaraki Prefectural Institute of Public Health|Pathogen Genomics Center|Sekizuka|Japan

>Spike|hCoV-19/USA/NV-NSPHL-A0098/2020|2020-04-15|EPI\_ISL\_515374|Original|hCoV-19^^Nevada|Human|Nevada State Public Health Laboratory|Nevada State Public Health Laboratory|Sevinsky|USA

>Spike|hCoV-19/USA/CA-ALSR-0673-SAN/2020|2020-05-15|EPI\_ISL\_483292|Original|hCoV-19^^California|Human|UC San Diego Center for Advanced Laboratory Medicine|Andersen lab at Scripps Research|Gangavarapu|USA

>Spike|hCoV-19/Finland/S5F8/2020|2020-09-10|EPI\_ISL\_737067|Original|hCoV-19^^Uusimaa|Human|Department of Virology and Immunology|Department of Virology|Smura|Finland

>Spike|hCoV-19/England/OXON-B148A/2020|2020-04-24|EPI\_ISL\_479017|Original|hCoV-19^^England|Human|Oxford Viromics|COVID-19 Genomics UK (COG-UK) Consortium|Golubchik|United Kingdom

>Spike|hCoV-19/Brazil/SP-L9-CD121/2020|2020-03-17|EPI\_ISL\_476471|Original|hCoV-19^^S\u00e3o Paulo|Human|Hospital da Cl\u00ednicas da Faculdade de Medicina da Universidade de S\u00e3o Paulo|Instituto de Medicina Tropical da Univesidade de S\u00e3o Paulo|Sabino|Brazil

>Spike|hCoV-19/Wales/MILK-A18065/2020|2020-10-01|EPI\_ISL\_595014|Original|hCoV-19^^Wales|Human|Northumbria University / South Tees Hospitals NHS Foundation Trust / North Cumbria Integrated Care NHS Foundation Trust / North Tees and Hartlepool NHS Foundation Trust / Newcastle Hospitals NHS Foundation Trust|COVID-19 Genomics UK (COG-UK) Consortium|Bashton|United Kingdom

>Spike|hCoV-19/England/BIRM-6292F/2020|2020-08-23|EPI\_ISL\_529629|Original|hCoV-19^^England|Human|University of Birmingham|COVID-19 Genomics UK (COG-UK) Consortium|Loman|United Kingdom

>Spike|hCoV-19/England/ALDP-A2FD91/2020|2020-10-06|EPI\_ISL\_587009|Original|hCoV-19^^England|Human|Lighthouse Lab in Alderley Park|Wellcome Sanger Institute for the COVID-19 Genomics UK (COG-UK) consortium|Davies|United Kingdom

>Spike|hCoV-19/Wales/PHWC-4A387C/2020|2020-12-15|EPI\_ISL\_764583|Original|hCoV-19^^Wales|Human|Wales Specialist Virology Centre Sequencing lab|COVID-19 Genomics UK (COG-UK) Consortium|Moore|United Kingdom

>Spike|hCoV-19/Scotland/CVR42/2020|2020-03-13|EPI\_ISL\_425770|Original|hCoV-19^^Scotland|Human|West of Scotland Specialist Virology Centre|COVID-19 Genomics UK (COG-UK) Consortium|Robertson|United Kingdom

>Spike|hCoV-19/USA/NY-Wadsworth-269616-01/2020|2020-11-10|EPI\_ISL\_734432|Original|hCoV-19^^New York|Human|Wadsworth Center|Wadsworth Center|Lasek-Nesselquist|USA

>Spike|hCoV-19/England/20166070904/2020|2020-04-16|EPI\_ISL\_466580|Original|hCoV-19^^England|Human|Respiratory Virus Unit|Respiratory Virus Unit|Platt|United Kingdom

>Spike|hCoV-19/USA/WA-S2169/2020|2020-06-08|EPI\_ISL\_497597|Original|hCoV-19^^Washington|Human|Washington State Department of Health|Seattle Flu Study|Lee|USA

>Spike|hCoV-19/Norway/1781/2020|2020-03-05|EPI\_ISL\_420138|Original|hCoV-19^^Norway|Human|University Hospital of Northern Norway|Norwegian Institute of Public Health|Hungnes|Norway

>Spike|hCoV-19/Netherlands/NoordHolland\_35/2020|2020-05-15|EPI\_ISL\_461224|Original|hCoV-19^^Noord Holland|Human|Dutch COVID-19 response team|Erasmus Medical Center|Oude Munnink|Netherlands

>Spike|hCoV-19/USA/TX-HMH-MCoV-14304/2020|2020-10-06|EPI\_ISL\_787589|Original|hCoV-19^^Texas|Human|Houston Methodist Hospital|Houston Methodist Hospital|Long|USA

>Spike|hCoV-19/Bangladesh/BCSIR-NILMRC-006.2/2020|2020-05-23|EPI\_ISL\_462094|Original|hCoV-19^^Dhaka|Human|National Institute of Laboratory Medicine and Referral Center|Genomic Research Lab|Khan|Bangladesh

>Spike|hCoV-19/USA/CA-ALSR-1667/2020|2020-03-24|EPI\_ISL\_494727|Original|hCoV-19^^California|Human|San Diego County Public Health Laboratory|Andersen lab at Scripps Research|Gangavarapu|USA

>Spike|hCoV-19/USA/TX-HMH-MCoV-10405/2020|2020-07-08|EPI\_ISL\_789456|Original|hCoV-19^^Texas|Human|Houston Methodist Hospital|Houston Methodist Hospital|Long|USA

>Spike|hCoV-19/Australia/VIC5289/2020|2020-07-17|EPI\_ISL\_520052|Original|hCoV-19^^Victoria|Human|Microbiological Diagnostic Unit - Public Health Laboratory (MDU-PHL)|MDU-PHL|Schultz|Australia

>Spike|hCoV-19/Wales/PHWC-27ABA/2020|2020-03-30|EPI\_ISL\_432198|Original|hCoV-19^^Wales|Human|Wales Specialist Virology Centre|Public Health Wales Microbiology Cardiff|Moore|United Kingdom

>Spike|hCoV-19/USA/CA-CZB-13683/2020|2020-11-04|EPI\_ISL\_738853|Original|hCoV-19^^California|Human|Santa Clara County Public Health Laboratory|Chan-Zuckerberg Biohub|Kamm|USA

>Spike|hCoV-19/Belgium/ULG-10721/2020|2020-09-14|EPI\_ISL\_641563|Original|hCoV-19^^Li\u00e8ge|Human|Department of Clinical Microbiology|GIGA Medical Genomics|Durkin|Belgium

>Spike|hCoV-19/Denmark/DCGC-19141/2020|2020-12-07|EPI\_ISL\_748777|Original|hCoV-19^^Hovedstaden|Human|Department of Virus and Microbiological Special Diagnostics|Albertsen Lab|Michaelsen|Denmark

>Spike|hCoV-19/India/MH-NCCS-NR-7779/2020|2020-06-26|EPI\_ISL\_722186|Original|hCoV-19^^Maharashtra|Human|National Centre For Cell Science|National Centre For Cell Science|Paul|India

>Spike|hCoV-19/India/MH-AFCO-15381/2020|2020-07-26|EPI\_ISL\_721633|Original|hCoV-19^^Maharashtra|Human|Armed Forces Medical College|National Centre For Cell Science|Paul|India

>Spike|hCoV-19/Denmark/DCGC-14754/2020|2020-11-23|EPI\_ISL\_711957|Original|hCoV-19^^Midtjylland|Human|Department of Virus and Microbiological Special Diagnostics|Albertsen Lab|Michaelsen|Denmark

>Spike|hCoV-19/Peru/LIM-UPCH-0014/2020|2020-06-16|EPI\_ISL\_529071|Original|hCoV-19^^Lima|Human|Laboratorio de Referencia Nacional de Virus Respiratorios|Laboratorio de Gen\u00f3mica Microbiana|Tsukayama|Peru

>Spike|hCoV-19/Ireland/D-NVRL-20IRL80158/2020|2020-11-07|EPI\_ISL\_732397|Original|hCoV-19^^Dublin|Human|National Virus Reference Laboratory|National Virus Reference Laboratory|Gonzalez|Ireland

>Spike|hCoV-19/USA/TX-DSHS-0277/2020|2020-06-13|EPI\_ISL\_527844|Original|hCoV-19^^Texas|Human|Texas Department of State Health Services|Texas Department of State Health Services|Rahman|USA

>Spike|hCoV-19/Chile/RM-ISPCH-33/2020|2020-03-17|EPI\_ISL\_445312|Original|hCoV-19^^Region Metropolitana de Santiago|Human|CLINICA UC SAN CARLOS DE APOQUINDO|Instituto de Salud Publica de Chile|Fernandez|Chile

>Spike|hCoV-19/England/CAMC-B333A6/2020|2020-11-05|EPI\_ISL\_659255|Original|hCoV-19^^England|Human|Lighthouse Lab in Cambridge|Wellcome Sanger Institute for the COVID-19 Genomics UK (COG-UK) Consortium|Davies|United Kingdom

>Spike|hCoV-19/Denmark/DCGC-3342/2020|2020-08-31|EPI\_ISL\_616096|Original|hCoV-19^^Hovedstaden|Human|Department of Virus and Microbiological Special Diagnostics|Albertsen lab|Michaelsen|Denmark

>Spike|hCoV-19/DRC/1422/2020|2020-04-08|EPI\_ISL\_434680|Original|hCoV-19^^Kinshasa|Human|Viral Respiratory Lab|Pathogen Sequencing Lab|Lusamaki|Democratic Republic of the Congo

>Spike|hCoV-19/Wales/PHWC-16D0E2/2020|2020-09-25|EPI\_ISL\_574201|Original|hCoV-19^^Wales|Human|Wales Specialist Virology Centre Sequencing lab|COVID-19 Genomics UK (COG-UK) Consortium|Moore|United Kingdom

>Spike|hCoV-19/USA/CA-CZB-10619/2020|2020-09-03|EPI\_ISL\_648553|Original|hCoV-19^^California|Human|Madera County Department of Public Health|Chan-Zuckerberg Biohub|Bhatt|USA

>Spike|hCoV-19/USA/WI-GMF-32513/2020|2020-11-09|EPI\_ISL\_661152|Original|hCoV-19^^Wisconsin|Human|Gundersen Molecular Diagnostics Laboratory|Kabara Cancer Research Institute|Kenny|USA

>Spike|hCoV-19/Australia/TAS77/2020|2020-04-07|EPI\_ISL\_522748|Original|hCoV-19^^Tasmania|Human|Royal Hobart Hospital Microbiology Department|MDU-PHL|Schultz|Australia

>Spike|hCoV-19/USA/TX-HMH-MCoV-19033/2020|2020-11-24|EPI\_ISL\_785293|Original|hCoV-19^^Texas|Human|Houston Methodist Hospital|Houston Methodist Hospital|Long|USA

>Spike|hCoV-19/England/QEUA-9C94A4/2020|2020-09-10|EPI\_ISL\_567445|Original|hCoV-19^^England|Human|Lighthouse Lab in Glasgow|Wellcome Sanger Institute for the COVID-19 Genomics UK (COG-UK) consortium|Davies|United Kingdom

>Spike|hCoV-19/England/MILK-B027FF/2020|2020-10-24|EPI\_ISL\_642872|Original|hCoV-19^^England|Human|Lighthouse Lab in Milton Keynes|Wellcome Sanger Institute for the COVID-19 Genomics UK (COG-UK) Consortium|Davies|United Kingdom

>Spike|hCoV-19/England/MILK-9E028F/2020|2020-09-19|EPI\_ISL\_601368|Original|hCoV-19^^England|Human|Lighthouse Lab in Milton Keynes|Wellcome Sanger Institute for the COVID-19 Genomics UK (COG-UK) consortium|Davies|United Kingdom

>Spike|hCoV-19/England/QEUA-9F8C95/2020|2020-09-27|EPI\_ISL\_588893|Original|hCoV-19^^England|Human|Lighthouse Lab in Glasgow|Wellcome Sanger Institute for the COVID-19 Genomics UK (COG-UK) consortium|Davies|United Kingdom

>Spike|hCoV-19/Sweden/20-51831/2020|2020-06-02|EPI\_ISL\_475532|Original|hCoV-19^^Vastmanland|Human|Kungsors VC|The Public Health Agency of Sweden|Svartstr\u00f6m|Sweden

>Spike|hCoV-19/Denmark/DCGC-9951/2020|2020-11-09|EPI\_ISL\_669290|Original|hCoV-19^^Hovedstaden|Human|Department of Virus and Microbiological Special Diagnostics|Albertsen Lab|Michaelsen|Denmark

>Spike|hCoV-19/USA/TX-HMH-7336/2020|2020-06-29|EPI\_ISL\_546683|Original|hCoV-19^^Texas|Human|Houston Methodist Hospital|Houston Methodist Hospital|Long|USA

>Spike|hCoV-19/England/NORW-E7236/2020|2020-04-21|EPI\_ISL\_453555|Original|hCoV-19^^England|Human|Quadram Institute Bioscience|COVID-19 Genomics UK (COG-UK) Consortium|Alikhan|United Kingdom

>Spike|hCoV-19/USA/CA-ALSR-1016-IPL/2020|2020-04-23|EPI\_ISL\_483464|Original|hCoV-19^^California|Human|UC San Diego Center for Advanced Laboratory Medicine|Andersen lab at Scripps Research|Gangavarapu|USA

>Spike|hCoV-19/England/201360187/2020|2020-03-24|EPI\_ISL\_421772|Original|hCoV-19^^England|Human|Respiratory Virus Unit|Respiratory Virus Unit|Platt|United Kingdom

>Spike|hCoV-19/USA/WI-GMF-09471/2020|2020-07-06|EPI\_ISL\_489945|Original|hCoV-19^^Wisconsin|Human|Gundersen Molecular Diagnostics Laboratory|Kabara Cancer Research Institute|Kenny|USA

>Spike|hCoV-19/Wales/ALDP-B24CBC/2020|2020-11-04|EPI\_ISL\_711013|Original|hCoV-19^^Wales|Human|Lighthouse Lab in Alderley Park|Wellcome Sanger Institute for the COVID-19 Genomics UK (COG-UK) Consortium|Davies|United Kingdom

>Spike|hCoV-19/England/MILK-B5A3E5/2020|2020-11-06|EPI\_ISL\_658247|Original|hCoV-19^^England|Human|Lighthouse Lab in Milton Keynes|Wellcome Sanger Institute for the COVID-19 Genomics UK (COG-UK) Consortium|Davies|United Kingdom

>Spike|hCoV-19/England/MILK-A06404/2020|2020-10-01|EPI\_ISL\_599963|Original|hCoV-19^^England|Human|Lighthouse Lab in Milton Keynes|Wellcome Sanger Institute for the COVID-19 Genomics UK (COG-UK) consortium|Davies|United Kingdom

>Spike|hCoV-19/England/QEUH-96F4A0/2020|2020-08-17|EPI\_ISL\_530408|Original|hCoV-19^^England|Human|Lighthouse Lab in Glasgow|Wellcome Sanger Institute for the COVID-19 Genomics UK (COG-UK) consortium|Davies|United Kingdom

>Spike|hCoV-19/England/MILK-CA663B/2020|2020-12-18|EPI\_ISL\_761660|Original|hCoV-19^^England|Human|Lighthouse Lab in Milton Keynes|Wellcome Sanger Institute for the COVID-19 Genomics UK (COG-UK) Consortium|Davies|United Kingdom

>Spike|hCoV-19/Canada/QC-LSPQ-L00216197/2020|2020-03-12|EPI\_ISL\_535745|Original|hCoV-19^^Quebec|Human|H\u00f4pital Laurentien|Laboratoire de sant\u00e9 publique du Qu\u00e9bec|Moreira|Canada

>Spike|hCoV-19/USA/TX-HMH-MCoV-15538/2020|2020-10-24|EPI\_ISL\_787022|Original|hCoV-19^^Texas|Human|Houston Methodist Hospital|Houston Methodist Hospital|Long|USA

>Spike|hCoV-19/England/CAMB-7D3E7/2020|2020-04-06|EPI\_ISL\_442240|Original|hCoV-19^^England|Human|Department of Pathology|Wellcome Sanger Institute for the COVID-19 Genomics UK (COG-UK) consortium|Amato|United Kingdom

>Spike|hCoV-19/England/ALDP-B62DDD/2020|2020-11-08|EPI\_ISL\_655490|Original|hCoV-19^^England|Human|Lighthouse Lab in Alderley Park|Wellcome Sanger Institute for the COVID-19 Genomics UK (COG-UK) Consortium|Davies|United Kingdom

>Spike|hCoV-19/England/ALDP-944553/2020|2020-06-07|EPI\_ISL\_554623|Original|hCoV-19^^England|Human|Lighthouse Lab in Alderley Park|Wellcome Sanger Institute for the COVID-19 Genomics UK (COG-UK) consortium|Davies|United Kingdom

>Spike|hCoV-19/England/MILK-99E280/2020|2020-08-31|EPI\_ISL\_550632|Original|hCoV-19^^England|Human|Lighthouse Lab in Milton Keynes|Wellcome Sanger Institute for the COVID-19 Genomics UK (COG-UK) consortium|Davies|United Kingdom

>Spike|hCoV-19/Northern Ireland/QEUH-96B85D/2020|2020-08-16|EPI\_ISL\_531251|Original|hCoV-19^^Northern Ireland|Human|Lighthouse Lab in Glasgow|Wellcome Sanger Institute for the COVID-19 Genomics UK (COG-UK) consortium|Davies|United Kingdom

>Spike|hCoV-19/USA/UT-UPHL-2009298/2020|2020-05-16|EPI\_ISL\_524907|Original|hCoV-19^^Utah|Human|Utah Public Health Laboratory|Utah Public Health Laboratory|Young|USA

>Spike|hCoV-19/England/CAMC-9D1F4E/2020|2020-09-18|EPI\_ISL\_601530|Original|hCoV-19^^England|Human|Lighthouse Lab in Cambridge|Wellcome Sanger Institute for the COVID-19 Genomics UK (COG-UK) consortium|Davies|United Kingdom

>Spike|hCoV-19/Spain/VC-IBV-98003474/2020|2020-04-07|EPI\_ISL\_539273|Original|hCoV-19^^Comunitat Valenciana|Human|Hospital Universitario de La Ribera (Alzira|SeqCOVID-SPAIN consortium|IBV (CSIC)|Comas|Spain

>Spike|hCoV-19/England/NORW-E6E60/2020|2020-04-18|EPI\_ISL\_448984|Original|hCoV-19^^England|Human|Quadram Institute Bioscience|COVID-19 Genomics UK (COG-UK) Consortium|Alikhan|United Kingdom

>Spike|hCoV-19/Australia/SAP458/2020|2020-03-18|EPI\_ISL\_508144|Original|hCoV-19^^South Australia|Human|SA Pathology|SA Pathology|Leong|Australia

>Spike|hCoV-19/Wales/PHWC-16DC2A/2020|2020-09-25|EPI\_ISL\_577509|Original|hCoV-19^^Wales|Human|Wales Specialist Virology Centre Sequencing lab|COVID-19 Genomics UK (COG-UK) Consortium|Moore|United Kingdom

>Spike|hCoV-19/England/QEUA-C31E79/2020|2020-12-11|EPI\_ISL\_731431|Original|hCoV-19^^England|Human|Lighthouse Lab in Glasgow|Wellcome Sanger Institute for the COVID-19 Genomics UK (COG-UK) Consortium|Davies|United Kingdom

>Spike|hCoV-19/England/201420004/2020|2020-03-30|EPI\_ISL\_465891|Original|hCoV-19^^England|Human|Respiratory Virus Unit|Respiratory Virus Unit|Platt|United Kingdom

>Spike|hCoV-19/England/ALDP-C3CEF6/2020|2020-12-10|EPI\_ISL\_731134|Original|hCoV-19^^England|Human|Lighthouse Lab in Alderley Park|Wellcome Sanger Institute for the COVID-19 Genomics UK (COG-UK) Consortium|Davies|United Kingdom

>Spike|hCoV-19/Australia/NSW2887/2020|2020-03-13|EPI\_ISL\_678360|Original|hCoV-19^^New South Wales|Human|Area of Virology|Virology Research Laboratory; Area of Virology|Foster|Australia

>Spike|hCoV-19/England/ALDP-B1AFA1/2020|2020-11-01|EPI\_ISL\_645681|Original|hCoV-19^^England|Human|Lighthouse Lab in Alderley Park|Wellcome Sanger Institute for the COVID-19 Genomics UK (COG-UK) Consortium|Davies|United Kingdom

>Spike|hCoV-19/Canada/ON-PHL-20-03681/2020|2020-11-00|EPI\_ISL\_775165|Original|hCoV-19^^Ontario|Human|Public Health Ontario Laboratory|Public Health Ontario Laboratory|Guthrie|Canada

>Spike|hCoV-19/England/ALDP-C3B808/2020|2020-12-11|EPI\_ISL\_730931|Original|hCoV-19^^England|Human|Lighthouse Lab in Alderley Park|Wellcome Sanger Institute for the COVID-19 Genomics UK (COG-UK) Consortium|Davies|United Kingdom

>Spike|hCoV-19/Luxembourg/LNS7638444/2020|2020-10-31|EPI\_ISL\_744604|Original|hCoV-19^^Luxembourg|Human|Laboratoire national de sant\u00e9|Laboratoire national de sant\u00e9|Wienecke-Baldacchino|Luxembourg

>Spike|hCoV-19/England/QEUA-96B459/2020|2020-08-13|EPI\_ISL\_531302|Original|hCoV-19^^England|Human|Lighthouse Lab in Glasgow|Wellcome Sanger Institute for the COVID-19 Genomics UK (COG-UK) consortium|Davies|United Kingdom

>Spike|hCoV-19/England/ALDP-BC65C0/2020|2020-11-20|EPI\_ISL\_721276|Original|hCoV-19^^England|Human|Lighthouse Lab in Alderley Park|Wellcome Sanger Institute for the COVID-19 Genomics UK (COG-UK) Consortium|Davies|United Kingdom

>Spike|hCoV-19/England/QEUA-AE4CB9/2020|2020-10-27|EPI\_ISL\_633301|Original|hCoV-19^^England|Human|Lighthouse Lab in Glasgow|Wellcome Sanger Institute for the COVID-19 Genomics UK (COG-UK) consortium|Davies|United Kingdom

>Spike|hCoV-19/England/MILK-BAC108/2020|2020-11-18|EPI\_ISL\_783160|Original|hCoV-19^^England|Human|Lighthouse Lab in Milton Keynes|Wellcome Sanger Institute for the COVID-19 Genomics UK (COG-UK) Consortium|Davies|United Kingdom

>Spike|hCoV-19/England/QEUA-A01366/2020|2020-10-01|EPI\_ISL\_595803|Original|hCoV-19^^England|Human|Virology Department|COVID-19 Genomics UK (COG-UK) Consortium|de Silva|United Kingdom

>Spike|hCoV-19/Vietnam/40125/2020|2020-07-00|EPI\_ISL\_759875|Original|hCoV-19^^Vietnam|Human|National Influenza Center|National Influenza Center|Ung|Vietnam

>Spike|hCoV-19/England/ALDP-AA46E4/2020|2020-10-21|EPI\_ISL\_624554|Original|hCoV-19^^England|Human|Lighthouse Lab in Alderley Park|Wellcome Sanger Institute for the COVID-19 Genomics UK (COG-UK) consortium|Davies|United Kingdom

>Spike|hCoV-19/USA/TX-HMH-MCoV-16293/2020|2020-10-31|EPI\_ISL\_785977|Original|hCoV-19^^Texas|Human|Houston Methodist Hospital|Houston Methodist Hospital|Long|USA

>Spike|hCoV-19/England/201060037/2020|2020-03-05|EPI\_ISL\_464374|Original|hCoV-19^^England|Human|Respiratory Virus Unit|Respiratory Virus Unit|Platt|United Kingdom

>Spike|hCoV-19/USA/NY-Wadsworth-281986-01/2020|2020-12-01|EPI\_ISL\_754415|Original|hCoV-19^^New York|Human|Wadsworth Center|Wadsworth Center|Lasek-Nesselquist|USA

>Spike|hCoV-19/England/LIVE-9A056/2020|2020-04-17|EPI\_ISL\_439840|Original|hCoV-19^^England|Human|Liverpool Clinical Laboratories|COVID-19 Genomics UK (COG-UK) Consortium|Haldenby|United Kingdom

>Spike|hCoV-19/Malaysia/UNIMAS-0099/2020|2020-03-31|EPI\_ISL\_718163|Original|hCoV-19^^Sarawak|Human|Ministry of Health Hospitals|Institute of Health and Community Medicine|Jonathan|Malaysia

>Spike|hCoV-19/England/NORW-FA203/2020|2020-12-07|EPI\_ISL\_725482|Original|hCoV-19^^England|Human|Quadram Institute Bioscience|COVID-19 Genomics UK (COG-UK) Consortium|Alikhan|United Kingdom

>Spike|hCoV-19/New Zealand/20CV0191/2020|2020-08-29|EPI\_ISL\_548057|Original|hCoV-19^^Auckland|Human|North Shore Hospital|Institute of Environmental Science and Research (ESR)|Wang|New Zealand

>Spike|hCoV-19/England/MILK-B05659/2020|2020-10-24|EPI\_ISL\_652187|Original|hCoV-19^^England|Human|Queens Medical Centre|COVID-19 Genomics UK (COG-UK) Consortium|Loose|United Kingdom

>Spike|hCoV-19/USA/WI-UW-449/2020|2020-06-18|EPI\_ISL\_484824|Original|hCoV-19^^Wisconsin|Human|University of Wisconsin-Madison AIDS Vaccine Research Laboratories|University of Wisconsin-Madison AIDS Vaccine Research Laboratories|Baczenas|USA

>Spike|hCoV-19/England/MILK-BAAEF4/2020|2020-11-18|EPI\_ISL\_783280|Original|hCoV-19^^England|Human|Lighthouse Lab in Milton Keynes|Wellcome Sanger Institute for the COVID-19 Genomics UK (COG-UK) Consortium|Davies|United Kingdom

>Spike|hCoV-19/Scotland/QEUIH-BCE249/2020|2020-11-26|EPI\_ISL\_710816|Original|hCoV-19^^Scotland|Human|Lighthouse Lab in Glasgow|Wellcome Sanger Institute for the COVID-19 Genomics UK (COG-UK) Consortium|Davies|United Kingdom

>Spike|hCoV-19/USA/UT-QDX-1863/2020|2020-03-15|EPI\_ISL\_604176|Original|hCoV-19^^Utah|Human|Quest Diagnostics|Quest Diagnostics|Kagan|USA

>Spike|hCoV-19/Australia/WA433/2020|2020-09-25|EPI\_ISL\_672645|Original|hCoV-19^^Western Australia|Human|PathWest Laboratory Medicine WA|PathWest Laboratory Medicine WA Microbial Surveillance Unit|Sikazwe|Australia

>Spike|hCoV-19/South Africa/KRISP-K002363/2020|2020-07-21|EPI\_ISL\_515731|Original|hCoV-19^^KwaZulu-Natal|Human|NHLs-IALCH|KRISP|de Oliveira|South Africa

>Spike|hCoV-19/Denmark/DCGC-996/2020|2020-03-09|EPI\_ISL\_614582|Original|hCoV-19^^Sjaelland|Human|Department of Virus and Microbiological Special Diagnostics|Albertsen lab|Michaelsen|Denmark

>Spike|hCoV-19/Australia/VIC3015/2020|2020-07-04|EPI\_ISL\_521844|Original|hCoV-19^^Victoria|Human|Victorian Infectious Diseases Reference Laboratory (VIDRL)|VIDRL and MDU-PHL|Schultz|Australia

>Spike|hCoV-19/Denmark/DCGC-15133/2020|2020-11-23|EPI\_ISL\_713649|Original|hCoV-19^^Midtjylland|Human|Department of Virus and Microbiological Special Diagnostics|Albertsen Lab|Michaelsen|Denmark

>Spike|hCoV-19/Russia/OMS-ORINFI-2535S/2020|2020-04-08|EPI\_ISL\_569826|Original|hCoV-19^^Omsk|Human|Omsk Research Institute of Natural Focal Infections|WHO National Influenza Centre Russian Federation|Komissarov|Russia

>Spike|hCoV-19/Scotland/QEUIH-9FFEB6/2020|2020-10-02|EPI\_ISL\_600462|Original|hCoV-19^^Scotland|Human|Lighthouse Lab in Glasgow|Wellcome Sanger Institute for the COVID-19 Genomics UK (COG-UK) consortium|Davies|United Kingdom

>Spike|hCoV-19/Singapore/1111/2020|2020-10-19|EPI\_ISL\_605820|Original|hCoV-19^^Singapore|Human|National Public Health Laboratory|National Public Health Laboratory|Mak|Singapore

>Spike|hCoV-19/USA/TX-HMH-MCoV-14541/2020|2020-10-09|EPI\_ISL\_787826|Original|hCoV-19^^Texas|Human|Houston Methodist Hospital|Houston Methodist Hospital|Long|USA

>Spike|hCoV-19/England/ALDP-B1AE59/2020|2020-11-01|EPI\_ISL\_645860|Original|hCoV-19^^England|Human|Lighthouse Lab in Alderley Park|Wellcome Sanger Institute for the COVID-19 Genomics UK (COG-UK) Consortium|Davies|United Kingdom

>Spike|hCoV-19/Spain/GA-IBV-004061/2020|2020-03-18|EPI\_ISL\_510299|Original|hCoV-19^^Galicia|Human|Hospital Cl\u00e9nico Universitario de Santiago de Compostela|SeqCOVID-SPAIN consortium|IBV (CSIC)|Comas|Spain

>Spike|hCoV-19/Switzerland/BL-ETHZ-280084/2020|2020-09-07|EPI\_ISL\_560457|Original|hCoV-19^^Basel-Landschaft|Human|Viollier AG|Department of Biosystems Science and Engineering|Nadeau|Switzerland

>Spike|hCoV-19/USA/WA-UW-4565/2020|2020-03-30|EPI\_ISL\_429603|Original|hCoV-19^^Washington|Human|UW Virology Lab|UW Virology Lab|Roychoudhury|USA

>Spike|hCoV-19/England/MILK-B38B21/2020|2020-11-01|EPI\_ISL\_659048|Original|hCoV-19^^England|Human|Lighthouse Lab in Milton Keynes|Wellcome Sanger Institute for the COVID-19 Genomics UK (COG-UK) Consortium|Davies|United Kingdom

>Spike|hCoV-19/SaudiArabia/KAUST-JEDDAH877/2020|2020-05-24|EPI\_ISL\_513029|Original|hCoV-19^^Jeddah|Human|Pathogen Genomics Lab King Abdullah



University of Science and Technology(KAUST)|Pathogen Genomics Lab King Abdullah  
University of Science and Technology(KAUST)|Mohamed Ghazzali|Saudi Arabia  
>Spike|hCoV-19/England/QEUEH-B9E00C/2020|2020-11-18|EPI\_ISL\_720986|Original|hCoV-  
19^^England|Human|Lighthouse Lab in Glasgow|Wellcome Sanger Institute for the COVID-  
19 Genomics UK (COG-UK) Consortium|Davies|United Kingdom  
>Spike|hCoV-19/Japan/PG-3339/2020|2020-04-00|EPI\_ISL\_691454|Original|hCoV-  
19^^Japan|Human|Pathogen Genomics Center|Pathogen Genomics Center|Sekizuka|Japan  
>Spike|hCoV-19/Australia/VIC2387/2020|2020-06-29|EPI\_ISL\_522105|Original|hCoV-  
19^^Victoria|Human|Victorian Infectious Diseases Reference Laboratory (VIDRL)|VIDRL  
and MDU-PHL|Schultz|Australia  
>Spike|hCoV-19/Jordan/AQ-ALSR-5260/2020|2020-10-12|EPI\_ISL\_730498|Original|hCoV-  
19^^Aqaba|Human|Biolab Diagnostic Laboratories|Andersen lab at Scripps  
Research|Gangavarapu|Jordan  
>Spike|hCoV-19/Poland/PL\_MCB\_72/2020|2020-05-10|EPI\_ISL\_645071|Original|hCoV-  
19^^Poland|Human|Human Genome Variation Research Group|Human Genome Variation  
Research Group||Poland  
>Spike|hCoV-19/USA/TX-HMH-3608/2020|2020-06-15|EPI\_ISL\_543063|Original|hCoV-  
19^^Texas|Human|Houston Methodist Hospital|Houston Methodist Hospital|Long|USA  
>Spike|hCoV-19/Scotland/EDB6935/2020|2020-04-03|EPI\_ISL\_529692|Original|hCoV-  
19^^Scotland|Human|Virology Department|COVID-19 Genomics UK (COG-UK)  
Consortium|Williams|United Kingdom  
>Spike|hCoV-19/Denmark/DCGC-10024/2020|2020-11-09|EPI\_ISL\_668461|Original|hCoV-  
19^^Hovedstaden|Human|Department of Virus and Microbiological Special  
Diagnostics|Albertsen Lab|Michaelsen|Denmark  
>Spike|hCoV-19/India/MH-ACTREC-140/2020|2020-05-28|EPI\_ISL\_699796|Original|hCoV-  
19^^Maharashtra|Human|Hematopathology Laboratory|Hematopathology  
Laboratory|Patkar|India  
>Spike|hCoV-19/England/QEUEH-793153/2020|2020-07-15|EPI\_ISL\_533048|Original|hCoV-  
19^^England|Human|Lighthouse Lab in Glasgow|Wellcome Sanger Institute for the COVID-  
19 Genomics UK (COG-UK) consortium|Davies|United Kingdom  
>Spike|hCoV-19/England/ALDP-9C5499/2020|2020-09-10|EPI\_ISL\_567802|Original|hCoV-  
19^^England|Human|Lighthouse Lab in Alderley Park|Wellcome Sanger Institute for the  
COVID-19 Genomics UK (COG-UK) consortium|Davies|United Kingdom  
>Spike|hCoV-19/USA/CA-CZB-3686/2020|2020-07-22|EPI\_ISL\_548414|Original|hCoV-  
19^^California|Human|University of California|Chan-Zuckerberg Biohub|Bhatt|USA  
>Spike|hCoV-19/England/LIVE-1D29CF/2020|2020-03-29|EPI\_ISL\_611734|Original|hCoV-  
19^^England|Human|Liverpool Clinical Laboratories|COVID-19 Genomics UK (COG-UK)  
Consortium|Haldenby|United Kingdom  
>Spike|hCoV-19/Denmark/DCGC-8761/2020|2020-10-26|EPI\_ISL\_625841|Original|hCoV-  
19^^Hovedstaden|Human|Department of Virus and Microbiological Special  
Diagnostics|Albertsen lab|Michaelsen|Denmark  
>Spike|hCoV-19/England/CAMC-B21244/2020|2020-11-02|EPI\_ISL\_647778|Original|hCoV-  
19^^England|Human|Lighthouse Lab in Cambridge|Wellcome Sanger Institute for the  
COVID-19 Genomics UK (COG-UK) Consortium|Davies|United Kingdom  
>Spike|hCoV-19/England/ALDP-A948D2/2020|2020-10-19|EPI\_ISL\_611231|Original|hCoV-  
19^^England|Human|Lighthouse Lab in Alderley Park|Wellcome Sanger Institute for the  
COVID-19 Genomics UK (COG-UK) consortium|Davies|United Kingdom  
>Spike|hCoV-19/Belgium/UGent-299/2020|2020-11-27|EPI\_ISL\_718025|Original|hCoV-  
19^^Ghent|Human|Lab voor klinische biologie|Onderzoeksgroep  
Virologie|Lambrechts|Belgium  
>Spike|hCoV-19/England/NORT-28AA1D/2020|2020-04-14|EPI\_ISL\_457309|Original|hCoV-  
19^^England|Human|Northumbria University / South Tees Hospitals NHS Foundation Trust  
/ North Cumbria Integrated Care NHS Foundation Trust / North Tees and Hartlepool NHS  
Foundation Trust / Newcastle Hospitals NHS Foundation Trust|COVID-19 Genomics UK  
(COG-UK) Consortium|Bashton|United Kingdom  
>Spike|hCoV-19/England/NORT-295AA6/2020|2020-04-03|EPI\_ISL\_478648|Original|hCoV-  
19^^England|Human|Northumbria University / South Tees Hospitals NHS Foundation Trust  
/ North Cumbria Integrated Care NHS Foundation Trust / North Tees and Hartlepool NHS  
Foundation Trust / Newcastle Hospitals NHS Foundation Trust|COVID-19 Genomics UK  
(COG-UK) Consortium|Bashton|United Kingdom

>Spike|hCoV-19/USA/CO-CSU-C2980-1/2020|2020-04-02|EPI\_ISL\_527410|Original|hCoV-19^^Colorado|Human|Colorado State University - Ebel Lab|Colorado State University - Ebel Lab|Cline|USA

>Spike|hCoV-19/England/MILK-B56AE4/2020|2020-11-05|EPI\_ISL\_656987|Original|hCoV-19^^England|Human|Lighthouse Lab in Milton Keynes|Wellcome Sanger Institute for the COVID-19 Genomics UK (COG-UK) Consortium|Davies|United Kingdom

>Spike|hCoV-19/Denmark/DCGC-10373/2020|2020-11-02|EPI\_ISL\_669460|Original|hCoV-19^^Hovedstaden|Human|Department of Virus and Microbiological Special Diagnostics|Albertsen Lab|Michaelsen|Denmark

>Spike|hCoV-19/Switzerland/TG-ETHZ-410306/2020|2020-12-15|EPI\_ISL\_737564|Original|hCoV-19^^Thurgau|Human|Viollier AG|Department of Biosystems Science and Engineering|Nadeau|Switzerland

>Spike|hCoV-19/Singapore/254/2020|2020-05-15|EPI\_ISL\_462372|Original|hCoV-19^^Singapore|Human|National Public Health Laboratory|National Public Health Laboratory|Mak|Singapore

>Spike|hCoV-19/England/LOND-124F49B/2020|2020-09-20|EPI\_ISL\_665156|Original|hCoV-19^^England|Human|University College London Hospital|COVID-19 Genomics UK (COG-UK) Consortium|Byott|United Kingdom

>Spike|hCoV-19/England/201580278/2020|2020-04-09|EPI\_ISL\_466363|Original|hCoV-19^^England|Human|Respiratory Virus Unit|Respiratory Virus Unit|Platt|United Kingdom

>Spike|hCoV-19/Scotland/CVR1947/2020|2020-04-08|EPI\_ISL\_484530|Original|hCoV-19^^Scotland|Human|West of Scotland Specialist Virology Centre|COVID-19 Genomics UK (COG-UK) Consortium|Robertson|United Kingdom

>Spike|hCoV-19/England/ALDP-C3D147/2020|2020-12-10|EPI\_ISL\_731779|Original|hCoV-19^^England|Human|Lighthouse Lab in Alderley Park|Wellcome Sanger Institute for the COVID-19 Genomics UK (COG-UK) Consortium|Davies|United Kingdom

>Spike|hCoV-19/Chile/RM-128039/2020|2020-07-18|EPI\_ISL\_746613|Original|hCoV-19^^Region Metropolitana de Santiago|Human|Genetica Molecular and Subdepartamento de Virologia ISP Chile|Instituto de Salud Publica de Chile|Tognarelli|Chile

>Spike|hCoV-19/USA/CA-CZB-3652/2020|2020-07-18|EPI\_ISL\_516727|Original|hCoV-19^^California|Human|UCSF Clinical Microbiology Laboratory|Chan-Zuckerberg Biohub|Kamm|USA

>Spike|hCoV-19/England/MILK-B05EBB/2020|2020-10-24|EPI\_ISL\_642768|Original|hCoV-19^^England|Human|Lighthouse Lab in Milton Keynes|Wellcome Sanger Institute for the COVID-19 Genomics UK (COG-UK) Consortium|Davies|United Kingdom

>Spike|hCoV-19/Jordan/AM-ALSR-5154/2020|2020-10-16|EPI\_ISL\_730393|Original|hCoV-19^^Amman|Human|Biolab Diagnostic Laboratories|Andersen lab at Scripps Research|Gangavarapu|Jordan

>Spike|hCoV-19/USA/OR-OHSU-0546/2020|2020-06-16|EPI\_ISL\_525840|Original|hCoV-19^^Oregon|Human|OHSU Lab Services Molecular Microbiology Lab|Ginkgo Bioworks Clinical Laboratory|O'Roak|USA

>Spike|hCoV-19/England/CAMC-A3ECED/2020|2020-10-05|EPI\_ISL\_609709|Original|hCoV-19^^England|Human|Lighthouse Lab in Cambridge|Wellcome Sanger Institute for the COVID-19 Genomics UK (COG-UK) consortium|Davies|United Kingdom

>Spike|hCoV-19/South Africa/NHLS-UCT-GS-3462/2020|2020-09-28|EPI\_ISL\_640132|Original|hCoV-19^^Western Cape|Human|Groote Schuur Hospital wv GSH|NHLS/UCT|Iranzadeh|South Africa

>Spike|hCoV-19/Switzerland/ZH-ETHZ-332169/2020|2020-10-22|EPI\_ISL\_614978|Original|hCoV-19^^Zurich|Human|Viollier AG|Department of Biosystems Science and Engineering|Nadeau|Switzerland

>Spike|hCoV-19/St Eustatius/BQ-RIVM-10371/2020|2020-09-08|EPI\_ISL\_636601|Original|hCoV-19^^St Eustatius|Human|Dutch COVID-19 response team|National Institute for Public Health and the Environment (RIVM)|Meijer|St Eustatius

>Spike|hCoV-19/USA/WI-WSLH-200532/2020|2020-05-27|EPI\_ISL\_578671|Original|hCoV-19^^Wisconsin|Human|Wisconsin State Laboratory of Hygiene Communicable Disease Division|Wisconsin State Laboratory of Hygiene Communicable Disease Division|Florek|USA

>Spike|hCoV-19/Finland/5LS20H9/2020|2020-10-05|EPI\_ISL\_756054|Original|hCoV-19^^Uusimaa|Human|Department of Virology and Immunology|Department of Virology|Smura|Finland

>Spike|hCoV-19/Scotland/QEUH-9F7D2A/2020|2020-09-27|EPI\_ISL\_600898|Original|hCoV-19^^Scotland|Human|Lighthouse Lab in Glasgow|Wellcome Sanger Institute for the COVID-19 Genomics UK (COG-UK) consortium|Davies|United Kingdom

>Spike|hCoV-19/England/PORT-2D0E2B/2020|2020-03-30|EPI\_ISL\_475291|Original|hCoV-19^^England|Human|Centre for Enzyme Innovation|COVID-19 Genomics UK (COG-UK) Consortium|Robson|United Kingdom

>Spike|hCoV-19/England/QEUH-AD4A3A/2020|2020-10-26|EPI\_ISL\_634108|Original|hCoV-19^^England|Human|Lighthouse Lab in Glasgow|Wellcome Sanger Institute for the COVID-19 Genomics UK (COG-UK) consortium|Davies|United Kingdom

>Spike|hCoV-19/USA/TX-HMH0192/2020|2020-03-23|EPI\_ISL\_434867|Original|hCoV-19^^Texas|Human|Houston Methodist Hospital|Houston Methodist Hospital|Long|USA

>Spike|hCoV-19/Wales/PHWC-497EF1/2020|2020-11-30|EPI\_ISL\_726995|Original|hCoV-19^^Wales|Human|Originating lab|COVID-19 Genomics UK (COG-UK) Consortium|Moore|United Kingdom

>Spike|hCoV-19/England/CAMC-C43551/2020|2020-12-10|EPI\_ISL\_719472|Original|hCoV-19^^England|Human|Lighthouse Lab in Cambridge|Wellcome Sanger Institute for the COVID-19 Genomics UK (COG-UK) Consortium|Davies|United Kingdom

>Spike|hCoV-19/England/ALDP-B46971/2020|2020-11-07|EPI\_ISL\_655984|Original|hCoV-19^^England|Human|Lighthouse Lab in Alderley Park|Wellcome Sanger Institute for the COVID-19 Genomics UK (COG-UK) Consortium|Davies|United Kingdom

>Spike|hCoV-19/England/ALDP-A85995/2020|2020-10-18|EPI\_ISL\_610363|Original|hCoV-19^^England|Human|Lighthouse Lab in Alderley Park|Wellcome Sanger Institute for the COVID-19 Genomics UK (COG-UK) consortium|Davies|United Kingdom

>Spike|hCoV-19/England/CAMC-9D71AC/2020|2020-09-22|EPI\_ISL\_584351|Original|hCoV-19^^England|Human|Virology Department|COVID-19 Genomics UK (COG-UK) Consortium|de Silva|United Kingdom

>Spike|hCoV-19/Denmark/DCGC-9446/2020|2020-11-09|EPI\_ISL\_668532|Original|hCoV-19^^Hovedstaden|Human|Department of Virus and Microbiological Special Diagnostics|Albertsen Lab|Michaelsen|Denmark

>Spike|hCoV-19/England/ALDP-9ED9BA/2020|2020-05-05|EPI\_ISL\_580645|Original|hCoV-19^^England|Human|Lighthouse Lab in Alderley Park|Wellcome Sanger Institute for the COVID-19 Genomics UK (COG-UK) consortium|Davies|United Kingdom

>Spike|hCoV-19/Russia/Novosibirsk-84101/2020|2020-03-27|EPI\_ISL\_428918|Vero|hCoV-19^^Novosibirsk|Human|State Research Center of Virology and Biotechnology VECTOR|State Research Center of Virology and Biotechnology VECTOR|Shvalov|Russia

>Spike|hCoV-19/England/204591527/2020|2020-11-06|EPI\_ISL\_700640|Original|hCoV-19^^England|Human|Respiratory Virus Unit|COVID-19 Genomics UK (COG-UK) Consortium|Platt|United Kingdom

>Spike|hCoV-19/England/20144004404/2020|2020-03-31|EPI\_ISL\_423485|Original|hCoV-19^^England|Human|Respiratory Virus Unit|Respiratory Virus Unit|Platt|United Kingdom

>Spike|hCoV-19/USA/UT-UPHL-2012758551/2020|2020-10-02|EPI\_ISL\_746118|Original|hCoV-19^^Utah|Human|Ginkgo Bioworks Clinical Laboratory|Utah Public Health Laboratory|Young|USA

>Spike|hCoV-19/Sweden/20-50292/2020|2020-03-10|EPI\_ISL\_454900|Original|hCoV-19^^Stockholm|Human|Karolinska Universitetslaboratoriet|The Public Health Agency of Sweden|Svartstr\u00f6m|Sweden

>Spike|hCoV-19/England/QEUH-AA023F/2020|2020-10-20|EPI\_ISL\_611362|Original|hCoV-19^^England|Human|Lighthouse Lab in Glasgow|Wellcome Sanger Institute for the COVID-19 Genomics UK (COG-UK) consortium|Davies|United Kingdom

>Spike|hCoV-19/USA/OR-OHSU-2990/2020|2020-09-10|EPI\_ISL\_667451|Original|hCoV-19^^Oregon|Human|OHSU Lab Services Molecular Microbiology Lab|Oregon SARS-CoV-2 Genome Sequencing Center|O'Roak|USA

>Spike|hCoV-19/Switzerland/Vs-ETHZ-410737/2020|2020-12-12|EPI\_ISL\_737865|Original|hCoV-19^^Valais|Human|Viollier AG|Department of Biosystems Science and Engineering|Nadeau|Switzerland

>Spike|hCoV-19/England/ALDP-B62836/2020|2020-11-09|EPI\_ISL\_656486|Original|hCoV-19^^England|Human|Lighthouse Lab in Alderley Park|Wellcome Sanger Institute for the COVID-19 Genomics UK (COG-UK) Consortium|Davies|United Kingdom

>Spike|hCoV-19/Denmark/DCGC-8491/2020|2020-10-26|EPI\_ISL\_625912|Original|hCoV-19^^Sjaelland|Human|Department of Virus and Microbiological Special Diagnostics|Albertsen lab|Michaelsen|Denmark

>Spike|hCoV-19/Wales/PHWC-48B212/2020|2020-11-03|EPI\_ISL\_666208|Original|hCoV-19^^Wales|Human|Wales Specialist Virology Centre Sequencing lab|COVID-19 Genomics UK (COG-UK) Consortium|Moore|United Kingdom

>Spike|hCoV-19/Japan/PG-7366/2020|2020-06-00|EPI\_ISL\_688468|Original|hCoV-19^^Japan|Human|Pathogen Genomics Center|Pathogen Genomics Center|Sekizuka|Japan

>Spike|hCoV-19/England/MILK-9AAB68/2020|2020-09-01|EPI\_ISL\_550844|Original|hCoV-19^^England|Human|Lighthouse Lab in Milton Keynes|Wellcome Sanger Institute for the COVID-19 Genomics UK (COG-UK) consortium|Davies|United Kingdom

>Spike|hCoV-19/USA/NY-Wadsworth-289757-01/2020|2020-12-21|EPI\_ISL\_767504|Original|hCoV-19^^New York|Human|Wadsworth Center|Wadsworth Center|Lasek-Nesselquist|USA

>Spike|hCoV-19/Australia/VIC7890/2020|2020-08-17|EPI\_ISL\_564731|Original|hCoV-19^^Victoria|Human|Microbiological Diagnostic Unit - Public Health Laboratory (MDU-PHL)|MDU-PHL|Schultz|Australia

>Spike|hCoV-19/Wales/PHWC-16D96F/2020|2020-09-21|EPI\_ISL\_577470|Original|hCoV-19^^Wales|Human|Wales Specialist Virology Centre Sequencing lab|COVID-19 Genomics UK (COG-UK) Consortium|Moore|United Kingdom

>Spike|hCoV-19/England/GSTT-6726/2020|2020-03-29|EPI\_ISL\_560720|Original|hCoV-19^^England|Human|Centre for Clinical Infection and Diagnostics Research and Genomics Innovation Unit|Centre for Clinical Infection and Diagnostics Research and Genomics Innovation Unit|Awan|United Kingdom

>Spike|hCoV-19/Denmark/DCGC-22051/2020|2020-12-14|EPI\_ISL\_758109|Original|hCoV-19^^Nordjylland|Human|Department of Virus and Microbiological Special Diagnostics|Albertsen Lab|Michaelsen|Denmark

>Spike|hCoV-19/England/20188036404/2020|2020-04-30|EPI\_ISL\_465507|Original|hCoV-19^^England|Human|Respiratory Virus Unit|Respiratory Virus Unit|Platt|United Kingdom

>Spike|hCoV-19/Scotland/QEUEH-96A9E2/2020|2020-08-17|EPI\_ISL\_534680|Original|hCoV-19^^Scotland|Human|NHSGGC West of Scotland Specialist Virology Centre / MRC-University of Glasgow Centre for Virus Research|Wellcome Sanger Institute for the COVID-19 Genomics UK (COG-UK) consortium|Davies|United Kingdom

>Spike|hCoV-19/England/CAMC-B536B6/2020|2020-11-08|EPI\_ISL\_656856|Original|hCoV-19^^England|Human|Lighthouse Lab in Cambridge|Wellcome Sanger Institute for the COVID-19 Genomics UK (COG-UK) Consortium|Davies|United Kingdom

>Spike|hCoV-19/Switzerland/SH-ETHZ-340114/2020|2020-10-26|EPI\_ISL\_721856|Original|hCoV-19^^Schaffhausen|Human|Viollier AG|Department of Biosystems Science and Engineering|Nadeau|Switzerland

>Spike|hCoV-19/Australia/ACT0059/2020|2020-04-12|EPI\_ISL\_498523|Original|hCoV-19^^Australian Capital Territory|Human|ACT Pathology|Schwessinger Lab|Hall|Australia

>Spike|hCoV-19/England/QEUEH-998426/2020|2020-08-22|EPI\_ISL\_539900|Original|hCoV-19^^England|Human|Lighthouse Lab in Glasgow|Wellcome Sanger Institute for the COVID-19 Genomics UK (COG-UK) consortium|Davies|United Kingdom

>Spike|hCoV-19/mink/Netherlands/NB-EMC-41-3/2020|2020-08-27|EPI\_ISL\_577790|Original|hCoV-19^^Limburg|Neovison vison|Dutch COVID-19 response team|Erasmus Medical Center|Oude Munnink|Netherlands

>Spike|hCoV-19/England/QEUEH-CDF4A8/2020|2020-12-26|EPI\_ISL\_782216|Original|hCoV-19^^England|Human|Lighthouse Lab in Glasgow|Wellcome Sanger Institute for the COVID-19 Genomics UK (COG-UK) Consortium|Davies|United Kingdom

>Spike|hCoV-19/USA/UT-UPHL-201204351/2020|2020-03-30|EPI\_ISL\_672532|Original|hCoV-19^^Utah|Human|Utah Public Health Laboratory|Utah Public Health Laboratory|Young|USA

>Spike|hCoV-19/USA/LA-EVTL140/2020|2020-03-28|EPI\_ISL\_455983|Original|hCoV-19^^Louisiana|Human|LSUHS Emerging Viral Threat Laboratory|Microbial Genome Sequencing Center|Kamil|USA

>Spike|hCoV-19/England/GSTT-265E474/2020|2020-03-31|EPI\_ISL\_484204|Original|hCoV-19^^England|Human|Centre for Clinical Infection and Diagnostics Research and Genomics Innovation Unit|COVID-19 Genomics UK (COG-UK) Consortium|Awan|United Kingdom

>Spike|hCoV-19/England/SHEF-C66F5/2020|2020-06-15|EPI\_ISL\_479220|Original|hCoV-19^^England|Human|Virology Department|COVID-19 Genomics UK (COG-UK) Consortium|de Silva|United Kingdom

>Spike|hCoV-19/England/NORT-288EAA/2020|2020-03-24|EPI\_ISL\_458603|Original|hCoV-19^^England|Human|NU-OMICS DNA Sequencing research facility|Wellcome Sanger Institute for the COVID-19 Genomics UK (COG-UK) consortium|Davies|United Kingdom

>Spike|hCoV-19/England/QEUH-9F340B/2020|2020-09-24|EPI\_ISL\_588658|Original|hCoV-19^^England|Human|Lighthouse Lab in Glasgow|Wellcome Sanger Institute for the COVID-19 Genomics UK (COG-UK) consortium|Davies|United Kingdom

>Spike|hCoV-19/Japan/PG-8490/2020|2020-06-00|EPI\_ISL\_687589|Original|hCoV-19^^Japan|Human|Pathogen Genomics Center|Pathogen Genomics Center|Sekizuka|Japan

>Spike|hCoV-19/England/QEUH-B11247/2020|2020-11-02|EPI\_ISL\_642604|Original|hCoV-19^^England|Human|Lighthouse Lab in Glasgow|Wellcome Sanger Institute for the COVID-19 Genomics UK (COG-UK) Consortium|Davies|United Kingdom

>Spike|hCoV-19/USA/TX-HMH-2890/2020|2020-06-09|EPI\_ISL\_543858|Original|hCoV-19^^Texas|Human|Houston Methodist Hospital|Houston Methodist Hospital|Long|USA

>Spike|hCoV-19/USA/CA-CZB-10966/2020|2020-09-22|EPI\_ISL\_583172|Original|hCoV-19^^California|Human|Tulare County Public Health Lab|Chan-Zuckerberg Biohub|Bhatt|USA

>Spike|hCoV-19/USA/NY-NYCPHL-001075/2020|2020-10-15|EPI\_ISL\_633076|Original|hCoV-19^^New York|Human|DOHMH Chelsea|New York City Public Health Laboratory|Wang|USA

>Spike|hCoV-19/Rwanda/M95143-RD/2020|2020-07-15|EPI\_ISL\_707783|Original|hCoV-19^^Rwanda|Human|Rwanda National Reference Laboratory|Rwanda National Reference Laboratory|Mukantwari|Rwanda

>Spike|hCoV-19/Russia/CRIE4955821/2020|2020-07-16|EPI\_ISL\_534338|Original|hCoV-19^^Moscow|Human|Molecular diagnostic laboratory of Federal Budget Institution of Science \Central Research Institute of Epidemiology\ of The Federal Service on Customers' Rights Protection and Human Well-being Surveillance|Group of Genomics and Postgenomic Technologies of Central Research Institute of Epidemiology|Speranskaya|Russia

>Spike|hCoV-19/Spain/RI-IBV-98002366/2020|2020-03-10|EPI\_ISL\_537862|Original|hCoV-19^^La Rioja|Human|Centro de Investigaci\u00f3n Biom\u00e9dica de La Rioja - Hospital San Pedro Logro\u00f1o|SeqCOVID-SPAIN consortium/IBV (CSIC)|Comas|Spain

>Spike|hCoV-19/Qatar/QA20/2020|2020-03-23|EPI\_ISL\_427416|Original|hCoV-19^^Doha|Human|Ministry of Public Health (MoPH)|Biomedical Research Center (BRC)|Benslimane|Qatar

>Spike|hCoV-19/USA/LA-GBCL-26556579/2020|2020-04-14|EPI\_ISL\_485205|Original|hCoV-19^^Louisiana|Human|River Road Testing Lab|Ginkgo Bioworks Clinical Laboratory|Smith|USA

>Spike|hCoV-19/SaudiArabia/KAUST-MADINAH397/2020|2020-04-24|EPI\_ISL\_513150|Original|hCoV-19^^Madinah|Human|Pathogen Genomics Lab King Abdullah University of Science and Technology(KAUST)|Pathogen Genomics Lab King Abdullah University of Science and Technology(KAUST)|Mohamed Ghazzali|Saudi Arabia

>Spike|hCoV-19/England/ALDP-BB9C9E/2020|2020-11-20|EPI\_ISL\_703024|Original|hCoV-19^^England|Human|Lighthouse Lab in Alderley Park|Wellcome Sanger Institute for the COVID-19 Genomics UK (COG-UK) Consortium|Davies|United Kingdom

>Spike|hCoV-19/Oman/205026358/2020|2020-04-03|EPI\_ISL\_457981|Original|hCoV-19^^Muscat|Human|Oman-NIC|Department of\u00a0Microbiology\u00a0and Immunology-SQUH|AL Zadjali|Oman

>Spike|hCoV-19/England/ALDP-A673C8/2020|2020-10-12|EPI\_ISL\_630570|Original|hCoV-19^^England|Human|Lighthouse Lab in Alderley Park|Wellcome Sanger Institute for the COVID-19 Genomics UK (COG-UK) consortium|Davies|United Kingdom

>Spike|hCoV-19/Spain/MD-IBV-97010042/2020|2020-03-12|EPI\_ISL\_779724|Original|hCoV-19^^Madrid|Human|IdISSC/Hospital Cl\u00e9nico San Carlos de Madrid\u200b|SeqCOVID-SPAIN consortium/IBV (CSIC)|Comas|Spain

>Spike|hCoV-19/USA/TX-HMH-MCoV-8113/2020|2020-06-30|EPI\_ISL\_784205|Original|hCoV-19^^Texas|Human|Houston Methodist Hospital|Houston Methodist Hospital|Long|USA

>Spike|hCoV-19/USA/TX-HMH-MCoV-9671/2020|2020-06-29|EPI\_ISL\_780214|Original|hCoV-19^^Texas|Human|Houston Methodist Hospital|Houston Methodist Hospital|Long|USA

>Spike|hCoV-19/England/CAMC-94BBD2/2020|2020-07-15|EPI\_ISL\_556758|Original|hCoV-19^^England|Human|Lighthouse Lab in Cambridge|Wellcome Sanger Institute for the COVID-19 Genomics UK (COG-UK) consortium|Davies|United Kingdom

>Spike|hCoV-19/Japan/PG-5534/2020|2020-08-00|EPI\_ISL\_688659|Original|hCoV-19^^Japan|Human|Pathogen Genomics Center|Pathogen Genomics Center|Sekizuka|Japan

>Spike|hCoV-19/Germany/BY-MVP-0052/2020|2020-03-14|EPI\_ISL\_437251|Original|hCoV-19^^Bavaria|Human|Max von Pettenkofer Institute|Laboratory for Functional Genome Analysis|Graf|Germany

>Spike|hCoV-19/Canada/ON-PHL-20-00385/2020|2020-03-00|EPI\_ISL\_548776|Original|hCoV-19^^Ontario|Human|Public Health Ontario Laboratory|Public Health Ontario Laboratory|Guthrie|Canada

>Spike|hCoV-19/Denmark/DCGC-12717/2020|2020-11-16|EPI\_ISL\_682898|Original|hCoV-19^^Syddanmark|Human|Department of Virus and Microbiological Special Diagnostics|Albertsen Lab|Michaelsen|Denmark

>Spike|hCoV-19/England/MILK-B0263E/2020|2020-10-24|EPI\_ISL\_642858|Original|hCoV-19^^England|Human|Lighthouse Lab in Milton Keynes|Wellcome Sanger Institute for the COVID-19 Genomics UK (COG-UK) Consortium|Davies|United Kingdom

>Spike|hCoV-19/Denmark/DCGC-20327/2020|2020-11-16|EPI\_ISL\_748116|Original|hCoV-19^^Midtjylland|Human|Department of Virus and Microbiological Special Diagnostics|Albertsen Lab|Michaelsen|Denmark

>Spike|hCoV-19/DRC/5186/2020|2020-05-03|EPI\_ISL\_496512|Original|hCoV-19^^Kinshasa|Human|Viral Respiratory Lab|Pathogen Sequencing Lab|Lokilo|Democratic Republic of the Congo

>Spike|hCoV-19/Wales/PHWC-16E8BC/2020|2020-10-03|EPI\_ISL\_585784|Original|hCoV-19^^Wales|Human|Wales Specialist Virology Centre Sequencing lab|COVID-19 Genomics UK (COG-UK) Consortium|Moore|United Kingdom

>Spike|hCoV-19/Scotland/EDB9433/2020|2020-10-31|EPI\_ISL\_680526|Original|hCoV-19^^Scotland|Human|Virology Department|COVID-19 Genomics UK (COG-UK) Consortium|McHugh|United Kingdom

>Spike|hCoV-19/USA/TX-HMH-MCoV-11196/2020|2020-09-02|EPI\_ISL\_789732|Original|hCoV-19^^Texas|Human|Houston Methodist Hospital|Houston Methodist Hospital|Long|USA

>Spike|hCoV-19/England/LOND-1286E12/2020|2020-04-07|EPI\_ISL\_541755|Original|hCoV-19^^England|Human|Barts Health NHS Trust|Wellcome Sanger Institute for the COVID-19 Genomics UK (COG-UK) consortium|Davies|United Kingdom

>Spike|hCoV-19/Scotland/QEUEH-9983B0/2020|2020-08-26|EPI\_ISL\_568354|Original|hCoV-19^^Scotland|Human|Lighthouse Lab in Glasgow|Wellcome Sanger Institute for the COVID-19 Genomics UK (COG-UK) consortium|Davies|United Kingdom

>Spike|hCoV-19/Japan/PG-4519/2020|2020-07-00|EPI\_ISL\_689658|Original|hCoV-19^^Japan|Human|Pathogen Genomics Center|Pathogen Genomics Center|Sekizuka|Japan

>Spike|hCoV-19/Netherlands/GE-EMC-204/2020|2020-05-26|EPI\_ISL\_523186|Original|hCoV-19^^Gelderland|Human|Dutch COVID-19 response team|Erasmus Medical Center|Oude Munnink|Netherlands

>Spike|hCoV-19/South Korea/KCDC2543/2020|2020-06-22|EPI\_ISL\_514946|Original|hCoV-19^^South Korea|Human|Division of Viral Diseases|Division of Viral Diseases|Kim|South Korea

>Spike|hCoV-19/DRC/10507/2020|2020-05-18|EPI\_ISL\_527492|Original|hCoV-19^^Sud Kivu|Human|Viral Respiratory Lab|Pathogen Sequencing Lab|Lokilo|Democratic Republic of the Congo

>Spike|hCoV-19/Luxembourg/LNS5185009/2020|2020-07-29|EPI\_ISL\_744198|Original|hCoV-19^^Luxembourg|Human|Laboratoire national de sant\u00e9|Laboratoire national de sant\u00e9|Wienecke-Baldacchino|Luxembourg

>Spike|hCoV-19/Australia/VIC6835/2020|2020-07-25|EPI\_ISL\_564087|Original|hCoV-19^^Victoria|Human|Victorian Infectious Diseases Reference Laboratory (VIDRL)|VIDRL and MDU-PHL|Schultz|Australia

>Spike|hCoV-19/England/CAMC-C9863C/2020|2020-12-17|EPI\_ISL\_777343|Original|hCoV-19^^England|Human|Lighthouse Lab in Cambridge|Wellcome Sanger Institute for the COVID-19 Genomics UK (COG-UK) Consortium|Davies|United Kingdom

>Spike|hCoV-19/USA/TX-DSHS-1810/2020|2020-06-15|EPI\_ISL\_738180|Original|hCoV-19^^Texas|Human|Texas Department of State Health Services|Texas Department of State Health Services|Rahman|USA

>Spike|hCoV-19/USA/WA-S2770/2020|2020-08-01|EPI\_ISL\_530127|Original|hCoV-19^^Washington|Human|Seattle Flu Study|Seattle Flu Study|Lee|USA

>Spike|hCoV-19/England/ALDP-A70757/2020|2020-10-15|EPI\_ISL\_607808|Original|hCoV-19^^England|Human|Lighthouse Lab in Alderley Park|Wellcome Sanger Institute for the COVID-19 Genomics UK (COG-UK) consortium|Davies|United Kingdom

>Spike|hCoV-19/England/ALDP-B5CF0D/2020|2020-11-09|EPI\_ISL\_655855|Original|hCoV-19^^England|Human|Lighthouse Lab in Alderley Park|Wellcome Sanger Institute for the COVID-19 Genomics UK (COG-UK) Consortium|Davies|United Kingdom

>Spike|hCoV-19/England/ALDP-A9392B/2020|2020-10-20|EPI\_ISL\_611015|Original|hCoV-19^^England|Human|Lighthouse Lab in Alderley Park|Wellcome Sanger Institute for the COVID-19 Genomics UK (COG-UK) consortium|Davies|United Kingdom

>Spike|hCoV-19/England/MILK-B54F32/2020|2020-11-06|EPI\_ISL\_657842|Original|hCoV-19^^England|Human|Lighthouse Lab in Milton Keynes|Wellcome Sanger Institute for the COVID-19 Genomics UK (COG-UK) Consortium|Davies|United Kingdom

>Spike|hCoV-19/England/NORW-E80A4/2020|2020-04-13|EPI\_ISL\_449103|Original|hCoV-19^^England|Human|Quadram Institute Bioscience|COVID-19 Genomics UK (COG-UK) Consortium|Alikhan|United Kingdom

>Spike|hCoV-19/Denmark/DCGC-3722/2020|2020-08-31|EPI\_ISL\_615501|Original|hCoV-19^^Hovedstaden|Human|Department of Virus and Microbiological Special Diagnostics|Albertsen lab|Michaelsen|Denmark

>Spike|hCoV-19/England/CAMB-1B9CB6/2020|2020-11-06|EPI\_ISL\_651550|Original|hCoV-19^^England|Human|Department of Pathology|COVID-19 Genomics UK (COG-UK) Consortium|Goodfellow|United Kingdom

>Spike|hCoV-19/England/CAMC-B096A0/2020|2020-10-30|EPI\_ISL\_672975|Original|hCoV-19^^England|Human|Lighthouse Lab in Cambridge|Wellcome Sanger Institute for the COVID-19 Genomics UK (COG-UK) Consortium|Davies|United Kingdom

>Spike|hCoV-19/USA/LA-EVTL550/2020|2020-06-29|EPI\_ISL\_578954|Original|hCoV-19^^Louisiana|Human|LSUHS Emerging Viral Threat Laboratory|Microbial Genome Sequencing Center|Kamil|USA

>Spike|hCoV-19/USA/CA-ALSR-1551/2020|2020-05-05|EPI\_ISL\_494658|Original|hCoV-19^^California|Human|Scripps Medical Laboratory|Andersen lab at Scripps Research|Gangavarapu|USA

>Spike|hCoV-19/Denmark/DCGC-16387/2020|2020-11-16|EPI\_ISL\_714737|Original|hCoV-19^^Hovedstaden|Human|Department of Virus and Microbiological Special Diagnostics|Albertsen Lab|Michaelsen|Denmark

>Spike|hCoV-19/USA/MI-UM-10035681090/2020|2020-08-27|EPI\_ISL\_583287|Original|hCoV-19^^Michigan|Human|University of Michigan Clinical Microbiology Laboratory|Lauring Lab|Valesano|USA

>Spike|hCoV-19/France/ARA-59593/2020|2020-08-10|EPI\_ISL\_683368|Original|hCoV-19^^Auvergne-Rh\u00f4ne-Alpes|Human|CNR Virus des Infections Respiratoires - France SUD|CNR Virus des Infections Respiratoires - France SUD|Bal|France

>Spike|hCoV-19/Scotland/EDB2909/2020|2020-04-01|EPI\_ISL\_488895|Original|hCoV-19^^Scotland|Human|Virology Department|Wellcome Sanger Institute for the COVID-19 Genomics UK (COG-UK) consortium|Davies|United Kingdom

>Spike|hCoV-19/Spain/RI-IBV-99010904/2020|2020-09-14|EPI\_ISL\_732750|Original|hCoV-19^^La Rioja|Human|Centro de Investigaci\u00f3n Biom\u00e9dica de La Rioja - Hospital San Pedro Logro\u00f1o|SeqCOVID-SPAIN consortium|IBV (CSIC)|Comas|Spain

>Spike|hCoV-19/England/QEUA-B3FFA6/2020|2020-11-08|EPI\_ISL\_657248|Original|hCoV-19^^England|Human|Lighthouse Lab in Glasgow|Wellcome Sanger Institute for the COVID-19 Genomics UK (COG-UK) Consortium|Davies|United Kingdom

>Spike|hCoV-19/England/CAMB-848FD/2020|2020-03-05|EPI\_ISL\_440498|Original|hCoV-19^^England|Human|Department of Pathology|Wellcome Sanger Institute for the COVID-19 Genomics UK (COG-UK) consortium|Amato|United Kingdom

>Spike|hCoV-19/Spain/PV-IBV-001459/2020|2020-03-19|EPI\_ISL\_467146|Original|hCoV-19^^Basque Country|Human|Hospital Universitario Araba. Vitoria-Gasteiz|SeqCOVID-SPAIN consortium|IBV (CSIC)|Comas|Spain

>Spike|hCoV-19/England/CWAR-24FDDBA/2020|2020-06-05|EPI\_ISL\_584523|Original|hCoV-19^^England|Human|UHCW / University of Warwick|COVID-19 Genomics UK (COG-UK) Consortium|Stark|United Kingdom

>Spike|hCoV-19/England/ALDP-5D1829/2020|2020-06-19|EPI\_ISL\_558421|Original|hCoV-19^^England|Human|Lighthouse Lab in Alderley Park|Wellcome Sanger Institute for the COVID-19 Genomics UK (COG-UK) consortium|Davies|United Kingdom

>Spike|hCoV-19/USA/UT-UPHL-2009197/2020|2020-05-31|EPI\_ISL\_525180|Original|hCoV-19^^Utah|Human|Utah Public Health Laboratory|Utah Public Health Laboratory|Young|USA

>Spike|hCoV-19/Australia/ACT0076/2020|2020-03-27|EPI\_ISL\_498536|Original|hCoV-19^^Australian Capital Territory|Human|ACT Pathology|Schwessinger Lab|Hall|Australia

>Spike|hCoV-19/England/20119006204/2020|2020-03-13|EPI\_ISL\_465017|Original|hCoV-19^^England|Human|Respiratory Virus Unit|Respiratory Virus Unit|Platt|United Kingdom

>Spike|hCoV-19/Australia/VIC7082/2020|2020-07-29|EPI\_ISL\_564221|Original|hCoV-19^^Victoria|Human|Victorian Infectious Diseases Reference Laboratory (VIDRL)|VIDRL and MDU-PHL|Schultz|Australia

>Spike|hCoV-19/Gibraltar/205121222/2020|2020-00-00|EPI\_ISL\_766348|Original|hCoV-19^^Gibraltar|Human|Microbiology|Respiratory Virus Unit|Platt|Gibraltar

>Spike|hCoV-19/England/NOTT-11336A/2020|2020-09-16|EPI\_ISL\_549334|Original|hCoV-19^^England|Human|Queens Medical Centre|COVID-19 Genomics UK (COG-UK) Consortium|Loose|United Kingdom

>Spike|hCoV-19/Netherlands/ZH-EMC-808/2020|2020-10-15|EPI\_ISL\_632687|Original|hCoV-19^^Zuid Holland|Human|Dutch COVID-19 response team|Erasmus Medical Center|Oude Munnink|Netherlands

>Spike|hCoV-19/Denmark/DCGC-4754/2020|2020-09-14|EPI\_ISL\_622193|Original|hCoV-19^^Syddanmark|Human|Department of Virus and Microbiological Special Diagnostics|Albertsen lab|Michaelsen|Denmark

>Spike|hCoV-19/Denmark/DCGC-5808/2020|2020-09-28|EPI\_ISL\_620995|Original|hCoV-19^^Sjaelland|Human|Department of Virus and Microbiological Special Diagnostics|Albertsen lab|Michaelsen|Denmark

>Spike|hCoV-19/England/ALDP-8FAEAD/2020|2020-06-24|EPI\_ISL\_551402|Original|hCoV-19^^England|Human|Lighthouse Lab in Alderley Park|Wellcome Sanger Institute for the COVID-19 Genomics UK (COG-UK) consortium|Davies|United Kingdom

>Spike|hCoV-19/England/ALDP-BB2837/2020|2020-11-20|EPI\_ISL\_702786|Original|hCoV-19^^England|Human|Lighthouse Lab in Alderley Park|Wellcome Sanger Institute for the COVID-19 Genomics UK (COG-UK) Consortium|Davies|United Kingdom

>Spike|hCoV-19/Scotland/QEUH-A9E9F3/2020|2020-10-20|EPI\_ISL\_625332|Original|hCoV-19^^Scotland|Human|Lighthouse Lab in Glasgow|Wellcome Sanger Institute for the COVID-19 Genomics UK (COG-UK) consortium|Davies|United Kingdom

>Spike|hCoV-19/Wales/PHWC-491F4F/2020|2020-11-16|EPI\_ISL\_706797|Original|hCoV-19^^Wales|Human|Originating lab|COVID-19 Genomics UK (COG-UK) Consortium|Moore|United Kingdom

>Spike|hCoV-19/Spain/AR-IBV-97009509/2020|2020-07-24|EPI\_ISL\_671797|Original|hCoV-19^^Aragon|Human|Hospital Cl\u00ednico Universitario Lozano Blesa de Zaragoza (Espa\u00f1a)|SeqCOVID-SPAIN consortium/IBV(CSIC)|Comas|Spain

>Spike|hCoV-19/USA/TX-HMH-6807/2020|2020-06-25|EPI\_ISL\_546257|Original|hCoV-19^^Texas|Human|Houston Methodist Hospital|Houston Methodist Hospital|Long|USA

>Spike|hCoV-19/England/ALDP-A6D386/2020|2020-10-15|EPI\_ISL\_608227|Original|hCoV-19^^England|Human|Lighthouse Lab in Alderley Park|Wellcome Sanger Institute for the COVID-19 Genomics UK (COG-UK) consortium|Davies|United Kingdom

>Spike|hCoV-19/USA/TX-HMH-MCoV-14727/2020|2020-10-01|EPI\_ISL\_786212|Original|hCoV-19^^Texas|Human|Houston Methodist Hospital|Houston Methodist Hospital|Long|USA

>Spike|hCoV-19/Denmark/DCGC-3267/2020|2020-08-31|EPI\_ISL\_616209|Original|hCoV-19^^Hovedstaden|Human|Department of Virus and Microbiological Special Diagnostics|Albertsen lab|Michaelsen|Denmark

>Spike|hCoV-19/England/QEUH-B40124/2020|2020-11-08|EPI\_ISL\_657115|Original|hCoV-19^^England|Human|Lighthouse Lab in Glasgow|Wellcome Sanger Institute for the COVID-19 Genomics UK (COG-UK) Consortium|Davies|United Kingdom

>Spike|hCoV-19/Denmark/DCGC-3134/2020|2020-08-31|EPI\_ISL\_615953|Original|hCoV-19^^Hovedstaden|Human|Department of Virus and Microbiological Special Diagnostics|Albertsen lab|Michaelsen|Denmark



>Spike|hCoV-19/England/QEUA-A1EB7D/2020|2020-09-29|EPI\_ISL\_587378|Original|hCoV-19^^England|Human|Lighthouse Lab in Glasgow|Wellcome Sanger Institute for the COVID-19 Genomics UK (COG-UK) consortium|Davies|United Kingdom

>Spike|hCoV-19/Spain/PV-IBV-003214/2020|2020-03-13|EPI\_ISL\_480959|Original|hCoV-19^^Basque Country|Human|Servicio de Microbiolog\u00eda. Hospital Universitario Donostia. OSI Donostialdea. \u00c1rea de Enfermedades Infecciosas|SeqCOVID-SPAIN consortium/IBV (CSIC) |Comas|Spain

>Spike|hCoV-19/Netherlands/NB-RIVM-20270/2020|2020-11-20|EPI\_ISL\_723413|Original|hCoV-19^^Noord-Brabant|Human|Dutch COVID-19 response team|National Institute for Public Health and the Environment (RIVM)|Meijer|Netherlands

>Spike|hCoV-19/USA/CA-CZB-15098/2020|2020-11-20|EPI\_ISL\_739129|Original|hCoV-19^^California|Human|Santa Clara County Public Health Laboratory|Chan-Zuckerberg Biohub|Kamm|USA

>Spike|hCoV-19/Japan/PG-6681/2020|2020-07-00|EPI\_ISL\_687792|Original|hCoV-19^^Japan|Human|Pathogen Genomics Center|Pathogen Genomics Center|Sekizuka|Japan

>Spike|hCoV-19/USA/WI-UW-371/2020|2020-05-20|EPI\_ISL\_480353|Original|hCoV-19^^Wisconsin|Human|University of Wisconsin-Madison AIDS Vaccine Research Laboratories|University of Wisconsin-Madison AIDS Vaccine Research Laboratories|Baczenas|USA

>Spike|hCoV-19/South Korea/KCDC2602/2020|2020-07-01|EPI\_ISL\_515005|Original|hCoV-19^^South Korea|Human|Division of Viral Diseases|Division of Viral Diseases|Kim|South Korea

>Spike|hCoV-19/Portugal/PT0755/2020|2020-03-23|EPI\_ISL\_511014|Original|hCoV-19^^Portugal|Human|Instituto Nacional de Saude (INSA)|Instituto Nacional de Saude (INSA) |Borges|Portugal

>Spike|hCoV-19/Australia/VIC13095/2020|2020-07-28|EPI\_ISL\_640316|Original|hCoV-19^^Victoria|Human|Microbiological Diagnostic Unit - Public Health Laboratory (MDU-PHL) |MDU-PHL|Schultz|Australia

>Spike|hCoV-19/England/CAMC-A5846D/2020|2020-10-08|EPI\_ISL\_597169|Original|hCoV-19^^England|Human|Lighthouse Lab in Cambridge|Wellcome Sanger Institute for the COVID-19 Genomics UK (COG-UK) consortium|Davies|United Kingdom

>Spike|hCoV-19/USA/NY-PV09181/2020|2020-03-19|EPI\_ISL\_422540|Original|hCoV-19^^New York|Human|MSSM Clinical Microbiology Laboratories|MSSM Pathogen Surveillance Program|van Bakel|USA

>Spike|hCoV-19/United Arab Emirates/0290/2020|2020-05-18|EPI\_ISL\_698205|Original|hCoV-19^^Abu Dhabi|Human|Group 42 (G42) Healthcare|G42 Healthcare|Ogrodzki|United Arab Emirates

>Spike|hCoV-19/Luxembourg/LNS8592530/2020|2020-11-25|EPI\_ISL\_744768|Original|hCoV-19^^Luxembourg|Human|Laboratoire national de sant\u00e9|Laboratoire national de sant\u00e9|Wienecke-Baldacchino|Luxembourg

>Spike|hCoV-19/England/QEUA-9647EE/2020|2020-08-11|EPI\_ISL\_536925|Original|hCoV-19^^England|Human|Lighthouse Lab in Glasgow|Wellcome Sanger Institute for the COVID-19 Genomics UK (COG-UK) consortium|Davies|United Kingdom

>Spike|hCoV-19/Wales/PHWC-16CD64/2020|2020-06-14|EPI\_ISL\_574163|Original|hCoV-19^^Wales|Human|Wales Specialist Virology Centre Sequencing lab|COVID-19 Genomics UK (COG-UK) Consortium|Moore|United Kingdom

>Spike|hCoV-19/USA/TX-HMH-1248/2020|2020-03-31|EPI\_ISL\_542610|Original|hCoV-19^^Texas|Human|Houston Methodist Hospital|Houston Methodist Hospital|Long|USA

>Spike|hCoV-19/USA/MN-MDH-1914/2020|2020-10-18|EPI\_ISL\_613512|Original|hCoV-19^^Minnesota|Human|Public Health Laboratory - Infectious Disease Lab|Minnesota Department of Health|Lorentz|USA

>Spike|hCoV-19/Portugal/PT1587/2020|2020-07-02|EPI\_ISL\_693592|Original|hCoV-19^^Portugal|Human|Instituto Nacional de Saude (INSA)|Instituto Nacional de Saude (INSA) |Borges|Portugal

>Spike|hCoV-19/Denmark/DCGC-10503/2020|2020-11-02|EPI\_ISL\_670020|Original|hCoV-19^^Midtjylland|Human|Department of Virus and Microbiological Special Diagnostics|Albertsen Lab|Michaelsen|Denmark

>Spike|hCoV-19/England/QEUA-961848/2020|2020-07-31|EPI\_ISL\_536998|Original|hCoV-19^^England|Human|Lighthouse Lab in Glasgow|Wellcome Sanger Institute for the COVID-19 Genomics UK (COG-UK) consortium|Davies|United Kingdom

>Spike|hCoV-19/England/CAMB-7C6EF/2020|2020-04-05|EPI\_ISL\_441577|Original|hCoV-19^^England|Human|Department of Pathology|Wellcome Sanger Institute for the COVID-19 Genomics UK (COG-UK) consortium|Amato|United Kingdom

>Spike|hCoV-19/USA/FL-BPHL-0520/2020|2020-06-16|EPI\_ISL\_508723|Original|hCoV-19^^Florida|Human|Florida Bureau of Public Health Laboratories|Florida Bureau of Public Health Laboratories|Blanton|USA

>Spike|hCoV-19/Switzerland/BL-ETHZ-420713/2020|2020-12-24|EPI\_ISL\_768099|Original|hCoV-19^^Basel-Landschaft|Human|Viollier AG|Department of Biosystems Science and Engineering|Nadeau|Switzerland

>Spike|hCoV-19/Scotland/CVR4023/2020|2020-08-29|EPI\_ISL\_535122|Original|hCoV-19^^Scotland|Human|West of Scotland Specialist Virology Centre|COVID-19 Genomics UK (COG-UK) Consortium|Robertson|United Kingdom

>Spike|hCoV-19/England/QEUEH-BA3D58/2020|2020-11-18|EPI\_ISL\_721047|Original|hCoV-19^^England|Human|Lighthouse Lab in Glasgow|Wellcome Sanger Institute for the COVID-19 Genomics UK (COG-UK) Consortium|Davies|United Kingdom

>Spike|hCoV-19/Canada/ON-UHTC\_0115/2020|2020-05-20|EPI\_ISL\_526263|Original|hCoV-19^^Ontario|Human|Unity Health Toronto|Ontario Institute for Cancer Research|de Borja|Canada

>Spike|hCoV-19/Denmark/DCGC-15257/2020|2020-11-23|EPI\_ISL\_713725|Original|hCoV-19^^Hovedstaden|Human|Department of Virus and Microbiological Special Diagnostics|Albertsen Lab|Michaelsen|Denmark

>Spike|hCoV-19/USA/TX-HMH-MCoV-14360/2020|2020-10-05|EPI\_ISL\_787645|Original|hCoV-19^^Texas|Human|Houston Methodist Hospital|Houston Methodist Hospital|Long|USA

>Spike|hCoV-19/USA/WI-UW-1771/2020|2020-09-16|EPI\_ISL\_605643|Original|hCoV-19^^Wisconsin|Human|University of Wisconsin-Madison AIDS Vaccine Research Laboratories|University of Wisconsin-Madison AIDS Vaccine Research Laboratories|Baczenas|USA

>Spike|hCoV-19/Switzerland/AG-ETHZ-130028/2020|2020-05-13|EPI\_ISL\_467015|Original|hCoV-19^^Aargau|Human|Viollier AG|Department of Biosystems Science and Engineering|Nadeau|Switzerland

>Spike|hCoV-19/Sierra Leone/KGH-G-8603/2020|2020-04-23|EPI\_ISL\_512813|Original|hCoV-19^^Sierra Leone|Human|Kenema Government Hospital|Kenema Government Hospital|Sandi|Sierra Leone

>Spike|hCoV-19/USA/HI-H200739/2020|2020-12-09|EPI\_ISL\_753260|Original|hCoV-19^^Hawaii|Human|State Laboratories Division|State Laboratories Division|Sultana|USA

>Spike|hCoV-19/England/QEUEH-AD1930/2020|2020-10-26|EPI\_ISL\_634694|Original|hCoV-19^^England|Human|Lighthouse Lab in Glasgow|Wellcome Sanger Institute for the COVID-19 Genomics UK (COG-UK) consortium|Davies|United Kingdom

>Spike|hCoV-19/India/MH-ACTREC-514/2020|2020-08-19|EPI\_ISL\_700161|Original|hCoV-19^^Maharashtra|Human|Hematopathology Laboratory|Hematopathology Laboratory|Patkar|India

>Spike|hCoV-19/England/CAMC-A81DF7/2020|2020-10-12|EPI\_ISL\_610810|Original|hCoV-19^^England|Human|Lighthouse Lab in Cambridge|Wellcome Sanger Institute for the COVID-19 Genomics UK (COG-UK) consortium|Davies|United Kingdom

>Spike|hCoV-19/England/CAMB-1B0B0D/2020|2020-05-10|EPI\_ISL\_452939|Original|hCoV-19^^England|Human|Department of Pathology|COVID-19 Genomics UK (COG-UK) Consortium|Meredith|United Kingdom

>Spike|hCoV-19/Japan/PG-5826/2020|2020-08-00|EPI\_ISL\_688943|Original|hCoV-19^^Japan|Human|Fukuoka Institute of Health and Environmental Sciences|Pathogen Genomics Center|Sekizuka|Japan

>Spike|hCoV-19/Wales/PHWC-47FF65/2020|2020-10-08|EPI\_ISL\_612833|Original|hCoV-19^^Wales|Human|Wales Specialist Virology Centre Sequencing lab|COVID-19 Genomics UK (COG-UK) Consortium|Moore|United Kingdom

>Spike|hCoV-19/England/QEUEH-9DCB7C/2020|2020-09-21|EPI\_ISL\_580941|Original|hCoV-19^^England|Human|Lighthouse Lab in Glasgow|Wellcome Sanger Institute for the COVID-19 Genomics UK (COG-UK) consortium|Davies|United Kingdom

>Spike|hCoV-19/South Africa/KRISP-K001106/2020|2020-07-13|EPI\_ISL\_509355|Original|hCoV-19^^KwaZulu-Natal|Human|NHLS-IALCH|KRISP|de Oliveira|South Africa

>Spike|hCoV-19/India/DL-IGIB11304428/2020|2020-07-00|EPI\_ISL\_751243|Original|hCoV-19^^Delhi|Human|Devki Devi Foundation|CSIR-IGIB/Max|Pandey|India

>Spike|hCoV-19/Canada/BC\_05248019/2020|2020-04-00|EPI\_ISL\_466783|Original|hCoV-19^^British Columbia|Human|BCCDC Public Health Laboratory|BCCDC Public Health Laboratory|Harrigan|Canada

>Spike|hCoV-19/Saudi Arabia/KAUST-JEDDAH742/2020|2020-04-01|EPI\_ISL\_677944|Original|hCoV-19^^Jeddah|Human|Pathogen Genomics Lab King Abdullah University of Science and Technology(KAUST)|Pathogen Genomics Lab King Abdullah University of Science and Technology(KAUST)|Mohamed Ghazzali|Saudi Arabia

>Spike|hCoV-19/Switzerland/GR-ETHZ-410247/2020|2020-11-27|EPI\_ISL\_737761|Original|hCoV-19^^Graub\u00fcden|Human|Viollier AG|Department of Biosystems Science and Engineering|Nadeau|Switzerland

>Spike|hCoV-19/Lithuania/MR-LUHS-Eilnr47/2020|2020-04-08|EPI\_ISL\_603094|Original|hCoV-19^^Marijampoles apskritis|Human|Lithuanian University of Health Sciences Hospital|Lithuanian University of Health Sciences|Zemaitis|Lithuania

>Spike|hCoV-19/Australia/SAP306/2020|2020-03-31|EPI\_ISL\_483091|Original|hCoV-19^^South Australia|Human|SA Pathology|SA Pathology|Leong|Australia

>Spike|hCoV-19/England/QEUH-B40573/2020|2020-11-08|EPI\_ISL\_657134|Original|hCoV-19^^England|Human|Lighthouse Lab in Glasgow|Wellcome Sanger Institute for the COVID-19 Genomics UK (COG-UK) Consortium|Davies|United Kingdom

>Spike|hCoV-19/England/MILK-B3BBF1/2020|2020-10-31|EPI\_ISL\_679794|Original|hCoV-19^^England|Human|Oxford Viromics|COVID-19 Genomics UK (COG-UK) Consortium|Golubchik|United Kingdom

>Spike|hCoV-19/England/QEUH-A76BDD/2020|2020-10-12|EPI\_ISL\_611963|Original|hCoV-19^^England|Human|Queens Medical Centre|COVID-19 Genomics UK (COG-UK) Consortium|Loose|United Kingdom

>Spike|hCoV-19/England/CAMB-1B3250/2020|2020-05-21|EPI\_ISL\_456755|Original|hCoV-19^^England|Human|Department of Pathology|COVID-19 Genomics UK (COG-UK) Consortium|Meredith|United Kingdom

>Spike|hCoV-19/Canada/BC\_21993212/2020|2020-03-00|EPI\_ISL\_462820|Original|hCoV-19^^British Columbia|Human|BCCDC Public Health Laboratory|BCCDC Public Health Laboratory|Harrigan|Canada

>Spike|hCoV-19/USA/CA-ALSR-1104-SAN/2020|2020-06-18|EPI\_ISL\_483529|Original|hCoV-19^^California|Human|UC San Diego Center for Advanced Laboratory Medicine|Andersen lab at Scripps Research|Gangavarapu|USA

>Spike|hCoV-19/USA/CA-CZB-10917/2020|2020-08-27|EPI\_ISL\_583146|Original|hCoV-19^^California|Human|Humboldt County Public Health Laboratory|Chan-Zuckerberg Biohub|Bhatt|USA

>Spike|hCoV-19/England/QEUH-B69644/2020|2020-11-11|EPI\_ISL\_655065|Original|hCoV-19^^England|Human|Lighthouse Lab in Glasgow|Wellcome Sanger Institute for the COVID-19 Genomics UK (COG-UK) Consortium|Davies|United Kingdom

>Spike|hCoV-19/USA/TX-HMH-MCoV-19418/2020|2020-11-30|EPI\_ISL\_783829|Original|hCoV-19^^Texas|Human|Houston Methodist Hospital|Houston Methodist Hospital|Long|USA

>Spike|hCoV-19/England/QEUH-9B52FC/2020|2020-09-03|EPI\_ISL\_590207|Original|hCoV-19^^England|Human|Lighthouse Lab in Glasgow|Wellcome Sanger Institute for the COVID-19 Genomics UK (COG-UK) consortium|Davies|United Kingdom

>Spike|hCoV-19/England/MILK-B3A54F/2020|2020-11-02|EPI\_ISL\_659056|Original|hCoV-19^^England|Human|Lighthouse Lab in Milton Keynes|Wellcome Sanger Institute for the COVID-19 Genomics UK (COG-UK) Consortium|Davies|United Kingdom

>Spike|hCoV-19/England/PORT-2D1956/2020|2020-04-10|EPI\_ISL\_514473|Original|hCoV-19^^England|Human|Centre for Enzyme Innovation|COVID-19 Genomics UK (COG-UK) Consortium|Robson|United Kingdom

>Spike|hCoV-19/USA/CA-CHLA-PLM21825921/2020|2020-12-04|EPI\_ISL\_753617|Original|hCoV-19^^California|Human|Clinical virology Laboratory|Center for Personalized Medicine|Dien Bard|USA

>Spike|hCoV-19/USA/MI-MDHHS-SC20942/2020|2020-03-24|EPI\_ISL\_507732|Original|hCoV-19^^Michigan|Human|Michigan Department of Health and Human Services|Michigan Department of Health and Human Services|Blankenship|USA

>Spike|hCoV-19/USA/WA-S239/2020|2020-03-07|EPI\_ISL\_430277|Original|hCoV-19^^Washington|Human|Washington State Department of Health|Seattle Flu Study|Bedford|USA

>Spike|hCoV-19/USA/TX-HMH-MCoV-12693/2020|2020-08-30|EPI\_ISL\_790467|Original|hCoV-19^^Texas|Human|Houston Methodist Hospital|Houston Methodist Hospital|Long|USA

>Spike|hCoV-19/France/ARA-104314/2020|2020-11-09|EPI\_ISL\_683349|Original|hCoV-19^^Auvergne-Rh\u00f4ne-Alpes|Human|CNR Virus des Infections Respiratoires - France SUD|CNR Virus des Infections Respiratoires - France SUD|Bal|France

>Spike|hCoV-19/USA/UT-02130/2020|2020-04-14|EPI\_ISL\_470732|Original|hCoV-19^^Utah|Human|Utah Public Health Laboratory|Utah Public Health Laboratory|Butz|USA

>Spike|hCoV-19/Scotland/EDB4717/2020|2020-04-27|EPI\_ISL\_487884|Original|hCoV-19^^Scotland|Human|Virology Department|Wellcome Sanger Institute for the COVID-19 Genomics UK (COG-UK) consortium|Davies|United Kingdom

>Spike|hCoV-19/England/CAMC-AB1DA3/2020|2020-10-23|EPI\_ISL\_623605|Original|hCoV-19^^England|Human|Lighthouse Lab in Cambridge|Wellcome Sanger Institute for the COVID-19 Genomics UK (COG-UK) consortium|Davies|United Kingdom

>Spike|hCoV-19/England/BIRM-6285F/2020|2020-08-15|EPI\_ISL\_529624|Original|hCoV-19^^England|Human|University of Birmingham|COVID-19 Genomics UK (COG-UK) Consortium|Loman|United Kingdom

>Spike|hCoV-19/Denmark/DCGC-16920/2020|2020-12-14|EPI\_ISL\_750311|Original|hCoV-19^^Nordjylland|Human|Department of Virus and Microbiological Special Diagnostics|Albertsen Lab|Michaelsen|Denmark

>Spike|hCoV-19/England/BRIS-12DDE7/2020|2020-06-01|EPI\_ISL\_481979|Original|hCoV-19^^England|Human|PHE South West Regional Laboratory|Wellcome Sanger Institute for the COVID-19 Genomics UK (COG-UK) consortium|Davies|United Kingdom

>Spike|hCoV-19/England/ALDP-8E2C53/2020|2020-06-25|EPI\_ISL\_557135|Original|hCoV-19^^England|Human|Lighthouse Lab in Alderley Park|Wellcome Sanger Institute for the COVID-19 Genomics UK (COG-UK) consortium|Davies|United Kingdom

>Spike|hCoV-19/Scotland/CVR225/2020|2020-03-17|EPI\_ISL\_433274|Original|hCoV-19^^Scotland|Human|West of Scotland Specialist Virology Centre|COVID-19 Genomics UK (COG-UK) Consortium|Robertson|United Kingdom

>Spike|hCoV-19/USA/MI-UM-10036524330/2020|2020-10-19|EPI\_ISL\_628878|Original|hCoV-19^^Michigan|Human|University of Michigan Clinical Microbiology Laboratory|Lauring Lab|Valesano|USA

>Spike|hCoV-19/USA/CO-CDPHE-2011020202/2020|2020-11-01|EPI\_ISL\_771237|Original|hCoV-19^^Colorado|Human|Colorado Department of Public Health and Environment|Colorado Department of Public Health and Environment|Bankers|USA

>Spike|hCoV-19/USA/MI-UM-10036707634/2020|2020-10-30|EPI\_ISL\_682146|Original|hCoV-19^^Michigan|Human|University of Michigan Clinical Microbiology Laboratory|Lauring Lab|Valesano|USA

>Spike|hCoV-19/Singapore/823/2020|2020-08-11|EPI\_ISL\_516823|Original|hCoV-19^^Singapore|Human|National Public Health Laboratory|National Public Health Laboratory|Mak|Singapore

>Spike|hCoV-19/Germany/SH-ChVir3200/2020|2020-03-22|EPI\_ISL\_729541|Original|hCoV-19^^Schleswig-Holstein|Human|A. Krumbholz|Charit\u00e9 Universit\u00e4tsmedizin Berlin|Muehlemann|Germany

>Spike|hCoV-19/Scotland/EDB8363/2020|2020-10-12|EPI\_ISL\_612037|Original|hCoV-19^^Scotland|Human|Virology Department|COVID-19 Genomics UK (COG-UK) Consortium|McHugh|United Kingdom

>Spike|hCoV-19/USA/OR-OHSU-0875/2020|2020-06-29|EPI\_ISL\_525918|Original|hCoV-19^^Oregon|Human|OHSU Lab Services Molecular Microbiology Lab|Oregon SARS-CoV-2 Genome Sequencing Center|O'Roak|USA

>Spike|hCoV-19/England/CAMC-A3E4B8/2020|2020-10-06|EPI\_ISL\_609651|Original|hCoV-19^^England|Human|Lighthouse Lab in Cambridge|Wellcome Sanger Institute for the COVID-19 Genomics UK (COG-UK) consortium|Davies|United Kingdom

>Spike|hCoV-19/Australia/VIC2575/2020|2020-07-03|EPI\_ISL\_522253|Original|hCoV-19^^Victoria|Human|Microbiological Diagnostic Unit - Public Health Laboratory (MDU-PHL)|MDU-PHL|Schultz|Australia

>Spike|hCoV-19/USA/NY-Wadsworth-292786-01/2020|2020-12-27|EPI\_ISL\_769953|Original|hCoV-19^^New York|Human|Albany Medical Center Hospital Clinical Laboratories|Wadsworth Center|Lasek-Nesselquist|USA

>Spike|hCoV-19/Netherlands/NoordBrabant\_139/2020|2020-00-00|EPI\_ISL\_461174|Original|hCoV-19^^Noord Brabant|Human|Dutch COVID-19 response team|Erasmus Medical Center|Oude Munnink|Netherlands

>Spike|hCoV-19/Wales/PHWC-490739/2020|2020-11-13|EPI\_ISL\_706505|Original|hCoV-19^^Wales|Human|Originating lab|COVID-19 Genomics UK (COG-UK) Consortium|Moore|United Kingdom

>Spike|hCoV-19/England/ALDP-94A098/2020|2020-06-11|EPI\_ISL\_556431|Original|hCoV-19^^England|Human|Lighthouse Lab in Alderley Park|Wellcome Sanger Institute for the COVID-19 Genomics UK (COG-UK) consortium|Davies|United Kingdom

>Spike|hCoV-19/USA/WA-UW193/2020|2020-03-13|EPI\_ISL\_417342|Original|hCoV-19^^Washington|Human|UW Virology Lab|UW Virology Lab|Roychoudhury|USA

>Spike|hCoV-19/India/HR-THSTI-BAL-39/2020|2020-04-07|EPI\_ISL\_454858|Original|hCoV-19^^Haryana|Human|Translational Health Science and Technology Institute -ESIC medical college and hospital|THSTI Bioassay laboratory|Medigeshi|India

>Spike|hCoV-19/Japan/PG-0424/2020|2020-04-04|EPI\_ISL\_480092|Original|hCoV-19^^Kansai|Human|Department of Infectious Diseases|Pathogen Genomics Center|Sekizuka|Japan

>Spike|hCoV-19/Wales/PHWC-16F6B1/2020|2020-09-29|EPI\_ISL\_586005|Original|hCoV-19^^Wales|Human|Wales Specialist Virology Centre Sequencing lab|COVID-19 Genomics UK (COG-UK) Consortium|Moore|United Kingdom

>Spike|hCoV-19/England/QEUEH-9F86C4/2020|2020-09-27|EPI\_ISL\_588830|Original|hCoV-19^^England|Human|Lighthouse Lab in Glasgow|Wellcome Sanger Institute for the COVID-19 Genomics UK (COG-UK) consortium|Davies|United Kingdom

>Spike|hCoV-19/Malaysia/8816/2020|2020-03-18|EPI\_ISL\_501224|Original|hCoV-19^^Kuala Lumpur|Human|Department of Medical Microbiology|Department of Medical Microbiology|Chan|Malaysia

>Spike|hCoV-19/England/CAMC-B21305/2020|2020-11-02|EPI\_ISL\_647493|Original|hCoV-19^^England|Human|Lighthouse Lab in Cambridge|Wellcome Sanger Institute for the COVID-19 Genomics UK (COG-UK) Consortium|Davies|United Kingdom

>Spike|hCoV-19/England/NORT-29ECB6/2020|2020-05-10|EPI\_ISL\_493536|Original|hCoV-19^^England|Human|Northumbria University / South Tees Hospitals NHS Foundation Trust / North Cumbria Integrated Care NHS Foundation Trust / North Tees and Hartlepool NHS Foundation Trust / Newcastle Hospitals NHS Foundation Trust|COVID-19 Genomics UK (COG-UK) Consortium|Bashton|United Kingdom

>Spike|hCoV-19/Australia/WA148/2020|2020-03-28|EPI\_ISL\_596711|Original|hCoV-19^^Western Australia|Human|PathWest Laboratory Medicine WA|PathWest Laboratory Medicine WA Microbial Surveillance Unit|Sikazwe|Australia

>Spike|hCoV-19/Denmark/DCGC-9279/2020|2020-11-16|EPI\_ISL\_668885|Original|hCoV-19^^Nordjylland|Human|Department of Virus and Microbiological Special Diagnostics|Albertsen Lab|Michaelsen|Denmark

>Spike|hCoV-19/England/QEUEH-96DF1A/2020|2020-08-17|EPI\_ISL\_530416|Original|hCoV-19^^England|Human|Lighthouse Lab in Glasgow|Wellcome Sanger Institute for the COVID-19 Genomics UK (COG-UK) consortium|Davies|United Kingdom

>Spike|hCoV-19/USA/TX-HMH-3614/2020|2020-06-15|EPI\_ISL\_543068|Original|hCoV-19^^Texas|Human|Houston Methodist Hospital|Houston Methodist Hospital|Long|USA

>Spike|hCoV-19/Japan/PG-4841/2020|2020-08-00|EPI\_ISL\_689963|Original|hCoV-19^^Japan|Human|Pathogen Genomics Center|Pathogen Genomics Center|Sekizuka|Japan

>Spike|hCoV-19/Germany/HH-hpi-pl645/2020|2020-03-17|EPI\_ISL\_775665|Original|hCoV-19^^Hamburg|Human|University Medical Center Hamburg Eppendorf|Heinrich Pette Institute|Robitaille|Germany

>Spike|hCoV-19/Spain/GA-IBV-004053/2020|2020-03-18|EPI\_ISL\_510292|Original|hCoV-19^^Galicia|Human|Hospital Cl\u00e9nico Universitario de Santiago de Compostela|SeqCOVID-SPAIN consortium|IBV (CSIC)|Comas|Spain

>Spike|hCoV-19/England/SHEF-10B2CCA/2020|2020-05-11|EPI\_ISL\_537249|Original|hCoV-19^^England|Human|Virology Department|Wellcome Sanger Institute for the COVID-19 Genomics UK (COG-UK) consortium|Davies|United Kingdom

>Spike|hCoV-19/England/ALDP-7032A6/2020|2020-06-30|EPI\_ISL\_557576|Original|hCoV-19^^England|Human|Lighthouse Lab in Alderley Park|Wellcome Sanger Institute for the COVID-19 Genomics UK (COG-UK) consortium|Davies|United Kingdom

>Spike|hCoV-19/Wales/PHWC-254EB/2020|2020-03-23|EPI\_ISL\_420999|Original|hCoV-19^^Wales|Human|Wales Specialist Virology Centre|Public Health Wales Microbiology Cardiff|Moore|United Kingdom

>Spike|hCoV-19/Wales/ALDP-BBA477/2020|2020-11-20|EPI\_ISL\_710712|Original|hCoV-19^^Wales|Human|Lighthouse Lab in Alderley Park|Wellcome Sanger Institute for the COVID-19 Genomics UK (COG-UK) Consortium|Davies|United Kingdom

>Spike|hCoV-19/Australia/VIC8816/2020|2020-08-01|EPI\_ISL\_565214|Original|hCoV-19^^Victoria|Human|Victorian Infectious Diseases Reference Laboratory (VIDRL)|VIDRL and MDU-PHL|Schultz|Australia

>Spike|hCoV-19/USA/TX-HMH-MCoV-8633/2020|2020-07-01|EPI\_ISL\_780663|Original|hCoV-19^^Texas|Human|Houston Methodist Hospital|Houston Methodist Hospital|Long|USA

>Spike|hCoV-19/USA/WA-UW162/2020|2020-03-13|EPI\_ISL\_416700|Original|hCoV-19^^Washington|Human|UW Virology Lab|UW Virology Lab|Roychoudhury|USA

>Spike|hCoV-19/England/MILK-ACC3D0/2020|2020-10-21|EPI\_ISL\_629388|Original|hCoV-19^^England|Human|Lighthouse Lab in Milton Keynes|Wellcome Sanger Institute for the COVID-19 Genomics UK (COG-UK) consortium|Davies|United Kingdom

>Spike|hCoV-19/England/MILK-A7AD00/2020|2020-10-15|EPI\_ISL\_606674|Original|hCoV-19^^England|Human|Lighthouse Lab in Milton Keynes|Wellcome Sanger Institute for the COVID-19 Genomics UK (COG-UK) consortium|Davies|United Kingdom

>Spike|hCoV-19/USA/TX-HMH067/2020|2020-03-18|EPI\_ISL\_434776|Original|hCoV-19^^Texas|Human|Houston Methodist Hospital|Houston Methodist Hospital|Long|USA

>Spike|hCoV-19/England/MILK-BAC7F7/2020|2020-11-18|EPI\_ISL\_783236|Original|hCoV-19^^England|Human|Lighthouse Lab in Milton Keynes|Wellcome Sanger Institute for the COVID-19 Genomics UK (COG-UK) Consortium|Davies|United Kingdom

>Spike|hCoV-19/England/ALDP-9FCC37/2020|2020-10-01|EPI\_ISL\_588021|Original|hCoV-19^^England|Human|Lighthouse Lab in Alderley Park|Wellcome Sanger Institute for the COVID-19 Genomics UK (COG-UK) consortium|Davies|United Kingdom

>Spike|hCoV-19/USA/CA-QDX-2623/2020|2020-03-15|EPI\_ISL\_604897|Original|hCoV-19^^California|Human|Quest Diagnostics|Quest Diagnostics|Kagan|USA

>Spike|hCoV-19/USA/LA-BIE-054/2020|2020-04-07|EPI\_ISL\_455610|Original|hCoV-19^^Louisiana|Human|Ochsner Health|Bioinfoexperts|Cross|USA

>Spike|hCoV-19/England/ALDP-B84B80/2020|2020-11-14|EPI\_ISL\_675800|Original|hCoV-19^^England|Human|Lighthouse Lab in Alderley Park|Wellcome Sanger Institute for the COVID-19 Genomics UK (COG-UK) Consortium|Davies|United Kingdom

>Spike|hCoV-19/Denmark/DCGC-2687/2020|2020-08-10|EPI\_ISL\_617739|Original|hCoV-19^^Midtjylland|Human|Department of Virus and Microbiological Special Diagnostics|Albertsen lab|Michaelsen|Denmark

>Spike|hCoV-19/Wales/PHWC-1625A2/2020|2020-05-13|EPI\_ISL\_473092|Original|hCoV-19^^Wales|Human|Wales Specialist Virology Centre Sequencing lab|COVID-19 Genomics UK (COG-UK) Consortium|Moore|United Kingdom

>Spike|hCoV-19/Japan/PG-8968/2020|2020-09-00|EPI\_ISL\_686514|Original|hCoV-19^^Japan|Human|Pathogen Genomics Center|Pathogen Genomics Center|Sekizuka|Japan

>Spike|hCoV-19/Scotland/GCVR-17036B/2020|2020-03-23|EPI\_ISL\_459623|Original|hCoV-19^^Scotland|Human|NHSGGC West of Scotland Specialist Virology Centre / MRC-University of Glasgow Centre for Virus Research|Wellcome Sanger Institute for the COVID-19 Genomics UK (COG-UK) consortium|Davies|United Kingdom

>Spike|hCoV-19/USA/CA-ALSR-5069/2020|2020-07-01|EPI\_ISL\_730330|Original|hCoV-19^^California|Human|San Diego County Public Health Laboratory|Andersen lab at Scripps Research|Gangavarapu|USA

>Spike|hCoV-19/Australia/VIC12331/2020|2020-07-29|EPI\_ISL\_640494|Original|hCoV-19^^Victoria|Human|Microbiological Diagnostic Unit - Public Health Laboratory (MDU-PHL)|MDU-PHL|Schultz|Australia

>Spike|hCoV-19/USA/TX-HMH-MCoV-15989/2020|2020-07-10|EPI\_ISL\_785673|Original|hCoV-19^^Texas|Human|Houston Methodist Hospital|Houston Methodist Hospital|Long|USA

>Spike|hCoV-19/Wales/PHWC-16D835/2020|2020-09-25|EPI\_ISL\_577451|Original|hCoV-19^^Wales|Human|Wales Specialist Virology Centre Sequencing lab|COVID-19 Genomics UK (COG-UK) Consortium|Moore|United Kingdom

>Spike|hCoV-19/England/LIVE-9DFA1/2020|2020-04-02|EPI\_ISL\_453255|Original|hCoV-19^^England|Human|Liverpool Clinical Laboratories|COVID-19 Genomics UK (COG-UK) Consortium|Haldenby|United Kingdom

>Spike|hCoV-19/Malaysia/UNIMAS-15695/2020|2020-10-14|EPI\_ISL\_718168|Original|hCoV-19^^Sarawak|Human|Ministry of Health Hospitals|Institute of Health and Community Medicine|Jonathan|Malaysia

>Spike|hCoV-19/England/QEUA-B67093/2020|2020-11-11|EPI\_ISL\_661357|Original|hCoV-19^^England|Human|Lighthouse Lab in Glasgow|Wellcome Sanger Institute for the COVID-19 Genomics UK (COG-UK) Consortium|Davies|United Kingdom

>Spike|hCoV-19/England/20149023904/2020|2020-04-03|EPI\_ISL\_466173|Original|hCoV-19^^England|Human|Respiratory Virus Unit|Respiratory Virus Unit|Platt|United Kingdom

>Spike|hCoV-19/Australia/VIC2327/2020|2020-06-25|EPI\_ISL\_522048|Original|hCoV-19^^Victoria|Human|Microbiological Diagnostic Unit - Public Health Laboratory (MDU-PHL)|MDU-PHL|Schultz|Australia

>Spike|hCoV-19/Spain/MD-HLP-52/2020|2020-04-20|EPI\_ISL\_530055|Original|hCoV-19^^Madrid|Human|Hospital Universitario La Paz|Hospital Universitario La Paz|Viedma|Spain

>Spike|hCoV-19/USA/CO-QDX-1903/2020|2020-03-16|EPI\_ISL\_604220|Original|hCoV-19^^Colorado|Human|Quest Diagnostics|Quest Diagnostics|Kagan|USA

>Spike|hCoV-19/Brazil/RS-00649/2020|2020-11-25|EPI\_ISL\_770595|Original|hCoV-19^^Rio Grande do Sul|Human|Laborat\u00f3rio de Microbiologia Molecular - Universidade FEEVALE|Bioinformatics Laboratory / LNCC|Almeida|Brazil

>Spike|hCoV-19/England/LOND-D707B/2020|2020-04-03|EPI\_ISL\_478458|Original|hCoV-19^^England|Human|University College London|COVID-19 Genomics UK (COG-UK) Consortium|Roy|United Kingdom

>Spike|hCoV-19/England/CAMC-BC1BC3/2020|2020-11-22|EPI\_ISL\_704813|Original|hCoV-19^^England|Human|Lighthouse Lab in Cambridge|Wellcome Sanger Institute for the COVID-19 Genomics UK (COG-UK) Consortium|Davies|United Kingdom

>Spike|hCoV-19/USA/UT-UPHL-2012309299/2020|2020-08-06|EPI\_ISL\_746055|Original|hCoV-19^^Utah|Human|Ginkgo Bioworks Clinical Laboratory|Utah Public Health Laboratory|Young|USA

>Spike|hCoV-19/Japan/PG-2687/2020|2020-03-00|EPI\_ISL\_690819|Original|hCoV-19^^Japan|Human|Kanagawa Prefectural Institute of Public Health|Pathogen Genomics Center|Sekizuka|Japan

>Spike|hCoV-19/USA/LA-EVTL375/2020|2020-06-01|EPI\_ISL\_578781|Original|hCoV-19^^Louisiana|Human|LSUHS Emerging Viral Threat Laboratory|Microbial Genome Sequencing Center|Kamil|USA

>Spike|hCoV-19/Netherlands/GE-RIVM-20949/2020|2020-12-22|EPI\_ISL\_790973|Original|hCoV-19^^Gelderland|Human|Dutch COVID-19 response team|National Institute for Public Health and the Environment (RIVM)|Meijer|Netherlands

>Spike|hCoV-19/England/MILK-AC7FFF/2020|2020-10-19|EPI\_ISL\_629483|Original|hCoV-19^^England|Human|Lighthouse Lab in Milton Keynes|Wellcome Sanger Institute for the COVID-19 Genomics UK (COG-UK) consortium|Davies|United Kingdom

>Spike|hCoV-19/England/MILK-B5689F/2020|2020-11-06|EPI\_ISL\_656924|Original|hCoV-19^^England|Human|Lighthouse Lab in Milton Keynes|Wellcome Sanger Institute for the COVID-19 Genomics UK (COG-UK) Consortium|Davies|United Kingdom

>Spike|hCoV-19/England/QEUA-C32BAE/2020|2020-12-11|EPI\_ISL\_782581|Original|hCoV-19^^England|Human|Lighthouse Lab in Glasgow|Wellcome Sanger Institute for the COVID-19 Genomics UK (COG-UK) Consortium|Davies|United Kingdom

>Spike|hCoV-19/USA/MA-CDC-STM-P021/2020|2020-12-19|EPI\_ISL\_755611|Original|hCoV-19^^Massachusetts|Human|Helix/Illumina|Genomics and Discovery|Cook|USA

>Spike|hCoV-19/Canada/MB-NML-1190/2020|2020-08-09|EPI\_ISL\_582504|Original|hCoV-19^^Manitoba|Human|Cadham Provincial Laboratory|National Microbiology Laboratory (NML)|Majer|Canada

>Spike|hCoV-19/USA/CA-ALSR-4580/2020|2020-07-10|EPI\_ISL\_667019|Original|hCoV-19^^California|Human|San Diego County Public Health Laboratory|Andersen lab at Scripps Research|Gangavarapu|USA

>Spike|hCoV-19/England/ALDP-A85C8D/2020|2020-10-17|EPI\_ISL\_610476|Original|hCoV-19^^England|Human|Lighthouse Lab in Alderley Park|Wellcome Sanger Institute for the COVID-19 Genomics UK (COG-UK) consortium|Davies|United Kingdom

>Spike|hCoV-19/England/MILK-62C457/2020|2020-07-05|EPI\_ISL\_557877|Original|hCoV-19^^England|Human|Lighthouse Lab in Milton Keynes|Wellcome Sanger Institute for the COVID-19 Genomics UK (COG-UK) consortium|Davies|United Kingdom

>Spike|hCoV-19/USA/FL-BPHL-1492/2020|2020-09-11|EPI\_ISL\_568590|Original|hCoV-19^^Florida|Human|Florida Bureau of Public Health Laboratories|Florida Bureau of Public Health Laboratories|Blanton|USA

>Spike|hCoV-19/England/MILK-A05CC1/2020|2020-09-30|EPI\_ISL\_599968|Original|hCoV-19^^England|Human|Lighthouse Lab in Milton Keynes|Wellcome Sanger Institute for the COVID-19 Genomics UK (COG-UK) consortium|Davies|United Kingdom

>Spike|hCoV-19/USA/TX-HMH-MCoV-8268/2020|2020-07-07|EPI\_ISL\_784299|Original|hCoV-19^^Texas|Human|Houston Methodist Hospital|Houston Methodist Hospital|Long|USA

>Spike|hCoV-19/USA/CA-ALSR-4863/2020|2020-11-04|EPI\_ISL\_730183|Original|hCoV-19^^California|Human|San Diego County Public Health Laboratory|Andersen lab at Scripps Research|Gangavarapu|USA

>Spike|hCoV-19/Russia/KR-RII-12198S/2020|2020-11-18|EPI\_ISL\_732985|Original|hCoV-19^^Karelia|Human|WHO National Influenza Centre Russian Federation|WHO National Influenza Centre Russian Federation|Komissarov|Russia

>Spike|hCoV-19/England/QEUEH-96C3C4/2020|2020-08-12|EPI\_ISL\_530851|Original|hCoV-19^^England|Human|Lighthouse Lab in Glasgow|Wellcome Sanger Institute for the COVID-19 Genomics UK (COG-UK) consortium|Davies|United Kingdom

>Spike|hCoV-19/Denmark/DCGC-16226/2020|2020-11-16|EPI\_ISL\_714650|Original|hCoV-19^^Hovedstaden|Human|Department of Virus and Microbiological Special Diagnostics|Albertsen Lab|Michaelsen|Denmark

>Spike|hCoV-19/India/MP-DRDE 4083/2020|2020-05-17|EPI\_ISL\_476886|Original|hCoV-19^^Madhya Pradesh|Human|Defence Research & Development Establishment (DRDE)|Defence Research & Development Establishment (DRDE)|Dash|India

>Spike|hCoV-19/USA/TX-HMH-MCoV-18373/2020|2020-11-18|EPI\_ISL\_784721|Original|hCoV-19^^Texas|Human|Houston Methodist Hospital|Houston Methodist Hospital|Long|USA

>Spike|hCoV-19/Spain/VC-FISABIO-35/2020|2020-03-09|EPI\_ISL\_420120|Original|hCoV-19^^Comunitat Valenciana|Human|Servicio de Microbiolog\u00eda. Consorcio Hospital General Universitario de Valencia|Sequencing and Bioinformatics Service and Molecular Epidemiology Research Group. FISABIO-Public Health|Gonzalez-Candelas|Spain

>Spike|hCoV-19/England/QEUEH-B6741F/2020|2020-11-11|EPI\_ISL\_662009|Original|hCoV-19^^England|Human|Lighthouse Lab in Glasgow|Wellcome Sanger Institute for the COVID-19 Genomics UK (COG-UK) Consortium|Davies|United Kingdom

>Spike|hCoV-19/Netherlands/un-EMC-805/2020|2020-11-11|EPI\_ISL\_722426|Original|hCoV-19^^Netherlands|Human|Dutch COVID-19 response team|Erasmus Medical Center|Oude Munnink|Netherlands

>Spike|hCoV-19/England/20168005004/2020|2020-04-17|EPI\_ISL\_466598|Original|hCoV-19^^England|Human|Respiratory Virus Unit|Respiratory Virus Unit|Platt|United Kingdom

>Spike|hCoV-19/USA/VA-DCLS-0136/2020|2020-04-13|EPI\_ISL\_437775|Original|hCoV-19^^Virginia|Human|Virginia DCLS|Virginia DCLS|St. Jacques|USA

>Spike|hCoV-19/England/NORW-F1512/2020|2020-10-22|EPI\_ISL\_627601|Original|hCoV-19^^England|Human|Quadram Institute Bioscience|COVID-19 Genomics UK (COG-UK) Consortium|Alikhan|United Kingdom

>Spike|hCoV-19/England/ALDP-A93A19/2020|2020-10-19|EPI\_ISL\_611172|Original|hCoV-19^^England|Human|Lighthouse Lab in Alderley Park|Wellcome Sanger Institute for the COVID-19 Genomics UK (COG-UK) consortium|Davies|United Kingdom

>Spike|hCoV-19/England/ALDP-9E6EFE/2020|2020-09-24|EPI\_ISL\_580455|Original|hCoV-19^^England|Human|Lighthouse Lab in Alderley Park|Wellcome Sanger Institute for the COVID-19 Genomics UK (COG-UK) consortium|Davies|United Kingdom

>Spike|hCoV-19/USA/WI-GMF-32613/2020|2020-11-09|EPI\_ISL\_661159|Original|hCoV-19^^Wisconsin|Human|Gundersen Molecular Diagnostics Laboratory|Kabara Cancer Research Institute|Kenny|USA

>Spike|hCoV-19/Scotland/CVR4017/2020|2020-08-29|EPI\_ISL\_535116|Original|hCoV-19^^Scotland|Human|West of Scotland Specialist Virology Centre|COVID-19 Genomics UK (COG-UK) Consortium|Robertson|United Kingdom



>Spike|hCoV-19/England/NORW-21F910/2020|2020-12-11|EPI\_ISL\_725062|Original|hCoV-19^^England|Human|Quadram Institute Bioscience|COVID-19 Genomics UK (COG-UK) Consortium|Alikhan|United Kingdom

>Spike|hCoV-19/Wales/PHWC-27F42/2020|2020-03-24|EPI\_ISL\_431987|Original|hCoV-19^^Wales|Human|Wales Specialist Virology Centre|Public Health Wales Microbiology Cardiff|Moore|United Kingdom

>Spike|hCoV-19/England/ALDP-B24D6E/2020|2020-11-04|EPI\_ISL\_646487|Original|hCoV-19^^England|Human|Lighthouse Lab in Alderley Park|Wellcome Sanger Institute for the COVID-19 Genomics UK (COG-UK) Consortium|Davies|United Kingdom

>Spike|hCoV-19/USA/MI-MDHHS-SC21420/2020|2020-04-07|EPI\_ISL\_507674|Original|hCoV-19^^Michigan|Human|Michigan Department of Health and Human Services|Michigan Department of Health and Human Services|Blankenship|USA

>Spike|hCoV-19/USA/FL-AJ5U/2020|2020-07-05|EPI\_ISL\_513291|Original|hCoV-19^^Florida|Human|University of Miami Immunology and Histocompatibility Laboratory|University of Miami Immunology and Histocompatibility Laboratory|Margolles-Clark|USA

>Spike|hCoV-19/Germany/NW-HHU-412/2020|2020-11-11|EPI\_ISL\_718086|Original|hCoV-19^^North Rhine-Westphalia|Human|ZOTZ KLIMAS MVZ D\u00f0fcsseldorf-Centrum GbR \u00dcBAG f\u00fcr Labormedizin|Center of Medical Microbiology|Wienemann|Germany

>Spike|hCoV-19/Scotland/EDB054/2020|2020-03-18|EPI\_ISL\_425858|Original|hCoV-19^^Scotland|Human|Virology Department|COVID-19 Genomics UK (COG-UK) Consortium|Williams|United Kingdom

>Spike|hCoV-19/Japan/PG-4371/2020|2020-05-00|EPI\_ISL\_692598|Original|hCoV-19^^Japan|Human|Pathogen Genomics Center|Pathogen Genomics Center|Sekizuka|Japan

>Spike|hCoV-19/Switzerland/BS-42203970/2020|2020-03-27|EPI\_ISL\_581736|Original|hCoV-19^^Basel-Stadt|Human|University Hospital Basel|University Hospital Basel|Roloff Handschin|Switzerland

>Spike|hCoV-19/Wales/PHWC-48BA65/2020|2020-11-03|EPI\_ISL\_680585|Original|hCoV-19^^Wales|Human|Wales Specialist Virology Centre Sequencing lab|COVID-19 Genomics UK (COG-UK) Consortium|Moore|United Kingdom

>Spike|hCoV-19/England/MILK-9F1CF6/2020|2020-09-24|EPI\_ISL\_589714|Original|hCoV-19^^England|Human|Lighthouse Lab in Milton Keynes|Wellcome Sanger Institute for the COVID-19 Genomics UK (COG-UK) consortium|Davies|United Kingdom

>Spike|hCoV-19/England/ALDP-B24715/2020|2020-11-04|EPI\_ISL\_646857|Original|hCoV-19^^England|Human|Lighthouse Lab in Alderley Park|Wellcome Sanger Institute for the COVID-19 Genomics UK (COG-UK) Consortium|Davies|United Kingdom

>Spike|hCoV-19/England/ALDP-A2EBF2/2020|2020-10-05|EPI\_ISL\_586978|Original|hCoV-19^^England|Human|Lighthouse Lab in Alderley Park|Wellcome Sanger Institute for the COVID-19 Genomics UK (COG-UK) consortium|Davies|United Kingdom

>Spike|hCoV-19/England/MILK-9E0D9D/2020|2020-09-19|EPI\_ISL\_580885|Original|hCoV-19^^England|Human|Lighthouse Lab in Milton Keynes|Wellcome Sanger Institute for the COVID-19 Genomics UK (COG-UK) consortium|Davies|United Kingdom

>Spike|hCoV-19/Scotland/QEUEH-9C8F3B/2020|2020-09-14|EPI\_ISL\_576039|Original|hCoV-19^^Scotland|Human|Lighthouse Lab in Glasgow|Wellcome Sanger Institute for the COVID-19 Genomics UK (COG-UK) consortium|Davies|United Kingdom

>Spike|hCoV-19/Scotland/QEUEH-9AE681/2020|2020-09-05|EPI\_ISL\_577365|Original|hCoV-19^^Scotland|Human|University of Exeter|COVID-19 Genomics UK (COG-UK) Consortium|Temperton|United Kingdom

>Spike|hCoV-19/Chile/RM-133191/2020|2020-07-25|EPI\_ISL\_746632|Original|hCoV-19^^Region Metropolitana de Santiago|Human|Genética Molecular and Subdepartamento de Virología ISP Chile|Instituto de Salud Pública de Chile|Tognarelli|Chile

>Spike|hCoV-19/England/MILK-ABC0EB/2020|2020-10-21|EPI\_ISL\_630981|Original|hCoV-19^^England|Human|Lighthouse Lab in Milton Keynes|Wellcome Sanger Institute for the COVID-19 Genomics UK (COG-UK) consortium|Davies|United Kingdom

>Spike|hCoV-19/Japan/PG-5522/2020|2020-08-00|EPI\_ISL\_688647|Original|hCoV-19^^Japan|Human|Pathogen Genomics Center|Pathogen Genomics Center|Sekizuka|Japan

>Spike|hCoV-19/England/CAMB-77329/2020|2020-03-31|EPI\_ISL\_439390|Original|hCoV-19^^England|Human|Department of Pathology|Wellcome Sanger Institute for the COVID-19 Genomics UK (COG-UK) consortium|Amato|United Kingdom

>Spike|hCoV-19/England/NOTT-11c7FC/2020|2020-11-17|EPI\_ISL\_651408|Original|hCoV-19^^England|Human|Queens Medical Centre|COVID-19 Genomics UK (COG-UK) Consortium|Loose|United Kingdom

>Spike|hCoV-19/Wales/PHWC-28882/2020|2020-03-31|EPI\_ISL\_432407|Original|hCoV-19^^Wales|Human|Wales Specialist Virology Centre|Public Health Wales Microbiology Cardiff|Moore|United Kingdom

>Spike|hCoV-19/England/CAMB-75868/2020|2020-03-20|EPI\_ISL\_440325|Original|hCoV-19^^England|Human|Department of Pathology|Wellcome Sanger Institute for the COVID-19 Genomics UK (COG-UK) consortium|Amato|United Kingdom

>Spike|hCoV-19/USA/MI-UM-10036587181/2020|2020-10-23|EPI\_ISL\_649989|Original|hCoV-19^^Michigan|Human|University of Michigan Clinical Microbiology Laboratory|Lauring Lab|Valesano|USA

>Spike|hCoV-19/England/LOND-1264D1D/2020|2020-11-23|EPI\_ISL\_724559|Original|hCoV-19^^England|Human|University College London|COVID-19 Genomics UK (COG-UK) Consortium|Roy|United Kingdom

>Spike|hCoV-19/England/NOTT-118778/2020|2020-10-28|EPI\_ISL\_627683|Original|hCoV-19^^England|Human|Queens Medical Centre|COVID-19 Genomics UK (COG-UK) Consortium|Loose|United Kingdom

>Spike|hCoV-19/Netherlands/Overijssel\_19/2020|2020-04-13|EPI\_ISL\_460808|Original|hCoV-19^^Overijssel|Human|Dutch COVID-19 response team|Erasmus Medical Center|Oude Munnink|Netherlands

>Spike|hCoV-19/USA/CA-QDX-2350/2020|2020-03-17|EPI\_ISL\_604649|Original|hCoV-19^^California|Human|Quest Diagnostics|Quest Diagnostics|Kagan|USA

>Spike|hCoV-19/Wales/PHWC-33884/2020|2020-04-20|EPI\_ISL\_446760|Original|hCoV-19^^Wales|Human|Wales Specialist Virology Centre|Public Health Wales Microbiology Cardiff|Moore|United Kingdom

>Spike|hCoV-19/Luxembourg/LNS8562064/2020|2020-10-31|EPI\_ISL\_744763|Original|hCoV-19^^Luxembourg|Human|Laboratoire national de sant\u00e9|Laboratoire national de sant\u00e9|Wienecke-Baldacchino|Luxembourg

>Spike|hCoV-19/USA/WA-S2782/2020|2020-08-10|EPI\_ISL\_530139|Original|hCoV-19^^Washington|Human|Seattle Flu Study|Seattle Flu Study|Lee|USA

>Spike|hCoV-19/England/BRIS-129686/2020|2020-03-31|EPI\_ISL\_458841|Original|hCoV-19^^England|Human|PHE South West Regional Laboratory|Wellcome Sanger Institute for the COVID-19 Genomics UK (COG-UK) consortium|Davies|United Kingdom

>Spike|hCoV-19/Brazil/PE-IAM1082/2020|2020-05-03|EPI\_ISL\_572375|Original|hCoV-19^^Pernambuco|Human|LACEN/PE|WallauLab|Wallau|Brazil

>Spike|hCoV-19/Japan/PG-2070/2020|2020-04-00|EPI\_ISL\_685675|Original|hCoV-19^^Japan|Human|Tokyo Metropolitan Institute of Public Health|Pathogen Genomics Center|Sekizuka|Japan

>Spike|hCoV-19/Spain/CT-IBV-99009890/2020|2020-08-06|EPI\_ISL\_660287|Original|hCoV-19^^Catalunya|Human|Servicio de Microbiolog\u00eda|SeqCOVID-SPAIN consortium|IBV (CSIC) |Comas|Spain

>Spike|hCoV-19/Scotland/CVR5321/2020|2020-10-24|EPI\_ISL\_651755|Original|hCoV-19^^Scotland|Human|West of Scotland Specialist Virology Centre|COVID-19 Genomics UK (COG-UK) Consortium|Robertson|United Kingdom

>Spike|hCoV-19/Denmark/DCGC-22082/2020|2020-12-14|EPI\_ISL\_758541|Original|hCoV-19^^Hovedstaden|Human|Department of Virus and Microbiological Special Diagnostics|Albertsen Lab|Michaelsen|Denmark

>Spike|hCoV-19/USA/NY-NYCPHL-001416/2020|2020-11-19|EPI\_ISL\_683788|Original|hCoV-19^^New York|Human|DOHMH Chelsea|New York City Public Health Laboratory|Wang|USA

>Spike|hCoV-19/USA/WI-UW-1568/2020|2020-09-16|EPI\_ISL\_605446|Original|hCoV-19^^Wisconsin|Human|University of Wisconsin-Madison AIDS Vaccine Research Laboratories|University of Wisconsin-Madison AIDS Vaccine Research Laboratories|Baczenas|USA

>Spike|hCoV-19/England/C200044524/2020|2020-11-06|EPI\_ISL\_664025|Original|hCoV-19^^England|Human|Respiratory Virus Unit|COVID-19 Genomics UK (COG-UK) Consortium|Platt|United Kingdom

>Spike|hCoV-19/Canada/ON-E50/2020|2020-05-29|EPI\_ISL\_593525|Original|hCoV-19^^Ontario|Human|Eastern Ontario Regional Laboratory Association|McMaster University|McArthur|Canada

>Spike|hCoV-19/Gambia/NPHL-2706/2020|2020-00-00|EPI\_ISL\_561287|Original|hCoV-19^^Kombo|Human|MRCG at LSHTM Genomics lab|MRCG at LSHTM Genomics lab|Sesay|Gambia

>Spike|hCoV-19/Denmark/DCGC-22453/2020|2020-12-14|EPI\_ISL\_757571|Original|hCoV-19^^Hovedstaden|Human|Department of Virus and Microbiological Special Diagnostics|Albertsen Lab|Michaelsen|Denmark

>Spike|hCoV-19/Australia/VIC2357/2020|2020-06-26|EPI\_ISL\_522077|Original|hCoV-19^^Victoria|Human|Victorian Infectious Diseases Reference Laboratory (VIDRL)|VIDRL and MDU-PHL|Schultz|Australia

>Spike|hCoV-19/England/ALDP-A6F5D9/2020|2020-10-15|EPI\_ISL\_607945|Original|hCoV-19^^England|Human|Lighthouse Lab in Alderley Park|Wellcome Sanger Institute for the COVID-19 Genomics UK (COG-UK) consortium|Davies|United Kingdom

>Spike|hCoV-19/Australia/NSW209/2020|2020-03-20|EPI\_ISL\_427755|Original|hCoV-19^^New South Wales|Human|Centre for Infectious Diseases and Microbiology Public Health|NSW Health Pathology - Institute of Clinical Pathology and Medical Research; Westmead Hospital; University of Sydney|Gall|Australia

>Spike|hCoV-19/Scotland/EDB2689/2020|2020-03-26|EPI\_ISL\_487940|Original|hCoV-19^^Scotland|Human|Virology Department|Wellcome Sanger Institute for the COVID-19 Genomics UK (COG-UK) consortium|Davies|United Kingdom

>Spike|hCoV-19/Japan/PG-2897/2020|2020-03-00|EPI\_ISL\_691023|Original|hCoV-19^^Japan|Human|Pathogen Genomics Center|Pathogen Genomics Center|Sekizuka|Japan

>Spike|hCoV-19/Canada/ON-PHL-5756/2020|2020-03-00|EPI\_ISL\_418358|Original|hCoV-19^^Ontario|Human|Public Health Ontario Laboratories|Public Health Ontario Laboratories|Eshaghi|Canada

>Spike|hCoV-19/Wales/PHWC-4A1AA5/2020|2020-12-11|EPI\_ISL\_743771|Original|hCoV-19^^Wales|Human|Wales Specialist Virology Centre Sequencing lab|COVID-19 Genomics UK (COG-UK) Consortium|Moore|United Kingdom

>Spike|hCoV-19/USA/UT-UPHL-2009143/2020|2020-05-31|EPI\_ISL\_525136|Original|hCoV-19^^Utah|Human|Utah Public Health Laboratory|Utah Public Health Laboratory|Young|USA

>Spike|hCoV-19/England/CAMC-A3E5B5/2020|2020-10-05|EPI\_ISL\_609795|Original|hCoV-19^^England|Human|Lighthouse Lab in Cambridge|Wellcome Sanger Institute for the COVID-19 Genomics UK (COG-UK) consortium|Davies|United Kingdom

>Spike|hCoV-19/Sichuan/SC-WCH4-284/2020|2020-02-02|EPI\_ISL\_451386|Original|hCoV-19^^Sichuan|Human|West China Hospital of Sichuan University|State Key Laboratory of Biotherapy of Sichuan University|Tang|China

>Spike|hCoV-19/USA/TX-HMH-1798/2020|2020-05-17|EPI\_ISL\_542847|Original|hCoV-19^^Texas|Human|Houston Methodist Hospital|Houston Methodist Hospital|Long|USA

>Spike|hCoV-19/Denmark/DCGC-16550/2020|2020-11-16|EPI\_ISL\_714164|Original|hCoV-19^^Hovedstaden|Human|Department of Virus and Microbiological Special Diagnostics|Albertsen Lab|Michaelsen|Denmark

>Spike|hCoV-19/England/ALDP-9E76B9/2020|2020-09-24|EPI\_ISL\_580081|Original|hCoV-19^^England|Human|Lighthouse Lab in Alderley Park|Wellcome Sanger Institute for the COVID-19 Genomics UK (COG-UK) consortium|Davies|United Kingdom

>Spike|hCoV-19/England/ALDP-9D94CF/2020|2020-09-18|EPI\_ISL\_576732|Original|hCoV-19^^England|Human|Oxford Viromics|COVID-19 Genomics UK (COG-UK) Consortium|Golubchik|United Kingdom

>Spike|hCoV-19/Wales/PHWC-49F819/2020|2020-12-08|EPI\_ISL\_743274|Original|hCoV-19^^Wales|Human|Wales Specialist Virology Centre Sequencing lab|COVID-19 Genomics UK (COG-UK) Consortium|Moore|United Kingdom

>Spike|hCoV-19/South Korea/KCDC2137/2020|2020-03-20|EPI\_ISL\_498038|Original|hCoV-19^^South Korea|Human|Division of Viral Diseases|Division of Viral Diseases|Kim|South Korea

>Spike|hCoV-19/USA/FL-BPHL-1197/2020|2020-08-21|EPI\_ISL\_526683|Original|hCoV-19^^Florida|Human|Florida Bureau of Public Health Laboratories|Florida Bureau of Public Health Laboratories|Blanton|USA

>Spike|hCoV-19/USA/TX-HMH-MCoV-18594/2020|2020-11-19|EPI\_ISL\_784942|Original|hCoV-19^^Texas|Human|Houston Methodist Hospital|Houston Methodist Hospital|Long|USA

>Spike|hCoV-19/England/QEUH-AAF0CD/2020|2020-10-21|EPI\_ISL\_644102|Original|hCoV-19^^England|Human|Lighthouse Lab in Glasgow|Wellcome Sanger Institute for the COVID-19 Genomics UK (COG-UK) Consortium|Davies|United Kingdom

>Spike|hCoV-19/USA/MI-MDHHS-SC20623/2020|2020-04-17|EPI\_ISL\_462705|Original|hCoV-19^^Michigan|Human|Michigan Department of Health and Human Services|Michigan Department of Health and Human Services|Blankenship|USA

>Spike|hCoV-19/Finland/18MR4cF8/2020|2020-11-18|EPI\_ISL\_757329|Original|hCoV-19^^Uusimaa|Human|Department of Virology and Immunology|Department of Virology|Smura|Finland

>Spike|hCoV-19/USA/TX-DSHS-0379/2020|2020-06-14|EPI\_ISL\_538315|Original|hCoV-19^^Texas|Human|Texas Department of State Health Services|Texas Department of State Health Services|Rahman|USA

>Spike|hCoV-19/England/QEUEH-99BFB9/2020|2020-08-30|EPI\_ISL\_559776|Original|hCoV-19^^England|Human|Oxford Viromics|COVID-19 Genomics UK (COG-UK) Consortium|Golubchik|United Kingdom

>Spike|hCoV-19/Luxembourg/LNS1389060/2020|2020-10-26|EPI\_ISL\_739926|Original|hCoV-19^^Luxembourg|Human|Laboratoire national de sant\u00e9|Laboratoire national de sant\u00e9|Wienecke-Baldacchino|Luxembourg

>Spike|hCoV-19/Spain/MD-IBV-97010005/2020|2020-03-18|EPI\_ISL\_683666|Original|hCoV-19^^Madrid|Human|IdISSC/Hospital Cl\u00e9nico San Carlos de Madrid\u200b|SeqCOVID-SPAIN consortium/IBV (CSIC)|Comas|Spain

>Spike|hCoV-19/Denmark/DCGC-9520/2020|2020-11-09|EPI\_ISL\_669017|Original|hCoV-19^^Sjaelland|Human|Department of Virus and Microbiological Special Diagnostics|Albertsen Lab|Michaelsen|Denmark

>Spike|hCoV-19/Denmark/DCGC-10939/2020|2020-11-02|EPI\_ISL\_670298|Original|hCoV-19^^Hovedstaden|Human|Department of Virus and Microbiological Special Diagnostics|Albertsen Lab|Michaelsen|Denmark

>Spike|hCoV-19/England/NORW-E896D/2020|2020-04-11|EPI\_ISL\_448254|Original|hCoV-19^^England|Human|Quadram Institute Bioscience|COVID-19 Genomics UK (COG-UK) Consortium|Alikhan|United Kingdom

>Spike|hCoV-19/England/SHEF-CA424/2020|2020-09-19|EPI\_ISL\_573722|Original|hCoV-19^^England|Human|Virology Department|COVID-19 Genomics UK (COG-UK) Consortium|de Silva|United Kingdom

>Spike|hCoV-19/Chile/RM-204371/2020|2020-10-12|EPI\_ISL\_746761|Original|hCoV-19^^Region Metropolitana de Santiago|Human|Genetica Molecular and Subdepartamento de Virologia ISP Chile|Instituto de Salud Publica de Chile|Tognarelli|Chile

>Spike|hCoV-19/England/NORT-1B721DB/2020|2020-11-25|EPI\_ISL\_724858|Original|hCoV-19^^England|Human|Northumbria University / South Tees Hospitals NHS Foundation Trust / North Cumbria Integrated Care NHS Foundation Trust / North Tees and Hartlepool NHS Foundation Trust / Newcastle Hospitals NHS Foundation Trust|COVID-19 Genomics UK (COG-UK) Consortium|Bashton|United Kingdom

>Spike|hCoV-19/England/CAMC-B211FC/2020|2020-11-03|EPI\_ISL\_647557|Original|hCoV-19^^England|Human|Lighthouse Lab in Cambridge|Wellcome Sanger Institute for the COVID-19 Genomics UK (COG-UK) Consortium|Davies|United Kingdom

>Spike|hCoV-19/Portugal/PT1823/2020|2020-11-15|EPI\_ISL\_732045|Original|hCoV-19^^Portugal|Human|Instituto Nacional de Saude (INSA)|Instituto Nacional de Saude (INSA)|Borges|Portugal

>Spike|hCoV-19/Wales/PHWC-16A4E9/2020|2020-09-06|EPI\_ISL\_535261|Original|hCoV-19^^Wales|Human|Wales Specialist Virology Centre Sequencing lab|COVID-19 Genomics UK (COG-UK) Consortium|Moore|United Kingdom

>Spike|hCoV-19/USA/CA-ALSR-4489/2020|2020-10-26|EPI\_ISL\_666965|Original|hCoV-19^^California|Human|San Diego County Public Health Laboratory|Andersen lab at Scripps Research|Gangavarapu|USA

>Spike|hCoV-19/England/CAMB-824A0/2020|2020-04-14|EPI\_ISL\_443438|Original|hCoV-19^^England|Human|Department of Pathology|Wellcome Sanger Institute for the COVID-19 Genomics UK (COG-UK) consortium|Amato|United Kingdom

>Spike|hCoV-19/England/20130033604/2020|2020-03-22|EPI\_ISL\_423602|Original|hCoV-19^^England|Human|Respiratory Virus Unit|Respiratory Virus Unit|Platt|United Kingdom

>Spike|hCoV-19/India/TG-CCMB-AA372/2020|2020-08-11|EPI\_ISL\_539757|Original|hCoV-19^^Telangana|Human|CSIR-Centre for Cellular and Molecular Biology|CSIR-Centre for Cellular and Molecular Biology|Mukherjee|India

>Spike|hCoV-19/Iceland/185/2020|2020-03-16|EPI\_ISL\_417678|Original|hCoV-19^^Reykjavik|Human|The National University Hospital of Iceland|deCODE genetics|J\|u00f3nsson|Iceland

>Spike|hCoV-19/India/WB-S70/2020|2020-05-25|EPI\_ISL\_508460|Original|hCoV-19^^West Bengal|Human|ICMR-National Institute of Cholera and Enteric Diseases|National Institute of Biomedical Genomics|Maitra|India

>Spike|hCoV-19/Scotland/QEUIH-AD436C/2020|2020-10-26|EPI\_ISL\_649693|Original|hCoV-19^^Scotland|Human|Lighthouse Lab in Glasgow|Wellcome Sanger Institute for the COVID-19 Genomics UK (COG-UK) Consortium|Davies|United Kingdom

>Spike|hCoV-19/England/CAMC-B9A6C2/2020|2020-11-15|EPI\_ISL\_673839|Original|hCoV-19^^England|Human|Lighthouse Lab in Cambridge|Wellcome Sanger Institute for the COVID-19 Genomics UK (COG-UK) Consortium|Davies|United Kingdom

>Spike|hCoV-19/Denmark/DCGC-11137/2020|2020-11-02|EPI\_ISL\_669806|Original|hCoV-19^^Nordjylland|Human|Department of Virus and Microbiological Special Diagnostics|Albertsen Lab|Michaelsen|Denmark

>Spike|hCoV-19/USA/CO-CDPHE-2011210355/2020|2020-11-19|EPI\_ISL\_771155|Original|hCoV-19^^Colorado|Human|Colorado Department of Public Health and Environment|Colorado Department of Public Health and Environment|Bankers|USA

>Spike|hCoV-19/Scotland/EDB3180/2020|2020-04-06|EPI\_ISL\_487709|Original|hCoV-19^^Scotland|Human|Virology Department|Wellcome Sanger Institute for the COVID-19 Genomics UK (COG-UK) consortium|Davies|United Kingdom

>Spike|hCoV-19/Denmark/DCGC-5283/2020|2020-09-14|EPI\_ISL\_615214|Original|hCoV-19^^Syddanmark|Human|Department of Virus and Microbiological Special Diagnostics|Albertsen lab|Michaelsen|Denmark

>Spike|hCoV-19/Portugal/PT1398/2020|2020-03-28|EPI\_ISL\_511357|Original|hCoV-19^^Portugal|Human|Instituto Nacional de Saude (INSA)|Instituto Nacional de Saude (INSA)|Borges|Portugal

>Spike|hCoV-19/Wales/PHWC-4A3FE0/2020|2020-12-13|EPI\_ISL\_764651|Original|hCoV-19^^Wales|Human|Wales Specialist Virology Centre Sequencing lab|COVID-19 Genomics UK (COG-UK) Consortium|Moore|United Kingdom

>Spike|hCoV-19/Australia/VIC11734/2020|2020-07-21|EPI\_ISL\_563475|Original|hCoV-19^^Victoria|Human|Microbiological Diagnostic Unit - Public Health Laboratory (MDU-PHL)|MDU-PHL|Schultz|Australia

>Spike|hCoV-19/England/MILK-B89F61/2020|2020-11-13|EPI\_ISL\_675596|Original|hCoV-19^^England|Human|Lighthouse Lab in Milton Keynes|Wellcome Sanger Institute for the COVID-19 Genomics UK (COG-UK) Consortium|Davies|United Kingdom

>Spike|hCoV-19/England/MILK-A05A03/2020|2020-09-29|EPI\_ISL\_600015|Original|hCoV-19^^England|Human|Lighthouse Lab in Milton Keynes|Wellcome Sanger Institute for the COVID-19 Genomics UK (COG-UK) consortium|Davies|United Kingdom

>Spike|hCoV-19/Australia/VIC10961/2020|2020-07-29|EPI\_ISL\_563170|Original|hCoV-19^^Victoria|Human|Microbiological Diagnostic Unit - Public Health Laboratory (MDU-PHL)|MDU-PHL|Schultz|Australia

>Spike|hCoV-19/England/ALDP-A2E48E/2020|2020-10-06|EPI\_ISL\_586582|Original|hCoV-19^^England|Human|Lighthouse Lab in Alderley Park|Wellcome Sanger Institute for the COVID-19 Genomics UK (COG-UK) consortium|Davies|United Kingdom

>Spike|hCoV-19/Switzerland/BS-42203342/2020|2020-03-23|EPI\_ISL\_581723|Original|hCoV-19^^Basel-Stadt|Human|University Hospital Basel|University Hospital Basel|Roloff Handschin|Switzerland

>Spike|hCoV-19/USA/VA-DCLS-1111/2020|2020-06-18|EPI\_ISL\_529914|Original|hCoV-19^^Virginia|Human|Virginia Division of Consolidated Laboratory Services|Virginia Division of Consolidated Laboratory Services|St. Jacques|USA

>Spike|hCoV-19/England/ALDP-49F5B8/2020|2020-05-22|EPI\_ISL\_559630|Original|hCoV-19^^England|Human|Lighthouse Lab in Alderley Park|Wellcome Sanger Institute for the COVID-19 Genomics UK (COG-UK) consortium|Davies|United Kingdom

>Spike|hCoV-19/England/QEUIH-B130D2/2020|2020-11-02|EPI\_ISL\_642259|Original|hCoV-19^^England|Human|Lighthouse Lab in Glasgow|Wellcome Sanger Institute for the COVID-19 Genomics UK (COG-UK) Consortium|Davies|United Kingdom

>Spike|hCoV-19/India/TG-CDFD-C1131/2020|2020-05-30|EPI\_ISL\_528547|Original|hCoV-19^^Telangana|Human|National Genomics Core-Center for DNA Fingerprinting and

Diagnostics|National Genomics Core- Center for DNA Fingerprinting and Diagnostics (NGC-CDFD)- DBT's PAN-INDIA-1000 Genome consortium|Vashisht|India  
>Spike|hCoV-19/Australia/VIC4707/2020|2020-07-16|EPI\_ISL\_519095|Original|hCoV-19^^Victoria|Human|Microbiological Diagnostic Unit - Public Health Laboratory (MDU-PHL)|MDU-PHL|Schultz|Australia  
>Spike|hCoV-19/Japan/PG-3576/2020|2020-06-00|EPI\_ISL\_691832|Original|hCoV-19^^Japan|Human|Pathogen Genomics Center|Pathogen Genomics Center|Sekizuka|Japan  
>Spike|hCoV-19/England/NORT-28D063/2020|2020-10-06|EPI\_ISL\_665787|Original|hCoV-19^^England|Human|Northumbria University / South Tees Hospitals NHS Foundation Trust / North Cumbria Integrated Care NHS Foundation Trust / North Tees and Hartlepool NHS Foundation Trust / Newcastle Hospitals NHS Foundation Trust|COVID-19 Genomics UK (COG-UK) Consortium|Bashton|United Kingdom  
>Spike|hCoV-19/England/CAMC-A8227F/2020|2020-10-12|EPI\_ISL\_610701|Original|hCoV-19^^England|Human|Lighthouse Lab in Cambridge|Wellcome Sanger Institute for the COVID-19 Genomics UK (COG-UK) consortium|Davies|United Kingdom  
>Spike|hCoV-19/Netherlands/NoordHolland\_26/2020|2020-05-06|EPI\_ISL\_461216|Original|hCoV-19^^Noord Holland|Human|Dutch COVID-19 response team|Erasmus Medical Center|Oude Munnink|Netherlands  
>Spike|hCoV-19/England/QEUEH-961893/2020|2020-08-02|EPI\_ISL\_536986|Original|hCoV-19^^England|Human|Lighthouse Lab in Glasgow|Wellcome Sanger Institute for the COVID-19 Genomics UK (COG-UK) consortium|Davies|United Kingdom  
>Spike|hCoV-19/USA/VA-DCLS-0761/2020|2020-06-23|EPI\_ISL\_526877|Original|hCoV-19^^Virginia|Human|Virginia DCLS|Virginia DCLS|St. Jacques|USA  
>Spike|hCoV-19/England/MILK-A69AA3/2020|2020-10-09|EPI\_ISL\_665282|Original|hCoV-19^^England|Human|University of Exeter|COVID-19 Genomics UK (COG-UK) Consortium|Temperton|United Kingdom  
>Spike|hCoV-19/Australia/NSW232/2020|2020-03-27|EPI\_ISL\_451498|Original|hCoV-19^^New South Wales|Human|Pathology West - NSW Health Pathology|NSW Health Pathology - Institute of Clinical Pathology and Medical Research; Westmead Hospital; University of Sydney|Gall|Australia  
>Spike|hCoV-19/USA/WA-UW-10953/2020|2020-06-13|EPI\_ISL\_570362|Original|hCoV-19^^Washington|Human|UW Virology Lab|UW Virology Lab|Roychoudhury|USA  
>Spike|hCoV-19/Denmark/DCGC-7707/2020|2020-10-19|EPI\_ISL\_618590|Original|hCoV-19^^Hovedstaden|Human|Department of Virus and Microbiological Special Diagnostics|Albertsen lab|Michaelsen|Denmark  
>Spike|hCoV-19/Denmark/DCGC-5873/2020|2020-09-28|EPI\_ISL\_621060|Original|hCoV-19^^Midtjylland|Human|Department of Virus and Microbiological Special Diagnostics|Albertsen lab|Michaelsen|Denmark  
>Spike|hCoV-19/USA/MI-MDHHS-SC21728/2020|2020-08-08|EPI\_ISL\_529847|Original|hCoV-19^^Michigan|Human|Michigan Department of Health and Human Services|Michigan Department of Health and Human Services|Blankenship|USA  
>Spike|hCoV-19/England/MILK-B54E53/2020|2020-11-06|EPI\_ISL\_657753|Original|hCoV-19^^England|Human|Lighthouse Lab in Milton Keynes|Wellcome Sanger Institute for the COVID-19 Genomics UK (COG-UK) Consortium|Davies|United Kingdom  
>Spike|hCoV-19/Canada/QC\_AM7/2020|2020-04-08|EPI\_ISL\_515215|Original|hCoV-19^^Quebec|Human|Laboratoire de microbiologie|Smith Laboratory|Smith|Canada  
>Spike|hCoV-19/Switzerland/VD-ETHZ-190087/2020|2020-07-07|EPI\_ISL\_500943|Original|hCoV-19^^Vaud|Human|Viollier AG|Department of Biosystems Science and Engineering|Nadeau|Switzerland  
>Spike|hCoV-19/USA/MN-MDH-1497/2020|2020-03-20|EPI\_ISL\_518890|Original|hCoV-19^^Minnesota|Human|Mayo Clinic & Mayo Clinic Laboratories|Minnesota Department of Health|Garfin|USA  
>Spike|hCoV-19/Denmark/DCGC-17281/2020|2020-12-14|EPI\_ISL\_750877|Original|hCoV-19^^Sjaelland|Human|Department of Virus and Microbiological Special Diagnostics|Albertsen Lab|Michaelsen|Denmark  
>Spike|hCoV-19/Canada/ON-PHL-20-01318/2020|2020-06-00|EPI\_ISL\_548921|Original|hCoV-19^^Ontario|Human|Public Health Ontario Laboratory|Public Health Ontario Laboratory|Guthrie|Canada

>Spike|hCoV-19/England/ALDP-C06693/2020|2020-12-06|EPI\_ISL\_709352|Original|hCoV-19^^England|Human|Lighthouse Lab in Alderley Park|Wellcome Sanger Institute for the COVID-19 Genomics UK (COG-UK) Consortium|Davies|United Kingdom

>Spike|hCoV-19/England/210100400/2021|2021-01-00|EPI\_ISL\_791201|Original|hCoV-19^^England|Human|Respiratory Virus Unit|COVID-19 Genomics UK (COG-UK) Consortium|Platt|United Kingdom

>Spike|hCoV-19/Switzerland/TG-UZH-IMV10/2020|2020-04-14|EPI\_ISL\_590832|Vero P2|hCoV-19^^Thurgau|Human|Institute of Medical Virology|Institute of Medical Virology|Kufner|Switzerland

>Spike|hCoV-19/Spain/CM-IBV-003781/2020|2020-04-03|EPI\_ISL\_474813|Original|hCoV-19^^Castilla La Mancha|Human|Complejo Hospitalario Universitario de Albacete|SeqCOVID-SPAIN consortium|IBV(CSIC)|Comas|Spain

>Spike|hCoV-19/Wales/PHWC-48DACD/2020|2020-11-01|EPI\_ISL\_680723|Original|hCoV-19^^Wales|Human|Wales Specialist Virology Centre Sequencing lab|COVID-19 Genomics UK (COG-UK) Consortium|Moore|United Kingdom

>Spike|hCoV-19/Canada/ON-S811/2020|2020-04-10|EPI\_ISL\_591164|Original|hCoV-19^^Ontario|Human|Toronto Invasive Bacterial Diseases Network|McMaster University|McArthur|Canada

>Spike|hCoV-19/England/ALDP-B48344/2020|2020-11-07|EPI\_ISL\_649198|Original|hCoV-19^^England|Human|Lighthouse Lab in Alderley Park|Wellcome Sanger Institute for the COVID-19 Genomics UK (COG-UK) Consortium|Davies|United Kingdom

>Spike|hCoV-19/England/CAMB-1B7F19/2020|2020-10-16|EPI\_ISL\_637689|Original|hCoV-19^^England|Human|Department of Pathology|COVID-19 Genomics UK (COG-UK) Consortium|Goodfellow|United Kingdom

>Spike|hCoV-19/Northern Ireland/NIRE-106EC3/2020|2020-05-21|EPI\_ISL\_501015|Original|hCoV-19^^Northern Ireland|Human|Regional Virus Laboratory|Wellcome Sanger Institute for the COVID-19 Genomics UK (COG-UK) consortium|Davies|United Kingdom

>Spike|hCoV-19/England/QEUA-96F9CF/2020|2020-08-18|EPI\_ISL\_540309|Original|hCoV-19^^England|Human|Lighthouse Lab in Glasgow|Wellcome Sanger Institute for the COVID-19 Genomics UK (COG-UK) consortium|Davies|United Kingdom

>Spike|hCoV-19/Ireland/LH-NVRL-20ILR08014/2020|2020-11-11|EPI\_ISL\_732413|Original|hCoV-19^^Louth|Human|National Virus Reference Laboratory|National Virus Reference Laboratory|Gonzalez|Ireland

>Spike|hCoV-19/South Africa/LR00018/2020|2020-07-03|EPI\_ISL\_515148|Original|hCoV-19^^North West|Human|National Institute for Communicable Diseases of the National Health Laboratory Service|National Institute for Communicable Diseases of the National Health Laboratory Service|Allam|South Africa

>Spike|hCoV-19/Wales/PHWC-2C5B4/2020|2020-03-31|EPI\_ISL\_445879|Original|hCoV-19^^Wales|Human|Wales Specialist Virology Centre|Public Health Wales Microbiology Cardiff|Moore|United Kingdom

>Spike|hCoV-19/England/CAMC-A583D9/2020|2020-10-07|EPI\_ISL\_597024|Original|hCoV-19^^England|Human|Lighthouse Lab in Cambridge|Wellcome Sanger Institute for the COVID-19 Genomics UK (COG-UK) consortium|Davies|United Kingdom

>Spike|hCoV-19/England/MILK-D0BF65/2020|2020-12-20|EPI\_ISL\_781947|Original|hCoV-19^^England|Human|Lighthouse Lab in Milton Keynes|Wellcome Sanger Institute for the COVID-19 Genomics UK (COG-UK) Consortium|Davies|United Kingdom

>Spike|hCoV-19/England/MILK-CAA109/2020|2020-12-18|EPI\_ISL\_768883|Original|hCoV-19^^England|Human|Lighthouse Lab in Milton Keynes|Wellcome Sanger Institute for the COVID-19 Genomics UK (COG-UK) Consortium|Davies|United Kingdom

>Spike|hCoV-19/USA/HI-H200044/2020|2020-04-02|EPI\_ISL\_752629|Original|hCoV-19^^Hawaii|Human|State Laboratories Division|State Laboratories Division|Sultana|USA

>Spike|hCoV-19/England/201360224/2020|2020-03-25|EPI\_ISL\_423254|Original|hCoV-19^^England|Human|Respiratory Virus Unit|Respiratory Virus Unit|Platt|United Kingdom

>Spike|hCoV-19/Canada/ON-S1803/2020|2020-11-24|EPI\_ISL\_729275|Original|hCoV-19^^Ontario|Human|Toronto Invasive Bacterial Diseases Network|McMaster University|McArthur|Canada

>Spike|hCoV-19/England/QEUA-53C0AC/2020|2020-05-18|EPI\_ISL\_532193|Original|hCoV-19^^England|Human|Lighthouse Lab in Glasgow|Wellcome Sanger Institute for the COVID-19 Genomics UK (COG-UK) consortium|Davies|United Kingdom

>Spike|hCoV-19/England/QEUA-9658AE/2020|2020-08-12|EPI\_ISL\_530995|Original|hCoV-19^^England|Human|Lighthouse Lab in Glasgow|Wellcome Sanger Institute for the COVID-19 Genomics UK (COG-UK) consortium|Davies|United Kingdom

>Spike|hCoV-19/env/Belgium/VAN-93030-N/2020|2020-04-05|EPI\_ISL\_539301|Original|hCoV-19^^Antwerp|Environment|KWR Watercycle Research Institute|Erasmus Medical Center|Graaf|Belgium

>Spike|hCoV-19/Scotland/QEUA-9CEF26/2020|2020-09-17|EPI\_ISL\_602017|Original|hCoV-19^^Scotland|Human|Lighthouse Lab in Glasgow|Wellcome Sanger Institute for the COVID-19 Genomics UK (COG-UK) consortium|Davies|United Kingdom

>Spike|hCoV-19/Finland/21SS13G9/2020|2020-09-21|EPI\_ISL\_757381|Original|hCoV-19^^Uusimaa|Human|Department of Virology and Immunology|Department of Virology|Smura|Finland

>Spike|hCoV-19/Wales/MILK-A463ED/2020|2020-10-04|EPI\_ISL\_609285|Original|hCoV-19^^Wales|Human|Lighthouse Lab in Milton Keynes|Wellcome Sanger Institute for the COVID-19 Genomics UK (COG-UK) consortium|Davies|United Kingdom

>Spike|hCoV-19/USA/WI-UW-2191/2020|2020-10-26|EPI\_ISL\_677594|Original|hCoV-19^^Wisconsin|Human|University of Wisconsin-Madison AIDS Vaccine Research Laboratories|University of Wisconsin-Madison AIDS Vaccine Research Laboratories|Baczenas|USA

>Spike|hCoV-19/USA/CA-CZB-6938/2020|2020-08-26|EPI\_ISL\_582892|Original|hCoV-19^^California|Human|County of Santa Clara Public Health Department|Chan-Zuckerberg Biohub|Bhatt|USA

>Spike|hCoV-19/Switzerland/VS-ETHZ-410386/2020|2020-11-25|EPI\_ISL\_737851|Original|hCoV-19^^Valais|Human|Viollier AG|Department of Biosystems Science and Engineering|Nadeau|Switzerland

>Spike|hCoV-19/England/QEUA-96555C/2020|2020-08-12|EPI\_ISL\_531094|Original|hCoV-19^^England|Human|Lighthouse Lab in Glasgow|Wellcome Sanger Institute for the COVID-19 Genomics UK (COG-UK) consortium|Davies|United Kingdom

>Spike|hCoV-19/England/CAMC-B07903/2020|2020-10-30|EPI\_ISL\_643659|Original|hCoV-19^^England|Human|Lighthouse Lab in Cambridge|Wellcome Sanger Institute for the COVID-19 Genomics UK (COG-UK) Consortium|Davies|United Kingdom

>Spike|hCoV-19/Austria/CeMM0924/2020|2020-03-18|EPI\_ISL\_583776|Original|hCoV-19^^Austria|Human|Dr. Gernot Walder GmbH|Bergthaler laboratory|Bergthaler|Austria

>Spike|hCoV-19/USA/CT-Yale-033/2020|2020-03-18|EPI\_ISL\_428371|Original|hCoV-19^^Connecticut|Human|Yale Clinical Virology Laboratory|Grubaugh Lab - Yale School of Public Health|Grubaugh|USA

>Spike|hCoV-19/Denmark/DCGC-21414/2020|2020-12-21|EPI\_ISL\_758155|Original|hCoV-19^^Hovedstaden|Human|Department of Virus and Microbiological Special Diagnostics|Albertsen Lab|Michaelsen|Denmark

>Spike|hCoV-19/England/ALDP-9D98F0/2020|2020-09-18|EPI\_ISL\_576770|Original|hCoV-19^^England|Human|Oxford Viromics|COVID-19 Genomics UK (COG-UK) Consortium|Golubchik|United Kingdom

>Spike|hCoV-19/Wales/PHWC-16685A/2020|2020-06-23|EPI\_ISL\_494049|Original|hCoV-19^^Wales|Human|Originating lab|COVID-19 Genomics UK (COG-UK) Consortium|Moore|United Kingdom

>Spike|hCoV-19/USA/CO-UW-739/2020|2020-06-29|EPI\_ISL\_491304|Original|hCoV-19^^Colorado|Human|University of Wisconsin-Madison AIDS Vaccine Research Laboratories|University of Wisconsin-Madison AIDS Vaccine Research Laboratories|Baczenas|USA

>Spike|hCoV-19/England/MILK-9AACB0/2020|2020-09-01|EPI\_ISL\_550818|Original|hCoV-19^^England|Human|Lighthouse Lab in Milton Keynes|Wellcome Sanger Institute for the COVID-19 Genomics UK (COG-UK) consortium|Davies|United Kingdom

>Spike|hCoV-19/England/ALDP-BC7398/2020|2020-11-22|EPI\_ISL\_721200|Original|hCoV-19^^England|Human|Lighthouse Lab in Alderley Park|Wellcome Sanger Institute for the COVID-19 Genomics UK (COG-UK) Consortium|Davies|United Kingdom

>Spike|hCoV-19/Japan/PG-1878/2020|2020-05-00|EPI\_ISL\_685484|Original|hCoV-19^^Japan|Human|Tokyo Metropolitan Institute of Public Health|Pathogen Genomics Center|Sekizuka|Japan



>Spike|hCoV-19/England/QEUEH-BCE319/2020|2020-11-26|EPI\_ISL\_704337|Original|hCoV-19^^England|Human|Lighthouse Lab in Glasgow|Wellcome Sanger Institute for the COVID-19 Genomics UK (COG-UK) Consortium|Davies|United Kingdom

>Spike|hCoV-19/Denmark/DCGC-5642/2020|2020-09-28|EPI\_ISL\_619929|Original|hCoV-19^^Midtjylland|Human|Department of Virus and Microbiological Special Diagnostics|Albertsen lab|Michaelsen|Denmark

>Spike|hCoV-19/England/CAMB-735FA/2020|2020-03-20|EPI\_ISL\_440289|Original|hCoV-19^^England|Human|Department of Pathology|Wellcome Sanger Institute for the COVID-19 Genomics UK (COG-UK) consortium|Amato|United Kingdom

>Spike|hCoV-19/Austria/CeMM1066/2020|2020-03-15|EPI\_ISL\_583879|Original|hCoV-19^^Austria|Human|Center for Virology|Bergthaler laboratory|Bergthaler|Austria

>Spike|hCoV-19/England/ALDP-A853B5/2020|2020-10-17|EPI\_ISL\_610300|Original|hCoV-19^^England|Human|Lighthouse Lab in Alderley Park|Wellcome Sanger Institute for the COVID-19 Genomics UK (COG-UK) consortium|Davies|United Kingdom

>Spike|hCoV-19/South Africa/R10767/2020|2020-06-15|EPI\_ISL\_490305|Original|hCoV-19^^Western Cape|Human|National Institute for Communicable Diseases of the National Health Laboratory Service|National Institute for Communicable Diseases of the National Health Laboratory Service|Allam|South Africa

>Spike|hCoV-19/Denmark/DCGC-21615/2020|2020-12-21|EPI\_ISL\_757961|Original|hCoV-19^^Hovedstaden|Human|Department of Virus and Microbiological Special Diagnostics|Albertsen Lab|Michaelsen|Denmark

>Spike|hCoV-19/England/ALDP-9498A0/2020|2020-06-12|EPI\_ISL\_556352|Original|hCoV-19^^England|Human|Lighthouse Lab in Alderley Park|Wellcome Sanger Institute for the COVID-19 Genomics UK (COG-UK) consortium|Davies|United Kingdom

>Spike|hCoV-19/Denmark/DCGC-9314/2020|2020-11-16|EPI\_ISL\_668903|Original|hCoV-19^^Nordjylland|Human|Department of Virus and Microbiological Special Diagnostics|Albertsen Lab|Michaelsen|Denmark

>Spike|hCoV-19/USA/CA-ALSR-3567/2020|2020-06-19|EPI\_ISL\_636087|Original|hCoV-19^^California|Human|San Diego County Public Health Laboratory|Andersen lab at Scripps Research|Gangavarapu|USA

>Spike|hCoV-19/England/QEUEH-C33A37/2020|2020-12-11|EPI\_ISL\_734001|Original|hCoV-19^^England|Human|Lighthouse Lab in Glasgow|Wellcome Sanger Institute for the COVID-19 Genomics UK (COG-UK) Consortium|Davies|United Kingdom

>Spike|hCoV-19/USA/NY-NYCPHL-000678/2020|2020-03-13|EPI\_ISL\_632096|Original|hCoV-19^^New York|Human|Jamaica Hospital Medical Center|New York City Public Health Laboratory|Wang|USA

>Spike|hCoV-19/Wales/PHWC-487586/2020|2020-10-29|EPI\_ISL\_638158|Original|hCoV-19^^Wales|Human|Wales Specialist Virology Centre Sequencing lab|COVID-19 Genomics UK (COG-UK) Consortium|Moore|United Kingdom

>Spike|hCoV-19/USA/WA-S1692/2020|2020-05-31|EPI\_ISL\_496118|Original|hCoV-19^^Washington|Human|Washington State Department of Health|Seattle Flu Study|Lee|USA

>Spike|hCoV-19/England/NOTT-1125CF/2020|2020-04-29|EPI\_ISL\_484400|Original|hCoV-19^^England|Human|Lincolnshire Hospitals and DeepSeq Nottingham|COVID-19 Genomics UK (COG-UK) Consortium|Loose|United Kingdom

>Spike|hCoV-19/England/ALDP-B1B9A2/2020|2020-11-01|EPI\_ISL\_645719|Original|hCoV-19^^England|Human|Lighthouse Lab in Alderley Park|Wellcome Sanger Institute for the COVID-19 Genomics UK (COG-UK) Consortium|Davies|United Kingdom

>Spike|hCoV-19/USA/TX-HMH-MCoV-10908/2020|2020-07-09|EPI\_ISL\_789680|Original|hCoV-19^^Texas|Human|Houston Methodist Hospital|Houston Methodist Hospital|Long|USA

>Spike|hCoV-19/USA/WI-GMF-31213/2020|2020-11-03|EPI\_ISL\_661077|Original|hCoV-19^^Wisconsin|Human|Gundersen Molecular Diagnostics Laboratory|Kabara Cancer Research Institute|Kenny|USA

>Spike|hCoV-19/USA/NY-NYUMC556/2020|2020-03-31|EPI\_ISL\_444673|Original|hCoV-19^^New York|Human|NYU Langone Health|Departments of Pathology and Medicine|Maurano|USA

>Spike|hCoV-19/Spain/CN-IBV-002604/2020|2020-03-18|EPI\_ISL\_474917|Original|hCoV-19^^Canary Islands|Human|Hospital Universitario de Gran Canaria Dr. Negr\u00ededn|SeqCOVID-SPAIN consortium|IBV(CSIC)|Comas|Spain

>Spike|hCoV-19/England/CAMC-AEB20B/2020|2020-10-26|EPI\_ISL\_633299|Original|hCoV-19^^England|Human|Lighthouse Lab in Cambridge|Wellcome Sanger Institute for the COVID-19 Genomics UK (COG-UK) consortium|Davies|United Kingdom

>Spike|hCoV-19/USA/NY-NYCPHL-001287/2020|2020-11-09|EPI\_ISL\_683878|Original|hCoV-19^^New York|Human|DOHMH Jamaica|New York City Public Health Laboratory|Wang|USA

>Spike|hCoV-19/Germany/HH-hpi-p1296/2020|2020-03-19|EPI\_ISL\_775844|Original|hCoV-19^^Hamburg|Human|University Medical Center Hamburg Eppendorf|Heinrich Pette Institute|Robitaille|Germany

>Spike|hCoV-19/Iceland/57/2020|2020-03-06|EPI\_ISL\_417692|Original|hCoV-19^^Reykjavik|Human|The National University Hospital of Iceland|deCODE genetics|J\u00f3nsson|Iceland

>Spike|hCoV-19/USA/IL-NM0108/2020|2020-03-20|EPI\_ISL\_444593|Original|hCoV-19^^Illinois|Human|Northwestern Memorial Hospital|Ozer Lab|Ozer|USA

>Spike|hCoV-19/USA/CA-IGI-0233/2020|2020-07-02|EPI\_ISL\_569903|Original|hCoV-19^^California|Human|Innovative Genomics Institute|Innovative Genomics Institute|Wyman|USA

>Spike|hCoV-19/Switzerland/BS-42209162/2020|2020-03-27|EPI\_ISL\_581774|Original|hCoV-19^^Basel-Stadt|Human|University Hospital Basel|University Hospital Basel|Roloff Handschin|Switzerland

>Spike|hCoV-19/Ireland/MH-NVRL-73IRL22943/2020|2020-09-16|EPI\_ISL\_578244|Original|hCoV-19^^Meath|Human|National Virus Reference Laboratory|National Virus Reference Laboratory|Gonzalez|Ireland

>Spike|hCoV-19/Wales/PHWC-16E773/2020|2020-09-29|EPI\_ISL\_585765|Original|hCoV-19^^Wales|Human|Wales Specialist Virology Centre Sequencing lab|COVID-19 Genomics UK (COG-UK) Consortium|Moore|United Kingdom

>Spike|hCoV-19/Wales/PHWC-4903CC/2020|2020-10-30|EPI\_ISL\_705265|Original|hCoV-19^^Wales|Human|Originating lab|COVID-19 Genomics UK (COG-UK) Consortium|Moore|United Kingdom

>Spike|hCoV-19/England/QEUEH-9C9547/2020|2020-09-10|EPI\_ISL\_567433|Original|hCoV-19^^England|Human|Lighthouse Lab in Glasgow|Wellcome Sanger Institute for the COVID-19 Genomics UK (COG-UK) consortium|Davies|United Kingdom

>Spike|hCoV-19/England/CAMC-BFBDE8/2020|2020-12-04|EPI\_ISL\_709256|Original|hCoV-19^^England|Human|Lighthouse Lab in Cambridge|Wellcome Sanger Institute for the COVID-19 Genomics UK (COG-UK) Consortium|Davies|United Kingdom

>Spike|hCoV-19/England/QEUEH-9CE6F4/2020|2020-09-17|EPI\_ISL\_590061|Original|hCoV-19^^England|Human|Lighthouse Lab in Glasgow|Wellcome Sanger Institute for the COVID-19 Genomics UK (COG-UK) consortium|Davies|United Kingdom

>Spike|hCoV-19/Scotland/CVR6054/2020|2020-11-27|EPI\_ISL\_704184|Original|hCoV-19^^Scotland|Human|West of Scotland Specialist Virology Centre|COVID-19 Genomics UK (COG-UK) Consortium|Robertson|United Kingdom

>Spike|hCoV-19/France/PAC-IHU-0496/2020|2020-04-03|EPI\_ISL\_569551|Original|hCoV-19^^Provence-Alpes-C\u00f4te-d\u00e0z|Human|MEPHI|MEPHI|Levasseur|France

>Spike|hCoV-19/USA/NM-UNM-00534/2020|2020-05-10|EPI\_ISL\_542956|Original|hCoV-19^^New Mexico|Human|TriCore Reference Laboratories|Center for Global Health|Domman|USA

>Spike|hCoV-19/USA/WA-UW-1689/2020|2020-03-19|EPI\_ISL\_424211|Original|hCoV-19^^Washington|Human|UW Virology Lab|UW Virology Lab|Roychoudhury|USA

>Spike|hCoV-19/England/MILK-CA97F9/2020|2020-12-17|EPI\_ISL\_762243|Original|hCoV-19^^England|Human|Lighthouse Lab in Milton Keynes|Wellcome Sanger Institute for the COVID-19 Genomics UK (COG-UK) Consortium|Davies|United Kingdom

>Spike|hCoV-19/USA/CA-CZB-2206/2020|2020-05-27|EPI\_ISL\_513754|Original|hCoV-19^^California|Human|Orange County Public Health Lab|Chan-Zuckerberg Biohub|Kamm|USA

>Spike|hCoV-19/England/LOND-124FBA5/2020|2020-03-26|EPI\_ISL\_665188|Original|hCoV-19^^England|Human|University College London Hospital|COVID-19 Genomics UK (COG-UK) Consortium|Byott|United Kingdom

>Spike|hCoV-19/Luxembourg/LNS5381060/2020|2020-10-21|EPI\_ISL\_744224|Original|hCoV-19^^Luxembourg|Human|Laboratoire national de sant\u00e9|Laboratoire national de sant\u00e9|Wienecke-Baldacchino|Luxembourg

>Spike|hCoV-19/England/BRIS-185372C/2020|2020-04-13|EPI\_ISL\_492307|Original|hCoV-19^^England|Human|PHE South West Regional Laboratory|Wellcome Sanger Institute for the COVID-19 Genomics UK (COG-UK) consortium|Davies|United Kingdom

>Spike|hCoV-19/Australia/VIC11637/2020|2020-07-18|EPI\_ISL\_641003|Original|hCoV-19^^Victoria|Human|Microbiological Diagnostic Unit - Public Health Laboratory (MDU-PHL)|MDU-PHL|Schultz|Australia

>Spike|hCoV-19/Wales/PHWC-49EA41/2020|2020-12-08|EPI\_ISL\_743085|Original|hCoV-19^^Wales|Human|Wales Specialist Virology Centre Sequencing lab|COVID-19 Genomics UK (COG-UK) Consortium|Moore|United Kingdom

>Spike|hCoV-19/England/CAMB-1B7D1F/2020|2020-10-14|EPI\_ISL\_637730|Original|hCoV-19^^England|Human|Department of Pathology|COVID-19 Genomics UK (COG-UK) Consortium|Goodfellow|United Kingdom

>Spike|hCoV-19/England/NORT-286F6D/2020|2020-10-21|EPI\_ISL\_652342|Original|hCoV-19^^England|Human|Northumbria University / South Tees Hospitals NHS Foundation Trust / North Cumbria Integrated Care NHS Foundation Trust / North Tees and Hartlepool NHS Foundation Trust / Newcastle Hospitals NHS Foundation Trust|COVID-19 Genomics UK (COG-UK) Consortium|Bashton|United Kingdom

>Spike|hCoV-19/England/QEUH-9B6FB8/2020|2020-09-04|EPI\_ISL\_590684|Original|hCoV-19^^England|Human|Lighthouse Lab in Glasgow|Wellcome Sanger Institute for the COVID-19 Genomics UK (COG-UK) consortium|Davies|United Kingdom

>Spike|hCoV-19/Wales/PHWC-15FDEC/2020|2020-05-25|EPI\_ISL\_472857|Original|hCoV-19^^Wales|Human|Wales Specialist Virology Centre Sequencing lab|COVID-19 Genomics UK (COG-UK) Consortium|Moore|United Kingdom

>Spike|hCoV-19/USA/CA-ALSR-3726/2020|2020-05-27|EPI\_ISL\_636169|Original|hCoV-19^^California|Human|San Diego County Public Health Laboratory|Andersen lab at Scripps Research|Gangavarapu|USA

>Spike|hCoV-19/USA/TX-HMH-MCoV-13500/2020|2020-08-21|EPI\_ISL\_788629|Original|hCoV-19^^Texas|Human|Houston Methodist Hospital|Houston Methodist Hospital|Long|USA

>Spike|hCoV-19/Denmark/DCGC-9339/2020|2020-11-16|EPI\_ISL\_668916|Original|hCoV-19^^Nordjylland|Human|Department of Virus and Microbiological Special Diagnostics|Albertsen Lab|Michaelsen|Denmark

>Spike|hCoV-19/Belgium/UGent-183/2020|2020-10-18|EPI\_ISL\_634894|Original|hCoV-19^^Ghent|Human|Lab voor klinische biologie|Onderzoeksgroep Virologie|Lambrechts|Belgium

>Spike|hCoV-19/USA/NY-NYUMC618/2020|2020-04-02|EPI\_ISL\_444735|Original|hCoV-19^^New York|Human|NYU Langone Health|Departments of Pathology and Medicine|Maurano|USA

>Spike|hCoV-19/Denmark/DCGC-13272/2020|2020-11-30|EPI\_ISL\_712696|Original|hCoV-19^^Hovedstaden|Human|Department of Virus and Microbiological Special Diagnostics|Albertsen Lab|Michaelsen|Denmark

>Spike|hCoV-19/USA/WY-WYPHL005/2020|2020-03-15|EPI\_ISL\_421347|Original|hCoV-19^^Wyoming|Human|Wyoming Public Health Laboratory|Center for Global Health|Domman|USA

>Spike|hCoV-19/USA/WA-S78/2020|2020-03-05|EPI\_ISL\_417131|Original|hCoV-19^^Washington|Human|Washington State Department of Health|Seattle Flu Study|Bedford|USA

>Spike|hCoV-19/Scotland/CVR1909/2020|2020-04-06|EPI\_ISL\_493745|Original|hCoV-19^^Scotland|Human|West of Scotland Specialist Virology Centre|COVID-19 Genomics UK (COG-UK) Consortium|Robertson|United Kingdom

>Spike|hCoV-19/DRC/04188/2020|2020-04-25|EPI\_ISL\_471413|Original|hCoV-19^^Haut-Katanga|Human|Viral Respiratory Lab|Pathogen Sequencing Lab|Lusamaki|Democratic Republic of the Congo

>Spike|hCoV-19/Scotland/CVR4461/2020|2020-09-20|EPI\_ISL\_585326|Original|hCoV-19^^Scotland|Human|Lighthouse Lab in Glasgow / MRC-University of Glasgow Centre for Virus Research|COVID-19 Genomics UK (COG-UK) Consortium|Robertson|United Kingdom

>Spike|hCoV-19/Japan/PG-2474/2020|2020-05-00|EPI\_ISL\_686079|Original|hCoV-19^^Japan|Human|Pathogen Genomics Center|Pathogen Genomics Center|Sekizuka|Japan

>Spike|hCoV-19/Portugal/PT1285/2020|2020-03-24|EPI\_ISL\_511246|Original|hCoV-19^^Portugal|Human|Instituto Nacional de Saude (INSA) and Instituto Gulbenkian de Ciencia (IGC)|Instituto Nacional de Saude (INSA) and Instituto Gulbenkian de Ciencia (IGC)|Borges|Portugal

>Spike|hCoV-19/England/ALDP-B832E6/2020|2020-11-14|EPI\_ISL\_675487|Original|hCoV-19^^England|Human|Lighthouse Lab in Alderley Park|Wellcome Sanger Institute for the COVID-19 Genomics UK (COG-UK) Consortium|Davies|United Kingdom

>Spike|hCoV-19/England/ALDP-9551C4/2020|2020-06-12|EPI\_ISL\_553357|Original|hCoV-19^^England|Human|Lighthouse Lab in Alderley Park|Wellcome Sanger Institute for the COVID-19 Genomics UK (COG-UK) consortium|Davies|United Kingdom

>Spike|hCoV-19/USA/TX-HMH-7495/2020|2020-06-26|EPI\_ISL\_546801|Original|hCoV-19^^Texas|Human|Houston Methodist Hospital|Houston Methodist Hospital|Long|USA

>Spike|hCoV-19/Denmark/DCGC-7383/2020|2020-10-12|EPI\_ISL\_619336|Original|hCoV-19^^Midtjylland|Human|Department of Virus and Microbiological Special Diagnostics|Albertsen lab|Michaelsen|Denmark

>Spike|hCoV-19/England/CAMB-7D226/2020|2020-04-06|EPI\_ISL\_442090|Original|hCoV-19^^England|Human|Department of Pathology|Wellcome Sanger Institute for the COVID-19 Genomics UK (COG-UK) consortium|Amato|United Kingdom

>Spike|hCoV-19/England/QEUEH-962E63/2020|2020-08-10|EPI\_ISL\_531584|Original|hCoV-19^^England|Human|Lighthouse Lab in Glasgow|Wellcome Sanger Institute for the COVID-19 Genomics UK (COG-UK) consortium|Davies|United Kingdom

>Spike|hCoV-19/England/MILK-9C35D4/2020|2020-09-07|EPI\_ISL\_566694|Original|hCoV-19^^England|Human|Lighthouse Lab in Milton Keynes|Wellcome Sanger Institute for the COVID-19 Genomics UK (COG-UK) consortium|Davies|United Kingdom

>Spike|hCoV-19/England/ALDP-B1ACC8/2020|2020-11-01|EPI\_ISL\_646004|Original|hCoV-19^^England|Human|Lighthouse Lab in Alderley Park|Wellcome Sanger Institute for the COVID-19 Genomics UK (COG-UK) Consortium|Davies|United Kingdom

>Spike|hCoV-19/Canada/ON-PHL-20-03794/2020|2020-11-00|EPI\_ISL\_775055|Original|hCoV-19^^Ontario|Human|Public Health Ontario Laboratory|Public Health Ontario Laboratory|Guthrie|Canada

>Spike|hCoV-19/Ireland/LK-UHL8/2020|2020-04-01|EPI\_ISL\_681760|Original|hCoV-19^^Limerick|Human|University Hospital Limerick|Irish Coronavirus Sequencing Consortium - Teagasc Moorepark|Walsh|Ireland

>Spike|hCoV-19/Madagascar/VIRO-2728/2020|2020-03-26|EPI\_ISL\_677636|Original|hCoV-19^^Toamasina|Human|Virology Unit|Virology Unit|Brook|Madagascar

>Spike|hCoV-19/Wales/MILK-B058EA/2020|2020-10-24|EPI\_ISL\_652204|Original|hCoV-19^^Wales|Human|Queens Medical Centre|COVID-19 Genomics UK (COG-UK) Consortium|Loose|United Kingdom

>Spike|hCoV-19/USA/TX-HMH-6000/2020|2020-06-30|EPI\_ISL\_547157|Original|hCoV-19^^Texas|Human|Houston Methodist Hospital|Houston Methodist Hospital|Long|USA

>Spike|hCoV-19/Wales/PHWC-163F58/2020|2020-04-23|EPI\_ISL\_474106|Original|hCoV-19^^Wales|Human|Originating lab|COVID-19 Genomics UK (COG-UK) Consortium|Moore|United Kingdom

>Spike|hCoV-19/England/MILK-AB7763/2020|2020-10-19|EPI\_ISL\_623293|Original|hCoV-19^^England|Human|Lighthouse Lab in Milton Keynes|Wellcome Sanger Institute for the COVID-19 Genomics UK (COG-UK) consortium|Davies|United Kingdom

>Spike|hCoV-19/USA/TX-DSHS-0267/2020|2020-06-13|EPI\_ISL\_527834|Original|hCoV-19^^Texas|Human|Texas Department of State Health Services|Texas Department of State Health Services|Rahman|USA

>Spike|hCoV-19/England/ALDP-C3A405/2020|2020-12-09|EPI\_ISL\_731157|Original|hCoV-19^^England|Human|Lighthouse Lab in Alderley Park|Wellcome Sanger Institute for the COVID-19 Genomics UK (COG-UK) Consortium|Davies|United Kingdom

>Spike|hCoV-19/Spain/RI-IBV-005966/2020|2020-03-07|EPI\_ISL\_500400|Original|hCoV-19^^La Rioja|Human|Centro de Investigaci\u00f3n Biom\u00e9dica de La Rioja - Hospital San Pedro Logro\u00f1o|SeqCOVID-SPAIN consortium|IBV (CSIC)|Comas|Spain

>Spike|hCoV-19/England/QEUEH-B7C8DF/2020|2020-11-14|EPI\_ISL\_741799|Original|hCoV-19^^England|Human|Oxford Viromics|COVID-19 Genomics UK (COG-UK) Consortium|Golubchik|United Kingdom

>Spike|hCoV-19/Brazil/SC-L15-CD265/2020|2020-03-29|EPI\_ISL\_476259|Original|hCoV-19^^Santa Catarina|Human|Hospital da Cl\u00e9nicas da Faculdade de Medicina da Universidade de S\u00e3o Paulo|Instituto de Medicina Tropical da Univesidade de S\u00e3o Paulo|Faria|Brazil

>Spike|hCoV-19/England/BIRM-654A3/2020|2020-10-06|EPI\_ISL\_594560|Original|hCoV-19^^England|Human|University of Birmingham|COVID-19 Genomics UK (COG-UK) Consortium|Loman|United Kingdom

>Spike|hCoV-19/England/NORT-28B092/2020|2020-04-17|EPI\_ISL\_492918|Original|hCoV-19^^England|Human|NU-OMICS DNA Sequencing research facility|Wellcome Sanger Institute for the COVID-19 Genomics UK (COG-UK) consortium|Davies|United Kingdom

>Spike|hCoV-19/South Africa/Tygerberg\_321\_CC2/2020|2020-10-12|EPI\_ISL\_660130|Original|hCoV-19^Western Cape|Human|Lancet|National Health Laboratory Service (NHLS)|de Oliveira|South Africa

>Spike|hCoV-19/Scotland/CVR5092/2020|2020-10-16|EPI\_ISL\_626967|Original|hCoV-19^Scotland|Human|West of Scotland Specialist Virology Centre|COVID-19 Genomics UK (COG-UK) Consortium|Robertson|United Kingdom

>Spike|hCoV-19/India/GJ-GBRC353/2020|2020-06-25|EPI\_ISL\_514600|Original|hCoV-19^Gujarat|Human|B.J. Medical College and Civil hospital|Gujarat Biotechnology Research Centre|Joshi|India

>Spike|hCoV-19/Germany/HH-hpi-p1581/2020|2020-03-16|EPI\_ISL\_776056|Original|hCoV-19^Hamburg|Human|University Medical Center Hamburg Eppendorf|Heinrich Pette Institute|Robitaille|Germany

>Spike|hCoV-19/Scotland/CVR4914/2020|2020-10-07|EPI\_ISL\_594680|Original|hCoV-19^Scotland|Human|West of Scotland Specialist Virology Centre|COVID-19 Genomics UK (COG-UK) Consortium|Robertson|United Kingdom

>Spike|hCoV-19/South Korea/KCDC2274/2020|2020-05-17|EPI\_ISL\_510611|Original|hCoV-19^South Korea|Human|Division of Viral Diseases|Division of Viral Diseases|Kim|South Korea

>Spike|hCoV-19/England/NORT-29C1D7/2020|2020-06-22|EPI\_ISL\_499485|Original|hCoV-19^England|Human|Northumbria University / South Tees Hospitals NHS Foundation Trust / North Cumbria Integrated Care NHS Foundation Trust / North Tees and Hartlepool NHS Foundation Trust / Newcastle Hospitals NHS Foundation Trust|COVID-19 Genomics UK (COG-UK) Consortium|Bashton|United Kingdom

>Spike|hCoV-19/USA/TX-HMH-MCoV-16163/2020|2020-10-26|EPI\_ISL\_785847|Original|hCoV-19^Texas|Human|Houston Methodist Hospital|Houston Methodist Hospital|Long|USA

>Spike|hCoV-19/England/ALDP-AA2006/2020|2020-10-22|EPI\_ISL\_624464|Original|hCoV-19^England|Human|Lighthouse Lab in Alderley Park|Wellcome Sanger Institute for the COVID-19 Genomics UK (COG-UK) consortium|Davies|United Kingdom

>Spike|hCoV-19/Scotland/EDB8298/2020|2020-10-12|EPI\_ISL\_612317|Original|hCoV-19^Scotland|Human|Virology Department|COVID-19 Genomics UK (COG-UK) Consortium|McHugh|United Kingdom

>Spike|hCoV-19/USA/WI-UW-1223/2020|2020-08-19|EPI\_ISL\_536596|Original|hCoV-19^Wisconsin|Human|University of Wisconsin-Madison AIDS Vaccine Research Laboratories|University of Wisconsin-Madison AIDS Vaccine Research Laboratories|Baczenas|USA

>Spike|hCoV-19/Luxembourg/LNS5450477/2020|2020-10-23|EPI\_ISL\_744231|Original|hCoV-19^Luxembourg|Human|Laboratoire national de sant\u00e9|Laboratoire national de sant\u00e9|Wienecke-Baldacchino|Luxembourg

>Spike|hCoV-19/Denmark/DCGC-17506/2020|2020-12-14|EPI\_ISL\_751030|Original|hCoV-19^Syddanmark|Human|Department of Virus and Microbiological Special Diagnostics|Albertsen Lab|Michaelsen|Denmark

>Spike|hCoV-19/Australia/VIC15220/2020|2020-08-03|EPI\_ISL\_593199|Original|hCoV-19^Victoria|Human|Microbiological Diagnostic Unit - Public Health Laboratory (MDU-PHL)|MDU-PHL|Schultz|Australia

>Spike|hCoV-19/Japan/PG-3617/2020|2020-07-00|EPI\_ISL\_691870|Original|hCoV-19^Japan|Human|Pathogen Genomics Center|Pathogen Genomics Center|Sekizuka|Japan

>Spike|hCoV-19/Belgium/regal-12141419/2020|2020-12-14|EPI\_ISL\_738471|Original|hCoV-19^Mol|Human|UZ Leuven|KU Leuven|Maes|Belgium

>Spike|hCoV-19/England/LIVE-DC3770/2020|2020-11-11|EPI\_ISL\_705190|Original|hCoV-19^England|Human|Liverpool Clinical Laboratories|COVID-19 Genomics UK (COG-UK) Consortium|Haldenby|United Kingdom

>Spike|hCoV-19/England/ALDP-B73902/2020|2020-11-12|EPI\_ISL\_662564|Original|hCoV-19^England|Human|Lighthouse Lab in Alderley Park|Wellcome Sanger Institute for the COVID-19 Genomics UK (COG-UK) Consortium|Davies|United Kingdom

>Spike|hCoV-19/Japan/PG-7211/2020|2020-07-00|EPI\_ISL\_688315|Original|hCoV-19^Japan|Human|Saitama Prefectural Institute of Public Health|Pathogen Genomics Center|Sekizuka|Japan

>Spike|hCoV-19/Netherlands/ZH-EMC-460/2020|2020-08-12|EPI\_ISL\_523797|Original|hCoV-19^Zuid Holland|Human|Dutch COVID-19 response team|Erasmus Medical Center|Oude Munnink|Netherlands

>Spike|hCoV-19/England/LIVE-9COEB/2020|2020-04-01|EPI\_ISL\_449509|Original|hCoV-19^^England|Human|Liverpool Clinical Laboratories|COVID-19 Genomics UK (COG-UK) Consortium|Haldenby|United Kingdom

>Spike|hCoV-19/England/OXON-AE013/2020|2020-00-00|EPI\_ISL\_448655|Original|hCoV-19^^England|Human|Oxford Viromics|COVID-19 Genomics UK (COG-UK) Consortium|Golubchik|United Kingdom

>Spike|hCoV-19/USA/WA-UW-6185/2020|2020-04-01|EPI\_ISL\_430953|Original|hCoV-19^^Washington|Human|UW Virology Lab|UW Virology Lab|Roychoudhury|USA

>Spike|hCoV-19/Scotland/EDB9287/2020|2020-11-05|EPI\_ISL\_666070|Original|hCoV-19^^Scotland|Human|Virology Department|COVID-19 Genomics UK (COG-UK) Consortium|McHugh|United Kingdom

>Spike|hCoV-19/Netherlands/Gelderland\_5/2020|2020-03-10|EPI\_ISL\_422641|Original|hCoV-19^^Gelderland|Human|Dutch COVID-19 response team|Erasmus Medical Center|Oude Munnink|Netherlands

>Spike|hCoV-19/England/20168033004/2020|2020-04-15|EPI\_ISL\_466610|Original|hCoV-19^^England|Human|Respiratory Virus Unit|Respiratory Virus Unit|Platt|United Kingdom

>Spike|hCoV-19/USA/TX-DSHS-0727/2020|2020-05-13|EPI\_ISL\_584129|Original|hCoV-19^^Texas|Human|Texas Department of State Health Services|Texas Department of State Health Services|Rahman|USA

>Spike|hCoV-19/Luxembourg/LNS0726804/2020|2020-10-31|EPI\_ISL\_739822|Original|hCoV-19^^Luxembourg|Human|Laboratoire national de sant\u00e9|Laboratoire national de sant\u00e9|Wienecke-Baldacchino|Luxembourg

>Spike|hCoV-19/Netherlands/Utrecht\_3/2020|2020-03-03|EPI\_ISL\_414437|Original|hCoV-19^^Utrecht|Human|Dutch COVID-19 response team|Erasmus Medical Center|Oude Munnink|Netherlands

>Spike|hCoV-19/Netherlands/GE-EMC-190/2020|2020-04-29|EPI\_ISL\_523172|Original|hCoV-19^^Gelderland|Human|Dutch COVID-19 response team|Erasmus Medical Center|Oude Munnink|Netherlands

>Spike|hCoV-19/USA/MN-QDX-1740/2020|2020-03-17|EPI\_ISL\_604079|Original|hCoV-19^^Minnesota|Human|Quest Diagnostics|Quest Diagnostics|Kagan|USA

>Spike|hCoV-19/Australia/VIC4934/2020|2020-07-14|EPI\_ISL\_519308|Original|hCoV-19^^Victoria|Human|Victorian Infectious Diseases Reference Laboratory (VIDRL)|VIDRL and MDU-PHL|Schultz|Australia

>Spike|hCoV-19/England/MILK-B38A15/2020|2020-10-31|EPI\_ISL\_658811|Original|hCoV-19^^England|Human|Lighthouse Lab in Milton Keynes|Wellcome Sanger Institute for the COVID-19 Genomics UK (COG-UK) Consortium|Davies|United Kingdom

>Spike|hCoV-19/USA/TX-HMH-MCoV-15511/2020|2020-10-23|EPI\_ISL\_786995|Original|hCoV-19^^Texas|Human|Houston Methodist Hospital|Houston Methodist Hospital|Long|USA

>Spike|hCoV-19/England/CAMC-C7202B/2020|2020-12-15|EPI\_ISL\_769046|Original|hCoV-19^^England|Human|Lighthouse Lab in Cambridge|Wellcome Sanger Institute for the COVID-19 Genomics UK (COG-UK) Consortium|Davies|United Kingdom

>Spike|hCoV-19/England/CAMC-B08E4F/2020|2020-10-29|EPI\_ISL\_673113|Original|hCoV-19^^England|Human|Lighthouse Lab in Cambridge|Wellcome Sanger Institute for the COVID-19 Genomics UK (COG-UK) Consortium|Davies|United Kingdom

>Spike|hCoV-19/Australia/NSW858/2020|2020-08-13|EPI\_ISL\_526200|Original|hCoV-19^^New South Wales|Human|St Vincent's Pathology (SydPath)|NSW Health Pathology - Institute of Clinical Pathology and Medical Research; Westmead Hospital; University of Sydney|Gall|Australia

>Spike|hCoV-19/England/EXET-13836F/2020|2020-09-10|EPI\_ISL\_612395|Original|hCoV-19^^England|Human|University of Exeter|COVID-19 Genomics UK (COG-UK) Consortium|Temperton|United Kingdom

>Spike|hCoV-19/USA/MA-MGH-00305/2020|2020-04-01|EPI\_ISL\_460432|Original|hCoV-19^^Massachusetts|Human|Massachusetts General Hospital|Infectious Disease Program|Lemieux|USA

>Spike|hCoV-19/England/BIRM-61331/2020|2020-06-13|EPI\_ISL\_477762|Original|hCoV-19^^England|Human|University of Birmingham|COVID-19 Genomics UK (COG-UK) Consortium|Loman|United Kingdom

>Spike|hCoV-19/England/NORW-F2159/2020|2020-10-19|EPI\_ISL\_627656|Original|hCoV-19^^England|Human|Quadram Institute Bioscience|COVID-19 Genomics UK (COG-UK) Consortium|Alikhan|United Kingdom

>Spike|hCoV-19/England/ALDP-A6D5EA/2020|2020-10-14|EPI\_ISL\_607129|Original|hCoV-19^^England|Human|Lighthouse Lab in Alderley Park|Wellcome Sanger Institute for the COVID-19 Genomics UK (COG-UK) consortium|Davies|United Kingdom

>Spike|hCoV-19/England/205090348/2020|2020-12-11|EPI\_ISL\_747506|Original|hCoV-19^^England|Human|Respiratory Virus Unit|COVID-19 Genomics UK (COG-UK) Consortium|Miah|United Kingdom

>Spike|hCoV-19/Netherlands/UT-RIVM-20617/2020|2020-12-16|EPI\_ISL\_790696|Original|hCoV-19^^Utrecht|Human|Dutch COVID-19 response team|National Institute for Public Health and the Environment (RIVM)|Meijer|Netherlands

>Spike|hCoV-19/USA/CA-ALSR-0979-SAN/2020|2020-04-02|EPI\_ISL\_483438|Original|hCoV-19^^California|Human|UC San Diego Center for Advanced Laboratory Medicine|Andersen lab at Scripps Research|Gangavarapu|USA

>Spike|hCoV-19/Switzerland/GE-HUG-3650/2020|2020-03-16|EPI\_ISL\_429209|Original|hCoV-19^^Geneve|Human|University Hospitals of Geneva Laboratory of Virology|University Hospitals of Geneva Laboratory of Virology|Cordey|Switzerland

>Spike|hCoV-19/USA/WA-S897/2020|2020-04-27|EPI\_ISL\_463387|Original|hCoV-19^^Washington|Human|Washington State Department of Health|Seattle Flu Study|Bedford|USA

>Spike|hCoV-19/England/LEED-2AA21F/2020|2020-04-07|EPI\_ISL\_538824|Original|hCoV-19^^England|Human|Leeds Teaching Hospitals NHS Trust and Public Health England|Wellcome Sanger Institute for the COVID-19 Genomics UK (COG-UK) consortium|Davies|United Kingdom

>Spike|hCoV-19/Australia/VIC664/2020|2020-03-27|EPI\_ISL\_426960|Original|hCoV-19^^Victoria|Human|Victorian Infectious Diseases Reference Laboratory (VIDRL)|Microbiological Diagnostic Unit Public Health Laboratory and Victorian Infectious Diseases Reference Laboratory|Schultz|Australia

>Spike|hCoV-19/England/BIRM-65A29/2020|2020-10-01|EPI\_ISL\_594602|Original|hCoV-19^^England|Human|University of Birmingham|COVID-19 Genomics UK (COG-UK) Consortium|Loman|United Kingdom

>Spike|hCoV-19/England/ALDP-B5B92E/2020|2020-11-08|EPI\_ISL\_655471|Original|hCoV-19^^England|Human|Lighthouse Lab in Alderley Park|Wellcome Sanger Institute for the COVID-19 Genomics UK (COG-UK) Consortium|Davies|United Kingdom

>Spike|hCoV-19/Netherlands/Friesland\_45/2020|2020-05-03|EPI\_ISL\_460860|Original|hCoV-19^^Friesland|Human|Dutch COVID-19 response team|Erasmus Medical Center|Oude Munnink|Netherlands

>Spike|hCoV-19/England/CAMB-843CF/2020|2020-04-16|EPI\_ISL\_443445|Original|hCoV-19^^England|Human|Department of Pathology|Wellcome Sanger Institute for the COVID-19 Genomics UK (COG-UK) consortium|Amato|United Kingdom

>Spike|hCoV-19/Japan/PG-8312/2020|2020-08-00|EPI\_ISL\_687411|Original|hCoV-19^^Japan|Human|Pathogen Genomics Center|Pathogen Genomics Center|Sekizuka|Japan

>Spike|hCoV-19/USA/HI-H200144/2020|2020-06-26|EPI\_ISL\_752707|Original|hCoV-19^^Hawaii|Human|State Laboratories Division|State Laboratories Division|Sultana|USA

>Spike|hCoV-19/France/ARA-98691/2020|2020-11-01|EPI\_ISL\_683400|Original|hCoV-19^^Auvergne-Rh\u00f4ne-Alpes|Human|CNR Virus des Infections Respiratoires - France SUD|CNR Virus des Infections Respiratoires - France SUD|Bal|France

>Spike|hCoV-19/Malaysia/1713/2020|2020-03-25|EPI\_ISL\_501186|Original|hCoV-19^^Kuala Lumpur|Human|Department of Medical Microbiology|Department of Medical Microbiology|Chan|Malaysia

>Spike|hCoV-19/Scotland/QEUH-B31830/2020|2020-11-04|EPI\_ISL\_676406|Original|hCoV-19^^Scotland|Human|Lighthouse Lab in Glasgow|Wellcome Sanger Institute for the COVID-19 Genomics UK (COG-UK) Consortium|Davies|United Kingdom

>Spike|hCoV-19/USA/WA-S2428/2020|2020-06-15|EPI\_ISL\_497060|Original|hCoV-19^^Washington|Human|Washington State Department of Health|Seattle Flu Study|Lee|USA

>Spike|hCoV-19/England/QEUH-96F200/2020|2020-08-17|EPI\_ISL\_530454|Original|hCoV-19^^England|Human|Lighthouse Lab in Glasgow|Wellcome Sanger Institute for the COVID-19 Genomics UK (COG-UK) consortium|Davies|United Kingdom

>Spike|hCoV-19/England/QEUH-962E81/2020|2020-08-10|EPI\_ISL\_531708|Original|hCoV-19^^England|Human|Lighthouse Lab in Glasgow|Wellcome Sanger Institute for the COVID-19 Genomics UK (COG-UK) consortium|Davies|United Kingdom

>Spike|hCoV-19/Wales/PHWC-486217/2020|2020-10-27|EPI\_ISL\_639020|Original|hCoV-19^^Wales|Human|Wales Specialist Virology Centre Sequencing lab|COVID-19 Genomics UK (COG-UK) Consortium|Moore|United Kingdom

>Spike|hCoV-19/Australia/VIC7248/2020|2020-07-27|EPI\_ISL\_564311|Original|hCoV-19^^Victoria|Human|Microbiological Diagnostic Unit - Public Health Laboratory (MDU-PHL)|MDU-PHL|Schultz|Australia

>Spike|hCoV-19/Belgium/reg-0512675/2020|2020-05-12|EPI\_ISL\_738216|Original|hCoV-19^^Oud-Heverlee|Human|UZ Leuven|KU Leuven|Maes|Belgium

>Spike|hCoV-19/England/MILK-B3AA6E/2020|2020-11-01|EPI\_ISL\_706042|Original|hCoV-19^^England|Human|Oxford Viromics|COVID-19 Genomics UK (COG-UK) Consortium|Golubchik|United Kingdom

>Spike|hCoV-19/USA/MD-HP12060/2020|2020-11-21|EPI\_ISL\_791392|Original|hCoV-19^^Maryland|Human|Johns Hopkins Hospital Department of Pathology|Johns Hopkins Hospital Department of Pathology|Morris|USA

>Spike|hCoV-19/Spain/MD-IBV-99008641/2020|2020-09-29|EPI\_ISL\_654175|Original|hCoV-19^^Madrid|Human|Hospital General Universitario Gregorio Mara\u00f1a|SeqCOVID-SPAIN consortium/IBV (CSIC)|Comas|Spain

>Spike|hCoV-19/Portugal/PT0070/2020|2020-03-21|EPI\_ISL\_421473|Original|hCoV-19^^Portugal|Human|Instituto Nacional de Saude (INSA)|Instituto Nacional de Saude (INSA)|Borges|Portugal

>Spike|hCoV-19/India/TG-CCMB-R187/2020|2020-08-09|EPI\_ISL\_539679|Original|hCoV-19^^Telangana|Human|CSIR-Centre for Cellular and Molecular Biology|CSIR-Centre for Cellular and Molecular Biology|Mukherjee|India

>Spike|hCoV-19/USA/CT-Yale-151/2020|2020-03-13|EPI\_ISL\_435720|Original|hCoV-19^^Connecticut|Human|Yale Clinical Virology Laboratory|Grubaugh Lab - Yale School of Public Health|Grubaugh|USA

>Spike|hCoV-19/Denmark/DCGC-19817/2020|2020-12-07|EPI\_ISL\_747807|Original|hCoV-19^^Hovedstaden|Human|Department of Virus and Microbiological Special Diagnostics|Albertsen Lab|Michaelsen|Denmark

>Spike|hCoV-19/England/NORT-2A6222/2020|2020-03-02|EPI\_ISL\_507128|Original|hCoV-19^^England|Human|Northumbria University / South Tees Hospitals NHS Foundation Trust / North Cumbria Integrated Care NHS Foundation Trust / North Tees and Hartlepool NHS Foundation Trust / Newcastle Hospitals NHS Foundation Trust|COVID-19 Genomics UK (COG-UK) Consortium|Bashton|United Kingdom

>Spike|hCoV-19/Wales/CAMC-AB212E/2020|2020-10-22|EPI\_ISL\_634816|Original|hCoV-19^^Wales|Human|Lighthouse Lab in Cambridge|Wellcome Sanger Institute for the COVID-19 Genomics UK (COG-UK) consortium|Davies|United Kingdom

>Spike|hCoV-19/USA/VA-DCLS-0894/2020|2020-05-13|EPI\_ISL\_516680|Original|hCoV-19^^Virginia|Human|Virginia DCLS|Virginia DCLS|St. Jacques|USA

>Spike|hCoV-19/USA/VA-DCLS-1427/2020|2020-07-12|EPI\_ISL\_581550|Original|hCoV-19^^Virginia|Human|Virginia DCLS|Virginia DCLS|St. Jacques|USA

>Spike|hCoV-19/England/20118050504/2020|2020-03-13|EPI\_ISL\_464922|Original|hCoV-19^^England|Human|Respiratory Virus Unit|Respiratory Virus Unit|Platt|United Kingdom

>Spike|hCoV-19/USA/TX-HMH-MCoV-18043/2020|2020-11-16|EPI\_ISL\_786191|Original|hCoV-19^^Texas|Human|Houston Methodist Hospital|Houston Methodist Hospital|Long|USA

>Spike|hCoV-19/Denmark/DCGC-19465/2020|2020-12-07|EPI\_ISL\_748964|Original|hCoV-19^^Midtjylland|Human|Department of Virus and Microbiological Special Diagnostics|Albertsen Lab|Michaelsen|Denmark

>Spike|hCoV-19/Wales/PHWC-3466B/2020|2020-04-20|EPI\_ISL\_446954|Original|hCoV-19^^Wales|Human|Wales Specialist Virology Centre|Public Health Wales Microbiology Cardiff|Moore|United Kingdom

>Spike|hCoV-19/England/EXET-13DD20/2020|2020-12-02|EPI\_ISL\_724287|Original|hCoV-19^^England|Human|University of Exeter|COVID-19 Genomics UK (COG-UK) Consortium|Temperton|United Kingdom

>Spike|hCoV-19/England/CWAR-24FDEC6/2020|2020-06-06|EPI\_ISL\_584540|Original|hCoV-19^^England|Human|UHCW / University of Warwick|COVID-19 Genomics UK (COG-UK) Consortium|Stark|United Kingdom

>Spike|hCoV-19/USA/WA-UW42/2020|2020-03-09|EPI\_ISL\_415607|Original|hCoV-19^^Washington|Human|UW Virology Lab|UW Virology Lab|Roychoudhury|USA



>Spike|hCoV-19/England/OXON-B4D6E/2020|2020-04-23|EPI\_ISL\_535012|Original|hCoV-19^^England|Human|Oxford Viromics|COVID-19 Genomics UK (COG-UK) Consortium|Golubchik|United Kingdom

>Spike|hCoV-19/England/MILK-C615A8/2020|2020-12-13|EPI\_ISL\_735592|Original|hCoV-19^^England|Human|Lighthouse Lab in Milton Keynes|Wellcome Sanger Institute for the COVID-19 Genomics UK (COG-UK) Consortium|Davies|United Kingdom

>Spike|hCoV-19/England/ALDP-A524AF/2020|2020-10-07|EPI\_ISL\_598187|Original|hCoV-19^^England|Human|Lighthouse Lab in Alderley Park|Wellcome Sanger Institute for the COVID-19 Genomics UK (COG-UK) consortium|Davies|United Kingdom

>Spike|hCoV-19/England/CAMC-B99CD0/2020|2020-11-15|EPI\_ISL\_673545|Original|hCoV-19^^England|Human|Lighthouse Lab in Cambridge|Wellcome Sanger Institute for the COVID-19 Genomics UK (COG-UK) Consortium|Davies|United Kingdom

>Spike|hCoV-19/USA/NY-NYUMC927/2020|2020-03-17|EPI\_ISL\_467420|Original|hCoV-19^^New York|Human|NYU Langone Health|Departments of Pathology and Medicine|Maurano|USA

>Spike|hCoV-19/Sweden/20-53276/2020|2020-10-29|EPI\_ISL\_648159|Original|hCoV-19^^Sweden|Human|Sundsvall|The Public Health Agency of Sweden|Svartstr\u00f6m|Sweden

>Spike|hCoV-19/England/MILK-93D2B0/2020|2020-06-21|EPI\_ISL\_552963|Original|hCoV-19^^England|Human|Lighthouse Lab in Milton Keynes|Wellcome Sanger Institute for the COVID-19 Genomics UK (COG-UK) consortium|Davies|United Kingdom

>Spike|hCoV-19/SaudiArabia/KAUST-JEDDAH468/2020|2020-08-04|EPI\_ISL\_512923|Original|hCoV-19^^Jeddah|Human|Pathogen Genomics Lab King Abdullah University of Science and Technology(KAUST)|Pathogen Genomics Lab King Abdullah University of Science and Technology(KAUST)|Mohamed Ghazzali|Saudi Arabia

>Spike|hCoV-19/Denmark/DCGC-14266/2020|2020-11-30|EPI\_ISL\_711419|Original|hCoV-19^^Hovedstaden|Human|Department of Virus and Microbiological Special Diagnostics|Albertsen Lab|Michaelsen|Denmark

>Spike|hCoV-19/USA/VA-DCLS-1176/2020|2020-07-23|EPI\_ISL\_525203|Original|hCoV-19^^Virginia|Human|Virginia DCLS|Virginia DCLS|St. Jacques|USA

>Spike|hCoV-19/USA/NY-PV08415/2020|2020-03-16|EPI\_ISL\_421378|Original|hCoV-19^^New York|Human|MSHS Clinical Microbiology Laboratories|MSHS Pathogen Surveillance Program|van Bakel|USA

>Spike|hCoV-19/England/NORT-293844/2020|2020-07-06|EPI\_ISL\_499554|Original|hCoV-19^^England|Human|Northumbria University / South Tees Hospitals NHS Foundation Trust / North Cumbria Integrated Care NHS Foundation Trust / North Tees and Hartlepool NHS Foundation Trust / Newcastle Hospitals NHS Foundation Trust|COVID-19 Genomics UK (COG-UK) Consortium|Bashton|United Kingdom

>Spike|hCoV-19/USA/CO-CDPHE-2010280225/2020|2020-10-26|EPI\_ISL\_710240|Original|hCoV-19^^Colorado|Human|Colorado Department of Public Health and Environment|Colorado Department of Public Health and Environment|Bankers|USA

>Spike|hCoV-19/England/20132066804/2020|2020-03-23|EPI\_ISL\_423791|Original|hCoV-19^^England|Human|Respiratory Virus Unit|Respiratory Virus Unit|Platt|United Kingdom

>Spike|hCoV-19/England/ALDP-B83D30/2020|2020-11-14|EPI\_ISL\_674404|Original|hCoV-19^^England|Human|Lighthouse Lab in Alderley Park|Wellcome Sanger Institute for the COVID-19 Genomics UK (COG-UK) Consortium|Davies|United Kingdom

>Spike|hCoV-19/Denmark/DCGC-21342/2020|2020-12-21|EPI\_ISL\_759085|Original|hCoV-19^^Sjælland|Human|Department of Virus and Microbiological Special Diagnostics|Albertsen Lab|Michaelsen|Denmark

>Spike|hCoV-19/England/ALDP-C3BF9A/2020|2020-12-10|EPI\_ISL\_731798|Original|hCoV-19^^England|Human|Lighthouse Lab in Alderley Park|Wellcome Sanger Institute for the COVID-19 Genomics UK (COG-UK) Consortium|Davies|United Kingdom

>Spike|hCoV-19/Singapore/931/2020|2020-03-29|EPI\_ISL\_538463|Original|hCoV-19^^Singapore|Human|Department of Laboratory Medicine|Department of Laboratory Medicine|Chen|Singapore

>Spike|hCoV-19/Jordan/AM-ALSR-4093/2020|2020-10-03|EPI\_ISL\_636453|Original|hCoV-19^^Amman|Human|Biolab Diagnostic Laboratories|Andersen lab at Scripps Research|Gangavarapu|Jordan

>Spike|hCoV-19/England/LIVE-DC09AA/2020|2020-11-04|EPI\_ISL\_705402|Original|hCoV-19^^England|Human|Liverpool Clinical Laboratories|COVID-19 Genomics UK (COG-UK) Consortium|Haldenby|United Kingdom

>Spike|hCoV-19/Scotland/QEUH-9F66A8/2020|2020-09-27|EPI\_ISL\_600625|Original|hCoV-19^^Scotland|Human|Lighthouse Lab in Glasgow|Wellcome Sanger Institute for the COVID-19 Genomics UK (COG-UK) consortium|Davies|United Kingdom

>Spike|hCoV-19/France/NAQ-SC281/2020|2020-03-30|EPI\_ISL\_644674|Original|hCoV-19^^Nouvelle-Aquitaine|Human|CHU de Limoges|CNR Virus des Infections Respiratoires - France SUD|Bal|France

>Spike|hCoV-19/South Africa/KRISP-K000598/2020|2020-07-03|EPI\_ISL\_509251|Original|hCoV-19^^KwaZulu-Natal|Human|NHLs-IALCH|KRISP|de Oliveira|South Africa

>Spike|hCoV-19/USA/FL-BPHL-1429/2020|2020-09-01|EPI\_ISL\_549211|Original|hCoV-19^^Florida|Human|Florida Bureau of Public Health Laboratories|Florida Bureau of Public Health Laboratories|Blanton|USA

>Spike|hCoV-19/England/NOTT-11FA0F/2020|2020-11-28|EPI\_ISL\_725598|Original|hCoV-19^^England|Human|Lincolnshire Hospitals and DeepSeq Nottingham|COVID-19 Genomics UK (COG-UK) Consortium|Loose|United Kingdom

>Spike|hCoV-19/USA/TX-HMH-MCoV-12956/2020|2020-08-28|EPI\_ISL\_788108|Original|hCoV-19^^Texas|Human|Houston Methodist Hospital|Houston Methodist Hospital|Long|USA

>Spike|hCoV-19/Wales/PHWC-499F92/2020|2020-11-25|EPI\_ISL\_727474|Original|hCoV-19^^Wales|Human|Originating lab|COVID-19 Genomics UK (COG-UK) Consortium|Moore|United Kingdom

>Spike|hCoV-19/USA/TX-DSHS-1982/2020|2020-06-18|EPI\_ISL\_766768|Original|hCoV-19^^Texas|Human|Texas Department of State Health Services|Texas Department of State Health Services|Rahman|USA

>Spike|hCoV-19/England/QEUH-B6ADA8/2020|2020-11-11|EPI\_ISL\_662316|Original|hCoV-19^^England|Human|Lighthouse Lab in Glasgow|Wellcome Sanger Institute for the COVID-19 Genomics UK (COG-UK) Consortium|Davies|United Kingdom

>Spike|hCoV-19/Finland/S9A4/2020|2020-10-11|EPI\_ISL\_737080|Original|hCoV-19^^Uusimaa|Human|Department of Virology and Immunology|Department of Virology|Smura|Finland

>Spike|hCoV-19/Scotland/EDB5506/2020|2020-04-24|EPI\_ISL\_487761|Original|hCoV-19^^Scotland|Human|Virology Department|Wellcome Sanger Institute for the COVID-19 Genomics UK (COG-UK) consortium|Davies|United Kingdom

>Spike|hCoV-19/England/CAMB-7AF13/2020|2020-04-10|EPI\_ISL\_433894|Original|hCoV-19^^England|Human|Department of Pathology|COVID-19 Genomics UK (COG-UK) Consortium|Meredith|United Kingdom

>Spike|hCoV-19/Singapore/275/2020|2020-05-06|EPI\_ISL\_462393|Original|hCoV-19^^Singapore|Human|National Public Health Laboratory|National Public Health Laboratory|Mak|Singapore

>Spike|hCoV-19/Sweden/20-50130/2020|2020-03-06|EPI\_ISL\_429141|Original|hCoV-19^^Varmland|Human|Klinisk mikrobiologi Orebro|The Public Health Agency of Sweden|Svartstr\u00f6m|Sweden

>Spike|hCoV-19/England/OXON-ACC6C/2020|2020-04-06|EPI\_ISL\_448522|Original|hCoV-19^^England|Human|Oxford Viromics|COVID-19 Genomics UK (COG-UK) Consortium|Golubchik|United Kingdom

>Spike|hCoV-19/Hungary/MH-597/2020|2020-04-10|EPI\_ISL\_526215|Original|hCoV-19^^Pest county|Human|Hungarian Defence Forces Military Medical Centre|National Laboratory of Virology|Kemenesi|Hungary

>Spike|hCoV-19/South Korea/KCDC2228/2020|2020-05-08|EPI\_ISL\_510566|Original|hCoV-19^^South Korea|Human|Division of Viral Diseases|Division of Viral Diseases|Kim|South Korea

>Spike|hCoV-19/England/NORT-28851E/2020|2020-12-05|EPI\_ISL\_725020|Original|hCoV-19^^England|Human|Northumbria University / South Tees Hospitals NHS Foundation Trust / North Cumbria Integrated Care NHS Foundation Trust / North Tees and Hartlepool NHS Foundation Trust / Newcastle Hospitals NHS Foundation Trust|COVID-19 Genomics UK (COG-UK) Consortium|Bashton|United Kingdom

>Spike|hCoV-19/Canada/ON-SLB3105/2020|2020-04-18|EPI\_ISL\_717742|Original|hCoV-19^^Ontario|Human|Kingston Health Sciences Centre and Queen's University|Ontario Institute for Cancer Research|de Borja|Canada

>Spike|hCoV-19/Wales/PHWC-48A116/2020|2020-11-03|EPI\_ISL\_652525|Original|hCoV-19^^Wales|Human|Wales Specialist Virology Centre Sequencing lab|COVID-19 Genomics UK (COG-UK) Consortium|Moore|United Kingdom

>Spike|hCoV-19/England/CAMC-9D2077/2020|2020-09-19|EPI\_ISL\_601624|Original|hCoV-19^^England|Human|Lighthouse Lab in Cambridge|Wellcome Sanger Institute for the COVID-19 Genomics UK (COG-UK) consortium|Davies|United Kingdom

>Spike|hCoV-19/England/QEUH-AD2EF4/2020|2020-10-26|EPI\_ISL\_629893|Original|hCoV-19^^England|Human|Lighthouse Lab in Glasgow|Wellcome Sanger Institute for the COVID-19 Genomics UK (COG-UK) consortium|Davies|United Kingdom

>Spike|hCoV-19/USA/TX-DSHS-1044/2020|2020-06-15|EPI\_ISL\_628720|Original|hCoV-19^^Texas|Human|Texas Department of State Health Services|Texas Department of State Health Services|Rahman|USA

>Spike|hCoV-19/USA/TX-HMH-4092/2020|2020-06-17|EPI\_ISL\_543362|Original|hCoV-19^^Texas|Human|Houston Methodist Hospital|Houston Methodist Hospital|Long|USA

>Spike|hCoV-19/USA/WA-QDX-527/2020|2020-03-18|EPI\_ISL\_571400|Original|hCoV-19^^Washington|Human|Quest Diagnostics|Quest Diagnostics|Kagan|USA

>Spike|hCoV-19/Thailand/SamutSakhon-CONI-0335/2020|2020-12-19|EPI\_ISL\_733529|Original|hCoV-19^^Samut Sakhon|Human|Institute for Urban Disease Control and Prevention|COVID-19 Network Investigations (CONI) Alliance|Batty|Thailand

>Spike|hCoV-19/England/CAMC-B3607F/2020|2020-11-05|EPI\_ISL\_645370|Original|hCoV-19^^England|Human|Lighthouse Lab in Cambridge|Wellcome Sanger Institute for the COVID-19 Genomics UK (COG-UK) Consortium|Davies|United Kingdom

>Spike|hCoV-19/Australia/NSW931/2020|2020-09-06|EPI\_ISL\_547596|Original|hCoV-19^^New South Wales|Human|St Vincent's Pathology (SydPath)|NSW Health Pathology - Institute of Clinical Pathology and Medical Research; Westmead Hospital; University of Sydney|Gall|Australia

>Spike|hCoV-19/USA/MI-MDHHS-SC20104/2020|2020-03-25|EPI\_ISL\_436884|Original|hCoV-19^^Michigan|Human|Michigan Department of Health and Human Services|Michigan Department of Health and Human Services|Blankenship|USA

>Spike|hCoV-19/Spain/CL-IBV-97006212/2020|2020-04-13|EPI\_ISL\_537358|Original|hCoV-19^^Castilla y Leon|Human|Universidad de Le\u00f3n|SeqCOVID-SPAIN consortium/IBV (CSIC) |Comas|Spain

>Spike|hCoV-19/Scotland/EDB986/2020|2020-04-06|EPI\_ISL\_432895|Original|hCoV-19^^Scotland|Human|Virology Department|COVID-19 Genomics UK (COG-UK) Consortium|Williams|United Kingdom

>Spike|hCoV-19/England/LOND-12F0FD4/2020|2020-12-07|EPI\_ISL\_724599|Original|hCoV-19^^England|Human|University College London|COVID-19 Genomics UK (COG-UK) Consortium|Roy|United Kingdom

>Spike|hCoV-19/USA/TX-HMH-MCoV-9787/2020|2020-07-03|EPI\_ISL\_780277|Original|hCoV-19^^Texas|Human|Houston Methodist Hospital|Houston Methodist Hospital|Long|USA

>Spike|hCoV-19/Denmark/DCGC-3623/2020|2020-08-31|EPI\_ISL\_616391|Original|hCoV-19^^Syddanmark|Human|Department of Virus and Microbiological Special Diagnostics|Albertsen lab|Michaelsen|Denmark

>Spike|hCoV-19/England/MILK-9C23DB/2020|2020-09-07|EPI\_ISL\_566603|Original|hCoV-19^^England|Human|Lighthouse Lab in Milton Keynes|Wellcome Sanger Institute for the COVID-19 Genomics UK (COG-UK) consortium|Davies|United Kingdom

>Spike|hCoV-19/Scotland/QEUH-A1E0C9/2020|2020-10-01|EPI\_ISL\_598878|Original|hCoV-19^^Scotland|Human|Lighthouse Lab in Glasgow|Wellcome Sanger Institute for the COVID-19 Genomics UK (COG-UK) consortium|Davies|United Kingdom

>Spike|hCoV-19/Australia/VIC12269/2020|2020-07-23|EPI\_ISL\_640884|Original|hCoV-19^^Victoria|Human|Microbiological Diagnostic Unit - Public Health Laboratory (MDU-PHL) |MDU-PHL|Schultz|Australia

>Spike|hCoV-19/India/MH-ACTREC-395/2020|2020-07-29|EPI\_ISL\_700044|Original|hCoV-19^^Maharashtra|Human|Hematopathology Laboratory|Hematopathology Laboratory|Patkar|India

>Spike|hCoV-19/Denmark/DCGC-3365/2020|2020-08-31|EPI\_ISL\_616122|Original|hCoV-19^^Hovedstaden|Human|Department of Virus and Microbiological Special Diagnostics|Albertsen lab|Michaelsen|Denmark

>Spike|hCoV-19/England/CAMC-A3EC92/2020|2020-10-05|EPI\_ISL\_609755|Original|hCoV-19^^England|Human|Lighthouse Lab in Cambridge|Wellcome Sanger Institute for the COVID-19 Genomics UK (COG-UK) consortium|Davies|United Kingdom

>Spike|hCoV-19/South Africa/NHLS-UCT-GS-1373/2020|2020-11-13|EPI\_ISL\_700541|Original|hCoV-19^^Western Cape|Human|Kwanokuthula CDC wc KWA|NHLS/UCT|Iranzadeh|South Africa

>Spike|hCoV-19/USA/CA-CZB-1081/2020|2020-04-25|EPI\_ISL\_437081|Original|hCoV-19^^California|Human|County of Santa Clara Public Health|Chan-Zuckerberg Biohub|Hao|USA

>Spike|hCoV-19/USA/CA-CHLA-PLM16207422/2020|2020-12-05|EPI\_ISL\_753640|Original|hCoV-19^^California|Human|Clinical virology Laboratory|Center for Personalized Medicine|Dien Bard|USA

>Spike|hCoV-19/England/ALDP-A506E7/2020|2020-10-07|EPI\_ISL\_597614|Original|hCoV-19^^England|Human|Lighthouse Lab in Alderley Park|Wellcome Sanger Institute for the COVID-19 Genomics UK (COG-UK) consortium|Davies|United Kingdom

>Spike|hCoV-19/England/CAMC-B0A092/2020|2020-10-29|EPI\_ISL\_673055|Original|hCoV-19^^England|Human|Lighthouse Lab in Cambridge|Wellcome Sanger Institute for the COVID-19 Genomics UK (COG-UK) Consortium|Davies|United Kingdom

>Spike|hCoV-19/USA/CA-CZB-13026/2020|2020-05-12|EPI\_ISL\_672309|Original|hCoV-19^^California|Human|Alameda County Public Health Lab|Chan-Zuckerberg Biohub|Bhatt|USA

>Spike|hCoV-19/England/GSTT-265D642/2020|2020-03-23|EPI\_ISL\_483991|Original|hCoV-19^^England|Human|Centre for Clinical Infection and Diagnostics Research and Genomics Innovation Unit|COVID-19 Genomics UK (COG-UK) Consortium|Awan|United Kingdom

>Spike|hCoV-19/England/MILK-ACC07F/2020|2020-10-21|EPI\_ISL\_629377|Original|hCoV-19^^England|Human|Lighthouse Lab in Milton Keynes|Wellcome Sanger Institute for the COVID-19 Genomics UK (COG-UK) consortium|Davies|United Kingdom

>Spike|hCoV-19/Wales/PHWC-487BEE/2020|2020-10-27|EPI\_ISL\_639286|Original|hCoV-19^^Wales|Human|Wales Specialist Virology Centre Sequencing lab|COVID-19 Genomics UK (COG-UK) Consortium|Moore|United Kingdom

>Spike|hCoV-19/England/20118062704/2020|2020-03-11|EPI\_ISL\_464937|Original|hCoV-19^^England|Human|Respiratory Virus Unit|Respiratory Virus Unit|Platt|United Kingdom

>Spike|hCoV-19/Australia/NSW2263/2020|2020-03-22|EPI\_ISL\_500699|Original|hCoV-19^^New South Wales|Human|Area of Virology|Area of Virology|Bull|Australia

>Spike|hCoV-19/England/QEUEH-C3331E/2020|2020-12-11|EPI\_ISL\_734083|Original|hCoV-19^^England|Human|Lighthouse Lab in Glasgow|Wellcome Sanger Institute for the COVID-19 Genomics UK (COG-UK) Consortium|Davies|United Kingdom

>Spike|hCoV-19/USA/FL-BPHL-1036/2020|2020-07-22|EPI\_ISL\_517926|Original|hCoV-19^^Florida|Human|Florida Bureau of Public Health Laboratories|Florida Bureau of Public Health Laboratories|Blanton|USA

>Spike|hCoV-19/England/CAMC-CB8C8F/2020|2020-12-19|EPI\_ISL\_777776|Original|hCoV-19^^England|Human|Lighthouse Lab in Cambridge|Wellcome Sanger Institute for the COVID-19 Genomics UK (COG-UK) Consortium|Davies|United Kingdom

>Spike|hCoV-19/USA/TX-HMH-MCoV-12249/2020|2020-09-25|EPI\_ISL\_790268|Original|hCoV-19^^Texas|Human|Houston Methodist Hospital|Houston Methodist Hospital|Long|USA

>Spike|hCoV-19/Australia/VIC4725/2020|2020-07-13|EPI\_ISL\_519113|Original|hCoV-19^^Victoria|Human|Microbiological Diagnostic Unit - Public Health Laboratory (MDU-PHL)|MDU-PHL|Schultz|Australia

>Spike|hCoV-19/USA/MD-QDX-113/2020|2020-03-13|EPI\_ISL\_467867|Original|hCoV-19^^Maryland|Human|Quest Diagnostics|Quest Diagnostics|Kagan|USA

>Spike|hCoV-19/England/CAMC-AAFA1A/2020|2020-10-22|EPI\_ISL\_631144|Original|hCoV-19^^England|Human|Lighthouse Lab in Cambridge|Wellcome Sanger Institute for the COVID-19 Genomics UK (COG-UK) consortium|Davies|United Kingdom

>Spike|hCoV-19/Denmark/DCGC-10872/2020|2020-11-02|EPI\_ISL\_670258|Original|hCoV-19^^Hovedstaden|Human|Department of Virus and Microbiological Special Diagnostics|Albertsen Lab|Michaelsen|Denmark

>Spike|hCoV-19/Suriname/SR-18/2020|2020-06-25|EPI\_ISL\_517629|Original|hCoV-19^^Suriname|Human|Academic Hospital Paramaribo|Erasmus Medical Center|M\u00f0fcnger|Suriname

>Spike|hCoV-19/USA/TX-HMH-MCoV-14997/2020|2020-10-16|EPI\_ISL\_786481|Original|hCoV-19^^Texas|Human|Houston Methodist Hospital|Houston Methodist Hospital|Long|USA

>Spike|hCoV-19/England/QEUH-9DC365/2020|2020-09-21|EPI\_ISL\_580916|Original|hCoV-19^^England|Human|Lighthouse Lab in Glasgow|Wellcome Sanger Institute for the COVID-19 Genomics UK (COG-UK) consortium|Davies|United Kingdom

>Spike|hCoV-19/USA/CA-ALSR-2379/2020|2020-07-07|EPI\_ISL\_635450|Original|hCoV-19^^California|Human|San Diego County Public Health Laboratory|Andersen lab at Scripps Research|Gangavarapu|USA

>Spike|hCoV-19/Wales/PHWC-4A593B/2020|2020-12-14|EPI\_ISL\_763576|Original|hCoV-19^^Wales|Human|Wales Specialist Virology Centre Sequencing lab|COVID-19 Genomics UK (COG-UK) Consortium|Moore|United Kingdom

>Spike|hCoV-19/Germany/NW-HHU-433/2020|2020-10-25|EPI\_ISL\_733508|Original|hCoV-19^^North Rhine-Westphalia|Human|ZOTZ KLIMAS MVZ D\u00f0fcsseldorf-Centrum GbR \u00dcBAG f\u00fcr Labormedizin|Center of Medical Microbiology|Wienemann|Germany

>Spike|hCoV-19/England/MILK-B38A60/2020|2020-10-31|EPI\_ISL\_658825|Original|hCoV-19^^England|Human|Lighthouse Lab in Milton Keynes|Wellcome Sanger Institute for the COVID-19 Genomics UK (COG-UK) Consortium|Davies|United Kingdom

>Spike|hCoV-19/Denmark/DCGC-15078/2020|2020-11-23|EPI\_ISL\_713277|Original|hCoV-19^^Midtjylland|Human|Department of Virus and Microbiological Special Diagnostics|Albertsen Lab|Michaelsen|Denmark

>Spike|hCoV-19/England/NORT-295420/2020|2020-03-31|EPI\_ISL\_478635|Original|hCoV-19^^England|Human|Northumbria University / South Tees Hospitals NHS Foundation Trust / North Cumbria Integrated Care NHS Foundation Trust / North Tees and Hartlepool NHS Foundation Trust / Newcastle Hospitals NHS Foundation Trust|COVID-19 Genomics UK (COG-UK) Consortium|Bashton|United Kingdom

>Spike|hCoV-19/England/CAMB-72CF6/2020|2020-03-22|EPI\_ISL\_440099|Original|hCoV-19^^England|Human|Department of Pathology|Wellcome Sanger Institute for the COVID-19 Genomics UK (COG-UK) consortium|Amato|United Kingdom

>Spike|hCoV-19/Denmark/DCGC-18623/2020|2020-12-07|EPI\_ISL\_750087|Original|hCoV-19^^Nordjylland|Human|Department of Virus and Microbiological Special Diagnostics|Albertsen Lab|Michaelsen|Denmark

>Spike|hCoV-19/Australia/VIC2755/2020|2020-07-06|EPI\_ISL\_521590|Original|hCoV-19^^Victoria|Human|Microbiological Diagnostic Unit - Public Health Laboratory (MDU-PHL) |MDU-PHL|Schultz|Australia

>Spike|hCoV-19/Sweden/20-08939/2020|2020-07-15|EPI\_ISL\_534229|Original|hCoV-19^^Skane|Human|Skanes universitetssjukhus Lund|The Public Health Agency of Sweden|Svartstr\u00f6m|Sweden

>Spike|hCoV-19/USA/WA-UW-10199/2020|2020-06-01|EPI\_ISL\_570278|Original|hCoV-19^^Washington|Human|UW Virology Lab|UW Virology Lab|Roychoudhury|USA

>Spike|hCoV-19/Japan/PG-3518/2020|2020-06-00|EPI\_ISL\_691774|Original|hCoV-19^^Japan|Human|Pathogen Genomics Center|Pathogen Genomics Center|Sekizuka|Japan

>Spike|hCoV-19/Scotland/CVR2131/2020|2020-04-10|EPI\_ISL\_477859|Original|hCoV-19^^Scotland|Human|West of Scotland Specialist Virology Centre|COVID-19 Genomics UK (COG-UK) Consortium|Robertson|United Kingdom

>Spike|hCoV-19/England/MILK-AB937C/2020|2020-10-22|EPI\_ISL\_623673|Original|hCoV-19^^England|Human|Lighthouse Lab in Milton Keynes|Wellcome Sanger Institute for the COVID-19 Genomics UK (COG-UK) consortium|Davies|United Kingdom

>Spike|hCoV-19/Israel/CVL-n3767/2020|2020-03-10|EPI\_ISL\_649082|Original|hCoV-19^^Nir-Tzvi|Human|Israel Central Virology laboratory|Israel Central Virology laboratory|Zuckerman|Israel

>Spike|hCoV-19/Denmark/DCGC-14800/2020|2020-11-23|EPI\_ISL\_711991|Original|hCoV-19^^Hovedstaden|Human|Department of Virus and Microbiological Special Diagnostics|Albertsen Lab|Michaelsen|Denmark

>Spike|hCoV-19/Australia/VIC5133/2020|2020-07-19|EPI\_ISL\_519936|Original|hCoV-19^^Victoria|Human|Microbiological Diagnostic Unit - Public Health Laboratory (MDU-PHL) |MDU-PHL|Schultz|Australia

>Spike|hCoV-19/England/NORW-E7166/2020|2020-04-19|EPI\_ISL\_449007|Original|hCoV-19^^England|Human|Quadram Institute Bioscience|COVID-19 Genomics UK (COG-UK) Consortium|Alikhan|United Kingdom

>Spike|hCoV-19/Australia/VIC2839/2020|2020-07-04|EPI\_ISL\_521670|Original|hCoV-19^^Victoria|Human|Microbiological Diagnostic Unit - Public Health Laboratory (MDU-PHL) |MDU-PHL|Schultz|Australia

>Spike|hCoV-19/England/QEUH-B7CC97/2020|2020-11-14|EPI\_ISL\_741820|Original|hCoV-19^^England|Human|Oxford Viromics|COVID-19 Genomics UK (COG-UK) Consortium|Golubchik|United Kingdom

>Spike|hCoV-19/England/MILK-A474F8/2020|2020-10-06|EPI\_ISL\_598300|Original|hCoV-19^^England|Human|Lighthouse Lab in Milton Keynes|Wellcome Sanger Institute for the COVID-19 Genomics UK (COG-UK) consortium|Davies|United Kingdom

>Spike|hCoV-19/Denmark/DCGC-10596/2020|2020-11-02|EPI\_ISL\_670077|Original|hCoV-19^^Nordjylland|Human|Department of Virus and Microbiological Special Diagnostics|Albertsen Lab|Michaelsen|Denmark

>Spike|hCoV-19/USA/CA-CZB-11274/2020|2020-09-11|EPI\_ISL\_739223|Original|hCoV-19^^California|Human|Napa-Solano-Yolo- Marin County (NSYM) Public Health Laboratories|Chan-Zuckerberg Biohub|Kamm|USA

>Spike|hCoV-19/England/ALDP-9CCD3D/2020|2020-09-16|EPI\_ISL\_566194|Original|hCoV-19^^England|Human|Lighthouse Lab in Alderley Park|Wellcome Sanger Institute for the COVID-19 Genomics UK (COG-UK) consortium|Davies|United Kingdom

>Spike|hCoV-19/Norway/1917/2020|2020-03-10|EPI\_ISL\_420143|Original|hCoV-19^^Norway|Human|Unilabs Laboratory Medicine|Norwegian Institute of Public Health|Hungnes|Norway

>Spike|hCoV-19/England/BIRM-61AF0/2020|2020-03-25|EPI\_ISL\_529357|Original|hCoV-19^^England|Human|University of Birmingham|COVID-19 Genomics UK (COG-UK) Consortium|Loman|United Kingdom

>Spike|hCoV-19/USA/CA-CZB-14431/2020|2020-11-04|EPI\_ISL\_738895|Original|hCoV-19^^California|Human|Alameda County Public Health Lab|Chan-Zuckerberg Biohub|Kamm|USA

>Spike|hCoV-19/Wales/PHWC-4880DF/2020|2020-10-26|EPI\_ISL\_639349|Original|hCoV-19^^Wales|Human|Wales Specialist Virology Centre Sequencing lab|COVID-19 Genomics UK (COG-UK) Consortium|Moore|United Kingdom

>Spike|hCoV-19/Australia/VIC6825/2020|2020-07-24|EPI\_ISL\_564078|Original|hCoV-19^^Victoria|Human|Victorian Infectious Diseases Reference Laboratory (VIDRL) |VIDRL and MDU-PHL|Schultz|Australia

>Spike|hCoV-19/England/BRIS-123B23/2020|2020-04-07|EPI\_ISL\_442790|Original|hCoV-19^^England|Human|PHE South West Regional Laboratory|Wellcome Sanger Institute for the COVID-19 Genomics UK (COG-UK) consortium|Amato|United Kingdom

>Spike|hCoV-19/Netherlands/OV-EMC-93/2020|2020-09-12|EPI\_ISL\_722817|Original|hCoV-19^^Overijssel|Human|Dutch COVID-19 response team|Erasmus Medical Center|Oude Munnink|Netherlands

>Spike|hCoV-19/England/ALDP-5A67E4/2020|2020-06-13|EPI\_ISL\_558678|Original|hCoV-19^^England|Human|Lighthouse Lab in Alderley Park|Wellcome Sanger Institute for the COVID-19 Genomics UK (COG-UK) consortium|Davies|United Kingdom

>Spike|hCoV-19/Scotland/EDB7866/2020|2020-09-16|EPI\_ISL\_585426|Original|hCoV-19^^Scotland|Human|Virology Department|COVID-19 Genomics UK (COG-UK) Consortium|McHugh|United Kingdom

>Spike|hCoV-19/USA/CA-CZB-14092/2020|2020-06-22|EPI\_ISL\_738828|Original|hCoV-19^^California|Human|Alameda County Public Health Lab|Chan-Zuckerberg Biohub|Kamm|USA

>Spike|hCoV-19/England/ALDP-B6270C/2020|2020-11-08|EPI\_ISL\_656648|Original|hCoV-19^^England|Human|Lighthouse Lab in Alderley Park|Wellcome Sanger Institute for the COVID-19 Genomics UK (COG-UK) Consortium|Davies|United Kingdom

>Spike|hCoV-19/USA/TX-DSHS-1171/2020|2020-07-03|EPI\_ISL\_634971|Original|hCoV-19^^Texas|Human|Texas Department of State Health Services|Texas Department of State Health Services|Rahman|USA

>Spike|hCoV-19/Australia/VIC13573/2020|2020-08-02|EPI\_ISL\_563761|Original|hCoV-19^^Victoria|Human|Microbiological Diagnostic Unit - Public Health Laboratory (MDU-PHL) |MDU-PHL|Schultz|Australia

>Spike|hCoV-19/Bulgaria/24/2020|2020-04-22|EPI\_ISL\_480304|Original|hCoV-19^^Kyustendil|Human|National Reference Laboratory \Influenza and acute respiratory diseases\ |NRL-HIV|Ivanov|Bulgaria

>Spike|hCoV-19/USA/WA-UW-11487/2020|2020-06-24|EPI\_ISL\_570420|Original|hCoV-19^^Washington|Human|UW Virology Lab|UW Virology Lab|Roychoudhury|USA

>Spike|hCoV-19/Czech Republic/NRL\_8972-5/2020|2020-09-15|EPI\_ISL\_626583|Original|hCoV-19^^Prague|Human|The National Institute of Public Health|State Veterinary Institute Prague|Nagy|Czech Republic

>Spike|hCoV-19/USA/LA-GBCL-26492488/2020|2020-04-25|EPI\_ISL\_485049|Original|hCoV-19^^Louisiana|Human|River Road Testing Lab|Ginkgo Bioworks Clinical Laboratory|Smith|USA

>Spike|hCoV-19/Denmark/DCGC-19241/2020|2020-12-07|EPI\_ISL\_748209|Original|hCoV-19^^Syddanmark|Human|Department of Virus and Microbiological Special Diagnostics|Albertsen Lab|Michaelsen|Denmark

>Spike|hCoV-19/Belgium/rega-0712715/2020|2020-07-12|EPI\_ISL\_738222|Original|hCoV-19^^Brussel|Human|UZ Leuven|KU Leuven|Maes|Belgium

>Spike|hCoV-19/Singapore/365/2020|2020-04-06|EPI\_ISL\_469120|Original|hCoV-19^^Singapore|Human|National Public Health Laboratory|National Public Health Laboratory|Mak|Singapore

>Spike|hCoV-19/Sweden/20-50312/2020|2020-03-12|EPI\_ISL\_429160|Original|hCoV-19^^Ostergotland|Human|Klinisk mikrobiologi Orebro|The Public Health Agency of Sweden|Svartstr\u00f6m|Sweden

>Spike|hCoV-19/USA/TX-HMH-7918/2020|2020-06-29|EPI\_ISL\_545706|Original|hCoV-19^^Texas|Human|Houston Methodist Hospital|Houston Methodist Hospital|Long|USA

>Spike|hCoV-19/England/CAMC-B21411/2020|2020-10-31|EPI\_ISL\_647200|Original|hCoV-19^^England|Human|Lighthouse Lab in Cambridge|Wellcome Sanger Institute for the COVID-19 Genomics UK (COG-UK) Consortium|Davies|United Kingdom

>Spike|hCoV-19/USA/WA-UW-8527/2020|2020-05-04|EPI\_ISL\_461407|Original|hCoV-19^^Washington|Human|UW Virology Lab|UW Virology Lab|Roychoudhury|USA

>Spike|hCoV-19/England/CAMB-81614/2020|2020-04-10|EPI\_ISL\_442822|Original|hCoV-19^^England|Human|Department of Pathology|Wellcome Sanger Institute for the COVID-19 Genomics UK (COG-UK) consortium|Amato|United Kingdom

>Spike|hCoV-19/Israel/701002681/2020|2020-03-27|EPI\_ISL\_447285|Original|hCoV-19^^South Coast District|Human|Microbiology Division|Stern Lab|Miller|Israel

>Spike|hCoV-19/USA/TX-HMH-571/2020|2020-04-06|EPI\_ISL\_546959|Original|hCoV-19^^Texas|Human|Houston Methodist Hospital|Houston Methodist Hospital|Long|USA

>Spike|hCoV-19/India/UT-50437-CSIR-IGIB/2020|2020-07-26|EPI\_ISL\_636792|Original|hCoV-19^^Uttarakhand|Human|National Centre for Disease control (NCDC)|NCDC/CSIR-IGIB|Faruq|India

>Spike|hCoV-19/United Arab Emirates/L2004034680/2020|2020-04-18|EPI\_ISL\_520671|Original|hCoV-19^^United Arab Emirates|Human|Mohammed Bin Rashid University of Medicine and Health Sciences|Al Jalila Genomics Center|Ramaswamy|United Arab Emirates

>Spike|hCoV-19/Japan/PG-6891/2020|2020-00-00|EPI\_ISL\_687999|Original|hCoV-19^^Japan|Human|Pathogen Genomics Center|Pathogen Genomics Center|Sekizuka|Japan

>Spike|hCoV-19/Denmark/DCGC-13977/2020|2020-11-30|EPI\_ISL\_711490|Original|hCoV-19^^Syddanmark|Human|Department of Virus and Microbiological Special Diagnostics|Albertsen Lab|Michaelsen|Denmark

>Spike|hCoV-19/Netherlands/ZH-EMC-250/2020|2020-00-00|EPI\_ISL\_523592|Original|hCoV-19^^Zuid Holland|Human|Dutch COVID-19 response team|Erasmus Medical Center|Oude Munnink|Netherlands

>Spike|hCoV-19/England/CAMB-7EBDF/2020|2020-04-07|EPI\_ISL\_442971|Original|hCoV-19^^England|Human|Department of Pathology|Wellcome Sanger Institute for the COVID-19 Genomics UK (COG-UK) consortium|Amato|United Kingdom

>Spike|hCoV-19/South Africa/KRISP-K001067/2020|2020-07-02|EPI\_ISL\_509323|Original|hCoV-19^^KwaZulu-Natal|Human|NHLS-IALCH|KRISP|de Oliveira|South Africa

>Spike|hCoV-19/USA/WA-S2840/2020|2020-09-15|EPI\_ISL\_574682|Original|hCoV-19^^Washington|Human|Seattle Flu Study|Seattle Flu Study|Lee|USA

>Spike|hCoV-19/England/204490718/2020|2020-10-30|EPI\_ISL\_666770|Original|hCoV-19^^England|Human|Respiratory Virus Unit|COVID-19 Genomics UK (COG-UK) Consortium|Platt|United Kingdom

>Spike|hCoV-19/England/MILK-B54AAA/2020|2020-11-06|EPI\_ISL\_658021|Original|hCoV-19^^England|Human|Lighthouse Lab in Milton Keynes|Wellcome Sanger Institute for the COVID-19 Genomics UK (COG-UK) Consortium|Davies|United Kingdom

>Spike|hCoV-19/Ireland/CO-NVRL-78IRL77020/2020|2020-11-22|EPI\_ISL\_752580|Original|hCoV-19^^Cork|Human|National Virus Reference Laboratory|National Virus Reference Laboratory|Gonzalez|Ireland

>Spike|hCoV-19/Switzerland/SO-42222503/2020|2020-04-06|EPI\_ISL\_581684|Original|hCoV-19^^Solothurn|Human|University Hospital Basel|University Hospital Basel|Roloff Handschin|Switzerland

>Spike|hCoV-19/USA/AZ-TG592633/2020|2020-08-07|EPI\_ISL\_695636|Original|hCoV-19^^Arizona|Human|TGen North|TGen North|French|USA

>Spike|hCoV-19/England/ALDP-B635D4/2020|2020-11-09|EPI\_ISL\_656446|Original|hCoV-19^^England|Human|Lighthouse Lab in Alderley Park|Wellcome Sanger Institute for the COVID-19 Genomics UK (COG-UK) Consortium|Davies|United Kingdom

>Spike|hCoV-19/Finland/7LS23E7/2020|2020-10-07|EPI\_ISL\_756029|Original|hCoV-19^^Uusimaa|Human|Department of Virology and Immunology|Department of Virology|Smura|Finland

>Spike|hCoV-19/Japan/PG-2467/2020|2020-04-00|EPI\_ISL\_686072|Original|hCoV-19^^Japan|Human|Pathogen Genomics Center|Pathogen Genomics Center|Sekizuka|Japan

>Spike|hCoV-19/Canada/BC\_18547866/2020|2020-03-00|EPI\_ISL\_462759|Original|hCoV-19^^British Columbia|Human|BCCDC Public Health Laboratory|BCCDC Public Health Laboratory|Harrigan|Canada

>Spike|hCoV-19/England/CAMB-77E64/2020|2020-04-01|EPI\_ISL\_440820|Original|hCoV-19^^England|Human|Department of Pathology|Wellcome Sanger Institute for the COVID-19 Genomics UK (COG-UK) consortium|Amato|United Kingdom

>Spike|hCoV-19/England/CAMC-A419FF/2020|2020-10-05|EPI\_ISL\_609494|Original|hCoV-19^^England|Human|Lighthouse Lab in Cambridge|Wellcome Sanger Institute for the COVID-19 Genomics UK (COG-UK) consortium|Davies|United Kingdom

>Spike|hCoV-19/England/ALDP-B5B302/2020|2020-11-08|EPI\_ISL\_655516|Original|hCoV-19^^England|Human|Lighthouse Lab in Alderley Park|Wellcome Sanger Institute for the COVID-19 Genomics UK (COG-UK) Consortium|Davies|United Kingdom

>Spike|hCoV-19/England/CAMC-B09057/2020|2020-10-29|EPI\_ISL\_672922|Original|hCoV-19^^England|Human|Lighthouse Lab in Cambridge|Wellcome Sanger Institute for the COVID-19 Genomics UK (COG-UK) Consortium|Davies|United Kingdom

>Spike|hCoV-19/Turkey/IST-GLAB-303/2020|2020-05-28|EPI\_ISL\_735343|Original|hCoV-19^^Istanbul|Human|Genomic Laboratory (GLAB) (Conjoint lab of Health Directorate of Istanbul and Istanbul Technical University)|Genomic Laboratory (GLAB)|Karacan|Turkey

>Spike|hCoV-19/USA/NY-Wadsworth-248655-01/2020|2020-10-19|EPI\_ISL\_754720|Original|hCoV-19^^New York|Human|Wadsworth Center|Wadsworth Center|Lasek-Nesselquist|USA

>Spike|hCoV-19/England/20134040703/2020|2020-03-24|EPI\_ISL\_420515|Original|hCoV-19^^England|Human|Respiratory Virus Unit|Respiratory Virus Unit|Platt|United Kingdom

>Spike|hCoV-19/Denmark/DCGC-12202/2020|2020-11-16|EPI\_ISL\_682383|Original|hCoV-19^^Hovedstaden|Human|Department of Virus and Microbiological Special Diagnostics|Albertsen Lab|Michaelsen|Denmark

>Spike|hCoV-19/England/CAM-COGUK-1AE12E/2020|2020-04-27|EPI\_ISL\_524595|Original|hCoV-19^^England|Human|Department of Pathology|Wellcome Sanger Institute for the COVID-19 Genomics UK (COG-UK) Consortium|Davies|United Kingdom

>Spike|hCoV-19/England/QEUEH-B7D892/2020|2020-11-14|EPI\_ISL\_741888|Original|hCoV-19^^England|Human|Oxford Viromics|COVID-19 Genomics UK (COG-UK) Consortium|Golubchik|United Kingdom

>Spike|hCoV-19/USA/AZ-TG670208/2020|2020-04-30|EPI\_ISL\_696398|Original|hCoV-19^^Arizona|Human|Sonora Quest Laboratories|TGen North|French|USA

>Spike|hCoV-19/England/LIVE-DCC4CB/2020|2020-11-26|EPI\_ISL\_724510|Original|hCoV-19^^England|Human|Liverpool Clinical Laboratories|COVID-19 Genomics UK (COG-UK) Consortium|Haldenby|United Kingdom

>Spike|hCoV-19/England/CAMB-72300/2020|2020-03-27|EPI\_ISL\_439661|Original|hCoV-19^^England|Human|Department of Pathology|Wellcome Sanger Institute for the COVID-19 Genomics UK (COG-UK) consortium|Amato|United Kingdom

>Spike|hCoV-19/Norway/4797/2020|2020-10-23|EPI\_ISL\_668409|Original|hCoV-19^^Vestfold og Telemark|Human|Unilabs Laboratory Medicine|Norwegian Institute of Public Health|Kopperud Riis|Norway



>Spike|hCoV-19/Switzerland/AG-ETHZ-410042/2020|2020-12-16|EPI\_ISL\_737651|Original|hCoV-19^^Aargau|Human|Viollier AG|Department of Biosystems Science and Engineering|Nadeau|Switzerland

>Spike|hCoV-19/England/CAMB-827A7/2020|2020-04-14|EPI\_ISL\_443464|Original|hCoV-19^^England|Human|Department of Pathology|Wellcome Sanger Institute for the COVID-19 Genomics UK (COG-UK) consortium|Amato|United Kingdom

>Spike|hCoV-19/Netherlands/GE-RIVM-20312/2020|2020-11-20|EPI\_ISL\_723451|Original|hCoV-19^^Gelderland|Human|Dutch COVID-19 response team|National Institute for Public Health and the Environment (RIVM)|Meijer|Netherlands

>Spike|hCoV-19/USA/AZ-TG664277/2020|2020-04-28|EPI\_ISL\_696078|Original|hCoV-19^^Arizona|Human|Sonora Quest Laboratories|TGen North|French|USA

>Spike|hCoV-19/England/MILK-A17E20/2020|2020-10-01|EPI\_ISL\_594991|Original|hCoV-19^^England|Human|Northumbria University / South Tees Hospitals NHS Foundation Trust / North Cumbria Integrated Care NHS Foundation Trust / North Tees and Hartlepool NHS Foundation Trust / Newcastle Hospitals NHS Foundation Trust|COVID-19 Genomics UK (COG-UK) Consortium|Bashton|United Kingdom

>Spike|hCoV-19/USA/FL-BPHL-1275/2020|2020-08-07|EPI\_ISL\_541207|Original|hCoV-19^^Florida|Human|Florida Bureau of Public Health Laboratories|Florida Bureau of Public Health Laboratories|Blanton|USA

>Spike|hCoV-19/England/QEUEH-A0BB73/2020|2020-10-01|EPI\_ISL\_599314|Original|hCoV-19^^England|Human|Lighthouse Lab in Glasgow|Wellcome Sanger Institute for the COVID-19 Genomics UK (COG-UK) Consortium|Davies|United Kingdom

>Spike|hCoV-19/England/MILK-993A47/2020|2020-08-26|EPI\_ISL\_552443|Original|hCoV-19^^England|Human|Lighthouse Lab in Milton Keynes|Wellcome Sanger Institute for the COVID-19 Genomics UK (COG-UK) consortium|Davies|United Kingdom

>Spike|hCoV-19/England/LEED-2A86E8/2020|2020-03-25|EPI\_ISL\_539153|Original|hCoV-19^^England|Human|Leeds Teaching Hospitals NHS Trust and Public Health England|Wellcome Sanger Institute for the COVID-19 Genomics UK (COG-UK) consortium|Davies|United Kingdom

>Spike|hCoV-19/USA/UT-UPHL-2009084/2020|2020-05-15|EPI\_ISL\_525091|Original|hCoV-19^^Utah|Human|Utah Public Health Laboratory|Utah Public Health Laboratory|Young|USA

>Spike|hCoV-19/Netherlands/NoordBrabant\_3/2020|2020-03-02|EPI\_ISL\_414429|Original|hCoV-19^^Noord Brabant|Human|Dutch COVID-19 response team|Erasmus Medical Center|Oude Munnink|Netherlands

>Spike|hCoV-19/Japan/PG-5782/2020|2020-08-00|EPI\_ISL\_688901|Original|hCoV-19^^Japan|Human|Fukuoka Institute of Health and Environmental Sciences|Pathogen Genomics Center|Sekizuka|Japan

>Spike|hCoV-19/USA/WI-UW-2019/2020|2020-09-18|EPI\_ISL\_677426|Original|hCoV-19^^Wisconsin|Human|University of Wisconsin-Madison AIDS Vaccine Research Laboratories|University of Wisconsin-Madison AIDS Vaccine Research Laboratories|Baczenas|USA

>Spike|hCoV-19/England/20144009004/2020|2020-03-31|EPI\_ISL\_423503|Original|hCoV-19^^England|Human|Respiratory Virus Unit|Respiratory Virus Unit|Platt|United Kingdom

>Spike|hCoV-19/England/QEUEH-BC3F6B/2020|2020-11-24|EPI\_ISL\_703393|Original|hCoV-19^^England|Human|Lighthouse Lab in Glasgow|Wellcome Sanger Institute for the COVID-19 Genomics UK (COG-UK) Consortium|Davies|United Kingdom

>Spike|hCoV-19/Denmark/DCGC-10121/2020|2020-11-09|EPI\_ISL\_669408|Original|hCoV-19^^Nordjylland|Human|Department of Virus and Microbiological Special Diagnostics|Albertsen Lab|Michaelsen|Denmark

>Spike|hCoV-19/England/QEUEH-9C9DF4/2020|2020-09-10|EPI\_ISL\_567438|Original|hCoV-19^^England|Human|Lighthouse Lab in Glasgow|Wellcome Sanger Institute for the COVID-19 Genomics UK (COG-UK) consortium|Davies|United Kingdom

>Spike|hCoV-19/Japan/PG-1324/2020|2020-04-00|EPI\_ISL\_684932|Original|hCoV-19^^Japan|Human|Saitama Prefectural Institute of Public Health|Pathogen Genomics Center|Sekizuka|Japan

>Spike|hCoV-19/England/BRIS-1238C2/2020|2020-04-06|EPI\_ISL\_442785|Original|hCoV-19^^England|Human|PHE South West Regional Laboratory|Wellcome Sanger Institute for the COVID-19 Genomics UK (COG-UK) consortium|Amato|United Kingdom

>Spike|hCoV-19/USA/WY-WPHL-20150413/2020|2020-11-23|EPI\_ISL\_770108|Original|hCoV-19^^Wyoming|Human|Wyoming Public Health Laboratory|Wyoming Public Health Laboratory|Hull|USA

>Spike|hCoV-19/England/BRIS-122CB8/2020|2020-04-01|EPI\_ISL\_440669|Original|hCoV-19^^England|Human|PHE South West Regional Laboratory|Wellcome Sanger Institute for the COVID-19 Genomics UK (COG-UK) consortium|Amato|United Kingdom

>Spike|hCoV-19/USA/AZ-TG547342/2020|2020-07-06|EPI\_ISL\_695490|Original|hCoV-19^^Arizona|Human|AZ SPHL|TGen North|French|USA

>Spike|hCoV-19/England/MILK-ACD16C/2020|2020-10-21|EPI\_ISL\_630022|Original|hCoV-19^^England|Human|Lighthouse Lab in Milton Keynes|Wellcome Sanger Institute for the COVID-19 Genomics UK (COG-UK) consortium|Davies|United Kingdom

>Spike|hCoV-19/USA/LA-EVTL441/2020|2020-06-16|EPI\_ISL\_578845|Original|hCoV-19^^Louisiana|Human|LSUHS Emerging Viral Threat Laboratory|Microbial Genome Sequencing Center|Kamil|USA

>Spike|hCoV-19/Scotland/CVR4291/2020|2020-09-09|EPI\_ISL\_559963|Original|hCoV-19^^Scotland|Human|Lighthouse Lab in Glasgow / MRC-University of Glasgow Centre for Virus Research|COVID-19 Genomics UK (COG-UK) Consortium|Robertson|United Kingdom

>Spike|hCoV-19/England/QEUEH-B2F747/2020|2020-11-04|EPI\_ISL\_646214|Original|hCoV-19^^England|Human|Lighthouse Lab in Glasgow|Wellcome Sanger Institute for the COVID-19 Genomics UK (COG-UK) Consortium|Davies|United Kingdom

>Spike|hCoV-19/England/ALDP-A6710A/2020|2020-10-12|EPI\_ISL\_630527|Original|hCoV-19^^England|Human|Lighthouse Lab in Alderley Park|Wellcome Sanger Institute for the COVID-19 Genomics UK (COG-UK) consortium|Davies|United Kingdom

>Spike|hCoV-19/France/PAC-IHU-0590/2020|2020-04-10|EPI\_ISL\_569607|Original|hCoV-19^^Provence-Alpes-C\u00f4te-d\u2019Azur|Human|MEPHI|MEPHI|Levasseur|France

>Spike|hCoV-19/USA/MA-MGH-00533/2020|2020-03-18|EPI\_ISL\_460413|Original|hCoV-19^^Massachusetts|Human|Massachusetts General Hospital|Infectious Disease Program|Lemieux|USA

>Spike|hCoV-19/England/QEUEH-8A02AA/2020|2020-07-27|EPI\_ISL\_532797|Original|hCoV-19^^England|Human|Lighthouse Lab in Glasgow|Wellcome Sanger Institute for the COVID-19 Genomics UK (COG-UK) consortium|Davies|United Kingdom

>Spike|hCoV-19/England/ALDP-AA29DE/2020|2020-10-22|EPI\_ISL\_630794|Original|hCoV-19^^England|Human|Lighthouse Lab in Alderley Park|Wellcome Sanger Institute for the COVID-19 Genomics UK (COG-UK) consortium|Davies|United Kingdom

>Spike|hCoV-19/England/OXON-AF7D1/2020|2020-04-15|EPI\_ISL\_478773|Original|hCoV-19^^England|Human|Oxford Viromics|COVID-19 Genomics UK (COG-UK) Consortium|Golubchik|United Kingdom

>Spike|hCoV-19/Chile/MA-ISPCH-11/2020|2020-03-22|EPI\_ISL\_445292|Original|hCoV-19^^Magallanes|Human|CLINICA MAGALLANES S.A.|Instituto de Salud Publica de Chile|Fernandez|Chile

>Spike|hCoV-19/Wales/MILK-A47795/2020|2020-10-05|EPI\_ISL\_609264|Original|hCoV-19^^Wales|Human|Lighthouse Lab in Milton Keynes|Wellcome Sanger Institute for the COVID-19 Genomics UK (COG-UK) consortium|Davies|United Kingdom

>Spike|hCoV-19/South Africa/KRISP-K002670/2020|2020-08-02|EPI\_ISL\_535536|Original|hCoV-19^^KwaZulu-Natal|Human|NHLS-IALCH|KRISP|de Oliveira|South Africa

>Spike|hCoV-19/USA/CA-CZB-1412/2020|2020-04-20|EPI\_ISL\_468387|Original|hCoV-19^^California|Human|Alameda County Public Health Lab|Chan-Zuckerberg Biohub|Hao|USA

>Spike|hCoV-19/USA/NY-QDX-1178/2020|2020-03-13|EPI\_ISL\_571988|Original|hCoV-19^^New York|Human|Quest Diagnostics|Quest Diagnostics|Kagan|USA

>Spike|hCoV-19/USA/MA-MGH-00770/2020|2020-04-12|EPI\_ISL\_791758|Original|hCoV-19^^Massachusetts|Human|Massachusetts General Hospital|Infectious Disease Program|Park|USA

>Spike|hCoV-19/England/ALDP-C8A248/2020|2020-12-16|EPI\_ISL\_756539|Original|hCoV-19^^England|Human|Lighthouse Lab in Alderley Park|Wellcome Sanger Institute for the COVID-19 Genomics UK (COG-UK) Consortium|Davies|United Kingdom

>Spike|hCoV-19/England/QEUEH-9F54CD/2020|2020-09-25|EPI\_ISL\_588552|Original|hCoV-19^^England|Human|Lighthouse Lab in Glasgow|Wellcome Sanger Institute for the COVID-19 Genomics UK (COG-UK) consortium|Davies|United Kingdom

>Spike|hCoV-19/USA/IA-GMF-15767/2020|2020-08-17|EPI\_ISL\_547711|Original|hCoV-19^^Iowa|Human|Gundersen Molecular Diagnostics Laboratory|Kabara Cancer Research Institute|Kenny|USA

>Spike|hCoV-19/England/EXET-135890/2020|2020-04-15|EPI\_ISL\_478276|Original|hCoV-19^^England|Human|University of Exeter|COVID-19 Genomics UK (COG-UK) Consortium|Temperton|United Kingdom

>Spike|hCoV-19/USA/MI-QDX-318/2020|2020-03-21|EPI\_ISL\_571062|Original|hCoV-19^^Michigan|Human|Quest Diagnostics|Quest Diagnostics|Kagan|USA

>Spike|hCoV-19/England/QEUEH-9D01C1/2020|2020-09-16|EPI\_ISL\_589901|Original|hCoV-19^^England|Human|Lighthouse Lab in Glasgow|Wellcome Sanger Institute for the COVID-19 Genomics UK (COG-UK) consortium|Davies|United Kingdom

>Spike|hCoV-19/Spain/PV-IBV-004251/2020|2020-04-06|EPI\_ISL\_500315|Original|hCoV-19^^Basque Country|Human|Servicio de Microbiolog\u00eda. Hospital Universitario Donostia. OSI Donostialdea. \u00c1rea de Enfermedades Infecciosas|SeqCOVID-SPAIN consortium/IBV (CSIC)|Comas|Spain

>Spike|hCoV-19/USA/MD-MDH-0363/2020|2020-10-22|EPI\_ISL\_648298|Original|hCoV-19^^Maryland|Human|MD PHL|MD PHL|Keller|USA

>Spike|hCoV-19/USA/TX-HMH-MCoV-11550/2020|2020-09-12|EPI\_ISL\_789984|Original|hCoV-19^^Texas|Human|Houston Methodist Hospital|Houston Methodist Hospital|Long|USA

>Spike|hCoV-19/Denmark/DCGC-18403/2020|2020-12-07|EPI\_ISL\_749944|Original|hCoV-19^^Syddanmark|Human|Department of Virus and Microbiological Special Diagnostics|Albertsen Lab|Michaelsen|Denmark

>Spike|hCoV-19/USA/TX-HMH-MCoV-9862/2020|2020-07-06|EPI\_ISL\_780310|Original|hCoV-19^^Texas|Human|Houston Methodist Hospital|Houston Methodist Hospital|Long|USA

>Spike|hCoV-19/England/NORT-281F9F/2020|2020-03-25|EPI\_ISL\_478493|Original|hCoV-19^^England|Human|Northumbria University / South Tees Hospitals NHS Foundation Trust / North Cumbria Integrated Care NHS Foundation Trust / North Tees and Hartlepool NHS Foundation Trust / Newcastle Hospitals NHS Foundation Trust|COVID-19 Genomics UK (COG-UK) Consortium|Bashton|United Kingdom

>Spike|hCoV-19/England/QEUEH-9B50B6/2020|2020-09-04|EPI\_ISL\_590264|Original|hCoV-19^^England|Human|Lighthouse Lab in Glasgow|Wellcome Sanger Institute for the COVID-19 Genomics UK (COG-UK) consortium|Davies|United Kingdom

>Spike|hCoV-19/England/ALDP-95A596/2020|2020-06-12|EPI\_ISL\_553511|Original|hCoV-19^^England|Human|Lighthouse Lab in Alderley Park|Wellcome Sanger Institute for the COVID-19 Genomics UK (COG-UK) consortium|Davies|United Kingdom

>Spike|hCoV-19/USA/UT-UPHL-201112188/2020|2020-09-25|EPI\_ISL\_628948|Original|hCoV-19^^Utah|Human|Utah Public Health Laboratory|Utah Public Health Laboratory|Young|USA

>Spike|hCoV-19/USA/UT-UPHL-2012565545/2020|2020-07-26|EPI\_ISL\_745598|Original|hCoV-19^^Utah|Human|Ginkgo Bioworks Clinical Laboratory|Utah Public Health Laboratory|Young|USA

>Spike|hCoV-19/England/SHEF-D1E1D/2020|2020-10-09|EPI\_ISL\_613403|Original|hCoV-19^^England|Human|Virology Department|COVID-19 Genomics UK (COG-UK) Consortium|de Silva|United Kingdom

>Spike|hCoV-19/England/ALDP-BCA32C/2020|2020-11-23|EPI\_ISL\_703498|Original|hCoV-19^^England|Human|Lighthouse Lab in Alderley Park|Wellcome Sanger Institute for the COVID-19 Genomics UK (COG-UK) Consortium|Davies|United Kingdom

>Spike|hCoV-19/Singapore/646/2020|2020-05-18|EPI\_ISL\_493406|Original|hCoV-19^^Singapore|Human|National Public Health Laboratory|National Public Health Laboratory|Mak|Singapore

>Spike|hCoV-19/Denmark/DCGC-14997/2020|2020-11-23|EPI\_ISL\_713569|Original|hCoV-19^^Midtjylland|Human|Department of Virus and Microbiological Special Diagnostics|Albertsen Lab|Michaelsen|Denmark

>Spike|hCoV-19/England/NORW-222E1B/2020|2020-12-19|EPI\_ISL\_741534|Original|hCoV-19^^England|Human|Quadram Institute Bioscience|COVID-19 Genomics UK (COG-UK) Consortium|Alikhan|United Kingdom

>Spike|hCoV-19/England/MILK-B3A512/2020|2020-11-02|EPI\_ISL\_659088|Original|hCoV-19^^England|Human|Lighthouse Lab in Milton Keynes|Wellcome Sanger Institute for the COVID-19 Genomics UK (COG-UK) Consortium|Davies|United Kingdom

>Spike|hCoV-19/Japan/PG-5233/2020|2020-08-00|EPI\_ISL\_690336|Original|hCoV-19^^Japan|Human|Pathogen Genomics Center|Pathogen Genomics Center|Sekizuka|Japan

>Spike|hCoV-19/USA/CA-CZB-14981/2020|2020-11-18|EPI\_ISL\_738581|Original|hCoV-19^^California|Human|Santa Clara County Public Health Laboratory|Chan-Zuckerberg Biohub|Kamm|USA

>Spike|hCoV-19/England/NORT-284275/2020|2020-03-16|EPI\_ISL\_488485|Original|hCoV-19^^England|Human|NU-OMICS DNA Sequencing research facility|Wellcome Sanger Institute for the COVID-19 Genomics UK (COG-UK) consortium|Davies|United Kingdom

>Spike|hCoV-19/Wales/PHWC-16E1B1/2020|2020-10-02|EPI\_ISL\_585680|Original|hCoV-19^^Wales|Human|Wales Specialist Virology Centre Sequencing lab|COVID-19 Genomics UK (COG-UK) Consortium|Moore|United Kingdom

>Spike|hCoV-19/Scotland/QEUH-990172/2020|2020-08-26|EPI\_ISL\_539957|Original|hCoV-19^^Scotland|Human|Lighthouse Lab in Glasgow|Wellcome Sanger Institute for the COVID-19 Genomics UK (COG-UK) consortium|Davies|United Kingdom

>Spike|hCoV-19/USA/TX-HMH-MCoV-18211/2020|2020-11-14|EPI\_ISL\_784559|Original|hCoV-19^^Texas|Human|Houston Methodist Hospital|Houston Methodist Hospital|Long|USA

>Spike|hCoV-19/England/ALDP-B1AB34/2020|2020-11-01|EPI\_ISL\_647643|Original|hCoV-19^^England|Human|Lighthouse Lab in Alderley Park|Wellcome Sanger Institute for the COVID-19 Genomics UK (COG-UK) Consortium|Davies|United Kingdom

>Spike|hCoV-19/England/NOTT-10E1E0/2020|2020-03-19|EPI\_ISL\_425510|Original|hCoV-19^^England|Human|Queens Medical Centre|COVID-19 Genomics UK (COG-UK) Consortium|Loose|United Kingdom

>Spike|hCoV-19/USA/MI-UM-10035713605/2020|2020-08-29|EPI\_ISL\_583278|Original|hCoV-19^^Michigan|Human|University of Michigan Clinical Microbiology Laboratory|Lauring Lab|Valesano|USA

>Spike|hCoV-19/Japan/PG-0099/2020|2020-03-08|EPI\_ISL\_479842|Original|hCoV-19^^Hokkaido|Human|Sapporo City Institute of Public Health|Pathogen Genomics Center|Sekizuka|Japan

>Spike|hCoV-19/Australia/VIC13997/2020|2020-07-15|EPI\_ISL\_563917|Original|hCoV-19^^Victoria|Human|Microbiological Diagnostic Unit - Public Health Laboratory (MDU-PHL)|MDU-PHL|Schultz|Australia

>Spike|hCoV-19/USA/MN-MDH-1661/2020|2020-04-03|EPI\_ISL\_560748|Original|hCoV-19^^Minnesota|Human|Minnesota Department of Health|Minnesota Department of Health|Garfin|USA

>Spike|hCoV-19/USA/WA-UW-2960/2020|2020-03-26|EPI\_ISL\_486060|Original|hCoV-19^^Washington|Human|UW Virology Lab|UW Virology Lab|Roychoudhury|USA

>Spike|hCoV-19/Australia/SAP418/2020|2020-04-20|EPI\_ISL\_492180|Original|hCoV-19^^South Australia|Human|SA Pathology|SA Pathology|Leong|Australia

>Spike|hCoV-19/England/MILK-B96D85/2020|2020-11-13|EPI\_ISL\_674848|Original|hCoV-19^^England|Human|Lighthouse Lab in Milton Keynes|Wellcome Sanger Institute for the COVID-19 Genomics UK (COG-UK) Consortium|Davies|United Kingdom

>Spike|hCoV-19/USA/LA-CDC-2119/2020|2020-05-29|EPI\_ISL\_535351|Original|hCoV-19^^Louisiana|Human|LA Office of Public Health Laboratories|Pathogen Discovery|Queen|USA

>Spike|hCoV-19/England/MILK-A7A632/2020|2020-10-15|EPI\_ISL\_606680|Original|hCoV-19^^England|Human|Lighthouse Lab in Milton Keynes|Wellcome Sanger Institute for the COVID-19 Genomics UK (COG-UK) consortium|Davies|United Kingdom

>Spike|hCoV-19/USA/MI-MDHHS-SC22350/2020|2020-11-09|EPI\_ISL\_708330|Original|hCoV-19^^Michigan|Human|Michigan Department of Health and Human Services|Michigan Department of Health and Human Services|Jacob|USA

>Spike|hCoV-19/Scotland/CVR13/2020|2020-03-11|EPI\_ISL\_425672|Original|hCoV-19^^Scotland|Human|West of Scotland Specialist Virology Centre|COVID-19 Genomics UK (COG-UK) Consortium|Robertson|United Kingdom

>Spike|hCoV-19/USA/TX-DSHS-0059/2020|2020-05-09|EPI\_ISL\_517990|Original|hCoV-19^^Texas|Human|Texas Department of State Health Services|Texas Department of State Health Services|Rahman|USA

>Spike|hCoV-19/USA/TX-HMH-2745/2020|2020-06-04|EPI\_ISL\_545522|Original|hCoV-19^^Texas|Human|Houston Methodist Hospital|Houston Methodist Hospital|Long|USA

>Spike|hCoV-19/Denmark/DCGC-5768/2020|2020-09-28|EPI\_ISL\_620955|Original|hCoV-19^^Nordjylland|Human|Department of Virus and Microbiological Special Diagnostics|Albertsen lab|Michaelsen|Denmark

>Spike|hCoV-19/USA/TX-QDX-746/2020|2020-03-19|EPI\_ISL\_571558|Original|hCoV-19^^Texas|Human|Quest Diagnostics|Quest Diagnostics|Kagan|USA

>Spike|hCoV-19/England/QEUA-963CA4/2020|2020-08-11|EPI\_ISL\_531518|Original|hCoV-19^^England|Human|Lighthouse Lab in Glasgow|Wellcome Sanger Institute for the COVID-19 Genomics UK (COG-UK) consortium|Davies|United Kingdom

>Spike|hCoV-19/England/MILK-9AB52D/2020|2020-08-31|EPI\_ISL\_551227|Original|hCoV-19^^England|Human|Lighthouse Lab in Milton Keynes|Wellcome Sanger Institute for the COVID-19 Genomics UK (COG-UK) consortium|Davies|United Kingdom

>Spike|hCoV-19/Sweden/20-51065/2020|2020-04-14|EPI\_ISL\_475126|Original|hCoV-19^^Vasterbotten|Human|Umea klinisk mikrobiologi|The Public Health Agency of Sweden|Svartstr\u00f6m|Sweden

>Spike|hCoV-19/Scotland/EDB6515/2020|2020-06-15|EPI\_ISL\_478249|Original|hCoV-19^^Scotland|Human|Virology Department|COVID-19 Genomics UK (COG-UK) Consortium|Williams|United Kingdom

>Spike|hCoV-19/England/MILK-BB12B2/2020|2020-11-17|EPI\_ISL\_720235|Original|hCoV-19^^England|Human|Lighthouse Lab in Milton Keynes|Wellcome Sanger Institute for the COVID-19 Genomics UK (COG-UK) Consortium|Davies|United Kingdom

>Spike|hCoV-19/Netherlands/NB-RIVM-20605/2020|2020-12-07|EPI\_ISL\_790688|Original|hCoV-19^^Noord-Brabant|Human|Dutch COVID-19 response team|National Institute for Public Health and the Environment (RIVM)|Meijer|Netherlands

>Spike|hCoV-19/USA/CA-CDPH-UC1/2020|2020-02-28|EPI\_ISL\_413557|Original|hCoV-19^^California|Human|California Department of Public Health|Chiu Laboratory|Chiu|USA

>Spike|hCoV-19/England/MILK-9AB569/2020|2020-08-31|EPI\_ISL\_549442|Original|hCoV-19^^England|Human|Oxford Viromics|COVID-19 Genomics UK (COG-UK) Consortium|Golubchik|United Kingdom

>Spike|hCoV-19/USA/TX-HMH-MCoV-8827/2020|2020-07-01|EPI\_ISL\_780779|Original|hCoV-19^^Texas|Human|Houston Methodist Hospital|Houston Methodist Hospital|Long|USA

>Spike|hCoV-19/Australia/VIC16880/2020|2020-00-00|EPI\_ISL\_663619|Original|hCoV-19^^Victoria|Human|Microbiological Diagnostic Unit - Public Health Laboratory (MDU-PHL)|MDU-PHL|Schultz|Australia

>Spike|hCoV-19/England/QEUA-B0E68D/2020|2020-11-01|EPI\_ISL\_641960|Original|hCoV-19^^England|Human|Lighthouse Lab in Glasgow|Wellcome Sanger Institute for the COVID-19 Genomics UK (COG-UK) Consortium|Davies|United Kingdom

>Spike|hCoV-19/England/CAMB-73E68/2020|2020-03-18|EPI\_ISL\_440353|Original|hCoV-19^^England|Human|Department of Pathology|Wellcome Sanger Institute for the COVID-19 Genomics UK (COG-UK) consortium|Amato|United Kingdom

>Spike|hCoV-19/England/LOND-D6AC9/2020|2020-05-14|EPI\_ISL\_461770|Original|hCoV-19^^England|Human|University College London|COVID-19 Genomics UK (COG-UK) Consortium|Roy|United Kingdom

>Spike|hCoV-19/USA/TX-HMH-MCoV-18804/2020|2020-11-24|EPI\_ISL\_785131|Original|hCoV-19^^Texas|Human|Houston Methodist Hospital|Houston Methodist Hospital|Long|USA

>Spike|hCoV-19/Scotland/GCVR-16FDDA/2020|2020-03-23|EPI\_ISL\_489608|Original|hCoV-19^^Scotland|Human|NHSGGC West of Scotland Specialist Virology Centre / MRC-University of Glasgow Centre for Virus Research|Wellcome Sanger Institute for the COVID-19 Genomics UK (COG-UK) consortium|Davies|United Kingdom

>Spike|hCoV-19/France/NAQ-SC780/2020|2020-12-18|EPI\_ISL\_779843|Original|hCoV-19^^Nouvelle-Aquitaine|Human|CHU Bordeaux|CNR Virus des Infections Respiratoires - France SUD|Bal|France

>Spike|hCoV-19/USA/CA-SR0460/2020|2020-03-08|EPI\_ISL\_467982|Original|hCoV-19^^California|Human|San Diego County Public Health Laboratory|Andersen lab at Scripps Research|Gangavarapu|USA

>Spike|hCoV-19/Wales/CAMC-A3E6C1/2020|2020-10-05|EPI\_ISL\_625444|Original|hCoV-19^^Wales|Human|Lighthouse Lab in Cambridge|Wellcome Sanger Institute for the COVID-19 Genomics UK (COG-UK) consortium|Davies|United Kingdom

>Spike|hCoV-19/England/ALDP-B23804/2020|2020-11-04|EPI\_ISL\_646821|Original|hCoV-19^^England|Human|Lighthouse Lab in Alderley Park|Wellcome Sanger Institute for the COVID-19 Genomics UK (COG-UK) Consortium|Davies|United Kingdom

>Spike|hCoV-19/England/ALDP-927468/2020|2020-06-22|EPI\_ISL\_551374|Original|hCoV-19^^England|Human|Lighthouse Lab in Alderley Park|Wellcome Sanger Institute for the COVID-19 Genomics UK (COG-UK) consortium|Davies|United Kingdom

>Spike|hCoV-19/England/QEUH-A8B865/2020|2020-10-17|EPI\_ISL\_643286|Original|hCoV-19^^England|Human|Lighthouse Lab in Glasgow|Wellcome Sanger Institute for the COVID-19 Genomics UK (COG-UK) Consortium|Davies|United Kingdom

>Spike|hCoV-19/Portugal/IGC4560/2020|2020-06-12|EPI\_ISL\_491263|Original|hCoV-19^^Portugal|Human|Instituto Gulbenkian de Ci\u00eancia|Instituto Gulbenkian de Ci\u00eancia|Leite|Portugal

>Spike|hCoV-19/England/QEUH-941107/2020|2020-07-29|EPI\_ISL\_532646|Original|hCoV-19^^England|Human|Lighthouse Lab in Glasgow|Wellcome Sanger Institute for the COVID-19 Genomics UK (COG-UK) consortium|Davies|United Kingdom

>Spike|hCoV-19/USA/TX-HMH-MCoV-14094/2020|2020-08-14|EPI\_ISL\_787380|Original|hCoV-19^^Texas|Human|Houston Methodist Hospital|Houston Methodist Hospital|Long|USA

>Spike|hCoV-19/England/LIVE-9A89A/2020|2020-03-28|EPI\_ISL\_449370|Original|hCoV-19^^England|Human|Liverpool Clinical Laboratories|COVID-19 Genomics UK (COG-UK) Consortium|Haldenby|United Kingdom

>Spike|hCoV-19/England/BRIS-123895/2020|2020-04-06|EPI\_ISL\_442808|Original|hCoV-19^^England|Human|PHE South West Regional Laboratory|Wellcome Sanger Institute for the COVID-19 Genomics UK (COG-UK) consortium|Amato|United Kingdom

>Spike|hCoV-19/Japan/PG-6964/2020|2020-07-00|EPI\_ISL\_688069|Original|hCoV-19^^Japan|Human|Pathogen Genomics Center|Pathogen Genomics Center|Sekizuka|Japan

>Spike|hCoV-19/USA/TX-HMH-MCoV-19214/2020|2020-11-27|EPI\_ISL\_783694|Original|hCoV-19^^Texas|Human|Houston Methodist Hospital|Houston Methodist Hospital|Long|USA

>Spike|hCoV-19/England/204661395/2020|2020-11-11|EPI\_ISL\_766266|Original|hCoV-19^^England|Human|Respiratory Virus Unit|COVID-19 Genomics UK (COG-UK) Consortium|Platt|United Kingdom

>Spike|hCoV-19/Denmark/DCGC-4997/2020|2020-09-21|EPI\_ISL\_621807|Original|hCoV-19^^Hovedstaden|Human|Department of Virus and Microbiological Special Diagnostics|Albertsen lab|Michaelsen|Denmark

>Spike|hCoV-19/Japan/PG-4783/2020|2020-08-00|EPI\_ISL\_689630|Original|hCoV-19^^Japan|Human|Pathogen Genomics Center|Pathogen Genomics Center|Sekizuka|Japan

>Spike|hCoV-19/England/ALDP-B839D2/2020|2020-11-14|EPI\_ISL\_674311|Original|hCoV-19^^England|Human|Lighthouse Lab in Alderley Park|Wellcome Sanger Institute for the COVID-19 Genomics UK (COG-UK) Consortium|Davies|United Kingdom

>Spike|hCoV-19/England/ALDP-CF12A6/2020|2020-12-16|EPI\_ISL\_781877|Original|hCoV-19^^England|Human|Lighthouse Lab in Alderley Park|Wellcome Sanger Institute for the COVID-19 Genomics UK (COG-UK) Consortium|Davies|United Kingdom

>Spike|hCoV-19/England/ALDP-C3DD16/2020|2020-12-10|EPI\_ISL\_731793|Original|hCoV-19^^England|Human|Lighthouse Lab in Alderley Park|Wellcome Sanger Institute for the COVID-19 Genomics UK (COG-UK) Consortium|Davies|United Kingdom

>Spike|hCoV-19/England/NOTT-11479A/2020|2020-10-08|EPI\_ISL\_584750|Original|hCoV-19^^England|Human|Queens Medical Centre|COVID-19 Genomics UK (COG-UK) Consortium|Loose|United Kingdom

>Spike|hCoV-19/USA/NY-Wadsworth-10695-01/2020|2020-03-04|EPI\_ISL\_426029|Original|hCoV-19^^New York|Human|Wadsworth Center|Wadsworth Center|Lasek-Nesselquist|USA

>Spike|hCoV-19/England/BRIS-123473/2020|2020-04-06|EPI\_ISL\_442707|Original|hCoV-19^^England|Human|PHE South West Regional Laboratory|Wellcome Sanger Institute for the COVID-19 Genomics UK (COG-UK) consortium|Amato|United Kingdom

>Spike|hCoV-19/England/NORW-F8DAA/2020|2020-11-29|EPI\_ISL\_725376|Original|hCoV-19^^England|Human|Quadram Institute Bioscience|COVID-19 Genomics UK (COG-UK) Consortium|Alikhan|United Kingdom

>Spike|hCoV-19/Austria/CeMM0161/2020|2020-03-05|EPI\_ISL\_438007|Original|hCoV-19^^Vienna|Human|Center for Virology|Bergthaler laboratory|Bergthaler|Austria

>Spike|hCoV-19/USA/UT-UPHL-01958/2020|2020-04-15|EPI\_ISL\_575242|Original|hCoV-19^^Utah|Human|Utah Public Health Laboratory|Utah Public Health Laboratory|Young|USA

>Spike|hCoV-19/England/NOTT-11342B/2020|2020-09-17|EPI\_ISL\_549504|Original|hCoV-19^^England|Human|Queens Medical Centre|COVID-19 Genomics UK (COG-UK) Consortium|Loose|United Kingdom

>Spike|hCoV-19/Spain/CT-IBV-005556/2020|2020-03-17|EPI\_ISL\_508618|Original|hCoV-19^^Catalunya|Human|Departamento de Microbiolog\u00eda|SeqCOVID-SPAIN consortium/IBV (CSIC) |Comas|Spain

>Spike|hCoV-19/Wales/PHWC-48DD88/2020|2020-11-06|EPI\_ISL\_680755|Original|hCoV-19^^Wales|Human|Wales Specialist Virology Centre Sequencing lab|COVID-19 Genomics UK (COG-UK) Consortium|Moore|United Kingdom

>Spike|hCoV-19/England/ALDP-A6F278/2020|2020-10-15|EPI\_ISL\_607071|Original|hCoV-19^^England|Human|Lighthouse Lab in Alderley Park|Wellcome Sanger Institute for the COVID-19 Genomics UK (COG-UK) consortium|Davies|United Kingdom

>Spike|hCoV-19/England/C200042066/2020|2020-00-00|EPI\_ISL\_649804|Original|hCoV-19^^England|Human|Respiratory Virus Unit|COVID-19 Genomics UK (COG-UK) Consortium|Platt|United Kingdom

>Spike|hCoV-19/Northern Ireland/NIRE-23307B/2020|2020-09-28|EPI\_ISL\_680250|Original|hCoV-19^^Northern Ireland|Human|Regional Virus Laboratory|COVID-19 Genomics UK (COG-UK) Consortium|Fairley|United Kingdom

>Spike|hCoV-19/England/20166000804/2020|2020-04-15|EPI\_ISL\_466497|Original|hCoV-19^^England|Human|Respiratory Virus Unit|Respiratory Virus Unit|Platt|United Kingdom

>Spike|hCoV-19/England/SHEF-CDF99/2020|2020-10-13|EPI\_ISL\_611997|Original|hCoV-19^^England|Human|Virology Department|COVID-19 Genomics UK (COG-UK) Consortium|de Silva|United Kingdom

>Spike|hCoV-19/USA/CA-CZB-2085/2020|2020-05-04|EPI\_ISL\_486328|Original|hCoV-19^^California|Human|San Joaquin County Public Health Lab|Chan-Zuckerberg Biohub|McGeever|USA

>Spike|hCoV-19/USA/TX-DSHS-0418/2020|2020-06-16|EPI\_ISL\_542476|Original|hCoV-19^^Texas|Human|Texas Department of State Health Services|Texas Department of State Health Services|Rahman|USA

>Spike|hCoV-19/Spain/IB-IBV-99010819/2020|2020-08-01|EPI\_ISL\_691618|Original|hCoV-19^^Balear Islands|Human|Servicio de Microbiolog\u00eda|SeqCOVID-SPAIN consortium/IBV (CSIC) |Comas|Spain

>Spike|hCoV-19/England/QEUH-CDEAC5/2020|2020-12-26|EPI\_ISL\_782433|Original|hCoV-19^^England|Human|Lighthouse Lab in Glasgow|Wellcome Sanger Institute for the COVID-19 Genomics UK (COG-UK) Consortium|Davies|United Kingdom

>Spike|hCoV-19/England/CAMB-1B7070/2020|2020-10-13|EPI\_ISL\_638299|Original|hCoV-19^^England|Human|Department of Pathology|COVID-19 Genomics UK (COG-UK) Consortium|Goodfellow|United Kingdom

>Spike|hCoV-19/Scotland/QEUH-AACA4A/2020|2020-10-21|EPI\_ISL\_652887|Original|hCoV-19^^Scotland|Human|Oxford Viromics|COVID-19 Genomics UK (COG-UK) Consortium|Golubchik|United Kingdom

>Spike|hCoV-19/England/CAMB-778DF/2020|2020-03-31|EPI\_ISL\_439445|Original|hCoV-19^^England|Human|Department of Pathology|Wellcome Sanger Institute for the COVID-19 Genomics UK (COG-UK) consortium|Amato|United Kingdom

>Spike|hCoV-19/Australia/NSW883/2020|2020-08-17|EPI\_ISL\_544964|Original|hCoV-19^^New South Wales|Human|Sydney South West Pathology Service (SSWPS) - Liverpool Hospital - NSW Health Pathology|NSW Health Pathology - Institute of Clinical Pathology and Medical Research; Westmead Hospital; University of Sydney|Gall|Australia

>Spike|hCoV-19/England/MILK-B38AD9/2020|2020-10-31|EPI\_ISL\_658949|Original|hCoV-19^^England|Human|Lighthouse Lab in Milton Keynes|Wellcome Sanger Institute for the COVID-19 Genomics UK (COG-UK) Consortium|Davies|United Kingdom

>Spike|hCoV-19/USA/MD-MDH-0021/2020|2020-04-01|EPI\_ISL\_481269|Original|hCoV-19^^Maryland|Human|Maryland Department of Health|Maryland Department of Health|Keller|USA

>Spike|hCoV-19/Netherlands/FL-EMC-30/2020|2020-10-06|EPI\_ISL\_632652|Original|hCoV-19^^Flevoland|Human|Dutch COVID-19 response team|Erasmus Medical Center|Oude Munnink|Netherlands

>Spike|hCoV-19/Japan/PG-5759/2020|2020-08-00|EPI\_ISL\_688878|Original|hCoV-19^^Japan|Human|Pathogen Genomics Center|Pathogen Genomics Center|Sekizuka|Japan

>Spike|hCoV-19/USA/TX-HMH-6163/2020|2020-06-23|EPI\_ISL\_547283|Original|hCoV-19^^Texas|Human|Houston Methodist Hospital|Houston Methodist Hospital|Long|USA

>Spike|hCoV-19/England/QEUA-AAE77E/2020|2020-10-22|EPI\_ISL\_630703|Original|hCoV-19^^England|Human|Lighthouse Lab in Glasgow|Wellcome Sanger Institute for the COVID-19 Genomics UK (COG-UK) consortium|Davies|United Kingdom

>Spike|hCoV-19/Netherlands/Drenthe\_3/2020|2020-04-06|EPI\_ISL\_460637|Original|hCoV-19^^Drenthe|Human|Dutch COVID-19 response team|Erasmus Medical Center|Oude Munnink|Netherlands

>Spike|hCoV-19/England/20132095704/2020|2020-03-23|EPI\_ISL\_423828|Original|hCoV-19^^England|Human|Respiratory Virus Unit|Respiratory Virus Unit|Platt|United Kingdom

>Spike|hCoV-19/Spain/AN-IBV-001980/2020|2020-03-15|EPI\_ISL\_509619|Original|hCoV-19^^Andalucia|Human|Servicio de Microbiolog\u00eda. HRU de M\u00e9llaga. Servicio Andaluz de Salud|SeqCOVID-SPAIN consortium|IBV(CSIC)|Comas|Spain

>Spike|hCoV-19/USA/UT-UPHL-201013682/2020|2020-04-03|EPI\_ISL\_594407|Original|hCoV-19^^Utah|Human|Utah Public Health Laboratory|Utah Public Health Laboratory|Young|USA

>Spike|hCoV-19/Australia/VIC1436/2020|2020-04-17|EPI\_ISL\_456441|Original|hCoV-19^^Victoria|Human|Victorian Infectious Diseases Reference Laboratory (VIDRL)|Microbiological Diagnostic Unit Public Health Laboratory and Victorian Infectious Diseases Reference Laboratory|Schultz|Australia

>Spike|hCoV-19/Spain/PV-IBV-004211/2020|2020-04-03|EPI\_ISL\_510496|Original|hCoV-19^^Basque Country|Human|Servicio de Microbiolog\u00eda. Hospital Universitario Donostia. OSI Donostialdea. \u00c1rea de Enfermedades Infecciosas|SeqCOVID-SPAIN consortium|IBV(CSIC)|Comas|Spain

>Spike|hCoV-19/Northern Ireland/NIRE-23458A/2020|2020-10-19|EPI\_ISL\_680408|Original|hCoV-19^^Northern Ireland|Human|Regional Virus Laboratory|COVID-19 Genomics UK (COG-UK) Consortium|Fairley|United Kingdom

>Spike|hCoV-19/USA/MN-MDH-1745/2020|2020-04-10|EPI\_ISL\_576254|Original|hCoV-19^^Minnesota|Human|Minnesota Department of Health|Minnesota Department of Health|Garfin|USA

>Spike|hCoV-19/Wales/PHWC-1637F6/2020|2020-05-05|EPI\_ISL\_473999|Original|hCoV-19^^Wales|Human|Originating lab|COVID-19 Genomics UK (COG-UK) Consortium|Moore|United Kingdom

>Spike|hCoV-19/England/QEUA-C7C847/2020|2020-12-16|EPI\_ISL\_757017|Original|hCoV-19^^England|Human|Lighthouse Lab in Glasgow|Wellcome Sanger Institute for the COVID-19 Genomics UK (COG-UK) Consortium|Davies|United Kingdom

>Spike|hCoV-19/USA/WA-S2506/2020|2020-06-17|EPI\_ISL\_497138|Original|hCoV-19^^Washington|Human|Washington State Department of Health|Seattle Flu Study|Lee|USA

>Spike|hCoV-19/Denmark/DCGC-13825/2020|2020-11-30|EPI\_ISL\_713046|Original|hCoV-19^^Hovedstaden|Human|Department of Virus and Microbiological Special Diagnostics|Albertsen Lab|Michaelsen|Denmark

>Spike|hCoV-19/Japan/PG-2914/2020|2020-04-00|EPI\_ISL\_691040|Original|hCoV-19^^Japan|Human|Pathogen Genomics Center|Pathogen Genomics Center|Sekizuka|Japan

>Spike|hCoV-19/Germany/SH-hpi-pl424/2020|2020-03-04|EPI\_ISL\_775684|Original|hCoV-19^^Schleswig-Holstein|Human|University Medical Center Hamburg Eppendorf|Heinrich Pette Institute|Robitaille|Germany

>Spike|hCoV-19/England/SHEF-C9953/2020|2020-03-25|EPI\_ISL\_442344|Original|hCoV-19^^England|Human|Virology Department|COVID-19 Genomics UK (COG-UK) Consortium|de Silva|United Kingdom

>Spike|hCoV-19/Wales/PHWC-30D79/2020|2020-04-09|EPI\_ISL\_446355|Original|hCoV-19^^Wales|Human|Wales Specialist Virology Centre|Public Health Wales Microbiology Cardiff|Moore|United Kingdom

>Spike|hCoV-19/Luxembourg/LNS7911820/2020|2020-10-15|EPI\_ISL\_744653|Original|hCoV-19^^Luxembourg|Human|Laboratoire national de sant\u00e9|Laboratoire national de sant\u00e9|Wienecke-Baldacchino|Luxembourg

>Spike|hCoV-19/USA/LA-CDC-1918/2020|2020-05-07|EPI\_ISL\_535344|Original|hCoV-19^^Louisiana|Human|LA Office of Public Health Laboratories|Pathogen Discovery|Queen|USA

>Spike|hCoV-19/Kenya/C8579/2020|2020-05-20|EPI\_ISL\_568870|Original|hCoV-19^^Kwale|Human|KEMRI-Wellcome Trust Research Programme/KEMRI-CGMR-C Kilifi|KEMRI-Wellcome Trust Research Programme/KEMRI-CGMR-C Kilifi|Githinji|Kenya



>Spike|hCoV-19/Denmark/DCGC-3208/2020|2020-08-24|EPI\_ISL\_616764|Original|hCoV-19^^NA|Human|Department of Virus and Microbiological Special Diagnostics|Albertsen lab|Michaelsen|Denmark

>Spike|hCoV-19/USA/LA-EVTL1435/2020|2020-12-15|EPI\_ISL\_779101|Original|hCoV-19^^Louisiana|Human|LSUHS Emerging Viral Threat Laboratory|Microbial Genome Sequencing Center|Kamil|USA

>Spike|hCoV-19/USA/TX-HMH-MCoV-9169/2020|2020-07-02|EPI\_ISL\_780431|Original|hCoV-19^^Texas|Human|Houston Methodist Hospital|Houston Methodist Hospital|Long|USA

>Spike|hCoV-19/Japan/PG-0201/2020|2020-03-13|EPI\_ISL\_479904|Original|hCoV-19^^Kansai|Human|Himeji City Institute of Environment and Health|Pathogen Genomics Center|Sekizuka|Japan

>Spike|hCoV-19/Canada/ON-PHL-20-03626/2020|2020-11-00|EPI\_ISL\_775132|Original|hCoV-19^^Ontario|Human|Public Health Ontario Laboratory|Public Health Ontario Laboratory|Guthrie|Canada

>Spike|hCoV-19/England/ALDP-94ED42/2020|2020-06-17|EPI\_ISL\_556478|Original|hCoV-19^^England|Human|Lighthouse Lab in Alderley Park|Wellcome Sanger Institute for the COVID-19 Genomics UK (COG-UK) consortium|Davies|United Kingdom

>Spike|hCoV-19/Canada/QC-LSPQ-L00243054/2020|2020-03-30|EPI\_ISL\_536347|Original|hCoV-19^^Quebec|Human|H\u00f4pital Pierre-Boucher|Laboratoire de sant\u00e9 publique du Qu\u00e9bec|Moreira|Canada

>Spike|hCoV-19/France/PAC-IHU-0522/2020|2020-04-06|EPI\_ISL\_569570|Original|hCoV-19^^Provence-Alpes-C\u00f4te-d\u2019Azur|Human|MEPHI|MEPHI|Levasseur|France

>Spike|hCoV-19/England/ALDP-955E81/2020|2020-06-11|EPI\_ISL\_554091|Original|hCoV-19^^England|Human|Lighthouse Lab in Alderley Park|Wellcome Sanger Institute for the COVID-19 Genomics UK (COG-UK) consortium|Davies|United Kingdom

>Spike|hCoV-19/England/ALDP-97F1C4/2020|2020-07-30|EPI\_ISL\_529530|Original|hCoV-19^^England|Human|Queens Medical Centre|COVID-19 Genomics UK (COG-UK) Consortium|Loose|United Kingdom

>Spike|hCoV-19/England/QEUH-B31CCB/2020|2020-11-04|EPI\_ISL\_646163|Original|hCoV-19^^England|Human|Lighthouse Lab in Glasgow|Wellcome Sanger Institute for the COVID-19 Genomics UK (COG-UK) Consortium|Davies|United Kingdom

>Spike|hCoV-19/USA/AR-CDC-2072/2020|2020-03-31|EPI\_ISL\_450800|Original|hCoV-19^^Arkansas|Human|AR Dept. of Health-Public Health Lab|Pathogen Discovery|Queen|USA

>Spike|hCoV-19/USA/AZ-TG401836/2020|2020-06-23|EPI\_ISL\_694854|Original|hCoV-19^^Arizona|Human|TGen North|TGen North|French|USA

>Spike|hCoV-19/England/LIVE-DB41DE/2020|2020-10-19|EPI\_ISL\_652083|Original|hCoV-19^^England|Human|Liverpool Clinical Laboratories|COVID-19 Genomics UK (COG-UK) Consortium|Haldenby|United Kingdom

>Spike|hCoV-19/USA/CA-CZB-1797/2020|2020-04-16|EPI\_ISL\_486126|Original|hCoV-19^^California|Human|Orange County Public Health Laboratory|Chan-Zuckerberg Biohub|McGeever|USA

>Spike|hCoV-19/England/MILK-B95FBD/2020|2020-11-13|EPI\_ISL\_676108|Original|hCoV-19^^England|Human|Lighthouse Lab in Milton Keynes|Wellcome Sanger Institute for the COVID-19 Genomics UK (COG-UK) Consortium|Davies|United Kingdom

>Spike|hCoV-19/England/QEUH-C93200/2020|2020-12-17|EPI\_ISL\_762182|Original|hCoV-19^^England|Human|Lighthouse Lab in Glasgow|Wellcome Sanger Institute for the COVID-19 Genomics UK (COG-UK) Consortium|Davies|United Kingdom

>Spike|hCoV-19/England/EXET-13ACDB/2020|2020-11-11|EPI\_ISL\_664115|Original|hCoV-19^^England|Human|University of Exeter|COVID-19 Genomics UK (COG-UK) Consortium|Temperton|United Kingdom

>Spike|hCoV-19/Scotland/QEUH-962C78/2020|2020-08-11|EPI\_ISL\_531703|Original|hCoV-19^^Scotland|Human|NHSGGC West of Scotland Specialist Virology Centre / MRC-University of Glasgow Centre for Virus Research|Wellcome Sanger Institute for the COVID-19 Genomics UK (COG-UK) consortium|Davies|United Kingdom

>Spike|hCoV-19/England/ALDP-A6CC8C/2020|2020-10-14|EPI\_ISL\_607122|Original|hCoV-19^^England|Human|Lighthouse Lab in Alderley Park|Wellcome Sanger Institute for the COVID-19 Genomics UK (COG-UK) consortium|Davies|United Kingdom

>Spike|hCoV-19/India/MH-ACTREC-212/2020|2020-06-29|EPI\_ISL\_699866|Original|hCoV-19^^Maharashtra|Human|Hematopathology Laboratory|Hematopathology Laboratory|Patkar|India

>Spike|hCoV-19/USA/TX-HMH-MCoV-9462/2020|2020-07-03|EPI\_ISL\_781135|Original|hCoV-19^^Texas|Human|Houston Methodist Hospital|Houston Methodist Hospital|Long|USA

>Spike|hCoV-19/USA/PA-MGSC21-04/2020|2020-03-27|EPI\_ISL\_436475|Original|hCoV-19^^Pennsylvania|Human|UPMC Clinical Laboratory|Microbial Genome Sequencing Center|Cooper|USA

>Spike|hCoV-19/Japan/PG-3590/2020|2020-07-00|EPI\_ISL\_691844|Original|hCoV-19^^Japan|Human|Pathogen Genomics Center|Pathogen Genomics Center|Sekizuka|Japan

>Spike|hCoV-19/England/PORT-2E98A9/2020|2020-11-05|EPI\_ISL\_727737|Original|hCoV-19^^England|Human|Centre for Enzyme Innovation|COVID-19 Genomics UK (COG-UK) Consortium|Robson|United Kingdom

>Spike|hCoV-19/USA/UT-UPHL-2012910509/2020|2020-11-28|EPI\_ISL\_747008|Original|hCoV-19^^Utah|Human|Utah Public Health Laboratory|Utah Public Health Laboratory|Gallagher|USA

>Spike|hCoV-19/Denmark/DCGC-22053/2020|2020-12-14|EPI\_ISL\_757813|Original|hCoV-19^^Syddanmark|Human|Department of Virus and Microbiological Special Diagnostics|Albertsen Lab|Michaelsen|Denmark

>Spike|hCoV-19/USA/TX-HMH0389/2020|2020-04-01|EPI\_ISL\_434976|Original|hCoV-19^^Texas|Human|Houston Methodist Hospital|Houston Methodist Hospital|Long|USA

>Spike|hCoV-19/England/CAMC-B08085/2020|2020-10-30|EPI\_ISL\_643476|Original|hCoV-19^^England|Human|Lighthouse Lab in Cambridge|Wellcome Sanger Institute for the COVID-19 Genomics UK (COG-UK) Consortium|Davies|United Kingdom

>Spike|hCoV-19/Denmark/DCGC-10551/2020|2020-11-02|EPI\_ISL\_670048|Original|hCoV-19^^Midtjylland|Human|Department of Virus and Microbiological Special Diagnostics|Albertsen Lab|Michaelsen|Denmark

>Spike|hCoV-19/USA/VA-DCLS-0799/2020|2020-07-18|EPI\_ISL\_522810|Original|hCoV-19^^Virginia|Human|Virginia DCLS|Virginia DCLS|St. Jacques|USA

>Spike|hCoV-19/England/SHEF-C5052/2020|2020-04-27|EPI\_ISL\_475380|Original|hCoV-19^^England|Human|Virology Department|COVID-19 Genomics UK (COG-UK) Consortium|de Silva|United Kingdom

>Spike|hCoV-19/England/QEUA-9CA0FA/2020|2020-09-10|EPI\_ISL\_567412|Original|hCoV-19^^England|Human|Lighthouse Lab in Glasgow|Wellcome Sanger Institute for the COVID-19 Genomics UK (COG-UK) consortium|Davies|United Kingdom

>Spike|hCoV-19/England/MILK-BAB2D9/2020|2020-11-17|EPI\_ISL\_783339|Original|hCoV-19^^England|Human|Lighthouse Lab in Milton Keynes|Wellcome Sanger Institute for the COVID-19 Genomics UK (COG-UK) Consortium|Davies|United Kingdom

>Spike|hCoV-19/USA/TX-HMH-MCoV-8964/2020|2020-07-02|EPI\_ISL\_780863|Original|hCoV-19^^Texas|Human|Houston Methodist Hospital|Houston Methodist Hospital|Long|USA

>Spike|hCoV-19/England/MILK-B558DC/2020|2020-11-05|EPI\_ISL\_657373|Original|hCoV-19^^England|Human|Lighthouse Lab in Milton Keynes|Wellcome Sanger Institute for the COVID-19 Genomics UK (COG-UK) Consortium|Davies|United Kingdom

>Spike|hCoV-19/England/MILK-A7E8CF/2020|2020-10-13|EPI\_ISL\_606874|Original|hCoV-19^^England|Human|Lighthouse Lab in Milton Keynes|Wellcome Sanger Institute for the COVID-19 Genomics UK (COG-UK) consortium|Davies|United Kingdom

>Spike|hCoV-19/England/BRIS-12AEE7/2020|2020-05-01|EPI\_ISL\_458470|Original|hCoV-19^^England|Human|PHE South West Regional Laboratory|Wellcome Sanger Institute for the COVID-19 Genomics UK (COG-UK) consortium|Davies|United Kingdom

>Spike|hCoV-19/England/ALDP-A85B17/2020|2020-10-17|EPI\_ISL\_610497|Original|hCoV-19^^England|Human|Lighthouse Lab in Alderley Park|Wellcome Sanger Institute for the COVID-19 Genomics UK (COG-UK) consortium|Davies|United Kingdom

>Spike|hCoV-19/USA/SC-DHEC-0549/2020|2020-06-19|EPI\_ISL\_529088|Original|hCoV-19^^South Carolina|Human|Microbiology Division|Microbiology Division|Flores,H.|USA

>Spike|hCoV-19/England/QEUA-998EA0/2020|2020-08-24|EPI\_ISL\_541795|Original|hCoV-19^^England|Human|Lighthouse Lab in Glasgow|Wellcome Sanger Institute for the COVID-19 Genomics UK (COG-UK) consortium|Davies|United Kingdom

>Spike|hCoV-19/England/QEUA-AD66F8/2020|2020-10-26|EPI\_ISL\_634113|Original|hCoV-19^^England|Human|Lighthouse Lab in Glasgow|Wellcome Sanger Institute for the COVID-19 Genomics UK (COG-UK) consortium|Davies|United Kingdom

>Spike|hCoV-19/Netherlands/NB-RIVM-10052/2020|2020-03-18|EPI\_ISL\_547482|Original|hCoV-19^^Noord Brabant|Human|Dutch COVID-19 response

team|National Institute for Public Health and the Environment  
(RIVM)|Meijer|Netherlands  
>Spike|hCoV-19/USA/MI-UM-10036115045/2020|2020-09-24|EPI\_ISL\_590712|Original|hCoV-  
19^^Michigan|Human|University of Michigan Clinical Microbiology Laboratory|Lauring  
Lab|Valesano|USA  
>Spike|hCoV-19/Portugal/PT1957/2020|2020-11-13|EPI\_ISL\_732184|Original|hCoV-  
19^^Portugal|Human|Instituto Nacional de Saude (INSA) and Instituto Gulbenkian de  
Ciencia (IGC)|Instituto Nacional de Saude (INSA) and Instituto Gulbenkian de Ciencia  
(IGC)|Borges|Portugal  
>Spike|hCoV-19/USA/WA-S436/2020|2020-03-31|EPI\_ISL\_434196|Original|hCoV-  
19^^Washington|Human|Washington State Department of Health|Seattle Flu  
Study|Bedford|USA  
>Spike|hCoV-19/Australia/SAP246/2020|2020-03-26|EPI\_ISL\_468014|Original|hCoV-  
19^^South Australia|Human|SA Pathology|SA Pathology|Leong|Australia  
>Spike|hCoV-19/Australia/VIC6462/2020|2020-07-23|EPI\_ISL\_521240|Original|hCoV-  
19^^Victoria|Human|Microbiological Diagnostic Unit - Public Health Laboratory (MDU-  
PHL)|MDU-PHL|Schultz|Australia  
>Spike|hCoV-19/USA/LA-BIE-038/2020|2020-04-04|EPI\_ISL\_463286|Original|hCoV-  
19^^Louisiana|Human|Ochsner Health|Bioinfoexperts|Cross|USA  
>Spike|hCoV-19/USA/CO-CDPHE-2005220143/2020|2020-05-21|EPI\_ISL\_710212|Original|hCoV-  
19^^Colorado|Human|Colorado Department of Public Health and Environment|Colorado  
Department of Public Health and Environment|Bankers|USA  
>Spike|hCoV-19/England/ALDP-BB5281/2020|2020-11-21|EPI\_ISL\_701955|Original|hCoV-  
19^^England|Human|Lighthouse Lab in Alderley Park|Wellcome Sanger Institute for the  
COVID-19 Genomics UK (COG-UK) Consortium|Davies|United Kingdom  
>Spike|hCoV-19/England/PORT-2D7307/2020|2020-10-26|EPI\_ISL\_628331|Original|hCoV-  
19^^England|Human|Centre for Enzyme Innovation|COVID-19 Genomics UK (COG-UK)  
Consortium|Robson|United Kingdom  
>Spike|hCoV-19/Denmark/DCGC-17909/2020|2020-12-14|EPI\_ISL\_749638|Original|hCoV-  
19^^Midtjylland|Human|Department of Virus and Microbiological Special  
Diagnostics|Albertsen Lab|Michaelsen|Denmark  
>Spike|hCoV-19/Netherlands/ZH-EMC-1017/2020|2020-11-16|EPI\_ISL\_722395|Original|hCoV-  
19^^Zuid Holland|Human|Dutch COVID-19 response team|Erasmus Medical Center|Oude  
Munnink|Netherlands  
>Spike|hCoV-19/India/MH-ACTREC-354/2020|2020-07-22|EPI\_ISL\_700003|Original|hCoV-  
19^^Maharashtra|Human|Hematopathology Laboratory|Hematopathology  
Laboratory|Patkar|India  
>Spike|hCoV-19/USA/WA-UW-47458/2020|2020-12-09|EPI\_ISL\_776730|Original|hCoV-  
19^^Washington|Human|UW Virology Lab|UW Virology Lab|Roychoudhury|USA  
>Spike|hCoV-19/USA/UT-UPHL-2012260600/2020|2020-11-30|EPI\_ISL\_746854|Original|hCoV-  
19^^Utah|Human|Utah Public Health Laboratory|Utah Public Health  
Laboratory|Gallagher|USA  
>Spike|hCoV-19/USA/TX-DSHS-1341/2020|2020-04-07|EPI\_ISL\_654923|Original|hCoV-  
19^^Texas|Human|Texas Department of State Health Services|Texas Department of State  
Health Services|Rahman|USA  
>Spike|hCoV-19/England/QEUEH-AEFB57/2020|2020-10-29|EPI\_ISL\_662707|Original|hCoV-  
19^^England|Human|Lighthouse Lab in Glasgow|Wellcome Sanger Institute for the COVID-  
19 Genomics UK (COG-UK) Consortium|Davies|United Kingdom  
>Spike|hCoV-19/South Africa/KRISP-02/2020|2020-03-23|EPI\_ISL\_421572|Original|hCoV-  
19^^KwaZulu-Natal|Human|Molecular Diagnostic Services and FLOWpath|KRISP|de  
Oliveira|South Africa  
>Spike|hCoV-19/England/LIVE-9DF38/2020|2020-04-07|EPI\_ISL\_453250|Original|hCoV-  
19^^England|Human|Liverpool Clinical Laboratories|COVID-19 Genomics UK (COG-UK)  
Consortium|Haldenby|United Kingdom  
>Spike|hCoV-19/England/QEUEH-A029BE/2020|2020-09-29|EPI\_ISL\_584940|Original|hCoV-  
19^^England|Human|Quadram Institute Bioscience|COVID-19 Genomics UK (COG-UK)  
Consortium|Alikhan|United Kingdom  
>Spike|hCoV-19/Spain/RI-IBV-99005871/2020|2020-03-11|EPI\_ISL\_537414|Original|hCoV-  
19^^La Rioja|Human|Centro de Investigaci\u00f3n Biom\u00e9dica de La Rioja - Hospital  
San Pedro Logro\u00f1o|SeqCOVID-SPAIN consortium/IBV (CSIC)|Comas|Spain

>Spike|hCoV-19/Denmark/DCGC-1333/2020|2020-06-01|EPI\_ISL\_618007|Original|hCoV-19^^Hovedstaden|Human|Department of Virus and Microbiological Special Diagnostics|Albertsen lab|Michaelsen|Denmark

>Spike|hCoV-19/USA/NY-Wadsworth-289945-01/2020|2020-12-21|EPI\_ISL\_767520|Original|hCoV-19^^New York|Human|Wadsworth Center|Wadsworth Center|Lasek-Nesselquist|USA

>Spike|hCoV-19/Finland/23LS1H5/2020|2020-10-23|EPI\_ISL\_759774|Original|hCoV-19^^Uusimaa|Human|Department of Virology and Immunology|Department of Virology|Smura|Finland

>Spike|hCoV-19/England/MILK-ABC4B2/2020|2020-10-22|EPI\_ISL\_631103|Original|hCoV-19^^England|Human|Lighthouse Lab in Milton Keynes|Wellcome Sanger Institute for the COVID-19 Genomics UK (COG-UK) consortium|Davies|United Kingdom

>Spike|hCoV-19/Scotland/QEUH-9B82EA/2020|2020-09-09|EPI\_ISL\_568223|Original|hCoV-19^^Scotland|Human|Lighthouse Lab in Glasgow|Wellcome Sanger Institute for the COVID-19 Genomics UK (COG-UK) consortium|Davies|United Kingdom

>Spike|hCoV-19/USA/TX-HMH-1011/2020|2020-04-10|EPI\_ISL\_542492|Original|hCoV-19^^Texas|Human|Houston Methodist Hospital|Houston Methodist Hospital|Long|USA

>Spike|hCoV-19/Japan/PG-0830/2020|2020-04-00|EPI\_ISL\_684440|Original|hCoV-19^^Japan|Human|Fukuoka Institute of Health and Environmental Sciences|Pathogen Genomics Center|Sekizuka|Japan

>Spike|hCoV-19/Canada/ON-PHL-3536/2020|2020-03-00|EPI\_ISL\_418362|Original|hCoV-19^^Ontario|Human|Public Health Ontario Laboratories|Public Health Ontario Laboratories|Eshaghi|Canada

>Spike|hCoV-19/Switzerland/Vs-ETHZ-250103/2020|2020-08-20|EPI\_ISL\_535618|Original|hCoV-19^^Valais|Human|Viollier AG|Department of Biosystems Science and Engineering|Nadeau|Switzerland

>Spike|hCoV-19/Australia/VIC14118/2020|2020-09-20|EPI\_ISL\_592346|Original|hCoV-19^^Victoria|Human|Microbiological Diagnostic Unit - Public Health Laboratory (MDU-PHL)|MDU-PHL|Schultz|Australia

>Spike|hCoV-19/Netherlands/ZH-EMC-708/2020|2020-09-28|EPI\_ISL\_632556|Original|hCoV-19^^Zuid Holland|Human|Dutch COVID-19 response team|Erasmus Medical Center|Oude Munnink|Netherlands

>Spike|hCoV-19/USA/MI-UM-10036813433/2020|2020-11-06|EPI\_ISL\_728403|Original|hCoV-19^^Michigan|Human|University of Michigan Clinical Microbiology Laboratory|Lauring Lab|Valesano|USA

>Spike|hCoV-19/Taiwan/NTU21/2020|2020-03-19|EPI\_ISL\_422422|Vero E6|hCoV-19^^Taipei|Human|Department of Laboratory Medicine|Microbial Genomics Core Lab|Lin|Taiwan

>Spike|hCoV-19/England/ALDP-8FEDAC/2020|2020-06-24|EPI\_ISL\_551433|Original|hCoV-19^^England|Human|Lighthouse Lab in Alderley Park|Wellcome Sanger Institute for the COVID-19 Genomics UK (COG-UK) consortium|Davies|United Kingdom

>Spike|hCoV-19/England/SHEF-C0D32/2020|2020-10-30|EPI\_ISL\_638877|Original|hCoV-19^^England|Human|Virology Department|COVID-19 Genomics UK (COG-UK) Consortium|de Silva|United Kingdom

>Spike|hCoV-19/Denmark/DCGC-17782/2020|2020-12-14|EPI\_ISL\_749565|Original|hCoV-19^^Sjaelland|Human|Department of Virus and Microbiological Special Diagnostics|Albertsen Lab|Michaelsen|Denmark

>Spike|hCoV-19/Denmark/DCGC-4516/2020|2020-09-21|EPI\_ISL\_621312|Original|hCoV-19^^Nordjylland|Human|Department of Virus and Microbiological Special Diagnostics|Albertsen lab|Michaelsen|Denmark

>Spike|hCoV-19/India/GJ-GBRC93/2020|2020-04-28|EPI\_ISL\_447555|Original|hCoV-19^^Gujarat|Human|GMERS Medical College and Hospital|Gujarat Biotechnology Research Centre|Joshi|India

>Spike|hCoV-19/Spain/VC-FISABIO-179/2020|2020-03-21|EPI\_ISL\_436274|Original|hCoV-19^^Comunitat Valenciana|Human|Servicio de Microbiolog\u00eda. Consorcio Hospital General Universitario de Valencia|Sequencing and Bioinformatics Service and Molecular Epidemiology Research Group. FISABIO-Public Health|Gonzalez-Candelas|Spain

>Spike|hCoV-19/England/NORT-282CC4/2020|2020-03-29|EPI\_ISL\_472225|Original|hCoV-19^^England|Human|Northumbria University / South Tees Hospitals NHS Foundation Trust / North Cumbria Integrated Care NHS Foundation Trust / North Tees and Hartlepool NHS

Foundation Trust / Newcastle Hospitals NHS Foundation Trust|COVID-19 Genomics UK (COG-UK) Consortium|Bashton|United Kingdom  
>Spike|hCoV-19/Belgium/ULG-10529/2020|2020-10-23|EPI\_ISL\_626300|Original|hCoV-19^^Li\u00e8ge|Human|Department of Clinical Microbiology|GIGA Medical Genomics|Durkin|Belgium  
>Spike|hCoV-19/England/LOND-D3BE7/2020|2020-04-04|EPI\_ISL\_449639|Original|hCoV-19^^England|Human|University College London|COVID-19 Genomics UK (COG-UK) Consortium|Roy|United Kingdom  
>Spike|hCoV-19/USA/MN-MDH-2176/2020|2020-11-24|EPI\_ISL\_723127|Original|hCoV-19^^Minnesota|Human|Minnesota Department of Health|Minnesota Department of Health|Lorentz|USA  
>Spike|hCoV-19/England/QEUEH-A1E82B/2020|2020-09-29|EPI\_ISL\_587349|Original|hCoV-19^^England|Human|Lighthouse Lab in Glasgow|Wellcome Sanger Institute for the COVID-19 Genomics UK (COG-UK) consortium|Davies|United Kingdom  
>Spike|hCoV-19/USA/CA-CZB-14926/2020|2020-11-27|EPI\_ISL\_738741|Original|hCoV-19^^California|Human|Orange County Public Health Lab|Chan-Zuckerberg Biohub|Kamm|USA  
>Spike|hCoV-19/USA/LA-EVTL694/2020|2020-07-14|EPI\_ISL\_653386|Original|hCoV-19^^Louisiana|Human|LSUHS Emerging Viral Threat Laboratory|Microbial Genome Sequencing Center|Kamil|USA  
>Spike|hCoV-19/England/LIVE-A8F76/2020|2020-03-26|EPI\_ISL\_517238|Original|hCoV-19^^England|Human|Liverpool Clinical Laboratories|COVID-19 Genomics UK (COG-UK) Consortium|Haldenby|United Kingdom  
>Spike|hCoV-19/Canada/BC-BCCDC-8604/2020|2020-11-00|EPI\_ISL\_740847|Original|hCoV-19^^British Columbia|Human|BCCDC Public Health Laboratory|BCCDC Public Health Laboratory|Prystajecky|Canada  
>Spike|hCoV-19/USA/TX-HMH-MCoV-9003/2020|2020-07-02|EPI\_ISL\_780887|Original|hCoV-19^^Texas|Human|Houston Methodist Hospital|Houston Methodist Hospital|Long|USA  
>Spike|hCoV-19/England/ALDP-A6C90D/2020|2020-10-15|EPI\_ISL\_608345|Original|hCoV-19^^England|Human|Lighthouse Lab in Alderley Park|Wellcome Sanger Institute for the COVID-19 Genomics UK (COG-UK) consortium|Davies|United Kingdom  
>Spike|hCoV-19/USA/FL-BPHL-1221/2020|2020-07-27|EPI\_ISL\_541194|Original|hCoV-19^^Florida|Human|Florida Bureau of Public Health Laboratories|Florida Bureau of Public Health Laboratories|Blanton|USA  
>Spike|hCoV-19/England/QEUEH-A00033/2020|2020-10-02|EPI\_ISL\_600367|Original|hCoV-19^^England|Human|Lighthouse Lab in Glasgow|Wellcome Sanger Institute for the COVID-19 Genomics UK (COG-UK) consortium|Davies|United Kingdom  
>Spike|hCoV-19/USA/WI-WSLH-200246/2020|2020-04-14|EPI\_ISL\_578464|Original|hCoV-19^^Wisconsin|Human|Wisconsin State Laboratory of Hygiene Communicable Disease Division|Wisconsin State Laboratory of Hygiene Communicable Disease Division|Florek|USA  
>Spike|hCoV-19/USA/CA-ALSR-2668/2020|2020-07-12|EPI\_ISL\_635619|Original|hCoV-19^^California|Human|San Diego County Public Health Laboratory|Andersen lab at Scripps Research|Gangavarapu|USA  
>Spike|hCoV-19/England/CAMC-B5213E/2020|2020-11-08|EPI\_ISL\_657920|Original|hCoV-19^^England|Human|Lighthouse Lab in Cambridge|Wellcome Sanger Institute for the COVID-19 Genomics UK (COG-UK) Consortium|Davies|United Kingdom  
>Spike|hCoV-19/England/SHEF-C683B/2020|2020-09-05|EPI\_ISL\_559910|Original|hCoV-19^^England|Human|Virology Department|COVID-19 Genomics UK (COG-UK) Consortium|de Silva|United Kingdom  
>Spike|hCoV-19/USA/TX-HMH-6961/2020|2020-06-28|EPI\_ISL\_546388|Original|hCoV-19^^Texas|Human|Houston Methodist Hospital|Houston Methodist Hospital|Long|USA  
>Spike|hCoV-19/England/ALDP-BBA8C6/2020|2020-11-20|EPI\_ISL\_701806|Original|hCoV-19^^England|Human|Lighthouse Lab in Alderley Park|Wellcome Sanger Institute for the COVID-19 Genomics UK (COG-UK) Consortium|Davies|United Kingdom  
>Spike|hCoV-19/Australia/VIC9675/2020|2020-08-15|EPI\_ISL\_565647|Original|hCoV-19^^Victoria|Human|Microbiological Diagnostic Unit - Public Health Laboratory (MDU-PHL)|MDU-PHL|Schultz|Australia  
>Spike|hCoV-19/USA/LA-EVTL430/2020|2020-06-11|EPI\_ISL\_578836|Original|hCoV-19^^Louisiana|Human|LSUHS Emerging Viral Threat Laboratory|Microbial Genome Sequencing Center|Kamil|USA

>Spike|hCoV-19/England/QEUEH-9B74C7/2020|2020-09-05|EPI\_ISL\_590641|Original|hCoV-19^^England|Human|Lighthouse Lab in Glasgow|Wellcome Sanger Institute for the COVID-19 Genomics UK (COG-UK) consortium|Davies|United Kingdom

>Spike|hCoV-19/Wales/MILK-9C3932/2020|2020-09-10|EPI\_ISL\_566717|Original|hCoV-19^^Wales|Human|Lighthouse Lab in Milton Keynes|Wellcome Sanger Institute for the COVID-19 Genomics UK (COG-UK) consortium|Davies|United Kingdom

>Spike|hCoV-19/England/ALDP-951E2B/2020|2020-06-10|EPI\_ISL\_551338|Original|hCoV-19^^England|Human|Lighthouse Lab in Alderley Park|Wellcome Sanger Institute for the COVID-19 Genomics UK (COG-UK) consortium|Davies|United Kingdom

>Spike|hCoV-19/USA/WA-UW319/2020|2020-03-15|EPI\_ISL\_418886|Original|hCoV-19^^Washington|Human|UW Virology Lab|UW Virology Lab|Roychoudhury|USA

>Spike|hCoV-19/Denmark/DCGC-4011/2020|2020-09-14|EPI\_ISL\_615783|Original|hCoV-19^^Hovedstaden|Human|Department of Virus and Microbiological Special Diagnostics|Albertsen lab|Michaelsen|Denmark

>Spike|hCoV-19/England/CAMB-1BC3FA/2020|2020-11-26|EPI\_ISL\_723870|Original|hCoV-19^^England|Human|Department of Pathology|COVID-19 Genomics UK (COG-UK) Consortium|Goodfellow|United Kingdom

>Spike|hCoV-19/Australia/NSW3638/2020|2020-12-12|EPI\_ISL\_717705|Original|hCoV-19^^New South Wales|Human|Area of Virology|Virology Research Laboratory; Area of Virology|Foster|Australia

>Spike|hCoV-19/England/201021555/2020|2020-03-03|EPI\_ISL\_464294|Original|hCoV-19^^England|Human|Respiratory Virus Unit|Respiratory Virus Unit|Platt|United Kingdom

>Spike|hCoV-19/Wales/PHWC-25955/2020|2020-03-24|EPI\_ISL\_422329|Original|hCoV-19^^Wales|Human|Wales Specialist Virology Centre|Public Health Wales Microbiology Cardiff|Moore|United Kingdom

>Spike|hCoV-19/USA/CA-ALSR-3216/2020|2020-08-01|EPI\_ISL\_635916|Original|hCoV-19^^California|Human|San Diego County Public Health Laboratory|Andersen lab at Scripps Research|Gangavarapu|USA

>Spike|hCoV-19/Singapore/251/2020|2020-03-21|EPI\_ISL\_462369|Original|hCoV-19^^Singapore|Human|National Public Health Laboratory|National Public Health Laboratory|Mak|Singapore

>Spike|hCoV-19/England/20139010604/2020|2020-03-27|EPI\_ISL\_421873|Original|hCoV-19^^England|Human|Respiratory Virus Unit|Respiratory Virus Unit|Platt|United Kingdom

>Spike|hCoV-19/England/QEUEH-C324FE/2020|2020-12-11|EPI\_ISL\_782539|Original|hCoV-19^^England|Human|Lighthouse Lab in Glasgow|Wellcome Sanger Institute for the COVID-19 Genomics UK (COG-UK) Consortium|Davies|United Kingdom

>Spike|hCoV-19/Australia/NSW1077/2020|2020-07-31|EPI\_ISL\_593711|Original|hCoV-19^^New South Wales|Human|South Eastern Area Laboratory Services (SEALS)|NSW Health Pathology - Institute of Clinical Pathology and Medical Research; Westmead Hospital; University of Sydney|Gall|Australia

>Spike|hCoV-19/Scotland/EDB6546/2020|2020-04-13|EPI\_ISL\_487660|Original|hCoV-19^^Scotland|Human|Virology Department|Wellcome Sanger Institute for the COVID-19 Genomics UK (COG-UK) consortium|Davies|United Kingdom

>Spike|hCoV-19/England/QEUEH-C5B7D8/2020|2020-12-14|EPI\_ISL\_735987|Original|hCoV-19^^England|Human|Lighthouse Lab in Glasgow|Wellcome Sanger Institute for the COVID-19 Genomics UK (COG-UK) Consortium|Davies|United Kingdom

>Spike|hCoV-19/Ireland/DL-NVRL-20G45634/2020|2020-04-03|EPI\_ISL\_666703|Original|hCoV-19^^Donegal|Human|National Virus Reference Lab (NVRL)|Irish Coronavirus Sequencing Consortium-Teagasc Grange|McCabe|Ireland

>Spike|hCoV-19/Switzerland/ZH-ETHZ-300406/2020|2020-09-29|EPI\_ISL\_603371|Original|hCoV-19^^Zurich|Human|Viollier AG|Department of Biosystems Science and Engineering|Nadeau|Switzerland

>Spike|hCoV-19/Spain/MD-IBV-99008479/2020|2020-08-10|EPI\_ISL\_654061|Original|hCoV-19^^Madrid|Human|Hospital General Universitario Gregorio Mara\u00f1a|SeqCOVID-SPAIN consortium/IBV (CSIC)|Comas|Spain

>Spike|hCoV-19/England/ALDP-AA573B/2020|2020-10-22|EPI\_ISL\_630840|Original|hCoV-19^^England|Human|Lighthouse Lab in Alderley Park|Wellcome Sanger Institute for the COVID-19 Genomics UK (COG-UK) consortium|Davies|United Kingdom

>Spike|hCoV-19/Netherlands/NH-RIVM-20231/2020|2020-11-30|EPI\_ISL\_723381|Original|hCoV-19^^Noord-Holland|Human|Dutch COVID-19 response team|National Institute for Public Health and the Environment (RIVM)|Meijer|Netherlands

>Spike|hCoV-19/Belgium/DAL-0327318/2020|2020-03-27|EPI\_ISL\_462172|Original|hCoV-19^^Anzegem|Human|KU Leuven|KU Leuven|Maes|Belgium

>Spike|hCoV-19/England/ALDP-951D5B/2020|2020-06-10|EPI\_ISL\_555437|Original|hCoV-19^^England|Human|Lighthouse Lab in Alderley Park|Wellcome Sanger Institute for the COVID-19 Genomics UK (COG-UK) consortium|Davies|United Kingdom

>Spike|hCoV-19/England/NORW-222F45/2020|2020-11-09|EPI\_ISL\_741552|Original|hCoV-19^^England|Human|Quadram Institute Bioscience|COVID-19 Genomics UK (COG-UK) Consortium|Alikhan|United Kingdom

>Spike|hCoV-19/Denmark/DCGC-12467/2020|2020-11-16|EPI\_ISL\_682648|Original|hCoV-19^^Hovedstaden|Human|Department of Virus and Microbiological Special Diagnostics|Albertsen Lab|Michaelsen|Denmark

>Spike|hCoV-19/Spain/IB-IBV-2523/2020|2020-03-20|EPI\_ISL\_468956|Original|hCoV-19^^Illes Balears|Human|Servicio de Microbiolog\u00eda|SeqCOVID-SPAIN consortium|IBV (CSIC)|Comas|Spain

>Spike|hCoV-19/Wales/PHWC-2BD71/2020|2020-04-08|EPI\_ISL\_445843|Original|hCoV-19^^Wales|Human|Wales Specialist Virology Centre|Public Health Wales Microbiology Cardiff|Moore|United Kingdom

>Spike|hCoV-19/England/20164067904/2020|2020-04-13|EPI\_ISL\_466466|Original|hCoV-19^^England|Human|Respiratory Virus Unit|Respiratory Virus Unit|Platt|United Kingdom

>Spike|hCoV-19/Japan/PG-5247/2020|2020-07-00|EPI\_ISL\_690350|Original|hCoV-19^^Japan|Human|Pathogen Genomics Center|Pathogen Genomics Center|Sekizuka|Japan

>Spike|hCoV-19/USA/LA-GBCL-26556525/2020|2020-04-16|EPI\_ISL\_485169|Original|hCoV-19^^Louisiana|Human|River Road Testing Lab|Ginkgo Bioworks Clinical Laboratory|Smith|USA

>Spike|hCoV-19/England/ALDP-B5E1C9/2020|2020-11-09|EPI\_ISL\_723639|Original|hCoV-19^^England|Human|Oxford Viromics|COVID-19 Genomics UK (COG-UK) Consortium|Golubchik|United Kingdom

>Spike|hCoV-19/England/205260414/2020|2020-00-00|EPI\_ISL\_766534|Original|hCoV-19^^England|Human|Respiratory Virus Unit|COVID-19 Genomics UK (COG-UK) Consortium|Platt|United Kingdom

>Spike|hCoV-19/USA/CA-CZB-3299/2020|2020-07-21|EPI\_ISL\_548311|Original|hCoV-19^^California|Human|County of San Luis Obispo Public Health Laboratory|Chan-Zuckerberg Biohub|Bhatt|USA

>Spike|hCoV-19/England/MILK-B8871F/2020|2020-11-14|EPI\_ISL\_674443|Original|hCoV-19^^England|Human|Lighthouse Lab in Milton Keynes|Wellcome Sanger Institute for the COVID-19 Genomics UK (COG-UK) Consortium|Davies|United Kingdom

>Spike|hCoV-19/Denmark/ALAB-SSI-1192/2020|2020-03-31|EPI\_ISL\_437636|Original|hCoV-19^^Denmark|Human|Department of Virus and Microbiological Special Diagnostics|Albertsen lab|Kirkegaard|Denmark

>Spike|hCoV-19/England/LOND-D5DEF/2020|2020-04-18|EPI\_ISL\_444248|Original|hCoV-19^^England|Human|University College London|COVID-19 Genomics UK (COG-UK) Consortium|Roy|United Kingdom

>Spike|hCoV-19/Denmark/DCGC-20424/2020|2020-12-21|EPI\_ISL\_759139|Original|hCoV-19^^Hovedstaden|Human|Department of Virus and Microbiological Special Diagnostics|Albertsen Lab|Michaelsen|Denmark

>Spike|hCoV-19/England/MILK-A4568B/2020|2020-10-06|EPI\_ISL\_598725|Original|hCoV-19^^England|Human|Lighthouse Lab in Milton Keynes|Wellcome Sanger Institute for the COVID-19 Genomics UK (COG-UK) consortium|Davies|United Kingdom

>Spike|hCoV-19/Denmark/ALAB-SSI-596/2020|2020-03-28|EPI\_ISL\_436985|Original|hCoV-19^^Denmark|Human|Department of Virus and Microbiological Special Diagnostics|Albertsen lab|Kirkegaard|Denmark

>Spike|hCoV-19/South Africa/KRISP-K002860/2020|2020-08-31|EPI\_ISL\_602675|Original|hCoV-19^^KwaZulu-Natal|Human|NHLS-IALCH|KRISP|de Oliveira|South Africa

>Spike|hCoV-19/Northern Ireland/NIRE-1022F8/2020|2020-03-23|EPI\_ISL\_441400|Original|hCoV-19^^Northern Ireland|Human|Regional Virus Laboratory|COVID-19 Genomics UK (COG-UK) Consortium|Fairley|United Kingdom

>Spike|hCoV-19/Denmark/DCGC-1048/2020|2020-03-16|EPI\_ISL\_614679|Original|hCoV-19^^Midtjylland|Human|Department of Virus and Microbiological Special Diagnostics|Albertsen lab|Michaelsen|Denmark

>Spike|hCoV-19/USA/FL-BPHL-0242/2020|2020-05-02|EPI\_ISL\_480893|Original|hCoV-19^^Florida|Human|Florida Bureau of Public Health Laboratories|Florida Bureau of Public Health Laboratories|Blanton|USA

>Spike|hCoV-19/USA/TX-HMH057/2020|2020-03-17|EPI\_ISL\_434766|Original|hCoV-19^^Texas|Human|Houston Methodist Hospital|Houston Methodist Hospital|Long|USA

>Spike|hCoV-19/USA/TX-HMH-MCoV-15397/2020|2020-10-22|EPI\_ISL\_786881|Original|hCoV-19^^Texas|Human|Houston Methodist Hospital|Houston Methodist Hospital|Long|USA

>Spike|hCoV-19/Scotland/CVR2578/2020|2020-04-16|EPI\_ISL\_477979|Original|hCoV-19^^Scotland|Human|West of Scotland Specialist Virology Centre|COVID-19 Genomics UK (COG-UK) Consortium|Robertson|United Kingdom

>Spike|hCoV-19/England/ALDP-724COB/2020|2020-07-01|EPI\_ISL\_557686|Original|hCoV-19^^England|Human|Lighthouse Lab in Alderley Park|Wellcome Sanger Institute for the COVID-19 Genomics UK (COG-UK) consortium|Davies|United Kingdom

>Spike|hCoV-19/USA/NY-NYCPHL-000315/2020|2020-04-23|EPI\_ISL\_631841|Original|hCoV-19^^New York|Human|OCME Office Of Chief Medical Examiner|New York City Public Health Laboratory|Wang|USA

>Spike|hCoV-19/Luxembourg/LNS1213113/2020|2020-10-29|EPI\_ISL\_739909|Original|hCoV-19^^Luxembourg|Human|Laboratoire national de sant\u00e9|Laboratoire national de sant\u00e9|Wienecke-Baldacchino|Luxembourg

>Spike|hCoV-19/England/ALDP-CB4D53/2020|2020-12-20|EPI\_ISL\_761170|Original|hCoV-19^^England|Human|Lighthouse Lab in Alderley Park|Wellcome Sanger Institute for the COVID-19 Genomics UK (COG-UK) Consortium|Davies|United Kingdom

>Spike|hCoV-19/India/MP-DRDE-4624/2020|2020-05-25|EPI\_ISL\_476896|Original|hCoV-19^^Madhya Pradesh|Human|Defence Research & Development Establishment (DRDE)|Defence Research & Development Establishment (DRDE)|Dash|India

>Spike|hCoV-19/England/MILK-975FF1/2020|2020-08-21|EPI\_ISL\_552778|Original|hCoV-19^^England|Human|Lighthouse Lab in Milton Keynes|Wellcome Sanger Institute for the COVID-19 Genomics UK (COG-UK) consortium|Davies|United Kingdom

>Spike|hCoV-19/South Africa/KRISP-K002201/2020|2020-07-01|EPI\_ISL\_515599|Original|hCoV-19^^KwaZulu-Natal|Human|NHLS-IALCH|KRISP|de Oliveira|South Africa

>Spike|hCoV-19/Japan/PG-4112/2020|2020-07-00|EPI\_ISL\_692352|Original|hCoV-19^^Japan|Human|Pathogen Genomics Center|Pathogen Genomics Center|Sekizuka|Japan

>Spike|hCoV-19/England/SHEF-CE99A/2020|2020-11-30|EPI\_ISL\_707004|Original|hCoV-19^^England|Human|Virology Department|COVID-19 Genomics UK (COG-UK) Consortium|de Silva|United Kingdom

>Spike|hCoV-19/England/ALDP-CEFC16/2020|2020-12-17|EPI\_ISL\_781893|Original|hCoV-19^^England|Human|Lighthouse Lab in Alderley Park|Wellcome Sanger Institute for the COVID-19 Genomics UK (COG-UK) Consortium|Davies|United Kingdom

>Spike|hCoV-19/USA/CA-QDX-1584/2020|2020-03-17|EPI\_ISL\_603895|Original|hCoV-19^^California|Human|Quest Diagnostics|Quest Diagnostics|Kagan|USA

>Spike|hCoV-19/England/20130093704/2020|2020-03-23|EPI\_ISL\_423685|Original|hCoV-19^^England|Human|Respiratory Virus Unit|Respiratory Virus Unit|Platt|United Kingdom

>Spike|hCoV-19/Shanghai/SH0037/2020|2020-01-30|EPI\_ISL\_416346|Original|hCoV-19^^Shanghai|Human|Shanghai Public Health Clinical Center|National Research Center for Translational Medicine (Shanghai)|Zhang|China

>Spike|hCoV-19/England/CAMB-78B4E/2020|2020-04-03|EPI\_ISL\_441056|Original|hCoV-19^^England|Human|Department of Pathology|Wellcome Sanger Institute for the COVID-19 Genomics UK (COG-UK) consortium|Amato|United Kingdom

>Spike|hCoV-19/England/MILK-A45032/2020|2020-10-06|EPI\_ISL\_598596|Original|hCoV-19^^England|Human|Lighthouse Lab in Milton Keynes|Wellcome Sanger Institute for the COVID-19 Genomics UK (COG-UK) consortium|Davies|United Kingdom

>Spike|hCoV-19/Denmark/DCGC-10295/2020|2020-11-09|EPI\_ISL\_669881|Original|hCoV-19^^Hovedstaden|Human|Department of Virus and Microbiological Special Diagnostics|Albertsen Lab|Michaelsen|Denmark



>Spike|hCoV-19/England/QEUA-965880/2020|2020-08-12|EPI\_ISL\_531117|Original|hCoV-19^^England|Human|Lighthouse Lab in Glasgow|Wellcome Sanger Institute for the COVID-19 Genomics UK (COG-UK) consortium|Davies|United Kingdom

>Spike|hCoV-19/Australia/VIC1446/2020|2020-04-19|EPI\_ISL\_562216|Original|hCoV-19^^Victoria|Human|Victorian Infectious Diseases Reference Laboratory (VIDRL)|VIDRL and MDU-PHL|Schultz|Australia

>Spike|hCoV-19/USA/WA-S1035/2020|2020-05-01|EPI\_ISL\_463525|Original|hCoV-19^^Washington|Human|Washington State Department of Health|Seattle Flu Study|Bedford|USA

>Spike|hCoV-19/USA/TX-HMH-5763/2020|2020-06-29|EPI\_ISL\_546997|Original|hCoV-19^^Texas|Human|Houston Methodist Hospital|Houston Methodist Hospital|Long|USA

>Spike|hCoV-19/USA/LA-BIE-097/2020|2020-04-06|EPI\_ISL\_426628|Original|hCoV-19^^Louisiana|Human|Ochsner Health|BioInfoExperts|Cross|USA

>Spike|hCoV-19/England/ALDP-9CBEA4/2020|2020-09-15|EPI\_ISL\_575443|Original|hCoV-19^^England|Human|Lighthouse Lab in Alderley Park|Wellcome Sanger Institute for the COVID-19 Genomics UK (COG-UK) consortium|Davies|United Kingdom

>Spike|hCoV-19/England/ALDP-A923A6/2020|2020-10-19|EPI\_ISL\_611282|Original|hCoV-19^^England|Human|Lighthouse Lab in Alderley Park|Wellcome Sanger Institute for the COVID-19 Genomics UK (COG-UK) consortium|Davies|United Kingdom

>Spike|hCoV-19/England/CAMB-1AE9CC/2020|2020-04-30|EPI\_ISL\_524613|Original|hCoV-19^^England|Human|Department of Pathology|Wellcome Sanger Institute for the COVID-19 Genomics UK (COG-UK) consortium|Davies|United Kingdom

>Spike|hCoV-19/USA/WA-UW-10130/2020|2020-05-29|EPI\_ISL\_461474|Original|hCoV-19^^Washington|Human|UW Virology Lab|UW Virology Lab|Roychoudhury|USA

>Spike|hCoV-19/Scotland/QEUA-9E51BA/2020|2020-09-24|EPI\_ISL\_600978|Original|hCoV-19^^Scotland|Human|Lighthouse Lab in Glasgow|Wellcome Sanger Institute for the COVID-19 Genomics UK (COG-UK) consortium|Davies|United Kingdom

>Spike|hCoV-19/Denmark/DCGC-6354/2020|2020-09-21|EPI\_ISL\_622304|Original|hCoV-19^^Hovedstaden|Human|Department of Virus and Microbiological Special Diagnostics|Albertsen lab|Michaelsen|Denmark

>Spike|hCoV-19/Spain/VC-FISABIO-166/2020|2020-03-19|EPI\_ISL\_436261|Original|hCoV-19^^Comunitat Valenciana|Human|Servicio de Microbiología. Hospital Universitario Doctor Peset|Sequencing and Bioinformatics Service and Molecular Epidemiology Research Group. FISABIO-Public Health|Gonzalez-Candelas|Spain

>Spike|hCoV-19/United Arab Emirates/0011/2020|2020-05-07|EPI\_ISL\_698221|Original|hCoV-19^^Abu Dhabi|Human|Group 42 (G42) Healthcare|G42 Healthcare|Ogrodzki|United Arab Emirates

>Spike|hCoV-19/Ireland/D-NVRL-MPU95698/2020|2020-04-13|EPI\_ISL\_767786|Original|hCoV-19^^Dublin|Human|National Virus Reference Laboratory|Irish Coronavirus Sequencing Consortium - Teagasc Moorepark|Walsh|Ireland

>Spike|hCoV-19/England/QEUA-B43437/2020|2020-11-08|EPI\_ISL\_657062|Original|hCoV-19^^England|Human|Lighthouse Lab in Glasgow|Wellcome Sanger Institute for the COVID-19 Genomics UK (COG-UK) Consortium|Davies|United Kingdom

>Spike|hCoV-19/USA/CA-CSMC60/2020|2020-04-01|EPI\_ISL\_475674|Original|hCoV-19^^California|Human|Cedars-Sinai Medical Center|Cedars-Sinai Medical Center|Zhang|USA

>Spike|hCoV-19/England/ALDP-A688C8/2020|2020-10-12|EPI\_ISL\_608350|Original|hCoV-19^^England|Human|Lighthouse Lab in Alderley Park|Wellcome Sanger Institute for the COVID-19 Genomics UK (COG-UK) consortium|Davies|United Kingdom

>Spike|hCoV-19/England/ALDP-94DD52/2020|2020-06-20|EPI\_ISL\_555564|Original|hCoV-19^^England|Human|Lighthouse Lab in Alderley Park|Wellcome Sanger Institute for the COVID-19 Genomics UK (COG-UK) consortium|Davies|United Kingdom

>Spike|hCoV-19/Switzerland/BS-42338923/2020|2020-07-03|EPI\_ISL\_581894|Original|hCoV-19^^Basel-Stadt|Human|University Hospital Basel|University Hospital Basel|Roloff Handschin|Switzerland

>Spike|hCoV-19/USA/WA-UW-12652/2020|2020-06-29|EPI\_ISL\_570883|Original|hCoV-19^^Washington|Human|UW Virology Lab|UW Virology Lab|Roychoudhury|USA

>Spike|hCoV-19/Spain/PV-IBV-000865/2020|2020-03-25|EPI\_ISL\_452690|Original|hCoV-19^^Basque Country|Human|Servicio de Microbiología. Hospital Universitario

Donostia. OSI Donostialdea. \u00clrea de Enfermedades Infecciosas|SeqCOVID-SPAIN consortium/IBV (CSIC) |Comas|Spain

>Spike|hCoV-19/England/MILK-ABB3B6/2020|2020-10-21|EPI\_ISL\_623387|Original|hCoV-19^^England|Human|Lighthouse Lab in Milton Keynes|Wellcome Sanger Institute for the COVID-19 Genomics UK (COG-UK) consortium|Davies|United Kingdom

>Spike|hCoV-19/England/ALDP-A51622/2020|2020-10-07|EPI\_ISL\_598011|Original|hCoV-19^^England|Human|Lighthouse Lab in Alderley Park|Wellcome Sanger Institute for the COVID-19 Genomics UK (COG-UK) consortium|Davies|United Kingdom

>Spike|hCoV-19/Wales/PHW35/2020|2020-03-11|EPI\_ISL\_416024|Original|hCoV-19^^Wales|Human|Wales Specialist Virology Centre|Public Health Wales Microbiology Cardiff|Moore|United Kingdom

>Spike|hCoV-19/Australia/VIC16392/2020|2020-08-04|EPI\_ISL\_640907|Original|hCoV-19^^Victoria|Human|Microbiological Diagnostic Unit - Public Health Laboratory (MDU-PHL) |MDU-PHL|Schultz|Australia

>Spike|hCoV-19/England/MILK-991B91/2020|2020-08-26|EPI\_ISL\_577028|Original|hCoV-19^^England|Human|Northumbria University / South Tees Hospitals NHS Foundation Trust / North Cumbria Integrated Care NHS Foundation Trust / North Tees and Hartlepool NHS Foundation Trust / Newcastle Hospitals NHS Foundation Trust|COVID-19 Genomics UK (COG-UK) Consortium|Bashton|United Kingdom

>Spike|hCoV-19/Australia/NSW2774/2020|2020-09-10|EPI\_ISL\_678344|Original|hCoV-19^^New South Wales|Human|Area of Virology|Virology Research Laboratory; Area of Virology|Foster|Australia

>Spike|hCoV-19/England/204221378/2020|2020-00-00|EPI\_ISL\_593786|Original|hCoV-19^^England|Human|Respiratory Virus Unit|Respiratory Virus Unit|Platt|United Kingdom

>Spike|hCoV-19/Scotland/QEUA-AD541D/2020|2020-10-26|EPI\_ISL\_649696|Original|hCoV-19^^Scotland|Human|Lighthouse Lab in Glasgow|Wellcome Sanger Institute for the COVID-19 Genomics UK (COG-UK) Consortium|Davies|United Kingdom

>Spike|hCoV-19/England/QEUA-A208F9/2020|2020-10-01|EPI\_ISL\_587666|Original|hCoV-19^^England|Human|Lighthouse Lab in Glasgow|Wellcome Sanger Institute for the COVID-19 Genomics UK (COG-UK) consortium|Davies|United Kingdom

>Spike|hCoV-19/USA/CA-CZB-14946/2020|2020-11-29|EPI\_ISL\_739132|Original|hCoV-19^^California|Human|Orange County Public Health Lab|Chan-Zuckerberg Biohub|Kamm|USA

>Spike|hCoV-19/USA/TX-DSHS-0297/2020|2020-06-13|EPI\_ISL\_534265|Original|hCoV-19^^Texas|Human|Texas Department of State Health Services|Texas Department of State Health Services|Rahman|USA

>Spike|hCoV-19/Denmark/DCGC-8381/2020|2020-10-26|EPI\_ISL\_617340|Original|hCoV-19^^Hovedstaden|Human|Department of Virus and Microbiological Special Diagnostics|Albertsen lab|Michaelsen|Denmark

>Spike|hCoV-19/Denmark/DCGC-13386/2020|2020-11-30|EPI\_ISL\_712167|Original|hCoV-19^^Hovedstaden|Human|Department of Virus and Microbiological Special Diagnostics|Albertsen Lab|Michaelsen|Denmark

>Spike|hCoV-19/India/MH-NIV-26115/2020|2020-05-12|EPI\_ISL\_479525|Original|hCoV-19^^Maharashtra|Human|NIV Influenza|NIV Influenza|Potdar|India

>Spike|hCoV-19/England/CAMB-82929/2020|2020-04-21|EPI\_ISL\_438639|Original|hCoV-19^^England|Human|Department of Pathology|COVID-19 Genomics UK (COG-UK) Consortium|Meredith|United Kingdom

>Spike|hCoV-19/England/QEUA-9DA929/2020|2020-09-22|EPI\_ISL\_580895|Original|hCoV-19^^England|Human|Lighthouse Lab in Glasgow|Wellcome Sanger Institute for the COVID-19 Genomics UK (COG-UK) consortium|Davies|United Kingdom

>Spike|hCoV-19/Chile/RM-130081/2020|2020-07-21|EPI\_ISL\_746622|Original|hCoV-19^^Region Metropolitana de Santiago|Human|Genetica Molecular and Subdepartamento de Virologia ISP Chile|Instituto de Salud Publica de Chile|Tognarelli|Chile

>Spike|hCoV-19/Saudi Arabia/KAUST-MADINAH1381/2020|2020-06-04|EPI\_ISL\_678019|Original|hCoV-19^^Madinah|Human|Pathogen Genomics Lab King Abdullah University of Science and Technology(KAUST)|Pathogen Genomics Lab King Abdullah University of Science and Technology(KAUST)|Mohamed Ghazzali|Saudi Arabia

>Spike|hCoV-19/Australia/VIC2491/2020|2020-06-30|EPI\_ISL\_522189|Original|hCoV-19^^Victoria|Human|Microbiological Diagnostic Unit - Public Health Laboratory (MDU-PHL) |MDU-PHL|Schultz|Australia

>Spike|hCoV-19/Brazil/SP-L7-CD81/2020|2020-03-24|EPI\_ISL\_476446|Original|hCoV-19^^S\u00e3o Paulo|Human|Hospital da Cl\u00e9nicas da Faculdade de Medicina da Universidade de S\u00e3o Paulo|Instituto de Medicina Tropical da Univesidade de S\u00e3o Paulo|Faria|Brazil

>Spike|hCoV-19/England/ALDP-A50C7C/2020|2020-10-07|EPI\_ISL\_597825|Original|hCoV-19^^England|Human|Lighthouse Lab in Alderley Park|Wellcome Sanger Institute for the COVID-19 Genomics UK (COG-UK) consortium|Davies|United Kingdom

>Spike|hCoV-19/England/LOND-12E8616/2020|2020-12-15|EPI\_ISL\_741335|Original|hCoV-19^^England|Human|University College London|COVID-19 Genomics UK (COG-UK) Consortium|Roy|United Kingdom

>Spike|hCoV-19/England/LEED-2A868E/2020|2020-03-29|EPI\_ISL\_539059|Original|hCoV-19^^England|Human|Leeds Teaching Hospitals NHS Trust and Public Health England|Wellcome Sanger Institute for the COVID-19 Genomics UK (COG-UK) consortium|Davies|United Kingdom

>Spike|hCoV-19/USA/MI-MDHHS-SC20361/2020|2020-03-14|EPI\_ISL\_450572|Original|hCoV-19^^Michigan|Human|Michigan Department of Health and Human Services|Michigan Department of Health and Human Services|Blankenship|USA

>Spike|hCoV-19/Canada/QC-LSPQ-L00232148/2020|2020-03-22|EPI\_ISL\_535980|Original|hCoV-19^^Quebec|Human|Centre hospitalier Anna-Laberge|Laboratoire de sant\u00e9 publique du Qu\u00e9bec|Moreira|Canada

>Spike|hCoV-19/South Korea/KDCA0429/2020|2020-11-09|EPI\_ISL\_760213|Original|hCoV-19^^South Korea|Human|Division of Emerging Infectious Diseases|Division of Emerging Infectious Diseases|Park|South Korea

>Spike|hCoV-19/England/BRIS-12EC70/2020|2020-04-21|EPI\_ISL\_488284|Original|hCoV-19^^England|Human|PHE South West Regional Laboratory|Wellcome Sanger Institute for the COVID-19 Genomics UK (COG-UK) consortium|Davies|United Kingdom

>Spike|hCoV-19/England/NORW-E88AC/2020|2020-04-11|EPI\_ISL\_448244|Original|hCoV-19^^England|Human|Quadram Institute Bioscience|COVID-19 Genomics UK (COG-UK) Consortium|Alikhan|United Kingdom

>Spike|hCoV-19/Australia/VIC5373/2020|2020-07-17|EPI\_ISL\_520136|Original|hCoV-19^^Victoria|Human|Microbiological Diagnostic Unit - Public Health Laboratory (MDU-PHL)|MDU-PHL|Schultz|Australia

>Spike|hCoV-19/England/ALDP-8F6928/2020|2020-06-24|EPI\_ISL\_556605|Original|hCoV-19^^England|Human|Lighthouse Lab in Alderley Park|Wellcome Sanger Institute for the COVID-19 Genomics UK (COG-UK) consortium|Davies|United Kingdom

>Spike|hCoV-19/USA/UT-08339/2020|2020-05-14|EPI\_ISL\_524127|Original|hCoV-19^^Utah|Human|Utah Public Health Laboratory|Utah Public Health Laboratory|Young|USA

>Spike|hCoV-19/Wales/PHWC-48797B/2020|2020-10-29|EPI\_ISL\_639256|Original|hCoV-19^^Wales|Human|Wales Specialist Virology Centre Sequencing lab|COVID-19 Genomics UK (COG-UK) Consortium|Moore|United Kingdom

>Spike|hCoV-19/USA/TX-HMH0157/2020|2020-03-23|EPI\_ISL\_434856|Original|hCoV-19^^Texas|Human|Houston Methodist Hospital|Houston Methodist Hospital|Long|USA

>Spike|hCoV-19/France/PAC-IHU-1575/2020|2020-09-08|EPI\_ISL\_569208|Original|hCoV-19^^Provence-Alpes-C\u00f4te-d\u00e0zur|Human|MEPHI|MEPHI|Levasseur|France

>Spike|hCoV-19/England/MILK-ACE031/2020|2020-10-21|EPI\_ISL\_630128|Original|hCoV-19^^England|Human|Lighthouse Lab in Milton Keynes|Wellcome Sanger Institute for the COVID-19 Genomics UK (COG-UK) consortium|Davies|United Kingdom

>Spike|hCoV-19/Denmark/DCGC-2956/2020|2020-08-24|EPI\_ISL\_616717|Original|hCoV-19^^Hovedstaden|Human|Department of Virus and Microbiological Special Diagnostics|Albertsen lab|Michaelsen|Denmark

>Spike|hCoV-19/Australia/WA115/2020|2020-04-07|EPI\_ISL\_596678|Original|hCoV-19^^Western Australia|Human|PathWest Laboratory Medicine WA|PathWest Laboratory Medicine WA Microbial Surveillance Unit|Sikazwe|Australia

>Spike|hCoV-19/env/Belgium/VBR-93036-N/2020|2020-04-05|EPI\_ISL\_539304|Original|hCoV-19^^Flemish Brabant|Environment|KWR Watercycle Research Institute|Erasmus Medical Center|Graaf|Belgium

>Spike|hCoV-19/USA/TX-HMH-4141/2020|2020-06-18|EPI\_ISL\_543404|Original|hCoV-19^^Texas|Human|Houston Methodist Hospital|Houston Methodist Hospital|Long|USA

>Spike|hCoV-19/England/ALDP-C3B5A7/2020|2020-12-09|EPI\_ISL\_730915|Original|hCoV-19^^England|Human|Lighthouse Lab in Alderley Park|Wellcome Sanger Institute for the COVID-19 Genomics UK (COG-UK) Consortium|Davies|United Kingdom

>Spike|hCoV-19/England/CAMC-A6611A/2020|2020-10-11|EPI\_ISL\_637631|Original|hCoV-19^^England|Human|Department of Pathology|COVID-19 Genomics UK (COG-UK) Consortium|Goodfellow|United Kingdom

>Spike|hCoV-19/England/CAMC-A59262/2020|2020-10-09|EPI\_ISL\_609160|Original|hCoV-19^^England|Human|Lighthouse Lab in Cambridge|Wellcome Sanger Institute for the COVID-19 Genomics UK (COG-UK) consortium|Davies|United Kingdom

>Spike|hCoV-19/USA/WA-S1791/2020|2020-06-02|EPI\_ISL\_496217|Original|hCoV-19^^Washington|Human|Washington State Department of Health|Seattle Flu Study|Lee|USA

>Spike|hCoV-19/Belgium/regA-10061029/2020|2020-10-06|EPI\_ISL\_735052|Original|hCoV-19^^Sint-Stevens-Woluwe|Human|UZ Leuven|KU Leuven|Maes|Belgium

>Spike|hCoV-19/USA/CA-CHLA-PLM57302171/2020|2020-12-16|EPI\_ISL\_753690|Original|hCoV-19^^California|Human|Clinical virology Laboratory|Center for Personalized Medicine|Dien Bard|USA

>Spike|hCoV-19/USA/CA-CZB-10291/2020|2020-09-08|EPI\_ISL\_648499|Original|hCoV-19^^California|Human|Orange County Public Health Lab|Chan-Zuckerberg Biohub|Bhatt|USA

>Spike|hCoV-19/England/QEUA-AF413F/2020|2020-10-30|EPI\_ISL\_663174|Original|hCoV-19^^England|Human|Lighthouse Lab in Glasgow|Wellcome Sanger Institute for the COVID-19 Genomics UK (COG-UK) Consortium|Davies|United Kingdom

>Spike|hCoV-19/Denmark/DCGC-14149/2020|2020-11-30|EPI\_ISL\_711239|Original|hCoV-19^^Midtjylland|Human|Department of Virus and Microbiological Special Diagnostics|Albertsen Lab|Michaelsen|Denmark

>Spike|hCoV-19/Australia/NSW707/2020|2020-07-25|EPI\_ISL\_513350|Original|hCoV-19^^New South Wales|Human|Pathology West - NSW Health Pathology|NSW Health Pathology - Institute of Clinical Pathology and Medical Research; Westmead Hospital; University of Sydney|Gall|Australia

>Spike|hCoV-19/Australia/WA257/2020|2020-08-27|EPI\_ISL\_594171|Original|hCoV-19^^Western Australia|Human|PathWest Laboratory Medicine WA|PathWest Laboratory Medicine WA Microbial Surveillance Unit|Sikazwe|Australia

>Spike|hCoV-19/England/CAMB-7A265/2020|2020-04-03|EPI\_ISL\_441267|Original|hCoV-19^^England|Human|Department of Pathology|Wellcome Sanger Institute for the COVID-19 Genomics UK (COG-UK) consortium|Amato|United Kingdom

>Spike|hCoV-19/Japan/PG-8582/2020|2020-08-00|EPI\_ISL\_686178|Original|hCoV-19^^Japan|Human|Pathogen Genomics Center|Pathogen Genomics Center|Sekizuka|Japan

>Spike|hCoV-19/England/MILK-B01DB2/2020|2020-10-24|EPI\_ISL\_642843|Original|hCoV-19^^England|Human|Lighthouse Lab in Milton Keynes|Wellcome Sanger Institute for the COVID-19 Genomics UK (COG-UK) Consortium|Davies|United Kingdom

>Spike|hCoV-19/South Africa/KRISP-K003470/2020|2020-09-10|EPI\_ISL\_602803|Original|hCoV-19^^KwaZulu-Natal|Human|NHLS-IALCH|KRISP|de Oliveira|South Africa

>Spike|hCoV-19/England/CAMC-BC0E16/2020|2020-11-22|EPI\_ISL\_704894|Original|hCoV-19^^England|Human|Lighthouse Lab in Cambridge|Wellcome Sanger Institute for the COVID-19 Genomics UK (COG-UK) Consortium|Davies|United Kingdom

>Spike|hCoV-19/Scotland/CVR402/2020|2020-03-22|EPI\_ISL\_439075|Original|hCoV-19^^Scotland|Human|West of Scotland Specialist Virology Centre|COVID-19 Genomics UK (COG-UK) Consortium|Robertson|United Kingdom

>Spike|hCoV-19/USA/IA-CDC-2-3714371/2020|2020-11-29|EPI\_ISL\_751687|Original|hCoV-19^^Iowa|Human|IA State Hygienic Laboratory|Genomics and Discovery|Queen|USA

>Spike|hCoV-19/Brazil/SP-L8-CD106/2020|2020-03-23|EPI\_ISL\_476453|Original|hCoV-19^^S\u00e3o Paulo|Human|Hospital da Cl\u00ednicas da Faculdade de Medicina da Universidade de S\u00e3o Paulo|Instituto de Medicina Tropical da Univesidade de S\u00e3o Paulo|Faria|Brazil

>Spike|hCoV-19/England/ALDP-B83046/2020|2020-11-14|EPI\_ISL\_675666|Original|hCoV-19^^England|Human|Lighthouse Lab in Alderley Park|Wellcome Sanger Institute for the COVID-19 Genomics UK (COG-UK) Consortium|Davies|United Kingdom

>Spike|hCoV-19/Switzerland/SH-ETHZ-180032/2020|2020-07-01|EPI\_ISL\_489974|Original|hCoV-19^^Schaffhausen|Human|Viollier AG|Department of Biosystems Science and Engineering|Nadeau|Switzerland

>Spike|hCoV-19/Denmark/DCGC-17550/2020|2020-12-14|EPI\_ISL\_751062|Original|hCoV-19^^Sjaelland|Human|Department of Virus and Microbiological Special Diagnostics|Albertsen Lab|Michaelsen|Denmark

>Spike|hCoV-19/England/ALDP-A2E406/2020|2020-10-06|EPI\_ISL\_586672|Original|hCoV-19^^England|Human|Lighthouse Lab in Alderley Park|Wellcome Sanger Institute for the COVID-19 Genomics UK (COG-UK) consortium|Davies|United Kingdom

>Spike|hCoV-19/Scotland/CVR5235/2020|2020-10-19|EPI\_ISL\_626988|Original|hCoV-19^^Scotland|Human|West of Scotland Specialist Virology Centre|COVID-19 Genomics UK (COG-UK) Consortium|Robertson|United Kingdom

>Spike|hCoV-19/Belgium/ULG-11067/2020|2020-12-14|EPI\_ISL\_737318|Original|hCoV-19^^Li\u00e8ge|Human|Department of Clinical Microbiology|GIGA Medical Genomics|Durkin|Belgium

>Spike|hCoV-19/Australia/NSW13/2020|2020-03-04|EPI\_ISL\_413599|Original|hCoV-19^^New South Wales|Human|Centre for Infectious Diseases and Microbiology - Public Health|NSW Health Pathology - Institute of Clinical Pathology and Medical Research; Westmead Hospital; University of Sydney|Rockett|Australia

>Spike|hCoV-19/USA/HI-H200607/2020|2020-11-23|EPI\_ISL\_753133|Original|hCoV-19^^Hawaii|Human|State Laboratories Division|State Laboratories Division|Sultana|USA

>Spike|hCoV-19/South Africa/LR00125/2020|2020-07-20|EPI\_ISL\_514357|Original|hCoV-19^^Gauteng|Human|National Institute for Communicable Diseases of the National Health Laboratory Service|National Institute for Communicable Diseases of the National Health Laboratory Service|Allam|South Africa

>Spike|hCoV-19/Scotland/QEUA-95E4FF/2020|2020-08-10|EPI\_ISL\_534428|Original|hCoV-19^^Scotland|Human|NHS GGC West of Scotland Specialist Virology Centre / MRC-University of Glasgow Centre for Virus Research|Wellcome Sanger Institute for the COVID-19 Genomics UK (COG-UK) consortium|Davies|United Kingdom

>Spike|hCoV-19/England/QEUA-9FAEAC/2020|2020-09-28|EPI\_ISL\_588215|Original|hCoV-19^^England|Human|Lighthouse Lab in Glasgow|Wellcome Sanger Institute for the COVID-19 Genomics UK (COG-UK) consortium|Davies|United Kingdom

>Spike|hCoV-19/Northern Ireland/NIRE-108FBF/2020|2020-10-13|EPI\_ISL\_652305|Original|hCoV-19^^Northern Ireland|Human|Regional Virus Laboratory|COVID-19 Genomics UK (COG-UK) Consortium|Fairley|United Kingdom

>Spike|hCoV-19/England/QEUA-A49B79/2020|2020-10-03|EPI\_ISL\_595961|Original|hCoV-19^^England|Human|Quadram Institute Bioscience|COVID-19 Genomics UK (COG-UK) Consortium|Alikhan|United Kingdom

>Spike|hCoV-19/USA/CA-QDX-1557/2020|2020-03-18|EPI\_ISL\_603802|Original|hCoV-19^^California|Human|Quest Diagnostics|Quest Diagnostics|Kagan|USA

>Spike|hCoV-19/Luxembourg/LNS6959492/2020|2020-07-16|EPI\_ISL\_744486|Original|hCoV-19^^Luxembourg|Human|Laboratoire national de sant\u00e9|Laboratoire national de sant\u00e9|Wienecke-Baldacchino|Luxembourg

>Spike|hCoV-19/Scotland/EDB3215/2020|2020-04-07|EPI\_ISL\_487719|Original|hCoV-19^^Scotland|Human|Virology Department|Wellcome Sanger Institute for the COVID-19 Genomics UK (COG-UK) consortium|Davies|United Kingdom

>Spike|hCoV-19/Switzerland/BS-ETHZ-120035/2020|2020-04-19|EPI\_ISL\_468225|Original|hCoV-19^^Basel-Stadt|Human|Viollier AG|Department of Biosystems Science and Engineering|Nadeau|Switzerland

>Spike|hCoV-19/England/MILK-6285D0/2020|2020-07-05|EPI\_ISL\_557742|Original|hCoV-19^^England|Human|Lighthouse Lab in Milton Keynes|Wellcome Sanger Institute for the COVID-19 Genomics UK (COG-UK) consortium|Davies|United Kingdom

>Spike|hCoV-19/Netherlands/OV-EMC-118/2020|2020-11-07|EPI\_ISL\_763158|Original|hCoV-19^^Overijssel|Human|Dutch COVID-19 response team|Erasmus Medical Center|Oude Munnink|Netherlands

>Spike|hCoV-19/USA/FL-UF-17/2020|2020-04-22|EPI\_ISL\_468720|Original|hCoV-19^^Florida|Human|University of Florida|University of Florida|Lednicky|USA

>Spike|hCoV-19/Bahrain/341036654/2020|2020-11-16|EPI\_ISL\_684029|Original|hCoV-19^^Bahrain|Human|Communicable Disease Laboratory|Communicable Disease Laboratory|Altaif|Bahrain

>Spike|hCoV-19/Thailand/Bangkok-CONI-0308/2020|2020-03-16|EPI\_ISL\_693379|Original|hCoV-19^^Bangkok|Human|Ramathibodi Hospital|COVID-19 Network Investigations (CONI) Alliance|Batty|Thailand

>Spike|hCoV-19/Australia/NSW1195/2020|2020-10-30|EPI\_ISL\_667795|Original|hCoV-19^^New South Wales|Human|South Eastern Area Laboratory Services (SEALS)|NSW Health Pathology - Institute of Clinical Pathology and Medical Research; Westmead Hospital; University of Sydney|Gall|Australia

>Spike|hCoV-19/Wales/PHWC-355E5/2020|2020-04-24|EPI\_ISL\_474451|Original|hCoV-19^^Wales|Human|Originating lab|COVID-19 Genomics UK (COG-UK) Consortium|Moore|United Kingdom

>Spike|hCoV-19/Luxembourg/LNS7808479/2020|2020-11-28|EPI\_ISL\_744635|Original|hCoV-19^^Luxembourg|Human|Laboratoire national de sant\u00e9|Laboratoire national de sant\u00e9|Wienecke-Baldacchino|Luxembourg

>Spike|hCoV-19/Japan/NGY-NNH-031/2020|2020-07-23|EPI\_ISL\_636997|Original|hCoV-19^^Aichi|Human|Department of Infectious Diseases and Immunology|Clinical Research Center|Iwatani|Japan

>Spike|hCoV-19/Malaysia/UNIMAS-0136/2020|2020-03-31|EPI\_ISL\_718152|Original|hCoV-19^^Sarawak|Human|Ministry of Health Hospitals|Institute of Health and Community Medicine|Jonathan|Malaysia

>Spike|hCoV-19/Indonesia/JB-TFRIC19-R49544/2020|2020-07-25|EPI\_ISL\_528759|Original|hCoV-19^^West Java|Human|Santo Borromeus Hospital|School of Life Sciences and Technology & School of Pharmacy-Institut Teknologi Bandung; Molecular Genetics Laboratory-Faculty of Medicine-Universitas Padjadjaran; Laboratorium Kesehatan Provinsi Jawa Barat|Tan|Indonesia

>Spike|hCoV-19/New Zealand/20CV0219/2020|2020-09-01|EPI\_ISL\_548066|Original|hCoV-19^^Auckland|Human|North Shore Hospital|Institute of Environmental Science and Research (ESR)|Wang|New Zealand

>Spike|hCoV-19/England/MILK-A6B300/2020|2020-10-09|EPI\_ISL\_608823|Original|hCoV-19^^England|Human|Lighthouse Lab in Milton Keynes|Wellcome Sanger Institute for the COVID-19 Genomics UK (COG-UK) consortium|Davies|United Kingdom

>Spike|hCoV-19/USA/MI-MDHHS-SC20792/2020|2020-04-29|EPI\_ISL\_471813|Original|hCoV-19^^Michigan|Human|Michigan Department of Health and Human Services|Michigan Department of Health and Human Services|Blankenship|USA

>Spike|hCoV-19/USA/TX-HMH-MCoV-18167/2020|2020-11-14|EPI\_ISL\_784515|Original|hCoV-19^^Texas|Human|Houston Methodist Hospital|Houston Methodist Hospital|Long|USA

>Spike|hCoV-19/USA/FL-BPHL-0386/2020|2020-04-29|EPI\_ISL\_489795|Original|hCoV-19^^Florida|Human|Florida Bureau of Public Health Laboratories|Florida Bureau of Public Health Laboratories|Blanton|USA

>Spike|hCoV-19/USA/WI-UW-240/2020|2020-03-27|EPI\_ISL\_428336|Original|hCoV-19^^Wisconsin|Human|University of Wisconsin-Madison AIDS Vaccine Research Laboratories|University of Wisconsin-Madison AIDS Vaccine Research Laboratories|Moreno|USA

>Spike|hCoV-19/South Africa/KRISP-K002324/2020|2020-07-22|EPI\_ISL\_515700|Original|hCoV-19^^KwaZulu-Natal|Human|NHLS-IALCH|KRISP|de Oliveira|South Africa

>Spike|hCoV-19/South Africa/NHLS-UCT-GS-1047/2020|2020-10-28|EPI\_ISL\_700539|Original|hCoV-19^^Western Cape|Human|Conville CDC wc CVC|NHLS/UCT|Iranzadeh|South Africa

>Spike|hCoV-19/Japan/PG-5419/2020|2020-08-00|EPI\_ISL\_690522|Original|hCoV-19^^Japan|Human|Fukuoka Institute of Health and Environmental Sciences|Pathogen Genomics Center|Sekizuka|Japan

>Spike|hCoV-19/Scotland/QEUH-AADD40/2020|2020-10-22|EPI\_ISL\_623876|Original|hCoV-19^^Scotland|Human|Lighthouse Lab in Glasgow|Wellcome Sanger Institute for the COVID-19 Genomics UK (COG-UK) consortium|Davies|United Kingdom

>Spike|hCoV-19/England/CAMC-C75662/2020|2020-12-15|EPI\_ISL\_769178|Original|hCoV-19^^England|Human|Lighthouse Lab in Cambridge|Wellcome Sanger Institute for the COVID-19 Genomics UK (COG-UK) Consortium|Davies|United Kingdom

>Spike|hCoV-19/England/MILK-9A8C67/2020|2020-08-31|EPI\_ISL\_550108|Original|hCoV-19^^England|Human|Lighthouse Lab in Milton Keynes|Wellcome Sanger Institute for the COVID-19 Genomics UK (COG-UK) consortium|Davies|United Kingdom

>Spike|hCoV-19/USA/WI-WSLH-200728/2020|2020-07-02|EPI\_ISL\_631484|Original|hCoV-19^^Wisconsin|Human|Wisconsin State Laboratory of Hygiene Communicable Disease

Division|Wisconsin State Laboratory of Hygiene Communicable Disease  
Division|Florek|USA  
>Spike|hCoV-19/Spain/MD-IBV-006437/2020|2020-05-28|EPI\_ISL\_510148|Original|hCoV-19^^Madrid|Human|Hospital General Universitario Gregorio Mara\u00f1\u00f3n|SeqCOVID-SPAIN consortium/IBV (CSIC)|Comas|Spain  
>Spike|hCoV-19/Mexico/BCN-ALSR-2484/2020|2020-05-26|EPI\_ISL\_635495|Original|hCoV-19^^Baja California|Human|Centro de Diagn\u221a\u2265tico COVID-19 UABC Tijuana|Andersen lab at Scripps Research|Gangavarapu|Mexico  
>Spike|hCoV-19/Scotland/QEUIH-96D4B1/2020|2020-08-19|EPI\_ISL\_534626|Original|hCoV-19^^Scotland|Human|NHSGGC West of Scotland Specialist Virology Centre / MRC-University of Glasgow Centre for Virus Research|Wellcome Sanger Institute for the COVID-19 Genomics UK (COG-UK) consortium|Davies|United Kingdom  
>Spike|hCoV-19/Hungary/SRC-00419/2020|2020-03-26|EPI\_ISL\_435410|Original|hCoV-19^^Baranya|Human|Virological Research Group|Bioinformatics Research Group|Herczeg|Hungary  
>Spike|hCoV-19/Wales/PHWC-48AEE2/2020|2020-11-02|EPI\_ISL\_666171|Original|hCoV-19^^Wales|Human|Wales Specialist Virology Centre Sequencing lab|COVID-19 Genomics UK (COG-UK) Consortium|Moore|United Kingdom  
>Spike|hCoV-19/England/ALDP-A2DDDF/2020|2020-10-03|EPI\_ISL\_586721|Original|hCoV-19^^England|Human|Lighthouse Lab in Alderley Park|Wellcome Sanger Institute for the COVID-19 Genomics UK (COG-UK) consortium|Davies|United Kingdom  
>Spike|hCoV-19/England/CAMB-1BBBA8/2020|2020-11-18|EPI\_ISL\_679203|Original|hCoV-19^^England|Human|Department of Pathology|COVID-19 Genomics UK (COG-UK) Consortium|Goodfellow|United Kingdom  
>Spike|hCoV-19/Japan/PG-6036/2020|2020-07-00|EPI\_ISL\_689148|Original|hCoV-19^^Japan|Human|Pathogen Genomics Center|Pathogen Genomics Center|Sekizuka|Japan  
>Spike|hCoV-19/England/SHEF-CD97D/2020|2020-03-30|EPI\_ISL\_432551|Original|hCoV-19^^England|Human|Virology Department|COVID-19 Genomics UK (COG-UK) Consortium|de Silva|United Kingdom  
>Spike|hCoV-19/England/SHEF-10C60E5/2020|2020-12-16|EPI\_ISL\_763653|Original|hCoV-19^^England|Human|Virology Department|COVID-19 Genomics UK (COG-UK) Consortium|de Silva|United Kingdom  
>Spike|hCoV-19/England/ALDP-B5DF39/2020|2020-11-09|EPI\_ISL\_723613|Original|hCoV-19^^England|Human|Northumbria University / South Tees Hospitals NHS Foundation Trust / North Cumbria Integrated Care NHS Foundation Trust / North Tees and Hartlepool NHS Foundation Trust / Newcastle Hospitals NHS Foundation Trust|COVID-19 Genomics UK (COG-UK) Consortium|Bashton|United Kingdom  
>Spike|hCoV-19/Japan/PG-5972/2020|2020-07-00|EPI\_ISL\_689087|Original|hCoV-19^^Japan|Human|Tokyo Metropolitan Institute of Public Health|Pathogen Genomics Center|Sekizuka|Japan  
>Spike|hCoV-19/England/ALDP-CB610A/2020|2020-12-20|EPI\_ISL\_761670|Original|hCoV-19^^England|Human|Lighthouse Lab in Alderley Park|Wellcome Sanger Institute for the COVID-19 Genomics UK (COG-UK) Consortium|Davies|United Kingdom  
>Spike|hCoV-19/England/LIVE-A5401/2020|2020-03-20|EPI\_ISL\_499819|Original|hCoV-19^^England|Human|Liverpool Clinical Laboratories|COVID-19 Genomics UK (COG-UK) Consortium|Haldenby|United Kingdom  
>Spike|hCoV-19/USA/AZ-TG547233/2020|2020-07-02|EPI\_ISL\_695440|Original|hCoV-19^^Arizona|Human|AZ SPHL|TGen North|French|USA  
>Spike|hCoV-19/USA/MI-MDHHS-SC20182/2020|2020-03-24|EPI\_ISL\_436860|Original|hCoV-19^^Michigan|Human|Michigan Department of Health and Human Services|Michigan Department of Health and Human Services|Blankenship|USA  
>Spike|hCoV-19/USA/FL-BPHL-0113/2020|2020-04-07|EPI\_ISL\_450847|Original|hCoV-19^^Florida|Human|Florida Bureau of Public Health Laboratories|Florida Bureau of Public Health Laboratories|Blanton|USA  
>Spike|hCoV-19/England/ALDP-A875DB/2020|2020-10-17|EPI\_ISL\_606164|Original|hCoV-19^^England|Human|Lighthouse Lab in Alderley Park|Wellcome Sanger Institute for the COVID-19 Genomics UK (COG-UK) consortium|Davies|United Kingdom  
>Spike|hCoV-19/England/NORW-E6F9A/2020|2020-04-19|EPI\_ISL\_448994|Original|hCoV-19^^England|Human|Quadram Institute Bioscience|COVID-19 Genomics UK (COG-UK) Consortium|Alikhan|United Kingdom

>Spike|hCoV-19/Portugal/IGC4103/2020|2020-06-01|EPI\_ISL\_491231|Original|hCoV-19^^Portugal|Human|Instituto Gulbenkian de Ci\u00eancia|Instituto Gulbenkian de Ci\u00eancia|Leite|Portugal

>Spike|hCoV-19/England/CAMB-79EEA/2020|2020-04-02|EPI\_ISL\_440559|Original|hCoV-19^^England|Human|Department of Pathology|Wellcome Sanger Institute for the COVID-19 Genomics UK (COG-UK) consortium|Amato|United Kingdom

>Spike|hCoV-19/Belgium/ITM\_C406/2020|2020-04-09|EPI\_ISL\_434386|Original|hCoV-19^^Antwerp|Human|Hospital AZ Rivierenland|Institute of Tropical Medicine|Selhorst|Belgium

>Spike|hCoV-19/Spain/CN-IBV-002600/2020|2020-03-16|EPI\_ISL\_467087|Original|hCoV-19^^Canary Islands|Human|Hospital Universitario de Gran Canaria Dr. Negr\u00e9|SeqCOVID-SPAIN consortium|IBV(CSIC)|Comas|Spain

>Spike|hCoV-19/Australia/NSW2938/2020|2020-10-03|EPI\_ISL\_678370|Original|hCoV-19^^New South Wales|Human|Area of Virology|Virology Research Laboratory; Area of Virology|Foster|Australia

>Spike|hCoV-19/England/ALDP-C8B54E/2020|2020-12-17|EPI\_ISL\_756407|Original|hCoV-19^^England|Human|Lighthouse Lab in Alderley Park|Wellcome Sanger Institute for the COVID-19 Genomics UK (COG-UK) Consortium|Davies|United Kingdom

>Spike|hCoV-19/USA/WA-S2246/2020|2020-06-09|EPI\_ISL\_497674|Original|hCoV-19^^Washington|Human|Washington State Department of Health|Seattle Flu Study|Lee|USA

>Spike|hCoV-19/Denmark/DCGC-21332/2020|2020-12-21|EPI\_ISL\_759684|Original|hCoV-19^^Syddanmark|Human|Department of Virus and Microbiological Special Diagnostics|Albertsen Lab|Michaelsen|Denmark

>Spike|hCoV-19/Australia/QLD957/2020|2020-07-27|EPI\_ISL\_530240|Original|hCoV-19^^Queensland|Human|Queensland Health Forensic and Scientific Services|Public Health Virology Laboratory|Nguyen|Australia

>Spike|hCoV-19/Wales/PHWC-4A6466/2020|2020-12-17|EPI\_ISL\_765039|Original|hCoV-19^^Wales|Human|Wales Specialist Virology Centre Sequencing lab|COVID-19 Genomics UK (COG-UK) Consortium|Moore|United Kingdom

>Spike|hCoV-19/USA/MI-QDX-726/2020|2020-03-19|EPI\_ISL\_571459|Original|hCoV-19^^Michigan|Human|Quest Diagnostics|Quest Diagnostics|Kagan|USA

>Spike|hCoV-19/Japan/PG-3086/2020|2020-04-00|EPI\_ISL\_691209|Original|hCoV-19^^Japan|Human|Pathogen Genomics Center|Pathogen Genomics Center|Sekizuka|Japan

>Spike|hCoV-19/USA/LA-EVTL422/2020|2020-06-10|EPI\_ISL\_578828|Original|hCoV-19^^Louisiana|Human|LSUHS Emerging Viral Threat Laboratory|Microbial Genome Sequencing Center|Kamil|USA

>Spike|hCoV-19/Wales/PHWC-49147D/2020|2020-11-18|EPI\_ISL\_706656|Original|hCoV-19^^Wales|Human|Originating lab|COVID-19 Genomics UK (COG-UK) Consortium|Moore|United Kingdom

>Spike|hCoV-19/England/OXON-ADC7A/2020|2020-00-00|EPI\_ISL\_448626|Original|hCoV-19^^England|Human|Oxford Viromics|COVID-19 Genomics UK (COG-UK) Consortium|Golubchik|United Kingdom

>Spike|hCoV-19/USA/WI-UW-774/2020|2020-07-06|EPI\_ISL\_495478|Original|hCoV-19^^Wisconsin|Human|University of Wisconsin-Madison AIDS Vaccine Research Laboratories|University of Wisconsin-Madison AIDS Vaccine Research Laboratories|Baczenas|USA

>Spike|hCoV-19/USA/WI-GMF-09752/2020|2020-07-07|EPI\_ISL\_489955|Original|hCoV-19^^Wisconsin|Human|Gundersen Molecular Diagnostics Laboratory|Kabara Cancer Research Institute|Kenny|USA

>Spike|hCoV-19/England/QEUEH-B11687/2020|2020-11-02|EPI\_ISL\_642268|Original|hCoV-19^^England|Human|Lighthouse Lab in Glasgow|Wellcome Sanger Institute for the COVID-19 Genomics UK (COG-UK) Consortium|Davies|United Kingdom

>Spike|hCoV-19/Scotland/QEUEH-96D509/2020|2020-08-19|EPI\_ISL\_534607|Original|hCoV-19^^Scotland|Human|NHSGGC West of Scotland Specialist Virology Centre / MRC-University of Glasgow Centre for Virus Research|Wellcome Sanger Institute for the COVID-19 Genomics UK (COG-UK) consortium|Davies|United Kingdom

>Spike|hCoV-19/Wales/PHWC-16528A/2020|2020-05-11|EPI\_ISL\_479442|Original|hCoV-19^^Wales|Human|Wales Specialist Virology Centre Sequencing lab|COVID-19 Genomics UK (COG-UK) Consortium|Moore|United Kingdom



>Spike|hCoV-19/England/LIVE-9A38A/2020|2020-04-17|EPI\_ISL\_440858|Original|hCoV-19^^England|Human|Liverpool Clinical Laboratories|COVID-19 Genomics UK (COG-UK) Consortium|Haldenby|United Kingdom

>Spike|hCoV-19/England/QEUEH-9DEC77/2020|2020-09-21|EPI\_ISL\_581344|Original|hCoV-19^^England|Human|Lighthouse Lab in Glasgow|Wellcome Sanger Institute for the COVID-19 Genomics UK (COG-UK) consortium|Davies|United Kingdom

>Spike|hCoV-19/England/CAMC-B99FF5/2020|2020-11-15|EPI\_ISL\_673509|Original|hCoV-19^^England|Human|Lighthouse Lab in Cambridge|Wellcome Sanger Institute for the COVID-19 Genomics UK (COG-UK) Consortium|Davies|United Kingdom

>Spike|hCoV-19/Spain/VC-FISABIO-14/2020|2020-03-09|EPI\_ISL\_419678|Original|hCoV-19^^Comunitat Valenciana|Human|Servicio de Microbiolog\u00eda. Consorcio Hospital General Universitario de Valencia|Sequencing and Bioinformatics Service and Molecular Epidemiology Research Group. FISABIO-Public Health|Gonzalez-Candelas|Spain

>Spike|hCoV-19/Australia/VIC9959/2020|2020-07-23|EPI\_ISL\_565805|Original|hCoV-19^^Victoria|Human|Microbiological Diagnostic Unit - Public Health Laboratory (MDU-PHL)|MDU-PHL|Schultz|Australia

>Spike|hCoV-19/Spain/CT-IBV-97010124/2020|2020-11-13|EPI\_ISL\_683642|Original|hCoV-19^^Catalunya|Human|Servicio de Microbiolog\u00eda|SeqCOVID-SPAIN consortium/IBV (CSIC)|Comas|Spain

>Spike|hCoV-19/England/CAMB-1BAECE/2020|2020-11-11|EPI\_ISL\_665000|Original|hCoV-19^^England|Human|Department of Pathology|COVID-19 Genomics UK (COG-UK) Consortium|Goodfellow|United Kingdom

>Spike|hCoV-19/USA/WA-S508/2020|2020-03-30|EPI\_ISL\_434268|Original|hCoV-19^^Washington|Human|Washington State Department of Health|Seattle Flu Study|Bedford|USA

>Spike|hCoV-19/England/ALDP-A2F159/2020|2020-10-05|EPI\_ISL\_587159|Original|hCoV-19^^England|Human|Lighthouse Lab in Alderley Park|Wellcome Sanger Institute for the COVID-19 Genomics UK (COG-UK) consortium|Davies|United Kingdom

>Spike|hCoV-19/England/QEUEH-9D00A6/2020|2020-09-15|EPI\_ISL\_601821|Original|hCoV-19^^England|Human|Lighthouse Lab in Glasgow|Wellcome Sanger Institute for the COVID-19 Genomics UK (COG-UK) consortium|Davies|United Kingdom

>Spike|hCoV-19/England/QEUEH-B13719/2020|2020-10-30|EPI\_ISL\_641861|Original|hCoV-19^^England|Human|Lighthouse Lab in Glasgow|Wellcome Sanger Institute for the COVID-19 Genomics UK (COG-UK) Consortium|Davies|United Kingdom

>Spike|hCoV-19/USA/MA-MASPHL-00388/2020|2020-05-12|EPI\_ISL\_693156|Original|hCoV-19^^Massachusetts|Human|Massachusetts State Public Health Laboratory|Massachusetts State Public Health Laboratory|Lang|USA

>Spike|hCoV-19/Austria/CeMM0320/2020|2020-03-30|EPI\_ISL\_475791|Original|hCoV-19^^Vienna|Human|Center for Virology|Bergthaler laboratory|Bergthaler|Austria

>Spike|hCoV-19/England/ALDP-B75056/2020|2020-11-12|EPI\_ISL\_662141|Original|hCoV-19^^England|Human|Lighthouse Lab in Alderley Park|Wellcome Sanger Institute for the COVID-19 Genomics UK (COG-UK) Consortium|Davies|United Kingdom

>Spike|hCoV-19/England/CAMC-B0B116/2020|2020-10-30|EPI\_ISL\_643562|Original|hCoV-19^^England|Human|Lighthouse Lab in Cambridge|Wellcome Sanger Institute for the COVID-19 Genomics UK (COG-UK) Consortium|Davies|United Kingdom

>Spike|hCoV-19/Japan/PG-3388/2020|2020-05-00|EPI\_ISL\_691502|Original|hCoV-19^^Japan|Human|Pathogen Genomics Center|Pathogen Genomics Center|Sekizuka|Japan

>Spike|hCoV-19/England/204261094/2020|2020-10-14|EPI\_ISL\_622856|Original|hCoV-19^^England|Human|Respiratory Virus Unit|Respiratory Virus Unit|Platt|United Kingdom

>Spike|hCoV-19/England/NOTT-119346/2020|2020-10-31|EPI\_ISL\_637300|Original|hCoV-19^^England|Human|Queens Medical Centre|COVID-19 Genomics UK (COG-UK) Consortium|Loose|United Kingdom

>Spike|hCoV-19/Romania/ROSV\_5000/2020|2020-04-27|EPI\_ISL\_491082|Original|hCoV-19^^Suceava|Human|Suceava County Emergency Hospital|\Stefan cel Mare\ University Metagenomics Lab|Lobiuc|Romania

>Spike|hCoV-19/USA/WI-WSLH-200359/2020|2020-04-21|EPI\_ISL\_578529|Original|hCoV-19^^Wisconsin|Human|Wisconsin State Laboratory of Hygiene Communicable Disease Division|Wisconsin State Laboratory of Hygiene Communicable Disease Division|Florek|USA

>Spike|hCoV-19/USA/CA-CZB-14652/2020|2020-11-16|EPI\_ISL\_739055|Original|hCoV-19^^California|Human|Orange County Public Health Lab|Chan-Zuckerberg Biohub|Kamm|USA

>Spike|hCoV-19/USA/CA-CZB-1326/2020|2020-03-22|EPI\_ISL\_468357|Original|hCoV-19^^California|Human|Alameda County Public Health Lab|Chan-Zuckerberg Biohub|Hao|USA

>Spike|hCoV-19/USA/MI-MDHHS-SC22486/2020|2020-11-08|EPI\_ISL\_708587|Original|hCoV-19^^Michigan|Human|Michigan Department of Health and Human Services|Michigan Department of Health and Human Services|Jacob|USA

>Spike|hCoV-19/Canada/QC-LSPQ-L00239440/2020|2020-03-26|EPI\_ISL\_536253|Original|hCoV-19^^Quebec|Human|H\u00f4pital Pierre-Boucher|Laboratoire de sant\u00e9 publique du Qu\u00e9bec|Moreira|Canada

>Spike|hCoV-19/Australia/VIC9542/2020|2020-08-21|EPI\_ISL\_594145|Original|hCoV-19^^Victoria|Human|MDU-PHL|MDU-PHL|Schultz|Australia

>Spike|hCoV-19/England/ALDP-B1BC9A/2020|2020-11-01|EPI\_ISL\_646077|Original|hCoV-19^^England|Human|Lighthouse Lab in Alderley Park|Wellcome Sanger Institute for the COVID-19 Genomics UK (COG-UK) Consortium|Davies|United Kingdom

>Spike|hCoV-19/USA/OR-OHSU-3043/2020|2020-09-30|EPI\_ISL\_667454|Original|hCoV-19^^Oregon|Human|OHSU Lab Services Molecular Microbiology Lab|Oregon SARS-CoV-2 Genome Sequencing Center|O'Roak|USA

>Spike|hCoV-19/USA/TX-CDC-3009/2020|2020-03-10|EPI\_ISL\_452112|Original|hCoV-19^^Texas|Human|Texas DSHS Lab Services|Pathogen Discovery|Queen|USA

>Spike|hCoV-19/USA/NY-NYUMC30/2020|2020-03-17|EPI\_ISL\_418976|Original|hCoV-19^^New York|Human|NYU Langone Health|Department of Pathology and Medicine|Maurano|USA

>Spike|hCoV-19/England/QEUA-A7882F/2020|2020-10-12|EPI\_ISL\_638766|Original|hCoV-19^^England|Human|Oxford Viromics|COVID-19 Genomics UK (COG-UK) Consortium|Golubchik|United Kingdom

>Spike|hCoV-19/Denmark/DCGC-7384/2020|2020-10-12|EPI\_ISL\_619345|Original|hCoV-19^^Midtjylland|Human|Department of Virus and Microbiological Special Diagnostics|Albertsen lab|Michaelsen|Denmark

>Spike|hCoV-19/Denmark/DCGC-4802/2020|2020-09-21|EPI\_ISL\_621412|Original|hCoV-19^^Sjælland|Human|Department of Virus and Microbiological Special Diagnostics|Albertsen lab|Michaelsen|Denmark

>Spike|hCoV-19/USA/CA-ALSR-0659-IPL/2020|2020-04-29|EPI\_ISL\_483284|Original|hCoV-19^^California|Human|UC San Diego Center for Advanced Laboratory Medicine|Andersen lab at Scripps Research|Gangavarapu|USA

>Spike|hCoV-19/South Africa/NHLS-UCT-GS-0847/2020|2020-07-24|EPI\_ISL\_640071|Original|hCoV-19^^Western Cape|Human|Guguletu CHC w GDH|NHLS/UCT|Iranzadeh|South Africa

>Spike|hCoV-19/England/MILK-9929F0/2020|2020-08-27|EPI\_ISL\_552183|Original|hCoV-19^^England|Human|Lighthouse Lab in Milton Keynes|Wellcome Sanger Institute for the COVID-19 Genomics UK (COG-UK) consortium|Davies|United Kingdom

>Spike|hCoV-19/Wales/PHWC-49A052/2020|2020-12-01|EPI\_ISL\_727485|Original|hCoV-19^^Wales|Human|Originating lab|COVID-19 Genomics UK (COG-UK) Consortium|Moore|United Kingdom

>Spike|hCoV-19/Australia/NT19/2020|2020-00-00|EPI\_ISL\_426636|Original|hCoV-19^^Northern territory|Human|Royal Darwin Hospital Pathology|Microbiological Diagnostic Unit Public Health Laboratory and Victorian Infectious Diseases Reference Laboratory|Schultz|Australia

>Spike|hCoV-19/Australia/VIC12997/2020|2020-08-01|EPI\_ISL\_592143|Original|hCoV-19^^Victoria|Human|Victorian Infectious Diseases Reference Laboratory (VIDRL)|VIDRL and MDU-PHL|Schultz|Australia

>Spike|hCoV-19/USA/WI-UW-1807/2020|2020-09-11|EPI\_ISL\_605679|Original|hCoV-19^^Wisconsin|Human|University of Wisconsin-Madison AIDS Vaccine Research Laboratories|University of Wisconsin-Madison AIDS Vaccine Research Laboratories|Baczenas|USA

>Spike|hCoV-19/United Arab Emirates/0287/2020|2020-05-17|EPI\_ISL\_698467|Original|hCoV-19^^Abu Dhabi|Human|Group 42 (G42) Healthcare|G42 Healthcare|Ogrodzki|United Arab Emirates

>Spike|hCoV-19/Wales/ALDP-9CD367/2020|2020-09-16|EPI\_ISL\_566219|Original|hCoV-19^^Wales|Human|Lighthouse Lab in Alderley Park|Wellcome Sanger Institute for the COVID-19 Genomics UK (COG-UK) consortium|Davies|United Kingdom

>Spike|hCoV-19/USA/CA-QDX-1536/2020|2020-03-17|EPI\_ISL\_603784|Original|hCoV-19^^California|Human|Quest Diagnostics|Quest Diagnostics|Kagan|USA

>Spike|hCoV-19/Scotland/CVR4019/2020|2020-08-29|EPI\_ISL\_535118|Original|hCoV-19^^Scotland|Human|West of Scotland Specialist Virology Centre|COVID-19 Genomics UK (COG-UK) Consortium|Robertson|United Kingdom

>Spike|hCoV-19/Denmark/DCGC-9784/2020|2020-11-09|EPI\_ISL\_669175|Original|hCoV-19^^Syddanmark|Human|Department of Virus and Microbiological Special Diagnostics|Albertsen Lab|Michaelsen|Denmark

>Spike|hCoV-19/Denmark/DCGC-17541/2020|2020-12-14|EPI\_ISL\_751056|Original|hCoV-19^^Hovedstaden|Human|Department of Virus and Microbiological Special Diagnostics|Albertsen Lab|Michaelsen|Denmark

>Spike|hCoV-19/USA/AZ-TG640877/2020|2020-04-13|EPI\_ISL\_695807|Original|hCoV-19^^Arizona|Human|Sonora Quest Laboratories|TGen North|French|USA

>Spike|hCoV-19/Denmark/DCGC-22293/2020|2020-12-14|EPI\_ISL\_757841|Original|hCoV-19^^Hovedstaden|Human|Department of Virus and Microbiological Special Diagnostics|Albertsen Lab|Michaelsen|Denmark

>Spike|hCoV-19/Denmark/DCGC-1886/2020|2020-04-27|EPI\_ISL\_622542|Original|hCoV-19^^Hovedstaden|Human|Department of Virus and Microbiological Special Diagnostics|Albertsen lab|Michaelsen|Denmark

>Spike|hCoV-19/Australia/VIC10132/2020|2020-08-05|EPI\_ISL\_562802|Original|hCoV-19^^Victoria|Human|Microbiological Diagnostic Unit - Public Health Laboratory (MDU-PHL)|MDU-PHL|Schultz|Australia

>Spike|hCoV-19/USA/MD-MDH-0107/2020|2020-05-27|EPI\_ISL\_522842|Original|hCoV-19^^Maryland|Human|Maryland Department of Health|Maryland Department of Health|Keller|USA

>Spike|hCoV-19/Wales/MILK-97687D/2020|2020-08-21|EPI\_ISL\_552766|Original|hCoV-19^^Wales|Human|Lighthouse Lab in Milton Keynes|Wellcome Sanger Institute for the COVID-19 Genomics UK (COG-UK) consortium|Davies|United Kingdom

>Spike|hCoV-19/England/ALDP-C8B2B0/2020|2020-12-17|EPI\_ISL\_762887|Original|hCoV-19^^England|Human|Lighthouse Lab in Alderley Park|Wellcome Sanger Institute for the COVID-19 Genomics UK (COG-UK) Consortium|Davies|United Kingdom

>Spike|hCoV-19/USA/WA-NH13/2020|2020-03-13|EPI\_ISL\_418782|Original|hCoV-19^^Washington|Human|WA State Department of Health|Pathogen Discovery|Queen|USA

>Spike|hCoV-19/England/QEUEH-AF4CB6/2020|2020-10-30|EPI\_ISL\_662950|Original|hCoV-19^^England|Human|Lighthouse Lab in Glasgow|Wellcome Sanger Institute for the COVID-19 Genomics UK (COG-UK) Consortium|Davies|United Kingdom

>Spike|hCoV-19/Wales/PHWC-15E66A/2020|2020-05-13|EPI\_ISL\_472824|Original|hCoV-19^^Wales|Human|Wales Specialist Virology Centre Sequencing lab|COVID-19 Genomics UK (COG-UK) Consortium|Moore|United Kingdom

>Spike|hCoV-19/USA/TX-DSHS-0510/2020|2020-06-21|EPI\_ISL\_560953|Original|hCoV-19^^Texas|Human|Texas Department of State Health Services|Texas Department of State Health Services|Rahman|USA

>Spike|hCoV-19/Portugal/PT1841/2020|2020-11-10|EPI\_ISL\_732061|Original|hCoV-19^^Portugal|Human|Instituto Nacional de Saude (INSA)|Instituto Nacional de Saude (INSA)|Borges|Portugal

>Spike|hCoV-19/England/MILK-A7A34A/2020|2020-10-15|EPI\_ISL\_606794|Original|hCoV-19^^England|Human|Lighthouse Lab in Milton Keynes|Wellcome Sanger Institute for the COVID-19 Genomics UK (COG-UK) consortium|Davies|United Kingdom

>Spike|hCoV-19/Wales/QEUEH-B1255C/2020|2020-11-02|EPI\_ISL\_647867|Original|hCoV-19^^Wales|Human|Lighthouse Lab in Glasgow|Wellcome Sanger Institute for the COVID-19 Genomics UK (COG-UK) Consortium|Davies|United Kingdom

>Spike|hCoV-19/England/MILK-C53882/2020|2020-12-12|EPI\_ISL\_769647|Original|hCoV-19^^England|Human|Lighthouse Lab in Milton Keynes|Wellcome Sanger Institute for the COVID-19 Genomics UK (COG-UK) Consortium|Davies|United Kingdom

>Spike|hCoV-19/USA/WI-UW-808/2020|2020-07-15|EPI\_ISL\_509817|Original|hCoV-19^^Wisconsin|Human|University of Wisconsin-Madison AIDS Vaccine Research Laboratories|University of Wisconsin-Madison AIDS Vaccine Research Laboratories|Baczenas|USA

>Spike|hCoV-19/England/CAMB-77453/2020|2020-03-31|EPI\_ISL\_438545|Original|hCoV-19^^England|Human|Department of Pathology|Wellcome Sanger Institute for the COVID-19 Genomics UK (COG-UK) consortium|Amato|United Kingdom

>Spike|hCoV-19/USA/CA-ALSR-4475/2020|2020-07-08|EPI\_ISL\_649052|Original|hCoV-19^^California|Human|San Diego County Public Health Laboratory|Andersen lab at Scripps Research|Gangavarapu|USA

>Spike|hCoV-19/England/ALDP-9542D1/2020|2020-06-13|EPI\_ISL\_553767|Original|hCoV-19^^England|Human|Lighthouse Lab in Alderley Park|Wellcome Sanger Institute for the COVID-19 Genomics UK (COG-UK) consortium|Davies|United Kingdom

>Spike|hCoV-19/USA/LA-EVTL997/2020|2020-08-20|EPI\_ISL\_653688|Original|hCoV-19^^Louisiana|Human|LSUHS Emerging Viral Threat Laboratory|Microbial Genome Sequencing Center|Kamil|USA

>Spike|hCoV-19/Japan/PG-0275/2020|2020-03-00|EPI\_ISL\_479956|Original|hCoV-19^^Kansai|Human|Osaka Institute of Public Health|Pathogen Genomics Center|Sekizuka|Japan

>Spike|hCoV-19/Spain/AN-IBV-001322/2020|2020-03-23|EPI\_ISL\_452551|Original|hCoV-19^^Andalucia|Human|Servicio de Microbiolog\u00eda y Parasitolog\u00eda cl\u00ednica. UCEIMP. Hospital Universitario Virgen del Roc\u00edo/IBIS/CSIC/US.|SeqCOVID-SPAIN consortium/IBV (CSIC) |Comas|Spain

>Spike|hCoV-19/Singapore/434/2020|2020-03-13|EPI\_ISL\_475965|Original|hCoV-19^^Singapore|Human|National Public Health Laboratory|National Public Health Laboratory|Mak|Singapore

>Spike|hCoV-19/England/QEUEH-98F932/2020|2020-08-26|EPI\_ISL\_540123|Original|hCoV-19^^England|Human|Lighthouse Lab in Glasgow|Wellcome Sanger Institute for the COVID-19 Genomics UK (COG-UK) consortium|Davies|United Kingdom

>Spike|hCoV-19/India/TG-CCMB-M740/2020|2020-06-11|EPI\_ISL\_495235|Original|hCoV-19^^Telangana|Human|CSIR-Centre for Cellular and Molecular Biology|CSIR-Centre for Cellular and Molecular Biology|Banu|India

>Spike|hCoV-19/Netherlands/ZH-EMC-1103/2020|2020-12-13|EPI\_ISL\_722775|Original|hCoV-19^^Zuid Holland|Human|Dutch COVID-19 response team|Erasmus Medical Center|Oude Munnink|Netherlands

>Spike|hCoV-19/Australia/VIC1275/2020|2020-03-25|EPI\_ISL\_430687|Original|hCoV-19^^Victoria|Human|Microbiological Diagnostic Unit Public Health Laboratory|Microbiological Diagnostic Unit Public Health Laboratory|Schultz|Australia

>Spike|hCoV-19/England/MILK-970A40/2020|2020-08-18|EPI\_ISL\_553262|Original|hCoV-19^^England|Human|Lighthouse Lab in Milton Keynes|Wellcome Sanger Institute for the COVID-19 Genomics UK (COG-UK) consortium|Davies|United Kingdom

>Spike|hCoV-19/England/QEUEH-B0E1D7/2020|2020-11-02|EPI\_ISL\_642120|Original|hCoV-19^^England|Human|Lighthouse Lab in Glasgow|Wellcome Sanger Institute for the COVID-19 Genomics UK (COG-UK) Consortium|Davies|United Kingdom

>Spike|hCoV-19/England/NORT-292414/2020|2020-05-04|EPI\_ISL\_489144|Original|hCoV-19^^England|Human|NU-OMICS DNA Sequencing research facility|Wellcome Sanger Institute for the COVID-19 Genomics UK (COG-UK) consortium|Davies|United Kingdom

>Spike|hCoV-19/Scotland/CVR3082/2020|2020-04-24|EPI\_ISL\_449184|Original|hCoV-19^^Scotland|Human|West of Scotland Specialist Virology Centre|COVID-19 Genomics UK (COG-UK) Consortium|Robertson|United Kingdom

>Spike|hCoV-19/USA/NY-NYUMC407/2020|2020-04-12|EPI\_ISL\_430434|Original|hCoV-19^^New York|Human|NYU Langone Health|Departments of Pathology and Medicine|Maurano|USA

>Spike|hCoV-19/USA/TX-HMH-MCoV-9387/2020|2020-07-03|EPI\_ISL\_781089|Original|hCoV-19^^Texas|Human|Houston Methodist Hospital|Houston Methodist Hospital|Long|USA

>Spike|hCoV-19/England/QEUEH-CAD9B3/2020|2020-12-20|EPI\_ISL\_760885|Original|hCoV-19^^England|Human|Lighthouse Lab in Glasgow|Wellcome Sanger Institute for the COVID-19 Genomics UK (COG-UK) Consortium|Davies|United Kingdom

>Spike|hCoV-19/USA/MN-MDH-1713/2020|2020-08-23|EPI\_ISL\_560800|Original|hCoV-19^^Minnesota|Human|M Health Fairview|Minnesota Department of Health|Garfin|USA

>Spike|hCoV-19/USA/WI-UW-699/2020|2020-06-29|EPI\_ISL\_491377|Original|hCoV-19^^Wisconsin|Human|University of Wisconsin-Madison AIDS Vaccine Research Laboratories|University of Wisconsin-Madison AIDS Vaccine Research Laboratories|Baczenas|USA

>Spike|hCoV-19/England/QEUA-AAC6FB/2020|2020-10-21|EPI\_ISL\_652868|Original|hCoV-19^^England|Human|Oxford Viromics|COVID-19 Genomics UK (COG-UK) Consortium|Golubchik|United Kingdom

>Spike|hCoV-19/England/20189042501/2020|2020-05-01|EPI\_ISL\_465528|Original|hCoV-19^^England|Human|Respiratory Virus Unit|Respiratory Virus Unit|Platt|United Kingdom

>Spike|hCoV-19/Denmark/DCGC-4681/2020|2020-09-14|EPI\_ISL\_621913|Original|hCoV-19^^Hovedstaden|Human|Department of Virus and Microbiological Special Diagnostics|Albertsen lab|Michaelsen|Denmark

>Spike|hCoV-19/Canada/MB-NML-1125/2020|2020-08-04|EPI\_ISL\_582459|Original|hCoV-19^^Manitoba|Human|Cadham Provincial Laboratory|National Microbiology Laboratory (NML)|Majer|Canada

>Spike|hCoV-19/Australia/VIC14313/2020|2020-08-04|EPI\_ISL\_591718|Original|hCoV-19^^Victoria|Human|Microbiological Diagnostic Unit - Public Health Laboratory (MDU-PHL)|MDU-PHL|Schultz|Australia

>Spike|hCoV-19/Canada/ON-S80/2020|2020-03-19|EPI\_ISL\_586448|Original|hCoV-19^^Ontario|Human|Toronto Invasive Bacterial Diseases Network|McMaster University|McArthur|Canada

>Spike|hCoV-19/USA/NY-Wadsworth-251951-01/2020|2020-10-22|EPI\_ISL\_734392|Original|hCoV-19^^New York|Human|Wadsworth Center|Wadsworth Center|Lasek-Nesselquist|USA

>Spike|hCoV-19/Sweden/20-50933/2020|2020-04-20|EPI\_ISL\_475161|Original|hCoV-19^^Vasternorrland|Human|Klinisk mikrobiologi Vasternorrland|The Public Health Agency of Sweden|Svartstr\u00f6m|Sweden

>Spike|hCoV-19/India/MH-NIV-6315/2020|2020-03-30|EPI\_ISL\_454542|Original|hCoV-19^^Maharashtra|Human|NIV Influenza|NIV Influenza|Potdar|India

>Spike|hCoV-19/USA/MA-JLL-17S1/2020|2020-00-00|EPI\_ISL\_632305|Original|hCoV-19^^Massachusetts|Human|Brigham and Women's Hospital|Jonathan Li laboratory|Choudhary|USA

>Spike|hCoV-19/England/CAMC-B078CA/2020|2020-10-30|EPI\_ISL\_643697|Original|hCoV-19^^England|Human|Lighthouse Lab in Cambridge|Wellcome Sanger Institute for the COVID-19 Genomics UK (COG-UK) Consortium|Davies|United Kingdom

>Spike|hCoV-19/England/LIVE-DB3AC5/2020|2020-10-21|EPI\_ISL\_650939|Original|hCoV-19^^England|Human|Liverpool Clinical Laboratories|COVID-19 Genomics UK (COG-UK) Consortium|Haldenby|United Kingdom

>Spike|hCoV-19/USA/WI-UW-132/2020|2020-04-10|EPI\_ISL\_427439|Original|hCoV-19^^Wisconsin|Human|University of Wisconsin-Madison AIDS Vaccine Research Laboratories|University of Wisconsin-Madison AIDS Vaccine Research Laboratories|Baczenas|USA

>Spike|hCoV-19/Wales/PHWC-4804F9/2020|2020-10-22|EPI\_ISL\_612895|Original|hCoV-19^^Wales|Human|Wales Specialist Virology Centre Sequencing lab|COVID-19 Genomics UK (COG-UK) Consortium|Moore|United Kingdom

>Spike|hCoV-19/Denmark/DCGC-14671/2020|2020-11-23|EPI\_ISL\_711440|Original|hCoV-19^^Sjælland|Human|Department of Virus and Microbiological Special Diagnostics|Albertsen Lab|Michaelsen|Denmark

>Spike|hCoV-19/Belgium/reg-0414494/2020|2020-04-14|EPI\_ISL\_734577|Original|hCoV-19^^Ath|Human|UZ Leuven|KU Leuven|Maes|Belgium

>Spike|hCoV-19/England/CAMC-BFB771/2020|2020-12-05|EPI\_ISL\_709096|Original|hCoV-19^^England|Human|Lighthouse Lab in Cambridge|Wellcome Sanger Institute for the COVID-19 Genomics UK (COG-UK) Consortium|Davies|United Kingdom

>Spike|hCoV-19/England/ALDP-A6C949/2020|2020-10-14|EPI\_ISL\_607023|Original|hCoV-19^^England|Human|Lighthouse Lab in Alderley Park|Wellcome Sanger Institute for the COVID-19 Genomics UK (COG-UK) consortium|Davies|United Kingdom

>Spike|hCoV-19/England/QEUA-C643F6/2020|2020-12-14|EPI\_ISL\_778504|Original|hCoV-19^^England|Human|Lighthouse Lab in Glasgow|Wellcome Sanger Institute for the COVID-19 Genomics UK (COG-UK) Consortium|Davies|United Kingdom

>Spike|hCoV-19/England/QEUA-CC31FB/2020|2020-12-21|EPI\_ISL\_760807|Original|hCoV-19^^England|Human|Lighthouse Lab in Glasgow|Wellcome Sanger Institute for the COVID-19 Genomics UK (COG-UK) Consortium|Davies|United Kingdom

>Spike|hCoV-19/Wales/PHWC-16ABD5/2020|2020-09-12|EPI\_ISL\_560168|Original|hCoV-19^^Wales|Human|Wales Specialist Virology Centre Sequencing lab|COVID-19 Genomics UK (COG-UK) Consortium|Moore|United Kingdom

>Spike|hCoV-19/South Korea/KDCA0198/2020|2020-11-24|EPI\_ISL\_747433|Original|hCoV-19^^South Korea|Human|Division of Emerging Infectious Diseases|Division of Emerging Infectious Diseases|Park|South Korea

>Spike|hCoV-19/USA/WI-UW-2531/2020|2020-12-30|EPI\_ISL\_779362|Original|hCoV-19^^Wisconsin|Human|University of Wisconsin-Madison AIDS Vaccine Research Laboratories|University of Wisconsin-Madison AIDS Vaccine Research Laboratories|Moreno|USA

>Spike|hCoV-19/Scotland/CVR487/2020|2020-03-23|EPI\_ISL\_433303|Original|hCoV-19^^Scotland|Human|West of Scotland Specialist Virology Centre|COVID-19 Genomics UK (COG-UK) Consortium|Robertson|United Kingdom

>Spike|hCoV-19/Denmark/DCGC-15032/2020|2020-11-23|EPI\_ISL\_713593|Original|hCoV-19^^Midtjylland|Human|Department of Virus and Microbiological Special Diagnostics|Albertsen Lab|Michaelsen|Denmark

>Spike|hCoV-19/Denmark/DCGC-17705/2020|2020-12-14|EPI\_ISL\_750266|Original|hCoV-19^^Hovedstaden|Human|Department of Virus and Microbiological Special Diagnostics|Albertsen Lab|Michaelsen|Denmark

>Spike|hCoV-19/USA/CA-CZB-2115/2020|2020-05-13|EPI\_ISL\_486345|Original|hCoV-19^^California|Human|UCSF Clinical Microbiology Laboratory|Chan-Zuckerberg Biohub|McGeever|USA

>Spike|hCoV-19/England/QEUA-9B405D/2020|2020-09-03|EPI\_ISL\_559877|Original|hCoV-19^^England|Human|Oxford Viromics|COVID-19 Genomics UK (COG-UK) Consortium|Golubchik|United Kingdom

>Spike|hCoV-19/Denmark/DCGC-18344/2020|2020-12-07|EPI\_ISL\_749903|Original|hCoV-19^^Midtjylland|Human|Department of Virus and Microbiological Special Diagnostics|Albertsen Lab|Michaelsen|Denmark

>Spike|hCoV-19/Austria/CeMM0029/2020|2020-03-09|EPI\_ISL\_437918|Original|hCoV-19^^Ischgl|Human|Institut f\u00fcr Virologie am Department f\u00fcr Hygiene|Bergthaler laboratory|Bergthaler|Austria

>Spike|hCoV-19/Luxembourg/LNS7392121/2020|2020-10-26|EPI\_ISL\_744563|Original|hCoV-19^^Luxembourg|Human|Laboratoire national de sant\u00e9|Laboratoire national de sant\u00e9|Wienecke-Baldacchino|Luxembourg

>Spike|hCoV-19/England/SHEF-CBC0D/2020|2020-05-30|EPI\_ISL\_535074|Original|hCoV-19^^England|Human|Virology Department|COVID-19 Genomics UK (COG-UK) Consortium|de Silva|United Kingdom

>Spike|hCoV-19/England/ALDP-C0646C/2020|2020-12-06|EPI\_ISL\_709349|Original|hCoV-19^^England|Human|Lighthouse Lab in Alderley Park|Wellcome Sanger Institute for the COVID-19 Genomics UK (COG-UK) Consortium|Davies|United Kingdom

>Spike|hCoV-19/England/ALDP-9E9EDD/2020|2020-09-24|EPI\_ISL\_580032|Original|hCoV-19^^England|Human|Lighthouse Lab in Alderley Park|Wellcome Sanger Institute for the COVID-19 Genomics UK (COG-UK) consortium|Davies|United Kingdom

>Spike|hCoV-19/England/ALDP-66D232/2020|2020-07-03|EPI\_ISL\_558121|Original|hCoV-19^^England|Human|Lighthouse Lab in Alderley Park|Wellcome Sanger Institute for the COVID-19 Genomics UK (COG-UK) consortium|Davies|United Kingdom

>Spike|hCoV-19/USA/CA-CHLA-PLM60947497/2020|2020-11-15|EPI\_ISL\_753336|Original|hCoV-19^^California|Human|Clinical virology Laboratory|Center for Personalized Medicine|Dien Bard|USA

>Spike|hCoV-19/USA/TX-HMH-6118/2020|2020-07-04|EPI\_ISL\_547253|Original|hCoV-19^^Texas|Human|Houston Methodist Hospital|Houston Methodist Hospital|Long|USA

>Spike|hCoV-19/England/OXON-AF3FB/2020|2020-04-13|EPI\_ISL\_478734|Original|hCoV-19^^England|Human|Oxford Viromics|COVID-19 Genomics UK (COG-UK) Consortium|Golubchik|United Kingdom

>Spike|hCoV-19/Denmark/DCGC-12785/2020|2020-11-09|EPI\_ISL\_682966|Original|hCoV-19^^Midtjylland|Human|Department of Virus and Microbiological Special Diagnostics|Albertsen Lab|Michaelsen|Denmark

>Spike|hCoV-19/England/ALDP-C8A0A8/2020|2020-12-16|EPI\_ISL\_762659|Original|hCoV-19^^England|Human|Lighthouse Lab in Alderley Park|Wellcome Sanger Institute for the COVID-19 Genomics UK (COG-UK) Consortium|Davies|United Kingdom

>Spike|hCoV-19/Canada/BC\_15918444/2020|2020-04-00|EPI\_ISL\_468678|Original|hCoV-19^^British Columbia|Human|BCCDC Public Health Laboratory|BCCDC Public Health Laboratory|Harrigan|Canada

>Spike|hCoV-19/USA/NY-Wadsworth-289888-01/2020|2020-12-22|EPI\_ISL\_767514|Original|hCoV-19^^New York|Human|Wadsworth Center|Wadsworth Center|Lasek-Nesselquist|USA

>Spike|hCoV-19/USA/WI-UW-661/2020|2020-06-26|EPI\_ISL\_491348|Original|hCoV-19^^Wisconsin|Human|University of Wisconsin-Madison AIDS Vaccine Research Laboratories|University of Wisconsin-Madison AIDS Vaccine Research Laboratories|Baczenas|USA

>Spike|hCoV-19/England/CAMB-78DC0/2020|2020-04-02|EPI\_ISL\_441279|Original|hCoV-19^^England|Human|Department of Pathology|Wellcome Sanger Institute for the COVID-19 Genomics UK (COG-UK) consortium|Amato|United Kingdom

>Spike|hCoV-19/USA/TX-DSHS-0993/2020|2020-07-03|EPI\_ISL\_614000|Original|hCoV-19^^Texas|Human|Texas Department of State Health Services|Texas Department of State Health Services|Rahman|USA

>Spike|hCoV-19/England/ALDP-5A5A82/2020|2020-06-15|EPI\_ISL\_558876|Original|hCoV-19^^England|Human|Lighthouse Lab in Alderley Park|Wellcome Sanger Institute for the COVID-19 Genomics UK (COG-UK) consortium|Davies|United Kingdom

>Spike|hCoV-19/Australia/VIC14738/2020|2020-08-13|EPI\_ISL\_592978|Original|hCoV-19^^Victoria|Human|Victorian Infectious Diseases Reference Laboratory (VIDRL)|VIDRL and MDU-PHL|Schultz|Australia

>Spike|hCoV-19/England/MILK-97529E/2020|2020-08-21|EPI\_ISL\_552557|Original|hCoV-19^^England|Human|Lighthouse Lab in Milton Keynes|Wellcome Sanger Institute for the COVID-19 Genomics UK (COG-UK) consortium|Davies|United Kingdom

>Spike|hCoV-19/England/ALDP-B260EB/2020|2020-11-04|EPI\_ISL\_646558|Original|hCoV-19^^England|Human|Lighthouse Lab in Alderley Park|Wellcome Sanger Institute for the COVID-19 Genomics UK (COG-UK) Consortium|Davies|United Kingdom

>Spike|hCoV-19/England/20132107704/2020|2020-03-24|EPI\_ISL\_423845|Original|hCoV-19^^England|Human|Respiratory Virus Unit|Respiratory Virus Unit|Platt|United Kingdom

>Spike|hCoV-19/Wales/PHWC-4A22CA/2020|2020-12-14|EPI\_ISL\_743870|Original|hCoV-19^^Wales|Human|Wales Specialist Virology Centre Sequencing lab|COVID-19 Genomics UK (COG-UK) Consortium|Moore|United Kingdom

>Spike|hCoV-19/Scotland/QEUA-96C87A/2020|2020-08-21|EPI\_ISL\_534570|Original|hCoV-19^^Scotland|Human|NHSGGC West of Scotland Specialist Virology Centre / MRC-University of Glasgow Centre for Virus Research|Wellcome Sanger Institute for the COVID-19 Genomics UK (COG-UK) consortium|Davies|United Kingdom

>Spike|hCoV-19/USA/WA-S2523/2020|2020-06-15|EPI\_ISL\_497155|Original|hCoV-19^^Washington|Human|Washington State Department of Health|Seattle Flu Study|Lee|USA

>Spike|hCoV-19/Belgium/regA-0411449/2020|2020-04-11|EPI\_ISL\_476959|Original|hCoV-19^^Harchies|Human|KU Leuven|KU Leuven|Maes|Belgium

>Spike|hCoV-19/Wales/PHWC-48DF82/2020|2020-11-09|EPI\_ISL\_680785|Original|hCoV-19^^Wales|Human|Wales Specialist Virology Centre Sequencing lab|COVID-19 Genomics UK (COG-UK) Consortium|Moore|United Kingdom

>Spike|hCoV-19/USA/AZ-TG381595/2020|2020-06-15|EPI\_ISL\_694665|Original|hCoV-19^^Arizona|Human|TGen North|TGen North|French|USA

>Spike|hCoV-19/Netherlands/NB-EMC-202/2020|2020-00-00|EPI\_ISL\_523325|Original|hCoV-19^^Noord Brabant|Human|Dutch COVID-19 response team|Erasmus Medical Center|Oude Munnink|Netherlands

>Spike|hCoV-19/USA/UT-03808/2020|2020-04-02|EPI\_ISL\_509594|Original|hCoV-19^^Utah|Human|Utah Public Health Laboratory|Utah Public Health Laboratory|Butz|USA

>Spike|hCoV-19/England/QEUA-96B43B/2020|2020-08-14|EPI\_ISL\_531338|Original|hCoV-19^^England|Human|Lighthouse Lab in Glasgow|Wellcome Sanger Institute for the COVID-19 Genomics UK (COG-UK) consortium|Davies|United Kingdom

>Spike|hCoV-19/Japan/PG-7576/2020|2020-07-00|EPI\_ISL\_686678|Original|hCoV-19^^Japan|Human|Chiba Prefectural Institute of Public Health|Pathogen Genomics Center|Sekizuka|Japan

>Spike|hCoV-19/England/NORT-294D80/2020|2020-03-28|EPI\_ISL\_488591|Original|hCoV-19^^England|Human|NU-OMICS DNA Sequencing research facility|Wellcome Sanger Institute for the COVID-19 Genomics UK (COG-UK) consortium|Davies|United Kingdom

>Spike|hCoV-19/England/QEUA-B2EC58/2020|2020-11-04|EPI\_ISL\_659779|Original|hCoV-19^^England|Human|Lighthouse Lab in Glasgow|Wellcome Sanger Institute for the COVID-19 Genomics UK (COG-UK) Consortium|Davies|United Kingdom

>Spike|hCoV-19/Norway/4817/2020|2020-10-26|EPI\_ISL\_635075|Original|hCoV-19^^Oslo|Human|Norwegian Institute of Public Health|Norwegian Institute of Public Health|Vollan|Norway

>Spike|hCoV-19/England/20126104604/2020|2020-03-18|EPI\_ISL\_423916|Original|hCoV-19^^England|Human|Respiratory Virus Unit|Respiratory Virus Unit|Platt|United Kingdom

>Spike|hCoV-19/England/ALDP-B736ED/2020|2020-11-12|EPI\_ISL\_662365|Original|hCoV-19^^England|Human|Lighthouse Lab in Alderley Park|Wellcome Sanger Institute for the COVID-19 Genomics UK (COG-UK) Consortium|Davies|United Kingdom

>Spike|hCoV-19/Switzerland/BE-ETHZ-321494/2020|2020-10-15|EPI\_ISL\_603706|Original|hCoV-19^^Bern|Human|Viollier AG|Department of Biosystems Science and Engineering|Nadeau|Switzerland

>Spike|hCoV-19/England/BIRM-64FFE/2020|2020-09-28|EPI\_ISL\_594539|Original|hCoV-19^^England|Human|University of Birmingham|COVID-19 Genomics UK (COG-UK) Consortium|Loman|United Kingdom

>Spike|hCoV-19/Brazil/CE-L11-CD196/2020|2020-03-23|EPI\_ISL\_476200|Original|hCoV-19^^Cear\u00e1|Human|DB Diagn\u00f3sticos do Brasil|Instituto de Medicina Tropical da Universidade de S\u00e3o Paulo|Faria|Brazil

>Spike|hCoV-19/USA/UT-UPHL-201202700/2020|2020-12-01|EPI\_ISL\_684022|Original|hCoV-19^^Utah|Human|Utah Public Health Laboratory|Utah Public Health Laboratory|Young|USA

>Spike|hCoV-19/Denmark/DCGC-15555/2020|2020-11-23|EPI\_ISL\_713298|Original|hCoV-19^^Hovedstaden|Human|Department of Virus and Microbiological Special Diagnostics|Albertsen Lab|Michaelsen|Denmark

>Spike|hCoV-19/France/ARA-SC057/2020|2020-04-09|EPI\_ISL\_666671|Original|hCoV-19^^Auvergne-Rh\u00f4ne-Alpes|Human|Laboratoire du Centre Hospitalier Annecy Genevois|CNR Virus des Infections Respiratoires - France SUD|Bal|France

>Spike|hCoV-19/USA/WA-UW-10039/2020|2020-05-29|EPI\_ISL\_461455|Original|hCoV-19^^Washington|Human|UW Virology Lab|UW Virology Lab|Roychoudhury|USA

>Spike|hCoV-19/England/QEUA-54CC3C/2020|2020-05-12|EPI\_ISL\_533387|Original|hCoV-19^^England|Human|Lighthouse Lab in Glasgow|Wellcome Sanger Institute for the COVID-19 Genomics UK (COG-UK) consortium|Davies|United Kingdom

>Spike|hCoV-19/USA/VA-DCLS-2119/2020|2020-10-24|EPI\_ISL\_677239|Original|hCoV-19^^Virginia|Human|Virginia Division of Consolidated Laboratory Services|Virginia Division of Consolidated Laboratory Services|St. Jacques|USA

>Spike|hCoV-19/England/QEUA-C3190F/2020|2020-12-11|EPI\_ISL\_782650|Original|hCoV-19^^England|Human|Lighthouse Lab in Glasgow|Wellcome Sanger Institute for the COVID-19 Genomics UK (COG-UK) Consortium|Davies|United Kingdom

>Spike|hCoV-19/England/SHEF-C0FF0/2020|2020-04-28|EPI\_ISL\_475350|Original|hCoV-19^^England|Human|Virology Department|COVID-19 Genomics UK (COG-UK) Consortium|de Silva|United Kingdom

>Spike|hCoV-19/Northern Ireland/QEUA-964405/2020|2020-08-11|EPI\_ISL\_536920|Original|hCoV-19^^Northern Ireland|Human|Lighthouse Lab in Glasgow|Wellcome Sanger Institute for the COVID-19 Genomics UK (COG-UK) consortium|Davies|United Kingdom

>Spike|hCoV-19/England/ALDP-9EE148/2020|2020-05-08|EPI\_ISL\_589447|Original|hCoV-19^^England|Human|Lighthouse Lab in Alderley Park|Wellcome Sanger Institute for the COVID-19 Genomics UK (COG-UK) consortium|Davies|United Kingdom

>Spike|hCoV-19/USA/TX-HMH-MCoV-15534/2020|2020-10-23|EPI\_ISL\_787018|Original|hCoV-19^^Texas|Human|Houston Methodist Hospital|Houston Methodist Hospital|Long|USA

>Spike|hCoV-19/England/ALDP-95A226/2020|2020-06-12|EPI\_ISL\_555040|Original|hCoV-19^^England|Human|Lighthouse Lab in Alderley Park|Wellcome Sanger Institute for the COVID-19 Genomics UK (COG-UK) consortium|Davies|United Kingdom

>Spike|hCoV-19/England/NOTT-121862/2020|2020-12-22|EPI\_ISL\_764517|Original|hCoV-19^^England|Human|Queens Medical Centre|COVID-19 Genomics UK (COG-UK) Consortium|Loose|United Kingdom

>Spike|hCoV-19/England/205260473/2020|2020-12-18|EPI\_ISL\_754324|Original|hCoV-19^^England|Human|Respiratory Virus Unit|COVID-19 Genomics UK (COG-UK) Consortium|Platt|United Kingdom



>Spike|hCoV-19/England/MILK-B949DE/2020|2020-11-14|EPI\_ISL\_673790|Original|hCoV-19^^England|Human|Lighthouse Lab in Milton Keynes|Wellcome Sanger Institute for the COVID-19 Genomics UK (COG-UK) Consortium|Davies|United Kingdom

>Spike|hCoV-19/France/ARA-18038/2020|2020-04-01|EPI\_ISL\_678502|Original|hCoV-19^^Auvergne-Rh\u00f4ne-Alpes|Human|CNR Virus des Infections Respiratoires - France SUD|CNR Virus des Infections Respiratoires - France SUD|Bal|France

>Spike|hCoV-19/Denmark/DCGC-1812/2020|2020-05-18|EPI\_ISL\_617954|Original|hCoV-19^^Hovedstaden|Human|Department of Virus and Microbiological Special Diagnostics|Albertsen lab|Michaelsen|Denmark

>Spike|hCoV-19/Brazil/SP-L8-CD112/2020|2020-03-17|EPI\_ISL\_476458|Original|hCoV-19^^S\u00e3o Paulo|Human|Hospital da Cl\u00ednicas da Faculdade de Medicina da Universidade de S\u00e3o Paulo|Instituto de Medicina Tropical da Univesidade de S\u00e3o Paulo|Sabino|Brazil

>Spike|hCoV-19/England/GSTT-6584/2020|2020-03-28|EPI\_ISL\_561367|Original|hCoV-19^^England|Human|Centre for Clinical Infection and Diagnostics Research and Genomics Innovation Unit|Centre for Clinical Infection and Diagnostics Research and Genomics Innovation Unit|Awan|United Kingdom

>Spike|hCoV-19/England/LEED-2AA14F/2020|2020-03-12|EPI\_ISL\_538842|Original|hCoV-19^^England|Human|Leeds Teaching Hospitals NHS Trust and Public Health England|Wellcome Sanger Institute for the COVID-19 Genomics UK (COG-UK) consortium|Davies|United Kingdom

>Spike|hCoV-19/England/ALDP-A2D6C5/2020|2020-10-06|EPI\_ISL\_586679|Original|hCoV-19^^England|Human|Lighthouse Lab in Alderley Park|Wellcome Sanger Institute for the COVID-19 Genomics UK (COG-UK) consortium|Davies|United Kingdom

>Spike|hCoV-19/Netherlands/ZuidHolland\_45/2020|2020-03-19|EPI\_ISL\_422917|Original|hCoV-19^^Zuid Holland|Human|Dutch COVID-19 response team|Erasmus Medical Center|Oude Munnink|Netherlands

>Spike|hCoV-19/Singapore/34/2020|2020-03-12|EPI\_ISL\_420111|Original|hCoV-19^^Singapore|Human|National Centre for Infectious Diseases|Programme in Emerging Infectious Diseases|Smith|Singapore

>Spike|hCoV-19/Japan/PG-5829/2020|2020-08-00|EPI\_ISL\_688946|Original|hCoV-19^^Japan|Human|Fukuoka Institute of Health and Environmental Sciences|Pathogen Genomics Center|Sekizuka|Japan

>Spike|hCoV-19/England/CAMC-9415B0/2020|2020-07-22|EPI\_ISL\_556847|Original|hCoV-19^^England|Human|Lighthouse Lab in Cambridge|Wellcome Sanger Institute for the COVID-19 Genomics UK (COG-UK) consortium|Davies|United Kingdom

>Spike|hCoV-19/Luxembourg/LNS2444455/2020|2020-10-23|EPI\_ISL\_740124|Original|hCoV-19^^Luxembourg|Human|Laboratoire national de sant\u00e9|Laboratoire national de sant\u00e9|Wienecke-Baldacchino|Luxembourg

>Spike|hCoV-19/USA/AZ-TG493508/2020|2020-07-13|EPI\_ISL\_695232|Original|hCoV-19^^Arizona|Human|TGen North|TGen North|French|USA

>Spike|hCoV-19/Australia/NSW1110/2020|2020-08-29|EPI\_ISL\_593725|Original|hCoV-19^^New South Wales|Human|South Eastern Area Laboratory Services (SEALS)|NSW Health Pathology - Institute of Clinical Pathology and Medical Research; Westmead Hospital; University of Sydney|Gall|Australia

>Spike|hCoV-19/Japan/PG-4369/2020|2020-07-00|EPI\_ISL\_692596|Original|hCoV-19^^Japan|Human|Pathogen Genomics Center|Pathogen Genomics Center|Sekizuka|Japan

>Spike|hCoV-19/USA/WI-UW-1774/2020|2020-09-16|EPI\_ISL\_605646|Original|hCoV-19^^Wisconsin|Human|University of Wisconsin-Madison AIDS Vaccine Research Laboratories|University of Wisconsin-Madison AIDS Vaccine Research Laboratories|Baczenas|USA

>Spike|hCoV-19/Australia/VIC10788/2020|2020-09-02|EPI\_ISL\_563090|Original|hCoV-19^^Victoria|Human|Microbiological Diagnostic Unit - Public Health Laboratory (MDU-PHL)|MDU-PHL|Schultz|Australia

>Spike|hCoV-19/England/CAMC-B0BAB1/2020|2020-10-29|EPI\_ISL\_643600|Original|hCoV-19^^England|Human|Lighthouse Lab in Cambridge|Wellcome Sanger Institute for the COVID-19 Genomics UK (COG-UK) Consortium|Davies|United Kingdom

>Spike|hCoV-19/England/QEUH-9C8A2B/2020|2020-09-10|EPI\_ISL\_567081|Original|hCoV-19^^England|Human|Lighthouse Lab in Glasgow|Wellcome Sanger Institute for the COVID-19 Genomics UK (COG-UK) consortium|Davies|United Kingdom

>Spike|hCoV-19/Wales/PHWC-48B3D3/2020|2020-11-04|EPI\_ISL\_666232|Original|hCoV-19^^Wales|Human|Wales Specialist Virology Centre Sequencing lab|COVID-19 Genomics UK (COG-UK) Consortium|Moore|United Kingdom

>Spike|hCoV-19/Guangzhou/GZMU0003/2020|2020-02-07|EPI\_ISL\_429074|Original|hCoV-19^^Guangzhou|Human|The First Affiliated Hospital of Guangzhou Medical University|BGI-shenzhen & The First Affiliated Hospital of Guangzhou Medical University|Ji|China

>Spike|hCoV-19/Japan/PG-4966/2020|2020-07-00|EPI\_ISL\_690084|Original|hCoV-19^^Japan|Human|Pathogen Genomics Center|Pathogen Genomics Center|Sekizuka|Japan

>Spike|hCoV-19/New Zealand/20CV0249/2020|2020-09-06|EPI\_ISL\_548078|Original|hCoV-19^^Auckland|Human|LabPLUS|Institute of Environmental Science and Research (ESR)|Wang|New Zealand

>Spike|hCoV-19/England/QEUH-B0E8F0/2020|2020-11-02|EPI\_ISL\_642059|Original|hCoV-19^^England|Human|Lighthouse Lab in Glasgow|Wellcome Sanger Institute for the COVID-19 Genomics UK (COG-UK) Consortium|Davies|United Kingdom

>Spike|hCoV-19/Australia/TAS261/2020|2020-04-08|EPI\_ISL\_522689|Original|hCoV-19^^Tasmania|Human|Royal Hobart Hospital Microbiology Department|MDU-PHL|Schultz|Australia

>Spike|hCoV-19/Spain/RI-IBV-99005893/2020|2020-03-22|EPI\_ISL\_537435|Original|hCoV-19^^La Rioja|Human|Centro de Investigaci\u00f3n Biom\u00e9dica de La Rioja - Hospital San Pedro Logro\u00f1o|SeqCOVID-SPAIN consortium/IBV (CSIC)|Comas|Spain

>Spike|hCoV-19/England/CAMB-1B01A1/2020|2020-05-06|EPI\_ISL\_448112|Original|hCoV-19^^England|Human|Department of Pathology|COVID-19 Genomics UK (COG-UK) Consortium|Meredith|United Kingdom

>Spike|hCoV-19/Scotland/EDB4652/2020|2020-05-08|EPI\_ISL\_478179|Original|hCoV-19^^Scotland|Human|Virology Department|COVID-19 Genomics UK (COG-UK) Consortium|Williams|United Kingdom

>Spike|hCoV-19/England/SHEF-C72D2/2020|2020-04-27|EPI\_ISL\_479225|Original|hCoV-19^^England|Human|Virology Department|COVID-19 Genomics UK (COG-UK) Consortium|de Silva|United Kingdom

>Spike|hCoV-19/England/MILK-ACE58D/2020|2020-10-21|EPI\_ISL\_629614|Original|hCoV-19^^England|Human|Lighthouse Lab in Milton Keynes|Wellcome Sanger Institute for the COVID-19 Genomics UK (COG-UK) consortium|Davies|United Kingdom

>Spike|hCoV-19/Netherlands/ZH-EMC-293/2020|2020-07-03|EPI\_ISL\_523635|Original|hCoV-19^^Zuid Holland|Human|Dutch COVID-19 response team|Erasmus Medical Center|Oude Munnink|Netherlands

>Spike|hCoV-19/England/QEUH-96320C/2020|2020-08-11|EPI\_ISL\_531628|Original|hCoV-19^^England|Human|Lighthouse Lab in Glasgow|Wellcome Sanger Institute for the COVID-19 Genomics UK (COG-UK) consortium|Davies|United Kingdom

>Spike|hCoV-19/England/CAMB-81C30/2020|2020-04-12|EPI\_ISL\_443060|Original|hCoV-19^^England|Human|Department of Pathology|Wellcome Sanger Institute for the COVID-19 Genomics UK (COG-UK) consortium|Amato|United Kingdom

>Spike|hCoV-19/Russia/MUR-RII-MH1700S/2020|2020-09-17|EPI\_ISL\_602344|Original|hCoV-19^^Murmansk|Human|HELIX LLC|WHO National Influenza Centre Russian Federation|Komissarov|Russia

>Spike|hCoV-19/England/QEUH-AD5170/2020|2020-10-26|EPI\_ISL\_634132|Original|hCoV-19^^England|Human|Lighthouse Lab in Glasgow|Wellcome Sanger Institute for the COVID-19 Genomics UK (COG-UK) consortium|Davies|United Kingdom

>Spike|hCoV-19/Scotland/CVR2073/2020|2020-04-09|EPI\_ISL\_490659|Original|hCoV-19^^Scotland|Human|West of Scotland Specialist Virology Centre|COVID-19 Genomics UK (COG-UK) Consortium|Robertson|United Kingdom

>Spike|hCoV-19/Australia/SAP285/2020|2020-03-31|EPI\_ISL\_468035|Original|hCoV-19^^South Australia|Human|SA Pathology|SA Pathology|Leong|Australia

>Spike|hCoV-19/England/NORW-F992D/2020|2020-12-03|EPI\_ISL\_725410|Original|hCoV-19^^England|Human|Quadram Institute Bioscience|COVID-19 Genomics UK (COG-UK) Consortium|Alikhan|United Kingdom

>Spike|hCoV-19/England/MILK-ACEA8E/2020|2020-10-21|EPI\_ISL\_629549|Original|hCoV-19^^England|Human|Lighthouse Lab in Milton Keynes|Wellcome Sanger Institute for the COVID-19 Genomics UK (COG-UK) consortium|Davies|United Kingdom

>Spike|hCoV-19/Australia/VIC7984/2020|2020-08-10|EPI\_ISL\_564789|Original|hCoV-19^^Victoria|Human|Microbiological Diagnostic Unit - Public Health Laboratory (MDU-PHL) |MDU-PHL|Schultz|Australia

>Spike|hCoV-19/USA/UT-01883/2020|2020-04-13|EPI\_ISL\_470703|Original|hCoV-19^^Utah|Human|Utah Public Health Laboratory|Utah Public Health Laboratory|Young|USA

>Spike|hCoV-19/env/Beijing/BJ2452/2020|2020-03-14|EPI\_ISL\_430743|Original|hCoV-19^^Beijing|Environment|Chinese PLA Institute for Disease Control and Prevention|Chinese PLA Institute for Disease Control and Prevention|Li|China

>Spike|hCoV-19/Spain/NC-IBV-001406/2020|2020-03-20|EPI\_ISL\_452495|Original|hCoV-19^^Navarra|Human|Cl\u00ednica Universidad de Navarra. Servicio de Enfermedades Infecciosas y Microbiolog\u00eda cl\u00ednica|SeqCOVID-SPAIN consortium/IBV (CSIC) |Comas|Spain

>Spike|hCoV-19/England/CAMB-81799/2020|2020-04-11|EPI\_ISL\_442564|Original|hCoV-19^^England|Human|Department of Pathology|Wellcome Sanger Institute for the COVID-19 Genomics UK (COG-UK) consortium|Amato|United Kingdom

>Spike|hCoV-19/USA/NY-NYCPHL-000383/2020|2020-03-29|EPI\_ISL\_631875|Original|hCoV-19^^New York|Human|Richmond University Medical Center|New York City Public Health Laboratory|Wang|USA

>Spike|hCoV-19/England/LOND-1262E94/2020|2020-10-16|EPI\_ISL\_612450|Original|hCoV-19^^England|Human|University College London|COVID-19 Genomics UK (COG-UK) Consortium|Roy|United Kingdom

>Spike|hCoV-19/Australia/NSW364/2020|2020-04-14|EPI\_ISL\_451625|Original|hCoV-19^^New South Wales|Human|Pathology West - NSW Health Pathology|NSW Health Pathology - Institute of Clinical Pathology and Medical Research; Westmead Hospital; University of Sydney|Gall|Australia

>Spike|hCoV-19/England/MILK-AB7736/2020|2020-10-19|EPI\_ISL\_623331|Original|hCoV-19^^England|Human|Lighthouse Lab in Milton Keynes|Wellcome Sanger Institute for the COVID-19 Genomics UK (COG-UK) consortium|Davies|United Kingdom

>Spike|hCoV-19/England/CAMC-BC1C2A/2020|2020-11-22|EPI\_ISL\_704785|Original|hCoV-19^^England|Human|Lighthouse Lab in Cambridge|Wellcome Sanger Institute for the COVID-19 Genomics UK (COG-UK) Consortium|Davies|United Kingdom

>Spike|hCoV-19/England/QEUA-A21175/2020|2020-10-01|EPI\_ISL\_587530|Original|hCoV-19^^England|Human|Lighthouse Lab in Glasgow|Wellcome Sanger Institute for the COVID-19 Genomics UK (COG-UK) consortium|Davies|United Kingdom

>Spike|hCoV-19/Italy/VEN-IZSVE-94-28/2020|2020-04-17|EPI\_ISL\_522868|Original|hCoV-19^^Veneto|Human|ULSS9 Distretto di Bussolengo|Istituto Zooprofilattico Sperimentale delle Venezie|Quaranta|Italy

>Spike|hCoV-19/England/ALDP-BB33AE/2020|2020-11-19|EPI\_ISL\_702678|Original|hCoV-19^^England|Human|Lighthouse Lab in Alderley Park|Wellcome Sanger Institute for the COVID-19 Genomics UK (COG-UK) Consortium|Davies|United Kingdom

>Spike|hCoV-19/England/QEUA-9B4DFC/2020|2020-09-07|EPI\_ISL\_590365|Original|hCoV-19^^England|Human|Lighthouse Lab in Glasgow|Wellcome Sanger Institute for the COVID-19 Genomics UK (COG-UK) consortium|Davies|United Kingdom

>Spike|hCoV-19/South Korea/KCDC2708/2020|2020-07-07|EPI\_ISL\_522487|Original|hCoV-19^^South Korea|Human|Division of Viral Diseases|Division of Viral Diseases|Kim|South Korea

>Spike|hCoV-19/Japan/PG-6719/2020|2020-08-00|EPI\_ISL\_687830|Original|hCoV-19^^Japan|Human|Pathogen Genomics Center|Pathogen Genomics Center|Sekizuka|Japan

>Spike|hCoV-19/USA/WA-UW-13400/2020|2020-07-02|EPI\_ISL\_501148|Original|hCoV-19^^Washington|Human|University of Washington Virology Lab|University of Washington Virology Lab|Roychoudhury|USA

>Spike|hCoV-19/USA/OR-OHSU-0253/2020|2020-04-06|EPI\_ISL\_667080|Original|hCoV-19^^Oregon|Human|OHSU Lab Services Molecular Microbiology Lab|Oregon SARS-CoV-2 Genome Sequencing Center|O'Roak|USA

>Spike|hCoV-19/Denmark/DCGC-21699/2020|2020-12-21|EPI\_ISL\_757764|Original|hCoV-19^^Sjaelland|Human|Department of Virus and Microbiological Special Diagnostics|Albertsen Lab|Michaelsen|Denmark

>Spike|hCoV-19/USA/TX-HMH-MCoV-15025/2020|2020-10-16|EPI\_ISL\_786509|Original|hCoV-19^^Texas|Human|Houston Methodist Hospital|Houston Methodist Hospital|Long|USA

>Spike|hCoV-19/England/CAMC-941D6D/2020|2020-07-22|EPI\_ISL\_556852|Original|hCoV-19^^England|Human|Lighthouse Lab in Cambridge|Wellcome Sanger Institute for the COVID-19 Genomics UK (COG-UK) consortium|Davies|United Kingdom

>Spike|hCoV-19/Northern Ireland/NIRE-10210A/2020|2020-03-20|EPI\_ISL\_441382|Original|hCoV-19^^Northern Ireland|Human|Regional Virus Laboratory|COVID-19 Genomics UK (COG-UK) Consortium|Fairley|United Kingdom

>Spike|hCoV-19/England/QEUA-C5C42B/2020|2020-12-14|EPI\_ISL\_769530|Original|hCoV-19^^England|Human|Lighthouse Lab in Glasgow|Wellcome Sanger Institute for the COVID-19 Genomics UK (COG-UK) Consortium|Davies|United Kingdom

>Spike|hCoV-19/Norway/5735/2020|2020-11-13|EPI\_ISL\_708153|Original|hCoV-19^^M\u00f8re og Romsdal|Human|Innlandet Hospital Trust|Norwegian Institute of Public Health|Kopperud Riis|Norway

>Spike|hCoV-19/Denmark/DCGC-20620/2020|2020-12-21|EPI\_ISL\_758908|Original|hCoV-19^^Nordjylland|Human|Department of Virus and Microbiological Special Diagnostics|Albertsen Lab|Michaelsen|Denmark

>Spike|hCoV-19/France/PAC-IHU-0438/2020|2020-04-03|EPI\_ISL\_569508|Original|hCoV-19^^Provence-Alpes-C\u00f4te-d\u0201Azur|Human|MEPHI|MEPHI|Levasseur|France

>Spike|hCoV-19/USA/FL-BPHL-1556/2020|2020-09-09|EPI\_ISL\_568654|Original|hCoV-19^^Florida|Human|Florida Bureau of Public Health Laboratories|Florida Bureau of Public Health Laboratories|Blanton|USA

>Spike|hCoV-19/England/ALDP-981E7D/2020|2020-08-09|EPI\_ISL\_529548|Original|hCoV-19^^England|Human|Queens Medical Centre|COVID-19 Genomics UK (COG-UK) Consortium|Loose|United Kingdom

>Spike|hCoV-19/Spain/MD-IBV-99008566/2020|2020-09-21|EPI\_ISL\_654106|Original|hCoV-19^^Madrid|Human|Hospital General Universitario Gregorio Mar\u00f1a|SeqCOVID-SPAIN consortium|IBV (CSIC)|Comas|Spain

>Spike|hCoV-19/Belgium/regal-0615692/2020|2020-06-15|EPI\_ISL\_734753|Original|hCoV-19^^Leuven|Human|UZ Leuven|KU Leuven|Maes|Belgium

>Spike|hCoV-19/USA/ME-HETL-J0135/2020|2020-09-09|EPI\_ISL\_755330|Original|hCoV-19^^Maine|Human|Maine Health and Environmental Testing Laboratory|Tewhey Lab|Tewhey|USA

>Spike|hCoV-19/England/CAMB-1ADB9A/2020|2020-05-03|EPI\_ISL\_448041|Original|hCoV-19^^England|Human|Department of Pathology|COVID-19 Genomics UK (COG-UK) Consortium|Meredith|United Kingdom

>Spike|hCoV-19/Wales/PHWC-48928D/2020|2020-11-01|EPI\_ISL\_639556|Original|hCoV-19^^Wales|Human|Wales Specialist Virology Centre Sequencing lab|COVID-19 Genomics UK (COG-UK) Consortium|Moore|United Kingdom

>Spike|hCoV-19/England/CAMB-1B19E4/2020|2020-05-13|EPI\_ISL\_452994|Original|hCoV-19^^England|Human|Department of Pathology|COVID-19 Genomics UK (COG-UK) Consortium|Meredith|United Kingdom

>Spike|hCoV-19/Denmark/DCGC-7252/2020|2020-10-12|EPI\_ISL\_619229|Original|hCoV-19^^Sjælland|Human|Department of Virus and Microbiological Special Diagnostics|Albertsen lab|Michaelsen|Denmark

>Spike|hCoV-19/England/20120013404/2020|2020-03-15|EPI\_ISL\_465154|Original|hCoV-19^^England|Human|Respiratory Virus Unit|Respiratory Virus Unit|Platt|United Kingdom

>Spike|hCoV-19/USA/TX-HMH-MCoV-18110/2020|2020-11-16|EPI\_ISL\_784458|Original|hCoV-19^^Texas|Human|Houston Methodist Hospital|Houston Methodist Hospital|Long|USA

>Spike|hCoV-19/England/MILK-9746DF/2020|2020-08-21|EPI\_ISL\_575825|Original|hCoV-19^^England|Human|Lighthouse Lab in Milton Keynes|Wellcome Sanger Institute for the COVID-19 Genomics UK (COG-UK) consortium|Davies|United Kingdom

>Spike|hCoV-19/Japan/PG-2356/2020|2020-04-00|EPI\_ISL\_685961|Original|hCoV-19^^Japan|Human|Pathogen Genomics Center|Pathogen Genomics Center|Sekizuka|Japan

>Spike|hCoV-19/Uruguay/UY-75/2020|2020-04-25|EPI\_ISL\_480343|Original|hCoV-19^^Montevideo|Human|Microbial Genomics Laboratory|Microbial Genomics Laboratory|Iraola|Uruguay

>Spike|hCoV-19/England/CAMB-75561/2020|2020-03-14|EPI\_ISL\_440383|Original|hCoV-19^^England|Human|Department of Pathology|Wellcome Sanger Institute for the COVID-19 Genomics UK (COG-UK) consortium|Amato|United Kingdom

>Spike|hCoV-19/England/MILK-BB122B/2020|2020-11-17|EPI\_ISL\_720056|Original|hCoV-19^^England|Human|Lighthouse Lab in Milton Keynes|Wellcome Sanger Institute for the COVID-19 Genomics UK (COG-UK) Consortium|Davies|United Kingdom

>Spike|hCoV-19/England/QEUEH-9C83F3/2020|2020-09-11|EPI\_ISL\_567232|Original|hCoV-19^^England|Human|Lighthouse Lab in Glasgow|Wellcome Sanger Institute for the COVID-19 Genomics UK (COG-UK) consortium|Davies|United Kingdom

>Spike|hCoV-19/England/NORT-28D28B/2020|2020-11-15|EPI\_ISL\_703599|Original|hCoV-19^^England|Human|Northumbria University / South Tees Hospitals NHS Foundation Trust / North Cumbria Integrated Care NHS Foundation Trust / North Tees and Hartlepool NHS Foundation Trust / Newcastle Hospitals NHS Foundation Trust|COVID-19 Genomics UK (COG-UK) Consortium|Bashton|United Kingdom

>Spike|hCoV-19/Wales/PHWC-16A70E/2020|2020-09-09|EPI\_ISL\_560093|Original|hCoV-19^^Wales|Human|Wales Specialist Virology Centre Sequencing lab|COVID-19 Genomics UK (COG-UK) Consortium|Moore|United Kingdom

>Spike|hCoV-19/USA/WA-UW-12671/2020|2020-06-29|EPI\_ISL\_570888|Original|hCoV-19^^Washington|Human|UW Virology Lab|UW Virology Lab|Roychoudhury|USA

>Spike|hCoV-19/USA/UT-UPHL-2012760285/2020|2020-08-08|EPI\_ISL\_745473|Original|hCoV-19^^Utah|Human|Ginkgo Bioworks Clinical Laboratory|Utah Public Health Laboratory|Young|USA

>Spike|hCoV-19/Japan/PG-7667/2020|2020-08-00|EPI\_ISL\_686769|Original|hCoV-19^^Japan|Human|Chiba Prefectural Institute of Public Health|Pathogen Genomics Center|Sekizuka|Japan

>Spike|hCoV-19/England/CAMC-B37D0E/2020|2020-11-05|EPI\_ISL\_658787|Original|hCoV-19^^England|Human|Lighthouse Lab in Cambridge|Wellcome Sanger Institute for the COVID-19 Genomics UK (COG-UK) Consortium|Davies|United Kingdom

>Spike|hCoV-19/England/OXON-B110B/2020|2020-04-27|EPI\_ISL\_478997|Original|hCoV-19^^England|Human|Oxford Viromics|COVID-19 Genomics UK (COG-UK) Consortium|Golubchik|United Kingdom

>Spike|hCoV-19/USA/WA-S2412/2020|2020-06-15|EPI\_ISL\_497044|Original|hCoV-19^^Washington|Human|Washington State Department of Health|Seattle Flu Study|Lee|USA

>Spike|hCoV-19/Brazil/ES-225/2020|2020-02-29|EPI\_ISL\_415128|Original|hCoV-19^^Esp\u00edrito Santo|Human|LACEN/ES - Laborat\u00f3rio Central de Sa\u00fade P\u00fablica do Esp\u00edrito Santo|Instituto Oswaldo Cruz FIOCRUZ - Laboratory of Respiratory Viruses and Measles (LVRs)|Silva|Brazil

>Spike|hCoV-19/Belgium/reg-09221139/2020|2020-09-22|EPI\_ISL\_738232|Original|hCoV-19^^Kumtich|Human|UZ Leuven|KU Leuven|Maes|Belgium

>Spike|hCoV-19/Denmark/DCGC-4311/2020|2020-09-07|EPI\_ISL\_615748|Original|hCoV-19^^Hovedstaden|Human|Department of Virus and Microbiological Special Diagnostics|Albertsen lab|Michaelsen|Denmark

>Spike|hCoV-19/Denmark/DCGC-7546/2020|2020-10-12|EPI\_ISL\_618427|Original|hCoV-19^^Hovedstaden|Human|Department of Virus and Microbiological Special Diagnostics|Albertsen lab|Michaelsen|Denmark

>Spike|hCoV-19/USA/CT-UW-6594/2020|2020-04-02|EPI\_ISL\_461417|Original|hCoV-19^^Connecticut|Human|UW Virology Lab|UW Virology Lab|Roychoudhury|USA

>Spike|hCoV-19/Australia/WA335/2020|2020-03-10|EPI\_ISL\_596878|Original|hCoV-19^^Western Australia|Human|PathWest Laboratory Medicine WA|PathWest Laboratory Medicine WA Microbial Surveillance Unit|Sikazwe|Australia

>Spike|hCoV-19/Denmark/DCGC-1518/2020|2020-06-08|EPI\_ISL\_618122|Original|hCoV-19^^Sjaelland|Human|Department of Virus and Microbiological Special Diagnostics|Albertsen lab|Michaelsen|Denmark

>Spike|hCoV-19/England/MILK-B38E91/2020|2020-11-01|EPI\_ISL\_658835|Original|hCoV-19^^England|Human|Lighthouse Lab in Milton Keynes|Wellcome Sanger Institute for the COVID-19 Genomics UK (COG-UK) Consortium|Davies|United Kingdom

>Spike|hCoV-19/England/NORT-29500E/2020|2020-03-29|EPI\_ISL\_478625|Original|hCoV-19^^England|Human|Northumbria University / South Tees Hospitals NHS Foundation Trust / North Cumbria Integrated Care NHS Foundation Trust / North Tees and Hartlepool NHS Foundation Trust / Newcastle Hospitals NHS Foundation Trust|COVID-19 Genomics UK (COG-UK) Consortium|Bashton|United Kingdom

>Spike|hCoV-19/England/LIVE-1D2CE4/2020|2020-03-29|EPI\_ISL\_612051|Original|hCoV-19^^England|Human|Liverpool Clinical Laboratories|COVID-19 Genomics UK (COG-UK) Consortium|Haldenby|United Kingdom

>Spike|hCoV-19/England/QEUH-9C9161/2020|2020-09-11|EPI\_ISL\_567138|Original|hCoV-19^^England|Human|Lighthouse Lab in Glasgow|Wellcome Sanger Institute for the COVID-19 Genomics UK (COG-UK) consortium|Davies|United Kingdom

>Spike|hCoV-19/Ireland/TA-NVRL-75IRL33036/2020|2020-10-07|EPI\_ISL\_671931|Original|hCoV-19^^Tipperary|Human|National Virus Reference Laboratory|National Virus Reference Laboratory|Gonzalez|Ireland

>Spike|hCoV-19/USA/NY-NYUMC315/2020|2020-03-30|EPI\_ISL\_430342|Original|hCoV-19^^New York|Human|NYU Langone Health|Departments of Pathology and Medicine|Maurano|USA

>Spike|hCoV-19/England/ALDP-AA39FB/2020|2020-10-22|EPI\_ISL\_624227|Original|hCoV-19^^England|Human|Lighthouse Lab in Alderley Park|Wellcome Sanger Institute for the COVID-19 Genomics UK (COG-UK) consortium|Davies|United Kingdom

>Spike|hCoV-19/Denmark/DCGC-2262/2020|2020-08-10|EPI\_ISL\_617619|Original|hCoV-19^^Nordjylland|Human|Department of Virus and Microbiological Special Diagnostics|Albertsen lab|Michaelsen|Denmark

>Spike|hCoV-19/USA/NY-Wadsworth-276659-01/2020|2020-11-18|EPI\_ISL\_754583|Original|hCoV-19^^New York|Human|Wadsworth Center|Wadsworth Center|Lasek-Nesselquist|USA

>Spike|hCoV-19/England/CAMC-9D1D53/2020|2020-09-19|EPI\_ISL\_601615|Original|hCoV-19^^England|Human|Lighthouse Lab in Cambridge|Wellcome Sanger Institute for the COVID-19 Genomics UK (COG-UK) consortium|Davies|United Kingdom

>Spike|hCoV-19/France/OCC-53/2020|2020-07-13|EPI\_ISL\_593868|Original|hCoV-19^^Occitanie|Human|CHU Purpan - Laboratoire de Virologie - Institut F\u00e9deratif de Biologie|CHU Purpan - Laboratoire de Virologie - Institut F\u00e9deratif de Biologie|Latour|France

>Spike|hCoV-19/Denmark/DCGC-8419/2020|2020-10-26|EPI\_ISL\_617916|Original|hCoV-19^^Nordjylland|Human|Department of Virus and Microbiological Special Diagnostics|Albertsen lab|Michaelsen|Denmark

>Spike|hCoV-19/Australia/WA11/2020|2020-02-22|EPI\_ISL\_420456|Original|hCoV-19^^Western Australia|Human|PathWest Laboratory Medicine WA|PathWest Laboratory Medicine WA|Sikazwe|Australia

>Spike|hCoV-19/USA/UT-UPHL-2012157829/2020|2020-12-02|EPI\_ISL\_747027|Original|hCoV-19^^Utah|Human|Utah Public Health Laboratory|Utah Public Health Laboratory|Gallagher|USA

>Spike|hCoV-19/England/PORT-2D38DF/2020|2020-04-16|EPI\_ISL\_529347|Original|hCoV-19^^England|Human|Centre for Enzyme Innovation|COVID-19 Genomics UK (COG-UK) Consortium|Robson|United Kingdom

>Spike|hCoV-19/Germany/BY-MVP-0250/2020|2020-04-30|EPI\_ISL\_466904|Original|hCoV-19^^Bavaria|Human|Max von Pettenkofer Institute|Laboratory for Functional Genome Analysis|Graf|Germany

>Spike|hCoV-19/England/MILK-6F58B5/2020|2020-06-30|EPI\_ISL\_557456|Original|hCoV-19^^England|Human|Lighthouse Lab in Milton Keynes|Wellcome Sanger Institute for the COVID-19 Genomics UK (COG-UK) consortium|Davies|United Kingdom

>Spike|hCoV-19/Australia/VIC6603/2020|2020-07-18|EPI\_ISL\_521365|Original|hCoV-19^^Victoria|Human|Victorian Infectious Diseases Reference Laboratory (VIDRL)|VIDRL and MDU-PHL|Schultz|Australia

>Spike|hCoV-19/Japan/PG-1958/2020|2020-04-00|EPI\_ISL\_685564|Original|hCoV-19^^Japan|Human|Pathogen Genomics Center|Pathogen Genomics Center|Sekizuka|Japan

>Spike|hCoV-19/USA/CO-CDPHE-2011193707/2020|2020-11-17|EPI\_ISL\_771251|Original|hCoV-19^^Colorado|Human|Colorado Department of Public Health and Environment|Colorado Department of Public Health and Environment|Bankers|USA

>Spike|hCoV-19/Denmark/DCGC-11868/2020|2020-10-26|EPI\_ISL\_671188|Original|hCoV-19^^Nordjylland|Human|Department of Virus and Microbiological Special Diagnostics|Albertsen Lab|Michaelsen|Denmark

>Spike|hCoV-19/England/BRIS-1853373/2020|2020-04-06|EPI\_ISL\_492402|Original|hCoV-19^^England|Human|PHE South West Regional Laboratory|Wellcome Sanger Institute for the COVID-19 Genomics UK (COG-UK) consortium|Davies|United Kingdom

>Spike|hCoV-19/England/20144065604/2020|2020-03-31|EPI\_ISL\_421956|Original|hCoV-19^^England|Human|Respiratory Virus Unit|Respiratory Virus Unit|Platt|United Kingdom

>Spike|hCoV-19/England/ALDP-AA0A46/2020|2020-10-22|EPI\_ISL\_625028|Original|hCoV-19^^England|Human|Lighthouse Lab in Alderley Park|Wellcome Sanger Institute for the COVID-19 Genomics UK (COG-UK) consortium|Davies|United Kingdom

>Spike|hCoV-19/Australia/VIC888/2020|2020-04-06|EPI\_ISL\_427141|Original|hCoV-19^^Victoria|Human|Victorian Infectious Diseases Reference Laboratory (VIDRL)|Microbiological Diagnostic Unit Public Health Laboratory and Victorian Infectious Diseases Reference Laboratory|Schultz|Australia

>Spike|hCoV-19/USA/FL-BPHL-1186/2020|2020-08-20|EPI\_ISL\_526672|Original|hCoV-19^^Florida|Human|Florida Bureau of Public Health Laboratories|Florida Bureau of Public Health Laboratories|Blanton|USA

>Spike|hCoV-19/New Zealand/20VR3895/2020|2020-00-00|EPI\_ISL\_548092|Original|hCoV-19^^Auckland|Human|LabPLUS|Institute of Environmental Science and Research (ESR)|Wang|New Zealand

>Spike|hCoV-19/Australia/TAS234/2020|2020-04-10|EPI\_ISL\_522663|Original|hCoV-19^^Tasmania|Human|Royal Hobart Hospital Microbiology Department|MDU-PHL|Schultz|Australia

>Spike|hCoV-19/England/ALDP-A2E767/2020|2020-10-05|EPI\_ISL\_586867|Original|hCoV-19^^England|Human|Lighthouse Lab in Alderley Park|Wellcome Sanger Institute for the COVID-19 Genomics UK (COG-UK) consortium|Davies|United Kingdom

>Spike|hCoV-19/USA/CO-CDPHE-2004220732/2020|2020-04-20|EPI\_ISL\_710184|Original|hCoV-19^^Colorado|Human|Colorado Department of Public Health and Environment|Colorado Department of Public Health and Environment|Bankers|USA

>Spike|hCoV-19/Scotland/CVR796/2020|2020-03-26|EPI\_ISL\_433341|Original|hCoV-19^^Scotland|Human|West of Scotland Specialist Virology Centre|COVID-19 Genomics UK (COG-UK) Consortium|Robertson|United Kingdom

>Spike|hCoV-19/Canada/ON-UHTC\_0004/2020|2020-03-18|EPI\_ISL\_464051|unknown|hCoV-19^^Ontario|Human|Unity Health Toronto|Ontario Institute for Cancer Research|de Borja|Canada

>Spike|hCoV-19/Wuhan/IME-WH02/2020|2019-12-30|EPI\_ISL\_529214|Original|hCoV-19^^Hubei|Human|Beijing Institute of Microbiology and Epidemiology|Beijing Institute of Microbiology and Epidemiology|Fan|China

>Spike|hCoV-19/England/CAMC-A416E9/2020|2020-10-07|EPI\_ISL\_609484|Original|hCoV-19^^England|Human|Lighthouse Lab in Cambridge|Wellcome Sanger Institute for the COVID-19 Genomics UK (COG-UK) consortium|Davies|United Kingdom

>Spike|hCoV-19/England/ALDP-9ED8BD/2020|2020-05-08|EPI\_ISL\_580695|Original|hCoV-19^^England|Human|Lighthouse Lab in Alderley Park|Wellcome Sanger Institute for the COVID-19 Genomics UK (COG-UK) consortium|Davies|United Kingdom

>Spike|hCoV-19/Brazil/RS-6195/2020|2020-05-11|EPI\_ISL\_729794|Original|hCoV-19^^Rio Grande do Sul|Human|Laboratorio Central de Saude Publica do Estado do Rio Grande do Sul (LACEN-RS)|Laboratory of Respiratory Viruses and Measles|Silva|Brazil

>Spike|hCoV-19/England/ALDP-A51EDF/2020|2020-10-07|EPI\_ISL\_597997|Original|hCoV-19^^England|Human|Lighthouse Lab in Alderley Park|Wellcome Sanger Institute for the COVID-19 Genomics UK (COG-UK) consortium|Davies|United Kingdom

>Spike|hCoV-19/Netherlands/ZH-EMC-321/2020|2020-06-25|EPI\_ISL\_523662|Original|hCoV-19^^Zuid Holland|Human|Dutch COVID-19 response team|Erasmus Medical Center|Oude Munnink|Netherlands

>Spike|hCoV-19/Wales/PHWC-48005F/2020|2020-10-22|EPI\_ISL\_611905|Original|hCoV-19^^Wales|Human|Wales Specialist Virology Centre Sequencing lab|COVID-19 Genomics UK (COG-UK) Consortium|Moore|United Kingdom

>Spike|hCoV-19/England/CAMC-BBB634/2020|2020-11-18|EPI\_ISL\_705560|Original|hCoV-19^^England|Human|Department of Pathology|COVID-19 Genomics UK (COG-UK) Consortium|Goodfellow|United Kingdom

>Spike|hCoV-19/Australia/QLDID939/2020|2020-03-24|EPI\_ISL\_444793|Original|hCoV-19^^Queensland|Human|Pathology Queensland|Public Health Virology Laboratory|Warrilow|Australia

>Spike|hCoV-19/England/QEUH-9B9D06/2020|2020-09-07|EPI\_ISL\_549596|Original|hCoV-19^^England|Human|Lighthouse Lab in Glasgow|Wellcome Sanger Institute for the COVID-19 Genomics UK (COG-UK) consortium|Davies|United Kingdom

>Spike|hCoV-19/Australia/VIC2141/2020|2020-06-20|EPI\_ISL\_480742|Original|hCoV-19^^Victoria|Human|Victorian Infectious Diseases Reference Laboratory (VIDRL)|VIDRL and MDU-PHL|Schultz|Australia

>Spike|hCoV-19/Spain/VC-FISABIO-604/2020|2020-04-01|EPI\_ISL\_447523|Original|hCoV-19^^Comunitat Valenciana|Human|Servicio de Microbiologia. Hospital Clinico Universitario de Valencia|Sequencing and Bioinformatics Service and Molecular Epidemiology Research Group. FISABIO-Public Health|Gonzalez-Candelas|Spain

>Spike|hCoV-19/Australia/VIC4045/2020|2020-00-00|EPI\_ISL\_519427|Original|hCoV-19^^Victoria|Human|Microbiological Diagnostic Unit - Public Health Laboratory (MDU-PHL)|MDU-PHL|Schultz|Australia

>Spike|hCoV-19/Australia/NSW-SAViD-2752/2020|2020-09-09|EPI\_ISL\_537287|Original|hCoV-19^^New South Wales|Human|Area of Virology|Area of Virology|Yeang|Australia

>Spike|hCoV-19/Malaysia/IMR-WC253176/2020|2020-11-02|EPI\_ISL\_728170|Original|hCoV-19^^Malaysia|Human|Institute for Medical Research|Institute for Medical Research|Suppiah|Malaysia

>Spike|hCoV-19/Scotland/QEUH-9F4A44/2020|2020-09-27|EPI\_ISL\_600747|Original|hCoV-19^^Scotland|Human|Lighthouse Lab in Glasgow|Wellcome Sanger Institute for the COVID-19 Genomics UK (COG-UK) consortium|Davies|United Kingdom

>Spike|hCoV-19/England/C200044475/2020|2020-11-06|EPI\_ISL\_666760|Original|hCoV-19^^England|Human|Respiratory Virus Unit|COVID-19 Genomics UK (COG-UK) Consortium|Platt|United Kingdom

>Spike|hCoV-19/USA/TX-HMH-MCoV-19707/2020|2020-11-18|EPI\_ISL\_784059|Original|hCoV-19^^Texas|Human|Houston Methodist Hospital|Houston Methodist Hospital|Long|USA

>Spike|hCoV-19/Switzerland/BE-ETHZ-300280/2020|2020-10-01|EPI\_ISL\_603312|Original|hCoV-19^^Bern|Human|Viollier AG|Department of Biosystems Science and Engineering|Nadeau|Switzerland

>Spike|hCoV-19/USA/VA-DCLS-1639/2020|2020-08-18|EPI\_ISL\_614042|Original|hCoV-19^^Virginia|Human|Virginia DCLS|Virginia DCLS|St. Jacques|USA

>Spike|hCoV-19/England/MILK-B9755F/2020|2020-11-14|EPI\_ISL\_675124|Original|hCoV-19^^England|Human|Lighthouse Lab in Milton Keynes|Wellcome Sanger Institute for the COVID-19 Genomics UK (COG-UK) Consortium|Davies|United Kingdom

>Spike|hCoV-19/New Zealand/20CV0536/2020|2020-10-16|EPI\_ISL\_637088|Original|hCoV-19^^Bay of Plenty|Human|PathLab Bay of Plenty|Institute of Environmental Science and Research (ESR)|Wang|New Zealand

>Spike|hCoV-19/Canada/QC-LSPQ-L00231766/2020|2020-03-22|EPI\_ISL\_535961|Original|hCoV-19^^Quebec|Human|H\u00f4pital Charles-LeMoine|Laboratoire de sant\u00e9 publique du Qu\u00e9bec|Moreira|Canada

>Spike|hCoV-19/USA/VA-DCLS-1271/2020|2020-08-12|EPI\_ISL\_529958|Original|hCoV-19^^Virginia|Human|Virginia DCLS|Virginia DCLS|St. Jacques|USA

>Spike|hCoV-19/England/QEUH-B7EAC8/2020|2020-11-14|EPI\_ISL\_667928|Original|hCoV-19^^England|Human|Lighthouse Lab in Glasgow|Wellcome Sanger Institute for the COVID-19 Genomics UK (COG-UK) Consortium|Davies|United Kingdom

>Spike|hCoV-19/England/QEUH-964FF5/2020|2020-08-13|EPI\_ISL\_531161|Original|hCoV-19^^England|Human|Lighthouse Lab in Glasgow|Wellcome Sanger Institute for the COVID-19 Genomics UK (COG-UK) consortium|Davies|United Kingdom

>Spike|hCoV-19/USA/MI-MDHHS-SC21358/2020|2020-04-01|EPI\_ISL\_507612|Original|hCoV-19^^Michigan|Human|Michigan Department of Health and Human Services|Michigan Department of Health and Human Services|Blankenship|USA

>Spike|hCoV-19/Australia/VIC6024/2020|2020-07-22|EPI\_ISL\_518065|Original|hCoV-19^^Victoria|Human|Microbiological Diagnostic Unit - Public Health Laboratory (MDU-PHL)|MDU-PHL|Schultz|Australia

>Spike|hCoV-19/USA/CA-CZB-7146/2020|2020-09-08|EPI\_ISL\_582930|Original|hCoV-19^^California|Human|County of Santa Clara Public Health Department|Chan-Zuckerberg Biohub|Bhatt|USA

>Spike|hCoV-19/Netherlands/un-EMC-724/2020|2020-04-13|EPI\_ISL\_523479|Original|hCoV-19^^Netherlands|Human|Dutch COVID-19 response team|Erasmus Medical Center|Oude Munnink|Netherlands

>Spike|hCoV-19/USA/CA-QDX-1419/2020|2020-03-18|EPI\_ISL\_572071|Original|hCoV-19^^California|Human|Quest Diagnostics|Quest Diagnostics|Kagan|USA



>Spike|hCoV-19/USA/CA-ALSR-4816/2020|2020-04-05|EPI\_ISL\_730158|Original|hCoV-19^^California|Human|Scripps Medical Laboratory|Andersen lab at Scripps Research|Gangavarapu|USA

>Spike|hCoV-19/England/LIVE-9COBE/2020|2020-04-01|EPI\_ISL\_449507|Original|hCoV-19^^England|Human|Liverpool Clinical Laboratories|COVID-19 Genomics UK (COG-UK) Consortium|Haldenby|United Kingdom

>Spike|hCoV-19/England/QEUH-96B556/2020|2020-08-17|EPI\_ISL\_531281|Original|hCoV-19^^England|Human|Lighthouse Lab in Glasgow|Wellcome Sanger Institute for the COVID-19 Genomics UK (COG-UK) consortium|Davies|United Kingdom

>Spike|hCoV-19/England/BRIS-12267E/2020|2020-04-04|EPI\_ISL\_440679|Original|hCoV-19^^England|Human|PHE South West Regional Laboratory|Wellcome Sanger Institute for the COVID-19 Genomics UK (COG-UK) consortium|Amato|United Kingdom

>Spike|hCoV-19/USA/NY-Wadsworth-51088-01/2020|2020-04-17|EPI\_ISL\_676865|Original|hCoV-19^^New York|Human|Wadsworth Center|Wadsworth Center|Lasek-Nesselquist|USA

>Spike|hCoV-19/England/MILK-99D685/2020|2020-08-30|EPI\_ISL\_549882|Original|hCoV-19^^England|Human|Lighthouse Lab in Milton Keynes|Wellcome Sanger Institute for the COVID-19 Genomics UK (COG-UK) consortium|Davies|United Kingdom

>Spike|hCoV-19/Australia/VIC12450/2020|2020-07-28|EPI\_ISL\_591991|Original|hCoV-19^^Victoria|Human|Microbiological Diagnostic Unit - Public Health Laboratory (MDU-PHL)|MDU-PHL|Schultz|Australia

>Spike|hCoV-19/Australia/VIC15218/2020|2020-08-02|EPI\_ISL\_593197|Original|hCoV-19^^Victoria|Human|Microbiological Diagnostic Unit - Public Health Laboratory (MDU-PHL)|MDU-PHL|Schultz|Australia

>Spike|hCoV-19/England/LIVE-DC3C80/2020|2020-11-08|EPI\_ISL\_705874|Original|hCoV-19^^England|Human|Liverpool Clinical Laboratories|COVID-19 Genomics UK (COG-UK) Consortium|Haldenby|United Kingdom

>Spike|hCoV-19/India/MH-GA8/2020|2020-06-17|EPI\_ISL\_508274|Original|hCoV-19^^Maharashtra|Human|Government Medical College|National Institute of Biomedical Genomics|Maitra|India

>Spike|hCoV-19/Denmark/DCGC-3517/2020|2020-08-31|EPI\_ISL\_616308|Original|hCoV-19^^Nordjylland|Human|Department of Virus and Microbiological Special Diagnostics|Albertsen lab|Michaelsen|Denmark

>Spike|hCoV-19/England/QEUH-B2D4F7/2020|2020-11-04|EPI\_ISL\_659821|Original|hCoV-19^^England|Human|Lighthouse Lab in Glasgow|Wellcome Sanger Institute for the COVID-19 Genomics UK (COG-UK) Consortium|Davies|United Kingdom

>Spike|hCoV-19/USA/MA-MASPHL-00043/2020|2020-04-02|EPI\_ISL\_791546|Original|hCoV-19^^Massachusetts|Human|Massachusetts State Public Health Laboratory|Infectious Disease Program|Park|USA

>Spike|hCoV-19/USA/LA-EVTL809/2020|2020-07-25|EPI\_ISL\_653500|Original|hCoV-19^^Louisiana|Human|LSUHS Emerging Viral Threat Laboratory|Microbial Genome Sequencing Center|Kamil|USA

>Spike|hCoV-19/England/NORT-2A494D/2020|2020-09-14|EPI\_ISL\_573390|Original|hCoV-19^^England|Human|Northumbria University / South Tees Hospitals NHS Foundation Trust / North Cumbria Integrated Care NHS Foundation Trust / North Tees and Hartlepool NHS Foundation Trust / Newcastle Hospitals NHS Foundation Trust|COVID-19 Genomics UK (COG-UK) Consortium|Bashton|United Kingdom

>Spike|hCoV-19/Denmark/ALAB-HH27/2020|2020-03-11|EPI\_ISL\_429285|Original|hCoV-19^^Denmark|Human|Department of Clinical Microbiology|Albertsen lab|Kirkegaard|Denmark

>Spike|hCoV-19/Portugal/PT1780/2020|2020-11-17|EPI\_ISL\_732009|Original|hCoV-19^^Portugal|Human|Instituto Nacional de Saude (INSA)|Instituto Nacional de Saude (INSA)|Borges|Portugal

>Spike|hCoV-19/Portugal/PT0995/2020|2020-03-22|EPI\_ISL\_511543|Original|hCoV-19^^Portugal|Human|Instituto Nacional de Saude (INSA)|Instituto Nacional de Saude (INSA)|Borges|Portugal

>Spike|hCoV-19/England/MILK-ACBF91/2020|2020-10-20|EPI\_ISL\_629200|Original|hCoV-19^^England|Human|Lighthouse Lab in Milton Keynes|Wellcome Sanger Institute for the COVID-19 Genomics UK (COG-UK) consortium|Davies|United Kingdom

>Spike|hCoV-19/England/BRIS-1289F7/2020|2020-04-14|EPI\_ISL\_458818|Original|hCoV-19^^England|Human|PHE South West Regional Laboratory|Wellcome Sanger Institute for the COVID-19 Genomics UK (COG-UK) consortium|Davies|United Kingdom

>Spike|hCoV-19/England/LIVE-9EA90/2020|2020-04-04|EPI\_ISL\_453360|Original|hCoV-19^^England|Human|Liverpool Clinical Laboratories|COVID-19 Genomics UK (COG-UK) Consortium|Haldenby|United Kingdom

>Spike|hCoV-19/Wales/MILK-9E11DC/2020|2020-09-20|EPI\_ISL\_580861|Original|hCoV-19^^Wales|Human|Lighthouse Lab in Milton Keynes|Wellcome Sanger Institute for the COVID-19 Genomics UK (COG-UK) consortium|Davies|United Kingdom

>Spike|hCoV-19/England/ALDP-B83082/2020|2020-11-14|EPI\_ISL\_675567|Original|hCoV-19^^England|Human|Lighthouse Lab in Alderley Park|Wellcome Sanger Institute for the COVID-19 Genomics UK (COG-UK) Consortium|Davies|United Kingdom

>Spike|hCoV-19/Singapore/1092/2020|2020-10-05|EPI\_ISL\_596482|Original|hCoV-19^^Singapore|Human|National Public Health Laboratory|National Public Health Laboratory|Mak|Singapore

>Spike|hCoV-19/England/BRIS-125CE2/2020|2020-03-30|EPI\_ISL\_443794|Original|hCoV-19^^England|Human|PHE South West Regional Laboratory|Wellcome Sanger Institute for the COVID-19 Genomics UK (COG-UK) consortium|Amato|United Kingdom

>Spike|hCoV-19/Australia/VIC1620/2020|2020-05-07|EPI\_ISL\_456528|Original|hCoV-19^^Victoria|Human|Victorian Infectious Diseases Reference Laboratory (VIDRL)|Microbiological Diagnostic Unit Public Health Laboratory and Victorian Infectious Diseases Reference Laboratory|Schultz|Australia

>Spike|hCoV-19/USA/FL-BPHL-0712/2020|2020-03-30|EPI\_ISL\_509770|Original|hCoV-19^^Florida|Human|Florida Bureau of Public Health Laboratories|Florida Bureau of Public Health Laboratories|Blanton|USA

>Spike|hCoV-19/USA/UT-QDX-119/2020|2020-03-13|EPI\_ISL\_467910|Original|hCoV-19^^Utah|Human|Quest Diagnostics|Quest Diagnostics|Kagan|USA

>Spike|hCoV-19/USA/TX-HMH-MCoV-14134/2020|2020-10-02|EPI\_ISL\_787419|Original|hCoV-19^^Texas|Human|Houston Methodist Hospital|Houston Methodist Hospital|Long|USA

>Spike|hCoV-19/England/ALDP-B74CEA/2020|2020-11-12|EPI\_ISL\_662181|Original|hCoV-19^^England|Human|Lighthouse Lab in Alderley Park|Wellcome Sanger Institute for the COVID-19 Genomics UK (COG-UK) Consortium|Davies|United Kingdom

>Spike|hCoV-19/USA/UT-UPHL-05255/2020|2020-07-05|EPI\_ISL\_560868|Original|hCoV-19^^Utah|Human|Utah Public Health Laboratory|Utah Public Health Laboratory|Young|USA

>Spike|hCoV-19/England/CAMB-1B99FB/2020|2020-11-07|EPI\_ISL\_664579|Original|hCoV-19^^England|Human|Department of Pathology|COVID-19 Genomics UK (COG-UK) Consortium|Goodfellow|United Kingdom

>Spike|hCoV-19/USA/TX-DSHS-1265/2020|2020-06-16|EPI\_ISL\_644206|Original|hCoV-19^^Texas|Human|Texas Department of State Health Services|Texas Department of State Health Services|Rahman|USA

>Spike|hCoV-19/England/ALDP-AA3C4D/2020|2020-10-22|EPI\_ISL\_624539|Original|hCoV-19^^England|Human|Lighthouse Lab in Alderley Park|Wellcome Sanger Institute for the COVID-19 Genomics UK (COG-UK) consortium|Davies|United Kingdom

>Spike|hCoV-19/England/02/2020|2020-01-29|EPI\_ISL\_407073|Original|hCoV-19^^England|Human|Respiratory Virus Unit|Respiratory Virus Unit|Zambon|United Kingdom

>Spike|hCoV-19/United Arab Emirates/0920/2020|2020-06-26|EPI\_ISL\_699058|Original|hCoV-19^^Abu Dhabi|Human|Group 42 (G42) Healthcare|G42 Healthcare|Ogrodzki|United Arab Emirates

>Spike|hCoV-19/USA/CA-CZB-16182/2020|2020-12-02|EPI\_ISL\_738591|Original|hCoV-19^^California|Human|Renegade|Chan-Zuckerberg Biohub|Kamm|USA

>Spike|hCoV-19/Wales/PHWC-492E8D/2020|2020-11-27|EPI\_ISL\_725800|Original|hCoV-19^^Wales|Human|Originating lab|COVID-19 Genomics UK (COG-UK) Consortium|Moore|United Kingdom

>Spike|hCoV-19/England/MILK-97650D/2020|2020-08-20|EPI\_ISL\_575934|Original|hCoV-19^^England|Human|Lighthouse Lab in Milton Keynes|Wellcome Sanger Institute for the COVID-19 Genomics UK (COG-UK) consortium|Davies|United Kingdom

>Spike|hCoV-19/Wales/PHWC-490AB8/2020|2020-11-16|EPI\_ISL\_703768|Original|hCoV-19^^Wales|Human|Originating lab|COVID-19 Genomics UK (COG-UK) Consortium|Moore|United Kingdom

>Spike|hCoV-19/USA/NY-Wadsworth-279166-01/2020|2020-11-23|EPI\_ISL\_754478|Original|hCoV-19^^New York|Human|Wadsworth Center|Wadsworth Center|Lasek-Nesselquist|USA

>Spike|hCoV-19/England/SHEF-C4B61/2020|2020-11-19|EPI\_ISL\_680137|Original|hCoV-19^^England|Human|Virology Department|COVID-19 Genomics UK (COG-UK) Consortium|de Silva|United Kingdom

>Spike|hCoV-19/England/CAMB-1B04D5/2020|2020-05-11|EPI\_ISL\_452885|Original|hCoV-19^^England|Human|Department of Pathology|COVID-19 Genomics UK (COG-UK) Consortium|Meredith|United Kingdom

>Spike|hCoV-19/Denmark/DCGC-1271/2020|2020-06-08|EPI\_ISL\_618064|Original|hCoV-19^^Nordjylland|Human|Department of Virus and Microbiological Special Diagnostics|Albertsen lab|Michaelsen|Denmark

>Spike|hCoV-19/USA/NY-Wadsworth-290710-01/2020|2020-12-20|EPI\_ISL\_767543|Original|hCoV-19^^New York|Human|URMC LABS|Wadsworth Center|Lasek-Nesselquist|USA

>Spike|hCoV-19/Japan/PG-7818/2020|2020-08-00|EPI\_ISL\_686920|Original|hCoV-19^^Japan|Human|Pathogen Genomics Center|Pathogen Genomics Center|Sekizuka|Japan

>Spike|hCoV-19/England/ALDP-59FD28/2020|2020-06-14|EPI\_ISL\_558821|Original|hCoV-19^^England|Human|Lighthouse Lab in Alderley Park|Wellcome Sanger Institute for the COVID-19 Genomics UK (COG-UK) consortium|Davies|United Kingdom

>Spike|hCoV-19/Australia/VIC11780/2020|2020-07-18|EPI\_ISL\_641216|Original|hCoV-19^^Victoria|Human|Microbiological Diagnostic Unit - Public Health Laboratory (MDU-PHL)|MDU-PHL|Schultz|Australia

>Spike|hCoV-19/Denmark/DCGC-21226/2020|2020-12-21|EPI\_ISL\_758819|Original|hCoV-19^^Hovedstaden|Human|Department of Virus and Microbiological Special Diagnostics|Albertsen Lab|Michaelsen|Denmark

>Spike|hCoV-19/Australia/WA416/2020|2020-05-28|EPI\_ISL\_672628|Original|hCoV-19^^Western Australia|Human|PathWest Laboratory Medicine WA|PathWest Laboratory Medicine WA Microbial Surveillance Unit|Sikazwe|Australia

>Spike|hCoV-19/England/ALDP-9CAAB0/2020|2020-09-16|EPI\_ISL\_575566|Original|hCoV-19^^England|Human|Lighthouse Lab in Alderley Park|Wellcome Sanger Institute for the COVID-19 Genomics UK (COG-UK) consortium|Davies|United Kingdom

>Spike|hCoV-19/Wales/PHWC-47D820/2020|2020-10-07|EPI\_ISL\_586198|Original|hCoV-19^^Wales|Human|Wales Specialist Virology Centre Sequencing lab|COVID-19 Genomics UK (COG-UK) Consortium|Moore|United Kingdom

>Spike|hCoV-19/Scotland/QEUEH-9697E9/2020|2020-08-14|EPI\_ISL\_531032|Original|hCoV-19^^Scotland|Human|NHSGGC West of Scotland Specialist Virology Centre / MRC-University of Glasgow Centre for Virus Research|Wellcome Sanger Institute for the COVID-19 Genomics UK (COG-UK) consortium|Davies|United Kingdom

>Spike|hCoV-19/South Africa/LR00101/2020|2020-07-14|EPI\_ISL\_514400|Original|hCoV-19^^Mpumalanga|Human|National Institute for Communicable Diseases of the National Health Laboratory Service|National Institute for Communicable Diseases of the National Health Laboratory Service|Allam|South Africa

>Spike|hCoV-19/Romania/ROSV\_12421/2020|2020-06-08|EPI\_ISL\_491042|Original|hCoV-19^^Suceava|Human|Suceava County Emergency Hospital|\Stefan cel Mare\ University Metagenomics Lab|Lobiuc|Romania

>Spike|hCoV-19/England/NORT-281D2C/2020|2020-03-24|EPI\_ISL\_478483|Original|hCoV-19^^England|Human|Northumbria University / South Tees Hospitals NHS Foundation Trust / North Cumbria Integrated Care NHS Foundation Trust / North Tees and Hartlepool NHS Foundation Trust / Newcastle Hospitals NHS Foundation Trust|COVID-19 Genomics UK (COG-UK) Consortium|Bashton|United Kingdom

>Spike|hCoV-19/India/KA-IB5/2020|2020-06-03|EPI\_ISL\_508327|Original|hCoV-19^^Karnataka|Human|Indian Institute of Science|National Institute of Biomedical Genomics|Maitra|India

>Spike|hCoV-19/Gambia/NPHL-2500/2020|2020-07-21|EPI\_ISL\_561263|Original|hCoV-19^^Kombo|Human|MRCG at LSHTM Genomics lab|MRCG at LSHTM Genomics lab|Sesay|Gambia

>Spike|hCoV-19/Australia/NSW325/2020|2020-04-09|EPI\_ISL\_451587|Original|hCoV-19^^New South Wales|Human|Pathology North Hunter- NSW Health Pathology|NSW Health Pathology - Institute of Clinical Pathology and Medical Research; Westmead Hospital; University of Sydney|Gall|Australia

>Spike|hCoV-19/Japan/PG-6300/2020|2020-08-00|EPI\_ISL\_689411|Original|hCoV-19^^Japan|Human|Pathogen Genomics Center|Pathogen Genomics Center|Sekizuka|Japan

>Spike|hCoV-19/England/ALDP-B46847/2020|2020-11-06|EPI\_ISL\_656299|Original|hCoV-19^^England|Human|Lighthouse Lab in Alderley Park|Wellcome Sanger Institute for the COVID-19 Genomics UK (COG-UK) Consortium|Davies|United Kingdom

>Spike|hCoV-19/Rwanda/U66405-RD/2020|2020-07-00|EPI\_ISL\_615069|Original|hCoV-19^^Rwanda|Human|Rwanda National Reference Laboratory|Rwanda National Laboratory|Mukantwari|Rwanda

>Spike|hCoV-19/England/ALDP-A5281C/2020|2020-10-07|EPI\_ISL\_597900|Original|hCoV-19^^England|Human|Lighthouse Lab in Alderley Park|Wellcome Sanger Institute for the COVID-19 Genomics UK (COG-UK) consortium|Davies|United Kingdom

>Spike|hCoV-19/England/MILK-B04D19/2020|2020-10-24|EPI\_ISL\_651038|Original|hCoV-19^^England|Human|Department of Pathology|COVID-19 Genomics UK (COG-UK) Consortium|Goodfellow|United Kingdom

>Spike|hCoV-19/Denmark/DCGC-14122/2020|2020-11-30|EPI\_ISL\_711417|Original|hCoV-19^^Hovedstaden|Human|Department of Virus and Microbiological Special Diagnostics|Albertsen Lab|Michaelsen|Denmark

>Spike|hCoV-19/USA/MN-MDH-1935/2020|2020-10-01|EPI\_ISL\_613491|Original|hCoV-19^^Minnesota|Human|Public Health Laboratory - Infectious Disease Lab|Minnesota Department of Health|Lorentz|USA

>Spike|hCoV-19/England/BRIS-130DA5/2020|2020-03-23|EPI\_ISL\_501563|Original|hCoV-19^^England|Human|PHE South West Regional Laboratory|Wellcome Sanger Institute for the COVID-19 Genomics UK (COG-UK) consortium|Davies|United Kingdom

>Spike|hCoV-19/England/CAMC-C9901F/2020|2020-12-17|EPI\_ISL\_762069|Original|hCoV-19^^England|Human|Lighthouse Lab in Cambridge|Wellcome Sanger Institute for the COVID-19 Genomics UK (COG-UK) Consortium|Davies|United Kingdom

>Spike|hCoV-19/USA/TX-HMH-MCoV-10582/2020|2020-07-06|EPI\_ISL\_789544|Original|hCoV-19^^Texas|Human|Houston Methodist Hospital|Houston Methodist Hospital|Long|USA

>Spike|hCoV-19/England/NORT-29B4B1/2020|2020-06-01|EPI\_ISL\_493494|Original|hCoV-19^^England|Human|Northumbria University / South Tees Hospitals NHS Foundation Trust / North Cumbria Integrated Care NHS Foundation Trust / North Tees and Hartlepool NHS Foundation Trust / Newcastle Hospitals NHS Foundation Trust|COVID-19 Genomics UK (COG-UK) Consortium|Bashton|United Kingdom

>Spike|hCoV-19/Denmark/DCGC-21277/2020|2020-12-21|EPI\_ISL\_758826|Original|hCoV-19^^Hovedstaden|Human|Department of Virus and Microbiological Special Diagnostics|Albertsen Lab|Michaelsen|Denmark

>Spike|hCoV-19/England/MILK-B0472A/2020|2020-10-24|EPI\_ISL\_652168|Original|hCoV-19^^England|Human|Department of Pathology|COVID-19 Genomics UK (COG-UK) Consortium|Goodfellow|United Kingdom

>Spike|hCoV-19/Wales/PHWC-49244F/2020|2020-11-17|EPI\_ISL\_706848|Original|hCoV-19^^Wales|Human|Originating lab|COVID-19 Genomics UK (COG-UK) Consortium|Moore|United Kingdom

>Spike|hCoV-19/Russia/AMU-RII-MH10147S/2020|2020-11-19|EPI\_ISL\_733461|Original|hCoV-19^^Amur|Human|WHO National Influenza Centre Russian Federation|WHO National Influenza Centre Russian Federation|Komissarov|Russia

>Spike|hCoV-19/USA/AZ-TG273340/2020|2020-04-01|EPI\_ISL\_694055|Original|hCoV-19^^Arizona|Human|AZ SPHL|TGen North|French|USA

>Spike|hCoV-19/Denmark/DCGC-18757/2020|2020-12-07|EPI\_ISL\_748538|Original|hCoV-19^^Midtjylland|Human|Department of Virus and Microbiological Special Diagnostics|Albertsen Lab|Michaelsen|Denmark

>Spike|hCoV-19/England/ALDP-8E99A0/2020|2020-06-25|EPI\_ISL\_556593|Original|hCoV-19^^England|Human|Lighthouse Lab in Alderley Park|Wellcome Sanger Institute for the COVID-19 Genomics UK (COG-UK) consortium|Davies|United Kingdom

>Spike|hCoV-19/Australia/VIC4454/2020|2020-07-16|EPI\_ISL\_519750|Original|hCoV-19^^Victoria|Human|Microbiological Diagnostic Unit - Public Health Laboratory (MDU-PHL)|MDU-PHL|Schultz|Australia

>Spike|hCoV-19/USA/CA-QDX-2130/2020|2020-03-18|EPI\_ISL\_604421|Original|hCoV-19^^California|Human|Quest Diagnostics|Quest Diagnostics|Kagan|USA

>Spike|hCoV-19/England/ALDP-AA37F1/2020|2020-10-22|EPI\_ISL\_625002|Original|hCoV-19^^England|Human|Lighthouse Lab in Alderley Park|Wellcome Sanger Institute for the COVID-19 Genomics UK (COG-UK) consortium|Davies|United Kingdom

>Spike|hCoV-19/Denmark/DCGC-10362/2020|2020-11-02|EPI\_ISL\_669926|Original|hCoV-19^^Syddanmark|Human|Department of Virus and Microbiological Special Diagnostics|Albertsen Lab|Michaelsen|Denmark

>Spike|hCoV-19/Singapore/748/2020|2020-06-22|EPI\_ISL\_500562|Original|hCoV-19^^Singapore|Human|Singapore General Hospital|Department of Microbiology|Abdul Rahman|Singapore

>Spike|hCoV-19/USA/VA-DCLS-1402/2020|2020-07-13|EPI\_ISL\_572240|Original|hCoV-19^^Virginia|Human|Virginia DCLS|Virginia DCLS|St. Jacques|USA

>Spike|hCoV-19/Denmark/ALAB-SSI-660/2020|2020-03-29|EPI\_ISL\_437027|Original|hCoV-19^^Denmark|Human|Department of Virus and Microbiological Special Diagnostics|Albertsen lab|Kirkegaard|Denmark

>Spike|hCoV-19/England/QEUEH-AD110B/2020|2020-10-26|EPI\_ISL\_633959|Original|hCoV-19^^England|Human|Lighthouse Lab in Glasgow|Wellcome Sanger Institute for the COVID-19 Genomics UK (COG-UK) consortium|Davies|United Kingdom

>Spike|hCoV-19/Australia/VIC14596/2020|2020-08-07|EPI\_ISL\_592910|Original|hCoV-19^^Victoria|Human|Microbiological Diagnostic Unit - Public Health Laboratory (MDU-PHL)|MDU-PHL|Schultz|Australia

>Spike|hCoV-19/England/CAMC-B21C46/2020|2020-11-02|EPI\_ISL\_647369|Original|hCoV-19^^England|Human|Lighthouse Lab in Cambridge|Wellcome Sanger Institute for the COVID-19 Genomics UK (COG-UK) Consortium|Davies|United Kingdom

>Spike|hCoV-19/Norway/6302/2020|2020-11-29|EPI\_ISL\_775384|Original|hCoV-19^^Rogaland|Human|Unilabs Laboratory Medicine|Norwegian Institute of Public Health|Vollan|Norway

>Spike|hCoV-19/England/QEUEH-BA18D1/2020|2020-11-18|EPI\_ISL\_719867|Original|hCoV-19^^England|Human|Lighthouse Lab in Glasgow|Wellcome Sanger Institute for the COVID-19 Genomics UK (COG-UK) Consortium|Davies|United Kingdom

>Spike|hCoV-19/USA/TX-HMH-3768/2020|2020-06-15|EPI\_ISL\_543177|Original|hCoV-19^^Texas|Human|Houston Methodist Hospital|Houston Methodist Hospital|Long|USA

>Spike|hCoV-19/England/ALDP-BCA5CC/2020|2020-11-23|EPI\_ISL\_703301|Original|hCoV-19^^England|Human|Lighthouse Lab in Alderley Park|Wellcome Sanger Institute for the COVID-19 Genomics UK (COG-UK) Consortium|Davies|United Kingdom

>Spike|hCoV-19/England/CAMB-7A9D9/2020|2020-04-03|EPI\_ISL\_441342|Original|hCoV-19^^England|Human|Department of Pathology|Wellcome Sanger Institute for the COVID-19 Genomics UK (COG-UK) consortium|Amato|United Kingdom

>Spike|hCoV-19/USA/FL-BPHL-1531/2020|2020-05-15|EPI\_ISL\_568629|Original|hCoV-19^^Florida|Human|Florida Bureau of Public Health Laboratories|Florida Bureau of Public Health Laboratories|Blanton|USA

>Spike|hCoV-19/England/ALDP-920AE5/2020|2020-06-23|EPI\_ISL\_552883|Original|hCoV-19^^England|Human|Lighthouse Lab in Alderley Park|Wellcome Sanger Institute for the COVID-19 Genomics UK (COG-UK) consortium|Davies|United Kingdom

>Spike|hCoV-19/Latvia/044/2020|2020-03-22|EPI\_ISL\_486426|Original|hCoV-19^^Latvia|Human|Latvijas Infektolo\u0123ijas centrs|Latvian Biomedical Research and Study Centre|Zrelavs|Latvia

>Spike|hCoV-19/New Zealand/20VR1962/2020|2020-04-05|EPI\_ISL\_579181|Original|hCoV-19^^Southern|Human|Southern Community Labs Dunedin|Institute of Environmental Science and Research (ESR)|Wang|New Zealand

>Spike|hCoV-19/USA/MA-MASPHL-00265/2020|2020-04-17|EPI\_ISL\_791699|Original|hCoV-19^^Massachusetts|Human|Massachusetts State Public Health Laboratory|Infectious Disease Program|Park|USA

>Spike|hCoV-19/USA/TX-HMH-MCoV-19197/2020|2020-11-28|EPI\_ISL\_783684|Original|hCoV-19^^Texas|Human|Houston Methodist Hospital|Houston Methodist Hospital|Long|USA

>Spike|hCoV-19/England/CAMC-9D1FF3/2020|2020-09-18|EPI\_ISL\_601682|Original|hCoV-19^^England|Human|Lighthouse Lab in Cambridge|Wellcome Sanger Institute for the COVID-19 Genomics UK (COG-UK) consortium|Davies|United Kingdom

>Spike|hCoV-19/England/MILK-99DA2F/2020|2020-08-30|EPI\_ISL\_550580|Original|hCoV-19^^England|Human|Lighthouse Lab in Milton Keynes|Wellcome Sanger Institute for the COVID-19 Genomics UK (COG-UK) consortium|Davies|United Kingdom

>Spike|hCoV-19/USA/LA-EVTL1438/2020|2020-12-15|EPI\_ISL\_779104|Original|hCoV-19^^Louisiana|Human|LSUHS Emerging Viral Threat Laboratory|Microbial Genome Sequencing Center|Kamil|USA

>Spike|hCoV-19/England/20130086204/2020|2020-03-20|EPI\_ISL\_423671|Original|hCoV-19^^England|Human|Respiratory Virus Unit|Respiratory Virus Unit|Platt|United Kingdom

>Spike|hCoV-19/England/NORT-2844E8/2020|2020-03-21|EPI\_ISL\_478552|Original|hCoV-19^^England|Human|Northumbria University / South Tees Hospitals NHS Foundation Trust / North Cumbria Integrated Care NHS Foundation Trust / North Tees and Hartlepool NHS Foundation Trust / Newcastle Hospitals NHS Foundation Trust|COVID-19 Genomics UK (COG-UK) Consortium|Bashton|United Kingdom

>Spike|hCoV-19/Costa Rica/INC-0118/2020|2020-07-24|EPI\_ISL\_682257|Original|hCoV-19^^Cartago|Human|HOSPITAL SAN JUAN DE DIOS|Inciensa|Soto-Garita|Costa Rica

>Spike|hCoV-19/England/CAMC-A577A1/2020|2020-10-08|EPI\_ISL\_597401|Original|hCoV-19^^England|Human|Lighthouse Lab in Cambridge|Wellcome Sanger Institute for the COVID-19 Genomics UK (COG-UK) consortium|Davies|United Kingdom

>Spike|hCoV-19/England/CAMB-7C2DC/2020|2020-04-15|EPI\_ISL\_434024|Original|hCoV-19^^England|Human|Department of Pathology|COVID-19 Genomics UK (COG-UK) Consortium|Meredith|United Kingdom

>Spike|hCoV-19/England/CAMC-B9ADAF/2020|2020-11-15|EPI\_ISL\_673240|Original|hCoV-19^^England|Human|Lighthouse Lab in Cambridge|Wellcome Sanger Institute for the COVID-19 Genomics UK (COG-UK) Consortium|Davies|United Kingdom

>Spike|hCoV-19/USA/MA-MGH-00089/2020|2020-03-25|EPI\_ISL\_460184|Original|hCoV-19^^Massachusetts|Human|Massachusetts General Hospital|Infectious Disease Program|Lemieux|USA

>Spike|hCoV-19/Wales/PHWC-491C57/2020|2020-11-11|EPI\_ISL\_705419|Original|hCoV-19^^Wales|Human|Originating lab|COVID-19 Genomics UK (COG-UK) Consortium|Moore|United Kingdom

>Spike|hCoV-19/England/MILK-B555F3/2020|2020-11-05|EPI\_ISL\_657593|Original|hCoV-19^^England|Human|Lighthouse Lab in Milton Keynes|Wellcome Sanger Institute for the COVID-19 Genomics UK (COG-UK) Consortium|Davies|United Kingdom

>Spike|hCoV-19/England/QEUH-C159D4/2020|2020-12-05|EPI\_ISL\_709497|Original|hCoV-19^^England|Human|Lighthouse Lab in Glasgow|Wellcome Sanger Institute for the COVID-19 Genomics UK (COG-UK) Consortium|Davies|United Kingdom

>Spike|hCoV-19/Denmark/DCGC-16154/2020|2020-11-16|EPI\_ISL\_714609|Original|hCoV-19^^Midtjylland|Human|Department of Virus and Microbiological Special Diagnostics|Albertsen Lab|Michaelsen|Denmark

>Spike|hCoV-19/Germany/NW-MPP-5/2020|2020-05-25|EPI\_ISL\_487427|Original|hCoV-19^^North Rhine-Westphalia|Human|Labor Knei\u00dfler GmbH & Co. KG|Heinrich Pette Institute|G\u00f6ttingen|Germany

>Spike|hCoV-19/Denmark/DCGC-14064/2020|2020-11-30|EPI\_ISL\_711544|Original|hCoV-19^^Syddanmark|Human|Department of Virus and Microbiological Special Diagnostics|Albertsen Lab|Michaelsen|Denmark

>Spike|hCoV-19/England/SHEF-C042E/2020|2020-03-27|EPI\_ISL\_420179|Original|hCoV-19^^England|Human|Virology Department|Department of Infection|de Silva|United Kingdom

>Spike|hCoV-19/Iceland/228/2020|2020-03-17|EPI\_ISL\_417556|Original|hCoV-19^^Reykjavik|Human|The National University Hospital of Iceland|deCODE genetics|J\u00f3nsson|Iceland

>Spike|hCoV-19/USA/TX-HMH-MCoV-8807/2020|2020-07-01|EPI\_ISL\_780769|Original|hCoV-19^^Texas|Human|Houston Methodist Hospital|Houston Methodist Hospital|Long|USA

>Spike|hCoV-19/Australia/VIC169/2020|2020-03-18|EPI\_ISL\_419866|Original|hCoV-19^^Victoria|Human|Victorian Infectious Diseases Reference Laboratory (VIDRL)|Victorian Infectious Diseases Reference Laboratory and Microbiological Diagnostic Unit Public Health Laboratory|Schultz|Australia

>Spike|hCoV-19/England/ALDP-A6E570/2020|2020-10-15|EPI\_ISL\_607127|Original|hCoV-19^^England|Human|Lighthouse Lab in Alderley Park|Wellcome Sanger Institute for the COVID-19 Genomics UK (COG-UK) consortium|Davies|United Kingdom

>Spike|hCoV-19/England/QEUH-A8B531/2020|2020-10-15|EPI\_ISL\_643176|Original|hCoV-19^^England|Human|Lighthouse Lab in Glasgow|Wellcome Sanger Institute for the COVID-19 Genomics UK (COG-UK) Consortium|Davies|United Kingdom

>Spike|hCoV-19/England/NORT-2827A5/2020|2020-03-27|EPI\_ISL\_488544|Original|hCoV-19^^England|Human|NU-OMICS DNA Sequencing research facility|Wellcome Sanger Institute for the COVID-19 Genomics UK (COG-UK) consortium|Davies|United Kingdom

>Spike|hCoV-19/Indonesia/JI-ITD-12202V/2020|2020-06-09|EPI\_ISL\_529967|Vero P1|hCoV-19^^East Java|Human|RSUD Sidoarjo|Institute of Tropical Disease|Lusida|Indonesia

>Spike|hCoV-19/USA/TX-HMH0445/2020|2020-04-03|EPI\_ISL\_435025|Original|hCoV-19^^Texas|Human|Houston Methodist Hospital|Houston Methodist Hospital|Long|USA

>Spike|hCoV-19/USA/WA-UW-1846/2020|2020-03-22|EPI\_ISL\_424288|Original|hCoV-19^^Washington|Human|UW Virology Lab|UW Virology Lab|Roychoudhury|USA

>Spike|hCoV-19/Japan/PG-6630/2020|2020-08-00|EPI\_ISL\_687742|Original|hCoV-19^^Japan|Human|Pathogen Genomics Center|Pathogen Genomics Center|Sekizuka|Japan

>Spike|hCoV-19/England/ALDP-C47FE6/2020|2020-12-12|EPI\_ISL\_718935|Original|hCoV-19^^England|Human|Lighthouse Lab in Alderley Park|Wellcome Sanger Institute for the COVID-19 Genomics UK (COG-UK) Consortium|Davies|United Kingdom

>Spike|hCoV-19/England/QEUEH-AE2BDC/2020|2020-10-27|EPI\_ISL\_633458|Original|hCoV-19^^England|Human|Lighthouse Lab in Glasgow|Wellcome Sanger Institute for the COVID-19 Genomics UK (COG-UK) consortium|Davies|United Kingdom

>Spike|hCoV-19/USA/TX-HMH-4112/2020|2020-06-18|EPI\_ISL\_543379|Original|hCoV-19^^Texas|Human|Houston Methodist Hospital|Houston Methodist Hospital|Long|USA

>Spike|hCoV-19/England/ALDP-B4806B/2020|2020-11-07|EPI\_ISL\_649358|Original|hCoV-19^^England|Human|Lighthouse Lab in Alderley Park|Wellcome Sanger Institute for the COVID-19 Genomics UK (COG-UK) Consortium|Davies|United Kingdom

>Spike|hCoV-19/England/ALDP-A2F283/2020|2020-10-05|EPI\_ISL\_587253|Original|hCoV-19^^England|Human|Lighthouse Lab in Alderley Park|Wellcome Sanger Institute for the COVID-19 Genomics UK (COG-UK) consortium|Davies|United Kingdom

>Spike|hCoV-19/United Arab Emirates/0781/2020|2020-05-19|EPI\_ISL\_698924|Original|hCoV-19^^Abu Dhabi|Human|Group 42 (G42) Healthcare|G42 Healthcare|Ogrodzki|United Arab Emirates

>Spike|hCoV-19/Denmark/ALAB-SSI420A/2020|2020-03-22|EPI\_ISL\_429519|Original|hCoV-19^^Denmark|Human|Department of Virus and Microbiological Special Diagnostics|Albertsen lab|Kirkegaard|Denmark

>Spike|hCoV-19/England/ALDP-C39D38/2020|2020-12-09|EPI\_ISL\_730679|Original|hCoV-19^^England|Human|Lighthouse Lab in Alderley Park|Wellcome Sanger Institute for the COVID-19 Genomics UK (COG-UK) Consortium|Davies|United Kingdom

>Spike|hCoV-19/Sweden/20-53764/2020|2020-12-20|EPI\_ISL\_766635|Original|hCoV-19^^Ostergotland|Human|Klinisk mikrobiologi|The Public Health Agency of Sweden|Svartstr\u00f6m|Sweden

>Spike|hCoV-19/England/BRIS-126AAB/2020|2020-04-10|EPI\_ISL\_458961|Original|hCoV-19^^England|Human|PHE South West Regional Laboratory|Wellcome Sanger Institute for the COVID-19 Genomics UK (COG-UK) consortium|Davies|United Kingdom

>Spike|hCoV-19/Iceland/349/2020|2020-03-00|EPI\_ISL\_424373|Original|hCoV-19^^Reykjavik|Human|The National University Hospital of Iceland|deCODE genetics|J\u00f3nsson|Iceland

>Spike|hCoV-19/Denmark/DCGC-8565/2020|2020-10-26|EPI\_ISL\_625940|Original|hCoV-19^^Midtjylland|Human|Department of Virus and Microbiological Special Diagnostics|Albertsen lab|Michaelsen|Denmark

>Spike|hCoV-19/USA/SC-DHEC-0074/2020|2020-04-01|EPI\_ISL\_529176|Original|hCoV-19^^South Carolina|Human|South Carolina Department of Health and Environmental Control|South Carolina Department of Health and Environmental Control|Flores|USA

>Spike|hCoV-19/England/ALDP-9CC474/2020|2020-09-16|EPI\_ISL\_573109|Original|hCoV-19^^England|Human|Quadram Institute Bioscience|COVID-19 Genomics UK (COG-UK) Consortium|Alikhan|United Kingdom

>Spike|hCoV-19/England/LIVE-99BED/2020|2020-04-12|EPI\_ISL\_439807|Original|hCoV-19^^England|Human|Liverpool Clinical Laboratories|COVID-19 Genomics UK (COG-UK) Consortium|Haldenby|United Kingdom

>Spike|hCoV-19/England/ALDP-9521C7/2020|2020-06-09|EPI\_ISL\_553676|Original|hCoV-19^^England|Human|Lighthouse Lab in Alderley Park|Wellcome Sanger Institute for the COVID-19 Genomics UK (COG-UK) consortium|Davies|United Kingdom

>Spike|hCoV-19/Wales/PHWC-163750/2020|2020-04-23|EPI\_ISL\_473989|Original|hCoV-19^^Wales|Human|Originating lab|COVID-19 Genomics UK (COG-UK) Consortium|Moore|United Kingdom

>Spike|hCoV-19/USA/UT-UPHL-2009155/2020|2020-05-27|EPI\_ISL\_525145|Original|hCoV-19^^Utah|Human|Utah Public Health Laboratory|Utah Public Health Laboratory|Young|USA

>Spike|hCoV-19/England/ALDP-6EB80D/2020|2020-06-30|EPI\_ISL\_557667|Original|hCoV-19^^England|Human|Lighthouse Lab in Alderley Park|Wellcome Sanger Institute for the COVID-19 Genomics UK (COG-UK) consortium|Davies|United Kingdom

>Spike|hCoV-19/Australia/VIC6358/2020|2020-07-21|EPI\_ISL\_521154|Original|hCoV-19^^Victoria|Human|Microbiological Diagnostic Unit - Public Health Laboratory (MDU-PHL)|MDU-PHL|Schultz|Australia

>Spike|hCoV-19/England/MILK-9A6874/2020|2020-08-31|EPI\_ISL\_550223|Original|hCoV-19^^England|Human|Lighthouse Lab in Milton Keynes|Wellcome Sanger Institute for the COVID-19 Genomics UK (COG-UK) consortium|Davies|United Kingdom

>Spike|hCoV-19/England/CAMC-CB7AC2/2020|2020-12-18|EPI\_ISL\_777778|Original|hCoV-19^^England|Human|Lighthouse Lab in Cambridge|Wellcome Sanger Institute for the COVID-19 Genomics UK (COG-UK) Consortium|Davies|United Kingdom

>Spike|hCoV-19/Bermuda/204990929/2020|2020-11-18|EPI\_ISL\_780397|Original|hCoV-19^^Bermuda|Human|Bermuda Government Molecular Diagnostics Laboratory (MDL)|Respiratory Virus Unit|Platt|Bermuda

>Spike|hCoV-19/England/QEUEH-BA225A/2020|2020-11-18|EPI\_ISL\_719872|Original|hCoV-19^^England|Human|Lighthouse Lab in Glasgow|Wellcome Sanger Institute for the COVID-19 Genomics UK (COG-UK) Consortium|Davies|United Kingdom

>Spike|hCoV-19/Denmark/DCGC-2467/2020|2020-06-01|EPI\_ISL\_617428|Original|hCoV-19^^Sjaelland|Human|Department of Virus and Microbiological Special Diagnostics|Albertsen lab|Michaelsen|Denmark

>Spike|hCoV-19/USA/WA-UW-3969/2020|2020-03-31|EPI\_ISL\_427223|Original|hCoV-19^^Washington|Human|UW Virology Lab|UW Virology Lab|Roychoudhury|USA

>Spike|hCoV-19/England/NORT-1B726DC/2020|2020-12-03|EPI\_ISL\_724896|Original|hCoV-19^^England|Human|Northumbria University / South Tees Hospitals NHS Foundation Trust / North Cumbria Integrated Care NHS Foundation Trust / North Tees and Hartlepool NHS Foundation Trust / Newcastle Hospitals NHS Foundation Trust|COVID-19 Genomics UK (COG-UK) Consortium|Bashton|United Kingdom

>Spike|hCoV-19/Saudi Arabia/KAUST-RIYADH1174/2020|2020-06-05|EPI\_ISL\_678194|Original|hCoV-19^^Riyadh|Human|Pathogen Genomics Lab King Abdullah University of Science and Technology(KAUST)|Pathogen Genomics Lab King Abdullah University of Science and Technology(KAUST)|Mohamed Ghazzali|Saudi Arabia

>Spike|hCoV-19/USA/WI-GMF-24758/2020|2020-10-08|EPI\_ISL\_660910|Original|hCoV-19^^Wisconsin|Human|Gundersen Molecular Diagnostics Laboratory|Kabara Cancer Research Institute|Kenny|USA

>Spike|hCoV-19/England/LIVE-9F26A/2020|2020-05-03|EPI\_ISL\_453441|Original|hCoV-19^^England|Human|Liverpool Clinical Laboratories|COVID-19 Genomics UK (COG-UK) Consortium|Haldenby|United Kingdom

>Spike|hCoV-19/England/ALDP-AA5391/2020|2020-10-21|EPI\_ISL\_624941|Original|hCoV-19^^England|Human|Lighthouse Lab in Alderley Park|Wellcome Sanger Institute for the COVID-19 Genomics UK (COG-UK) consortium|Davies|United Kingdom

>Spike|hCoV-19/England/ALDP-AC5DBB/2020|2020-10-14|EPI\_ISL\_631217|Original|hCoV-19^^England|Human|Lighthouse Lab in Alderley Park|Wellcome Sanger Institute for the COVID-19 Genomics UK (COG-UK) consortium|Davies|United Kingdom

>Spike|hCoV-19/England/OXON-AE7F0/2020|2020-00-00|EPI\_ISL\_448722|Original|hCoV-19^^England|Human|Oxford Viromics|COVID-19 Genomics UK (COG-UK) Consortium|Golubchik|United Kingdom

>Spike|hCoV-19/England/SHEF-CE7BE/2020|2020-05-08|EPI\_ISL\_490631|Original|hCoV-19^^England|Human|Virology Department|COVID-19 Genomics UK (COG-UK) Consortium|de Silva|United Kingdom

>Spike|hCoV-19/England/SHEF-CC64A/2020|2020-04-02|EPI\_ISL\_432527|Original|hCoV-19^^England|Human|Virology Department|COVID-19 Genomics UK (COG-UK) Consortium|de Silva|United Kingdom



>Spike|hCoV-19/England/MILK-A23C72/2020|2020-10-03|EPI\_ISL\_595113|Original|hCoV-19^^England|Human|Centre for Enzyme Innovation|COVID-19 Genomics UK (COG-UK) Consortium|Robson|United Kingdom

>Spike|hCoV-19/India/OR-ILSCV35475/2020|2020-06-10|EPI\_ISL\_481199|Original|hCoV-19^^Odisha|Human|Immunogenomics lab|Immunogenomics lab|Raghav|India

>Spike|hCoV-19/Wales/PHWC-4960B0/2020|2020-11-25|EPI\_ISL\_726528|Original|hCoV-19^^Wales|Human|Originating lab|COVID-19 Genomics UK (COG-UK) Consortium|Moore|United Kingdom

>Spike|hCoV-19/Romania/ROSV\_3316/2020|2020-04-20|EPI\_ISL\_491068|Original|hCoV-19^^Suceava|Human|Suceava County Emergency Hospital|\Stefan cel Mare\ University Metagenomics Lab|Lobiuc|Romania

>Spike|hCoV-19/USA/MI-QDX-314/2020|2020-03-22|EPI\_ISL\_571058|Original|hCoV-19^^Michigan|Human|Quest Diagnostics|Quest Diagnostics|Kagan|USA

>Spike|hCoV-19/Wales/PHWC-4833AE/2020|2020-09-06|EPI\_ISL\_627811|Original|hCoV-19^^Wales|Human|Wales Specialist Virology Centre Sequencing lab|COVID-19 Genomics UK (COG-UK) Consortium|Moore|United Kingdom

>Spike|hCoV-19/England/CAMB-1BBB20/2020|2020-11-20|EPI\_ISL\_679195|Original|hCoV-19^^England|Human|Department of Pathology|COVID-19 Genomics UK (COG-UK) Consortium|Goodfellow|United Kingdom

>Spike|hCoV-19/Germany/BW-UKT-a021/2020|2020-04-08|EPI\_ISL\_723080|Original|hCoV-19^^Baden-Wuerttemberg|Human|Institute of Medical Genetics and Applied Genomics|Institute of Medical Genetics and Applied Genomics|Gross|Germany

>Spike|hCoV-19/USA/WA-S2643/2020|2020-06-20|EPI\_ISL\_497275|Original|hCoV-19^^Washington|Human|Washington State Department of Health|Seattle Flu Study|Lee|USA

>Spike|hCoV-19/Spain/MD-IBV-99008532/2020|2020-09-10|EPI\_ISL\_654080|Original|hCoV-19^^Madrid|Human|Hospital General Universitario Gregorio Mara\u00f1a|SeqCOVID-SPAIN consortium/IBV (CSIC)|Comas|Spain

>Spike|hCoV-19/Japan/PG-8202/2020|2020-08-00|EPI\_ISL\_687301|Original|hCoV-19^^Japan|Human|Pathogen Genomics Center|Pathogen Genomics Center|Sekizuka|Japan

>Spike|hCoV-19/England/QEUEH-C145C2/2020|2020-12-06|EPI\_ISL\_709334|Original|hCoV-19^^England|Human|Lighthouse Lab in Glasgow|Wellcome Sanger Institute for the COVID-19 Genomics UK (COG-UK) Consortium|Davies|United Kingdom

>Spike|hCoV-19/USA/TX-HMH-MCoV-19549/2020|2020-11-17|EPI\_ISL\_783923|Original|hCoV-19^^Texas|Human|Houston Methodist Hospital|Houston Methodist Hospital|Long|USA

>Spike|hCoV-19/USA/AZ-TG648593/2020|2020-04-29|EPI\_ISL\_695845|Original|hCoV-19^^Arizona|Human|Sonora Quest Laboratories|TGen North|French|USA

>Spike|hCoV-19/Scotland/GCVR-1715EC/2020|2020-03-30|EPI\_ISL\_524512|Original|hCoV-19^^Scotland|Human|NHSGGC West of Scotland Specialist Virology Centre / MRC-University of Glasgow Centre for Virus Research|Wellcome Sanger Institute for the COVID-19 Genomics UK (COG-UK) consortium|Davies|United Kingdom

>Spike|hCoV-19/Scotland/CVR5585/2020|2020-10-31|EPI\_ISL\_650727|Original|hCoV-19^^Scotland|Human|West of Scotland Specialist Virology Centre|COVID-19 Genomics UK (COG-UK) Consortium|Robertson|United Kingdom

>Spike|hCoV-19/England/ALDP-A94447/2020|2020-10-20|EPI\_ISL\_624812|Original|hCoV-19^^England|Human|Lighthouse Lab in Alderley Park|Wellcome Sanger Institute for the COVID-19 Genomics UK (COG-UK) consortium|Davies|United Kingdom

>Spike|hCoV-19/Norway/2856/2020|2020-07-02|EPI\_ISL\_500779|Original|hCoV-19^^Norway|Human|Akershus University Hospital|Norwegian Institute of Public Health|Kopperud Riis|Norway

>Spike|hCoV-19/Japan/PG-0407/2020|2020-03-30|EPI\_ISL\_480076|Original|hCoV-19^^Kanto|Human|Shizuoka City Institute of Environmental Sciences and Public Health|Pathogen Genomics Center|Sekizuka|Japan

>Spike|hCoV-19/Switzerland/BL-ETHZ-410308/2020|2020-12-15|EPI\_ISL\_737536|Original|hCoV-19^^Basel-Landschaft|Human|Viollier AG|Department of Biosystems Science and Engineering|Nadeau|Switzerland

>Spike|hCoV-19/USA/TX-HMH-2404/2020|2020-05-25|EPI\_ISL\_545291|Original|hCoV-19^^Texas|Human|Houston Methodist Hospital|Houston Methodist Hospital|Long|USA

>Spike|hCoV-19/England/ALDP-BB5069/2020|2020-11-20|EPI\_ISL\_701740|Original|hCoV-19^^England|Human|Lighthouse Lab in Alderley Park|Wellcome Sanger Institute for the COVID-19 Genomics UK (COG-UK) Consortium|Davies|United Kingdom

>Spike|hCoV-19/Russia/PRI-RII-MH931S/2020|2020-08-12|EPI\_ISL\_733022|Original|hCoV-19^^Primorsky|Human|WHO National Influenza Centre Russian Federation|WHO National Influenza Centre Russian Federation|Komissarov|Russia

>Spike|hCoV-19/Sweden/20-08078/2020|2020-03-05|EPI\_ISL\_454453|Original|hCoV-19^^Stockholm|Human|Karolinska Universitetslaboratoriet|The Public Health Agency of Sweden|Svartstr\u00f6m|Sweden

>Spike|hCoV-19/England/QEUH-C32B62/2020|2020-12-11|EPI\_ISL\_782570|Original|hCoV-19^^England|Human|Lighthouse Lab in Glasgow|Wellcome Sanger Institute for the COVID-19 Genomics UK (COG-UK) Consortium|Davies|United Kingdom

>Spike|hCoV-19/USA/VA-DCLS-2508/2020|2020-11-16|EPI\_ISL\_734283|Original|hCoV-19^^Virginia|Human|Virginia Division of Consolidated Laboratory Services (DCLS)|Virginia Division of Consolidated Laboratory Services (DCLS)|St. Jacques|USA

>Spike|hCoV-19/Japan/PG-4982/2020|2020-08-00|EPI\_ISL\_689635|Original|hCoV-19^^Japan|Human|Pathogen Genomics Center|Pathogen Genomics Center|Sekizuka|Japan

>Spike|hCoV-19/England/LOND-D4C7A/2020|2020-04-15|EPI\_ISL\_449670|Original|hCoV-19^^England|Human|University College London|COVID-19 Genomics UK (COG-UK) Consortium|Roy|United Kingdom

>Spike|hCoV-19/England/MILK-A4613E/2020|2020-10-06|EPI\_ISL\_598577|Original|hCoV-19^^England|Human|Lighthouse Lab in Milton Keynes|Wellcome Sanger Institute for the COVID-19 Genomics UK (COG-UK) consortium|Davies|United Kingdom

>Spike|hCoV-19/Germany/NW-HHU-398/2020|2020-11-01|EPI\_ISL\_718077|Original|hCoV-19^^North Rhine-Westphalia|Human|ZOTZ KLIMAS MVZ D\u00fcsseldorf-Centrum GbR \u00dcBAG f\u00fcr Labormedizin|Center of Medical Microbiology|Wienemann|Germany

>Spike|hCoV-19/Australia/WA304/2020|2020-03-15|EPI\_ISL\_596847|Original|hCoV-19^^Western Australia|Human|PathWest Laboratory Medicine WA|PathWest Laboratory Medicine WA Microbial Surveillance Unit|Sikazwe|Australia

>Spike|hCoV-19/England/LIVE-DB60C0/2020|2020-11-07|EPI\_ISL\_652093|Original|hCoV-19^^England|Human|Liverpool Clinical Laboratories|COVID-19 Genomics UK (COG-UK) Consortium|Haldenby|United Kingdom

>Spike|hCoV-19/Vietnam/PIHCM-420/2020|2020-03-22|EPI\_ISL\_654884|Vero E6|hCoV-19^^Ho Chi Minh city|Human|Pasteur Institute in Ho Chi Minh city|Department of Microbiology and Immunology - Pasteur Institute in Ho Chi Minh city|Vu|Viet Nam

>Spike|hCoV-19/England/CAMC-B78484/2020|2020-11-11|EPI\_ISL\_783394|Original|hCoV-19^^England|Human|Lighthouse Lab in Cambridge|Wellcome Sanger Institute for the COVID-19 Genomics UK (COG-UK) Consortium|Davies|United Kingdom

>Spike|hCoV-19/USA/FL-BPHL-0270/2020|2020-05-05|EPI\_ISL\_480921|Original|hCoV-19^^Florida|Human|Florida Bureau of Public Health Laboratories|Florida Bureau of Public Health Laboratories|Blanton|USA

>Spike|hCoV-19/England/QEUH-969AA4/2020|2020-08-11|EPI\_ISL\_531216|Original|hCoV-19^^England|Human|Lighthouse Lab in Glasgow|Wellcome Sanger Institute for the COVID-19 Genomics UK (COG-UK) consortium|Davies|United Kingdom

>Spike|hCoV-19/England/QEUH-9F5AE9/2020|2020-09-25|EPI\_ISL\_588766|Original|hCoV-19^^England|Human|Lighthouse Lab in Glasgow|Wellcome Sanger Institute for the COVID-19 Genomics UK (COG-UK) consortium|Davies|United Kingdom

>Spike|hCoV-19/USA/MI-MDHHS-SC22237/2020|2020-10-30|EPI\_ISL\_666903|Original|hCoV-19^^Michigan|Human|Michigan Department of Health and Human Services|Michigan Department of Health and Human Services|Jacob|USA

>Spike|hCoV-19/USA/CA-CZB-14829/2020|2020-11-18|EPI\_ISL\_738807|Original|hCoV-19^^California|Human|Humboldt County Public Health Laboratory|Chan-Zuckerberg Biohub|Kamm|USA

>Spike|hCoV-19/Israel/CVL-66-ngs/2020|2020-12-24|EPI\_ISL\_776577|Original|hCoV-19^^Israel|Human|Israel Central Virology laboratory|Israel Central Virology laboratory|Zuckerman|Israel

>Spike|hCoV-19/Scotland/EDB5846/2020|2020-04-28|EPI\_ISL\_487860|Original|hCoV-19^^Scotland|Human|Virology Department|Wellcome Sanger Institute for the COVID-19 Genomics UK (COG-UK) consortium|Davies|United Kingdom

>Spike|hCoV-19/USA/WI-UW-849/2020|2020-07-01|EPI\_ISL\_509855|Original|hCoV-19^^Wisconsin|Human|University of Wisconsin-Madison AIDS Vaccine Research Laboratories|University of Wisconsin-Madison AIDS Vaccine Research Laboratories|Baczenas|USA

>Spike|hCoV-19/Switzerland/AG-ETHZ-210017/2020|2020-07-21|EPI\_ISL\_511986|Original|hCoV-19^^Aargau|Human|Viollier AG|Department of Biosystems Science and Engineering|Nadeau|Switzerland

>Spike|hCoV-19/Australia/VIC11988/2020|2020-07-23|EPI\_ISL\_591906|Original|hCoV-19^^Victoria|Human|Microbiological Diagnostic Unit - Public Health Laboratory (MDU-PHL)|MDU-PHL|Schultz|Australia

>Spike|hCoV-19/England/ALDP-A6FD86/2020|2020-10-14|EPI\_ISL\_607040|Original|hCoV-19^^England|Human|Lighthouse Lab in Alderley Park|Wellcome Sanger Institute for the COVID-19 Genomics UK (COG-UK) consortium|Davies|United Kingdom

>Spike|hCoV-19/USA/IL-NM-0668/2020|2020-05-08|EPI\_ISL\_626463|Original|hCoV-19^^Illinois|Human|Northwestern Memorial Hospital|Ozer Lab|Ozer|USA

>Spike|hCoV-19/India/MH-ACTREC-252/2020|2020-07-07|EPI\_ISL\_699904|Original|hCoV-19^^Maharashtra|Human|Hematopathology Laboratory|Hematopathology Laboratory|Patkar|India

>Spike|hCoV-19/Denmark/DCGC-19943/2020|2020-12-07|EPI\_ISL\_747880|Original|hCoV-19^^Denmark|Human|Department of Virus and Microbiological Special Diagnostics|Albertsen Lab|Michaelsen|Denmark

>Spike|hCoV-19/USA/CA-SEARCH-5365/2020|2020-12-14|EPI\_ISL\_755177|Original|hCoV-19^^California|Human|UCSD EXCITE lab|Andersen lab at Scripps Research|Gangavarapu|USA

>Spike|hCoV-19/Australia/WA28/2020|2020-03-20|EPI\_ISL\_470845|Original|hCoV-19^^Western Australia|Human|PathWest Laboratory Medicine WA|PathWest Laboratory Medicine WA|Sikazwe|Australia

>Spike|hCoV-19/England/MILK-A79F1A/2020|2020-10-15|EPI\_ISL\_606619|Original|hCoV-19^^England|Human|Lighthouse Lab in Milton Keynes|Wellcome Sanger Institute for the COVID-19 Genomics UK (COG-UK) consortium|Davies|United Kingdom

>Spike|hCoV-19/Spain/IB-IBV-2503/2020|2020-03-19|EPI\_ISL\_468996|Original|hCoV-19^^Illes Balears|Human|Servicio de Microbiolog\u00eda|SeqCOVID-SPAIN consortium/IBV (CSIC)|Comas|Spain

>Spike|hCoV-19/Switzerland/ZH-ETHZ-310484/2020|2020-10-08|EPI\_ISL\_603554|Original|hCoV-19^^Zurich|Human|Viollier AG|Department of Biosystems Science and Engineering|Nadeau|Switzerland

>Spike|hCoV-19/Japan/PG-1165/2020|2020-04-00|EPI\_ISL\_684775|Original|hCoV-19^^Japan|Human|Pathogen Genomics Center|Pathogen Genomics Center|Sekizuka|Japan

>Spike|hCoV-19/Wales/PHWC-49975E/2020|2020-12-03|EPI\_ISL\_727350|Original|hCoV-19^^Wales|Human|Originating lab|COVID-19 Genomics UK (COG-UK) Consortium|Moore|United Kingdom

>Spike|hCoV-19/Wales/PHWC-491D45/2020|2020-11-12|EPI\_ISL\_706773|Original|hCoV-19^^Wales|Human|Originating lab|COVID-19 Genomics UK (COG-UK) Consortium|Moore|United Kingdom

>Spike|hCoV-19/England/QEUH-9AEA0D/2020|2020-09-05|EPI\_ISL\_577264|Original|hCoV-19^^England|Human|University of Exeter|COVID-19 Genomics UK (COG-UK) Consortium|Temperton|United Kingdom

>Spike|hCoV-19/Switzerland/ZH-ETHZ-270084/2020|2020-09-02|EPI\_ISL\_541517|Original|hCoV-19^^Zurich|Human|Viollier AG|Department of Biosystems Science and Engineering|Nadeau|Switzerland

>Spike|hCoV-19/Denmark/DCGC-7318/2020|2020-10-12|EPI\_ISL\_618938|Original|hCoV-19^^Hovedstaden|Human|Department of Virus and Microbiological Special Diagnostics|Albertsen lab|Michaelsen|Denmark

>Spike|hCoV-19/Netherlands/un-EMC-765/2020|2020-00-00|EPI\_ISL\_523521|Original|hCoV-19^^Netherlands|Human|Dutch COVID-19 response team|Erasmus Medical Center|Oude Munnink|Netherlands

>Spike|hCoV-19/USA/TX-DSHS-0003/2020|2020-05-08|EPI\_ISL\_515252|Original|hCoV-19^^Texas|Human|Texas Department of State Health Services|Texas Department of State Health Services|Rahman|USA

>Spike|hCoV-19/Australia/VIC12761/2020|2020-07-28|EPI\_ISL\_592073|Original|hCoV-19^^Victoria|Human|Microbiological Diagnostic Unit - Public Health Laboratory (MDU-PHL)|MDU-PHL|Schultz|Australia

>Spike|hCoV-19/India/DL-IGIB11305086/2020|2020-07-00|EPI\_ISL\_751286|Original|hCoV-19^^Delhi|Human|Devki Devi Foundation|CSIR-IGIB/Max|Pandey|India

>Spike|hCoV-19/England/SHEF-C8444/2020|2020-04-10|EPI\_ISL\_442028|Original|hCoV-19^^England|Human|Virology Department|COVID-19 Genomics UK (COG-UK) Consortium|de Silva|United Kingdom

>Spike|hCoV-19/Denmark/DCGC-9571/2020|2020-11-09|EPI\_ISL\_669045|Original|hCoV-19^^Hovedstaden|Human|Department of Virus and Microbiological Special Diagnostics|Albertsen Lab|Michaelsen|Denmark

>Spike|hCoV-19/USA/AZ-TG594918/2020|2020-08-10|EPI\_ISL\_695638|Original|hCoV-19^^Arizona|Human|TGen North|TGen North|French|USA

>Spike|hCoV-19/USA/CA-CZB-13052/2020|2020-05-17|EPI\_ISL\_672326|Original|hCoV-19^^California|Human|Alameda County Public Health Lab|Chan-Zuckerberg Biohub|Bhatt|USA

>Spike|hCoV-19/USA/AZ-TG618043/2020|2020-07-20|EPI\_ISL\_695685|Original|hCoV-19^^Arizona|Human|AZ SPHL|TGen North|French|USA

>Spike|hCoV-19/USA/UT-UPHL-201103815/2020|2020-04-04|EPI\_ISL\_623176|Original|hCoV-19^^Utah|Human|Utah Public Health Laboratory|Utah Public Health Laboratory|Young|USA

>Spike|hCoV-19/England/QEUEH-B2B787/2020|2020-11-03|EPI\_ISL\_646504|Original|hCoV-19^^England|Human|Lighthouse Lab in Glasgow|Wellcome Sanger Institute for the COVID-19 Genomics UK (COG-UK) Consortium|Davies|United Kingdom

>Spike|hCoV-19/USA/OR-OHSU-2145/2020|2020-08-05|EPI\_ISL\_667127|Original|hCoV-19^^Oregon|Human|OHSU Lab Services Molecular Microbiology Lab|Oregon SARS-CoV-2 Genome Sequencing Center|O'Roak|USA

>Spike|hCoV-19/Australia/NSW127/2020|2020-03-26|EPI\_ISL\_427808|Original|hCoV-19^^New South Wales|Human|Centre for Infectious Diseases and Microbiology Public Health|NSW Health Pathology - Institute of Clinical Pathology and Medical Research; Westmead Hospital; University of Sydney|Gall|Australia

>Spike|hCoV-19/England/QEUEH-AD03BB/2020|2020-10-24|EPI\_ISL\_629952|Original|hCoV-19^^England|Human|Lighthouse Lab in Glasgow|Wellcome Sanger Institute for the COVID-19 Genomics UK (COG-UK) consortium|Davies|United Kingdom

>Spike|hCoV-19/England/ALDP-9E775C/2020|2020-09-24|EPI\_ISL\_638215|Original|hCoV-19^^England|Human|Department of Pathology|COVID-19 Genomics UK (COG-UK) Consortium|Goodfellow|United Kingdom

>Spike|hCoV-19/USA/TX-HMH-5077/2020|2020-06-24|EPI\_ISL\_544507|Original|hCoV-19^^Texas|Human|Houston Methodist Hospital|Houston Methodist Hospital|Long|USA

>Spike|hCoV-19/England/QEUEH-A9ECDC/2020|2020-10-20|EPI\_ISL\_611311|Original|hCoV-19^^England|Human|Lighthouse Lab in Glasgow|Wellcome Sanger Institute for the COVID-19 Genomics UK (COG-UK) consortium|Davies|United Kingdom

>Spike|hCoV-19/USA/TX-HMH-MCoV-19693/2020|2020-11-30|EPI\_ISL\_784047|Original|hCoV-19^^Texas|Human|Houston Methodist Hospital|Houston Methodist Hospital|Long|USA

>Spike|hCoV-19/England/ALDP-B1A76D/2020|2020-11-01|EPI\_ISL\_646001|Original|hCoV-19^^England|Human|Lighthouse Lab in Alderley Park|Wellcome Sanger Institute for the COVID-19 Genomics UK (COG-UK) Consortium|Davies|United Kingdom

>Spike|hCoV-19/Scotland/CVR1081/2020|2020-03-29|EPI\_ISL\_433507|Original|hCoV-19^^Scotland|Human|West of Scotland Specialist Virology Centre|COVID-19 Genomics UK (COG-UK) Consortium|Robertson|United Kingdom

>Spike|hCoV-19/Japan/PG-3464/2020|2020-07-00|EPI\_ISL\_691574|Original|hCoV-19^^Japan|Human|Pathogen Genomics Center|Pathogen Genomics Center|Sekizuka|Japan

>Spike|hCoV-19/England/ALDP-5BF85E/2020|2020-06-20|EPI\_ISL\_558725|Original|hCoV-19^^England|Human|Lighthouse Lab in Alderley Park|Wellcome Sanger Institute for the COVID-19 Genomics UK (COG-UK) consortium|Davies|United Kingdom

>Spike|hCoV-19/England/QEUEH-9DA8FF/2020|2020-09-21|EPI\_ISL\_601405|Original|hCoV-19^^England|Human|Lighthouse Lab in Glasgow|Wellcome Sanger Institute for the COVID-19 Genomics UK (COG-UK) consortium|Davies|United Kingdom

>Spike|hCoV-19/England/NORT-2A5F4A/2020|2020-10-11|EPI\_ISL\_637376|Original|hCoV-19^^England|Human|Northumbria University / South Tees Hospitals NHS Foundation Trust / North Cumbria Integrated Care NHS Foundation Trust / North Tees and Hartlepool NHS Foundation Trust / Newcastle Hospitals NHS Foundation Trust|COVID-19 Genomics UK (COG-UK) Consortium|Bashton|United Kingdom

>Spike|hCoV-19/Spain/MD-IBV-004963/2020|2020-05-04|EPI\_ISL\_481105|Original|hCoV-19^^Madrid|Human|Hospital General Universitario Gregorio Mara\u00f1a|SeqCOVID-SPAIN consortium|IBV (CSIC)|Comas|Spain

>Spike|hCoV-19/Denmark/DCGC-14612/2020|2020-11-23|EPI\_ISL\_711871|Original|hCoV-19^^Nordjylland|Human|Department of Virus and Microbiological Special Diagnostics|Albertsen Lab|Michaelsen|Denmark

>Spike|hCoV-19/India/TG-CCMB-R305/2020|2020-08-09|EPI\_ISL\_539643|Original|hCoV-19^^Telangana|Human|CSIR-Centre for Cellular and Molecular Biology|CSIR-Centre for Cellular and Molecular Biology|Mukherjee|India

>Spike|hCoV-19/England/CAMB-80642/2020|2020-04-10|EPI\_ISL\_470417|Original|hCoV-19^^England|Human|Department of Pathology|Wellcome Sanger Institute for the COVID-19 Genomics UK (COG-UK) consortium|Davies|United Kingdom

>Spike|hCoV-19/England/CAMC-AAFDE4/2020|2020-10-21|EPI\_ISL\_623520|Original|hCoV-19^^England|Human|Lighthouse Lab in Cambridge|Wellcome Sanger Institute for the COVID-19 Genomics UK (COG-UK) consortium|Davies|United Kingdom

>Spike|hCoV-19/England/QEUEH-B6BE68/2020|2020-11-11|EPI\_ISL\_655213|Original|hCoV-19^^England|Human|Lighthouse Lab in Glasgow|Wellcome Sanger Institute for the COVID-19 Genomics UK (COG-UK) Consortium|Davies|United Kingdom

>Spike|hCoV-19/Norway/6703/2020|2020-12-07|EPI\_ISL\_775406|Original|hCoV-19^^Vestfold og Telemark|Human|Unilabs Laboratory Medicine|Norwegian Institute of Public Health|Vollan|Norway

>Spike|hCoV-19/Wales/PHWC-49FF7E/2020|2020-12-11|EPI\_ISL\_743375|Original|hCoV-19^^Wales|Human|Wales Specialist Virology Centre Sequencing lab|COVID-19 Genomics UK (COG-UK) Consortium|Moore|United Kingdom

>Spike|hCoV-19/Germany/BE-ChVir-D1929-7417/2020|2020-10-09|EPI\_ISL\_753781|Original|hCoV-19^^Berlin|Human|Charit\u00e9 Universit\u00e4tsmedizin Berlin|Charit\u00e9 Universit\u00e4tsmedizin Berlin|Muehlemann|Germany

>Spike|hCoV-19/Denmark/DCGC-12305/2020|2020-11-16|EPI\_ISL\_682486|Original|hCoV-19^^Hovedstaden|Human|Department of Virus and Microbiological Special Diagnostics|Albertsen Lab|Michaelsen|Denmark

>Spike|hCoV-19/Russia/MUR-RII-MH2077S/2020|2020-09-22|EPI\_ISL\_602406|Original|hCoV-19^^Murmansk|Human|HELIX LLC|WHO National Influenza Centre Russian Federation|Komissarov|Russia

>Spike|hCoV-19/England/ALDP-CB37FC/2020|2020-12-18|EPI\_ISL\_761909|Original|hCoV-19^^England|Human|Lighthouse Lab in Alderley Park|Wellcome Sanger Institute for the COVID-19 Genomics UK (COG-UK) Consortium|Davies|United Kingdom

>Spike|hCoV-19/Switzerland/GR-ETHZ-120198/2020|2020-04-28|EPI\_ISL\_468272|Original|hCoV-19^^Graubunden|Human|Viollier AG|Department of Biosystems Science and Engineering|Nadeau|Switzerland

>Spike|hCoV-19/Uganda/UG100/2020|2020-08-14|EPI\_ISL\_737945|Original|hCoV-19^^Uganda|Human|Uganda Central Public Health Lab and Uganda Virus Research Institute|MRC/UVRI & LSHTM Uganda\u00a0Research Unit|Cotten|Uganda

>Spike|hCoV-19/England/MILK-9C21E0/2020|2020-09-08|EPI\_ISL\_566422|Original|hCoV-19^^England|Human|Lighthouse Lab in Milton Keynes|Wellcome Sanger Institute for the COVID-19 Genomics UK (COG-UK) consortium|Davies|United Kingdom

>Spike|hCoV-19/USA/TX-HMH-MCoV-12638/2020|2020-08-31|EPI\_ISL\_789871|Original|hCoV-19^^Texas|Human|Houston Methodist Hospital|Houston Methodist Hospital|Long|USA

>Spike|hCoV-19/England/MILK-A6BD02/2020|2020-10-08|EPI\_ISL\_609071|Original|hCoV-19^^England|Human|Lighthouse Lab in Milton Keynes|Wellcome Sanger Institute for the COVID-19 Genomics UK (COG-UK) consortium|Davies|United Kingdom

>Spike|hCoV-19/France/ARA-110406/2020|2020-11-21|EPI\_ISL\_728538|Original|hCoV-19^^Auvergne-Rh\u00f4ne-Alpes|Human|CNR Virus des Infections Respiratoires - France SUD|CNR Virus des Infections Respiratoires - France SUD|Bal|France

>Spike|hCoV-19/Wales/ALDP-9EABC6/2020|2020-09-24|EPI\_ISL\_580260|Original|hCoV-19^^Wales|Human|Lighthouse Lab in Alderley Park|Wellcome Sanger Institute for the COVID-19 Genomics UK (COG-UK) consortium|Davies|United Kingdom

>Spike|hCoV-19/South Africa/N00093/2020|2020-08-11|EPI\_ISL\_622973|Original|hCoV-19^^Eastern Cape|Human|National Health Laboratory Service|National Institute for Communicable Diseases of the National Health Laboratory Service|Allam|South Africa

>Spike|hCoV-19/Wales/PHWC-3309B/2020|2020-04-14|EPI\_ISL\_446732|Original|hCoV-19^^Wales|Human|Wales Specialist Virology Centre|Public Health Wales Microbiology Cardiff|Moore|United Kingdom

>Spike|hCoV-19/Scotland/QEUA-AADCCB/2020|2020-10-22|EPI\_ISL\_624164|Original|hCoV-19^^Scotland|Human|Lighthouse Lab in Glasgow|Wellcome Sanger Institute for the COVID-19 Genomics UK (COG-UK) consortium|Davies|United Kingdom

>Spike|hCoV-19/Australia/VIC9119/2020|2020-08-20|EPI\_ISL\_565397|Original|hCoV-19^^Victoria|Human|Microbiological Diagnostic Unit - Public Health Laboratory (MDU-PHL)|MDU-PHL|Schultz|Australia

>Spike|hCoV-19/USA/WA-UW-6213/2020|2020-04-01|EPI\_ISL\_430956|Original|hCoV-19^^Washington|Human|UW Virology Lab|UW Virology Lab|Roychoudhury|USA

>Spike|hCoV-19/Gibraltar/204841758/2020|2020-00-00|EPI\_ISL\_671325|Original|hCoV-19^^Gibraltar|Human|Microbiology|Respiratory Virus Unit|Platt|Gibraltar

>Spike|hCoV-19/Scotland/CVR2750/2020|2020-04-18|EPI\_ISL\_438974|Original|hCoV-19^^Scotland|Human|West of Scotland Specialist Virology Centre|COVID-19 Genomics UK (COG-UK) Consortium|Robertson|United Kingdom

>Spike|hCoV-19/England/NORW-E7193/2020|2020-04-20|EPI\_ISL\_449009|Original|hCoV-19^^England|Human|Quadram Institute Bioscience|COVID-19 Genomics UK (COG-UK) Consortium|Alikhan|United Kingdom

>Spike|hCoV-19/England/QEUA-A1F9EB/2020|2020-10-01|EPI\_ISL\_587699|Original|hCoV-19^^England|Human|Lighthouse Lab in Glasgow|Wellcome Sanger Institute for the COVID-19 Genomics UK (COG-UK) consortium|Davies|United Kingdom

>Spike|hCoV-19/USA/NM-DOH-2020313314/2020|2020-08-26|EPI\_ISL\_574267|Original|hCoV-19^^New Mexico|Human|New Mexico Department of Health Scientific Laboratory|New Mexico Department of Health Scientific Laboratory|Johnson|USA

>Spike|hCoV-19/England/ALDP-BB5175/2020|2020-11-21|EPI\_ISL\_701761|Original|hCoV-19^^England|Human|Lighthouse Lab in Alderley Park|Wellcome Sanger Institute for the COVID-19 Genomics UK (COG-UK) Consortium|Davies|United Kingdom

>Spike|hCoV-19/England/MILK-486CA0/2020|2020-05-15|EPI\_ISL\_559677|Original|hCoV-19^^England|Human|Lighthouse Lab in Milton Keynes|Wellcome Sanger Institute for the COVID-19 Genomics UK (COG-UK) consortium|Davies|United Kingdom

>Spike|hCoV-19/England/204291001/2020|2020-10-16|EPI\_ISL\_613616|Original|hCoV-19^^England|Human|Respiratory Virus Unit|Respiratory Virus Unit|Platt|United Kingdom

>Spike|hCoV-19/Russia/MOS-CRIE-13372214/2020|2020-11-06|EPI\_ISL\_745235|Original|hCoV-19^^Moscow|Human|Molecular diagnostic laboratory of Federal Budget Institution of Science \Central Research Institute of Epidemiology\ of The Federal Service on Customers' Rights Protection and Human Well-being Surveillance|Group of Genomics and Postgenomic Technologies of Central Research Institute of Epidemiology

>y|Korneenko|Russia

>Spike|hCoV-19/USA/MI-QDX-1728/2020|2020-03-17|EPI\_ISL\_604043|Original|hCoV-19^^Michigan|Human|Quest Diagnostics|Quest Diagnostics|Kagan|USA

>Spike|hCoV-19/Wales/PHWC-49F56D/2020|2020-12-08|EPI\_ISL\_743233|Original|hCoV-19^^Wales|Human|Wales Specialist Virology Centre Sequencing lab|COVID-19 Genomics UK (COG-UK) Consortium|Moore|United Kingdom

>Spike|hCoV-19/USA/CA-UCLA-105/2020|2020-04-04|EPI\_ISL\_537469|Original|hCoV-19^^California|Human|UCLA Pathology Clinical Microbiology Lab|Kruglyak Lab|Boocock|USA

>Spike|hCoV-19/England/201090761/2020|2020-03-06|EPI\_ISL\_464602|Original|hCoV-19^^England|Human|Respiratory Virus Unit|Respiratory Virus Unit|Platt|United Kingdom

>Spike|hCoV-19/England/CAMC-B34624/2020|2020-11-05|EPI\_ISL\_659663|Original|hCoV-19^^England|Human|Lighthouse Lab in Cambridge|Wellcome Sanger Institute for the COVID-19 Genomics UK (COG-UK) Consortium|Davies|United Kingdom

>Spike|hCoV-19/Denmark/DCGC-15198/2020|2020-11-23|EPI\_ISL\_713687|Original|hCoV-19^^Hovedstaden|Human|Department of Virus and Microbiological Special Diagnostics|Albertsen Lab|Michaelsen|Denmark

>Spike|hCoV-19/England/QEUA-AE2D6D/2020|2020-10-27|EPI\_ISL\_633677|Original|hCoV-19^^England|Human|Lighthouse Lab in Glasgow|Wellcome Sanger Institute for the COVID-19 Genomics UK (COG-UK) consortium|Davies|United Kingdom

>Spike|hCoV-19/USA/TX-HMH-MCoV-13231/2020|2020-08-26|EPI\_ISL\_788381|Original|hCoV-19^^Texas|Human|Houston Methodist Hospital|Houston Methodist Hospital|Long|USA

>Spike|hCoV-19/USA/NM-DOH-2020616663/2020|2020-12-12|EPI\_ISL\_751824|Original|hCoV-19^^New Mexico|Human|New Mexico Department of Health Scientific Laboratory|New Mexico Department of Health Scientific Laboratory|Malone|USA

>Spike|hCoV-19/England/ALDP-B84A0B/2020|2020-11-15|EPI\_ISL\_674193|Original|hCoV-19^^England|Human|Lighthouse Lab in Alderley Park|Wellcome Sanger Institute for the COVID-19 Genomics UK (COG-UK) Consortium|Davies|United Kingdom

>Spike|hCoV-19/Luxembourg/LNS8070927/2020|2020-11-24|EPI\_ISL\_744677|Original|hCoV-19^^Luxembourg|Human|Laboratoire national de sant\u00e9|Laboratoire national de sant\u00e9|Wienecke-Baldacchino|Luxembourg

>Spike|hCoV-19/Netherlands/ZH-EMC-1245/2020|2020-12-23|EPI\_ISL\_763314|Original|hCoV-19^^Zuid Holland|Human|Dutch COVID-19 response team|Erasmus Medical Center|Oude Munnink|Netherlands

>Spike|hCoV-19/England/CAMC-94C087/2020|2020-07-17|EPI\_ISL\_556652|Original|hCoV-19^^England|Human|Lighthouse Lab in Cambridge|Wellcome Sanger Institute for the COVID-19 Genomics UK (COG-UK) consortium|Davies|United Kingdom

>Spike|hCoV-19/England/ALDP-AA1B9D/2020|2020-10-22|EPI\_ISL\_630895|Original|hCoV-19^^England|Human|Lighthouse Lab in Alderley Park|Wellcome Sanger Institute for the COVID-19 Genomics UK (COG-UK) consortium|Davies|United Kingdom

>Spike|hCoV-19/England/MILK-9C3774/2020|2020-09-07|EPI\_ISL\_566936|Original|hCoV-19^^England|Human|Lighthouse Lab in Milton Keynes|Wellcome Sanger Institute for the COVID-19 Genomics UK (COG-UK) consortium|Davies|United Kingdom

>Spike|hCoV-19/Denmark/DCGC-1133/2020|2020-03-16|EPI\_ISL\_614611|Original|hCoV-19^^Hovedstaden|Human|Department of Virus and Microbiological Special Diagnostics|Albertsen lab|Michaelsen|Denmark

>Spike|hCoV-19/England/NOTT-1100C0/2020|2020-04-10|EPI\_ISL\_441468|Original|hCoV-19^^England|Human|Queens Medical Centre|COVID-19 Genomics UK (COG-UK) Consortium|Loose|United Kingdom

>Spike|hCoV-19/USA/NY-PV08135/2020|2020-03-17|EPI\_ISL\_421357|Original|hCoV-19^^New York|Human|MSHS Clinical Microbiology Laboratories|MSHS Pathogen Surveillance Program|van Bakel|USA

>Spike|hCoV-19/Denmark/DCGC-12016/2020|2020-06-08|EPI\_ISL\_671263|Original|hCoV-19^^Nordjylland|Human|Department of Virus and Microbiological Special Diagnostics|Albertsen Lab|Michaelsen|Denmark

>Spike|hCoV-19/England/QEUEH-96F3FE/2020|2020-08-15|EPI\_ISL\_530595|Original|hCoV-19^^England|Human|Lighthouse Lab in Glasgow|Wellcome Sanger Institute for the COVID-19 Genomics UK (COG-UK) consortium|Davies|United Kingdom

>Spike|hCoV-19/Netherlands/ZH-EMC-873/2020|2020-10-04|EPI\_ISL\_632373|Original|hCoV-19^^Zuid Holland|Human|Dutch COVID-19 response team|Erasmus Medical Center|Oude Munnink|Netherlands

>Spike|hCoV-19/Scotland/QEUEH-9FFEE3/2020|2020-10-02|EPI\_ISL\_600411|Original|hCoV-19^^Scotland|Human|Lighthouse Lab in Glasgow|Wellcome Sanger Institute for the COVID-19 Genomics UK (COG-UK) consortium|Davies|United Kingdom

>Spike|hCoV-19/USA/TX-DSHS-0392/2020|2020-05-31|EPI\_ISL\_542452|Original|hCoV-19^^Texas|Human|Texas Department of State Health Services|Texas Department of State Health Services|Rahman|USA

>Spike|hCoV-19/USA/TX-DSHS-0795/2020|2020-06-02|EPI\_ISL\_590860|Original|hCoV-19^^Texas|Human|Texas Department of State Health Services|Texas Department of State Health Services|Rahman|USA

>Spike|hCoV-19/England/LOND-D5945/2020|2020-04-16|EPI\_ISL\_457281|Original|hCoV-19^^England|Human|University College London|COVID-19 Genomics UK (COG-UK) Consortium|Roy|United Kingdom

>Spike|hCoV-19/Wales/PHWC-49B622/2020|2020-12-07|EPI\_ISL\_742361|Original|hCoV-19^^Wales|Human|Wales Specialist Virology Centre Sequencing lab|COVID-19 Genomics UK (COG-UK) Consortium|Moore|United Kingdom

>Spike|hCoV-19/SaudiArabia/KAUST-MADINAH1103/2020|2020-06-13|EPI\_ISL\_513109|Original|hCoV-19^^Madinah|Human|Pathogen Genomics Lab King Abdullah University of Science and Technology(KAUST)|Pathogen Genomics Lab King Abdullah University of Science and Technology(KAUST)|Mohamed Ghazzali|Saudi Arabia

>Spike|hCoV-19/Peru/LIM-UPCH-0162/2020|2020-08-28|EPI\_ISL\_568555|Original|hCoV-19^^Lima|Human|Laboratorio de Referencia Nacional de Virus Respiratorios|Laboratorio de Gen\u00f3mica Microbiana|Tsukayama|Peru

>Spike|hCoV-19/Japan/PG-7201/2020|2020-07-00|EPI\_ISL\_688305|Original|hCoV-19^^Japan|Human|Saitama Prefectural Institute of Public Health|Pathogen Genomics Center|Sekizuka|Japan

>Spike|hCoV-19/Iran/SA-Isf-19/2020|2020-05-09|EPI\_ISL\_591065|Original|hCoV-19^^Iran|Human|Infectious Diseases and Tropical Medicine Research Center|Infectious Diseases and Tropical Medicine Research Center|Haghjooy Javanmard,S.|Iran

>Spike|hCoV-19/England/NOTT-111D22/2020|2020-06-06|EPI\_ISL\_472400|Original|hCoV-19^^England|Human|Queens Medical Centre|COVID-19 Genomics UK (COG-UK) Consortium|Loose|United Kingdom

>Spike|hCoV-19/Netherlands/LI-EMC-77/2020|2020-06-03|EPI\_ISL\_523282|Original|hCoV-19^^Limburg|Human|Dutch COVID-19 response team|Erasmus Medical Center|Oude Munnink|Netherlands

>Spike|hCoV-19/Denmark/DCGC-20996/2020|2020-12-21|EPI\_ISL\_758954|Original|hCoV-19^^Syddanmark|Human|Department of Virus and Microbiological Special Diagnostics|Albertsen Lab|Michaelsen|Denmark

>Spike|hCoV-19/England/ALDP-9E9E55/2020|2020-09-24|EPI\_ISL\_580128|Original|hCoV-19^^England|Human|Lighthouse Lab in Alderley Park|Wellcome Sanger Institute for the COVID-19 Genomics UK (COG-UK) consortium|Davies|United Kingdom

>Spike|hCoV-19/England/CAMC-B52AF7/2020|2020-11-09|EPI\_ISL\_657357|Original|hCoV-19^^England|Human|Lighthouse Lab in Cambridge|Wellcome Sanger Institute for the COVID-19 Genomics UK (COG-UK) Consortium|Davies|United Kingdom

>Spike|hCoV-19/England/204500136/2020|2020-11-01|EPI\_ISL\_660778|Original|hCoV-19^^England|Human|Respiratory Virus Unit|COVID-19 Genomics UK (COG-UK) Consortium|Platt|United Kingdom

>Spike|hCoV-19/England/CAMC-A40E2E/2020|2020-10-06|EPI\_ISL\_609339|Original|hCoV-19^^England|Human|Lighthouse Lab in Cambridge|Wellcome Sanger Institute for the COVID-19 Genomics UK (COG-UK) consortium|Davies|United Kingdom

>Spike|hCoV-19/USA/NY-NYUMC322/2020|2020-03-30|EPI\_ISL\_430349|Original|hCoV-19^^New York|Human|NYU Langone Health|Departments of Pathology and Medicine|Maurano|USA

>Spike|hCoV-19/USA/NY-Wadsworth-292845-01/2020|2020-12-28|EPI\_ISL\_769983|Original|hCoV-19^^New York|Human|Albany Medical Center Hospital Clinical Laboratories|Wadsworth Center|Lasek-Nesselquist|USA

>Spike|hCoV-19/Luxembourg/LNS4432996/2020|2020-10-27|EPI\_ISL\_740468|Original|hCoV-19^^Luxembourg|Human|Laboratoire national de sant\u00e9|Laboratoire national de sant\u00e9|Wienecke-Baldacchino|Luxembourg

>Spike|hCoV-19/USA/TX-DSHS-0670/2020|2020-07-19|EPI\_ISL\_576323|Original|hCoV-19^^Texas|Human|Texas Department of State Health Services|Texas Department of State Health Services|Rahman|USA

>Spike|hCoV-19/USA/LA-EVTL1118/2020|2020-12-04|EPI\_ISL\_768388|Original|hCoV-19^^Louisiana|Human|LSUHS Emerging Viral Threat Laboratory|Microbial Genome Sequencing Center|Kamil|USA

>Spike|hCoV-19/Wales/PHWC-494AF0/2020|2020-11-26|EPI\_ISL\_726217|Original|hCoV-19^^Wales|Human|Originating lab|COVID-19 Genomics UK (COG-UK) Consortium|Moore|United Kingdom

>Spike|hCoV-19/England/ALDP-B5CC06/2020|2020-11-09|EPI\_ISL\_655703|Original|hCoV-19^^England|Human|Lighthouse Lab in Alderley Park|Wellcome Sanger Institute for the COVID-19 Genomics UK (COG-UK) Consortium|Davies|United Kingdom

>Spike|hCoV-19/USA/MI-MDHHS-SC20068/2020|2020-03-22|EPI\_ISL\_437155|Original|hCoV-19^^Michigan|Human|Michigan Department of Health and Human Services|Michigan Department of Health and Human Services|Blankenship|USA

>Spike|hCoV-19/USA/HI-H200268/2020|2020-09-01|EPI\_ISL\_752827|Original|hCoV-19^^Hawaii|Human|State Laboratories Division|State Laboratories Division|Sultana|USA

>Spike|hCoV-19/USA/TX-HMH-2276/2020|2020-05-11|EPI\_ISL\_545218|Original|hCoV-19^^Texas|Human|Houston Methodist Hospital|Houston Methodist Hospital|Long|USA

>Spike|hCoV-19/England/QEUH-B677CB/2020|2020-11-11|EPI\_ISL\_661499|Original|hCoV-19^^England|Human|Lighthouse Lab in Glasgow|Wellcome Sanger Institute for the COVID-19 Genomics UK (COG-UK) Consortium|Davies|United Kingdom

>Spike|hCoV-19/Norway/6774/2020|2020-12-12|EPI\_ISL\_775413|Original|hCoV-19^^Oslo|Human|Oslo University Hospital|Norwegian Institute of Public Health|Vollan|Norway



>Spike|hCoV-19/England/LIVE-A53D7/2020|2020-03-19|EPI\_ISL\_500115|Original|hCoV-19^^England|Human|Liverpool Clinical Laboratories|COVID-19 Genomics UK (COG-UK) Consortium|Haldenby|United Kingdom

>Spike|hCoV-19/Netherlands/NA\_481/2020|2020-03-17|EPI\_ISL\_455283|Original|hCoV-19^^Netherlands|Human|Dutch COVID-19 response team|Erasmus Medical Center|Oude Munnink|Netherlands

>Spike|hCoV-19/Northern Ireland/NIRE-108A09/2020|2020-10-11|EPI\_ISL\_627524|Original|hCoV-19^^Northern Ireland|Human|Regional Virus Laboratory|COVID-19 Genomics UK (COG-UK) Consortium|Fairley|United Kingdom

>Spike|hCoV-19/USA/VA-DCLS-0914/2020|2020-05-13|EPI\_ISL\_522786|Original|hCoV-19^^Virginia|Human|Virginia DCLS|Virginia DCLS|St. Jacques|USA

>Spike|hCoV-19/England/QEUEH-B7CEBF/2020|2020-11-14|EPI\_ISL\_674625|Original|hCoV-19^^England|Human|Lighthouse Lab in Glasgow|Wellcome Sanger Institute for the COVID-19 Genomics UK (COG-UK) Consortium|Davies|United Kingdom

>Spike|hCoV-19/USA/MA-QDX-1509/2020|2020-03-17|EPI\_ISL\_603840|Original|hCoV-19^^Massachusetts|Human|Quest Diagnostics|Quest Diagnostics|Kagan|USA

>Spike|hCoV-19/Denmark/DCGC-19274/2020|2020-12-07|EPI\_ISL\_748212|Original|hCoV-19^^Sjaelland|Human|Department of Virus and Microbiological Special Diagnostics|Albertsen Lab|Michaelsen|Denmark

>Spike|hCoV-19/England/MILK-9E2A58/2020|2020-09-21|EPI\_ISL\_581129|Original|hCoV-19^^England|Human|Lighthouse Lab in Milton Keynes|Wellcome Sanger Institute for the COVID-19 Genomics UK (COG-UK) consortium|Davies|United Kingdom

>Spike|hCoV-19/Hungary/US-56260w/2020|2020-10-02|EPI\_ISL\_677775|Original|hCoV-19^^Csongr\u00e9ld county|Human|University of Szeged|National Laboratory of Virology|Kemenesi|Hungary

>Spike|hCoV-19/Canada/NS-NML-1369/2020|2020-04-14|EPI\_ISL\_579745|Original|hCoV-19^^Nova Scotia|Human|QEII Health Sciences Centre|National Microbiology Laboratory (NML)|Majer|Canada

>Spike|hCoV-19/Indonesia/JI-ITDua-4437NTv/2020|2020-04-19|EPI\_ISL\_759955|Vero P1|hCoV-19^^East Java|Human|Primasatya Husada Citra Hospital|Institute of Tropical Disease|Shimizu|Indonesia

>Spike|hCoV-19/England/QEUEH-A49A4F/2020|2020-10-08|EPI\_ISL\_628447|Original|hCoV-19^^England|Human|Oxford Viromics|COVID-19 Genomics UK (COG-UK) Consortium|Golubchik|United Kingdom

>Spike|hCoV-19/England/ALDP-A6FEDE/2020|2020-10-15|EPI\_ISL\_608338|Original|hCoV-19^^England|Human|Lighthouse Lab in Alderley Park|Wellcome Sanger Institute for the COVID-19 Genomics UK (COG-UK) consortium|Davies|United Kingdom

>Spike|hCoV-19/Costa Rica/INC-0138/2020|2020-08-17|EPI\_ISL\_682276|Original|hCoV-19^^Heredia|Human|LABORATORIOS LABIN|Inciensa|Soto-Garita|Costa Rica

>Spike|hCoV-19/Luxembourg/LNS0468115/2020|2020-11-13|EPI\_ISL\_739780|Original|hCoV-19^^Luxembourg|Human|Laboratoire national de sant\u00e9|Laboratoire national de sant\u00e9|Wienecke-Baldacchino|Luxembourg

>Spike|hCoV-19/England/ALDP-4A8E57/2020|2020-06-13|EPI\_ISL\_559500|Original|hCoV-19^^England|Human|Lighthouse Lab in Alderley Park|Wellcome Sanger Institute for the COVID-19 Genomics UK (COG-UK) consortium|Davies|United Kingdom

>Spike|hCoV-19/Belgium/ULG-11117/2020|2020-12-17|EPI\_ISL\_737365|Original|hCoV-19^^Li\u00e8ge|Human|Department of Clinical Microbiology|GIGA Medical Genomics|Durkin|Belgium

>Spike|hCoV-19/USA/WY-WPHL-20172338/2020|2020-12-30|EPI\_ISL\_770481|Original|hCoV-19^^Wyoming|Human|Wyoming Public Health Laboratory|Wyoming Public Health Laboratory|Hull|USA

>Spike|hCoV-19/England/MILK-B3A99E/2020|2020-11-02|EPI\_ISL\_679695|Original|hCoV-19^^England|Human|Oxford Viromics|COVID-19 Genomics UK (COG-UK) Consortium|Golubchik|United Kingdom

>Spike|hCoV-19/USA/MI-UM-10036854288/2020|2020-11-09|EPI\_ISL\_728512|Original|hCoV-19^^Michigan|Human|University of Michigan Clinical Microbiology Laboratory|Lauring Lab|Valesano|USA

>Spike|hCoV-19/Scotland/CVR632/2020|2020-03-25|EPI\_ISL\_425792|Original|hCoV-19^^Scotland|Human|West of Scotland Specialist Virology Centre|COVID-19 Genomics UK (COG-UK) Consortium|Robertson|United Kingdom

>Spike|hCoV-19/Japan/PG-7284/2020|2020-08-00|EPI\_ISL\_688387|Original|hCoV-19^^Japan|Human|Saitama Prefectural Institute of Public Health|Pathogen Genomics Center|Sekizuka|Japan

>Spike|hCoV-19/USA/AZ-TG296715/2020|2020-05-08|EPI\_ISL\_694245|Original|hCoV-19^^Arizona|Human|TGen North|TGen North|French|USA

>Spike|hCoV-19/USA/FL-BPHL-0980/2020|2020-07-29|EPI\_ISL\_517870|Original|hCoV-19^^Florida|Human|Florida Bureau of Public Health Laboratories|Florida Bureau of Public Health Laboratories|Blanton|USA

>Spike|hCoV-19/USA/WA-S2438/2020|2020-06-16|EPI\_ISL\_497070|Original|hCoV-19^^Washington|Human|Washington State Department of Health|Seattle Flu Study|Lee|USA

>Spike|hCoV-19/Ireland/KK-NVRL-20G43871/2020|2020-03-28|EPI\_ISL\_681913|Original|hCoV-19^^Kilkenny|Human|National Virus Reference Laboratory|Irish Coronavirus Sequencing Consortium - Teagasc Moorepark|Walsh|Ireland

>Spike|hCoV-19/England/QEUA-9DD434/2020|2020-09-21|EPI\_ISL\_599620|Original|hCoV-19^^England|Human|Lighthouse Lab in Glasgow|Wellcome Sanger Institute for the COVID-19 Genomics UK (COG-UK) consortium|Davies|United Kingdom

>Spike|hCoV-19/Latvia/054/2020|2020-05-28|EPI\_ISL\_486438|Original|hCoV-19^^Latvia|Human|E. Gulbja laboratorija|Latvian Biomedical Research and Study Centre|Zrelavs|Latvia

>Spike|hCoV-19/Luxembourg/LNS2345895/2020|2020-12-29|EPI\_ISL\_771138|Original|hCoV-19^^Luxembourg|Human|Laboratoire national de sant\u00e9|Laboratoire national de sant\u00e9|Wienecke-Baldacchino|Luxembourg

>Spike|hCoV-19/Singapore/278/2020|2020-03-21|EPI\_ISL\_462396|Original|hCoV-19^^Singapore|Human|National Public Health Laboratory|National Public Health Laboratory|Mak|Singapore

>Spike|hCoV-19/Wales/PHWC-48B93B/2020|2020-11-07|EPI\_ISL\_666302|Original|hCoV-19^^Wales|Human|Wales Specialist Virology Centre Sequencing lab|COVID-19 Genomics UK (COG-UK) Consortium|Moore|United Kingdom

>Spike|hCoV-19/Canada/QC\_AO3/2020|2020-04-09|EPI\_ISL\_463920|Original|hCoV-19^^Quebec|Human|Laboratoire de microbiologie|Smith Laboratory|Smith|Canada

>Spike|hCoV-19/England/BRIS-128F6E/2020|2020-04-18|EPI\_ISL\_458839|Original|hCoV-19^^England|Human|PHE South West Regional Laboratory|Wellcome Sanger Institute for the COVID-19 Genomics UK (COG-UK) consortium|Davies|United Kingdom

>Spike|hCoV-19/South Africa/KRISP-K000601/2020|2020-07-13|EPI\_ISL\_509254|Original|hCoV-19^^KwaZulu-Natal|Human|NHLS-IALCH|KRISP|de Oliveira|South Africa

>Spike|hCoV-19/England/QEUA-9E34E0/2020|2020-09-22|EPI\_ISL\_584851|Original|hCoV-19^^England|Human|Northumbria University / South Tees Hospitals NHS Foundation Trust / North Cumbria Integrated Care NHS Foundation Trust / North Tees and Hartlepool NHS Foundation Trust / Newcastle Hospitals NHS Foundation Trust|COVID-19 Genomics UK (COG-UK) Consortium|Bashton|United Kingdom

>Spike|hCoV-19/South Africa/NHLS-UCT-GS-0040/2020|2020-03-18|EPI\_ISL\_640038|Original|hCoV-19^^Western Cape|Human|Knysna Hospital wv KNY|NHLS/UCT|Iranzadeh|South Africa

>Spike|hCoV-19/USA/LA-EVTL049/2020|2020-05-01|EPI\_ISL\_451210|Original|hCoV-19^^Louisiana|Human|LSUHS Emerging Viral Threat Laboratory|Microbial Genome Sequencing Center|Kamil|USA

>Spike|hCoV-19/Australia/VIC15336/2020|2020-09-09|EPI\_ISL\_593256|Original|hCoV-19^^Victoria|Human|Victorian Infectious Diseases Reference Laboratory (VIDRL)|VIDRL and MDU-PHL|Schultz|Australia

>Spike|hCoV-19/USA/UN-CDC-7493/2020|2020-04-22|EPI\_ISL\_514077|Original|hCoV-19^^USA|Human|Navy and Marine Corps Public Health Center|Pathogen Discovery|Queen|USA

>Spike|hCoV-19/Australia/VIC9633/2020|2020-08-21|EPI\_ISL\_562744|Original|hCoV-19^^Victoria|Human|Microbiological Diagnostic Unit - Public Health Laboratory (MDU-PHL)|MDU-PHL|Schultz|Australia

>Spike|hCoV-19/Hong Kong/HKPU-1437/2020|2020-07-12|EPI\_ISL\_610189|Original|hCoV-19^^Hong Kong|Human|Department of Health Technology and Informatics|Department of Health Technology and Informatics|Leung|China

>Spike|hCoV-19/Japan/PG-3133/2020|2020-06-00|EPI\_ISL\_691255|Original|hCoV-19^^Japan|Human|Pathogen Genomics Center|Pathogen Genomics Center|Sekizuka|Japan

>Spike|hCoV-19/USA/CA-ALSR-5028/2020|2020-12-06|EPI\_ISL\_730299|Original|hCoV-19^^California|Human|San Diego County Public Health Laboratory|Andersen lab at Scripps Research|Gangavarapu|USA

>Spike|hCoV-19/Australia/NSW1143/2020|2020-09-30|EPI\_ISL\_593753|Original|hCoV-19^^New South Wales|Human|South Eastern Area Laboratory Services (SEALS)|NSW Health Pathology - Institute of Clinical Pathology and Medical Research; Westmead Hospital; University of Sydney|Gall|Australia

>Spike|hCoV-19/Denmark/DCGC-18057/2020|2020-12-14|EPI\_ISL\_749729|Original|hCoV-19^^Hovedstaden|Human|Department of Virus and Microbiological Special Diagnostics|Albertsen Lab|Michaelsen|Denmark

>Spike|hCoV-19/Canada/ON-PHL-20-03712/2020|2020-11-00|EPI\_ISL\_775194|Original|hCoV-19^^Ontario|Human|Public Health Ontario Laboratory|Public Health Ontario Laboratory|Guthrie|Canada

>Spike|hCoV-19/England/EXET-13760D/2020|2020-06-01|EPI\_ISL\_471980|Original|hCoV-19^^England|Human|University of Exeter|COVID-19 Genomics UK (COG-UK) Consortium|Temperton|United Kingdom

>Spike|hCoV-19/USA/MI-QDX-357/2020|2020-03-23|EPI\_ISL\_571100|Original|hCoV-19^^Michigan|Human|Quest Diagnostics|Quest Diagnostics|Kagan|USA

>Spike|hCoV-19/England/LIVE-DCA700/2020|2020-12-07|EPI\_ISL\_724379|Original|hCoV-19^^England|Human|Liverpool Clinical Laboratories|COVID-19 Genomics UK (COG-UK) Consortium|Haldenby|United Kingdom

>Spike|hCoV-19/Luxembourg/LNS6663810/2020|2020-11-11|EPI\_ISL\_744446|Original|hCoV-19^^Luxembourg|Human|Laboratoire national de sant\u00e9|Laboratoire national de sant\u00e9|Wienecke-Baldacchino|Luxembourg

>Spike|hCoV-19/England/CAMC-C1E8A1/2020|2020-12-06|EPI\_ISL\_761074|Original|hCoV-19^^England|Human|Lighthouse Lab in Cambridge|Wellcome Sanger Institute for the COVID-19 Genomics UK (COG-UK) Consortium|Davies|United Kingdom

>Spike|hCoV-19/England/QEUH-B82144/2020|2020-11-14|EPI\_ISL\_668260|Original|hCoV-19^^England|Human|Lighthouse Lab in Glasgow|Wellcome Sanger Institute for the COVID-19 Genomics UK (COG-UK) Consortium|Davies|United Kingdom

>Spike|hCoV-19/England/QEUH-9BA8B9/2020|2020-09-08|EPI\_ISL\_573609|Original|hCoV-19^^England|Human|Oxford Viromics|COVID-19 Genomics UK (COG-UK) Consortium|Golubchik|United Kingdom

>Spike|hCoV-19/USA/NY-Wadsworth-34804-01/2020|2020-03-31|EPI\_ISL\_525645|Original|hCoV-19^^New York|Human|Wadsworth Center|Wadsworth Center|Plitnick|USA

>Spike|hCoV-19/England/ALDP-BBACD9/2020|2020-11-20|EPI\_ISL\_703042|Original|hCoV-19^^England|Human|Lighthouse Lab in Alderley Park|Wellcome Sanger Institute for the COVID-19 Genomics UK (COG-UK) Consortium|Davies|United Kingdom

>Spike|hCoV-19/England/LIVE-A81CB/2020|2020-03-26|EPI\_ISL\_517127|Original|hCoV-19^^England|Human|Liverpool Clinical Laboratories|COVID-19 Genomics UK (COG-UK) Consortium|Haldenby|United Kingdom

>Spike|hCoV-19/Denmark/DCGC-3626/2020|2020-08-31|EPI\_ISL\_616394|Original|hCoV-19^^Syddanmark|Human|Department of Virus and Microbiological Special Diagnostics|Albertsen lab|Michaelsen|Denmark

>Spike|hCoV-19/Gambia/NPHL-3062/2020|2020-00-00|EPI\_ISL\_561311|Original|hCoV-19^^Kombo|Human|MRCG at LSHTM Genomics lab|MRCG at LSHTM Genomics lab|Sesay|Gambia

>Spike|hCoV-19/Sweden/20-53366/2020|2020-11-06|EPI\_ISL\_710606|Original|hCoV-19^^Skane|Human|Halsomedicinskt Center|The Public Health Agency of Sweden|Svartstr\u00f6m|Sweden

>Spike|hCoV-19/Switzerland/BL-ETHZ-100005/2020|2020-03-06|EPI\_ISL\_466930|Original|hCoV-19^^Basel-Landschaft|Human|Viollier AG|Department of Biosystems Science and Engineering|Nadeau|Switzerland

>Spike|hCoV-19/England/CAMC-C43F53/2020|2020-12-10|EPI\_ISL\_719578|Original|hCoV-19^^England|Human|Lighthouse Lab in Cambridge|Wellcome Sanger Institute for the COVID-19 Genomics UK (COG-UK) Consortium|Davies|United Kingdom

>Spike|hCoV-19/USA/TX-HMH-MCoV-14955/2020|2020-10-13|EPI\_ISL\_786439|Original|hCoV-19^^Texas|Human|Houston Methodist Hospital|Houston Methodist Hospital|Long|USA

>Spike|hCoV-19/England/OXON-B4C43/2020|2020-04-12|EPI\_ISL\_535002|Original|hCoV-19^^England|Human|Oxford Viromics|COVID-19 Genomics UK (COG-UK) Consortium|Golubchik|United Kingdom

>Spike|hCoV-19/USA/MI-QDX-309/2020|2020-03-21|EPI\_ISL\_571053|Original|hCoV-19^^Michigan|Human|Quest Diagnostics|Quest Diagnostics|Kagan|USA

>Spike|hCoV-19/Singapore/16/2020|2020-02-06|EPI\_ISL\_418997|Original|hCoV-19^^Singapore|Human|National Public Health Laboratory|National Public Health Laboratory|Mak|Singapore

>Spike|hCoV-19/England/ALDP-B46012/2020|2020-11-07|EPI\_ISL\_656167|Original|hCoV-19^^England|Human|Lighthouse Lab in Alderley Park|Wellcome Sanger Institute for the COVID-19 Genomics UK (COG-UK) Consortium|Davies|United Kingdom

>Spike|hCoV-19/USA/LA-GBCL-26684437/2020|2020-04-11|EPI\_ISL\_485263|Original|hCoV-19^^Louisiana|Human|River Road Testing Lab|Ginkgo Bioworks Clinical Laboratory|Smith|USA

>Spike|hCoV-19/England/MILK-A45E1A/2020|2020-10-06|EPI\_ISL\_598772|Original|hCoV-19^^England|Human|Lighthouse Lab in Milton Keynes|Wellcome Sanger Institute for the COVID-19 Genomics UK (COG-UK) consortium|Davies|United Kingdom

>Spike|hCoV-19/Brazil/DF-619i/2020|2020-03-13|EPI\_ISL\_427295|Vero E6 Pl|hCoV-19^^Distrito Federal|Human|Instituto Oswaldo Cruz FIOCRUZ - Laboratory of Respiratory Viruses and Measles (LVRS)|Instituto Oswaldo Cruz FIOCRUZ - Laboratory of Respiratory Viruses and Measles (LVRS)|Silva|Brazil

>Spike|hCoV-19/England/20129033904/2020|2020-03-20|EPI\_ISL\_424025|Original|hCoV-19^^England|Human|Respiratory Virus Unit|Respiratory Virus Unit|Platt|United Kingdom

>Spike|hCoV-19/Wales/PHWC-28E26/2020|2020-04-02|EPI\_ISL\_445446|Original|hCoV-19^^Wales|Human|Wales Specialist Virology Centre|Public Health Wales Microbiology Cardiff|Moore|United Kingdom

>Spike|hCoV-19/USA/LA-UW-MAYO90/2020|2020-03-18|EPI\_ISL\_501078|Original|hCoV-19^^Louisiana|Human|Mayo Clinic Laboratories|University of Washington Virology Lab|Roychoudhury|USA

>Spike|hCoV-19/USA/WA-UW-23283/2020|2020-08-05|EPI\_ISL\_576417|Original|hCoV-19^^Washington|Human|UW Virology Lab|UW Virology Lab|Roychoudhury|USA

>Spike|hCoV-19/England/ALDP-684A1F/2020|2020-07-01|EPI\_ISL\_551823|Original|hCoV-19^^England|Human|Lighthouse Lab in Alderley Park|Wellcome Sanger Institute for the COVID-19 Genomics UK (COG-UK) consortium|Davies|United Kingdom

>Spike|hCoV-19/Japan/PG-1499/2020|2020-04-00|EPI\_ISL\_685106|Original|hCoV-19^^Japan|Human|Saitama Prefectural Institute of Public Health|Pathogen Genomics Center|Sekizuka|Japan

>Spike|hCoV-19/USA/FL-BPHL-1742/2020|2020-10-02|EPI\_ISL\_613860|Original|hCoV-19^^Florida|Human|Florida Bureau of Public Health Laboratories|Florida Bureau of Public Health Laboratories|Blanton|USA

>Spike|hCoV-19/England/CAMB-1AC1E4/2020|2020-04-28|EPI\_ISL\_447945|Original|hCoV-19^^England|Human|Department of Pathology|COVID-19 Genomics UK (COG-UK) Consortium|Meredith|United Kingdom

>Spike|hCoV-19/England/LIVE-A2431/2020|2020-05-20|EPI\_ISL\_490382|Original|hCoV-19^^England|Human|Liverpool Clinical Laboratories|COVID-19 Genomics UK (COG-UK) Consortium|Haldenby|United Kingdom

>Spike|hCoV-19/USA/TX-HMH-2058/2020|2020-05-01|EPI\_ISL\_545094|Original|hCoV-19^^Texas|Human|Houston Methodist Hospital|Houston Methodist Hospital|Long|USA

>Spike|hCoV-19/Netherlands/ZH-EMC-314/2020|2020-05-23|EPI\_ISL\_523656|Original|hCoV-19^^Zuid Holland|Human|Dutch COVID-19 response team|Erasmus Medical Center|Oude Munnink|Netherlands

>Spike|hCoV-19/Switzerland/BE-ETHZ-410558/2020|2020-11-26|EPI\_ISL\_737733|Original|hCoV-19^^Bern|Human|Viollier AG|Department of Biosystems Science and Engineering|Nadeau|Switzerland

>Spike|hCoV-19/Canada/Qc-L00240642/2020|2020-03-27|EPI\_ISL\_465681|Original|hCoV-19^^Quebec|Human|H\u00f4pital Charles-LeMoine|Laboratoire de sant\u00e9 publique du Qu\u00e9bec|Moreira|Canada

>Spike|hCoV-19/USA/AR-CDC-4296/2020|2020-07-17|EPI\_ISL\_527647|Original|hCoV-19^^Arkansas|Human|AR Dept. of Health-Public Health Lab|Pathogen Discovery|Queen|USA

>Spike|hCoV-19/Denmark/DCGC-5764/2020|2020-09-28|EPI\_ISL\_619913|Original|hCoV-19^^Sjaelland|Human|Department of Virus and Microbiological Special Diagnostics|Albertsen lab|Michaelsen|Denmark

>Spike|hCoV-19/England/MILK-C60FE7/2020|2020-12-13|EPI\_ISL\_769258|Original|hCoV-19^^England|Human|Lighthouse Lab in Milton Keynes|Wellcome Sanger Institute for the COVID-19 Genomics UK (COG-UK) Consortium|Davies|United Kingdom

>Spike|hCoV-19/Wales/PHWC-166A54/2020|2020-06-10|EPI\_ISL\_494073|Original|hCoV-19^^Wales|Human|Originating lab|COVID-19 Genomics UK (COG-UK) Consortium|Moore|United Kingdom

>Spike|hCoV-19/England/QEUEH-B3FF88/2020|2020-11-08|EPI\_ISL\_657286|Original|hCoV-19^^England|Human|Lighthouse Lab in Glasgow|Wellcome Sanger Institute for the COVID-19 Genomics UK (COG-UK) Consortium|Davies|United Kingdom

>Spike|hCoV-19/USA/VA-DCLS-1850/2020|2020-09-23|EPI\_ISL\_614076|Original|hCoV-19^^Virginia|Human|Virginia DCLS|Virginia DCLS|St. Jacques|USA

>Spike|hCoV-19/USA/DE-DHSS-F1009547/2020|2020-10-04|EPI\_ISL\_693752|Original|hCoV-19^^Delaware|Human|Delaware Public Health Laboratory|Delaware Public Health Laboratory|Bajwa|USA

>Spike|hCoV-19/England/CAMC-D042FA/2020|2020-12-14|EPI\_ISL\_781625|Original|hCoV-19^^England|Human|Lighthouse Lab in Cambridge|Wellcome Sanger Institute for the COVID-19 Genomics UK (COG-UK) Consortium|Davies|United Kingdom

>Spike|hCoV-19/Finland/28A76S6/2020|2020-04-28|EPI\_ISL\_481631|Original|hCoV-19^^Uusimaa|Human|Department of Virology and Immunology|Department of Virology|Smura|Finland

>Spike|hCoV-19/Australia/VIC48/2020|2020-03-12|EPI\_ISL\_419762|Original|hCoV-19^^Victoria|Human|Victorian Infectious Diseases Reference Laboratory (VIDRL)|Victorian Infectious Diseases Reference Laboratory and Microbiological Diagnostic Unit Public Health Laboratory|Schultz|Australia

>Spike|hCoV-19/Wales/ALDP-AA4909/2020|2020-10-21|EPI\_ISL\_624206|Original|hCoV-19^^Wales|Human|Lighthouse Lab in Alderley Park|Wellcome Sanger Institute for the COVID-19 Genomics UK (COG-UK) consortium|Davies|United Kingdom

>Spike|hCoV-19/England/CAMC-B090C0/2020|2020-10-29|EPI\_ISL\_673116|Original|hCoV-19^^England|Human|Lighthouse Lab in Cambridge|Wellcome Sanger Institute for the COVID-19 Genomics UK (COG-UK) Consortium|Davies|United Kingdom

>Spike|hCoV-19/England/CAMB-1B1119/2020|2020-05-04|EPI\_ISL\_459227|Original|hCoV-19^^England|Human|Department of Pathology|Wellcome Sanger Institute for the COVID-19 Genomics UK (COG-UK) consortium|Davies|United Kingdom

>Spike|hCoV-19/Luxembourg/LNS4906867/2020|2020-10-26|EPI\_ISL\_744156|Original|hCoV-19^^Luxembourg|Human|Laboratoire national de sant\u00e9|Laboratoire national de sant\u00e9|Wienecke-Baldacchino|Luxembourg

>Spike|hCoV-19/USA/WA-S1638/2020|2020-05-27|EPI\_ISL\_496064|Original|hCoV-19^^Washington|Human|Washington State Department of Health|Seattle Flu Study|Lee|USA

>Spike|hCoV-19/South Korea/KCDC2202/2020|2020-04-11|EPI\_ISL\_506995|Original|hCoV-19^^South Korea|Human|Division of Viral Diseases|Division of Viral Diseases|Kim|South Korea

>Spike|hCoV-19/England/CAMB-7BCFD/2020|2020-04-04|EPI\_ISL\_442144|Original|hCoV-19^^England|Human|Department of Pathology|Wellcome Sanger Institute for the COVID-19 Genomics UK (COG-UK) consortium|Amato|United Kingdom

>Spike|hCoV-19/England/ALDP-B46337/2020|2020-11-07|EPI\_ISL\_656021|Original|hCoV-19^^England|Human|Lighthouse Lab in Alderley Park|Wellcome Sanger Institute for the COVID-19 Genomics UK (COG-UK) Consortium|Davies|United Kingdom

>Spike|hCoV-19/Wales/PHWC-4A64FD/2020|2020-12-17|EPI\_ISL\_763488|Original|hCoV-19^^Wales|Human|Wales Specialist Virology Centre Sequencing lab|COVID-19 Genomics UK (COG-UK) Consortium|Moore|United Kingdom

>Spike|hCoV-19/England/20144023704/2020|2020-03-27|EPI\_ISL\_423527|Original|hCoV-19^^England|Human|Respiratory Virus Unit|Respiratory Virus Unit|Platt|United Kingdom

>Spike|hCoV-19/env/USA/FL-UF3/2020|2020-03-25|EPI\_ISL\_434677|Original|hCoV-19^^Florida|Environment|Lednicky Laboratory at Emerging Pathogens Institute|Lednicky Laboratory at Emerging Pathogens Institute|Elbadry|USA

>Spike|hCoV-19/Canada/ON-PHL-20-00024/2020|2020-00-00|EPI\_ISL\_548705|Original|hCoV-19^^Ontario|Human|Public Health Ontario Laboratory|Public Health Ontario Laboratory|Guthrie|Canada

>Spike|hCoV-19/England/QEUA-96C643/2020|2020-08-13|EPI\_ISL\_530803|Original|hCoV-19^^England|Human|Lighthouse Lab in Glasgow|Wellcome Sanger Institute for the COVID-19 Genomics UK (COG-UK) consortium|Davies|United Kingdom

>Spike|hCoV-19/USA/WI-GMF-01993/2020|2020-04-28|EPI\_ISL\_436894|Original|hCoV-19^^Wisconsin|Human|Gundersen Molecular Diagnostics Laboratory|Kabara Cancer Research Institute|Kenny|USA

>Spike|hCoV-19/England/QEUA-B9FA58/2020|2020-11-18|EPI\_ISL\_720977|Original|hCoV-19^^England|Human|Lighthouse Lab in Glasgow|Wellcome Sanger Institute for the COVID-19 Genomics UK (COG-UK) Consortium|Davies|United Kingdom

>Spike|hCoV-19/USA/FL-BPHL-0062/2020|2020-04-15|EPI\_ISL\_445005|Original|hCoV-19^^Florida|Human|Florida Bureau of Public Health Laboratories|Florida Bureau of Public Health Laboratories|Blanton|USA

>Spike|hCoV-19/Scotland/CVR4273/2020|2020-09-09|EPI\_ISL\_559947|Original|hCoV-19^^Scotland|Human|Lighthouse Lab in Glasgow / MRC-University of Glasgow Centre for Virus Research|COVID-19 Genomics UK (COG-UK) Consortium|Robertson|United Kingdom

>Spike|hCoV-19/USA/NY-Wadsworth-281413-01/2020|2020-11-05|EPI\_ISL\_734478|Original|hCoV-19^^New York|Human|Masonic Medical Research Institute|Wadsworth Center|Lasek-Nesselquist|USA

>Spike|hCoV-19/England/QEUA-9CFBC7/2020|2020-09-16|EPI\_ISL\_589876|Original|hCoV-19^^England|Human|Lighthouse Lab in Glasgow|Wellcome Sanger Institute for the COVID-19 Genomics UK (COG-UK) consortium|Davies|United Kingdom

>Spike|hCoV-19/Denmark/DCGC-17489/2020|2020-12-14|EPI\_ISL\_750356|Original|hCoV-19^^Midtjylland|Human|Department of Virus and Microbiological Special Diagnostics|Albertsen Lab|Michaelsen|Denmark

>Spike|hCoV-19/England/MILK-BB114C/2020|2020-11-17|EPI\_ISL\_720525|Original|hCoV-19^^England|Human|Lighthouse Lab in Milton Keynes|Wellcome Sanger Institute for the COVID-19 Genomics UK (COG-UK) Consortium|Davies|United Kingdom

>Spike|hCoV-19/England/QEUA-BC3C28/2020|2020-11-25|EPI\_ISL\_703900|Original|hCoV-19^^England|Human|Lighthouse Lab in Glasgow|Wellcome Sanger Institute for the COVID-19 Genomics UK (COG-UK) Consortium|Davies|United Kingdom

>Spike|hCoV-19/Japan/PG-4799/2020|2020-08-00|EPI\_ISL\_689924|Original|hCoV-19^^Japan|Human|Pathogen Genomics Center|Pathogen Genomics Center|Sekizuka|Japan

>Spike|hCoV-19/Denmark/DCGC-8901/2020|2020-10-26|EPI\_ISL\_625702|Original|hCoV-19^^Hovedstaden|Human|Department of Virus and Microbiological Special Diagnostics|Albertsen lab|Michaelsen|Denmark

>Spike|hCoV-19/England/QEUA-A9D6DF/2020|2020-10-20|EPI\_ISL\_727784|Original|hCoV-19^^England|Human|Centre for Enzyme Innovation|COVID-19 Genomics UK (COG-UK) Consortium|Robson|United Kingdom

>Spike|hCoV-19/Denmark/DCGC-12578/2020|2020-11-16|EPI\_ISL\_682759|Original|hCoV-19^^Syddanmark|Human|Department of Virus and Microbiological Special Diagnostics|Albertsen Lab|Michaelsen|Denmark

>Spike|hCoV-19/England/CAMC-9D1E8D/2020|2020-09-19|EPI\_ISL\_601569|Original|hCoV-19^^England|Human|Lighthouse Lab in Cambridge|Wellcome Sanger Institute for the COVID-19 Genomics UK (COG-UK) consortium|Davies|United Kingdom

>Spike|hCoV-19/USA/UT-01686/2020|2020-04-13|EPI\_ISL\_454710|Original|hCoV-19^^Utah|Human|Utah Public Health Laboratory|Utah Public Health Laboratory|Young|USA

>Spike|hCoV-19/England/PORT-2D116D/2020|2020-04-17|EPI\_ISL\_475333|Original|hCoV-19^^England|Human|Centre for Enzyme Innovation|COVID-19 Genomics UK (COG-UK) Consortium|Robson|United Kingdom

>Spike|hCoV-19/England/C200027419/2020|2020-10-08|EPI\_ISL\_733584|Original|hCoV-19^^England|Human|Respiratory Virus Unit|COVID-19 Genomics UK (COG-UK) Consortium|Lackenby|United Kingdom

>Spike|hCoV-19/Japan/PG-6967/2020|2020-07-00|EPI\_ISL\_688072|Original|hCoV-19^^Japan|Human|Pathogen Genomics Center|Pathogen Genomics Center|Sekizuka|Japan

>Spike|hCoV-19/Luxembourg/LNS8732928/2020|2020-10-23|EPI\_ISL\_744801|Original|hCoV-19^^Luxembourg|Human|Laboratoire national de sant\u00e9|Laboratoire national de sant\u00e9|Wienecke-Baldacchino|Luxembourg

>Spike|hCoV-19/USA/WA-S2301/2020|2020-06-11|EPI\_ISL\_496933|Original|hCoV-19^^Washington|Human|Washington State Department of Health|Seattle Flu Study|Lee|USA

>Spike|hCoV-19/Spain/VC-IBV-98004336/2020|2020-03-24|EPI\_ISL\_654475|Original|hCoV-19^^Comunitat\_Valenciana|Human|Servicio de Microbiolog\u00eda. Hospital General Universitario de Castell\u00f3n|SeqCOVID-SPAIN consortium/IBV(CSIC)|Comas|Spain

>Spike|hCoV-19/USA/FL-BPHL-0686/2020|2020-03-26|EPI\_ISL\_509744|Original|hCoV-19^^Florida|Human|Florida Bureau of Public Health Laboratories|Florida Bureau of Public Health Laboratories|Blanton|USA

>Spike|hCoV-19/USA/TX-HMH-7193/2020|2020-06-29|EPI\_ISL\_546587|Original|hCoV-19^^Texas|Human|Houston Methodist Hospital|Houston Methodist Hospital|Long|USA

>Spike|hCoV-19/USA/UT-08612/2020|2020-05-18|EPI\_ISL\_524354|Original|hCoV-19^^Utah|Human|Utah Public Health Laboratory|Utah Public Health Laboratory|Young|USA

>Spike|hCoV-19/Russia/SVE-RII-MH4675S/2020|2020-09-20|EPI\_ISL\_733232|Original|hCoV-19^^Sverdlovsk|Human|UMMC-Health|WHO National Influenza Centre Russian Federation|Komissarov|Russia

>Spike|hCoV-19/USA/CA-IGI-0811/2020|2020-06-19|EPI\_ISL\_756345|Original|hCoV-19^^California|Human|Innovative Genomics Institute|Innovative Genomics Institute|Wyman|USA

>Spike|hCoV-19/USA/UT-01594/2020|2020-04-09|EPI\_ISL\_449832|Original|hCoV-19^^Utah|Human|Utah Public Health Laboratory|Utah Public Health Laboratory|Young|USA

>Spike|hCoV-19/Wales/QEUH-AD3479/2020|2020-10-26|EPI\_ISL\_647968|Original|hCoV-19^^Wales|Human|Lighthouse Lab in Glasgow|Wellcome Sanger Institute for the COVID-19 Genomics UK (COG-UK) Consortium|Davies|United Kingdom

>Spike|hCoV-19/England/QEUH-B4024F/2020|2020-11-08|EPI\_ISL\_657173|Original|hCoV-19^^England|Human|Lighthouse Lab in Glasgow|Wellcome Sanger Institute for the COVID-19 Genomics UK (COG-UK) Consortium|Davies|United Kingdom

>Spike|hCoV-19/Belgium/reg-0417503/2020|2020-04-17|EPI\_ISL\_734596|Original|hCoV-19^^Mouscron|Human|UZ Leuven|KU Leuven|Maes|Belgium

>Spike|hCoV-19/USA/OR-OHSU-2115/2020|2020-08-04|EPI\_ISL\_667118|Original|hCoV-19^^Oregon|Human|OHSU Lab Services Molecular Microbiology Lab|Oregon SARS-CoV-2 Genome Sequencing Center|O'Roak|USA

>Spike|hCoV-19/England/MILK-AC740F/2020|2020-10-22|EPI\_ISL\_630208|Original|hCoV-19^^England|Human|Lighthouse Lab in Milton Keynes|Wellcome Sanger Institute for the COVID-19 Genomics UK (COG-UK) consortium|Davies|United Kingdom

>Spike|hCoV-19/England/20119048004/2020|2020-03-14|EPI\_ISL\_465071|Original|hCoV-19^^England|Human|Respiratory Virus Unit|Respiratory Virus Unit|Platt|United Kingdom

>Spike|hCoV-19/Denmark/DCGC-1365/2020|2020-03-30|EPI\_ISL\_622215|Original|hCoV-19^^Sjælland|Human|Department of Virus and Microbiological Special Diagnostics|Albertsen lab|Michaelsen|Denmark

>Spike|hCoV-19/USA/TX-HMH-7846/2020|2020-07-01|EPI\_ISL\_545664|Original|hCoV-19^^Texas|Human|Houston Methodist Hospital|Houston Methodist Hospital|Long|USA

>Spike|hCoV-19/Wales/PHWC-4930B3/2020|2020-11-28|EPI\_ISL\_725834|Original|hCoV-19^^Wales|Human|Originating lab|COVID-19 Genomics UK (COG-UK) Consortium|Moore|United Kingdom

>Spike|hCoV-19/Belgium/ULG-10362/2020|2020-08-07|EPI\_ISL\_540529|Original|hCoV-19^^Liège|Human|Department of Clinical Microbiology|GIGA Medical Genomics|Durkin|Belgium

>Spike|hCoV-19/Kenya/C5696/2020|2020-05-11|EPI\_ISL\_568771|Original|hCoV-19^^Mombasa|Human|KEMRI-Wellcome Trust Research Programme|KEMRI-CGMR-C Kilifi|KEMRI-Wellcome Trust Research Programme|KEMRI-CGMR-C Kilifi|Githinji|Kenya

>Spike|hCoV-19/Wales/PHWC-3463E/2020|2020-04-21|EPI\_ISL\_446951|Original|hCoV-19^^Wales|Human|Wales Specialist Virology Centre|Public Health Wales Microbiology Cardiff|Moore|United Kingdom

>Spike|hCoV-19/USA/WA-UW-45090/2020|2020-12-08|EPI\_ISL\_747208|Original|hCoV-19^^Washington|Human|UW Virology Lab|UW Virology Lab|Roychoudhury|USA

>Spike|hCoV-19/England/ALDP-A948B4/2020|2020-10-19|EPI\_ISL\_610998|Original|hCoV-19^^England|Human|Lighthouse Lab in Alderley Park|Wellcome Sanger Institute for the COVID-19 Genomics UK (COG-UK) consortium|Davies|United Kingdom

>Spike|hCoV-19/USA/CA-LACPHL-AA00020/2020|2020-08-06|EPI\_ISL\_710118|Original|hCoV-19^^California|Human|Los Angeles County PHL|Los Angeles County PHL|Hemarajata|USA

>Spike|hCoV-19/USA/MD-MDH-0019/2020|2020-04-01|EPI\_ISL\_481267|Original|hCoV-19^^Maryland|Human|Maryland Department of Health|Maryland Department of Health|Keller|USA

>Spike|hCoV-19/England/QEUA-A63AB8/2020|2020-10-12|EPI\_ISL\_628663|Original|hCoV-19^^England|Human|Oxford Viromics|COVID-19 Genomics UK (COG-UK) Consortium|Golubchik|United Kingdom

>Spike|hCoV-19/USA/MI-MDHHS-SC20988/2020|2020-05-26|EPI\_ISL\_507775|Original|hCoV-19^^Michigan|Human|Michigan Department of Health and Human Services|Michigan Department of Health and Human Services|Blankenship|USA

>Spike|hCoV-19/Scotland/EDB2138/2020|2020-04-20|EPI\_ISL\_491693|Original|hCoV-19^^Scotland|Human|Virology Department|Wellcome Sanger Institute for the COVID-19 Genomics UK (COG-UK) consortium|Davies|United Kingdom

>Spike|hCoV-19/Scotland/EDB297/2020|2020-03-28|EPI\_ISL\_425966|Original|hCoV-19^^Scotland|Human|Virology Department|COVID-19 Genomics UK (COG-UK) Consortium|Williams|United Kingdom

>Spike|hCoV-19/England/ALDP-C23108/2020|2020-12-06|EPI\_ISL\_733885|Original|hCoV-19^^England|Human|Lighthouse Lab in Alderley Park|Wellcome Sanger Institute for the COVID-19 Genomics UK (COG-UK) Consortium|Davies|United Kingdom

>Spike|hCoV-19/England/BRIS-126A32/2020|2020-04-09|EPI\_ISL\_459094|Original|hCoV-19^^England|Human|PHE South West Regional Laboratory|Wellcome Sanger Institute for the COVID-19 Genomics UK (COG-UK) consortium|Davies|United Kingdom

>Spike|hCoV-19/Scotland/QEUA-9CE5F7/2020|2020-09-17|EPI\_ISL\_601868|Original|hCoV-19^^Scotland|Human|Lighthouse Lab in Glasgow|Wellcome Sanger Institute for the COVID-19 Genomics UK (COG-UK) consortium|Davies|United Kingdom

>Spike|hCoV-19/USA/MI-MDHHS-SC20516/2020|2020-04-12|EPI\_ISL\_460564|Original|hCoV-19^^Michigan|Human|Michigan Department of Health and Human Services|Michigan Department of Health and Human Services|Blankenship|USA

>Spike|hCoV-19/USA/CA-CZB-2083/2020|2020-05-04|EPI\_ISL\_486326|Original|hCoV-19^^California|Human|San Joaquin County Public Health Lab|Chan-Zuckerberg Biohub|McGeever|USA

>Spike|hCoV-19/England/MILK-A473EC/2020|2020-10-06|EPI\_ISL\_598262|Original|hCoV-19^^England|Human|Lighthouse Lab in Milton Keynes|Wellcome Sanger Institute for the COVID-19 Genomics UK (COG-UK) consortium|Davies|United Kingdom

>Spike|hCoV-19/USA/OR-PROV-057/2020|2020-04-11|EPI\_ISL\_482337|Original|hCoV-19^^Oregon|Human|Providence St. Joseph Health Molecular Genomics Laboratory|Providence St. Joseph Health Molecular Genomics Laboratory|Dowdell|USA

>Spike|hCoV-19/England/ALDP-BBA750/2020|2020-11-20|EPI\_ISL\_701902|Original|hCoV-19^^England|Human|Lighthouse Lab in Alderley Park|Wellcome Sanger Institute for the COVID-19 Genomics UK (COG-UK) Consortium|Davies|United Kingdom

>Spike|hCoV-19/Netherlands/NA\_67/2020|2020-03-09|EPI\_ISL\_422827|Original|hCoV-19^^Netherlands|Human|Dutch COVID-19 response team|Erasmus Medical Center|Oude Munnink|Netherlands

>Spike|hCoV-19/USA/MN-MDH-418/2020|2020-04-09|EPI\_ISL\_437371|Original|hCoV-19^^Minnesota|Human|Minnesota Department of Health|Minnesota Department of Health|Garfin|USA

>Spike|hCoV-19/England/NORT-2A5EE3/2020|2020-10-06|EPI\_ISL\_611576|Original|hCoV-19^^England|Human|Northumbria University / South Tees Hospitals NHS Foundation Trust / North Cumbria Integrated Care NHS Foundation Trust / North Tees and Hartlepool NHS Foundation Trust / Newcastle Hospitals NHS Foundation Trust|COVID-19 Genomics UK (COG-UK) Consortium|Bashton|United Kingdom

>Spike|hCoV-19/Scotland/GCVR-170046/2020|2020-03-24|EPI\_ISL\_459591|Original|hCoV-19^^Scotland|Human|NHSGGC West of Scotland Specialist Virology Centre / MRC-University of Glasgow Centre for Virus Research|Wellcome Sanger Institute for the COVID-19 Genomics UK (COG-UK) consortium|Davies|United Kingdom

>Spike|hCoV-19/USA/TX-HMH-7473/2020|2020-06-26|EPI\_ISL\_546789|Original|hCoV-19^^Texas|Human|Houston Methodist Hospital|Houston Methodist Hospital|Long|USA

>Spike|hCoV-19/USA/MI-MDHHS-SC21240/2020|2020-04-07|EPI\_ISL\_507495|Original|hCoV-19^^Michigan|Human|Michigan Department of Health and Human Services|Michigan Department of Health and Human Services|Blankenship|USA



>Spike|hCoV-19/Gambia/NPHL-247/2020|2020-00-00|EPI\_ISL\_561257|Original|hCoV-19^^Kombo|Human|MRCG at LSHTM Genomics lab|MRCG at LSHTM Genomics lab|Sesay|Gambia

>Spike|hCoV-19/England/CAMB-A97D1C/2020|2020-12-15|EPI\_ISL\_741006|Original|hCoV-19^^England|Human|Department of Pathology|COVID-19 Genomics UK (COG-UK) Consortium|Goodfellow|United Kingdom

>Spike|hCoV-19/USA/TX-HMH-6758/2020|2020-06-24|EPI\_ISL\_546222|Original|hCoV-19^^Texas|Human|Houston Methodist Hospital|Houston Methodist Hospital|Long|USA

>Spike|hCoV-19/England/ALDP-A8535B/2020|2020-10-16|EPI\_ISL\_610381|Original|hCoV-19^^England|Human|Lighthouse Lab in Alderley Park|Wellcome Sanger Institute for the COVID-19 Genomics UK (COG-UK) consortium|Davies|United Kingdom

>Spike|hCoV-19/Germany/HH-hpi-p2310/2020|2020-03-18|EPI\_ISL\_775699|Original|hCoV-19^^Hamburg|Human|University Medical Center Hamburg Eppendorf|Heinrich Pette Institute|Robitaille|Germany

>Spike|hCoV-19/Netherlands/ZH-EMC-1079/2020|2020-10-31|EPI\_ISL\_722589|Original|hCoV-19^^Zuid Holland|Human|Dutch COVID-19 response team|Erasmus Medical Center|Oude Munnink|Netherlands

>Spike|hCoV-19/Australia/VIC4722/2020|2020-07-15|EPI\_ISL\_519110|Original|hCoV-19^^Victoria|Human|Microbiological Diagnostic Unit - Public Health Laboratory (MDU-PHL)|MDU-PHL|Schultz|Australia

>Spike|hCoV-19/Wales/PHWC-4819BD/2020|2020-10-15|EPI\_ISL\_613131|Original|hCoV-19^^Wales|Human|Wales Specialist Virology Centre Sequencing lab|COVID-19 Genomics UK (COG-UK) Consortium|Moore|United Kingdom

>Spike|hCoV-19/England/ALDP-B1AA55/2020|2020-11-01|EPI\_ISL\_647594|Original|hCoV-19^^England|Human|Lighthouse Lab in Alderley Park|Wellcome Sanger Institute for the COVID-19 Genomics UK (COG-UK) Consortium|Davies|United Kingdom

>Spike|hCoV-19/Denmark/DCGC-13129/2020|2020-11-30|EPI\_ISL\_712602|Original|hCoV-19^^Hovedstaden|Human|Department of Virus and Microbiological Special Diagnostics|Albertsen Lab|Michaelsen|Denmark

>Spike|hCoV-19/England/ALDP-B5D212/2020|2020-11-09|EPI\_ISL\_678873|Original|hCoV-19^^England|Human|Department of Pathology|COVID-19 Genomics UK (COG-UK) Consortium|Goodfellow|United Kingdom

>Spike|hCoV-19/Australia/VIC2161/2020|2020-06-17|EPI\_ISL\_480770|Original|hCoV-19^^Victoria|Human|Microbiological Diagnostic Unit - Public Health Laboratory (MDU-PHL)|MDU-PHL|Schultz|Australia

>Spike|hCoV-19/England/ALDP-9E5B07/2020|2020-09-24|EPI\_ISL\_589564|Original|hCoV-19^^England|Human|Lighthouse Lab in Alderley Park|Wellcome Sanger Institute for the COVID-19 Genomics UK (COG-UK) consortium|Davies|United Kingdom

>Spike|hCoV-19/England/ALDP-AA0994/2020|2020-10-22|EPI\_ISL\_630811|Original|hCoV-19^^England|Human|Lighthouse Lab in Alderley Park|Wellcome Sanger Institute for the COVID-19 Genomics UK (COG-UK) consortium|Davies|United Kingdom

>Spike|hCoV-19/USA/CA-ALSR-3404/2020|2020-07-07|EPI\_ISL\_636006|Original|hCoV-19^^California|Human|San Diego County Public Health Laboratory|Andersen lab at Scripps Research|Gangavarapu|USA

>Spike|hCoV-19/England/MILK-C2F3D9/2020|2020-12-07|EPI\_ISL\_782773|Original|hCoV-19^^England|Human|Lighthouse Lab in Milton Keynes|Wellcome Sanger Institute for the COVID-19 Genomics UK (COG-UK) Consortium|Davies|United Kingdom

>Spike|hCoV-19/England/QEUH-A0115D/2020|2020-10-02|EPI\_ISL\_584904|Original|hCoV-19^^England|Human|University of Exeter|COVID-19 Genomics UK (COG-UK) Consortium|Temperton|United Kingdom

>Spike|hCoV-19/USA/WI-WSLH-200582/2020|2020-06-08|EPI\_ISL\_578693|Original|hCoV-19^^Wisconsin|Human|Wisconsin State Laboratory of Hygiene Communicable Disease Division|Wisconsin State Laboratory of Hygiene Communicable Disease Division|Florek|USA

>Spike|hCoV-19/Singapore/614/2020|2020-05-09|EPI\_ISL\_490064|Original|hCoV-19^^Singapore|Human|National Public Health Laboratory|National Public Health Laboratory|Mak|Singapore

>Spike|hCoV-19/Denmark/DCGC-20295/2020|2020-11-30|EPI\_ISL\_748098|Original|hCoV-19^^Hovedstaden|Human|Department of Virus and Microbiological Special Diagnostics|Albertsen Lab|Michaelsen|Denmark

>Spike|hCoV-19/USA/TX-HMH-1788/2020|2020-05-12|EPI\_ISL\_542839|Original|hCoV-19^^Texas|Human|Houston Methodist Hospital|Houston Methodist Hospital|Long|USA

>Spike|hCoV-19/England/SHEF-COA0E/2020|2020-11-22|EPI\_ISL\_680110|Original|hCoV-19^^England|Human|Virology Department|COVID-19 Genomics UK (COG-UK) Consortium|de Silva|United Kingdom

>Spike|hCoV-19/Australia/SAP498/2020|2020-10-12|EPI\_ISL\_602579|Original|hCoV-19^^South Australia|Human|SA Pathology|SA Pathology|Leong|Australia

>Spike|hCoV-19/USA/CA-ALSR-1379/2020|2020-06-23|EPI\_ISL\_494570|Original|hCoV-19^^California|Human|Rady's Childrens Hospital|Andersen lab at Scripps Research|Gangavarapu|USA

>Spike|hCoV-19/England/ALDP-95124D/2020|2020-06-14|EPI\_ISL\_554467|Original|hCoV-19^^England|Human|Lighthouse Lab in Alderley Park|Wellcome Sanger Institute for the COVID-19 Genomics UK (COG-UK) consortium|Davies|United Kingdom

>Spike|hCoV-19/England/BRIS-18539BD/2020|2020-04-16|EPI\_ISL\_492430|Original|hCoV-19^^England|Human|PHE South West Regional Laboratory|Wellcome Sanger Institute for the COVID-19 Genomics UK (COG-UK) consortium|Davies|United Kingdom

>Spike|hCoV-19/Denmark/DCGC-2507/2020|2020-08-10|EPI\_ISL\_617778|Original|hCoV-19^^Midtjylland|Human|Department of Virus and Microbiological Special Diagnostics|Albertsen lab|Michaelsen|Denmark

>Spike|hCoV-19/Chile/RM-84953/2020|2020-05-31|EPI\_ISL\_746810|Original|hCoV-19^^Region Metropolitana de Santiago|Human|Genetica Molecular and Subdepartamento de Virologia ISP Chile|Instituto de Salud Publica de Chile|Tognarelli|Chile

>Spike|hCoV-19/Australia/SAP370/2020|2020-03-21|EPI\_ISL\_492135|Original|hCoV-19^^South Australia|Human|SA Pathology|SA Pathology|Leong|Australia

>Spike|hCoV-19/England/201121154/2020|2020-03-10|EPI\_ISL\_464686|Original|hCoV-19^^England|Human|Respiratory Virus Unit|Respiratory Virus Unit|Platt|United Kingdom

>Spike|hCoV-19/USA/AZ-TG513833/2020|2020-07-17|EPI\_ISL\_695311|Original|hCoV-19^^Arizona|Human|TGen North|TGen North|French|USA

>Spike|hCoV-19/England/ALDP-A2DF06/2020|2020-10-06|EPI\_ISL\_586855|Original|hCoV-19^^England|Human|Lighthouse Lab in Alderley Park|Wellcome Sanger Institute for the COVID-19 Genomics UK (COG-UK) consortium|Davies|United Kingdom

>Spike|hCoV-19/Wales/PHWC-28DB0/2020|2020-04-03|EPI\_ISL\_445440|Original|hCoV-19^^Wales|Human|Wales Specialist Virology Centre|Public Health Wales Microbiology Cardiff|Moore|United Kingdom

>Spike|hCoV-19/England/ALDP-BC642D/2020|2020-11-20|EPI\_ISL\_721281|Original|hCoV-19^^England|Human|Lighthouse Lab in Alderley Park|Wellcome Sanger Institute for the COVID-19 Genomics UK (COG-UK) Consortium|Davies|United Kingdom

>Spike|hCoV-19/England/MILK-B8D431/2020|2020-11-13|EPI\_ISL\_674117|Original|hCoV-19^^England|Human|Lighthouse Lab in Milton Keynes|Wellcome Sanger Institute for the COVID-19 Genomics UK (COG-UK) Consortium|Davies|United Kingdom

>Spike|hCoV-19/India/KA-IB22/2020|2020-05-19|EPI\_ISL\_508300|Original|hCoV-19^^Karnataka|Human|Indian Institute of Science|National Institute of Biomedical Genomics|Maitra|India

>Spike|hCoV-19/Australia/WA07/2020|2020-03-13|EPI\_ISL\_420537|Original|hCoV-19^^Western Australia|Human|Department of Microbiology|Department of Microbiology|Sikazwe|Australia

>Spike|hCoV-19/England/MILK-A7CA16/2020|2020-10-15|EPI\_ISL\_606330|Original|hCoV-19^^England|Human|Lighthouse Lab in Milton Keynes|Wellcome Sanger Institute for the COVID-19 Genomics UK (COG-UK) consortium|Davies|United Kingdom

>Spike|hCoV-19/England/MILK-B38F70/2020|2020-11-02|EPI\_ISL\_652290|Original|hCoV-19^^England|Human|University of Exeter|COVID-19 Genomics UK (COG-UK) Consortium|Temperton|United Kingdom

>Spike|hCoV-19/England/MILK-B385BA/2020|2020-11-01|EPI\_ISL\_659002|Original|hCoV-19^^England|Human|Lighthouse Lab in Milton Keynes|Wellcome Sanger Institute for the COVID-19 Genomics UK (COG-UK) Consortium|Davies|United Kingdom

>Spike|hCoV-19/USA/UT-QDX-2664/2020|2020-03-12|EPI\_ISL\_604985|Original|hCoV-19^^Utah|Human|Quest Diagnostics|Quest Diagnostics|Kagan|USA

>Spike|hCoV-19/Wales/PHWC-3612C/2020|2020-04-28|EPI\_ISL\_474624|Original|hCoV-19^^Wales|Human|Originating lab|COVID-19 Genomics UK (COG-UK) Consortium|Moore|United Kingdom

>Spike|hCoV-19/England/ALDP-B46391/2020|2020-11-07|EPI\_ISL\_656032|Original|hCoV-19^^England|Human|Lighthouse Lab in Alderley Park|Wellcome Sanger Institute for the COVID-19 Genomics UK (COG-UK) Consortium|Davies|United Kingdom

>Spike|hCoV-19/Wales/PHWC-162C34/2020|2020-05-29|EPI\_ISL\_473180|Original|hCoV-19^^Wales|Human|Wales Specialist Virology Centre Sequencing lab|COVID-19 Genomics UK (COG-UK) Consortium|Moore|United Kingdom

>Spike|hCoV-19/Germany/HH-hpi-p2014/2020|2020-03-21|EPI\_ISL\_776322|Original|hCoV-19^^Hamburg|Human|University Medical Center Hamburg Eppendorf|Heinrich Pette Institute|Robitaille|Germany

>Spike|hCoV-19/England/EXET-13B0A1/2020|2020-11-11|EPI\_ISL\_665109|Original|hCoV-19^^England|Human|University of Exeter|COVID-19 Genomics UK (COG-UK) Consortium|Temperton|United Kingdom

>Spike|hCoV-19/USA/TX-HMH-8027/2020|2020-07-01|EPI\_ISL\_545799|Original|hCoV-19^^Texas|Human|Houston Methodist Hospital|Houston Methodist Hospital|Long|USA

>Spike|hCoV-19/England/QEUEH-B11C76/2020|2020-11-02|EPI\_ISL\_642232|Original|hCoV-19^^England|Human|Lighthouse Lab in Glasgow|Wellcome Sanger Institute for the COVID-19 Genomics UK (COG-UK) Consortium|Davies|United Kingdom

>Spike|hCoV-19/USA/TX-HMH-MCoV-14905/2020|2020-10-15|EPI\_ISL\_786389|Original|hCoV-19^^Texas|Human|Houston Methodist Hospital|Houston Methodist Hospital|Long|USA

>Spike|hCoV-19/Australia/VIC12579/2020|2020-07-29|EPI\_ISL\_641082|Original|hCoV-19^^Victoria|Human|Microbiological Diagnostic Unit - Public Health Laboratory (MDU-PHL)|MDU-PHL|Schultz|Australia

>Spike|hCoV-19/England/NOTT-11034F/2020|2020-04-12|EPI\_ISL\_441502|Original|hCoV-19^^England|Human|Queens Medical Centre|COVID-19 Genomics UK (COG-UK) Consortium|Loose|United Kingdom

>Spike|hCoV-19/Gibraltar/204841742/2020|2020-00-00|EPI\_ISL\_671309|Original|hCoV-19^^Gibraltar|Human|Microbiology|Respiratory Virus Unit|Platt|Gibraltar

>Spike|hCoV-19/England/QEUEH-A1DF09/2020|2020-10-01|EPI\_ISL\_587555|Original|hCoV-19^^England|Human|Lighthouse Lab in Glasgow|Wellcome Sanger Institute for the COVID-19 Genomics UK (COG-UK) consortium|Davies|United Kingdom

>Spike|hCoV-19/USA/CA-CZB-13959/2020|2020-06-21|EPI\_ISL\_739201|Original|hCoV-19^^California|Human|Alameda County Public Health Lab|Chan-Zuckerberg Biohub|Kamm|USA

>Spike|hCoV-19/France/PAC-IHU-0830/2020|2020-05-20|EPI\_ISL\_568983|Original|hCoV-19^^Provence-Alpes-C\u00f4te-d\u2019Azur|Human|MEPHI|MEPHI|Levasseur|France

>Spike|hCoV-19/England/205090900/2020|2020-12-12|EPI\_ISL\_747510|Original|hCoV-19^^England|Human|Respiratory Virus Unit|COVID-19 Genomics UK (COG-UK) Consortium|Miah|United Kingdom

>Spike|hCoV-19/England/ALDP-B1BF91/2020|2020-11-01|EPI\_ISL\_645596|Original|hCoV-19^^England|Human|Lighthouse Lab in Alderley Park|Wellcome Sanger Institute for the COVID-19 Genomics UK (COG-UK) Consortium|Davies|United Kingdom

>Spike|hCoV-19/Brazil/SP-L11-CD177/2020|2020-03-17|EPI\_ISL\_476190|Original|hCoV-19^^S\u00e3o Paulo|Human|DB Diagn\u00f3sticos do Brasil|Instituto de Medicina Tropical da Univesidade de S\u00e3o Paulo|Sabino|Brazil

>Spike|hCoV-19/England/MILK-BB024A/2020|2020-11-18|EPI\_ISL\_720033|Original|hCoV-19^^England|Human|Lighthouse Lab in Milton Keynes|Wellcome Sanger Institute for the COVID-19 Genomics UK (COG-UK) Consortium|Davies|United Kingdom

>Spike|hCoV-19/England/ALDP-90C92E/2020|2020-06-23|EPI\_ISL\_551524|Original|hCoV-19^^England|Human|Lighthouse Lab in Alderley Park|Wellcome Sanger Institute for the COVID-19 Genomics UK (COG-UK) consortium|Davies|United Kingdom

>Spike|hCoV-19/England/MILK-B5670B/2020|2020-11-05|EPI\_ISL\_657536|Original|hCoV-19^^England|Human|Lighthouse Lab in Milton Keynes|Wellcome Sanger Institute for the COVID-19 Genomics UK (COG-UK) Consortium|Davies|United Kingdom

>Spike|hCoV-19/England/QEUEH-CAD9C2/2020|2020-12-20|EPI\_ISL\_760999|Original|hCoV-19^^England|Human|Lighthouse Lab in Glasgow|Wellcome Sanger Institute for the COVID-19 Genomics UK (COG-UK) Consortium|Davies|United Kingdom

>Spike|hCoV-19/USA/WA-UW-11394/2020|2020-06-23|EPI\_ISL\_570402|Original|hCoV-19^^Washington|Human|UW Virology Lab|UW Virology Lab|Roychoudhury|USA

>Spike|hCoV-19/England/NORW-EE8F1/2020|2020-06-04|EPI\_ISL\_484337|Original|hCoV-19^^England|Human|Quadram Institute Bioscience|COVID-19 Genomics UK (COG-UK) Consortium|Alikhan|United Kingdom

>Spike|hCoV-19/Wales/PHWC-4847FC/2020|2020-10-23|EPI\_ISL\_627018|Original|hCoV-19^^Wales|Human|Wales Specialist Virology Centre Sequencing lab|COVID-19 Genomics UK (COG-UK) Consortium|Moore|United Kingdom

>Spike|hCoV-19/Sweden/20-50131/2020|2020-03-06|EPI\_ISL\_429142|Original|hCoV-19^^Varmland|Human|Klinisk mikrobiologi Orebro|The Public Health Agency of Sweden|Svartstr\u00f6m|Sweden

>Spike|hCoV-19/Wales/MILK-9EF53C/2020|2020-09-25|EPI\_ISL\_600929|Original|hCoV-19^^Wales|Human|Lighthouse Lab in Milton Keynes|Wellcome Sanger Institute for the COVID-19 Genomics UK (COG-UK) consortium|Davies|United Kingdom

>Spike|hCoV-19/USA/VA-DCLS-1571/2020|2020-08-14|EPI\_ISL\_610132|Original|hCoV-19^^Virginia|Human|Virginia DCLS|Virginia DCLS|St. Jacques|USA

>Spike|hCoV-19/USA/TX-HMH-5606/2020|2020-06-19|EPI\_ISL\_544897|Original|hCoV-19^^Texas|Human|Houston Methodist Hospital|Houston Methodist Hospital|Long|USA

>Spike|hCoV-19/Denmark/DCGC-15833/2020|2020-11-23|EPI\_ISL\_714049|Original|hCoV-19^^Hovedstaden|Human|Department of Virus and Microbiological Special Diagnostics|Albertsen Lab|Michaelsen|Denmark

>Spike|hCoV-19/England/BRIS-12C137/2020|2020-05-10|EPI\_ISL\_469407|Original|hCoV-19^^England|Human|PHE South West Regional Laboratory|Wellcome Sanger Institute for the COVID-19 Genomics UK (COG-UK) consortium|Davies|United Kingdom

>Spike|hCoV-19/Wales/PHWC-366B4/2020|2020-05-02|EPI\_ISL\_474699|Original|hCoV-19^^Wales|Human|Originating lab|COVID-19 Genomics UK (COG-UK) Consortium|Moore|United Kingdom

>Spike|hCoV-19/USA/WI-UW-2153/2020|2020-10-15|EPI\_ISL\_677557|Original|hCoV-19^^Wisconsin|Human|University of Wisconsin-Madison AIDS Vaccine Research Laboratories|University of Wisconsin-Madison AIDS Vaccine Research Laboratories|Baczenas|USA

>Spike|hCoV-19/USA/TX-HMH-3823/2020|2020-06-11|EPI\_ISL\_543227|Original|hCoV-19^^Texas|Human|Houston Methodist Hospital|Houston Methodist Hospital|Long|USA

>Spike|hCoV-19/Spain/MD-IBV-006411/2020|2020-05-04|EPI\_ISL\_510126|Original|hCoV-19^^Madrid|Human|Hospital General Universitario Gregorio Mara\u00f1\u00f3n|SeqCOVID-SPAIN consortium/IBV (CSIC)|Comas|Spain

>Spike|hCoV-19/Denmark/DCGC-6442/2020|2020-10-12|EPI\_ISL\_620342|Original|hCoV-19^^Midtjylland|Human|Department of Virus and Microbiological Special Diagnostics|Albertsen lab|Michaelsen|Denmark

>Spike|hCoV-19/USA/MI-MDHHS-SC22474/2020|2020-11-08|EPI\_ISL\_708575|Original|hCoV-19^^Michigan|Human|Michigan Department of Health and Human Services|Michigan Department of Health and Human Services|Jacob|USA

>Spike|hCoV-19/Germany/BW-UKT-a005/2020|2020-03-25|EPI\_ISL\_723098|Original|hCoV-19^^Baden-Wuerttemberg|Human|Institute of Medical Genetics and Applied Genomics|Institute of Medical Genetics and Applied Genomics|Gross|Germany

>Spike|hCoV-19/Japan/PG-3501/2020|2020-07-00|EPI\_ISL\_691610|Original|hCoV-19^^Japan|Human|Pathogen Genomics Center|Pathogen Genomics Center|Sekizuka|Japan

>Spike|hCoV-19/USA/TX-HMH-4568/2020|2020-06-22|EPI\_ISL\_543722|Original|hCoV-19^^Texas|Human|Houston Methodist Hospital|Houston Methodist Hospital|Long|USA

>Spike|hCoV-19/England/MILK-970D38/2020|2020-08-18|EPI\_ISL\_553036|Original|hCoV-19^^England|Human|Lighthouse Lab in Milton Keynes|Wellcome Sanger Institute for the COVID-19 Genomics UK (COG-UK) consortium|Davies|United Kingdom

>Spike|hCoV-19/SaudiArabia/KAUST-MADINAH1044/2020|2020-06-13|EPI\_ISL\_513076|Original|hCoV-19^^Madinah|Human|Pathogen Genomics Lab King Abdullah University of Science and Technology(KAUST)|Pathogen Genomics Lab King Abdullah University of Science and Technology(KAUST)|Mohamed Ghazzali|Saudi Arabia

>Spike|hCoV-19/Denmark/DCGC-16840/2020|2020-12-14|EPI\_ISL\_750203|Original|hCoV-19^^Syddanmark|Human|Department of Virus and Microbiological Special Diagnostics|Albertsen Lab|Michaelsen|Denmark

>Spike|hCoV-19/Australia/VIC2883/2020|2020-06-28|EPI\_ISL\_521714|Original|hCoV-19^^Victoria|Human|Microbiological Diagnostic Unit - Public Health Laboratory (MDU-PHL)|MDU-PHL|Schultz|Australia

>Spike|hCoV-19/USA/CA-CZB-15279/2020|2020-11-28|EPI\_ISL\_739642|Original|hCoV-19^^California|Human|Santa Clara County Public Health Laboratory|Chan-Zuckerberg Biohub|Kamm|USA

>Spike|hCoV-19/England/ALDP-A66CBF/2020|2020-10-12|EPI\_ISL\_630456|Original|hCoV-19^^England|Human|Lighthouse Lab in Alderley Park|Wellcome Sanger Institute for the COVID-19 Genomics UK (COG-UK) consortium|Davies|United Kingdom

>Spike|hCoV-19/USA/TX-HMH-MCoV-8311/2020|2020-07-08|EPI\_ISL\_784323|Original|hCoV-19^^Texas|Human|Houston Methodist Hospital|Houston Methodist Hospital|Long|USA

>Spike|hCoV-19/Switzerland/BL-ETHZ-380348/2020|2020-11-21|EPI\_ISL\_721791|Original|hCoV-19^^Basel-Landschaft|Human|Viollier AG|Department of Biosystems Science and Engineering|Nadeau|Switzerland

>Spike|hCoV-19/England/GSTT-265D606/2020|2020-03-23|EPI\_ISL\_483987|Original|hCoV-19^^England|Human|Centre for Clinical Infection and Diagnostics Research and Genomics Innovation Unit|COVID-19 Genomics UK (COG-UK) Consortium|Awan|United Kingdom

>Spike|hCoV-19/USA/TX-HMH-MCoV-13486/2020|2020-08-22|EPI\_ISL\_788615|Original|hCoV-19^^Texas|Human|Houston Methodist Hospital|Houston Methodist Hospital|Long|USA

>Spike|hCoV-19/Australia/VIC8855/2020|2020-07-22|EPI\_ISL\_565240|Original|hCoV-19^^Victoria|Human|Microbiological Diagnostic Unit - Public Health Laboratory (MDU-PHL)|MDU-PHL|Schultz|Australia

>Spike|hCoV-19/England/MILK-B87B23/2020|2020-11-13|EPI\_ISL\_724833|Original|hCoV-19^^England|Human|Oxford Viromics|COVID-19 Genomics UK (COG-UK) Consortium|Golubchik|United Kingdom

>Spike|hCoV-19/England/SHEF-CE280/2020|2020-04-26|EPI\_ISL\_490629|Original|hCoV-19^^England|Human|Virology Department|COVID-19 Genomics UK (COG-UK) Consortium|de Silva|United Kingdom

>Spike|hCoV-19/England/MILK-A45E56/2020|2020-10-06|EPI\_ISL\_598761|Original|hCoV-19^^England|Human|Lighthouse Lab in Milton Keynes|Wellcome Sanger Institute for the COVID-19 Genomics UK (COG-UK) consortium|Davies|United Kingdom

>Spike|hCoV-19/Denmark/DCGC-5623/2020|2020-09-28|EPI\_ISL\_620948|Original|hCoV-19^^Syddanmark|Human|Department of Virus and Microbiological Special Diagnostics|Albertsen lab|Michaelsen|Denmark

>Spike|hCoV-19/England/MILK-99DC0B/2020|2020-08-30|EPI\_ISL\_550783|Original|hCoV-19^^England|Human|Lighthouse Lab in Milton Keynes|Wellcome Sanger Institute for the COVID-19 Genomics UK (COG-UK) consortium|Davies|United Kingdom

>Spike|hCoV-19/England/CAMC-B52C79/2020|2020-11-09|EPI\_ISL\_657470|Original|hCoV-19^^England|Human|Lighthouse Lab in Cambridge|Wellcome Sanger Institute for the COVID-19 Genomics UK (COG-UK) Consortium|Davies|United Kingdom

>Spike|hCoV-19/USA/CA-ALSR-3411/2020|2020-07-07|EPI\_ISL\_636013|Original|hCoV-19^^California|Human|San Diego County Public Health Laboratory|Andersen lab at Scripps Research|Gangavarapu|USA

>Spike|hCoV-19/Japan/IC-0397/2020|2020-12-00|EPI\_ISL\_736893|Original|hCoV-19^^Japan|Human|Pathogen Genomics Center|Pathogen Genomics Center|Sekizuka|Japan

>Spike|hCoV-19/United Arab Emirates/0463/2020|2020-05-18|EPI\_ISL\_698633|Original|hCoV-19^^Abu Dhabi|Human|Group 42 (G42) Healthcare|G42 Healthcare|Ogrodzki|United Arab Emirates

>Spike|hCoV-19/England/ALDP-94E5B3/2020|2020-06-19|EPI\_ISL\_555473|Original|hCoV-19^^England|Human|Lighthouse Lab in Alderley Park|Wellcome Sanger Institute for the COVID-19 Genomics UK (COG-UK) consortium|Davies|United Kingdom

>Spike|hCoV-19/England/MILK-BB15D7/2020|2020-11-17|EPI\_ISL\_720175|Original|hCoV-19^^England|Human|Lighthouse Lab in Milton Keynes|Wellcome Sanger Institute for the COVID-19 Genomics UK (COG-UK) Consortium|Davies|United Kingdom

>Spike|hCoV-19/Thailand/Bangkok-0059/2020|2020-03-28|EPI\_ISL\_447001|Original|hCoV-19^^Bangkok|Human|Ramathibodi Hospital|COVID-19 Network Investigations (CONI) Alliance|Batty|Thailand

>Spike|hCoV-19/Denmark/DCGC-3116/2020|2020-08-31|EPI\_ISL\_615933|Original|hCoV-19^^Hovedstaden|Human|Department of Virus and Microbiological Special Diagnostics|Albertsen lab|Michaelsen|Denmark

>Spike|hCoV-19/England/ALDP-C22EF3/2020|2020-12-06|EPI\_ISL\_733731|Original|hCoV-19^^England|Human|Lighthouse Lab in Alderley Park|Wellcome Sanger Institute for the COVID-19 Genomics UK (COG-UK) Consortium|Davies|United Kingdom

>Spike|hCoV-19/USA/TX-HMH-6778/2020|2020-06-25|EPI\_ISL\_546237|Original|hCoV-19^^Texas|Human|Houston Methodist Hospital|Houston Methodist Hospital|Long|USA

>Spike|hCoV-19/Canada/Qc-L00240893/2020|2020-03-27|EPI\_ISL\_465692|Original|hCoV-19^^Quebec|Human|CSSS Haut-Richelieu/Rouville (H\u00f4pital)|Laboratoire de sant\u00e9 publique du Qu\u00e9bec|Moreira|Canada

>Spike|hCoV-19/Wales/PHWC-49817F/2020|2020-11-30|EPI\_ISL\_727034|Original|hCoV-19^^Wales|Human|Originating lab|COVID-19 Genomics UK (COG-UK) Consortium|Moore|United Kingdom

>Spike|hCoV-19/Canada/ON-PHL-20-03808/2020|2020-11-00|EPI\_ISL\_775069|Original|hCoV-19^^Ontario|Human|Public Health Ontario Laboratory|Public Health Ontario Laboratory|Guthrie|Canada

>Spike|hCoV-19/England/MILK-A7B394/2020|2020-10-14|EPI\_ISL\_607621|Original|hCoV-19^^England|Human|Lighthouse Lab in Milton Keynes|Wellcome Sanger Institute for the COVID-19 Genomics UK (COG-UK) consortium|Davies|United Kingdom

>Spike|hCoV-19/England/QEUH-B4075F/2020|2020-11-08|EPI\_ISL\_657295|Original|hCoV-19^^England|Human|Lighthouse Lab in Glasgow|Wellcome Sanger Institute for the COVID-19 Genomics UK (COG-UK) Consortium|Davies|United Kingdom

>Spike|hCoV-19/England/CAMB-7F576/2020|2020-04-08|EPI\_ISL\_442946|Original|hCoV-19^^England|Human|Department of Pathology|Wellcome Sanger Institute for the COVID-19 Genomics UK (COG-UK) consortium|Amato|United Kingdom

>Spike|hCoV-19/USA/TX-HMH-4725/2020|2020-06-20|EPI\_ISL\_544288|Original|hCoV-19^^Texas|Human|Houston Methodist Hospital|Houston Methodist Hospital|Long|USA

>Spike|hCoV-19/USA/WA-S2431/2020|2020-06-14|EPI\_ISL\_497063|Original|hCoV-19^^Washington|Human|Washington State Department of Health|Seattle Flu Study|Lee|USA

>Spike|hCoV-19/England/ALDP-9538D0/2020|2020-06-07|EPI\_ISL\_553832|Original|hCoV-19^^England|Human|Lighthouse Lab in Alderley Park|Wellcome Sanger Institute for the COVID-19 Genomics UK (COG-UK) consortium|Davies|United Kingdom

>Spike|hCoV-19/Portugal/PT0815/2020|2020-03-20|EPI\_ISL\_511074|Original|hCoV-19^^Portugal|Human|Instituto Nacional de Saude (INSA)|Instituto Nacional de Saude (INSA)|Borges|Portugal

>Spike|hCoV-19/England/201161691/2020|2020-03-12|EPI\_ISL\_464872|Original|hCoV-19^^England|Human|Respiratory Virus Unit|Respiratory Virus Unit|Platt|United Kingdom

>Spike|hCoV-19/USA/NY-NYCPHL-000771/2020|2020-03-20|EPI\_ISL\_632151|Original|hCoV-19^^New York|Human|Jamaica Hospital Medical Center|New York City Public Health Laboratory|Wang|USA

>Spike|hCoV-19/Australia/WA187/2020|2020-04-08|EPI\_ISL\_596750|Original|hCoV-19^^Western Australia|Human|PathWest Laboratory Medicine WA|PathWest Laboratory Medicine WA Microbial Surveillance Unit|Sikazwe|Australia

>Spike|hCoV-19/England/ALDP-C062CC/2020|2020-12-04|EPI\_ISL\_709427|Original|hCoV-19^^England|Human|Lighthouse Lab in Alderley Park|Wellcome Sanger Institute for the COVID-19 Genomics UK (COG-UK) Consortium|Davies|United Kingdom

>Spike|hCoV-19/Wales/PHWC-49744A/2020|2020-11-27|EPI\_ISL\_726831|Original|hCoV-19^^Wales|Human|Originating lab|COVID-19 Genomics UK (COG-UK) Consortium|Moore|United Kingdom

>Spike|hCoV-19/England/20126036002/2020|2020-03-18|EPI\_ISL\_418765|Original|hCoV-19^^England|Human|Respiratory Virus Unit|Respiratory Virus Unit|Platt|United Kingdom

>Spike|hCoV-19/Australia/VIC1812/2020|2020-05-27|EPI\_ISL\_480636|Original|hCoV-19^^Victoria|Human|Victorian Infectious Diseases Reference Laboratory (VIDRL)|VIDRL and MDU-PHL|Schultz|Australia

>Spike|hCoV-19/England/CAMC-A64CEE/2020|2020-10-09|EPI\_ISL\_608611|Original|hCoV-19^^England|Human|Lighthouse Lab in Cambridge|Wellcome Sanger Institute for the COVID-19 Genomics UK (COG-UK) consortium|Davies|United Kingdom

>Spike|hCoV-19/South Korea/KCDC2530/2020|2020-06-18|EPI\_ISL\_514933|Original|hCoV-19^^South Korea|Human|Division of Viral Diseases|Division of Viral Diseases|Kim|South Korea

>Spike|hCoV-19/USA/MA-MASPHL-00256/2020|2020-04-17|EPI\_ISL\_791694|Original|hCoV-19^^Massachusetts|Human|Massachusetts State Public Health Laboratory|Infectious Disease Program|Park|USA

>Spike|hCoV-19/Wales/ALDP-C597BC/2020|2020-12-14|EPI\_ISL\_767127|Original|hCoV-19^^Wales|Human|Lighthouse Lab in Alderley Park|Wellcome Sanger Institute for the COVID-19 Genomics UK (COG-UK) Consortium|Davies|United Kingdom

>Spike|hCoV-19/USA/IL-QDX-1101/2020|2020-03-18|EPI\_ISL\_571844|Original|hCoV-19^^Illinois|Human|Quest Diagnostics|Quest Diagnostics|Kagan|USA

>Spike|hCoV-19/England/ALDP-A6DE76/2020|2020-10-14|EPI\_ISL\_607772|Original|hCoV-19^^England|Human|Lighthouse Lab in Alderley Park|Wellcome Sanger Institute for the COVID-19 Genomics UK (COG-UK) consortium|Davies|United Kingdom

>Spike|hCoV-19/England/20102004104/2020|2020-03-02|EPI\_ISL\_464278|Original|hCoV-19^^England|Human|Respiratory Virus Unit|Respiratory Virus Unit|Platt|United Kingdom

>Spike|hCoV-19/Denmark/DCGC-11639/2020|2020-10-26|EPI\_ISL\_671041|Original|hCoV-19^^Midtjylland|Human|Department of Virus and Microbiological Special Diagnostics|Albertsen Lab|Michaelsen|Denmark

>Spike|hCoV-19/England/204390349/2020|2020-10-23|EPI\_ISL\_637141|Original|hCoV-19^^England|Human|Respiratory Virus Unit|COVID-19 Genomics UK (COG-UK) Consortium|Platt|United Kingdom

>Spike|hCoV-19/England/ALDP-B634AA/2020|2020-11-09|EPI\_ISL\_656522|Original|hCoV-19^^England|Human|Lighthouse Lab in Alderley Park|Wellcome Sanger Institute for the COVID-19 Genomics UK (COG-UK) Consortium|Davies|United Kingdom

>Spike|hCoV-19/England/20156048304/2020|2020-04-08|EPI\_ISL\_466329|Original|hCoV-19^^England|Human|Respiratory Virus Unit|Respiratory Virus Unit|Platt|United Kingdom

>Spike|hCoV-19/Australia/VIC2206/2020|2020-06-25|EPI\_ISL\_521948|Original|hCoV-19^^Victoria|Human|Victorian Infectious Diseases Reference Laboratory (VIDRL)|VIDRL and MDU-PHL|Schultz|Australia

>Spike|hCoV-19/Wales/PHWC-162D5F/2020|2020-05-26|EPI\_ISL\_473195|Original|hCoV-19^^Wales|Human|Wales Specialist Virology Centre Sequencing lab|COVID-19 Genomics UK (COG-UK) Consortium|Moore|United Kingdom

>Spike|hCoV-19/USA/TX-HMH-MCoV-18147/2020|2020-11-14|EPI\_ISL\_784495|Original|hCoV-19^^Texas|Human|Houston Methodist Hospital|Houston Methodist Hospital|Long|USA

>Spike|hCoV-19/USA/OR-OHSU-1049/2020|2020-07-08|EPI\_ISL\_525959|Original|hCoV-19^^Oregon|Human|OHSU Lab Services Molecular Microbiology Lab|Oregon SARS-CoV-2 Genome Sequencing Center|O'Roak|USA

>Spike|hCoV-19/England/ALDP-91E90B/2020|2020-06-23|EPI\_ISL\_553285|Original|hCoV-19^^England|Human|Lighthouse Lab in Alderley Park|Wellcome Sanger Institute for the COVID-19 Genomics UK (COG-UK) consortium|Davies|United Kingdom

>Spike|hCoV-19/Scotland/EDB9033/2020|2020-11-01|EPI\_ISL\_652036|Original|hCoV-19^^Scotland|Human|Virology Department|COVID-19 Genomics UK (COG-UK) Consortium|McHugh|United Kingdom

>Spike|hCoV-19/Germany/HB-ChVir2097/2020|2020-03-11|EPI\_ISL\_729500|Original|hCoV-19^^Bremen|Human|A. Krumbholz|Charit\u00e9 Universit\u00e4tsmedizin Berlin|Muehlemann|Germany

>Spike|hCoV-19/England/CAMC-A57B78/2020|2020-10-09|EPI\_ISL\_597254|Original|hCoV-19^^England|Human|Lighthouse Lab in Cambridge|Wellcome Sanger Institute for the COVID-19 Genomics UK (COG-UK) consortium|Davies|United Kingdom

>Spike|hCoV-19/England/LOND-D6179/2020|2020-04-20|EPI\_ISL\_482182|Original|hCoV-19^^England|Human|University College London|Wellcome Sanger Institute for the COVID-19 Genomics UK (COG-UK) consortium|Davies|United Kingdom

>Spike|hCoV-19/Japan/PG-8520/2020|2020-07-00|EPI\_ISL\_686116|Original|hCoV-19^^Japan|Human|Pathogen Genomics Center|Pathogen Genomics Center|Sekizuka|Japan

>Spike|hCoV-19/England/QEUEH-A3676C/2020|2020-10-05|EPI\_ISL\_706916|Original|hCoV-19^^England|Human|Oxford Viromics|COVID-19 Genomics UK (COG-UK) Consortium|Golubchik|United Kingdom

>Spike|hCoV-19/USA/UT-UPHL-2012172138/2020|2020-11-30|EPI\_ISL\_746956|Original|hCoV-19^^Utah|Human|Utah Public Health Laboratory|Utah Public Health Laboratory|Gallagher|USA

>Spike|hCoV-19/England/LOND-12600AF/2020|2020-03-18|EPI\_ISL\_516862|Original|hCoV-19^^England|Human|North West London Pathology|Wellcome Sanger Institute for the COVID-19 Genomics UK (COG-UK) consortium|Davies|United Kingdom

>Spike|hCoV-19/England/ALDP-B4854E/2020|2020-11-07|EPI\_ISL\_649355|Original|hCoV-19^^England|Human|Lighthouse Lab in Alderley Park|Wellcome Sanger Institute for the COVID-19 Genomics UK (COG-UK) Consortium|Davies|United Kingdom

>Spike|hCoV-19/Denmark/DCGC-9264/2020|2020-11-16|EPI\_ISL\_668879|Original|hCoV-19^^Midtjylland|Human|Department of Virus and Microbiological Special Diagnostics|Albertsen Lab|Michaelsen|Denmark

>Spike|hCoV-19/Denmark/DCGC-2854/2020|2020-08-17|EPI\_ISL\_616682|Original|hCoV-19^^Hovedstaden|Human|Department of Virus and Microbiological Special Diagnostics|Albertsen lab|Michaelsen|Denmark

>Spike|hCoV-19/England/QEUH-9B7843/2020|2020-09-08|EPI\_ISL\_590610|Original|hCoV-19^^England|Human|Lighthouse Lab in Glasgow|Wellcome Sanger Institute for the COVID-19 Genomics UK (COG-UK) consortium|Davies|United Kingdom

>Spike|hCoV-19/Hangzhou/HZCDC0091/2020|2020-01-21|EPI\_ISL\_421228|Original|hCoV-19^^Hangzhou|Human|Hangzhou Center for Diseases Control and Prevention|Hangzhou Center for Diseases Control and Prevention|Li|China

>Spike|hCoV-19/South Africa/KRISP-K003372/2020|2020-09-10|EPI\_ISL\_602762|Original|hCoV-19^^KwaZulu-Natal|Human|NHLS-IALCH|KRISP|de Oliveira|South Africa

>Spike|hCoV-19/England/20128033702/2020|2020-03-18|EPI\_ISL\_420471|Original|hCoV-19^^England|Human|Respiratory Virus Unit|Respiratory Virus Unit|Platt|United Kingdom

>Spike|hCoV-19/Brazil/RJ-LVM161-2/2020|2020-03-19|EPI\_ISL\_528539|Vero-E6|hCoV-19^^Rio de Janeiro|Human|LVM/UFRJ|LNCC|Almeida|Brazil

>Spike|hCoV-19/USA/CA-CZB-10794/2020|2020-06-22|EPI\_ISL\_583054|Original|hCoV-19^^California|Human|Humboldt County Public Health Laboratory|Chan-Zuckerberg Biohub|Bhatt|USA

>Spike|hCoV-19/India/MH-GA51/2020|2020-06-20|EPI\_ISL\_508246|Original|hCoV-19^^Maharashtra|Human|Government Medical College|National Institute of Biomedical Genomics|Maitra|India

>Spike|hCoV-19/Portugal/PT1559/2020|2020-06-27|EPI\_ISL\_693570|Original|hCoV-19^^Portugal|Human|Instituto Nacional de Saude (INSA)|Instituto Nacional de Saude (INSA)|Borges|Portugal

>Spike|hCoV-19/England/CAMC-C45A8D/2020|2020-12-10|EPI\_ISL\_718608|Original|hCoV-19^^England|Human|Lighthouse Lab in Cambridge|Wellcome Sanger Institute for the COVID-19 Genomics UK (COG-UK) Consortium|Davies|United Kingdom

>Spike|hCoV-19/Denmark/DCGC-21029/2020|2020-12-21|EPI\_ISL\_759514|Original|hCoV-19^^Midtjylland|Human|Department of Virus and Microbiological Special Diagnostics|Albertsen Lab|Michaelsen|Denmark

>Spike|hCoV-19/Wales/PHWC-28D47/2020|2020-04-02|EPI\_ISL\_432156|Original|hCoV-19^^Wales|Human|Wales Specialist Virology Centre|Public Health Wales Microbiology Cardiff|Moore|United Kingdom

>Spike|hCoV-19/England/CAMC-B51946/2020|2020-11-08|EPI\_ISL\_658227|Original|hCoV-19^^England|Human|Lighthouse Lab in Cambridge|Wellcome Sanger Institute for the COVID-19 Genomics UK (COG-UK) Consortium|Davies|United Kingdom

>Spike|hCoV-19/USA/TX-HMH-MCoV-14630/2020|2020-10-11|EPI\_ISL\_787915|Original|hCoV-19^^Texas|Human|Houston Methodist Hospital|Houston Methodist Hospital|Long|USA

>Spike|hCoV-19/Scotland/QEUH-9CECD4/2020|2020-09-17|EPI\_ISL\_601902|Original|hCoV-19^^Scotland|Human|Lighthouse Lab in Glasgow|Wellcome Sanger Institute for the COVID-19 Genomics UK (COG-UK) consortium|Davies|United Kingdom

>Spike|hCoV-19/Scotland/EDB890/2020|2020-04-04|EPI\_ISL\_457021|Original|hCoV-19^^Scotland|Human|Virology Department|COVID-19 Genomics UK (COG-UK) Consortium|Williams|United Kingdom

>Spike|hCoV-19/USA/MA-MASPHL-00144/2020|2020-04-03|EPI\_ISL\_791616|Original|hCoV-19^^Massachusetts|Human|Massachusetts State Public Health Laboratory|Infectious Disease Program|Park|USA

>Spike|hCoV-19/Scotland/QEUH-9FB37F/2020|2020-09-29|EPI\_ISL\_600551|Original|hCoV-19^^Scotland|Human|Lighthouse Lab in Glasgow|Wellcome Sanger Institute for the COVID-19 Genomics UK (COG-UK) consortium|Davies|United Kingdom

>Spike|hCoV-19/England/BRIS-130798/2020|2020-04-12|EPI\_ISL\_492549|Original|hCoV-19^^England|Human|PHE South West Regional Laboratory|Wellcome Sanger Institute for the COVID-19 Genomics UK (COG-UK) consortium|Davies|United Kingdom

>Spike|hCoV-19/England/MILK-ABC43A/2020|2020-10-20|EPI\_ISL\_631083|Original|hCoV-19^^England|Human|Lighthouse Lab in Milton Keynes|Wellcome Sanger Institute for the COVID-19 Genomics UK (COG-UK) consortium|Davies|United Kingdom



>Spike|hCoV-19/Scotland/QEUH-A6371B/2020|2020-10-12|EPI\_ISL\_596137|Original|hCoV-19^^Scotland|Human|Quadram Institute Bioscience|COVID-19 Genomics UK (COG-UK) Consortium|Alikhan|United Kingdom

>Spike|hCoV-19/Scotland/EDB5128/2020|2020-05-17|EPI\_ISL\_456977|Original|hCoV-19^^Scotland|Human|Virology Department|COVID-19 Genomics UK (COG-UK) Consortium|Williams|United Kingdom

>Spike|hCoV-19/England/QEUH-9DECA4/2020|2020-09-21|EPI\_ISL\_581267|Original|hCoV-19^^England|Human|Lighthouse Lab in Glasgow|Wellcome Sanger Institute for the COVID-19 Genomics UK (COG-UK) consortium|Davies|United Kingdom

>Spike|hCoV-19/Netherlands/Gelderland\_6/2020|2020-03-09|EPI\_ISL\_422642|Original|hCoV-19^^Gelderland|Human|Dutch COVID-19 response team|Erasmus Medical Center|Oude Munnink|Netherlands

>Spike|hCoV-19/England/CAMB-1B0D34/2020|2020-05-11|EPI\_ISL\_452966|Original|hCoV-19^^England|Human|Department of Pathology|COVID-19 Genomics UK (COG-UK) Consortium|Meredith|United Kingdom

>Spike|hCoV-19/USA/VA-DCLS-0690/2020|2020-04-18|EPI\_ISL\_500851|Original|hCoV-19^^Virginia|Human|Virginia DCLS|Virginia DCLS|St. Jacques|USA

>Spike|hCoV-19/England/CAMB-76ECF/2020|2020-03-31|EPI\_ISL\_439521|Original|hCoV-19^^England|Human|Department of Pathology|Wellcome Sanger Institute for the COVID-19 Genomics UK (COG-UK) consortium|Amato|United Kingdom

>Spike|hCoV-19/Norway/6597/2020|2020-12-02|EPI\_ISL\_775400|Original|hCoV-19^^Nordland|Human|Nordland Hospital - Bodo|Norwegian Institute of Public Health|Vollan|Norway

>Spike|hCoV-19/Denmark/DCGC-1624/2020|2020-04-06|EPI\_ISL\_619266|Original|hCoV-19^^Hovedstaden|Human|Department of Virus and Microbiological Special Diagnostics|Albertsen lab|Michaelsen|Denmark

>Spike|hCoV-19/England/PORT-2F50A2/2020|2020-00-00|EPI\_ISL\_702985|Original|hCoV-19^^England|Human|Centre for Enzyme Innovation|COVID-19 Genomics UK (COG-UK) Consortium|Robson|United Kingdom

>Spike|hCoV-19/Netherlands/FR-RIVM-20777/2020|2020-12-12|EPI\_ISL\_790918|Original|hCoV-19^^Friesland|Human|Dutch COVID-19 response team|National Institute for Public Health and the Environment (RIVM)|Meijer|Netherlands

>Spike|hCoV-19/Denmark/ALAB-HH-156/2020|2020-03-19|EPI\_ISL\_452031|Original|hCoV-19^^Denmark|Human|Department of Clinical Microbiology|Albertsen lab|Kirkegaard|Denmark

>Spike|hCoV-19/Australia/VIC3341/2020|2020-07-08|EPI\_ISL\_521020|Original|hCoV-19^^Victoria|Human|Microbiological Diagnostic Unit - Public Health Laboratory (MDU-PHL)|MDU-PHL|Schultz|Australia

>Spike|hCoV-19/Poland/1105973/2020|2020-03-19|EPI\_ISL\_428234|Original|hCoV-19^^Pomorskie|Human|Hematology Laboratory|Department of Virology|Smura|Poland

>Spike|hCoV-19/England/MILK-BAAA5A/2020|2020-11-17|EPI\_ISL\_681630|Original|hCoV-19^^England|Human|Lighthouse Lab in Milton Keynes|Wellcome Sanger Institute for the COVID-19 Genomics UK (COG-UK) Consortium|Davies|United Kingdom

>Spike|hCoV-19/Italy/ABR-IZSGC-TE46456/2020|2020-05-14|EPI\_ISL\_529002|Original|hCoV-19^^Abruzzo|Human|Servizio di igiene epidemiologia e sanit\u00e0 pubblica (SIESP)-Chieti|Istituto Zooprofilattico Sperimentale dell'Abruzzo e Molise \G.Caporale\|Lorusso|Italy

>Spike|hCoV-19/England/CAMC-B07824/2020|2020-10-31|EPI\_ISL\_643813|Original|hCoV-19^^England|Human|Lighthouse Lab in Cambridge|Wellcome Sanger Institute for the COVID-19 Genomics UK (COG-UK) Consortium|Davies|United Kingdom

>Spike|hCoV-19/Japan/PG-8678/2020|2020-09-00|EPI\_ISL\_686274|Original|hCoV-19^^Japan|Human|Pathogen Genomics Center|Pathogen Genomics Center|Sekizuka|Japan

>Spike|hCoV-19/Japan/PG-5175/2020|2020-08-00|EPI\_ISL\_690278|Original|hCoV-19^^Japan|Human|Pathogen Genomics Center|Pathogen Genomics Center|Sekizuka|Japan

>Spike|hCoV-19/Denmark/DCGC-15487/2020|2020-11-23|EPI\_ISL\_713122|Original|hCoV-19^^Hovedstaden|Human|Department of Virus and Microbiological Special Diagnostics|Albertsen Lab|Michaelsen|Denmark

>Spike|hCoV-19/India/GJ-GBRC263a/2020|2020-06-12|EPI\_ISL\_483856|Original|hCoV-19^^Gujarat|Human|Department of Microbiology|Gujarat Biotechnology Research Centre|Joshi|India

>Spike|hCoV-19/England/QEUEH-A9D086/2020|2020-10-20|EPI\_ISL\_652651|Original|hCoV-19^^England|Human|Queens Medical Centre|COVID-19 Genomics UK (COG-UK) Consortium|Loose|United Kingdom

>Spike|hCoV-19/Denmark/DCGC-20313/2020|2020-11-23|EPI\_ISL\_747587|Original|hCoV-19^^Hovedstaden|Human|Department of Virus and Microbiological Special Diagnostics|Albertsen Lab|Michaelsen|Denmark

>Spike|hCoV-19/England/QEUEH-C5CB9F/2020|2020-12-14|EPI\_ISL\_736015|Original|hCoV-19^^England|Human|Lighthouse Lab in Glasgow|Wellcome Sanger Institute for the COVID-19 Genomics UK (COG-UK) Consortium|Davies|United Kingdom

>Spike|hCoV-19/Canada/ON-S1490/2020|2020-08-00|EPI\_ISL\_770842|Original|hCoV-19^^Ontario|Human|Toronto Invasive Bacterial Diseases Network|McMaster University|McArthur|Canada

>Spike|hCoV-19/India/GJ-GBRC-421b/2020|2020-07-14|EPI\_ISL\_590692|Original|hCoV-19^^Gujarat|Human|Government Hospital, Veraval|Gujarat Biotechnology Research Centre|Joshi|India

>Spike|hCoV-19/South Korea/KCDC2275/2020|2020-05-18|EPI\_ISL\_510612|Original|hCoV-19^^South Korea|Human|Division of Viral Diseases|Division of Viral Diseases|Kim|South Korea

>Spike|hCoV-19/Australia/VIC5676/2020|2020-07-05|EPI\_ISL\_518483|Original|hCoV-19^^Victoria|Human|Microbiological Diagnostic Unit - Public Health Laboratory (MDU-PHL)|MDU-PHL|Schultz|Australia

>Spike|hCoV-19/England/CAMC-B51111/2020|2020-11-08|EPI\_ISL\_658029|Original|hCoV-19^^England|Human|Lighthouse Lab in Cambridge|Wellcome Sanger Institute for the COVID-19 Genomics UK (COG-UK) Consortium|Davies|United Kingdom

>Spike|hCoV-19/England/ALDP-A51570/2020|2020-10-07|EPI\_ISL\_598106|Original|hCoV-19^^England|Human|Lighthouse Lab in Alderley Park|Wellcome Sanger Institute for the COVID-19 Genomics UK (COG-UK) consortium|Davies|United Kingdom

>Spike|hCoV-19/England/QEUEH-A5E494/2020|2020-10-12|EPI\_ISL\_597385|Original|hCoV-19^^England|Human|Lighthouse Lab in Glasgow|Wellcome Sanger Institute for the COVID-19 Genomics UK (COG-UK) consortium|Davies|United Kingdom

>Spike|hCoV-19/Scotland/CVR3171/2020|2020-04-27|EPI\_ISL\_449201|Original|hCoV-19^^Scotland|Human|West of Scotland Specialist Virology Centre|COVID-19 Genomics UK (COG-UK) Consortium|Robertson|United Kingdom

>Spike|hCoV-19/England/LIVE-A99E0/2020|2020-03-25|EPI\_ISL\_517305|Original|hCoV-19^^England|Human|Liverpool Clinical Laboratories|COVID-19 Genomics UK (COG-UK) Consortium|Haldenby|United Kingdom

>Spike|hCoV-19/England/ALDP-A2EECC/2020|2020-10-05|EPI\_ISL\_587274|Original|hCoV-19^^England|Human|Lighthouse Lab in Alderley Park|Wellcome Sanger Institute for the COVID-19 Genomics UK (COG-UK) consortium|Davies|United Kingdom

>Spike|hCoV-19/USA/AZ-TG522745/2020|2020-07-20|EPI\_ISL\_695386|Original|hCoV-19^^Arizona|Human|TGen North|TGen North|French|USA

>Spike|hCoV-19/Japan/PG-7013/2020|2020-08-00|EPI\_ISL\_688118|Original|hCoV-19^^Japan|Human|Pathogen Genomics Center|Pathogen Genomics Center|Sekizuka|Japan

>Spike|hCoV-19/Luxembourg/LNS2272431/2020|2020-10-19|EPI\_ISL\_740090|Original|hCoV-19^^Luxembourg|Human|Laboratoire national de sant\u00e9|Laboratoire national de sant\u00e9|Wienecke-Baldacchino|Luxembourg

>Spike|hCoV-19/Australia/NSW180/2020|2020-03-22|EPI\_ISL\_427701|Original|hCoV-19^^New South Wales|Human|Centre for Infectious Diseases and Microbiology Public Health|NSW Health Pathology - Institute of Clinical Pathology and Medical Research; Westmead Hospital; University of Sydney|Gall|Australia

>Spike|hCoV-19/USA/WA-S1459/2020|2020-05-21|EPI\_ISL\_495909|Original|hCoV-19^^Washington|Human|Washington State Department of Health|Seattle Flu Study|Lee|USA

>Spike|hCoV-19/USA/MI-QDX-908/2020|2020-03-20|EPI\_ISL\_571627|Original|hCoV-19^^Michigan|Human|Quest Diagnostics|Quest Diagnostics|Kagan|USA

>Spike|hCoV-19/SaudiArabia/KAUST-JEDDAH918/2020|2020-04-06|EPI\_ISL\_513049|Original|hCoV-19^^Jeddah|Human|Pathogen Genomics Lab King Abdullah

University of Science and Technology(KAUST)|Pathogen Genomics Lab King Abdullah  
University of Science and Technology(KAUST)|Mohamed Ghazzali|Saudi Arabia  
>Spike|hCoV-19/Scotland/CVR2941/2020|2020-04-22|EPI\_ISL\_461601|Original|hCoV-  
19^^Scotland|Human|West of Scotland Specialist Virology Centre|COVID-19 Genomics UK  
(COG-UK) Consortium|Robertson|United Kingdom  
>Spike|hCoV-19/England/QEUA-B6A573/2020|2020-11-11|EPI\_ISL\_662434|Original|hCoV-  
19^^England|Human|Lighthouse Lab in Glasgow|Wellcome Sanger Institute for the COVID-  
19 Genomics UK (COG-UK) Consortium|Davies|United Kingdom  
>Spike|hCoV-19/England/ALDP-A5268B/2020|2020-10-07|EPI\_ISL\_597932|Original|hCoV-  
19^^England|Human|Lighthouse Lab in Alderley Park|Wellcome Sanger Institute for the  
COVID-19 Genomics UK (COG-UK) consortium|Davies|United Kingdom  
>Spike|hCoV-19/USA/IL-NM-0673/2020|2020-03-28|EPI\_ISL\_626465|Original|hCoV-  
19^^Illinois|Human|Northwestern Memorial Hospital|Ozer Lab|Ozer|USA  
>Spike|hCoV-19/Bahrein/BAH-16/2020|2020-04-08|EPI\_ISL\_483557|Original|hCoV-  
19^^Bahrain|Human|Kingdom of Bahrein Ministry of Health|Erasmus Medical Center|Oude  
Munnink|Bahrain  
>Spike|hCoV-19/Switzerland/VD-ETHZ-230066/2020|2020-08-  
05|EPI\_ISL\_516601|Original|hCoV-19^^Vaud|Human|Viollier AG|Department of Biosystems  
Science and Engineering|Nadeau|Switzerland  
>Spike|hCoV-19/Scotland/QEUA-7D36D0/2020|2020-07-23|EPI\_ISL\_532885|Original|hCoV-  
19^^Scotland|Human|NHSGGC West of Scotland Specialist Virology Centre / MRC-  
University of Glasgow Centre for Virus Research|Wellcome Sanger Institute for the  
COVID-19 Genomics UK (COG-UK) consortium|Davies|United Kingdom  
>Spike|hCoV-19/Spain/AR-ISCI-201849/2020|2020-03-09|EPI\_ISL\_539518|Original|hCoV-  
19^^Aragon|Human|Hospital Universitario Miguel Servet|Instituto de Salud Carlos  
III|Caballero|Spain  
>Spike|hCoV-19/USA/NY-PV09345/2020|2020-03-24|EPI\_ISL\_450033|Original|hCoV-19^^New  
York|Human|MSHS Clinical Microbiology Laboratories|MSHS Pathogen Surveillance  
Program|van Bakel|USA  
>Spike|hCoV-19/Netherlands/OV-RIVM-20515/2020|2020-10-  
22|EPI\_ISL\_728730|Original|hCoV-19^^Overijssel|Human|Dutch COVID-19 response  
team|National Institute for Public Health and the Environment  
(RIVM)|Meijer|Netherlands  
>Spike|hCoV-19/England/ALDP-AA09FE/2020|2020-10-22|EPI\_ISL\_630789|Original|hCoV-  
19^^England|Human|Lighthouse Lab in Alderley Park|Wellcome Sanger Institute for the  
COVID-19 Genomics UK (COG-UK) consortium|Davies|United Kingdom  
>Spike|hCoV-19/England/ALDP-CBE472/2020|2020-12-18|EPI\_ISL\_760752|Original|hCoV-  
19^^England|Human|Lighthouse Lab in Alderley Park|Wellcome Sanger Institute for the  
COVID-19 Genomics UK (COG-UK) Consortium|Davies|United Kingdom  
>Spike|hCoV-19/Denmark/DCGC-17938/2020|2020-12-14|EPI\_ISL\_749656|Original|hCoV-  
19^^Sjaelland|Human|Department of Virus and Microbiological Special  
Diagnostics|Albertsen Lab|Michaelsen|Denmark  
>Spike|hCoV-19/India/MH-NIV-2387/2020|2020-03-13|EPI\_ISL\_454527|Original|hCoV-  
19^^Maharashtra|Human|NIV Influenza|NIV Influenza|Potdar|India  
>Spike|hCoV-19/USA/CA-QDX-2107/2020|2020-03-17|EPI\_ISL\_604413|Original|hCoV-  
19^^California|Human|Quest Diagnostics|Quest Diagnostics|Kagan|USA  
>Spike|hCoV-19/USA/LA-EVTL1012/2020|2020-08-24|EPI\_ISL\_653703|Original|hCoV-  
19^^Louisiana|Human|LSUHS Emerging Viral Threat Laboratory|Microbial Genome  
Sequencing Center|Kamil|USA  
>Spike|hCoV-19/Saudi Arabia/KAUST-MADINAH1129/2020|2020-06-  
13|EPI\_ISL\_677987|Original|hCoV-19^^Madinah|Human|Pathogen Genomics Lab King Abdullah  
University of Science and Technology(KAUST)|Pathogen Genomics Lab King Abdullah  
University of Science and Technology(KAUST)|Mohamed Ghazzali|Saudi Arabia  
>Spike|hCoV-19/England/LIVE-A6172/2020|2020-03-21|EPI\_ISL\_499688|Original|hCoV-  
19^^England|Human|Liverpool Clinical Laboratories|COVID-19 Genomics UK (COG-UK)  
Consortium|Haldenby|United Kingdom  
>Spike|hCoV-19/England/QEUA-BCCDB3/2020|2020-11-26|EPI\_ISL\_704482|Original|hCoV-  
19^^England|Human|Lighthouse Lab in Glasgow|Wellcome Sanger Institute for the COVID-  
19 Genomics UK (COG-UK) Consortium|Davies|United Kingdom

>Spike|hCoV-19/Australia/VIC7309/2020|2020-07-26|EPI\_ISL\_564338|Original|hCoV-19^^Victoria|Human|Victorian Infectious Diseases Reference Laboratory (VIDRL)|VIDRL and MDU-PHL|Schultz|Australia

>Spike|hCoV-19/England/QEUA-9DB0AB/2020|2020-09-19|EPI\_ISL\_580879|Original|hCoV-19^^England|Human|Lighthouse Lab in Glasgow|Wellcome Sanger Institute for the COVID-19 Genomics UK (COG-UK) consortium|Davies|United Kingdom

>Spike|hCoV-19/Australia/WA332/2020|2020-04-13|EPI\_ISL\_596875|Original|hCoV-19^^Western Australia|Human|PathWest Laboratory Medicine WA|PathWest Laboratory Medicine WA Microbial Surveillance Unit|Sikazwe|Australia

>Spike|hCoV-19/Israel/701002456/2020|2020-03-24|EPI\_ISL\_447298|Original|hCoV-19^^South Coast District|Human|Microbiology Division|Stern Lab|Miller|Israel

>Spike|hCoV-19/Denmark/DCGC-1617/2020|2020-04-13|EPI\_ISL\_619273|Original|hCoV-19^^Hovedstaden|Human|Department of Virus and Microbiological Special Diagnostics|Albertsen lab|Michaelsen|Denmark

>Spike|hCoV-19/Northern Ireland/NIRE-101253/2020|2020-04-28|EPI\_ISL\_482115|Original|hCoV-19^^Northern Ireland|Human|Regional Virus Laboratory|Wellcome Sanger Institute for the COVID-19 Genomics UK (COG-UK) consortium|Davies|United Kingdom

>Spike|hCoV-19/Spain/RI-IBV-h2285/2020|2020-03-01|EPI\_ISL\_468764|Original|hCoV-19^^La Rioja|Human|Centro de Investigaci\u00f3n Biom\u00e9dica de La Rioja - Hospital San Pedro Logro\u00f1o|SeqCOVID-SPAIN consortium/IBV (CSIC)|Comas|Spain

>Spike|hCoV-19/Norway/7089/2020|2020-11-27|EPI\_ISL\_775415|Original|hCoV-19^^Oslo|Human|Oslo University Hospital|Norwegian Institute of Public Health|Vollan|Norway

>Spike|hCoV-19/Wales/PHWC-15FD91/2020|2020-05-22|EPI\_ISL\_472854|Original|hCoV-19^^Wales|Human|Wales Specialist Virology Centre Sequencing lab|COVID-19 Genomics UK (COG-UK) Consortium|Moore|United Kingdom

>Spike|hCoV-19/India/MH-NCCS-NR-14607/2020|2020-07-26|EPI\_ISL\_721655|Original|hCoV-19^^Maharashtra|Human|National Centre For Cell Science|National Centre For Cell Science|Paul|India

>Spike|hCoV-19/England/MILK-A06A8A/2020|2020-10-01|EPI\_ISL\_599916|Original|hCoV-19^^England|Human|Lighthouse Lab in Milton Keynes|Wellcome Sanger Institute for the COVID-19 Genomics UK (COG-UK) consortium|Davies|United Kingdom

>Spike|hCoV-19/England/ALDP-A6738C/2020|2020-10-12|EPI\_ISL\_630592|Original|hCoV-19^^England|Human|Lighthouse Lab in Alderley Park|Wellcome Sanger Institute for the COVID-19 Genomics UK (COG-UK) consortium|Davies|United Kingdom

>Spike|hCoV-19/England/NORT-292A6D/2020|2020-05-22|EPI\_ISL\_489067|Original|hCoV-19^^England|Human|NU-OMICS DNA Sequencing research facility|Wellcome Sanger Institute for the COVID-19 Genomics UK (COG-UK) consortium|Davies|United Kingdom

>Spike|hCoV-19/England/ALDP-9E98EE/2020|2020-09-24|EPI\_ISL\_584262|Original|hCoV-19^^England|Human|Virology Department|COVID-19 Genomics UK (COG-UK) Consortium|de Silva|United Kingdom

>Spike|hCoV-19/Wales/PHWC-2F26F/2020|2020-04-06|EPI\_ISL\_446224|Original|hCoV-19^^Wales|Human|Wales Specialist Virology Centre|Public Health Wales Microbiology Cardiff|Moore|United Kingdom

>Spike|hCoV-19/India/MP-NCDC-4859/2020|2020-04-20|EPI\_ISL\_436457|Original|hCoV-19^^Madhya Pradesh|Human|National Centre for Disease control (NCDC)|NCDC/CSIR-IGIB|Singh|India

>Spike|hCoV-19/England/ALDP-A4FD7D/2020|2020-10-07|EPI\_ISL\_597874|Original|hCoV-19^^England|Human|Lighthouse Lab in Alderley Park|Wellcome Sanger Institute for the COVID-19 Genomics UK (COG-UK) consortium|Davies|United Kingdom

>Spike|hCoV-19/Wales/PHWC-16CFE6/2020|2020-09-21|EPI\_ISL\_574194|Original|hCoV-19^^Wales|Human|Wales Specialist Virology Centre Sequencing lab|COVID-19 Genomics UK (COG-UK) Consortium|Moore|United Kingdom

>Spike|hCoV-19/USA/NM-NMDOH-2020135001/2020|2020-06-18|EPI\_ISL\_535288|Original|hCoV-19^^New Mexico|Human|New Mexico Department of Health Scientific Laboratory|New Mexico Department of Health Scientific Laboratory|Johnson|USA

>Spike|hCoV-19/USA/TX-HMH0361/2020|2020-03-29|EPI\_ISL\_434954|Original|hCoV-19^^Texas|Human|Houston Methodist Hospital|Houston Methodist Hospital|Long|USA

>Spike|hCoV-19/England/MILK-A464EA/2020|2020-10-05|EPI\_ISL\_598618|Original|hCoV-19^^England|Human|Lighthouse Lab in Milton Keynes|Wellcome Sanger Institute for the COVID-19 Genomics UK (COG-UK) consortium|Davies|United Kingdom

>Spike|hCoV-19/Japan/PG-1025/2020|2020-04-00|EPI\_ISL\_684635|Original|hCoV-19^^Japan|Human|Fukuoka Institute of Health and Environmental Sciences|Pathogen Genomics Center|Sekizuka|Japan

>Spike|hCoV-19/USA/CA-ALSR-3841/2020|2020-06-11|EPI\_ISL\_636237|Original|hCoV-19^^California|Human|San Diego County Public Health Laboratory|Andersen lab at Scripps Research|Gangavarapu|USA

>Spike|hCoV-19/Sweden/20-08088/2020|2020-03-05|EPI\_ISL\_454461|Original|hCoV-19^^Stockholm|Human|Karolinska Universitetslaboratoriet|The Public Health Agency of Sweden|Svartstr\u00f6m|Sweden

>Spike|hCoV-19/USA/CA-CZB-10230/2020|2020-05-18|EPI\_ISL\_672266|Original|hCoV-19^^California|Human|The Ashley Laboratory|Chan-Zuckerberg Biohub|Bhatt|USA

>Spike|hCoV-19/England/ALDP-AA49BE/2020|2020-10-22|EPI\_ISL\_625176|Original|hCoV-19^^England|Human|Lighthouse Lab in Alderley Park|Wellcome Sanger Institute for the COVID-19 Genomics UK (COG-UK) consortium|Davies|United Kingdom

>Spike|hCoV-19/Australia/VIC14287/2020|2020-08-03|EPI\_ISL\_592436|Original|hCoV-19^^Victoria|Human|Microbiological Diagnostic Unit - Public Health Laboratory (MDU-PHL)|MDU-PHL|Schultz|Australia

>Spike|hCoV-19/England/LIVE-9FC3F/2020|2020-06-01|EPI\_ISL\_472050|Original|hCoV-19^^England|Human|Liverpool Clinical Laboratories|COVID-19 Genomics UK (COG-UK) Consortium|Haldenby|United Kingdom

>Spike|hCoV-19/Wales/PHWC-48AC06/2020|2020-11-04|EPI\_ISL\_666135|Original|hCoV-19^^Wales|Human|Wales Specialist Virology Centre Sequencing lab|COVID-19 Genomics UK (COG-UK) Consortium|Moore|United Kingdom

>Spike|hCoV-19/England/QEUEH-B692E6/2020|2020-11-11|EPI\_ISL\_661394|Original|hCoV-19^^England|Human|Lighthouse Lab in Glasgow|Wellcome Sanger Institute for the COVID-19 Genomics UK (COG-UK) Consortium|Davies|United Kingdom

>Spike|hCoV-19/USA/UT-UPHL-201125055/2020|2020-09-28|EPI\_ISL\_628940|Original|hCoV-19^^Utah|Human|Utah Public Health Laboratory|Utah Public Health Laboratory|Young|USA

>Spike|hCoV-19/Wales/MILK-9F0565/2020|2020-09-24|EPI\_ISL\_580698|Original|hCoV-19^^Wales|Human|Lighthouse Lab in Milton Keynes|Wellcome Sanger Institute for the COVID-19 Genomics UK (COG-UK) consortium|Davies|United Kingdom

>Spike|hCoV-19/Netherlands/FR-RIVM-20198/2020|2020-11-29|EPI\_ISL\_723352|Original|hCoV-19^^Friesland|Human|Dutch COVID-19 response team|National Institute for Public Health and the Environment (RIVM)|Meijer|Netherlands

>Spike|hCoV-19/France/OCC-150/2020|2020-11-14|EPI\_ISL\_751470|Original|hCoV-19^^Occitanie|Human|CHU Purpan - Laboratoire de Virologie - Institut F\u00e9d\u00e9ratif de Biologie|CHU Purpan - Laboratoire de Virologie - Institut F\u00e9d\u00e9ratif de Biologie|Latour|France

>Spike|hCoV-19/Japan/PG-5280/2020|2020-08-00|EPI\_ISL\_690383|Original|hCoV-19^^Japan|Human|Pathogen Genomics Center|Pathogen Genomics Center|Sekizuka|Japan

>Spike|hCoV-19/USA/CT-Yale-316/2020|2020-03-31|EPI\_ISL\_476544|Original|hCoV-19^^Connecticut|Human|Yale Clinical Virology Laboratory|Grubaugh Lab - Yale School of Public Health|Grubaugh|USA

>Spike|hCoV-19/Scotland/QEUEH-A1F602/2020|2020-10-01|EPI\_ISL\_599112|Original|hCoV-19^^Scotland|Human|Lighthouse Lab in Glasgow|Wellcome Sanger Institute for the COVID-19 Genomics UK (COG-UK) consortium|Davies|United Kingdom

>Spike|hCoV-19/USA/MI-MDHHS-SC21584/2020|2020-03-23|EPI\_ISL\_516311|Original|hCoV-19^^Michigan|Human|Michigan Department of Health and Human Services|Michigan Department of Health and Human Services|Blankenship|USA

>Spike|hCoV-19/England/SHEF-10D1C98/2020|2020-12-16|EPI\_ISL\_727949|Original|hCoV-19^^England|Human|Virology Department|COVID-19 Genomics UK (COG-UK) Consortium|de Silva|United Kingdom

>Spike|hCoV-19/England/QEUEH-C9383B/2020|2020-12-16|EPI\_ISL\_777112|Original|hCoV-19^^England|Human|Lighthouse Lab in Glasgow|Wellcome Sanger Institute for the COVID-19 Genomics UK (COG-UK) Consortium|Davies|United Kingdom

>Spike|hCoV-19/South Korea/KDCA0458/2020|2020-11-17|EPI\_ISL\_760242|Original|hCoV-19^^South Korea|Human|Division of Emerging Infectious Diseases|Division of Emerging Infectious Diseases|Park|South Korea

>Spike|hCoV-19/England/CAMB-72995/2020|2020-03-23|EPI\_ISL\_439888|Original|hCoV-19^^England|Human|Department of Pathology|Wellcome Sanger Institute for the COVID-19 Genomics UK (COG-UK) consortium|Amato|United Kingdom

>Spike|hCoV-19/England/ALDP-9E6C8B/2020|2020-09-24|EPI\_ISL\_580578|Original|hCoV-19^^England|Human|Lighthouse Lab in Alderley Park|Wellcome Sanger Institute for the COVID-19 Genomics UK (COG-UK) consortium|Davies|United Kingdom

>Spike|hCoV-19/USA/CA-CHLA-PLM66404200/2020|2020-11-18|EPI\_ISL\_753379|Original|hCoV-19^^California|Human|Clinical virology Laboratory|Center for Personalized Medicine|Dien Bard|USA

>Spike|hCoV-19/USA/CA-SEARCH-5541/2020|2020-11-23|EPI\_ISL\_755284|Original|hCoV-19^^California|Human|San Diego County Public Health Laboratory|Andersen lab at Scripps Research|Gangavarapu|USA

>Spike|hCoV-19/England/MILK-BAC144/2020|2020-11-18|EPI\_ISL\_783248|Original|hCoV-19^^England|Human|Lighthouse Lab in Milton Keynes|Wellcome Sanger Institute for the COVID-19 Genomics UK (COG-UK) Consortium|Davies|United Kingdom

>Spike|hCoV-19/USA/IL-UW-142/2020|2020-04-10|EPI\_ISL\_427449|Original|hCoV-19^^Illinois|Human|University of Wisconsin-Madison AIDS Vaccine Research Laboratories|University of Wisconsin-Madison AIDS Vaccine Research Laboratories|Baczenas|USA

>Spike|hCoV-19/USA/TX-HMH-MCoV-11778/2020|2020-09-08|EPI\_ISL\_790109|Original|hCoV-19^^Texas|Human|Houston Methodist Hospital|Houston Methodist Hospital|Long|USA

>Spike|hCoV-19/Scotland/CVR1295/2020|2020-03-30|EPI\_ISL\_438786|Original|hCoV-19^^Scotland|Human|West of Scotland Specialist Virology Centre|COVID-19 Genomics UK (COG-UK) Consortium|Robertson|United Kingdom

>Spike|hCoV-19/Northern Ireland/NIRE-103F87/2020|2020-04-08|EPI\_ISL\_482046|Original|hCoV-19^^Northern Ireland|Human|Regional Virus Laboratory|Wellcome Sanger Institute for the COVID-19 Genomics UK (COG-UK) consortium|Davies|United Kingdom

>Spike|hCoV-19/Uruguay/TYT-M98/2020|2020-06-27|EPI\_ISL\_750174|Original|hCoV-19^^Treinta y Tres|Human|Sanatorio Americano|Institut Pasteur de Montevideo|Spangenberg|Uruguay

>Spike|hCoV-19/England/ALDP-9FD735/2020|2020-10-01|EPI\_ISL\_587764|Original|hCoV-19^^England|Human|Lighthouse Lab in Alderley Park|Wellcome Sanger Institute for the COVID-19 Genomics UK (COG-UK) consortium|Davies|United Kingdom

>Spike|hCoV-19/England/QEUA-AD2FA6/2020|2020-10-26|EPI\_ISL\_629941|Original|hCoV-19^^England|Human|Lighthouse Lab in Glasgow|Wellcome Sanger Institute for the COVID-19 Genomics UK (COG-UK) consortium|Davies|United Kingdom

>Spike|hCoV-19/England/LOND-124D4AC/2020|2020-05-12|EPI\_ISL\_507101|Original|hCoV-19^^England|Human|University College London Hospital|COVID-19 Genomics UK (COG-UK) Consortium|Byott|United Kingdom

>Spike|hCoV-19/Japan/PG-2263/2020|2020-04-00|EPI\_ISL\_685868|Original|hCoV-19^^Japan|Human|Pathogen Genomics Center|Pathogen Genomics Center|Sekizuka|Japan

>Spike|hCoV-19/England/ALDP-9CB0F9/2020|2020-09-16|EPI\_ISL\_575623|Original|hCoV-19^^England|Human|Lighthouse Lab in Alderley Park|Wellcome Sanger Institute for the COVID-19 Genomics UK (COG-UK) consortium|Davies|United Kingdom

>Spike|hCoV-19/England/MILK-957B3D/2020|2020-06-09|EPI\_ISL\_554200|Original|hCoV-19^^England|Human|Lighthouse Lab in Milton Keynes|Wellcome Sanger Institute for the COVID-19 Genomics UK (COG-UK) consortium|Davies|United Kingdom

>Spike|hCoV-19/Scotland/QEUA-A4BBB3/2020|2020-10-08|EPI\_ISL\_628512|Original|hCoV-19^^Scotland|Human|Oxford Viromics|COVID-19 Genomics UK (COG-UK) Consortium|Golubchik|United Kingdom

>Spike|hCoV-19/USA/CA-CDC-4685/2020|2020-06-02|EPI\_ISL\_535663|Original|hCoV-19^^California|Human|CDPH|Pathogen Discovery|Queen|USA

>Spike|hCoV-19/England/QEUA-A3128E/2020|2020-10-05|EPI\_ISL\_595876|Original|hCoV-19^^England|Human|Quadram Institute Bioscience|COVID-19 Genomics UK (COG-UK) Consortium|Alikhan|United Kingdom

>Spike|hCoV-19/Panama/333467/2020|2020-03-23|EPI\_ISL\_496743|Original|hCoV-19^^Panama Center|Human|Gorgas Memorial Laboratory of Health Studies|Gorgas Memorial Laboratory of Health Studies|Martinez|Panama

>Spike|hCoV-19/Germany/HH-hpi-p1734/2020|2020-03-14|EPI\_ISL\_776113|Original|hCoV-19^^Hamburg|Human|University Medical Center Hamburg Eppendorf|Heinrich Pette Institute|Robitaille|Germany

>Spike|hCoV-19/USA/AZ-TG569481/2020|2020-07-10|EPI\_ISL\_695576|Original|hCoV-19^^Arizona|Human|AZ SPHL|TGen North|French|USA

>Spike|hCoV-19/USA/TX-HMH-4242/2020|2020-06-18|EPI\_ISL\_543455|Original|hCoV-19^^Texas|Human|Houston Methodist Hospital|Houston Methodist Hospital|Long|USA

>Spike|hCoV-19/England/QEUA-B6843C/2020|2020-11-11|EPI\_ISL\_661329|Original|hCoV-19^^England|Human|Lighthouse Lab in Glasgow|Wellcome Sanger Institute for the COVID-19 Genomics UK (COG-UK) Consortium|Davies|United Kingdom

>Spike|hCoV-19/Wales/PHWC-32C89/2020|2020-04-07|EPI\_ISL\_446672|Original|hCoV-19^^Wales|Human|Wales Specialist Virology Centre|Public Health Wales Microbiology Cardiff|Moore|United Kingdom

>Spike|hCoV-19/Japan/PG-1881/2020|2020-05-00|EPI\_ISL\_685487|Original|hCoV-19^^Japan|Human|Tokyo Metropolitan Institute of Public Health|Pathogen Genomics Center|Sekizuka|Japan

>Spike|hCoV-19/Switzerland/ZH-ETHZ-140091/2020|2020-04-18|EPI\_ISL\_476133|Original|hCoV-19^^Zurich|Human|Viollier AG|Department of Biosystems Science and Engineering|Nadeau|Switzerland

>Spike|hCoV-19/England/QEUA-C32B71/2020|2020-12-11|EPI\_ISL\_782683|Original|hCoV-19^^England|Human|Lighthouse Lab in Glasgow|Wellcome Sanger Institute for the COVID-19 Genomics UK (COG-UK) Consortium|Davies|United Kingdom

>Spike|hCoV-19/England/MILK-BA9BD0/2020|2020-11-17|EPI\_ISL\_681559|Original|hCoV-19^^England|Human|Lighthouse Lab in Milton Keynes|Wellcome Sanger Institute for the COVID-19 Genomics UK (COG-UK) Consortium|Davies|United Kingdom

>Spike|hCoV-19/USA/NM-UNM-00834/2020|2020-05-05|EPI\_ISL\_610271|Original|hCoV-19^^New Mexico|Human|New Mexico Department of Health Scientific Laboratory Division|Center for Global Health|Domman|USA

>Spike|hCoV-19/England/ALDP-A5015F/2020|2020-10-07|EPI\_ISL\_597855|Original|hCoV-19^^England|Human|Lighthouse Lab in Alderley Park|Wellcome Sanger Institute for the COVID-19 Genomics UK (COG-UK) consortium|Davies|United Kingdom

>Spike|hCoV-19/India/HR-MW39/2020|2020-06-10|EPI\_ISL\_511928|Original|hCoV-19^^Haryana|Human|Mahatma Gandhi Institute of Medical Sciences|National Institute of Biomedical Genomics -\u00a0DBT's PAN-INDIA 1000 SARS--CoV-2 RNA Genome Sequencing Consortium|Maitra|India

>Spike|hCoV-19/England/QEUA-CCD9F9/2020|2020-12-24|EPI\_ISL\_782386|Original|hCoV-19^^England|Human|Lighthouse Lab in Glasgow|Wellcome Sanger Institute for the COVID-19 Genomics UK (COG-UK) Consortium|Davies|United Kingdom

>Spike|hCoV-19/India/GJ-GBRC157a/2020|2020-05-27|EPI\_ISL\_461486|Original|hCoV-19^^Gujarat|Human|B.J. Medical College and Civil hospital|Gujarat Biotechnology Research Centre|Joshi|India

>Spike|hCoV-19/England/QEUA-A8C3EB/2020|2020-10-18|EPI\_ISL\_643290|Original|hCoV-19^^England|Human|Lighthouse Lab in Glasgow|Wellcome Sanger Institute for the COVID-19 Genomics UK (COG-UK) Consortium|Davies|United Kingdom

>Spike|hCoV-19/USA/TX-HMH-MCoV-16393/2020|2020-11-02|EPI\_ISL\_786077|Original|hCoV-19^^Texas|Human|Houston Methodist Hospital|Houston Methodist Hospital|Long|USA

>Spike|hCoV-19/Australia/VIC16725/2020|2020-08-07|EPI\_ISL\_663552|Original|hCoV-19^^Victoria|Human|Microbiological Diagnostic Unit - Public Health Laboratory (MDU-PHL)|MDU-PHL|Schultz|Australia

>Spike|hCoV-19/England/QEUA-AD35D0/2020|2020-10-26|EPI\_ISL\_634642|Original|hCoV-19^^England|Human|Lighthouse Lab in Glasgow|Wellcome Sanger Institute for the COVID-19 Genomics UK (COG-UK) consortium|Davies|United Kingdom

>Spike|hCoV-19/USA/MI-UM-10035733857/2020|2020-08-31|EPI\_ISL\_583302|Original|hCoV-19^^Michigan|Human|University of Michigan Clinical Microbiology Laboratory|Lauring Lab|Valesano|USA

>Spike|hCoV-19/Denmark/ALAB-HH-124/2020|2020-03-11|EPI\_ISL\_452005|Original|hCoV-19^^Denmark|Human|Department of Clinical Microbiology|Albertsen lab|Kirkegaard|Denmark

>Spike|hCoV-19/USA/FL-BPHL-0281/2020|2020-05-12|EPI\_ISL\_480932|Original|hCoV-19^^Florida|Human|Florida Bureau of Public Health Laboratories|Florida Bureau of Public Health Laboratories|Blanton|USA

>Spike|hCoV-19/England/ALDP-C3A960/2020|2020-12-08|EPI\_ISL\_730739|Original|hCoV-19^^England|Human|Lighthouse Lab in Alderley Park|Wellcome Sanger Institute for the COVID-19 Genomics UK (COG-UK) Consortium|Davies|United Kingdom

>Spike|hCoV-19/Wales/PHWC-496E3E/2020|2020-11-24|EPI\_ISL\_726735|Original|hCoV-19^^Wales|Human|Originating lab|COVID-19 Genomics UK (COG-UK) Consortium|Moore|United Kingdom

>Spike|hCoV-19/England/ALDP-A7049C/2020|2020-10-15|EPI\_ISL\_607779|Original|hCoV-19^^England|Human|Lighthouse Lab in Alderley Park|Wellcome Sanger Institute for the COVID-19 Genomics UK (COG-UK) consortium|Davies|United Kingdom

>Spike|hCoV-19/England/ALDP-BCA562/2020|2020-11-23|EPI\_ISL\_703602|Original|hCoV-19^^England|Human|Lighthouse Lab in Alderley Park|Wellcome Sanger Institute for the COVID-19 Genomics UK (COG-UK) Consortium|Davies|United Kingdom

>Spike|hCoV-19/Japan/PG-2986/2020|2020-04-00|EPI\_ISL\_691110|Original|hCoV-19^^Japan|Human|Pathogen Genomics Center|Pathogen Genomics Center|Sekizuka|Japan

>Spike|hCoV-19/India/GJ-GBRC267a/2020|2020-06-13|EPI\_ISL\_483862|Original|hCoV-19^^Gujarat|Human|Department of Microbiology|Gujarat Biotechnology Research Centre|Joshi|India

>Spike|hCoV-19/USA/TX-DSHS-0581/2020|2020-06-02|EPI\_ISL\_569693|Original|hCoV-19^^Texas|Human|Texas Department of State Health Services|Texas Department of State Health Services|Rahman|USA

>Spike|hCoV-19/India/MH-ACTREC-622/2020|2020-09-11|EPI\_ISL\_700257|Original|hCoV-19^^Maharashtra|Human|Hematopathology Laboratory|Hematopathology Laboratory|Patkar|India

>Spike|hCoV-19/Australia/VIC1041/2020|2020-04-03|EPI\_ISL\_430536|Original|hCoV-19^^Victoria|Human|Victorian Infectious Diseases Reference Laboratory (VIDRL)|Microbiological Diagnostic Unit Public Health Laboratory and Victorian Infectious Diseases Reference Laboratory|Schultz|Australia

>Spike|hCoV-19/Austria/CeMM0166/2020|2020-03-06|EPI\_ISL\_438011|Original|hCoV-19^^Vienna|Human|Center for Virology|Bergthaler laboratory|Bergthaler|Austria

>Spike|hCoV-19/Brazil/RJ-00341/2020|2020-05-04|EPI\_ISL\_623144|Original|hCoV-19^^Rio de Janeiro|Human|Laboratorio de Virologia Molecular / UFRJ|Bioinformatics Laboratory / LNCC|Almeida|Brazil

>Spike|hCoV-19/Norway/4749/2020|2020-10-22|EPI\_ISL\_668396|Original|hCoV-19^^Viken|Human|Furst Medical Laboratory|Norwegian Institute of Public Health|Kopperud Riis|Norway

>Spike|hCoV-19/USA/WA-OHSU-2097/2020|2020-08-04|EPI\_ISL\_667115|Original|hCoV-19^^Washington|Human|OHSU Lab Services Molecular Microbiology Lab|Oregon SARS-CoV-2 Genome Sequencing Center|O'Roak|USA

>Spike|hCoV-19/England/NORW-ECFB2/2020|2020-06-18|EPI\_ISL\_499601|Original|hCoV-19^^England|Human|Quadram Institute Bioscience|COVID-19 Genomics UK (COG-UK) Consortium|Alikhan|United Kingdom

>Spike|hCoV-19/Brazil/SP-148/2020|2020-03-23|EPI\_ISL\_468313|Original|hCoV-19^^S\u00e3o Paulo|Human|Vigilancia Epidemiologica de S\u00e3o Bernardo do Campo|Instituto Adolfo Lutz|Sacchi|Brazil

>Spike|hCoV-19/USA/AZ-TG670224/2020|2020-04-30|EPI\_ISL\_696407|Original|hCoV-19^^Arizona|Human|Sonora Quest Laboratories|TGen North|French|USA

>Spike|hCoV-19/Gambia/GC19-2450/2020|2020-07-21|EPI\_ISL\_561107|Original|hCoV-19^^Kombo|Human|MRCG at LSHTM Genomics lab|MRCG at LSHTM Genomics lab|Sesay|Gambia

>Spike|hCoV-19/USA/WA-S242/2020|2020-03-01|EPI\_ISL\_430280|Original|hCoV-19^^Washington|Human|Washington State Department of Health|Seattle Flu Study|Bedford|USA

>Spike|hCoV-19/Bahrain/341051639\_S14\_L001/2020|2020-11-21|EPI\_ISL\_678267|Original|hCoV-19^^Bahrain|Human|Communicable Disease Laboratory|Communicable Disease Laboratory|Altaif|Bahrain



>Spike|hCoV-19/Denmark/DCGC-21459/2020|2020-12-21|EPI\_ISL\_758177|Original|hCoV-19^^Hovedstaden|Human|Department of Virus and Microbiological Special Diagnostics|Albertsen Lab|Michaelsen|Denmark

>Spike|hCoV-19/Spain/MD-IBV-005309/2020|2020-03-16|EPI\_ISL\_510190|Original|hCoV-19^^Madrid|Human|Hospital General Universitario Gregorio Mara\u00f1\u00f3n|SeqCOVID-SPAIN consortium/IBV (CSIC)|Comas|Spain

>Spike|hCoV-19/USA/NY-Wadsworth-213974-01/2020|2020-09-09|EPI\_ISL\_765496|Original|hCoV-19^^New York|Human|Wadsworth Center|Wadsworth Center|Lasek-Nesselquist|USA

>Spike|hCoV-19/USA/MN-MDH-1464/2020|2020-03-24|EPI\_ISL\_518858|Original|hCoV-19^^Minnesota|Human|Mayo Clinic & Mayo Clinic Laboratories|Minnesota Department of Health|Garfin|USA

>Spike|hCoV-19/South Africa/KRISP-0445/2020|2020-06-30|EPI\_ISL\_498058|Original|hCoV-19^^KwaZulu-Natal|Human|NHLs-IALCH|KRISP|de Oliveira|South Africa

>Spike|hCoV-19/England/CAMC-B35FA0/2020|2020-11-05|EPI\_ISL\_645283|Original|hCoV-19^^England|Human|Lighthouse Lab in Cambridge|Wellcome Sanger Institute for the COVID-19 Genomics UK (COG-UK) Consortium|Davies|United Kingdom

>Spike|hCoV-19/USA/WA-UW-3008/2020|2020-03-27|EPI\_ISL\_486076|Original|hCoV-19^^Washington|Human|UW Virology Lab|UW Virology Lab|Roychoudhury|USA

>Spike|hCoV-19/England/BIRM-5FC0E/2020|2020-05-20|EPI\_ISL\_473390|Original|hCoV-19^^England|Human|University of Birmingham|COVID-19 Genomics UK (COG-UK) Consortium|Loman|United Kingdom

>Spike|hCoV-19/England/MILK-99C5F2/2020|2020-08-30|EPI\_ISL\_550735|Original|hCoV-19^^England|Human|Lighthouse Lab in Milton Keynes|Wellcome Sanger Institute for the COVID-19 Genomics UK (COG-UK) consortium|Davies|United Kingdom

>Spike|hCoV-19/Denmark/DCGC-21042/2020|2020-12-21|EPI\_ISL\_758792|Original|hCoV-19^^Sjaelland|Human|Department of Virus and Microbiological Special Diagnostics|Albertsen Lab|Michaelsen|Denmark

>Spike|hCoV-19/South Africa/KRISP-K002874/2020|2020-09-04|EPI\_ISL\_602687|Original|hCoV-19^^KwaZulu-Natal|Human|NHLs-IALCH|KRISP|de Oliveira|South Africa

>Spike|hCoV-19/Netherlands/Utrecht\_20/2020|2020-03-11|EPI\_ISL\_422897|Original|hCoV-19^^Utrecht|Human|Dutch COVID-19 response team|Erasmus Medical Center|Oude Munnink|Netherlands

>Spike|hCoV-19/England/CAMC-B37111/2020|2020-11-05|EPI\_ISL\_645466|Original|hCoV-19^^England|Human|Lighthouse Lab in Cambridge|Wellcome Sanger Institute for the COVID-19 Genomics UK (COG-UK) Consortium|Davies|United Kingdom

>Spike|hCoV-19/New Zealand/20CV0474/2020|2020-10-22|EPI\_ISL\_622812|Original|hCoV-19^^Canterbury|Human|Canterbury Health Laboratories|Institute of Environmental Science and Research (ESR)|Wang|New Zealand

>Spike|hCoV-19/England/MILK-B960F5/2020|2020-11-14|EPI\_ISL\_676058|Original|hCoV-19^^England|Human|Lighthouse Lab in Milton Keynes|Wellcome Sanger Institute for the COVID-19 Genomics UK (COG-UK) Consortium|Davies|United Kingdom

>Spike|hCoV-19/Wales/PHWC-492A3E/2020|2020-11-23|EPI\_ISL\_725736|Original|hCoV-19^^Wales|Human|Originating lab|COVID-19 Genomics UK (COG-UK) Consortium|Moore|United Kingdom

>Spike|hCoV-19/England/ALDP-B1B289/2020|2020-11-02|EPI\_ISL\_645889|Original|hCoV-19^^England|Human|Lighthouse Lab in Alderley Park|Wellcome Sanger Institute for the COVID-19 Genomics UK (COG-UK) Consortium|Davies|United Kingdom

>Spike|hCoV-19/England/CAMB-1B7EA3/2020|2020-10-13|EPI\_ISL\_637641|Original|hCoV-19^^England|Human|Department of Pathology|COVID-19 Genomics UK (COG-UK) Consortium|Goodfellow|United Kingdom

>Spike|hCoV-19/Scotland/QEUEH-9D0E06/2020|2020-09-16|EPI\_ISL\_601865|Original|hCoV-19^^Scotland|Human|Lighthouse Lab in Glasgow|Wellcome Sanger Institute for the COVID-19 Genomics UK (COG-UK) consortium|Davies|United Kingdom

>Spike|hCoV-19/England/C200042086/2020|2020-11-02|EPI\_ISL\_649807|Original|hCoV-19^^England|Human|Respiratory Virus Unit|COVID-19 Genomics UK (COG-UK) Consortium|Platt|United Kingdom

>Spike|hCoV-19/Jordan/AZ-ALSR-5301/2020|2020-10-31|EPI\_ISL\_730537|Original|hCoV-19^^Zarqa|Human|Biolab Diagnostic Laboratories|Andersen lab at Scripps Research|Gangavarapu|Jordan

>Spike|hCoV-19/England/CAMB-7F716/2020|2020-04-09|EPI\_ISL\_470498|Original|hCoV-19^^England|Human|Department of Pathology|Wellcome Sanger Institute for the COVID-19 Genomics UK (COG-UK) consortium|Davies|United Kingdom

>Spike|hCoV-19/Denmark/DCGC-16887/2020|2020-12-14|EPI\_ISL\_750208|Original|hCoV-19^^Syddanmark|Human|Department of Virus and Microbiological Special Diagnostics|Albertsen Lab|Michaelsen|Denmark

>Spike|hCoV-19/England/LIVE-9F3B2/2020|2020-05-01|EPI\_ISL\_453452|Original|hCoV-19^^England|Human|Liverpool Clinical Laboratories|COVID-19 Genomics UK (COG-UK) Consortium|Haldenby|United Kingdom

>Spike|hCoV-19/USA/TX-HMH-MCoV-15887/2020|2020-07-10|EPI\_ISL\_785571|Original|hCoV-19^^Texas|Human|Houston Methodist Hospital|Houston Methodist Hospital|Long|USA

>Spike|hCoV-19/England/MILK-B8D38F/2020|2020-11-13|EPI\_ISL\_674109|Original|hCoV-19^^England|Human|Lighthouse Lab in Milton Keynes|Wellcome Sanger Institute for the COVID-19 Genomics UK (COG-UK) Consortium|Davies|United Kingdom

>Spike|hCoV-19/USA/UT-02928/2020|2020-04-30|EPI\_ISL\_509547|Original|hCoV-19^^Utah|Human|Utah Public Health Laboratory|Utah Public Health Laboratory|Butz|USA

>Spike|hCoV-19/USA/MI-MDHHS-SC20924/2020|2020-05-26|EPI\_ISL\_476060|Original|hCoV-19^^Michigan|Human|Michigan Department of Health and Human Services|Michigan Department of Health and Human Services|Blankenship|USA

>Spike|hCoV-19/Scotland/CVR1448/2020|2020-04-01|EPI\_ISL\_438815|Original|hCoV-19^^Scotland|Human|West of Scotland Specialist Virology Centre|COVID-19 Genomics UK (COG-UK) Consortium|Robertson|United Kingdom

>Spike|hCoV-19/England/MILK-9A964A/2020|2020-09-02|EPI\_ISL\_551231|Original|hCoV-19^^England|Human|Lighthouse Lab in Milton Keynes|Wellcome Sanger Institute for the COVID-19 Genomics UK (COG-UK) consortium|Davies|United Kingdom

>Spike|hCoV-19/Denmark/DCGC-20681/2020|2020-12-21|EPI\_ISL\_759296|Original|hCoV-19^^Nordjylland|Human|Department of Virus and Microbiological Special Diagnostics|Albertsen Lab|Michaelsen|Denmark

>Spike|hCoV-19/India/UN-N8/2020|2020-00-00|EPI\_ISL\_497763|Original|hCoV-19^^India|Human|CSIR-CDRI/SGPGI|CSIR-CDRI/SGPGI|Singh|India

>Spike|hCoV-19/USA/WI-GMF-17378/2020|2020-08-27|EPI\_ISL\_547738|Original|hCoV-19^^Wisconsin|Human|Gundersen Molecular Diagnostics Laboratory|Kabara Cancer Research Institute|Kenny|USA

>Spike|hCoV-19/Germany/BW-UKT-a002/2020|2020-03-23|EPI\_ISL\_723093|Original|hCoV-19^^Baden-Wuerttemberg|Human|Institute of Medical Genetics and Applied Genomics|Institute of Medical Genetics and Applied Genomics|Gross|Germany

>Spike|hCoV-19/England/CAMC-9D229F/2020|2020-09-18|EPI\_ISL\_601691|Original|hCoV-19^^England|Human|Lighthouse Lab in Cambridge|Wellcome Sanger Institute for the COVID-19 Genomics UK (COG-UK) consortium|Davies|United Kingdom

>Spike|hCoV-19/Denmark/DCGC-22066/2020|2020-12-14|EPI\_ISL\_758534|Original|hCoV-19^^Hovedstaden|Human|Department of Virus and Microbiological Special Diagnostics|Albertsen Lab|Michaelsen|Denmark

>Spike|hCoV-19/England/MILK-A6A732/2020|2020-10-09|EPI\_ISL\_627516|Original|hCoV-19^^England|Human|Virology Department|COVID-19 Genomics UK (COG-UK) Consortium|de Silva|United Kingdom

>Spike|hCoV-19/England/ALDP-A879EE/2020|2020-10-16|EPI\_ISL\_606135|Original|hCoV-19^^England|Human|Lighthouse Lab in Alderley Park|Wellcome Sanger Institute for the COVID-19 Genomics UK (COG-UK) consortium|Davies|United Kingdom

>Spike|hCoV-19/USA/LA-EVTL158/2020|2020-04-01|EPI\_ISL\_456001|Original|hCoV-19^^Louisiana|Human|LSUHS Emerging Viral Threat Laboratory|Microbial Genome Sequencing Center|Kamil|USA

>Spike|hCoV-19/USA/TX-HMH-MCoV-14281/2020|2020-10-05|EPI\_ISL\_787566|Original|hCoV-19^^Texas|Human|Houston Methodist Hospital|Houston Methodist Hospital|Long|USA

>Spike|hCoV-19/Wales/PHWC-16A0F4/2020|2020-08-25|EPI\_ISL\_535201|Original|hCoV-19^^Wales|Human|Wales Specialist Virology Centre Sequencing lab|COVID-19 Genomics UK (COG-UK) Consortium|Moore|United Kingdom

>Spike|hCoV-19/Scotland/QEUA-96F9B0/2020|2020-08-18|EPI\_ISL\_540287|Original|hCoV-19^^Scotland|Human|Lighthouse Lab in Glasgow|Wellcome Sanger Institute for the COVID-19 Genomics UK (COG-UK) consortium|Davies|United Kingdom

>Spike|hCoV-19/England/CAMC-B08AC3/2020|2020-10-29|EPI\_ISL\_643832|Original|hCoV-19^^England|Human|Lighthouse Lab in Cambridge|Wellcome Sanger Institute for the COVID-19 Genomics UK (COG-UK) Consortium|Davies|United Kingdom

>Spike|hCoV-19/Canada/ON\_QGLO-037/2020|2020-03-30|EPI\_ISL\_459888|Original|hCoV-19^^Ontario|Human|Kingston Health Sciences Center|Queen's Genomics Lab at Ongwanada (Q-GLO)|Sjaarda|Canada

>Spike|hCoV-19/Indonesia/KR-NIHRD-PME9874/2020|2020-11-11|EPI\_ISL\_791985|Original|hCoV-19^^Kepulauan Riau|Human|RS Santa Maria Pekanbaru|National Institute of Health Research and Development|Setiawati|Indonesia

>Spike|hCoV-19/USA/NY-Wadsworth-281391-01/2020|2020-10-23|EPI\_ISL\_734460|Original|hCoV-19^^New York|Human|Masonic Medical Research Institute|Wadsworth Center|Lasek-Nesselquist|USA

>Spike|hCoV-19/Australia/SAP344/2020|2020-03-24|EPI\_ISL\_483120|Original|hCoV-19^^South Australia|Human|SA Pathology|SA Pathology|Leong|Australia

>Spike|hCoV-19/USA/AK-PHL817/2020|2020-07-04|EPI\_ISL\_528527|Original|hCoV-19^^Alaska|Human|Alaska State Virology Laboratory|Alaska State Virology Laboratory|Drown|USA

>Spike|hCoV-19/USA/CA-ALSR-2746/2020|2020-07-15|EPI\_ISL\_635656|Original|hCoV-19^^California|Human|San Diego County Public Health Laboratory|Andersen lab at Scripps Research|Gangavarapu|USA

>Spike|hCoV-19/Denmark/DCGC-9871/2020|2020-11-09|EPI\_ISL\_668488|Original|hCoV-19^^Hovedstaden|Human|Department of Virus and Microbiological Special Diagnostics|Albertsen Lab|Michaelsen|Denmark

>Spike|hCoV-19/Scotland/QEUA-9CF4BD/2020|2020-09-17|EPI\_ISL\_601923|Original|hCoV-19^^Scotland|Human|Lighthouse Lab in Glasgow|Wellcome Sanger Institute for the COVID-19 Genomics UK (COG-UK) consortium|Davies|United Kingdom

>Spike|hCoV-19/USA/TX-HMH-MCoV-9441/2020|2020-07-03|EPI\_ISL\_781123|Original|hCoV-19^^Texas|Human|Houston Methodist Hospital|Houston Methodist Hospital|Long|USA

>Spike|hCoV-19/England/ALDP-955D39/2020|2020-06-12|EPI\_ISL\_553891|Original|hCoV-19^^England|Human|Lighthouse Lab in Alderley Park|Wellcome Sanger Institute for the COVID-19 Genomics UK (COG-UK) consortium|Davies|United Kingdom

>Spike|hCoV-19/England/QEUA-B41202/2020|2020-11-08|EPI\_ISL\_658703|Original|hCoV-19^^England|Human|Lighthouse Lab in Glasgow|Wellcome Sanger Institute for the COVID-19 Genomics UK (COG-UK) Consortium|Davies|United Kingdom

>Spike|hCoV-19/Chile/RM-150435/2020|2020-08-13|EPI\_ISL\_746647|Original|hCoV-19^^Region Metropolitana de Santiago|Human|Genetica Molecular and Subdepartamento de Virologia ISP Chile|Instituto de Salud Publica de Chile|Tognarelli|Chile

>Spike|hCoV-19/England/OXON-B0825/2020|2020-00-00|EPI\_ISL\_478913|Original|hCoV-19^^England|Human|Oxford Viromics|COVID-19 Genomics UK (COG-UK) Consortium|Golubchik|United Kingdom

>Spike|hCoV-19/USA/TX-HMH-MCoV-10267/2020|2020-07-07|EPI\_ISL\_789404|Original|hCoV-19^^Texas|Human|Houston Methodist Hospital|Houston Methodist Hospital|Long|USA

>Spike|hCoV-19/USA/SC-20-1601-T03/2020|2020-07-03|EPI\_ISL\_516773|Original|hCoV-19^^South Carolina|Human|van Bakel Laboratory|van Bakel Laboratory|van Bakel|USA

>Spike|hCoV-19/Turkey/KU-019/2020|2020-06-05|EPI\_ISL\_495429|Original|hCoV-19^^Kars Province|Human|Kafkas University|Kafkas University|Karamese|Turkey

>Spike|hCoV-19/England/CAMC-94858C/2020|2020-07-18|EPI\_ISL\_556733|Original|hCoV-19^^England|Human|Lighthouse Lab in Cambridge|Wellcome Sanger Institute for the COVID-19 Genomics UK (COG-UK) consortium|Davies|United Kingdom

>Spike|hCoV-19/England/ALDP-BB8C9F/2020|2020-11-20|EPI\_ISL\_702616|Original|hCoV-19^^England|Human|Lighthouse Lab in Alderley Park|Wellcome Sanger Institute for the COVID-19 Genomics UK (COG-UK) Consortium|Davies|United Kingdom

>Spike|hCoV-19/Scotland/EDB6609/2020|2020-06-22|EPI\_ISL\_484684|Original|hCoV-19^^Scotland|Human|Virology Department|COVID-19 Genomics UK (COG-UK) Consortium|Williams|United Kingdom

>Spike|hCoV-19/England/ALDP-C3B5F2/2020|2020-12-09|EPI\_ISL\_730791|Original|hCoV-19^^England|Human|Lighthouse Lab in Alderley Park|Wellcome Sanger Institute for the COVID-19 Genomics UK (COG-UK) Consortium|Davies|United Kingdom

>Spike|hCoV-19/USA/MN-QDX-1710/2020|2020-03-17|EPI\_ISL\_604064|Original|hCoV-19^^Minnesota|Human|Quest Diagnostics|Quest Diagnostics|Kagan|USA

>Spike|hCoV-19/England/MILK-9EF244/2020|2020-09-24|EPI\_ISL\_594910|Original|hCoV-19^^England|Human|Oxford Viromics|COVID-19 Genomics UK (COG-UK) Consortium|Golubchik|United Kingdom

>Spike|hCoV-19/USA/UT-UPHL-2012821012/2020|2020-11-12|EPI\_ISL\_746948|Original|hCoV-19^^Utah|Human|Utah Public Health Laboratory|Utah Public Health Laboratory|Gallagher|USA

>Spike|hCoV-19/England/SHEF-C493A/2020|2020-04-01|EPI\_ISL\_432792|Original|hCoV-19^^England|Human|Virology Department|COVID-19 Genomics UK (COG-UK) Consortium|de Silva|United Kingdom

>Spike|hCoV-19/England/QEUA-CC3832/2020|2020-12-21|EPI\_ISL\_760620|Original|hCoV-19^^England|Human|Lighthouse Lab in Glasgow|Wellcome Sanger Institute for the COVID-19 Genomics UK (COG-UK) Consortium|Davies|United Kingdom

>Spike|hCoV-19/Beijing/IME-HZ01/2020|2020-01-22|EPI\_ISL\_450444|unknown|hCoV-19^^Beijing|Human|20 Dongda Street|Dept. OPA|Submitter|China

>Spike|hCoV-19/USA/TX-HMH-1104/2020|2020-04-22|EPI\_ISL\_542533|Original|hCoV-19^^Texas|Human|Houston Methodist Hospital|Houston Methodist Hospital|Long|USA

>Spike|hCoV-19/Italy/UMB-IZSUM-48682-23/2020|2020-10-29|EPI\_ISL\_763326|Original|hCoV-19^^Umbria|Human|Istituto Zooprofilattico Sperimentale dell' Umbria e delle Marche - Togo Rosati|Istituto Superiore di Sanit\u00e0|De Sabato|Italy

>Spike|hCoV-19/England/NOTT-113555/2020|2020-09-20|EPI\_ISL\_549512|Original|hCoV-19^^England|Human|Queens Medical Centre|COVID-19 Genomics UK (COG-UK) Consortium|Loose|United Kingdom

>Spike|hCoV-19/England/NORT-2936FF/2020|2020-06-30|EPI\_ISL\_499549|Original|hCoV-19^^England|Human|Northumbria University / South Tees Hospitals NHS Foundation Trust / North Cumbria Integrated Care NHS Foundation Trust / North Tees and Hartlepool NHS Foundation Trust / Newcastle Hospitals NHS Foundation Trust|COVID-19 Genomics UK (COG-UK) Consortium|Bashton|United Kingdom

>Spike|hCoV-19/USA/MA-MASPHL-00454/2020|2020-04-30|EPI\_ISL\_693107|Original|hCoV-19^^Massachusetts|Human|Massachusetts State Public Health Laboratory|Massachusetts State Public Health Laboratory|Lang|USA

>Spike|hCoV-19/USA/TX-HMH-2863/2020|2020-06-08|EPI\_ISL\_543833|Original|hCoV-19^^Texas|Human|Houston Methodist Hospital|Houston Methodist Hospital|Long|USA

>Spike|hCoV-19/USA/FL-BPHL-026/2020|2020-04-14|EPI\_ISL\_436530|Original|hCoV-19^^Florida|Human|Florida Bureau of Public Health Laboratories|Florida Bureau of Public Health Laboratories|Blanton|USA

>Spike|hCoV-19/England/OXON-B210A/2020|2020-04-22|EPI\_ISL\_479116|Original|hCoV-19^^England|Human|Oxford Viromics|COVID-19 Genomics UK (COG-UK) Consortium|Golubchik|United Kingdom

>Spike|hCoV-19/England/QEUA-BCBDC3/2020|2020-11-27|EPI\_ISL\_704558|Original|hCoV-19^^England|Human|Lighthouse Lab in Glasgow|Wellcome Sanger Institute for the COVID-19 Genomics UK (COG-UK) Consortium|Davies|United Kingdom

>Spike|hCoV-19/USA/TX-HMH-MCoV-16000/2020|2020-07-10|EPI\_ISL\_785684|Original|hCoV-19^^Texas|Human|Houston Methodist Hospital|Houston Methodist Hospital|Long|USA

>Spike|hCoV-19/England/NOTT-111BFB/2020|2020-05-29|EPI\_ISL\_472384|Original|hCoV-19^^England|Human|Queens Medical Centre|COVID-19 Genomics UK (COG-UK) Consortium|Loose|United Kingdom

>Spike|hCoV-19/USA/LA-EVTL178/2020|2020-05-14|EPI\_ISL\_574313|Original|hCoV-19^^Louisiana|Human|LSUHS Emerging Viral Threat Laboratory|Microbial Genome Sequencing Center|Kamil|USA

>Spike|hCoV-19/England/ALDP-B5DCF6/2020|2020-11-08|EPI\_ISL\_723583|Original|hCoV-19^^England|Human|Northumbria University / South Tees Hospitals NHS Foundation Trust / North Cumbria Integrated Care NHS Foundation Trust / North Tees and Hartlepool NHS Foundation Trust / Newcastle Hospitals NHS Foundation Trust|COVID-19 Genomics UK (COG-UK) Consortium|Bashton|United Kingdom

>Spike|hCoV-19/USA/TX-HMH-3280/2020|2020-06-11|EPI\_ISL\_544098|Original|hCoV-19^^Texas|Human|Houston Methodist Hospital|Houston Methodist Hospital|Long|USA

>Spike|hCoV-19/Switzerland/BE-ETHZ-190063/2020|2020-07-09|EPI\_ISL\_500923|Original|hCoV-19^^Bern|Human|Viollier AG|Department of Biosystems Science and Engineering|Nadeau|Switzerland

>Spike|hCoV-19/Spain/MD-IBV-99008540/2020|2020-09-05|EPI\_ISL\_654086|Original|hCoV-19^^Madrid|Human|Hospital General Universitario Gregorio Mara\u00f1a|SeqCOVID-SPAIN consortium/IBV (CSIC)|Comas|Spain

>Spike|hCoV-19/USA/NY-NYUMC79/2020|2020-03-18|EPI\_ISL\_421580|Original|hCoV-19^^New York|Human|NYU Langone Health|Departments of Pathology and Medicine|Maurano|USA

>Spike|hCoV-19/Russia/StPetersburg-RII15520S/2020|2020-05-15|EPI\_ISL\_507268|Original|hCoV-19^^Saint Petersburg|Human|WHO National Influenza Centre Russian Federation|WHO National Influenza Centre Russian Federation|Komissarov|Russia

>Spike|hCoV-19/Japan/PG-3855/2020|2020-07-00|EPI\_ISL\_692106|Original|hCoV-19^^Japan|Human|Pathogen Genomics Center|Pathogen Genomics Center|Sekizuka|Japan

>Spike|hCoV-19/USA/CA-ALSR-2399/2020|2020-07-06|EPI\_ISL\_635458|Original|hCoV-19^^California|Human|San Diego County Public Health Laboratory|Andersen lab at Scripps Research|Gangavarapu|USA

>Spike|hCoV-19/France/PAC-IHU-0290/2020|2020-03-31|EPI\_ISL\_569435|Original|hCoV-19^^Provence-Alpes-C\u00f4te-d\u2019Azur|Human|MEPHI|MEPHI|Levasseur|France

>Spike|hCoV-19/USA/MN-MDH-1277/2020|2020-03-14|EPI\_ISL\_482998|Original|hCoV-19^^Minnesota|Human|Minnesota Department of Health|Minnesota Department of Health|Garfin|USA

>Spike|hCoV-19/England/QEUA-A9F0C0/2020|2020-10-20|EPI\_ISL\_611336|Original|hCoV-19^^England|Human|Lighthouse Lab in Glasgow|Wellcome Sanger Institute for the COVID-19 Genomics UK (COG-UK) consortium|Davies|United Kingdom

>Spike|hCoV-19/England/LIVE-DB7E7A/2020|2020-10-26|EPI\_ISL\_651376|Original|hCoV-19^^England|Human|Liverpool Clinical Laboratories|COVID-19 Genomics UK (COG-UK) Consortium|Haldenby|United Kingdom

>Spike|hCoV-19/England/LIVE-1E013F/2020|2020-10-11|EPI\_ISL\_627445|Original|hCoV-19^^England|Human|Liverpool Clinical Laboratories|COVID-19 Genomics UK (COG-UK) Consortium|Haldenby|United Kingdom

>Spike|hCoV-19/USA/VA-DCLS-1311/2020|2020-07-23|EPI\_ISL\_572253|Original|hCoV-19^^Virginia|Human|Virginia DCLS|Virginia DCLS|St. Jacques|USA

>Spike|hCoV-19/England/NOTT-10F5D4/2020|2020-04-03|EPI\_ISL\_433025|Original|hCoV-19^^England|Human|Queens Medical Centre|COVID-19 Genomics UK (COG-UK) Consortium|Loose|United Kingdom

>Spike|hCoV-19/USA/OR-OHSU-2039/2020|2020-08-01|EPI\_ISL\_667100|Original|hCoV-19^^Oregon|Human|OHSU Lab Services Molecular Microbiology Lab|Oregon SARS-CoV-2 Genome Sequencing Center|O'Roak|USA

>Spike|hCoV-19/Denmark/DCGC-4137/2020|2020-09-21|EPI\_ISL\_621957|Original|hCoV-19^^Hovedstaden|Human|Department of Virus and Microbiological Special Diagnostics|Albertsen lab|Michaelsen|Denmark

>Spike|hCoV-19/England/CAMB-1B679A/2020|2020-10-06|EPI\_ISL\_584305|Original|hCoV-19^^England|Human|Department of Pathology|COVID-19 Genomics UK (COG-UK) Consortium|Goodfellow|United Kingdom

>Spike|hCoV-19/England/BRIS-1853276/2020|2020-04-01|EPI\_ISL\_492263|Original|hCoV-19^^England|Human|PHE South West Regional Laboratory|Wellcome Sanger Institute for the COVID-19 Genomics UK (COG-UK) consortium|Davies|United Kingdom

>Spike|hCoV-19/Japan/PG-2930/2020|2020-04-00|EPI\_ISL\_691056|Original|hCoV-19^^Japan|Human|Pathogen Genomics Center|Pathogen Genomics Center|Sekizuka|Japan

>Spike|hCoV-19/USA/TX-HMH-MCoV-14150/2020|2020-10-03|EPI\_ISL\_787435|Original|hCoV-19^^Texas|Human|Houston Methodist Hospital|Houston Methodist Hospital|Long|USA

>Spike|hCoV-19/USA/MD-HP12129/2020|2020-12-20|EPI\_ISL\_791439|Original|hCoV-19^^Maryland|Human|Johns Hopkins Hospital Department of Pathology|Johns Hopkins Hospital Department of Pathology|Morris|USA

>Spike|hCoV-19/Belgium/reg-0916971/2020|2020-09-16|EPI\_ISL\_734961|Original|hCoV-19^^Begijnendijk|Human|UZ Leuven|KU Leuven|Maes|Belgium

>Spike|hCoV-19/USA/AZ-TG555647/2020|2020-07-29|EPI\_ISL\_695542|Original|hCoV-19^^Arizona|Human|TGen North|TGen North|French|USA

>Spike|hCoV-19/England/ALDP-B47CB3/2020|2020-11-07|EPI\_ISL\_649440|Original|hCoV-19^^England|Human|Lighthouse Lab in Alderley Park|Wellcome Sanger Institute for the COVID-19 Genomics UK (COG-UK) Consortium|Davies|United Kingdom

>Spike|hCoV-19/England/NORW-F5183/2020|2020-11-21|EPI\_ISL\_725226|Original|hCoV-19^^England|Human|Quadram Institute Bioscience|COVID-19 Genomics UK (COG-UK) Consortium|Alikhan|United Kingdom

>Spike|hCoV-19/England/QEUEH-A4BC47/2020|2020-10-05|EPI\_ISL\_628519|Original|hCoV-19^^England|Human|Oxford Viromics|COVID-19 Genomics UK (COG-UK) Consortium|Golubchik|United Kingdom

>Spike|hCoV-19/USA/TX-DSHS-1559/2020|2020-06-22|EPI\_ISL\_681872|Original|hCoV-19^^Texas|Human|Texas Department of State Health Services|Texas Department of State Health Services|Rahman|USA

>Spike|hCoV-19/USA/AZ-TG485093/2020|2020-07-09|EPI\_ISL\_695078|Original|hCoV-19^^Arizona|Human|TGen North|TGen North|French|USA

>Spike|hCoV-19/USA/FL-BPHL-2247/2020|2020-07-27|EPI\_ISL\_666869|Original|hCoV-19^^Florida|Human|Florida Bureau of Public Health Laboratories|Florida Bureau of Public Health Laboratories|Blanton|USA

>Spike|hCoV-19/Wales/PHWC-16AD48/2020|2020-09-12|EPI\_ISL\_560191|Original|hCoV-19^^Wales|Human|Wales Specialist Virology Centre Sequencing lab|COVID-19 Genomics UK (COG-UK) Consortium|Moore|United Kingdom

>Spike|hCoV-19/USA/CA-ALSR-3442/2020|2020-09-15|EPI\_ISL\_636032|Original|hCoV-19^^California|Human|San Diego County Public Health Laboratory|Andersen lab at Scripps Research|Gangavarapu|USA

>Spike|hCoV-19/England/BRIS-123428/2020|2020-04-06|EPI\_ISL\_442668|Original|hCoV-19^^England|Human|PHE South West Regional Laboratory|Wellcome Sanger Institute for the COVID-19 Genomics UK (COG-UK) consortium|Amato|United Kingdom

>Spike|hCoV-19/Denmark/DCGC-13181/2020|2020-11-30|EPI\_ISL\_712636|Original|hCoV-19^^Midtjylland|Human|Department of Virus and Microbiological Special Diagnostics|Albertsen Lab|Michaelsen|Denmark

>Spike|hCoV-19/England/MILK-A6B124/2020|2020-10-09|EPI\_ISL\_608763|Original|hCoV-19^^England|Human|Lighthouse Lab in Milton Keynes|Wellcome Sanger Institute for the COVID-19 Genomics UK (COG-UK) consortium|Davies|United Kingdom

>Spike|hCoV-19/Panama/336417/2020|2020-04-04|EPI\_ISL\_496847|Original|hCoV-19^^Panama Center|Human|Gorgas Memorial Laboratory of Health Studies|Gorgas Memorial Laboratory of Health Studies|Martinez|Panama

>Spike|hCoV-19/England/EXET-13C41D/2020|2020-11-21|EPI\_ISL\_705383|Original|hCoV-19^^England|Human|University of Exeter|COVID-19 Genomics UK (COG-UK) Consortium|Temperton|United Kingdom

>Spike|hCoV-19/USA/TX-HMH-MCoV-15619/2020|2020-10-26|EPI\_ISL\_785303|Original|hCoV-19^^Texas|Human|Houston Methodist Hospital|Houston Methodist Hospital|Long|USA

>Spike|hCoV-19/England/EXET-138684/2020|2020-10-16|EPI\_ISL\_626726|Original|hCoV-19^^England|Human|University of Exeter|COVID-19 Genomics UK (COG-UK) Consortium|Temperton|United Kingdom

>Spike|hCoV-19/England/ALDP-B1F874/2020|2020-11-01|EPI\_ISL\_646019|Original|hCoV-19^^England|Human|Lighthouse Lab in Alderley Park|Wellcome Sanger Institute for the COVID-19 Genomics UK (COG-UK) Consortium|Davies|United Kingdom

>Spike|hCoV-19/England/CAMB-7F2E8/2020|2020-04-08|EPI\_ISL\_442967|Original|hCoV-19^^England|Human|Department of Pathology|Wellcome Sanger Institute for the COVID-19 Genomics UK (COG-UK) consortium|Amato|United Kingdom

>Spike|hCoV-19/USA/CT-Yale-059/2020|2020-03-28|EPI\_ISL\_428379|Original|hCoV-19^^Connecticut|Human|Yale COVID-19 Biorepository|Grubaugh Lab - Yale School of Public Health|Grubaugh|USA

>Spike|hCoV-19/USA/TX-QDX-189/2020|2020-04-27|EPI\_ISL\_494544|Original|hCoV-19^^Texas|Human|Quest Diagnostics|Quest Diagnostics|Kagan|USA

>Spike|hCoV-19/Spain/MD-IBV-99012342/2020|2020-11-20|EPI\_ISL\_779991|Original|hCoV-19^^Madrid|Human|Hospital General Universitario Gregorio Marañón|SeqCOVID-SPAIN consortium/IBV (CSIC)|Comas|Spain

>Spike|hCoV-19/USA/MA-MGH-03475/2020|2020-11-19|EPI\_ISL\_765853|Original|hCoV-19^^Massachusetts|Human|Massachusetts General Hospital|Infectious Disease Program|Park|USA

>Spike|hCoV-19/Singapore/679/2020|2020-07-02|EPI\_ISL\_498577|Original|hCoV-19^^Singapore|Human|National Public Health Laboratory|National Public Health Laboratory|Mak|Singapore

>Spike|hCoV-19/England/PORT-2D13FE/2020|2020-03-25|EPI\_ISL\_479194|Original|hCoV-19^^England|Human|Centre for Enzyme Innovation|COVID-19 Genomics UK (COG-UK) Consortium|Robson|United Kingdom

>Spike|hCoV-19/Chile/RM-ISPCH-1/2020|2020-03-03|EPI\_ISL\_414579|Original|hCoV-19^^Region Metropolitana de Santiago|Human|Clinica Alemana de Santiago|Instituto de Salud Publica de Chile|Fernandez|Chile

>Spike|hCoV-19/England/MILK-BB18A1/2020|2020-11-17|EPI\_ISL\_720209|Original|hCoV-19^^England|Human|Lighthouse Lab in Milton Keynes|Wellcome Sanger Institute for the COVID-19 Genomics UK (COG-UK) Consortium|Davies|United Kingdom

>Spike|hCoV-19/England/QEUEH-9F2E2C/2020|2020-09-23|EPI\_ISL\_588551|Original|hCoV-19^^England|Human|Lighthouse Lab in Glasgow|Wellcome Sanger Institute for the COVID-19 Genomics UK (COG-UK) consortium|Davies|United Kingdom

>Spike|hCoV-19/Russia/MOW-RII-MH3430S/2020|2020-10-07|EPI\_ISL\_733148|Original|hCoV-19^^Moscow|Human|HELIX LLC|WHO National Influenza Centre Russian Federation|Komissarov|Russia

>Spike|hCoV-19/Spain/IB-IBV-99010815/2020|2020-07-30|EPI\_ISL\_691631|Original|hCoV-19^^Balear Islands|Human|Servicio de Microbiolog\u00eda|SeqCOVID-SPAIN consortium/IBV (CSIC) |Comas|Spain

>Spike|hCoV-19/England/LIVE-DBDDC2/2020|2020-10-30|EPI\_ISL\_664637|Original|hCoV-19^^England|Human|Liverpool Clinical Laboratories|COVID-19 Genomics UK (COG-UK) Consortium|Haldenby|United Kingdom

>Spike|hCoV-19/England/CAMC-B9A291/2020|2020-11-15|EPI\_ISL\_673567|Original|hCoV-19^^England|Human|Lighthouse Lab in Cambridge|Wellcome Sanger Institute for the COVID-19 Genomics UK (COG-UK) Consortium|Davies|United Kingdom

>Spike|hCoV-19/Germany/SH-ChVir20030/2020|2020-11-06|EPI\_ISL\_729472|Original|hCoV-19^^Schleswig-Holstein|Human|A. Krumbholz|Charit\u00e9 Universit\u00e4tsmedizin Berlin|Muehlemann|Germany

>Spike|hCoV-19/USA/CA-ALSR-4216/2020|2020-08-14|EPI\_ISL\_648891|Original|hCoV-19^^California|Human|San Diego County Public Health Laboratory|Andersen lab at Scripps Research|Gangavarapu|USA

>Spike|hCoV-19/USA/MI-MDHHS-SC22084/2020|2020-03-24|EPI\_ISL\_594196|Original|hCoV-19^^Michigan|Human|Michigan Department of Health and Human Services|Michigan Department of Health and Human Services|Jacob|USA

>Spike|hCoV-19/Wales/PHWC-493D07/2020|2020-11-19|EPI\_ISL\_726014|Original|hCoV-19^^Wales|Human|Originating lab|COVID-19 Genomics UK (COG-UK) Consortium|Moore|United Kingdom

>Spike|hCoV-19/England/ALDP-59E5D6/2020|2020-06-14|EPI\_ISL\_558780|Original|hCoV-19^^England|Human|Lighthouse Lab in Alderley Park|Wellcome Sanger Institute for the COVID-19 Genomics UK (COG-UK) consortium|Davies|United Kingdom

>Spike|hCoV-19/Wales/PHWC-486587/2020|2020-10-27|EPI\_ISL\_638150|Original|hCoV-19^^Wales|Human|Wales Specialist Virology Centre Sequencing lab|COVID-19 Genomics UK (COG-UK) Consortium|Moore|United Kingdom

>Spike|hCoV-19/USA/KY-9A10/2020|2020-03-18|EPI\_ISL\_468064|Original|hCoV-19^^Kentucky|Human|unknown|Computer Science and Engineering|Submitter|USA

>Spike|hCoV-19/Australia/NSW2042/2020|2020-03-20|EPI\_ISL\_500613|Original|hCoV-19^^New South Wales|Human|Area of Virology|Area of Virology|Bull|Australia

>Spike|hCoV-19/England/CAMC-B0A083/2020|2020-10-29|EPI\_ISL\_672934|Original|hCoV-19^^England|Human|Lighthouse Lab in Cambridge|Wellcome Sanger Institute for the COVID-19 Genomics UK (COG-UK) Consortium|Davies|United Kingdom

>Spike|hCoV-19/England/NOTT-110084/2020|2020-04-15|EPI\_ISL\_441465|Original|hCoV-19^^England|Human|Queens Medical Centre|COVID-19 Genomics UK (COG-UK) Consortium|Loose|United Kingdom

>Spike|hCoV-19/England/CAMC-A417E6/2020|2020-10-06|EPI\_ISL\_609482|Original|hCoV-19^^England|Human|Lighthouse Lab in Cambridge|Wellcome Sanger Institute for the COVID-19 Genomics UK (COG-UK) consortium|Davies|United Kingdom

>Spike|hCoV-19/Australia/NSW541/2020|2020-03-22|EPI\_ISL\_455080|Original|hCoV-19^^New South Wales|Human|South Eastern Area Laboratory Services|NSW Health Pathology - Institute of Clinical Pathology and Medical Research; Westmead Hospital; University of Sydney|Gall|Australia

>Spike|hCoV-19/England/ALDP-BB57BF/2020|2020-11-20|EPI\_ISL\_703123|Original|hCoV-19^^England|Human|Lighthouse Lab in Alderley Park|Wellcome Sanger Institute for the COVID-19 Genomics UK (COG-UK) Consortium|Davies|United Kingdom

>Spike|hCoV-19/India/GJ-GBRC298a/2020|2020-06-15|EPI\_ISL\_495040|Original|hCoV-19^^Gujarat|Human|GMERS Medical College & Hospital|Gujarat Biotechnology Research Centre|Joshi|India

>Spike|hCoV-19/England/MILK-A23A5A/2020|2020-10-03|EPI\_ISL\_638455|Original|hCoV-19^^England|Human|Centre for Enzyme Innovation|COVID-19 Genomics UK (COG-UK) Consortium|Robson|United Kingdom

>Spike|hCoV-19/England/MILK-B05F21/2020|2020-10-24|EPI\_ISL\_643009|Original|hCoV-19^^England|Human|Lighthouse Lab in Milton Keynes|Wellcome Sanger Institute for the COVID-19 Genomics UK (COG-UK) Consortium|Davies|United Kingdom

>Spike|hCoV-19/England/CAMC-AB1D76/2020|2020-10-22|EPI\_ISL\_623736|Original|hCoV-19^^England|Human|Lighthouse Lab in Cambridge|Wellcome Sanger Institute for the COVID-19 Genomics UK (COG-UK) consortium|Davies|United Kingdom

>Spike|hCoV-19/USA/UT-UPHL-00020/2020|2020-03-13|EPI\_ISL\_603049|Original|hCoV-19^^Utah|Human|Utah Public Health Laboratory|Utah Public Health Laboratory|Young|USA

>Spike|hCoV-19/USA/CA-CZB-3680/2020|2020-07-20|EPI\_ISL\_548374|Original|hCoV-19^^California|Human|University of California|Chan-Zuckerberg Biohub|Bhatt|USA

>Spike|hCoV-19/Gibraltar/204462878/2020|2020-10-29|EPI\_ISL\_615045|Original|hCoV-19^^Gibraltar|Human|Microbiology|Respiratory Virus Unit|Platt|Gibraltar

>Spike|hCoV-19/England/ALDP-A66DCB/2020|2020-10-12|EPI\_ISL\_630477|Original|hCoV-19^^England|Human|Lighthouse Lab in Alderley Park|Wellcome Sanger Institute for the COVID-19 Genomics UK (COG-UK) consortium|Davies|United Kingdom

>Spike|hCoV-19/England/NOTT-11BCA3/2020|2020-11-13|EPI\_ISL\_650811|Original|hCoV-19^^England|Human|Queens Medical Centre|COVID-19 Genomics UK (COG-UK) Consortium|Loose|United Kingdom

>Spike|hCoV-19/Netherlands/FL-EMC-33/2020|2020-10-16|EPI\_ISL\_632728|Original|hCoV-19^^Flevoland|Human|Dutch COVID-19 response team|Erasmus Medical Center|Oude Munnink|Netherlands

>Spike|hCoV-19/Spain/PV-ISCI-201607/2020|2020-03-03|EPI\_ISL\_419240|Original|hCoV-19^^Basque Country|Human|HOSPITAL TXAGORRITXU|Instituto de Salud Carlos III|Caballero|Spain

>Spike|hCoV-19/USA/NY-NYCPHL-000516/2020|2020-03-20|EPI\_ISL\_631977|Original|hCoV-19^^New York|Human|SUNY Downstate Medical Center|New York City Public Health Laboratory|Wang|USA

>Spike|hCoV-19/USA/MI-UM-10036821132/2020|2020-11-06|EPI\_ISL\_728378|Original|hCoV-19^^Michigan|Human|University of Michigan Clinical Microbiology Laboratory|Lauring Lab|Valesano|USA

>Spike|hCoV-19/USA/MI-MDHHS-SC21347/2020|2020-04-01|EPI\_ISL\_507601|Original|hCoV-19^^Michigan|Human|Michigan Department of Health and Human Services|Michigan Department of Health and Human Services|Blankenship|USA

>Spike|hCoV-19/India/WB-IK52/2020|2020-05-05|EPI\_ISL\_511902|Original|hCoV-19^^West Bengal|Human|Institute of Post Graduate Medical Education & Research|National Institute of Biomedical Genomics -\u00a0DBT's PAN-INDIA 1000 SARS--CoV-2 RNA Genome Sequencing Consortium|Maitra|India

>Spike|hCoV-19/Scotland/QEUIH-A4C709/2020|2020-10-07|EPI\_ISL\_595993|Original|hCoV-19^^Scotland|Human|Quadram Institute Bioscience|COVID-19 Genomics UK (COG-UK) Consortium|Alikhan|United Kingdom

>Spike|hCoV-19/Denmark/DCGC-21773/2020|2020-12-21|EPI\_ISL\_758353|Original|hCoV-19^^Hovedstaden|Human|Department of Virus and Microbiological Special Diagnostics|Albertsen Lab|Michaelsen|Denmark



>Spike|hCoV-19/Australia/VIC5117/2020|2020-07-19|EPI\_ISL\_519920|Original|hCoV-19^^Victoria|Human|Microbiological Diagnostic Unit - Public Health Laboratory (MDU-PHL)|MDU-PHL|Schultz|Australia

>Spike|hCoV-19/Netherlands/Leiden-0001/2020|2020-03-03|EPI\_ISL\_482746|Original|hCoV-19^^Netherlands|Human|Medical Microbiology|Medical Microbiology|Submitter|Netherlands

>Spike|hCoV-19/USA/WI-UW-2421/2020|2020-12-04|EPI\_ISL\_754665|Original|hCoV-19^^Wisconsin|Human|University of Wisconsin-Madison AIDS Vaccine Research Laboratories|University of Wisconsin-Madison AIDS Vaccine Research Laboratories|Moreno|USA

>Spike|hCoV-19/England/NORT-2A7106/2020|2020-10-28|EPI\_ISL\_637280|Original|hCoV-19^^England|Human|Northumbria University / South Tees Hospitals NHS Foundation Trust / North Cumbria Integrated Care NHS Foundation Trust / North Tees and Hartlepool NHS Foundation Trust / Newcastle Hospitals NHS Foundation Trust|COVID-19 Genomics UK (COG-UK) Consortium|Bashton|United Kingdom

>Spike|hCoV-19/USA/TX-HMH-MCoV-13669/2020|2020-08-19|EPI\_ISL\_788767|Original|hCoV-19^^Texas|Human|Houston Methodist Hospital|Houston Methodist Hospital|Long|USA

>Spike|hCoV-19/Wales/PHWC-4912DD/2020|2020-11-12|EPI\_ISL\_706638|Original|hCoV-19^^Wales|Human|Originating lab|COVID-19 Genomics UK (COG-UK) Consortium|Moore|United Kingdom

>Spike|hCoV-19/USA/FL-BPHL-0559/2020|2020-07-06|EPI\_ISL\_508762|Original|hCoV-19^^Florida|Human|Florida Bureau of Public Health Laboratories|Florida Bureau of Public Health Laboratories|Blanton|USA

>Spike|hCoV-19/England/QEUEH-AD4821/2020|2020-10-26|EPI\_ISL\_634030|Original|hCoV-19^^England|Human|Lighthouse Lab in Glasgow|Wellcome Sanger Institute for the COVID-19 Genomics UK (COG-UK) consortium|Davies|United Kingdom

>Spike|hCoV-19/USA/LA-EVTL442/2020|2020-06-16|EPI\_ISL\_578846|Original|hCoV-19^^Louisiana|Human|LSUHS Emerging Viral Threat Laboratory|Microbial Genome Sequencing Center|Kamil|USA

>Spike|hCoV-19/England/20129173004/2020|2020-03-21|EPI\_ISL\_424144|Original|hCoV-19^^England|Human|Respiratory Virus Unit|Respiratory Virus Unit|Platt|United Kingdom

>Spike|hCoV-19/England/CAMB-1AC490/2020|2020-04-21|EPI\_ISL\_489569|Original|hCoV-19^^England|Human|Department of Pathology|Wellcome Sanger Institute for the COVID-19 Genomics UK (COG-UK) consortium|Davies|United Kingdom

>Spike|hCoV-19/Spain/VC-FISABIO-525/2020|2020-03-27|EPI\_ISL\_447476|Original|hCoV-19^^Comunitat Valenciana|Human|Servicio de Microbiologia. Hospital Clinico Universitario de Valencia|Sequencing and Bioinformatics Service and Molecular Epidemiology Research Group. FISABIO-Public Health|Gonzalez-Candelas|Spain

>Spike|hCoV-19/USA/RI-CDC-2-3714559/2020|2020-12-03|EPI\_ISL\_751595|Original|hCoV-19^^Rhode Island|Human|RI State Health Laboratories|Genomics and Discovery|Queen|USA

>Spike|hCoV-19/Denmark/DCGC-4188/2020|2020-09-21|EPI\_ISL\_622081|Original|hCoV-19^^Hovedstaden|Human|Department of Virus and Microbiological Special Diagnostics|Albertsen lab|Michaelsen|Denmark

>Spike|hCoV-19/Northern Ireland/NIRE-1072E4/2020|2020-03-30|EPI\_ISL\_585135|Original|hCoV-19^^Northern Ireland|Human|Regional Virus Laboratory|COVID-19 Genomics UK (COG-UK) Consortium|Fairley|United Kingdom

>Spike|hCoV-19/USA/WA-UW-11561/2020|2020-06-22|EPI\_ISL\_570436|Original|hCoV-19^^Washington|Human|UW Virology Lab|UW Virology Lab|Roychoudhury|USA

>Spike|hCoV-19/USA/WA-OHSU-1345/2020|2020-07-14|EPI\_ISL\_509186|Original|hCoV-19^^Washington|Human|OHSU Lab Services Molecular Microbiology Lab|Oregon SARS-CoV-2 Genome Sequencing Center|O'Roak|USA

>Spike|hCoV-19/Denmark/DCGC-10253/2020|2020-11-09|EPI\_ISL\_669859|Original|hCoV-19^^Nordjylland|Human|Department of Virus and Microbiological Special Diagnostics|Albertsen Lab|Michaelsen|Denmark

>Spike|hCoV-19/England/QEUEH-CC2D61/2020|2020-12-21|EPI\_ISL\_778274|Original|hCoV-19^^England|Human|Lighthouse Lab in Glasgow|Wellcome Sanger Institute for the COVID-19 Genomics UK (COG-UK) Consortium|Davies|United Kingdom

>Spike|hCoV-19/USA/UT-UPHL-2012085032/2020|2020-08-09|EPI\_ISL\_745795|Original|hCoV-19^^Utah|Human|Ginkgo Bioworks Clinical Laboratory|Utah Public Health Laboratory|Young|USA

>Spike|hCoV-19/Canada/QC\_AF6/2020|2020-04-06|EPI\_ISL\_463912|Original|hCoV-19^^Quebec|Human|Laboratoire de microbiologie|Smith Laboratory|Smith|Canada

>Spike|hCoV-19/USA/CA-IGI-0710/2020|2020-07-24|EPI\_ISL\_677877|Original|hCoV-19^^California|Human|Innovative Genomics Institute|Innovative Genomics Institute|Wyman|USA

>Spike|hCoV-19/Brazil/SP-L14-CD240/2020|2020-03-26|EPI\_ISL\_476244|Original|hCoV-19^^S\u00e3o Paulo|Human|Hospital da Cl\u00ednicas da Faculdade de Medicina da Universidade de S\u00e3o Paulo|Instituto de Medicina Tropical da Univesidade de S\u00e3o Paulo|Sabino|Brazil

>Spike|hCoV-19/Denmark/DCGC-6723/2020|2020-04-20|EPI\_ISL\_622361|Original|hCoV-19^^Hovedstaden|Human|Department of Virus and Microbiological Special Diagnostics|Albertsen lab|Michaelsen|Denmark

>Spike|hCoV-19/Australia/VIC7761/2020|2020-08-02|EPI\_ISL\_564636|Original|hCoV-19^^Victoria|Human|Microbiological Diagnostic Unit - Public Health Laboratory (MDU-PHL)|MDU-PHL|Schultz|Australia

>Spike|hCoV-19/England/MILK-AB74C6/2020|2020-10-21|EPI\_ISL\_623538|Original|hCoV-19^^England|Human|Lighthouse Lab in Milton Keynes|Wellcome Sanger Institute for the COVID-19 Genomics UK (COG-UK) consortium|Davies|United Kingdom

>Spike|hCoV-19/England/BRIS-121E86/2020|2020-03-19|EPI\_ISL\_440032|Original|hCoV-19^^England|Human|PHE South West Regional Laboratory|Wellcome Sanger Institute for the COVID-19 Genomics UK (COG-UK) consortium|Amato|United Kingdom

>Spike|hCoV-19/Australia/VIC4510/2020|2020-07-16|EPI\_ISL\_518921|Original|hCoV-19^^Victoria|Human|Microbiological Diagnostic Unit - Public Health Laboratory (MDU-PHL)|MDU-PHL|Schultz|Australia

>Spike|hCoV-19/England/CAMC-A587BF/2020|2020-10-09|EPI\_ISL\_596985|Original|hCoV-19^^England|Human|Lighthouse Lab in Cambridge|Wellcome Sanger Institute for the COVID-19 Genomics UK (COG-UK) consortium|Davies|United Kingdom

>Spike|hCoV-19/Wuhan/HB-WH2-165/2020|2020-02-11|EPI\_ISL\_455375|Original|hCoV-19^^Hubei|Human|Wuhan Chain Medical Labs (CMLabs)|State Key Laboratory of Biotherapy of Sichuan University|Tang|China

>Spike|hCoV-19/USA/TX-HMH-MCoV-10260/2020|2020-07-07|EPI\_ISL\_789398|Original|hCoV-19^^Texas|Human|Houston Methodist Hospital|Houston Methodist Hospital|Long|USA

>Spike|hCoV-19/USA/WI-UW-150/2020|2020-04-13|EPI\_ISL\_427457|Original|hCoV-19^^Wisconsin|Human|University of Wisconsin-Madison AIDS Vaccine Research Laboratories|University of Wisconsin-Madison AIDS Vaccine Research Laboratories|Baczenas|USA

>Spike|hCoV-19/Scotland/GCVR-17134C/2020|2020-03-26|EPI\_ISL\_459643|Original|hCoV-19^^Scotland|Human|NHSGGC West of Scotland Specialist Virology Centre / MRC-University of Glasgow Centre for Virus Research|Wellcome Sanger Institute for the COVID-19 Genomics UK (COG-UK) consortium|Davies|United Kingdom

>Spike|hCoV-19/Spain/CT-IBV-97009566/2020|2020-07-28|EPI\_ISL\_683639|Original|hCoV-19^^Catalunya|Human|Servicio de Microbiolog\u00eda|SeqCOVID-SPAIN consortium|IBV (CSIC)|Comas|Spain

>Spike|hCoV-19/Peru/LIM-UPCH-0193/2020|2020-10-16|EPI\_ISL\_729888|Original|hCoV-19^^Lima|Human|Laboratorio de Referencia Nacional de Virus Respiratorios|Laboratorio de Gen\u00f3mica Microbiana|Tsukayama|Peru

>Spike|hCoV-19/USA/TX-HMH-MCoV-12598/2020|2020-08-31|EPI\_ISL\_790412|Original|hCoV-19^^Texas|Human|Houston Methodist Hospital|Houston Methodist Hospital|Long|USA

>Spike|hCoV-19/Denmark/DCGC-6476/2020|2020-10-12|EPI\_ISL\_620376|Original|hCoV-19^^Midtjylland|Human|Department of Virus and Microbiological Special Diagnostics|Albertsen lab|Michaelsen|Denmark

>Spike|hCoV-19/Austria/CeMM0084/2020|2020-03-24|EPI\_ISL\_437949|Original|hCoV-19^^Steinach am Brenner|Human|Universitaetsklinik f\u00fcr Innere Medizin II Innsbruck|Bergthaler laboratory|Bergthaler|Austria

>Spike|hCoV-19/England/201090235/2020|2020-03-04|EPI\_ISL\_464547|Original|hCoV-19^^England|Human|Respiratory Virus Unit|Respiratory Virus Unit|Platt|United Kingdom

>Spike|hCoV-19/USA/WA-S86/2020|2020-03-01|EPI\_ISL\_417139|Original|hCoV-19^^Washington|Human|Washington State Department of Health|Seattle Flu Study|Bedford|USA

>Spike|hCoV-19/England/20134040803/2020|2020-03-23|EPI\_ISL\_420516|Original|hCoV-19^^England|Human|Respiratory Virus Unit|Respiratory Virus Unit|Platt|United Kingdom

>Spike|hCoV-19/USA/MI-MDHHS-SC20508/2020|2020-05-06|EPI\_ISL\_460556|Original|hCoV-19^^Michigan|Human|Michigan Department of Health and Human Services|Michigan Department of Health and Human Services|Blankenship|USA

>Spike|hCoV-19/Denmark/DCGC-1632/2020|2020-04-06|EPI\_ISL\_619063|Original|hCoV-19^^Hovedstaden|Human|Department of Virus and Microbiological Special Diagnostics|Albertsen lab|Michaelsen|Denmark

>Spike|hCoV-19/Scotland/CVR3272/2020|2020-05-06|EPI\_ISL\_493842|Original|hCoV-19^^Scotland|Human|West of Scotland Specialist Virology Centre|COVID-19 Genomics UK (COG-UK) Consortium|Robertson|United Kingdom

>Spike|hCoV-19/USA/CA-CZB-4030/2020|2020-08-07|EPI\_ISL\_548664|Original|hCoV-19^^California|Human|County of Santa Clara Public Health Department|Chan-Zuckerberg Biohub|Bhatt|USA

>Spike|hCoV-19/USA/LA-EVTL496/2020|2020-07-30|EPI\_ISL\_578900|Original|hCoV-19^^Louisiana|Human|LSUHS Emerging Viral Threat Laboratory|Microbial Genome Sequencing Center|Kamil|USA

>Spike|hCoV-19/England/ALDP-9EDE51/2020|2020-05-08|EPI\_ISL\_580686|Original|hCoV-19^^England|Human|Lighthouse Lab in Alderley Park|Wellcome Sanger Institute for the COVID-19 Genomics UK (COG-UK) Consortium|Davies|United Kingdom

>Spike|hCoV-19/USA/MN-QDX-1335/2020|2020-03-14|EPI\_ISL\_572124|Original|hCoV-19^^Minnesota|Human|Quest Diagnostics|Quest Diagnostics|Kagan|USA

>Spike|hCoV-19/Australia/NSW318/2020|2020-04-01|EPI\_ISL\_451581|Original|hCoV-19^^New South Wales|Human|Pathology Sydney South West - NSW Health Pathology|NSW Health Pathology - Institute of Clinical Pathology and Medical Research; Westmead Hospital; University of Sydney|Gall|Australia

>Spike|hCoV-19/USA/OR-OHSU-1825/2020|2020-07-27|EPI\_ISL\_526039|Original|hCoV-19^^Oregon|Human|OHSU Lab Services Molecular Microbiology Lab|Oregon SARS-CoV-2 Genome Sequencing Center|O'Roak|USA

>Spike|hCoV-19/USA/UT-UPHL-2012655372/2020|2020-10-24|EPI\_ISL\_745533|Original|hCoV-19^^Utah|Human|Ginkgo Bioworks Clinical Laboratory|Utah Public Health Laboratory|Young|USA

>Spike|hCoV-19/USA/NM-DOH-2020632129/2020|2020-12-20|EPI\_ISL\_766916|Original|hCoV-19^^New Mexico|Human|New Mexico Department of Health Scientific Laboratory|New Mexico Department of Health Scientific Laboratory|Malone|USA

>Spike|hCoV-19/Switzerland/AG-ETHZ-380291/2020|2020-11-25|EPI\_ISL\_721718|Original|hCoV-19^^Aargau|Human|Viollier AG|Department of Biosystems Science and Engineering|Nadeau|Switzerland

>Spike|hCoV-19/England/ALDP-A6C42A/2020|2020-10-14|EPI\_ISL\_608273|Original|hCoV-19^^England|Human|Lighthouse Lab in Alderley Park|Wellcome Sanger Institute for the COVID-19 Genomics UK (COG-UK) consortium|Davies|United Kingdom

>Spike|hCoV-19/Wales/PHWC-49B103/2020|2020-12-07|EPI\_ISL\_742297|Original|hCoV-19^^Wales|Human|Wales Specialist Virology Centre Sequencing lab|COVID-19 Genomics UK (COG-UK) Consortium|Moore|United Kingdom

>Spike|hCoV-19/USA/AZ-TG654345/2020|2020-04-13|EPI\_ISL\_695987|Original|hCoV-19^^Arizona|Human|Sonora Quest Laboratories|TGen North|French|USA

>Spike|hCoV-19/USA/TX-HMH-MCoV-15929/2020|2020-07-10|EPI\_ISL\_785613|Original|hCoV-19^^Texas|Human|Houston Methodist Hospital|Houston Methodist Hospital|Long|USA

>Spike|hCoV-19/USA/WA-UW-11328/2020|2020-06-22|EPI\_ISL\_570395|Original|hCoV-19^^Washington|Human|UW Virology Lab|UW Virology Lab|Roychoudhury|USA

>Spike|hCoV-19/England/QEUEH-964E43/2020|2020-08-13|EPI\_ISL\_531089|Original|hCoV-19^^England|Human|Lighthouse Lab in Glasgow|Wellcome Sanger Institute for the COVID-19 Genomics UK (COG-UK) consortium|Davies|United Kingdom

>Spike|hCoV-19/USA/AZ-TG618046/2020|2020-07-20|EPI\_ISL\_695688|Original|hCoV-19^^Arizona|Human|AZ SPHL|TGen North|French|USA

>Spike|hCoV-19/Iceland/84/2020|2020-03-10|EPI\_ISL\_417761|Original|hCoV-19^^Reykjavik|Human|The National University Hospital of Iceland|deCODE genetics|J\u00f3nsson|Iceland

>Spike|hCoV-19/USA/MA-MGH-03462/2020|2020-11-17|EPI\_ISL\_765846|Original|hCoV-19^^Massachusetts|Human|Massachusetts General Hospital|Infectious Disease Program|Park|USA

>Spike|hCoV-19/United Arab Emirates/0764/2020|2020-05-19|EPI\_ISL\_698908|Original|hCoV-19^^Abu Dhabi|Human|Group 42 (G42) Healthcare|G42 Healthcare|Ogrodzki|United Arab Emirates

>Spike|hCoV-19/England/CAMC-B2102C/2020|2020-11-02|EPI\_ISL\_647350|Original|hCoV-19^^England|Human|Lighthouse Lab in Cambridge|Wellcome Sanger Institute for the COVID-19 Genomics UK (COG-UK) Consortium|Davies|United Kingdom

>Spike|hCoV-19/Panama/336523/2020|2020-04-05|EPI\_ISL\_496852|Original|hCoV-19^^Panama Center|Human|Gorgas Memorial Laboratory of Health Studies|Gorgas Memorial Laboratory of Health Studies|Martinez|Panama

>Spike|hCoV-19/USA/TX-HMH-MCoV-10113/2020|2020-07-07|EPI\_ISL\_789325|Original|hCoV-19^^Texas|Human|Houston Methodist Hospital|Houston Methodist Hospital|Long|USA

>Spike|hCoV-19/England/MILK-B552ED/2020|2020-11-05|EPI\_ISL\_658022|Original|hCoV-19^^England|Human|Lighthouse Lab in Milton Keynes|Wellcome Sanger Institute for the COVID-19 Genomics UK (COG-UK) Consortium|Davies|United Kingdom

>Spike|hCoV-19/England/MILK-BB0DFE/2020|2020-11-18|EPI\_ISL\_720517|Original|hCoV-19^^England|Human|Lighthouse Lab in Milton Keynes|Wellcome Sanger Institute for the COVID-19 Genomics UK (COG-UK) Consortium|Davies|United Kingdom

>Spike|hCoV-19/USA/MN-CDC-6572/2020|2020-04-20|EPI\_ISL\_527733|Original|hCoV-19^^Minnesota|Human|MN PHL Division|Pathogen Discovery|Queen|USA

>Spike|hCoV-19/England/MILK-A05D64/2020|2020-09-28|EPI\_ISL\_599908|Original|hCoV-19^^England|Human|Lighthouse Lab in Milton Keynes|Wellcome Sanger Institute for the COVID-19 Genomics UK (COG-UK) consortium|Davies|United Kingdom

>Spike|hCoV-19/England/LIVE-DCC425/2020|2020-11-25|EPI\_ISL\_724506|Original|hCoV-19^^England|Human|Liverpool Clinical Laboratories|COVID-19 Genomics UK (COG-UK) Consortium|Haldenby|United Kingdom

>Spike|hCoV-19/Denmark/DCGC-5183/2020|2020-09-21|EPI\_ISL\_621721|Original|hCoV-19^^Nordjylland|Human|Department of Virus and Microbiological Special Diagnostics|Albertsen lab|Michaelsen|Denmark

>Spike|hCoV-19/Australia/NSW2063/2020|2020-03-19|EPI\_ISL\_509496|Original|hCoV-19^^New South Wales|Human|Area of Virology|Area of Virology|Yeang|Australia

>Spike|hCoV-19/USA/NY-CDC-2-3714164/2020|2020-11-24|EPI\_ISL\_751580|Original|hCoV-19^^New York|Human|NYSDOH Wadsworth Center|Genomics and Discovery|Queen|USA

>Spike|hCoV-19/England/CAMB-824EC/2020|2020-04-13|EPI\_ISL\_443472|Original|hCoV-19^^England|Human|Department of Pathology|Wellcome Sanger Institute for the COVID-19 Genomics UK (COG-UK) consortium|Amato|United Kingdom

>Spike|hCoV-19/USA/MA-MASPHL-00633/2020|2020-05-12|EPI\_ISL\_692995|Original|hCoV-19^^Massachusetts|Human|Massachusetts State Public Health Laboratory|Massachusetts State Public Health Laboratory|Lang|USA

>Spike|hCoV-19/England/LOND-1260300/2020|2020-03-15|EPI\_ISL\_524663|Original|hCoV-19^^England|Human|North West London Pathology|Wellcome Sanger Institute for the COVID-19 Genomics UK (COG-UK) consortium|Davies|United Kingdom

>Spike|hCoV-19/Scotland/QEUEH-A60F07/2020|2020-10-13|EPI\_ISL\_665490|Original|hCoV-19^^Scotland|Human|Northumbria University / South Tees Hospitals NHS Foundation Trust / North Cumbria Integrated Care NHS Foundation Trust / North Tees and Hartlepool NHS Foundation Trust / Newcastle Hospitals NHS Foundation Trust|COVID-19 Genomics UK (COG-UK) Consortium|Bashton|United Kingdom

>Spike|hCoV-19/England/SHEF-10CFEF1/2020|2020-12-05|EPI\_ISL\_742024|Original|hCoV-19^^England|Human|Virology Department|COVID-19 Genomics UK (COG-UK) Consortium|de Silva|United Kingdom

>Spike|hCoV-19/England/QEUEH-9F6DEF/2020|2020-09-27|EPI\_ISL\_595634|Original|hCoV-19^^England|Human|Oxford Viromics|COVID-19 Genomics UK (COG-UK) Consortium|Golubchik|United Kingdom

>Spike|hCoV-19/Hong Kong/VM20060346/2020|2020-07-19|EPI\_ISL\_539812|Original|hCoV-19^^Hong Kong|Human|Asiaworld Expo Command Post|Hong Kong Department of Health|Tsang|China

>Spike|hCoV-19/Scotland/EDB3354/2020|2020-04-09|EPI\_ISL\_487743|Original|hCoV-19^^Scotland|Human|Virology Department|Wellcome Sanger Institute for the COVID-19 Genomics UK (COG-UK) consortium|Davies|United Kingdom

>Spike|hCoV-19/USA/TX-HMH-4468/2020|2020-06-17|EPI\_ISL\_543645|Original|hCoV-19^^Texas|Human|Houston Methodist Hospital|Houston Methodist Hospital|Long|USA

>Spike|hCoV-19/England/ALDP-9CD1F4/2020|2020-09-16|EPI\_ISL\_566277|Original|hCoV-19^^England|Human|Lighthouse Lab in Alderley Park|Wellcome Sanger Institute for the COVID-19 Genomics UK (COG-UK) consortium|Davies|United Kingdom

>Spike|hCoV-19/England/CAMB-1AA720/2020|2020-04-17|EPI\_ISL\_470311|Original|hCoV-19^^England|Human|Department of Pathology|Wellcome Sanger Institute for the COVID-19 Genomics UK (COG-UK) consortium|Davies|United Kingdom

>Spike|hCoV-19/England/LEED-2A8994/2020|2020-04-03|EPI\_ISL\_539145|Original|hCoV-19^^England|Human|Leeds Teaching Hospitals NHS Trust and Public Health England|Wellcome Sanger Institute for the COVID-19 Genomics UK (COG-UK) consortium|Davies|United Kingdom

>Spike|hCoV-19/Switzerland/BS-ETHZ-100148/2020|2020-03-16|EPI\_ISL\_451732|Original|hCoV-19^^Basel-Stadt|Human|Viollier AG|Department of Biosystems Science and Engineering|Nadeau|Switzerland

>Spike|hCoV-19/USA/TX-HMH-MCoV-12811/2020|2020-08-19|EPI\_ISL\_790541|Original|hCoV-19^^Texas|Human|Houston Methodist Hospital|Houston Methodist Hospital|Long|USA

>Spike|hCoV-19/Vietnam/HCMC-35014/2020|2020-03-21|EPI\_ISL\_498189|unknown|hCoV-19^^Ho Chi Minh City|Human|OUCRU|OUCRU|Nguyen|Vietnam

>Spike|hCoV-19/Sweden/20-05627/2020|2020-03-13|EPI\_ISL\_434645|Original|hCoV-19^^Dalarna|Human|Svardsjo VC|The Public Health Agency of Sweden|Svartstr\u00f6m|Sweden

>Spike|hCoV-19/Northern Ireland/QEUA-96B8F3/2020|2020-08-16|EPI\_ISL\_531287|Original|hCoV-19^^Northern Ireland|Human|Lighthouse Lab in Glasgow|Wellcome Sanger Institute for the COVID-19 Genomics UK (COG-UK) consortium|Davies|United Kingdom

>Spike|hCoV-19/Scotland/QEUA-BEAE9E/2020|2020-12-04|EPI\_ISL\_710621|Original|hCoV-19^^Scotland|Human|Lighthouse Lab in Glasgow|Wellcome Sanger Institute for the COVID-19 Genomics UK (COG-UK) Consortium|Davies|United Kingdom

>Spike|hCoV-19/England/LIVE-9C009/2020|2020-03-23|EPI\_ISL\_449501|Original|hCoV-19^^England|Human|Liverpool Clinical Laboratories|COVID-19 Genomics UK (COG-UK) Consortium|Haldenby|United Kingdom

>Spike|hCoV-19/New Zealand/20VR2097/2020|2020-04-05|EPI\_ISL\_456376|Original|hCoV-19^^Counties Manukau|Human|Middlemore Hospital|Institute of Environmental Science and Research (ESR)|de Ligt|New Zealand

>Spike|hCoV-19/England/NORW-F2317/2020|2020-00-00|EPI\_ISL\_627661|Original|hCoV-19^^England|Human|Quadram Institute Bioscience|COVID-19 Genomics UK (COG-UK) Consortium|Alikhan|United Kingdom

>Spike|hCoV-19/USA/TX-HMH-MCoV-18788/2020|2020-11-21|EPI\_ISL\_785118|Original|hCoV-19^^Texas|Human|Houston Methodist Hospital|Houston Methodist Hospital|Long|USA

>Spike|hCoV-19/England/ALDP-9B5854/2020|2020-08-28|EPI\_ISL\_590321|Original|hCoV-19^^England|Human|Lighthouse Lab in Alderley Park|Wellcome Sanger Institute for the COVID-19 Genomics UK (COG-UK) consortium|Davies|United Kingdom

>Spike|hCoV-19/Denmark/DCGC-17640/2020|2020-12-14|EPI\_ISL\_750364|Original|hCoV-19^^Midtjylland|Human|Department of Virus and Microbiological Special Diagnostics|Albertsen Lab|Michaelsen|Denmark

>Spike|hCoV-19/USA/TX-HMH-MCoV-14664/2020|2020-10-11|EPI\_ISL\_787949|Original|hCoV-19^^Texas|Human|Houston Methodist Hospital|Houston Methodist Hospital|Long|USA

>Spike|hCoV-19/England/205260469/2020|2020-12-19|EPI\_ISL\_754322|Original|hCoV-19^^England|Human|Respiratory Virus Unit|COVID-19 Genomics UK (COG-UK) Consortium|Platt|United Kingdom

>Spike|hCoV-19/England/ALDP-BBB106/2020|2020-11-20|EPI\_ISL\_701834|Original|hCoV-19^^England|Human|Lighthouse Lab in Alderley Park|Wellcome Sanger Institute for the COVID-19 Genomics UK (COG-UK) Consortium|Davies|United Kingdom

>Spike|hCoV-19/Australia/VIC9725/2020|2020-08-24|EPI\_ISL\_565675|Original|hCoV-19^^Victoria|Human|Microbiological Diagnostic Unit - Public Health Laboratory (MDU-PHL)|MDU-PHL|Schultz|Australia

>Spike|hCoV-19/England/QEUA-A36A90/2020|2020-10-04|EPI\_ISL\_638041|Original|hCoV-19^^England|Human|Wales Specialist Virology Centre Sequencing lab|COVID-19 Genomics UK (COG-UK) Consortium|Moore|United Kingdom

>Spike|hCoV-19/Denmark/DCGC-16907/2020|2020-12-14|EPI\_ISL\_750636|Original|hCoV-19^^Syddanmark|Human|Department of Virus and Microbiological Special Diagnostics|Albertsen Lab|Michaelsen|Denmark

>Spike|hCoV-19/Denmark/DCGC-6766/2020|2020-10-12|EPI\_ISL\_619462|Original|hCoV-19^^Hovedstaden|Human|Department of Virus and Microbiological Special Diagnostics|Albertsen lab|Michaelsen|Denmark

>Spike|hCoV-19/Wales/PHWC-4A0DBC/2020|2020-12-12|EPI\_ISL\_743577|Original|hCoV-19^^Wales|Human|Wales Specialist Virology Centre Sequencing lab|COVID-19 Genomics UK (COG-UK) Consortium|Moore|United Kingdom

>Spike|hCoV-19/Scotland/GCVR-171731/2020|2020-03-28|EPI\_ISL\_489596|Original|hCoV-19^^Scotland|Human|NHSGGC West of Scotland Specialist Virology Centre / MRC-University of Glasgow Centre for Virus Research|Wellcome Sanger Institute for the COVID-19 Genomics UK (COG-UK) consortium|Davies|United Kingdom

>Spike|hCoV-19/England/201790459/2020|2020-04-25|EPI\_ISL\_526765|Original|hCoV-19^^England|Human|Respiratory Virus Unit|Respiratory Virus Unit|Miah|United Kingdom

>Spike|hCoV-19/Thailand/Bangkok-0071/2020|2020-03-30|EPI\_ISL\_445380|Original|hCoV-19^^Bangkok|Human|Ramathibodi Hospital|COVID-19 Network Investigations (CONI) Alliance|Batty|Thailand

>Spike|hCoV-19/USA/AZ-TG493639/2020|2020-07-13|EPI\_ISL\_695234|Original|hCoV-19^^Arizona|Human|TGen North|TGen North|French|USA

>Spike|hCoV-19/Australia/VIC3976/2020|2020-07-13|EPI\_ISL\_519368|Original|hCoV-19^^Victoria|Human|Microbiological Diagnostic Unit - Public Health Laboratory (MDU-PHL) |MDU-PHL|Schultz|Australia

>Spike|hCoV-19/USA/CA-CZB-3764/2020|2020-04-14|EPI\_ISL\_548480|Original|hCoV-19^^California|Human|Ventura County Public Health Lab|Chan-Zuckerberg Biohub|Bhatt|USA

>Spike|hCoV-19/Canada/ON-UHTC\_0105/2020|2020-05-15|EPI\_ISL\_526260|Original|hCoV-19^^Ontario|Human|Unity Health Toronto|Ontario Institute for Cancer Research|de Borja|Canada

>Spike|hCoV-19/England/OXON-AD08D/2020|2020-04-07|EPI\_ISL\_448557|Original|hCoV-19^^England|Human|Oxford Viromics|COVID-19 Genomics UK (COG-UK) Consortium|Golubchik|United Kingdom

>Spike|hCoV-19/England/LIVE-DC4627/2020|2020-11-10|EPI\_ISL\_702536|Original|hCoV-19^^England|Human|Liverpool Clinical Laboratories|COVID-19 Genomics UK (COG-UK) Consortium|Haldenby|United Kingdom

>Spike|hCoV-19/England/ALDP-94EE5E/2020|2020-06-17|EPI\_ISL\_556413|Original|hCoV-19^^England|Human|Lighthouse Lab in Alderley Park|Wellcome Sanger Institute for the COVID-19 Genomics UK (COG-UK) consortium|Davies|United Kingdom

>Spike|hCoV-19/Scotland/CVR4425/2020|2020-09-14|EPI\_ISL\_585297|Original|hCoV-19^^Scotland|Human|Lighthouse Lab in Glasgow / MRC-University of Glasgow Centre for Virus Research|COVID-19 Genomics UK (COG-UK) Consortium|Robertson|United Kingdom

>Spike|hCoV-19/Scotland/EDB5251/2020|2020-05-21|EPI\_ISL\_456996|Original|hCoV-19^^Scotland|Human|Virology Department|COVID-19 Genomics UK (COG-UK) Consortium|Williams|United Kingdom

>Spike|hCoV-19/Austria/CeMM0249/2020|2020-03-21|EPI\_ISL\_438079|Original|hCoV-19^^Vienna|Human|Center for Virology|Bergthaler laboratory|Bergthaler|Austria

>Spike|hCoV-19/USA/AZ-TG395885/2020|2020-06-06|EPI\_ISL\_694730|Original|hCoV-19^^Arizona|Human|AZ SPHL|TGen North|French|USA

>Spike|hCoV-19/England/ALDP-95AD70/2020|2020-06-09|EPI\_ISL\_555543|Original|hCoV-19^^England|Human|Lighthouse Lab in Alderley Park|Wellcome Sanger Institute for the COVID-19 Genomics UK (COG-UK) consortium|Davies|United Kingdom

>Spike|hCoV-19/Scotland/EDB8031/2020|2020-10-01|EPI\_ISL\_585472|Original|hCoV-19^^Scotland|Human|Virology Department|COVID-19 Genomics UK (COG-UK) Consortium|McHugh|United Kingdom

>Spike|hCoV-19/Spain/RI-IBV-99005847/2020|2020-03-29|EPI\_ISL\_537390|Original|hCoV-19^^La Rioja|Human|Centro de Investigaci\u00f3n Biom\u00e9dica de La Rioja - Hospital San Pedro Logro\u00f1o|SeqCOVID-SPAIN consortium/IBV (CSIC) |Comas|Spain

>Spike|hCoV-19/USA/WA-S734/2020|2020-04-13|EPI\_ISL\_449904|Original|hCoV-19^^Washington|Human|Washington State Department of Health|Seattle Flu Study|Bedford|USA

>Spike|hCoV-19/England/ALDP-A5085A/2020|2020-10-07|EPI\_ISL\_597880|Original|hCoV-19^^England|Human|Lighthouse Lab in Alderley Park|Wellcome Sanger Institute for the COVID-19 Genomics UK (COG-UK) consortium|Davies|United Kingdom

>Spike|hCoV-19/USA/CA-CZB-2370/2020|2020-05-15|EPI\_ISL\_513811|Original|hCoV-19^^California|Human|Orange County Public Health Laboratory|Chan-Zuckerberg Biohub|Kamm|USA

>Spike|hCoV-19/England/ALDP-953858/2020|2020-06-08|EPI\_ISL\_553851|Original|hCoV-19^^England|Human|Lighthouse Lab in Alderley Park|Wellcome Sanger Institute for the COVID-19 Genomics UK (COG-UK) consortium|Davies|United Kingdom

>Spike|hCoV-19/Denmark/DCGC-15561/2020|2020-11-23|EPI\_ISL\_713894|Original|hCoV-19^^Hovedstaden|Human|Department of Virus and Microbiological Special Diagnostics|Albertsen Lab|Michaelsen|Denmark

>Spike|hCoV-19/Denmark/DCGC-14017/2020|2020-11-30|EPI\_ISL\_711092|Original|hCoV-19^^Syddanmark|Human|Department of Virus and Microbiological Special Diagnostics|Albertsen Lab|Michaelsen|Denmark

>Spike|hCoV-19/USA/CA-ALSR-5037/2020|2020-12-06|EPI\_ISL\_730307|Original|hCoV-19^^California|Human|San Diego County Public Health Laboratory|Andersen lab at Scripps Research|Gangavarapu|USA

>Spike|hCoV-19/USA/WA-S687/2020|2020-04-08|EPI\_ISL\_449857|Original|hCoV-19^^Washington|Human|Washington State Department of Health|Seattle Flu Study|Bedford|USA

>Spike|hCoV-19/England/MILK-ACE990/2020|2020-10-22|EPI\_ISL\_629607|Original|hCoV-19^^England|Human|Lighthouse Lab in Milton Keynes|Wellcome Sanger Institute for the COVID-19 Genomics UK (COG-UK) consortium|Davies|United Kingdom

>Spike|hCoV-19/Japan/TKYE630074/2020|2020-08-00|EPI\_ISL\_649138|Original|hCoV-19^^Japan|Human|Tokyo Metropolitan Institute of Public Health|Tokyo Metropolitan Institute of Public Health|Ryota|Japan

>Spike|hCoV-19/Canada/MB-NML-603/2020|2020-03-23|EPI\_ISL\_582285|Original|hCoV-19^^Manitoba|Human|Cadham Provincial Laboratory|National Microbiology Laboratory (NML)|Majer|Canada

>Spike|hCoV-19/Taiwan/NTU07/2020|2020-03-13|EPI\_ISL\_422410|Vero E6|hCoV-19^^Taipei|Human|Department of Laboratory Medicine|Microbial Genomics Core Lab|Lin|Taiwan

>Spike|hCoV-19/USA/UT-UPHL-2012150055/2020|2020-08-17|EPI\_ISL\_745564|Original|hCoV-19^^Utah|Human|Ginkgo Bioworks Clinical Laboratory|Utah Public Health Laboratory|Young|USA

>Spike|hCoV-19/USA/CA-ALSR-3527/2020|2020-09-08|EPI\_ISL\_636070|Original|hCoV-19^^California|Human|San Diego County Public Health Laboratory|Andersen lab at Scripps Research|Gangavarapu|USA

>Spike|hCoV-19/Denmark/DCGC-16473/2020|2020-11-16|EPI\_ISL\_714789|Original|hCoV-19^^Midtjylland|Human|Department of Virus and Microbiological Special Diagnostics|Albertsen Lab|Michaelsen|Denmark

>Spike|hCoV-19/Spain/VC-IBV-98003104/2020|2020-03-15|EPI\_ISL\_538040|Original|hCoV-19^^Comunitat Valenciana|Human|Hospital Universitari i Polit\u00e8cnic La Fe de Val\u00e8ncia|SeqCOVID-SPAIN consortium|IBV(CSIC)|Comas|Spain

>Spike|hCoV-19/Netherlands/ZH-EMC-572/2020|2020-09-20|EPI\_ISL\_578000|Original|hCoV-19^^Zuid Holland|Human|Dutch COVID-19 response team|Erasmus Medical Center|Oude Munnink|Netherlands

>Spike|hCoV-19/Zimbabwe/ZW-6985/2020|2020-05-01|EPI\_ISL\_644752|Original|hCoV-19^^Zimbabwe|Human|National Microbiology Reference Laboratory|Quadram Institute Bioscience|Alikhan|Zimbabwe

>Spike|hCoV-19/USA/NY-MSK-9A/2020|2020-03-15|EPI\_ISL\_583461|Original|hCoV-19^^New York|Human|Memorial Sloan Kettering Cancer Center|van Bakel Laboratory|van Bakel|USA

>Spike|hCoV-19/England/QEUH-96AF3B/2020|2020-08-15|EPI\_ISL\_531383|Original|hCoV-19^^England|Human|Lighthouse Lab in Glasgow|Wellcome Sanger Institute for the COVID-19 Genomics UK (COG-UK) consortium|Davies|United Kingdom

>Spike|hCoV-19/England/OXON-AEB30/2020|2020-00-00|EPI\_ISL\_448759|Original|hCoV-19^^England|Human|Oxford Viromics|COVID-19 Genomics UK (COG-UK) Consortium|Golubchik|United Kingdom

>Spike|hCoV-19/England/MILK-BABB74/2020|2020-11-18|EPI\_ISL\_681462|Original|hCoV-19^^England|Human|Lighthouse Lab in Milton Keynes|Wellcome Sanger Institute for the COVID-19 Genomics UK (COG-UK) Consortium|Davies|United Kingdom

>Spike|hCoV-19/England/CAMC-B34DE3/2020|2020-11-05|EPI\_ISL\_659571|Original|hCoV-19^^England|Human|Lighthouse Lab in Cambridge|Wellcome Sanger Institute for the COVID-19 Genomics UK (COG-UK) Consortium|Davies|United Kingdom

>Spike|hCoV-19/England/CAMC-AB18EE/2020|2020-10-23|EPI\_ISL\_623774|Original|hCoV-19^^England|Human|Lighthouse Lab in Cambridge|Wellcome Sanger Institute for the COVID-19 Genomics UK (COG-UK) consortium|Davies|United Kingdom

>Spike|hCoV-19/Thailand/SI204487-NT/2020|2020-03-11|EPI\_ISL\_437611|unknown|hCoV-19^^Thailand|Human|unknown|Faculty of Medicine|Submitter|Thailand

>Spike|hCoV-19/Germany/HH-hpi-p2389/2020|2020-06-11|EPI\_ISL\_775652|Original|hCoV-19^^Hamburg|Human|University Medical Center Hamburg Eppendorf|Heinrich Pette Institute|Robitaille|Germany

>Spike|hCoV-19/Spain/IB-IBV-99010783/2020|2020-10-06|EPI\_ISL\_691673|Original|hCoV-19^^Balear Islands|Human|Servicio de Microbiolog\u00eda|SeqCOVID-SPAIN consortium/IBV (CSIC) |Comas|Spain

>Spike|hCoV-19/USA/TX-HMH-4594/2020|2020-06-21|EPI\_ISL\_543741|Original|hCoV-19^^Texas|Human|Houston Methodist Hospital|Houston Methodist Hospital|Long|USA

>Spike|hCoV-19/USA/WA-SFS-S2854/2020|2020-09-03|EPI\_ISL\_575032|Original|hCoV-19^^Washington|Human|Seattle Flu Study|Seattle Flu Study|Lee|USA

>Spike|hCoV-19/England/ALDP-953DE0/2020|2020-06-12|EPI\_ISL\_554411|Original|hCoV-19^^England|Human|Lighthouse Lab in Alderley Park|Wellcome Sanger Institute for the COVID-19 Genomics UK (COG-UK) consortium|Davies|United Kingdom

>Spike|hCoV-19/England/20142078104/2020|2020-03-30|EPI\_ISL\_465943|Original|hCoV-19^^England|Human|Respiratory Virus Unit|Respiratory Virus Unit|Platt|United Kingdom

>Spike|hCoV-19/England/LIVE-9B76F/2020|2020-04-22|EPI\_ISL\_440874|Original|hCoV-19^^England|Human|Liverpool Clinical Laboratories|COVID-19 Genomics UK (COG-UK) Consortium|Haldenby|United Kingdom

>Spike|hCoV-19/England/QEUA-A9D6EE/2020|2020-10-20|EPI\_ISL\_680020|Original|hCoV-19^^England|Human|Centre for Enzyme Innovation|COVID-19 Genomics UK (COG-UK) Consortium|Robson|United Kingdom

>Spike|hCoV-19/USA/TX-HMH-1936/2020|2020-05-18|EPI\_ISL\_542909|Original|hCoV-19^^Texas|Human|Houston Methodist Hospital|Houston Methodist Hospital|Long|USA

>Spike|hCoV-19/Malaysia/5815/2020|2020-04-06|EPI\_ISL\_501213|Original|hCoV-19^^Kuala Lumpur|Human|Department of Medical Microbiology|Department of Medical Microbiology|Chan|Malaysia

>Spike|hCoV-19/Brazil/SP-08/2020|2020-03-04|EPI\_ISL\_416029|Original|hCoV-19^^S\u00e3o Paulo|Human|Laboirat\u00f3rio Fleury|Instituto Adolfo Lutz|Sacchi|Brazil

>Spike|hCoV-19/Chile/RM-ISPCH-49/2020|2020-03-23|EPI\_ISL\_445328|Original|hCoV-19^^Region Metropolitana de Santiago|Human|MEGASALUD S.A.|Instituto de Salud Publica de Chile|Fernandez|Chile

>Spike|hCoV-19/England/ALDP-A6CABF/2020|2020-10-15|EPI\_ISL\_607201|Original|hCoV-19^^England|Human|Lighthouse Lab in Alderley Park|Wellcome Sanger Institute for the COVID-19 Genomics UK (COG-UK) consortium|Davies|United Kingdom

>Spike|hCoV-19/England/ALDP-B240ED/2020|2020-11-04|EPI\_ISL\_646418|Original|hCoV-19^^England|Human|Lighthouse Lab in Alderley Park|Wellcome Sanger Institute for the COVID-19 Genomics UK (COG-UK) Consortium|Davies|United Kingdom

>Spike|hCoV-19/England/MILK-A7DC3D/2020|2020-10-13|EPI\_ISL\_606458|Original|hCoV-19^^England|Human|Lighthouse Lab in Milton Keynes|Wellcome Sanger Institute for the COVID-19 Genomics UK (COG-UK) consortium|Davies|United Kingdom

>Spike|hCoV-19/Netherlands/NA\_708/2020|2020-05-07|EPI\_ISL\_461143|Original|hCoV-19^^Netherlands|Human|Dutch COVID-19 response team|Erasmus Medical Center|Oude Munnink|Netherlands

>Spike|hCoV-19/Northern Ireland/NIRE-107509/2020|2020-03-30|EPI\_ISL\_585162|Original|hCoV-19^^Northern Ireland|Human|Regional Virus Laboratory|COVID-19 Genomics UK (COG-UK) Consortium|Fairley|United Kingdom



>Spike|hCoV-19/England/LOND-1264BE6/2020|2020-11-23|EPI\_ISL\_724544|Original|hCoV-19^^England|Human|University College London|COVID-19 Genomics UK (COG-UK) Consortium|Roy|United Kingdom

>Spike|hCoV-19/England/ALDP-C48A4E/2020|2020-12-12|EPI\_ISL\_736559|Original|hCoV-19^^England|Human|Lighthouse Lab in Alderley Park|Wellcome Sanger Institute for the COVID-19 Genomics UK (COG-UK) Consortium|Davies|United Kingdom

>Spike|hCoV-19/Wales/MILK-9D4D32/2020|2020-09-19|EPI\_ISL\_601519|Original|hCoV-19^^Wales|Human|Lighthouse Lab in Milton Keynes|Wellcome Sanger Institute for the COVID-19 Genomics UK (COG-UK) consortium|Davies|United Kingdom

>Spike|hCoV-19/Australia/VIC4197/2020|2020-07-16|EPI\_ISL\_519525|Original|hCoV-19^^Victoria|Human|Microbiological Diagnostic Unit - Public Health Laboratory (MDU-PHL)|MDU-PHL|Schultz|Australia

>Spike|hCoV-19/Canada/ON-PHL-20-03743/2020|2020-11-00|EPI\_ISL\_775211|Original|hCoV-19^^Ontario|Human|Public Health Ontario Laboratory|Public Health Ontario Laboratory|Guthrie|Canada

>Spike|hCoV-19/Wales/PHWC-4943E6/2020|2020-11-18|EPI\_ISL\_726110|Original|hCoV-19^^Wales|Human|Originating lab|COVID-19 Genomics UK (COG-UK) Consortium|Moore|United Kingdom

>Spike|hCoV-19/England/QEUEH-5E2CA1/2020|2020-06-17|EPI\_ISL\_533329|Original|hCoV-19^^England|Human|Lighthouse Lab in Glasgow|Wellcome Sanger Institute for the COVID-19 Genomics UK (COG-UK) consortium|Davies|United Kingdom

>Spike|hCoV-19/England/ALDP-AA4BD6/2020|2020-10-21|EPI\_ISL\_624493|Original|hCoV-19^^England|Human|Lighthouse Lab in Alderley Park|Wellcome Sanger Institute for the COVID-19 Genomics UK (COG-UK) consortium|Davies|United Kingdom

>Spike|hCoV-19/USA/CA-IGI-0122/2020|2020-06-08|EPI\_ISL\_495144|Original|hCoV-19^^California|Human|Innovative Genomics Institute|Innovative Genomics Institute|Shivram|USA

>Spike|hCoV-19/USA/WI-UW-884/2020|2020-07-10|EPI\_ISL\_509886|Original|hCoV-19^^Wisconsin|Human|University of Wisconsin-Madison AIDS Vaccine Research Laboratories|University of Wisconsin-Madison AIDS Vaccine Research Laboratories|Baczenas|USA

>Spike|hCoV-19/Shanghai/SH0071/2020|2020-02-07|EPI\_ISL\_416374|Original|hCoV-19^^Shanghai|Human|Shanghai Public Health Clinical Center|National Research Center for Translational Medicine (Shanghai)|Zhang|China

>Spike|hCoV-19/England/CAMB-75CD5/2020|2020-03-30|EPI\_ISL\_438331|Original|hCoV-19^^England|Human|Department of Pathology|Wellcome Sanger Institute for the COVID-19 Genomics UK (COG-UK) consortium|Amato|United Kingdom

>Spike|hCoV-19/England/QEUEH-BCD7D2/2020|2020-11-26|EPI\_ISL\_704463|Original|hCoV-19^^England|Human|Lighthouse Lab in Glasgow|Wellcome Sanger Institute for the COVID-19 Genomics UK (COG-UK) Consortium|Davies|United Kingdom

>Spike|hCoV-19/England/MILK-ACC09D/2020|2020-10-21|EPI\_ISL\_629119|Original|hCoV-19^^England|Human|Lighthouse Lab in Milton Keynes|Wellcome Sanger Institute for the COVID-19 Genomics UK (COG-UK) consortium|Davies|United Kingdom

>Spike|hCoV-19/Wales/PHWC-485A89/2020|2020-10-24|EPI\_ISL\_628245|Original|hCoV-19^^Wales|Human|Wales Specialist Virology Centre Sequencing lab|COVID-19 Genomics UK (COG-UK) Consortium|Moore|United Kingdom

>Spike|hCoV-19/USA/AZ-TG366714/2020|2020-06-02|EPI\_ISL\_694478|Original|hCoV-19^^Arizona|Human|AZ SPHL|TGen North|French|USA

>Spike|hCoV-19/Norway/2793/2020|2020-06-25|EPI\_ISL\_493359|Original|hCoV-19^^Norway|Human|Furst Medical Laboratory|Norwegian Institute of Public Health|Kopperud Riis|Norway

>Spike|hCoV-19/England/MILK-970C2C/2020|2020-08-18|EPI\_ISL\_553040|Original|hCoV-19^^England|Human|Lighthouse Lab in Milton Keynes|Wellcome Sanger Institute for the COVID-19 Genomics UK (COG-UK) consortium|Davies|United Kingdom

>Spike|hCoV-19/USA/TX-HMH-MCoV-9254/2020|2020-07-03|EPI\_ISL\_781018|Original|hCoV-19^^Texas|Human|Houston Methodist Hospital|Houston Methodist Hospital|Long|USA

>Spike|hCoV-19/USA/CA-CZB-13759/2020|2020-09-17|EPI\_ISL\_739634|Original|hCoV-19^^California|Human|Alameda County Public Health Lab|Chan-Zuckerberg Biohub|Kamm|USA

>Spike|hCoV-19/USA/TX-DSHS-0845/2020|2020-06-09|EPI\_ISL\_593585|Original|hCoV-19^^Texas|Human|Texas Department of State Health Services|Texas Department of State Health Services|Rahman|USA

>Spike|hCoV-19/USA/TX-HMH-2779/2020|2020-06-03|EPI\_ISL\_545549|Original|hCoV-19^^Texas|Human|Houston Methodist Hospital|Houston Methodist Hospital|Long|USA

>Spike|hCoV-19/England/QEUA-B109DA/2020|2020-11-02|EPI\_ISL\_642607|Original|hCoV-19^^England|Human|Lighthouse Lab in Glasgow|Wellcome Sanger Institute for the COVID-19 Genomics UK (COG-UK) Consortium|Davies|United Kingdom

>Spike|hCoV-19/Netherlands/NA\_97/2020|2020-03-18|EPI\_ISL\_422857|Original|hCoV-19^^Netherlands|Human|Dutch COVID-19 response team|Erasmus Medical Center|Oude Munnink|Netherlands

>Spike|hCoV-19/Morocco/HMIMV-Rabat1435-04/2020|2020-04-19|EPI\_ISL\_471459|Original|hCoV-19^^Rabat|Human|Centre de Virologie des Maladies Tropicales|Functional Genomic Platform/Service Analyses Biologique/UATRS/ Centre National Pour la Recherche Scientifique Et Technique (CNRST)|El Fahime|Morocco

>Spike|hCoV-19/England/CAMB-7D271/2020|2020-04-06|EPI\_ISL\_442067|Original|hCoV-19^^England|Human|Department of Pathology|Wellcome Sanger Institute for the COVID-19 Genomics UK (COG-UK) consortium|Amato|United Kingdom

>Spike|hCoV-19/Wales/PHWC-367EE/2020|2020-04-28|EPI\_ISL\_474714|Original|hCoV-19^^Wales|Human|Originating lab|COVID-19 Genomics UK (COG-UK) Consortium|Moore|United Kingdom

>Spike|hCoV-19/USA/LA-GBCL-26556581/2020|2020-04-14|EPI\_ISL\_485206|Original|hCoV-19^^Louisiana|Human|River Road Testing Lab|Ginkgo Bioworks Clinical Laboratory|Smith|USA

>Spike|hCoV-19/South Africa/KRISP-0559/2020|2020-07-14|EPI\_ISL\_498098|Original|hCoV-19^^KwaZulu-Natal|Human|NHLs-IALCH|KRISP|de Oliveira|South Africa

>Spike|hCoV-19/Australia/NSW1020/2020|2020-03-26|EPI\_ISL\_593665|Original|hCoV-19^^New South Wales|Human|Pathology West - NSW Health Pathology|NSW Health Pathology - Institute of Clinical Pathology and Medical Research; Westmead Hospital; University of Sydney|Gall|Australia

>Spike|hCoV-19/USA/TX-HMH-MCoV-12665/2020|2020-08-31|EPI\_ISL\_790450|Original|hCoV-19^^Texas|Human|Houston Methodist Hospital|Houston Methodist Hospital|Long|USA

>Spike|hCoV-19/South Africa/NHLs-UCT-GS-2211/2020|2020-08-05|EPI\_ISL\_700521|Original|hCoV-19^^Western Cape|Human|Alma CDC wc AHC|NHLs/UCT|Iranzadeh|South Africa

>Spike|hCoV-19/USA/CA-CZB-12854/2020|2020-10-19|EPI\_ISL\_648494|Original|hCoV-19^^California|Human|Santa Clara County Public Health Laboratory|Chan-Zuckerberg Biohub|Bhatt|USA

>Spike|hCoV-19/England/NOTT-113B71/2020|2020-09-27|EPI\_ISL\_573462|Original|hCoV-19^^England|Human|Queens Medical Centre|COVID-19 Genomics UK (COG-UK) Consortium|Loose|United Kingdom

>Spike|hCoV-19/Germany/SH-ChVir2000/2020|2020-03-09|EPI\_ISL\_729498|Original|hCoV-19^^Schleswig-Holstein|Human|A. Krumbholz|Charit\u00e9 Universit\u00e4tsmedizin Berlin|Muehlemann|Germany

>Spike|hCoV-19/England/QEUA-96D17E/2020|2020-08-19|EPI\_ISL\_530692|Original|hCoV-19^^England|Human|Lighthouse Lab in Glasgow|Wellcome Sanger Institute for the COVID-19 Genomics UK (COG-UK) consortium|Davies|United Kingdom

>Spike|hCoV-19/France/ARA-122351/2020|2020-12-20|EPI\_ISL\_745394|Original|hCoV-19^^Auvergne-Rh\u00f4ne-Alpes|Human|CNR Virus des Infections Respiratoires - France SUD|CNR Virus des Infections Respiratoires - France SUD|Bal|France

>Spike|hCoV-19/England/MILK-B3DAC5/2020|2020-11-02|EPI\_ISL\_741385|Original|hCoV-19^^England|Human|Oxford Viromics|COVID-19 Genomics UK (COG-UK) Consortium|Golubchik|United Kingdom

>Spike|hCoV-19/USA/VA-DCLS-1602/2020|2020-08-14|EPI\_ISL\_614013|Original|hCoV-19^^Virginia|Human|Virginia DCLS|Virginia DCLS|St. Jacques|USA

>Spike|hCoV-19/South Korea/KDCA0358/2020|2020-10-20|EPI\_ISL\_760143|Original|hCoV-19^^South Korea|Human|Division of Emerging Infectious Diseases|Division of Emerging Infectious Diseases|Park|South Korea

>Spike|hCoV-19/England/NOTT-1107DA/2020|2020-04-20|EPI\_ISL\_441860|Original|hCoV-19^^England|Human|Queens Medical Centre|COVID-19 Genomics UK (COG-UK) Consortium|Loose|United Kingdom

>Spike|hCoV-19/India/TG-CCMB-J199/2020|2020-04-01|EPI\_ISL\_450327|Original|hCoV-19^^Telangana|Human|CSIR-Centre for Cellular and Molecular Biology|CSIR-Centre for Cellular and Molecular Biology|Banu|India

>Spike|hCoV-19/USA/TX-HMH-MCoV-12121/2020|2020-09-25|EPI\_ISL\_790208|Original|hCoV-19^^Texas|Human|Houston Methodist Hospital|Houston Methodist Hospital|Long|USA

>Spike|hCoV-19/USA/MD-MDH-0325/2020|2020-10-14|EPI\_ISL\_648271|Original|hCoV-19^^Maryland|Human|MD PHL|MD PHL|Keller|USA

>Spike|hCoV-19/Denmark/DCGC-13810/2020|2020-11-30|EPI\_ISL\_713038|Original|hCoV-19^^Hovedstaden|Human|Department of Virus and Microbiological Special Diagnostics|Albertsen Lab|Michaelsen|Denmark

>Spike|hCoV-19/England/MILK-CB1BC5/2020|2020-12-06|EPI\_ISL\_760896|Original|hCoV-19^^England|Human|Lighthouse Lab in Milton Keynes|Wellcome Sanger Institute for the COVID-19 Genomics UK (COG-UK) Consortium|Davies|United Kingdom

>Spike|hCoV-19/England/CAMC-B99423/2020|2020-11-15|EPI\_ISL\_673357|Original|hCoV-19^^England|Human|Lighthouse Lab in Cambridge|Wellcome Sanger Institute for the COVID-19 Genomics UK (COG-UK) Consortium|Davies|United Kingdom

>Spike|hCoV-19/USA/OR-OHSU-1839/2020|2020-07-27|EPI\_ISL\_526044|Original|hCoV-19^^Oregon|Human|OHSU Lab Services Molecular Microbiology Lab|Oregon SARS-CoV-2 Genome Sequencing Center|O'Roak|USA

>Spike|hCoV-19/USA/MI-MDHHS-SC21953/2020|2020-03-31|EPI\_ISL\_566004|Original|hCoV-19^^Michigan|Human|Michigan Department of Health and Human Services|Michigan Department of Health and Human Services|Blankenship|USA

>Spike|hCoV-19/England/MILK-B06CB0/2020|2020-10-29|EPI\_ISL\_652271|Original|hCoV-19^^England|Human|Quadram Institute Bioscience|COVID-19 Genomics UK (COG-UK) Consortium|Alikhan|United Kingdom

>Spike|hCoV-19/England/ALDP-9526F5/2020|2020-06-09|EPI\_ISL\_553928|Original|hCoV-19^^England|Human|Lighthouse Lab in Alderley Park|Wellcome Sanger Institute for the COVID-19 Genomics UK (COG-UK) consortium|Davies|United Kingdom

>Spike|hCoV-19/Switzerland/OW-ETHZ-410147/2020|2020-12-15|EPI\_ISL\_737769|Original|hCoV-19^^Obwalden|Human|Viollier AG|Department of Biosystems Science and Engineering|Nadeau|Switzerland

>Spike|hCoV-19/England/ALDP-6E51BD/2020|2020-06-29|EPI\_ISL\_557636|Original|hCoV-19^^England|Human|Lighthouse Lab in Alderley Park|Wellcome Sanger Institute for the COVID-19 Genomics UK (COG-UK) consortium|Davies|United Kingdom

>Spike|hCoV-19/Japan/PG-6120/2020|2020-08-00|EPI\_ISL\_689232|Original|hCoV-19^^Japan|Human|Pathogen Genomics Center|Pathogen Genomics Center|Sekizuka|Japan

>Spike|hCoV-19/England/ALDP-950F65/2020|2020-06-14|EPI\_ISL\_554183|Original|hCoV-19^^England|Human|Lighthouse Lab in Alderley Park|Wellcome Sanger Institute for the COVID-19 Genomics UK (COG-UK) consortium|Davies|United Kingdom

>Spike|hCoV-19/England/201120178/2020|2020-03-07|EPI\_ISL\_464667|Original|hCoV-19^^England|Human|Respiratory Virus Unit|Respiratory Virus Unit|Platt|United Kingdom

>Spike|hCoV-19/Japan/PG-8251/2020|2020-08-00|EPI\_ISL\_687350|Original|hCoV-19^^Japan|Human|Pathogen Genomics Center|Pathogen Genomics Center|Sekizuka|Japan

>Spike|hCoV-19/England/MILK-B395D7/2020|2020-11-02|EPI\_ISL\_658908|Original|hCoV-19^^England|Human|Lighthouse Lab in Milton Keynes|Wellcome Sanger Institute for the COVID-19 Genomics UK (COG-UK) Consortium|Davies|United Kingdom

>Spike|hCoV-19/England/QEUA-9DDA23/2020|2020-09-21|EPI\_ISL\_599794|Original|hCoV-19^^England|Human|Lighthouse Lab in Glasgow|Wellcome Sanger Institute for the COVID-19 Genomics UK (COG-UK) consortium|Davies|United Kingdom

>Spike|hCoV-19/England/CAMB-1B930C/2020|2020-11-04|EPI\_ISL\_651699|Original|hCoV-19^^England|Human|Department of Pathology|COVID-19 Genomics UK (COG-UK) Consortium|Goodfellow|United Kingdom

>Spike|hCoV-19/England/ALDP-B247AC/2020|2020-11-04|EPI\_ISL\_647070|Original|hCoV-19^^England|Human|Lighthouse Lab in Alderley Park|Wellcome Sanger Institute for the COVID-19 Genomics UK (COG-UK) Consortium|Davies|United Kingdom

>Spike|hCoV-19/USA/TX-HMH-6442/2020|2020-07-05|EPI\_ISL\_545999|Original|hCoV-19^^Texas|Human|Houston Methodist Hospital|Houston Methodist Hospital|Long|USA

>Spike|hCoV-19/England/MILK-BB0E0A/2020|2020-11-18|EPI\_ISL\_720484|Original|hCoV-19^^England|Human|Lighthouse Lab in Milton Keynes|Wellcome Sanger Institute for the COVID-19 Genomics UK (COG-UK) Consortium|Davies|United Kingdom

>Spike|hCoV-19/England/BRIS-12BBB2/2020|2020-05-16|EPI\_ISL\_469350|Original|hCoV-19^^England|Human|PHE South West Regional Laboratory|Wellcome Sanger Institute for the COVID-19 Genomics UK (COG-UK) consortium|Davies|United Kingdom

>Spike|hCoV-19/England/MILK-BAABDF/2020|2020-11-18|EPI\_ISL\_681448|Original|hCoV-19^^England|Human|Lighthouse Lab in Milton Keynes|Wellcome Sanger Institute for the COVID-19 Genomics UK (COG-UK) Consortium|Davies|United Kingdom

>Spike|hCoV-19/England/QEUEH-997C01/2020|2020-08-28|EPI\_ISL\_549545|Original|hCoV-19^^England|Human|Oxford Viromics|COVID-19 Genomics UK (COG-UK) Consortium|Golubchik|United Kingdom

>Spike|hCoV-19/England/QEUEH-C3490C/2020|2020-12-11|EPI\_ISL\_733999|Original|hCoV-19^^England|Human|Lighthouse Lab in Glasgow|Wellcome Sanger Institute for the COVID-19 Genomics UK (COG-UK) Consortium|Davies|United Kingdom

>Spike|hCoV-19/Scotland/EDB5683/2020|2020-05-28|EPI\_ISL\_473836|Original|hCoV-19^^Scotland|Human|Virology Department|COVID-19 Genomics UK (COG-UK) Consortium|Williams|United Kingdom

>Spike|hCoV-19/Sweden/20-52637/2020|2020-08-21|EPI\_ISL\_534257|Original|hCoV-19^^Vasternorrland|Human|Laboratoriemedicin Vasternorrland|The Public Health Agency of Sweden|Svartstr\u00f6m|Sweden

>Spike|hCoV-19/Scotland/EDB11317/2020|2020-12-24|EPI\_ISL\_764363|Original|hCoV-19^^Scotland|Human|Virology Department|COVID-19 Genomics UK (COG-UK) Consortium|McHugh|United Kingdom

>Spike|hCoV-19/USA/TX-HMH-MCoV-8904/2020|2020-07-02|EPI\_ISL\_780822|Original|hCoV-19^^Texas|Human|Houston Methodist Hospital|Houston Methodist Hospital|Long|USA

>Spike|hCoV-19/USA/WA-S1038/2020|2020-05-03|EPI\_ISL\_463528|Original|hCoV-19^^Washington|Human|Washington State Department of Health|Seattle Flu Study|Bedford|USA

>Spike|hCoV-19/USA/TX-HMH-5579/2020|2020-06-25|EPI\_ISL\_544876|Original|hCoV-19^^Texas|Human|Houston Methodist Hospital|Houston Methodist Hospital|Long|USA

>Spike|hCoV-19/Poland/Masovia-14965/2020|2020-09-27|EPI\_ISL\_754902|Original|hCoV-19^^Masovia|Human|Laboratory Diagnostics and Clinical Immunology of Developmental Age|genXone SA|Kaszuba|Poland

>Spike|hCoV-19/Japan/PG-0355/2020|2020-03-31|EPI\_ISL\_480027|Original|hCoV-19^^Kanto|Human|Ibaraki Prefectural Institute of Public Health|Pathogen Genomics Center|Sekizuka|Japan

>Spike|hCoV-19/Australia/VIC3839/2020|2020-07-12|EPI\_ISL\_520552|Original|hCoV-19^^Victoria|Human|Microbiological Diagnostic Unit - Public Health Laboratory (MDU-PHL)|MDU-PHL|Schultz|Australia

>Spike|hCoV-19/England/BRIS-12E311/2020|2020-04-21|EPI\_ISL\_481971|Original|hCoV-19^^England|Human|PHE South West Regional Laboratory|Wellcome Sanger Institute for the COVID-19 Genomics UK (COG-UK) consortium|Davies|United Kingdom

>Spike|hCoV-19/England/MILK-642628/2020|2020-07-04|EPI\_ISL\_556261|Original|hCoV-19^^England|Human|Lighthouse Lab in Milton Keynes|Wellcome Sanger Institute for the COVID-19 Genomics UK (COG-UK) consortium|Davies|United Kingdom

>Spike|hCoV-19/Denmark/DCGC-1775/2020|2020-07-13|EPI\_ISL\_618211|Original|hCoV-19^^Hovedstaden|Human|Department of Virus and Microbiological Special Diagnostics|Albertsen lab|Michaelsen|Denmark

>Spike|hCoV-19/England/204221427/2020|2020-00-00|EPI\_ISL\_593806|Original|hCoV-19^^England|Human|Respiratory Virus Unit|Respiratory Virus Unit|Platt|United Kingdom

>Spike|hCoV-19/USA/LA-EVTL1239/2020|2020-12-17|EPI\_ISL\_768508|Original|hCoV-19^^Louisiana|Human|LSUHS Emerging Viral Threat Laboratory|Microbial Genome Sequencing Center|Kamil|USA

>Spike|hCoV-19/USA/TX-HMH-3605/2020|2020-06-15|EPI\_ISL\_543060|Original|hCoV-19^^Texas|Human|Houston Methodist Hospital|Houston Methodist Hospital|Long|USA

>Spike|hCoV-19/England/LIVE-DC9B41/2020|2020-12-05|EPI\_ISL\_705158|Original|hCoV-19^^England|Human|Liverpool Clinical Laboratories|COVID-19 Genomics UK (COG-UK) Consortium|Haldenby|United Kingdom

>Spike|hCoV-19/USA/TX-HMH-MCoV-8240/2020|2020-07-07|EPI\_ISL\_784284|Original|hCoV-19^^Texas|Human|Houston Methodist Hospital|Houston Methodist Hospital|Long|USA

>Spike|hCoV-19/England/ALDP-AA38B2/2020|2020-10-22|EPI\_ISL\_625248|Original|hCoV-19^^England|Human|Lighthouse Lab in Alderley Park|Wellcome Sanger Institute for the COVID-19 Genomics UK (COG-UK) consortium|Davies|United Kingdom

>Spike|hCoV-19/Scotland/EDB7949/2020|2020-09-27|EPI\_ISL\_585458|Original|hCoV-19^^Scotland|Human|Virology Department|COVID-19 Genomics UK (COG-UK) Consortium|McHugh|United Kingdom

>Spike|hCoV-19/Benin/1022/2020|2020-03-25|EPI\_ISL\_476826|Original|hCoV-19^^Cotonou|Human|Laboratoire des Fi\u00e8vres H\u00e9morragiques Virales du Benin|Charit\u00e9-Universit\u00e4tsmedizin Berlin|Moreira-Soto|Benin

>Spike|hCoV-19/Canada/ON-S1886/2020|2020-11-24|EPI\_ISL\_729311|Original|hCoV-19^^Ontario|Human|Toronto Invasive Bacterial Diseases Network|McMaster University|McArthur|Canada

>Spike|hCoV-19/England/CAMB-7E2AD/2020|2020-04-17|EPI\_ISL\_434060|Original|hCoV-19^^England|Human|Department of Pathology|COVID-19 Genomics UK (COG-UK) Consortium|Meredith|United Kingdom

>Spike|hCoV-19/Denmark/DCGC-13441/2020|2020-11-30|EPI\_ISL\_712802|Original|hCoV-19^^Hovedstaden|Human|Department of Virus and Microbiological Special Diagnostics|Albertsen Lab|Michaelsen|Denmark

>Spike|hCoV-19/USA/TX-HMH-3309/2020|2020-06-10|EPI\_ISL\_544121|Original|hCoV-19^^Texas|Human|Houston Methodist Hospital|Houston Methodist Hospital|Long|USA

>Spike|hCoV-19/Denmark/DCGC-12638/2020|2020-11-16|EPI\_ISL\_682819|Original|hCoV-19^^Hovedstaden|Human|Department of Virus and Microbiological Special Diagnostics|Albertsen Lab|Michaelsen|Denmark

>Spike|hCoV-19/England/ALDP-BBA76F/2020|2020-11-20|EPI\_ISL\_702019|Original|hCoV-19^^England|Human|Lighthouse Lab in Alderley Park|Wellcome Sanger Institute for the COVID-19 Genomics UK (COG-UK) Consortium|Davies|United Kingdom

>Spike|hCoV-19/USA/TX-HMH-7998/2020|2020-06-29|EPI\_ISL\_545778|Original|hCoV-19^^Texas|Human|Houston Methodist Hospital|Houston Methodist Hospital|Long|USA

>Spike|hCoV-19/mink/Netherlands/NB-EMC-18-14/2020|2020-07-04|EPI\_ISL\_523041|Original|hCoV-19^^Noord Brabant|Neovison vison|Dutch COVID-19 response team|Erasmus Medical Center|Oude Munnink|Netherlands

>Spike|hCoV-19/Denmark/DCGC-21991/2020|2020-12-14|EPI\_ISL\_758498|Original|hCoV-19^^Hovedstaden|Human|Department of Virus and Microbiological Special Diagnostics|Albertsen Lab|Michaelsen|Denmark

>Spike|hCoV-19/USA/WA-UW-10652/2020|2020-06-09|EPI\_ISL\_570340|Original|hCoV-19^^Washington|Human|UW Virology Lab|UW Virology Lab|Roychoudhury|USA

>Spike|hCoV-19/England/SHEF-10D0D96/2020|2020-12-14|EPI\_ISL\_765179|Original|hCoV-19^^England|Human|Virology Department|COVID-19 Genomics UK (COG-UK) Consortium|de Silva|United Kingdom

>Spike|hCoV-19/Denmark/DCGC-17904/2020|2020-12-14|EPI\_ISL\_749635|Original|hCoV-19^^Sjælland|Human|Department of Virus and Microbiological Special Diagnostics|Albertsen Lab|Michaelsen|Denmark

>Spike|hCoV-19/Italy/VEN-IZSVE-20RS2272-42\_PD/2020|2020-12-20|EPI\_ISL\_763084|Original|hCoV-19^^Veneto|Human|Microbiologia e Virologia|Istituto Zooprofilattico Sperimentale delle Venezie|Quaranta|Italy

>Spike|hCoV-19/England/SHEF-C5571/2020|2020-05-04|EPI\_ISL\_490595|Original|hCoV-19^^England|Human|Virology Department|COVID-19 Genomics UK (COG-UK) Consortium|de Silva|United Kingdom

>Spike|hCoV-19/Wales/PHWC-49D918/2020|2020-12-05|EPI\_ISL\_742848|Original|hCoV-19^^Wales|Human|Wales Specialist Virology Centre Sequencing lab|COVID-19 Genomics UK (COG-UK) Consortium|Moore|United Kingdom

>Spike|hCoV-19/USA/FL-BPHL-2112/2020|2020-03-12|EPI\_ISL\_653265|Original|hCoV-19^^Florida|Human|Florida Bureau of Public Health Laboratories|Florida Bureau of Public Health Laboratories|Blanton|USA

>Spike|hCoV-19/Australia/VIC4819/2020|2020-07-17|EPI\_ISL\_519204|Original|hCoV-19^^Victoria|Human|Microbiological Diagnostic Unit - Public Health Laboratory (MDU-PHL)|MDU-PHL|Schultz|Australia

>Spike|hCoV-19/South Africa/NHLS-UCT-GS-2032/2020|2020-09-18|EPI\_ISL\_640124|Original|hCoV-19^Western Cape|Human|False Bay Hospital wc FBH|NHLS/UCT|Iranzadeh|South Africa

>Spike|hCoV-19/England/QEUEH-9FFD22/2020|2020-10-02|EPI\_ISL\_600164|Original|hCoV-19^England|Human|Lighthouse Lab in Glasgow|Wellcome Sanger Institute for the COVID-19 Genomics UK (COG-UK) consortium|Davies|United Kingdom

>Spike|hCoV-19/England/QEUEH-B68979/2020|2020-11-11|EPI\_ISL\_662152|Original|hCoV-19^England|Human|Lighthouse Lab in Glasgow|Wellcome Sanger Institute for the COVID-19 Genomics UK (COG-UK) Consortium|Davies|United Kingdom

>Spike|hCoV-19/Scotland/QEUEH-9F32E3/2020|2020-09-24|EPI\_ISL\_600781|Original|hCoV-19^Scotland|Human|Lighthouse Lab in Glasgow|Wellcome Sanger Institute for the COVID-19 Genomics UK (COG-UK) consortium|Davies|United Kingdom

>Spike|hCoV-19/Gibraltar/204462871/2020|2020-10-29|EPI\_ISL\_615038|Original|hCoV-19^Gibraltar|Human|Microbiology|Respiratory Virus Unit|Platt|Gibraltar

>Spike|hCoV-19/USA/NY-NYCPHL-001133/2020|2020-10-26|EPI\_ISL\_671716|Original|hCoV-19^New York|Human|DOHMH PHL|New York City Public Health Laboratory|Wang|USA

>Spike|hCoV-19/Denmark/DCGC-15659/2020|2020-11-23|EPI\_ISL\_713945|Original|hCoV-19^Syddanmark|Human|Department of Virus and Microbiological Special Diagnostics|Albertsen Lab|Michaelsen|Denmark

>Spike|hCoV-19/England/MILK-AC9054/2020|2020-10-22|EPI\_ISL\_629638|Original|hCoV-19^England|Human|Lighthouse Lab in Milton Keynes|Wellcome Sanger Institute for the COVID-19 Genomics UK (COG-UK) consortium|Davies|United Kingdom

>Spike|hCoV-19/England/201090619/2020|2020-03-04|EPI\_ISL\_464592|Original|hCoV-19^England|Human|Respiratory Virus Unit|Respiratory Virus Unit|Platt|United Kingdom

>Spike|hCoV-19/India/GJ-GBRC323b/2020|2020-06-12|EPI\_ISL\_495080|Original|hCoV-19^Gujarat|Human|Department of MicroBiology|Gujarat Biotechnology Research Centre|Joshi|India

>Spike|hCoV-19/England/ALDP-C3C1FD/2020|2020-12-10|EPI\_ISL\_730932|Original|hCoV-19^England|Human|Lighthouse Lab in Alderley Park|Wellcome Sanger Institute for the COVID-19 Genomics UK (COG-UK) Consortium|Davies|United Kingdom

>Spike|hCoV-19/USA/WA-S2041/2020|2020-06-05|EPI\_ISL\_497469|Original|hCoV-19^Washington|Human|Washington State Department of Health|Seattle Flu Study|Lee|USA

>Spike|hCoV-19/South Korea/KDCA0385/2020|2020-11-04|EPI\_ISL\_760169|Original|hCoV-19^South Korea|Human|Division of Emerging Infectious Diseases|Division of Emerging Infectious Diseases|Park|South Korea

>Spike|hCoV-19/Wales/PHWC-320D8/2020|2020-04-13|EPI\_ISL\_446604|Original|hCoV-19^Wales|Human|Wales Specialist Virology Centre|Public Health Wales Microbiology Cardiff|Moore|United Kingdom

>Spike|hCoV-19/USA/TX-HMH-5325/2020|2020-06-23|EPI\_ISL\_544682|Original|hCoV-19^Texas|Human|Houston Methodist Hospital|Houston Methodist Hospital|Long|USA

>Spike|hCoV-19/England/CAMB-7E8AB/2020|2020-04-08|EPI\_ISL\_442615|Original|hCoV-19^England|Human|Department of Pathology|Wellcome Sanger Institute for the COVID-19 Genomics UK (COG-UK) consortium|Amato|United Kingdom

>Spike|hCoV-19/England/CAMC-B33E1E/2020|2020-11-05|EPI\_ISL\_659316|Original|hCoV-19^England|Human|Lighthouse Lab in Cambridge|Wellcome Sanger Institute for the COVID-19 Genomics UK (COG-UK) Consortium|Davies|United Kingdom

>Spike|hCoV-19/England/QEUEH-9985C9/2020|2020-08-24|EPI\_ISL\_540076|Original|hCoV-19^England|Human|Lighthouse Lab in Glasgow|Wellcome Sanger Institute for the COVID-19 Genomics UK (COG-UK) consortium|Davies|United Kingdom

>Spike|hCoV-19/Norway/5429/2020|2020-10-26|EPI\_ISL\_708091|Original|hCoV-19^Troms og Finnmark|Human|University Hospital of Northern Norway|Norwegian Institute of Public Health|Kopperud Riis|Norway

>Spike|hCoV-19/Hong Kong/HKU-200723-022/2020|2020-03-06|EPI\_ISL\_497789|Original|hCoV-19^Hong Kong|Human|Department of Microbiology|Department of Microbiology|Chan|China

>Spike|hCoV-19/USA/MA-MGH-00430/2020|2020-03-07|EPI\_ISL\_460366|Original|hCoV-19^Massachusetts|Human|Massachusetts General Hospital|Infectious Disease Program|Lemieux|USA

>Spike|hCoV-19/England/ALDP-9B5A12/2020|2020-08-28|EPI\_ISL\_590442|Original|hCoV-19^England|Human|Lighthouse Lab in Alderley Park|Wellcome Sanger Institute for the COVID-19 Genomics UK (COG-UK) consortium|Davies|United Kingdom

>Spike|hCoV-19/England/ALDP-B62450/2020|2020-11-07|EPI\_ISL\_656490|Original|hCoV-19^^England|Human|Lighthouse Lab in Alderley Park|Wellcome Sanger Institute for the COVID-19 Genomics UK (COG-UK) Consortium|Davies|United Kingdom

>Spike|hCoV-19/Denmark/DCGC-17995/2020|2020-12-14|EPI\_ISL\_749688|Original|hCoV-19^^Syddanmark|Human|Department of Virus and Microbiological Special Diagnostics|Albertsen Lab|Michaelsen|Denmark

>Spike|hCoV-19/Belgium/ULG-10406/2020|2020-08-21|EPI\_ISL\_540573|Original|hCoV-19^^Li\u00e8ge|Human|Department of Clinical Microbiology|GIGA Medical Genomics|Durkin|Belgium

>Spike|hCoV-19/England/MILK-A46954/2020|2020-10-06|EPI\_ISL\_598460|Original|hCoV-19^^England|Human|Lighthouse Lab in Milton Keynes|Wellcome Sanger Institute for the COVID-19 Genomics UK (COG-UK) consortium|Davies|United Kingdom

>Spike|hCoV-19/New Zealand/20CV0293/2020|2020-03-26|EPI\_ISL\_579083|Original|hCoV-19^^Auckland|Human|Canterbury Health Laboratories|Institute of Environmental Science and Research (ESR)|Wang|New Zealand

>Spike|hCoV-19/England/ALDP-C5987D/2020|2020-12-13|EPI\_ISL\_736076|Original|hCoV-19^^England|Human|Lighthouse Lab in Alderley Park|Wellcome Sanger Institute for the COVID-19 Genomics UK (COG-UK) Consortium|Davies|United Kingdom

>Spike|hCoV-19/USA/LA-EVTL482/2020|2020-06-23|EPI\_ISL\_578886|Original|hCoV-19^^Louisiana|Human|LSUHS Emerging Viral Threat Laboratory|Microbial Genome Sequencing Center|Kamil|USA

>Spike|hCoV-19/England/ALDP-B74AC2/2020|2020-11-12|EPI\_ISL\_678969|Original|hCoV-19^^England|Human|Queens Medical Centre|COVID-19 Genomics UK (COG-UK) Consortium|Loose|United Kingdom

>Spike|hCoV-19/England/ALDP-B62A30/2020|2020-11-09|EPI\_ISL\_656623|Original|hCoV-19^^England|Human|Lighthouse Lab in Alderley Park|Wellcome Sanger Institute for the COVID-19 Genomics UK (COG-UK) Consortium|Davies|United Kingdom

>Spike|hCoV-19/Russia/StPetersburg-RII4726S/2020|2020-04-07|EPI\_ISL\_427334|Original|hCoV-19^^Saint Petersburg|Human|WHO National Influenza Centre Russian Federation|WHO National Influenza Centre Russian Federation|Komissarov|Russia

>Spike|hCoV-19/England/NORT-283698/2020|2020-03-31|EPI\_ISL\_478503|Original|hCoV-19^^England|Human|Northumbria University / South Tees Hospitals NHS Foundation Trust / North Cumbria Integrated Care NHS Foundation Trust / North Tees and Hartlepool NHS Foundation Trust / Newcastle Hospitals NHS Foundation Trust|COVID-19 Genomics UK (COG-UK) Consortium|Bashton|United Kingdom

>Spike|hCoV-19/England/QEUH-AD4DE6/2020|2020-10-26|EPI\_ISL\_633754|Original|hCoV-19^^England|Human|Lighthouse Lab in Glasgow|Wellcome Sanger Institute for the COVID-19 Genomics UK (COG-UK) consortium|Davies|United Kingdom

>Spike|hCoV-19/England/LIVE-DBD1B7/2020|2020-10-27|EPI\_ISL\_664444|Original|hCoV-19^^England|Human|Liverpool Clinical Laboratories|COVID-19 Genomics UK (COG-UK) Consortium|Haldenby|United Kingdom

>Spike|hCoV-19/England/ALDP-AA1EB2/2020|2020-10-22|EPI\_ISL\_624404|Original|hCoV-19^^England|Human|Lighthouse Lab in Alderley Park|Wellcome Sanger Institute for the COVID-19 Genomics UK (COG-UK) consortium|Davies|United Kingdom

>Spike|hCoV-19/USA/MN-QDX-2715/2020|2020-03-13|EPI\_ISL\_605027|Original|hCoV-19^^Minnesota|Human|Quest Diagnostics|Quest Diagnostics|Kagan|USA

>Spike|hCoV-19/England/20099072604/2020|2020-02-28|EPI\_ISL\_464224|Original|hCoV-19^^England|Human|Respiratory Virus Unit|Respiratory Virus Unit|Platt|United Kingdom

>Spike|hCoV-19/Denmark/DCGC-4425/2020|2020-09-14|EPI\_ISL\_621846|Original|hCoV-19^^Sjaelland|Human|Department of Virus and Microbiological Special Diagnostics|Albertsen lab|Michaelsen|Denmark

>Spike|hCoV-19/Denmark/DCGC-6855/2020|2020-10-12|EPI\_ISL\_619700|Original|hCoV-19^^Hovedstaden|Human|Department of Virus and Microbiological Special Diagnostics|Albertsen lab|Michaelsen|Denmark

>Spike|hCoV-19/England/MILK-CA979F/2020|2020-12-17|EPI\_ISL\_762236|Original|hCoV-19^^England|Human|Lighthouse Lab in Milton Keynes|Wellcome Sanger Institute for the COVID-19 Genomics UK (COG-UK) Consortium|Davies|United Kingdom

>Spike|hCoV-19/USA/MI-UM-10035963996/2020|2020-09-15|EPI\_ISL\_583355|Original|hCoV-19^^Michigan|Human|University of Michigan Clinical Microbiology Laboratory|Lauring Lab|Valesano|USA

>Spike|hCoV-19/SaudiArabia/KAUST-JEDDAH1022/2020|2020-06-23|EPI\_ISL\_512892|Original|hCoV-19^^Jeddah|Human|Pathogen Genomics Lab King Abdullah University of Science and Technology(KAUST)|Pathogen Genomics Lab King Abdullah University of Science and Technology(KAUST)|Mohamed Ghazzali|Saudi Arabia

>Spike|hCoV-19/Chile/RM-ISPCH-23/2020|2020-03-21|EPI\_ISL\_445302|Original|hCoV-19^^Region Metropolitana de Santiago|Human|INSTITUTO MEDICO LEGAL|Instituto de Salud Publica de Chile|Fernandez|Chile

>Spike|hCoV-19/England/MILK-82264A/2020|2020-07-17|EPI\_ISL\_557275|Original|hCoV-19^^England|Human|Lighthouse Lab in Milton Keynes|Wellcome Sanger Institute for the COVID-19 Genomics UK (COG-UK) consortium|Davies|United Kingdom

>Spike|hCoV-19/USA/AZ-TG654369/2020|2020-04-13|EPI\_ISL\_696006|Original|hCoV-19^^Arizona|Human|Sonora Quest Laboratories|TGen North|French|USA

>Spike|hCoV-19/USA/NM-UNM-00009/2020|2020-03-14|EPI\_ISL\_467591|Original|hCoV-19^^New Mexico|Human|New Mexico Department of Health Scientific Laboratory Division|Center for Global Health|Domman|USA

>Spike|hCoV-19/USA/CA-CDPH180/2020|2020-09-28|EPI\_ISL\_754917|Original|hCoV-19^^California|Human|California Department of Public Health|California Department of Public Health|Bell|USA

>Spike|hCoV-19/England/ALDP-954787/2020|2020-06-09|EPI\_ISL\_555324|Original|hCoV-19^^England|Human|Lighthouse Lab in Alderley Park|Wellcome Sanger Institute for the COVID-19 Genomics UK (COG-UK) consortium|Davies|United Kingdom

>Spike|hCoV-19/England/ALDP-951B24/2020|2020-06-10|EPI\_ISL\_551335|Original|hCoV-19^^England|Human|Lighthouse Lab in Alderley Park|Wellcome Sanger Institute for the COVID-19 Genomics UK (COG-UK) consortium|Davies|United Kingdom

>Spike|hCoV-19/England/CAMB-7240D/2020|2020-03-24|EPI\_ISL\_439542|Original|hCoV-19^^England|Human|Department of Pathology|Wellcome Sanger Institute for the COVID-19 Genomics UK (COG-UK) consortium|Amato|United Kingdom

>Spike|hCoV-19/USA/CA-ALSR-0657-IPL/2020|2020-04-17|EPI\_ISL\_483282|Original|hCoV-19^^California|Human|UC San Diego Center for Advanced Laboratory Medicine|Andersen lab at Scripps Research|Gangavarapu|USA

>Spike|hCoV-19/Netherlands/UT-RIVM-20380/2020|2020-12-07|EPI\_ISL\_728600|Original|hCoV-19^^Utrecht|Human|Dutch COVID-19 response team|National Institute for Public Health and the Environment (RIVM)|Meijer|Netherlands

>Spike|hCoV-19/England/SHEF-C423F/2020|2020-06-24|EPI\_ISL\_493676|Original|hCoV-19^^England|Human|Virology Department|COVID-19 Genomics UK (COG-UK) Consortium|de Silva|United Kingdom

>Spike|hCoV-19/Scotland/CVR6040/2020|2020-11-30|EPI\_ISL\_705715|Original|hCoV-19^^Scotland|Human|West of Scotland Specialist Virology Centre|COVID-19 Genomics UK (COG-UK) Consortium|Robertson|United Kingdom

>Spike|hCoV-19/England/NORW-EA6CE/2020|2020-05-24|EPI\_ISL\_472295|Original|hCoV-19^^England|Human|Quadram Institute Bioscience|COVID-19 Genomics UK (COG-UK) Consortium|Alikhan|United Kingdom

>Spike|hCoV-19/Belgium/ULG-10016/2020|2020-03-30|EPI\_ISL\_421194|Original|hCoV-19^^Liège|Human|Department of Clinical Microbiology|GIGA Medical Genomics|Durkin|Belgium

>Spike|hCoV-19/USA/CA-CZB-10622/2020|2020-09-03|EPI\_ISL\_648550|Original|hCoV-19^^California|Human|Madera County Department of Public Health|Chan-Zuckerberg Biohub|Bhatt|USA

>Spike|hCoV-19/England/PORT-2F6153/2020|2020-11-13|EPI\_ISL\_741744|Original|hCoV-19^^England|Human|Centre for Enzyme Innovation|COVID-19 Genomics UK (COG-UK) Consortium|Robson|United Kingdom

>Spike|hCoV-19/Colombia/VAC-GUV-92042/2020|2020-03-31|EPI\_ISL\_447756|Original|hCoV-19^^Valle del Cauca|Human|Instituto Nacional de Salud|Grupo de Investigaciones Microbiológicas-UR (GIMUR)|Ramírez|Colombia



>Spike|hCoV-19/England/ALDP-94B510/2020|2020-06-12|EPI\_ISL\_556491|Original|hCoV-19^^England|Human|Lighthouse Lab in Alderley Park|Wellcome Sanger Institute for the COVID-19 Genomics UK (COG-UK) consortium|Davies|United Kingdom

>Spike|hCoV-19/Italy/LAZ-INMI-60/2020|2020-06-07|EPI\_ISL\_603167|Original|hCoV-19^^Lazio|Human|INMI Lazzaro Spallanzani IRCCS|INMI Lazzaro Spallanzani IRCCS|Gruber|Italy

>Spike|hCoV-19/England/CAMB-74113/2020|2020-03-20|EPI\_ISL\_440312|Original|hCoV-19^^England|Human|Department of Pathology|Wellcome Sanger Institute for the COVID-19 Genomics UK (COG-UK) consortium|Amato|United Kingdom

>Spike|hCoV-19/Chile/RM-127602/2020|2020-07-17|EPI\_ISL\_746605|Original|hCoV-19^^Region Metropolitana de Santiago|Human|Genetica Molecular and Subdepartamento de Virologia ISP Chile|Instituto de Salud Publica de Chile|Tognarelli|Chile

>Spike|hCoV-19/England/CAMB-1AB66E/2020|2020-04-22|EPI\_ISL\_470099|Original|hCoV-19^^England|Human|Department of Pathology|Wellcome Sanger Institute for the COVID-19 Genomics UK (COG-UK) consortium|Davies|United Kingdom

>Spike|hCoV-19/USA/FL-BPHL-1966/2020|2020-04-13|EPI\_ISL\_653119|Original|hCoV-19^^Florida|Human|Florida Bureau of Public Health Laboratories|Florida Bureau of Public Health Laboratories|Blanton|USA

>Spike|hCoV-19/Australia/VIC14868/2020|2020-08-21|EPI\_ISL\_593036|Original|hCoV-19^^Victoria|Human|Microbiological Diagnostic Unit - Public Health Laboratory (MDU-PHL) |MDU-PHL|Schultz|Australia

>Spike|hCoV-19/Scotland/GCVR-171D4E/2020|2020-03-29|EPI\_ISL\_524499|Original|hCoV-19^^Scotland|Human|NHSGGC West of Scotland Specialist Virology Centre / MRC-University of Glasgow Centre for Virus Research|Wellcome Sanger Institute for the COVID-19 Genomics UK (COG-UK) consortium|Davies|United Kingdom

>Spike|hCoV-19/North Macedonia/2339/2020|2020-06-04|EPI\_ISL\_677677|Original|hCoV-19^^Shtip|Human|Clinical Hospital - Shtip|Research Center for Genetic Engineering and Biotechnology \Georgi D. Efremov\u201d|Dimovski|North Macedonia

>Spike|hCoV-19/Kenya/C1751/2020|2020-04-22|EPI\_ISL\_457867|Original|hCoV-19^^Kenya|Human|KEMRI-CGMR-C|KEMRI-Wellcome Trust Research Programme/KEMRI-CGMR-C Kilifi|Githinji|Kenya

>Spike|hCoV-19/England/ALDP-B25F1C/2020|2020-11-04|EPI\_ISL\_646540|Original|hCoV-19^^England|Human|Lighthouse Lab in Alderley Park|Wellcome Sanger Institute for the COVID-19 Genomics UK (COG-UK) Consortium|Davies|United Kingdom

>Spike|hCoV-19/USA/CA-CZB-3871/2020|2020-07-17|EPI\_ISL\_548570|Original|hCoV-19^^California|Human|County of Santa Clara Public Health Department|Chan-Zuckerberg Biohub|Bhatt|USA

>Spike|hCoV-19/England/NORW-ED9C2/2020|2020-00-00|EPI\_ISL\_490509|Original|hCoV-19^^England|Human|Quadram Institute Bioscience|COVID-19 Genomics UK (COG-UK) Consortium|Alikhan|United Kingdom

>Spike|hCoV-19/USA/DE-DHSS-FLW00407558/2020|2020-12-02|EPI\_ISL\_767009|Original|hCoV-19^^Delaware|Human|Delaware Public Health Laboratory|Delaware Public Health Laboratory|Bajwa|USA

>Spike|hCoV-19/USA/CA-CHLA-PLM41214732/2020|2020-11-20|EPI\_ISL\_753393|Original|hCoV-19^^California|Human|Clinical virology Laboratory|Center for Personalized Medicine|Dien Bard|USA

>Spike|hCoV-19/England/ALDP-9D93E0/2020|2020-09-18|EPI\_ISL\_576724|Original|hCoV-19^^England|Human|Oxford Viromics|COVID-19 Genomics UK (COG-UK) Consortium|Golubchik|United Kingdom

>Spike|hCoV-19/Australia/VIC3061/2020|2020-07-07|EPI\_ISL\_520768|Original|hCoV-19^^Victoria|Human|Microbiological Diagnostic Unit - Public Health Laboratory (MDU-PHL) |MDU-PHL|Schultz|Australia

>Spike|hCoV-19/Norway/6691/2020|2020-11-24|EPI\_ISL\_775511|Original|hCoV-19^^Oslo|Human|Norwegian Institute of Public Health|Norwegian Institute of Public Health|Vollan|Norway

>Spike|hCoV-19/England/ALDP-91F700/2020|2020-06-23|EPI\_ISL\_553316|Original|hCoV-19^^England|Human|Lighthouse Lab in Alderley Park|Wellcome Sanger Institute for the COVID-19 Genomics UK (COG-UK) consortium|Davies|United Kingdom

>Spike|hCoV-19/England/NOTT-113C32/2020|2020-09-29|EPI\_ISL\_573469|Original|hCoV-19^^England|Human|Queens Medical Centre|COVID-19 Genomics UK (COG-UK) Consortium|Loose|United Kingdom

>Spike|hCoV-19/Wales/PHWC-49DA9D/2020|2020-12-08|EPI\_ISL\_742869|Original|hCoV-19^^Wales|Human|Wales Specialist Virology Centre Sequencing lab|COVID-19 Genomics UK (COG-UK) Consortium|Moore|United Kingdom

>Spike|hCoV-19/USA/PA-MGEL-00640/2020|2020-09-21|EPI\_ISL\_682029|Original|hCoV-19^^Pennsylvania|Human|UPMC Clinical Microbiology Laboratory|Microbial Genomic Epidemiology Laboratory|Griffith|USA

>Spike|hCoV-19/England/ALDP-C06A1F/2020|2020-12-05|EPI\_ISL\_709351|Original|hCoV-19^^England|Human|Lighthouse Lab in Alderley Park|Wellcome Sanger Institute for the COVID-19 Genomics UK (COG-UK) Consortium|Davies|United Kingdom

>Spike|hCoV-19/England/MILK-9C44A9/2020|2020-09-10|EPI\_ISL\_581376|Original|hCoV-19^^England|Human|Lighthouse Lab in Milton Keynes|Wellcome Sanger Institute for the COVID-19 Genomics UK (COG-UK) consortium|Davies|United Kingdom

>Spike|hCoV-19/Australia/VIC6174/2020|2020-07-22|EPI\_ISL\_518179|Original|hCoV-19^^Victoria|Human|Victorian Infectious Diseases Reference Laboratory (VIDRL)|VIDRL and MDU-PHL|Schultz|Australia

>Spike|hCoV-19/South Korea/KCDC2046/2020|2020-02-21|EPI\_ISL\_471452|Original|hCoV-19^^South Korea|Human|Division of Viral Diseases|Division of Viral Diseases|Kim|South Korea

>Spike|hCoV-19/Ireland/D-NVRL-78IRL75840/2020|2020-11-23|EPI\_ISL\_752577|Original|hCoV-19^^Dublin|Human|National Virus Reference Laboratory|National Virus Reference Laboratory|Gonzalez|Ireland

>Spike|hCoV-19/Gibraltar/204421242/2020|2020-10-27|EPI\_ISL\_613701|Original|hCoV-19^^Gibraltar|Human|Microbiology|Respiratory Virus Unit|Platt|Gibraltar

>Spike|hCoV-19/mink/Netherlands/NB01\_02KS/2020|2020-04-29|EPI\_ISL\_447624|Original|hCoV-19^^Netherlands|Mustela lutreola|Virology|Virology|Oreshkova|Netherlands

>Spike|hCoV-19/England/ALDP-B1F65C/2020|2020-11-01|EPI\_ISL\_645842|Original|hCoV-19^^England|Human|Lighthouse Lab in Alderley Park|Wellcome Sanger Institute for the COVID-19 Genomics UK (COG-UK) Consortium|Davies|United Kingdom

>Spike|hCoV-19/USA/OR-UW-24378/2020|2020-08-13|EPI\_ISL\_570584|Original|hCoV-19^^Oregon|Human|UW Virology Lab|UW Virology Lab|Roychoudhury|USA

>Spike|hCoV-19/Canada/QC\_AS5/2020|2020-04-05|EPI\_ISL\_476513|Original|hCoV-19^^Quebec|Human|Laboratoire de microbiologie|Smith Laboratory|Smith|Canada

>Spike|hCoV-19/Spain/MD-IBV-99008738/2020|2020-10-16|EPI\_ISL\_654305|Original|hCoV-19^^Madrid|Human|Hospital General Universitario Gregorio Mara\u00f1\u00f3n|SeqCOVID-SPAIN consortium|IBV (CSIC)|Comas|Spain

>Spike|hCoV-19/England/NORW-E888E/2020|2020-04-12|EPI\_ISL\_448242|Original|hCoV-19^^England|Human|Quadram Institute Bioscience|COVID-19 Genomics UK (COG-UK) Consortium|Alikhan|United Kingdom

>Spike|hCoV-19/Canada/ON-PHL-20-01789/2020|2020-07-00|EPI\_ISL\_636939|Original|hCoV-19^^Ontario|Human|Public Health Ontario Laboratory|Public Health Ontario Laboratory|Guthrie|Canada

>Spike|hCoV-19/Denmark/DCGC-11959/2020|2020-09-14|EPI\_ISL\_671232|Original|hCoV-19^^Nordjylland|Human|Department of Virus and Microbiological Special Diagnostics|Albertsen Lab|Michaelsen|Denmark

>Spike|hCoV-19/England/LIVE-9F07F/2020|2020-04-14|EPI\_ISL\_453424|Original|hCoV-19^^England|Human|Liverpool Clinical Laboratories|COVID-19 Genomics UK (COG-UK) Consortium|Haldenby|United Kingdom

>Spike|hCoV-19/England/LEED-2A98B4/2020|2020-04-08|EPI\_ISL\_538909|Original|hCoV-19^^England|Human|Leeds Teaching Hospitals NHS Trust and Public Health England|Wellcome Sanger Institute for the COVID-19 Genomics UK (COG-UK) consortium|Davies|United Kingdom

>Spike|hCoV-19/Netherlands/NH-RIVM-20134/2020|2020-11-14|EPI\_ISL\_723305|Original|hCoV-19^^Noord-Holland|Human|Dutch COVID-19 response team|National Institute for Public Health and the Environment (RIVM)|Meijer|Netherlands

>Spike|hCoV-19/USA/WI-UW-1420/2020|2020-09-11|EPI\_ISL\_541553|Original|hCoV-19^^Wisconsin|Human|University of Wisconsin-Madison Campus AIDS Vaccine Research

Laboratories|University of Wisconsin-Madison AIDS Vaccine Research  
Laboratories|Baczenas|USA  
>Spike|hCoV-19/USA/MI-MDHHS-SC22705/2020|2020-12-09|EPI\_ISL\_767354|Original|hCoV-19^^Michigan|Human|Michigan Department of Health and Human Services|Michigan Department of Health and Human Services|Jacob|USA  
>Spike|hCoV-19/Scotland/QEUH-A9B361/2020|2020-10-20|EPI\_ISL\_625392|Original|hCoV-19^^Scotland|Human|Lighthouse Lab in Glasgow|Wellcome Sanger Institute for the COVID-19 Genomics UK (COG-UK) consortium|Davies|United Kingdom  
>Spike|hCoV-19/England/MILK-ACC19A/2020|2020-10-21|EPI\_ISL\_629112|Original|hCoV-19^^England|Human|Lighthouse Lab in Milton Keynes|Wellcome Sanger Institute for the COVID-19 Genomics UK (COG-UK) consortium|Davies|United Kingdom  
>Spike|hCoV-19/England/MILK-B973A0/2020|2020-11-14|EPI\_ISL\_675090|Original|hCoV-19^^England|Human|Lighthouse Lab in Milton Keynes|Wellcome Sanger Institute for the COVID-19 Genomics UK (COG-UK) Consortium|Davies|United Kingdom  
>Spike|hCoV-19/USA/MN-MDH-2094/2020|2020-10-23|EPI\_ISL\_683723|Original|hCoV-19^^Minnesota|Human|Mayo Clinic & Mayo Clinic Laboratories|Minnesota Department of Health|Garfin|USA  
>Spike|hCoV-19/England/CAMC-C7716F/2020|2020-12-16|EPI\_ISL\_769038|Original|hCoV-19^^England|Human|Lighthouse Lab in Cambridge|Wellcome Sanger Institute for the COVID-19 Genomics UK (COG-UK) Consortium|Davies|United Kingdom  
>Spike|hCoV-19/Ireland/D-NVRL-72IRL19319/2020|2020-09-04|EPI\_ISL\_578210|Original|hCoV-19^^Dublin|Human|National Virus Reference Laboratory|National Virus Reference Laboratory|Gonzalez|Ireland  
>Spike|hCoV-19/United Arab Emirates/0259/2020|2020-05-17|EPI\_ISL\_698440|Original|hCoV-19^^Abu Dhabi|Human|Group 42 (G42) Healthcare|G42 Healthcare|Ogrodzki|United Arab Emirates  
>Spike|hCoV-19/England/GSTT-265D703/2020|2020-03-24|EPI\_ISL\_484002|Original|hCoV-19^^England|Human|Centre for Clinical Infection and Diagnostics Research and Genomics Innovation Unit|COVID-19 Genomics UK (COG-UK) Consortium|Awan|United Kingdom  
>Spike|hCoV-19/Japan/IC-0159/2020|2020-09-00|EPI\_ISL\_667588|Original|hCoV-19^^Japan|Human|Pathogen Genomics Center|Pathogen Genomics Center|Sekizuka|Japan  
>Spike|hCoV-19/USA/TX-HMH-MCoV-13741/2020|2020-08-17|EPI\_ISL\_788834|Original|hCoV-19^^Texas|Human|Houston Methodist Hospital|Houston Methodist Hospital|Long|USA  
>Spike|hCoV-19/Scotland/CVR4176/2020|2020-08-31|EPI\_ISL\_540853|Original|hCoV-19^^Scotland|Human|Lighthouse Lab in Glasgow / MRC-University of Glasgow Centre for Virus Research|COVID-19 Genomics UK (COG-UK) Consortium|Robertson|United Kingdom  
>Spike|hCoV-19/USA/MD-HP12006/2020|2020-11-30|EPI\_ISL\_791351|Original|hCoV-19^^Maryland|Human|Johns Hopkins Hospital Department of Pathology|Johns Hopkins Hospital Department of Pathology|Morris|USA  
>Spike|hCoV-19/Denmark/DCGC-8762/2020|2020-10-26|EPI\_ISL\_626071|Original|hCoV-19^^Hovedstaden|Human|Department of Virus and Microbiological Special Diagnostics|Albertsen lab|Michaelsen|Denmark  
>Spike|hCoV-19/USA/UT-UPHL-2012096473/2020|2020-10-26|EPI\_ISL\_745494|Original|hCoV-19^^Utah|Human|Ginkgo Bioworks Clinical Laboratory|Utah Public Health Laboratory|Young|USA  
>Spike|hCoV-19/England/CAMB-7381F/2020|2020-04-01|EPI\_ISL\_425244|Original|hCoV-19^^England|Human|Department of Pathology|COVID-19 Genomics UK (COG-UK) Consortium|Meredith|United Kingdom  
>Spike|hCoV-19/England/CAMC-B080FE/2020|2020-10-29|EPI\_ISL\_643403|Original|hCoV-19^^England|Human|Lighthouse Lab in Cambridge|Wellcome Sanger Institute for the COVID-19 Genomics UK (COG-UK) Consortium|Davies|United Kingdom  
>Spike|hCoV-19/USA/MA-MGH-00023/2020|2020-03-24|EPI\_ISL\_460149|Original|hCoV-19^^Massachusetts|Human|Massachusetts General Hospital|Infectious Disease Program|Lemieux|USA  
>Spike|hCoV-19/Japan/PG-1052/2020|2020-04-00|EPI\_ISL\_684662|Original|hCoV-19^^Japan|Human|Fukuoka Institute of Health and Environmental Sciences|Pathogen Genomics Center|Sekizuka|Japan  
>Spike|hCoV-19/Scotland/QEUH-9AD29D/2020|2020-09-05|EPI\_ISL\_560023|Original|hCoV-19^^Scotland|Human|Oxford Viromics|COVID-19 Genomics UK (COG-UK) Consortium|Golubchik|United Kingdom

>Spike|hCoV-19/Switzerland/BE-UNIBE-190-4089/2020|2020-03-22|EPI\_ISL\_574829|Original|hCoV-19^^Bern|Human|Institute for Infectious Diseases|Institute for Infectious Diseases|Koch|Switzerland

>Spike|hCoV-19/England/MILK-B8EC38/2020|2020-11-13|EPI\_ISL\_674529|Original|hCoV-19^^England|Human|Lighthouse Lab in Milton Keynes|Wellcome Sanger Institute for the COVID-19 Genomics UK (COG-UK) Consortium|Davies|United Kingdom

>Spike|hCoV-19/Denmark/DCGC-7045/2020|2020-10-12|EPI\_ISL\_619893|Original|hCoV-19^^Syddanmark|Human|Department of Virus and Microbiological Special Diagnostics|Albertsen lab|Michaelsen|Denmark

>Spike|hCoV-19/USA/MI-MDHHS-SC21488/2020|2020-07-25|EPI\_ISL\_516215|Original|hCoV-19^^Michigan|Human|Michigan Department of Health and Human Services|Michigan Department of Health and Human Services|Blankenship|USA

>Spike|hCoV-19/Israel/CVL-n3380/2020|2020-03-09|EPI\_ISL\_649075|Original|hCoV-19^^Haifa|Human|Israel Central Virology laboratory|Israel Central Virology laboratory|Zuckerman|Israel

>Spike|hCoV-19/Japan/PG-3043/2020|2020-04-00|EPI\_ISL\_691166|Original|hCoV-19^^Japan|Human|Pathogen Genomics Center|Pathogen Genomics Center|Sekizuka|Japan

>Spike|hCoV-19/England/NOTT-12040D/2020|2020-12-08|EPI\_ISL\_725613|Original|hCoV-19^^England|Human|Queens Medical Centre|COVID-19 Genomics UK (COG-UK) Consortium|Loose|United Kingdom

>Spike|hCoV-19/USA/NY-NYCPHL-000163/2020|2020-04-09|EPI\_ISL\_631699|Original|hCoV-19^^New York|Human|Flushing Hospital Medical Center|New York City Public Health Laboratory|Wang|USA

>Spike|hCoV-19/Wales/MILK-B02BE4/2020|2020-10-24|EPI\_ISL\_647840|Original|hCoV-19^^Wales|Human|Lighthouse Lab in Milton Keynes|Wellcome Sanger Institute for the COVID-19 Genomics UK (COG-UK) Consortium|Davies|United Kingdom

>Spike|hCoV-19/Northern Ireland/NIRE-109130/2020|2020-10-20|EPI\_ISL\_652316|Original|hCoV-19^^Northern Ireland|Human|Regional Virus Laboratory|COVID-19 Genomics UK (COG-UK) Consortium|Fairley|United Kingdom

>Spike|hCoV-19/USA/NV-QDX-2627/2020|2020-03-15|EPI\_ISL\_604950|Original|hCoV-19^^Nevada|Human|Quest Diagnostics|Quest Diagnostics|Kagan|USA

>Spike|hCoV-19/England/MILK-AB7F3E/2020|2020-10-21|EPI\_ISL\_623564|Original|hCoV-19^^England|Human|Lighthouse Lab in Milton Keynes|Wellcome Sanger Institute for the COVID-19 Genomics UK (COG-UK) consortium|Davies|United Kingdom

>Spike|hCoV-19/New Zealand/20VR2563/2020|2020-00-00|EPI\_ISL\_548126|Original|hCoV-19^^Auckland|Human|Middlemore Hospital|Institute of Environmental Science and Research (ESR)|Wang|New Zealand

>Spike|hCoV-19/England/CAMC-B33DB7/2020|2020-11-05|EPI\_ISL\_659264|Original|hCoV-19^^England|Human|Lighthouse Lab in Cambridge|Wellcome Sanger Institute for the COVID-19 Genomics UK (COG-UK) Consortium|Davies|United Kingdom

>Spike|hCoV-19/England/MILK-993528/2020|2020-08-26|EPI\_ISL\_552119|Original|hCoV-19^^England|Human|Lighthouse Lab in Milton Keynes|Wellcome Sanger Institute for the COVID-19 Genomics UK (COG-UK) consortium|Davies|United Kingdom

>Spike|hCoV-19/USA/SC\_NHRC\_01/2020|2020-03-27|EPI\_ISL\_444995|Original|hCoV-19^^South Carolina|Human|Naval Health Research Center|Naval Medical Research Center Biological Defense Research Directorate|Voegtly|USA

>Spike|hCoV-19/England/ALDP-9D8E4A/2020|2020-09-18|EPI\_ISL\_576677|Original|hCoV-19^^England|Human|Oxford Viromics|COVID-19 Genomics UK (COG-UK) Consortium|Golubchik|United Kingdom

>Spike|hCoV-19/Luxembourg/LNS4515413/2020|2020-11-18|EPI\_ISL\_740484|Original|hCoV-19^^Luxembourg|Human|Laboratoire national de sant\u00e9|Laboratoire national de sant\u00e9|Wienecke-Baldacchino|Luxembourg

>Spike|hCoV-19/England/BIRM-648A8/2020|2020-09-17|EPI\_ISL\_594521|Original|hCoV-19^^England|Human|University of Birmingham|COVID-19 Genomics UK (COG-UK) Consortium|Loman|United Kingdom

>Spike|hCoV-19/Canada/QC-LSPQ-L00227830/2020|2020-03-19|EPI\_ISL\_535868|Original|hCoV-19^^Quebec|Human|H\u00f4pital du Suro\u00eet|Laboratoire de sant\u00e9 publique du Qu\u00e9bec|Moreira|Canada

>Spike|hCoV-19/England/CAMB-1BAA33/2020|2020-11-12|EPI\_ISL\_664280|Original|hCoV-19^^England|Human|Department of Pathology|COVID-19 Genomics UK (COG-UK) Consortium|Goodfellow|United Kingdom

>Spike|hCoV-19/Sweden/20-50664/2020|2020-04-06|EPI\_ISL\_475153|Original|hCoV-19^^Vasternorrland|Human|Klinisk mikrobiologi Vasternorrland|The Public Health Agency of Sweden|Svartstr\u00f6m|Sweden

>Spike|hCoV-19/USA/CA-CZB-12960/2020|2020-07-21|EPI\_ISL\_672377|Original|hCoV-19^^California|Human|San Francisco Public Health Laboratory|Chan-Zuckerberg Biohub|Bhatt|USA

>Spike|hCoV-19/England/NOTT-121017/2020|2020-12-14|EPI\_ISL\_741623|Original|hCoV-19^^England|Human|Queens Medical Centre|COVID-19 Genomics UK (COG-UK) Consortium|Loose|United Kingdom

>Spike|hCoV-19/England/QEUA-9F3A18/2020|2020-09-24|EPI\_ISL\_588518|Original|hCoV-19^^England|Human|Lighthouse Lab in Glasgow|Wellcome Sanger Institute for the COVID-19 Genomics UK (COG-UK) consortium|Davies|United Kingdom

>Spike|hCoV-19/Wales/ALDP-4F500A/2020|2020-06-24|EPI\_ISL\_559270|Original|hCoV-19^^Wales|Human|Lighthouse Lab in Alderley Park|Wellcome Sanger Institute for the COVID-19 Genomics UK (COG-UK) consortium|Davies|United Kingdom

>Spike|hCoV-19/USA/TX-HMH-MCoV-17999/2020|2020-11-16|EPI\_ISL\_786147|Original|hCoV-19^^Texas|Human|Houston Methodist Hospital|Houston Methodist Hospital|Long|USA

>Spike|hCoV-19/Wales/PHWC-2E1BE/2020|2020-04-07|EPI\_ISL\_446068|Original|hCoV-19^^Wales|Human|Wales Specialist Virology Centre|Public Health Wales Microbiology Cardiff|Moore|United Kingdom

>Spike|hCoV-19/Germany/TH-IIMK-CaSe-32/2020|2020-11-16|EPI\_ISL\_768727|Original|hCoV-19^^Thuringia|Human|Jena University Hospital|Institute of infectious medicine & hospital hygiene|Brandt|Germany

>Spike|hCoV-19/Wales/PHWC-4A4608/2020|2020-12-16|EPI\_ISL\_764714|Original|hCoV-19^^Wales|Human|Wales Specialist Virology Centre Sequencing lab|COVID-19 Genomics UK (COG-UK) Consortium|Moore|United Kingdom

>Spike|hCoV-19/England/MILK-9A96FF/2020|2020-08-31|EPI\_ISL\_551252|Original|hCoV-19^^England|Human|Lighthouse Lab in Milton Keynes|Wellcome Sanger Institute for the COVID-19 Genomics UK (COG-UK) consortium|Davies|United Kingdom

>Spike|hCoV-19/England/ALDP-9E5721/2020|2020-09-24|EPI\_ISL\_589341|Original|hCoV-19^^England|Human|Lighthouse Lab in Alderley Park|Wellcome Sanger Institute for the COVID-19 Genomics UK (COG-UK) consortium|Davies|United Kingdom

>Spike|hCoV-19/Italy/APU-PODV-15921572/2020|2020-08-15|EPI\_ISL\_788972|Original|hCoV-19^^Apulia|Human|Ospedale \Di Venere\|Beaconlab (Bioinformatics|Chiara|Italy

>Spike|hCoV-19/England/QEUA-B419C1/2020|2020-11-08|EPI\_ISL\_658626|Original|hCoV-19^^England|Human|Lighthouse Lab in Glasgow|Wellcome Sanger Institute for the COVID-19 Genomics UK (COG-UK) Consortium|Davies|United Kingdom

>Spike|hCoV-19/USA/IL-UW-1503/2020|2020-09-16|EPI\_ISL\_541546|Original|hCoV-19^^Illinois|Human|University of Wisconsin-Madison AIDS Vaccine Research Laboratories|University of Wisconsin-Madison AIDS Vaccine Research Laboratories|Baczenas|USA

>Spike|hCoV-19/England/MILK-B8EFB7/2020|2020-11-13|EPI\_ISL\_675236|Original|hCoV-19^^England|Human|Lighthouse Lab in Milton Keynes|Wellcome Sanger Institute for the COVID-19 Genomics UK (COG-UK) Consortium|Davies|United Kingdom

>Spike|hCoV-19/Japan/PG-5592/2020|2020-08-00|EPI\_ISL\_688717|Original|hCoV-19^^Japan|Human|Pathogen Genomics Center|Pathogen Genomics Center|Sekizuka|Japan

>Spike|hCoV-19/India/MH-NIV-QC-1844/2020|2020-09-15|EPI\_ISL\_577730|Original|hCoV-19^^Maharashtra|Human|NIV Influenza|NIV Influenza|Potdar|India

>Spike|hCoV-19/England/LIVE-A18FA/2020|2020-06-08|EPI\_ISL\_490344|Original|hCoV-19^^England|Human|Liverpool Clinical Laboratories|COVID-19 Genomics UK (COG-UK) Consortium|Haldenby|United Kingdom

>Spike|hCoV-19/USA/IL-NM-0495/2020|2020-04-24|EPI\_ISL\_626432|Original|hCoV-19^^Illinois|Human|Northwestern Memorial Hospital|Ozer Lab|Ozer|USA

>Spike|hCoV-19/Wales/CAMC-AEAF14/2020|2020-10-26|EPI\_ISL\_647906|Original|hCoV-19^^Wales|Human|Lighthouse Lab in Cambridge|Wellcome Sanger Institute for the COVID-19 Genomics UK (COG-UK) Consortium|Davies|United Kingdom

>Spike|hCoV-19/Germany/HH-hpi-p2367/2020|2020-03-25|EPI\_ISL\_776454|Original|hCoV-19^^Hamburg|Human|University Medical Center Hamburg Eppendorf|Heinrich Pette Institute|Robitaille|Germany

>Spike|hCoV-19/USA/MA-MGH-03141/2020|2020-09-05|EPI\_ISL\_765715|Original|hCoV-19^^Massachusetts|Human|Massachusetts General Hospital|Infectious Disease Program|Park|USA

>Spike|hCoV-19/Italy/VEN-IZSve-20RS2160-34/2020|2020-11-30|EPI\_ISL\_747483|Original|hCoV-19^^Veneto|Human|Ospedale San Bonifacio|Istituto Zooprofilattico Sperimentale delle Venezie|Quaranta|Italy

>Spike|hCoV-19/England/ALDP-C39FC9/2020|2020-12-09|EPI\_ISL\_730906|Original|hCoV-19^^England|Human|Lighthouse Lab in Alderley Park|Wellcome Sanger Institute for the COVID-19 Genomics UK (COG-UK) Consortium|Davies|United Kingdom

>Spike|hCoV-19/Luxembourg/LNS8805109/2020|2020-12-01|EPI\_ISL\_770946|Original|hCoV-19^^Luxembourg|Human|Laboratoire national de sant\u00e9|Laboratoire national de sant\u00e9|Wienecke-Baldacchino|Luxembourg

>Spike|hCoV-19/England/ALDP-9EA917/2020|2020-09-24|EPI\_ISL\_580082|Original|hCoV-19^^England|Human|Lighthouse Lab in Alderley Park|Wellcome Sanger Institute for the COVID-19 Genomics UK (COG-UK) consortium|Davies|United Kingdom

>Spike|hCoV-19/Wales/PHWC-48E622/2020|2020-11-13|EPI\_ISL\_680887|Original|hCoV-19^^Wales|Human|Wales Specialist Virology Centre Sequencing lab|COVID-19 Genomics UK (COG-UK) Consortium|Moore|United Kingdom

>Spike|hCoV-19/Denmark/DCGC-22559/2020|2020-12-14|EPI\_ISL\_757397|Original|hCoV-19^^Hovedstaden|Human|Department of Virus and Microbiological Special Diagnostics|Albertsen Lab|Michaelsen|Denmark

>Spike|hCoV-19/Denmark/DCGC-15912/2020|2020-11-23|EPI\_ISL\_714462|Original|hCoV-19^^Sjaelland|Human|Department of Virus and Microbiological Special Diagnostics|Albertsen Lab|Michaelsen|Denmark

>Spike|hCoV-19/England/CAMC-C2C970/2020|2020-12-08|EPI\_ISL\_733856|Original|hCoV-19^^England|Human|Lighthouse Lab in Cambridge|Wellcome Sanger Institute for the COVID-19 Genomics UK (COG-UK) Consortium|Davies|United Kingdom

>Spike|hCoV-19/South Africa/NHLS-UCT-GP-5332/2020|2020-05-04|EPI\_ISL\_700582|Original|hCoV-19^^Western Cape|Human|Dr Abdurahman CDC wc DAC|NHLS/UCT|Iranzadeh|South Africa

>Spike|hCoV-19/France/PAC-IHU-1377/2020|2020-08-08|EPI\_ISL\_569146|Original|hCoV-19^^Provence-Alpes-C\u00f4te-d\u0152Azur|Human|MEPHI|MEPHI|Levasseur|France

>Spike|hCoV-19/USA/TX-HMH-7220/2020|2020-06-29|EPI\_ISL\_546609|Original|hCoV-19^^Texas|Human|Houston Methodist Hospital|Houston Methodist Hospital|Long|USA

>Spike|hCoV-19/Australia/SAP127/2020|2020-03-22|EPI\_ISL\_451136|Original|hCoV-19^^South Australia|Human|SA Pathology|SA Pathology|Leong|Australia

>Spike|hCoV-19/Wales/PHWC-4801F2/2020|2020-10-22|EPI\_ISL\_611819|Original|hCoV-19^^Wales|Human|Wales Specialist Virology Centre Sequencing lab|COVID-19 Genomics UK (COG-UK) Consortium|Moore|United Kingdom

>Spike|hCoV-19/Netherlands/UT-RIVM-21002/2020|2020-12-19|EPI\_ISL\_791019|Original|hCoV-19^^Utrecht|Human|Dutch COVID-19 response team|National Institute for Public Health and the Environment (RIVM)|Meijer|Netherlands

>Spike|hCoV-19/USA/MI-MDHHS-SC22513/2020|2020-11-18|EPI\_ISL\_708216|Original|hCoV-19^^Michigan|Human|Michigan Department of Health and Human Services|Michigan Department of Health and Human Services|Jacob|USA

>Spike|hCoV-19/Wales/PHWC-3598F/2020|2020-04-24|EPI\_ISL\_474504|Original|hCoV-19^^Wales|Human|Originating lab|COVID-19 Genomics UK (COG-UK) Consortium|Moore|United Kingdom

>Spike|hCoV-19/England/CAMB-811AA/2020|2020-04-20|EPI\_ISL\_438577|Original|hCoV-19^^England|Human|Department of Pathology|COVID-19 Genomics UK (COG-UK) Consortium|Meredith|United Kingdom

>Spike|hCoV-19/Canada/QC-LSPQ-L00218268/2020|2020-03-14|EPI\_ISL\_535772|Original|hCoV-19^^Quebec|Human|CHUL-LABO MULTI / MICRO|Laboratoire de sant\u00e9 publique du Qu\u00e9bec|Moreira|Canada

>Spike|hCoV-19/USA/PA-MGEL-00220/2020|2020-04-08|EPI\_ISL\_681968|Original|hCoV-19^^Pennsylvania|Human|UPMC Clinical Microbiology Laboratory|Microbial Genomic Epidemiology Laboratory|Griffith|USA

>Spike|hCoV-19/Switzerland/BL-ETHZ-240020/2020|2020-08-10|EPI\_ISL\_523871|Original|hCoV-19^^Basel-Landschaft|Human|Viollier AG|Department of Biosystems Science and Engineering|Nadeau|Switzerland

>Spike|hCoV-19/England/ALDP-A5073F/2020|2020-10-07|EPI\_ISL\_597784|Original|hCoV-19^^England|Human|Lighthouse Lab in Alderley Park|Wellcome Sanger Institute for the COVID-19 Genomics UK (COG-UK) consortium|Davies|United Kingdom

>Spike|hCoV-19/Denmark/DCGC-11620/2020|2020-11-02|EPI\_ISL\_671029|Original|hCoV-19^^Nordjylland|Human|Department of Virus and Microbiological Special Diagnostics|Albertsen Lab|Michaelsen|Denmark

>Spike|hCoV-19/England/LIVE-A66CE/2020|2020-03-19|EPI\_ISL\_499731|Original|hCoV-19^^England|Human|Liverpool Clinical Laboratories|COVID-19 Genomics UK (COG-UK) Consortium|Haldenby|United Kingdom

>Spike|hCoV-19/Australia/VIC12998/2020|2020-08-03|EPI\_ISL\_591679|Original|hCoV-19^^Victoria|Human|Victorian Infectious Diseases Reference Laboratory (VIDRL)|VIDRL and MDU-PHL|Schultz|Australia

>Spike|hCoV-19/Denmark/DCGC-4270/2020|2020-09-07|EPI\_ISL\_615707|Original|hCoV-19^^Hovedstaden|Human|Department of Virus and Microbiological Special Diagnostics|Albertsen lab|Michaelsen|Denmark

>Spike|hCoV-19/Australia/WA294/2020|2020-04-04|EPI\_ISL\_596837|Original|hCoV-19^^Western Australia|Human|PathWest Laboratory Medicine WA|PathWest Laboratory Medicine WA Microbial Surveillance Unit|Sikazwe|Australia

>Spike|hCoV-19/England/CAMB-83E1A/2020|2020-04-26|EPI\_ISL\_438697|Original|hCoV-19^^England|Human|Department of Pathology|COVID-19 Genomics UK (COG-UK) Consortium|Meredith|United Kingdom

>Spike|hCoV-19/Denmark/DCGC-15894/2020|2020-11-23|EPI\_ISL\_714089|Original|hCoV-19^^Hovedstaden|Human|Department of Virus and Microbiological Special Diagnostics|Albertsen Lab|Michaelsen|Denmark

>Spike|hCoV-19/Northern Ireland/NIRE-108966/2020|2020-09-10|EPI\_ISL\_585221|Original|hCoV-19^^Northern Ireland|Human|Regional Virus Laboratory|COVID-19 Genomics UK (COG-UK) Consortium|Fairley|United Kingdom

>Spike|hCoV-19/Wales/ALDP-A67BEE/2020|2020-10-10|EPI\_ISL\_625431|Original|hCoV-19^^Wales|Human|Lighthouse Lab in Alderley Park|Wellcome Sanger Institute for the COVID-19 Genomics UK (COG-UK) consortium|Davies|United Kingdom

>Spike|hCoV-19/England/ALDP-951B9D/2020|2020-06-10|EPI\_ISL\_551301|Original|hCoV-19^^England|Human|Lighthouse Lab in Alderley Park|Wellcome Sanger Institute for the COVID-19 Genomics UK (COG-UK) consortium|Davies|United Kingdom

>Spike|hCoV-19/Australia/NSW1113/2020|2020-09-02|EPI\_ISL\_593728|Original|hCoV-19^^New South Wales|Human|South Eastern Area Laboratory Services (SEALS)|NSW Health Pathology - Institute of Clinical Pathology and Medical Research; Westmead Hospital; University of Sydney|Gall|Australia

>Spike|hCoV-19/England/CWAR-24FDAE0/2020|2020-05-03|EPI\_ISL\_584478|Original|hCoV-19^^England|Human|UHCW / University of Warwick|COVID-19 Genomics UK (COG-UK) Consortium|Stark|United Kingdom

>Spike|hCoV-19/England/MILK-BDC697/2020|2020-11-27|EPI\_ISL\_709712|Original|hCoV-19^^England|Human|Lighthouse Lab in Milton Keynes|Wellcome Sanger Institute for the COVID-19 Genomics UK (COG-UK) Consortium|Davies|United Kingdom

>Spike|hCoV-19/Wales/PHWC-25DA4/2020|2020-03-25|EPI\_ISL\_422310|Original|hCoV-19^^Wales|Human|Wales Specialist Virology Centre|Public Health Wales Microbiology Cardiff|Moore|United Kingdom

>Spike|hCoV-19/USA/TX-HMH-7159/2020|2020-06-29|EPI\_ISL\_546554|Original|hCoV-19^^Texas|Human|Houston Methodist Hospital|Houston Methodist Hospital|Long|USA

>Spike|hCoV-19/England/QEUH-B7E345/2020|2020-11-14|EPI\_ISL\_727858|Original|hCoV-19^^England|Human|Oxford Viromics|COVID-19 Genomics UK (COG-UK) Consortium|Golubchik|United Kingdom

>Spike|hCoV-19/USA/UT-UPHL-2012876311/2020|2020-08-03|EPI\_ISL\_745761|Original|hCoV-19^^Utah|Human|Ginkgo Bioworks Clinical Laboratory|Utah Public Health Laboratory|Young|USA

>Spike|hCoV-19/USA/TX-HMH-1136/2020|2020-04-23|EPI\_ISL\_542545|Original|hCoV-19^^Texas|Human|Houston Methodist Hospital|Houston Methodist Hospital|Long|USA

>Spike|hCoV-19/USA/AZ-TG366702/2020|2020-06-01|EPI\_ISL\_694466|Original|hCoV-19^^Arizona|Human|AZ SPHL|TGen North|French|USA

>Spike|hCoV-19/France/ARA-SC075/2020|2020-04-21|EPI\_ISL\_629107|Original|hCoV-19^^Auvergne-Rh\u00f4ne-Alpes|Human|Laboratoire du Centre Hospitalier Annecy Genevois|CNR Virus des Infections Respiratoires - France SUD|Bal|France

>Spike|hCoV-19/Scotland/GCVR-1730DA/2020|2020-04-04|EPI\_ISL\_524562|Original|hCoV-19^^Scotland|Human|NHSGGC West of Scotland Specialist Virology Centre / MRC-University of Glasgow Centre for Virus Research|Wellcome Sanger Institute for the COVID-19 Genomics UK (COG-UK) consortium|Davies|United Kingdom

>Spike|hCoV-19/England/EXET-13560F/2020|2020-04-12|EPI\_ISL\_457076|Original|hCoV-19^^England|Human|University of Exeter|COVID-19 Genomics UK (COG-UK) Consortium|Temperton|United Kingdom

>Spike|hCoV-19/Wales/PHWC-49C90A/2020|2020-11-19|EPI\_ISL\_742620|Original|hCoV-19^^Wales|Human|Wales Specialist Virology Centre Sequencing lab|COVID-19 Genomics UK (COG-UK) Consortium|Moore|United Kingdom

>Spike|hCoV-19/Australia/VIC4258/2020|2020-07-13|EPI\_ISL\_519586|Original|hCoV-19^^Victoria|Human|Microbiological Diagnostic Unit - Public Health Laboratory (MDU-PHL)|MDU-PHL|Schultz|Australia

>Spike|hCoV-19/England/CAMC-B34141/2020|2020-11-05|EPI\_ISL\_659429|Original|hCoV-19^^England|Human|Lighthouse Lab in Cambridge|Wellcome Sanger Institute for the COVID-19 Genomics UK (COG-UK) Consortium|Davies|United Kingdom

>Spike|hCoV-19/Japan/PG-1067/2020|2020-04-00|EPI\_ISL\_684677|Original|hCoV-19^^Japan|Human|Fukuoka Institute of Health and Environmental Sciences|Pathogen Genomics Center|Sekizuka|Japan

>Spike|hCoV-19/Switzerland/BS-UHB-42189862/2020|2020-03-13|EPI\_ISL\_528054|Original|hCoV-19^^Basel-Stadt|Human|University Hospital Basel|University Hospital Basel|Roloff Handschin|Switzerland

>Spike|hCoV-19/England/CAMC-B22FA6/2020|2020-11-02|EPI\_ISL\_647407|Original|hCoV-19^^England|Human|Lighthouse Lab in Cambridge|Wellcome Sanger Institute for the COVID-19 Genomics UK (COG-UK) Consortium|Davies|United Kingdom

>Spike|hCoV-19/Wales/PHWC-35ECC/2020|2020-04-28|EPI\_ISL\_474586|Original|hCoV-19^^Wales|Human|Originating lab|COVID-19 Genomics UK (COG-UK) Consortium|Moore|United Kingdom

>Spike|hCoV-19/Australia/VIC2776/2020|2020-07-01|EPI\_ISL\_521610|Original|hCoV-19^^Victoria|Human|Microbiological Diagnostic Unit - Public Health Laboratory (MDU-PHL)|MDU-PHL|Schultz|Australia

>Spike|hCoV-19/USA/CO-CDPHE-2009184258/2020|2020-09-16|EPI\_ISL\_710347|Original|hCoV-19^^Colorado|Human|Colorado Department of Public Health and Environment|Colorado Department of Public Health and Environment|Bankers|USA

>Spike|hCoV-19/USA/UT-UPHL-201232529/2020|2020-04-06|EPI\_ISL\_678530|Original|hCoV-19^^Utah|Human|Utah Public Health Laboratory|Utah Public Health Laboratory|Young|USA

>Spike|hCoV-19/England/ALDP-B2400B/2020|2020-11-04|EPI\_ISL\_646261|Original|hCoV-19^^England|Human|Lighthouse Lab in Alderley Park|Wellcome Sanger Institute for the COVID-19 Genomics UK (COG-UK) Consortium|Davies|United Kingdom

>Spike|hCoV-19/England/NORT-2945C4/2020|2020-08-03|EPI\_ISL\_573348|Original|hCoV-19^^England|Human|Northumbria University / South Tees Hospitals NHS Foundation Trust / North Cumbria Integrated Care NHS Foundation Trust / North Tees and Hartlepool NHS Foundation Trust / Newcastle Hospitals NHS Foundation Trust|COVID-19 Genomics UK (COG-UK) Consortium|Bashton|United Kingdom

>Spike|hCoV-19/England/204281018/2020|2020-10-15|EPI\_ISL\_613598|Original|hCoV-19^^England|Human|Respiratory Virus Unit|Respiratory Virus Unit|Platt|United Kingdom

>Spike|hCoV-19/Scotland/CVR3979/2020|2020-08-27|EPI\_ISL\_540776|Original|hCoV-19^^Scotland|Human|West of Scotland Specialist Virology Centre|COVID-19 Genomics UK (COG-UK) Consortium|Robertson|United Kingdom

>Spike|hCoV-19/Scotland/QEUH-9C8E98/2020|2020-09-14|EPI\_ISL\_576005|Original|hCoV-19^^Scotland|Human|Lighthouse Lab in Glasgow|Wellcome Sanger Institute for the COVID-19 Genomics UK (COG-UK) consortium|Davies|United Kingdom



>Spike|hCoV-19/Denmark/DCGC-10498/2020|2020-11-02|EPI\_ISL\_670017|Original|hCoV-19^^Midtjylland|Human|Department of Virus and Microbiological Special Diagnostics|Albertsen Lab|Michaelsen|Denmark

>Spike|hCoV-19/Denmark/DCGC-3690/2020|2020-09-07|EPI\_ISL\_615465|Original|hCoV-19^^Hovedstaden|Human|Department of Virus and Microbiological Special Diagnostics|Albertsen lab|Michaelsen|Denmark

>Spike|hCoV-19/England/MILK-9AA139/2020|2020-09-01|EPI\_ISL\_550988|Original|hCoV-19^^England|Human|Lighthouse Lab in Milton Keynes|Wellcome Sanger Institute for the COVID-19 Genomics UK (COG-UK) consortium|Davies|United Kingdom

>Spike|hCoV-19/England/20146008504/2020|2020-03-31|EPI\_ISL\_423576|Original|hCoV-19^^England|Human|Respiratory Virus Unit|Respiratory Virus Unit|Platt|United Kingdom

>Spike|hCoV-19/Denmark/DCGC-1386/2020|2020-04-06|EPI\_ISL\_618805|Original|hCoV-19^^Sjaelland|Human|Department of Virus and Microbiological Special Diagnostics|Albertsen lab|Michaelsen|Denmark

>Spike|hCoV-19/England/QEUEH-B0E368/2020|2020-11-02|EPI\_ISL\_642190|Original|hCoV-19^^England|Human|Lighthouse Lab in Glasgow|Wellcome Sanger Institute for the COVID-19 Genomics UK (COG-UK) Consortium|Davies|United Kingdom

>Spike|hCoV-19/England/ALDP-BB9BEC/2020|2020-11-21|EPI\_ISL\_702502|Original|hCoV-19^^England|Human|Lighthouse Lab in Alderley Park|Wellcome Sanger Institute for the COVID-19 Genomics UK (COG-UK) Consortium|Davies|United Kingdom

>Spike|hCoV-19/England/OXON-AD0F6/2020|2020-00-00|EPI\_ISL\_448563|Original|hCoV-19^^England|Human|Oxford Viromics|COVID-19 Genomics UK (COG-UK) Consortium|Golubchik|United Kingdom

>Spike|hCoV-19/Japan/PG-2044/2020|2020-04-00|EPI\_ISL\_685649|Original|hCoV-19^^Japan|Human|Pathogen Genomics Center|Pathogen Genomics Center|Sekizuka|Japan

>Spike|hCoV-19/Ireland/KE-NVRL-73IRL13512/2020|2020-09-16|EPI\_ISL\_578287|Original|hCoV-19^^Kildare|Human|National Virus Reference Laboratory|National Virus Reference Laboratory|Gonzalez|Ireland

>Spike|hCoV-19/Iceland/322/2020|2020-03-18|EPI\_ISL\_417651|Original|hCoV-19^^Reykjavik|Human|The National University Hospital of Iceland|deCODE genetics|J\u00f3nsson|Iceland

>Spike|hCoV-19/England/ALDP-AC5DCA/2020|2020-10-14|EPI\_ISL\_631056|Original|hCoV-19^^England|Human|Lighthouse Lab in Alderley Park|Wellcome Sanger Institute for the COVID-19 Genomics UK (COG-UK) consortium|Davies|United Kingdom

>Spike|hCoV-19/England/ALDP-C8DE41/2020|2020-12-15|EPI\_ISL\_777584|Original|hCoV-19^^England|Human|Lighthouse Lab in Alderley Park|Wellcome Sanger Institute for the COVID-19 Genomics UK (COG-UK) Consortium|Davies|United Kingdom

>Spike|hCoV-19/Mexico/BCN-ALSR-2539/2020|2020-06-24|EPI\_ISL\_635542|Original|hCoV-19^^Baja California|Human|Centro de Diagn\u00f3stico COVID-19 UABC Tijuana|Andersen lab at Scripps Research|Gangavarapu|Mexico

>Spike|hCoV-19/USA/CA-CZB-13848/2020|2020-08-11|EPI\_ISL\_738848|Original|hCoV-19^^California|Human|Alameda County Public Health Lab|Chan-Zuckerberg Biohub|Kamm|USA

>Spike|hCoV-19/Denmark/DCGC-2841/2020|2020-08-24|EPI\_ISL\_616668|Original|hCoV-19^^Nordjylland|Human|Department of Virus and Microbiological Special Diagnostics|Albertsen lab|Michaelsen|Denmark

>Spike|hCoV-19/England/NORT-29E5BB/2020|2020-05-02|EPI\_ISL\_493520|Original|hCoV-19^^England|Human|Northumbria University / South Tees Hospitals NHS Foundation Trust / North Cumbria Integrated Care NHS Foundation Trust / North Tees and Hartlepool NHS Foundation Trust / Newcastle Hospitals NHS Foundation Trust|COVID-19 Genomics UK (COG-UK) Consortium|Bashton|United Kingdom

>Spike|hCoV-19/Germany/HH-hpi-pl331/2020|2020-03-24|EPI\_ISL\_775788|Original|hCoV-19^^Hamburg|Human|University Medical Center Hamburg Eppendorf|Heinrich Pette Institute|Robitaille|Germany

>Spike|hCoV-19/Netherlands/GE-EMC-379/2020|2020-10-11|EPI\_ISL\_722498|Original|hCoV-19^^Gelderland|Human|Dutch COVID-19 response team|Erasmus Medical Center|Oude Munnink|Netherlands

>Spike|hCoV-19/USA/AZ-TG273310/2020|2020-04-01|EPI\_ISL\_426566|Original|hCoV-19^^Arizona|Human|AZ SPHL|TGen North|Lemmer|USA

>Spike|hCoV-19/Finland/11CD9/2020|2020-10-31|EPI\_ISL\_732569|Original|hCoV-19^^Uusimaa|Human|Department of Virology and Immunology|Department of Virology|Smura|Finland

>Spike|hCoV-19/England/ALDP-953506/2020|2020-06-08|EPI\_ISL\_553865|Original|hCoV-19^^England|Human|Lighthouse Lab in Alderley Park|Wellcome Sanger Institute for the COVID-19 Genomics UK (COG-UK) consortium|Davies|United Kingdom

>Spike|hCoV-19/England/20144008004/2020|2020-03-31|EPI\_ISL\_423498|Original|hCoV-19^^England|Human|Respiratory Virus Unit|Respiratory Virus Unit|Platt|United Kingdom

>Spike|hCoV-19/USA/CO-CDPHE-2009053319/2020|2020-09-04|EPI\_ISL\_710149|Original|hCoV-19^^Colorado|Human|Colorado Department of Public Health and Environment|Colorado Department of Public Health and Environment|Bankers|USA

>Spike|hCoV-19/USA/WA-S2655/2020|2020-06-21|EPI\_ISL\_497287|Original|hCoV-19^^Washington|Human|Washington State Department of Health|Seattle Flu Study|Lee|USA

>Spike|hCoV-19/South Korea/IHC719/2020|2020-02-23|EPI\_ISL\_540997|Vero|hCoV-19^^Gwangju|Human|Health and Environmental Research Institute of Gwangju Metropolitan city|Health and Environmental Research Institute of Gwangju Metropolitan city|Kim|South Korea

>Spike|hCoV-19/Japan/PG-7065/2020|2020-08-00|EPI\_ISL\_688170|Original|hCoV-19^^Japan|Human|Pathogen Genomics Center|Pathogen Genomics Center|Sekizuka|Japan

>Spike|hCoV-19/Wales/PHWC-4A4E6A/2020|2020-12-09|EPI\_ISL\_764796|Original|hCoV-19^^Wales|Human|Wales Specialist Virology Centre Sequencing lab|COVID-19 Genomics UK (COG-UK) Consortium|Moore|United Kingdom

>Spike|hCoV-19/Netherlands/OV-RIVM-20762/2020|2020-12-09|EPI\_ISL\_790823|Original|hCoV-19^^Overijssel|Human|Dutch COVID-19 response team|National Institute for Public Health and the Environment (RIVM)|Meijer|Netherlands

>Spike|hCoV-19/Denmark/DCGC-14348/2020|2020-11-30|EPI\_ISL\_711710|Original|hCoV-19^^Nordjylland|Human|Department of Virus and Microbiological Special Diagnostics|Albertsen Lab|Michaelsen|Denmark

>Spike|hCoV-19/Australia/VIC16113/2020|2020-08-06|EPI\_ISL\_640497|Original|hCoV-19^^Victoria|Human|Microbiological Diagnostic Unit - Public Health Laboratory (MDU-PHL)|MDU-PHL|Schultz|Australia

>Spike|hCoV-19/England/QEUH-9B557B/2020|2020-09-03|EPI\_ISL\_590449|Original|hCoV-19^^England|Human|Lighthouse Lab in Glasgow|Wellcome Sanger Institute for the COVID-19 Genomics UK (COG-UK) consortium|Davies|United Kingdom

>Spike|hCoV-19/England/CAMC-B0CC05/2020|2020-10-30|EPI\_ISL\_643627|Original|hCoV-19^^England|Human|Lighthouse Lab in Cambridge|Wellcome Sanger Institute for the COVID-19 Genomics UK (COG-UK) Consortium|Davies|United Kingdom

>Spike|hCoV-19/England/ALDP-B83F76/2020|2020-11-14|EPI\_ISL\_674208|Original|hCoV-19^^England|Human|Lighthouse Lab in Alderley Park|Wellcome Sanger Institute for the COVID-19 Genomics UK (COG-UK) Consortium|Davies|United Kingdom

>Spike|hCoV-19/England/ALDP-A705E4/2020|2020-10-15|EPI\_ISL\_607979|Original|hCoV-19^^England|Human|Lighthouse Lab in Alderley Park|Wellcome Sanger Institute for the COVID-19 Genomics UK (COG-UK) consortium|Davies|United Kingdom

>Spike|hCoV-19/England/MILK-99CF03/2020|2020-08-30|EPI\_ISL\_549909|Original|hCoV-19^^England|Human|Lighthouse Lab in Milton Keynes|Wellcome Sanger Institute for the COVID-19 Genomics UK (COG-UK) consortium|Davies|United Kingdom

>Spike|hCoV-19/Scotland/QEUH-C543EA/2020|2020-12-12|EPI\_ISL\_757048|Original|hCoV-19^^Scotland|Human|Lighthouse Lab in Glasgow|Wellcome Sanger Institute for the COVID-19 Genomics UK (COG-UK) Consortium|Davies|United Kingdom

>Spike|hCoV-19/Denmark/DCGC-2168/2020|2020-08-10|EPI\_ISL\_617467|Original|hCoV-19^^Midtjylland|Human|Department of Virus and Microbiological Special Diagnostics|Albertsen lab|Michaelsen|Denmark

>Spike|hCoV-19/Switzerland/BS-UHB-42195727/2020|2020-03-17|EPI\_ISL\_528185|Original|hCoV-19^^Basel-Stadt|Human|University Hospital Basel|University Hospital Basel|Roloff Handschin|Switzerland

>Spike|hCoV-19/USA/MI-UM-2006S000870/2020|2020-03-31|EPI\_ISL\_484723|Original|hCoV-19^^Michigan|Human|University of Michigan Clinical Microbiology Laboratory|Lauring Lab|Valesano|USA

>Spike|hCoV-19/USA/WA-S430/2020|2020-03-25|EPI\_ISL\_434190|Original|hCoV-19^^Washington|Human|Washington State Department of Health|Seattle Flu Study|Bedford|USA

>Spike|hCoV-19/Israel/CVL-124-ngs/2020|2020-12-27|EPI\_ISL\_776839|Original|hCoV-19^^Israel|Human|Israel Central Virology laboratory|Israel Central Virology laboratory|Zuckerman|Israel

>Spike|hCoV-19/South Korea/KDCA0167/2020|2020-11-19|EPI\_ISL\_747401|Original|hCoV-19^^South Korea|Human|Division of Emerging Infectious Diseases|Division of Emerging Infectious Diseases|Park|South Korea

>Spike|hCoV-19/USA/TX-HMH-5261/2020|2020-06-23|EPI\_ISL\_544634|Original|hCoV-19^^Texas|Human|Houston Methodist Hospital|Houston Methodist Hospital|Long|USA

>Spike|hCoV-19/USA/CA-CZB-15200/2020|2020-11-23|EPI\_ISL\_739310|Original|hCoV-19^^California|Human|Santa Clara County Public Health Laboratory|Chan-Zuckerberg Biohub|Kamm|USA

>Spike|hCoV-19/France/NAQ-SC278/2020|2020-03-31|EPI\_ISL\_645182|Original|hCoV-19^^Nouvelle-Aquitaine|Human|CHU de Limoges|CNR Virus des Infections Respiratoires - France SUD|Bal|France

>Spike|hCoV-19/Germany/HH-hpi-p2032/2020|2020-03-21|EPI\_ISL\_775666|Original|hCoV-19^^Hamburg|Human|University Medical Center Hamburg Eppendorf|Heinrich Pette Institute|Robitaille|Germany

>Spike|hCoV-19/Ukraine/203100318/2020|2020-06-23|EPI\_ISL\_512598|Original|hCoV-19^^Ukraine|Human|National Laboratory for Influenza/Virology reference laboratory|Respiratory Virus Unit|Platt|Ukraine

>Spike|hCoV-19/Australia/VIC876/2020|2020-04-05|EPI\_ISL\_427131|Original|hCoV-19^^Victoria|Human|Victorian Infectious Diseases Reference Laboratory (VIDRL)|Microbiological Diagnostic Unit Public Health Laboratory and Victorian Infectious Diseases Reference Laboratory|Schultz|Australia

>Spike|hCoV-19/Canada/ON-OICR-SLB2797/2020|2020-03-28|EPI\_ISL\_538329|Original|hCoV-19^^Ontario|Human|Kingston Health Sciences Centre / Queen's University|Ontario Institute for Cancer Research|de Borja|Canada

>Spike|hCoV-19/Australia/VIC5645/2020|2020-07-16|EPI\_ISL\_518456|Original|hCoV-19^^Victoria|Human|Victorian Infectious Diseases Reference Laboratory (VIDRL)|VIDRL and MDU-PHL|Schultz|Australia

>Spike|hCoV-19/England/NORT-29AB80/2020|2020-05-21|EPI\_ISL\_492472|Original|hCoV-19^^England|Human|NU-OMICS DNA Sequencing research facility|Wellcome Sanger Institute for the COVID-19 Genomics UK (COG-UK) consortium|Davies|United Kingdom

>Spike|hCoV-19/Denmark/DCGC-12325/2020|2020-11-16|EPI\_ISL\_682506|Original|hCoV-19^^Hovedstaden|Human|Department of Virus and Microbiological Special Diagnostics|Albertsen Lab|Michaelsen|Denmark

>Spike|hCoV-19/USA/SC-DHEC-0156/2020|2020-05-04|EPI\_ISL\_529184|Original|hCoV-19^^South Carolina|Human|South Carolina Department of Health and Environmental Control|South Carolina Department of Health and Environmental Control|Flores|USA

>Spike|hCoV-19/Japan/IC-0509/2020|2020-12-00|EPI\_ISL\_768718|Original|hCoV-19^^Japan|Human|Pathogen Genomics Center|Pathogen Genomics Center|Sekizuka|Japan

>Spike|hCoV-19/England/MILK-B050E2/2020|2020-10-24|EPI\_ISL\_637540|Original|hCoV-19^^England|Human|Virology Department|COVID-19 Genomics UK (COG-UK) Consortium|de Silva|United Kingdom

>Spike|hCoV-19/USA/TX-HMH-MCoV-18030/2020|2020-11-16|EPI\_ISL\_786178|Original|hCoV-19^^Texas|Human|Houston Methodist Hospital|Houston Methodist Hospital|Long|USA

>Spike|hCoV-19/Japan/PG-6179/2020|2020-08-00|EPI\_ISL\_689291|Original|hCoV-19^^Japan|Human|Pathogen Genomics Center|Pathogen Genomics Center|Sekizuka|Japan

>Spike|hCoV-19/USA/WA-S1740/2020|2020-06-02|EPI\_ISL\_496166|Original|hCoV-19^^Washington|Human|Washington State Department of Health|Seattle Flu Study|Lee|USA

>Spike|hCoV-19/Japan/PG-3225/2020|2020-04-00|EPI\_ISL\_691342|Original|hCoV-19^^Japan|Human|Pathogen Genomics Center|Pathogen Genomics Center|Sekizuka|Japan

>Spike|hCoV-19/USA/TX-HMH-MCoV-19750/2020|2020-11-20|EPI\_ISL\_784094|Original|hCoV-19^^Texas|Human|Houston Methodist Hospital|Houston Methodist Hospital|Long|USA

>Spike|hCoV-19/England/LIVE-DC0A4D/2020|2020-11-04|EPI\_ISL\_705348|Original|hCoV-19^^England|Human|Liverpool Clinical Laboratories|COVID-19 Genomics UK (COG-UK) Consortium|Haldenby|United Kingdom

>Spike|hCoV-19/England/20192020301/2020|2020-05-04|EPI\_ISL\_465598|Original|hCoV-19^^England|Human|Respiratory Virus Unit|Respiratory Virus Unit|Platt|United Kingdom

>Spike|hCoV-19/Switzerland/UR-ETHZ-190027/2020|2020-07-06|EPI\_ISL\_500891|Original|hCoV-19^^Uri|Human|Viollier AG|Department of Biosystems Science and Engineering|Nadeau|Switzerland

>Spike|hCoV-19/England/MILK-C2F6FE/2020|2020-12-07|EPI\_ISL\_782978|Original|hCoV-19^^England|Human|Lighthouse Lab in Milton Keynes|Wellcome Sanger Institute for the COVID-19 Genomics UK (COG-UK) Consortium|Davies|United Kingdom

>Spike|hCoV-19/Wales/PHWC-15D522/2020|2020-05-07|EPI\_ISL\_472733|Original|hCoV-19^^Wales|Human|Wales Specialist Virology Centre Sequencing lab|COVID-19 Genomics UK (COG-UK) Consortium|Moore|United Kingdom

>Spike|hCoV-19/Denmark/DCGC-20732/2020|2020-12-21|EPI\_ISL\_759331|Original|hCoV-19^^Midtjylland|Human|Department of Virus and Microbiological Special Diagnostics|Albertsen Lab|Michaelsen|Denmark

>Spike|hCoV-19/England/BRIS-12BE40/2020|2020-05-08|EPI\_ISL\_469450|Original|hCoV-19^^England|Human|PHE South West Regional Laboratory|Wellcome Sanger Institute for the COVID-19 Genomics UK (COG-UK) consortium|Davies|United Kingdom

>Spike|hCoV-19/USA/TX-HMH-MCoV-9010/2020|2020-07-02|EPI\_ISL\_780894|Original|hCoV-19^^Texas|Human|Houston Methodist Hospital|Houston Methodist Hospital|Long|USA

>Spike|hCoV-19/Australia/VIC2721/2020|2020-07-04|EPI\_ISL\_521558|Original|hCoV-19^^Victoria|Human|Victorian Infectious Diseases Reference Laboratory (VIDRL)|VIDRL and MDU-PHL|Schultz|Australia

>Spike|hCoV-19/USA/WI-UW-1235/2020|2020-08-17|EPI\_ISL\_536608|Original|hCoV-19^^Wisconsin|Human|University of Wisconsin-Madison AIDS Vaccine Research Laboratories|University of Wisconsin-Madison AIDS Vaccine Research Laboratories|Baczenas|USA

>Spike|hCoV-19/England/MILK-A91A1B/2020|2020-10-19|EPI\_ISL\_706003|Original|hCoV-19^^England|Human|Oxford Viromics|COVID-19 Genomics UK (COG-UK) Consortium|Golubchik|United Kingdom

>Spike|hCoV-19/England/ALDP-A85124/2020|2020-10-17|EPI\_ISL\_610460|Original|hCoV-19^^England|Human|Lighthouse Lab in Alderley Park|Wellcome Sanger Institute for the COVID-19 Genomics UK (COG-UK) consortium|Davies|United Kingdom

>Spike|hCoV-19/Ireland/D-NVRL-20IRL77557/2020|2020-11-05|EPI\_ISL\_732399|Original|hCoV-19^^Dublin|Human|National Virus Reference Laboratory|National Virus Reference Laboratory|Gonzalez|Ireland

>Spike|hCoV-19/Denmark/DCGC-908/2020|2020-05-04|EPI\_ISL\_614471|Original|hCoV-19^^Hovedstaden|Human|Department of Virus and Microbiological Special Diagnostics|Albertsen lab|Michaelsen|Denmark

>Spike|hCoV-19/Guatemala/CDC-1233/2020|2020-03-18|EPI\_ISL\_509700|Original|hCoV-19^^Guatemala|Human|Guatemala Ministry of Public Health|Pathogen Discovery|Queen|Guatemala

>Spike|hCoV-19/England/OXON-AD357/2020|2020-00-00|EPI\_ISL\_448576|Original|hCoV-19^^England|Human|Oxford Viromics|COVID-19 Genomics UK (COG-UK) Consortium|Golubchik|United Kingdom

>Spike|hCoV-19/Canada/ON-PHL-20-03695/2020|2020-11-00|EPI\_ISL\_775178|Original|hCoV-19^^Ontario|Human|Public Health Ontario Laboratory|Public Health Ontario Laboratory|Guthrie|Canada

>Spike|hCoV-19/England/LOND-1264DFF/2020|2020-11-22|EPI\_ISL\_724570|Original|hCoV-19^^England|Human|University College London|COVID-19 Genomics UK (COG-UK) Consortium|Roy|United Kingdom

>Spike|hCoV-19/Japan/PG-8054/2020|2020-08-00|EPI\_ISL\_687155|Original|hCoV-19^^Japan|Human|Pathogen Genomics Center|Pathogen Genomics Center|Sekizuka|Japan

>Spike|hCoV-19/Scotland/QEUH-96A1BD/2020|2020-08-13|EPI\_ISL\_534404|Original|hCoV-19^^Scotland|Human|NHSGGC West of Scotland Specialist Virology Centre / MRC-University of Glasgow Centre for Virus Research|Wellcome Sanger Institute for the COVID-19 Genomics UK (COG-UK) consortium|Davies|United Kingdom

>Spike|hCoV-19/England/ALDP-51D4E1/2020|2020-06-02|EPI\_ISL\_559054|Original|hCoV-19^^England|Human|Lighthouse Lab in Alderley Park|Wellcome Sanger Institute for the COVID-19 Genomics UK (COG-UK) consortium|Davies|United Kingdom

>Spike|hCoV-19/Scotland/CVR5623/2020|2020-11-01|EPI\_ISL\_651873|Original|hCoV-19^^Scotland|Human|West of Scotland Specialist Virology Centre|COVID-19 Genomics UK (COG-UK) Consortium|Robertson|United Kingdom

>Spike|hCoV-19/Denmark/DCGC-853/2020|2020-05-04|EPI\_ISL\_614791|Original|hCoV-19^^Hovedstaden|Human|Department of Virus and Microbiological Special Diagnostics|Albertsen lab|Michaelsen|Denmark

>Spike|hCoV-19/Spain/MD-HLP-R64/2020|2020-03-17|EPI\_ISL\_530110|Original|hCoV-19^^Madrid|Human|Hospital Universitario Ram\u00f3n y Cajal|Hospital Universitario La Paz|Viedma|Spain

>Spike|hCoV-19/Netherlands/ZH-EMC-1225/2020|2020-12-23|EPI\_ISL\_763294|Original|hCoV-19^^Zuid Holland|Human|Dutch COVID-19 response team|Erasmus Medical Center|Oude Munnink|Netherlands

>Spike|hCoV-19/England/CAMC-C447D2/2020|2020-12-10|EPI\_ISL\_719529|Original|hCoV-19^^England|Human|Lighthouse Lab in Cambridge|Wellcome Sanger Institute for the COVID-19 Genomics UK (COG-UK) Consortium|Davies|United Kingdom

>Spike|hCoV-19/USA/VI-CDC-3638/2020|2020-03-19|EPI\_ISL\_464167|Original|hCoV-19^^Virgin Islands|Human|VI-US Virgin Islands Department of Health|Pathogen Discovery|Queen|USA

>Spike|hCoV-19/England/ALDP-745E77/2020|2020-06-29|EPI\_ISL\_557433|Original|hCoV-19^^England|Human|Lighthouse Lab in Alderley Park|Wellcome Sanger Institute for the COVID-19 Genomics UK (COG-UK) consortium|Davies|United Kingdom

>Spike|hCoV-19/England/ALDP-A6F1E4/2020|2020-10-15|EPI\_ISL\_607168|Original|hCoV-19^^England|Human|Lighthouse Lab in Alderley Park|Wellcome Sanger Institute for the COVID-19 Genomics UK (COG-UK) consortium|Davies|United Kingdom

>Spike|hCoV-19/Switzerland/BS-42210967/2020|2020-03-28|EPI\_ISL\_581810|Original|hCoV-19^^Basel-Stadt|Human|University Hospital Basel|University Hospital Basel|Roloff Handschin|Switzerland

>Spike|hCoV-19/USA/WA-S828/2020|2020-04-16|EPI\_ISL\_449998|Original|hCoV-19^^Washington|Human|Washington State Department of Health|Seattle Flu Study|Bedford|USA

>Spike|hCoV-19/Japan/PG-1397/2020|2020-04-00|EPI\_ISL\_685004|Original|hCoV-19^^Japan|Human|Saitama Prefectural Institute of Public Health|Pathogen Genomics Center|Sekizuka|Japan

>Spike|hCoV-19/England/ALDP-B625F3/2020|2020-11-08|EPI\_ISL\_656385|Original|hCoV-19^^England|Human|Lighthouse Lab in Alderley Park|Wellcome Sanger Institute for the COVID-19 Genomics UK (COG-UK) Consortium|Davies|United Kingdom

>Spike|hCoV-19/England/SHEF-C143C/2020|2020-06-29|EPI\_ISL\_493668|Original|hCoV-19^^England|Human|Virology Department|COVID-19 Genomics UK (COG-UK) Consortium|de Silva|United Kingdom

>Spike|hCoV-19/Wales/PHWC-4A63E1/2020|2020-12-17|EPI\_ISL\_765034|Original|hCoV-19^^Wales|Human|Wales Specialist Virology Centre Sequencing lab|COVID-19 Genomics UK (COG-UK) Consortium|Moore|United Kingdom

>Spike|hCoV-19/England/EXET-13E545/2020|2020-00-00|EPI\_ISL\_724328|Original|hCoV-19^^England|Human|University of Exeter|COVID-19 Genomics UK (COG-UK) Consortium|Temperton|United Kingdom

>Spike|hCoV-19/England/CAMB-1B7FA0/2020|2020-10-13|EPI\_ISL\_638380|Original|hCoV-19^^England|Human|Department of Pathology|COVID-19 Genomics UK (COG-UK) Consortium|Goodfellow|United Kingdom

>Spike|hCoV-19/Scotland/EDB2744/2020|2020-03-27|EPI\_ISL\_487788|Original|hCoV-19^^Scotland|Human|Virology Department|Wellcome Sanger Institute for the COVID-19 Genomics UK (COG-UK) consortium|Davies|United Kingdom

>Spike|hCoV-19/England/MILK-9D4D6F/2020|2020-09-19|EPI\_ISL\_601670|Original|hCoV-19^^England|Human|Lighthouse Lab in Milton Keynes|Wellcome Sanger Institute for the COVID-19 Genomics UK (COG-UK) consortium|Davies|United Kingdom

>Spike|hCoV-19/Denmark/DCGC-5364/2020|2020-09-14|EPI\_ISL\_615295|Original|hCoV-19^^Nordjylland|Human|Department of Virus and Microbiological Special Diagnostics|Albertsen lab|Michaelsen|Denmark

>Spike|hCoV-19/Australia/VIC11658/2020|2020-07-23|EPI\_ISL\_563449|Original|hCoV-19^^Victoria|Human|Microbiological Diagnostic Unit - Public Health Laboratory (MDU-PHL)|MDU-PHL|Schultz|Australia

>Spike|hCoV-19/Hong Kong/HKPU49-3001/2020|2020-02-11|EPI\_ISL\_419223|Original|hCoV-19^^Hong Kong|Human|Department of Pathology|Department of Health Technology and Informatics|Leung|China

>Spike|hCoV-19/USA/MI-QDX-721/2020|2020-03-22|EPI\_ISL\_571454|Original|hCoV-19^^Michigan|Human|Quest Diagnostics|Quest Diagnostics|Kagan|USA

>Spike|hCoV-19/England/LIVE-DB3BB3/2020|2020-10-20|EPI\_ISL\_652074|Original|hCoV-19^^England|Human|Liverpool Clinical Laboratories|COVID-19 Genomics UK (COG-UK) Consortium|Haldenby|United Kingdom

>Spike|hCoV-19/Japan/IC-0275/2020|2020-11-00|EPI\_ISL\_667704|Original|hCoV-19^^Japan|Human|Pathogen Genomics Center|Pathogen Genomics Center|Sekizuka|Japan

>Spike|hCoV-19/USA/NY-NYCPHL-001125/2020|2020-10-22|EPI\_ISL\_671708|Original|hCoV-19^^New York|Human|DOHMH Morrisania|New York City Public Health Laboratory|Wang|USA

>Spike|hCoV-19/United Arab Emirates/0959/2020|2020-06-28|EPI\_ISL\_699095|Original|hCoV-19^^Abu Dhabi|Human|Group 42 (G42) Healthcare|G42 Healthcare|Ogrodzki|United Arab Emirates

>Spike|hCoV-19/England/QEUH-960B31/2020|2020-08-02|EPI\_ISL\_532112|Original|hCoV-19^^England|Human|Lighthouse Lab in Glasgow|Wellcome Sanger Institute for the COVID-19 Genomics UK (COG-UK) consortium|Davies|United Kingdom

>Spike|hCoV-19/Wales/PHWC-49255B/2020|2020-11-18|EPI\_ISL\_704001|Original|hCoV-19^^Wales|Human|Originating lab|COVID-19 Genomics UK (COG-UK) Consortium|Moore|United Kingdom

>Spike|hCoV-19/USA/CA-QDX-816/2020|2020-03-23|EPI\_ISL\_571507|Original|hCoV-19^^California|Human|Quest Diagnostics|Quest Diagnostics|Kagan|USA

>Spike|hCoV-19/England/CAMC-9452D3/2020|2020-07-14|EPI\_ISL\_556933|Original|hCoV-19^^England|Human|Lighthouse Lab in Cambridge|Wellcome Sanger Institute for the COVID-19 Genomics UK (COG-UK) consortium|Davies|United Kingdom

>Spike|hCoV-19/mink/Netherlands/NB-EMC-49-1/2020|2020-09-05|EPI\_ISL\_577815|Original|hCoV-19^^Noord Brabant|Neovison vison|Dutch COVID-19 response team|Erasmus Medical Center|Oude Munnink|Netherlands

>Spike|hCoV-19/England/QEUH-9F3D97/2020|2020-09-24|EPI\_ISL\_588532|Original|hCoV-19^^England|Human|Lighthouse Lab in Glasgow|Wellcome Sanger Institute for the COVID-19 Genomics UK (COG-UK) consortium|Davies|United Kingdom

>Spike|hCoV-19/Spain/VC-FISABIO-11/2020|2020-03-20|EPI\_ISL\_419675|Original|hCoV-19^^Comunitat Valenciana|Human|Servicio de Microbiolog\u00eda. Consorcio Hospital General Universitario de Valencia|Sequencing and Bioinformatics Service and Molecular Epidemiology Research Group. FISABIO-Public Health|Gonzalez-Candelas|Spain

>Spike|hCoV-19/England/CAMB-1B8F54/2020|2020-11-02|EPI\_ISL\_651692|Original|hCoV-19^^England|Human|Department of Pathology|COVID-19 Genomics UK (COG-UK) Consortium|Goodfellow|United Kingdom

>Spike|hCoV-19/Denmark/DCGC-6105/2020|2020-10-05|EPI\_ISL\_620300|Original|hCoV-19^^Hovedstaden|Human|Department of Virus and Microbiological Special Diagnostics|Albertsen lab|Michaelsen|Denmark

>Spike|hCoV-19/Scotland/QEUH-9B896D/2020|2020-09-07|EPI\_ISL\_568230|Original|hCoV-19^^Scotland|Human|Lighthouse Lab in Glasgow|Wellcome Sanger Institute for the COVID-19 Genomics UK (COG-UK) consortium|Davies|United Kingdom

>Spike|hCoV-19/England/MILK-9731FD/2020|2020-08-20|EPI\_ISL\_575944|Original|hCoV-19^^England|Human|Lighthouse Lab in Milton Keynes|Wellcome Sanger Institute for the COVID-19 Genomics UK (COG-UK) consortium|Davies|United Kingdom

>Spike|hCoV-19/USA/TX-HMH-MCoV-15676/2020|2020-07-09|EPI\_ISL\_785360|Original|hCoV-19^^Texas|Human|Houston Methodist Hospital|Houston Methodist Hospital|Long|USA

>Spike|hCoV-19/England/ALDP-BE9239/2020|2020-12-03|EPI\_ISL\_708965|Original|hCoV-19^^England|Human|Lighthouse Lab in Alderley Park|Wellcome Sanger Institute for the COVID-19 Genomics UK (COG-UK) Consortium|Davies|United Kingdom

>Spike|hCoV-19/Denmark/DCGC-13212/2020|2020-11-30|EPI\_ISL\_712655|Original|hCoV-19^^Hovedstaden|Human|Department of Virus and Microbiological Special Diagnostics|Albertsen Lab|Michaelsen|Denmark

>Spike|hCoV-19/USA/MI-UM-2006S000889/2020|2020-03-27|EPI\_ISL\_484736|Original|hCoV-19^^Michigan|Human|University of Michigan Clinical Microbiology Laboratory|Lauring Lab|Valesano|USA

>Spike|hCoV-19/USA/MD-MDH-0205/2020|2020-09-14|EPI\_ISL\_560818|Original|hCoV-19^^Maryland|Human|Maryland Public Health Laboratory|Maryland Public Health Laboratory|Keller|USA

>Spike|hCoV-19/England/204590491/2020|2020-11-06|EPI\_ISL\_683512|Original|hCoV-19^^England|Human|Respiratory Virus Unit|COVID-19 Genomics UK (COG-UK) Consortium|Platt|United Kingdom

>Spike|hCoV-19/Denmark/DCGC-10053/2020|2020-11-09|EPI\_ISL\_669363|Original|hCoV-19^^Hovedstaden|Human|Department of Virus and Microbiological Special Diagnostics|Albertsen Lab|Michaelsen|Denmark

>Spike|hCoV-19/Belgium/ULG-11046/2020|2020-12-01|EPI\_ISL\_722931|Original|hCoV-19^^Liege|Human|Department of Clinical Microbiology|GIGA Medical Genomics|Durkin|Belgium

>Spike|hCoV-19/Singapore/1386/2020|2020-07-21|EPI\_ISL\_648740|Original|hCoV-19^^Singapore|Human|Department of Laboratory Medicine|Department of Laboratory Medicine|Chen|Singapore

>Spike|hCoV-19/USA/TX-HMH-MCoV-15251/2020|2020-10-20|EPI\_ISL\_786735|Original|hCoV-19^^Texas|Human|Houston Methodist Hospital|Houston Methodist Hospital|Long|USA

>Spike|hCoV-19/USA/NE-11511/2020|2020-05-05|EPI\_ISL\_475224|Original|hCoV-19^^Nebraska|Human|Nebraska Public Health Laboratory|UNMC COVID-19 Response Team|Pratt|USA

>Spike|hCoV-19/Canada/ON-PHL-2653/2020|2020-03-00|EPI\_ISL\_418371|Original|hCoV-19^^Ontario|Human|Public Health Ontario Laboratories|Public Health Ontario Laboratories|Eshaghi|Canada

>Spike|hCoV-19/England/QEUA-9FF1CC/2020|2020-10-02|EPI\_ISL\_600227|Original|hCoV-19^^England|Human|Lighthouse Lab in Glasgow|Wellcome Sanger Institute for the COVID-19 Genomics UK (COG-UK) consortium|Davies|United Kingdom

>Spike|hCoV-19/Germany/BW-MVZ-LS-50/2020|2020-04-29|EPI\_ISL\_640267|Original|hCoV-19^^Baden-W\u00fcrtemberg|Human|MVZ Labor\u00e4rzte Singen|MVZ Labor\u00e4rzte Singen|Schmidt|Germany

>Spike|hCoV-19/England/MILK-99CB96/2020|2020-08-30|EPI\_ISL\_549869|Original|hCoV-19^^England|Human|Lighthouse Lab in Milton Keynes|Wellcome Sanger Institute for the COVID-19 Genomics UK (COG-UK) consortium|Davies|United Kingdom

>Spike|hCoV-19/England/ALDP-9FD726/2020|2020-10-01|EPI\_ISL\_587976|Original|hCoV-19^^England|Human|Lighthouse Lab in Alderley Park|Wellcome Sanger Institute for the COVID-19 Genomics UK (COG-UK) consortium|Davies|United Kingdom

>Spike|hCoV-19/Netherlands/UT-RIVM-20996/2020|2020-12-22|EPI\_ISL\_791015|Original|hCoV-19^^Utrecht|Human|Dutch COVID-19 response team|National Institute for Public Health and the Environment (RIVM)|Meijer|Netherlands

>Spike|hCoV-19/Wales/PHWC-48D1AA/2020|2020-11-10|EPI\_ISL\_666590|Original|hCoV-19^^Wales|Human|Wales Specialist Virology Centre Sequencing lab|COVID-19 Genomics UK (COG-UK) Consortium|Moore|United Kingdom

>Spike|hCoV-19/France/ARA-120919/2020|2020-12-16|EPI\_ISL\_779788|Original|hCoV-19^^Auvergne-Rh\u00f4ne-Alpes|Human|CNR Virus des Infections Respiratoires - France SUD|CNR Virus des Infections Respiratoires - France SUD|Bal|France

>Spike|hCoV-19/USA/UT-UPHL-201117228/2020|2020-04-29|EPI\_ISL\_634922|Original|hCoV-19^^Utah|Human|Utah Public Health Laboratory|Utah Public Health Laboratory|Young|USA

>Spike|hCoV-19/Japan/Donner35/2020|2020-04-03|EPI\_ISL\_469293|Original|hCoV-19^^Kanto|Human|Keio University Hospital|Keio University Hospital|Kosaki|Japan

>Spike|hCoV-19/Germany/NW-HHU-482/2020|2020-12-04|EPI\_ISL\_770716|Original|hCoV-19^^North Rhine-Westphalia|Human|ZOTZ KLIMAS MVZ D\u00fcrkesseldorf-Centrum GbR \u00dcBAG f\u00fcr Labormedizin|Center of Medical Microbiology|Wienemann|Germany

>Spike|hCoV-19/England/QEUA-BA31B6/2020|2020-11-18|EPI\_ISL\_672790|Original|hCoV-19^^England|Human|Lighthouse Lab in Glasgow|Wellcome Sanger Institute for the COVID-19 Genomics UK (COG-UK) Consortium|Davies|United Kingdom

>Spike|hCoV-19/USA/CO-CSU-E0983-1/2020|2020-04-08|EPI\_ISL\_527483|Original|hCoV-19^^Colorado|Human|Colorado State University - Ebel Lab|Colorado State University - Ebel Lab|Cline|USA

>Spike|hCoV-19/USA/WA-UW218/2020|2020-03-13|EPI\_ISL\_417367|Original|hCoV-19^^Washington|Human|UW Virology Lab|UW Virology Lab|Roychoudhury|USA

>Spike|hCoV-19/South Africa/KRISP-K000566/2020|2020-07-13|EPI\_ISL\_509223|Original|hCoV-19^^KwaZulu-Natal|Human|NHLS-IALCH|KRISP|de Oliveira|South Africa

>Spike|hCoV-19/Mexico/BCN-ALSR-2570/2020|2020-07-08|EPI\_ISL\_635571|Original|hCoV-19^^Baja California|Human|Centro de Diagn\u221a\u2265tico COVID-19 UABC Tijuana|Andersen lab at Scripps Research|Gangavarapu|Mexico

>Spike|hCoV-19/Japan/PG-6685/2020|2020-07-00|EPI\_ISL\_687796|Original|hCoV-19^^Japan|Human|Pathogen Genomics Center|Pathogen Genomics Center|Sekizuka|Japan

>Spike|hCoV-19/England/204381433/2020|2020-10-22|EPI\_ISL\_637125|Original|hCoV-19^^England|Human|Respiratory Virus Unit|COVID-19 Genomics UK (COG-UK) Consortium|Platt|United Kingdom

>Spike|hCoV-19/England/CAMB-1ABA80/2020|2020-04-20|EPI\_ISL\_470341|Original|hCoV-19^^England|Human|Department of Pathology|Wellcome Sanger Institute for the COVID-19 Genomics UK (COG-UK) consortium|Davies|United Kingdom

>Spike|hCoV-19/England/QEUH-95F977/2020|2020-08-06|EPI\_ISL\_532387|Original|hCoV-19^^England|Human|Lighthouse Lab in Glasgow|Wellcome Sanger Institute for the COVID-19 Genomics UK (COG-UK) consortium|Davies|United Kingdom

>Spike|hCoV-19/Japan/DP0196/2020|2020-02-15|EPI\_ISL\_416583|Original|hCoV-19^^Japan|Human|Japanese Quarantine Stations|Pathogen Genomics Center|Sekizuka|Japan

>Spike|hCoV-19/England/BIRM-657F5/2020|2020-10-02|EPI\_ISL\_594585|Original|hCoV-19^^England|Human|University of Birmingham|COVID-19 Genomics UK (COG-UK) Consortium|Loman|United Kingdom

>Spike|hCoV-19/England/BRIS-130C20/2020|2020-03-23|EPI\_ISL\_492512|Original|hCoV-19^^England|Human|PHE South West Regional Laboratory|Wellcome Sanger Institute for the COVID-19 Genomics UK (COG-UK) consortium|Davies|United Kingdom

>Spike|hCoV-19/Denmark/DCGC-3181/2020|2020-08-31|EPI\_ISL\_616003|Original|hCoV-19^^Midtjylland|Human|Department of Virus and Microbiological Special Diagnostics|Albertsen lab|Michaelsen|Denmark

>Spike|hCoV-19/England/ALDP-9E9B8B/2020|2020-09-24|EPI\_ISL\_580160|Original|hCoV-19^^England|Human|Lighthouse Lab in Alderley Park|Wellcome Sanger Institute for the COVID-19 Genomics UK (COG-UK) consortium|Davies|United Kingdom

>Spike|hCoV-19/USA/CA-CZB-14084/2020|2020-06-23|EPI\_ISL\_739495|Original|hCoV-19^^California|Human|Alameda County Public Health Lab|Chan-Zuckerberg Biohub|Kamm|USA

>Spike|hCoV-19/England/NORT-295EAA/2020|2020-03-31|EPI\_ISL\_478666|Original|hCoV-19^^England|Human|Northumbria University / South Tees Hospitals NHS Foundation Trust / North Cumbria Integrated Care NHS Foundation Trust / North Tees and Hartlepool NHS Foundation Trust / Newcastle Hospitals NHS Foundation Trust|COVID-19 Genomics UK (COG-UK) Consortium|Bashton|United Kingdom

>Spike|hCoV-19/England/QEUH-9CF24A/2020|2020-09-15|EPI\_ISL\_590091|Original|hCoV-19^^England|Human|Lighthouse Lab in Glasgow|Wellcome Sanger Institute for the COVID-19 Genomics UK (COG-UK) consortium|Davies|United Kingdom

>Spike|hCoV-19/Australia/WA344/2020|2020-09-24|EPI\_ISL\_596886|Original|hCoV-19^^Western Australia|Human|PathWest Laboratory Medicine WA|PathWest Laboratory Medicine WA Microbial Surveillance Unit|Sikazwe|Australia

>Spike|hCoV-19/Spain/PV-IBV-000940/2020|2020-03-28|EPI\_ISL\_452632|Original|hCoV-19^^Basque Country|Human|Servicio de Microbiolog\u00eda. Hospital Universitario Donostia. OSI Donostialdea. \u00clrea de Enfermedades Infecciosas|SeqCOVID-SPAIN consortium|IBV (CSIC) |Comas|Spain

>Spike|hCoV-19/South Africa/Tygerberg\_30/2020|2020-03-29|EPI\_ISL\_464141|Original|hCoV-19^^Western Cape|Human|National Health Laboratory Service (NHLS)|Division of Medical Virology|Engelbrecht|South Africa

>Spike|hCoV-19/Denmark/DCGC-12605/2020|2020-11-16|EPI\_ISL\_682786|Original|hCoV-19^^Hovedstaden|Human|Department of Virus and Microbiological Special Diagnostics|Albertsen Lab|Michaelsen|Denmark

>Spike|hCoV-19/USA/CA-IGI-0345/2020|2020-07-10|EPI\_ISL\_576533|Original|hCoV-19^^California|Human|Innovative Genomics Institute|Innovative Genomics Institute|Wyman|USA

>Spike|hCoV-19/England/ALDP-94F628/2020|2020-06-18|EPI\_ISL\_555916|Original|hCoV-19^^England|Human|Lighthouse Lab in Alderley Park|Wellcome Sanger Institute for the COVID-19 Genomics UK (COG-UK) consortium|Davies|United Kingdom



>Spike|hCoV-19/Japan/PG-1415/2020|2020-04-00|EPI\_ISL\_685022|Original|hCoV-19^^Japan|Human|Saitama Prefectural Institute of Public Health|Pathogen Genomics Center|Sekizuka|Japan

>Spike|hCoV-19/England/QEUA-B7D66B/2020|2020-11-14|EPI\_ISL\_674530|Original|hCoV-19^^England|Human|Lighthouse Lab in Glasgow|Wellcome Sanger Institute for the COVID-19 Genomics UK (COG-UK) Consortium|Davies|United Kingdom

>Spike|hCoV-19/England/ALDP-A2F326/2020|2020-10-05|EPI\_ISL\_587021|Original|hCoV-19^^England|Human|Lighthouse Lab in Alderley Park|Wellcome Sanger Institute for the COVID-19 Genomics UK (COG-UK) consortium|Davies|United Kingdom

>Spike|hCoV-19/USA/MN-QDX-995/2020|2020-03-14|EPI\_ISL\_571792|Original|hCoV-19^^Minnesota|Human|Quest Diagnostics|Quest Diagnostics|Kagan|USA

>Spike|hCoV-19/England/MILK-A6C1D8/2020|2020-10-10|EPI\_ISL\_608894|Original|hCoV-19^^England|Human|Lighthouse Lab in Milton Keynes|Wellcome Sanger Institute for the COVID-19 Genomics UK (COG-UK) consortium|Davies|United Kingdom

>Spike|hCoV-19/England/LIVE-DB651C/2020|2020-11-06|EPI\_ISL\_652101|Original|hCoV-19^^England|Human|Liverpool Clinical Laboratories|COVID-19 Genomics UK (COG-UK) Consortium|Haldenby|United Kingdom

>Spike|hCoV-19/England/QEUA-A4D489/2020|2020-10-05|EPI\_ISL\_628601|Original|hCoV-19^^England|Human|Oxford Viromics|COVID-19 Genomics UK (COG-UK) Consortium|Golubchik|United Kingdom

>Spike|hCoV-19/Tunisia/5008/2020|2020-03-24|EPI\_ISL\_699656|Original|hCoV-19^^Tunis|Human|1-Laboratory of Microbiology|1-Clinical and Experimental Pharmacology Lab|Boutiba-Ben Boubaker|Tunisia

>Spike|hCoV-19/England/QEUA-76DA93/2020|2020-07-17|EPI\_ISL\_533188|Original|hCoV-19^^England|Human|Lighthouse Lab in Glasgow|Wellcome Sanger Institute for the COVID-19 Genomics UK (COG-UK) consortium|Davies|United Kingdom

>Spike|hCoV-19/USA/VA-DCLS-1279/2020|2020-08-14|EPI\_ISL\_572294|Original|hCoV-19^^Virginia|Human|Virginia DCLS|Virginia DCLS|St. Jacques|USA

>Spike|hCoV-19/England/ALDP-5D4C84/2020|2020-06-18|EPI\_ISL\_558425|Original|hCoV-19^^England|Human|Lighthouse Lab in Alderley Park|Wellcome Sanger Institute for the COVID-19 Genomics UK (COG-UK) consortium|Davies|United Kingdom

>Spike|hCoV-19/Australia/VIC5655/2020|2020-07-17|EPI\_ISL\_518465|Original|hCoV-19^^Victoria|Human|Victorian Infectious Diseases Reference Laboratory (VIDRL)|VIDRL and MDU-PHL|Schultz|Australia

>Spike|hCoV-19/Denmark/DCGC-18779/2020|2020-12-07|EPI\_ISL\_748551|Original|hCoV-19^^Midtjylland|Human|Department of Virus and Microbiological Special Diagnostics|Albertsen Lab|Michaelsen|Denmark

>Spike|hCoV-19/England/QEUA-9B8860/2020|2020-09-08|EPI\_ISL\_549688|Original|hCoV-19^^England|Human|Lighthouse Lab in Glasgow|Wellcome Sanger Institute for the COVID-19 Genomics UK (COG-UK) consortium|Davies|United Kingdom

>Spike|hCoV-19/England/ALDP-C3DCBF/2020|2020-12-10|EPI\_ISL\_731604|Original|hCoV-19^^England|Human|Lighthouse Lab in Alderley Park|Wellcome Sanger Institute for the COVID-19 Genomics UK (COG-UK) Consortium|Davies|United Kingdom

>Spike|hCoV-19/England/QEUA-9D0D72/2020|2020-09-15|EPI\_ISL\_589947|Original|hCoV-19^^England|Human|Lighthouse Lab in Glasgow|Wellcome Sanger Institute for the COVID-19 Genomics UK (COG-UK) consortium|Davies|United Kingdom

>Spike|hCoV-19/Netherlands/GE-EMC-400/2020|2020-10-25|EPI\_ISL\_722545|Original|hCoV-19^^Gelderland|Human|Dutch COVID-19 response team|Erasmus Medical Center|Oude Munnink|Netherlands

>Spike|hCoV-19/USA/NY-NYCPHL-001321/2020|2020-11-10|EPI\_ISL\_683966|Original|hCoV-19^^New York|Human|DOHMH Morrisania|New York City Public Health Laboratory|Wang|USA

>Spike|hCoV-19/England/204080876/2020|2020-10-01|EPI\_ISL\_609828|Original|hCoV-19^^England|Human|Respiratory Virus Unit|Respiratory Virus Unit|Platt|United Kingdom

>Spike|hCoV-19/Thailand/74/2020|2020-01-13|EPI\_ISL\_403963|Original|hCoV-19^^Nonthaburi|Human|Bamrasnaradura Hospital|1. Department of Medical Sciences|Okada|Thailand

>Spike|hCoV-19/USA/AZ-TG569498/2020|2020-07-10|EPI\_ISL\_695585|Original|hCoV-19^^Arizona|Human|AZ SPHL|TGen North|French|USA

>Spike|hCoV-19/England/LEED-2A98D2/2020|2020-04-09|EPI\_ISL\_538910|Original|hCoV-19^^England|Human|Leeds Teaching Hospitals NHS Trust and Public Health

England|Wellcome Sanger Institute for the COVID-19 Genomics UK (COG-UK) consortium|Davies|United Kingdom  
>Spike|hCoV-19/USA/WI-UW-2367/2020|2020-11-16|EPI\_ISL\_728133|Original|hCoV-19^^Wisconsin|Human|University of Wisconsin-Madison AIDS Vaccine Research Laboratories|University of Wisconsin-Madison AIDS Vaccine Research Laboratories|Baczenas|USA  
>Spike|hCoV-19/Wales/PHWC-26417/2020|2020-03-27|EPI\_ISL\_422112|Original|hCoV-19^^Wales|Human|Wales Specialist Virology Centre|Public Health Wales Microbiology Cardiff|Moore|United Kingdom  
>Spike|hCoV-19/USA/CA-ALSR-3544/2020|2020-06-19|EPI\_ISL\_636077|Original|hCoV-19^^California|Human|San Diego County Public Health Laboratory|Andersen lab at Scripps Research|Gangavarapu|USA  
>Spike|hCoV-19/France/OCC-164/2020|2020-10-29|EPI\_ISL\_751483|Original|hCoV-19^^Occitanie|Human|CHU Purpan - Laboratoire de Virologie - Institut F\u00e9d\u00e9ratif de Biologie|CHU Purpan - Laboratoire de Virologie - Institut F\u00e9d\u00e9ratif de Biologie|Latour|France  
>Spike|hCoV-19/USA/WI-WSLH-200048/2020|2020-03-22|EPI\_ISL\_471213|Original|hCoV-19^^Wisconsin|Human|Wisconsin State Laboratory of Hygiene Communicable Disease Division|Wisconsin State Laboratory of Hygiene Communicable Disease Division|Florek|USA  
>Spike|hCoV-19/England/QEUEH-9F5560/2020|2020-09-24|EPI\_ISL\_588649|Original|hCoV-19^^England|Human|Lighthouse Lab in Glasgow|Wellcome Sanger Institute for the COVID-19 Genomics UK (COG-UK) consortium|Davies|United Kingdom  
>Spike|hCoV-19/Austria/CeMM0990/2020|2020-04-11|EPI\_ISL\_583834|Original|hCoV-19^^Austria|Human|Dr. Gernot Walder GmbH|Bergthaler laboratory|Bergthaler|Austria  
>Spike|hCoV-19/England/ALDP-CEC253/2020|2020-12-21|EPI\_ISL\_782207|Original|hCoV-19^^England|Human|Lighthouse Lab in Alderley Park|Wellcome Sanger Institute for the COVID-19 Genomics UK (COG-UK) Consortium|Davies|United Kingdom  
>Spike|hCoV-19/Canada/ON-S120/2020|2020-03-22|EPI\_ISL\_586293|Original|hCoV-19^^Ontario|Human|Toronto Invasive Bacterial Diseases Network|McMaster University|McArthur|Canada  
>Spike|hCoV-19/USA/TX-HMH-906/2020|2020-04-09|EPI\_ISL\_545909|Original|hCoV-19^^Texas|Human|Houston Methodist Hospital|Houston Methodist Hospital|Long|USA  
>Spike|hCoV-19/Australia/VIC8758/2020|2020-07-28|EPI\_ISL\_565179|Original|hCoV-19^^Victoria|Human|Victorian Infectious Diseases Reference Laboratory (VIDRL)|VIDRL and MDU-PHL|Schultz|Australia  
>Spike|hCoV-19/Wales/PHWC-4982B8/2020|2020-12-01|EPI\_ISL\_727050|Original|hCoV-19^^Wales|Human|Originating lab|COVID-19 Genomics UK (COG-UK) Consortium|Moore|United Kingdom  
>Spike|hCoV-19/England/QEUEH-79285F/2020|2020-07-15|EPI\_ISL\_533135|Original|hCoV-19^^England|Human|Lighthouse Lab in Glasgow|Wellcome Sanger Institute for the COVID-19 Genomics UK (COG-UK) consortium|Davies|United Kingdom  
>Spike|hCoV-19/Italy/APU-UniMI-809/2020|2020-03-19|EPI\_ISL\_469020|Original|hCoV-19^^Apulia|Human|Istituto Zooprofilattico Sperimentale Puglia e Basilicata; Dipartimento di Bioscienze|Beaconlab (Bioinformatics)|Chiara|Italy  
>Spike|hCoV-19/Wales/PHWC-48B36A/2020|2020-10-28|EPI\_ISL\_666226|Original|hCoV-19^^Wales|Human|Wales Specialist Virology Centre Sequencing lab|COVID-19 Genomics UK (COG-UK) Consortium|Moore|United Kingdom  
>Spike|hCoV-19/USA/AK-PHL414/2020|2020-06-03|EPI\_ISL\_522398|Original|hCoV-19^^Alaska|Human|Alaska State Virology Laboratory|Alaska State Virology Laboratory|Chen|USA  
>Spike|hCoV-19/England/ALDP-B62FB9/2020|2020-11-08|EPI\_ISL\_655618|Original|hCoV-19^^England|Human|Lighthouse Lab in Alderley Park|Wellcome Sanger Institute for the COVID-19 Genomics UK (COG-UK) Consortium|Davies|United Kingdom  
>Spike|hCoV-19/Belgium/reg-0417523/2020|2020-04-17|EPI\_ISL\_734614|Original|hCoV-19^^Herent|Human|UZ Leuven|KU Leuven|Maes|Belgium  
>Spike|hCoV-19/Denmark/DCGC-3786/2020|2020-08-31|EPI\_ISL\_622689|Original|hCoV-19^^NA|Human|Department of Virus and Microbiological Special Diagnostics|Albertsen lab|Michaelsen|Denmark

>Spike|hCoV-19/Israel/ISR\_IT0320/2020|2020-03-01|EPI\_ISL\_419210|Vero|hCoV-19^^Ramat Gan|Human|The Chaim Sheba Medical Center|Israel Institute for Biological Research|Zvi|Israel

>Spike|hCoV-19/Japan/PG-3836/2020|2020-07-00|EPI\_ISL\_692087|Original|hCoV-19^^Japan|Human|Pathogen Genomics Center|Pathogen Genomics Center|Sekizuka|Japan

>Spike|hCoV-19/Germany/BB-ChVir-W1076-4385/2020|2020-04-04|EPI\_ISL\_753774|Original|hCoV-19^^Brandenburg|Human|Charit\u00e9 Universit\u00e4tsmedizin Berlin|Charit\u00e9 Universit\u00e4tsmedizin Berlin|Muehlemann|Germany

>Spike|hCoV-19/Wales/PHWC-16BCD1/2020|2020-09-15|EPI\_ISL\_573964|Original|hCoV-19^^Wales|Human|Wales Specialist Virology Centre Sequencing lab|COVID-19 Genomics UK (COG-UK) Consortium|Moore|United Kingdom

>Spike|hCoV-19/England/ALDP-C8B414/2020|2020-12-16|EPI\_ISL\_756439|Original|hCoV-19^^England|Human|Lighthouse Lab in Alderley Park|Wellcome Sanger Institute for the COVID-19 Genomics UK (COG-UK) Consortium|Davies|United Kingdom

>Spike|hCoV-19/Australia/NSW1117/2020|2020-09-15|EPI\_ISL\_593731|Original|hCoV-19^^New South Wales|Human|South Eastern Area Laboratory Services (SEALS)|NSW Health Pathology - Institute of Clinical Pathology and Medical Research; Westmead Hospital; University of Sydney|Gall|Australia

>Spike|hCoV-19/England/201290386/2020|2020-03-21|EPI\_ISL\_465802|Original|hCoV-19^^England|Human|Respiratory Virus Unit|Respiratory Virus Unit|Platt|United Kingdom

>Spike|hCoV-19/Belgium/ULG-10761/2020|2020-10-06|EPI\_ISL\_641603|Original|hCoV-19^^Li\u00e8ge|Human|Department of Clinical Microbiology|GIGA Medical Genomics|Durkin|Belgium

>Spike|hCoV-19/Canada/ON-S1975/2020|2020-11-24|EPI\_ISL\_755689|Original|hCoV-19^^Ontario|Human|Toronto Invasive Bacterial Diseases Network|McMaster University|McArthur|Canada

>Spike|hCoV-19/India/OR-ILSCV12744/2020|2020-05-09|EPI\_ISL\_463015|Original|hCoV-19^^Odisha|Human|Institute of Life Sciences|Immunogenomics lab|Raghav|India

>Spike|hCoV-19/England/NORT-284E08/2020|2020-03-26|EPI\_ISL\_488538|Original|hCoV-19^^England|Human|NU-OMICS DNA Sequencing research facility|Wellcome Sanger Institute for the COVID-19 Genomics UK (COG-UK) consortium|Davies|United Kingdom

>Spike|hCoV-19/Luxembourg/LNS5711030/2020|2020-04-21|EPI\_ISL\_445072|Original|hCoV-19^^Luxembourg|Human|Laboratoire National de Sante|Laboratoire National de Sante|Wienecke-Baldacchino|Luxembourg

>Spike|hCoV-19/England/SHEF-CC1B2/2020|2020-09-07|EPI\_ISL\_559930|Original|hCoV-19^^England|Human|Virology Department|COVID-19 Genomics UK (COG-UK) Consortium|de Silva|United Kingdom

>Spike|hCoV-19/Wales/PHWC-48CD98/2020|2020-11-07|EPI\_ISL\_666538|Original|hCoV-19^^Wales|Human|Wales Specialist Virology Centre Sequencing lab|COVID-19 Genomics UK (COG-UK) Consortium|Moore|United Kingdom

>Spike|hCoV-19/USA/TX-HMH-2095/2020|2020-05-23|EPI\_ISL\_545118|Original|hCoV-19^^Texas|Human|Houston Methodist Hospital|Houston Methodist Hospital|Long|USA

>Spike|hCoV-19/England/ALDP-8D64D2/2020|2020-06-24|EPI\_ISL\_557105|Original|hCoV-19^^England|Human|Lighthouse Lab in Alderley Park|Wellcome Sanger Institute for the COVID-19 Genomics UK (COG-UK) consortium|Davies|United Kingdom

>Spike|hCoV-19/Germany/SH-ChVir20781/2020|2020-11-27|EPI\_ISL\_729691|Original|hCoV-19^^Schleswig-Holstein|Human|A. Krumbholz|Charit\u00e9 Universit\u00e4tsmedizin Berlin|Muehlemann|Germany

>Spike|hCoV-19/England/CAMC-AB02E1/2020|2020-10-22|EPI\_ISL\_623330|Original|hCoV-19^^England|Human|Lighthouse Lab in Cambridge|Wellcome Sanger Institute for the COVID-19 Genomics UK (COG-UK) consortium|Davies|United Kingdom

>Spike|hCoV-19/Senegal/57476/2020|2020-06-06|EPI\_ISL\_476149|Original|hCoV-19^^Dakar|Human|Institut Pasteur Dakar|Institut Pasteur de Dakar|Dia|Senegal

>Spike|hCoV-19/USA/MN-QDX-257/2020|2020-04-30|EPI\_ISL\_498729|Original|hCoV-19^^Minnesota|Human|Quest Diagnostics|Quest Diagnostics|Kagan|USA

>Spike|hCoV-19/Australia/VIC10221/2020|2020-08-26|EPI\_ISL\_562829|Original|hCoV-19^^Victoria|Human|Microbiological Diagnostic Unit - Public Health Laboratory (MDU-PHL)|MDU-PHL|Schultz|Australia

>Spike|hCoV-19/Wales/MILK-9C3149/2020|2020-09-09|EPI\_ISL\_566838|Original|hCoV-19^^Wales|Human|Lighthouse Lab in Milton Keynes|Wellcome Sanger Institute for the COVID-19 Genomics UK (COG-UK) consortium|Davies|United Kingdom

>Spike|hCoV-19/Wales/PHWC-4874A7/2020|2020-10-27|EPI\_ISL\_638053|Original|hCoV-19^^Wales|Human|Wales Specialist Virology Centre Sequencing lab|COVID-19 Genomics UK (COG-UK) Consortium|Moore|United Kingdom

>Spike|hCoV-19/Australia/NSW231/2020|2020-03-27|EPI\_ISL\_451497|Original|hCoV-19^^New South Wales|Human|Pathology West - NSW Health Pathology|NSW Health Pathology - Institute of Clinical Pathology and Medical Research; Westmead Hospital; University of Sydney|Gall|Australia

>Spike|hCoV-19/Wales/PHWC-49445C/2020|2020-11-19|EPI\_ISL\_726117|Original|hCoV-19^^Wales|Human|Originating lab|COVID-19 Genomics UK (COG-UK) Consortium|Moore|United Kingdom

>Spike|hCoV-19/England/QEUA-9642A1/2020|2020-08-11|EPI\_ISL\_536934|Original|hCoV-19^^England|Human|Lighthouse Lab in Glasgow|Wellcome Sanger Institute for the COVID-19 Genomics UK (COG-UK) consortium|Davies|United Kingdom

>Spike|hCoV-19/England/ALDP-9B5D19/2020|2020-08-28|EPI\_ISL\_572965|Original|hCoV-19^^England|Human|Oxford Viromics|COVID-19 Genomics UK (COG-UK) Consortium|Golubchik|United Kingdom

>Spike|hCoV-19/USA/NY-NYCPHL-001499/2020|2020-11-30|EPI\_ISL\_745425|Original|hCoV-19^^New York|Human|DOHMH Central Harlem|New York City Public Health Laboratory|Wang|USA

>Spike|hCoV-19/Australia/VIC8368/2020|2020-08-12|EPI\_ISL\_564969|Original|hCoV-19^^Victoria|Human|Microbiological Diagnostic Unit - Public Health Laboratory (MDU-PHL) |MDU-PHL|Schultz|Australia

>Spike|hCoV-19/Netherlands/NB-RIVM-20575/2020|2020-12-13|EPI\_ISL\_790659|Original|hCoV-19^^Noord-Brabant|Human|Dutch COVID-19 response team|National Institute for Public Health and the Environment (RIVM)|Meijer|Netherlands

>Spike|hCoV-19/USA/WA-UW-12685/2020|2020-06-29|EPI\_ISL\_570889|Original|hCoV-19^^Washington|Human|UW Virology Lab|UW Virology Lab|Roychoudhury|USA

>Spike|hCoV-19/USA/MI-UM-10033852420/2020|2020-04-04|EPI\_ISL\_578141|Original|hCoV-19^^Michigan|Human|University of Michigan Clinical Microbiology Laboratory|Lauring Lab|Valesano|USA

>Spike|hCoV-19/India/TG-CCMB-AA42/2020|2020-08-10|EPI\_ISL\_539758|Original|hCoV-19^^Telangana|Human|CSIR-Centre for Cellular and Molecular Biology|CSIR-Centre for Cellular and Molecular Biology|Mukherjee|India

>Spike|hCoV-19/Denmark/DCGC-14142/2020|2020-11-30|EPI\_ISL\_711080|Original|hCoV-19^^Hovedstaden|Human|Department of Virus and Microbiological Special Diagnostics|Albertsen Lab|Michaelsen|Denmark

>Spike|hCoV-19/France/HDF-8255/2020|2020-04-03|EPI\_ISL\_560597|Original|hCoV-19^^Hauts-de-France|Human|hospital|National Reference Center for Viruses of Respiratory Infections|Enouf|France

>Spike|hCoV-19/England/MILK-A7DF61/2020|2020-10-12|EPI\_ISL\_637867|Original|hCoV-19^^England|Human|Oxford Viromics|COVID-19 Genomics UK (COG-UK) Consortium|Golubchik|United Kingdom

>Spike|hCoV-19/Switzerland/BS-UHB-42201769/2020|2020-03-21|EPI\_ISL\_528310|Original|hCoV-19^^Basel-Stadt|Human|University Hospital Basel|University Hospital Basel|Roloff Handschin|Switzerland

>Spike|hCoV-19/Wales/PHWC-498713/2020|2020-11-25|EPI\_ISL\_727116|Original|hCoV-19^^Wales|Human|Originating lab|COVID-19 Genomics UK (COG-UK) Consortium|Moore|United Kingdom

>Spike|hCoV-19/Switzerland/SZ-ETHZ-390388/2020|2020-12-01|EPI\_ISL\_721901|Original|hCoV-19^^Schwyz|Human|Viollier AG|Department of Biosystems Science and Engineering|Nadeau|Switzerland

>Spike|hCoV-19/England/LIVE-9E6C9/2020|2020-04-11|EPI\_ISL\_453323|Original|hCoV-19^^England|Human|Liverpool Clinical Laboratories|COVID-19 Genomics UK (COG-UK) Consortium|Haldenby|United Kingdom

>Spike|hCoV-19/Denmark/DCGC-20688/2020|2020-12-21|EPI\_ISL\_759302|Original|hCoV-19^^Midtjylland|Human|Department of Virus and Microbiological Special Diagnostics|Albertsen Lab|Michaelsen|Denmark

>Spike|hCoV-19/England/QEUH-9DEF32/2020|2020-09-21|EPI\_ISL\_584833|Original|hCoV-19^^England|Human|University College London|COVID-19 Genomics UK (COG-UK) Consortium|Roy|United Kingdom

>Spike|hCoV-19/Denmark/DCGC-2007/2020|2020-06-22|EPI\_ISL\_618174|Original|hCoV-19^^Sjaelland|Human|Department of Virus and Microbiological Special Diagnostics|Albertsen lab|Michaelsen|Denmark

>Spike|hCoV-19/England/ALDP-9CBB43/2020|2020-09-16|EPI\_ISL\_575678|Original|hCoV-19^^England|Human|Lighthouse Lab in Alderley Park|Wellcome Sanger Institute for the COVID-19 Genomics UK (COG-UK) consortium|Davies|United Kingdom

>Spike|hCoV-19/USA/FL-BPHL-1051/2020|2020-05-07|EPI\_ISL\_517941|Original|hCoV-19^^Florida|Human|Florida Bureau of Public Health Laboratories|Florida Bureau of Public Health Laboratories|Blanton|USA

>Spike|hCoV-19/England/BRIS-129862/2020|2020-04-01|EPI\_ISL\_458302|Original|hCoV-19^^England|Human|PHE South West Regional Laboratory|Wellcome Sanger Institute for the COVID-19 Genomics UK (COG-UK) consortium|Davies|United Kingdom

>Spike|hCoV-19/England/ALDP-9FCF6B/2020|2020-10-01|EPI\_ISL\_587830|Original|hCoV-19^^England|Human|Lighthouse Lab in Alderley Park|Wellcome Sanger Institute for the COVID-19 Genomics UK (COG-UK) consortium|Davies|United Kingdom

>Spike|hCoV-19/Australia/VIC4788/2020|2020-07-18|EPI\_ISL\_519174|Original|hCoV-19^^Victoria|Human|Microbiological Diagnostic Unit - Public Health Laboratory (MDU-PHL)|MDU-PHL|Schultz|Australia

>Spike|hCoV-19/Scotland/QEUH-7B078B/2020|2020-07-19|EPI\_ISL\_532876|Original|hCoV-19^^Scotland|Human|NHSGGC West of Scotland Specialist Virology Centre / MRC-University of Glasgow Centre for Virus Research|Wellcome Sanger Institute for the COVID-19 Genomics UK (COG-UK) consortium|Davies|United Kingdom

>Spike|hCoV-19/England/MILK-BB256D/2020|2020-11-18|EPI\_ISL\_720104|Original|hCoV-19^^England|Human|Lighthouse Lab in Milton Keynes|Wellcome Sanger Institute for the COVID-19 Genomics UK (COG-UK) Consortium|Davies|United Kingdom

>Spike|hCoV-19/Scotland/QEUH-9F4A62/2020|2020-09-27|EPI\_ISL\_600711|Original|hCoV-19^^Scotland|Human|Lighthouse Lab in Glasgow|Wellcome Sanger Institute for the COVID-19 Genomics UK (COG-UK) consortium|Davies|United Kingdom

>Spike|hCoV-19/Netherlands/ZH-RIVM-20739/2020|2020-12-23|EPI\_ISL\_790805|Original|hCoV-19^^Zuid-holland|Human|Dutch COVID-19 response team|National Institute for Public Health and the Environment (RIVM)|Meijer|Netherlands

>Spike|hCoV-19/Wales/PHWC-15CFE9/2020|2020-05-06|EPI\_ISL\_472653|Original|hCoV-19^^Wales|Human|Wales Specialist Virology Centre Sequencing lab|COVID-19 Genomics UK (COG-UK) Consortium|Moore|United Kingdom

>Spike|hCoV-19/USA/AZ-TG276158/2020|2020-04-10|EPI\_ISL\_694094|Original|hCoV-19^^Arizona|Human|AZ SPHL|TGen North|French|USA

>Spike|hCoV-19/Switzerland/AG-ETHZ-300312/2020|2020-09-25|EPI\_ISL\_603344|Original|hCoV-19^^Aargau|Human|Viollier AG|Department of Biosystems Science and Engineering|Nadeau|Switzerland

>Spike|hCoV-19/Scotland/QEUH-A0B8D6/2020|2020-10-03|EPI\_ISL\_599214|Original|hCoV-19^^Scotland|Human|Lighthouse Lab in Glasgow|Wellcome Sanger Institute for the COVID-19 Genomics UK (COG-UK) consortium|Davies|United Kingdom

>Spike|hCoV-19/England/NOTT-113BBD/2020|2020-09-27|EPI\_ISL\_573465|Original|hCoV-19^^England|Human|Queens Medical Centre|COVID-19 Genomics UK (COG-UK) Consortium|Loose|United Kingdom

>Spike|hCoV-19/USA/UT-08718/2020|2020-05-21|EPI\_ISL\_524775|Original|hCoV-19^^Utah|Human|Utah Public Health Laboratory|Utah Public Health Laboratory|Young|USA

>Spike|hCoV-19/Oman/RESP-20-B-6588/2020|2020-06-05|EPI\_ISL\_525429|Original|hCoV-19^^Muscat|Human|Oman-National Influenza Center|Biotechnology & OMICs Laboratory|Al Mahruqi|Oman

>Spike|hCoV-19/England/CAMC-BD18AB/2020|2020-11-27|EPI\_ISL\_702172|Original|hCoV-19^^England|Human|Lighthouse Lab in Cambridge|Wellcome Sanger Institute for the COVID-19 Genomics UK (COG-UK) Consortium|Davies|United Kingdom

>Spike|hCoV-19/Ireland/D-NVRL-AIIDM0175v1/2020|2020-10-21|EPI\_ISL\_768783|Original|hCoV-19^^Dublin|Human|AIID|Irish Coronavirus Sequencing Consortium - National Virus Reference Laboratory|Gonzalez|Ireland

>Spike|hCoV-19/Spain/VC-FISABIO-212/2020|2020-03-28|EPI\_ISL\_436307|Original|hCoV-19^^Comunitat Valenciana|Human|Servicio de Microbiologia. Hospital Clinico Universitario de Valencia|Sequencing and Bioinformatics Service and Molecular Epidemiology Research Group. FISABIO-Public Health|Gonzalez-Candelas|Spain

>Spike|hCoV-19/USA/CA-CZB-12852/2020|2020-10-20|EPI\_ISL\_648493|Original|hCoV-19^^California|Human|Santa Clara County Public Health Laboratory|Chan-Zuckerberg Biohub|Bhatt|USA

>Spike|hCoV-19/Zhejiang/OS1/2020|2020-03-24|EPI\_ISL\_455688|unknown|hCoV-19^^Zhejiang|Human|unknown|Department of Microbiology|Submitter|China

>Spike|hCoV-19/Canada/QC-LSPQ-L00230882/2020|2020-03-21|EPI\_ISL\_535937|Original|hCoV-19^^Quebec|Human|H\u00f4pital du Centre-de-la-Mauricie|Laboratoire de sant\u00e9 publique du Qu\u00e9bec|Moreira|Canada

>Spike|hCoV-19/England/CAMC-A3F305/2020|2020-10-05|EPI\_ISL\_609732|Original|hCoV-19^^England|Human|Lighthouse Lab in Cambridge|Wellcome Sanger Institute for the COVID-19 Genomics UK (COG-UK) consortium|Davies|United Kingdom

>Spike|hCoV-19/England/CAMC-BC1905/2020|2020-11-20|EPI\_ISL\_704537|Original|hCoV-19^^England|Human|Department of Pathology|COVID-19 Genomics UK (COG-UK) Consortium|Goodfellow|United Kingdom

>Spike|hCoV-19/England/MILK-9D4E6C/2020|2020-09-19|EPI\_ISL\_601710|Original|hCoV-19^^England|Human|Lighthouse Lab in Milton Keynes|Wellcome Sanger Institute for the COVID-19 Genomics UK (COG-UK) consortium|Davies|United Kingdom

>Spike|hCoV-19/Australia/NSW1017/2020|2020-03-25|EPI\_ISL\_593662|Original|hCoV-19^^New South Wales|Human|Pathology West - NSW Health Pathology|NSW Health Pathology - Institute of Clinical Pathology and Medical Research; Westmead Hospital; University of Sydney|Gall|Australia

>Spike|hCoV-19/USA/TX-HMH-MCoV-18610/2020|2020-11-19|EPI\_ISL\_784958|Original|hCoV-19^^Texas|Human|Houston Methodist Hospital|Houston Methodist Hospital|Long|USA

>Spike|hCoV-19/Switzerland/SO-ETHZ-331068/2020|2020-10-20|EPI\_ISL\_614943|Original|hCoV-19^^Solothurn|Human|Viollier AG|Department of Biosystems Science and Engineering|Nadeau|Switzerland

>Spike|hCoV-19/USA/WA-S953/2020|2020-04-27|EPI\_ISL\_463443|Original|hCoV-19^^Washington|Human|Washington State Department of Health|Seattle Flu Study|Bedford|USA

>Spike|hCoV-19/USA/WA-UW187/2020|2020-03-13|EPI\_ISL\_416725|Original|hCoV-19^^Washington|Human|UW Virology Lab|UW Virology Lab|Roychoudhury|USA

>Spike|hCoV-19/Saudi Arabia/KAUST-MAKKAH235/2020|2020-04-06|EPI\_ISL\_678140|Original|hCoV-19^^Makkah|Human|Pathogen Genomics Lab King Abdullah University of Science and Technology(KAUST)|Pathogen Genomics Lab King Abdullah University of Science and Technology(KAUST)|Mohamed Ghazzali|Saudi Arabia

>Spike|hCoV-19/England/MILK-B04F13/2020|2020-10-24|EPI\_ISL\_651044|Original|hCoV-19^^England|Human|Department of Pathology|COVID-19 Genomics UK (COG-UK) Consortium|Goodfellow|United Kingdom

>Spike|hCoV-19/England/201090022/2020|2020-03-03|EPI\_ISL\_464502|Original|hCoV-19^^England|Human|Respiratory Virus Unit|Respiratory Virus Unit|Platt|United Kingdom

>Spike|hCoV-19/England/QEUEH-96F82C/2020|2020-08-17|EPI\_ISL\_540306|Original|hCoV-19^^England|Human|Lighthouse Lab in Glasgow|Wellcome Sanger Institute for the COVID-19 Genomics UK (COG-UK) consortium|Davies|United Kingdom

>Spike|hCoV-19/Scotland/CVR2486/2020|2020-04-15|EPI\_ISL\_493807|Original|hCoV-19^^Scotland|Human|West of Scotland Specialist Virology Centre|COVID-19 Genomics UK (COG-UK) Consortium|Robertson|United Kingdom

>Spike|hCoV-19/England/ALDP-9BE6BB/2020|2020-09-09|EPI\_ISL\_568161|Original|hCoV-19^^England|Human|Lighthouse Lab in Alderley Park|Wellcome Sanger Institute for the COVID-19 Genomics UK (COG-UK) consortium|Davies|United Kingdom

>Spike|hCoV-19/USA/TX-HMH-MCoV-18320/2020|2020-11-17|EPI\_ISL\_784668|Original|hCoV-19^^Texas|Human|Houston Methodist Hospital|Houston Methodist Hospital|Long|USA

>Spike|hCoV-19/England/MILK-9C404B/2020|2020-09-09|EPI\_ISL\_566954|Original|hCoV-19^^England|Human|Lighthouse Lab in Milton Keynes|Wellcome Sanger Institute for the COVID-19 Genomics UK (COG-UK) consortium|Davies|United Kingdom

>Spike|hCoV-19/England/ALDP-B1A2D5/2020|2020-11-01|EPI\_ISL\_645871|Original|hCoV-19^^England|Human|Lighthouse Lab in Alderley Park|Wellcome Sanger Institute for the COVID-19 Genomics UK (COG-UK) Consortium|Davies|United Kingdom

>Spike|hCoV-19/USA/NY-NYCPHL-000211/2020|2020-04-20|EPI\_ISL\_631744|Original|hCoV-19^^New York|Human|Jamaica Hospital Medical Center|New York City Public Health Laboratory|Wang|USA

>Spike|hCoV-19/England/QEUEH-B668D8/2020|2020-11-11|EPI\_ISL\_662445|Original|hCoV-19^^England|Human|Lighthouse Lab in Glasgow|Wellcome Sanger Institute for the COVID-19 Genomics UK (COG-UK) Consortium|Davies|United Kingdom

>Spike|hCoV-19/Russia/OMS-ORINFI-6215S/2020|2020-05-10|EPI\_ISL\_569738|Original|hCoV-19^^Omsk|Human|Omsk Research Institute of Natural Focal Infections|WHO National Influenza Centre Russian Federation|Komissarov|Russia

>Spike|hCoV-19/USA/UT-UPHL-2012505195/2020|2020-10-27|EPI\_ISL\_746241|Original|hCoV-19^^Utah|Human|Ginkgo Bioworks Clinical Laboratory|Utah Public Health Laboratory|Young|USA

>Spike|hCoV-19/Canada/BC-BCCDC-6404/2020|2020-10-00|EPI\_ISL\_740559|Original|hCoV-19^^British Columbia|Human|BCCDC Public Health Laboratory|BCCDC Public Health Laboratory|Prystajecky|Canada

>Spike|hCoV-19/Bosnia and Herzegovina/03\_Tuzla/2020|2020-05-25|EPI\_ISL\_463893|Original|hCoV-19^^Tuzla|Human|University Clinical Center Tuzla|Alea Geneti\u010dki Centar|Konjodolic|Bosnia and Herzegovina

>Spike|hCoV-19/USA/MI-MDHHS-SC21759/2020|2020-08-05|EPI\_ISL\_529877|Original|hCoV-19^^Michigan|Human|Michigan Department of Health and Human Services|Michigan Department of Health and Human Services|Blankenship|USA

>Spike|hCoV-19/Austria/CeMM0047/2020|2020-03-25|EPI\_ISL\_437933|Original|hCoV-19^^Innsbruck|Human|Universitaetsklinik f\u00fcr Innere Medizin II Innsbruck|Bergthaler laboratory|Bergthaler|Austria

>Spike|hCoV-19/Finland/5LS18C7/2020|2020-10-05|EPI\_ISL\_756050|Original|hCoV-19^^Uusimaa|Human|Department of Virology and Immunology|Department of Virology|Smura|Finland

>Spike|hCoV-19/England/MILK-9A8344/2020|2020-08-19|EPI\_ISL\_550128|Original|hCoV-19^^England|Human|Lighthouse Lab in Milton Keynes|Wellcome Sanger Institute for the COVID-19 Genomics UK (COG-UK) consortium|Davies|United Kingdom

>Spike|hCoV-19/England/201000003/2020|2020-03-01|EPI\_ISL\_414013|Original|hCoV-19^^England|Human|Respiratory Virus Unit|Respiratory Virus Unit|Platt|United Kingdom

>Spike|hCoV-19/USA/TX-HMH-2570/2020|2020-06-02|EPI\_ISL\_545394|Original|hCoV-19^^Texas|Human|Houston Methodist Hospital|Houston Methodist Hospital|Long|USA

>Spike|hCoV-19/Scotland/CVR4491/2020|2020-09-21|EPI\_ISL\_585354|Original|hCoV-19^^Scotland|Human|Lighthouse Lab in Glasgow / MRC-University of Glasgow Centre for Virus Research|COVID-19 Genomics UK (COG-UK) Consortium|Robertson|United Kingdom

>Spike|hCoV-19/USA/NV-NSPHL-A0009/2020|2020-03-14|EPI\_ISL\_515298|Original|hCoV-19^^Nevada|Human|Nevada State Public Health Laboratory|Nevada State Public Health Laboratory|Sevinsky|USA

>Spike|hCoV-19/Denmark/DCGC-4992/2020|2020-09-14|EPI\_ISL\_622758|Original|hCoV-19^^Hovedstaden|Human|Department of Virus and Microbiological Special Diagnostics|Albertsen lab|Michaelsen|Denmark

>Spike|hCoV-19/England/QEUEH-9FA6A4/2020|2020-09-29|EPI\_ISL\_588086|Original|hCoV-19^^England|Human|Lighthouse Lab in Glasgow|Wellcome Sanger Institute for the COVID-19 Genomics UK (COG-UK) consortium|Davies|United Kingdom

>Spike|hCoV-19/Japan/PG-6123/2020|2020-08-00|EPI\_ISL\_689235|Original|hCoV-19^^Japan|Human|Pathogen Genomics Center|Pathogen Genomics Center|Sekizuka|Japan

>Spike|hCoV-19/Scotland/QEUEH-9F3D79/2020|2020-09-27|EPI\_ISL\_600821|Original|hCoV-19^^Scotland|Human|Lighthouse Lab in Glasgow|Wellcome Sanger Institute for the COVID-19 Genomics UK (COG-UK) consortium|Davies|United Kingdom

>Spike|hCoV-19/England/MILK-817A4C/2020|2020-07-16|EPI\_ISL\_557334|Original|hCoV-19^^England|Human|Lighthouse Lab in Milton Keynes|Wellcome Sanger Institute for the COVID-19 Genomics UK (COG-UK) consortium|Davies|United Kingdom

>Spike|hCoV-19/Wales/PHWC-48FCF2/2020|2020-11-11|EPI\_ISL\_681217|Original|hCoV-19^^Wales|Human|Wales Specialist Virology Centre Sequencing lab|COVID-19 Genomics UK (COG-UK) Consortium|Moore|United Kingdom

>Spike|hCoV-19/USA/WA-UW-2777/2020|2020-03-29|EPI\_ISL\_486033|Original|hCoV-19^^Washington|Human|UW Virology Lab|UW Virology Lab|Roychoudhury|USA

>Spike|hCoV-19/Denmark/DCGC-4487/2020|2020-09-07|EPI\_ISL\_615672|Original|hCoV-19^^Nordjylland|Human|Department of Virus and Microbiological Special Diagnostics|Albertsen lab|Michaelsen|Denmark

>Spike|hCoV-19/England/ALDP-C3A344/2020|2020-12-09|EPI\_ISL\_731076|Original|hCoV-19^^England|Human|Lighthouse Lab in Alderley Park|Wellcome Sanger Institute for the COVID-19 Genomics UK (COG-UK) Consortium|Davies|United Kingdom

>Spike|hCoV-19/Wales/PHWC-49020B/2020|2020-11-18|EPI\_ISL\_706459|Original|hCoV-19^^Wales|Human|Originating lab|COVID-19 Genomics UK (COG-UK) Consortium|Moore|United Kingdom

>Spike|hCoV-19/Singapore/180/2020|2020-03-21|EPI\_ISL\_462298|Original|hCoV-19^^Singapore|Human|National Public Health Laboratory|National Public Health Laboratory|Mak|Singapore

>Spike|hCoV-19/Luxembourg/LNS5857830/2020|2020-11-18|EPI\_ISL\_744310|Original|hCoV-19^^Luxembourg|Human|Laboratoire national de sant\u00e9|Laboratoire national de sant\u00e9|Wienecke-Baldacchino|Luxembourg

>Spike|hCoV-19/Wales/PHWC-492CA1/2020|2020-11-27|EPI\_ISL\_725773|Original|hCoV-19^^Wales|Human|Originating lab|COVID-19 Genomics UK (COG-UK) Consortium|Moore|United Kingdom

>Spike|hCoV-19/England/204781353/2020|2020-00-00|EPI\_ISL\_649115|Original|hCoV-19^^England|Human|Respiratory Virus Unit|COVID-19 Genomics UK (COG-UK) Consortium|Platt|United Kingdom

>Spike|hCoV-19/Japan/PG-7185/2020|2020-07-00|EPI\_ISL\_688289|Original|hCoV-19^^Japan|Human|Saitama Prefectural Institute of Public Health|Pathogen Genomics Center|Sekizuka|Japan

>Spike|hCoV-19/England/MILK-99CD27/2020|2020-08-30|EPI\_ISL\_549910|Original|hCoV-19^^England|Human|Lighthouse Lab in Milton Keynes|Wellcome Sanger Institute for the COVID-19 Genomics UK (COG-UK) consortium|Davies|United Kingdom

>Spike|hCoV-19/England/QEUH-9F3377/2020|2020-09-24|EPI\_ISL\_588663|Original|hCoV-19^^England|Human|Lighthouse Lab in Glasgow|Wellcome Sanger Institute for the COVID-19 Genomics UK (COG-UK) consortium|Davies|United Kingdom

>Spike|hCoV-19/Italy/LOM-INMI-8058/2020|2020-02-25|EPI\_ISL\_460094|Original|hCoV-19^^Lombardy|Human|Molecular Virology Unit|Laboratory of Virology|Gruber|Italy

>Spike|hCoV-19/USA/UT-UPHL-201131364/2020|2020-05-12|EPI\_ISL\_628999|Original|hCoV-19^^Utah|Human|Utah Public Health Laboratory|Utah Public Health Laboratory|Young|USA

>Spike|hCoV-19/England/CAMC-C9946E/2020|2020-12-17|EPI\_ISL\_762097|Original|hCoV-19^^England|Human|Lighthouse Lab in Cambridge|Wellcome Sanger Institute for the COVID-19 Genomics UK (COG-UK) Consortium|Davies|United Kingdom

>Spike|hCoV-19/Spain/MD-IBV-003702/2020|2020-04-02|EPI\_ISL\_467235|Original|hCoV-19^^Madrid|Human|Hospital General Universitario Gregorio Mara\u00f1a|SeqCOVID-SPAIN consortium|IBV (CSIC)|Comas|Spain

>Spike|hCoV-19/England/QEUH-CAD6E9/2020|2020-12-20|EPI\_ISL\_761094|Original|hCoV-19^^England|Human|Lighthouse Lab in Glasgow|Wellcome Sanger Institute for the COVID-19 Genomics UK (COG-UK) Consortium|Davies|United Kingdom

>Spike|hCoV-19/Spain/AR-IBV-98010640/2020|2020-10-06|EPI\_ISL\_722264|Original|hCoV-19^^Aragon|Human|Servicio de Microbiolog\u00eda|SeqCOVID-SPAIN consortium|IBV (CSIC)|Comas|Spain

>Spike|hCoV-19/England/LOND-D3B05/2020|2020-04-04|EPI\_ISL\_449626|Original|hCoV-19^^England|Human|University College London|COVID-19 Genomics UK (COG-UK) Consortium|Roy|United Kingdom

>Spike|hCoV-19/Denmark/DCGC-19938/2020|2020-12-07|EPI\_ISL\_747616|Original|hCoV-19^^Hovedstaden|Human|Department of Virus and Microbiological Special Diagnostics|Albertsen Lab|Michaelsen|Denmark

>Spike|hCoV-19/Switzerland/LU-ETHZ-110027/2020|2020-04-01|EPI\_ISL\_486465|Original|hCoV-19^^Luzern|Human|Viollier AG|Department of Biosystems Science and Engineering|Nadeau|Switzerland



>Spike|hCoV-19/England/ALDP-B1FA05/2020|2020-11-02|EPI\_ISL\_646125|Original|hCoV-19^^England|Human|Lighthouse Lab in Alderley Park|Wellcome Sanger Institute for the COVID-19 Genomics UK (COG-UK) Consortium|Davies|United Kingdom

>Spike|hCoV-19/USA/OR-OHSU-3561/2020|2020-10-21|EPI\_ISL\_667506|Original|hCoV-19^^Oregon|Human|OHSU Lab Services Molecular Microbiology Lab|Oregon SARS-CoV-2 Genome Sequencing Center|O'Roak|USA

>Spike|hCoV-19/Hong Kong/VM20030491/2020|2020-07-06|EPI\_ISL\_510086|Original|hCoV-19^^Hong Kong|Human|Kwong Wah Hospital|Hong Kong Department of Health|Mak|China

>Spike|hCoV-19/England/ALDP-A93615/2020|2020-10-20|EPI\_ISL\_611235|Original|hCoV-19^^England|Human|Lighthouse Lab in Alderley Park|Wellcome Sanger Institute for the COVID-19 Genomics UK (COG-UK) consortium|Davies|United Kingdom

>Spike|hCoV-19/USA/CA-CZB-15333/2020|2020-10-26|EPI\_ISL\_739402|Original|hCoV-19^^California|Human|Santa Clara County Public Health Laboratory|Chan-Zuckerberg Biohub|Kamm|USA

>Spike|hCoV-19/New Zealand/20CV0211/2020|2020-08-29|EPI\_ISL\_548115|Original|hCoV-19^^Auckland|Human|Middlemore Hospital|Institute of Environmental Science and Research (ESR)|Wang|New Zealand

>Spike|hCoV-19/England/ALDP-986731/2020|2020-08-05|EPI\_ISL\_529576|Original|hCoV-19^^England|Human|Quadram Institute Bioscience|COVID-19 Genomics UK (COG-UK) Consortium|Alikhan|United Kingdom

>Spike|hCoV-19/India/PB-IMT-L178/2020|2020-05-30|EPI\_ISL\_539487|Original|hCoV-19^^Punjab|Human|Civil Hospital|CSIR-Institute of Microbial Technology|Patil|India

>Spike|hCoV-19/England/ALDP-BCABBB/2020|2020-11-23|EPI\_ISL\_703342|Original|hCoV-19^^England|Human|Lighthouse Lab in Alderley Park|Wellcome Sanger Institute for the COVID-19 Genomics UK (COG-UK) Consortium|Davies|United Kingdom

>Spike|hCoV-19/USA/WA-S1102/2020|2020-05-04|EPI\_ISL\_463592|Original|hCoV-19^^Washington|Human|Washington State Department of Health|Seattle Flu Study|Bedford|USA

>Spike|hCoV-19/Austria/CeMM0220/2020|2020-03-16|EPI\_ISL\_438054|Original|hCoV-19^^Vienna|Human|Center for Virology|Bergthaler laboratory|Bergthaler|Austria

>Spike|hCoV-19/Denmark/DCGC-22333/2020|2020-12-14|EPI\_ISL\_758684|Original|hCoV-19^^Sjaelland|Human|Department of Virus and Microbiological Special Diagnostics|Albertsen Lab|Michaelsen|Denmark

>Spike|hCoV-19/Germany/HH-hpi-p1524/2020|2020-03-12|EPI\_ISL\_776024|Original|hCoV-19^^Hamburg|Human|University Medical Center Hamburg Eppendorf|Heinrich Pette Institute|Robitaille|Germany

>Spike|hCoV-19/Australia/VIC3224/2020|2020-07-01|EPI\_ISL\_520907|Original|hCoV-19^^Victoria|Human|Victorian Infectious Diseases Reference Laboratory (VIDRL)|VIDRL and MDU-PHL|Schultz|Australia

>Spike|hCoV-19/Northern Ireland/NIRE-FC5F9/2020|2020-04-12|EPI\_ISL\_470036|Original|hCoV-19^^Northern Ireland|Human|Regional Virus Laboratory|Wellcome Sanger Institute for the COVID-19 Genomics UK (COG-UK) consortium|Davies|United Kingdom

>Spike|hCoV-19/Canada/ON-S1893/2020|2020-11-24|EPI\_ISL\_729316|Original|hCoV-19^^Ontario|Human|Toronto Invasive Bacterial Diseases Network|McMaster University|McArthur|Canada

>Spike|hCoV-19/England/ALDP-A87BD9/2020|2020-10-17|EPI\_ISL\_606285|Original|hCoV-19^^England|Human|Lighthouse Lab in Alderley Park|Wellcome Sanger Institute for the COVID-19 Genomics UK (COG-UK) consortium|Davies|United Kingdom

>Spike|hCoV-19/USA/CA-QDX-1040/2020|2020-03-17|EPI\_ISL\_571705|Original|hCoV-19^^California|Human|Quest Diagnostics|Quest Diagnostics|Kagan|USA

>Spike|hCoV-19/USA/WA-S1182/2020|2020-05-06|EPI\_ISL\_463672|Original|hCoV-19^^Washington|Human|Washington State Department of Health|Seattle Flu Study|Bedford|USA

>Spike|hCoV-19/Australia/VIC5508/2020|2020-07-21|EPI\_ISL\_518344|Original|hCoV-19^^Victoria|Human|Microbiological Diagnostic Unit - Public Health Laboratory (MDU-PHL)|MDU-PHL|Schultz|Australia

>Spike|hCoV-19/England/ALDP-BB38BE/2020|2020-11-19|EPI\_ISL\_701819|Original|hCoV-19^^England|Human|Lighthouse Lab in Alderley Park|Wellcome Sanger Institute for the COVID-19 Genomics UK (COG-UK) Consortium|Davies|United Kingdom

>Spike|hCoV-19/England/MILK-9953A4/2020|2020-08-24|EPI\_ISL\_552277|Original|hCoV-19^^England|Human|Lighthouse Lab in Milton Keynes|Wellcome Sanger Institute for the COVID-19 Genomics UK (COG-UK) consortium|Davies|United Kingdom

>Spike|hCoV-19/England/CAMC-B54846/2020|2020-11-08|EPI\_ISL\_658256|Original|hCoV-19^^England|Human|Lighthouse Lab in Cambridge|Wellcome Sanger Institute for the COVID-19 Genomics UK (COG-UK) Consortium|Davies|United Kingdom

>Spike|hCoV-19/England/NORT-291AD7/2020|2020-04-24|EPI\_ISL\_453544|Original|hCoV-19^^England|Human|Northumbria University / South Tees Hospitals NHS Foundation Trust / North Cumbria Integrated Care NHS Foundation Trust / North Tees and Hartlepool NHS Foundation Trust / Newcastle Hospitals NHS Foundation Trust|COVID-19 Genomics UK (COG-UK) Consortium|Bashton|United Kingdom

>Spike|hCoV-19/USA/WY-WPHL-20095145/2020|2020-10-12|EPI\_ISL\_766882|Original|hCoV-19^^Wyoming|Human|Wyoming Public Health Laboratory|Wyoming Public Health Laboratory|Hull|USA

>Spike|hCoV-19/Brazil/SE-L10-CD147/2020|2020-03-12|EPI\_ISL\_476176|Original|hCoV-19^^Sergipe|Human|DB Diagn\u00f3sticos do Brasil|Instituto de Medicina Tropical da Universidade de S\u00e3o Paulo|Sabino|Brazil

>Spike|hCoV-19/Poland/19845/2020|2020-11-00|EPI\_ISL\_732922|Original|hCoV-19^^Poland|Human|genXone SA|genXone SA|Kaszuba|Poland

>Spike|hCoV-19/England/OXON-B0BD1/2020|2020-04-17|EPI\_ISL\_478943|Original|hCoV-19^^England|Human|Oxford Viromics|COVID-19 Genomics UK (COG-UK) Consortium|Golubchik|United Kingdom

>Spike|hCoV-19/Wales/PHWC-49148C/2020|2020-11-19|EPI\_ISL\_706657|Original|hCoV-19^^Wales|Human|Originating lab|COVID-19 Genomics UK (COG-UK) Consortium|Moore|United Kingdom

>Spike|hCoV-19/England/QEUA-C3332D/2020|2020-12-11|EPI\_ISL\_734135|Original|hCoV-19^^England|Human|Lighthouse Lab in Glasgow|Wellcome Sanger Institute for the COVID-19 Genomics UK (COG-UK) Consortium|Davies|United Kingdom

>Spike|hCoV-19/Denmark/DCGC-2408/2020|2020-08-10|EPI\_ISL\_617590|Original|hCoV-19^^Syddanmark|Human|Department of Virus and Microbiological Special Diagnostics|Albertsen lab|Michaelsen|Denmark

>Spike|hCoV-19/USA/TX-HMH-5573/2020|2020-06-26|EPI\_ISL\_544871|Original|hCoV-19^^Texas|Human|Houston Methodist Hospital|Houston Methodist Hospital|Long|USA

>Spike|hCoV-19/Denmark/DCGC-13221/2020|2020-11-30|EPI\_ISL\_712152|Original|hCoV-19^^Hovedstaden|Human|Department of Virus and Microbiological Special Diagnostics|Albertsen Lab|Michaelsen|Denmark

>Spike|hCoV-19/England/LEED-2A9E94/2020|2020-03-24|EPI\_ISL\_538766|Original|hCoV-19^^England|Human|Leeds Teaching Hospitals NHS Trust and Public Health England|Wellcome Sanger Institute for the COVID-19 Genomics UK (COG-UK) consortium|Davies|United Kingdom

>Spike|hCoV-19/England/20204114504/2020|2020-05-13|EPI\_ISL\_528392|Original|hCoV-19^^England|Human|Respiratory Virus Unit|Respiratory Virus Unit|Ledesma|United Kingdom

>Spike|hCoV-19/Wales/PHWC-4A6448/2020|2020-12-17|EPI\_ISL\_765038|Original|hCoV-19^^Wales|Human|Wales Specialist Virology Centre Sequencing lab|COVID-19 Genomics UK (COG-UK) Consortium|Moore|United Kingdom

>Spike|hCoV-19/Scotland/EDB11319/2020|2020-12-24|EPI\_ISL\_764364|Original|hCoV-19^^Scotland|Human|Virology Department|COVID-19 Genomics UK (COG-UK) Consortium|McHugh|United Kingdom

>Spike|hCoV-19/USA/SC-DHEC-0789/2020|2020-06-26|EPI\_ISL\_538398|Original|hCoV-19^^South Carolina|Human|Microbiology Division|Microbiology Division|Flores|USA

>Spike|hCoV-19/United Arab Emirates/0413/2020|2020-05-15|EPI\_ISL\_698588|Original|hCoV-19^^Abu Dhabi|Human|Group 42 (G42) Healthcare|G42 Healthcare|Ogrodzki|United Arab Emirates

>Spike|hCoV-19/England/QEUA-AF48C1/2020|2020-10-30|EPI\_ISL\_663154|Original|hCoV-19^^England|Human|Lighthouse Lab in Glasgow|Wellcome Sanger Institute for the COVID-19 Genomics UK (COG-UK) Consortium|Davies|United Kingdom

>Spike|hCoV-19/Spain/AN-IBV-001983/2020|2020-03-15|EPI\_ISL\_452403|Original|hCoV-19^^Andalucia|Human|Servicio de Microbiolog\u00eda. HRU de M\u00e9llaga. Servicio Andaluz de Salud|SeqCOVID-SPAIN consortium|IBV(CSIC)|Comas|Spain

>Spike|hCoV-19/USA/LA-EVTL1335/2020|2020-12-11|EPI\_ISL\_779001|Original|hCoV-19^^Louisiana|Human|LSUHS Emerging Viral Threat Laboratory|Microbial Genome Sequencing Center|Kamil|USA

>Spike|hCoV-19/USA/FL-BPHL-0461/2020|2020-03-24|EPI\_ISL\_495367|Original|hCoV-19^^Florida|Human|Florida Bureau of Public Health Laboratories|Florida Bureau of Public Health Laboratories|Blanton|USA

>Spike|hCoV-19/England/BIRM-626A0/2020|2020-07-24|EPI\_ISL\_529430|Original|hCoV-19^^England|Human|University of Birmingham|COVID-19 Genomics UK (COG-UK) Consortium|Loman|United Kingdom

>Spike|hCoV-19/England/ALDP-8FF163/2020|2020-06-24|EPI\_ISL\_556997|Original|hCoV-19^^England|Human|Lighthouse Lab in Alderley Park|Wellcome Sanger Institute for the COVID-19 Genomics UK (COG-UK) consortium|Davies|United Kingdom

>Spike|hCoV-19/England/CAMC-A652CD/2020|2020-10-11|EPI\_ISL\_637314|Original|hCoV-19^^England|Human|Department of Pathology|COVID-19 Genomics UK (COG-UK) Consortium|Goodfellow|United Kingdom

>Spike|hCoV-19/USA/MI-MDHHS-SC21965/2020|2020-08-18|EPI\_ISL\_566016|Original|hCoV-19^^Michigan|Human|Michigan Department of Health and Human Services|Michigan Department of Health and Human Services|Blankenship|USA

>Spike|hCoV-19/Russia/Chechenya-83801/2020|2020-03-26|EPI\_ISL\_428909|Vero|hCoV-19^^Chechen|Human|State Research Center of Virology and Biotechnology VECTOR|State Research Center of Virology and Biotechnology VECTOR|Shvalov|Russia

>Spike|hCoV-19/Singapore/885nan/2020|2020-05-05|EPI\_ISL\_648759|Original|hCoV-19^^Singapore|Human|Department of Laboratory Medicine|Department of Laboratory Medicine|Chen|Singapore

>Spike|hCoV-19/USA/CT-Yale-484/2020|2020-09-18|EPI\_ISL\_729755|Original|hCoV-19^^Connecticut|Human|Connecticut Department of Health|Grubaugh Lab - Yale School of Public Health|Grubaugh|USA

>Spike|hCoV-19/England/MILK-A0661D/2020|2020-10-01|EPI\_ISL\_599834|Original|hCoV-19^^England|Human|Lighthouse Lab in Milton Keynes|Wellcome Sanger Institute for the COVID-19 Genomics UK (COG-UK) consortium|Davies|United Kingdom

>Spike|hCoV-19/Ireland/LH-NVRL-20ILR08009/2020|2020-11-11|EPI\_ISL\_732436|Original|hCoV-19^^Louth|Human|National Virus Reference Laboratory|National Virus Reference Laboratory|Gonzalez|Ireland

>Spike|hCoV-19/Switzerland/BE-ETHZ-210066/2020|2020-07-21|EPI\_ISL\_510798|Original|hCoV-19^^Bern|Human|Viollier AG|Department of Biosystems Science and Engineering|Nadeau|Switzerland

>Spike|hCoV-19/Wales/PHWC-48ACBB/2020|2020-10-29|EPI\_ISL\_666144|Original|hCoV-19^^Wales|Human|Wales Specialist Virology Centre Sequencing lab|COVID-19 Genomics UK (COG-UK) Consortium|Moore|United Kingdom

>Spike|hCoV-19/USA/TX-HMH-2553/2020|2020-06-01|EPI\_ISL\_545381|Original|hCoV-19^^Texas|Human|Houston Methodist Hospital|Houston Methodist Hospital|Long|USA

>Spike|hCoV-19/Wales/PHWC-48C8A6/2020|2020-11-04|EPI\_ISL\_665511|Original|hCoV-19^^Wales|Human|Wales Specialist Virology Centre Sequencing lab|COVID-19 Genomics UK (COG-UK) Consortium|Moore|United Kingdom

>Spike|hCoV-19/England/ALDP-A92977/2020|2020-10-19|EPI\_ISL\_610978|Original|hCoV-19^^England|Human|Lighthouse Lab in Alderley Park|Wellcome Sanger Institute for the COVID-19 Genomics UK (COG-UK) consortium|Davies|United Kingdom

>Spike|hCoV-19/England/SHEF-CE709/2020|2020-05-10|EPI\_ISL\_475465|Original|hCoV-19^^England|Human|Virology Department|COVID-19 Genomics UK (COG-UK) Consortium|de Silva|United Kingdom

>Spike|hCoV-19/Denmark/DCGC-8150/2020|2020-10-26|EPI\_ISL\_617233|Original|hCoV-19^^Hovedstaden|Human|Department of Virus and Microbiological Special Diagnostics|Albertsen lab|Michaelsen|Denmark

>Spike|hCoV-19/India/MH-ACTREC-360/2020|2020-07-23|EPI\_ISL\_700009|Original|hCoV-19^^Maharashtra|Human|Hematopathology Laboratory|Hematopathology Laboratory|Patkar|India

>Spike|hCoV-19/Scotland/QEUH-B7E390/2020|2020-11-14|EPI\_ISL\_676355|Original|hCoV-19^^Scotland|Human|Lighthouse Lab in Glasgow|Wellcome Sanger Institute for the COVID-19 Genomics UK (COG-UK) Consortium|Davies|United Kingdom

>Spike|hCoV-19/Sweden/20-50931/2020|2020-04-20|EPI\_ISL\_475160|Original|hCoV-19^^Vasternorrland|Human|Klinisk mikrobiologi Vasternorrland|The Public Health Agency of Sweden|Svartstr\u00f6m|Sweden

>Spike|hCoV-19/Italy/APU-IZSPB\_272PT/2020|2020-11-02|EPI\_ISL\_653767|Original|hCoV-19^^Apulia|Human|I.R.C.C.S. \S. De Bellis\ - Ente Ospedaliero|Istituto Zooprofilattico Sperimentale della Puglia e della Basilicata|Parisi|Italy

>Spike|hCoV-19/United Arab Emirates/0360/2020|2020-05-16|EPI\_ISL\_698535|Original|hCoV-19^^Abu Dhabi|Human|Group 42 (G42) Healthcare|G42 Healthcare|Ogrodzki|United Arab Emirates

>Spike|hCoV-19/England/CAMC-B79517/2020|2020-11-12|EPI\_ISL\_667812|Original|hCoV-19^^England|Human|Lighthouse Lab in Cambridge|Wellcome Sanger Institute for the COVID-19 Genomics UK (COG-UK) Consortium|Davies|United Kingdom

>Spike|hCoV-19/mink/Netherlands/NB-EMC-1-9/2020|2020-04-28|EPI\_ISL\_523046|Original|hCoV-19^^Noord Brabant|Neovison vison|Dutch COVID-19 response team|Erasmus Medical Center|Oude Munnink|Netherlands

>Spike|hCoV-19/England/OXON-ADD3B/2020|2020-00-00|EPI\_ISL\_448632|Original|hCoV-19^^England|Human|Oxford Viromics|COVID-19 Genomics UK (COG-UK) Consortium|Golubchik|United Kingdom

>Spike|hCoV-19/USA/CA-ALSR-1670/2020|2020-04-02|EPI\_ISL\_494730|Original|hCoV-19^^California|Human|San Diego County Public Health Laboratory|Andersen lab at Scripps Research|Gangavarapu|USA

>Spike|hCoV-19/England/20149003304/2020|2020-04-03|EPI\_ISL\_466092|Original|hCoV-19^^England|Human|Respiratory Virus Unit|Respiratory Virus Unit|Platt|United Kingdom

>Spike|hCoV-19/Denmark/DCGC-4090/2020|2020-09-14|EPI\_ISL\_622046|Original|hCoV-19^^Hovedstaden|Human|Department of Virus and Microbiological Special Diagnostics|Albertsen lab|Michaelsen|Denmark

>Spike|hCoV-19/England/CAMC-B22F3D/2020|2020-11-03|EPI\_ISL\_647434|Original|hCoV-19^^England|Human|Lighthouse Lab in Cambridge|Wellcome Sanger Institute for the COVID-19 Genomics UK (COG-UK) Consortium|Davies|United Kingdom

>Spike|hCoV-19/Scotland/CVR5595/2020|2020-10-31|EPI\_ISL\_650764|Original|hCoV-19^^Scotland|Human|West of Scotland Specialist Virology Centre|COVID-19 Genomics UK (COG-UK) Consortium|Robertson|United Kingdom

>Spike|hCoV-19/India/KA-nimh-19669/2020|2020-05-16|EPI\_ISL\_515969|Original|hCoV-19^^Karnataka|Human|MIMS|Department of Neurovirology|Pattabiraman|India

>Spike|hCoV-19/England/QEUEH-B0E8C3/2020|2020-11-02|EPI\_ISL\_641926|Original|hCoV-19^^England|Human|Lighthouse Lab in Glasgow|Wellcome Sanger Institute for the COVID-19 Genomics UK (COG-UK) Consortium|Davies|United Kingdom

>Spike|hCoV-19/England/LOND-124F246/2020|2020-04-17|EPI\_ISL\_665147|Original|hCoV-19^^England|Human|University College London Hospital|COVID-19 Genomics UK (COG-UK) Consortium|Byott|United Kingdom

>Spike|hCoV-19/USA/TX-HMH-1188/2020|2020-04-23|EPI\_ISL\_542576|Original|hCoV-19^^Texas|Human|Houston Methodist Hospital|Houston Methodist Hospital|Long|USA

>Spike|hCoV-19/England/ALDP-C889BE/2020|2020-12-17|EPI\_ISL\_762789|Original|hCoV-19^^England|Human|Lighthouse Lab in Alderley Park|Wellcome Sanger Institute for the COVID-19 Genomics UK (COG-UK) Consortium|Davies|United Kingdom

>Spike|hCoV-19/England/LOND-12F0806/2020|2020-11-17|EPI\_ISL\_679580|Original|hCoV-19^^England|Human|University College London|COVID-19 Genomics UK (COG-UK) Consortium|Roy|United Kingdom

>Spike|hCoV-19/USA/WA-S1613/2020|2020-05-26|EPI\_ISL\_496039|Original|hCoV-19^^Washington|Human|Washington State Department of Health|Seattle Flu Study|Lee|USA

>Spike|hCoV-19/Switzerland/VD-ETHZ-300248/2020|2020-09-30|EPI\_ISL\_603280|Original|hCoV-19^^Vaud|Human|Viollier AG|Department of Biosystems Science and Engineering|Nadeau|Switzerland

>Spike|hCoV-19/Denmark/ALAB-SSI219/2020|2020-03-10|EPI\_ISL\_429409|Original|hCoV-19^^Denmark|Human|Department of Virus and Microbiological Special Diagnostics|Albertsen lab|Kirkegaard|Denmark

>Spike|hCoV-19/Australia/VIC9343/2020|2020-08-03|EPI\_ISL\_565510|Original|hCoV-19^^Victoria|Human|Microbiological Diagnostic Unit - Public Health Laboratory (MDU-PHL)|MDU-PHL|Schultz|Australia

>Spike|hCoV-19/South Korea/KDCA0065/2020|2020-09-16|EPI\_ISL\_747306|Original|hCoV-19^^South Korea|Human|Division of Emerging Infectious Diseases|Division of Emerging Infectious Diseases|Park|South Korea

>Spike|hCoV-19/England/ALDP-9846CD/2020|2020-07-28|EPI\_ISL\_529563|Original|hCoV-19^^England|Human|Quadram Institute Bioscience|COVID-19 Genomics UK (COG-UK) Consortium|Alikhan|United Kingdom

>Spike|hCoV-19/England/CAMC-C3FB92/2020|2020-12-10|EPI\_ISL\_719368|Original|hCoV-19^^England|Human|Lighthouse Lab in Cambridge|Wellcome Sanger Institute for the COVID-19 Genomics UK (COG-UK) Consortium|Davies|United Kingdom

>Spike|hCoV-19/Hong Kong/VM20031159/2020|2020-07-07|EPI\_ISL\_510093|Original|hCoV-19^^Hong Kong|Human|Queen Elizabeth Hospital|Hong Kong Department of Health|Mak|China

>Spike|hCoV-19/Australia/NSW3666/2020|2020-12-16|EPI\_ISL\_710513|Original|hCoV-19^^New South Wales|Human|Area of Virology|Area of Virology|Yeang|Australia

>Spike|hCoV-19/Spain/AR-IBV-98010736/2020|2020-11-12|EPI\_ISL\_722271|Original|hCoV-19^^Aragon|Human|Servicio de Microbiolog\u00eda|SeqCOVID-SPAIN consortium|IBV (CSIC) |Comas|Spain

>Spike|hCoV-19/England/NORW-EAB65/2020|2020-04-29|EPI\_ISL\_461884|Original|hCoV-19^^England|Human|Quadram Institute Bioscience|COVID-19 Genomics UK (COG-UK) Consortium|Alikhan|United Kingdom

>Spike|hCoV-19/USA/MI-MDHHS-SC20035/2020|2020-03-18|EPI\_ISL\_437122|Original|hCoV-19^^Michigan|Human|Michigan Department of Health and Human Services|Michigan Department of Health and Human Services|Blankenship|USA

>Spike|hCoV-19/Jordan/AQ-ALSR-5251/2020|2020-10-18|EPI\_ISL\_730489|Original|hCoV-19^^Aqaba|Human|Biolab Diagnostic Laboratories|Andersen lab at Scripps Research|Gangavarapu|Jordan

>Spike|hCoV-19/India/TG-CCMB-AC529/2020|2020-08-19|EPI\_ISL\_539772|Original|hCoV-19^^Telangana|Human|CSIR-Centre for Cellular and Molecular Biology|CSIR-Centre for Cellular and Molecular Biology|Mukherjee|India

>Spike|hCoV-19/USA/TX-HMH-MCoV-15542/2020|2020-10-23|EPI\_ISL\_787026|Original|hCoV-19^^Texas|Human|Houston Methodist Hospital|Houston Methodist Hospital|Long|USA

>Spike|hCoV-19/Australia/VIC12744/2020|2020-07-29|EPI\_ISL\_641071|Original|hCoV-19^^Victoria|Human|Microbiological Diagnostic Unit - Public Health Laboratory (MDU-PHL) |MDU-PHL|Schultz|Australia

>Spike|hCoV-19/England/CAMB-722F4/2020|2020-03-28|EPI\_ISL\_439618|Original|hCoV-19^^England|Human|Department of Pathology|Wellcome Sanger Institute for the COVID-19 Genomics UK (COG-UK) consortium|Amato|United Kingdom

>Spike|hCoV-19/England/QEUH-962416/2020|2020-08-10|EPI\_ISL\_531750|Original|hCoV-19^^England|Human|Lighthouse Lab in Glasgow|Wellcome Sanger Institute for the COVID-19 Genomics UK (COG-UK) consortium|Davies|United Kingdom

>Spike|hCoV-19/England/QEUH-9FA7A1/2020|2020-09-28|EPI\_ISL\_588220|Original|hCoV-19^^England|Human|Lighthouse Lab in Glasgow|Wellcome Sanger Institute for the COVID-19 Genomics UK (COG-UK) consortium|Davies|United Kingdom

>Spike|hCoV-19/England/20132048102/2020|2020-03-22|EPI\_ISL\_420497|Original|hCoV-19^^England|Human|Respiratory Virus Unit|Respiratory Virus Unit|Platt|United Kingdom

>Spike|hCoV-19/Northern Ireland/NIRE-FC0E9/2020|2020-04-13|EPI\_ISL\_470023|Original|hCoV-19^^Northern Ireland|Human|Regional Virus Laboratory|Wellcome Sanger Institute for the COVID-19 Genomics UK (COG-UK) consortium|Davies|United Kingdom

>Spike|hCoV-19/Australia/VIC15760/2020|2020-08-03|EPI\_ISL\_593446|Original|hCoV-19^^Victoria|Human|Microbiological Diagnostic Unit - Public Health Laboratory (MDU-PHL) |MDU-PHL|Schultz|Australia

>Spike|hCoV-19/Panama/330286/2020|2020-03-09|EPI\_ISL\_496661|Original|hCoV-19^^Panama Center|Human|Gorgas Memorial Laboratory of Health Studies|Gorgas Memorial Laboratory of Health Studies|Martinez|Panama

>Spike|hCoV-19/Denmark/DCGC-9853/2020|2020-11-09|EPI\_ISL\_669229|Original|hCoV-19^^Midtjylland|Human|Department of Virus and Microbiological Special Diagnostics|Albertsen Lab|Michaelsen|Denmark

>Spike|hCoV-19/England/ALDP-B62FE6/2020|2020-11-08|EPI\_ISL\_655494|Original|hCoV-19^^England|Human|Lighthouse Lab in Alderley Park|Wellcome Sanger Institute for the COVID-19 Genomics UK (COG-UK) Consortium|Davies|United Kingdom

>Spike|hCoV-19/England/CAMC-B1FC0F/2020|2020-11-02|EPI\_ISL\_647489|Original|hCoV-19^^England|Human|Lighthouse Lab in Cambridge|Wellcome Sanger Institute for the COVID-19 Genomics UK (COG-UK) Consortium|Davies|United Kingdom

>Spike|hCoV-19/England/LIVE-AACAA/2020|2020-08-01|EPI\_ISL\_540608|Original|hCoV-19^^England|Human|Liverpool Clinical Laboratories|COVID-19 Genomics UK (COG-UK) Consortium|Haldenby|United Kingdom

>Spike|hCoV-19/USA/WI-UW-1421/2020|2020-09-11|EPI\_ISL\_541554|Original|hCoV-19^^Wisconsin|Human|University of Wisconsin-Madison Campus AIDS Vaccine Research Laboratories|University of Wisconsin-Madison AIDS Vaccine Research Laboratories|Baczenas|USA

>Spike|hCoV-19/England/MILK-9C3B4B/2020|2020-09-09|EPI\_ISL\_566960|Original|hCoV-19^^England|Human|Lighthouse Lab in Milton Keynes|Wellcome Sanger Institute for the COVID-19 Genomics UK (COG-UK) consortium|Davies|United Kingdom

>Spike|hCoV-19/England/QEUEH-A0ACBD/2020|2020-10-03|EPI\_ISL\_599447|Original|hCoV-19^^England|Human|Lighthouse Lab in Glasgow|Wellcome Sanger Institute for the COVID-19 Genomics UK (COG-UK) consortium|Davies|United Kingdom

>Spike|hCoV-19/Wales/PHWC-47E5CE/2020|2020-10-12|EPI\_ISL\_595474|Original|hCoV-19^^Wales|Human|Originating lab|COVID-19 Genomics UK (COG-UK) Consortium|Moore|United Kingdom

>Spike|hCoV-19/England/QEUEH-A1F4AE/2020|2020-10-01|EPI\_ISL\_587469|Original|hCoV-19^^England|Human|Lighthouse Lab in Glasgow|Wellcome Sanger Institute for the COVID-19 Genomics UK (COG-UK) consortium|Davies|United Kingdom

>Spike|hCoV-19/USA/OH-CDC-2-3693576/2020|2020-11-04|EPI\_ISL\_747129|Original|hCoV-19^^Ohio|Human|Respiratory Viruses Branch|Respiratory Viruses Branch|Queen|USA

>Spike|hCoV-19/England/SHEF-CCF03/2020|2020-09-21|EPI\_ISL\_573733|Original|hCoV-19^^England|Human|Virology Department|COVID-19 Genomics UK (COG-UK) Consortium|de Silva|United Kingdom

>Spike|hCoV-19/England/BRIS-1281E0/2020|2020-04-16|EPI\_ISL\_469666|Original|hCoV-19^^England|Human|PHE South West Regional Laboratory|Wellcome Sanger Institute for the COVID-19 Genomics UK (COG-UK) consortium|Davies|United Kingdom

>Spike|hCoV-19/USA/DE-DHSS-F918451/2020|2020-03-31|EPI\_ISL\_593966|Original|hCoV-19^^Delaware|Human|Delaware Public Health Lab|Delaware Public Health Lab|Bajwa|USA

>Spike|hCoV-19/England/ALDP-B23770/2020|2020-11-04|EPI\_ISL\_647043|Original|hCoV-19^^England|Human|Lighthouse Lab in Alderley Park|Wellcome Sanger Institute for the COVID-19 Genomics UK (COG-UK) Consortium|Davies|United Kingdom

>Spike|hCoV-19/USA/MN-CDC-6286/2020|2020-06-09|EPI\_ISL\_527693|Original|hCoV-19^^Minnesota|Human|MN PHL Division|Pathogen Discovery|Queen|USA

>Spike|hCoV-19/England/ALDP-A6FFBD/2020|2020-10-15|EPI\_ISL\_608280|Original|hCoV-19^^England|Human|Lighthouse Lab in Alderley Park|Wellcome Sanger Institute for the COVID-19 Genomics UK (COG-UK) consortium|Davies|United Kingdom

>Spike|hCoV-19/England/CAMC-B78BDA/2020|2020-11-12|EPI\_ISL\_667833|Original|hCoV-19^^England|Human|Lighthouse Lab in Cambridge|Wellcome Sanger Institute for the COVID-19 Genomics UK (COG-UK) Consortium|Davies|United Kingdom

>Spike|hCoV-19/Greece/261\_32221/2020|2020-03-10|EPI\_ISL\_437907|Original|hCoV-19^^Athens|Human|Laboratory of Microbiology|Laboratory of Biology|Karakasiliotis|Greece

>Spike|hCoV-19/USA/OR-OHSU-0649/2020|2020-06-16|EPI\_ISL\_525870|Original|hCoV-19^^Oregon|Human|OHSU Lab Services Molecular Microbiology Lab|Oregon SARS-CoV-2 Genome Sequencing Center|O'Roak|USA

>Spike|hCoV-19/Wales/PHWC-48B7D7/2020|2020-11-03|EPI\_ISL\_666285|Original|hCoV-19^^Wales|Human|Wales Specialist Virology Centre Sequencing lab|COVID-19 Genomics UK (COG-UK) Consortium|Moore|United Kingdom

>Spike|hCoV-19/Scotland/GCVR-17226C/2020|2020-03-30|EPI\_ISL\_469969|Original|hCoV-19^^Scotland|Human|NHSGGC West of Scotland Specialist Virology Centre / MRC-University of Glasgow Centre for Virus Research|Wellcome Sanger Institute for the COVID-19 Genomics UK (COG-UK) consortium|Davies|United Kingdom

>Spike|hCoV-19/Scotland/EDB8062/2020|2020-09-30|EPI\_ISL\_594827|Original|hCoV-19^^Scotland|Human|Virology Department|COVID-19 Genomics UK (COG-UK) Consortium|McHugh|United Kingdom

>Spike|hCoV-19/USA/WA-S2585/2020|2020-06-19|EPI\_ISL\_497217|Original|hCoV-19^^Washington|Human|Washington State Department of Health|Seattle Flu Study|Lee|USA

>Spike|hCoV-19/England/MILK-A45B13/2020|2020-10-06|EPI\_ISL\_598814|Original|hCoV-19^^England|Human|Lighthouse Lab in Milton Keynes|Wellcome Sanger Institute for the COVID-19 Genomics UK (COG-UK) consortium|Davies|United Kingdom

>Spike|hCoV-19/Portugal/PT0029/2020|2020-03-09|EPI\_ISL\_418014|Original|hCoV-19^^Portugal|Human|CHULC - H Curry Cabral|Instituto Nacional de Saude (INSA)|Borges|Portugal

>Spike|hCoV-19/England/ALDP-C3AB5B/2020|2020-12-09|EPI\_ISL\_731547|Original|hCoV-19^^England|Human|Lighthouse Lab in Alderley Park|Wellcome Sanger Institute for the COVID-19 Genomics UK (COG-UK) Consortium|Davies|United Kingdom

>Spike|hCoV-19/Australia/NSW708/2020|2020-07-25|EPI\_ISL\_513351|Original|hCoV-19^^New South Wales|Human|Pathology West - NSW Health Pathology|NSW Health Pathology - Institute of Clinical Pathology and Medical Research; Westmead Hospital; University of Sydney|Gall|Australia

>Spike|hCoV-19/Japan/PG-6089/2020|2020-07-00|EPI\_ISL\_689201|Original|hCoV-19^^Japan|Human|Pathogen Genomics Center|Pathogen Genomics Center|Sekizuka|Japan

>Spike|hCoV-19/England/ALDP-B63DBE/2020|2020-11-08|EPI\_ISL\_655303|Original|hCoV-19^^England|Human|Lighthouse Lab in Alderley Park|Wellcome Sanger Institute for the COVID-19 Genomics UK (COG-UK) Consortium|Davies|United Kingdom

>Spike|hCoV-19/England/CAMC-B522A4/2020|2020-11-08|EPI\_ISL\_656859|Original|hCoV-19^^England|Human|Lighthouse Lab in Cambridge|Wellcome Sanger Institute for the COVID-19 Genomics UK (COG-UK) Consortium|Davies|United Kingdom

>Spike|hCoV-19/England/CAMB-79F50/2020|2020-04-02|EPI\_ISL\_441266|Original|hCoV-19^^England|Human|Department of Pathology|Wellcome Sanger Institute for the COVID-19 Genomics UK (COG-UK) consortium|Amato|United Kingdom

>Spike|hCoV-19/England/QEUA-A9F400/2020|2020-10-20|EPI\_ISL\_611352|Original|hCoV-19^^England|Human|Lighthouse Lab in Glasgow|Wellcome Sanger Institute for the COVID-19 Genomics UK (COG-UK) consortium|Davies|United Kingdom

>Spike|hCoV-19/Austria/CeMM0830/2020|2020-04-20|EPI\_ISL\_583725|Original|hCoV-19^^Austria|Human|Center for Virology|Bergthaler laboratory|Bergthaler|Austria

>Spike|hCoV-19/Germany/NW-HHU-84/2020|2020-08-17|EPI\_ISL\_539600|Original|hCoV-19^^North Rhine-Westphalia|Human|ZOTZ KLIMAS MVZ D\u00f0fcsselldorf-Centrum GbR \u00dcBAG f\u00f0r Labormedizin|Center of Medical Microbiology|Wienemann|Germany

>Spike|hCoV-19/England/ALDP-59A4FB/2020|2020-06-15|EPI\_ISL\_558263|Original|hCoV-19^^England|Human|Lighthouse Lab in Alderley Park|Wellcome Sanger Institute for the COVID-19 Genomics UK (COG-UK) consortium|Davies|United Kingdom

>Spike|hCoV-19/England/QEUA-AE22F5/2020|2020-10-26|EPI\_ISL\_633621|Original|hCoV-19^^England|Human|Lighthouse Lab in Glasgow|Wellcome Sanger Institute for the COVID-19 Genomics UK (COG-UK) consortium|Davies|United Kingdom

>Spike|hCoV-19/England/CAMC-A5937E/2020|2020-10-09|EPI\_ISL\_597020|Original|hCoV-19^^England|Human|Lighthouse Lab in Cambridge|Wellcome Sanger Institute for the COVID-19 Genomics UK (COG-UK) consortium|Davies|United Kingdom

>Spike|hCoV-19/Switzerland/SO-ETHZ-350185/2020|2020-11-04|EPI\_ISL\_693834|Original|hCoV-19^^Solothurn|Human|Viollier AG|Department of Biosystems Science and Engineering|Nadeau|Switzerland

>Spike|hCoV-19/Wales/CAMC-A58A6B/2020|2020-10-09|EPI\_ISL\_609161|Original|hCoV-19^^Wales|Human|Lighthouse Lab in Cambridge|Wellcome Sanger Institute for the COVID-19 Genomics UK (COG-UK) consortium|Davies|United Kingdom

>Spike|hCoV-19/England/ALDP-950FDE/2020|2020-06-13|EPI\_ISL\_554250|Original|hCoV-19^^England|Human|Lighthouse Lab in Alderley Park|Wellcome Sanger Institute for the COVID-19 Genomics UK (COG-UK) consortium|Davies|United Kingdom

>Spike|hCoV-19/England/MILK-B94279/2020|2020-11-13|EPI\_ISL\_676029|Original|hCoV-19^^England|Human|Lighthouse Lab in Milton Keynes|Wellcome Sanger Institute for the COVID-19 Genomics UK (COG-UK) Consortium|Davies|United Kingdom

>Spike|hCoV-19/Wales/PHWC-160647/2020|2020-04-17|EPI\_ISL\_472957|Original|hCoV-19^^Wales|Human|Wales Specialist Virology Centre Sequencing lab|COVID-19 Genomics UK (COG-UK) Consortium|Moore|United Kingdom

>Spike|hCoV-19/Panama/332513/2020|2020-03-23|EPI\_ISL\_496713|Original|hCoV-19^^Panama West|Human|Gorgas Memorial Laboratory of Health Studies|Gorgas Memorial Laboratory of Health Studies|Martinez|Panama

>Spike|hCoV-19/USA/UT-UPHL-2008855/2020|2020-06-01|EPI\_ISL\_524871|Original|hCoV-19^^Utah|Human|Utah Public Health Laboratory|Utah Public Health Laboratory|Young|USA

>Spike|hCoV-19/England/LIVE-A694D/2020|2020-03-16|EPI\_ISL\_499590|Original|hCoV-19^^England|Human|Liverpool Clinical Laboratories|COVID-19 Genomics UK (COG-UK) Consortium|Haldenby|United Kingdom

>Spike|hCoV-19/Canada/QC-LSPQ-L00242714/2020|2020-03-29|EPI\_ISL\_536335|Original|hCoV-19^^Quebec|Human|H\u00f4pital Pierre-Boucher|Laboratoire de sant\u00e9 publique du Qu\u00e9bec|Moreira|Canada

>Spike|hCoV-19/England/ALDP-9C5244/2020|2020-09-10|EPI\_ISL\_567832|Original|hCoV-19^^England|Human|Lighthouse Lab in Alderley Park|Wellcome Sanger Institute for the COVID-19 Genomics UK (COG-UK) consortium|Davies|United Kingdom

>Spike|hCoV-19/Japan/PG-0928/2020|2020-04-00|EPI\_ISL\_684538|Original|hCoV-19^^Japan|Human|Pathogen Genomics Center|Pathogen Genomics Center|Sekizuka|Japan

>Spike|hCoV-19/England/CAMB-7B99C/2020|2020-04-04|EPI\_ISL\_441630|Original|hCoV-19^^England|Human|Department of Pathology|Wellcome Sanger Institute for the COVID-19 Genomics UK (COG-UK) consortium|Amato|United Kingdom

>Spike|hCoV-19/USA/NY-Wadsworth-287412-01/2020|2020-12-15|EPI\_ISL\_767458|Original|hCoV-19^^New York|Human|Wadsworth Center|Wadsworth Center|Lasek-Nesselquist|USA

>Spike|hCoV-19/England/QEUEH-C3140E/2020|2020-12-10|EPI\_ISL\_731414|Original|hCoV-19^^England|Human|Lighthouse Lab in Glasgow|Wellcome Sanger Institute for the COVID-19 Genomics UK (COG-UK) Consortium|Davies|United Kingdom

>Spike|hCoV-19/Wales/PHWC-49FC4A/2020|2020-12-09|EPI\_ISL\_743336|Original|hCoV-19^^Wales|Human|Wales Specialist Virology Centre Sequencing lab|COVID-19 Genomics UK (COG-UK) Consortium|Moore|United Kingdom

>Spike|hCoV-19/England/CAMB-79B4D/2020|2020-04-02|EPI\_ISL\_441335|Original|hCoV-19^^England|Human|Department of Pathology|Wellcome Sanger Institute for the COVID-19 Genomics UK (COG-UK) consortium|Amato|United Kingdom

>Spike|hCoV-19/England/QEUEH-B0FC99/2020|2020-11-02|EPI\_ISL\_642100|Original|hCoV-19^^England|Human|Lighthouse Lab in Glasgow|Wellcome Sanger Institute for the COVID-19 Genomics UK (COG-UK) Consortium|Davies|United Kingdom

>Spike|hCoV-19/England/CAMC-B3580F/2020|2020-11-05|EPI\_ISL\_659486|Original|hCoV-19^^England|Human|Lighthouse Lab in Cambridge|Wellcome Sanger Institute for the COVID-19 Genomics UK (COG-UK) Consortium|Davies|United Kingdom

>Spike|hCoV-19/England/NORW-F06E3/2020|2020-10-05|EPI\_ISL\_584737|Original|hCoV-19^^England|Human|Quadram Institute Bioscience|COVID-19 Genomics UK (COG-UK) Consortium|Alikhan|United Kingdom

>Spike|hCoV-19/USA/CA-CZB-14825/2020|2020-11-19|EPI\_ISL\_738865|Original|hCoV-19^^California|Human|Humboldt County Public Health Laboratory|Chan-Zuckerberg Biohub|Kamm|USA

>Spike|hCoV-19/Scotland/CVR5225/2020|2020-10-19|EPI\_ISL\_627397|Original|hCoV-19^^Scotland|Human|West of Scotland Specialist Virology Centre|COVID-19 Genomics UK (COG-UK) Consortium|Robertson|United Kingdom

>Spike|hCoV-19/USA/UT-UPHL-2009317/2020|2020-05-18|EPI\_ISL\_524922|Original|hCoV-19^^Utah|Human|Utah Public Health Laboratory|Utah Public Health Laboratory|Young|USA

>Spike|hCoV-19/England/QEUEH-BA26E5/2020|2020-11-18|EPI\_ISL\_719943|Original|hCoV-19^^England|Human|Lighthouse Lab in Glasgow|Wellcome Sanger Institute for the COVID-19 Genomics UK (COG-UK) Consortium|Davies|United Kingdom

>Spike|hCoV-19/England/ALDP-A6E4CE/2020|2020-10-15|EPI\_ISL\_607807|Original|hCoV-19^^England|Human|Lighthouse Lab in Alderley Park|Wellcome Sanger Institute for the COVID-19 Genomics UK (COG-UK) consortium|Davies|United Kingdom

>Spike|hCoV-19/England/QEUEH-A3386C/2020|2020-10-05|EPI\_ISL\_628411|Original|hCoV-19^^England|Human|Virology Department|COVID-19 Genomics UK (COG-UK) Consortium|de Silva|United Kingdom

>Spike|hCoV-19/New Zealand/20VR2554/2020|2020-04-15|EPI\_ISL\_456385|Original|hCoV-19^^Counties Manukau|Human|Middlemore Hospital|Institute of Environmental Science and Research (ESR)|de Ligt|New Zealand



>Spike|hCoV-19/USA/HI-H200601/2020|2020-10-05|EPI\_ISL\_753127|Original|hCoV-19^^Hawaii|Human|State Laboratories Division|State Laboratories Division|Sultana|USA

>Spike|hCoV-19/USA/TX-HMH-MCoV-9482/2020|2020-07-03|EPI\_ISL\_781147|Original|hCoV-19^^Texas|Human|Houston Methodist Hospital|Houston Methodist Hospital|Long|USA

>Spike|hCoV-19/England/CAMB-74070/2020|2020-03-17|EPI\_ISL\_440334|Original|hCoV-19^^England|Human|Department of Pathology|Wellcome Sanger Institute for the COVID-19 Genomics UK (COG-UK) consortium|Amato|United Kingdom

>Spike|hCoV-19/Australia/VIC9040/2020|2020-08-01|EPI\_ISL\_565369|Original|hCoV-19^^Victoria|Human|Microbiological Diagnostic Unit - Public Health Laboratory (MDU-PHL)|MDU-PHL|Schultz|Australia

>Spike|hCoV-19/Scotland/QEUH-9C8BCE/2020|2020-09-14|EPI\_ISL\_576028|Original|hCoV-19^^Scotland|Human|Lighthouse Lab in Glasgow|Wellcome Sanger Institute for the COVID-19 Genomics UK (COG-UK) consortium|Davies|United Kingdom

>Spike|hCoV-19/England/QEUH-C34605/2020|2020-12-11|EPI\_ISL\_734101|Original|hCoV-19^^England|Human|Lighthouse Lab in Glasgow|Wellcome Sanger Institute for the COVID-19 Genomics UK (COG-UK) Consortium|Davies|United Kingdom

>Spike|hCoV-19/Japan/PG-5531/2020|2020-08-00|EPI\_ISL\_688656|Original|hCoV-19^^Japan|Human|Pathogen Genomics Center|Pathogen Genomics Center|Sekizuka|Japan

>Spike|hCoV-19/Wales/PHWC-2EC26/2020|2020-04-06|EPI\_ISL\_446129|Original|hCoV-19^^Wales|Human|Wales Specialist Virology Centre|Public Health Wales Microbiology Cardiff|Moore|United Kingdom

>Spike|hCoV-19/England/QEUH-B2CFAC/2020|2020-11-04|EPI\_ISL\_680091|Original|hCoV-19^^England|Human|Department of Pathology|COVID-19 Genomics UK (COG-UK) Consortium|Goodfellow|United Kingdom

>Spike|hCoV-19/Japan/PG-5049/2020|2020-07-00|EPI\_ISL\_690160|Original|hCoV-19^^Japan|Human|Pathogen Genomics Center|Pathogen Genomics Center|Sekizuka|Japan

>Spike|hCoV-19/Denmark/DCGC-9762/2020|2020-11-09|EPI\_ISL\_669155|Original|hCoV-19^^Sjaelland|Human|Department of Virus and Microbiological Special Diagnostics|Albertsen Lab|Michaelsen|Denmark

>Spike|hCoV-19/England/QEUH-969691/2020|2020-08-14|EPI\_ISL\_531129|Original|hCoV-19^^England|Human|Lighthouse Lab in Glasgow|Wellcome Sanger Institute for the COVID-19 Genomics UK (COG-UK) consortium|Davies|United Kingdom

>Spike|hCoV-19/Russia/TAM-RII-MH2858S/2020|2020-09-26|EPI\_ISL\_733040|Original|hCoV-19^^Tambov|Human|HELIX LLC|WHO National Influenza Centre Russian Federation|Komissarov|Russia

>Spike|hCoV-19/Belgium/reg-0507488/2020|2020-05-07|EPI\_ISL\_477005|Original|hCoV-19^^Lummen|Human|KU Leuven|KU Leuven|Maes|Belgium

>Spike|hCoV-19/England/204690991/2020|2020-11-13|EPI\_ISL\_686592|Original|hCoV-19^^England|Human|Respiratory Virus Unit|COVID-19 Genomics UK (COG-UK) Consortium|Platt|United Kingdom

>Spike|hCoV-19/England/QEUH-B2BF07/2020|2020-11-02|EPI\_ISL\_646552|Original|hCoV-19^^England|Human|Lighthouse Lab in Glasgow|Wellcome Sanger Institute for the COVID-19 Genomics UK (COG-UK) Consortium|Davies|United Kingdom

>Spike|hCoV-19/England/NOTT-10F844/2020|2020-04-04|EPI\_ISL\_433054|Original|hCoV-19^^England|Human|Queens Medical Centre|COVID-19 Genomics UK (COG-UK) Consortium|Loose|United Kingdom

>Spike|hCoV-19/England/ALDP-6EB849/2020|2020-06-30|EPI\_ISL\_557610|Original|hCoV-19^^England|Human|Lighthouse Lab in Alderley Park|Wellcome Sanger Institute for the COVID-19 Genomics UK (COG-UK) consortium|Davies|United Kingdom

>Spike|hCoV-19/England/CAMC-CB7910/2020|2020-12-18|EPI\_ISL\_777800|Original|hCoV-19^^England|Human|Lighthouse Lab in Cambridge|Wellcome Sanger Institute for the COVID-19 Genomics UK (COG-UK) Consortium|Davies|United Kingdom

>Spike|hCoV-19/Denmark/DCGC-16075/2020|2020-11-16|EPI\_ISL\_714465|Original|hCoV-19^^Hovedstaden|Human|Department of Virus and Microbiological Special Diagnostics|Albertsen Lab|Michaelsen|Denmark

>Spike|hCoV-19/England/MILK-B38BC7/2020|2020-11-01|EPI\_ISL\_658993|Original|hCoV-19^^England|Human|Lighthouse Lab in Milton Keynes|Wellcome Sanger Institute for the COVID-19 Genomics UK (COG-UK) Consortium|Davies|United Kingdom

>Spike|hCoV-19/USA/TX-HMH-MCoV-15333/2020|2020-10-21|EPI\_ISL\_786817|Original|hCoV-19^^Texas|Human|Houston Methodist Hospital|Houston Methodist Hospital|Long|USA

>Spike|hCoV-19/Hungary/UD-91370/2020|2020-10-05|EPI\_ISL\_671478|Original|hCoV-19^^Hajd\u00fa-Bihar county|Human|University of Debrecen|National Laboratory of Virology|Kemenesi|Hungary

>Spike|hCoV-19/Belgium/VDLM-0330305/2020|2020-03-30|EPI\_ISL\_462159|Original|hCoV-19^^Olen|Human|KU Leuven|KU Leuven|Maes|Belgium

>Spike|hCoV-19/USA/NE-11343/2020|2020-05-03|EPI\_ISL\_475209|Original|hCoV-19^^Nebraska|Human|Nebraska Public Health Laboratory|UNMC COVID-19 Response Team|Pratt|USA

>Spike|hCoV-19/England/QEUA-9F4BC9/2020|2020-09-24|EPI\_ISL\_588347|Original|hCoV-19^^England|Human|Lighthouse Lab in Glasgow|Wellcome Sanger Institute for the COVID-19 Genomics UK (COG-UK) consortium|Davies|United Kingdom

>Spike|hCoV-19/Japan/PG-8788/2020|2020-08-00|EPI\_ISL\_686377|Original|hCoV-19^^Japan|Human|Pathogen Genomics Center|Pathogen Genomics Center|Sekizuka|Japan

>Spike|hCoV-19/Peru/LIM-INS-097/2020|2020-07-01|EPI\_ISL\_536496|Original|hCoV-19^^Lima|Human|Instituto Nacional de Salud|Laboratorio de Infecciones Respiratorias Agudas|Lopez|Peru

>Spike|hCoV-19/USA/TX-HMH-MCoV-16263/2020|2020-10-30|EPI\_ISL\_785947|Original|hCoV-19^^Texas|Human|Houston Methodist Hospital|Houston Methodist Hospital|Long|USA

>Spike|hCoV-19/England/BIRM-65CAB/2020|2020-10-10|EPI\_ISL\_612217|Original|hCoV-19^^England|Human|University of Birmingham|COVID-19 Genomics UK (COG-UK) Consortium|Loman|United Kingdom

>Spike|hCoV-19/USA/NY-NYCPHL-000236/2020|2020-03-18|EPI\_ISL\_631765|Original|hCoV-19^^New York|Human|Bellevue Hospital Center|New York City Public Health Laboratory|Wang|USA

>Spike|hCoV-19/SaudiArabia/KAUST-JEDDAH847/2020|2020-05-24|EPI\_ISL\_513019|Original|hCoV-19^^Jeddah|Human|Pathogen Genomics Lab King Abdullah University of Science and Technology(KAUST)|Pathogen Genomics Lab King Abdullah University of Science and Technology(KAUST)|Mohamed Ghazzali|Saudi Arabia

>Spike|hCoV-19/Denmark/DCGC-8547/2020|2020-10-26|EPI\_ISL\_625685|Original|hCoV-19^^Hovedstaden|Human|Department of Virus and Microbiological Special Diagnostics|Albertsen lab|Michaelsen|Denmark

>Spike|hCoV-19/Ecuador/USFQ-167/2020|2020-07-25|EPI\_ISL\_516651|Original|hCoV-19^^Los Rios|Human|Institute of Microbiology|Institute of Microbiology|Cardenas|Ecuador

>Spike|hCoV-19/USA/TX-HMH-MCoV-10538/2020|2020-07-10|EPI\_ISL\_789526|Original|hCoV-19^^Texas|Human|Houston Methodist Hospital|Houston Methodist Hospital|Long|USA

>Spike|hCoV-19/USA/WA-UW-22405/2020|2020-08-06|EPI\_ISL\_570676|Original|hCoV-19^^Washington|Human|UW Virology Lab|UW Virology Lab|Roychoudhury|USA

>Spike|hCoV-19/England/ALDP-A6C369/2020|2020-10-15|EPI\_ISL\_608175|Original|hCoV-19^^England|Human|Lighthouse Lab in Alderley Park|Wellcome Sanger Institute for the COVID-19 Genomics UK (COG-UK) consortium|Davies|United Kingdom

>Spike|hCoV-19/USA/UT-QDX-1828/2020|2020-03-15|EPI\_ISL\_604146|Original|hCoV-19^^Utah|Human|Quest Diagnostics|Quest Diagnostics|Kagan|USA

>Spike|hCoV-19/England/QEUA-C159A7/2020|2020-12-05|EPI\_ISL\_709343|Original|hCoV-19^^England|Human|Lighthouse Lab in Glasgow|Wellcome Sanger Institute for the COVID-19 Genomics UK (COG-UK) Consortium|Davies|United Kingdom

>Spike|hCoV-19/Japan/IC-0511/2020|2020-12-00|EPI\_ISL\_768720|Original|hCoV-19^^Japan|Human|Pathogen Genomics Center|Pathogen Genomics Center|Sekizuka|Japan

>Spike|hCoV-19/England/ALDP-C8E842/2020|2020-12-15|EPI\_ISL\_777157|Original|hCoV-19^^England|Human|Lighthouse Lab in Alderley Park|Wellcome Sanger Institute for the COVID-19 Genomics UK (COG-UK) Consortium|Davies|United Kingdom

>Spike|hCoV-19/Scotland/QEUA-A369B1/2020|2020-10-05|EPI\_ISL\_637997|Original|hCoV-19^^Scotland|Human|Wales Specialist Virology Centre Sequencing lab|COVID-19 Genomics UK (COG-UK) Consortium|Moore|United Kingdom

>Spike|hCoV-19/Kazakhstan/17920/2020|2020-04-15|EPI\_ISL\_454577|Original|hCoV-19^^Nur-Sultan|Human|Laboratory of virology|Laboratory of molecular-genetic research|Abdaliyev|Kazakhstan

>Spike|hCoV-19/Wales/PHWC-49BFFA/2020|2020-12-07|EPI\_ISL\_742494|Original|hCoV-19^^Wales|Human|Wales Specialist Virology Centre Sequencing lab|COVID-19 Genomics UK (COG-UK) Consortium|Moore|United Kingdom

>Spike|hCoV-19/Russia/OMS-ORINFI-4828S/2020|2020-07-10|EPI\_ISL\_569816|Original|hCoV-19^^Omsk|Human|Omsk Research Institute of Natural Focal Infections|WHO National Influenza Centre Russian Federation|Komissarov|Russia

>Spike|hCoV-19/USA/TX-HMH-MCoV-12663/2020|2020-08-31|EPI\_ISL\_790449|Original|hCoV-19^^Texas|Human|Houston Methodist Hospital|Houston Methodist Hospital|Long|USA

>Spike|hCoV-19/England/NOTT-1114D2/2020|2020-05-09|EPI\_ISL\_457574|Original|hCoV-19^^England|Human|Queens Medical Centre|COVID-19 Genomics UK (COG-UK) Consortium|Loose|United Kingdom

>Spike|hCoV-19/Denmark/DCGC-22213/2020|2020-12-14|EPI\_ISL\_758618|Original|hCoV-19^^Midtjylland|Human|Department of Virus and Microbiological Special Diagnostics|Albertsen Lab|Michaelsen|Denmark

>Spike|hCoV-19/England/CAMC-A81AE1/2020|2020-10-14|EPI\_ISL\_610710|Original|hCoV-19^^England|Human|Lighthouse Lab in Cambridge|Wellcome Sanger Institute for the COVID-19 Genomics UK (COG-UK) consortium|Davies|United Kingdom

>Spike|hCoV-19/USA/TX-HMH-MCoV-14660/2020|2020-10-10|EPI\_ISL\_787945|Original|hCoV-19^^Texas|Human|Houston Methodist Hospital|Houston Methodist Hospital|Long|USA

>Spike|hCoV-19/England/ALDP-B1B7B7/2020|2020-11-01|EPI\_ISL\_645903|Original|hCoV-19^^England|Human|Lighthouse Lab in Alderley Park|Wellcome Sanger Institute for the COVID-19 Genomics UK (COG-UK) Consortium|Davies|United Kingdom

>Spike|hCoV-19/Canada/ON-S189/2020|2020-03-25|EPI\_ISL\_586376|Original|hCoV-19^^Ontario|Human|Toronto Invasive Bacterial Diseases Network|McMaster University|McArthur|Canada

>Spike|hCoV-19/USA/MN-MDH-1351/2020|2020-04-20|EPI\_ISL\_507940|Original|hCoV-19^^Minnesota|Human|Minnesota Department of Health|Minnesota Department of Health|Garfin|USA

>Spike|hCoV-19/USA/NY-Wadsworth-292702-01/2020|2020-12-04|EPI\_ISL\_767710|Original|hCoV-19^^New York|Human|MEMORIAL SLOAN KETTERING CANCER CENTER|Wadsworth Center|Lasek-Nesselquist|USA

>Spike|hCoV-19/Spain/CL-IBV-97006252/2020|2020-04-20|EPI\_ISL\_537624|Original|hCoV-19^^Castilla y Leon|Human|Universidad de Le\u00f3n|SeqCOVID-SPAIN consortium|IBV (CSIC)|Comas|Spain

>Spike|hCoV-19/USA/IL-NM-0376/2020|2020-03-28|EPI\_ISL\_626383|Original|hCoV-19^^Illinois|Human|Northwestern Memorial Hospital|Ozer Lab|Ozer|USA

>Spike|hCoV-19/Switzerland/BE-ETHZ-120238/2020|2020-05-01|EPI\_ISL\_468299|Original|hCoV-19^^Bern|Human|Viollier AG|Department of Biosystems Science and Engineering|Nadeau|Switzerland

>Spike|hCoV-19/United Arab Emirates/L3290248500/2020|2020-05-19|EPI\_ISL\_520694|Original|hCoV-19^^United Arab Emirates|Human|Mohammed Bin Rashid University of Medicine and Health Sciences|Al Jalila Genomics Center|Ramaswamy|United Arab Emirates

>Spike|hCoV-19/Australia/VIC13070/2020|2020-08-04|EPI\_ISL\_592176|Original|hCoV-19^^Victoria|Human|Victorian Infectious Diseases Reference Laboratory (VIDRL)|VIDRL and MDU-PHL|Schultz|Australia

>Spike|hCoV-19/England/ALDP-4AD775/2020|2020-06-14|EPI\_ISL\_559324|Original|hCoV-19^^England|Human|Lighthouse Lab in Alderley Park|Wellcome Sanger Institute for the COVID-19 Genomics UK (COG-UK) consortium|Davies|United Kingdom

>Spike|hCoV-19/England/CAMB-1B0AA6/2020|2020-05-13|EPI\_ISL\_452936|Original|hCoV-19^^England|Human|Department of Pathology|COVID-19 Genomics UK (COG-UK) Consortium|Meredith|United Kingdom

>Spike|hCoV-19/England/ALDP-C4813A/2020|2020-12-12|EPI\_ISL\_718957|Original|hCoV-19^^England|Human|Lighthouse Lab in Alderley Park|Wellcome Sanger Institute for the COVID-19 Genomics UK (COG-UK) Consortium|Davies|United Kingdom

>Spike|hCoV-19/England/QEUH-AD58D5/2020|2020-10-26|EPI\_ISL\_634626|Original|hCoV-19^^England|Human|Lighthouse Lab in Glasgow|Wellcome Sanger Institute for the COVID-19 Genomics UK (COG-UK) consortium|Davies|United Kingdom

>Spike|hCoV-19/France/PAC-IHU-0450/2020|2020-04-04|EPI\_ISL\_569517|Original|hCoV-19^^Provence-Alpes-C\u00f4te-d\u00e0z|Human|MEPHI|MEPHI|Levasseur|France

>Spike|hCoV-19/England/QEUH-A0B2E7/2020|2020-09-30|EPI\_ISL\_599359|Original|hCoV-19^^England|Human|Lighthouse Lab in Glasgow|Wellcome Sanger Institute for the COVID-19 Genomics UK (COG-UK) consortium|Davies|United Kingdom

>Spike|hCoV-19/USA/TX-HMH-3290/2020|2020-06-12|EPI\_ISL\_544107|Original|hCoV-19^^Texas|Human|Houston Methodist Hospital|Houston Methodist Hospital|Long|USA

>Spike|hCoV-19/USA/MN-MDH-1655/2020|2020-08-19|EPI\_ISL\_539849|Original|hCoV-19^^Minnesota|Human|Mayo Clinic & Mayo Clinic Laboratories|Minnesota Department of Health|Garfin|USA

>Spike|hCoV-19/Iceland/340/2020|2020-03-15|EPI\_ISL\_417669|Original|hCoV-19^^Reykjavik|Human|deCODE genetics|deCODE genetics|J\u00f3nsson|Iceland

>Spike|hCoV-19/England/NORT-2948CB/2020|2020-03-27|EPI\_ISL\_490448|Original|hCoV-19^^England|Human|Northumbria University / South Tees Hospitals NHS Foundation Trust / North Cumbria Integrated Care NHS Foundation Trust / North Tees and Hartlepool NHS Foundation Trust / Newcastle Hospitals NHS Foundation Trust|COVID-19 Genomics UK (COG-UK) Consortium|Bashton|United Kingdom

>Spike|hCoV-19/USA/NY-Wadsworth-269507-01/2020|2020-11-10|EPI\_ISL\_754576|Original|hCoV-19^^New York|Human|Wadsworth Center|Wadsworth Center|Lasek-Nesselquist|USA

>Spike|hCoV-19/USA/TX-HMH-MCoV-13326/2020|2020-08-25|EPI\_ISL\_788474|Original|hCoV-19^^Texas|Human|Houston Methodist Hospital|Houston Methodist Hospital|Long|USA

>Spike|hCoV-19/Switzerland/BE-ETHZ-370487/2020|2020-11-16|EPI\_ISL\_693972|Original|hCoV-19^^Bern|Human|Viollier AG|Department of Biosystems Science and Engineering|Nadeau|Switzerland

>Spike|hCoV-19/England/204291069/2020|2020-10-16|EPI\_ISL\_668444|Original|hCoV-19^^England|Human|Respiratory Virus Unit|COVID-19 Genomics UK (COG-UK) Consortium|Platt|United Kingdom

>Spike|hCoV-19/England/QEUAH-AD3AFF/2020|2020-10-25|EPI\_ISL\_629758|Original|hCoV-19^^England|Human|Lighthouse Lab in Glasgow|Wellcome Sanger Institute for the COVID-19 Genomics UK (COG-UK) consortium|Davies|United Kingdom

>Spike|hCoV-19/Wales/PHWC-480F61/2020|2020-10-19|EPI\_ISL\_613018|Original|hCoV-19^^Wales|Human|Wales Specialist Virology Centre Sequencing lab|COVID-19 Genomics UK (COG-UK) Consortium|Moore|United Kingdom

>Spike|hCoV-19/Iceland/261/2020|2020-03-17|EPI\_ISL\_417589|Original|hCoV-19^^Reykjavik|Human|The National University Hospital of Iceland|deCODE genetics|J\u00f3nsson|Iceland

>Spike|hCoV-19/England/CAMC-A41106/2020|2020-10-07|EPI\_ISL\_609522|Original|hCoV-19^^England|Human|Lighthouse Lab in Cambridge|Wellcome Sanger Institute for the COVID-19 Genomics UK (COG-UK) consortium|Davies|United Kingdom

>Spike|hCoV-19/Austria/CeMM0245/2020|2020-03-20|EPI\_ISL\_438075|Original|hCoV-19^^Vienna|Human|Center for Virology|Bergthaler laboratory|Bergthaler|Austria

>Spike|hCoV-19/England/MILK-9D3A4B/2020|2020-09-18|EPI\_ISL\_601500|Original|hCoV-19^^England|Human|Lighthouse Lab in Milton Keynes|Wellcome Sanger Institute for the COVID-19 Genomics UK (COG-UK) consortium|Davies|United Kingdom

>Spike|hCoV-19/England/MILK-B97795/2020|2020-11-14|EPI\_ISL\_674969|Original|hCoV-19^^England|Human|Lighthouse Lab in Milton Keynes|Wellcome Sanger Institute for the COVID-19 Genomics UK (COG-UK) Consortium|Davies|United Kingdom

>Spike|hCoV-19/Japan/PG-5108/2020|2020-08-00|EPI\_ISL\_690217|Original|hCoV-19^^Japan|Human|Gunma Prefectural Institute of Public Health and Environmental Sciences|Pathogen Genomics Center|Sekizuka|Japan

>Spike|hCoV-19/Burkina Faso/2598/2020|2020-09-14|EPI\_ISL\_660459|Original|hCoV-19^^Bobo Dioulasso|Human|Laboratoire de Microbiologie CHU Sourou Sanou|Centre Muraz|Ouedraogo|Burkina Faso

>Spike|hCoV-19/Ireland/G-NVRL-MPF73373/2020|2020-05-19|EPI\_ISL\_767792|Original|hCoV-19^^Galway|Human|National Virus Reference Laboratory|Irish Coronavirus Sequencing Consortium - Teagasc Moorepark|Walsh|Ireland

>Spike|hCoV-19/England/SHEF-C4F38/2020|2020-10-31|EPI\_ISL\_653067|Original|hCoV-19^^England|Human|Virology Department|COVID-19 Genomics UK (COG-UK) Consortium|de Silva|United Kingdom

>Spike|hCoV-19/USA/TX-HMH-2211/2020|2020-05-23|EPI\_ISL\_545184|Original|hCoV-19^^Texas|Human|Houston Methodist Hospital|Houston Methodist Hospital|Long|USA

>Spike|hCoV-19/Wales/PHWC-24A08/2020|2020-03-19|EPI\_ISL\_419469|Original|hCoV-19^^Wales|Human|Wales Specialist Virology Centre|Public Health Wales Microbiology Cardiff|Moore|United Kingdom

>Spike|hCoV-19/England/CAMB-1AE3FB/2020|2020-04-29|EPI\_ISL\_459429|Original|hCoV-19^^England|Human|Department of Pathology|Wellcome Sanger Institute for the COVID-19 Genomics UK (COG-UK) consortium|Davies|United Kingdom

>Spike|hCoV-19/USA/TX-HMH-MCoV-14243/2020|2020-10-05|EPI\_ISL\_787528|Original|hCoV-19^^Texas|Human|Houston Methodist Hospital|Houston Methodist Hospital|Long|USA

>Spike|hCoV-19/Wales/PHWC-165D3E/2020|2020-06-15|EPI\_ISL\_490797|Original|hCoV-19^^Wales|Human|Wales Specialist Virology Centre Sequencing lab|COVID-19 Genomics UK (COG-UK) Consortium|Moore|United Kingdom

>Spike|hCoV-19/USA/TX-HMH-MCoV-8285/2020|2020-07-07|EPI\_ISL\_783539|Original|hCoV-19^^Texas|Human|Houston Methodist Hospital|Houston Methodist Hospital|Long|USA

>Spike|hCoV-19/USA/TX-HMH-6319/2020|2020-07-06|EPI\_ISL\_547388|Original|hCoV-19^^Texas|Human|Houston Methodist Hospital|Houston Methodist Hospital|Long|USA

>Spike|hCoV-19/USA/WA-UW204/2020|2020-03-13|EPI\_ISL\_417353|Original|hCoV-19^^Washington|Human|UW Virology Lab|UW Virology Lab|Roychoudhury|USA

>Spike|hCoV-19/USA/TX-HMH-4135/2020|2020-06-18|EPI\_ISL\_543399|Original|hCoV-19^^Texas|Human|Houston Methodist Hospital|Houston Methodist Hospital|Long|USA

>Spike|hCoV-19/Wales/PHWC-167E39/2020|2020-06-07|EPI\_ISL\_494163|Original|hCoV-19^^Wales|Human|Originating lab|COVID-19 Genomics UK (COG-UK) Consortium|Moore|United Kingdom

>Spike|hCoV-19/Hong Kong/VM20040266/2020|2020-07-13|EPI\_ISL\_523849|Original|hCoV-19^^Hong Kong|Human|United Christian Hospital|Hong Kong Department of Health|Mak|China

>Spike|hCoV-19/South Africa/NHLS-UCT-GP-5156/2020|2020-04-21|EPI\_ISL\_700454|Original|hCoV-19^^Western Cape|Human|Heideveld CDC wc HVP|NHLS/UCT|Iranzadeh|South Africa

>Spike|hCoV-19/Luxembourg/LNS6379862/2020|2020-11-01|EPI\_ISL\_744405|Original|hCoV-19^^Luxembourg|Human|Laboratoire national de sant\u00e9|Laboratoire national de sant\u00e9|Wienecke-Baldacchino|Luxembourg

>Spike|hCoV-19/England/QEUH-B13B68/2020|2020-11-02|EPI\_ISL\_641622|Original|hCoV-19^^England|Human|Lighthouse Lab in Glasgow|Wellcome Sanger Institute for the COVID-19 Genomics UK (COG-UK) Consortium|Davies|United Kingdom

>Spike|hCoV-19/Japan/PG-3094/2020|2020-04-00|EPI\_ISL\_691216|Original|hCoV-19^^Japan|Human|Pathogen Genomics Center|Pathogen Genomics Center|Sekizuka|Japan

>Spike|hCoV-19/England/MILK-9A6ABA/2020|2020-09-02|EPI\_ISL\_550065|Original|hCoV-19^^England|Human|Lighthouse Lab in Milton Keynes|Wellcome Sanger Institute for the COVID-19 Genomics UK (COG-UK) consortium|Davies|United Kingdom

>Spike|hCoV-19/Portugal/PT1420/2020|2020-03-26|EPI\_ISL\_511379|Original|hCoV-19^^Portugal|Human|Instituto Nacional de Saude (INSA)|Instituto Nacional de Saude (INSA)|Borges|Portugal

>Spike|hCoV-19/USA/NV-NSPHL-A0091/2020|2020-04-13|EPI\_ISL\_515368|Original|hCoV-19^^Nevada|Human|Nevada State Public Health Laboratory|Nevada State Public Health Laboratory|Sevinsky|USA

>Spike|hCoV-19/England/ALDP-9518E1/2020|2020-06-10|EPI\_ISL\_555328|Original|hCoV-19^^England|Human|Lighthouse Lab in Alderley Park|Wellcome Sanger Institute for the COVID-19 Genomics UK (COG-UK) consortium|Davies|United Kingdom

>Spike|hCoV-19/England/CAMC-A81F5B/2020|2020-10-12|EPI\_ISL\_610820|Original|hCoV-19^^England|Human|Lighthouse Lab in Cambridge|Wellcome Sanger Institute for the COVID-19 Genomics UK (COG-UK) consortium|Davies|United Kingdom

>Spike|hCoV-19/England/CAMC-C47511/2020|2020-12-11|EPI\_ISL\_718667|Original|hCoV-19^^England|Human|Lighthouse Lab in Cambridge|Wellcome Sanger Institute for the COVID-19 Genomics UK (COG-UK) Consortium|Davies|United Kingdom

>Spike|hCoV-19/USA/WI-UW-1720/2020|2020-09-11|EPI\_ISL\_605593|Original|hCoV-19^^Wisconsin|Human|University of Wisconsin-Madison AIDS Vaccine Research Laboratories|University of Wisconsin-Madison AIDS Vaccine Research Laboratories|Baczenas|USA

>Spike|hCoV-19/Singapore/324/2020|2020-03-19|EPI\_ISL\_462088|Original|hCoV-19^^Singapore|Human|Singapore General Hospital|Department of Microbiology|Abdul Rahman|Singapore

>Spike|hCoV-19/USA/CO-CDPHE-2009170087/2020|2020-09-16|EPI\_ISL\_710340|Original|hCoV-19^^Colorado|Human|Colorado Department of Public Health and Environment|Colorado Department of Public Health and Environment|Bankers|USA

>Spike|hCoV-19/USA/TX-HMH-3914/2020|2020-06-16|EPI\_ISL\_543277|Original|hCoV-19^^Texas|Human|Houston Methodist Hospital|Houston Methodist Hospital|Long|USA

>Spike|hCoV-19/Japan/PG-1203/2020|2020-04-00|EPI\_ISL\_684813|Original|hCoV-19^^Japan|Human|Yamagata Prefectural Institute of Public Health|Pathogen Genomics Center|Sekizuka|Japan

>Spike|hCoV-19/England/CAMB-8415C/2020|2020-04-24|EPI\_ISL\_438741|Original|hCoV-19^^England|Human|Department of Pathology|COVID-19 Genomics UK (COG-UK) Consortium|Meredith|United Kingdom

>Spike|hCoV-19/South Africa/KRISP-K004642/2020|2020-11-01|EPI\_ISL\_660657|Original|hCoV-19^^KwaZulu-Natal|Human|NHLS-IALCH|KRISP|de Oliveira|South Africa

>Spike|hCoV-19/England/ALDP-95D28D/2020|2020-06-16|EPI\_ISL\_553386|Original|hCoV-19^^England|Human|Lighthouse Lab in Alderley Park|Wellcome Sanger Institute for the COVID-19 Genomics UK (COG-UK) consortium|Davies|United Kingdom

>Spike|hCoV-19/USA/TX-HMH-MCoV-18631/2020|2020-11-20|EPI\_ISL\_784979|Original|hCoV-19^^Texas|Human|Houston Methodist Hospital|Houston Methodist Hospital|Long|USA

>Spike|hCoV-19/USA/MI-MDHHS-SC20933/2020|2020-03-21|EPI\_ISL\_507723|Original|hCoV-19^^Michigan|Human|Michigan Department of Health and Human Services|Michigan Department of Health and Human Services|Blankenship|USA

>Spike|hCoV-19/England/SHEF-10CF69F/2020|2020-12-12|EPI\_ISL\_727933|Original|hCoV-19^^England|Human|Virology Department|COVID-19 Genomics UK (COG-UK) Consortium|de Silva|United Kingdom

>Spike|hCoV-19/England/ALDP-5D1B02/2020|2020-06-19|EPI\_ISL\_558411|Original|hCoV-19^^England|Human|Lighthouse Lab in Alderley Park|Wellcome Sanger Institute for the COVID-19 Genomics UK (COG-UK) consortium|Davies|United Kingdom

>Spike|hCoV-19/England/ALDP-B19F0C/2020|2020-11-01|EPI\_ISL\_645760|Original|hCoV-19^^England|Human|Lighthouse Lab in Alderley Park|Wellcome Sanger Institute for the COVID-19 Genomics UK (COG-UK) Consortium|Davies|United Kingdom

>Spike|hCoV-19/Gibraltar/204462867/2020|2020-10-29|EPI\_ISL\_615034|Original|hCoV-19^^Gibraltar|Human|Microbiology|Respiratory Virus Unit|Platt|Gibraltar

>Spike|hCoV-19/England/QEUEH-95E79C/2020|2020-08-07|EPI\_ISL\_532405|Original|hCoV-19^^England|Human|Lighthouse Lab in Glasgow|Wellcome Sanger Institute for the COVID-19 Genomics UK (COG-UK) consortium|Davies|United Kingdom

>Spike|hCoV-19/England/MILK-B38471/2020|2020-11-01|EPI\_ISL\_659047|Original|hCoV-19^^England|Human|Lighthouse Lab in Milton Keynes|Wellcome Sanger Institute for the COVID-19 Genomics UK (COG-UK) Consortium|Davies|United Kingdom

>Spike|hCoV-19/Denmark/DCGC-15664/2020|2020-11-23|EPI\_ISL\_713949|Original|hCoV-19^^Nordjylland|Human|Department of Virus and Microbiological Special Diagnostics|Albertsen Lab|Michaelsen|Denmark

>Spike|hCoV-19/England/204981682/2020|2020-12-02|EPI\_ISL\_754242|Original|hCoV-19^^England|Human|Respiratory Virus Unit|COVID-19 Genomics UK (COG-UK) Consortium|Platt|United Kingdom

>Spike|hCoV-19/Scotland/QEUEH-96F992/2020|2020-08-18|EPI\_ISL\_540327|Original|hCoV-19^^Scotland|Human|Lighthouse Lab in Glasgow|Wellcome Sanger Institute for the COVID-19 Genomics UK (COG-UK) consortium|Davies|United Kingdom

>Spike|hCoV-19/Spain/PV-IBV-000712/2020|2020-03-07|EPI\_ISL\_452755|Original|hCoV-19^^Basque Country|Human|Hospital Universitario Araba. Vitoria-Gasteiz,|SeqCOVID-SPAIN consortium|IBV (CSIC)|Comas|Spain

>Spike|hCoV-19/USA/LA-BIE-039/2020|2020-04-04|EPI\_ISL\_463287|Original|hCoV-19^^Louisiana|Human|Ochsner Health|Bioinfoexperts|Cross|USA

>Spike|hCoV-19/England/QEUEH-960EFC/2020|2020-08-04|EPI\_ISL\_532100|Original|hCoV-19^^England|Human|Lighthouse Lab in Glasgow|Wellcome Sanger Institute for the COVID-19 Genomics UK (COG-UK) consortium|Davies|United Kingdom

>Spike|hCoV-19/England/QEUEH-CAD90E/2020|2020-12-20|EPI\_ISL\_761239|Original|hCoV-19^^England|Human|Lighthouse Lab in Glasgow|Wellcome Sanger Institute for the COVID-19 Genomics UK (COG-UK) Consortium|Davies|United Kingdom

>Spike|hCoV-19/England/ALDP-C88EA0/2020|2020-12-16|EPI\_ISL\_756616|Original|hCoV-19^^England|Human|Lighthouse Lab in Alderley Park|Wellcome Sanger Institute for the COVID-19 Genomics UK (COG-UK) Consortium|Davies|United Kingdom

>Spike|hCoV-19/Wales/PHWC-497AEE/2020|2020-11-23|EPI\_ISL\_726932|Original|hCoV-19^^Wales|Human|Originating lab|COVID-19 Genomics UK (COG-UK) Consortium|Moore|United Kingdom

>Spike|hCoV-19/Spain/MD-HLP-48/2020|2020-04-12|EPI\_ISL\_530051|Original|hCoV-19^^Madrid|Human|Hospital Universitario La Paz|Hospital Universitario La Paz|Viedma|Spain

>Spike|hCoV-19/USA/MN-MDH-1971/2020|2020-10-24|EPI\_ISL\_634845|Original|hCoV-19^^Minnesota|Human|Minnesota Department of Health|Minnesota Department of Health|Lorentz|USA

>Spike|hCoV-19/Denmark/DCGC-18914/2020|2020-12-07|EPI\_ISL\_748638|Original|hCoV-19^^Hovedstaden|Human|Department of Virus and Microbiological Special Diagnostics|Albertsen Lab|Michaelsen|Denmark

>Spike|hCoV-19/England/204240973/2020|2020-10-14|EPI\_ISL\_622849|Original|hCoV-19^^England|Human|Respiratory Virus Unit|Respiratory Virus Unit|Platt|United Kingdom

>Spike|hCoV-19/England/BRIS-12ABA4/2020|2020-05-01|EPI\_ISL\_458323|Original|hCoV-19^^England|Human|PHE South West Regional Laboratory|Wellcome Sanger Institute for the COVID-19 Genomics UK (COG-UK) consortium|Davies|United Kingdom

>Spike|hCoV-19/England/CAMC-B79C4F/2020|2020-11-12|EPI\_ISL\_741043|Original|hCoV-19^^England|Human|Oxford Viromics|COVID-19 Genomics UK (COG-UK) Consortium|Golubchik|United Kingdom

>Spike|hCoV-19/Scotland/CVR5719/2020|2020-11-09|EPI\_ISL\_651932|Original|hCoV-19^^Scotland|Human|West of Scotland Specialist Virology Centre|COVID-19 Genomics UK (COG-UK) Consortium|Robertson|United Kingdom

>Spike|hCoV-19/England/QEUEH-B434DD/2020|2020-11-08|EPI\_ISL\_657125|Original|hCoV-19^^England|Human|Lighthouse Lab in Glasgow|Wellcome Sanger Institute for the COVID-19 Genomics UK (COG-UK) Consortium|Davies|United Kingdom

>Spike|hCoV-19/Belgium/ULG-10619/2020|2020-09-05|EPI\_ISL\_626252|Original|hCoV-19^^Li\u00e8ge|Human|Department of Clinical Microbiology|GIGA Medical Genomics|Durkin|Belgium

>Spike|hCoV-19/England/MILK-B8F01D/2020|2020-11-13|EPI\_ISL\_675153|Original|hCoV-19^^England|Human|Lighthouse Lab in Milton Keynes|Wellcome Sanger Institute for the COVID-19 Genomics UK (COG-UK) Consortium|Davies|United Kingdom

>Spike|hCoV-19/USA/CA-IGI-0216/2020|2020-07-01|EPI\_ISL\_569894|Original|hCoV-19^^California|Human|Innovative Genomics Institute|Innovative Genomics Institute|Wyman|USA

>Spike|hCoV-19/England/QEUEH-9FB2DC/2020|2020-09-29|EPI\_ISL\_588098|Original|hCoV-19^^England|Human|Lighthouse Lab in Glasgow|Wellcome Sanger Institute for the COVID-19 Genomics UK (COG-UK) consortium|Davies|United Kingdom

>Spike|hCoV-19/Denmark/DCGC-5437/2020|2020-09-14|EPI\_ISL\_615369|Original|hCoV-19^^Midtjylland|Human|Department of Virus and Microbiological Special Diagnostics|Albertsen lab|Michaelsen|Denmark

>Spike|hCoV-19/England/QEUEH-AAC637/2020|2020-10-21|EPI\_ISL\_652862|Original|hCoV-19^^England|Human|Oxford Viromics|COVID-19 Genomics UK (COG-UK) Consortium|Golubchik|United Kingdom

>Spike|hCoV-19/Japan/PG-3897/2020|2020-07-00|EPI\_ISL\_692148|Original|hCoV-19^^Japan|Human|Pathogen Genomics Center|Pathogen Genomics Center|Sekizuka|Japan

>Spike|hCoV-19/England/LIVE-9AD13/2020|2020-03-30|EPI\_ISL\_449395|Original|hCoV-19^^England|Human|Liverpool Clinical Laboratories|COVID-19 Genomics UK (COG-UK) Consortium|Haldenby|United Kingdom

>Spike|hCoV-19/USA/FL-AF28/2020|2020-06-28|EPI\_ISL\_513280|Original|hCoV-19^^Florida|Human|University of Miami Immunology and Histocompatibility Laboratory|University of Miami Immunology and Histocompatibility Laboratory|Margolles-Clark|USA

>Spike|hCoV-19/England/CAMC-B99784/2020|2020-11-15|EPI\_ISL\_673450|Original|hCoV-19^^England|Human|Lighthouse Lab in Cambridge|Wellcome Sanger Institute for the COVID-19 Genomics UK (COG-UK) Consortium|Davies|United Kingdom

>Spike|hCoV-19/South Korea/KCDC2809/2020|2020-07-30|EPI\_ISL\_526743|Original|hCoV-19^^South Korea|Human|Center for Laboratory Control of Infectious Diseases|Center for Laboratory Control of Infectious Diseases|Kim|South Korea

>Spike|hCoV-19/Wales/PHWC-16BB98/2020|2020-09-16|EPI\_ISL\_573950|Original|hCoV-19^^Wales|Human|Wales Specialist Virology Centre Sequencing lab|COVID-19 Genomics UK (COG-UK) Consortium|Moore|United Kingdom

>Spike|hCoV-19/Scotland/EDB2092/2020|2020-04-19|EPI\_ISL\_433190|Original|hCoV-19^^Scotland|Human|Virology Department|COVID-19 Genomics UK (COG-UK) Consortium|Williams|United Kingdom

>Spike|hCoV-19/USA/MA-MGH-00048/2020|2020-03-23|EPI\_ISL\_460291|Original|hCoV-19^^Massachusetts|Human|Massachusetts General Hospital|Infectious Disease Program|Lemieux|USA

>Spike|hCoV-19/Wales/PHWC-49E829/2020|2020-12-08|EPI\_ISL\_743054|Original|hCoV-19^^Wales|Human|Wales Specialist Virology Centre Sequencing lab|COVID-19 Genomics UK (COG-UK) Consortium|Moore|United Kingdom

>Spike|hCoV-19/England/ALDP-A865AF/2020|2020-10-17|EPI\_ISL\_606233|Original|hCoV-19^^England|Human|Lighthouse Lab in Alderley Park|Wellcome Sanger Institute for the COVID-19 Genomics UK (COG-UK) consortium|Davies|United Kingdom

>Spike|hCoV-19/England/LIVE-DB3078/2020|2020-10-30|EPI\_ISL\_651123|Original|hCoV-19^^England|Human|Liverpool Clinical Laboratories|COVID-19 Genomics UK (COG-UK) Consortium|Haldenby|United Kingdom

>Spike|hCoV-19/Russia/MOS-CRIE7150909/2020|2020-08-24|EPI\_ISL\_653925|Original|hCoV-19^^Moscow|Human|Molecular diagnostic laboratory of Federal Budget Institution of Science \Central Research Institute of Epidemiology\ of The Federal Service on Customers' Rights Protection and Human Well-being Surveillance|Group of Genomics and Postgenomic Technologies of Central Research Institute of Epidemiology|Samoilov|Russia

>Spike|hCoV-19/England/MILK-BAA5A4/2020|2020-11-18|EPI\_ISL\_681517|Original|hCoV-19^^England|Human|Lighthouse Lab in Milton Keynes|Wellcome Sanger Institute for the COVID-19 Genomics UK (COG-UK) Consortium|Davies|United Kingdom

>Spike|hCoV-19/USA/TX-HMH-MCoV-8213/2020|2020-07-07|EPI\_ISL\_783591|Original|hCoV-19^^Texas|Human|Houston Methodist Hospital|Houston Methodist Hospital|Long|USA

>Spike|hCoV-19/USA/NY-QDX-1230/2020|2020-03-17|EPI\_ISL\_572006|Original|hCoV-19^^New York|Human|Quest Diagnostics|Quest Diagnostics|Kagan|USA

>Spike|hCoV-19/USA/ME-HETL-J0054/2020|2020-03-14|EPI\_ISL\_513465|Original|hCoV-19^^Maine|Human|Maine HETL|Tewhey Lab|Tewhey|USA

>Spike|hCoV-19/USA/WI-UW-1713/2020|2020-09-11|EPI\_ISL\_605586|Original|hCoV-19^^Wisconsin|Human|University of Wisconsin-Madison AIDS Vaccine Research Laboratories|University of Wisconsin-Madison AIDS Vaccine Research Laboratories|Baczenas|USA

>Spike|hCoV-19/Netherlands/ZuidHolland\_69/2020|2020-03-24|EPI\_ISL\_422937|Original|hCoV-19^^Zuid Holland|Human|Dutch COVID-19 response team|Erasmus Medical Center|Oude Munnink|Netherlands

>Spike|hCoV-19/Wales/PHWC-2A264/2020|2020-04-05|EPI\_ISL\_445543|Original|hCoV-19^^Wales|Human|Wales Specialist Virology Centre|Public Health Wales Microbiology Cardiff|Moore|United Kingdom

>Spike|hCoV-19/England/MILK-85324C/2020|2020-07-17|EPI\_ISL\_557489|Original|hCoV-19^^England|Human|Lighthouse Lab in Milton Keynes|Wellcome Sanger Institute for the COVID-19 Genomics UK (COG-UK) consortium|Davies|United Kingdom

>Spike|hCoV-19/Russia/SVE-RII-MH212S/2020|2020-07-23|EPI\_ISL\_732994|Original|hCoV-19^^Sverdlovsk|Human|UMMC-Health|WHO National Influenza Centre Russian Federation|Komissarov|Russia

>Spike|hCoV-19/England/ALDP-954BC7/2020|2020-06-11|EPI\_ISL\_553498|Original|hCoV-19^^England|Human|Lighthouse Lab in Alderley Park|Wellcome Sanger Institute for the COVID-19 Genomics UK (COG-UK) consortium|Davies|United Kingdom

>Spike|hCoV-19/Australia/VIC1949/2020|2020-06-09|EPI\_ISL\_480673|Original|hCoV-19^^Victoria|Human|Victorian Infectious Diseases Reference Laboratory (VIDRL)|VIDRL and MDU-PHL|Schultz|Australia

>Spike|hCoV-19/USA/TX-HMH-1298/2020|2020-04-27|EPI\_ISL\_542635|Original|hCoV-19^^Texas|Human|Houston Methodist Hospital|Houston Methodist Hospital|Long|USA



>Spike|hCoV-19/England/ALDP-9E5A28/2020|2020-09-24|EPI\_ISL\_589467|Original|hCoV-19^^England|Human|Lighthouse Lab in Alderley Park|Wellcome Sanger Institute for the COVID-19 Genomics UK (COG-UK) consortium|Davies|United Kingdom

>Spike|hCoV-19/USA/NY-NYUMC228/2020|2020-04-03|EPI\_ISL\_427628|Original|hCoV-19^^New York|Human|NYU Langone Health|Departments of Pathology and Medicine|Maurano|USA

>Spike|hCoV-19/USA/HI-H200592/2020|2020-11-21|EPI\_ISL\_753118|Original|hCoV-19^^Hawaii|Human|State Laboratories Division|State Laboratories Division|Sultana|USA

>Spike|hCoV-19/USA/WY-WPHL-20158493/2020|2020-12-04|EPI\_ISL\_756255|Original|hCoV-19^^Wyoming|Human|Wyoming Public Health Laboratory|Wyoming Public Health Laboratory|Hull|USA

>Spike|hCoV-19/USA/SC-CDC-2-3714362/2020|2020-12-02|EPI\_ISL\_751611|Original|hCoV-19^^South Carolina|Human|SC Dept of Health and Env. Control-Bureau of Laboratories|Genomics and Discovery|Queen|USA

>Spike|hCoV-19/USA/WI-GMF-15087/2020|2020-08-11|EPI\_ISL\_547698|Original|hCoV-19^^Wisconsin|Human|Gundersen Molecular Diagnostics Laboratory|Kabara Cancer Research Institute|Kenny|USA

>Spike|hCoV-19/Wales/PHWC-2B04B/2020|2020-04-08|EPI\_ISL\_432271|Original|hCoV-19^^Wales|Human|Wales Specialist Virology Centre|Public Health Wales Microbiology Cardiff|Moore|United Kingdom

>Spike|hCoV-19/South Korea/KDCA0078/2020|2020-09-24|EPI\_ISL\_747318|Original|hCoV-19^^South Korea|Human|Division of Emerging Infectious Diseases|Division of Emerging Infectious Diseases|Park|South Korea

>Spike|hCoV-19/USA/TX-HMH-MCoV-11693/2020|2020-09-01|EPI\_ISL\_790088|Original|hCoV-19^^Texas|Human|Houston Methodist Hospital|Houston Methodist Hospital|Long|USA

>Spike|hCoV-19/England/NORT-28B1AE/2020|2020-04-18|EPI\_ISL\_492961|Original|hCoV-19^^England|Human|NU-OMICS DNA Sequencing research facility|Wellcome Sanger Institute for the COVID-19 Genomics UK (COG-UK) consortium|Davies|United Kingdom

>Spike|hCoV-19/Australia/VIC1336/2020|2020-04-13|EPI\_ISL\_430698|Original|hCoV-19^^Victoria|Human|Victorian Infectious Diseases Reference Laboratory (VIDRL)|Microbiological Diagnostic Unit Public Health Laboratory and Victorian Infectious Diseases Reference Laboratory|Schultz|Australia

>Spike|hCoV-19/Australia/VIC7782/2020|2020-08-02|EPI\_ISL\_564652|Original|hCoV-19^^Victoria|Human|Microbiological Diagnostic Unit - Public Health Laboratory (MDU-PHL)|MDU-PHL|Schultz|Australia

>Spike|hCoV-19/Indonesia/JT-UGM-47964/2020|2020-08-31|EPI\_ISL\_610162|Original|hCoV-19^^Central Java|Human|RSUD Dr. Tjitrowardojo|Genetics Working Group (Pokja Genetik) Faculty of Medicine|Gunadi|Indonesia

>Spike|hCoV-19/England/LIVE-9E614/2020|2020-04-10|EPI\_ISL\_453317|Original|hCoV-19^^England|Human|Liverpool Clinical Laboratories|COVID-19 Genomics UK (COG-UK) Consortium|Haldenby|United Kingdom

>Spike|hCoV-19/England/ALDP-CEC96D/2020|2020-12-21|EPI\_ISL\_782226|Original|hCoV-19^^England|Human|Lighthouse Lab in Alderley Park|Wellcome Sanger Institute for the COVID-19 Genomics UK (COG-UK) Consortium|Davies|United Kingdom

>Spike|hCoV-19/England/BRIS-1333BF/2020|2020-05-21|EPI\_ISL\_495099|Original|hCoV-19^^England|Human|PHE South West Regional Laboratory|Wellcome Sanger Institute for the COVID-19 Genomics UK (COG-UK) consortium|Davies|United Kingdom

>Spike|hCoV-19/Canada/Qc-L00241208/2020|2020-03-27|EPI\_ISL\_450314|Original|hCoV-19^^Quebec|Human|H\u00f4pital Pierre-Boucher|Laboratoire de sant\u00e9 publique du Qu\u00e9bec|Moreira|Canada

>Spike|hCoV-19/Australia/VIC14340/2020|2020-07-30|EPI\_ISL\_591808|Original|hCoV-19^^Victoria|Human|Microbiological Diagnostic Unit - Public Health Laboratory (MDU-PHL)|MDU-PHL|Schultz|Australia

>Spike|hCoV-19/USA/WA-S2543/2020|2020-06-16|EPI\_ISL\_497175|Original|hCoV-19^^Washington|Human|Washington State Department of Health|Seattle Flu Study|Lee|USA

>Spike|hCoV-19/England/ALDP-94FEB7/2020|2020-06-16|EPI\_ISL\_555133|Original|hCoV-19^^England|Human|Lighthouse Lab in Alderley Park|Wellcome Sanger Institute for the COVID-19 Genomics UK (COG-UK) consortium|Davies|United Kingdom

>Spike|hCoV-19/USA/GA-CDC-7877/2020|2020-10-28|EPI\_ISL\_681816|Original|hCoV-19^^Georgia|Human|GA Department of Public Health Laboratory|Pathogen Discovery|Queen|USA

>Spike|hCoV-19/USA/CA-CZB-15081/2020|2020-11-20|EPI\_ISL\_738909|Original|hCoV-19^^California|Human|Santa Clara County Public Health Laboratory|Chan-Zuckerberg Biohub|Kamm|USA

>Spike|hCoV-19/England/ALDP-B24FC2/2020|2020-11-04|EPI\_ISL\_646698|Original|hCoV-19^^England|Human|Lighthouse Lab in Alderley Park|Wellcome Sanger Institute for the COVID-19 Genomics UK (COG-UK) Consortium|Davies|United Kingdom

>Spike|hCoV-19/England/MILK-BB0FBC/2020|2020-11-18|EPI\_ISL\_720130|Original|hCoV-19^^England|Human|Lighthouse Lab in Milton Keynes|Wellcome Sanger Institute for the COVID-19 Genomics UK (COG-UK) Consortium|Davies|United Kingdom

>Spike|hCoV-19/USA/TX-HMH-1516/2020|2020-04-28|EPI\_ISL\_542766|Original|hCoV-19^^Texas|Human|Houston Methodist Hospital|Houston Methodist Hospital|Long|USA

>Spike|hCoV-19/Wales/PHWC-4A5A65/2020|2020-12-18|EPI\_ISL\_763525|Original|hCoV-19^^Wales|Human|Wales Specialist Virology Centre Sequencing lab|COVID-19 Genomics UK (COG-UK) Consortium|Moore|United Kingdom

>Spike|hCoV-19/Wales/PHWC-47D4D1/2020|2020-10-09|EPI\_ISL\_586152|Original|hCoV-19^^Wales|Human|Wales Specialist Virology Centre Sequencing lab|COVID-19 Genomics UK (COG-UK) Consortium|Moore|United Kingdom

>Spike|hCoV-19/England/NORW-F0CE1/2020|2020-00-00|EPI\_ISL\_595213|Original|hCoV-19^^England|Human|Quadram Institute Bioscience|COVID-19 Genomics UK (COG-UK) Consortium|Alikhan|United Kingdom

>Spike|hCoV-19/Wales/PHWC-4933AB/2020|2020-11-28|EPI\_ISL\_725877|Original|hCoV-19^^Wales|Human|Originating lab|COVID-19 Genomics UK (COG-UK) Consortium|Moore|United Kingdom

>Spike|hCoV-19/Australia/NSW2005/2020|2020-03-14|EPI\_ISL\_500597|Original|hCoV-19^^New South Wales|Human|Area of Virology|Area of Virology|Bull|Australia

>Spike|hCoV-19/USA/NY-QDX-136/2020|2020-03-16|EPI\_ISL\_467889|Original|hCoV-19^^New York|Human|Quest Diagnostics|Quest Diagnostics|Kagan|USA

>Spike|hCoV-19/England/MILK-ACFAAB/2020|2020-10-22|EPI\_ISL\_652120|Original|hCoV-19^^England|Human|Oxford Viromics|COVID-19 Genomics UK (COG-UK) Consortium|Golubchik|United Kingdom

>Spike|hCoV-19/USA/WI-UW-2107/2020|2020-09-28|EPI\_ISL\_677512|Original|hCoV-19^^Wisconsin|Human|University of Wisconsin-Madison AIDS Vaccine Research Laboratories|University of Wisconsin-Madison AIDS Vaccine Research Laboratories|Baczenas|USA

>Spike|hCoV-19/USA/FL-BPHL-0241/2020|2020-05-02|EPI\_ISL\_480892|Original|hCoV-19^^Florida|Human|Florida Bureau of Public Health Laboratories|Florida Bureau of Public Health Laboratories|Blanton|USA

>Spike|hCoV-19/Scotland/CAMC-A57352/2020|2020-10-09|EPI\_ISL\_609203|Original|hCoV-19^^Scotland|Human|Lighthouse Lab in Cambridge|Wellcome Sanger Institute for the COVID-19 Genomics UK (COG-UK) consortium|Davies|United Kingdom

>Spike|hCoV-19/Japan/PG-6171/2020|2020-08-00|EPI\_ISL\_689283|Original|hCoV-19^^Japan|Human|Pathogen Genomics Center|Pathogen Genomics Center|Sekizuka|Japan

>Spike|hCoV-19/USA/WA-UW-47418/2020|2020-12-11|EPI\_ISL\_776724|Original|hCoV-19^^Washington|Human|UW Virology Lab|UW Virology Lab|Roychoudhury|USA

>Spike|hCoV-19/Denmark/DCGC-6820/2020|2020-10-12|EPI\_ISL\_619517|Original|hCoV-19^^Hovedstaden|Human|Department of Virus and Microbiological Special Diagnostics|Albertsen lab|Michaelsen|Denmark

>Spike|hCoV-19/Australia/QLD1060/2020|2020-09-15|EPI\_ISL\_576144|Original|hCoV-19^^Australia|Human|unknown|Public Health Virology Laboratory|Nguyen|Australia

>Spike|hCoV-19/Canada/QC-LSPQ-L00235639/2020|2020-03-24|EPI\_ISL\_536104|Original|hCoV-19^^Quebec|Human|Centre hospitalier Anna-Laberge|Laboratoire de sant\u00e9 publique du Qu\u00e9bec|Moreira|Canada

>Spike|hCoV-19/England/ALDP-C3D4E4/2020|2020-12-10|EPI\_ISL\_730996|Original|hCoV-19^^England|Human|Lighthouse Lab in Alderley Park|Wellcome Sanger Institute for the COVID-19 Genomics UK (COG-UK) Consortium|Davies|United Kingdom

>Spike|hCoV-19/England/CAMC-B07A88/2020|2020-10-29|EPI\_ISL\_643568|Original|hCoV-19^^England|Human|Lighthouse Lab in Cambridge|Wellcome Sanger Institute for the COVID-19 Genomics UK (COG-UK) Consortium|Davies|United Kingdom

>Spike|hCoV-19/USA/TX-HMH0193/2020|2020-03-23|EPI\_ISL\_434868|Original|hCoV-19^^Texas|Human|Houston Methodist Hospital|Houston Methodist Hospital|Long|USA

>Spike|hCoV-19/Turkey/HSGM-4698/2020|2020-03-18|EPI\_ISL\_437332|Vero P1|hCoV-19^^Istanbul|Human|Ministry of Health Turkey|Ministry of Health Turkey|Bayrakdar|Turkey

>Spike|hCoV-19/England/MILK-B86702/2020|2020-11-13|EPI\_ISL\_674147|Original|hCoV-19^^England|Human|Lighthouse Lab in Milton Keynes|Wellcome Sanger Institute for the COVID-19 Genomics UK (COG-UK) Consortium|Davies|United Kingdom

>Spike|hCoV-19/Gibraltar/204462851/2020|2020-10-29|EPI\_ISL\_615021|Original|hCoV-19^^Gibraltar|Human|Microbiology|Respiratory Virus Unit|Platt|Gibraltar

>Spike|hCoV-19/USA/OH-ODH-SC35210/2020|2020-04-24|EPI\_ISL\_780377|Original|hCoV-19^^Ohio|Human|Ohio Department of Health Laboratory|Ohio Department of Health Laboratory|Holmes|USA

>Spike|hCoV-19/England/ALDP-95647F/2020|2020-06-08|EPI\_ISL\_553999|Original|hCoV-19^^England|Human|Lighthouse Lab in Alderley Park|Wellcome Sanger Institute for the COVID-19 Genomics UK (COG-UK) consortium|Davies|United Kingdom

>Spike|hCoV-19/Netherlands/NB-EMC-352/2020|2020-10-22|EPI\_ISL\_722533|Original|hCoV-19^^Noord Brabant|Human|Dutch COVID-19 response team|Erasmus Medical Center|Oude Munnink|Netherlands

>Spike|hCoV-19/USA/TX-HMH-4848/2020|2020-06-22|EPI\_ISL\_544374|Original|hCoV-19^^Texas|Human|Houston Methodist Hospital|Houston Methodist Hospital|Long|USA

>Spike|hCoV-19/Belgium/ULG-10883/2020|2020-11-13|EPI\_ISL\_678426|Original|hCoV-19^^Li\u00e8ge|Human|Department of Clinical Microbiology|GIGA Medical Genomics|Durkin|Belgium

>Spike|hCoV-19/England/MILK-B55D73/2020|2020-11-06|EPI\_ISL\_658359|Original|hCoV-19^^England|Human|Lighthouse Lab in Milton Keynes|Wellcome Sanger Institute for the COVID-19 Genomics UK (COG-UK) Consortium|Davies|United Kingdom

>Spike|hCoV-19/Northern Ireland/QEUI-95ED5E/2020|2020-08-08|EPI\_ISL\_532447|Original|hCoV-19^^Northern Ireland|Human|Lighthouse Lab in Glasgow|Wellcome Sanger Institute for the COVID-19 Genomics UK (COG-UK) consortium|Davies|United Kingdom

>Spike|hCoV-19/England/EXET-137940/2020|2020-05-12|EPI\_ISL\_512338|Original|hCoV-19^^England|Human|University of Exeter|COVID-19 Genomics UK (COG-UK) Consortium|Temperton|United Kingdom

>Spike|hCoV-19/England/QEUI-B688A9/2020|2020-11-11|EPI\_ISL\_655036|Original|hCoV-19^^England|Human|Lighthouse Lab in Glasgow|Wellcome Sanger Institute for the COVID-19 Genomics UK (COG-UK) Consortium|Davies|United Kingdom

>Spike|hCoV-19/Sweden/20-21494/2020|2020-05-15|EPI\_ISL\_615076|Original|hCoV-19^^Uppsala|Human|Uppsala klinisk mikrobiologi|The Public Health Agency of Sweden|Svartstr\u00f6m|Sweden

>Spike|hCoV-19/England/BRIS-125E82/2020|2020-03-30|EPI\_ISL\_443955|Original|hCoV-19^^England|Human|PHE South West Regional Laboratory|Wellcome Sanger Institute for the COVID-19 Genomics UK (COG-UK) consortium|Amato|United Kingdom

>Spike|hCoV-19/USA/WA-UW-12801/2020|2020-06-29|EPI\_ISL\_570904|Original|hCoV-19^^Washington|Human|UW Virology Lab|UW Virology Lab|Roychoudhury|USA

>Spike|hCoV-19/Gambia/NPHL-2344/2020|2020-00-00|EPI\_ISL\_561243|Original|hCoV-19^^Kombo|Human|MRCG at LSHTM Genomics lab|MRCG at LSHTM Genomics lab|Sesay|Gambia

>Spike|hCoV-19/England/20124012902/2020|2020-03-18|EPI\_ISL\_418699|Original|hCoV-19^^England|Human|Respiratory Virus Unit|Respiratory Virus Unit|Platt|United Kingdom

>Spike|hCoV-19/Spain/PV-IBV-000805/2020|2020-03-08|EPI\_ISL\_452717|Original|hCoV-19^^Basque Country|Human|Hospital Universitario Araba. Vitoria-Gasteiz,|SeqCOVID-SPAIN consortium|IBV (CSIC)|Comas|Spain

>Spike|hCoV-19/England/ALDP-9443C2/2020|2020-06-07|EPI\_ISL\_554780|Original|hCoV-19^^England|Human|Lighthouse Lab in Alderley Park|Wellcome Sanger Institute for the COVID-19 Genomics UK (COG-UK) consortium|Davies|United Kingdom

>Spike|hCoV-19/Netherlands/ZuidHolland\_156/2020|2020-04-28|EPI\_ISL\_461329|Original|hCoV-19^^Zuid Holland|Human|Dutch COVID-19 response team|Erasmus Medical Center|Oude Munnink|Netherlands

>Spike|hCoV-19/Australia/VIC6091/2020|2020-07-11|EPI\_ISL\_518116|Original|hCoV-19^^Victoria|Human|Victorian Infectious Diseases Reference Laboratory (VIDRL)|VIDRL and MDU-PHL|Schultz|Australia

>Spike|hCoV-19/USA/MN-MDH-1081/2020|2020-06-03|EPI\_ISL\_470761|Original|hCoV-19^^Minnesota|Human|Minnesota Department of Health|Minnesota Department of Health|Garfin|USA

>Spike|hCoV-19/Canada/ON-UHTC\_0398/2020|2020-11-24|EPI\_ISL\_698079|Original|hCoV-19^^Ontario|Human|Unity Health Toronto|Ontario Institute for Cancer Research|de Borja|Canada

>Spike|hCoV-19/USA/VA-DCLS-1975/2020|2020-10-07|EPI\_ISL\_644891|Original|hCoV-19^^Virginia|Human|Virginia DCLS|Virginia DCLS|St. Jacques|USA

>Spike|hCoV-19/Australia/SAP208/2020|2020-04-20|EPI\_ISL\_492132|Original|hCoV-19^^South Australia|Human|SA Pathology|SA Pathology|Leong|Australia

>Spike|hCoV-19/England/201121113/2020|2020-03-09|EPI\_ISL\_464681|Original|hCoV-19^^England|Human|Respiratory Virus Unit|Respiratory Virus Unit|Platt|United Kingdom

>Spike|hCoV-19/Chile/RM-87410-TC1/2020|2020-06-01|EPI\_ISL\_746817|Vero E6|hCoV-19^^Region Metropolitana de Santiago|Human|Genetica Molecular and Subdepartamento de Virologia ISP Chile|Instituto de Salud Publica de Chile|Tognarelli|Chile

>Spike|hCoV-19/England/ALDP-BC7C06/2020|2020-11-23|EPI\_ISL\_721463|Original|hCoV-19^^England|Human|Lighthouse Lab in Alderley Park|Wellcome Sanger Institute for the COVID-19 Genomics UK (COG-UK) Consortium|Davies|United Kingdom

>Spike|hCoV-19/England/SHEF-D21D7/2020|2020-03-26|EPI\_ISL\_442506|Original|hCoV-19^^England|Human|Virology Department|COVID-19 Genomics UK (COG-UK) Consortium|de Silva|United Kingdom

>Spike|hCoV-19/Norway/2390/2020|2020-04-02|EPI\_ISL\_449794|Original|hCoV-19^^Norway|Human|Dept. of Medical Microbiology|Norwegian Institute of Public Health|Hungnes|Norway

>Spike|hCoV-19/England/20142022204/2020|2020-03-29|EPI\_ISL\_465932|Original|hCoV-19^^England|Human|Respiratory Virus Unit|Respiratory Virus Unit|Platt|United Kingdom

>Spike|hCoV-19/England/ALDP-CB6841/2020|2020-12-17|EPI\_ISL\_761126|Original|hCoV-19^^England|Human|Lighthouse Lab in Alderley Park|Wellcome Sanger Institute for the COVID-19 Genomics UK (COG-UK) Consortium|Davies|United Kingdom

>Spike|hCoV-19/Jordan/AM-ALSR-5136/2020|2020-10-20|EPI\_ISL\_730376|Original|hCoV-19^^Amman|Human|Biolab Diagnostic Laboratories|Andersen lab at Scripps Research|Gangavarapu|Jordan

>Spike|hCoV-19/England/CAMC-B07B94/2020|2020-10-29|EPI\_ISL\_643662|Original|hCoV-19^^England|Human|Lighthouse Lab in Cambridge|Wellcome Sanger Institute for the COVID-19 Genomics UK (COG-UK) Consortium|Davies|United Kingdom

>Spike|hCoV-19/Japan/PG-7327/2020|2020-08-00|EPI\_ISL\_688430|Original|hCoV-19^^Japan|Human|Pathogen Genomics Center|Pathogen Genomics Center|Sekizuka|Japan

>Spike|hCoV-19/USA/WI-UW-2462/2020|2020-12-21|EPI\_ISL\_759737|Original|hCoV-19^^Wisconsin|Human|University of Wisconsin-Madison AIDS Vaccine Research Laboratories|University of Wisconsin-Madison AIDS Vaccine Research Laboratories|Moreno|USA

>Spike|hCoV-19/England/MILK-B554AB/2020|2020-11-05|EPI\_ISL\_658004|Original|hCoV-19^^England|Human|Lighthouse Lab in Milton Keynes|Wellcome Sanger Institute for the COVID-19 Genomics UK (COG-UK) Consortium|Davies|United Kingdom

>Spike|hCoV-19/USA/TX-HMH-MCoV-18032/2020|2020-11-16|EPI\_ISL\_786180|Original|hCoV-19^^Texas|Human|Houston Methodist Hospital|Houston Methodist Hospital|Long|USA

>Spike|hCoV-19/Denmark/DCGC-11749/2020|2020-10-26|EPI\_ISL\_670759|Original|hCoV-19^^Hovedstaden|Human|Department of Virus and Microbiological Special Diagnostics|Albertsen Lab|Michaelsen|Denmark

>Spike|hCoV-19/Denmark/DCGC-3091/2020|2020-08-24|EPI\_ISL\_616871|Original|hCoV-19^^Midtjylland|Human|Department of Virus and Microbiological Special Diagnostics|Albertsen lab|Michaelsen|Denmark

>Spike|hCoV-19/USA/CA-CZB-1237/2020|2020-05-12|EPI\_ISL\_454657|Original|hCoV-19^^California|Human|County of Santa Clara Public Health Department|Chan-Zuckerberg Biohub|Hao|USA

>Spike|hCoV-19/England/BIRM-5FBF2/2020|2020-05-20|EPI\_ISL\_473389|Original|hCoV-19^^England|Human|University of Birmingham|COVID-19 Genomics UK (COG-UK) Consortium|Loman|United Kingdom

>Spike|hCoV-19/Scotland/GCVR-17124F/2020|2020-03-26|EPI\_ISL\_459538|Original|hCoV-19^^Scotland|Human|NHSGGC West of Scotland Specialist Virology Centre / MRC-

University of Glasgow Centre for Virus Research|Wellcome Sanger Institute for the COVID-19 Genomics UK (COG-UK) consortium|Davies|United Kingdom  
>Spike|hCoV-19/Luxembourg/LNS7892400/2020|2020-10-30|EPI\_ISL\_744649|Original|hCoV-19^^Luxembourg|Human|Laboratoire national de sant\u00e9|Laboratoire national de sant\u00e9|Wienecke-Baldacchino|Luxembourg  
>Spike|hCoV-19/England/ALDP-B1D0E7/2020|2020-11-01|EPI\_ISL\_664559|Original|hCoV-19^^England|Human|Centre for Enzyme Innovation|COVID-19 Genomics UK (COG-UK) Consortium|Robson|United Kingdom  
>Spike|hCoV-19/England/ALDP-6C44E8/2020|2020-07-01|EPI\_ISL\_556167|Original|hCoV-19^^England|Human|Lighthouse Lab in Alderley Park|Wellcome Sanger Institute for the COVID-19 Genomics UK (COG-UK) consortium|Davies|United Kingdom  
>Spike|hCoV-19/England/QEUH-B0DB52/2020|2020-11-02|EPI\_ISL\_642168|Original|hCoV-19^^England|Human|Lighthouse Lab in Glasgow|Wellcome Sanger Institute for the COVID-19 Genomics UK (COG-UK) Consortium|Davies|United Kingdom  
>Spike|hCoV-19/USA/UT-UPHL-04315\_2/2020|2020-05-17|EPI\_ISL\_591306|Original|hCoV-19^^Utah|Human|Utah Public Health Laboratory|Utah Public Health Laboratory|Young|USA  
>Spike|hCoV-19/USA/MI-QDX-1126/2020|2020-03-20|EPI\_ISL\_571856|Original|hCoV-19^^Michigan|Human|Quest Diagnostics|Quest Diagnostics|Kagan|USA  
>Spike|hCoV-19/Gibraltar/204421219/2020|2020-10-27|EPI\_ISL\_613680|Original|hCoV-19^^Gibraltar|Human|Microbiology|Respiratory Virus Unit|Platt|Gibraltar  
>Spike|hCoV-19/Australia/VIC7233/2020|2020-07-25|EPI\_ISL\_564300|Original|hCoV-19^^Victoria|Human|Microbiological Diagnostic Unit - Public Health Laboratory (MDU-PHL)|MDU-PHL|Schultz|Australia  
>Spike|hCoV-19/South Africa/KRISP-K004018/2020|2020-10-12|EPI\_ISL\_635002|Original|hCoV-19^^KwaZulu-Natal|Human|National Health Laboratory Service - Inkosi Albert Luthuli Central Hospital (NHLS-IALCH)|KRISP|de Oliveira|South Africa  
>Spike|hCoV-19/Denmark/DCGC-5000/2020|2020-09-21|EPI\_ISL\_621808|Original|hCoV-19^^Hovedstaden|Human|Department of Virus and Microbiological Special Diagnostics|Albertsen lab|Michaelsen|Denmark  
>Spike|hCoV-19/Netherlands/NB-EMC-313/2020|2020-10-06|EPI\_ISL\_632446|Original|hCoV-19^^Noord Brabant|Human|Dutch COVID-19 response team|Erasmus Medical Center|Oude Munnink|Netherlands  
>Spike|hCoV-19/Scotland/QEUH-A9D860/2020|2020-10-20|EPI\_ISL\_727790|Original|hCoV-19^^Scotland|Human|Centre for Enzyme Innovation|COVID-19 Genomics UK (COG-UK) Consortium|Robson|United Kingdom  
>Spike|hCoV-19/Denmark/DCGC-3535/2020|2020-08-31|EPI\_ISL\_616328|Original|hCoV-19^^Hovedstaden|Human|Department of Virus and Microbiological Special Diagnostics|Albertsen lab|Michaelsen|Denmark  
>Spike|hCoV-19/England/ALDP-B62A6D/2020|2020-11-09|EPI\_ISL\_656368|Original|hCoV-19^^England|Human|Lighthouse Lab in Alderley Park|Wellcome Sanger Institute for the COVID-19 Genomics UK (COG-UK) Consortium|Davies|United Kingdom  
>Spike|hCoV-19/Scotland/QEUH-9CF64E/2020|2020-09-17|EPI\_ISL\_601992|Original|hCoV-19^^Scotland|Human|Lighthouse Lab in Glasgow|Wellcome Sanger Institute for the COVID-19 Genomics UK (COG-UK) consortium|Davies|United Kingdom  
>Spike|hCoV-19/England/MILK-9F27C7/2020|2020-09-25|EPI\_ISL\_589135|Original|hCoV-19^^England|Human|Lighthouse Lab in Milton Keynes|Wellcome Sanger Institute for the COVID-19 Genomics UK (COG-UK) consortium|Davies|United Kingdom  
>Spike|hCoV-19/Norway/3784/2020|2020-09-29|EPI\_ISL\_668439|Original|hCoV-19^^Viken|Human|Ostfold Hospital Trust - Kalnes|Norwegian Institute of Public Health|Kopperud Riis|Norway  
>Spike|hCoV-19/USA/MA-MASPHL-00076/2020|2020-04-03|EPI\_ISL\_791566|Original|hCoV-19^^Massachusetts|Human|Massachusetts State Public Health Laboratory|Infectious Disease Program|Park|USA  
>Spike|hCoV-19/Wales/PHWC-32FBD/2020|2020-04-14|EPI\_ISL\_446719|Original|hCoV-19^^Wales|Human|Wales Specialist Virology Centre|Public Health Wales Microbiology Cardiff|Moore|United Kingdom  
>Spike|hCoV-19/Japan/PG-8301/2020|2020-08-00|EPI\_ISL\_687400|Original|hCoV-19^^Japan|Human|Pathogen Genomics Center|Pathogen Genomics Center|Sekizuka|Japan

>Spike|hCoV-19/Scotland/CVR2949/2020|2020-04-22|EPI\_ISL\_478048|Original|hCoV-19^^Scotland|Human|West of Scotland Specialist Virology Centre|COVID-19 Genomics UK (COG-UK) Consortium|Robertson|United Kingdom

>Spike|hCoV-19/Switzerland/GE-HUG-0304/2020|2020-04-02|EPI\_ISL\_429218|Original|hCoV-19^^Geneve|Human|University Hospitals of Geneva Laboratory of Virology|University Hospitals of Geneva Laboratory of Virology|Cordey|Switzerland

>Spike|hCoV-19/England/QEUH-CADACF/2020|2020-12-20|EPI\_ISL\_760923|Original|hCoV-19^^England|Human|Lighthouse Lab in Glasgow|Wellcome Sanger Institute for the COVID-19 Genomics UK (COG-UK) Consortium|Davies|United Kingdom

>Spike|hCoV-19/Scotland/QEUH-9C7CDB/2020|2020-09-15|EPI\_ISL\_576040|Original|hCoV-19^^Scotland|Human|Lighthouse Lab in Glasgow|Wellcome Sanger Institute for the COVID-19 Genomics UK (COG-UK) consortium|Davies|United Kingdom

>Spike|hCoV-19/Denmark/DCGC-6513/2020|2020-10-05|EPI\_ISL\_619413|Original|hCoV-19^^Midtjylland|Human|Department of Virus and Microbiological Special Diagnostics|Albertsen lab|Michaelsen|Denmark

>Spike|hCoV-19/Netherlands/ZuidHolland\_93/2020|2020-03-29|EPI\_ISL\_422960|Original|hCoV-19^^Zuid Holland|Human|Dutch COVID-19 response team|Erasmus Medical Center|Oude Munnink|Netherlands

>Spike|hCoV-19/England/SHEF-C0813/2020|2020-03-25|EPI\_ISL\_420166|Original|hCoV-19^^England|Human|Virology Department|Department of Infection|de Silva|United Kingdom

>Spike|hCoV-19/Wales/PHWC-165606/2020|2020-06-27|EPI\_ISL\_484688|Original|hCoV-19^^Wales|Human|Originating lab|COVID-19 Genomics UK (COG-UK) Consortium|Moore|United Kingdom

>Spike|hCoV-19/USA/NY-Wadsworth-34728-01/2020|2020-04-01|EPI\_ISL\_525644|Original|hCoV-19^^New York|Human|Wadsworth Center|Wadsworth Center|Plitnick|USA

>Spike|hCoV-19/Denmark/DCGC-3627/2020|2020-08-31|EPI\_ISL\_616395|Original|hCoV-19^^Syddanmark|Human|Department of Virus and Microbiological Special Diagnostics|Albertsen lab|Michaelsen|Denmark

>Spike|hCoV-19/England/201080027/2020|2020-03-05|EPI\_ISL\_464432|Original|hCoV-19^^England|Human|Respiratory Virus Unit|Respiratory Virus Unit|Platt|United Kingdom

>Spike|hCoV-19/USA/FL-BPHL-0068/2020|2020-04-16|EPI\_ISL\_445011|Original|hCoV-19^^Florida|Human|Florida Bureau of Public Health Laboratories|Florida Bureau of Public Health Laboratories|Blanton|USA

>Spike|hCoV-19/England/CAMC-B21DE9/2020|2020-11-01|EPI\_ISL\_647178|Original|hCoV-19^^England|Human|Lighthouse Lab in Cambridge|Wellcome Sanger Institute for the COVID-19 Genomics UK (COG-UK) Consortium|Davies|United Kingdom

>Spike|hCoV-19/USA/TX-DSHS-1084/2020|2020-05-14|EPI\_ISL\_615125|Original|hCoV-19^^Texas|Human|Texas Department of State Health Services|Texas Department of State Health Services|Rahman|USA

>Spike|hCoV-19/USA/LA-EVTL686/2020|2020-07-15|EPI\_ISL\_653378|Original|hCoV-19^^Louisiana|Human|LSUHS Emerging Viral Threat Laboratory|Microbial Genome Sequencing Center|Kamil|USA

>Spike|hCoV-19/England/ALDP-49692E/2020|2020-06-07|EPI\_ISL\_559359|Original|hCoV-19^^England|Human|Lighthouse Lab in Alderley Park|Wellcome Sanger Institute for the COVID-19 Genomics UK (COG-UK) consortium|Davies|United Kingdom

>Spike|hCoV-19/USA/TX-HMH-MCoV-14044/2020|2020-08-14|EPI\_ISL\_787332|Original|hCoV-19^^Texas|Human|Houston Methodist Hospital|Houston Methodist Hospital|Long|USA

>Spike|hCoV-19/Northern Ireland/NIRE-FB75E/2020|2020-03-25|EPI\_ISL\_448974|Original|hCoV-19^^Northern Ireland|Human|Regional Virus Laboratory|COVID-19 Genomics UK (COG-UK) Consortium|Fairley|United Kingdom

>Spike|hCoV-19/Spain/CT-IBV-004155/2020|2020-03-26|EPI\_ISL\_510067|Original|hCoV-19^^Catalunya|Human|Instituto de Investigaciones Biomédicas de Barcelona (CSIC)|SeqCOVID-SPAIN consortium|IBV(CSIC)|Comas|Spain

>Spike|hCoV-19/Northern Ireland/QEUH-96DB61/2020|2020-08-20|EPI\_ISL\_530718|Original|hCoV-19^^Northern Ireland|Human|Lighthouse Lab in Glasgow|Wellcome Sanger Institute for the COVID-19 Genomics UK (COG-UK) consortium|Davies|United Kingdom

>Spike|hCoV-19/USA/MN-MDH-1260/2020|2020-06-09|EPI\_ISL\_482981|Original|hCoV-19^^Minnesota|Human|Mayo Clinic & Mayo Clinic Laboratories|Minnesota Department of Health|Garfin|USA

>Spike|hCoV-19/England/20189176801/2020|2020-05-01|EPI\_ISL\_465575|Original|hCoV-19^^England|Human|Respiratory Virus Unit|Respiratory Virus Unit|Platt|United Kingdom

>Spike|hCoV-19/England/QEUEH-9FFAFE/2020|2020-09-30|EPI\_ISL\_600182|Original|hCoV-19^^England|Human|Lighthouse Lab in Glasgow|Wellcome Sanger Institute for the COVID-19 Genomics UK (COG-UK) consortium|Davies|United Kingdom

>Spike|hCoV-19/USA/CA-ALSR-0757-IPL/2020|2020-05-13|EPI\_ISL\_483337|Original|hCoV-19^^California|Human|UC San Diego Center for Advanced Laboratory Medicine|Andersen lab at Scripps Research|Gangavarapu|USA

>Spike|hCoV-19/USA/NY-Wadsworth-290758-01/2020|2020-12-21|EPI\_ISL\_767576|Original|hCoV-19^^New York|Human|URMC LABS|Wadsworth Center|Lasek-Nesselquist|USA

>Spike|hCoV-19/Wales/PHWC-48B4EF/2020|2020-10-29|EPI\_ISL\_666245|Original|hCoV-19^^Wales|Human|Wales Specialist Virology Centre Sequencing lab|COVID-19 Genomics UK (COG-UK) Consortium|Moore|United Kingdom

>Spike|hCoV-19/England/SHEF-CB2FC/2020|2020-05-22|EPI\_ISL\_484493|Original|hCoV-19^^England|Human|Virology Department|COVID-19 Genomics UK (COG-UK) Consortium|de Silva|United Kingdom

>Spike|hCoV-19/USA/NJ-QDX-133/2020|2020-03-13|EPI\_ISL\_467876|Original|hCoV-19^^New Jersey|Human|Quest Diagnostics|Quest Diagnostics|Kagan|USA

>Spike|hCoV-19/Japan/PG-4642/2020|2020-07-00|EPI\_ISL\_689779|Original|hCoV-19^^Japan|Human|Fukuoka Institute of Health and Environmental Sciences|Pathogen Genomics Center|Sekizuka|Japan

>Spike|hCoV-19/England/ALDP-9530AB/2020|2020-06-11|EPI\_ISL\_553669|Original|hCoV-19^^England|Human|Lighthouse Lab in Alderley Park|Wellcome Sanger Institute for the COVID-19 Genomics UK (COG-UK) consortium|Davies|United Kingdom

>Spike|hCoV-19/Northern Ireland/NIRE-235307/2020|2020-10-19|EPI\_ISL\_764426|Original|hCoV-19^^Northern Ireland|Human|Regional Virus Laboratory|COVID-19 Genomics UK (COG-UK) Consortium|Fairley|United Kingdom

>Spike|hCoV-19/Vietnam/IBT-NIHE-05/2020|2020-03-25|EPI\_ISL\_479757|Vero|hCoV-19^^Hanoi|Human|National Institute of Hygiene and Epidemiology (NIHE)|National Key Laboratory of Gene Technology|Nguyen|Vietnam

>Spike|hCoV-19/Cote d'Ivoire/BKE0706/2020|2020-07-24|EPI\_ISL\_614382|Original|hCoV-19^^Bouafle|Human|Molecular diagnostic unit for viral haemorrhagic fevers and emerging viruses|Project group Epidemiology of Highly Pathogenic Microorganisms|Calvignac-Spencer|C\u00f4te d'Ivoire

>Spike|hCoV-19/England/ALDP-94FA59/2020|2020-06-18|EPI\_ISL\_555171|Original|hCoV-19^^England|Human|Lighthouse Lab in Alderley Park|Wellcome Sanger Institute for the COVID-19 Genomics UK (COG-UK) consortium|Davies|United Kingdom

>Spike|hCoV-19/Australia/NSW168/2020|2020-03-21|EPI\_ISL\_427739|Original|hCoV-19^^New South Wales|Human|Centre for Infectious Diseases and Microbiology Public Health|NSW Health Pathology - Institute of Clinical Pathology and Medical Research; Westmead Hospital; University of Sydney|Gall|Australia

>Spike|hCoV-19/England/PORT-2D2D2C/2020|2020-04-06|EPI\_ISL\_611925|Original|hCoV-19^^England|Human|Centre for Enzyme Innovation|COVID-19 Genomics UK (COG-UK) Consortium|Robson|United Kingdom

>Spike|hCoV-19/Wales/PHWC-4818FC/2020|2020-10-18|EPI\_ISL\_613123|Original|hCoV-19^^Wales|Human|Wales Specialist Virology Centre Sequencing lab|COVID-19 Genomics UK (COG-UK) Consortium|Moore|United Kingdom

>Spike|hCoV-19/USA/NC-SLPH-0017/2020|2020-08-08|EPI\_ISL\_538521|Original|hCoV-19^^North Carolina|Human|Infectious Diseases|Infectious Diseases|Chase|USA

>Spike|hCoV-19/England/QEUEH-B67E7B/2020|2020-11-11|EPI\_ISL\_661601|Original|hCoV-19^^England|Human|Lighthouse Lab in Glasgow|Wellcome Sanger Institute for the COVID-19 Genomics UK (COG-UK) Consortium|Davies|United Kingdom

>Spike|hCoV-19/USA/MI-UM-10036306710/2020|2020-10-06|EPI\_ISL\_596604|Original|hCoV-19^^Michigan|Human|University of Michigan Clinical Microbiology Laboratory|Lauring Lab|Valesano|USA

>Spike|hCoV-19/Scotland/QEUEH-9F3DE2/2020|2020-09-24|EPI\_ISL\_600767|Original|hCoV-19^^Scotland|Human|Lighthouse Lab in Glasgow|Wellcome Sanger Institute for the COVID-19 Genomics UK (COG-UK) consortium|Davies|United Kingdom

>Spike|hCoV-19/England/ALDP-9E6F64/2020|2020-09-24|EPI\_ISL\_580608|Original|hCoV-19^^England|Human|Lighthouse Lab in Alderley Park|Wellcome Sanger Institute for the COVID-19 Genomics UK (COG-UK) consortium|Davies|United Kingdom

>Spike|hCoV-19/USA/TX-HMH-MCoV-8567/2020|2020-07-01|EPI\_ISL\_780630|Original|hCoV-19^^Texas|Human|Houston Methodist Hospital|Houston Methodist Hospital|Long|USA

>Spike|hCoV-19/England/QEUEH-B67F78/2020|2020-11-11|EPI\_ISL\_662109|Original|hCoV-19^^England|Human|Lighthouse Lab in Glasgow|Wellcome Sanger Institute for the COVID-19 Genomics UK (COG-UK) Consortium|Davies|United Kingdom

>Spike|hCoV-19/France/PDL-SC608/2020|2020-03-21|EPI\_ISL\_663255|Original|hCoV-19^^Pays-de-la-Loire|Human|CHU Nantes|CNR Virus des Infections Respiratoires - France SUD|Bal|France

>Spike|hCoV-19/Japan/IC-0076/2020|2020-07-00|EPI\_ISL\_591418|Original|hCoV-19^^Japan|Human|Pathogen Genomics Center|Pathogen Genomics Center|Sekizuka|Japan

>Spike|hCoV-19/Wales/PHWC-4A03E7/2020|2020-12-05|EPI\_ISL\_743440|Original|hCoV-19^^Wales|Human|Wales Specialist Virology Centre Sequencing lab|COVID-19 Genomics UK (COG-UK) Consortium|Moore|United Kingdom

>Spike|hCoV-19/Wales/PHWC-493E22/2020|2020-11-18|EPI\_ISL\_726032|Original|hCoV-19^^Wales|Human|Originating lab|COVID-19 Genomics UK (COG-UK) Consortium|Moore|United Kingdom

>Spike|hCoV-19/Denmark/DCGC-11140/2020|2020-11-02|EPI\_ISL\_670411|Original|hCoV-19^^Hovedstaden|Human|Department of Virus and Microbiological Special Diagnostics|Albertsen Lab|Michaelsen|Denmark

>Spike|hCoV-19/England/QEUEH-B10776/2020|2020-11-02|EPI\_ISL\_641829|Original|hCoV-19^^England|Human|Lighthouse Lab in Glasgow|Wellcome Sanger Institute for the COVID-19 Genomics UK (COG-UK) Consortium|Davies|United Kingdom

>Spike|hCoV-19/England/BRIS-124946/2020|2020-03-25|EPI\_ISL\_443940|Original|hCoV-19^^England|Human|PHE South West Regional Laboratory|Wellcome Sanger Institute for the COVID-19 Genomics UK (COG-UK) consortium|Amato|United Kingdom

>Spike|hCoV-19/Scotland/QEUEH-95ED03/2020|2020-08-08|EPI\_ISL\_532452|Original|hCoV-19^^Scotland|Human|NHSGGC West of Scotland Specialist Virology Centre / MRC-University of Glasgow Centre for Virus Research|Wellcome Sanger Institute for the COVID-19 Genomics UK (COG-UK) consortium|Davies|United Kingdom

>Spike|hCoV-19/England/QEUEH-B9FB37/2020|2020-11-18|EPI\_ISL\_721173|Original|hCoV-19^^England|Human|Lighthouse Lab in Glasgow|Wellcome Sanger Institute for the COVID-19 Genomics UK (COG-UK) Consortium|Davies|United Kingdom

>Spike|hCoV-19/Scotland/QEUEH-AD5459/2020|2020-10-26|EPI\_ISL\_649704|Original|hCoV-19^^Scotland|Human|Lighthouse Lab in Glasgow|Wellcome Sanger Institute for the COVID-19 Genomics UK (COG-UK) Consortium|Davies|United Kingdom

>Spike|hCoV-19/Scotland/QEUEH-A0CAFD/2020|2020-10-03|EPI\_ISL\_585618|Original|hCoV-19^^Scotland|Human|Quadram Institute Bioscience|COVID-19 Genomics UK (COG-UK) Consortium|Alikhan|United Kingdom

>Spike|hCoV-19/Wales/PHWC-2AFA9/2020|2020-04-06|EPI\_ISL\_474260|Original|hCoV-19^^Wales|Human|Originating lab|COVID-19 Genomics UK (COG-UK) Consortium|Moore|United Kingdom

>Spike|hCoV-19/USA/TX-HMH-6092/2020|2020-06-30|EPI\_ISL\_547231|Original|hCoV-19^^Texas|Human|Houston Methodist Hospital|Houston Methodist Hospital|Long|USA

>Spike|hCoV-19/Wales/PHWC-4923AC/2020|2020-11-17|EPI\_ISL\_706842|Original|hCoV-19^^Wales|Human|Originating lab|COVID-19 Genomics UK (COG-UK) Consortium|Moore|United Kingdom

>Spike|hCoV-19/England/EXET-13AD9C/2020|2020-11-11|EPI\_ISL\_664611|Original|hCoV-19^^England|Human|University of Exeter|COVID-19 Genomics UK (COG-UK) Consortium|Temperton|United Kingdom

>Spike|hCoV-19/India/MH-GA47/2020|2020-06-20|EPI\_ISL\_508241|Original|hCoV-19^^Maharashtra|Human|Government Medical College|National Institute of Biomedical Genomics|Maitra|India



>Spike|hCoV-19/England/ALDP-A4FDAA/2020|2020-10-06|EPI\_ISL\_597859|Original|hCoV-19^^England|Human|Lighthouse Lab in Alderley Park|Wellcome Sanger Institute for the COVID-19 Genomics UK (COG-UK) consortium|Davies|United Kingdom

>Spike|hCoV-19/Spain/PV-IBV-004273/2020|2020-04-07|EPI\_ISL\_510392|Original|hCoV-19^^Basque Country|Human|Servicio de Microbiolog\u00eda. Hospital Universitario Donostia. OSI Donostialdea. \u00clrea de Enfermedades Infecciosas|SeqCOVID-SPAIN consortium/IBV (CSIC) |Comas|Spain

>Spike|hCoV-19/Beijing/DT-travelIT03/2020|2020-03-07|EPI\_ISL\_452354|Original|hCoV-19^^Beijing|Human|Laboratory of Infectious Diseases Center of Beijing Ditan Hospital|Laboratory of Infectious Diseases Center of Beijing Ditan Hospital|Yang|China

>Spike|hCoV-19/USA/CA-IGI-0368/2020|2020-07-16|EPI\_ISL\_576550|Original|hCoV-19^^California|Human|Innovative Genomics Institute|Innovative Genomics Institute|Wyman|USA

>Spike|hCoV-19/Luxembourg/LNS9579356/2020|2020-03-30|EPI\_ISL\_429708|Original|hCoV-19^^Luxembourg|Human|Laboratoire National de Sante|Laboratoire National de Sante|Wienecke-Baldacchino|Luxembourg

>Spike|hCoV-19/Wales/PHWC-495C80/2020|2020-11-25|EPI\_ISL\_726464|Original|hCoV-19^^Wales|Human|Originating lab|COVID-19 Genomics UK (COG-UK) Consortium|Moore|United Kingdom

>Spike|hCoV-19/Germany/BY-MVP-0023/2020|2020-03-12|EPI\_ISL\_437223|Original|hCoV-19^^Bavaria|Human|Max von Pettenkofer Institute|Laboratory for Functional Genome Analysis|Graf|Germany

>Spike|hCoV-19/Denmark/DCGC-16935/2020|2020-12-14|EPI\_ISL\_750652|Original|hCoV-19^^Midtjylland|Human|Department of Virus and Microbiological Special Diagnostics|Albertsen Lab|Michaelsen|Denmark

>Spike|hCoV-19/England/ALDP-B1A123/2020|2020-11-02|EPI\_ISL\_645584|Original|hCoV-19^^England|Human|Lighthouse Lab in Alderley Park|Wellcome Sanger Institute for the COVID-19 Genomics UK (COG-UK) Consortium|Davies|United Kingdom

>Spike|hCoV-19/England/LIVE-AA31E/2020|2020-03-22|EPI\_ISL\_517436|Original|hCoV-19^^England|Human|Liverpool Clinical Laboratories|COVID-19 Genomics UK (COG-UK) Consortium|Haldenby|United Kingdom

>Spike|hCoV-19/Wales/PHWC-48D33B/2020|2020-11-15|EPI\_ISL\_680609|Original|hCoV-19^^Wales|Human|Wales Specialist Virology Centre Sequencing lab|COVID-19 Genomics UK (COG-UK) Consortium|Moore|United Kingdom

>Spike|hCoV-19/Wales/PHWC-2EDC9/2020|2020-04-07|EPI\_ISL\_446154|Original|hCoV-19^^Wales|Human|Wales Specialist Virology Centre|Public Health Wales Microbiology Cardiff|Moore|United Kingdom

>Spike|hCoV-19/Denmark/DCGC-18923/2020|2020-12-07|EPI\_ISL\_748164|Original|hCoV-19^^Hovedstaden|Human|Department of Virus and Microbiological Special Diagnostics|Albertsen Lab|Michaelsen|Denmark

>Spike|hCoV-19/USA/AZ-TG351935/2020|2020-05-25|EPI\_ISL\_694409|Original|hCoV-19^^Arizona|Human|AZ SPHL|TGen North|French|USA

>Spike|hCoV-19/USA/MN-MDH-1612/2020|2020-04-26|EPI\_ISL\_530208|Original|hCoV-19^^Minnesota|Human|Minnesota Department of Health|Minnesota Department of Health|Garfin|USA

>Spike|hCoV-19/USA/WA-UW-4317/2020|2020-03-31|EPI\_ISL\_437829|Original|hCoV-19^^Washington|Human|UW Virology Lab|UW Virology Lab|Roychoudhury|USA

>Spike|hCoV-19/Spain/IB-IBV-99011548/2020|2020-12-15|EPI\_ISL\_779859|Original|hCoV-19^^Balear Islands|Human|Servicio de Microbiolog\u00eda|SeqCOVID-SPAIN consortium/IBV (CSIC) |Comas|Spain

>Spike|hCoV-19/England/204291821/2020|2020-10-17|EPI\_ISL\_613628|Original|hCoV-19^^England|Human|Respiratory Virus Unit|Respiratory Virus Unit|Platt|United Kingdom

>Spike|hCoV-19/USA/CA-CZB-3775/2020|2020-05-30|EPI\_ISL\_548459|Original|hCoV-19^^California|Human|Ventura County Public Health Lab|Chan-Zuckerberg Biohub|Bhatt|USA

>Spike|hCoV-19/England/QEUH-B67330/2020|2020-11-11|EPI\_ISL\_662307|Original|hCoV-19^^England|Human|Lighthouse Lab in Glasgow|Wellcome Sanger Institute for the COVID-19 Genomics UK (COG-UK) Consortium|Davies|United Kingdom

>Spike|hCoV-19/Denmark/DCGC-6749/2020|2020-04-20|EPI\_ISL\_622347|Original|hCoV-19^^Hovedstaden|Human|Department of Virus and Microbiological Special Diagnostics|Albertsen lab|Michaelsen|Denmark

>Spike|hCoV-19/Scotland/EDB9972/2020|2020-11-17|EPI\_ISL\_680554|Original|hCoV-19^^Scotland|Human|Virology Department|COVID-19 Genomics UK (COG-UK) Consortium|McHugh|United Kingdom

>Spike|hCoV-19/England/MILK-9D53C6/2020|2020-09-19|EPI\_ISL\_577054|Original|hCoV-19^^England|Human|Centre for Enzyme Innovation|COVID-19 Genomics UK (COG-UK) Consortium|Robson|United Kingdom

>Spike|hCoV-19/England/201620047/2020|2020-04-12|EPI\_ISL\_466393|Original|hCoV-19^^England|Human|Respiratory Virus Unit|Respiratory Virus Unit|Platt|United Kingdom

>Spike|hCoV-19/USA/UT-08614/2020|2020-05-19|EPI\_ISL\_524355|Original|hCoV-19^^Utah|Human|Utah Public Health Laboratory|Utah Public Health Laboratory|Young|USA

>Spike|hCoV-19/Australia/VIC4496/2020|2020-07-16|EPI\_ISL\_518907|Original|hCoV-19^^Victoria|Human|Microbiological Diagnostic Unit - Public Health Laboratory (MDU-PHL)|MDU-PHL|Schultz|Australia

>Spike|hCoV-19/USA/WI-GMF-00228/2020|2020-03-23|EPI\_ISL\_418187|Original|hCoV-19^^Wisconsin|Human|Gundersen Molecular Diagnostics Laboratory|Kabara Cancer Research Institute|Kenny|USA

>Spike|hCoV-19/USA/WA-S1956/2020|2020-06-02|EPI\_ISL\_497384|Original|hCoV-19^^Washington|Human|Washington State Department of Health|Seattle Flu Study|Lee|USA

>Spike|hCoV-19/USA/TX-HMH-MCoV-10536/2020|2020-07-09|EPI\_ISL\_789245|Original|hCoV-19^^Texas|Human|Houston Methodist Hospital|Houston Methodist Hospital|Long|USA

>Spike|hCoV-19/Denmark/DCGC-12676/2020|2020-11-16|EPI\_ISL\_682857|Original|hCoV-19^^Syddanmark|Human|Department of Virus and Microbiological Special Diagnostics|Albertsen Lab|Michaelsen|Denmark

>Spike|hCoV-19/USA/WI-UW-34/2020|2020-03-26|EPI\_ISL\_421292|Original|hCoV-19^^Wisconsin|Human|University of Wisconsin-Madison AIDS Vaccine Research Laboratories|University of Wisconsin-Madison AIDS Vaccine Research Laboratories|Baczenas|USA

>Spike|hCoV-19/Israel/CVL-n-10864/2020|2020-04-23|EPI\_ISL\_474984|Original|hCoV-19^^Jerusalem|Human|Israel Central Virology laboratory|Israel Central Virology laboratory|Zuckerman|Israel

>Spike|hCoV-19/England/MILK-A4607D/2020|2020-10-06|EPI\_ISL\_598688|Original|hCoV-19^^England|Human|Lighthouse Lab in Milton Keynes|Wellcome Sanger Institute for the COVID-19 Genomics UK (COG-UK) consortium|Davies|United Kingdom

>Spike|hCoV-19/United Arab Emirates/0611/2020|2020-05-15|EPI\_ISL\_698767|Original|hCoV-19^^Abu Dhabi|Human|Group 42 (G42) Healthcare|G42 Healthcare|Ogrodzki|United Arab Emirates

>Spike|hCoV-19/England/CAMC-946E65/2020|2020-07-16|EPI\_ISL\_556797|Original|hCoV-19^^England|Human|Lighthouse Lab in Cambridge|Wellcome Sanger Institute for the COVID-19 Genomics UK (COG-UK) consortium|Davies|United Kingdom

>Spike|hCoV-19/Australia/VIC16050/2020|2020-08-04|EPI\_ISL\_640371|Original|hCoV-19^^Victoria|Human|Microbiological Diagnostic Unit - Public Health Laboratory (MDU-PHL)|MDU-PHL|Schultz|Australia

>Spike|hCoV-19/Jordan/AM-ALSR-4082/2020|2020-10-03|EPI\_ISL\_636442|Original|hCoV-19^^Amman|Human|Biolab Diagnostic Laboratories|Andersen lab at Scripps Research|Gangavarapu|Jordan

>Spike|hCoV-19/Finland/14A51S15/2020|2020-04-14|EPI\_ISL\_481552|Original|hCoV-19^^Uusimaa|Human|Department of Virology and Immunology|Department of Virology|Smura|Finland

>Spike|hCoV-19/Germany/HH-hpi-p1574/2020|2020-03-15|EPI\_ISL\_776052|Original|hCoV-19^^Hamburg|Human|University Medical Center Hamburg Eppendorf|Heinrich Pette Institute|Robitaille|Germany

>Spike|hCoV-19/England/BRIS-123AEA/2020|2020-04-07|EPI\_ISL\_442722|Original|hCoV-19^^England|Human|PHE South West Regional Laboratory|Wellcome Sanger Institute for the COVID-19 Genomics UK (COG-UK) consortium|Amato|United Kingdom

>Spike|hCoV-19/Scotland/GCVR-1739DF/2020|2020-04-07|EPI\_ISL\_459144|Original|hCoV-19^^Scotland|Human|NHSGGC West of Scotland Specialist Virology Centre / MRC-

University of Glasgow Centre for Virus Research|Wellcome Sanger Institute for the COVID-19 Genomics UK (COG-UK) consortium|Davies|United Kingdom  
>Spike|hCoV-19/England/QEUI-BCB561/2020|2020-11-27|EPI\_ISL\_704275|Original|hCoV-19^^England|Human|Lighthouse Lab in Glasgow|Wellcome Sanger Institute for the COVID-19 Genomics UK (COG-UK) Consortium|Davies|United Kingdom  
>Spike|hCoV-19/USA/UT-UPHL-2012666296/2020|2020-08-15|EPI\_ISL\_745883|Original|hCoV-19^^Utah|Human|Ginkgo Bioworks Clinical Laboratory|Utah Public Health Laboratory|Young|USA  
>Spike|hCoV-19/USA/MI-MDHHS-SC22413/2020|2020-11-14|EPI\_ISL\_708246|Original|hCoV-19^^Michigan|Human|Michigan Department of Health and Human Services|Michigan Department of Health and Human Services|Jacob|USA  
>Spike|hCoV-19/Wales/PHWC-162706/2020|2020-05-14|EPI\_ISL\_473110|Original|hCoV-19^^Wales|Human|Wales Specialist Virology Centre Sequencing lab|COVID-19 Genomics UK (COG-UK) Consortium|Moore|United Kingdom  
>Spike|hCoV-19/Japan/PG-2021/2020|2020-04-00|EPI\_ISL\_685626|Original|hCoV-19^^Japan|Human|Pathogen Genomics Center|Pathogen Genomics Center|Sekizuka|Japan  
>Spike|hCoV-19/England/MILK-A44C7B/2020|2020-10-06|EPI\_ISL\_598557|Original|hCoV-19^^England|Human|Lighthouse Lab in Milton Keynes|Wellcome Sanger Institute for the COVID-19 Genomics UK (COG-UK) consortium|Davies|United Kingdom  
>Spike|hCoV-19/England/BRIS-121DF2/2020|2020-03-20|EPI\_ISL\_439974|Original|hCoV-19^^England|Human|PHE South West Regional Laboratory|Wellcome Sanger Institute for the COVID-19 Genomics UK (COG-UK) consortium|Amato|United Kingdom  
>Spike|hCoV-19/England/QEUI-95FB08/2020|2020-08-02|EPI\_ISL\_532366|Original|hCoV-19^^England|Human|Lighthouse Lab in Glasgow|Wellcome Sanger Institute for the COVID-19 Genomics UK (COG-UK) consortium|Davies|United Kingdom  
>Spike|hCoV-19/England/ALDP-6FF8BB/2020|2020-06-29|EPI\_ISL\_557714|Original|hCoV-19^^England|Human|Lighthouse Lab in Alderley Park|Wellcome Sanger Institute for the COVID-19 Genomics UK (COG-UK) consortium|Davies|United Kingdom  
>Spike|hCoV-19/England/ALDP-CB4BE0/2020|2020-12-18|EPI\_ISL\_761908|Original|hCoV-19^^England|Human|Lighthouse Lab in Alderley Park|Wellcome Sanger Institute for the COVID-19 Genomics UK (COG-UK) Consortium|Davies|United Kingdom  
>Spike|hCoV-19/Switzerland/BE-ETHZ-390437/2020|2020-11-04|EPI\_ISL\_729080|Original|hCoV-19^^Bern|Human|Viollier AG|Department of Biosystems Science and Engineering|Nadeau|Switzerland  
>Spike|hCoV-19/India/MH-NIV-183948/2020|2020-08-28|EPI\_ISL\_541718|Original|hCoV-19^^Maharashtra|Human|National Institute of Virology|National Institute of Virology|Potdar|India  
>Spike|hCoV-19/Portugal/PT0045/2020|2020-03-18|EPI\_ISL\_421448|Original|hCoV-19^^Portugal|Human|H Guimaraes|Instituto Nacional de Saude (INSA)|Borges|Portugal  
>Spike|hCoV-19/USA/CA-CZB-14605/2020|2020-10-29|EPI\_ISL\_739474|Original|hCoV-19^^California|Human|Napa-Solano-Yolo- Marin County (NSYM) Public Health Laboratories|Chan-Zuckerberg Biohub|Kamm|USA  
>Spike|hCoV-19/Denmark/DCGC-12687/2020|2020-11-16|EPI\_ISL\_682868|Original|hCoV-19^^Hovedstaden|Human|Department of Virus and Microbiological Special Diagnostics|Albertsen Lab|Michaelsen|Denmark  
>Spike|hCoV-19/Scotland/CVR4311/2020|2020-09-15|EPI\_ISL\_572623|Original|hCoV-19^^Scotland|Human|West of Scotland Specialist Virology Centre|COVID-19 Genomics UK (COG-UK) Consortium|Robertson|United Kingdom  
>Spike|hCoV-19/USA/TX-HMH-MCoV-13778/2020|2020-08-17|EPI\_ISL\_788871|Original|hCoV-19^^Texas|Human|Houston Methodist Hospital|Houston Methodist Hospital|Long|USA  
>Spike|hCoV-19/England/203690348/2020|2020-09-05|EPI\_ISL\_534723|Original|hCoV-19^^England|Human|Respiratory Virus Unit|Respiratory Virus Unit|Platt|United Kingdom  
>Spike|hCoV-19/England/ALDP-A6D140/2020|2020-10-14|EPI\_ISL\_608071|Original|hCoV-19^^England|Human|Lighthouse Lab in Alderley Park|Wellcome Sanger Institute for the COVID-19 Genomics UK (COG-UK) consortium|Davies|United Kingdom  
>Spike|hCoV-19/USA/CA-UCLA-68/2020|2020-04-01|EPI\_ISL\_537593|Original|hCoV-19^^California|Human|UCLA Pathology Clinical Microbiology Lab|Kruglyak Lab|Boocock|USA

>Spike|hCoV-19/USA/MI-MDHHS-SC21364/2020|2020-04-04|EPI\_ISL\_507618|Original|hCoV-19^^Michigan|Human|Michigan Department of Health and Human Services|Michigan Department of Health and Human Services|Blankenship|USA

>Spike|hCoV-19/USA/WI-GMF-13783/2020|2020-08-04|EPI\_ISL\_547658|Original|hCoV-19^^Wisconsin|Human|Gundersen Molecular Diagnostics Laboratory|Kabara Cancer Research Institute|Kenny|USA

>Spike|hCoV-19/South Korea/KCDC2209/2020|2020-04-13|EPI\_ISL\_510548|Original|hCoV-19^^South Korea|Human|Division of Viral Diseases|Division of Viral Diseases|Kim|South Korea

>Spike|hCoV-19/Netherlands/GE-EMC-194/2020|2020-06-03|EPI\_ISL\_523176|Original|hCoV-19^^Gelderland|Human|Dutch COVID-19 response team|Erasmus Medical Center|Oude Munnink|Netherlands

>Spike|hCoV-19/Northern Ireland/NIRE-FF2D1/2020|2020-04-22|EPI\_ISL\_469878|Original|hCoV-19^^Northern Ireland|Human|Regional Virus Laboratory|Wellcome Sanger Institute for the COVID-19 Genomics UK (COG-UK) consortium|Davies|United Kingdom

>Spike|hCoV-19/USA/NM-DOH-2020313239/2020|2020-08-26|EPI\_ISL\_574266|Original|hCoV-19^^New Mexico|Human|New Mexico Department of Health Scientific Laboratory|New Mexico Department of Health Scientific Laboratory|Johnson|USA

>Spike|hCoV-19/Australia/VIC17585/2020|2020-07-20|EPI\_ISL\_663933|Original|hCoV-19^^Victoria|Human|Microbiological Diagnostic Unit - Public Health Laboratory (MDU-PHL)|MDU-PHL|Schultz|Australia

>Spike|hCoV-19/USA/WA-UW-4065/2020|2020-04-01|EPI\_ISL\_437816|Original|hCoV-19^^Washington|Human|UW Virology Lab|UW Virology Lab|Roychoudhury|USA

>Spike|hCoV-19/USA/CA-ALSR-3821/2020|2020-06-19|EPI\_ISL\_636225|Original|hCoV-19^^California|Human|San Diego County Public Health Laboratory|Andersen lab at Scripps Research|Gangavarapu|USA

>Spike|hCoV-19/Japan/PG-7207/2020|2020-07-00|EPI\_ISL\_688311|Original|hCoV-19^^Japan|Human|Saitama Prefectural Institute of Public Health|Pathogen Genomics Center|Sekizuka|Japan

>Spike|hCoV-19/Denmark/DCGC-8632/2020|2020-10-26|EPI\_ISL\_625781|Original|hCoV-19^^Sjaelland|Human|Department of Virus and Microbiological Special Diagnostics|Albertsen lab|Michaelsen|Denmark

>Spike|hCoV-19/England/CAMC-B51B31/2020|2020-11-09|EPI\_ISL\_658220|Original|hCoV-19^^England|Human|Lighthouse Lab in Cambridge|Wellcome Sanger Institute for the COVID-19 Genomics UK (COG-UK) Consortium|Davies|United Kingdom

>Spike|hCoV-19/USA/AZ-TG648628/2020|2020-04-29|EPI\_ISL\_695865|Original|hCoV-19^^Arizona|Human|Sonora Quest Laboratories|TGen North|French|USA

>Spike|hCoV-19/USA/TX-HMH-MCoV-10322/2020|2020-07-08|EPI\_ISL\_789422|Original|hCoV-19^^Texas|Human|Houston Methodist Hospital|Houston Methodist Hospital|Long|USA

>Spike|hCoV-19/England/CAMC-B3483D/2020|2020-11-06|EPI\_ISL\_659479|Original|hCoV-19^^England|Human|Lighthouse Lab in Cambridge|Wellcome Sanger Institute for the COVID-19 Genomics UK (COG-UK) Consortium|Davies|United Kingdom

>Spike|hCoV-19/Australia/VIC7038/2020|2020-07-17|EPI\_ISL\_561863|Original|hCoV-19^^Victoria|Human|Victorian Infectious Diseases Reference Laboratory (VIDRL)|VIDRL and MDU-PHL|Schultz|Australia

>Spike|hCoV-19/Portugal/PT1655/2020|2020-11-08|EPI\_ISL\_731957|Original|hCoV-19^^Portugal|Human|Instituto Nacional de Saude (INSA)|Instituto Nacional de Saude (INSA)|Borges|Portugal

>Spike|hCoV-19/England/CAMB-822F1/2020|2020-04-12|EPI\_ISL\_443670|Original|hCoV-19^^England|Human|Department of Pathology|Wellcome Sanger Institute for the COVID-19 Genomics UK (COG-UK) consortium|Amato|United Kingdom

>Spike|hCoV-19/England/MILK-B54E71/2020|2020-11-06|EPI\_ISL\_657715|Original|hCoV-19^^England|Human|Lighthouse Lab in Milton Keynes|Wellcome Sanger Institute for the COVID-19 Genomics UK (COG-UK) Consortium|Davies|United Kingdom

>Spike|hCoV-19/Canada/QC-LSPQ-L00241959/2020|2020-03-28|EPI\_ISL\_536299|Original|hCoV-19^^Quebec|Human|CSSS Haut-Richelieu/Rouville (H\u00f4pital)|Laboratoire de sant\u00e9 publique du Qu\u00e9bec|Moreira|Canada

>Spike|hCoV-19/USA/MA-MGH-00745/2020|2020-04-10|EPI\_ISL\_791742|Original|hCoV-19^^Massachusetts|Human|Massachusetts General Hospital|Infectious Disease Program|Park|USA

>Spike|hCoV-19/England/ALDP-5C96EE/2020|2020-06-19|EPI\_ISL\_558479|Original|hCoV-19^^England|Human|Lighthouse Lab in Alderley Park|Wellcome Sanger Institute for the COVID-19 Genomics UK (COG-UK) consortium|Davies|United Kingdom

>Spike|hCoV-19/England/ALDP-94DA5B/2020|2020-06-17|EPI\_ISL\_555213|Original|hCoV-19^^England|Human|Lighthouse Lab in Alderley Park|Wellcome Sanger Institute for the COVID-19 Genomics UK (COG-UK) consortium|Davies|United Kingdom

>Spike|hCoV-19/Australia/VIC4877/2020|2020-07-13|EPI\_ISL\_519260|Original|hCoV-19^^Victoria|Human|Victorian Infectious Diseases Reference Laboratory (VIDRL)|VIDRL and MDU-PHL|Schultz|Australia

>Spike|hCoV-19/Netherlands/GE-RIVM-20522/2020|2020-11-25|EPI\_ISL\_728737|Original|hCoV-19^^Gelderland|Human|Dutch COVID-19 response team|National Institute for Public Health and the Environment (RIVM)|Meijer|Netherlands

>Spike|hCoV-19/Spain/AS-IBV-98006601/2020|2020-03-13|EPI\_ISL\_654645|Original|hCoV-19^^Asturias|Human|Servicio de Microbiolog\u00eda|SeqCOVID-SPAIN consortium|IBV (CSIC)|Comas|Spain

>Spike|hCoV-19/Switzerland/BL-UHB-42194287/2020|2020-03-16|EPI\_ISL\_528157|Original|hCoV-19^^Basel-Land|Human|University Hospital Basel|University Hospital Basel|Roloff Handschin|Switzerland

>Spike|hCoV-19/Slovenia/6051/2020|2020-03-11|EPI\_ISL\_635226|Original|hCoV-19^^Slovenia|Human|Institute of Microbiology and Immunology|Institute of Microbiology and Immunology|Zakotnik|Slovenia

>Spike|hCoV-19/USA/AZ-TG382559/2020|2020-06-15|EPI\_ISL\_694685|Original|hCoV-19^^Arizona|Human|TGen North|TGen North|French|USA

>Spike|hCoV-19/England/SHEF-C8435/2020|2020-04-25|EPI\_ISL\_490611|Original|hCoV-19^^England|Human|Virology Department|COVID-19 Genomics UK (COG-UK) Consortium|de Silva|United Kingdom

>Spike|hCoV-19/Japan/PG-1822/2020|2020-04-00|EPI\_ISL\_685428|Original|hCoV-19^^Japan|Human|Tokyo Metropolitan Institute of Public Health|Pathogen Genomics Center|Sekizuka|Japan

>Spike|hCoV-19/Latvia/205/2020|2020-09-21|EPI\_ISL\_770041|Original|hCoV-19^^Latvia|Human|E. Gulbja Laboratorija|Latvian Biomedical Research and Study Centre|Zrelavs|Latvia

>Spike|hCoV-19/Japan/PG-7137/2020|2020-08-00|EPI\_ISL\_688242|Original|hCoV-19^^Japan|Human|Pathogen Genomics Center|Pathogen Genomics Center|Sekizuka|Japan

>Spike|hCoV-19/England/QEUA-97010F/2020|2020-08-16|EPI\_ISL\_568412|Original|hCoV-19^^England|Human|Lighthouse Lab in Glasgow|Wellcome Sanger Institute for the COVID-19 Genomics UK (COG-UK) consortium|Davies|United Kingdom

>Spike|hCoV-19/USA/OR-OHSU-0200/2020|2020-03-30|EPI\_ISL\_509071|Original|hCoV-19^^Oregon|Human|OHSU Lab Services Molecular Microbiology Lab|Oregon SARS-CoV-2 Genome Sequencing Center|O'Roak|USA

>Spike|hCoV-19/USA/NY-NYCPHL-000197/2020|2020-04-16|EPI\_ISL\_631732|Original|hCoV-19^^New York|Human|Flushing Hospital Medical Center|New York City Public Health Laboratory|Wang|USA

>Spike|hCoV-19/England/QEUA-96E605/2020|2020-08-17|EPI\_ISL\_530581|Original|hCoV-19^^England|Human|Lighthouse Lab in Glasgow|Wellcome Sanger Institute for the COVID-19 Genomics UK (COG-UK) consortium|Davies|United Kingdom

>Spike|hCoV-19/England/BRIS-12D048/2020|2020-04-26|EPI\_ISL\_481853|Original|hCoV-19^^England|Human|PHE South West Regional Laboratory|Wellcome Sanger Institute for the COVID-19 Genomics UK (COG-UK) consortium|Davies|United Kingdom

>Spike|hCoV-19/England/CAMB-81A54/2020|2020-04-12|EPI\_ISL\_443095|Original|hCoV-19^^England|Human|Department of Pathology|Wellcome Sanger Institute for the COVID-19 Genomics UK (COG-UK) consortium|Amato|United Kingdom

>Spike|hCoV-19/England/MILK-BB03A1/2020|2020-11-17|EPI\_ISL\_720448|Original|hCoV-19^^England|Human|Lighthouse Lab in Milton Keynes|Wellcome Sanger Institute for the COVID-19 Genomics UK (COG-UK) Consortium|Davies|United Kingdom

>Spike|hCoV-19/Switzerland/BS-42408481/2020|2020-08-24|EPI\_ISL\_581984|Original|hCoV-19^^Basel-Stadt|Human|University Hospital Basel|University Hospital Basel|Roloff Handschin|Switzerland

>Spike|hCoV-19/England/ALDP-A2FA21/2020|2020-10-03|EPI\_ISL\_587193|Original|hCoV-19^^England|Human|Lighthouse Lab in Alderley Park|Wellcome Sanger Institute for the COVID-19 Genomics UK (COG-UK) consortium|Davies|United Kingdom

>Spike|hCoV-19/USA/MA-MGH-03203/2020|2020-10-01|EPI\_ISL\_765745|Original|hCoV-19^^Massachusetts|Human|Massachusetts General Hospital|Infectious Disease Program|Park|USA

>Spike|hCoV-19/USA/MI-MDHHS-SC20411/2020|2020-03-15|EPI\_ISL\_452285|Original|hCoV-19^^Michigan|Human|Michigan Department of Health and Human Services|Michigan Department of Health and Human Services|Blankenship|USA

>Spike|hCoV-19/Denmark/DCGC-14609/2020|2020-11-23|EPI\_ISL\_711870|Original|hCoV-19^^Hovedstaden|Human|Department of Virus and Microbiological Special Diagnostics|Albertsen Lab|Michaelsen|Denmark

>Spike|hCoV-19/England/ALDP-BB3C67/2020|2020-11-20|EPI\_ISL\_701981|Original|hCoV-19^^England|Human|Lighthouse Lab in Alderley Park|Wellcome Sanger Institute for the COVID-19 Genomics UK (COG-UK) Consortium|Davies|United Kingdom

>Spike|hCoV-19/Australia/VIC8147/2020|2020-08-06|EPI\_ISL\_564873|Original|hCoV-19^^Victoria|Human|Microbiological Diagnostic Unit - Public Health Laboratory (MDU-PHL)|MDU-PHL|Schultz|Australia

>Spike|hCoV-19/England/QEUH-B7E9CB/2020|2020-11-14|EPI\_ISL\_668045|Original|hCoV-19^^England|Human|Lighthouse Lab in Glasgow|Wellcome Sanger Institute for the COVID-19 Genomics UK (COG-UK) Consortium|Davies|United Kingdom

>Spike|hCoV-19/Switzerland/VD-ETHZ-100172/2020|2020-03-16|EPI\_ISL\_574982|Original|hCoV-19^^Vaud|Human|Viollier AG|Department of Biosystems Science and Engineering|Nadeau|Switzerland

>Spike|hCoV-19/Denmark/DCGC-20557/2020|2020-12-21|EPI\_ISL\_759218|Original|hCoV-19^^Nordjylland|Human|Department of Virus and Microbiological Special Diagnostics|Albertsen Lab|Michaelsen|Denmark

>Spike|hCoV-19/Scotland/QEUH-9F615C/2020|2020-09-27|EPI\_ISL\_600857|Original|hCoV-19^^Scotland|Human|Lighthouse Lab in Glasgow|Wellcome Sanger Institute for the COVID-19 Genomics UK (COG-UK) consortium|Davies|United Kingdom

>Spike|hCoV-19/New Zealand/20VR0989/2020|2020-03-17|EPI\_ISL\_456174|Original|hCoV-19^^Auckland|Human|LabPLUS|Institute of Environmental Science and Research (ESR)|de Ligt|New Zealand

>Spike|hCoV-19/Bangladesh/SUST-GEB-Habiganj-4/2020|2020-11-25|EPI\_ISL\_754177|Original|hCoV-19^^Sylhet|Human|Specialized Lab for COVID-19 Detection|Specialized Lab for COVID-19 Detection|Jewel|Bangladesh

>Spike|hCoV-19/England/CAMB-7D52D/2020|2020-04-03|EPI\_ISL\_441721|Original|hCoV-19^^England|Human|Department of Pathology|Wellcome Sanger Institute for the COVID-19 Genomics UK (COG-UK) consortium|Amato|United Kingdom

>Spike|hCoV-19/USA/WA-UW-11349/2020|2020-06-21|EPI\_ISL\_570399|Original|hCoV-19^^Washington|Human|UW Virology Lab|UW Virology Lab|Roychoudhury|USA

>Spike|hCoV-19/Brazil/SP-508/2020|2020-04-13|EPI\_ISL\_468320|Original|hCoV-19^^S\u00e3o Paulo|Human|Secretaria Municipal de Saude de Hortolandia|Instituto Adolfo Lutz|Sacchi|Brazil

>Spike|hCoV-19/England/NOTT-1140DB/2020|2020-10-03|EPI\_ISL\_577138|Original|hCoV-19^^England|Human|Queens Medical Centre|COVID-19 Genomics UK (COG-UK) Consortium|Loose|United Kingdom

>Spike|hCoV-19/Scotland/GCVR-170732/2020|2020-03-26|EPI\_ISL\_489638|Original|hCoV-19^^Scotland|Human|NHSGGC West of Scotland Specialist Virology Centre / MRC - University of Glasgow Centre for Virus Research|Wellcome Sanger Institute for the COVID-19 Genomics UK (COG-UK) consortium|Davies|United Kingdom

>Spike|hCoV-19/Netherlands/GE-EMC-181/2020|2020-05-24|EPI\_ISL\_523163|Original|hCoV-19^^Gelderland|Human|Dutch COVID-19 response team|Erasmus Medical Center|Oude Munnink|Netherlands

>Spike|hCoV-19/Scotland/CVR4390/2020|2020-09-14|EPI\_ISL\_585264|Original|hCoV-19^^Scotland|Human|West of Scotland Specialist Virology Centre|COVID-19 Genomics UK (COG-UK) Consortium|Robertson|United Kingdom

>Spike|hCoV-19/Australia/VIC7834/2020|2020-07-28|EPI\_ISL\_564687|Original|hCoV-19^^Victoria|Human|Microbiological Diagnostic Unit - Public Health Laboratory (MDU-PHL)|MDU-PHL|Schultz|Australia

>Spike|hCoV-19/England/QEUA-B666B0/2020|2020-11-11|EPI\_ISL\_661425|Original|hCoV-19^^England|Human|Lighthouse Lab in Glasgow|Wellcome Sanger Institute for the COVID-19 Genomics UK (COG-UK) Consortium|Davies|United Kingdom

>Spike|hCoV-19/Morocco/15N/2020|2020-05-15|EPI\_ISL\_458150|Original|hCoV-19^^Casablanca|Human|ANOUAL|ANOUAL|Fekkak|Morocco

>Spike|hCoV-19/Australia/VIC6796/2020|2020-07-21|EPI\_ISL\_564062|Original|hCoV-19^^Victoria|Human|Victorian Infectious Diseases Reference Laboratory (VIDRL)|VIDRL and MDU-PHL|Schultz|Australia

>Spike|hCoV-19/England/NORT-293F21/2020|2020-07-21|EPI\_ISL\_573332|Original|hCoV-19^^England|Human|Northumbria University / South Tees Hospitals NHS Foundation Trust / North Cumbria Integrated Care NHS Foundation Trust / North Tees and Hartlepool NHS Foundation Trust / Newcastle Hospitals NHS Foundation Trust|COVID-19 Genomics UK (COG-UK) Consortium|Bashton|United Kingdom

>Spike|hCoV-19/Wales/PHWC-48D429/2020|2020-11-01|EPI\_ISL\_680623|Original|hCoV-19^^Wales|Human|Wales Specialist Virology Centre Sequencing lab|COVID-19 Genomics UK (COG-UK) Consortium|Moore|United Kingdom

>Spike|hCoV-19/Australia/NSW656/2020|2020-07-12|EPI\_ISL\_498775|Original|hCoV-19^^New South Wales|Human|Histopath|NSW Health Pathology - Institute of Clinical Pathology and Medical Research; Westmead Hospital; University of Sydney|Gall|Australia

>Spike|hCoV-19/Japan/PG-8383/2020|2020-07-00|EPI\_ISL\_687482|Original|hCoV-19^^Japan|Human|Pathogen Genomics Center|Pathogen Genomics Center|Sekizuka|Japan

>Spike|hCoV-19/Switzerland/VD-ETHZ-140067/2020|2020-04-29|EPI\_ISL\_476115|Original|hCoV-19^^Vaud|Human|Viollier AG|Department of Biosystems Science and Engineering|Nadeau|Switzerland

>Spike|hCoV-19/England/QEUA-9A40C9/2020|2020-09-01|EPI\_ISL\_540209|Original|hCoV-19^^England|Human|Lighthouse Lab in Glasgow|Wellcome Sanger Institute for the COVID-19 Genomics UK (COG-UK) consortium|Davies|United Kingdom

>Spike|hCoV-19/Nigeria/EK220-CV54/2020|2020-05-14|EPI\_ISL\_487102|Original|hCoV-19^^Ekiti State|Human|Nigeria Centre for Disease Control (NCDC)|African Centre of Excellence for Genomics of Infectious Diseases (ACEGID)|Oluniyi|Nigeria

>Spike|hCoV-19/Scotland/GCVR-170D8B/2020|2020-03-28|EPI\_ISL\_524527|Original|hCoV-19^^Scotland|Human|NHSGGC West of Scotland Specialist Virology Centre / MRC-University of Glasgow Centre for Virus Research|Wellcome Sanger Institute for the COVID-19 Genomics UK (COG-UK) consortium|Davies|United Kingdom

>Spike|hCoV-19/England/QEUA-BCC5CA/2020|2020-11-27|EPI\_ISL\_703996|Original|hCoV-19^^England|Human|Lighthouse Lab in Glasgow|Wellcome Sanger Institute for the COVID-19 Genomics UK (COG-UK) Consortium|Davies|United Kingdom

>Spike|hCoV-19/Spain/MD-IBV-99008635/2020|2020-09-29|EPI\_ISL\_654206|Original|hCoV-19^^Madrid|Human|Hospital General Universitario Gregorio Mara\u00f1\u00f3n|SeqCOVID-SPAIN consortium|IBV (CSIC)|Comas|Spain

>Spike|hCoV-19/Japan/PG-7200/2020|2020-07-00|EPI\_ISL\_688304|Original|hCoV-19^^Japan|Human|Saitama Prefectural Institute of Public Health|Pathogen Genomics Center|Sekizuka|Japan

>Spike|hCoV-19/Denmark/DCGC-5200/2020|2020-09-14|EPI\_ISL\_621738|Original|hCoV-19^^Syddanmark|Human|Department of Virus and Microbiological Special Diagnostics|Albertsen lab|Michaelsen|Denmark

>Spike|hCoV-19/Colombia/ANT-INS-79256/2020|2020-03-11|EPI\_ISL\_417924|Original|hCoV-19^^Antioquia|Human|Secretar\u00eda de Salud Medell\u00edn|Instituto Nacional de Salud|D\u00edaz|Colombia

>Spike|hCoV-19/USA/WI-UW-854/2020|2020-07-09|EPI\_ISL\_509860|Original|hCoV-19^^Wisconsin|Human|University of Wisconsin-Madison AIDS Vaccine Research Laboratories|University of Wisconsin-Madison AIDS Vaccine Research Laboratories|Baczenas|USA

>Spike|hCoV-19/Scotland/CVR4677/2020|2020-09-28|EPI\_ISL\_612306|Original|hCoV-19^^Scotland|Human|West of Scotland Specialist Virology Centre|COVID-19 Genomics UK (COG-UK) Consortium|Robertson|United Kingdom

>Spike|hCoV-19/England/MILK-9736B2/2020|2020-08-20|EPI\_ISL\_575777|Original|hCoV-19^^England|Human|Lighthouse Lab in Milton Keynes|Wellcome Sanger Institute for the COVID-19 Genomics UK (COG-UK) consortium|Davies|United Kingdom

>Spike|hCoV-19/England/QEUA-9B49DA/2020|2020-09-03|EPI\_ISL\_590385|Original|hCoV-19^^England|Human|Lighthouse Lab in Glasgow|Wellcome Sanger Institute for the COVID-19 Genomics UK (COG-UK) consortium|Davies|United Kingdom

>Spike|hCoV-19/USA/MD-MDH-0487/2020|2020-11-30|EPI\_ISL\_778872|Original|hCoV-19^^Maryland|Human|Maryland Public Health Laboratory|Maryland Public Health Laboratory|Keller|USA

>Spike|hCoV-19/England/QEUA-C5BBCD/2020|2020-12-14|EPI\_ISL\_769335|Original|hCoV-19^^England|Human|Lighthouse Lab in Glasgow|Wellcome Sanger Institute for the COVID-19 Genomics UK (COG-UK) Consortium|Davies|United Kingdom

>Spike|hCoV-19/England/MILK-AC9467/2020|2020-10-21|EPI\_ISL\_630090|Original|hCoV-19^^England|Human|Lighthouse Lab in Milton Keynes|Wellcome Sanger Institute for the COVID-19 Genomics UK (COG-UK) consortium|Davies|United Kingdom

>Spike|hCoV-19/Wales/PHWC-2A62C/2020|2020-04-06|EPI\_ISL\_445596|Original|hCoV-19^^Wales|Human|Wales Specialist Virology Centre|Public Health Wales Microbiology Cardiff|Moore|United Kingdom

>Spike|hCoV-19/Scotland/QEUA-B0DB25/2020|2020-11-02|EPI\_ISL\_649520|Original|hCoV-19^^Scotland|Human|Lighthouse Lab in Glasgow|Wellcome Sanger Institute for the COVID-19 Genomics UK (COG-UK) Consortium|Davies|United Kingdom

>Spike|hCoV-19/England/QEUA-9F7C96/2020|2020-09-27|EPI\_ISL\_588753|Original|hCoV-19^^England|Human|Lighthouse Lab in Glasgow|Wellcome Sanger Institute for the COVID-19 Genomics UK (COG-UK) consortium|Davies|United Kingdom

>Spike|hCoV-19/England/MILK-95DC52/2020|2020-06-18|EPI\_ISL\_556158|Original|hCoV-19^^England|Human|Lighthouse Lab in Milton Keynes|Wellcome Sanger Institute for the COVID-19 Genomics UK (COG-UK) consortium|Davies|United Kingdom

>Spike|hCoV-19/Belgium/regal-10191126/2020|2020-10-19|EPI\_ISL\_735157|Original|hCoV-19^^Maaseik|Human|UZ Leuven|KU Leuven|Maes|Belgium

>Spike|hCoV-19/England/MILK-A4575B/2020|2020-10-06|EPI\_ISL\_598542|Original|hCoV-19^^England|Human|Lighthouse Lab in Milton Keynes|Wellcome Sanger Institute for the COVID-19 Genomics UK (COG-UK) consortium|Davies|United Kingdom

>Spike|hCoV-19/France/PAC-IHU-1092/2020|2020-08-05|EPI\_ISL\_569050|Original|hCoV-19^^Provence-Alpes-C\u00f4te-d\u2019Azur|Human|MEPHI|MEPHI|Levasseur|France

>Spike|hCoV-19/Austria/CeMM0647/2020|2020-03-29|EPI\_ISL\_583621|Original|hCoV-19^^See|Human|Pathologie-Labor Dr. Obrist- Dr. Brunhuber|Bergthaler laboratory|Bergthaler|Austria

>Spike|hCoV-19/Denmark/DCGC-4416/2020|2020-09-14|EPI\_ISL\_621837|Original|hCoV-19^^Syddanmark|Human|Department of Virus and Microbiological Special Diagnostics|Albertsen lab|Michaelsen|Denmark

>Spike|hCoV-19/England/CAMB-1ACFAE/2020|2020-04-24|EPI\_ISL\_489436|Original|hCoV-19^^England|Human|Department of Pathology|Wellcome Sanger Institute for the COVID-19 Genomics UK (COG-UK) consortium|Davies|United Kingdom

>Spike|hCoV-19/England/ALDP-AA0F47/2020|2020-10-22|EPI\_ISL\_624023|Original|hCoV-19^^England|Human|Lighthouse Lab in Alderley Park|Wellcome Sanger Institute for the COVID-19 Genomics UK (COG-UK) consortium|Davies|United Kingdom

>Spike|hCoV-19/Wales/PHWC-47F985/2020|2020-10-12|EPI\_ISL\_612750|Original|hCoV-19^^Wales|Human|Wales Specialist Virology Centre Sequencing lab|COVID-19 Genomics UK (COG-UK) Consortium|Moore|United Kingdom

>Spike|hCoV-19/Belgium/UGent-226/2020|2020-11-15|EPI\_ISL\_717577|Original|hCoV-19^^Ghent|Human|Lab voor klinische biologie|Onderzoeksgroep Virologie|Lambrechts|Belgium

>Spike|hCoV-19/Australia/VIC2310/2020|2020-06-25|EPI\_ISL\_522031|Original|hCoV-19^^Victoria|Human|Microbiological Diagnostic Unit - Public Health Laboratory (MDU-PHL)|MDU-PHL|Schultz|Australia

>Spike|hCoV-19/Portugal/PT0110/2020|2020-03-23|EPI\_ISL\_453826|Original|hCoV-19^^Portugal|Human|unknown|Instituto Nacional de Sa\u00fade (INSA)|Borges|Portugal

>Spike|hCoV-19/USA/WI-UW-933/2020|2020-05-07|EPI\_ISL\_509933|Original|hCoV-19^^Wisconsin|Human|University of Wisconsin-Madison AIDS Vaccine Research



Laboratories|University of Wisconsin-Madison AIDS Vaccine Research  
Laboratories|Baczenas|USA  
>Spike|hCoV-19/England/ALDP-95119B/2020|2020-06-12|EPI\_ISL\_554207|Original|hCoV-19^^England|Human|Lighthouse Lab in Alderley Park|Wellcome Sanger Institute for the COVID-19 Genomics UK (COG-UK) consortium|Davies|United Kingdom  
>Spike|hCoV-19/South Africa/UFS-VIRO-NGS-11/2020|2020-10-15|EPI\_ISL\_682324|Original|hCoV-19^^Free State|Human|NHLS Universitas Academic|UFS Virology|Bester|South Africa  
>Spike|hCoV-19/USA/UT-UPHL-2009187/2020|2020-05-22|EPI\_ISL\_525170|Original|hCoV-19^^Utah|Human|Utah Public Health Laboratory|Utah Public Health Laboratory|Young|USA  
>Spike|hCoV-19/Singapore/721/2020|2020-06-24|EPI\_ISL\_500542|Original|hCoV-19^^Singapore|Human|Singapore General Hospital|Department of Microbiology|Abdul Rahman|Singapore  
>Spike|hCoV-19/England/ALDP-B24E6B/2020|2020-11-04|EPI\_ISL\_646510|Original|hCoV-19^^England|Human|Lighthouse Lab in Alderley Park|Wellcome Sanger Institute for the COVID-19 Genomics UK (COG-UK) Consortium|Davies|United Kingdom  
>Spike|hCoV-19/England/MILK-ACD8D0/2020|2020-10-22|EPI\_ISL\_630223|Original|hCoV-19^^England|Human|Lighthouse Lab in Milton Keynes|Wellcome Sanger Institute for the COVID-19 Genomics UK (COG-UK) consortium|Davies|United Kingdom  
>Spike|hCoV-19/England/QEUEH-A36C03/2020|2020-10-04|EPI\_ISL\_638704|Original|hCoV-19^^England|Human|Wales Specialist Virology Centre Sequencing lab|COVID-19 Genomics UK (COG-UK) Consortium|Moore|United Kingdom  
>Spike|hCoV-19/England/MILK-AB8726/2020|2020-10-21|EPI\_ISL\_623467|Original|hCoV-19^^England|Human|Lighthouse Lab in Milton Keynes|Wellcome Sanger Institute for the COVID-19 Genomics UK (COG-UK) consortium|Davies|United Kingdom  
>Spike|hCoV-19/England/NORT-29C84B/2020|2020-04-23|EPI\_ISL\_488132|Original|hCoV-19^^England|Human|NU-OMICS DNA Sequencing research facility|Wellcome Sanger Institute for the COVID-19 Genomics UK (COG-UK) consortium|Davies|United Kingdom  
>Spike|hCoV-19/England/QEUEH-9AEBBF/2020|2020-09-03|EPI\_ISL\_573484|Original|hCoV-19^^England|Human|University College London|COVID-19 Genomics UK (COG-UK) Consortium|Roy|United Kingdom  
>Spike|hCoV-19/New Zealand/20VR3914/2020|2020-00-00|EPI\_ISL\_548098|Original|hCoV-19^^Auckland|Human|North Shore Hospital|Institute of Environmental Science and Research (ESR)|Wang|New Zealand  
>Spike|hCoV-19/England/NOTT-11F47A/2020|2020-11-25|EPI\_ISL\_702879|Original|hCoV-19^^England|Human|Queens Medical Centre|COVID-19 Genomics UK (COG-UK) Consortium|Loose|United Kingdom  
>Spike|hCoV-19/Denmark/DCGC-9546/2020|2020-11-09|EPI\_ISL\_668608|Original|hCoV-19^^Syddanmark|Human|Department of Virus and Microbiological Special Diagnostics|Albertsen Lab|Michaelsen|Denmark  
>Spike|hCoV-19/Tunisia/ADAGE-24755/2020|2020-11-08|EPI\_ISL\_712062|Original|hCoV-19^^Sfax|Human|Laboratoire de Microbiologie- CHU Habib Bourguiba \u2013 Sfax adresse|Laboratoire des Proc\u00e9d\u00e9s de Criblage Mol\u00e9culaire et Cellulaire-Centre de Biotechnologie de Sfax|Abid|Tunisia  
>Spike|hCoV-19/France/PAC-MEPHI-1749/2020|2020-09-18|EPI\_ISL\_644441|Original|hCoV-19^^Provence-Alpes-Cote-d\u2019Azur|Human|MEPHI|MEPHI|Levasseur|France  
>Spike|hCoV-19/England/BRIS-12EF0E/2020|2020-04-23|EPI\_ISL\_488437|Original|hCoV-19^^England|Human|PHE South West Regional Laboratory|Wellcome Sanger Institute for the COVID-19 Genomics UK (COG-UK) consortium|Davies|United Kingdom  
>Spike|hCoV-19/Russia/OMS-ORINFI-4890S/2020|2020-05-03|EPI\_ISL\_569854|Original|hCoV-19^^Omsk|Human|Omsk Research Institute of Natural Focal Infections|WHO National Influenza Centre Russian Federation|Komissarov|Russia  
>Spike|hCoV-19/Scotland/CVR6120/2020|2020-12-06|EPI\_ISL\_724214|Original|hCoV-19^^Scotland|Human|West of Scotland Specialist Virology Centre|COVID-19 Genomics UK (COG-UK) Consortium|Robertson|United Kingdom  
>Spike|hCoV-19/USA/MI-MDHHS-SC21824/2020|2020-03-17|EPI\_ISL\_565867|Original|hCoV-19^^Michigan|Human|Michigan Department of Health and Human Services|Michigan Department of Health and Human Services|Blankenship|USA

>Spike|hCoV-19/Canada/NB\_252/2020|2020-04-01|EPI\_ISL\_481749|Original|hCoV-19^^New Brunswick|Human|Dr. Georges-L.-Dumont University Hospital Centre|National Microbiology Laboratory|Grudeski|Canada

>Spike|hCoV-19/Australia/VIC7475/2020|2020-07-23|EPI\_ISL\_564434|Original|hCoV-19^^Victoria|Human|Microbiological Diagnostic Unit - Public Health Laboratory (MDU-PHL)|MDU-PHL|Schultz|Australia

>Spike|hCoV-19/England/ALDP-A6E5BC/2020|2020-10-15|EPI\_ISL\_607054|Original|hCoV-19^^England|Human|Lighthouse Lab in Alderley Park|Wellcome Sanger Institute for the COVID-19 Genomics UK (COG-UK) consortium|Davies|United Kingdom

>Spike|hCoV-19/Canada/ON-CVD00053/2020|2020-03-23|EPI\_ISL\_586267|Original|hCoV-19^^Ontario|Human|Toronto Invasive Bacterial Diseases Network|McMaster University|McArthur|Canada

>Spike|hCoV-19/Belgium/ULG-10178/2020|2020-05-09|EPI\_ISL\_455966|Original|hCoV-19^^Li\u00e8ge|Human|Department of Clinical Microbiology|GIGA Medical Genomics|Durkin|Belgium

>Spike|hCoV-19/USA/TX-HMH-MCoV-19447/2020|2020-11-29|EPI\_ISL\_783845|Original|hCoV-19^^Texas|Human|Houston Methodist Hospital|Houston Methodist Hospital|Long|USA

>Spike|hCoV-19/USA/OR-OHSU-0161/2020|2020-04-21|EPI\_ISL\_509064|Original|hCoV-19^^Oregon|Human|OHSU Lab Services Molecular Microbiology Lab|Oregon SARS-CoV-2 Genome Sequencing Center|O'Roak|USA

>Spike|hCoV-19/England/OXON-B02FA/2020|2020-04-19|EPI\_ISL\_478873|Original|hCoV-19^^England|Human|Oxford Viromics|COVID-19 Genomics UK (COG-UK) Consortium|Golubchik|United Kingdom

>Spike|hCoV-19/England/BRIS-12B781/2020|2020-05-19|EPI\_ISL\_487554|Original|hCoV-19^^England|Human|PHE South West Regional Laboratory|Wellcome Sanger Institute for the COVID-19 Genomics UK (COG-UK) consortium|Davies|United Kingdom

>Spike|hCoV-19/Scotland/EDB3558/2020|2020-04-14|EPI\_ISL\_439285|Original|hCoV-19^^Scotland|Human|Virology Department|COVID-19 Genomics UK (COG-UK) Consortium|Williams|United Kingdom

>Spike|hCoV-19/Wales/PHWC-29BE2/2020|2020-04-04|EPI\_ISL\_432017|Original|hCoV-19^^Wales|Human|Wales Specialist Virology Centre|Public Health Wales Microbiology Cardiff|Moore|United Kingdom

>Spike|hCoV-19/USA/MA-MGH-00488/2020|2020-03-27|EPI\_ISL\_460185|Original|hCoV-19^^Massachusetts|Human|Massachusetts General Hospital|Infectious Disease Program|Lemieux|USA

>Spike|hCoV-19/USA/HI-H200145/2020|2020-07-10|EPI\_ISL\_752708|Original|hCoV-19^^Hawaii|Human|State Laboratories Division|State Laboratories Division|Sultana|USA

>Spike|hCoV-19/England/QEUH-AD1244/2020|2020-10-26|EPI\_ISL\_633704|Original|hCoV-19^^England|Human|Lighthouse Lab in Glasgow|Wellcome Sanger Institute for the COVID-19 Genomics UK (COG-UK) consortium|Davies|United Kingdom

>Spike|hCoV-19/England/SHEF-C394A/2020|2020-03-25|EPI\_ISL\_441949|Original|hCoV-19^^England|Human|Virology Department|COVID-19 Genomics UK (COG-UK) Consortium|de Silva|United Kingdom

>Spike|hCoV-19/Scotland/EDB3359/2020|2020-04-09|EPI\_ISL\_487874|Original|hCoV-19^^Scotland|Human|Virology Department|Wellcome Sanger Institute for the COVID-19 Genomics UK (COG-UK) consortium|Davies|United Kingdom

>Spike|hCoV-19/USA/TX-HMH-5812/2020|2020-06-29|EPI\_ISL\_547034|Original|hCoV-19^^Texas|Human|Houston Methodist Hospital|Houston Methodist Hospital|Long|USA

>Spike|hCoV-19/England/MILK-A6C2D5/2020|2020-10-08|EPI\_ISL\_609044|Original|hCoV-19^^England|Human|Lighthouse Lab in Milton Keynes|Wellcome Sanger Institute for the COVID-19 Genomics UK (COG-UK) consortium|Davies|United Kingdom

>Spike|hCoV-19/Denmark/DCGC-1496/2020|2020-05-25|EPI\_ISL\_617980|Original|hCoV-19^^Hovedstaden|Human|Department of Virus and Microbiological Special Diagnostics|Albertsen lab|Michaelsen|Denmark

>Spike|hCoV-19/Norway/4903/2020|2020-10-25|EPI\_ISL\_668427|Original|hCoV-19^^Agder|Human|Hospital of Southern Norway - Kristiansand|Norwegian Institute of Public Health|Kopperud Riis|Norway

>Spike|hCoV-19/Japan/PG-7295/2020|2020-08-00|EPI\_ISL\_688398|Original|hCoV-19^^Japan|Human|Saitama Prefectural Institute of Public Health|Pathogen Genomics Center|Sekizuka|Japan

>Spike|hCoV-19/India/UP-NCDC-02320/2020|2020-03-29|EPI\_ISL\_435099|Original|hCoV-19^^Uttar Pradesh|Human|National Centre for Disease control (NCDC)|NCDC/CSIR-IGIB|Faruq|India

>Spike|hCoV-19/England/QEUA-B2B356/2020|2020-11-03|EPI\_ISL\_646462|Original|hCoV-19^^England|Human|Lighthouse Lab in Glasgow|Wellcome Sanger Institute for the COVID-19 Genomics UK (COG-UK) Consortium|Davies|United Kingdom

>Spike|hCoV-19/Denmark/DCGC-10961/2020|2020-11-02|EPI\_ISL\_670311|Original|hCoV-19^^Hovedstaden|Human|Department of Virus and Microbiological Special Diagnostics|Albertsen Lab|Michaelsen|Denmark

>Spike|hCoV-19/England/CAMC-C45434/2020|2020-12-10|EPI\_ISL\_718566|Original|hCoV-19^^England|Human|Lighthouse Lab in Cambridge|Wellcome Sanger Institute for the COVID-19 Genomics UK (COG-UK) Consortium|Davies|United Kingdom

>Spike|hCoV-19/England/CAMC-A647FC/2020|2020-10-11|EPI\_ISL\_608912|Original|hCoV-19^^England|Human|Lighthouse Lab in Cambridge|Wellcome Sanger Institute for the COVID-19 Genomics UK (COG-UK) consortium|Davies|United Kingdom

>Spike|hCoV-19/Japan/Donner57/2020|2020-07-11|EPI\_ISL\_644961|Original|hCoV-19^^Kanto|Human|Department of Infectious Diseases|Center for Medical Genetics|Kosaki|Japan

>Spike|hCoV-19/Netherlands/NH-RIVM-20430/2020|2020-12-08|EPI\_ISL\_728650|Original|hCoV-19^^Noord-Holland|Human|Dutch COVID-19 response team|National Institute for Public Health and the Environment (RIVM)|Meijer|Netherlands

>Spike|hCoV-19/USA/TX-HMH-MCoV-8971/2020|2020-07-02|EPI\_ISL\_780867|Original|hCoV-19^^Texas|Human|Houston Methodist Hospital|Houston Methodist Hospital|Long|USA

>Spike|hCoV-19/Scotland/CVR4124/2020|2020-09-08|EPI\_ISL\_540822|Original|hCoV-19^^Scotland|Human|West of Scotland Specialist Virology Centre|COVID-19 Genomics UK (COG-UK) Consortium|Robertson|United Kingdom

>Spike|hCoV-19/USA/NMDOH-2020174489/2020|2020-07-01|EPI\_ISL\_542024|Original|hCoV-19^^New Mexico|Human|New Mexico Department of Health Scientific Laboratory|New Mexico Department of Health Scientific Laboratory|Johnson|USA

>Spike|hCoV-19/England/ALDP-4A39F1/2020|2020-05-27|EPI\_ISL\_559642|Original|hCoV-19^^England|Human|Lighthouse Lab in Alderley Park|Wellcome Sanger Institute for the COVID-19 Genomics UK (COG-UK) consortium|Davies|United Kingdom

>Spike|hCoV-19/USA/TX-HMH-MCoV-14344/2020|2020-10-05|EPI\_ISL\_787629|Original|hCoV-19^^Texas|Human|Houston Methodist Hospital|Houston Methodist Hospital|Long|USA

>Spike|hCoV-19/England/NORW-E9CEB/2020|2020-04-30|EPI\_ISL\_448360|Original|hCoV-19^^England|Human|Quadram Institute Bioscience|COVID-19 Genomics UK (COG-UK) Consortium|Alikhan|United Kingdom

>Spike|hCoV-19/Spain/PV-IBV-004282/2020|2020-04-08|EPI\_ISL\_510399|Original|hCoV-19^^Basque Country|Human|Servicio de Microbiolog\u00eda. Hospital Universitario Donostia. OSI Donostialdea. \u00clrea de Enfermedades Infecciosas|SeqCOVID-SPAIN consortium/IBV (CSIC)|Comas|Spain

>Spike|hCoV-19/England/ALDP-A510AC/2020|2020-10-07|EPI\_ISL\_597852|Original|hCoV-19^^England|Human|Lighthouse Lab in Alderley Park|Wellcome Sanger Institute for the COVID-19 Genomics UK (COG-UK) consortium|Davies|United Kingdom

>Spike|hCoV-19/USA/TX-DSHS-1883/2020|2020-07-08|EPI\_ISL\_751505|Original|hCoV-19^^Texas|Human|Texas Department of State Health Services|Texas Department of State Health Services|Rahman|USA

>Spike|hCoV-19/England/ALDP-A2E2DF/2020|2020-10-06|EPI\_ISL\_586610|Original|hCoV-19^^England|Human|Lighthouse Lab in Alderley Park|Wellcome Sanger Institute for the COVID-19 Genomics UK (COG-UK) consortium|Davies|United Kingdom

>Spike|hCoV-19/USA/TX-HMH-MCoV-15741/2020|2020-07-09|EPI\_ISL\_785425|Original|hCoV-19^^Texas|Human|Houston Methodist Hospital|Houston Methodist Hospital|Long|USA

>Spike|hCoV-19/Netherlands/Utrecht\_15/2020|2020-03-08|EPI\_ISL\_414554|Original|hCoV-19^^Utrecht|Human|Dutch COVID-19 response team|Erasmus Medical Center|Oude Munnink|Netherlands

>Spike|hCoV-19/Scotland/EDB1342/2020|2020-04-10|EPI\_ISL\_491699|Original|hCoV-19^^Scotland|Human|Virology Department|Wellcome Sanger Institute for the COVID-19 Genomics UK (COG-UK) consortium|Davies|United Kingdom

>Spike|hCoV-19/mink/Netherlands/NB-EMC-13-10/2020|2020-06-14|EPI\_ISL\_523011|Original|hCoV-19^^Noord Brabant|Neovison vison|Dutch COVID-19 response team|Erasmus Medical Center|Oude Munnink|Netherlands

>Spike|hCoV-19/Netherlands/LI-RIVM-20488/2020|2020-12-07|EPI\_ISL\_728703|Original|hCoV-19^^Limburg|Human|Dutch COVID-19 response team|National Institute for Public Health and the Environment (RIVM)|Meijer|Netherlands

>Spike|hCoV-19/Wales/PHWC-49CFDB/2020|2020-12-09|EPI\_ISL\_742717|Original|hCoV-19^^Wales|Human|Wales Specialist Virology Centre Sequencing lab|COVID-19 Genomics UK (COG-UK) Consortium|Moore|United Kingdom

>Spike|hCoV-19/Scotland/QEUH-9ADF5A/2020|2020-09-05|EPI\_ISL\_638897|Original|hCoV-19^^Scotland|Human|Department of Pathology|COVID-19 Genomics UK (COG-UK) Consortium|Goodfellow|United Kingdom

>Spike|hCoV-19/Denmark/DCGC-11996/2020|2020-08-10|EPI\_ISL\_671243|Original|hCoV-19^^Midtjylland|Human|Department of Virus and Microbiological Special Diagnostics|Albertsen Lab|Michaelsen|Denmark

>Spike|hCoV-19/England/EXET-13F1B9/2020|2020-12-15|EPI\_ISL\_763631|Original|hCoV-19^^England|Human|University of Exeter|COVID-19 Genomics UK (COG-UK) Consortium|Temperton|United Kingdom

>Spike|hCoV-19/Latvia/100/2020|2020-08-04|EPI\_ISL\_515187|Original|hCoV-19^^Latvia|Human|E. Gulbja Laboratorija|Latvian Biomedical Research and Study Centre|Zrelavs|Latvia

>Spike|hCoV-19/England/MILK-C2FCA1/2020|2020-12-07|EPI\_ISL\_733780|Original|hCoV-19^^England|Human|Lighthouse Lab in Milton Keynes|Wellcome Sanger Institute for the COVID-19 Genomics UK (COG-UK) Consortium|Davies|United Kingdom

>Spike|hCoV-19/England/LIVE-A4F4D/2020|2020-03-14|EPI\_ISL\_499909|Original|hCoV-19^^England|Human|Liverpool Clinical Laboratories|COVID-19 Genomics UK (COG-UK) Consortium|Haldenby|United Kingdom

>Spike|hCoV-19/Australia/NSW216/2020|2020-03-17|EPI\_ISL\_427732|Original|hCoV-19^^New South Wales|Human|Centre for Infectious Diseases and Microbiology Public Health|NSW Health Pathology - Institute of Clinical Pathology and Medical Research; Westmead Hospital; University of Sydney|Gall|Australia

>Spike|hCoV-19/USA/AZ-TG305999/2020|2020-04-30|EPI\_ISL\_694309|Original|hCoV-19^^Arizona|Human|AZ SPHL|TGen North|French|USA

>Spike|hCoV-19/USA/LA-GBCL-26544540/2020|2020-04-18|EPI\_ISL\_485121|Original|hCoV-19^^Louisiana|Human|River Road Testing Lab|Ginkgo Bioworks Clinical Laboratory|Smith|USA

>Spike|hCoV-19/Australia/NSW238/2020|2020-03-28|EPI\_ISL\_451504|Original|hCoV-19^^New South Wales|Human|Pathology West - NSW Health Pathology|NSW Health Pathology - Institute of Clinical Pathology and Medical Research; Westmead Hospital; University of Sydney|Gall|Australia

>Spike|hCoV-19/England/EXET-1389E5/2020|2020-10-09|EPI\_ISL\_626804|Original|hCoV-19^^England|Human|University of Exeter|COVID-19 Genomics UK (COG-UK) Consortium|Temperton|United Kingdom

>Spike|hCoV-19/England/CAMC-B9812D/2020|2020-11-15|EPI\_ISL\_674859|Original|hCoV-19^^England|Human|Lighthouse Lab in Cambridge|Wellcome Sanger Institute for the COVID-19 Genomics UK (COG-UK) Consortium|Davies|United Kingdom

>Spike|hCoV-19/USA/VI-CDC-4371/2020|2020-04-26|EPI\_ISL\_454649|Original|hCoV-19^^Virgin Islands|Human|VI-US Virgin Islands Department of Health|Pathogen Discovery|Queen|USA

>Spike|hCoV-19/USA/TX-HMH-MCoV-18349/2020|2020-11-18|EPI\_ISL\_784697|Original|hCoV-19^^Texas|Human|Houston Methodist Hospital|Houston Methodist Hospital|Long|USA

>Spike|hCoV-19/USA/OR-OHSU-1679/2020|2020-07-22|EPI\_ISL\_526001|Original|hCoV-19^^Oregon|Human|OHSU Lab Services Molecular Microbiology Lab|Oregon SARS-CoV-2 Genome Sequencing Center|O'Roak|USA

>Spike|hCoV-19/USA/CA-QDX-1910/2020|2020-03-15|EPI\_ISL\_604198|Original|hCoV-19^^California|Human|Quest Diagnostics|Quest Diagnostics|Kagan|USA

>Spike|hCoV-19/Japan/PG-6165/2020|2020-08-00|EPI\_ISL\_689277|Original|hCoV-19^^Japan|Human|Pathogen Genomics Center|Pathogen Genomics Center|Sekizuka|Japan

>Spike|hCoV-19/USA/NY-Wadsworth-283453-01/2020|2020-12-05|EPI\_ISL\_754446|Original|hCoV-19^^New York|Human|Wadsworth Center|Wadsworth Center|Lasek-Nesselquist|USA

>Spike|hCoV-19/Denmark/DCGC-1072/2020|2020-05-25|EPI\_ISL\_614497|Original|hCoV-19^^Hovedstaden|Human|Department of Virus and Microbiological Special Diagnostics|Albertsen lab|Michaelsen|Denmark

>Spike|hCoV-19/England/CAMB-A97E46/2020|2020-12-12|EPI\_ISL\_764333|Original|hCoV-19^^England|Human|Department of Pathology|COVID-19 Genomics UK (COG-UK) Consortium|Goodfellow|United Kingdom

>Spike|hCoV-19/Netherlands/ZH-EMC-1113/2020|2020-12-07|EPI\_ISL\_763192|Original|hCoV-19^^Zuid Holland|Human|Dutch COVID-19 response team|Erasmus Medical Center|Oude Munnink|Netherlands

>Spike|hCoV-19/Morocco/FMP-20/2020|2020-12-00|EPI\_ISL\_728340|Original|hCoV-19^^Mohammedia|Human|Laboratoire Biolife|Laboratoire de Biotechnologie|Ouahgiri|Morocco

>Spike|hCoV-19/USA/NMDOH-2020189536/2020|2020-07-07|EPI\_ISL\_542031|Original|hCoV-19^^Texas|Human|New Mexico Department of Health Scientific Laboratory|New Mexico Department of Health Scientific Laboratory|Johnson|USA

>Spike|hCoV-19/Japan/PG-0408/2020|2020-03-30|EPI\_ISL\_480077|Original|hCoV-19^^Kanto|Human|Shizuoka City Institute of Environmental Sciences and Public Health|Pathogen Genomics Center|Sekizuka|Japan

>Spike|hCoV-19/England/MILK-BABF3C/2020|2020-11-18|EPI\_ISL\_720667|Original|hCoV-19^^England|Human|Lighthouse Lab in Milton Keynes|Wellcome Sanger Institute for the COVID-19 Genomics UK (COG-UK) Consortium|Davies|United Kingdom

>Spike|hCoV-19/Luxembourg/LNS2611167/2020|2020-11-23|EPI\_ISL\_740158|Original|hCoV-19^^Luxembourg|Human|Laboratoire national de sant\u00e9|Laboratoire national de sant\u00e9|Wienecke-Baldacchino|Luxembourg

>Spike|hCoV-19/England/QEUH-AF1545/2020|2020-10-29|EPI\_ISL\_665400|Original|hCoV-19^^England|Human|Northumbria University / South Tees Hospitals NHS Foundation Trust / North Cumbria Integrated Care NHS Foundation Trust / North Tees and Hartlepool NHS Foundation Trust / Newcastle Hospitals NHS Foundation Trust|COVID-19 Genomics UK (COG-UK) Consortium|Bashton|United Kingdom

>Spike|hCoV-19/Scotland/CVR5865/2020|2020-11-17|EPI\_ISL\_666055|Original|hCoV-19^^Scotland|Human|West of Scotland Specialist Virology Centre|COVID-19 Genomics UK (COG-UK) Consortium|Robertson|United Kingdom

>Spike|hCoV-19/England/MILK-9F2044/2020|2020-09-24|EPI\_ISL\_589183|Original|hCoV-19^^England|Human|Lighthouse Lab in Milton Keynes|Wellcome Sanger Institute for the COVID-19 Genomics UK (COG-UK) consortium|Davies|United Kingdom

>Spike|hCoV-19/Denmark/DCGC-8460/2020|2020-10-26|EPI\_ISL\_617928|Original|hCoV-19^^Nordjylland|Human|Department of Virus and Microbiological Special Diagnostics|Albertsen lab|Michaelsen|Denmark

>Spike|hCoV-19/USA/MN-GMF-09331/2020|2020-07-05|EPI\_ISL\_489903|Original|hCoV-19^^Minnesota|Human|Gundersen Molecular Diagnostics Laboratory|Kabara Cancer Research Institute|Kenny|USA

>Spike|hCoV-19/USA/FL-BPHL-1861/2020|2020-04-10|EPI\_ISL\_613939|Original|hCoV-19^^Florida|Human|Florida Bureau of Public Health Laboratories|Florida Bureau of Public Health Laboratories|Blanton|USA

>Spike|hCoV-19/USA/FL-BPHL-1238/2020|2020-06-01|EPI\_ISL\_541161|Original|hCoV-19^^Florida|Human|Florida Bureau of Public Health Laboratories|Florida Bureau of Public Health Laboratories|Blanton|USA

>Spike|hCoV-19/Latvia/165/2020|2020-09-18|EPI\_ISL\_639662|Original|hCoV-19^^Latvia|Human|E. Gulbja Laboratorija|Latvian Biomedical Research and Study Centre|Zrelavs|Latvia

>Spike|hCoV-19/Scotland/QEUH-9E485C/2020|2020-09-23|EPI\_ISL\_601073|Original|hCoV-19^^Scotland|Human|Lighthouse Lab in Glasgow|Wellcome Sanger Institute for the COVID-19 Genomics UK (COG-UK) consortium|Davies|United Kingdom

>Spike|hCoV-19/USA/TX-HMH-MCoV-15580/2020|2020-10-25|EPI\_ISL\_787064|Original|hCoV-19^^Texas|Human|Houston Methodist Hospital|Houston Methodist Hospital|Long|USA

>Spike|hCoV-19/USA/TX-DSHS-1595/2020|2020-06-22|EPI\_ISL\_700740|Original|hCoV-19^^Texas|Human|Texas Department of State Health Services|Texas Department of State Health Services|Rahman|USA

>Spike|hCoV-19/England/ALDP-5A97A5/2020|2020-06-15|EPI\_ISL\_558656|Original|hCoV-19^^England|Human|Lighthouse Lab in Alderley Park|Wellcome Sanger Institute for the COVID-19 Genomics UK (COG-UK) consortium|Davies|United Kingdom

>Spike|hCoV-19/England/LIVE-9C8B6/2020|2020-03-22|EPI\_ISL\_449591|Original|hCoV-19^^England|Human|Liverpool Clinical Laboratories|COVID-19 Genomics UK (COG-UK) Consortium|Haldenby|United Kingdom

>Spike|hCoV-19/England/MILK-9A6E81/2020|2020-09-01|EPI\_ISL\_550091|Original|hCoV-19^^England|Human|Lighthouse Lab in Milton Keynes|Wellcome Sanger Institute for the COVID-19 Genomics UK (COG-UK) consortium|Davies|United Kingdom

>Spike|hCoV-19/United Arab Emirates/0725/2020|2020-05-19|EPI\_ISL\_698876|Original|hCoV-19^^Abu Dhabi|Human|Group 42 (G42) Healthcare|G42 Healthcare|Ogrodzki|United Arab Emirates

>Spike|hCoV-19/SaudiArabia/KAUST-MAKKAH812/2020|2020-04-24|EPI\_ISL\_513261|Original|hCoV-19^^Makkah|Human|Pathogen Genomics Lab King Abdullah University of Science and Technology(KAUST)|Pathogen Genomics Lab King Abdullah University of Science and Technology(KAUST)|Mohamed Ghazzali|Saudi Arabia

>Spike|hCoV-19/Wales/PHWC-496DAA/2020|2020-11-24|EPI\_ISL\_726727|Original|hCoV-19^^Wales|Human|Originating lab|COVID-19 Genomics UK (COG-UK) Consortium|Moore|United Kingdom

>Spike|hCoV-19/Norway/7103/2020|2020-12-18|EPI\_ISL\_775426|Original|hCoV-19^^Oslo|Human|Oslo University Hospital|Norwegian Institute of Public Health|Vollan|Norway

>Spike|hCoV-19/Australia/VIC13790/2020|2020-09-13|EPI\_ISL\_563840|Original|hCoV-19^^Victoria|Human|Victorian Infectious Diseases Reference Laboratory (VIDRL)|VIDRL and MDU-PHL|Schultz|Australia

>Spike|hCoV-19/Gambia/GC19-3192/2020|2020-07-27|EPI\_ISL\_561046|Original|hCoV-19^^Kombo|Human|MRCG at LSHTM Genomics lab|MRCG at LSHTM Genomics lab|Sesay|Gambia

>Spike|hCoV-19/Australia/VIC2283/2020|2020-06-26|EPI\_ISL\_522005|Original|hCoV-19^^Victoria|Human|Microbiological Diagnostic Unit - Public Health Laboratory (MDU-PHL)|MDU-PHL|Schultz|Australia

>Spike|hCoV-19/USA/AZ-TG558317/2020|2020-07-29|EPI\_ISL\_695545|Original|hCoV-19^^Arizona|Human|TGen North|TGen North|French|USA

>Spike|hCoV-19/England/ALDP-A50B42/2020|2020-10-07|EPI\_ISL\_597546|Original|hCoV-19^^England|Human|Lighthouse Lab in Alderley Park|Wellcome Sanger Institute for the COVID-19 Genomics UK (COG-UK) consortium|Davies|United Kingdom

>Spike|hCoV-19/Taiwan/CGMH-CGU-20/2020|2020-03-18|EPI\_ISL\_424978|Vero E6|hCoV-19^^Taoyuan|Human|Laboratory Medicine|Department of Laboratory Medicine|Yi Chun|Taiwan

>Spike|hCoV-19/England/NORT-29637D/2020|2020-05-14|EPI\_ISL\_484268|Original|hCoV-19^^England|Human|Northumbria University / South Tees Hospitals NHS Foundation Trust / North Cumbria Integrated Care NHS Foundation Trust / North Tees and Hartlepool NHS Foundation Trust / Newcastle Hospitals NHS Foundation Trust|COVID-19 Genomics UK (COG-UK) Consortium|Bashton|United Kingdom

>Spike|hCoV-19/England/ALDP-6B5620/2020|2020-07-01|EPI\_ISL\_557969|Original|hCoV-19^^England|Human|Lighthouse Lab in Alderley Park|Wellcome Sanger Institute for the COVID-19 Genomics UK (COG-UK) consortium|Davies|United Kingdom

>Spike|hCoV-19/France/NAQ-SC220/2020|2020-03-28|EPI\_ISL\_645171|Original|hCoV-19^^Nouvelle-Aquitaine|Human|CHU Bordeaux|CNR Virus des Infections Respiratoires - France SUD|Bal|France

>Spike|hCoV-19/Greece/53/2020|2020-04-04|EPI\_ISL\_434466|Original|hCoV-19^^Athens|Human|Laboratory of Microbiology|Laboratory of Biology|Karakasiliotis|Greece

>Spike|hCoV-19/England/QEUH-A02981/2020|2020-09-29|EPI\_ISL\_595845|Original|hCoV-19^^England|Human|Quadram Institute Bioscience|COVID-19 Genomics UK (COG-UK) Consortium|Alikhan|United Kingdom

>Spike|hCoV-19/Austria/CeMM1010/2020|2020-03-26|EPI\_ISL\_583849|Original|hCoV-19^^Austria|Human|Dr. Gernot Walder GmbH|Bergthaler laboratory|Bergthaler|Austria

>Spike|hCoV-19/England/ALDP-9FD243/2020|2020-10-02|EPI\_ISL\_587757|Original|hCoV-19^^England|Human|Lighthouse Lab in Alderley Park|Wellcome Sanger Institute for the COVID-19 Genomics UK (COG-UK) consortium|Davies|United Kingdom

>Spike|hCoV-19/Switzerland/BS-UHB-42178995/2020|2020-03-06|EPI\_ISL\_527942|Original|hCoV-19^^Basel-Stadt|Human|University Hospital Basel|University Hospital Basel|Roloff Handschin|Switzerland

>Spike|hCoV-19/England/PORT-2CFD8C/2020|2020-05-06|EPI\_ISL\_461995|Original|hCoV-19^^England|Human|Centre for Enzyme Innovation|COVID-19 Genomics UK (COG-UK) Consortium|Robson|United Kingdom

>Spike|hCoV-19/Canada/ON-PHL-20-03760/2020|2020-11-00|EPI\_ISL\_775070|Original|hCoV-19^^Ontario|Human|Public Health Ontario Laboratory|Public Health Ontario Laboratory|Guthrie|Canada

>Spike|hCoV-19/Australia/VIC16101/2020|2020-08-02|EPI\_ISL\_640836|Original|hCoV-19^^Victoria|Human|Microbiological Diagnostic Unit - Public Health Laboratory (MDU-PHL)|MDU-PHL|Schultz|Australia

>Spike|hCoV-19/Colombia/RIS-INS-80245/2020|2020-03-16|EPI\_ISL\_456155|Original|hCoV-19^^Risaralda|Human|Instituto Nacional de Salud - Unidad de Secuenciación y Análisis Genómico|Instituto Nacional de Salud|Díaz|Colombia

>Spike|hCoV-19/Northern Ireland/NIRE-1016C0/2020|2020-04-30|EPI\_ISL\_482075|Original|hCoV-19^^Northern Ireland|Human|Regional Virus Laboratory|Wellcome Sanger Institute for the COVID-19 Genomics UK (COG-UK) consortium|Davies|United Kingdom

>Spike|hCoV-19/USA/WI-UW-1329/2020|2020-08-30|EPI\_ISL\_536700|Original|hCoV-19^^Wisconsin|Human|University of Wisconsin-Madison AIDS Vaccine Research Laboratories|University of Wisconsin-Madison AIDS Vaccine Research Laboratories|Baczenas|USA

>Spike|hCoV-19/USA/WA-UW-45106/2020|2020-12-08|EPI\_ISL\_747217|Original|hCoV-19^^Washington|Human|UW Virology Lab|UW Virology Lab|Roychoudhury|USA

>Spike|hCoV-19/England/ALDP-C04B78/2020|2020-12-04|EPI\_ISL\_720734|Original|hCoV-19^^England|Human|Lighthouse Lab in Alderley Park|Wellcome Sanger Institute for the COVID-19 Genomics UK (COG-UK) Consortium|Davies|United Kingdom

>Spike|hCoV-19/England/MILK-AC7F95/2020|2020-10-21|EPI\_ISL\_629520|Original|hCoV-19^^England|Human|Lighthouse Lab in Milton Keynes|Wellcome Sanger Institute for the COVID-19 Genomics UK (COG-UK) consortium|Davies|United Kingdom

>Spike|hCoV-19/Japan/PG-0463/2020|2020-03-30|EPI\_ISL\_480124|Original|hCoV-19^^HokurikuShinsyu|Human|Fukui Prefectural Institute of Public Health and Environmental Science|Pathogen Genomics Center|Sekizuka|Japan

>Spike|hCoV-19/Denmark/DCGC-14904/2020|2020-11-23|EPI\_ISL\_712056|Original|hCoV-19^^Hovedstaden|Human|Department of Virus and Microbiological Special Diagnostics|Albertsen Lab|Michaelsen|Denmark

>Spike|hCoV-19/England/QEUA-9655A7/2020|2020-08-11|EPI\_ISL\_531019|Original|hCoV-19^^England|Human|Lighthouse Lab in Glasgow|Wellcome Sanger Institute for the COVID-19 Genomics UK (COG-UK) consortium|Davies|United Kingdom

>Spike|hCoV-19/England/QEUA-A3342C/2020|2020-10-05|EPI\_ISL\_628379|Original|hCoV-19^^England|Human|Virology Department|COVID-19 Genomics UK (COG-UK) Consortium|de Silva|United Kingdom

>Spike|hCoV-19/USA/CA-QDX-2160/2020|2020-03-18|EPI\_ISL\_604435|Original|hCoV-19^^California|Human|Quest Diagnostics|Quest Diagnostics|Kagan|USA

>Spike|hCoV-19/Jordan/AM-ALSR-3994/2020|2020-10-03|EPI\_ISL\_636357|Original|hCoV-19^^Amman|Human|Biolab Diagnostic Laboratories|Andersen lab at Scripps Research|Gangavarapu|Jordan

>Spike|hCoV-19/Australia/WA390/2020|2020-10-18|EPI\_ISL\_605866|Original|hCoV-19^^Western Australia|Human|PathWest Laboratory Medicine WA|PathWest Laboratory Medicine WA Microbial Surveillance Unit|Sikazwe|Australia

>Spike|hCoV-19/Switzerland/BL-42243952/2020|2020-04-24|EPI\_ISL\_581918|Original|hCoV-19^^Basel-Land|Human|University Hospital Basel|University Hospital Basel|Roloff Handschin|Switzerland

>Spike|hCoV-19/England/BRIS-121CC8/2020|2020-03-18|EPI\_ISL\_440204|Original|hCoV-19^^England|Human|PHE South West Regional Laboratory|Wellcome Sanger Institute for the COVID-19 Genomics UK (COG-UK) consortium|Amato|United Kingdom

>Spike|hCoV-19/Romania/ROSV\_3376/2020|2020-04-20|EPI\_ISL\_491069|Original|hCoV-19^^Suceava|Human|Suceava County Emergency Hospital|\Stefan cel Mare\ University Metagenomics Lab|Lobiuc|Romania

>Spike|hCoV-19/Denmark/DCGC-15569/2020|2020-11-23|EPI\_ISL\_713900|Original|hCoV-19^^Hovedstaden|Human|Department of Virus and Microbiological Special Diagnostics|Albertsen Lab|Michaelsen|Denmark

>Spike|hCoV-19/USA/UT-UPHL-201130464/2020|2020-06-19|EPI\_ISL\_640281|Original|hCoV-19^^Utah|Human|Utah Public Health Laboratory|Utah Public Health Laboratory|Young|USA

>Spike|hCoV-19/USA/CT-UW-5073/2020|2020-04-06|EPI\_ISL\_429645|Original|hCoV-19^^Connecticut|Human|UW Virology Lab|UW Virology Lab|Roychoudhury|USA

>Spike|hCoV-19/England/ALDP-B84995/2020|2020-11-14|EPI\_ISL\_675247|Original|hCoV-19^^England|Human|Lighthouse Lab in Alderley Park|Wellcome Sanger Institute for the COVID-19 Genomics UK (COG-UK) Consortium|Davies|United Kingdom

>Spike|hCoV-19/England/CAMC-B20B59/2020|2020-11-02|EPI\_ISL\_647525|Original|hCoV-19^^England|Human|Lighthouse Lab in Cambridge|Wellcome Sanger Institute for the COVID-19 Genomics UK (COG-UK) Consortium|Davies|United Kingdom

>Spike|hCoV-19/Gambia/NPHL-2443/2020|2020-00-00|EPI\_ISL\_561248|Original|hCoV-19^^Kombo|Human|MRCG at LSHTM Genomics lab|MRCG at LSHTM Genomics lab|Sesay|Gambia

>Spike|hCoV-19/England/204682067/2020|2020-11-12|EPI\_ISL\_693405|Original|hCoV-19^^England|Human|Respiratory Virus Unit|COVID-19 Genomics UK (COG-UK) Consortium|Platt|United Kingdom

>Spike|hCoV-19/Ukraine/203100357/2020|2020-05-08|EPI\_ISL\_512636|Original|hCoV-19^^Ukraine|Human|National Laboratory for Influenza/Virology reference laboratory|Respiratory Virus Unit|Platt|Ukraine

>Spike|hCoV-19/USA/TX-HMH-MCoV-11568/2020|2020-09-11|EPI\_ISL\_789980|Original|hCoV-19^^Texas|Human|Houston Methodist Hospital|Houston Methodist Hospital|Long|USA

>Spike|hCoV-19/Wales/PHWC-169EDD/2020|2020-08-30|EPI\_ISL\_529710|Original|hCoV-19^^Wales|Human|Wales Specialist Virology Centre Sequencing lab|COVID-19 Genomics UK (COG-UK) Consortium|Moore|United Kingdom

>Spike|hCoV-19/USA/FL-BPHL-04/2020|2020-04-03|EPI\_ISL\_436508|Original|hCoV-19^^Florida|Human|Florida Bureau of Public Health Laboratories|Florida Bureau of Public Health Laboratories|Blanton|USA

>Spike|hCoV-19/Australia/VIC5071/2020|2020-07-19|EPI\_ISL\_519874|Original|hCoV-19^^Victoria|Human|Microbiological Diagnostic Unit - Public Health Laboratory (MDU-PHL)|MDU-PHL|Schultz|Australia

>Spike|hCoV-19/USA/WA-OHSU-0517/2020|2020-06-05|EPI\_ISL\_526096|Original|hCoV-19^^Washington|Human|OHSU Lab Services Molecular Microbiology Lab|Oregon SARS-CoV-2 Genome Sequencing Center|O'Roak|USA

>Spike|hCoV-19/India/TG-NGC-CDFD-18/2020|2020-05-27|EPI\_ISL\_466856|Original|hCoV-19^^Telangana|Human|National Genomics Core-Center for DNA Fingerprinting and Diagnostics|National Genomics Core-Center for DNA Fingerprinting and Diagnostics (NGC-CDFD)- DBT's PAN-INDIA-1000 Genome consortium|Vashisht|India

>Spike|hCoV-19/Saudi Arabia/KAUST-MAKKAH158/2020|2020-04-06|EPI\_ISL\_678117|Original|hCoV-19^^Makkah|Human|Pathogen Genomics Lab King Abdullah University of Science and Technology(KAUST)|Pathogen Genomics Lab King Abdullah University of Science and Technology(KAUST)|Mohamed Ghazzali|Saudi Arabia

>Spike|hCoV-19/England/CAMC-C994F5/2020|2020-12-17|EPI\_ISL\_762042|Original|hCoV-19^^England|Human|Lighthouse Lab in Cambridge|Wellcome Sanger Institute for the COVID-19 Genomics UK (COG-UK) Consortium|Davies|United Kingdom

>Spike|hCoV-19/England/CAMC-946ABC/2020|2020-07-14|EPI\_ISL\_556957|Original|hCoV-19^^England|Human|Lighthouse Lab in Cambridge|Wellcome Sanger Institute for the COVID-19 Genomics UK (COG-UK) consortium|Davies|United Kingdom

>Spike|hCoV-19/England/MILK-CA6DAF/2020|2020-12-18|EPI\_ISL\_761417|Original|hCoV-19^^England|Human|Lighthouse Lab in Milton Keynes|Wellcome Sanger Institute for the COVID-19 Genomics UK (COG-UK) Consortium|Davies|United Kingdom

>Spike|hCoV-19/USA/IL-UW-138/2020|2020-04-12|EPI\_ISL\_427445|Original|hCoV-19^^Illinois|Human|University of Wisconsin-Madison AIDS Vaccine Research Laboratories|University of Wisconsin-Madison AIDS Vaccine Research Laboratories|Baczenas|USA



>Spike|hCoV-19/England/MILK-ACFEBE/2020|2020-10-22|EPI\_ISL\_652143|Original|hCoV-19^^England|Human|Oxford Viromics|COVID-19 Genomics UK (COG-UK) Consortium|Golubchik|United Kingdom

>Spike|hCoV-19/England/CAMB-77DB2/2020|2020-04-01|EPI\_ISL\_440831|Original|hCoV-19^^England|Human|Department of Pathology|Wellcome Sanger Institute for the COVID-19 Genomics UK (COG-UK) consortium|Amato|United Kingdom

>Spike|hCoV-19/Singapore/971/2020|2020-03-21|EPI\_ISL\_548979|Original|hCoV-19^^Singapore|Human|National Public Health Laboratory|National Public Health Laboratory|Mak|Singapore

>Spike|hCoV-19/England/MILK-B02285/2020|2020-10-24|EPI\_ISL\_642958|Original|hCoV-19^^England|Human|Lighthouse Lab in Milton Keynes|Wellcome Sanger Institute for the COVID-19 Genomics UK (COG-UK) Consortium|Davies|United Kingdom

>Spike|hCoV-19/England/CAMC-B7AC7B/2020|2020-11-12|EPI\_ISL\_723954|Original|hCoV-19^^England|Human|Oxford Viromics|COVID-19 Genomics UK (COG-UK) Consortium|Golubchik|United Kingdom

>Spike|hCoV-19/Wales/PHWC-29B1F/2020|2020-04-02|EPI\_ISL\_474241|Original|hCoV-19^^Wales|Human|Originating lab|COVID-19 Genomics UK (COG-UK) Consortium|Moore|United Kingdom

>Spike|hCoV-19/Ireland/OY-NVRL-73IRL30167/2020|2020-09-07|EPI\_ISL\_578318|Original|hCoV-19^^Offaly|Human|National Virus Reference Laboratory|National Virus Reference Laboratory|Gonzalez|Ireland

>Spike|hCoV-19/Iceland/30/2020|2020-03-03|EPI\_ISL\_417773|Original|hCoV-19^^Reykjavik|Human|The National University Hospital of Iceland|deCODE genetics|J\u00f3nsson|Iceland

>Spike|hCoV-19/Singapore/672/2020|2020-06-23|EPI\_ISL\_498570|Original|hCoV-19^^Singapore|Human|National Public Health Laboratory|National Public Health Laboratory|Mak|Singapore

>Spike|hCoV-19/USA/TX-QDX-188/2020|2020-04-27|EPI\_ISL\_494543|Original|hCoV-19^^Texas|Human|Quest Diagnostics|Quest Diagnostics|Kagan|USA

>Spike|hCoV-19/Zimbabwe/ZW-9947/2020|2020-06-01|EPI\_ISL\_644818|Original|hCoV-19^^Zimbabwe|Human|National Microbiology Reference Laboratory|Quadram Institute Bioscience|Alikhan|Zimbabwe

>Spike|hCoV-19/USA/MI-UM-10036592138/2020|2020-10-23|EPI\_ISL\_650012|Original|hCoV-19^^Michigan|Human|University of Michigan Clinical Microbiology Laboratory|Lauring Lab|Valesano|USA

>Spike|hCoV-19/England/QEUH-A02954/2020|2020-09-29|EPI\_ISL\_584937|Original|hCoV-19^^England|Human|Quadram Institute Bioscience|COVID-19 Genomics UK (COG-UK) Consortium|Alikhan|United Kingdom

>Spike|hCoV-19/England/QEUH-9C9E2E/2020|2020-09-10|EPI\_ISL\_567337|Original|hCoV-19^^England|Human|Lighthouse Lab in Glasgow|Wellcome Sanger Institute for the COVID-19 Genomics UK (COG-UK) consortium|Davies|United Kingdom

>Spike|hCoV-19/England/201180391/2020|2020-03-12|EPI\_ISL\_464907|Original|hCoV-19^^England|Human|Respiratory Virus Unit|Respiratory Virus Unit|Platt|United Kingdom

>Spike|hCoV-19/Scotland/QEUH-C5CADE/2020|2020-12-14|EPI\_ISL\_757039|Original|hCoV-19^^Scotland|Human|Lighthouse Lab in Glasgow|Wellcome Sanger Institute for the COVID-19 Genomics UK (COG-UK) Consortium|Davies|United Kingdom

>Spike|hCoV-19/Wales/PHWC-4A1F4C/2020|2020-12-14|EPI\_ISL\_743833|Original|hCoV-19^^Wales|Human|Wales Specialist Virology Centre Sequencing lab|COVID-19 Genomics UK (COG-UK) Consortium|Moore|United Kingdom

>Spike|hCoV-19/England/ALDP-9528E0/2020|2020-06-12|EPI\_ISL\_553947|Original|hCoV-19^^England|Human|Lighthouse Lab in Alderley Park|Wellcome Sanger Institute for the COVID-19 Genomics UK (COG-UK) consortium|Davies|United Kingdom

>Spike|hCoV-19/Denmark/DCGC-14454/2020|2020-11-30|EPI\_ISL\_711184|Original|hCoV-19^^Hovedstaden|Human|Department of Virus and Microbiological Special Diagnostics|Albertsen Lab|Michaelsen|Denmark

>Spike|hCoV-19/Ireland/D-NVRL-AIIDV0079v1/2020|2020-04-13|EPI\_ISL\_644212|Original|hCoV-19^^Dublin|Human|CEPHR / Vincent's Hospital|Irish Coronavirus Sequencing Consortium - National Virus Reference Laboratory|Gonzalez|Ireland

>Spike|hCoV-19/Indonesia/SU-NIHRD-PME4745/2020|2020-00-00|EPI\_ISL\_538500|Original|hCoV-19^^North Sumatra|Human|RS Prima Husada Cipta Medan North Sumatra|National Institute of Health Research and Development|Setiawati|Indonesia

>Spike|hCoV-19/England/CAMC-B217AF/2020|2020-11-02|EPI\_ISL\_647211|Original|hCoV-19^^England|Human|Lighthouse Lab in Cambridge|Wellcome Sanger Institute for the COVID-19 Genomics UK (COG-UK) Consortium|Davies|United Kingdom

>Spike|hCoV-19/Australia/VIC4515/2020|2020-07-16|EPI\_ISL\_518926|Original|hCoV-19^^Victoria|Human|Microbiological Diagnostic Unit - Public Health Laboratory (MDU-PHL) |MDU-PHL|Schultz|Australia

>Spike|hCoV-19/England/LOND-126040D/2020|2020-03-16|EPI\_ISL\_524671|Original|hCoV-19^^England|Human|North West London Pathology|Wellcome Sanger Institute for the COVID-19 Genomics UK (COG-UK) consortium|Davies|United Kingdom

>Spike|hCoV-19/England/QEUH-A9F96B/2020|2020-10-19|EPI\_ISL\_650444|Original|hCoV-19^^England|Human|University of Exeter|COVID-19 Genomics UK (COG-UK) Consortium|Temperton|United Kingdom

>Spike|hCoV-19/England/QEUH-B3FA3C/2020|2020-11-08|EPI\_ISL\_658466|Original|hCoV-19^^England|Human|Lighthouse Lab in Glasgow|Wellcome Sanger Institute for the COVID-19 Genomics UK (COG-UK) Consortium|Davies|United Kingdom

>Spike|hCoV-19/Japan/PG-4340/2020|2020-07-00|EPI\_ISL\_692568|Original|hCoV-19^^Japan|Human|Pathogen Genomics Center|Pathogen Genomics Center|Sekizuka|Japan

>Spike|hCoV-19/Canada/QC-LSPQ-L00243673/2020|2020-03-31|EPI\_ISL\_536369|Original|hCoV-19^^Quebec|Human|Centre hospitalier Anna-Laberge|Laboratoire de sant\u00e9 publique du Qu\u00e9bec|Moreira|Canada

>Spike|hCoV-19/England/ALDP-94E7DB/2020|2020-06-20|EPI\_ISL\_555003|Original|hCoV-19^^England|Human|Lighthouse Lab in Alderley Park|Wellcome Sanger Institute for the COVID-19 Genomics UK (COG-UK) consortium|Davies|United Kingdom

>Spike|hCoV-19/England/NORW-E9304/2020|2020-04-27|EPI\_ISL\_453591|Original|hCoV-19^^England|Human|Quadram Institute Bioscience|COVID-19 Genomics UK (COG-UK) Consortium|Alikhan|United Kingdom

>Spike|hCoV-19/Japan/PG-4465/2020|2020-07-00|EPI\_ISL\_692688|Original|hCoV-19^^Japan|Human|Pathogen Genomics Center|Pathogen Genomics Center|Sekizuka|Japan

>Spike|hCoV-19/Spain/VC-FISABIO-471/2020|2020-03-26|EPI\_ISL\_447471|Original|hCoV-19^^Comunitat Valenciana|Human|Servicio de Microbiologia. Hospital Clinico Universitario de Valencia|Sequencing and Bioinformatics Service and Molecular Epidemiology Research Group. FISABIO-Public Health|Gonzalez-Candelas|Spain

>Spike|hCoV-19/England/QEUH-BA116D/2020|2020-11-18|EPI\_ISL\_672860|Original|hCoV-19^^England|Human|Lighthouse Lab in Glasgow|Wellcome Sanger Institute for the COVID-19 Genomics UK (COG-UK) Consortium|Davies|United Kingdom

>Spike|hCoV-19/Denmark/DCGC-14786/2020|2020-11-23|EPI\_ISL\_711980|Original|hCoV-19^^Midtjylland|Human|Department of Virus and Microbiological Special Diagnostics|Albertsen Lab|Michaelsen|Denmark

>Spike|hCoV-19/England/NOTT-117E38/2020|2020-10-25|EPI\_ISL\_627673|Original|hCoV-19^^England|Human|Queens Medical Centre|COVID-19 Genomics UK (COG-UK) Consortium|Loose|United Kingdom

>Spike|hCoV-19/USA/FL-BPHL-1817/2020|2020-04-08|EPI\_ISL\_613906|Original|hCoV-19^^Florida|Human|Florida Bureau of Public Health Laboratories|Florida Bureau of Public Health Laboratories|Blanton|USA

>Spike|hCoV-19/England/CAMB-1AC17B/2020|2020-04-27|EPI\_ISL\_444379|Original|hCoV-19^^England|Human|Department of Pathology|COVID-19 Genomics UK (COG-UK) Consortium|Meredith|United Kingdom

>Spike|hCoV-19/Saudi Arabia/KAUST-Makkah190/2020|2020-04-06|EPI\_ISL\_437707|Original|hCoV-19^^Makkah|Human|Pathogen Genomics Lab King Abdullah University of Science and Technology(KAUST)|Pathogen Genomics Lab King Abdullah University of Science and Technology(KAUST)|Mohamed Ghazzali|Saudi Arabia

>Spike|hCoV-19/USA/CA-CZB-10822/2020|2020-07-13|EPI\_ISL\_583072|Original|hCoV-19^^California|Human|Humboldt County Public Health Laboratory|Chan-Zuckerberg Biohub|Bhatt|USA

>Spike|hCoV-19/India/WB-IK81/2020|2020-05-17|EPI\_ISL\_511905|Original|hCoV-19^^West Bengal|Human|Institute of Post Graduate Medical Education & Research|National

Institute of Biomedical Genomics -\u00a0DBT's PAN-INDIA 1000 SARS--CoV-2 RNA Genome Sequencing Consortium|Maitra|India  
>Spike|hCoV-19/USA/CA-CZB-1484/2020|2020-05-01|EPI\_ISL\_468435|Original|hCoV-19^^California|Human|County of San Luis Obispo Public Health Laboratory|Chan-Zuckerberg Biohub|Hao|USA  
>Spike|hCoV-19/Australia/QLD978/2020|2020-04-01|EPI\_ISL\_530229|Original|hCoV-19^^Queensland|Human|Queensland Health Forensic and Scientific Services|Public Health Virology Laboratory|Nguyen|Australia  
>Spike|hCoV-19/England/20139066504/2020|2020-03-28|EPI\_ISL\_465855|Original|hCoV-19^^England|Human|Respiratory Virus Unit|Respiratory Virus Unit|Platt|United Kingdom  
>Spike|hCoV-19/England/ALDP-5D0189/2020|2020-06-19|EPI\_ISL\_558534|Original|hCoV-19^^England|Human|Lighthouse Lab in Alderley Park|Wellcome Sanger Institute for the COVID-19 Genomics UK (COG-UK) consortium|Davies|United Kingdom  
>Spike|hCoV-19/England/MILK-B88B22/2020|2020-11-14|EPI\_ISL\_675921|Original|hCoV-19^^England|Human|Lighthouse Lab in Milton Keynes|Wellcome Sanger Institute for the COVID-19 Genomics UK (COG-UK) Consortium|Davies|United Kingdom  
>Spike|hCoV-19/England/ALDP-9E6D5B/2020|2020-09-24|EPI\_ISL\_580427|Original|hCoV-19^^England|Human|Lighthouse Lab in Alderley Park|Wellcome Sanger Institute for the COVID-19 Genomics UK (COG-UK) consortium|Davies|United Kingdom  
>Spike|hCoV-19/USA/NY-Wadsworth-276906-01/2020|2020-11-18|EPI\_ISL\_754582|Original|hCoV-19^^New York|Human|Wadsworth Center|Wadsworth Center|Lasek-Nesselquist|USA  
>Spike|hCoV-19/England/GSTT-265DAA0/2020|2020-03-27|EPI\_ISL\_484059|Original|hCoV-19^^England|Human|Centre for Clinical Infection and Diagnostics Research and Genomics Innovation Unit|COVID-19 Genomics UK (COG-UK) Consortium|Awan|United Kingdom  
>Spike|hCoV-19/USA/ID-QDX-683/2020|2020-03-16|EPI\_ISL\_571430|Original|hCoV-19^^Idaho|Human|Quest Diagnostics|Quest Diagnostics|Kagan|USA  
>Spike|hCoV-19/USA/CA-CZB-6997/2020|2020-08-04|EPI\_ISL\_582924|Original|hCoV-19^^California|Human|County of Santa Clara Public Health Department|Chan-Zuckerberg Biohub|Bhatt|USA  
>Spike|hCoV-19/USA/WI-UW-2015/2020|2020-10-06|EPI\_ISL\_677422|Original|hCoV-19^^Wisconsin|Human|University of Wisconsin-Madison AIDS Vaccine Research Laboratories|University of Wisconsin-Madison AIDS Vaccine Research Laboratories|Baczenas|USA  
>Spike|hCoV-19/England/CAMC-B229E4/2020|2020-11-02|EPI\_ISL\_647357|Original|hCoV-19^^England|Human|Lighthouse Lab in Cambridge|Wellcome Sanger Institute for the COVID-19 Genomics UK (COG-UK) Consortium|Davies|United Kingdom  
>Spike|hCoV-19/England/CAMC-C40E3B/2020|2020-12-10|EPI\_ISL\_719253|Original|hCoV-19^^England|Human|Lighthouse Lab in Cambridge|Wellcome Sanger Institute for the COVID-19 Genomics UK (COG-UK) Consortium|Davies|United Kingdom  
>Spike|hCoV-19/Peru/ARE-INS-072/2020|2020-03-18|EPI\_ISL\_523979|Original|hCoV-19^^Arequipa|Human|Laboratorio de Referencia Nacional de Virus Respiratorio. Centro Nacional de Salud Publica. Instituto Nacional de Salud Peru.|Laboratorio de Referencia Nacional de Biotecnolog\u00eda y Biolog\u00eda Molecular. Centro Nacional de Salud Publica. Instituto Nacional de Salud Peru.|Padilla Rojas|Peru  
>Spike|hCoV-19/Belgium/regal-12111322/2020|2020-12-11|EPI\_ISL\_738375|Original|hCoV-19^^Mol|Human|UZ Leuven|KU Leuven|Maes|Belgium  
>Spike|hCoV-19/England/QEUEH-9B8F7A/2020|2020-09-09|EPI\_ISL\_549662|Original|hCoV-19^^England|Human|Lighthouse Lab in Glasgow|Wellcome Sanger Institute for the COVID-19 Genomics UK (COG-UK) consortium|Davies|United Kingdom  
>Spike|hCoV-19/USA/TX-DSHS-1266/2020|2020-06-16|EPI\_ISL\_644207|Original|hCoV-19^^Texas|Human|Texas Department of State Health Services|Texas Department of State Health Services|Rahman|USA  
>Spike|hCoV-19/England/QEUEH-9FF539/2020|2020-10-02|EPI\_ISL\_600256|Original|hCoV-19^^England|Human|Lighthouse Lab in Glasgow|Wellcome Sanger Institute for the COVID-19 Genomics UK (COG-UK) consortium|Davies|United Kingdom  
>Spike|hCoV-19/Singapore/282/2020|2020-04-09|EPI\_ISL\_462400|Original|hCoV-19^^Singapore|Human|National Public Health Laboratory|National Public Health Laboratory|Mak|Singapore

>Spike|hCoV-19/England/BIRM-5E2D0/2020|2020-04-16|EPI\_ISL\_444282|Original|hCoV-19^^England|Human|University of Birmingham|COVID-19 Genomics UK (COG-UK) Consortium|Loman|United Kingdom

>Spike|hCoV-19/USA/WA-UW-3917/2020|2020-03-27|EPI\_ISL\_427208|Original|hCoV-19^^Washington|Human|UW Virology Lab|UW Virology Lab|Roychoudhury|USA

>Spike|hCoV-19/Denmark/DCGC-7771/2020|2020-10-19|EPI\_ISL\_618680|Original|hCoV-19^^Midtjylland|Human|Department of Virus and Microbiological Special Diagnostics|Albertsen lab|Michaelsen|Denmark

>Spike|hCoV-19/Denmark/DCGC-22384/2020|2020-12-14|EPI\_ISL\_757529|Original|hCoV-19^^Hovedstaden|Human|Department of Virus and Microbiological Special Diagnostics|Albertsen Lab|Michaelsen|Denmark

>Spike|hCoV-19/Australia/VIC11336/2020|2020-08-29|EPI\_ISL\_563333|Original|hCoV-19^^Victoria|Human|Microbiological Diagnostic Unit - Public Health Laboratory (MDU-PHL) |MDU-PHL|Schultz|Australia

>Spike|hCoV-19/USA/TX-HMH-7356/2020|2020-06-29|EPI\_ISL\_546701|Original|hCoV-19^^Texas|Human|Houston Methodist Hospital|Houston Methodist Hospital|Long|USA

>Spike|hCoV-19/Singapore/853/2020|2020-08-21|EPI\_ISL\_527362|Original|hCoV-19^^Singapore|Human|National Public Health Laboratory|National Public Health Laboratory|Mak|Singapore

>Spike|hCoV-19/England/CAMC-9DFA30/2020|2020-09-20|EPI\_ISL\_638142|Original|hCoV-19^^England|Human|Department of Pathology|COVID-19 Genomics UK (COG-UK) Consortium|Goodfellow|United Kingdom

>Spike|hCoV-19/Australia/VIC323/2020|2020-03-24|EPI\_ISL\_420014|Original|hCoV-19^^Victoria|Human|Microbiological Diagnostic Unit Public Health Laboratory|Microbiological Diagnostic Unit Public Health Laboratory|Schultz|Australia

>Spike|hCoV-19/England/CAMC-C46FE7/2020|2020-12-10|EPI\_ISL\_718757|Original|hCoV-19^^England|Human|Lighthouse Lab in Cambridge|Wellcome Sanger Institute for the COVID-19 Genomics UK (COG-UK) Consortium|Davies|United Kingdom

>Spike|hCoV-19/Australia/NSW937/2020|2020-08-31|EPI\_ISL\_545009|Original|hCoV-19^^New South Wales|Human|South Eastern Area Laboratory Services (SEALS)|NSW Health Pathology - Institute of Clinical Pathology and Medical Research; Westmead Hospital; University of Sydney|Gall|Australia

>Spike|hCoV-19/England/ALDP-BBA073/2020|2020-11-20|EPI\_ISL\_701937|Original|hCoV-19^^England|Human|Lighthouse Lab in Alderley Park|Wellcome Sanger Institute for the COVID-19 Genomics UK (COG-UK) Consortium|Davies|United Kingdom

>Spike|hCoV-19/USA/FL-BPHL-1926/2020|2020-07-28|EPI\_ISL\_613840|Original|hCoV-19^^Florida|Human|Florida Bureau of Public Health Laboratories|Florida Bureau of Public Health Laboratories|Blanton|USA

>Spike|hCoV-19/England/CAMB-1AD0C8/2020|2020-04-29|EPI\_ISL\_447965|Original|hCoV-19^^England|Human|Department of Pathology|COVID-19 Genomics UK (COG-UK) Consortium|Meredith|United Kingdom

>Spike|hCoV-19/Russia/OMS-ORINFI-7146S/2020|2020-05-14|EPI\_ISL\_569745|Original|hCoV-19^^Omsk|Human|Omsk Research Institute of Natural Focal Infections|WHO National Influenza Centre Russian Federation|Komissarov|Russia

>Spike|hCoV-19/Scotland/QEUH-95F740/2020|2020-08-08|EPI\_ISL\_532283|Original|hCoV-19^^Scotland|Human|NHSGGC West of Scotland Specialist Virology Centre / MRC-University of Glasgow Centre for Virus Research|Wellcome Sanger Institute for the COVID-19 Genomics UK (COG-UK) consortium|Davies|United Kingdom

>Spike|hCoV-19/England/20134059604/2020|2020-03-24|EPI\_ISL\_423144|Original|hCoV-19^^England|Human|Respiratory Virus Unit|Respiratory Virus Unit|Platt|United Kingdom

>Spike|hCoV-19/Wales/PHWC-25B31/2020|2020-03-24|EPI\_ISL\_422218|Original|hCoV-19^^Wales|Human|Wales Specialist Virology Centre|Public Health Wales Microbiology Cardiff|Moore|United Kingdom

>Spike|hCoV-19/USA/OR-OHSU-0544/2020|2020-06-16|EPI\_ISL\_525839|Original|hCoV-19^^Oregon|Human|OHSU Lab Services Molecular Microbiology Lab|Ginkgo Bioworks Clinical Laboratory|O'Roak|USA

>Spike|hCoV-19/Wales/PHWC-16B5B8/2020|2020-09-17|EPI\_ISL\_573875|Original|hCoV-19^^Wales|Human|Wales Specialist Virology Centre Sequencing lab|COVID-19 Genomics UK (COG-UK) Consortium|Moore|United Kingdom

>Spike|hCoV-19/England/SHEF-10D1D59/2020|2020-12-17|EPI\_ISL\_727950|Original|hCoV-19^^England|Human|Virology Department|COVID-19 Genomics UK (COG-UK) Consortium|de Silva|United Kingdom

>Spike|hCoV-19/Scotland/QEUH-AD4144/2020|2020-10-26|EPI\_ISL\_649730|Original|hCoV-19^^Scotland|Human|Lighthouse Lab in Glasgow|Wellcome Sanger Institute for the COVID-19 Genomics UK (COG-UK) Consortium|Davies|United Kingdom

>Spike|hCoV-19/USA/CA-CZB-2757/2020|2020-06-27|EPI\_ISL\_582862|Original|hCoV-19^^California|Human|County of Santa Clara Public Health Department|Chan-Zuckerberg Biohub|Bhatt|USA

>Spike|hCoV-19/England/MILK-BAA0D0/2020|2020-11-18|EPI\_ISL\_783251|Original|hCoV-19^^England|Human|Lighthouse Lab in Milton Keynes|Wellcome Sanger Institute for the COVID-19 Genomics UK (COG-UK) Consortium|Davies|United Kingdom

>Spike|hCoV-19/England/CAMC-B99EBC/2020|2020-11-15|EPI\_ISL\_673575|Original|hCoV-19^^England|Human|Lighthouse Lab in Cambridge|Wellcome Sanger Institute for the COVID-19 Genomics UK (COG-UK) Consortium|Davies|United Kingdom

>Spike|hCoV-19/USA/VA-DCLS-0266/2020|2020-04-22|EPI\_ISL\_452839|Original|hCoV-19^^Virginia|Human|Virginia DCLS|Virginia DCLS|St. Jacques|USA

>Spike|hCoV-19/Canada/NS-NML-905/2020|2020-03-21|EPI\_ISL\_579554|Original|hCoV-19^^Nova Scotia|Human|QEII Health Sciences Centre|National Microbiology Laboratory (NML)|Majer|Canada

>Spike|hCoV-19/Czech Republic/NRL\_8496/2020|2020-08-31|EPI\_ISL\_577638|Original|hCoV-19^^Central Bohemia Region|Human|The National Institute of Public Health|State Veterinary Institute Prague|Nagy|Czech Republic

>Spike|hCoV-19/Germany/BY-ER-1/2020|2020-03-00|EPI\_ISL\_610249|Vero B4 P2|hCoV-19^^Bavaria|Human|Virologisches Institut|Virologisches Institut|Ensser|Germany

>Spike|hCoV-19/Germany/NW-MPP-3/2020|2020-05-25|EPI\_ISL\_487419|Original|hCoV-19^^North Rhine-Westphalia|Human|Labor Knei\u00dfler GmbH & Co. KG|Heinrich Pette Institute|G\u00fcnter|Germany

>Spike|hCoV-19/England/QEUH-C5BF3A/2020|2020-12-14|EPI\_ISL\_769396|Original|hCoV-19^^England|Human|Lighthouse Lab in Glasgow|Wellcome Sanger Institute for the COVID-19 Genomics UK (COG-UK) Consortium|Davies|United Kingdom

>Spike|hCoV-19/Wales/PHWC-2A194/2020|2020-04-05|EPI\_ISL\_445535|Original|hCoV-19^^Wales|Human|Wales Specialist Virology Centre|Public Health Wales Microbiology Cardiff|Moore|United Kingdom

>Spike|hCoV-19/USA/OR-OHSU-2814/2020|2020-09-01|EPI\_ISL\_667323|Original|hCoV-19^^Oregon|Human|OHSU Lab Services Molecular Microbiology Lab|Oregon SARS-CoV-2 Genome Sequencing Center|O'Roak|USA

>Spike|hCoV-19/England/ALDP-B63C57/2020|2020-11-08|EPI\_ISL\_655441|Original|hCoV-19^^England|Human|Lighthouse Lab in Alderley Park|Wellcome Sanger Institute for the COVID-19 Genomics UK (COG-UK) Consortium|Davies|United Kingdom

>Spike|hCoV-19/USA/AZ-TG547325/2020|2020-07-06|EPI\_ISL\_695481|Original|hCoV-19^^Arizona|Human|AZ SPHL|TGen North|French|USA

>Spike|hCoV-19/England/ALDP-A2DFAC/2020|2020-10-06|EPI\_ISL\_586920|Original|hCoV-19^^England|Human|Lighthouse Lab in Alderley Park|Wellcome Sanger Institute for the COVID-19 Genomics UK (COG-UK) consortium|Davies|United Kingdom

>Spike|hCoV-19/USA/TX-DSHS-0723/2020|2020-05-13|EPI\_ISL\_584126|Original|hCoV-19^^Texas|Human|Texas Department of State Health Services|Texas Department of State Health Services|Rahman|USA

>Spike|hCoV-19/USA/CA-UCLA-77/2020|2020-03-17|EPI\_ISL\_537598|Original|hCoV-19^^California|Human|UCLA Pathology Clinical Microbiology Lab|Kruglyak Lab|Boocock|USA

>Spike|hCoV-19/Japan/PG-3155/2020|2020-06-00|EPI\_ISL\_691275|Original|hCoV-19^^Japan|Human|Pathogen Genomics Center|Pathogen Genomics Center|Sekizuka|Japan

>Spike|hCoV-19/England/203690361/2020|2020-09-05|EPI\_ISL\_534728|Original|hCoV-19^^England|Human|Respiratory Virus Unit|Respiratory Virus Unit|Platt|United Kingdom

>Spike|hCoV-19/England/CAMC-B09646/2020|2020-10-30|EPI\_ISL\_673123|Original|hCoV-19^^England|Human|Lighthouse Lab in Cambridge|Wellcome Sanger Institute for the COVID-19 Genomics UK (COG-UK) Consortium|Davies|United Kingdom

>Spike|hCoV-19/Australia/VIC1555/2020|2020-05-10|EPI\_ISL\_456594|Original|hCoV-19^^Victoria|Human|Microbiological Diagnostic Unit Public Health Laboratory|Microbiological Diagnostic Unit Public Health Laboratory|Schultz|Australia

>Spike|hCoV-19/Japan/PG-3514/2020|2020-06-00|EPI\_ISL\_691770|Original|hCoV-19^^Japan|Human|Pathogen Genomics Center|Pathogen Genomics Center|Sekizuka|Japan

>Spike|hCoV-19/Wales/PHWC-4938AC/2020|2020-11-29|EPI\_ISL\_725952|Original|hCoV-19^^Wales|Human|Originating lab|COVID-19 Genomics UK (COG-UK) Consortium|Moore|United Kingdom

>Spike|hCoV-19/USA/FL-BPHL-0713/2020|2020-03-30|EPI\_ISL\_509771|Original|hCoV-19^^Florida|Human|Florida Bureau of Public Health Laboratories|Florida Bureau of Public Health Laboratories|Blanton|USA

>Spike|hCoV-19/Scotland/CVR5710/2020|2020-11-07|EPI\_ISL\_650451|Original|hCoV-19^^Scotland|Human|West of Scotland Specialist Virology Centre|COVID-19 Genomics UK (COG-UK) Consortium|Robertson|United Kingdom

>Spike|hCoV-19/England/CAMC-C45258/2020|2020-12-10|EPI\_ISL\_719300|Original|hCoV-19^^England|Human|Lighthouse Lab in Cambridge|Wellcome Sanger Institute for the COVID-19 Genomics UK (COG-UK) Consortium|Davies|United Kingdom

>Spike|hCoV-19/Belgium/ULG-10227/2020|2020-05-16|EPI\_ISL\_498133|Original|hCoV-19^^Li\u00e8ge|Human|Department of Clinical Microbiology|GIGA Medical Genomics|Durkin|Belgium

>Spike|hCoV-19/USA/FL-BPHL-1519/2020|2020-07-27|EPI\_ISL\_568617|Original|hCoV-19^^Florida|Human|Florida Bureau of Public Health Laboratories|Florida Bureau of Public Health Laboratories|Blanton|USA

>Spike|hCoV-19/Denmark/DCGC-3575/2020|2020-08-31|EPI\_ISL\_616903|Original|hCoV-19^^Hovedstaden|Human|Department of Virus and Microbiological Special Diagnostics|Albertsen lab|Michaelsen|Denmark

>Spike|hCoV-19/USA/WA-UW-4765/2020|2020-03-28|EPI\_ISL\_461403|Original|hCoV-19^^Washington|Human|UW Virology Lab|UW Virology Lab|Roychoudhury|USA

>Spike|hCoV-19/New Zealand/20CV0589/2020|2020-11-18|EPI\_ISL\_661263|Original|hCoV-19^^Auckland|Human|LabPLUS|Institute of Environmental Science and Research (ESR)|Wang|New Zealand

>Spike|hCoV-19/Australia/WA200/2020|2020-04-15|EPI\_ISL\_596763|Original|hCoV-19^^Western Australia|Human|PathWest Laboratory Medicine WA|PathWest Laboratory Medicine WA Microbial Surveillance Unit|Sikazwe|Australia

>Spike|hCoV-19/England/QEUH-AF3EA2/2020|2020-10-30|EPI\_ISL\_662939|Original|hCoV-19^^England|Human|Lighthouse Lab in Glasgow|Wellcome Sanger Institute for the COVID-19 Genomics UK (COG-UK) Consortium|Davies|United Kingdom

>Spike|hCoV-19/USA/CA-ALSR-3732/2020|2020-05-27|EPI\_ISL\_636173|Original|hCoV-19^^California|Human|San Diego County Public Health Laboratory|Andersen lab at Scripps Research|Gangavarapu|USA

>Spike|hCoV-19/Scotland/QEUH-9D15C4/2020|2020-09-14|EPI\_ISL\_577380|Original|hCoV-19^^Scotland|Human|University of Exeter|COVID-19 Genomics UK (COG-UK) Consortium|Temperton|United Kingdom

>Spike|hCoV-19/Belgium/ULG-11096/2020|2020-12-16|EPI\_ISL\_737345|Original|hCoV-19^^Li\u00e8ge|Human|Department of Clinical Microbiology|GIGA Medical Genomics|Durkin|Belgium

>Spike|hCoV-19/England/NORT-29DBD8/2020|2020-05-07|EPI\_ISL\_484311|Original|hCoV-19^^England|Human|Northumbria University / South Tees Hospitals NHS Foundation Trust / North Cumbria Integrated Care NHS Foundation Trust / North Tees and Hartlepool NHS Foundation Trust / Newcastle Hospitals NHS Foundation Trust|COVID-19 Genomics UK (COG-UK) Consortium|Bashton|United Kingdom

>Spike|hCoV-19/England/OXON-B3048/2020|2020-04-18|EPI\_ISL\_534834|Original|hCoV-19^^England|Human|Oxford Viromics|COVID-19 Genomics UK (COG-UK) Consortium|Golubchik|United Kingdom

>Spike|hCoV-19/USA/TX-HMH-MCoV-13668/2020|2020-08-20|EPI\_ISL\_788766|Original|hCoV-19^^Texas|Human|Houston Methodist Hospital|Houston Methodist Hospital|Long|USA

>Spike|hCoV-19/Wales/PHWC-163170/2020|2020-05-30|EPI\_ISL\_473255|Original|hCoV-19^^Wales|Human|Wales Specialist Virology Centre Sequencing lab|COVID-19 Genomics UK (COG-UK) Consortium|Moore|United Kingdom

>Spike|hCoV-19/Scotland/EDB4550/2020|2020-05-06|EPI\_ISL\_493905|Original|hCoV-19^^Scotland|Human|Virology Department|COVID-19 Genomics UK (COG-UK) Consortium|Williams|United Kingdom

>Spike|hCoV-19/USA/CA-CDPH019/2020|2020-03-04|EPI\_ISL\_515912|Original|hCoV-19^^California|Human|California Department of Public Health|California Department of Public Health|Bell|USA

>Spike|hCoV-19/Wales/PHWC-49E689/2020|2020-12-07|EPI\_ISL\_743031|Original|hCoV-19^^Wales|Human|Wales Specialist Virology Centre Sequencing lab|COVID-19 Genomics UK (COG-UK) Consortium|Moore|United Kingdom

>Spike|hCoV-19/Wales/PHWC-2C9D6/2020|2020-03-31|EPI\_ISL\_474314|Original|hCoV-19^^Wales|Human|Originating lab|COVID-19 Genomics UK (COG-UK) Consortium|Moore|United Kingdom

>Spike|hCoV-19/Scotland/GCVR-16FC0A/2020|2020-03-21|EPI\_ISL\_489635|Original|hCoV-19^^Scotland|Human|NHSGGC West of Scotland Specialist Virology Centre / MRC-University of Glasgow Centre for Virus Research|Wellcome Sanger Institute for the COVID-19 Genomics UK (COG-UK) consortium|Davies|United Kingdom

>Spike|hCoV-19/England/MILK-B8CA5E/2020|2020-11-13|EPI\_ISL\_675927|Original|hCoV-19^^England|Human|Lighthouse Lab in Milton Keynes|Wellcome Sanger Institute for the COVID-19 Genomics UK (COG-UK) Consortium|Davies|United Kingdom

>Spike|hCoV-19/Spain/AN-IBV-001090/2020|2020-03-27|EPI\_ISL\_452596|Original|hCoV-19^^Andalucia|Human|Servicio de Microbiolog\u00eda y Parasitolog\u00eda cl\u00ednica. UCEIMP. Hospital Universitario Virgen del Roc\u00edo/IBIS/CSIC/US.|SeqCOVID-SPAIN consortium/IBV (CSIC) |Comas|Spain

>Spike|hCoV-19/Wales/PHWC-4A6651/2020|2020-12-17|EPI\_ISL\_765056|Original|hCoV-19^^Wales|Human|Wales Specialist Virology Centre Sequencing lab|COVID-19 Genomics UK (COG-UK) Consortium|Moore|United Kingdom

>Spike|hCoV-19/USA/UT-UPHL-2009630/2020|2020-07-19|EPI\_ISL\_605306|Original|hCoV-19^^Utah|Human|Utah Public Health Laboratory|Utah Public Health Laboratory|Young|USA

>Spike|hCoV-19/Sweden/20-50144/2020|2020-03-04|EPI\_ISL\_454884|Original|hCoV-19^^Stockholm|Human|Karolinska Universitetslaboratoriet|The Public Health Agency of Sweden|Svartstr\u00f6m|Sweden

>Spike|hCoV-19/Finland/S3CB11/2020|2020-10-30|EPI\_ISL\_732643|Original|hCoV-19^^Uusimaa|Human|Department of Virology and Immunology|Department of Virology|Smura|Finland

>Spike|hCoV-19/England/QEUA-9A406F/2020|2020-09-01|EPI\_ISL\_540159|Original|hCoV-19^^England|Human|Lighthouse Lab in Glasgow|Wellcome Sanger Institute for the COVID-19 Genomics UK (COG-UK) consortium|Davies|United Kingdom

>Spike|hCoV-19/Wales/MILK-9E0FE2/2020|2020-09-20|EPI\_ISL\_580873|Original|hCoV-19^^Wales|Human|Lighthouse Lab in Milton Keynes|Wellcome Sanger Institute for the COVID-19 Genomics UK (COG-UK) consortium|Davies|United Kingdom

>Spike|hCoV-19/England/BRIS-1221C8/2020|2020-03-22|EPI\_ISL\_440033|Original|hCoV-19^^England|Human|PHE South West Regional Laboratory|Wellcome Sanger Institute for the COVID-19 Genomics UK (COG-UK) consortium|Amato|United Kingdom

>Spike|hCoV-19/Chile/MA-194111-B/2020|2020-09-27|EPI\_ISL\_746524|Original|hCoV-19^^Magallanes|Human|Genetica Molecular and Subdepartamento de Virologia ISP Chile|Instituto de Salud Publica de Chile|Tognarelli|Chile

>Spike|hCoV-19/England/QEUA-B7E907/2020|2020-11-14|EPI\_ISL\_667987|Original|hCoV-19^^England|Human|Lighthouse Lab in Glasgow|Wellcome Sanger Institute for the COVID-19 Genomics UK (COG-UK) Consortium|Davies|United Kingdom

>Spike|hCoV-19/Brazil/SP-0105/2020|2020-03-13|EPI\_ISL\_417929|Original|hCoV-19^^S\u00e3o Paulo|Human|Laborat\u00f3rio Hermes Pardini|Bioinformatics Laboratory - LNCC|Almeida|Brazil

>Spike|hCoV-19/Italy/VEN-IZSve-12666/2020|2020-06-11|EPI\_ISL\_636465|Original|hCoV-19^^Veneto|Human|ULSS6 Euganea|Istituto Zooprofilattico Sperimentale delle Venezie|Quaranta|Italy

>Spike|hCoV-19/USA/TX-HMH-6911/2020|2020-06-25|EPI\_ISL\_546344|Original|hCoV-19^^Texas|Human|Houston Methodist Hospital|Houston Methodist Hospital|Long|USA

>Spike|hCoV-19/England/LIVE-DCC4E9/2020|2020-11-25|EPI\_ISL\_724512|Original|hCoV-19^^England|Human|Liverpool Clinical Laboratories|COVID-19 Genomics UK (COG-UK) Consortium|Haldenby|United Kingdom

>Spike|hCoV-19/England/CAMC-BC0EE9/2020|2020-11-20|EPI\_ISL\_705131|Original|hCoV-19^^England|Human|Lighthouse Lab in Cambridge|Wellcome Sanger Institute for the COVID-19 Genomics UK (COG-UK) Consortium|Davies|United Kingdom

>Spike|hCoV-19/England/ALDP-A6940F/2020|2020-10-12|EPI\_ISL\_609068|Original|hCoV-19^^England|Human|Lighthouse Lab in Alderley Park|Wellcome Sanger Institute for the COVID-19 Genomics UK (COG-UK) consortium|Davies|United Kingdom

>Spike|hCoV-19/Northern Ireland/NIRE-FC33B/2020|2020-04-12|EPI\_ISL\_470058|Original|hCoV-19^^Northern Ireland|Human|Regional Virus Laboratory|Wellcome Sanger Institute for the COVID-19 Genomics UK (COG-UK) consortium|Davies|United Kingdom

>Spike|hCoV-19/USA/UT-UPHL-2008860/2020|2020-05-26|EPI\_ISL\_524978|Original|hCoV-19^^Utah|Human|Utah Public Health Laboratory|Utah Public Health Laboratory|Young|USA

>Spike|hCoV-19/India/DL-NCDC2200-CSIR-IGIB/2020|2020-05-18|EPI\_ISL\_482549|Original|hCoV-19^^Delhi|Human|National Centre for Disease control (NCDC)|NCDC/CSIR-IGIB|Pandey|India

>Spike|hCoV-19/USA/CA-CZB0705/2020|2020-03-23|EPI\_ISL\_429024|Original|hCoV-19^^California|Human|UCSF Clinical Microbiology Laboratory|Chan-Zuckerberg Biohub|Kamm|USA

>Spike|hCoV-19/Singapore/592/2020|2020-06-26|EPI\_ISL\_483615|Original|hCoV-19^^Singapore|Human|National Public Health Laboratory|National Public Health Laboratory|Mak|Singapore

>Spike|hCoV-19/England/BRIS-12B5D2/2020|2020-05-20|EPI\_ISL\_487604|Original|hCoV-19^^England|Human|PHE South West Regional Laboratory|Wellcome Sanger Institute for the COVID-19 Genomics UK (COG-UK) consortium|Davies|United Kingdom

>Spike|hCoV-19/Wales/PHWC-483AE5/2020|2020-10-22|EPI\_ISL\_627894|Original|hCoV-19^^Wales|Human|Wales Specialist Virology Centre Sequencing lab|COVID-19 Genomics UK (COG-UK) Consortium|Moore|United Kingdom

>Spike|hCoV-19/USA/MA-QDX-127/2020|2020-03-13|EPI\_ISL\_467851|Original|hCoV-19^^Massachusetts|Human|Quest Diagnostics|Quest Diagnostics|Kagan|USA

>Spike|hCoV-19/England/SHEF-C29B4/2020|2020-11-13|EPI\_ISL\_680125|Original|hCoV-19^^England|Human|Virology Department|COVID-19 Genomics UK (COG-UK) Consortium|de Silva|United Kingdom

>Spike|hCoV-19/USA/MN-MDH-1688/2020|2020-04-08|EPI\_ISL\_560775|Original|hCoV-19^^Minnesota|Human|Minnesota Department of Health|Minnesota Department of Health|Garfin|USA

>Spike|hCoV-19/Australia/VIC2623/2020|2020-06-30|EPI\_ISL\_521469|Original|hCoV-19^^Victoria|Human|Victorian Infectious Diseases Reference Laboratory (VIDRL)|VIDRL and MDU-PHL|Schultz|Australia

>Spike|hCoV-19/Denmark/DCGC-4900/2020|2020-09-21|EPI\_ISL\_621586|Original|hCoV-19^^Hovedstaden|Human|Department of Virus and Microbiological Special Diagnostics|Albertsen lab|Michaelsen|Denmark

>Spike|hCoV-19/Hungary/UD-57949/2020|2020-08-31|EPI\_ISL\_671437|Original|hCoV-19^^Hajd\u00fa-Bihar county|Human|University of Debrecen|National Laboratory of Virology|Kemenesi|Hungary

>Spike|hCoV-19/USA/UT-UPHL-2012731966/2020|2020-11-25|EPI\_ISL\_746898|Original|hCoV-19^^Utah|Human|Utah Public Health Laboratory|Utah Public Health Laboratory|Gallagher|USA

>Spike|hCoV-19/Wales/PHWC-347E0/2020|2020-04-16|EPI\_ISL\_446977|Original|hCoV-19^^Wales|Human|Wales Specialist Virology Centre|Public Health Wales Microbiology Cardiff|Moore|United Kingdom

>Spike|hCoV-19/England/SHEF-D1E2C/2020|2020-04-02|EPI\_ISL\_432642|Original|hCoV-19^^England|Human|Virology Department|COVID-19 Genomics UK (COG-UK) Consortium|de Silva|United Kingdom

>Spike|hCoV-19/USA/AZ-TG532051/2020|2020-07-01|EPI\_ISL\_695399|Original|hCoV-19^^Arizona|Human|AZ SPHL|TGen North|French|USA

>Spike|hCoV-19/England/SHEF-D1A0A/2020|2020-10-18|EPI\_ISL\_613401|Original|hCoV-19^^England|Human|Virology Department|COVID-19 Genomics UK (COG-UK) Consortium|de Silva|United Kingdom



>Spike|hCoV-19/England/ALDP-9E5ADD/2020|2020-09-24|EPI\_ISL\_589551|Original|hCoV-19^^England|Human|Lighthouse Lab in Alderley Park|Wellcome Sanger Institute for the COVID-19 Genomics UK (COG-UK) consortium|Davies|United Kingdom

>Spike|hCoV-19/Singapore/1371/2020|2020-06-30|EPI\_ISL\_648722|Original|hCoV-19^^Singapore|Human|Department of Laboratory Medicine|Department of Laboratory Medicine|Chen|Singapore

>Spike|hCoV-19/England/ALDP-BC788A/2020|2020-11-22|EPI\_ISL\_721209|Original|hCoV-19^^England|Human|Lighthouse Lab in Alderley Park|Wellcome Sanger Institute for the COVID-19 Genomics UK (COG-UK) Consortium|Davies|United Kingdom

>Spike|hCoV-19/Denmark/DCGC-5128/2020|2020-09-21|EPI\_ISL\_621666|Original|hCoV-19^^Syddanmark|Human|Department of Virus and Microbiological Special Diagnostics|Albertsen lab|Michaelsen|Denmark

>Spike|hCoV-19/USA/WA-S1466/2020|2020-05-21|EPI\_ISL\_495916|Original|hCoV-19^^Washington|Human|Washington State Department of Health|Seattle Flu Study|Lee|USA

>Spike|hCoV-19/England/QEUEH-9F9960/2020|2020-09-26|EPI\_ISL\_589054|Original|hCoV-19^^England|Human|Lighthouse Lab in Glasgow|Wellcome Sanger Institute for the COVID-19 Genomics UK (COG-UK) consortium|Davies|United Kingdom

>Spike|hCoV-19/England/LCST-24D6F2A/2020|2020-06-13|EPI\_ISL\_484251|Original|hCoV-19^^England|Human|University Hospitals Of Leicester NHS Trust and DeepSeq Nottingham|COVID-19 Genomics UK (COG-UK) Consortium|Loose|United Kingdom

>Spike|hCoV-19/England/MILK-569D72/2020|2020-06-10|EPI\_ISL\_558284|Original|hCoV-19^^England|Human|Lighthouse Lab in Milton Keynes|Wellcome Sanger Institute for the COVID-19 Genomics UK (COG-UK) consortium|Davies|United Kingdom

>Spike|hCoV-19/USA/TX-HMH-MCoV-19452/2020|2020-11-30|EPI\_ISL\_783848|Original|hCoV-19^^Texas|Human|Houston Methodist Hospital|Houston Methodist Hospital|Long|USA

>Spike|hCoV-19/India/KA-IB7/2020|2020-06-17|EPI\_ISL\_508335|Original|hCoV-19^^Karnataka|Human|Indian Institute of Science|National Institute of Biomedical Genomics|Maitra|India

>Spike|hCoV-19/England/BRIS-125C5B/2020|2020-03-29|EPI\_ISL\_443967|Original|hCoV-19^^England|Human|PHE South West Regional Laboratory|Wellcome Sanger Institute for the COVID-19 Genomics UK (COG-UK) consortium|Amato|United Kingdom

>Spike|hCoV-19/England/QEUEH-9B4E9F/2020|2020-09-03|EPI\_ISL\_590266|Original|hCoV-19^^England|Human|Lighthouse Lab in Glasgow|Wellcome Sanger Institute for the COVID-19 Genomics UK (COG-UK) consortium|Davies|United Kingdom

>Spike|hCoV-19/Scotland/CVR1652/2020|2020-04-06|EPI\_ISL\_433643|Original|hCoV-19^^Scotland|Human|West of Scotland Specialist Virology Centre|COVID-19 Genomics UK (COG-UK) Consortium|Robertson|United Kingdom

>Spike|hCoV-19/Denmark/DCGC-11172/2020|2020-11-02|EPI\_ISL\_670436|Original|hCoV-19^^Nordjylland|Human|Department of Virus and Microbiological Special Diagnostics|Albertsen Lab|Michaelsen|Denmark

>Spike|hCoV-19/England/QEUEH-96E22F/2020|2020-08-20|EPI\_ISL\_530599|Original|hCoV-19^^England|Human|Lighthouse Lab in Glasgow|Wellcome Sanger Institute for the COVID-19 Genomics UK (COG-UK) consortium|Davies|United Kingdom

>Spike|hCoV-19/USA/TX-HMH-5273/2020|2020-06-19|EPI\_ISL\_544643|Original|hCoV-19^^Texas|Human|Houston Methodist Hospital|Houston Methodist Hospital|Long|USA

>Spike|hCoV-19/USA/TX-HMH-MCoV-13508/2020|2020-08-22|EPI\_ISL\_788635|Original|hCoV-19^^Texas|Human|Houston Methodist Hospital|Houston Methodist Hospital|Long|USA

>Spike|hCoV-19/England/204441528/2020|2020-10-18|EPI\_ISL\_622884|Original|hCoV-19^^England|Human|Respiratory Virus Unit|Respiratory Virus Unit|Platt|United Kingdom

>Spike|hCoV-19/Denmark/DCGC-20937/2020|2020-12-21|EPI\_ISL\_759458|Original|hCoV-19^^Hovedstaden|Human|Department of Virus and Microbiological Special Diagnostics|Albertsen Lab|Michaelsen|Denmark

>Spike|hCoV-19/USA/NY-NYCPHL-000914/2020|2020-03-20|EPI\_ISL\_632975|Original|hCoV-19^^New York|Human|Richmond University Medical Center|New York City Public Health Laboratory|Wang|USA

>Spike|hCoV-19/Scotland/CVR811/2020|2020-03-27|EPI\_ISL\_433346|Original|hCoV-19^^Scotland|Human|West of Scotland Specialist Virology Centre|COVID-19 Genomics UK (COG-UK) Consortium|Robertson|United Kingdom

>Spike|hCoV-19/USA/LA-EVTL510/2020|2020-06-23|EPI\_ISL\_578914|Original|hCoV-19^^Louisiana|Human|LSUHS Emerging Viral Threat Laboratory|Microbial Genome Sequencing Center|Kamil|USA

>Spike|hCoV-19/Japan/PG-6292/2020|2020-07-00|EPI\_ISL\_689403|Original|hCoV-19^^Japan|Human|Pathogen Genomics Center|Pathogen Genomics Center|Sekizuka|Japan

>Spike|hCoV-19/Wales/PHWC-482A04/2020|2020-10-21|EPI\_ISL\_613259|Original|hCoV-19^^Wales|Human|Wales Specialist Virology Centre Sequencing lab|COVID-19 Genomics UK (COG-UK) Consortium|Moore|United Kingdom

>Spike|hCoV-19/Australia/VIC3081/2020|2020-07-10|EPI\_ISL\_520788|Original|hCoV-19^^Victoria|Human|Microbiological Diagnostic Unit - Public Health Laboratory (MDU-PHL) |MDU-PHL|Schultz|Australia

>Spike|hCoV-19/Japan/PG-8240/2020|2020-08-00|EPI\_ISL\_687339|Original|hCoV-19^^Japan|Human|Pathogen Genomics Center|Pathogen Genomics Center|Sekizuka|Japan

>Spike|hCoV-19/Denmark/DCGC-16626/2020|2020-11-16|EPI\_ISL\_714878|Original|hCoV-19^^Hovedstaden|Human|Department of Virus and Microbiological Special Diagnostics|Albertsen Lab|Michaelsen|Denmark

>Spike|hCoV-19/Scotland/QEUH-96B0EC/2020|2020-08-18|EPI\_ISL\_534668|Original|hCoV-19^^Scotland|Human|NHSGGC West of Scotland Specialist Virology Centre / MRC-University of Glasgow Centre for Virus Research|Wellcome Sanger Institute for the COVID-19 Genomics UK (COG-UK) consortium|Davies|United Kingdom

>Spike|hCoV-19/Denmark/DCGC-6462/2020|2020-10-12|EPI\_ISL\_620362|Original|hCoV-19^^Syddanmark|Human|Department of Virus and Microbiological Special Diagnostics|Albertsen lab|Michaelsen|Denmark

>Spike|hCoV-19/Denmark/DCGC-22605/2020|2020-12-14|EPI\_ISL\_757667|Original|hCoV-19^^Nordjylland|Human|Department of Virus and Microbiological Special Diagnostics|Albertsen Lab|Michaelsen|Denmark

>Spike|hCoV-19/England/OXON-B2207/2020|2020-04-20|EPI\_ISL\_479128|Original|hCoV-19^^England|Human|Oxford Viromics|COVID-19 Genomics UK (COG-UK) Consortium|Golubchik|United Kingdom

>Spike|hCoV-19/USA/MI-MDHHS-SC20965/2020|2020-04-06|EPI\_ISL\_507753|Original|hCoV-19^^Michigan|Human|Michigan Department of Health and Human Services|Michigan Department of Health and Human Services|Blankenship|USA

>Spike|hCoV-19/Denmark/DCGC-12962/2020|2020-12-07|EPI\_ISL\_712491|Original|hCoV-19^^Hovedstaden|Human|Department of Virus and Microbiological Special Diagnostics|Albertsen Lab|Michaelsen|Denmark

>Spike|hCoV-19/Jordan/AM-ALSR-3930/2020|2020-09-30|EPI\_ISL\_636295|Original|hCoV-19^^Amman|Human|Biolab Diagnostic Laboratories|Andersen lab at Scripps Research|Gangavarapu|Jordan

>Spike|hCoV-19/Uganda/UG025/2020|2020-05-02|EPI\_ISL\_737949|Original|hCoV-19^^Uganda|Human|Uganda Central Public Health Lab and Uganda Virus Research Institute|MRC/UVRI & LSHTM Uganda Research Unit|Cotten|Uganda

>Spike|hCoV-19/Japan/PG-0967/2020|2020-04-00|EPI\_ISL\_684577|Original|hCoV-19^^Japan|Human|Gunma Prefectural Institute of Public Health and Environmental Sciences|Pathogen Genomics Center|Sekizuka|Japan

>Spike|hCoV-19/India/GJ-GBRC20/2020|2020-04-26|EPI\_ISL\_437449|Original|hCoV-19^^Gujarat|Human|B.J. Medical College and Civil hospital|Gujarat Biotechnology Research Centre|Joshi|India

>Spike|hCoV-19/Singapore/1434/2020|2020-11-30|EPI\_ISL\_693322|Original|hCoV-19^^Singapore|Human|National Public Health Laboratory|National Public Health Laboratory|Mak|Singapore

>Spike|hCoV-19/Wales/PHWC-166D2E/2020|2020-06-27|EPI\_ISL\_494106|Original|hCoV-19^^Wales|Human|Originating lab|COVID-19 Genomics UK (COG-UK) Consortium|Moore|United Kingdom

>Spike|hCoV-19/England/MILK-AC76FA/2020|2020-10-19|EPI\_ISL\_630088|Original|hCoV-19^^England|Human|Lighthouse Lab in Milton Keynes|Wellcome Sanger Institute for the COVID-19 Genomics UK (COG-UK) consortium|Davies|United Kingdom

>Spike|hCoV-19/England/QEUH-9C941D/2020|2020-09-10|EPI\_ISL\_567277|Original|hCoV-19^^England|Human|Lighthouse Lab in Glasgow|Wellcome Sanger Institute for the COVID-19 Genomics UK (COG-UK) consortium|Davies|United Kingdom

>Spike|hCoV-19/Wales/MILK-9D5065/2020|2020-09-19|EPI\_ISL\_577386|Original|hCoV-19^^Wales|Human|Centre for Enzyme Innovation|COVID-19 Genomics UK (COG-UK) Consortium|Robson|United Kingdom

>Spike|hCoV-19/Scotland/QEUIH-9FB60D/2020|2020-09-29|EPI\_ISL\_600606|Original|hCoV-19^^Scotland|Human|Lighthouse Lab in Glasgow|Wellcome Sanger Institute for the COVID-19 Genomics UK (COG-UK) consortium|Davies|United Kingdom

>Spike|hCoV-19/England/CAMC-BFB9A8/2020|2020-12-04|EPI\_ISL\_709117|Original|hCoV-19^^England|Human|Lighthouse Lab in Cambridge|Wellcome Sanger Institute for the COVID-19 Genomics UK (COG-UK) Consortium|Davies|United Kingdom

>Spike|hCoV-19/United Arab Emirates/0041/2020|2020-05-17|EPI\_ISL\_698250|Original|hCoV-19^^Abu Dhabi|Human|Group 42 (G42) Healthcare|G42 Healthcare|Ogrodzki|United Arab Emirates

>Spike|hCoV-19/Switzerland/GE-SNRCI-8927/2020|2020-03-00|EPI\_ISL\_548233|Original|hCoV-19^^Geneve|Human|Laboratoire de Virologie|Swiss National Reference Centre for Influenza|Gon\u00e7alves Cabecinhas|Switzerland

>Spike|hCoV-19/England/MILK-AB85D1/2020|2020-10-21|EPI\_ISL\_623671|Original|hCoV-19^^England|Human|Lighthouse Lab in Milton Keynes|Wellcome Sanger Institute for the COVID-19 Genomics UK (COG-UK) consortium|Davies|United Kingdom

>Spike|hCoV-19/Brazil/SP-L5-CAMPI102/2020|2020-04-25|EPI\_ISL\_476408|Original|hCoV-19^^S\u00e3o Paulo|Human|Laborat\u00f3rio de Patologia Cl\u00ednica - UNICAMP|Laborat\u00f3rio de Estudos de V\u00edrus Emergentes - UNICAMP|Sabino|Brazil

>Spike|hCoV-19/England/CAMB-781E2/2020|2020-04-05|EPI\_ISL\_433705|Original|hCoV-19^^England|Human|Department of Pathology|COVID-19 Genomics UK (COG-UK) Consortium|Meredith|United Kingdom

>Spike|hCoV-19/USA/AZ-TG648632/2020|2020-04-29|EPI\_ISL\_695868|Original|hCoV-19^^Arizona|Human|Sonora Quest Laboratories|TGen North|French|USA

>Spike|hCoV-19/USA/LA-EVTL448/2020|2020-06-19|EPI\_ISL\_578852|Original|hCoV-19^^Louisiana|Human|LSUHS Emerging Viral Threat Laboratory|Microbial Genome Sequencing Center|Kamil|USA

>Spike|hCoV-19/England/ALDP-B7493E/2020|2020-11-12|EPI\_ISL\_662068|Original|hCoV-19^^England|Human|Lighthouse Lab in Alderley Park|Wellcome Sanger Institute for the COVID-19 Genomics UK (COG-UK) Consortium|Davies|United Kingdom

>Spike|hCoV-19/Switzerland/BS-UHB-42186504/2020|2020-03-11|EPI\_ISL\_528009|Original|hCoV-19^^Basel-Stadt|Human|University Hospital Basel|University Hospital Basel|Roloff Handschin|Switzerland

>Spike|hCoV-19/USA/TX-HMH-2661/2020|2020-06-06|EPI\_ISL\_545459|Original|hCoV-19^^Texas|Human|Houston Methodist Hospital|Houston Methodist Hospital|Long|USA

>Spike|hCoV-19/Wales/PHWC-4A099A/2020|2020-12-10|EPI\_ISL\_743521|Original|hCoV-19^^Wales|Human|Wales Specialist Virology Centre Sequencing lab|COVID-19 Genomics UK (COG-UK) Consortium|Moore|United Kingdom

>Spike|hCoV-19/England/MILK-CB1020/2020|2020-12-04|EPI\_ISL\_760904|Original|hCoV-19^^England|Human|Lighthouse Lab in Milton Keynes|Wellcome Sanger Institute for the COVID-19 Genomics UK (COG-UK) Consortium|Davies|United Kingdom

>Spike|hCoV-19/England/NORT-29546C/2020|2020-04-01|EPI\_ISL\_478637|Original|hCoV-19^^England|Human|Northumbria University / South Tees Hospitals NHS Foundation Trust / North Cumbria Integrated Care NHS Foundation Trust / North Tees and Hartlepool NHS Foundation Trust / Newcastle Hospitals NHS Foundation Trust|COVID-19 Genomics UK (COG-UK) Consortium|Bashton|United Kingdom

>Spike|hCoV-19/Wales/PHWC-48E938/2020|2020-11-13|EPI\_ISL\_680934|Original|hCoV-19^^Wales|Human|Wales Specialist Virology Centre Sequencing lab|COVID-19 Genomics UK (COG-UK) Consortium|Moore|United Kingdom

>Spike|hCoV-19/England/ALDP-C48BE1/2020|2020-12-12|EPI\_ISL\_736647|Original|hCoV-19^^England|Human|Lighthouse Lab in Alderley Park|Wellcome Sanger Institute for the COVID-19 Genomics UK (COG-UK) Consortium|Davies|United Kingdom

>Spike|hCoV-19/England/LOND-D368C/2020|2020-03-31|EPI\_ISL\_440971|Original|hCoV-19^^England|Human|University College London|COVID-19 Genomics UK (COG-UK) Consortium|Roy|United Kingdom

>Spike|hCoV-19/Wales/PHWC-4856B2/2020|2020-10-26|EPI\_ISL\_628206|Original|hCoV-19^^Wales|Human|Wales Specialist Virology Centre Sequencing lab|COVID-19 Genomics UK (COG-UK) Consortium|Moore|United Kingdom

>Spike|hCoV-19/England/ALDP-C3CBB3/2020|2020-12-10|EPI\_ISL\_731809|Original|hCoV-19^^England|Human|Lighthouse Lab in Alderley Park|Wellcome Sanger Institute for the COVID-19 Genomics UK (COG-UK) Consortium|Davies|United Kingdom

>Spike|hCoV-19/England/MILK-B943C1/2020|2020-11-14|EPI\_ISL\_676268|Original|hCoV-19^^England|Human|Lighthouse Lab in Milton Keynes|Wellcome Sanger Institute for the COVID-19 Genomics UK (COG-UK) Consortium|Davies|United Kingdom

>Spike|hCoV-19/England/ALDP-B63BD2/2020|2020-11-08|EPI\_ISL\_656517|Original|hCoV-19^^England|Human|Lighthouse Lab in Alderley Park|Wellcome Sanger Institute for the COVID-19 Genomics UK (COG-UK) Consortium|Davies|United Kingdom

>Spike|hCoV-19/USA/NY-NYCPHL-000863/2020|2020-03-25|EPI\_ISL\_632239|Original|hCoV-19^^New York|Human|Jamaica Hospital Medical Center|New York City Public Health Laboratory|Wang|USA

>Spike|hCoV-19/England/MILK-AB8049/2020|2020-10-21|EPI\_ISL\_623227|Original|hCoV-19^^England|Human|Lighthouse Lab in Milton Keynes|Wellcome Sanger Institute for the COVID-19 Genomics UK (COG-UK) consortium|Davies|United Kingdom

>Spike|hCoV-19/England/SHEF-CC89F/2020|2020-10-11|EPI\_ISL\_611545|Original|hCoV-19^^England|Human|Virology Department|COVID-19 Genomics UK (COG-UK) Consortium|de Silva|United Kingdom

>Spike|hCoV-19/Saudi Arabia/KAUST-MAKKAH1536/2020|2020-04-13|EPI\_ISL\_678104|Original|hCoV-19^^Makkah|Human|Pathogen Genomics Lab King Abdullah University of Science and Technology(KAUST)|Pathogen Genomics Lab King Abdullah University of Science and Technology(KAUST)|Mohamed Ghazzali|Saudi Arabia

>Spike|hCoV-19/Iceland/483/2020|2020-03-20|EPI\_ISL\_424506|Original|hCoV-19^^Reykjavik|Human|The National University Hospital of Iceland|deCODE genetics|J\u00f3nsson|Iceland

>Spike|hCoV-19/Australia/NSW555/2020|2020-03-29|EPI\_ISL\_455094|Original|hCoV-19^^New South Wales|Human|Pathology Sydney South West - NSW Health Pathology|NSW Health Pathology - Institute of Clinical Pathology and Medical Research; Westmead Hospital; University of Sydney|Gall|Australia

>Spike|hCoV-19/India/GJ-GBRC305a/2020|2020-06-15|EPI\_ISL\_495054|Original|hCoV-19^^Gujarat|Human|GMERS Medical College & Hospital|Gujarat Biotechnology Research Centre|Joshi|India

>Spike|hCoV-19/USA/FL-BPHL-1756/2020|2020-10-02|EPI\_ISL\_613749|Original|hCoV-19^^Florida|Human|Florida Bureau of Public Health Laboratories|Florida Bureau of Public Health Laboratories|Blanton|USA

>Spike|hCoV-19/Japan/PG-4265/2020|2020-07-00|EPI\_ISL\_692495|Original|hCoV-19^^Japan|Human|Fukuoka Institute of Health and Environmental Sciences|Pathogen Genomics Center|Sekizuka|Japan

>Spike|hCoV-19/Denmark/DCGC-3633/2020|2020-08-31|EPI\_ISL\_616404|Original|hCoV-19^^Hovedstaden|Human|Department of Virus and Microbiological Special Diagnostics|Albertsen lab|Michaelsen|Denmark

>Spike|hCoV-19/USA/CA-ALSR-3059/2020|2020-08-04|EPI\_ISL\_635821|Original|hCoV-19^^California|Human|San Diego County Public Health Laboratory|Andersen lab at Scripps Research|Gangavarapu|USA

>Spike|hCoV-19/USA/WA-S2626/2020|2020-06-19|EPI\_ISL\_497258|Original|hCoV-19^^Washington|Human|Washington State Department of Health|Seattle Flu Study|Lee|USA

>Spike|hCoV-19/England/QEUH-A61D48/2020|2020-10-13|EPI\_ISL\_628650|Original|hCoV-19^^England|Human|Oxford Viromics|COVID-19 Genomics UK (COG-UK) Consortium|Golubchik|United Kingdom

>Spike|hCoV-19/USA/NM-DOH-2020315157/2020|2020-08-27|EPI\_ISL\_732705|Original|hCoV-19^^New Mexico|Human|New Mexico Department of Health Scientific Laboratory|New Mexico Department of Health Scientific Laboratory|Johnson|USA

>Spike|hCoV-19/England/PORT-2D4D93/2020|2020-00-00|EPI\_ISL\_706870|Original|hCoV-19^^England|Human|Centre for Enzyme Innovation|COVID-19 Genomics UK (COG-UK) Consortium|Robson|United Kingdom

>Spike|hCoV-19/USA/WI-QDX-789/2020|2020-03-20|EPI\_ISL\_571570|Original|hCoV-19^^Wisconsin|Human|Quest Diagnostics|Quest Diagnostics|Kagan|USA

>Spike|hCoV-19/England/ALDP-A95AAE/2020|2020-10-19|EPI\_ISL\_624663|Original|hCoV-19^^England|Human|Lighthouse Lab in Alderley Park|Wellcome Sanger Institute for the COVID-19 Genomics UK (COG-UK) consortium|Davies|United Kingdom

>Spike|hCoV-19/Spain/VC-FISABIO-46/2020|2020-03-16|EPI\_ISL\_421516|Original|hCoV-19^^Comunitat Valenciana|Human|Servicio de Microbiologia. Hospital Clinico Universitario de Valencia|Sequencing and Bioinformatics Service and Molecular Epidemiology Research Group. FISABIO-Public Health|Gonzalez-Candelas|Spain

>Spike|hCoV-19/France/ARA-22132/2020|2020-04-08|EPI\_ISL\_508997|Original|hCoV-19^^Auvergne-Rh\u00f4ne-Alpes|Human|CNR Virus des Infections Respiratoires - France SUD|CNR Virus des Infections Respiratoires - France SUD|Josset|France

>Spike|hCoV-19/England/MILK-9A699F/2020|2020-09-01|EPI\_ISL\_581383|Original|hCoV-19^^England|Human|Lighthouse Lab in Milton Keynes|Wellcome Sanger Institute for the COVID-19 Genomics UK (COG-UK) consortium|Davies|United Kingdom

>Spike|hCoV-19/Australia/QLD1269/2020|2020-03-22|EPI\_ISL\_693271|Original|hCoV-19^^Australia|Human|unknown|Public Health Virology Laboratory|Nguyen|Australia

>Spike|hCoV-19/England/20119030804/2020|2020-03-14|EPI\_ISL\_465042|Original|hCoV-19^^England|Human|Respiratory Virus Unit|Respiratory Virus Unit|Platt|United Kingdom

>Spike|hCoV-19/USA/CA-CZB0139/2020|2020-04-08|EPI\_ISL\_429031|Original|hCoV-19^^California|Human|UCSF Clinical Microbiology Laboratory|Chan-Zuckerberg Biohub|Kamm|USA

>Spike|hCoV-19/England/QEUEH-96DE86/2020|2020-08-18|EPI\_ISL\_530531|Original|hCoV-19^^England|Human|Lighthouse Lab in Glasgow|Wellcome Sanger Institute for the COVID-19 Genomics UK (COG-UK) consortium|Davies|United Kingdom

>Spike|hCoV-19/USA/MI-MDHHS-SC20414/2020|2020-03-15|EPI\_ISL\_452288|Original|hCoV-19^^Michigan|Human|Michigan Department of Health and Human Services|Michigan Department of Health and Human Services|Blankenship|USA

>Spike|hCoV-19/USA/MA-MASPHL-00326/2020|2020-04-27|EPI\_ISL\_693191|Original|hCoV-19^^Massachusetts|Human|Massachusetts State Public Health Laboratory|Massachusetts State Public Health Laboratory|Lang|USA

>Spike|hCoV-19/Russia/MOW-RII-MH1989S/2020|2020-05-25|EPI\_ISL\_596333|Original|hCoV-19^^Moscow|Human|Pathogenic Microorganisms Variability Laboratory|WHO National Influenza Centre Russian Federation|Komissarov|Russia

>Spike|hCoV-19/Germany/BW-UT-021/2020|2020-05-20|EPI\_ISL\_508698|Original|hCoV-19^^Baden-W\u00fcrtemberg|Human|Institut f\u00fcr Virologie und Epidemiologie der Viruskrankheiten|NGS Competence Center T\u00fcbingen|Angelov|Germany

>Spike|hCoV-19/England/ALDP-4A4574/2020|2020-06-03|EPI\_ISL\_559475|Original|hCoV-19^^England|Human|Lighthouse Lab in Alderley Park|Wellcome Sanger Institute for the COVID-19 Genomics UK (COG-UK) consortium|Davies|United Kingdom

>Spike|hCoV-19/Spain/VC-IBV-98003079/2020|2020-03-14|EPI\_ISL\_538016|Original|hCoV-19^^Comunitat Valenciana|Human|Hospital Universitari i Polit\u00e8cnic La Fe de Val\u00e8ncia|SeqCOVID-SPAIN consortium/IBV(CSIC)|Comas|Spain

>Spike|hCoV-19/Spain/VC-FISABIO-613/2020|2020-03-31|EPI\_ISL\_447531|Original|hCoV-19^^Comunitat Valenciana|Human|Servicio de Microbiologia. Hospital Clinico Universitario de Valencia|Sequencing and Bioinformatics Service and Molecular Epidemiology Research Group. FISABIO-Public Health|Gonzalez-Candelas|Spain

>Spike|hCoV-19/England/MILK-C517C3/2020|2020-12-07|EPI\_ISL\_769744|Original|hCoV-19^^England|Human|Lighthouse Lab in Milton Keynes|Wellcome Sanger Institute for the COVID-19 Genomics UK (COG-UK) Consortium|Davies|United Kingdom

>Spike|hCoV-19/USA/OR-PROV-122/2020|2020-04-27|EPI\_ISL\_482386|Original|hCoV-19^^Oregon|Human|Providence St. Joseph Health Molecular Genomics Laboratory|Providence St. Joseph Health Molecular Genomics Laboratory|Dowdell|USA

>Spike|hCoV-19/USA/LA-EVTL1149/2020|2020-12-09|EPI\_ISL\_768418|Original|hCoV-19^^Louisiana|Human|LSUHS Emerging Viral Threat Laboratory|Microbial Genome Sequencing Center|Kamil|USA

>Spike|hCoV-19/USA/TX-HMH-MCoV-16238/2020|2020-10-28|EPI\_ISL\_785922|Original|hCoV-19^^Texas|Human|Houston Methodist Hospital|Houston Methodist Hospital|Long|USA

>Spike|hCoV-19/India/WB-IICB-036/2020|2020-10-29|EPI\_ISL\_661309|Original|hCoV-19^^West Bengal|Human|CSIR-Indian Institute of Chemical Biology|CSIR-Indian Institute of Chemical Biology|Bhowmik|India

>Spike|hCoV-19/England/ALDP-A4FE3E/2020|2020-10-07|EPI\_ISL\_597555|Original|hCoV-19^^England|Human|Lighthouse Lab in Alderley Park|Wellcome Sanger Institute for the COVID-19 Genomics UK (COG-UK) consortium|Davies|United Kingdom

>Spike|hCoV-19/England/MILK-C00602/2020|2020-12-02|EPI\_ISL\_720895|Original|hCoV-19^^England|Human|Lighthouse Lab in Milton Keynes|Wellcome Sanger Institute for the COVID-19 Genomics UK (COG-UK) Consortium|Davies|United Kingdom

>Spike|hCoV-19/Spain/MD-IBV-99012411/2020|2020-11-16|EPI\_ISL\_780065|Original|hCoV-19^^Madrid|Human|Hospital General Universitario Gregorio Mara\u00f1a\u00f3n|SeqCOVID-SPAIN consortium/IBV (CSIC)|Comas|Spain

>Spike|hCoV-19/USA/UT-UPHL-2012214216/2020|2020-08-13|EPI\_ISL\_746158|Original|hCoV-19^^Utah|Human|Ginkgo Bioworks Clinical Laboratory|Utah Public Health Laboratory|Young|USA

>Spike|hCoV-19/Sweden/20-52900/2020|2020-09-15|EPI\_ISL\_766627|Original|hCoV-19^^Stockholm|Human|Klinisk mikrobiologi|The Public Health Agency of Sweden|Svartstr\u00f6m|Sweden

>Spike|hCoV-19/Netherlands/NA\_38/2020|2020-03-13|EPI\_ISL\_422799|Original|hCoV-19^^Netherlands|Human|Dutch COVID-19 response team|Erasmus Medical Center|Oude Munnink|Netherlands

>Spike|hCoV-19/Japan/PG-4637/2020|2020-07-00|EPI\_ISL\_689774|Original|hCoV-19^^Japan|Human|Fukuoka Institute of Health and Environmental Sciences|Pathogen Genomics Center|Sekizuka|Japan

>Spike|hCoV-19/England/QEUA-B3F7BD/2020|2020-11-08|EPI\_ISL\_658519|Original|hCoV-19^^England|Human|Lighthouse Lab in Glasgow|Wellcome Sanger Institute for the COVID-19 Genomics UK (COG-UK) Consortium|Davies|United Kingdom

>Spike|hCoV-19/England/ALDP-9EAD57/2020|2020-09-24|EPI\_ISL\_579982|Original|hCoV-19^^England|Human|Lighthouse Lab in Alderley Park|Wellcome Sanger Institute for the COVID-19 Genomics UK (COG-UK) consortium|Davies|United Kingdom

>Spike|hCoV-19/Singapore/1464/2020|2020-12-12|EPI\_ISL\_728200|Original|hCoV-19^^Singapore|Human|National Public Health Laboratory|National Public Health Laboratory|Mak|Singapore

>Spike|hCoV-19/England/CAMB-1BBAAB/2020|2020-11-18|EPI\_ISL\_679187|Original|hCoV-19^^England|Human|Department of Pathology|COVID-19 Genomics UK (COG-UK) Consortium|Goodfellow|United Kingdom

>Spike|hCoV-19/Scotland/CVR1444/2020|2020-04-01|EPI\_ISL\_433589|Original|hCoV-19^^Scotland|Human|West of Scotland Specialist Virology Centre|COVID-19 Genomics UK (COG-UK) Consortium|Robertson|United Kingdom

>Spike|hCoV-19/England/LIVE-DC6DF3/2020|2020-11-24|EPI\_ISL\_705315|Original|hCoV-19^^England|Human|Liverpool Clinical Laboratories|COVID-19 Genomics UK (COG-UK) Consortium|Haldenby|United Kingdom

>Spike|hCoV-19/Netherlands/GE-EMC-318/2020|2020-10-05|EPI\_ISL\_632650|Original|hCoV-19^^Gelderland|Human|Dutch COVID-19 response team|Erasmus Medical Center|Oude Munnink|Netherlands

>Spike|hCoV-19/England/MILK-99317F/2020|2020-08-27|EPI\_ISL\_552080|Original|hCoV-19^^England|Human|Lighthouse Lab in Milton Keynes|Wellcome Sanger Institute for the COVID-19 Genomics UK (COG-UK) consortium|Davies|United Kingdom

>Spike|hCoV-19/England/QEUA-B425AE/2020|2020-11-08|EPI\_ISL\_657222|Original|hCoV-19^^England|Human|Lighthouse Lab in Glasgow|Wellcome Sanger Institute for the COVID-19 Genomics UK (COG-UK) Consortium|Davies|United Kingdom

>Spike|hCoV-19/Denmark/DCGC-20956/2020|2020-12-21|EPI\_ISL\_759472|Original|hCoV-19^^Midtjylland|Human|Department of Virus and Microbiological Special Diagnostics|Albertsen Lab|Michaelsen|Denmark

>Spike|hCoV-19/Wales/PHWC-47E0CD/2020|2020-09-26|EPI\_ISL\_595404|Original|hCoV-19^^Wales|Human|Originating lab|COVID-19 Genomics UK (COG-UK) Consortium|Moore|United Kingdom

>Spike|hCoV-19/England/OXON-B00D2/2020|2020-04-18|EPI\_ISL\_478854|Original|hCoV-19^^England|Human|Oxford Viromics|COVID-19 Genomics UK (COG-UK) Consortium|Golubchik|United Kingdom

>Spike|hCoV-19/Australia/VIC6886/2020|2020-07-11|EPI\_ISL\_564116|Original|hCoV-19^^Victoria|Human|Microbiological Diagnostic Unit - Public Health Laboratory (MDU-PHL)|MDU-PHL|Schultz|Australia

>Spike|hCoV-19/England/SHEF-CEAF1/2020|2020-08-04|EPI\_ISL\_517568|Original|hCoV-19^^England|Human|Virology Department|COVID-19 Genomics UK (COG-UK) Consortium|de Silva|United Kingdom

>Spike|hCoV-19/Israel/CVL-nL6/2020|2020-03-00|EPI\_ISL\_435291|Original|hCoV-19^^Israel|Human|Central Virology Laboratory|Central Virology Laboratory|Zuckerman|Israel

>Spike|hCoV-19/England/ALDP-A86062/2020|2020-10-17|EPI\_ISL\_610323|Original|hCoV-19^^England|Human|Lighthouse Lab in Alderley Park|Wellcome Sanger Institute for the COVID-19 Genomics UK (COG-UK) consortium|Davies|United Kingdom

>Spike|hCoV-19/England/BRIS-128432/2020|2020-04-16|EPI\_ISL\_469616|Original|hCoV-19^^England|Human|PHE South West Regional Laboratory|Wellcome Sanger Institute for the COVID-19 Genomics UK (COG-UK) consortium|Davies|United Kingdom

>Spike|hCoV-19/Japan/PG-3662/2020|2020-04-00|EPI\_ISL\_691915|Original|hCoV-19^^Japan|Human|Pathogen Genomics Center|Pathogen Genomics Center|Sekizuka|Japan

>Spike|hCoV-19/United Arab Emirates/0195/2020|2020-05-18|EPI\_ISL\_698381|Original|hCoV-19^^Abu Dhabi|Human|Group 42 (G42) Healthcare|G42 Healthcare|Ogrodzki|United Arab Emirates

>Spike|hCoV-19/England/MILK-ACE6B7/2020|2020-10-21|EPI\_ISL\_629460|Original|hCoV-19^^England|Human|Lighthouse Lab in Milton Keynes|Wellcome Sanger Institute for the COVID-19 Genomics UK (COG-UK) consortium|Davies|United Kingdom

>Spike|hCoV-19/USA/MD-MDH-0174/2020|2020-06-03|EPI\_ISL\_534711|Original|hCoV-19^^Maryland|Human|MD PHL|MD PHL|Keller|USA

>Spike|hCoV-19/Singapore/122/2020|2020-03-18|EPI\_ISL\_443214|Original|hCoV-19^^Singapore|Human|National Public Health Laboratory|National Public Health Laboratory|Mak|Singapore

>Spike|hCoV-19/Japan/PG-5812/2020|2020-08-00|EPI\_ISL\_688929|Original|hCoV-19^^Japan|Human|Fukuoka Institute of Health and Environmental Sciences|Pathogen Genomics Center|Sekizuka|Japan

>Spike|hCoV-19/United Arab Emirates/1057/2020|2020-06-11|EPI\_ISL\_698132|Original|hCoV-19^^Abu Dhabi|Human|Group 42 (G42) Healthcare|G42 Healthcare|Ogrodzki|United Arab Emirates

>Spike|hCoV-19/England/QEUA-9F581C/2020|2020-09-25|EPI\_ISL\_588429|Original|hCoV-19^^England|Human|Lighthouse Lab in Glasgow|Wellcome Sanger Institute for the COVID-19 Genomics UK (COG-UK) consortium|Davies|United Kingdom

>Spike|hCoV-19/England/CAMC-A658BC/2020|2020-10-11|EPI\_ISL\_608546|Original|hCoV-19^^England|Human|Lighthouse Lab in Cambridge|Wellcome Sanger Institute for the COVID-19 Genomics UK (COG-UK) consortium|Davies|United Kingdom

>Spike|hCoV-19/Bangladesh/G-40/2020|2020-03-26|EPI\_ISL\_600564|Original|hCoV-19^^Dhaka|Human|Institute of Epidemiology Disease Control And Research|Institute for Developing Science and Health Initiatives|Cowley|Bangladesh

>Spike|hCoV-19/USA/CA-ALSR-3812/2020|2020-06-23|EPI\_ISL\_636217|Original|hCoV-19^^California|Human|San Diego County Public Health Laboratory|Andersen lab at Scripps Research|Gangavarapu|USA

>Spike|hCoV-19/Singapore/214/2020|2020-03-06|EPI\_ISL\_462332|Original|hCoV-19^^Singapore|Human|National Public Health Laboratory|National Public Health Laboratory|Mak|Singapore

>Spike|hCoV-19/England/201380280/2020|2020-03-23|EPI\_ISL\_421828|Original|hCoV-19^^England|Human|Respiratory Virus Unit|Respiratory Virus Unit|Platt|United Kingdom

>Spike|hCoV-19/England/CAMC-C4605D/2020|2020-12-10|EPI\_ISL\_718338|Original|hCoV-19^^England|Human|Lighthouse Lab in Cambridge|Wellcome Sanger Institute for the COVID-19 Genomics UK (COG-UK) Consortium|Davies|United Kingdom

>Spike|hCoV-19/England/NORT-1B71AC2/2020|2020-11-16|EPI\_ISL\_706316|Original|hCoV-19^^England|Human|Northumbria University / South Tees Hospitals NHS Foundation Trust / North Cumbria Integrated Care NHS Foundation Trust / North Tees and Hartlepool NHS Foundation Trust / Newcastle Hospitals NHS Foundation Trust|COVID-19 Genomics UK (COG-UK) Consortium|Bashton|United Kingdom

>Spike|hCoV-19/Scotland/GCVR-171B62/2020|2020-03-30|EPI\_ISL\_524500|Original|hCoV-19^^Scotland|Human|NHSGGC West of Scotland Specialist Virology Centre / MRC-University of Glasgow Centre for Virus Research|Wellcome Sanger Institute for the COVID-19 Genomics UK (COG-UK) consortium|Davies|United Kingdom

>Spike|hCoV-19/USA/WI-GMF-22117/2020|2020-09-23|EPI\_ISL\_660851|Original|hCoV-19^^Wisconsin|Human|Gundersen Molecular Diagnostics Laboratory|Kabara Cancer Research Institute|Kenny|USA

>Spike|hCoV-19/Iceland/187/2020|2020-03-16|EPI\_ISL\_417551|Original|hCoV-19^^Reykjavik|Human|The National University Hospital of Iceland|deCODE genetics|J\u00f3nsson|Iceland

>Spike|hCoV-19/South Africa/KRISP-K003380/2020|2020-09-09|EPI\_ISL\_602768|Original|hCoV-19^^KwaZulu-Natal|Human|NHLS-IALCH|KRISP|de Oliveira|South Africa

>Spike|hCoV-19/England/ALDP-B62F31/2020|2020-11-08|EPI\_ISL\_655478|Original|hCoV-19^^England|Human|Lighthouse Lab in Alderley Park|Wellcome Sanger Institute for the COVID-19 Genomics UK (COG-UK) Consortium|Davies|United Kingdom

>Spike|hCoV-19/England/BRIS-12912B/2020|2020-04-18|EPI\_ISL\_458792|Original|hCoV-19^^England|Human|PHE South West Regional Laboratory|Wellcome Sanger Institute for the COVID-19 Genomics UK (COG-UK) consortium|Davies|United Kingdom

>Spike|hCoV-19/England/QEUEH-CC2E04/2020|2020-12-21|EPI\_ISL\_778102|Original|hCoV-19^^England|Human|Lighthouse Lab in Glasgow|Wellcome Sanger Institute for the COVID-19 Genomics UK (COG-UK) Consortium|Davies|United Kingdom

>Spike|hCoV-19/England/QEUEH-9D2F89/2020|2020-09-18|EPI\_ISL\_577304|Original|hCoV-19^^England|Human|Centre for Enzyme Innovation|COVID-19 Genomics UK (COG-UK) Consortium|Robson|United Kingdom

>Spike|hCoV-19/USA/PA\_4395/2020|2020-03-09|EPI\_ISL\_424885|Original|hCoV-19^^Pennsylvania|Human|PA Department of Health|Pathogen Discovery|Queen|USA

>Spike|hCoV-19/Wales/PHWC-49111C/2020|2020-11-17|EPI\_ISL\_706613|Original|hCoV-19^^Wales|Human|Originating lab|COVID-19 Genomics UK (COG-UK) Consortium|Moore|United Kingdom

>Spike|hCoV-19/England/201180055/2020|2020-03-12|EPI\_ISL\_464878|Original|hCoV-19^^England|Human|Respiratory Virus Unit|Respiratory Virus Unit|Platt|United Kingdom

>Spike|hCoV-19/England/ALDP-C8E763/2020|2020-12-15|EPI\_ISL\_777639|Original|hCoV-19^^England|Human|Lighthouse Lab in Alderley Park|Wellcome Sanger Institute for the COVID-19 Genomics UK (COG-UK) Consortium|Davies|United Kingdom

>Spike|hCoV-19/Australia/VIC6312/2020|2020-07-23|EPI\_ISL\_518300|Original|hCoV-19^^Victoria|Human|Microbiological Diagnostic Unit - Public Health Laboratory (MDU-PHL)|MDU-PHL|Schultz|Australia

>Spike|hCoV-19/England/QEUEH-A22709/2020|2020-10-01|EPI\_ISL\_587617|Original|hCoV-19^^England|Human|Lighthouse Lab in Glasgow|Wellcome Sanger Institute for the COVID-19 Genomics UK (COG-UK) consortium|Davies|United Kingdom

>Spike|hCoV-19/France/PAC-IHU-1176/2020|2020-08-15|EPI\_ISL\_569077|Original|hCoV-19^^Provence-Alpes-C\u00f4te-d\u2019Azur|Human|MEPHI|MEPHI|Levasseur|France

>Spike|hCoV-19/England/ALDP-950E2C/2020|2020-06-14|EPI\_ISL\_554596|Original|hCoV-19^^England|Human|Lighthouse Lab in Alderley Park|Wellcome Sanger Institute for the COVID-19 Genomics UK (COG-UK) consortium|Davies|United Kingdom

>Spike|hCoV-19/South Africa/N00108/2020|2020-06-11|EPI\_ISL\_623016|Original|hCoV-19^^Mpumalanga|Human|National Health Laboratory Service|National Institute for Communicable Diseases of the National Health Laboratory Service|Allam|South Africa

>Spike|hCoV-19/Germany/HH-hpi-p2148/2020|2020-03-28|EPI\_ISL\_776380|Original|hCoV-19^^Hamburg|Human|University Medical Center Hamburg Eppendorf|Heinrich Pette Institute|Robitaille|Germany

>Spike|hCoV-19/Nigeria/AK-CV274/2020|2020-07-25|EPI\_ISL\_729958|Original|hCoV-19^^Akwa-Ibom State|Human|Nigeria Centre for Disease Control (NCDC)|African Centre of Excellence for Genomics of Infectious Diseases (ACEGID)|Oluniyi|Nigeria

>Spike|hCoV-19/Spain/RI-IBV-006005/2020|2020-03-21|EPI\_ISL\_500436|Original|hCoV-19^^La Rioja|Human|Centro de Investigaci\u00f3n Biom\u00e9dica de La Rioja - Hospital San Pedro Logro\u00f1o|SeqCOVID-SPAIN consortium/IBV (CSIC)|Comas|Spain

>Spike|hCoV-19/Russia/SVE-RII-MH184S/2020|2020-07-08|EPI\_ISL\_560309|Original|hCoV-19^^Sverdlovsk|Human|UMMC-Health|WHO National Influenza Centre Russian Federation|Komissarov|Russia

>Spike|hCoV-19/Denmark/ALAB-HH-123/2020|2020-03-11|EPI\_ISL\_452004|Original|hCoV-19^^Denmark|Human|Department of Clinical Microbiology|Albertsen lab|Kirkegaard|Denmark

>Spike|hCoV-19/Portugal/R1294/2020|2020-06-14|EPI\_ISL\_491274|Original|hCoV-19^^Portugal|Human|Instituto Gulbenkian de Ci\u00eancia|Instituto Gulbenkian de Ci\u00eancia|Leite|Portugal



>Spike|hCoV-19/England/LIVE-AA0AE/2020|2020-03-23|EPI\_ISL\_517398|Original|hCoV-19^^England|Human|Liverpool Clinical Laboratories|COVID-19 Genomics UK (COG-UK) Consortium|Haldenby|United Kingdom

>Spike|hCoV-19/USA/TX-DSHS-0784/2020|2020-05-22|EPI\_ISL\_590853|Original|hCoV-19^^Texas|Human|Texas Department of State Health Services|Texas Department of State Health Services|Rahman|USA

>Spike|hCoV-19/Israel/2113256/2020|2020-04-14|EPI\_ISL\_447343|Original|hCoV-19^^Jerusalem District|Human|Clinical Virology Unit|Stern Lab|Miller|Israel

>Spike|hCoV-19/England/210100382/2021|2021-01-04|EPI\_ISL\_791260|Original|hCoV-19^^England|Human|Respiratory Virus Unit|COVID-19 Genomics UK (COG-UK) Consortium|Platt|United Kingdom

>Spike|hCoV-19/England/QEUEH-AE1CE9/2020|2020-10-26|EPI\_ISL\_633519|Original|hCoV-19^^England|Human|Lighthouse Lab in Glasgow|Wellcome Sanger Institute for the COVID-19 Genomics UK (COG-UK) consortium|Davies|United Kingdom

>Spike|hCoV-19/Switzerland/BE-ETHZ-410222/2020|2020-12-14|EPI\_ISL\_737462|Original|hCoV-19^^Bern|Human|Viollier AG|Department of Biosystems Science and Engineering|Nadeau|Switzerland

>Spike|hCoV-19/Indonesia/JK-EIJK48/2020|2020-06-08|EPI\_ISL\_574617|Original|hCoV-19^^Jakarta|Human|RS Kramat 128|Eijkman Institute for Molecular Biology|Soebandrio|Indonesia

>Spike|hCoV-19/Japan/PG-4936/2020|2020-07-00|EPI\_ISL\_690056|Original|hCoV-19^^Japan|Human|Pathogen Genomics Center|Pathogen Genomics Center|Sekizuka|Japan

>Spike|hCoV-19/Northern Ireland/QEUEH-96C92C/2020|2020-08-21|EPI\_ISL\_530646|Original|hCoV-19^^Northern Ireland|Human|Lighthouse Lab in Glasgow|Wellcome Sanger Institute for the COVID-19 Genomics UK (COG-UK) consortium|Davies|United Kingdom

>Spike|hCoV-19/United Arab Emirates/0396/2020|2020-05-19|EPI\_ISL\_698571|Original|hCoV-19^^Abu Dhabi|Human|Group 42 (G42) Healthcare|G42 Healthcare|Ogrodzki|United Arab Emirates

>Spike|hCoV-19/England/ALDP-95ABA3/2020|2020-06-11|EPI\_ISL\_555731|Original|hCoV-19^^England|Human|Lighthouse Lab in Alderley Park|Wellcome Sanger Institute for the COVID-19 Genomics UK (COG-UK) consortium|Davies|United Kingdom

>Spike|hCoV-19/mink/Netherlands/NB-EMC-1-17/2020|2020-04-28|EPI\_ISL\_523002|Original|hCoV-19^^Noord Brabant|Neovison vison|Dutch COVID-19 response team|Erasmus Medical Center|Oude Munnink|Netherlands

>Spike|hCoV-19/Bangladesh/BCSIR-NILMRC-146/2020|2020-06-18|EPI\_ISL\_480427|Original|hCoV-19^^Dhaka|Human|National Institute of Laboratory Medicine and Referral Center|Bangladesh Council of Scientific and Industrial Research|Khan|Bangladesh

>Spike|hCoV-19/England/QEUEH-C5C7B9/2020|2020-12-14|EPI\_ISL\_735961|Original|hCoV-19^^England|Human|Lighthouse Lab in Glasgow|Wellcome Sanger Institute for the COVID-19 Genomics UK (COG-UK) Consortium|Davies|United Kingdom

>Spike|hCoV-19/England/ALDP-A6E112/2020|2020-10-13|EPI\_ISL\_607066|Original|hCoV-19^^England|Human|Lighthouse Lab in Alderley Park|Wellcome Sanger Institute for the COVID-19 Genomics UK (COG-UK) consortium|Davies|United Kingdom

>Spike|hCoV-19/Scotland/EDB6029/2020|2020-05-07|EPI\_ISL\_487989|Original|hCoV-19^^Scotland|Human|Virology Department|Wellcome Sanger Institute for the COVID-19 Genomics UK (COG-UK) consortium|Davies|United Kingdom

>Spike|hCoV-19/Scotland/MILK-99A309/2020|2020-08-27|EPI\_ISL\_550299|Original|hCoV-19^^Scotland|Human|Lighthouse Lab in Milton Keynes|Wellcome Sanger Institute for the COVID-19 Genomics UK (COG-UK) consortium|Davies|United Kingdom

>Spike|hCoV-19/USA/TX-DSHS-0061/2020|2020-05-09|EPI\_ISL\_517992|Original|hCoV-19^^Texas|Human|Texas Department of State Health Services|Texas Department of State Health Services|Rahman|USA

>Spike|hCoV-19/Denmark/DCGC-10081/2020|2020-11-09|EPI\_ISL\_669383|Original|hCoV-19^^Hovedstaden|Human|Department of Virus and Microbiological Special Diagnostics|Albertsen Lab|Michaelsen|Denmark

>Spike|hCoV-19/Switzerland/BE-ETHZ-310504/2020|2020-10-08|EPI\_ISL\_603572|Original|hCoV-19^^Bern|Human|Viollier AG|Department of Biosystems Science and Engineering|Nadeau|Switzerland

>Spike|hCoV-19/Denmark/DCGC-12003/2020|2020-06-22|EPI\_ISL\_671250|Original|hCoV-19^^Nordjylland|Human|Department of Virus and Microbiological Special Diagnostics|Albertsen Lab|Michaelsen|Denmark

>Spike|hCoV-19/England/ALDP-A507A8/2020|2020-10-07|EPI\_ISL\_597540|Original|hCoV-19^^England|Human|Lighthouse Lab in Alderley Park|Wellcome Sanger Institute for the COVID-19 Genomics UK (COG-UK) consortium|Davies|United Kingdom

>Spike|hCoV-19/England/CAMC-9EC405/2020|2020-09-24|EPI\_ISL\_580610|Original|hCoV-19^^England|Human|Lighthouse Lab in Cambridge|Wellcome Sanger Institute for the COVID-19 Genomics UK (COG-UK) consortium|Davies|United Kingdom

>Spike|hCoV-19/England/NORT-2813B1/2020|2020-03-13|EPI\_ISL\_488758|Original|hCoV-19^^England|Human|NU-OMICS DNA Sequencing research facility|Wellcome Sanger Institute for the COVID-19 Genomics UK (COG-UK) consortium|Davies|United Kingdom

>Spike|hCoV-19/England/QEUH-CAD494/2020|2020-12-20|EPI\_ISL\_761276|Original|hCoV-19^^England|Human|Lighthouse Lab in Glasgow|Wellcome Sanger Institute for the COVID-19 Genomics UK (COG-UK) Consortium|Davies|United Kingdom

>Spike|hCoV-19/Netherlands/LI-RIVM-10105/2020|2020-00-00|EPI\_ISL\_547471|Original|hCoV-19^^Limburg|Human|Dutch COVID-19 response team|National Institute for Public Health and the Environment (RIVM)|Meijer|Netherlands

>Spike|hCoV-19/USA/ID-QDX-607/2020|2020-03-18|EPI\_ISL\_571302|Original|hCoV-19^^Idaho|Human|Quest Diagnostics|Quest Diagnostics|Kagan|USA

>Spike|hCoV-19/United Arab Emirates/0142/2020|2020-05-18|EPI\_ISL\_698329|Original|hCoV-19^^Abu Dhabi|Human|Group 42 (G42) Healthcare|G42 Healthcare|Ogrodzki|United Arab Emirates

>Spike|hCoV-19/France/NAQ-SC256/2020|2020-03-03|EPI\_ISL\_645177|Original|hCoV-19^^Nouvelle-Aquitaine|Human|CHU de Limoges|CNR Virus des Infections Respiratoires - France SUD|Bal|France

>Spike|hCoV-19/Scotland/QEUH-9DC16B/2020|2020-09-22|EPI\_ISL\_601126|Original|hCoV-19^^Scotland|Human|Lighthouse Lab in Glasgow|Wellcome Sanger Institute for the COVID-19 Genomics UK (COG-UK) consortium|Davies|United Kingdom

>Spike|hCoV-19/England/QEUH-9D0273/2020|2020-09-14|EPI\_ISL\_589981|Original|hCoV-19^^England|Human|Lighthouse Lab in Glasgow|Wellcome Sanger Institute for the COVID-19 Genomics UK (COG-UK) consortium|Davies|United Kingdom

>Spike|hCoV-19/Scotland/CVR3546/2020|2020-05-14|EPI\_ISL\_473681|Original|hCoV-19^^Scotland|Human|West of Scotland Specialist Virology Centre|COVID-19 Genomics UK (COG-UK) Consortium|Robertson|United Kingdom

>Spike|hCoV-19/Canada/ON-S2020/2020|2020-11-16|EPI\_ISL\_755806|Original|hCoV-19^^Ontario|Human|Toronto Invasive Bacterial Diseases Network|McMaster University|McArthur|Canada

>Spike|hCoV-19/England/ALDP-C39EF9/2020|2020-12-09|EPI\_ISL\_731027|Original|hCoV-19^^England|Human|Lighthouse Lab in Alderley Park|Wellcome Sanger Institute for the COVID-19 Genomics UK (COG-UK) Consortium|Davies|United Kingdom

>Spike|hCoV-19/Gibraltar/205121210/2020|2020-00-00|EPI\_ISL\_766337|Original|hCoV-19^^Gibraltar|Human|Microbiology|Respiratory Virus Unit|Platt|Gibraltar

>Spike|hCoV-19/Wales/PHWC-2B1C0/2020|2020-04-08|EPI\_ISL\_432378|Original|hCoV-19^^Wales|Human|Wales Specialist Virology Centre|Public Health Wales Microbiology Cardiff|Moore|United Kingdom

>Spike|hCoV-19/England/MILK-A7C630/2020|2020-10-15|EPI\_ISL\_606562|Original|hCoV-19^^England|Human|Lighthouse Lab in Milton Keynes|Wellcome Sanger Institute for the COVID-19 Genomics UK (COG-UK) consortium|Davies|United Kingdom

>Spike|hCoV-19/Japan/PG-4624/2020|2020-07-00|EPI\_ISL\_689761|Original|hCoV-19^^Japan|Human|Fukuoka Institute of Health and Environmental Sciences|Pathogen Genomics Center|Sekizuka|Japan

>Spike|hCoV-19/Brazil/RJ-00347/2020|2020-04-24|EPI\_ISL\_623150|Original|hCoV-19^^Rio de Janeiro|Human|Laboratorio de Virologia Molecular / UFRJ|Bioinformatics Laboratory / LNCC|Almeida|Brazil

>Spike|hCoV-19/USA/AZ-TG664490/2020|2020-04-20|EPI\_ISL\_696116|Original|hCoV-19^^Arizona|Human|Sonora Quest Laboratories|TGen North|French|USA

>Spike|hCoV-19/England/ALDP-B838D5/2020|2020-11-14|EPI\_ISL\_675419|Original|hCoV-19^^England|Human|Lighthouse Lab in Alderley Park|Wellcome Sanger Institute for the COVID-19 Genomics UK (COG-UK) Consortium|Davies|United Kingdom

>Spike|hCoV-19/Hungary/US-32381w/2020|2020-09-02|EPI\_ISL\_677746|Original|hCoV-19^^Csongr\u00e9ld county|Human|University of Szeged|National Laboratory of Virology|Kemenesi|Hungary

>Spike|hCoV-19/Wales/PHWC-4A5F0C/2020|2020-12-15|EPI\_ISL\_764982|Original|hCoV-19^^Wales|Human|Wales Specialist Virology Centre Sequencing lab|COVID-19 Genomics UK (COG-UK) Consortium|Moore|United Kingdom

>Spike|hCoV-19/England/LIVE-9CF75/2020|2020-04-06|EPI\_ISL\_449597|Original|hCoV-19^^England|Human|Liverpool Clinical Laboratories|COVID-19 Genomics UK (COG-UK) Consortium|Haldenby|United Kingdom

>Spike|hCoV-19/Austria/CeMM0159/2020|2020-03-04|EPI\_ISL\_438005|Original|hCoV-19^^Vienna|Human|Center for Virology|Bergthaler laboratory|Bergthaler|Austria

>Spike|hCoV-19/Scotland/CVR452/2020|2020-03-23|EPI\_ISL\_433297|Original|hCoV-19^^Scotland|Human|West of Scotland Specialist Virology Centre|COVID-19 Genomics UK (COG-UK) Consortium|Robertson|United Kingdom

>Spike|hCoV-19/England/201141524/2020|2020-03-02|EPI\_ISL\_464762|Original|hCoV-19^^England|Human|Respiratory Virus Unit|Respiratory Virus Unit|Platt|United Kingdom

>Spike|hCoV-19/England/QEUH-A1DA53/2020|2020-09-29|EPI\_ISL\_587307|Original|hCoV-19^^England|Human|Lighthouse Lab in Glasgow|Wellcome Sanger Institute for the COVID-19 Genomics UK (COG-UK) consortium|Davies|United Kingdom

>Spike|hCoV-19/USA/NY-Wadsworth-280805-01/2020|2020-11-30|EPI\_ISL\_754506|Original|hCoV-19^^New York|Human|Wadsworth Center|Wadsworth Center|Lasek-Nesselquist|USA

>Spike|hCoV-19/New Zealand/20VR1992/2020|2020-00-00|EPI\_ISL\_579193|Original|hCoV-19^^Combined Wellington|Human|Wellington SCL (WN)|Institute of Environmental Science and Research (ESR)|Wang|New Zealand

>Spike|hCoV-19/USA/LA-EVTL04/2020|2020-04-13|EPI\_ISL\_435037|Original|hCoV-19^^Louisiana|Human|LSUHS Emerging Viral Threat Laboratory|Microbial Genome Sequencing Center|Kamil|USA

>Spike|hCoV-19/Scotland/QEUH-9DD7C2/2020|2020-09-21|EPI\_ISL\_599691|Original|hCoV-19^^Scotland|Human|Lighthouse Lab in Glasgow|Wellcome Sanger Institute for the COVID-19 Genomics UK (COG-UK) consortium|Davies|United Kingdom

>Spike|hCoV-19/Australia/VIC10822/2020|2020-09-01|EPI\_ISL\_563111|Original|hCoV-19^^Victoria|Human|Microbiological Diagnostic Unit - Public Health Laboratory (MDU-PHL)|MDU-PHL|Schultz|Australia

>Spike|hCoV-19/England/ALDP-A84A0C/2020|2020-10-18|EPI\_ISL\_610480|Original|hCoV-19^^England|Human|Lighthouse Lab in Alderley Park|Wellcome Sanger Institute for the COVID-19 Genomics UK (COG-UK) consortium|Davies|United Kingdom

>Spike|hCoV-19/Australia/VIC4940/2020|2020-07-14|EPI\_ISL\_519314|Original|hCoV-19^^Victoria|Human|Victorian Infectious Diseases Reference Laboratory (VIDRL)|VIDRL and MDU-PHL|Schultz|Australia

>Spike|hCoV-19/England/ALDP-B24C43/2020|2020-11-04|EPI\_ISL\_646823|Original|hCoV-19^^England|Human|Lighthouse Lab in Alderley Park|Wellcome Sanger Institute for the COVID-19 Genomics UK (COG-UK) Consortium|Davies|United Kingdom

>Spike|hCoV-19/England/CAMB-776B7/2020|2020-03-31|EPI\_ISL\_439501|Original|hCoV-19^^England|Human|Department of Pathology|Wellcome Sanger Institute for the COVID-19 Genomics UK (COG-UK) consortium|Amato|United Kingdom

>Spike|hCoV-19/USA/MI-MDHHS-SC22143/2020|2020-10-20|EPI\_ISL\_614194|Original|hCoV-19^^Michigan|Human|Michigan Department of Health and Human Services|Michigan Department of Health and Human Services|Jacob|USA

>Spike|hCoV-19/Wales/PHWC-4881AF/2020|2020-10-28|EPI\_ISL\_639361|Original|hCoV-19^^Wales|Human|Wales Specialist Virology Centre Sequencing lab|COVID-19 Genomics UK (COG-UK) Consortium|Moore|United Kingdom

>Spike|hCoV-19/USA/UT\_8906/2020|2020-03-07|EPI\_ISL\_424890|Original|hCoV-19^^Utah|Human|UT-Unified State Labs|Pathogen Discovery|Queen|USA

>Spike|hCoV-19/Switzerland/BL-ETHZ-270216/2020|2020-08-30|EPI\_ISL\_541462|Original|hCoV-19^^Basel-Landschaft|Human|Viollier AG|Department of Biosystems Science and Engineering|Nadeau|Switzerland

>Spike|hCoV-19/Northern Ireland/NIRE-1051F8/2020|2020-04-01|EPI\_ISL\_472136|Original|hCoV-19^^Northern Ireland|Human|Regional Virus Laboratory|COVID-19 Genomics UK (COG-UK) Consortium|Fairley|United Kingdom

>Spike|hCoV-19/Wales/PHWC-47EA56/2020|2020-10-10|EPI\_ISL\_595542|Original|hCoV-19^^Wales|Human|Originating lab|COVID-19 Genomics UK (COG-UK) Consortium|Moore|United Kingdom

>Spike|hCoV-19/England/NOTT-1103A9/2020|2020-04-16|EPI\_ISL\_441508|Original|hCoV-19^^England|Human|Queens Medical Centre|COVID-19 Genomics UK (COG-UK) Consortium|Loose|United Kingdom

>Spike|hCoV-19/England/NORT-1B71109/2020|2020-11-14|EPI\_ISL\_706303|Original|hCoV-19^^England|Human|Northumbria University / South Tees Hospitals NHS Foundation Trust / North Cumbria Integrated Care NHS Foundation Trust / North Tees and Hartlepool NHS Foundation Trust / Newcastle Hospitals NHS Foundation Trust|COVID-19 Genomics UK (COG-UK) Consortium|Bashton|United Kingdom

>Spike|hCoV-19/Australia/VIC7655/2020|2020-08-11|EPI\_ISL\_564555|Original|hCoV-19^^Victoria|Human|Victorian Infectious Diseases Reference Laboratory (VIDRL)|VIDRL and MDU-PHL|Schultz|Australia

>Spike|hCoV-19/USA/UT-QDX-2070/2020|2020-03-15|EPI\_ISL\_604385|Original|hCoV-19^^Utah|Human|Quest Diagnostics|Quest Diagnostics|Kagan|USA

>Spike|hCoV-19/Scotland/CVR1520/2020|2020-04-03|EPI\_ISL\_453010|Original|hCoV-19^^Scotland|Human|West of Scotland Specialist Virology Centre|COVID-19 Genomics UK (COG-UK) Consortium|Robertson|United Kingdom

>Spike|hCoV-19/Denmark/DCGC-3470/2020|2020-08-31|EPI\_ISL\_616257|Original|hCoV-19^^Hovedstaden|Human|Department of Virus and Microbiological Special Diagnostics|Albertsen lab|Michaelsen|Denmark

>Spike|hCoV-19/Canada/ON-S237/2020|2020-03-26|EPI\_ISL\_755827|Original|hCoV-19^^Ontario|Human|Toronto Invasive Bacterial Diseases Network|McMaster University|McArthur|Canada

>Spike|hCoV-19/Spain/MD-IBV-004926/2020|2020-04-03|EPI\_ISL\_481102|Original|hCoV-19^^Madrid|Human|Hospital General Universitario Gregorio Mara\u00f1\u00f3n|SeqCOVID-SPAIN consortium|IBV (CSIC)|Comas|Spain

>Spike|hCoV-19/Scotland/QEUH-A4BA6B/2020|2020-10-08|EPI\_ISL\_628506|Original|hCoV-19^^Scotland|Human|Oxford Viromics|COVID-19 Genomics UK (COG-UK) Consortium|Golubchik|United Kingdom

>Spike|hCoV-19/USA/CA-ALSR-3028/2020|2020-09-02|EPI\_ISL\_635798|Original|hCoV-19^^California|Human|San Diego County Public Health Laboratory|Andersen lab at Scripps Research|Gangavarapu|USA

>Spike|hCoV-19/Netherlands/OV-RIVM-20676/2020|2020-12-08|EPI\_ISL\_790745|Original|hCoV-19^^Overijssel|Human|Dutch COVID-19 response team|National Institute for Public Health and the Environment (RIVM)|Meijer|Netherlands

>Spike|hCoV-19/England/NORT-2814FA/2020|2020-03-16|EPI\_ISL\_488779|Original|hCoV-19^^England|Human|NU-OMICS DNA Sequencing research facility|Wellcome Sanger Institute for the COVID-19 Genomics UK (COG-UK) consortium|Davies|United Kingdom

>Spike|hCoV-19/Switzerland/BL-ETHZ-360266/2020|2020-11-08|EPI\_ISL\_729235|Original|hCoV-19^^Basel-Landschaft|Human|Viollier AG|Department of Biosystems Science and Engineering|Nadeau|Switzerland

>Spike|hCoV-19/Switzerland/NE-ETHZ-420666/2020|2020-12-24|EPI\_ISL\_768129|Original|hCoV-19^^Neuch\u00e2tel|Human|Viollier AG|Department of Biosystems Science and Engineering|Nadeau|Switzerland

>Spike|hCoV-19/England/QEUH-A33741/2020|2020-10-05|EPI\_ISL\_627280|Original|hCoV-19^^England|Human|Virology Department|COVID-19 Genomics UK (COG-UK) Consortium|de Silva|United Kingdom

>Spike|hCoV-19/Japan/PG-3463/2020|2020-07-00|EPI\_ISL\_691573|Original|hCoV-19^^Japan|Human|Pathogen Genomics Center|Pathogen Genomics Center|Sekizuka|Japan

>Spike|hCoV-19/USA/AZ-TG568540/2020|2020-08-03|EPI\_ISL\_695562|Original|hCoV-19^^Arizona|Human|TGen North|TGen North|French|USA

>Spike|hCoV-19/Thailand/CO63-332-3/2020|2020-03-14|EPI\_ISL\_450965|Original|hCoV-19^^Thailand|Human|Center of Excellence in Clinical Virology|Center of Excellence in Clinical Virology|Poovorawan|Thailand

>Spike|hCoV-19/England/CAMC-C26BDA/2020|2020-12-07|EPI\_ISL\_782857|Original|hCoV-19^^England|Human|Lighthouse Lab in Cambridge|Wellcome Sanger Institute for the COVID-19 Genomics UK (COG-UK) Consortium|Davies|United Kingdom

>Spike|hCoV-19/Australia/VIC9905/2020|2020-08-25|EPI\_ISL\_562687|Original|hCoV-19^^Victoria|Human|Microbiological Diagnostic Unit - Public Health Laboratory (MDU-PHL) |MDU-PHL|Schultz|Australia

>Spike|hCoV-19/Scotland/EDB1896/2020|2020-04-16|EPI\_ISL\_491616|Original|hCoV-19^^Scotland|Human|Virology Department|Wellcome Sanger Institute for the COVID-19 Genomics UK (COG-UK) Consortium|Davies|United Kingdom

>Spike|hCoV-19/England/ALDP-B27220/2020|2020-11-04|EPI\_ISL\_664390|Original|hCoV-19^^England|Human|Northumbria University / South Tees Hospitals NHS Foundation Trust / North Cumbria Integrated Care NHS Foundation Trust / North Tees and Hartlepool NHS Foundation Trust / Newcastle Hospitals NHS Foundation Trust|COVID-19 Genomics UK (COG-UK) Consortium|Bashton|United Kingdom

>Spike|hCoV-19/Australia/VIC5675/2020|2020-07-06|EPI\_ISL\_518482|Original|hCoV-19^^Victoria|Human|Microbiological Diagnostic Unit - Public Health Laboratory (MDU-PHL) |MDU-PHL|Schultz|Australia

>Spike|hCoV-19/England/20119033504/2020|2020-03-12|EPI\_ISL\_465049|Original|hCoV-19^^England|Human|Respiratory Virus Unit|Respiratory Virus Unit|Platt|United Kingdom

>Spike|hCoV-19/England/CAMB-1AA2E3/2020|2020-04-17|EPI\_ISL\_443676|Original|hCoV-19^^England|Human|Department of Pathology|Wellcome Sanger Institute for the COVID-19 Genomics UK (COG-UK) consortium|Amato|United Kingdom

>Spike|hCoV-19/England/EXET-13A743/2020|2020-11-11|EPI\_ISL\_665071|Original|hCoV-19^^England|Human|University of Exeter|COVID-19 Genomics UK (COG-UK) Consortium|Temperton|United Kingdom

>Spike|hCoV-19/USA/FL-BPHL-1914/2020|2020-07-20|EPI\_ISL\_613742|Original|hCoV-19^^Florida|Human|Florida Bureau of Public Health Laboratories|Florida Bureau of Public Health Laboratories|Blanton|USA

>Spike|hCoV-19/Netherlands/FL-EMC-31/2020|2020-10-23|EPI\_ISL\_632361|Original|hCoV-19^^Flevoland|Human|Dutch COVID-19 response team|Erasmus Medical Center|Oude Munnink|Netherlands

>Spike|hCoV-19/Denmark/DCGC-9564/2020|2020-11-09|EPI\_ISL\_669042|Original|hCoV-19^^Hovedstaden|Human|Department of Virus and Microbiological Special Diagnostics|Albertsen Lab|Michaelsen|Denmark

>Spike|hCoV-19/USA/MI-MDHHS-SC21831/2020|2020-03-24|EPI\_ISL\_565874|Original|hCoV-19^^Michigan|Human|Michigan Department of Health and Human Services|Michigan Department of Health and Human Services|Blankenship|USA

>Spike|hCoV-19/USA/TX-HMH-7033/2020|2020-06-28|EPI\_ISL\_546451|Original|hCoV-19^^Texas|Human|Houston Methodist Hospital|Houston Methodist Hospital|Long|USA

>Spike|hCoV-19/Denmark/ALAB-SSI-1268/2020|2020-03-09|EPI\_ISL\_444838|Original|hCoV-19^^Denmark|Human|Department of Virus and Microbiological Special Diagnostics|Albertsen lab|Kirkegaard|Denmark

>Spike|hCoV-19/Wales/MILK-9E1E20/2020|2020-09-20|EPI\_ISL\_581335|Original|hCoV-19^^Wales|Human|Lighthouse Lab in Milton Keynes|Wellcome Sanger Institute for the COVID-19 Genomics UK (COG-UK) consortium|Davies|United Kingdom

>Spike|hCoV-19/England/MILK-ACEA15/2020|2020-10-22|EPI\_ISL\_629507|Original|hCoV-19^^England|Human|Lighthouse Lab in Milton Keynes|Wellcome Sanger Institute for the COVID-19 Genomics UK (COG-UK) consortium|Davies|United Kingdom

>Spike|hCoV-19/Switzerland/BE-ETHZ-410104/2020|2020-12-14|EPI\_ISL\_737443|Original|hCoV-19^^Bern|Human|Viollier AG|Department of Biosystems Science and Engineering|Nadeau|Switzerland

>Spike|hCoV-19/England/ALDP-B75A1C/2020|2020-11-12|EPI\_ISL\_664927|Original|hCoV-19^^England|Human|Quadram Institute Bioscience|COVID-19 Genomics UK (COG-UK) Consortium|Alikhan|United Kingdom

>Spike|hCoV-19/England/MILK-A7B385/2020|2020-10-14|EPI\_ISL\_607542|Original|hCoV-19^^England|Human|Lighthouse Lab in Milton Keynes|Wellcome Sanger Institute for the COVID-19 Genomics UK (COG-UK) consortium|Davies|United Kingdom

>Spike|hCoV-19/England/204200167/2020|2020-10-09|EPI\_ISL\_609872|Original|hCoV-19^^England|Human|Respiratory Virus Unit|Respiratory Virus Unit|Platt|United Kingdom

>Spike|hCoV-19/Northern Ireland/NIRE-10685C/2020|2020-05-10|EPI\_ISL\_501055|Original|hCoV-19^^Northern Ireland|Human|Regional Virus Laboratory|Wellcome Sanger Institute for the COVID-19 Genomics UK (COG-UK) consortium|Davies|United Kingdom

>Spike|hCoV-19/England/QEUEH-B8139A/2020|2020-11-14|EPI\_ISL\_661685|Original|hCoV-19^^England|Human|Lighthouse Lab in Glasgow|Wellcome Sanger Institute for the COVID-19 Genomics UK (COG-UK) Consortium|Davies|United Kingdom

>Spike|hCoV-19/England/BRIS-124BD7/2020|2020-03-26|EPI\_ISL\_443979|Original|hCoV-19^^England|Human|PHE South West Regional Laboratory|Wellcome Sanger Institute for the COVID-19 Genomics UK (COG-UK) consortium|Amato|United Kingdom

>Spike|hCoV-19/Scotland/CVR2940/2020|2020-04-22|EPI\_ISL\_461600|Original|hCoV-19^^Scotland|Human|West of Scotland Specialist Virology Centre|COVID-19 Genomics UK (COG-UK) Consortium|Robertson|United Kingdom

>Spike|hCoV-19/USA/WA-S80/2020|2020-03-05|EPI\_ISL\_417133|Original|hCoV-19^^Washington|Human|Washington State Department of Health|Seattle Flu Study|Bedford|USA

>Spike|hCoV-19/England/MILK-AB78AC/2020|2020-10-21|EPI\_ISL\_623729|Original|hCoV-19^^England|Human|Lighthouse Lab in Milton Keynes|Wellcome Sanger Institute for the COVID-19 Genomics UK (COG-UK) consortium|Davies|United Kingdom

>Spike|hCoV-19/Australia/VIC10029/2020|2020-08-20|EPI\_ISL\_562769|Original|hCoV-19^^Victoria|Human|Microbiological Diagnostic Unit - Public Health Laboratory (MDU-PHL) |MDU-PHL|Schultz|Australia

>Spike|hCoV-19/Denmark/DCGC-17413/2020|2020-12-14|EPI\_ISL\_750964|Original|hCoV-19^^Midtjylland|Human|Department of Virus and Microbiological Special Diagnostics|Albertsen Lab|Michaelsen|Denmark

>Spike|hCoV-19/England/CAMB-789BD/2020|2020-04-06|EPI\_ISL\_433801|Original|hCoV-19^^England|Human|Department of Pathology|COVID-19 Genomics UK (COG-UK) Consortium|Meredith|United Kingdom

>Spike|hCoV-19/Wales/PHWC-2658D/2020|2020-03-26|EPI\_ISL\_422346|Original|hCoV-19^^Wales|Human|Wales Specialist Virology Centre|Public Health Wales Microbiology Cardiff|Moore|United Kingdom

>Spike|hCoV-19/England/QEUEH-AD154B/2020|2020-10-24|EPI\_ISL\_633884|Original|hCoV-19^^England|Human|Lighthouse Lab in Glasgow|Wellcome Sanger Institute for the COVID-19 Genomics UK (COG-UK) consortium|Davies|United Kingdom

>Spike|hCoV-19/England/BRIS-12A99B/2020|2020-04-29|EPI\_ISL\_458446|Original|hCoV-19^^England|Human|PHE South West Regional Laboratory|Wellcome Sanger Institute for the COVID-19 Genomics UK (COG-UK) consortium|Davies|United Kingdom

>Spike|hCoV-19/Russia/SVE-RII-MH248S/2020|2020-08-10|EPI\_ISL\_733004|Original|hCoV-19^^Sverdlovsk|Human|UMMC-Health|WHO National Influenza Centre Russian Federation|Komissarov|Russia

>Spike|hCoV-19/Germany/HH-hpi-p1311/2020|2020-03-21|EPI\_ISL\_775853|Original|hCoV-19^^Hamburg|Human|University Medical Center Hamburg Eppendorf|Heinrich Pette Institute|Robitaille|Germany

>Spike|hCoV-19/Denmark/DCGC-4667/2020|2020-09-14|EPI\_ISL\_621899|Original|hCoV-19^^Hovedstaden|Human|Department of Virus and Microbiological Special Diagnostics|Albertsen lab|Michaelsen|Denmark

>Spike|hCoV-19/Scotland/QEUEH-95E6F9/2020|2020-08-07|EPI\_ISL\_532538|Original|hCoV-19^^Scotland|Human|NHSGGC West of Scotland Specialist Virology Centre / MRC-University of Glasgow Centre for Virus Research|Wellcome Sanger Institute for the COVID-19 Genomics UK (COG-UK) consortium|Davies|United Kingdom

>Spike|hCoV-19/USA/TX-HMH-3022/2020|2020-05-30|EPI\_ISL\_543940|Original|hCoV-19^^Texas|Human|Houston Methodist Hospital|Houston Methodist Hospital|Long|USA

>Spike|hCoV-19/England/BRIS-1277B2/2020|2020-04-01|EPI\_ISL\_469771|Original|hCoV-19^^England|Human|PHE South West Regional Laboratory|Wellcome Sanger Institute for the COVID-19 Genomics UK (COG-UK) consortium|Davies|United Kingdom

>Spike|hCoV-19/England/ALDP-9D75BF/2020|2020-09-18|EPI\_ISL\_576569|Original|hCoV-19^^England|Human|Oxford Viromics|COVID-19 Genomics UK (COG-UK) Consortium|Golubchik|United Kingdom

>Spike|hCoV-19/England/QEUA-B303F4/2020|2020-11-04|EPI\_ISL\_659890|Original|hCoV-19^^England|Human|Lighthouse Lab in Glasgow|Wellcome Sanger Institute for the COVID-19 Genomics UK (COG-UK) Consortium|Davies|United Kingdom

>Spike|hCoV-19/England/QEUA-B12291/2020|2020-11-02|EPI\_ISL\_642219|Original|hCoV-19^^England|Human|Lighthouse Lab in Glasgow|Wellcome Sanger Institute for the COVID-19 Genomics UK (COG-UK) Consortium|Davies|United Kingdom

>Spike|hCoV-19/Denmark/DCGC-1932/2020|2020-05-04|EPI\_ISL\_622526|Original|hCoV-19^^Hovedstaden|Human|Department of Virus and Microbiological Special Diagnostics|Albertsen lab|Michaelsen|Denmark

>Spike|hCoV-19/Italy/ABR-IZSGC-TE6577/2020|2020-03-24|EPI\_ISL\_429234|Original|hCoV-19^^Abruzzo|Human|Ospedale Civile Giuseppe Mazzini|Istituto Zooprofilattico Sperimentale dell'Abruzzo e Molise \G. Caporale\|Lorusso|Italy

>Spike|hCoV-19/Japan/PG-1011/2020|2020-03-00|EPI\_ISL\_684621|Original|hCoV-19^^Japan|Human|Tokyo Metropolitan Institute of Public Health|Pathogen Genomics Center|Sekizuka|Japan

>Spike|hCoV-19/Denmark/DCGC-7823/2020|2020-10-19|EPI\_ISL\_618763|Original|hCoV-19^^Nordjylland|Human|Department of Virus and Microbiological Special Diagnostics|Albertsen lab|Michaelsen|Denmark

>Spike|hCoV-19/England/ALDP-C3B765/2020|2020-12-11|EPI\_ISL\_731208|Original|hCoV-19^^England|Human|Lighthouse Lab in Alderley Park|Wellcome Sanger Institute for the COVID-19 Genomics UK (COG-UK) Consortium|Davies|United Kingdom

>Spike|hCoV-19/Denmark/DCGC-14114/2020|2020-11-30|EPI\_ISL\_711577|Original|hCoV-19^^Sjaelland|Human|Department of Virus and Microbiological Special Diagnostics|Albertsen Lab|Michaelsen|Denmark

>Spike|hCoV-19/India/UT-63116-CSIR-IGIB/2020|2020-08-05|EPI\_ISL\_636829|Original|hCoV-19^^Uttarakhand|Human|National Centre for Disease control (NCDC)|NCDC/CSIR-IGIB|Faruq|India

>Spike|hCoV-19/South Africa/N00115/2020|2020-06-25|EPI\_ISL\_622974|Original|hCoV-19^^Mpumalanga|Human|National Health Laboratory Service|National Institute for Communicable Diseases of the National Health Laboratory Service|Allam|South Africa

>Spike|hCoV-19/Australia/WA451/2020|2020-03-29|EPI\_ISL\_708745|Original|hCoV-19^^Western Australia|Human|PathWest Laboratory Medicine WA|PathWest Laboratory Medicine WA Microbial Surveillance Unit|Sikazwe|Australia

>Spike|hCoV-19/Denmark/DCGC-11452/2020|2020-11-02|EPI\_ISL\_670929|Original|hCoV-19^^Hovedstaden|Human|Department of Virus and Microbiological Special Diagnostics|Albertsen Lab|Michaelsen|Denmark

>Spike|hCoV-19/Canada/BC\_11025311/2020|2020-04-00|EPI\_ISL\_467316|Original|hCoV-19^^British Columbia|Human|BCCDC Public Health Laboratory|BCCDC Public Health Laboratory|Harrigan|Canada

>Spike|hCoV-19/England/SHEF-C33D3/2020|2020-03-19|EPI\_ISL\_457598|Original|hCoV-19^^England|Human|Virology Department|COVID-19 Genomics UK (COG-UK) Consortium|de Silva|United Kingdom

>Spike|hCoV-19/Hong Kong/VB20220907/2020|2020-10-18|EPI\_ISL\_760058|Original|hCoV-19^^Hong Kong|Human|Hong Kong Department of Health|School of Public Health|Chu|China

>Spike|hCoV-19/Japan/PG-7668/2020|2020-08-00|EPI\_ISL\_686770|Original|hCoV-19^^Japan|Human|Chiba Prefectural Institute of Public Health|Pathogen Genomics Center|Sekizuka|Japan

>Spike|hCoV-19/Scotland/QEUA-9E5150/2020|2020-09-24|EPI\_ISL\_601054|Original|hCoV-19^^Scotland|Human|Lighthouse Lab in Glasgow|Wellcome Sanger Institute for the COVID-19 Genomics UK (COG-UK) consortium|Davies|United Kingdom

>Spike|hCoV-19/India/MH-ACTREC-627/2020|2020-09-11|EPI\_ISL\_700262|Original|hCoV-19^^Maharashtra|Human|Hematopathology Laboratory|Hematopathology Laboratory|Patkar|India

>Spike|hCoV-19/England/LIVE-A438D/2020|2020-06-16|EPI\_ISL\_490419|Original|hCoV-19^^England|Human|Liverpool Clinical Laboratories|COVID-19 Genomics UK (COG-UK) Consortium|Haldenby|United Kingdom

>Spike|hCoV-19/England/205221138/2020|2020-12-22|EPI\_ISL\_766245|Original|hCoV-19^^England|Human|Respiratory Virus Unit|COVID-19 Genomics UK (COG-UK) Consortium|Platt|United Kingdom

>Spike|hCoV-19/England/MILK-BAB6A0/2020|2020-11-18|EPI\_ISL\_681631|Original|hCoV-19^^England|Human|Lighthouse Lab in Milton Keynes|Wellcome Sanger Institute for the COVID-19 Genomics UK (COG-UK) Consortium|Davies|United Kingdom

>Spike|hCoV-19/England/ALDP-708951/2020|2020-06-30|EPI\_ISL\_557712|Original|hCoV-19^^England|Human|Lighthouse Lab in Alderley Park|Wellcome Sanger Institute for the COVID-19 Genomics UK (COG-UK) consortium|Davies|United Kingdom

>Spike|hCoV-19/USA/UT-UPHL-04861/2020|2020-05-23|EPI\_ISL\_575181|Original|hCoV-19^^Utah|Human|Utah Public Health Laboratory|Utah Public Health Laboratory|Young|USA

>Spike|hCoV-19/England/ALDP-9E9C6A/2020|2020-09-24|EPI\_ISL\_580187|Original|hCoV-19^^England|Human|Lighthouse Lab in Alderley Park|Wellcome Sanger Institute for the COVID-19 Genomics UK (COG-UK) Consortium|Davies|United Kingdom

>Spike|hCoV-19/England/MILK-B3CFA9/2020|2020-11-02|EPI\_ISL\_704879|Original|hCoV-19^^England|Human|Oxford Viromics|COVID-19 Genomics UK (COG-UK) Consortium|Golubchik|United Kingdom

>Spike|hCoV-19/Spain/MD-IBV-99008797/2020|2020-09-21|EPI\_ISL\_654148|Original|hCoV-19^^Madrid|Human|Hospital General Universitario Gregorio Mara\u00f1\u00f3n|SeqCOVID-SPAIN consortium/IBV (CSIC)|Comas|Spain

>Spike|hCoV-19/United Arab Emirates/0700/2020|2020-05-15|EPI\_ISL\_698851|Original|hCoV-19^^Abu Dhabi|Human|Group 42 (G42) Healthcare|G42 Healthcare|Ogrodzki|United Arab Emirates

>Spike|hCoV-19/Singapore/772/2020|2020-07-15|EPI\_ISL\_509382|Original|hCoV-19^^Singapore|Human|Singapore General Hospital|Department of Microbiology|Abdul Rahman|Singapore

>Spike|hCoV-19/Wales/PHWC-4A4A0C/2020|2020-12-15|EPI\_ISL\_764757|Original|hCoV-19^^Wales|Human|Wales Specialist Virology Centre Sequencing lab|COVID-19 Genomics UK (COG-UK) Consortium|Moore|United Kingdom

>Spike|hCoV-19/Tunisia/ADAGE-24763/2020|2020-11-08|EPI\_ISL\_712064|Original|hCoV-19^^Sfax|Human|Laboratoire de Microbiologie- CHU Habib Bourguiba \u2013 Sfax adresse|Laboratoire des Proc\u00e9s de Criblage Mol\u00e9culaire et Cellulaire-Centre de Biotechnologie de Sfax|Abid|Tunisia

>Spike|hCoV-19/England/MILK-9E1FC3/2020|2020-09-20|EPI\_ISL\_581320|Original|hCoV-19^^England|Human|Lighthouse Lab in Milton Keynes|Wellcome Sanger Institute for the COVID-19 Genomics UK (COG-UK) consortium|Davies|United Kingdom

>Spike|hCoV-19/Scotland/CVR3406/2020|2020-05-07|EPI\_ISL\_456830|Original|hCoV-19^^Scotland|Human|West of Scotland Specialist Virology Centre|COVID-19 Genomics UK (COG-UK) Consortium|Robertson|United Kingdom

>Spike|hCoV-19/Denmark/DCGC-4845/2020|2020-09-21|EPI\_ISL\_621530|Original|hCoV-19^^Hovedstaden|Human|Department of Virus and Microbiological Special Diagnostics|Albertsen lab|Michaelsen|Denmark

>Spike|hCoV-19/England/NOTT-1125ED/2020|2020-04-29|EPI\_ISL\_484402|Original|hCoV-19^^England|Human|Lincolnshire Hospitals and DeepSeq Nottingham|COVID-19 Genomics UK (COG-UK) Consortium|Loose|United Kingdom

>Spike|hCoV-19/England/CAMC-A3EF4E/2020|2020-10-06|EPI\_ISL\_609768|Original|hCoV-19^^England|Human|Lighthouse Lab in Cambridge|Wellcome Sanger Institute for the COVID-19 Genomics UK (COG-UK) consortium|Davies|United Kingdom

>Spike|hCoV-19/England/CAMB-7B38F/2020|2020-04-12|EPI\_ISL\_433947|Original|hCoV-19^^England|Human|Department of Pathology|COVID-19 Genomics UK (COG-UK) Consortium|Meredith|United Kingdom

>Spike|hCoV-19/Denmark/DCGC-6854/2020|2020-10-12|EPI\_ISL\_619699|Original|hCoV-19^^Hovedstaden|Human|Department of Virus and Microbiological Special Diagnostics|Albertsen lab|Michaelsen|Denmark

>Spike|hCoV-19/Denmark/DCGC-6469/2020|2020-10-12|EPI\_ISL\_620369|Original|hCoV-19^^Syddanmark|Human|Department of Virus and Microbiological Special Diagnostics|Albertsen lab|Michaelsen|Denmark

>Spike|hCoV-19/Wales/PHWC-2C675/2020|2020-03-31|EPI\_ISL\_445891|Original|hCoV-19^^Wales|Human|Wales Specialist Virology Centre|Public Health Wales Microbiology Cardiff|Moore|United Kingdom

>Spike|hCoV-19/Australia/VIC218/2020|2020-03-20|EPI\_ISL\_419913|Original|hCoV-19^^Victoria|Human|Victorian Infectious Diseases Reference Laboratory



(VIDRL)|Victorian Infectious Diseases Reference Laboratory and Microbiological Diagnostic Unit Public Health Laboratory|Schultz|Australia  
>Spike|hCoV-19/England/QEUA-9D05C5/2020|2020-09-14|EPI\_ISL\_589908|Original|hCoV-19^^England|Human|Lighthouse Lab in Glasgow|Wellcome Sanger Institute for the COVID-19 Genomics UK (COG-UK) consortium|Davies|United Kingdom  
>Spike|hCoV-19/Denmark/DCGC-1098/2020|2020-03-16|EPI\_ISL\_614616|Original|hCoV-19^^Syddanmark|Human|Department of Virus and Microbiological Special Diagnostics|Albertsen lab|Michaelsen|Denmark  
>Spike|hCoV-19/Denmark/DCGC-10687/2020|2020-11-02|EPI\_ISL\_670138|Original|hCoV-19^^Sjaelland|Human|Department of Virus and Microbiological Special Diagnostics|Albertsen Lab|Michaelsen|Denmark  
>Spike|hCoV-19/Denmark/ALAB-SSI156/2020|2020-03-10|EPI\_ISL\_429372|Original|hCoV-19^^Denmark|Human|Department of Virus and Microbiological Special Diagnostics|Albertsen lab|Kirkegaard|Denmark  
>Spike|hCoV-19/Australia/VIC10463/2020|2020-09-04|EPI\_ISL\_562920|Original|hCoV-19^^Victoria|Human|Microbiological Diagnostic Unit - Public Health Laboratory (MDU-PHL)|MDU-PHL|Schultz|Australia  
>Spike|hCoV-19/Netherlands/FR-RIVM-20199/2020|2020-11-29|EPI\_ISL\_723353|Original|hCoV-19^^Friesland|Human|Dutch COVID-19 response team|National Institute for Public Health and the Environment (RIVM)|Meijer|Netherlands  
>Spike|hCoV-19/Nigeria/BO-CV347/2020|2020-05-17|EPI\_ISL\_730012|Original|hCoV-19^^Borno State|Human|Nigeria Centre for Disease Control (NCDC)|African Centre of Excellence for Genomics of Infectious Diseases (ACEGID)|Oluniyi|Nigeria  
>Spike|hCoV-19/Australia/VIC2316/2020|2020-06-24|EPI\_ISL\_522037|Original|hCoV-19^^Victoria|Human|Microbiological Diagnostic Unit - Public Health Laboratory (MDU-PHL)|MDU-PHL|Schultz|Australia  
>Spike|hCoV-19/England/ALDP-A4FB28/2020|2020-10-07|EPI\_ISL\_597574|Original|hCoV-19^^England|Human|Lighthouse Lab in Alderley Park|Wellcome Sanger Institute for the COVID-19 Genomics UK (COG-UK) consortium|Davies|United Kingdom  
>Spike|hCoV-19/Japan/IC-0608/2021|2021-01-00|EPI\_ISL\_779694|Original|hCoV-19^^Japan|Human|Pathogen Genomics Center|Pathogen Genomics Center|Sekizuka|Japan  
>Spike|hCoV-19/Wales/PHWC-30ED0/2020|2020-04-09|EPI\_ISL\_446376|Original|hCoV-19^^Wales|Human|Wales Specialist Virology Centre|Public Health Wales Microbiology Cardiff|Moore|United Kingdom  
>Spike|hCoV-19/Wales/PHWC-48FB5F/2020|2020-11-10|EPI\_ISL\_681192|Original|hCoV-19^^Wales|Human|Wales Specialist Virology Centre Sequencing lab|COVID-19 Genomics UK (COG-UK) Consortium|Moore|United Kingdom  
>Spike|hCoV-19/England/BIRM-6AAD9/2020|2020-11-11|EPI\_ISL\_651646|Original|hCoV-19^^England|Human|University of Birmingham|COVID-19 Genomics UK (COG-UK) Consortium|Loman|United Kingdom  
>Spike|hCoV-19/USA/TX-HMH-MCoV-13427/2020|2020-08-23|EPI\_ISL\_788563|Original|hCoV-19^^Texas|Human|Houston Methodist Hospital|Houston Methodist Hospital|Long|USA  
>Spike|hCoV-19/Canada/BC\_17548428/2020|2020-03-00|EPI\_ISL\_460614|Original|hCoV-19^^British Columbia|Human|BCCDC Public Health Laboratory|BCCDC Public Health Laboratory|Harrigan|Canada  
>Spike|hCoV-19/USA/MN-MDH-1484/2020|2020-03-21|EPI\_ISL\_518878|Original|hCoV-19^^Minnesota|Human|Mayo Clinic & Mayo Clinic Laboratories|Minnesota Department of Health|Garfin|USA  
>Spike|hCoV-19/England/QEUA-AABC90/2020|2020-10-21|EPI\_ISL\_652819|Original|hCoV-19^^England|Human|Oxford Viromics|COVID-19 Genomics UK (COG-UK) Consortium|Golubchik|United Kingdom  
>Spike|hCoV-19/England/LIVE-9B88A/2020|2020-04-22|EPI\_ISL\_440881|Original|hCoV-19^^England|Human|Liverpool Clinical Laboratories|COVID-19 Genomics UK (COG-UK) Consortium|Haldenby|United Kingdom  
>Spike|hCoV-19/Denmark/DCGC-7031/2020|2020-10-12|EPI\_ISL\_619878|Original|hCoV-19^^Hovedstaden|Human|Department of Virus and Microbiological Special Diagnostics|Albertsen lab|Michaelsen|Denmark  
>Spike|hCoV-19/Wales/PHWC-35C4A/2020|2020-04-27|EPI\_ISL\_474547|Original|hCoV-19^^Wales|Human|Originating lab|COVID-19 Genomics UK (COG-UK) Consortium|Moore|United Kingdom

>Spike|hCoV-19/USA/AZ-TG670200/2020|2020-04-30|EPI\_ISL\_696391|Original|hCoV-19^^Arizona|Human|Sonora Quest Laboratories|TGen North|French|USA

>Spike|hCoV-19/England/CAMB-1BA3ED/2020|2020-11-11|EPI\_ISL\_664433|Original|hCoV-19^^England|Human|Department of Pathology|COVID-19 Genomics UK (COG-UK) Consortium|Goodfellow|United Kingdom

>Spike|hCoV-19/Scotland/QEUH-C168F4/2020|2020-12-06|EPI\_ISL\_710683|Original|hCoV-19^^Scotland|Human|Lighthouse Lab in Glasgow|Wellcome Sanger Institute for the COVID-19 Genomics UK (COG-UK) Consortium|Davies|United Kingdom

>Spike|hCoV-19/Australia/VIC5830/2020|2020-07-22|EPI\_ISL\_518624|Original|hCoV-19^^Victoria|Human|Microbiological Diagnostic Unit - Public Health Laboratory (MDU-PHL)|MDU-PHL|Schultz|Australia

>Spike|hCoV-19/USA/TX-HMH-MCoV-15416/2020|2020-10-21|EPI\_ISL\_786900|Original|hCoV-19^^Texas|Human|Houston Methodist Hospital|Houston Methodist Hospital|Long|USA

>Spike|hCoV-19/France/PAC-IHU-0498/2020|2020-04-03|EPI\_ISL\_569553|Original|hCoV-19^^Provence-Alpes-C\u00f4te-d\u00a9Azur|Human|MEPHI|MEPHI|Levasseur|France

>Spike|hCoV-19/England/ALDP-BB2BB6/2020|2020-11-19|EPI\_ISL\_702991|Original|hCoV-19^^England|Human|Lighthouse Lab in Alderley Park|Wellcome Sanger Institute for the COVID-19 Genomics UK (COG-UK) Consortium|Davies|United Kingdom

>Spike|hCoV-19/Indonesia/AC-NIHRD-C0057926/2020|2020-09-15|EPI\_ISL\_757287|Original|hCoV-19^^Aceh|Human|National Institute of Health Research and Development|National Institute of Health Research and Development|Setiawati|Indonesia

>Spike|hCoV-19/Germany/NW-HHU-284/2020|2020-09-29|EPI\_ISL\_770759|Original|hCoV-19^^North Rhine-Westphalia|Human|ZOTZ KLIMAS MVZ D\u00fcsseldorf-Centrum GbR \u00dcBAG f\u00fcr Labormedizin|Center of Medical Microbiology|Wienemann|Germany

>Spike|hCoV-19/USA/TX-HMH-5685/2020|2020-06-26|EPI\_ISL\_546945|Original|hCoV-19^^Texas|Human|Houston Methodist Hospital|Houston Methodist Hospital|Long|USA

>Spike|hCoV-19/England/QEUH-9A45CA/2020|2020-09-01|EPI\_ISL\_540152|Original|hCoV-19^^England|Human|Lighthouse Lab in Glasgow|Wellcome Sanger Institute for the COVID-19 Genomics UK (COG-UK) consortium|Davies|United Kingdom

>Spike|hCoV-19/USA/MA-MGH-00206/2020|2020-03-27|EPI\_ISL\_460242|Original|hCoV-19^^Massachusetts|Human|Massachusetts General Hospital|Infectious Disease Program|Lemieux|USA

>Spike|hCoV-19/England/QEUH-96168A/2020|2020-08-03|EPI\_ISL\_537038|Original|hCoV-19^^England|Human|Lighthouse Lab in Glasgow|Wellcome Sanger Institute for the COVID-19 Genomics UK (COG-UK) consortium|Davies|United Kingdom

>Spike|hCoV-19/Wales/MILK-B050A6/2020|2020-10-24|EPI\_ISL\_639008|Original|hCoV-19^^Wales|Human|Virology Department|COVID-19 Genomics UK (COG-UK) Consortium|de Silva|United Kingdom

>Spike|hCoV-19/Denmark/DCGC-20130/2020|2020-12-07|EPI\_ISL\_747673|Original|hCoV-19^^Syddanmark|Human|Department of Virus and Microbiological Special Diagnostics|Albertsen Lab|Michaelsen|Denmark

>Spike|hCoV-19/USA/NY-NYCPHL-001200/2020|2020-11-02|EPI\_ISL\_683775|Original|hCoV-19^^New York|Human|DOHMH Jamaica|New York City Public Health Laboratory|Wang|USA

>Spike|hCoV-19/USA/NY-Wadsworth-292964-01/2020|2020-12-28|EPI\_ISL\_769984|Original|hCoV-19^^New York|Human|Albany Medical Center Hospital Clinical Laboratories|Wadsworth Center|Lasek-Nesselquist|USA

>Spike|hCoV-19/USA/MI-QDX-399/2020|2020-03-24|EPI\_ISL\_571138|Original|hCoV-19^^Michigan|Human|Quest Diagnostics|Quest Diagnostics|Kagan|USA

>Spike|hCoV-19/England/CAMB-1BCD29/2020|2020-12-01|EPI\_ISL\_764301|Original|hCoV-19^^England|Human|Department of Pathology|COVID-19 Genomics UK (COG-UK) Consortium|Goodfellow|United Kingdom

>Spike|hCoV-19/USA/MN-MDH-1628/2020|2020-03-29|EPI\_ISL\_530224|Original|hCoV-19^^Minnesota|Human|Minnesota Department of Health|Minnesota Department of Health|Garfin|USA

>Spike|hCoV-19/Japan/PG-6652/2020|2020-07-00|EPI\_ISL\_687764|Original|hCoV-19^^Japan|Human|Pathogen Genomics Center|Pathogen Genomics Center|Sekizuka|Japan

>Spike|hCoV-19/England/MILK-B94974/2020|2020-11-14|EPI\_ISL\_676276|Original|hCoV-19^^England|Human|Lighthouse Lab in Milton Keynes|Wellcome Sanger Institute for the COVID-19 Genomics UK (COG-UK) Consortium|Davies|United Kingdom

>Spike|hCoV-19/England/MILK-BDC9F8/2020|2020-11-26|EPI\_ISL\_709751|Original|hCoV-19^^England|Human|Lighthouse Lab in Milton Keynes|Wellcome Sanger Institute for the COVID-19 Genomics UK (COG-UK) Consortium|Davies|United Kingdom

>Spike|hCoV-19/USA/WI-GMF-32135/2020|2020-11-07|EPI\_ISL\_661126|Original|hCoV-19^^Wisconsin|Human|Gundersen Molecular Diagnostics Laboratory|Kabara Cancer Research Institute|Kenny|USA

>Spike|hCoV-19/Lithuania/C20-05-R16/2020|2020-05-21|EPI\_ISL\_560395|Original|hCoV-19^^Vilnius|Human|Vilnius University Hospital Santaros Klinikos|Institute of Biotechnology|Timinskas|Lithuania

>Spike|hCoV-19/USA/VA-DCLS-0683/2020|2020-04-18|EPI\_ISL\_500845|Original|hCoV-19^^Virginia|Human|Virginia DCLS|Virginia DCLS|St. Jacques|USA

>Spike|hCoV-19/Scotland/CVR4101/2020|2020-09-04|EPI\_ISL\_540805|Original|hCoV-19^^Scotland|Human|West of Scotland Specialist Virology Centre|COVID-19 Genomics UK (COG-UK) Consortium|Robertson|United Kingdom

>Spike|hCoV-19/USA/TX-HMH-MCoV-18503/2020|2020-11-19|EPI\_ISL\_784851|Original|hCoV-19^^Texas|Human|Houston Methodist Hospital|Houston Methodist Hospital|Long|USA

>Spike|hCoV-19/England/QEUA-BA2AF8/2020|2020-11-18|EPI\_ISL\_672762|Original|hCoV-19^^England|Human|Lighthouse Lab in Glasgow|Wellcome Sanger Institute for the COVID-19 Genomics UK (COG-UK) Consortium|Davies|United Kingdom

>Spike|hCoV-19/USA/TX-HMH0363/2020|2020-03-30|EPI\_ISL\_434955|Original|hCoV-19^^Texas|Human|Houston Methodist Hospital|Houston Methodist Hospital|Long|USA

>Spike|hCoV-19/Singapore/1006/2020|2020-03-23|EPI\_ISL\_574490|VeroE6 P2|hCoV-19^^Singapore|Human|Programme in Emerging Infectious Diseases|National Public Health Laboratory|Mak|Singapore

>Spike|hCoV-19/USA/PA-MGEL-00273/2020|2020-04-22|EPI\_ISL\_681996|Original|hCoV-19^^Pennsylvania|Human|UPMC Clinical Microbiology Laboratory|Microbial Genomic Epidemiology Laboratory|Griffith|USA

>Spike|hCoV-19/Japan/PG-8080/2020|2020-08-00|EPI\_ISL\_687181|Original|hCoV-19^^Japan|Human|Pathogen Genomics Center|Pathogen Genomics Center|Sekizuka|Japan

>Spike|hCoV-19/USA/CA-CDPH064/2020|2020-03-27|EPI\_ISL\_755036|Original|hCoV-19^^California|Human|California Department of Public Health|California Department of Public Health|Bell|USA

>Spike|hCoV-19/England/ALDP-94EF1F/2020|2020-06-17|EPI\_ISL\_556203|Original|hCoV-19^^England|Human|Lighthouse Lab in Alderley Park|Wellcome Sanger Institute for the COVID-19 Genomics UK (COG-UK) consortium|Davies|United Kingdom

>Spike|hCoV-19/USA/DE-DHSS-F918108/2020|2020-03-27|EPI\_ISL\_583995|Original|hCoV-19^^Delaware|Human|Delaware Public Health Lab|Delaware Public Health Lab|Bajwa|USA

>Spike|hCoV-19/USA/CA-CZB-1995/2020|2020-04-30|EPI\_ISL\_486258|Original|hCoV-19^^California|Human|Orange County Public Health Laboratory|Chan-Zuckerberg Biohub|McGeever|USA

>Spike|hCoV-19/Australia/VIC143/2020|2020-03-16|EPI\_ISL\_419840|Original|hCoV-19^^Victoria|Human|Victorian Infectious Diseases Reference Laboratory (VIDRL)|Victorian Infectious Diseases Reference Laboratory and Microbiological Diagnostic Unit Public Health Laboratory|Schultz|Australia

>Spike|hCoV-19/Ireland/D-NVRL-MPZ60412/2020|2020-04-30|EPI\_ISL\_767754|Original|hCoV-19^^Dublin|Human|National Virus Reference Laboratory|Irish Coronavirus Sequencing Consortium - Teagasc Moorepark|Walsh|Ireland

>Spike|hCoV-19/England/MILK-A7CD3B/2020|2020-10-13|EPI\_ISL\_606767|Original|hCoV-19^^England|Human|Lighthouse Lab in Milton Keynes|Wellcome Sanger Institute for the COVID-19 Genomics UK (COG-UK) consortium|Davies|United Kingdom

>Spike|hCoV-19/Scotland/CVR5868/2020|2020-11-17|EPI\_ISL\_666058|Original|hCoV-19^^Scotland|Human|West of Scotland Specialist Virology Centre|COVID-19 Genomics UK (COG-UK) Consortium|Robertson|United Kingdom

>Spike|hCoV-19/England/LIVE-AA25D/2020|2020-03-23|EPI\_ISL\_517425|Original|hCoV-19^^England|Human|Liverpool Clinical Laboratories|COVID-19 Genomics UK (COG-UK) Consortium|Haldenby|United Kingdom

>Spike|hCoV-19/England/20122121504/2020|2020-03-17|EPI\_ISL\_465768|Original|hCoV-19^^England|Human|Respiratory Virus Unit|Respiratory Virus Unit|Platt|United Kingdom

>Spike|hCoV-19/England/ALDP-A2EDB0/2020|2020-10-05|EPI\_ISL\_587051|Original|hCoV-19^England|Human|Lighthouse Lab in Alderley Park|Wellcome Sanger Institute for the COVID-19 Genomics UK (COG-UK) consortium|Davies|United Kingdom

>Spike|hCoV-19/Denmark/DCGC-21795/2020|2020-12-21|EPI\_ISL\_758366|Original|hCoV-19^Hovedstaden|Human|Department of Virus and Microbiological Special Diagnostics|Albertsen Lab|Michaelsen|Denmark

>Spike|hCoV-19/USA/TX-HMH-MCoV-9451/2020|2020-07-03|EPI\_ISL\_781129|Original|hCoV-19^Texas|Human|Houston Methodist Hospital|Houston Methodist Hospital|Long|USA

>Spike|hCoV-19/Denmark/DCGC-17486/2020|2020-12-14|EPI\_ISL\_751018|Original|hCoV-19^Syddanmark|Human|Department of Virus and Microbiological Special Diagnostics|Albertsen Lab|Michaelsen|Denmark

>Spike|hCoV-19/England/204981095/2020|2020-12-02|EPI\_ISL\_754355|Original|hCoV-19^England|Human|Respiratory Virus Unit|COVID-19 Genomics UK (COG-UK) Consortium|Platt|United Kingdom

>Spike|hCoV-19/England/MILK-9942C6/2020|2020-08-26|EPI\_ISL\_551678|Original|hCoV-19^England|Human|Lighthouse Lab in Milton Keynes|Wellcome Sanger Institute for the COVID-19 Genomics UK (COG-UK) consortium|Davies|United Kingdom

>Spike|hCoV-19/Denmark/DCGC-22145/2020|2020-12-14|EPI\_ISL\_758583|Original|hCoV-19^Hovedstaden|Human|Department of Virus and Microbiological Special Diagnostics|Albertsen Lab|Michaelsen|Denmark

>Spike|hCoV-19/England/EXET-137834/2020|2020-05-03|EPI\_ISL\_471987|Original|hCoV-19^England|Human|University of Exeter|COVID-19 Genomics UK (COG-UK) Consortium|Temperton|United Kingdom

>Spike|hCoV-19/England/ALDP-C3CBE0/2020|2020-12-10|EPI\_ISL\_731828|Original|hCoV-19^England|Human|Lighthouse Lab in Alderley Park|Wellcome Sanger Institute for the COVID-19 Genomics UK (COG-UK) Consortium|Davies|United Kingdom

>Spike|hCoV-19/Northern Ireland/NIRE-FF2A4/2020|2020-04-23|EPI\_ISL\_469854|Original|hCoV-19^Northern Ireland|Human|Regional Virus Laboratory|Wellcome Sanger Institute for the COVID-19 Genomics UK (COG-UK) consortium|Davies|United Kingdom

>Spike|hCoV-19/Finland/26M7974/2020|2020-03-26|EPI\_ISL\_481623|Original|hCoV-19^Uusimaa|Human|Department of Virology and Immunology|Department of Virology|Smura|Finland

>Spike|hCoV-19/USA/NJ-NYUMC344/2020|2020-04-08|EPI\_ISL\_430371|Original|hCoV-19^New Jersey|Human|NYU Langone Health|Departments of Pathology and Medicine|Maurano|USA

>Spike|hCoV-19/England/ALDP-AA3A61/2020|2020-10-22|EPI\_ISL\_624214|Original|hCoV-19^England|Human|Lighthouse Lab in Alderley Park|Wellcome Sanger Institute for the COVID-19 Genomics UK (COG-UK) consortium|Davies|United Kingdom

>Spike|hCoV-19/England/ALDP-A2DE18/2020|2020-10-06|EPI\_ISL\_586907|Original|hCoV-19^England|Human|Lighthouse Lab in Alderley Park|Wellcome Sanger Institute for the COVID-19 Genomics UK (COG-UK) Consortium|Davies|United Kingdom

>Spike|hCoV-19/USA/NY-NYUMC486/2020|2020-03-18|EPI\_ISL\_436734|Original|hCoV-19^New York|Human|NYU Langone Health|Departments of Pathology and Medicine|Maurano|USA

>Spike|hCoV-19/England/CAMB-1AF07B/2020|2020-04-29|EPI\_ISL\_459288|Original|hCoV-19^England|Human|Department of Pathology|Wellcome Sanger Institute for the COVID-19 Genomics UK (COG-UK) consortium|Davies|United Kingdom

>Spike|hCoV-19/USA/NY-NYCPHL-000012/2020|2020-03-09|EPI\_ISL\_631510|Original|hCoV-19^New York|Human|New York Presbyterian/ Weill Cornell Medical Center|New York City Public Health Laboratory|Wang|USA

>Spike|hCoV-19/England/ALDP-6D4F7B/2020|2020-07-02|EPI\_ISL\_556161|Original|hCoV-19^England|Human|Lighthouse Lab in Alderley Park|Wellcome Sanger Institute for the COVID-19 Genomics UK (COG-UK) consortium|Davies|United Kingdom

>Spike|hCoV-19/mink/Denmark/AD6-Farm1/2020|2020-06-14|EPI\_ISL\_626345|Original|hCoV-19^Denmark|Neovison vison|Statens Serum Institute|Statens Serum Institute|Rasmussen|Denmark

>Spike|hCoV-19/Denmark/DCGC-21303/2020|2020-12-21|EPI\_ISL\_759662|Original|hCoV-19^Syddanmark|Human|Department of Virus and Microbiological Special Diagnostics|Albertsen Lab|Michaelsen|Denmark

>Spike|hCoV-19/England/QEUA-B6A4A3/2020|2020-11-11|EPI\_ISL\_662314|Original|hCoV-19^^England|Human|Lighthouse Lab in Glasgow|Wellcome Sanger Institute for the COVID-19 Genomics UK (COG-UK) Consortium|Davies|United Kingdom

>Spike|hCoV-19/USA/TX-HMH-7940/2020|2020-06-26|EPI\_ISL\_545725|Original|hCoV-19^^Texas|Human|Houston Methodist Hospital|Houston Methodist Hospital|Long|USA

>Spike|hCoV-19/Greece/220\_35357/2020|2020-03-18|EPI\_ISL\_437887|Original|hCoV-19^^Athens|Human|Laboratory of Microbiology|Laboratory of Biology|Karakasiliotis|Greece

>Spike|hCoV-19/England/CAMC-B7AA26/2020|2020-11-12|EPI\_ISL\_741154|Original|hCoV-19^^England|Human|Oxford Viromics|COVID-19 Genomics UK (COG-UK) Consortium|Golubchik|United Kingdom

>Spike|hCoV-19/USA/MI-MDHHS-SC22205/2020|2020-10-23|EPI\_ISL\_644373|Original|hCoV-19^^Michigan|Human|Michigan Department of Health and Human Services|Michigan Department of Health and Human Services|Jacob|USA

>Spike|hCoV-19/England/ALDP-A703BD/2020|2020-10-15|EPI\_ISL\_607869|Original|hCoV-19^^England|Human|Lighthouse Lab in Alderley Park|Wellcome Sanger Institute for the COVID-19 Genomics UK (COG-UK) consortium|Davies|United Kingdom

>Spike|hCoV-19/England/CAMC-B77977/2020|2020-11-11|EPI\_ISL\_661741|Original|hCoV-19^^England|Human|Lighthouse Lab in Cambridge|Wellcome Sanger Institute for the COVID-19 Genomics UK (COG-UK) Consortium|Davies|United Kingdom

>Spike|hCoV-19/Denmark/DCGC-13363/2020|2020-11-30|EPI\_ISL\_712750|Original|hCoV-19^^Sjaelland|Human|Department of Virus and Microbiological Special Diagnostics|Albertsen Lab|Michaelsen|Denmark

>Spike|hCoV-19/Scotland/QEUA-A781E8/2020|2020-10-14|EPI\_ISL\_638961|Original|hCoV-19^^Scotland|Human|Oxford Viromics|COVID-19 Genomics UK (COG-UK) Consortium|Golubchik|United Kingdom

>Spike|hCoV-19/England/ALDP-C3D824/2020|2020-12-10|EPI\_ISL\_730829|Original|hCoV-19^^England|Human|Lighthouse Lab in Alderley Park|Wellcome Sanger Institute for the COVID-19 Genomics UK (COG-UK) Consortium|Davies|United Kingdom

>Spike|hCoV-19/England/ALDP-AA52A3/2020|2020-10-21|EPI\_ISL\_625215|Original|hCoV-19^^England|Human|Lighthouse Lab in Alderley Park|Wellcome Sanger Institute for the COVID-19 Genomics UK (COG-UK) consortium|Davies|United Kingdom

>Spike|hCoV-19/USA/MA-MASPHL-00063/2020|2020-04-03|EPI\_ISL\_791560|Original|hCoV-19^^Massachusetts|Human|Massachusetts State Public Health Laboratory|Infectious Disease Program|Park|USA

>Spike|hCoV-19/Denmark/DCGC-11414/2020|2020-11-02|EPI\_ISL\_670903|Original|hCoV-19^^Syddanmark|Human|Department of Virus and Microbiological Special Diagnostics|Albertsen Lab|Michaelsen|Denmark

>Spike|hCoV-19/England/MILK-9F18E3/2020|2020-09-25|EPI\_ISL\_589685|Original|hCoV-19^^England|Human|Lighthouse Lab in Milton Keynes|Wellcome Sanger Institute for the COVID-19 Genomics UK (COG-UK) consortium|Davies|United Kingdom

>Spike|hCoV-19/Denmark/DCGC-11738/2020|2020-10-26|EPI\_ISL\_671106|Original|hCoV-19^^Sjaelland|Human|Department of Virus and Microbiological Special Diagnostics|Albertsen Lab|Michaelsen|Denmark

>Spike|hCoV-19/England/MILK-A7D2C2/2020|2020-10-13|EPI\_ISL\_606569|Original|hCoV-19^^England|Human|Lighthouse Lab in Milton Keynes|Wellcome Sanger Institute for the COVID-19 Genomics UK (COG-UK) consortium|Davies|United Kingdom

>Spike|hCoV-19/England/ALDP-B25116/2020|2020-11-04|EPI\_ISL\_646529|Original|hCoV-19^^England|Human|Lighthouse Lab in Alderley Park|Wellcome Sanger Institute for the COVID-19 Genomics UK (COG-UK) Consortium|Davies|United Kingdom

>Spike|hCoV-19/USA/CA-ALSR-1380/2020|2020-03-12|EPI\_ISL\_494571|Original|hCoV-19^^California|Human|San Diego County Public Health Laboratory|Andersen lab at Scripps Research|Gangavarapu|USA

>Spike|hCoV-19/USA/UT-08440/2020|2020-05-20|EPI\_ISL\_524215|Original|hCoV-19^^Utah|Human|Utah Public Health Laboratory|Utah Public Health Laboratory|Young|USA

>Spike|hCoV-19/USA/LA-EVTL1252/2020|2020-12-02|EPI\_ISL\_778918|Original|hCoV-19^^Louisiana|Human|LSUHS Emerging Viral Threat Laboratory|Microbial Genome Sequencing Center|Kamil|USA

>Spike|hCoV-19/Wales/PHWC-47FACE/2020|2020-10-06|EPI\_ISL\_612769|Original|hCoV-19^^Wales|Human|Wales Specialist Virology Centre Sequencing lab|COVID-19 Genomics UK (COG-UK) Consortium|Moore|United Kingdom

>Spike|hCoV-19/England/PORT-2D0CB8/2020|2020-04-24|EPI\_ISL\_475272|Original|hCoV-19^^England|Human|Centre for Enzyme Innovation|COVID-19 Genomics UK (COG-UK) Consortium|Robson|United Kingdom

>Spike|hCoV-19/Netherlands/ZH-EMC-309/2020|2020-05-23|EPI\_ISL\_523651|Original|hCoV-19^^Zuid Holland|Human|Dutch COVID-19 response team|Erasmus Medical Center|Oude Munnink|Netherlands

>Spike|hCoV-19/England/QEUA-A30F4C/2020|2020-10-05|EPI\_ISL\_595848|Original|hCoV-19^^England|Human|Quadram Institute Bioscience|COVID-19 Genomics UK (COG-UK) Consortium|Alikhan|United Kingdom

>Spike|hCoV-19/Netherlands/ZH-EMC-671/2020|2020-09-30|EPI\_ISL\_632513|Original|hCoV-19^^Zuid Holland|Human|Dutch COVID-19 response team|Erasmus Medical Center|Oude Munnink|Netherlands

>Spike|hCoV-19/Switzerland/BL-ETHZ-380277/2020|2020-11-22|EPI\_ISL\_721785|Original|hCoV-19^^Basel-Landschaft|Human|Viollier AG|Department of Biosystems Science and Engineering|Nadeau|Switzerland

>Spike|hCoV-19/USA/TX-HMH-MCoV-8332/2020|2020-07-08|EPI\_ISL\_784337|Original|hCoV-19^^Texas|Human|Houston Methodist Hospital|Houston Methodist Hospital|Long|USA

>Spike|hCoV-19/England/ALDP-BBA3E3/2020|2020-11-21|EPI\_ISL\_701910|Original|hCoV-19^^England|Human|Lighthouse Lab in Alderley Park|Wellcome Sanger Institute for the COVID-19 Genomics UK (COG-UK) Consortium|Davies|United Kingdom

>Spike|hCoV-19/USA/DC-HP00799/2020|2020-04-12|EPI\_ISL\_511864|Original|hCoV-19^^District of Columbia|Human|Johns Hopkins Hospital Department of Pathology|Johns Hopkins Hospital Department of Pathology|Ramakrishnan|USA

>Spike|hCoV-19/Switzerland/GE-ETHZ-350276/2020|2020-10-30|EPI\_ISL\_728814|Original|hCoV-19^^Geneva|Human|Viollier AG|Department of Biosystems Science and Engineering|Nadeau|Switzerland

>Spike|hCoV-19/USA/UT-03008/2020|2020-04-30|EPI\_ISL\_509558|Original|hCoV-19^^Utah|Human|Utah Public Health Laboratory|Utah Public Health Laboratory|Butz|USA

>Spike|hCoV-19/Canada/ON-PHL-20-01806/2020|2020-06-00|EPI\_ISL\_636950|Original|hCoV-19^^Ontario|Human|Public Health Ontario Laboratory|Public Health Ontario Laboratory|Guthrie|Canada

>Spike|hCoV-19/Denmark/DCGC-6644/2020|2020-10-12|EPI\_ISL\_619546|Original|hCoV-19^^Syddanmark|Human|Department of Virus and Microbiological Special Diagnostics|Albertsen lab|Michaelsen|Denmark

>Spike|hCoV-19/England/QEUA-A9B765/2020|2020-10-20|EPI\_ISL\_611381|Original|hCoV-19^^England|Human|Lighthouse Lab in Glasgow|Wellcome Sanger Institute for the COVID-19 Genomics UK (COG-UK) consortium|Davies|United Kingdom

>Spike|hCoV-19/Luxembourg/LNS1848261/2020|2020-11-01|EPI\_ISL\_740006|Original|hCoV-19^^Luxembourg|Human|Laboratoire national de sant\u00e9|Laboratoire national de sant\u00e9|Wienecke-Baldacchino|Luxembourg

>Spike|hCoV-19/England/QEUA-AE25A1/2020|2020-10-27|EPI\_ISL\_633512|Original|hCoV-19^^England|Human|Lighthouse Lab in Glasgow|Wellcome Sanger Institute for the COVID-19 Genomics UK (COG-UK) consortium|Davies|United Kingdom

>Spike|hCoV-19/South Africa/NHLS-UCT-GS-0828/2020|2020-10-15|EPI\_ISL\_700543|Original|hCoV-19^^Western Cape|Human|Great Brak River Clinic w/GBC|NHLS/UCT|Iranzadeh|South Africa

>Spike|hCoV-19/Scotland/EDB6328/2020|2020-06-01|EPI\_ISL\_473938|Original|hCoV-19^^Scotland|Human|Virology Department|COVID-19 Genomics UK (COG-UK) Consortium|Williams|United Kingdom

>Spike|hCoV-19/USA/FL-BPHL-1907/2020|2020-07-17|EPI\_ISL\_613768|Original|hCoV-19^^Florida|Human|Florida Bureau of Public Health Laboratories|Florida Bureau of Public Health Laboratories|Blanton|USA

>Spike|hCoV-19/USA/NY-NYCPHL-000992/2020|2020-08-31|EPI\_ISL\_633017|Original|hCoV-19^^New York|Human|DOHMH Chelsea|New York City Public Health Laboratory|Wang|USA

>Spike|hCoV-19/England/LIVE-1DD7AC/2020|2020-10-03|EPI\_ISL\_612434|Original|hCoV-19^^England|Human|Liverpool Clinical Laboratories|COVID-19 Genomics UK (COG-UK) Consortium|Haldenby|United Kingdom

>Spike|hCoV-19/England/QEUA-BC47F9/2020|2020-11-25|EPI\_ISL\_703608|Original|hCoV-19^^England|Human|Lighthouse Lab in Glasgow|Wellcome Sanger Institute for the COVID-19 Genomics UK (COG-UK) Consortium|Davies|United Kingdom

>Spike|hCoV-19/Switzerland/ZH-ETHZ-390405/2020|2020-12-03|EPI\_ISL\_721971|Original|hCoV-19^^Zurich|Human|Viollier AG|Department of Biosystems Science and Engineering|Nadeau|Switzerland

>Spike|hCoV-19/USA/TX-DSHS-0354/2020|2020-06-13|EPI\_ISL\_538291|Original|hCoV-19^^Texas|Human|Texas Department of State Health Services|Texas Department of State Health Services|Rahman|USA

>Spike|hCoV-19/USA/WA-UW-32910/2020|2020-10-17|EPI\_ISL\_737097|Original|hCoV-19^^Washington|Human|UW Virology Lab|UW Virology Lab|Roychoudhury|USA

>Spike|hCoV-19/Netherlands/NA\_699/2020|2020-04-16|EPI\_ISL\_461134|Original|hCoV-19^^Netherlands|Human|Dutch COVID-19 response team|Erasmus Medical Center|Oude Munnink|Netherlands

>Spike|hCoV-19/USA/MA-MGH-00699/2020|2020-04-06|EPI\_ISL\_460268|Original|hCoV-19^^Massachusetts|Human|Massachusetts General Hospital|Infectious Disease Program|Lemieux|USA

>Spike|hCoV-19/England/ALDP-C3C861/2020|2020-12-10|EPI\_ISL\_731880|Original|hCoV-19^^England|Human|Lighthouse Lab in Alderley Park|Wellcome Sanger Institute for the COVID-19 Genomics UK (COG-UK) Consortium|Davies|United Kingdom

>Spike|hCoV-19/USA/UT-UPHL-2012521294/2020|2020-09-22|EPI\_ISL\_746000|Original|hCoV-19^^Utah|Human|Ginkgo Bioworks Clinical Laboratory|Utah Public Health Laboratory|Young|USA

>Spike|hCoV-19/USA/TX-HMH-3409/2020|2020-06-14|EPI\_ISL\_544169|Original|hCoV-19^^Texas|Human|Houston Methodist Hospital|Houston Methodist Hospital|Long|USA

>Spike|hCoV-19/Australia/VIC16733/2020|2020-08-08|EPI\_ISL\_663558|Original|hCoV-19^^Victoria|Human|Microbiological Diagnostic Unit - Public Health Laboratory (MDU-PHL)|MDU-PHL|Schultz|Australia

>Spike|hCoV-19/England/LIVE-DB9995/2020|2020-11-09|EPI\_ISL\_679382|Original|hCoV-19^^England|Human|Liverpool Clinical Laboratories|COVID-19 Genomics UK (COG-UK) Consortium|Haldenby|United Kingdom

>Spike|hCoV-19/England/CAMB-834DC/2020|2020-04-15|EPI\_ISL\_443447|Original|hCoV-19^^England|Human|Department of Pathology|Wellcome Sanger Institute for the COVID-19 Genomics UK (COG-UK) consortium|Amato|United Kingdom

>Spike|hCoV-19/Netherlands/GE-EMC-232/2020|2020-06-12|EPI\_ISL\_523212|Original|hCoV-19^^Gelderland|Human|Dutch COVID-19 response team|Erasmus Medical Center|Oude Munnink|Netherlands

>Spike|hCoV-19/USA/MI-UM-10036858924/2020|2020-11-09|EPI\_ISL\_728500|Original|hCoV-19^^Michigan|Human|University of Michigan Clinical Microbiology Laboratory|Lauring Lab|Valesano|USA

>Spike|hCoV-19/England/ALDP-9FD4F2/2020|2020-10-01|EPI\_ISL\_587913|Original|hCoV-19^^England|Human|Lighthouse Lab in Alderley Park|Wellcome Sanger Institute for the COVID-19 Genomics UK (COG-UK) consortium|Davies|United Kingdom

>Spike|hCoV-19/England/PORT-2EA18F/2020|2020-00-00|EPI\_ISL\_665745|Original|hCoV-19^^England|Human|Centre for Enzyme Innovation|COVID-19 Genomics UK (COG-UK) Consortium|Robson|United Kingdom

>Spike|hCoV-19/England/ALDP-BBB1CA/2020|2020-11-21|EPI\_ISL\_701856|Original|hCoV-19^^England|Human|Lighthouse Lab in Alderley Park|Wellcome Sanger Institute for the COVID-19 Genomics UK (COG-UK) Consortium|Davies|United Kingdom

>Spike|hCoV-19/USA/UT-UPHL-2012637932/2020|2020-11-24|EPI\_ISL\_747001|Original|hCoV-19^^Utah|Human|Utah Public Health Laboratory|Utah Public Health Laboratory|Gallagher|USA

>Spike|hCoV-19/England/QEUA-B6753A/2020|2020-11-11|EPI\_ISL\_662559|Original|hCoV-19^^England|Human|Lighthouse Lab in Glasgow|Wellcome Sanger Institute for the COVID-19 Genomics UK (COG-UK) Consortium|Davies|United Kingdom

>Spike|hCoV-19/Spain/MD-IBV-97010078/2020|2020-03-19|EPI\_ISL\_779750|Original|hCoV-19^^Madrid|Human|IdISSC/Hospital Cl\u00e9nico San Carlos de Madrid\u200b|SeqCOVID-SPAIN consortium/IBV (CSIC)|Comas|Spain

>Spike|hCoV-19/England/LIVE-DAE887/2020|2020-10-24|EPI\_ISL\_638023|Original|hCoV-19^^England|Human|Liverpool Clinical Laboratories|COVID-19 Genomics UK (COG-UK) Consortium|Haldenby|United Kingdom

>Spike|hCoV-19/USA/TX-HMH-5379/2020|2020-06-26|EPI\_ISL\_544731|Original|hCoV-19^^Texas|Human|Houston Methodist Hospital|Houston Methodist Hospital|Long|USA

>Spike|hCoV-19/Japan/PG-4385/2020|2020-07-00|EPI\_ISL\_692612|Original|hCoV-19^^Japan|Human|Pathogen Genomics Center|Pathogen Genomics Center|Sekizuka|Japan

>Spike|hCoV-19/DRC/3937/2020|2020-04-25|EPI\_ISL\_471398|Original|hCoV-19^^Kinshasa|Human|Viral Respiratory Lab|Pathogen Sequencing Lab|Lusamaki|Democratic Republic of the Congo

>Spike|hCoV-19/England/OXON-B2DD9/2020|2020-03-30|EPI\_ISL\_534815|Original|hCoV-19^^England|Human|Oxford Viromics|COVID-19 Genomics UK (COG-UK) Consortium|Golubchik|United Kingdom

>Spike|hCoV-19/India/DL-59597-CSIR-IGIB/2020|2020-08-05|EPI\_ISL\_636816|Original|hCoV-19^^Delhi|Human|National Centre for Disease control (NCDC)|NCDC/CSIR-IGIB|Faruq|India

>Spike|hCoV-19/Denmark/DCGC-19268/2020|2020-12-07|EPI\_ISL\_748162|Original|hCoV-19^^Syddanmark|Human|Department of Virus and Microbiological Special Diagnostics|Albertsen Lab|Michaelsen|Denmark

>Spike|hCoV-19/USA/NY-Wadsworth-27271-01/2020|2020-03-23|EPI\_ISL\_676759|Original|hCoV-19^^New York|Human|Wadsworth Center|Wadsworth Center|Lasek-Nesselquist|USA

>Spike|hCoV-19/Wales/PHWC-48E701/2020|2020-11-13|EPI\_ISL\_680900|Original|hCoV-19^^Wales|Human|Wales Specialist Virology Centre Sequencing lab|COVID-19 Genomics UK (COG-UK) Consortium|Moore|United Kingdom

>Spike|hCoV-19/Switzerland/BE-ETHZ-110068/2020|2020-04-01|EPI\_ISL\_486497|Original|hCoV-19^^Bern|Human|Viollier AG|Department of Biosystems Science and Engineering|Nadeau|Switzerland

>Spike|hCoV-19/Switzerland/BL-UHB-42202619/2020|2020-03-22|EPI\_ISL\_418439|Original|hCoV-19^^Basel|Human|University Hospital Basel|University Hospital Basel|Roloff Handschin|Switzerland

>Spike|hCoV-19/England/NOTT-11DB2C/2020|2020-11-24|EPI\_ISL\_679935|Original|hCoV-19^^England|Human|Queens Medical Centre|COVID-19 Genomics UK (COG-UK) Consortium|Loose|United Kingdom

>Spike|hCoV-19/USA/NY-Wadsworth-248740-01/2020|2020-10-19|EPI\_ISL\_754716|Original|hCoV-19^^New York|Human|Wadsworth Center|Wadsworth Center|Lasek-Nesselquist|USA

>Spike|hCoV-19/Brazil/SP-L33-CD859/2020|2020-04-22|EPI\_ISL\_722025|Original|hCoV-19^^S\u00e3o Paulo|Human|Hospital das Cl\u00ednicas Universidade de S\u00e3o Paulo Medical School|Laborat\u00f3rio de Parasitologia M\u00e9dica - Instituto de Medicina Tropical - Universidade de S\u00e3o Paulo|de Jesus|Brazil

>Spike|hCoV-19/USA/UT-UPHL-2009511/2020|2020-07-19|EPI\_ISL\_605194|Original|hCoV-19^^Utah|Human|Utah Public Health Laboratory|Utah Public Health Laboratory|Young|USA

>Spike|hCoV-19/Hong Kong/HKU-200723-099/2020|2020-07-09|EPI\_ISL\_497866|Original|hCoV-19^^Hong Kong|Human|Department of Microbiology|Department of Microbiology|Chan|China

>Spike|hCoV-19/Australia/VIC17985/2020|2020-08-22|EPI\_ISL\_779603|Original|hCoV-19^^Victoria|Human|Microbiological Diagnostic Unit - Public Health Laboratory (MDU-PHL)|MDU-PHL|Beck|Australia

>Spike|hCoV-19/England/QEUEH-B118CD/2020|2020-11-02|EPI\_ISL\_642375|Original|hCoV-19^^England|Human|Lighthouse Lab in Glasgow|Wellcome Sanger Institute for the COVID-19 Genomics UK (COG-UK) Consortium|Davies|United Kingdom

>Spike|hCoV-19/England/ALDP-AA4602/2020|2020-10-21|EPI\_ISL\_624352|Original|hCoV-19^^England|Human|Lighthouse Lab in Alderley Park|Wellcome Sanger Institute for the COVID-19 Genomics UK (COG-UK) consortium|Davies|United Kingdom

>Spike|hCoV-19/England/QEUEH-B69608/2020|2020-11-11|EPI\_ISL\_654973|Original|hCoV-19^^England|Human|Lighthouse Lab in Glasgow|Wellcome Sanger Institute for the COVID-19 Genomics UK (COG-UK) Consortium|Davies|United Kingdom

>Spike|hCoV-19/USA/TX-HMH-2534/2020|2020-06-01|EPI\_ISL\_545366|Original|hCoV-19^^Texas|Human|Houston Methodist Hospital|Houston Methodist Hospital|Long|USA

>Spike|hCoV-19/England/MILK-A8E99C/2020|2020-10-19|EPI\_ISL\_651369|Original|hCoV-19^^England|Human|Northumbria University / South Tees Hospitals NHS Foundation Trust



/ North Cumbria Integrated Care NHS Foundation Trust / North Tees and Hartlepool NHS Foundation Trust / Newcastle Hospitals NHS Foundation Trust|COVID-19 Genomics UK (COG-UK) Consortium|Bashton|United Kingdom  
>Spike|hCoV-19/USA/CA-CZB079/2020|2020-03-28|EPI\_ISL\_429005|Original|hCoV-19^^California|Human|UCSF Clinical Microbiology Laboratory|Chan-Zuckerberg Biohub|Kamm|USA  
>Spike|hCoV-19/England/NORT-28953B/2020|2020-03-30|EPI\_ISL\_458597|Original|hCoV-19^^England|Human|NU-OMICS DNA Sequencing research facility|Wellcome Sanger Institute for the COVID-19 Genomics UK (COG-UK) consortium|Davies|United Kingdom  
>Spike|hCoV-19/Brazil/SP-L2-CAMPI30/2020|2020-04-14|EPI\_ISL\_476337|Original|hCoV-19^^S\u00e3o Paulo|Human|Laborat\u00f3rio de Patologia Cl\u00ednica - UNICAMP|Laborat\u00f3rio de Estudos de V\u00edrus Emergentes - UNICAMP|Faria|Brazil  
>Spike|hCoV-19/Ireland/D-NVRL-20G35101/2020|2020-03-20|EPI\_ISL\_605129|Original|hCoV-19^^Dublin|Human|National Virus Reference Laboratory|Irish Coronavirus Sequencing Consortium - Helixworks|Chalapati|Ireland  
>Spike|hCoV-19/Scotland/EDB8572/2020|2020-10-20|EPI\_ISL\_651963|Original|hCoV-19^^Scotland|Human|Virology Department|COVID-19 Genomics UK (COG-UK) Consortium|McHugh|United Kingdom  
>Spike|hCoV-19/England/LIVE-A3913/2020|2020-06-10|EPI\_ISL\_490390|Original|hCoV-19^^England|Human|Liverpool Clinical Laboratories|COVID-19 Genomics UK (COG-UK) Consortium|Haldenby|United Kingdom  
>Spike|hCoV-19/USA/MI-UM-10036858527/2020|2020-11-09|EPI\_ISL\_728453|Original|hCoV-19^^Michigan|Human|University of Michigan Clinical Microbiology Laboratory|Lauring Lab|Valesano|USA  
>Spike|hCoV-19/Aruba/AW-RIVM-10391/2020|2020-08-07|EPI\_ISL\_636517|Original|hCoV-19^^Aruba|Human|Dutch COVID-19 response team|National Institute for Public Health and the Environment (RIVM)|Meijer|Aruba  
>Spike|hCoV-19/Denmark/DCGC-14576/2020|2020-11-30|EPI\_ISL\_711849|Original|hCoV-19^^Sjælland|Human|Department of Virus and Microbiological Special Diagnostics|Albertsen Lab|Michaelsen|Denmark  
>Spike|hCoV-19/England/ALDP-B2479D/2020|2020-11-04|EPI\_ISL\_647085|Original|hCoV-19^^England|Human|Lighthouse Lab in Alderley Park|Wellcome Sanger Institute for the COVID-19 Genomics UK (COG-UK) Consortium|Davies|United Kingdom  
>Spike|hCoV-19/South Korea/KCDC2739/2020|2020-07-16|EPI\_ISL\_522518|Original|hCoV-19^^South Korea|Human|Center for Laboratory Control of Infectious Diseases|Center for Laboratory Control of Infectious Diseases|Kim|South Korea  
>Spike|hCoV-19/England/ALDP-9DA22E/2020|2020-09-19|EPI\_ISL\_576857|Original|hCoV-19^^England|Human|Oxford Viromics|COVID-19 Genomics UK (COG-UK) Consortium|Golubchik|United Kingdom  
>Spike|hCoV-19/Wales/PHWC-497CF7/2020|2020-11-30|EPI\_ISL\_726963|Original|hCoV-19^^Wales|Human|Originating lab|COVID-19 Genomics UK (COG-UK) Consortium|Moore|United Kingdom  
>Spike|hCoV-19/England/CAMB-1B91F3/2020|2020-10-26|EPI\_ISL\_705546|Original|hCoV-19^^England|Human|Department of Pathology|COVID-19 Genomics UK (COG-UK) Consortium|Goodfellow|United Kingdom  
>Spike|hCoV-19/England/CAMC-A81CBE/2020|2020-10-12|EPI\_ISL\_610690|Original|hCoV-19^^England|Human|Lighthouse Lab in Cambridge|Wellcome Sanger Institute for the COVID-19 Genomics UK (COG-UK) consortium|Davies|United Kingdom  
>Spike|hCoV-19/Denmark/DCGC-13149/2020|2020-11-30|EPI\_ISL\_712616|Original|hCoV-19^^Hovedstaden|Human|Department of Virus and Microbiological Special Diagnostics|Albertsen Lab|Michaelsen|Denmark  
>Spike|hCoV-19/USA/TX-HMH-MCoV-15237/2020|2020-10-20|EPI\_ISL\_786721|Original|hCoV-19^^Texas|Human|Houston Methodist Hospital|Houston Methodist Hospital|Long|USA  
>Spike|hCoV-19/Russia/Moscow\_PMVL-3/2020|2020-05-05|EPI\_ISL\_470897|Vero E6|hCoV-19^^Moscow|Human|Pathogenic Microorganisms Variability Laboratory|Pathogenic Microorganisms Variability Laboratory|Shchetinin|Russia  
>Spike|hCoV-19/England/CAMB-1B908D/2020|2020-00-00|EPI\_ISL\_705511|Original|hCoV-19^^England|Human|Department of Pathology|COVID-19 Genomics UK (COG-UK) Consortium|Goodfellow|United Kingdom

>Spike|hCoV-19/USA/FL-BPHL-1979/2020|2020-04-17|EPI\_ISL\_653132|Original|hCoV-19^^Florida|Human|Florida Bureau of Public Health Laboratories|Florida Bureau of Public Health Laboratories|Blanton|USA

>Spike|hCoV-19/England/ALDP-9FD182/2020|2020-10-02|EPI\_ISL\_587817|Original|hCoV-19^^England|Human|Lighthouse Lab in Alderley Park|Wellcome Sanger Institute for the COVID-19 Genomics UK (COG-UK) consortium|Davies|United Kingdom

>Spike|hCoV-19/England/ALDP-CEBA7A/2020|2020-12-21|EPI\_ISL\_782235|Original|hCoV-19^^England|Human|Lighthouse Lab in Alderley Park|Wellcome Sanger Institute for the COVID-19 Genomics UK (COG-UK) Consortium|Davies|United Kingdom

>Spike|hCoV-19/USA/MN-MDH-1537/2020|2020-08-03|EPI\_ISL\_527602|Original|hCoV-19^^Minnesota|Human|Minnesota Department of Health|Minnesota Department of Health|Garfin|USA

>Spike|hCoV-19/England/MILK-60EB38/2020|2020-07-06|EPI\_ISL\_557926|Original|hCoV-19^^England|Human|Lighthouse Lab in Milton Keynes|Wellcome Sanger Institute for the COVID-19 Genomics UK (COG-UK) consortium|Davies|United Kingdom

>Spike|hCoV-19/USA/GA-CDC-7720/2020|2020-10-27|EPI\_ISL\_681805|Original|hCoV-19^^Georgia|Human|GA Department of Public Health Laboratory|Pathogen Discovery|Queen|USA

>Spike|hCoV-19/USA/SC-DHEC-0776/2020|2020-06-26|EPI\_ISL\_538395|Original|hCoV-19^^South Carolina|Human|Microbiology Division|Microbiology Division|Flores|USA

>Spike|hCoV-19/Wales/PHWC-169875/2020|2020-07-15|EPI\_ISL\_512524|Original|hCoV-19^^Wales|Human|Wales Specialist Virology Centre Sequencing lab|COVID-19 Genomics UK (COG-UK) Consortium|Moore|United Kingdom

>Spike|hCoV-19/USA/CA-QDX-33/2020|2020-03-15|EPI\_ISL\_467827|Original|hCoV-19^^California|Human|Quest Diagnostics|Quest Diagnostics|Kagan|USA

>Spike|hCoV-19/Switzerland/ZH-UZH-IMV121/2020|2020-12-20|EPI\_ISL\_730637|Original|hCoV-19^^Zurich|Human|M\u00e4nnedorf Hospital|Institute of Medical Virology|Schmutz|Switzerland

>Spike|hCoV-19/England/EXET-136A99/2020|2020-05-04|EPI\_ISL\_457246|Original|hCoV-19^^England|Human|University of Exeter|COVID-19 Genomics UK (COG-UK) Consortium|Temperton|United Kingdom

>Spike|hCoV-19/Germany/BE-ChVir4525/2020|2020-04-00|EPI\_ISL\_729405|Original|hCoV-19^^Berlin|Human|Charit\u00e9 Universit\u00e4tsmedizin Berlin|Charit\u00e9 Universit\u00e4tsmedizin Berlin|Muehlemann|Germany

>Spike|hCoV-19/England/20142002704/2020|2020-03-30|EPI\_ISL\_423424|Original|hCoV-19^^England|Human|Respiratory Virus Unit|Respiratory Virus Unit|Platt|United Kingdom

>Spike|hCoV-19/USA/TX-HMH-MCoV-15409/2020|2020-10-22|EPI\_ISL\_786893|Original|hCoV-19^^Texas|Human|Houston Methodist Hospital|Houston Methodist Hospital|Long|USA

>Spike|hCoV-19/England/QEUEH-B65ED7/2020|2020-11-10|EPI\_ISL\_655697|Original|hCoV-19^^England|Human|Lighthouse Lab in Glasgow|Wellcome Sanger Institute for the COVID-19 Genomics UK (COG-UK) Consortium|Davies|United Kingdom

>Spike|hCoV-19/England/ALDP-BBA44A/2020|2020-11-21|EPI\_ISL\_701952|Original|hCoV-19^^England|Human|Lighthouse Lab in Alderley Park|Wellcome Sanger Institute for the COVID-19 Genomics UK (COG-UK) Consortium|Davies|United Kingdom

>Spike|hCoV-19/USA/NY-PV09123/2020|2020-03-19|EPI\_ISL\_422498|Original|hCoV-19^^New York|Human|MSHS Clinical Microbiology Laboratories|MSHS Pathogen Surveillance Program|van Bakel|USA

>Spike|hCoV-19/England/CAMC-B21D34/2020|2020-11-02|EPI\_ISL\_645869|Original|hCoV-19^^England|Human|Lighthouse Lab in Cambridge|Wellcome Sanger Institute for the COVID-19 Genomics UK (COG-UK) Consortium|Davies|United Kingdom

>Spike|hCoV-19/Israel/CVL-n25947/2020|2020-07-20|EPI\_ISL\_514281|Original|hCoV-19^^Jerusalem District|Human|Israel Central Virology laboratory|Israel Central Virology laboratory|Zuckerman|Israel

>Spike|hCoV-19/France/PAC-IHU-0620/2020|2020-04-12|EPI\_ISL\_568893|Original|hCoV-19^^Provence-Alpes-C\u00f4te-d\u00e0z|Human|MEPHI|MEPHI|Levasseur|France

>Spike|hCoV-19/England/MILK-A44B23/2020|2020-10-07|EPI\_ISL\_598737|Original|hCoV-19^^England|Human|Lighthouse Lab in Milton Keynes|Wellcome Sanger Institute for the COVID-19 Genomics UK (COG-UK) consortium|Davies|United Kingdom

>Spike|hCoV-19/Wales/ALDP-BB5236/2020|2020-11-21|EPI\_ISL\_710710|Original|hCoV-19^^Wales|Human|Lighthouse Lab in Alderley Park|Wellcome Sanger Institute for the COVID-19 Genomics UK (COG-UK) Consortium|Davies|United Kingdom

>Spike|hCoV-19/Denmark/DCGC-4337/2020|2020-09-07|EPI\_ISL\_615537|Original|hCoV-19^^Sjaelland|Human|Department of Virus and Microbiological Special Diagnostics|Albertsen lab|Michaelsen|Denmark

>Spike|hCoV-19/South Korea/KCDC2381/2020|2020-05-31|EPI\_ISL\_514784|Original|hCoV-19^^South Korea|Human|Division of Viral Diseases|Division of Viral Diseases|Kim|South Korea

>Spike|hCoV-19/England/QEUA-C53ECC/2020|2020-12-11|EPI\_ISL\_736321|Original|hCoV-19^^England|Human|Lighthouse Lab in Glasgow|Wellcome Sanger Institute for the COVID-19 Genomics UK (COG-UK) Consortium|Davies|United Kingdom

>Spike|hCoV-19/Wales/PHWC-485C1A/2020|2020-10-25|EPI\_ISL\_628265|Original|hCoV-19^^Wales|Human|Wales Specialist Virology Centre Sequencing lab|COVID-19 Genomics UK (COG-UK) Consortium|Moore|United Kingdom

>Spike|hCoV-19/Luxembourg/LNS2404691/2020|2020-10-26|EPI\_ISL\_740117|Original|hCoV-19^^Luxembourg|Human|Laboratoire national de sant\u00e9|Laboratoire national de sant\u00e9|Wienecke-Baldacchino|Luxembourg

>Spike|hCoV-19/USA/MI-MDHHS-SC21342/2020|2020-04-02|EPI\_ISL\_507596|Original|hCoV-19^^Michigan|Human|Michigan Department of Health and Human Services|Michigan Department of Health and Human Services|Blankenship|USA

>Spike|hCoV-19/Australia/VIC639/2020|2020-03-29|EPI\_ISL\_426935|Original|hCoV-19^^Victoria|Human|Victorian Infectious Diseases Reference Laboratory (VIDRL)|Microbiological Diagnostic Unit Public Health Laboratory and Victorian Infectious Diseases Reference Laboratory|Schultz|Australia

>Spike|hCoV-19/Scotland/QEUA-9E4D5D/2020|2020-09-24|EPI\_ISL\_601081|Original|hCoV-19^^Scotland|Human|Lighthouse Lab in Glasgow|Wellcome Sanger Institute for the COVID-19 Genomics UK (COG-UK) consortium|Davies|United Kingdom

>Spike|hCoV-19/England/MILK-B55229/2020|2020-11-05|EPI\_ISL\_657927|Original|hCoV-19^^England|Human|Lighthouse Lab in Milton Keynes|Wellcome Sanger Institute for the COVID-19 Genomics UK (COG-UK) Consortium|Davies|United Kingdom

>Spike|hCoV-19/Denmark/DCGC-18284/2020|2020-12-07|EPI\_ISL\_749863|Original|hCoV-19^^Syddanmark|Human|Department of Virus and Microbiological Special Diagnostics|Albertsen Lab|Michaelsen|Denmark

>Spike|hCoV-19/Belgium/ULG-3662/2020|2020-03-07|EPI\_ISL\_417008|Original|hCoV-19^^Li\u00e8ge|Human|Department of Clinical Microbiology|GIGA Medical Genomics|Durkin|Belgium

>Spike|hCoV-19/Italy/LOM-UniMI06/2020|2020-02-24|EPI\_ISL\_779707|Original|hCoV-19^^Lombardy|Human|Laboratory of Infectious Diseases|Laboratory of Infectious Diseases|Lai|Italy

>Spike|hCoV-19/USA/TX-DSHS-1006/2020|2020-07-03|EPI\_ISL\_613976|Original|hCoV-19^^Texas|Human|Texas Department of State Health Services|Texas Department of State Health Services|Rahman|USA

>Spike|hCoV-19/Portugal/PT0521/2020|2020-03-23|EPI\_ISL\_454245|Original|hCoV-19^^Portugal|Human|unknown|Instituto Nacional de Saude (INSA)|Borges|Portugal

>Spike|hCoV-19/Belgium/regal-10151117/2020|2020-10-15|EPI\_ISL\_734495|Original|hCoV-19^^Overijse|Human|UZ Leuven|KU Leuven|Maes|Belgium

>Spike|hCoV-19/USA/CA-SCCPHD-UC147/2020|2020-03-07|EPI\_ISL\_435626|Original|hCoV-19^^California|Human|Santa Clara County Public Health Department|Chiu Laboratory|Chiu|USA

>Spike|hCoV-19/Wales/MILK-9E29F1/2020|2020-09-20|EPI\_ISL\_581153|Original|hCoV-19^^Wales|Human|Lighthouse Lab in Milton Keynes|Wellcome Sanger Institute for the COVID-19 Genomics UK (COG-UK) consortium|Davies|United Kingdom

>Spike|hCoV-19/England/NORT-29D288/2020|2020-05-04|EPI\_ISL\_499800|Original|hCoV-19^^England|Human|Northumbria University / South Tees Hospitals NHS Foundation Trust / North Cumbria Integrated Care NHS Foundation Trust / North Tees and Hartlepool NHS Foundation Trust / Newcastle Hospitals NHS Foundation Trust|COVID-19 Genomics UK (COG-UK) Consortium|Bashton|United Kingdom

>Spike|hCoV-19/Wales/PHWC-2C727/2020|2020-03-31|EPI\_ISL\_445902|Original|hCoV-19^^Wales|Human|Wales Specialist Virology Centre|Public Health Wales Microbiology Cardiff|Moore|United Kingdom

>Spike|hCoV-19/Spain/PV-IBV-003245/2020|2020-03-16|EPI\_ISL\_481039|Original|hCoV-19^^Basque Country|Human|Servicio de Microbiolog\u00eda. Hospital Universitario Donostia. OSI Donostialdea. \u00c1rea de Enfermedades Infecciosas|SeqCOVID-SPAIN consortium/IBV (CSIC) |Comas|Spain

>Spike|hCoV-19/India/MH-AFCO-14752/2020|2020-07-22|EPI\_ISL\_721629|Original|hCoV-19^^Maharashtra|Human|Armed Forces Medical College|National Centre For Cell Science|Paul|India

>Spike|hCoV-19/England/CAMC-B2261A/2020|2020-11-01|EPI\_ISL\_645987|Original|hCoV-19^^England|Human|Lighthouse Lab in Cambridge|Wellcome Sanger Institute for the COVID-19 Genomics UK (COG-UK) Consortium|Davies|United Kingdom

>Spike|hCoV-19/England/ALDP-A84B54/2020|2020-10-18|EPI\_ISL\_610291|Original|hCoV-19^^England|Human|Lighthouse Lab in Alderley Park|Wellcome Sanger Institute for the COVID-19 Genomics UK (COG-UK) consortium|Davies|United Kingdom

>Spike|hCoV-19/England/NORT-29E5D9/2020|2020-05-02|EPI\_ISL\_493521|Original|hCoV-19^^England|Human|Northumbria University / South Tees Hospitals NHS Foundation Trust / North Cumbria Integrated Care NHS Foundation Trust / North Tees and Hartlepool NHS Foundation Trust / Newcastle Hospitals NHS Foundation Trust|COVID-19 Genomics UK (COG-UK) Consortium|Bashton|United Kingdom

>Spike|hCoV-19/England/20170041404/2020|2020-04-17|EPI\_ISL\_465292|Original|hCoV-19^^England|Human|Respiratory Virus Unit|Respiratory Virus Unit|Platt|United Kingdom

>Spike|hCoV-19/England/MILK-9C700C/2020|2020-09-11|EPI\_ISL\_572942|Original|hCoV-19^^England|Human|Northumbria University / South Tees Hospitals NHS Foundation Trust / North Cumbria Integrated Care NHS Foundation Trust / North Tees and Hartlepool NHS Foundation Trust / Newcastle Hospitals NHS Foundation Trust|COVID-19 Genomics UK (COG-UK) Consortium|Bashton|United Kingdom

>Spike|hCoV-19/Wales/PHWC-16CCA3/2020|2020-09-26|EPI\_ISL\_574155|Original|hCoV-19^^Wales|Human|Wales Specialist Virology Centre Sequencing lab|COVID-19 Genomics UK (COG-UK) Consortium|Moore|United Kingdom

>Spike|hCoV-19/Belgium/ULG-11069/2020|2020-12-15|EPI\_ISL\_737320|Original|hCoV-19^^Li\u00e8ge|Human|Department of Clinical Microbiology|GIGA Medical Genomics|Durkin|Belgium

>Spike|hCoV-19/USA/MN-QDX-1779/2020|2020-03-16|EPI\_ISL\_604091|Original|hCoV-19^^Minnesota|Human|Quest Diagnostics|Quest Diagnostics|Kagan|USA

>Spike|hCoV-19/USA/TX-HMH-MCoV-18543/2020|2020-11-20|EPI\_ISL\_784891|Original|hCoV-19^^Texas|Human|Houston Methodist Hospital|Houston Methodist Hospital|Long|USA

>Spike|hCoV-19/Portugal/IGC4095/2020|2020-06-01|EPI\_ISL\_491228|Original|hCoV-19^^Portugal|Human|Instituto Gulbenkian de Ci\u00eancia|Instituto Gulbenkian de Ci\u00eancia|Leite|Portugal

>Spike|hCoV-19/Denmark/ALAB-SSI207/2020|2020-03-10|EPI\_ISL\_429404|Original|hCoV-19^^Denmark|Human|Department of Virus and Microbiological Special Diagnostics|Albertsen lab|Kirkegaard|Denmark

>Spike|hCoV-19/USA/CA-CSMC110/2020|2020-03-22|EPI\_ISL\_475586|Original|hCoV-19^^California|Human|Cedars-Sinai Medical Center|Cedars-Sinai Medical Center|Zhang|USA

>Spike|hCoV-19/Canada/BC-BCCDC-8593/2020|2020-11-00|EPI\_ISL\_740840|Original|hCoV-19^^British Columbia|Human|BCCDC Public Health Laboratory|BCCDC Public Health Laboratory|Prystajecky|Canada

>Spike|hCoV-19/USA/NY-PV08490/2020|2020-03-17|EPI\_ISL\_421426|Original|hCoV-19^^New York|Human|MSHS Clinical Microbiology Laboratories|MSHS Pathogen Surveillance Program|van Bakel|USA

>Spike|hCoV-19/Japan/PG-0904/2020|2020-03-00|EPI\_ISL\_684514|Original|hCoV-19^^Japan|Human|Tokyo Metropolitan Institute of Public Health|Pathogen Genomics Center|Sekizuka|Japan

>Spike|hCoV-19/Denmark/DCGC-14230/2020|2020-11-30|EPI\_ISL\_711642|Original|hCoV-19^^Hovedstaden|Human|Department of Virus and Microbiological Special Diagnostics|Albertsen Lab|Michaelsen|Denmark

>Spike|hCoV-19/Scotland/CVR2481/2020|2020-04-15|EPI\_ISL\_484591|Original|hCoV-19^^Scotland|Human|West of Scotland Specialist Virology Centre|COVID-19 Genomics UK (COG-UK) Consortium|Robertson|United Kingdom

>Spike|hCoV-19/Japan/PG-4643/2020|2020-07-00|EPI\_ISL\_689780|Original|hCoV-19^^Japan|Human|Fukuoka Institute of Health and Environmental Sciences|Pathogen Genomics Center|Sekizuka|Japan

>Spike|hCoV-19/Denmark/DCGC-12985/2020|2020-12-07|EPI\_ISL\_712509|Original|hCoV-19^^Sjaelland|Human|Department of Virus and Microbiological Special Diagnostics|Albertsen Lab|Michaelsen|Denmark

>Spike|hCoV-19/England/ALDP-CED049/2020|2020-12-20|EPI\_ISL\_782478|Original|hCoV-19^^England|Human|Lighthouse Lab in Alderley Park|Wellcome Sanger Institute for the COVID-19 Genomics UK (COG-UK) Consortium|Davies|United Kingdom

>Spike|hCoV-19/Denmark/DCGC-18818/2020|2020-12-07|EPI\_ISL\_748576|Original|hCoV-19^^Midtjylland|Human|Department of Virus and Microbiological Special Diagnostics|Albertsen Lab|Michaelsen|Denmark

>Spike|hCoV-19/USA/TX-HMH-MCoV-12690/2020|2020-08-31|EPI\_ISL\_790465|Original|hCoV-19^^Texas|Human|Houston Methodist Hospital|Houston Methodist Hospital|Long|USA

>Spike|hCoV-19/Australia/VIC5631/2020|2020-07-16|EPI\_ISL\_518442|Original|hCoV-19^^Victoria|Human|Victorian Infectious Diseases Reference Laboratory (VIDRL)|VIDRL and MDU-PHL|Schultz|Australia

>Spike|hCoV-19/USA/TX-HMH-6152/2020|2020-06-22|EPI\_ISL\_547275|Original|hCoV-19^^Texas|Human|Houston Methodist Hospital|Houston Methodist Hospital|Long|USA

>Spike|hCoV-19/Scotland/QEUA-96314B/2020|2020-08-11|EPI\_ISL\_531546|Original|hCoV-19^^Scotland|Human|NHSGGC West of Scotland Specialist Virology Centre / MRC-University of Glasgow Centre for Virus Research|Wellcome Sanger Institute for the COVID-19 Genomics UK (COG-UK) consortium|Davies|United Kingdom

>Spike|hCoV-19/England/ALDP-954C2E/2020|2020-06-12|EPI\_ISL\_553395|Original|hCoV-19^^England|Human|Lighthouse Lab in Alderley Park|Wellcome Sanger Institute for the COVID-19 Genomics UK (COG-UK) consortium|Davies|United Kingdom

>Spike|hCoV-19/England/ALDP-B5D42B/2020|2020-11-10|EPI\_ISL\_678898|Original|hCoV-19^^England|Human|Department of Pathology|COVID-19 Genomics UK (COG-UK) Consortium|Goodfellow|United Kingdom

>Spike|hCoV-19/England/QEUA-AD2067/2020|2020-10-26|EPI\_ISL\_634101|Original|hCoV-19^^England|Human|Lighthouse Lab in Glasgow|Wellcome Sanger Institute for the COVID-19 Genomics UK (COG-UK) consortium|Davies|United Kingdom

>Spike|hCoV-19/USA/WA-S1866/2020|2020-05-27|EPI\_ISL\_496292|Original|hCoV-19^^Washington|Human|Washington State Department of Health|Seattle Flu Study|Lee|USA

>Spike|hCoV-19/England/QEUA-9CFE46/2020|2020-09-15|EPI\_ISL\_589960|Original|hCoV-19^^England|Human|Lighthouse Lab in Glasgow|Wellcome Sanger Institute for the COVID-19 Genomics UK (COG-UK) consortium|Davies|United Kingdom

>Spike|hCoV-19/England/ALDP-9C52BD/2020|2020-09-10|EPI\_ISL\_567657|Original|hCoV-19^^England|Human|Lighthouse Lab in Alderley Park|Wellcome Sanger Institute for the COVID-19 Genomics UK (COG-UK) consortium|Davies|United Kingdom

>Spike|hCoV-19/Australia/SAP310/2020|2020-03-27|EPI\_ISL\_483093|Original|hCoV-19^^South Australia|Human|SA Pathology|SA Pathology|Leong|Australia

>Spike|hCoV-19/Netherlands/ZH-EMC-690/2020|2020-09-25|EPI\_ISL\_632544|Original|hCoV-19^^Zuid Holland|Human|Dutch COVID-19 response team|Erasmus Medical Center|Oude Munnink|Netherlands

>Spike|hCoV-19/USA/MI-MDHHS-SC20707/2020|2020-04-27|EPI\_ISL\_471731|Original|hCoV-19^^Michigan|Human|Michigan Department of Health and Human Services|Michigan Department of Health and Human Services|Blankenship|USA

>Spike|hCoV-19/England/QEUA-9C9B36/2020|2020-09-10|EPI\_ISL\_567352|Original|hCoV-19^^England|Human|Lighthouse Lab in Glasgow|Wellcome Sanger Institute for the COVID-19 Genomics UK (COG-UK) consortium|Davies|United Kingdom

>Spike|hCoV-19/USA/WA-S274/2020|2020-03-08|EPI\_ISL\_430128|Original|hCoV-19^^Washington|Human|Seattle Flu Study|Seattle Flu Study|Bedford|USA

>Spike|hCoV-19/Australia/VIC4061/2020|2020-07-10|EPI\_ISL\_519443|Original|hCoV-19^^Victoria|Human|Microbiological Diagnostic Unit - Public Health Laboratory (MDU-PHL)|MDU-PHL|Schultz|Australia

>Spike|hCoV-19/USA/TX-HMH-MCoV-14183/2020|2020-10-02|EPI\_ISL\_787468|Original|hCoV-19^^Texas|Human|Houston Methodist Hospital|Houston Methodist Hospital|Long|USA

>Spike|hCoV-19/USA/NY-NYCPHL-000583/2020|2020-03-09|EPI\_ISL\_632041|Original|hCoV-19^^New York|Human|New York Presbyterian Lower Manhattan|New York City Public Health Laboratory|Wang|USA

>Spike|hCoV-19/England/ALDP-950EA4/2020|2020-06-14|EPI\_ISL\_554189|Original|hCoV-19^^England|Human|Lighthouse Lab in Alderley Park|Wellcome Sanger Institute for the COVID-19 Genomics UK (COG-UK) consortium|Davies|United Kingdom

>Spike|hCoV-19/Japan/PG-6126/2020|2020-08-00|EPI\_ISL\_689238|Original|hCoV-19^^Japan|Human|Pathogen Genomics Center|Pathogen Genomics Center|Sekizuka|Japan

>Spike|hCoV-19/Wuhan/HB-WH1-130/2020|2020-03-02|EPI\_ISL\_454909|Original|hCoV-19^^Hubei|Human|Wuhan Chain Medical Labs (CMLabs)|State Key Laboratory of Biotherapy of Sichuan University|Tang|China

>Spike|hCoV-19/Wales/PHWC-48885F/2020|2020-11-03|EPI\_ISL\_639436|Original|hCoV-19^^Wales|Human|Wales Specialist Virology Centre Sequencing lab|COVID-19 Genomics UK (COG-UK) Consortium|Moore|United Kingdom

>Spike|hCoV-19/England/QEUA-9F8C2C/2020|2020-09-27|EPI\_ISL\_588961|Original|hCoV-19^^England|Human|Lighthouse Lab in Glasgow|Wellcome Sanger Institute for the COVID-19 Genomics UK (COG-UK) consortium|Davies|United Kingdom

>Spike|hCoV-19/Canada/BC\_21451231/2020|2020-04-00|EPI\_ISL\_477029|Original|hCoV-19^^British Columbia|Human|BCCDC Public Health Laboratory|BCCDC Public Health Laboratory|Harrigan|Canada

>Spike|hCoV-19/Spain/VC-FISABIO-240/2020|2020-03-26|EPI\_ISL\_436335|Original|hCoV-19^^Comunitat Valenciana|Human|Servicio de Microbiologia. Hospital Clinico Universitario de Valencia|Sequencing and Bioinformatics Service and Molecular Epidemiology Research Group. FISABIO-Public Health|Gonzalez-Candelas|Spain

>Spike|hCoV-19/Wales/PHWC-493341/2020|2020-11-28|EPI\_ISL\_725871|Original|hCoV-19^^Wales|Human|Originating lab|COVID-19 Genomics UK (COG-UK) Consortium|Moore|United Kingdom

>Spike|hCoV-19/Belgium/ULG-11085/2020|2020-12-15|EPI\_ISL\_737335|Original|hCoV-19^^Li\u00e8ge|Human|Department of Clinical Microbiology|GIGA Medical Genomics|Durkin|Belgium

>Spike|hCoV-19/Australia/VIC11030/2020|2020-08-03|EPI\_ISL\_563210|Original|hCoV-19^^Victoria|Human|Microbiological Diagnostic Unit - Public Health Laboratory (MDU-PHL)|MDU-PHL|Schultz|Australia

>Spike|hCoV-19/England/CAMC-A81F1F/2020|2020-10-13|EPI\_ISL\_610781|Original|hCoV-19^^England|Human|Lighthouse Lab in Cambridge|Wellcome Sanger Institute for the COVID-19 Genomics UK (COG-UK) consortium|Davies|United Kingdom

>Spike|hCoV-19/England/QEUA-9AECBC/2020|2020-08-31|EPI\_ISL\_572957|Original|hCoV-19^^England|Human|University College London|COVID-19 Genomics UK (COG-UK) Consortium|Roy|United Kingdom

>Spike|hCoV-19/Portugal/PT1859/2020|2020-11-13|EPI\_ISL\_732078|Original|hCoV-19^^Portugal|Human|Instituto Nacional de Saude (INSA)|Instituto Nacional de Saude (INSA)|Borges|Portugal

>Spike|hCoV-19/Denmark/DCGC-11491/2020|2020-11-02|EPI\_ISL\_670954|Original|hCoV-19^^Nordjylland|Human|Department of Virus and Microbiological Special Diagnostics|Albertsen Lab|Michaelsen|Denmark

>Spike|hCoV-19/USA/CA-SR0383/2020|2020-04-27|EPI\_ISL\_458263|Original|hCoV-19^^California|Human|Scripps Medical Laboratory|Andersen lab at Scripps Research|Gangavarapu|USA

>Spike|hCoV-19/Canada/NB-224/2020|2020-03-26|EPI\_ISL\_479640|Original|hCoV-19^^New Brunswick|Human|Dr. Georges-L.-Dumont University Hospital Centre|National Microbiology Laboratory|Majer|Canada

>Spike|hCoV-19/USA/PA-MGEL-00005/2020|2020-03-26|EPI\_ISL\_681943|Original|hCoV-19^^Pennsylvania|Human|UPMC Clinical Microbiology Laboratory|Microbial Genomic Epidemiology Laboratory|Griffith|USA

>Spike|hCoV-19/USA/FL-BPHL-1489/2020|2020-08-10|EPI\_ISL\_568587|Original|hCoV-19^^Florida|Human|Florida Bureau of Public Health Laboratories|Florida Bureau of Public Health Laboratories|Blanton|USA

>Spike|hCoV-19/Singapore/913/2020|2020-02-20|EPI\_ISL\_538436|Original|hCoV-19^^Singapore|Human|Department of Laboratory Medicine|Department of Laboratory Medicine|Chen|Singapore

>Spike|hCoV-19/England/CAMC-CFD92D/2020|2020-12-23|EPI\_ISL\_781829|Original|hCoV-19^^England|Human|Lighthouse Lab in Cambridge|Wellcome Sanger Institute for the COVID-19 Genomics UK (COG-UK) Consortium|Davies|United Kingdom

>Spike|hCoV-19/Denmark/DCGC-6323/2020|2020-09-14|EPI\_ISL\_615823|Original|hCoV-19^^Hovedstaden|Human|Department of Virus and Microbiological Special Diagnostics|Albertsen lab|Michaelsen|Denmark

>Spike|hCoV-19/Belgium/ULG-10551/2020|2020-10-23|EPI\_ISL\_626312|Original|hCoV-19^^Li\u00e8ge|Human|Department of Clinical Microbiology|GIGA Medical Genomics|Durkin|Belgium

>Spike|hCoV-19/England/MILK-AC92D6/2020|2020-10-21|EPI\_ISL\_629191|Original|hCoV-19^^England|Human|Lighthouse Lab in Milton Keynes|Wellcome Sanger Institute for the COVID-19 Genomics UK (COG-UK) consortium|Davies|United Kingdom

>Spike|hCoV-19/USA/UT-08552/2020|2020-05-18|EPI\_ISL\_524311|Original|hCoV-19^^Utah|Human|Utah Public Health Laboratory|Utah Public Health Laboratory|Young|USA

>Spike|hCoV-19/Canada/NL\_72/2020|2020-03-19|EPI\_ISL\_482479|Original|hCoV-19^^Newfoundland and Labrador|Human|Public Health Laboratory|National Microbiology Laboratory|Majer|Canada

>Spike|hCoV-19/England/NORW-E703C/2020|2020-04-19|EPI\_ISL\_448998|Original|hCoV-19^^England|Human|Quadram Institute Bioscience|COVID-19 Genomics UK (COG-UK) Consortium|Alikhan|United Kingdom

>Spike|hCoV-19/England/CAMC-B22216/2020|2020-11-02|EPI\_ISL\_646128|Original|hCoV-19^^England|Human|Lighthouse Lab in Cambridge|Wellcome Sanger Institute for the COVID-19 Genomics UK (COG-UK) Consortium|Davies|United Kingdom

>Spike|hCoV-19/England/GSTT-265DC04/2020|2020-03-28|EPI\_ISL\_484081|Original|hCoV-19^^England|Human|Centre for Clinical Infection and Diagnostics Research and Genomics Innovation Unit|COVID-19 Genomics UK (COG-UK) Consortium|Awan|United Kingdom

>Spike|hCoV-19/Canada/BC-BCCDC-8619/2020|2020-11-00|EPI\_ISL\_740855|Original|hCoV-19^^British Columbia|Human|BCCDC Public Health Laboratory|BCCDC Public Health Laboratory|Prystajecky|Canada

>Spike|hCoV-19/England/QEUEH-C4BD15/2020|2020-12-14|EPI\_ISL\_736631|Original|hCoV-19^^England|Human|Lighthouse Lab in Glasgow|Wellcome Sanger Institute for the COVID-19 Genomics UK (COG-UK) Consortium|Davies|United Kingdom

>Spike|hCoV-19/Netherlands/NH-EMC-39/2020|2020-05-15|EPI\_ISL\_523408|Original|hCoV-19^^Noord Holland|Human|Dutch COVID-19 response team|Erasmus Medical Center|Oude Munnink|Netherlands

>Spike|hCoV-19/USA/MI-QDX-1704/2020|2020-03-18|EPI\_ISL\_604039|Original|hCoV-19^^Michigan|Human|Quest Diagnostics|Quest Diagnostics|Kagan|USA

>Spike|hCoV-19/Singapore/849/2020|2020-06-14|EPI\_ISL\_518014|Original|hCoV-19^^Singapore|Human|Singapore General Hospital|Department of Microbiology|Abdul Rahman|Singapore

>Spike|hCoV-19/England/CAMB-75C5D/2020|2020-03-29|EPI\_ISL\_438304|Original|hCoV-19^^England|Human|Department of Pathology|Wellcome Sanger Institute for the COVID-19 Genomics UK (COG-UK) consortium|Amato|United Kingdom

>Spike|hCoV-19/Russia/SPE-RII-MH6849S/2020|2020-11-13|EPI\_ISL\_733399|Original|hCoV-19^^Saint Petersburg|Human|HELIX LLC|WHO National Influenza Centre Russian Federation|Komissarov|Russia

>Spike|hCoV-19/Luxembourg/LNS6860551/2020|2020-12-28|EPI\_ISL\_770883|Original|hCoV-19^^Luxembourg|Human|Laboratoire national de sant\u00e9|Laboratoire national de sant\u00e9|Wienecke-Baldacchino|Luxembourg

>Spike|hCoV-19/England/ALDP-B24F77/2020|2020-11-04|EPI\_ISL\_646770|Original|hCoV-19^^England|Human|Lighthouse Lab in Alderley Park|Wellcome Sanger Institute for the COVID-19 Genomics UK (COG-UK) Consortium|Davies|United Kingdom

>Spike|hCoV-19/Scotland/CVR248/2020|2020-03-20|EPI\_ISL\_433276|Original|hCoV-19^^Scotland|Human|West of Scotland Specialist Virology Centre|COVID-19 Genomics UK (COG-UK) Consortium|Robertson|United Kingdom

>Spike|hCoV-19/Denmark/DCGC-21127/2020|2020-12-21|EPI\_ISL\_759568|Original|hCoV-19^^Hovedstaden|Human|Department of Virus and Microbiological Special Diagnostics|Albertsen Lab|Michaelsen|Denmark

>Spike|hCoV-19/England/QEUA-AA0220/2020|2020-10-20|EPI\_ISL\_611460|Original|hCoV-19^^England|Human|Lighthouse Lab in Glasgow|Wellcome Sanger Institute for the COVID-19 Genomics UK (COG-UK) consortium|Davies|United Kingdom

>Spike|hCoV-19/England/QEUA-C3481E/2020|2020-12-11|EPI\_ISL\_734138|Original|hCoV-19^^England|Human|Lighthouse Lab in Glasgow|Wellcome Sanger Institute for the COVID-19 Genomics UK (COG-UK) Consortium|Davies|United Kingdom

>Spike|hCoV-19/Switzerland/AG-ETHZ-180018/2020|2020-06-29|EPI\_ISL\_489966|Original|hCoV-19^^Aargau|Human|Viollier AG|Department of Biosystems Science and Engineering|Nadeau|Switzerland

>Spike|hCoV-19/USA/CA-CZB-10310/2020|2020-09-11|EPI\_ISL\_583028|Original|hCoV-19^^California|Human|Orange County Public Health Lab|Chan-Zuckerberg Biohub|Bhatt|USA

>Spike|hCoV-19/Scotland/EDB4454/2020|2020-05-06|EPI\_ISL\_461711|Original|hCoV-19^^Scotland|Human|Virology Department|COVID-19 Genomics UK (COG-UK) Consortium|Williams|United Kingdom

>Spike|hCoV-19/Belgium/regal-12091379/2020|2020-12-09|EPI\_ISL\_738431|Original|hCoV-19^^Mol|Human|UZ Leuven|KU Leuven|Maes|Belgium

>Spike|hCoV-19/Canada/Qc-L00241214/2020|2020-03-23|EPI\_ISL\_465700|Original|hCoV-19^^Quebec|Human|H\u00f4pital Pierre-Boucher|Laboratoire de sant\u00e9 publique du Qu\u00e9bec|Moreira|Canada

>Spike|hCoV-19/Wales/PHWC-1681F3/2020|2020-04-20|EPI\_ISL\_494212|Original|hCoV-19^^Wales|Human|Originating lab|COVID-19 Genomics UK (COG-UK) Consortium|Moore|United Kingdom

>Spike|hCoV-19/USA/WA-UW-13366/2020|2020-07-01|EPI\_ISL\_501144|Original|hCoV-19^^Washington|Human|University of Washington Virology Lab|University of Washington Virology Lab|Roychoudhury|USA

>Spike|hCoV-19/Kuwait/KU-2/2020|2020-05-10|EPI\_ISL\_746320|Original|hCoV-19^^Kuwait|Human|Mubarak Al-Kabeer Hospital|Virology Unit|Madi|Kuwait

>Spike|hCoV-19/England/LOND-1250EB7/2020|2020-11-05|EPI\_ISL\_665785|Original|hCoV-19^^England|Human|University College London Hospital|COVID-19 Genomics UK (COG-UK) Consortium|Byott|United Kingdom

>Spike|hCoV-19/USA/NY-NYUMC509/2020|2020-03-30|EPI\_ISL\_444626|Original|hCoV-19^^New York|Human|NYU Langone Health|Departments of Pathology and Medicine|Maurano|USA

>Spike|hCoV-19/USA/CO-CDC-2-3713980/2020|2020-12-03|EPI\_ISL\_751575|Original|hCoV-19^^Colorado|Human|CO Dept. of Public Health and Environment|Genomics and Discovery|Queen|USA

>Spike|hCoV-19/Wales/ALDP-C3B440/2020|2020-12-08|EPI\_ISL\_767206|Original|hCoV-19^^Wales|Human|Lighthouse Lab in Alderley Park|Wellcome Sanger Institute for the COVID-19 Genomics UK (COG-UK) Consortium|Davies|United Kingdom

>Spike|hCoV-19/Sweden/20-53267/2020|2020-10-26|EPI\_ISL\_661291|Original|hCoV-19^^Vasternorrland|Human|Mikrobiologen|The Public Health Agency of Sweden|Svartstr\u00f6m|Sweden

>Spike|hCoV-19/Australia/VIC5299/2020|2020-07-16|EPI\_ISL\_520062|Original|hCoV-19^^Victoria|Human|Microbiological Diagnostic Unit - Public Health Laboratory (MDU-PHL)|MDU-PHL|Schultz|Australia

>Spike|hCoV-19/Japan/PG-5055/2020|2020-08-00|EPI\_ISL\_690166|Original|hCoV-19^^Japan|Human|Pathogen Genomics Center|Pathogen Genomics Center|Sekizuka|Japan

>Spike|hCoV-19/Netherlands/OV-EMC-53/2020|2020-05-04|EPI\_ISL\_523437|Original|hCoV-19^^Overijssel|Human|Dutch COVID-19 response team|Erasmus Medical Center|Oude Munnink|Netherlands

>Spike|hCoV-19/Netherlands/NB-EMC-322/2020|2020-07-08|EPI\_ISL\_632775|Original|hCoV-19^^Noord Brabant|Human|Dutch COVID-19 response team|Erasmus Medical Center|Oude Munnink|Netherlands

>Spike|hCoV-19/Denmark/ALAB-SSI-833/2020|2020-03-30|EPI\_ISL\_444929|Original|hCoV-19^^Denmark|Human|Department of Virus and Microbiological Special Diagnostics|Albertsen lab|Kirkegaard|Denmark



>Spike|hCoV-19/Switzerland/ZH-ETHZ-260087/2020|2020-08-25|EPI\_ISL\_539408|Original|hCoV-19^^Zurich|Human|Viollier AG|Department of Biosystems Science and Engineering|Nadeau|Switzerland

>Spike|hCoV-19/England/MILK-A7ACB8/2020|2020-10-15|EPI\_ISL\_606800|Original|hCoV-19^^England|Human|Lighthouse Lab in Milton Keynes|Wellcome Sanger Institute for the COVID-19 Genomics UK (COG-UK) consortium|Davies|United Kingdom

>Spike|hCoV-19/USA/NY-PV09449/2020|2020-03-09|EPI\_ISL\_450123|Original|hCoV-19^^New York|Human|MSHS Clinical Microbiology Laboratories|MSHS Pathogen Surveillance Program|van Bakel|USA

>Spike|hCoV-19/England/CAMC-BD1F00/2020|2020-11-28|EPI\_ISL\_702091|Original|hCoV-19^^England|Human|Lighthouse Lab in Cambridge|Wellcome Sanger Institute for the COVID-19 Genomics UK (COG-UK) Consortium|Davies|United Kingdom

>Spike|hCoV-19/Australia/NSW2827/2020|2020-10-04|EPI\_ISL\_577597|Original|hCoV-19^^New South Wales|Human|Area of Virology|Area of Virology|Yeang|Australia

>Spike|hCoV-19/England/MILK-B031A5/2020|2020-10-21|EPI\_ISL\_642851|Original|hCoV-19^^England|Human|Lighthouse Lab in Milton Keynes|Wellcome Sanger Institute for the COVID-19 Genomics UK (COG-UK) Consortium|Davies|United Kingdom

>Spike|hCoV-19/Russia/KDA-RII-MH2773S/2020|2020-09-17|EPI\_ISL\_602443|Original|hCoV-19^^Krasnodar|Human|HELIX LLC|WHO National Influenza Centre Russian Federation|Komissarov|Russia

>Spike|hCoV-19/USA/TX-HMH-MCoV-18106/2020|2020-11-17|EPI\_ISL\_784454|Original|hCoV-19^^Texas|Human|Houston Methodist Hospital|Houston Methodist Hospital|Long|USA

>Spike|hCoV-19/Chile/RM-110981/2020|2020-06-25|EPI\_ISL\_746578|Original|hCoV-19^^Region Metropolitana de Santiago|Human|Genetica Molecular and Subdepartamento de Virologia ISP Chile|Instituto de Salud Publica de Chile|Tognarelli|Chile

>Spike|hCoV-19/Denmark/DCGC-16804/2020|2020-12-14|EPI\_ISL\_750574|Original|hCoV-19^^Hovedstaden|Human|Department of Virus and Microbiological Special Diagnostics|Albertsen Lab|Michaelsen|Denmark

>Spike|hCoV-19/Japan/IC-0024/2020|2020-04-00|EPI\_ISL\_591368|Original|hCoV-19^^Japan|Human|Pathogen Genomics Center|Pathogen Genomics Center|Sekizuka|Japan

>Spike|hCoV-19/England/ALDP-B1A3D2/2020|2020-11-01|EPI\_ISL\_646117|Original|hCoV-19^^England|Human|Lighthouse Lab in Alderley Park|Wellcome Sanger Institute for the COVID-19 Genomics UK (COG-UK) Consortium|Davies|United Kingdom

>Spike|hCoV-19/Scotland/EDB3162/2020|2020-04-06|EPI\_ISL\_488967|Original|hCoV-19^^Scotland|Human|Virology Department|Wellcome Sanger Institute for the COVID-19 Genomics UK (COG-UK) consortium|Davies|United Kingdom

>Spike|hCoV-19/Denmark/DCGC-18598/2020|2020-12-07|EPI\_ISL\_750071|Original|hCoV-19^^Hovedstaden|Human|Department of Virus and Microbiological Special Diagnostics|Albertsen Lab|Michaelsen|Denmark

>Spike|hCoV-19/USA/UT-UPHL-2012033033/2020|2020-11-30|EPI\_ISL\_779295|Original|hCoV-19^^Utah|Human|Utah Public Health Laboratory|Utah Public Health Laboratory|Gallagher|USA

>Spike|hCoV-19/Spain/PV-IBV-000855/2020|2020-03-11|EPI\_ISL\_452697|Original|hCoV-19^^Basque Country|Human|Hospital Universitario Araba. Vitoria-Gasteiz,|SeqCOVID-SPAIN consortium/IBV (CSIC)|Comas|Spain

>Spike|hCoV-19/New Zealand/20VR2023/2020|2020-00-00|EPI\_ISL\_579210|Original|hCoV-19^^Combined Wellington|Human|Wellington SCL (WN)|Institute of Environmental Science and Research (ESR)|Wang|New Zealand

>Spike|hCoV-19/England/QEUEH-B6A230/2020|2020-11-11|EPI\_ISL\_662599|Original|hCoV-19^^England|Human|Lighthouse Lab in Glasgow|Wellcome Sanger Institute for the COVID-19 Genomics UK (COG-UK) Consortium|Davies|United Kingdom

>Spike|hCoV-19/Mexico/BCN-ALSR-1474/2020|2020-04-28|EPI\_ISL\_496343|Original|hCoV-19^^Baja California|Human|Infectolab|Andersen lab at Scripps Research|Gangavarapu|Mexico

>Spike|hCoV-19/England/205260452/2020|2020-12-21|EPI\_ISL\_754380|Original|hCoV-19^^England|Human|Respiratory Virus Unit|COVID-19 Genomics UK (COG-UK) Consortium|Platt|United Kingdom

>Spike|hCoV-19/England/CAMC-B08805/2020|2020-10-29|EPI\_ISL\_643850|Original|hCoV-19^^England|Human|Lighthouse Lab in Cambridge|Wellcome Sanger Institute for the COVID-19 Genomics UK (COG-UK) Consortium|Davies|United Kingdom

>Spike|hCoV-19/England/QEUEH-96CB26/2020|2020-08-21|EPI\_ISL\_530698|Original|hCoV-19^^England|Human|Lighthouse Lab in Glasgow|Wellcome Sanger Institute for the COVID-19 Genomics UK (COG-UK) consortium|Davies|United Kingdom

>Spike|hCoV-19/Wales/PHWC-48FD77/2020|2020-11-11|EPI\_ISL\_681225|Original|hCoV-19^^Wales|Human|Wales Specialist Virology Centre Sequencing lab|COVID-19 Genomics UK (COG-UK) Consortium|Moore|United Kingdom

>Spike|hCoV-19/England/LIVE-A9C9C/2020|2020-03-25|EPI\_ISL\_517346|Original|hCoV-19^^England|Human|Liverpool Clinical Laboratories|COVID-19 Genomics UK (COG-UK) Consortium|Haldenby|United Kingdom

>Spike|hCoV-19/England/GSTT-6754/2020|2020-03-30|EPI\_ISL\_560729|Original|hCoV-19^^England|Human|Centre for Clinical Infection and Diagnostics Research and Genomics Innovation Unit|Centre for Clinical Infection and Diagnostics Research and Genomics Innovation Unit|Awan|United Kingdom

>Spike|hCoV-19/Australia/VIC9248/2020|2020-08-11|EPI\_ISL\_565464|Original|hCoV-19^^Victoria|Human|Victorian Infectious Diseases Reference Laboratory (VIDRL)|VIDRL and MDU-PHL|Schultz|Australia

>Spike|hCoV-19/England/PORT-2E9C52/2020|2020-00-00|EPI\_ISL\_704587|Original|hCoV-19^^England|Human|Centre for Enzyme Innovation|COVID-19 Genomics UK (COG-UK) Consortium|Robson|United Kingdom

>Spike|hCoV-19/Northern Ireland/NIRE-FAC8D/2020|2020-03-26|EPI\_ISL\_441765|Original|hCoV-19^^Northern Ireland|Human|Regional Virus Laboratory|Wellcome Sanger Institute for the COVID-19 Genomics UK (COG-UK) consortium|Amato|United Kingdom

>Spike|hCoV-19/USA/TX-HMH-5127/2020|2020-06-21|EPI\_ISL\_544542|Original|hCoV-19^^Texas|Human|Houston Methodist Hospital|Houston Methodist Hospital|Long|USA

>Spike|hCoV-19/England/QEUEH-9DD1E2/2020|2020-09-21|EPI\_ISL\_599813|Original|hCoV-19^^England|Human|Lighthouse Lab in Glasgow|Wellcome Sanger Institute for the COVID-19 Genomics UK (COG-UK) consortium|Davies|United Kingdom

>Spike|hCoV-19/England/ALDP-9C5147/2020|2020-09-10|EPI\_ISL\_567668|Original|hCoV-19^^England|Human|Lighthouse Lab in Alderley Park|Wellcome Sanger Institute for the COVID-19 Genomics UK (COG-UK) consortium|Davies|United Kingdom

>Spike|hCoV-19/Japan/TKYT22355/2020|2020-07-00|EPI\_ISL\_649127|Original|hCoV-19^^Japan|Human|Tokyo Metropolitan Institute of Public Health|Tokyo Metropolitan Institute of Public Health|Ryota|Japan

>Spike|hCoV-19/England/LCST-24D732D/2020|2020-06-29|EPI\_ISL\_499979|Original|hCoV-19^^England|Human|University Hospitals Of Leicester NHS Trust and DeepSeq Nottingham|COVID-19 Genomics UK (COG-UK) Consortium|Loose|United Kingdom

>Spike|hCoV-19/Gambia/NPHL-2729/2020|2020-07-23|EPI\_ISL\_561290|Original|hCoV-19^^Kombo|Human|MRCG at LSHTM Genomics lab|MRCG at LSHTM Genomics lab|Sesay|Gambia

>Spike|hCoV-19/Denmark/DCGC-9407/2020|2020-11-16|EPI\_ISL\_668956|Original|hCoV-19^^Nordjylland|Human|Department of Virus and Microbiological Special Diagnostics|Albertsen Lab|Michaelsen|Denmark

>Spike|hCoV-19/Wales/PHWC-16AC0F/2020|2020-09-13|EPI\_ISL\_560171|Original|hCoV-19^^Wales|Human|Wales Specialist Virology Centre Sequencing lab|COVID-19 Genomics UK (COG-UK) Consortium|Moore|United Kingdom

>Spike|hCoV-19/Canada/QC\_AR2/2020|2020-04-03|EPI\_ISL\_476512|Original|hCoV-19^^Quebec|Human|Laboratoire de microbiologie|Smith Laboratory|Smith|Canada

>Spike|hCoV-19/Brazil/SP-425/2020|2020-07-10|EPI\_ISL\_574594|Original|hCoV-19^^S\u00e3o Paulo|Human|Hospital Escola da Universidade de Taubate|Instituto Adolfo Lutz|Sacchi|Brazil

>Spike|hCoV-19/Spain/PV-HUB-50066191/2020|2020-06-08|EPI\_ISL\_489835|Original|hCoV-19^^Basque Country|Human|Clinical Microbiology Laboratory- Basurto University Hospital|Biocruces-Bizkaia|Urrutikoetxea-Gutierrez|Spain

>Spike|hCoV-19/England/CAMB-7368E/2020|2020-03-22|EPI\_ISL\_440261|Original|hCoV-19^^England|Human|Department of Pathology|Wellcome Sanger Institute for the COVID-19 Genomics UK (COG-UK) consortium|Amato|United Kingdom

>Spike|hCoV-19/USA/TX-DSHS-0218/2020|2020-04-02|EPI\_ISL\_525779|Original|hCoV-19^^Texas|Human|Texas Department of State Health Services|Texas Department of State Health Services|Rahman|USA

>Spike|hCoV-19/Australia/NSW974/2020|2020-09-15|EPI\_ISL\_545046|Original|hCoV-19^^New South Wales|Human|Pathology West - NSW Health Pathology|NSW Health Pathology - Institute of Clinical Pathology and Medical Research; Westmead Hospital; University of Sydney|Gall|Australia

>Spike|hCoV-19/England/QEUA-A0B2F6/2020|2020-09-29|EPI\_ISL\_599144|Original|hCoV-19^^England|Human|Lighthouse Lab in Glasgow|Wellcome Sanger Institute for the COVID-19 Genomics UK (COG-UK) consortium|Davies|United Kingdom

>Spike|hCoV-19/England/SHEF-10C8F9B/2020|2020-12-19|EPI\_ISL\_765159|Original|hCoV-19^^England|Human|Virology Department|COVID-19 Genomics UK (COG-UK) Consortium|de Silva|United Kingdom

>Spike|hCoV-19/England/NORT-2995A1/2020|2020-04-24|EPI\_ISL\_492459|Original|hCoV-19^^England|Human|NU-OMICS DNA Sequencing research facility|Wellcome Sanger Institute for the COVID-19 Genomics UK (COG-UK) consortium|Davies|United Kingdom

>Spike|hCoV-19/USA/OR-OHSU-0665/2020|2020-06-16|EPI\_ISL\_525876|Original|hCoV-19^^Oregon|Human|OHSU Lab Services Molecular Microbiology Lab|Oregon SARS-CoV-2 Genome Sequencing Center|O'Roak|USA

>Spike|hCoV-19/Spain/MD-HLP-105-2/2020|2020-05-04|EPI\_ISL\_534331|Original|hCoV-19^^Madrid|Human|Hospital Universitario La Paz|Hospital Universitario La Paz|Viedma|Spain

>Spike|hCoV-19/Chile/RM-167057/2020|2020-09-02|EPI\_ISL\_746496|Original|hCoV-19^^Region Metropolitana de Santiago|Human|Genetica Molecular and Subdepartamento de Virologia ISP Chile|Instituto de Salud Publica de Chile|Tognarelli|Chile

>Spike|hCoV-19/Denmark/DCGC-7719/2020|2020-10-19|EPI\_ISL\_618592|Original|hCoV-19^^Hovedstaden|Human|Department of Virus and Microbiological Special Diagnostics|Albertsen lab|Michaelsen|Denmark

>Spike|hCoV-19/USA/GA-QDX-2150/2020|2020-03-14|EPI\_ISL\_604450|Original|hCoV-19^^Georgia|Human|Quest Diagnostics|Quest Diagnostics|Kagan|USA

>Spike|hCoV-19/Canada/QC-LSPQ-L00232447/2020|2020-03-22|EPI\_ISL\_535987|Original|hCoV-19^^Quebec|Human|H\u00f4pital de Rouyn-Noranda|Laboratoire de sant\u00e9 publique du Qu\u00e9bec|Moreira|Canada

>Spike|hCoV-19/USA/MI-MDHHS-SC21726/2020|2020-08-04|EPI\_ISL\_529845|Original|hCoV-19^^Michigan|Human|Michigan Department of Health and Human Services|Michigan Department of Health and Human Services|Blankenship|USA

>Spike|hCoV-19/Netherlands/ZE-EMC-65/2020|2020-00-00|EPI\_ISL\_523564|Original|hCoV-19^^Zeeland|Human|Dutch COVID-19 response team|Erasmus Medical Center|Oude Munnink|Netherlands

>Spike|hCoV-19/Netherlands/NA\_217/2020|2020-03-26|EPI\_ISL\_422752|Original|hCoV-19^^Netherlands|Human|Dutch COVID-19 response team|Erasmus Medical Center|Oude Munnink|Netherlands

>Spike|hCoV-19/Australia/VIC4840/2020|2020-00-00|EPI\_ISL\_519224|Original|hCoV-19^^Victoria|Human|Microbiological Diagnostic Unit - Public Health Laboratory (MDU-PHL)|MDU-PHL|Schultz|Australia

>Spike|hCoV-19/USA/FL-BPHL-2092/2020|2020-07-23|EPI\_ISL\_653245|Original|hCoV-19^^Florida|Human|Florida Bureau of Public Health Laboratories|Florida Bureau of Public Health Laboratories|Blanton|USA

>Spike|hCoV-19/USA/TX-HMH-MCoV-9553/2020|2020-07-06|EPI\_ISL\_780155|Original|hCoV-19^^Texas|Human|Houston Methodist Hospital|Houston Methodist Hospital|Long|USA

>Spike|hCoV-19/England/CAMB-7A520/2020|2020-04-02|EPI\_ISL\_441326|Original|hCoV-19^^England|Human|Department of Pathology|Wellcome Sanger Institute for the COVID-19 Genomics UK (COG-UK) consortium|Amato|United Kingdom

>Spike|hCoV-19/England/QEUA-962874/2020|2020-08-10|EPI\_ISL\_531482|Original|hCoV-19^^England|Human|Lighthouse Lab in Glasgow|Wellcome Sanger Institute for the COVID-19 Genomics UK (COG-UK) consortium|Davies|United Kingdom

>Spike|hCoV-19/England/ALDP-A674C5/2020|2020-10-12|EPI\_ISL\_630631|Original|hCoV-19^^England|Human|Lighthouse Lab in Alderley Park|Wellcome Sanger Institute for the COVID-19 Genomics UK (COG-UK) consortium|Davies|United Kingdom

>Spike|hCoV-19/USA/CA-CZB-13009/2020|2020-10-23|EPI\_ISL\_672298|Original|hCoV-19^^California|Human|Santa Clara County Public Health Laboratory|Chan-Zuckerberg Biohub|Bhatt|USA

>Spike|hCoV-19/England/SHEF-CF058/2020|2020-11-28|EPI\_ISL\_703660|Original|hCoV-19^^England|Human|Virology Department|COVID-19 Genomics UK (COG-UK) Consortium|de Silva|United Kingdom

>Spike|hCoV-19/USA/WA-UW-1801/2020|2020-03-23|EPI\_ISL\_424251|Original|hCoV-19^^Washington|Human|UW Virology Lab|UW Virology Lab|Roychoudhury|USA

>Spike|hCoV-19/Luxembourg/LNS3218144/2020|2020-10-26|EPI\_ISL\_740275|Original|hCoV-19^^Luxembourg|Human|Laboratoire national de sant\u00e9|Laboratoire national de sant\u00e9|Wienecke-Baldacchino|Luxembourg

>Spike|hCoV-19/Netherlands/Gelderland\_3/2020|2020-03-09|EPI\_ISL\_415463|Original|hCoV-19^^Gelderland|Human|Dutch COVID-19 response team|Erasmus Medical Center|Oude Munnink|Netherlands

>Spike|hCoV-19/USA/CA-CZB-9791/2020|2020-06-05|EPI\_ISL\_672178|Original|hCoV-19^^California|Human|The Ashley Laboratory|Chan-Zuckerberg Biohub|Bhatt|USA

>Spike|hCoV-19/USA/CA-CZB-14073/2020|2020-06-25|EPI\_ISL\_738876|Original|hCoV-19^^California|Human|Alameda County Public Health Lab|Chan-Zuckerberg Biohub|Kamm|USA

>Spike|hCoV-19/USA/TX-DSHS-0517/2020|2020-06-23|EPI\_ISL\_560960|Original|hCoV-19^^Texas|Human|Texas Department of State Health Services|Texas Department of State Health Services|Rahman|USA

>Spike|hCoV-19/USA/MI-MDHHS-SC21259/2020|2020-04-03|EPI\_ISL\_507514|Original|hCoV-19^^Michigan|Human|Michigan Department of Health and Human Services|Michigan Department of Health and Human Services|Blankenship|USA

>Spike|hCoV-19/England/203020502/2020|2020-07-09|EPI\_ISL\_500708|Original|hCoV-19^^England|Human|Respiratory Virus Unit|Respiratory Virus Unit|Platt|United Kingdom

>Spike|hCoV-19/Australia/VIC11183/2020|2020-07-29|EPI\_ISL\_563287|Original|hCoV-19^^Victoria|Human|Microbiological Diagnostic Unit - Public Health Laboratory (MDU-PHL)|MDU-PHL|Schultz|Australia

>Spike|hCoV-19/Switzerland/BL-ETHZ-310383/2020|2020-10-08|EPI\_ISL\_603457|Original|hCoV-19^^Basel-Landschaft|Human|Viollier AG|Department of Biosystems Science and Engineering|Nadeau|Switzerland

>Spike|hCoV-19/England/NORW-EC969/2020|2020-05-08|EPI\_ISL\_457572|Original|hCoV-19^^England|Human|Quadram Institute Bioscience|COVID-19 Genomics UK (COG-UK) Consortium|Alikhan|United Kingdom

>Spike|hCoV-19/Spain/AN-IBV-002969/2020|2020-03-30|EPI\_ISL\_474957|Original|hCoV-19^^Andalucia|Human|Hospital Universitario Virgen de las Nieves de Granada-SAS|SeqCOVID-SPAIN consortium/IBV(CSIC)|Comas|Spain

>Spike|hCoV-19/England/CAMB-78F24/2020|2020-04-02|EPI\_ISL\_440622|Original|hCoV-19^^England|Human|Department of Pathology|Wellcome Sanger Institute for the COVID-19 Genomics UK (COG-UK) consortium|Amato|United Kingdom

>Spike|hCoV-19/USA/WA-UW-5400/2020|2020-04-05|EPI\_ISL\_430906|Original|hCoV-19^^Washington|Human|UW Virology Lab|UW Virology Lab|Roychoudhury|USA

>Spike|hCoV-19/Japan/PG-0763/2020|2020-03-00|EPI\_ISL\_684373|Original|hCoV-19^^Japan|Human|Pathogen Genomics Center|Pathogen Genomics Center|Sekizuka|Japan

>Spike|hCoV-19/England/CAMC-B77582/2020|2020-11-11|EPI\_ISL\_661781|Original|hCoV-19^^England|Human|Lighthouse Lab in Cambridge|Wellcome Sanger Institute for the COVID-19 Genomics UK (COG-UK) Consortium|Davies|United Kingdom

>Spike|hCoV-19/Denmark/DCGC-18098/2020|2020-12-14|EPI\_ISL\_749753|Original|hCoV-19^^Hovedstaden|Human|Department of Virus and Microbiological Special Diagnostics|Albertsen Lab|Michaelsen|Denmark

>Spike|hCoV-19/Denmark/DCGC-2320/2020|2020-08-10|EPI\_ISL\_617657|Original|hCoV-19^^Hovedstaden|Human|Department of Virus and Microbiological Special Diagnostics|Albertsen lab|Michaelsen|Denmark

>Spike|hCoV-19/USA/MI-MDHHS-SC21395/2020|2020-03-23|EPI\_ISL\_507649|Original|hCoV-19^^Michigan|Human|Michigan Department of Health and Human Services|Michigan Department of Health and Human Services|Blankenship|USA

>Spike|hCoV-19/India/DL-69864-CSIR-IGIB/2020|2020-08-14|EPI\_ISL\_636771|Original|hCoV-19^^Delhi|Human|National Centre for Disease control (NCDC)|NCDC/CSIR-IGIB|Faruq|India

>Spike|hCoV-19/USA/NY-WCMP10B08P/2020|2020-03-15|EPI\_ISL\_427559|Original|hCoV-19^^New York|Human|NewYork-Presbyterian & Mason Lab|Mason Lab|Mason|USA

>Spike|hCoV-19/Thailand/SamutSakhon-CONI-0362/2020|2020-12-19|EPI\_ISL\_733556|Original|hCoV-19^^Samut Sakhon|Human|Institute for Urban Disease Control and Prevention|COVID-19 Network Investigations (CONI) Alliance|Batty|Thailand

>Spike|hCoV-19/USA/CA-CHLA-PLM31468132/2020|2020-11-02|EPI\_ISL\_753269|Original|hCoV-19^^California|Human|Clinical virology Laboratory|Center for Personalized Medicine|Dien Bard|USA

>Spike|hCoV-19/Netherlands/ZH-EMC-969/2020|2020-10-25|EPI\_ISL\_722548|Original|hCoV-19^^Zuid Holland|Human|Dutch COVID-19 response team|Erasmus Medical Center|Oude Munnink|Netherlands

>Spike|hCoV-19/Japan/PG-7108/2020|2020-08-00|EPI\_ISL\_688213|Original|hCoV-19^^Japan|Human|Pathogen Genomics Center|Pathogen Genomics Center|Sekizuka|Japan

>Spike|hCoV-19/USA/NY-NYCPHL-000234/2020|2020-04-04|EPI\_ISL\_631763|Original|hCoV-19^^New York|Human|OCME Office Of Chief Medical Examiner|New York City Public Health Laboratory|Wang|USA

>Spike|hCoV-19/Poland/76078/2020|2020-11-00|EPI\_ISL\_732856|Original|hCoV-19^^Poland|Human|genXone SA|genXone SA|Kaszuba|Poland

>Spike|hCoV-19/England/204841918/2020|2020-11-25|EPI\_ISL\_683584|Original|hCoV-19^^England|Human|Respiratory Virus Unit|COVID-19 Genomics UK (COG-UK) Consortium|Platt|United Kingdom

>Spike|hCoV-19/Spain/GA-ISCI-201792/2020|2020-03-09|EPI\_ISL\_455328|Original|hCoV-19^^Galicia|Human|Complejo Hospitalario Universitario La Coruna|Instituto de Salud Carlos III|Caballero|Spain

>Spike|hCoV-19/England/CAMB-7CDF9/2020|2020-04-05|EPI\_ISL\_442078|Original|hCoV-19^^England|Human|Department of Pathology|Wellcome Sanger Institute for the COVID-19 Genomics UK (COG-UK) consortium|Amato|United Kingdom

>Spike|hCoV-19/Portugal/PT1252/2020|2020-03-17|EPI\_ISL\_511213|Original|hCoV-19^^Portugal|Human|Instituto Nacional de Saude (INSA) and Instituto Gulbenkian de Ciencia (IGC)|Instituto Nacional de Saude (INSA) and Instituto Gulbenkian de Ciencia (IGC)|Borges|Portugal

>Spike|hCoV-19/Sweden/20-52356/2020|2020-07-07|EPI\_ISL\_648133|Original|hCoV-19^^Varmland|Human|Klinisk mikrobiologi centralsjukhuset Karlstad|The Public Health Agency of Sweden|Svartstr\u00f6m|Sweden

>Spike|hCoV-19/England/MILK-BFCBED/2020|2020-12-02|EPI\_ISL\_720744|Original|hCoV-19^^England|Human|Lighthouse Lab in Milton Keynes|Wellcome Sanger Institute for the COVID-19 Genomics UK (COG-UK) Consortium|Davies|United Kingdom

>Spike|hCoV-19/Belgium/ULG-10505/2020|2020-09-23|EPI\_ISL\_581667|Original|hCoV-19^^Li\u00e8ge|Human|Department of Clinical Microbiology|GIGA Medical Genomics|Durkin|Belgium

>Spike|hCoV-19/Portugal/PT1170/2020|2020-03-20|EPI\_ISL\_511716|Original|hCoV-19^^Portugal|Human|Instituto Nacional de Saude (INSA)|Instituto Nacional de Saude (INSA)|Borges|Portugal

>Spike|hCoV-19/Portugal/PT1932/2020|2020-11-15|EPI\_ISL\_731906|Original|hCoV-19^^Portugal|Human|Instituto Nacional de Saude (INSA) and Instituto Gulbenkian de Ciencia (IGC)|Instituto Nacional de Saude (INSA) and Instituto Gulbenkian de Ciencia (IGC)|Borges|Portugal

>Spike|hCoV-19/Gambia/GC19-3110/2020|2020-07-25|EPI\_ISL\_561165|Original|hCoV-19^^Kombo|Human|MRCG at LSHTM Genomics lab|MRCG at LSHTM Genomics lab|Sesay|Gambia

>Spike|hCoV-19/Denmark/DCGC-15996/2020|2020-11-23|EPI\_ISL\_714463|Original|hCoV-19^^Hovedstaden|Human|Department of Virus and Microbiological Special Diagnostics|Albertsen Lab|Michaelsen|Denmark

>Spike|hCoV-19/Netherlands/NB-EMC-388/2020|2020-09-30|EPI\_ISL\_722310|Original|hCoV-19^^Noord Brabant|Human|Dutch COVID-19 response team|Erasmus Medical Center|Oude Munnink|Netherlands

>Spike|hCoV-19/Australia/VIC7097/2020|2020-08-01|EPI\_ISL\_564228|Original|hCoV-19^^Victoria|Human|Victorian Infectious Diseases Reference Laboratory (VIDRL)|VIDRL and MDU-PHL|Schultz|Australia

>Spike|hCoV-19/Ireland/D-NVRL-75IRL76096/2020|2020-10-13|EPI\_ISL\_671891|Original|hCoV-19^^Dublin|Human|National Virus Reference Laboratory|National Virus Reference Laboratory|Gonzalez|Ireland

>Spike|hCoV-19/Israel/2047604/2020|2020-03-29|EPI\_ISL\_447388|Original|hCoV-19^^North District|Human|Clinical Microbiology Laboratory|Stern Lab|Miller|Israel

>Spike|hCoV-19/England/BRIS-12DE8A/2020|2020-06-02|EPI\_ISL\_482005|Original|hCoV-19^^England|Human|PHE South West Regional Laboratory|Wellcome Sanger Institute for the COVID-19 Genomics UK (COG-UK) consortium|Davies|United Kingdom

>Spike|hCoV-19/USA/AZ-TG664543/2020|2020-04-20|EPI\_ISL\_696160|Original|hCoV-19^^Arizona|Human|Sonora Quest Laboratories|TGen North|French|USA

>Spike|hCoV-19/USA/VA-DCLS-1762/2020|2020-09-09|EPI\_ISL\_644857|Original|hCoV-19^^Virginia|Human|Virginia DCLS|Virginia DCLS|St. Jacques|USA

>Spike|hCoV-19/Wales/PHWC-168F08/2020|2020-04-03|EPI\_ISL\_499366|Original|hCoV-19^^Wales|Human|Originating lab|COVID-19 Genomics UK (COG-UK) Consortium|Moore|United Kingdom

>Spike|hCoV-19/Australia/TAS262/2020|2020-03-27|EPI\_ISL\_522690|Original|hCoV-19^^Tasmania|Human|Royal Hobart Hospital Microbiology Department|MDU-PHL|Schultz|Australia

>Spike|hCoV-19/Wales/PHWC-1604F2/2020|2020-05-20|EPI\_ISL\_472944|Original|hCoV-19^^Wales|Human|Wales Specialist Virology Centre Sequencing lab|COVID-19 Genomics UK (COG-UK) Consortium|Moore|United Kingdom

>Spike|hCoV-19/Saint Martin/IPG-7348/2020|2020-03-28|EPI\_ISL\_613448|Original|hCoV-19^^Saint Martin|Human|Institut Pasteur de la Guadeloupe|Institut Pasteur de la Guadeloupe|Enouf|Saint Martin

>Spike|hCoV-19/England/CAMC-B99001/2020|2020-11-15|EPI\_ISL\_673377|Original|hCoV-19^^England|Human|Lighthouse Lab in Cambridge|Wellcome Sanger Institute for the COVID-19 Genomics UK (COG-UK) Consortium|Davies|United Kingdom

>Spike|hCoV-19/England/204291054/2020|2020-10-15|EPI\_ISL\_622870|Original|hCoV-19^^England|Human|Respiratory Virus Unit|Respiratory Virus Unit|Platt|United Kingdom

>Spike|hCoV-19/USA/CA-CHLA-PLM87172348/2020|2020-12-01|EPI\_ISL\_753562|Original|hCoV-19^^California|Human|Clinical virology Laboratory|Center for Personalized Medicine|Dien Bard|USA

>Spike|hCoV-19/USA/MI-QDX-651/2020|2020-03-19|EPI\_ISL\_571374|Original|hCoV-19^^Michigan|Human|Quest Diagnostics|Quest Diagnostics|Kagan|USA

>Spike|hCoV-19/Bangladesh/DNAS\_DRCIM\_isl\_Tanjima/2020|2020-06-28|EPI\_ISL\_774956|Original|hCoV-19^^Dhaka|Human|Designated Reference Institute for Chemical Measurements (DRICM)|DNA SOLUTION LTD.|Rabbi|Bangladesh

>Spike|hCoV-19/Japan/NGY-NNH-023/2020|2020-03-31|EPI\_ISL\_636990|Original|hCoV-19^^Aichi|Human|Department of Infectious Diseases and Immunology|Clinical Research Center|Iwatani|Japan

>Spike|hCoV-19/Northern Ireland/NIRE-1036BF/2020|2020-04-17|EPI\_ISL\_489177|Original|hCoV-19^^Northern Ireland|Human|Regional Virus Laboratory|Wellcome Sanger Institute for the COVID-19 Genomics UK (COG-UK) consortium|Davies|United Kingdom

>Spike|hCoV-19/USA/MI-MDHHS-SC20270/2020|2020-04-02|EPI\_ISL\_447068|Original|hCoV-19^^Michigan|Human|Michigan Department of Health and Human Services|Michigan Department of Health and Human Services|Blankenship|USA

>Spike|hCoV-19/USA/TX-HMH-MCoV-12187/2020|2020-09-21|EPI\_ISL\_789972|Original|hCoV-19^^Texas|Human|Houston Methodist Hospital|Houston Methodist Hospital|Long|USA

>Spike|hCoV-19/Switzerland/BL-ETHZ-250105/2020|2020-08-20|EPI\_ISL\_535620|Original|hCoV-19^^Basel-Landschaft|Human|Viollier AG|Department of Biosystems Science and Engineering|Nadeau|Switzerland

>Spike|hCoV-19/England/GSTT-265D3D2/2020|2020-03-18|EPI\_ISL\_483953|Original|hCoV-19^^England|Human|Centre for Clinical Infection and Diagnostics Research and Genomics Innovation Unit|COVID-19 Genomics UK (COG-UK) Consortium|Awan|United Kingdom

>Spike|hCoV-19/England/CAMB-1AD259/2020|2020-04-30|EPI\_ISL\_447982|Original|hCoV-19^^England|Human|Department of Pathology|COVID-19 Genomics UK (COG-UK) Consortium|Meredith|United Kingdom

>Spike|hCoV-19/USA/FL-BPHL-1075/2020|2020-04-24|EPI\_ISL\_526561|Original|hCoV-19^^Florida|Human|Florida Bureau of Public Health Laboratories|Florida Bureau of Public Health Laboratories|Blanton|USA

>Spike|hCoV-19/Latvia/136/2020|2020-08-28|EPI\_ISL\_639633|Original|hCoV-19^^Latvia|Human|Centr\u001011\u00101 Laboratorija|Latvian Biomedical Research and Study Centre|Zrelavs|Latvia

>Spike|hCoV-19/England/EXET-1353F9/2020|2020-04-17|EPI\_ISL\_457056|Original|hCoV-19^^England|Human|University of Exeter|COVID-19 Genomics UK (COG-UK) Consortium|Temperton|United Kingdom

>Spike|hCoV-19/England/CAMB-78829/2020|2020-04-07|EPI\_ISL\_433778|Original|hCoV-19^^England|Human|Department of Pathology|COVID-19 Genomics UK (COG-UK) Consortium|Meredith|United Kingdom

>Spike|hCoV-19/Luxembourg/LNS0333768/2020|2020-11-29|EPI\_ISL\_739759|Original|hCoV-19^^Luxembourg|Human|Laboratoire national de sant\u00e9|Laboratoire national de sant\u00e9|Wienecke-Baldacchino|Luxembourg

>Spike|hCoV-19/England/LIVE-DB641F/2020|2020-11-07|EPI\_ISL\_650272|Original|hCoV-19^^England|Human|Liverpool Clinical Laboratories|COVID-19 Genomics UK (COG-UK) Consortium|Haldenby|United Kingdom

>Spike|hCoV-19/USA/TX-DSHS-1776/2020|2020-07-13|EPI\_ISL\_751541|Original|hCoV-19^^Texas|Human|Texas Department of State Health Services|Texas Department of State Health Services|Rahman|USA

>Spike|hCoV-19/Denmark/DCGC-2414/2020|2020-08-10|EPI\_ISL\_617596|Original|hCoV-19^^Hovedstaden|Human|Department of Virus and Microbiological Special Diagnostics|Albertsen lab|Michaelsen|Denmark

>Spike|hCoV-19/Scotland/QEUH-9AD039/2020|2020-09-05|EPI\_ISL\_560016|Original|hCoV-19^^Scotland|Human|Oxford Viromics|COVID-19 Genomics UK (COG-UK) Consortium|Golubchik|United Kingdom

>Spike|hCoV-19/Japan/PG-5539/2020|2020-08-00|EPI\_ISL\_688664|Original|hCoV-19^^Japan|Human|Pathogen Genomics Center|Pathogen Genomics Center|Sekizuka|Japan

>Spike|hCoV-19/Scotland/MILK-A69E5C/2020|2020-10-09|EPI\_ISL\_625411|Original|hCoV-19^^Scotland|Human|Lighthouse Lab in Milton Keynes|Wellcome Sanger Institute for the COVID-19 Genomics UK (COG-UK) consortium|Davies|United Kingdom

>Spike|hCoV-19/USA/MN-MDH-2213/2020|2020-12-02|EPI\_ISL\_770787|Original|hCoV-19^^Minnesota|Human|Minnesota Department of Health|Minnesota Department of Health|Lorentz|USA

>Spike|hCoV-19/England/MILK-9A9264/2020|2020-09-01|EPI\_ISL\_550997|Original|hCoV-19^^England|Human|Lighthouse Lab in Milton Keynes|Wellcome Sanger Institute for the COVID-19 Genomics UK (COG-UK) consortium|Davies|United Kingdom

>Spike|hCoV-19/Denmark/DCGC-4790/2020|2020-09-21|EPI\_ISL\_621400|Original|hCoV-19^^Sjaelland|Human|Department of Virus and Microbiological Special Diagnostics|Albertsen lab|Michaelsen|Denmark

>Spike|hCoV-19/Scotland/EDB2831/2020|2020-03-31|EPI\_ISL\_456900|Original|hCoV-19^^Scotland|Human|Virology Department|COVID-19 Genomics UK (COG-UK) Consortium|Williams|United Kingdom

>Spike|hCoV-19/Northern Ireland/NIRE-103206/2020|2020-04-20|EPI\_ISL\_489358|Original|hCoV-19^^Northern Ireland|Human|Regional Virus Laboratory|Wellcome Sanger Institute for the COVID-19 Genomics UK (COG-UK) Consortium|Davies|United Kingdom

>Spike|hCoV-19/Japan/PG-1350/2020|2020-04-00|EPI\_ISL\_684958|Original|hCoV-19^^Japan|Human|Saitama Prefectural Institute of Public Health|Pathogen Genomics Center|Sekizuka|Japan

>Spike|hCoV-19/Australia/VIC4350/2020|2020-07-14|EPI\_ISL\_519646|Original|hCoV-19^^Victoria|Human|Microbiological Diagnostic Unit - Public Health Laboratory (MDU-PHL)|MDU-PHL|Schultz|Australia

>Spike|hCoV-19/England/CAMB-7ADDD/2020|2020-04-09|EPI\_ISL\_433877|Original|hCoV-19^^England|Human|Department of Pathology|COVID-19 Genomics UK (COG-UK) Consortium|Meredith|United Kingdom

>Spike|hCoV-19/Japan/PG-6595/2020|2020-08-00|EPI\_ISL\_687707|Original|hCoV-19^^Japan|Human|Niigata Prefectural Institute of Public Health and Environmental Sciences|Pathogen Genomics Center|Sekizuka|Japan

>Spike|hCoV-19/England/MILK-99CAE4/2020|2020-08-31|EPI\_ISL\_550578|Original|hCoV-19^^England|Human|Lighthouse Lab in Milton Keynes|Wellcome Sanger Institute for the COVID-19 Genomics UK (COG-UK) consortium|Davies|United Kingdom

>Spike|hCoV-19/USA/TX-HMH-MCoV-16097/2020|2020-10-29|EPI\_ISL\_785781|Original|hCoV-19^^Texas|Human|Houston Methodist Hospital|Houston Methodist Hospital|Long|USA

>Spike|hCoV-19/USA/TX-HMH-7179/2020|2020-06-29|EPI\_ISL\_546574|Original|hCoV-19^^Texas|Human|Houston Methodist Hospital|Houston Methodist Hospital|Long|USA

>Spike|hCoV-19/Denmark/DCGC-15969/2020|2020-11-23|EPI\_ISL\_714511|Original|hCoV-19^^Midtjylland|Human|Department of Virus and Microbiological Special Diagnostics|Albertsen Lab|Michaelsen|Denmark

>Spike|hCoV-19/Ireland/KE-NVRL-73IRL29560/2020|2020-09-07|EPI\_ISL\_578298|Original|hCoV-19^^Kildare|Human|National Virus Reference Laboratory|National Virus Reference Laboratory|Gonzalez|Ireland

>Spike|hCoV-19/Wales/PHWC-4936FD/2020|2020-11-29|EPI\_ISL\_725929|Original|hCoV-19^^Wales|Human|Originating lab|COVID-19 Genomics UK (COG-UK) Consortium|Moore|United Kingdom

>Spike|hCoV-19/Spain/AN-IBV-001919/2020|2020-03-17|EPI\_ISL\_467080|Original|hCoV-19^^Andalucia|Human|Hospital Universitario Puerta del Mar de C\00ealdiz - INIBICA|SeqCOVID-SPAIN consortium|IBV (CSIC)|Comas|Spain

>Spike|hCoV-19/Netherlands/UT-EMC-229/2020|2020-12-13|EPI\_ISL\_722767|Original|hCoV-19^^Utrecht|Human|Dutch COVID-19 response team|Erasmus Medical Center|Oude Munnink|Netherlands

>Spike|hCoV-19/USA/WI-UW-1229/2020|2020-08-14|EPI\_ISL\_536602|Original|hCoV-19^^Wisconsin|Human|University of Wisconsin-Madison AIDS Vaccine Research Laboratories|University of Wisconsin-Madison AIDS Vaccine Research Laboratories|Baczenas|USA

>Spike|hCoV-19/Netherlands/NB-RIVM-20576/2020|2020-12-13|EPI\_ISL\_790660|Original|hCoV-19^^Noord-Brabant|Human|Dutch COVID-19 response team|National Institute for Public Health and the Environment (RIVM)|Meijer|Netherlands

>Spike|hCoV-19/England/MILK-B96022/2020|2020-11-13|EPI\_ISL\_676148|Original|hCoV-19^^England|Human|Lighthouse Lab in Milton Keynes|Wellcome Sanger Institute for the COVID-19 Genomics UK (COG-UK) Consortium|Davies|United Kingdom

>Spike|hCoV-19/England/ALDP-94C47C/2020|2020-06-15|EPI\_ISL\_555987|Original|hCoV-19^^England|Human|Lighthouse Lab in Alderley Park|Wellcome Sanger Institute for the COVID-19 Genomics UK (COG-UK) consortium|Davies|United Kingdom

>Spike|hCoV-19/USA/LA-EVTL1240/2020|2020-12-17|EPI\_ISL\_768509|Original|hCoV-19^^Louisiana|Human|LSUHS Emerging Viral Threat Laboratory|Microbial Genome Sequencing Center|Kamil|USA

>Spike|hCoV-19/England/QEUH-C4BCFA/2020|2020-12-14|EPI\_ISL\_736567|Original|hCoV-19^^England|Human|Lighthouse Lab in Glasgow|Wellcome Sanger Institute for the COVID-19 Genomics UK (COG-UK) Consortium|Davies|United Kingdom

>Spike|hCoV-19/USA/AK-PHL471/2020|2020-06-11|EPI\_ISL\_522402|Original|hCoV-19^^Alaska|Human|Alaska State Virology Laboratory|Alaska State Virology Laboratory|Chen|USA

>Spike|hCoV-19/Japan/PG-2354/2020|2020-04-00|EPI\_ISL\_685959|Original|hCoV-19^^Japan|Human|Pathogen Genomics Center|Pathogen Genomics Center|Sekizuka|Japan

>Spike|hCoV-19/England/MILK-978477/2020|2020-07-30|EPI\_ISL\_526413|Original|hCoV-19^^England|Human|Queens Medical Centre|COVID-19 Genomics UK (COG-UK) Consortium|Loose|United Kingdom

>Spike|hCoV-19/England/MILK-A6ABBE/2020|2020-10-09|EPI\_ISL\_608805|Original|hCoV-19^^England|Human|Lighthouse Lab in Milton Keynes|Wellcome Sanger Institute for the COVID-19 Genomics UK (COG-UK) consortium|Davies|United Kingdom

>Spike|hCoV-19/Denmark/DCGC-18671/2020|2020-12-07|EPI\_ISL\_750116|Original|hCoV-19^^Sjaelland|Human|Department of Virus and Microbiological Special Diagnostics|Albertsen Lab|Michaelsen|Denmark

>Spike|hCoV-19/England/MILK-93E0A6/2020|2020-06-21|EPI\_ISL\_553323|Original|hCoV-19^^England|Human|Lighthouse Lab in Milton Keynes|Wellcome Sanger Institute for the COVID-19 Genomics UK (COG-UK) consortium|Davies|United Kingdom

>Spike|hCoV-19/England/QEUH-87F15C/2020|2020-07-25|EPI\_ISL\_532740|Original|hCoV-19^^England|Human|Lighthouse Lab in Glasgow|Wellcome Sanger Institute for the COVID-19 Genomics UK (COG-UK) consortium|Davies|United Kingdom



>Spike|hCoV-19/Netherlands/NA\_504/2020|2020-03-23|EPI\_ISL\_460677|Original|hCoV-19^^Netherlands|Human|Dutch COVID-19 response team|Erasmus Medical Center|Oude Munnink|Netherlands

>Spike|hCoV-19/New Zealand/20CV0169/2020|2020-08-25|EPI\_ISL\_548040|Original|hCoV-19^^Auckland|Human|LabPLUS|Institute of Environmental Science and Research (ESR)|Wang|New Zealand

>Spike|hCoV-19/Russia/StPetersburg-RII17949S/2020|2020-05-27|EPI\_ISL\_507283|Original|hCoV-19^^Saint Petersburg|Human|WHO National Influenza Centre Russian Federation|WHO National Influenza Centre Russian Federation|Komissarov|Russia

>Spike|hCoV-19/Denmark/DCGC-20639/2020|2020-12-21|EPI\_ISL\_759268|Original|hCoV-19^^Nordjylland|Human|Department of Virus and Microbiological Special Diagnostics|Albertsen Lab|Michaelsen|Denmark

>Spike|hCoV-19/Japan/PG-0849/2020|2020-04-00|EPI\_ISL\_684459|Original|hCoV-19^^Japan|Human|Fukuoka Institute of Health and Environmental Sciences|Pathogen Genomics Center|Sekizuka|Japan

>Spike|hCoV-19/England/QEUH-AD2313/2020|2020-10-26|EPI\_ISL\_629923|Original|hCoV-19^^England|Human|Lighthouse Lab in Glasgow|Wellcome Sanger Institute for the COVID-19 Genomics UK (COG-UK) consortium|Davies|United Kingdom

>Spike|hCoV-19/England/201060018/2020|2020-03-03|EPI\_ISL\_464363|Original|hCoV-19^^England|Human|Respiratory Virus Unit|Respiratory Virus Unit|Platt|United Kingdom

>Spike|hCoV-19/USA/UT-UPHL-2009475/2020|2020-07-18|EPI\_ISL\_605160|Original|hCoV-19^^Utah|Human|Utah Public Health Laboratory|Utah Public Health Laboratory|Young|USA

>Spike|hCoV-19/Denmark/DCGC-14501/2020|2020-11-30|EPI\_ISL\_711800|Original|hCoV-19^^Hovedstaden|Human|Department of Virus and Microbiological Special Diagnostics|Albertsen Lab|Michaelsen|Denmark

>Spike|hCoV-19/England/QEUH-B11BC4/2020|2020-11-02|EPI\_ISL\_642381|Original|hCoV-19^^England|Human|Lighthouse Lab in Glasgow|Wellcome Sanger Institute for the COVID-19 Genomics UK (COG-UK) Consortium|Davies|United Kingdom

>Spike|hCoV-19/England/QEUH-9F5111/2020|2020-09-27|EPI\_ISL\_637307|Original|hCoV-19^^England|Human|Department of Pathology|COVID-19 Genomics UK (COG-UK) Consortium|Goodfellow|United Kingdom

>Spike|hCoV-19/Canada/ON-E28/2020|2020-05-24|EPI\_ISL\_593506|Original|hCoV-19^^Ontario|Human|Eastern Ontario Regional Laboratory Association|McMaster University|McArthur|Canada

>Spike|hCoV-19/Germany/HH-hpi-p1813/2020|2020-03-22|EPI\_ISL\_776171|Original|hCoV-19^^Hamburg|Human|University Medical Center Hamburg Eppendorf|Heinrich Pette Institute|Robitaille|Germany

>Spike|hCoV-19/Japan/PG-2524/2020|2020-05-00|EPI\_ISL\_690659|Original|hCoV-19^^Japan|Human|Saitama Prefectural Institute of Public Health|Pathogen Genomics Center|Sekizuka|Japan

>Spike|hCoV-19/Canada/QC-LSPQ-L00235802/2020|2020-03-24|EPI\_ISL\_536109|Original|hCoV-19^^Quebec|Human|CSSS de Port-Cartier|Laboratoire de sant\u00e9 publique du Qu\u00e9bec|Moreira|Canada

>Spike|hCoV-19/Slovenia/11172/2020|2020-03-22|EPI\_ISL\_635256|Original|hCoV-19^^Slovenia|Human|Institute of Microbiology and Immunology|Institute of Microbiology and Immunology|Zakotnik|Slovenia

>Spike|hCoV-19/England/ALDP-AA0CB9/2020|2020-10-22|EPI\_ISL\_624911|Original|hCoV-19^^England|Human|Lighthouse Lab in Alderley Park|Wellcome Sanger Institute for the COVID-19 Genomics UK (COG-UK) consortium|Davies|United Kingdom

>Spike|hCoV-19/Australia/QLD1157/2020|2020-03-31|EPI\_ISL\_639760|Original|hCoV-19^^Australia|Human|unknown|Public Health Virology Laboratory|Nguyen|Australia

>Spike|hCoV-19/England/LIVE-DCC1E2/2020|2020-11-23|EPI\_ISL\_724494|Original|hCoV-19^^England|Human|Liverpool Clinical Laboratories|COVID-19 Genomics UK (COG-UK) Consortium|Haldenby|United Kingdom

>Spike|hCoV-19/USA/NY-NYCPHL-001119/2020|2020-10-21|EPI\_ISL\_671702|Original|hCoV-19^^New York|Human|DOHMH Chelsea|New York City Public Health Laboratory|Wang|USA

>Spike|hCoV-19/England/MILK-B88A07/2020|2020-11-14|EPI\_ISL\_675713|Original|hCoV-19^^England|Human|Lighthouse Lab in Milton Keynes|Wellcome Sanger Institute for the COVID-19 Genomics UK (COG-UK) Consortium|Davies|United Kingdom

>Spike|hCoV-19/Scotland/QEUH-98F55C/2020|2020-08-28|EPI\_ISL\_568462|Original|hCoV-19^^Scotland|Human|Lighthouse Lab in Glasgow|Wellcome Sanger Institute for the COVID-19 Genomics UK (COG-UK) consortium|Davies|United Kingdom

>Spike|hCoV-19/England/QEUH-A8BD75/2020|2020-10-16|EPI\_ISL\_643060|Original|hCoV-19^^England|Human|Lighthouse Lab in Glasgow|Wellcome Sanger Institute for the COVID-19 Genomics UK (COG-UK) Consortium|Davies|United Kingdom

>Spike|hCoV-19/USA/CT-Yale-297/2020|2020-03-28|EPI\_ISL\_476526|Original|hCoV-19^^Connecticut|Human|Yale Clinical Virology Laboratory|Grubaugh Lab - Yale School of Public Health|Grubaugh|USA

>Spike|hCoV-19/Scotland/EDB182/2020|2020-03-24|EPI\_ISL\_425928|Original|hCoV-19^^Scotland|Human|Virology Department|COVID-19 Genomics UK (COG-UK) Consortium|Williams|United Kingdom

>Spike|hCoV-19/Ireland/LK-NVRL-78IRL70746/2020|2020-11-22|EPI\_ISL\_752542|Original|hCoV-19^^Limerick|Human|National Virus Reference Laboratory|National Virus Reference Laboratory|Gonzalez|Ireland

>Spike|hCoV-19/Japan/PG-8962/2020|2020-09-00|EPI\_ISL\_686508|Original|hCoV-19^^Japan|Human|Pathogen Genomics Center|Pathogen Genomics Center|Sekizuka|Japan

>Spike|hCoV-19/England/SHEF-C618B/2020|2020-05-27|EPI\_ISL\_535059|Original|hCoV-19^^England|Human|Virology Department|COVID-19 Genomics UK (COG-UK) Consortium|de Silva|United Kingdom

>Spike|hCoV-19/Denmark/DCGC-9550/2020|2020-11-09|EPI\_ISL\_669034|Original|hCoV-19^^Hovedstaden|Human|Department of Virus and Microbiological Special Diagnostics|Albertsen Lab|Michaelsen|Denmark

>Spike|hCoV-19/Panama/339459/2020|2020-04-11|EPI\_ISL\_496893|Original|hCoV-19^^Colon|Human|Gorgas Memorial Laboratory of Health Studies|Gorgas Memorial Laboratory of Health Studies|Martinez|Panama

>Spike|hCoV-19/Israel/51146500/2020|2020-04-05|EPI\_ISL\_447314|Original|hCoV-19^^Tel Aviv District|Human|Clinical Virology Laboratory|Stern Lab|Miller|Israel

>Spike|hCoV-19/USA/NY-PV09356/2020|2020-03-16|EPI\_ISL\_450044|Original|hCoV-19^^New York|Human|MSHS Clinical Microbiology Laboratories|MSHS Pathogen Surveillance Program|van Bakel|USA

>Spike|hCoV-19/Australia/VIC4826/2020|2020-07-17|EPI\_ISL\_519210|Original|hCoV-19^^Victoria|Human|Microbiological Diagnostic Unit - Public Health Laboratory (MDU-PHL)|MDU-PHL|Schultz|Australia

>Spike|hCoV-19/USA/WA-S1656/2020|2020-05-29|EPI\_ISL\_496082|Original|hCoV-19^^Washington|Human|Washington State Department of Health|Seattle Flu Study|Lee|USA

>Spike|hCoV-19/USA/NY-NYUMC806/2020|2020-03-25|EPI\_ISL\_456042|Original|hCoV-19^^New York|Human|NYU Langone Health|Departments of Pathology and Medicine|Maurano|USA

>Spike|hCoV-19/United Arab Emirates/0339/2020|2020-05-19|EPI\_ISL\_708829|Original|hCoV-19^^Abu Dhabi|Human|Group 42 (G42) Healthcare|G42 Healthcare|Ogrodzki|United Arab Emirates

>Spike|hCoV-19/Netherlands/ZH-EMC-1092/2020|2020-12-13|EPI\_ISL\_722772|Original|hCoV-19^^Zuid Holland|Human|Dutch COVID-19 response team|Erasmus Medical Center|Oude Munnink|Netherlands

>Spike|hCoV-19/Denmark/DCGC-787/2020|2020-03-30|EPI\_ISL\_614881|Original|hCoV-19^^Nordjylland|Human|Department of Virus and Microbiological Special Diagnostics|Albertsen lab|Michaelsen|Denmark

>Spike|hCoV-19/Wales/PHWC-49FA6E/2020|2020-12-09|EPI\_ISL\_743311|Original|hCoV-19^^Wales|Human|Wales Specialist Virology Centre Sequencing lab|COVID-19 Genomics UK (COG-UK) Consortium|Moore|United Kingdom

>Spike|hCoV-19/England/20099072904/2020|2020-02-27|EPI\_ISL\_464225|Original|hCoV-19^^England|Human|Respiratory Virus Unit|Respiratory Virus Unit|Platt|United Kingdom

>Spike|hCoV-19/Brazil/SP-L14-CD232/2020|2020-03-26|EPI\_ISL\_476238|Original|hCoV-19^^S\u00e3o Paulo|Human|Hospital da Cl\u00ednicas da Faculdade de Medicina da Universidade de S\u00e3o Paulo|Instituto de Medicina Tropical da Univesidade de S\u00e3o Paulo|Sabino|Brazil

>Spike|hCoV-19/USA/NY-Wadsworth-285990-01/2020|2020-12-10|EPI\_ISL\_754544|Original|hCoV-19^^New York|Human|Wadsworth Center|Wadsworth Center|Lasek-Nesselquist|USA

>Spike|hCoV-19/Scotland/EDB3654/2020|2020-04-27|EPI\_ISL\_473790|Original|hCoV-19^^Scotland|Human|Virology Department|COVID-19 Genomics UK (COG-UK) Consortium|Williams|United Kingdom

>Spike|hCoV-19/Japan/PG-5980/2020|2020-08-00|EPI\_ISL\_689095|Original|hCoV-19^^Japan|Human|Pathogen Genomics Center|Pathogen Genomics Center|Sekizuka|Japan

>Spike|hCoV-19/England/QEUEH-AD351C/2020|2020-10-26|EPI\_ISL\_633755|Original|hCoV-19^^England|Human|Lighthouse Lab in Glasgow|Wellcome Sanger Institute for the COVID-19 Genomics UK (COG-UK) consortium|Davies|United Kingdom

>Spike|hCoV-19/USA/CA-CZB-2049/2020|2020-04-21|EPI\_ISL\_486293|Original|hCoV-19^^California|Human|San Joaquin County Public Health Lab|Chan-Zuckerberg Biohub|McGeever|USA

>Spike|hCoV-19/England/ALDP-94F2D9/2020|2020-06-18|EPI\_ISL\_555992|Original|hCoV-19^^England|Human|Lighthouse Lab in Alderley Park|Wellcome Sanger Institute for the COVID-19 Genomics UK (COG-UK) consortium|Davies|United Kingdom

>Spike|hCoV-19/Wales/MILK-958695/2020|2020-06-09|EPI\_ISL\_554621|Original|hCoV-19^^Wales|Human|Lighthouse Lab in Milton Keynes|Wellcome Sanger Institute for the COVID-19 Genomics UK (COG-UK) consortium|Davies|United Kingdom

>Spike|hCoV-19/England/QEUEH-C32230/2020|2020-12-11|EPI\_ISL\_730860|Original|hCoV-19^^England|Human|Lighthouse Lab in Glasgow|Wellcome Sanger Institute for the COVID-19 Genomics UK (COG-UK) Consortium|Davies|United Kingdom

>Spike|hCoV-19/Australia/VIC8331/2020|2020-08-14|EPI\_ISL\_564945|Original|hCoV-19^^Victoria|Human|Microbiological Diagnostic Unit - Public Health Laboratory (MDU-PHL)|MDU-PHL|Schultz|Australia

>Spike|hCoV-19/England/BRIS-129695/2020|2020-03-31|EPI\_ISL\_458778|Original|hCoV-19^^England|Human|PHE South West Regional Laboratory|Wellcome Sanger Institute for the COVID-19 Genomics UK (COG-UK) consortium|Davies|United Kingdom

>Spike|hCoV-19/England/ALDP-AA51A6/2020|2020-10-22|EPI\_ISL\_624100|Original|hCoV-19^^England|Human|Lighthouse Lab in Alderley Park|Wellcome Sanger Institute for the COVID-19 Genomics UK (COG-UK) consortium|Davies|United Kingdom

>Spike|hCoV-19/England/NORT-2A5CBC/2020|2020-10-03|EPI\_ISL\_584710|Original|hCoV-19^^England|Human|Northumbria University / South Tees Hospitals NHS Foundation Trust / North Cumbria Integrated Care NHS Foundation Trust / North Tees and Hartlepool NHS Foundation Trust / Newcastle Hospitals NHS Foundation Trust|COVID-19 Genomics UK (COG-UK) Consortium|Bashton|United Kingdom

>Spike|hCoV-19/Denmark/DCGC-913/2020|2020-04-20|EPI\_ISL\_614733|Original|hCoV-19^^Nordjylland|Human|Department of Virus and Microbiological Special Diagnostics|Albertsen lab|Michaelsen|Denmark

>Spike|hCoV-19/England/NORW-EC671/2020|2020-05-10|EPI\_ISL\_457546|Original|hCoV-19^^England|Human|Quadram Institute Bioscience|COVID-19 Genomics UK (COG-UK) Consortium|Alikhan|United Kingdom

>Spike|hCoV-19/England/CAMB-1ABCA8/2020|2020-04-20|EPI\_ISL\_470098|Original|hCoV-19^^England|Human|Department of Pathology|Wellcome Sanger Institute for the COVID-19 Genomics UK (COG-UK) consortium|Davies|United Kingdom

>Spike|hCoV-19/Wales/ALDP-BE9600/2020|2020-12-02|EPI\_ISL\_710648|Original|hCoV-19^^Wales|Human|Lighthouse Lab in Alderley Park|Wellcome Sanger Institute for the COVID-19 Genomics UK (COG-UK) Consortium|Davies|United Kingdom

>Spike|hCoV-19/Wales/PHWC-15C329/2020|2020-04-18|EPI\_ISL\_472471|Original|hCoV-19^^Wales|Human|Wales Specialist Virology Centre Sequencing lab|COVID-19 Genomics UK (COG-UK) Consortium|Moore|United Kingdom

>Spike|hCoV-19/England/ALDP-A2F1C2/2020|2020-10-05|EPI\_ISL\_587018|Original|hCoV-19^^England|Human|Lighthouse Lab in Alderley Park|Wellcome Sanger Institute for the COVID-19 Genomics UK (COG-UK) consortium|Davies|United Kingdom

>Spike|hCoV-19/Denmark/DCGC-17784/2020|2020-12-14|EPI\_ISL\_749182|Original|hCoV-19^^Hovedstaden|Human|Department of Virus and Microbiological Special Diagnostics|Albertsen Lab|Michaelsen|Denmark

>Spike|hCoV-19/Spain/CL-IBV-97006242/2020|2020-04-15|EPI\_ISL\_537616|Original|hCoV-19^^Castilla y Leon|Human|Universidad de Le\u00f3n|SeqCOVID-SPAIN consortium|IBV (CSIC)|Comas|Spain

>Spike|hCoV-19/Denmark/DCGC-21353/2020|2020-12-21|EPI\_ISL\_759696|Original|hCoV-19^^Syddanmark|Human|Department of Virus and Microbiological Special Diagnostics|Albertsen Lab|Michaelsen|Denmark

>Spike|hCoV-19/Netherlands/ZH-EMC-531/2020|2020-00-00|EPI\_ISL\_577959|Original|hCoV-19^^Zuid Holland|Human|Dutch COVID-19 response team|Erasmus Medical Center|Oude Munnink|Netherlands

>Spike|hCoV-19/Germany/HH-hpi-p1798/2020|2020-03-19|EPI\_ISL\_775830|Original|hCoV-19^^Hamburg|Human|University Medical Center Hamburg Eppendorf|Heinrich Pette Institute|Robitaille|Germany

>Spike|hCoV-19/mink/Netherlands/NB-EMC-8-11/2020|2020-06-01|EPI\_ISL\_523113|Original|hCoV-19^^Limburg|Neovison vison|Dutch COVID-19 response team|Erasmus Medical Center|Oude Munnink|Netherlands

>Spike|hCoV-19/Scotland/EDB6435/2020|2020-04-21|EPI\_ISL\_487797|Original|hCoV-19^^Scotland|Human|Virology Department|Wellcome Sanger Institute for the COVID-19 Genomics UK (COG-UK) consortium|Davies|United Kingdom

>Spike|hCoV-19/USA/CO-QDX-2274/2020|2020-03-16|EPI\_ISL\_604522|Original|hCoV-19^^Colorado|Human|Quest Diagnostics|Quest Diagnostics|Kagan|USA

>Spike|hCoV-19/England/CAMB-7F707/2020|2020-04-09|EPI\_ISL\_470378|Original|hCoV-19^^England|Human|Department of Pathology|Wellcome Sanger Institute for the COVID-19 Genomics UK (COG-UK) consortium|Davies|United Kingdom

>Spike|hCoV-19/England/NORT-282ABB/2020|2020-03-28|EPI\_ISL\_488514|Original|hCoV-19^^England|Human|NU-OMICS DNA Sequencing research facility|Wellcome Sanger Institute for the COVID-19 Genomics UK (COG-UK) consortium|Davies|United Kingdom

>Spike|hCoV-19/USA/NMDOH-2020322068/2020|2020-09-01|EPI\_ISL\_542075|Original|hCoV-19^^New Mexico|Human|New Mexico Department of Health Scientific Laboratory|New Mexico Department of Health Scientific Laboratory|Johnson|USA

>Spike|hCoV-19/England/ALDP-95291A/2020|2020-06-12|EPI\_ISL\_554079|Original|hCoV-19^^England|Human|Lighthouse Lab in Alderley Park|Wellcome Sanger Institute for the COVID-19 Genomics UK (COG-UK) consortium|Davies|United Kingdom

>Spike|hCoV-19/England/MILK-9EF8AC/2020|2020-09-23|EPI\_ISL\_594953|Original|hCoV-19^^England|Human|Queens Medical Centre|COVID-19 Genomics UK (COG-UK) Consortium|Loose|United Kingdom

>Spike|hCoV-19/England/MILK-A0565A/2020|2020-09-30|EPI\_ISL\_600036|Original|hCoV-19^^England|Human|Lighthouse Lab in Milton Keynes|Wellcome Sanger Institute for the COVID-19 Genomics UK (COG-UK) consortium|Davies|United Kingdom

>Spike|hCoV-19/Denmark/DCGC-20899/2020|2020-12-21|EPI\_ISL\_758925|Original|hCoV-19^^Syddanmark|Human|Department of Virus and Microbiological Special Diagnostics|Albertsen Lab|Michaelsen|Denmark

>Spike|hCoV-19/USA/WI-UW-279/2020|2020-04-03|EPI\_ISL\_436573|Original|hCoV-19^^Wisconsin|Human|University of Wisconsin-Madison AIDS Vaccine Research Laboratories|University of Wisconsin-Madison AIDS Vaccine Research Laboratories|Baczenas|USA

>Spike|hCoV-19/England/ALDP-B469BD/2020|2020-11-07|EPI\_ISL\_655993|Original|hCoV-19^^England|Human|Lighthouse Lab in Alderley Park|Wellcome Sanger Institute for the COVID-19 Genomics UK (COG-UK) Consortium|Davies|United Kingdom

>Spike|hCoV-19/England/BRIS-12D7AD/2020|2020-05-07|EPI\_ISL\_481836|Original|hCoV-19^^England|Human|PHE South West Regional Laboratory|Wellcome Sanger Institute for the COVID-19 Genomics UK (COG-UK) consortium|Davies|United Kingdom

>Spike|hCoV-19/India/DL-MaxCov0023-CSIR-IGIB/2020|2020-05-08|EPI\_ISL\_459925|Original|hCoV-19^^Delhi|Human|Devki Devi Foundation|CSIR-IGIB/Max|Pandey|India

>Spike|hCoV-19/Belgium/ULG-10930/2020|2020-11-24|EPI\_ISL\_678469|Original|hCoV-19^^Li\u00e8ge|Human|Department of Clinical Microbiology|GIGA Medical Genomics|Durkin|Belgium

>Spike|hCoV-19/England/CAMC-9DF872/2020|2020-09-21|EPI\_ISL\_638429|Original|hCoV-19^^England|Human|Department of Pathology|COVID-19 Genomics UK (COG-UK) Consortium|Goodfellow|United Kingdom

>Spike|hCoV-19/Australia/VIC6921/2020|2020-07-21|EPI\_ISL\_564141|Original|hCoV-19^^Victoria|Human|Microbiological Diagnostic Unit - Public Health Laboratory (MDU-PHL)|MDU-PHL|Schultz|Australia

>Spike|hCoV-19/USA/WA-S2598/2020|2020-06-18|EPI\_ISL\_497230|Original|hCoV-19^^Washington|Human|Washington State Department of Health|Seattle Flu Study|Lee|USA

>Spike|hCoV-19/USA/AZ-TG519159/2020|2020-06-30|EPI\_ISL\_695359|Original|hCoV-19^^Arizona|Human|AZ SPHL|TGen North|French|USA

>Spike|hCoV-19/England/QEUA-A0B0CF/2020|2020-10-01|EPI\_ISL\_599285|Original|hCoV-19^^England|Human|Lighthouse Lab in Glasgow|Wellcome Sanger Institute for the COVID-19 Genomics UK (COG-UK) consortium|Davies|United Kingdom

>Spike|hCoV-19/Denmark/DCGC-8176/2020|2020-10-26|EPI\_ISL\_617235|Original|hCoV-19^^Hovedstaden|Human|Department of Virus and Microbiological Special Diagnostics|Albertsen lab|Michaelsen|Denmark

>Spike|hCoV-19/England/NORT-2980ED/2020|2020-04-28|EPI\_ISL\_488142|Original|hCoV-19^^England|Human|NU-OMICS DNA Sequencing research facility|Wellcome Sanger Institute for the COVID-19 Genomics UK (COG-UK) consortium|Davies|United Kingdom

>Spike|hCoV-19/England/ALDP-C8CBF0/2020|2020-12-15|EPI\_ISL\_777165|Original|hCoV-19^^England|Human|Lighthouse Lab in Alderley Park|Wellcome Sanger Institute for the COVID-19 Genomics UK (COG-UK) Consortium|Davies|United Kingdom

>Spike|hCoV-19/South Korea/KDCA0451/2020|2020-11-16|EPI\_ISL\_760235|Original|hCoV-19^^South Korea|Human|Division of Emerging Infectious Diseases|Division of Emerging Infectious Diseases|Park|South Korea

>Spike|hCoV-19/Bangladesh/BCSIR-NILMRC-107/2020|2020-06-07|EPI\_ISL\_475166|Original|hCoV-19^^Rangpur|Human|National Institute of Laboratory Medicine and Referral Center|Genomic Research Lab|Khan|Bangladesh

>Spike|hCoV-19/England/MILK-B55380/2020|2020-11-04|EPI\_ISL\_657770|Original|hCoV-19^^England|Human|Lighthouse Lab in Milton Keynes|Wellcome Sanger Institute for the COVID-19 Genomics UK (COG-UK) Consortium|Davies|United Kingdom

>Spike|hCoV-19/Luxembourg/LNS1239541/2020|2020-12-18|EPI\_ISL\_739910|Original|hCoV-19^^Luxembourg|Human|Laboratoire national de sant\u00e9|Laboratoire national de sant\u00e9|Wienecke-Baldacchino|Luxembourg

>Spike|hCoV-19/England/QEUA-AD0CA1/2020|2020-10-26|EPI\_ISL\_634242|Original|hCoV-19^^England|Human|Lighthouse Lab in Glasgow|Wellcome Sanger Institute for the COVID-19 Genomics UK (COG-UK) consortium|Davies|United Kingdom

>Spike|hCoV-19/England/ALDP-9552FE/2020|2020-06-12|EPI\_ISL\_554492|Original|hCoV-19^^England|Human|Lighthouse Lab in Alderley Park|Wellcome Sanger Institute for the COVID-19 Genomics UK (COG-UK) consortium|Davies|United Kingdom

>Spike|hCoV-19/England/QEUA-AD54FF/2020|2020-10-26|EPI\_ISL\_633909|Original|hCoV-19^^England|Human|Lighthouse Lab in Glasgow|Wellcome Sanger Institute for the COVID-19 Genomics UK (COG-UK) consortium|Davies|United Kingdom

>Spike|hCoV-19/Scotland/GCVR-1702AA/2020|2020-03-24|EPI\_ISL\_459697|Original|hCoV-19^^Scotland|Human|NHSGGC West of Scotland Specialist Virology Centre / MRC-University of Glasgow Centre for Virus Research|Wellcome Sanger Institute for the COVID-19 Genomics UK (COG-UK) consortium|Davies|United Kingdom

>Spike|hCoV-19/USA/MI-MDHHS-SC22494/2020|2020-11-04|EPI\_ISL\_708595|Original|hCoV-19^^Michigan|Human|Michigan Department of Health and Human Services|Michigan Department of Health and Human Services|Jacob|USA

>Spike|hCoV-19/Scotland/CVR5239/2020|2020-10-14|EPI\_ISL\_627406|Original|hCoV-19^^Scotland|Human|West of Scotland Specialist Virology Centre|COVID-19 Genomics UK (COG-UK) Consortium|Robertson|United Kingdom

>Spike|hCoV-19/Israel/ISR\_NH\_AS\_0625/2020|2020-06-25|EPI\_ISL\_594157|Original|hCoV-19^^Israel|Human|Israel Institute for Biological Research|Israel Institute for Biological Research|Zaide|Israel

>Spike|hCoV-19/England/ALDP-B4623A/2020|2020-11-05|EPI\_ISL\_656194|Original|hCoV-19^^England|Human|Lighthouse Lab in Alderley Park|Wellcome Sanger Institute for the COVID-19 Genomics UK (COG-UK) Consortium|Davies|United Kingdom

>Spike|hCoV-19/England/MILK-99C57A/2020|2020-08-30|EPI\_ISL\_550763|Original|hCoV-19^^England|Human|Lighthouse Lab in Milton Keynes|Wellcome Sanger Institute for the COVID-19 Genomics UK (COG-UK) consortium|Davies|United Kingdom

>Spike|hCoV-19/Wales/PHWC-499A19/2020|2020-12-04|EPI\_ISL\_727389|Original|hCoV-19^^Wales|Human|Originating lab|COVID-19 Genomics UK (COG-UK) Consortium|Moore|United Kingdom

>Spike|hCoV-19/USA/TX-HMH-MCoV-14191/2020|2020-10-02|EPI\_ISL\_787476|Original|hCoV-19^^Texas|Human|Houston Methodist Hospital|Houston Methodist Hospital|Long|USA

>Spike|hCoV-19/Scotland/CVR3966/2020|2020-08-10|EPI\_ISL\_517582|Original|hCoV-19^^Scotland|Human|West of Scotland Specialist Virology Centre|COVID-19 Genomics UK (COG-UK) Consortium|Robertson|United Kingdom

>Spike|hCoV-19/England/QEUH-B2EDBF/2020|2020-11-03|EPI\_ISL\_660002|Original|hCoV-19^^England|Human|Lighthouse Lab in Glasgow|Wellcome Sanger Institute for the COVID-19 Genomics UK (COG-UK) Consortium|Davies|United Kingdom

>Spike|hCoV-19/England/ALDP-B23E02/2020|2020-11-04|EPI\_ISL\_646385|Original|hCoV-19^^England|Human|Lighthouse Lab in Alderley Park|Wellcome Sanger Institute for the COVID-19 Genomics UK (COG-UK) Consortium|Davies|United Kingdom

>Spike|hCoV-19/USA/MI-UM-10036764267/2020|2020-11-03|EPI\_ISL\_707819|Original|hCoV-19^^Michigan|Human|University of Michigan Clinical Microbiology Laboratory|Lauring Lab|Valesano|USA

>Spike|hCoV-19/England/MILK-999C78/2020|2020-08-29|EPI\_ISL\_550266|Original|hCoV-19^^England|Human|Lighthouse Lab in Milton Keynes|Wellcome Sanger Institute for the COVID-19 Genomics UK (COG-UK) consortium|Davies|United Kingdom

>Spike|hCoV-19/England/204690328/2020|2020-11-13|EPI\_ISL\_683532|Original|hCoV-19^^England|Human|Respiratory Virus Unit|COVID-19 Genomics UK (COG-UK) Consortium|Platt|United Kingdom

>Spike|hCoV-19/England/ALDP-9047A4/2020|2020-06-24|EPI\_ISL\_551400|Original|hCoV-19^^England|Human|Lighthouse Lab in Alderley Park|Wellcome Sanger Institute for the COVID-19 Genomics UK (COG-UK) consortium|Davies|United Kingdom

>Spike|hCoV-19/England/20162007804/2020|2020-04-13|EPI\_ISL\_527333|Original|hCoV-19^^England|Human|Respiratory Virus Unit|Respiratory Virus Unit|Ledesma|United Kingdom

>Spike|hCoV-19/Denmark/DCGC-5675/2020|2020-09-28|EPI\_ISL\_619962|Original|hCoV-19^^Hovedstaden|Human|Department of Virus and Microbiological Special Diagnostics|Albertsen lab|Michaelsen|Denmark

>Spike|hCoV-19/USA/MA-JLL-865452S/2020|2020-04-22|EPI\_ISL\_648265|Original|hCoV-19^^Massachusetts|Human|Brigham and Women's Hospital|Jonathan Li laboratory|Choudhary|USA

>Spike|hCoV-19/Russia/SPE-RII-MH956S/2020|2020-09-03|EPI\_ISL\_596364|Original|hCoV-19^^Saint Petersburg|Human|HELIX LCC|WHO National Influenza Centre Russian Federation|Komissarov|Russia

>Spike|hCoV-19/England/204240532/2020|2020-10-13|EPI\_ISL\_609893|Original|hCoV-19^^England|Human|Respiratory Virus Unit|Respiratory Virus Unit|Platt|United Kingdom

>Spike|hCoV-19/England/BRIS-12EF1D/2020|2020-04-23|EPI\_ISL\_488220|Original|hCoV-19^^England|Human|PHE South West Regional Laboratory|Wellcome Sanger Institute for the COVID-19 Genomics UK (COG-UK) consortium|Davies|United Kingdom

>Spike|hCoV-19/USA/IL-UW-1075/2020|2020-07-27|EPI\_ISL\_516501|Original|hCoV-19^^Illinois|Human|University of Wisconsin-Madison AIDS Vaccine Research Laboratories|University of Wisconsin-Madison AIDS Vaccine Research Laboratories|Baczenas|USA

>Spike|hCoV-19/New Zealand/20CV0437/2020|2020-10-20|EPI\_ISL\_622774|Original|hCoV-19^^Auckland|Human|LabPLUS|Institute of Environmental Science and Research (ESR)|Wang|New Zealand

>Spike|hCoV-19/USA/MA-MASPHL-00810/2020|2020-05-26|EPI\_ISL\_692890|Original|hCoV-19^^Massachusetts|Human|Massachusetts State Public Health Laboratory|Massachusetts State Public Health Laboratory|Lang|USA

>Spike|hCoV-19/Japan/PG-4980/2020|2020-08-00|EPI\_ISL\_690096|Original|hCoV-19^^Japan|Human|Pathogen Genomics Center|Pathogen Genomics Center|Sekizuka|Japan

>Spike|hCoV-19/England/NOTT-10E48D/2020|2020-03-12|EPI\_ISL\_425550|Original|hCoV-19^^England|Human|Queens Medical Centre|COVID-19 Genomics UK (COG-UK) Consortium|Loose|United Kingdom

>Spike|hCoV-19/USA/WI-WSLH-200678/2020|2020-08-19|EPI\_ISL\_631435|Original|hCoV-19^^Wisconsin|Human|Wisconsin State Laboratory of Hygiene Communicable Disease Division|Wisconsin State Laboratory of Hygiene Communicable Disease Division|Florek|USA

>Spike|hCoV-19/Singapore/972/2020|2020-03-22|EPI\_ISL\_548980|Original|hCoV-19^^Singapore|Human|National Public Health Laboratory|National Public Health Laboratory|Mak|Singapore

>Spike|hCoV-19/Wales/PHWC-16D932/2020|2020-09-21|EPI\_ISL\_577467|Original|hCoV-19^^Wales|Human|Wales Specialist Virology Centre Sequencing lab|COVID-19 Genomics UK (COG-UK) Consortium|Moore|United Kingdom

>Spike|hCoV-19/Japan/PG-5688/2020|2020-05-00|EPI\_ISL\_688812|Original|hCoV-19^^Japan|Human|Pathogen Genomics Center|Pathogen Genomics Center|Sekizuka|Japan

>Spike|hCoV-19/USA/UT-02140/2020|2020-04-14|EPI\_ISL\_470711|Original|hCoV-19^^Utah|Human|Utah Public Health Laboratory|Utah Public Health Laboratory|Young|USA

>Spike|hCoV-19/Sichuan/SC-NC-073/2020|2020-01-30|EPI\_ISL\_451332|Original|hCoV-19^^Sichuan|Human|West China Hospital of Sichuan University|State Key Laboratory of Biotherapy of Sichuan University|Tang|China

>Spike|hCoV-19/USA/OR-OHSU-0647/2020|2020-06-16|EPI\_ISL\_525868|Original|hCoV-19^^Oregon|Human|OHSU Lab Services Molecular Microbiology Lab|Oregon SARS-CoV-2 Genome Sequencing Center|O'Roak|USA

>Spike|hCoV-19/India/MH-BJMC-12267/2020|2020-06-27|EPI\_ISL\_728268|Original|hCoV-19^^Maharashtra|Human|B.J. Govt. Medical College|National Centre For Cell Science|Paul|India

>Spike|hCoV-19/Belgium/DC-0322355/2020|2020-03-22|EPI\_ISL\_462209|Original|hCoV-19^^Mol|Human|KU Leuven|KU Leuven|Maes|Belgium

>Spike|hCoV-19/USA/GA-CDC-7365/2020|2020-10-22|EPI\_ISL\_681783|Original|hCoV-19^^Georgia|Human|GA Department of Public Health Laboratory|Pathogen Discovery|Queen|USA

>Spike|hCoV-19/Denmark/DCGC-2817/2020|2020-08-17|EPI\_ISL\_616453|Original|hCoV-19^^Midtjylland|Human|Department of Virus and Microbiological Special Diagnostics|Albertsen lab|Michaelsen|Denmark

>Spike|hCoV-19/Denmark/DCGC-13899/2020|2020-11-30|EPI\_ISL\_713091|Original|hCoV-19^^Sjaelland|Human|Department of Virus and Microbiological Special Diagnostics|Albertsen Lab|Michaelsen|Denmark

>Spike|hCoV-19/Denmark/DCGC-2107/2020|2020-07-27|EPI\_ISL\_618369|Original|hCoV-19^^Midtjylland|Human|Department of Virus and Microbiological Special Diagnostics|Albertsen lab|Michaelsen|Denmark

>Spike|hCoV-19/Singapore/885/2020|2020-05-06|EPI\_ISL\_536426|Original|hCoV-19^^Singapore|Human|National Public Health Laboratory|National Public Health Laboratory|Mak|Singapore

>Spike|hCoV-19/England/QEUEH-B1005D/2020|2020-11-02|EPI\_ISL\_642613|Original|hCoV-19^^England|Human|Lighthouse Lab in Glasgow|Wellcome Sanger Institute for the COVID-19 Genomics UK (COG-UK) Consortium|Davies|United Kingdom

>Spike|hCoV-19/USA/MI-MDHHS-SC20466/2020|2020-03-28|EPI\_ISL\_460005|Original|hCoV-19^^Michigan|Human|Michigan Department of Health and Human Services|Michigan Department of Health and Human Services|Blankenship|USA

>Spike|hCoV-19/Denmark/DCGC-9395/2020|2020-11-16|EPI\_ISL\_668948|Original|hCoV-19^^Midtjylland|Human|Department of Virus and Microbiological Special Diagnostics|Albertsen Lab|Michaelsen|Denmark

>Spike|hCoV-19/Wales/PHWC-49403A/2020|2020-11-14|EPI\_ISL\_726057|Original|hCoV-19^^Wales|Human|Originating lab|COVID-19 Genomics UK (COG-UK) Consortium|Moore|United Kingdom

>Spike|hCoV-19/Wales/PHWC-491A20/2020|2020-11-10|EPI\_ISL\_706728|Original|hCoV-19^^Wales|Human|Originating lab|COVID-19 Genomics UK (COG-UK) Consortium|Moore|United Kingdom

>Spike|hCoV-19/England/204380503/2020|2020-10-23|EPI\_ISL\_637123|Original|hCoV-19^^England|Human|Respiratory Virus Unit|COVID-19 Genomics UK (COG-UK) Consortium|Platt|United Kingdom

>Spike|hCoV-19/Denmark/DCGC-18107/2020|2020-12-14|EPI\_ISL\_749758|Original|hCoV-19^^Syddanmark|Human|Department of Virus and Microbiological Special Diagnostics|Albertsen Lab|Michaelsen|Denmark

>Spike|hCoV-19/Australia/WA337/2020|2020-03-15|EPI\_ISL\_596880|Original|hCoV-19^^Western Australia|Human|PathWest Laboratory Medicine WA|PathWest Laboratory Medicine WA Microbial Surveillance Unit|Sikazwe|Australia

>Spike|hCoV-19/Denmark/ALAB-SSI-846/2020|2020-03-30|EPI\_ISL\_444937|Original|hCoV-19^^Denmark|Human|Department of Virus and Microbiological Special Diagnostics|Albertsen lab|Kirkegaard|Denmark

>Spike|hCoV-19/USA/AZ-TG664286/2020|2020-04-29|EPI\_ISL\_696085|Original|hCoV-19^^Arizona|Human|Sonora Quest Laboratories|TGen North|French|USA

>Spike|hCoV-19/USA/WI-UW-2061/2020|2020-09-23|EPI\_ISL\_677466|Original|hCoV-19^^Wisconsin|Human|University of Wisconsin-Madison AIDS Vaccine Research Laboratories|University of Wisconsin-Madison AIDS Vaccine Research Laboratories|Baczenas|USA

>Spike|hCoV-19/USA/FL-BPHL-0518/2020|2020-06-15|EPI\_ISL\_508721|Original|hCoV-19^^Florida|Human|Florida Bureau of Public Health Laboratories|Florida Bureau of Public Health Laboratories|Blanton|USA

>Spike|hCoV-19/Scotland/QEUH-C14CDC/2020|2020-12-06|EPI\_ISL\_710677|Original|hCoV-19^^Scotland|Human|Lighthouse Lab in Glasgow|Wellcome Sanger Institute for the COVID-19 Genomics UK (COG-UK) Consortium|Davies|United Kingdom

>Spike|hCoV-19/Scotland/QEUH-9C8715/2020|2020-09-15|EPI\_ISL\_576030|Original|hCoV-19^^Scotland|Human|Lighthouse Lab in Glasgow|Wellcome Sanger Institute for the COVID-19 Genomics UK (COG-UK) consortium|Davies|United Kingdom

>Spike|hCoV-19/Australia/VIC13624/2020|2020-07-31|EPI\_ISL\_563789|Original|hCoV-19^^Victoria|Human|Microbiological Diagnostic Unit - Public Health Laboratory (MDU-PHL)|MDU-PHL|Schultz|Australia

>Spike|hCoV-19/Scotland/QEUH-B9FEC5/2020|2020-11-18|EPI\_ISL\_757193|Original|hCoV-19^^Scotland|Human|Lighthouse Lab in Glasgow|Wellcome Sanger Institute for the COVID-19 Genomics UK (COG-UK) Consortium|Davies|United Kingdom

>Spike|hCoV-19/Hong Kong/HKPU-4954/2020|2020-09-13|EPI\_ISL\_610218|Original|hCoV-19^^Hong Kong|Human|Department of Health Technology and Informatics|Department of Health Technology and Informatics|Leung|China

>Spike|hCoV-19/Oman/RESP-20-6417/2020|2020-03-29|EPI\_ISL\_457996|Original|hCoV-19^^Muscat|Human|Oman-NIC|Oman-NIC|Al Mahruqi|Oman

>Spike|hCoV-19/India/MH-GA100/2020|2020-06-17|EPI\_ISL\_511941|Original|hCoV-19^^Maharashtra|Human|Government Medical College|National Institute of Biomedical Genomics -\u00a0DBT's PAN-INDIA 1000 SARS--CoV-2 RNA Genome Sequencing Consortium|Maitra|India

>Spike|hCoV-19/USA/WA-S28/2020|2020-03-02|EPI\_ISL\_417081|Original|hCoV-19^^Washington|Human|Washington State Department of Health|Seattle Flu Study|Bedford|USA

>Spike|hCoV-19/Jordan/AM-ALSR-4067/2020|2020-10-03|EPI\_ISL\_636427|Original|hCoV-19^^Amman|Human|Biolab Diagnostic Laboratories|Andersen lab at Scripps Research|Gangavarapu|Jordan

>Spike|hCoV-19/Scotland/EDB7801/2020|2020-09-19|EPI\_ISL\_572599|Original|hCoV-19^^Scotland|Human|Virology Department|COVID-19 Genomics UK (COG-UK) Consortium|Williams|United Kingdom

>Spike|hCoV-19/USA/TX-HMH-MCoV-16135/2020|2020-10-26|EPI\_ISL\_785819|Original|hCoV-19^^Texas|Human|Houston Methodist Hospital|Houston Methodist Hospital|Long|USA

>Spike|hCoV-19/England/NORW-F6E9A/2020|2020-12-07|EPI\_ISL\_725309|Original|hCoV-19^^England|Human|Quadram Institute Bioscience|COVID-19 Genomics UK (COG-UK) Consortium|Alikhan|United Kingdom

>Spike|hCoV-19/England/MILK-9C3BD2/2020|2020-09-09|EPI\_ISL\_566896|Original|hCoV-19^^England|Human|Lighthouse Lab in Milton Keynes|Wellcome Sanger Institute for the COVID-19 Genomics UK (COG-UK) consortium|Davies|United Kingdom

>Spike|hCoV-19/USA/TX-HMH-MCoV-13703/2020|2020-08-20|EPI\_ISL\_788799|Original|hCoV-19^^Texas|Human|Houston Methodist Hospital|Houston Methodist Hospital|Long|USA

>Spike|hCoV-19/England/NORT-1B617DD/2020|2020-10-30|EPI\_ISL\_705293|Original|hCoV-19^^England|Human|Northumbria University / South Tees Hospitals NHS Foundation Trust / North Cumbria Integrated Care NHS Foundation Trust / North Tees and Hartlepool NHS Foundation Trust / Newcastle Hospitals NHS Foundation Trust|COVID-19 Genomics UK (COG-UK) Consortium|Bashton|United Kingdom

>Spike|hCoV-19/Spain/MD-IBV-99008574/2020|2020-09-21|EPI\_ISL\_654114|Original|hCoV-19^^Madrid|Human|Hospital General Universitario Gregorio Marañ\u00f1a|SeqCOVID-SPAIN consortium/IBV (CSIC)|Comas|Spain



>Spike|hCoV-19/USA/NY-NYUMC494/2020|2020-03-18|EPI\_ISL\_436742|Original|hCoV-19^^New York|Human|NYU Langone Health|Departments of Pathology and Medicine|Maurano|USA

>Spike|hCoV-19/England/MILK-B5A312/2020|2020-11-06|EPI\_ISL\_658127|Original|hCoV-19^^England|Human|Lighthouse Lab in Milton Keynes|Wellcome Sanger Institute for the COVID-19 Genomics UK (COG-UK) Consortium|Davies|United Kingdom

>Spike|hCoV-19/Australia/VIC9376/2020|2020-08-17|EPI\_ISL\_565529|Original|hCoV-19^^Victoria|Human|Microbiological Diagnostic Unit - Public Health Laboratory (MDU-PHL)|MDU-PHL|Schultz|Australia

>Spike|hCoV-19/England/CAMB-1AE3CE/2020|2020-05-05|EPI\_ISL\_448053|Original|hCoV-19^^England|Human|Department of Pathology|COVID-19 Genomics UK (COG-UK) Consortium|Meredith|United Kingdom

>Spike|hCoV-19/USA/FL-BPHL-1309/2020|2020-06-23|EPI\_ISL\_541247|Original|hCoV-19^^Florida|Human|Florida Bureau of Public Health Laboratories|Florida Bureau of Public Health Laboratories|Blanton|USA

>Spike|hCoV-19/USA/NY-Wadsworth-292814-01/2020|2020-12-26|EPI\_ISL\_769970|Original|hCoV-19^^New York|Human|Albany Medical Center Hospital Clinical Laboratories|Wadsworth Center|Lasek-Nesselquist|USA

>Spike|hCoV-19/Netherlands/GE-EMC-209/2020|2020-05-29|EPI\_ISL\_523191|Original|hCoV-19^^Gelderland|Human|Dutch COVID-19 response team|Erasmus Medical Center|Oude Munnink|Netherlands

>Spike|hCoV-19/England/SHEF-C7EDE/2020|2020-04-15|EPI\_ISL\_457624|Original|hCoV-19^^England|Human|Virology Department|COVID-19 Genomics UK (COG-UK) Consortium|de Silva|United Kingdom

>Spike|hCoV-19/England/QEUEH-B41590/2020|2020-11-08|EPI\_ISL\_658422|Original|hCoV-19^^England|Human|Lighthouse Lab in Glasgow|Wellcome Sanger Institute for the COVID-19 Genomics UK (COG-UK) Consortium|Davies|United Kingdom

>Spike|hCoV-19/Wales/PHWC-164661/2020|2020-05-06|EPI\_ISL\_474210|Original|hCoV-19^^Wales|Human|Originating lab|COVID-19 Genomics UK (COG-UK) Consortium|Moore|United Kingdom

>Spike|hCoV-19/Switzerland/ZH-ETHZ-400069/2020|2020-12-05|EPI\_ISL\_729121|Original|hCoV-19^^Zurich|Human|Viollier AG|Department of Biosystems Science and Engineering|Nadeau|Switzerland

>Spike|hCoV-19/Denmark/DCGC-5882/2020|2020-09-28|EPI\_ISL\_621069|Original|hCoV-19^^Midtjylland|Human|Department of Virus and Microbiological Special Diagnostics|Albertsen lab|Michaelsen|Denmark

>Spike|hCoV-19/Wales/PHWC-31E1B/2020|2020-04-07|EPI\_ISL\_446572|Original|hCoV-19^^Wales|Human|Wales Specialist Virology Centre|Public Health Wales Microbiology Cardiff|Moore|United Kingdom

>Spike|hCoV-19/Portugal/PT2024/2020|2020-11-22|EPI\_ISL\_732242|Original|hCoV-19^^Portugal|Human|Instituto Nacional de Saude (INSA) and Instituto Gulbenkian de Ciencia (IGC)|Instituto Nacional de Saude (INSA) and Instituto Gulbenkian de Ciencia (IGC)|Borges|Portugal

>Spike|hCoV-19/Ireland/LH-NVRL-73IRL41493/2020|2020-09-09|EPI\_ISL\_639850|Original|hCoV-19^^Louth|Human|National Virus Reference Laboratory|National Virus Reference Laboratory|Gonzalez|Ireland

>Spike|hCoV-19/Luxembourg/LNS7437554/2020|2020-11-11|EPI\_ISL\_744571|Original|hCoV-19^^Luxembourg|Human|Laboratoire national de sant\u00e9|Laboratoire national de sant\u00e9|Wienecke-Baldacchino|Luxembourg

>Spike|hCoV-19/Denmark/DCGC-10921/2020|2020-11-02|EPI\_ISL\_670284|Original|hCoV-19^^Sjaelland|Human|Department of Virus and Microbiological Special Diagnostics|Albertsen Lab|Michaelsen|Denmark

>Spike|hCoV-19/England/20140070004/2020|2020-03-30|EPI\_ISL\_423405|Original|hCoV-19^^England|Human|Respiratory Virus Unit|Respiratory Virus Unit|Platt|United Kingdom

>Spike|hCoV-19/England/MILK-BAA53B/2020|2020-11-17|EPI\_ISL\_783215|Original|hCoV-19^^England|Human|Lighthouse Lab in Milton Keynes|Wellcome Sanger Institute for the COVID-19 Genomics UK (COG-UK) Consortium|Davies|United Kingdom

>Spike|hCoV-19/England/MILK-ABB44A/2020|2020-10-21|EPI\_ISL\_623480|Original|hCoV-19^^England|Human|Lighthouse Lab in Milton Keynes|Wellcome Sanger Institute for the COVID-19 Genomics UK (COG-UK) consortium|Davies|United Kingdom

>Spike|hCoV-19/England/OXON-AFE45/2020|2020-04-09|EPI\_ISL\_478829|Original|hCoV-19^^England|Human|Oxford Viromics|COVID-19 Genomics UK (COG-UK) Consortium|Golubchik|United Kingdom

>Spike|hCoV-19/Wales/PHWC-47E616/2020|2020-10-06|EPI\_ISL\_595479|Original|hCoV-19^^Wales|Human|Originating lab|COVID-19 Genomics UK (COG-UK) Consortium|Moore|United Kingdom

>Spike|hCoV-19/Wales/PHWC-496205/2020|2020-11-21|EPI\_ISL\_726547|Original|hCoV-19^^Wales|Human|Originating lab|COVID-19 Genomics UK (COG-UK) Consortium|Moore|United Kingdom

>Spike|hCoV-19/India/WB-IK32/2020|2020-05-01|EPI\_ISL\_508362|Original|hCoV-19^^West Bengal|Human|Institute of Post Graduate Medical Education & Research|National Institute of Biomedical Genomics|Maitra|India

>Spike|hCoV-19/India/DL-ILBS-271M/2020|2020-05-01|EPI\_ISL\_605808|Original|hCoV-19^^Delhi|Human|Clinical Virology Laboratory|ILBS - IGIB|Rooge|India

>Spike|hCoV-19/USA/CA-CSMC97/2020|2020-04-02|EPI\_ISL\_475714|Original|hCoV-19^^California|Human|Cedars-Sinai Medical Center|Cedars-Sinai Medical Center|Zhang|USA

>Spike|hCoV-19/Denmark/DCGC-19590/2020|2020-12-07|EPI\_ISL\_749046|Original|hCoV-19^^Syddanmark|Human|Department of Virus and Microbiological Special Diagnostics|Albertsen Lab|Michaelsen|Denmark

>Spike|hCoV-19/England/204220385/2020|2020-10-12|EPI\_ISL\_609886|Original|hCoV-19^^England|Human|Respiratory Virus Unit|Respiratory Virus Unit|Platt|United Kingdom

>Spike|hCoV-19/USA/CA-QDX-1919/2020|2020-03-16|EPI\_ISL\_604203|Original|hCoV-19^^California|Human|Quest Diagnostics|Quest Diagnostics|Kagan|USA

>Spike|hCoV-19/USA/TX-HMH-MCoV-14720/2020|2020-10-11|EPI\_ISL\_786205|Original|hCoV-19^^Texas|Human|Houston Methodist Hospital|Houston Methodist Hospital|Long|USA

>Spike|hCoV-19/Hong Kong/HKU-IHCE0511-012c/2020|2020-03-14|EPI\_ISL\_538551|Original|hCoV-19^^Hong Kong|Human|Department of Microbiology|Department of Microbiology|Chan|China

>Spike|hCoV-19/USA/FL-BPHL-1960/2020|2020-04-12|EPI\_ISL\_653113|Original|hCoV-19^^Florida|Human|Florida Bureau of Public Health Laboratories|Florida Bureau of Public Health Laboratories|Blanton|USA

>Spike|hCoV-19/USA/OR-OHSU-0258/2020|2020-04-11|EPI\_ISL\_509083|Original|hCoV-19^^Oregon|Human|OHSU Lab Services Molecular Microbiology Lab|Oregon SARS-CoV-2 Genome Sequencing Center|O'Roak|USA

>Spike|hCoV-19/France/ARA-SC114/2020|2020-04-06|EPI\_ISL\_700378|Original|hCoV-19^^Auvergne-Rh\u00f4ne-Alpes|Human|Centre hospitalier M\u00e9tropole Savoie|CNR Virus des Infections Respiratoires - France SUD|Bal|France

>Spike|hCoV-19/Japan/PG-2230/2020|2020-04-00|EPI\_ISL\_685835|Original|hCoV-19^^Japan|Human|Pathogen Genomics Center|Pathogen Genomics Center|Sekizuka|Japan

>Spike|hCoV-19/Canada/ON-E66/2020|2020-06-09|EPI\_ISL\_593539|Original|hCoV-19^^Ontario|Human|Eastern Ontario Regional Laboratory Association|McMaster University|McArthur|Canada

>Spike|hCoV-19/England/ALDP-924D24/2020|2020-06-23|EPI\_ISL\_551415|Original|hCoV-19^^England|Human|Lighthouse Lab in Alderley Park|Wellcome Sanger Institute for the COVID-19 Genomics UK (COG-UK) consortium|Davies|United Kingdom

>Spike|hCoV-19/England/MILK-957DA0/2020|2020-06-10|EPI\_ISL\_554758|Original|hCoV-19^^England|Human|Lighthouse Lab in Milton Keynes|Wellcome Sanger Institute for the COVID-19 Genomics UK (COG-UK) consortium|Davies|United Kingdom

>Spike|hCoV-19/England/MILK-ACC1C7/2020|2020-10-21|EPI\_ISL\_629316|Original|hCoV-19^^England|Human|Lighthouse Lab in Milton Keynes|Wellcome Sanger Institute for the COVID-19 Genomics UK (COG-UK) consortium|Davies|United Kingdom

>Spike|hCoV-19/Wales/PHWC-16973C/2020|2020-04-18|EPI\_ISL\_512505|Original|hCoV-19^^Wales|Human|Wales Specialist Virology Centre Sequencing lab|COVID-19 Genomics UK (COG-UK) Consortium|Moore|United Kingdom

>Spike|hCoV-19/USA/CA-ALSR-5046/2020|2020-12-04|EPI\_ISL\_730313|Original|hCoV-19^^California|Human|San Diego County Public Health Laboratory|Andersen lab at Scripps Research|Gangavarapu|USA

>Spike|hCoV-19/England/CAMB-1B9A61/2020|2020-11-08|EPI\_ISL\_679147|Original|hCoV-19^^England|Human|Department of Pathology|COVID-19 Genomics UK (COG-UK) Consortium|Goodfellow|United Kingdom

>Spike|hCoV-19/England/CAMB-7514F/2020|2020-03-17|EPI\_ISL\_440432|Original|hCoV-19^^England|Human|Department of Pathology|Wellcome Sanger Institute for the COVID-19 Genomics UK (COG-UK) consortium|Amato|United Kingdom

>Spike|hCoV-19/USA/WI-UW-2307/2020|2020-11-26|EPI\_ISL\_728073|Original|hCoV-19^^Wisconsin|Human|University of Wisconsin-Madison AIDS Vaccine Research Laboratories|University of Wisconsin-Madison AIDS Vaccine Research Laboratories|Baczenas|USA

>Spike|hCoV-19/Denmark/DCGC-2812/2020|2020-08-17|EPI\_ISL\_616648|Original|hCoV-19^^Hovedstaden|Human|Department of Virus and Microbiological Special Diagnostics|Albertsen lab|Michaelsen|Denmark

>Spike|hCoV-19/England/ALDP-4A7948/2020|2020-06-08|EPI\_ISL\_559564|Original|hCoV-19^^England|Human|Lighthouse Lab in Alderley Park|Wellcome Sanger Institute for the COVID-19 Genomics UK (COG-UK) consortium|Davies|United Kingdom

>Spike|hCoV-19/England/CAMB-7BB2D/2020|2020-04-03|EPI\_ISL\_442268|Original|hCoV-19^^England|Human|Department of Pathology|Wellcome Sanger Institute for the COVID-19 Genomics UK (COG-UK) consortium|Amato|United Kingdom

>Spike|hCoV-19/USA/MA-MGH-02842/2020|2020-10-20|EPI\_ISL\_765659|Original|hCoV-19^^Massachusetts|Human|Massachusetts General Hospital|Infectious Disease Program|Park|USA

>Spike|hCoV-19/England/CAMB-81104/2020|2020-04-20|EPI\_ISL\_438568|Original|hCoV-19^^England|Human|Department of Pathology|COVID-19 Genomics UK (COG-UK) Consortium|Meredith|United Kingdom

>Spike|hCoV-19/England/ALDP-9C5851/2020|2020-09-11|EPI\_ISL\_567730|Original|hCoV-19^^England|Human|Lighthouse Lab in Alderley Park|Wellcome Sanger Institute for the COVID-19 Genomics UK (COG-UK) consortium|Davies|United Kingdom

>Spike|hCoV-19/USA/UT-UPHL-2009071/2020|2020-05-14|EPI\_ISL\_525079|Original|hCoV-19^^Utah|Human|Utah Public Health Laboratory|Utah Public Health Laboratory|Young|USA

>Spike|hCoV-19/England/ALDP-AA19B1/2020|2020-10-21|EPI\_ISL\_623981|Original|hCoV-19^^England|Human|Lighthouse Lab in Alderley Park|Wellcome Sanger Institute for the COVID-19 Genomics UK (COG-UK) consortium|Davies|United Kingdom

>Spike|hCoV-19/USA/VA-DCLS-2198/2020|2020-11-04|EPI\_ISL\_734251|Original|hCoV-19^^Virginia|Human|Virginia Division of Consolidated Laboratory Services (DCLS)|Virginia Division of Consolidated Laboratory Services (DCLS)|St. Jacques|USA

>Spike|hCoV-19/USA/CA-ALSR-1211/2020|2020-05-01|EPI\_ISL\_494441|Original|hCoV-19^^California|Human|San Diego County Public Health Laboratory|Andersen lab at Scripps Research|Gangavarapu|USA

>Spike|hCoV-19/Wales/PHWC-29BF1/2020|2020-04-04|EPI\_ISL\_432243|Original|hCoV-19^^Wales|Human|Wales Specialist Virology Centre|Public Health Wales Microbiology Cardiff|Moore|United Kingdom

>Spike|hCoV-19/Japan/PG-3533/2020|2020-06-00|EPI\_ISL\_691789|Original|hCoV-19^^Japan|Human|Pathogen Genomics Center|Pathogen Genomics Center|Sekizuka|Japan

>Spike|hCoV-19/Scotland/CVR4691/2020|2020-09-30|EPI\_ISL\_611709|Original|hCoV-19^^Scotland|Human|West of Scotland Specialist Virology Centre|COVID-19 Genomics UK (COG-UK) Consortium|Robertson|United Kingdom

>Spike|hCoV-19/USA/FL-BPHL-0677/2020|2020-03-24|EPI\_ISL\_509735|Original|hCoV-19^^Florida|Human|Florida Bureau of Public Health Laboratories|Florida Bureau of Public Health Laboratories|Blanton|USA

>Spike|hCoV-19/Brazil/SP-750/2020|2020-06-25|EPI\_ISL\_735408|Original|hCoV-19^^S\u00e3o Paulo|Human|COVID 19 Centro de Combate ao Coronavirus CCC Jandira|Instituto Adolfo Lutz|Sacchi|Brazil

>Spike|hCoV-19/England/QEUH-AEFA3C/2020|2020-10-29|EPI\_ISL\_662672|Original|hCoV-19^^England|Human|Lighthouse Lab in Glasgow|Wellcome Sanger Institute for the COVID-19 Genomics UK (COG-UK) Consortium|Davies|United Kingdom

>Spike|hCoV-19/USA/TX-HMH-MCoV-18898/2020|2020-11-25|EPI\_ISL\_785206|Original|hCoV-19^^Texas|Human|Houston Methodist Hospital|Houston Methodist Hospital|Long|USA

>Spike|hCoV-19/England/MILK-BABCF9/2020|2020-11-18|EPI\_ISL\_783346|Original|hCoV-19^^England|Human|Lighthouse Lab in Milton Keynes|Wellcome Sanger Institute for the COVID-19 Genomics UK (COG-UK) Consortium|Davies|United Kingdom

>Spike|hCoV-19/England/QEUA-AE318E/2020|2020-10-27|EPI\_ISL\_633422|Original|hCoV-19^^England|Human|Lighthouse Lab in Glasgow|Wellcome Sanger Institute for the COVID-19 Genomics UK (COG-UK) consortium|Davies|United Kingdom

>Spike|hCoV-19/England/CAMB-1B0235/2020|2020-04-30|EPI\_ISL\_459256|Original|hCoV-19^^England|Human|Department of Pathology|Wellcome Sanger Institute for the COVID-19 Genomics UK (COG-UK) consortium|Davies|United Kingdom

>Spike|hCoV-19/England/ALDP-5C9A5B/2020|2020-06-19|EPI\_ISL\_558565|Original|hCoV-19^^England|Human|Lighthouse Lab in Alderley Park|Wellcome Sanger Institute for the COVID-19 Genomics UK (COG-UK) consortium|Davies|United Kingdom

>Spike|hCoV-19/USA/MI-MDHHS-SC21403/2020|2020-04-10|EPI\_ISL\_507657|Original|hCoV-19^^Michigan|Human|Michigan Department of Health and Human Services|Michigan Department of Health and Human Services|Blankenship|USA

>Spike|hCoV-19/Wales/PHWC-485A7A/2020|2020-10-23|EPI\_ISL\_628244|Original|hCoV-19^^Wales|Human|Wales Specialist Virology Centre Sequencing lab|COVID-19 Genomics UK (COG-UK) Consortium|Moore|United Kingdom

>Spike|hCoV-19/England/BIRM-6592C/2020|2020-10-02|EPI\_ISL\_594596|Original|hCoV-19^^England|Human|University of Birmingham|COVID-19 Genomics UK (COG-UK) Consortium|Loman|United Kingdom

>Spike|hCoV-19/USA/UT-02697/2020|2020-04-27|EPI\_ISL\_522265|Original|hCoV-19^^Utah|Human|Utah Public Health Laboratory|Utah Public Health Laboratory|Young|USA

>Spike|hCoV-19/Finland/29M14S1/2020|2020-03-29|EPI\_ISL\_481640|Original|hCoV-19^^Uusimaa|Human|Department of Virology and Immunology|Department of Virology|Smura|Finland

>Spike|hCoV-19/USA/CO-CDPHE-2010280216/2020|2020-10-26|EPI\_ISL\_710367|Original|hCoV-19^^Colorado|Human|Colorado Department of Public Health and Environment|Colorado Department of Public Health and Environment|Bankers|USA

>Spike|hCoV-19/USA/WY-WPHL-20172216/2020|2020-12-30|EPI\_ISL\_770458|Original|hCoV-19^^Wyoming|Human|Wyoming Public Health Laboratory|Wyoming Public Health Laboratory|Hull|USA

>Spike|hCoV-19/Denmark/DCGC-17089/2020|2020-12-14|EPI\_ISL\_750327|Original|hCoV-19^^Midtjylland|Human|Department of Virus and Microbiological Special Diagnostics|Albertsen Lab|Michaelsen|Denmark

>Spike|hCoV-19/USA/NY-Wadsworth-21493-01/2020|2020-03-18|EPI\_ISL\_525621|Original|hCoV-19^^New York|Human|Wadsworth Center|Wadsworth Center|Plitnick|USA

>Spike|hCoV-19/Scotland/EDB5320/2020|2020-05-21|EPI\_ISL\_493952|Original|hCoV-19^^Scotland|Human|Virology Department|COVID-19 Genomics UK (COG-UK) Consortium|Williams|United Kingdom

>Spike|hCoV-19/Germany/BY-MGZ-04/2020|2020-05-11|EPI\_ISL\_490208|Original|hCoV-19^^Bavaria|Human|M\u00fcrchen Klinik Schwabing|MGZ Medical Genetics Center|Wolf|Germany

>Spike|hCoV-19/Japan/PG-1424/2020|2020-04-00|EPI\_ISL\_685031|Original|hCoV-19^^Japan|Human|Saitama Prefectural Institute of Public Health|Pathogen Genomics Center|Sekizuka|Japan

>Spike|hCoV-19/England/LOND-D6258/2020|2020-04-20|EPI\_ISL\_482215|Original|hCoV-19^^England|Human|University College London|Wellcome Sanger Institute for the COVID-19 Genomics UK (COG-UK) consortium|Davies|United Kingdom

>Spike|hCoV-19/England/ALDP-A92D11/2020|2020-10-19|EPI\_ISL\_611151|Original|hCoV-19^^England|Human|Lighthouse Lab in Alderley Park|Wellcome Sanger Institute for the COVID-19 Genomics UK (COG-UK) consortium|Davies|United Kingdom

>Spike|hCoV-19/England/MILK-B8E4B8/2020|2020-11-13|EPI\_ISL\_674523|Original|hCoV-19^^England|Human|Lighthouse Lab in Milton Keynes|Wellcome Sanger Institute for the COVID-19 Genomics UK (COG-UK) Consortium|Davies|United Kingdom

>Spike|hCoV-19/Belgium/BEG-0324149/2020|2020-03-24|EPI\_ISL\_420406|Original|hCoV-19^^Confontaine|Human|KU Leuven|KU Leuven|Maes|Belgium

>Spike|hCoV-19/England/MILK-A461C5/2020|2020-10-06|EPI\_ISL\_598645|Original|hCoV-19^^England|Human|Lighthouse Lab in Milton Keynes|Wellcome Sanger Institute for the COVID-19 Genomics UK (COG-UK) consortium|Davies|United Kingdom

>Spike|hCoV-19/England/ALDP-C3C782/2020|2020-12-10|EPI\_ISL\_731241|Original|hCoV-19^^England|Human|Lighthouse Lab in Alderley Park|Wellcome Sanger Institute for the COVID-19 Genomics UK (COG-UK) Consortium|Davies|United Kingdom

>Spike|hCoV-19/USA/CA-CHLA-PLM65511564/2020|2020-11-30|EPI\_ISL\_753492|Original|hCoV-19^^California|Human|Clinical virology Laboratory|Center for Personalized Medicine|Dien Bard|USA

>Spike|hCoV-19/England/QEUEH-B80F3D/2020|2020-11-14|EPI\_ISL\_667867|Original|hCoV-19^^England|Human|Lighthouse Lab in Glasgow|Wellcome Sanger Institute for the COVID-19 Genomics UK (COG-UK) Consortium|Davies|United Kingdom

>Spike|hCoV-19/Denmark/DCGC-2475/2020|2020-08-10|EPI\_ISL\_617743|Original|hCoV-19^^Hovedstaden|Human|Department of Virus and Microbiological Special Diagnostics|Albertsen lab|Michaelsen|Denmark

>Spike|hCoV-19/England/PORT-2D115E/2020|2020-06-09|EPI\_ISL\_484407|Original|hCoV-19^^England|Human|Centre for Enzyme Innovation|COVID-19 Genomics UK (COG-UK) Consortium|Robson|United Kingdom

>Spike|hCoV-19/Belgium/UGent-245/2020|2020-10-26|EPI\_ISL\_717629|Original|hCoV-19^^Ghent|Human|Lab voor klinische biologie|Onderzoeksgroep Virologie|Lambrechts|Belgium

>Spike|hCoV-19/Canada/MB-NML-1169/2020|2020-08-03|EPI\_ISL\_582490|Original|hCoV-19^^Manitoba|Human|Cadham Provincial Laboratory|National Microbiology Laboratory (NML)|Majer|Canada

>Spike|hCoV-19/Australia/WA422/2020|2020-03-23|EPI\_ISL\_672634|Original|hCoV-19^^Western Australia|Human|PathWest Laboratory Medicine WA|PathWest Laboratory Medicine WA Microbial Surveillance Unit|Sikazwe|Australia

>Spike|hCoV-19/England/MILK-A79615/2020|2020-10-13|EPI\_ISL\_606901|Original|hCoV-19^^England|Human|Lighthouse Lab in Milton Keynes|Wellcome Sanger Institute for the COVID-19 Genomics UK (COG-UK) consortium|Davies|United Kingdom

>Spike|hCoV-19/Netherlands/UT-EMC-59/2020|2020-07-27|EPI\_ISL\_523536|Original|hCoV-19^^Utrecht|Human|Dutch COVID-19 response team|Erasmus Medical Center|Oude Munnink|Netherlands

>Spike|hCoV-19/Portugal/PT1293/2020|2020-03-24|EPI\_ISL\_511254|Original|hCoV-19^^Portugal|Human|Instituto Nacional de Saude (INSA) and Instituto Gulbenkian de Ciencia (IGC)|Instituto Nacional de Saude (INSA) and Instituto Gulbenkian de Ciencia (IGC)|Borges|Portugal

>Spike|hCoV-19/USA/WA-UW255/2020|2020-03-16|EPI\_ISL\_418040|Original|hCoV-19^^Washington|Human|UW Virology Lab|UW Virology Lab|Roychoudhury|USA

>Spike|hCoV-19/England/QEUEH-BC4841/2020|2020-11-25|EPI\_ISL\_703429|Original|hCoV-19^^England|Human|Lighthouse Lab in Glasgow|Wellcome Sanger Institute for the COVID-19 Genomics UK (COG-UK) Consortium|Davies|United Kingdom

>Spike|hCoV-19/USA/UT-08391/2020|2020-05-15|EPI\_ISL\_524172|Original|hCoV-19^^Utah|Human|Utah Public Health Laboratory|Utah Public Health Laboratory|Young|USA

>Spike|hCoV-19/Colombia/DC-INS-05-07/2020|2020-06-17|EPI\_ISL\_526974|Original|hCoV-19^^Bogota|Human|Instituto Nacional de Salud|Instituto Nacional de Salud|Franco-Mu\u00f1oz|Colombia

>Spike|hCoV-19/USA/UT-03020/2020|2020-05-01|EPI\_ISL\_509562|Original|hCoV-19^^Utah|Human|Utah Public Health Laboratory|Utah Public Health Laboratory|Butz|USA

>Spike|hCoV-19/England/ALDP-9BE026/2020|2020-09-09|EPI\_ISL\_568101|Original|hCoV-19^^England|Human|Lighthouse Lab in Alderley Park|Wellcome Sanger Institute for the COVID-19 Genomics UK (COG-UK) consortium|Davies|United Kingdom

>Spike|hCoV-19/Scotland/QEUEH-7B19B1/2020|2020-07-19|EPI\_ISL\_532894|Original|hCoV-19^^Scotland|Human|NHSGGC West of Scotland Specialist Virology Centre / MRC-University of Glasgow Centre for Virus Research|Wellcome Sanger Institute for the COVID-19 Genomics UK (COG-UK) consortium|Davies|United Kingdom

>Spike|hCoV-19/USA/MI-MDHHS-SC20295/2020|2020-03-15|EPI\_ISL\_447092|Original|hCoV-19^^Michigan|Human|Michigan Department of Health and Human Services|Michigan Department of Health and Human Services|Blankenship|USA

>Spike|hCoV-19/South Africa/R10752/2020|2020-06-12|EPI\_ISL\_490302|Original|hCoV-19^^Western Cape|Human|National Institute for Communicable Diseases of the National Health Laboratory Service|National Institute for Communicable Diseases of the National Health Laboratory Service|Allam|South Africa

>Spike|hCoV-19/Denmark/DCGC-14420/2020|2020-11-30|EPI\_ISL\_711131|Original|hCoV-19^^Hovedstaden|Human|Department of Virus and Microbiological Special Diagnostics|Albertsen Lab|Michaelsen|Denmark

>Spike|hCoV-19/USA/TX-HMH-2829/2020|2020-06-08|EPI\_ISL\_543803|Original|hCoV-19^^Texas|Human|Houston Methodist Hospital|Houston Methodist Hospital|Long|USA

>Spike|hCoV-19/England/NOTT-10EB1F/2020|2020-03-30|EPI\_ISL\_425641|Original|hCoV-19^^England|Human|Queens Medical Centre|COVID-19 Genomics UK (COG-UK) Consortium|Loose|United Kingdom

>Spike|hCoV-19/England/CAMC-C3FA4A/2020|2020-12-10|EPI\_ISL\_719113|Original|hCoV-19^^England|Human|Lighthouse Lab in Cambridge|Wellcome Sanger Institute for the COVID-19 Genomics UK (COG-UK) Consortium|Davies|United Kingdom

>Spike|hCoV-19/England/QEUH-B6B211/2020|2020-11-11|EPI\_ISL\_662425|Original|hCoV-19^^England|Human|Lighthouse Lab in Glasgow|Wellcome Sanger Institute for the COVID-19 Genomics UK (COG-UK) Consortium|Davies|United Kingdom

>Spike|hCoV-19/Wales/PHWC-30EA3/2020|2020-04-09|EPI\_ISL\_446373|Original|hCoV-19^^Wales|Human|Wales Specialist Virology Centre|Public Health Wales Microbiology Cardiff|Moore|United Kingdom

>Spike|hCoV-19/Finland/23SS2E3/2020|2020-09-23|EPI\_ISL\_759804|Original|hCoV-19^^Uusimaa|Human|Department of Virology and Immunology|Department of Virology|Smura|Finland

>Spike|hCoV-19/Australia/NSW201/2020|2020-03-21|EPI\_ISL\_427710|Original|hCoV-19^^New South Wales|Human|Centre for Infectious Diseases and Microbiology Public Health|NSW Health Pathology - Institute of Clinical Pathology and Medical Research; Westmead Hospital; University of Sydney|Gall|Australia

>Spike|hCoV-19/Scotland/QEUH-9DCAD9/2020|2020-09-22|EPI\_ISL\_601117|Original|hCoV-19^^Scotland|Human|Lighthouse Lab in Glasgow|Wellcome Sanger Institute for the COVID-19 Genomics UK (COG-UK) consortium|Davies|United Kingdom

>Spike|hCoV-19/England/204040300/2020|2020-09-29|EPI\_ISL\_622837|Original|hCoV-19^^England|Human|Respiratory Virus Unit|Respiratory Virus Unit|Platt|United Kingdom

>Spike|hCoV-19/Denmark/DCGC-18929/2020|2020-12-07|EPI\_ISL\_748646|Original|hCoV-19^^Syddanmark|Human|Department of Virus and Microbiological Special Diagnostics|Albertsen Lab|Michaelsen|Denmark

>Spike|hCoV-19/England/CAMC-B34B9E/2020|2020-11-05|EPI\_ISL\_659581|Original|hCoV-19^^England|Human|Lighthouse Lab in Cambridge|Wellcome Sanger Institute for the COVID-19 Genomics UK (COG-UK) Consortium|Davies|United Kingdom

>Spike|hCoV-19/England/ALDP-CB34D7/2020|2020-12-20|EPI\_ISL\_761247|Original|hCoV-19^^England|Human|Lighthouse Lab in Alderley Park|Wellcome Sanger Institute for the COVID-19 Genomics UK (COG-UK) Consortium|Davies|United Kingdom

>Spike|hCoV-19/Australia/VIC10141/2020|2020-08-13|EPI\_ISL\_562072|Original|hCoV-19^^Victoria|Human|Victorian Infectious Diseases Reference Laboratory (VIDRL)|VIDRL and MDU-PHL|Schultz|Australia

>Spike|hCoV-19/England/LIVE-9B8D5/2020|2020-04-19|EPI\_ISL\_440884|Original|hCoV-19^^England|Human|Liverpool Clinical Laboratories|COVID-19 Genomics UK (COG-UK) Consortium|Haldenby|United Kingdom

>Spike|hCoV-19/England/LIVE-DB95DD/2020|2020-11-09|EPI\_ISL\_664685|Original|hCoV-19^^England|Human|Liverpool Clinical Laboratories|COVID-19 Genomics UK (COG-UK) Consortium|Haldenby|United Kingdom

>Spike|hCoV-19/Brazil/SP-L24-CD528/2020|2020-04-14|EPI\_ISL\_672689|Original|hCoV-19^^S\u00e3o Paulo|Human|Hospital das Cl\u00ednicas da Faculdade de Medicina da Universidade de S\u00e3o Paulo (HC-FMUSP)|Laborat\u00f3rio de Parasitologia M\u00e9dica - Instituto de Medicina Tropical - Universidade de S\u00e3o Paulo|de Jesus|Brazil

>Spike|hCoV-19/England/QEUH-AE1B82/2020|2020-10-24|EPI\_ISL\_633595|Original|hCoV-19^^England|Human|Lighthouse Lab in Glasgow|Wellcome Sanger Institute for the COVID-19 Genomics UK (COG-UK) consortium|Davies|United Kingdom

>Spike|hCoV-19/France/PAC-IHU-0243/2020|2020-03-30|EPI\_ISL\_569405|Original|hCoV-19^^Provence-Alpes-C\u00f4te-d\u0027Azur|Human|MEPHI|MEPHI|Levasseur|France

>Spike|hCoV-19/USA/OR-OHSU-2968/2020|2020-09-07|EPI\_ISL\_667435|Original|hCoV-19^^Oregon|Human|OHSU Lab Services Molecular Microbiology Lab|Oregon SARS-CoV-2 Genome Sequencing Center|O'Roak|USA

>Spike|hCoV-19/USA/MD-MDH-0314/2020|2020-10-17|EPI\_ISL\_633090|Original|hCoV-19^^Maryland|Human|MD PHL|MD PHL|Keller|USA

>Spike|hCoV-19/USA/AZ-TG670242/2020|2020-03-26|EPI\_ISL\_696422|Original|hCoV-19^^Arizona|Human|Sonora Quest Laboratories|TGen North|French|USA

>Spike|hCoV-19/England/CAMC-CB7C17/2020|2020-12-19|EPI\_ISL\_777841|Original|hCoV-19^^England|Human|Lighthouse Lab in Cambridge|Wellcome Sanger Institute for the COVID-19 Genomics UK (COG-UK) Consortium|Davies|United Kingdom

>Spike|hCoV-19/USA/MI-MDHHS-SC20832/2020|2020-04-17|EPI\_ISL\_471853|Original|hCoV-19^^Michigan|Human|Michigan Department of Health and Human Services|Michigan Department of Health and Human Services|Blankenship|USA

>Spike|hCoV-19/Belgium/ULG-10038/2020|2020-03-30|EPI\_ISL\_427346|Original|hCoV-19^^Liege|Human|Department of Clinical Microbiology|GIGA Medical Genomics|Durkin|Belgium

>Spike|hCoV-19/England/QEUEH-C31A0C/2020|2020-12-11|EPI\_ISL\_730813|Original|hCoV-19^^England|Human|Lighthouse Lab in Glasgow|Wellcome Sanger Institute for the COVID-19 Genomics UK (COG-UK) Consortium|Davies|United Kingdom

>Spike|hCoV-19/Australia/VIC2455/2020|2020-06-26|EPI\_ISL\_522161|Original|hCoV-19^^Victoria|Human|Victorian Infectious Diseases Reference Laboratory (VIDRL)|VIDRL and MDU-PHL|Schultz|Australia

>Spike|hCoV-19/Panama/328848/2020|2020-03-08|EPI\_ISL\_496614|Original|hCoV-19^^Panama Center|Human|Gorgas Memorial Laboratory of Health Studies|Gorgas Memorial Laboratory of Health Studies|Martinez|Panama

>Spike|hCoV-19/England/CAMB-1B81D6/2020|2020-10-19|EPI\_ISL\_637737|Original|hCoV-19^^England|Human|Department of Pathology|COVID-19 Genomics UK (COG-UK) Consortium|Goodfellow|United Kingdom

>Spike|hCoV-19/England/CAMC-B9A370/2020|2020-11-15|EPI\_ISL\_673766|Original|hCoV-19^^England|Human|Lighthouse Lab in Cambridge|Wellcome Sanger Institute for the COVID-19 Genomics UK (COG-UK) Consortium|Davies|United Kingdom

>Spike|hCoV-19/Germany/BE-ChVir-D2011-5016/2020|2020-10-15|EPI\_ISL\_753899|Original|hCoV-19^^Berlin|Human|Charit\u00e9 Universit\u00e4tsmedizin Berlin|Charit\u00e9 Universit\u00e4tsmedizin Berlin|Muehleemann|Germany

>Spike|hCoV-19/USA/OR-OHSU-1365/2020|2020-07-15|EPI\_ISL\_509189|Original|hCoV-19^^Oregon|Human|OHSU Lab Services Molecular Microbiology Lab|Oregon SARS-CoV-2 Genome Sequencing Center|O'Roak|USA

>Spike|hCoV-19/Peru/ICA-INS-012/2020|2020-03-09|EPI\_ISL\_489989|Original|hCoV-19^^Ica|Human|Laboratorio de Referencia Nacional de Virus Respiratorio. Instituto Nacional de Salud Per\u00fa|Laboratorio de Referencia Nacional de Biotecnolog\u00eda y Biolog\u00eda Molecular. Instituto Nacional de Salud Per\u00fa|Padilla Rojas|Peru

>Spike|hCoV-19/England/MILK-9766DD/2020|2020-08-20|EPI\_ISL\_575774|Original|hCoV-19^^England|Human|Lighthouse Lab in Milton Keynes|Wellcome Sanger Institute for the COVID-19 Genomics UK (COG-UK) consortium|Davies|United Kingdom

>Spike|hCoV-19/India/GJ-GBRC257b/2020|2020-06-12|EPI\_ISL\_483847|Original|hCoV-19^^Gujarat|Human|Pandit Deendayal Upadhyay Government Medical College|Gujarat Biotechnology Research Centre|Joshi|India

>Spike|hCoV-19/England/QEUEH-962CC3/2020|2020-08-11|EPI\_ISL\_531725|Original|hCoV-19^^England|Human|Lighthouse Lab in Glasgow|Wellcome Sanger Institute for the COVID-19 Genomics UK (COG-UK) consortium|Davies|United Kingdom

>Spike|hCoV-19/England/NORT-2848BF/2020|2020-03-23|EPI\_ISL\_478571|Original|hCoV-19^^England|Human|Northumbria University / South Tees Hospitals NHS Foundation Trust / North Cumbria Integrated Care NHS Foundation Trust / North Tees and Hartlepool NHS Foundation Trust / Newcastle Hospitals NHS Foundation Trust|COVID-19 Genomics UK (COG-UK) Consortium|Bashton|United Kingdom

>Spike|hCoV-19/Ireland/LH-NVRL-20ILR11485/2020|2020-11-20|EPI\_ISL\_732510|Original|hCoV-19^^Louth|Human|National Virus Reference Laboratory|National Virus Reference Laboratory|Gonzalez|Ireland

>Spike|hCoV-19/USA/VA-DCLS-2066/2020|2020-10-20|EPI\_ISL\_677192|Original|hCoV-19^^Virginia|Human|Virginia Division of Consolidated Laboratory Services|Virginia Division of Consolidated Laboratory Services|St. Jacques|USA

>Spike|hCoV-19/England/MILK-B8C7FD/2020|2020-11-13|EPI\_ISL\_675994|Original|hCoV-19^^England|Human|Lighthouse Lab in Milton Keynes|Wellcome Sanger Institute for the COVID-19 Genomics UK (COG-UK) Consortium|Davies|United Kingdom

>Spike|hCoV-19/Scotland/GCVR-171722/2020|2020-03-28|EPI\_ISL\_489686|Original|hCoV-19^^Scotland|Human|NHSGGC West of Scotland Specialist Virology Centre / MRC-University of Glasgow Centre for Virus Research|Wellcome Sanger Institute for the COVID-19 Genomics UK (COG-UK) consortium|Davies|United Kingdom

>Spike|hCoV-19/Spain/NC-IBV-001376/2020|2020-03-13|EPI\_ISL\_452525|Original|hCoV-19^^Navarra|Human|Cl\u00ednica Universidad de Navarra. Servicio de Enfermedades Infecciosas y Microbiolog\u00eda cl\u00ednica|SeqCOVID-SPAIN consortium/IBV (CSIC) |Comas|Spain

>Spike|hCoV-19/USA/TX-DSHS-1672/2020|2020-06-24|EPI\_ISL\_710063|Original|hCoV-19^^Texas|Human|Texas Department of State Health Services|Texas Department of State Health Services|Rahman|USA

>Spike|hCoV-19/England/ALDP-C3A6A5/2020|2020-12-09|EPI\_ISL\_731440|Original|hCoV-19^^England|Human|Lighthouse Lab in Alderley Park|Wellcome Sanger Institute for the COVID-19 Genomics UK (COG-UK) Consortium|Davies|United Kingdom

>Spike|hCoV-19/Germany/SH-ChVir8606/2020|2020-08-23|EPI\_ISL\_729593|Original|hCoV-19^^Schleswig-Holstein|Human|A. Krumbholz|Charit\u00e9 Universit\u00e4tsmedizin Berlin|Muehlemann|Germany

>Spike|hCoV-19/Japan/PG-8589/2020|2020-08-00|EPI\_ISL\_686185|Original|hCoV-19^^Japan|Human|Pathogen Genomics Center|Pathogen Genomics Center|Sekizuka|Japan

>Spike|hCoV-19/South Africa/KRISP-K000617/2020|2020-07-01|EPI\_ISL\_509269|Original|hCoV-19^^KwaZulu-Natal|Human|NHLs-IALCH|KRISP|de Oliveira|South Africa

>Spike|hCoV-19/Australia/WA328/2020|2020-03-25|EPI\_ISL\_596871|Original|hCoV-19^^Western Australia|Human|PathWest Laboratory Medicine WA|PathWest Laboratory Medicine WA Microbial Surveillance Unit|Sikazwe|Australia

>Spike|hCoV-19/Netherlands/ZH-RIVM-20453/2020|2020-10-26|EPI\_ISL\_728672|Original|hCoV-19^^Zuid-holland|Human|Dutch COVID-19 response team|National Institute for Public Health and the Environment (RIVM)|Meijer|Netherlands

>Spike|hCoV-19/England/QEUA-9F7AAB/2020|2020-09-27|EPI\_ISL\_589254|Original|hCoV-19^^England|Human|Lighthouse Lab in Glasgow|Wellcome Sanger Institute for the COVID-19 Genomics UK (COG-UK) consortium|Davies|United Kingdom

>Spike|hCoV-19/England/ALDP-AA36D6/2020|2020-10-21|EPI\_ISL\_623965|Original|hCoV-19^^England|Human|Lighthouse Lab in Alderley Park|Wellcome Sanger Institute for the COVID-19 Genomics UK (COG-UK) consortium|Davies|United Kingdom

>Spike|hCoV-19/Wales/PHWC-4841B2/2020|2020-10-22|EPI\_ISL\_627974|Original|hCoV-19^^Wales|Human|Wales Specialist Virology Centre Sequencing lab|COVID-19 Genomics UK (COG-UK) Consortium|Moore|United Kingdom

>Spike|hCoV-19/England/PORT-2F60B0/2020|2020-12-04|EPI\_ISL\_741736|Original|hCoV-19^^England|Human|Centre for Enzyme Innovation|COVID-19 Genomics UK (COG-UK) Consortium|Robson|United Kingdom

>Spike|hCoV-19/Wales/PHWC-486C91/2020|2020-10-26|EPI\_ISL\_637885|Original|hCoV-19^^Wales|Human|Wales Specialist Virology Centre Sequencing lab|COVID-19 Genomics UK (COG-UK) Consortium|Moore|United Kingdom

>Spike|hCoV-19/England/ALDP-639AEC/2020|2020-07-04|EPI\_ISL\_556206|Original|hCoV-19^^England|Human|Lighthouse Lab in Alderley Park|Wellcome Sanger Institute for the COVID-19 Genomics UK (COG-UK) consortium|Davies|United Kingdom

>Spike|hCoV-19/Spain/CL-IBV-97006295/2020|2020-04-21|EPI\_ISL\_537665|Original|hCoV-19^^Castilla y Leon|Human|Universidad de Le\u00f3n|SeqCOVID-SPAIN consortium/IBV (CSIC) |Comas|Spain



>Spike|hCoV-19/England/MILK-A911DA/2020|2020-10-16|EPI\_ISL\_638509|Original|hCoV-19^^England|Human|Oxford Viromics|COVID-19 Genomics UK (COG-UK) Consortium|Golubchik|United Kingdom

>Spike|hCoV-19/Russia/StPetersburg-RII8934S/2020|2020-04-23|EPI\_ISL\_450291|Original|hCoV-19^^Saint Petersburg|Human|WHO National Influenza Centre Russian Federation|WHO National Influenza Centre Russian Federation|Komissarov|Russia

>Spike|hCoV-19/Denmark/DCGC-17491/2020|2020-12-14|EPI\_ISL\_751022|Original|hCoV-19^^Nordjylland|Human|Department of Virus and Microbiological Special Diagnostics|Albertsen Lab|Michaelsen|Denmark

>Spike|hCoV-19/England/MILK-9C2B6A/2020|2020-09-10|EPI\_ISL\_566488|Original|hCoV-19^^England|Human|Lighthouse Lab in Milton Keynes|Wellcome Sanger Institute for the COVID-19 Genomics UK (COG-UK) consortium|Davies|United Kingdom

>Spike|hCoV-19/Japan/Donner19/2020|2020-04-13|EPI\_ISL\_438963|Original|hCoV-19^^Kanto|Human|Keio University School of Medicine|Keio University School of Medicine|Kosaki|Japan

>Spike|hCoV-19/Denmark/DCGC-14099/2020|2020-11-30|EPI\_ISL\_711567|Original|hCoV-19^^Denmark|Human|Department of Virus and Microbiological Special Diagnostics|Albertsen Lab|Michaelsen|Denmark

>Spike|hCoV-19/USA/NY-Wadsworth-65683-01/2020|2020-04-23|EPI\_ISL\_676879|Original|hCoV-19^^New York|Human|Wadsworth Center|Wadsworth Center|Lasek-Nesselquist|USA

>Spike|hCoV-19/England/QEUA-96AEB6/2020|2020-08-15|EPI\_ISL\_531366|Original|hCoV-19^^England|Human|Lighthouse Lab in Glasgow|Wellcome Sanger Institute for the COVID-19 Genomics UK (COG-UK) consortium|Davies|United Kingdom

>Spike|hCoV-19/Wales/PHWC-47E6CB/2020|2020-10-08|EPI\_ISL\_595488|Original|hCoV-19^^Wales|Human|Originating lab|COVID-19 Genomics UK (COG-UK) Consortium|Moore|United Kingdom

>Spike|hCoV-19/USA/TX-DSHS-0832/2020|2020-06-07|EPI\_ISL\_593575|Original|hCoV-19^^Texas|Human|Texas Department of State Health Services|Texas Department of State Health Services|Rahman|USA

>Spike|hCoV-19/England/CAMB-1AB83B/2020|2020-04-20|EPI\_ISL\_470110|Original|hCoV-19^^England|Human|Department of Pathology|Wellcome Sanger Institute for the COVID-19 Genomics UK (COG-UK) consortium|Davies|United Kingdom

>Spike|hCoV-19/Australia/VIC5992/2020|2020-07-20|EPI\_ISL\_518767|Original|hCoV-19^^Victoria|Human|Microbiological Diagnostic Unit - Public Health Laboratory (MDU-PHL)|MDU-PHL|Schultz|Australia

>Spike|hCoV-19/USA/WI-UW-1538/2020|2020-09-14|EPI\_ISL\_605416|Original|hCoV-19^^Wisconsin|Human|University of Wisconsin-Madison AIDS Vaccine Research Laboratories|University of Wisconsin-Madison AIDS Vaccine Research Laboratories|Baczenas|USA

>Spike|hCoV-19/Denmark/DCGC-6264/2020|2020-10-05|EPI\_ISL\_620024|Original|hCoV-19^^Midtjylland|Human|Department of Virus and Microbiological Special Diagnostics|Albertsen lab|Michaelsen|Denmark

>Spike|hCoV-19/England/QEUA-AD0791/2020|2020-10-24|EPI\_ISL\_634224|Original|hCoV-19^^England|Human|Lighthouse Lab in Glasgow|Wellcome Sanger Institute for the COVID-19 Genomics UK (COG-UK) consortium|Davies|United Kingdom

>Spike|hCoV-19/USA/CA-ALSR-3164/2020|2020-08-24|EPI\_ISL\_635892|Original|hCoV-19^^California|Human|San Diego County Public Health Laboratory|Andersen lab at Scripps Research|Gangavarapu|USA

>Spike|hCoV-19/Wales/PHWC-4921DF/2020|2020-11-18|EPI\_ISL\_703761|Original|hCoV-19^^Wales|Human|Originating lab|COVID-19 Genomics UK (COG-UK) Consortium|Moore|United Kingdom

>Spike|hCoV-19/England/ALDP-AA549E/2020|2020-10-21|EPI\_ISL\_625089|Original|hCoV-19^^England|Human|Lighthouse Lab in Alderley Park|Wellcome Sanger Institute for the COVID-19 Genomics UK (COG-UK) consortium|Davies|United Kingdom

>Spike|hCoV-19/England/CAMC-A6460E/2020|2020-10-11|EPI\_ISL\_608876|Original|hCoV-19^^England|Human|Lighthouse Lab in Cambridge|Wellcome Sanger Institute for the COVID-19 Genomics UK (COG-UK) consortium|Davies|United Kingdom

>Spike|hCoV-19/Japan/PG-1268/2020|2020-00-00|EPI\_ISL\_684878|Original|hCoV-19^^Japan|Human|Pathogen Genomics Center|Pathogen Genomics Center|Sekizuka|Japan

>Spike|hCoV-19/Israel/2089712/2020|2020-04-01|EPI\_ISL\_447367|Original|hCoV-19^^Jerusalem District|Human|Clinical Virology Unit|Stern Lab|Miller|Israel

>Spike|hCoV-19/England/QEUD-9AEC9E/2020|2020-09-03|EPI\_ISL\_573492|Original|hCoV-19^^England|Human|University College London|COVID-19 Genomics UK (COG-UK) Consortium|Roy|United Kingdom

>Spike|hCoV-19/Spain/CT-IBV-97010110/2020|2020-11-16|EPI\_ISL\_683636|Original|hCoV-19^^Catalunya|Human|Servicio de Microbiolog\u00eda|SeqCOVID-SPAIN consortium/IBV (CSIC)|Comas|Spain

>Spike|hCoV-19/Denmark/DCGC-5838/2020|2020-09-28|EPI\_ISL\_621025|Original|hCoV-19^^Syddanmark|Human|Department of Virus and Microbiological Special Diagnostics|Albertsen lab|Michaelsen|Denmark

>Spike|hCoV-19/England/LEED-2A8AFB/2020|2020-03-29|EPI\_ISL\_539019|Original|hCoV-19^^England|Human|Leeds Teaching Hospitals NHS Trust and Public Health England|Wellcome Sanger Institute for the COVID-19 Genomics UK (COG-UK) consortium|Davies|United Kingdom

>Spike|hCoV-19/USA/NY-QDX-1181/2020|2020-03-14|EPI\_ISL\_571991|Original|hCoV-19^^New York|Human|Quest Diagnostics|Quest Diagnostics|Kagan|USA

>Spike|hCoV-19/Scotland/QEUD-96FEEE/2020|2020-08-18|EPI\_ISL\_568411|Original|hCoV-19^^Scotland|Human|Lighthouse Lab in Glasgow|Wellcome Sanger Institute for the COVID-19 Genomics UK (COG-UK) consortium|Davies|United Kingdom

>Spike|hCoV-19/England/QEUD-9AF222/2020|2020-09-03|EPI\_ISL\_559829|Original|hCoV-19^^England|Human|Oxford Viromics|COVID-19 Genomics UK (COG-UK) Consortium|Golubchik|United Kingdom

>Spike|hCoV-19/Denmark/DCGC-6226/2020|2020-10-05|EPI\_ISL\_619986|Original|hCoV-19^^Midtjylland|Human|Department of Virus and Microbiological Special Diagnostics|Albertsen lab|Michaelsen|Denmark

>Spike|hCoV-19/England/NORT-28C9B4/2020|2020-05-17|EPI\_ISL\_469322|Original|hCoV-19^^England|Human|NU-OMICS DNA Sequencing research facility|Wellcome Sanger Institute for the COVID-19 Genomics UK (COG-UK) consortium|Davies|United Kingdom

>Spike|hCoV-19/England/SHEF-C94F8/2020|2020-07-21|EPI\_ISL\_517559|Original|hCoV-19^^England|Human|Virology Department|COVID-19 Genomics UK (COG-UK) Consortium|de Silva|United Kingdom

>Spike|hCoV-19/Wales/MILK-9D4CAE/2020|2020-09-19|EPI\_ISL\_601609|Original|hCoV-19^^Wales|Human|Lighthouse Lab in Milton Keynes|Wellcome Sanger Institute for the COVID-19 Genomics UK (COG-UK) consortium|Davies|United Kingdom

>Spike|hCoV-19/Netherlands/NoordBrabant\_5/2020|2020-03-05|EPI\_ISL\_414430|Original|hCoV-19^^Noord Brabant|Human|Dutch COVID-19 response team|Erasmus Medical Center|Oude Munnink|Netherlands

>Spike|hCoV-19/Australia/VIC3429/2020|2020-07-13|EPI\_ISL\_521099|Original|hCoV-19^^Victoria|Human|Microbiological Diagnostic Unit - Public Health Laboratory (MDU-PHL)|MDU-PHL|Schultz|Australia

>Spike|hCoV-19/Denmark/DCGC-18012/2020|2020-12-14|EPI\_ISL\_749701|Original|hCoV-19^^Hovedstaden|Human|Department of Virus and Microbiological Special Diagnostics|Albertsen Lab|Michaelsen|Denmark

>Spike|hCoV-19/England/LOND-1266EBE/2020|2020-12-10|EPI\_ISL\_741226|Original|hCoV-19^^England|Human|University College London|COVID-19 Genomics UK (COG-UK) Consortium|Roy|United Kingdom

>Spike|hCoV-19/USA/CO-CSU-D2575-1/2020|2020-04-29|EPI\_ISL\_527461|Original|hCoV-19^^Colorado|Human|Colorado State University - Ebel Lab|Colorado State University - Ebel Lab|Cline|USA

>Spike|hCoV-19/England/CAMC-BFB47A/2020|2020-12-04|EPI\_ISL\_709244|Original|hCoV-19^^England|Human|Lighthouse Lab in Cambridge|Wellcome Sanger Institute for the COVID-19 Genomics UK (COG-UK) Consortium|Davies|United Kingdom

>Spike|hCoV-19/Australia/VIC4964/2020|2020-07-17|EPI\_ISL\_519330|Original|hCoV-19^^Victoria|Human|Microbiological Diagnostic Unit - Public Health Laboratory (MDU-PHL)|MDU-PHL|Schultz|Australia

>Spike|hCoV-19/Australia/VIC8978/2020|2020-07-28|EPI\_ISL\_565328|Original|hCoV-19^^Victoria|Human|Microbiological Diagnostic Unit - Public Health Laboratory (MDU-PHL)|MDU-PHL|Schultz|Australia

>Spike|hCoV-19/USA/CT-Yale-367/2020|2020-08-17|EPI\_ISL\_527781|Original|hCoV-19^^Connecticut|Human|Connecticut State Department of Public Health|Grubaugh Lab - Yale School of Public Health|Fauver|USA

>Spike|hCoV-19/Spain/MD-IBV-99008642/2020|2020-09-29|EPI\_ISL\_654210|Original|hCoV-19^^Madrid|Human|Hospital General Universitario Gregorio Mara\u00f1\u00f3n|SeqCOVID-SPAIN consortium/IBV (CSIC)|Comas|Spain

>Spike|hCoV-19/Wales/PHWC-48460E/2020|2020-10-23|EPI\_ISL\_626960|Original|hCoV-19^^Wales|Human|Wales Specialist Virology Centre Sequencing lab|COVID-19 Genomics UK (COG-UK) Consortium|Moore|United Kingdom

>Spike|hCoV-19/USA/UT-08290/2020|2020-05-19|EPI\_ISL\_524089|Original|hCoV-19^^Utah|Human|Utah Public Health Laboratory|Utah Public Health Laboratory|Young|USA

>Spike|hCoV-19/Belgium/ULG-10102/2020|2020-04-06|EPI\_ISL\_427353|Original|hCoV-19^^Liege|Human|Department of Clinical Microbiology|GIGA Medical Genomics|Durkin|Belgium

>Spike|hCoV-19/USA/NC\_200326/2020|2020-03-00|EPI\_ISL\_454822|Original|hCoV-19^^North Carolina|Human|Dirk Dittmer|Dirk Dittmer|Moorad|USA

>Spike|hCoV-19/Japan/Donner51/2020|2020-07-06|EPI\_ISL\_644956|Original|hCoV-19^^Kanto|Human|Department of Infectious Diseases|Center for Medical Genetics|Kosaki|Japan

>Spike|hCoV-19/USA/CA-QDX-2676/2020|2020-03-16|EPI\_ISL\_604916|Original|hCoV-19^^California|Human|Quest Diagnostics|Quest Diagnostics|Kagan|USA

>Spike|hCoV-19/England/LIVE-A9054/2020|2020-03-25|EPI\_ISL\_517252|Original|hCoV-19^^England|Human|Liverpool Clinical Laboratories|COVID-19 Genomics UK (COG-UK) Consortium|Haldenby|United Kingdom

>Spike|hCoV-19/Japan/PG-3819/2020|2020-06-00|EPI\_ISL\_692070|Original|hCoV-19^^Japan|Human|Pathogen Genomics Center|Pathogen Genomics Center|Sekizuka|Japan

>Spike|hCoV-19/England/EXET-136D09/2020|2020-04-20|EPI\_ISL\_471915|Original|hCoV-19^^England|Human|University of Exeter|COVID-19 Genomics UK (COG-UK) Consortium|Temperton|United Kingdom

>Spike|hCoV-19/England/ALDP-90C627/2020|2020-06-22|EPI\_ISL\_553706|Original|hCoV-19^^England|Human|Lighthouse Lab in Alderley Park|Wellcome Sanger Institute for the COVID-19 Genomics UK (COG-UK) consortium|Davies|United Kingdom

>Spike|hCoV-19/USA/NM-UNM-00670/2020|2020-05-08|EPI\_ISL\_560338|Original|hCoV-19^^New Mexico|Human|TriCore Reference Laboratories|Center for Global Health|Domman|USA

>Spike|hCoV-19/England/20179028804/2020|2020-04-22|EPI\_ISL\_465425|Original|hCoV-19^^England|Human|Respiratory Virus Unit|Respiratory Virus Unit|Platt|United Kingdom

>Spike|hCoV-19/Portugal/PT0071/2020|2020-03-21|EPI\_ISL\_421474|Original|hCoV-19^^Portugal|Human|Instituto Nacional de Saude (INSA)|Instituto Nacional de Saude (INSA)|Borges|Portugal

>Spike|hCoV-19/Australia/VIC7731/2020|2020-08-06|EPI\_ISL\_564613|Original|hCoV-19^^Victoria|Human|Microbiological Diagnostic Unit - Public Health Laboratory (MDU-PHL)|MDU-PHL|Schultz|Australia

>Spike|hCoV-19/South Korea/KCDC2534/2020|2020-06-20|EPI\_ISL\_514937|Original|hCoV-19^^South Korea|Human|Division of Viral Diseases|Division of Viral Diseases|Kim|South Korea

>Spike|hCoV-19/England/SHEF-10CECF8/2020|2020-12-04|EPI\_ISL\_742014|Original|hCoV-19^^England|Human|Virology Department|COVID-19 Genomics UK (COG-UK) Consortium|de Silva|United Kingdom

>Spike|hCoV-19/Germany/BE-ChVir-W2122-5977/2020|2020-10-15|EPI\_ISL\_754018|Original|hCoV-19^^Berlin|Human|Charit\u00e9 Universit\u00e4tsmedizin Berlin|Charit\u00e9 Universit\u00e4tsmedizin Berlin|Muehleemann|Germany

>Spike|hCoV-19/Denmark/DCGC-6729/2020|2020-04-20|EPI\_ISL\_622344|Original|hCoV-19^^Sjaelland|Human|Department of Virus and Microbiological Special Diagnostics|Albertsen lab|Michaelsen|Denmark

>Spike|hCoV-19/England/OXON-ACD1E/2020|2020-04-05|EPI\_ISL\_448530|Original|hCoV-19^^England|Human|Oxford Viromics|COVID-19 Genomics UK (COG-UK) Consortium|Golubchik|United Kingdom

>Spike|hCoV-19/USA/TX-DSHS-1934/2020|2020-06-21|EPI\_ISL\_765925|Original|hCoV-19^^Texas|Human|TXDSHS|TXDSHS|Rahman|USA

>Spike|hCoV-19/England/QEUH-B30B65/2020|2020-11-03|EPI\_ISL\_659817|Original|hCoV-19^^England|Human|Lighthouse Lab in Glasgow|Wellcome Sanger Institute for the COVID-19 Genomics UK (COG-UK) Consortium|Davies|United Kingdom

>Spike|hCoV-19/Japan/PG-5136/2020|2020-08-00|EPI\_ISL\_690243|Original|hCoV-19^^Japan|Human|Gunma Prefectural Institute of Public Health and Environmental Sciences|Pathogen Genomics Center|Sekizuka|Japan

>Spike|hCoV-19/Scotland/CVR2634/2020|2020-04-17|EPI\_ISL\_484623|Original|hCoV-19^^Scotland|Human|West of Scotland Specialist Virology Centre|COVID-19 Genomics UK (COG-UK) Consortium|Robertson|United Kingdom

>Spike|hCoV-19/Scotland/CVR4557/2020|2020-09-22|EPI\_ISL\_585415|Original|hCoV-19^^Scotland|Human|Lighthouse Lab in Glasgow / MRC-University of Glasgow Centre for Virus Research|COVID-19 Genomics UK (COG-UK) Consortium|Robertson|United Kingdom

>Spike|hCoV-19/USA/LA-EVTL845/2020|2020-07-28|EPI\_ISL\_653536|Original|hCoV-19^^Louisiana|Human|LSUHS Emerging Viral Threat Laboratory|Microbial Genome Sequencing Center|Kamil|USA

>Spike|hCoV-19/USA/UT-0537/2020|2020-04-04|EPI\_ISL\_435371|Original|hCoV-19^^Utah|Human|Utah Public Health Laboratory|Utah Public Health Laboratory|Young|USA

>Spike|hCoV-19/England/ALDP-C39D74/2020|2020-12-09|EPI\_ISL\_730884|Original|hCoV-19^^England|Human|Lighthouse Lab in Alderley Park|Wellcome Sanger Institute for the COVID-19 Genomics UK (COG-UK) Consortium|Davies|United Kingdom

>Spike|hCoV-19/USA/NY-Wadsworth-46991-01/2020|2020-04-14|EPI\_ISL\_676853|Original|hCoV-19^^New York|Human|Wadsworth Center|Wadsworth Center|Lasek-Nesselquist|USA

>Spike|hCoV-19/Japan/PG-6483/2020|2020-08-00|EPI\_ISL\_688628|Original|hCoV-19^^Japan|Human|Pathogen Genomics Center|Pathogen Genomics Center|Sekizuka|Japan

>Spike|hCoV-19/USA/TX-HMH-2674/2020|2020-06-03|EPI\_ISL\_545468|Original|hCoV-19^^Texas|Human|Houston Methodist Hospital|Houston Methodist Hospital|Long|USA

>Spike|hCoV-19/USA/WI-UW-2433/2020|2020-12-14|EPI\_ISL\_754640|Original|hCoV-19^^Wisconsin|Human|University of Wisconsin-Madison AIDS Vaccine Research Laboratories|University of Wisconsin-Madison AIDS Vaccine Research Laboratories|Moreno|USA

>Spike|hCoV-19/Beijing/DT-WH02/2020|2020-02-04|EPI\_ISL\_452357|Original|hCoV-19^^Beijing|Human|Laboratory of Infectious Diseases Center of Beijing Ditan Hospital|Laboratory of Infectious Diseases Center of Beijing Ditan Hospital|Yang|China

>Spike|hCoV-19/Wales/PHWC-16ECA1/2020|2020-10-04|EPI\_ISL\_585847|Original|hCoV-19^^Wales|Human|Wales Specialist Virology Centre Sequencing lab|COVID-19 Genomics UK (COG-UK) Consortium|Moore|United Kingdom

>Spike|hCoV-19/England/QEUH-9D0756/2020|2020-09-16|EPI\_ISL\_589874|Original|hCoV-19^^England|Human|Lighthouse Lab in Glasgow|Wellcome Sanger Institute for the COVID-19 Genomics UK (COG-UK) consortium|Davies|United Kingdom

>Spike|hCoV-19/USA/CA-IGI-0372/2020|2020-06-29|EPI\_ISL\_576553|Original|hCoV-19^^California|Human|Innovative Genomics Institute|Innovative Genomics Institute|Wyman|USA

>Spike|hCoV-19/England/BRIS-1311B7/2020|2020-05-21|EPI\_ISL\_467694|Original|hCoV-19^^England|Human|PHE South West Regional Laboratory|Wellcome Sanger Institute for the COVID-19 Genomics UK (COG-UK) consortium|Davies|United Kingdom

>Spike|hCoV-19/England/205160989/2020|2020-12-15|EPI\_ISL\_766427|Original|hCoV-19^^England|Human|Respiratory Virus Unit|COVID-19 Genomics UK (COG-UK) Consortium|Platt|United Kingdom

>Spike|hCoV-19/India/MH-MW36/2020|2020-06-06|EPI\_ISL\_511927|Original|hCoV-19^^Maharashtra|Human|Mahatma Gandhi Institute of Medical Sciences|National Institute of Biomedical Genomics -\u00a0DBT's PAN-INDIA 1000 SARS--CoV-2 RNA Genome Sequencing Consortium|Maitra|India

>Spike|hCoV-19/Scotland/CVR4052/2020|2020-08-30|EPI\_ISL\_535146|Original|hCoV-19^^Scotland|Human|West of Scotland Specialist Virology Centre|COVID-19 Genomics UK (COG-UK) Consortium|Robertson|United Kingdom

>Spike|hCoV-19/England/CAMC-A3FBB2/2020|2020-10-05|EPI\_ISL\_609614|Original|hCoV-19^^England|Human|Lighthouse Lab in Cambridge|Wellcome Sanger Institute for the COVID-19 Genomics UK (COG-UK) consortium|Davies|United Kingdom

>Spike|hCoV-19/England/CAMB-76287/2020|2020-03-27|EPI\_ISL\_438343|Original|hCoV-19^^England|Human|Department of Pathology|Wellcome Sanger Institute for the COVID-19 Genomics UK (COG-UK) consortium|Amato|United Kingdom

>Spike|hCoV-19/USA/TX-HMH-MCoV-18143/2020|2020-11-12|EPI\_ISL\_784491|Original|hCoV-19^^Texas|Human|Houston Methodist Hospital|Houston Methodist Hospital|Long|USA

>Spike|hCoV-19/Brazil/PE-IAM87/2020|2020-04-08|EPI\_ISL\_500485|Original|hCoV-19^^Pernambuco|Human|LACEN/PE|WallauLab|Wallau|Brazil

>Spike|hCoV-19/Italy/LAZ-INMI-100/2020|2020-11-03|EPI\_ISL\_718265|Original|hCoV-19^^Lazio|Human|National Institute for Infectious Diseases|National Institute for Infectious Diseases|Gruber|Italy

>Spike|hCoV-19/USA/CA-CZB-14932/2020|2020-11-27|EPI\_ISL\_739646|Original|hCoV-19^^California|Human|Orange County Public Health Lab|Chan-Zuckerberg Biohub|Kamm|USA

>Spike|hCoV-19/Scotland/EDB4830/2020|2020-04-03|EPI\_ISL\_453158|Original|hCoV-19^^Scotland|Human|Virology Department|COVID-19 Genomics UK (COG-UK) Consortium|Williams|United Kingdom

>Spike|hCoV-19/USA/WA-S2557/2020|2020-06-17|EPI\_ISL\_497189|Original|hCoV-19^^Washington|Human|Washington State Department of Health|Seattle Flu Study|Lee|USA

>Spike|hCoV-19/Denmark/ALAB-SSI-825/2020|2020-03-28|EPI\_ISL\_437676|Original|hCoV-19^^Denmark|Human|Department of Virus and Microbiological Special Diagnostics|Albertsen lab|Kirkegaard|Denmark

>Spike|hCoV-19/England/EXET-135C3A/2020|2020-04-10|EPI\_ISL\_457149|Original|hCoV-19^^England|Human|University of Exeter|COVID-19 Genomics UK (COG-UK) Consortium|Temperton|United Kingdom

>Spike|hCoV-19/Belgium/reg-a0401879/2020|2020-04-01|EPI\_ISL\_734529|Original|hCoV-19^^Chaumont-gistoux|Human|UZ Leuven|KU Leuven|Maes|Belgium

>Spike|hCoV-19/USA/MN-MDH-436/2020|2020-04-09|EPI\_ISL\_437373|Original|hCoV-19^^Minnesota|Human|Minnesota Department of Health|Minnesota Department of Health|Garfin|USA

>Spike|hCoV-19/England/CAMC-B08216/2020|2020-10-30|EPI\_ISL\_643529|Original|hCoV-19^^England|Human|Lighthouse Lab in Cambridge|Wellcome Sanger Institute for the COVID-19 Genomics UK (COG-UK) Consortium|Davies|United Kingdom

>Spike|hCoV-19/England/CAMB-83BC8/2020|2020-04-15|EPI\_ISL\_443349|Original|hCoV-19^^England|Human|Department of Pathology|Wellcome Sanger Institute for the COVID-19 Genomics UK (COG-UK) consortium|Amato|United Kingdom

>Spike|hCoV-19/England/CAMC-B99D28/2020|2020-11-15|EPI\_ISL\_673542|Original|hCoV-19^^England|Human|Lighthouse Lab in Cambridge|Wellcome Sanger Institute for the COVID-19 Genomics UK (COG-UK) Consortium|Davies|United Kingdom

>Spike|hCoV-19/England/CAMC-B3724B/2020|2020-11-05|EPI\_ISL\_645231|Original|hCoV-19^^England|Human|Lighthouse Lab in Cambridge|Wellcome Sanger Institute for the COVID-19 Genomics UK (COG-UK) Consortium|Davies|United Kingdom

>Spike|hCoV-19/England/ALDP-98199A/2020|2020-08-10|EPI\_ISL\_526354|Original|hCoV-19^^England|Human|Queens Medical Centre|COVID-19 Genomics UK (COG-UK) Consortium|Loose|United Kingdom

>Spike|hCoV-19/USA/WA-UW-10472/2020|2020-06-07|EPI\_ISL\_570318|Original|hCoV-19^^Washington|Human|UW Virology Lab|UW Virology Lab|Roychoudhury|USA

>Spike|hCoV-19/USA/WA-S194/2020|2020-03-20|EPI\_ISL\_430232|Original|hCoV-19^^Washington|Human|Washington State Department of Health|Seattle Flu Study|Bedford|USA

>Spike|hCoV-19/Wales/PHWC-489BBF/2020|2020-10-25|EPI\_ISL\_652464|Original|hCoV-19^^Wales|Human|Wales Specialist Virology Centre Sequencing lab|COVID-19 Genomics UK (COG-UK) Consortium|Moore|United Kingdom

>Spike|hCoV-19/England/ALDP-A4F979/2020|2020-10-07|EPI\_ISL\_597606|Original|hCoV-19^^England|Human|Lighthouse Lab in Alderley Park|Wellcome Sanger Institute for the COVID-19 Genomics UK (COG-UK) consortium|Davies|United Kingdom

>Spike|hCoV-19/USA/NY-Wadsworth-200221-01/2020|2020-06-24|EPI\_ISL\_677056|Original|hCoV-19^^New York|Human|Masonic Medical Research Institute|Wadsworth Center|Lasek-Nesselquist|USA

>Spike|hCoV-19/Scotland/CVR2600/2020|2020-04-16|EPI\_ISL\_477984|Original|hCoV-19^^Scotland|Human|West of Scotland Specialist Virology Centre|COVID-19 Genomics UK (COG-UK) Consortium|Robertson|United Kingdom

>Spike|hCoV-19/England/20108006802/2020|2020-03-04|EPI\_ISL\_417254|Original|hCoV-19^^England|Human|Respiratory Virus Unit|Respiratory Virus Unit|Platt|United Kingdom

>Spike|hCoV-19/England/ALDP-B8376F/2020|2020-11-14|EPI\_ISL\_675402|Original|hCoV-19^^England|Human|Lighthouse Lab in Alderley Park|Wellcome Sanger Institute for the COVID-19 Genomics UK (COG-UK) Consortium|Davies|United Kingdom

>Spike|hCoV-19/England/MILK-A7B789/2020|2020-10-15|EPI\_ISL\_607320|Original|hCoV-19^^England|Human|Lighthouse Lab in Milton Keynes|Wellcome Sanger Institute for the COVID-19 Genomics UK (COG-UK) consortium|Davies|United Kingdom

>Spike|hCoV-19/England/C200043779/2020|2020-11-06|EPI\_ISL\_666743|Original|hCoV-19^^England|Human|Respiratory Virus Unit|COVID-19 Genomics UK (COG-UK) Consortium|Platt|United Kingdom

>Spike|hCoV-19/Japan/PG-7814/2020|2020-07-00|EPI\_ISL\_686916|Original|hCoV-19^^Japan|Human|Pathogen Genomics Center|Pathogen Genomics Center|Sekizuka|Japan

>Spike|hCoV-19/USA/FL-BPHL-2127/2020|2020-04-07|EPI\_ISL\_653280|Original|hCoV-19^^Florida|Human|Florida Bureau of Public Health Laboratories|Florida Bureau of Public Health Laboratories|Blanton|USA

>Spike|hCoV-19/England/CAMC-B98318/2020|2020-11-15|EPI\_ISL\_674851|Original|hCoV-19^^England|Human|Lighthouse Lab in Cambridge|Wellcome Sanger Institute for the COVID-19 Genomics UK (COG-UK) Consortium|Davies|United Kingdom

>Spike|hCoV-19/USA/WI-UW-1465/2020|2020-09-10|EPI\_ISL\_541597|Original|hCoV-19^^Wisconsin|Human|University of Wisconsin-Madison AIDS Vaccine Research Laboratories|University of Wisconsin-Madison AIDS Vaccine Research Laboratories|Baczenas|USA

>Spike|hCoV-19/Sweden/20-53239/2020|2020-10-26|EPI\_ISL\_648203|Original|hCoV-19^^Sweden|Human|Linkoping|The Public Health Agency of Sweden|Svartstr\u00f6m|Sweden

>Spike|hCoV-19/Wales/PHWC-2BAA7/2020|2020-03-28|EPI\_ISL\_445803|Original|hCoV-19^^Wales|Human|Wales Specialist Virology Centre|Public Health Wales Microbiology Cardiff|Moore|United Kingdom

>Spike|hCoV-19/USA/CT-UW-3120/2020|2020-03-27|EPI\_ISL\_485938|Original|hCoV-19^^Connecticut|Human|UW Virology Lab|UW Virology Lab|Roychoudhury|USA

>Spike|hCoV-19/England/LIVE-DC2FD3/2020|2020-11-25|EPI\_ISL\_705857|Original|hCoV-19^^England|Human|Liverpool Clinical Laboratories|COVID-19 Genomics UK (COG-UK) Consortium|Haldenby|United Kingdom

>Spike|hCoV-19/Australia/VIC2825/2020|2020-07-03|EPI\_ISL\_521656|Original|hCoV-19^^Victoria|Human|Microbiological Diagnostic Unit - Public Health Laboratory (MDU-PHL)|MDU-PHL|Schultz|Australia

>Spike|hCoV-19/USA/NY-NYCPHL-001260/2020|2020-11-07|EPI\_ISL\_683840|Original|hCoV-19^^New York|Human|DOHMH Morrisania|New York City Public Health Laboratory|Wang|USA

>Spike|hCoV-19/USA/CA-CDPH032/2020|2020-06-22|EPI\_ISL\_515923|Original|hCoV-19^^California|Human|California Department of Public Health|California Department of Public Health|Bell|USA

>Spike|hCoV-19/USA/MA-MGH-03020/2020|2020-07-22|EPI\_ISL\_765682|Original|hCoV-19^^Massachusetts|Human|Massachusetts General Hospital|Infectious Disease Program|Park|USA

>Spike|hCoV-19/England/MILK-9A9765/2020|2020-08-31|EPI\_ISL\_551098|Original|hCoV-19^^England|Human|Lighthouse Lab in Milton Keynes|Wellcome Sanger Institute for the COVID-19 Genomics UK (COG-UK) consortium|Davies|United Kingdom

>Spike|hCoV-19/USA/TX-HMH-3635/2020|2020-06-15|EPI\_ISL\_543085|Original|hCoV-19^^Texas|Human|Houston Methodist Hospital|Houston Methodist Hospital|Long|USA

>Spike|hCoV-19/Japan/PG-1946/2020|2020-04-00|EPI\_ISL\_685552|Original|hCoV-19^^Japan|Human|Pathogen Genomics Center|Pathogen Genomics Center|Sekizuka|Japan

>Spike|hCoV-19/Saudi Arabia/KAUST-MAKKAH176/2020|2020-04-06|EPI\_ISL\_678073|Original|hCoV-19^^Makkah|Human|Pathogen Genomics Lab King Abdullah

University of Science and Technology(KAUST)|Pathogen Genomics Lab King Abdullah  
University of Science and Technology(KAUST)|Mohamed Ghazzali|Saudi Arabia  
>Spike|hCoV-19/USA/VA-DCLS-0600/2020|2020-03-27|EPI\_ISL\_526818|Original|hCoV-  
19^^Virginia|Human|Virginia DCLS|Virginia DCLS|St. Jacques|USA  
>Spike|hCoV-19/England/QEUEH-B12ED9/2020|2020-11-02|EPI\_ISL\_642733|Original|hCoV-  
19^^England|Human|Lighthouse Lab in Glasgow|Wellcome Sanger Institute for the COVID-  
19 Genomics UK (COG-UK) Consortium|Davies|United Kingdom  
>Spike|hCoV-19/Northern Ireland/NIRE-10525F/2020|2020-04-  
01|EPI\_ISL\_472138|Original|hCoV-19^^Northern Ireland|Human|Regional Virus  
Laboratory|COVID-19 Genomics UK (COG-UK) Consortium|Fairley|United Kingdom  
>Spike|hCoV-19/Scotland/EDB694/2020|2020-04-01|EPI\_ISL\_433224|Original|hCoV-  
19^^Scotland|Human|Virology Department|COVID-19 Genomics UK (COG-UK)  
Consortium|Williams|United Kingdom  
>Spike|hCoV-19/England/ALDP-652E78/2020|2020-07-03|EPI\_ISL\_558006|Original|hCoV-  
19^^England|Human|Lighthouse Lab in Alderley Park|Wellcome Sanger Institute for the  
COVID-19 Genomics UK (COG-UK) consortium|Davies|United Kingdom  
>Spike|hCoV-19/USA/NM-DOH-2020309719/2020|2020-08-24|EPI\_ISL\_602196|Original|hCoV-  
19^^New Mexico|Human|New Mexico Department of Health Scientific Laboratory|New Mexico  
Department of Health Scientific Laboratory|Johnson|USA  
>Spike|hCoV-19/USA/UT-QDX-2653/2020|2020-03-13|EPI\_ISL\_604981|Original|hCoV-  
19^^Utah|Human|Quest Diagnostics|Quest Diagnostics|Kagan|USA  
>Spike|hCoV-19/England/MILK-9C4209/2020|2020-09-07|EPI\_ISL\_566757|Original|hCoV-  
19^^England|Human|Lighthouse Lab in Milton Keynes|Wellcome Sanger Institute for the  
COVID-19 Genomics UK (COG-UK) consortium|Davies|United Kingdom  
>Spike|hCoV-19/USA/TX-HMH-6300/2020|2020-07-04|EPI\_ISL\_547374|Original|hCoV-  
19^^Texas|Human|Houston Methodist Hospital|Houston Methodist Hospital|Long|USA  
>Spike|hCoV-19/England/CAMB-82A80/2020|2020-04-22|EPI\_ISL\_438653|Original|hCoV-  
19^^England|Human|Department of Pathology|COVID-19 Genomics UK (COG-UK)  
Consortium|Meredith|United Kingdom  
>Spike|hCoV-19/England/LIVE-DB61BE/2020|2020-11-06|EPI\_ISL\_651297|Original|hCoV-  
19^^England|Human|Liverpool Clinical Laboratories|COVID-19 Genomics UK (COG-UK)  
Consortium|Haldenby|United Kingdom  
>Spike|hCoV-19/England/QEUEH-96BEA6/2020|2020-08-15|EPI\_ISL\_531447|Original|hCoV-  
19^^England|Human|Lighthouse Lab in Glasgow|Wellcome Sanger Institute for the COVID-  
19 Genomics UK (COG-UK) consortium|Davies|United Kingdom  
>Spike|hCoV-19/New Zealand/20VR1000/2020|2020-03-16|EPI\_ISL\_579120|Original|hCoV-  
19^^Auckland|Human|LabPLUS|Institute of Environmental Science and Research  
(ESR)|Wang|New Zealand  
>Spike|hCoV-19/USA/NY-Wadsworth-225049-01/2020|2020-09-  
22|EPI\_ISL\_677110|Original|hCoV-19^^New York|Human|Wadsworth Center|Wadsworth  
Center|Lasek-Nesselquist|USA  
>Spike|hCoV-19/England/MILK-99DE7E/2020|2020-08-30|EPI\_ISL\_550521|Original|hCoV-  
19^^England|Human|Lighthouse Lab in Milton Keynes|Wellcome Sanger Institute for the  
COVID-19 Genomics UK (COG-UK) consortium|Davies|United Kingdom  
>Spike|hCoV-19/England/BRIS-130965/2020|2020-04-13|EPI\_ISL\_492567|Original|hCoV-  
19^^England|Human|PHE South West Regional Laboratory|Wellcome Sanger Institute for  
the COVID-19 Genomics UK (COG-UK) consortium|Davies|United Kingdom  
>Spike|hCoV-19/Ireland/D-NVRL-20ILR10861/2020|2020-11-  
22|EPI\_ISL\_732377|Original|hCoV-19^^Dublin|Human|National Virus Reference  
Laboratory|National Virus Reference Laboratory|Gonzalez|Ireland  
>Spike|hCoV-19/Luxembourg/LNS4360137/2020|2020-11-01|EPI\_ISL\_740455|Original|hCoV-  
19^^Luxembourg|Human|Laboratoire national de sant\u00e9|Laboratoire national de  
sant\u00e9|Wienecke-Baldacchino|Luxembourg  
>Spike|hCoV-19/USA/NM-NMDOH-2020328776/2020|2020-09-04|EPI\_ISL\_644593|Original|hCoV-  
19^^New Mexico|Human|New Mexico Department of Health Scientific Laboratory|New Mexico  
Department of Health Scientific Laboratory|Johnson|USA  
>Spike|hCoV-19/Japan/PG-0943/2020|2020-04-00|EPI\_ISL\_684553|Original|hCoV-  
19^^Japan|Human|Pathogen Genomics Center|Pathogen Genomics Center|Sekizuka|Japan

>Spike|hCoV-19/England/ALDP-949D38/2020|2020-06-10|EPI\_ISL\_556461|Original|hCoV-19^^England|Human|Lighthouse Lab in Alderley Park|Wellcome Sanger Institute for the COVID-19 Genomics UK (COG-UK) consortium|Davies|United Kingdom

>Spike|hCoV-19/England/20102001604/2020|2020-03-02|EPI\_ISL\_464269|Original|hCoV-19^^England|Human|Respiratory Virus Unit|Respiratory Virus Unit|Platt|United Kingdom

>Spike|hCoV-19/Spain/VC-FISABIO-139/2020|2020-03-18|EPI\_ISL\_436234|Original|hCoV-19^^Comunitat Valenciana|Human|Servicio de Microbiolog\u00eda. Consorcio Hospital General Universitario de Valencia|Sequencing and Bioinformatics Service and Molecular Epidemiology Research Group. FISABIO-Public Health|Gonzalez-Candelas|Spain

>Spike|hCoV-19/England/MILK-B977FF/2020|2020-11-14|EPI\_ISL\_675041|Original|hCoV-19^^England|Human|Lighthouse Lab in Milton Keynes|Wellcome Sanger Institute for the COVID-19 Genomics UK (COG-UK) Consortium|Davies|United Kingdom

>Spike|hCoV-19/Denmark/DCGC-12660/2020|2020-11-16|EPI\_ISL\_682841|Original|hCoV-19^^Midtjylland|Human|Department of Virus and Microbiological Special Diagnostics|Albertsen Lab|Michaelsen|Denmark

>Spike|hCoV-19/USA/CA-UCLA-180/2020|2020-03-18|EPI\_ISL\_537507|Original|hCoV-19^^California|Human|UCLA Pathology Clinical Microbiology Lab|Kruglyak Lab|Boocock|USA

>Spike|hCoV-19/England/LOND-12F07CD/2020|2020-11-16|EPI\_ISL\_679577|Original|hCoV-19^^England|Human|University College London|COVID-19 Genomics UK (COG-UK) Consortium|Roy|United Kingdom

>Spike|hCoV-19/Italy/VEN-UniVR-19/2020|2020-08-21|EPI\_ISL\_751340|Original|hCoV-19^^Veneto|Human|IRCCS Sacro Cuore Don Calabria Hospital|University of Verona|Mori|Italy

>Spike|hCoV-19/England/MILK-9F0468/2020|2020-09-24|EPI\_ISL\_580842|Original|hCoV-19^^England|Human|Lighthouse Lab in Milton Keynes|Wellcome Sanger Institute for the COVID-19 Genomics UK (COG-UK) consortium|Davies|United Kingdom

>Spike|hCoV-19/USA/WA-S1964/2020|2020-06-03|EPI\_ISL\_497392|Original|hCoV-19^^Washington|Human|Washington State Department of Health|Seattle Flu Study|Lee|USA

>Spike|hCoV-19/England/MILK-ABB77E/2020|2020-10-21|EPI\_ISL\_623508|Original|hCoV-19^^England|Human|Lighthouse Lab in Milton Keynes|Wellcome Sanger Institute for the COVID-19 Genomics UK (COG-UK) consortium|Davies|United Kingdom

>Spike|hCoV-19/Japan/IC-0130/2020|2020-08-00|EPI\_ISL\_667559|Original|hCoV-19^^Japan|Human|Pathogen Genomics Center|Pathogen Genomics Center|Sekizuka|Japan

>Spike|hCoV-19/Wales/PHWC-27012/2020|2020-03-28|EPI\_ISL\_422034|Original|hCoV-19^^Wales|Human|Wales Specialist Virology Centre|Public Health Wales Microbiology Cardiff|Moore|United Kingdom

>Spike|hCoV-19/USA/WA-S838/2020|2020-04-22|EPI\_ISL\_463328|Original|hCoV-19^^Washington|Human|Washington State Department of Health|Seattle Flu Study|Bedford|USA

>Spike|hCoV-19/United Arab Emirates/0615/2020|2020-05-15|EPI\_ISL\_698771|Original|hCoV-19^^Abu Dhabi|Human|Group 42 (G42) Healthcare|G42 Healthcare|Ogrodzki|United Arab Emirates

>Spike|hCoV-19/Canada/BC\_13086747/2020|2020-04-00|EPI\_ISL\_467339|Original|hCoV-19^^British Columbia|Human|BCCDC Public Health Laboratory|BCCDC Public Health Laboratory|Harrigan|Canada

>Spike|hCoV-19/USA/MA-MASPHL-00075/2020|2020-04-03|EPI\_ISL\_791565|Original|hCoV-19^^Massachusetts|Human|Massachusetts State Public Health Laboratory|Infectious Disease Program|Park|USA

>Spike|hCoV-19/England/LIVE-1D6E44/2020|2020-09-17|EPI\_ISL\_572905|Original|hCoV-19^^England|Human|Liverpool Clinical Laboratories|COVID-19 Genomics UK (COG-UK) Consortium|Haldenby|United Kingdom

>Spike|hCoV-19/India/TG-CDFD-C3295/2020|2020-06-20|EPI\_ISL\_528595|Original|hCoV-19^^Telangana|Human|National Genomics Core-Center for DNA Fingerprinting and Diagnostics|National Genomics Core-Center for DNA Fingerprinting and Diagnostics (NGC-CDFD)- DBT's PAN-INDIA-1000 Genome consortium|Vashisht|India

>Spike|hCoV-19/England/MILK-62D82D/2020|2020-07-05|EPI\_ISL\_557832|Original|hCoV-19^^England|Human|Lighthouse Lab in Milton Keynes|Wellcome Sanger Institute for the COVID-19 Genomics UK (COG-UK) consortium|Davies|United Kingdom



>Spike|hCoV-19/USA/LA-EVTL283/2020|2020-08-26|EPI\_ISL\_574417|Original|hCoV-19^^Louisiana|Human|LSUHS Emerging Viral Threat Laboratory|Microbial Genome Sequencing Center|Kamil|USA

>Spike|hCoV-19/Australia/VIC7933/2020|2020-08-16|EPI\_ISL\_564755|Original|hCoV-19^^Victoria|Human|Microbiological Diagnostic Unit - Public Health Laboratory (MDU-PHL)|MDU-PHL|Schultz|Australia

>Spike|hCoV-19/England/ALDP-94CCA1/2020|2020-06-15|EPI\_ISL\_556037|Original|hCoV-19^^England|Human|Lighthouse Lab in Alderley Park|Wellcome Sanger Institute for the COVID-19 Genomics UK (COG-UK) consortium|Davies|United Kingdom

>Spike|hCoV-19/Wales/PHWC-47D19E/2020|2020-10-09|EPI\_ISL\_586106|Original|hCoV-19^^Wales|Human|Wales Specialist Virology Centre Sequencing lab|COVID-19 Genomics UK (COG-UK) Consortium|Moore|United Kingdom

>Spike|hCoV-19/USA/MN-MDH-1276/2020|2020-03-12|EPI\_ISL\_482997|Original|hCoV-19^^Minnesota|Human|Minnesota Department of Health|Minnesota Department of Health|Garfin|USA

>Spike|hCoV-19/England/QEUA-997D86/2020|2020-08-24|EPI\_ISL\_537151|Original|hCoV-19^^England|Human|Lighthouse Lab in Glasgow|Wellcome Sanger Institute for the COVID-19 Genomics UK (COG-UK) consortium|Davies|United Kingdom

>Spike|hCoV-19/Switzerland/NE-ETHZ-390319/2020|2020-11-29|EPI\_ISL\_721832|Original|hCoV-19^^Neuch\u00e2tel|Human|Viollier AG|Department of Biosystems Science and Engineering|Nadeau|Switzerland

>Spike|hCoV-19/England/QEUA-B68DAA/2020|2020-11-11|EPI\_ISL\_662242|Original|hCoV-19^^England|Human|Lighthouse Lab in Glasgow|Wellcome Sanger Institute for the COVID-19 Genomics UK (COG-UK) Consortium|Davies|United Kingdom

>Spike|hCoV-19/USA/WI-UW-2459/2020|2020-12-21|EPI\_ISL\_759734|Original|hCoV-19^^Wisconsin|Human|University of Wisconsin-Madison AIDS Vaccine Research Laboratories|University of Wisconsin-Madison AIDS Vaccine Research Laboratories|Moreno|USA

>Spike|hCoV-19/England/QEUA-B134E5/2020|2020-10-31|EPI\_ISL\_641882|Original|hCoV-19^^England|Human|Lighthouse Lab in Glasgow|Wellcome Sanger Institute for the COVID-19 Genomics UK (COG-UK) Consortium|Davies|United Kingdom

>Spike|hCoV-19/Wales/PHWC-493DAD/2020|2020-11-20|EPI\_ISL\_726024|Original|hCoV-19^^Wales|Human|Originating lab|COVID-19 Genomics UK (COG-UK) Consortium|Moore|United Kingdom

>Spike|hCoV-19/Scotland/EDB1243/2020|2020-04-09|EPI\_ISL\_491564|Original|hCoV-19^^Scotland|Human|Virology Department|Wellcome Sanger Institute for the COVID-19 Genomics UK (COG-UK) consortium|Davies|United Kingdom

>Spike|hCoV-19/Italy/FVG-ICGEB-S5/2020|2020-03-01|EPI\_ISL\_417419|Vero E6 P1|hCoV-19^^Friuli Venezia Giulia|Human|Laboratory of Molecular Virology International Center for Genetic Engineering and Biotechnology (ICGEB)|ARGO Open Lab Platform for Genome sequencing|Marcello|Italy

>Spike|hCoV-19/USA/MI-MDHHS-SC22675/2020|2020-11-27|EPI\_ISL\_737289|Original|hCoV-19^^Michigan|Human|Michigan Department of Health and Human Services|Michigan Department of Health and Human Services|Blankenship|USA

>Spike|hCoV-19/USA/WI-GMF-25226/2020|2020-10-11|EPI\_ISL\_660919|Original|hCoV-19^^Wisconsin|Human|Gundersen Molecular Diagnostics Laboratory|Kabara Cancer Research Institute|Kenny|USA

>Spike|hCoV-19/England/BIRM-61E4F/2020|2020-03-26|EPI\_ISL\_529222|Original|hCoV-19^^England|Human|University of Birmingham|COVID-19 Genomics UK (COG-UK) Consortium|Loman|United Kingdom

>Spike|hCoV-19/Wales/MILK-958729/2020|2020-06-10|EPI\_ISL\_554783|Original|hCoV-19^^Wales|Human|Lighthouse Lab in Milton Keynes|Wellcome Sanger Institute for the COVID-19 Genomics UK (COG-UK) consortium|Davies|United Kingdom

>Spike|hCoV-19/England/QEUA-9D0AC6/2020|2020-09-16|EPI\_ISL\_589932|Original|hCoV-19^^England|Human|Lighthouse Lab in Glasgow|Wellcome Sanger Institute for the COVID-19 Genomics UK (COG-UK) consortium|Davies|United Kingdom

>Spike|hCoV-19/England/NORW-E8684/2020|2020-04-18|EPI\_ISL\_449172|Original|hCoV-19^^England|Human|Quadram Institute Bioscience|COVID-19 Genomics UK (COG-UK) Consortium|Alikhan|United Kingdom

>Spike|hCoV-19/USA/TX-HMH-MCoV-13890/2020|2020-08-17|EPI\_ISL\_787182|Original|hCoV-19^^Texas|Human|Houston Methodist Hospital|Houston Methodist Hospital|Long|USA

>Spike|hCoV-19/England/ALDP-C3AFE6/2020|2020-12-09|EPI\_ISL\_731671|Original|hCoV-19^^England|Human|Lighthouse Lab in Alderley Park|Wellcome Sanger Institute for the COVID-19 Genomics UK (COG-UK) Consortium|Davies|United Kingdom

>Spike|hCoV-19/Switzerland/BS-42359388/2020|2020-07-19|EPI\_ISL\_581910|Original|hCoV-19^^Basel-Stadt|Human|University Hospital Basel|University Hospital Basel|Roloff Handschin|Switzerland

>Spike|hCoV-19/USA/PR-B2D2/2020|2020-08-03|EPI\_ISL\_602325|Original|hCoV-19^^Puerto Rico|Human|University of Miami Immunology and Histocompatibility Laboratory|University of Miami Immunology and Histocompatibility Laboratory|Margolles-Clark|USA

>Spike|hCoV-19/Denmark/DCGC-18452/2020|2020-12-07|EPI\_ISL\_749977|Original|hCoV-19^^Midtjylland|Human|Department of Virus and Microbiological Special Diagnostics|Albertsen Lab|Michaelsen|Denmark

>Spike|hCoV-19/USA/TX-HMH-MCoV-8324/2020|2020-07-07|EPI\_ISL\_784332|Original|hCoV-19^^Texas|Human|Houston Methodist Hospital|Houston Methodist Hospital|Long|USA

>Spike|hCoV-19/England/NOTT-1199BD/2020|2020-11-02|EPI\_ISL\_627717|Original|hCoV-19^^England|Human|Queens Medical Centre|COVID-19 Genomics UK (COG-UK) Consortium|Loose|United Kingdom

>Spike|hCoV-19/England/QEUEH-C54247/2020|2020-12-11|EPI\_ISL\_736235|Original|hCoV-19^^England|Human|Lighthouse Lab in Glasgow|Wellcome Sanger Institute for the COVID-19 Genomics UK (COG-UK) Consortium|Davies|United Kingdom

>Spike|hCoV-19/Finland/23LS7DH3/2020|2020-10-23|EPI\_ISL\_759789|Original|hCoV-19^^Uusimaa|Human|Department of Virology and Immunology|Department of Virology|Smura|Finland

>Spike|hCoV-19/USA/NY-NYUMC175/2020|2020-04-01|EPI\_ISL\_427472|Original|hCoV-19^^New York|Human|NYU Langone Health|Departments of Pathology and Medicine|Maurano|USA

>Spike|hCoV-19/USA/TX-HMH-7617/2020|2020-06-26|EPI\_ISL\_546891|Original|hCoV-19^^Texas|Human|Houston Methodist Hospital|Houston Methodist Hospital|Long|USA

>Spike|hCoV-19/USA/TX-HMH023/2020|2020-03-13|EPI\_ISL\_434733|Original|hCoV-19^^Texas|Human|Houston Methodist Hospital|Houston Methodist Hospital|Long|USA

>Spike|hCoV-19/England/CAMC-9484AD/2020|2020-07-26|EPI\_ISL\_556960|Original|hCoV-19^^England|Human|Lighthouse Lab in Cambridge|Wellcome Sanger Institute for the COVID-19 Genomics UK (COG-UK) consortium|Davies|United Kingdom

>Spike|hCoV-19/USA/PA-MGEL-00751/2020|2020-09-15|EPI\_ISL\_682045|Original|hCoV-19^^Pennsylvania|Human|UPMC Clinical Microbiology Laboratory|Microbial Genomic Epidemiology Laboratory|Griffith|USA

>Spike|hCoV-19/England/QEUEH-9A4427/2020|2020-09-01|EPI\_ISL\_540149|Original|hCoV-19^^England|Human|Lighthouse Lab in Glasgow|Wellcome Sanger Institute for the COVID-19 Genomics UK (COG-UK) consortium|Davies|United Kingdom

>Spike|hCoV-19/USA/CA-UCLA-22/2020|2020-05-12|EPI\_ISL\_537526|Original|hCoV-19^^California|Human|UCLA Pathology Clinical Microbiology Lab|Kruglyak Lab|Boocock|USA

>Spike|hCoV-19/England/ALDP-95CE4E/2020|2020-06-15|EPI\_ISL\_554943|Original|hCoV-19^^England|Human|Lighthouse Lab in Alderley Park|Wellcome Sanger Institute for the COVID-19 Genomics UK (COG-UK) consortium|Davies|United Kingdom

>Spike|hCoV-19/Chile/MA-212212/2020|2020-10-22|EPI\_ISL\_746534|Original|hCoV-19^^Magallanes|Human|Genetica Molecular and Subdepartamento de Virologia ISP Chile|Instituto de Salud Publica de Chile|Tognarelli|Chile

>Spike|hCoV-19/England/LOND-124FFF4/2020|2020-04-10|EPI\_ISL\_665191|Original|hCoV-19^^England|Human|University College London Hospital|COVID-19 Genomics UK (COG-UK) Consortium|Byott|United Kingdom

>Spike|hCoV-19/England/QEUEH-9F6D76/2020|2020-09-27|EPI\_ISL\_595630|Original|hCoV-19^^England|Human|Oxford Viromics|COVID-19 Genomics UK (COG-UK) Consortium|Golubchik|United Kingdom

>Spike|hCoV-19/USA/IL-NM027/2020|2020-03-16|EPI\_ISL\_444537|Original|hCoV-19^^Illinois|Human|Northwestern Memorial Hospital|Ozer Lab|Ozer|USA

>Spike|hCoV-19/Denmark/DCGC-21374/2020|2020-12-21|EPI\_ISL\_757896|Original|hCoV-19^^Midtjylland|Human|Department of Virus and Microbiological Special Diagnostics|Albertsen Lab|Michaelsen|Denmark

>Spike|hCoV-19/France/ARA-109382/2020|2020-11-19|EPI\_ISL\_728531|Original|hCoV-19^^Auvergne-Rh\u00f4ne-Alpes|Human|CNR Virus des Infections Respiratoires - France SUD|CNR Virus des Infections Respiratoires - France SUD|Bal|France

>Spike|hCoV-19/Denmark/DCGC-7188/2020|2020-10-12|EPI\_ISL\_619189|Original|hCoV-19^^Hovedstaden|Human|Department of Virus and Microbiological Special Diagnostics|Albertsen lab|Michaelsen|Denmark

>Spike|hCoV-19/Australia/VIC13503/2020|2020-09-04|EPI\_ISL\_592274|Original|hCoV-19^^Victoria|Human|Microbiological Diagnostic Unit - Public Health Laboratory (MDU-PHL)|MDU-PHL|Schultz|Australia

>Spike|hCoV-19/England/ALDP-AA1052/2020|2020-10-22|EPI\_ISL\_624468|Original|hCoV-19^^England|Human|Lighthouse Lab in Alderley Park|Wellcome Sanger Institute for the COVID-19 Genomics UK (COG-UK) consortium|Davies|United Kingdom

>Spike|hCoV-19/England/MILK-99A1E1/2020|2020-08-30|EPI\_ISL\_550358|Original|hCoV-19^^England|Human|Lighthouse Lab in Milton Keynes|Wellcome Sanger Institute for the COVID-19 Genomics UK (COG-UK) consortium|Davies|United Kingdom

>Spike|hCoV-19/Canada/BC\_11135150/2020|2020-04-00|EPI\_ISL\_467318|Original|hCoV-19^^British Columbia|Human|BCCDC Public Health Laboratory|BCCDC Public Health Laboratory|Harrigan|Canada

>Spike|hCoV-19/England/SHEF-CC370/2020|2020-05-01|EPI\_ISL\_462055|Original|hCoV-19^^England|Human|Virology Department|COVID-19 Genomics UK (COG-UK) Consortium|de Silva|United Kingdom

>Spike|hCoV-19/USA/CA-ALSR-3728/2020|2020-05-30|EPI\_ISL\_636170|Original|hCoV-19^^California|Human|San Diego County Public Health Laboratory|Andersen lab at Scripps Research|Gangavarapu|USA

>Spike|hCoV-19/USA/UT-02008/2020|2020-04-16|EPI\_ISL\_454726|Original|hCoV-19^^Utah|Human|Utah Public Health Laboratory|Utah Public Health Laboratory|Young|USA

>Spike|hCoV-19/Wales/PHWC-163C33/2020|2020-04-30|EPI\_ISL\_474059|Original|hCoV-19^^Wales|Human|Originating lab|COVID-19 Genomics UK (COG-UK) Consortium|Moore|United Kingdom

>Spike|hCoV-19/Wales/PHWC-164A29/2020|2020-05-19|EPI\_ISL\_479336|Original|hCoV-19^^Wales|Human|Wales Specialist Virology Centre Sequencing lab|COVID-19 Genomics UK (COG-UK) Consortium|Moore|United Kingdom

>Spike|hCoV-19/England/ALDP-9E579A/2020|2020-09-24|EPI\_ISL\_589412|Original|hCoV-19^^England|Human|Lighthouse Lab in Alderley Park|Wellcome Sanger Institute for the COVID-19 Genomics UK (COG-UK) consortium|Davies|United Kingdom

>Spike|hCoV-19/England/CAMC-B3434B/2020|2020-11-06|EPI\_ISL\_659471|Original|hCoV-19^^England|Human|Lighthouse Lab in Cambridge|Wellcome Sanger Institute for the COVID-19 Genomics UK (COG-UK) Consortium|Davies|United Kingdom

>Spike|hCoV-19/USA/TX-DSHS-1914/2020|2020-07-11|EPI\_ISL\_751539|Original|hCoV-19^^Texas|Human|Texas Department of State Health Services|Texas Department of State Health Services|Rahman|USA

>Spike|hCoV-19/USA/CA-ALSR-4537/2020|2020-09-10|EPI\_ISL\_666996|Original|hCoV-19^^California|Human|San Diego County Public Health Laboratory|Andersen lab at Scripps Research|Gangavarapu|USA

>Spike|hCoV-19/Spain/PV-IBV-000897/2020|2020-03-26|EPI\_ISL\_452666|Original|hCoV-19^^Basque Country|Human|Servicio de Microbiolog\u00eda. Hospital Universitario Donostia. OSI Donostialdea. \u00clrea de Enfermedades Infecciosas|SeqCOVID-SPAIN consortium|IBV (CSIC)|Comas|Spain

>Spike|hCoV-19/France/PAC-IHU-0104/2020|2020-03-23|EPI\_ISL\_569310|Original|hCoV-19^^Provence-Alpes-C\u00f4te-d\u2019Azur|Human|MEPHI|MEPHI|Levasseur|France

>Spike|hCoV-19/England/ALDP-A68C35/2020|2020-10-12|EPI\_ISL\_608399|Original|hCoV-19^^England|Human|Lighthouse Lab in Alderley Park|Wellcome Sanger Institute for the COVID-19 Genomics UK (COG-UK) consortium|Davies|United Kingdom

>Spike|hCoV-19/USA/FL-BPHL-1645/2020|2020-07-02|EPI\_ISL\_594334|Original|hCoV-19^^Florida|Human|Florida Bureau of Public Health Laboratories|Florida Bureau of Public Health Laboratories|Blanton|USA

>Spike|hCoV-19/Scotland/EDB1030/2020|2020-04-06|EPI\_ISL\_559971|Original|hCoV-19^^Scotland|Human|Virology Department|COVID-19 Genomics UK (COG-UK) Consortium|Williams|United Kingdom

>Spike|hCoV-19/Canada/QC-LSPQ-L00229648/2020|2020-03-20|EPI\_ISL\_535898|Original|hCoV-19^^Quebec|Human|H\u00f4pital Sainte-Croix|Laboratoire de sant\u00e9 publique du Qu\u00e9bec|Moreira|Canada

>Spike|hCoV-19/India/OR-ILSCV16809/2020|2020-05-11|EPI\_ISL\_463054|Original|hCoV-19^^Odisha|Human|Institute of Life Sciences|Immunogenomics lab|Raghav|India

>Spike|hCoV-19/USA/WI-GMF-13029/2020|2020-07-29|EPI\_ISL\_547650|Original|hCoV-19^^Wisconsin|Human|Gundersen Molecular Diagnostics Laboratory|Kabara Cancer Research Institute|Kenny|USA

>Spike|hCoV-19/England/20144017704/2020|2020-04-01|EPI\_ISL\_423511|Original|hCoV-19^^England|Human|Respiratory Virus Unit|Respiratory Virus Unit|Platt|United Kingdom

>Spike|hCoV-19/England/MILK-9E2D7D/2020|2020-09-21|EPI\_ISL\_581268|Original|hCoV-19^^England|Human|Lighthouse Lab in Milton Keynes|Wellcome Sanger Institute for the COVID-19 Genomics UK (COG-UK) consortium|Davies|United Kingdom

>Spike|hCoV-19/Japan/PG-1312/2020|2020-04-00|EPI\_ISL\_684920|Original|hCoV-19^^Japan|Human|Saitama Prefectural Institute of Public Health|Pathogen Genomics Center|Sekizuka|Japan

>Spike|hCoV-19/Wales/PHWC-3421C/2020|2020-04-17|EPI\_ISL\_446889|Original|hCoV-19^^Wales|Human|Wales Specialist Virology Centre|Public Health Wales Microbiology Cardiff|Moore|United Kingdom

>Spike|hCoV-19/England/ALDP-BC744A/2020|2020-11-22|EPI\_ISL\_721512|Original|hCoV-19^^England|Human|Lighthouse Lab in Alderley Park|Wellcome Sanger Institute for the COVID-19 Genomics UK (COG-UK) Consortium|Davies|United Kingdom

>Spike|hCoV-19/Netherlands/GE-EMC-397/2020|2020-10-18|EPI\_ISL\_722511|Original|hCoV-19^^Gelderland|Human|Dutch COVID-19 response team|Erasmus Medical Center|Oude Munnink|Netherlands

>Spike|hCoV-19/USA/HI-H200554/2020|2020-10-24|EPI\_ISL\_753083|Original|hCoV-19^^Hawaii|Human|State Laboratories Division|State Laboratories Division|Sultana|USA

>Spike|hCoV-19/England/CAMB-1B8E93/2020|2020-11-02|EPI\_ISL\_651005|Original|hCoV-19^^England|Human|Department of Pathology|COVID-19 Genomics UK (COG-UK) Consortium|Goodfellow|United Kingdom

>Spike|hCoV-19/Switzerland/BS-42374720/2020|2020-07-30|EPI\_ISL\_581931|Original|hCoV-19^^Basel-Stadt|Human|University Hospital Basel|University Hospital Basel|Roloff Handschin|Switzerland

>Spike|hCoV-19/Netherlands/ZH-EMC-1239/2020|2020-12-21|EPI\_ISL\_763308|Original|hCoV-19^^Zuid Holland|Human|Dutch COVID-19 response team|Erasmus Medical Center|Oude Munnink|Netherlands

>Spike|hCoV-19/England/CAMC-A665F0/2020|2020-10-11|EPI\_ISL\_626885|Original|hCoV-19^^England|Human|University of Exeter|COVID-19 Genomics UK (COG-UK) Consortium|Temperton|United Kingdom

>Spike|hCoV-19/Denmark/DCGC-22503/2020|2020-12-14|EPI\_ISL\_757597|Original|hCoV-19^^Nordjylland|Human|Department of Virus and Microbiological Special Diagnostics|Albertsen Lab|Michaelsen|Denmark

>Spike|hCoV-19/Denmark/DCGC-20521/2020|2020-12-21|EPI\_ISL\_758714|Original|hCoV-19^^Hovedstaden|Human|Department of Virus and Microbiological Special Diagnostics|Albertsen Lab|Michaelsen|Denmark

>Spike|hCoV-19/Australia/VIC534/2020|2020-03-25|EPI\_ISL\_426800|Original|hCoV-19^^Victoria|Human|Victorian Infectious Diseases Reference Laboratory (VIDRL)|Microbiological Diagnostic Unit Public Health Laboratory and Victorian Infectious Diseases Reference Laboratory|Schultz|Australia

>Spike|hCoV-19/England/QEUA-A218AD/2020|2020-10-01|EPI\_ISL\_587423|Original|hCoV-19^^England|Human|Lighthouse Lab in Glasgow|Wellcome Sanger Institute for the COVID-19 Genomics UK (COG-UK) consortium|Davies|United Kingdom

>Spike|hCoV-19/USA/TX-HMH-MCoV-9032/2020|2020-07-02|EPI\_ISL\_780908|Original|hCoV-19^^Texas|Human|Houston Methodist Hospital|Houston Methodist Hospital|Long|USA

>Spike|hCoV-19/Wales/PHWC-49F934/2020|2020-12-09|EPI\_ISL\_743292|Original|hCoV-19^^Wales|Human|Wales Specialist Virology Centre Sequencing lab|COVID-19 Genomics UK (COG-UK) Consortium|Moore|United Kingdom

>Spike|hCoV-19/England/ALDP-9EA20D/2020|2020-09-24|EPI\_ISL\_580067|Original|hCoV-19^^England|Human|Lighthouse Lab in Alderley Park|Wellcome Sanger Institute for the COVID-19 Genomics UK (COG-UK) consortium|Davies|United Kingdom

>Spike|hCoV-19/USA/UT-QDX-1787/2020|2020-03-12|EPI\_ISL\_604119|Original|hCoV-19^^Utah|Human|Quest Diagnostics|Quest Diagnostics|Kagan|USA

>Spike|hCoV-19/USA/TX-HMH-MCoV-11808/2020|2020-09-14|EPI\_ISL\_790113|Original|hCoV-19^^Texas|Human|Houston Methodist Hospital|Houston Methodist Hospital|Long|USA

>Spike|hCoV-19/USA/FL-BPHL-1179/2020|2020-08-20|EPI\_ISL\_526665|Original|hCoV-19^^Florida|Human|Florida Bureau of Public Health Laboratories|Florida Bureau of Public Health Laboratories|Blanton|USA

>Spike|hCoV-19/Australia/VIC14767/2020|2020-08-17|EPI\_ISL\_592990|Original|hCoV-19^^Victoria|Human|Microbiological Diagnostic Unit - Public Health Laboratory (MDU-PHL)|MDU-PHL|Schultz|Australia

>Spike|hCoV-19/England/QEUEH-9B46F1/2020|2020-09-04|EPI\_ISL\_590196|Original|hCoV-19^^England|Human|Lighthouse Lab in Glasgow|Wellcome Sanger Institute for the COVID-19 Genomics UK (COG-UK) consortium|Davies|United Kingdom

>Spike|hCoV-19/USA/NY-NYUMC751/2020|2020-03-20|EPI\_ISL\_451665|Original|hCoV-19^^New York|Human|NYU Langone Health|Departments of Pathology and Medicine|Maurano|USA

>Spike|hCoV-19/England/LEED-2A8C8C/2020|2020-04-03|EPI\_ISL\_539012|Original|hCoV-19^^England|Human|Leeds Teaching Hospitals NHS Trust and Public Health England|Wellcome Sanger Institute for the COVID-19 Genomics UK (COG-UK) consortium|Davies|United Kingdom

>Spike|hCoV-19/USA/UT-03470/2020|2020-03-15|EPI\_ISL\_450539|Original|hCoV-19^^Utah|Human|Utah Public Health Laboratory|Utah Public Health Laboratory|Young|USA

>Spike|hCoV-19/Hong Kong/VM20100078/2020|2020-08-05|EPI\_ISL\_637022|Original|hCoV-19^^Hong Kong|Human|Tin Shui Wai Hospital|Hong Kong Department of Health|Mak|China

>Spike|hCoV-19/England/ALDP-B626A5/2020|2020-11-07|EPI\_ISL\_656441|Original|hCoV-19^^England|Human|Lighthouse Lab in Alderley Park|Wellcome Sanger Institute for the COVID-19 Genomics UK (COG-UK) Consortium|Davies|United Kingdom

>Spike|hCoV-19/Switzerland/SH-ETHZ-400332/2020|2020-12-08|EPI\_ISL\_729166|Original|hCoV-19^^Schaffhausen|Human|Viollier AG|Department of Biosystems Science and Engineering|Nadeau|Switzerland

>Spike|hCoV-19/USA/MD-HP00028/2020|2020-03-26|EPI\_ISL\_438224|Original|hCoV-19^^Maryland|Human|Johns Hopkins Hospital Department of Pathology|Johns Hopkins Hospital Department of Pathology|Ramakrishnan|USA

>Spike|hCoV-19/England/MILK-ACD68B/2020|2020-10-21|EPI\_ISL\_634292|Original|hCoV-19^^England|Human|Lighthouse Lab in Milton Keynes|Wellcome Sanger Institute for the COVID-19 Genomics UK (COG-UK) consortium|Davies|United Kingdom

>Spike|hCoV-19/England/ALDP-95091C/2020|2020-06-14|EPI\_ISL\_554442|Original|hCoV-19^^England|Human|Lighthouse Lab in Alderley Park|Wellcome Sanger Institute for the COVID-19 Genomics UK (COG-UK) consortium|Davies|United Kingdom

>Spike|hCoV-19/USA/MI-MDHHS-SC22578/2020|2020-11-23|EPI\_ISL\_737148|Original|hCoV-19^^Michigan|Human|Michigan Department of Health and Human Services|Michigan Department of Health and Human Services|Blankenship|USA

>Spike|hCoV-19/USA/TX-DSHS-0086/2020|2020-05-11|EPI\_ISL\_522371|Original|hCoV-19^^Texas|Human|Texas Department of State Health Services|Texas Department of State Health Services|Rahman|USA

>Spike|hCoV-19/USA/MA-MGH-03450/2020|2020-11-14|EPI\_ISL\_765842|Original|hCoV-19^^Massachusetts|Human|Massachusetts General Hospital|Infectious Disease Program|Park|USA

>Spike|hCoV-19/Singapore/582/2020|2020-04-04|EPI\_ISL\_483605|Original|hCoV-19^^Singapore|Human|National Public Health Laboratory|National Public Health Laboratory|Mak|Singapore

>Spike|hCoV-19/USA/VA-DCLS-2266/2020|2020-11-13|EPI\_ISL\_723510|Original|hCoV-19^^Virginia|Human|Virginia Division of Consolidated Laboratory Services (DCLS)|Virginia Division of Consolidated Laboratory Services (DCLS)|St. Jacques|USA

>Spike|hCoV-19/Northern Ireland/NIRE-2359F6/2020|2020-11-10|EPI\_ISL\_742173|Original|hCoV-19^^Northern Ireland|Human|Regional Virus Laboratory|COVID-19 Genomics UK (COG-UK) Consortium|Fairley|United Kingdom

>Spike|hCoV-19/England/ALDP-A512F1/2020|2020-10-08|EPI\_ISL\_598109|Original|hCoV-19^^England|Human|Lighthouse Lab in Alderley Park|Wellcome Sanger Institute for the COVID-19 Genomics UK (COG-UK) consortium|Davies|United Kingdom

>Spike|hCoV-19/Wales/PHWC-49DD0D/2020|2020-11-30|EPI\_ISL\_742899|Original|hCoV-19^^Wales|Human|Wales Specialist Virology Centre Sequencing lab|COVID-19 Genomics UK (COG-UK) Consortium|Moore|United Kingdom

>Spike|hCoV-19/England/MILK-B8EFF3/2020|2020-11-13|EPI\_ISL\_675436|Original|hCoV-19^^England|Human|Lighthouse Lab in Milton Keynes|Wellcome Sanger Institute for the COVID-19 Genomics UK (COG-UK) Consortium|Davies|United Kingdom

>Spike|hCoV-19/Japan/PG-8295/2020|2020-08-00|EPI\_ISL\_687394|Original|hCoV-19^^Japan|Human|Pathogen Genomics Center|Pathogen Genomics Center|Sekizuka|Japan

>Spike|hCoV-19/England/ALDP-9EDFE5/2020|2020-05-06|EPI\_ISL\_589541|Original|hCoV-19^^England|Human|Lighthouse Lab in Alderley Park|Wellcome Sanger Institute for the COVID-19 Genomics UK (COG-UK) consortium|Davies|United Kingdom

>Spike|hCoV-19/Wales/PHWC-47E661/2020|2020-09-30|EPI\_ISL\_595483|Original|hCoV-19^^Wales|Human|Originating lab|COVID-19 Genomics UK (COG-UK) Consortium|Moore|United Kingdom

>Spike|hCoV-19/England/BRIS-1223B3/2020|2020-04-04|EPI\_ISL\_440795|Original|hCoV-19^^England|Human|PHE South West Regional Laboratory|Wellcome Sanger Institute for the COVID-19 Genomics UK (COG-UK) consortium|Amato|United Kingdom

>Spike|hCoV-19/Portugal/PT1453/2020|2020-03-17|EPI\_ISL\_511412|Original|hCoV-19^^Portugal|Human|Instituto Nacional de Saude (INSA)|Instituto Nacional de Saude (INSA)|Borges|Portugal

>Spike|hCoV-19/Wales/PHWC-48FB13/2020|2020-11-10|EPI\_ISL\_681189|Original|hCoV-19^^Wales|Human|Wales Specialist Virology Centre Sequencing lab|COVID-19 Genomics UK (COG-UK) Consortium|Moore|United Kingdom

>Spike|hCoV-19/England/CAMB-791C3/2020|2020-04-03|EPI\_ISL\_441826|Original|hCoV-19^^England|Human|Department of Pathology|Wellcome Sanger Institute for the COVID-19 Genomics UK (COG-UK) consortium|Amato|United Kingdom

>Spike|hCoV-19/USA/FL-04-UMTL-96NV/2020|2020-04-06|EPI\_ISL\_479760|Original|hCoV-19^^Florida|Human|University of Miami Immunology and Histocompatibility Laboratory|University of Miami Immunology and Histocompatibility Laboratory|Margolles-Clark|USA

>Spike|hCoV-19/Japan/PG-2952/2020|2020-04-00|EPI\_ISL\_691078|Original|hCoV-19^^Japan|Human|Pathogen Genomics Center|Pathogen Genomics Center|Sekizuka|Japan

>Spike|hCoV-19/South Africa/UFS-VIRO-NGS-32/2020|2020-10-05|EPI\_ISL\_682339|Original|hCoV-19^^Free State|Human|NHLS Universitas Academic|UFS Virology|Bester|South Africa

>Spike|hCoV-19/Scotland/EDB5474/2020|2020-04-25|EPI\_ISL\_461748|Original|hCoV-19^^Scotland|Human|Virology Department|COVID-19 Genomics UK (COG-UK) Consortium|Williams|United Kingdom

>Spike|hCoV-19/England/MILK-9927BA/2020|2020-08-27|EPI\_ISL\_551946|Original|hCoV-19^^England|Human|Lighthouse Lab in Milton Keynes|Wellcome Sanger Institute for the COVID-19 Genomics UK (COG-UK) consortium|Davies|United Kingdom

>Spike|hCoV-19/Ireland/LS-NVRL-71IRL96316/2020|2020-08-01|EPI\_ISL\_525376|Original|hCoV-19^^Laois|Human|National Virus Reference Laboratory|National Virus Reference Laboratory|Gonzalez|Ireland

>Spike|hCoV-19/England/ALDP-981EF5/2020|2020-08-10|EPI\_ISL\_552719|Original|hCoV-19^^England|Human|Lighthouse Lab in Alderley Park|Wellcome Sanger Institute for the COVID-19 Genomics UK (COG-UK) consortium|Davies|United Kingdom

>Spike|hCoV-19/Luxembourg/LNS2669816/2020|2020-11-16|EPI\_ISL\_740164|Original|hCoV-19^^Luxembourg|Human|Laboratoire national de sant\u00e9|Laboratoire national de sant\u00e9|Wienecke-Baldacchino|Luxembourg

>Spike|hCoV-19/Wales/PHWC-1661F5/2020|2020-06-16|EPI\_ISL\_490850|Original|hCoV-19^^Wales|Human|Wales Specialist Virology Centre Sequencing lab|COVID-19 Genomics UK (COG-UK) Consortium|Moore|United Kingdom

>Spike|hCoV-19/Japan/IC-0430/2020|2020-11-00|EPI\_ISL\_768639|Original|hCoV-19^^Japan|Human|Pathogen Genomics Center|Pathogen Genomics Center|Sekizuka|Japan

>Spike|hCoV-19/England/20168032904/2020|2020-04-16|EPI\_ISL\_466609|Original|hCoV-19^^England|Human|Respiratory Virus Unit|Respiratory Virus Unit|Platt|United Kingdom

>Spike|hCoV-19/Wales/MILK-993F75/2020|2020-08-25|EPI\_ISL\_551649|Original|hCoV-19^^Wales|Human|Lighthouse Lab in Milton Keynes|Wellcome Sanger Institute for the COVID-19 Genomics UK (COG-UK) consortium|Davies|United Kingdom

>Spike|hCoV-19/England/CAMB-762D2/2020|2020-03-28|EPI\_ISL\_438362|Original|hCoV-19^^England|Human|Department of Pathology|Wellcome Sanger Institute for the COVID-19 Genomics UK (COG-UK) consortium|Amato|United Kingdom

>Spike|hCoV-19/Denmark/DCGC-12246/2020|2020-11-16|EPI\_ISL\_682427|Original|hCoV-19^^Sjaelland|Human|Department of Virus and Microbiological Special Diagnostics|Albertsen Lab|Michaelsen|Denmark

>Spike|hCoV-19/England/ALDP-A691BD/2020|2020-10-13|EPI\_ISL\_608569|Original|hCoV-19^^England|Human|Lighthouse Lab in Alderley Park|Wellcome Sanger Institute for the COVID-19 Genomics UK (COG-UK) consortium|Davies|United Kingdom

>Spike|hCoV-19/USA/WI-UW-197/2020|2020-03-24|EPI\_ISL\_428293|Original|hCoV-19^^Wisconsin|Human|University of Wisconsin-Madison AIDS Vaccine Research Laboratories|University of Wisconsin-Madison AIDS Vaccine Research Laboratories|Moreno|USA

>Spike|hCoV-19/Denmark/DCGC-11681/2020|2020-10-26|EPI\_ISL\_671064|Original|hCoV-19^^Hovedstaden|Human|Department of Virus and Microbiological Special Diagnostics|Albertsen Lab|Michaelsen|Denmark

>Spike|hCoV-19/Denmark/DCGC-12950/2020|2020-12-07|EPI\_ISL\_712481|Original|hCoV-19^^Hovedstaden|Human|Department of Virus and Microbiological Special Diagnostics|Albertsen Lab|Michaelsen|Denmark

>Spike|hCoV-19/England/CAMB-80888/2020|2020-04-10|EPI\_ISL\_442830|Original|hCoV-19^^England|Human|Department of Pathology|Wellcome Sanger Institute for the COVID-19 Genomics UK (COG-UK) consortium|Amato|United Kingdom

>Spike|hCoV-19/Wales/PHWC-15DA14/2020|2020-05-13|EPI\_ISL\_472754|Original|hCoV-19^^Wales|Human|Wales Specialist Virology Centre Sequencing lab|COVID-19 Genomics UK (COG-UK) Consortium|Moore|United Kingdom

>Spike|hCoV-19/England/MILK-B3B57B/2020|2020-11-01|EPI\_ISL\_706064|Original|hCoV-19^^England|Human|Oxford Viromics|COVID-19 Genomics UK (COG-UK) Consortium|Golubchik|United Kingdom

>Spike|hCoV-19/Czech Republic/NRL\_9604/2020|2020-09-29|EPI\_ISL\_626591|Original|hCoV-19^^South Bohemian Region|Human|The National Institute of Public Health|State Veterinary Institute Prague|Nagy|Czech Republic

>Spike|hCoV-19/Luxembourg/LNS5415838/2020|2020-10-05|EPI\_ISL\_744228|Original|hCoV-19^^Luxembourg|Human|Laboratoire national de sant\u00e9|Laboratoire national de sant\u00e9|Wienecke-Baldacchino|Luxembourg

>Spike|hCoV-19/Denmark/DCGC-10851/2020|2020-11-02|EPI\_ISL\_669752|Original|hCoV-19^^Hovedstaden|Human|Department of Virus and Microbiological Special Diagnostics|Albertsen Lab|Michaelsen|Denmark

>Spike|hCoV-19/England/CAMB-1AE355/2020|2020-04-28|EPI\_ISL\_524592|Original|hCoV-19^^England|Human|Department of Pathology|Wellcome Sanger Institute for the COVID-19 Genomics UK (COG-UK) consortium|Davies|United Kingdom

>Spike|hCoV-19/Wales/MILK-B0259B/2020|2020-10-24|EPI\_ISL\_647818|Original|hCoV-19^^Wales|Human|Lighthouse Lab in Milton Keynes|Wellcome Sanger Institute for the COVID-19 Genomics UK (COG-UK) Consortium|Davies|United Kingdom

>Spike|hCoV-19/United Arab Emirates/0031/2020|2020-05-17|EPI\_ISL\_698240|Original|hCoV-19^^Abu Dhabi|Human|Group 42 (G42) Healthcare|G42 Healthcare|Ogrodzki|United Arab Emirates

>Spike|hCoV-19/England/QEUA-AAF045/2020|2020-10-20|EPI\_ISL\_653012|Original|hCoV-19^^England|Human|Oxford Viromics|COVID-19 Genomics UK (COG-UK) Consortium|Golubchik|United Kingdom

>Spike|hCoV-19/England/QEUA-BF19C0/2020|2020-12-05|EPI\_ISL\_709107|Original|hCoV-19^^England|Human|Lighthouse Lab in Glasgow|Wellcome Sanger Institute for the COVID-19 Genomics UK (COG-UK) Consortium|Davies|United Kingdom

>Spike|hCoV-19/USA/WA-UW-22419/2020|2020-08-07|EPI\_ISL\_570681|Original|hCoV-19^^Washington|Human|UW Virology Lab|UW Virology Lab|Roychoudhury|USA

>Spike|hCoV-19/Wales/PHWC-49688B/2020|2020-11-20|EPI\_ISL\_726648|Original|hCoV-19^^Wales|Human|Originating lab|COVID-19 Genomics UK (COG-UK) Consortium|Moore|United Kingdom

>Spike|hCoV-19/England/MILK-958000/2020|2020-06-14|EPI\_ISL\_554805|Original|hCoV-19^^England|Human|Lighthouse Lab in Milton Keynes|Wellcome Sanger Institute for the COVID-19 Genomics UK (COG-UK) consortium|Davies|United Kingdom

>Spike|hCoV-19/Weifang/WF0026/2020|2020-02-00|EPI\_ISL\_413761|Original|hCoV-19^^Weifang|Human|Weifang Center for Disease Control and Prevention|Weifang Center for Disease Control and Prevention & BGI-Shenzhen|Li|China

>Spike|hCoV-19/Belgium/regal-12141309/2020|2020-12-14|EPI\_ISL\_738363|Original|hCoV-19^^Mol|Human|UZ Leuven|KU Leuven|Maes|Belgium

>Spike|hCoV-19/Denmark/DCGC-5977/2020|2020-09-21|EPI\_ISL\_621086|Original|hCoV-19^^Midtjylland|Human|Department of Virus and Microbiological Special Diagnostics|Albertsen lab|Michaelsen|Denmark

>Spike|hCoV-19/USA/UT-08452/2020|2020-05-19|EPI\_ISL\_524224|Original|hCoV-19^^Utah|Human|Utah Public Health Laboratory|Utah Public Health Laboratory|Young|USA

>Spike|hCoV-19/USA/TX-DSHS-1544/2020|2020-06-16|EPI\_ISL\_681876|Original|hCoV-19^^Texas|Human|Texas Department of State Health Services|Texas Department of State Health Services|Rahman|USA

>Spike|hCoV-19/England/SHEF-BFF9A/2020|2020-03-25|EPI\_ISL\_418316|Original|hCoV-19^^England|Human|Virology Department|Department of Infection|de Silva|United Kingdom

>Spike|hCoV-19/England/BIRM-5E3CE/2020|2020-04-14|EPI\_ISL\_444294|Original|hCoV-19^^England|Human|University of Birmingham|COVID-19 Genomics UK (COG-UK) Consortium|Loman|United Kingdom

>Spike|hCoV-19/Luxembourg/LNS9993908/2020|2020-11-12|EPI\_ISL\_745027|Original|hCoV-19^^Luxembourg|Human|Laboratoire national de sant\u00e9|Laboratoire national de sant\u00e9|Wienecke-Baldacchino|Luxembourg

>Spike|hCoV-19/England/ALDP-923FF2/2020|2020-06-23|EPI\_ISL\_551447|Original|hCoV-19^^England|Human|Lighthouse Lab in Alderley Park|Wellcome Sanger Institute for the COVID-19 Genomics UK (COG-UK) consortium|Davies|United Kingdom

>Spike|hCoV-19/England/201180370/2020|2020-03-13|EPI\_ISL\_464904|Original|hCoV-19^^England|Human|Respiratory Virus Unit|Respiratory Virus Unit|Platt|United Kingdom

>Spike|hCoV-19/England/MILK-ACD2B4/2020|2020-10-21|EPI\_ISL\_630176|Original|hCoV-19^^England|Human|Lighthouse Lab in Milton Keynes|Wellcome Sanger Institute for the COVID-19 Genomics UK (COG-UK) consortium|Davies|United Kingdom

>Spike|hCoV-19/Denmark/DCGC-1130/2020|2020-03-16|EPI\_ISL\_614618|Original|hCoV-19^^Syddanmark|Human|Department of Virus and Microbiological Special Diagnostics|Albertsen lab|Michaelsen|Denmark

>Spike|hCoV-19/New Zealand/20VR1624/2020|2020-03-27|EPI\_ISL\_456234|Original|hCoV-19^^Southern|Human|Southern Community Labs Dunedin|Institute of Environmental Science and Research (ESR)|de Ligt|New Zealand

>Spike|hCoV-19/England/NOTT-119ABA/2020|2020-11-04|EPI\_ISL\_627723|Original|hCoV-19^^England|Human|Queens Medical Centre|COVID-19 Genomics UK (COG-UK) Consortium|Loose|United Kingdom

>Spike|hCoV-19/Australia/NSW545/2020|2020-04-05|EPI\_ISL\_455084|Original|hCoV-19^^New South Wales|Human|South Eastern Area Laboratory Services|NSW Health Pathology - Institute of Clinical Pathology and Medical Research; Westmead Hospital; University of Sydney|Gall|Australia

>Spike|hCoV-19/SaudiArabia/KAUST-JEDDAH922/2020|2020-04-06|EPI\_ISL\_513053|Original|hCoV-19^^Jeddah|Human|Pathogen Genomics Lab King Abdullah University of Science and Technology(KAUST)|Pathogen Genomics Lab King Abdullah University of Science and Technology(KAUST)|Mohamed Ghazzali|Saudi Arabia

>Spike|hCoV-19/Northern Ireland/NIRE-FA9B3/2020|2020-03-26|EPI\_ISL\_441781|Original|hCoV-19^^Northern Ireland|Human|Regional Virus Laboratory|Wellcome Sanger Institute for the COVID-19 Genomics UK (COG-UK) consortium|Amato|United Kingdom

>Spike|hCoV-19/Chile/RM-CMM-0071M/2020|2020-05-01|EPI\_ISL\_629019|Original|hCoV-19^^Region Metropolitana de Santiago|Human|Centro de Biotecnolog\u00eda Vegetal|Center for Mathematical Modeling and Center for Genome Regulation. Santiago|Palma V\u00e9jares|Chile

>Spike|hCoV-19/Scotland/QEUH-963FAB/2020|2020-08-12|EPI\_ISL\_534368|Original|hCoV-19^^Scotland|Human|NHSGGC West of Scotland Specialist Virology Centre / MRC-



University of Glasgow Centre for Virus Research|Wellcome Sanger Institute for the COVID-19 Genomics UK (COG-UK) consortium|Davies|United Kingdom  
>Spike|hCoV-19/Belgium/UGent-227/2020|2020-11-08|EPI\_ISL\_717622|Original|hCoV-19^^Ghent|Human|Lab voor klinische biologie|Onderzoeksgroep Virologie|Lambrechts|Belgium  
>Spike|hCoV-19/England/QEUEH-9C7E5D/2020|2020-09-10|EPI\_ISL\_567069|Original|hCoV-19^^England|Human|Lighthouse Lab in Glasgow|Wellcome Sanger Institute for the COVID-19 Genomics UK (COG-UK) consortium|Davies|United Kingdom  
>Spike|hCoV-19/USA/WA-S175/2020|2020-03-19|EPI\_ISL\_430213|Original|hCoV-19^^Washington|Human|Washington State Department of Health|Seattle Flu Study|Bedford|USA  
>Spike|hCoV-19/Sichuan/SC-WCH1-002/2020|2020-02-08|EPI\_ISL\_451375|Original|hCoV-19^^Sichuan|Human|West China Hospital of Sichuan University|State Key Laboratory of Biotherapy of Sichuan University|Tang|China  
>Spike|hCoV-19/Australia/VIC6096/2020|2020-07-07|EPI\_ISL\_518121|Original|hCoV-19^^Victoria|Human|Victorian Infectious Diseases Reference Laboratory (VIDRL)|VIDRL and MDU-PHL|Schultz|Australia  
>Spike|hCoV-19/USA/WI-UW-1411/2020|2020-09-04|EPI\_ISL\_536781|Original|hCoV-19^^Wisconsin|Human|University of Wisconsin-Madison AIDS Vaccine Research Laboratories|University of Wisconsin-Madison AIDS Vaccine Research Laboratories|Baczenas|USA  
>Spike|hCoV-19/England/QEUEH-CC2657/2020|2020-12-21|EPI\_ISL\_760272|Original|hCoV-19^^England|Human|Lighthouse Lab in Glasgow|Wellcome Sanger Institute for the COVID-19 Genomics UK (COG-UK) Consortium|Davies|United Kingdom  
>Spike|hCoV-19/Malaysia/IMR-WC258707/2020|2020-11-06|EPI\_ISL\_728210|Original|hCoV-19^^Malaysia|Human|Institute for Medical Research|Institute for Medical Research|Suppiah|Malaysia  
>Spike|hCoV-19/England/QEUEH-B669B7/2020|2020-11-11|EPI\_ISL\_654968|Original|hCoV-19^^England|Human|Lighthouse Lab in Glasgow|Wellcome Sanger Institute for the COVID-19 Genomics UK (COG-UK) Consortium|Davies|United Kingdom  
>Spike|hCoV-19/England/NORT-29DA44/2020|2020-05-07|EPI\_ISL\_488105|Original|hCoV-19^^England|Human|NU-OMICS DNA Sequencing research facility|Wellcome Sanger Institute for the COVID-19 Genomics UK (COG-UK) consortium|Davies|United Kingdom  
>Spike|hCoV-19/USA/ME-HETL-J0322/2020|2020-11-30|EPI\_ISL\_755451|Original|hCoV-19^^Maine|Human|Maine Health and Environmental Testing Laboratory|Tewhey Lab|Tewhey|USA  
>Spike|hCoV-19/Japan/PG-1146/2020|2020-04-00|EPI\_ISL\_684756|Original|hCoV-19^^Japan|Human|Pathogen Genomics Center|Pathogen Genomics Center|Sekizuka|Japan  
>Spike|hCoV-19/Scotland/CVR1421/2020|2020-04-01|EPI\_ISL\_438804|Original|hCoV-19^^Scotland|Human|West of Scotland Specialist Virology Centre|COVID-19 Genomics UK (COG-UK) Consortium|Robertson|United Kingdom  
>Spike|hCoV-19/Wales/PHWC-4A5476/2020|2020-12-15|EPI\_ISL\_764869|Original|hCoV-19^^Wales|Human|Wales Specialist Virology Centre Sequencing lab|COVID-19 Genomics UK (COG-UK) Consortium|Moore|United Kingdom  
>Spike|hCoV-19/India/MH-ACTREC-275/2020|2020-07-10|EPI\_ISL\_699927|Original|hCoV-19^^Maharashtra|Human|Hematopathology Laboratory|Hematopathology Laboratory|Patkar|India  
>Spike|hCoV-19/Senegal/65052/2020|2020-06-13|EPI\_ISL\_476574|Original|hCoV-19^^Dakar|Human|Institut Pasteur Dakar|Institut Pasteur de Dakar|Dia|Senegal  
>Spike|hCoV-19/Singapore/834/2020|2020-06-15|EPI\_ISL\_517997|Original|hCoV-19^^Singapore|Human|Singapore General Hospital|Department of Microbiology|Abdul Rahman|Singapore  
>Spike|hCoV-19/USA/WA-UW-380/2020|2020-03-24|EPI\_ISL\_524443|Original|hCoV-19^^Washington|Human|University of Washington Virology Lab|Laboratory Medicine|Roychoudhury|USA  
>Spike|hCoV-19/Japan/PG-6800/2020|2020-08-00|EPI\_ISL\_687909|Original|hCoV-19^^Japan|Human|Pathogen Genomics Center|Pathogen Genomics Center|Sekizuka|Japan  
>Spike|hCoV-19/England/MILK-B3DCDE/2020|2020-11-01|EPI\_ISL\_706255|Original|hCoV-19^^England|Human|Oxford Viromics|COVID-19 Genomics UK (COG-UK) Consortium|Golubchik|United Kingdom

>Spike|hCoV-19/Wales/PHWC-168ADA/2020|2020-04-19|EPI\_ISL\_494327|Original|hCoV-19^^Wales|Human|Originating lab|COVID-19 Genomics UK (COG-UK) Consortium|Moore|United Kingdom

>Spike|hCoV-19/Canada/Qc-L00240846/2020|2020-03-27|EPI\_ISL\_465688|Original|hCoV-19^^Quebec|Human|Centre hospitalier Anna-Laberge|Laboratoire de sant\u00e9 publique du Qu\u00e9bec|Moreira|Canada

>Spike|hCoV-19/Spain/CT-IBV-003165/2020|2020-03-16|EPI\_ISL\_510261|Original|hCoV-19^^Catalunya|Human|Hospital de la Santa Creu i Sant Pau. Servicio de Microbiolog\u00eda|SeqCOVID-SPAIN consortium/IBV(CSIC)|Comas|Spain

>Spike|hCoV-19/USA/TX-HMH-6019/2020|2020-06-30|EPI\_ISL\_547171|Original|hCoV-19^^Texas|Human|Houston Methodist Hospital|Houston Methodist Hospital|Long|USA

>Spike|hCoV-19/Japan/TKYT30408/2020|2020-08-00|EPI\_ISL\_649141|Original|hCoV-19^^Japan|Human|Tokyo Metropolitan Institute of Public Health|Tokyo Metropolitan Institute of Public Health|Ryota|Japan

>Spike|hCoV-19/South Korea/KCDC2724/2020|2020-07-13|EPI\_ISL\_522503|Original|hCoV-19^^South Korea|Human|Division of Viral Diseases|Division of Viral Diseases|Kim|South Korea

>Spike|hCoV-19/Denmark/DCGC-3112/2020|2020-08-31|EPI\_ISL\_615929|Original|hCoV-19^^Hovedstaden|Human|Department of Virus and Microbiological Special Diagnostics|Albertsen lab|Michaelsen|Denmark

>Spike|hCoV-19/Wales/PHWC-164054/2020|2020-05-09|EPI\_ISL\_474120|Original|hCoV-19^^Wales|Human|Originating lab|COVID-19 Genomics UK (COG-UK) Consortium|Moore|United Kingdom

>Spike|hCoV-19/England/ALDP-B5B681/2020|2020-11-09|EPI\_ISL\_655363|Original|hCoV-19^^England|Human|Lighthouse Lab in Alderley Park|Wellcome Sanger Institute for the COVID-19 Genomics UK (COG-UK) Consortium|Davies|United Kingdom

>Spike|hCoV-19/USA/CA-SEARCH-5398/2020|2020-12-02|EPI\_ISL\_755209|Original|hCoV-19^^California|Human|UCSD EXCITE lab|Andersen lab at Scripps Research|Gangavarapu|USA

>Spike|hCoV-19/England/MILK-B3BF31/2020|2020-11-01|EPI\_ISL\_706108|Original|hCoV-19^^England|Human|Oxford Viromics|COVID-19 Genomics UK (COG-UK) Consortium|Golubchik|United Kingdom

>Spike|hCoV-19/USA/OR-OHSU-2055/2020|2020-08-03|EPI\_ISL\_667104|Original|hCoV-19^^Oregon|Human|OHSU Lab Services Molecular Microbiology Lab|Oregon SARS-CoV-2 Genome Sequencing Center|O'Roak|USA

>Spike|hCoV-19/Spain/PV-IBV-004199/2020|2020-04-03|EPI\_ISL\_510484|Original|hCoV-19^^Basque Country|Human|Servicio de Microbiolog\u00eda. Hospital Universitario Donostia. OSI Donostialdea. \u00c1rea de Enfermedades Infecciosas|SeqCOVID-SPAIN consortium/IBV(CSIC)|Comas|Spain

>Spike|hCoV-19/England/20104014404/2020|2020-03-03|EPI\_ISL\_464331|Original|hCoV-19^^England|Human|Respiratory Virus Unit|Respiratory Virus Unit|Platt|United Kingdom

>Spike|hCoV-19/Japan/PG-4168/2020|2020-07-00|EPI\_ISL\_692407|Original|hCoV-19^^Japan|Human|Pathogen Genomics Center|Pathogen Genomics Center|Sekizuka|Japan

>Spike|hCoV-19/USA/TX-HMH-MCoV-12718/2020|2020-08-30|EPI\_ISL\_790481|Original|hCoV-19^^Texas|Human|Houston Methodist Hospital|Houston Methodist Hospital|Long|USA

>Spike|hCoV-19/Canada/ON-PHL-20-03763/2020|2020-11-00|EPI\_ISL\_775073|Original|hCoV-19^^Ontario|Human|Public Health Ontario Laboratory|Public Health Ontario Laboratory|Guthrie|Canada

>Spike|hCoV-19/Gambia/GC192574/2020|2020-07-21|EPI\_ISL\_561116|Original|hCoV-19^^Kombo|Human|MRCG at LSHTM Genomics lab|MRCG at LSHTM Genomics lab|Sesay|Gambia

>Spike|hCoV-19/USA/TX-HMH-MCoV-13414/2020|2020-08-24|EPI\_ISL\_788552|Original|hCoV-19^^Texas|Human|Houston Methodist Hospital|Houston Methodist Hospital|Long|USA

>Spike|hCoV-19/Scotland/CVR435/2020|2020-03-23|EPI\_ISL\_433292|Original|hCoV-19^^Scotland|Human|West of Scotland Specialist Virology Centre|COVID-19 Genomics UK (COG-UK) Consortium|Robertson|United Kingdom

>Spike|hCoV-19/USA/UT-UPHL-03078/2020|2020-05-04|EPI\_ISL\_560913|Original|hCoV-19^^Utah|Human|Utah Public Health Laboratory|Utah Public Health Laboratory|Young|USA

>Spike|hCoV-19/Belgium/ULG-10126/2020|2020-04-07|EPI\_ISL\_427372|Original|hCoV-19^^Liege|Human|Department of Clinical Microbiology|GIGA Medical Genomics|Durkin|Belgium

>Spike|hCoV-19/England/ALDP-B624F6/2020|2020-11-08|EPI\_ISL\_656665|Original|hCoV-19^^England|Human|Lighthouse Lab in Alderley Park|Wellcome Sanger Institute for the COVID-19 Genomics UK (COG-UK) Consortium|Davies|United Kingdom

>Spike|hCoV-19/England/ALDP-9CAD20/2020|2020-09-16|EPI\_ISL\_575740|Original|hCoV-19^^England|Human|Lighthouse Lab in Alderley Park|Wellcome Sanger Institute for the COVID-19 Genomics UK (COG-UK) consortium|Davies|United Kingdom

>Spike|hCoV-19/England/NORT-2843FA/2020|2020-03-20|EPI\_ISL\_478545|Original|hCoV-19^^England|Human|Northumbria University / South Tees Hospitals NHS Foundation Trust / North Cumbria Integrated Care NHS Foundation Trust / North Tees and Hartlepool NHS Foundation Trust / Newcastle Hospitals NHS Foundation Trust|COVID-19 Genomics UK (COG-UK) Consortium|Bashton|United Kingdom

>Spike|hCoV-19/England/CAMC-A57F4F/2020|2020-10-09|EPI\_ISL\_597113|Original|hCoV-19^^England|Human|Lighthouse Lab in Cambridge|Wellcome Sanger Institute for the COVID-19 Genomics UK (COG-UK) consortium|Davies|United Kingdom

>Spike|hCoV-19/USA/FL-BPHL-0700/2020|2020-03-29|EPI\_ISL\_509758|Original|hCoV-19^^Florida|Human|Florida Bureau of Public Health Laboratories|Florida Bureau of Public Health Laboratories|Blanton|USA

>Spike|hCoV-19/England/CAMC-B23224/2020|2020-11-03|EPI\_ISL\_651724|Original|hCoV-19^^England|Human|Virology Department|COVID-19 Genomics UK (COG-UK) Consortium|de Silva|United Kingdom

>Spike|hCoV-19/Australia/VIC16040/2020|2020-08-03|EPI\_ISL\_640589|Original|hCoV-19^^Victoria|Human|Microbiological Diagnostic Unit - Public Health Laboratory (MDU-PHL) |MDU-PHL|Schultz|Australia

>Spike|hCoV-19/England/QEUAH-9FAC57/2020|2020-09-27|EPI\_ISL\_588181|Original|hCoV-19^^England|Human|Lighthouse Lab in Glasgow|Wellcome Sanger Institute for the COVID-19 Genomics UK (COG-UK) consortium|Davies|United Kingdom

>Spike|hCoV-19/Scotland/EDB2707/2020|2020-03-27|EPI\_ISL\_488901|Original|hCoV-19^^Scotland|Human|Virology Department|Wellcome Sanger Institute for the COVID-19 Genomics UK (COG-UK) consortium|Davies|United Kingdom

>Spike|hCoV-19/Denmark/DCGC-5339/2020|2020-09-14|EPI\_ISL\_615270|Original|hCoV-19^^Nordjylland|Human|Department of Virus and Microbiological Special Diagnostics|Albertsen lab|Michaelsen|Denmark

>Spike|hCoV-19/Japan/PG-3800/2020|2020-07-00|EPI\_ISL\_692051|Original|hCoV-19^^Japan|Human|Niigata Prefectural Institute of Public Health and Environmental Sciences|Pathogen Genomics Center|Sekizuka|Japan

>Spike|hCoV-19/Wales/MILK-9AA1C0/2020|2020-09-01|EPI\_ISL\_550978|Original|hCoV-19^^Wales|Human|Lighthouse Lab in Milton Keynes|Wellcome Sanger Institute for the COVID-19 Genomics UK (COG-UK) consortium|Davies|United Kingdom

>Spike|hCoV-19/Belgium/regA-0517555/2020|2020-05-17|EPI\_ISL\_734739|Original|hCoV-19^^Westerlo|Human|UZ Leuven|KU Leuven|Maes|Belgium

>Spike|hCoV-19/England/ALDP-A6D1C8/2020|2020-10-14|EPI\_ISL\_608053|Original|hCoV-19^^England|Human|Lighthouse Lab in Alderley Park|Wellcome Sanger Institute for the COVID-19 Genomics UK (COG-UK) consortium|Davies|United Kingdom

>Spike|hCoV-19/USA/LA-EVTL678/2020|2020-07-13|EPI\_ISL\_653370|Original|hCoV-19^^Louisiana|Human|LSUHS Emerging Viral Threat Laboratory|Microbial Genome Sequencing Center|Kamil|USA

>Spike|hCoV-19/USA/TX-HMH-MCoV-18512/2020|2020-11-20|EPI\_ISL\_784860|Original|hCoV-19^^Texas|Human|Houston Methodist Hospital|Houston Methodist Hospital|Long|USA

>Spike|hCoV-19/England/MILK-B556D2/2020|2020-11-04|EPI\_ISL\_657361|Original|hCoV-19^^England|Human|Lighthouse Lab in Milton Keynes|Wellcome Sanger Institute for the COVID-19 Genomics UK (COG-UK) Consortium|Davies|United Kingdom

>Spike|hCoV-19/England/ALDP-C8C8F9/2020|2020-12-14|EPI\_ISL\_777071|Original|hCoV-19^^England|Human|Lighthouse Lab in Alderley Park|Wellcome Sanger Institute for the COVID-19 Genomics UK (COG-UK) Consortium|Davies|United Kingdom

>Spike|hCoV-19/England/MILK-A7CB8C/2020|2020-10-15|EPI\_ISL\_606489|Original|hCoV-19^^England|Human|Lighthouse Lab in Milton Keynes|Wellcome Sanger Institute for the COVID-19 Genomics UK (COG-UK) consortium|Davies|United Kingdom

>Spike|hCoV-19/England/ALDP-C3D2AE/2020|2020-12-10|EPI\_ISL\_731826|Original|hCoV-19^^England|Human|Lighthouse Lab in Alderley Park|Wellcome Sanger Institute for the COVID-19 Genomics UK (COG-UK) Consortium|Davies|United Kingdom

>Spike|hCoV-19/Denmark/DCGC-18044/2020|2020-12-14|EPI\_ISL\_749720|Original|hCoV-19^^Syddanmark|Human|Department of Virus and Microbiological Special Diagnostics|Albertsen Lab|Michaelsen|Denmark

>Spike|hCoV-19/England/ALDP-B62405/2020|2020-11-09|EPI\_ISL\_656538|Original|hCoV-19^^England|Human|Lighthouse Lab in Alderley Park|Wellcome Sanger Institute for the COVID-19 Genomics UK (COG-UK) Consortium|Davies|United Kingdom

>Spike|hCoV-19/England/CAMB-79B10/2020|2020-03-27|EPI\_ISL\_433825|Original|hCoV-19^^England|Human|Department of Pathology|COVID-19 Genomics UK (COG-UK) Consortium|Meredith|United Kingdom

>Spike|hCoV-19/England/MILK-9AB314/2020|2020-08-31|EPI\_ISL\_551093|Original|hCoV-19^^England|Human|Lighthouse Lab in Milton Keynes|Wellcome Sanger Institute for the COVID-19 Genomics UK (COG-UK) consortium|Davies|United Kingdom

>Spike|hCoV-19/England/20122103304/2020|2020-03-17|EPI\_ISL\_465766|Original|hCoV-19^^England|Human|Respiratory Virus Unit|Respiratory Virus Unit|Platt|United Kingdom

>Spike|hCoV-19/Denmark/DCGC-21061/2020|2020-12-21|EPI\_ISL\_759531|Original|hCoV-19^^Hovedstaden|Human|Department of Virus and Microbiological Special Diagnostics|Albertsen Lab|Michaelsen|Denmark

>Spike|hCoV-19/USA/CA-QDX-1400/2020|2020-03-18|EPI\_ISL\_572059|Original|hCoV-19^^California|Human|Quest Diagnostics|Quest Diagnostics|Kagan|USA

>Spike|hCoV-19/Switzerland/LU-ETHZ-270082/2020|2020-09-02|EPI\_ISL\_541467|Original|hCoV-19^^Luzern|Human|Viollier AG|Department of Biosystems Science and Engineering|Nadeau|Switzerland

>Spike|hCoV-19/Wales/PHWC-16035F/2020|2020-05-22|EPI\_ISL\_472922|Original|hCoV-19^^Wales|Human|Wales Specialist Virology Centre Sequencing lab|COVID-19 Genomics UK (COG-UK) Consortium|Moore|United Kingdom

>Spike|hCoV-19/England/NOTT-10F0D3/2020|2020-03-31|EPI\_ISL\_432962|Original|hCoV-19^^England|Human|Queens Medical Centre|COVID-19 Genomics UK (COG-UK) Consortium|Loose|United Kingdom

>Spike|hCoV-19/England/20129096804/2020|2020-03-11|EPI\_ISL\_424084|Original|hCoV-19^^England|Human|Respiratory Virus Unit|Respiratory Virus Unit|Platt|United Kingdom

>Spike|hCoV-19/England/QEUEH-87FDB2/2020|2020-07-23|EPI\_ISL\_532808|Original|hCoV-19^^England|Human|Lighthouse Lab in Glasgow|Wellcome Sanger Institute for the COVID-19 Genomics UK (COG-UK) consortium|Davies|United Kingdom

>Spike|hCoV-19/Belgium/ITM\_C5189\_200701416/2020|2020-06-30|EPI\_ISL\_649154|Original|hCoV-19^^Brussels|Human|Queen Astrid Military Hospital|Institute of Tropical Medicine|Selhorst|Belgium

>Spike|hCoV-19/USA/MI-QDX-896/2020|2020-03-19|EPI\_ISL\_571617|Original|hCoV-19^^Michigan|Human|Quest Diagnostics|Quest Diagnostics|Kagan|USA

>Spike|hCoV-19/USA/TX-HMH-6009/2020|2020-07-01|EPI\_ISL\_547164|Original|hCoV-19^^Texas|Human|Houston Methodist Hospital|Houston Methodist Hospital|Long|USA

>Spike|hCoV-19/USA/TX-HMH-5108/2020|2020-06-29|EPI\_ISL\_544531|Original|hCoV-19^^Texas|Human|Houston Methodist Hospital|Houston Methodist Hospital|Long|USA

>Spike|hCoV-19/Australia/VIC1464/2020|2020-04-21|EPI\_ISL\_456446|Original|hCoV-19^^Victoria|Human|Victorian Infectious Diseases Reference Laboratory (VIDRL)|Microbiological Diagnostic Unit Public Health Laboratory and Victorian Infectious Diseases Reference Laboratory|Schultz|Australia

>Spike|hCoV-19/USA/CA-CZB-3904/2020|2020-07-27|EPI\_ISL\_548502|Original|hCoV-19^^California|Human|County of San Luis Obispo Public Health Laboratory|Chan-Zuckerberg Biohub|Bhatt|USA

>Spike|hCoV-19/Belgium/VHV-0324118/2020|2020-03-24|EPI\_ISL\_420375|Original|hCoV-19^^Tervuren|Human|KU Leuven|KU Leuven|Maes|Belgium

>Spike|hCoV-19/Ireland/LH-NVRL-20IRL52389/2020|2020-10-01|EPI\_ISL\_639895|Original|hCoV-19^^Louth|Human|National Virus Reference Laboratory|National Virus Reference Laboratory|Gonzalez|Ireland

>Spike|hCoV-19/England/ALDP-951CE5/2020|2020-06-10|EPI\_ISL\_551288|Original|hCoV-19^^England|Human|Lighthouse Lab in Alderley Park|Wellcome Sanger Institute for the COVID-19 Genomics UK (COG-UK) consortium|Davies|United Kingdom

>Spike|hCoV-19/Scotland/CVR1277/2020|2020-03-30|EPI\_ISL\_433531|Original|hCoV-19^^Scotland|Human|West of Scotland Specialist Virology Centre|COVID-19 Genomics UK (COG-UK) Consortium|Robertson|United Kingdom

>Spike|hCoV-19/Wales/PHWC-49A6C9/2020|2020-12-02|EPI\_ISL\_727583|Original|hCoV-19^^Wales|Human|Originating lab|COVID-19 Genomics UK (COG-UK) Consortium|Moore|United Kingdom

>Spike|hCoV-19/England/QEUA-9F8961/2020|2020-09-27|EPI\_ISL\_588990|Original|hCoV-19^^England|Human|Lighthouse Lab in Glasgow|Wellcome Sanger Institute for the COVID-19 Genomics UK (COG-UK) consortium|Davies|United Kingdom

>Spike|hCoV-19/England/QEUA-B6C67E/2020|2020-11-11|EPI\_ISL\_661554|Original|hCoV-19^^England|Human|Lighthouse Lab in Glasgow|Wellcome Sanger Institute for the COVID-19 Genomics UK (COG-UK) Consortium|Davies|United Kingdom

>Spike|hCoV-19/England/SHEF-CAC77/2020|2020-05-06|EPI\_ISL\_475431|Original|hCoV-19^^England|Human|Virology Department|COVID-19 Genomics UK (COG-UK) Consortium|de Silva|United Kingdom

>Spike|hCoV-19/England/NORT-297ED5/2020|2020-04-29|EPI\_ISL\_488110|Original|hCoV-19^^England|Human|NU-OMICS DNA Sequencing research facility|Wellcome Sanger Institute for the COVID-19 Genomics UK (COG-UK) consortium|Davies|United Kingdom

>Spike|hCoV-19/England/MILK-9E1F2D/2020|2020-09-20|EPI\_ISL\_581304|Original|hCoV-19^^England|Human|Lighthouse Lab in Milton Keynes|Wellcome Sanger Institute for the COVID-19 Genomics UK (COG-UK) consortium|Davies|United Kingdom

>Spike|hCoV-19/England/ALDP-9C59A9/2020|2020-09-10|EPI\_ISL\_567546|Original|hCoV-19^^England|Human|Lighthouse Lab in Alderley Park|Wellcome Sanger Institute for the COVID-19 Genomics UK (COG-UK) consortium|Davies|United Kingdom

>Spike|hCoV-19/England/ALDP-9ECFF5/2020|2020-05-05|EPI\_ISL\_589326|Original|hCoV-19^^England|Human|Lighthouse Lab in Alderley Park|Wellcome Sanger Institute for the COVID-19 Genomics UK (COG-UK) consortium|Davies|United Kingdom

>Spike|hCoV-19/USA/AZ-TG273344/2020|2020-04-03|EPI\_ISL\_694057|Original|hCoV-19^^Arizona|Human|AZ SPHL|TGen North|French|USA

>Spike|hCoV-19/Australia/VIC16670/2020|2020-08-05|EPI\_ISL\_640472|Original|hCoV-19^^Victoria|Human|Microbiological Diagnostic Unit - Public Health Laboratory (MDU-PHL)|MDU-PHL|Schultz|Australia

>Spike|hCoV-19/England/ALDP-982CFA/2020|2020-08-10|EPI\_ISL\_552580|Original|hCoV-19^^England|Human|Lighthouse Lab in Alderley Park|Wellcome Sanger Institute for the COVID-19 Genomics UK (COG-UK) consortium|Davies|United Kingdom

>Spike|hCoV-19/USA/FL-BPHL-1921/2020|2020-07-22|EPI\_ISL\_613773|Original|hCoV-19^^Florida|Human|Florida Bureau of Public Health Laboratories|Florida Bureau of Public Health Laboratories|Blanton|USA

>Spike|hCoV-19/France/PAC-MEPHI-1931/2020|2020-08-27|EPI\_ISL\_644463|Original|hCoV-19^^Provence-Alpes-Cote-d\u2019Azur|Human|MEPHI|MEPHI|Levasseur|France

>Spike|hCoV-19/Belgium/UGent-192/2020|2020-10-20|EPI\_ISL\_717608|Original|hCoV-19^^Ghent|Human|Lab voor klinische biologie|Onderzoeksgroep Virologie|Lambrechts|Belgium

>Spike|hCoV-19/USA/CA-CHLA-PLM74999531/2020|2020-12-03|EPI\_ISL\_753659|Original|hCoV-19^^California|Human|Clinical virology Laboratory|Center for Personalized Medicine|Dien Bard|USA

>Spike|hCoV-19/USA/MI-MDHHS-SC21607/2020|2020-03-28|EPI\_ISL\_516334|Original|hCoV-19^^Michigan|Human|Michigan Department of Health and Human Services|Michigan Department of Health and Human Services|Blankenship|USA

>Spike|hCoV-19/England/MILK-AB8735/2020|2020-10-21|EPI\_ISL\_623718|Original|hCoV-19^^England|Human|Lighthouse Lab in Milton Keynes|Wellcome Sanger Institute for the COVID-19 Genomics UK (COG-UK) consortium|Davies|United Kingdom

>Spike|hCoV-19/USA/TX-DSHS-0051/2020|2020-05-09|EPI\_ISL\_517982|Original|hCoV-19^^Texas|Human|Texas Department of State Health Services|Texas Department of State Health Services|Rahman|USA

>Spike|hCoV-19/Wales/PHWC-48C2E4/2020|2020-11-08|EPI\_ISL\_666415|Original|hCoV-19^^Wales|Human|Wales Specialist Virology Centre Sequencing lab|COVID-19 Genomics UK (COG-UK) Consortium|Moore|United Kingdom

>Spike|hCoV-19/USA/TX-HMH-6846/2020|2020-06-25|EPI\_ISL\_546285|Original|hCoV-19^^Texas|Human|Houston Methodist Hospital|Houston Methodist Hospital|Long|USA

>Spike|hCoV-19/England/204661581/2020|2020-11-12|EPI\_ISL\_693413|Original|hCoV-19^^England|Human|Respiratory Virus Unit|COVID-19 Genomics UK (COG-UK) Consortium|Platt|United Kingdom

>Spike|hCoV-19/England/ALDP-BB355D/2020|2020-11-19|EPI\_ISL\_702754|Original|hCoV-19^^England|Human|Lighthouse Lab in Alderley Park|Wellcome Sanger Institute for the COVID-19 Genomics UK (COG-UK) Consortium|Davies|United Kingdom

>Spike|hCoV-19/USA/TX-HMH-MCoV-10585/2020|2020-07-08|EPI\_ISL\_789546|Original|hCoV-19^^Texas|Human|Houston Methodist Hospital|Houston Methodist Hospital|Long|USA

>Spike|hCoV-19/USA/NY-NYUMC589/2020|2020-03-31|EPI\_ISL\_444706|Original|hCoV-19^^New York|Human|NYU Langone Health|Departments of Pathology and Medicine|Maurano|USA

>Spike|hCoV-19/USA/WA-S2059/2020|2020-06-05|EPI\_ISL\_497487|Original|hCoV-19^^Washington|Human|Washington State Department of Health|Seattle Flu Study|Lee|USA

>Spike|hCoV-19/USA/TX-HMH-8005/2020|2020-07-01|EPI\_ISL\_545783|Original|hCoV-19^^Texas|Human|Houston Methodist Hospital|Houston Methodist Hospital|Long|USA

>Spike|hCoV-19/USA/CA-CZB-10169/2020|2020-06-23|EPI\_ISL\_672243|Original|hCoV-19^^California|Human|The Ashley Laboratory|Chan-Zuckerberg Biohub|Bhatt|USA

>Spike|hCoV-19/Netherlands/UT-EMC-232/2020|2020-00-00|EPI\_ISL\_763184|Original|hCoV-19^^Utrecht|Human|Dutch COVID-19 response team|Erasmus Medical Center|Oude Munnink|Netherlands

>Spike|hCoV-19/USA/OR-OHSU-1041/2020|2020-07-08|EPI\_ISL\_525956|Original|hCoV-19^^Oregon|Human|OHSU Lab Services Molecular Microbiology Lab|Oregon SARS-CoV-2 Genome Sequencing Center|O'Roak|USA

>Spike|hCoV-19/USA/MN-MDH-1604/2020|2020-05-03|EPI\_ISL\_530200|Original|hCoV-19^^Minnesota|Human|Minnesota Department of Health|Minnesota Department of Health|Garfin|USA

>Spike|hCoV-19/Finland/29A89S/2020|2020-04-29|EPI\_ISL\_481638|Original|hCoV-19^^Uusimaa|Human|Department of Virology and Immunology|Department of Virology|Smura|Finland

>Spike|hCoV-19/Latvia/122/2020|2020-08-24|EPI\_ISL\_534211|Original|hCoV-19^^Latvia|Human|Centr\u0101l\u0101 laboratorija|Latvian Biomedical Research and Study Centre|Zrelovs|Latvia

>Spike|hCoV-19/Netherlands/NA\_128/2020|2020-03-17|EPI\_ISL\_422672|Original|hCoV-19^^Netherlands|Human|Dutch COVID-19 response team|Erasmus Medical Center|Oude Munnink|Netherlands

>Spike|hCoV-19/Wales/PHWC-167F81/2020|2020-04-19|EPI\_ISL\_494181|Original|hCoV-19^^Wales|Human|Originating lab|COVID-19 Genomics UK (COG-UK) Consortium|Moore|United Kingdom

>Spike|hCoV-19/Sweden/20-05983/2020|2020-03-18|EPI\_ISL\_475562|Original|hCoV-19^^Vastra Gotaland|Human|Din Klinik|The Public Health Agency of Sweden|Svartstr\u00f6m|Sweden

>Spike|hCoV-19/USA/LA-EVTL673/2020|2020-07-13|EPI\_ISL\_653365|Original|hCoV-19^^Louisiana|Human|LSUHS Emerging Viral Threat Laboratory|Microbial Genome Sequencing Center|Kamil|USA

>Spike|hCoV-19/England/LOND-1266DDF/2020|2020-12-10|EPI\_ISL\_741212|Original|hCoV-19^^England|Human|University College London|COVID-19 Genomics UK (COG-UK) Consortium|Roy|United Kingdom

>Spike|hCoV-19/USA/MI-UM-10036455942/2020|2020-10-15|EPI\_ISL\_628836|Original|hCoV-19^^Michigan|Human|University of Michigan Clinical Microbiology Laboratory|Lauring Lab|Valesano|USA

>Spike|hCoV-19/Wales/PHWC-26D0D/2020|2020-03-30|EPI\_ISL\_422097|Original|hCoV-19^^Wales|Human|Wales Specialist Virology Centre|Public Health Wales Microbiology Cardiff|Moore|United Kingdom

>Spike|hCoV-19/Wales/PHWC-4947EA/2020|2020-11-20|EPI\_ISL\_726169|Original|hCoV-19^^Wales|Human|Originating lab|COVID-19 Genomics UK (COG-UK) Consortium|Moore|United Kingdom

>Spike|hCoV-19/Panama/331580/2020|2020-03-19|EPI\_ISL\_496688|Original|hCoV-19^^Chiriqui|Human|Gorgas Memorial Laboratory of Health Studies|Gorgas Memorial Laboratory of Health Studies|Martinez|Panama

>Spike|hCoV-19/England/ALDP-B8431F/2020|2020-11-14|EPI\_ISL\_675302|Original|hCoV-19^^England|Human|Lighthouse Lab in Alderley Park|Wellcome Sanger Institute for the COVID-19 Genomics UK (COG-UK) Consortium|Davies|United Kingdom

>Spike|hCoV-19/England/ALDP-9CCA45/2020|2020-09-16|EPI\_ISL\_572549|Original|hCoV-19^^England|Human|Quadram Institute Bioscience|COVID-19 Genomics UK (COG-UK) Consortium|Alikhan|United Kingdom

>Spike|hCoV-19/England/QEUA-B7CC79/2020|2020-11-14|EPI\_ISL\_741818|Original|hCoV-19^^England|Human|Oxford Viromics|COVID-19 Genomics UK (COG-UK) Consortium|Golubchik|United Kingdom

>Spike|hCoV-19/Denmark/DCGC-22074/2020|2020-12-14|EPI\_ISL\_757814|Original|hCoV-19^^Hovedstaden|Human|Department of Virus and Microbiological Special Diagnostics|Albertsen Lab|Michaelsen|Denmark

>Spike|hCoV-19/Norway/3132/2020|2020-08-07|EPI\_ISL\_549155|Original|hCoV-19^^Oslo|Human|Ostfold Hospital Trust - Kalnes|Norwegian Institute of Public Health|Kopperud Riis|Norway

>Spike|hCoV-19/USA/WI-UW-399/2020|2020-03-16|EPI\_ISL\_480381|Original|hCoV-19^^Wisconsin|Human|University of Wisconsin-Madison AIDS Vaccine Research Laboratories|University of Wisconsin-Madison AIDS Vaccine Research Laboratories|Baczenas|USA

>Spike|hCoV-19/Australia/VIC6317/2020|2020-07-24|EPI\_ISL\_518305|Original|hCoV-19^^Victoria|Human|Microbiological Diagnostic Unit - Public Health Laboratory (MDU-PHL)|MDU-PHL|Schultz|Australia

>Spike|hCoV-19/England/CAMC-A5939C/2020|2020-10-09|EPI\_ISL\_597106|Original|hCoV-19^^England|Human|Lighthouse Lab in Cambridge|Wellcome Sanger Institute for the COVID-19 Genomics UK (COG-UK) consortium|Davies|United Kingdom

>Spike|hCoV-19/Scotland/EDB5990/2020|2020-05-05|EPI\_ISL\_487877|Original|hCoV-19^^Scotland|Human|Virology Department|Wellcome Sanger Institute for the COVID-19 Genomics UK (COG-UK) consortium|Davies|United Kingdom

>Spike|hCoV-19/USA/TX-DSHS-0997/2020|2020-07-03|EPI\_ISL\_613992|Original|hCoV-19^^Texas|Human|Texas Department of State Health Services|Texas Department of State Health Services|Rahman|USA

>Spike|hCoV-19/USA/CA-LACPHL-AE00021/2020|2020-07-06|EPI\_ISL\_707918|Original|hCoV-19^^California|Human|Los Angeles County Public Health Laboratory|Los Angeles County Public Health Laboratory|Hemarajata|USA

>Spike|hCoV-19/Netherlands/ZH-EMC-379/2020|2020-08-02|EPI\_ISL\_523719|Original|hCoV-19^^Zuid Holland|Human|Dutch COVID-19 response team|Erasmus Medical Center|Oude Munnink|Netherlands

>Spike|hCoV-19/England/QEUA-A4AFC7/2020|2020-10-05|EPI\_ISL\_628464|Original|hCoV-19^^England|Human|Oxford Viromics|COVID-19 Genomics UK (COG-UK) Consortium|Golubchik|United Kingdom

>Spike|hCoV-19/England/QEUA-A9D183/2020|2020-10-20|EPI\_ISL\_652661|Original|hCoV-19^^England|Human|Queens Medical Centre|COVID-19 Genomics UK (COG-UK) Consortium|Loose|United Kingdom

>Spike|hCoV-19/England/QEUA-C313D4/2020|2020-12-09|EPI\_ISL\_731284|Original|hCoV-19^^England|Human|Lighthouse Lab in Glasgow|Wellcome Sanger Institute for the COVID-19 Genomics UK (COG-UK) Consortium|Davies|United Kingdom

>Spike|hCoV-19/Scotland/QEUA-B0EFFB/2020|2020-11-02|EPI\_ISL\_649502|Original|hCoV-19^^Scotland|Human|Lighthouse Lab in Glasgow|Wellcome Sanger Institute for the COVID-19 Genomics UK (COG-UK) Consortium|Davies|United Kingdom

>Spike|hCoV-19/USA/UT-UPHL-03100/2020|2020-05-04|EPI\_ISL\_575250|Original|hCoV-19^^Utah|Human|Utah Public Health Laboratory|Utah Public Health Laboratory|Young|USA

>Spike|hCoV-19/England/QEUA-9F87D0/2020|2020-09-27|EPI\_ISL\_588771|Original|hCoV-19^^England|Human|Lighthouse Lab in Glasgow|Wellcome Sanger Institute for the COVID-19 Genomics UK (COG-UK) consortium|Davies|United Kingdom

>Spike|hCoV-19/England/CAMC-C473EA/2020|2020-12-10|EPI\_ISL\_718685|Original|hCoV-19^^England|Human|Lighthouse Lab in Cambridge|Wellcome Sanger Institute for the COVID-19 Genomics UK (COG-UK) Consortium|Davies|United Kingdom

>Spike|hCoV-19/Denmark/DCGC-21183/2020|2020-12-21|EPI\_ISL\_759599|Original|hCoV-19^^Hovedstaden|Human|Department of Virus and Microbiological Special Diagnostics|Albertsen Lab|Michaelsen|Denmark

>Spike|hCoV-19/USA/AZ-TG399390/2020|2020-06-23|EPI\_ISL\_694853|Original|hCoV-19^^Arizona|Human|TGen North|TGen North|French|USA

>Spike|hCoV-19/England/ALDP-95655E/2020|2020-06-08|EPI\_ISL\_554096|Original|hCoV-19^^England|Human|Lighthouse Lab in Alderley Park|Wellcome Sanger Institute for the COVID-19 Genomics UK (COG-UK) consortium|Davies|United Kingdom

>Spike|hCoV-19/USA/CA-CZB-15122/2020|2020-11-23|EPI\_ISL\_739443|Original|hCoV-19^^California|Human|Santa Clara County Public Health Laboratory|Chan-Zuckerberg Biohub|Kamm|USA

>Spike|hCoV-19/England/NOTT-11F8C9/2020|2020-11-27|EPI\_ISL\_725581|Original|hCoV-19^^England|Human|Lincolnshire Hospitals and DeepSeq Nottingham|COVID-19 Genomics UK (COG-UK) Consortium|Loose|United Kingdom

>Spike|hCoV-19/Denmark/DCGC-3990/2020|2020-09-14|EPI\_ISL\_615760|Original|hCoV-19^^Nordjylland|Human|Department of Virus and Microbiological Special Diagnostics|Albertsen lab|Michaelsen|Denmark

>Spike|hCoV-19/Wales/PHWC-485DCC/2020|2020-10-24|EPI\_ISL\_628281|Original|hCoV-19^^Wales|Human|Wales Specialist Virology Centre Sequencing lab|COVID-19 Genomics UK (COG-UK) Consortium|Moore|United Kingdom

>Spike|hCoV-19/USA/WA-S1282/2020|2020-05-12|EPI\_ISL\_495732|Original|hCoV-19^^Washington|Human|Washington State Department of Health|Seattle Flu Study|Lee|USA

>Spike|hCoV-19/Belgium/ULG-10564/2020|2020-10-23|EPI\_ISL\_626309|Original|hCoV-19^^Li\u00e8ge|Human|Department of Clinical Microbiology|GIGA Medical Genomics|Durkin|Belgium

>Spike|hCoV-19/Denmark/DCGC-11604/2020|2020-11-02|EPI\_ISL\_671019|Original|hCoV-19^^Hovedstaden|Human|Department of Virus and Microbiological Special Diagnostics|Albertsen Lab|Michaelsen|Denmark

>Spike|hCoV-19/USA/MI-MDHHS-SC20034/2020|2020-03-19|EPI\_ISL\_437121|Original|hCoV-19^^Michigan|Human|Michigan Department of Health and Human Services|Michigan Department of Health and Human Services|Blankenship|USA

>Spike|hCoV-19/Germany/HH-hpi-p1343/2020|2020-03-23|EPI\_ISL\_775888|Original|hCoV-19^^Hamburg|Human|University Medical Center Hamburg Eppendorf|Heinrich Pette Institute|Robitaille|Germany

>Spike|hCoV-19/Germany/NW-HHU-193/2020|2020-03-31|EPI\_ISL\_602467|Original|hCoV-19^^North Rhine-Westphalia|Human|Institute for Virology|Center of Medical Microbiology|Wienemann|Germany

>Spike|hCoV-19/England/QEUH-9F70A9/2020|2020-09-27|EPI\_ISL\_595658|Original|hCoV-19^^England|Human|Oxford Viromics|COVID-19 Genomics UK (COG-UK) Consortium|Golubchik|United Kingdom

>Spike|hCoV-19/Wales/PHWC-49FA9B/2020|2020-12-09|EPI\_ISL\_743314|Original|hCoV-19^^Wales|Human|Wales Specialist Virology Centre Sequencing lab|COVID-19 Genomics UK (COG-UK) Consortium|Moore|United Kingdom

>Spike|hCoV-19/England/LIVE-A8EF1/2020|2020-03-26|EPI\_ISL\_517231|Original|hCoV-19^^England|Human|Liverpool Clinical Laboratories|COVID-19 Genomics UK (COG-UK) Consortium|Haldenby|United Kingdom

>Spike|hCoV-19/Denmark/DCGC-3328/2020|2020-08-31|EPI\_ISL\_616082|Original|hCoV-19^^Midtjylland|Human|Department of Virus and Microbiological Special Diagnostics|Albertsen lab|Michaelsen|Denmark

>Spike|hCoV-19/Japan/PG-7717/2020|2020-08-00|EPI\_ISL\_686819|Original|hCoV-19^^Japan|Human|Chiba Prefectural Institute of Public Health|Pathogen Genomics Center|Sekizuka|Japan

>Spike|hCoV-19/Denmark/DCGC-18575/2020|2020-12-07|EPI\_ISL\_750055|Original|hCoV-19^^Hovedstaden|Human|Department of Virus and Microbiological Special Diagnostics|Albertsen Lab|Michaelsen|Denmark

>Spike|hCoV-19/England/20186079504/2020|2020-04-28|EPI\_ISL\_465479|Original|hCoV-19^^England|Human|Respiratory Virus Unit|Respiratory Virus Unit|Platt|United Kingdom

>Spike|hCoV-19/England/ALDP-A87113/2020|2020-10-17|EPI\_ISL\_606173|Original|hCoV-19^^England|Human|Lighthouse Lab in Alderley Park|Wellcome Sanger Institute for the COVID-19 Genomics UK (COG-UK) consortium|Davies|United Kingdom

>Spike|hCoV-19/South Africa/Tygerberg\_359\_CC2/2020|2020-10-12|EPI\_ISL\_660154|Original|hCoV-19^^Western Cape|Human|PathCare|National Health Laboratory Service (NHLS)|de Oliveira|South Africa



>Spike|hCoV-19/Wales/PHWC-3381B/2020|2020-04-15|EPI\_ISL\_446753|Original|hCoV-19^^Wales|Human|Wales Specialist Virology Centre|Public Health Wales Microbiology Cardiff|Moore|United Kingdom

>Spike|hCoV-19/USA/CA-CZB-9650/2020|2020-04-24|EPI\_ISL\_672149|Original|hCoV-19^^California|Human|The Ashley Laboratory|Chan-Zuckerberg Biohub|Bhatt|USA

>Spike|hCoV-19/USA/TX-HMH-MCoV-8830/2020|2020-07-01|EPI\_ISL\_780781|Original|hCoV-19^^Texas|Human|Houston Methodist Hospital|Houston Methodist Hospital|Long|USA

>Spike|hCoV-19/Japan/PG-6493/2020|2020-09-00|EPI\_ISL\_689595|Original|hCoV-19^^Japan|Human|Pathogen Genomics Center|Pathogen Genomics Center|Sekizuka|Japan

>Spike|hCoV-19/Thailand/Bangkok-CONI-0327/2020|2020-12-08|EPI\_ISL\_728559|Original|hCoV-19^^Bangkok|Human|Institute for Urban Disease Control and Prevention|COVID-19 Network Investigations (CONI) Alliance|Batty|Thailand

>Spike|hCoV-19/USA/CA-SR0408/2020|2020-04-20|EPI\_ISL\_458278|Original|hCoV-19^^California|Human|Scripps Medical Laboratory|Andersen lab at Scripps Research|Gangavarapu|USA

>Spike|hCoV-19/Switzerland/BS-ETHZ-370358/2020|2020-11-13|EPI\_ISL\_693945|Original|hCoV-19^^Basel-Stadt|Human|Viollier AG|Department of Biosystems Science and Engineering|Nadeau|Switzerland

>Spike|hCoV-19/England/NORT-28D528/2020|2020-11-17|EPI\_ISL\_706344|Original|hCoV-19^^England|Human|Northumbria University / South Tees Hospitals NHS Foundation Trust / North Cumbria Integrated Care NHS Foundation Trust / North Tees and Hartlepool NHS Foundation Trust / Newcastle Hospitals NHS Foundation Trust|COVID-19 Genomics UK (COG-UK) Consortium|Bashton|United Kingdom

>Spike|hCoV-19/England/202822170/2020|2020-05-30|EPI\_ISL\_490227|Original|hCoV-19^^England|Human|Respiratory Virus Unit|Respiratory Virus Unit|Platt|United Kingdom

>Spike|hCoV-19/Singapore/90/2020|2020-04-23|EPI\_ISL\_435695|Original|hCoV-19^^Singapore|Human|National Public Health Laboratory|National Public Health Laboratory|Mak|Singapore

>Spike|hCoV-19/England/ALDP-BB2AF5/2020|2020-11-20|EPI\_ISL\_703009|Original|hCoV-19^^England|Human|Lighthouse Lab in Alderley Park|Wellcome Sanger Institute for the COVID-19 Genomics UK (COG-UK) Consortium|Davies|United Kingdom

>Spike|hCoV-19/India/MH-NIV-220751/2020|2020-09-21|EPI\_ISL\_577653|Original|hCoV-19^^Maharashtra|Human|NIV Influenza|NIV Influenza|Potdar|India

>Spike|hCoV-19/Canada/ON-S1297/2020|2020-05-22|EPI\_ISL\_586341|Original|hCoV-19^^Ontario|Human|Toronto Invasive Bacterial Diseases Network|McMaster University|McArthur|Canada

>Spike|hCoV-19/Luxembourg/LNS0281498/2020|2020-10-19|EPI\_ISL\_739749|Original|hCoV-19^^Luxembourg|Human|Laboratoire national de sant\u00e9|Laboratoire national de sant\u00e9|Wienecke-Baldacchino|Luxembourg

>Spike|hCoV-19/England/201360296/2020|2020-03-25|EPI\_ISL\_421775|Original|hCoV-19^^England|Human|Respiratory Virus Unit|Respiratory Virus Unit|Platt|United Kingdom

>Spike|hCoV-19/Netherlands/GE-RIVM-20095/2020|2020-11-19|EPI\_ISL\_723273|Original|hCoV-19^^Gelderland|Human|Dutch COVID-19 response team|National Institute for Public Health and the Environment (RIVM)|Meijer|Netherlands

>Spike|hCoV-19/United Arab Emirates/0629/2020|2020-05-15|EPI\_ISL\_698785|Original|hCoV-19^^Abu Dhabi|Human|Group 42 (G42) Healthcare|G42 Healthcare|Ogrodzki|United Arab Emirates

>Spike|hCoV-19/England/CAMC-B0CC14/2020|2020-10-30|EPI\_ISL\_643426|Original|hCoV-19^^England|Human|Lighthouse Lab in Cambridge|Wellcome Sanger Institute for the COVID-19 Genomics UK (COG-UK) Consortium|Davies|United Kingdom

>Spike|hCoV-19/USA/MI-MDHHS-SC20583/2020|2020-04-29|EPI\_ISL\_462665|Original|hCoV-19^^Michigan|Human|Michigan Department of Health and Human Services|Michigan Department of Health and Human Services|Blankenship|USA

>Spike|hCoV-19/England/LOND-12F0833/2020|2020-11-18|EPI\_ISL\_679583|Original|hCoV-19^^England|Human|University College London|COVID-19 Genomics UK (COG-UK) Consortium|Roy|United Kingdom

>Spike|hCoV-19/Australia/VIC3959/2020|2020-07-13|EPI\_ISL\_519353|Original|hCoV-19^^Victoria|Human|Microbiological Diagnostic Unit - Public Health Laboratory (MDU-PHL)|MDU-PHL|Schultz|Australia

>Spike|hCoV-19/Japan/PG-0366/2020|2020-03-24|EPI\_ISL\_480036|Original|hCoV-19^^Kanto|Human|Tochigi Prefectural Institute of Public Health and Environmental Science|Pathogen Genomics Center|Sekizuka|Japan

>Spike|hCoV-19/USA/TX-DSHS-0337/2020|2020-06-13|EPI\_ISL\_538275|Original|hCoV-19^^Texas|Human|Texas Department of State Health Services|Texas Department of State Health Services|Rahman|USA

>Spike|hCoV-19/Scotland/EDB11341/2020|2020-12-26|EPI\_ISL\_764372|Original|hCoV-19^^Scotland|Human|Virology Department|COVID-19 Genomics UK (COG-UK) Consortium|McHugh|United Kingdom

>Spike|hCoV-19/USA/CA-CZB-10617/2020|2020-09-03|EPI\_ISL\_648554|Original|hCoV-19^^California|Human|Madera County Department of Public Health|Chan-Zuckerberg Biohub|Bhatt|USA

>Spike|hCoV-19/Italy/VEN-UniVR-94/2020|2020-03-25|EPI\_ISL\_751402|Original|hCoV-19^^Veneto|Human|IRCCS Sacro Cuore Don Calabria Hospital|University of Verona|Mori|Italy

>Spike|hCoV-19/Scotland/CVR2171/2020|2020-04-11|EPI\_ISL\_490671|Original|hCoV-19^^Scotland|Human|West of Scotland Specialist Virology Centre|COVID-19 Genomics UK (COG-UK) Consortium|Robertson|United Kingdom

>Spike|hCoV-19/England/MILK-BDC293/2020|2020-11-26|EPI\_ISL\_709591|Original|hCoV-19^^England|Human|Lighthouse Lab in Milton Keynes|Wellcome Sanger Institute for the COVID-19 Genomics UK (COG-UK) Consortium|Davies|United Kingdom

>Spike|hCoV-19/England/MILK-B38FCB/2020|2020-11-02|EPI\_ISL\_650634|Original|hCoV-19^^England|Human|University of Exeter|COVID-19 Genomics UK (COG-UK) Consortium|Temperton|United Kingdom

>Spike|hCoV-19/Denmark/DCGC-21599/2020|2020-12-21|EPI\_ISL\_757910|Original|hCoV-19^^Hovedstaden|Human|Department of Virus and Microbiological Special Diagnostics|Albertsen Lab|Michaelsen|Denmark

>Spike|hCoV-19/England/MILK-993A0B/2020|2020-08-26|EPI\_ISL\_552332|Original|hCoV-19^^England|Human|Lighthouse Lab in Milton Keynes|Wellcome Sanger Institute for the COVID-19 Genomics UK (COG-UK) consortium|Davies|United Kingdom

>Spike|hCoV-19/USA/TX-DSHS-0468/2020|2020-06-21|EPI\_ISL\_541999|Original|hCoV-19^^Texas|Human|Texas Department of State Health Services|Texas Department of State Health Services|Rahman|USA

>Spike|hCoV-19/England/QEUA-B66B75/2020|2020-11-11|EPI\_ISL\_662453|Original|hCoV-19^^England|Human|Lighthouse Lab in Glasgow|Wellcome Sanger Institute for the COVID-19 Genomics UK (COG-UK) Consortium|Davies|United Kingdom

>Spike|hCoV-19/USA/CA-CZB-15259/2020|2020-11-24|EPI\_ISL\_738546|Original|hCoV-19^^California|Human|Santa Clara County Public Health Laboratory|Chan-Zuckerberg Biohub|Kamm|USA

>Spike|hCoV-19/Norway/2454/2020|2020-04-17|EPI\_ISL\_471172|Vero E6 Pl|hCoV-19^^Norway|Human|Unilabs Laboratory Medicine|Norwegian Institute of Public Health|Hungnes|Norway

>Spike|hCoV-19/Wales/PHWC-48744D/2020|2020-10-30|EPI\_ISL\_639195|Original|hCoV-19^^Wales|Human|Wales Specialist Virology Centre Sequencing lab|COVID-19 Genomics UK (COG-UK) Consortium|Moore|United Kingdom

>Spike|hCoV-19/Italy/APU-IZSPB\_200PT/2020|2020-08-28|EPI\_ISL\_653764|Original|hCoV-19^^Apulia|Human|I.R.C.C.S. \S. De Bellis\ - Ente Ospedaliero|Istituto Zooprofilattico Sperimentale della Puglia e della Basilicata|Parisi|Italy

>Spike|hCoV-19/USA/MA-JLL-19S/2020|2020-00-00|EPI\_ISL\_632307|Original|hCoV-19^^Massachusetts|Human|Brigham and Women's Hospital|Jonathan Li laboratory|Choudhary|USA

>Spike|hCoV-19/USA/CA-CZB-12329/2020|2020-10-08|EPI\_ISL\_648407|Original|hCoV-19^^California|Human|Santa Clara County Public Health Laboratory|Chan-Zuckerberg Biohub|Bhatt|USA

>Spike|hCoV-19/England/SHEF-C333D/2020|2020-05-25|EPI\_ISL\_535049|Original|hCoV-19^^England|Human|Virology Department|COVID-19 Genomics UK (COG-UK) Consortium|de Silva|United Kingdom

>Spike|hCoV-19/England/QEUA-A0C87B/2020|2020-10-03|EPI\_ISL\_599280|Original|hCoV-19^^England|Human|Lighthouse Lab in Glasgow|Wellcome Sanger Institute for the COVID-19 Genomics UK (COG-UK) consortium|Davies|United Kingdom

>Spike|hCoV-19/England/HECH-2599E43/2020|2020-05-06|EPI\_ISL\_482089|Original|hCoV-19^^England|Human|Microbiology Department|Wellcome Sanger Institute for the COVID-19 Genomics UK (COG-UK) consortium|Davies|United Kingdom

>Spike|hCoV-19/DRC/11022/2020|2020-05-24|EPI\_ISL\_527551|Original|hCoV-19^^Kinshasa|Human|Viral Respiratory Lab|Pathogen Sequencing Lab|Lokilo|Democratic Republic of the Congo

>Spike|hCoV-19/USA/LA-GBCL-26629230/2020|2020-04-22|EPI\_ISL\_485228|Original|hCoV-19^^Louisiana|Human|River Road Testing Lab|Ginkgo Bioworks Clinical Laboratory|Smith|USA

>Spike|hCoV-19/USA/WA-S2603/2020|2020-06-18|EPI\_ISL\_497235|Original|hCoV-19^^Washington|Human|Washington State Department of Health|Seattle Flu Study|Lee|USA

>Spike|hCoV-19/USA/VA-DCLS-1477/2020|2020-08-22|EPI\_ISL\_572215|Original|hCoV-19^^Virginia|Human|Virginia DCLS|Virginia DCLS|St. Jacques|USA

>Spike|hCoV-19/England/ALDP-9E8A43/2020|2020-09-24|EPI\_ISL\_638274|Original|hCoV-19^^England|Human|Centre for Enzyme Innovation|COVID-19 Genomics UK (COG-UK) Consortium|Robson|United Kingdom

>Spike|hCoV-19/Canada/BC\_22502164/2020|2020-04-00|EPI\_ISL\_477032|Original|hCoV-19^^British Columbia|Human|BCCDC Public Health Laboratory|BCCDC Public Health Laboratory|Harrigan|Canada

>Spike|hCoV-19/USA/LA-EVTL1336/2020|2020-12-11|EPI\_ISL\_779002|Original|hCoV-19^^Louisiana|Human|LSUHS Emerging Viral Threat Laboratory|Microbial Genome Sequencing Center|Kamil|USA

>Spike|hCoV-19/USA/MI-QDX-1665/2020|2020-03-17|EPI\_ISL\_603967|Original|hCoV-19^^Michigan|Human|Quest Diagnostics|Quest Diagnostics|Kagan|USA

>Spike|hCoV-19/England/ALDP-9E7006/2020|2020-09-24|EPI\_ISL\_580352|Original|hCoV-19^^England|Human|Lighthouse Lab in Alderley Park|Wellcome Sanger Institute for the COVID-19 Genomics UK (COG-UK) consortium|Davies|United Kingdom

>Spike|hCoV-19/Denmark/DCGC-2667/2020|2020-08-17|EPI\_ISL\_617887|Original|hCoV-19^^Hovedstaden|Human|Department of Virus and Microbiological Special Diagnostics|Albertsen lab|Michaelsen|Denmark

>Spike|hCoV-19/USA/MI-MDHHS-SC20539/2020|2020-05-11|EPI\_ISL\_460587|Original|hCoV-19^^Michigan|Human|Michigan Department of Health and Human Services|Michigan Department of Health and Human Services|Blankenship|USA

>Spike|hCoV-19/England/QEUH-A4C2F9/2020|2020-10-05|EPI\_ISL\_628560|Original|hCoV-19^^England|Human|Oxford Viromics|COVID-19 Genomics UK (COG-UK) Consortium|Golubchik|United Kingdom

>Spike|hCoV-19/USA/HI-H200522/2020|2020-11-02|EPI\_ISL\_753056|Original|hCoV-19^^Hawaii|Human|State Laboratories Division|State Laboratories Division|Sultana|USA

>Spike|hCoV-19/England/MILK-A45ECF/2020|2020-10-06|EPI\_ISL\_598784|Original|hCoV-19^^England|Human|Lighthouse Lab in Milton Keynes|Wellcome Sanger Institute for the COVID-19 Genomics UK (COG-UK) consortium|Davies|United Kingdom

>Spike|hCoV-19/England/ALDP-499A64/2020|2020-05-26|EPI\_ISL\_559418|Original|hCoV-19^^England|Human|Lighthouse Lab in Alderley Park|Wellcome Sanger Institute for the COVID-19 Genomics UK (COG-UK) consortium|Davies|United Kingdom

>Spike|hCoV-19/England/CAMB-1AB6C8/2020|2020-04-21|EPI\_ISL\_470173|Original|hCoV-19^^England|Human|Department of Pathology|Wellcome Sanger Institute for the COVID-19 Genomics UK (COG-UK) consortium|Davies|United Kingdom

>Spike|hCoV-19/Denmark/DCGC-18904/2020|2020-12-07|EPI\_ISL\_748630|Original|hCoV-19^^Midtjylland|Human|Department of Virus and Microbiological Special Diagnostics|Albertsen Lab|Michaelsen|Denmark

>Spike|hCoV-19/Japan/PG-7543/2020|2020-08-00|EPI\_ISL\_686645|Original|hCoV-19^^Japan|Human|Pathogen Genomics Center|Pathogen Genomics Center|Sekizuka|Japan

>Spike|hCoV-19/Belgium/regA-0911940/2020|2020-09-11|EPI\_ISL\_734927|Original|hCoV-19^^Huldenbergh|Human|UZ Leuven|KU Leuven|Maes|Belgium

>Spike|hCoV-19/USA/MD-MDH-0048/2020|2020-04-12|EPI\_ISL\_509452|Original|hCoV-19^^Maryland|Human|Maryland Department of Health|Maryland Department of Health|Keller|USA

>Spike|hCoV-19/USA/TX-HMH-1374/2020|2020-04-11|EPI\_ISL\_542680|Original|hCoV-19^^Texas|Human|Houston Methodist Hospital|Houston Methodist Hospital|Long|USA

>Spike|hCoV-19/USA/CA-ALSR-1665/2020|2020-04-02|EPI\_ISL\_494726|Original|hCoV-19^^California|Human|San Diego County Public Health Laboratory|Andersen lab at Scripps Research|Gangavarapu|USA

>Spike|hCoV-19/England/CAMC-94874A/2020|2020-07-15|EPI\_ISL\_556760|Original|hCoV-19^^England|Human|Lighthouse Lab in Cambridge|Wellcome Sanger Institute for the COVID-19 Genomics UK (COG-UK) consortium|Davies|United Kingdom

>Spike|hCoV-19/England/OXON-ADC3E/2020|2020-00-00|EPI\_ISL\_448624|Original|hCoV-19^^England|Human|Oxford Viromics|COVID-19 Genomics UK (COG-UK) Consortium|Golubchik|United Kingdom

>Spike|hCoV-19/USA/TX-HMH-MCoV-14682/2020|2020-10-01|EPI\_ISL\_787967|Original|hCoV-19^^Texas|Human|Houston Methodist Hospital|Houston Methodist Hospital|Long|USA

>Spike|hCoV-19/USA/CA-CDPH110/2020|2020-09-17|EPI\_ISL\_755050|Original|hCoV-19^^California|Human|California Department of Public Health|California Department of Public Health|Bell|USA

>Spike|hCoV-19/USA/TX-HMH-2105/2020|2020-05-20|EPI\_ISL\_545124|Original|hCoV-19^^Texas|Human|Houston Methodist Hospital|Houston Methodist Hospital|Long|USA

>Spike|hCoV-19/Canada/ON\_QGLO-01/2020|2020-03-18|EPI\_ISL\_459866|Original|hCoV-19^^Ontario|Human|Kingston Health Sciences Center|Queen's Genomics Lab at Ongwanada (Q-GLO)|Sjaarda|Canada

>Spike|hCoV-19/USA/CA-QDX-1546/2020|2020-03-17|EPI\_ISL\_603793|Original|hCoV-19^^California|Human|Quest Diagnostics|Quest Diagnostics|Kagan|USA

>Spike|hCoV-19/England/QEUEH-9C8478/2020|2020-09-11|EPI\_ISL\_567152|Original|hCoV-19^^England|Human|Lighthouse Lab in Glasgow|Wellcome Sanger Institute for the COVID-19 Genomics UK (COG-UK) consortium|Davies|United Kingdom

>Spike|hCoV-19/England/QEUEH-C32467/2020|2020-12-11|EPI\_ISL\_782525|Original|hCoV-19^^England|Human|Lighthouse Lab in Glasgow|Wellcome Sanger Institute for the COVID-19 Genomics UK (COG-UK) Consortium|Davies|United Kingdom

>Spike|hCoV-19/United Arab Emirates/0291/2020|2020-05-18|EPI\_ISL\_698470|Original|hCoV-19^^Abu Dhabi|Human|Group 42 (G42) Healthcare|G42 Healthcare|Ogrodzki|United Arab Emirates

>Spike|hCoV-19/USA/FL-AJ53/2020|2020-07-04|EPI\_ISL\_513288|Original|hCoV-19^^Florida|Human|University of Miami Immunology and Histocompatibility Laboratory|University of Miami Immunology and Histocompatibility Laboratory|Margolles-Clark|USA

>Spike|hCoV-19/Canada/ON-PHL-20-01219/2020|2020-06-00|EPI\_ISL\_548841|Original|hCoV-19^^Ontario|Human|Public Health Ontario Laboratory|Public Health Ontario Laboratory|Guthrie|Canada

>Spike|hCoV-19/Denmark/DCGC-5296/2020|2020-09-14|EPI\_ISL\_615227|Original|hCoV-19^^Nordjylland|Human|Department of Virus and Microbiological Special Diagnostics|Albertsen lab|Michaelsen|Denmark

>Spike|hCoV-19/England/204560308/2020|2020-11-04|EPI\_ISL\_678677|Original|hCoV-19^^England|Human|Respiratory Virus Unit|COVID-19 Genomics UK (COG-UK) Consortium|Platt|United Kingdom

>Spike|hCoV-19/USA/AZ-TG654700/2020|2020-04-01|EPI\_ISL\_696017|Original|hCoV-19^^Arizona|Human|Sonora Quest Laboratories|TGen North|French|USA

>Spike|hCoV-19/France/ARA75924/2020|2020-09-20|EPI\_ISL\_639984|Original|hCoV-19^^Auvergne-Rhone-Alpes|Human|Centre Hospitalier de Bourg en Bresse|CNR Virus des Infections Respiratoires - France SUD|Josset|France

>Spike|hCoV-19/Denmark/DCGC-15974/2020|2020-11-23|EPI\_ISL\_714514|Original|hCoV-19^^Syddanmark|Human|Department of Virus and Microbiological Special Diagnostics|Albertsen Lab|Michaelsen|Denmark

>Spike|hCoV-19/USA/VA-DCLS-0288/2020|2020-04-22|EPI\_ISL\_463094|Original|hCoV-19^^Virginia|Human|Virginia DCLS|Virginia DCLS|St. Jacques|USA

>Spike|hCoV-19/England/CAMC-B077EB/2020|2020-10-31|EPI\_ISL\_643861|Original|hCoV-19^^England|Human|Lighthouse Lab in Cambridge|Wellcome Sanger Institute for the COVID-19 Genomics UK (COG-UK) Consortium|Davies|United Kingdom

>Spike|hCoV-19/Italy/ABR-IZSGC-TE5487/2020|2020-03-19|EPI\_ISL\_528926|Original|hCoV-19^^Abruzzo|Human|Ospedale \Giuseppe Mazzini\ -Teramo|Istituto Zooprofilattico Sperimentale dell'Abruzzo e Molise \G.Caporale\|Lorusso|Italy

>Spike|hCoV-19/Ireland/CE-UHL23/2020|2020-04-07|EPI\_ISL\_681711|Original|hCoV-19^^Clare|Human|University Hospital Limerick|Irish Coronavirus Sequencing Consortium - Teagasc Moorepark|Walsh|Ireland

>Spike|hCoV-19/USA/CA-CZB090/2020|2020-03-28|EPI\_ISL\_429049|Original|hCoV-19^^California|Human|UCSF Clinical Microbiology Laboratory|Chan-Zuckerberg Biohub|Kamm|USA

>Spike|hCoV-19/England/CAMC-948452/2020|2020-07-21|EPI\_ISL\_556981|Original|hCoV-19^^England|Human|Lighthouse Lab in Cambridge|Wellcome Sanger Institute for the COVID-19 Genomics UK (COG-UK) consortium|Davies|United Kingdom

>Spike|hCoV-19/England/QEUEH-9CE72E/2020|2020-09-17|EPI\_ISL\_590156|Original|hCoV-19^^England|Human|Lighthouse Lab in Glasgow|Wellcome Sanger Institute for the COVID-19 Genomics UK (COG-UK) consortium|Davies|United Kingdom

>Spike|hCoV-19/England/QEUEH-AAB0C1/2020|2020-10-21|EPI\_ISL\_652770|Original|hCoV-19^^England|Human|Oxford Viromics|COVID-19 Genomics UK (COG-UK) Consortium|Golubchik|United Kingdom

>Spike|hCoV-19/England/LOND-D6407/2020|2020-04-20|EPI\_ISL\_487589|Original|hCoV-19^^England|Human|University College London|Wellcome Sanger Institute for the COVID-19 Genomics UK (COG-UK) consortium|Davies|United Kingdom

>Spike|hCoV-19/England/NOTT-10ED64/2020|2020-03-28|EPI\_ISL\_432920|Original|hCoV-19^^England|Human|Queens Medical Centre|COVID-19 Genomics UK (COG-UK) Consortium|Loose|United Kingdom

>Spike|hCoV-19/England/QEUEH-96F4FB/2020|2020-08-17|EPI\_ISL\_530549|Original|hCoV-19^^England|Human|Lighthouse Lab in Glasgow|Wellcome Sanger Institute for the COVID-19 Genomics UK (COG-UK) consortium|Davies|United Kingdom

>Spike|hCoV-19/England/QEUEH-B11B79/2020|2020-11-02|EPI\_ISL\_642384|Original|hCoV-19^^England|Human|Lighthouse Lab in Glasgow|Wellcome Sanger Institute for the COVID-19 Genomics UK (COG-UK) Consortium|Davies|United Kingdom

>Spike|hCoV-19/Australia/VIC13271/2020|2020-07-25|EPI\_ISL\_563648|Original|hCoV-19^^Victoria|Human|Microbiological Diagnostic Unit - Public Health Laboratory (MDU-PHL)|MDU-PHL|Schultz|Australia

>Spike|hCoV-19/England/ALDP-9CA9D1/2020|2020-09-17|EPI\_ISL\_575644|Original|hCoV-19^^England|Human|Lighthouse Lab in Alderley Park|Wellcome Sanger Institute for the COVID-19 Genomics UK (COG-UK) consortium|Davies|United Kingdom

>Spike|hCoV-19/England/LIVE-A43C9/2020|2020-06-16|EPI\_ISL\_499948|Original|hCoV-19^^England|Human|Liverpool Clinical Laboratories|COVID-19 Genomics UK (COG-UK) Consortium|Haldenby|United Kingdom

>Spike|hCoV-19/USA/CA-CZB-14257/2020|2020-08-20|EPI\_ISL\_738553|Original|hCoV-19^^California|Human|Alameda County Public Health Lab|Chan-Zuckerberg Biohub|Kamm|USA

>Spike|hCoV-19/Scotland/ALDP-9128CE/2020|2020-06-23|EPI\_ISL\_568467|Original|hCoV-19^^Scotland|Human|Lighthouse Lab in Alderley Park|Wellcome Sanger Institute for the COVID-19 Genomics UK (COG-UK) consortium|Davies|United Kingdom

>Spike|hCoV-19/Japan/PG-1552/2020|2020-04-00|EPI\_ISL\_685158|Original|hCoV-19^^Japan|Human|Pathogen Genomics Center|Pathogen Genomics Center|Sekizuka|Japan

>Spike|hCoV-19/England/MILK-B3CEBB/2020|2020-11-02|EPI\_ISL\_706202|Original|hCoV-19^^England|Human|Oxford Viromics|COVID-19 Genomics UK (COG-UK) Consortium|Golubchik|United Kingdom

>Spike|hCoV-19/Japan/PG-3960/2020|2020-07-00|EPI\_ISL\_692208|Original|hCoV-19^^Japan|Human|Pathogen Genomics Center|Pathogen Genomics Center|Sekizuka|Japan

>Spike|hCoV-19/Switzerland/BE-ETHZ-310447/2020|2020-10-08|EPI\_ISL\_603520|Original|hCoV-19^^Bern|Human|Viollier AG|Department of Biosystems Science and Engineering|Nadeau|Switzerland

>Spike|hCoV-19/England/CAMB-74711/2020|2020-03-29|EPI\_ISL\_425327|Original|hCoV-19^^England|Human|Department of Pathology|COVID-19 Genomics UK (COG-UK) Consortium|Meredith|United Kingdom

>Spike|hCoV-19/Denmark/DCGC-19015/2020|2020-12-07|EPI\_ISL\_748698|Original|hCoV-19^^Hovedstaden|Human|Department of Virus and Microbiological Special Diagnostics|Albertsen Lab|Michaelsen|Denmark

>Spike|hCoV-19/South Africa/KRISP-0404/2020|2020-06-24|EPI\_ISL\_495529|Original|hCoV-19^^KwaZulu-Natal|Human|NHLs-IALCH|KRISP|de Oliveira|South Africa

>Spike|hCoV-19/Peru/LIM-UPCH-0030/2020|2020-06-17|EPI\_ISL\_540930|Original|hCoV-19^^Lima|Human|Laboratorio de Referencia Nacional de Virus Respiratorios|Laboratorio de Gen\u00f3mica Microbiana|Tsukayama|Peru

>Spike|hCoV-19/Scotland/CVR4494/2020|2020-09-21|EPI\_ISL\_585357|Original|hCoV-19^^Scotland|Human|Lighthouse Lab in Glasgow / MRC-University of Glasgow Centre for Virus Research|COVID-19 Genomics UK (COG-UK) Consortium|Robertson|United Kingdom

>Spike|hCoV-19/Ireland/TA-NVRL-78IRL73009/2020|2020-11-22|EPI\_ISL\_752547|Original|hCoV-19^^Tipperary|Human|National Virus Reference Laboratory|National Virus Reference Laboratory|Gonzalez|Ireland

>Spike|hCoV-19/Wales/PHWC-163556/2020|2020-04-25|EPI\_ISL\_473961|Original|hCoV-19^^Wales|Human|Originating lab|COVID-19 Genomics UK (COG-UK) Consortium|Moore|United Kingdom

>Spike|hCoV-19/Germany/NW-HHU-529/2020|2020-12-14|EPI\_ISL\_779940|Original|hCoV-19^^North Rhine-Westphalia|Human|Center of Medical Microbiology|Center of Medical Microbiology|Wienemann|Germany

>Spike|hCoV-19/Japan/PG-3252/2020|2020-06-00|EPI\_ISL\_691367|Original|hCoV-19^^Japan|Human|Saitama Prefectural Institute of Public Health|Pathogen Genomics Center|Sekizuka|Japan

>Spike|hCoV-19/USA/NM-DOH-2020318937/2020|2020-08-27|EPI\_ISL\_732742|Original|hCoV-19^^New Mexico|Human|New Mexico Department of Health Scientific Laboratory|New Mexico Department of Health Scientific Laboratory|Johnson|USA

>Spike|hCoV-19/Denmark/ALAB-SSI-723/2020|2020-03-28|EPI\_ISL\_444874|Original|hCoV-19^^Denmark|Human|Department of Virus and Microbiological Special Diagnostics|Albertsen lab|Kirkegaard|Denmark

>Spike|hCoV-19/Spain/NC-IBV-98005470/2020|2020-03-28|EPI\_ISL\_538609|Original|hCoV-19^^Navarra|Human|Cl\u00ednica Universidad de Navarra. Servicio de Enfermedades Infecciosas y Microbiolog\u00eda cl\u00ednica|SeqCOVID-SPAIN consortium|IBV (CSIC) |Comas|Spain

>Spike|hCoV-19/England/MILK-A6C080/2020|2020-10-11|EPI\_ISL\_608882|Original|hCoV-19^^England|Human|Lighthouse Lab in Milton Keynes|Wellcome Sanger Institute for the COVID-19 Genomics UK (COG-UK) consortium|Davies|United Kingdom

>Spike|hCoV-19/Spain/GA-ISCI-202230/2020|2020-03-11|EPI\_ISL\_455333|Original|hCoV-19^^Galicia|Human|Complejo Hospitalario Universitario de Santiago|Instituto de Salud Carlos III|Caballero|Spain

>Spike|hCoV-19/USA/CA-CHLA-PLM09774868/2020|2020-12-01|EPI\_ISL\_753624|Original|hCoV-19^^California|Human|Clinical virology Laboratory|Center for Personalized Medicine|Dien Bard|USA

>Spike|hCoV-19/USA/NY-Wadsworth-279841-01/2020|2020-11-24|EPI\_ISL\_754485|Original|hCoV-19^^New York|Human|Wadsworth Center|Wadsworth Center|Lasek-Nesselquist|USA

>Spike|hCoV-19/USA/TX-HMH-MCoV-19245/2020|2020-11-27|EPI\_ISL\_783715|Original|hCoV-19^^Texas|Human|Houston Methodist Hospital|Houston Methodist Hospital|Long|USA

>Spike|hCoV-19/India/UN-2020773/2020|2020-00-00|EPI\_ISL\_420550|Vero CCL81 P1|hCoV-19^^India|Human|Indian Council of Medical Research-National Institute of Virology|Indian Council of Medical Research-National Institute of Virology|Yadav|India

>Spike|hCoV-19/England/ALDP-B48371/2020|2020-11-07|EPI\_ISL\_649194|Original|hCoV-19^^England|Human|Lighthouse Lab in Alderley Park|Wellcome Sanger Institute for the COVID-19 Genomics UK (COG-UK) Consortium|Davies|United Kingdom

>Spike|hCoV-19/Denmark/DCGC-21592/2020|2020-12-21|EPI\_ISL\_758253|Original|hCoV-19^^Syddanmark|Human|Department of Virus and Microbiological Special Diagnostics|Albertsen Lab|Michaelsen|Denmark

>Spike|hCoV-19/England/QEUEH-96364C/2020|2020-08-10|EPI\_ISL\_531697|Original|hCoV-19^^England|Human|Lighthouse Lab in Glasgow|Wellcome Sanger Institute for the COVID-19 Genomics UK (COG-UK) consortium|Davies|United Kingdom

>Spike|hCoV-19/England/20109002104/2020|2020-03-04|EPI\_ISL\_464501|Original|hCoV-19^^England|Human|Respiratory Virus Unit|Respiratory Virus Unit|Platt|United Kingdom

>Spike|hCoV-19/England/ALDP-A2EAAA/2020|2020-10-05|EPI\_ISL\_587164|Original|hCoV-19^^England|Human|Lighthouse Lab in Alderley Park|Wellcome Sanger Institute for the COVID-19 Genomics UK (COG-UK) consortium|Davies|United Kingdom

>Spike|hCoV-19/Wales/PHWC-48C7C7/2020|2020-11-07|EPI\_ISL\_666468|Original|hCoV-19^^Wales|Human|Wales Specialist Virology Centre Sequencing lab|COVID-19 Genomics UK (COG-UK) Consortium|Moore|United Kingdom

>Spike|hCoV-19/Netherlands/NB-EMC-339/2020|2020-10-26|EPI\_ISL\_722553|Original|hCoV-19^^Noord Brabant|Human|Dutch COVID-19 response team|Erasmus Medical Center|Oude Munnink|Netherlands

>Spike|hCoV-19/England/SHEF-10C56F3/2020|2020-12-19|EPI\_ISL\_741936|Original|hCoV-19^^England|Human|Virology Department|COVID-19 Genomics UK (COG-UK) Consortium|de Silva|United Kingdom

>Spike|hCoV-19/England/SHEF-CB432/2020|2020-03-26|EPI\_ISL\_442383|Original|hCoV-19^^England|Human|Virology Department|COVID-19 Genomics UK (COG-UK) Consortium|de Silva|United Kingdom

>Spike|hCoV-19/Serbia/Subotica-062172304/2020|2020-04-22|EPI\_ISL\_676599|Original|hCoV-19^^Subotica|Human|Scientific Veterinary Institute Novi Sad|Veterinary Specialized Institute \Kraljevo\|Vidanovic|Serbia

>Spike|hCoV-19/Denmark/DCGC-20655/2020|2020-12-21|EPI\_ISL\_758756|Original|hCoV-19^^Hovedstaden|Human|Department of Virus and Microbiological Special Diagnostics|Albertsen Lab|Michaelsen|Denmark

>Spike|hCoV-19/England/20172054804/2020|2020-04-20|EPI\_ISL\_465358|Original|hCoV-19^^England|Human|Respiratory Virus Unit|Respiratory Virus Unit|Platt|United Kingdom

>Spike|hCoV-19/Scotland/CVR4956/2020|2020-10-06|EPI\_ISL\_594720|Original|hCoV-19^^Scotland|Human|West of Scotland Specialist Virology Centre|COVID-19 Genomics UK (COG-UK) Consortium|Robertson|United Kingdom

>Spike|hCoV-19/Japan/PG-1856/2020|2020-05-00|EPI\_ISL\_685462|Original|hCoV-19^^Japan|Human|Tokyo Metropolitan Institute of Public Health|Pathogen Genomics Center|Sekizuka|Japan

>Spike|hCoV-19/Germany/BY-MVP-V2011376/2020|2020-03-13|EPI\_ISL\_420902|Original|hCoV-19^^Bavaria|Human|Max von Pettenkofer Institute|Laboratory for Functional Genome Analysis|Graf|Germany

>Spike|hCoV-19/Singapore/1042/2020|2020-03-22|EPI\_ISL\_574527|Original|hCoV-19^^Singapore|Human|National Public Health Laboratory|National Public Health Laboratory|Mak|Singapore

>Spike|hCoV-19/USA/FL-BPHL-0872/2020|2020-07-08|EPI\_ISL\_514218|Original|hCoV-19^^Florida|Human|Florida Bureau of Public Health Laboratories|Florida Bureau of Public Health Laboratories|Blanton|USA

>Spike|hCoV-19/Scotland/EDB5121/2020|2020-05-17|EPI\_ISL\_453193|Original|hCoV-19^^Scotland|Human|Virology Department|COVID-19 Genomics UK (COG-UK) Consortium|Williams|United Kingdom

>Spike|hCoV-19/Iceland/127/2020|2020-03-12|EPI\_ISL\_417727|Original|hCoV-19^^Reykjavik|Human|The National University Hospital of Iceland|deCODE genetics|J\u00f3nsson|Iceland

>Spike|hCoV-19/Denmark/DCGC-11829/2020|2020-10-26|EPI\_ISL\_671160|Original|hCoV-19^^Midtjylland|Human|Department of Virus and Microbiological Special Diagnostics|Albertsen Lab|Michaelsen|Denmark

>Spike|hCoV-19/Japan/PG-5480/2020|2020-08-00|EPI\_ISL\_690583|Original|hCoV-19^^Japan|Human|Pathogen Genomics Center|Pathogen Genomics Center|Sekizuka|Japan

>Spike|hCoV-19/USA/TX-HMH-MCoV-10866/2020|2020-07-09|EPI\_ISL\_789666|Original|hCoV-19^^Texas|Human|Houston Methodist Hospital|Houston Methodist Hospital|Long|USA

>Spike|hCoV-19/Australia/VIC2039/2020|2020-06-11|EPI\_ISL\_563978|Original|hCoV-19^^Victoria|Human|Victorian Infectious Diseases Reference Laboratory (VIDRL)|VIDRL and MDU-PHL|Schultz|Australia

>Spike|hCoV-19/USA/MT-CDC-2-3714190/2020|2020-12-02|EPI\_ISL\_751775|Original|hCoV-19^^Montana|Human|MT Public Health Laboratory|Genomics and Discovery|Queen|USA

>Spike|hCoV-19/England/C200042763/2020|2020-11-02|EPI\_ISL\_666735|Original|hCoV-19^^England|Human|Respiratory Virus Unit|COVID-19 Genomics UK (COG-UK) Consortium|Platt|United Kingdom

>Spike|hCoV-19/England/QEUH-A0C204/2020|2020-10-01|EPI\_ISL\_584963|Original|hCoV-19^^England|Human|Quadram Institute Bioscience|COVID-19 Genomics UK (COG-UK) Consortium|Alikhan|United Kingdom

>Spike|hCoV-19/England/CAMB-75B05/2020|2020-03-30|EPI\_ISL\_439482|Original|hCoV-19^^England|Human|Department of Pathology|Wellcome Sanger Institute for the COVID-19 Genomics UK (COG-UK) consortium|Amato|United Kingdom

>Spike|hCoV-19/USA/TX-HMH-2449/2020|2020-05-28|EPI\_ISL\_545315|Original|hCoV-19^^Texas|Human|Houston Methodist Hospital|Houston Methodist Hospital|Long|USA

>Spike|hCoV-19/England/CAMC-B549DA/2020|2020-11-09|EPI\_ISL\_658064|Original|hCoV-19^^England|Human|Lighthouse Lab in Cambridge|Wellcome Sanger Institute for the COVID-19 Genomics UK (COG-UK) Consortium|Davies|United Kingdom

>Spike|hCoV-19/Denmark/DCGC-1819/2020|2020-06-08|EPI\_ISL\_618024|Original|hCoV-19^^Syddanmark|Human|Department of Virus and Microbiological Special Diagnostics|Albertsen lab|Michaelsen|Denmark

>Spike|hCoV-19/Wales/MILK-992C51/2020|2020-08-26|EPI\_ISL\_552045|Original|hCoV-19^^Wales|Human|Lighthouse Lab in Milton Keynes|Wellcome Sanger Institute for the COVID-19 Genomics UK (COG-UK) consortium|Davies|United Kingdom

>Spike|hCoV-19/England/MILK-958A11/2020|2020-06-15|EPI\_ISL\_554852|Original|hCoV-19^^England|Human|Lighthouse Lab in Milton Keynes|Wellcome Sanger Institute for the COVID-19 Genomics UK (COG-UK) consortium|Davies|United Kingdom

>Spike|hCoV-19/England/CAMB-83A43/2020|2020-04-15|EPI\_ISL\_443382|Original|hCoV-19^^England|Human|Department of Pathology|Wellcome Sanger Institute for the COVID-19 Genomics UK (COG-UK) consortium|Amato|United Kingdom

>Spike|hCoV-19/Wales/PHWC-4A2734/2020|2020-12-17|EPI\_ISL\_743934|Original|hCoV-19^^Wales|Human|Wales Specialist Virology Centre Sequencing lab|COVID-19 Genomics UK (COG-UK) Consortium|Moore|United Kingdom

>Spike|hCoV-19/Ireland/CE-NVRL-AIIDV1105v5/2020|2020-04-28|EPI\_ISL\_644315|Original|hCoV-19^^Clare|Human|CEPHR / Vincent's Hospital|Irish Coronavirus Sequencing Consortium - National Virus Reference Laboratory|Gonzalez|Ireland

>Spike|hCoV-19/Netherlands/NB-RIVM-20353/2020|2020-12-09|EPI\_ISL\_728573|Original|hCoV-19^^Noord-Brabant|Human|Dutch COVID-19 response team|National Institute for Public Health and the Environment (RIVM)|Meijer|Netherlands

>Spike|hCoV-19/Scotland/CVR3003/2020|2020-04-23|EPI\_ISL\_484655|Original|hCoV-19^^Scotland|Human|West of Scotland Specialist Virology Centre|COVID-19 Genomics UK (COG-UK) Consortium|Robertson|United Kingdom

>Spike|hCoV-19/Portugal/PT1827/2020|2020-11-15|EPI\_ISL\_732049|Original|hCoV-19^^Portugal|Human|Instituto Nacional de Saude (INSA)|Instituto Nacional de Saude (INSA)|Borges|Portugal

>Spike|hCoV-19/Netherlands/Overijssel\_22/2020|2020-04-14|EPI\_ISL\_460811|Original|hCoV-19^^Overijssel|Human|Dutch COVID-19 response team|Erasmus Medical Center|Oude Munnink|Netherlands

>Spike|hCoV-19/Portugal/PT1572/2020|2020-06-28|EPI\_ISL\_693580|Original|hCoV-19^^Portugal|Human|Instituto Nacional de Saude (INSA)|Instituto Nacional de Saude (INSA)|Borges|Portugal

>Spike|hCoV-19/Denmark/DCGC-7803/2020|2020-10-19|EPI\_ISL\_618792|Original|hCoV-19^^Syddanmark|Human|Department of Virus and Microbiological Special Diagnostics|Albertsen lab|Michaelsen|Denmark

>Spike|hCoV-19/USA/FL-BPHL-1558/2020|2020-09-09|EPI\_ISL\_568656|Original|hCoV-19^^Florida|Human|Florida Bureau of Public Health Laboratories|Florida Bureau of Public Health Laboratories|Blanton|USA

>Spike|hCoV-19/Denmark/DCGC-5287/2020|2020-09-14|EPI\_ISL\_615218|Original|hCoV-19^^Syddanmark|Human|Department of Virus and Microbiological Special Diagnostics|Albertsen lab|Michaelsen|Denmark

>Spike|hCoV-19/Japan/PG-3169/2020|2020-03-00|EPI\_ISL\_691289|Original|hCoV-19^^Japan|Human|Pathogen Genomics Center|Pathogen Genomics Center|Sekizuka|Japan

>Spike|hCoV-19/England/SHEF-10D3D1B/2020|2020-12-19|EPI\_ISL\_742062|Original|hCoV-19^^England|Human|Virology Department|COVID-19 Genomics UK (COG-UK) Consortium|de Silva|United Kingdom

>Spike|hCoV-19/Scotland/EDB5214/2020|2020-05-20|EPI\_ISL\_456987|Original|hCoV-19^^Scotland|Human|Virology Department|COVID-19 Genomics UK (COG-UK) Consortium|Williams|United Kingdom



>Spike|hCoV-19/USA/NY-Wadsworth-286664-01/2020|2020-12-14|EPI\_ISL\_767450|Original|hCoV-19^^New York|Human|Wadsworth Center|Wadsworth Center|Lasek-Nesselquist|USA

>Spike|hCoV-19/USA/IN-CDC-2-3714077/2020|2020-12-04|EPI\_ISL\_751626|Original|hCoV-19^^Indiana|Human|IN State Department of Health Laboratory Services|Genomics and Discovery|Queen|USA

>Spike|hCoV-19/USA/ID-QDX-1105/2020|2020-03-19|EPI\_ISL\_571836|Original|hCoV-19^^Idaho|Human|Quest Diagnostics|Quest Diagnostics|Kagan|USA

>Spike|hCoV-19/England/ALDP-9B66FF/2020|2020-08-28|EPI\_ISL\_573030|Original|hCoV-19^^England|Human|Oxford Viromics|COVID-19 Genomics UK (COG-UK) Consortium|Golubchik|United Kingdom

>Spike|hCoV-19/Sweden/20-08113/2020|2020-03-09|EPI\_ISL\_454484|Original|hCoV-19^^Vasternorrland|Human|Karolinska Universitetslaboratoriet|The Public Health Agency of Sweden|Svartstr\u00f6m|Sweden

>Spike|hCoV-19/USA/TX-HMH-MCoV-11200/2020|2020-09-02|EPI\_ISL\_789735|Original|hCoV-19^^Texas|Human|Houston Methodist Hospital|Houston Methodist Hospital|Long|USA

>Spike|hCoV-19/Canada/ON-SLB3108/2020|2020-04-19|EPI\_ISL\_717726|Original|hCoV-19^^Ontario|Human|Kingston Health Sciences Centre and Queen's University|Ontario Institute for Cancer Research|de Borja|Canada

>Spike|hCoV-19/England/MILK-A19301/2020|2020-10-03|EPI\_ISL\_612501|Original|hCoV-19^^England|Human|Wales Specialist Virology Centre Sequencing lab|COVID-19 Genomics UK (COG-UK) Consortium|Moore|United Kingdom

>Spike|hCoV-19/Sweden/20-52399/2020|2020-07-15|EPI\_ISL\_710587|Original|hCoV-19^^Vastra Gotaland|Human|Omtanken Grimmered|The Public Health Agency of Sweden|Svartstr\u00f6m|Sweden

>Spike|hCoV-19/Wales/PHWC-3274C/2020|2020-04-15|EPI\_ISL\_474346|Original|hCoV-19^^Wales|Human|Originating lab|COVID-19 Genomics UK (COG-UK) Consortium|Moore|United Kingdom

>Spike|hCoV-19/USA/TX-HMH-MCoV-19135/2020|2020-11-23|EPI\_ISL\_783646|Original|hCoV-19^^Texas|Human|Houston Methodist Hospital|Houston Methodist Hospital|Long|USA

>Spike|hCoV-19/Scotland/QEUH-C0115B/2020|2020-12-05|EPI\_ISL\_757263|Original|hCoV-19^^Scotland|Human|Lighthouse Lab in Glasgow|Wellcome Sanger Institute for the COVID-19 Genomics UK (COG-UK) Consortium|Davies|United Kingdom

>Spike|hCoV-19/Denmark/DCGC-17356/2020|2020-12-14|EPI\_ISL\_750928|Original|hCoV-19^^Nordjylland|Human|Department of Virus and Microbiological Special Diagnostics|Albertsen Lab|Michaelsen|Denmark

>Spike|hCoV-19/USA/CA-CHLA-PLM26509492/2020|2020-11-03|EPI\_ISL\_753272|Original|hCoV-19^^California|Human|Clinical virology Laboratory|Center for Personalized Medicine|Dien Bard|USA

>Spike|hCoV-19/USA/FL-USAFSAM-S033/2020|2020-03-25|EPI\_ISL\_512801|Original|hCoV-19^^Florida|Human|Public Health|Public Health|Fries|USA

>Spike|hCoV-19/USA/UT-UPHL-2012737998/2020|2020-11-30|EPI\_ISL\_746924|Original|hCoV-19^^Utah|Human|Utah Public Health Laboratory|Utah Public Health Laboratory|Gallagher|USA

>Spike|hCoV-19/Denmark/DCGC-15902/2020|2020-11-23|EPI\_ISL\_714093|Original|hCoV-19^^Syddanmark|Human|Department of Virus and Microbiological Special Diagnostics|Albertsen Lab|Michaelsen|Denmark

>Spike|hCoV-19/USA/WY-WYPHL-00048/2020|2020-03-25|EPI\_ISL\_462940|Original|hCoV-19^^Wyoming|Human|Wyoming Public Health Laboratory|Center for Global Health|Domman|USA

>Spike|hCoV-19/England/LEED-2A9B51/2020|2020-04-12|EPI\_ISL\_538855|Original|hCoV-19^^England|Human|Leeds Teaching Hospitals NHS Trust and Public Health England|Wellcome Sanger Institute for the COVID-19 Genomics UK (COG-UK) consortium|Davies|United Kingdom

>Spike|hCoV-19/Scotland/GCVR-17083F/2020|2020-03-25|EPI\_ISL\_489587|Original|hCoV-19^^Scotland|Human|NHSGGC West of Scotland Specialist Virology Centre / MRC-University of Glasgow Centre for Virus Research|Wellcome Sanger Institute for the COVID-19 Genomics UK (COG-UK) consortium|Davies|United Kingdom

>Spike|hCoV-19/Netherlands/NH-RIVM-20080/2020|2020-11-12|EPI\_ISL\_723259|Original|hCoV-19^^Noord-Holland|Human|Dutch COVID-19 response team|National Institute for Public Health and the Environment (RIVM)|Meijer|Netherlands

>Spike|hCoV-19/England/SHEF-CB03E/2020|2020-09-01|EPI\_ISL\_540753|Original|hCoV-19^^England|Human|Virology Department|COVID-19 Genomics UK (COG-UK) Consortium|de Silva|United Kingdom

>Spike|hCoV-19/England/MILK-ABBFD0/2020|2020-10-22|EPI\_ISL\_630998|Original|hCoV-19^^England|Human|Lighthouse Lab in Milton Keynes|Wellcome Sanger Institute for the COVID-19 Genomics UK (COG-UK) consortium|Davies|United Kingdom

>Spike|hCoV-19/England/ALDP-95507C/2020|2020-06-12|EPI\_ISL\_553412|Original|hCoV-19^^England|Human|Lighthouse Lab in Alderley Park|Wellcome Sanger Institute for the COVID-19 Genomics UK (COG-UK) consortium|Davies|United Kingdom

>Spike|hCoV-19/England/CAMC-B32D7C/2020|2020-11-05|EPI\_ISL\_659433|Original|hCoV-19^^England|Human|Lighthouse Lab in Cambridge|Wellcome Sanger Institute for the COVID-19 Genomics UK (COG-UK) Consortium|Davies|United Kingdom

>Spike|hCoV-19/Denmark/DCGC-21671/2020|2020-12-21|EPI\_ISL\_758300|Original|hCoV-19^^Hovedstaden|Human|Department of Virus and Microbiological Special Diagnostics|Albertsen Lab|Michaelsen|Denmark

>Spike|hCoV-19/England/MILK-AB753C/2020|2020-10-21|EPI\_ISL\_623636|Original|hCoV-19^^England|Human|Lighthouse Lab in Milton Keynes|Wellcome Sanger Institute for the COVID-19 Genomics UK (COG-UK) consortium|Davies|United Kingdom

>Spike|hCoV-19/USA/CA-CZB-3362/2020|2020-07-15|EPI\_ISL\_548274|Original|hCoV-19^^California|Human|Orange County Public Health Laboratory|Chan-Zuckerberg Biohub|Bhatt|USA

>Spike|hCoV-19/Scotland/CVR4347/2020|2020-09-11|EPI\_ISL\_572534|Original|hCoV-19^^Scotland|Human|West of Scotland Specialist Virology Centre|COVID-19 Genomics UK (COG-UK) Consortium|Robertson|United Kingdom

>Spike|hCoV-19/England/MILK-B95102/2020|2020-11-13|EPI\_ISL\_673787|Original|hCoV-19^^England|Human|Lighthouse Lab in Milton Keynes|Wellcome Sanger Institute for the COVID-19 Genomics UK (COG-UK) Consortium|Davies|United Kingdom

>Spike|hCoV-19/USA/LA-CDC-2-3693761/2020|2020-11-04|EPI\_ISL\_747072|Original|hCoV-19^^Louisiana|Human|Respiratory Viruses Branch|Respiratory Viruses Branch|Queen|USA

>Spike|hCoV-19/Wales/CAMC-AEAF23/2020|2020-10-26|EPI\_ISL\_647909|Original|hCoV-19^^Wales|Human|Lighthouse Lab in Cambridge|Wellcome Sanger Institute for the COVID-19 Genomics UK (COG-UK) Consortium|Davies|United Kingdom

>Spike|hCoV-19/France/ARA-SC194/2020|2020-04-28|EPI\_ISL\_700368|Original|hCoV-19^^Auvergne-Rh\u00f4ne-Alpes|Human|Laboratoire de virologie|CNR Virus des Infections Respiratoires - France SUD|Bal|France

>Spike|hCoV-19/Denmark/DCGC-11299/2020|2020-11-02|EPI\_ISL\_670823|Original|hCoV-19^^Hovedstaden|Human|Department of Virus and Microbiological Special Diagnostics|Albertsen Lab|Michaelsen|Denmark

>Spike|hCoV-19/England/20149008804/2020|2020-03-31|EPI\_ISL\_466140|Original|hCoV-19^^England|Human|Respiratory Virus Unit|Respiratory Virus Unit|Platt|United Kingdom

>Spike|hCoV-19/Northern Ireland/NIRE-234EDA/2020|2020-10-23|EPI\_ISL\_764143|Original|hCoV-19^^Northern Ireland|Human|Regional Virus Laboratory|COVID-19 Genomics UK (COG-UK) Consortium|Fairley|United Kingdom

>Spike|hCoV-19/Denmark/DCGC-8993/2020|2020-10-26|EPI\_ISL\_626185|Original|hCoV-19^^Midtjylland|Human|Department of Virus and Microbiological Special Diagnostics|Albertsen lab|Michaelsen|Denmark

>Spike|hCoV-19/Northern Ireland/NIRE-101FC5/2020|2020-03-23|EPI\_ISL\_453483|Original|hCoV-19^^Northern Ireland|Human|Regional Virus Laboratory|COVID-19 Genomics UK (COG-UK) Consortium|Fairley|United Kingdom

>Spike|hCoV-19/England/LOND-12635CB/2020|2020-11-04|EPI\_ISL\_679452|Original|hCoV-19^^England|Human|University College London|COVID-19 Genomics UK (COG-UK) Consortium|Roy|United Kingdom

>Spike|hCoV-19/Wales/PHWC-4885D0/2020|2020-10-29|EPI\_ISL\_639412|Original|hCoV-19^^Wales|Human|Wales Specialist Virology Centre Sequencing lab|COVID-19 Genomics UK (COG-UK) Consortium|Moore|United Kingdom

>Spike|hCoV-19/Germany/TH-RKI-NP-0054/2020|2020-12-14|EPI\_ISL\_763002|Original|hCoV-19^^Thuringia|Human|Unit 17|Project group Epidemiology of Highly Pathogenic Microorganisms|Schubert|Germany

>Spike|hCoV-19/Australia/VIC3528/2020|2020-07-09|EPI\_ISL\_520277|Original|hCoV-19^^Victoria|Human|Victorian Infectious Diseases Reference Laboratory (VIDRL)|VIDRL and MDU-PHL|Schultz|Australia

>Spike|hCoV-19/England/MILK-ACE0D7/2020|2020-10-22|EPI\_ISL\_630269|Original|hCoV-19^^England|Human|Lighthouse Lab in Milton Keynes|Wellcome Sanger Institute for the COVID-19 Genomics UK (COG-UK) consortium|Davies|United Kingdom

>Spike|hCoV-19/Japan/PG-5494/2020|2020-08-00|EPI\_ISL\_690596|Original|hCoV-19^^Japan|Human|Pathogen Genomics Center|Pathogen Genomics Center|Sekizuka|Japan

>Spike|hCoV-19/Japan/PG-7342/2020|2020-08-00|EPI\_ISL\_688445|Original|hCoV-19^^Japan|Human|Pathogen Genomics Center|Pathogen Genomics Center|Sekizuka|Japan

>Spike|hCoV-19/England/ALDP-AA3CB6/2020|2020-10-21|EPI\_ISL\_624334|Original|hCoV-19^^England|Human|Lighthouse Lab in Alderley Park|Wellcome Sanger Institute for the COVID-19 Genomics UK (COG-UK) consortium|Davies|United Kingdom

>Spike|hCoV-19/Tunisia/2909/2020|2020-03-02|EPI\_ISL\_707791|Original|hCoV-19^^Gafsa|Human|1-Laboratory of Microbiology|1-Clinical and Experimental Pharmacology Lab|Boutiba-Ben Boubaker|Tunisia

>Spike|hCoV-19/England/NOTT-11C6C2/2020|2020-11-16|EPI\_ISL\_652407|Original|hCoV-19^^England|Human|Queens Medical Centre|COVID-19 Genomics UK (COG-UK) Consortium|Loose|United Kingdom

>Spike|hCoV-19/USA/NY-Wadsworth-280302-01/2020|2020-11-26|EPI\_ISL\_754490|Original|hCoV-19^^New York|Human|Wadsworth Center|Wadsworth Center|Lasek-Nesselquist|USA

>Spike|hCoV-19/England/BRIS-1853DC0/2020|2020-04-27|EPI\_ISL\_492442|Original|hCoV-19^^England|Human|PHE South West Regional Laboratory|Wellcome Sanger Institute for the COVID-19 Genomics UK (COG-UK) consortium|Davies|United Kingdom

>Spike|hCoV-19/England/QEUH-9F3C9A/2020|2020-09-24|EPI\_ISL\_588517|Original|hCoV-19^^England|Human|Lighthouse Lab in Glasgow|Wellcome Sanger Institute for the COVID-19 Genomics UK (COG-UK) consortium|Davies|United Kingdom

>Spike|hCoV-19/USA/WI-UW-2125/2020|2020-09-29|EPI\_ISL\_677530|Original|hCoV-19^^Wisconsin|Human|University of Wisconsin-Madison AIDS Vaccine Research Laboratories|University of Wisconsin-Madison AIDS Vaccine Research Laboratories|Baczenas|USA

>Spike|hCoV-19/Denmark/DCGC-20219/2020|2020-11-30|EPI\_ISL\_748057|Original|hCoV-19^^Hovedstaden|Human|Department of Virus and Microbiological Special Diagnostics|Albertsen Lab|Michaelsen|Denmark

>Spike|hCoV-19/Gambia/NPHL-1645/2020|2020-08-04|EPI\_ISL\_561236|Original|hCoV-19^^Kombo|Human|MRCG at LSHTM Genomics lab|MRCG at LSHTM Genomics lab|Sesay|Gambia

>Spike|hCoV-19/England/ALDP-BCA0DA/2020|2020-11-23|EPI\_ISL\_703460|Original|hCoV-19^^England|Human|Lighthouse Lab in Alderley Park|Wellcome Sanger Institute for the COVID-19 Genomics UK (COG-UK) Consortium|Davies|United Kingdom

>Spike|hCoV-19/USA/TX-DSHS-0862/2020|2020-06-16|EPI\_ISL\_593594|Original|hCoV-19^^Texas|Human|Texas Department of State Health Services|Texas Department of State Health Services|Rahman|USA

>Spike|hCoV-19/England/MILK-A6AE00/2020|2020-10-09|EPI\_ISL\_608798|Original|hCoV-19^^England|Human|Lighthouse Lab in Milton Keynes|Wellcome Sanger Institute for the COVID-19 Genomics UK (COG-UK) consortium|Davies|United Kingdom

>Spike|hCoV-19/Canada/MB-NML-653/2020|2020-03-11|EPI\_ISL\_632932|Original|hCoV-19^^Manitoba|Human|Cadham Provincial laboratory|Cadham Provincial laboratory|Majer|Canada

>Spike|hCoV-19/SaudiArabia/KAUST-JEDDAH838/2020|2020-05-24|EPI\_ISL\_513011|Original|hCoV-19^^Jeddah|Human|Pathogen Genomics Lab King Abdullah University of Science and Technology(KAUST)|Pathogen Genomics Lab King Abdullah University of Science and Technology(KAUST)|Mohamed Ghazzali|Saudi Arabia

>Spike|hCoV-19/England/ALDP-8B7A5D/2020|2020-06-27|EPI\_ISL\_557040|Original|hCoV-19^^England|Human|Lighthouse Lab in Alderley Park|Wellcome Sanger Institute for the COVID-19 Genomics UK (COG-UK) consortium|Davies|United Kingdom

>Spike|hCoV-19/England/QEUEH-9CFE19/2020|2020-09-16|EPI\_ISL\_589944|Original|hCoV-19^^England|Human|Lighthouse Lab in Glasgow|Wellcome Sanger Institute for the COVID-19 Genomics UK (COG-UK) consortium|Davies|United Kingdom

>Spike|hCoV-19/England/CAMC-BCOE52/2020|2020-11-23|EPI\_ISL\_705098|Original|hCoV-19^^England|Human|Lighthouse Lab in Cambridge|Wellcome Sanger Institute for the COVID-19 Genomics UK (COG-UK) Consortium|Davies|United Kingdom

>Spike|hCoV-19/Japan/PG-3840/2020|2020-07-00|EPI\_ISL\_692091|Original|hCoV-19^^Japan|Human|Pathogen Genomics Center|Pathogen Genomics Center|Sekizuka|Japan

>Spike|hCoV-19/USA/TX-HMH-MCoV-11413/2020|2020-09-07|EPI\_ISL\_790017|Original|hCoV-19^^Texas|Human|Houston Methodist Hospital|Houston Methodist Hospital|Long|USA

>Spike|hCoV-19/Wales/MILK-9E0735/2020|2020-09-20|EPI\_ISL\_601350|Original|hCoV-19^^Wales|Human|Lighthouse Lab in Milton Keynes|Wellcome Sanger Institute for the COVID-19 Genomics UK (COG-UK) consortium|Davies|United Kingdom

>Spike|hCoV-19/England/ALDP-9EA4DA/2020|2020-09-24|EPI\_ISL\_580163|Original|hCoV-19^^England|Human|Lighthouse Lab in Alderley Park|Wellcome Sanger Institute for the COVID-19 Genomics UK (COG-UK) consortium|Davies|United Kingdom

>Spike|hCoV-19/USA/WA-S1016/2020|2020-04-29|EPI\_ISL\_463506|Original|hCoV-19^^Washington|Human|Washington State Department of Health|Seattle Flu Study|Bedford|USA

>Spike|hCoV-19/Wales/PHWC-48EB32/2020|2020-11-03|EPI\_ISL\_680966|Original|hCoV-19^^Wales|Human|Wales Specialist Virology Centre Sequencing lab|COVID-19 Genomics UK (COG-UK) Consortium|Moore|United Kingdom

>Spike|hCoV-19/Gambia/GC19-3807/2020|2020-07-27|EPI\_ISL\_561085|Original|hCoV-19^^Kombo|Human|MRCG at LSHTM Genomics lab|MRCG at LSHTM Genomics lab|Sesay|Gambia

>Spike|hCoV-19/Switzerland/BS-ETHZ-130020/2020|2020-05-08|EPI\_ISL\_467012|Original|hCoV-19^^Basel-Stadt|Human|Viollier AG|Department of Biosystems Science and Engineering|Nadeau|Switzerland

>Spike|hCoV-19/India/MH-ACTREC-050/2020|2020-05-13|EPI\_ISL\_699706|Original|hCoV-19^^Maharashtra|Human|Hematopathology Laboratory|Hematopathology Laboratory|Patkar|India

>Spike|hCoV-19/Germany/HH-hpi-p2087/2020|2020-03-20|EPI\_ISL\_776350|Original|hCoV-19^^Hamburg|Human|University Medical Center Hamburg Eppendorf|Heinrich Pette Institute|Robitaille|Germany

>Spike|hCoV-19/USA/AZ-TG366705/2020|2020-06-01|EPI\_ISL\_694469|Original|hCoV-19^^Arizona|Human|AZ SPHL|TGen North|French|USA

>Spike|hCoV-19/Netherlands/FL-EMC-20/2020|2020-05-22|EPI\_ISL\_523129|Original|hCoV-19^^Flevoland|Human|Dutch COVID-19 response team|Erasmus Medical Center|Oude Munnink|Netherlands

>Spike|hCoV-19/England/LIVE-DC1C73/2020|2020-11-20|EPI\_ISL\_705821|Original|hCoV-19^^England|Human|Liverpool Clinical Laboratories|COVID-19 Genomics UK (COG-UK) Consortium|Haldenby|United Kingdom

>Spike|hCoV-19/USA/AR-CDC-2-3693691/2020|2020-10-30|EPI\_ISL\_747067|Original|hCoV-19^^Arkansas|Human|Respiratory Viruses Branch|Respiratory Viruses Branch|Queen|USA

>Spike|hCoV-19/Denmark/DCGC-1813/2020|2020-05-25|EPI\_ISL\_617956|Original|hCoV-19^^Hovedstaden|Human|Department of Virus and Microbiological Special Diagnostics|Albertsen lab|Michaelsen|Denmark

>Spike|hCoV-19/England/CAMC-B354FC/2020|2020-11-05|EPI\_ISL\_659426|Original|hCoV-19^^England|Human|Lighthouse Lab in Cambridge|Wellcome Sanger Institute for the COVID-19 Genomics UK (COG-UK) Consortium|Davies|United Kingdom

>Spike|hCoV-19/England/QEUEH-A1E2D2/2020|2020-09-29|EPI\_ISL\_587527|Original|hCoV-19^^England|Human|Lighthouse Lab in Glasgow|Wellcome Sanger Institute for the COVID-19 Genomics UK (COG-UK) consortium|Davies|United Kingdom

>Spike|hCoV-19/Japan/PG-7692/2020|2020-08-00|EPI\_ISL\_686794|Original|hCoV-19^^Japan|Human|Chiba Prefectural Institute of Public Health|Pathogen Genomics Center|Sekizuka|Japan

>Spike|hCoV-19/USA/MN-MDH-1592/2020|2020-05-18|EPI\_ISL\_530188|Original|hCoV-19^^Minnesota|Human|Minnesota Department of Health|Minnesota Department of Health|Garfin|USA

>Spike|hCoV-19/Japan/IC-0550/2020|2020-12-00|EPI\_ISL\_779233|Original|hCoV-19^^Japan|Human|Pathogen Genomics Center|Pathogen Genomics Center|Sekizuka|Japan

>Spike|hCoV-19/Wales/CVR4746/2020|2020-09-19|EPI\_ISL\_627337|Original|hCoV-19^^Wales|Human|West of Scotland Specialist Virology Centre|COVID-19 Genomics UK (COG-UK) Consortium|Robertson|United Kingdom

>Spike|hCoV-19/USA/UT-UPHL-2008865/2020|2020-05-28|EPI\_ISL\_524982|Original|hCoV-19^^Utah|Human|Utah Public Health Laboratory|Utah Public Health Laboratory|Young|USA

>Spike|hCoV-19/England/QEUEH-9B810B/2020|2020-09-04|EPI\_ISL\_590677|Original|hCoV-19^^England|Human|Lighthouse Lab in Glasgow|Wellcome Sanger Institute for the COVID-19 Genomics UK (COG-UK) consortium|Davies|United Kingdom

>Spike|hCoV-19/USA/LA-EVTL394/2020|2020-06-03|EPI\_ISL\_578800|Original|hCoV-19^^Louisiana|Human|LSUHS Emerging Viral Threat Laboratory|Microbial Genome Sequencing Center|Kamil|USA

>Spike|hCoV-19/USA/TX-DSHS-1385/2020|2020-05-13|EPI\_ISL\_654749|Original|hCoV-19^^Texas|Human|Texas Department of State Health Services|Texas Department of State Health Services|Rahman|USA

>Spike|hCoV-19/England/MILK-B86650/2020|2020-11-13|EPI\_ISL\_674036|Original|hCoV-19^^England|Human|Lighthouse Lab in Milton Keynes|Wellcome Sanger Institute for the COVID-19 Genomics UK (COG-UK) Consortium|Davies|United Kingdom

>Spike|hCoV-19/USA/WI-UW-1645/2020|2020-09-10|EPI\_ISL\_605519|Original|hCoV-19^^Wisconsin|Human|University of Wisconsin-Madison AIDS Vaccine Research Laboratories|University of Wisconsin-Madison AIDS Vaccine Research Laboratories|Baczenas|USA

>Spike|hCoV-19/Vietnam/VNHN\_0419/2020|2020-03-10|EPI\_ISL\_435312|Original|hCoV-19^^Vietnam|Human|National Hospital of Tropical Diseases|Oxford University Clinical Research Unit|Nguyen|Vietnam

>Spike|hCoV-19/USA/TX-HMH-1263/2020|2020-03-30|EPI\_ISL\_542617|Original|hCoV-19^^Texas|Human|Houston Methodist Hospital|Houston Methodist Hospital|Long|USA

>Spike|hCoV-19/Netherlands/OV-EMC-94/2020|2020-09-08|EPI\_ISL\_722847|Original|hCoV-19^^Overijssel|Human|Dutch COVID-19 response team|Erasmus Medical Center|Oude Munnink|Netherlands

>Spike|hCoV-19/England/MILK-510EB3/2020|2020-06-10|EPI\_ISL\_559071|Original|hCoV-19^^England|Human|Lighthouse Lab in Milton Keynes|Wellcome Sanger Institute for the COVID-19 Genomics UK (COG-UK) consortium|Davies|United Kingdom

>Spike|hCoV-19/Switzerland/BS-42355465/2020|2020-07-16|EPI\_ISL\_581888|Original|hCoV-19^^Basel-Stadt|Human|University Hospital Basel|University Hospital Basel|Roloff Handschin|Switzerland

>Spike|hCoV-19/Australia/VIC7389/2020|2020-07-29|EPI\_ISL\_564375|Original|hCoV-19^^Victoria|Human|Victorian Infectious Diseases Reference Laboratory (VIDRL)|VIDRL and MDU-PHL|Schultz|Australia

>Spike|hCoV-19/England/CAMC-A64DEB/2020|2020-10-11|EPI\_ISL\_608596|Original|hCoV-19^^England|Human|Lighthouse Lab in Cambridge|Wellcome Sanger Institute for the COVID-19 Genomics UK (COG-UK) consortium|Davies|United Kingdom

>Spike|hCoV-19/England/NORT-282B7C/2020|2020-03-28|EPI\_ISL\_472213|Original|hCoV-19^^England|Human|Northumbria University / South Tees Hospitals NHS Foundation Trust / North Cumbria Integrated Care NHS Foundation Trust / North Tees and Hartlepool NHS Foundation Trust / Newcastle Hospitals NHS Foundation Trust|COVID-19 Genomics UK (COG-UK) Consortium|Bashton|United Kingdom

>Spike|hCoV-19/India/GJ-GBRC-405a/2020|2020-06-25|EPI\_ISL\_586526|Original|hCoV-19^^Gujarat|Human|B.J. Medical College and Civil hospital|Gujarat Biotechnology Research Centre|Joshi|India

>Spike|hCoV-19/Wales/PHWC-499B34/2020|2020-12-05|EPI\_ISL\_727405|Original|hCoV-19^^Wales|Human|Originating lab|COVID-19 Genomics UK (COG-UK) Consortium|Moore|United Kingdom

>Spike|hCoV-19/Denmark/DCGC-1694/2020|2020-06-22|EPI\_ISL\_618162|Original|hCoV-19^^Nordjylland|Human|Department of Virus and Microbiological Special Diagnostics|Albertsen lab|Michaelsen|Denmark

>Spike|hCoV-19/USA/CA-CZB-11277/2020|2020-04-30|EPI\_ISL\_738777|Original|hCoV-19^^California|Human|Napa-Solano-Yolo- Marin County (NSYM) Public Health Laboratories|Chan-Zuckerberg Biohub|Kamm|USA

>Spike|hCoV-19/USA/CO-CSU-E0462-2/2020|2020-05-13|EPI\_ISL\_527480|Original|hCoV-19^^Colorado|Human|Colorado State University - Ebel Lab|Colorado State University - Ebel Lab|Cline|USA

>Spike|hCoV-19/USA/UT-UPHL-2009554/2020|2020-07-15|EPI\_ISL\_605233|Original|hCoV-19^^Utah|Human|Utah Public Health Laboratory|Utah Public Health Laboratory|Young|USA

>Spike|hCoV-19/England/NORT-297181/2020|2020-04-23|EPI\_ISL\_488159|Original|hCoV-19^^England|Human|NU-OMICS DNA Sequencing research facility|Wellcome Sanger Institute for the COVID-19 Genomics UK (COG-UK) consortium|Davies|United Kingdom

>Spike|hCoV-19/Denmark/DCGC-3413/2020|2020-08-31|EPI\_ISL\_616172|Original|hCoV-19^^Sjaelland|Human|Department of Virus and Microbiological Special Diagnostics|Albertsen lab|Michaelsen|Denmark

>Spike|hCoV-19/England/NOTT-10FC0C/2020|2020-04-07|EPI\_ISL\_432699|Original|hCoV-19^^England|Human|Queens Medical Centre|COVID-19 Genomics UK (COG-UK) Consortium|Loose|United Kingdom

>Spike|hCoV-19/England/NORT-28D4A3/2020|2020-11-17|EPI\_ISL\_702812|Original|hCoV-19^^England|Human|Northumbria University / South Tees Hospitals NHS Foundation Trust / North Cumbria Integrated Care NHS Foundation Trust / North Tees and Hartlepool NHS Foundation Trust / Newcastle Hospitals NHS Foundation Trust|COVID-19 Genomics UK (COG-UK) Consortium|Bashton|United Kingdom

>Spike|hCoV-19/South Africa/KRISP-K002690/2020|2020-07-27|EPI\_ISL\_535552|Original|hCoV-19^^KwaZulu-Natal|Human|NHLS-IALCH|KRISP|de Oliveira|South Africa

>Spike|hCoV-19/England/QEUA-A61610/2020|2020-10-12|EPI\_ISL\_628623|Original|hCoV-19^^England|Human|Oxford Viromics|COVID-19 Genomics UK (COG-UK) Consortium|Golubchik|United Kingdom

>Spike|hCoV-19/Wales/PHWC-495770/2020|2020-11-23|EPI\_ISL\_726393|Original|hCoV-19^^Wales|Human|Originating lab|COVID-19 Genomics UK (COG-UK) Consortium|Moore|United Kingdom

>Spike|hCoV-19/Luxembourg/LNS6437419/2020|2020-12-25|EPI\_ISL\_771083|Original|hCoV-19^^Luxembourg|Human|Laboratoire national de sant\u00e9|Laboratoire national de sant\u00e9|Wienecke-Baldacchino|Luxembourg

>Spike|hCoV-19/England/CAMC-BD21CD/2020|2020-11-28|EPI\_ISL\_702218|Original|hCoV-19^^England|Human|Lighthouse Lab in Cambridge|Wellcome Sanger Institute for the COVID-19 Genomics UK (COG-UK) Consortium|Davies|United Kingdom

>Spike|hCoV-19/Netherlands/NB-EMC-348/2020|2020-10-29|EPI\_ISL\_722567|Original|hCoV-19^^Noord Brabant|Human|Dutch COVID-19 response team|Erasmus Medical Center|Oude Munnink|Netherlands

>Spike|hCoV-19/USA/WA-S2753/2020|2020-07-27|EPI\_ISL\_525743|Original|hCoV-19^^Washington|Human|Seattle Flu Study|Seattle Flu Study|Lee|USA

>Spike|hCoV-19/England/ALDP-A52894/2020|2020-10-07|EPI\_ISL\_598222|Original|hCoV-19^^England|Human|Lighthouse Lab in Alderley Park|Wellcome Sanger Institute for the COVID-19 Genomics UK (COG-UK) consortium|Davies|United Kingdom

>Spike|hCoV-19/USA/CA-IGI-0082/2020|2020-05-28|EPI\_ISL\_511836|Original|hCoV-19^^California|Human|Innovative Genomics Institute|Innovative Genomics Institute|Wyman|USA

>Spike|hCoV-19/USA/TX-HMH-MCoV-9276/2020|2020-07-03|EPI\_ISL\_781028|Original|hCoV-19^^Texas|Human|Houston Methodist Hospital|Houston Methodist Hospital|Long|USA

>Spike|hCoV-19/England/MILK-ACC5CB/2020|2020-10-21|EPI\_ISL\_634401|Original|hCoV-19^^England|Human|Lighthouse Lab in Milton Keynes|Wellcome Sanger Institute for the COVID-19 Genomics UK (COG-UK) consortium|Davies|United Kingdom

>Spike|hCoV-19/Switzerland/BS-42389973/2020|2020-08-11|EPI\_ISL\_581947|Original|hCoV-19^^Basel-Stadt|Human|University Hospital Basel|University Hospital Basel|Roloff Handschin|Switzerland

>Spike|hCoV-19/USA/CA-SR0135/2020|2020-03-31|EPI\_ISL\_445116|Original|hCoV-19^^California|Human|UC San Diego Center for Advanced Laboratory Medicine|Andersen lab at Scripps Research|Gangavarapu|USA

>Spike|hCoV-19/Costa Rica/INC-0063/2020|2020-06-20|EPI\_ISL\_512669|Original|hCoV-19^^Alajuela|Human|Area De Salud Alajuela Norte - Clinica Dr. Marcial Rodriguez|Inciensa|Brenes Porras|Costa Rica

>Spike|hCoV-19/Japan/PG-4483/2020|2020-07-00|EPI\_ISL\_692706|Original|hCoV-19^^Japan|Human|Pathogen Genomics Center|Pathogen Genomics Center|Sekizuka|Japan

>Spike|hCoV-19/Lithuania/MR-LUHS-Eilnr474/2020|2020-09-12|EPI\_ISL\_636902|Original|hCoV-19^^Kauno apskritis|Human|Lithuanian University of Health Sciences Hospital|Lithuanian University of Health Sciences|Zemaitis|Lithuania

>Spike|hCoV-19/Slovenia/12230/2020|2020-03-24|EPI\_ISL\_635258|Original|hCoV-19^^Slovenia|Human|Institute of Microbiology and Immunology|Institute of Microbiology and Immunology|Zakotnik|Slovenia

>Spike|hCoV-19/France/IDF-3212/2020|2020-03-23|EPI\_ISL\_420061|Original|hCoV-19^^\u00cele-de-France|Human|CMIP|National Reference Center for Viruses of Respiratory Infections|Enouf|France

>Spike|hCoV-19/USA/MD-HP12152/2020|2020-12-29|EPI\_ISL\_791461|Original|hCoV-19^^Maryland|Human|Johns Hopkins Hospital Department of Pathology|Johns Hopkins Hospital Department of Pathology|Morris|USA

>Spike|hCoV-19/USA/NE-11503/2020|2020-05-05|EPI\_ISL\_475220|Original|hCoV-19^^Nebraska|Human|Nebraska Public Health Laboratory|UNMC COVID-19 Response Team|Pratt|USA

>Spike|hCoV-19/Luxembourg/LNS0876307/2020|2020-11-30|EPI\_ISL\_770968|Original|hCoV-19^^Luxembourg|Human|Laboratoire national de sant\u00e9|Laboratoire national de sant\u00e9|Wienecke-Baldacchino|Luxembourg

>Spike|hCoV-19/England/MILK-B04C94/2020|2020-10-23|EPI\_ISL\_650697|Original|hCoV-19^^England|Human|Department of Pathology|COVID-19 Genomics UK (COG-UK) Consortium|Goodfellow|United Kingdom

>Spike|hCoV-19/South Korea/KDCA0389/2020|2020-11-04|EPI\_ISL\_760173|Original|hCoV-19^^South Korea|Human|Division of Emerging Infectious Diseases|Division of Emerging Infectious Diseases|Park|South Korea

>Spike|hCoV-19/Denmark/DCGC-3155/2020|2020-08-31|EPI\_ISL\_615975|Original|hCoV-19^^Midtjylland|Human|Department of Virus and Microbiological Special Diagnostics|Albertsen lab|Michaelsen|Denmark

>Spike|hCoV-19/England/MILK-99478B/2020|2020-08-25|EPI\_ISL\_552391|Original|hCoV-19^^England|Human|Lighthouse Lab in Milton Keynes|Wellcome Sanger Institute for the COVID-19 Genomics UK (COG-UK) consortium|Davies|United Kingdom

>Spike|hCoV-19/Brazil/RS-00639/2020|2020-11-25|EPI\_ISL\_770587|Original|hCoV-19^^Rio Grande do Sul|Human|Laborat\u00f3rio de Microbiologia Molecular - Universidade FEEVALE|Bioinformatics Laboratory / LNCC|Almeida|Brazil

>Spike|hCoV-19/USA/CA-CZB-11850/2020|2020-09-30|EPI\_ISL\_625611|Original|hCoV-19^^California|Human|Alameda County Public Health Lab|Chan-Zuckerberg Biohub|Bhatt|USA

>Spike|hCoV-19/USA/MN129-MDH129/2020|2020-03-16|EPI\_ISL\_421685|Original|hCoV-19^^Minnesota|Human|Minnesota Department of Health|Minnesota Department of Health|Wang|USA

>Spike|hCoV-19/Wales/PHWC-49B8C2/2020|2020-12-05|EPI\_ISL\_742400|Original|hCoV-19^^Wales|Human|Wales Specialist Virology Centre Sequencing lab|COVID-19 Genomics UK (COG-UK) Consortium|Moore|United Kingdom

>Spike|hCoV-19/England/NORW-EE369/2020|2020-04-24|EPI\_ISL\_490532|Original|hCoV-19^^England|Human|Quadram Institute Bioscience|COVID-19 Genomics UK (COG-UK) Consortium|Alikhan|United Kingdom

>Spike|hCoV-19/Denmark/ALAB-SSI467/2020|2020-03-25|EPI\_ISL\_429547|Original|hCoV-19^^Denmark|Human|Department of Virus and Microbiological Special Diagnostics|Albertsen lab|Kirkegaard|Denmark

>Spike|hCoV-19/Australia/VIC17871/2020|2020-08-27|EPI\_ISL\_779519|Original|hCoV-19^^Victoria|Human|Microbiological Diagnostic Unit - Public Health Laboratory (MDU-PHL)|MDU-PHL|Beck|Australia

>Spike|hCoV-19/Canada/ON-S1439/2020|2020-08-25|EPI\_ISL\_591201|Original|hCoV-19^^Ontario|Human|Toronto Invasive Bacterial Diseases Network|McMaster University|McArthur|Canada

>Spike|hCoV-19/Japan/PG-7056/2020|2020-08-00|EPI\_ISL\_688161|Original|hCoV-19^^Japan|Human|Pathogen Genomics Center|Pathogen Genomics Center|Sekizuka|Japan

>Spike|hCoV-19/England/LCST-24D735A/2020|2020-06-29|EPI\_ISL\_499810|Original|hCoV-19^^England|Human|University Hospitals Of Leicester NHS Trust and DeepSeq Nottingham|COVID-19 Genomics UK (COG-UK) Consortium|Loose|United Kingdom

>Spike|hCoV-19/Latvia/077/2020|2020-07-16|EPI\_ISL\_501829|Original|hCoV-19^^Latvia|Human|E. Gulbja Laboratorija|Latvian Biomedical Research and Study Centre|Zrelavs|Latvia

>Spike|hCoV-19/USA/AZ-TG280881/2020|2020-04-24|EPI\_ISL\_694210|Original|hCoV-19^^Arizona|Human|AZ SPHL|TGen North|French|USA

>Spike|hCoV-19/Equatorial Guinea/12705/2020|2020-05-30|EPI\_ISL\_648312|Original|hCoV-19^^Bioko Norte|Human|Laboratorio de Investigaciones de Baney|University Hospital Basel|Hosch|Equatorial Guinea

>Spike|hCoV-19/England/OXON-AE471/2020|2020-00-00|EPI\_ISL\_448692|Original|hCoV-19^^England|Human|Oxford Viromics|COVID-19 Genomics UK (COG-UK) Consortium|Golubchik|United Kingdom

>Spike|hCoV-19/USA/TX-HMH-2713/2020|2020-06-05|EPI\_ISL\_545497|Original|hCoV-19^^Texas|Human|Houston Methodist Hospital|Houston Methodist Hospital|Long|USA

>Spike|hCoV-19/Italy/APU-IZSPB-189PT/2020|2020-08-28|EPI\_ISL\_722866|Original|hCoV-19^^Apulia|Human|I.R.C.C.S. \S. De Bellis\ - Ente Ospedaliero|Istituto Zooprofilattico Sperimentale della Puglia e della Basilicata|Parisi|Italy

>Spike|hCoV-19/Netherlands/GE-EMC-276/2020|2020-06-10|EPI\_ISL\_523255|Original|hCoV-19^^Gelderland|Human|Dutch COVID-19 response team|Erasmus Medical Center|Oude Munnink|Netherlands

>Spike|hCoV-19/England/BRIS-128FE6/2020|2020-04-19|EPI\_ISL\_458763|Original|hCoV-19^^England|Human|PHE South West Regional Laboratory|Wellcome Sanger Institute for the COVID-19 Genomics UK (COG-UK) consortium|Davies|United Kingdom

>Spike|hCoV-19/USA/FL-BPHL-1325/2020|2020-07-14|EPI\_ISL\_541263|Original|hCoV-19^^Florida|Human|Florida Bureau of Public Health Laboratories|Florida Bureau of Public Health Laboratories|Blanton|USA

>Spike|hCoV-19/India/TG-CCMB-M711/2020|2020-06-11|EPI\_ISL\_495229|Original|hCoV-19^^Telangana|Human|CSIR-Centre for Cellular and Molecular Biology|CSIR-Centre for Cellular and Molecular Biology|Banu|India

>Spike|hCoV-19/England/ALDP-9ED5E3/2020|2020-05-08|EPI\_ISL\_589281|Original|hCoV-19^^England|Human|Lighthouse Lab in Alderley Park|Wellcome Sanger Institute for the COVID-19 Genomics UK (COG-UK) consortium|Davies|United Kingdom

>Spike|hCoV-19/USA/FL-BPHL-1459/2020|2020-04-09|EPI\_ISL\_549241|Original|hCoV-19^^Florida|Human|Florida Bureau of Public Health Laboratories|Florida Bureau of Public Health Laboratories|Blanton|USA

>Spike|hCoV-19/Australia/VIC3380/2020|2020-07-08|EPI\_ISL\_521059|Original|hCoV-19^^Victoria|Human|Microbiological Diagnostic Unit - Public Health Laboratory (MDU-PHL)|MDU-PHL|Schultz|Australia

>Spike|hCoV-19/England/MILK-ABC1E8/2020|2020-10-21|EPI\_ISL\_631047|Original|hCoV-19^^England|Human|Lighthouse Lab in Milton Keynes|Wellcome Sanger Institute for the COVID-19 Genomics UK (COG-UK) consortium|Davies|United Kingdom

>Spike|hCoV-19/England/MILK-BABF2D/2020|2020-11-18|EPI\_ISL\_720380|Original|hCoV-19^^England|Human|Lighthouse Lab in Milton Keynes|Wellcome Sanger Institute for the COVID-19 Genomics UK (COG-UK) Consortium|Davies|United Kingdom

>Spike|hCoV-19/England/CAMC-B097CB/2020|2020-10-30|EPI\_ISL\_673156|Original|hCoV-19^^England|Human|Lighthouse Lab in Cambridge|Wellcome Sanger Institute for the COVID-19 Genomics UK (COG-UK) Consortium|Davies|United Kingdom

>Spike|hCoV-19/England/CAMC-AEAB98/2020|2020-10-26|EPI\_ISL\_633116|Original|hCoV-19^^England|Human|Lighthouse Lab in Cambridge|Wellcome Sanger Institute for the COVID-19 Genomics UK (COG-UK) consortium|Davies|United Kingdom

>Spike|hCoV-19/England/ALDP-9CD006/2020|2020-09-16|EPI\_ISL\_566205|Original|hCoV-19^^England|Human|Lighthouse Lab in Alderley Park|Wellcome Sanger Institute for the COVID-19 Genomics UK (COG-UK) consortium|Davies|United Kingdom

>Spike|hCoV-19/Wales/PHWC-16D264/2020|2020-09-23|EPI\_ISL\_574218|Original|hCoV-19^^Wales|Human|Wales Specialist Virology Centre Sequencing lab|COVID-19 Genomics UK (COG-UK) Consortium|Moore|United Kingdom



>Spike|hCoV-19/Japan/PG-5848/2020|2020-08-00|EPI\_ISL\_688965|Original|hCoV-19^^Japan|Human|Fukuoka Institute of Health and Environmental Sciences|Pathogen Genomics Center|Sekizuka|Japan

>Spike|hCoV-19/USA/WA-S1598/2020|2020-05-26|EPI\_ISL\_496024|Original|hCoV-19^^Washington|Human|Washington State Department of Health|Seattle Flu Study|Lee|USA

>Spike|hCoV-19/USA/TX-HMH-4056/2020|2020-06-17|EPI\_ISL\_543332|Original|hCoV-19^^Texas|Human|Houston Methodist Hospital|Houston Methodist Hospital|Long|USA

>Spike|hCoV-19/England/NOTT-11F823/2020|2020-11-26|EPI\_ISL\_725575|Original|hCoV-19^^England|Human|Lincolnshire Hospitals and DeepSeq Nottingham|COVID-19 Genomics UK (COG-UK) Consortium|Loose|United Kingdom

>Spike|hCoV-19/Denmark/DCGC-20825/2020|2020-12-21|EPI\_ISL\_759388|Original|hCoV-19^^Syddanmark|Human|Department of Virus and Microbiological Special Diagnostics|Albertsen Lab|Michaelsen|Denmark

>Spike|hCoV-19/Japan/PG-1899/2020|2020-05-00|EPI\_ISL\_685505|Original|hCoV-19^^Japan|Human|Pathogen Genomics Center|Pathogen Genomics Center|Sekizuka|Japan

>Spike|hCoV-19/England/MILK-A45FCC/2020|2020-10-06|EPI\_ISL\_598674|Original|hCoV-19^^England|Human|Lighthouse Lab in Milton Keynes|Wellcome Sanger Institute for the COVID-19 Genomics UK (COG-UK) consortium|Davies|United Kingdom

>Spike|hCoV-19/USA/WA-UW-19463/2020|2020-07-31|EPI\_ISL\_570803|Original|hCoV-19^^Washington|Human|UW Virology Lab|UW Virology Lab|Roychoudhury|USA

>Spike|hCoV-19/Wales/PHWC-169426/2020|2020-04-01|EPI\_ISL\_499442|Original|hCoV-19^^Wales|Human|Wales Specialist Virology Centre Sequencing lab|COVID-19 Genomics UK (COG-UK) Consortium|Moore|United Kingdom

>Spike|hCoV-19/England/ALDP-8B5A13/2020|2020-06-29|EPI\_ISL\_557132|Original|hCoV-19^^England|Human|Lighthouse Lab in Alderley Park|Wellcome Sanger Institute for the COVID-19 Genomics UK (COG-UK) consortium|Davies|United Kingdom

>Spike|hCoV-19/England/QEUEH-B31EB6/2020|2020-11-04|EPI\_ISL\_646270|Original|hCoV-19^^England|Human|Lighthouse Lab in Glasgow|Wellcome Sanger Institute for the COVID-19 Genomics UK (COG-UK) Consortium|Davies|United Kingdom

>Spike|hCoV-19/England/ALDP-95116E/2020|2020-06-13|EPI\_ISL\_554279|Original|hCoV-19^^England|Human|Lighthouse Lab in Alderley Park|Wellcome Sanger Institute for the COVID-19 Genomics UK (COG-UK) consortium|Davies|United Kingdom

>Spike|hCoV-19/England/MILK-ACC367/2020|2020-10-21|EPI\_ISL\_629332|Original|hCoV-19^^England|Human|Lighthouse Lab in Milton Keynes|Wellcome Sanger Institute for the COVID-19 Genomics UK (COG-UK) consortium|Davies|United Kingdom

>Spike|hCoV-19/USA/NE-11805/2020|2020-05-05|EPI\_ISL\_475235|Original|hCoV-19^^Nebraska|Human|Nebraska Public Health Laboratory|UNMC COVID-19 Response Team|Pratt|USA

>Spike|hCoV-19/Wales/PHWC-1643B5/2020|2020-04-25|EPI\_ISL\_474169|Original|hCoV-19^^Wales|Human|Originating lab|COVID-19 Genomics UK (COG-UK) Consortium|Moore|United Kingdom

>Spike|hCoV-19/England/QEUEH-B69811/2020|2020-11-11|EPI\_ISL\_661350|Original|hCoV-19^^England|Human|Lighthouse Lab in Glasgow|Wellcome Sanger Institute for the COVID-19 Genomics UK (COG-UK) Consortium|Davies|United Kingdom

>Spike|hCoV-19/England/ALDP-B84E2D/2020|2020-11-14|EPI\_ISL\_676000|Original|hCoV-19^^England|Human|Lighthouse Lab in Alderley Park|Wellcome Sanger Institute for the COVID-19 Genomics UK (COG-UK) Consortium|Davies|United Kingdom

>Spike|hCoV-19/Belgium/FA-0328311/2020|2020-03-28|EPI\_ISL\_462165|Original|hCoV-19^^Boussu|Human|KU Leuven|KU Leuven|Maes|Belgium

>Spike|hCoV-19/England/ALDP-499615/2020|2020-05-27|EPI\_ISL\_559413|Original|hCoV-19^^England|Human|Lighthouse Lab in Alderley Park|Wellcome Sanger Institute for the COVID-19 Genomics UK (COG-UK) consortium|Davies|United Kingdom

>Spike|hCoV-19/USA/UT-QDX-2315/2020|2020-03-16|EPI\_ISL\_604722|Original|hCoV-19^^Utah|Human|Quest Diagnostics|Quest Diagnostics|Kagan|USA

>Spike|hCoV-19/England/20149024404/2020|2020-04-03|EPI\_ISL\_466174|Original|hCoV-19^^England|Human|Respiratory Virus Unit|Respiratory Virus Unit|Platt|United Kingdom

>Spike|hCoV-19/Ecuador/UEES-7332/2020|2020-00-00|EPI\_ISL\_672011|Original|hCoV-19^^Ecuador|Human|UEES BioLab|Omics Sciences Laboratory|Fernandez Cadena|Ecuador

>Spike|hCoV-19/USA/TX-HMH-6707/2020|2020-06-24|EPI\_ISL\_546184|Original|hCoV-19^^Texas|Human|Houston Methodist Hospital|Houston Methodist Hospital|Long|USA

>Spike|hCoV-19/USA/TX-HMH-MCoV-15990/2020|2020-07-10|EPI\_ISL\_785674|Original|hCoV-19^^Texas|Human|Houston Methodist Hospital|Houston Methodist Hospital|Long|USA

>Spike|hCoV-19/Wales/PHWC-2A079/2020|2020-04-04|EPI\_ISL\_432334|Original|hCoV-19^^Wales|Human|Wales Specialist Virology Centre|Public Health Wales Microbiology Cardiff|Moore|United Kingdom

>Spike|hCoV-19/Denmark/DCGC-7604/2020|2020-10-19|EPI\_ISL\_618500|Original|hCoV-19^^Hovedstaden|Human|Department of Virus and Microbiological Special Diagnostics|Albertsen lab|Michaelsen|Denmark

>Spike|hCoV-19/England/QEUI-79C4F7/2020|2020-07-15|EPI\_ISL\_533102|Original|hCoV-19^^England|Human|Lighthouse Lab in Glasgow|Wellcome Sanger Institute for the COVID-19 Genomics UK (COG-UK) consortium|Davies|United Kingdom

>Spike|hCoV-19/Northern Ireland/QEUI-964F40/2020|2020-08-13|EPI\_ISL\_531053|Original|hCoV-19^^Northern Ireland|Human|Lighthouse Lab in Glasgow|Wellcome Sanger Institute for the COVID-19 Genomics UK (COG-UK) consortium|Davies|United Kingdom

>Spike|hCoV-19/USA/CA-CHLA-PLM01011779/2020|2020-12-03|EPI\_ISL\_753605|Original|hCoV-19^^California|Human|Clinical virology Laboratory|Center for Personalized Medicine|Dien Bard|USA

>Spike|hCoV-19/England/CAMB-1BD001/2020|2020-12-03|EPI\_ISL\_723921|Original|hCoV-19^^England|Human|Department of Pathology|COVID-19 Genomics UK (COG-UK) Consortium|Goodfellow|United Kingdom

>Spike|hCoV-19/England/BRIS-12E742/2020|2020-04-21|EPI\_ISL\_488449|Original|hCoV-19^^England|Human|PHE South West Regional Laboratory|Wellcome Sanger Institute for the COVID-19 Genomics UK (COG-UK) consortium|Davies|United Kingdom

>Spike|hCoV-19/England/MILK-B88982/2020|2020-11-13|EPI\_ISL\_675807|Original|hCoV-19^^England|Human|Lighthouse Lab in Milton Keynes|Wellcome Sanger Institute for the COVID-19 Genomics UK (COG-UK) Consortium|Davies|United Kingdom

>Spike|hCoV-19/England/OXON-AC877/2020|2020-04-05|EPI\_ISL\_448489|Original|hCoV-19^^England|Human|Oxford Viromics|COVID-19 Genomics UK (COG-UK) Consortium|Golubchik|United Kingdom

>Spike|hCoV-19/England/ALDP-9B58DC/2020|2020-08-28|EPI\_ISL\_590215|Original|hCoV-19^^England|Human|Lighthouse Lab in Alderley Park|Wellcome Sanger Institute for the COVID-19 Genomics UK (COG-UK) consortium|Davies|United Kingdom

>Spike|hCoV-19/Denmark/DCGC-11191/2020|2020-11-02|EPI\_ISL\_670445|Original|hCoV-19^^Hovedstaden|Human|Department of Virus and Microbiological Special Diagnostics|Albertsen Lab|Michaelsen|Denmark

>Spike|hCoV-19/England/20109005904/2020|2020-03-04|EPI\_ISL\_464520|Original|hCoV-19^^England|Human|Respiratory Virus Unit|Respiratory Virus Unit|Platt|United Kingdom

>Spike|hCoV-19/Spain/MD-IBV-99008622/2020|2020-09-13|EPI\_ISL\_654198|Original|hCoV-19^^Madrid|Human|Hospital General Universitario Gregorio Mara\u00f1a|SeqCOVID-SPAIN consortium/IBV (CSIC)|Comas|Spain

>Spike|hCoV-19/England/CAMC-942A83/2020|2020-07-22|EPI\_ISL\_556871|Original|hCoV-19^^England|Human|Lighthouse Lab in Cambridge|Wellcome Sanger Institute for the COVID-19 Genomics UK (COG-UK) consortium|Davies|United Kingdom

>Spike|hCoV-19/Switzerland/VD-ETHZ-300256/2020|2020-09-30|EPI\_ISL\_603288|Original|hCoV-19^^Vaud|Human|Viollier AG|Department of Biosystems Science and Engineering|Nadeau|Switzerland

>Spike|hCoV-19/USA/CA-CDPH106/2020|2020-08-11|EPI\_ISL\_754918|Original|hCoV-19^^California|Human|California Department of Public Health|California Department of Public Health|Bell|USA

>Spike|hCoV-19/England/ALDP-9E88EF/2020|2020-09-24|EPI\_ISL\_637417|Original|hCoV-19^^England|Human|Department of Pathology|COVID-19 Genomics UK (COG-UK) Consortium|Goodfellow|United Kingdom

>Spike|hCoV-19/Scotland/EDB7107/2020|2020-08-03|EPI\_ISL\_514532|Original|hCoV-19^^Scotland|Human|Virology Department|COVID-19 Genomics UK (COG-UK) Consortium|Williams|United Kingdom

>Spike|hCoV-19/Spain/MD-ISCI-2014625/2020|2020-08-18|EPI\_ISL\_691710|Original|hCoV-19^^Madrid|Human|Hospital Cl\u00e9nico San Carlos|Instituto de Salud Carlos III|Caballero|Spain

>Spike|hCoV-19/Scotland/EDB056/2020|2020-03-18|EPI\_ISL\_425860|Original|hCoV-19^^Scotland|Human|Virology Department|COVID-19 Genomics UK (COG-UK) Consortium|Williams|United Kingdom

>Spike|hCoV-19/Wales/PHWC-31103/2020|2020-04-10|EPI\_ISL\_446405|Original|hCoV-19^^Wales|Human|Wales Specialist Virology Centre|Public Health Wales Microbiology Cardiff|Moore|United Kingdom

>Spike|hCoV-19/Japan/PG-5911/2020|2020-08-00|EPI\_ISL\_689026|Original|hCoV-19^^Japan|Human|Pathogen Genomics Center|Pathogen Genomics Center|Sekizuka|Japan

>Spike|hCoV-19/Japan/PG-0739/2020|2020-04-00|EPI\_ISL\_684349|Original|hCoV-19^^Japan|Human|Pathogen Genomics Center|Pathogen Genomics Center|Sekizuka|Japan

>Spike|hCoV-19/Australia/NSW148/2020|2020-03-23|EPI\_ISL\_427683|Original|hCoV-19^^New South Wales|Human|Centre for Infectious Diseases and Microbiology Public Health|NSW Health Pathology - Institute of Clinical Pathology and Medical Research; Westmead Hospital; University of Sydney|Gall|Australia

>Spike|hCoV-19/England/NORT-286AF3/2020|2020-10-15|EPI\_ISL\_638574|Original|hCoV-19^^England|Human|Northumbria University / South Tees Hospitals NHS Foundation Trust / North Cumbria Integrated Care NHS Foundation Trust / North Tees and Hartlepool NHS Foundation Trust / Newcastle Hospitals NHS Foundation Trust|COVID-19 Genomics UK (COG-UK) Consortium|Bashton|United Kingdom

>Spike|hCoV-19/England/CAMC-AAFEB4/2020|2020-10-23|EPI\_ISL\_623312|Original|hCoV-19^^England|Human|Lighthouse Lab in Cambridge|Wellcome Sanger Institute for the COVID-19 Genomics UK (COG-UK) consortium|Davies|United Kingdom

>Spike|hCoV-19/USA/FL-BPHL-0507/2020|2020-06-10|EPI\_ISL\_508710|Original|hCoV-19^^Florida|Human|Florida Bureau of Public Health Laboratories|Florida Bureau of Public Health Laboratories|Blanton|USA

>Spike|hCoV-19/USA/WA-UW-1272/2020|2020-03-16|EPI\_ISL\_570816|Original|hCoV-19^^Washington|Human|UW Virology Lab|UW Virology Lab|Roychoudhury|USA

>Spike|hCoV-19/England/CAMC-A65940/2020|2020-10-11|EPI\_ISL\_608642|Original|hCoV-19^^England|Human|Lighthouse Lab in Cambridge|Wellcome Sanger Institute for the COVID-19 Genomics UK (COG-UK) consortium|Davies|United Kingdom

>Spike|hCoV-19/England/ALDP-9BE7D6/2020|2020-09-09|EPI\_ISL\_568092|Original|hCoV-19^^England|Human|Lighthouse Lab in Alderley Park|Wellcome Sanger Institute for the COVID-19 Genomics UK (COG-UK) consortium|Davies|United Kingdom

>Spike|hCoV-19/USA/MI-UM-10034004586/2020|2020-04-23|EPI\_ISL\_578163|Original|hCoV-19^^Michigan|Human|University of Michigan Clinical Microbiology Laboratory|Lauring Lab|Valesano|USA

>Spike|hCoV-19/Denmark/DCGC-9303/2020|2020-11-16|EPI\_ISL\_668897|Original|hCoV-19^^Nordjylland|Human|Department of Virus and Microbiological Special Diagnostics|Albertsen Lab|Michaelsen|Denmark

>Spike|hCoV-19/England/ALDP-B1B7F3/2020|2020-11-01|EPI\_ISL\_645982|Original|hCoV-19^^England|Human|Lighthouse Lab in Alderley Park|Wellcome Sanger Institute for the COVID-19 Genomics UK (COG-UK) Consortium|Davies|United Kingdom

>Spike|hCoV-19/England/ALDP-953A34/2020|2020-06-08|EPI\_ISL\_553861|Original|hCoV-19^^England|Human|Lighthouse Lab in Alderley Park|Wellcome Sanger Institute for the COVID-19 Genomics UK (COG-UK) consortium|Davies|United Kingdom

>Spike|hCoV-19/USA/PA-QDX-2014/2020|2020-03-18|EPI\_ISL\_604374|Original|hCoV-19^^Pennsylvania|Human|Quest Diagnostics|Quest Diagnostics|Kagan|USA

>Spike|hCoV-19/Wales/PHWC-2C781/2020|2020-03-31|EPI\_ISL\_445907|Original|hCoV-19^^Wales|Human|Wales Specialist Virology Centre|Public Health Wales Microbiology Cardiff|Moore|United Kingdom

>Spike|hCoV-19/Canada/MB-NML-1189/2020|2020-08-08|EPI\_ISL\_582503|Original|hCoV-19^^Manitoba|Human|Cadham Provincial Laboratory|National Microbiology Laboratory (NML)|Majer|Canada

>Spike|hCoV-19/England/MILK-B95023/2020|2020-11-13|EPI\_ISL\_673814|Original|hCoV-19^^England|Human|Lighthouse Lab in Milton Keynes|Wellcome Sanger Institute for the COVID-19 Genomics UK (COG-UK) Consortium|Davies|United Kingdom

>Spike|hCoV-19/Denmark/DCGC-14238/2020|2020-11-30|EPI\_ISL\_711647|Original|hCoV-19^^Midtjylland|Human|Department of Virus and Microbiological Special Diagnostics|Albertsen Lab|Michaelsen|Denmark

>Spike|hCoV-19/USA/NY-NYCPHL-000063/2020|2020-03-11|EPI\_ISL\_631557|Original|hCoV-19^^New York|Human|NYC HH Lincoln Medical And Mental Health Center|New York City Public Health Laboratory|Wang|USA

>Spike|hCoV-19/India/TG-CCMB-L1453/2020|2020-05-25|EPI\_ISL\_471592|Original|hCoV-19^^Telangana|Human|CSIR-Centre for Cellular and Molecular Biology|CSIR-Centre for Cellular and Molecular Biology|Banu|India

>Spike|hCoV-19/India/DL-IGIB11304392/2020|2020-07-00|EPI\_ISL\_751302|Original|hCoV-19^^Delhi|Human|Devki Devi Foundation|CSIR-IGIB/Max|Pandey|India

>Spike|hCoV-19/France/PAC-IHU-0959/2020|2020-07-13|EPI\_ISL\_569011|Original|hCoV-19^^Provence-Alpes-C\u00f4te-d\u00a9Azur|Human|MEPHI|MEPHI|Levasseur|France

>Spike|hCoV-19/England/ALDP-B83DE5/2020|2020-11-14|EPI\_ISL\_674360|Original|hCoV-19^^England|Human|Lighthouse Lab in Alderley Park|Wellcome Sanger Institute for the COVID-19 Genomics UK (COG-UK) Consortium|Davies|United Kingdom

>Spike|hCoV-19/England/CAMB-7DEE6/2020|2020-04-06|EPI\_ISL\_441626|Original|hCoV-19^^England|Human|Department of Pathology|Wellcome Sanger Institute for the COVID-19 Genomics UK (COG-UK) consortium|Amato|United Kingdom

>Spike|hCoV-19/USA/ID-QDX-1087/2020|2020-03-19|EPI\_ISL\_571828|Original|hCoV-19^^Idaho|Human|Quest Diagnostics|Quest Diagnostics|Kagan|USA

>Spike|hCoV-19/England/ALDP-9C595E/2020|2020-09-10|EPI\_ISL\_567824|Original|hCoV-19^^England|Human|Lighthouse Lab in Alderley Park|Wellcome Sanger Institute for the COVID-19 Genomics UK (COG-UK) consortium|Davies|United Kingdom

>Spike|hCoV-19/USA/AZ-TG502738/2020|2020-07-15|EPI\_ISL\_695286|Original|hCoV-19^^Arizona|Human|TGen North|TGen North|French|USA

>Spike|hCoV-19/Spain/PV-IBV-98007631/2020|2020-09-07|EPI\_ISL\_582039|Original|hCoV-19^^Basque Country|Human|Servicio de Microbiolog\u00eda. Hospital Universitario Donostia. OSI Donostialdea. \u00c1rea de Enfermedades Infecciosas|SeqCOVID-SPAIN consortium|IBV (CSIC) |Comas|Spain

>Spike|hCoV-19/Japan/IC-0036/2020|2020-04-00|EPI\_ISL\_591378|Original|hCoV-19^^Japan|Human|Pathogen Genomics Center|Pathogen Genomics Center|Sekizuka|Japan

>Spike|hCoV-19/USA/WA-S2327/2020|2020-06-10|EPI\_ISL\_496959|Original|hCoV-19^^Washington|Human|Washington State Department of Health|Seattle Flu Study|Lee|USA

>Spike|hCoV-19/England/204540598/2020|2020-11-03|EPI\_ISL\_678656|Original|hCoV-19^^England|Human|Respiratory Virus Unit|COVID-19 Genomics UK (COG-UK) Consortium|Platt|United Kingdom

>Spike|hCoV-19/England/CAMB-1B198A/2020|2020-05-14|EPI\_ISL\_452988|Original|hCoV-19^^England|Human|Department of Pathology|COVID-19 Genomics UK (COG-UK) Consortium|Meredith|United Kingdom

>Spike|hCoV-19/Spain/CT-HUVH-VH6552/2020|2020-03-23|EPI\_ISL\_444984|Original|hCoV-19^^Catalunya|Human|Hospital Universitari Vall d'Hebron - Vall d'Hebron Institut de Recerca|Hospital Universitari Vall d'Hebron|Anton|Spain

>Spike|hCoV-19/Austria/CeMM0491/2020|2020-03-27|EPI\_ISL\_583580|Original|hCoV-19^^Linz|Human|Institute for Medical and Chemical Laboratory Diagnostics|Bergthaler laboratory|Bergthaler|Austria

>Spike|hCoV-19/USA/AZ-TG547288/2020|2020-07-05|EPI\_ISL\_695463|Original|hCoV-19^^Arizona|Human|AZ SPHL|TGen North|French|USA

>Spike|hCoV-19/Denmark/DCGC-10617/2020|2020-11-02|EPI\_ISL\_670091|Original|hCoV-19^^Nordjylland|Human|Department of Virus and Microbiological Special Diagnostics|Albertsen Lab|Michaelsen|Denmark

>Spike|hCoV-19/England/SHEF-C31CA/2020|2020-04-30|EPI\_ISL\_462009|Original|hCoV-19^^England|Human|Virology Department|COVID-19 Genomics UK (COG-UK) Consortium|de Silva|United Kingdom

>Spike|hCoV-19/England/MILK-99A891/2020|2020-08-29|EPI\_ISL\_550304|Original|hCoV-19^^England|Human|Lighthouse Lab in Milton Keynes|Wellcome Sanger Institute for the COVID-19 Genomics UK (COG-UK) consortium|Davies|United Kingdom

>Spike|hCoV-19/Wales/MILK-A0656B/2020|2020-10-01|EPI\_ISL\_599950|Original|hCoV-19^^Wales|Human|Lighthouse Lab in Milton Keynes|Wellcome Sanger Institute for the COVID-19 Genomics UK (COG-UK) consortium|Davies|United Kingdom

>Spike|hCoV-19/USA/TX-HMH-3588/2020|2020-06-15|EPI\_ISL\_543045|Original|hCoV-19^^Texas|Human|Houston Methodist Hospital|Houston Methodist Hospital|Long|USA

>Spike|hCoV-19/England/MILK-A1D80E/2020|2020-10-03|EPI\_ISL\_595089|Original|hCoV-19^^England|Human|Queens Medical Centre|COVID-19 Genomics UK (COG-UK) Consortium|Loose|United Kingdom

>Spike|hCoV-19/Germany/HH-hpi-p2436/2020|2020-04-29|EPI\_ISL\_776503|Original|hCoV-19^^Hamburg|Human|University Medical Center Hamburg Eppendorf|Heinrich Pette Institute|Robitaille|Germany

>Spike|hCoV-19/USA/WI-WSLH-200239/2020|2020-04-13|EPI\_ISL\_578459|Original|hCoV-19^^Wisconsin|Human|Wisconsin State Laboratory of Hygiene Communicable Disease Division|Wisconsin State Laboratory of Hygiene Communicable Disease Division|Florek|USA

>Spike|hCoV-19/England/ALDP-A6E1E5/2020|2020-10-15|EPI\_ISL\_607811|Original|hCoV-19^^England|Human|Lighthouse Lab in Alderley Park|Wellcome Sanger Institute for the COVID-19 Genomics UK (COG-UK) consortium|Davies|United Kingdom

>Spike|hCoV-19/Canada/NS-NML-1325/2020|2020-04-10|EPI\_ISL\_579705|Original|hCoV-19^^Nova Scotia|Human|QEII Health Sciences Centre|National Microbiology Laboratory (NML)|Majer|Canada

>Spike|hCoV-19/Australia/VIC12027/2020|2020-07-24|EPI\_ISL\_641046|Original|hCoV-19^^Victoria|Human|Microbiological Diagnostic Unit - Public Health Laboratory (MDU-PHL)|MDU-PHL|Schultz|Australia

>Spike|hCoV-19/England/QEUEH-AD18E8/2020|2020-10-26|EPI\_ISL\_634578|Original|hCoV-19^^England|Human|Lighthouse Lab in Glasgow|Wellcome Sanger Institute for the COVID-19 Genomics UK (COG-UK) consortium|Davies|United Kingdom

>Spike|hCoV-19/England/EXET-135599/2020|2020-04-12|EPI\_ISL\_457072|Original|hCoV-19^^England|Human|University of Exeter|COVID-19 Genomics UK (COG-UK) Consortium|Temperton|United Kingdom

>Spike|hCoV-19/England/MILK-991CBC/2020|2020-08-27|EPI\_ISL\_552255|Original|hCoV-19^^England|Human|Lighthouse Lab in Milton Keynes|Wellcome Sanger Institute for the COVID-19 Genomics UK (COG-UK) consortium|Davies|United Kingdom

>Spike|hCoV-19/Russia/SPE-RII-MH1509S/2020|2020-09-10|EPI\_ISL\_596284|Original|hCoV-19^^Saint Petersburg|Human|HELIX LCC|WHO National Influenza Centre Russian Federation|Komissarov|Russia

>Spike|hCoV-19/Shangrao/JX29/2020|2020-01-22|EPI\_ISL\_421244|Original|hCoV-19^^Jiangxi|Human|Jiangxi Province Center for Disease Control and Prevention|Jiangxi Province Center for Disease Control and Prevention|Xiong|China

>Spike|hCoV-19/Wales/PHWC-2B139/2020|2020-04-08|EPI\_ISL\_432105|Original|hCoV-19^^Wales|Human|Wales Specialist Virology Centre|Public Health Wales Microbiology Cardiff|Moore|United Kingdom

>Spike|hCoV-19/England/QEUEH-C341B9/2020|2020-12-08|EPI\_ISL\_734117|Original|hCoV-19^^England|Human|Lighthouse Lab in Glasgow|Wellcome Sanger Institute for the COVID-19 Genomics UK (COG-UK) Consortium|Davies|United Kingdom

>Spike|hCoV-19/Spain/CL-IBV-97006175/2020|2020-04-06|EPI\_ISL\_537322|Original|hCoV-19^^Castilla y Leon|Human|Universidad de Le\u00f3n|SeqCOVID-SPAIN consortium|IBV (CSIC)|Comas|Spain

>Spike|hCoV-19/England/QEUEH-5DCF38/2020|2020-06-17|EPI\_ISL\_533333|Original|hCoV-19^^England|Human|Lighthouse Lab in Glasgow|Wellcome Sanger Institute for the COVID-19 Genomics UK (COG-UK) consortium|Davies|United Kingdom

>Spike|hCoV-19/Wales/PHWC-4990EA/2020|2020-12-03|EPI\_ISL\_727256|Original|hCoV-19^^Wales|Human|Originating lab|COVID-19 Genomics UK (COG-UK) Consortium|Moore|United Kingdom

>Spike|hCoV-19/England/QEUEH-AD437B/2020|2020-10-26|EPI\_ISL\_634698|Original|hCoV-19^^England|Human|Lighthouse Lab in Glasgow|Wellcome Sanger Institute for the COVID-19 Genomics UK (COG-UK) consortium|Davies|United Kingdom

>Spike|hCoV-19/England/QEUEH-9CA090/2020|2020-09-10|EPI\_ISL\_567476|Original|hCoV-19^^England|Human|Lighthouse Lab in Glasgow|Wellcome Sanger Institute for the COVID-19 Genomics UK (COG-UK) consortium|Davies|United Kingdom

>Spike|hCoV-19/USA/TX-HMH-MCoV-10028/2020|2020-07-06|EPI\_ISL\_789293|Original|hCoV-19^^Texas|Human|Houston Methodist Hospital|Houston Methodist Hospital|Long|USA

>Spike|hCoV-19/England/CAMC-B99317/2020|2020-11-15|EPI\_ISL\_673479|Original|hCoV-19^^England|Human|Lighthouse Lab in Cambridge|Wellcome Sanger Institute for the COVID-19 Genomics UK (COG-UK) Consortium|Davies|United Kingdom

>Spike|hCoV-19/New Zealand/20VR3168/2020|2020-03-24|EPI\_ISL\_579458|Original|hCoV-19^^Canterbury|Human|Canterbury Health Laboratories|Institute of Environmental Science and Research (ESR)|Wang|New Zealand

>Spike|hCoV-19/Denmark/DCGC-7328/2020|2020-10-12|EPI\_ISL\_619288|Original|hCoV-19^^NA|Human|Department of Virus and Microbiological Special Diagnostics|Albertsen lab|Michaelsen|Denmark

>Spike|hCoV-19/Scotland/CVR6066/2020|2020-12-01|EPI\_ISL\_705725|Original|hCoV-19^^Scotland|Human|West of Scotland Specialist Virology Centre|COVID-19 Genomics UK (COG-UK) Consortium|Robertson|United Kingdom

>Spike|hCoV-19/Netherlands/DR-EMC-4/2020|2020-04-17|EPI\_ISL\_523122|Original|hCoV-19^^Drenthe|Human|Dutch COVID-19 response team|Erasmus Medical Center|Oude Munnink|Netherlands

>Spike|hCoV-19/Sweden/20-53341/2020|2020-11-01|EPI\_ISL\_710599|Original|hCoV-19^^Halland|Human|Klinisk mikrobiologi|The Public Health Agency of Sweden|Svartstr\u00f6m|Sweden

>Spike|hCoV-19/Switzerland/ZH-ETHZ-390422/2020|2020-11-04|EPI\_ISL\_729069|Original|hCoV-19^^Zurich|Human|Viollier AG|Department of Biosystems Science and Engineering|Nadeau|Switzerland

>Spike|hCoV-19/England/ALDP-BB9593/2020|2020-11-20|EPI\_ISL\_702584|Original|hCoV-19^^England|Human|Lighthouse Lab in Alderley Park|Wellcome Sanger Institute for the COVID-19 Genomics UK (COG-UK) Consortium|Davies|United Kingdom

>Spike|hCoV-19/England/ALDP-AA4541/2020|2020-10-22|EPI\_ISL\_624935|Original|hCoV-19^^England|Human|Lighthouse Lab in Alderley Park|Wellcome Sanger Institute for the COVID-19 Genomics UK (COG-UK) consortium|Davies|United Kingdom

>Spike|hCoV-19/England/MILK-B94A9F/2020|2020-11-13|EPI\_ISL\_676082|Original|hCoV-19^^England|Human|Lighthouse Lab in Milton Keynes|Wellcome Sanger Institute for the COVID-19 Genomics UK (COG-UK) Consortium|Davies|United Kingdom

>Spike|hCoV-19/India/DL-NCDC7667-CSIR-IGIB/2020|2020-05-28|EPI\_ISL\_482658|Original|hCoV-19^^Delhi|Human|National Centre for Disease control (NCDC)|NCDC/CSIR-IGIB|Singh|India

>Spike|hCoV-19/England/QEUEH-C3424D/2020|2020-12-09|EPI\_ISL\_734044|Original|hCoV-19^^England|Human|Lighthouse Lab in Glasgow|Wellcome Sanger Institute for the COVID-19 Genomics UK (COG-UK) Consortium|Davies|United Kingdom

>Spike|hCoV-19/Canada/QC\_AG3/2020|2020-04-08|EPI\_ISL\_476502|Original|hCoV-19^^Quebec|Human|Laboratoire de microbiologie|Smith Laboratory|Smith|Canada

>Spike|hCoV-19/England/MILK-B897C3/2020|2020-11-13|EPI\_ISL\_675737|Original|hCoV-19^^England|Human|Lighthouse Lab in Milton Keynes|Wellcome Sanger Institute for the COVID-19 Genomics UK (COG-UK) Consortium|Davies|United Kingdom

>Spike|hCoV-19/England/LIVE-DC8993/2020|2020-11-16|EPI\_ISL\_703884|Original|hCoV-19^^England|Human|Liverpool Clinical Laboratories|COVID-19 Genomics UK (COG-UK) Consortium|Haldenby|United Kingdom

>Spike|hCoV-19/USA/WA-UW-23555/2020|2020-08-11|EPI\_ISL\_570595|Original|hCoV-19^^Washington|Human|UW Virology Lab|UW Virology Lab|Roychoudhury|USA

>Spike|hCoV-19/Australia/QLD1127/2020|2020-03-22|EPI\_ISL\_639744|Original|hCoV-19^^Australia|Human|unknown|Public Health Virology Laboratory|Nguyen|Australia

>Spike|hCoV-19/England/CAMB-75B7E/2020|2020-03-30|EPI\_ISL\_438278|Original|hCoV-19^^England|Human|Department of Pathology|Wellcome Sanger Institute for the COVID-19 Genomics UK (COG-UK) consortium|Amato|United Kingdom

>Spike|hCoV-19/Denmark/DCGC-7718/2020|2020-10-19|EPI\_ISL\_618582|Original|hCoV-19^^Hovedstaden|Human|Department of Virus and Microbiological Special Diagnostics|Albertsen lab|Michaelsen|Denmark

>Spike|hCoV-19/USA/MD-MDH-0428/2020|2020-10-14|EPI\_ISL\_666796|Original|hCoV-19^^Maryland|Human|Maryland Public Health Laboratory|Maryland Public Health Laboratory|Keller|USA

>Spike|hCoV-19/Wales/PHWC-1653E1/2020|2020-06-03|EPI\_ISL\_479461|Original|hCoV-19^^Wales|Human|Wales Specialist Virology Centre Sequencing lab|COVID-19 Genomics UK (COG-UK) Consortium|Moore|United Kingdom

>Spike|hCoV-19/USA/HI-H200446/2020|2020-10-08|EPI\_ISL\_752989|Original|hCoV-19^^Hawaii|Human|State Laboratories Division|State Laboratories Division|Sultana|USA

>Spike|hCoV-19/England/205181948/2020|2020-12-17|EPI\_ISL\_791213|Original|hCoV-19^^England|Human|Respiratory Virus Unit|COVID-19 Genomics UK (COG-UK) Consortium|Platt|United Kingdom

>Spike|hCoV-19/Denmark/DCGC-8179/2020|2020-10-26|EPI\_ISL\_617204|Original|hCoV-19^^Hovedstaden|Human|Department of Virus and Microbiological Special Diagnostics|Albertsen lab|Michaelsen|Denmark

>Spike|hCoV-19/England/ALDP-AA4EDD/2020|2020-10-21|EPI\_ISL\_630767|Original|hCoV-19^^England|Human|Lighthouse Lab in Alderley Park|Wellcome Sanger Institute for the COVID-19 Genomics UK (COG-UK) consortium|Davies|United Kingdom

>Spike|hCoV-19/Denmark/DCGC-18701/2020|2020-12-07|EPI\_ISL\_750132|Original|hCoV-19^^Nordjylland|Human|Department of Virus and Microbiological Special Diagnostics|Albertsen Lab|Michaelsen|Denmark

>Spike|hCoV-19/USA/TX-HMH-MCoV-12869/2020|2020-08-18|EPI\_ISL\_788021|Original|hCoV-19^^Texas|Human|Houston Methodist Hospital|Houston Methodist Hospital|Long|USA

>Spike|hCoV-19/England/SHEF-CAAE6/2020|2020-11-11|EPI\_ISL\_680169|Original|hCoV-19^^England|Human|Virology Department|COVID-19 Genomics UK (COG-UK) Consortium|de Silva|United Kingdom

>Spike|hCoV-19/Germany/NW-HHU-178/2020|2020-03-26|EPI\_ISL\_602500|Original|hCoV-19^^North Rhine-Westphalia|Human|Institute for Virology|Center of Medical Microbiology|Wienemann|Germany

>Spike|hCoV-19/England/ALDP-B83CF7/2020|2020-11-14|EPI\_ISL\_674233|Original|hCoV-19^^England|Human|Lighthouse Lab in Alderley Park|Wellcome Sanger Institute for the COVID-19 Genomics UK (COG-UK) Consortium|Davies|United Kingdom

>Spike|hCoV-19/Belgium/QOJ-030751/2020|2020-03-07|EPI\_ISL\_420316|Original|hCoV-19^^Dilbeek|Human|KU Leuven|KU Leuven|Maes|Belgium

>Spike|hCoV-19/France/PAC-IHU-1363/2020|2020-08-20|EPI\_ISL\_569142|Original|hCoV-19^^Provence-Alpes-C\u00f4te-d\u2019Azur|Human|MEPHI|MEPHI|Levasseur|France

>Spike|hCoV-19/England/BIRM-66ED1/2020|2020-10-28|EPI\_ISL\_651601|Original|hCoV-19^^England|Human|University of Birmingham|COVID-19 Genomics UK (COG-UK) Consortium|Loman|United Kingdom

>Spike|hCoV-19/England/204690958/2020|2020-11-13|EPI\_ISL\_686591|Original|hCoV-19^^England|Human|Respiratory Virus Unit|COVID-19 Genomics UK (COG-UK) Consortium|Platt|United Kingdom

>Spike|hCoV-19/Denmark/DCGC-16141/2020|2020-11-16|EPI\_ISL\_714466|Original|hCoV-19^^Hovedstaden|Human|Department of Virus and Microbiological Special Diagnostics|Albertsen Lab|Michaelsen|Denmark

>Spike|hCoV-19/USA/MN2-MDH2/2020|2020-03-07|EPI\_ISL\_414589|Original|hCoV-19^^Minnesota|Human|Minnesota Department of Health|Minnesota Department of Health|Wang|USA

>Spike|hCoV-19/USA/CA-QDX-214/2020|2020-05-01|EPI\_ISL\_494509|Original|hCoV-19^^California|Human|Quest Diagnostics|Quest Diagnostics|Kagan|USA

>Spike|hCoV-19/Switzerland/ZH-ETHZ-160021/2020|2020-06-15|EPI\_ISL\_486514|Original|hCoV-19^^Zurich|Human|Viollier AG|Department of Biosystems Science and Engineering|Nadeau|Switzerland

>Spike|hCoV-19/Belgium/ULG-10948/2020|2020-09-05|EPI\_ISL\_707727|Original|hCoV-19^^Li\u00e8ge|Human|Department of Clinical Microbiology|GIGA Medical Genomics|Durkin|Belgium

>Spike|hCoV-19/Scotland/CAMC-A580D2/2020|2020-10-09|EPI\_ISL\_609177|Original|hCoV-19^^Scotland|Human|Lighthouse Lab in Cambridge|Wellcome Sanger Institute for the COVID-19 Genomics UK (COG-UK) consortium|Davies|United Kingdom

>Spike|hCoV-19/Argentina/PAIS-G0001/2020|2020-04-15|EPI\_ISL\_499083|Vero c176 P3|hCoV-19^^Cordoba|Human|Instituto de Virologia \Dr. J. M. Vanella\|Laboratorio de Virolog\u00eda|Gallego|Argentina

>Spike|hCoV-19/England/20132021204/2020|2020-03-23|EPI\_ISL\_423743|Original|hCoV-19^^England|Human|Respiratory Virus Unit|Respiratory Virus Unit|Platt|United Kingdom

>Spike|hCoV-19/Wales/PHWC-2912C/2020|2020-04-03|EPI\_ISL\_445484|Original|hCoV-19^^Wales|Human|Wales Specialist Virology Centre|Public Health Wales Microbiology Cardiff|Moore|United Kingdom

>Spike|hCoV-19/Denmark/DCGC-5812/2020|2020-09-28|EPI\_ISL\_620999|Original|hCoV-19^^Nordjylland|Human|Department of Virus and Microbiological Special Diagnostics|Albertsen lab|Michaelsen|Denmark

>Spike|hCoV-19/Wales/PHWC-3232A/2020|2020-04-09|EPI\_ISL\_446634|Original|hCoV-19^^Wales|Human|Wales Specialist Virology Centre|Public Health Wales Microbiology Cardiff|Moore|United Kingdom

>Spike|hCoV-19/India/TG-CCMB-J166/2020|2020-04-01|EPI\_ISL\_447568|Original|hCoV-19^^Telangana|Human|CSIR-Centre for Cellular and Molecular Biology|CSIR-Centre for Cellular and Molecular Biology|Banu|India

>Spike|hCoV-19/Denmark/DCGC-18863/2020|2020-12-07|EPI\_ISL\_748604|Original|hCoV-19^^Hovedstaden|Human|Department of Virus and Microbiological Special Diagnostics|Albertsen Lab|Michaelsen|Denmark

>Spike|hCoV-19/England/QEUEH-AF04EF/2020|2020-10-29|EPI\_ISL\_662835|Original|hCoV-19^^England|Human|Lighthouse Lab in Glasgow|Wellcome Sanger Institute for the COVID-19 Genomics UK (COG-UK) Consortium|Davies|United Kingdom

>Spike|hCoV-19/England/EXET-139E21/2020|2020-00-00|EPI\_ISL\_679347|Original|hCoV-19^^England|Human|University of Exeter|COVID-19 Genomics UK (COG-UK) Consortium|Temperton|United Kingdom

>Spike|hCoV-19/England/ALDP-74982A/2020|2020-06-29|EPI\_ISL\_557408|Original|hCoV-19^^England|Human|Lighthouse Lab in Alderley Park|Wellcome Sanger Institute for the COVID-19 Genomics UK (COG-UK) consortium|Davies|United Kingdom

>Spike|hCoV-19/USA/UN-UW-5742/2020|2020-04-07|EPI\_ISL\_430916|Original|hCoV-19^^USA|Human|UW Virology Lab|UW Virology Lab|Roychoudhury|USA

>Spike|hCoV-19/Denmark/DCGC-15455/2020|2020-11-23|EPI\_ISL\_713833|Original|hCoV-19^^Hovedstaden|Human|Department of Virus and Microbiological Special Diagnostics|Albertsen Lab|Michaelsen|Denmark

>Spike|hCoV-19/Japan/PG-3579/2020|2020-06-00|EPI\_ISL\_691835|Original|hCoV-19^^Japan|Human|Pathogen Genomics Center|Pathogen Genomics Center|Sekizuka|Japan

>Spike|hCoV-19/USA/UN-UW-2096/2020|2020-04-16|EPI\_ISL\_485950|Original|hCoV-19^^USA|Human|UW Virology Lab|UW Virology Lab|Roychoudhury|USA

>Spike|hCoV-19/USA/TX-HMH-MCoV-19570/2020|2020-11-17|EPI\_ISL\_783942|Original|hCoV-19^^Texas|Human|Houston Methodist Hospital|Houston Methodist Hospital|Long|USA

>Spike|hCoV-19/USA/HI-H200676/2020|2020-11-25|EPI\_ISL\_753199|Original|hCoV-19^^Hawaii|Human|State Laboratories Division|State Laboratories Division|Sultana|USA

>Spike|hCoV-19/Canada/ON-UHTC-0166/2020|2020-05-18|EPI\_ISL\_569953|Original|hCoV-19^^Ontario|Human|Unity Health Toronto|Ontario Institute for Cancer Research|de Borja|Canada

>Spike|hCoV-19/England/QEUEH-9C7F3C/2020|2020-09-11|EPI\_ISL\_567166|Original|hCoV-19^^England|Human|Lighthouse Lab in Glasgow|Wellcome Sanger Institute for the COVID-19 Genomics UK (COG-UK) consortium|Davies|United Kingdom

>Spike|hCoV-19/USA/MD-HP12013/2020|2020-11-03|EPI\_ISL\_791355|Original|hCoV-19^^Maryland|Human|Johns Hopkins Hospital Department of Pathology|Johns Hopkins Hospital Department of Pathology|Morris|USA

>Spike|hCoV-19/England/LEED-2A973F/2020|2020-04-13|EPI\_ISL\_538751|Original|hCoV-19^^England|Human|Leeds Teaching Hospitals NHS Trust and Public Health England|Wellcome Sanger Institute for the COVID-19 Genomics UK (COG-UK) consortium|Davies|United Kingdom

>Spike|hCoV-19/Scotland/MILK-A6B7B9/2020|2020-10-09|EPI\_ISL\_625420|Original|hCoV-19^^Scotland|Human|Lighthouse Lab in Milton Keynes|Wellcome Sanger Institute for the COVID-19 Genomics UK (COG-UK) consortium|Davies|United Kingdom

>Spike|hCoV-19/England/CAMC-B545E5/2020|2020-11-08|EPI\_ISL\_658181|Original|hCoV-19^^England|Human|Lighthouse Lab in Cambridge|Wellcome Sanger Institute for the COVID-19 Genomics UK (COG-UK) Consortium|Davies|United Kingdom

>Spike|hCoV-19/USA/FL-BPHL-0631/2020|2020-04-06|EPI\_ISL\_508835|Original|hCoV-19^^Florida|Human|Florida Bureau of Public Health Laboratories|Florida Bureau of Public Health Laboratories|Blanton|USA

>Spike|hCoV-19/USA/TX-HMH-MCoV-13737/2020|2020-08-17|EPI\_ISL\_788830|Original|hCoV-19^^Texas|Human|Houston Methodist Hospital|Houston Methodist Hospital|Long|USA

>Spike|hCoV-19/USA/AZ-TG280826/2020|2020-04-21|EPI\_ISL\_694172|Original|hCoV-19^^Arizona|Human|AZ SPHL|TGen North|French|USA



>Spike|hCoV-19/South Korea/KDCA0085/2020|2020-10-08|EPI\_ISL\_747324|Original|hCoV-19^^South Korea|Human|Division of Emerging Infectious Diseases|Division of Emerging Infectious Diseases|Park|South Korea

>Spike|hCoV-19/England/MILK-970961/2020|2020-08-18|EPI\_ISL\_553241|Original|hCoV-19^^England|Human|Lighthouse Lab in Milton Keynes|Wellcome Sanger Institute for the COVID-19 Genomics UK (COG-UK) consortium|Davies|United Kingdom

>Spike|hCoV-19/Norway/4307/2020|2020-10-06|EPI\_ISL\_775446|Original|hCoV-19^^Troms og Finnmark|Human|University Hospital of Northern Norway|Norwegian Institute of Public Health|Vollan|Norway

>Spike|hCoV-19/Australia/VIC2728/2020|2020-07-05|EPI\_ISL\_521563|Original|hCoV-19^^Victoria|Human|Microbiological Diagnostic Unit - Public Health Laboratory (MDU-PHL)|MDU-PHL|Schultz|Australia

>Spike|hCoV-19/India/UT-AR15/2020|2020-05-24|EPI\_ISL\_508162|Original|hCoV-19^^Uttarakhand|Human|All india institute of Medical Sciences Rishikesh|National Institute of Biomedical Genomics|Maitra|India

>Spike|hCoV-19/Japan/PG-4309/2020|2020-07-00|EPI\_ISL\_692537|Original|hCoV-19^^Japan|Human|Pathogen Genomics Center|Pathogen Genomics Center|Sekizuka|Japan

>Spike|hCoV-19/England/QEUEH-B65E22/2020|2020-11-10|EPI\_ISL\_655756|Original|hCoV-19^^England|Human|Lighthouse Lab in Glasgow|Wellcome Sanger Institute for the COVID-19 Genomics UK (COG-UK) Consortium|Davies|United Kingdom

>Spike|hCoV-19/Northern Ireland/NIRE-100DDB/2020|2020-05-01|EPI\_ISL\_469884|Original|hCoV-19^^Northern Ireland|Human|Regional Virus Laboratory|Wellcome Sanger Institute for the COVID-19 Genomics UK (COG-UK) consortium|Davies|United Kingdom

>Spike|hCoV-19/USA/MI-MDHHS-SC20013/2020|2020-03-13|EPI\_ISL\_437100|Original|hCoV-19^^Michigan|Human|Michigan Department of Health and Human Services|Michigan Department of Health and Human Services|Blankenship|USA

>Spike|hCoV-19/Wales/PHWC-48BEF0/2020|2020-11-07|EPI\_ISL\_666368|Original|hCoV-19^^Wales|Human|Wales Specialist Virology Centre Sequencing lab|COVID-19 Genomics UK (COG-UK) Consortium|Moore|United Kingdom

>Spike|hCoV-19/USA/PA-MGEL-00239/2020|2020-04-16|EPI\_ISL\_681979|Original|hCoV-19^^Pennsylvania|Human|UPMC Clinical Microbiology Laboratory|Microbial Genomic Epidemiology Laboratory|Griffith|USA

>Spike|hCoV-19/USA/TX-HMH-813/2020|2020-04-10|EPI\_ISL\_545847|Original|hCoV-19^^Texas|Human|Houston Methodist Hospital|Houston Methodist Hospital|Long|USA

>Spike|hCoV-19/England/MILK-999CB4/2020|2020-08-29|EPI\_ISL\_550311|Original|hCoV-19^^England|Human|Lighthouse Lab in Milton Keynes|Wellcome Sanger Institute for the COVID-19 Genomics UK (COG-UK) consortium|Davies|United Kingdom

>Spike|hCoV-19/England/LIVE-DBEAE8/2020|2020-10-27|EPI\_ISL\_664164|Original|hCoV-19^^England|Human|Liverpool Clinical Laboratories|COVID-19 Genomics UK (COG-UK) Consortium|Haldenby|United Kingdom

>Spike|hCoV-19/Portugal/PT1819/2020|2020-11-14|EPI\_ISL\_732042|Original|hCoV-19^^Portugal|Human|Instituto Nacional de Saude (INSA)|Instituto Nacional de Saude (INSA)|Borges|Portugal

>Spike|hCoV-19/England/ALDP-9CD525/2020|2020-09-16|EPI\_ISL\_566167|Original|hCoV-19^^England|Human|Lighthouse Lab in Alderley Park|Wellcome Sanger Institute for the COVID-19 Genomics UK (COG-UK) consortium|Davies|United Kingdom

>Spike|hCoV-19/England/ALDP-952446/2020|2020-06-09|EPI\_ISL\_555559|Original|hCoV-19^^England|Human|Lighthouse Lab in Alderley Park|Wellcome Sanger Institute for the COVID-19 Genomics UK (COG-UK) consortium|Davies|United Kingdom

>Spike|hCoV-19/Australia/VIC2426/2020|2020-06-27|EPI\_ISL\_522136|Original|hCoV-19^^Victoria|Human|Victorian Infectious Diseases Reference Laboratory (VIDRL)|VIDRL and MDU-PHL|Schultz|Australia

>Spike|hCoV-19/England/ALDP-9FD805/2020|2020-10-02|EPI\_ISL\_587737|Original|hCoV-19^^England|Human|Lighthouse Lab in Alderley Park|Wellcome Sanger Institute for the COVID-19 Genomics UK (COG-UK) consortium|Davies|United Kingdom

>Spike|hCoV-19/USA/MI-QDX-340/2020|2020-03-22|EPI\_ISL\_571084|Original|hCoV-19^^Michigan|Human|Quest Diagnostics|Quest Diagnostics|Kagan|USA

>Spike|hCoV-19/Wales/PHWC-2B861/2020|2020-04-08|EPI\_ISL\_445771|Original|hCoV-19^^Wales|Human|Wales Specialist Virology Centre|Public Health Wales Microbiology Cardiff|Moore|United Kingdom

>Spike|hCoV-19/Denmark/DCGC-12414/2020|2020-11-16|EPI\_ISL\_682595|Original|hCoV-19^^Sjaelland|Human|Department of Virus and Microbiological Special Diagnostics|Albertsen Lab|Michaelsen|Denmark

>Spike|hCoV-19/Netherlands/ZH-EMC-1011/2020|2020-11-01|EPI\_ISL\_722605|Original|hCoV-19^^Zuid Holland|Human|Dutch COVID-19 response team|Erasmus Medical Center|Oude Munnink|Netherlands

>Spike|hCoV-19/Wales/MILK-9EF0D1/2020|2020-09-24|EPI\_ISL\_594899|Original|hCoV-19^^Wales|Human|Oxford Viromics|COVID-19 Genomics UK (COG-UK) Consortium|Golubchik|United Kingdom

>Spike|hCoV-19/England/LIVE-A298D/2020|2020-06-09|EPI\_ISL\_500013|Original|hCoV-19^^England|Human|Liverpool Clinical Laboratories|COVID-19 Genomics UK (COG-UK) Consortium|Haldenby|United Kingdom

>Spike|hCoV-19/England/20104008502/2020|2020-03-01|EPI\_ISL\_417229|Original|hCoV-19^^England|Human|Respiratory Virus Unit|Respiratory Virus Unit|Platt|United Kingdom

>Spike|hCoV-19/Iceland/597/2020|2020-03-28|EPI\_ISL\_424617|Original|hCoV-19^^Reykjavik|Human|The National University Hospital of Iceland|deCODE genetics|J\u00f3nsson|Iceland

>Spike|hCoV-19/England/CAMB-1AD5BA/2020|2020-04-26|EPI\_ISL\_489462|Original|hCoV-19^^England|Human|Department of Pathology|Wellcome Sanger Institute for the COVID-19 Genomics UK (COG-UK) consortium|Davies|United Kingdom

>Spike|hCoV-19/England/QEUA-AAD36C/2020|2020-10-20|EPI\_ISL\_624077|Original|hCoV-19^^England|Human|Lighthouse Lab in Glasgow|Wellcome Sanger Institute for the COVID-19 Genomics UK (COG-UK) consortium|Davies|United Kingdom

>Spike|hCoV-19/England/QEUA-AE52B6/2020|2020-10-27|EPI\_ISL\_633327|Original|hCoV-19^^England|Human|Lighthouse Lab in Glasgow|Wellcome Sanger Institute for the COVID-19 Genomics UK (COG-UK) consortium|Davies|United Kingdom

>Spike|hCoV-19/USA/AZ-TG548499/2020|2020-07-27|EPI\_ISL\_695525|Original|hCoV-19^^Arizona|Human|TGen North|TGen North|French|USA

>Spike|hCoV-19/Denmark/DCGC-10045/2020|2020-11-09|EPI\_ISL\_669358|Original|hCoV-19^^Hovedstaden|Human|Department of Virus and Microbiological Special Diagnostics|Albertsen Lab|Michaelsen|Denmark

>Spike|hCoV-19/Japan/PG-7562/2020|2020-07-00|EPI\_ISL\_686664|Original|hCoV-19^^Japan|Human|Chiba Prefectural Institute of Public Health|Pathogen Genomics Center|Sekizuka|Japan

>Spike|hCoV-19/Australia/VIC9921/2020|2020-08-25|EPI\_ISL\_565781|Original|hCoV-19^^Victoria|Human|Microbiological Diagnostic Unit - Public Health Laboratory (MDU-PHL)|MDU-PHL|Schultz|Australia

>Spike|hCoV-19/England/QEUA-A4C086/2020|2020-10-05|EPI\_ISL\_628541|Original|hCoV-19^^England|Human|Oxford Viromics|COVID-19 Genomics UK (COG-UK) Consortium|Golubchik|United Kingdom

>Spike|hCoV-19/England/MILK-9952A7/2020|2020-08-24|EPI\_ISL\_552313|Original|hCoV-19^^England|Human|Lighthouse Lab in Milton Keynes|Wellcome Sanger Institute for the COVID-19 Genomics UK (COG-UK) consortium|Davies|United Kingdom

>Spike|hCoV-19/Iran/SA-Isf-31/2020|2020-07-09|EPI\_ISL\_672583|Original|hCoV-19^^Iran|Human|Infectious Diseases and Tropical Medicine Research Center|Infectious Diseases and Tropical Medicine Research Center|Ahangarzadeh, S.|Iran

>Spike|hCoV-19/Denmark/DCGC-20359/2020|2020-12-21|EPI\_ISL\_759104|Original|hCoV-19^^Nordjylland|Human|Department of Virus and Microbiological Special Diagnostics|Albertsen Lab|Michaelsen|Denmark

>Spike|hCoV-19/Peru/JUN-INS-047/2020|2020-04-11|EPI\_ISL\_516647|Original|hCoV-19^^Junin|Human|Laboratorio de Referencia Nacional de Virus Respiratorio. Centro Nacional de Salud Publica. Instituto Nacional de Salud Peru.|Laboratorio de Referencia Nacional de Biotecnolog\u00eda y Biolog\u00eda Molecular. Centro Nacional de Salud Publica. Instituto Nacional de Salud Peru.|Padilla Rojas|Peru

>Spike|hCoV-19/USA/CA-CZB-13385/2020|2020-08-31|EPI\_ISL\_672086|Original|hCoV-19^^California|Human|Alameda County Public Health Lab|Chan-Zuckerberg Biohub|Bhatt|USA

>Spike|hCoV-19/England/QEUH-AAF009/2020|2020-10-20|EPI\_ISL\_651549|Original|hCoV-19^^England|Human|Oxford Viromics|COVID-19 Genomics UK (COG-UK) Consortium|Golubchik|United Kingdom

>Spike|hCoV-19/Japan/PG-3479/2020|2020-07-00|EPI\_ISL\_691589|Original|hCoV-19^^Japan|Human|Pathogen Genomics Center|Pathogen Genomics Center|Sekizuka|Japan

>Spike|hCoV-19/USA/HI-H200130/2020|2020-07-05|EPI\_ISL\_752693|Original|hCoV-19^^Hawaii|Human|State Laboratories Division|State Laboratories Division|Sultana|USA

>Spike|hCoV-19/England/MILK-A7CCC5/2020|2020-10-13|EPI\_ISL\_606659|Original|hCoV-19^^England|Human|Lighthouse Lab in Milton Keynes|Wellcome Sanger Institute for the COVID-19 Genomics UK (COG-UK) consortium|Davies|United Kingdom

>Spike|hCoV-19/USA/TX-HMH-MCoV-18008/2020|2020-11-16|EPI\_ISL\_786156|Original|hCoV-19^^Texas|Human|Houston Methodist Hospital|Houston Methodist Hospital|Long|USA

>Spike|hCoV-19/Scotland/EDB151/2020|2020-03-24|EPI\_ISL\_425919|Original|hCoV-19^^Scotland|Human|Virology Department|COVID-19 Genomics UK (COG-UK) Consortium|Williams|United Kingdom

>Spike|hCoV-19/United Arab Emirates/0342/2020|2020-05-16|EPI\_ISL\_698517|Original|hCoV-19^^Abu Dhabi|Human|Group 42 (G42) Healthcare|G42 Healthcare|Ogrodzki|United Arab Emirates

>Spike|hCoV-19/England/QEUH-AD327F/2020|2020-10-25|EPI\_ISL\_633990|Original|hCoV-19^^England|Human|Lighthouse Lab in Glasgow|Wellcome Sanger Institute for the COVID-19 Genomics UK (COG-UK) consortium|Davies|United Kingdom

>Spike|hCoV-19/England/QEUH-9B9EF4/2020|2020-09-05|EPI\_ISL\_549695|Original|hCoV-19^^England|Human|Lighthouse Lab in Glasgow|Wellcome Sanger Institute for the COVID-19 Genomics UK (COG-UK) consortium|Davies|United Kingdom

>Spike|hCoV-19/USA/WA-SFS-S2850/2020|2020-09-01|EPI\_ISL\_575028|Original|hCoV-19^^Washington|Human|Seattle Flu Study|Seattle Flu Study|Lee|USA

>Spike|hCoV-19/England/MILK-C90FA2/2020|2020-12-10|EPI\_ISL\_777141|Original|hCoV-19^^England|Human|Lighthouse Lab in Milton Keynes|Wellcome Sanger Institute for the COVID-19 Genomics UK (COG-UK) Consortium|Davies|United Kingdom

>Spike|hCoV-19/England/MILK-9F1160/2020|2020-09-25|EPI\_ISL\_589655|Original|hCoV-19^^England|Human|Lighthouse Lab in Milton Keynes|Wellcome Sanger Institute for the COVID-19 Genomics UK (COG-UK) consortium|Davies|United Kingdom

>Spike|hCoV-19/Denmark/DCGC-12788/2020|2020-11-02|EPI\_ISL\_682969|Original|hCoV-19^^Nordjylland|Human|Department of Virus and Microbiological Special Diagnostics|Albertsen Lab|Michaelsen|Denmark

>Spike|hCoV-19/England/ALDP-9EAF06/2020|2020-09-24|EPI\_ISL\_580080|Original|hCoV-19^^England|Human|Lighthouse Lab in Alderley Park|Wellcome Sanger Institute for the COVID-19 Genomics UK (COG-UK) consortium|Davies|United Kingdom

>Spike|hCoV-19/England/EXET-13896D/2020|2020-10-19|EPI\_ISL\_627431|Original|hCoV-19^^England|Human|University of Exeter|COVID-19 Genomics UK (COG-UK) Consortium|Temperton|United Kingdom

>Spike|hCoV-19/USA/CO-QDX-877/2020|2020-03-16|EPI\_ISL\_571592|Original|hCoV-19^^Colorado|Human|Quest Diagnostics|Quest Diagnostics|Kagan|USA

>Spike|hCoV-19/Switzerland/SG-ETHZ-390220/2020|2020-11-27|EPI\_ISL\_721849|Original|hCoV-19^^St Gallen|Human|Viollier AG|Department of Biosystems Science and Engineering|Nadeau|Switzerland

>Spike|hCoV-19/England/CAMB-7250A/2020|2020-03-22|EPI\_ISL\_439875|Original|hCoV-19^^England|Human|Department of Pathology|Wellcome Sanger Institute for the COVID-19 Genomics UK (COG-UK) consortium|Amato|United Kingdom

>Spike|hCoV-19/USA/UT-UPHL-02824/2020|2020-04-25|EPI\_ISL\_575086|Original|hCoV-19^^Utah|Human|Utah Public Health Laboratory|Utah Public Health Laboratory|Young|USA

>Spike|hCoV-19/Denmark/DCGC-8576/2020|2020-10-26|EPI\_ISL\_625932|Original|hCoV-19^^Sjaelland|Human|Department of Virus and Microbiological Special Diagnostics|Albertsen lab|Michaelsen|Denmark

>Spike|hCoV-19/USA/WA-S1780/2020|2020-06-02|EPI\_ISL\_496206|Original|hCoV-19^^Washington|Human|Washington State Department of Health|Seattle Flu Study|Lee|USA

>Spike|hCoV-19/Japan/PG-2223/2020|2020-04-00|EPI\_ISL\_685828|Original|hCoV-19^^Japan|Human|Pathogen Genomics Center|Pathogen Genomics Center|Sekizuka|Japan

>Spike|hCoV-19/England/ALDP-A6703A/2020|2020-10-12|EPI\_ISL\_630481|Original|hCoV-19^^England|Human|Lighthouse Lab in Alderley Park|Wellcome Sanger Institute for the COVID-19 Genomics UK (COG-UK) consortium|Davies|United Kingdom

>Spike|hCoV-19/England/QEUH-AAAF5C/2020|2020-10-20|EPI\_ISL\_652757|Original|hCoV-19^^England|Human|Oxford Viromics|COVID-19 Genomics UK (COG-UK) Consortium|Golubchik|United Kingdom

>Spike|hCoV-19/USA/MA-MASPHL-01009/2020|2020-06-06|EPI\_ISL\_692797|Original|hCoV-19^^Massachusetts|Human|Massachusetts State Public Health Laboratory|Massachusetts State Public Health Laboratory|Lang|USA

>Spike|hCoV-19/Scotland/QEUH-A02C2E/2020|2020-09-27|EPI\_ISL\_585595|Original|hCoV-19^^Scotland|Human|Quadram Institute Bioscience|COVID-19 Genomics UK (COG-UK) Consortium|Alikhan|United Kingdom

>Spike|hCoV-19/USA/ME-HETL-J0275/2020|2020-10-03|EPI\_ISL\_755421|Original|hCoV-19^^Maine|Human|Maine Health and Environmental Testing Laboratory|Tewhey Lab|Tewhey|USA

>Spike|hCoV-19/Wales/PHWC-49D383/2020|2020-12-10|EPI\_ISL\_742771|Original|hCoV-19^^Wales|Human|Wales Specialist Virology Centre Sequencing lab|COVID-19 Genomics UK (COG-UK) Consortium|Moore|United Kingdom

>Spike|hCoV-19/Netherlands/UT-RIVM-20142/2020|2020-11-30|EPI\_ISL\_723312|Original|hCoV-19^^Utrecht|Human|Dutch COVID-19 response team|National Institute for Public Health and the Environment (RIVM)|Meijer|Netherlands

>Spike|hCoV-19/USA/WA-UW-6321/2020|2020-04-02|EPI\_ISL\_570096|Original|hCoV-19^^Washington|Human|UW Virology Lab|UW Virology Lab|Roychoudhury|USA

>Spike|hCoV-19/France/NAQ-SC589/2020|2020-05-19|EPI\_ISL\_663238|Original|hCoV-19^^Nouvelle-Aquitaine|Human|CHU Poitiers|CNR Virus des Infections Respiratoires - France SUD|Bal|France

>Spike|hCoV-19/Switzerland/BS-UHB-42191689/2020|2020-03-15|EPI\_ISL\_528105|Original|hCoV-19^^Basel-Stadt|Human|University Hospital Basel|University Hospital Basel|Roloff Handschin|Switzerland

>Spike|hCoV-19/England/ALDP-98C391/2020|2020-07-25|EPI\_ISL\_529259|Original|hCoV-19^^England|Human|Liverpool Clinical Laboratories|COVID-19 Genomics UK (COG-UK) Consortium|Haldenby|United Kingdom

>Spike|hCoV-19/Denmark/DCGC-15705/2020|2020-11-23|EPI\_ISL\_713973|Original|hCoV-19^^Midtjylland|Human|Department of Virus and Microbiological Special Diagnostics|Albertsen Lab|Michaelsen|Denmark

>Spike|hCoV-19/Spain/MD-IBV-99008754/2020|2020-10-20|EPI\_ISL\_654312|Original|hCoV-19^^Madrid|Human|Hospital General Universitario Gregorio Mara\u00f1a|SeqCOVID-SPAIN consortium|IBV (CSIC)|Comas|Spain

>Spike|hCoV-19/Japan/IC-0582/2020|2020-10-00|EPI\_ISL\_779668|Original|hCoV-19^^Japan|Human|Pathogen Genomics Center|Pathogen Genomics Center|Sekizuka|Japan

>Spike|hCoV-19/USA/NY-NYCPHL-000231/2020|2020-03-26|EPI\_ISL\_631760|Original|hCoV-19^^New York|Human|OCME Office Of Chief Medical Examiner|New York City Public Health Laboratory|Wang|USA

>Spike|hCoV-19/India/DL-NCDC-02415/2020|2020-03-30|EPI\_ISL\_435111|Original|hCoV-19^^Delhi|Human|National Centre for Disease control (NCDC)|NCDC/CSIR-IGIB|Faruq|India

>Spike|hCoV-19/Belgium/ULG-10502/2020|2020-09-25|EPI\_ISL\_581664|Original|hCoV-19^^Li\u00e8ge|Human|Department of Clinical Microbiology|GIGA Medical Genomics|Durkin|Belgium

>Spike|hCoV-19/Denmark/DCGC-14480/2020|2020-11-30|EPI\_ISL\_711790|Original|hCoV-19^^Syddanmark|Human|Department of Virus and Microbiological Special Diagnostics|Albertsen Lab|Michaelsen|Denmark

>Spike|hCoV-19/England/MILK-99A8CE/2020|2020-08-29|EPI\_ISL\_550409|Original|hCoV-19^^England|Human|Lighthouse Lab in Milton Keynes|Wellcome Sanger Institute for the COVID-19 Genomics UK (COG-UK) consortium|Davies|United Kingdom

>Spike|hCoV-19/USA/FL-BPHL-2100/2020|2020-03-05|EPI\_ISL\_653253|Original|hCoV-19^^Florida|Human|Florida Bureau of Public Health Laboratories|Florida Bureau of Public Health Laboratories|Blanton|USA

>Spike|hCoV-19/Canada/ON-PHL-20-90085/2020|2020-03-00|EPI\_ISL\_548935|Original|hCoV-19^^Ontario|Human|Public Health Ontario Laboratory|Public Health Ontario Laboratory|Guthrie|Canada

>Spike|hCoV-19/England/ALDP-94FCDB/2020|2020-06-16|EPI\_ISL\_555241|Original|hCoV-19^^England|Human|Lighthouse Lab in Alderley Park|Wellcome Sanger Institute for the COVID-19 Genomics UK (COG-UK) consortium|Davies|United Kingdom

>Spike|hCoV-19/USA/TX-HMH-2073/2020|2020-05-12|EPI\_ISL\_545103|Original|hCoV-19^^Texas|Human|Houston Methodist Hospital|Houston Methodist Hospital|Long|USA

>Spike|hCoV-19/Wales/PHWC-4958B9/2020|2020-11-24|EPI\_ISL\_726409|Original|hCoV-19^^Wales|Human|Originating lab|COVID-19 Genomics UK (COG-UK) Consortium|Moore|United Kingdom

>Spike|hCoV-19/Netherlands/NA\_396/2020|2020-04-03|EPI\_ISL\_455198|Original|hCoV-19^^Netherlands|Human|Dutch COVID-19 response team|Erasmus Medical Center|Oude Munnink|Netherlands

>Spike|hCoV-19/India/KA-nimh-14834/2020|2020-05-08|EPI\_ISL\_515958|Original|hCoV-19^^Karnataka|Human|DH|Department of Neurovirology|Pattabiraman|India

>Spike|hCoV-19/Denmark/DCGC-7037/2020|2020-10-12|EPI\_ISL\_619884|Original|hCoV-19^^Hovedstaden|Human|Department of Virus and Microbiological Special Diagnostics|Albertsen lab|Michaelsen|Denmark

>Spike|hCoV-19/England/CAMB-73F29/2020|2020-03-20|EPI\_ISL\_440324|Original|hCoV-19^^England|Human|Department of Pathology|Wellcome Sanger Institute for the COVID-19 Genomics UK (COG-UK) consortium|Amato|United Kingdom

>Spike|hCoV-19/England/QEUEH-B12097/2020|2020-11-02|EPI\_ISL\_642748|Original|hCoV-19^^England|Human|Lighthouse Lab in Glasgow|Wellcome Sanger Institute for the COVID-19 Genomics UK (COG-UK) Consortium|Davies|United Kingdom

>Spike|hCoV-19/USA/IA-GMF-21344/2020|2020-09-20|EPI\_ISL\_660831|Original|hCoV-19^^Iowa|Human|Gundersen Molecular Diagnostics Laboratory|Kabara Cancer Research Institute|Kenny|USA

>Spike|hCoV-19/Germany/NW-HHU-292/2020|2020-09-30|EPI\_ISL\_631336|Original|hCoV-19^^North Rhine-Westphalia|Human|ZOTZ KLIMAS MVZ D\u00f0fcsseldorf-Centrum GbR \u00dcBAG f\u00f0r Labormedizin|Center of Medical Microbiology|Wienemann|Germany

>Spike|hCoV-19/USA/UT-UPHL-2012873181/2020|2020-07-27|EPI\_ISL\_745483|Original|hCoV-19^^Utah|Human|Ginkgo Bioworks Clinical Laboratory|Utah Public Health Laboratory|Young|USA

>Spike|hCoV-19/Ireland/D-NVRL-20G38988/2020|2020-03-26|EPI\_ISL\_671376|Original|hCoV-19^^Dublin|Human|National Virus Reference Laboratory|Irish Coronavirus Sequencing Consortium - Teagasc Moorepark|Walsh|Ireland

>Spike|hCoV-19/Australia/NSW847/2020|2020-08-06|EPI\_ISL\_526189|Original|hCoV-19^^New South Wales|Human|St Vincent's Pathology (SydPath)|NSW Health Pathology - Institute of Clinical Pathology and Medical Research; Westmead Hospital; University of Sydney|Gall|Australia

>Spike|hCoV-19/Scotland/CVR4163/2020|2020-08-31|EPI\_ISL\_540844|Original|hCoV-19^^Scotland|Human|Lighthouse Lab in Glasgow / MRC-University of Glasgow Centre for Virus Research|COVID-19 Genomics UK (COG-UK) Consortium|Robertson|United Kingdom

>Spike|hCoV-19/England/QEUEH-C93EEE/2020|2020-12-16|EPI\_ISL\_777504|Original|hCoV-19^^England|Human|Lighthouse Lab in Glasgow|Wellcome Sanger Institute for the COVID-19 Genomics UK (COG-UK) Consortium|Davies|United Kingdom

>Spike|hCoV-19/Scotland/QEUEH-AAE5A1/2020|2020-10-22|EPI\_ISL\_623921|Original|hCoV-19^^Scotland|Human|Lighthouse Lab in Glasgow|Wellcome Sanger Institute for the COVID-19 Genomics UK (COG-UK) consortium|Davies|United Kingdom

>Spike|hCoV-19/England/ALDP-9CD6B9/2020|2020-09-16|EPI\_ISL\_566229|Original|hCoV-19^^England|Human|Lighthouse Lab in Alderley Park|Wellcome Sanger Institute for the COVID-19 Genomics UK (COG-UK) consortium|Davies|United Kingdom

>Spike|hCoV-19/USA/FL-BPHL-0737/2020|2020-07-16|EPI\_ISL\_509795|Original|hCoV-19^^Florida|Human|Florida Bureau of Public Health Laboratories|Florida Bureau of Public Health Laboratories|Blanton|USA

>Spike|hCoV-19/USA/MN-MDH-2105/2020|2020-11-06|EPI\_ISL\_683734|Original|hCoV-19^^Minnesota|Human|Minnesota Department of Health|Minnesota Department of Health|Garfin|USA

>Spike|hCoV-19/USA/UT-UPHL-2009050/2020|2020-05-12|EPI\_ISL\_525064|Original|hCoV-19^^Utah|Human|Utah Public Health Laboratory|Utah Public Health Laboratory|Young|USA

>Spike|hCoV-19/England/ALDP-954471/2020|2020-06-13|EPI\_ISL\_553757|Original|hCoV-19^^England|Human|Lighthouse Lab in Alderley Park|Wellcome Sanger Institute for the COVID-19 Genomics UK (COG-UK) consortium|Davies|United Kingdom

>Spike|hCoV-19/Denmark/DCGC-895/2020|2020-05-18|EPI\_ISL\_614459|Original|hCoV-19^^Hovedstaden|Human|Department of Virus and Microbiological Special Diagnostics|Albertsen lab|Michaelsen|Denmark

>Spike|hCoV-19/England/QEUA-9B9D51/2020|2020-09-09|EPI\_ISL\_549768|Original|hCoV-19^^England|Human|Lighthouse Lab in Glasgow|Wellcome Sanger Institute for the COVID-19 Genomics UK (COG-UK) consortium|Davies|United Kingdom

>Spike|hCoV-19/England/MILK-AC7E7A/2020|2020-10-21|EPI\_ISL\_634326|Original|hCoV-19^^England|Human|Lighthouse Lab in Milton Keynes|Wellcome Sanger Institute for the COVID-19 Genomics UK (COG-UK) consortium|Davies|United Kingdom

>Spike|hCoV-19/England/MILK-9F06DB/2020|2020-09-25|EPI\_ISL\_580839|Original|hCoV-19^^England|Human|Lighthouse Lab in Milton Keynes|Wellcome Sanger Institute for the COVID-19 Genomics UK (COG-UK) consortium|Davies|United Kingdom

>Spike|hCoV-19/Chile/LL-ISPCH-2/2020|2020-03-29|EPI\_ISL\_445334|Original|hCoV-19^^Los Lagos|Human|CLINICA UNIVERSITARIA DE PUERTO MONTT S.A.|Instituto de Salud Publica de Chile|Fernandez|Chile

>Spike|hCoV-19/Australia/VIC16489/2020|2020-08-06|EPI\_ISL\_640619|Original|hCoV-19^^Victoria|Human|Microbiological Diagnostic Unit - Public Health Laboratory (MDU-PHL)|MDU-PHL|Schultz|Australia

>Spike|hCoV-19/Denmark/DCGC-19090/2020|2020-12-07|EPI\_ISL\_748751|Original|hCoV-19^^Syddanmark|Human|Department of Virus and Microbiological Special Diagnostics|Albertsen Lab|Michaelsen|Denmark

>Spike|hCoV-19/Japan/PG-1989/2020|2020-04-00|EPI\_ISL\_685594|Original|hCoV-19^^Japan|Human|Pathogen Genomics Center|Pathogen Genomics Center|Sekizuka|Japan

>Spike|hCoV-19/USA/TX-DSHS-0521/2020|2020-06-23|EPI\_ISL\_560963|Original|hCoV-19^^Texas|Human|Texas Department of State Health Services|Texas Department of State Health Services|Rahman|USA

>Spike|hCoV-19/Denmark/DCGC-22464/2020|2020-12-14|EPI\_ISL\_757423|Original|hCoV-19^^Sjaelland|Human|Department of Virus and Microbiological Special Diagnostics|Albertsen Lab|Michaelsen|Denmark

>Spike|hCoV-19/Finland/25LS6CE1/2020|2020-10-25|EPI\_ISL\_759913|Original|hCoV-19^^Uusimaa|Human|Department of Virology and Immunology|Department of Virology|Smura|Finland

>Spike|hCoV-19/Scotland/EDB2893/2020|2020-04-01|EPI\_ISL\_489027|Original|hCoV-19^^Scotland|Human|Virology Department|Wellcome Sanger Institute for the COVID-19 Genomics UK (COG-UK) consortium|Davies|United Kingdom

>Spike|hCoV-19/England/CAMB-7BAA8/2020|2020-04-04|EPI\_ISL\_442275|Original|hCoV-19^^England|Human|Department of Pathology|Wellcome Sanger Institute for the COVID-19 Genomics UK (COG-UK) consortium|Amato|United Kingdom

>Spike|hCoV-19/England/CAMC-A58AE3/2020|2020-10-09|EPI\_ISL\_597163|Original|hCoV-19^^England|Human|Lighthouse Lab in Cambridge|Wellcome Sanger Institute for the COVID-19 Genomics UK (COG-UK) consortium|Davies|United Kingdom

>Spike|hCoV-19/England/QEUA-C4B86F/2020|2020-12-13|EPI\_ISL\_769677|Original|hCoV-19^^England|Human|Lighthouse Lab in Glasgow|Wellcome Sanger Institute for the COVID-19 Genomics UK (COG-UK) Consortium|Davies|United Kingdom

>Spike|hCoV-19/England/ALDP-A2E891/2020|2020-10-05|EPI\_ISL\_587092|Original|hCoV-19^^England|Human|Lighthouse Lab in Alderley Park|Wellcome Sanger Institute for the COVID-19 Genomics UK (COG-UK) consortium|Davies|United Kingdom

>Spike|hCoV-19/USA/CA-CZB-2378/2020|2020-05-15|EPI\_ISL\_513818|Original|hCoV-19^^California|Human|Orange County Public Health Laboratory|Chan-Zuckerberg Biohub|Kamm|USA

>Spike|hCoV-19/Denmark/DCGC-11608/2020|2020-11-02|EPI\_ISL\_670469|Original|hCoV-19^^Hovedstaden|Human|Department of Virus and Microbiological Special Diagnostics|Albertsen Lab|Michaelsen|Denmark

>Spike|hCoV-19/England/ALDP-A6EC7B/2020|2020-10-15|EPI\_ISL\_607006|Original|hCoV-19^^England|Human|Lighthouse Lab in Alderley Park|Wellcome Sanger Institute for the COVID-19 Genomics UK (COG-UK) consortium|Davies|United Kingdom

>Spike|hCoV-19/South Africa/KRISP-K002753/2020|2020-08-15|EPI\_ISL\_529749|Original|hCoV-19^^KwaZulu-Natal|Human|NHLS-IALCH|KRISP|de Oliveira|South Africa

>Spike|hCoV-19/USA/FL-BPHL-047/2020|2020-04-16|EPI\_ISL\_436551|Original|hCoV-19^^Florida|Human|Florida Bureau of Public Health Laboratories|Florida Bureau of Public Health Laboratories|Blanton|USA

>Spike|hCoV-19/Hong Kong/HKU-200723-051/2020|2020-04-01|EPI\_ISL\_497818|Original|hCoV-19^^Hong Kong|Human|Department of Microbiology|Department of Microbiology|Chan|China

>Spike|hCoV-19/England/ALDP-B5DE78/2020|2020-11-08|EPI\_ISL\_723602|Original|hCoV-19^^England|Human|Northumbria University / South Tees Hospitals NHS Foundation Trust / North Cumbria Integrated Care NHS Foundation Trust / North Tees and Hartlepool NHS Foundation Trust / Newcastle Hospitals NHS Foundation Trust|COVID-19 Genomics UK (COG-UK) Consortium|Bashton|United Kingdom

>Spike|hCoV-19/USA/TX-HMH-MCoV-8608/2020|2020-07-01|EPI\_ISL\_780648|Original|hCoV-19^^Texas|Human|Houston Methodist Hospital|Houston Methodist Hospital|Long|USA

>Spike|hCoV-19/England/BIRM-63EA7/2020|2020-09-04|EPI\_ISL\_576894|Original|hCoV-19^^England|Human|University of Birmingham|COVID-19 Genomics UK (COG-UK) Consortium|Loman|United Kingdom

>Spike|hCoV-19/England/ALDP-9BE220/2020|2020-09-09|EPI\_ISL\_568150|Original|hCoV-19^^England|Human|Lighthouse Lab in Alderley Park|Wellcome Sanger Institute for the COVID-19 Genomics UK (COG-UK) consortium|Davies|United Kingdom

>Spike|hCoV-19/England/CAMB-1B9C4D/2020|2020-11-09|EPI\_ISL\_664966|Original|hCoV-19^^England|Human|Department of Pathology|COVID-19 Genomics UK (COG-UK) Consortium|Goodfellow|United Kingdom

>Spike|hCoV-19/Australia/VIC10590/2020|2020-08-28|EPI\_ISL\_562974|Original|hCoV-19^^Victoria|Human|Microbiological Diagnostic Unit - Public Health Laboratory (MDU-PHL) |MDU-PHL|Schultz|Australia

>Spike|hCoV-19/England/ALDP-BCA1AA/2020|2020-11-23|EPI\_ISL\_703478|Original|hCoV-19^^England|Human|Lighthouse Lab in Alderley Park|Wellcome Sanger Institute for the COVID-19 Genomics UK (COG-UK) Consortium|Davies|United Kingdom

>Spike|hCoV-19/Costa Rica/INC-0142/2020|2020-09-05|EPI\_ISL\_770006|Original|hCoV-19^^Puntarenas|Human|Hle - Asociacion Hogar De Ancianos De Palmar Sur De Osa|Inciensa|Soto-Garita|Costa Rica

>Spike|hCoV-19/England/QEUH-A0B074/2020|2020-10-01|EPI\_ISL\_599442|Original|hCoV-19^^England|Human|Lighthouse Lab in Glasgow|Wellcome Sanger Institute for the COVID-19 Genomics UK (COG-UK) consortium|Davies|United Kingdom

>Spike|hCoV-19/England/ALDP-9ECFC8/2020|2020-05-05|EPI\_ISL\_589356|Original|hCoV-19^^England|Human|Lighthouse Lab in Alderley Park|Wellcome Sanger Institute for the COVID-19 Genomics UK (COG-UK) consortium|Davies|United Kingdom

>Spike|hCoV-19/England/LIVE-DC0B95/2020|2020-11-03|EPI\_ISL\_705360|Original|hCoV-19^^England|Human|Liverpool Clinical Laboratories|COVID-19 Genomics UK (COG-UK) Consortium|Haldenby|United Kingdom

>Spike|hCoV-19/USA/UT-QDX-1839/2020|2020-03-14|EPI\_ISL\_604156|Original|hCoV-19^^Utah|Human|Quest Diagnostics|Quest Diagnostics|Kagan|USA

>Spike|hCoV-19/England/SHEF-C578A/2020|2020-05-22|EPI\_ISL\_484456|Original|hCoV-19^^England|Human|Virology Department|COVID-19 Genomics UK (COG-UK) Consortium|de Silva|United Kingdom

>Spike|hCoV-19/England/ALDP-666381/2020|2020-07-03|EPI\_ISL\_555751|Original|hCoV-19^^England|Human|Lighthouse Lab in Alderley Park|Wellcome Sanger Institute for the COVID-19 Genomics UK (COG-UK) consortium|Davies|United Kingdom

>Spike|hCoV-19/Spain/MD-HLP-105-3/2020|2020-05-02|EPI\_ISL\_534332|Original|hCoV-19^^Madrid|Human|Hospital Universitario La Paz|Hospital Universitario La Paz|Viedma|Spain

>Spike|hCoV-19/Wales/PHWC-26B9A/2020|2020-03-27|EPI\_ISL\_422254|Original|hCoV-19^^Wales|Human|Wales Specialist Virology Centre|Public Health Wales Microbiology Cardiff|Moore|United Kingdom

>Spike|hCoV-19/Denmark/DCGC-8518/2020|2020-10-26|EPI\_ISL\_625927|Original|hCoV-19^^Hovedstaden|Human|Department of Virus and Microbiological Special Diagnostics|Albertsen lab|Michaelsen|Denmark

>Spike|hCoV-19/England/ALDP-9E7464/2020|2020-09-24|EPI\_ISL\_594470|Original|hCoV-19^^England|Human|Oxford Viromics|COVID-19 Genomics UK (COG-UK) Consortium|Golubchik|United Kingdom

>Spike|hCoV-19/USA/NY-Wadsworth-207256-01/2020|2020-09-01|EPI\_ISL\_677090|Original|hCoV-19^^New York|Human|Wadsworth Center|Wadsworth Center|Lasek-Nesselquist|USA

>Spike|hCoV-19/India/DL-NCDC1962-CSIR-IGIB/2020|2020-05-18|EPI\_ISL\_482516|Original|hCoV-19^^Delhi|Human|National Centre for Disease control (NCDC)|NCDC/CSIR-IGIB|Pandey|India

>Spike|hCoV-19/England/201100981/2020|2020-03-08|EPI\_ISL\_464651|Original|hCoV-19^^England|Human|Respiratory Virus Unit|Respiratory Virus Unit|Platt|United Kingdom

>Spike|hCoV-19/Germany/ChVir1967/2020|2020-03-07|EPI\_ISL\_729491|Original|hCoV-19^^Germany|Human|Charit\u00e9 Universit\u00e4tsmedizin Berlin|Charit\u00e9 Universit\u00e4tsmedizin Berlin|Muehlemann|Germany

>Spike|hCoV-19/England/ALDP-A95394/2020|2020-10-19|EPI\_ISL\_624694|Original|hCoV-19^^England|Human|Lighthouse Lab in Alderley Park|Wellcome Sanger Institute for the COVID-19 Genomics UK (COG-UK) consortium|Davies|United Kingdom

>Spike|hCoV-19/England/204720526/2020|2020-11-16|EPI\_ISL\_678716|Original|hCoV-19^^England|Human|Respiratory Virus Unit|COVID-19 Genomics UK (COG-UK) Consortium|Platt|United Kingdom

>Spike|hCoV-19/USA/TX-HMH-3168/2020|2020-06-10|EPI\_ISL\_544044|Original|hCoV-19^^Texas|Human|Houston Methodist Hospital|Houston Methodist Hospital|Long|USA

>Spike|hCoV-19/Scotland/GCVR-170A75/2020|2020-03-26|EPI\_ISL\_459555|Original|hCoV-19^^Scotland|Human|NHSGGC West of Scotland Specialist Virology Centre / MRC-University of Glasgow Centre for Virus Research|Wellcome Sanger Institute for the COVID-19 Genomics UK (COG-UK) consortium|Davies|United Kingdom

>Spike|hCoV-19/Luxembourg/LNS5745708/2020|2020-12-01|EPI\_ISL\_770951|Original|hCoV-19^^Luxembourg|Human|Laboratoire national de sant\u00e9|Laboratoire national de sant\u00e9|Wienecke-Baldacchino|Luxembourg

>Spike|hCoV-19/England/BRIS-12316D/2020|2020-04-05|EPI\_ISL\_442636|Original|hCoV-19^^England|Human|PHE South West Regional Laboratory|Wellcome Sanger Institute for the COVID-19 Genomics UK (COG-UK) consortium|Amato|United Kingdom

>Spike|hCoV-19/England/ALDP-BB2828/2020|2020-11-20|EPI\_ISL\_702799|Original|hCoV-19^^England|Human|Lighthouse Lab in Alderley Park|Wellcome Sanger Institute for the COVID-19 Genomics UK (COG-UK) Consortium|Davies|United Kingdom

>Spike|hCoV-19/Denmark/DCGC-6157/2020|2020-10-05|EPI\_ISL\_620060|Original|hCoV-19^^Midtjylland|Human|Department of Virus and Microbiological Special Diagnostics|Albertsen lab|Michaelsen|Denmark

>Spike|hCoV-19/England/CAMC-A572FB/2020|2020-10-09|EPI\_ISL\_597520|Original|hCoV-19^^England|Human|Lighthouse Lab in Cambridge|Wellcome Sanger Institute for the COVID-19 Genomics UK (COG-UK) consortium|Davies|United Kingdom

>Spike|hCoV-19/England/LOND-124DF8D/2020|2020-00-00|EPI\_ISL\_584661|Original|hCoV-19^^England|Human|University College London Hospital|COVID-19 Genomics UK (COG-UK) Consortium|Byott|United Kingdom

>Spike|hCoV-19/England/CAMB-1AD6A8/2020|2020-05-01|EPI\_ISL\_447994|Original|hCoV-19^^England|Human|Department of Pathology|COVID-19 Genomics UK (COG-UK) Consortium|Meredith|United Kingdom

>Spike|hCoV-19/USA/MA-MGH-03083/2020|2020-08-14|EPI\_ISL\_765702|Original|hCoV-19^^Massachusetts|Human|Massachusetts General Hospital|Infectious Disease Program|Park|USA

>Spike|hCoV-19/Northern Ireland/NIRE-103822/2020|2020-04-16|EPI\_ISL\_489161|Original|hCoV-19^^Northern Ireland|Human|Regional Virus Laboratory|Wellcome Sanger Institute for the COVID-19 Genomics UK (COG-UK) consortium|Davies|United Kingdom

>Spike|hCoV-19/England/CAMB-83463/2020|2020-04-24|EPI\_ISL\_438680|Original|hCoV-19^^England|Human|Department of Pathology|COVID-19 Genomics UK (COG-UK) Consortium|Meredith|United Kingdom

>Spike|hCoV-19/South Africa/KRISP-K000582/2020|2020-07-13|EPI\_ISL\_509238|Original|hCoV-19^^KwaZulu-Natal|Human|NHLS-IALCH|KRISP|de Oliveira|South Africa



>Spike|hCoV-19/Wales/PHWC-2F047/2020|2020-04-06|EPI\_ISL\_446191|Original|hCoV-19^^Wales|Human|Wales Specialist Virology Centre|Public Health Wales Microbiology Cardiff|Moore|United Kingdom

>Spike|hCoV-19/England/LIVE-A5735/2020|2020-03-19|EPI\_ISL\_500146|Original|hCoV-19^^England|Human|Liverpool Clinical Laboratories|COVID-19 Genomics UK (COG-UK) Consortium|Haldenby|United Kingdom

>Spike|hCoV-19/Belgium/UGent-82/2020|2020-03-11|EPI\_ISL\_468731|Original|hCoV-19^^Ghent|Human|Lab voor klinische biologie|Onderzoeksgroep Virologie|Lambrechts|Belgium

>Spike|hCoV-19/Russia/KDA-RII-MH2769S/2020|2020-09-23|EPI\_ISL\_602440|Original|hCoV-19^^Krasnodar|Human|HELIX LLC|WHO National Influenza Centre Russian Federation|Komissarov|Russia

>Spike|hCoV-19/England/ALDP-9CD3A3/2020|2020-09-16|EPI\_ISL\_566281|Original|hCoV-19^^England|Human|Lighthouse Lab in Alderley Park|Wellcome Sanger Institute for the COVID-19 Genomics UK (COG-UK) consortium|Davies|United Kingdom

>Spike|hCoV-19/Wales/PHWC-162AA3/2020|2020-05-30|EPI\_ISL\_473157|Original|hCoV-19^^Wales|Human|Wales Specialist Virology Centre Sequencing lab|COVID-19 Genomics UK (COG-UK) Consortium|Moore|United Kingdom

>Spike|hCoV-19/USA/NY-Wadsworth-286249-01/2020|2020-12-10|EPI\_ISL\_754566|Original|hCoV-19^^New York|Human|Wadsworth Center|Wadsworth Center|Lasek-Nesselquist|USA

>Spike|hCoV-19/England/MILK-61E045/2020|2020-07-06|EPI\_ISL\_557753|Original|hCoV-19^^England|Human|Lighthouse Lab in Milton Keynes|Wellcome Sanger Institute for the COVID-19 Genomics UK (COG-UK) consortium|Davies|United Kingdom

>Spike|hCoV-19/Japan/PG-1477/2020|2020-04-00|EPI\_ISL\_685084|Original|hCoV-19^^Japan|Human|Saitama Prefectural Institute of Public Health|Pathogen Genomics Center|Sekizuka|Japan

>Spike|hCoV-19/USA/TX-HMH-MCoV-12468/2020|2020-09-29|EPI\_ISL\_790352|Original|hCoV-19^^Texas|Human|Houston Methodist Hospital|Houston Methodist Hospital|Long|USA

>Spike|hCoV-19/Netherlands/UT-RIVM-10155/2020|2020-00-00|EPI\_ISL\_547542|Original|hCoV-19^^Utrecht|Human|Dutch COVID-19 response team|National Institute for Public Health and the Environment (RIVM)|Meijer|Netherlands

>Spike|hCoV-19/Wales/PHWC-247C5/2020|2020-03-19|EPI\_ISL\_419446|Original|hCoV-19^^Wales|Human|Wales Specialist Virology Centre|Public Health Wales Microbiology Cardiff|Moore|United Kingdom

>Spike|hCoV-19/England/CAMC-BC005C/2020|2020-11-22|EPI\_ISL\_704737|Original|hCoV-19^^England|Human|Lighthouse Lab in Cambridge|Wellcome Sanger Institute for the COVID-19 Genomics UK (COG-UK) Consortium|Davies|United Kingdom

>Spike|hCoV-19/England/CAMC-B35508/2020|2020-11-05|EPI\_ISL\_659483|Original|hCoV-19^^England|Human|Lighthouse Lab in Cambridge|Wellcome Sanger Institute for the COVID-19 Genomics UK (COG-UK) Consortium|Davies|United Kingdom

>Spike|hCoV-19/England/ALDP-B1CE2A/2020|2020-11-01|EPI\_ISL\_645541|Original|hCoV-19^^England|Human|Lighthouse Lab in Alderley Park|Wellcome Sanger Institute for the COVID-19 Genomics UK (COG-UK) Consortium|Davies|United Kingdom

>Spike|hCoV-19/Denmark/DCGC-22196/2020|2020-12-14|EPI\_ISL\_758608|Original|hCoV-19^^Sjaelland|Human|Department of Virus and Microbiological Special Diagnostics|Albertsen Lab|Michaelsen|Denmark

>Spike|hCoV-19/Japan/PG-2648/2020|2020-04-00|EPI\_ISL\_690780|Original|hCoV-19^^Japan|Human|Pathogen Genomics Center|Pathogen Genomics Center|Sekizuka|Japan

>Spike|hCoV-19/Wales/PHWC-48CD6B/2020|2020-11-03|EPI\_ISL\_666536|Original|hCoV-19^^Wales|Human|Wales Specialist Virology Centre Sequencing lab|COVID-19 Genomics UK (COG-UK) Consortium|Moore|United Kingdom

>Spike|hCoV-19/England/ALDP-A87025/2020|2020-10-17|EPI\_ISL\_605953|Original|hCoV-19^^England|Human|Lighthouse Lab in Alderley Park|Wellcome Sanger Institute for the COVID-19 Genomics UK (COG-UK) consortium|Davies|United Kingdom

>Spike|hCoV-19/England/ALDP-94E137/2020|2020-06-17|EPI\_ISL\_555602|Original|hCoV-19^^England|Human|Lighthouse Lab in Alderley Park|Wellcome Sanger Institute for the COVID-19 Genomics UK (COG-UK) consortium|Davies|United Kingdom

>Spike|hCoV-19/USA/AZ-TG366707/2020|2020-06-01|EPI\_ISL\_694471|Original|hCoV-19^^Arizona|Human|AZ SPHL|TGen North|French|USA

>Spike|hCoV-19/USA/TX-HMH-1147/2020|2020-04-27|EPI\_ISL\_542552|Original|hCoV-19^^Texas|Human|Houston Methodist Hospital|Houston Methodist Hospital|Long|USA

>Spike|hCoV-19/England/SHEF-D29DF/2020|2020-04-17|EPI\_ISL\_457684|Original|hCoV-19^^England|Human|Virology Department|COVID-19 Genomics UK (COG-UK) Consortium|de Silva|United Kingdom

>Spike|hCoV-19/Scotland/EDB4930/2020|2020-05-14|EPI\_ISL\_473800|Original|hCoV-19^^Scotland|Human|Virology Department|COVID-19 Genomics UK (COG-UK) Consortium|Williams|United Kingdom

>Spike|hCoV-19/USA/WA-UW-22922/2020|2020-08-11|EPI\_ISL\_570735|Original|hCoV-19^^Washington|Human|UW Virology Lab|UW Virology Lab|Roychoudhury|USA

>Spike|hCoV-19/Wales/PHWC-4A3FC2/2020|2020-12-13|EPI\_ISL\_764650|Original|hCoV-19^^Wales|Human|Wales Specialist Virology Centre Sequencing lab|COVID-19 Genomics UK (COG-UK) Consortium|Moore|United Kingdom

>Spike|hCoV-19/England/MILK-9E2B55/2020|2020-09-21|EPI\_ISL\_581227|Original|hCoV-19^^England|Human|Lighthouse Lab in Milton Keynes|Wellcome Sanger Institute for the COVID-19 Genomics UK (COG-UK) consortium|Davies|United Kingdom

>Spike|hCoV-19/England/20102007004/2020|2020-03-02|EPI\_ISL\_464285|Original|hCoV-19^^England|Human|Respiratory Virus Unit|Respiratory Virus Unit|Platt|United Kingdom

>Spike|hCoV-19/Spain/VC-FISABIO-75/2020|2020-03-19|EPI\_ISL\_425199|Original|hCoV-19^^Comunitat Valenciana|Human|Servicio de Microbiologia. Hospital Clinico Universitario de Valencia|Sequencing and Bioinformatics Service and Molecular Epidemiology Research Group. FISABIO-Public Health|Gonzalez-Candelas|Spain

>Spike|hCoV-19/England/ALDP-C8AC2C/2020|2020-12-16|EPI\_ISL\_756408|Original|hCoV-19^^England|Human|Lighthouse Lab in Alderley Park|Wellcome Sanger Institute for the COVID-19 Genomics UK (COG-UK) Consortium|Davies|United Kingdom

>Spike|hCoV-19/USA/TX-HMH-4454/2020|2020-06-12|EPI\_ISL\_543631|Original|hCoV-19^^Texas|Human|Houston Methodist Hospital|Houston Methodist Hospital|Long|USA

>Spike|hCoV-19/USA/TX-HMH-MCoV-12803/2020|2020-08-19|EPI\_ISL\_790535|Original|hCoV-19^^Texas|Human|Houston Methodist Hospital|Houston Methodist Hospital|Long|USA

>Spike|hCoV-19/England/NORW-E9119/2020|2020-04-28|EPI\_ISL\_461822|Original|hCoV-19^^England|Human|Quadram Institute Bioscience|COVID-19 Genomics UK (COG-UK) Consortium|Alikhan|United Kingdom

>Spike|hCoV-19/USA/LA-EVTL1089/2020|2020-11-30|EPI\_ISL\_768359|Original|hCoV-19^^Louisiana|Human|LSUHS Emerging Viral Threat Laboratory|Microbial Genome Sequencing Center|Kamil|USA

>Spike|hCoV-19/Wales/PHWC-32991/2020|2020-04-14|EPI\_ISL\_474374|Original|hCoV-19^^Wales|Human|Originating lab|COVID-19 Genomics UK (COG-UK) Consortium|Moore|United Kingdom

>Spike|hCoV-19/USA/MI-UM-10036708302/2020|2020-10-30|EPI\_ISL\_682147|Original|hCoV-19^^Michigan|Human|University of Michigan Clinical Microbiology Laboratory|Lauring Lab|Valesano|USA

>Spike|hCoV-19/South Korea/KCDC2813/2020|2020-08-11|EPI\_ISL\_526746|Original|hCoV-19^^South Korea|Human|Center for Laboratory Control of Infectious Diseases|Center for Laboratory Control of Infectious Diseases|Kim|South Korea

>Spike|hCoV-19/England/CAMB-1B0763/2020|2020-05-07|EPI\_ISL\_452919|Original|hCoV-19^^England|Human|Department of Pathology|COVID-19 Genomics UK (COG-UK) Consortium|Meredith|United Kingdom

>Spike|hCoV-19/England/QEUH-9F5982/2020|2020-09-25|EPI\_ISL\_588783|Original|hCoV-19^^England|Human|Lighthouse Lab in Glasgow|Wellcome Sanger Institute for the COVID-19 Genomics UK (COG-UK) consortium|Davies|United Kingdom

>Spike|hCoV-19/Spain/AN-IBV-001056/2020|2020-04-01|EPI\_ISL\_452616|Original|hCoV-19^^Andalucia|Human|Servicio de Microbiolog\u00eda y Parasitolog\u00eda cl\u00ednica. UCEIMP. Hospital Universitario Virgen del Roc\u00edo/IBIS/CSIC/US.|SeqCOVID-SPAIN consortium/IBV (CSIC) |Comas|Spain

>Spike|hCoV-19/Wales/PHWC-163028/2020|2020-05-21|EPI\_ISL\_473235|Original|hCoV-19^^Wales|Human|Wales Specialist Virology Centre Sequencing lab|COVID-19 Genomics UK (COG-UK) Consortium|Moore|United Kingdom

>Spike|hCoV-19/Denmark/DCGC-1862/2020|2020-06-29|EPI\_ISL\_622558|Original|hCoV-19^^Hovedstaden|Human|Department of Virus and Microbiological Special Diagnostics|Albertsen lab|Michaelsen|Denmark

>Spike|hCoV-19/Japan/PG-5920/2020|2020-08-00|EPI\_ISL\_689035|Original|hCoV-19^^Japan|Human|Pathogen Genomics Center|Pathogen Genomics Center|Sekizuka|Japan

>Spike|hCoV-19/United Arab Emirates/0108/2020|2020-05-15|EPI\_ISL\_698298|Original|hCoV-19^^Abu Dhabi|Human|Group 42 (G42) Healthcare|G42 Healthcare|Ogrodzki|United Arab Emirates

>Spike|hCoV-19/England/MILK-9F2572/2020|2020-09-24|EPI\_ISL\_589167|Original|hCoV-19^^England|Human|Lighthouse Lab in Milton Keynes|Wellcome Sanger Institute for the COVID-19 Genomics UK (COG-UK) consortium|Davies|United Kingdom

>Spike|hCoV-19/Netherlands/ZH-EMC-416/2020|2020-08-11|EPI\_ISL\_523756|Original|hCoV-19^^Zuid Holland|Human|Dutch COVID-19 response team|Erasmus Medical Center|Oude Munnink|Netherlands

>Spike|hCoV-19/Finland/17SS13C11/2020|2020-09-17|EPI\_ISL\_756250|Original|hCoV-19^^Uusimaa|Human|Department of Virology and Immunology|Department of Virology|Smura|Finland

>Spike|hCoV-19/Wales/PHWC-48113D/2020|2020-10-18|EPI\_ISL\_613037|Original|hCoV-19^^Wales|Human|Wales Specialist Virology Centre Sequencing lab|COVID-19 Genomics UK (COG-UK) Consortium|Moore|United Kingdom

>Spike|hCoV-19/England/QEUA-B804C5/2020|2020-11-14|EPI\_ISL\_661715|Original|hCoV-19^^England|Human|Lighthouse Lab in Glasgow|Wellcome Sanger Institute for the COVID-19 Genomics UK (COG-UK) Consortium|Davies|United Kingdom

>Spike|hCoV-19/France/ARA-110928/2020|2020-11-23|EPI\_ISL\_728541|Original|hCoV-19^^Auvergne-Rh\u00f4ne-Alpes|Human|CNR Virus des Infections Respiratoires - France SUD|CNR Virus des Infections Respiratoires - France SUD|Bal|France

>Spike|hCoV-19/South Korea/KDCA0261/2020|2020-08-14|EPI\_ISL\_760026|Original|hCoV-19^^South Korea|Human|Division of Emerging Infectious Diseases|Division of Emerging Infectious Diseases|Park|South Korea

>Spike|hCoV-19/England/CAMC-BBB9C2/2020|2020-11-21|EPI\_ISL\_724077|Original|hCoV-19^^England|Human|Northumbria University / South Tees Hospitals NHS Foundation Trust / North Cumbria Integrated Care NHS Foundation Trust / North Tees and Hartlepool NHS Foundation Trust / Newcastle Hospitals NHS Foundation Trust|COVID-19 Genomics UK (COG-UK) Consortium|Bashton|United Kingdom

>Spike|hCoV-19/USA/NY-NYCPHL-001480/2020|2020-11-27|EPI\_ISL\_745414|Original|hCoV-19^^New York|Human|DOHMH Jamaica|New York City Public Health Laboratory|Wang|USA

>Spike|hCoV-19/USA/WA-UW-1656/2020|2020-03-20|EPI\_ISL\_424198|Original|hCoV-19^^Washington|Human|UW Virology Lab|UW Virology Lab|Roychoudhury|USA

>Spike|hCoV-19/Japan/PG-6928/2020|2020-09-00|EPI\_ISL\_688034|Original|hCoV-19^^Japan|Human|Pathogen Genomics Center|Pathogen Genomics Center|Sekizuka|Japan

>Spike|hCoV-19/Japan/IC-0008/2020|2020-03-00|EPI\_ISL\_591354|Original|hCoV-19^^Japan|Human|Pathogen Genomics Center|Pathogen Genomics Center|Sekizuka|Japan

>Spike|hCoV-19/England/MILK-9AAD26/2020|2020-09-01|EPI\_ISL\_550922|Original|hCoV-19^^England|Human|Lighthouse Lab in Milton Keynes|Wellcome Sanger Institute for the COVID-19 Genomics UK (COG-UK) consortium|Davies|United Kingdom

>Spike|hCoV-19/England/NORT-282DC1/2020|2020-03-29|EPI\_ISL\_472234|Original|hCoV-19^^England|Human|Northumbria University / South Tees Hospitals NHS Foundation Trust / North Cumbria Integrated Care NHS Foundation Trust / North Tees and Hartlepool NHS Foundation Trust / Newcastle Hospitals NHS Foundation Trust|COVID-19 Genomics UK (COG-UK) Consortium|Bashton|United Kingdom

>Spike|hCoV-19/England/MILK-993FEE/2020|2020-08-25|EPI\_ISL\_551691|Original|hCoV-19^^England|Human|Lighthouse Lab in Milton Keynes|Wellcome Sanger Institute for the COVID-19 Genomics UK (COG-UK) consortium|Davies|United Kingdom

>Spike|hCoV-19/England/QEUA-B6AFDF/2020|2020-11-11|EPI\_ISL\_662340|Original|hCoV-19^^England|Human|Lighthouse Lab in Glasgow|Wellcome Sanger Institute for the COVID-19 Genomics UK (COG-UK) Consortium|Davies|United Kingdom

>Spike|hCoV-19/Canada/ON\_MU-S212/2020|2020-03-26|EPI\_ISL\_463973|Original|hCoV-19^^Ontario|Human|Toronto Invasive Bacterial Diseases Network|McMaster University|McArthur|Canada

>Spike|hCoV-19/Singapore/572/2020|2020-05-20|EPI\_ISL\_483595|Original|hCoV-19^^Singapore|Human|National Public Health Laboratory|National Public Health Laboratory|Mak|Singapore

>Spike|hCoV-19/USA/AZ-TG448874/2020|2020-06-29|EPI\_ISL\_695019|Original|hCoV-19^^Arizona|Human|TGen North|TGen North|French|USA

>Spike|hCoV-19/England/MILK-C2FC74/2020|2020-12-07|EPI\_ISL\_733771|Original|hCoV-19^^England|Human|Lighthouse Lab in Milton Keynes|Wellcome Sanger Institute for the COVID-19 Genomics UK (COG-UK) Consortium|Davies|United Kingdom

>Spike|hCoV-19/USA/NY-QDX-848/2020|2020-03-17|EPI\_ISL\_571658|Original|hCoV-19^^New York|Human|Quest Diagnostics|Quest Diagnostics|Kagan|USA

>Spike|hCoV-19/England/QEUA-9FF469/2020|2020-09-30|EPI\_ISL\_600225|Original|hCoV-19^^England|Human|Lighthouse Lab in Glasgow|Wellcome Sanger Institute for the COVID-19 Genomics UK (COG-UK) consortium|Davies|United Kingdom

>Spike|hCoV-19/USA/TX-HMH-MCoV-14747/2020|2020-10-12|EPI\_ISL\_786232|Original|hCoV-19^^Texas|Human|Houston Methodist Hospital|Houston Methodist Hospital|Long|USA

>Spike|hCoV-19/England/CAMB-7507F/2020|2020-03-17|EPI\_ISL\_440405|Original|hCoV-19^^England|Human|Department of Pathology|Wellcome Sanger Institute for the COVID-19 Genomics UK (COG-UK) consortium|Amato|United Kingdom

>Spike|hCoV-19/England/NOTT-110E5D/2020|2020-04-29|EPI\_ISL\_448427|Original|hCoV-19^^England|Human|Queens Medical Centre|COVID-19 Genomics UK (COG-UK) Consortium|Loose|United Kingdom

>Spike|hCoV-19/United Arab Emirates/0418/2020|2020-05-15|EPI\_ISL\_698593|Original|hCoV-19^^Abu Dhabi|Human|Group 42 (G42) Healthcare|G42 Healthcare|Ogrodzki|United Arab Emirates

>Spike|hCoV-19/Switzerland/BS-ETHZ-170026/2020|2020-06-23|EPI\_ISL\_486538|Original|hCoV-19^^Basel-Stadt|Human|Viollier AG|Department of Biosystems Science and Engineering|Nadeau|Switzerland

>Spike|hCoV-19/England/CAMB-1BB99F/2020|2020-11-18|EPI\_ISL\_679170|Original|hCoV-19^^England|Human|Department of Pathology|COVID-19 Genomics UK (COG-UK) Consortium|Goodfellow|United Kingdom

>Spike|hCoV-19/England/QEUA-AAC7BC/2020|2020-10-21|EPI\_ISL\_652872|Original|hCoV-19^^England|Human|Oxford Viromics|COVID-19 Genomics UK (COG-UK) Consortium|Golubchik|United Kingdom

>Spike|hCoV-19/Portugal/PT1328/2020|2020-03-18|EPI\_ISL\_511287|Original|hCoV-19^^Portugal|Human|Instituto Nacional de Saude (INSA) and Instituto Gulbenkian de Ciencia (IGC)|Instituto Nacional de Saude (INSA) and Instituto Gulbenkian de Ciencia (IGC)|Borges|Portugal

>Spike|hCoV-19/England/MILK-B8F271/2020|2020-11-13|EPI\_ISL\_675446|Original|hCoV-19^^England|Human|Lighthouse Lab in Milton Keynes|Wellcome Sanger Institute for the COVID-19 Genomics UK (COG-UK) Consortium|Davies|United Kingdom

>Spike|hCoV-19/England/MILK-9E039B/2020|2020-09-20|EPI\_ISL\_601299|Original|hCoV-19^^England|Human|Lighthouse Lab in Milton Keynes|Wellcome Sanger Institute for the COVID-19 Genomics UK (COG-UK) consortium|Davies|United Kingdom

>Spike|hCoV-19/Wales/PHWC-1665CC/2020|2020-06-27|EPI\_ISL\_494020|Original|hCoV-19^^Wales|Human|Originating lab|COVID-19 Genomics UK (COG-UK) Consortium|Moore|United Kingdom

>Spike|hCoV-19/England/CAMC-BD1A1E/2020|2020-11-27|EPI\_ISL\_702143|Original|hCoV-19^^England|Human|Lighthouse Lab in Cambridge|Wellcome Sanger Institute for the COVID-19 Genomics UK (COG-UK) Consortium|Davies|United Kingdom

>Spike|hCoV-19/Northern Ireland/NIRE-FC993/2020|2020-04-22|EPI\_ISL\_459332|Original|hCoV-19^^Northern Ireland|Human|Regional Virus Laboratory|Wellcome Sanger Institute for the COVID-19 Genomics UK (COG-UK) consortium|Davies|United Kingdom

>Spike|hCoV-19/USA/CA-QDX-814/2020|2020-03-23|EPI\_ISL\_571505|Original|hCoV-19^^California|Human|Quest Diagnostics|Quest Diagnostics|Kagan|USA

>Spike|hCoV-19/England/OXON-B24C5/2020|2020-04-02|EPI\_ISL\_479148|Original|hCoV-19^^England|Human|Oxford Viromics|COVID-19 Genomics UK (COG-UK) Consortium|Golubchik|United Kingdom

>Spike|hCoV-19/Denmark/DCGC-17895/2020|2020-12-14|EPI\_ISL\_749629|Original|hCoV-19^^Hovedstaden|Human|Department of Virus and Microbiological Special Diagnostics|Albertsen Lab|Michaelsen|Denmark

>Spike|hCoV-19/USA/NY-Wadsworth-192883-01/2020|2020-07-02|EPI\_ISL\_677012|Original|hCoV-19^^New York|Human|Masonic Medical Research Institute|Wadsworth Center|Lasek-Nesselquist|USA

>Spike|hCoV-19/Switzerland/BS-42385186/2020|2020-08-07|EPI\_ISL\_581941|Original|hCoV-19^^Basel-Stadt|Human|University Hospital Basel|University Hospital Basel|Roloff Handschin|Switzerland

>Spike|hCoV-19/USA/MA-MGH-00959/2020|2020-05-03|EPI\_ISL\_791835|Original|hCoV-19^^Massachusetts|Human|Massachusetts General Hospital|Infectious Disease Program|Park|USA

>Spike|hCoV-19/England/QEUEH-B3FF2E/2020|2020-11-08|EPI\_ISL\_657188|Original|hCoV-19^^England|Human|Lighthouse Lab in Glasgow|Wellcome Sanger Institute for the COVID-19 Genomics UK (COG-UK) Consortium|Davies|United Kingdom

>Spike|hCoV-19/India/GJ-GBRC284a/2020|2020-06-30|EPI\_ISL\_495021|Original|hCoV-19^^Gujarat|Human|Government Medical College|Gujarat Biotechnology Research Centre|Joshi|India

>Spike|hCoV-19/Greece/156/2020|2020-03-16|EPI\_ISL\_434482|Original|hCoV-19^^Athens|Human|Laboratory of Microbiology|Laboratory of Biology|Karakasiliotis|Greece

>Spike|hCoV-19/USA/FL-BPHL-2046/2020|2020-06-19|EPI\_ISL\_653199|Original|hCoV-19^^Florida|Human|Florida Bureau of Public Health Laboratories|Florida Bureau of Public Health Laboratories|Blanton|USA

>Spike|hCoV-19/England/CAMB-1B9F62/2020|2020-11-04|EPI\_ISL\_651570|Original|hCoV-19^^England|Human|Department of Pathology|COVID-19 Genomics UK (COG-UK) Consortium|Goodfellow|United Kingdom

>Spike|hCoV-19/England/QEUEH-C5D527/2020|2020-12-14|EPI\_ISL\_736184|Original|hCoV-19^^England|Human|Lighthouse Lab in Glasgow|Wellcome Sanger Institute for the COVID-19 Genomics UK (COG-UK) Consortium|Davies|United Kingdom

>Spike|hCoV-19/Estonia/ChVir1985/2020|2020-03-00|EPI\_ISL\_420067|Original|hCoV-19^^Estonia|Human|Health Board Laboratory of Communicable Diseases|Charite\u0301 Universita\u0308tsmedizin Berlin|Muehlemann|Estonia

>Spike|hCoV-19/Japan/PG-4477/2020|2020-07-00|EPI\_ISL\_692700|Original|hCoV-19^^Japan|Human|Pathogen Genomics Center|Pathogen Genomics Center|Sekizuka|Japan

>Spike|hCoV-19/England/CAMC-B3658F/2020|2020-11-05|EPI\_ISL\_645490|Original|hCoV-19^^England|Human|Lighthouse Lab in Cambridge|Wellcome Sanger Institute for the COVID-19 Genomics UK (COG-UK) Consortium|Davies|United Kingdom

>Spike|hCoV-19/Wales/PHWC-4995EB/2020|2020-12-03|EPI\_ISL\_727329|Original|hCoV-19^^Wales|Human|Originating lab|COVID-19 Genomics UK (COG-UK) Consortium|Moore|United Kingdom

>Spike|hCoV-19/Turkey/IST-GLAB-289/2020|2020-05-22|EPI\_ISL\_735334|Original|hCoV-19^^Istanbul|Human|Genomic Laboratory (GLAB) (Conjoint lab of Health Directorate of Istanbul and Istanbul Technical University)|Genomic Laboratory (GLAB)|Karacan|Turkey

>Spike|hCoV-19/England/CAMC-B09E4E/2020|2020-10-31|EPI\_ISL\_673218|Original|hCoV-19^^England|Human|Lighthouse Lab in Cambridge|Wellcome Sanger Institute for the COVID-19 Genomics UK (COG-UK) Consortium|Davies|United Kingdom

>Spike|hCoV-19/Japan/PG-2583/2020|2020-04-00|EPI\_ISL\_690717|Original|hCoV-19^^Japan|Human|Pathogen Genomics Center|Pathogen Genomics Center|Sekizuka|Japan

>Spike|hCoV-19/England/MILK-958194/2020|2020-06-14|EPI\_ISL\_554629|Original|hCoV-19^^England|Human|Lighthouse Lab in Milton Keynes|Wellcome Sanger Institute for the COVID-19 Genomics UK (COG-UK) consortium|Davies|United Kingdom

>Spike|hCoV-19/Netherlands/Zeeland\_41/2020|2020-04-06|EPI\_ISL\_461280|Original|hCoV-19^^Zeeland|Human|Dutch COVID-19 response team|Erasmus Medical Center|Oude Munnink|Netherlands

>Spike|hCoV-19/USA/MN-MDH-1450/2020|2020-03-26|EPI\_ISL\_514669|Original|hCoV-19^^Minnesota|Human|Minnesota Department of Health|Minnesota Department of Health|Garfin|USA

>Spike|hCoV-19/England/NORW-EF650/2020|2020-00-00|EPI\_ISL\_529388|Original|hCoV-19^^England|Human|Quadram Institute Bioscience|COVID-19 Genomics UK (COG-UK) Consortium|Alikhan|United Kingdom

>Spike|hCoV-19/Scotland/QEUH-AF7257/2020|2020-10-29|EPI\_ISL\_676450|Original|hCoV-19^^Scotland|Human|Lighthouse Lab in Glasgow|Wellcome Sanger Institute for the COVID-19 Genomics UK (COG-UK) Consortium|Davies|United Kingdom

>Spike|hCoV-19/England/MILK-C30609/2020|2020-12-07|EPI\_ISL\_783039|Original|hCoV-19^^England|Human|Lighthouse Lab in Milton Keynes|Wellcome Sanger Institute for the COVID-19 Genomics UK (COG-UK) Consortium|Davies|United Kingdom

>Spike|hCoV-19/Ireland/D-NVRL-AIIDV0076v1/2020|2020-04-11|EPI\_ISL\_644332|Original|hCoV-19^^Dublin|Human|CEPHR / Vincent's Hospital|Irish Coronavirus Sequencing Consortium - National Virus Reference Laboratory|Gonzalez|Ireland

>Spike|hCoV-19/USA/TX-HMH-MCoV-9814/2020|2020-07-06|EPI\_ISL\_780289|Original|hCoV-19^^Texas|Human|Houston Methodist Hospital|Houston Methodist Hospital|Long|USA

>Spike|hCoV-19/Scotland/GCVR-173B06/2020|2020-04-07|EPI\_ISL\_459129|Original|hCoV-19^^Scotland|Human|NHSGGC West of Scotland Specialist Virology Centre / MRC-University of Glasgow Centre for Virus Research|Wellcome Sanger Institute for the COVID-19 Genomics UK (COG-UK) consortium|Davies|United Kingdom

>Spike|hCoV-19/England/ALDP-B1A32D/2020|2020-11-01|EPI\_ISL\_645984|Original|hCoV-19^^England|Human|Lighthouse Lab in Alderley Park|Wellcome Sanger Institute for the COVID-19 Genomics UK (COG-UK) Consortium|Davies|United Kingdom

>Spike|hCoV-19/England/BIRM-6A2A4/2020|2020-11-09|EPI\_ISL\_679036|Original|hCoV-19^^England|Human|University of Birmingham|COVID-19 Genomics UK (COG-UK) Consortium|Loman|United Kingdom

>Spike|hCoV-19/England/QEUH-B6AA1A/2020|2020-11-11|EPI\_ISL\_662355|Original|hCoV-19^^England|Human|Lighthouse Lab in Glasgow|Wellcome Sanger Institute for the COVID-19 Genomics UK (COG-UK) Consortium|Davies|United Kingdom

>Spike|hCoV-19/Peru/LIM-UPCH-0011/2020|2020-03-20|EPI\_ISL\_529068|Original|hCoV-19^^Lima|Human|Laboratorio de Referencia Nacional de Virus Respiratorios|Laboratorio de Gen\u00f3mica Microbiana|Tsukayama|Peru

>Spike|hCoV-19/England/QEUH-A01A70/2020|2020-10-01|EPI\_ISL\_680003|Original|hCoV-19^^England|Human|Virology Department|COVID-19 Genomics UK (COG-UK) Consortium|de Silva|United Kingdom

>Spike|hCoV-19/USA/ME-HETL-J0112/2020|2020-08-27|EPI\_ISL\_755315|Original|hCoV-19^^Maine|Human|Maine Health and Environmental Testing Laboratory|Tewhey Lab|Tewhey|USA

>Spike|hCoV-19/England/QEUH-A36AAF/2020|2020-10-03|EPI\_ISL\_638692|Original|hCoV-19^^England|Human|Wales Specialist Virology Centre Sequencing lab|COVID-19 Genomics UK (COG-UK) Consortium|Moore|United Kingdom

>Spike|hCoV-19/England/QEUH-9F9247/2020|2020-09-26|EPI\_ISL\_588899|Original|hCoV-19^^England|Human|Lighthouse Lab in Glasgow|Wellcome Sanger Institute for the COVID-19 Genomics UK (COG-UK) consortium|Davies|United Kingdom

>Spike|hCoV-19/England/LIVE-A924F/2020|2020-03-25|EPI\_ISL\_517281|Original|hCoV-19^^England|Human|Liverpool Clinical Laboratories|COVID-19 Genomics UK (COG-UK) Consortium|Haldenby|United Kingdom

>Spike|hCoV-19/England/20139014404/2020|2020-03-27|EPI\_ISL\_421877|Original|hCoV-19^^England|Human|Respiratory Virus Unit|Respiratory Virus Unit|Platt|United Kingdom

>Spike|hCoV-19/Japan/PG-7497/2020|2020-08-00|EPI\_ISL\_688599|Original|hCoV-19^^Japan|Human|Tokyo Metropolitan Institute of Public Health|Pathogen Genomics Center|Sekizuka|Japan

>Spike|hCoV-19/Finland/30MA7S2/2020|2020-03-30|EPI\_ISL\_481662|Original|hCoV-19^^Uusimaa|Human|Department of Virology and Immunology|Department of Virology|Smura|Finland

>Spike|hCoV-19/Scotland/QEUH-9E44FE/2020|2020-09-23|EPI\_ISL\_601082|Original|hCoV-19^^Scotland|Human|Lighthouse Lab in Glasgow|Wellcome Sanger Institute for the COVID-19 Genomics UK (COG-UK) consortium|Davies|United Kingdom

>Spike|hCoV-19/England/QEUH-9F48D1/2020|2020-09-25|EPI\_ISL\_588293|Original|hCoV-19^^England|Human|Lighthouse Lab in Glasgow|Wellcome Sanger Institute for the COVID-19 Genomics UK (COG-UK) consortium|Davies|United Kingdom

>Spike|hCoV-19/USA/CA-CZB-215/2020|2020-08-26|EPI\_ISL\_583001|Original|hCoV-19^^California|Human|Orange County Public Health Lab|Chan-Zuckerberg Biohub|Bhatt|USA

>Spike|hCoV-19/England/LOND-124D381/2020|2020-03-24|EPI\_ISL\_507090|Original|hCoV-19^^England|Human|University College London Hospital|COVID-19 Genomics UK (COG-UK) Consortium|Byott|United Kingdom

>Spike|hCoV-19/USA/TX-HMH-2632/2020|2020-06-04|EPI\_ISL\_545439|Original|hCoV-19^^Texas|Human|Houston Methodist Hospital|Houston Methodist Hospital|Long|USA

>Spike|hCoV-19/England/QEUEH-AF18F1/2020|2020-10-30|EPI\_ISL\_666019|Original|hCoV-19^^England|Human|Northumbria University / South Tees Hospitals NHS Foundation Trust / North Cumbria Integrated Care NHS Foundation Trust / North Tees and Hartlepool NHS Foundation Trust / Newcastle Hospitals NHS Foundation Trust|COVID-19 Genomics UK (COG-UK) Consortium|Bashton|United Kingdom

>Spike|hCoV-19/England/ALDP-944052/2020|2020-06-07|EPI\_ISL\_554694|Original|hCoV-19^^England|Human|Lighthouse Lab in Alderley Park|Wellcome Sanger Institute for the COVID-19 Genomics UK (COG-UK) consortium|Davies|United Kingdom

>Spike|hCoV-19/Wales/PHWC-47E810/2020|2020-10-11|EPI\_ISL\_595508|Original|hCoV-19^^Wales|Human|Originating lab|COVID-19 Genomics UK (COG-UK) Consortium|Moore|United Kingdom

>Spike|hCoV-19/USA/NY-NYCPHL-001044/2020|2020-10-08|EPI\_ISL\_633056|Original|hCoV-19^^New York|Human|DOHMH Central Harlem|New York City Public Health Laboratory|Wang|USA

>Spike|hCoV-19/England/CAMC-BC1422/2020|2020-11-22|EPI\_ISL\_704513|Original|hCoV-19^^England|Human|Department of Pathology|COVID-19 Genomics UK (COG-UK) Consortium|Goodfellow|United Kingdom

>Spike|hCoV-19/Spain/MD-IBV-97009994/2020|2020-03-28|EPI\_ISL\_683658|Original|hCoV-19^^Madrid|Human|IdISSC/Hospital Cl\u00e9nico San Carlos de Madrid\u200b|SeqCOVID-SPAIN consortium/IBV (CSIC)|Comas|Spain

>Spike|hCoV-19/Denmark/DCGC-21495/2020|2020-12-21|EPI\_ISL\_758194|Original|hCoV-19^^Hovedstaden|Human|Department of Virus and Microbiological Special Diagnostics|Albertsen Lab|Michaelsen|Denmark

>Spike|hCoV-19/Wales/PHWC-49204B/2020|2020-11-16|EPI\_ISL\_706810|Original|hCoV-19^^Wales|Human|Originating lab|COVID-19 Genomics UK (COG-UK) Consortium|Moore|United Kingdom

>Spike|hCoV-19/USA/MI-SC2-0007/2020|2020-03-12|EPI\_ISL\_424989|unknown|hCoV-19^^Michigan|Human|Bureau of Laboratories|Michigan Department of Health and Human Services|Blankenship|USA

>Spike|hCoV-19/Canada/ON-UHTC\_0001/2020|2020-03-23|EPI\_ISL\_464023|unknown|hCoV-19^^Ontario|Human|Unity Health Toronto|Ontario Institute for Cancer Research|de Borja|Canada

>Spike|hCoV-19/Australia/VIC1002/2020|2020-03-31|EPI\_ISL\_430486|Original|hCoV-19^^Victoria|Human|Victorian Infectious Diseases Reference Laboratory (VIDRL)|Microbiological Diagnostic Unit Public Health Laboratory and Victorian Infectious Diseases Reference Laboratory|Schultz|Australia

>Spike|hCoV-19/USA/MA-MGH-03345/2020|2020-11-05|EPI\_ISL\_765795|Original|hCoV-19^^Massachusetts|Human|Massachusetts General Hospital|Infectious Disease Program|Park|USA

>Spike|hCoV-19/England/ALDP-4F7035/2020|2020-06-24|EPI\_ISL\_559110|Original|hCoV-19^^England|Human|Lighthouse Lab in Alderley Park|Wellcome Sanger Institute for the COVID-19 Genomics UK (COG-UK) consortium|Davies|United Kingdom

>Spike|hCoV-19/USA/MI-MDHHS-SC21118/2020|2020-03-27|EPI\_ISL\_507894|Original|hCoV-19^^Michigan|Human|Michigan Department of Health and Human Services|Michigan Department of Health and Human Services|Blankenship|USA

>Spike|hCoV-19/Australia/VIC14390/2020|2020-09-02|EPI\_ISL\_591818|Original|hCoV-19^^Victoria|Human|Microbiological Diagnostic Unit - Public Health Laboratory (MDU-PHL)|MDU-PHL|Schultz|Australia

>Spike|hCoV-19/USA/FL-BPHL-1978/2020|2020-04-17|EPI\_ISL\_653131|Original|hCoV-19^^Florida|Human|Florida Bureau of Public Health Laboratories|Florida Bureau of Public Health Laboratories|Blanton|USA

>Spike|hCoV-19/Japan/PG-7910/2020|2020-08-00|EPI\_ISL\_687011|Original|hCoV-19^^Japan|Human|Pathogen Genomics Center|Pathogen Genomics Center|Sekizuka|Japan

>Spike|hCoV-19/England/MILK-9A93AD/2020|2020-09-01|EPI\_ISL\_551132|Original|hCoV-19^^England|Human|Lighthouse Lab in Milton Keynes|Wellcome Sanger Institute for the COVID-19 Genomics UK (COG-UK) consortium|Davies|United Kingdom

>Spike|hCoV-19/USA/WA-S691/2020|2020-04-08|EPI\_ISL\_449861|Original|hCoV-19^^Washington|Human|Washington State Department of Health|Seattle Flu Study|Bedford|USA

>Spike|hCoV-19/USA/TX-DSHS-0032/2020|2020-05-07|EPI\_ISL\_517965|Original|hCoV-19^^Texas|Human|Texas Department of State Health Services|Texas Department of State Health Services|Rahman|USA

>Spike|hCoV-19/India/DL-NCDC-IGIB-77797A/2020|2020-08-24|EPI\_ISL\_581506|Original|hCoV-19^^Delhi|Human|NCDC/IGIB|NCDC/IGIB|Faruq|India

>Spike|hCoV-19/Belgium/GQL-0328309/2020|2020-03-28|EPI\_ISL\_462163|Original|hCoV-19^^Ciney|Human|KU Leuven|KU Leuven|Maes|Belgium

>Spike|hCoV-19/Ireland/D-SVUH-R6702/2020|2020-04-01|EPI\_ISL\_596656|Original|hCoV-19^^Dublin|Human|St.Vincent's University Hospital|St.Vincent's University Hospital|Gonzalez|Ireland

>Spike|hCoV-19/USA/MN-MDH-1952/2020|2020-08-31|EPI\_ISL\_613474|Original|hCoV-19^^Minnesota|Human|Public Health Laboratory - Infectious Disease Lab|Minnesota Department of Health|Lorentz|USA

>Spike|hCoV-19/USA/TX-HMH-MCoV-15238/2020|2020-10-20|EPI\_ISL\_786722|Original|hCoV-19^^Texas|Human|Houston Methodist Hospital|Houston Methodist Hospital|Long|USA

>Spike|hCoV-19/England/NORW-222EB1/2020|2020-12-19|EPI\_ISL\_741543|Original|hCoV-19^^England|Human|Quadram Institute Bioscience|COVID-19 Genomics UK (COG-UK) Consortium|Alikhan|United Kingdom

>Spike|hCoV-19/Netherlands/GE-EMC-367/2020|2020-11-13|EPI\_ISL\_722629|Original|hCoV-19^^Gelderland|Human|Dutch COVID-19 response team|Erasmus Medical Center|Oude Munnink|Netherlands

>Spike|hCoV-19/England/LOND-1263640/2020|2020-11-03|EPI\_ISL\_679460|Original|hCoV-19^^England|Human|University College London|COVID-19 Genomics UK (COG-UK) Consortium|Roy|United Kingdom

>Spike|hCoV-19/Wales/PHWC-486CFB/2020|2020-11-01|EPI\_ISL\_639125|Original|hCoV-19^^Wales|Human|Wales Specialist Virology Centre Sequencing lab|COVID-19 Genomics UK (COG-UK) Consortium|Moore|United Kingdom

>Spike|hCoV-19/Australia/VIC3455/2020|2020-07-05|EPI\_ISL\_521119|Original|hCoV-19^^Victoria|Human|Victorian Infectious Diseases Reference Laboratory (VIDRL)|VIDRL and MDU-PHL|Schultz|Australia

>Spike|hCoV-19/England/CAMB-7FCBD/2020|2020-04-15|EPI\_ISL\_444401|Original|hCoV-19^^England|Human|Department of Pathology|COVID-19 Genomics UK (COG-UK) Consortium|Meredith|United Kingdom

>Spike|hCoV-19/USA/MI-MDHHS-SC20807/2020|2020-05-20|EPI\_ISL\_471828|Original|hCoV-19^^Michigan|Human|Michigan Department of Health and Human Services|Michigan Department of Health and Human Services|Blankenship|USA

>Spike|hCoV-19/USA/TX-HMH-7080/2020|2020-06-28|EPI\_ISL\_546487|Original|hCoV-19^^Texas|Human|Houston Methodist Hospital|Houston Methodist Hospital|Long|USA

>Spike|hCoV-19/Wales/MILK-9D3BC0/2020|2020-09-18|EPI\_ISL\_601646|Original|hCoV-19^^Wales|Human|Lighthouse Lab in Milton Keynes|Wellcome Sanger Institute for the COVID-19 Genomics UK (COG-UK) consortium|Davies|United Kingdom

>Spike|hCoV-19/USA/CA-ALSR-3257/2020|2020-09-05|EPI\_ISL\_635933|Original|hCoV-19^^California|Human|San Diego County Public Health Laboratory|Andersen lab at Scripps Research|Gangavarapu|USA

>Spike|hCoV-19/Scotland/GCVR-1718D4/2020|2020-03-28|EPI\_ISL\_489661|Original|hCoV-19^^Scotland|Human|NHSGGC West of Scotland Specialist Virology Centre / MRC - University of Glasgow Centre for Virus Research|Wellcome Sanger Institute for the COVID-19 Genomics UK (COG-UK) consortium|Davies|United Kingdom

>Spike|hCoV-19/USA/NV-UW-1311/2020|2020-08-27|EPI\_ISL\_536683|Original|hCoV-19^^Nevada|Human|University of Wisconsin-Madison AIDS Vaccine Research Laboratories|University of Wisconsin-Madison AIDS Vaccine Research Laboratories|Baczenas|USA



>Spike|hCoV-19/South Africa/KRISP-0154/2020|2020-06-01|EPI\_ISL\_467504|Original|hCoV-19^^KwaZulu-Natal|Human|Molecular Diagnostics Services (MDS)|KRISP|de Oliveira|South Africa

>Spike|hCoV-19/India/MH-ACTREC-529/2020|2020-08-25|EPI\_ISL\_700175|Original|hCoV-19^^Maharashtra|Human|Hematopathology Laboratory|Hematopathology Laboratory|Patkar|India

>Spike|hCoV-19/Wales/PHWC-28AB9/2020|2020-04-01|EPI\_ISL\_445397|Original|hCoV-19^^Wales|Human|Wales Specialist Virology Centre|Public Health Wales Microbiology Cardiff|Moore|United Kingdom

>Spike|hCoV-19/Denmark/DCGC-16259/2020|2020-11-16|EPI\_ISL\_714670|Original|hCoV-19^^Midtjylland|Human|Department of Virus and Microbiological Special Diagnostics|Albertsen Lab|Michaelsen|Denmark

>Spike|hCoV-19/England/NOTT-114FA1/2020|2020-10-12|EPI\_ISL\_584784|Original|hCoV-19^^England|Human|Queens Medical Centre|COVID-19 Genomics UK (COG-UK) Consortium|Loose|United Kingdom

>Spike|hCoV-19/Scotland/CVR5836/2020|2020-11-14|EPI\_ISL\_666038|Original|hCoV-19^^Scotland|Human|West of Scotland Specialist Virology Centre|COVID-19 Genomics UK (COG-UK) Consortium|Robertson|United Kingdom

>Spike|hCoV-19/England/ALDP-9E9A33/2020|2020-09-24|EPI\_ISL\_584281|Original|hCoV-19^^England|Human|Virology Department|COVID-19 Genomics UK (COG-UK) Consortium|de Silva|United Kingdom

>Spike|hCoV-19/England/NORT-292EBC/2020|2020-05-15|EPI\_ISL\_489084|Original|hCoV-19^^England|Human|NU-OMICS DNA Sequencing research facility|Wellcome Sanger Institute for the COVID-19 Genomics UK (COG-UK) consortium|Davies|United Kingdom

>Spike|hCoV-19/Wales/PHWC-49B464/2020|2020-11-12|EPI\_ISL\_742339|Original|hCoV-19^^Wales|Human|Wales Specialist Virology Centre Sequencing lab|COVID-19 Genomics UK (COG-UK) Consortium|Moore|United Kingdom

>Spike|hCoV-19/USA/MN-QDX-983/2020|2020-03-15|EPI\_ISL\_571782|Original|hCoV-19^^Minnesota|Human|Quest Diagnostics|Quest Diagnostics|Kagan|USA

>Spike|hCoV-19/Denmark/DCGC-13807/2020|2020-11-30|EPI\_ISL\_712288|Original|hCoV-19^^Midtjylland|Human|Department of Virus and Microbiological Special Diagnostics|Albertsen Lab|Michaelsen|Denmark

>Spike|hCoV-19/England/QEUEH-B13CED/2020|2020-11-02|EPI\_ISL\_641909|Original|hCoV-19^^England|Human|Lighthouse Lab in Glasgow|Wellcome Sanger Institute for the COVID-19 Genomics UK (COG-UK) Consortium|Davies|United Kingdom

>Spike|hCoV-19/Wales/MILK-B02C4B/2020|2020-10-24|EPI\_ISL\_647849|Original|hCoV-19^^Wales|Human|Lighthouse Lab in Milton Keynes|Wellcome Sanger Institute for the COVID-19 Genomics UK (COG-UK) Consortium|Davies|United Kingdom

>Spike|hCoV-19/England/LIVE-A55E0/2020|2020-03-20|EPI\_ISL\_499822|Original|hCoV-19^^England|Human|Liverpool Clinical Laboratories|COVID-19 Genomics UK (COG-UK) Consortium|Haldenby|United Kingdom

>Spike|hCoV-19/Spain/CL-IBV-97006326/2020|2020-05-08|EPI\_ISL\_537682|Original|hCoV-19^^Castilla y Leon|Human|Universidad de Le\u00f3n|SeqCOVID-SPAIN consortium/IBV (CSIC)|Comas|Spain

>Spike|hCoV-19/USA/CT-Yale-357/2020|2020-08-17|EPI\_ISL\_527773|Original|hCoV-19^^Connecticut|Human|Connecticut State Department of Public Health|Grubaugh Lab - Yale School of Public Health|Fauver|USA

>Spike|hCoV-19/England/QEUEH-CC7AB0/2020|2020-12-22|EPI\_ISL\_760517|Original|hCoV-19^^England|Human|Lighthouse Lab in Glasgow|Wellcome Sanger Institute for the COVID-19 Genomics UK (COG-UK) Consortium|Davies|United Kingdom

>Spike|hCoV-19/England/SHEF-C3B71/2020|2020-04-18|EPI\_ISL\_462011|Original|hCoV-19^^England|Human|Virology Department|COVID-19 Genomics UK (COG-UK) Consortium|de Silva|United Kingdom

>Spike|hCoV-19/England/MILK-9C3D72/2020|2020-09-04|EPI\_ISL\_566880|Original|hCoV-19^^England|Human|Lighthouse Lab in Milton Keynes|Wellcome Sanger Institute for the COVID-19 Genomics UK (COG-UK) consortium|Davies|United Kingdom

>Spike|hCoV-19/England/204590453/2020|2020-11-06|EPI\_ISL\_683477|Original|hCoV-19^^England|Human|Respiratory Virus Unit|COVID-19 Genomics UK (COG-UK) Consortium|Platt|United Kingdom

>Spike|hCoV-19/USA/WA-S2769/2020|2020-07-13|EPI\_ISL\_530126|Original|hCoV-19^^Washington|Human|Seattle Flu Study|Seattle Flu Study|Lee|USA

>Spike|hCoV-19/England/MILK-9F0583/2020|2020-09-24|EPI\_ISL\_580827|Original|hCoV-19^^England|Human|Lighthouse Lab in Milton Keynes|Wellcome Sanger Institute for the COVID-19 Genomics UK (COG-UK) consortium|Davies|United Kingdom

>Spike|hCoV-19/New Zealand/20CV0410/2020|2020-10-02|EPI\_ISL\_582021|Original|hCoV-19^^Bay of Plenty|Human|PathLab Bay of Plenty|Institute of Environmental Science and Research (ESR)|Wang|New Zealand

>Spike|hCoV-19/Wales/PHWC-16F88E/2020|2020-10-08|EPI\_ISL\_586030|Original|hCoV-19^^Wales|Human|Wales Specialist Virology Centre Sequencing lab|COVID-19 Genomics UK (COG-UK) Consortium|Moore|United Kingdom

>Spike|hCoV-19/England/MILK-9949A3/2020|2020-08-24|EPI\_ISL\_552415|Original|hCoV-19^^England|Human|Lighthouse Lab in Milton Keynes|Wellcome Sanger Institute for the COVID-19 Genomics UK (COG-UK) consortium|Davies|United Kingdom

>Spike|hCoV-19/Poland/PL\_P3/2020|2020-03-28|EPI\_ISL\_428926|Original|hCoV-19^^Malopolskie|Human|ViroGenetics - BSL3 Laboratory of Virology; Human Genome Variation Research Group & Genomics Centre MCB; Bioinformatics Research Group; Wojew\u00f3dzka Stacja Sanitarno-Epidemiologiczna w Krakowie|ViroGenetics - BSL3 Laboratory of Virology; Human Genome Variation Research Group & Genomics Centre MCB; Bioinformatics Research Group|Kopera|Poland

>Spike|hCoV-19/England/NORW-22190C/2020|2020-12-18|EPI\_ISL\_764455|Original|hCoV-19^^England|Human|Quadram Institute Bioscience|COVID-19 Genomics UK (COG-UK) Consortium|Alikhan|United Kingdom

>Spike|hCoV-19/England/NOTT-110D50/2020|2020-04-29|EPI\_ISL\_448413|Original|hCoV-19^^England|Human|Queens Medical Centre|COVID-19 Genomics UK (COG-UK) Consortium|Loose|United Kingdom

>Spike|hCoV-19/England/QEUA-B3FAA5/2020|2020-11-08|EPI\_ISL\_658567|Original|hCoV-19^^England|Human|Lighthouse Lab in Glasgow|Wellcome Sanger Institute for the COVID-19 Genomics UK (COG-UK) Consortium|Davies|United Kingdom

>Spike|hCoV-19/Denmark/DCGC-1089/2020|2020-05-25|EPI\_ISL\_614514|Original|hCoV-19^^Hovedstaden|Human|Department of Virus and Microbiological Special Diagnostics|Albertsen lab|Michaelsen|Denmark

>Spike|hCoV-19/Australia/ACT0058/2020|2020-03-27|EPI\_ISL\_498522|Original|hCoV-19^^Australian Capital Territory|Human|ACT Pathology|Schwessinger Lab|Hall|Australia

>Spike|hCoV-19/England/QEUA-B665A4/2020|2020-11-11|EPI\_ISL\_661592|Original|hCoV-19^^England|Human|Lighthouse Lab in Glasgow|Wellcome Sanger Institute for the COVID-19 Genomics UK (COG-UK) Consortium|Davies|United Kingdom

>Spike|hCoV-19/England/20188035704/2020|2020-04-30|EPI\_ISL\_465506|Original|hCoV-19^^England|Human|Respiratory Virus Unit|Respiratory Virus Unit|Platt|United Kingdom

>Spike|hCoV-19/Wales/PHWC-34452/2020|2020-04-16|EPI\_ISL\_446923|Original|hCoV-19^^Wales|Human|Wales Specialist Virology Centre|Public Health Wales Microbiology Cardiff|Moore|United Kingdom

>Spike|hCoV-19/England/QEUA-BEB01F/2020|2020-12-03|EPI\_ISL\_708953|Original|hCoV-19^^England|Human|Lighthouse Lab in Glasgow|Wellcome Sanger Institute for the COVID-19 Genomics UK (COG-UK) Consortium|Davies|United Kingdom

>Spike|hCoV-19/Denmark/ALAB-SSI-718/2020|2020-03-27|EPI\_ISL\_444872|Original|hCoV-19^^Denmark|Human|Department of Virus and Microbiological Special Diagnostics|Albertsen lab|Kirkegaard|Denmark

>Spike|hCoV-19/USA/TX-HMH047/2020|2020-03-15|EPI\_ISL\_434756|Original|hCoV-19^^Texas|Human|Houston Methodist Hospital|Houston Methodist Hospital|Long|USA

>Spike|hCoV-19/USA/WA-S1719/2020|2020-06-01|EPI\_ISL\_496145|Original|hCoV-19^^Washington|Human|Washington State Department of Health|Seattle Flu Study|Lee|USA

>Spike|hCoV-19/England/CAMC-9D1D17/2020|2020-09-18|EPI\_ISL\_601715|Original|hCoV-19^^England|Human|Lighthouse Lab in Cambridge|Wellcome Sanger Institute for the COVID-19 Genomics UK (COG-UK) consortium|Davies|United Kingdom

>Spike|hCoV-19/Denmark/DCGC-12344/2020|2020-11-16|EPI\_ISL\_682525|Original|hCoV-19^^Syddanmark|Human|Department of Virus and Microbiological Special Diagnostics|Albertsen Lab|Michaelsen|Denmark

>Spike|hCoV-19/Denmark/DCGC-10927/2020|2020-11-02|EPI\_ISL\_670287|Original|hCoV-19^^Hovedstaden|Human|Department of Virus and Microbiological Special Diagnostics|Albertsen Lab|Michaelsen|Denmark

>Spike|hCoV-19/USA/MI-MDHHS-SC21453/2020|2020-03-17|EPI\_ISL\_507707|Original|hCoV-19^^Michigan|Human|Michigan Department of Health and Human Services|Michigan Department of Health and Human Services|Blankenship|USA

>Spike|hCoV-19/England/LOND-1264278/2020|2020-11-16|EPI\_ISL\_705961|Original|hCoV-19^^England|Human|University College London|COVID-19 Genomics UK (COG-UK) Consortium|Roy|United Kingdom

>Spike|hCoV-19/England/MILK-B882C3/2020|2020-11-13|EPI\_ISL\_674473|Original|hCoV-19^^England|Human|Lighthouse Lab in Milton Keynes|Wellcome Sanger Institute for the COVID-19 Genomics UK (COG-UK) Consortium|Davies|United Kingdom

>Spike|hCoV-19/Wales/ALDP-BB553D/2020|2020-11-21|EPI\_ISL\_710732|Original|hCoV-19^^Wales|Human|Lighthouse Lab in Alderley Park|Wellcome Sanger Institute for the COVID-19 Genomics UK (COG-UK) Consortium|Davies|United Kingdom

>Spike|hCoV-19/England/CAMC-A65861/2020|2020-10-11|EPI\_ISL\_637386|Original|hCoV-19^^England|Human|Department of Pathology|COVID-19 Genomics UK (COG-UK) Consortium|Goodfellow|United Kingdom

>Spike|hCoV-19/USA/TX-HMH-MCoV-13537/2020|2020-08-20|EPI\_ISL\_788661|Original|hCoV-19^^Texas|Human|Houston Methodist Hospital|Houston Methodist Hospital|Long|USA

>Spike|hCoV-19/Japan/PG-3474/2020|2020-07-00|EPI\_ISL\_691584|Original|hCoV-19^^Japan|Human|Pathogen Genomics Center|Pathogen Genomics Center|Sekizuka|Japan

>Spike|hCoV-19/England/QEUEH-B11FB9/2020|2020-11-01|EPI\_ISL\_642605|Original|hCoV-19^^England|Human|Lighthouse Lab in Glasgow|Wellcome Sanger Institute for the COVID-19 Genomics UK (COG-UK) Consortium|Davies|United Kingdom

>Spike|hCoV-19/Switzerland/BE-ETHZ-350383/2020|2020-10-31|EPI\_ISL\_728874|Original|hCoV-19^^Bern|Human|Viollier AG|Department of Biosystems Science and Engineering|Nadeau|Switzerland

>Spike|hCoV-19/England/QEUEH-9C86EB/2020|2020-09-11|EPI\_ISL\_567223|Original|hCoV-19^^England|Human|Lighthouse Lab in Glasgow|Wellcome Sanger Institute for the COVID-19 Genomics UK (COG-UK) consortium|Davies|United Kingdom

>Spike|hCoV-19/USA/TX-HMH-1249/2020|2020-04-02|EPI\_ISL\_542611|Original|hCoV-19^^Texas|Human|Houston Methodist Hospital|Houston Methodist Hospital|Long|USA

>Spike|hCoV-19/Netherlands/Utrecht\_10028/2020|2020-04-01|EPI\_ISL\_454777|Original|hCoV-19^^Utrecht|Human|Dutch COVID-19 response team|National Institute for Public Health and the Environment (RIVM)|Meijer|Netherlands

>Spike|hCoV-19/USA/CA-ALSR-2818/2020|2020-07-22|EPI\_ISL\_635694|Original|hCoV-19^^California|Human|San Diego County Public Health Laboratory|Andersen lab at Scripps Research|Gangavarapu|USA

>Spike|hCoV-19/Wales/PHWC-480F43/2020|2020-10-18|EPI\_ISL\_613016|Original|hCoV-19^^Wales|Human|Wales Specialist Virology Centre Sequencing lab|COVID-19 Genomics UK (COG-UK) Consortium|Moore|United Kingdom

>Spike|hCoV-19/Canada/QC\_AW2/2020|2020-04-01|EPI\_ISL\_463952|Original|hCoV-19^^Quebec|Human|Laboratoire de microbiologie|Smith Laboratory|Smith|Canada

>Spike|hCoV-19/USA/TX-HMH-MCoV-8509/2020|2020-07-01|EPI\_ISL\_780458|Original|hCoV-19^^Texas|Human|Houston Methodist Hospital|Houston Methodist Hospital|Long|USA

>Spike|hCoV-19/Belgium/ULG-10561/2020|2020-10-23|EPI\_ISL\_626330|Original|hCoV-19^^Li\u00e8ge|Human|Department of Clinical Microbiology|GIGA Medical Genomics|Durkin|Belgium

>Spike|hCoV-19/USA/OR-OHSU-1597/2020|2020-07-21|EPI\_ISL\_525985|Original|hCoV-19^^Oregon|Human|OHSU Lab Services Molecular Microbiology Lab|Oregon SARS-CoV-2 Genome Sequencing Center|O'Roak|USA

>Spike|hCoV-19/Kazakhstan/16173/2020|2020-05-14|EPI\_ISL\_454497|Original|hCoV-19^^Nur-Sultan|Human|RSE \National Center for Biotechnology| RSE \National Center for Biotechnology| Kalendar|Kazakhstan

>Spike|hCoV-19/Australia/VIC3573/2020|2020-07-07|EPI\_ISL\_520322|Original|hCoV-19^^Victoria|Human|Victorian Infectious Diseases Reference Laboratory (VIDRL)|VIDRL and MDU-PHL|Schultz|Australia

>Spike|hCoV-19/Wales/ALDP-C497EC/2020|2020-12-11|EPI\_ISL\_767146|Original|hCoV-19^^Wales|Human|Lighthouse Lab in Alderley Park|Wellcome Sanger Institute for the COVID-19 Genomics UK (COG-UK) Consortium|Davies|United Kingdom

>Spike|hCoV-19/Singapore/504/2020|2020-04-20|EPI\_ISL\_479582|Original|hCoV-19^^Singapore|Human|National Public Health Laboratory|National Public Health Laboratory|Mak|Singapore

>Spike|hCoV-19/England/CAMC-AB21B5/2020|2020-10-23|EPI\_ISL\_623578|Original|hCoV-19^^England|Human|Lighthouse Lab in Cambridge|Wellcome Sanger Institute for the COVID-19 Genomics UK (COG-UK) consortium|Davies|United Kingdom

>Spike|hCoV-19/USA/TX-HMH-MCoV-13735/2020|2020-08-18|EPI\_ISL\_788828|Original|hCoV-19^^Texas|Human|Houston Methodist Hospital|Houston Methodist Hospital|Long|USA

>Spike|hCoV-19/Australia/VIC1135/2020|2020-04-08|EPI\_ISL\_430601|Original|hCoV-19^^Victoria|Human|Victorian Infectious Diseases Reference Laboratory (VIDRL)|Microbiological Diagnostic Unit Public Health Laboratory and Victorian Infectious Diseases Reference Laboratory|Schultz|Australia

>Spike|hCoV-19/Japan/PG-2759/2020|2020-04-00|EPI\_ISL\_690891|Original|hCoV-19^^Japan|Human|Pathogen Genomics Center|Pathogen Genomics Center|Sekizuka|Japan

>Spike|hCoV-19/Australia/VIC2183/2020|2020-06-23|EPI\_ISL\_521929|Original|hCoV-19^^Victoria|Human|Microbiological Diagnostic Unit - Public Health Laboratory (MDU-PHL)|MDU-PHL|Schultz|Australia

>Spike|hCoV-19/England/QEUEH-B9E01B/2020|2020-11-18|EPI\_ISL\_721046|Original|hCoV-19^^England|Human|Lighthouse Lab in Glasgow|Wellcome Sanger Institute for the COVID-19 Genomics UK (COG-UK) Consortium|Davies|United Kingdom

>Spike|hCoV-19/Luxembourg/LNS4136398/2020|2020-11-10|EPI\_ISL\_740425|Original|hCoV-19^^Luxembourg|Human|Laboratoire national de sant\u00e9|Laboratoire national de sant\u00e9|Wienecke-Baldacchino|Luxembourg

>Spike|hCoV-19/England/NORW-21F85F/2020|2020-12-07|EPI\_ISL\_725057|Original|hCoV-19^^England|Human|Quadram Institute Bioscience|COVID-19 Genomics UK (COG-UK) Consortium|Alikhan|United Kingdom

>Spike|hCoV-19/Wales/PHWC-3282B/2020|2020-04-15|EPI\_ISL\_474355|Original|hCoV-19^^Wales|Human|Originating lab|COVID-19 Genomics UK (COG-UK) Consortium|Moore|United Kingdom

>Spike|hCoV-19/England/MILK-A194E0/2020|2020-10-03|EPI\_ISL\_612512|Original|hCoV-19^^England|Human|Wales Specialist Virology Centre Sequencing lab|COVID-19 Genomics UK (COG-UK) Consortium|Moore|United Kingdom

>Spike|hCoV-19/USA/WA-UW-2056/2020|2020-03-24|EPI\_ISL\_477700|Original|hCoV-19^^Washington|Human|UW Virology Lab|UW Virology Lab|Roychoudhury|USA

>Spike|hCoV-19/England/QEUEH-9B4FF6/2020|2020-09-07|EPI\_ISL\_590374|Original|hCoV-19^^England|Human|Lighthouse Lab in Glasgow|Wellcome Sanger Institute for the COVID-19 Genomics UK (COG-UK) consortium|Davies|United Kingdom

>Spike|hCoV-19/USA/CA-CZB-1920/2020|2020-04-23|EPI\_ISL\_486212|Original|hCoV-19^^California|Human|Orange County Public Health Laboratory|Chan-Zuckerberg Biohub|McGeever|USA

>Spike|hCoV-19/England/ALDP-B263D3/2020|2020-11-04|EPI\_ISL\_646752|Original|hCoV-19^^England|Human|Lighthouse Lab in Alderley Park|Wellcome Sanger Institute for the COVID-19 Genomics UK (COG-UK) Consortium|Davies|United Kingdom

>Spike|hCoV-19/Denmark/DCGC-10504/2020|2020-11-02|EPI\_ISL\_670021|Original|hCoV-19^^Sjaelland|Human|Department of Virus and Microbiological Special Diagnostics|Albertsen Lab|Michaelsen|Denmark

>Spike|hCoV-19/Switzerland/BS-ETHZ-100018/2020|2020-03-08|EPI\_ISL\_466942|Original|hCoV-19^^Basel-Stadt|Human|Viollier AG|Department of Biosystems Science and Engineering|Nadeau|Switzerland

>Spike|hCoV-19/England/CAMC-C77141/2020|2020-12-16|EPI\_ISL\_768972|Original|hCoV-19^^England|Human|Lighthouse Lab in Cambridge|Wellcome Sanger Institute for the COVID-19 Genomics UK (COG-UK) Consortium|Davies|United Kingdom

>Spike|hCoV-19/England/CAMC-B3278D/2020|2020-11-05|EPI\_ISL\_659420|Original|hCoV-19^^England|Human|Lighthouse Lab in Cambridge|Wellcome Sanger Institute for the COVID-19 Genomics UK (COG-UK) Consortium|Davies|United Kingdom

>Spike|hCoV-19/England/NORT-1B727E8/2020|2020-12-04|EPI\_ISL\_724901|Original|hCoV-19^^England|Human|Northumbria University / South Tees Hospitals NHS Foundation Trust

/ North Cumbria Integrated Care NHS Foundation Trust / North Tees and Hartlepool NHS Foundation Trust / Newcastle Hospitals NHS Foundation Trust|COVID-19 Genomics UK (COG-UK) Consortium|Bashton|United Kingdom  
>Spike|hCoV-19/England/NOTT-112ED3/2020|2020-08-07|EPI\_ISL\_514453|Original|hCoV-19^England|Human|Queens Medical Centre|COVID-19 Genomics UK (COG-UK) Consortium|Loose|United Kingdom  
>Spike|hCoV-19/Austria/CeMM0931/2020|2020-03-21|EPI\_ISL\_583783|Original|hCoV-19^Austria|Human|Dr. Gernot Walder GmbH|Bergthaler laboratory|Bergthaler|Austria  
>Spike|hCoV-19/England/ALDP-95316C/2020|2020-06-11|EPI\_ISL\_554413|Original|hCoV-19^England|Human|Lighthouse Lab in Alderley Park|Wellcome Sanger Institute for the COVID-19 Genomics UK (COG-UK) consortium|Davies|United Kingdom  
>Spike|hCoV-19/Scotland/EDB114/2020|2020-03-22|EPI\_ISL\_425901|Original|hCoV-19^Scotland|Human|Virology Department|COVID-19 Genomics UK (COG-UK) Consortium|Williams|United Kingdom  
>Spike|hCoV-19/USA/NY-NYCPHL-001051/2020|2020-10-14|EPI\_ISL\_633062|Original|hCoV-19^New York|Human|DOHMH Jamaica|New York City Public Health Laboratory|Wang|USA  
>Spike|hCoV-19/Russia/OMS-ORINFI-120S/2020|2020-05-14|EPI\_ISL\_569818|Original|hCoV-19^Omsk|Human|Omsk Research Institute of Natural Focal Infections|WHO National Influenza Centre Russian Federation|Komissarov|Russia  
>Spike|hCoV-19/Portugal/PT0201/2020|2020-03-29|EPI\_ISL\_455625|Original|hCoV-19^Portugal|Human|unknown|Instituto Nacional de Saude (INSA)|Borges|Portugal  
>Spike|hCoV-19/Finland/18MR2cA8/2020|2020-11-18|EPI\_ISL\_757323|Original|hCoV-19^Uusimaa|Human|Department of Virology and Immunology|Department of Virology|Smura|Finland  
>Spike|hCoV-19/USA/MN-MDH-1702/2020|2020-04-09|EPI\_ISL\_560789|Original|hCoV-19^Minnesota|Human|Minnesota Department of Health|Minnesota Department of Health|Garfin|USA  
>Spike|hCoV-19/New Zealand/20VR3493/2020|2020-04-20|EPI\_ISL\_579506|Original|hCoV-19^Canterbury|Human|Canterbury Health Laboratories|Institute of Environmental Science and Research (ESR)|Wang|New Zealand  
>Spike|hCoV-19/England/ALDP-A94429/2020|2020-10-19|EPI\_ISL\_610942|Original|hCoV-19^England|Human|Lighthouse Lab in Alderley Park|Wellcome Sanger Institute for the COVID-19 Genomics UK (COG-UK) consortium|Davies|United Kingdom  
>Spike|hCoV-19/Australia/VIC594/2020|2020-03-25|EPI\_ISL\_426851|Original|hCoV-19^Victoria|Human|Victorian Infectious Diseases Reference Laboratory (VIDRL)|Microbiological Diagnostic Unit Public Health Laboratory and Victorian Infectious Diseases Reference Laboratory|Schultz|Australia  
>Spike|hCoV-19/England/MILK-BABC44/2020|2020-11-18|EPI\_ISL\_681460|Original|hCoV-19^England|Human|Lighthouse Lab in Milton Keynes|Wellcome Sanger Institute for the COVID-19 Genomics UK (COG-UK) Consortium|Davies|United Kingdom  
>Spike|hCoV-19/England/QEUEH-AE522F/2020|2020-10-27|EPI\_ISL\_633382|Original|hCoV-19^England|Human|Lighthouse Lab in Glasgow|Wellcome Sanger Institute for the COVID-19 Genomics UK (COG-UK) consortium|Davies|United Kingdom  
>Spike|hCoV-19/USA/TX-HMH-MCoV-19386/2020|2020-11-30|EPI\_ISL\_783809|Original|hCoV-19^Texas|Human|Houston Methodist Hospital|Houston Methodist Hospital|Long|USA  
>Spike|hCoV-19/England/QEUEH-B6851B/2020|2020-11-11|EPI\_ISL\_655045|Original|hCoV-19^England|Human|Lighthouse Lab in Glasgow|Wellcome Sanger Institute for the COVID-19 Genomics UK (COG-UK) Consortium|Davies|United Kingdom  
>Spike|hCoV-19/India/WB-IK47/2020|2020-05-04|EPI\_ISL\_508374|Original|hCoV-19^West Bengal|Human|Institute of Post Graduate Medical Education & Research|National Institute of Biomedical Genomics|Maitra|India  
>Spike|hCoV-19/USA/WA-UW-334/2020|2020-03-24|EPI\_ISL\_524438|Original|hCoV-19^Washington|Human|University of Washington Virology Lab|Laboratory Medicine|Roychoudhury|USA  
>Spike|hCoV-19/Wales/PHWC-4A2330/2020|2020-12-10|EPI\_ISL\_743874|Original|hCoV-19^Wales|Human|Wales Specialist Virology Centre Sequencing lab|COVID-19 Genomics UK (COG-UK) Consortium|Moore|United Kingdom  
>Spike|hCoV-19/Peru/LIM-INS-099/2020|2020-07-04|EPI\_ISL\_536498|Original|hCoV-19^Lima|Human|Instituto Nacional de Salud|Laboratorio de Infecciones Respiratorias Agudas|Lopez|Peru

>Spike|hCoV-19/England/ALDP-CEC8F7/2020|2020-12-21|EPI\_ISL\_782202|Original|hCoV-19^^England|Human|Lighthouse Lab in Alderley Park|Wellcome Sanger Institute for the COVID-19 Genomics UK (COG-UK) Consortium|Davies|United Kingdom

>Spike|hCoV-19/USA/NY-NYCPHL-000952/2020|2020-09-29|EPI\_ISL\_632989|Original|hCoV-19^^New York|Human|DOHMH Corona|New York City Public Health Laboratory|Wang|USA

>Spike|hCoV-19/England/QEUEH-C326BC/2020|2020-12-11|EPI\_ISL\_782707|Original|hCoV-19^^England|Human|Lighthouse Lab in Glasgow|Wellcome Sanger Institute for the COVID-19 Genomics UK (COG-UK) Consortium|Davies|United Kingdom

>Spike|hCoV-19/Egypt/EGY-S031/2020|2020-08-17|EPI\_ISL\_526986|Original|hCoV-19^^Egypt|Human|Biological prevention|Biological prevention|Seadawy|Egypt

>Spike|hCoV-19/England/20104008802/2020|2020-03-03|EPI\_ISL\_417231|Original|hCoV-19^^England|Human|Respiratory Virus Unit|Respiratory Virus Unit|Platt|United Kingdom

>Spike|hCoV-19/Japan/PG-2494/2020|2020-04-00|EPI\_ISL\_686099|Original|hCoV-19^^Japan|Human|Saitama Prefectural Institute of Public Health|Pathogen Genomics Center|Sekizuka|Japan

>Spike|hCoV-19/England/CAMC-B0AE3E/2020|2020-10-30|EPI\_ISL\_643611|Original|hCoV-19^^England|Human|Lighthouse Lab in Cambridge|Wellcome Sanger Institute for the COVID-19 Genomics UK (COG-UK) Consortium|Davies|United Kingdom

>Spike|hCoV-19/England/CAMB-7DA00/2020|2020-04-06|EPI\_ISL\_441778|Original|hCoV-19^^England|Human|Department of Pathology|Wellcome Sanger Institute for the COVID-19 Genomics UK (COG-UK) consortium|Amato|United Kingdom

>Spike|hCoV-19/England/QEUEH-B81A0E/2020|2020-11-14|EPI\_ISL\_667895|Original|hCoV-19^^England|Human|Lighthouse Lab in Glasgow|Wellcome Sanger Institute for the COVID-19 Genomics UK (COG-UK) Consortium|Davies|United Kingdom

>Spike|hCoV-19/Wales/PHWC-1697C3/2020|2020-07-26|EPI\_ISL\_512513|Original|hCoV-19^^Wales|Human|Wales Specialist Virology Centre Sequencing lab|COVID-19 Genomics UK (COG-UK) Consortium|Moore|United Kingdom

>Spike|hCoV-19/England/QEUEH-A640A6/2020|2020-10-11|EPI\_ISL\_628686|Original|hCoV-19^^England|Human|Oxford Viromics|COVID-19 Genomics UK (COG-UK) Consortium|Golubchik|United Kingdom

>Spike|hCoV-19/England/ALDP-90C5EE/2020|2020-06-23|EPI\_ISL\_553335|Original|hCoV-19^^England|Human|Lighthouse Lab in Alderley Park|Wellcome Sanger Institute for the COVID-19 Genomics UK (COG-UK) consortium|Davies|United Kingdom

>Spike|hCoV-19/Denmark/DCGC-1334/2020|2020-06-01|EPI\_ISL\_618008|Original|hCoV-19^^Hovedstaden|Human|Department of Virus and Microbiological Special Diagnostics|Albertsen lab|Michaelsen|Denmark

>Spike|hCoV-19/USA/HI-H200350/2020|2020-09-15|EPI\_ISL\_752906|Original|hCoV-19^^Hawaii|Human|State Laboratories Division|State Laboratories Division|Sultana|USA

>Spike|hCoV-19/Spain/VC-FISABIO-233/2020|2020-03-26|EPI\_ISL\_436328|Original|hCoV-19^^Comunitat Valenciana|Human|Servicio de Microbiologia. Hospital Clinico Universitario de Valencia|Sequencing and Bioinformatics Service and Molecular Epidemiology Research Group. FISABIO-Public Health|Gonzalez-Candelas|Spain

>Spike|hCoV-19/USA/LA-EVTL1338/2020|2020-12-11|EPI\_ISL\_779004|Original|hCoV-19^^Louisiana|Human|LSUHS Emerging Viral Threat Laboratory|Microbial Genome Sequencing Center|Kamil|USA

>Spike|hCoV-19/England/ALDP-C3A3EA/2020|2020-12-09|EPI\_ISL\_731066|Original|hCoV-19^^England|Human|Lighthouse Lab in Alderley Park|Wellcome Sanger Institute for the COVID-19 Genomics UK (COG-UK) Consortium|Davies|United Kingdom

>Spike|hCoV-19/Luxembourg/LNS3444661/2020|2020-11-19|EPI\_ISL\_740311|Original|hCoV-19^^Luxembourg|Human|Laboratoire national de sant\u00e9|Laboratoire national de sant\u00e9|Wienecke-Baldacchino|Luxembourg

>Spike|hCoV-19/USA/MA-MGH-03156/2020|2020-09-09|EPI\_ISL\_765723|Original|hCoV-19^^Massachusetts|Human|Massachusetts General Hospital|Infectious Disease Program|Park|USA

>Spike|hCoV-19/USA/MI-QDX-1630/2020|2020-03-17|EPI\_ISL\_603961|Original|hCoV-19^^Michigan|Human|Quest Diagnostics|Quest Diagnostics|Kagan|USA

>Spike|hCoV-19/Sweden/20-52899/2020|2020-09-16|EPI\_ISL\_766593|Original|hCoV-19^^Stockholm|Human|Klinisk mikrobiologi|The Public Health Agency of Sweden|Svartstr\u00f6m|Sweden

>Spike|hCoV-19/England/ALDP-AA0F74/2020|2020-10-22|EPI\_ISL\_624555|Original|hCoV-19^^England|Human|Lighthouse Lab in Alderley Park|Wellcome Sanger Institute for the COVID-19 Genomics UK (COG-UK) consortium|Davies|United Kingdom

>Spike|hCoV-19/England/MILK-99E2F9/2020|2020-08-31|EPI\_ISL\_550760|Original|hCoV-19^^England|Human|Lighthouse Lab in Milton Keynes|Wellcome Sanger Institute for the COVID-19 Genomics UK (COG-UK) consortium|Davies|United Kingdom

>Spike|hCoV-19/Switzerland/SG-ETHZ-140018/2020|2020-05-18|EPI\_ISL\_476088|Original|hCoV-19^^Sankt Gallen|Human|Viollier AG|Department of Biosystems Science and Engineering|Nadeau|Switzerland

>Spike|hCoV-19/USA/MN-MDH-1037/2020|2020-05-07|EPI\_ISL\_462882|Original|hCoV-19^^Minnesota|Human|Minnesota Department of Health|Minnesota Department of Health|Garfin|USA

>Spike|hCoV-19/England/ALDP-BC7D8B/2020|2020-11-23|EPI\_ISL\_721277|Original|hCoV-19^^England|Human|Lighthouse Lab in Alderley Park|Wellcome Sanger Institute for the COVID-19 Genomics UK (COG-UK) Consortium|Davies|United Kingdom

>Spike|hCoV-19/USA/WA-S281/2020|2020-02-29|EPI\_ISL\_430135|Original|hCoV-19^^Washington|Human|Seattle Flu Study|Seattle Flu Study|Bedford|USA

>Spike|hCoV-19/Wales/PHWC-4A55CE/2020|2020-12-16|EPI\_ISL\_764890|Original|hCoV-19^^Wales|Human|Wales Specialist Virology Centre Sequencing lab|COVID-19 Genomics UK (COG-UK) Consortium|Moore|United Kingdom

>Spike|hCoV-19/Wales/PHWC-16436A/2020|2020-05-03|EPI\_ISL\_474164|Original|hCoV-19^^Wales|Human|Originating lab|COVID-19 Genomics UK (COG-UK) Consortium|Moore|United Kingdom

>Spike|hCoV-19/USA/CA-CZB-15974/2020|2020-11-30|EPI\_ISL\_739319|Original|hCoV-19^^California|Human|Santa Clara County Public Health Laboratory|Chan-Zuckerberg Biohub|Kamm|USA

>Spike|hCoV-19/England/MILK-B04F04/2020|2020-10-24|EPI\_ISL\_650632|Original|hCoV-19^^England|Human|Department of Pathology|COVID-19 Genomics UK (COG-UK) Consortium|Goodfellow|United Kingdom

>Spike|hCoV-19/USA/WI-UW-67/2020|2020-03-25|EPI\_ISL\_421325|Original|hCoV-19^^Wisconsin|Human|University of Wisconsin-Madison AIDS Vaccine Research Laboratories|University of Wisconsin-Madison AIDS Vaccine Research Laboratories|Baczenas|USA

>Spike|hCoV-19/England/ALDP-94FA4A/2020|2020-06-16|EPI\_ISL\_555195|Original|hCoV-19^^England|Human|Lighthouse Lab in Alderley Park|Wellcome Sanger Institute for the COVID-19 Genomics UK (COG-UK) consortium|Davies|United Kingdom

>Spike|hCoV-19/England/ALDP-95666A/2020|2020-06-08|EPI\_ISL\_553982|Original|hCoV-19^^England|Human|Lighthouse Lab in Alderley Park|Wellcome Sanger Institute for the COVID-19 Genomics UK (COG-UK) consortium|Davies|United Kingdom

>Spike|hCoV-19/England/MILK-B3B02F/2020|2020-11-01|EPI\_ISL\_679736|Original|hCoV-19^^England|Human|Oxford Viromics|COVID-19 Genomics UK (COG-UK) Consortium|Golubchik|United Kingdom

>Spike|hCoV-19/USA/VA-DCLS-0513/2020|2020-05-29|EPI\_ISL\_485824|Original|hCoV-19^^Virginia|Human|Virginia DCLS|Virginia DCLS|St. Jacques|USA

>Spike|hCoV-19/Jordan/AM-ALSR-3946/2020|2020-09-30|EPI\_ISL\_636310|Original|hCoV-19^^Amman|Human|Biolab Diagnostic Laboratories|Andersen lab at Scripps Research|Gangavarapu|Jordan

>Spike|hCoV-19/Australia/VIC12393/2020|2020-07-28|EPI\_ISL\_640423|Original|hCoV-19^^Victoria|Human|Microbiological Diagnostic Unit - Public Health Laboratory (MDU-PHL)|MDU-PHL|Schultz|Australia

>Spike|hCoV-19/Bangladesh/BCSIR-NILMRC-104/2020|2020-06-07|EPI\_ISL\_475165|Original|hCoV-19^^Rangpur|Human|National Institute of Laboratory Medicine and Referral Center|Genomic Research Lab|Khan|Bangladesh

>Spike|hCoV-19/USA/MI-UM-10036421549/2020|2020-10-13|EPI\_ISL\_610097|Original|hCoV-19^^Michigan|Human|University of Michigan Clinical Microbiology Laboratory|Lauring Lab|Valesano|USA

>Spike|hCoV-19/England/ALDP-B47E62/2020|2020-11-07|EPI\_ISL\_649258|Original|hCoV-19^^England|Human|Lighthouse Lab in Alderley Park|Wellcome Sanger Institute for the COVID-19 Genomics UK (COG-UK) Consortium|Davies|United Kingdom

>Spike|hCoV-19/USA/TX-HMH-2557/2020|2020-06-01|EPI\_ISL\_545384|Original|hCoV-19^^Texas|Human|Houston Methodist Hospital|Houston Methodist Hospital|Long|USA

>Spike|hCoV-19/England/205201132/2020|2020-12-17|EPI\_ISL\_791221|Original|hCoV-19^^England|Human|Respiratory Virus Unit|COVID-19 Genomics UK (COG-UK) Consortium|Platt|United Kingdom

>Spike|hCoV-19/Wales/PHWC-48254F/2020|2020-10-20|EPI\_ISL\_613227|Original|hCoV-19^^Wales|Human|Wales Specialist Virology Centre Sequencing lab|COVID-19 Genomics UK (COG-UK) Consortium|Moore|United Kingdom

>Spike|hCoV-19/Wales/PHWC-15C338/2020|2020-05-07|EPI\_ISL\_472472|Original|hCoV-19^^Wales|Human|Wales Specialist Virology Centre Sequencing lab|COVID-19 Genomics UK (COG-UK) Consortium|Moore|United Kingdom

>Spike|hCoV-19/USA/WA-S2448/2020|2020-06-16|EPI\_ISL\_497080|Original|hCoV-19^^Washington|Human|Washington State Department of Health|Seattle Flu Study|Lee|USA

>Spike|hCoV-19/Canada/ON\_QGLO-018/2020|2020-03-27|EPI\_ISL\_459875|Original|hCoV-19^^Ontario|Human|Kingston Health Sciences Center|Queen's Genomics Lab at Ongwanada (Q-GLO)|Sjaarda|Canada

>Spike|hCoV-19/USA/MN-MDH-1383/2020|2020-07-09|EPI\_ISL\_507971|Original|hCoV-19^^Minnesota|Human|Avera McKennan Laboratory|Minnesota Department of Health|Garfin|USA

>Spike|hCoV-19/Switzerland/VD-ETHZ-280141/2020|2020-09-08|EPI\_ISL\_560505|Original|hCoV-19^^Vaud|Human|Viollier AG|Department of Biosystems Science and Engineering|Nadeau|Switzerland

>Spike|hCoV-19/USA/TX-DSHS-1371/2020|2020-05-11|EPI\_ISL\_654770|Original|hCoV-19^^Texas|Human|Texas Department of State Health Services|Texas Department of State Health Services|Rahman|USA

>Spike|hCoV-19/England/20169032504/2020|2020-04-17|EPI\_ISL\_465227|Original|hCoV-19^^England|Human|Respiratory Virus Unit|Respiratory Virus Unit|Platt|United Kingdom

>Spike|hCoV-19/Germany/NW-UBI-49/2020|2020-03-12|EPI\_ISL\_631302|Original|hCoV-19^^North Rhine-Westphalia|Human|MVZ DIAMEDIS Diagnostische Medizin Sennestadt GmbH|Bielefeld University|Brandt|Germany

>Spike|hCoV-19/USA/TX-HMH-2620/2020|2020-06-03|EPI\_ISL\_545432|Original|hCoV-19^^Texas|Human|Houston Methodist Hospital|Houston Methodist Hospital|Long|USA

>Spike|hCoV-19/Netherlands/NH-EMC-46/2020|2020-06-11|EPI\_ISL\_523415|Original|hCoV-19^^Noord Holland|Human|Dutch COVID-19 response team|Erasmus Medical Center|Oude Munnink|Netherlands

>Spike|hCoV-19/USA/MA-MASPHL-00730/2020|2020-09-22|EPI\_ISL\_692942|Original|hCoV-19^^Massachusetts|Human|Massachusetts State Public Health Laboratory|Massachusetts State Public Health Laboratory|Lang|USA

>Spike|hCoV-19/USA/TX-HMH-MCoV-8924/2020|2020-07-02|EPI\_ISL\_780835|Original|hCoV-19^^Texas|Human|Houston Methodist Hospital|Houston Methodist Hospital|Long|USA

>Spike|hCoV-19/England/MILK-CB2809/2020|2020-12-01|EPI\_ISL\_761039|Original|hCoV-19^^England|Human|Lighthouse Lab in Milton Keynes|Wellcome Sanger Institute for the COVID-19 Genomics UK (COG-UK) Consortium|Davies|United Kingdom

>Spike|hCoV-19/India/MH-AFMC-5318/2020|2020-05-21|EPI\_ISL\_496539|Original|hCoV-19^^Maharashtra|Human|Armed Forces Medical College|National Centre For Cell Science|Paul|India

>Spike|hCoV-19/England/NORW-E9647/2020|2020-04-22|EPI\_ISL\_453609|Original|hCoV-19^^England|Human|Quadram Institute Bioscience|COVID-19 Genomics UK (COG-UK) Consortium|Alikhan|United Kingdom

>Spike|hCoV-19/Netherlands/NA\_568/2020|2020-04-11|EPI\_ISL\_460732|Original|hCoV-19^^Netherlands|Human|Dutch COVID-19 response team|Erasmus Medical Center|Oude Munnink|Netherlands

>Spike|hCoV-19/USA/OR-OHSU-3912/2020|2020-10-30|EPI\_ISL\_667516|Original|hCoV-19^^Oregon|Human|OHSU Lab Services Molecular Microbiology Lab|Oregon SARS-CoV-2 Genome Sequencing Center|O'Roak|USA

>Spike|hCoV-19/England/QEUH-9AEF86/2020|2020-09-03|EPI\_ISL\_573519|Original|hCoV-19^^England|Human|University College London|COVID-19 Genomics UK (COG-UK) Consortium|Roy|United Kingdom

>Spike|hCoV-19/Netherlands/ZH-RIVM-10116/2020|2020-00-00|EPI\_ISL\_547563|Original|hCoV-19^^Zuid Holland|Human|Dutch COVID-19 response



team|National Institute for Public Health and the Environment  
(RIVM)|Meijer|Netherlands  
>Spike|hCoV-19/USA/MI-MDHHS-SC21268/2020|2020-04-03|EPI\_ISL\_507523|Original|hCoV-19^^Michigan|Human|Michigan Department of Health and Human Services|Michigan Department of Health and Human Services|Blankenship|USA  
>Spike|hCoV-19/England/MILK-B9780B/2020|2020-11-14|EPI\_ISL\_674958|Original|hCoV-19^^England|Human|Lighthouse Lab in Milton Keynes|Wellcome Sanger Institute for the COVID-19 Genomics UK (COG-UK) Consortium|Davies|United Kingdom  
>Spike|hCoV-19/Denmark/DCGC-11485/2020|2020-11-02|EPI\_ISL\_670949|Original|hCoV-19^^Syddanmark|Human|Department of Virus and Microbiological Special Diagnostics|Albertsen Lab|Michaelsen|Denmark  
>Spike|hCoV-19/USA/WA-UW-11630/2020|2020-06-18|EPI\_ISL\_570449|Original|hCoV-19^^Washington|Human|UW Virology Lab|UW Virology Lab|Roychoudhury|USA  
>Spike|hCoV-19/England/ALDP-9CB439/2020|2020-09-16|EPI\_ISL\_575704|Original|hCoV-19^^England|Human|Lighthouse Lab in Alderley Park|Wellcome Sanger Institute for the COVID-19 Genomics UK (COG-UK) consortium|Davies|United Kingdom  
>Spike|hCoV-19/South Africa/LR00136/2020|2020-07-20|EPI\_ISL\_514367|Original|hCoV-19^^Gauteng|Human|National Institute for Communicable Diseases of the National Health Laboratory Service|National Institute for Communicable Diseases of the National Health Laboratory Service|Allam|South Africa  
>Spike|hCoV-19/Australia/VIC15120/2020|2020-08-13|EPI\_ISL\_593146|Original|hCoV-19^^Victoria|Human|Microbiological Diagnostic Unit - Public Health Laboratory (MDU-PHL)|MDU-PHL|Schultz|Australia  
>Spike|hCoV-19/USA/NY-NYUMC233/2020|2020-04-06|EPI\_ISL\_427633|Original|hCoV-19^^New York|Human|NYU Langone Health|Departments of Pathology and Medicine|Maurano|USA  
>Spike|hCoV-19/Denmark/DCGC-19299/2020|2020-12-07|EPI\_ISL\_748260|Original|hCoV-19^^Syddanmark|Human|Department of Virus and Microbiological Special Diagnostics|Albertsen Lab|Michaelsen|Denmark  
>Spike|hCoV-19/Australia/VIC5015/2020|2020-07-18|EPI\_ISL\_519819|Original|hCoV-19^^Victoria|Human|Microbiological Diagnostic Unit - Public Health Laboratory (MDU-PHL)|MDU-PHL|Schultz|Australia  
>Spike|hCoV-19/England/PORT-2D363F/2020|2020-04-15|EPI\_ISL\_517529|Original|hCoV-19^^England|Human|Centre for Enzyme Innovation|COVID-19 Genomics UK (COG-UK) Consortium|Robson|United Kingdom  
>Spike|hCoV-19/Costa Rica/INC-0058/2020|2020-06-18|EPI\_ISL\_512664|Original|hCoV-19^^Alajuela|Human|Area De Salud Alajuela Norte - Clinica Dr. Marcial Rodriguez|Inciensa|Brenes Porras|Costa Rica  
>Spike|hCoV-19/USA/TX-HMH-5251/2020|2020-06-23|EPI\_ISL\_544628|Original|hCoV-19^^Texas|Human|Houston Methodist Hospital|Houston Methodist Hospital|Long|USA  
>Spike|hCoV-19/England/BRIS-12B2CC/2020|2020-05-02|EPI\_ISL\_487532|Original|hCoV-19^^England|Human|PHE South West Regional Laboratory|Wellcome Sanger Institute for the COVID-19 Genomics UK (COG-UK) consortium|Davies|United Kingdom  
>Spike|hCoV-19/Netherlands/ZuidHolland\_198/2020|2020-04-28|EPI\_ISL\_461370|Original|hCoV-19^^Zuid Holland|Human|Dutch COVID-19 response team|Erasmus Medical Center|Oude Munnink|Netherlands  
>Spike|hCoV-19/Spain/CM-IBV-003883/2020|2020-05-18|EPI\_ISL\_474826|Original|hCoV-19^^Castilla La Mancha|Human|Complejo Hospitalario Universitario de Albacete|SeqCOVID-SPAIN consortium|IBV(CSIC)|Comas|Spain  
>Spike|hCoV-19/USA/FL-BPHL-0142/2020|2020-03-09|EPI\_ISL\_480793|Original|hCoV-19^^Florida|Human|Florida Bureau of Public Health Laboratories|Florida Bureau of Public Health Laboratories|Blanton|USA  
>Spike|hCoV-19/Wales/PHWC-497EE2/2020|2020-11-30|EPI\_ISL\_726994|Original|hCoV-19^^Wales|Human|Originating lab|COVID-19 Genomics UK (COG-UK) Consortium|Moore|United Kingdom  
>Spike|hCoV-19/Netherlands/NH-RIVM-10071/2020|2020-05-01|EPI\_ISL\_547498|Original|hCoV-19^^Noord Holland|Human|Dutch COVID-19 response team|National Institute for Public Health and the Environment (RIVM)|Meijer|Netherlands

>Spike|hCoV-19/Spain/VC-IBV-98003615/2020|2020-03-17|EPI\_ISL\_538630|Original|hCoV-19^^Comunitat Valenciana|Human|Servicio de Microbiolog\u00eda. Hospital General Universitario de Castell\u00f3n|SeqCOVID-SPAIN consortium/IBV(CSIC)|Comas|Spain

>Spike|hCoV-19/England/210100350/2021|2021-01-04|EPI\_ISL\_791234|Original|hCoV-19^^England|Human|Respiratory Virus Unit|COVID-19 Genomics UK (COG-UK) Consortium|Platt|United Kingdom

>Spike|hCoV-19/Switzerland/BE-ETHZ-410219/2020|2020-12-14|EPI\_ISL\_737436|Original|hCoV-19^^Bern|Human|Viollier AG|Department of Biosystems Science and Engineering|Nadeau|Switzerland

>Spike|hCoV-19/Wales/PHWC-48E1B8/2020|2020-11-09|EPI\_ISL\_680819|Original|hCoV-19^^Wales|Human|Wales Specialist Virology Centre Sequencing lab|COVID-19 Genomics UK (COG-UK) Consortium|Moore|United Kingdom

>Spike|hCoV-19/USA/MA-MASPHL-00978/2020|2020-11-03|EPI\_ISL\_692804|Original|hCoV-19^^Massachusetts|Human|Massachusetts State Public Health Laboratory|Massachusetts State Public Health Laboratory|Lang|USA

>Spike|hCoV-19/USA/FL-BPHL-0780/2020|2020-04-07|EPI\_ISL\_512584|Original|hCoV-19^^Florida|Human|Florida Bureau of Public Health Laboratories|Florida Bureau of Public Health Laboratories|Blanton|USA

>Spike|hCoV-19/France/PAC-MEPHI-1703/2020|2020-09-17|EPI\_ISL\_644427|Original|hCoV-19^^Provence-Alpes-Cote-d\u2019Azur|Human|MEPHI|MEPHI|Levasseur|France

>Spike|hCoV-19/USA/NY-Wadsworth-192891-01/2020|2020-07-04|EPI\_ISL\_677019|Original|hCoV-19^^New York|Human|Masonic Medical Research Institute|Wadsworth Center|Lasek-Nesselquist|USA

>Spike|hCoV-19/Belgium/DRR-0401366/2020|2020-04-01|EPI\_ISL\_462220|Original|hCoV-19^^Ploegsteert|Human|KU Leuven|KU Leuven|Maes|Belgium

>Spike|hCoV-19/USA/WA-S2295/2020|2020-06-10|EPI\_ISL\_497723|Original|hCoV-19^^Washington|Human|Washington State Department of Health|Seattle Flu Study|Lee|USA

>Spike|hCoV-19/England/CAMB-1AAD3D/2020|2020-04-19|EPI\_ISL\_470280|Original|hCoV-19^^England|Human|Department of Pathology|Wellcome Sanger Institute for the COVID-19 Genomics UK (COG-UK) consortium|Davies|United Kingdom

>Spike|hCoV-19/Japan/PG-4598/2020|2020-08-00|EPI\_ISL\_689735|Original|hCoV-19^^Japan|Human|Pathogen Genomics Center|Pathogen Genomics Center|Sekizuka|Japan

>Spike|hCoV-19/USA/CA-CZB-3881/2020|2020-07-17|EPI\_ISL\_548546|Original|hCoV-19^^California|Human|County of Santa Clara Public Health Department|Chan-Zuckerberg Biohub|Bhatt|USA

>Spike|hCoV-19/USA/NJ-NYUMC421/2020|2020-04-22|EPI\_ISL\_435488|Original|hCoV-19^^New Jersey|Human|NYU Langone Health|Departments of Pathology and Medicine|Maurano|USA

>Spike|hCoV-19/USA/AZ-TG664525/2020|2020-04-20|EPI\_ISL\_696142|Original|hCoV-19^^Arizona|Human|Sonora Quest Laboratories|TGen North|French|USA

>Spike|hCoV-19/England/BRIS-126A23/2020|2020-04-09|EPI\_ISL\_458932|Original|hCoV-19^^England|Human|PHE South West Regional Laboratory|Wellcome Sanger Institute for the COVID-19 Genomics UK (COG-UK) consortium|Davies|United Kingdom

>Spike|hCoV-19/England/204721103/2020|2020-11-16|EPI\_ISL\_678722|Original|hCoV-19^^England|Human|Respiratory Virus Unit|COVID-19 Genomics UK (COG-UK) Consortium|Platt|United Kingdom

>Spike|hCoV-19/Denmark/DCGC-14678/2020|2020-11-23|EPI\_ISL\_711209|Original|hCoV-19^^Hovedstaden|Human|Department of Virus and Microbiological Special Diagnostics|Albertsen Lab|Michaelsen|Denmark

>Spike|hCoV-19/Netherlands/NA\_501/2020|2020-03-24|EPI\_ISL\_460674|Original|hCoV-19^^Netherlands|Human|Dutch COVID-19 response team|Erasmus Medical Center|Oude Munnink|Netherlands

>Spike|hCoV-19/USA/OR-OHSU-2987/2020|2020-09-10|EPI\_ISL\_667450|Original|hCoV-19^^Oregon|Human|OHSU Lab Services Molecular Microbiology Lab|Oregon SARS-CoV-2 Genome Sequencing Center|O'Roak|USA

>Spike|hCoV-19/England/QEUH-A5E203/2020|2020-10-12|EPI\_ISL\_597514|Original|hCoV-19^^England|Human|Lighthouse Lab in Glasgow|Wellcome Sanger Institute for the COVID-19 Genomics UK (COG-UK) consortium|Davies|United Kingdom

>Spike|hCoV-19/Netherlands/ZH-EMC-600/2020|2020-09-18|EPI\_ISL\_578028|Original|hCoV-19^^Zuid Holland|Human|Dutch COVID-19 response team|Erasmus Medical Center|Oude Munnink|Netherlands

>Spike|hCoV-19/Wales/PHWC-4A5573/2020|2020-12-16|EPI\_ISL\_764885|Original|hCoV-19^^Wales|Human|Wales Specialist Virology Centre Sequencing lab|COVID-19 Genomics UK (COG-UK) Consortium|Moore|United Kingdom

>Spike|hCoV-19/USA/LA-EVTL1281/2020|2020-12-10|EPI\_ISL\_778947|Original|hCoV-19^^Louisiana|Human|LSUHS Emerging Viral Threat Laboratory|Microbial Genome Sequencing Center|Kamil|USA

>Spike|hCoV-19/USA/TX-HMH-4203/2020|2020-06-19|EPI\_ISL\_543434|Original|hCoV-19^^Texas|Human|Houston Methodist Hospital|Houston Methodist Hospital|Long|USA

>Spike|hCoV-19/Wales/PHWC-484AB7/2020|2020-10-23|EPI\_ISL\_628076|Original|hCoV-19^^Wales|Human|Wales Specialist Virology Centre Sequencing lab|COVID-19 Genomics UK (COG-UK) Consortium|Moore|United Kingdom

>Spike|hCoV-19/England/CAMB-7DE13/2020|2020-04-07|EPI\_ISL\_470465|Original|hCoV-19^^England|Human|Department of Pathology|Wellcome Sanger Institute for the COVID-19 Genomics UK (COG-UK) consortium|Davies|United Kingdom

>Spike|hCoV-19/Singapore/1396/2020|2020-11-09|EPI\_ISL\_645123|Original|hCoV-19^^Singapore|Human|National Public Health Laboratory|National Public Health Laboratory|Mak|Singapore

>Spike|hCoV-19/England/CAMC-B088E7/2020|2020-10-30|EPI\_ISL\_643934|Original|hCoV-19^^England|Human|Lighthouse Lab in Cambridge|Wellcome Sanger Institute for the COVID-19 Genomics UK (COG-UK) Consortium|Davies|United Kingdom

>Spike|hCoV-19/Japan/PG-8757/2020|2020-09-00|EPI\_ISL\_686353|Original|hCoV-19^^Japan|Human|Pathogen Genomics Center|Pathogen Genomics Center|Sekizuka|Japan

>Spike|hCoV-19/USA/TX-HMH-7665/2020|2020-06-26|EPI\_ISL\_546925|Original|hCoV-19^^Texas|Human|Houston Methodist Hospital|Houston Methodist Hospital|Long|USA

>Spike|hCoV-19/England/ALDP-B1DB22/2020|2020-11-01|EPI\_ISL\_646120|Original|hCoV-19^^England|Human|Lighthouse Lab in Alderley Park|Wellcome Sanger Institute for the COVID-19 Genomics UK (COG-UK) Consortium|Davies|United Kingdom

>Spike|hCoV-19/Denmark/DCGC-5290/2020|2020-09-14|EPI\_ISL\_615221|Original|hCoV-19^^Syddanmark|Human|Department of Virus and Microbiological Special Diagnostics|Albertsen lab|Michaelsen|Denmark

>Spike|hCoV-19/England/QEUEH-9DCE55/2020|2020-09-21|EPI\_ISL\_599678|Original|hCoV-19^^England|Human|Lighthouse Lab in Glasgow|Wellcome Sanger Institute for the COVID-19 Genomics UK (COG-UK) consortium|Davies|United Kingdom

>Spike|hCoV-19/England/CAMB-7D402/2020|2020-04-06|EPI\_ISL\_441601|Original|hCoV-19^^England|Human|Department of Pathology|Wellcome Sanger Institute for the COVID-19 Genomics UK (COG-UK) consortium|Amato|United Kingdom

>Spike|hCoV-19/Switzerland/UR-ETHZ-321519/2020|2020-10-15|EPI\_ISL\_603728|Original|hCoV-19^^Uri|Human|Viollier AG|Department of Biosystems Science and Engineering|Nadeau|Switzerland

>Spike|hCoV-19/South Africa/N00038/2020|2020-08-13|EPI\_ISL\_623057|Original|hCoV-19^^Eastern Cape|Human|National Health Laboratory Service|National Institute for Communicable Diseases of the National Health Laboratory Service|Allam|South Africa

>Spike|hCoV-19/USA/TX-HMH-MCoV-8560/2020|2020-07-01|EPI\_ISL\_780472|Original|hCoV-19^^Texas|Human|Houston Methodist Hospital|Houston Methodist Hospital|Long|USA

>Spike|hCoV-19/South Korea/KCDC2248/2020|2020-05-10|EPI\_ISL\_510586|Original|hCoV-19^^South Korea|Human|Division of Viral Diseases|Division of Viral Diseases|Kim|South Korea

>Spike|hCoV-19/Northern Ireland/NIRE-1091C7/2020|2020-10-20|EPI\_ISL\_652320|Original|hCoV-19^^Northern Ireland|Human|Regional Virus Laboratory|COVID-19 Genomics UK (COG-UK) Consortium|Fairley|United Kingdom

>Spike|hCoV-19/England/NOTT-112301/2020|2020-04-22|EPI\_ISL\_484369|Original|hCoV-19^^England|Human|Lincolnshire Hospitals and DeepSeq Nottingham|COVID-19 Genomics UK (COG-UK) Consortium|Loose|United Kingdom

>Spike|hCoV-19/USA/HI-H200590/2020|2020-11-20|EPI\_ISL\_753116|Original|hCoV-19^^Hawaii|Human|State Laboratories Division|State Laboratories Division|Sultana|USA

>Spike|hCoV-19/Brazil/RJ-2776/2020|2020-04-27|EPI\_ISL\_467363|Original|hCoV-19^^Rio de Janeiro|Human|Laboratory of Respiratory Viruses and Measles|Laboratory of Respiratory Viruses and Measles|Silva|Brazil

>Spike|hCoV-19/England/ALDP-49DEBF/2020|2020-05-19|EPI\_ISL\_559558|Original|hCoV-19^^England|Human|Lighthouse Lab in Alderley Park|Wellcome Sanger Institute for the COVID-19 Genomics UK (COG-UK) consortium|Davies|United Kingdom

>Spike|hCoV-19/USA/TX-HMH-MCoV-14248/2020|2020-10-03|EPI\_ISL\_787533|Original|hCoV-19^^Texas|Human|Houston Methodist Hospital|Houston Methodist Hospital|Long|USA

>Spike|hCoV-19/Italy/ABR-IZSGC-TE4891/2020|2020-03-17|EPI\_ISL\_528920|Original|hCoV-19^^Abruzzo|Human|Presidio Ospedaliero \Santo Spirito\ -Pescara|Istitituto Zooprofilattico Sperimentale dell'Abruzzo e Molise \G.Caporale\|Lorusso|Italy

>Spike|hCoV-19/USA/CA-LACPHL-AE00038/2020|2020-07-15|EPI\_ISL\_708730|Original|hCoV-19^^California|Human|Los Angeles County Public Health Laboratory|Los Angeles County Public Health Laboratory|Hemarajata|USA

>Spike|hCoV-19/USA/AZ-TG547245/2020|2020-07-03|EPI\_ISL\_695444|Original|hCoV-19^^Arizona|Human|AZ SPHL|TGen North|French|USA

>Spike|hCoV-19/Scotland/QEUEH-9DD285/2020|2020-09-21|EPI\_ISL\_599525|Original|hCoV-19^^Scotland|Human|Lighthouse Lab in Glasgow|Wellcome Sanger Institute for the COVID-19 Genomics UK (COG-UK) consortium|Davies|United Kingdom

>Spike|hCoV-19/England/QEUEH-A9FFC3/2020|2020-10-20|EPI\_ISL\_652698|Original|hCoV-19^^England|Human|University of Exeter|COVID-19 Genomics UK (COG-UK) Consortium|Temperton|United Kingdom

>Spike|hCoV-19/England/OXON-B0C0B/2020|2020-04-23|EPI\_ISL\_478946|Original|hCoV-19^^England|Human|Oxford Viromics|COVID-19 Genomics UK (COG-UK) Consortium|Golubchik|United Kingdom

>Spike|hCoV-19/England/MILK-BAAA87/2020|2020-11-17|EPI\_ISL\_681519|Original|hCoV-19^^England|Human|Lighthouse Lab in Milton Keynes|Wellcome Sanger Institute for the COVID-19 Genomics UK (COG-UK) Consortium|Davies|United Kingdom

>Spike|hCoV-19/England/CAMB-73A73/2020|2020-03-31|EPI\_ISL\_425272|Original|hCoV-19^^England|Human|Department of Pathology|COVID-19 Genomics UK (COG-UK) Consortium|Meredith|United Kingdom

>Spike|hCoV-19/England/MILK-B02355/2020|2020-10-23|EPI\_ISL\_642769|Original|hCoV-19^^England|Human|Lighthouse Lab in Milton Keynes|Wellcome Sanger Institute for the COVID-19 Genomics UK (COG-UK) Consortium|Davies|United Kingdom

>Spike|hCoV-19/Denmark/DCGC-8358/2020|2020-10-26|EPI\_ISL\_617090|Original|hCoV-19^^Hovedstaden|Human|Department of Virus and Microbiological Special Diagnostics|Albertsen lab|Michaelsen|Denmark

>Spike|hCoV-19/India/MH-NIV-226874/2020|2020-09-25|EPI\_ISL\_577640|Original|hCoV-19^^Maharashtra|Human|NIV Influenza|NIV Influenza|Potdar|India

>Spike|hCoV-19/Wales/PHWC-495A2C/2020|2020-11-25|EPI\_ISL\_726428|Original|hCoV-19^^Wales|Human|Originating lab|COVID-19 Genomics UK (COG-UK) Consortium|Moore|United Kingdom

>Spike|hCoV-19/Switzerland/BE-ETHZ-320201/2020|2020-10-10|EPI\_ISL\_737685|Original|hCoV-19^^Bern|Human|Viollier AG|Department of Biosystems Science and Engineering|Nadeau|Switzerland

>Spike|hCoV-19/India/DL-NCDC-3400/2020|2020-04-06|EPI\_ISL\_436436|Original|hCoV-19^^Delhi|Human|National Centre for Disease control (NCDC)|NCDC/CSIR-IGIB|Singh|India

>Spike|hCoV-19/USA/TX-HMH-MCoV-9544/2020|2020-07-03|EPI\_ISL\_781176|Original|hCoV-19^^Texas|Human|Houston Methodist Hospital|Houston Methodist Hospital|Long|USA

>Spike|hCoV-19/Wales/PHWC-492791/2020|2020-11-29|EPI\_ISL\_725698|Original|hCoV-19^^Wales|Human|Originating lab|COVID-19 Genomics UK (COG-UK) Consortium|Moore|United Kingdom

>Spike|hCoV-19/USA/CA-ALSR-3877/2020|2020-07-16|EPI\_ISL\_636256|Original|hCoV-19^^California|Human|San Diego County Public Health Laboratory|Andersen lab at Scripps Research|Gangavarapu|USA

>Spike|hCoV-19/Japan/PG-7485/2020|2020-08-00|EPI\_ISL\_688587|Original|hCoV-19^^Japan|Human|Tokyo Metropolitan Institute of Public Health|Pathogen Genomics Center|Sekizuka|Japan

>Spike|hCoV-19/Scotland/CVR322/2020|2020-03-20|EPI\_ISL\_439050|Original|hCoV-19^^Scotland|Human|West of Scotland Specialist Virology Centre|COVID-19 Genomics UK (COG-UK) Consortium|Robertson|United Kingdom

>Spike|hCoV-19/USA/MD-HP12033/2020|2020-11-08|EPI\_ISL\_791367|Original|hCoV-19^^Maryland|Human|Johns Hopkins Hospital Department of Pathology|Johns Hopkins Hospital Department of Pathology|Morris|USA

>Spike|hCoV-19/USA/NE-10900/2020|2020-05-04|EPI\_ISL\_466667|Original|hCoV-19^^Nebraska|Human|Nebraska Public Health Laboratory|UNMC COVID-19 Response Team|Pratt|USA

>Spike|hCoV-19/Netherlands/GE-EMC-342/2020|2020-10-20|EPI\_ISL\_632742|Original|hCoV-19^^Gelderland|Human|Dutch COVID-19 response team|Erasmus Medical Center|Oude Munnink|Netherlands

>Spike|hCoV-19/England/MILK-9938F2/2020|2020-08-26|EPI\_ISL\_552192|Original|hCoV-19^^England|Human|Lighthouse Lab in Milton Keynes|Wellcome Sanger Institute for the COVID-19 Genomics UK (COG-UK) consortium|Davies|United Kingdom

>Spike|hCoV-19/Northern Ireland/NIRE-10878A/2020|2020-09-09|EPI\_ISL\_585202|Original|hCoV-19^^Northern Ireland|Human|Regional Virus Laboratory|COVID-19 Genomics UK (COG-UK) Consortium|Fairley|United Kingdom

>Spike|hCoV-19/United Arab Emirates/0135/2020|2020-05-18|EPI\_ISL\_698173|Original|hCoV-19^^Abu Dhabi|Human|Group 42 (G42) Healthcare|G42 Healthcare|Ogrodzki|United Arab Emirates

>Spike|hCoV-19/England/MILK-A79B61/2020|2020-10-15|EPI\_ISL\_606837|Original|hCoV-19^^England|Human|Lighthouse Lab in Milton Keynes|Wellcome Sanger Institute for the COVID-19 Genomics UK (COG-UK) consortium|Davies|United Kingdom

>Spike|hCoV-19/Scotland/MILK-A6B77D/2020|2020-10-09|EPI\_ISL\_625412|Original|hCoV-19^^Scotland|Human|Lighthouse Lab in Milton Keynes|Wellcome Sanger Institute for the COVID-19 Genomics UK (COG-UK) consortium|Davies|United Kingdom

>Spike|hCoV-19/England/QEUA-9CA995/2020|2020-09-10|EPI\_ISL\_567451|Original|hCoV-19^^England|Human|Lighthouse Lab in Glasgow|Wellcome Sanger Institute for the COVID-19 Genomics UK (COG-UK) consortium|Davies|United Kingdom

>Spike|hCoV-19/Hong Kong/CM20000221/2020|2020-11-05|EPI\_ISL\_733574|Original|hCoV-19^^Hong Kong|Human|Temporary Specimen Collection Centre|Hong Kong Department of Health|Tsang|China

>Spike|hCoV-19/Finland/S11CA6/2020|2020-10-30|EPI\_ISL\_732628|Original|hCoV-19^^Uusimaa|Human|Department of Virology and Immunology|Department of Virology|Smura|Finland

>Spike|hCoV-19/USA/TX-HMH-MCoV-16376/2020|2020-11-02|EPI\_ISL\_786060|Original|hCoV-19^^Texas|Human|Houston Methodist Hospital|Houston Methodist Hospital|Long|USA

>Spike|hCoV-19/England/QEUA-BA3A33/2020|2020-11-18|EPI\_ISL\_672755|Original|hCoV-19^^England|Human|Lighthouse Lab in Glasgow|Wellcome Sanger Institute for the COVID-19 Genomics UK (COG-UK) Consortium|Davies|United Kingdom

>Spike|hCoV-19/Belgium/Rega-0328191/2020|2020-03-28|EPI\_ISL\_458161|Original|hCoV-19^^Dour|Human|KU Leuven|KU Leuven|Maes|Belgium

>Spike|hCoV-19/Belgium/UGent-323/2020|2020-12-09|EPI\_ISL\_745210|Original|hCoV-19^^Ghent|Human|Lab voor klinische biologie|Onderzoeksgroep Virologie|Lambrechts|Belgium

>Spike|hCoV-19/USA/NV-NSPHL-A0041/2020|2020-03-23|EPI\_ISL\_515324|Original|hCoV-19^^Nevada|Human|Nevada State Public Health Laboratory|Nevada State Public Health Laboratory|Sevinsky|USA

>Spike|hCoV-19/Australia/VIC14224/2020|2020-08-01|EPI\_ISL\_592400|Original|hCoV-19^^Victoria|Human|Microbiological Diagnostic Unit - Public Health Laboratory (MDU-PHL)|MDU-PHL|Schultz|Australia

>Spike|hCoV-19/England/MILK-ACE259/2020|2020-10-21|EPI\_ISL\_629173|Original|hCoV-19^^England|Human|Lighthouse Lab in Milton Keynes|Wellcome Sanger Institute for the COVID-19 Genomics UK (COG-UK) consortium|Davies|United Kingdom

>Spike|hCoV-19/Wales/PHWC-1686C7/2020|2020-04-20|EPI\_ISL\_494272|Original|hCoV-19^^Wales|Human|Originating lab|COVID-19 Genomics UK (COG-UK) Consortium|Moore|United Kingdom

>Spike|hCoV-19/Ecuador/USFQ-216/2020|2020-08-05|EPI\_ISL\_539788|Original|hCoV-19^^Azua|Human|Institute of Microbiology|Institute of Microbiology|Cardenas|Ecuador

>Spike|hCoV-19/England/MILK-A1851B/2020|2020-09-30|EPI\_ISL\_595044|Original|hCoV-19^^England|Human|Northumbria University / South Tees Hospitals NHS Foundation Trust / North Cumbria Integrated Care NHS Foundation Trust / North Tees and Hartlepool NHS

Foundation Trust / Newcastle Hospitals NHS Foundation Trust|COVID-19 Genomics UK (COG-UK) Consortium|Bashton|United Kingdom

>Spike|hCoV-19/Japan/PG-5954/2020|2020-00-00|EPI\_ISL\_689069|Original|hCoV-19^^Japan|Human|Gunma Prefectural Institute of Public Health and Environmental Sciences|Pathogen Genomics Center|Sekizuka|Japan

>Spike|hCoV-19/Norway/3123/2020|2020-08-07|EPI\_ISL\_549146|Original|hCoV-19^^Viken|Human|Ostfold Hospital Trust - Kalnes|Norwegian Institute of Public Health|Kopperud Riis|Norway

>Spike|hCoV-19/USA/TX-HMH-5905/2020|2020-06-30|EPI\_ISL\_547099|Original|hCoV-19^^Texas|Human|Houston Methodist Hospital|Houston Methodist Hospital|Long|USA

>Spike|hCoV-19/England/QEUA-96A047/2020|2020-08-10|EPI\_ISL\_530819|Original|hCoV-19^^England|Human|Lighthouse Lab in Glasgow|Wellcome Sanger Institute for the COVID-19 Genomics UK (COG-UK) consortium|Davies|United Kingdom

>Spike|hCoV-19/Australia/WA107/2020|2020-03-17|EPI\_ISL\_512760|Original|hCoV-19^^Western Australia|Human|PathWest Laboratory Medicine WA|PathWest Laboratory Medicine WA Microbial Surveillance Unit|Sikazwe|Australia

>Spike|hCoV-19/England/QEUA-9D3173/2020|2020-09-17|EPI\_ISL\_577312|Original|hCoV-19^^England|Human|Centre for Enzyme Innovation|COVID-19 Genomics UK (COG-UK) Consortium|Robson|United Kingdom

>Spike|hCoV-19/Switzerland/BL-ETHZ-270215/2020|2020-08-30|EPI\_ISL\_541461|Original|hCoV-19^^Basel-Landschaft|Human|Viollier AG|Department of Biosystems Science and Engineering|Nadeau|Switzerland

>Spike|hCoV-19/USA/WA-S328/2020|2020-04-03|EPI\_ISL\_434088|Original|hCoV-19^^Washington|Human|Washington State Department of Health|Seattle Flu Study|Bedford|USA

>Spike|hCoV-19/England/QEUA-C3229A/2020|2020-12-11|EPI\_ISL\_782694|Original|hCoV-19^^England|Human|Lighthouse Lab in Glasgow|Wellcome Sanger Institute for the COVID-19 Genomics UK (COG-UK) Consortium|Davies|United Kingdom

>Spike|hCoV-19/England/ALDP-A2E5A9/2020|2020-10-06|EPI\_ISL\_586600|Original|hCoV-19^^England|Human|Lighthouse Lab in Alderley Park|Wellcome Sanger Institute for the COVID-19 Genomics UK (COG-UK) consortium|Davies|United Kingdom

>Spike|hCoV-19/Denmark/DCGC-21075/2020|2020-12-21|EPI\_ISL\_759537|Original|hCoV-19^^Midtjylland|Human|Department of Virus and Microbiological Special Diagnostics|Albertsen Lab|Michaelsen|Denmark

>Spike|hCoV-19/Hangzhou/HZCDC0025/2020|2020-01-21|EPI\_ISL\_421234|Original|hCoV-19^^Hangzhou|Human|Hangzhou Center for Diseases Control and Prevention|Hangzhou Center for Diseases Control and Prevention|Li|China

>Spike|hCoV-19/England/QEUA-C316EA/2020|2020-12-10|EPI\_ISL\_731297|Original|hCoV-19^^England|Human|Lighthouse Lab in Glasgow|Wellcome Sanger Institute for the COVID-19 Genomics UK (COG-UK) Consortium|Davies|United Kingdom

>Spike|hCoV-19/England/NOTT-1147A9/2020|2020-10-08|EPI\_ISL\_584751|Original|hCoV-19^^England|Human|Queens Medical Centre|COVID-19 Genomics UK (COG-UK) Consortium|Loose|United Kingdom

>Spike|hCoV-19/South Korea/YS008/2020|2020-06-07|EPI\_ISL\_660110|Vero P3|hCoV-19^^Seoul|Human|Division of Infectious Diseases|Department of biotechnology|Kim|South Korea

>Spike|hCoV-19/England/NORT-282004/2020|2020-03-25|EPI\_ISL\_472188|Original|hCoV-19^^England|Human|Northumbria University / South Tees Hospitals NHS Foundation Trust / North Cumbria Integrated Care NHS Foundation Trust / North Tees and Hartlepool NHS Foundation Trust / Newcastle Hospitals NHS Foundation Trust|COVID-19 Genomics UK (COG-UK) Consortium|Bashton|United Kingdom

>Spike|hCoV-19/Australia/VIC13482/2020|2020-08-03|EPI\_ISL\_592258|Original|hCoV-19^^Victoria|Human|Microbiological Diagnostic Unit - Public Health Laboratory (MDU-PHL) |MDU-PHL|Schultz|Australia

>Spike|hCoV-19/Denmark/DCGC-5265/2020|2020-09-14|EPI\_ISL\_615196|Original|hCoV-19^^Sjaelland|Human|Department of Virus and Microbiological Special Diagnostics|Albertsen lab|Michaelsen|Denmark

>Spike|hCoV-19/Scotland/QEUA-A4B773/2020|2020-10-08|EPI\_ISL\_628477|Original|hCoV-19^^Scotland|Human|Oxford Viromics|COVID-19 Genomics UK (COG-UK) Consortium|Golubchik|United Kingdom

>Spike|hCoV-19/USA/MN-QDX-956/2020|2020-03-16|EPI\_ISL\_571757|Original|hCoV-19^^Minnesota|Human|Quest Diagnostics|Quest Diagnostics|Kagan|USA

>Spike|hCoV-19/Netherlands/ZH-EMC-469/2020|2020-08-17|EPI\_ISL\_523805|Original|hCoV-19^^Zuid Holland|Human|Dutch COVID-19 response team|Erasmus Medical Center|Oude Munnink|Netherlands

>Spike|hCoV-19/Canada/QC-LSPQ-L00221605/2020|2020-03-16|EPI\_ISL\_535809|Original|hCoV-19^^Quebec|Human|H\u00f4pital de Hull|Laboratoire de sant\u00e9 publique du Qu\u00e9bec|Moreira|Canada

>Spike|hCoV-19/Denmark/DCGC-6895/2020|2020-10-12|EPI\_ISL\_619740|Original|hCoV-19^^Sjaelland|Human|Department of Virus and Microbiological Special Diagnostics|Albertsen lab|Michaelsen|Denmark

>Spike|hCoV-19/USA/MA-MGH-00538/2020|2020-03-19|EPI\_ISL\_460275|Original|hCoV-19^^Massachusetts|Human|Massachusetts General Hospital|Infectious Disease Program|Lemieux|USA

>Spike|hCoV-19/England/MILK-A7ADA6/2020|2020-10-15|EPI\_ISL\_606432|Original|hCoV-19^^England|Human|Lighthouse Lab in Milton Keynes|Wellcome Sanger Institute for the COVID-19 Genomics UK (COG-UK) consortium|Davies|United Kingdom

>Spike|hCoV-19/England/SHEF-10C9C48/2020|2020-12-15|EPI\_ISL\_727891|Original|hCoV-19^^England|Human|Virology Department|COVID-19 Genomics UK (COG-UK) Consortium|de Silva|United Kingdom

>Spike|hCoV-19/England/QEUA-A2243F/2020|2020-10-01|EPI\_ISL\_587601|Original|hCoV-19^^England|Human|Lighthouse Lab in Glasgow|Wellcome Sanger Institute for the COVID-19 Genomics UK (COG-UK) consortium|Davies|United Kingdom

>Spike|hCoV-19/England/ALDP-9D7B62/2020|2020-09-18|EPI\_ISL\_576616|Original|hCoV-19^^England|Human|Oxford Viromics|COVID-19 Genomics UK (COG-UK) Consortium|Golubchik|United Kingdom

>Spike|hCoV-19/England/LIVE-DC6C41/2020|2020-11-30|EPI\_ISL\_703310|Original|hCoV-19^^England|Human|Liverpool Clinical Laboratories|COVID-19 Genomics UK (COG-UK) Consortium|Haldenby|United Kingdom

>Spike|hCoV-19/USA/NV-NSPHL-A0131/2020|2020-04-29|EPI\_ISL\_515399|Original|hCoV-19^^Nevada|Human|Nevada State Public Health Laboratory|Nevada State Public Health Laboratory|Sevinsky|USA

>Spike|hCoV-19/USA/VA-DCLS-1084/2020|2020-06-18|EPI\_ISL\_528678|Original|hCoV-19^^Virginia|Human|Virginia Division of Consolidated Laboratory Services (DCLS)|Virginia Division of Consolidated Laboratory Services (DCLS)|St. Jacques|USA

>Spike|hCoV-19/USA/NMDOH-2020323679/2020|2020-09-01|EPI\_ISL\_542089|Original|hCoV-19^^New Mexico|Human|New Mexico Department of Health Scientific Laboratory|New Mexico Department of Health Scientific Laboratory|Johnson|USA

>Spike|hCoV-19/USA/TX-HMH-MCoV-16250/2020|2020-10-19|EPI\_ISL\_785934|Original|hCoV-19^^Texas|Human|Houston Methodist Hospital|Houston Methodist Hospital|Long|USA

>Spike|hCoV-19/United Arab Emirates/0940/2020|2020-06-27|EPI\_ISL\_699076|Original|hCoV-19^^Abu Dhabi|Human|Group 42 (G42) Healthcare|G42 Healthcare|Ogrodzki|United Arab Emirates

>Spike|hCoV-19/USA/MI-MDHHS-SC22351/2020|2020-11-09|EPI\_ISL\_708331|Original|hCoV-19^^Michigan|Human|Michigan Department of Health and Human Services|Michigan Department of Health and Human Services|Jacob|USA

>Spike|hCoV-19/Germany/HH-hpi-p2161/2020|2020-03-28|EPI\_ISL\_775690|Original|hCoV-19^^Hamburg|Human|University Medical Center Hamburg Eppendorf|Heinrich Pette Institute|Robitaille|Germany

>Spike|hCoV-19/Germany/BW-MVZ-LS-21/2020|2020-04-15|EPI\_ISL\_640239|Original|hCoV-19^^Baden-W\u00fcrtemberg|Human|MVZ Labor\u00e4rzte Singen|MVZ Labor\u00e4rzte Singen|Schmidt|Germany

>Spike|hCoV-19/South Korea/KCDC2726/2020|2020-07-14|EPI\_ISL\_522505|Original|hCoV-19^^South Korea|Human|Center for Laboratory Control of Infectious Diseases|Center for Laboratory Control of Infectious Diseases|Kim|South Korea

>Spike|hCoV-19/USA/FL-BPHL-2232/2020|2020-08-10|EPI\_ISL\_666854|Original|hCoV-19^^Florida|Human|Florida Bureau of Public Health Laboratories|Florida Bureau of Public Health Laboratories|Blanton|USA

>Spike|hCoV-19/England/NORW-F5156/2020|2020-11-21|EPI\_ISL\_725224|Original|hCoV-19^^England|Human|Quadram Institute Bioscience|COVID-19 Genomics UK (COG-UK) Consortium|Alikhan|United Kingdom

>Spike|hCoV-19/Spain/MD-IBV-99012432/2020|2020-10-13|EPI\_ISL\_780073|Original|hCoV-19^^Madrid|Human|Hospital General Universitario Gregorio Mara\u00f1a\u00f3n|SeqCOVID-SPAIN consortium/IBV (CSIC)|Comas|Spain

>Spike|hCoV-19/England/LIVE-99B65/2020|2020-04-13|EPI\_ISL\_439803|Original|hCoV-19^^England|Human|Liverpool Clinical Laboratories|COVID-19 Genomics UK (COG-UK) Consortium|Haldenby|United Kingdom

>Spike|hCoV-19/Canada/BC\_24192775/2020|2020-03-00|EPI\_ISL\_463196|Original|hCoV-19^^British Columbia|Human|BCCDC Public Health Laboratory|BCCDC Public Health Laboratory|Harrigan|Canada

>Spike|hCoV-19/Bangladesh/BCSIR-NILMRC-181/2020|2020-06-20|EPI\_ISL\_483629|Original|hCoV-19^^Rajshahi|Human|National Institute of Laboratory Medicine and Referral Center|Genomic Research Lab|Khan|Bangladesh

>Spike|hCoV-19/Switzerland/AG-ETHZ-420521/2020|2020-12-22|EPI\_ISL\_767982|Original|hCoV-19^^Aargau|Human|Viollier AG|Department of Biosystems Science and Engineering|Nadeau|Switzerland

>Spike|hCoV-19/Wales/ALDP-AA382B/2020|2020-10-22|EPI\_ISL\_625013|Original|hCoV-19^^Wales|Human|Lighthouse Lab in Alderley Park|Wellcome Sanger Institute for the COVID-19 Genomics UK (COG-UK) consortium|Davies|United Kingdom

>Spike|hCoV-19/Luxembourg/LNS1535878/2020|2020-11-27|EPI\_ISL\_739951|Original|hCoV-19^^Luxembourg|Human|Laboratoire national de sant\u00e9|Laboratoire national de sant\u00e9|Wienecke-Baldacchino|Luxembourg

>Spike|hCoV-19/Austria/CeMM0100/2020|2020-03-20|EPI\_ISL\_437961|Original|hCoV-19^^Innsbruck|Human|Universitaetsklinik f\u00fcr Innere Medizin II|Innsbruck|Bergthaler laboratory|Bergthaler|Austria

>Spike|hCoV-19/Japan/PG-5447/2020|2020-08-00|EPI\_ISL\_690550|Original|hCoV-19^^Japan|Human|Pathogen Genomics Center|Pathogen Genomics Center|Sekizuka|Japan

>Spike|hCoV-19/Australia/NSW2750/2020|2020-09-02|EPI\_ISL\_530340|Original|hCoV-19^^New South Wales|Human|Area of Virology|Area of Virology|Yeang|Australia

>Spike|hCoV-19/Finland/23LS6E9/2020|2020-10-23|EPI\_ISL\_759784|Original|hCoV-19^^Uusimaa|Human|Department of Virology and Immunology|Department of Virology|Smura|Finland

>Spike|hCoV-19/England/QEUA-C544BA/2020|2020-12-12|EPI\_ISL\_736238|Original|hCoV-19^^England|Human|Lighthouse Lab in Glasgow|Wellcome Sanger Institute for the COVID-19 Genomics UK (COG-UK) Consortium|Davies|United Kingdom

>Spike|hCoV-19/Germany/HH-hpi-pl425/2020|2020-03-09|EPI\_ISL\_775922|Original|hCoV-19^^Hamburg|Human|University Medical Center Hamburg Eppendorf|Heinrich Pette Institute|Robitaille|Germany

>Spike|hCoV-19/England/MILK-BB204E/2020|2020-11-18|EPI\_ISL\_720234|Original|hCoV-19^^England|Human|Lighthouse Lab in Milton Keynes|Wellcome Sanger Institute for the COVID-19 Genomics UK (COG-UK) Consortium|Davies|United Kingdom

>Spike|hCoV-19/England/ALDP-C49C83/2020|2020-12-11|EPI\_ISL\_718877|Original|hCoV-19^^England|Human|Lighthouse Lab in Alderley Park|Wellcome Sanger Institute for the COVID-19 Genomics UK (COG-UK) Consortium|Davies|United Kingdom

>Spike|hCoV-19/Wales/PHWC-49A74E/2020|2020-12-02|EPI\_ISL\_727590|Original|hCoV-19^^Wales|Human|Originating lab|COVID-19 Genomics UK (COG-UK) Consortium|Moore|United Kingdom

>Spike|hCoV-19/USA/TX-HMH-MCoV-18587/2020|2020-11-20|EPI\_ISL\_784935|Original|hCoV-19^^Texas|Human|Houston Methodist Hospital|Houston Methodist Hospital|Long|USA

>Spike|hCoV-19/England/MILK-4B15ED/2020|2020-06-04|EPI\_ISL\_559204|Original|hCoV-19^^England|Human|Lighthouse Lab in Milton Keynes|Wellcome Sanger Institute for the COVID-19 Genomics UK (COG-UK) consortium|Davies|United Kingdom

>Spike|hCoV-19/Wales/PHWC-49D602/2020|2020-12-11|EPI\_ISL\_742808|Original|hCoV-19^^Wales|Human|Wales Specialist Virology Centre Sequencing lab|COVID-19 Genomics UK (COG-UK) Consortium|Moore|United Kingdom

>Spike|hCoV-19/USA/WA-UW287/2020|2020-03-15|EPI\_ISL\_418072|Original|hCoV-19^^Washington|Human|UW Virology Lab|UW Virology Lab|Roychoudhury|USA



>Spike|hCoV-19/Scotland/QEUEH-AACAE0/2020|2020-10-21|EPI\_ISL\_652893|Original|hCoV-19^^Scotland|Human|Oxford Viromics|COVID-19 Genomics UK (COG-UK) Consortium|Golubchik|United Kingdom

>Spike|hCoV-19/Japan/PG-2454/2020|2020-04-00|EPI\_ISL\_686059|Original|hCoV-19^^Japan|Human|Pathogen Genomics Center|Pathogen Genomics Center|Sekizuka|Japan

>Spike|hCoV-19/Denmark/DCGC-17194/2020|2020-12-14|EPI\_ISL\_750815|Original|hCoV-19^^Sjaelland|Human|Department of Virus and Microbiological Special Diagnostics|Albertsen Lab|Michaelsen|Denmark

>Spike|hCoV-19/USA/TX-HMH-2746/2020|2020-06-04|EPI\_ISL\_545523|Original|hCoV-19^^Texas|Human|Houston Methodist Hospital|Houston Methodist Hospital|Long|USA

>Spike|hCoV-19/Wales/PHWC-4998F1/2020|2020-12-04|EPI\_ISL\_727375|Original|hCoV-19^^Wales|Human|Originating lab|COVID-19 Genomics UK (COG-UK) Consortium|Moore|United Kingdom

>Spike|hCoV-19/Belgium/ULG-10885/2020|2020-11-13|EPI\_ISL\_678428|Original|hCoV-19^^Li\u00e8ge|Human|Department of Clinical Microbiology|GIGA Medical Genomics|Durkin|Belgium

>Spike|hCoV-19/Canada/ON-S1470/2020|2020-08-26|EPI\_ISL\_591106|Original|hCoV-19^^Ontario|Human|Toronto Invasive Bacterial Diseases Network|McMaster University|McArthur|Canada

>Spike|hCoV-19/USA/WA-S1571/2020|2020-05-26|EPI\_ISL\_495997|Original|hCoV-19^^Washington|Human|Washington State Department of Health|Seattle Flu Study|Lee|USA

>Spike|hCoV-19/USA/TX-HMH-8071/2020|2020-07-01|EPI\_ISL\_545837|Original|hCoV-19^^Texas|Human|Houston Methodist Hospital|Houston Methodist Hospital|Long|USA

>Spike|hCoV-19/USA/TX-HMH-MCoV-18887/2020|2020-11-25|EPI\_ISL\_785198|Original|hCoV-19^^Texas|Human|Houston Methodist Hospital|Houston Methodist Hospital|Long|USA

>Spike|hCoV-19/Ireland/MO-NVRL-20G45847/2020|2020-04-03|EPI\_ISL\_681909|Original|hCoV-19^^Mayo|Human|National Virus Reference Laboratory|Irish Coronavirus Sequencing Consortium - Teagasc Moorepark|Walsh|Ireland

>Spike|hCoV-19/Scotland/CVR4675/2020|2020-09-28|EPI\_ISL\_611878|Original|hCoV-19^^Scotland|Human|West of Scotland Specialist Virology Centre|COVID-19 Genomics UK (COG-UK) Consortium|Robertson|United Kingdom

>Spike|hCoV-19/England/ALDP-B5C714/2020|2020-11-08|EPI\_ISL\_655829|Original|hCoV-19^^England|Human|Lighthouse Lab in Alderley Park|Wellcome Sanger Institute for the COVID-19 Genomics UK (COG-UK) Consortium|Davies|United Kingdom

>Spike|hCoV-19/England/LIVE-A8565/2020|2020-03-26|EPI\_ISL\_517180|Original|hCoV-19^^England|Human|Liverpool Clinical Laboratories|COVID-19 Genomics UK (COG-UK) Consortium|Haldenby|United Kingdom

>Spike|hCoV-19/Scotland/QEUEH-9E516F/2020|2020-09-24|EPI\_ISL\_601063|Original|hCoV-19^^Scotland|Human|Lighthouse Lab in Glasgow|Wellcome Sanger Institute for the COVID-19 Genomics UK (COG-UK) consortium|Davies|United Kingdom

>Spike|hCoV-19/USA/UT-UPHL-201031937/2020|2020-06-21|EPI\_ISL\_611497|Original|hCoV-19^^Utah|Human|Utah Public Health Laboratory|Utah Public Health Laboratory|Young|USA

>Spike|hCoV-19/England/BRIS-1307C5/2020|2020-04-12|EPI\_ISL\_492622|Original|hCoV-19^^England|Human|PHE South West Regional Laboratory|Wellcome Sanger Institute for the COVID-19 Genomics UK (COG-UK) consortium|Davies|United Kingdom

>Spike|hCoV-19/England/ALDP-AA40D7/2020|2020-10-22|EPI\_ISL\_624154|Original|hCoV-19^^England|Human|Lighthouse Lab in Alderley Park|Wellcome Sanger Institute for the COVID-19 Genomics UK (COG-UK) consortium|Davies|United Kingdom

>Spike|hCoV-19/England/MILK-9A524A/2020|2020-09-02|EPI\_ISL\_550081|Original|hCoV-19^^England|Human|Lighthouse Lab in Milton Keynes|Wellcome Sanger Institute for the COVID-19 Genomics UK (COG-UK) consortium|Davies|United Kingdom

>Spike|hCoV-19/England/MILK-82310C/2020|2020-07-17|EPI\_ISL\_557220|Original|hCoV-19^^England|Human|Lighthouse Lab in Milton Keynes|Wellcome Sanger Institute for the COVID-19 Genomics UK (COG-UK) consortium|Davies|United Kingdom

>Spike|hCoV-19/USA/AZ-TG664250/2020|2020-04-28|EPI\_ISL\_696053|Original|hCoV-19^^Arizona|Human|Sonora Quest Laboratories|TGen North|French|USA

>Spike|hCoV-19/Wales/PHWC-36599/2020|2020-04-30|EPI\_ISL\_474685|Original|hCoV-19^^Wales|Human|Originating lab|COVID-19 Genomics UK (COG-UK) Consortium|Moore|United Kingdom

>Spike|hCoV-19/England/CAMC-B77B62/2020|2020-11-12|EPI\_ISL\_661853|Original|hCoV-19^^England|Human|Lighthouse Lab in Cambridge|Wellcome Sanger Institute for the COVID-19 Genomics UK (COG-UK) Consortium|Davies|United Kingdom

>Spike|hCoV-19/USA/WI-UW-1825/2020|2020-09-09|EPI\_ISL\_605697|Original|hCoV-19^^Wisconsin|Human|University of Wisconsin-Madison AIDS Vaccine Research Laboratories|University of Wisconsin-Madison AIDS Vaccine Research Laboratories|Baczenas|USA

>Spike|hCoV-19/USA/TX-HMH-MCoV-13263/2020|2020-08-25|EPI\_ISL\_788412|Original|hCoV-19^^Texas|Human|Houston Methodist Hospital|Houston Methodist Hospital|Long|USA

>Spike|hCoV-19/South Korea/KCDC2241/2020|2020-05-08|EPI\_ISL\_510579|Original|hCoV-19^^South Korea|Human|Division of Viral Diseases|Division of Viral Diseases|Kim|South Korea

>Spike|hCoV-19/Netherlands/NoordBrabant\_146/2020|2020-04-05|EPI\_ISL\_461181|Original|hCoV-19^^Noord Brabant|Human|Dutch COVID-19 response team|Erasmus Medical Center|Oude Munnink|Netherlands

>Spike|hCoV-19/USA/CA-LACPHL-AE00057/2020|2020-07-09|EPI\_ISL\_765995|Original|hCoV-19^^California|Human|USC Clinical Lab|Los Angeles County PHL|Hemarajata|USA

>Spike|hCoV-19/Singapore/213/2020|2020-04-17|EPI\_ISL\_462331|Original|hCoV-19^^Singapore|Human|National Public Health Laboratory|National Public Health Laboratory|Mak|Singapore

>Spike|hCoV-19/England/QEUEH-AAE477/2020|2020-10-20|EPI\_ISL\_623942|Original|hCoV-19^^England|Human|Lighthouse Lab in Glasgow|Wellcome Sanger Institute for the COVID-19 Genomics UK (COG-UK) consortium|Davies|United Kingdom

>Spike|hCoV-19/Scotland/CVR4139/2020|2020-08-29|EPI\_ISL\_540827|Original|hCoV-19^^Scotland|Human|Lighthouse Lab in Glasgow / MRC-University of Glasgow Centre for Virus Research|COVID-19 Genomics UK (COG-UK) Consortium|Robertson|United Kingdom

>Spike|hCoV-19/USA/IA-CDC-4054/2020|2020-03-10|EPI\_ISL\_648000|Original|hCoV-19^^Iowa|Human|IA State Hygienic Laboratory|Pathogen Discovery|Queen|USA

>Spike|hCoV-19/USA/MI-MDHHS-SC22131/2020|2020-10-19|EPI\_ISL\_614182|Original|hCoV-19^^Michigan|Human|Michigan Department of Health and Human Services|Michigan Department of Health and Human Services|Jacob|USA

>Spike|hCoV-19/England/QEUEH-AF1123/2020|2020-10-29|EPI\_ISL\_665410|Original|hCoV-19^^England|Human|Northumbria University / South Tees Hospitals NHS Foundation Trust / North Cumbria Integrated Care NHS Foundation Trust / North Tees and Hartlepool NHS Foundation Trust / Newcastle Hospitals NHS Foundation Trust|COVID-19 Genomics UK (COG-UK) Consortium|Bashton|United Kingdom

>Spike|hCoV-19/USA/CA-ALSR-1798/2020|2020-05-12|EPI\_ISL\_512190|Original|hCoV-19^^California|Human|San Diego County Public Health Laboratory|Andersen lab at Scripps Research|Gangavarapu|USA

>Spike|hCoV-19/Scotland/CVR5703/2020|2020-11-04|EPI\_ISL\_650736|Original|hCoV-19^^Scotland|Human|West of Scotland Specialist Virology Centre|COVID-19 Genomics UK (COG-UK) Consortium|Robertson|United Kingdom

>Spike|hCoV-19/USA/TX-HMH-MCoV-14638/2020|2020-10-10|EPI\_ISL\_787923|Original|hCoV-19^^Texas|Human|Houston Methodist Hospital|Houston Methodist Hospital|Long|USA

>Spike|hCoV-19/England/BIRM-678E1/2020|2020-11-04|EPI\_ISL\_650233|Original|hCoV-19^^England|Human|University of Birmingham|COVID-19 Genomics UK (COG-UK) Consortium|Loman|United Kingdom

>Spike|hCoV-19/Canada/ON-S1242/2020|2020-04-27|EPI\_ISL\_586310|Original|hCoV-19^^Ontario|Human|Toronto Invasive Bacterial Diseases Network|McMaster University|McArthur|Canada

>Spike|hCoV-19/England/QEUEH-B66B93/2020|2020-11-11|EPI\_ISL\_662551|Original|hCoV-19^^England|Human|Lighthouse Lab in Glasgow|Wellcome Sanger Institute for the COVID-19 Genomics UK (COG-UK) Consortium|Davies|United Kingdom

>Spike|hCoV-19/USA/WI-UW-405/2020|2020-03-18|EPI\_ISL\_480387|Original|hCoV-19^^Wisconsin|Human|University of Wisconsin-Madison AIDS Vaccine Research Laboratories|University of Wisconsin-Madison AIDS Vaccine Research Laboratories|Baczenas|USA

>Spike|hCoV-19/USA/CO-CDPHE-2008021160/2020|2020-07-23|EPI\_ISL\_710319|Original|hCoV-19^^Colorado|Human|Colorado Department of Public Health and Environment|Colorado Department of Public Health and Environment|Bankers|USA

>Spike|hCoV-19/USA/CA-ALSR-1972/2020|2020-06-26|EPI\_ISL\_512270|Original|hCoV-19^^California|Human|San Diego County Public Health Laboratory|Andersen lab at Scripps Research|Gangavarapu|USA

>Spike|hCoV-19/England/CAMC-BFB46B/2020|2020-12-04|EPI\_ISL\_709196|Original|hCoV-19^^England|Human|Lighthouse Lab in Cambridge|Wellcome Sanger Institute for the COVID-19 Genomics UK (COG-UK) Consortium|Davies|United Kingdom

>Spike|hCoV-19/England/QEUEH-A0030D/2020|2020-10-02|EPI\_ISL\_600382|Original|hCoV-19^^England|Human|Lighthouse Lab in Glasgow|Wellcome Sanger Institute for the COVID-19 Genomics UK (COG-UK) consortium|Davies|United Kingdom

>Spike|hCoV-19/Wales/PHWC-49B4CE/2020|2020-11-14|EPI\_ISL\_742344|Original|hCoV-19^^Wales|Human|Wales Specialist Virology Centre Sequencing lab|COVID-19 Genomics UK (COG-UK) Consortium|Moore|United Kingdom

>Spike|hCoV-19/England/ALDP-B5CE79/2020|2020-11-10|EPI\_ISL\_655894|Original|hCoV-19^^England|Human|Lighthouse Lab in Alderley Park|Wellcome Sanger Institute for the COVID-19 Genomics UK (COG-UK) Consortium|Davies|United Kingdom

>Spike|hCoV-19/USA/VA-DCLS-0226/2020|2020-04-03|EPI\_ISL\_452803|Original|hCoV-19^^Virginia|Human|Virginia DCLS|Virginia DCLS|St. Jacques|USA

>Spike|hCoV-19/England/CAMB-83BB9/2020|2020-04-16|EPI\_ISL\_443344|Original|hCoV-19^^England|Human|Department of Pathology|Wellcome Sanger Institute for the COVID-19 Genomics UK (COG-UK) consortium|Amato|United Kingdom

>Spike|hCoV-19/Spain/ML-ISCI-202452/2020|2020-03-14|EPI\_ISL\_455348|Original|hCoV-19^^Melilla|Human|Hospital Comarcal de Melilla|Instituto de Salud Carlos III|Caballero|Spain

>Spike|hCoV-19/Norway/5401/2020|2020-10-26|EPI\_ISL\_708079|Original|hCoV-19^^Troms og Finnmark|Human|University Hospital of Northern Norway|Norwegian Institute of Public Health|Kopperud Riis|Norway

>Spike|hCoV-19/Spain/CT-IBV-97009577/2020|2020-08-19|EPI\_ISL\_683604|Original|hCoV-19^^Catalunya|Human|Servicio de Microbiolog\u00eda|SeqCOVID-SPAIN consortium|IBV (CSIC) |Comas|Spain

>Spike|hCoV-19/England/ALDP-A6F09C/2020|2020-10-14|EPI\_ISL\_607695|Original|hCoV-19^^England|Human|Lighthouse Lab in Alderley Park|Wellcome Sanger Institute for the COVID-19 Genomics UK (COG-UK) consortium|Davies|United Kingdom

>Spike|hCoV-19/USA/WI-WSLH-200105/2020|2020-03-31|EPI\_ISL\_578337|Original|hCoV-19^^Wisconsin|Human|Wisconsin State Laboratory of Hygiene Communicable Disease Division|Wisconsin State Laboratory of Hygiene Communicable Disease Division|Florek|USA

>Spike|hCoV-19/Wales/PHWC-49343F/2020|2020-11-29|EPI\_ISL\_725886|Original|hCoV-19^^Wales|Human|Originating lab|COVID-19 Genomics UK (COG-UK) Consortium|Moore|United Kingdom

>Spike|hCoV-19/India/MH-NIV-7786/2020|2020-04-06|EPI\_ISL\_452209|Original|hCoV-19^^Maharashtra|Human|NIV Influenza|NIV Influenza|Potdar|India

>Spike|hCoV-19/USA/LA-GBCL-26556570/2020|2020-04-15|EPI\_ISL\_485199|Original|hCoV-19^^Louisiana|Human|River Road Testing Lab|Ginkgo Bioworks Clinical Laboratory|Smith|USA

>Spike|hCoV-19/mink/Netherlands/NB-EMC-28-3/2020|2020-08-08|EPI\_ISL\_577751|Original|hCoV-19^^Noord Brabant|Neovison vison|Dutch COVID-19 response team|Erasmus Medical Center|Oude Munnink|Netherlands

>Spike|hCoV-19/Denmark/DCGC-14284/2020|2020-11-30|EPI\_ISL\_711116|Original|hCoV-19^^Hovedstaden|Human|Department of Virus and Microbiological Special Diagnostics|Albertsen Lab|Michaelsen|Denmark

>Spike|hCoV-19/USA/UT-08372/2020|2020-05-12|EPI\_ISL\_524155|Original|hCoV-19^^Utah|Human|Utah Public Health Laboratory|Utah Public Health Laboratory|Young|USA

>Spike|hCoV-19/England/QEUEH-96B34D/2020|2020-08-13|EPI\_ISL\_531354|Original|hCoV-19^^England|Human|Lighthouse Lab in Glasgow|Wellcome Sanger Institute for the COVID-19 Genomics UK (COG-UK) consortium|Davies|United Kingdom

>Spike|hCoV-19/Canada/BC-BCCDC-7258/2020|2020-11-00|EPI\_ISL\_740643|Original|hCoV-19^^British Columbia|Human|BCCDC Public Health Laboratory|BCCDC Public Health Laboratory|Prystajek|Canada

>Spike|hCoV-19/Australia/VIC2294/2020|2020-06-28|EPI\_ISL\_522015|Original|hCoV-19^^Victoria|Human|Microbiological Diagnostic Unit - Public Health Laboratory (MDU-PHL) |MDU-PHL|Schultz|Australia

>Spike|hCoV-19/Denmark/DCGC-3209/2020|2020-08-24|EPI\_ISL\_616765|Original|hCoV-19^^Nordjylland|Human|Department of Virus and Microbiological Special Diagnostics|Albertsen lab|Michaelsen|Denmark

>Spike|hCoV-19/Netherlands/Gelderland\_39/2020|2020-04-22|EPI\_ISL\_460939|Original|hCoV-19^^Gelderland|Human|Dutch COVID-19 response team|Erasmus Medical Center|Oude Munnink|Netherlands

>Spike|hCoV-19/England/GSTT-265D27B/2020|2020-03-16|EPI\_ISL\_483933|Original|hCoV-19^^England|Human|Centre for Clinical Infection and Diagnostics Research and Genomics Innovation Unit|COVID-19 Genomics UK (COG-UK) Consortium|Awan|United Kingdom

>Spike|hCoV-19/USA/TX-HMH-MCoV-8442/2020|2020-07-01|EPI\_ISL\_784397|Original|hCoV-19^^Texas|Human|Houston Methodist Hospital|Houston Methodist Hospital|Long|USA

>Spike|hCoV-19/Wales/MILK-9C20B6/2020|2020-09-11|EPI\_ISL\_566541|Original|hCoV-19^^Wales|Human|Lighthouse Lab in Milton Keynes|Wellcome Sanger Institute for the COVID-19 Genomics UK (COG-UK) consortium|Davies|United Kingdom

>Spike|hCoV-19/England/CAMB-7F79E/2020|2020-04-08|EPI\_ISL\_443019|Original|hCoV-19^^England|Human|Department of Pathology|Wellcome Sanger Institute for the COVID-19 Genomics UK (COG-UK) consortium|Amato|United Kingdom

>Spike|hCoV-19/Wales/QEUEH-AD07DD/2020|2020-10-26|EPI\_ISL\_647967|Original|hCoV-19^^Wales|Human|Lighthouse Lab in Glasgow|Wellcome Sanger Institute for the COVID-19 Genomics UK (COG-UK) Consortium|Davies|United Kingdom

>Spike|hCoV-19/Japan/PG-0130/2020|2020-03-12|EPI\_ISL\_479856|Original|hCoV-19^^Kansai|Human|Department of Infectious Diseases|Pathogen Genomics Center|Sekizuka|Japan

>Spike|hCoV-19/USA/UT-08432/2020|2020-05-26|EPI\_ISL\_524208|Original|hCoV-19^^Utah|Human|Utah Public Health Laboratory|Utah Public Health Laboratory|Young|USA

>Spike|hCoV-19/Australia/VIC17917/2020|2020-08-24|EPI\_ISL\_779556|Original|hCoV-19^^Victoria|Human|Microbiological Diagnostic Unit - Public Health Laboratory (MDU-PHL) |MDU-PHL|Beck|Australia

>Spike|hCoV-19/USA/ID-UW-3196/2020|2020-03-26|EPI\_ISL\_490992|Original|hCoV-19^^Idaho|Human|UW Virology Lab|UW Virology Lab|Roychoudhury|USA

>Spike|hCoV-19/England/QEUEH-A36E58/2020|2020-10-05|EPI\_ISL\_638720|Original|hCoV-19^^England|Human|Wales Specialist Virology Centre Sequencing lab|COVID-19 Genomics UK (COG-UK) Consortium|Moore|United Kingdom

>Spike|hCoV-19/USA/MN-MDH-2057/2020|2020-03-26|EPI\_ISL\_683686|Original|hCoV-19^^Minnesota|Human|M Health Fairview|Minnesota Department of Health|Garfin|USA

>Spike|hCoV-19/England/ALDP-BBB036/2020|2020-11-20|EPI\_ISL\_701680|Original|hCoV-19^^England|Human|Lighthouse Lab in Alderley Park|Wellcome Sanger Institute for the COVID-19 Genomics UK (COG-UK) Consortium|Davies|United Kingdom

>Spike|hCoV-19/Spain/CT-IBV-97007949/2020|2020-10-07|EPI\_ISL\_654516|Original|hCoV-19^^Catalunya|Human|Servicio de Microbiolog\u00eda|SeqCOVID-SPAIN consortium|IBV (CSIC) |Comas|Spain

>Spike|hCoV-19/Norway/4633/2020|2020-10-18|EPI\_ISL\_635175|Original|hCoV-19^^Vestland|Human|Ostfold Hospital Trust - Kalnes|Norwegian Institute of Public Health|Vollan|Norway

>Spike|hCoV-19/USA/UT-UPHL-201109489/2020|2020-10-01|EPI\_ISL\_623179|Original|hCoV-19^^Utah|Human|Utah Public Health Laboratory|Utah Public Health Laboratory|Young|USA

>Spike|hCoV-19/Switzerland/BL-42222531/2020|2020-04-06|EPI\_ISL\_581685|Original|hCoV-19^^Basel-Land|Human|University Hospital Basel|University Hospital Basel|Roloff Handschin|Switzerland

>Spike|hCoV-19/Switzerland/TG-ETHZ-410087/2020|2020-12-17|EPI\_ISL\_737819|Original|hCoV-19^^Thurgau|Human|Viollier AG|Department of Biosystems Science and Engineering|Nadeau|Switzerland

>Spike|hCoV-19/USA/CA-CZB082/2020|2020-03-28|EPI\_ISL\_429032|Original|hCoV-19^^California|Human|UCSF Clinical Microbiology Laboratory|Chan-Zuckerberg Biohub|Kamm|USA

>Spike|hCoV-19/England/20136096704/2020|2020-03-23|EPI\_ISL\_420649|Original|hCoV-19^^England|Human|Respiratory Virus Unit|Respiratory Virus Unit|Platt|United Kingdom

>Spike|hCoV-19/Wales/PHWC-480040/2020|2020-10-22|EPI\_ISL\_612844|Original|hCoV-19^^Wales|Human|Wales Specialist Virology Centre Sequencing lab|COVID-19 Genomics UK (COG-UK) Consortium|Moore|United Kingdom

>Spike|hCoV-19/Belgium/reg-0423599/2020|2020-04-23|EPI\_ISL\_734646|Original|hCoV-19^^Sint-Gilles|Human|UZ Leuven|KU Leuven|Maes|Belgium

>Spike|hCoV-19/South Korea/KCDC2453/2020|2020-06-07|EPI\_ISL\_514856|Original|hCoV-19^^South Korea|Human|Division of Viral Diseases|Division of Viral Diseases|Kim|South Korea

>Spike|hCoV-19/England/EXET-13EE77/2020|2020-12-14|EPI\_ISL\_763556|Original|hCoV-19^^England|Human|University of Exeter|COVID-19 Genomics UK (COG-UK) Consortium|Temperton|United Kingdom

>Spike|hCoV-19/Denmark/DCGC-11373/2020|2020-11-02|EPI\_ISL\_670872|Original|hCoV-19^^Midtjylland|Human|Department of Virus and Microbiological Special Diagnostics|Albertsen Lab|Michaelsen|Denmark

>Spike|hCoV-19/England/SHEF-C22D7/2020|2020-09-15|EPI\_ISL\_559899|Original|hCoV-19^^England|Human|Virology Department|COVID-19 Genomics UK (COG-UK) Consortium|de Silva|United Kingdom

>Spike|hCoV-19/USA/AZ-TG320868/2020|2020-05-20|EPI\_ISL\_694333|Original|hCoV-19^^Arizona|Human|TGen North|TGen North|French|USA

>Spike|hCoV-19/Scotland/CVR5749/2020|2020-11-09|EPI\_ISL\_651954|Original|hCoV-19^^Scotland|Human|West of Scotland Specialist Virology Centre|COVID-19 Genomics UK (COG-UK) Consortium|Robertson|United Kingdom

>Spike|hCoV-19/USA/OH-UW-2597/2021|2021-01-03|EPI\_ISL\_791114|Original|hCoV-19^^Ohio|Human|University of Wisconsin-Madison AIDS Vaccine Research Laboratories|University of Wisconsin-Madison AIDS Vaccine Research Laboratories|Moreno|USA

>Spike|hCoV-19/England/QEUEH-B319F1/2020|2020-11-04|EPI\_ISL\_646353|Original|hCoV-19^^England|Human|Lighthouse Lab in Glasgow|Wellcome Sanger Institute for the COVID-19 Genomics UK (COG-UK) Consortium|Davies|United Kingdom

>Spike|hCoV-19/Wales/PHWC-495F2D/2020|2020-11-23|EPI\_ISL\_726506|Original|hCoV-19^^Wales|Human|Originating lab|COVID-19 Genomics UK (COG-UK) Consortium|Moore|United Kingdom

>Spike|hCoV-19/USA/MN-MDH-1012/2020|2020-04-30|EPI\_ISL\_462857|Original|hCoV-19^^Minnesota|Human|Minnesota Department of Health|Minnesota Department of Health|Garfin|USA

>Spike|hCoV-19/England/CAMC-A41ED2/2020|2020-10-06|EPI\_ISL\_609495|Original|hCoV-19^^England|Human|Lighthouse Lab in Cambridge|Wellcome Sanger Institute for the COVID-19 Genomics UK (COG-UK) consortium|Davies|United Kingdom

>Spike|hCoV-19/USA/NY-NYCPHL-000894/2020|2020-07-15|EPI\_ISL\_632963|Original|hCoV-19^^New York|Human|NYC Department Of Health And Mental Hygiene|New York City Public Health Laboratory|Wang|USA

>Spike|hCoV-19/India/TG-NGC-CDFD-08/2020|2020-05-12|EPI\_ISL\_466846|Original|hCoV-19^^Telangana|Human|National Genomics Core-Center for DNA Fingerprinting and Diagnostics|National Genomics Core-Center for DNA Fingerprinting and Diagnostics (NGC-CDFD)- DBT's PAN-INDIA-1000 Genome consortium|Vashisht|India

>Spike|hCoV-19/England/CAMC-B08E12/2020|2020-10-29|EPI\_ISL\_672923|Original|hCoV-19^^England|Human|Lighthouse Lab in Cambridge|Wellcome Sanger Institute for the COVID-19 Genomics UK (COG-UK) Consortium|Davies|United Kingdom

>Spike|hCoV-19/England/BRIS-130F45/2020|2020-03-24|EPI\_ISL\_501558|Original|hCoV-19^^England|Human|PHE South West Regional Laboratory|Wellcome Sanger Institute for the COVID-19 Genomics UK (COG-UK) consortium|Davies|United Kingdom

>Spike|hCoV-19/Denmark/DCGC-7501/2020|2020-10-12|EPI\_ISL\_619381|Original|hCoV-19^^Midtjylland|Human|Department of Virus and Microbiological Special Diagnostics|Albertsen lab|Michaelsen|Denmark

>Spike|hCoV-19/Portugal/PT1980/2020|2020-11-09|EPI\_ISL\_732203|Original|hCoV-19^^Portugal|Human|Instituto Nacional de Saude (INSA) and Instituto Gulbenkian de Ciencia (IGC)|Instituto Nacional de Saude (INSA) and Instituto Gulbenkian de Ciencia (IGC)|Borges|Portugal

>Spike|hCoV-19/Denmark/DCGC-11890/2020|2020-10-26|EPI\_ISL\_671199|Original|hCoV-19^^Syddanmark|Human|Department of Virus and Microbiological Special Diagnostics|Albertsen Lab|Michaelsen|Denmark

>Spike|hCoV-19/England/CAMC-A64CDF/2020|2020-10-09|EPI\_ISL\_608429|Original|hCoV-19^^England|Human|Lighthouse Lab in Cambridge|Wellcome Sanger Institute for the COVID-19 Genomics UK (COG-UK) consortium|Davies|United Kingdom

>Spike|hCoV-19/Ireland/KK-NVRL-73IRL21709/2020|2020-09-04|EPI\_ISL\_578308|Original|hCoV-19^^Kilkenny|Human|National Virus Reference Laboratory|National Virus Reference Laboratory|Gonzalez|Ireland

>Spike|hCoV-19/England/ALDP-AA325A/2020|2020-10-22|EPI\_ISL\_625039|Original|hCoV-19^^England|Human|Lighthouse Lab in Alderley Park|Wellcome Sanger Institute for the COVID-19 Genomics UK (COG-UK) consortium|Davies|United Kingdom

>Spike|hCoV-19/USA/NY-Wadsworth-200230-01/2020|2020-07-02|EPI\_ISL\_677064|Original|hCoV-19^^New York|Human|Masonic Medical Research Institute|Wadsworth Center|Lasek-Nesselquist|USA

>Spike|hCoV-19/USA/MA-MGH-00018/2020|2020-03-25|EPI\_ISL\_460102|Original|hCoV-19^^Massachusetts|Human|Massachusetts General Hospital|Infectious Disease Program|Lemieux|USA

>Spike|hCoV-19/Japan/DP0804/2020|2020-02-17|EPI\_ISL\_416631|Original|hCoV-19^^Japan|Human|Japanese Quarantine Stations|Pathogen Genomics Center|Sekizuka|Japan

>Spike|hCoV-19/Australia/VIC5904/2020|2020-07-22|EPI\_ISL\_518684|Original|hCoV-19^^Victoria|Human|Microbiological Diagnostic Unit - Public Health Laboratory (MDU-PHL)|MDU-PHL|Schultz|Australia

>Spike|hCoV-19/England/CAMB-81FOA/2020|2020-04-23|EPI\_ISL\_438594|Original|hCoV-19^^England|Human|Department of Pathology|COVID-19 Genomics UK (COG-UK) Consortium|Meredith|United Kingdom

>Spike|hCoV-19/England/205261298/2020|2020-12-18|EPI\_ISL\_754377|Original|hCoV-19^^England|Human|Respiratory Virus Unit|COVID-19 Genomics UK (COG-UK) Consortium|Platt|United Kingdom

>Spike|hCoV-19/England/QEUEH-B7CCD3/2020|2020-11-14|EPI\_ISL\_741821|Original|hCoV-19^^England|Human|Oxford Viromics|COVID-19 Genomics UK (COG-UK) Consortium|Golubchik|United Kingdom

>Spike|hCoV-19/Australia/VIC9600/2020|2020-08-19|EPI\_ISL\_565620|Original|hCoV-19^^Victoria|Human|Microbiological Diagnostic Unit - Public Health Laboratory (MDU-PHL)|MDU-PHL|Schultz|Australia

>Spike|hCoV-19/England/QEUEH-95F133/2020|2020-08-05|EPI\_ISL\_532530|Original|hCoV-19^^England|Human|Lighthouse Lab in Glasgow|Wellcome Sanger Institute for the COVID-19 Genomics UK (COG-UK) consortium|Davies|United Kingdom

>Spike|hCoV-19/Wales/PHWC-3081E/2020|2020-04-08|EPI\_ISL\_446285|Original|hCoV-19^^Wales|Human|Wales Specialist Virology Centre|Public Health Wales Microbiology Cardiff|Moore|United Kingdom

>Spike|hCoV-19/USA/TX-HMH-MCoV-14328/2020|2020-10-06|EPI\_ISL\_787613|Original|hCoV-19^^Texas|Human|Houston Methodist Hospital|Houston Methodist Hospital|Long|USA

>Spike|hCoV-19/England/CAMB-82C5D/2020|2020-04-22|EPI\_ISL\_438674|Original|hCoV-19^^England|Human|Department of Pathology|COVID-19 Genomics UK (COG-UK) Consortium|Meredith|United Kingdom

>Spike|hCoV-19/South Africa/KRISP-K002607/2020|2020-07-30|EPI\_ISL\_535471|Original|hCoV-19^^KwaZulu-Natal|Human|NHLS-IALCH|KRISP|de Oliveira|South Africa

>Spike|hCoV-19/Wales/PHWC-48008C/2020|2020-10-22|EPI\_ISL\_612040|Original|hCoV-19^^Wales|Human|Wales Specialist Virology Centre Sequencing lab|COVID-19 Genomics UK (COG-UK) Consortium|Moore|United Kingdom

>Spike|hCoV-19/Singapore/1418/2020|2020-11-11|EPI\_ISL\_654817|Original|hCoV-19^^Singapore|Human|National Public Health Laboratory|National Public Health Laboratory|Mak|Singapore

>Spike|hCoV-19/England/CAMC-A6653C/2020|2020-10-11|EPI\_ISL\_626662|Original|hCoV-19^^England|Human|University of Exeter|COVID-19 Genomics UK (COG-UK) Consortium|Temperton|United Kingdom

>Spike|hCoV-19/England/OXON-B2A78/2020|2020-03-09|EPI\_ISL\_534790|Original|hCoV-19^^England|Human|Oxford Viromics|COVID-19 Genomics UK (COG-UK) Consortium|Golubchik|United Kingdom

>Spike|hCoV-19/Denmark/DCGC-19189/2020|2020-12-07|EPI\_ISL\_748802|Original|hCoV-19^^Hovedstaden|Human|Department of Virus and Microbiological Special Diagnostics|Albertsen Lab|Michaelsen|Denmark

>Spike|hCoV-19/Canada/ON-PHL-20-01282/2020|2020-06-00|EPI\_ISL\_548887|Original|hCoV-19^^Ontario|Human|Public Health Ontario Laboratory|Public Health Ontario Laboratory|Guthrie|Canada

>Spike|hCoV-19/England/PORT-2D3E82/2020|2020-04-22|EPI\_ISL\_512417|Original|hCoV-19^^England|Human|Centre for Enzyme Innovation|COVID-19 Genomics UK (COG-UK) Consortium|Robson|United Kingdom

>Spike|hCoV-19/USA/NY-NYCPHL-001109/2020|2020-10-19|EPI\_ISL\_671692|Original|hCoV-19^^New York|Human|DOHMH Jamaica|New York City Public Health Laboratory|Wang|USA

>Spike|hCoV-19/England/BRIS-18538B0/2020|2020-04-15|EPI\_ISL\_492318|Original|hCoV-19^^England|Human|PHE South West Regional Laboratory|Wellcome Sanger Institute for the COVID-19 Genomics UK (COG-UK) consortium|Davies|United Kingdom

>Spike|hCoV-19/Canada/ON-S309/2020|2020-03-28|EPI\_ISL\_586392|Original|hCoV-19^^Ontario|Human|Toronto Invasive Bacterial Diseases Network|McMaster University|McArthur|Canada

>Spike|hCoV-19/Denmark/DCGC-13396/2020|2020-11-30|EPI\_ISL\_712772|Original|hCoV-19^^Hovedstaden|Human|Department of Virus and Microbiological Special Diagnostics|Albertsen Lab|Michaelsen|Denmark

>Spike|hCoV-19/USA/TX-DSHS-1520/2020|2020-06-23|EPI\_ISL\_683435|Original|hCoV-19^^Texas|Human|Texas Department of State Health Services|Texas Department of State Health Services|Rahman|USA

>Spike|hCoV-19/Australia/NSW2051/2020|2020-03-22|EPI\_ISL\_509494|Original|hCoV-19^^New South Wales|Human|Area of Virology|Area of Virology|Yeang|Australia

>Spike|hCoV-19/Israel/130710390/2020|2020-04-17|EPI\_ISL\_447461|Original|hCoV-19^^Tel Aviv District|Human|Clinical Microbiology Laboratory|Stern Lab|Miller|Israel

>Spike|hCoV-19/Denmark/DCGC-17042/2020|2020-12-14|EPI\_ISL\_750725|Original|hCoV-19^^Midtjylland|Human|Department of Virus and Microbiological Special Diagnostics|Albertsen Lab|Michaelsen|Denmark

>Spike|hCoV-19/Scotland/EDB6443/2020|2020-04-27|EPI\_ISL\_491556|Original|hCoV-19^^Scotland|Human|Virology Department|Wellcome Sanger Institute for the COVID-19 Genomics UK (COG-UK) consortium|Davies|United Kingdom

>Spike|hCoV-19/USA/WA-UW-12936/2020|2020-06-29|EPI\_ISL\_570935|Original|hCoV-19^^Washington|Human|UW Virology Lab|UW Virology Lab|Roychoudhury|USA

>Spike|hCoV-19/Gambia/NPHL-2538/2020|2020-07-21|EPI\_ISL\_561272|Original|hCoV-19^^Kombo|Human|MRCG at LSHTM Genomics lab|MRCG at LSHTM Genomics lab|Sesay|Gambia

>Spike|hCoV-19/England/OXON-AE7B4/2020|2020-00-00|EPI\_ISL\_448719|Original|hCoV-19^^England|Human|Oxford Viromics|COVID-19 Genomics UK (COG-UK) Consortium|Golubchik|United Kingdom

>Spike|hCoV-19/England/QEUEH-A1E384/2020|2020-09-29|EPI\_ISL\_587430|Original|hCoV-19^^England|Human|Lighthouse Lab in Glasgow|Wellcome Sanger Institute for the COVID-19 Genomics UK (COG-UK) consortium|Davies|United Kingdom

>Spike|hCoV-19/DRC/2939/2020|2020-04-17|EPI\_ISL\_437354|Original|hCoV-19^^Kinshasa|Human|Viral Respiratory Lab|Pathogen Sequencing Lab|Amuri|Democratic Republic of the Congo

>Spike|hCoV-19/England/ALDP-B63D81/2020|2020-11-08|EPI\_ISL\_655502|Original|hCoV-19^^England|Human|Lighthouse Lab in Alderley Park|Wellcome Sanger Institute for the COVID-19 Genomics UK (COG-UK) Consortium|Davies|United Kingdom

>Spike|hCoV-19/USA/CA-CZB-4026/2020|2020-08-05|EPI\_ISL\_548673|Original|hCoV-19^^California|Human|County of Santa Clara Public Health Department|Chan-Zuckerberg Biohub|Bhatt|USA

>Spike|hCoV-19/England/NORW-E8305/2020|2020-04-08|EPI\_ISL\_449140|Original|hCoV-19^^England|Human|Quadram Institute Bioscience|COVID-19 Genomics UK (COG-UK) Consortium|Alikhan|United Kingdom

>Spike|hCoV-19/Kenya/C2685/2020|2020-04-25|EPI\_ISL\_457884|Original|hCoV-19^^Kenya|Human|KEMRI-CGMR-C|KEMRI-Wellcome Trust Research Programme|KEMRI-CGMR-C Kilifi|Githinji|Kenya

>Spike|hCoV-19/Netherlands/ZH-EMC-762/2020|2020-10-01|EPI\_ISL\_632599|Original|hCoV-19^^Zuid Holland|Human|Dutch COVID-19 response team|Erasmus Medical Center|Oude Munnink|Netherlands

>Spike|hCoV-19/Japan/PG-5992/2020|2020-07-00|EPI\_ISL\_689105|Original|hCoV-19^^Japan|Human|Pathogen Genomics Center|Pathogen Genomics Center|Sekizuka|Japan

>Spike|hCoV-19/Spain/CT-IBV-99009925/2020|2020-08-13|EPI\_ISL\_660321|Original|hCoV-19^^Catalunya|Human|Servicio de Microbiolog\u00eda|SeqCOVID-SPAIN consortium/IBV (CSIC)|Comas|Spain

>Spike|hCoV-19/England/ALDP-B1CEA2/2020|2020-11-01|EPI\_ISL\_645713|Original|hCoV-19^^England|Human|Lighthouse Lab in Alderley Park|Wellcome Sanger Institute for the COVID-19 Genomics UK (COG-UK) Consortium|Davies|United Kingdom

>Spike|hCoV-19/England/CAMB-7276E/2020|2020-03-23|EPI\_ISL\_439881|Original|hCoV-19^^England|Human|Department of Pathology|Wellcome Sanger Institute for the COVID-19 Genomics UK (COG-UK) consortium|Amato|United Kingdom

>Spike|hCoV-19/USA/TX-HMH-4536/2020|2020-06-22|EPI\_ISL\_543701|Original|hCoV-19^^Texas|Human|Houston Methodist Hospital|Houston Methodist Hospital|Long|USA

>Spike|hCoV-19/England/ALDP-CB4B1D/2020|2020-12-18|EPI\_ISL\_761117|Original|hCoV-19^^England|Human|Lighthouse Lab in Alderley Park|Wellcome Sanger Institute for the COVID-19 Genomics UK (COG-UK) Consortium|Davies|United Kingdom

>Spike|hCoV-19/England/LIVE-A6215/2020|2020-03-21|EPI\_ISL\_499694|Original|hCoV-19^^England|Human|Liverpool Clinical Laboratories|COVID-19 Genomics UK (COG-UK) Consortium|Haldenby|United Kingdom

>Spike|hCoV-19/Denmark/DCGC-13076/2020|2020-11-30|EPI\_ISL\_712569|Original|hCoV-19^^Syddanmark|Human|Department of Virus and Microbiological Special Diagnostics|Albertsen Lab|Michaelsen|Denmark

>Spike|hCoV-19/USA/IL-UW-133/2020|2020-04-12|EPI\_ISL\_427440|Original|hCoV-19^^Illinois|Human|University of Wisconsin-Madison AIDS Vaccine Research Laboratories|University of Wisconsin-Madison AIDS Vaccine Research Laboratories|Baczenas|USA

>Spike|hCoV-19/USA/CO-CDPHE-2004220685/2020|2020-04-21|EPI\_ISL\_710180|Original|hCoV-19^^Colorado|Human|Colorado Department of Public Health and Environment|Colorado Department of Public Health and Environment|Bankers|USA

>Spike|hCoV-19/Denmark/DCGC-9229/2020|2020-11-16|EPI\_ISL\_668606|Original|hCoV-19^^Syddanmark|Human|Department of Virus and Microbiological Special Diagnostics|Albertsen Lab|Michaelsen|Denmark

>Spike|hCoV-19/England/CAMC-A59332/2020|2020-10-08|EPI\_ISL\_596992|Original|hCoV-19^^England|Human|Lighthouse Lab in Cambridge|Wellcome Sanger Institute for the COVID-19 Genomics UK (COG-UK) consortium|Davies|United Kingdom

>Spike|hCoV-19/Denmark/DCGC-1291/2020|2020-06-08|EPI\_ISL\_618075|Original|hCoV-19^^Hovedstaden|Human|Department of Virus and Microbiological Special Diagnostics|Albertsen lab|Michaelsen|Denmark

>Spike|hCoV-19/England/ALDP-BBB397/2020|2020-11-21|EPI\_ISL\_702425|Original|hCoV-19^^England|Human|Lighthouse Lab in Alderley Park|Wellcome Sanger Institute for the COVID-19 Genomics UK (COG-UK) Consortium|Davies|United Kingdom

>Spike|hCoV-19/Wales/PHWC-49BD87/2020|2020-12-06|EPI\_ISL\_742465|Original|hCoV-19^^Wales|Human|Wales Specialist Virology Centre Sequencing lab|COVID-19 Genomics UK (COG-UK) Consortium|Moore|United Kingdom

>Spike|hCoV-19/Wales/PHWC-483B3D/2020|2020-10-14|EPI\_ISL\_627897|Original|hCoV-19^^Wales|Human|Wales Specialist Virology Centre Sequencing lab|COVID-19 Genomics UK (COG-UK) Consortium|Moore|United Kingdom

>Spike|hCoV-19/Switzerland/BL-UHB-42197260/2020|2020-03-18|EPI\_ISL\_528211|Original|hCoV-19^^Basel-Land|Human|University Hospital Basel|University Hospital Basel|Roloff Handschin|Switzerland

>Spike|hCoV-19/England/CAMC-B0711A/2020|2020-10-29|EPI\_ISL\_643653|Original|hCoV-19^^England|Human|Lighthouse Lab in Cambridge|Wellcome Sanger Institute for the COVID-19 Genomics UK (COG-UK) Consortium|Davies|United Kingdom



>Spike|hCoV-19/Switzerland/BE-ETHZ-321090/2020|2020-10-14|EPI\_ISL\_737703|Original|hCoV-19^^Bern|Human|Viollier AG|Department of Biosystems Science and Engineering|Nadeau|Switzerland

>Spike|hCoV-19/USA/TX-HMH-3747/2020|2020-06-16|EPI\_ISL\_543159|Original|hCoV-19^^Texas|Human|Houston Methodist Hospital|Houston Methodist Hospital|Long|USA

>Spike|hCoV-19/England/MILK-ACF16A/2020|2020-10-22|EPI\_ISL\_629647|Original|hCoV-19^^England|Human|Lighthouse Lab in Milton Keynes|Wellcome Sanger Institute for the COVID-19 Genomics UK (COG-UK) consortium|Davies|United Kingdom

>Spike|hCoV-19/England/LOND-124D56D/2020|2020-06-16|EPI\_ISL\_507108|Original|hCoV-19^^England|Human|University College London Hospital|COVID-19 Genomics UK (COG-UK) Consortium|Byott|United Kingdom

>Spike|hCoV-19/England/CAMC-BC063C/2020|2020-11-19|EPI\_ISL\_705061|Original|hCoV-19^^England|Human|Lighthouse Lab in Cambridge|Wellcome Sanger Institute for the COVID-19 Genomics UK (COG-UK) Consortium|Davies|United Kingdom

>Spike|hCoV-19/England/QEUEH-AAE705/2020|2020-10-22|EPI\_ISL\_630827|Original|hCoV-19^^England|Human|Lighthouse Lab in Glasgow|Wellcome Sanger Institute for the COVID-19 Genomics UK (COG-UK) consortium|Davies|United Kingdom

>Spike|hCoV-19/USA/CA-ALSR-3439/2020|2020-06-01|EPI\_ISL\_636030|Original|hCoV-19^^California|Human|San Diego County Public Health Laboratory|Andersen lab at Scripps Research|Gangavarapu|USA

>Spike|hCoV-19/France/HDF-1684/2020|2020-02-29|EPI\_ISL\_414626|Original|hCoV-19^^Hauts-de-France|Human|unknown|National Reference Center for Viruses of Respiratory Infections|Enouf|France

>Spike|hCoV-19/Denmark/DCGC-4563/2020|2020-09-21|EPI\_ISL\_621360|Original|hCoV-19^^Sjaelland|Human|Department of Virus and Microbiological Special Diagnostics|Albertsen lab|Michaelsen|Denmark

>Spike|hCoV-19/Japan/NF-11/2020|2020-04-00|EPI\_ISL\_591481|Original|hCoV-19^^Japan|Human|Pathogen Genomics Center|Pathogen Genomics Center|Sekizuka|Japan

>Spike|hCoV-19/Australia/VIC11304/2020|2020-08-25|EPI\_ISL\_563323|Original|hCoV-19^^Victoria|Human|Microbiological Diagnostic Unit - Public Health Laboratory (MDU-PHL)|MDU-PHL|Schultz|Australia

>Spike|hCoV-19/England/PORT-2D159E/2020|2020-04-20|EPI\_ISL\_512402|Original|hCoV-19^^England|Human|Centre for Enzyme Innovation|COVID-19 Genomics UK (COG-UK) Consortium|Robson|United Kingdom

>Spike|hCoV-19/Canada/ON-PHL-20-03611/2020|2020-11-00|EPI\_ISL\_775119|Original|hCoV-19^^Ontario|Human|Public Health Ontario Laboratory|Public Health Ontario Laboratory|Guthrie|Canada

>Spike|hCoV-19/Wales/PHWC-48BBCC/2020|2020-11-02|EPI\_ISL\_666332|Original|hCoV-19^^Wales|Human|Wales Specialist Virology Centre Sequencing lab|COVID-19 Genomics UK (COG-UK) Consortium|Moore|United Kingdom

>Spike|hCoV-19/USA/UT-UPHL-201116223/2020|2020-05-13|EPI\_ISL\_648592|Original|hCoV-19^^Utah|Human|Utah Public Health Laboratory|Utah Public Health Laboratory|Young|USA

>Spike|hCoV-19/England/MILK-B96CC4/2020|2020-11-13|EPI\_ISL\_675073|Original|hCoV-19^^England|Human|Lighthouse Lab in Milton Keynes|Wellcome Sanger Institute for the COVID-19 Genomics UK (COG-UK) Consortium|Davies|United Kingdom

>Spike|hCoV-19/Canada/BC-BCCDC-8588/2020|2020-11-00|EPI\_ISL\_740835|Original|hCoV-19^^British Columbia|Human|BCCDC Public Health Laboratory|BCCDC Public Health Laboratory|Prystajecky|Canada

>Spike|hCoV-19/Japan/PG-7760/2020|2020-04-00|EPI\_ISL\_686862|Original|hCoV-19^^Japan|Human|Pathogen Genomics Center|Pathogen Genomics Center|Sekizuka|Japan

>Spike|hCoV-19/Denmark/DCGC-3794/2020|2020-08-10|EPI\_ISL\_622666|Original|hCoV-19^^Hovedstaden|Human|Department of Virus and Microbiological Special Diagnostics|Albertsen lab|Michaelsen|Denmark

>Spike|hCoV-19/USA/CA-QDX-794/2020|2020-03-21|EPI\_ISL\_571488|Original|hCoV-19^^California|Human|Quest Diagnostics|Quest Diagnostics|Kagan|USA

>Spike|hCoV-19/England/ALDP-BB8E8A/2020|2020-11-20|EPI\_ISL\_702696|Original|hCoV-19^^England|Human|Lighthouse Lab in Alderley Park|Wellcome Sanger Institute for the COVID-19 Genomics UK (COG-UK) Consortium|Davies|United Kingdom

>Spike|hCoV-19/USA/TX-DSHS-1165/2020|2020-07-03|EPI\_ISL\_634965|Original|hCoV-19^^Texas|Human|Texas Department of State Health Services|Texas Department of State Health Services|Rahman|USA

>Spike|hCoV-19/England/20148033504/2020|2020-03-31|EPI\_ISL\_466057|Original|hCoV-19^^England|Human|Respiratory Virus Unit|Respiratory Virus Unit|Platt|United Kingdom

>Spike|hCoV-19/Wales/PHWC-16CA03/2020|2020-06-26|EPI\_ISL\_574120|Original|hCoV-19^^Wales|Human|Wales Specialist Virology Centre Sequencing lab|COVID-19 Genomics UK (COG-UK) Consortium|Moore|United Kingdom

>Spike|hCoV-19/England/MILK-AC842C/2020|2020-10-21|EPI\_ISL\_629211|Original|hCoV-19^^England|Human|Lighthouse Lab in Milton Keynes|Wellcome Sanger Institute for the COVID-19 Genomics UK (COG-UK) consortium|Davies|United Kingdom

>Spike|hCoV-19/England/NORW-F6C72/2020|2020-12-01|EPI\_ISL\_706382|Original|hCoV-19^^England|Human|Quadram Institute Bioscience|COVID-19 Genomics UK (COG-UK) Consortium|Alikhan|United Kingdom

>Spike|hCoV-19/Scotland/QEUIH-943712/2020|2020-08-02|EPI\_ISL\_532598|Original|hCoV-19^^Scotland|Human|NHSGGC West of Scotland Specialist Virology Centre / MRC-University of Glasgow Centre for Virus Research|Wellcome Sanger Institute for the COVID-19 Genomics UK (COG-UK) consortium|Davies|United Kingdom

>Spike|hCoV-19/England/CAMC-B54794/2020|2020-11-08|EPI\_ISL\_658286|Original|hCoV-19^^England|Human|Lighthouse Lab in Cambridge|Wellcome Sanger Institute for the COVID-19 Genomics UK (COG-UK) Consortium|Davies|United Kingdom

>Spike|hCoV-19/Scotland/QEUIH-B31821/2020|2020-11-04|EPI\_ISL\_676426|Original|hCoV-19^^Scotland|Human|Lighthouse Lab in Glasgow|Wellcome Sanger Institute for the COVID-19 Genomics UK (COG-UK) Consortium|Davies|United Kingdom

>Spike|hCoV-19/USA/VA-DCLS-1701/2020|2020-09-05|EPI\_ISL\_609981|Original|hCoV-19^^Virginia|Human|Virginia DCLS|Virginia DCLS|St. Jacques|USA

>Spike|hCoV-19/New Zealand/20CV0598/2020|2020-11-18|EPI\_ISL\_682279|Original|hCoV-19^^Counties Manukau|Human|Middlemore Hospital|Institute of Environmental Science and Research (ESR)|Wang|New Zealand

>Spike|hCoV-19/England/ALDP-A872A7/2020|2020-10-17|EPI\_ISL\_606255|Original|hCoV-19^^England|Human|Lighthouse Lab in Alderley Park|Wellcome Sanger Institute for the COVID-19 Genomics UK (COG-UK) consortium|Davies|United Kingdom

>Spike|hCoV-19/Australia/NSW761/2020|2020-07-20|EPI\_ISL\_513403|Original|hCoV-19^^New South Wales|Human|Laverty Pathology|NSW Health Pathology - Institute of Clinical Pathology and Medical Research; Westmead Hospital; University of Sydney|Gall|Australia

>Spike|hCoV-19/England/NOTT-1105D0/2020|2020-04-26|EPI\_ISL\_441534|Original|hCoV-19^^England|Human|Queens Medical Centre|COVID-19 Genomics UK (COG-UK) Consortium|Loose|United Kingdom

>Spike|hCoV-19/Denmark/DCGC-10576/2020|2020-11-02|EPI\_ISL\_670063|Original|hCoV-19^^Syddanmark|Human|Department of Virus and Microbiological Special Diagnostics|Albertsen Lab|Michaelsen|Denmark

>Spike|hCoV-19/USA/NM-NMDOH-2020324112/2020|2020-09-02|EPI\_ISL\_632825|Original|hCoV-19^^New Mexico|Human|New Mexico Department of Health Scientific Laboratory|New Mexico Department of Health Scientific Laboratory|Johnson|USA

>Spike|hCoV-19/Brazil/PA-0229/2020|2020-04-01|EPI\_ISL\_470603|Original|hCoV-19^^Par\u00e1|Human|Hermes Pardini|Bioinformatics Laboratory / LNCC|Almeida|Brazil

>Spike|hCoV-19/USA/CA-CDPH083/2020|2020-07-20|EPI\_ISL\_754968|Original|hCoV-19^^California|Human|California Department of Public Health|California Department of Public Health|Bell|USA

>Spike|hCoV-19/England/ALDP-C484E6/2020|2020-12-12|EPI\_ISL\_736651|Original|hCoV-19^^England|Human|Lighthouse Lab in Alderley Park|Wellcome Sanger Institute for the COVID-19 Genomics UK (COG-UK) Consortium|Davies|United Kingdom

>Spike|hCoV-19/USA/TX-DSHS-1047/2020|2020-06-15|EPI\_ISL\_628715|Original|hCoV-19^^Texas|Human|Texas Department of State Health Services|Texas Department of State Health Services|Rahman|USA

>Spike|hCoV-19/England/QEUIH-BC39D6/2020|2020-11-25|EPI\_ISL\_704133|Original|hCoV-19^^England|Human|Lighthouse Lab in Glasgow|Wellcome Sanger Institute for the COVID-19 Genomics UK (COG-UK) Consortium|Davies|United Kingdom

>Spike|hCoV-19/Spain/IB-IBV-002492/2020|2020-03-14|EPI\_ISL\_467056|Original|hCoV-19^^Illes Balears|Human|Servicio de Microbiolog\u00eda|SeqCOVID-SPAIN consortium/IBV (CSIC) |Comas|Spain

>Spike|hCoV-19/Australia/VIC737/2020|2020-03-30|EPI\_ISL\_427016|Original|hCoV-19^^Victoria|Human|Victorian Infectious Diseases Reference Laboratory (VIDRL)|Microbiological Diagnostic Unit Public Health Laboratory and Victorian Infectious Diseases Reference Laboratory|Schultz|Australia

>Spike|hCoV-19/England/LEED-2A8B34/2020|2020-04-01|EPI\_ISL\_539152|Original|hCoV-19^^England|Human|Leeds Teaching Hospitals NHS Trust and Public Health England|Wellcome Sanger Institute for the COVID-19 Genomics UK (COG-UK) Consortium|Davies|United Kingdom

>Spike|hCoV-19/USA/CA-IGI-0245/2020|2020-07-01|EPI\_ISL\_569909|Original|hCoV-19^^California|Human|Innovative Genomics Institute|Innovative Genomics Institute|Wyman|USA

>Spike|hCoV-19/England/NORT-28846C/2020|2020-11-21|EPI\_ISL\_725015|Original|hCoV-19^^England|Human|Northumbria University / South Tees Hospitals NHS Foundation Trust / North Cumbria Integrated Care NHS Foundation Trust / North Tees and Hartlepool NHS Foundation Trust / Newcastle Hospitals NHS Foundation Trust|COVID-19 Genomics UK (COG-UK) Consortium|Bashton|United Kingdom

>Spike|hCoV-19/England/QEUA-B7C6C6/2020|2020-11-14|EPI\_ISL\_727813|Original|hCoV-19^^England|Human|Oxford Viromics|COVID-19 Genomics UK (COG-UK) Consortium|Golubchik|United Kingdom

>Spike|hCoV-19/England/ALDP-B85590/2020|2020-11-14|EPI\_ISL\_674392|Original|hCoV-19^^England|Human|Lighthouse Lab in Alderley Park|Wellcome Sanger Institute for the COVID-19 Genomics UK (COG-UK) Consortium|Davies|United Kingdom

>Spike|hCoV-19/England/NORW-F9538/2020|2020-12-01|EPI\_ISL\_706415|Original|hCoV-19^^England|Human|Quadram Institute Bioscience|COVID-19 Genomics UK (COG-UK) Consortium|Alikhan|United Kingdom

>Spike|hCoV-19/England/EKHU-260F1F3/2020|2020-05-19|EPI\_ISL\_501631|Original|hCoV-19^^England|Human|Lab Microbiology|Wellcome Sanger Institute for the COVID-19 Genomics UK (COG-UK) consortium|Davies|United Kingdom

>Spike|hCoV-19/Spain/VC-FISABIO-24/2020|2020-03-09|EPI\_ISL\_419688|Original|hCoV-19^^Comunitat Valenciana|Human|Servicio de Microbiolog\u00eda. Consorcio Hospital General Universitario de Valencia|Sequencing and Bioinformatics Service and Molecular Epidemiology Research Group. FISABIO-Public Health|Gonzalez-Candelas|Spain

>Spike|hCoV-19/England/MILK-B97294/2020|2020-11-14|EPI\_ISL\_675101|Original|hCoV-19^^England|Human|Lighthouse Lab in Milton Keynes|Wellcome Sanger Institute for the COVID-19 Genomics UK (COG-UK) Consortium|Davies|United Kingdom

>Spike|hCoV-19/England/MILK-BB2460/2020|2020-11-18|EPI\_ISL\_720297|Original|hCoV-19^^England|Human|Lighthouse Lab in Milton Keynes|Wellcome Sanger Institute for the COVID-19 Genomics UK (COG-UK) Consortium|Davies|United Kingdom

>Spike|hCoV-19/USA/TX-HMH-MCoV-9184/2020|2020-07-02|EPI\_ISL\_780987|Original|hCoV-19^^Texas|Human|Houston Methodist Hospital|Houston Methodist Hospital|Long|USA

>Spike|hCoV-19/England/NORW-F918F/2020|2020-11-26|EPI\_ISL\_704916|Original|hCoV-19^^England|Human|Quadram Institute Bioscience|COVID-19 Genomics UK (COG-UK) Consortium|Alikhan|United Kingdom

>Spike|hCoV-19/France/PAC-IHU-0282/2020|2020-03-31|EPI\_ISL\_569429|Original|hCoV-19^^Provence-Alpes-C\u00f4te-d\u00e0z|Human|MEPHI|MEPHI|Levasseur|France

>Spike|hCoV-19/USA/MI-UM-10035547701/2020|2020-08-19|EPI\_ISL\_583258|Original|hCoV-19^^Michigan|Human|University of Michigan Clinical Microbiology Laboratory|Lauring Lab|Valesano|USA

>Spike|hCoV-19/Denmark/DCGC-19466/2020|2020-12-07|EPI\_ISL\_748965|Original|hCoV-19^^Midtjylland|Human|Department of Virus and Microbiological Special Diagnostics|Albertsen Lab|Michaelsen|Denmark

>Spike|hCoV-19/England/ALDP-CEAF4F/2020|2020-12-21|EPI\_ISL\_781331|Original|hCoV-19^^England|Human|Lighthouse Lab in Alderley Park|Wellcome Sanger Institute for the COVID-19 Genomics UK (COG-UK) Consortium|Davies|United Kingdom

>Spike|hCoV-19/USA/CA-ALSR-1614/2020|2020-05-19|EPI\_ISL\_494687|Original|hCoV-19^^California|Human|Scripps Medical Laboratory|Andersen lab at Scripps Research|Gangavarapu|USA

>Spike|hCoV-19/England/LIVE-A3B0E/2020|2020-06-10|EPI\_ISL\_490393|Original|hCoV-19^^England|Human|Liverpool Clinical Laboratories|COVID-19 Genomics UK (COG-UK) Consortium|Haldenby|United Kingdom

>Spike|hCoV-19/Finland/24SS11G1/2020|2020-09-24|EPI\_ISL\_759828|Original|hCoV-19^^Uusimaa|Human|Department of Virology and Immunology|Department of Virology|Smura|Finland

>Spike|hCoV-19/England/PORT-2EA486/2020|2020-00-00|EPI\_ISL\_665615|Original|hCoV-19^^England|Human|Centre for Enzyme Innovation|COVID-19 Genomics UK (COG-UK) Consortium|Robson|United Kingdom

>Spike|hCoV-19/England/CAMB-1BABC7/2020|2020-11-13|EPI\_ISL\_664549|Original|hCoV-19^^England|Human|Department of Pathology|COVID-19 Genomics UK (COG-UK) Consortium|Goodfellow|United Kingdom

>Spike|hCoV-19/Scotland/CVR3108/2020|2020-04-25|EPI\_ISL\_461681|Original|hCoV-19^^Scotland|Human|West of Scotland Specialist Virology Centre|COVID-19 Genomics UK (COG-UK) Consortium|Robertson|United Kingdom

>Spike|hCoV-19/USA/FL-BPHL-1765/2020|2020-10-04|EPI\_ISL\_613871|Original|hCoV-19^^Florida|Human|Florida Bureau of Public Health Laboratories|Florida Bureau of Public Health Laboratories|Blanton|USA

>Spike|hCoV-19/New Zealand/20VR1297/2020|2020-03-20|EPI\_ISL\_456213|Original|hCoV-19^^Counties Manukau|Human|Middlemore Hospital|Institute of Environmental Science and Research (ESR)|de Ligt|New Zealand

>Spike|hCoV-19/England/QEUH-B69C60/2020|2020-11-11|EPI\_ISL\_655026|Original|hCoV-19^^England|Human|Lighthouse Lab in Glasgow|Wellcome Sanger Institute for the COVID-19 Genomics UK (COG-UK) Consortium|Davies|United Kingdom

>Spike|hCoV-19/USA/MI-UM-2006S001042/2020|2020-05-05|EPI\_ISL\_495566|Original|hCoV-19^^Michigan|Human|University of Michigan Clinical Microbiology Laboratory|Lauring Lab|Valesano|USA

>Spike|hCoV-19/England/MILK-A45867/2020|2020-10-06|EPI\_ISL\_598763|Original|hCoV-19^^England|Human|Lighthouse Lab in Milton Keynes|Wellcome Sanger Institute for the COVID-19 Genomics UK (COG-UK) consortium|Davies|United Kingdom

>Spike|hCoV-19/England/MILK-9586B3/2020|2020-06-09|EPI\_ISL\_554790|Original|hCoV-19^^England|Human|Lighthouse Lab in Milton Keynes|Wellcome Sanger Institute for the COVID-19 Genomics UK (COG-UK) consortium|Davies|United Kingdom

>Spike|hCoV-19/Netherlands/ZuidHolland\_167/2020|2020-04-03|EPI\_ISL\_461339|Original|hCoV-19^^Zuid Holland|Human|Dutch COVID-19 response team|Erasmus Medical Center|Oude Munnink|Netherlands

>Spike|hCoV-19/Netherlands/NA\_62/2020|2020-03-09|EPI\_ISL\_422823|Original|hCoV-19^^Netherlands|Human|Dutch COVID-19 response team|Erasmus Medical Center|Oude Munnink|Netherlands

>Spike|hCoV-19/England/CAMB-1B8ABD/2020|2020-00-00|EPI\_ISL\_650961|Original|hCoV-19^^England|Human|Department of Pathology|COVID-19 Genomics UK (COG-UK) Consortium|Goodfellow|United Kingdom

>Spike|hCoV-19/India/MH-ACTREC-401/2020|2020-07-29|EPI\_ISL\_700050|Original|hCoV-19^^Maharashtra|Human|Hematopathology Laboratory|Hematopathology Laboratory|Patkar|India

>Spike|hCoV-19/England/20142015404/2020|2020-03-31|EPI\_ISL\_465922|Original|hCoV-19^^England|Human|Respiratory Virus Unit|Respiratory Virus Unit|Platt|United Kingdom

>Spike|hCoV-19/England/CWAR-24FDED5/2020|2020-06-08|EPI\_ISL\_584541|Original|hCoV-19^^England|Human|UHCW / University of Warwick|COVID-19 Genomics UK (COG-UK) Consortium|Stark|United Kingdom

>Spike|hCoV-19/Wales/PHWC-25919/2020|2020-03-25|EPI\_ISL\_422229|Original|hCoV-19^^Wales|Human|Wales Specialist Virology Centre|Public Health Wales Microbiology Cardiff|Moore|United Kingdom

>Spike|hCoV-19/England/BRIS-1854248/2020|2020-04-28|EPI\_ISL\_492427|Original|hCoV-19^^England|Human|PHE South West Regional Laboratory|Wellcome Sanger Institute for the COVID-19 Genomics UK (COG-UK) consortium|Davies|United Kingdom

>Spike|hCoV-19/USA/CO-CDPHE-2011210344/2020|2020-11-19|EPI\_ISL\_771274|Original|hCoV-19^^Colorado|Human|Colorado Department of Public Health and Environment|Colorado Department of Public Health and Environment|Bankers|USA

>Spike|hCoV-19/USA/VA-DCLS-2408/2020|2020-11-20|EPI\_ISL\_734179|Original|hCoV-19^^Virginia|Human|Virginia Division of Consolidated Laboratory Services (DCLS)|Virginia Division of Consolidated Laboratory Services (DCLS)|St. Jacques|USA

>Spike|hCoV-19/Belgium/regal-11271172/2020|2020-11-27|EPI\_ISL\_735225|Original|hCoV-19^^Bilzen|Human|UZ Leuven|KU Leuven|Maes|Belgium

>Spike|hCoV-19/Canada/QC-LSPQ-L00233169/2020|2020-03-22|EPI\_ISL\_536010|Original|hCoV-19^^Quebec|Human|H\u00f4pital Sainte-Croix|Laboratoire de sant\u00e9 publique du Qu\u00e9bec|Moreira|Canada

>Spike|hCoV-19/England/QEUA-9A422D/2020|2020-09-01|EPI\_ISL\_540226|Original|hCoV-19^^England|Human|Lighthouse Lab in Glasgow|Wellcome Sanger Institute for the COVID-19 Genomics UK (COG-UK) consortium|Davies|United Kingdom

>Spike|hCoV-19/England/QEUA-B1298D/2020|2020-11-02|EPI\_ISL\_642225|Original|hCoV-19^^England|Human|Lighthouse Lab in Glasgow|Wellcome Sanger Institute for the COVID-19 Genomics UK (COG-UK) Consortium|Davies|United Kingdom

>Spike|hCoV-19/Wales/PHWC-48403D/2020|2020-10-24|EPI\_ISL\_627958|Original|hCoV-19^^Wales|Human|Wales Specialist Virology Centre Sequencing lab|COVID-19 Genomics UK (COG-UK) Consortium|Moore|United Kingdom

>Spike|hCoV-19/England/NOTT-11677A/2020|2020-10-13|EPI\_ISL\_612571|Original|hCoV-19^^England|Human|Queens Medical Centre|COVID-19 Genomics UK (COG-UK) Consortium|Loose|United Kingdom

>Spike|hCoV-19/England/BRIS-12B0B3/2020|2020-05-05|EPI\_ISL\_469842|Original|hCoV-19^^England|Human|PHE South West Regional Laboratory|Wellcome Sanger Institute for the COVID-19 Genomics UK (COG-UK) consortium|Davies|United Kingdom

>Spike|hCoV-19/England/ALDP-CB46EF/2020|2020-12-18|EPI\_ISL\_761065|Original|hCoV-19^^England|Human|Lighthouse Lab in Alderley Park|Wellcome Sanger Institute for the COVID-19 Genomics UK (COG-UK) Consortium|Davies|United Kingdom

>Spike|hCoV-19/England/QEUA-B7E442/2020|2020-11-14|EPI\_ISL\_668271|Original|hCoV-19^^England|Human|Lighthouse Lab in Glasgow|Wellcome Sanger Institute for the COVID-19 Genomics UK (COG-UK) Consortium|Davies|United Kingdom

>Spike|hCoV-19/Russia/TAM-RII-MH2856S/2020|2020-09-26|EPI\_ISL\_733038|Original|hCoV-19^^Tambov|Human|HELIIX LLC|WHO National Influenza Centre Russian Federation|Komissarov|Russia

>Spike|hCoV-19/New Zealand/20VR3144/2020|2020-03-21|EPI\_ISL\_579436|Original|hCoV-19^^Canterbury|Human|Canterbury Health Laboratories|Institute of Environmental Science and Research (ESR)|Wang|New Zealand

>Spike|hCoV-19/England/LIVE-9CE0F/2020|2020-04-26|EPI\_ISL\_440946|Original|hCoV-19^^England|Human|Liverpool Clinical Laboratories|COVID-19 Genomics UK (COG-UK) Consortium|Haldenby|United Kingdom

>Spike|hCoV-19/Denmark/DCGC-8376/2020|2020-10-26|EPI\_ISL\_617339|Original|hCoV-19^^Nordjylland|Human|Department of Virus and Microbiological Special Diagnostics|Albertsen lab|Michaelsen|Denmark

>Spike|hCoV-19/Denmark/DCGC-15571/2020|2020-11-23|EPI\_ISL\_713242|Original|hCoV-19^^Midtjylland|Human|Department of Virus and Microbiological Special Diagnostics|Albertsen Lab|Michaelsen|Denmark

>Spike|hCoV-19/England/CAMC-946C89/2020|2020-07-16|EPI\_ISL\_556820|Original|hCoV-19^^England|Human|Lighthouse Lab in Cambridge|Wellcome Sanger Institute for the COVID-19 Genomics UK (COG-UK) consortium|Davies|United Kingdom

>Spike|hCoV-19/USA/WA-UW300/2020|2020-03-13|EPI\_ISL\_418868|Original|hCoV-19^^Washington|Human|UW Virology Lab|UW Virology Lab|Roychoudhury|USA

>Spike|hCoV-19/England/MILK-9E0568/2020|2020-09-20|EPI\_ISL\_601388|Original|hCoV-19^^England|Human|Lighthouse Lab in Milton Keynes|Wellcome Sanger Institute for the COVID-19 Genomics UK (COG-UK) consortium|Davies|United Kingdom

>Spike|hCoV-19/Denmark/DCGC-1725/2020|2020-05-04|EPI\_ISL\_617384|Original|hCoV-19^^Hovedstaden|Human|Department of Virus and Microbiological Special Diagnostics|Albertsen lab|Michaelsen|Denmark

>Spike|hCoV-19/Scotland/EDB8685/2020|2020-10-24|EPI\_ISL\_650165|Original|hCoV-19^^Scotland|Human|Virology Department|COVID-19 Genomics UK (COG-UK) Consortium|McHugh|United Kingdom

>Spike|hCoV-19/Switzerland/SO-ETHZ-410346/2020|2020-12-17|EPI\_ISL\_737591|Original|hCoV-19^^Solothurn|Human|Viollier AG|Department of Biosystems Science and Engineering|Nadeau|Switzerland

>Spike|hCoV-19/Denmark/DCGC-18155/2020|2020-12-14|EPI\_ISL\_749785|Original|hCoV-19^^Midtjylland|Human|Department of Virus and Microbiological Special Diagnostics|Albertsen Lab|Michaelsen|Denmark

>Spike|hCoV-19/Scotland/QEUH-7557E2/2020|2020-07-18|EPI\_ISL\_533000|Original|hCoV-19^^Scotland|Human|NHSGGC West of Scotland Specialist Virology Centre / MRC-University of Glasgow Centre for Virus Research|Wellcome Sanger Institute for the COVID-19 Genomics UK (COG-UK) consortium|Davies|United Kingdom

>Spike|hCoV-19/Wales/PHWC-49398B/2020|2020-11-30|EPI\_ISL\_725963|Original|hCoV-19^^Wales|Human|Originating lab|COVID-19 Genomics UK (COG-UK) Consortium|Moore|United Kingdom

>Spike|hCoV-19/USA/TX-HMH-MCoV-18880/2020|2020-11-24|EPI\_ISL\_785193|Original|hCoV-19^^Texas|Human|Houston Methodist Hospital|Houston Methodist Hospital|Long|USA

>Spike|hCoV-19/England/ALDP-981F01/2020|2020-08-10|EPI\_ISL\_552783|Original|hCoV-19^^England|Human|Lighthouse Lab in Alderley Park|Wellcome Sanger Institute for the COVID-19 Genomics UK (COG-UK) consortium|Davies|United Kingdom

>Spike|hCoV-19/England/MILK-B94A71/2020|2020-11-13|EPI\_ISL\_676102|Original|hCoV-19^^England|Human|Lighthouse Lab in Milton Keynes|Wellcome Sanger Institute for the COVID-19 Genomics UK (COG-UK) Consortium|Davies|United Kingdom

>Spike|hCoV-19/England/CAMC-94B792/2020|2020-07-16|EPI\_ISL\_556792|Original|hCoV-19^^England|Human|Lighthouse Lab in Cambridge|Wellcome Sanger Institute for the COVID-19 Genomics UK (COG-UK) consortium|Davies|United Kingdom

>Spike|hCoV-19/USA/CA-ALSR-1052-SAN/2020|2020-06-21|EPI\_ISL\_483484|Original|hCoV-19^^California|Human|UC San Diego Center for Advanced Laboratory Medicine|Andersen lab at Scripps Research|Gangavarapu|USA

>Spike|hCoV-19/Japan/PG-2606/2020|2020-04-00|EPI\_ISL\_690740|Original|hCoV-19^^Japan|Human|Pathogen Genomics Center|Pathogen Genomics Center|Sekizuka|Japan

>Spike|hCoV-19/England/QEUH-9C8126/2020|2020-09-11|EPI\_ISL\_567240|Original|hCoV-19^^England|Human|Lighthouse Lab in Glasgow|Wellcome Sanger Institute for the COVID-19 Genomics UK (COG-UK) consortium|Davies|United Kingdom

>Spike|hCoV-19/Brazil/RS-L10-CD174/2020|2020-03-17|EPI\_ISL\_476187|Original|hCoV-19^^Rio Grande do Sul|Human|DB Diagn\u00f3sticos do Brasil|Instituto de Medicina Tropical da Universidade de S\u00e3o Paulo|Sabino|Brazil

>Spike|hCoV-19/England/ALDP-BC7B18/2020|2020-11-23|EPI\_ISL\_721283|Original|hCoV-19^^England|Human|Lighthouse Lab in Alderley Park|Wellcome Sanger Institute for the COVID-19 Genomics UK (COG-UK) Consortium|Davies|United Kingdom

>Spike|hCoV-19/USA/UT-UPHL-201104904/2020|2020-04-09|EPI\_ISL\_623205|Original|hCoV-19^^Utah|Human|Utah Public Health Laboratory|Utah Public Health Laboratory|Young|USA

>Spike|hCoV-19/Germany/HH-hpi-pl842/2020|2020-03-22|EPI\_ISL\_776193|Original|hCoV-19^^Hamburg|Human|University Medical Center Hamburg Eppendorf|Heinrich Pette Institute|Robitaille|Germany

>Spike|hCoV-19/Wales/PHWC-16088D/2020|2020-05-20|EPI\_ISL\_472987|Original|hCoV-19^^Wales|Human|Wales Specialist Virology Centre Sequencing lab|COVID-19 Genomics UK (COG-UK) Consortium|Moore|United Kingdom

>Spike|hCoV-19/England/CAMC-B7875E/2020|2020-11-09|EPI\_ISL\_783490|Original|hCoV-19^^England|Human|Lighthouse Lab in Cambridge|Wellcome Sanger Institute for the COVID-19 Genomics UK (COG-UK) Consortium|Davies|United Kingdom

>Spike|hCoV-19/Denmark/DCGC-11119/2020|2020-11-02|EPI\_ISL\_670401|Original|hCoV-19^^Hovedstaden|Human|Department of Virus and Microbiological Special Diagnostics|Albertsen Lab|Michaelsen|Denmark

>Spike|hCoV-19/England/LIVE-A77BB/2020|2020-03-27|EPI\_ISL\_517070|Original|hCoV-19^^England|Human|Liverpool Clinical Laboratories|COVID-19 Genomics UK (COG-UK) Consortium|Haldenby|United Kingdom

>Spike|hCoV-19/Switzerland/BS-UHB-42201513/2020|2020-03-21|EPI\_ISL\_528298|Original|hCoV-19^^Basel-Stadt|Human|University Hospital Basel|University Hospital Basel|Roloff Handschin|Switzerland

>Spike|hCoV-19/France/PAC-IHU-1513/2020|2020-08-12|EPI\_ISL\_569184|Original|hCoV-19^^Provence-Alpes-C\u00f4te-d\u2019Azur|Human|MEPHI|MEPHI|Levasseur|France

>Spike|hCoV-19/England/NORW-F3F7C/2020|2020-10-09|EPI\_ISL\_725172|Original|hCoV-19^^England|Human|Quadram Institute Bioscience|COVID-19 Genomics UK (COG-UK) Consortium|Alikhan|United Kingdom

>Spike|hCoV-19/Scotland/QEUIH-B694FF/2020|2020-11-11|EPI\_ISL\_676319|Original|hCoV-19^^Scotland|Human|Lighthouse Lab in Glasgow|Wellcome Sanger Institute for the COVID-19 Genomics UK (COG-UK) Consortium|Davies|United Kingdom

>Spike|hCoV-19/USA/CA-ALSR-3034/2020|2020-09-01|EPI\_ISL\_635803|Original|hCoV-19^^California|Human|San Diego County Public Health Laboratory|Andersen lab at Scripps Research|Gangavarapu|USA

>Spike|hCoV-19/Denmark/DCGC-19713/2020|2020-12-07|EPI\_ISL\_748522|Original|hCoV-19^^Hovedstaden|Human|Department of Virus and Microbiological Special Diagnostics|Albertsen Lab|Michaelsen|Denmark

>Spike|hCoV-19/Switzerland/VD-ETHZ-320405/2020|2020-10-12|EPI\_ISL\_737885|Original|hCoV-19^^Vaud|Human|Viollier AG|Department of Biosystems Science and Engineering|Nadeau|Switzerland

>Spike|hCoV-19/Gibraltar/205121263/2020|2020-00-00|EPI\_ISL\_766382|Original|hCoV-19^^Gibraltar|Human|Microbiology|Respiratory Virus Unit|Platt|Gibraltar

>Spike|hCoV-19/Wales/PHWC-319B0/2020|2020-04-10|EPI\_ISL\_446512|Original|hCoV-19^^Wales|Human|Wales Specialist Virology Centre|Public Health Wales Microbiology Cardiff|Moore|United Kingdom

>Spike|hCoV-19/Australia/TAS224/2020|2020-03-27|EPI\_ISL\_522653|Original|hCoV-19^^Tasmania|Human|Royal Hobart Hospital Microbiology Department|MDU-PHL|Schultz|Australia

>Spike|hCoV-19/England/ALDP-6532E4/2020|2020-07-03|EPI\_ISL\_558153|Original|hCoV-19^^England|Human|Lighthouse Lab in Alderley Park|Wellcome Sanger Institute for the COVID-19 Genomics UK (COG-UK) consortium|Davies|United Kingdom

>Spike|hCoV-19/Wales/MILK-B048BE/2020|2020-10-24|EPI\_ISL\_652172|Original|hCoV-19^^Wales|Human|Department of Pathology|COVID-19 Genomics UK (COG-UK) Consortium|Goodfellow|United Kingdom

>Spike|hCoV-19/Netherlands/OV-RIVM-20503/2020|2020-11-17|EPI\_ISL\_728718|Original|hCoV-19^^Overijssel|Human|Dutch COVID-19 response team|National Institute for Public Health and the Environment (RIVM)|Meijer|Netherlands

>Spike|hCoV-19/England/CAMB-1B3AA3/2020|2020-05-27|EPI\_ISL\_461574|Original|hCoV-19^^England|Human|Department of Pathology|COVID-19 Genomics UK (COG-UK) Consortium|Meredith|United Kingdom

>Spike|hCoV-19/England/ALDP-A6E4A0/2020|2020-10-15|EPI\_ISL\_606985|Original|hCoV-19^^England|Human|Lighthouse Lab in Alderley Park|Wellcome Sanger Institute for the COVID-19 Genomics UK (COG-UK) consortium|Davies|United Kingdom

>Spike|hCoV-19/England/ALDP-BCA1C8/2020|2020-11-23|EPI\_ISL\_703248|Original|hCoV-19^^England|Human|Lighthouse Lab in Alderley Park|Wellcome Sanger Institute for the COVID-19 Genomics UK (COG-UK) Consortium|Davies|United Kingdom

>Spike|hCoV-19/England/SHEF-C0D7E/2020|2020-11-22|EPI\_ISL\_680112|Original|hCoV-19^^England|Human|Virology Department|COVID-19 Genomics UK (COG-UK) Consortium|de Silva|United Kingdom

>Spike|hCoV-19/England/MILK-B96E0A/2020|2020-11-14|EPI\_ISL\_675114|Original|hCoV-19^^England|Human|Lighthouse Lab in Milton Keynes|Wellcome Sanger Institute for the COVID-19 Genomics UK (COG-UK) Consortium|Davies|United Kingdom

>Spike|hCoV-19/England/QEUIH-BA19FC/2020|2020-11-18|EPI\_ISL\_719772|Original|hCoV-19^^England|Human|Lighthouse Lab in Glasgow|Wellcome Sanger Institute for the COVID-19 Genomics UK (COG-UK) Consortium|Davies|United Kingdom

>Spike|hCoV-19/USA/NE-10862/2020|2020-05-04|EPI\_ISL\_475191|Original|hCoV-19^^Nebraska|Human|Nebraska Public Health Laboratory|UNMC COVID-19 Response Team|Pratt|USA

>Spike|hCoV-19/Wales/PHWC-26866/2020|2020-03-27|EPI\_ISL\_422281|Original|hCoV-19^^Wales|Human|Wales Specialist Virology Centre|Public Health Wales Microbiology Cardiff|Moore|United Kingdom

>Spike|hCoV-19/England/NOTT-1126AE/2020|2020-04-14|EPI\_ISL\_490563|Original|hCoV-19^^England|Human|Lincolnshire Hospitals and DeepSeq Nottingham|COVID-19 Genomics UK (COG-UK) Consortium|Loose|United Kingdom

>Spike|hCoV-19/Wales/PHWC-4A1CCD/2020|2020-12-11|EPI\_ISL\_743802|Original|hCoV-19^^Wales|Human|Wales Specialist Virology Centre Sequencing lab|COVID-19 Genomics UK (COG-UK) Consortium|Moore|United Kingdom

>Spike|hCoV-19/Denmark/DCGC-13304/2020|2020-11-30|EPI\_ISL\_712305|Original|hCoV-19^^Midtjylland|Human|Department of Virus and Microbiological Special Diagnostics|Albertsen Lab|Michaelsen|Denmark

>Spike|hCoV-19/Switzerland/GE-ETHZ-350211/2020|2020-10-30|EPI\_ISL\_693859|Original|hCoV-19^^Geneva|Human|Viollier AG|Department of Biosystems Science and Engineering|Nadeau|Switzerland

>Spike|hCoV-19/USA/WI-UW-908/2020|2020-07-12|EPI\_ISL\_509909|Original|hCoV-19^^Wisconsin|Human|University of Wisconsin-Madison AIDS Vaccine Research Laboratories|University of Wisconsin-Madison AIDS Vaccine Research Laboratories|Baczenas|USA

>Spike|hCoV-19/Denmark/DCGC-8007/2020|2020-10-26|EPI\_ISL\_617122|Original|hCoV-19^^Hovedstaden|Human|Department of Virus and Microbiological Special Diagnostics|Albertsen lab|Michaelsen|Denmark

>Spike|hCoV-19/Denmark/DCGC-19561/2020|2020-12-07|EPI\_ISL\_749026|Original|hCoV-19^^Hovedstaden|Human|Department of Virus and Microbiological Special Diagnostics|Albertsen Lab|Michaelsen|Denmark

>Spike|hCoV-19/England/QEUA-A0B1EA/2020|2020-09-30|EPI\_ISL\_599192|Original|hCoV-19^^England|Human|Lighthouse Lab in Glasgow|Wellcome Sanger Institute for the COVID-19 Genomics UK (COG-UK) consortium|Davies|United Kingdom

>Spike|hCoV-19/Netherlands/ZuidHolland\_219/2020|2020-05-10|EPI\_ISL\_461391|Original|hCoV-19^^Zuid Holland|Human|Dutch COVID-19 response team|Erasmus Medical Center|Oude Munnink|Netherlands

>Spike|hCoV-19/Scotland/QEUA-A9B3CB/2020|2020-10-20|EPI\_ISL\_625345|Original|hCoV-19^^Scotland|Human|Lighthouse Lab in Glasgow|Wellcome Sanger Institute for the COVID-19 Genomics UK (COG-UK) consortium|Davies|United Kingdom

>Spike|hCoV-19/England/MILK-B971B5/2020|2020-11-14|EPI\_ISL\_674842|Original|hCoV-19^^England|Human|Lighthouse Lab in Milton Keynes|Wellcome Sanger Institute for the COVID-19 Genomics UK (COG-UK) Consortium|Davies|United Kingdom

>Spike|hCoV-19/USA/CA-ALSR-1621/2020|2020-04-23|EPI\_ISL\_494692|Original|hCoV-19^^California|Human|Scripps Medical Laboratory|Andersen lab at Scripps Research|Gangavarapu|USA

>Spike|hCoV-19/England/ALDP-A6DBBB/2020|2020-10-14|EPI\_ISL\_607765|Original|hCoV-19^^England|Human|Lighthouse Lab in Alderley Park|Wellcome Sanger Institute for the COVID-19 Genomics UK (COG-UK) consortium|Davies|United Kingdom

>Spike|hCoV-19/Wales/PHWC-48A7BA/2020|2020-11-04|EPI\_ISL\_652599|Original|hCoV-19^^Wales|Human|Wales Specialist Virology Centre Sequencing lab|COVID-19 Genomics UK (COG-UK) Consortium|Moore|United Kingdom

>Spike|hCoV-19/England/QEUA-B3F8BA/2020|2020-11-08|EPI\_ISL\_658457|Original|hCoV-19^^England|Human|Lighthouse Lab in Glasgow|Wellcome Sanger Institute for the COVID-19 Genomics UK (COG-UK) Consortium|Davies|United Kingdom

>Spike|hCoV-19/England/MILK-9EE7EC/2020|2020-09-23|EPI\_ISL\_580844|Original|hCoV-19^^England|Human|Lighthouse Lab in Milton Keynes|Wellcome Sanger Institute for the COVID-19 Genomics UK (COG-UK) consortium|Davies|United Kingdom

>Spike|hCoV-19/Singapore/1132/2020|2020-10-31|EPI\_ISL\_626643|Original|hCoV-19^^Singapore|Human|National Public Health Laboratory|National Public Health Laboratory|Mak|Singapore

>Spike|hCoV-19/England/ALDP-A67D9D/2020|2020-10-09|EPI\_ISL\_608909|Original|hCoV-19^^England|Human|Lighthouse Lab in Alderley Park|Wellcome Sanger Institute for the COVID-19 Genomics UK (COG-UK) consortium|Davies|United Kingdom

>Spike|hCoV-19/Italy/VEN-UniVR-31/2020|2020-08-28|EPI\_ISL\_751346|Original|hCoV-19^^Veneto|Human|IRCCS Sacro Cuore Don Calabria Hospital|University of Verona|Mori|Italy

>Spike|hCoV-19/USA/LA-EVTL834/2020|2020-07-28|EPI\_ISL\_653525|Original|hCoV-19^^Louisiana|Human|LSUHS Emerging Viral Threat Laboratory|Microbial Genome Sequencing Center|Kamil|USA

>Spike|hCoV-19/England/20148035504/2020|2020-04-02|EPI\_ISL\_466063|Original|hCoV-19^^England|Human|Respiratory Virus Unit|Respiratory Virus Unit|Platt|United Kingdom



>Spike|hCoV-19/England/ALDP-A6EE66/2020|2020-10-14|EPI\_ISL\_607180|Original|hCoV-19^^England|Human|Lighthouse Lab in Alderley Park|Wellcome Sanger Institute for the COVID-19 Genomics UK (COG-UK) consortium|Davies|United Kingdom

>Spike|hCoV-19/USA/LA-GBCL-26513004/2020|2020-04-23|EPI\_ISL\_485069|Original|hCoV-19^^Louisiana|Human|River Road Testing Lab|Ginkgo Bioworks Clinical Laboratory|Smith|USA

>Spike|hCoV-19/Israel/CVL-38-ngs/2020|2020-12-24|EPI\_ISL\_776578|Original|hCoV-19^^Israel|Human|Israel Central Virology laboratory|Israel Central Virology laboratory|Zuckerman|Israel

>Spike|hCoV-19/Scotland/QEUH-9902AC/2020|2020-08-29|EPI\_ISL\_534451|Original|hCoV-19^^Scotland|Human|NHSGGC West of Scotland Specialist Virology Centre / MRC-University of Glasgow Centre for Virus Research|Wellcome Sanger Institute for the COVID-19 Genomics UK (COG-UK) consortium|Davies|United Kingdom

>Spike|hCoV-19/India/GJ-GBRC104/2020|2020-05-07|EPI\_ISL\_451149|Original|hCoV-19^^Gujarat|Human|M.P Shah Government Medocal college Jamnagar|Gujarat Biotechnology Research Centre|Joshi|India

>Spike|hCoV-19/England/CAMC-B78545/2020|2020-11-11|EPI\_ISL\_661742|Original|hCoV-19^^England|Human|Lighthouse Lab in Cambridge|Wellcome Sanger Institute for the COVID-19 Genomics UK (COG-UK) Consortium|Davies|United Kingdom

>Spike|hCoV-19/USA/MI-MDHHS-SC22436/2020|2020-11-18|EPI\_ISL\_708269|Original|hCoV-19^^Michigan|Human|Michigan Department of Health and Human Services|Michigan Department of Health and Human Services|Jacob|USA

>Spike|hCoV-19/England/CAMB-7CED8/2020|2020-04-06|EPI\_ISL\_442208|Original|hCoV-19^^England|Human|Department of Pathology|Wellcome Sanger Institute for the COVID-19 Genomics UK (COG-UK) consortium|Amato|United Kingdom

>Spike|hCoV-19/Spain/AR-IBV-005112/2020|2020-04-26|EPI\_ISL\_510382|Original|hCoV-19^^Aragon|Human|Servicio de Microbiolog\u00eda|SeqCOVID-SPAIN consortium|IBV (CSIC) |Comas|Spain

>Spike|hCoV-19/England/CAMC-B33564/2020|2020-11-05|EPI\_ISL\_659153|Original|hCoV-19^^England|Human|Lighthouse Lab in Cambridge|Wellcome Sanger Institute for the COVID-19 Genomics UK (COG-UK) Consortium|Davies|United Kingdom

>Spike|hCoV-19/England/ALDP-B76161/2020|2020-11-12|EPI\_ISL\_723739|Original|hCoV-19^^England|Human|Oxford Viromics|COVID-19 Genomics UK (COG-UK) Consortium|Golubchik|United Kingdom

>Spike|hCoV-19/England/NORT-1B87355/2020|2020-10-13|EPI\_ISL\_724977|Original|hCoV-19^^England|Human|Northumbria University / South Tees Hospitals NHS Foundation Trust / North Cumbria Integrated Care NHS Foundation Trust / North Tees and Hartlepool NHS Foundation Trust / Newcastle Hospitals NHS Foundation Trust|COVID-19 Genomics UK (COG-UK) Consortium|Bashton|United Kingdom

>Spike|hCoV-19/England/ALDP-9CBC6E/2020|2020-09-16|EPI\_ISL\_575410|Original|hCoV-19^^England|Human|Lighthouse Lab in Alderley Park|Wellcome Sanger Institute for the COVID-19 Genomics UK (COG-UK) consortium|Davies|United Kingdom

>Spike|hCoV-19/Portugal/PT0435/2020|2020-03-20|EPI\_ISL\_454159|Original|hCoV-19^^Portugal|Human|unknown|Instituto Nacional de Saude (INSA)|Borges|Portugal

>Spike|hCoV-19/USA/NY-Wadsworth-288843-01/2020|2020-12-18|EPI\_ISL\_767488|Original|hCoV-19^^New York|Human|Wadsworth Center|Wadsworth Center|Lasek-Nesselquist|USA

>Spike|hCoV-19/Wales/PHWC-2ED23/2020|2020-04-07|EPI\_ISL\_446144|Original|hCoV-19^^Wales|Human|Wales Specialist Virology Centre|Public Health Wales Microbiology Cardiff|Moore|United Kingdom

>Spike|hCoV-19/England/CAMC-A82A86/2020|2020-10-12|EPI\_ISL\_610867|Original|hCoV-19^^England|Human|Lighthouse Lab in Cambridge|Wellcome Sanger Institute for the COVID-19 Genomics UK (COG-UK) consortium|Davies|United Kingdom

>Spike|hCoV-19/Singapore/464/2020|2020-05-04|EPI\_ISL\_475995|Original|hCoV-19^^Singapore|Human|National Public Health Laboratory|National Public Health Laboratory|Mak|Singapore

>Spike|hCoV-19/Scotland/EDB5893/2020|2020-04-29|EPI\_ISL\_473868|Original|hCoV-19^^Scotland|Human|Virology Department|COVID-19 Genomics UK (COG-UK) Consortium|Williams|United Kingdom

>Spike|hCoV-19/England/ALDP-B61FAB/2020|2020-11-08|EPI\_ISL\_656535|Original|hCoV-19^^England|Human|Lighthouse Lab in Alderley Park|Wellcome Sanger Institute for the COVID-19 Genomics UK (COG-UK) Consortium|Davies|United Kingdom

>Spike|hCoV-19/England/LOND-D41B7/2020|2020-04-06|EPI\_ISL\_444097|Original|hCoV-19^^England|Human|University College London|COVID-19 Genomics UK (COG-UK) Consortium|Roy|United Kingdom

>Spike|hCoV-19/England/MILK-ACF7A4/2020|2020-10-22|EPI\_ISL\_629442|Original|hCoV-19^^England|Human|Lighthouse Lab in Milton Keynes|Wellcome Sanger Institute for the COVID-19 Genomics UK (COG-UK) consortium|Davies|United Kingdom

>Spike|hCoV-19/England/LOND-1266F7F/2020|2020-12-10|EPI\_ISL\_741235|Original|hCoV-19^^England|Human|University College London|COVID-19 Genomics UK (COG-UK) Consortium|Roy|United Kingdom

>Spike|hCoV-19/Denmark/DCGC-16696/2020|2020-11-02|EPI\_ISL\_714923|Original|hCoV-19^^Midtjylland|Human|Department of Virus and Microbiological Special Diagnostics|Albertsen Lab|Michaelsen|Denmark

>Spike|hCoV-19/Australia/VIC11793/2020|2020-08-01|EPI\_ISL\_591684|Original|hCoV-19^^Victoria|Human|Victorian Infectious Diseases Reference Laboratory (VIDRL)|VIDRL and MDU-PHL|Schultz|Australia

>Spike|hCoV-19/Sweden/20-08091/2020|2020-03-20|EPI\_ISL\_454463|Original|hCoV-19^^Stockholm|Human|Karolinska Universitetslaboratoriet|The Public Health Agency of Sweden|Svartstr\u00f6m|Sweden

>Spike|hCoV-19/USA/LA-EVTL956/2020|2020-08-13|EPI\_ISL\_653647|Original|hCoV-19^^Louisiana|Human|LSUHS Emerging Viral Threat Laboratory|Microbial Genome Sequencing Center|Kamil|USA

>Spike|hCoV-19/England/QEUH-95FD02/2020|2020-08-03|EPI\_ISL\_531891|Original|hCoV-19^^England|Human|Lighthouse Lab in Glasgow|Wellcome Sanger Institute for the COVID-19 Genomics UK (COG-UK) consortium|Davies|United Kingdom

>Spike|hCoV-19/USA/AK-PHL1882/2020|2020-07-22|EPI\_ISL\_528511|Original|hCoV-19^^Alaska|Human|Alaska State Virology Laboratory|Alaska State Virology Laboratory|Drown|USA

>Spike|hCoV-19/India/MH-ACTREC-192/2020|2020-06-22|EPI\_ISL\_699846|Original|hCoV-19^^Maharashtra|Human|Hematopathology Laboratory|Hematopathology Laboratory|Patkar|India

>Spike|hCoV-19/Denmark/DCGC-15513/2020|2020-11-23|EPI\_ISL\_713862|Original|hCoV-19^^Hovedstaden|Human|Department of Virus and Microbiological Special Diagnostics|Albertsen Lab|Michaelsen|Denmark

>Spike|hCoV-19/Nigeria/KW298-CV48/2020|2020-05-08|EPI\_ISL\_487107|Original|hCoV-19^^Kwara State|Human|Nigeria Centre for Disease Control (NCDC)|African Centre of Excellence for Genomics of Infectious Diseases (ACEGID)|Oluniyi|Nigeria

>Spike|hCoV-19/Germany/NW-HHU-241/2020|2020-09-15|EPI\_ISL\_631374|Original|hCoV-19^^North Rhine-Westphalia|Human|ZOTZ KLIMAS MVZ D\u00fcsseldorf-Centrum GbR \u00dcBAG f\u00fcr Labormedizin|Center of Medical Microbiology|Wienemann|Germany

>Spike|hCoV-19/Austria/CeMM0490/2020|2020-03-21|EPI\_ISL\_583579|Original|hCoV-19^^Hochficht|Human|Institute for Medical and Chemical Laboratory Diagnostics|Bergthaler laboratory|Bergthaler|Austria

>Spike|hCoV-19/Denmark/DCGC-6529/2020|2020-10-05|EPI\_ISL\_619429|Original|hCoV-19^^Hovedstaden|Human|Department of Virus and Microbiological Special Diagnostics|Albertsen lab|Michaelsen|Denmark

>Spike|hCoV-19/South Africa/KRISP-K004323/2020|2020-10-25|EPI\_ISL\_660199|Original|hCoV-19^^KwaZulu-Natal|Human|NHLS-IALCH|KRISP|de Oliveira|South Africa

>Spike|hCoV-19/England/MILK-B96EFB/2020|2020-11-13|EPI\_ISL\_674993|Original|hCoV-19^^England|Human|Lighthouse Lab in Milton Keynes|Wellcome Sanger Institute for the COVID-19 Genomics UK (COG-UK) Consortium|Davies|United Kingdom

>Spike|hCoV-19/USA/CA-CZB-3670/2020|2020-08-11|EPI\_ISL\_516745|Original|hCoV-19^^California|Human|UCSF Clinical Microbiology Laboratory|Chan-Zuckerberg Biohub|Kamm|USA

>Spike|hCoV-19/Denmark/DCGC-4195/2020|2020-09-21|EPI\_ISL\_622088|Original|hCoV-19^^Syddanmark|Human|Department of Virus and Microbiological Special Diagnostics|Albertsen lab|Michaelsen|Denmark

>Spike|hCoV-19/Wales/PHWC-32FF9/2020|2020-04-13|EPI\_ISL\_446723|Original|hCoV-19^^Wales|Human|Wales Specialist Virology Centre|Public Health Wales Microbiology Cardiff|Moore|United Kingdom

>Spike|hCoV-19/England/QEUEH-AD5E3D/2020|2020-10-26|EPI\_ISL\_634581|Original|hCoV-19^^England|Human|Lighthouse Lab in Glasgow|Wellcome Sanger Institute for the COVID-19 Genomics UK (COG-UK) consortium|Davies|United Kingdom

>Spike|hCoV-19/USA/WA-S1891/2020|2020-05-28|EPI\_ISL\_496317|Original|hCoV-19^^Washington|Human|Washington State Department of Health|Seattle Flu Study|Lee|USA

>Spike|hCoV-19/Denmark/DCGC-14724/2020|2020-11-23|EPI\_ISL\_711933|Original|hCoV-19^^Nordjylland|Human|Department of Virus and Microbiological Special Diagnostics|Albertsen Lab|Michaelsen|Denmark

>Spike|hCoV-19/Sweden/20-52657/2020|2020-06-02|EPI\_ISL\_660421|Original|hCoV-19^^Orebro|Human|Klinisk mikrobiologi|The Public Health Agency of Sweden|Svartstr\u00f6m|Sweden

>Spike|hCoV-19/England/QEUEH-AD0DF9/2020|2020-10-26|EPI\_ISL\_633720|Original|hCoV-19^^England|Human|Lighthouse Lab in Glasgow|Wellcome Sanger Institute for the COVID-19 Genomics UK (COG-UK) consortium|Davies|United Kingdom

>Spike|hCoV-19/Italy/LOM-UniMI15/2020|2020-03-18|EPI\_ISL\_780411|Original|hCoV-19^^Lombardy|Human|Laboratory of Infectious Diseases|Laboratory of Infectious Diseases|Lai|Italy

>Spike|hCoV-19/England/MILK-A22B2B/2020|2020-10-03|EPI\_ISL\_611756|Original|hCoV-19^^England|Human|Northumbria University / South Tees Hospitals NHS Foundation Trust / North Cumbria Integrated Care NHS Foundation Trust / North Tees and Hartlepool NHS Foundation Trust / Newcastle Hospitals NHS Foundation Trust|COVID-19 Genomics UK (COG-UK) Consortium|Bashton|United Kingdom

>Spike|hCoV-19/Denmark/DCGC-11688/2020|2020-10-26|EPI\_ISL\_671069|Original|hCoV-19^^Hovedstaden|Human|Department of Virus and Microbiological Special Diagnostics|Albertsen Lab|Michaelsen|Denmark

>Spike|hCoV-19/England/MILK-B8C766/2020|2020-11-13|EPI\_ISL\_675992|Original|hCoV-19^^England|Human|Lighthouse Lab in Milton Keynes|Wellcome Sanger Institute for the COVID-19 Genomics UK (COG-UK) Consortium|Davies|United Kingdom

>Spike|hCoV-19/Canada/ON-PHL-20-03604/2020|2020-11-00|EPI\_ISL\_775112|Original|hCoV-19^^Ontario|Human|Public Health Ontario Laboratory|Public Health Ontario Laboratory|Guthrie|Canada

>Spike|hCoV-19/England/PORT-2D1D4B/2020|2020-04-03|EPI\_ISL\_499274|Original|hCoV-19^^England|Human|Centre for Enzyme Innovation|COVID-19 Genomics UK (COG-UK) Consortium|Robson|United Kingdom

>Spike|hCoV-19/Germany/BY-ChVir-W1130-5743/2020|2020-03-27|EPI\_ISL\_754034|Original|hCoV-19^^Bavaria|Human|Charit\u00e9 Universit\u00e4tsmedizin Berlin|Charit\u00e9 Universit\u00e4tsmedizin Berlin|Muehlemann|Germany

>Spike|hCoV-19/England/LIVE-DCBA7F/2020|2020-11-24|EPI\_ISL\_724449|Original|hCoV-19^^England|Human|Liverpool Clinical Laboratories|COVID-19 Genomics UK (COG-UK) Consortium|Haldenby|United Kingdom

>Spike|hCoV-19/England/ALDP-A69074/2020|2020-10-12|EPI\_ISL\_609133|Original|hCoV-19^^England|Human|Lighthouse Lab in Alderley Park|Wellcome Sanger Institute for the COVID-19 Genomics UK (COG-UK) consortium|Davies|United Kingdom

>Spike|hCoV-19/Germany/HH-hpi-p2186/2020|2020-03-21|EPI\_ISL\_776414|Original|hCoV-19^^Hamburg|Human|University Medical Center Hamburg Eppendorf|Heinrich Pette Institute|Robitaille|Germany

>Spike|hCoV-19/England/MILK-A91732/2020|2020-10-19|EPI\_ISL\_705980|Original|hCoV-19^^England|Human|Oxford Viromics|COVID-19 Genomics UK (COG-UK) Consortium|Golubchik|United Kingdom

>Spike|hCoV-19/Denmark/DCGC-19357/2020|2020-12-07|EPI\_ISL\_748345|Original|hCoV-19^^Syddanmark|Human|Department of Virus and Microbiological Special Diagnostics|Albertsen Lab|Michaelsen|Denmark

>Spike|hCoV-19/Australia/VIC11320/2020|2020-07-13|EPI\_ISL\_563328|Original|hCoV-19^^Victoria|Human|Microbiological Diagnostic Unit - Public Health Laboratory (MDU-PHL)|MDU-PHL|Schultz|Australia

>Spike|hCoV-19/Denmark/DCGC-12443/2020|2020-11-16|EPI\_ISL\_682624|Original|hCoV-19^^Midtjylland|Human|Department of Virus and Microbiological Special Diagnostics|Albertsen Lab|Michaelsen|Denmark

>Spike|hCoV-19/Scotland/QEUH-9F65F6/2020|2020-09-27|EPI\_ISL\_600748|Original|hCoV-19^^Scotland|Human|Lighthouse Lab in Glasgow|Wellcome Sanger Institute for the COVID-19 Genomics UK (COG-UK) consortium|Davies|United Kingdom

>Spike|hCoV-19/Kenya/C7855/2020|2020-05-17|EPI\_ISL\_568850|Original|hCoV-19^^Kwale|Human|KEMRI-Wellcome Trust Research Programme/KEMRI-CGMR-C Kilifi|KEMRI-Wellcome Trust Research Programme/KEMRI-CGMR-C Kilifi|Githinji|Kenya

>Spike|hCoV-19/England/201360052/2020|2020-03-24|EPI\_ISL\_423202|Original|hCoV-19^^England|Human|Respiratory Virus Unit|Respiratory Virus Unit|Platt|United Kingdom

>Spike|hCoV-19/USA/TX-HMH-1737/2020|2020-05-07|EPI\_ISL\_542804|Original|hCoV-19^^Texas|Human|Houston Methodist Hospital|Houston Methodist Hospital|Long|USA

>Spike|hCoV-19/USA/AZ-TG408186/2020|2020-06-16|EPI\_ISL\_694927|Original|hCoV-19^^Arizona|Human|AZ SPHL|TGen North|French|USA

>Spike|hCoV-19/England/ALDP-A511A9/2020|2020-10-07|EPI\_ISL\_598111|Original|hCoV-19^^England|Human|Lighthouse Lab in Alderley Park|Wellcome Sanger Institute for the COVID-19 Genomics UK (COG-UK) consortium|Davies|United Kingdom

>Spike|hCoV-19/Australia/VIC15624/2020|2020-07-28|EPI\_ISL\_593383|Original|hCoV-19^^Victoria|Human|Microbiological Diagnostic Unit - Public Health Laboratory (MDU-PHL) |MDU-PHL|Schultz|Australia

>Spike|hCoV-19/Denmark/DCGC-3895/2020|2020-09-07|EPI\_ISL\_615614|Original|hCoV-19^^Syddanmark|Human|Department of Virus and Microbiological Special Diagnostics|Albertsen lab|Michaelsen|Denmark

>Spike|hCoV-19/Australia/VIC8665/2020|2020-08-11|EPI\_ISL\_565135|Original|hCoV-19^^Victoria|Human|Microbiological Diagnostic Unit - Public Health Laboratory (MDU-PHL) |MDU-PHL|Schultz|Australia

>Spike|hCoV-19/England/ALDP-A50E94/2020|2020-10-07|EPI\_ISL\_597697|Original|hCoV-19^^England|Human|Lighthouse Lab in Alderley Park|Wellcome Sanger Institute for the COVID-19 Genomics UK (COG-UK) consortium|Davies|United Kingdom

>Spike|hCoV-19/England/LOND-D56A8/2020|2020-04-16|EPI\_ISL\_449713|Original|hCoV-19^^England|Human|University College London|COVID-19 Genomics UK (COG-UK) Consortium|Roy|United Kingdom

>Spike|hCoV-19/Canada/ON-PHL-20-03758/2020|2020-11-00|EPI\_ISL\_775041|Original|hCoV-19^^Ontario|Human|Public Health Ontario Laboratory|Public Health Ontario Laboratory|Guthrie|Canada

>Spike|hCoV-19/Japan/PG-5461/2020|2020-08-00|EPI\_ISL\_690564|Original|hCoV-19^^Japan|Human|Pathogen Genomics Center|Pathogen Genomics Center|Sekizuka|Japan

>Spike|hCoV-19/Ireland/MH-NVRL-77IRL72666/2020|2020-11-05|EPI\_ISL\_752522|Original|hCoV-19^^Meath|Human|National Virus Reference Laboratory|National Virus Reference Laboratory|Gonzalez|Ireland

>Spike|hCoV-19/Japan/PG-0874/2020|2020-04-00|EPI\_ISL\_684484|Original|hCoV-19^^Japan|Human|Pathogen Genomics Center|Pathogen Genomics Center|Sekizuka|Japan

>Spike|hCoV-19/England/PORT-2D0B8E/2020|2020-04-24|EPI\_ISL\_577195|Original|hCoV-19^^England|Human|Centre for Enzyme Innovation|COVID-19 Genomics UK (COG-UK) Consortium|Robson|United Kingdom

>Spike|hCoV-19/England/LOND-12F0DCB/2020|2020-11-29|EPI\_ISL\_705337|Original|hCoV-19^^England|Human|University College London|COVID-19 Genomics UK (COG-UK) Consortium|Roy|United Kingdom

>Spike|hCoV-19/England/CAMB-7616C/2020|2020-03-30|EPI\_ISL\_439465|Original|hCoV-19^^England|Human|Department of Pathology|Wellcome Sanger Institute for the COVID-19 Genomics UK (COG-UK) consortium|Amato|United Kingdom

>Spike|hCoV-19/England/QEUH-CC9720/2020|2020-12-23|EPI\_ISL\_782116|Original|hCoV-19^^England|Human|Lighthouse Lab in Glasgow|Wellcome Sanger Institute for the COVID-19 Genomics UK (COG-UK) Consortium|Davies|United Kingdom

>Spike|hCoV-19/Wuhan/HB-WH2-145/2020|2020-03-02|EPI\_ISL\_455369|Original|hCoV-19^^Hubei|Human|Wuhan Chain Medical Labs (CMLabs)|State Key Laboratory of Biotherapy of Sichuan University|Tang|China

>Spike|hCoV-19/England/QEUEH-7DADD4/2020|2020-07-20|EPI\_ISL\_532892|Original|hCoV-19^^England|Human|Lighthouse Lab in Glasgow|Wellcome Sanger Institute for the COVID-19 Genomics UK (COG-UK) consortium|Davies|United Kingdom

>Spike|hCoV-19/USA/WA-OHSU-0525/2020|2020-06-15|EPI\_ISL\_526098|Original|hCoV-19^^Washington|Human|OHSU Lab Services Molecular Microbiology Lab|Oregon SARS-CoV-2 Genome Sequencing Center|O'Roak|USA

>Spike|hCoV-19/Japan/PG-1154/2020|2020-04-00|EPI\_ISL\_684764|Original|hCoV-19^^Japan|Human|Pathogen Genomics Center|Pathogen Genomics Center|Sekizuka|Japan

>Spike|hCoV-19/USA/UT-UPHL-2009235/2020|2020-05-15|EPI\_ISL\_525228|Original|hCoV-19^^Utah|Human|Utah Public Health Laboratory|Utah Public Health Laboratory|Young|USA

>Spike|hCoV-19/Spain/RI-IBV-99010994/2020|2020-10-22|EPI\_ISL\_732817|Original|hCoV-19^^La\_Rioja|Human|Centro de Investigaci\u00f3n Biom\u00e9dica de La Rioja - Hospital San Pedro Logro\u00f1o|SeqCOVID-SPAIN consortium|IBV (CSIC)|Comas|Spain

>Spike|hCoV-19/Scotland/QEUEH-9D0862/2020|2020-09-16|EPI\_ISL\_601846|Original|hCoV-19^^Scotland|Human|Lighthouse Lab in Glasgow|Wellcome Sanger Institute for the COVID-19 Genomics UK (COG-UK) consortium|Davies|United Kingdom

>Spike|hCoV-19/Belgium/ULG-10175/2020|2020-05-08|EPI\_ISL\_455963|Original|hCoV-19^^Li\u00e8ge|Human|Department of Clinical Microbiology|GIGA Medical Genomics|Durkin|Belgium

>Spike|hCoV-19/England/BRIS-12181F/2020|2020-03-03|EPI\_ISL\_440235|Original|hCoV-19^^England|Human|PHE South West Regional Laboratory|Wellcome Sanger Institute for the COVID-19 Genomics UK (COG-UK) consortium|Amato|United Kingdom

>Spike|hCoV-19/Jordan/AQ-ALSR-5276/2020|2020-10-18|EPI\_ISL\_730514|Original|hCoV-19^^Aqaba|Human|Biolab Diagnostic Laboratories|Andersen lab at Scripps Research|Gangavarapu|Jordan

>Spike|hCoV-19/Wales/PHWC-2C684/2020|2020-03-31|EPI\_ISL\_445892|Original|hCoV-19^^Wales|Human|Wales Specialist Virology Centre|Public Health Wales Microbiology Cardiff|Moore|United Kingdom

>Spike|hCoV-19/England/204200095/2020|2020-10-10|EPI\_ISL\_609864|Original|hCoV-19^^England|Human|Respiratory Virus Unit|Respiratory Virus Unit|Platt|United Kingdom

>Spike|hCoV-19/South Africa/KRISP-K001364/2020|2020-07-16|EPI\_ISL\_515849|Original|hCoV-19^^KwaZulu-Natal|Human|Medical Disagnostics Services (MDS)|KRISP|de Oliveira|South Africa

>Spike|hCoV-19/Denmark/DCGC-14715/2020|2020-11-23|EPI\_ISL\_711926|Original|hCoV-19^^Hovedstaden|Human|Department of Virus and Microbiological Special Diagnostics|Albertsen Lab|Michaelsen|Denmark

>Spike|hCoV-19/Shanghai/SH0080/2020|2020-02-08|EPI\_ISL\_416382|Original|hCoV-19^^Shanghai|Human|Shanghai Public Health Clinical Center|National Research Center for Translational Medicine (Shanghai)|Zhang|China

>Spike|hCoV-19/England/BRIS-125F07/2020|2020-03-31|EPI\_ISL\_443894|Original|hCoV-19^^England|Human|PHE South West Regional Laboratory|Wellcome Sanger Institute for the COVID-19 Genomics UK (COG-UK) consortium|Amato|United Kingdom

>Spike|hCoV-19/USA/OH-ODH-SC35177/2020|2020-04-23|EPI\_ISL\_778862|Original|hCoV-19^^Ohio|Human|Ohio Department of Health Laboratory|Ohio Department of Health Laboratory|Holmes|USA

>Spike|hCoV-19/England/QEUEH-AD48F4/2020|2020-10-25|EPI\_ISL\_634091|Original|hCoV-19^^England|Human|Lighthouse Lab in Glasgow|Wellcome Sanger Institute for the COVID-19 Genomics UK (COG-UK) consortium|Davies|United Kingdom

>Spike|hCoV-19/Scotland/QEUEH-B0F2B5/2020|2020-11-02|EPI\_ISL\_649530|Original|hCoV-19^^Scotland|Human|Lighthouse Lab in Glasgow|Wellcome Sanger Institute for the COVID-19 Genomics UK (COG-UK) Consortium|Davies|United Kingdom

>Spike|hCoV-19/USA/CA-QDX-550/2020|2020-03-19|EPI\_ISL\_571273|Original|hCoV-19^^California|Human|Quest Diagnostics|Quest Diagnostics|Kagan|USA

>Spike|hCoV-19/Japan/PG-7671/2020|2020-08-00|EPI\_ISL\_686773|Original|hCoV-19^^Japan|Human|Chiba Prefectural Institute of Public Health|Pathogen Genomics Center|Sekizuka|Japan

>Spike|hCoV-19/England/20126025902/2020|2020-03-18|EPI\_ISL\_418758|Original|hCoV-19^^England|Human|Respiratory Virus Unit|Respiratory Virus Unit|Platt|United Kingdom

>Spike|hCoV-19/India/UT-58264-CSIR-IGIB/2020|2020-08-03|EPI\_ISL\_636798|Original|hCoV-19^^Uttarakhand|Human|National Centre for Disease control (NCDC)|NCDC/CSIR-IGIB|Faruq|India

>Spike|hCoV-19/France/ARA-06391/2020|2020-03-06|EPI\_ISL\_525536|Original|hCoV-19^^Auvergne-Rh\u00f4ne-Alpes|Human|CNR Virus des Infections Respiratoires - France SUD|CNR Virus des Infections Respiratoires - France SUD|Josset|France

>Spike|hCoV-19/Scotland/QEUH-9B78CB/2020|2020-09-08|EPI\_ISL\_602107|Original|hCoV-19^^Scotland|Human|Lighthouse Lab in Glasgow|Wellcome Sanger Institute for the COVID-19 Genomics UK (COG-UK) consortium|Davies|United Kingdom

>Spike|hCoV-19/Switzerland/GE-SNRCI-3276/2020|2020-03-00|EPI\_ISL\_548166|Original|hCoV-19^^Geneve|Human|Laboratoire de Virologie|Swiss National Reference Centre for Influenza|Gon\u00e7alves Cabecinhas|Switzerland

>Spike|hCoV-19/Japan/Donner45/2020|2020-06-20|EPI\_ISL\_644950|Original|hCoV-19^^Kanto|Human|Department of Infectious Diseases|Center for Medical Genetics|Kosaki|Japan

>Spike|hCoV-19/Italy/TUS-UOS-18/2020|2020-06-07|EPI\_ISL\_591329|Original|hCoV-19^^Tuscany|Human|Dipartimento di Biotecnologie Mediche|Dipartimento di Biotecnologie Mediche|Cusi|Italy

>Spike|hCoV-19/Germany/NW-HHU-340/2020|2020-10-13|EPI\_ISL\_666629|Original|hCoV-19^^North Rhine-Westphalia|Human|ZOTZ KLIMAS MVZ D\u00fcsseldorf-Centrum GbR \u00dcBAG f\u00fcr Labormedizin|Center of Medical Microbiology|Wienemann|Germany

>Spike|hCoV-19/Japan/PG-1383/2020|2020-04-00|EPI\_ISL\_684990|Original|hCoV-19^^Japan|Human|Saitama Prefectural Institute of Public Health|Pathogen Genomics Center|Sekizuka|Japan

>Spike|hCoV-19/USA/NY-NYUMC331/2020|2020-04-13|EPI\_ISL\_430358|Original|hCoV-19^^New York|Human|NYU Langone Health|Departments of Pathology and Medicine|Maurano|USA

>Spike|hCoV-19/Netherlands/Utrecht\_2/2020|2020-03-03|EPI\_ISL\_414436|Original|hCoV-19^^Utrecht|Human|Dutch COVID-19 response team|Erasmus Medical Center|Oude Munnink|Netherlands

>Spike|hCoV-19/Portugal/PT1064/2020|2020-03-28|EPI\_ISL\_511611|Original|hCoV-19^^Portugal|Human|Instituto Nacional de Saude (INSA)|Instituto Nacional de Saude (INSA)|Borges|Portugal

>Spike|hCoV-19/Australia/NSW1265/2020|2020-12-22|EPI\_ISL\_740896|Original|hCoV-19^^New South Wales|Human|Histopath|NSW Health Pathology - Institute of Clinical Pathology and Medical Research; Westmead Hospital; University of Sydney|Gall|Australia

>Spike|hCoV-19/Scotland/QEUH-AD1C19/2020|2020-10-26|EPI\_ISL\_644007|Original|hCoV-19^^Scotland|Human|Lighthouse Lab in Glasgow|Wellcome Sanger Institute for the COVID-19 Genomics UK (COG-UK) Consortium|Davies|United Kingdom

>Spike|hCoV-19/England/MILK-AB7C55/2020|2020-10-21|EPI\_ISL\_623599|Original|hCoV-19^^England|Human|Lighthouse Lab in Milton Keynes|Wellcome Sanger Institute for the COVID-19 Genomics UK (COG-UK) consortium|Davies|United Kingdom

>Spike|hCoV-19/Japan/IC-0052/2020|2020-06-00|EPI\_ISL\_591394|Original|hCoV-19^^Japan|Human|Pathogen Genomics Center|Pathogen Genomics Center|Sekizuka|Japan

>Spike|hCoV-19/Australia/NSW646/2020|2020-07-01|EPI\_ISL\_498765|Original|hCoV-19^^New South Wales|Human|Sydney South West Pathology Service (SSWPS) - Concord Repatriation General Hospital - NSW Health Pathology|NSW Health Pathology - Institute of Clinical Pathology and Medical Research; Westmead Hospital; University of Sydney|Gall|Australia

>Spike|hCoV-19/Russia/StPetersburg-RII8409S/2020|2020-04-22|EPI\_ISL\_450282|Original|hCoV-19^^Saint Petersburg|Human|WHO National Influenza Centre Russian Federation|WHO National Influenza Centre Russian Federation|Komissarov|Russia

>Spike|hCoV-19/Japan/PG-3949/2020|2020-07-00|EPI\_ISL\_692198|Original|hCoV-19^^Japan|Human|Pathogen Genomics Center|Pathogen Genomics Center|Sekizuka|Japan

>Spike|hCoV-19/England/LIVE-1E214C/2020|2020-09-28|EPI\_ISL\_594860|Original|hCoV-19^^England|Human|Liverpool Clinical Laboratories|COVID-19 Genomics UK (COG-UK) Consortium|Haldenby|United Kingdom

>Spike|hCoV-19/England/MILK-9C2317/2020|2020-09-09|EPI\_ISL\_566628|Original|hCoV-19^^England|Human|Lighthouse Lab in Milton Keynes|Wellcome Sanger Institute for the COVID-19 Genomics UK (COG-UK) consortium|Davies|United Kingdom

>Spike|hCoV-19/England/QEUH-96D466/2020|2020-08-20|EPI\_ISL\_530664|Original|hCoV-19^^England|Human|Lighthouse Lab in Glasgow|Wellcome Sanger Institute for the COVID-19 Genomics UK (COG-UK) consortium|Davies|United Kingdom

>Spike|hCoV-19/England/ALDP-BBB5BF/2020|2020-11-19|EPI\_ISL\_702486|Original|hCoV-19^^England|Human|Lighthouse Lab in Alderley Park|Wellcome Sanger Institute for the COVID-19 Genomics UK (COG-UK) Consortium|Davies|United Kingdom

>Spike|hCoV-19/England/QEUH-CC2684/2020|2020-12-21|EPI\_ISL\_760255|Original|hCoV-19^^England|Human|Lighthouse Lab in Glasgow|Wellcome Sanger Institute for the COVID-19 Genomics UK (COG-UK) Consortium|Davies|United Kingdom

>Spike|hCoV-19/USA/CA-SEARCH-5361/2020|2020-12-15|EPI\_ISL\_755173|Original|hCoV-19^^California|Human|UCSD EXCITE lab|Andersen lab at Scripps Research|Gangavarapu|USA

>Spike|hCoV-19/Netherlands/ZH-RIVM-10339/2020|2020-00-00|EPI\_ISL\_636596|Original|hCoV-19^^ZuidHolland|Human|Dutch COVID-19 response team|National Institute for Public Health and the Environment (RIVM)|Meijer|Netherlands

>Spike|hCoV-19/South Africa/R10874/2020|2020-06-19|EPI\_ISL\_490311|Original|hCoV-19^^Gauteng|Human|National Institute for Communicable Diseases of the National Health Laboratory Service|National Institute for Communicable Diseases of the National Health Laboratory Service|Allam|South Africa

>Spike|hCoV-19/Australia/TAS133/2020|2020-04-16|EPI\_ISL\_522599|Original|hCoV-19^^Tasmania|Human|Royal Hobart Hospital Microbiology Department|MDU-PHL|Schultz|Australia

>Spike|hCoV-19/Wales/PHWC-49979A/2020|2020-12-03|EPI\_ISL\_727354|Original|hCoV-19^^Wales|Human|Originating lab|COVID-19 Genomics UK (COG-UK) Consortium|Moore|United Kingdom

>Spike|hCoV-19/England/SHEF-10B2E2E/2020|2020-05-16|EPI\_ISL\_537220|Original|hCoV-19^^England|Human|Virology Department|Wellcome Sanger Institute for the COVID-19 Genomics UK (COG-UK) consortium|Davies|United Kingdom

>Spike|hCoV-19/Netherlands/ZH-EMC-1236/2020|2020-11-17|EPI\_ISL\_763305|Original|hCoV-19^^Zuid Holland|Human|Dutch COVID-19 response team|Erasmus Medical Center|Oude Munnink|Netherlands

>Spike|hCoV-19/England/ALDP-A85027/2020|2020-10-16|EPI\_ISL\_610611|Original|hCoV-19^^England|Human|Lighthouse Lab in Alderley Park|Wellcome Sanger Institute for the COVID-19 Genomics UK (COG-UK) consortium|Davies|United Kingdom

>Spike|hCoV-19/England/LEED-2AA042/2020|2020-04-08|EPI\_ISL\_538949|Original|hCoV-19^^England|Human|Leeds Teaching Hospitals NHS Trust and Public Health England|Wellcome Sanger Institute for the COVID-19 Genomics UK (COG-UK) consortium|Davies|United Kingdom

>Spike|hCoV-19/Wales/PHWC-47E2C7/2020|2020-10-09|EPI\_ISL\_595433|Original|hCoV-19^^Wales|Human|Originating lab|COVID-19 Genomics UK (COG-UK) Consortium|Moore|United Kingdom

>Spike|hCoV-19/Wales/PHWC-32C01/2020|2020-04-14|EPI\_ISL\_446665|Original|hCoV-19^^Wales|Human|Wales Specialist Virology Centre|Public Health Wales Microbiology Cardiff|Moore|United Kingdom

>Spike|hCoV-19/USA/CA-CZB-15150/2020|2020-11-23|EPI\_ISL\_738971|Original|hCoV-19^^California|Human|Santa Clara County Public Health Laboratory|Chan-Zuckerberg Biohub|Kamm|USA

>Spike|hCoV-19/USA/WA-UW-21734/2020|2020-08-05|EPI\_ISL\_570996|Original|hCoV-19^^Washington|Human|UW Virology Lab|UW Virology Lab|Roychoudhury|USA

>Spike|hCoV-19/England/201360122/2020|2020-03-25|EPI\_ISL\_423217|Original|hCoV-19^^England|Human|Respiratory Virus Unit|Respiratory Virus Unit|Platt|United Kingdom

>Spike|hCoV-19/USA/UT-UPHL-2008810/2020|2020-05-29|EPI\_ISL\_524836|Original|hCoV-19^^Utah|Human|Utah Public Health Laboratory|Utah Public Health Laboratory|Young|USA

>Spike|hCoV-19/England/CAMC-BBC5EB/2020|2020-11-21|EPI\_ISL\_724159|Original|hCoV-19^^England|Human|Quadram Institute Bioscience|COVID-19 Genomics UK (COG-UK) Consortium|Alikhan|United Kingdom

>Spike|hCoV-19/Germany/HH-hpi-p1724/2020|2020-03-15|EPI\_ISL\_776104|Original|hCoV-19^^Hamburg|Human|University Medical Center Hamburg Eppendorf|Heinrich Pette Institute|Robitaille|Germany

>Spike|hCoV-19/Indonesia/YO-UGM-00061/2020|2020-06-16|EPI\_ISL\_575331|Original|hCoV-19^^Special Region of Yogyakarta|Human|RSUD Wates|Genetics Working Group (Pokja Genetik) Faculty of Medicine|Gunadi|Indonesia

>Spike|hCoV-19/England/20132003204/2020|2020-03-22|EPI\_ISL\_423712|Original|hCoV-19^^England|Human|Respiratory Virus Unit|Respiratory Virus Unit|Platt|United Kingdom

>Spike|hCoV-19/England/CAMB-7FA3B/2020|2020-04-08|EPI\_ISL\_470413|Original|hCoV-19^^England|Human|Department of Pathology|Wellcome Sanger Institute for the COVID-19 Genomics UK (COG-UK) consortium|Davies|United Kingdom

>Spike|hCoV-19/Netherlands/ZH-EMC-337/2020|2020-06-24|EPI\_ISL\_523678|Original|hCoV-19^^Zuid Holland|Human|Dutch COVID-19 response team|Erasmus Medical Center|Oude Munnink|Netherlands

>Spike|hCoV-19/England/QEUH-96F21F/2020|2020-08-15|EPI\_ISL\_530539|Original|hCoV-19^^England|Human|Lighthouse Lab in Glasgow|Wellcome Sanger Institute for the COVID-19 Genomics UK (COG-UK) consortium|Davies|United Kingdom

>Spike|hCoV-19/USA/CA-CZB036/2020|2020-03-25|EPI\_ISL\_429039|Original|hCoV-19^^California|Human|UCSF Clinical Microbiology Laboratory|Chan-Zuckerberg Biohub|Kamm|USA

>Spike|hCoV-19/Singapore/731/2020|2020-06-22|EPI\_ISL\_500552|Original|hCoV-19^^Singapore|Human|Singapore General Hospital|Department of Microbiology|Abdul Rahman|Singapore

>Spike|hCoV-19/Canada/QC-LSPQ-L00238804/2020|2020-03-26|EPI\_ISL\_536221|Original|hCoV-19^^Quebec|Human|Centre hospitalier Anna-Laberge|Laboratoire de sant\u00e9 publique du Qu\u00e9bec|Moreira|Canada

>Spike|hCoV-19/England/SHEF-D02C7/2020|2020-05-27|EPI\_ISL\_535091|Original|hCoV-19^^England|Human|Virology Department|COVID-19 Genomics UK (COG-UK) Consortium|de Silva|United Kingdom

>Spike|hCoV-19/Australia/VIC6179/2020|2020-07-22|EPI\_ISL\_518184|Original|hCoV-19^^Victoria|Human|Victorian Infectious Diseases Reference Laboratory (VIDRL)|VIDRL and MDU-PHL|Schultz|Australia

>Spike|hCoV-19/Japan/PG-2796/2020|2020-04-00|EPI\_ISL\_690923|Original|hCoV-19^^Japan|Human|Pathogen Genomics Center|Pathogen Genomics Center|Sekizuka|Japan

>Spike|hCoV-19/United Arab Emirates/L920634731/2020|2020-03-31|EPI\_ISL\_520728|Original|hCoV-19^^United Arab Emirates|Human|Mohammed Bin Rashid University of Medicine and Health Sciences|Al Jalila Genomics Center|Ramaswamy|United Arab Emirates

>Spike|hCoV-19/England/LIVE-DB2BA5/2020|2020-11-03|EPI\_ISL\_651355|Original|hCoV-19^^England|Human|Liverpool Clinical Laboratories|COVID-19 Genomics UK (COG-UK) Consortium|Haldenby|United Kingdom

>Spike|hCoV-19/England/MILK-9C35E3/2020|2020-09-10|EPI\_ISL\_566695|Original|hCoV-19^^England|Human|Lighthouse Lab in Milton Keynes|Wellcome Sanger Institute for the COVID-19 Genomics UK (COG-UK) consortium|Davies|United Kingdom

>Spike|hCoV-19/England/MILK-B8F833/2020|2020-11-13|EPI\_ISL\_674767|Original|hCoV-19^^England|Human|Lighthouse Lab in Milton Keynes|Wellcome Sanger Institute for the COVID-19 Genomics UK (COG-UK) Consortium|Davies|United Kingdom

>Spike|hCoV-19/Australia/VIC17501/2020|2020-08-19|EPI\_ISL\_663542|Original|hCoV-19^^Victoria|Human|Microbiological Diagnostic Unit - Public Health Laboratory (MDU-PHL)|MDU-PHL|Schultz|Australia

>Spike|hCoV-19/Saudi Arabia/KAUST-Makkah18/2020|2020-03-23|EPI\_ISL\_437467|Original|hCoV-19^^Makkah|Human|Pathogen Genomics Lab King Abdullah University of Science and Technology(KAUST)|Pathogen Genomics Lab King Abdullah University of Science and Technology(KAUST)|Mohamed Ghazzali|Saudi Arabia

>Spike|hCoV-19/Denmark/DCGC-13519/2020|2020-11-30|EPI\_ISL\_712850|Original|hCoV-19^^Sjaelland|Human|Department of Virus and Microbiological Special Diagnostics|Albertsen Lab|Michaelsen|Denmark

>Spike|hCoV-19/England/SHEF-C0682/2020|2020-03-25|EPI\_ISL\_420232|Original|hCoV-19^^England|Human|Virology Department|Department of Infection|de Silva|United Kingdom

>Spike|hCoV-19/England/QEUH-B7FDFB/2020|2020-11-14|EPI\_ISL\_661841|Original|hCoV-19^^England|Human|Lighthouse Lab in Glasgow|Wellcome Sanger Institute for the COVID-19 Genomics UK (COG-UK) Consortium|Davies|United Kingdom



>Spike|hCoV-19/USA/CA-QDX-1525/2020|2020-03-18|EPI\_ISL\_603778|Original|hCoV-19^^California|Human|Quest Diagnostics|Quest Diagnostics|Kagan|USA  
>Spike|hCoV-19/USA/VA-DCLS-0339/2020|2020-05-19|EPI\_ISL\_467939|Original|hCoV-19^^Virginia|Human|Virginia DCLS|Virginia DCLS|St. Jacques|USA  
>Spike|hCoV-19/England/QEUA-BC4225/2020|2020-11-24|EPI\_ISL\_703612|Original|hCoV-19^^England|Human|Lighthouse Lab in Glasgow|Wellcome Sanger Institute for the COVID-19 Genomics UK (COG-UK) Consortium|Davies|United Kingdom  
>Spike|hCoV-19/Spain/RI-IBV-005995/2020|2020-03-22|EPI\_ISL\_500427|Original|hCoV-19^^La Rioja|Human|Centro de Investigaci\u00f3n Biom\u00e9dica de La Rioja - Hospital San Pedro Logro\u00f1o|SeqCOVID-SPAIN consortium/IBV (CSIC)|Comas|Spain  
>Spike|hCoV-19/England/QEUA-C3482D/2020|2020-12-11|EPI\_ISL\_733976|Original|hCoV-19^^England|Human|Lighthouse Lab in Glasgow|Wellcome Sanger Institute for the COVID-19 Genomics UK (COG-UK) Consortium|Davies|United Kingdom  
>Spike|hCoV-19/England/MILK-A06431/2020|2020-10-01|EPI\_ISL\_599927|Original|hCoV-19^^England|Human|Lighthouse Lab in Milton Keynes|Wellcome Sanger Institute for the COVID-19 Genomics UK (COG-UK) consortium|Davies|United Kingdom  
>Spike|hCoV-19/USA/TX-HMH-MCoV-15582/2020|2020-10-26|EPI\_ISL\_787066|Original|hCoV-19^^Texas|Human|Houston Methodist Hospital|Houston Methodist Hospital|Long|USA  
>Spike|hCoV-19/England/20092096704/2020|2020-02-24|EPI\_ISL\_464183|Original|hCoV-19^^England|Human|Respiratory Virus Unit|Respiratory Virus Unit|Platt|United Kingdom  
>Spike|hCoV-19/USA/UT-UPHL-01961/2020|2020-04-15|EPI\_ISL\_575244|Original|hCoV-19^^Utah|Human|Utah Public Health Laboratory|Utah Public Health Laboratory|Young|USA  
>Spike|hCoV-19/USA/TX-HMH-547/2020|2020-04-07|EPI\_ISL\_544796|Original|hCoV-19^^Texas|Human|Houston Methodist Hospital|Houston Methodist Hospital|Long|USA  
>Spike|hCoV-19/USA/TX-QDX-262/2020|2020-04-30|EPI\_ISL\_498743|Original|hCoV-19^^Texas|Human|Quest Diagnostics|Quest Diagnostics|Kagan|USA  
>Spike|hCoV-19/Denmark/DCGC-4050/2020|2020-09-14|EPI\_ISL\_622006|Original|hCoV-19^^Hovedstaden|Human|Department of Virus and Microbiological Special Diagnostics|Albertsen lab|Michaelsen|Denmark  
>Spike|hCoV-19/England/EXET-139B75/2020|2020-00-00|EPI\_ISL\_679325|Original|hCoV-19^^England|Human|University of Exeter|COVID-19 Genomics UK (COG-UK) Consortium|Temperton|United Kingdom  
>Spike|hCoV-19/England/MILK-9C3B87/2020|2020-09-09|EPI\_ISL\_566852|Original|hCoV-19^^England|Human|Lighthouse Lab in Milton Keynes|Wellcome Sanger Institute for the COVID-19 Genomics UK (COG-UK) consortium|Davies|United Kingdom  
>Spike|hCoV-19/Denmark/DCGC-14079/2020|2020-11-30|EPI\_ISL\_711552|Original|hCoV-19^^Hovedstaden|Human|Department of Virus and Microbiological Special Diagnostics|Albertsen Lab|Michaelsen|Denmark  
>Spike|hCoV-19/USA/VA-DCLS-0592/2020|2020-03-28|EPI\_ISL\_526812|Original|hCoV-19^^Virginia|Human|Virginia DCLS|Virginia DCLS|St. Jacques|USA  
>Spike|hCoV-19/England/MILK-975D42/2020|2020-08-20|EPI\_ISL\_552727|Original|hCoV-19^^England|Human|Lighthouse Lab in Milton Keynes|Wellcome Sanger Institute for the COVID-19 Genomics UK (COG-UK) consortium|Davies|United Kingdom  
>Spike|hCoV-19/Spain/MD-IBV-99008671/2020|2020-10-01|EPI\_ISL\_654230|Original|hCoV-19^^Madrid|Human|Hospital General Universitario Gregorio Mara\u00f1\u00f3n|SeqCOVID-SPAIN consortium/IBV (CSIC)|Comas|Spain  
>Spike|hCoV-19/England/QEUA-AD06B2/2020|2020-10-23|EPI\_ISL\_629791|Original|hCoV-19^^England|Human|Lighthouse Lab in Glasgow|Wellcome Sanger Institute for the COVID-19 Genomics UK (COG-UK) consortium|Davies|United Kingdom  
>Spike|hCoV-19/USA/TX-HMH-MCoV-14646/2020|2020-10-10|EPI\_ISL\_787931|Original|hCoV-19^^Texas|Human|Houston Methodist Hospital|Houston Methodist Hospital|Long|USA  
>Spike|hCoV-19/England/ALDP-B76116/2020|2020-11-12|EPI\_ISL\_723735|Original|hCoV-19^^England|Human|Oxford Viromics|COVID-19 Genomics UK (COG-UK) Consortium|Golubchik|United Kingdom  
>Spike|hCoV-19/Northern Ireland/NIRE-2336F1/2020|2020-09-29|EPI\_ISL\_680310|Original|hCoV-19^^Northern Ireland|Human|Regional Virus Laboratory|COVID-19 Genomics UK (COG-UK) Consortium|Fairley|United Kingdom  
>Spike|hCoV-19/Netherlands/NoordBrabant\_158/2020|2020-04-22|EPI\_ISL\_461193|Original|hCoV-19^^Noord Brabant|Human|Dutch COVID-19 response team|Erasmus Medical Center|Oude Munnink|Netherlands

>Spike|hCoV-19/Scotland/CVR4068/2020|2020-08-31|EPI\_ISL\_535159|Original|hCoV-19^^Scotland|Human|West of Scotland Specialist Virology Centre|COVID-19 Genomics UK (COG-UK) Consortium|Robertson|United Kingdom

>Spike|hCoV-19/Australia/VIC5750/2020|2020-07-21|EPI\_ISL\_518549|Original|hCoV-19^^Victoria|Human|Microbiological Diagnostic Unit - Public Health Laboratory (MDU-PHL)|MDU-PHL|Schultz|Australia

>Spike|hCoV-19/France/PAC-MEPHI-2181/2020|2020-09-28|EPI\_ISL\_644524|Original|hCoV-19^^Provence-Alpes-Cote-d\u2019Azur|Human|MEPHI|MEPHI|Levasseur|France

>Spike|hCoV-19/England/CAMC-B227EA/2020|2020-11-01|EPI\_ISL\_647291|Original|hCoV-19^^England|Human|Lighthouse Lab in Cambridge|Wellcome Sanger Institute for the COVID-19 Genomics UK (COG-UK) Consortium|Davies|United Kingdom

>Spike|hCoV-19/Denmark/DCGC-13394/2020|2020-11-30|EPI\_ISL\_712107|Original|hCoV-19^^Hovedstaden|Human|Department of Virus and Microbiological Special Diagnostics|Albertsen Lab|Michaelsen|Denmark

>Spike|hCoV-19/USA/MD-MDH-0140/2020|2020-07-09|EPI\_ISL\_534700|Original|hCoV-19^^Maryland|Human|MD PHL|MD PHL|Keller|USA

>Spike|hCoV-19/Denmark/DCGC-10167/2020|2020-11-09|EPI\_ISL\_669431|Original|hCoV-19^^Syddanmark|Human|Department of Virus and Microbiological Special Diagnostics|Albertsen Lab|Michaelsen|Denmark

>Spike|hCoV-19/Israel/CVL-37-ngs/2020|2020-12-24|EPI\_ISL\_776629|Original|hCoV-19^^Israel|Human|Israel Central Virology laboratory|Israel Central Virology laboratory|Zuckerman|Israel

>Spike|hCoV-19/Wales/PHWC-15C990/2020|2020-05-03|EPI\_ISL\_472564|Original|hCoV-19^^Wales|Human|Wales Specialist Virology Centre Sequencing lab|COVID-19 Genomics UK (COG-UK) Consortium|Moore|United Kingdom

>Spike|hCoV-19/Japan/PG-3651/2020|2020-04-00|EPI\_ISL\_691904|Original|hCoV-19^^Japan|Human|Pathogen Genomics Center|Pathogen Genomics Center|Sekizuka|Japan

>Spike|hCoV-19/USA/TX-HMH-2866/2020|2020-06-08|EPI\_ISL\_543836|Original|hCoV-19^^Texas|Human|Houston Methodist Hospital|Houston Methodist Hospital|Long|USA

>Spike|hCoV-19/England/BRIS-122CA9/2020|2020-04-01|EPI\_ISL\_440703|Original|hCoV-19^^England|Human|PHE South West Regional Laboratory|Wellcome Sanger Institute for the COVID-19 Genomics UK (COG-UK) consortium|Amato|United Kingdom

>Spike|hCoV-19/Bangladesh/DNAS\_DRICM\_isl\_MH-13/2020|2020-06-28|EPI\_ISL\_774999|Original|hCoV-19^^Dhaka|Human|Designated Reference Institute for Chemical Measurements (DRICM)|DNA SOLUTION LTD.|Rabbi|Bangladesh

>Spike|hCoV-19/England/MILK-AC9A65/2020|2020-10-21|EPI\_ISL\_630148|Original|hCoV-19^^England|Human|Lighthouse Lab in Milton Keynes|Wellcome Sanger Institute for the COVID-19 Genomics UK (COG-UK) consortium|Davies|United Kingdom

>Spike|hCoV-19/England/LIVE-9FD87/2020|2020-06-02|EPI\_ISL\_472061|Original|hCoV-19^^England|Human|Liverpool Clinical Laboratories|COVID-19 Genomics UK (COG-UK) Consortium|Haldenby|United Kingdom

>Spike|hCoV-19/Japan/IC-0062/2020|2020-06-00|EPI\_ISL\_591404|Original|hCoV-19^^Japan|Human|Pathogen Genomics Center|Pathogen Genomics Center|Sekizuka|Japan

>Spike|hCoV-19/Italy/VEN-UniVR-144/2020|2020-04-06|EPI\_ISL\_751441|Original|hCoV-19^^Veneto|Human|IRCCS Sacro Cuore Don Calabria Hospital|University of Verona|Mori|Italy

>Spike|hCoV-19/England/ALDP-BE8EDC/2020|2020-12-02|EPI\_ISL\_708981|Original|hCoV-19^^England|Human|Lighthouse Lab in Alderley Park|Wellcome Sanger Institute for the COVID-19 Genomics UK (COG-UK) Consortium|Davies|United Kingdom

>Spike|hCoV-19/Denmark/DCGC-10379/2020|2020-11-02|EPI\_ISL\_669562|Original|hCoV-19^^Hovedstaden|Human|Department of Virus and Microbiological Special Diagnostics|Albertsen Lab|Michaelsen|Denmark

>Spike|hCoV-19/England/ALDP-A6D74E/2020|2020-10-15|EPI\_ISL\_608101|Original|hCoV-19^^England|Human|Lighthouse Lab in Alderley Park|Wellcome Sanger Institute for the COVID-19 Genomics UK (COG-UK) consortium|Davies|United Kingdom

>Spike|hCoV-19/India/MH-ACTREC-400/2020|2020-07-29|EPI\_ISL\_700049|Original|hCoV-19^^Maharashtra|Human|Hematopathology Laboratory|Hematopathology Laboratory|Patkar|India

>Spike|hCoV-19/USA/TX-HMH-MCoV-15700/2020|2020-07-10|EPI\_ISL\_785384|Original|hCoV-19^^Texas|Human|Houston Methodist Hospital|Houston Methodist Hospital|Long|USA

>Spike|hCoV-19/Scotland/EDB4365/2020|2020-04-24|EPI\_ISL\_449298|Original|hCoV-19^^Scotland|Human|Virology Department|COVID-19 Genomics UK (COG-UK) Consortium|Williams|United Kingdom

>Spike|hCoV-19/South Africa/KRISP-0028/2020|2020-04-02|EPI\_ISL\_467438|Original|hCoV-19^^KwaZulu-Natal|Human|NHLs-IALCH|KRISP|de Oliveira|South Africa

>Spike|hCoV-19/Japan/PG-8508/2020|2020-09-00|EPI\_ISL\_687607|Original|hCoV-19^^Japan|Human|Pathogen Genomics Center|Pathogen Genomics Center|Sekizuka|Japan

>Spike|hCoV-19/USA/OR-OHSU-0452/2020|2020-06-09|EPI\_ISL\_525811|Original|hCoV-19^^Oregon|Human|OHSU Lab Services Molecular Microbiology Lab|Ginkgo Bioworks Clinical Laboratory|O'Roak|USA

>Spike|hCoV-19/England/ALDP-952428/2020|2020-06-09|EPI\_ISL\_555735|Original|hCoV-19^^England|Human|Lighthouse Lab in Alderley Park|Wellcome Sanger Institute for the COVID-19 Genomics UK (COG-UK) consortium|Davies|United Kingdom

>Spike|hCoV-19/Belgium/VAM-0506416/2020|2020-05-06|EPI\_ISL\_462270|Original|hCoV-19^^Bauffe|Human|KU Leuven|KU Leuven|Maes|Belgium

>Spike|hCoV-19/Denmark/DCGC-17972/2020|2020-12-14|EPI\_ISL\_749672|Original|hCoV-19^^Hovedstaden|Human|Department of Virus and Microbiological Special Diagnostics|Albertsen Lab|Michaelsen|Denmark

>Spike|hCoV-19/USA/WI-GMF-19225/2020|2020-09-08|EPI\_ISL\_547795|Original|hCoV-19^^Wisconsin|Human|Gundersen Molecular Diagnostics Laboratory|Kabara Cancer Research Institute|Kenny|USA

>Spike|hCoV-19/Portugal/PT2079/2020|2020-11-13|EPI\_ISL\_732293|Original|hCoV-19^^Portugal|Human|Instituto Nacional de Saude (INSA) and Instituto Gulbenkian de Ciencia (IGC)|Instituto Nacional de Saude (INSA) and Instituto Gulbenkian de Ciencia (IGC)|Borges|Portugal

>Spike|hCoV-19/USA/TX-HMH-MCoV-8458/2020|2020-07-01|EPI\_ISL\_780571|Original|hCoV-19^^Texas|Human|Houston Methodist Hospital|Houston Methodist Hospital|Long|USA

>Spike|hCoV-19/India/DL-NCDC3788-CSIR-IGIB/2020|2020-05-20|EPI\_ISL\_482572|Original|hCoV-19^^Delhi|Human|National Centre for Disease control (NCDC)|NCDC/CSIR-IGIB|Pandey|India

>Spike|hCoV-19/France/PAC-IHU-0283/2020|2020-03-31|EPI\_ISL\_569430|Original|hCoV-19^^Provence-Alpes-C\u00f4te-d\u2019Azur|Human|MEPHI|MEPHI|Levasseur|France

>Spike|hCoV-19/Scotland/QEUH-9B52CF/2020|2020-09-02|EPI\_ISL\_602072|Original|hCoV-19^^Scotland|Human|Lighthouse Lab in Glasgow|Wellcome Sanger Institute for the COVID-19 Genomics UK (COG-UK) consortium|Davies|United Kingdom

>Spike|hCoV-19/USA/CA-CZB-15367/2020|2020-12-08|EPI\_ISL\_738658|Original|hCoV-19^^California|Human|Monterey County Public Health Lab|Chan-Zuckerberg Biohub|Kamm|USA

>Spike|hCoV-19/USA/WA-S1004/2020|2020-04-29|EPI\_ISL\_463494|Original|hCoV-19^^Washington|Human|Washington State Department of Health|Seattle Flu Study|Bedford|USA

>Spike|hCoV-19/England/ALDP-A51B05/2020|2020-10-07|EPI\_ISL\_598122|Original|hCoV-19^^England|Human|Lighthouse Lab in Alderley Park|Wellcome Sanger Institute for the COVID-19 Genomics UK (COG-UK) consortium|Davies|United Kingdom

>Spike|hCoV-19/Sweden/20-53766/2020|2020-12-20|EPI\_ISL\_766636|Original|hCoV-19^^Ostergotland|Human|Klinisk mikrobiologi|The Public Health Agency of Sweden|Svartstr\u00f6m|Sweden

>Spike|hCoV-19/England/204621525/2020|2020-11-10|EPI\_ISL\_700611|Original|hCoV-19^^England|Human|Respiratory Virus Unit|COVID-19 Genomics UK (COG-UK) Consortium|Platt|United Kingdom

>Spike|hCoV-19/USA/CO-CDPHE-2009090318/2020|2020-09-08|EPI\_ISL\_677314|Original|hCoV-19^^Colorado|Human|Colorado Department of Public Health and Environment|Colorado Department of Public Health and Environment|Bankers|USA

>Spike|hCoV-19/Scotland/EDB6907/2020|2020-05-09|EPI\_ISL\_526513|Original|hCoV-19^^Scotland|Human|Virology Department|COVID-19 Genomics UK (COG-UK) Consortium|Williams|United Kingdom

>Spike|hCoV-19/England/201640110/2020|2020-04-14|EPI\_ISL\_466439|Original|hCoV-19^^England|Human|Respiratory Virus Unit|Respiratory Virus Unit|Platt|United Kingdom

>Spike|hCoV-19/England/CAMB-7BE8E/2020|2020-04-05|EPI\_ISL\_470435|Original|hCoV-19^^England|Human|Department of Pathology|Wellcome Sanger Institute for the COVID-19 Genomics UK (COG-UK) consortium|Davies|United Kingdom

>Spike|hCoV-19/Ireland/D-NVRL-20G35116/2020|2020-03-20|EPI\_ISL\_605133|Original|hCoV-19^^Dublin|Human|National Virus Reference Laboratory|Irish Coronavirus Sequencing Consortium - Helixworks|Chalapati|Ireland

>Spike|hCoV-19/Singapore/310/2020|2020-04-06|EPI\_ISL\_462428|Original|hCoV-19^^Singapore|Human|National Public Health Laboratory|National Public Health Laboratory|Mak|Singapore

>Spike|hCoV-19/England/QEUEH-CC99DF/2020|2020-12-23|EPI\_ISL\_781922|Original|hCoV-19^^England|Human|Lighthouse Lab in Glasgow|Wellcome Sanger Institute for the COVID-19 Genomics UK (COG-UK) Consortium|Davies|United Kingdom

>Spike|hCoV-19/England/MILK-A475AA/2020|2020-10-06|EPI\_ISL\_598339|Original|hCoV-19^^England|Human|Lighthouse Lab in Milton Keynes|Wellcome Sanger Institute for the COVID-19 Genomics UK (COG-UK) consortium|Davies|United Kingdom

>Spike|hCoV-19/England/ALDP-6D3F7C/2020|2020-07-02|EPI\_ISL\_556226|Original|hCoV-19^^England|Human|Lighthouse Lab in Alderley Park|Wellcome Sanger Institute for the COVID-19 Genomics UK (COG-UK) consortium|Davies|United Kingdom

>Spike|hCoV-19/USA/WA-UW-13310/2020|2020-07-03|EPI\_ISL\_501136|Original|hCoV-19^^Washington|Human|University of Washington Virology Lab|University of Washington Virology Lab|Roychoudhury|USA

>Spike|hCoV-19/Scotland/CVR2745/2020|2020-04-18|EPI\_ISL\_438943|Original|hCoV-19^^Scotland|Human|West of Scotland Specialist Virology Centre|COVID-19 Genomics UK (COG-UK) Consortium|Robertson|United Kingdom

>Spike|hCoV-19/England/QEUEH-C5BC8E/2020|2020-12-14|EPI\_ISL\_736099|Original|hCoV-19^^England|Human|Lighthouse Lab in Glasgow|Wellcome Sanger Institute for the COVID-19 Genomics UK (COG-UK) Consortium|Davies|United Kingdom

>Spike|hCoV-19/Denmark/DCGC-1244/2020|2020-05-04|EPI\_ISL\_614760|Original|hCoV-19^^Hovedstaden|Human|Department of Virus and Microbiological Special Diagnostics|Albertsen lab|Michaelsen|Denmark

>Spike|hCoV-19/Australia/VIC4931/2020|2020-07-14|EPI\_ISL\_519305|Original|hCoV-19^^Victoria|Human|Victorian Infectious Diseases Reference Laboratory (VIDRL)|VIDRL and MDU-PHL|Schultz|Australia

>Spike|hCoV-19/USA/NV-NSPHL-A0054/2020|2020-03-27|EPI\_ISL\_515336|Original|hCoV-19^^Nevada|Human|Nevada State Public Health Laboratory|Nevada State Public Health Laboratory|Sevinsky|USA

>Spike|hCoV-19/England/ALDP-9CB82E/2020|2020-09-16|EPI\_ISL\_575409|Original|hCoV-19^^England|Human|Lighthouse Lab in Alderley Park|Wellcome Sanger Institute for the COVID-19 Genomics UK (COG-UK) consortium|Davies|United Kingdom

>Spike|hCoV-19/England/CAMB-77B30/2020|2020-03-31|EPI\_ISL\_439510|Original|hCoV-19^^England|Human|Department of Pathology|Wellcome Sanger Institute for the COVID-19 Genomics UK (COG-UK) consortium|Amato|United Kingdom

>Spike|hCoV-19/Japan/PG-3126/2020|2020-05-00|EPI\_ISL\_691248|Original|hCoV-19^^Japan|Human|Pathogen Genomics Center|Pathogen Genomics Center|Sekizuka|Japan

>Spike|hCoV-19/USA/CO-CSU-D1990-1/2020|2020-04-02|EPI\_ISL\_527454|Original|hCoV-19^^Colorado|Human|Colorado State University - Ebel Lab|Colorado State University - Ebel Lab|Cline|USA

>Spike|hCoV-19/England/CAMB-7AA6D/2020|2020-04-10|EPI\_ISL\_433831|Original|hCoV-19^^England|Human|Department of Pathology|COVID-19 Genomics UK (COG-UK) Consortium|Meredith|United Kingdom

>Spike|hCoV-19/Wales/PHWC-31534/2020|2020-04-12|EPI\_ISL\_446458|Original|hCoV-19^^Wales|Human|Wales Specialist Virology Centre|Public Health Wales Microbiology Cardiff|Moore|United Kingdom

>Spike|hCoV-19/Wales/ALDP-C3971C/2020|2020-12-07|EPI\_ISL\_767194|Original|hCoV-19^^Wales|Human|Lighthouse Lab in Alderley Park|Wellcome Sanger Institute for the COVID-19 Genomics UK (COG-UK) Consortium|Davies|United Kingdom

>Spike|hCoV-19/Japan/PG-6629/2020|2020-08-00|EPI\_ISL\_687741|Original|hCoV-19^^Japan|Human|Pathogen Genomics Center|Pathogen Genomics Center|Sekizuka|Japan

>Spike|hCoV-19/Denmark/DCGC-1020/2020|2020-04-06|EPI\_ISL\_614480|Original|hCoV-19^^Hovedstaden|Human|Department of Virus and Microbiological Special Diagnostics|Albertsen lab|Michaelsen|Denmark

>Spike|hCoV-19/USA/MN-MDH-2121/2020|2020-10-30|EPI\_ISL\_683750|Original|hCoV-19^^Minnesota|Human|Minnesota Department of Health|Minnesota Department of Health|Garfin|USA

>Spike|hCoV-19/USA/CA-CZB-2277/2020|2020-03-18|EPI\_ISL\_513773|Original|hCoV-19^^California|Human|County of Santa Clara Public Health Department|Chan-Zuckerberg Biohub|Kamm|USA

>Spike|hCoV-19/Japan/PG-0197/2020|2020-03-20|EPI\_ISL\_479902|Original|hCoV-19^^Kanto|Human|Niigata Prefectural Institute of Public Health and Environmental Sciences|Pathogen Genomics Center|Sekizuka|Japan

>Spike|hCoV-19/England/ALDP-9543FC/2020|2020-06-13|EPI\_ISL\_553733|Original|hCoV-19^^England|Human|Lighthouse Lab in Alderley Park|Wellcome Sanger Institute for the COVID-19 Genomics UK (COG-UK) consortium|Davies|United Kingdom

>Spike|hCoV-19/Canada/QC\_AC6/2020|2020-04-05|EPI\_ISL\_444509|Original|hCoV-19^^Quebec|Human|Laboratoire de microbiologie|Smith Laboratory|Smith|Canada

>Spike|hCoV-19/England/QEUEH-B1170C/2020|2020-11-02|EPI\_ISL\_642471|Original|hCoV-19^^England|Human|Lighthouse Lab in Glasgow|Wellcome Sanger Institute for the COVID-19 Genomics UK (COG-UK) Consortium|Davies|United Kingdom

>Spike|hCoV-19/USA/CA-ALSR-4298/2020|2020-10-09|EPI\_ISL\_648950|Original|hCoV-19^^California|Human|San Diego County Public Health Laboratory|Andersen lab at Scripps Research|Gangavarapu|USA

>Spike|hCoV-19/England/ALDP-B46EAF/2020|2020-11-07|EPI\_ISL\_656094|Original|hCoV-19^^England|Human|Lighthouse Lab in Alderley Park|Wellcome Sanger Institute for the COVID-19 Genomics UK (COG-UK) Consortium|Davies|United Kingdom

>Spike|hCoV-19/South Africa/KRISP-K000596/2020|2020-07-02|EPI\_ISL\_509249|Original|hCoV-19^^KwaZulu-Natal|Human|NHLs-IALCH|KRISP|de Oliveira|South Africa

>Spike|hCoV-19/Spain/VC-IBV-98000415/2020|2020-03-28|EPI\_ISL\_539222|Original|hCoV-19^^Comunitat Valenciana|Human|Servicio de Microbiologia. Hospital Clinico Universitario de Valencia|SeqCOVID-SPAIN consortium|IBV (CSIC)|Comas|Spain

>Spike|hCoV-19/Finland/15A99S16/2020|2020-04-15|EPI\_ISL\_481564|Original|hCoV-19^^Uusimaa|Human|Department of Virology and Immunology|Department of Virology|Smura|Finland

>Spike|hCoV-19/Switzerland/VD-ETHZ-210053/2020|2020-07-19|EPI\_ISL\_511990|Original|hCoV-19^^Vaud|Human|Viollier AG|Department of Biosystems Science and Engineering|Nadeau|Switzerland

>Spike|hCoV-19/England/QEUEH-96FD5A/2020|2020-08-18|EPI\_ISL\_540297|Original|hCoV-19^^England|Human|Lighthouse Lab in Glasgow|Wellcome Sanger Institute for the COVID-19 Genomics UK (COG-UK) consortium|Davies|United Kingdom

>Spike|hCoV-19/South Korea/KCDC2086/2020|2020-02-22|EPI\_ISL\_497987|Original|hCoV-19^^South Korea|Human|Division of Viral Diseases|Division of Viral Diseases|Kim|South Korea

>Spike|hCoV-19/England/QEUEH-998FDA/2020|2020-08-24|EPI\_ISL\_541821|Original|hCoV-19^^England|Human|Lighthouse Lab in Glasgow|Wellcome Sanger Institute for the COVID-19 Genomics UK (COG-UK) consortium|Davies|United Kingdom

>Spike|hCoV-19/USA/VA-DCLS-0159/2020|2020-04-14|EPI\_ISL\_437792|Original|hCoV-19^^Virginia|Human|Virginia DCLS|Virginia DCLS|St. Jacques|USA

>Spike|hCoV-19/Gibraltar/204462806/2020|2020-10-29|EPI\_ISL\_614981|Original|hCoV-19^^Gibraltar|Human|Microbiology|Respiratory Virus Unit|Platt|Gibraltar

>Spike|hCoV-19/Panama/338393/2020|2020-04-09|EPI\_ISL\_496868|Original|hCoV-19^^Panama Center|Human|Gorgas Memorial Laboratory of Health Studies|Gorgas Memorial Laboratory of Health Studies|Martinez|Panama

>Spike|hCoV-19/England/TBSD-2488F54/2020|2020-04-26|EPI\_ISL\_482062|Original|hCoV-19^^England|Human|The Department of Microbiology|Wellcome Sanger Institute for the COVID-19 Genomics UK (COG-UK) consortium|Davies|United Kingdom

>Spike|hCoV-19/United Arab Emirates/0792/2020|2020-05-19|EPI\_ISL\_698932|Original|hCoV-19^^Abu Dhabi|Human|Group 42 (G42) Healthcare|G42 Healthcare|Ogrodzki|United Arab Emirates

>Spike|hCoV-19/England/HECH-259A343/2020|2020-06-04|EPI\_ISL\_488846|Original|hCoV-19^^England|Human|Microbiology Department|Wellcome Sanger Institute for the COVID-19 Genomics UK (COG-UK) consortium|Davies|United Kingdom

>Spike|hCoV-19/Japan/PG-6163/2020|2020-08-00|EPI\_ISL\_689275|Original|hCoV-19^^Japan|Human|Pathogen Genomics Center|Pathogen Genomics Center|Sekizuka|Japan

>Spike|hCoV-19/USA/TX-HMH-MCoV-13403/2020|2020-08-23|EPI\_ISL\_788546|Original|hCoV-19^^Texas|Human|Houston Methodist Hospital|Houston Methodist Hospital|Long|USA

>Spike|hCoV-19/England/ALDP-9521D6/2020|2020-06-09|EPI\_ISL\_553660|Original|hCoV-19^^England|Human|Lighthouse Lab in Alderley Park|Wellcome Sanger Institute for the COVID-19 Genomics UK (COG-UK) consortium|Davies|United Kingdom

>Spike|hCoV-19/Canada/BC\_08534834/2020|2020-04-00|EPI\_ISL\_477064|Original|hCoV-19^^British Columbia|Human|BCCDC Public Health Laboratory|BCCDC Public Health Laboratory|Harrigan|Canada

>Spike|hCoV-19/England/20132005304/2020|2020-03-23|EPI\_ISL\_423721|Original|hCoV-19^^England|Human|Respiratory Virus Unit|Respiratory Virus Unit|Platt|United Kingdom

>Spike|hCoV-19/England/ALDP-94F093/2020|2020-06-18|EPI\_ISL\_555892|Original|hCoV-19^^England|Human|Lighthouse Lab in Alderley Park|Wellcome Sanger Institute for the COVID-19 Genomics UK (COG-UK) consortium|Davies|United Kingdom

>Spike|hCoV-19/Wales/QEUA-A4BFD5/2020|2020-10-05|EPI\_ISL\_628536|Original|hCoV-19^^Wales|Human|Oxford Viromics|COVID-19 Genomics UK (COG-UK) Consortium|Golubchik|United Kingdom

>Spike|hCoV-19/Wales/PHWC-4929F5/2020|2020-11-21|EPI\_ISL\_725733|Original|hCoV-19^^Wales|Human|Originating lab|COVID-19 Genomics UK (COG-UK) Consortium|Moore|United Kingdom

>Spike|hCoV-19/England/MILK-9C27B1/2020|2020-09-10|EPI\_ISL\_566546|Original|hCoV-19^^England|Human|Lighthouse Lab in Milton Keynes|Wellcome Sanger Institute for the COVID-19 Genomics UK (COG-UK) consortium|Davies|United Kingdom

>Spike|hCoV-19/Denmark/DCGC-13818/2020|2020-11-30|EPI\_ISL\_713040|Original|hCoV-19^^Sjaelland|Human|Department of Virus and Microbiological Special Diagnostics|Albertsen Lab|Michaelsen|Denmark

>Spike|hCoV-19/USA/NM-DOH-2020616576/2020|2020-12-12|EPI\_ISL\_751806|Original|hCoV-19^^New Mexico|Human|New Mexico Department of Health Scientific Laboratory|New Mexico Department of Health Scientific Laboratory|Malone|USA

>Spike|hCoV-19/Netherlands/ZH-RIVM-20708/2020|2020-12-22|EPI\_ISL\_790775|Original|hCoV-19^^Zuid-holland|Human|Dutch COVID-19 response team|National Institute for Public Health and the Environment (RIVM)|Meijer|Netherlands

>Spike|hCoV-19/Czech Republic/IAB\_1/2020|2020-03-27|EPI\_ISL\_426883|Original|hCoV-19^^Czech Republic|Human|Motol University Hospital|Institute of Applied Biotechnologies a.s.|Broz|Czech Republic

>Spike|hCoV-19/USA/UT-UPHL-2012106938/2020|2020-08-15|EPI\_ISL\_745509|Original|hCoV-19^^Utah|Human|Ginkgo Bioworks Clinical Laboratory|Utah Public Health Laboratory|Young|USA

>Spike|hCoV-19/Bangladesh/DNAS\_DRCIM\_isl\_P2-106/2020|2020-07-02|EPI\_ISL\_774931|Original|hCoV-19^^Dhaka|Human|Designated Reference Institute for Chemical Measurements (DRICM)|DNA SOLUTION LTD.|Rabbi|Bangladesh

>Spike|hCoV-19/England/ALDP-C8B520/2020|2020-12-17|EPI\_ISL\_756648|Original|hCoV-19^^England|Human|Lighthouse Lab in Alderley Park|Wellcome Sanger Institute for the COVID-19 Genomics UK (COG-UK) Consortium|Davies|United Kingdom

>Spike|hCoV-19/USA/LA-CDC-1915/2020|2020-05-07|EPI\_ISL\_535342|Original|hCoV-19^^Louisiana|Human|LA Office of Public Health Laboratories|Pathogen Discovery|Queen|USA

>Spike|hCoV-19/Denmark/DCGC-2184/2020|2020-08-10|EPI\_ISL\_617483|Original|hCoV-19^^Midtjylland|Human|Department of Virus and Microbiological Special Diagnostics|Albertsen lab|Michaelsen|Denmark

>Spike|hCoV-19/England/ALDP-BB31C2/2020|2020-11-19|EPI\_ISL\_702755|Original|hCoV-19^^England|Human|Lighthouse Lab in Alderley Park|Wellcome Sanger Institute for the COVID-19 Genomics UK (COG-UK) Consortium|Davies|United Kingdom

>Spike|hCoV-19/England/CAMB-74CC7/2020|2020-03-18|EPI\_ISL\_425364|Original|hCoV-19^^England|Human|Department of Pathology|COVID-19 Genomics UK (COG-UK) Consortium|Meredith|United Kingdom

>Spike|hCoV-19/England/ALDP-B829A6/2020|2020-11-14|EPI\_ISL\_675250|Original|hCoV-19^^England|Human|Lighthouse Lab in Alderley Park|Wellcome Sanger Institute for the COVID-19 Genomics UK (COG-UK) Consortium|Davies|United Kingdom

>Spike|hCoV-19/USA/DE-DHSS-F917779/2020|2020-03-24|EPI\_ISL\_560406|Original|hCoV-19^^Delaware|Human|Delaware Public Health Lab|Delaware Public Health Lab|Bajwa|USA

>Spike|hCoV-19/USA/MI-MDHHS-SC21096/2020|2020-03-26|EPI\_ISL\_507872|Original|hCoV-19^^Michigan|Human|Michigan Department of Health and Human Services|Michigan Department of Health and Human Services|Blankenship|USA

>Spike|hCoV-19/Australia/VIC241/2020|2020-03-21|EPI\_ISL\_419936|Original|hCoV-19^^Victoria|Human|Victorian Infectious Diseases Reference Laboratory (VIDRL)|Victorian Infectious Diseases Reference Laboratory and Microbiological Diagnostic Unit Public Health Laboratory|Schultz|Australia

>Spike|hCoV-19/England/ALDP-B73683/2020|2020-11-12|EPI\_ISL\_662405|Original|hCoV-19^^England|Human|Lighthouse Lab in Alderley Park|Wellcome Sanger Institute for the COVID-19 Genomics UK (COG-UK) Consortium|Davies|United Kingdom

>Spike|hCoV-19/USA/WA-S717/2020|2020-04-11|EPI\_ISL\_449887|Original|hCoV-19^^Washington|Human|Washington State Department of Health|Seattle Flu Study|Bedford|USA

>Spike|hCoV-19/Wales/PHWC-4A441D/2020|2020-12-16|EPI\_ISL\_764277|Original|hCoV-19^^Wales|Human|Wales Specialist Virology Centre Sequencing lab|COVID-19 Genomics UK (COG-UK) Consortium|Moore|United Kingdom

>Spike|hCoV-19/England/BIRM-6A5AB/2020|2020-11-09|EPI\_ISL\_650582|Original|hCoV-19^^England|Human|University of Birmingham|COVID-19 Genomics UK (COG-UK) Consortium|Loman|United Kingdom

>Spike|hCoV-19/England/QEUA-A4CDAD/2020|2020-10-05|EPI\_ISL\_596055|Original|hCoV-19^^England|Human|Quadram Institute Bioscience|COVID-19 Genomics UK (COG-UK) Consortium|Alikhan|United Kingdom

>Spike|hCoV-19/England/LIVE-DC97C5/2020|2020-12-04|EPI\_ISL\_705311|Original|hCoV-19^^England|Human|Liverpool Clinical Laboratories|COVID-19 Genomics UK (COG-UK) Consortium|Haldenby|United Kingdom

>Spike|hCoV-19/USA/TX-HMH-MCoV-12608/2020|2020-08-31|EPI\_ISL\_790417|Original|hCoV-19^^Texas|Human|Houston Methodist Hospital|Houston Methodist Hospital|Long|USA

>Spike|hCoV-19/Ireland/CO-NVRL-75IRL33266/2020|2020-10-07|EPI\_ISL\_671874|Original|hCoV-19^^Cork|Human|National Virus Reference Laboratory|National Virus Reference Laboratory|Gonzalez|Ireland

>Spike|hCoV-19/USA/CA-CZB-1421/2020|2020-03-20|EPI\_ISL\_468394|Original|hCoV-19^^California|Human|County of San Luis Obispo Public Health Laboratory|Chan-Zuckerberg Biohub|Hao|USA

>Spike|hCoV-19/England/CAMC-AB1B9A/2020|2020-10-23|EPI\_ISL\_623829|Original|hCoV-19^^England|Human|Lighthouse Lab in Cambridge|Wellcome Sanger Institute for the COVID-19 Genomics UK (COG-UK) consortium|Davies|United Kingdom

>Spike|hCoV-19/Gambia/GC19-3438/2020|2020-07-27|EPI\_ISL\_561180|Original|hCoV-19^^Kombo|Human|MRCG at LSHTM Genomics lab|MRCG at LSHTM Genomics lab|Sesay|Gambia

>Spike|hCoV-19/England/PORT-2D167D/2020|2020-04-17|EPI\_ISL\_484418|Original|hCoV-19^^England|Human|Centre for Enzyme Innovation|COVID-19 Genomics UK (COG-UK) Consortium|Robson|United Kingdom

>Spike|hCoV-19/England/QEUA-B7BF80/2020|2020-11-14|EPI\_ISL\_668311|Original|hCoV-19^^England|Human|Lighthouse Lab in Glasgow|Wellcome Sanger Institute for the COVID-19 Genomics UK (COG-UK) Consortium|Davies|United Kingdom

>Spike|hCoV-19/England/QEUA-B9F6BE/2020|2020-11-18|EPI\_ISL\_721145|Original|hCoV-19^^England|Human|Lighthouse Lab in Glasgow|Wellcome Sanger Institute for the COVID-19 Genomics UK (COG-UK) Consortium|Davies|United Kingdom

>Spike|hCoV-19/Canada/NB\_270/2020|2020-04-10|EPI\_ISL\_481755|Original|hCoV-19^^New Brunswick|Human|Dr. Georges-L.-Dumont University Hospital Centre|National Microbiology Laboratory|Grudeski|Canada

>Spike|hCoV-19/Spain/VC-FISABIO-6/2020|2020-02-27|EPI\_ISL\_416485|Original|hCoV-19^^Comunitat Valenciana|Human|Servicio de Microbiologia. Consorcio Hospital General

Universitario de Valencia|Sequencing and Bioinformatics Service and Molecular Epidemiology Research Group. FISABIO-Public Health|Gonzalez-Candelas|Spain  
>Spike|hCoV-19/USA/UT-UPHL-2009565/2020|2020-07-18|EPI\_ISL\_605244|Original|hCoV-19^^Utah|Human|Utah Public Health Laboratory|Utah Public Health Laboratory|Young|USA  
>Spike|hCoV-19/USA/NY-NYUMC919/2020|2020-03-18|EPI\_ISL\_467412|Original|hCoV-19^^New York|Human|NYU Langone Health|Departments of Pathology and Medicine|Maurano|USA  
>Spike|hCoV-19/England/CAMC-946797/2020|2020-07-15|EPI\_ISL\_556940|Original|hCoV-19^^England|Human|Lighthouse Lab in Cambridge|Wellcome Sanger Institute for the COVID-19 Genomics UK (COG-UK) Consortium|Davies|United Kingdom  
>Spike|hCoV-19/England/OXON-AF66B/2020|2020-00-00|EPI\_ISL\_478760|Original|hCoV-19^^England|Human|Oxford Viromics|COVID-19 Genomics UK (COG-UK) Consortium|Golubchik|United Kingdom  
>Spike|hCoV-19/Spain/MD-IBV-006396/2020|2020-03-19|EPI\_ISL\_510117|Original|hCoV-19^^Madrid|Human|Hospital General Universitario Gregorio Mara\u00f1\u00f3n|SeqCOVID-SPAIN consortium/IBV (CSIC)|Comas|Spain  
>Spike|hCoV-19/Switzerland/GE-ETHZ-100318/2020|2020-03-18|EPI\_ISL\_574936|Original|hCoV-19^^Geneva|Human|Viollier AG|Department of Biosystems Science and Engineering|Nadeau|Switzerland  
>Spike|hCoV-19/Guangzhou/GZMU0044/2020|2020-02-25|EPI\_ISL\_414689|Original|hCoV-19^^Guangdong|Human|State Key Laboratory of Respiratory Disease|The First Affiliated Hospital of Guangzhou Medical University & BGI-Shenzhen|Ji|China  
>Spike|hCoV-19/Japan/PG-1815/2020|2020-04-00|EPI\_ISL\_685421|Original|hCoV-19^^Japan|Human|Tokyo Metropolitan Institute of Public Health|Pathogen Genomics Center|Sekizuka|Japan  
>Spike|hCoV-19/Denmark/DCGC-7292/2020|2020-10-12|EPI\_ISL\_619066|Original|hCoV-19^^Midtjylland|Human|Department of Virus and Microbiological Special Diagnostics|Albertsen lab|Michaelsen|Denmark  
>Spike|hCoV-19/England/ALDP-A9630C/2020|2020-10-19|EPI\_ISL\_624587|Original|hCoV-19^^England|Human|Lighthouse Lab in Alderley Park|Wellcome Sanger Institute for the COVID-19 Genomics UK (COG-UK) consortium|Davies|United Kingdom  
>Spike|hCoV-19/USA/OH-ODH-SC35063/2020|2020-04-23|EPI\_ISL\_775600|Original|hCoV-19^^Ohio|Human|Ohio Department of Health Laboratory|Ohio Department of Health Laboratory|Holmes|USA  
>Spike|hCoV-19/England/LIVE-A76BE/2020|2020-03-28|EPI\_ISL\_517056|Original|hCoV-19^^England|Human|Liverpool Clinical Laboratories|COVID-19 Genomics UK (COG-UK) Consortium|Haldenby|United Kingdom  
>Spike|hCoV-19/England/ALDP-9B5AF4/2020|2020-08-28|EPI\_ISL\_590277|Original|hCoV-19^^England|Human|Lighthouse Lab in Alderley Park|Wellcome Sanger Institute for the COVID-19 Genomics UK (COG-UK) consortium|Davies|United Kingdom  
>Spike|hCoV-19/USA/MA-MGH-01017/2020|2020-04-30|EPI\_ISL\_791844|Original|hCoV-19^^Massachusetts|Human|Massachusetts General Hospital|Infectious Disease Program|Park|USA  
>Spike|hCoV-19/Scotland/QEUA-96E210/2020|2020-08-20|EPI\_ISL\_530535|Original|hCoV-19^^Scotland|Human|NHSGGC West of Scotland Specialist Virology Centre / MRC-University of Glasgow Centre for Virus Research|Wellcome Sanger Institute for the COVID-19 Genomics UK (COG-UK) consortium|Davies|United Kingdom  
>Spike|hCoV-19/England/ALDP-952789/2020|2020-06-11|EPI\_ISL\_553950|Original|hCoV-19^^England|Human|Lighthouse Lab in Alderley Park|Wellcome Sanger Institute for the COVID-19 Genomics UK (COG-UK) consortium|Davies|United Kingdom  
>Spike|hCoV-19/USA/WA-S1457/2020|2020-05-21|EPI\_ISL\_495907|Original|hCoV-19^^Washington|Human|Washington State Department of Health|Seattle Flu Study|Lee|USA  
>Spike|hCoV-19/USA/TX-DSHS-1722/2020|2020-06-19|EPI\_ISL\_708619|Original|hCoV-19^^Texas|Human|Texas Department of State Health Services|Texas Department of State Health Services|Rahman|USA  
>Spike|hCoV-19/Scotland/CVR5204/2020|2020-10-15|EPI\_ISL\_626839|Original|hCoV-19^^Scotland|Human|West of Scotland Specialist Virology Centre|COVID-19 Genomics UK (COG-UK) Consortium|Robertson|United Kingdom  
>Spike|hCoV-19/Scotland/QEUA-A00DB4/2020|2020-10-02|EPI\_ISL\_585573|Original|hCoV-19^^Scotland|Human|University of Exeter|COVID-19 Genomics UK (COG-UK) Consortium|Temperton|United Kingdom



>Spike|hCoV-19/England/204761686/2020|2020-11-18|EPI\_ISL\_683561|Original|hCoV-19^^England|Human|Respiratory Virus Unit|COVID-19 Genomics UK (COG-UK) Consortium|Platt|United Kingdom

>Spike|hCoV-19/USA/WA-S1976/2020|2020-06-03|EPI\_ISL\_497404|Original|hCoV-19^^Washington|Human|Washington State Department of Health|Seattle Flu Study|Lee|USA

>Spike|hCoV-19/Spain/MD-HLP-103/2020|2020-04-24|EPI\_ISL\_530030|Original|hCoV-19^^Madrid|Human|Hospital Universitario La Paz|Hospital Universitario La Paz|Viedma|Spain

>Spike|hCoV-19/USA/UT-UPHL-2012797881/2020|2020-08-06|EPI\_ISL\_745536|Original|hCoV-19^^Utah|Human|Ginkgo Bioworks Clinical Laboratory|Utah Public Health Laboratory|Young|USA

>Spike|hCoV-19/Scotland/CVR3812/2020|2020-05-20|EPI\_ISL\_478138|Original|hCoV-19^^Scotland|Human|West of Scotland Specialist Virology Centre|COVID-19 Genomics UK (COG-UK) Consortium|Robertson|United Kingdom

>Spike|hCoV-19/India/GJ-GBRC-377a/2020|2020-07-11|EPI\_ISL\_524735|Original|hCoV-19^^Gujarat|Human|Government General Hospital|Gujarat Biotechnology Research Centre|Joshi|India

>Spike|hCoV-19/France/ARA-66769/2020|2020-09-02|EPI\_ISL\_683384|Original|hCoV-19^^Auvergne-Rh\u00f4ne-Alpes|Human|CNR Virus des Infections Respiratoires - France SUD|CNR Virus des Infections Respiratoires - France SUD|Bal|France

>Spike|hCoV-19/Scotland/QEUH-9B4AC8/2020|2020-09-07|EPI\_ISL\_602058|Original|hCoV-19^^Scotland|Human|Lighthouse Lab in Glasgow|Wellcome Sanger Institute for the COVID-19 Genomics UK (COG-UK) consortium|Davies|United Kingdom

>Spike|hCoV-19/England/LIVE-DC0940/2020|2020-11-04|EPI\_ISL\_705393|Original|hCoV-19^^England|Human|Liverpool Clinical Laboratories|COVID-19 Genomics UK (COG-UK) Consortium|Haldenby|United Kingdom

>Spike|hCoV-19/Japan/PG-3284/2020|2020-04-00|EPI\_ISL\_691399|Original|hCoV-19^^Japan|Human|Pathogen Genomics Center|Pathogen Genomics Center|Sekizuka|Japan

>Spike|hCoV-19/England/CAMC-CFDAEE/2020|2020-12-21|EPI\_ISL\_781607|Original|hCoV-19^^England|Human|Lighthouse Lab in Cambridge|Wellcome Sanger Institute for the COVID-19 Genomics UK (COG-UK) Consortium|Davies|United Kingdom

>Spike|hCoV-19/USA/MI-UM-10033768659/2020|2020-03-24|EPI\_ISL\_578101|Original|hCoV-19^^Michigan|Human|University of Michigan Clinical Microbiology Laboratory|Lauring Lab|Valesano|USA

>Spike|hCoV-19/USA/TX-HMH-MCoV-10483/2020|2020-07-08|EPI\_ISL\_789496|Original|hCoV-19^^Texas|Human|Houston Methodist Hospital|Houston Methodist Hospital|Long|USA

>Spike|hCoV-19/Canada/QC-AG1/2020|2020-04-00|EPI\_ISL\_435344|Original|hCoV-19^^Quebec|Human|Laboratoire de microbiologie|Smith Laboratory|Smith|Canada

>Spike|hCoV-19/England/ALDP-A2E600/2020|2020-10-05|EPI\_ISL\_586690|Original|hCoV-19^^England|Human|Lighthouse Lab in Alderley Park|Wellcome Sanger Institute for the COVID-19 Genomics UK (COG-UK) consortium|Davies|United Kingdom

>Spike|hCoV-19/USA/WA-UW-6496/2020|2020-04-03|EPI\_ISL\_570123|Original|hCoV-19^^Washington|Human|UW Virology Lab|UW Virology Lab|Roychoudhury|USA

>Spike|hCoV-19/England/20126011202/2020|2020-03-17|EPI\_ISL\_418754|Original|hCoV-19^^England|Human|Respiratory Virus Unit|Respiratory Virus Unit|Platt|United Kingdom

>Spike|hCoV-19/England/QEUH-9FF29C/2020|2020-10-02|EPI\_ISL\_600307|Original|hCoV-19^^England|Human|Lighthouse Lab in Glasgow|Wellcome Sanger Institute for the COVID-19 Genomics UK (COG-UK) consortium|Davies|United Kingdom

>Spike|hCoV-19/England/MILK-999C87/2020|2020-08-29|EPI\_ISL\_550359|Original|hCoV-19^^England|Human|Lighthouse Lab in Milton Keynes|Wellcome Sanger Institute for the COVID-19 Genomics UK (COG-UK) consortium|Davies|United Kingdom

>Spike|hCoV-19/Wales/PHWC-4989E0/2020|2020-12-03|EPI\_ISL\_727156|Original|hCoV-19^^Wales|Human|Originating lab|COVID-19 Genomics UK (COG-UK) Consortium|Moore|United Kingdom

>Spike|hCoV-19/England/QEUH-9B854B/2020|2020-09-07|EPI\_ISL\_549733|Original|hCoV-19^^England|Human|Lighthouse Lab in Glasgow|Wellcome Sanger Institute for the COVID-19 Genomics UK (COG-UK) consortium|Davies|United Kingdom

>Spike|hCoV-19/USA/MA-MGH-00501/2020|2020-03-27|EPI\_ISL\_460258|Original|hCoV-19^^Massachusetts|Human|Massachusetts General Hospital|Infectious Disease Program|Lemieux|USA

>Spike|hCoV-19/Iceland/308/2020|2020-03-18|EPI\_ISL\_417637|Original|hCoV-19^^Reykjavik|Human|The National University Hospital of Iceland|deCODE genetics|J\u00f3nsson|Iceland

>Spike|hCoV-19/England/ALDP-A84BAF/2020|2020-10-18|EPI\_ISL\_610413|Original|hCoV-19^^England|Human|Lighthouse Lab in Alderley Park|Wellcome Sanger Institute for the COVID-19 Genomics UK (COG-UK) consortium|Davies|United Kingdom

>Spike|hCoV-19/England/CAMC-B20B2C/2020|2020-11-02|EPI\_ISL\_647703|Original|hCoV-19^^England|Human|Lighthouse Lab in Cambridge|Wellcome Sanger Institute for the COVID-19 Genomics UK (COG-UK) Consortium|Davies|United Kingdom

>Spike|hCoV-19/USA/TX-HMH-2252/2020|2020-05-21|EPI\_ISL\_545205|Original|hCoV-19^^Texas|Human|Houston Methodist Hospital|Houston Methodist Hospital|Long|USA

>Spike|hCoV-19/England/MILK-9AAC0B/2020|2020-09-01|EPI\_ISL\_550953|Original|hCoV-19^^England|Human|Lighthouse Lab in Milton Keynes|Wellcome Sanger Institute for the COVID-19 Genomics UK (COG-UK) consortium|Davies|United Kingdom

>Spike|hCoV-19/England/MILK-B3B61E/2020|2020-11-02|EPI\_ISL\_706070|Original|hCoV-19^^England|Human|Oxford Viromics|COVID-19 Genomics UK (COG-UK) Consortium|Golubchik|United Kingdom

>Spike|hCoV-19/England/ALDP-6CCF2B/2020|2020-07-02|EPI\_ISL\_556144|Original|hCoV-19^^England|Human|Lighthouse Lab in Alderley Park|Wellcome Sanger Institute for the COVID-19 Genomics UK (COG-UK) consortium|Davies|United Kingdom

>Spike|hCoV-19/Northern Ireland/QEUA-96CACF/2020|2020-08-21|EPI\_ISL\_530786|Original|hCoV-19^^Northern Ireland|Human|Lighthouse Lab in Glasgow|Wellcome Sanger Institute for the COVID-19 Genomics UK (COG-UK) consortium|Davies|United Kingdom

>Spike|hCoV-19/England/QEUA-A1DA80/2020|2020-09-29|EPI\_ISL\_587329|Original|hCoV-19^^England|Human|Lighthouse Lab in Glasgow|Wellcome Sanger Institute for the COVID-19 Genomics UK (COG-UK) consortium|Davies|United Kingdom

>Spike|hCoV-19/Wales/PHWC-480602/2020|2020-10-12|EPI\_ISL\_612910|Original|hCoV-19^^Wales|Human|Wales Specialist Virology Centre Sequencing lab|COVID-19 Genomics UK (COG-UK) Consortium|Moore|United Kingdom

>Spike|hCoV-19/Scotland/EDB8831/2020|2020-10-26|EPI\_ISL\_652007|Original|hCoV-19^^Scotland|Human|Virology Department|COVID-19 Genomics UK (COG-UK) Consortium|McHugh|United Kingdom

>Spike|hCoV-19/Wales/PHWC-35FAB/2020|2020-04-27|EPI\_ISL\_474600|Original|hCoV-19^^Wales|Human|Originating lab|COVID-19 Genomics UK (COG-UK) Consortium|Moore|United Kingdom

>Spike|hCoV-19/Denmark/DCGC-19068/2020|2020-12-07|EPI\_ISL\_748152|Original|hCoV-19^^Hovedstaden|Human|Department of Virus and Microbiological Special Diagnostics|Albertsen Lab|Michaelsen|Denmark

>Spike|hCoV-19/England/NORW-FA3E2/2020|2020-12-06|EPI\_ISL\_725502|Original|hCoV-19^^England|Human|Quadram Institute Bioscience|COVID-19 Genomics UK (COG-UK) Consortium|Alikhan|United Kingdom

>Spike|hCoV-19/Hong Kong/HKPU89-2502/2020|2020-02-26|EPI\_ISL\_419250|Original|hCoV-19^^Hong Kong|Human|Department of Clinical Pathology|Department of Health Technology and Informatics|Leung|China

>Spike|hCoV-19/England/NORW-F05D7/2020|2020-00-00|EPI\_ISL\_627584|Original|hCoV-19^^England|Human|Quadram Institute Bioscience|COVID-19 Genomics UK (COG-UK) Consortium|Alikhan|United Kingdom

>Spike|hCoV-19/India/UT-AR60/2020|2020-06-09|EPI\_ISL\_508197|Original|hCoV-19^^Uttarakhand|Human|All india institute of Medical Sciences Rishikesh|National Institute of Biomedical Genomics|Maitra|India

>Spike|hCoV-19/USA/AZ-TG497941/2020|2020-07-14|EPI\_ISL\_695266|Original|hCoV-19^^Arizona|Human|TGen North|TGen North|French|USA

>Spike|hCoV-19/USA/WA-S585/2020|2020-03-26|EPI\_ISL\_434345|Original|hCoV-19^^Washington|Human|Washington State Department of Health|Seattle Flu Study|Bedford|USA

>Spike|hCoV-19/England/QEUA-B10688/2020|2020-11-02|EPI\_ISL\_641643|Original|hCoV-19^^England|Human|Lighthouse Lab in Glasgow|Wellcome Sanger Institute for the COVID-19 Genomics UK (COG-UK) Consortium|Davies|United Kingdom

>Spike|hCoV-19/Australia/NSW1134/2020|2020-04-09|EPI\_ISL\_593771|Original|hCoV-19^^New South Wales|Human|South Eastern Area Laboratory Services (SEALS)|NSW Health Pathology - Institute of Clinical Pathology and Medical Research; Westmead Hospital; University of Sydney|Gall|Australia

>Spike|hCoV-19/Spain/VC-IBV-98003550/2020|2020-03-29|EPI\_ISL\_537975|Original|hCoV-19^^Comunitat Valenciana|Human|Servicio de Microbiolog\u00eda. Hospital General Universitario de Castell\u00f3n|SeqCOVID-SPAIN consortium/IBV(CSIC)|Comas|Spain

>Spike|hCoV-19/Denmark/DCGC-12252/2020|2020-11-16|EPI\_ISL\_682433|Original|hCoV-19^^Hovedstaden|Human|Department of Virus and Microbiological Special Diagnostics|Albertsen Lab|Michaelsen|Denmark

>Spike|hCoV-19/Spain/AN-IBV-001101/2020|2020-03-29|EPI\_ISL\_452587|Original|hCoV-19^^Andalucia|Human|Servicio de Microbiolog\u00eda y Parasitolog\u00eda cl\u00ednica. UCEIMP. Hospital Universitario Virgen del Roc\u00edo/IBIS/CSIC/US.|SeqCOVID-SPAIN consortium/IBV(CSIC)|Comas|Spain

>Spike|hCoV-19/Japan/PG-8876/2020|2020-08-00|EPI\_ISL\_686422|Original|hCoV-19^^Japan|Human|Pathogen Genomics Center|Pathogen Genomics Center|Sekizuka|Japan

>Spike|hCoV-19/England/BRIS-12CC36/2020|2020-04-18|EPI\_ISL\_481909|Original|hCoV-19^^England|Human|PHE South West Regional Laboratory|Wellcome Sanger Institute for the COVID-19 Genomics UK (COG-UK) consortium|Davies|United Kingdom

>Spike|hCoV-19/USA/NY-Wadsworth-44556-01/2020|2020-04-10|EPI\_ISL\_525667|Original|hCoV-19^^New York|Human|Wadsworth Center|Wadsworth Center|Plitnick|USA

>Spike|hCoV-19/England/BRIS-1249BF/2020|2020-03-26|EPI\_ISL\_443825|Original|hCoV-19^^England|Human|PHE South West Regional Laboratory|Wellcome Sanger Institute for the COVID-19 Genomics UK (COG-UK) consortium|Amato|United Kingdom

>Spike|hCoV-19/Denmark/DCGC-1947/2020|2020-04-27|EPI\_ISL\_622529|Original|hCoV-19^^Hovedstaden|Human|Department of Virus and Microbiological Special Diagnostics|Albertsen lab|Michaelsen|Denmark

>Spike|hCoV-19/Saudi Arabia/KAUST-Makkah196/2020|2020-04-06|EPI\_ISL\_437710|Original|hCoV-19^^Makkah|Human|Pathogen Genomics Lab King Abdullah University of Science and Technology(KAUST)|Pathogen Genomics Lab King Abdullah University of Science and Technology(KAUST)|Mohamed Ghazzali|Saudi Arabia

>Spike|hCoV-19/USA/TX-DSHS-1442/2020|2020-06-24|EPI\_ISL\_671628|Original|hCoV-19^^Texas|Human|Texas Department of State Health Services|Texas Department of State Health Services|Rahman|USA

>Spike|hCoV-19/Switzerland/ZH-ETHZ-101175/2020|2020-03-31|EPI\_ISL\_451838|Original|hCoV-19^^Zurich|Human|Viollier AG|Department of Biosystems Science and Engineering|Nadeau|Switzerland

>Spike|hCoV-19/Belgium/regal-11021206/2020|2020-11-02|EPI\_ISL\_735216|Original|hCoV-19^^Meulebeke|Human|UZ Leuven|KU Leuven|Maes|Belgium

>Spike|hCoV-19/USA/NM-NMDOH-2020324977/2020|2020-09-02|EPI\_ISL\_632837|Original|hCoV-19^^New Mexico|Human|New Mexico Department of Health Scientific Laboratory|New Mexico Department of Health Scientific Laboratory|Johnson|USA

>Spike|hCoV-19/Norway/1951/2020|2020-03-09|EPI\_ISL\_420145|Original|hCoV-19^^Norway|Human|Forde Hospital Department of Microbiology|Norwegian Institute of Public Health|Hungnes|Norway

>Spike|hCoV-19/Denmark/DCGC-4405/2020|2020-09-07|EPI\_ISL\_615403|Original|hCoV-19^^Midtjylland|Human|Department of Virus and Microbiological Special Diagnostics|Albertsen lab|Michaelsen|Denmark

>Spike|hCoV-19/England/203580245/2020|2020-08-27|EPI\_ISL\_566069|Original|hCoV-19^^England|Human|Respiratory Virus Unit|Respiratory Virus Unit|Platt|United Kingdom

>Spike|hCoV-19/England/QEUEH-88D3CE/2020|2020-07-27|EPI\_ISL\_532823|Original|hCoV-19^^England|Human|Lighthouse Lab in Glasgow|Wellcome Sanger Institute for the COVID-19 Genomics UK (COG-UK) consortium|Davies|United Kingdom

>Spike|hCoV-19/Wales/PHWC-497BEB/2020|2020-11-24|EPI\_ISL\_726946|Original|hCoV-19^^Wales|Human|Originating lab|COVID-19 Genomics UK (COG-UK) Consortium|Moore|United Kingdom

>Spike|hCoV-19/Spain/PV-IBV-2094/2020|2020-04-11|EPI\_ISL\_468936|Original|hCoV-19^^Basque Country|Human|Servicio de Microbiolog\u00eda. Hospital Universitario

Donostia. OSI Donostialdea. \u00clrea de Enfermedades Infecciosas|SeqCOVID-SPAIN consortium/IBV (CSIC) |Comas|Spain  
>Spike|hCoV-19/USA/WI-GMF-27794/2020|2020-10-26|EPI\_ISL\_660991|Original|hCoV-19^^Wisconsin|Human|Gundersen Molecular Diagnostics Laboratory|Kabara Cancer Research Institute|Kenny|USA  
>Spike|hCoV-19/Belgium/ULG-11044/2020|2020-11-30|EPI\_ISL\_722957|Original|hCoV-19^^Liege|Human|Department of Clinical Microbiology|GIGA Medical Genomics|Durkin|Belgium  
>Spike|hCoV-19/Wales/PHWC-160225/2020|2020-05-16|EPI\_ISL\_472909|Original|hCoV-19^^Wales|Human|Wales Specialist Virology Centre Sequencing lab|COVID-19 Genomics UK (COG-UK) Consortium|Moore|United Kingdom  
>Spike|hCoV-19/USA/UT-UPHL-2008979/2020|2020-05-14|EPI\_ISL\_525299|Original|hCoV-19^^Utah|Human|Utah Public Health Laboratory|Utah Public Health Laboratory|Young|USA  
>Spike|hCoV-19/Scotland/QEUEH-9F6769/2020|2020-09-27|EPI\_ISL\_600744|Original|hCoV-19^^Scotland|Human|Lighthouse Lab in Glasgow|Wellcome Sanger Institute for the COVID-19 Genomics UK (COG-UK) consortium|Davies|United Kingdom  
>Spike|hCoV-19/USA/WA-UW34/2020|2020-03-07|EPI\_ISL\_414621|Original|hCoV-19^^Washington|Human|UW Virology Lab|UW Virology Lab|Roychoudhury|USA  
>Spike|hCoV-19/USA/SC-DHEC-1117/2020|2020-07-10|EPI\_ISL\_574571|Original|hCoV-19^^South Carolina|Human|Microbiology Division|Microbiology Division|Flores|USA  
>Spike|hCoV-19/USA/WA-S2482/2020|2020-06-15|EPI\_ISL\_497114|Original|hCoV-19^^Washington|Human|Washington State Department of Health|Seattle Flu Study|Lee|USA  
>Spike|hCoV-19/Netherlands/ZH-EMC-320/2020|2020-07-03|EPI\_ISL\_523661|Original|hCoV-19^^Zuid Holland|Human|Dutch COVID-19 response team|Erasmus Medical Center|Oude Munnink|Netherlands  
>Spike|hCoV-19/Spain/IB-IBV-99007217/2020|2020-03-17|EPI\_ISL\_541958|Original|hCoV-19^^Balear Islands|Human|Servicio de Microbiolog\u00eda|SeqCOVID-SPAIN consortium/IBV (CSIC) |Comas|Spain  
>Spike|hCoV-19/Australia/VIC13112/2020|2020-07-29|EPI\_ISL\_563621|Original|hCoV-19^^Victoria|Human|Microbiological Diagnostic Unit - Public Health Laboratory (MDU-PHL) |MDU-PHL|Schultz|Australia  
>Spike|hCoV-19/England/CAMC-C268E2/2020|2020-12-08|EPI\_ISL\_733715|Original|hCoV-19^^England|Human|Lighthouse Lab in Cambridge|Wellcome Sanger Institute for the COVID-19 Genomics UK (COG-UK) Consortium|Davies|United Kingdom  
>Spike|hCoV-19/England/QEUEH-B3FDE8/2020|2020-11-08|EPI\_ISL\_657151|Original|hCoV-19^^England|Human|Lighthouse Lab in Glasgow|Wellcome Sanger Institute for the COVID-19 Genomics UK (COG-UK) Consortium|Davies|United Kingdom  
>Spike|hCoV-19/Wales/PHWC-2BC38/2020|2020-04-09|EPI\_ISL\_445823|Original|hCoV-19^^Wales|Human|Wales Specialist Virology Centre|Public Health Wales Microbiology Cardiff|Moore|United Kingdom  
>Spike|hCoV-19/USA/UT-UPHL-201200759/2020|2020-04-06|EPI\_ISL\_672563|Original|hCoV-19^^Utah|Human|Utah Public Health Laboratory|Utah Public Health Laboratory|Young|USA  
>Spike|hCoV-19/USA/WA\_0447/2020|2020-03-19|EPI\_ISL\_426446|Original|hCoV-19^^Washington|Human|WA State Department of Health|Pathogen Discovery|Queen|USA  
>Spike|hCoV-19/England/NORW-EB171/2020|2020-05-04|EPI\_ISL\_472303|Original|hCoV-19^^England|Human|Quadram Institute Bioscience|COVID-19 Genomics UK (COG-UK) Consortium|Alikhan|United Kingdom  
>Spike|hCoV-19/Australia/VIC8674/2020|2020-07-24|EPI\_ISL\_565139|Original|hCoV-19^^Victoria|Human|Victorian Infectious Diseases Reference Laboratory (VIDRL) |VIDRL and MDU-PHL|Schultz|Australia  
>Spike|hCoV-19/Japan/PG-2164/2020|2020-04-00|EPI\_ISL\_685769|Original|hCoV-19^^Japan|Human|Pathogen Genomics Center|Pathogen Genomics Center|Sekizuka|Japan  
>Spike|hCoV-19/South Africa/KRISP-K001076/2020|2020-07-04|EPI\_ISL\_509330|Original|hCoV-19^^KwaZulu-Natal|Human|NHLS-IALCH|KRISP|de Oliveira|South Africa  
>Spike|hCoV-19/Wales/PHWC-16D61D/2020|2020-09-25|EPI\_ISL\_577421|Original|hCoV-19^^Wales|Human|Wales Specialist Virology Centre Sequencing lab|COVID-19 Genomics UK (COG-UK) Consortium|Moore|United Kingdom

>Spike|hCoV-19/South Africa/KRISP-K002664/2020|2020-08-02|EPI\_ISL\_535530|Original|hCoV-19^^KwaZulu-Natal|Human|NHLS-IALCH|KRISP|de Oliveira|South Africa

>Spike|hCoV-19/England/ALDP-6495E8/2020|2020-07-04|EPI\_ISL\_558160|Original|hCoV-19^^England|Human|Lighthouse Lab in Alderley Park|Wellcome Sanger Institute for the COVID-19 Genomics UK (COG-UK) consortium|Davies|United Kingdom

>Spike|hCoV-19/Denmark/DCGC-18700/2020|2020-12-07|EPI\_ISL\_749348|Original|hCoV-19^^Midtjylland|Human|Department of Virus and Microbiological Special Diagnostics|Albertsen Lab|Michaelsen|Denmark

>Spike|hCoV-19/England/204660292/2020|2020-11-11|EPI\_ISL\_686564|Original|hCoV-19^^England|Human|Respiratory Virus Unit|COVID-19 Genomics UK (COG-UK) Consortium|Platt|United Kingdom

>Spike|hCoV-19/Denmark/DCGC-15102/2020|2020-11-23|EPI\_ISL\_713632|Original|hCoV-19^^Hovedstaden|Human|Department of Virus and Microbiological Special Diagnostics|Albertsen Lab|Michaelsen|Denmark

>Spike|hCoV-19/USA/MI-MDHHS-SC20969/2020|2020-03-26|EPI\_ISL\_507757|Original|hCoV-19^^Michigan|Human|Michigan Department of Health and Human Services|Michigan Department of Health and Human Services|Blankenship|USA

>Spike|hCoV-19/England/LEED-2A8220/2020|2020-04-27|EPI\_ISL\_539006|Original|hCoV-19^^England|Human|Leeds Teaching Hospitals NHS Trust and Public Health England|Wellcome Sanger Institute for the COVID-19 Genomics UK (COG-UK) Consortium|Davies|United Kingdom

>Spike|hCoV-19/USA/FL-BPHL-1736/2020|2020-10-02|EPI\_ISL\_613857|Original|hCoV-19^^Florida|Human|Florida Bureau of Public Health Laboratories|Florida Bureau of Public Health Laboratories|Blanton|USA

>Spike|hCoV-19/USA/TX-HMH-4804/2020|2020-06-20|EPI\_ISL\_544342|Original|hCoV-19^^Texas|Human|Houston Methodist Hospital|Houston Methodist Hospital|Long|USA

>Spike|hCoV-19/USA/TX-HMH-MCoV-8536/2020|2020-07-01|EPI\_ISL\_780613|Original|hCoV-19^^Texas|Human|Houston Methodist Hospital|Houston Methodist Hospital|Long|USA

>Spike|hCoV-19/England/QEUEH-B66B1B/2020|2020-11-11|EPI\_ISL\_662399|Original|hCoV-19^^England|Human|Lighthouse Lab in Glasgow|Wellcome Sanger Institute for the COVID-19 Genomics UK (COG-UK) Consortium|Davies|United Kingdom

>Spike|hCoV-19/England/QEUEH-B7C0C8/2020|2020-11-14|EPI\_ISL\_668257|Original|hCoV-19^^England|Human|Lighthouse Lab in Glasgow|Wellcome Sanger Institute for the COVID-19 Genomics UK (COG-UK) Consortium|Davies|United Kingdom

>Spike|hCoV-19/England/CAMC-B09716/2020|2020-10-30|EPI\_ISL\_673134|Original|hCoV-19^^England|Human|Lighthouse Lab in Cambridge|Wellcome Sanger Institute for the COVID-19 Genomics UK (COG-UK) Consortium|Davies|United Kingdom

>Spike|hCoV-19/England/ALDP-9CA AFC/2020|2020-09-16|EPI\_ISL\_575423|Original|hCoV-19^^England|Human|Lighthouse Lab in Alderley Park|Wellcome Sanger Institute for the COVID-19 Genomics UK (COG-UK) consortium|Davies|United Kingdom

>Spike|hCoV-19/England/LIVE-DC3039/2020|2020-11-25|EPI\_ISL\_704134|Original|hCoV-19^^England|Human|Liverpool Clinical Laboratories|COVID-19 Genomics UK (COG-UK) Consortium|Haldenby|United Kingdom

>Spike|hCoV-19/USA/ID-QDX-700/2020|2020-03-18|EPI\_ISL\_571432|Original|hCoV-19^^Idaho|Human|Quest Diagnostics|Quest Diagnostics|Kagan|USA

>Spike|hCoV-19/England/CAMB-1AFC3B/2020|2020-05-03|EPI\_ISL\_459205|Original|hCoV-19^^England|Human|Department of Pathology|Wellcome Sanger Institute for the COVID-19 Genomics UK (COG-UK) consortium|Davies|United Kingdom

>Spike|hCoV-19/USA/AK-PHL097/2020|2020-04-02|EPI\_ISL\_492057|Original|hCoV-19^^Alaska|Human|Alaska State Virology Laboratory|Alaska State Virology Laboratory|Drown|USA

>Spike|hCoV-19/USA/CA-CZB-15175/2020|2020-11-23|EPI\_ISL\_738789|Original|hCoV-19^^California|Human|Santa Clara County Public Health Laboratory|Chan-Zuckerberg Biohub|Kamm|USA

>Spike|hCoV-19/Ireland/un-NVRL-AIIDB0134v1-2/2020|2020-12-11|EPI\_ISL\_791308|Original|hCoV-19^^Ireland|Human|National Virus Reference Laboratory|Irish Coronavirus Sequencing Consortium - Teagasc Moorepark|Walsh|Ireland

>Spike|hCoV-19/England/MILK-ABB0DD/2020|2020-10-21|EPI\_ISL\_623365|Original|hCoV-19^^England|Human|Lighthouse Lab in Milton Keynes|Wellcome Sanger Institute for the COVID-19 Genomics UK (COG-UK) consortium|Davies|United Kingdom

>Spike|hCoV-19/England/CAMC-C771C9/2020|2020-12-16|EPI\_ISL\_768937|Original|hCoV-19^^England|Human|Lighthouse Lab in Cambridge|Wellcome Sanger Institute for the COVID-19 Genomics UK (COG-UK) Consortium|Davies|United Kingdom

>Spike|hCoV-19/England/ALDP-B1C0AC/2020|2020-10-31|EPI\_ISL\_645948|Original|hCoV-19^^England|Human|Lighthouse Lab in Alderley Park|Wellcome Sanger Institute for the COVID-19 Genomics UK (COG-UK) Consortium|Davies|United Kingdom

>Spike|hCoV-19/England/MILK-A46FDA/2020|2020-10-06|EPI\_ISL\_598313|Original|hCoV-19^^England|Human|Lighthouse Lab in Milton Keynes|Wellcome Sanger Institute for the COVID-19 Genomics UK (COG-UK) consortium|Davies|United Kingdom

>Spike|hCoV-19/England/ALDP-BBA3D4/2020|2020-11-21|EPI\_ISL\_701873|Original|hCoV-19^^England|Human|Lighthouse Lab in Alderley Park|Wellcome Sanger Institute for the COVID-19 Genomics UK (COG-UK) Consortium|Davies|United Kingdom

>Spike|hCoV-19/Portugal/PT0006a/2020|2020-03-06|EPI\_ISL\_417990|Original|hCoV-19^^Portugal|Human|CHULC - H Curry Cabral|Instituto Nacional de Saude (INSA)|Borges|Portugal

>Spike|hCoV-19/Switzerland/BS-ETHZ-370264/2020|2020-11-05|EPI\_ISL\_693939|Original|hCoV-19^^Basel-Stadt|Human|Viollier AG|Department of Biosystems Science and Engineering|Nadeau|Switzerland

>Spike|hCoV-19/England/QEUH-96E0F8/2020|2020-08-17|EPI\_ISL\_530473|Original|hCoV-19^^England|Human|Lighthouse Lab in Glasgow|Wellcome Sanger Institute for the COVID-19 Genomics UK (COG-UK) consortium|Davies|United Kingdom

>Spike|hCoV-19/Canada/NB-206/2020|2020-03-27|EPI\_ISL\_479627|Original|hCoV-19^^New Brunswick|Human|Dr. Georges-L.-Dumont University Hospital Centre|National Microbiology Laboratory|Majer|Canada

>Spike|hCoV-19/England/QEUH-BC36B1/2020|2020-11-25|EPI\_ISL\_703922|Original|hCoV-19^^England|Human|Lighthouse Lab in Glasgow|Wellcome Sanger Institute for the COVID-19 Genomics UK (COG-UK) Consortium|Davies|United Kingdom

>Spike|hCoV-19/England/QEUH-964784/2020|2020-08-11|EPI\_ISL\_536961|Original|hCoV-19^^England|Human|Lighthouse Lab in Glasgow|Wellcome Sanger Institute for the COVID-19 Genomics UK (COG-UK) consortium|Davies|United Kingdom

>Spike|hCoV-19/Scotland/CVR4932/2020|2020-10-05|EPI\_ISL\_594698|Original|hCoV-19^^Scotland|Human|West of Scotland Specialist Virology Centre|COVID-19 Genomics UK (COG-UK) Consortium|Robertson|United Kingdom

>Spike|hCoV-19/Ireland/LS-NVRL-20Z06376/2020|2020-04-16|EPI\_ISL\_671385|Original|hCoV-19^^Laois|Human|National Virus Reference Laboratory|Irish Coronavirus Sequencing Consortium - Teagasc Moorepark|Walsh|Ireland

>Spike|hCoV-19/Australia/VIC5324/2020|2020-07-16|EPI\_ISL\_520087|Original|hCoV-19^^Victoria|Human|Microbiological Diagnostic Unit - Public Health Laboratory (MDU-PHL)|MDU-PHL|Schultz|Australia

>Spike|hCoV-19/Thailand/Bangkok-CONI-0018/2020|2020-03-20|EPI\_ISL\_450723|Original|hCoV-19^^Bangkok|Human|Ramathibodi Hospital|COVID-19 Network Investigations (CONI) Alliance|Batty|Thailand

>Spike|hCoV-19/USA/MI-UM-10036448245/2020|2020-10-14|EPI\_ISL\_610103|Original|hCoV-19^^Michigan|Human|University of Michigan Clinical Microbiology Laboratory|Lauring Lab|Valesano|USA

>Spike|hCoV-19/USA/NY-NYCPHL-000024/2020|2020-03-11|EPI\_ISL\_631520|Original|hCoV-19^^New York|Human|NYC HH Lincoln Medical And Mental Health Center|New York City Public Health Laboratory|Wang|USA

>Spike|hCoV-19/Wales/PHWC-49FEF9/2020|2020-12-11|EPI\_ISL\_743368|Original|hCoV-19^^Wales|Human|Wales Specialist Virology Centre Sequencing lab|COVID-19 Genomics UK (COG-UK) Consortium|Moore|United Kingdom

>Spike|hCoV-19/England/LOND-12643EE/2020|2020-11-15|EPI\_ISL\_679542|Original|hCoV-19^^England|Human|University College London|COVID-19 Genomics UK (COG-UK) Consortium|Roy|United Kingdom

>Spike|hCoV-19/England/QEUH-A20255/2020|2020-10-01|EPI\_ISL\_587639|Original|hCoV-19^^England|Human|Lighthouse Lab in Glasgow|Wellcome Sanger Institute for the COVID-19 Genomics UK (COG-UK) consortium|Davies|United Kingdom

>Spike|hCoV-19/England/CAMC-A3E52E/2020|2020-10-06|EPI\_ISL\_609689|Original|hCoV-19^^England|Human|Lighthouse Lab in Cambridge|Wellcome Sanger Institute for the COVID-19 Genomics UK (COG-UK) consortium|Davies|United Kingdom

>Spike|hCoV-19/England/QEUEH-B12B2D/2020|2020-11-02|EPI\_ISL\_642594|Original|hCoV-19^^England|Human|Lighthouse Lab in Glasgow|Wellcome Sanger Institute for the COVID-19 Genomics UK (COG-UK) Consortium|Davies|United Kingdom

>Spike|hCoV-19/Wales/PHWC-318B3/2020|2020-04-11|EPI\_ISL\_446500|Original|hCoV-19^^Wales|Human|Wales Specialist Virology Centre|Public Health Wales Microbiology Cardiff|Moore|United Kingdom

>Spike|hCoV-19/England/CAMC-B51FCC/2020|2020-11-08|EPI\_ISL\_657728|Original|hCoV-19^^England|Human|Lighthouse Lab in Cambridge|Wellcome Sanger Institute for the COVID-19 Genomics UK (COG-UK) Consortium|Davies|United Kingdom

>Spike|hCoV-19/Switzerland/AG-ETHZ-410271/2020|2020-12-14|EPI\_ISL\_737478|Original|hCoV-19^^Aargau|Human|Viollier AG|Department of Biosystems Science and Engineering|Nadeau|Switzerland

>Spike|hCoV-19/England/CAMB-83F62/2020|2020-04-26|EPI\_ISL\_438714|Original|hCoV-19^^England|Human|Department of Pathology|COVID-19 Genomics UK (COG-UK) Consortium|Meredith|United Kingdom

>Spike|hCoV-19/England/MILK-B393FB/2020|2020-11-01|EPI\_ISL\_658944|Original|hCoV-19^^England|Human|Lighthouse Lab in Milton Keynes|Wellcome Sanger Institute for the COVID-19 Genomics UK (COG-UK) Consortium|Davies|United Kingdom

>Spike|hCoV-19/USA/TX-HMH-3215/2020|2020-06-12|EPI\_ISL\_544083|Original|hCoV-19^^Texas|Human|Houston Methodist Hospital|Houston Methodist Hospital|Long|USA

>Spike|hCoV-19/Denmark/DCGC-20396/2020|2020-12-21|EPI\_ISL\_758721|Original|hCoV-19^^Hovedstaden|Human|Department of Virus and Microbiological Special Diagnostics|Albertsen Lab|Michaelsen|Denmark

>Spike|hCoV-19/Saudi Arabia/KAUST-MAKKAH1635/2020|2020-04-26|EPI\_ISL\_678134|Original|hCoV-19^^Makkah|Human|Pathogen Genomics Lab King Abdullah University of Science and Technology(KAUST)|Pathogen Genomics Lab King Abdullah University of Science and Technology(KAUST)|Mohamed Ghazzali|Saudi Arabia

>Spike|hCoV-19/England/QEUEH-53157B/2020|2020-05-18|EPI\_ISL\_532155|Original|hCoV-19^^England|Human|Lighthouse Lab in Glasgow|Wellcome Sanger Institute for the COVID-19 Genomics UK (COG-UK) consortium|Davies|United Kingdom

>Spike|hCoV-19/England/QEUEH-9AD093/2020|2020-09-02|EPI\_ISL\_559817|Original|hCoV-19^^England|Human|Oxford Viromics|COVID-19 Genomics UK (COG-UK) Consortium|Golubchik|United Kingdom

>Spike|hCoV-19/USA/VA-DCLS-0421/2020|2020-04-28|EPI\_ISL\_477637|Original|hCoV-19^^Virginia|Human|Virginia DCLS|Virginia DCLS|St. Jacques|USA

>Spike|hCoV-19/England/LIVE-DC4A2B/2020|2020-11-10|EPI\_ISL\_705910|Original|hCoV-19^^England|Human|Liverpool Clinical Laboratories|COVID-19 Genomics UK (COG-UK) Consortium|Haldenby|United Kingdom

>Spike|hCoV-19/USA/WA-S2710/2020|2020-06-18|EPI\_ISL\_525700|Original|hCoV-19^^Washington|Human|Seattle Flu Study|Seattle Flu Study|Lee|USA

>Spike|hCoV-19/Netherlands/NB-EMC-344/2020|2020-10-21|EPI\_ISL\_722524|Original|hCoV-19^^Noord Brabant|Human|Dutch COVID-19 response team|Erasmus Medical Center|Oude Munnink|Netherlands

>Spike|hCoV-19/England/204262880/2020|2020-10-15|EPI\_ISL\_649809|Original|hCoV-19^^England|Human|Respiratory Virus Unit|COVID-19 Genomics UK (COG-UK) Consortium|Platt|United Kingdom

>Spike|hCoV-19/USA/TX-DSHS-0444/2020|2020-06-05|EPI\_ISL\_541979|Original|hCoV-19^^Texas|Human|Texas Department of State Health Services|Texas Department of State Health Services|Rahman|USA

>Spike|hCoV-19/England/CAMB-7905D/2020|2020-04-03|EPI\_ISL\_441813|Original|hCoV-19^^England|Human|Department of Pathology|Wellcome Sanger Institute for the COVID-19 Genomics UK (COG-UK) consortium|Amato|United Kingdom

>Spike|hCoV-19/Netherlands/Utrecht\_22/2020|2020-03-03|EPI\_ISL\_422899|Original|hCoV-19^^Utrecht|Human|Dutch COVID-19 response team|Erasmus Medical Center|Oude Munnink|Netherlands

>Spike|hCoV-19/South Korea/KDCA0344/2020|2020-07-30|EPI\_ISL\_760130|Original|hCoV-19^^South Korea|Human|Division of Emerging Infectious Diseases|Division of Emerging Infectious Diseases|Park|South Korea

>Spike|hCoV-19/England/204761674/2020|2020-11-18|EPI\_ISL\_683555|Original|hCoV-19^^England|Human|Respiratory Virus Unit|COVID-19 Genomics UK (COG-UK) Consortium|Platt|United Kingdom

>Spike|hCoV-19/USA/CA-ALSR-3418/2020|2020-07-07|EPI\_ISL\_636016|Original|hCoV-19^^California|Human|San Diego County Public Health Laboratory|Andersen lab at Scripps Research|Gangavarapu|USA

>Spike|hCoV-19/USA/WA-UW-865/2020|2020-03-14|EPI\_ISL\_476939|Original|hCoV-19^^Washington|Human|UW Virology Lab|UW Virology Lab|Roychoudhury|USA

>Spike|hCoV-19/Poland/77205/2020|2020-11-00|EPI\_ISL\_732887|Original|hCoV-19^^Poland|Human|genXone SA|genXone SA|Kaszuba|Poland

>Spike|hCoV-19/Spain/CB-IBV-98007073/2020|2020-09-03|EPI\_ISL\_582103|Original|hCoV-19^^Cantabria|Human|Hospital Universitario Marqu\u00e9s de Valdecilla - IDIVAL (Santander|SeqCOVID-SPAIN consortium|IBV (CSIC)|Comas|Spain

>Spike|hCoV-19/England/QEUA-A025C9/2020|2020-09-29|EPI\_ISL\_584914|Original|hCoV-19^^England|Human|Quadram Institute Bioscience|COVID-19 Genomics UK (COG-UK) Consortium|Alikhan|United Kingdom

>Spike|hCoV-19/Japan/PG-7324/2020|2020-08-00|EPI\_ISL\_688427|Original|hCoV-19^^Japan|Human|Pathogen Genomics Center|Pathogen Genomics Center|Sekizuka|Japan

>Spike|hCoV-19/Bahrain/341063114\_S18\_L001/2020|2020-11-12|EPI\_ISL\_678269|Original|hCoV-19^^Bahrain|Human|Communicable Disease Laboratory|Communicable Disease Laboratory|Altaif|Bahrain

>Spike|hCoV-19/England/NORT-282031/2020|2020-03-25|EPI\_ISL\_472191|Original|hCoV-19^^England|Human|Northumbria University / South Tees Hospitals NHS Foundation Trust / North Cumbria Integrated Care NHS Foundation Trust / North Tees and Hartlepool NHS Foundation Trust / Newcastle Hospitals NHS Foundation Trust|COVID-19 Genomics UK (COG-UK) Consortium|Bashton|United Kingdom

>Spike|hCoV-19/USA/WA-S2135/2020|2020-06-08|EPI\_ISL\_497563|Original|hCoV-19^^Washington|Human|Washington State Department of Health|Seattle Flu Study|Lee|USA

>Spike|hCoV-19/Switzerland/BL-UHB-42190998/2020|2020-03-14|EPI\_ISL\_528084|Original|hCoV-19^^Basel-Land|Human|University Hospital Basel|University Hospital Basel|Roloff Handschin|Switzerland

>Spike|hCoV-19/Brazil/SP-188/2020|2020-03-24|EPI\_ISL\_515565|Original|hCoV-19^^S\u00e3o Paulo|Human|Hospital do Servidor P\u00fablico Estadual Francisco Morato de Oliveira|Instituto Adolfo Lutz|Sacchi|Brazil

>Spike|hCoV-19/Ireland/D-NVRL-20Z06235/2020|2020-04-17|EPI\_ISL\_681905|Original|hCoV-19^^Dublin|Human|National Virus Reference Laboratory|Irish Coronavirus Sequencing Consortium - Teagasc Moorepark|Walsh|Ireland

>Spike|hCoV-19/Australia/VIC13558/2020|2020-08-02|EPI\_ISL\_563753|Original|hCoV-19^^Victoria|Human|Microbiological Diagnostic Unit - Public Health Laboratory (MDU-PHL)|MDU-PHL|Schultz|Australia

>Spike|hCoV-19/England/NORW-E7A01/2020|2020-05-04|EPI\_ISL\_449088|Original|hCoV-19^^England|Human|Quadram Institute Bioscience|COVID-19 Genomics UK (COG-UK) Consortium|Alikhan|United Kingdom

>Spike|hCoV-19/England/MILK-C5021E/2020|2020-12-11|EPI\_ISL\_769618|Original|hCoV-19^^England|Human|Lighthouse Lab in Milton Keynes|Wellcome Sanger Institute for the COVID-19 Genomics UK (COG-UK) Consortium|Davies|United Kingdom

>Spike|hCoV-19/Wales/PHWC-2CB2B/2020|2020-04-01|EPI\_ISL\_445951|Original|hCoV-19^^Wales|Human|Wales Specialist Virology Centre|Public Health Wales Microbiology Cardiff|Moore|United Kingdom

>Spike|hCoV-19/England/MILK-993CE7/2020|2020-08-27|EPI\_ISL\_552281|Original|hCoV-19^^England|Human|Lighthouse Lab in Milton Keynes|Wellcome Sanger Institute for the COVID-19 Genomics UK (COG-UK) consortium|Davies|United Kingdom

>Spike|hCoV-19/USA/NY-Wadsworth-292782-01/2020|2020-12-28|EPI\_ISL\_769917|Original|hCoV-19^^New York|Human|Albany Medical Center Hospital Clinical Laboratories|Wadsworth Center|Lasek-Nesselquist|USA

>Spike|hCoV-19/USA/TX-HMH-MCoV-16087/2020|2020-10-30|EPI\_ISL\_785771|Original|hCoV-19^^Texas|Human|Houston Methodist Hospital|Houston Methodist Hospital|Long|USA



>Spike|hCoV-19/Denmark/DCGC-14182/2020|2020-11-30|EPI\_ISL\_711611|Original|hCoV-19^^Syddanmark|Human|Department of Virus and Microbiological Special Diagnostics|Albertsen Lab|Michaelsen|Denmark

>Spike|hCoV-19/England/ALDP-521532/2020|2020-06-02|EPI\_ISL\_558945|Original|hCoV-19^^England|Human|Lighthouse Lab in Alderley Park|Wellcome Sanger Institute for the COVID-19 Genomics UK (COG-UK) consortium|Davies|United Kingdom

>Spike|hCoV-19/Italy/ABR-IZSGC-TE27020/2020|2020-04-27|EPI\_ISL\_436725|Original|hCoV-19^^Abruzzo|Human|RSA/RP Villa San Giovanni - Gruppo Edos|Istituto Zooprofilattico Sperimentale dell'Abruzzo e Molise \G.Caporale\|Lorusso|Italy

>Spike|hCoV-19/Saudi Arabia/KAUST-Makkah168/2020|2020-04-06|EPI\_ISL\_437479|Original|hCoV-19^^Makkah|Human|Pathogen Genomics Lab King Abdullah University of Science and Technology(KAUST)|Pathogen Genomics Lab King Abdullah University of Science and Technology(KAUST)|Mohamed Ghazzali|Saudi Arabia

>Spike|hCoV-19/USA/WA-UW-2102/2020|2020-03-25|EPI\_ISL\_603263|Original|hCoV-19^^Washington|Human|UW Virology Lab|UW Virology Lab|Roychoudhury|USA

>Spike|hCoV-19/Scotland/QEUH-A0C2E6/2020|2020-10-03|EPI\_ISL\_599333|Original|hCoV-19^^Scotland|Human|Lighthouse Lab in Glasgow|Wellcome Sanger Institute for the COVID-19 Genomics UK (COG-UK) consortium|Davies|United Kingdom

>Spike|hCoV-19/England/CAMC-BBC2C6/2020|2020-11-22|EPI\_ISL\_704842|Original|hCoV-19^^England|Human|Quadram Institute Bioscience|COVID-19 Genomics UK (COG-UK) Consortium|Alikhan|United Kingdom

>Spike|hCoV-19/USA/TX-HMH-4101/2020|2020-06-18|EPI\_ISL\_543371|Original|hCoV-19^^Texas|Human|Houston Methodist Hospital|Houston Methodist Hospital|Long|USA

>Spike|hCoV-19/India/MH-ACTREC-456/2020|2020-08-09|EPI\_ISL\_700104|Original|hCoV-19^^Maharashtra|Human|Hematopathology Laboratory|Hematopathology Laboratory|Patkar|India

>Spike|hCoV-19/England/ALDP-CED313/2020|2020-12-17|EPI\_ISL\_782068|Original|hCoV-19^^England|Human|Lighthouse Lab in Alderley Park|Wellcome Sanger Institute for the COVID-19 Genomics UK (COG-UK) Consortium|Davies|United Kingdom

>Spike|hCoV-19/USA/NY-Wadsworth-223644-01/2020|2020-09-20|EPI\_ISL\_677104|Original|hCoV-19^^New York|Human|Wadsworth Center|Wadsworth Center|Lasek-Nesselquist|USA

>Spike|hCoV-19/England/CAMC-AB1918/2020|2020-10-23|EPI\_ISL\_623641|Original|hCoV-19^^England|Human|Lighthouse Lab in Cambridge|Wellcome Sanger Institute for the COVID-19 Genomics UK (COG-UK) consortium|Davies|United Kingdom

>Spike|hCoV-19/Denmark/DCGC-18233/2020|2020-12-14|EPI\_ISL\_749830|Original|hCoV-19^^Nordjylland|Human|Department of Virus and Microbiological Special Diagnostics|Albertsen Lab|Michaelsen|Denmark

>Spike|hCoV-19/England/MILK-A0612B/2020|2020-10-01|EPI\_ISL\_599984|Original|hCoV-19^^England|Human|Lighthouse Lab in Milton Keynes|Wellcome Sanger Institute for the COVID-19 Genomics UK (COG-UK) consortium|Davies|United Kingdom

>Spike|hCoV-19/Denmark/DCGC-3614/2020|2020-08-31|EPI\_ISL\_616382|Original|hCoV-19^^Hovedstaden|Human|Department of Virus and Microbiological Special Diagnostics|Albertsen lab|Michaelsen|Denmark

>Spike|hCoV-19/USA/NY-Wadsworth-38698-01/2020|2020-04-05|EPI\_ISL\_525653|Original|hCoV-19^^New York|Human|Wadsworth Center|Wadsworth Center|Plitnick|USA

>Spike|hCoV-19/England/NORT-1B71BDE/2020|2020-11-19|EPI\_ISL\_706319|Original|hCoV-19^^England|Human|Northumbria University / South Tees Hospitals NHS Foundation Trust / North Cumbria Integrated Care NHS Foundation Trust / North Tees and Hartlepool NHS Foundation Trust / Newcastle Hospitals NHS Foundation Trust|COVID-19 Genomics UK (COG-UK) Consortium|Bashton|United Kingdom

>Spike|hCoV-19/Germany/NW-HHU-271/2020|2020-09-23|EPI\_ISL\_631359|Original|hCoV-19^^North Rhine-Westphalia|Human|ZOTZ KLIMAS MVZ D\u00f0fcsselldorf-Centrum GbR \u00dcBAG f\u00f0r Labormedizin|Center of Medical Microbiology|Wienemann|Germany

>Spike|hCoV-19/Spain/PV-IBV-000915/2020|2020-03-27|EPI\_ISL\_452653|Original|hCoV-19^^Basque Country|Human|Servicio de Microbiolog\u00eda. Hospital Universitario Donostia. OSI Donostialdea. \u00clrea de Enfermedades Infecciosas|SeqCOVID-SPAIN consortium/IBV (CSIC) |Comas|Spain

>Spike|hCoV-19/USA/WA-UW-1309/2020|2020-03-17|EPI\_ISL\_422977|Original|hCoV-19^^Washington|Human|UW Virology Lab|UW Virology Lab|Roychoudhury|USA

>Spike|hCoV-19/England/MILK-A44AF9/2020|2020-10-07|EPI\_ISL\_598637|Original|hCoV-19^^England|Human|Lighthouse Lab in Milton Keynes|Wellcome Sanger Institute for the COVID-19 Genomics UK (COG-UK) consortium|Davies|United Kingdom

>Spike|hCoV-19/England/QEUA-AEFB84/2020|2020-10-29|EPI\_ISL\_662849|Original|hCoV-19^^England|Human|Lighthouse Lab in Glasgow|Wellcome Sanger Institute for the COVID-19 Genomics UK (COG-UK) Consortium|Davies|United Kingdom

>Spike|hCoV-19/Denmark/DCGC-13136/2020|2020-11-30|EPI\_ISL\_712607|Original|hCoV-19^^Midtjylland|Human|Department of Virus and Microbiological Special Diagnostics|Albertsen Lab|Michaelsen|Denmark

>Spike|hCoV-19/England/NORW-2225E9/2020|2020-12-19|EPI\_ISL\_741506|Original|hCoV-19^^England|Human|Quadram Institute Bioscience|COVID-19 Genomics UK (COG-UK) Consortium|Alikhan|United Kingdom

>Spike|hCoV-19/Finland/13SS5B11/2020|2020-09-13|EPI\_ISL\_737235|Original|hCoV-19^^Uusimaa|Human|Department of Virology and Immunology|Department of Virology|Smura|Finland

>Spike|hCoV-19/Russia/KDA-RII-MH1685S/2020|2020-09-04|EPI\_ISL\_596316|Original|hCoV-19^^Krasnodar|Human|HELIX LCC|WHO National Influenza Centre Russian Federation|Komissarov|Russia

>Spike|hCoV-19/England/CAMB-7A6C3/2020|2020-04-02|EPI\_ISL\_441806|Original|hCoV-19^^England|Human|Department of Pathology|Wellcome Sanger Institute for the COVID-19 Genomics UK (COG-UK) consortium|Amato|United Kingdom

>Spike|hCoV-19/England/QEUA-B425CC/2020|2020-11-08|EPI\_ISL\_657165|Original|hCoV-19^^England|Human|Lighthouse Lab in Glasgow|Wellcome Sanger Institute for the COVID-19 Genomics UK (COG-UK) Consortium|Davies|United Kingdom

>Spike|hCoV-19/USA/WI-WSLH-200414/2020|2020-06-02|EPI\_ISL\_578576|Original|hCoV-19^^Wisconsin|Human|Wisconsin State Laboratory of Hygiene Communicable Disease Division|Wisconsin State Laboratory of Hygiene Communicable Disease Division|Florek|USA

>Spike|hCoV-19/England/MILK-BB113D/2020|2020-11-17|EPI\_ISL\_720460|Original|hCoV-19^^England|Human|Lighthouse Lab in Milton Keynes|Wellcome Sanger Institute for the COVID-19 Genomics UK (COG-UK) Consortium|Davies|United Kingdom

>Spike|hCoV-19/USA/NM-DOH-2020616502/2020|2020-12-12|EPI\_ISL\_751818|Original|hCoV-19^^New Mexico|Human|New Mexico Department of Health Scientific Laboratory|New Mexico Department of Health Scientific Laboratory|Malone|USA

>Spike|hCoV-19/USA/TX-HMH-MCoV-10722/2020|2020-07-08|EPI\_ISL\_789604|Original|hCoV-19^^Texas|Human|Houston Methodist Hospital|Houston Methodist Hospital|Long|USA

>Spike|hCoV-19/Scotland/CVR2620/2020|2020-04-17|EPI\_ISL\_477990|Original|hCoV-19^^Scotland|Human|West of Scotland Specialist Virology Centre|COVID-19 Genomics UK (COG-UK) Consortium|Robertson|United Kingdom

>Spike|hCoV-19/Wales/PHWC-495682/2020|2020-11-23|EPI\_ISL\_726378|Original|hCoV-19^^Wales|Human|Originating lab|COVID-19 Genomics UK (COG-UK) Consortium|Moore|United Kingdom

>Spike|hCoV-19/Scotland/QEUA-9DD59B/2020|2020-09-21|EPI\_ISL\_599770|Original|hCoV-19^^Scotland|Human|Lighthouse Lab in Glasgow|Wellcome Sanger Institute for the COVID-19 Genomics UK (COG-UK) consortium|Davies|United Kingdom

>Spike|hCoV-19/Wales/PHWC-487058/2020|2020-10-30|EPI\_ISL\_639160|Original|hCoV-19^^Wales|Human|Wales Specialist Virology Centre Sequencing lab|COVID-19 Genomics UK (COG-UK) Consortium|Moore|United Kingdom

>Spike|hCoV-19/England/ALDP-C398EC/2020|2020-12-09|EPI\_ISL\_730671|Original|hCoV-19^^England|Human|Lighthouse Lab in Alderley Park|Wellcome Sanger Institute for the COVID-19 Genomics UK (COG-UK) Consortium|Davies|United Kingdom

>Spike|hCoV-19/England/WSFT-25C111C/2020|2020-05-08|EPI\_ISL\_492867|Original|hCoV-19^^England|Human|Department of Medical Microbiology|Wellcome Sanger Institute for the COVID-19 Genomics UK (COG-UK) consortium|Davies|United Kingdom

>Spike|hCoV-19/USA/NY-Wadsworth-290736-01/2020|2020-12-22|EPI\_ISL\_767561|Original|hCoV-19^^New York|Human|URMC LABS|Wadsworth Center|Lasek-Nesselquist|USA

>Spike|hCoV-19/USA/MN-MDH-1658/2020|2020-04-01|EPI\_ISL\_560745|Original|hCoV-19^^Minnesota|Human|Minnesota Department of Health|Minnesota Department of Health|Garfin|USA

>Spike|hCoV-19/Denmark/DCGC-19478/2020|2020-12-07|EPI\_ISL\_748977|Original|hCoV-19^^Syddanmark|Human|Department of Virus and Microbiological Special Diagnostics|Albertsen Lab|Michaelsen|Denmark

>Spike|hCoV-19/England/CAMC-B995B7/2020|2020-11-15|EPI\_ISL\_673556|Original|hCoV-19^^England|Human|Lighthouse Lab in Cambridge|Wellcome Sanger Institute for the COVID-19 Genomics UK (COG-UK) Consortium|Davies|United Kingdom

>Spike|hCoV-19/USA/WI-UW-2143/2020|2020-10-15|EPI\_ISL\_677547|Original|hCoV-19^^Wisconsin|Human|University of Wisconsin-Madison AIDS Vaccine Research Laboratories|University of Wisconsin-Madison AIDS Vaccine Research Laboratories|Baczenas|USA

>Spike|hCoV-19/USA/TX-HMH-MCoV-9072/2020|2020-07-02|EPI\_ISL\_780928|Original|hCoV-19^^Texas|Human|Houston Methodist Hospital|Houston Methodist Hospital|Long|USA

>Spike|hCoV-19/USA/TX-HMH-1856/2020|2020-05-10|EPI\_ISL\_542881|Original|hCoV-19^^Texas|Human|Houston Methodist Hospital|Houston Methodist Hospital|Long|USA

>Spike|hCoV-19/Norway/5329/2020|2020-11-02|EPI\_ISL\_708060|Original|hCoV-19^^Vestfold og Telemark|Human|Unilabs Laboratory Medicine|Norwegian Institute of Public Health|Kopperud Riis|Norway

>Spike|hCoV-19/England/QEUEH-A9EEC7/2020|2020-10-20|EPI\_ISL\_611385|Original|hCoV-19^^England|Human|Lighthouse Lab in Glasgow|Wellcome Sanger Institute for the COVID-19 Genomics UK (COG-UK) consortium|Davies|United Kingdom

>Spike|hCoV-19/England/EXET-137D80/2020|2020-06-17|EPI\_ISL\_540582|Original|hCoV-19^^England|Human|University of Exeter|COVID-19 Genomics UK (COG-UK) Consortium|Temperton|United Kingdom

>Spike|hCoV-19/England/20144071804/2020|2020-03-31|EPI\_ISL\_421961|Original|hCoV-19^^England|Human|Respiratory Virus Unit|Respiratory Virus Unit|Platt|United Kingdom

>Spike|hCoV-19/England/QEUEH-9F39C0/2020|2020-09-24|EPI\_ISL\_588560|Original|hCoV-19^^England|Human|Lighthouse Lab in Glasgow|Wellcome Sanger Institute for the COVID-19 Genomics UK (COG-UK) consortium|Davies|United Kingdom

>Spike|hCoV-19/USA/MI-QDX-306/2020|2020-03-22|EPI\_ISL\_571050|Original|hCoV-19^^Michigan|Human|Quest Diagnostics|Quest Diagnostics|Kagan|USA

>Spike|hCoV-19/Spain/PV-IBV-004263/2020|2020-04-07|EPI\_ISL\_500327|Original|hCoV-19^^Basque Country|Human|Servicio de Microbiolog\u00eda. Hospital Universitario Donostia. OSI Donostialdea. \u00clrea de Enfermedades Infecciosas|SeqCOVID-SPAIN consortium|IBV (CSIC)|Comas|Spain

>Spike|hCoV-19/South Africa/KRISP-K002727/2020|2020-08-14|EPI\_ISL\_529726|Original|hCoV-19^^KwaZulu-Natal|Human|NHLS-IALCH|KRISP|de Oliveira|South Africa

>Spike|hCoV-19/Germany/HH-hpi-p2422/2020|2020-04-20|EPI\_ISL\_776491|Original|hCoV-19^^Hamburg|Human|University Medical Center Hamburg Eppendorf|Heinrich Pette Institute|Robitaille|Germany

>Spike|hCoV-19/Denmark/DCGC-21554/2020|2020-12-21|EPI\_ISL\_758231|Original|hCoV-19^^Hovedstaden|Human|Department of Virus and Microbiological Special Diagnostics|Albertsen Lab|Michaelsen|Denmark

>Spike|hCoV-19/USA/TX-HMH-5313/2020|2020-06-25|EPI\_ISL\_544673|Original|hCoV-19^^Texas|Human|Houston Methodist Hospital|Houston Methodist Hospital|Long|USA

>Spike|hCoV-19/USA/UT-UPHL-2009210/2020|2020-05-12|EPI\_ISL\_525210|Original|hCoV-19^^Utah|Human|Utah Public Health Laboratory|Utah Public Health Laboratory|Young|USA

>Spike|hCoV-19/Wales/PHWC-4A53F1/2020|2020-12-15|EPI\_ISL\_764863|Original|hCoV-19^^Wales|Human|Wales Specialist Virology Centre Sequencing lab|COVID-19 Genomics UK (COG-UK) Consortium|Moore|United Kingdom

>Spike|hCoV-19/England/MILK-992240/2020|2020-08-25|EPI\_ISL\_540662|Original|hCoV-19^^England|Human|Queens Medical Centre|COVID-19 Genomics UK (COG-UK) Consortium|Loose|United Kingdom

>Spike|hCoV-19/England/BRIS-129ECA/2020|2020-04-16|EPI\_ISL\_458468|Original|hCoV-19^^England|Human|PHE South West Regional Laboratory|Wellcome Sanger Institute for the COVID-19 Genomics UK (COG-UK) consortium|Davies|United Kingdom

>Spike|hCoV-19/Netherlands/ZH-EMC-484/2020|2020-08-14|EPI\_ISL\_577914|Original|hCoV-19^^Zuid Holland|Human|Dutch COVID-19 response team|Erasmus Medical Center|Oude Munnink|Netherlands

>Spike|hCoV-19/England/QEUEH-B6844B/2020|2020-11-11|EPI\_ISL\_661418|Original|hCoV-19^^England|Human|Lighthouse Lab in Glasgow|Wellcome Sanger Institute for the COVID-19 Genomics UK (COG-UK) Consortium|Davies|United Kingdom

>Spike|hCoV-19/Canada/AB-Z0001/2020|2020-05-13|EPI\_ISL\_504185|Original|hCoV-19^^Alberta|Human|Discovery DNA|Discovery DNA|Hittel|Canada

>Spike|hCoV-19/South Korea/KCDC2782/2020|2020-07-24|EPI\_ISL\_526716|Original|hCoV-19^^South Korea|Human|Division of Viral Diseases|Division of Viral Diseases|Kim|South Korea

>Spike|hCoV-19/USA/UT-QDX-2650/2020|2020-03-13|EPI\_ISL\_604980|Original|hCoV-19^^Utah|Human|Quest Diagnostics|Quest Diagnostics|Kagan|USA

>Spike|hCoV-19/Denmark/DCGC-7914/2020|2020-10-26|EPI\_ISL\_618842|Original|hCoV-19^^Nordjylland|Human|Department of Virus and Microbiological Special Diagnostics|Albertsen lab|Michaelsen|Denmark

>Spike|hCoV-19/Wales/PHWC-4A087F/2020|2020-12-09|EPI\_ISL\_743504|Original|hCoV-19^^Wales|Human|Wales Specialist Virology Centre Sequencing lab|COVID-19 Genomics UK (COG-UK) Consortium|Moore|United Kingdom

>Spike|hCoV-19/USA/CO-CDPHE-2011210245/2020|2020-11-19|EPI\_ISL\_771266|Original|hCoV-19^^Colorado|Human|Colorado Department of Public Health and Environment|Colorado Department of Public Health and Environment|Bankers|USA

>Spike|hCoV-19/Japan/DP0699/2020|2020-02-17|EPI\_ISL\_416617|Original|hCoV-19^^Japan|Human|Japanese Quarantine Stations|Pathogen Genomics Center|Sekizuka|Japan

>Spike|hCoV-19/South Korea/KCDC2344/2020|2020-05-27|EPI\_ISL\_510680|Original|hCoV-19^^South Korea|Human|Division of Viral Diseases|Division of Viral Diseases|Kim|South Korea

>Spike|hCoV-19/Australia/VIC1107/2020|2020-04-07|EPI\_ISL\_430590|Original|hCoV-19^^Victoria|Human|Victorian Infectious Diseases Reference Laboratory (VIDRL)|Microbiological Diagnostic Unit Public Health Laboratory and Victorian Infectious Diseases Reference Laboratory|Schultz|Australia

>Spike|hCoV-19/England/CAMC-B07F01/2020|2020-10-29|EPI\_ISL\_643881|Original|hCoV-19^^England|Human|Lighthouse Lab in Cambridge|Wellcome Sanger Institute for the COVID-19 Genomics UK (COG-UK) Consortium|Davies|United Kingdom

>Spike|hCoV-19/Switzerland/GE-SNRCI-8123/2020|2020-03-00|EPI\_ISL\_548216|Original|hCoV-19^^Geneve|Human|Laboratoire de Virologie|Swiss National Reference Centre for Influenza|Gon\u00e7alves Cabecinhas|Switzerland

>Spike|hCoV-19/England/ALDP-9FD51D/2020|2020-10-01|EPI\_ISL\_587902|Original|hCoV-19^^England|Human|Lighthouse Lab in Alderley Park|Wellcome Sanger Institute for the COVID-19 Genomics UK (COG-UK) consortium|Davies|United Kingdom

>Spike|hCoV-19/USA/LA-QDX-1998/2020|2020-03-17|EPI\_ISL\_604337|Original|hCoV-19^^Louisiana|Human|Quest Diagnostics|Quest Diagnostics|Kagan|USA

>Spike|hCoV-19/England/BRIS-12E6EB/2020|2020-04-20|EPI\_ISL\_488301|Original|hCoV-19^^England|Human|PHE South West Regional Laboratory|Wellcome Sanger Institute for the COVID-19 Genomics UK (COG-UK) consortium|Davies|United Kingdom

>Spike|hCoV-19/England/QEUEH-9FFB55/2020|2020-10-02|EPI\_ISL\_600326|Original|hCoV-19^^England|Human|Lighthouse Lab in Glasgow|Wellcome Sanger Institute for the COVID-19 Genomics UK (COG-UK) consortium|Davies|United Kingdom

>Spike|hCoV-19/England/LIVE-DCC62F/2020|2020-11-28|EPI\_ISL\_724522|Original|hCoV-19^^England|Human|Liverpool Clinical Laboratories|COVID-19 Genomics UK (COG-UK) Consortium|Haldenby|United Kingdom

>Spike|hCoV-19/Australia/VIC3280/2020|2020-07-06|EPI\_ISL\_520959|Original|hCoV-19^^Victoria|Human|Microbiological Diagnostic Unit - Public Health Laboratory (MDU-PHL)|MDU-PHL|Schultz|Australia

>Spike|hCoV-19/USA/CA-SCCPHD-UC101/2020|2020-02-26|EPI\_ISL\_435580|Original|hCoV-19^^California|Human|Santa Clara County Public Health Department|Chiu Laboratory|Chiu|USA

>Spike|hCoV-19/England/QEUEH-9F6040/2020|2020-09-25|EPI\_ISL\_588861|Original|hCoV-19^^England|Human|Lighthouse Lab in Glasgow|Wellcome Sanger Institute for the COVID-19 Genomics UK (COG-UK) consortium|Davies|United Kingdom

>Spike|hCoV-19/Portugal/PT0057/2020|2020-03-20|EPI\_ISL\_421460|Original|hCoV-19^^Portugal|Human|H Dr. Nelio Mendonca - Funchal|Instituto Nacional de Saude (INSA)|Borges|Portugal

>Spike|hCoV-19/England/ALDP-B85B43/2020|2020-11-14|EPI\_ISL\_675545|Original|hCoV-19^^England|Human|Lighthouse Lab in Alderley Park|Wellcome Sanger Institute for the COVID-19 Genomics UK (COG-UK) Consortium|Davies|United Kingdom

>Spike|hCoV-19/England/NOTT-116349/2020|2020-10-19|EPI\_ISL\_595315|Original|hCoV-19^^England|Human|Queens Medical Centre|COVID-19 Genomics UK (COG-UK) Consortium|Loose|United Kingdom

>Spike|hCoV-19/Wales/PHWC-33D0D/2020|2020-04-18|EPI\_ISL\_446814|Original|hCoV-19^^Wales|Human|Wales Specialist Virology Centre|Public Health Wales Microbiology Cardiff|Moore|United Kingdom

>Spike|hCoV-19/USA/TX-HMH-7937/2020|2020-06-26|EPI\_ISL\_545721|Original|hCoV-19^^Texas|Human|Houston Methodist Hospital|Houston Methodist Hospital|Long|USA

>Spike|hCoV-19/Denmark/DCGC-18179/2020|2020-12-14|EPI\_ISL\_749797|Original|hCoV-19^^Hovedstaden|Human|Department of Virus and Microbiological Special Diagnostics|Albertsen Lab|Michaelsen|Denmark

>Spike|hCoV-19/North Macedonia/3017/2020|2020-06-10|EPI\_ISL\_516420|Original|hCoV-19^^Skopje|Human|Center for public health - Skopje|Research Center for Genetic Engineering and Biotechnology \Georgi D. Efremov\u201d|Dimovski|North Macedonia

>Spike|hCoV-19/Wales/PHWC-49C0BA/2020|2020-12-07|EPI\_ISL\_742505|Original|hCoV-19^^Wales|Human|Wales Specialist Virology Centre Sequencing lab|COVID-19 Genomics UK (COG-UK) Consortium|Moore|United Kingdom

>Spike|hCoV-19/England/QEUEH-AD2F97/2020|2020-10-26|EPI\_ISL\_629817|Original|hCoV-19^^England|Human|Lighthouse Lab in Glasgow|Wellcome Sanger Institute for the COVID-19 Genomics UK (COG-UK) consortium|Davies|United Kingdom

>Spike|hCoV-19/India/KA-nimh-11877/2020|2020-05-06|EPI\_ISL\_486404|Original|hCoV-19^^Karnataka|Human|Victoria Hospital|Department of Neurovirology|Pattabiraman|India

>Spike|hCoV-19/Australia/NSW2387/2020|2020-05-31|EPI\_ISL\_678310|Original|hCoV-19^^New South Wales|Human|Area of Virology|Virology Research Laboratory; Area of Virology|Foster|Australia

>Spike|hCoV-19/Ecuador/UEES-3911/2020|2020-00-00|EPI\_ISL\_671984|Original|hCoV-19^^Ecuador|Human|UEES BioLab|Omics Sciences Laboratory|Fernandez Cadena|Ecuador

>Spike|hCoV-19/Wales/PHWC-1626DC/2020|2020-05-19|EPI\_ISL\_473107|Original|hCoV-19^^Wales|Human|Wales Specialist Virology Centre Sequencing lab|COVID-19 Genomics UK (COG-UK) Consortium|Moore|United Kingdom

>Spike|hCoV-19/England/20100010404/2020|2020-03-01|EPI\_ISL\_464257|Original|hCoV-19^^England|Human|Respiratory Virus Unit|Respiratory Virus Unit|Platt|United Kingdom

>Spike|hCoV-19/England/CAMB-1B7F64/2020|2020-10-13|EPI\_ISL\_637736|Original|hCoV-19^^England|Human|Department of Pathology|COVID-19 Genomics UK (COG-UK) Consortium|Goodfellow|United Kingdom

>Spike|hCoV-19/Scotland/QEUEH-A499F7/2020|2020-10-08|EPI\_ISL\_628444|Original|hCoV-19^^Scotland|Human|Oxford Viromics|COVID-19 Genomics UK (COG-UK) Consortium|Golubchik|United Kingdom

>Spike|hCoV-19/USA/LA-EVTL295/2020|2020-08-26|EPI\_ISL\_574429|Original|hCoV-19^^Louisiana|Human|LSUHS Emerging Viral Threat Laboratory|Microbial Genome Sequencing Center|Kamil|USA

>Spike|hCoV-19/England/MILK-A05E70/2020|2020-09-30|EPI\_ISL\_599913|Original|hCoV-19^^England|Human|Lighthouse Lab in Milton Keynes|Wellcome Sanger Institute for the COVID-19 Genomics UK (COG-UK) consortium|Davies|United Kingdom

>Spike|hCoV-19/England/MILK-999C3C/2020|2020-08-29|EPI\_ISL\_550347|Original|hCoV-19^^England|Human|Lighthouse Lab in Milton Keynes|Wellcome Sanger Institute for the COVID-19 Genomics UK (COG-UK) consortium|Davies|United Kingdom

>Spike|hCoV-19/England/CAMB-84462/2020|2020-04-16|EPI\_ISL\_443469|Original|hCoV-19^^England|Human|Department of Pathology|Wellcome Sanger Institute for the COVID-19 Genomics UK (COG-UK) consortium|Amato|United Kingdom

>Spike|hCoV-19/England/QEUEH-9B7C0B/2020|2020-09-03|EPI\_ISL\_590682|Original|hCoV-19^^England|Human|Lighthouse Lab in Glasgow|Wellcome Sanger Institute for the COVID-19 Genomics UK (COG-UK) consortium|Davies|United Kingdom

>Spike|hCoV-19/South Korea/KCDC2264/2020|2020-05-13|EPI\_ISL\_510602|Original|hCoV-19^^South Korea|Human|Division of Viral Diseases|Division of Viral Diseases|Kim|South Korea

>Spike|hCoV-19/Denmark/DCGC-7813/2020|2020-10-19|EPI\_ISL\_618772|Original|hCoV-19^^Hovedstaden|Human|Department of Virus and Microbiological Special Diagnostics|Albertsen lab|Michaelsen|Denmark

>Spike|hCoV-19/England/ALDP-A2DE54/2020|2020-10-05|EPI\_ISL\_586633|Original|hCoV-19^^England|Human|Lighthouse Lab in Alderley Park|Wellcome Sanger Institute for the COVID-19 Genomics UK (COG-UK) consortium|Davies|United Kingdom

>Spike|hCoV-19/Japan/PG-7501/2020|2020-08-00|EPI\_ISL\_688603|Original|hCoV-19^^Japan|Human|Tokyo Metropolitan Institute of Public Health|Pathogen Genomics Center|Sekizuka|Japan

>Spike|hCoV-19/USA/LA-GBCL-26791733/2020|2020-04-09|EPI\_ISL\_485906|Original|hCoV-19^^Louisiana|Human|River Road Testing Lab|Ginkgo Bioworks Clinical Laboratory|Smith|USA

>Spike|hCoV-19/Denmark/DCGC-14063/2020|2020-11-30|EPI\_ISL\_711063|Original|hCoV-19^^Hovedstaden|Human|Department of Virus and Microbiological Special Diagnostics|Albertsen Lab|Michaelsen|Denmark

>Spike|hCoV-19/USA/UT-UPHL-2012208753/2020|2020-08-10|EPI\_ISL\_745829|Original|hCoV-19^^Utah|Human|Ginkgo Bioworks Clinical Laboratory|Utah Public Health Laboratory|Young|USA

>Spike|hCoV-19/Scotland/QEUH-A1F699/2020|2020-10-01|EPI\_ISL\_599044|Original|hCoV-19^^Scotland|Human|Lighthouse Lab in Glasgow|Wellcome Sanger Institute for the COVID-19 Genomics UK (COG-UK) consortium|Davies|United Kingdom

>Spike|hCoV-19/USA/CA-IGI-0236/2020|2020-07-02|EPI\_ISL\_569905|Original|hCoV-19^^California|Human|Innovative Genomics Institute|Innovative Genomics Institute|Wyman|USA

>Spike|hCoV-19/Australia/VIC12895/2020|2020-07-30|EPI\_ISL\_640501|Original|hCoV-19^^Victoria|Human|Microbiological Diagnostic Unit - Public Health Laboratory (MDU-PHL)|MDU-PHL|Schultz|Australia

>Spike|hCoV-19/Australia/VIC10838/2020|2020-07-30|EPI\_ISL\_563121|Original|hCoV-19^^Victoria|Human|Microbiological Diagnostic Unit - Public Health Laboratory (MDU-PHL)|MDU-PHL|Schultz|Australia

>Spike|hCoV-19/Denmark/DCGC-21026/2020|2020-12-21|EPI\_ISL\_758957|Original|hCoV-19^^Hovedstaden|Human|Department of Virus and Microbiological Special Diagnostics|Albertsen Lab|Michaelsen|Denmark

>Spike|hCoV-19/USA/NY-Wadsworth-291677-01/2020|2020-12-24|EPI\_ISL\_767603|Original|hCoV-19^^New York|Human|SARATOGA HOSPITAL LABORATORY|Wadsworth Center|Lasek-Nesselquist|USA

>Spike|hCoV-19/England/CAMC-BD36AF/2020|2020-11-27|EPI\_ISL\_702271|Original|hCoV-19^^England|Human|Lighthouse Lab in Cambridge|Wellcome Sanger Institute for the COVID-19 Genomics UK (COG-UK) Consortium|Davies|United Kingdom

>Spike|hCoV-19/England/CAMB-8178A/2020|2020-04-12|EPI\_ISL\_443082|Original|hCoV-19^^England|Human|Department of Pathology|Wellcome Sanger Institute for the COVID-19 Genomics UK (COG-UK) consortium|Amato|United Kingdom

>Spike|hCoV-19/USA/LA-EVTL1211/2020|2020-12-14|EPI\_ISL\_768480|Original|hCoV-19^^Louisiana|Human|LSUHS Emerging Viral Threat Laboratory|Microbial Genome Sequencing Center|Kamil|USA

>Spike|hCoV-19/Sweden/RV-FOI-3/2020|2020-03-17|EPI\_ISL\_549026|Original|hCoV-19^^Vasterbotten|Human|Klinisk mikrobiologi|Unit for Biological Agents|Sjodin|Sweden

>Spike|hCoV-19/England/MILK-B022D0/2020|2020-10-24|EPI\_ISL\_709909|Original|hCoV-19^^England|Human|Lighthouse Lab in Milton Keynes|Wellcome Sanger Institute for the COVID-19 Genomics UK (COG-UK) Consortium|Davies|United Kingdom

>Spike|hCoV-19/USA/TX-DSHS-0137/2020|2020-06-11|EPI\_ISL\_522964|Original|hCoV-19^^Texas|Human|Texas Department of State Health Services|Texas Department of State Health Services|Rahman|USA

>Spike|hCoV-19/Switzerland/VD-ETHZ-270187/2020|2020-08-30|EPI\_ISL\_541501|Original|hCoV-19^^Vaud|Human|Viollier AG|Department of Biosystems Science and Engineering|Nadeau|Switzerland

>Spike|hCoV-19/England/LIVE-DC1842/2020|2020-11-06|EPI\_ISL\_702774|Original|hCoV-19^^England|Human|Liverpool Clinical Laboratories|COVID-19 Genomics UK (COG-UK) Consortium|Haldenby|United Kingdom

>Spike|hCoV-19/USA/CA-ALSR-3555/2020|2020-06-03|EPI\_ISL\_636081|Original|hCoV-19^^California|Human|San Diego County Public Health Laboratory|Andersen lab at Scripps Research|Gangavarapu|USA

>Spike|hCoV-19/USA/UT-UPHL-201128848/2020|2020-10-07|EPI\_ISL\_628945|Original|hCoV-19^^Utah|Human|Utah Public Health Laboratory|Utah Public Health Laboratory|Young|USA

>Spike|hCoV-19/Belgium/UGent-171/2020|2020-10-02|EPI\_ISL\_634887|Original|hCoV-19^^Ghent|Human|Lab voor klinische biologie|Onderzoeksgroep Virologie|Lambrechts|Belgium

>Spike|hCoV-19/England/OXON-B02CD/2020|2020-04-10|EPI\_ISL\_478871|Original|hCoV-19^^England|Human|Oxford Viromics|COVID-19 Genomics UK (COG-UK) Consortium|Golubchik|United Kingdom

>Spike|hCoV-19/Scotland/QEUH-965792/2020|2020-08-14|EPI\_ISL\_530979|Original|hCoV-19^^Scotland|Human|NHSGGC West of Scotland Specialist Virology Centre / MRC-University of Glasgow Centre for Virus Research|Wellcome Sanger Institute for the COVID-19 Genomics UK (COG-UK) consortium|Davies|United Kingdom

>Spike|hCoV-19/Spain/AN-IBV-002852/2020|2020-03-13|EPI\_ISL\_474842|Original|hCoV-19^^Andalucia|Human|Hospital Universitario Virgen de las Nieves de Granada-SAS|SeqCOVID-SPAIN consortium/IBV(CSIC)|Comas|Spain

>Spike|hCoV-19/USA/TX-HMH-MCoV-8542/2020|2020-07-01|EPI\_ISL\_780618|Original|hCoV-19^^Texas|Human|Houston Methodist Hospital|Houston Methodist Hospital|Long|USA

>Spike|hCoV-19/USA/MD-MDH-0136/2020|2020-07-10|EPI\_ISL\_524899|Original|hCoV-19^^Maryland|Human|MD PHL|MD PHL|Keller|USA

>Spike|hCoV-19/England/NORT-297048/2020|2020-04-24|EPI\_ISL\_488130|Original|hCoV-19^^England|Human|NU-OMICS DNA Sequencing research facility|Wellcome Sanger Institute for the COVID-19 Genomics UK (COG-UK) consortium|Davies|United Kingdom

>Spike|hCoV-19/England/QEUH-B40555/2020|2020-11-08|EPI\_ISL\_657207|Original|hCoV-19^^England|Human|Lighthouse Lab in Glasgow|Wellcome Sanger Institute for the COVID-19 Genomics UK (COG-UK) Consortium|Davies|United Kingdom

>Spike|hCoV-19/England/ALDP-4F5CF7/2020|2020-06-24|EPI\_ISL\_559237|Original|hCoV-19^^England|Human|Lighthouse Lab in Alderley Park|Wellcome Sanger Institute for the COVID-19 Genomics UK (COG-UK) consortium|Davies|United Kingdom

>Spike|hCoV-19/Australia/VIC12729/2020|2020-07-27|EPI\_ISL\_592065|Original|hCoV-19^^Victoria|Human|Microbiological Diagnostic Unit - Public Health Laboratory (MDU-PHL)|MDU-PHL|Schultz|Australia

>Spike|hCoV-19/USA/WA-UW-22177/2020|2020-08-06|EPI\_ISL\_570636|Original|hCoV-19^^Washington|Human|UW Virology Lab|UW Virology Lab|Roychoudhury|USA

>Spike|hCoV-19/USA/NC\_200459/2020|2020-04-00|EPI\_ISL\_458001|Original|hCoV-19^^North Carolina|Human|Dirk Dittmer|Dirk Dittmer|Moorad|USA

>Spike|hCoV-19/Scotland/QEUH-B694A4/2020|2020-11-11|EPI\_ISL\_676321|Original|hCoV-19^^Scotland|Human|Lighthouse Lab in Glasgow|Wellcome Sanger Institute for the COVID-19 Genomics UK (COG-UK) Consortium|Davies|United Kingdom

>Spike|hCoV-19/USA/UT-UPHL-2012401784/2020|2020-07-26|EPI\_ISL\_745675|Original|hCoV-19^^Utah|Human|Ginkgo Bioworks Clinical Laboratory|Utah Public Health Laboratory|Young|USA

>Spike|hCoV-19/Australia/VIC10754/2020|2020-07-30|EPI\_ISL\_563072|Original|hCoV-19^^Victoria|Human|Microbiological Diagnostic Unit - Public Health Laboratory (MDU-PHL)|MDU-PHL|Schultz|Australia

>Spike|hCoV-19/England/CAMB-1B84EC/2020|2020-10-19|EPI\_ISL\_638203|Original|hCoV-19^^England|Human|Department of Pathology|COVID-19 Genomics UK (COG-UK) Consortium|Goodfellow|United Kingdom

>Spike|hCoV-19/Australia/VIC6368/2020|2020-07-21|EPI\_ISL\_521163|Original|hCoV-19^^Victoria|Human|Microbiological Diagnostic Unit - Public Health Laboratory (MDU-PHL)|MDU-PHL|Schultz|Australia

>Spike|hCoV-19/USA/CA-CZB-13999/2020|2020-06-10|EPI\_ISL\_739035|Original|hCoV-19^^California|Human|Alameda County Public Health Lab|Chan-Zuckerberg Biohub|Kamm|USA

>Spike|hCoV-19/USA/OR-OHSU-0777/2020|2020-06-27|EPI\_ISL\_525898|Original|hCoV-19^^Oregon|Human|OHSU Lab Services Molecular Microbiology Lab|Oregon SARS-CoV-2 Genome Sequencing Center|O'Roak|USA

>Spike|hCoV-19/Spain/VC-FISABIO-264/2020|2020-03-27|EPI\_ISL\_436359|Original|hCoV-19^^Comunitat Valenciana|Human|Servicio de Microbiologia. Hospital Clinico Universitario de Valencia|Sequencing and Bioinformatics Service and Molecular Epidemiology Research Group. FISABIO-Public Health|Gonzalez-Candelas|Spain

>Spike|hCoV-19/USA/HI-H200434/2020|2020-10-01|EPI\_ISL\_752977|Original|hCoV-19^^Hawaii|Human|State Laboratories Division|State Laboratories Division|Sultana|USA

>Spike|hCoV-19/England/SHEF-C60AC/2020|2020-09-17|EPI\_ISL\_572767|Original|hCoV-19^^England|Human|Virology Department|COVID-19 Genomics UK (COG-UK) Consortium|de Silva|United Kingdom

>Spike|hCoV-19/Australia/VIC1398/2020|2020-04-15|EPI\_ISL\_562696|Original|hCoV-19^^Victoria|Human|Victorian Infectious Diseases Reference Laboratory (VIDRL)|VIDRL and MDU-PHL|Schultz|Australia

>Spike|hCoV-19/Luxembourg/LNS2212205/2020|2020-10-30|EPI\_ISL\_740080|Original|hCoV-19^^Luxembourg|Human|Laboratoire national de sant\u00e9|Laboratoire national de sant\u00e9|Wienecke-Baldacchino|Luxembourg

>Spike|hCoV-19/England/MILK-A18A49/2020|2020-10-03|EPI\_ISL\_627474|Original|hCoV-19^^England|Human|University College London|COVID-19 Genomics UK (COG-UK) Consortium|Roy|United Kingdom

>Spike|hCoV-19/England/CAMC-B9AC2A/2020|2020-11-15|EPI\_ISL\_673331|Original|hCoV-19^^England|Human|Lighthouse Lab in Cambridge|Wellcome Sanger Institute for the COVID-19 Genomics UK (COG-UK) Consortium|Davies|United Kingdom

>Spike|hCoV-19/USA/AZ-TG569475/2020|2020-07-10|EPI\_ISL\_695573|Original|hCoV-19^^Arizona|Human|AZ SPHL|TGen North|French|USA

>Spike|hCoV-19/Bangladesh/DNAS\_isl\_DRCIM\_6302/2020|2020-04-29|EPI\_ISL\_774910|Original|hCoV-19^^Dhaka|Human|Designated Reference Institute for Chemical Measurements (DRICM)|DNA SOLUTION LTD.|Rabbi|Bangladesh

>Spike|hCoV-19/Denmark/DCGC-10748/2020|2020-11-02|EPI\_ISL\_670181|Original|hCoV-19^^Midtjylland|Human|Department of Virus and Microbiological Special Diagnostics|Albertsen Lab|Michaelsen|Denmark

>Spike|hCoV-19/USA/MI-QDX-595/2020|2020-03-18|EPI\_ISL\_571332|Original|hCoV-19^^Michigan|Human|Quest Diagnostics|Quest Diagnostics|Kagan|USA

>Spike|hCoV-19/England/MILK-B3A1E1/2020|2020-11-01|EPI\_ISL\_659085|Original|hCoV-19^^England|Human|Lighthouse Lab in Milton Keynes|Wellcome Sanger Institute for the COVID-19 Genomics UK (COG-UK) Consortium|Davies|United Kingdom

>Spike|hCoV-19/Indonesia/JK-NIHRD-MI52946/2020|2020-08-20|EPI\_ISL\_538509|Original|hCoV-19^^Jakarta|Human|National Institute of Health Research and Development|National Institute of Health Research and Development|Setiawati|Indonesia

>Spike|hCoV-19/USA/MD\_NIDDL\_2981/2020|2020-04-07|EPI\_ISL\_491908|Original|hCoV-19^^Maryland|Human|Naval Infectious Diseases Diagnostic Laboratory|Naval Medical Research Center Biological Defense Research Directorate|Voegtly|USA

>Spike|hCoV-19/Scotland/QEUIH-9637EF/2020|2020-08-11|EPI\_ISL\_531677|Original|hCoV-19^^Scotland|Human|NHSGGC West of Scotland Specialist Virology Centre / MRC-University of Glasgow Centre for Virus Research|Wellcome Sanger Institute for the COVID-19 Genomics UK (COG-UK) consortium|Davies|United Kingdom

>Spike|hCoV-19/Bangladesh/BCSIR-NILMRC-369/2020|2020-07-21|EPI\_ISL\_514245|Original|hCoV-19^^Chittagong|Human|National Institute of Laboratory Medicine and Referral Center|Genomic Research Lab|Khan|Bangladesh

>Spike|hCoV-19/England/MILK-B04A30/2020|2020-10-24|EPI\_ISL\_650200|Original|hCoV-19^^England|Human|Department of Pathology|COVID-19 Genomics UK (COG-UK) Consortium|Goodfellow|United Kingdom

>Spike|hCoV-19/USA/TX-DSHS-1201/2020|2020-03-17|EPI\_ISL\_631663|Original|hCoV-19^^Texas|Human|Texas Department of State Health Services|Texas Department of State Health Services|Rahman|USA

>Spike|hCoV-19/England/EXET-134F9C/2020|2020-00-00|EPI\_ISL\_457024|Original|hCoV-19^^England|Human|University of Exeter|COVID-19 Genomics UK (COG-UK) Consortium|Temperton|United Kingdom



>Spike|hCoV-19/USA/OR-OHSU-0369/2020|2020-05-29|EPI\_ISL\_509120|Original|hCoV-19^^Oregon|Human|OHSU Lab Services Molecular Microbiology Lab|Oregon SARS-CoV-2 Genome Sequencing Center|O'Roak|USA

>Spike|hCoV-19/USA/MI-MDHHS-SC21139/2020|2020-03-30|EPI\_ISL\_507915|Original|hCoV-19^^Michigan|Human|Michigan Department of Health and Human Services|Michigan Department of Health and Human Services|Blankenship|USA

>Spike|hCoV-19/USA/CA-CZB-1980/2020|2020-05-06|EPI\_ISL\_486249|Original|hCoV-19^^California|Human|Orange County Public Health Laboratory|Chan-Zuckerberg Biohub|McGeever|USA

>Spike|hCoV-19/Japan/PG-3623/2020|2020-04-00|EPI\_ISL\_691876|Original|hCoV-19^^Japan|Human|Pathogen Genomics Center|Pathogen Genomics Center|Sekizuka|Japan

>Spike|hCoV-19/USA/CA-CZB-13547/2020|2020-06-11|EPI\_ISL\_672493|Original|hCoV-19^^California|Human|UCSF Clinical Microbiology Laboratory|Chan-Zuckerberg Biohub|Bhatt|USA

>Spike|hCoV-19/Japan/PG-0710/2020|2020-04-00|EPI\_ISL\_684320|Original|hCoV-19^^Japan|Human|Pathogen Genomics Center|Pathogen Genomics Center|Sekizuka|Japan

>Spike|hCoV-19/France/NAQ-SC213/2020|2020-03-27|EPI\_ISL\_649965|Original|hCoV-19^^Nouvelle-Aquitaine|Human|CHU Bordeaux|CNR Virus des Infections Respiratoires - France SUD|Bal|France

>Spike|hCoV-19/Northern Ireland/NIRE-233FE7/2020|2020-10-13|EPI\_ISL\_680331|Original|hCoV-19^^Northern Ireland|Human|Regional Virus Laboratory|COVID-19 Genomics UK (COG-UK) Consortium|Fairley|United Kingdom

>Spike|hCoV-19/USA/CA-ALSR-2180/2020|2020-06-04|EPI\_ISL\_635377|Original|hCoV-19^^California|Human|San Diego County Public Health Laboratory|Andersen lab at Scripps Research|Gangavarapu|USA

>Spike|hCoV-19/England/ALDP-9CD7B6/2020|2020-09-16|EPI\_ISL\_566199|Original|hCoV-19^^England|Human|Lighthouse Lab in Alderley Park|Wellcome Sanger Institute for the COVID-19 Genomics UK (COG-UK) consortium|Davies|United Kingdom

>Spike|hCoV-19/Italy/ABR-IZSGC-TE6570/2020|2020-03-24|EPI\_ISL\_429230|Original|hCoV-19^^Abruzzo|Human|Ospedale Civile Giuseppe Mazzini|Istituto Zooprofilattico Sperimentale dell'Abruzzo e Molise \G. Caporale\|Lorusso|Italy

>Spike|hCoV-19/USA/MN-MDH-322/2020|2020-03-30|EPI\_ISL\_450780|Original|hCoV-19^^Minnesota|Human|Minnesota Department of Health|Minnesota Department of Health|Garfin|USA

>Spike|hCoV-19/England/QEUEH-9DE758/2020|2020-09-21|EPI\_ISL\_581262|Original|hCoV-19^^England|Human|Lighthouse Lab in Glasgow|Wellcome Sanger Institute for the COVID-19 Genomics UK (COG-UK) consortium|Davies|United Kingdom

>Spike|hCoV-19/France/PAC02011/2020|2020-03-07|EPI\_ISL\_693390|Original|hCoV-19^^Provence-Alpes-C\u00f4te-d\u2019Azur|Human|CHU de Nice - H\u00f4pital Archet 2|CNR Virus des Infections Respiratoires - France SUD|Bal|France

>Spike|hCoV-19/Norway/3593/2020|2020-07-31|EPI\_ISL\_590925|Original|hCoV-19^^Norway|Human|University Hospital of Northern Norway|Norwegian Institute of Public Health|Vollan|Norway

>Spike|hCoV-19/England/CAMB-1B0CEC/2020|2020-05-11|EPI\_ISL\_452963|Original|hCoV-19^^England|Human|Department of Pathology|COVID-19 Genomics UK (COG-UK) Consortium|Meredith|United Kingdom

>Spike|hCoV-19/Scotland/CVR4088/2020|2020-08-31|EPI\_ISL\_535178|Original|hCoV-19^^Scotland|Human|West of Scotland Specialist Virology Centre|COVID-19 Genomics UK (COG-UK) Consortium|Robertson|United Kingdom

>Spike|hCoV-19/Denmark/DCGC-12257/2020|2020-11-16|EPI\_ISL\_682438|Original|hCoV-19^^Midtjylland|Human|Department of Virus and Microbiological Special Diagnostics|Albertsen Lab|Michaelsen|Denmark

>Spike|hCoV-19/England/NORW-EA619/2020|2020-05-19|EPI\_ISL\_461858|Original|hCoV-19^^England|Human|Quadram Institute Bioscience|COVID-19 Genomics UK (COG-UK) Consortium|Alikhan|United Kingdom

>Spike|hCoV-19/England/BRIS-124CE3/2020|2020-03-26|EPI\_ISL\_443721|Original|hCoV-19^^England|Human|PHE South West Regional Laboratory|Wellcome Sanger Institute for the COVID-19 Genomics UK (COG-UK) consortium|Amato|United Kingdom

>Spike|hCoV-19/England/MILK-BDC62E/2020|2020-11-27|EPI\_ISL\_709740|Original|hCoV-19^^England|Human|Lighthouse Lab in Milton Keynes|Wellcome Sanger Institute for the COVID-19 Genomics UK (COG-UK) Consortium|Davies|United Kingdom

>Spike|hCoV-19/England/QEUH-961963/2020|2020-08-03|EPI\_ISL\_537029|Original|hCoV-19^^England|Human|Lighthouse Lab in Glasgow|Wellcome Sanger Institute for the COVID-19 Genomics UK (COG-UK) consortium|Davies|United Kingdom

>Spike|hCoV-19/Finland/16MR7cA4/2020|2020-11-16|EPI\_ISL\_757296|Original|hCoV-19^^Uusimaa|Human|Department of Virology and Immunology|Department of Virology|Smura|Finland

>Spike|hCoV-19/Northern Ireland/NIRE-108AAF/2020|2020-10-10|EPI\_ISL\_627532|Original|hCoV-19^^Northern Ireland|Human|Regional Virus Laboratory|COVID-19 Genomics UK (COG-UK) Consortium|Fairley|United Kingdom

>Spike|hCoV-19/England/BRIS-12962C/2020|2020-04-20|EPI\_ISL\_458810|Original|hCoV-19^^England|Human|PHE South West Regional Laboratory|Wellcome Sanger Institute for the COVID-19 Genomics UK (COG-UK) consortium|Davies|United Kingdom

>Spike|hCoV-19/Scotland/QEUH-BODA28/2020|2020-11-02|EPI\_ISL\_649537|Original|hCoV-19^^Scotland|Human|Lighthouse Lab in Glasgow|Wellcome Sanger Institute for the COVID-19 Genomics UK (COG-UK) Consortium|Davies|United Kingdom

>Spike|hCoV-19/Japan/PG-2646/2020|2020-06-00|EPI\_ISL\_690778|Original|hCoV-19^^Japan|Human|Pathogen Genomics Center|Pathogen Genomics Center|Sekizuka|Japan

>Spike|hCoV-19/Japan/PG-4471/2020|2020-07-00|EPI\_ISL\_692694|Original|hCoV-19^^Japan|Human|Pathogen Genomics Center|Pathogen Genomics Center|Sekizuka|Japan

>Spike|hCoV-19/Canada/NB-223/2020|2020-03-26|EPI\_ISL\_479639|Original|hCoV-19^^New Brunswick|Human|Dr. Georges-L.-Dumont University Hospital Centre|National Microbiology Laboratory|Majer|Canada

>Spike|hCoV-19/Luxembourg/LNS2961665/2020|2020-09-28|EPI\_ISL\_740226|Original|hCoV-19^^Luxembourg|Human|Laboratoire national de sant\u00e9|Laboratoire national de sant\u00e9|Wienecke-Baldacchino|Luxembourg

>Spike|hCoV-19/Spain/MD-IBV-004915/2020|2020-03-11|EPI\_ISL\_481055|Original|hCoV-19^^Madrid|Human|Hospital General Universitario Gregorio Mara\u00f1\u00f3n|SeqCOVID-SPAIN consortium|IBV (CSIC)|Comas|Spain

>Spike|hCoV-19/Denmark/DCGC-3511/2020|2020-08-31|EPI\_ISL\_616300|Original|hCoV-19^^Sjaelland|Human|Department of Virus and Microbiological Special Diagnostics|Albertsen lab|Michaelsen|Denmark

>Spike|hCoV-19/Australia/VIC9002/2020|2020-07-30|EPI\_ISL\_561680|Original|hCoV-19^^Victoria|Human|Microbiological Diagnostic Unit - Public Health Laboratory (MDU-PHL)|MDU-PHL|Schultz|Australia

>Spike|hCoV-19/USA/MN-MDH-1475/2020|2020-03-23|EPI\_ISL\_518869|Original|hCoV-19^^Minnesota|Human|Mayo Clinic & Mayo Clinic Laboratories|Minnesota Department of Health|Garfin|USA

>Spike|hCoV-19/England/CAMB-1B33B7/2020|2020-05-25|EPI\_ISL\_461559|Original|hCoV-19^^England|Human|Department of Pathology|COVID-19 Genomics UK (COG-UK) Consortium|Meredith|United Kingdom

>Spike|hCoV-19/USA/MI-UM-10035622031/2020|2020-08-24|EPI\_ISL\_583260|Original|hCoV-19^^Michigan|Human|University of Michigan Clinical Microbiology Laboratory|Lauring Lab|Valesano|USA

>Spike|hCoV-19/USA/WI-UW-466/2020|2020-06-11|EPI\_ISL\_484841|Original|hCoV-19^^Wisconsin|Human|University of Wisconsin-Madison AIDS Vaccine Research Laboratories|University of Wisconsin-Madison AIDS Vaccine Research Laboratories|Baczenas|USA

>Spike|hCoV-19/England/LIVE-A488E/2020|2020-03-12|EPI\_ISL\_500050|Original|hCoV-19^^England|Human|Liverpool Clinical Laboratories|COVID-19 Genomics UK (COG-UK) Consortium|Haldenby|United Kingdom

>Spike|hCoV-19/Germany/NI-ChVir21542/2020|2020-12-20|EPI\_ISL\_754175|Original|hCoV-19^^Lower Saxony|Human|Charit\u00e9 Universit\u00e4tsmedizin Berlin|Charit\u00e9 Universit\u00e4tsmedizin Berlin|Muehlemann|Germany

>Spike|hCoV-19/USA/CA-SEARCH-5420/2020|2020-11-29|EPI\_ISL\_755229|Original|hCoV-19^^California|Human|UCSD EXCITE lab|Andersen lab at Scripps Research|Gangavarapu|USA

>Spike|hCoV-19/England/CAMC-BD12CB/2020|2020-11-29|EPI\_ISL\_702139|Original|hCoV-19^^England|Human|Lighthouse Lab in Cambridge|Wellcome Sanger Institute for the COVID-19 Genomics UK (COG-UK) Consortium|Davies|United Kingdom

>Spike|hCoV-19/Denmark/DCGC-8575/2020|2020-10-26|EPI\_ISL\_625962|Original|hCoV-19^^Hovedstaden|Human|Department of Virus and Microbiological Special Diagnostics|Albertsen lab|Michaelsen|Denmark

>Spike|hCoV-19/Denmark/DCGC-10341/2020|2020-11-02|EPI\_ISL\_669911|Original|hCoV-19^^Syddanmark|Human|Department of Virus and Microbiological Special Diagnostics|Albertsen Lab|Michaelsen|Denmark

>Spike|hCoV-19/India/DL-NCDC2216-CSIR-IGIB/2020|2020-05-19|EPI\_ISL\_482553|Original|hCoV-19^^Delhi|Human|National Centre for Disease control (NCDC)|NCDC/CSIR-IGIB|Pandey|India

>Spike|hCoV-19/USA/AZ-TG670260/2020|2020-03-25|EPI\_ISL\_696436|Original|hCoV-19^^Arizona|Human|Sonora Quest Laboratories|TGen North|French|USA

>Spike|hCoV-19/England/CAMC-A64C75/2020|2020-10-11|EPI\_ISL\_609121|Original|hCoV-19^^England|Human|Lighthouse Lab in Cambridge|Wellcome Sanger Institute for the COVID-19 Genomics UK (COG-UK) Consortium|Davies|United Kingdom

>Spike|hCoV-19/England/LOND-12F0E40/2020|2020-12-03|EPI\_ISL\_705078|Original|hCoV-19^^England|Human|University College London|COVID-19 Genomics UK (COG-UK) Consortium|Roy|United Kingdom

>Spike|hCoV-19/USA/MD-HP00132/2020|2020-03-16|EPI\_ISL\_457820|Original|hCoV-19^^Maryland|Human|Johns Hopkins Hospital Department of Pathology|Johns Hopkins Hospital Department of Pathology|Ramakrishnan|USA

>Spike|hCoV-19/Wales/PHWC-48B151/2020|2020-11-05|EPI\_ISL\_666198|Original|hCoV-19^^Wales|Human|Wales Specialist Virology Centre Sequencing lab|COVID-19 Genomics UK (COG-UK) Consortium|Moore|United Kingdom

>Spike|hCoV-19/Bangladesh/DNAS\_DRCIM\_isl\_6840/2020|2020-04-29|EPI\_ISL\_774905|Original|hCoV-19^^Dhaka|Human|Designated Reference Institute for Chemical Measurements (DRICM)|DNA SOLUTION LTD.|Rabbi|Bangladesh

>Spike|hCoV-19/Denmark/DCGC-7790/2020|2020-10-19|EPI\_ISL\_618689|Original|hCoV-19^^Midtjylland|Human|Department of Virus and Microbiological Special Diagnostics|Albertsen lab|Michaelsen|Denmark

>Spike|hCoV-19/England/ALDP-BCA553/2020|2020-11-23|EPI\_ISL\_703480|Original|hCoV-19^^England|Human|Lighthouse Lab in Alderley Park|Wellcome Sanger Institute for the COVID-19 Genomics UK (COG-UK) Consortium|Davies|United Kingdom

>Spike|hCoV-19/Switzerland/BL-ETHZ-360275/2020|2020-11-08|EPI\_ISL\_729231|Original|hCoV-19^^Basel-Landschaft|Human|Viollier AG|Department of Biosystems Science and Engineering|Nadeau|Switzerland

>Spike|hCoV-19/England/ALDP-A2DA6F/2020|2020-10-06|EPI\_ISL\_586775|Original|hCoV-19^^England|Human|Lighthouse Lab in Alderley Park|Wellcome Sanger Institute for the COVID-19 Genomics UK (COG-UK) consortium|Davies|United Kingdom

>Spike|hCoV-19/England/CAMC-B0B028/2020|2020-10-29|EPI\_ISL\_643517|Original|hCoV-19^^England|Human|Lighthouse Lab in Cambridge|Wellcome Sanger Institute for the COVID-19 Genomics UK (COG-UK) Consortium|Davies|United Kingdom

>Spike|hCoV-19/Singapore/668nan/2020|2020-05-13|EPI\_ISL\_648785|Original|hCoV-19^^Singapore|Human|Department of Laboratory Medicine|Department of Laboratory Medicine|Chen|Singapore

>Spike|hCoV-19/England/CAMC-B3492B/2020|2020-11-05|EPI\_ISL\_659528|Original|hCoV-19^^England|Human|Lighthouse Lab in Cambridge|Wellcome Sanger Institute for the COVID-19 Genomics UK (COG-UK) Consortium|Davies|United Kingdom

>Spike|hCoV-19/England/OXON-B01DF/2020|2020-04-19|EPI\_ISL\_478864|Original|hCoV-19^^England|Human|Oxford Viromics|COVID-19 Genomics UK (COG-UK) Consortium|Golubchik|United Kingdom

>Spike|hCoV-19/USA/CA-ALSR-1436/2020|2020-03-27|EPI\_ISL\_494602|Original|hCoV-19^^California|Human|Scripps Medical Laboratory|Andersen lab at Scripps Research|Gangavarapu|USA

>Spike|hCoV-19/England/ALDP-A52032/2020|2020-10-07|EPI\_ISL\_597937|Original|hCoV-19^^England|Human|Lighthouse Lab in Alderley Park|Wellcome Sanger Institute for the COVID-19 Genomics UK (COG-UK) consortium|Davies|United Kingdom

>Spike|hCoV-19/Wales/PHWC-49F1D2/2020|2020-12-08|EPI\_ISL\_743178|Original|hCoV-19^^Wales|Human|Wales Specialist Virology Centre Sequencing lab|COVID-19 Genomics UK (COG-UK) Consortium|Moore|United Kingdom

>Spike|hCoV-19/Denmark/DCGC-16317/2020|2020-11-16|EPI\_ISL\_714268|Original|hCoV-19^^Hovedstaden|Human|Department of Virus and Microbiological Special Diagnostics|Albertsen Lab|Michaelsen|Denmark

>Spike|hCoV-19/USA/NY-Wadsworth-291990-01/2020|2020-12-21|EPI\_ISL\_767616|Original|hCoV-19^^New York|Human|WHITE PLAINS HOSPITAL CENTER LABORATORY|Wadsworth Center|Lasek-Nesselquist|USA

>Spike|hCoV-19/USA/WI-GMF-19279/2020|2020-09-08|EPI\_ISL\_547806|Original|hCoV-19^^Wisconsin|Human|Gundersen Molecular Diagnostics Laboratory|Kabara Cancer Research Institute|Kenny|USA

>Spike|hCoV-19/Germany/BE-ChVir-W1431-8290/2020|2020-06-19|EPI\_ISL\_753963|Original|hCoV-19^^Berlin|Human|Charit\u00e9 Universit\u00e4tsmedizin Berlin|Charit\u00e9 Universit\u00e4tsmedizin Berlin|Muehlemann|Germany

>Spike|hCoV-19/England/MILK-B8631D/2020|2020-11-13|EPI\_ISL\_673993|Original|hCoV-19^^England|Human|Lighthouse Lab in Milton Keynes|Wellcome Sanger Institute for the COVID-19 Genomics UK (COG-UK) Consortium|Davies|United Kingdom

>Spike|hCoV-19/Austria/CeMM0080/2020|2020-03-24|EPI\_ISL\_437947|Original|hCoV-19^^Ramsau im Zillertal|Human|Universitaetsklinik f\u00fcr Innere Medizin II Innsbruck|Bergthaler laboratory|Bergthaler|Austria

>Spike|hCoV-19/Denmark/DCGC-17934/2020|2020-12-14|EPI\_ISL\_749653|Original|hCoV-19^^Nordjylland|Human|Department of Virus and Microbiological Special Diagnostics|Albertsen Lab|Michaelsen|Denmark

>Spike|hCoV-19/England/ALDP-AA1CA9/2020|2020-10-22|EPI\_ISL\_624369|Original|hCoV-19^^England|Human|Lighthouse Lab in Alderley Park|Wellcome Sanger Institute for the COVID-19 Genomics UK (COG-UK) consortium|Davies|United Kingdom

>Spike|hCoV-19/Wales/PHWC-4905B7/2020|2020-11-06|EPI\_ISL\_706490|Original|hCoV-19^^Wales|Human|Originating lab|COVID-19 Genomics UK (COG-UK) Consortium|Moore|United Kingdom

>Spike|hCoV-19/England/20152067804/2020|2020-04-05|EPI\_ISL\_466240|Original|hCoV-19^^England|Human|Respiratory Virus Unit|Respiratory Virus Unit|Platt|United Kingdom

>Spike|hCoV-19/Peru/LIM-UPCH-0063/2020|2020-06-17|EPI\_ISL\_540947|Original|hCoV-19^^Lima|Human|Laboratorio de Referencia Nacional de Virus Respiratorios|Laboratorio de Gen\u00f3mica Microbiana|Tsukayama|Peru

>Spike|hCoV-19/Switzerland/AG-ETHZ-190045/2020|2020-07-08|EPI\_ISL\_500907|Original|hCoV-19^^Aargau|Human|Viollier AG|Department of Biosystems Science and Engineering|Nadeau|Switzerland

>Spike|hCoV-19/England/210100362/2021|2021-01-04|EPI\_ISL\_791245|Original|hCoV-19^^England|Human|Respiratory Virus Unit|COVID-19 Genomics UK (COG-UK) Consortium|Platt|United Kingdom

>Spike|hCoV-19/USA/MN-MDH-1069/2020|2020-05-21|EPI\_ISL\_470749|Original|hCoV-19^^Minnesota|Human|Minnesota Department of Health|Minnesota Department of Health|Garfin|USA

>Spike|hCoV-19/England/QEUA-B2DAAA/2020|2020-11-02|EPI\_ISL\_646955|Original|hCoV-19^^England|Human|Lighthouse Lab in Glasgow|Wellcome Sanger Institute for the COVID-19 Genomics UK (COG-UK) Consortium|Davies|United Kingdom

>Spike|hCoV-19/England/20142023704/2020|2020-03-31|EPI\_ISL\_423448|Original|hCoV-19^^England|Human|Respiratory Virus Unit|Respiratory Virus Unit|Platt|United Kingdom

>Spike|hCoV-19/Portugal/PT1256/2020|2020-03-18|EPI\_ISL\_511217|Original|hCoV-19^^Portugal|Human|Instituto Nacional de Saude (INSA) and Instituto Gulbenkian de Ciencia (IGC)|Instituto Nacional de Saude (INSA) and Instituto Gulbenkian de Ciencia (IGC)|Borges|Portugal

>Spike|hCoV-19/USA/TX-HMH-MCoV-18596/2020|2020-11-19|EPI\_ISL\_784944|Original|hCoV-19^^Texas|Human|Houston Methodist Hospital|Houston Methodist Hospital|Long|USA

>Spike|hCoV-19/Australia/VIC12580/2020|2020-07-26|EPI\_ISL\_592027|Original|hCoV-19^^Victoria|Human|Microbiological Diagnostic Unit - Public Health Laboratory (MDU-PHL)|MDU-PHL|Schultz|Australia

>Spike|hCoV-19/USA/MN-MDH-1819/2020|2020-04-15|EPI\_ISL\_590821|Original|hCoV-19^^Minnesota|Human|Minnesota Department of Health|Minnesota Department of Health|Lorentz|USA

>Spike|hCoV-19/England/CAMB-A97AAC/2020|2020-12-12|EPI\_ISL\_740995|Original|hCoV-19^^England|Human|Department of Pathology|COVID-19 Genomics UK (COG-UK) Consortium|Goodfellow|United Kingdom

>Spike|hCoV-19/England/ALDP-66A5B4/2020|2020-07-03|EPI\_ISL\_555743|Original|hCoV-19^^England|Human|Lighthouse Lab in Alderley Park|Wellcome Sanger Institute for the COVID-19 Genomics UK (COG-UK) consortium|Davies|United Kingdom

>Spike|hCoV-19/England/NORW-EFBD9/2020|2020-12-05|EPI\_ISL\_725108|Original|hCoV-19^^England|Human|Quadram Institute Bioscience|COVID-19 Genomics UK (COG-UK) Consortium|Alikhan|United Kingdom

>Spike|hCoV-19/England/QEUEH-B6A160/2020|2020-11-11|EPI\_ISL\_662466|Original|hCoV-19^^England|Human|Lighthouse Lab in Glasgow|Wellcome Sanger Institute for the COVID-19 Genomics UK (COG-UK) Consortium|Davies|United Kingdom

>Spike|hCoV-19/England/CAMB-732A8/2020|2020-03-23|EPI\_ISL\_440270|Original|hCoV-19^^England|Human|Department of Pathology|Wellcome Sanger Institute for the COVID-19 Genomics UK (COG-UK) consortium|Amato|United Kingdom

>Spike|hCoV-19/Denmark/DCGC-14666/2020|2020-11-23|EPI\_ISL\_711898|Original|hCoV-19^^Nordjylland|Human|Department of Virus and Microbiological Special Diagnostics|Albertsen Lab|Michaelsen|Denmark

>Spike|hCoV-19/USA/WA-UW-4695/2020|2020-04-06|EPI\_ISL\_429631|Original|hCoV-19^^Washington|Human|UW Virology Lab|UW Virology Lab|Roychoudhury|USA

>Spike|hCoV-19/England/CAMC-9DF71B/2020|2020-09-20|EPI\_ISL\_638419|Original|hCoV-19^^England|Human|Department of Pathology|COVID-19 Genomics UK (COG-UK) Consortium|Goodfellow|United Kingdom

>Spike|hCoV-19/Denmark/DCGC-15707/2020|2020-11-23|EPI\_ISL\_713974|Original|hCoV-19^^Syddanmark|Human|Department of Virus and Microbiological Special Diagnostics|Albertsen Lab|Michaelsen|Denmark

>Spike|hCoV-19/Northern Ireland/NIRE-FB493/2020|2020-03-16|EPI\_ISL\_441429|Original|hCoV-19^^Northern Ireland|Human|Regional Virus Laboratory|COVID-19 Genomics UK (COG-UK) Consortium|Fairley|United Kingdom

>Spike|hCoV-19/Scotland/CVR3298/2020|2020-04-30|EPI\_ISL\_456779|Original|hCoV-19^^Scotland|Human|West of Scotland Specialist Virology Centre|COVID-19 Genomics UK (COG-UK) Consortium|Robertson|United Kingdom

>Spike|hCoV-19/Costa Rica/INC-0151/2020|2020-09-23|EPI\_ISL\_770014|Original|hCoV-19^^San Jose|Human|Area De Salud Curridabat 2|Inciensa|Soto-Garita|Costa Rica

>Spike|hCoV-19/USA/OR-OHSU-1889/2020|2020-07-28|EPI\_ISL\_526060|Original|hCoV-19^^Oregon|Human|OHSU Lab Services Molecular Microbiology Lab|Oregon SARS-CoV-2 Genome Sequencing Center|O'Roak|USA

>Spike|hCoV-19/Scotland/EDB4594/2020|2020-05-07|EPI\_ISL\_478164|Original|hCoV-19^^Scotland|Human|Virology Department|COVID-19 Genomics UK (COG-UK) Consortium|Williams|United Kingdom

>Spike|hCoV-19/England/MILK-ACCD69/2020|2020-10-21|EPI\_ISL\_630183|Original|hCoV-19^^England|Human|Lighthouse Lab in Milton Keynes|Wellcome Sanger Institute for the COVID-19 Genomics UK (COG-UK) consortium|Davies|United Kingdom

>Spike|hCoV-19/England/MILK-958158/2020|2020-06-15|EPI\_ISL\_554742|Original|hCoV-19^^England|Human|Lighthouse Lab in Milton Keynes|Wellcome Sanger Institute for the COVID-19 Genomics UK (COG-UK) consortium|Davies|United Kingdom

>Spike|hCoV-19/Australia/VIC8935/2020|2020-07-23|EPI\_ISL\_565290|Original|hCoV-19^^Victoria|Human|Microbiological Diagnostic Unit - Public Health Laboratory (MDU-PHL)|MDU-PHL|Schultz|Australia

>Spike|hCoV-19/England/QEUEH-AAAE6E/2020|2020-10-21|EPI\_ISL\_652750|Original|hCoV-19^^England|Human|Oxford Viromics|COVID-19 Genomics UK (COG-UK) Consortium|Golubchik|United Kingdom

>Spike|hCoV-19/Denmark/DCGC-11307/2020|2020-11-02|EPI\_ISL\_670829|Original|hCoV-19^^Hovedstaden|Human|Department of Virus and Microbiological Special Diagnostics|Albertsen Lab|Michaelsen|Denmark

>Spike|hCoV-19/Canada/QC-LSPQ-L00237636/2020|2020-03-25|EPI\_ISL\_536191|Original|hCoV-19^^Quebec|Human|H\u00f4pital Charles-LeMoine|Laboratoire de sant\u00e9 publique du Qu\u00e9bec|Moreira|Canada

>Spike|hCoV-19/England/BRIS-126BB7/2020|2020-04-10|EPI\_ISL\_459042|Original|hCoV-19^^England|Human|PHE South West Regional Laboratory|Wellcome Sanger Institute for the COVID-19 Genomics UK (COG-UK) consortium|Davies|United Kingdom

>Spike|hCoV-19/England/ALDP-A67771/2020|2020-10-12|EPI\_ISL\_630486|Original|hCoV-19^^England|Human|Lighthouse Lab in Alderley Park|Wellcome Sanger Institute for the COVID-19 Genomics UK (COG-UK) consortium|Davies|United Kingdom

>Spike|hCoV-19/England/MILK-9C2BB5/2020|2020-09-10|EPI\_ISL\_566525|Original|hCoV-19^^England|Human|Lighthouse Lab in Milton Keynes|Wellcome Sanger Institute for the COVID-19 Genomics UK (COG-UK) consortium|Davies|United Kingdom

>Spike|hCoV-19/England/BIRM-66EC2/2020|2020-10-28|EPI\_ISL\_651600|Original|hCoV-19^^England|Human|University of Birmingham|COVID-19 Genomics UK (COG-UK) Consortium|Loman|United Kingdom

>Spike|hCoV-19/Bangladesh/DNAS\_DRICM\_isl\_R-2/2020|2020-07-17|EPI\_ISL\_775004|Original|hCoV-19^^Dhaka|Human|Designated Reference Institute for Chemical Measurements (DRICM)|DNA SOLUTION LTD.|Rabbi|Bangladesh

>Spike|hCoV-19/Switzerland/BL-UHB-42177897/2020|2020-03-05|EPI\_ISL\_527936|Original|hCoV-19^^Basel-Land|Human|University Hospital Basel|University Hospital Basel|Roloff Handschin|Switzerland

>Spike|hCoV-19/Wales/PHWC-49834C/2020|2020-12-01|EPI\_ISL\_727059|Original|hCoV-19^^Wales|Human|Originating lab|COVID-19 Genomics UK (COG-UK) Consortium|Moore|United Kingdom

>Spike|hCoV-19/England/ALDP-954F07/2020|2020-06-12|EPI\_ISL\_553603|Original|hCoV-19^^England|Human|Lighthouse Lab in Alderley Park|Wellcome Sanger Institute for the COVID-19 Genomics UK (COG-UK) consortium|Davies|United Kingdom

>Spike|hCoV-19/USA/CA-CHLA-PLM25366041/2020|2020-11-19|EPI\_ISL\_753383|Original|hCoV-19^^California|Human|Clinical virology Laboratory|Center for Personalized Medicine|Dien Bard|USA

>Spike|hCoV-19/England/ALDP-9CAA65/2020|2020-09-16|EPI\_ISL\_575584|Original|hCoV-19^^England|Human|Lighthouse Lab in Alderley Park|Wellcome Sanger Institute for the COVID-19 Genomics UK (COG-UK) consortium|Davies|United Kingdom

>Spike|hCoV-19/Scotland/QEUH-8A774A/2020|2020-07-24|EPI\_ISL\_532765|Original|hCoV-19^^Scotland|Human|NHSGGC West of Scotland Specialist Virology Centre / MRC-University of Glasgow Centre for Virus Research|Wellcome Sanger Institute for the COVID-19 Genomics UK (COG-UK) consortium|Davies|United Kingdom

>Spike|hCoV-19/England/CAMC-B33449/2020|2020-11-05|EPI\_ISL\_659327|Original|hCoV-19^^England|Human|Lighthouse Lab in Cambridge|Wellcome Sanger Institute for the COVID-19 Genomics UK (COG-UK) Consortium|Davies|United Kingdom

>Spike|hCoV-19/England/LOND-1263622/2020|2020-11-02|EPI\_ISL\_679458|Original|hCoV-19^^England|Human|University College London|COVID-19 Genomics UK (COG-UK) Consortium|Roy|United Kingdom

>Spike|hCoV-19/England/LIVE-A9D4E/2020|2020-03-25|EPI\_ISL\_517357|Original|hCoV-19^^England|Human|Liverpool Clinical Laboratories|COVID-19 Genomics UK (COG-UK) Consortium|Haldenby|United Kingdom

>Spike|hCoV-19/England/MILK-99A3FA/2020|2020-08-27|EPI\_ISL\_550305|Original|hCoV-19^^England|Human|Lighthouse Lab in Milton Keynes|Wellcome Sanger Institute for the COVID-19 Genomics UK (COG-UK) consortium|Davies|United Kingdom

>Spike|hCoV-19/Switzerland/BS-42344991/2020|2020-07-08|EPI\_ISL\_581882|Original|hCoV-19^^Basel-Stadt|Human|University Hospital Basel|University Hospital Basel|Roloff Handschin|Switzerland

>Spike|hCoV-19/Canada/NS-NML-1324/2020|2020-04-10|EPI\_ISL\_579704|Original|hCoV-19^^Nova Scotia|Human|QEII Health Sciences Centre|National Microbiology Laboratory (NML)|Majer|Canada

>Spike|hCoV-19/USA/WI-WSLH-200238/2020|2020-04-14|EPI\_ISL\_578458|Original|hCoV-19^^Wisconsin|Human|Wisconsin State Laboratory of Hygiene Communicable Disease Division|Wisconsin State Laboratory of Hygiene Communicable Disease Division|Florek|USA

>Spike|hCoV-19/England/MILK-AB7FA7/2020|2020-10-21|EPI\_ISL\_623391|Original|hCoV-19^^England|Human|Lighthouse Lab in Milton Keynes|Wellcome Sanger Institute for the COVID-19 Genomics UK (COG-UK) consortium|Davies|United Kingdom

>Spike|hCoV-19/Germany/HH-hpi-p1501/2020|2020-03-12|EPI\_ISL\_776007|Original|hCoV-19^^Hamburg|Human|University Medical Center Hamburg Eppendorf|Heinrich Pette Institute|Robitaille|Germany

>Spike|hCoV-19/England/ALDP-B74901/2020|2020-11-12|EPI\_ISL\_678958|Original|hCoV-19^^England|Human|Queens Medical Centre|COVID-19 Genomics UK (COG-UK) Consortium|Loose|United Kingdom

>Spike|hCoV-19/England/CAMB-7E146/2020|2020-04-16|EPI\_ISL\_434044|Original|hCoV-19^^England|Human|Department of Pathology|COVID-19 Genomics UK (COG-UK) Consortium|Meredith|United Kingdom

>Spike|hCoV-19/Denmark/DCGC-3761/2020|2020-05-04|EPI\_ISL\_622628|Original|hCoV-19^^Hovedstaden|Human|Department of Virus and Microbiological Special Diagnostics|Albertsen lab|Michaelsen|Denmark

>Spike|hCoV-19/Denmark/DCGC-19275/2020|2020-12-07|EPI\_ISL\_748859|Original|hCoV-19^^Hovedstaden|Human|Department of Virus and Microbiological Special Diagnostics|Albertsen Lab|Michaelsen|Denmark

>Spike|hCoV-19/England/ALDP-A87869/2020|2020-10-17|EPI\_ISL\_606146|Original|hCoV-19^^England|Human|Lighthouse Lab in Alderley Park|Wellcome Sanger Institute for the COVID-19 Genomics UK (COG-UK) consortium|Davies|United Kingdom

>Spike|hCoV-19/USA/AZ-TG664230/2020|2020-04-28|EPI\_ISL\_696037|Original|hCoV-19^^Arizona|Human|Sonora Quest Laboratories|TGen North|French|USA

>Spike|hCoV-19/England/ALDP-A67D33/2020|2020-10-09|EPI\_ISL\_608973|Original|hCoV-19^^England|Human|Lighthouse Lab in Alderley Park|Wellcome Sanger Institute for the COVID-19 Genomics UK (COG-UK) consortium|Davies|United Kingdom

>Spike|hCoV-19/Luxembourg/LNS4547737/2020|2020-11-23|EPI\_ISL\_740494|Original|hCoV-19^^Luxembourg|Human|Laboratoire national de sant\u00e9|Laboratoire national de sant\u00e9|Wienecke-Baldacchino|Luxembourg

>Spike|hCoV-19/England/MILK-C30539/2020|2020-12-07|EPI\_ISL\_733900|Original|hCoV-19^^England|Human|Lighthouse Lab in Milton Keynes|Wellcome Sanger Institute for the COVID-19 Genomics UK (COG-UK) Consortium|Davies|United Kingdom

>Spike|hCoV-19/Australia/VIC8451/2020|2020-07-27|EPI\_ISL\_565023|Original|hCoV-19^^Victoria|Human|Microbiological Diagnostic Unit - Public Health Laboratory (MDU-PHL)|MDU-PHL|Schultz|Australia

>Spike|hCoV-19/Australia/VIC13782/2020|2020-09-16|EPI\_ISL\_563834|Original|hCoV-19^^Victoria|Human|Microbiological Diagnostic Unit - Public Health Laboratory (MDU-PHL)|MDU-PHL|Schultz|Australia

>Spike|hCoV-19/England/LIVE-9D949/2020|2020-04-27|EPI\_ISL\_449605|Original|hCoV-19^^England|Human|Liverpool Clinical Laboratories|COVID-19 Genomics UK (COG-UK) Consortium|Haldenby|United Kingdom

>Spike|hCoV-19/England/PORT-2CF4D2/2020|2020-04-27|EPI\_ISL\_453687|Original|hCoV-19^^England|Human|Centre for Enzyme Innovation|COVID-19 Genomics UK (COG-UK) Consortium|Robson|United Kingdom

>Spike|hCoV-19/England/MILK-9F0A93/2020|2020-09-24|EPI\_ISL\_589712|Original|hCoV-19^^England|Human|Lighthouse Lab in Milton Keynes|Wellcome Sanger Institute for the COVID-19 Genomics UK (COG-UK) consortium|Davies|United Kingdom

>Spike|hCoV-19/USA/TX-HMH-MCoV-19154/2020|2020-11-23|EPI\_ISL\_783659|Original|hCoV-19^^Texas|Human|Houston Methodist Hospital|Houston Methodist Hospital|Long|USA

>Spike|hCoV-19/Denmark/DCGC-10196/2020|2020-11-09|EPI\_ISL\_669447|Original|hCoV-19^^Nordjylland|Human|Department of Virus and Microbiological Special Diagnostics|Albertsen Lab|Michaelsen|Denmark

>Spike|hCoV-19/USA/NY-Wadsworth-14427-04/2020|2020-03-08|EPI\_ISL\_676735|Original|hCoV-19^^New York|Human|Wadsworth Center|Wadsworth Center|Lasek-Nesselquist|USA

>Spike|hCoV-19/Wales/PHWC-48BF2A/2020|2020-11-01|EPI\_ISL\_665474|Original|hCoV-19^^Wales|Human|Wales Specialist Virology Centre Sequencing lab|COVID-19 Genomics UK (COG-UK) Consortium|Moore|United Kingdom

>Spike|hCoV-19/Germany/BY-MVP-0050/2020|2020-03-12|EPI\_ISL\_437249|Original|hCoV-19^^Bavaria|Human|Max von Pettenkofer Institute|Laboratory for Functional Genome Analysis|Graf|Germany

>Spike|hCoV-19/England/QEUA-9DD443/2020|2020-09-21|EPI\_ISL\_599503|Original|hCoV-19^^England|Human|Lighthouse Lab in Glasgow|Wellcome Sanger Institute for the COVID-19 Genomics UK (COG-UK) consortium|Davies|United Kingdom

>Spike|hCoV-19/England/20186131504/2020|2020-04-30|EPI\_ISL\_465711|Original|hCoV-19^^England|Human|Respiratory Virus Unit|Respiratory Virus Unit|Platt|United Kingdom

>Spike|hCoV-19/USA/TX-HMH-MCoV-18815/2020|2020-11-24|EPI\_ISL\_785141|Original|hCoV-19^^Texas|Human|Houston Methodist Hospital|Houston Methodist Hospital|Long|USA

>Spike|hCoV-19/Scotland/QEUA-A20DDC/2020|2020-10-01|EPI\_ISL\_599006|Original|hCoV-19^^Scotland|Human|Lighthouse Lab in Glasgow|Wellcome Sanger Institute for the COVID-19 Genomics UK (COG-UK) consortium|Davies|United Kingdom

>Spike|hCoV-19/England/MILK-970C77/2020|2020-08-18|EPI\_ISL\_553108|Original|hCoV-19^^England|Human|Lighthouse Lab in Milton Keynes|Wellcome Sanger Institute for the COVID-19 Genomics UK (COG-UK) consortium|Davies|United Kingdom

>Spike|hCoV-19/Denmark/DCGC-7067/2020|2020-10-12|EPI\_ISL\_619092|Original|hCoV-19^^Hovedstaden|Human|Department of Virus and Microbiological Special Diagnostics|Albertsen lab|Michaelsen|Denmark

>Spike|hCoV-19/England/CAMB-80545/2020|2020-04-09|EPI\_ISL\_470456|Original|hCoV-19^^England|Human|Department of Pathology|Wellcome Sanger Institute for the COVID-19 Genomics UK (COG-UK) consortium|Davies|United Kingdom

>Spike|hCoV-19/England/QEUA-BF0A0A/2020|2020-12-05|EPI\_ISL\_709009|Original|hCoV-19^^England|Human|Lighthouse Lab in Glasgow|Wellcome Sanger Institute for the COVID-19 Genomics UK (COG-UK) Consortium|Davies|United Kingdom

>Spike|hCoV-19/Japan/PG-0579/2020|2020-04-11|EPI\_ISL\_480218|Original|hCoV-19^^Kansai|Human|Department of Infectious Diseases|Pathogen Genomics Center|Sekizuka|Japan

>Spike|hCoV-19/England/QEUA-B7E8EC/2020|2020-11-14|EPI\_ISL\_668005|Original|hCoV-19^^England|Human|Lighthouse Lab in Glasgow|Wellcome Sanger Institute for the COVID-19 Genomics UK (COG-UK) Consortium|Davies|United Kingdom

>Spike|hCoV-19/Spain/MD-HLP-R82/2020|2020-05-07|EPI\_ISL\_530079|Original|hCoV-19^^Madrid|Human|Hospital Universitario La Paz|Hospital Universitario La Paz|Viedma|Spain

>Spike|hCoV-19/USA/WA-UW-2608/2020|2020-03-29|EPI\_ISL\_486005|Original|hCoV-19^^Washington|Human|UW Virology Lab|UW Virology Lab|Roychoudhury|USA

>Spike|hCoV-19/Japan/PG-6091/2020|2020-08-00|EPI\_ISL\_689203|Original|hCoV-19^^Japan|Human|Pathogen Genomics Center|Pathogen Genomics Center|Sekizuka|Japan

>Spike|hCoV-19/England/CAMC-C263B4/2020|2020-12-08|EPI\_ISL\_733846|Original|hCoV-19^^England|Human|Lighthouse Lab in Cambridge|Wellcome Sanger Institute for the COVID-19 Genomics UK (COG-UK) Consortium|Davies|United Kingdom

>Spike|hCoV-19/USA/NY-Wadsworth-211750-01/2020|2020-09-04|EPI\_ISL\_677097|Original|hCoV-19^^New York|Human|Wadsworth Center|Wadsworth Center|Lasek-Nesselquist|USA

>Spike|hCoV-19/USA/CA-CZB-13764/2020|2020-09-17|EPI\_ISL\_739062|Original|hCoV-19^^California|Human|Alameda County Public Health Lab|Chan-Zuckerberg Biohub|Kamm|USA

>Spike|hCoV-19/England/QEUA-B68D04/2020|2020-11-11|EPI\_ISL\_661971|Original|hCoV-19^^England|Human|Lighthouse Lab in Glasgow|Wellcome Sanger Institute for the COVID-19 Genomics UK (COG-UK) Consortium|Davies|United Kingdom

>Spike|hCoV-19/Scotland/EDB150/2020|2020-03-24|EPI\_ISL\_425918|Original|hCoV-19^^Scotland|Human|Virology Department|COVID-19 Genomics UK (COG-UK) Consortium|Williams|United Kingdom

>Spike|hCoV-19/Scotland/CVR2457/2020|2020-04-14|EPI\_ISL\_477945|Original|hCoV-19^^Scotland|Human|West of Scotland Specialist Virology Centre|COVID-19 Genomics UK (COG-UK) Consortium|Robertson|United Kingdom

>Spike|hCoV-19/England/CAMC-A64F9A/2020|2020-10-11|EPI\_ISL\_608467|Original|hCoV-19^^England|Human|Lighthouse Lab in Cambridge|Wellcome Sanger Institute for the COVID-19 Genomics UK (COG-UK) consortium|Davies|United Kingdom



>Spike|hCoV-19/England/QEUA-9B8C91/2020|2020-09-09|EPI\_ISL\_549694|Original|hCoV-19^^England|Human|Lighthouse Lab in Glasgow|Wellcome Sanger Institute for the COVID-19 Genomics UK (COG-UK) consortium|Davies|United Kingdom

>Spike|hCoV-19/USA/UT-04294/2020|2020-05-15|EPI\_ISL\_522339|Original|hCoV-19^^Utah|Human|Utah Public Health Laboratory|Utah Public Health Laboratory|Young|USA

>Spike|hCoV-19/USA/WY-WPHL-20062990/2020|2020-08-18|EPI\_ISL\_769884|Original|hCoV-19^^Wyoming|Human|Wyoming Public Health Laboratory|Wyoming Public Health Laboratory|Hull|USA

>Spike|hCoV-19/Netherlands/OV-RIVM-20125/2020|2020-11-11|EPI\_ISL\_723300|Original|hCoV-19^^Overijssel|Human|Dutch COVID-19 response team|National Institute for Public Health and the Environment (RIVM)|Meijer|Netherlands

>Spike|hCoV-19/Denmark/DCGC-13932/2020|2020-11-30|EPI\_ISL\_711462|Original|hCoV-19^^Hovedstaden|Human|Department of Virus and Microbiological Special Diagnostics|Albertsen Lab|Michaelsen|Denmark

>Spike|hCoV-19/Canada/BC\_21927217/2020|2020-03-00|EPI\_ISL\_462819|Original|hCoV-19^^British Columbia|Human|BCCDC Public Health Laboratory|BCCDC Public Health Laboratory|Harrigan|Canada

>Spike|hCoV-19/Switzerland/ZH-ETHZ-310442/2020|2020-10-08|EPI\_ISL\_603515|Original|hCoV-19^^Zurich|Human|Viollier AG|Department of Biosystems Science and Engineering|Nadeau|Switzerland

>Spike|hCoV-19/Denmark/DCGC-5605/2020|2020-09-28|EPI\_ISL\_620930|Original|hCoV-19^^Sjaelland|Human|Department of Virus and Microbiological Special Diagnostics|Albertsen lab|Michaelsen|Denmark

>Spike|hCoV-19/England/ALDP-B746BF/2020|2020-11-12|EPI\_ISL\_662176|Original|hCoV-19^^England|Human|Lighthouse Lab in Alderley Park|Wellcome Sanger Institute for the COVID-19 Genomics UK (COG-UK) Consortium|Davies|United Kingdom

>Spike|hCoV-19/Denmark/DCGC-17656/2020|2020-12-14|EPI\_ISL\_751127|Original|hCoV-19^^Hovedstaden|Human|Department of Virus and Microbiological Special Diagnostics|Albertsen Lab|Michaelsen|Denmark

>Spike|hCoV-19/USA/AZ-TG654326/2020|2020-04-13|EPI\_ISL\_695976|Original|hCoV-19^^Arizona|Human|Sonora Quest Laboratories|TGen North|French|USA

>Spike|hCoV-19/Belgium/reg-0409565/2020|2020-04-09|EPI\_ISL\_734555|Original|hCoV-19^^Tienen|Human|UZ Leuven|KU Leuven|Maes|Belgium

>Spike|hCoV-19/England/QEUA-B30BDE/2020|2020-11-03|EPI\_ISL\_659985|Original|hCoV-19^^England|Human|Lighthouse Lab in Glasgow|Wellcome Sanger Institute for the COVID-19 Genomics UK (COG-UK) Consortium|Davies|United Kingdom

>Spike|hCoV-19/USA/MN-MDH-1875/2020|2020-09-24|EPI\_ISL\_603010|Original|hCoV-19^^Minnesota|Human|Mayo Clinic & Mayo Clinic Laboratories|Minnesota Department of Health|Garfin|USA

>Spike|hCoV-19/USA/TX-HMH-MCoV-10016/2020|2020-07-06|EPI\_ISL\_789287|Original|hCoV-19^^Texas|Human|Houston Methodist Hospital|Houston Methodist Hospital|Long|USA

>Spike|hCoV-19/Portugal/PT0412/2020|2020-03-22|EPI\_ISL\_454136|Original|hCoV-19^^Portugal|Human|unknown|Instituto Nacional de Saude (INSA)|Borges|Portugal

>Spike|hCoV-19/India/MH-ACTREC-533/2020|2020-08-25|EPI\_ISL\_700179|Original|hCoV-19^^Maharashtra|Human|Hematopathology Laboratory|Hematopathology Laboratory|Patkar|India

>Spike|hCoV-19/Japan/PG-0344/2020|2020-03-30|EPI\_ISL\_480016|Original|hCoV-19^^Kanto|Human|Gunma Prefectural Institute of Public Health and Environmental Sciences|Pathogen Genomics Center|Sekizuka|Japan

>Spike|hCoV-19/Scotland/CVR4180/2020|2020-08-29|EPI\_ISL\_540856|Original|hCoV-19^^Scotland|Human|Lighthouse Lab in Glasgow / MRC-University of Glasgow Centre for Virus Research|COVID-19 Genomics UK (COG-UK) Consortium|Robertson|United Kingdom

>Spike|hCoV-19/Canada/ON-S1964/2020|2020-11-24|EPI\_ISL\_755680|Original|hCoV-19^^Ontario|Human|Toronto Invasive Bacterial Diseases Network|McMaster University|McArthur|Canada

>Spike|hCoV-19/Germany/TH-IIMK-CaSe-10/2020|2020-05-24|EPI\_ISL\_728321|Original|hCoV-19^^Thuringia|Human|Jena University Hospital|Institute of infectious medicine & hospital hygiene|Brandt|Germany

>Spike|hCoV-19/Japan/PG-0977/2020|2020-04-00|EPI\_ISL\_684587|Original|hCoV-19^^Japan|Human|Pathogen Genomics Center|Pathogen Genomics Center|Sekizuka|Japan

>Spike|hCoV-19/Scotland/EDB7080/2020|2020-08-02|EPI\_ISL\_514519|Original|hCoV-19^^Scotland|Human|Virology Department|COVID-19 Genomics UK (COG-UK) Consortium|Williams|United Kingdom

>Spike|hCoV-19/Portugal/PT1107/2020|2020-03-27|EPI\_ISL\_511654|Original|hCoV-19^^Portugal|Human|Instituto Nacional de Saude (INSA)|Instituto Nacional de Saude (INSA)|Borges|Portugal

>Spike|hCoV-19/USA/WA-UW-4414/2020|2020-03-31|EPI\_ISL\_443186|Original|hCoV-19^^Washington|Human|UW Virology Lab|UW Virology Lab|Roychoudhury|USA

>Spike|hCoV-19/Brazil/RJ-00421/2020|2020-10-29|EPI\_ISL\_717823|Original|hCoV-19^^Rio de Janeiro|Human|Laboratorio de Virologia Molecular / UFRJ|Bioinformatics Laboratory / LNCC|Almeida|Brazil

>Spike|hCoV-19/England/CAMC-B548BF/2020|2020-11-08|EPI\_ISL\_658260|Original|hCoV-19^^England|Human|Lighthouse Lab in Cambridge|Wellcome Sanger Institute for the COVID-19 Genomics UK (COG-UK) Consortium|Davies|United Kingdom

>Spike|hCoV-19/Belgium/ZF-0325152/2020|2020-03-25|EPI\_ISL\_420409|Original|hCoV-19^^Blandain|Human|KU Leuven|KU Leuven|Maes|Belgium

>Spike|hCoV-19/Denmark/DCGC-1730/2020|2020-05-11|EPI\_ISL\_617949|Original|hCoV-19^^Hovedstaden|Human|Department of Virus and Microbiological Special Diagnostics|Albertsen lab|Michaelsen|Denmark

>Spike|hCoV-19/England/CAMC-B9A501/2020|2020-11-16|EPI\_ISL\_673288|Original|hCoV-19^^England|Human|Lighthouse Lab in Cambridge|Wellcome Sanger Institute for the COVID-19 Genomics UK (COG-UK) Consortium|Davies|United Kingdom

>Spike|hCoV-19/Scotland/QEUA-9AF0EC/2020|2020-09-03|EPI\_ISL\_560026|Original|hCoV-19^^Scotland|Human|Oxford Viromics|COVID-19 Genomics UK (COG-UK) Consortium|Golubchik|United Kingdom

>Spike|hCoV-19/United Arab Emirates/0557/2020|2020-05-19|EPI\_ISL\_698718|Original|hCoV-19^^Abu Dhabi|Human|Group 42 (G42) Healthcare|G42 Healthcare|Ogrodzki|United Arab Emirates

>Spike|hCoV-19/Scotland/CVR2700/2020|2020-04-18|EPI\_ISL\_478022|Original|hCoV-19^^Scotland|Human|West of Scotland Specialist Virology Centre|COVID-19 Genomics UK (COG-UK) Consortium|Robertson|United Kingdom

>Spike|hCoV-19/USA/UT-UPHL-2012002538/2020|2020-12-01|EPI\_ISL\_779291|Original|hCoV-19^^Utah|Human|Utah Public Health Laboratory|Utah Public Health Laboratory|Gallagher|USA

>Spike|hCoV-19/England/QEUA-A215D3/2020|2020-10-01|EPI\_ISL\_587585|Original|hCoV-19^^England|Human|Lighthouse Lab in Glasgow|Wellcome Sanger Institute for the COVID-19 Genomics UK (COG-UK) consortium|Davies|United Kingdom

>Spike|hCoV-19/Denmark/DCGC-10609/2020|2020-11-02|EPI\_ISL\_670085|Original|hCoV-19^^Sjaelland|Human|Department of Virus and Microbiological Special Diagnostics|Albertsen Lab|Michaelsen|Denmark

>Spike|hCoV-19/England/ALDP-C3D8E8/2020|2020-12-10|EPI\_ISL\_730845|Original|hCoV-19^^England|Human|Lighthouse Lab in Alderley Park|Wellcome Sanger Institute for the COVID-19 Genomics UK (COG-UK) Consortium|Davies|United Kingdom

>Spike|hCoV-19/England/ALDP-BC8713/2020|2020-11-23|EPI\_ISL\_721302|Original|hCoV-19^^England|Human|Lighthouse Lab in Alderley Park|Wellcome Sanger Institute for the COVID-19 Genomics UK (COG-UK) Consortium|Davies|United Kingdom

>Spike|hCoV-19/England/MILK-AB8128/2020|2020-10-22|EPI\_ISL\_623384|Original|hCoV-19^^England|Human|Lighthouse Lab in Milton Keynes|Wellcome Sanger Institute for the COVID-19 Genomics UK (COG-UK) consortium|Davies|United Kingdom

>Spike|hCoV-19/USA/CA-SCCPHD-UC129/2020|2020-03-06|EPI\_ISL\_435608|Original|hCoV-19^^California|Human|Santa Clara County Public Health Department|Chiu Laboratory|Chiu|USA

>Spike|hCoV-19/USA/UT-028/2020|2020-03-19|EPI\_ISL\_417971|Original|hCoV-19^^Utah|Human|Utah Public Health Laboratory|Utah Public Health Laboratory|Young|USA

>Spike|hCoV-19/England/LIVE-DC3FA5/2020|2020-11-08|EPI\_ISL\_705883|Original|hCoV-19^^England|Human|Liverpool Clinical Laboratories|COVID-19 Genomics UK (COG-UK) Consortium|Haldenby|United Kingdom

>Spike|hCoV-19/USA/MI-UM-10036759541/2020|2020-11-03|EPI\_ISL\_682222|Original|hCoV-19^^Michigan|Human|University of Michigan Clinical Microbiology Laboratory|Lauring Lab|Valesano|USA

>Spike|hCoV-19/Northern Ireland/QEUA-9630A8/2020|2020-08-11|EPI\_ISL\_531773|Original|hCoV-19^^Northern Ireland|Human|Lighthouse Lab in Glasgow|Wellcome Sanger Institute for the COVID-19 Genomics UK (COG-UK) consortium|Davies|United Kingdom

>Spike|hCoV-19/England/MILK-B948B3/2020|2020-11-14|EPI\_ISL\_676298|Original|hCoV-19^^England|Human|Lighthouse Lab in Milton Keynes|Wellcome Sanger Institute for the COVID-19 Genomics UK (COG-UK) Consortium|Davies|United Kingdom

>Spike|hCoV-19/Denmark/DCGC-15993/2020|2020-11-23|EPI\_ISL\_714521|Original|hCoV-19^^Nordjylland|Human|Department of Virus and Microbiological Special Diagnostics|Albertsen Lab|Michaelsen|Denmark

>Spike|hCoV-19/Australia/VIC3388/2020|2020-07-08|EPI\_ISL\_521067|Original|hCoV-19^^Victoria|Human|Microbiological Diagnostic Unit - Public Health Laboratory (MDU-PHL)|MDU-PHL|Schultz|Australia

>Spike|hCoV-19/England/MILK-ACDCA7/2020|2020-10-22|EPI\_ISL\_630325|Original|hCoV-19^^England|Human|Lighthouse Lab in Milton Keynes|Wellcome Sanger Institute for the COVID-19 Genomics UK (COG-UK) consortium|Davies|United Kingdom

>Spike|hCoV-19/Denmark/DCGC-15353/2020|2020-11-23|EPI\_ISL\_713780|Original|hCoV-19^^Hovedstaden|Human|Department of Virus and Microbiological Special Diagnostics|Albertsen Lab|Michaelsen|Denmark

>Spike|hCoV-19/USA/TX-HMH-3293/2020|2020-06-11|EPI\_ISL\_544110|Original|hCoV-19^^Texas|Human|Houston Methodist Hospital|Houston Methodist Hospital|Long|USA

>Spike|hCoV-19/England/CAMB-7CA6B/2020|2020-04-04|EPI\_ISL\_442187|Original|hCoV-19^^England|Human|Department of Pathology|Wellcome Sanger Institute for the COVID-19 Genomics UK (COG-UK) consortium|Amato|United Kingdom

>Spike|hCoV-19/England/ALDP-BCA0BC/2020|2020-11-23|EPI\_ISL\_703374|Original|hCoV-19^^England|Human|Lighthouse Lab in Alderley Park|Wellcome Sanger Institute for the COVID-19 Genomics UK (COG-UK) Consortium|Davies|United Kingdom

>Spike|hCoV-19/Australia/VIC17819/2020|2020-07-28|EPI\_ISL\_779474|Original|hCoV-19^^Victoria|Human|Microbiological Diagnostic Unit - Public Health Laboratory (MDU-PHL)|MDU-PHL|Beck|Australia

>Spike|hCoV-19/Australia/WA284/2020|2020-03-17|EPI\_ISL\_596827|Original|hCoV-19^^Western Australia|Human|PathWest Laboratory Medicine WA|PathWest Laboratory Medicine WA Microbial Surveillance Unit|Sikazwe|Australia

>Spike|hCoV-19/Scotland/EDB3158/2020|2020-04-06|EPI\_ISL\_488963|Original|hCoV-19^^Scotland|Human|Virology Department|Wellcome Sanger Institute for the COVID-19 Genomics UK (COG-UK) consortium|Davies|United Kingdom

>Spike|hCoV-19/Japan/PG-0895/2020|2020-04-00|EPI\_ISL\_684505|Original|hCoV-19^^Japan|Human|Pathogen Genomics Center|Pathogen Genomics Center|Sekizuka|Japan

>Spike|hCoV-19/Northern Ireland/QEUA-962285/2020|2020-08-10|EPI\_ISL\_531843|Original|hCoV-19^^Northern Ireland|Human|Lighthouse Lab in Glasgow|Wellcome Sanger Institute for the COVID-19 Genomics UK (COG-UK) consortium|Davies|United Kingdom

>Spike|hCoV-19/England/LIVE-DCA928/2020|2020-12-07|EPI\_ISL\_724390|Original|hCoV-19^^England|Human|Liverpool Clinical Laboratories|COVID-19 Genomics UK (COG-UK) Consortium|Haldenby|United Kingdom

>Spike|hCoV-19/England/CAMC-B98A13/2020|2020-11-15|EPI\_ISL\_673800|Original|hCoV-19^^England|Human|Lighthouse Lab in Cambridge|Wellcome Sanger Institute for the COVID-19 Genomics UK (COG-UK) Consortium|Davies|United Kingdom

>Spike|hCoV-19/England/ALDP-AC5E5E/2020|2020-10-14|EPI\_ISL\_631046|Original|hCoV-19^^England|Human|Lighthouse Lab in Alderley Park|Wellcome Sanger Institute for the COVID-19 Genomics UK (COG-UK) consortium|Davies|United Kingdom

>Spike|hCoV-19/England/CAMC-B210D1/2020|2020-11-01|EPI\_ISL\_647775|Original|hCoV-19^^England|Human|Lighthouse Lab in Cambridge|Wellcome Sanger Institute for the COVID-19 Genomics UK (COG-UK) Consortium|Davies|United Kingdom

>Spike|hCoV-19/Malaysia/8451/2020|2020-04-12|EPI\_ISL\_501222|Original|hCoV-19^^Kuala Lumpur|Human|Department of Medical Microbiology|Department of Medical Microbiology|Chan|Malaysia

>Spike|hCoV-19/Netherlands/NA\_152/2020|2020-03-21|EPI\_ISL\_422687|Original|hCoV-19^^Netherlands|Human|Dutch COVID-19 response team|Erasmus Medical Center|Oude Munnink|Netherlands

>Spike|hCoV-19/England/LOND-12640AB/2020|2020-11-14|EPI\_ISL\_679521|Original|hCoV-19^^England|Human|University College London|COVID-19 Genomics UK (COG-UK) Consortium|Roy|United Kingdom

>Spike|hCoV-19/England/MILK-B386E4/2020|2020-11-02|EPI\_ISL\_662642|Original|hCoV-19^^England|Human|Lighthouse Lab in Milton Keynes|Wellcome Sanger Institute for the COVID-19 Genomics UK (COG-UK) Consortium|Davies|United Kingdom

>Spike|hCoV-19/Belgium/ULG-10241/2020|2020-06-30|EPI\_ISL\_498147|Original|hCoV-19^^Li\u00e8ge|Human|Department of Clinical Microbiology|GIGA Medical Genomics|Durkin|Belgium

>Spike|hCoV-19/Canada/ON-PHL-20-02231/2020|2020-09-00|EPI\_ISL\_671503|Original|hCoV-19^^Ontario|Human|Public Health Ontario Laboratory|Public Health Ontario Laboratory|Guthrie|Canada

>Spike|hCoV-19/United Arab Emirates/0675/2020|2020-05-15|EPI\_ISL\_698828|Original|hCoV-19^^Abu Dhabi|Human|Group 42 (G42) Healthcare|G42 Healthcare|Ogrodzki|United Arab Emirates

>Spike|hCoV-19/Denmark/DCGC-2428/2020|2020-08-10|EPI\_ISL\_617524|Original|hCoV-19^^Hovedstaden|Human|Department of Virus and Microbiological Special Diagnostics|Albertsen lab|Michaelsen|Denmark

>Spike|hCoV-19/Scotland/QEUH-9F4701/2020|2020-09-27|EPI\_ISL\_600674|Original|hCoV-19^^Scotland|Human|Lighthouse Lab in Glasgow|Wellcome Sanger Institute for the COVID-19 Genomics UK (COG-UK) consortium|Davies|United Kingdom

>Spike|hCoV-19/England/201161375/2020|2020-03-12|EPI\_ISL\_464835|Original|hCoV-19^^England|Human|Respiratory Virus Unit|Respiratory Virus Unit|Platt|United Kingdom

>Spike|hCoV-19/England/MILK-AC927C/2020|2020-10-21|EPI\_ISL\_629275|Original|hCoV-19^^England|Human|Lighthouse Lab in Milton Keynes|Wellcome Sanger Institute for the COVID-19 Genomics UK (COG-UK) consortium|Davies|United Kingdom

>Spike|hCoV-19/England/20170035404/2020|2020-04-20|EPI\_ISL\_465283|Original|hCoV-19^^England|Human|Respiratory Virus Unit|Respiratory Virus Unit|Platt|United Kingdom

>Spike|hCoV-19/England/ALDP-B74B0B/2020|2020-11-12|EPI\_ISL\_678972|Original|hCoV-19^^England|Human|Queens Medical Centre|COVID-19 Genomics UK (COG-UK) Consortium|Loose|United Kingdom

>Spike|hCoV-19/Ireland/WW-NVRL-AIIDV0018v1/2020|2020-04-02|EPI\_ISL\_644320|Original|hCoV-19^^Wicklow|Human|CEPHR / Vincent's Hospital|Irish Coronavirus Sequencing Consortium - National Virus Reference Laboratory|Gonzalez|Ireland

>Spike|hCoV-19/England/20166014904/2020|2020-04-15|EPI\_ISL\_466536|Original|hCoV-19^^England|Human|Respiratory Virus Unit|Respiratory Virus Unit|Platt|United Kingdom

>Spike|hCoV-19/Netherlands/ZH-EMC-656/2020|2020-07-05|EPI\_ISL\_632413|Original|hCoV-19^^Zuid Holland|Human|Dutch COVID-19 response team|Erasmus Medical Center|Oude Munnink|Netherlands

>Spike|hCoV-19/USA/OR-PROV-011/2020|2020-03-31|EPI\_ISL\_482298|Original|hCoV-19^^Oregon|Human|Providence St. Joseph Health Molecular Genomics Laboratory|Providence St. Joseph Health Molecular Genomics Laboratory|Dowdell|USA

>Spike|hCoV-19/Denmark/DCGC-3916/2020|2020-09-14|EPI\_ISL\_615827|Original|hCoV-19^^Hovedstaden|Human|Department of Virus and Microbiological Special Diagnostics|Albertsen lab|Michaelsen|Denmark

>Spike|hCoV-19/Costa Rica/INC-0072/2020|2020-06-19|EPI\_ISL\_527740|Original|hCoV-19^^Alajuela|Human|Area De Salud Alajuela Norte - Clinica Dr. Marcial Rodriguez|Inciensa|Soto-Garita|Costa Rica

>Spike|hCoV-19/Finland/14CB4/2020|2020-12-02|EPI\_ISL\_732579|Original|hCoV-19^^Uusimaa|Human|Department of Virology and Immunology|Department of Virology|Smura|Finland

>Spike|hCoV-19/England/QEUH-AD2F4C/2020|2020-10-25|EPI\_ISL\_629770|Original|hCoV-19^^England|Human|Lighthouse Lab in Glasgow|Wellcome Sanger Institute for the COVID-19 Genomics UK (COG-UK) consortium|Davies|United Kingdom

>Spike|hCoV-19/England/ALDP-BB51EE/2020|2020-11-20|EPI\_ISL\_701810|Original|hCoV-19^^England|Human|Lighthouse Lab in Alderley Park|Wellcome Sanger Institute for the COVID-19 Genomics UK (COG-UK) Consortium|Davies|United Kingdom

>Spike|hCoV-19/Australia/VIC2765/2020|2020-07-07|EPI\_ISL\_521600|Original|hCoV-19^^Victoria|Human|Microbiological Diagnostic Unit - Public Health Laboratory (MDU-PHL)|MDU-PHL|Schultz|Australia

>Spike|hCoV-19/Denmark/DCGC-20796/2020|2020-12-21|EPI\_ISL\_759069|Original|hCoV-19^^Hovedstaden|Human|Department of Virus and Microbiological Special Diagnostics|Albertsen Lab|Michaelsen|Denmark

>Spike|hCoV-19/Latvia/082/2020|2020-07-14|EPI\_ISL\_501895|Original|hCoV-19^^Latvia|Human|Centr\u0101l\u0101 laboratorija|Latvian Biomedical Research and Study Centre|Zrelavs|Latvia

>Spike|hCoV-19/USA/TX-DSHS-0922/2020|2020-06-15|EPI\_ISL\_602220|Original|hCoV-19^^Texas|Human|Texas Department of State Health Services|Texas Department of State Health Services|Rahman|USA

>Spike|hCoV-19/USA/TX-HMH-MCoV-9687/2020|2020-07-04|EPI\_ISL\_780226|Original|hCoV-19^^Texas|Human|Houston Methodist Hospital|Houston Methodist Hospital|Long|USA

>Spike|hCoV-19/Wales/PHWC-163E6A/2020|2020-04-27|EPI\_ISL\_474093|Original|hCoV-19^^Wales|Human|Originating lab|COVID-19 Genomics UK (COG-UK) Consortium|Moore|United Kingdom

>Spike|hCoV-19/Scotland/EDB7780/2020|2020-09-09|EPI\_ISL\_577349|Original|hCoV-19^^Scotland|Human|Virology Department|COVID-19 Genomics UK (COG-UK) Consortium|Williams|United Kingdom

>Spike|hCoV-19/Wales/PHWC-162FFF/2020|2020-05-13|EPI\_ISL\_473232|Original|hCoV-19^^Wales|Human|Wales Specialist Virology Centre Sequencing lab|COVID-19 Genomics UK (COG-UK) Consortium|Moore|United Kingdom

>Spike|hCoV-19/England/20129161104/2020|2020-03-12|EPI\_ISL\_424122|Original|hCoV-19^^England|Human|Respiratory Virus Unit|Respiratory Virus Unit|Platt|United Kingdom

>Spike|hCoV-19/England/NORW-F96BD/2020|2020-12-02|EPI\_ISL\_725391|Original|hCoV-19^^England|Human|Quadram Institute Bioscience|COVID-19 Genomics UK (COG-UK) Consortium|Alikhan|United Kingdom

>Spike|hCoV-19/Bangladesh/BCSIR-NILMRC-080/2020|2020-06-01|EPI\_ISL\_464162|Original|hCoV-19^^Dhaka|Human|National Institute of Laboratory Medicine and Referral Center|Genomic Research Lab|Khan|Bangladesh

>Spike|hCoV-19/England/QEUEH-AE1B64/2020|2020-10-26|EPI\_ISL\_633412|Original|hCoV-19^^England|Human|Lighthouse Lab in Glasgow|Wellcome Sanger Institute for the COVID-19 Genomics UK (COG-UK) consortium|Davies|United Kingdom

>Spike|hCoV-19/England/HECH-259AAA8/2020|2020-00-00|EPI\_ISL\_652071|Original|hCoV-19^^England|Human|University of Birmingham|COVID-19 Genomics UK (COG-UK) Consortium|Loman|United Kingdom

>Spike|hCoV-19/USA/TX-DSHS-0751/2020|2020-05-14|EPI\_ISL\_584152|Original|hCoV-19^^Texas|Human|Texas Department of State Health Services|Texas Department of State Health Services|Rahman|USA

>Spike|hCoV-19/USA/UT-02046/2020|2020-04-19|EPI\_ISL\_470667|Original|hCoV-19^^Utah|Human|Utah Public Health Laboratory|Utah Public Health Laboratory|Young|USA

>Spike|hCoV-19/Saudi Arabia/KAUST-Madinah31/2020|2020-03-26|EPI\_ISL\_437486|Original|hCoV-19^^Madinah|Human|Pathogen Genomics Lab King Abdullah University of Science and Technology(KAUST)|Pathogen Genomics Lab King Abdullah University of Science and Technology(KAUST)|Mohamed Ghazzali|Saudi Arabia

>Spike|hCoV-19/England/LOND-DA412/2020|2020-11-06|EPI\_ISL\_724628|Original|hCoV-19^^England|Human|University College London|COVID-19 Genomics UK (COG-UK) Consortium|Roy|United Kingdom

>Spike|hCoV-19/USA/MI-QDX-2206/2020|2020-03-14|EPI\_ISL\_604538|Original|hCoV-19^^Michigan|Human|Quest Diagnostics|Quest Diagnostics|Kagan|USA

>Spike|hCoV-19/Australia/NSW1055/2020|2020-07-07|EPI\_ISL\_593707|Original|hCoV-19^^New South Wales|Human|South Eastern Area Laboratory Services (SEALS)|NSW Health Pathology - Institute of Clinical Pathology and Medical Research; Westmead Hospital; University of Sydney|Gall|Australia

>Spike|hCoV-19/England/LEED-2A8299/2020|2020-04-02|EPI\_ISL\_539136|Original|hCoV-19^^England|Human|Leeds Teaching Hospitals NHS Trust and Public Health England|Wellcome Sanger Institute for the COVID-19 Genomics UK (COG-UK) consortium|Davies|United Kingdom

>Spike|hCoV-19/England/OXON-AFCB4/2020|2020-04-16|EPI\_ISL\_478819|Original|hCoV-19^^England|Human|Oxford Viromics|COVID-19 Genomics UK (COG-UK) Consortium|Golubchik|United Kingdom

>Spike|hCoV-19/England/QEUA-B417C7/2020|2020-11-08|EPI\_ISL\_658609|Original|hCoV-19^^England|Human|Lighthouse Lab in Glasgow|Wellcome Sanger Institute for the COVID-19 Genomics UK (COG-UK) Consortium|Davies|United Kingdom

>Spike|hCoV-19/England/MILK-A79AA0/2020|2020-10-15|EPI\_ISL\_606667|Original|hCoV-19^^England|Human|Lighthouse Lab in Milton Keynes|Wellcome Sanger Institute for the COVID-19 Genomics UK (COG-UK) consortium|Davies|United Kingdom

>Spike|hCoV-19/Spain/CT-IBV-005613/2020|2020-04-24|EPI\_ISL\_508657|Original|hCoV-19^^Catalunya|Human|Departamento de Microbiolog\u00eda|SeqCOVID-SPAIN consortium/IBV (CSIC) |Comas|Spain

>Spike|hCoV-19/England/ALDP-98CCC3/2020|2020-07-23|EPI\_ISL\_529274|Original|hCoV-19^^England|Human|Liverpool Clinical Laboratories|COVID-19 Genomics UK (COG-UK) Consortium|Haldenby|United Kingdom

>Spike|hCoV-19/Wales/PHWC-15C7B4/2020|2020-03-30|EPI\_ISL\_472538|Original|hCoV-19^^Wales|Human|Wales Specialist Virology Centre Sequencing lab|COVID-19 Genomics UK (COG-UK) Consortium|Moore|United Kingdom

>Spike|hCoV-19/England/ALDP-B1A34B/2020|2020-11-01|EPI\_ISL\_645878|Original|hCoV-19^^England|Human|Lighthouse Lab in Alderley Park|Wellcome Sanger Institute for the COVID-19 Genomics UK (COG-UK) Consortium|Davies|United Kingdom

>Spike|hCoV-19/England/BRIS-18534DA/2020|2020-04-07|EPI\_ISL\_492287|Original|hCoV-19^^England|Human|PHE South West Regional Laboratory|Wellcome Sanger Institute for the COVID-19 Genomics UK (COG-UK) consortium|Davies|United Kingdom

>Spike|hCoV-19/Spain/PV-IBV-001608/2020|2020-03-01|EPI\_ISL\_467161|Original|hCoV-19^^Basque Country|Human|Hospital Universitario Araba. Vitoria-Gasteiz|SeqCOVID-SPAIN consortium/IBV (CSIC) |Comas|Spain

>Spike|hCoV-19/mink/Netherlands/NB-EMC-47-2/2020|2020-09-04|EPI\_ISL\_577810|Original|hCoV-19^^Noord Brabant|Neovison vison|Dutch COVID-19 response team|Erasmus Medical Center|Oude Munnink|Netherlands

>Spike|hCoV-19/Canada/NS-NML-143/2020|2020-04-14|EPI\_ISL\_579520|Original|hCoV-19^^Nova Scotia|Human|QEII Health Sciences Centre|National Microbiology Laboratory (NML) |Majer|Canada

>Spike|hCoV-19/France/ARA-17177/2020|2020-03-30|EPI\_ISL\_508958|Original|hCoV-19^^Auvergne-Rh\u00f4ne-Alpes|Human|Centre Hospitalier Alpes LeMan|CNR Virus des Infections Respiratoires - France SUD|Josset|France

>Spike|hCoV-19/Denmark/DCGC-14136/2020|2020-11-30|EPI\_ISL\_711205|Original|hCoV-19^^Sjælland|Human|Department of Virus and Microbiological Special Diagnostics|Albertsen Lab|Michaelsen|Denmark

>Spike|hCoV-19/USA/TX-HMH-MCoV-13998/2020|2020-08-16|EPI\_ISL\_787289|Original|hCoV-19^^Texas|Human|Houston Methodist Hospital|Houston Methodist Hospital|Long|USA

>Spike|hCoV-19/Netherlands/UT-RIVM-20864/2020|2020-12-16|EPI\_ISL\_790833|Original|hCoV-19^^Utrecht|Human|Dutch COVID-19 response team|National Institute for Public Health and the Environment (RIVM) |Meijer|Netherlands

>Spike|hCoV-19/Hungary/UD-58203/2020|2020-09-02|EPI\_ISL\_671450|Original|hCoV-19^^Szabolcs-Szatm\u00e9r-Bereg county|Human|University of Debrecen|National Laboratory of Virology|Kemenesi|Hungary

>Spike|hCoV-19/Scotland/CVR1423/2020|2020-04-01|EPI\_ISL\_433579|Original|hCoV-19^^Scotland|Human|West of Scotland Specialist Virology Centre|COVID-19 Genomics UK (COG-UK) Consortium|Robertson|United Kingdom

>Spike|hCoV-19/Wales/PHWC-15D0A9/2020|2020-05-02|EPI\_ISL\_472665|Original|hCoV-19^^Wales|Human|Wales Specialist Virology Centre Sequencing lab|COVID-19 Genomics UK (COG-UK) Consortium|Moore|United Kingdom

>Spike|hCoV-19/England/QEUA-AF25F9/2020|2020-10-30|EPI\_ISL\_662711|Original|hCoV-19^^England|Human|Lighthouse Lab in Glasgow|Wellcome Sanger Institute for the COVID-19 Genomics UK (COG-UK) Consortium|Davies|United Kingdom

>Spike|hCoV-19/England/NOTT-1141D8/2020|2020-10-04|EPI\_ISL\_577147|Original|hCoV-19^^England|Human|Queens Medical Centre|COVID-19 Genomics UK (COG-UK) Consortium|Loose|United Kingdom

>Spike|hCoV-19/Wales/PHWC-49B8D1/2020|2020-12-05|EPI\_ISL\_742401|Original|hCoV-19^^Wales|Human|Wales Specialist Virology Centre Sequencing lab|COVID-19 Genomics UK (COG-UK) Consortium|Moore|United Kingdom

>Spike|hCoV-19/USA/WA-CDC-8375/2020|2020-03-03|EPI\_ISL\_594448|original|hCoV-19^^Washington|Human|Washington State Public Health Laboratories|Pathogen Discovery|Queen|USA

>Spike|hCoV-19/England/CAMB-75033/2020|2020-03-16|EPI\_ISL\_440402|Original|hCoV-19^^England|Human|Department of Pathology|Wellcome Sanger Institute for the COVID-19 Genomics UK (COG-UK) consortium|Amato|United Kingdom

>Spike|hCoV-19/Wales/PHWC-2ADCD/2020|2020-04-06|EPI\_ISL\_432320|Original|hCoV-19^^Wales|Human|Wales Specialist Virology Centre|Public Health Wales Microbiology Cardiff|Moore|United Kingdom

>Spike|hCoV-19/Denmark/DCGC-5063/2020|2020-09-21|EPI\_ISL\_621601|Original|hCoV-19^^Syddanmark|Human|Department of Virus and Microbiological Special Diagnostics|Albertsen lab|Michaelsen|Denmark

>Spike|hCoV-19/Switzerland/NE-ETHZ-410230/2020|2020-12-14|EPI\_ISL\_737767|Original|hCoV-19^^Neuch\u00e2tel|Human|Viollier AG|Department of Biosystems Science and Engineering|Nadeau|Switzerland

>Spike|hCoV-19/England/LIVE-9978F/2020|2020-04-09|EPI\_ISL\_439757|Original|hCoV-19^^England|Human|Liverpool Clinical Laboratories|COVID-19 Genomics UK (COG-UK) Consortium|Haldenby|United Kingdom

>Spike|hCoV-19/USA/WI-WSLH-200065/2020|2020-03-13|EPI\_ISL\_471230|Original|hCoV-19^^Wisconsin|Human|Wisconsin State Laboratory of Hygiene Communicable Disease Division|Wisconsin State Laboratory of Hygiene Communicable Disease Division|Florek|USA

>Spike|hCoV-19/England/ALDP-4986DA/2020|2020-05-25|EPI\_ISL\_559407|Original|hCoV-19^^England|Human|Lighthouse Lab in Alderley Park|Wellcome Sanger Institute for the COVID-19 Genomics UK (COG-UK) consortium|Davies|United Kingdom

>Spike|hCoV-19/Switzerland/VD-ETHZ-140025/2020|2020-05-18|EPI\_ISL\_476091|Original|hCoV-19^^Vaud|Human|Viollier AG|Department of Biosystems Science and Engineering|Nadeau|Switzerland

>Spike|hCoV-19/Australia/VIC8991/2020|2020-07-27|EPI\_ISL\_565341|Original|hCoV-19^^Victoria|Human|Microbiological Diagnostic Unit - Public Health Laboratory (MDU-PHL)|MDU-PHL|Schultz|Australia

>Spike|hCoV-19/Denmark/DCGC-19934/2020|2020-12-07|EPI\_ISL\_747557|Original|hCoV-19^^Sjaelland|Human|Department of Virus and Microbiological Special Diagnostics|Albertsen Lab|Michaelsen|Denmark

>Spike|hCoV-19/USA/WI-GMF-09509/2020|2020-07-05|EPI\_ISL\_489948|Original|hCoV-19^^Wisconsin|Human|Gundersen Molecular Diagnostics Laboratory|Kabara Cancer Research Institute|Kenny|USA

>Spike|hCoV-19/USA/FL-BPHL-1667/2020|2020-07-02|EPI\_ISL\_594356|Original|hCoV-19^^Florida|Human|Florida Bureau of Public Health Laboratories|Florida Bureau of Public Health Laboratories|Blanton|USA

>Spike|hCoV-19/South Korea/KCDC2065/2020|2020-02-09|EPI\_ISL\_497966|Vero E6 P1|hCoV-19^^South Korea|Human|Division of Viral Diseases|Division of Viral Diseases|Kim|South Korea

>Spike|hCoV-19/USA/CA-CZB-1491/2020|2020-03-24|EPI\_ISL\_468441|Original|hCoV-19^^California|Human|Humboldt County Public Health Laboratory|Chan-Zuckerberg Biohub|Hao|USA

>Spike|hCoV-19/England/MILK-B39E09/2020|2020-11-02|EPI\_ISL\_679669|Original|hCoV-19^^England|Human|Oxford Viromics|COVID-19 Genomics UK (COG-UK) Consortium|Golubchik|United Kingdom

>Spike|hCoV-19/England/ALDP-A6DFBF/2020|2020-10-14|EPI\_ISL\_607892|Original|hCoV-19^^England|Human|Lighthouse Lab in Alderley Park|Wellcome Sanger Institute for the COVID-19 Genomics UK (COG-UK) consortium|Davies|United Kingdom

>Spike|hCoV-19/England/ALDP-C3D675/2020|2020-12-10|EPI\_ISL\_731761|Original|hCoV-19^^England|Human|Lighthouse Lab in Alderley Park|Wellcome Sanger Institute for the COVID-19 Genomics UK (COG-UK) Consortium|Davies|United Kingdom

>Spike|hCoV-19/Netherlands/ZH-EMC-528/2020|2020-00-00|EPI\_ISL\_577956|Original|hCoV-19^^Zuid Holland|Human|Dutch COVID-19 response team|Erasmus Medical Center|Oude Munnink|Netherlands

>Spike|hCoV-19/Spain/MD-ISCI-2014627/2020|2020-08-18|EPI\_ISL\_691711|Original|hCoV-19^^Madrid|Human|Hospital Cl\u00e9nico San Carlos|Instituto de Salud Carlos III|Caballero|Spain

>Spike|hCoV-19/England/BRIS-125435/2020|2020-03-27|EPI\_ISL\_443749|Original|hCoV-19^^England|Human|PHE South West Regional Laboratory|Wellcome Sanger Institute for the COVID-19 Genomics UK (COG-UK) consortium|Amato|United Kingdom

>Spike|hCoV-19/Spain/CN-ISCI-201495/2020|2020-03-04|EPI\_ISL\_419233|Original|hCoV-19^^Canary Islands|Human|Hospital Universitario de Canarias|Instituto de Salud Carlos III|Caballero|Spain

>Spike|hCoV-19/England/QE-9F7531/2020|2020-09-27|EPI\_ISL\_589228|Original|hCoV-19^^England|Human|Lighthouse Lab in Glasgow|Wellcome Sanger Institute for the COVID-19 Genomics UK (COG-UK) consortium|Davies|United Kingdom

>Spike|hCoV-19/Denmark/ALAB-SSI-790/2020|2020-03-30|EPI\_ISL\_444907|Original|hCoV-19^^Denmark|Human|Department of Virus and Microbiological Special Diagnostics|Albertsen lab|Kirkegaard|Denmark

>Spike|hCoV-19/Scotland/EDB9506/2020|2020-10-29|EPI\_ISL\_652064|Original|hCoV-19^^Scotland|Human|Virology Department|COVID-19 Genomics UK (COG-UK) Consortium|McHugh|United Kingdom

>Spike|hCoV-19/Northern Ireland/NIRE-1035C1/2020|2020-04-17|EPI\_ISL\_489342|Original|hCoV-19^^Northern Ireland|Human|Regional Virus Laboratory|Wellcome Sanger Institute for the COVID-19 Genomics UK (COG-UK) consortium|Davies|United Kingdom

>Spike|hCoV-19/Australia/VIC4541/2020|2020-07-15|EPI\_ISL\_518952|Original|hCoV-19^^Victoria|Human|Microbiological Diagnostic Unit - Public Health Laboratory (MDU-PHL)|MDU-PHL|Schultz|Australia

>Spike|hCoV-19/England/CAMB-73457/2020|2020-03-21|EPI\_ISL\_440041|Original|hCoV-19^^England|Human|Department of Pathology|Wellcome Sanger Institute for the COVID-19 Genomics UK (COG-UK) consortium|Amato|United Kingdom

>Spike|hCoV-19/England/MILK-B568BD/2020|2020-11-05|EPI\_ISL\_656922|Original|hCoV-19^^England|Human|Lighthouse Lab in Milton Keynes|Wellcome Sanger Institute for the COVID-19 Genomics UK (COG-UK) Consortium|Davies|United Kingdom

>Spike|hCoV-19/Portugal/PT0711/2020|2020-03-24|EPI\_ISL\_510970|Original|hCoV-19^^Portugal|Human|Instituto Nacional de Saude (INSA)|Instituto Nacional de Saude (INSA)|Borges|Portugal

>Spike|hCoV-19/Netherlands/NA\_157/2020|2020-03-21|EPI\_ISL\_422692|Original|hCoV-19^^Netherlands|Human|Dutch COVID-19 response team|Erasmus Medical Center|Oude Munnink|Netherlands

>Spike|hCoV-19/USA/WI-UW-1245/2020|2020-08-18|EPI\_ISL\_536618|Original|hCoV-19^^Wisconsin|Human|University of Wisconsin-Madison AIDS Vaccine Research Laboratories|University of Wisconsin-Madison AIDS Vaccine Research Laboratories|Baczenas|USA

>Spike|hCoV-19/Denmark/DCGC-897/2020|2020-05-18|EPI\_ISL\_614461|Original|hCoV-19^^Hovedstaden|Human|Department of Virus and Microbiological Special Diagnostics|Albertsen lab|Michaelsen|Denmark

>Spike|hCoV-19/Spain/AR-IBV-98008011/2020|2020-09-30|EPI\_ISL\_654421|Original|hCoV-19^^Aragon|Human|Servicio de Microbiolog\u00eda|SeqCOVID-SPAIN consortium|IBV (CSIC)|Comas|Spain

>Spike|hCoV-19/England/NORT-282CD3/2020|2020-03-29|EPI\_ISL\_472226|Original|hCoV-19^^England|Human|Northumbria University / South Tees Hospitals NHS Foundation Trust / North Cumbria Integrated Care NHS Foundation Trust / North Tees and Hartlepool NHS Foundation Trust / Newcastle Hospitals NHS Foundation Trust|COVID-19 Genomics UK (COG-UK) Consortium|Bashton|United Kingdom

>Spike|hCoV-19/Wales/PHWC-498898/2020|2020-11-27|EPI\_ISL\_727135|Original|hCoV-19^^Wales|Human|Originating lab|COVID-19 Genomics UK (COG-UK) Consortium|Moore|United Kingdom



>Spike|hCoV-19/Scotland/EDB3414/2020|2020-04-10|EPI\_ISL\_487725|Original|hCoV-19^^Scotland|Human|Virology Department|Wellcome Sanger Institute for the COVID-19 Genomics UK (COG-UK) consortium|Davies|United Kingdom

>Spike|hCoV-19/USA/TX-HMH-7982/2020|2020-07-01|EPI\_ISL\_545763|Original|hCoV-19^^Texas|Human|Houston Methodist Hospital|Houston Methodist Hospital|Long|USA

>Spike|hCoV-19/England/ALDP-CBDCE4/2020|2020-12-19|EPI\_ISL\_760531|Original|hCoV-19^^England|Human|Lighthouse Lab in Alderley Park|Wellcome Sanger Institute for the COVID-19 Genomics UK (COG-UK) Consortium|Davies|United Kingdom

>Spike|hCoV-19/Australia/VIC16444/2020|2020-08-05|EPI\_ISL\_641078|Original|hCoV-19^^Victoria|Human|Microbiological Diagnostic Unit - Public Health Laboratory (MDU-PHL) |MDU-PHL|Schultz|Australia

>Spike|hCoV-19/England/LOND-DA087/2020|2020-11-07|EPI\_ISL\_665716|Original|hCoV-19^^England|Human|University College London|COVID-19 Genomics UK (COG-UK) Consortium|Roy|United Kingdom

>Spike|hCoV-19/USA/SC-DHEC-0619/2020|2020-06-19|EPI\_ISL\_538427|Original|hCoV-19^^South Carolina|Human|Microbiology Division|Microbiology Division|Flores|USA

>Spike|hCoV-19/England/20146010404/2020|2020-04-01|EPI\_ISL\_466026|Original|hCoV-19^^England|Human|Respiratory Virus Unit|Respiratory Virus Unit|Platt|United Kingdom

>Spike|hCoV-19/USA/LA-EVTL869/2020|2020-07-02|EPI\_ISL\_653560|Original|hCoV-19^^Louisiana|Human|LSUHS Emerging Viral Threat Laboratory|Microbial Genome Sequencing Center|Kamil|USA

>Spike|hCoV-19/Wales/PHWC-26A42/2020|2020-03-29|EPI\_ISL\_422077|Original|hCoV-19^^Wales|Human|Wales Specialist Virology Centre|Public Health Wales Microbiology Cardiff|Moore|United Kingdom

>Spike|hCoV-19/Switzerland/VD-ETHZ-270124/2020|2020-09-03|EPI\_ISL\_541492|Original|hCoV-19^^Vaud|Human|Viollier AG|Department of Biosystems Science and Engineering|Nadeau|Switzerland

>Spike|hCoV-19/South Africa/KRISP-EJ00540655/2020|2020-11-26|EPI\_ISL\_736992|Original|hCoV-19^^KwaZulu-Natal|Human|NHLs-IALCH|KRISP|de Oliveira|South Africa

>Spike|hCoV-19/Portugal/PT1743/2020|2020-11-09|EPI\_ISL\_731980|Original|hCoV-19^^Portugal|Human|Instituto Nacional de Saude (INSA)|Instituto Nacional de Saude (INSA)|Borges|Portugal

>Spike|hCoV-19/Japan/PG-7368/2020|2020-06-00|EPI\_ISL\_688470|Original|hCoV-19^^Japan|Human|Pathogen Genomics Center|Pathogen Genomics Center|Sekizuka|Japan

>Spike|hCoV-19/Spain/PV-IBV-005156/2020|2020-06-23|EPI\_ISL\_509643|Original|hCoV-19^^Basque Country|Human|Servicio de Microbiolog\u00eda. Hospital Universitario Donostia. OSI Donostialdea. \u00clrea de Enfermedades Infecciosas|SeqCOVID-SPAIN consortium|IBV (CSIC) |Comas|Spain

>Spike|hCoV-19/Denmark/DCGC-16399/2020|2020-11-16|EPI\_ISL\_714458|Original|hCoV-19^^Hovedstaden|Human|Department of Virus and Microbiological Special Diagnostics|Albertsen Lab|Michaelsen|Denmark

>Spike|hCoV-19/Italy/APU-UniMI-706/2020|2020-03-18|EPI\_ISL\_469016|Original|hCoV-19^^Apulia|Human|Istituto Zooprofilattico Sperimentale Puglia e Basilicata; Dipartimento di Bioscienze|Beaconlab (Bioinformatics)|Chiara|Italy

>Spike|hCoV-19/Denmark/DCGC-2510/2020|2020-08-10|EPI\_ISL\_617782|Original|hCoV-19^^Midtjylland|Human|Department of Virus and Microbiological Special Diagnostics|Albertsen lab|Michaelsen|Denmark

>Spike|hCoV-19/Wales/PHWC-4A4DE5/2020|2020-12-09|EPI\_ISL\_764793|Original|hCoV-19^^Wales|Human|Wales Specialist Virology Centre Sequencing lab|COVID-19 Genomics UK (COG-UK) Consortium|Moore|United Kingdom

>Spike|hCoV-19/USA/NY-NYUMC424/2020|2020-04-22|EPI\_ISL\_435491|Original|hCoV-19^^New York|Human|NYU Langone Health|Departments of Pathology and Medicine|Maurano|USA

>Spike|hCoV-19/England/PORT-2D4892/2020|2020-10-13|EPI\_ISL\_613296|Original|hCoV-19^^England|Human|Centre for Enzyme Innovation|COVID-19 Genomics UK (COG-UK) Consortium|Robson|United Kingdom

>Spike|hCoV-19/England/CAMC-991636/2020|2020-08-26|EPI\_ISL\_552065|Original|hCoV-19^^England|Human|Lighthouse Lab in Cambridge|Wellcome Sanger Institute for the COVID-19 Genomics UK (COG-UK) consortium|Davies|United Kingdom

>Spike|hCoV-19/Denmark/DCGC-13198/2020|2020-11-30|EPI\_ISL\_712645|Original|hCoV-19^^Hovedstaden|Human|Department of Virus and Microbiological Special Diagnostics|Albertsen Lab|Michaelsen|Denmark

>Spike|hCoV-19/England/ALDP-C06165/2020|2020-12-05|EPI\_ISL\_709526|Original|hCoV-19^^England|Human|Lighthouse Lab in Alderley Park|Wellcome Sanger Institute for the COVID-19 Genomics UK (COG-UK) Consortium|Davies|United Kingdom

>Spike|hCoV-19/Ireland/D-SVUH-R8382/2020|2020-04-09|EPI\_ISL\_596651|Original|hCoV-19^^Dublin|Human|St.Vincent's University Hospital|St.Vincent's University Hospital|Gonzalez|Ireland

>Spike|hCoV-19/England/BRIS-131032/2020|2020-03-24|EPI\_ISL\_501581|Original|hCoV-19^^England|Human|PHE South West Regional Laboratory|Wellcome Sanger Institute for the COVID-19 Genomics UK (COG-UK) consortium|Davies|United Kingdom

>Spike|hCoV-19/Singapore/564/2020|2020-04-03|EPI\_ISL\_483587|Original|hCoV-19^^Singapore|Human|National Public Health Laboratory|National Public Health Laboratory|Mak|Singapore

>Spike|hCoV-19/USA/WI-WSLH-200060/2020|2020-03-22|EPI\_ISL\_471225|Original|hCoV-19^^Wisconsin|Human|Wisconsin State Laboratory of Hygiene Communicable Disease Division|Wisconsin State Laboratory of Hygiene Communicable Disease Division|Florek|USA

>Spike|hCoV-19/Japan/PG-2205/2020|2020-04-00|EPI\_ISL\_685810|Original|hCoV-19^^Japan|Human|Pathogen Genomics Center|Pathogen Genomics Center|Sekizuka|Japan

>Spike|hCoV-19/USA/TX-HMH-MCoV-14611/2020|2020-10-10|EPI\_ISL\_787896|Original|hCoV-19^^Texas|Human|Houston Methodist Hospital|Houston Methodist Hospital|Long|USA

>Spike|hCoV-19/England/204760273/2020|2020-00-00|EPI\_ISL\_649109|Original|hCoV-19^^England|Human|Respiratory Virus Unit|COVID-19 Genomics UK (COG-UK) Consortium|Platt|United Kingdom

>Spike|hCoV-19/Netherlands/ZH-EMC-275/2020|2020-06-15|EPI\_ISL\_523617|Original|hCoV-19^^Zuid Holland|Human|Dutch COVID-19 response team|Erasmus Medical Center|Oude Munnink|Netherlands

>Spike|hCoV-19/England/MILK-9E13B8/2020|2020-09-20|EPI\_ISL\_581004|Original|hCoV-19^^England|Human|Lighthouse Lab in Milton Keynes|Wellcome Sanger Institute for the COVID-19 Genomics UK (COG-UK) consortium|Davies|United Kingdom

>Spike|hCoV-19/England/PORT-2F5EE4/2020|2020-10-07|EPI\_ISL\_651067|Original|hCoV-19^^England|Human|Centre for Enzyme Innovation|COVID-19 Genomics UK (COG-UK) Consortium|Robson|United Kingdom

>Spike|hCoV-19/USA/NY-NYUMC55/2020|2020-03-17|EPI\_ISL\_420570|Original|hCoV-19^^New York|Human|NYU Langone Health|Departments of Pathology and Medicine|Maurano|USA

>Spike|hCoV-19/England/MILK-B54CD1/2020|2020-11-05|EPI\_ISL\_657870|Original|hCoV-19^^England|Human|Lighthouse Lab in Milton Keynes|Wellcome Sanger Institute for the COVID-19 Genomics UK (COG-UK) Consortium|Davies|United Kingdom

>Spike|hCoV-19/Australia/VIC607/2020|2020-03-27|EPI\_ISL\_426862|Original|hCoV-19^^Victoria|Human|Victorian Infectious Diseases Reference Laboratory (VIDRL)|Microbiological Diagnostic Unit Public Health Laboratory and Victorian Infectious Diseases Reference Laboratory|Schultz|Australia

>Spike|hCoV-19/England/ALDP-71D555/2020|2020-07-01|EPI\_ISL\_557570|Original|hCoV-19^^England|Human|Lighthouse Lab in Alderley Park|Wellcome Sanger Institute for the COVID-19 Genomics UK (COG-UK) consortium|Davies|United Kingdom

>Spike|hCoV-19/Canada/QC-LSPQ-L00235866/2020|2020-03-22|EPI\_ISL\_536113|Original|hCoV-19^^Quebec|Human|H\u00f4pital et Centre d'H\u00e9bergement de Sept-Iles|Laboratoire de sant\u00e9 publique du Qu\u00e9bec|Moreira|Canada

>Spike|hCoV-19/England/NORT-1B72223/2020|2020-11-25|EPI\_ISL\_724861|Original|hCoV-19^^England|Human|Northumbria University / South Tees Hospitals NHS Foundation Trust / North Cumbria Integrated Care NHS Foundation Trust / North Tees and Hartlepool NHS Foundation Trust / Newcastle Hospitals NHS Foundation Trust|COVID-19 Genomics UK (COG-UK) Consortium|Bashton|United Kingdom

>Spike|hCoV-19/USA/UT-UPHL-2009269/2020|2020-05-14|EPI\_ISL\_525252|Original|hCoV-19^^Utah|Human|Utah Public Health Laboratory|Utah Public Health Laboratory|Young|USA

>Spike|hCoV-19/England/ALDP-9FD164/2020|2020-10-02|EPI\_ISL\_588027|Original|hCoV-19^^England|Human|Lighthouse Lab in Alderley Park|Wellcome Sanger Institute for the COVID-19 Genomics UK (COG-UK) consortium|Davies|United Kingdom

>Spike|hCoV-19/Scotland/QEUA-9B4CA4/2020|2020-09-03|EPI\_ISL\_602086|Original|hCoV-19^^Scotland|Human|Lighthouse Lab in Glasgow|Wellcome Sanger Institute for the COVID-19 Genomics UK (COG-UK) consortium|Davies|United Kingdom

>Spike|hCoV-19/USA/WA-S1737/2020|2020-06-01|EPI\_ISL\_496163|Original|hCoV-19^^Washington|Human|Washington State Department of Health|Seattle Flu Study|Lee|USA

>Spike|hCoV-19/England/20139046704/2020|2020-03-28|EPI\_ISL\_420690|Original|hCoV-19^^England|Human|Respiratory Virus Unit|Respiratory Virus Unit|Platt|United Kingdom

>Spike|hCoV-19/England/CAMB-8463F/2020|2020-04-27|EPI\_ISL\_438743|Original|hCoV-19^^England|Human|Department of Pathology|COVID-19 Genomics UK (COG-UK) Consortium|Meredith|United Kingdom

>Spike|hCoV-19/England/QEUA-AE2389/2020|2020-10-26|EPI\_ISL\_633554|Original|hCoV-19^^England|Human|Lighthouse Lab in Glasgow|Wellcome Sanger Institute for the COVID-19 Genomics UK (COG-UK) consortium|Davies|United Kingdom

>Spike|hCoV-19/England/CAMB-1B8C3F/2020|2020-11-02|EPI\_ISL\_651682|Original|hCoV-19^^England|Human|Department of Pathology|COVID-19 Genomics UK (COG-UK) Consortium|Goodfellow|United Kingdom

>Spike|hCoV-19/Japan/PG-8966/2020|2020-09-00|EPI\_ISL\_686512|Original|hCoV-19^^Japan|Human|Pathogen Genomics Center|Pathogen Genomics Center|Sekizuka|Japan

>Spike|hCoV-19/Scotland/GCVR-17000A/2020|2020-03-25|EPI\_ISL\_459625|Original|hCoV-19^^Scotland|Human|NHSGGC West of Scotland Specialist Virology Centre / MRC-University of Glasgow Centre for Virus Research|Wellcome Sanger Institute for the COVID-19 Genomics UK (COG-UK) consortium|Davies|United Kingdom

>Spike|hCoV-19/USA/MI-MDHHS-SC20931/2020|2020-03-18|EPI\_ISL\_507721|Original|hCoV-19^^Michigan|Human|Michigan Department of Health and Human Services|Michigan Department of Health and Human Services|Blankenship|USA

>Spike|hCoV-19/England/NOTT-111B37/2020|2020-06-01|EPI\_ISL\_461963|Original|hCoV-19^^England|Human|Queens Medical Centre|COVID-19 Genomics UK (COG-UK) Consortium|Loose|United Kingdom

>Spike|hCoV-19/Spain/AN-IBV-001147/2020|2020-03-28|EPI\_ISL\_452578|Original|hCoV-19^^Andalucia|Human|Servicio de Microbiolog\u00eda y Parasitolog\u00eda cl\u00ednica. UCEIMP. Hospital Universitario Virgen del Roc\u00edo/IBIS/CSIC/US.|SeqCOVID-SPAIN consortium/IBV (CSIC) |Comas|Spain

>Spike|hCoV-19/England/QEUA-9E479B/2020|2020-09-23|EPI\_ISL\_579815|Original|hCoV-19^^England|Human|Lighthouse Lab in Glasgow|Wellcome Sanger Institute for the COVID-19 Genomics UK (COG-UK) consortium|Davies|United Kingdom

>Spike|hCoV-19/Wales/PHWC-48BE78/2020|2020-11-04|EPI\_ISL\_666362|Original|hCoV-19^^Wales|Human|Wales Specialist Virology Centre Sequencing lab|COVID-19 Genomics UK (COG-UK) Consortium|Moore|United Kingdom

>Spike|hCoV-19/Scotland/QEUA-998A8E/2020|2020-08-24|EPI\_ISL\_568352|Original|hCoV-19^^Scotland|Human|Lighthouse Lab in Glasgow|Wellcome Sanger Institute for the COVID-19 Genomics UK (COG-UK) consortium|Davies|United Kingdom

>Spike|hCoV-19/Portugal/PT1297/2020|2020-03-24|EPI\_ISL\_582523|Original|hCoV-19^^Portugal|Human|unknown|Instituto Nacional de Saude (INSA) and Instituto Gulbenkian de Ciencia (IGC) |Borges|Portugal

>Spike|hCoV-19/England/CAMB-7DC64/2020|2020-04-06|EPI\_ISL\_441639|Original|hCoV-19^^England|Human|Department of Pathology|Wellcome Sanger Institute for the COVID-19 Genomics UK (COG-UK) consortium|Amato|United Kingdom

>Spike|hCoV-19/Switzerland/BS-UHB-42201778/2020|2020-03-21|EPI\_ISL\_528312|Original|hCoV-19^^Basel-Stadt|Human|University Hospital Basel|University Hospital Basel|Roloff Handschin|Switzerland

>Spike|hCoV-19/Wales/PHWC-31895/2020|2020-04-10|EPI\_ISL\_446498|Original|hCoV-19^^Wales|Human|Wales Specialist Virology Centre|Public Health Wales Microbiology Cardiff|Moore|United Kingdom

>Spike|hCoV-19/Wales/PHWC-490B00/2020|2020-11-15|EPI\_ISL\_706537|Original|hCoV-19^^Wales|Human|Originating lab|COVID-19 Genomics UK (COG-UK) Consortium|Moore|United Kingdom

>Spike|hCoV-19/USA/MI-UM-10036813555/2020|2020-11-06|EPI\_ISL\_728397|Original|hCoV-19^^Michigan|Human|University of Michigan Clinical Microbiology Laboratory|Lauring Lab|Valesano|USA

>Spike|hCoV-19/England/LIVE-9E6AB/2020|2020-04-11|EPI\_ISL\_453321|Original|hCoV-19^^England|Human|Liverpool Clinical Laboratories|COVID-19 Genomics UK (COG-UK) Consortium|Haldenby|United Kingdom

>Spike|hCoV-19/England/MILK-9E2AC1/2020|2020-09-21|EPI\_ISL\_581296|Original|hCoV-19^^England|Human|Lighthouse Lab in Milton Keynes|Wellcome Sanger Institute for the COVID-19 Genomics UK (COG-UK) consortium|Davies|United Kingdom

>Spike|hCoV-19/England/QEUEH-9F9380/2020|2020-09-26|EPI\_ISL\_588802|Original|hCoV-19^^England|Human|Lighthouse Lab in Glasgow|Wellcome Sanger Institute for the COVID-19 Genomics UK (COG-UK) consortium|Davies|United Kingdom

>Spike|hCoV-19/Netherlands/GE-EMC-281/2020|2020-05-27|EPI\_ISL\_523260|Original|hCoV-19^^Gelderland|Human|Dutch COVID-19 response team|Erasmus Medical Center|Oude Munnink|Netherlands

>Spike|hCoV-19/England/20144072404/2020|2020-03-31|EPI\_ISL\_466007|Original|hCoV-19^^England|Human|Respiratory Virus Unit|Respiratory Virus Unit|Platt|United Kingdom

>Spike|hCoV-19/Denmark/DCGC-14771/2020|2020-11-23|EPI\_ISL\_711968|Original|hCoV-19^^Nordjylland|Human|Department of Virus and Microbiological Special Diagnostics|Albertsen Lab|Michaelsen|Denmark

>Spike|hCoV-19/Wales/PHWC-48D16E/2020|2020-11-07|EPI\_ISL\_666587|Original|hCoV-19^^Wales|Human|Wales Specialist Virology Centre Sequencing lab|COVID-19 Genomics UK (COG-UK) Consortium|Moore|United Kingdom

>Spike|hCoV-19/USA/MI-UM-10036767316/2020|2020-11-03|EPI\_ISL\_682229|Original|hCoV-19^^Michigan|Human|University of Michigan Clinical Microbiology Laboratory|Lauring Lab|Valesano|USA

>Spike|hCoV-19/Denmark/DCGC-1995/2020|2020-07-20|EPI\_ISL\_618296|Original|hCoV-19^^Nordjylland|Human|Department of Virus and Microbiological Special Diagnostics|Albertsen lab|Michaelsen|Denmark

>Spike|hCoV-19/England/MILK-974903/2020|2020-08-21|EPI\_ISL\_575794|Original|hCoV-19^^England|Human|Lighthouse Lab in Milton Keynes|Wellcome Sanger Institute for the COVID-19 Genomics UK (COG-UK) consortium|Davies|United Kingdom

>Spike|hCoV-19/England/ALDP-AA15EA/2020|2020-10-22|EPI\_ISL\_624496|Original|hCoV-19^^England|Human|Lighthouse Lab in Alderley Park|Wellcome Sanger Institute for the COVID-19 Genomics UK (COG-UK) consortium|Davies|United Kingdom

>Spike|hCoV-19/England/ALDP-BBA741/2020|2020-11-20|EPI\_ISL\_701824|Original|hCoV-19^^England|Human|Lighthouse Lab in Alderley Park|Wellcome Sanger Institute for the COVID-19 Genomics UK (COG-UK) Consortium|Davies|United Kingdom

>Spike|hCoV-19/India/KA-nimh-3948/2020|2020-04-23|EPI\_ISL\_515941|Original|hCoV-19^^Karnataka|Human|CV RAMAN HOSPITAL|Department of Neurovirology|Pattabiraman|India

>Spike|hCoV-19/Switzerland/BE-UNIBE-188-3982/2020|2020-03-22|EPI\_ISL\_574827|Original|hCoV-19^^Bern|Human|Institute for Infectious Diseases|Institute for Infectious Diseases|Koch|Switzerland

>Spike|hCoV-19/USA/CA-ALSR-4746/2020|2020-06-26|EPI\_ISL\_730119|Original|hCoV-19^^California|Human|San Diego County Public Health Laboratory|Andersen lab at Scripps Research|Gangavarapu|USA

>Spike|hCoV-19/USA/CA-CHLA-PLM00400834/2020|2020-11-04|EPI\_ISL\_753273|Original|hCoV-19^^California|Human|Clinical virology Laboratory|Center for Personalized Medicine|Dien Bard|USA

>Spike|hCoV-19/Japan/PG-1355/2020|2020-04-00|EPI\_ISL\_684963|Original|hCoV-19^^Japan|Human|Saitama Prefectural Institute of Public Health|Pathogen Genomics Center|Sekizuka|Japan

>Spike|hCoV-19/Australia/VIC9521/2020|2020-08-19|EPI\_ISL\_565585|Original|hCoV-19^^Victoria|Human|Microbiological Diagnostic Unit - Public Health Laboratory (MDU-PHL)|MDU-PHL|Schultz|Australia

>Spike|hCoV-19/USA/TX-HMH-MCoV-11377/2020|2020-09-06|EPI\_ISL\_790003|Original|hCoV-19^^Texas|Human|Houston Methodist Hospital|Houston Methodist Hospital|Long|USA

>Spike|hCoV-19/Ireland/KK-NVRL-MPB59153/2020|2020-04-11|EPI\_ISL\_767803|Original|hCoV-19^^Kilkenny|Human|National Virus Reference Laboratory|Irish Coronavirus Sequencing Consortium - Teagasc Moorepark|Walsh|Ireland

>Spike|hCoV-19/England/EXET-13E32D/2020|2020-12-06|EPI\_ISL\_724319|Original|hCoV-19^^England|Human|University of Exeter|COVID-19 Genomics UK (COG-UK) Consortium|Temperton|United Kingdom

>Spike|hCoV-19/England/BRIS-130B41/2020|2020-03-12|EPI\_ISL\_492505|Original|hCoV-19^^England|Human|PHE South West Regional Laboratory|Wellcome Sanger Institute for the COVID-19 Genomics UK (COG-UK) consortium|Davies|United Kingdom

>Spike|hCoV-19/France/OCC-120/2020|2020-10-02|EPI\_ISL\_671965|Original|hCoV-19^^Occitanie|Human|CHU Purpan - Laboratoire de Virologie - Institut F\u00e9d\u00e9ratif de Biologie|CHU Purpan - Laboratoire de Virologie - Institut F\u00e9d\u00e9ratif de Biologie|Latour|France

>Spike|hCoV-19/Denmark/DCGC-2632/2020|2020-08-17|EPI\_ISL\_616511|Original|hCoV-19^^Sjælland|Human|Department of Virus and Microbiological Special Diagnostics|Albertsen lab|Michaelsen|Denmark

>Spike|hCoV-19/England/ALDP-B84C50/2020|2020-11-15|EPI\_ISL\_675974|Original|hCoV-19^^England|Human|Lighthouse Lab in Alderley Park|Wellcome Sanger Institute for the COVID-19 Genomics UK (COG-UK) Consortium|Davies|United Kingdom

>Spike|hCoV-19/England/ALDP-B260BE/2020|2020-11-04|EPI\_ISL\_646613|Original|hCoV-19^^England|Human|Lighthouse Lab in Alderley Park|Wellcome Sanger Institute for the COVID-19 Genomics UK (COG-UK) Consortium|Davies|United Kingdom

>Spike|hCoV-19/England/CAMB-1B630F/2020|2020-09-22|EPI\_ISL\_576898|Original|hCoV-19^^England|Human|Department of Pathology|COVID-19 Genomics UK (COG-UK) Consortium|Goodfellow|United Kingdom

>Spike|hCoV-19/Wales/PHWC-32E47/2020|2020-04-14|EPI\_ISL\_446696|Original|hCoV-19^^Wales|Human|Wales Specialist Virology Centre|Public Health Wales Microbiology Cardiff|Moore|United Kingdom

>Spike|hCoV-19/England/PORT-2D2AE9/2020|2020-04-03|EPI\_ISL\_517511|Original|hCoV-19^^England|Human|Centre for Enzyme Innovation|COVID-19 Genomics UK (COG-UK) Consortium|Robson|United Kingdom

>Spike|hCoV-19/Wales/PHWC-31006/2020|2020-04-10|EPI\_ISL\_446393|Original|hCoV-19^^Wales|Human|Wales Specialist Virology Centre|Public Health Wales Microbiology Cardiff|Moore|United Kingdom

>Spike|hCoV-19/Denmark/DCGC-22557/2020|2020-12-14|EPI\_ISL\_757634|Original|hCoV-19^^Midtjylland|Human|Department of Virus and Microbiological Special Diagnostics|Albertsen Lab|Michaelsen|Denmark

>Spike|hCoV-19/England/ALDP-BBAFA3/2020|2020-11-20|EPI\_ISL\_701678|Original|hCoV-19^^England|Human|Lighthouse Lab in Alderley Park|Wellcome Sanger Institute for the COVID-19 Genomics UK (COG-UK) Consortium|Davies|United Kingdom

>Spike|hCoV-19/Wales/PHWC-1646AD/2020|2020-05-11|EPI\_ISL\_474214|Original|hCoV-19^^Wales|Human|Originating lab|COVID-19 Genomics UK (COG-UK) Consortium|Moore|United Kingdom

>Spike|hCoV-19/France/ARA-SC414/2020|2020-05-25|EPI\_ISL\_660371|Original|hCoV-19^^Auvergne-Rhône-Alpes|Human|CHU Clermont-Ferrand|CNR Virus des Infections Respiratoires - France SUD|Bal|France

>Spike|hCoV-19/England/20139027204/2020|2020-03-27|EPI\_ISL\_421902|Original|hCoV-19^^England|Human|Respiratory Virus Unit|Respiratory Virus Unit|Platt|United Kingdom

>Spike|hCoV-19/England/CAMC-B34150/2020|2020-11-05|EPI\_ISL\_659681|Original|hCoV-19^^England|Human|Lighthouse Lab in Cambridge|Wellcome Sanger Institute for the COVID-19 Genomics UK (COG-UK) Consortium|Davies|United Kingdom

>Spike|hCoV-19/USA/TX-HMH-MCoV-12671/2020|2020-08-30|EPI\_ISL\_790455|Original|hCoV-19^^Texas|Human|Houston Methodist Hospital|Houston Methodist Hospital|Long|USA

>Spike|hCoV-19/USA/TX-HMH-611/2020|2020-04-10|EPI\_ISL\_547245|Original|hCoV-19^^Texas|Human|Houston Methodist Hospital|Houston Methodist Hospital|Long|USA

>Spike|hCoV-19/Wales/PHWC-48C24E/2020|2020-11-09|EPI\_ISL\_665539|Original|hCoV-19^^Wales|Human|Wales Specialist Virology Centre Sequencing lab|COVID-19 Genomics UK (COG-UK) Consortium|Moore|United Kingdom

>Spike|hCoV-19/Georgia/Tb-97937/2020|2020-09-23|EPI\_ISL\_754181|Original|hCoV-19^^Tbilisi|Human|Department for Virology|Department for Virology|Tomashvili|Georgia

>Spike|hCoV-19/England/CAMC-A6661B/2020|2020-10-11|EPI\_ISL\_626774|Original|hCoV-19^^England|Human|University of Exeter|COVID-19 Genomics UK (COG-UK) Consortium|Temperton|United Kingdom

>Spike|hCoV-19/Wales/ALDP-B4920A/2020|2020-11-07|EPI\_ISL\_710887|Original|hCoV-19^^Wales|Human|Lighthouse Lab in Alderley Park|Wellcome Sanger Institute for the COVID-19 Genomics UK (COG-UK) Consortium|Davies|United Kingdom

>Spike|hCoV-19/England/EXET-1387AF/2020|2020-10-19|EPI\_ISL\_627428|Original|hCoV-19^^England|Human|University of Exeter|COVID-19 Genomics UK (COG-UK) Consortium|Temperton|United Kingdom

>Spike|hCoV-19/Scotland/QEUH-AABFD3/2020|2020-10-21|EPI\_ISL\_652841|Original|hCoV-19^^Scotland|Human|Oxford Viromics|COVID-19 Genomics UK (COG-UK) Consortium|Golubchik|United Kingdom

>Spike|hCoV-19/USA/MI-UM-10036672506/2020|2020-10-28|EPI\_ISL\_650047|Original|hCoV-19^^Michigan|Human|University of Michigan Clinical Microbiology Laboratory|Lauring Lab|Valesano|USA

>Spike|hCoV-19/England/BIRM-5F4F7/2020|2020-00-00|EPI\_ISL\_461510|Original|hCoV-19^^England|Human|University of Birmingham|COVID-19 Genomics UK (COG-UK) Consortium|Loman|United Kingdom

>Spike|hCoV-19/Singapore/983/2020|2020-03-22|EPI\_ISL\_548991|Original|hCoV-19^^Singapore|Human|National Public Health Laboratory|National Public Health Laboratory|Mak|Singapore

>Spike|hCoV-19/Canada/ON-S856/2020|2020-04-11|EPI\_ISL\_586461|Original|hCoV-19^^Ontario|Human|Toronto Invasive Bacterial Diseases Network|McMaster University|McArthur|Canada

>Spike|hCoV-19/USA/WI-UW-2482/2020|2020-12-24|EPI\_ISL\_759756|Original|hCoV-19^^Wisconsin|Human|University of Wisconsin-Madison AIDS Vaccine Research Laboratories|University of Wisconsin-Madison AIDS Vaccine Research Laboratories|Moreno|USA

>Spike|hCoV-19/USA/ID-UW-1938/2020|2020-03-22|EPI\_ISL\_424318|Original|hCoV-19^^Idaho|Human|UW Virology Lab|UW Virology Lab|Roychoudhury|USA

>Spike|hCoV-19/France/IDF-10008DM/2020|2020-03-00|EPI\_ISL\_447697|Original|hCoV-19^^France|Human|H\u00f4pital Henri-Mondor Ap-Hp|H\u00f4pital Henri-Mondor Ap-Hp|Rodriguez|France

>Spike|hCoV-19/Kenya/C2041/2020|2020-04-23|EPI\_ISL\_457869|Original|hCoV-19^^Kenya|Human|KEMRI-CGMR-C|KEMRI-Wellcome Trust Research Programme|KEMRI-CGMR-C Kilifi|Githinji|Kenya

>Spike|hCoV-19/England/CAMB-7E999/2020|2020-04-06|EPI\_ISL\_443063|Original|hCoV-19^^England|Human|Department of Pathology|Wellcome Sanger Institute for the COVID-19 Genomics UK (COG-UK) consortium|Amato|United Kingdom

>Spike|hCoV-19/England/ALDP-A94562/2020|2020-10-20|EPI\_ISL\_624578|Original|hCoV-19^^England|Human|Lighthouse Lab in Alderley Park|Wellcome Sanger Institute for the COVID-19 Genomics UK (COG-UK) consortium|Davies|United Kingdom

>Spike|hCoV-19/England/LCST-24D725D/2020|2020-06-24|EPI\_ISL\_499976|Original|hCoV-19^^England|Human|University Hospitals Of Leicester NHS Trust and DeepSeq Nottingham|COVID-19 Genomics UK (COG-UK) Consortium|Loose|United Kingdom

>Spike|hCoV-19/Netherlands/ZH-EMC-731/2020|2020-10-08|EPI\_ISL\_632574|Original|hCoV-19^^Zuid Holland|Human|Dutch COVID-19 response team|Erasmus Medical Center|Oude Munnink|Netherlands

>Spike|hCoV-19/United Arab Emirates/0881/2020|2020-05-19|EPI\_ISL\_699019|Original|hCoV-19^^Abu Dhabi|Human|Group 42 (G42) Healthcare|G42 Healthcare|Ogrodzki|United Arab Emirates

>Spike|hCoV-19/USA/MI-MDHHS-SC20274/2020|2020-03-19|EPI\_ISL\_447072|Original|hCoV-19^^Michigan|Human|Michigan Department of Health and Human Services|Michigan Department of Health and Human Services|Blankenship|USA

>Spike|hCoV-19/Scotland/QEUH-9B0BF6/2020|2020-09-03|EPI\_ISL\_560038|Original|hCoV-19^^Scotland|Human|Oxford Viromics|COVID-19 Genomics UK (COG-UK) Consortium|Golubchik|United Kingdom

>Spike|hCoV-19/England/SHEF-CA08A/2020|2020-08-31|EPI\_ISL\_540747|Original|hCoV-19^^England|Human|Virology Department|COVID-19 Genomics UK (COG-UK) Consortium|de Silva|United Kingdom

>Spike|hCoV-19/England/MILK-ACE110/2020|2020-10-22|EPI\_ISL\_630066|Original|hCoV-19^^England|Human|Lighthouse Lab in Milton Keynes|Wellcome Sanger Institute for the COVID-19 Genomics UK (COG-UK) consortium|Davies|United Kingdom

>Spike|hCoV-19/USA/MD-MDH-0075/2020|2020-05-25|EPI\_ISL\_509479|Original|hCoV-19^^Maryland|Human|Maryland Department of Health|Maryland Department of Health|Keller|USA

>Spike|hCoV-19/USA/FL-BPHL-0522/2020|2020-06-18|EPI\_ISL\_508725|Original|hCoV-19^^Florida|Human|Florida Bureau of Public Health Laboratories|Florida Bureau of Public Health Laboratories|Blanton|USA

>Spike|hCoV-19/Denmark/DCGC-3679/2020|2020-09-07|EPI\_ISL\_615454|Original|hCoV-19^^Midtjylland|Human|Department of Virus and Microbiological Special Diagnostics|Albertsen lab|Michaelsen|Denmark

>Spike|hCoV-19/Scotland/EDB5153/2020|2020-05-17|EPI\_ISL\_493943|Original|hCoV-19^^Scotland|Human|Virology Department|COVID-19 Genomics UK (COG-UK) Consortium|Williams|United Kingdom

>Spike|hCoV-19/Wales/PHWC-16EB4A/2020|2020-10-01|EPI\_ISL\_585825|Original|hCoV-19^^Wales|Human|Wales Specialist Virology Centre Sequencing lab|COVID-19 Genomics UK (COG-UK) Consortium|Moore|United Kingdom

>Spike|hCoV-19/Switzerland/SO-ETHZ-400298/2020|2020-12-07|EPI\_ISL\_729063|Original|hCoV-19^^Solothurn|Human|Viollier AG|Department of Biosystems Science and Engineering|Nadeau|Switzerland

>Spike|hCoV-19/Denmark/DCGC-13580/2020|2020-11-30|EPI\_ISL\_712890|Original|hCoV-19^^Sjaelland|Human|Department of Virus and Microbiological Special Diagnostics|Albertsen Lab|Michaelsen|Denmark

>Spike|hCoV-19/Denmark/DCGC-3179/2020|2020-08-31|EPI\_ISL\_616001|Original|hCoV-19^^Hovedstaden|Human|Department of Virus and Microbiological Special Diagnostics|Albertsen lab|Michaelsen|Denmark

>Spike|hCoV-19/Mexico/SON-INDRE\_34/2020|2020-05-28|EPI\_ISL\_493349|Original|hCoV-19^^Sonora|Human|Instituto de Diagnostico y Referencia Epidemiologicos (INDRE)|Instituto de Diagnostico y Referencia Epidemiologicos (INDRE)|Rodriguez|Mexico

>Spike|hCoV-19/England/ALDP-C489F6/2020|2020-12-12|EPI\_ISL\_736614|Original|hCoV-19^^England|Human|Lighthouse Lab in Alderley Park|Wellcome Sanger Institute for the COVID-19 Genomics UK (COG-UK) Consortium|Davies|United Kingdom

>Spike|hCoV-19/USA/CA-CZB-11656/2020|2020-09-23|EPI\_ISL\_625482|Original|hCoV-19^^California|Human|Santa Clara County Public Health Laboratory|Chan-Zuckerberg Biohub|Bhatt|USA

>Spike|hCoV-19/Belgium/reg-0528690/2020|2020-05-28|EPI\_ISL\_734745|Original|hCoV-19^^Stevoort|Human|UZ Leuven|KU Leuven|Maes|Belgium

>Spike|hCoV-19/England/CAMB-83E38/2020|2020-04-27|EPI\_ISL\_438699|Original|hCoV-19^^England|Human|Department of Pathology|COVID-19 Genomics UK (COG-UK) Consortium|Meredith|United Kingdom

>Spike|hCoV-19/Wales/PHWC-16F7EB/2020|2020-10-02|EPI\_ISL\_586022|Original|hCoV-19^^Wales|Human|Wales Specialist Virology Centre Sequencing lab|COVID-19 Genomics UK (COG-UK) Consortium|Moore|United Kingdom

>Spike|hCoV-19/USA/FL-BPHL-1479/2020|2020-06-26|EPI\_ISL\_549261|Original|hCoV-19^^Florida|Human|Florida Bureau of Public Health Laboratories|Florida Bureau of Public Health Laboratories|Blanton|USA

>Spike|hCoV-19/Thailand/Bangkok-PH7928/2020|2020-09-14|EPI\_ISL\_708812|Vero 1|hCoV-19^^Bangkok|Human|World Medical Hospital|National Institute of Health|Phuygun|Thailand

>Spike|hCoV-19/Bangladesh/BCSIR-NILMRC-203/2020|2020-06-20|EPI\_ISL\_483700|Original|hCoV-19^^Chittagong|Human|National Institute of Laboratory Medicine and Referral Center|Genomic Research Lab|Khan|Bangladesh

>Spike|hCoV-19/Switzerland/VD-ETHZ-380226/2020|2020-11-23|EPI\_ISL\_721916|Original|hCoV-19^^Vaud|Human|Viollier AG|Department of Biosystems Science and Engineering|Nadeau|Switzerland

>Spike|hCoV-19/England/ALDP-BB3881/2020|2020-11-20|EPI\_ISL\_701783|Original|hCoV-19^^England|Human|Lighthouse Lab in Alderley Park|Wellcome Sanger Institute for the COVID-19 Genomics UK (COG-UK) Consortium|Davies|United Kingdom

>Spike|hCoV-19/Denmark/DCGC-891/2020|2020-05-18|EPI\_ISL\_614455|Original|hCoV-19^^Hovedstaden|Human|Department of Virus and Microbiological Special Diagnostics|Albertsen lab|Michaelsen|Denmark

>Spike|hCoV-19/England/NORT-282B6D/2020|2020-03-28|EPI\_ISL\_472212|Original|hCoV-19^^England|Human|Northumbria University / South Tees Hospitals NHS Foundation Trust / North Cumbria Integrated Care NHS Foundation Trust / North Tees and Hartlepool NHS

Foundation Trust / Newcastle Hospitals NHS Foundation Trust|COVID-19 Genomics UK  
(COG-UK) Consortium|Bashton|United Kingdom  
>Spike|hCoV-19/Wales/PHWC-480EA0/2020|2020-10-16|EPI\_ISL\_613011|Original|hCoV-  
19^^Wales|Human|Wales Specialist Virology Centre Sequencing lab|COVID-19 Genomics UK  
(COG-UK) Consortium|Moore|United Kingdom  
>Spike|hCoV-19/Russia/StPetersburg-RII7656S/2020|2020-04-  
20|EPI\_ISL\_450264|Original|hCoV-19^^Saint Petersburg|Human|WHO National Influenza  
Centre Russian Federation|WHO National Influenza Centre Russian  
Federation|Komissarov|Russia  
>Spike|hCoV-19/England/MILK-6239BB/2020|2020-07-06|EPI\_ISL\_557845|Original|hCoV-  
19^^England|Human|Lighthouse Lab in Milton Keynes|Wellcome Sanger Institute for the  
COVID-19 Genomics UK (COG-UK) consortium|Davies|United Kingdom  
>Spike|hCoV-19/USA/TX-HMH-6867/2020|2020-06-25|EPI\_ISL\_546302|Original|hCoV-  
19^^Texas|Human|Houston Methodist Hospital|Houston Methodist Hospital|Long|USA  
>Spike|hCoV-19/Japan/PG-1993/2020|2020-04-00|EPI\_ISL\_685598|Original|hCoV-  
19^^Japan|Human|Pathogen Genomics Center|Pathogen Genomics Center|Sekizuka|Japan  
>Spike|hCoV-19/Scotland/QEUIH-9F67E1/2020|2020-09-27|EPI\_ISL\_600655|Original|hCoV-  
19^^Scotland|Human|Lighthouse Lab in Glasgow|Wellcome Sanger Institute for the COVID-  
19 Genomics UK (COG-UK) consortium|Davies|United Kingdom  
>Spike|hCoV-19/Scotland/QEUIH-9D32CB/2020|2020-09-20|EPI\_ISL\_638913|Original|hCoV-  
19^^Scotland|Human|Centre for Enzyme Innovation|COVID-19 Genomics UK (COG-UK)  
Consortium|Robson|United Kingdom  
>Spike|hCoV-19/USA/AZ-TG395891/2020|2020-06-06|EPI\_ISL\_694735|Original|hCoV-  
19^^Arizona|Human|AZ SPHL|TGen North|French|USA  
>Spike|hCoV-19/USA/FL-BPHL-0594/2020|2020-03-24|EPI\_ISL\_508798|Original|hCoV-  
19^^Florida|Human|Florida Bureau of Public Health Laboratories|Florida Bureau of  
Public Health Laboratories|Blanton|USA  
>Spike|hCoV-19/Netherlands/ZH-EMC-1039/2020|2020-09-07|EPI\_ISL\_722846|Original|hCoV-  
19^^Zuid Holland|Human|Dutch COVID-19 response team|Erasmus Medical Center|Oude  
Munnink|Netherlands  
>Spike|hCoV-19/England/LIVE-1D7238/2020|2020-09-26|EPI\_ISL\_584598|Original|hCoV-  
19^^England|Human|Liverpool Clinical Laboratories|COVID-19 Genomics UK (COG-UK)  
Consortium|Haldenby|United Kingdom  
>Spike|hCoV-19/England/ALDP-9FCD43/2020|2020-10-02|EPI\_ISL\_587728|Original|hCoV-  
19^^England|Human|Lighthouse Lab in Alderley Park|Wellcome Sanger Institute for the  
COVID-19 Genomics UK (COG-UK) consortium|Davies|United Kingdom  
>Spike|hCoV-19/England/ALDP-A6DC4F/2020|2020-10-14|EPI\_ISL\_607647|Original|hCoV-  
19^^England|Human|Lighthouse Lab in Alderley Park|Wellcome Sanger Institute for the  
COVID-19 Genomics UK (COG-UK) consortium|Davies|United Kingdom  
>Spike|hCoV-19/England/QEUIH-B683E4/2020|2020-11-11|EPI\_ISL\_661580|Original|hCoV-  
19^^England|Human|Lighthouse Lab in Glasgow|Wellcome Sanger Institute for the COVID-  
19 Genomics UK (COG-UK) Consortium|Davies|United Kingdom  
>Spike|hCoV-19/England/NOTT-113CBA/2020|2020-09-29|EPI\_ISL\_573472|Original|hCoV-  
19^^England|Human|Queens Medical Centre|COVID-19 Genomics UK (COG-UK)  
Consortium|Loose|United Kingdom  
>Spike|hCoV-19/Scotland/QEUIH-9F2CC8/2020|2020-09-25|EPI\_ISL\_600809|Original|hCoV-  
19^^Scotland|Human|Lighthouse Lab in Glasgow|Wellcome Sanger Institute for the COVID-  
19 Genomics UK (COG-UK) consortium|Davies|United Kingdom  
>Spike|hCoV-19/USA/IL-UW-1961/2020|2020-09-23|EPI\_ISL\_677369|Original|hCoV-  
19^^Illinois|Human|University of Wisconsin-Madison AIDS Vaccine Research  
Laboratories|University of Wisconsin-Madison AIDS Vaccine Research  
Laboratories|Baczenas|USA  
>Spike|hCoV-19/England/LOND-D9AB7/2020|2020-09-18|EPI\_ISL\_584678|Original|hCoV-  
19^^England|Human|University College London|COVID-19 Genomics UK (COG-UK)  
Consortium|Roy|United Kingdom  
>Spike|hCoV-19/USA/VA\_6171/2020|2020-03-06|EPI\_ISL\_424907|Original|hCoV-  
19^^Virginia|Human|VA-Division of Consolidated Laboratory Services|Pathogen  
Discovery|Queen|USA



>Spike|hCoV-19/Canada/ON-E53/2020|2020-05-29|EPI\_ISL\_593528|Original|hCoV-19^^Ontario|Human|Eastern Ontario Regional Laboratory Association|McMaster University|McArthur|Canada

>Spike|hCoV-19/Russia/KDA-RII-MH4740S/2020|2020-10-17|EPI\_ISL\_733252|Original|hCoV-19^^Krasnodar|Human|WHO National Influenza Centre Russian Federation|WHO National Influenza Centre Russian Federation|Komissarov|Russia

>Spike|hCoV-19/USA/MI-UM-2006S000853/2020|2020-03-28|EPI\_ISL\_484712|Original|hCoV-19^^Michigan|Human|University of Michigan Clinical Microbiology Laboratory|Lauring Lab|Valesano|USA

>Spike|hCoV-19/England/20166003104/2020|2020-04-16|EPI\_ISL\_527337|Original|hCoV-19^^England|Human|Respiratory Virus Unit|Respiratory Virus Unit|Ledesma|United Kingdom

>Spike|hCoV-19/USA/WI-WSLH-200319/2020|2020-04-16|EPI\_ISL\_578500|Original|hCoV-19^^Wisconsin|Human|Wisconsin State Laboratory of Hygiene Communicable Disease Division|Wisconsin State Laboratory of Hygiene Communicable Disease Division|Florek|USA

>Spike|hCoV-19/USA/WI-UW-2628/2020|2020-12-31|EPI\_ISL\_791144|Original|hCoV-19^^Wisconsin|Human|University of Wisconsin-Madison AIDS Vaccine Research Laboratories|University of Wisconsin-Madison AIDS Vaccine Research Laboratories|Moreno|USA

>Spike|hCoV-19/Netherlands/ZH-EMC-714/2020|2020-10-05|EPI\_ISL\_632561|Original|hCoV-19^^Zuid Holland|Human|Dutch COVID-19 response team|Erasmus Medical Center|Oude Munnink|Netherlands

>Spike|hCoV-19/Denmark/DCGC-13793/2020|2020-11-30|EPI\_ISL\_713028|Original|hCoV-19^^Midtjylland|Human|Department of Virus and Microbiological Special Diagnostics|Albertsen Lab|Michaelsen|Denmark

>Spike|hCoV-19/Scotland/QEUH-96E18C/2020|2020-08-18|EPI\_ISL\_530562|Original|hCoV-19^^Scotland|Human|NHSGGC West of Scotland Specialist Virology Centre / MRC-University of Glasgow Centre for Virus Research|Wellcome Sanger Institute for the COVID-19 Genomics UK (COG-UK) consortium|Davies|United Kingdom

>Spike|hCoV-19/England/QEUH-9DCD1C/2020|2020-09-21|EPI\_ISL\_599809|Original|hCoV-19^^England|Human|Lighthouse Lab in Glasgow|Wellcome Sanger Institute for the COVID-19 Genomics UK (COG-UK) consortium|Davies|United Kingdom

>Spike|hCoV-19/Canada/ON-S117/2020|2020-03-22|EPI\_ISL\_586291|Original|hCoV-19^^Ontario|Human|Toronto Invasive Bacterial Diseases Network|McMaster University|McArthur|Canada

>Spike|hCoV-19/England/MILK-A91662/2020|2020-10-16|EPI\_ISL\_705973|Original|hCoV-19^^England|Human|Oxford Viromics|COVID-19 Genomics UK (COG-UK) Consortium|Golubchik|United Kingdom

>Spike|hCoV-19/Japan/PG-6867/2020|2020-06-00|EPI\_ISL\_687975|Original|hCoV-19^^Japan|Human|Pathogen Genomics Center|Pathogen Genomics Center|Sekizuka|Japan

>Spike|hCoV-19/Belgium/ULG-10911/2020|2020-11-14|EPI\_ISL\_678452|Original|hCoV-19^^Li\u00e8ge|Human|Department of Clinical Microbiology|GIGA Medical Genomics|Durkin|Belgium

>Spike|hCoV-19/Hong Kong/HKU-200723-034/2020|2020-07-14|EPI\_ISL\_497801|Original|hCoV-19^^Hong Kong|Human|Department of Microbiology|Department of Microbiology|Chan|China

>Spike|hCoV-19/USA/MA-MGH-00896/2020|2020-05-05|EPI\_ISL\_791813|Original|hCoV-19^^Massachusetts|Human|Massachusetts General Hospital|Infectious Disease Program|Park|USA

>Spike|hCoV-19/Australia/VIC5030/2020|2020-07-16|EPI\_ISL\_519834|Original|hCoV-19^^Victoria|Human|Microbiological Diagnostic Unit - Public Health Laboratory (MDU-PHL) |MDU-PHL|Schultz|Australia

>Spike|hCoV-19/USA/TX-DSHS-0600/2020|2020-06-04|EPI\_ISL\_569710|Original|hCoV-19^^Texas|Human|Texas Department of State Health Services|Texas Department of State Health Services|Rahman|USA

>Spike|hCoV-19/Canada/QC-LSPQ-L00236396/2020|2020-03-24|EPI\_ISL\_536127|Original|hCoV-19^^Quebec|Human|H\u00f4pital de Hull|Laboratoire de sant\u00e9 publique du Qu\u00e9bec|Moreira|Canada

>Spike|hCoV-19/Wales/PHWC-32D3B/2020|2020-04-07|EPI\_ISL\_446683|Original|hCoV-19^^Wales|Human|Wales Specialist Virology Centre|Public Health Wales Microbiology Cardiff|Moore|United Kingdom

>Spike|hCoV-19/England/LIVE-A5B93/2020|2020-03-16|EPI\_ISL\_499531|Original|hCoV-19^^England|Human|Liverpool Clinical Laboratories|COVID-19 Genomics UK (COG-UK) Consortium|Haldenby|United Kingdom

>Spike|hCoV-19/England/MILK-A7969D/2020|2020-10-14|EPI\_ISL\_606646|Original|hCoV-19^^England|Human|Lighthouse Lab in Milton Keynes|Wellcome Sanger Institute for the COVID-19 Genomics UK (COG-UK) consortium|Davies|United Kingdom

>Spike|hCoV-19/Japan/PG-3486/2020|2020-07-00|EPI\_ISL\_691596|Original|hCoV-19^^Japan|Human|Pathogen Genomics Center|Pathogen Genomics Center|Sekizuka|Japan

>Spike|hCoV-19/England/CAMC-B096CE/2020|2020-10-30|EPI\_ISL\_672973|Original|hCoV-19^^England|Human|Lighthouse Lab in Cambridge|Wellcome Sanger Institute for the COVID-19 Genomics UK (COG-UK) Consortium|Davies|United Kingdom

>Spike|hCoV-19/England/MILK-ACDBD7/2020|2020-10-21|EPI\_ISL\_630135|Original|hCoV-19^^England|Human|Lighthouse Lab in Milton Keynes|Wellcome Sanger Institute for the COVID-19 Genomics UK (COG-UK) consortium|Davies|United Kingdom

>Spike|hCoV-19/New Zealand/20VR3483/2020|2020-04-05|EPI\_ISL\_579501|Original|hCoV-19^^Canterbury|Human|Canterbury Health Laboratories|Institute of Environmental Science and Research (ESR)|Wang|New Zealand

>Spike|hCoV-19/Norway/2596/2020|2020-05-12|EPI\_ISL\_481207|Original|hCoV-19^^Norway|Human|Ostfold Hospital Trust - Kalnes|Norwegian Institute of Public Health|Kopperud Riis|Norway

>Spike|hCoV-19/India/TG-CCMB-L1024/2020|2020-05-11|EPI\_ISL\_458048|Original|hCoV-19^^Telangana|Human|CSIR-Centre for Cellular and Molecular Biology|CSIR-Centre for Cellular and Molecular Biology|Banu|India

>Spike|hCoV-19/USA/LA-EVTL600/2020|2020-06-30|EPI\_ISL\_579004|Original|hCoV-19^^Louisiana|Human|LSUHS Emerging Viral Threat Laboratory|Microbial Genome Sequencing Center|Kamil|USA

>Spike|hCoV-19/England/NOTT-111A94/2020|2020-05-26|EPI\_ISL\_461957|Original|hCoV-19^^England|Human|Queens Medical Centre|COVID-19 Genomics UK (COG-UK) Consortium|Loose|United Kingdom

>Spike|hCoV-19/USA/CA-ALSR-3142/2020|2020-07-14|EPI\_ISL\_635872|Original|hCoV-19^^California|Human|San Diego County Public Health Laboratory|Andersen lab at Scripps Research|Gangavarapu|USA

>Spike|hCoV-19/USA/FL-BPHL-0311/2020|2020-06-02|EPI\_ISL\_489720|Original|hCoV-19^^Florida|Human|Florida Bureau of Public Health Laboratories|Florida Bureau of Public Health Laboratories|Blanton|USA

>Spike|hCoV-19/Wales/PHWC-48B90E/2020|2020-11-06|EPI\_ISL\_666299|Original|hCoV-19^^Wales|Human|Wales Specialist Virology Centre Sequencing lab|COVID-19 Genomics UK (COG-UK) Consortium|Moore|United Kingdom

>Spike|hCoV-19/Ireland/LH-NVRL-73IRL70375/2020|2020-09-14|EPI\_ISL\_639841|Original|hCoV-19^^Louth|Human|National Virus Reference Laboratory|National Virus Reference Laboratory|Gonzalez|Ireland

>Spike|hCoV-19/Portugal/PT1757/2020|2020-11-13|EPI\_ISL\_731909|Original|hCoV-19^^Portugal|Human|Instituto Nacional de Saude (INSA)|Instituto Nacional de Saude (INSA)|Borges|Portugal

>Spike|hCoV-19/Luxembourg/LNS7388872/2020|2020-11-25|EPI\_ISL\_744560|Original|hCoV-19^^Luxembourg|Human|Laboratoire national de sant\u00e9|Laboratoire national de sant\u00e9|Wienecke-Baldacchino|Luxembourg

>Spike|hCoV-19/Germany/HH-hpi-p1852/2020|2020-03-23|EPI\_ISL\_776202|Original|hCoV-19^^Hamburg|Human|University Medical Center Hamburg Eppendorf|Heinrich Pette Institute|Robitaille|Germany

>Spike|hCoV-19/Denmark/DCGC-4172/2020|2020-09-14|EPI\_ISL\_621992|Original|hCoV-19^^Hovedstaden|Human|Department of Virus and Microbiological Special Diagnostics|Albertsen lab|Michaelsen|Denmark

>Spike|hCoV-19/Scotland/CVR4479/2020|2020-09-20|EPI\_ISL\_585343|Original|hCoV-19^^Scotland|Human|Lighthouse Lab in Glasgow / MRC-University of Glasgow Centre for Virus Research|COVID-19 Genomics UK (COG-UK) Consortium|Robertson|United Kingdom

>Spike|hCoV-19/Italy/LOM-INMI-13075-N/2020|2020-03-01|EPI\_ISL\_451309|Original|hCoV-19^^Lombardy|Human|Molecular Virology Unit|Laboratory of Virology|Gruber|Italy

>Spike|hCoV-19/England/ALDP-9E586A/2020|2020-09-24|EPI\_ISL\_589370|Original|hCoV-19^^England|Human|Lighthouse Lab in Alderley Park|Wellcome Sanger Institute for the COVID-19 Genomics UK (COG-UK) consortium|Davies|United Kingdom

>Spike|hCoV-19/Wales/PHWC-4836F0/2020|2020-10-24|EPI\_ISL\_627850|Original|hCoV-19^^Wales|Human|Wales Specialist Virology Centre Sequencing lab|COVID-19 Genomics UK (COG-UK) Consortium|Moore|United Kingdom

>Spike|hCoV-19/Spain/CT-IBV-97009586/2020|2020-08-18|EPI\_ISL\_683654|Original|hCoV-19^^Catalunya|Human|Servicio de Microbiolog\u00eda|SeqCOVID-SPAIN consortium/IBV (CSIC) |Comas|Spain

>Spike|hCoV-19/England/ALDP-B5E017/2020|2020-11-09|EPI\_ISL\_723624|Original|hCoV-19^^England|Human|Northumbria University / South Tees Hospitals NHS Foundation Trust / North Cumbria Integrated Care NHS Foundation Trust / North Tees and Hartlepool NHS Foundation Trust / Newcastle Hospitals NHS Foundation Trust|COVID-19 Genomics UK (COG-UK) Consortium|Bashton|United Kingdom

>Spike|hCoV-19/USA/TX-HMH-2804/2020|2020-06-08|EPI\_ISL\_545566|Original|hCoV-19^^Texas|Human|Houston Methodist Hospital|Houston Methodist Hospital|Long|USA

>Spike|hCoV-19/USA/UT-UPHL-2009278/2020|2020-05-15|EPI\_ISL\_525259|Original|hCoV-19^^Utah|Human|Utah Public Health Laboratory|Utah Public Health Laboratory|Young|USA

>Spike|hCoV-19/England/QEUEH-5EE434/2020|2020-06-16|EPI\_ISL\_533255|Original|hCoV-19^^England|Human|Lighthouse Lab in Glasgow|Wellcome Sanger Institute for the COVID-19 Genomics UK (COG-UK) consortium|Davies|United Kingdom

>Spike|hCoV-19/Denmark/ALAB-HH46/2020|2020-03-13|EPI\_ISL\_429300|Original|hCoV-19^^Denmark|Human|Department of Clinical Microbiology|Albertsen lab|Kirkegaard|Denmark

>Spike|hCoV-19/Wales/PHWC-265BA/2020|2020-03-27|EPI\_ISL\_422192|Original|hCoV-19^^Wales|Human|Wales Specialist Virology Centre|Public Health Wales Microbiology Cardiff|Moore|United Kingdom

>Spike|hCoV-19/England/ALDP-8CADA9/2020|2020-06-27|EPI\_ISL\_556627|Original|hCoV-19^^England|Human|Lighthouse Lab in Alderley Park|Wellcome Sanger Institute for the COVID-19 Genomics UK (COG-UK) consortium|Davies|United Kingdom

>Spike|hCoV-19/England/ALDP-B24D7D/2020|2020-11-04|EPI\_ISL\_646639|Original|hCoV-19^^England|Human|Lighthouse Lab in Alderley Park|Wellcome Sanger Institute for the COVID-19 Genomics UK (COG-UK) Consortium|Davies|United Kingdom

>Spike|hCoV-19/England/ALDP-B5D2A9/2020|2020-11-09|EPI\_ISL\_678882|Original|hCoV-19^^England|Human|Department of Pathology|COVID-19 Genomics UK (COG-UK) Consortium|Goodfellow|United Kingdom

>Spike|hCoV-19/Denmark/DCGC-4224/2020|2020-09-14|EPI\_ISL\_622117|Original|hCoV-19^^Nordjylland|Human|Department of Virus and Microbiological Special Diagnostics|Albertsen lab|Michaelsen|Denmark

>Spike|hCoV-19/Wales/PHWC-25005/2020|2020-03-20|EPI\_ISL\_420929|Original|hCoV-19^^Wales|Human|Wales Specialist Virology Centre|Public Health Wales Microbiology Cardiff|Moore|United Kingdom

>Spike|hCoV-19/Switzerland/GR-ETHZ-310521/2020|2020-10-08|EPI\_ISL\_603589|Original|hCoV-19^^Graubunden|Human|Viollier AG|Department of Biosystems Science and Engineering|Nadeau|Switzerland

>Spike|hCoV-19/India/MH-AFMC-5643/2020|2020-05-24|EPI\_ISL\_497883|Original|hCoV-19^^Maharashtra|Human|Armed Forces Medical College|National Centre For Cell Science|Paul|India

>Spike|hCoV-19/England/LIVE-A789A/2020|2020-03-27|EPI\_ISL\_517083|Original|hCoV-19^^England|Human|Liverpool Clinical Laboratories|COVID-19 Genomics UK (COG-UK) Consortium|Haldenby|United Kingdom

>Spike|hCoV-19/USA/UT-UPHL-2009487/2020|2020-07-19|EPI\_ISL\_605171|Original|hCoV-19^^Utah|Human|Utah Public Health Laboratory|Utah Public Health Laboratory|Young|USA

>Spike|hCoV-19/USA/WA-S1809/2020|2020-06-02|EPI\_ISL\_496235|Original|hCoV-19^^Washington|Human|Washington State Department of Health|Seattle Flu Study|Lee|USA

>Spike|hCoV-19/USA/TX-HMH-MCoV-12816/2020|2020-08-19|EPI\_ISL\_789942|Original|hCoV-19^^Texas|Human|Houston Methodist Hospital|Houston Methodist Hospital|Long|USA

>Spike|hCoV-19/England/LIVE-DCB909/2020|2020-11-22|EPI\_ISL\_724438|Original|hCoV-19^^England|Human|Liverpool Clinical Laboratories|COVID-19 Genomics UK (COG-UK) Consortium|Haldenby|United Kingdom

>Spike|hCoV-19/Wuhan/0126-C77/2020|2020-01-26|EPI\_ISL\_493178|Original|hCoV-19^^Hubei|Human|National Virus Resource Center|Computational Virology Group|Liu|China

>Spike|hCoV-19/Wales/PHWC-4A18E7/2020|2020-12-11|EPI\_ISL\_743743|Original|hCoV-19^^Wales|Human|Wales Specialist Virology Centre Sequencing lab|COVID-19 Genomics UK (COG-UK) Consortium|Moore|United Kingdom

>Spike|hCoV-19/England/201340875/2020|2020-03-24|EPI\_ISL\_423193|Original|hCoV-19^^England|Human|Respiratory Virus Unit|Respiratory Virus Unit|Platt|United Kingdom

>Spike|hCoV-19/England/CAMC-CB8C52/2020|2020-12-19|EPI\_ISL\_777836|Original|hCoV-19^^England|Human|Lighthouse Lab in Cambridge|Wellcome Sanger Institute for the COVID-19 Genomics UK (COG-UK) Consortium|Davies|United Kingdom

>Spike|hCoV-19/USA/UT-02878/2020|2020-04-29|EPI\_ISL\_513677|Original|hCoV-19^^Utah|Human|Utah Public Health Laboratory|Utah Public Health Laboratory|Butz|USA

>Spike|hCoV-19/Denmark/DCGC-4480/2020|2020-09-14|EPI\_ISL\_615665|Original|hCoV-19^^Nordjylland|Human|Department of Virus and Microbiological Special Diagnostics|Albertsen lab|Michaelsen|Denmark

>Spike|hCoV-19/England/QEUEH-9B8DDA/2020|2020-09-07|EPI\_ISL\_549608|Original|hCoV-19^^England|Human|Lighthouse Lab in Glasgow|Wellcome Sanger Institute for the COVID-19 Genomics UK (COG-UK) consortium|Davies|United Kingdom

>Spike|hCoV-19/USA/CA-CZB-3936/2020|2020-07-30|EPI\_ISL\_548554|Original|hCoV-19^^California|Human|Contra Costa Public Health Lab|Chan-Zuckerberg Biohub|Bhatt|USA

>Spike|hCoV-19/Spain/AN-IBV-001992/2020|2020-03-15|EPI\_ISL\_452401|Original|hCoV-19^^Andalucia|Human|Servicio de Microbiolog\u00eda. HRU de M\u00ella. Servicio Andaluz de Salud|SeqCOVID-SPAIN consortium|IBV(CSIC)|Comas|Spain

>Spike|hCoV-19/USA/NY-NYUMC192/2020|2020-04-01|EPI\_ISL\_427487|Original|hCoV-19^^New York|Human|NYU Langone Health|Departments of Pathology and Medicine|Maurano|USA

>Spike|hCoV-19/Wales/PHWC-168E47/2020|2020-06-24|EPI\_ISL\_499356|Original|hCoV-19^^Wales|Human|Originating lab|COVID-19 Genomics UK (COG-UK) Consortium|Moore|United Kingdom

>Spike|hCoV-19/Scotland/CVR1398/2020|2020-04-01|EPI\_ISL\_433567|Original|hCoV-19^^Scotland|Human|West of Scotland Specialist Virology Centre|COVID-19 Genomics UK (COG-UK) Consortium|Robertson|United Kingdom

>Spike|hCoV-19/England/CAMB-7F52B/2020|2020-04-09|EPI\_ISL\_470524|Original|hCoV-19^^England|Human|Department of Pathology|Wellcome Sanger Institute for the COVID-19 Genomics UK (COG-UK) consortium|Davies|United Kingdom

>Spike|hCoV-19/USA/TX-HMH-MCoV-14894/2020|2020-10-15|EPI\_ISL\_786378|Original|hCoV-19^^Texas|Human|Houston Methodist Hospital|Houston Methodist Hospital|Long|USA

>Spike|hCoV-19/Iceland/461/2020|2020-03-20|EPI\_ISL\_424484|Original|hCoV-19^^Reykjavik|Human|The National University Hospital of Iceland|deCODE genetics|J\u00f3nsson|Iceland

>Spike|hCoV-19/Luxembourg/LNS5578604/2020|2020-11-16|EPI\_ISL\_744254|Original|hCoV-19^^Luxembourg|Human|Laboratoire national de sant\u00e9|Laboratoire national de sant\u00e9|Wienecke-Baldacchino|Luxembourg

>Spike|hCoV-19/Japan/PG-5976/2020|2020-08-00|EPI\_ISL\_689091|Original|hCoV-19^^Japan|Human|Pathogen Genomics Center|Pathogen Genomics Center|Sekizuka|Japan

>Spike|hCoV-19/Spain/PV-IBV-003206/2020|2020-03-12|EPI\_ISL\_481036|Original|hCoV-19^^Basque Country|Human|Servicio de Microbiolog\u00eda. Hospital Universitario Donostia. OSI Donostialdea. \u00clrea de Enfermedades Infecciosas|SeqCOVID-SPAIN consortium|IBV(CSIC)|Comas|Spain

>Spike|hCoV-19/England/QEUEH-B9FB19/2020|2020-11-18|EPI\_ISL\_720995|Original|hCoV-19^^England|Human|Lighthouse Lab in Glasgow|Wellcome Sanger Institute for the COVID-19 Genomics UK (COG-UK) Consortium|Davies|United Kingdom

>Spike|hCoV-19/USA/UT-0519/2020|2020-04-03|EPI\_ISL\_430061|Original|hCoV-19^^Utah|Human|Utah Public Health Laboratory|Utah Public Health Laboratory|Young|USA

>Spike|hCoV-19/Australia/VIC3227/2020|2020-06-29|EPI\_ISL\_520910|Original|hCoV-19^^Victoria|Human|Victorian Infectious Diseases Reference Laboratory (VIDRL)|VIDRL and MDU-PHL|Schultz|Australia

>Spike|hCoV-19/England/SHEF-10D2CF1/2020|2020-12-19|EPI\_ISL\_742049|Original|hCoV-19^^England|Human|Virology Department|COVID-19 Genomics UK (COG-UK) Consortium|de Silva|United Kingdom

>Spike|hCoV-19/Australia/VIC2705/2020|2020-07-04|EPI\_ISL\_521543|Original|hCoV-19^^Victoria|Human|Victorian Infectious Diseases Reference Laboratory (VIDRL)|VIDRL and MDU-PHL|Schultz|Australia

>Spike|hCoV-19/USA/CA-CZB-1878/2020|2020-04-28|EPI\_ISL\_486177|Original|hCoV-19^^California|Human|Orange County Public Health Laboratory|Chan-Zuckerberg Biohub|McGeever|USA

>Spike|hCoV-19/England/ALDP-A6687F/2020|2020-10-12|EPI\_ISL\_630601|Original|hCoV-19^^England|Human|Lighthouse Lab in Alderley Park|Wellcome Sanger Institute for the COVID-19 Genomics UK (COG-UK) consortium|Davies|United Kingdom

>Spike|hCoV-19/Denmark/DCGC-6860/2020|2020-10-12|EPI\_ISL\_619705|Original|hCoV-19^^Syddanmark|Human|Department of Virus and Microbiological Special Diagnostics|Albertsen lab|Michaelsen|Denmark

>Spike|hCoV-19/USA/WI-UW-1043/2020|2020-08-01|EPI\_ISL\_516469|Original|hCoV-19^^Wisconsin|Human|University of Wisconsin-Madison AIDS Vaccine Research Laboratories|University of Wisconsin-Madison AIDS Vaccine Research Laboratories|Baczenas|USA

>Spike|hCoV-19/Scotland/EDB1732/2020|2020-04-15|EPI\_ISL\_433131|Original|hCoV-19^^Scotland|Human|Virology Department|COVID-19 Genomics UK (COG-UK) Consortium|Williams|United Kingdom

>Spike|hCoV-19/England/20099072004/2020|2020-02-28|EPI\_ISL\_464221|Original|hCoV-19^^England|Human|Respiratory Virus Unit|Respiratory Virus Unit|Platt|United Kingdom

>Spike|hCoV-19/Denmark/DCGC-11603/2020|2020-11-02|EPI\_ISL\_671018|Original|hCoV-19^^Hovedstaden|Human|Department of Virus and Microbiological Special Diagnostics|Albertsen Lab|Michaelsen|Denmark

>Spike|hCoV-19/South Korea/KCDC2256/2020|2020-05-12|EPI\_ISL\_510594|Original|hCoV-19^^South Korea|Human|Division of Viral Diseases|Division of Viral Diseases|Kim|South Korea

>Spike|hCoV-19/Japan/PG-7426/2020|2020-07-00|EPI\_ISL\_688528|Original|hCoV-19^^Japan|Human|Pathogen Genomics Center|Pathogen Genomics Center|Sekizuka|Japan

>Spike|hCoV-19/Denmark/DCGC-4422/2020|2020-09-21|EPI\_ISL\_621843|Original|hCoV-19^^Syddanmark|Human|Department of Virus and Microbiological Special Diagnostics|Albertsen lab|Michaelsen|Denmark

>Spike|hCoV-19/England/MILK-B8C414/2020|2020-11-13|EPI\_ISL\_674355|Original|hCoV-19^^England|Human|Lighthouse Lab in Milton Keynes|Wellcome Sanger Institute for the COVID-19 Genomics UK (COG-UK) Consortium|Davies|United Kingdom

>Spike|hCoV-19/USA/TX-HMH-717/2020|2020-04-08|EPI\_ISL\_546565|Original|hCoV-19^^Texas|Human|Houston Methodist Hospital|Houston Methodist Hospital|Long|USA

>Spike|hCoV-19/USA/NY-PV09429/2020|2020-03-12|EPI\_ISL\_450106|Original|hCoV-19^^New York|Human|MSHS Clinical Microbiology Laboratories|MSHS Pathogen Surveillance Program|van Bakel|USA

>Spike|hCoV-19/India/MH-ACTREC-510/2020|2020-08-19|EPI\_ISL\_700158|Original|hCoV-19^^Maharashtra|Human|Hematopathology Laboratory|Hematopathology Laboratory|Patkar|India

>Spike|hCoV-19/England/LOND-126703F/2020|2020-12-11|EPI\_ISL\_741244|Original|hCoV-19^^England|Human|University College London|COVID-19 Genomics UK (COG-UK) Consortium|Roy|United Kingdom

>Spike|hCoV-19/England/CAMB-723E2/2020|2020-03-24|EPI\_ISL\_439547|Original|hCoV-19^^England|Human|Department of Pathology|Wellcome Sanger Institute for the COVID-19 Genomics UK (COG-UK) consortium|Amato|United Kingdom

>Spike|hCoV-19/USA/UT-0894/2020|2020-04-05|EPI\_ISL\_435391|Original|hCoV-19^^Utah|Human|Utah Public Health Laboratory|Utah Public Health Laboratory|Young|USA

>Spike|hCoV-19/Denmark/DCGC-6762/2020|2020-10-12|EPI\_ISL\_619458|Original|hCoV-19^^Midtjylland|Human|Department of Virus and Microbiological Special Diagnostics|Albertsen lab|Michaelsen|Denmark

>Spike|hCoV-19/England/EXET-13BE4D/2020|2020-00-00|EPI\_ISL\_679367|Original|hCoV-19^^England|Human|University of Exeter|COVID-19 Genomics UK (COG-UK) Consortium|Temperton|United Kingdom

>Spike|hCoV-19/USA/TX-HMH-5430/2020|2020-06-26|EPI\_ISL\_544769|Original|hCoV-19^^Texas|Human|Houston Methodist Hospital|Houston Methodist Hospital|Long|USA

>Spike|hCoV-19/England/CAMC-9B22D1/2020|2020-09-04|EPI\_ISL\_549406|Original|hCoV-19^^England|Human|Oxford Viromics|COVID-19 Genomics UK (COG-UK) Consortium|Golubchik|United Kingdom

>Spike|hCoV-19/Switzerland/BL-UHB-42190269/2020|2020-03-13|EPI\_ISL\_528065|Original|hCoV-19^^Basel-Land|Human|University Hospital Basel|University Hospital Basel|Roloff Handschin|Switzerland

>Spike|hCoV-19/USA/CA-ALSR-0477-SAN/2020|2020-03-31|EPI\_ISL\_483167|Original|hCoV-19^^California|Human|UC San Diego Center for Advanced Laboratory Medicine|Andersen lab at Scripps Research|Gangavarapu|USA

>Spike|hCoV-19/USA/CA-CDPH084/2020|2020-07-28|EPI\_ISL\_755044|Original|hCoV-19^^California|Human|California Department of Public Health|California Department of Public Health|Bell|USA

>Spike|hCoV-19/Chile/AT-CMM-ATAC03/2020|2020-07-20|EPI\_ISL\_626550|Original|hCoV-19^^Atacama|Human|Laboratorio de Biología Molecular|Center for Mathematical Modeling and Center for Genome Regulation. Santiago|Palma Valdeavellanos|Chile

>Spike|hCoV-19/USA/TX-HMH-MCoV-14688/2020|2020-10-12|EPI\_ISL\_787973|Original|hCoV-19^^Texas|Human|Houston Methodist Hospital|Houston Methodist Hospital|Long|USA

>Spike|hCoV-19/USA/WI-GMF-09205/2020|2020-07-03|EPI\_ISL\_489943|Original|hCoV-19^^Wisconsin|Human|Gundersen Molecular Diagnostics Laboratory|Kabara Cancer Research Institute|Kenny|USA

>Spike|hCoV-19/USA/FL-BPHL-1779/2020|2020-07-30|EPI\_ISL\_613882|Original|hCoV-19^^Florida|Human|Florida Bureau of Public Health Laboratories|Florida Bureau of Public Health Laboratories|Blanton|USA

>Spike|hCoV-19/USA/WA-UW-12348/2020|2020-06-27|EPI\_ISL\_570508|Original|hCoV-19^^Washington|Human|UW Virology Lab|UW Virology Lab|Roychoudhury|USA

>Spike|hCoV-19/USA/WA-S708/2020|2020-04-09|EPI\_ISL\_449878|Original|hCoV-19^^Washington|Human|Washington State Department of Health|Seattle Flu Study|Bedford|USA

>Spike|hCoV-19/Russia/OMS-ORINFI-5762S/2020|2020-07-13|EPI\_ISL\_569787|Original|hCoV-19^^Omsk|Human|Omsk Research Institute of Natural Focal Infections|WHO National Influenza Centre Russian Federation|Komissarov|Russia

>Spike|hCoV-19/Australia/VIC2329/2020|2020-06-23|EPI\_ISL\_522050|Original|hCoV-19^^Victoria|Human|Microbiological Diagnostic Unit - Public Health Laboratory (MDU-PHL) |MDU-PHL|Schultz|Australia

>Spike|hCoV-19/USA/OR-OHSU-1833/2020|2020-07-27|EPI\_ISL\_526041|Original|hCoV-19^^Oregon|Human|OHSU Lab Services Molecular Microbiology Lab|Oregon SARS-CoV-2 Genome Sequencing Center|O'Roak|USA

>Spike|hCoV-19/USA/UT-02233/2020|2020-04-15|EPI\_ISL\_436930|Original|hCoV-19^^Utah|Human|Utah Public Health Laboratory|Utah Public Health Laboratory|Young|USA

>Spike|hCoV-19/England/ALDP-C3966A/2020|2020-12-09|EPI\_ISL\_731394|Original|hCoV-19^^England|Human|Lighthouse Lab in Alderley Park|Wellcome Sanger Institute for the COVID-19 Genomics UK (COG-UK) Consortium|Davies|United Kingdom

>Spike|hCoV-19/Scotland/CVR5097/2020|2020-10-17|EPI\_ISL\_626844|Original|hCoV-19^^Scotland|Human|West of Scotland Specialist Virology Centre|COVID-19 Genomics UK (COG-UK) Consortium|Robertson|United Kingdom

>Spike|hCoV-19/USA/OR-OHSU-3047/2020|2020-09-30|EPI\_ISL\_667457|Original|hCoV-19^^Oregon|Human|OHSU Lab Services Molecular Microbiology Lab|Oregon SARS-CoV-2 Genome Sequencing Center|O'Roak|USA

>Spike|hCoV-19/Northern Ireland/NIRE-FBEFF/2020|2020-04-11|EPI\_ISL\_459383|Original|hCoV-19^^Northern Ireland|Human|Regional Virus Laboratory|Wellcome Sanger Institute for the COVID-19 Genomics UK (COG-UK) consortium|Davies|United Kingdom

>Spike|hCoV-19/England/LIVE-A3D9F/2020|2020-05-19|EPI\_ISL\_500026|Original|hCoV-19^^England|Human|Liverpool Clinical Laboratories|COVID-19 Genomics UK (COG-UK) Consortium|Haldenby|United Kingdom

>Spike|hCoV-19/USA/NY-NYUMC29/2020|2020-03-17|EPI\_ISL\_418975|Original|hCoV-19^^New York|Human|NYU Langone Health|Department of Pathology and Medicine|Maurano|USA

>Spike|hCoV-19/Scotland/QEUIH-895967/2020|2020-07-28|EPI\_ISL\_532744|Original|hCoV-19^^Scotland|Human|NHS GGC West of Scotland Specialist Virology Centre / MRC-University of Glasgow Centre for Virus Research|Wellcome Sanger Institute for the COVID-19 Genomics UK (COG-UK) consortium|Davies|United Kingdom

>Spike|hCoV-19/England/MILK-B863E0/2020|2020-11-13|EPI\_ISL\_673958|Original|hCoV-19^^England|Human|Lighthouse Lab in Milton Keynes|Wellcome Sanger Institute for the COVID-19 Genomics UK (COG-UK) Consortium|Davies|United Kingdom

>Spike|hCoV-19/England/ALDP-B26467/2020|2020-11-04|EPI\_ISL\_646571|Original|hCoV-19^^England|Human|Lighthouse Lab in Alderley Park|Wellcome Sanger Institute for the COVID-19 Genomics UK (COG-UK) Consortium|Davies|United Kingdom

>Spike|hCoV-19/Germany/HH-hpi-p1974/2020|2020-03-26|EPI\_ISL\_776295|Original|hCoV-19^^Hamburg|Human|University Medical Center Hamburg Eppendorf|Heinrich Pette Institute|Robitaille|Germany

>Spike|hCoV-19/USA/WI-UW-218/2020|2020-03-25|EPI\_ISL\_428314|Original|hCoV-19^^Wisconsin|Human|University of Wisconsin-Madison AIDS Vaccine Research Laboratories|University of Wisconsin-Madison AIDS Vaccine Research Laboratories|Moreno|USA

>Spike|hCoV-19/Denmark/DCGC-9541/2020|2020-11-09|EPI\_ISL\_669030|Original|hCoV-19^^Hovedstaden|Human|Department of Virus and Microbiological Special Diagnostics|Albertsen Lab|Michaelsen|Denmark

>Spike|hCoV-19/Scotland/QEUIH-B6C580/2020|2020-11-11|EPI\_ISL\_676342|Original|hCoV-19^^Scotland|Human|Lighthouse Lab in Glasgow|Wellcome Sanger Institute for the COVID-19 Genomics UK (COG-UK) Consortium|Davies|United Kingdom

>Spike|hCoV-19/USA/CA-ALSR-3120/2020|2020-07-14|EPI\_ISL\_635858|Original|hCoV-19^^California|Human|San Diego County Public Health Laboratory|Andersen lab at Scripps Research|Gangavarapu|USA

>Spike|hCoV-19/Peru/LIM-UPCH-0031/2020|2020-06-18|EPI\_ISL\_540931|Original|hCoV-19^^Lima|Human|Laboratorio de Referencia Nacional de Virus Respiratorios|Laboratorio de Gen\u00f3mica Microbiana|Tsukayama|Peru

>Spike|hCoV-19/England/LIVE-9FABD/2020|2020-06-04|EPI\_ISL\_472036|Original|hCoV-19^^England|Human|Liverpool Clinical Laboratories|COVID-19 Genomics UK (COG-UK) Consortium|Haldenby|United Kingdom

>Spike|hCoV-19/England/CAMC-CB734F/2020|2020-12-18|EPI\_ISL\_778017|Original|hCoV-19^^England|Human|Lighthouse Lab in Cambridge|Wellcome Sanger Institute for the COVID-19 Genomics UK (COG-UK) Consortium|Davies|United Kingdom

>Spike|hCoV-19/Scotland/QEUIH-9F2CF5/2020|2020-09-25|EPI\_ISL\_600791|Original|hCoV-19^^Scotland|Human|Lighthouse Lab in Glasgow|Wellcome Sanger Institute for the COVID-19 Genomics UK (COG-UK) consortium|Davies|United Kingdom

>Spike|hCoV-19/England/CAMC-B52927/2020|2020-11-08|EPI\_ISL\_657481|Original|hCoV-19^^England|Human|Lighthouse Lab in Cambridge|Wellcome Sanger Institute for the COVID-19 Genomics UK (COG-UK) Consortium|Davies|United Kingdom

>Spike|hCoV-19/South Africa/KRISP-0403/2020|2020-06-23|EPI\_ISL\_495528|Original|hCoV-19^^KwaZulu-Natal|Human|NHLs-IALCH|KRISP|de Oliveira|South Africa

>Spike|hCoV-19/Japan/PG-1090/2020|2020-04-00|EPI\_ISL\_684700|Original|hCoV-19^^Japan|Human|Pathogen Genomics Center|Pathogen Genomics Center|Sekizuka|Japan

>Spike|hCoV-19/England/QEUIH-B117DF/2020|2020-11-02|EPI\_ISL\_642338|Original|hCoV-19^^England|Human|Lighthouse Lab in Glasgow|Wellcome Sanger Institute for the COVID-19 Genomics UK (COG-UK) Consortium|Davies|United Kingdom

>Spike|hCoV-19/Australia/VIC9778/2020|2020-07-25|EPI\_ISL\_565709|Original|hCoV-19^^Victoria|Human|Microbiological Diagnostic Unit - Public Health Laboratory (MDU-PHL)|MDU-PHL|Schultz|Australia

>Spike|hCoV-19/England/CAMC-B548FB/2020|2020-11-09|EPI\_ISL\_658307|Original|hCoV-19^^England|Human|Lighthouse Lab in Cambridge|Wellcome Sanger Institute for the COVID-19 Genomics UK (COG-UK) Consortium|Davies|United Kingdom

>Spike|hCoV-19/Wales/PHWC-4A640C/2020|2020-12-16|EPI\_ISL\_763671|Original|hCoV-19^^Wales|Human|Wales Specialist Virology Centre Sequencing lab|COVID-19 Genomics UK (COG-UK) Consortium|Moore|United Kingdom

>Spike|hCoV-19/Brazil/RJ-00560/2020|2020-11-03|EPI\_ISL\_717944|Original|hCoV-19^^Rio de Janeiro|Human|Laboratorio de Virologia Molecular / UFRJ|Bioinformatics Laboratory / LNCC|Almeida|Brazil

>Spike|hCoV-19/England/MILK-BAB5A3/2020|2020-11-18|EPI\_ISL\_705200|Original|hCoV-19^^England|Human|Lighthouse Lab in Milton Keynes|Wellcome Sanger Institute for the COVID-19 Genomics UK (COG-UK) Consortium|Davies|United Kingdom

>Spike|hCoV-19/Russia/MOS-CRIE-13351661/2020|2020-11-06|EPI\_ISL\_745240|Original|hCoV-19^^Moscow|Human|Molecular diagnostic laboratory of Federal Budget Institution of Science \Central Research Institute of Epidemiology\ of The Federal Service on Customers' Rights Protection and Human Well-being Surveillance|Group of Genomics and Postgenomic Technologies of Central Research Institute of Epidemiolog

>y|Korneenko|Russia

>Spike|hCoV-19/France/PAC-IHU-0551/2020|2020-04-08|EPI\_ISL\_569589|Original|hCoV-19^^Provence-Alpes-C\u00f4te-d\u00a0Azur|Human|MEPHI|MEPHI|Levasseur|France

>Spike|hCoV-19/Denmark/DCGC-10330/2020|2020-11-02|EPI\_ISL\_669466|Original|hCoV-19^^Sjaelland|Human|Department of Virus and Microbiological Special Diagnostics|Albertsen Lab|Michaelsen|Denmark

>Spike|hCoV-19/England/SHEF-C534A/2020|2020-10-20|EPI\_ISL\_613366|Original|hCoV-19^^England|Human|Virology Department|COVID-19 Genomics UK (COG-UK) Consortium|de Silva|United Kingdom

>Spike|hCoV-19/England/CAMC-A58B1D/2020|2020-10-09|EPI\_ISL\_597218|Original|hCoV-19^^England|Human|Lighthouse Lab in Cambridge|Wellcome Sanger Institute for the COVID-19 Genomics UK (COG-UK) consortium|Davies|United Kingdom

>Spike|hCoV-19/England/ALDP-BB3793/2020|2020-11-19|EPI\_ISL\_701714|Original|hCoV-19^^England|Human|Lighthouse Lab in Alderley Park|Wellcome Sanger Institute for the COVID-19 Genomics UK (COG-UK) Consortium|Davies|United Kingdom

>Spike|hCoV-19/England/CAMB-800AE/2020|2020-04-09|EPI\_ISL\_470369|Original|hCoV-19^^England|Human|Department of Pathology|Wellcome Sanger Institute for the COVID-19 Genomics UK (COG-UK) consortium|Davies|United Kingdom

>Spike|hCoV-19/USA/MO-WUSTL064/2020|2020-06-19|EPI\_ISL\_493083|Original|hCoV-19^^Missouri|Human|Washington University in St. Louis|Washington University in St. Louis|Tahan|USA

>Spike|hCoV-19/Wales/PHWC-49B14F/2020|2020-10-30|EPI\_ISL\_742301|Original|hCoV-19^^Wales|Human|Wales Specialist Virology Centre Sequencing lab|COVID-19 Genomics UK (COG-UK) Consortium|Moore|United Kingdom

>Spike|hCoV-19/USA/MA-MASPHL-00615/2020|2020-05-11|EPI\_ISL\_693006|Original|hCoV-19^^Massachusetts|Human|Massachusetts State Public Health Laboratory|Massachusetts State Public Health Laboratory|Lang|USA

>Spike|hCoV-19/Denmark/DCGC-7112/2020|2020-10-12|EPI\_ISL\_619148|Original|hCoV-19^^Hovedstaden|Human|Department of Virus and Microbiological Special Diagnostics|Albertsen lab|Michaelsen|Denmark

>Spike|hCoV-19/England/MILK-970925/2020|2020-08-18|EPI\_ISL\_553129|Original|hCoV-19^^England|Human|Lighthouse Lab in Milton Keynes|Wellcome Sanger Institute for the COVID-19 Genomics UK (COG-UK) consortium|Davies|United Kingdom

>Spike|hCoV-19/Scotland/EDB6647/2020|2020-05-26|EPI\_ISL\_493969|Original|hCoV-19^^Scotland|Human|Virology Department|COVID-19 Genomics UK (COG-UK) Consortium|Williams|United Kingdom

>Spike|hCoV-19/Australia/VIC134/2020|2020-03-22|EPI\_ISL\_419827|Original|hCoV-19^^Victoria|Human|Microbiological Diagnostic Unit Public Health Laboratory|Microbiological Diagnostic Unit Public Health Laboratory|Schultz|Australia

>Spike|hCoV-19/Russia/STA-RII-MH2776V/2020|2020-09-21|EPI\_ISL\_733396|Vero|hCoV-19^^Stavropol|Human|HELIX LLC|WHO National Influenza Centre Russian Federation|Komissarov|Russia

>Spike|hCoV-19/USA/TX-DSHS-1378/2020|2020-05-11|EPI\_ISL\_654762|Original|hCoV-19^^Texas|Human|Texas Department of State Health Services|Texas Department of State Health Services|Rahman|USA

>Spike|hCoV-19/Switzerland/BS-UHB-42190378/2020|2020-03-13|EPI\_ISL\_528070|Original|hCoV-19^^Basel-Stadt|Human|University Hospital Basel|University Hospital Basel|Roloff Handschin|Switzerland

>Spike|hCoV-19/Wales/PHWC-24A71/2020|2020-03-20|EPI\_ISL\_419475|Original|hCoV-19^^Wales|Human|Wales Specialist Virology Centre|Public Health Wales Microbiology Cardiff|Moore|United Kingdom



>Spike|hCoV-19/Japan/PG-6476/2020|2020-08-00|EPI\_ISL\_689581|Original|hCoV-19^^Japan|Human|Pathogen Genomics Center|Pathogen Genomics Center|Sekizuka|Japan

>Spike|hCoV-19/Canada/BC-BCCDC-8366/2020|2020-11-00|EPI\_ISL\_740755|Original|hCoV-19^^British Columbia|Human|BCCDC Public Health Laboratory|BCCDC Public Health Laboratory|Prystajacky|Canada

>Spike|hCoV-19/England/NORT-2A595B/2020|2020-09-30|EPI\_ISL\_584701|Original|hCoV-19^^England|Human|Northumbria University / South Tees Hospitals NHS Foundation Trust / North Cumbria Integrated Care NHS Foundation Trust / North Tees and Hartlepool NHS Foundation Trust / Newcastle Hospitals NHS Foundation Trust|COVID-19 Genomics UK (COG-UK) Consortium|Bashton|United Kingdom

>Spike|hCoV-19/Brazil/RJ-2777/2020|2020-04-25|EPI\_ISL\_467364|Original|hCoV-19^^Rio de Janeiro|Human|Laboratory of Respiratory Viruses and Measles|Laboratory of Respiratory Viruses and Measles|Silva|Brazil

>Spike|hCoV-19/Luxembourg/LNS3115160/2020|2020-03-16|EPI\_ISL\_740250|Original|hCoV-19^^Luxembourg|Human|Laboratoire national de sant\u00e9|Laboratoire national de sant\u00e9|Wienecke-Baldacchino|Luxembourg

>Spike|hCoV-19/England/QEUEH-B67CAE/2020|2020-11-11|EPI\_ISL\_655186|Original|hCoV-19^^England|Human|Lighthouse Lab in Glasgow|Wellcome Sanger Institute for the COVID-19 Genomics UK (COG-UK) Consortium|Davies|United Kingdom

>Spike|hCoV-19/England/CAMC-9DF63C/2020|2020-09-20|EPI\_ISL\_637755|Original|hCoV-19^^England|Human|Department of Pathology|COVID-19 Genomics UK (COG-UK) Consortium|Goodfellow|United Kingdom

>Spike|hCoV-19/Sweden/20-14013/2020|2020-04-27|EPI\_ISL\_455103|Original|hCoV-19^^Halland|Human|Huslakarna Varmbadhuset Varberg|The Public Health Agency of Sweden|Svartstr\u00f6m|Sweden

>Spike|hCoV-19/England/QEUEH-B8101B/2020|2020-11-14|EPI\_ISL\_661719|Original|hCoV-19^^England|Human|Lighthouse Lab in Glasgow|Wellcome Sanger Institute for the COVID-19 Genomics UK (COG-UK) Consortium|Davies|United Kingdom

>Spike|hCoV-19/United Arab Emirates/0019/2020|2020-05-07|EPI\_ISL\_698229|Original|hCoV-19^^Abu Dhabi|Human|Group 42 (G42) Healthcare|G42 Healthcare|Ogrodzki|United Arab Emirates

>Spike|hCoV-19/England/ALDP-A6E76B/2020|2020-10-15|EPI\_ISL\_607831|Original|hCoV-19^^England|Human|Lighthouse Lab in Alderley Park|Wellcome Sanger Institute for the COVID-19 Genomics UK (COG-UK) consortium|Davies|United Kingdom

>Spike|hCoV-19/Wales/QEUEH-B1246E/2020|2020-11-02|EPI\_ISL\_647871|Original|hCoV-19^^Wales|Human|Lighthouse Lab in Glasgow|Wellcome Sanger Institute for the COVID-19 Genomics UK (COG-UK) Consortium|Davies|United Kingdom

>Spike|hCoV-19/England/201140398/2020|2020-03-11|EPI\_ISL\_464731|Original|hCoV-19^^England|Human|Respiratory Virus Unit|Respiratory Virus Unit|Platt|United Kingdom

>Spike|hCoV-19/USA/NY-NYCPHL-000054/2020|2020-03-07|EPI\_ISL\_631548|Original|hCoV-19^^New York|Human|New York Presbyterian-Brooklyn Methodist Hospital|New York City Public Health Laboratory|Wang|USA

>Spike|hCoV-19/South Korea/KCDC2168/2020|2020-03-09|EPI\_ISL\_506962|Original|hCoV-19^^South Korea|Human|Division of Viral Diseases|Division of Viral Diseases|Kim|South Korea

>Spike|hCoV-19/Belgium/ULG-10022/2020|2020-03-31|EPI\_ISL\_421197|Original|hCoV-19^^Li\u00e8ge|Human|Department of Clinical Microbiology|GIGA Medical Genomics|Durkin|Belgium

>Spike|hCoV-19/England/20162000104/2020|2020-04-13|EPI\_ISL\_466376|Original|hCoV-19^^England|Human|Respiratory Virus Unit|Respiratory Virus Unit|Platt|United Kingdom

>Spike|hCoV-19/England/LOND-1267002/2020|2020-12-11|EPI\_ISL\_741242|Original|hCoV-19^^England|Human|University College London|COVID-19 Genomics UK (COG-UK) Consortium|Roy|United Kingdom

>Spike|hCoV-19/USA/TX-HMH-6540/2020|2020-06-26|EPI\_ISL\_546066|Original|hCoV-19^^Texas|Human|Houston Methodist Hospital|Houston Methodist Hospital|Long|USA

>Spike|hCoV-19/Belgium/ULG-11150/2020|2020-12-20|EPI\_ISL\_737394|Original|hCoV-19^^Li\u00e8ge|Human|Department of Clinical Microbiology|GIGA Medical Genomics|Durkin|Belgium

>Spike|hCoV-19/USA/TX-HMH-1391/2020|2020-04-01|EPI\_ISL\_542692|Original|hCoV-19^^Texas|Human|Houston Methodist Hospital|Houston Methodist Hospital|Long|USA

>Spike|hCoV-19/Denmark/DCGC-20546/2020|2020-12-21|EPI\_ISL\_759071|Original|hCoV-19^^Syddanmark|Human|Department of Virus and Microbiological Special Diagnostics|Albertsen Lab|Michaelsen|Denmark

>Spike|hCoV-19/USA/NY-NYCPHL-000114/2020|2020-03-28|EPI\_ISL\_631606|Original|hCoV-19^^New York|Human|Flushing Hospital Medical Center|New York City Public Health Laboratory|Wang|USA

>Spike|hCoV-19/USA/WA-S2449/2020|2020-06-16|EPI\_ISL\_497081|Original|hCoV-19^^Washington|Human|Washington State Department of Health|Seattle Flu Study|Lee|USA

>Spike|hCoV-19/USA/TX-DSHS-0940/2020|2020-06-20|EPI\_ISL\_602238|Original|hCoV-19^^Texas|Human|Texas Department of State Health Services|Texas Department of State Health Services|Rahman|USA

>Spike|hCoV-19/USA/MI-MDHHS-SC21510/2020|2020-04-01|EPI\_ISL\_516237|Original|hCoV-19^^Michigan|Human|Michigan Department of Health and Human Services|Michigan Department of Health and Human Services|Blankenship|USA

>Spike|hCoV-19/USA/MI-UM-10036767440/2020|2020-11-03|EPI\_ISL\_682205|Original|hCoV-19^^Michigan|Human|University of Michigan Clinical Microbiology Laboratory|Lauring Lab|Valesano|USA

>Spike|hCoV-19/England/ALDP-C25F75/2020|2020-12-06|EPI\_ISL\_783033|Original|hCoV-19^^England|Human|Lighthouse Lab in Alderley Park|Wellcome Sanger Institute for the COVID-19 Genomics UK (COG-UK) Consortium|Davies|United Kingdom

>Spike|hCoV-19/USA/MN-MDH-1444/2020|2020-03-26|EPI\_ISL\_514663|Original|hCoV-19^^Minnesota|Human|Minnesota Department of Health|Minnesota Department of Health|Garfin|USA

>Spike|hCoV-19/Russia/MUR-RII-MH6068S/2020|2020-11-11|EPI\_ISL\_733338|Original|hCoV-19^^Murmansk|Human|HELIX LLC|WHO National Influenza Centre Russian Federation|Komissarov|Russia

>Spike|hCoV-19/Japan/PG-3326/2020|2020-04-00|EPI\_ISL\_691441|Original|hCoV-19^^Japan|Human|Pathogen Genomics Center|Pathogen Genomics Center|Sekizuka|Japan

>Spike|hCoV-19/USA/NY-NYUMC884/2020|2020-05-03|EPI\_ISL\_467377|Original|hCoV-19^^New York|Human|NYU Langone Health|Departments of Pathology and Medicine|Maurano|USA

>Spike|hCoV-19/USA/VA-DCLS-0208/2020|2020-04-08|EPI\_ISL\_437423|Original|hCoV-19^^Virginia|Human|Virginia DCLS|Virginia DCLS|St. Jacques|USA

>Spike|hCoV-19/France/ARA-102363/2020|2020-11-05|EPI\_ISL\_732681|Original|hCoV-19^^Auvergne-Rh\u00f4ne-Alpes|Human|CNR Virus des Infections Respiratoires - France SUD|CNR Virus des Infections Respiratoires - France SUD|Bal|France

>Spike|hCoV-19/England/QEUH-A01B6E/2020|2020-10-01|EPI\_ISL\_680009|Original|hCoV-19^^England|Human|Virology Department|COVID-19 Genomics UK (COG-UK) Consortium|de Silva|United Kingdom

>Spike|hCoV-19/USA/TX-HMH-3352/2020|2020-06-12|EPI\_ISL\_544137|Original|hCoV-19^^Texas|Human|Houston Methodist Hospital|Houston Methodist Hospital|Long|USA

>Spike|hCoV-19/Australia/VIC70/2020|2020-03-13|EPI\_ISL\_419786|Original|hCoV-19^^Victoria|Human|Victorian Infectious Diseases Reference Laboratory (VIDRL)|Victorian Infectious Diseases Reference Laboratory and Microbiological Diagnostic Unit Public Health Laboratory|Schultz|Australia

>Spike|hCoV-19/Spain/AN-IBV-001272/2020|2020-03-24|EPI\_ISL\_452554|Original|hCoV-19^^Andalucia|Human|Servicio de Microbiolog\u00eda y Parasitolog\u00eda cl\u00ednica. UCEIMP. Hospital Universitario Virgen del Roc\u00edo/IBIS/CSIC/US.|SeqCOVID-SPAIN consortium/IBV (CSIC)|Comas|Spain

>Spike|hCoV-19/Wales/PHWC-162BFB/2020|2020-05-27|EPI\_ISL\_473177|Original|hCoV-19^^Wales|Human|Wales Specialist Virology Centre Sequencing lab|COVID-19 Genomics UK (COG-UK) Consortium|Moore|United Kingdom

>Spike|hCoV-19/England/205141823/2020|2020-12-14|EPI\_ISL\_766224|Original|hCoV-19^^England|Human|Respiratory Virus Unit|COVID-19 Genomics UK (COG-UK) Consortium|Platt|United Kingdom

>Spike|hCoV-19/Switzerland/BS-ETHZ-110039/2020|2020-04-01|EPI\_ISL\_486474|Original|hCoV-19^^Basel-Stadt|Human|Viollier AG|Department of Biosystems Science and Engineering|Nadeau|Switzerland

>Spike|hCoV-19/Brazil/SP-293/2020|2020-04-17|EPI\_ISL\_527857|Original|hCoV-19^^S\u00e3o Paulo|Human|Hospital Regional Vale do Ribeira|Instituto Adolfo Lutz|Sacchi|Brazil

>Spike|hCoV-19/Switzerland/ZH-ETHZ-410542/2020|2020-11-26|EPI\_ISL\_737923|Original|hCoV-19^^Zurich|Human|Viollier AG|Department of Biosystems Science and Engineering|Nadeau|Switzerland

>Spike|hCoV-19/England/CAMB-1B914E/2020|2020-00-00|EPI\_ISL\_705518|Original|hCoV-19^^England|Human|Department of Pathology|COVID-19 Genomics UK (COG-UK) Consortium|Goodfellow|United Kingdom

>Spike|hCoV-19/England/QEUH-BCBA71/2020|2020-11-27|EPI\_ISL\_704644|Original|hCoV-19^^England|Human|Lighthouse Lab in Glasgow|Wellcome Sanger Institute for the COVID-19 Genomics UK (COG-UK) Consortium|Davies|United Kingdom

>Spike|hCoV-19/USA/NY-PV08448/2020|2020-03-17|EPI\_ISL\_421399|Original|hCoV-19^^New York|Human|MSHS Clinical Microbiology Laboratories|MSHS Pathogen Surveillance Program|van Bakel|USA

>Spike|hCoV-19/USA/LA-EVTL1287/2020|2020-12-10|EPI\_ISL\_778953|Original|hCoV-19^^Louisiana|Human|LSUHS Emerging Viral Threat Laboratory|Microbial Genome Sequencing Center|Kamil|USA

>Spike|hCoV-19/Bangladesh/BCSIR-NILMRC-362/2020|2020-07-24|EPI\_ISL\_514235|Original|hCoV-19^^Chittagong|Human|National Institute of Laboratory Medicine and Referral Center|Genomic Research Lab|Khan|Bangladesh

>Spike|hCoV-19/England/BRIS-1853AAB/2020|2020-04-17|EPI\_ISL\_492222|Original|hCoV-19^^England|Human|PHE South West Regional Laboratory|Wellcome Sanger Institute for the COVID-19 Genomics UK (COG-UK) consortium|Davies|United Kingdom

>Spike|hCoV-19/England/CAMB-762E1/2020|2020-03-30|EPI\_ISL\_438413|Original|hCoV-19^^England|Human|Department of Pathology|Wellcome Sanger Institute for the COVID-19 Genomics UK (COG-UK) consortium|Amato|United Kingdom

>Spike|hCoV-19/England/MILK-994CAA/2020|2020-08-25|EPI\_ISL\_552388|Original|hCoV-19^^England|Human|Lighthouse Lab in Milton Keynes|Wellcome Sanger Institute for the COVID-19 Genomics UK (COG-UK) consortium|Davies|United Kingdom

>Spike|hCoV-19/Canada/NS-NML-1280/2020|2020-04-16|EPI\_ISL\_579665|Original|hCoV-19^^Nova Scotia|Human|QEII Health Sciences Centre|National Microbiology Laboratory (NML)|Majer|Canada

>Spike|hCoV-19/USA/MA-MGH-00238/2020|2020-04-06|EPI\_ISL\_460365|Original|hCoV-19^^Massachusetts|Human|Massachusetts General Hospital|Infectious Disease Program|Lemieux|USA

>Spike|hCoV-19/England/MILK-A7C463/2020|2020-10-15|EPI\_ISL\_606522|Original|hCoV-19^^England|Human|Lighthouse Lab in Milton Keynes|Wellcome Sanger Institute for the COVID-19 Genomics UK (COG-UK) consortium|Davies|United Kingdom

>Spike|hCoV-19/Wales/PHWC-4A1902/2020|2020-12-11|EPI\_ISL\_743745|Original|hCoV-19^^Wales|Human|Wales Specialist Virology Centre Sequencing lab|COVID-19 Genomics UK (COG-UK) Consortium|Moore|United Kingdom

>Spike|hCoV-19/Belgium/ULG-10998/2020|2020-11-14|EPI\_ISL\_707714|Original|hCoV-19^^Li\u00e8ge|Human|Department of Clinical Microbiology|GIGA Medical Genomics|Durkin|Belgium

>Spike|hCoV-19/England/MILK-843106/2020|2020-07-16|EPI\_ISL\_557325|Original|hCoV-19^^England|Human|Lighthouse Lab in Milton Keynes|Wellcome Sanger Institute for the COVID-19 Genomics UK (COG-UK) consortium|Davies|United Kingdom

>Spike|hCoV-19/USA/AZ-TG664539/2020|2020-04-20|EPI\_ISL\_696156|Original|hCoV-19^^Arizona|Human|Sonora Quest Laboratories|TGen North|French|USA

>Spike|hCoV-19/USA/AZ-TG408214/2020|2020-06-17|EPI\_ISL\_694950|Original|hCoV-19^^Arizona|Human|AZ SPHL|TGen North|French|USA

>Spike|hCoV-19/England/GSTT-265E23E/2020|2020-03-31|EPI\_ISL\_484173|Original|hCoV-19^^England|Human|Centre for Clinical Infection and Diagnostics Research and Genomics Innovation Unit|COVID-19 Genomics UK (COG-UK) Consortium|Awan|United Kingdom

>Spike|hCoV-19/USA/TX-DSHS-1865/2020|2020-06-24|EPI\_ISL\_745300|Original|hCoV-19^^Texas|Human|Texas Department of State Health Services|Texas Department of State Health Services|Rahman|USA

>Spike|hCoV-19/England/QEUH-96E016/2020|2020-08-18|EPI\_ISL\_530606|Original|hCoV-19^^England|Human|Lighthouse Lab in Glasgow|Wellcome Sanger Institute for the COVID-19 Genomics UK (COG-UK) consortium|Davies|United Kingdom

>Spike|hCoV-19/Wales/PHWC-488D50/2020|2020-11-03|EPI\_ISL\_639497|Original|hCoV-19^^Wales|Human|Wales Specialist Virology Centre Sequencing lab|COVID-19 Genomics UK (COG-UK) Consortium|Moore|United Kingdom

>Spike|hCoV-19/Portugal/PT0326/2020|2020-03-16|EPI\_ISL\_454042|Original|hCoV-19^^Portugal|Human|unknown|Instituto Nacional de Saude (INSA)|Borges|Portugal

>Spike|hCoV-19/England/ALDP-745A82/2020|2020-06-29|EPI\_ISL\_557398|Original|hCoV-19^^England|Human|Lighthouse Lab in Alderley Park|Wellcome Sanger Institute for the COVID-19 Genomics UK (COG-UK) consortium|Davies|United Kingdom

>Spike|hCoV-19/USA/MI-MDHHS-SC22638/2020|2020-12-02|EPI\_ISL\_737127|Original|hCoV-19^^Michigan|Human|Michigan Department of Health and Human Services|Michigan Department of Health and Human Services|Blankenship|USA

>Spike|hCoV-19/England/QEUH-CCD8B0/2020|2020-12-24|EPI\_ISL\_782464|Original|hCoV-19^^England|Human|Lighthouse Lab in Glasgow|Wellcome Sanger Institute for the COVID-19 Genomics UK (COG-UK) Consortium|Davies|United Kingdom

>Spike|hCoV-19/Australia/VIC17233/2020|2020-08-14|EPI\_ISL\_663807|Original|hCoV-19^^Victoria|Human|Microbiological Diagnostic Unit - Public Health Laboratory (MDU-PHL)|MDU-PHL|Schultz|Australia

>Spike|hCoV-19/USA/MA-MGH-03575/2020|2020-12-01|EPI\_ISL\_765890|Original|hCoV-19^^Massachusetts|Human|Massachusetts General Hospital|Infectious Disease Program|Park|USA

>Spike|hCoV-19/England/QEUH-B13C47/2020|2020-11-02|EPI\_ISL\_641871|Original|hCoV-19^^England|Human|Lighthouse Lab in Glasgow|Wellcome Sanger Institute for the COVID-19 Genomics UK (COG-UK) Consortium|Davies|United Kingdom

>Spike|hCoV-19/England/ALDP-94FCF9/2020|2020-06-16|EPI\_ISL\_555194|Original|hCoV-19^^England|Human|Lighthouse Lab in Alderley Park|Wellcome Sanger Institute for the COVID-19 Genomics UK (COG-UK) consortium|Davies|United Kingdom

>Spike|hCoV-19/England/ALDP-A68655/2020|2020-10-12|EPI\_ISL\_630409|Original|hCoV-19^^England|Human|Lighthouse Lab in Alderley Park|Wellcome Sanger Institute for the COVID-19 Genomics UK (COG-UK) consortium|Davies|United Kingdom

>Spike|hCoV-19/USA/CA-CDPH290/2020|2020-11-28|EPI\_ISL\_755111|Original|hCoV-19^^California|Human|California Department of Public Health|California Department of Public Health|Bell|USA

>Spike|hCoV-19/Denmark/DCGC-2095/2020|2020-07-27|EPI\_ISL\_618354|Original|hCoV-19^^Sjaelland|Human|Department of Virus and Microbiological Special Diagnostics|Albertsen lab|Michaelsen|Denmark

>Spike|hCoV-19/USA/TX-HMH-MCoV-15841/2020|2020-07-10|EPI\_ISL\_785525|Original|hCoV-19^^Texas|Human|Houston Methodist Hospital|Houston Methodist Hospital|Long|USA

>Spike|hCoV-19/Denmark/DCGC-5592/2020|2020-09-28|EPI\_ISL\_620917|Original|hCoV-19^^Sjaelland|Human|Department of Virus and Microbiological Special Diagnostics|Albertsen lab|Michaelsen|Denmark

>Spike|hCoV-19/Spain/AN-IBV-003009/2020|2020-04-01|EPI\_ISL\_474832|Original|hCoV-19^^Andalucia|Human|Hospital Universitario Virgen de las Nieves de Granada-SAS|SeqCOVID-SPAIN consortium|IBV(CSIC)|Comas|Spain

>Spike|hCoV-19/USA/WA-UW-13082/2020|2020-06-30|EPI\_ISL\_570949|Original|hCoV-19^^Washington|Human|UW Virology Lab|UW Virology Lab|Roychoudhury|USA

>Spike|hCoV-19/England/CAMB-1BBDA2/2020|2020-11-14|EPI\_ISL\_679232|Original|hCoV-19^^England|Human|Department of Pathology|COVID-19 Genomics UK (COG-UK) Consortium|Goodfellow|United Kingdom

>Spike|hCoV-19/England/PORT-2D43A0/2020|2020-09-22|EPI\_ISL\_577202|Original|hCoV-19^^England|Human|Centre for Enzyme Innovation|COVID-19 Genomics UK (COG-UK) Consortium|Robson|United Kingdom

>Spike|hCoV-19/USA/GA-EHC-161G/2020|2020-04-09|EPI\_ISL\_754748|Original|hCoV-19^^Georgia|Human|Emory Molecular Diagnostics Laboratory|Piantadosi Lab|Piantadosi|USA

>Spike|hCoV-19/USA/CA-CZB-15289/2020|2020-11-30|EPI\_ISL\_738855|Original|hCoV-19^^California|Human|Santa Clara County Public Health Laboratory|Chan-Zuckerberg Biohub|Kamm|USA

>Spike|hCoV-19/France/PAC-IHU-0785/2020|2020-04-29|EPI\_ISL\_568961|Original|hCoV-19^^Provence-Alpes-C\u00f4te-d\u2019Azur|Human|MEPHI|MEPHI|Levasseur|France

>Spike|hCoV-19/Austria/CeMM0216/2020|2020-03-16|EPI\_ISL\_438050|Original|hCoV-19^^Vienna|Human|Center for Virology|Bergthaler laboratory|Bergthaler|Austria

>Spike|hCoV-19/England/CAMC-A8241F/2020|2020-10-12|EPI\_ISL\_610788|Original|hCoV-19^^England|Human|Lighthouse Lab in Cambridge|Wellcome Sanger Institute for the COVID-19 Genomics UK (COG-UK) consortium|Davies|United Kingdom

>Spike|hCoV-19/USA/MI-MDHHS-SC22401/2020|2020-11-11|EPI\_ISL\_708234|Original|hCoV-19^^Michigan|Human|Michigan Department of Health and Human Services|Michigan Department of Health and Human Services|Jacob|USA

>Spike|hCoV-19/England/MILK-99CEBB/2020|2020-08-31|EPI\_ISL\_549847|Original|hCoV-19^^England|Human|Lighthouse Lab in Milton Keynes|Wellcome Sanger Institute for the COVID-19 Genomics UK (COG-UK) consortium|Davies|United Kingdom

>Spike|hCoV-19/Portugal/PT0196/2020|2020-03-29|EPI\_ISL\_453912|Original|hCoV-19^^Portugal|Human|unknown|Instituto Nacional de Saude (INSA)|Borges|Portugal

>Spike|hCoV-19/Japan/PG-5967/2020|2020-07-00|EPI\_ISL\_689082|Original|hCoV-19^^Japan|Human|Tokyo Metropolitan Institute of Public Health|Pathogen Genomics Center|Sekizuka|Japan

>Spike|hCoV-19/South Africa/LR00142/2020|2020-07-20|EPI\_ISL\_514373|Original|hCoV-19^^Gauteng|Human|National Institute for Communicable Diseases of the National Health Laboratory Service|National Institute for Communicable Diseases of the National Health Laboratory Service|Allam|South Africa

>Spike|hCoV-19/England/QEUA-9DD58C/2020|2020-09-21|EPI\_ISL\_599679|Original|hCoV-19^^England|Human|Lighthouse Lab in Glasgow|Wellcome Sanger Institute for the COVID-19 Genomics UK (COG-UK) consortium|Davies|United Kingdom

>Spike|hCoV-19/England/QEUA-B7ED56/2020|2020-11-14|EPI\_ISL\_661810|Original|hCoV-19^^England|Human|Lighthouse Lab in Glasgow|Wellcome Sanger Institute for the COVID-19 Genomics UK (COG-UK) Consortium|Davies|United Kingdom

>Spike|hCoV-19/Japan/PG-2675/2020|2020-06-00|EPI\_ISL\_690807|Original|hCoV-19^^Japan|Human|Tokyo Metropolitan Institute of Public Health|Pathogen Genomics Center|Sekizuka|Japan

>Spike|hCoV-19/Wales/PHWC-4970A0/2020|2020-11-25|EPI\_ISL\_726774|Original|hCoV-19^^Wales|Human|Originating lab|COVID-19 Genomics UK (COG-UK) Consortium|Moore|United Kingdom

>Spike|hCoV-19/England/LIVE-9E632/2020|2020-04-11|EPI\_ISL\_453318|Original|hCoV-19^^England|Human|Liverpool Clinical Laboratories|COVID-19 Genomics UK (COG-UK) Consortium|Haldenby|United Kingdom

>Spike|hCoV-19/Hong Kong/VB20090660/2020|2020-07-07|EPI\_ISL\_510082|Original|hCoV-19^^Hong Kong|Human|Communicable Disease Branch|Hong Kong Department of Health|Mak|China

>Spike|hCoV-19/USA/NY-NYUMC819/2020|2020-03-27|EPI\_ISL\_456055|Original|hCoV-19^^New York|Human|NYU Langone Health|Departments of Pathology and Medicine|Maurano|USA

>Spike|hCoV-19/England/ALDP-B24487/2020|2020-11-04|EPI\_ISL\_646876|Original|hCoV-19^^England|Human|Lighthouse Lab in Alderley Park|Wellcome Sanger Institute for the COVID-19 Genomics UK (COG-UK) Consortium|Davies|United Kingdom

>Spike|hCoV-19/England/ALDP-4AD21A/2020|2020-06-14|EPI\_ISL\_559301|Original|hCoV-19^^England|Human|Lighthouse Lab in Alderley Park|Wellcome Sanger Institute for the COVID-19 Genomics UK (COG-UK) consortium|Davies|United Kingdom

>Spike|hCoV-19/England/QEUA-AAEC9D/2020|2020-10-22|EPI\_ISL\_652996|Original|hCoV-19^^England|Human|Oxford Viromics|COVID-19 Genomics UK (COG-UK) Consortium|Golubchik|United Kingdom

>Spike|hCoV-19/Norway/2799/2020|2020-06-26|EPI\_ISL\_493365|Original|hCoV-19^^Norway|Human|Furst Medical Laboratory|Norwegian Institute of Public Health|Kopperud Riis|Norway

>Spike|hCoV-19/England/ALDP-A6D3C2/2020|2020-10-15|EPI\_ISL\_608003|Original|hCoV-19^^England|Human|Lighthouse Lab in Alderley Park|Wellcome Sanger Institute for the COVID-19 Genomics UK (COG-UK) consortium|Davies|United Kingdom

>Spike|hCoV-19/Singapore/1135/2020|2020-02-07|EPI\_ISL\_648043|Original|hCoV-19^^Singapore|Human|Department of Laboratory Medicine|Department of Laboratory Medicine|Chen|Singapore

>Spike|hCoV-19/South Korea/KCDC2058/2020|2020-02-22|EPI\_ISL\_481378|Original|hCoV-19^^South Korea|Human|Division of Viral Diseases|Division of Viral Diseases|Kim|South Korea

>Spike|hCoV-19/USA/NM-LANL-2020016073/2020|2020-04-07|EPI\_ISL\_596447|Original|hCoV-19^^New Mexico|Human|New Mexico Department of Health Scientific Laboratory Division|Los Alamos National Laboratory Bioscience Division|Lo|USA

>Spike|hCoV-19/Hong Kong/HKU-913a/2020|2020-01-31|EPI\_ISL\_450410|unknown|hCoV-19^^Hong Kong|Human|unknown|Microbiology|Submitter|China

>Spike|hCoV-19/USA/MD-MDH-0183/2020|2020-03-08|EPI\_ISL\_538267|Original|hCoV-19^^Maryland|Human|Maryland Public Health Laboratory|Maryland Public Health Laboratory|Keller|USA

>Spike|hCoV-19/Australia/VIC5716/2020|2020-07-18|EPI\_ISL\_518518|Original|hCoV-19^^Victoria|Human|Microbiological Diagnostic Unit - Public Health Laboratory (MDU-PHL)|MDU-PHL|Schultz|Australia

>Spike|hCoV-19/England/QEUI-B7E54F/2020|2020-11-14|EPI\_ISL\_667950|Original|hCoV-19^^England|Human|Lighthouse Lab in Glasgow|Wellcome Sanger Institute for the COVID-19 Genomics UK (COG-UK) Consortium|Davies|United Kingdom

>Spike|hCoV-19/Wales/MILK-974B2B/2020|2020-08-21|EPI\_ISL\_552496|Original|hCoV-19^^Wales|Human|Lighthouse Lab in Milton Keynes|Wellcome Sanger Institute for the COVID-19 Genomics UK (COG-UK) consortium|Davies|United Kingdom

>Spike|hCoV-19/Wales/PHWC-16E37F/2020|2020-10-02|EPI\_ISL\_585706|Original|hCoV-19^^Wales|Human|Wales Specialist Virology Centre Sequencing lab|COVID-19 Genomics UK (COG-UK) Consortium|Moore|United Kingdom

>Spike|hCoV-19/England/QEUI-C93A62/2020|2020-12-16|EPI\_ISL\_777021|Original|hCoV-19^^England|Human|Lighthouse Lab in Glasgow|Wellcome Sanger Institute for the COVID-19 Genomics UK (COG-UK) Consortium|Davies|United Kingdom

>Spike|hCoV-19/Denmark/DCGC-4026/2020|2020-09-14|EPI\_ISL\_615798|Original|hCoV-19^^Sjaelland|Human|Department of Virus and Microbiological Special Diagnostics|Albertsen lab|Michaelsen|Denmark

>Spike|hCoV-19/England/204742206/2020|2020-00-00|EPI\_ISL\_649915|Original|hCoV-19^^England|Human|Respiratory Virus Unit|COVID-19 Genomics UK (COG-UK) Consortium|Platt|United Kingdom

>Spike|hCoV-19/USA/MI-MDHHS-SC22170/2020|2020-10-20|EPI\_ISL\_614221|Original|hCoV-19^^Michigan|Human|Michigan Department of Health and Human Services|Michigan Department of Health and Human Services|Jacob|USA

>Spike|hCoV-19/England/QEUI-B6B79A/2020|2020-11-11|EPI\_ISL\_662512|Original|hCoV-19^^England|Human|Lighthouse Lab in Glasgow|Wellcome Sanger Institute for the COVID-19 Genomics UK (COG-UK) Consortium|Davies|United Kingdom

>Spike|hCoV-19/Belgium/regal-12111354/2020|2020-12-11|EPI\_ISL\_738407|Original|hCoV-19^^Mol|Human|UZ Leuven|KU Leuven|Maes|Belgium

>Spike|hCoV-19/Switzerland/ZH-ETHZ-101181/2020|2020-03-31|EPI\_ISL\_451843|Original|hCoV-19^^Zurich|Human|Viollier AG|Department of Biosystems Science and Engineering|Nadeau|Switzerland

>Spike|hCoV-19/Scotland/QEUI-960542/2020|2020-08-05|EPI\_ISL\_532049|Original|hCoV-19^^Scotland|Human|NHSGGC West of Scotland Specialist Virology Centre / MRC-University of Glasgow Centre for Virus Research|Wellcome Sanger Institute for the COVID-19 Genomics UK (COG-UK) consortium|Davies|United Kingdom

>Spike|hCoV-19/Denmark/DCGC-2412/2020|2020-08-10|EPI\_ISL\_617594|Original|hCoV-19^^Syddanmark|Human|Department of Virus and Microbiological Special Diagnostics|Albertsen lab|Michaelsen|Denmark

>Spike|hCoV-19/England/CAMB-77D2B/2020|2020-04-01|EPI\_ISL\_440601|Original|hCoV-19^^England|Human|Department of Pathology|Wellcome Sanger Institute for the COVID-19 Genomics UK (COG-UK) consortium|Amato|United Kingdom

>Spike|hCoV-19/USA/CA-ALSR-2016/2020|2020-05-09|EPI\_ISL\_635307|Original|hCoV-19^^California|Human|San Diego County Public Health Laboratory|Andersen lab at Scripps Research|Gangavarapu|USA

>Spike|hCoV-19/Scotland/QEUI-AD0597/2020|2020-10-26|EPI\_ISL\_649749|Original|hCoV-19^^Scotland|Human|Lighthouse Lab in Glasgow|Wellcome Sanger Institute for the COVID-19 Genomics UK (COG-UK) Consortium|Davies|United Kingdom

>Spike|hCoV-19/Scotland/EDB8035/2020|2020-10-01|EPI\_ISL\_594817|Original|hCoV-19^^Scotland|Human|Virology Department|COVID-19 Genomics UK (COG-UK) Consortium|McHugh|United Kingdom

>Spike|hCoV-19/Wales/PHWC-4A4125/2020|2020-12-16|EPI\_ISL\_763597|Original|hCoV-19^^Wales|Human|Wales Specialist Virology Centre Sequencing lab|COVID-19 Genomics UK (COG-UK) Consortium|Moore|United Kingdom

>Spike|hCoV-19/Japan/PG-8254/2020|2020-08-00|EPI\_ISL\_687353|Original|hCoV-19^^Japan|Human|Pathogen Genomics Center|Pathogen Genomics Center|Sekizuka|Japan

>Spike|hCoV-19/USA/WI-UW-1431/2020|2020-09-11|EPI\_ISL\_541564|Original|hCoV-19^^Wisconsin|Human|University of Wisconsin-Madison Campus AIDS Vaccine Research Laboratories|University of Wisconsin-Madison AIDS Vaccine Research Laboratories|Baczenas|USA

>Spike|hCoV-19/England/ALDP-B8387B/2020|2020-11-14|EPI\_ISL\_675214|Original|hCoV-19^^England|Human|Lighthouse Lab in Alderley Park|Wellcome Sanger Institute for the COVID-19 Genomics UK (COG-UK) Consortium|Davies|United Kingdom

>Spike|hCoV-19/USA/MO-WUSTL032/2020|2020-06-19|EPI\_ISL\_476021|Original|hCoV-19^^Missouri|Human|Washington University in St. Louis|Washington University in St. Louis|Tahan|USA

>Spike|hCoV-19/Japan/PG-6358/2020|2020-08-00|EPI\_ISL\_689469|Original|hCoV-19^^Japan|Human|Fukuoka Institute of Health and Environmental Sciences|Pathogen Genomics Center|Sekizuka|Japan

>Spike|hCoV-19/USA/FL-BPHL-0141/2020|2020-03-09|EPI\_ISL\_480792|Original|hCoV-19^^Florida|Human|Florida Bureau of Public Health Laboratories|Florida Bureau of Public Health Laboratories|Blanton|USA

>Spike|hCoV-19/USA/UT-QDX-1901/2020|2020-03-13|EPI\_ISL\_604283|Original|hCoV-19^^Utah|Human|Quest Diagnostics|Quest Diagnostics|Kagan|USA

>Spike|hCoV-19/USA/WA-UW-4732/2020|2020-03-29|EPI\_ISL\_429616|Original|hCoV-19^^Washington|Human|UW Virology Lab|UW Virology Lab|Roychoudhury|USA

>Spike|hCoV-19/Luxembourg/LNS1673015/2020|2020-04-21|EPI\_ISL\_434488|Original|hCoV-19^^Luxembourg|Human|Laboratoire National de Sante|Laboratoire National de Sante|Wienecke-Baldacchino|Luxembourg

>Spike|hCoV-19/England/QEUEH-A0072F/2020|2020-09-30|EPI\_ISL\_600292|Original|hCoV-19^^England|Human|Lighthouse Lab in Glasgow|Wellcome Sanger Institute for the COVID-19 Genomics UK (COG-UK) consortium|Davies|United Kingdom

>Spike|hCoV-19/USA/CA-ALSR-1125/2020|2020-04-04|EPI\_ISL\_494377|Original|hCoV-19^^California|Human|San Diego County Public Health Laboratory|Andersen lab at Scripps Research|Gangavarapu|USA

>Spike|hCoV-19/Scotland/EDB4235/2020|2020-04-21|EPI\_ISL\_453116|Original|hCoV-19^^Scotland|Human|Virology Department|COVID-19 Genomics UK (COG-UK) Consortium|Williams|United Kingdom

>Spike|hCoV-19/England/MILK-9A9228/2020|2020-08-31|EPI\_ISL\_551190|Original|hCoV-19^^England|Human|Lighthouse Lab in Milton Keynes|Wellcome Sanger Institute for the COVID-19 Genomics UK (COG-UK) consortium|Davies|United Kingdom

>Spike|hCoV-19/Scotland/QEUEH-9CFCF1/2020|2020-09-16|EPI\_ISL\_601824|Original|hCoV-19^^Scotland|Human|Lighthouse Lab in Glasgow|Wellcome Sanger Institute for the COVID-19 Genomics UK (COG-UK) consortium|Davies|United Kingdom

>Spike|hCoV-19/USA/MI-UM-10036824672/2020|2020-11-06|EPI\_ISL\_728418|Original|hCoV-19^^Michigan|Human|University of Michigan Clinical Microbiology Laboratory|Lauring Lab|Valesano|USA

>Spike|hCoV-19/USA/MA-MGH-01120/2020|2020-05-02|EPI\_ISL\_791882|Original|hCoV-19^^Massachusetts|Human|Massachusetts General Hospital|Infectious Disease Program|Park|USA

>Spike|hCoV-19/USA/NY-QDX-841/2020|2020-03-17|EPI\_ISL\_571652|Original|hCoV-19^^New York|Human|Quest Diagnostics|Quest Diagnostics|Kagan|USA

>Spike|hCoV-19/New Zealand/20VR2956/2020|2020-00-00|EPI\_ISL\_579375|Original|hCoV-19^^Auckland|Human|LabPLUS|Institute of Environmental Science and Research (ESR)|Wang|New Zealand

>Spike|hCoV-19/USA/LA-EVTL1280/2020|2020-12-10|EPI\_ISL\_778946|Original|hCoV-19^^Louisiana|Human|LSUHS Emerging Viral Threat Laboratory|Microbial Genome Sequencing Center|Kamil|USA

>Spike|hCoV-19/United Arab Emirates/0516/2020|2020-05-17|EPI\_ISL\_698679|Original|hCoV-19^^Abu Dhabi|Human|Group 42 (G42) Healthcare|G42 Healthcare|Ogrodzki|United Arab Emirates

>Spike|hCoV-19/Scotland/EDB1095/2020|2020-04-07|EPI\_ISL\_433391|Original|hCoV-19^^Scotland|Human|Virology Department|COVID-19 Genomics UK (COG-UK) Consortium|Williams|United Kingdom

>Spike|hCoV-19/England/LEED-2AA6E6/2020|2020-04-01|EPI\_ISL\_538983|Original|hCoV-19^^England|Human|Leeds Teaching Hospitals NHS Trust and Public Health England|Wellcome Sanger Institute for the COVID-19 Genomics UK (COG-UK) consortium|Davies|United Kingdom

>Spike|hCoV-19/Luxembourg/LNS7680274/2020|2020-11-05|EPI\_ISL\_744611|Original|hCoV-19^^Luxembourg|Human|Laboratoire national de sant\u00e9|Laboratoire national de sant\u00e9|Wienecke-Baldacchino|Luxembourg

>Spike|hCoV-19/England/LIVE-A3C92/2020|2020-05-19|EPI\_ISL\_500020|Original|hCoV-19^^England|Human|Liverpool Clinical Laboratories|COVID-19 Genomics UK (COG-UK) Consortium|Haldenby|United Kingdom

>Spike|hCoV-19/England/NORT-2A45FE/2020|2020-09-04|EPI\_ISL\_572702|Original|hCoV-19^^England|Human|Northumbria University / South Tees Hospitals NHS Foundation Trust / North Cumbria Integrated Care NHS Foundation Trust / North Tees and Hartlepool NHS Foundation Trust / Newcastle Hospitals NHS Foundation Trust|COVID-19 Genomics UK (COG-UK) Consortium|Bashton|United Kingdom

>Spike|hCoV-19/Denmark/DCGC-7414/2020|2020-10-12|EPI\_ISL\_619340|Original|hCoV-19^^Midtjylland|Human|Department of Virus and Microbiological Special Diagnostics|Albertsen lab|Michaelsen|Denmark

>Spike|hCoV-19/Denmark/DCGC-3049/2020|2020-08-31|EPI\_ISL\_616829|Original|hCoV-19^^Syddanmark|Human|Department of Virus and Microbiological Special Diagnostics|Albertsen lab|Michaelsen|Denmark

>Spike|hCoV-19/USA/VA-DCLS-1790/2020|2020-09-16|EPI\_ISL\_644874|Original|hCoV-19^^Virginia|Human|Virginia DCLS|Virginia DCLS|St. Jacques|USA

>Spike|hCoV-19/Switzerland/ZH-ETHZ-170020/2020|2020-06-24|EPI\_ISL\_486532|Original|hCoV-19^^Zurich|Human|Viollier AG|Department of Biosystems Science and Engineering|Nadeau|Switzerland

>Spike|hCoV-19/Ireland/CE-UHL58/2020|2020-05-01|EPI\_ISL\_681716|Original|hCoV-19^^Clare|Human|University Hospital Limerick|Irish Coronavirus Sequencing Consortium - Teagasc Moorepark|Walsh|Ireland

>Spike|hCoV-19/England/CAMC-C40369/2020|2020-12-10|EPI\_ISL\_718473|Original|hCoV-19^^England|Human|Lighthouse Lab in Cambridge|Wellcome Sanger Institute for the COVID-19 Genomics UK (COG-UK) Consortium|Davies|United Kingdom

>Spike|hCoV-19/Scotland/GCVR-1712C7/2020|2020-03-26|EPI\_ISL\_459680|Original|hCoV-19^^Scotland|Human|NHS GGC West of Scotland Specialist Virology Centre / MRC-University of Glasgow Centre for Virus Research|Wellcome Sanger Institute for the COVID-19 Genomics UK (COG-UK) consortium|Davies|United Kingdom

>Spike|hCoV-19/USA/CA-CZB-1060/2020|2020-04-08|EPI\_ISL\_437060|Original|hCoV-19^^California|Human|County of Santa Clara Public Health|Chan-Zuckerberg Biohub|Hao|USA

>Spike|hCoV-19/USA/TX-DSHS-2062/2020|2020-12-08|EPI\_ISL\_766658|Original|hCoV-19^^Texas|Human|Texas Department of State Health Services|Texas Department of State Health Services|Rahman|USA

>Spike|hCoV-19/Denmark/DCGC-12795/2020|2020-11-02|EPI\_ISL\_682976|Original|hCoV-19^^Nordjylland|Human|Department of Virus and Microbiological Special Diagnostics|Albertsen Lab|Michaelsen|Denmark

>Spike|hCoV-19/Kenya/C571/2020|2020-04-12|EPI\_ISL\_568702|Original|hCoV-19^^Mombasa|Human|KEMRI-Wellcome Trust Research Programme/KEMRI-CGMR-C Kilifi|KEMRI-Wellcome Trust Research Programme/KEMRI-CGMR-C Kilifi|Githinji|Kenya

>Spike|hCoV-19/USA/WI-UW-312/2020|2020-04-27|EPI\_ISL\_436606|Original|hCoV-19^^Wisconsin|Human|University of Wisconsin-Madison AIDS Vaccine Research Laboratories|University of Wisconsin-Madison AIDS Vaccine Research Laboratories|Baczenas|USA



>Spike|hCoV-19/Germany/SN-RKI-NP-0070/2020|2020-12-17|EPI\_ISL\_763010|Original|hCoV-19^^Saxony|Human|Unit 17|Project group Epidemiology of Highly Pathogenic Microorganisms|Schubert|Germany

>Spike|hCoV-19/Wales/PHWC-490256/2020|2020-11-19|EPI\_ISL\_706462|Original|hCoV-19^^Wales|Human|Originating lab|COVID-19 Genomics UK (COG-UK) Consortium|Moore|United Kingdom

>Spike|hCoV-19/USA/TX-HMH-MCoV-15968/2020|2020-07-10|EPI\_ISL\_785652|Original|hCoV-19^^Texas|Human|Houston Methodist Hospital|Houston Methodist Hospital|Long|USA

>Spike|hCoV-19/England/MILK-B8616E/2020|2020-11-13|EPI\_ISL\_673961|Original|hCoV-19^^England|Human|Lighthouse Lab in Milton Keynes|Wellcome Sanger Institute for the COVID-19 Genomics UK (COG-UK) Consortium|Davies|United Kingdom

>Spike|hCoV-19/Australia/VIC11713/2020|2020-07-24|EPI\_ISL\_591838|Original|hCoV-19^^Victoria|Human|Microbiological Diagnostic Unit - Public Health Laboratory (MDU-PHL)|MDU-PHL|Schultz|Australia

>Spike|hCoV-19/USA/WA-S2513/2020|2020-06-17|EPI\_ISL\_497145|Original|hCoV-19^^Washington|Human|Washington State Department of Health|Seattle Flu Study|Lee|USA

>Spike|hCoV-19/England/QEUEH-9F820C/2020|2020-09-27|EPI\_ISL\_589001|Original|hCoV-19^^England|Human|Lighthouse Lab in Glasgow|Wellcome Sanger Institute for the COVID-19 Genomics UK (COG-UK) consortium|Davies|United Kingdom

>Spike|hCoV-19/USA/IL-NM-1047/2020|2020-06-04|EPI\_ISL\_626492|Original|hCoV-19^^Illinois|Human|Northwestern Memorial Hospital|Ozer Lab|Ozer|USA

>Spike|hCoV-19/England/ALDP-5A3DF4/2020|2020-06-14|EPI\_ISL\_558769|Original|hCoV-19^^England|Human|Lighthouse Lab in Alderley Park|Wellcome Sanger Institute for the COVID-19 Genomics UK (COG-UK) consortium|Davies|United Kingdom

>Spike|hCoV-19/England/C200045842/2020|2020-11-10|EPI\_ISL\_664086|Original|hCoV-19^^England|Human|Respiratory Virus Unit|COVID-19 Genomics UK (COG-UK) Consortium|Platt|United Kingdom

>Spike|hCoV-19/England/ALDP-BB9F77/2020|2020-11-20|EPI\_ISL\_701971|Original|hCoV-19^^England|Human|Lighthouse Lab in Alderley Park|Wellcome Sanger Institute for the COVID-19 Genomics UK (COG-UK) Consortium|Davies|United Kingdom

>Spike|hCoV-19/USA/WI-GMF-20111/2020|2020-09-13|EPI\_ISL\_547849|Original|hCoV-19^^Wisconsin|Human|Gundersen Molecular Diagnostics Laboratory|Kabara Cancer Research Institute|Kenny|USA

>Spike|hCoV-19/England/CAMC-9DF283/2020|2020-09-20|EPI\_ISL\_638401|Original|hCoV-19^^England|Human|Department of Pathology|COVID-19 Genomics UK (COG-UK) Consortium|Goodfellow|United Kingdom

>Spike|hCoV-19/Wales/PHWC-49A92A/2020|2020-12-02|EPI\_ISL\_727619|Original|hCoV-19^^Wales|Human|Originating lab|COVID-19 Genomics UK (COG-UK) Consortium|Moore|United Kingdom

>Spike|hCoV-19/Malaysia/UNIMAS-15287/2020|2020-10-01|EPI\_ISL\_718214|Original|hCoV-19^^Sarawak|Human|Ministry of Health Hospitals|Institute of Health and Community Medicine|Jonathan|Malaysia

>Spike|hCoV-19/England/20109002704/2020|2020-03-03|EPI\_ISL\_464506|Original|hCoV-19^^England|Human|Respiratory Virus Unit|Respiratory Virus Unit|Platt|United Kingdom

>Spike|hCoV-19/USA/GA-CDC-7543/2020|2020-10-23|EPI\_ISL\_681794|Original|hCoV-19^^Georgia|Human|GA Department of Public Health Laboratory|Pathogen Discovery|Queen|USA

>Spike|hCoV-19/Brazil/SP-RP2/2020|2020-03-22|EPI\_ISL\_613709|Original|hCoV-19^^S\u00e3o Paulo|Human|Laboratory of Molecular Biology|Laboratory of Molecular Biology|Slavov|Brazil

>Spike|hCoV-19/USA/MI-QDX-2086/2020|2020-03-18|EPI\_ISL\_604459|Original|hCoV-19^^Michigan|Human|Quest Diagnostics|Quest Diagnostics|Kagan|USA

>Spike|hCoV-19/USA/VA-DCLS-1168/2020|2020-07-18|EPI\_ISL\_525195|Original|hCoV-19^^Virginia|Human|Virginia DCLS|Virginia DCLS|St. Jacques|USA

>Spike|hCoV-19/England/CAMB-1AB8D1/2020|2020-04-20|EPI\_ISL\_470203|Original|hCoV-19^^England|Human|Department of Pathology|Wellcome Sanger Institute for the COVID-19 Genomics UK (COG-UK) consortium|Davies|United Kingdom

>Spike|hCoV-19/England/QEUEH-B9F8A9/2020|2020-11-18|EPI\_ISL\_721101|Original|hCoV-19^^England|Human|Lighthouse Lab in Glasgow|Wellcome Sanger Institute for the COVID-19 Genomics UK (COG-UK) Consortium|Davies|United Kingdom

>Spike|hCoV-19/England/CAMC-B98FE7/2020|2020-11-15|EPI\_ISL\_673533|Original|hCoV-19^^England|Human|Lighthouse Lab in Cambridge|Wellcome Sanger Institute for the COVID-19 Genomics UK (COG-UK) Consortium|Davies|United Kingdom

>Spike|hCoV-19/England/ALDP-A2D59B/2020|2020-10-06|EPI\_ISL\_586835|Original|hCoV-19^^England|Human|Lighthouse Lab in Alderley Park|Wellcome Sanger Institute for the COVID-19 Genomics UK (COG-UK) consortium|Davies|United Kingdom

>Spike|hCoV-19/England/ALDP-A69478/2020|2020-10-12|EPI\_ISL\_608885|Original|hCoV-19^^England|Human|Lighthouse Lab in Alderley Park|Wellcome Sanger Institute for the COVID-19 Genomics UK (COG-UK) consortium|Davies|United Kingdom

>Spike|hCoV-19/Australia/SAP390/2020|2020-03-19|EPI\_ISL\_492155|Original|hCoV-19^^South Australia|Human|SA Pathology|SA Pathology|Leong|Australia

>Spike|hCoV-19/USA/UT-UPHL-2012590683/2020|2020-11-30|EPI\_ISL\_746870|Original|hCoV-19^^Utah|Human|Utah Public Health Laboratory|Utah Public Health Laboratory|Gallagher|USA

>Spike|hCoV-19/Australia/VIC9705/2020|2020-08-25|EPI\_ISL\_565663|Original|hCoV-19^^Victoria|Human|Microbiological Diagnostic Unit - Public Health Laboratory (MDU-PHL) |MDU-PHL|Schultz|Australia

>Spike|hCoV-19/Portugal/PT0276/2020|2020-04-05|EPI\_ISL\_453990|Original|hCoV-19^^Portugal|Human|unknown|Instituto Nacional de Saude (INSA)|Borges|Portugal

>Spike|hCoV-19/Denmark/DCGC-16252/2020|2020-11-16|EPI\_ISL\_714374|Original|hCoV-19^^Nordjylland|Human|Department of Virus and Microbiological Special Diagnostics|Albertsen Lab|Michaelsen|Denmark

>Spike|hCoV-19/Norway/5745/2020|2020-10-28|EPI\_ISL\_708156|Original|hCoV-19^^Vestfold og Telemark|Human|Vestfold Hospital|Norwegian Institute of Public Health|Kopperud Riis|Norway

>Spike|hCoV-19/New Zealand/20VR3150/2020|2020-03-22|EPI\_ISL\_579441|Original|hCoV-19^^Canterbury|Human|Canterbury Health Laboratories|Institute of Environmental Science and Research (ESR)|Wang|New Zealand

>Spike|hCoV-19/England/MILK-CAA01B/2020|2020-12-17|EPI\_ISL\_761517|Original|hCoV-19^^England|Human|Lighthouse Lab in Milton Keynes|Wellcome Sanger Institute for the COVID-19 Genomics UK (COG-UK) Consortium|Davies|United Kingdom

>Spike|hCoV-19/England/PORT-2D1EFD/2020|2020-04-05|EPI\_ISL\_499294|Original|hCoV-19^^England|Human|Centre for Enzyme Innovation|COVID-19 Genomics UK (COG-UK) Consortium|Robson|United Kingdom

>Spike|hCoV-19/England/201890916/2020|2020-04-30|EPI\_ISL\_526773|Original|hCoV-19^^England|Human|Respiratory Virus Unit|Respiratory Virus Unit|Miah|United Kingdom

>Spike|hCoV-19/England/QEUA-9F5005/2020|2020-09-24|EPI\_ISL\_588456|Original|hCoV-19^^England|Human|Lighthouse Lab in Glasgow|Wellcome Sanger Institute for the COVID-19 Genomics UK (COG-UK) consortium|Davies|United Kingdom

>Spike|hCoV-19/USA/UT-UPHL-201117069/2020|2020-04-20|EPI\_ISL\_648579|Original|hCoV-19^^Utah|Human|Utah Public Health Laboratory|Utah Public Health Laboratory|Young|USA

>Spike|hCoV-19/Scotland/CVR3962/2020|2020-08-03|EPI\_ISL\_514514|Original|hCoV-19^^Scotland|Human|West of Scotland Specialist Virology Centre|COVID-19 Genomics UK (COG-UK) Consortium|Robertson|United Kingdom

>Spike|hCoV-19/England/ALDP-A69171/2020|2020-10-13|EPI\_ISL\_608539|Original|hCoV-19^^England|Human|Lighthouse Lab in Alderley Park|Wellcome Sanger Institute for the COVID-19 Genomics UK (COG-UK) consortium|Davies|United Kingdom

>Spike|hCoV-19/USA/UT-UPHL-04856/2020|2020-05-23|EPI\_ISL\_575177|Original|hCoV-19^^Utah|Human|Utah Public Health Laboratory|Utah Public Health Laboratory|Young|USA

>Spike|hCoV-19/Northern Ireland/QEUA-79CC95/2020|2020-07-15|EPI\_ISL\_533077|Original|hCoV-19^^Northern Ireland|Human|Lighthouse Lab in Glasgow|Wellcome Sanger Institute for the COVID-19 Genomics UK (COG-UK) consortium|Davies|United Kingdom

>Spike|hCoV-19/England/ALDP-AC12CF/2020|2020-10-10|EPI\_ISL\_631074|Original|hCoV-19^^England|Human|Lighthouse Lab in Alderley Park|Wellcome Sanger Institute for the COVID-19 Genomics UK (COG-UK) consortium|Davies|United Kingdom

>Spike|hCoV-19/Japan/PG-6676/2020|2020-07-00|EPI\_ISL\_687787|Original|hCoV-19^^Japan|Human|Pathogen Genomics Center|Pathogen Genomics Center|Sekizuka|Japan

>Spike|hCoV-19/England/QEUA-9E43A6/2020|2020-09-21|EPI\_ISL\_579813|Original|hCoV-19^^England|Human|Lighthouse Lab in Glasgow|Wellcome Sanger Institute for the COVID-19 Genomics UK (COG-UK) consortium|Davies|United Kingdom

>Spike|hCoV-19/Scotland/QEUA-AD18F7/2020|2020-10-25|EPI\_ISL\_649698|Original|hCoV-19^^Scotland|Human|Lighthouse Lab in Glasgow|Wellcome Sanger Institute for the COVID-19 Genomics UK (COG-UK) Consortium|Davies|United Kingdom

>Spike|hCoV-19/England/CAMC-B0736F/2020|2020-10-30|EPI\_ISL\_643756|Original|hCoV-19^^England|Human|Lighthouse Lab in Cambridge|Wellcome Sanger Institute for the COVID-19 Genomics UK (COG-UK) Consortium|Davies|United Kingdom

>Spike|hCoV-19/USA/ME-HETL-J0141/2020|2020-09-09|EPI\_ISL\_755335|Original|hCoV-19^^Maine|Human|Maine Health and Environmental Testing Laboratory|Tewhey Lab|Tewhey|USA

>Spike|hCoV-19/England/CAMC-BD21EB/2020|2020-11-28|EPI\_ISL\_702025|Original|hCoV-19^^England|Human|Lighthouse Lab in Cambridge|Wellcome Sanger Institute for the COVID-19 Genomics UK (COG-UK) Consortium|Davies|United Kingdom

>Spike|hCoV-19/USA/CA-UCLA-30/2020|2020-05-31|EPI\_ISL\_537563|Original|hCoV-19^^California|Human|UCLA Pathology Clinical Microbiology Lab|Kruglyak Lab|Boocock|USA

>Spike|hCoV-19/England/LOND-126027C/2020|2020-03-14|EPI\_ISL\_524622|Original|hCoV-19^^England|Human|North West London Pathology|Wellcome Sanger Institute for the COVID-19 Genomics UK (COG-UK) consortium|Davies|United Kingdom

>Spike|hCoV-19/England/CAMC-B980D5/2020|2020-11-15|EPI\_ISL\_674973|Original|hCoV-19^^England|Human|Lighthouse Lab in Cambridge|Wellcome Sanger Institute for the COVID-19 Genomics UK (COG-UK) Consortium|Davies|United Kingdom

>Spike|hCoV-19/Wales/ALDP-A85133/2020|2020-10-16|EPI\_ISL\_625274|Original|hCoV-19^^Wales|Human|Lighthouse Lab in Alderley Park|Wellcome Sanger Institute for the COVID-19 Genomics UK (COG-UK) consortium|Davies|United Kingdom

>Spike|hCoV-19/England/NORT-1B7968A/2020|2020-12-02|EPI\_ISL\_741430|Original|hCoV-19^^England|Human|Northumbria University / South Tees Hospitals NHS Foundation Trust / North Cumbria Integrated Care NHS Foundation Trust / North Tees and Hartlepool NHS Foundation Trust / Newcastle Hospitals NHS Foundation Trust|COVID-19 Genomics UK (COG-UK) Consortium|Bashton|United Kingdom

>Spike|hCoV-19/Netherlands/GE-EMC-287/2020|2020-06-08|EPI\_ISL\_523266|Original|hCoV-19^^Gelderland|Human|Dutch COVID-19 response team|Erasmus Medical Center|Oude Munnink|Netherlands

>Spike|hCoV-19/USA/NY-NYCPHL-001493/2020|2020-11-30|EPI\_ISL\_745421|Original|hCoV-19^^New York|Human|DOHMH Chelsea|New York City Public Health Laboratory|Wang|USA

>Spike|hCoV-19/USA/NY-NYUMC575/2020|2020-03-30|EPI\_ISL\_444692|Original|hCoV-19^^New York|Human|NYU Langone Health|Departments of Pathology and Medicine|Maurano|USA

>Spike|hCoV-19/USA/TX-HMH-MCoV-14870/2020|2020-10-13|EPI\_ISL\_786354|Original|hCoV-19^^Texas|Human|Houston Methodist Hospital|Houston Methodist Hospital|Long|USA

>Spike|hCoV-19/France/OCC-73/2020|2020-08-31|EPI\_ISL\_593887|Original|hCoV-19^^Occitanie|Human|CHU Purpan - Laboratoire de Virologie - Institut F\u00e9deratif de Biologie|CHU Purpan - Laboratoire de Virologie - Institut F\u00e9deratif de Biologie|Latour|France

>Spike|hCoV-19/England/MILK-C2FB1D/2020|2020-12-07|EPI\_ISL\_733617|Original|hCoV-19^^England|Human|Lighthouse Lab in Milton Keynes|Wellcome Sanger Institute for the COVID-19 Genomics UK (COG-UK) Consortium|Davies|United Kingdom

>Spike|hCoV-19/Uruguay/UY-957/2020|2020-05-25|EPI\_ISL\_480346|Original|hCoV-19^^Rivera|Human|Microbial Genomics Laboratory|Microbial Genomics Laboratory|Iraola|Uruguay

>Spike|hCoV-19/Japan/IC-0576/2021|2021-01-00|EPI\_ISL\_779662|Original|hCoV-19^^Japan|Human|Pathogen Genomics Center|Pathogen Genomics Center|Sekizuka|Japan

>Spike|hCoV-19/USA/TX-HMH-MCoV-19385/2020|2020-11-30|EPI\_ISL\_783808|Original|hCoV-19^^Texas|Human|Houston Methodist Hospital|Houston Methodist Hospital|Long|USA

>Spike|hCoV-19/South Africa/KRISP-K002760/2020|2020-08-16|EPI\_ISL\_529756|Original|hCoV-19^^KwaZulu-Natal|Human|NHLS-IALCH|KRISP|de Oliveira|South Africa

>Spike|hCoV-19/England/CAMC-B37D2C/2020|2020-11-05|EPI\_ISL\_659077|Original|hCoV-19^^England|Human|Lighthouse Lab in Cambridge|Wellcome Sanger Institute for the COVID-19 Genomics UK (COG-UK) Consortium|Davies|United Kingdom

>Spike|hCoV-19/England/ALDP-94CA5C/2020|2020-06-15|EPI\_ISL\_555841|Original|hCoV-19^^England|Human|Lighthouse Lab in Alderley Park|Wellcome Sanger Institute for the COVID-19 Genomics UK (COG-UK) consortium|Davies|United Kingdom

>Spike|hCoV-19/England/LIVE-DC1D43/2020|2020-11-20|EPI\_ISL\_703162|Original|hCoV-19^^England|Human|Liverpool Clinical Laboratories|COVID-19 Genomics UK (COG-UK) Consortium|Haldenby|United Kingdom

>Spike|hCoV-19/Australia/VIC8797/2020|2020-07-31|EPI\_ISL\_562081|Original|hCoV-19^^Victoria|Human|Victorian Infectious Diseases Reference Laboratory (VIDRL)|VIDRL and MDU-PHL|Schultz|Australia

>Spike|hCoV-19/Spain/PV-IBV-000699/2020|2020-03-08|EPI\_ISL\_452765|Original|hCoV-19^^Basque Country|Human|Hospital Universitario Araba. Vitoria-Gasteiz,|SeqCOVID-SPAIN consortium/IBV (CSIC)|Comas|Spain

>Spike|hCoV-19/England/LIVE-9F23D/2020|2020-05-03|EPI\_ISL\_453439|Original|hCoV-19^^England|Human|Liverpool Clinical Laboratories|COVID-19 Genomics UK (COG-UK) Consortium|Haldenby|United Kingdom

>Spike|hCoV-19/England/ALDP-9CB6F7/2020|2020-09-16|EPI\_ISL\_575534|Original|hCoV-19^^England|Human|Lighthouse Lab in Alderley Park|Wellcome Sanger Institute for the COVID-19 Genomics UK (COG-UK) consortium|Davies|United Kingdom

>Spike|hCoV-19/Wales/CAMC-BC0EBC/2020|2020-11-20|EPI\_ISL\_710829|Original|hCoV-19^^Wales|Human|Lighthouse Lab in Cambridge|Wellcome Sanger Institute for the COVID-19 Genomics UK (COG-UK) Consortium|Davies|United Kingdom

>Spike|hCoV-19/USA/FL-QDX-791/2020|2020-03-21|EPI\_ISL\_571525|Original|hCoV-19^^Florida|Human|Quest Diagnostics|Quest Diagnostics|Kagan|USA

>Spike|hCoV-19/USA/TX-HMH-MCoV-9128/2020|2020-07-02|EPI\_ISL\_780958|Original|hCoV-19^^Texas|Human|Houston Methodist Hospital|Houston Methodist Hospital|Long|USA

>Spike|hCoV-19/USA/TX-DSHS-1330/2020|2020-04-02|EPI\_ISL\_654912|Original|hCoV-19^^Texas|Human|Texas Department of State Health Services|Texas Department of State Health Services|Rahman|USA

>Spike|hCoV-19/USA/TX-HMH-MCoV-12660/2020|2020-08-31|EPI\_ISL\_790446|Original|hCoV-19^^Texas|Human|Houston Methodist Hospital|Houston Methodist Hospital|Long|USA

>Spike|hCoV-19/Greece/207\_33548/2020|2020-03-14|EPI\_ISL\_447639|unknown|hCoV-19^^Athens|Human|unknown|Department of Medicine|Submitter|Greece

>Spike|hCoV-19/Australia/NSW375/2020|2020-03-08|EPI\_ISL\_451635|Original|hCoV-19^^New South Wales|Human|South Eastern Area Laboratory Services|NSW Health Pathology - Institute of Clinical Pathology and Medical Research; Westmead Hospital; University of Sydney|Gall|Australia

>Spike|hCoV-19/England/20139029404/2020|2020-03-26|EPI\_ISL\_421911|Original|hCoV-19^^England|Human|Respiratory Virus Unit|Respiratory Virus Unit|Platt|United Kingdom

>Spike|hCoV-19/Australia/VIC6399/2020|2020-07-24|EPI\_ISL\_521191|Original|hCoV-19^^Victoria|Human|Microbiological Diagnostic Unit - Public Health Laboratory (MDU-PHL)|MDU-PHL|Schultz|Australia

>Spike|hCoV-19/England/ALDP-A70414/2020|2020-10-15|EPI\_ISL\_607641|Original|hCoV-19^^England|Human|Lighthouse Lab in Alderley Park|Wellcome Sanger Institute for the COVID-19 Genomics UK (COG-UK) consortium|Davies|United Kingdom

>Spike|hCoV-19/Norway/3920/2020|2020-09-28|EPI\_ISL\_635123|Original|hCoV-19^^Agder|Human|Hospital of Southern Norway - Kristiansand|Norwegian Institute of Public Health|Vollan|Norway

>Spike|hCoV-19/Wales/PHWC-486AF1/2020|2020-10-26|EPI\_ISL\_639110|Original|hCoV-19^^Wales|Human|Wales Specialist Virology Centre Sequencing lab|COVID-19 Genomics UK (COG-UK) Consortium|Moore|United Kingdom

>Spike|hCoV-19/USA/HI-CDC-2-3714066/2020|2020-11-20|EPI\_ISL\_751767|Original|hCoV-19^^Hawaii|Human|HI Dept. of Health|Genomics and Discovery|Queen|USA

>Spike|hCoV-19/England/EXET-13AC80/2020|2020-11-11|EPI\_ISL\_665092|Original|hCoV-19^^England|Human|University of Exeter|COVID-19 Genomics UK (COG-UK) Consortium|Temperton|United Kingdom

>Spike|hCoV-19/Jordan/AM-ALSR-4033/2020|2020-10-03|EPI\_ISL\_636393|Original|hCoV-19^^Amman|Human|Biolab Diagnostic Laboratories|Andersen lab at Scripps Research|Gangavarapu|Jordan

>Spike|hCoV-19/USA/MI-UM-10036684769/2020|2020-10-29|EPI\_ISL\_682089|Original|hCoV-19^^Michigan|Human|University of Michigan Clinical Microbiology Laboratory|Lauring Lab|Valesano|USA

>Spike|hCoV-19/England/SHEF-CA318/2020|2020-11-10|EPI\_ISL\_680165|Original|hCoV-19^^England|Human|Virology Department|COVID-19 Genomics UK (COG-UK) Consortium|de Silva|United Kingdom

>Spike|hCoV-19/Australia/VIC9274/2020|2020-08-15|EPI\_ISL\_565478|Original|hCoV-19^^Victoria|Human|Microbiological Diagnostic Unit - Public Health Laboratory (MDU-PHL)|MDU-PHL|Schultz|Australia

>Spike|hCoV-19/USA/TX-HMH-1481/2020|2020-04-27|EPI\_ISL\_542743|Original|hCoV-19^^Texas|Human|Houston Methodist Hospital|Houston Methodist Hospital|Long|USA

>Spike|hCoV-19/England/204881279/2020|2020-11-00|EPI\_ISL\_678806|Original|hCoV-19^^England|Human|Respiratory Virus Unit|COVID-19 Genomics UK (COG-UK) Consortium|Platt|United Kingdom

>Spike|hCoV-19/England/MILK-B9616B/2020|2020-11-14|EPI\_ISL\_676033|Original|hCoV-19^^England|Human|Lighthouse Lab in Milton Keynes|Wellcome Sanger Institute for the COVID-19 Genomics UK (COG-UK) Consortium|Davies|United Kingdom

>Spike|hCoV-19/Ecuador/36192/2020|2020-05-08|EPI\_ISL\_491947|Original|hCoV-19^^Manabi|Human|Instituto Nacional de Investigaci\u00f3n en Salud P\u00fablica - INSPI|INSPI - Charit\u00e9|Bruno Caicedo|Ecuador

>Spike|hCoV-19/USA/AR-CDC-4212/2020|2020-07-11|EPI\_ISL\_527634|Original|hCoV-19^^Arkansas|Human|AR Dept. of Health-Public Health Lab|Pathogen Discovery|Queen|USA

>Spike|hCoV-19/USA/TX-HMH-MCoV-16264/2020|2020-10-30|EPI\_ISL\_785948|Original|hCoV-19^^Texas|Human|Houston Methodist Hospital|Houston Methodist Hospital|Long|USA

>Spike|hCoV-19/England/MILK-4C1D1F/2020|2020-06-06|EPI\_ISL\_559125|Original|hCoV-19^^England|Human|Lighthouse Lab in Milton Keynes|Wellcome Sanger Institute for the COVID-19 Genomics UK (COG-UK) consortium|Davies|United Kingdom

>Spike|hCoV-19/USA/CO-CSU-E2267/2020|2020-04-29|EPI\_ISL\_527487|Original|hCoV-19^^Colorado|Human|Colorado State University - Ebel Lab|Colorado State University - Ebel Lab|Cline|USA

>Spike|hCoV-19/India/TG-CDFD-C946/2020|2020-05-26|EPI\_ISL\_528604|Original|hCoV-19^^Telangana|Human|National Genomics Core-Center for DNA Fingerprinting and Diagnostics|National Genomics Core-Center for DNA Fingerprinting and Diagnostics (NGC-CDFD)- DBT's PAN-INDIA-1000 Genome consortium|Vashisht|India

>Spike|hCoV-19/England/20126103604/2020|2020-03-18|EPI\_ISL\_423913|Original|hCoV-19^^England|Human|Respiratory Virus Unit|Respiratory Virus Unit|Platt|United Kingdom

>Spike|hCoV-19/USA/TX-HMH-MCoV-8545/2020|2020-07-01|EPI\_ISL\_780459|Original|hCoV-19^^Texas|Human|Houston Methodist Hospital|Houston Methodist Hospital|Long|USA

>Spike|hCoV-19/Spain/VC-FISABIO-150/2020|2020-03-19|EPI\_ISL\_436245|Original|hCoV-19^^Comunitat Valenciana|Human|Servicio de Microbiologia. Hospital Universitario Doctor Peset|Sequencing and Bioinformatics Service and Molecular Epidemiology Research Group. FISABIO-Public Health|Gonzalez-Candelas|Spain

>Spike|hCoV-19/Wales/PHWC-49352D/2020|2020-11-28|EPI\_ISL\_725901|Original|hCoV-19^^Wales|Human|Originating lab|COVID-19 Genomics UK (COG-UK) Consortium|Moore|United Kingdom

>Spike|hCoV-19/England/MILK-9F2527/2020|2020-09-25|EPI\_ISL\_589147|Original|hCoV-19^^England|Human|Lighthouse Lab in Milton Keynes|Wellcome Sanger Institute for the COVID-19 Genomics UK (COG-UK) consortium|Davies|United Kingdom

>Spike|hCoV-19/Wales/PHWC-4A26A0/2020|2020-12-15|EPI\_ISL\_743926|Original|hCoV-19^^Wales|Human|Wales Specialist Virology Centre Sequencing lab|COVID-19 Genomics UK (COG-UK) Consortium|Moore|United Kingdom

>Spike|hCoV-19/England/CAMB-1AC1D5/2020|2020-04-28|EPI\_ISL\_444382|Original|hCoV-19^^England|Human|Department of Pathology|COVID-19 Genomics UK (COG-UK) Consortium|Meredith|United Kingdom

>Spike|hCoV-19/England/QEUH-BA2788/2020|2020-11-18|EPI\_ISL\_719959|Original|hCoV-19^^England|Human|Lighthouse Lab in Glasgow|Wellcome Sanger Institute for the COVID-19 Genomics UK (COG-UK) Consortium|Davies|United Kingdom

>Spike|hCoV-19/USA/HI-H200205/2020|2020-08-11|EPI\_ISL\_752764|Original|hCoV-19^^Hawaii|Human|State Laboratories Division|State Laboratories Division|Sultana|USA

>Spike|hCoV-19/Denmark/DCGC-13315/2020|2020-11-30|EPI\_ISL\_712724|Original|hCoV-19^^Midtjylland|Human|Department of Virus and Microbiological Special Diagnostics|Albertsen Lab|Michaelsen|Denmark

>Spike|hCoV-19/Chile/RM-157813/2020|2020-08-22|EPI\_ISL\_746684|Original|hCoV-19^^Region Metropolitana de Santiago|Human|Genetica Molecular and Subdepartamento de Virologia ISP Chile|Instituto de Salud Publica de Chile|Tognarelli|Chile

>Spike|hCoV-19/Scotland/EDB848/2020|2020-04-04|EPI\_ISL\_433255|Original|hCoV-19^^Scotland|Human|Virology Department|COVID-19 Genomics UK (COG-UK) Consortium|Williams|United Kingdom

>Spike|hCoV-19/Australia/VIC3315/2020|2020-07-09|EPI\_ISL\_520994|Original|hCoV-19^^Victoria|Human|Microbiological Diagnostic Unit - Public Health Laboratory (MDU-PHL) |MDU-PHL|Schultz|Australia

>Spike|hCoV-19/USA/UT-UPHL-03468/2020|2020-05-11|EPI\_ISL\_575282|Original|hCoV-19^^Utah|Human|Utah Public Health Laboratory|Utah Public Health Laboratory|Young|USA

>Spike|hCoV-19/USA/UT-UPHL-2009028/2020|2020-05-11|EPI\_ISL\_525333|Original|hCoV-19^^Utah|Human|Utah Public Health Laboratory|Utah Public Health Laboratory|Young|USA

>Spike|hCoV-19/Denmark/DCGC-19998/2020|2020-12-07|EPI\_ISL\_747565|Original|hCoV-19^^Midtjylland|Human|Department of Virus and Microbiological Special Diagnostics|Albertsen Lab|Michaelsen|Denmark

>Spike|hCoV-19/South Korea/KCDC2718/2020|2020-07-11|EPI\_ISL\_522497|Original|hCoV-19^^South Korea|Human|Center for Laboratory Control of Infectious Diseases|Center for Laboratory Control of Infectious Diseases|Kim|South Korea

>Spike|hCoV-19/USA/WI-UW-888/2020|2020-07-14|EPI\_ISL\_509890|Original|hCoV-19^^Wisconsin|Human|University of Wisconsin-Madison AIDS Vaccine Research Laboratories|University of Wisconsin-Madison AIDS Vaccine Research Laboratories|Baczenas|USA

>Spike|hCoV-19/USA/CA-IGI-0130/2020|2020-06-18|EPI\_ISL\_495152|Original|hCoV-19^^California|Human|Innovative Genomics Institute|Innovative Genomics Institute|Shivram|USA

>Spike|hCoV-19/Wales/MILK-970E35/2020|2020-08-18|EPI\_ISL\_553105|Original|hCoV-19^^Wales|Human|Lighthouse Lab in Milton Keynes|Wellcome Sanger Institute for the COVID-19 Genomics UK (COG-UK) consortium|Davies|United Kingdom

>Spike|hCoV-19/Denmark/DCGC-7144/2020|2020-10-12|EPI\_ISL\_619164|Original|hCoV-19^^Syddanmark|Human|Department of Virus and Microbiological Special Diagnostics|Albertsen lab|Michaelsen|Denmark

>Spike|hCoV-19/England/QEUEH-CADCE7/2020|2020-12-20|EPI\_ISL\_761007|Original|hCoV-19^^England|Human|Lighthouse Lab in Glasgow|Wellcome Sanger Institute for the COVID-19 Genomics UK (COG-UK) Consortium|Davies|United Kingdom

>Spike|hCoV-19/England/NORT-296F5B/2020|2020-04-22|EPI\_ISL\_499784|Original|hCoV-19^^England|Human|Northumbria University / South Tees Hospitals NHS Foundation Trust / North Cumbria Integrated Care NHS Foundation Trust / North Tees and Hartlepool NHS Foundation Trust / Newcastle Hospitals NHS Foundation Trust|COVID-19 Genomics UK (COG-UK) Consortium|Bashton|United Kingdom

>Spike|hCoV-19/England/MILK-99E3AB/2020|2020-08-31|EPI\_ISL\_550550|Original|hCoV-19^^England|Human|Lighthouse Lab in Milton Keynes|Wellcome Sanger Institute for the COVID-19 Genomics UK (COG-UK) consortium|Davies|United Kingdom

>Spike|hCoV-19/England/QEUEH-AAF081/2020|2020-10-20|EPI\_ISL\_721542|Original|hCoV-19^^England|Human|Lighthouse Lab in Glasgow|Wellcome Sanger Institute for the COVID-19 Genomics UK (COG-UK) Consortium|Davies|United Kingdom

>Spike|hCoV-19/Scotland/CVR4861/2020|2020-09-17|EPI\_ISL\_650850|Original|hCoV-19^^Scotland|Human|West of Scotland Specialist Virology Centre|COVID-19 Genomics UK (COG-UK) Consortium|Robertson|United Kingdom

>Spike|hCoV-19/England/LEED-2A975D/2020|2020-04-08|EPI\_ISL\_538748|Original|hCoV-19^^England|Human|Leeds Teaching Hospitals NHS Trust and Public Health England|Wellcome Sanger Institute for the COVID-19 Genomics UK (COG-UK) consortium|Davies|United Kingdom

>Spike|hCoV-19/England/ALDP-9EAA50/2020|2020-09-24|EPI\_ISL\_580164|Original|hCoV-19^^England|Human|Lighthouse Lab in Alderley Park|Wellcome Sanger Institute for the COVID-19 Genomics UK (COG-UK) consortium|Davies|United Kingdom

>Spike|hCoV-19/USA/TX-HMH-MCoV-15679/2020|2020-07-09|EPI\_ISL\_785363|Original|hCoV-19^^Texas|Human|Houston Methodist Hospital|Houston Methodist Hospital|Long|USA

>Spike|hCoV-19/Switzerland/SO-ETHZ-300412/2020|2020-09-29|EPI\_ISL\_603374|Original|hCoV-19^^Solothurn|Human|Viollier AG|Department of Biosystems Science and Engineering|Nadeau|Switzerland

>Spike|hCoV-19/England/CAMC-B07B0D/2020|2020-10-29|EPI\_ISL\_643334|Original|hCoV-19^^England|Human|Lighthouse Lab in Cambridge|Wellcome Sanger Institute for the COVID-19 Genomics UK (COG-UK) Consortium|Davies|United Kingdom

>Spike|hCoV-19/Denmark/DCGC-4380/2020|2020-09-14|EPI\_ISL\_615378|Original|hCoV-19^^Midtjylland|Human|Department of Virus and Microbiological Special Diagnostics|Albertsen lab|Michaelsen|Denmark

>Spike|hCoV-19/Australia/NSW621/2020|2020-05-31|EPI\_ISL\_490030|Original|hCoV-19^^New South Wales|Human|South Eastern Area Laboratory Services (SEALS)|NSW Health Pathology - Institute of Clinical Pathology and Medical Research; Westmead Hospital; University of Sydney|Gall|Australia

>Spike|hCoV-19/Canada/BC\_21127214/2020|2020-03-00|EPI\_ISL\_462792|Original|hCoV-19^^British Columbia|Human|BCCDC Public Health Laboratory|BCCDC Public Health Laboratory|Harrigan|Canada

>Spike|hCoV-19/USA/WA-UW92/2020|2020-03-11|EPI\_ISL\_416448|Original|hCoV-19^^Washington|Human|UW Virology Lab|UW Virology Lab|Roychoudhury|USA

>Spike|hCoV-19/England/ALDP-A85BDB/2020|2020-10-17|EPI\_ISL\_610530|Original|hCoV-19^^England|Human|Lighthouse Lab in Alderley Park|Wellcome Sanger Institute for the COVID-19 Genomics UK (COG-UK) consortium|Davies|United Kingdom

>Spike|hCoV-19/England/CAMB-7FDC9/2020|2020-04-20|EPI\_ISL\_444415|Original|hCoV-19^^England|Human|Department of Pathology|COVID-19 Genomics UK (COG-UK) Consortium|Meredith|United Kingdom

>Spike|hCoV-19/England/CAMB-1BC6D3/2020|2020-11-30|EPI\_ISL\_764285|Original|hCoV-19^^England|Human|Department of Pathology|COVID-19 Genomics UK (COG-UK) Consortium|Goodfellow|United Kingdom

>Spike|hCoV-19/Wales/PHWC-247E3/2020|2020-03-00|EPI\_ISL\_432326|Original|hCoV-19^^Wales|Human|Wales Specialist Virology Centre|Public Health Wales Microbiology Cardiff|Moore|United Kingdom

>Spike|hCoV-19/Gibraltar/205121247/2020|2020-00-00|EPI\_ISL\_766369|Original|hCoV-19^^Gibraltar|Human|Microbiology|Respiratory Virus Unit|Platt|Gibraltar

>Spike|hCoV-19/USA/WA-S2539/2020|2020-06-17|EPI\_ISL\_497171|Original|hCoV-19^^Washington|Human|Washington State Department of Health|Seattle Flu Study|Lee|USA

>Spike|hCoV-19/Denmark/DCGC-5654/2020|2020-09-28|EPI\_ISL\_619941|Original|hCoV-19^^Nordjylland|Human|Department of Virus and Microbiological Special Diagnostics|Albertsen lab|Michaelsen|Denmark

>Spike|hCoV-19/England/QEUA-9626B6/2020|2020-08-10|EPI\_ISL\_531619|Original|hCoV-19^^England|Human|Lighthouse Lab in Glasgow|Wellcome Sanger Institute for the COVID-19 Genomics UK (COG-UK) consortium|Davies|United Kingdom

>Spike|hCoV-19/England/LIVE-99707/2020|2020-04-09|EPI\_ISL\_439751|Original|hCoV-19^^England|Human|Liverpool Clinical Laboratories|COVID-19 Genomics UK (COG-UK) Consortium|Haldenby|United Kingdom

>Spike|hCoV-19/Denmark/DCGC-20490/2020|2020-12-21|EPI\_ISL\_759181|Original|hCoV-19^^Midtjylland|Human|Department of Virus and Microbiological Special Diagnostics|Albertsen Lab|Michaelsen|Denmark

>Spike|hCoV-19/England/MILK-9953E0/2020|2020-08-24|EPI\_ISL\_552396|Original|hCoV-19^^England|Human|Lighthouse Lab in Milton Keynes|Wellcome Sanger Institute for the COVID-19 Genomics UK (COG-UK) consortium|Davies|United Kingdom

>Spike|hCoV-19/England/20122087702/2020|2020-03-15|EPI\_ISL\_418677|Original|hCoV-19^^England|Human|Respiratory Virus Unit|Respiratory Virus Unit|Platt|United Kingdom

>Spike|hCoV-19/England/SHEF-C5702/2020|2020-03-18|EPI\_ISL\_479214|Original|hCoV-19^^England|Human|Virology Department|COVID-19 Genomics UK (COG-UK) Consortium|de Silva|United Kingdom

>Spike|hCoV-19/Austria/CeMM0281/2020|2020-03-25|EPI\_ISL\_438108|Original|hCoV-19^^Vienna|Human|Center for Virology|Bergthaler laboratory|Bergthaler|Austria

>Spike|hCoV-19/England/QEUA-7E25C2/2020|2020-07-18|EPI\_ISL\_532846|Original|hCoV-19^^England|Human|Lighthouse Lab in Glasgow|Wellcome Sanger Institute for the COVID-19 Genomics UK (COG-UK) consortium|Davies|United Kingdom

>Spike|hCoV-19/England/NORW-223041/2020|2020-12-20|EPI\_ISL\_741557|Original|hCoV-19^^England|Human|Quadram Institute Bioscience|COVID-19 Genomics UK (COG-UK) Consortium|Alikhan|United Kingdom

>Spike|hCoV-19/Thailand/Bangkok\_2848/2020|2020-03-00|EPI\_ISL\_515472|Vero P2|hCoV-19^^Bangkok|Human|National Institute of Health|National Institute of Health|Phuygun|Thailand

>Spike|hCoV-19/USA/MI-MDHHS-SC22650/2020|2020-11-16|EPI\_ISL\_737264|Original|hCoV-19^^Michigan|Human|Michigan Department of Health and Human Services|Michigan Department of Health and Human Services|Blankenship|USA

>Spike|hCoV-19/England/CAMC-B52DB2/2020|2020-11-09|EPI\_ISL\_657431|Original|hCoV-19^^England|Human|Lighthouse Lab in Cambridge|Wellcome Sanger Institute for the COVID-19 Genomics UK (COG-UK) Consortium|Davies|United Kingdom

>Spike|hCoV-19/South Africa/KRISP-K002854/2020|2020-08-29|EPI\_ISL\_602670|Original|hCoV-19^^KwaZulu-Natal|Human|NHLS-IALCH|KRISP|de Oliveira|South Africa

>Spike|hCoV-19/England/NOTT-10F325/2020|2020-04-01|EPI\_ISL\_432991|Original|hCoV-19^^England|Human|Queens Medical Centre|COVID-19 Genomics UK (COG-UK) Consortium|Loose|United Kingdom

>Spike|hCoV-19/England/ALDP-BB512A/2020|2020-11-21|EPI\_ISL\_701945|Original|hCoV-19^^England|Human|Lighthouse Lab in Alderley Park|Wellcome Sanger Institute for the COVID-19 Genomics UK (COG-UK) Consortium|Davies|United Kingdom

>Spike|hCoV-19/Spain/RI-IBV-005941/2020|2020-04-03|EPI\_ISL\_500376|Original|hCoV-19^^La Rioja|Human|Centro de Investigaci\u00f3n Biom\u00e9dica de La Rioja - Hospital San Pedro Logro\u00f1o|SeqCOVID-SPAIN consortium/IBV (CSIC)|Comas|Spain

>Spike|hCoV-19/England/MILK-C62194/2020|2020-12-13|EPI\_ISL\_735630|Original|hCoV-19^^England|Human|Lighthouse Lab in Milton Keynes|Wellcome Sanger Institute for the COVID-19 Genomics UK (COG-UK) Consortium|Davies|United Kingdom

>Spike|hCoV-19/USA/TX-HMH-MCoV-8503/2020|2020-07-01|EPI\_ISL\_780596|Original|hCoV-19^^Texas|Human|Houston Methodist Hospital|Houston Methodist Hospital|Long|USA

>Spike|hCoV-19/England/PORT-2D5D47/2020|2020-10-26|EPI\_ISL\_628321|Original|hCoV-19^^England|Human|Centre for Enzyme Innovation|COVID-19 Genomics UK (COG-UK) Consortium|Robson|United Kingdom

>Spike|hCoV-19/England/ALDP-97CC8A/2020|2020-07-17|EPI\_ISL\_526311|Original|hCoV-19^^England|Human|University of Birmingham|COVID-19 Genomics UK (COG-UK) Consortium|Loman|United Kingdom

>Spike|hCoV-19/India/DL-NCDC4590-CSIR-IGIB/2020|2020-05-23|EPI\_ISL\_482595|Original|hCoV-19^^Delhi|Human|National Centre for Disease control (NCDC)|NCDC/CSIR-IGIB|Singh|India

>Spike|hCoV-19/Jordan/AM-ALSR-5159/2020|2020-10-18|EPI\_ISL\_730398|Original|hCoV-19^^Amman|Human|Biolab Diagnostic Laboratories|Andersen lab at Scripps Research|Gangavarapu|Jordan

>Spike|hCoV-19/England/LEED-2A8132/2020|2020-04-03|EPI\_ISL\_539063|Original|hCoV-19^^England|Human|Leeds Teaching Hospitals NHS Trust and Public Health England|Wellcome Sanger Institute for the COVID-19 Genomics UK (COG-UK) consortium|Davies|United Kingdom

>Spike|hCoV-19/Spain/GA-ISCI-202077/2020|2020-03-11|EPI\_ISL\_539566|Original|hCoV-19^^Galicia|Human|Xerencia de Xesti\u00f3n Integrada de Pontevedra e o Saln\u00e9s|Instituto de Salud Carlos III|Caballero|Spain

>Spike|hCoV-19/England/QEUA-BE4061/2020|2020-11-30|EPI\_ISL\_709834|Original|hCoV-19^^England|Human|Lighthouse Lab in Glasgow|Wellcome Sanger Institute for the COVID-19 Genomics UK (COG-UK) Consortium|Davies|United Kingdom

>Spike|hCoV-19/Canada/MB-NML-872/2020|2020-03-21|EPI\_ISL\_582349|Original|hCoV-19^^Manitoba|Human|Cadham Provincial Laboratory|National Microbiology Laboratory (NML)|Majer|Canada



>Spike|hCoV-19/England/NORT-2866C2/2020|2020-10-09|EPI\_ISL\_638566|Original|hCoV-19^^England|Human|Northumbria University / South Tees Hospitals NHS Foundation Trust / North Cumbria Integrated Care NHS Foundation Trust / North Tees and Hartlepool NHS Foundation Trust / Newcastle Hospitals NHS Foundation Trust|COVID-19 Genomics UK (COG-UK) Consortium|Bashton|United Kingdom

>Spike|hCoV-19/England/BRIS-1326F3/2020|2020-06-11|EPI\_ISL\_511962|Original|hCoV-19^^England|Human|PHE South West Regional Laboratory|Wellcome Sanger Institute for the COVID-19 Genomics UK (COG-UK) consortium|Davies|United Kingdom

>Spike|hCoV-19/England/NORW-E77CE/2020|2020-05-06|EPI\_ISL\_449071|Original|hCoV-19^^England|Human|Quadram Institute Bioscience|COVID-19 Genomics UK (COG-UK) Consortium|Alikhan|United Kingdom

>Spike|hCoV-19/USA/TX-HMH-MCoV-8736/2020|2020-07-01|EPI\_ISL\_780725|Original|hCoV-19^^Texas|Human|Houston Methodist Hospital|Houston Methodist Hospital|Long|USA

>Spike|hCoV-19/Finland/20A21S5/2020|2020-04-20|EPI\_ISL\_481596|Original|hCoV-19^^Uusimaa|Human|Department of Virology and Immunology|Department of Virology|Smura|Finland

>Spike|hCoV-19/Spain/PV-IBV-000958/2020|2020-03-28|EPI\_ISL\_452617|Original|hCoV-19^^Basque Country|Human|Servicio de Microbiolog\u00eda. Hospital Universitario Donostia. OSI Donostialdea. \u00c1rea de Enfermedades Infecciosas|SeqCOVID-SPAIN consortium|IBV (CSIC) |Comas|Spain

>Spike|hCoV-19/England/LIVE-AA5BE/2020|2020-03-24|EPI\_ISL\_517470|Original|hCoV-19^^England|Human|Liverpool Clinical Laboratories|COVID-19 Genomics UK (COG-UK) Consortium|Haldenby|United Kingdom

>Spike|hCoV-19/Netherlands/NoordBrabant\_109/2020|2020-04-14|EPI\_ISL\_460790|Original|hCoV-19^^Noord Holland|Human|Dutch COVID-19 response team|Erasmus Medical Center|Oude Munnink|Netherlands

>Spike|hCoV-19/Germany/NW-HHU-419/2020|2020-11-11|EPI\_ISL\_718093|Original|hCoV-19^^North Rhine-Westphalia|Human|ZOTZ KLIMAS MVZ D\u00fcsseldorf-Centrum GbR \u00dcBAG f\u00fcr Labormedizin|Center of Medical Microbiology|Wienemann|Germany

>Spike|hCoV-19/USA/CA-CZB-10967/2020|2020-09-16|EPI\_ISL\_582943|Original|hCoV-19^^California|Human|County of Santa Clara Public Health Department|Chan-Zuckerberg Biohub|Bhatt|USA

>Spike|hCoV-19/England/ALDP-A95CF3/2020|2020-10-20|EPI\_ISL\_624744|Original|hCoV-19^^England|Human|Lighthouse Lab in Alderley Park|Wellcome Sanger Institute for the COVID-19 Genomics UK (COG-UK) consortium|Davies|United Kingdom

>Spike|hCoV-19/USA/CT-UW329/2020|2020-03-13|EPI\_ISL\_418896|Original|hCoV-19^^Connecticut|Human|UW Virology Lab|UW Virology Lab|Roychoudhury|USA

>Spike|hCoV-19/Belgium/ULG-10313/2020|2020-07-27|EPI\_ISL\_540480|Original|hCoV-19^^Li\u00e8ge|Human|Department of Clinical Microbiology|GIGA Medical Genomics|Durkin|Belgium

>Spike|hCoV-19/USA/MA-Yale-442/2020|2020-04-14|EPI\_ISL\_738254|Original|hCoV-19^^Massachusetts|Human|Connecticut Veterans' Affairs Hospital|Grubaugh Lab - Yale School of Public Health|Grubaugh|USA

>Spike|hCoV-19/USA/CA-CZB-14201/2020|2020-11-09|EPI\_ISL\_739108|Original|hCoV-19^^California|Human|Orange County Public Health Lab|Chan-Zuckerberg Biohub|Kamm|USA

>Spike|hCoV-19/USA/TX-HMH-799/2020|2020-04-16|EPI\_ISL\_545770|Original|hCoV-19^^Texas|Human|Houston Methodist Hospital|Houston Methodist Hospital|Long|USA

>Spike|hCoV-19/England/ALDP-9B63E9/2020|2020-08-28|EPI\_ISL\_573003|Original|hCoV-19^^England|Human|Oxford Viromics|COVID-19 Genomics UK (COG-UK) Consortium|Golubchik|United Kingdom

>Spike|hCoV-19/England/OXON-AD31B/2020|2020-00-00|EPI\_ISL\_448575|Original|hCoV-19^^England|Human|Oxford Viromics|COVID-19 Genomics UK (COG-UK) Consortium|Golubchik|United Kingdom

>Spike|hCoV-19/Australia/VIC3553/2020|2020-07-09|EPI\_ISL\_520302|Original|hCoV-19^^Victoria|Human|Victorian Infectious Diseases Reference Laboratory (VIDRL)|VIDRL and MDU-PHL|Schultz|Australia

>Spike|hCoV-19/USA/VA-DCLS-0295/2020|2020-04-27|EPI\_ISL\_463098|Original|hCoV-19^^Virginia|Human|Virginia DCLS|Virginia DCLS|St. Jacques|USA

>Spike|hCoV-19/Czech Republic/NRL\_9885/2020|2020-10-11|EPI\_ISL\_626615|Original|hCoV-19^^Central Bohemian Region|Human|The National Institute of Public Health|State Veterinary Institute Prague|Nagy|Czech Republic

>Spike|hCoV-19/England/MILK-832D60/2020|2020-07-16|EPI\_ISL\_557268|Original|hCoV-19^^England|Human|Lighthouse Lab in Milton Keynes|Wellcome Sanger Institute for the COVID-19 Genomics UK (COG-UK) consortium|Davies|United Kingdom

>Spike|hCoV-19/England/CAMB-1AEC3/2020|2020-05-06|EPI\_ISL\_448070|Original|hCoV-19^^England|Human|Department of Pathology|COVID-19 Genomics UK (COG-UK) Consortium|Meredith|United Kingdom

>Spike|hCoV-19/England/ALDP-C3D5C3/2020|2020-12-10|EPI\_ISL\_730773|Original|hCoV-19^^England|Human|Lighthouse Lab in Alderley Park|Wellcome Sanger Institute for the COVID-19 Genomics UK (COG-UK) Consortium|Davies|United Kingdom

>Spike|hCoV-19/England/ALDP-94DD43/2020|2020-06-20|EPI\_ISL\_555561|Original|hCoV-19^^England|Human|Lighthouse Lab in Alderley Park|Wellcome Sanger Institute for the COVID-19 Genomics UK (COG-UK) consortium|Davies|United Kingdom

>Spike|hCoV-19/England/SHEF-C6491/2020|2020-05-11|EPI\_ISL\_462024|Original|hCoV-19^^England|Human|Virology Department|COVID-19 Genomics UK (COG-UK) Consortium|de Silva|United Kingdom

>Spike|hCoV-19/USA/TX-HMH-MCoV-15181/2020|2020-10-19|EPI\_ISL\_786665|Original|hCoV-19^^Texas|Human|Houston Methodist Hospital|Houston Methodist Hospital|Long|USA

>Spike|hCoV-19/England/ALDP-AA1B8E/2020|2020-10-22|EPI\_ISL\_630916|Original|hCoV-19^^England|Human|Lighthouse Lab in Alderley Park|Wellcome Sanger Institute for the COVID-19 Genomics UK (COG-UK) consortium|Davies|United Kingdom

>Spike|hCoV-19/Scotland/EDB4267/2020|2020-04-22|EPI\_ISL\_487839|Original|hCoV-19^^Scotland|Human|Virology Department|Wellcome Sanger Institute for the COVID-19 Genomics UK (COG-UK) consortium|Davies|United Kingdom

>Spike|hCoV-19/England/QEUI-AD5D6D/2020|2020-10-26|EPI\_ISL\_633749|Original|hCoV-19^^England|Human|Lighthouse Lab in Glasgow|Wellcome Sanger Institute for the COVID-19 Genomics UK (COG-UK) consortium|Davies|United Kingdom

>Spike|hCoV-19/Scotland/CVR5620/2020|2020-11-02|EPI\_ISL\_651870|Original|hCoV-19^^Scotland|Human|West of Scotland Specialist Virology Centre|COVID-19 Genomics UK (COG-UK) Consortium|Robertson|United Kingdom

>Spike|hCoV-19/Finland/26LS5CD2/2020|2020-10-26|EPI\_ISL\_759938|Original|hCoV-19^^Uusimaa|Human|Department of Virology and Immunology|Department of Virology|Smura|Finland

>Spike|hCoV-19/Canada/NS-NML-1351/2020|2020-04-13|EPI\_ISL\_579728|Original|hCoV-19^^Nova Scotia|Human|QEII Health Sciences Centre|National Microbiology Laboratory (NML)|Majer|Canada

>Spike|hCoV-19/England/QEUI-B42623/2020|2020-11-08|EPI\_ISL\_657067|Original|hCoV-19^^England|Human|Lighthouse Lab in Glasgow|Wellcome Sanger Institute for the COVID-19 Genomics UK (COG-UK) Consortium|Davies|United Kingdom

>Spike|hCoV-19/USA/CO-CDPHE-2008161331/2020|2020-08-16|EPI\_ISL\_710217|Original|hCoV-19^^Colorado|Human|Colorado Department of Public Health and Environment|Colorado Department of Public Health and Environment|Bankers|USA

>Spike|hCoV-19/USA/WI-GMF-20442/2020|2020-09-15|EPI\_ISL\_547868|Original|hCoV-19^^Wisconsin|Human|Gundersen Molecular Diagnostics Laboratory|Kabara Cancer Research Institute|Kenny|USA

>Spike|hCoV-19/India/GJ-GBRC295/2020|2020-06-15|EPI\_ISL\_495035|Original|hCoV-19^^Gujarat|Human|GMERS Medical College & Hospital|Gujarat Biotechnology Research Centre|Joshi|India

>Spike|hCoV-19/Denmark/DCGC-21631/2020|2020-12-21|EPI\_ISL\_758275|Original|hCoV-19^^Nordjylland|Human|Department of Virus and Microbiological Special Diagnostics|Albertsen Lab|Michaelsen|Denmark

>Spike|hCoV-19/England/MILK-B8C502/2020|2020-11-13|EPI\_ISL\_674453|Original|hCoV-19^^England|Human|Lighthouse Lab in Milton Keynes|Wellcome Sanger Institute for the COVID-19 Genomics UK (COG-UK) Consortium|Davies|United Kingdom

>Spike|hCoV-19/USA/TX-DSHS-0464/2020|2020-06-21|EPI\_ISL\_541995|Original|hCoV-19^^Texas|Human|Texas Department of State Health Services|Texas Department of State Health Services|Rahman|USA

>Spike|hCoV-19/Norway/6242/2020|2020-11-23|EPI\_ISL\_775360|Original|hCoV-19^^Viken|Human|Unilabs Laboratory Medicine|Norwegian Institute of Public Health|Vollan|Norway

>Spike|hCoV-19/England/CAMC-B084E3/2020|2020-10-30|EPI\_ISL\_643579|Original|hCoV-19^^England|Human|Lighthouse Lab in Cambridge|Wellcome Sanger Institute for the COVID-19 Genomics UK (COG-UK) Consortium|Davies|United Kingdom

>Spike|hCoV-19/England/MILK-ACCC99/2020|2020-10-21|EPI\_ISL\_630107|Original|hCoV-19^^England|Human|Lighthouse Lab in Milton Keynes|Wellcome Sanger Institute for the COVID-19 Genomics UK (COG-UK) consortium|Davies|United Kingdom

>Spike|hCoV-19/Spain/AN-ISCI-201488/2020|2020-03-04|EPI\_ISL\_455315|Original|hCoV-19^^Andalucia|Human|Hospital Virgen de las Nieves|Instituto de Salud Carlos III|Caballero|Spain

>Spike|hCoV-19/Australia/VIC6139/2020|2020-07-22|EPI\_ISL\_518150|Original|hCoV-19^^Victoria|Human|Victorian Infectious Diseases Reference Laboratory (VIDRL)|VIDRL and MDU-PHL|Schultz|Australia

>Spike|hCoV-19/USA/WA-UW-3849/2020|2020-03-26|EPI\_ISL\_486094|Original|hCoV-19^^Washington|Human|UW Virology Lab|UW Virology Lab|Roychoudhury|USA

>Spike|hCoV-19/Wales/PHWC-48E0D9/2020|2020-11-09|EPI\_ISL\_680806|Original|hCoV-19^^Wales|Human|Wales Specialist Virology Centre Sequencing lab|COVID-19 Genomics UK (COG-UK) Consortium|Moore|United Kingdom

>Spike|hCoV-19/Austria/CeMM0041/2020|2020-03-05|EPI\_ISL\_437929|Original|hCoV-19^^Ischgl|Human|Institut für Virologie am Department für Hygiene|Bergthaler laboratory|Bergthaler|Austria

>Spike|hCoV-19/Wales/PHWC-298DC/2020|2020-04-02|EPI\_ISL\_474233|Original|hCoV-19^^Wales|Human|Originating lab|COVID-19 Genomics UK (COG-UK) Consortium|Moore|United Kingdom

>Spike|hCoV-19/Denmark/DCGC-18798/2020|2020-12-07|EPI\_ISL\_748561|Original|hCoV-19^^Midtjylland|Human|Department of Virus and Microbiological Special Diagnostics|Albertsen Lab|Michaelsen|Denmark

>Spike|hCoV-19/England/CAMC-A3E685/2020|2020-10-04|EPI\_ISL\_609717|Original|hCoV-19^^England|Human|Lighthouse Lab in Cambridge|Wellcome Sanger Institute for the COVID-19 Genomics UK (COG-UK) consortium|Davies|United Kingdom

>Spike|hCoV-19/Shaoxing/01/2020|2020-01-27|EPI\_ISL\_463889|Original|hCoV-19^^Zhejiang|Human|Shaoxing Center for Disease Control and Prevention|Department of Pathology and Laboratory Medicine|Yang|China

>Spike|hCoV-19/Wales/PHWC-4932EA/2020|2020-11-29|EPI\_ISL\_725866|Original|hCoV-19^^Wales|Human|Originating lab|COVID-19 Genomics UK (COG-UK) Consortium|Moore|United Kingdom

>Spike|hCoV-19/USA/UT-08486/2020|2020-05-19|EPI\_ISL\_524255|Original|hCoV-19^^Utah|Human|Utah Public Health Laboratory|Utah Public Health Laboratory|Young|USA

>Spike|hCoV-19/England/ALDP-CB3A7B/2020|2020-12-18|EPI\_ISL\_761837|Original|hCoV-19^^England|Human|Lighthouse Lab in Alderley Park|Wellcome Sanger Institute for the COVID-19 Genomics UK (COG-UK) Consortium|Davies|United Kingdom

>Spike|hCoV-19/Wales/PHWC-48B2A9/2020|2020-11-06|EPI\_ISL\_666216|Original|hCoV-19^^Wales|Human|Wales Specialist Virology Centre Sequencing lab|COVID-19 Genomics UK (COG-UK) Consortium|Moore|United Kingdom

>Spike|hCoV-19/Netherlands/Limburg\_44/2020|2020-04-06|EPI\_ISL\_461032|Original|hCoV-19^^Limburg|Human|Dutch COVID-19 response team|Erasmus Medical Center|Oude Munnink|Netherlands

>Spike|hCoV-19/USA/TX-DSHS-2041/2020|2020-11-12|EPI\_ISL\_766679|Original|hCoV-19^^Texas|Human|Texas Department of State Health Services|Texas Department of State Health Services|Rahman|USA

>Spike|hCoV-19/England/NOTT-10E5B7/2020|2020-03-26|EPI\_ISL\_425566|Original|hCoV-19^^England|Human|Queens Medical Centre|COVID-19 Genomics UK (COG-UK) Consortium|Loose|United Kingdom

>Spike|hCoV-19/USA/WA-S2033/2020|2020-06-06|EPI\_ISL\_497461|Original|hCoV-19^^Washington|Human|Washington State Department of Health|Seattle Flu Study|Lee|USA

>Spike|hCoV-19/Singapore/1272/2020|2020-05-05|EPI\_ISL\_648756|Original|hCoV-19^^Singapore|Human|Department of Laboratory Medicine|Department of Laboratory Medicine|Chen|Singapore

>Spike|hCoV-19/England/ALDP-9D9BF7/2020|2020-09-18|EPI\_ISL\_576802|Original|hCoV-19^^England|Human|Oxford Viromics|COVID-19 Genomics UK (COG-UK) Consortium|Golubchik|United Kingdom

>Spike|hCoV-19/USA/TX-HMH-1530/2020|2020-04-03|EPI\_ISL\_542777|Original|hCoV-19^^Texas|Human|Houston Methodist Hospital|Houston Methodist Hospital|Long|USA

>Spike|hCoV-19/Spain/AN-IBV-002972/2020|2020-03-31|EPI\_ISL\_474884|Original|hCoV-19^^Andalucia|Human|Hospital Universitario Virgen de las Nieves de Granada-SAS|SeqCOVID-SPAIN consortium/IBV(CSIC)|Comas|Spain

>Spike|hCoV-19/England/CAMC-BC0A6D/2020|2020-11-22|EPI\_ISL\_705016|Original|hCoV-19^^England|Human|Lighthouse Lab in Cambridge|Wellcome Sanger Institute for the COVID-19 Genomics UK (COG-UK) Consortium|Davies|United Kingdom

>Spike|hCoV-19/Switzerland/SH-ETHZ-410532/2020|2020-11-26|EPI\_ISL\_737774|Original|hCoV-19^^Schaffhausen|Human|Viollier AG|Department of Biosystems Science and Engineering|Nadeau|Switzerland

>Spike|hCoV-19/England/CAMC-A82EF3/2020|2020-10-12|EPI\_ISL\_610899|Original|hCoV-19^^England|Human|Lighthouse Lab in Cambridge|Wellcome Sanger Institute for the COVID-19 Genomics UK (COG-UK) consortium|Davies|United Kingdom

>Spike|hCoV-19/Australia/VIC378/2020|2020-03-22|EPI\_ISL\_426685|Original|hCoV-19^^Victoria|Human|Victorian Infectious Diseases Reference Laboratory (VIDRL)|Microbiological Diagnostic Unit Public Health Laboratory and Victorian Infectious Diseases Reference Laboratory|Schultz|Australia

>Spike|hCoV-19/Italy/TUS-UOS-23/2020|2020-03-29|EPI\_ISL\_591340|Original|hCoV-19^^Tuscany|Human|Dipartimento di Biotecnologie Mediche|Dipartimento di Biotecnologie Mediche|Cusi|Italy

>Spike|hCoV-19/Germany/NW-HHU-353/2020|2020-09-10|EPI\_ISL\_666640|Original|hCoV-19^^North Rhine-Westphalia|Human|ZOTZ KLIMAS MVZ D\u00f0fcsseldorf-Centrum GbR \u00dcBAG f\u00fcr Labormedizin|Center of Medical Microbiology|Wienemann|Germany

>Spike|hCoV-19/USA/MI-MDHHS-SC22111/2020|2020-10-14|EPI\_ISL\_614162|Original|hCoV-19^^Michigan|Human|Michigan Department of Health and Human Services|Michigan Department of Health and Human Services|Jacob|USA

>Spike|hCoV-19/India/TG-CDFD-N5427/2020|2020-06-01|EPI\_ISL\_528630|Original|hCoV-19^^Telangana|Human|National Genomics Core-Center for DNA Fingerprinting and Diagnostics|National Genomics Core-Center for DNA Fingerprinting and Diagnostics (NGC-CDFD)- DBT's PAN-INDIA-1000 Genome consortium|Vashisht|India

>Spike|hCoV-19/England/QEUH-A8C5C7/2020|2020-10-18|EPI\_ISL\_643272|Original|hCoV-19^^England|Human|Lighthouse Lab in Glasgow|Wellcome Sanger Institute for the COVID-19 Genomics UK (COG-UK) Consortium|Davies|United Kingdom

>Spike|hCoV-19/England/QEUH-B3F94E/2020|2020-11-08|EPI\_ISL\_658414|Original|hCoV-19^^England|Human|Lighthouse Lab in Glasgow|Wellcome Sanger Institute for the COVID-19 Genomics UK (COG-UK) Consortium|Davies|United Kingdom

>Spike|hCoV-19/Peru/AMZ-UPCH-0260/2020|2020-09-17|EPI\_ISL\_729906|Original|hCoV-19^^Amazonas|Human|Instituto de Medicina Tropical|Laboratorio de Gen\u00f3mica Microbiana|Tsukayama|Peru

>Spike|hCoV-19/Denmark/DCGC-5203/2020|2020-09-21|EPI\_ISL\_621741|Original|hCoV-19^^Syddanmark|Human|Department of Virus and Microbiological Special Diagnostics|Albertsen lab|Michaelsen|Denmark

>Spike|hCoV-19/New Zealand/20CV0080/2020|2020-08-15|EPI\_ISL\_547986|Original|hCoV-19^^Combined Auckland|Human|LabTests|Institute of Environmental Science and Research (ESR)|Wang|New Zealand

>Spike|hCoV-19/USA/WA-S1381/2020|2020-05-19|EPI\_ISL\_495831|Original|hCoV-19^^Washington|Human|Washington State Department of Health|Seattle Flu Study|Lee|USA

>Spike|hCoV-19/England/CAMB-1B2C62/2020|2020-05-18|EPI\_ISL\_477788|Original|hCoV-19^^England|Human|Department of Pathology|COVID-19 Genomics UK (COG-UK) Consortium|Meredith|United Kingdom

>Spike|hCoV-19/France/IDF-2534/2020|2020-03-14|EPI\_ISL\_418234|Original|hCoV-19^^\u00cele-de-France|Human|LABM GH nord Essonne|National Reference Center for Viruses of Respiratory Infections|Enouf|France

>Spike|hCoV-19/England/QEUH-B2EDEC/2020|2020-11-03|EPI\_ISL\_659847|Original|hCoV-19^^England|Human|Lighthouse Lab in Glasgow|Wellcome Sanger Institute for the COVID-19 Genomics UK (COG-UK) Consortium|Davies|United Kingdom

>Spike|hCoV-19/England/ALDP-49CD2C/2020|2020-06-14|EPI\_ISL\_559547|Original|hCoV-19^^England|Human|Lighthouse Lab in Alderley Park|Wellcome Sanger Institute for the COVID-19 Genomics UK (COG-UK) consortium|Davies|United Kingdom

>Spike|hCoV-19/England/NORT-287755/2020|2020-11-06|EPI\_ISL\_724989|Original|hCoV-19^^England|Human|Northumbria University / South Tees Hospitals NHS Foundation Trust / North Cumbria Integrated Care NHS Foundation Trust / North Tees and Hartlepool NHS Foundation Trust / Newcastle Hospitals NHS Foundation Trust|COVID-19 Genomics UK (COG-UK) Consortium|Bashton|United Kingdom

>Spike|hCoV-19/England/CAMC-B20825/2020|2020-11-01|EPI\_ISL\_647486|Original|hCoV-19^^England|Human|Lighthouse Lab in Cambridge|Wellcome Sanger Institute for the COVID-19 Genomics UK (COG-UK) Consortium|Davies|United Kingdom

>Spike|hCoV-19/Australia/VIC2020/2020|2020-06-03|EPI\_ISL\_480662|Original|hCoV-19^^Victoria|Human|Victorian Infectious Diseases Reference Laboratory (VIDRL)|VIDRL and MDU-PHL|Schultz|Australia

>Spike|hCoV-19/Australia/VIC11024/2020|2020-00-00|EPI\_ISL\_563207|Original|hCoV-19^^Victoria|Human|Microbiological Diagnostic Unit - Public Health Laboratory (MDU-PHL)|MDU-PHL|Schultz|Australia

>Spike|hCoV-19/England/MILK-BB155F/2020|2020-11-17|EPI\_ISL\_720072|Original|hCoV-19^^England|Human|Lighthouse Lab in Milton Keynes|Wellcome Sanger Institute for the COVID-19 Genomics UK (COG-UK) Consortium|Davies|United Kingdom

>Spike|hCoV-19/Philippines/PH-RITM-0017/2020|2020-03-04|EPI\_ISL\_491472|Original|hCoV-19^^NCR|Human|Cardinal Santos Medical Center|Research Institute for Tropical Medicine|Polotan|Philippines

>Spike|hCoV-19/Scotland/CVR251/2020|2020-03-19|EPI\_ISL\_438919|Original|hCoV-19^^Scotland|Human|West of Scotland Specialist Virology Centre|COVID-19 Genomics UK (COG-UK) Consortium|Robertson|United Kingdom

>Spike|hCoV-19/England/MILK-BAB2AC/2020|2020-11-18|EPI\_ISL\_681506|Original|hCoV-19^^England|Human|Lighthouse Lab in Milton Keynes|Wellcome Sanger Institute for the COVID-19 Genomics UK (COG-UK) Consortium|Davies|United Kingdom

>Spike|hCoV-19/Switzerland/BE-UNIBE-160-0067/2020|2020-03-16|EPI\_ISL\_574800|Original|hCoV-19^^Bern|Human|Institute for Infectious Diseases|Institute for Infectious Diseases|Koch|Switzerland

>Spike|hCoV-19/Denmark/DCGC-10493/2020|2020-11-02|EPI\_ISL\_670014|Original|hCoV-19^^Syddanmark|Human|Department of Virus and Microbiological Special Diagnostics|Albertsen Lab|Michaelsen|Denmark

>Spike|hCoV-19/England/QEUA-A9ECAF/2020|2020-10-20|EPI\_ISL\_611477|Original|hCoV-19^^England|Human|Lighthouse Lab in Glasgow|Wellcome Sanger Institute for the COVID-19 Genomics UK (COG-UK) consortium|Davies|United Kingdom

>Spike|hCoV-19/England/ALDP-B62D0A/2020|2020-11-08|EPI\_ISL\_655426|Original|hCoV-19^^England|Human|Lighthouse Lab in Alderley Park|Wellcome Sanger Institute for the COVID-19 Genomics UK (COG-UK) Consortium|Davies|United Kingdom

>Spike|hCoV-19/USA/TX-HMH-1401/2020|2020-04-30|EPI\_ISL\_542699|Original|hCoV-19^^Texas|Human|Houston Methodist Hospital|Houston Methodist Hospital|Long|USA

>Spike|hCoV-19/Bangladesh/DNAS\_DRCIM\_CPH\_isl\_438\_BGD/2020|2020-04-29|EPI\_ISL\_774885|Original|hCoV-19^^Dhaka|Human|Designated Reference Institute for Chemical Measurements (DRICM)|DNA SOLUTION LTD.|Rabbi|Bangladesh

>Spike|hCoV-19/England/QEUA-9CFFE9/2020|2020-09-14|EPI\_ISL\_589824|Original|hCoV-19^^England|Human|Lighthouse Lab in Glasgow|Wellcome Sanger Institute for the COVID-19 Genomics UK (COG-UK) consortium|Davies|United Kingdom

>Spike|hCoV-19/England/LIVE-A840E/2020|2020-03-26|EPI\_ISL\_517160|Original|hCoV-19^^England|Human|Liverpool Clinical Laboratories|COVID-19 Genomics UK (COG-UK) Consortium|Haldenby|United Kingdom

>Spike|hCoV-19/England/NORT-1B61861/2020|2020-11-10|EPI\_ISL\_703005|Original|hCoV-19^^England|Human|Northumbria University / South Tees Hospitals NHS Foundation Trust / North Cumbria Integrated Care NHS Foundation Trust / North Tees and Hartlepool NHS Foundation Trust / Newcastle Hospitals NHS Foundation Trust|COVID-19 Genomics UK (COG-UK) Consortium|Bashton|United Kingdom

>Spike|hCoV-19/England/ALDP-8D40C1/2020|2020-06-24|EPI\_ISL\_557120|Original|hCoV-19^^England|Human|Lighthouse Lab in Alderley Park|Wellcome Sanger Institute for the COVID-19 Genomics UK (COG-UK) consortium|Davies|United Kingdom

>Spike|hCoV-19/England/SHEF-CC6D1/2020|2020-04-10|EPI\_ISL\_442413|Original|hCoV-19^^England|Human|Virology Department|COVID-19 Genomics UK (COG-UK) Consortium|de Silva|United Kingdom

>Spike|hCoV-19/New Zealand/20VR1923/2020|2020-04-03|EPI\_ISL\_579165|Original|hCoV-19^^Southern|Human|Southern Community Labs Dunedin|Institute of Environmental Science and Research (ESR)|Wang|New Zealand

>Spike|hCoV-19/Trinidad/TT7923/2020|2020-09-14|EPI\_ISL\_717700|Original|hCoV-19^^Trinidad|Human|Trinidad Public Health Laboratory|Carrington Lab|Sahadeo|Trinidad

>Spike|hCoV-19/USA/UT-02424/2020|2020-04-21|EPI\_ISL\_470674|Original|hCoV-19^^Utah|Human|Utah Public Health Laboratory|Utah Public Health Laboratory|Young|USA

>Spike|hCoV-19/England/CAMB-1B7571/2020|2020-10-21|EPI\_ISL\_637410|Original|hCoV-19^^England|Human|Department of Pathology|COVID-19 Genomics UK (COG-UK) Consortium|Goodfellow|United Kingdom

>Spike|hCoV-19/Australia/VIC5738/2020|2020-07-18|EPI\_ISL\_518539|Original|hCoV-19^^Victoria|Human|Microbiological Diagnostic Unit - Public Health Laboratory (MDU-PHL)|MDU-PHL|Schultz|Australia

>Spike|hCoV-19/Gambia/GC19-3816/2020|2020-07-27|EPI\_ISL\_561089|Original|hCoV-19^^Kombo|Human|MRCG at LSHTM Genomics lab|MRCG at LSHTM Genomics lab|Sesay|Gambia

>Spike|hCoV-19/Singapore/1076/2020|2020-10-05|EPI\_ISL\_596466|Original|hCoV-19^^Singapore|Human|National Public Health Laboratory|National Public Health Laboratory|Mak|Singapore

>Spike|hCoV-19/USA/WA-S2222/2020|2020-06-08|EPI\_ISL\_497650|Original|hCoV-19^^Washington|Human|Washington State Department of Health|Seattle Flu Study|Lee|USA

>Spike|hCoV-19/Guangzhou/GZMU0078/2020|2020-02-11|EPI\_ISL\_457690|Original|hCoV-19^^Guangzhou|Human|The First Affiliated Hospital of Guangzhou Medical University|BGI-shenzhen & The First Affiliated Hospital of Guangzhou Medical University|Ji|China

>Spike|hCoV-19/Northern Ireland/NIRE-1022DA/2020|2020-03-23|EPI\_ISL\_441399|Original|hCoV-19^^Northern Ireland|Human|Regional Virus Laboratory|COVID-19 Genomics UK (COG-UK) Consortium|Fairley|United Kingdom

>Spike|hCoV-19/Denmark/DCGC-10178/2020|2020-11-09|EPI\_ISL\_669441|Original|hCoV-19^^Hovedstaden|Human|Department of Virus and Microbiological Special Diagnostics|Albertsen Lab|Michaelsen|Denmark

>Spike|hCoV-19/USA/MI-UM-10036454848/2020|2020-10-15|EPI\_ISL\_628852|Original|hCoV-19^^Michigan|Human|University of Michigan Clinical Microbiology Laboratory|Lauring Lab|Valesano|USA

>Spike|hCoV-19/Netherlands/ZH-EMC-1121/2020|2020-12-09|EPI\_ISL\_763200|Original|hCoV-19^^Zuid Holland|Human|Dutch COVID-19 response team|Erasmus Medical Center|Oude Munnink|Netherlands

>Spike|hCoV-19/England/QEUA-9DE12D/2020|2020-09-21|EPI\_ISL\_599505|Original|hCoV-19^^England|Human|Lighthouse Lab in Glasgow|Wellcome Sanger Institute for the COVID-19 Genomics UK (COG-UK) consortium|Davies|United Kingdom

>Spike|hCoV-19/USA/VA-DCLS-0741/2020|2020-07-02|EPI\_ISL\_526862|Original|hCoV-19^^Virginia|Human|Virginia DCLS|Virginia DCLS|St. Jacques|USA

>Spike|hCoV-19/USA/CA-ALSR-2061/2020|2020-04-22|EPI\_ISL\_635326|Original|hCoV-19^^California|Human|San Diego County Public Health Laboratory|Andersen lab at Scripps Research|Gangavarapu|USA

>Spike|hCoV-19/Switzerland/VB-ETHZ-100024/2020|2020-03-10|EPI\_ISL\_466948|Original|hCoV-19^^Valais|Human|Viollier AG|Department of Biosystems Science and Engineering|Nadeau|Switzerland

>Spike|hCoV-19/England/QEUA-A9F53A/2020|2020-10-20|EPI\_ISL\_611448|Original|hCoV-19^^England|Human|Lighthouse Lab in Glasgow|Wellcome Sanger Institute for the COVID-19 Genomics UK (COG-UK) consortium|Davies|United Kingdom

>Spike|hCoV-19/Norway/3108/2020|2020-08-05|EPI\_ISL\_549131|Original|hCoV-19^^Viken|Human|Ostfold Hospital Trust - Kalnes|Norwegian Institute of Public Health|Kopperud Riis|Norway

>Spike|hCoV-19/England/MILK-9A7FD8/2020|2020-09-02|EPI\_ISL\_572590|Original|hCoV-19^^England|Human|Virology Department|COVID-19 Genomics UK (COG-UK) Consortium|Williams|United Kingdom

>Spike|hCoV-19/Denmark/DCGC-16810/2020|2020-12-14|EPI\_ISL\_750386|Original|hCoV-19^^Hovedstaden|Human|Department of Virus and Microbiological Special Diagnostics|Albertsen Lab|Michaelsen|Denmark

>Spike|hCoV-19/England/CAMB-8117D/2020|2020-04-20|EPI\_ISL\_438574|Original|hCoV-19^^England|Human|Department of Pathology|COVID-19 Genomics UK (COG-UK) Consortium|Meredith|United Kingdom

>Spike|hCoV-19/England/ALDP-9CB3B4/2020|2020-09-17|EPI\_ISL\_575731|Original|hCoV-19^^England|Human|Lighthouse Lab in Alderley Park|Wellcome Sanger Institute for the COVID-19 Genomics UK (COG-UK) consortium|Davies|United Kingdom

>Spike|hCoV-19/England/MILK-CA6F03/2020|2020-12-18|EPI\_ISL\_761654|Original|hCoV-19^^England|Human|Lighthouse Lab in Milton Keynes|Wellcome Sanger Institute for the COVID-19 Genomics UK (COG-UK) Consortium|Davies|United Kingdom

>Spike|hCoV-19/England/MILK-AB7A1F/2020|2020-10-21|EPI\_ISL\_623692|Original|hCoV-19^^England|Human|Lighthouse Lab in Milton Keynes|Wellcome Sanger Institute for the COVID-19 Genomics UK (COG-UK) consortium|Davies|United Kingdom

>Spike|hCoV-19/USA/TX-HMH-MCoV-13694/2020|2020-08-20|EPI\_ISL\_788790|Original|hCoV-19^^Texas|Human|Houston Methodist Hospital|Houston Methodist Hospital|Long|USA

>Spike|hCoV-19/Austria/CeMM0499/2020|2020-03-26|EPI\_ISL\_583587|Original|hCoV-19^^Austria|Human|Institute for Medical and Chemical Laboratory Diagnostics|Bergthaler laboratory|Bergthaler|Austria

>Spike|hCoV-19/England/CAMB-1ADE19/2020|2020-04-25|EPI\_ISL\_459412|Original|hCoV-19^^England|Human|Department of Pathology|Wellcome Sanger Institute for the COVID-19 Genomics UK (COG-UK) consortium|Davies|United Kingdom

>Spike|hCoV-19/England/ALDP-9D8CC8/2020|2020-09-18|EPI\_ISL\_576661|Original|hCoV-19^^England|Human|Oxford Viromics|COVID-19 Genomics UK (COG-UK) Consortium|Golubchik|United Kingdom

>Spike|hCoV-19/USA/CA-ALSR-4283/2020|2020-10-06|EPI\_ISL\_648935|Original|hCoV-19^^California|Human|San Diego County Public Health Laboratory|Andersen lab at Scripps Research|Gangavarapu|USA

>Spike|hCoV-19/Brazil/SP-12/2020|2020-03-04|EPI\_ISL\_416034|Original|hCoV-19^^S\u00e3o Paulo|Human|Hospital Israelita Albert Einstein|Instituto Adolfo Lutz|Sacchi|Brazil

>Spike|hCoV-19/Scotland/EDB1118/2020|2020-04-06|EPI\_ISL\_433406|Original|hCoV-19^^Scotland|Human|Virology Department|COVID-19 Genomics UK (COG-UK) Consortium|Williams|United Kingdom

>Spike|hCoV-19/Denmark/DCGC-15383/2020|2020-11-23|EPI\_ISL\_713793|Original|hCoV-19^^Hovedstaden|Human|Department of Virus and Microbiological Special Diagnostics|Albertsen Lab|Michaelsen|Denmark

>Spike|hCoV-19/Russia/VOR-RII-MH2792S/2020|2020-09-26|EPI\_ISL\_602454|Original|hCoV-19^^Voronezh|Human|HELIX LLC|WHO National Influenza Centre Russian Federation|Komissarov|Russia

>Spike|hCoV-19/Spain/VC-IBV-98003578/2020|2020-03-30|EPI\_ISL\_537992|Original|hCoV-19^^Comunitat Valenciana|Human|Servicio de Microbiolog\u00eda. Hospital General Universitario de Castell\u00f3n|SeqCOVID-SPAIN consortium|IBV(CSIC)|Comas|Spain

>Spike|hCoV-19/England/SHEF-C0734/2020|2020-03-26|EPI\_ISL\_420242|Original|hCoV-19^^England|Human|Virology Department|Department of Infection|de Silva|United Kingdom

>Spike|hCoV-19/Australia/VIC8942/2020|2020-07-28|EPI\_ISL\_565296|Original|hCoV-19^^Victoria|Human|Microbiological Diagnostic Unit - Public Health Laboratory (MDU-PHL)|MDU-PHL|Schultz|Australia

>Spike|hCoV-19/Wales/PHWC-4A0790/2020|2020-12-08|EPI\_ISL\_743491|Original|hCoV-19^^Wales|Human|Wales Specialist Virology Centre Sequencing lab|COVID-19 Genomics UK (COG-UK) Consortium|Moore|United Kingdom

>Spike|hCoV-19/Austria/CeMM0359/2020|2020-04-02|EPI\_ISL\_438122|Vero P2|hCoV-19^^Vienna|Human|Center for Virology|Bergthaler laboratory|Bergthaler|Austria

>Spike|hCoV-19/England/204590751/2020|2020-11-05|EPI\_ISL\_700661|Original|hCoV-19^^England|Human|Respiratory Virus Unit|COVID-19 Genomics UK (COG-UK) Consortium|Platt|United Kingdom

>Spike|hCoV-19/Japan/PG-8782/2020|2020-08-00|EPI\_ISL\_686373|Original|hCoV-19^^Japan|Human|Pathogen Genomics Center|Pathogen Genomics Center|Sekizuka|Japan

>Spike|hCoV-19/Denmark/DCGC-10394/2020|2020-11-02|EPI\_ISL\_669940|Original|hCoV-19^^Hovedstaden|Human|Department of Virus and Microbiological Special Diagnostics|Albertsen Lab|Michaelsen|Denmark

>Spike|hCoV-19/Jordan/AM-ALSR-4038/2020|2020-10-03|EPI\_ISL\_636398|Original|hCoV-19^^Amman|Human|Biolab Diagnostic Laboratories|Andersen lab at Scripps Research|Gangavarapu|Jordan

>Spike|hCoV-19/Australia/VIC3464/2020|2020-07-06|EPI\_ISL\_521127|Original|hCoV-19^^Victoria|Human|Victorian Infectious Diseases Reference Laboratory (VIDRL)|VIDRL and MDU-PHL|Schultz|Australia

>Spike|hCoV-19/Bangladesh/DNAS\_DRICM\_isl\_18974/2020|2020-06-27|EPI\_ISL\_775002|Original|hCoV-19^^Dhaka|Human|Designated Reference Institute for Chemical Measurements (DRICM)|DNA SOLUTION LTD.|Rabbi|Bangladesh

>Spike|hCoV-19/Gibraltar/205121217/2020|2020-00-00|EPI\_ISL\_766343|Original|hCoV-19^^Gibraltar|Human|Microbiology|Respiratory Virus Unit|Platt|Gibraltar

>Spike|hCoV-19/South Africa/NHLS-UCT-GS-0659/2020|2020-10-22|EPI\_ISL\_700581|Original|hCoV-19^^Western Cape|Human|Conville CDC wc CVC|NHLS/UCT|Iranzadeh|South Africa

>Spike|hCoV-19/Japan/PG-7346/2020|2020-08-00|EPI\_ISL\_688449|Original|hCoV-19^^Japan|Human|Pathogen Genomics Center|Pathogen Genomics Center|Sekizuka|Japan

>Spike|hCoV-19/USA/AZ-TG410477/2020|2020-06-24|EPI\_ISL\_694964|Original|hCoV-19^^Arizona|Human|TGen North|TGen North|French|USA

>Spike|hCoV-19/USA/CA-CZB-13670/2020|2020-11-04|EPI\_ISL\_738628|Original|hCoV-19^^California|Human|Santa Clara County Public Health Laboratory|Chan-Zuckerberg Biohub|Kamm|USA

>Spike|hCoV-19/England/OXON-AF953/2020|2020-04-15|EPI\_ISL\_478787|Original|hCoV-19^^England|Human|Oxford Viromics|COVID-19 Genomics UK (COG-UK) Consortium|Golubchik|United Kingdom

>Spike|hCoV-19/England/ALDP-B5B706/2020|2020-11-09|EPI\_ISL\_655312|Original|hCoV-19^^England|Human|Lighthouse Lab in Alderley Park|Wellcome Sanger Institute for the COVID-19 Genomics UK (COG-UK) Consortium|Davies|United Kingdom

>Spike|hCoV-19/Netherlands/Gelderland\_18/2020|2020-04-08|EPI\_ISL\_460654|Original|hCoV-19^^Gelderland|Human|Dutch COVID-19 response team|Erasmus Medical Center|Oude Munnink|Netherlands

>Spike|hCoV-19/Wales/PHWC-165457/2020|2020-06-10|EPI\_ISL\_479466|Original|hCoV-19^^Wales|Human|Wales Specialist Virology Centre Sequencing lab|COVID-19 Genomics UK (COG-UK) Consortium|Moore|United Kingdom

>Spike|hCoV-19/USA/MN-MDH-1492/2020|2020-03-21|EPI\_ISL\_518885|Original|hCoV-19^^Minnesota|Human|Mayo Clinic & Mayo Clinic Laboratories|Minnesota Department of Health|Garfin|USA

>Spike|hCoV-19/USA/MA-MASPHL-00930/2020|2020-05-30|EPI\_ISL\_692824|Original|hCoV-19^^Massachusetts|Human|Massachusetts State Public Health Laboratory|Massachusetts State Public Health Laboratory|Lang|USA

>Spike|hCoV-19/England/CAMB-7F46A/2020|2020-04-08|EPI\_ISL\_442990|Original|hCoV-19^^England|Human|Department of Pathology|Wellcome Sanger Institute for the COVID-19 Genomics UK (COG-UK) consortium|Amato|United Kingdom

>Spike|hCoV-19/Australia/NSW1082/2020|2020-08-15|EPI\_ISL\_593678|Original|hCoV-19^^New South Wales|Human|Pathology West - NSW Health Pathology|NSW Health Pathology - Institute of Clinical Pathology and Medical Research; Westmead Hospital; University of Sydney|Gall|Australia

>Spike|hCoV-19/Colombia/ATL-INS-06/2020|2020-06-26|EPI\_ISL\_653757|Original|hCoV-19^^Atlantico|Human|Instituto Nacional de Salud|Instituto Nacional de Salud|Franco-Mu\u00f1oz|Colombia

>Spike|hCoV-19/England/BRIS-12EB28/2020|2020-04-24|EPI\_ISL\_488294|Original|hCoV-19^^England|Human|PHE South West Regional Laboratory|Wellcome Sanger Institute for the COVID-19 Genomics UK (COG-UK) consortium|Davies|United Kingdom

>Spike|hCoV-19/England/QEUH-A0BDC8/2020|2020-09-30|EPI\_ISL\_599153|Original|hCoV-19^^England|Human|Lighthouse Lab in Glasgow|Wellcome Sanger Institute for the COVID-19 Genomics UK (COG-UK) consortium|Davies|United Kingdom



>Spike|hCoV-19/Lithuania/MR-LUHS-Eilnr237525/2020|2020-12-22|EPI\_ISL\_770517|Original|hCoV-19^^Kauno apskritis|Human|Lithuanian University of Health Sciences Hospital|Lithuanian University of Health Sciences|Zemaitis|Lithuania

>Spike|hCoV-19/Japan/PG-2289/2020|2020-04-00|EPI\_ISL\_685894|Original|hCoV-19^^Japan|Human|Pathogen Genomics Center|Pathogen Genomics Center|Sekizuka|Japan

>Spike|hCoV-19/Denmark/DCGC-13950/2020|2020-11-30|EPI\_ISL\_711471|Original|hCoV-19^^Hovedstaden|Human|Department of Virus and Microbiological Special Diagnostics|Albertsen Lab|Michaelsen|Denmark

>Spike|hCoV-19/England/LIVE-AAE1D/2020|2020-07-28|EPI\_ISL\_540619|Original|hCoV-19^^England|Human|Liverpool Clinical Laboratories|COVID-19 Genomics UK (COG-UK) Consortium|Haldenby|United Kingdom

>Spike|hCoV-19/Australia/NSW2198/2020|2020-03-20|EPI\_ISL\_500659|Original|hCoV-19^^New South Wales|Human|Area of Virology|Area of Virology|Bull|Australia

>Spike|hCoV-19/England/ALDP-BB9997/2020|2020-11-20|EPI\_ISL\_702730|Original|hCoV-19^^England|Human|Lighthouse Lab in Alderley Park|Wellcome Sanger Institute for the COVID-19 Genomics UK (COG-UK) Consortium|Davies|United Kingdom

>Spike|hCoV-19/England/CAMB-1BA17A/2020|2020-11-10|EPI\_ISL\_664972|Original|hCoV-19^^England|Human|Department of Pathology|COVID-19 Genomics UK (COG-UK) Consortium|Goodfellow|United Kingdom

>Spike|hCoV-19/England/ALDP-9CD6D7/2020|2020-09-16|EPI\_ISL\_566160|Original|hCoV-19^^England|Human|Lighthouse Lab in Alderley Park|Wellcome Sanger Institute for the COVID-19 Genomics UK (COG-UK) consortium|Davies|United Kingdom

>Spike|hCoV-19/Netherlands/Utrecht\_1363628/2020|2020-03-01|EPI\_ISL\_413589|Original|hCoV-19^^Utrecht|Human|MHC Utrecht|Erasmus Medical Center|Oude Munnink|Netherlands

>Spike|hCoV-19/Luxembourg/LNS8615469/2020|2020-11-16|EPI\_ISL\_744776|Original|hCoV-19^^Luxembourg|Human|Laboratoire national de sant\u00e9|Laboratoire national de sant\u00e9|Wienecke-Baldacchino|Luxembourg

>Spike|hCoV-19/Austria/CeMM0505/2020|2020-03-22|EPI\_ISL\_583592|Original|hCoV-19^^Austria|Human|Institute for Medical and Chemical Laboratory Diagnostics|Bergthaler laboratory|Bergthaler|Austria

>Spike|hCoV-19/England/CAMC-B09066/2020|2020-10-29|EPI\_ISL\_673233|Original|hCoV-19^^England|Human|Lighthouse Lab in Cambridge|Wellcome Sanger Institute for the COVID-19 Genomics UK (COG-UK) Consortium|Davies|United Kingdom

>Spike|hCoV-19/France/BRE-8930/2020|2020-07-24|EPI\_ISL\_560598|Original|hCoV-19^^Bretagne|Human|Hospital|National Reference Center for Viruses of Respiratory Infections|Enouf|France

>Spike|hCoV-19/Scotland/CVR4340/2020|2020-09-10|EPI\_ISL\_572585|Original|hCoV-19^^Scotland|Human|West of Scotland Specialist Virology Centre|COVID-19 Genomics UK (COG-UK) Consortium|Robertson|United Kingdom

>Spike|hCoV-19/Australia/VIC7700/2020|2020-08-01|EPI\_ISL\_564589|Original|hCoV-19^^Victoria|Human|Microbiological Diagnostic Unit - Public Health Laboratory (MDU-PHL)|MDU-PHL|Schultz|Australia

>Spike|hCoV-19/Wales/PHWC-27BE4/2020|2020-03-31|EPI\_ISL\_431910|Original|hCoV-19^^Wales|Human|Wales Specialist Virology Centre|Public Health Wales Microbiology Cardiff|Moore|United Kingdom

>Spike|hCoV-19/England/QEUEH-AD5592/2020|2020-10-26|EPI\_ISL\_633879|Original|hCoV-19^^England|Human|Lighthouse Lab in Glasgow|Wellcome Sanger Institute for the COVID-19 Genomics UK (COG-UK) consortium|Davies|United Kingdom

>Spike|hCoV-19/Switzerland/VD-ETHZ-410190/2020|2020-12-13|EPI\_ISL\_737902|Original|hCoV-19^^Vaud|Human|Viollier AG|Department of Biosystems Science and Engineering|Nadeau|Switzerland

>Spike|hCoV-19/Canada/ON-PHL-20-03640/2020|2020-11-00|EPI\_ISL\_775144|Original|hCoV-19^^Ontario|Human|Public Health Ontario Laboratory|Public Health Ontario Laboratory|Guthrie|Canada

>Spike|hCoV-19/England/ALDP-6AF340/2020|2020-07-01|EPI\_ISL\_557752|Original|hCoV-19^^England|Human|Lighthouse Lab in Alderley Park|Wellcome Sanger Institute for the COVID-19 Genomics UK (COG-UK) consortium|Davies|United Kingdom

>Spike|hCoV-19/USA/OR-OHSU-4346/2020|2020-10-31|EPI\_ISL\_667536|Original|hCoV-19^^Oregon|Human|OHSU Lab Services Molecular Microbiology Lab|Oregon SARS-CoV-2 Genome Sequencing Center|O'Roak|USA

>Spike|hCoV-19/Thailand/Bangkok-CONI-0296/2020|2020-03-15|EPI\_ISL\_693369|Original|hCoV-19^^Bangkok|Human|Ramathibodi Hospital|COVID-19 Network Investigations (CONI) Alliance|Batty|Thailand

>Spike|hCoV-19/England/ALDP-9D8DF2/2020|2020-09-18|EPI\_ISL\_576674|Original|hCoV-19^^England|Human|Oxford Viromics|COVID-19 Genomics UK (COG-UK) Consortium|Golubchik|United Kingdom

>Spike|hCoV-19/England/NORW-EAE02/2020|2020-04-30|EPI\_ISL\_457380|Original|hCoV-19^^England|Human|Quadram Institute Bioscience|COVID-19 Genomics UK (COG-UK) Consortium|Alikhan|United Kingdom

>Spike|hCoV-19/USA/WA-S2217/2020|2020-06-08|EPI\_ISL\_497645|Original|hCoV-19^^Washington|Human|Washington State Department of Health|Seattle Flu Study|Lee|USA

>Spike|hCoV-19/Denmark/DCGC-6733/2020|2020-04-20|EPI\_ISL\_622383|Original|hCoV-19^^Hovedstaden|Human|Department of Virus and Microbiological Special Diagnostics|Albertsen lab|Michaelsen|Denmark

>Spike|hCoV-19/Canada/ON-S1972/2020|2020-11-24|EPI\_ISL\_755686|Original|hCoV-19^^Ontario|Human|Toronto Invasive Bacterial Diseases Network|McMaster University|McArthur|Canada

>Spike|hCoV-19/USA/CA-CZB-10149/2020|2020-06-04|EPI\_ISL\_672232|Original|hCoV-19^^California|Human|The Ashley Laboratory|Chan-Zuckerberg Biohub|Bhatt|USA

>Spike|hCoV-19/England/LOND-124F659/2020|2020-03-20|EPI\_ISL\_665162|Original|hCoV-19^^England|Human|University College London Hospital|COVID-19 Genomics UK (COG-UK) Consortium|Byott|United Kingdom

>Spike|hCoV-19/France/PAC-MEPHI-2341/2020|2020-10-08|EPI\_ISL\_644541|Original|hCoV-19^^Provence-Alpes-Cote-d\u2019Azur|Human|MEPHI|MEPHI|Levasseur|France

>Spike|hCoV-19/England/ALDP-A5108E/2020|2020-10-07|EPI\_ISL\_597820|Original|hCoV-19^^England|Human|Lighthouse Lab in Alderley Park|Wellcome Sanger Institute for the COVID-19 Genomics UK (COG-UK) consortium|Davies|United Kingdom

>Spike|hCoV-19/USA/CA-ALSR-2697/2020|2020-07-14|EPI\_ISL\_635636|Original|hCoV-19^^California|Human|San Diego County Public Health Laboratory|Andersen lab at Scripps Research|Gangavarapu|USA

>Spike|hCoV-19/USA/MA-MGH-01495/2020|2020-05-07|EPI\_ISL\_791958|Original|hCoV-19^^Massachusetts|Human|Massachusetts General Hospital|Infectious Disease Program|Park|USA

>Spike|hCoV-19/Denmark/DCGC-21502/2020|2020-12-21|EPI\_ISL\_757865|Original|hCoV-19^^Midtjylland|Human|Department of Virus and Microbiological Special Diagnostics|Albertsen Lab|Michaelsen|Denmark

>Spike|hCoV-19/Netherlands/UT-EMC-93/2020|2020-09-10|EPI\_ISL\_632497|Original|hCoV-19^^Utrecht|Human|Dutch COVID-19 response team|Erasmus Medical Center|Oude Munnink|Netherlands

>Spike|hCoV-19/Ecuador/20640/2020|2020-05-02|EPI\_ISL\_490201|Original|hCoV-19^^Guayaquil|Human|National Influenza Centre of INSPI-Ecuador|INSPI - Charit\u00e9|Bruno Caicedo|Ecuador

>Spike|hCoV-19/Scotland/CVR5906/2020|2020-11-17|EPI\_ISL\_705664|Original|hCoV-19^^Scotland|Human|West of Scotland Specialist Virology Centre|COVID-19 Genomics UK (COG-UK) Consortium|Robertson|United Kingdom

>Spike|hCoV-19/Australia/VIC7207/2020|2020-07-13|EPI\_ISL\_564282|Original|hCoV-19^^Victoria|Human|Microbiological Diagnostic Unit - Public Health Laboratory (MDU-PHL)|MDU-PHL|Schultz|Australia

>Spike|hCoV-19/Spain/PV-IBV-001610/2020|2020-03-12|EPI\_ISL\_467158|Original|hCoV-19^^Basque Country|Human|Hospital Universitario Araba. Vitoria-Gasteiz|SeqCOVID-SPAIN consortium|IBV (CSIC)|Comas|Spain

>Spike|hCoV-19/Wales/PHWC-25A8F/2020|2020-03-23|EPI\_ISL\_422255|Original|hCoV-19^^Wales|Human|Wales Specialist Virology Centre|Public Health Wales Microbiology Cardiff|Moore|United Kingdom

>Spike|hCoV-19/USA/FL-BPHL-0803/2020|2020-05-08|EPI\_ISL\_514149|Original|hCoV-19^^Florida|Human|Florida Bureau of Public Health Laboratories|Florida Bureau of Public Health Laboratories|Blanton|USA

>Spike|hCoV-19/Denmark/DCGC-16541/2020|2020-11-16|EPI\_ISL\_714826|Original|hCoV-19^^Hovedstaden|Human|Department of Virus and Microbiological Special Diagnostics|Albertsen Lab|Michaelsen|Denmark

>Spike|hCoV-19/Wales/PHWC-4A44FF/2020|2020-12-16|EPI\_ISL\_764702|Original|hCoV-19^^Wales|Human|Wales Specialist Virology Centre Sequencing lab|COVID-19 Genomics UK (COG-UK) Consortium|Moore|United Kingdom

>Spike|hCoV-19/USA/TX-HMH-MCoV-8610/2020|2020-07-01|EPI\_ISL\_780649|Original|hCoV-19^^Texas|Human|Houston Methodist Hospital|Houston Methodist Hospital|Long|USA

>Spike|hCoV-19/England/ALDP-B837C9/2020|2020-11-14|EPI\_ISL\_675220|Original|hCoV-19^^England|Human|Lighthouse Lab in Alderley Park|Wellcome Sanger Institute for the COVID-19 Genomics UK (COG-UK) Consortium|Davies|United Kingdom

>Spike|hCoV-19/USA/WI-UW-2550/2020|2020-12-29|EPI\_ISL\_779379|Original|hCoV-19^^Wisconsin|Human|University of Wisconsin-Madison AIDS Vaccine Research Laboratories|University of Wisconsin-Madison AIDS Vaccine Research Laboratories|Moreno|USA

>Spike|hCoV-19/England/BRIS-12BD25/2020|2020-05-16|EPI\_ISL\_469367|Original|hCoV-19^^England|Human|PHE South West Regional Laboratory|Wellcome Sanger Institute for the COVID-19 Genomics UK (COG-UK) consortium|Davies|United Kingdom

>Spike|hCoV-19/England/MILK-9C4096/2020|2020-09-10|EPI\_ISL\_566964|Original|hCoV-19^^England|Human|Lighthouse Lab in Milton Keynes|Wellcome Sanger Institute for the COVID-19 Genomics UK (COG-UK) consortium|Davies|United Kingdom

>Spike|hCoV-19/England/ALDP-A66D07/2020|2020-10-12|EPI\_ISL\_630428|Original|hCoV-19^^England|Human|Lighthouse Lab in Alderley Park|Wellcome Sanger Institute for the COVID-19 Genomics UK (COG-UK) consortium|Davies|United Kingdom

>Spike|hCoV-19/England/CAMB-1BA75A/2020|2020-11-16|EPI\_ISL\_664588|Original|hCoV-19^^England|Human|Department of Pathology|COVID-19 Genomics UK (COG-UK) Consortium|Goodfellow|United Kingdom

>Spike|hCoV-19/USA/TX-HMH-4768/2020|2020-06-22|EPI\_ISL\_544318|Original|hCoV-19^^Texas|Human|Houston Methodist Hospital|Houston Methodist Hospital|Long|USA

>Spike|hCoV-19/USA/PA-MGEL104/2020|2020-03-31|EPI\_ISL\_454383|Original|hCoV-19^^Pennsylvania|Human|UPMC Clinical Microbiology Laboratory|Microbial Genome Sequencing Center|Mustapha|USA

>Spike|hCoV-19/India/OR-ILSCV30167/2020|2020-05-23|EPI\_ISL\_481142|Original|hCoV-19^^Odisha|Human|Immunogenomics lab|Immunogenomics lab|Raghav|India

>Spike|hCoV-19/USA/NY-NYUMC383/2020|2020-04-10|EPI\_ISL\_430410|Original|hCoV-19^^New York|Human|NYU Langone Health|Departments of Pathology and Medicine|Maurano|USA

>Spike|hCoV-19/USA/MI-MDHHS-SC22373/2020|2020-11-12|EPI\_ISL\_708353|Original|hCoV-19^^Michigan|Human|Michigan Department of Health and Human Services|Michigan Department of Health and Human Services|Jacob|USA

>Spike|hCoV-19/Scotland/QEUH-9DACA8/2020|2020-09-22|EPI\_ISL\_601147|Original|hCoV-19^^Scotland|Human|Lighthouse Lab in Glasgow|Wellcome Sanger Institute for the COVID-19 Genomics UK (COG-UK) consortium|Davies|United Kingdom

>Spike|hCoV-19/England/QEUH-9AE302/2020|2020-09-03|EPI\_ISL\_637634|Original|hCoV-19^^England|Human|Department of Pathology|COVID-19 Genomics UK (COG-UK) Consortium|Goodfellow|United Kingdom

>Spike|hCoV-19/England/MILK-99CC84/2020|2020-08-30|EPI\_ISL\_549920|Original|hCoV-19^^England|Human|Lighthouse Lab in Milton Keynes|Wellcome Sanger Institute for the COVID-19 Genomics UK (COG-UK) consortium|Davies|United Kingdom

>Spike|hCoV-19/Northern Ireland/QEUH-9650D3/2020|2020-08-13|EPI\_ISL\_536868|Original|hCoV-19^^Northern Ireland|Human|Lighthouse Lab in Glasgow|Wellcome Sanger Institute for the COVID-19 Genomics UK (COG-UK) consortium|Davies|United Kingdom

>Spike|hCoV-19/England/ALDP-B48089/2020|2020-11-07|EPI\_ISL\_649420|Original|hCoV-19^^England|Human|Lighthouse Lab in Alderley Park|Wellcome Sanger Institute for the COVID-19 Genomics UK (COG-UK) Consortium|Davies|United Kingdom

>Spike|hCoV-19/England/QEUH-CC25D2/2020|2020-12-20|EPI\_ISL\_778098|Original|hCoV-19^^England|Human|Lighthouse Lab in Glasgow|Wellcome Sanger Institute for the COVID-19 Genomics UK (COG-UK) Consortium|Davies|United Kingdom

>Spike|hCoV-19/Scotland/EDB7851/2020|2020-09-22|EPI\_ISL\_572839|Original|hCoV-19^^Scotland|Human|Virology Department|COVID-19 Genomics UK (COG-UK) Consortium|Williams|United Kingdom

>Spike|hCoV-19/New Zealand/20CV0475/2020|2020-10-22|EPI\_ISL\_622768|Original|hCoV-19^^Canterbury|Human|Canterbury Health Laboratories|Institute of Environmental Science and Research (ESR)|Wang|New Zealand

>Spike|hCoV-19/USA/CA-ALSR-2344/2020|2020-07-09|EPI\_ISL\_635438|Original|hCoV-19^^California|Human|San Diego County Public Health Laboratory|Andersen lab at Scripps Research|Gangavarapu|USA

>Spike|hCoV-19/Wales/PHWC-168F53/2020|2020-06-27|EPI\_ISL\_499371|Original|hCoV-19^^Wales|Human|Originating lab|COVID-19 Genomics UK (COG-UK) Consortium|Moore|United Kingdom

>Spike|hCoV-19/England/OXON-AF9DB/2020|2020-04-14|EPI\_ISL\_478792|Original|hCoV-19^^England|Human|Oxford Viromics|COVID-19 Genomics UK (COG-UK) Consortium|Golubchik|United Kingdom

>Spike|hCoV-19/Denmark/DCGC-2071/2020|2020-05-18|EPI\_ISL\_618028|Original|hCoV-19^^Sjaelland|Human|Department of Virus and Microbiological Special Diagnostics|Albertsen lab|Michaelsen|Denmark

>Spike|hCoV-19/Oman/RESP-20-B-15349/2020|2020-05-21|EPI\_ISL\_525426|Original|hCoV-19^^Muscat|Human|Oman-National Influenza Center|Biotechnology & OMICS Laboratory|Al Mahruqi|Oman

>Spike|hCoV-19/Japan/PG-1630/2020|2020-04-00|EPI\_ISL\_685236|Original|hCoV-19^^Japan|Human|Tokyo Metropolitan Institute of Public Health|Pathogen Genomics Center|Sekizuka|Japan

>Spike|hCoV-19/England/204681084/2020|2020-11-13|EPI\_ISL\_686583|Original|hCoV-19^^England|Human|Respiratory Virus Unit|COVID-19 Genomics UK (COG-UK) Consortium|Platt|United Kingdom

>Spike|hCoV-19/USA/ID-UW-1957/2020|2020-03-20|EPI\_ISL\_424315|Original|hCoV-19^^Idaho|Human|UW Virology Lab|UW Virology Lab|Roychoudhury|USA

>Spike|hCoV-19/Denmark/DCGC-8514/2020|2020-10-26|EPI\_ISL\_625926|Original|hCoV-19^^Hovedstaden|Human|Department of Virus and Microbiological Special Diagnostics|Albertsen lab|Michaelsen|Denmark

>Spike|hCoV-19/England/MILK-AC8134/2020|2020-10-21|EPI\_ISL\_634261|Original|hCoV-19^^England|Human|Lighthouse Lab in Milton Keynes|Wellcome Sanger Institute for the COVID-19 Genomics UK (COG-UK) consortium|Davies|United Kingdom

>Spike|hCoV-19/Denmark/DCGC-4457/2020|2020-08-31|EPI\_ISL\_615642|Original|hCoV-19^^Syddanmark|Human|Department of Virus and Microbiological Special Diagnostics|Albertsen lab|Michaelsen|Denmark

>Spike|hCoV-19/Wales/PHWC-495242/2020|2020-11-22|EPI\_ISL\_726316|Original|hCoV-19^^Wales|Human|Originating lab|COVID-19 Genomics UK (COG-UK) Consortium|Moore|United Kingdom

>Spike|hCoV-19/Japan/PG-2128/2020|2020-05-00|EPI\_ISL\_685733|Original|hCoV-19^^Japan|Human|Pathogen Genomics Center|Pathogen Genomics Center|Sekizuka|Japan

>Spike|hCoV-19/England/MILK-A7CDC2/2020|2020-10-13|EPI\_ISL\_606554|Original|hCoV-19^^England|Human|Lighthouse Lab in Milton Keynes|Wellcome Sanger Institute for the COVID-19 Genomics UK (COG-UK) consortium|Davies|United Kingdom

>Spike|hCoV-19/USA/WA-UW-11287/2020|2020-06-19|EPI\_ISL\_570388|Original|hCoV-19^^Washington|Human|UW Virology Lab|UW Virology Lab|Roychoudhury|USA

>Spike|hCoV-19/England/SHEF-CE39C/2020|2020-05-27|EPI\_ISL\_535085|Original|hCoV-19^^England|Human|Virology Department|COVID-19 Genomics UK (COG-UK) Consortium|de Silva|United Kingdom

>Spike|hCoV-19/Denmark/DCGC-3896/2020|2020-09-07|EPI\_ISL\_615615|Original|hCoV-19^^Syddanmark|Human|Department of Virus and Microbiological Special Diagnostics|Albertsen lab|Michaelsen|Denmark

>Spike|hCoV-19/Belgium/reg-0918996/2020|2020-09-18|EPI\_ISL\_735000|Original|hCoV-19^^Sint-Pieters-Woluwe|Human|UZ Leuven|KU Leuven|Maes|Belgium

>Spike|hCoV-19/England/20136097804/2020|2020-03-25|EPI\_ISL\_420656|Original|hCoV-19^^England|Human|Respiratory Virus Unit|Respiratory Virus Unit|Platt|United Kingdom

>Spike|hCoV-19/England/WSFT-25C1A11/2020|2020-05-13|EPI\_ISL\_488861|Original|hCoV-19^^England|Human|Department of Medical Microbiology|Wellcome Sanger Institute for the COVID-19 Genomics UK (COG-UK) consortium|Davies|United Kingdom

>Spike|hCoV-19/England/EXET-1368EA/2020|2020-04-26|EPI\_ISL\_457239|Original|hCoV-19^^England|Human|University of Exeter|COVID-19 Genomics UK (COG-UK) Consortium|Temperton|United Kingdom

>Spike|hCoV-19/England/MILK-860D78/2020|2020-07-16|EPI\_ISL\_557353|Original|hCoV-19^^England|Human|Lighthouse Lab in Milton Keynes|Wellcome Sanger Institute for the COVID-19 Genomics UK (COG-UK) consortium|Davies|United Kingdom

>Spike|hCoV-19/England/LIVE-A47BE/2020|2020-03-10|EPI\_ISL\_500043|Original|hCoV-19^^England|Human|Liverpool Clinical Laboratories|COVID-19 Genomics UK (COG-UK) Consortium|Haldenby|United Kingdom

>Spike|hCoV-19/England/MILK-95896F/2020|2020-06-15|EPI\_ISL\_554706|Original|hCoV-19^^England|Human|Lighthouse Lab in Milton Keynes|Wellcome Sanger Institute for the COVID-19 Genomics UK (COG-UK) consortium|Davies|United Kingdom

>Spike|hCoV-19/USA/CA-CHLA-PLM35178516/2020|2020-11-30|EPI\_ISL\_753522|Original|hCoV-19^^California|Human|Clinical virology Laboratory|Center for Personalized Medicine|Dien Bard|USA

>Spike|hCoV-19/Aruba/AW-RIVM-10114/2020|2020-03-18|EPI\_ISL\_547447|Original|hCoV-19^^Aruba|Human|Dutch COVID-19 response team|National Institute for Public Health and the Environment (RIVM)|Meijer|Aruba

>Spike|hCoV-19/Denmark/DCGC-2983/2020|2020-08-24|EPI\_ISL\_616745|Original|hCoV-19^^Hovedstaden|Human|Department of Virus and Microbiological Special Diagnostics|Albertsen lab|Michaelsen|Denmark

>Spike|hCoV-19/New Zealand/20VR2648/2020|2020-00-00|EPI\_ISL\_579316|Original|hCoV-19^^Auckland|Human|LabPLUS|Institute of Environmental Science and Research (ESR)|Wang|New Zealand

>Spike|hCoV-19/USA/MI-QDX-926/2020|2020-03-22|EPI\_ISL\_571631|Original|hCoV-19^^Michigan|Human|Quest Diagnostics|Quest Diagnostics|Kagan|USA

>Spike|hCoV-19/Bahrain/341038022/2020|2020-11-16|EPI\_ISL\_682320|Original|hCoV-19^^Bahrain|Human|Communicable Disease Laboratory|Communicable Disease Laboratory|Altaif|Bahrain

>Spike|hCoV-19/USA/WI-UW-2220/2020|2020-09-26|EPI\_ISL\_677623|Original|hCoV-19^^Wisconsin|Human|University of Wisconsin-Madison AIDS Vaccine Research Laboratories|University of Wisconsin-Madison AIDS Vaccine Research Laboratories|Baczenas|USA

>Spike|hCoV-19/France/BRE-IPP9995/2020|2020-11-02|EPI\_ISL\_718248|Original|hCoV-19^^Bretagne|Human|Hospital|National Reference Center for Viruses of Respiratory Infections|Enouf|France

>Spike|hCoV-19/England/QEUEH-96DF47/2020|2020-08-17|EPI\_ISL\_530590|Original|hCoV-19^^England|Human|Lighthouse Lab in Glasgow|Wellcome Sanger Institute for the COVID-19 Genomics UK (COG-UK) consortium|Davies|United Kingdom

>Spike|hCoV-19/USA/MA-MASPHL-00421/2020|2020-04-27|EPI\_ISL\_693130|Original|hCoV-19^^Massachusetts|Human|Massachusetts State Public Health Laboratory|Massachusetts State Public Health Laboratory|Lang|USA

>Spike|hCoV-19/Poland/1157821/2020|2020-06-09|EPI\_ISL\_512303|Original|hCoV-19^^Pomorskie|Human|Hematology Laboratory|Department of Virology|Smura|Poland

>Spike|hCoV-19/Northern Ireland/MILK-9C71BE/2020|2020-09-08|EPI\_ISL\_573760|Original|hCoV-19^^Northern Ireland|Human|Northumbria University / South Tees Hospitals NHS Foundation Trust / North Cumbria Integrated Care NHS Foundation Trust / North Tees and Hartlepool NHS Foundation Trust / Newcastle Hospitals NHS Foundation Trust|COVID-19 Genomics UK (COG-UK) Consortium|Bashton|United Kingdom

>Spike|hCoV-19/USA/CA-SEARCH-5352/2020|2020-12-10|EPI\_ISL\_755167|Original|hCoV-19^^California|Human|UCSD EXCITE lab|Andersen lab at Scripps Research|Gangavarapu|USA

>Spike|hCoV-19/USA/WA-S2861/2020|2020-09-18|EPI\_ISL\_596392|Original|hCoV-19^^Washington|Human|Seattle Flu Study|Seattle Flu Study|Lee|USA

>Spike|hCoV-19/USA/TX-HMH-MCoV-10612/2020|2020-07-08|EPI\_ISL\_789560|Original|hCoV-19^^Texas|Human|Houston Methodist Hospital|Houston Methodist Hospital|Long|USA

>Spike|hCoV-19/Israel/CVL-164-ngs/2020|2020-12-27|EPI\_ISL\_776847|Original|hCoV-19^^Israel|Human|Israel Central Virology laboratory|Israel Central Virology laboratory|Zuckerman|Israel

>Spike|hCoV-19/Denmark/DCGC-7241/2020|2020-10-12|EPI\_ISL\_618928|Original|hCoV-19^^Hovedstaden|Human|Department of Virus and Microbiological Special Diagnostics|Albertsen lab|Michaelsen|Denmark

>Spike|hCoV-19/Australia/SAP119/2020|2020-03-20|EPI\_ISL\_492109|Original|hCoV-19^^South Australia|Human|SA Pathology|SA Pathology|Leong|Australia

>Spike|hCoV-19/Canada/MB-NML-1180/2020|2020-07-28|EPI\_ISL\_582497|Original|hCoV-19^^Manitoba|Human|Cadham Provincial Laboratory|National Microbiology Laboratory (NML)|Majer|Canada

>Spike|hCoV-19/USA/UT-08534/2020|2020-05-18|EPI\_ISL\_524295|Original|hCoV-19^^Utah|Human|Utah Public Health Laboratory|Utah Public Health Laboratory|Young|USA

>Spike|hCoV-19/England/ALDP-B63932/2020|2020-11-08|EPI\_ISL\_656458|Original|hCoV-19^^England|Human|Lighthouse Lab in Alderley Park|Wellcome Sanger Institute for the COVID-19 Genomics UK (COG-UK) Consortium|Davies|United Kingdom

>Spike|hCoV-19/England/MILK-9C4AB6/2020|2020-09-10|EPI\_ISL\_549476|Original|hCoV-19^^England|Human|Centre for Enzyme Innovation|COVID-19 Genomics UK (COG-UK) Consortium|Robson|United Kingdom

>Spike|hCoV-19/Wales/PHWC-488154/2020|2020-10-27|EPI\_ISL\_639357|Original|hCoV-19^^Wales|Human|Wales Specialist Virology Centre Sequencing lab|COVID-19 Genomics UK (COG-UK) Consortium|Moore|United Kingdom

>Spike|hCoV-19/Wales/CAMC-A80DF8/2020|2020-10-14|EPI\_ISL\_625295|Original|hCoV-19^^Wales|Human|Lighthouse Lab in Cambridge|Wellcome Sanger Institute for the COVID-19 Genomics UK (COG-UK) consortium|Davies|United Kingdom

>Spike|hCoV-19/England/NORT-282F61/2020|2020-03-28|EPI\_ISL\_488680|Original|hCoV-19^^England|Human|NU-OMICS DNA Sequencing research facility|Wellcome Sanger Institute for the COVID-19 Genomics UK (COG-UK) consortium|Davies|United Kingdom

>Spike|hCoV-19/England/QEUEH-B66FC4/2020|2020-11-11|EPI\_ISL\_662571|Original|hCoV-19^^England|Human|Lighthouse Lab in Glasgow|Wellcome Sanger Institute for the COVID-19 Genomics UK (COG-UK) Consortium|Davies|United Kingdom

>Spike|hCoV-19/USA/NY-Wadsworth-281388-01/2020|2020-10-20|EPI\_ISL\_734457|Original|hCoV-19^^New York|Human|Masonic Medical Research Institute|Wadsworth Center|Lasek-Nesselquist|USA

>Spike|hCoV-19/USA/WA-S2893/2020|2020-10-01|EPI\_ISL\_596424|Original|hCoV-19^^Washington|Human|Seattle Flu Study|Seattle Flu Study|Lee|USA

>Spike|hCoV-19/Australia/VIC14285/2020|2020-09-02|EPI\_ISL\_592435|Original|hCoV-19^^Victoria|Human|Microbiological Diagnostic Unit - Public Health Laboratory (MDU-PHL)|MDU-PHL|Schultz|Australia

>Spike|hCoV-19/Australia/VIC4330/2020|2020-07-13|EPI\_ISL\_519627|Original|hCoV-19^^Victoria|Human|Microbiological Diagnostic Unit - Public Health Laboratory (MDU-PHL)|MDU-PHL|Schultz|Australia

>Spike|hCoV-19/England/QEUEH-AE5438/2020|2020-10-26|EPI\_ISL\_633179|Original|hCoV-19^^England|Human|Lighthouse Lab in Glasgow|Wellcome Sanger Institute for the COVID-19 Genomics UK (COG-UK) consortium|Davies|United Kingdom

>Spike|hCoV-19/Scotland/QEUEH-A20316/2020|2020-10-01|EPI\_ISL\_598914|Original|hCoV-19^^Scotland|Human|Lighthouse Lab in Glasgow|Wellcome Sanger Institute for the COVID-19 Genomics UK (COG-UK) consortium|Davies|United Kingdom

>Spike|hCoV-19/Wales/PHWC-48E8D1/2020|2020-11-13|EPI\_ISL\_680928|Original|hCoV-19^^Wales|Human|Wales Specialist Virology Centre Sequencing lab|COVID-19 Genomics UK (COG-UK) Consortium|Moore|United Kingdom

>Spike|hCoV-19/Australia/VIC336/2020|2020-03-20|EPI\_ISL\_426645|Original|hCoV-19^^Victoria|Human|Victorian Infectious Diseases Reference Laboratory (VIDRL)|Microbiological Diagnostic Unit Public Health Laboratory and Victorian Infectious Diseases Reference Laboratory|Schultz|Australia

>Spike|hCoV-19/Northern Ireland/QEUEH-A02523/2020|2020-09-28|EPI\_ISL\_585260|Original|hCoV-19^^Northern Ireland|Human|Quadram Institute Bioscience|COVID-19 Genomics UK (COG-UK) Consortium|Alikhan|United Kingdom

>Spike|hCoV-19/England/PORT-2D1D5A/2020|2020-04-03|EPI\_ISL\_499275|Original|hCoV-19^^England|Human|Centre for Enzyme Innovation|COVID-19 Genomics UK (COG-UK) Consortium|Robson|United Kingdom

>Spike|hCoV-19/Australia/VIC16755/2020|2020-08-09|EPI\_ISL\_663570|Original|hCoV-19^^Victoria|Human|Microbiological Diagnostic Unit - Public Health Laboratory (MDU-PHL)|MDU-PHL|Schultz|Australia

>Spike|hCoV-19/Portugal/PT0056/2020|2020-03-20|EPI\_ISL\_421459|Original|hCoV-19^^Portugal|Human|H Dr. Nelio Mendonca - Funchal|Instituto Nacional de Saude (INSA)|Borges|Portugal

>Spike|hCoV-19/USA/MI-UM-10036755231/2020|2020-11-03|EPI\_ISL\_682193|Original|hCoV-19^^Michigan|Human|University of Michigan Clinical Microbiology Laboratory|Lauring Lab|Valesano|USA

>Spike|hCoV-19/Japan/PG-7766/2020|2020-04-00|EPI\_ISL\_686868|Original|hCoV-19^^Japan|Human|Pathogen Genomics Center|Pathogen Genomics Center|Sekizuka|Japan

>Spike|hCoV-19/England/LIVE-A5191/2020|2020-03-14|EPI\_ISL\_500110|Original|hCoV-19^^England|Human|Liverpool Clinical Laboratories|COVID-19 Genomics UK (COG-UK) Consortium|Haldenby|United Kingdom

>Spike|hCoV-19/Wales/PHWC-49FECC/2020|2020-12-11|EPI\_ISL\_743365|Original|hCoV-19^^Wales|Human|Wales Specialist Virology Centre Sequencing lab|COVID-19 Genomics UK (COG-UK) Consortium|Moore|United Kingdom

>Spike|hCoV-19/USA/WI-UW-1291/2020|2020-08-31|EPI\_ISL\_536663|Original|hCoV-19^^Wisconsin|Human|University of Wisconsin-Madison AIDS Vaccine Research Laboratories|University of Wisconsin-Madison AIDS Vaccine Research Laboratories|Baczenas|USA

>Spike|hCoV-19/Netherlands/ZH-EMC-912/2020|2020-11-03|EPI\_ISL\_722706|Original|hCoV-19^^Zuid Holland|Human|Dutch COVID-19 response team|Erasmus Medical Center|Oude Munnink|Netherlands

>Spike|hCoV-19/England/MILK-B8873D/2020|2020-11-14|EPI\_ISL\_674325|Original|hCoV-19^^England|Human|Lighthouse Lab in Milton Keynes|Wellcome Sanger Institute for the COVID-19 Genomics UK (COG-UK) Consortium|Davies|United Kingdom

>Spike|hCoV-19/England/QEUH-A2101E/2020|2020-10-01|EPI\_ISL\_587634|Original|hCoV-19^^England|Human|Lighthouse Lab in Glasgow|Wellcome Sanger Institute for the COVID-19 Genomics UK (COG-UK) consortium|Davies|United Kingdom

>Spike|hCoV-19/North Macedonia/2979/2020|2020-06-10|EPI\_ISL\_516419|Original|hCoV-19^^Skopje|Human|Center for public health - Skopje|Research Center for Genetic Engineering and Biotechnology \Georgi D. Efremov\u201d|Dimovski|North Macedonia

>Spike|hCoV-19/USA/NY-Wadsworth-233903-01/2020|2020-10-01|EPI\_ISL\_754530|Original|hCoV-19^^New York|Human|Wadsworth Center|Wadsworth Center|Lasek-Nesselquist|USA

>Spike|hCoV-19/USA/CA-CSMC140/2020|2020-04-12|EPI\_ISL\_475619|Original|hCoV-19^^California|Human|Cedars-Sinai Medical Center|Cedars-Sinai Medical Center|Zhang|USA

>Spike|hCoV-19/England/ALDP-B62308/2020|2020-11-09|EPI\_ISL\_656353|Original|hCoV-19^^England|Human|Lighthouse Lab in Alderley Park|Wellcome Sanger Institute for the COVID-19 Genomics UK (COG-UK) Consortium|Davies|United Kingdom

>Spike|hCoV-19/England/BRIS-12EE89/2020|2020-04-22|EPI\_ISL\_488338|Original|hCoV-19^^England|Human|PHE South West Regional Laboratory|Wellcome Sanger Institute for the COVID-19 Genomics UK (COG-UK) consortium|Davies|United Kingdom

>Spike|hCoV-19/Canada/NS-NML-1364/2020|2020-04-14|EPI\_ISL\_579740|Original|hCoV-19^^Nova Scotia|Human|QEII Health Sciences Centre|National Microbiology Laboratory (NML)|Majer|Canada

>Spike|hCoV-19/England/QEUH-B9E85F/2020|2020-11-18|EPI\_ISL\_719910|Original|hCoV-19^^England|Human|Lighthouse Lab in Glasgow|Wellcome Sanger Institute for the COVID-19 Genomics UK (COG-UK) Consortium|Davies|United Kingdom

>Spike|hCoV-19/Panama/328844/2020|2020-03-07|EPI\_ISL\_496613|Original|hCoV-19^^Panama Center|Human|Gorgas Memorial Laboratory of Health Studies|Gorgas Memorial Laboratory of Health Studies|Martinez|Panama

>Spike|hCoV-19/Wales/PHWC-32FEA/2020|2020-04-14|EPI\_ISL\_446722|Original|hCoV-19^^Wales|Human|Wales Specialist Virology Centre|Public Health Wales Microbiology Cardiff|Moore|United Kingdom

>Spike|hCoV-19/Scotland/CVR5177/2020|2020-10-19|EPI\_ISL\_626972|Original|hCoV-19^^Scotland|Human|West of Scotland Specialist Virology Centre|COVID-19 Genomics UK (COG-UK) Consortium|Robertson|United Kingdom

>Spike|hCoV-19/England/ALDP-B624D8/2020|2020-11-08|EPI\_ISL\_656656|Original|hCoV-19^^England|Human|Lighthouse Lab in Alderley Park|Wellcome Sanger Institute for the COVID-19 Genomics UK (COG-UK) Consortium|Davies|United Kingdom

>Spike|hCoV-19/Spain/PV-IBV-000749/2020|2020-03-08|EPI\_ISL\_452739|Original|hCoV-19^^Basque Country|Human|Hospital Universitario Araba. Vitoria-Gasteiz,|SeqCOVID-SPAIN consortium/IBV (CSIC)|Comas|Spain

>Spike|hCoV-19/Wales/PHWC-1688C1/2020|2020-04-21|EPI\_ISL\_494301|Original|hCoV-19^^Wales|Human|Originating lab|COVID-19 Genomics UK (COG-UK) Consortium|Moore|United Kingdom

>Spike|hCoV-19/England/ALDP-9CB75E/2020|2020-09-16|EPI\_ISL\_575688|Original|hCoV-19^^England|Human|Lighthouse Lab in Alderley Park|Wellcome Sanger Institute for the COVID-19 Genomics UK (COG-UK) consortium|Davies|United Kingdom

>Spike|hCoV-19/Canada/ON-CVD01345/2020|2020-04-29|EPI\_ISL\_586276|Original|hCoV-19^^Ontario|Human|Toronto Invasive Bacterial Diseases Network|McMaster University|McArthur|Canada

>Spike|hCoV-19/India/MH-ACTREC-249/2020|2020-07-07|EPI\_ISL\_699901|Original|hCoV-19^^Maharashtra|Human|Hematopathology Laboratory|Hematopathology Laboratory|Patkar|India

>Spike|hCoV-19/Canada/NB\_277/2020|2020-04-13|EPI\_ISL\_481758|Original|hCoV-19^^New Brunswick|Human|Dr. Georges-L.-Dumont University Hospital Centre|National Microbiology Laboratory|Grudeski|Canada

>Spike|hCoV-19/USA/NY-PV09342/2020|2020-03-24|EPI\_ISL\_450030|Original|hCoV-19^^New York|Human|MSSS Clinical Microbiology Laboratories|MSSS Pathogen Surveillance Program|van Bakel|USA

>Spike|hCoV-19/Spain/VC-IBV-98004309/2020|2020-03-24|EPI\_ISL\_538647|Original|hCoV-19^^Comunitat Valenciana|Human|Servicio de Microbiolog\u00eda. Hospital General Universitario de Castell\u00f3n|SeqCOVID-SPAIN consortium/IBV (CSIC)|Comas|Spain

>Spike|hCoV-19/USA/FL-BPHL-2052/2020|2020-06-27|EPI\_ISL\_653205|Original|hCoV-19^^Florida|Human|Florida Bureau of Public Health Laboratories|Florida Bureau of Public Health Laboratories|Blanton|USA

>Spike|hCoV-19/USA/MD-MDH-0037/2020|2020-04-07|EPI\_ISL\_486916|Original|hCoV-19^^Maryland|Human|Maryland Department of Health|Maryland Department of Health|Keller|USA

>Spike|hCoV-19/Shandong/LY003-2/2020|2020-01-23|EPI\_ISL\_414936|Original|hCoV-19^^Shandong|Human|Shandong Provincial Center for Disease Control and Prevention|Beijing Institute of Microbiology and Epidemiology|Ma|China

>Spike|hCoV-19/USA/CA-CZB-3939/2020|2020-07-31|EPI\_ISL\_548531|Original|hCoV-19^^California|Human|Contra Costa Public Health Lab|Chan-Zuckerberg Biohub|Bhatt|USA

>Spike|hCoV-19/England/BIRM-6AB6D/2020|2020-11-11|EPI\_ISL\_651651|Original|hCoV-19^^England|Human|University of Birmingham|COVID-19 Genomics UK (COG-UK) Consortium|Loman|United Kingdom

>Spike|hCoV-19/England/ALDP-A7046F/2020|2020-10-15|EPI\_ISL\_607912|Original|hCoV-19^^England|Human|Lighthouse Lab in Alderley Park|Wellcome Sanger Institute for the COVID-19 Genomics UK (COG-UK) consortium|Davies|United Kingdom

>Spike|hCoV-19/India/TG-CCMB-AA158/2020|2020-08-10|EPI\_ISL\_539646|Original|hCoV-19^^Telangana|Human|CSIR-Centre for Cellular and Molecular Biology|CSIR-Centre for Cellular and Molecular Biology|Mukherjee|India

>Spike|hCoV-19/Canada/NS-NML-1205/2020|2020-04-02|EPI\_ISL\_579606|Original|hCoV-19^^Nova Scotia|Human|QEII Health Sciences Centre|National Microbiology Laboratory (NML)|Majer|Canada

>Spike|hCoV-19/England/BIRM-60930/2020|2020-06-08|EPI\_ISL\_483906|Original|hCoV-19^^England|Human|University of Birmingham|COVID-19 Genomics UK (COG-UK) Consortium|Loman|United Kingdom

>Spike|hCoV-19/Wales/PHWC-4927CE/2020|2020-11-30|EPI\_ISL\_725701|Original|hCoV-19^^Wales|Human|Originating lab|COVID-19 Genomics UK (COG-UK) Consortium|Moore|United Kingdom



>Spike|hCoV-19/England/CAMC-B354A1/2020|2020-11-05|EPI\_ISL\_659593|Original|hCoV-19^^England|Human|Lighthouse Lab in Cambridge|Wellcome Sanger Institute for the COVID-19 Genomics UK (COG-UK) Consortium|Davies|United Kingdom

>Spike|hCoV-19/Belgium/rega-0915953/2020|2020-09-15|EPI\_ISL\_734943|Original|hCoV-19^^Everberg|Human|UZ Leuven|KU Leuven|Maes|Belgium

>Spike|hCoV-19/England/CAMC-9EC53F/2020|2020-09-24|EPI\_ISL\_580480|Original|hCoV-19^^England|Human|Lighthouse Lab in Cambridge|Wellcome Sanger Institute for the COVID-19 Genomics UK (COG-UK) consortium|Davies|United Kingdom

>Spike|hCoV-19/England/QEUH-B31E6B/2020|2020-11-04|EPI\_ISL\_646452|Original|hCoV-19^^England|Human|Lighthouse Lab in Glasgow|Wellcome Sanger Institute for the COVID-19 Genomics UK (COG-UK) Consortium|Davies|United Kingdom

>Spike|hCoV-19/India/DL-MN8/2020|2020-06-18|EPI\_ISL\_508422|Original|hCoV-19^^Delhi|Human|Maulana Azad Medical College|National Institute of Biomedical Genomics|Maitra|India

>Spike|hCoV-19/England/SHEF-C046A/2020|2020-03-27|EPI\_ISL\_420215|Original|hCoV-19^^England|Human|Virology Department|Department of Infection|de Silva|United Kingdom

>Spike|hCoV-19/Spain/VC-FISABIO-124/2020|2020-03-14|EPI\_ISL\_436219|Original|hCoV-19^^Comunitat Valenciana|Human|Servicio de Microbiolog\u00eda. Consorcio Hospital General Universitario de Valencia|Sequencing and Bioinformatics Service and Molecular Epidemiology Research Group. FISABIO-Public Health|Gonzalez-Candelas|Spain

>Spike|hCoV-19/USA/FL-BPHL-1287/2020|2020-08-28|EPI\_ISL\_541219|Original|hCoV-19^^Florida|Human|Florida Bureau of Public Health Laboratories|Florida Bureau of Public Health Laboratories|Blanton|USA

>Spike|hCoV-19/USA/CA-CZB-6722/2020|2020-08-18|EPI\_ISL\_582983|Original|hCoV-19^^California|Human|Orange County Public Health Lab|Chan-Zuckerberg Biohub|Bhatt|USA

>Spike|hCoV-19/England/QEUH-9F4FAF/2020|2020-09-25|EPI\_ISL\_638646|Original|hCoV-19^^England|Human|Department of Pathology|COVID-19 Genomics UK (COG-UK) Consortium|Goodfellow|United Kingdom

>Spike|hCoV-19/USA/TX-HMH-570/2020|2020-04-06|EPI\_ISL\_546952|Original|hCoV-19^^Texas|Human|Houston Methodist Hospital|Houston Methodist Hospital|Long|USA

>Spike|hCoV-19/England/CAMB-7EED6/2020|2020-04-07|EPI\_ISL\_442829|Original|hCoV-19^^England|Human|Department of Pathology|Wellcome Sanger Institute for the COVID-19 Genomics UK (COG-UK) consortium|Amato|United Kingdom

>Spike|hCoV-19/USA/MI-UM-10036743651/2020|2020-11-02|EPI\_ISL\_682186|Original|hCoV-19^^Michigan|Human|University of Michigan Clinical Microbiology Laboratory|Lauring Lab|Valesano|USA

>Spike|hCoV-19/England/ALDP-9CBDA7/2020|2020-09-16|EPI\_ISL\_575486|Original|hCoV-19^^England|Human|Lighthouse Lab in Alderley Park|Wellcome Sanger Institute for the COVID-19 Genomics UK (COG-UK) consortium|Davies|United Kingdom

>Spike|hCoV-19/USA/NY-NYCPHL-000044/2020|2020-03-09|EPI\_ISL\_631538|Original|hCoV-19^^New York|Human|Maimonides Medical Center|New York City Public Health Laboratory|Wang|USA

>Spike|hCoV-19/United Arab Emirates/0702/2020|2020-05-15|EPI\_ISL\_698853|Original|hCoV-19^^Abu Dhabi|Human|Group 42 (G42) Healthcare|G42 Healthcare|Ogrodzki|United Arab Emirates

>Spike|hCoV-19/England/CAMB-1AD5F6/2020|2020-04-25|EPI\_ISL\_489574|Original|hCoV-19^^England|Human|Department of Pathology|Wellcome Sanger Institute for the COVID-19 Genomics UK (COG-UK) consortium|Davies|United Kingdom

>Spike|hCoV-19/Wales/PHWC-47EFB1/2020|2020-10-10|EPI\_ISL\_612612|Original|hCoV-19^^Wales|Human|Wales Specialist Virology Centre Sequencing lab|COVID-19 Genomics UK (COG-UK) Consortium|Moore|United Kingdom

>Spike|hCoV-19/England/20148001404/2020|2020-04-02|EPI\_ISL\_466048|Original|hCoV-19^^England|Human|Respiratory Virus Unit|Respiratory Virus Unit|Platt|United Kingdom

>Spike|hCoV-19/England/QEUH-96BDE5/2020|2020-08-14|EPI\_ISL\_531232|Original|hCoV-19^^England|Human|Lighthouse Lab in Glasgow|Wellcome Sanger Institute for the COVID-19 Genomics UK (COG-UK) consortium|Davies|United Kingdom

>Spike|hCoV-19/USA/TX-DSHS-1734/2020|2020-06-20|EPI\_ISL\_710391|Original|hCoV-19^^Texas|Human|Texas Department of State Health Services|Texas Department of State Health Services|Rahman|USA

>Spike|hCoV-19/USA/TX-HMH-MCoV-12352/2020|2020-09-25|EPI\_ISL\_790311|Original|hCoV-19^^Texas|Human|Houston Methodist Hospital|Houston Methodist Hospital|Long|USA

>Spike|hCoV-19/Luxembourg/LNS0493779/2020|2020-10-19|EPI\_ISL\_739790|Original|hCoV-19^^Luxembourg|Human|Laboratoire national de sant\u00e9|Laboratoire national de sant\u00e9|Wienecke-Baldacchino|Luxembourg

>Spike|hCoV-19/England/ALDP-A6C4FD/2020|2020-10-15|EPI\_ISL\_608328|Original|hCoV-19^^England|Human|Lighthouse Lab in Alderley Park|Wellcome Sanger Institute for the COVID-19 Genomics UK (COG-UK) consortium|Davies|United Kingdom

>Spike|hCoV-19/India/MH-AFCO-9320/2020|2020-06-23|EPI\_ISL\_721643|Original|hCoV-19^^Maharashtra|Human|Armed Forces Medical College|National Centre For Cell Science|Paul|India

>Spike|hCoV-19/USA/CA-CZB-10818/2020|2020-07-08|EPI\_ISL\_583068|Original|hCoV-19^^California|Human|Humboldt County Public Health Laboratory|Chan-Zuckerberg Biohub|Bhatt|USA

>Spike|hCoV-19/Spain/MD-IBV-99008654/2020|2020-09-29|EPI\_ISL\_654217|Original|hCoV-19^^Madrid|Human|Hospital General Universitario Gregorio Mara\u00f1\u00f3n|SeqCOVID-SPAIN consortium/IBV (CSIC)|Comas|Spain

>Spike|hCoV-19/Australia/VIC16914/2020|2020-00-00|EPI\_ISL\_663638|Original|hCoV-19^^Victoria|Human|Microbiological Diagnostic Unit - Public Health Laboratory (MDU-PHL)|MDU-PHL|Schultz|Australia

>Spike|hCoV-19/USA/VA-DCLS-0622/2020|2020-04-01|EPI\_ISL\_526835|Original|hCoV-19^^Virginia|Human|Virginia DCLS|Virginia DCLS|St. Jacques|USA

>Spike|hCoV-19/Wales/PHWC-488057/2020|2020-10-28|EPI\_ISL\_639342|Original|hCoV-19^^Wales|Human|Wales Specialist Virology Centre Sequencing lab|COVID-19 Genomics UK (COG-UK) Consortium|Moore|United Kingdom

>Spike|hCoV-19/Germany/NW-HHU-272/2020|2020-09-24|EPI\_ISL\_631360|Original|hCoV-19^^North Rhine-Westphalia|Human|ZOTZ KLIMAS MVZ D\u00fcsseldorf-Centrum GbR \u00dcBAG f\u00fcr Labormedizin|Center of Medical Microbiology|Wienemann|Germany

>Spike|hCoV-19/USA/NY-NYUMC549/2020|2020-03-30|EPI\_ISL\_444666|Original|hCoV-19^^New York|Human|NYU Langone Health|Departments of Pathology and Medicine|Maurano|USA

>Spike|hCoV-19/USA/LA-EVTL348/2020|2020-05-25|EPI\_ISL\_578754|Original|hCoV-19^^Louisiana|Human|LSUHS Emerging Viral Threat Laboratory|Microbial Genome Sequencing Center|Kamil|USA

>Spike|hCoV-19/USA/WA-S2670/2020|2020-06-22|EPI\_ISL\_497302|Original|hCoV-19^^Washington|Human|Washington State Department of Health|Seattle Flu Study|Lee|USA

>Spike|hCoV-19/USA/TX-HMH-4077/2020|2020-06-17|EPI\_ISL\_543348|Original|hCoV-19^^Texas|Human|Houston Methodist Hospital|Houston Methodist Hospital|Long|USA

>Spike|hCoV-19/Japan/PG-5015/2020|2020-08-00|EPI\_ISL\_690126|Original|hCoV-19^^Japan|Human|Pathogen Genomics Center|Pathogen Genomics Center|Sekizuka|Japan

>Spike|hCoV-19/Denmark/DCGC-16827/2020|2020-12-14|EPI\_ISL\_750589|Original|hCoV-19^^Midtjylland|Human|Department of Virus and Microbiological Special Diagnostics|Albertsen Lab|Michaelsen|Denmark

>Spike|hCoV-19/USA/CA-CZB-10242/2020|2020-05-16|EPI\_ISL\_672270|Original|hCoV-19^^California|Human|The Ashley Laboratory|Chan-Zuckerberg Biohub|Bhatt|USA

>Spike|hCoV-19/England/CAMC-AAF519/2020|2020-10-22|EPI\_ISL\_631080|Original|hCoV-19^^England|Human|Lighthouse Lab in Cambridge|Wellcome Sanger Institute for the COVID-19 Genomics UK (COG-UK) consortium|Davies|United Kingdom

>Spike|hCoV-19/England/CAMC-94857D/2020|2020-07-18|EPI\_ISL\_556821|Original|hCoV-19^^England|Human|Lighthouse Lab in Cambridge|Wellcome Sanger Institute for the COVID-19 Genomics UK (COG-UK) consortium|Davies|United Kingdom

>Spike|hCoV-19/USA/NH\_0008/2020|2020-03-02|EPI\_ISL\_420792|Original|hCoV-19^^New Hampshire|Human|NH Department of Health and Human Services Public Health Labs|Pathogen Discovery|Queen|USA

>Spike|hCoV-19/USA/TX-DSHS-1059/2020|2020-06-15|EPI\_ISL\_628735|Original|hCoV-19^^Texas|Human|Texas Department of State Health Services|Texas Department of State Health Services|Rahman|USA

>Spike|hCoV-19/USA/CA-ALSR-3269/2020|2020-09-08|EPI\_ISL\_635944|Original|hCoV-19^^California|Human|San Diego County Public Health Laboratory|Andersen lab at Scripps Research|Gangavarapu|USA

>Spike|hCoV-19/New Zealand/20VR1795/2020|2020-03-22|EPI\_ISL\_579132|Original|hCoV-19^^Counties Manukau|Human|Middlemore Hospital|Institute of Environmental Science and Research (ESR)|Wang|New Zealand

>Spike|hCoV-19/England/ALDP-B76E79/2020|2020-11-12|EPI\_ISL\_723822|Original|hCoV-19^^England|Human|Oxford Viromics|COVID-19 Genomics UK (COG-UK) Consortium|Golubchik|United Kingdom

>Spike|hCoV-19/USA/AK-PHL448/2020|2020-06-08|EPI\_ISL\_560558|Original|hCoV-19^^Alaska|Human|Alaska State Virology Laboratory|Alaska State Virology Laboratory|Chen|USA

>Spike|hCoV-19/England/ALDP-B1B508/2020|2020-11-01|EPI\_ISL\_645580|Original|hCoV-19^^England|Human|Lighthouse Lab in Alderley Park|Wellcome Sanger Institute for the COVID-19 Genomics UK (COG-UK) Consortium|Davies|United Kingdom

>Spike|hCoV-19/Germany/NW-MPP-7/2020|2020-05-25|EPI\_ISL\_487429|Original|hCoV-19^^North Rhine-Westphalia|Human|Labor Knei\u00dfler GmbH & Co. KG|Heinrich Pette Institute|G\u00f6nter|Germany

>Spike|hCoV-19/Gambia/NPHL-2889/2020|2020-00-00|EPI\_ISL\_561301|Original|hCoV-19^^Kombo|Human|MRCG at LSHTM Genomics lab|MRCG at LSHTM Genomics lab|Sesay|Gambia

>Spike|hCoV-19/England/CAMC-C98F5F/2020|2020-12-18|EPI\_ISL\_762189|Original|hCoV-19^^England|Human|Lighthouse Lab in Cambridge|Wellcome Sanger Institute for the COVID-19 Genomics UK (COG-UK) Consortium|Davies|United Kingdom

>Spike|hCoV-19/England/BRIS-12FE88/2020|2020-04-10|EPI\_ISL\_492628|Original|hCoV-19^^England|Human|PHE South West Regional Laboratory|Wellcome Sanger Institute for the COVID-19 Genomics UK (COG-UK) consortium|Davies|United Kingdom

>Spike|hCoV-19/Australia/VIC13468/2020|2020-08-04|EPI\_ISL\_592247|Original|hCoV-19^^Victoria|Human|Microbiological Diagnostic Unit - Public Health Laboratory (MDU-PHL)|MDU-PHL|Schultz|Australia

>Spike|hCoV-19/USA/TX-HMH-MCoV-14838/2020|2020-10-12|EPI\_ISL\_786322|Original|hCoV-19^^Texas|Human|Houston Methodist Hospital|Houston Methodist Hospital|Long|USA

>Spike|hCoV-19/USA/AZ-TG491475/2020|2020-06-17|EPI\_ISL\_695109|Original|hCoV-19^^Arizona|Human|AZ SPHL|TGen North|French|USA

>Spike|hCoV-19/England/QEUH-9F4E57/2020|2020-09-25|EPI\_ISL\_588278|Original|hCoV-19^^England|Human|Lighthouse Lab in Glasgow|Wellcome Sanger Institute for the COVID-19 Genomics UK (COG-UK) consortium|Davies|United Kingdom

>Spike|hCoV-19/USA/AZ-TG305718/2020|2020-04-25|EPI\_ISL\_694255|Original|hCoV-19^^Arizona|Human|AZ SPHL|TGen North|French|USA

>Spike|hCoV-19/Spain/MD-IBV-99008718/2020|2020-10-16|EPI\_ISL\_654295|Original|hCoV-19^^Madrid|Human|Hospital General Universitario Gregorio Mara\u00f1a|SeqCOVID-SPAIN consortium/IBV (CSIC)|Comas|Spain

>Spike|hCoV-19/England/ALDP-6C1DE0/2020|2020-07-01|EPI\_ISL\_557820|Original|hCoV-19^^England|Human|Lighthouse Lab in Alderley Park|Wellcome Sanger Institute for the COVID-19 Genomics UK (COG-UK) consortium|Davies|United Kingdom

>Spike|hCoV-19/Scotland/QEUH-9905A3/2020|2020-08-29|EPI\_ISL\_534445|Original|hCoV-19^^Scotland|Human|NHSGGC West of Scotland Specialist Virology Centre / MRC-University of Glasgow Centre for Virus Research|Wellcome Sanger Institute for the COVID-19 Genomics UK (COG-UK) consortium|Davies|United Kingdom

>Spike|hCoV-19/Greece/10/2020|2020-03-18|EPI\_ISL\_418263|Original|hCoV-19^^Athens|Human|Laboratory of Microbiology|Laboratory of Biology|Karakasiliotis|Greece

>Spike|hCoV-19/Singapore/268/2020|2020-03-21|EPI\_ISL\_462386|Original|hCoV-19^^Singapore|Human|National Public Health Laboratory|National Public Health Laboratory|Mak|Singapore

>Spike|hCoV-19/Japan/PG-0931/2020|2020-04-00|EPI\_ISL\_684541|Original|hCoV-19^^Japan|Human|Pathogen Genomics Center|Pathogen Genomics Center|Sekizuka|Japan

>Spike|hCoV-19/England/QEUH-BA359C/2020|2020-11-18|EPI\_ISL\_721099|Original|hCoV-19^^England|Human|Lighthouse Lab in Glasgow|Wellcome Sanger Institute for the COVID-19 Genomics UK (COG-UK) Consortium|Davies|United Kingdom

>Spike|hCoV-19/USA/WA-S2257/2020|2020-06-09|EPI\_ISL\_497685|Original|hCoV-19^^Washington|Human|Washington State Department of Health|Seattle Flu Study|Lee|USA

>Spike|hCoV-19/England/CAMC-B086B0/2020|2020-10-29|EPI\_ISL\_643720|Original|hCoV-19^^England|Human|Lighthouse Lab in Cambridge|Wellcome Sanger Institute for the COVID-19 Genomics UK (COG-UK) Consortium|Davies|United Kingdom

>Spike|hCoV-19/USA/TX-HMH-2307/2020|2020-05-14|EPI\_ISL\_545237|Original|hCoV-19^^Texas|Human|Houston Methodist Hospital|Houston Methodist Hospital|Long|USA

>Spike|hCoV-19/England/ALDP-9D7A56/2020|2020-09-17|EPI\_ISL\_576609|Original|hCoV-19^^England|Human|Oxford Viromics|COVID-19 Genomics UK (COG-UK) Consortium|Golubchik|United Kingdom

>Spike|hCoV-19/Wales/PHWC-47CD9B/2020|2020-10-08|EPI\_ISL\_586047|Original|hCoV-19^^Wales|Human|Wales Specialist Virology Centre Sequencing lab|COVID-19 Genomics UK (COG-UK) Consortium|Moore|United Kingdom

>Spike|hCoV-19/England/MILK-C30083/2020|2020-12-07|EPI\_ISL\_782939|Original|hCoV-19^^England|Human|Lighthouse Lab in Milton Keynes|Wellcome Sanger Institute for the COVID-19 Genomics UK (COG-UK) Consortium|Davies|United Kingdom

>Spike|hCoV-19/USA/NY-Wadsworth-292647-01/2020|2020-12-07|EPI\_ISL\_767692|Original|hCoV-19^^New York|Human|MEMORIAL SLOAN KETTERING CANCER CENTER|Wadsworth Center|Lasek-Nesselquist|USA

>Spike|hCoV-19/USA/NY-QDX-1977/2020|2020-03-15|EPI\_ISL\_604277|Original|hCoV-19^^New York|Human|Quest Diagnostics|Quest Diagnostics|Kagan|USA

>Spike|hCoV-19/USA/CA-CZB-11815/2020|2020-10-01|EPI\_ISL\_625654|Original|hCoV-19^^California|Human|Orange County Public Health Lab|Chan-Zuckerberg Biohub|Bhatt|USA

>Spike|hCoV-19/USA/AR-CDC-6567/2020|2020-07-10|EPI\_ISL\_527657|Original|hCoV-19^^Arkansas|Human|AR Dept. of Health-Public Health Lab|Pathogen Discovery|Queen|USA

>Spike|hCoV-19/Scotland/QEUA-96D448/2020|2020-08-19|EPI\_ISL\_534516|Original|hCoV-19^^Scotland|Human|NHSGGC West of Scotland Specialist Virology Centre / MRC-University of Glasgow Centre for Virus Research|Wellcome Sanger Institute for the COVID-19 Genomics UK (COG-UK) consortium|Davies|United Kingdom

>Spike|hCoV-19/USA/AZ-TG305990/2020|2020-04-30|EPI\_ISL\_694306|Original|hCoV-19^^Arizona|Human|AZ SPHL|TGen North|French|USA

>Spike|hCoV-19/Switzerland/NE-ETHZ-350463/2020|2020-11-03|EPI\_ISL\_729208|Original|hCoV-19^^Neuch\u00e2tel|Human|Viollier AG|Department of Biosystems Science and Engineering|Nadeau|Switzerland

>Spike|hCoV-19/England/NORT-2842FD/2020|2020-03-17|EPI\_ISL\_488744|Original|hCoV-19^^England|Human|NU-OMICS DNA Sequencing research facility|Wellcome Sanger Institute for the COVID-19 Genomics UK (COG-UK) consortium|Davies|United Kingdom

>Spike|hCoV-19/England/EXET-13F17D/2020|2020-00-00|EPI\_ISL\_763386|Original|hCoV-19^^England|Human|University of Exeter|COVID-19 Genomics UK (COG-UK) Consortium|Temperton|United Kingdom

>Spike|hCoV-19/Denmark/DCGC-2253/2020|2020-08-10|EPI\_ISL\_617433|Original|hCoV-19^^Hovedstaden|Human|Department of Virus and Microbiological Special Diagnostics|Albertsen lab|Michaelsen|Denmark

>Spike|hCoV-19/England/204591729/2020|2020-11-07|EPI\_ISL\_700609|Original|hCoV-19^^England|Human|Respiratory Virus Unit|COVID-19 Genomics UK (COG-UK) Consortium|Platt|United Kingdom

>Spike|hCoV-19/England/CAMC-B20F20/2020|2020-11-02|EPI\_ISL\_647582|Original|hCoV-19^^England|Human|Lighthouse Lab in Cambridge|Wellcome Sanger Institute for the COVID-19 Genomics UK (COG-UK) Consortium|Davies|United Kingdom

>Spike|hCoV-19/Scotland/CVR2217/2020|2020-04-12|EPI\_ISL\_448161|Original|hCoV-19^^Scotland|Human|West of Scotland Specialist Virology Centre|COVID-19 Genomics UK (COG-UK) Consortium|Robertson|United Kingdom

>Spike|hCoV-19/England/QEUA-C1601A/2020|2020-12-06|EPI\_ISL\_709392|Original|hCoV-19^^England|Human|Lighthouse Lab in Glasgow|Wellcome Sanger Institute for the COVID-19 Genomics UK (COG-UK) Consortium|Davies|United Kingdom

>Spike|hCoV-19/Denmark/DCGC-3835/2020|2020-08-31|EPI\_ISL\_622715|Original|hCoV-19^^Hovedstaden|Human|Department of Virus and Microbiological Special Diagnostics|Albertsen lab|Michaelsen|Denmark

>Spike|hCoV-19/England/QEUA-AEF9C6/2020|2020-10-29|EPI\_ISL\_662755|Original|hCoV-19^^England|Human|Lighthouse Lab in Glasgow|Wellcome Sanger Institute for the COVID-19 Genomics UK (COG-UK) Consortium|Davies|United Kingdom

>Spike|hCoV-19/Japan/PG-0802/2020|2020-04-00|EPI\_ISL\_684412|Original|hCoV-19^^Japan|Human|Fukuoka Institute of Health and Environmental Sciences|Pathogen Genomics Center|Sekizuka|Japan

>Spike|hCoV-19/India/GJ-GBRC201b/2020|2020-06-08|EPI\_ISL\_469047|Original|hCoV-19^^Gujarat|Human|Dr. N. D. Desai Medical College & Hospital|Gujarat Biotechnology Research Centre|Joshi|India

>Spike|hCoV-19/Germany/NW-HHU-78/2020|2020-03-07|EPI\_ISL\_523949|Original|hCoV-19^^North Rhine-Westphalia|Human|Center of Medical Microbiology|Center of Medical Microbiology|Wienemann|Germany

>Spike|hCoV-19/England/CAMC-B1FF33/2020|2020-11-01|EPI\_ISL\_647662|Original|hCoV-19^^England|Human|Lighthouse Lab in Cambridge|Wellcome Sanger Institute for the COVID-19 Genomics UK (COG-UK) Consortium|Davies|United Kingdom

>Spike|hCoV-19/England/QEUH-B673B8/2020|2020-11-11|EPI\_ISL\_662250|Original|hCoV-19^^England|Human|Lighthouse Lab in Glasgow|Wellcome Sanger Institute for the COVID-19 Genomics UK (COG-UK) Consortium|Davies|United Kingdom

>Spike|hCoV-19/Canada/MB-NML-1039/2020|2020-03-30|EPI\_ISL\_582400|Original|hCoV-19^^Manitoba|Human|Cadham Provincial Laboratory|National Microbiology Laboratory (NML)|Majer|Canada

>Spike|hCoV-19/USA/MA-MGH-00822/2020|2020-04-13|EPI\_ISL\_791779|Original|hCoV-19^^Massachusetts|Human|Massachusetts General Hospital|Infectious Disease Program|Park|USA

>Spike|hCoV-19/England/ALDP-9E9839/2020|2020-09-24|EPI\_ISL\_638292|Original|hCoV-19^^England|Human|Centre for Enzyme Innovation|COVID-19 Genomics UK (COG-UK) Consortium|Robson|United Kingdom

>Spike|hCoV-19/USA/TX-HMH-5181/2020|2020-06-23|EPI\_ISL\_544580|Original|hCoV-19^^Texas|Human|Houston Methodist Hospital|Houston Methodist Hospital|Long|USA

>Spike|hCoV-19/England/204540373/2020|2020-11-03|EPI\_ISL\_686543|Original|hCoV-19^^England|Human|Respiratory Virus Unit|COVID-19 Genomics UK (COG-UK) Consortium|Platt|United Kingdom

>Spike|hCoV-19/England/SHEF-10D2963/2020|2020-12-16|EPI\_ISL\_727960|Original|hCoV-19^^England|Human|Virology Department|COVID-19 Genomics UK (COG-UK) Consortium|de Silva|United Kingdom

>Spike|hCoV-19/USA/WA-S664/2020|2020-04-22|EPI\_ISL\_438217|Original|hCoV-19^^Washington|Human|Washington State Department of Health|Seattle Flu Study|Bedford|USA

>Spike|hCoV-19/Denmark/DCGC-4497/2020|2020-09-07|EPI\_ISL\_615682|Original|hCoV-19^^Syddanmark|Human|Department of Virus and Microbiological Special Diagnostics|Albertsen lab|Michaelsen|Denmark

>Spike|hCoV-19/South Africa/NHLS-UCT-GS-1145/2020|2020-11-02|EPI\_ISL\_700554|Original|hCoV-19^^Western Cape|Human|Conville CDC wc CVC|NHLS/UCT|Iranzadeh|South Africa

>Spike|hCoV-19/England/20142131704/2020|2020-03-30|EPI\_ISL\_423471|Original|hCoV-19^^England|Human|Respiratory Virus Unit|Respiratory Virus Unit|Platt|United Kingdom

>Spike|hCoV-19/USA/CA-CZB-2744/2020|2020-06-27|EPI\_ISL\_582852|Original|hCoV-19^^California|Human|County of Santa Clara Public Health Department|Chan-Zuckerberg Biohub|Bhatt|USA

>Spike|hCoV-19/England/SHEF-C1D22/2020|2020-04-17|EPI\_ISL\_448836|Original|hCoV-19^^England|Human|Virology Department|COVID-19 Genomics UK (COG-UK) Consortium|de Silva|United Kingdom

>Spike|hCoV-19/England/ALDP-9510AD/2020|2020-06-13|EPI\_ISL\_554174|Original|hCoV-19^^England|Human|Lighthouse Lab in Alderley Park|Wellcome Sanger Institute for the COVID-19 Genomics UK (COG-UK) consortium|Davies|United Kingdom

>Spike|hCoV-19/Brazil/SP-L34-CD879/2020|2020-04-23|EPI\_ISL\_722027|Original|hCoV-19^^S\u00e3o Paulo|Human|Hospital das Cl\u00ednicas Universidade de S\u00e3o Paulo Medical School|Laborat\u00f3rio de Parasitologia M\u00e9dica - Instituto de Medicina Tropical - Universidade de S\u00e3o Paulo|de Jesus|Brazil

>Spike|hCoV-19/Japan/PG-1807/2020|2020-04-00|EPI\_ISL\_685413|Original|hCoV-19^^Japan|Human|Tokyo Metropolitan Institute of Public Health|Pathogen Genomics Center|Sekizuka|Japan

>Spike|hCoV-19/Wales/PHWC-484B69/2020|2020-10-19|EPI\_ISL\_628083|Original|hCoV-19^^Wales|Human|Wales Specialist Virology Centre Sequencing lab|COVID-19 Genomics UK (COG-UK) Consortium|Moore|United Kingdom

>Spike|hCoV-19/England/QEUH-9F3E67/2020|2020-09-24|EPI\_ISL\_588693|Original|hCoV-19^^England|Human|Lighthouse Lab in Glasgow|Wellcome Sanger Institute for the COVID-19 Genomics UK (COG-UK) consortium|Davies|United Kingdom

>Spike|hCoV-19/England/LIVE-DC4D8C/2020|2020-11-11|EPI\_ISL\_705916|Original|hCoV-19^^England|Human|Liverpool Clinical Laboratories|COVID-19 Genomics UK (COG-UK) Consortium|Haldenby|United Kingdom

>Spike|hCoV-19/USA/DE-DHSS-F1010031/2020|2020-10-17|EPI\_ISL\_708393|Original|hCoV-19^^Delaware|Human|Delaware Public Health Lab|Delaware Public Health Lab|Bajwa|USA

>Spike|hCoV-19/England/ALDP-BB5218/2020|2020-11-20|EPI\_ISL\_701907|Original|hCoV-19^^England|Human|Lighthouse Lab in Alderley Park|Wellcome Sanger Institute for the COVID-19 Genomics UK (COG-UK) Consortium|Davies|United Kingdom

>Spike|hCoV-19/England/ALDP-94B361/2020|2020-06-11|EPI\_ISL\_555822|Original|hCoV-19^^England|Human|Lighthouse Lab in Alderley Park|Wellcome Sanger Institute for the COVID-19 Genomics UK (COG-UK) consortium|Davies|United Kingdom

>Spike|hCoV-19/Scotland/CVR1856/2020|2020-04-08|EPI\_ISL\_433660|Original|hCoV-19^^Scotland|Human|West of Scotland Specialist Virology Centre|COVID-19 Genomics UK (COG-UK) Consortium|Robertson|United Kingdom

>Spike|hCoV-19/Australia/VIC5047/2020|2020-07-18|EPI\_ISL\_519851|Original|hCoV-19^^Victoria|Human|Microbiological Diagnostic Unit - Public Health Laboratory (MDU-PHL)|MDU-PHL|Schultz|Australia

>Spike|hCoV-19/USA/MA-MGH-01108/2020|2020-05-02|EPI\_ISL\_791876|Original|hCoV-19^^Massachusetts|Human|Massachusetts General Hospital|Infectious Disease Program|Park|USA

>Spike|hCoV-19/Russia/OMS-ORINFI-9033S/2020|2020-06-17|EPI\_ISL\_569775|Original|hCoV-19^^Omsk|Human|Omsk Research Institute of Natural Focal Infections|WHO National Influenza Centre Russian Federation|Komissarov|Russia

>Spike|hCoV-19/USA/TX-HMH-MCoV-18872/2020|2020-11-25|EPI\_ISL\_785187|Original|hCoV-19^^Texas|Human|Houston Methodist Hospital|Houston Methodist Hospital|Long|USA

>Spike|hCoV-19/USA/MA-MGH-02800/2020|2020-09-24|EPI\_ISL\_765638|Original|hCoV-19^^Massachusetts|Human|Massachusetts General Hospital|Infectious Disease Program|Park|USA

>Spike|hCoV-19/Scotland/CVR4684/2020|2020-09-29|EPI\_ISL\_611867|Original|hCoV-19^^Scotland|Human|West of Scotland Specialist Virology Centre|COVID-19 Genomics UK (COG-UK) Consortium|Robertson|United Kingdom

>Spike|hCoV-19/Wales/PHWC-481382/2020|2020-09-25|EPI\_ISL\_613061|Original|hCoV-19^^Wales|Human|Wales Specialist Virology Centre Sequencing lab|COVID-19 Genomics UK (COG-UK) Consortium|Moore|United Kingdom

>Spike|hCoV-19/Wales/PHWC-16C9AC/2020|2020-09-24|EPI\_ISL\_574115|Original|hCoV-19^^Wales|Human|Wales Specialist Virology Centre Sequencing lab|COVID-19 Genomics UK (COG-UK) Consortium|Moore|United Kingdom

>Spike|hCoV-19/Netherlands/NB-EMC-382/2020|2020-09-28|EPI\_ISL\_722836|Original|hCoV-19^^Noord Brabant|Human|Dutch COVID-19 response team|Erasmus Medical Center|Oude Munnink|Netherlands

>Spike|hCoV-19/England/CAMC-A65324/2020|2020-10-11|EPI\_ISL\_608607|Original|hCoV-19^^England|Human|Lighthouse Lab in Cambridge|Wellcome Sanger Institute for the COVID-19 Genomics UK (COG-UK) consortium|Davies|United Kingdom

>Spike|hCoV-19/USA/NY-NYCPHL-001206/2020|2020-11-02|EPI\_ISL\_745442|Original|hCoV-19^^New York|Human|DOHMH Morrisania|New York City Public Health Laboratory|Wang|USA

>Spike|hCoV-19/Australia/VIC5825/2020|2020-07-20|EPI\_ISL\_518619|Original|hCoV-19^^Victoria|Human|Microbiological Diagnostic Unit - Public Health Laboratory (MDU-PHL)|MDU-PHL|Schultz|Australia

>Spike|hCoV-19/USA/CA-ALSR-4296/2020|2020-10-20|EPI\_ISL\_648948|Original|hCoV-19^^California|Human|San Diego County Public Health Laboratory|Andersen lab at Scripps Research|Gangavarapu|USA

>Spike|hCoV-19/USA/FL-BPHL-0696/2020|2020-03-29|EPI\_ISL\_509754|Original|hCoV-19^^Florida|Human|Florida Bureau of Public Health Laboratories|Florida Bureau of Public Health Laboratories|Blanton|USA

>Spike|hCoV-19/Austria/CeMM0620/2020|2020-04-03|EPI\_ISL\_475929|Original|hCoV-19^^Austria|Human|Universitaetsklinik f\u00fcr Innere Medizin II Innsbruck|Bergthaler laboratory|Bergthaler|Austria

>Spike|hCoV-19/USA/VA-DCLS-1441/2020|2020-08-18|EPI\_ISL\_572308|Original|hCoV-19^^Virginia|Human|Virginia DCLS|Virginia DCLS|St. Jacques|USA

>Spike|hCoV-19/USA/UT-08597/2020|2020-05-07|EPI\_ISL\_524344|Original|hCoV-19^^Utah|Human|Utah Public Health Laboratory|Utah Public Health Laboratory|Young|USA

>Spike|hCoV-19/USA/CT-Yale-129/2020|2020-04-13|EPI\_ISL\_431092|Original|hCoV-19^^Connecticut|Human|Yale COVID-19 Biorepository|Grubaugh Lab - Yale School of Public Health|Grubaugh|USA

>Spike|hCoV-19/USA/WA-UW-9532/2020|2020-05-19|EPI\_ISL\_570259|Original|hCoV-19^^Washington|Human|UW Virology Lab|UW Virology Lab|Roychoudhury|USA

>Spike|hCoV-19/Japan/PG-6647/2020|2020-07-00|EPI\_ISL\_687759|Original|hCoV-19^^Japan|Human|Pathogen Genomics Center|Pathogen Genomics Center|Sekizuka|Japan

>Spike|hCoV-19/England/SHEF-C05C1/2020|2020-03-21|EPI\_ISL\_420282|Original|hCoV-19^^England|Human|Virology Department|Department of Infection|de Silva|United Kingdom

>Spike|hCoV-19/South Africa/NHLS-UCT-GP-5155/2020|2020-04-21|EPI\_ISL\_700412|Original|hCoV-19^^Western Cape|Human|Heideveld CDC wc HVP|NHLS/UCT|Iranzadeh|South Africa

>Spike|hCoV-19/Scotland/QEUH-9FB38E/2020|2020-09-29|EPI\_ISL\_600578|Original|hCoV-19^^Scotland|Human|Lighthouse Lab in Glasgow|Wellcome Sanger Institute for the COVID-19 Genomics UK (COG-UK) consortium|Davies|United Kingdom

>Spike|hCoV-19/England/CAMC-B52EEC/2020|2020-11-09|EPI\_ISL\_657668|Original|hCoV-19^^England|Human|Lighthouse Lab in Cambridge|Wellcome Sanger Institute for the COVID-19 Genomics UK (COG-UK) Consortium|Davies|United Kingdom

>Spike|hCoV-19/Denmark/DCGC-754/2020|2020-03-30|EPI\_ISL\_614877|Original|hCoV-19^^Hovedstaden|Human|Department of Virus and Microbiological Special Diagnostics|Albertsen lab|Michaelsen|Denmark

>Spike|hCoV-19/England/QEUH-AE241D/2020|2020-10-26|EPI\_ISL\_633443|Original|hCoV-19^^England|Human|Lighthouse Lab in Glasgow|Wellcome Sanger Institute for the COVID-19 Genomics UK (COG-UK) consortium|Davies|United Kingdom

>Spike|hCoV-19/USA/FL-BPHL-0552/2020|2020-05-29|EPI\_ISL\_508755|Original|hCoV-19^^Florida|Human|Florida Bureau of Public Health Laboratories|Florida Bureau of Public Health Laboratories|Blanton|USA

>Spike|hCoV-19/USA/LA-EVTL467/2020|2020-06-23|EPI\_ISL\_578871|Original|hCoV-19^^Louisiana|Human|LSUHS Emerging Viral Threat Laboratory|Microbial Genome Sequencing Center|Kamil|USA

>Spike|hCoV-19/Wales/PHWC-488233/2020|2020-10-29|EPI\_ISL\_639368|Original|hCoV-19^^Wales|Human|Wales Specialist Virology Centre Sequencing lab|COVID-19 Genomics UK (COG-UK) Consortium|Moore|United Kingdom

>Spike|hCoV-19/England/QEUH-969C9F/2020|2020-08-12|EPI\_ISL\_530813|Original|hCoV-19^^England|Human|Lighthouse Lab in Glasgow|Wellcome Sanger Institute for the COVID-19 Genomics UK (COG-UK) consortium|Davies|United Kingdom

>Spike|hCoV-19/England/LOND-D38D1/2020|2020-04-02|EPI\_ISL\_441004|Original|hCoV-19^^England|Human|University College London|COVID-19 Genomics UK (COG-UK) Consortium|Roy|United Kingdom

>Spike|hCoV-19/Saudi Arabia/KAUST-Madinah253/2020|2020-03-28|EPI\_ISL\_437737|Original|hCoV-19^^Madinah|Human|Pathogen Genomics Lab King Abdullah University of Science and Technology(KAUST)|Pathogen Genomics Lab King Abdullah University of Science and Technology(KAUST)|Mohamed Ghazzali|Saudi Arabia

>Spike|hCoV-19/England/CAMC-B33AFC/2020|2020-11-05|EPI\_ISL\_659152|Original|hCoV-19^^England|Human|Lighthouse Lab in Cambridge|Wellcome Sanger Institute for the COVID-19 Genomics UK (COG-UK) Consortium|Davies|United Kingdom

>Spike|hCoV-19/USA/OK-QDX-770/2020|2020-03-18|EPI\_ISL\_571553|Original|hCoV-19^^Oklahoma|Human|Quest Diagnostics|Quest Diagnostics|Kagan|USA

>Spike|hCoV-19/Wales/PHWC-4A2D9C/2020|2020-12-14|EPI\_ISL\_744015|Original|hCoV-19^^Wales|Human|Wales Specialist Virology Centre Sequencing lab|COVID-19 Genomics UK (COG-UK) Consortium|Moore|United Kingdom

>Spike|hCoV-19/Netherlands/NA\_521/2020|2020-03-29|EPI\_ISL\_460694|Original|hCoV-19^^Netherlands|Human|Dutch COVID-19 response team|Erasmus Medical Center|Oude Munnink|Netherlands

>Spike|hCoV-19/Montenegro/ChVir-1796572002/2020|2020-07-17|EPI\_ISL\_516927|Original|hCoV-19^^Montenegro|Human|Department for Molecular Diagnostics|Charite\u0301 Universita\u0308tsmedizin Berlin|Muehlemann|Montenegro

>Spike|hCoV-19/South Africa/KRISP-0021/2020|2020-04-02|EPI\_ISL\_467435|Original|hCoV-19^^KwaZulu-Natal|Human|AMPATH-DBN|KRISP|de Oliveira|South Africa

>Spike|hCoV-19/Germany/HH-hpi-p1612/2020|2020-03-16|EPI\_ISL\_775928|Original|hCoV-19^^Hamburg|Human|University Medical Center Hamburg Eppendorf|Heinrich Pette Institute|Robitaille|Germany

>Spike|hCoV-19/England/BRIS-12CEB8/2020|2020-04-24|EPI\_ISL\_481772|Original|hCoV-19^^England|Human|PHE South West Regional Laboratory|Wellcome Sanger Institute for the COVID-19 Genomics UK (COG-UK) consortium|Davies|United Kingdom

>Spike|hCoV-19/England/MILK-978653/2020|2020-07-31|EPI\_ISL\_550475|Original|hCoV-19^^England|Human|Lighthouse Lab in Milton Keynes|Wellcome Sanger Institute for the COVID-19 Genomics UK (COG-UK) consortium|Davies|United Kingdom

>Spike|hCoV-19/Scotland/QEUH-9BAEE4/2020|2020-09-09|EPI\_ISL\_573850|Original|hCoV-19^^Scotland|Human|Oxford Viromics|COVID-19 Genomics UK (COG-UK) Consortium|Golubchik|United Kingdom

>Spike|hCoV-19/England/ALDP-8BD240/2020|2020-06-27|EPI\_ISL\_556588|Original|hCoV-19^^England|Human|Lighthouse Lab in Alderley Park|Wellcome Sanger Institute for the COVID-19 Genomics UK (COG-UK) consortium|Davies|United Kingdom

>Spike|hCoV-19/India/WB-S22/2020|2020-04-21|EPI\_ISL\_455652|Original|hCoV-19^^West Bengal|Human|ICMR-National Institute of Cholera and Enteric Diseases|National Institute of Biomedical Genomics|Maitra|India

>Spike|hCoV-19/USA/ID-UW-4266/2020|2020-03-30|EPI\_ISL\_427170|Original|hCoV-19^^Idaho|Human|UW Virology Lab|UW Virology Lab|Roychoudhury|USA

>Spike|hCoV-19/Australia/VIC2871/2020|2020-07-04|EPI\_ISL\_521702|Original|hCoV-19^^Victoria|Human|Microbiological Diagnostic Unit - Public Health Laboratory (MDU-PHL)|MDU-PHL|Schultz|Australia

>Spike|hCoV-19/USA/NY-NYCPHL-001314/2020|2020-11-10|EPI\_ISL\_683914|Original|hCoV-19^^New York|Human|DOHMH Jamaica|New York City Public Health Laboratory|Wang|USA

>Spike|hCoV-19/England/LIVE-A77CA/2020|2020-03-27|EPI\_ISL\_517071|Original|hCoV-19^^England|Human|Liverpool Clinical Laboratories|COVID-19 Genomics UK (COG-UK) Consortium|Haldenby|United Kingdom

>Spike|hCoV-19/USA/CO-CDPHE-2008223165/2020|2020-08-22|EPI\_ISL\_710255|Original|hCoV-19^^Colorado|Human|Colorado Department of Public Health and Environment|Colorado Department of Public Health and Environment|Bankers|USA

>Spike|hCoV-19/USA/WA-S2723/2020|2020-07-03|EPI\_ISL\_525713|Original|hCoV-19^^Washington|Human|Seattle Flu Study|Seattle Flu Study|Lee|USA

>Spike|hCoV-19/USA/UT-UPHL-2012121783/2020|2020-08-11|EPI\_ISL\_745943|Original|hCoV-19^^Utah|Human|Ginkgo Bioworks Clinical Laboratory|Utah Public Health Laboratory|Young|USA

>Spike|hCoV-19/USA/UT-UPHL-2012125874/2020|2020-10-22|EPI\_ISL\_746219|Original|hCoV-19^^Utah|Human|Ginkgo Bioworks Clinical Laboratory|Utah Public Health Laboratory|Young|USA

>Spike|hCoV-19/USA/TX-HMH-MCoV-18282/2020|2020-11-17|EPI\_ISL\_784630|Original|hCoV-19^^Texas|Human|Houston Methodist Hospital|Houston Methodist Hospital|Long|USA

>Spike|hCoV-19/England/MILK-B8D352/2020|2020-11-13|EPI\_ISL\_674114|Original|hCoV-19^^England|Human|Lighthouse Lab in Milton Keynes|Wellcome Sanger Institute for the COVID-19 Genomics UK (COG-UK) Consortium|Davies|United Kingdom

>Spike|hCoV-19/Bangladesh/DNAS\_DRICM\_isl\_EK-91/2020|2020-07-10|EPI\_ISL\_774994|Original|hCoV-19^^Dhaka|Human|Designated Reference Institute for Chemical Measurements (DRICM)|DNA SOLUTION LTD.|Rabbi|Bangladesh

>Spike|hCoV-19/Ukraine/203100360/2020|2020-04-24|EPI\_ISL\_512639|Original|hCoV-19^^Ukraine|Human|National Laboratory for Influenza/Virology reference laboratory|Respiratory Virus Unit|Platt|Ukraine

>Spike|hCoV-19/Peru/ANC-INS-045/2020|2020-04-11|EPI\_ISL\_516628|Original|hCoV-19^^Ancash|Human|Laboratorio de Referencia Nacional de Virus Respiratorio. Centro



Nacional de Salud Publica. Instituto Nacional de Salud Peru. | Laboratorio de Referencia Nacional de Biotecnología y Biología Molecular. Centro Nacional de Salud Publica. Instituto Nacional de Salud Peru. | Padilla Rojas | Peru

> Spike | hCoV-19/England/20179043704/2020 | 2020-04-24 | EPI\_ISL\_527347 | Original | hCoV-19^England | Human | Respiratory Virus Unit | Respiratory Virus Unit | Ledesma | United Kingdom

> Spike | hCoV-19/England/20174003604/2020 | 2020-04-21 | EPI\_ISL\_465381 | Original | hCoV-19^England | Human | Respiratory Virus Unit | Respiratory Virus Unit | Platt | United Kingdom

> Spike | hCoV-19/USA/NV-NSPHL-A0163/2020 | 2020-05-15 | EPI\_ISL\_515425 | Original | hCoV-19^Nevada | Human | Nevada State Public Health Laboratory | Nevada State Public Health Laboratory | Sevinsky | USA

> Spike | hCoV-19/England/ALDP-9DA060/2020 | 2020-09-18 | EPI\_ISL\_576840 | Original | hCoV-19^England | Human | Oxford Viromics | COVID-19 Genomics UK (COG-UK) Consortium | Golubchik | United Kingdom

> Spike | hCoV-19/Wales/PHWC-16C371/2020 | 2020-09-20 | EPI\_ISL\_574046 | Original | hCoV-19^Wales | Human | Wales Specialist Virology Centre Sequencing lab | COVID-19 Genomics UK (COG-UK) Consortium | Moore | United Kingdom

> Spike | hCoV-19/South Korea/KCDC2008/2020 | 2020-02-05 | EPI\_ISL\_426171 | Original | hCoV-19^South Korea | Human | Division of Viral Diseases | Division of Viral Diseases | Kim | South Korea

> Spike | hCoV-19/Denmark/DCGC-11343/2020 | 2020-11-02 | EPI\_ISL\_670852 | Original | hCoV-19^Syddanmark | Human | Department of Virus and Microbiological Special Diagnostics | Albertsen Lab | Michaelsen | Denmark

> Spike | hCoV-19/USA/CA-ALSR-3402/2020 | 2020-07-07 | EPI\_ISL\_636005 | Original | hCoV-19^California | Human | San Diego County Public Health Laboratory | Andersen lab at Scripps Research | Gangavarapu | USA

> Spike | hCoV-19/England/QEUEH-C03EAD/2020 | 2020-12-04 | EPI\_ISL\_720889 | Original | hCoV-19^England | Human | Lighthouse Lab in Glasgow | Wellcome Sanger Institute for the COVID-19 Genomics UK (COG-UK) Consortium | Davies | United Kingdom

> Spike | hCoV-19/USA/AZ-TG306007/2020 | 2020-04-30 | EPI\_ISL\_694313 | Original | hCoV-19^Arizona | Human | AZ SPHL | TGen North | French | USA

> Spike | hCoV-19/USA/VA\_NIDDL\_3129/2020 | 2020-04-11 | EPI\_ISL\_491931 | Original | hCoV-19^Virginia | Human | Naval Infectious Diseases Diagnostic Laboratory | Naval Medical Research Center Biological Defense Research Directorate | Voegtly | USA

> Spike | hCoV-19/Switzerland/VD-ETHZ-350210/2020 | 2020-10-30 | EPI\_ISL\_693858 | Original | hCoV-19^Vaud | Human | Viollier AG | Department of Biosystems Science and Engineering | Nadeau | Switzerland

> Spike | hCoV-19/England/CAMB-7A57B/2020 | 2020-04-02 | EPI\_ISL\_441800 | Original | hCoV-19^England | Human | Department of Pathology | Wellcome Sanger Institute for the COVID-19 Genomics UK (COG-UK) consortium | Amato | United Kingdom

> Spike | hCoV-19/Austria/CeMM0299/2020 | 2020-03-27 | EPI\_ISL\_475775 | Original | hCoV-19^Vienna | Human | Center for Virology | Bergthaler laboratory | Bergthaler | Austria

> Spike | hCoV-19/USA/CA-CZB-11798/2020 | 2020-09-23 | EPI\_ISL\_625641 | Original | hCoV-19^California | Human | Orange County Public Health Lab | Chan-Zuckerberg Biohub | Bhatt | USA

> Spike | hCoV-19/Zimbabwe/ZW-29/2020 | 2020-03-01 | EPI\_ISL\_647978 | Original | hCoV-19^Zimbabwe | Human | National Microbiology Reference Laboratory | Quadram Institute Bioscience | Alikhan | Zimbabwe

> Spike | hCoV-19/Brazil/SP-L19-CD391/2020 | 2020-04-01 | EPI\_ISL\_476320 | Original | hCoV-19^S\u00e3o Paulo | Human | DB Diagn\u00f3sticos do Brasil | Instituto de Medicina Tropical da Universidade de S\u00e3o Paulo | Sabino | Brazil

> Spike | hCoV-19/England/CAMC-CF5309/2020 | 2020-12-18 | EPI\_ISL\_781620 | Original | hCoV-19^England | Human | Lighthouse Lab in Cambridge | Wellcome Sanger Institute for the COVID-19 Genomics UK (COG-UK) Consortium | Davies | United Kingdom

> Spike | hCoV-19/USA/WI-GMF-19240/2020 | 2020-09-08 | EPI\_ISL\_547798 | Original | hCoV-19^Wisconsin | Human | Gundersen Molecular Diagnostics Laboratory | Kabara Cancer Research Institute | Kenny | USA

> Spike | hCoV-19/Denmark/DCGC-11736/2020 | 2020-10-26 | EPI\_ISL\_671104 | Original | hCoV-19^Hovedstaden | Human | Department of Virus and Microbiological Special Diagnostics | Albertsen Lab | Michaelsen | Denmark

>Spike|hCoV-19/England/NOTT-113E4B/2020|2020-10-01|EPI\_ISL\_577116|Original|hCoV-19^^England|Human|Queens Medical Centre|COVID-19 Genomics UK (COG-UK) Consortium|Loose|United Kingdom

>Spike|hCoV-19/Italy/UMB-IZSUM-48682-18/2020|2020-10-29|EPI\_ISL\_763073|Original|hCoV-19^^Umbria|Human|Istituto Zooprofilattico Sperimentale dell' Umbria e delle Marche - Togo Rosati|Istituto Superiore di Sanit\u00e0|De Sabato|Italy

>Spike|hCoV-19/Italy/SAR-AMVRC-28/2020|2020-04-12|EPI\_ISL\_458085|Original|hCoV-19^^Sardinia|Human|Laboratorio Biologia Molecolare Sars Cov2 - UOC Laboratorio Analisi - Servizio Medicina di Laboratorio|Laboratorio specialistico UOC Ematologia - Ospedale \San Francesco\ - ATS-ASSL Nuoro|Piras|Italy

>Spike|hCoV-19/Spain/MD-IBV-99008487/2020|2020-09-10|EPI\_ISL\_654033|Original|hCoV-19^^Madrid|Human|Hospital General Universitario Gregorio Mara\u00f1\u00f3n|SeqCOVID-SPAIN consortium/IBV (CSIC) |Comas|Spain

>Spike|hCoV-19/England/QEUEH-A0B9C4/2020|2020-10-01|EPI\_ISL\_599273|Original|hCoV-19^^England|Human|Lighthouse Lab in Glasgow|Wellcome Sanger Institute for the COVID-19 Genomics UK (COG-UK) consortium|Davies|United Kingdom

>Spike|hCoV-19/USA/NY-Wadsworth-290361-01/2020|2020-12-16|EPI\_ISL\_765544|Original|hCoV-19^^New York|Human|MONTEFIORE MEDICAL CENTER LABORATORIES|Wadsworth Center|Lasek-Nesselquist|USA

>Spike|hCoV-19/Brazil/RJ-1948/2020|2020-04-13|EPI\_ISL\_456095|Original|hCoV-19^^Rio de Janeiro|Human|Laboratory of Respiratory Viruses and Measles|Laboratory of Respiratory Viruses and Measles|Silva|Brazil

>Spike|hCoV-19/Netherlands/ZH-EMC-504/2020|2020-08-25|EPI\_ISL\_577933|Original|hCoV-19^^Zuid Holland|Human|Dutch COVID-19 response team|Erasmus Medical Center|Oude Munnink|Netherlands

>Spike|hCoV-19/England/QEUEH-B7C63F/2020|2020-11-14|EPI\_ISL\_727807|Original|hCoV-19^^England|Human|Oxford Viromics|COVID-19 Genomics UK (COG-UK) Consortium|Golubchik|United Kingdom

>Spike|hCoV-19/USA/IA-GMF-13403/2020|2020-08-01|EPI\_ISL\_547657|Original|hCoV-19^^Iowa|Human|Gundersen Molecular Diagnostics Laboratory|Kabara Cancer Research Institute|Kenny|USA

>Spike|hCoV-19/USA/WI-UW-185/2020|2020-03-22|EPI\_ISL\_428281|Original|hCoV-19^^Wisconsin|Human|University of Wisconsin-Madison AIDS Vaccine Research Laboratories|University of Wisconsin-Madison AIDS Vaccine Research Laboratories|Moreno|USA

>Spike|hCoV-19/Spain/IB-IBV-99011561/2020|2020-12-14|EPI\_ISL\_779869|Original|hCoV-19^^Balear Islands|Human|Servicio de Microbiolog\u00eda|SeqCOVID-SPAIN consortium/IBV (CSIC) |Comas|Spain

>Spike|hCoV-19/Australia/VIC4343/2020|2020-07-14|EPI\_ISL\_519639|Original|hCoV-19^^Victoria|Human|Microbiological Diagnostic Unit - Public Health Laboratory (MDU-PHL) |MDU-PHL|Schultz|Australia

>Spike|hCoV-19/England/ALDP-A50966/2020|2020-10-07|EPI\_ISL\_597869|Original|hCoV-19^^England|Human|Lighthouse Lab in Alderley Park|Wellcome Sanger Institute for the COVID-19 Genomics UK (COG-UK) consortium|Davies|United Kingdom

>Spike|hCoV-19/Iceland/433/2020|2020-03-20|EPI\_ISL\_424457|Original|hCoV-19^^Reykjavik|Human|The National University Hospital of Iceland|deCODE genetics|J\u00f3nsson|Iceland

>Spike|hCoV-19/Luxembourg/LNS0156004/2020|2020-10-20|EPI\_ISL\_739726|Original|hCoV-19^^Luxembourg|Human|Laboratoire national de sant\u00e9|Laboratoire national de sant\u00e9|Wienecke-Baldacchino|Luxembourg

>Spike|hCoV-19/England/QEUEH-9CFC00/2020|2020-09-15|EPI\_ISL\_589847|Original|hCoV-19^^England|Human|Lighthouse Lab in Glasgow|Wellcome Sanger Institute for the COVID-19 Genomics UK (COG-UK) consortium|Davies|United Kingdom

>Spike|hCoV-19/England/NORT-286325/2020|2020-10-01|EPI\_ISL\_637793|Original|hCoV-19^^England|Human|Northumbria University / South Tees Hospitals NHS Foundation Trust / North Cumbria Integrated Care NHS Foundation Trust / North Tees and Hartlepool NHS Foundation Trust / Newcastle Hospitals NHS Foundation Trust|COVID-19 Genomics UK (COG-UK) Consortium|Bashton|United Kingdom

>Spike|hCoV-19/USA/CA-CZB-1972/2020|2020-05-07|EPI\_ISL\_486244|Original|hCoV-19^^California|Human|Orange County Public Health Laboratory|Chan-Zuckerberg Biohub|McGeever|USA

>Spike|hCoV-19/Scotland/QEUH-B10AF5/2020|2020-11-02|EPI\_ISL\_649587|Original|hCoV-19^^Scotland|Human|Lighthouse Lab in Glasgow|Wellcome Sanger Institute for the COVID-19 Genomics UK (COG-UK) Consortium|Davies|United Kingdom

>Spike|hCoV-19/USA/ME-HETL-J0004/2020|2020-03-13|EPI\_ISL\_513417|Original|hCoV-19^^Maine|Human|Maine HETL|Tewhey Lab|Tewhey|USA

>Spike|hCoV-19/Australia/VIC8973/2020|2020-07-28|EPI\_ISL\_565324|Original|hCoV-19^^Victoria|Human|Microbiological Diagnostic Unit - Public Health Laboratory (MDU-PHL)|MDU-PHL|Schultz|Australia

>Spike|hCoV-19/USA/MN-MDH-1569/2020|2020-08-21|EPI\_ISL\_530165|Original|hCoV-19^^Minnesota|Human|M Health Fairview|Minnesota Department of Health|Garfin|USA

>Spike|hCoV-19/Denmark/DCGC-4204/2020|2020-09-14|EPI\_ISL\_622097|Original|hCoV-19^^Hovedstaden|Human|Department of Virus and Microbiological Special Diagnostics|Albertsen lab|Michaelsen|Denmark

>Spike|hCoV-19/Spain/AN-IBV-98001770/2020|2020-04-10|EPI\_ISL\_538147|Original|hCoV-19^^Andalucia|Human|Servicio de Microbiolog\u00eda y Parasitolog\u00eda cl\u00ednica. UCEIMP. Hospital Universitario Virgen del Roc\u00edo/IBIS/CSIC/US|SeqCOVID-SPAIN consortium/IBV (CSIC)|Comas|Spain

>Spike|hCoV-19/England/NORT-2A4AD1/2020|2020-09-15|EPI\_ISL\_573395|Original|hCoV-19^^England|Human|Northumbria University / South Tees Hospitals NHS Foundation Trust / North Cumbria Integrated Care NHS Foundation Trust / North Tees and Hartlepool NHS Foundation Trust / Newcastle Hospitals NHS Foundation Trust|COVID-19 Genomics UK (COG-UK) Consortium|Bashton|United Kingdom

>Spike|hCoV-19/Scotland/QEUH-96E66F/2020|2020-08-19|EPI\_ISL\_534471|Original|hCoV-19^^Scotland|Human|NHSGGC West of Scotland Specialist Virology Centre / MRC-University of Glasgow Centre for Virus Research|Wellcome Sanger Institute for the COVID-19 Genomics UK (COG-UK) consortium|Davies|United Kingdom

>Spike|hCoV-19/Peru/LIM-INS-014/2020|2020-03-10|EPI\_ISL\_489990|Original|hCoV-19^^Lima|Human|Laboratorio de Referencia Nacional de Virus Respiratorio. Instituto Nacional de Salud Per\u00fa|Laboratorio de Referencia Nacional de Biotecnolog\u00eda y Biolog\u00eda Molecular. Instituto Nacional de Salud Per\u00fa|Padilla Rojas|Peru

>Spike|hCoV-19/USA/WA-S1882/2020|2020-05-28|EPI\_ISL\_496308|Original|hCoV-19^^Washington|Human|Washington State Department of Health|Seattle Flu Study|Lee|USA

>Spike|hCoV-19/England/ALDP-C48862/2020|2020-12-13|EPI\_ISL\_736518|Original|hCoV-19^^England|Human|Lighthouse Lab in Alderley Park|Wellcome Sanger Institute for the COVID-19 Genomics UK (COG-UK) Consortium|Davies|United Kingdom

>Spike|hCoV-19/Northern Ireland/NIRE-2343DB/2020|2020-10-15|EPI\_ISL\_680381|Original|hCoV-19^^Northern Ireland|Human|Regional Virus Laboratory|COVID-19 Genomics UK (COG-UK) Consortium|Fairley|United Kingdom

>Spike|hCoV-19/Netherlands/NA\_375/2020|2020-04-08|EPI\_ISL\_455178|Original|hCoV-19^^Netherlands|Human|Dutch COVID-19 response team|Erasmus Medical Center|Oude Munnink|Netherlands

>Spike|hCoV-19/England/EXET-136D54/2020|2020-04-23|EPI\_ISL\_471919|Original|hCoV-19^^England|Human|University of Exeter|COVID-19 Genomics UK (COG-UK) Consortium|Temperton|United Kingdom

>Spike|hCoV-19/England/BRIS-125CD3/2020|2020-03-31|EPI\_ISL\_443791|Original|hCoV-19^^England|Human|PHE South West Regional Laboratory|Wellcome Sanger Institute for the COVID-19 Genomics UK (COG-UK) consortium|Amato|United Kingdom

>Spike|hCoV-19/England/ALDP-51CD50/2020|2020-06-02|EPI\_ISL\_558977|Original|hCoV-19^^England|Human|Lighthouse Lab in Alderley Park|Wellcome Sanger Institute for the COVID-19 Genomics UK (COG-UK) consortium|Davies|United Kingdom

>Spike|hCoV-19/England/QEUH-9C9969/2020|2020-09-10|EPI\_ISL\_567490|Original|hCoV-19^^England|Human|Lighthouse Lab in Glasgow|Wellcome Sanger Institute for the COVID-19 Genomics UK (COG-UK) consortium|Davies|United Kingdom

>Spike|hCoV-19/England/MILK-B393BF/2020|2020-11-01|EPI\_ISL\_658898|Original|hCoV-19^^England|Human|Lighthouse Lab in Milton Keynes|Wellcome Sanger Institute for the COVID-19 Genomics UK (COG-UK) Consortium|Davies|United Kingdom

>Spike|hCoV-19/USA/NY-NYUMC792/2020|2020-03-27|EPI\_ISL\_456028|Original|hCoV-19^^New York|Human|NYU Langone Health|Departments of Pathology and Medicine|Maurano|USA

>Spike|hCoV-19/Japan/PG-7774/2020|2020-06-00|EPI\_ISL\_686876|Original|hCoV-19^^Japan|Human|Pathogen Genomics Center|Pathogen Genomics Center|Sekizuka|Japan

>Spike|hCoV-19/England/MILK-B3B696/2020|2020-11-01|EPI\_ISL\_706076|Original|hCoV-19^^England|Human|Oxford Viromics|COVID-19 Genomics UK (COG-UK) Consortium|Golubchik|United Kingdom

>Spike|hCoV-19/England/ALDP-6D0540/2020|2020-07-02|EPI\_ISL\_556142|Original|hCoV-19^^England|Human|Lighthouse Lab in Alderley Park|Wellcome Sanger Institute for the COVID-19 Genomics UK (COG-UK) consortium|Davies|United Kingdom

>Spike|hCoV-19/Denmark/ALAB-SSI352/2020|2020-03-23|EPI\_ISL\_429465|Original|hCoV-19^^Denmark|Human|Department of Virus and Microbiological Special Diagnostics|Albertsen lab|Kirkegaard|Denmark

>Spike|hCoV-19/Switzerland/BE-ETHZ-360023/2020|2020-11-10|EPI\_ISL\_693879|Original|hCoV-19^^Bern|Human|Viollier AG|Department of Biosystems Science and Engineering|Nadeau|Switzerland

>Spike|hCoV-19/Portugal/PT0851/2020|2020-03-27|EPI\_ISL\_511110|Original|hCoV-19^^Portugal|Human|Instituto Nacional de Saude (INSA)|Instituto Nacional de Saude (INSA)|Borges|Portugal

>Spike|hCoV-19/USA/WA-S2475/2020|2020-06-15|EPI\_ISL\_497107|Original|hCoV-19^^Washington|Human|Washington State Department of Health|Seattle Flu Study|Lee|USA

>Spike|hCoV-19/England/ALDP-4FA7A6/2020|2020-06-24|EPI\_ISL\_559172|Original|hCoV-19^^England|Human|Lighthouse Lab in Alderley Park|Wellcome Sanger Institute for the COVID-19 Genomics UK (COG-UK) consortium|Davies|United Kingdom

>Spike|hCoV-19/Austria/CeMM1050/2020|2020-04-20|EPI\_ISL\_583867|Original|hCoV-19^^Austria|Human|Institute for Laboratory Diagnostics and Microbiology|Bergthaler laboratory|Bergthaler|Austria

>Spike|hCoV-19/England/ALDP-9ED228/2020|2020-05-08|EPI\_ISL\_589546|Original|hCoV-19^^England|Human|Lighthouse Lab in Alderley Park|Wellcome Sanger Institute for the COVID-19 Genomics UK (COG-UK) consortium|Davies|United Kingdom

>Spike|hCoV-19/Russia/AST-RII-MH4465S/2020|2020-09-11|EPI\_ISL\_733203|Original|hCoV-19^^Astrakhan|Human|Pathogenic Microorganisms Variability Laboratory|WHO National Influenza Centre Russian Federation|Komissarov|Russia

>Spike|hCoV-19/France/ARA-SC154/2020|2020-03-10|EPI\_ISL\_634822|Original|hCoV-19^^Auvergne-Rhone-Alpes|Human|Laboratoire de virologie|CNR Virus des Infections Respiratoires - France SUD|Bal|France

>Spike|hCoV-19/Wales/PHWC-16AD0C/2020|2020-09-10|EPI\_ISL\_560187|Original|hCoV-19^^Wales|Human|Wales Specialist Virology Centre Sequencing lab|COVID-19 Genomics UK (COG-UK) Consortium|Moore|United Kingdom

>Spike|hCoV-19/USA/NY-NYUMC149/2020|2020-04-01|EPI\_ISL\_424956|Original|hCoV-19^^New York|Human|NYU Langone Health|Departments of Pathology and Medicine|Maurano|USA

>Spike|hCoV-19/England/NOTT-11578A/2020|2020-10-14|EPI\_ISL\_595261|Original|hCoV-19^^England|Human|Queens Medical Centre|COVID-19 Genomics UK (COG-UK) Consortium|Loose|United Kingdom

>Spike|hCoV-19/USA/MN-MDH-1518/2020|2020-07-06|EPI\_ISL\_527583|Original|hCoV-19^^Minnesota|Human|Minnesota Department of Health|Minnesota Department of Health|Garfin|USA

>Spike|hCoV-19/England/QEUH-AAB6A1/2020|2020-10-21|EPI\_ISL\_652805|Original|hCoV-19^^England|Human|Oxford Viromics|COVID-19 Genomics UK (COG-UK) Consortium|Golubchik|United Kingdom

>Spike|hCoV-19/England/MILK-95997D/2020|2020-06-05|EPI\_ISL\_554817|Original|hCoV-19^^England|Human|Lighthouse Lab in Milton Keynes|Wellcome Sanger Institute for the COVID-19 Genomics UK (COG-UK) consortium|Davies|United Kingdom

>Spike|hCoV-19/USA/NY-PV09406/2020|2020-03-12|EPI\_ISL\_450086|Original|hCoV-19^^New York|Human|MSHS Clinical Microbiology Laboratories|MSHS Pathogen Surveillance Program|van Bakel|USA

>Spike|hCoV-19/England/CAMB-1B0138/2020|2020-05-11|EPI\_ISL\_452880|Original|hCoV-19^^England|Human|Department of Pathology|COVID-19 Genomics UK (COG-UK) Consortium|Meredith|United Kingdom

>Spike|hCoV-19/England/MILK-ACDF53/2020|2020-10-21|EPI\_ISL\_630239|Original|hCoV-19^^England|Human|Lighthouse Lab in Milton Keynes|Wellcome Sanger Institute for the COVID-19 Genomics UK (COG-UK) consortium|Davies|United Kingdom

>Spike|hCoV-19/England/ALDP-A85B44/2020|2020-10-17|EPI\_ISL\_610546|Original|hCoV-19^^England|Human|Lighthouse Lab in Alderley Park|Wellcome Sanger Institute for the COVID-19 Genomics UK (COG-UK) consortium|Davies|United Kingdom

>Spike|hCoV-19/Iceland/191/2020|2020-03-16|EPI\_ISL\_417762|Original|hCoV-19^^Reykjavik|Human|The National University Hospital of Iceland|deCODE genetics|J\u00f3nsson|Iceland

>Spike|hCoV-19/Brazil/SP-L17-CD329/2020|2020-03-27|EPI\_ISL\_476301|Original|hCoV-19^^S\u00e3o Paulo|Human|DB Diagn\u00f3sticos do Brasil|Instituto de Medicina Tropical da Universidade de S\u00e3o Paulo|Sabino|Brazil

>Spike|hCoV-19/Denmark/DCGC-5985/2020|2020-09-21|EPI\_ISL\_621094|Original|hCoV-19^^Midtjylland|Human|Department of Virus and Microbiological Special Diagnostics|Albertsen lab|Michaelsen|Denmark

>Spike|hCoV-19/England/QEUA-A9FC08/2020|2020-10-20|EPI\_ISL\_665992|Original|hCoV-19^^England|Human|Northumbria University / South Tees Hospitals NHS Foundation Trust / North Cumbria Integrated Care NHS Foundation Trust / North Tees and Hartlepool NHS Foundation Trust / Newcastle Hospitals NHS Foundation Trust|COVID-19 Genomics UK (COG-UK) Consortium|Bashton|United Kingdom

>Spike|hCoV-19/Australia/NSW1348/2020|2020-12-29|EPI\_ISL\_767914|Original|hCoV-19^^New South Wales|Human|Sydney South West Pathology Service (SSWPS) - Royal Prince Alfred Hospital - NSW Health Pathology|NSW Health Pathology - Institute of Clinical Pathology and Medical Research; Westmead Hospital; University of Sydney|Gall|Australia

>Spike|hCoV-19/England/CAMB-A97A06/2020|2020-12-10|EPI\_ISL\_723945|Original|hCoV-19^^England|Human|Department of Pathology|COVID-19 Genomics UK (COG-UK) Consortium|Goodfellow|United Kingdom

>Spike|hCoV-19/England/QEUA-95E5FC/2020|2020-08-06|EPI\_ISL\_532287|Original|hCoV-19^^England|Human|Lighthouse Lab in Glasgow|Wellcome Sanger Institute for the COVID-19 Genomics UK (COG-UK) consortium|Davies|United Kingdom

>Spike|hCoV-19/Australia/VIC916/2020|2020-03-26|EPI\_ISL\_427151|Original|hCoV-19^^Victoria|Human|Victorian Infectious Diseases Reference Laboratory (VIDRL)|Microbiological Diagnostic Unit Public Health Laboratory and Victorian Infectious Diseases Reference Laboratory|Schultz|Australia

>Spike|hCoV-19/England/ALDP-A50F64/2020|2020-10-07|EPI\_ISL\_597635|Original|hCoV-19^^England|Human|Lighthouse Lab in Alderley Park|Wellcome Sanger Institute for the COVID-19 Genomics UK (COG-UK) consortium|Davies|United Kingdom

>Spike|hCoV-19/England/ALDP-9514B0/2020|2020-06-13|EPI\_ISL\_554140|Original|hCoV-19^^England|Human|Lighthouse Lab in Alderley Park|Wellcome Sanger Institute for the COVID-19 Genomics UK (COG-UK) consortium|Davies|United Kingdom

>Spike|hCoV-19/Denmark/DCGC-3349/2020|2020-08-31|EPI\_ISL\_616103|Original|hCoV-19^^Sjælland|Human|Department of Virus and Microbiological Special Diagnostics|Albertsen lab|Michaelsen|Denmark

>Spike|hCoV-19/Germany/SH-ChVir20773/2020|2020-11-26|EPI\_ISL\_729464|Original|hCoV-19^^Schleswig-Holstein|Human|A. Krumbholz|Charit\u00e9 Universit\u00e4tsmedizin Berlin|Muehlemann|Germany

>Spike|hCoV-19/Scotland/CVR5031/2020|2020-10-09|EPI\_ISL\_594765|Original|hCoV-19^^Scotland|Human|West of Scotland Specialist Virology Centre|COVID-19 Genomics UK (COG-UK) Consortium|Robertson|United Kingdom

>Spike|hCoV-19/USA/WA-OHSU-0444/2020|2020-06-08|EPI\_ISL\_526087|Original|hCoV-19^^Washington|Human|OHSU Lab Services Molecular Microbiology Lab|Ginkgo Bioworks Clinical Laboratory|O'Roak|USA

>Spike|hCoV-19/England/20129016104/2020|2020-03-19|EPI\_ISL\_424001|Original|hCoV-19^^England|Human|Respiratory Virus Unit|Respiratory Virus Unit|Platt|United Kingdom

>Spike|hCoV-19/England/OXON-B0272/2020|2020-04-19|EPI\_ISL\_478869|Original|hCoV-19^^England|Human|Oxford Viromics|COVID-19 Genomics UK (COG-UK) Consortium|Golubchik|United Kingdom

>Spike|hCoV-19/England/ALDP-95CF4B/2020|2020-06-16|EPI\_ISL\_553504|Original|hCoV-19^^England|Human|Lighthouse Lab in Alderley Park|Wellcome Sanger Institute for the COVID-19 Genomics UK (COG-UK) consortium|Davies|United Kingdom

>Spike|hCoV-19/England/ALDP-A2E758/2020|2020-10-05|EPI\_ISL\_587121|Original|hCoV-19^^England|Human|Lighthouse Lab in Alderley Park|Wellcome Sanger Institute for the COVID-19 Genomics UK (COG-UK) consortium|Davies|United Kingdom

>Spike|hCoV-19/France/ARA-SC121/2020|2020-04-13|EPI\_ISL\_700385|Original|hCoV-19^^Auvergne-Rh\u00f4ne-Alpes|Human|Centre hospitalier M\u00e9tropole Savoie|CNR Virus des Infections Respiratoires - France SUD|Bal|France

>Spike|hCoV-19/England/ALDP-678A96/2020|2020-07-02|EPI\_ISL\_551807|Original|hCoV-19^^England|Human|Lighthouse Lab in Alderley Park|Wellcome Sanger Institute for the COVID-19 Genomics UK (COG-UK) consortium|Davies|United Kingdom

>Spike|hCoV-19/USA/WA-UW-23365/2020|2020-08-02|EPI\_ISL\_576433|Original|hCoV-19^^Washington|Human|UW Virology Lab|UW Virology Lab|Roychoudhury|USA

>Spike|hCoV-19/USA/CA-CZB-13312/2020|2020-11-02|EPI\_ISL\_672436|Original|hCoV-19^^California|Human|Santa Clara County Public Health Laboratory|Chan-Zuckerberg Biohub|Bhatt|USA

>Spike|hCoV-19/Denmark/DCGC-17594/2020|2020-12-14|EPI\_ISL\_751093|Original|hCoV-19^^Nordjylland|Human|Department of Virus and Microbiological Special Diagnostics|Albertsen Lab|Michaelsen|Denmark

>Spike|hCoV-19/Australia/VIC5318/2020|2020-07-19|EPI\_ISL\_520081|Original|hCoV-19^^Victoria|Human|Microbiological Diagnostic Unit - Public Health Laboratory (MDU-PHL) |MDU-PHL|Schultz|Australia

>Spike|hCoV-19/USA/CA-CZB-9563/2020|2020-04-16|EPI\_ISL\_672133|Original|hCoV-19^^California|Human|The Ashley Laboratory|Chan-Zuckerberg Biohub|Bhatt|USA

>Spike|hCoV-19/USA/TX-HMH-1322/2020|2020-04-26|EPI\_ISL\_542652|Original|hCoV-19^^Texas|Human|Houston Methodist Hospital|Houston Methodist Hospital|Long|USA

>Spike|hCoV-19/England/QEUEH-9BA3B8/2020|2020-09-07|EPI\_ISL\_572936|Original|hCoV-19^^England|Human|Oxford Viromics|COVID-19 Genomics UK (COG-UK) Consortium|Golubchik|United Kingdom

>Spike|hCoV-19/England/SHEF-C477C/2020|2020-10-05|EPI\_ISL\_596197|Original|hCoV-19^^England|Human|Virology Department|COVID-19 Genomics UK (COG-UK) Consortium|de Silva|United Kingdom

>Spike|hCoV-19/England/ALDP-A528EF/2020|2020-10-07|EPI\_ISL\_598048|Original|hCoV-19^^England|Human|Lighthouse Lab in Alderley Park|Wellcome Sanger Institute for the COVID-19 Genomics UK (COG-UK) consortium|Davies|United Kingdom

>Spike|hCoV-19/Japan/PG-1733/2020|2020-04-00|EPI\_ISL\_685339|Original|hCoV-19^^Japan|Human|Pathogen Genomics Center|Pathogen Genomics Center|Sekizuka|Japan

>Spike|hCoV-19/England/QEUEH-9F515D/2020|2020-09-27|EPI\_ISL\_638658|Original|hCoV-19^^England|Human|Department of Pathology|COVID-19 Genomics UK (COG-UK) Consortium|Goodfellow|United Kingdom

>Spike|hCoV-19/Australia/SAP448/2020|2020-03-22|EPI\_ISL\_508139|Original|hCoV-19^^South Australia|Human|SA Pathology|SA Pathology|Leong|Australia

>Spike|hCoV-19/England/CAMC-A66578/2020|2020-10-11|EPI\_ISL\_626676|Original|hCoV-19^^England|Human|University of Exeter|COVID-19 Genomics UK (COG-UK) Consortium|Temperton|United Kingdom

>Spike|hCoV-19/England/BIRM-6A31A/2020|2020-11-09|EPI\_ISL\_679041|Original|hCoV-19^^England|Human|University of Birmingham|COVID-19 Genomics UK (COG-UK) Consortium|Loman|United Kingdom

>Spike|hCoV-19/India/GJ-GBRC-428b/2020|2020-07-15|EPI\_ISL\_586563|Original|hCoV-19^^Gujarat|Human|GMERS GMERS Medical College and Hospital|Gujarat Biotechnology Research Centre|Joshi|India

>Spike|hCoV-19/Iceland/295/2020|2020-03-18|EPI\_ISL\_417624|Original|hCoV-19^^Reykjavik|Human|The National University Hospital of Iceland|deCODE genetics|J\u00f3nsson|Iceland

>Spike|hCoV-19/Nigeria/OS-CV290/2020|2020-07-03|EPI\_ISL\_729970|Original|hCoV-19^^Osun State|Human|Nigeria Centre for Disease Control (NCDC)|African Centre of Excellence for Genomics of Infectious Diseases (ACEGID)|Oluniyi|Nigeria

>Spike|hCoV-19/New Zealand/20CV0375/2020|2020-09-29|EPI\_ISL\_579113|Original|hCoV-19^^Auckland|Human|LabPLUS|Institute of Environmental Science and Research (ESR)|Wang|New Zealand

>Spike|hCoV-19/Denmark/DCGC-2906/2020|2020-08-24|EPI\_ISL\_616540|Original|hCoV-19^^Syddanmark|Human|Department of Virus and Microbiological Special Diagnostics|Albertsen lab|Michaelsen|Denmark

>Spike|hCoV-19/Russia/PRI-RII-MH829S/2020|2020-08-07|EPI\_ISL\_733018|Original|hCoV-19^^Primorsky|Human|WHO National Influenza Centre Russian Federation|WHO National Influenza Centre Russian Federation|Komissarov|Russia

>Spike|hCoV-19/Denmark/DCGC-15331/2020|2020-11-23|EPI\_ISL\_713767|Original|hCoV-19^^Hovedstaden|Human|Department of Virus and Microbiological Special Diagnostics|Albertsen Lab|Michaelsen|Denmark

>Spike|hCoV-19/Scotland/CVR4069/2020|2020-08-31|EPI\_ISL\_535160|Original|hCoV-19^^Scotland|Human|West of Scotland Specialist Virology Centre|COVID-19 Genomics UK (COG-UK) Consortium|Robertson|United Kingdom

>Spike|hCoV-19/Netherlands/un-EMC-714/2020|2020-05-06|EPI\_ISL\_523469|Original|hCoV-19^^Netherlands|Human|Dutch COVID-19 response team|Erasmus Medical Center|Oude Munnink|Netherlands

>Spike|hCoV-19/Denmark/DCGC-16732/2020|2020-09-14|EPI\_ISL\_714929|Original|hCoV-19^^Syddanmark|Human|Department of Virus and Microbiological Special Diagnostics|Albertsen Lab|Michaelsen|Denmark

>Spike|hCoV-19/England/ALDP-9CBE4A/2020|2020-09-16|EPI\_ISL\_575425|Original|hCoV-19^^England|Human|Lighthouse Lab in Alderley Park|Wellcome Sanger Institute for the COVID-19 Genomics UK (COG-UK) consortium|Davies|United Kingdom

>Spike|hCoV-19/England/MILK-B38D3A/2020|2020-11-01|EPI\_ISL\_658830|Original|hCoV-19^^England|Human|Lighthouse Lab in Milton Keynes|Wellcome Sanger Institute for the COVID-19 Genomics UK (COG-UK) Consortium|Davies|United Kingdom

>Spike|hCoV-19/USA/CA-CZB-15458/2020|2020-12-03|EPI\_ISL\_738880|Original|hCoV-19^^California|Human|Orange County Public Health Lab|Chan-Zuckerberg Biohub|Kamm|USA

>Spike|hCoV-19/England/NORW-EC5ED/2020|2020-05-09|EPI\_ISL\_457539|Original|hCoV-19^^England|Human|Quadram Institute Bioscience|COVID-19 Genomics UK (COG-UK) Consortium|Alikhan|United Kingdom

>Spike|hCoV-19/Luxembourg/LNS8715972/2020|2020-11-17|EPI\_ISL\_744797|Original|hCoV-19^^Luxembourg|Human|Laboratoire national de sant\u00e9|Laboratoire national de sant\u00e9|Wienecke-Baldacchino|Luxembourg

>Spike|hCoV-19/England/QEUH-AA026C/2020|2020-10-20|EPI\_ISL\_611401|Original|hCoV-19^^England|Human|Lighthouse Lab in Glasgow|Wellcome Sanger Institute for the COVID-19 Genomics UK (COG-UK) consortium|Davies|United Kingdom

>Spike|hCoV-19/Scotland/CVR5096/2020|2020-10-17|EPI\_ISL\_627372|Original|hCoV-19^^Scotland|Human|West of Scotland Specialist Virology Centre|COVID-19 Genomics UK (COG-UK) Consortium|Robertson|United Kingdom

>Spike|hCoV-19/England/MILK-9C270C/2020|2020-09-10|EPI\_ISL\_566484|Original|hCoV-19^^England|Human|Lighthouse Lab in Milton Keynes|Wellcome Sanger Institute for the COVID-19 Genomics UK (COG-UK) consortium|Davies|United Kingdom

>Spike|hCoV-19/USA/CA-CZB-10826/2020|2020-07-13|EPI\_ISL\_583076|Original|hCoV-19^^California|Human|Humboldt County Public Health Laboratory|Chan-Zuckerberg Biohub|Bhatt|USA

>Spike|hCoV-19/USA/WA-S920/2020|2020-04-25|EPI\_ISL\_463410|Original|hCoV-19^^Washington|Human|Washington State Department of Health|Seattle Flu Study|Bedford|USA

>Spike|hCoV-19/Japan/PG-5730/2020|2020-07-00|EPI\_ISL\_688852|Original|hCoV-19^^Japan|Human|Pathogen Genomics Center|Pathogen Genomics Center|Sekizuka|Japan

>Spike|hCoV-19/England/ALDP-9FDDCA/2020|2020-10-01|EPI\_ISL\_588057|Original|hCoV-19^^England|Human|Lighthouse Lab in Alderley Park|Wellcome Sanger Institute for the COVID-19 Genomics UK (COG-UK) consortium|Davies|United Kingdom

>Spike|hCoV-19/England/20144052104/2020|2020-03-31|EPI\_ISL\_421953|Original|hCoV-19^^England|Human|Respiratory Virus Unit|Respiratory Virus Unit|Platt|United Kingdom

>Spike|hCoV-19/Switzerland/TI-ETHZ-100085/2020|2020-03-13|EPI\_ISL\_451677|Original|hCoV-19^^Ticino|Human|Viollier AG|Department of Biosystems Science and Engineering|Nadeau|Switzerland

>Spike|hCoV-19/England/ALDP-AA2886/2020|2020-10-22|EPI\_ISL\_624371|Original|hCoV-19^^England|Human|Lighthouse Lab in Alderley Park|Wellcome Sanger Institute for the COVID-19 Genomics UK (COG-UK) consortium|Davies|United Kingdom

>Spike|hCoV-19/USA/OR-OHSU-2319/2020|2020-08-10|EPI\_ISL\_667181|Original|hCoV-19^^Oregon|Human|OHSU Lab Services Molecular Microbiology Lab|Oregon SARS-CoV-2 Genome Sequencing Center|O'Roak|USA

>Spike|hCoV-19/England/ALDP-67E7D5/2020|2020-07-02|EPI\_ISL\_551812|Original|hCoV-19^^England|Human|Lighthouse Lab in Alderley Park|Wellcome Sanger Institute for the COVID-19 Genomics UK (COG-UK) consortium|Davies|United Kingdom

>Spike|hCoV-19/England/CAMC-9EB916/2020|2020-09-23|EPI\_ISL\_584384|Original|hCoV-19^^England|Human|Queens Medical Centre|COVID-19 Genomics UK (COG-UK) Consortium|Loose|United Kingdom

>Spike|hCoV-19/England/ALDP-A9522E/2020|2020-10-20|EPI\_ISL\_624594|Original|hCoV-19^^England|Human|Lighthouse Lab in Alderley Park|Wellcome Sanger Institute for the COVID-19 Genomics UK (COG-UK) consortium|Davies|United Kingdom

>Spike|hCoV-19/Australia/NSW335/2020|2020-04-08|EPI\_ISL\_451597|Original|hCoV-19^^New South Wales|Human|Medlab Pathology|NSW Health Pathology - Institute of Clinical Pathology and Medical Research; Westmead Hospital; University of Sydney|Gall|Australia

>Spike|hCoV-19/USA/UT-UPHL-2009222/2020|2020-05-13|EPI\_ISL\_525222|Original|hCoV-19^^Utah|Human|Utah Public Health Laboratory|Utah Public Health Laboratory|Young|USA

>Spike|hCoV-19/Scotland/CVR5111/2020|2020-10-18|EPI\_ISL\_626897|Original|hCoV-19^^Scotland|Human|West of Scotland Specialist Virology Centre|COVID-19 Genomics UK (COG-UK) Consortium|Robertson|United Kingdom

>Spike|hCoV-19/England/ALDP-9EDC2A/2020|2020-05-09|EPI\_ISL\_580690|Original|hCoV-19^^England|Human|Lighthouse Lab in Alderley Park|Wellcome Sanger Institute for the COVID-19 Genomics UK (COG-UK) consortium|Davies|United Kingdom

>Spike|hCoV-19/England/MILK-BFCD41/2020|2020-12-02|EPI\_ISL\_720800|Original|hCoV-19^^England|Human|Lighthouse Lab in Milton Keynes|Wellcome Sanger Institute for the COVID-19 Genomics UK (COG-UK) Consortium|Davies|United Kingdom

>Spike|hCoV-19/Wales/PHWC-2854F/2020|2020-03-30|EPI\_ISL\_432018|Original|hCoV-19^^Wales|Human|Wales Specialist Virology Centre|Public Health Wales Microbiology Cardiff|Moore|United Kingdom

>Spike|hCoV-19/USA/TX-HMH-MCoV-15874/2020|2020-07-10|EPI\_ISL\_785558|Original|hCoV-19^^Texas|Human|Houston Methodist Hospital|Houston Methodist Hospital|Long|USA

>Spike|hCoV-19/USA/MO-QDX-530/2020|2020-03-18|EPI\_ISL\_571382|Original|hCoV-19^^Missouri|Human|Quest Diagnostics|Quest Diagnostics|Kagan|USA

>Spike|hCoV-19/Scotland/CVR5036/2020|2020-10-09|EPI\_ISL\_594770|Original|hCoV-19^^Scotland|Human|West of Scotland Specialist Virology Centre|COVID-19 Genomics UK (COG-UK) Consortium|Robertson|United Kingdom

>Spike|hCoV-19/Australia/VIC3199/2020|2020-07-05|EPI\_ISL\_520885|Original|hCoV-19^^Victoria|Human|Victorian Infectious Diseases Reference Laboratory (VIDRL)|VIDRL and MDU-PHL|Schultz|Australia

>Spike|hCoV-19/USA/MI-UM-10036116103/2020|2020-09-24|EPI\_ISL\_583420|Original|hCoV-19^^Michigan|Human|University of Michigan Clinical Microbiology Laboratory|Lauring Lab|Valesano|USA

>Spike|hCoV-19/England/MILK-9C3A20/2020|2020-09-07|EPI\_ISL\_566985|Original|hCoV-19^^England|Human|Lighthouse Lab in Milton Keynes|Wellcome Sanger Institute for the COVID-19 Genomics UK (COG-UK) consortium|Davies|United Kingdom

>Spike|hCoV-19/USA/VA-DCLS-1502/2020|2020-07-28|EPI\_ISL\_581571|Original|hCoV-19^^Virginia|Human|Virginia DCLS|Virginia DCLS|St. Jacques|USA

>Spike|hCoV-19/USA/MI-UM-10036833653/2020|2020-11-07|EPI\_ISL\_728470|Original|hCoV-19^^Michigan|Human|University of Michigan Clinical Microbiology Laboratory|Lauring Lab|Valesano|USA

>Spike|hCoV-19/Denmark/DCGC-2131/2020|2020-07-27|EPI\_ISL\_618394|Original|hCoV-19^^Sjaelland|Human|Department of Virus and Microbiological Special Diagnostics|Albertsen lab|Michaelsen|Denmark

>Spike|hCoV-19/Canada/ON-S1414/2020|2020-08-23|EPI\_ISL\_591185|Original|hCoV-19^^Ontario|Human|Toronto Invasive Bacterial Diseases Network|McMaster University|McArthur|Canada



>Spike|hCoV-19/England/ALDP-A2FE43/2020|2020-10-06|EPI\_ISL\_587189|Original|hCoV-19^^England|Human|Lighthouse Lab in Alderley Park|Wellcome Sanger Institute for the COVID-19 Genomics UK (COG-UK) consortium|Davies|United Kingdom

>Spike|hCoV-19/USA/WI-UW-1116/2020|2020-07-28|EPI\_ISL\_516541|Original|hCoV-19^^Wisconsin|Human|University of Wisconsin-Madison AIDS Vaccine Research Laboratories|University of Wisconsin-Madison AIDS Vaccine Research Laboratories|Baczenas|USA

>Spike|hCoV-19/USA/FL-BPHL-0744/2020|2020-06-19|EPI\_ISL\_512550|Original|hCoV-19^^Florida|Human|Florida Bureau of Public Health Laboratories|Florida Bureau of Public Health Laboratories|Blanton|USA

>Spike|hCoV-19/USA/UT-UPHL-2012935315/2020|2020-06-19|EPI\_ISL\_746475|Original|hCoV-19^^Utah|Human|Utah Public Health Laboratory|Utah Public Health Laboratory|Gallagher|USA

>Spike|hCoV-19/England/NORW-EE800/2020|2020-04-24|EPI\_ISL\_490556|Original|hCoV-19^^England|Human|Quadram Institute Bioscience|COVID-19 Genomics UK (COG-UK) Consortium|Alikhan|United Kingdom

>Spike|hCoV-19/Belgium/VD-0318102/2020|2020-03-18|EPI\_ISL\_420358|Original|hCoV-19^^Honnelles|Human|KU Leuven|KU Leuven|Maes|Belgium

>Spike|hCoV-19/England/MILK-B959A0/2020|2020-11-13|EPI\_ISL\_675121|Original|hCoV-19^^England|Human|Lighthouse Lab in Milton Keynes|Wellcome Sanger Institute for the COVID-19 Genomics UK (COG-UK) Consortium|Davies|United Kingdom

>Spike|hCoV-19/India/GJ-GBRC-370/2020|2020-06-18|EPI\_ISL\_524726|Original|hCoV-19^^Gujarat|Human|B.J. Medical College and Civil hospital|Gujarat Biotechnology Research Centre|Joshi|India

>Spike|hCoV-19/France/ARA-19570/2020|2020-04-03|EPI\_ISL\_508980|Original|hCoV-19^^Auvergne-Rh\u00f4ne-Alpes|Human|CNR Virus des Infections Respiratoires - France SUD|CNR Virus des Infections Respiratoires - France SUD|Josset|France

>Spike|hCoV-19/England/QEUH-9CEC3E/2020|2020-09-17|EPI\_ISL\_590139|Original|hCoV-19^^England|Human|Lighthouse Lab in Glasgow|Wellcome Sanger Institute for the COVID-19 Genomics UK (COG-UK) consortium|Davies|United Kingdom

>Spike|hCoV-19/USA/CA-CZB-15163/2020|2020-11-23|EPI\_ISL\_738661|Original|hCoV-19^^California|Human|Santa Clara County Public Health Laboratory|Chan-Zuckerberg Biohub|Kamm|USA

>Spike|hCoV-19/England/ALDP-A2F5E4/2020|2020-10-05|EPI\_ISL\_587269|Original|hCoV-19^^England|Human|Lighthouse Lab in Alderley Park|Wellcome Sanger Institute for the COVID-19 Genomics UK (COG-UK) consortium|Davies|United Kingdom

>Spike|hCoV-19/England/PORT-2CFD40/2020|2020-05-08|EPI\_ISL\_461991|Original|hCoV-19^^England|Human|Centre for Enzyme Innovation|COVID-19 Genomics UK (COG-UK) Consortium|Robson|United Kingdom

>Spike|hCoV-19/DRC/5705/2020|2020-05-06|EPI\_ISL\_496494|Original|hCoV-19^^Kinshasa|Human|Viral Respiratory Lab|Pathogen Sequencing Lab|Lokilo|Democratic Republic of the Congo

>Spike|hCoV-19/India/GJ-GBRC-366a/2020|2020-06-18|EPI\_ISL\_524719|Original|hCoV-19^^Gujarat|Human|B.J. Medical College and Civil hospital|Gujarat Biotechnology Research Centre|Joshi|India

>Spike|hCoV-19/South Africa/KRISP-0131/2020|2020-05-13|EPI\_ISL\_467483|Original|hCoV-19^^KwaZulu-Natal|Human|Molecular Diagnostics Services (MDS)|KRISP|de Oliveira|South Africa

>Spike|hCoV-19/England/QEUH-B2E010/2020|2020-11-04|EPI\_ISL\_660042|Original|hCoV-19^^England|Human|Lighthouse Lab in Glasgow|Wellcome Sanger Institute for the COVID-19 Genomics UK (COG-UK) Consortium|Davies|United Kingdom

>Spike|hCoV-19/England/ALDP-BC83B5/2020|2020-11-23|EPI\_ISL\_721234|Original|hCoV-19^^England|Human|Lighthouse Lab in Alderley Park|Wellcome Sanger Institute for the COVID-19 Genomics UK (COG-UK) Consortium|Davies|United Kingdom

>Spike|hCoV-19/England/MILK-99C3F8/2020|2020-08-24|EPI\_ISL\_550723|Original|hCoV-19^^England|Human|Lighthouse Lab in Milton Keynes|Wellcome Sanger Institute for the COVID-19 Genomics UK (COG-UK) consortium|Davies|United Kingdom

>Spike|hCoV-19/USA/OR-OHSU-1707/2020|2020-07-23|EPI\_ISL\_526010|Original|hCoV-19^^Oregon|Human|OHSU Lab Services Molecular Microbiology Lab|Oregon SARS-CoV-2 Genome Sequencing Center|O'Roak|USA

>Spike|hCoV-19/Iceland/573/2020|2020-03-28|EPI\_ISL\_424593|Original|hCoV-19^^Reykjavik|Human|The National University Hospital of Iceland|deCODE genetics|J\u00f3nsson|Iceland

>Spike|hCoV-19/USA/AZ-TG456494/2020|2020-06-26|EPI\_ISL\_695044|Original|hCoV-19^^Arizona|Human|TGen North|TGen North|French|USA

>Spike|hCoV-19/Switzerland/AG-ETHZ-380330/2020|2020-11-26|EPI\_ISL\_721731|Original|hCoV-19^^Aargau|Human|Viollier AG|Department of Biosystems Science and Engineering|Nadeau|Switzerland

>Spike|hCoV-19/United Arab Emirates/0210/2020|2020-05-18|EPI\_ISL\_698396|Original|hCoV-19^^Abu Dhabi|Human|Group 42 (G42) Healthcare|G42 Healthcare|Ogrodzki|United Arab Emirates

>Spike|hCoV-19/England/LIVE-A158A/2020|2020-06-11|EPI\_ISL\_490331|Original|hCoV-19^^England|Human|Liverpool Clinical Laboratories|COVID-19 Genomics UK (COG-UK) Consortium|Haldenby|United Kingdom

>Spike|hCoV-19/England/PORT-2E8E5D/2020|2020-00-00|EPI\_ISL\_763620|Original|hCoV-19^^England|Human|Centre for Enzyme Innovation|COVID-19 Genomics UK (COG-UK) Consortium|Robson|United Kingdom

>Spike|hCoV-19/Denmark/DCGC-8082/2020|2020-10-26|EPI\_ISL\_617195|Original|hCoV-19^^Sjaelland|Human|Department of Virus and Microbiological Special Diagnostics|Albertsen lab|Michaelsen|Denmark

>Spike|hCoV-19/Spain/MD-IBV-99009624/2020|2020-09-09|EPI\_ISL\_654365|Original|hCoV-19^^Madrid|Human|Hospital General Universitario Gregorio Marañ\u00f1a|SeqCOVID-SPAIN consortium|IBV (CSIC)|Comas|Spain

>Spike|hCoV-19/USA/TX-DSHS-0129/2020|2020-06-11|EPI\_ISL\_522956|Original|hCoV-19^^Texas|Human|Texas Department of State Health Services|Texas Department of State Health Services|Rahman|USA

>Spike|hCoV-19/Mexico/SON-INDRE\_42/2020|2020-06-06|EPI\_ISL\_516623|Original|hCoV-19^^Sonora|Human|Instituto de Diagnostico y Referencia Epidemiologicos (INDRE)|Instituto de Diagnostico y Referencia Epidemiologicos (INDRE)|Rodriguez|Mexico

>Spike|hCoV-19/Australia/WA44/2020|2020-04-07|EPI\_ISL\_470861|Original|hCoV-19^^Western Australia|Human|PathWest Laboratory Medicine WA|PathWest Laboratory Medicine WA|Sikazwe|Australia

>Spike|hCoV-19/USA/TX-HMH-7481/2020|2020-06-26|EPI\_ISL\_546792|Original|hCoV-19^^Texas|Human|Houston Methodist Hospital|Houston Methodist Hospital|Long|USA

>Spike|hCoV-19/England/CAMC-C456B6/2020|2020-12-10|EPI\_ISL\_719425|Original|hCoV-19^^England|Human|Lighthouse Lab in Cambridge|Wellcome Sanger Institute for the COVID-19 Genomics UK (COG-UK) Consortium|Davies|United Kingdom

>Spike|hCoV-19/Wales/PHWC-48CC5F/2020|2020-11-07|EPI\_ISL\_665557|Original|hCoV-19^^Wales|Human|Wales Specialist Virology Centre Sequencing lab|COVID-19 Genomics UK (COG-UK) Consortium|Moore|United Kingdom

>Spike|hCoV-19/DRC/11078/2020|2020-05-24|EPI\_ISL\_527514|Original|hCoV-19^^Kinshasa|Human|Viral Respiratory Lab|Pathogen Sequencing Lab|Lokilo|Democratic Republic of the Congo

>Spike|hCoV-19/Poland/Pom7/2020|2020-04-26|EPI\_ISL\_451648|Original|hCoV-19^^Pomorze|Human|Hematology Laboratory|Laboratory of Recombinant Vaccines|Rabalski|Poland

>Spike|hCoV-19/Spain/CT-IBV-97009561/2020|2020-07-21|EPI\_ISL\_671858|Original|hCoV-19^^Catalunya|Human|Servicio de Microbiolog\u00eda|SeqCOVID-SPAIN consortium|IBV (CSIC)|Comas|Spain

>Spike|hCoV-19/Wales/PHWC-31A26/2020|2020-04-10|EPI\_ISL\_446518|Original|hCoV-19^^Wales|Human|Wales Specialist Virology Centre|Public Health Wales Microbiology Cardiff|Moore|United Kingdom

>Spike|hCoV-19/Kazakhstan/26474/2020|2020-04-26|EPI\_ISL\_454505|Original|hCoV-19^^Nur-Sultan|Human|RSE \National Center for Biotechnology|RSE \National Center for Biotechnology|Kalendar|Kazakhstan

>Spike|hCoV-19/Wales/PHWC-4881CD/2020|2020-10-30|EPI\_ISL\_639363|Original|hCoV-19^^Wales|Human|Wales Specialist Virology Centre Sequencing lab|COVID-19 Genomics UK (COG-UK) Consortium|Moore|United Kingdom

>Spike|hCoV-19/England/ALDP-A2DA05/2020|2020-10-06|EPI\_ISL\_586601|Original|hCoV-19^^England|Human|Lighthouse Lab in Alderley Park|Wellcome Sanger Institute for the COVID-19 Genomics UK (COG-UK) consortium|Davies|United Kingdom

>Spike|hCoV-19/New Zealand/20CV0058/2020|2020-08-13|EPI\_ISL\_547972|Original|hCoV-19^^Combined Auckland|Human|LabTests|Institute of Environmental Science and Research (ESR)|Wang|New Zealand

>Spike|hCoV-19/England/MILK-970DFC/2020|2020-08-18|EPI\_ISL\_553178|Original|hCoV-19^^England|Human|Lighthouse Lab in Milton Keynes|Wellcome Sanger Institute for the COVID-19 Genomics UK (COG-UK) consortium|Davies|United Kingdom

>Spike|hCoV-19/USA/IL-UW-1064/2020|2020-07-26|EPI\_ISL\_516490|Original|hCoV-19^^Illinois|Human|University of Wisconsin-Madison AIDS Vaccine Research Laboratories|University of Wisconsin-Madison AIDS Vaccine Research Laboratories|Baczenas|USA

>Spike|hCoV-19/Wales/PHWC-16E685/2020|2020-09-29|EPI\_ISL\_585751|Original|hCoV-19^^Wales|Human|Wales Specialist Virology Centre Sequencing lab|COVID-19 Genomics UK (COG-UK) Consortium|Moore|United Kingdom

>Spike|hCoV-19/Australia/VIC4285/2020|2020-07-13|EPI\_ISL\_519613|Original|hCoV-19^^Victoria|Human|Microbiological Diagnostic Unit - Public Health Laboratory (MDU-PHL)|MDU-PHL|Schultz|Australia

>Spike|hCoV-19/England/MILK-995939/2020|2020-08-23|EPI\_ISL\_551671|Original|hCoV-19^^England|Human|Lighthouse Lab in Milton Keynes|Wellcome Sanger Institute for the COVID-19 Genomics UK (COG-UK) consortium|Davies|United Kingdom

>Spike|hCoV-19/England/OXON-B17EB/2020|2020-04-24|EPI\_ISL\_479046|Original|hCoV-19^^England|Human|Oxford Viromics|COVID-19 Genomics UK (COG-UK) Consortium|Golubchik|United Kingdom

>Spike|hCoV-19/Portugal/PT1084/2020|2020-03-28|EPI\_ISL\_511631|Original|hCoV-19^^Portugal|Human|Instituto Nacional de Saude (INSA)|Instituto Nacional de Saude (INSA)|Borges|Portugal

>Spike|hCoV-19/England/ALDP-49AC6D/2020|2020-06-04|EPI\_ISL\_559356|Original|hCoV-19^^England|Human|Lighthouse Lab in Alderley Park|Wellcome Sanger Institute for the COVID-19 Genomics UK (COG-UK) consortium|Davies|United Kingdom

>Spike|hCoV-19/England/QEUEH-B67E4E/2020|2020-11-11|EPI\_ISL\_661415|Original|hCoV-19^^England|Human|Lighthouse Lab in Glasgow|Wellcome Sanger Institute for the COVID-19 Genomics UK (COG-UK) Consortium|Davies|United Kingdom

>Spike|hCoV-19/Denmark/DCGC-4917/2020|2020-09-21|EPI\_ISL\_621455|Original|hCoV-19^^Sjaelland|Human|Department of Virus and Microbiological Special Diagnostics|Albertsen lab|Michaelsen|Denmark

>Spike|hCoV-19/England/QEUEH-9DE5E5/2020|2020-09-21|EPI\_ISL\_581245|Original|hCoV-19^^England|Human|Lighthouse Lab in Glasgow|Wellcome Sanger Institute for the COVID-19 Genomics UK (COG-UK) consortium|Davies|United Kingdom

>Spike|hCoV-19/India/GJ-GBRC159b/2020|2020-05-27|EPI\_ISL\_461490|Original|hCoV-19^^Gujarat|Human|B.J. Medical College and Civil hospital|Gujarat Biotechnology Research Centre|Joshi|India

>Spike|hCoV-19/USA/WI-UW-560/2020|2020-06-25|EPI\_ISL\_484935|Original|hCoV-19^^Wisconsin|Human|University of Wisconsin-Madison AIDS Vaccine Research Laboratories|University of Wisconsin-Madison AIDS Vaccine Research Laboratories|Baczenas|USA

>Spike|hCoV-19/USA/NC\_200247/2020|2020-03-00|EPI\_ISL\_454804|Original|hCoV-19^^North Carolina|Human|Dirk Dittmer|Dirk Dittmer|Moorad|USA

>Spike|hCoV-19/England/QEUEH-AD2F6A/2020|2020-10-26|EPI\_ISL\_629825|Original|hCoV-19^^England|Human|Lighthouse Lab in Glasgow|Wellcome Sanger Institute for the COVID-19 Genomics UK (COG-UK) consortium|Davies|United Kingdom

>Spike|hCoV-19/England/CAMB-7BE51/2020|2020-04-05|EPI\_ISL\_470385|Original|hCoV-19^^England|Human|Department of Pathology|Wellcome Sanger Institute for the COVID-19 Genomics UK (COG-UK) consortium|Davies|United Kingdom

>Spike|hCoV-19/England/ALDP-916DDA/2020|2020-06-22|EPI\_ISL\_553720|Original|hCoV-19^^England|Human|Lighthouse Lab in Alderley Park|Wellcome Sanger Institute for the COVID-19 Genomics UK (COG-UK) consortium|Davies|United Kingdom

>Spike|hCoV-19/England/QEUA-A317CB/2020|2020-10-03|EPI\_ISL\_595912|Original|hCoV-19^^England|Human|Quadram Institute Bioscience|COVID-19 Genomics UK (COG-UK) Consortium|Alikhan|United Kingdom

>Spike|hCoV-19/England/ALDP-9E9857/2020|2020-09-24|EPI\_ISL\_584255|Original|hCoV-19^^England|Human|Virology Department|COVID-19 Genomics UK (COG-UK) Consortium|de Silva|United Kingdom

>Spike|hCoV-19/England/ALDP-953418/2020|2020-06-11|EPI\_ISL\_554364|Original|hCoV-19^^England|Human|Lighthouse Lab in Alderley Park|Wellcome Sanger Institute for the COVID-19 Genomics UK (COG-UK) consortium|Davies|United Kingdom

>Spike|hCoV-19/South Korea/KCDC2675/2020|2020-06-20|EPI\_ISL\_522457|Original|hCoV-19^^South Korea|Human|Center for Laboratory Control of Infectious Diseases|Center for Laboratory Control of Infectious Diseases|Kim|South Korea

>Spike|hCoV-19/India/GJ-GBRC274/2020|2020-06-13|EPI\_ISL\_483874|Original|hCoV-19^^Gujarat|Human|Department of Microbiology|Gujarat Biotechnology Research Centre|Joshi|India

>Spike|hCoV-19/England/MILK-99A62E/2020|2020-08-29|EPI\_ISL\_550375|Original|hCoV-19^^England|Human|Lighthouse Lab in Milton Keynes|Wellcome Sanger Institute for the COVID-19 Genomics UK (COG-UK) consortium|Davies|United Kingdom

>Spike|hCoV-19/England/ALDP-A947F3/2020|2020-10-19|EPI\_ISL\_611186|Original|hCoV-19^^England|Human|Lighthouse Lab in Alderley Park|Wellcome Sanger Institute for the COVID-19 Genomics UK (COG-UK) consortium|Davies|United Kingdom

>Spike|hCoV-19/Australia/NSW801/2020|2020-07-20|EPI\_ISL\_526143|Original|hCoV-19^^New South Wales|Human|Laverty Pathology|NSW Health Pathology - Institute of Clinical Pathology and Medical Research; Westmead Hospital; University of Sydney|Gall|Australia

>Spike|hCoV-19/USA/TX-HMH-4322/2020|2020-06-18|EPI\_ISL\_543531|Original|hCoV-19^^Texas|Human|Houston Methodist Hospital|Houston Methodist Hospital|Long|USA

>Spike|hCoV-19/Germany/BY-MVP-0090/2020|2020-04-02|EPI\_ISL\_437284|Original|hCoV-19^^Bavaria|Human|Max von Pettenkofer Institute|Laboratory for Functional Genome Analysis|Graf|Germany

>Spike|hCoV-19/USA/UT-UPHL-2009208/2020|2020-05-15|EPI\_ISL\_525208|Original|hCoV-19^^Utah|Human|Utah Public Health Laboratory|Utah Public Health Laboratory|Young|USA

>Spike|hCoV-19/Scotland/CVR1449/2020|2020-04-02|EPI\_ISL\_438816|Original|hCoV-19^^Scotland|Human|West of Scotland Specialist Virology Centre|COVID-19 Genomics UK (COG-UK) Consortium|Robertson|United Kingdom

>Spike|hCoV-19/Wales/PHWC-491B0F/2020|2020-11-10|EPI\_ISL\_706742|Original|hCoV-19^^Wales|Human|Originating lab|COVID-19 Genomics UK (COG-UK) Consortium|Moore|United Kingdom

>Spike|hCoV-19/England/20118172004/2020|2020-03-13|EPI\_ISL\_464994|Original|hCoV-19^^England|Human|Respiratory Virus Unit|Respiratory Virus Unit|Platt|United Kingdom

>Spike|hCoV-19/Chile/RM-168269/2020|2020-09-03|EPI\_ISL\_746702|Original|hCoV-19^^Region Metropolitana de Santiago|Human|Genetica Molecular and Subdepartamento de Virologia ISP Chile|Instituto de Salud Publica de Chile|Tognarelli|Chile

>Spike|hCoV-19/Lithuania/C20-05-R4/2020|2020-05-21|EPI\_ISL\_560400|Original|hCoV-19^^Vilnius|Human|Vilnius University Hospital Santaros Klinikos|Institute of Biotechnology|Timinskas|Lithuania

>Spike|hCoV-19/Denmark/DCGC-15590/2020|2020-11-23|EPI\_ISL\_713911|Original|hCoV-19^^Sjaelland|Human|Department of Virus and Microbiological Special Diagnostics|Albertsen Lab|Michaelsen|Denmark

>Spike|hCoV-19/England/QEUA-CC596A/2020|2020-12-22|EPI\_ISL\_760260|Original|hCoV-19^^England|Human|Lighthouse Lab in Glasgow|Wellcome Sanger Institute for the COVID-19 Genomics UK (COG-UK) Consortium|Davies|United Kingdom

>Spike|hCoV-19/Scotland/CVR978/2020|2020-03-28|EPI\_ISL\_439140|Original|hCoV-19^^Scotland|Human|West of Scotland Specialist Virology Centre|COVID-19 Genomics UK (COG-UK) Consortium|Robertson|United Kingdom

>Spike|hCoV-19/England/CAMB-83FCC/2020|2020-04-25|EPI\_ISL\_438719|Original|hCoV-19^^England|Human|Department of Pathology|COVID-19 Genomics UK (COG-UK) Consortium|Meredith|United Kingdom

>Spike|hCoV-19/DRC/11145/2020|2020-05-24|EPI\_ISL\_527501|Original|hCoV-19^^Kinshasa|Human|Viral Respiratory Lab|Pathogen Sequencing Lab|Lokilo|Democratic Republic of the Congo

>Spike|hCoV-19/USA/NY-PV09021/2020|2020-03-21|EPI\_ISL\_421596|Original|hCoV-19^^New York|Human|MSHS Clinical Microbiology Laboratories|MSHS Pathogen Surveillance Program|van Bakel|USA

>Spike|hCoV-19/USA/WI-UW-2570/2021|2021-01-04|EPI\_ISL\_788912|Original|hCoV-19^^Wisconsin|Human|University of Wisconsin-Madison AIDS Vaccine Research Laboratories|University of Wisconsin-Madison AIDS Vaccine Research Laboratories|Moreno|USA

>Spike|hCoV-19/Switzerland/SO-ETHZ-410293/2020|2020-12-15|EPI\_ISL\_737475|Original|hCoV-19^^Solothurn|Human|Viollier AG|Department of Biosystems Science and Engineering|Nadeau|Switzerland

>Spike|hCoV-19/England/QEUH-B40027/2020|2020-11-08|EPI\_ISL\_657220|Original|hCoV-19^^England|Human|Lighthouse Lab in Glasgow|Wellcome Sanger Institute for the COVID-19 Genomics UK (COG-UK) Consortium|Davies|United Kingdom

>Spike|hCoV-19/Spain/RI-IBV-99010956/2020|2020-10-24|EPI\_ISL\_732785|Original|hCoV-19^^La\_Rioja|Human|Centro de Investigaci\u00f3n Biom\u00e9dica de La Rioja - Hospital San Pedro Logro\u00f1o|SeqCOVID-SPAIN consortium|IBV (CSIC)|Comas|Spain

>Spike|hCoV-19/Northern Ireland/NIRE-106652/2020|2020-05-06|EPI\_ISL\_500988|Original|hCoV-19^^Northern Ireland|Human|Regional Virus Laboratory|Wellcome Sanger Institute for the COVID-19 Genomics UK (COG-UK) consortium|Davies|United Kingdom

>Spike|hCoV-19/Germany/NW-HHU-115/2020|2020-08-25|EPI\_ISL\_539592|Original|hCoV-19^^North Rhine-Westphalia|Human|ZOTZ KLIMAS MVZ D\u00fcsseldorf-Centrum GbR \u00dcBAG f\u00fcr Labormedizin|Center of Medical Microbiology|Wienemann|Germany

>Spike|hCoV-19/England/CAMC-B37278/2020|2020-11-05|EPI\_ISL\_645280|Original|hCoV-19^^England|Human|Lighthouse Lab in Cambridge|Wellcome Sanger Institute for the COVID-19 Genomics UK (COG-UK) Consortium|Davies|United Kingdom

>Spike|hCoV-19/USA/NM-NMDOH-2020215096/2020|2020-07-16|EPI\_ISL\_510879|Original|hCoV-19^^New Mexico|Human|New Mexico Department of Health Scientific Laboratory|New Mexico Department of Health Scientific Laboratory|Johnson|USA

>Spike|hCoV-19/Australia/VIC6685/2020|2020-07-20|EPI\_ISL\_521441|Original|hCoV-19^^Victoria|Human|Victorian Infectious Diseases Reference Laboratory (VIDRL)|VIDRL and MDU-PHL|Schultz|Australia

>Spike|hCoV-19/USA/IA-GMF-18813/2020|2020-09-05|EPI\_ISL\_547786|Original|hCoV-19^^Iowa|Human|Gundersen Molecular Diagnostics Laboratory|Kabara Cancer Research Institute|Kenny|USA

>Spike|hCoV-19/Netherlands/UT-EMC-151/2020|2020-11-15|EPI\_ISL\_722371|Original|hCoV-19^^Utrecht|Human|Dutch COVID-19 response team|Erasmus Medical Center|Oude Munnink|Netherlands

>Spike|hCoV-19/Switzerland/GR-ETHZ-250135/2020|2020-08-16|EPI\_ISL\_535641|Original|hCoV-19^^Graub\u00fcnden|Human|Viollier AG|Department of Biosystems Science and Engineering|Nadeau|Switzerland

>Spike|hCoV-19/South Africa/KRISP-K002789/2020|2020-08-21|EPI\_ISL\_529783|Original|hCoV-19^^KwaZulu-Natal|Human|NHLs-IALCH|KRISP|de Oliveira|South Africa

>Spike|hCoV-19/England/NORT-29BE3B/2020|2020-06-15|EPI\_ISL\_507123|Original|hCoV-19^^England|Human|Northumbria University / South Tees Hospitals NHS Foundation Trust / North Cumbria Integrated Care NHS Foundation Trust / North Tees and Hartlepool NHS Foundation Trust / Newcastle Hospitals NHS Foundation Trust|COVID-19 Genomics UK (COG-UK) Consortium|Bashton|United Kingdom

>Spike|hCoV-19/India/KA-nimh-4263/2020|2020-04-23|EPI\_ISL\_486395|Original|hCoV-19^^Karnataka|Human|BIMS|Department of Neurovirology|Pattabiraman|India

>Spike|hCoV-19/England/QEUH-B7EB5C/2020|2020-11-14|EPI\_ISL\_668075|Original|hCoV-19^^England|Human|Lighthouse Lab in Glasgow|Wellcome Sanger Institute for the COVID-19 Genomics UK (COG-UK) Consortium|Davies|United Kingdom

>Spike|hCoV-19/Wales/PHWC-4846FF/2020|2020-10-24|EPI\_ISL\_628035|Original|hCoV-19^^Wales|Human|Wales Specialist Virology Centre Sequencing lab|COVID-19 Genomics UK (COG-UK) Consortium|Moore|United Kingdom

>Spike|hCoV-19/USA/TX-HMH0269/2020|2020-03-26|EPI\_ISL\_434898|Original|hCoV-19^^Texas|Human|Houston Methodist Hospital|Houston Methodist Hospital|Long|USA

>Spike|hCoV-19/Wales/PHWC-32481/2020|2020-04-11|EPI\_ISL\_446650|Original|hCoV-19^^Wales|Human|Wales Specialist Virology Centre|Public Health Wales Microbiology Cardiff|Moore|United Kingdom

>Spike|hCoV-19/England/QEUH-AAAC55/2020|2020-10-21|EPI\_ISL\_652735|Original|hCoV-19^^England|Human|Oxford Viromics|COVID-19 Genomics UK (COG-UK) Consortium|Golubchik|United Kingdom

>Spike|hCoV-19/Wales/ALDP-AA24CE/2020|2020-10-22|EPI\_ISL\_624006|Original|hCoV-19^^Wales|Human|Lighthouse Lab in Alderley Park|Wellcome Sanger Institute for the COVID-19 Genomics UK (COG-UK) consortium|Davies|United Kingdom

>Spike|hCoV-19/England/ALDP-725156/2020|2020-07-01|EPI\_ISL\_557597|Original|hCoV-19^^England|Human|Lighthouse Lab in Alderley Park|Wellcome Sanger Institute for the COVID-19 Genomics UK (COG-UK) consortium|Davies|United Kingdom

>Spike|hCoV-19/Australia/VIC12638/2020|2020-07-31|EPI\_ISL\_640728|Original|hCoV-19^^Victoria|Human|Microbiological Diagnostic Unit - Public Health Laboratory (MDU-PHL)|MDU-PHL|Schultz|Australia

>Spike|hCoV-19/Scotland/QEUH-9F2D5C/2020|2020-09-25|EPI\_ISL\_600768|Original|hCoV-19^^Scotland|Human|Lighthouse Lab in Glasgow|Wellcome Sanger Institute for the COVID-19 Genomics UK (COG-UK) consortium|Davies|United Kingdom

>Spike|hCoV-19/Wales/PHWC-48BAA1/2020|2020-10-28|EPI\_ISL\_666319|Original|hCoV-19^^Wales|Human|Wales Specialist Virology Centre Sequencing lab|COVID-19 Genomics UK (COG-UK) Consortium|Moore|United Kingdom

>Spike|hCoV-19/England/CAMB-1B7E85/2020|2020-10-13|EPI\_ISL\_638377|Original|hCoV-19^^England|Human|Department of Pathology|COVID-19 Genomics UK (COG-UK) Consortium|Goodfellow|United Kingdom

>Spike|hCoV-19/England/MILK-975A5A/2020|2020-08-20|EPI\_ISL\_552469|Original|hCoV-19^^England|Human|Lighthouse Lab in Milton Keynes|Wellcome Sanger Institute for the COVID-19 Genomics UK (COG-UK) consortium|Davies|United Kingdom

>Spike|hCoV-19/Dominican Republic/ICGEB\_UNIBE051/2020|2020-03-01|EPI\_ISL\_523811|Original|hCoV-19^^Dominican Republic|Human|Universidad Iberoamericana|International Centre for Genetic Engineering and Biotechnology (ICGEB) and ARGO Open Lab Platform|Paulino-Ramirez|Dominican Republic

>Spike|hCoV-19/England/ALDP-B27439/2020|2020-11-04|EPI\_ISL\_646889|Original|hCoV-19^^England|Human|Lighthouse Lab in Alderley Park|Wellcome Sanger Institute for the COVID-19 Genomics UK (COG-UK) Consortium|Davies|United Kingdom

>Spike|hCoV-19/Scotland/CVR3997/2020|2020-09-02|EPI\_ISL\_540794|Original|hCoV-19^^Scotland|Human|West of Scotland Specialist Virology Centre|COVID-19 Genomics UK (COG-UK) Consortium|Robertson|United Kingdom

>Spike|hCoV-19/England/MILK-975F6A/2020|2020-08-20|EPI\_ISL\_552789|Original|hCoV-19^^England|Human|Lighthouse Lab in Milton Keynes|Wellcome Sanger Institute for the COVID-19 Genomics UK (COG-UK) consortium|Davies|United Kingdom

>Spike|hCoV-19/Costa Rica/INC-0112/2020|2020-07-21|EPI\_ISL\_682252|Original|hCoV-19^^San Jose|Human|AREA DE SALUD ESCAZU (COOPESANA)|Inciensa|Soto-Garita|Costa Rica

>Spike|hCoV-19/England/ALDP-9537D3/2020|2020-06-08|EPI\_ISL\_554371|Original|hCoV-19^^England|Human|Lighthouse Lab in Alderley Park|Wellcome Sanger Institute for the COVID-19 Genomics UK (COG-UK) consortium|Davies|United Kingdom

>Spike|hCoV-19/South Korea/KCDC2659/2020|2020-05-07|EPI\_ISL\_522442|Original|hCoV-19^^South Korea|Human|Center for Laboratory Control of Infectious Diseases|Center for Laboratory Control of Infectious Diseases|Kim|South Korea

>Spike|hCoV-19/Australia/NSW218/2020|2020-03-11|EPI\_ISL\_427665|Original|hCoV-19^^New South Wales|Human|Centre for Infectious Diseases and Microbiology Public Health|NSW Health Pathology - Institute of Clinical Pathology and Medical Research; Westmead Hospital; University of Sydney|Gall|Australia

>Spike|hCoV-19/England/ALDP-AA3BC8/2020|2020-10-22|EPI\_ISL\_624450|Original|hCoV-19^^England|Human|Lighthouse Lab in Alderley Park|Wellcome Sanger Institute for the COVID-19 Genomics UK (COG-UK) consortium|Davies|United Kingdom

>Spike|hCoV-19/USA/CA-CSMC28/2020|2020-03-25|EPI\_ISL\_475638|Original|hCoV-19^^California|Human|Cedars-Sinai Medical Center|Cedars-Sinai Medical Center|Zhang|USA

>Spike|hCoV-19/England/MILK-C3000B/2020|2020-12-07|EPI\_ISL\_783064|Original|hCoV-19^^England|Human|Lighthouse Lab in Milton Keynes|Wellcome Sanger Institute for the COVID-19 Genomics UK (COG-UK) Consortium|Davies|United Kingdom

>Spike|hCoV-19/Scotland/CVR1350/2020|2020-04-01|EPI\_ISL\_453007|Original|hCoV-19^^Scotland|Human|West of Scotland Specialist Virology Centre|COVID-19 Genomics UK (COG-UK) Consortium|Robertson|United Kingdom

>Spike|hCoV-19/England/NOTT-112592/2020|2020-04-27|EPI\_ISL\_484397|Original|hCoV-19^^England|Human|Lincolnshire Hospitals and DeepSeq Nottingham|COVID-19 Genomics UK (COG-UK) Consortium|Loose|United Kingdom

>Spike|hCoV-19/Iceland/444/2020|2020-03-20|EPI\_ISL\_424468|Original|hCoV-19^^Reykjavik|Human|The National University Hospital of Iceland|deCODE genetics|J\u00f3nsson|Iceland

>Spike|hCoV-19/England/QEUA-9F9A6D/2020|2020-09-26|EPI\_ISL\_589192|Original|hCoV-19^^England|Human|Lighthouse Lab in Glasgow|Wellcome Sanger Institute for the COVID-19 Genomics UK (COG-UK) consortium|Davies|United Kingdom

>Spike|hCoV-19/England/LIVE-DBA4FD/2020|2020-11-11|EPI\_ISL\_703059|Original|hCoV-19^^England|Human|Liverpool Clinical Laboratories|COVID-19 Genomics UK (COG-UK) Consortium|Haldenby|United Kingdom

>Spike|hCoV-19/USA/TX-HMH-4410/2020|2020-06-17|EPI\_ISL\_543599|Original|hCoV-19^^Texas|Human|Houston Methodist Hospital|Houston Methodist Hospital|Long|USA

>Spike|hCoV-19/England/ALDP-B7497A/2020|2020-11-12|EPI\_ISL\_662055|Original|hCoV-19^^England|Human|Lighthouse Lab in Alderley Park|Wellcome Sanger Institute for the COVID-19 Genomics UK (COG-UK) Consortium|Davies|United Kingdom

>Spike|hCoV-19/Scotland/QEUA-9B3A50/2020|2020-09-08|EPI\_ISL\_560056|Original|hCoV-19^^Scotland|Human|Virology Department|COVID-19 Genomics UK (COG-UK) Consortium|de Silva|United Kingdom

>Spike|hCoV-19/South Korea/BA-ACH\_2604/2020|2020-02-27|EPI\_ISL\_420799|Original|hCoV-19^^South Korea|Human|Brian D. Allgood Army Community Hospital|Pathogen Discovery|Queen|South Korea

>Spike|hCoV-19/Luxembourg/LNS2593581/2020|2020-10-23|EPI\_ISL\_740149|Original|hCoV-19^^Luxembourg|Human|Laboratoire national de sant\u00e9|Laboratoire national de sant\u00e9|Wienecke-Baldacchino|Luxembourg

>Spike|hCoV-19/Senegal/6481/2020|2020-04-21|EPI\_ISL\_486871|Original|hCoV-19^^Dakar|Human|Institut Pasteur Dakar|Institut Pasteur de Dakar|Dia|Senegal

>Spike|hCoV-19/Wales/PHWC-36238/2020|2020-04-29|EPI\_ISL\_474639|Original|hCoV-19^^Wales|Human|Originating lab|COVID-19 Genomics UK (COG-UK) Consortium|Moore|United Kingdom

>Spike|hCoV-19/England/LIVE-DCA445/2020|2020-12-05|EPI\_ISL\_724362|Original|hCoV-19^^England|Human|Liverpool Clinical Laboratories|COVID-19 Genomics UK (COG-UK) Consortium|Haldenby|United Kingdom

>Spike|hCoV-19/Japan/PG-5314/2020|2020-08-00|EPI\_ISL\_690417|Original|hCoV-19^^Japan|Human|Pathogen Genomics Center|Pathogen Genomics Center|Sekizuka|Japan

>Spike|hCoV-19/Denmark/DCGC-1026/2020|2020-06-01|EPI\_ISL\_614486|Original|hCoV-19^^Sjælland|Human|Department of Virus and Microbiological Special Diagnostics|Albertsen lab|Michaelsen|Denmark

>Spike|hCoV-19/England/ALDP-C9050A/2020|2020-12-12|EPI\_ISL\_777063|Original|hCoV-19^^England|Human|Lighthouse Lab in Alderley Park|Wellcome Sanger Institute for the COVID-19 Genomics UK (COG-UK) Consortium|Davies|United Kingdom

>Spike|hCoV-19/Luxembourg/LNS0682941/2020|2020-11-03|EPI\_ISL\_739816|Original|hCoV-19^^Luxembourg|Human|Laboratoire national de sant\u00e9|Laboratoire national de sant\u00e9|Wienecke-Baldacchino|Luxembourg

>Spike|hCoV-19/USA/MA-MASPHL-00150/2020|2020-04-03|EPI\_ISL\_791621|Original|hCoV-19^^Massachusetts|Human|Massachusetts State Public Health Laboratory|Infectious Disease Program|Park|USA

>Spike|hCoV-19/England/ALDP-B74224/2020|2020-11-12|EPI\_ISL\_664248|Original|hCoV-19^^England|Human|Quadram Institute Bioscience|COVID-19 Genomics UK (COG-UK) Consortium|Alikhan|United Kingdom

>Spike|hCoV-19/Australia/VIC4278/2020|2020-00-00|EPI\_ISL\_519606|Original|hCoV-19^^Victoria|Human|Microbiological Diagnostic Unit - Public Health Laboratory (MDU-PHL)|MDU-PHL|Schultz|Australia

>Spike|hCoV-19/England/CAMB-1B300B/2020|2020-05-22|EPI\_ISL\_456745|Original|hCoV-19^^England|Human|Department of Pathology|COVID-19 Genomics UK (COG-UK) Consortium|Meredith|United Kingdom

>Spike|hCoV-19/England/LIVE-9EEEF/2020|2020-04-09|EPI\_ISL\_453408|Original|hCoV-19^^England|Human|Liverpool Clinical Laboratories|COVID-19 Genomics UK (COG-UK) Consortium|Haldenby|United Kingdom

>Spike|hCoV-19/USA/CA-CZB-16058/2020|2020-11-29|EPI\_ISL\_739316|Original|hCoV-19^^California|Human|Renegade|Chan-Zuckerberg Biohub|Kamm|USA

>Spike|hCoV-19/England/20129077404/2020|2020-03-21|EPI\_ISL\_424067|Original|hCoV-19^^England|Human|Respiratory Virus Unit|Respiratory Virus Unit|Platt|United Kingdom

>Spike|hCoV-19/Gambia/GC19-3630/2020|2020-07-27|EPI\_ISL\_561200|Original|hCoV-19^^Kombo|Human|MRCG at LSHTM Genomics lab|MRCG at LSHTM Genomics lab|Sesay|Gambia

>Spike|hCoV-19/Switzerland/TG-ETHZ-100239/2020|2020-03-18|EPI\_ISL\_574956|Original|hCoV-19^^Thurgau|Human|Viollier AG|Department of Biosystems Science and Engineering|Nadeau|Switzerland

>Spike|hCoV-19/USA/TX-DSHS-0617/2020|2020-06-04|EPI\_ISL\_569727|Original|hCoV-19^^Texas|Human|Texas Department of State Health Services|Texas Department of State Health Services|Rahman|USA

>Spike|hCoV-19/Austria/CeMM0013/2020|2020-03-11|EPI\_ISL\_419666|Original|hCoV-19^^Austria|Human|Center for Virology|Bergthaler laboratory|Bergthaler|Austria

>Spike|hCoV-19/England/CAMB-1ABD87/2020|2020-04-21|EPI\_ISL\_470227|Original|hCoV-19^^England|Human|Department of Pathology|Wellcome Sanger Institute for the COVID-19 Genomics UK (COG-UK) consortium|Davies|United Kingdom

>Spike|hCoV-19/England/20144000104/2020|2020-03-31|EPI\_ISL\_465971|Original|hCoV-19^^England|Human|Respiratory Virus Unit|Respiratory Virus Unit|Platt|United Kingdom

>Spike|hCoV-19/England/CAMC-B09FA5/2020|2020-10-29|EPI\_ISL\_673012|Original|hCoV-19^^England|Human|Lighthouse Lab in Cambridge|Wellcome Sanger Institute for the COVID-19 Genomics UK (COG-UK) Consortium|Davies|United Kingdom

>Spike|hCoV-19/England/ALDP-952EA2/2020|2020-06-11|EPI\_ISL\_553682|Original|hCoV-19^^England|Human|Lighthouse Lab in Alderley Park|Wellcome Sanger Institute for the COVID-19 Genomics UK (COG-UK) consortium|Davies|United Kingdom

>Spike|hCoV-19/USA/WA-S1734/2020|2020-06-01|EPI\_ISL\_496160|Original|hCoV-19^^Washington|Human|Washington State Department of Health|Seattle Flu Study|Lee|USA

>Spike|hCoV-19/England/ALDP-9FDF1F/2020|2020-10-01|EPI\_ISL\_588024|Original|hCoV-19^^England|Human|Lighthouse Lab in Alderley Park|Wellcome Sanger Institute for the COVID-19 Genomics UK (COG-UK) consortium|Davies|United Kingdom

>Spike|hCoV-19/Japan/PG-2409/2020|2020-04-00|EPI\_ISL\_686014|Original|hCoV-19^^Japan|Human|Pathogen Genomics Center|Pathogen Genomics Center|Sekizuka|Japan

>Spike|hCoV-19/England/ALDP-B46865/2020|2020-11-06|EPI\_ISL\_656125|Original|hCoV-19^^England|Human|Lighthouse Lab in Alderley Park|Wellcome Sanger Institute for the COVID-19 Genomics UK (COG-UK) Consortium|Davies|United Kingdom

>Spike|hCoV-19/Wales/PHWC-496AA3/2020|2020-11-23|EPI\_ISL\_726681|Original|hCoV-19^^Wales|Human|Originating lab|COVID-19 Genomics UK (COG-UK) Consortium|Moore|United Kingdom

>Spike|hCoV-19/England/BRIS-12C7DB/2020|2020-05-12|EPI\_ISL\_469510|Original|hCoV-19^^England|Human|PHE South West Regional Laboratory|Wellcome Sanger Institute for the COVID-19 Genomics UK (COG-UK) consortium|Davies|United Kingdom

>Spike|hCoV-19/Wales/PHWC-49A535/2020|2020-12-02|EPI\_ISL\_727560|Original|hCoV-19^^Wales|Human|Originating lab|COVID-19 Genomics UK (COG-UK) Consortium|Moore|United Kingdom

>Spike|hCoV-19/Canada/BC\_05941876/2020|2020-04-00|EPI\_ISL\_466793|Original|hCoV-19^^British Columbia|Human|BCCDC Public Health Laboratory|BCCDC Public Health Laboratory|Harrigan|Canada

>Spike|hCoV-19/England/20119009304/2020|2020-03-13|EPI\_ISL\_465026|Original|hCoV-19^^England|Human|Respiratory Virus Unit|Respiratory Virus Unit|Platt|United Kingdom

>Spike|hCoV-19/Netherlands/Limburg\_49/2020|2020-04-07|EPI\_ISL\_461037|Original|hCoV-19^^Limburg|Human|Dutch COVID-19 response team|Erasmus Medical Center|Oude Munnink|Netherlands



>Spike|hCoV-19/England/CAMB-75385/2020|2020-03-18|EPI\_ISL\_440414|Original|hCoV-19^^England|Human|Department of Pathology|Wellcome Sanger Institute for the COVID-19 Genomics UK (COG-UK) consortium|Amato|United Kingdom

>Spike|hCoV-19/USA/TX-HMH-MCoV-9369/2020|2020-07-03|EPI\_ISL\_781082|Original|hCoV-19^^Texas|Human|Houston Methodist Hospital|Houston Methodist Hospital|Long|USA

>Spike|hCoV-19/England/QEUA-B1312A/2020|2020-11-02|EPI\_ISL\_642398|Original|hCoV-19^^England|Human|Lighthouse Lab in Glasgow|Wellcome Sanger Institute for the COVID-19 Genomics UK (COG-UK) Consortium|Davies|United Kingdom

>Spike|hCoV-19/Switzerland/SH-ETHZ-410085/2020|2020-12-17|EPI\_ISL\_737771|Original|hCoV-19^^Schaffhausen|Human|Viollier AG|Department of Biosystems Science and Engineering|Nadeau|Switzerland

>Spike|hCoV-19/Scotland/CVR5720/2020|2020-11-07|EPI\_ISL\_651933|Original|hCoV-19^^Scotland|Human|West of Scotland Specialist Virology Centre|COVID-19 Genomics UK (COG-UK) Consortium|Robertson|United Kingdom

>Spike|hCoV-19/Japan/PG-4683/2020|2020-08-00|EPI\_ISL\_689820|Original|hCoV-19^^Japan|Human|Fukuoka Institute of Health and Environmental Sciences|Pathogen Genomics Center|Sekizuka|Japan

>Spike|hCoV-19/Denmark/DCGC-3595/2020|2020-08-31|EPI\_ISL\_616238|Original|hCoV-19^^Syddanmark|Human|Department of Virus and Microbiological Special Diagnostics|Albertsen lab|Michaelsen|Denmark

>Spike|hCoV-19/Austria/CeMM0295/2020|2020-03-27|EPI\_ISL\_438118|Original|hCoV-19^^Vienna|Human|Center for Virology|Bergthaler laboratory|Bergthaler|Austria

>Spike|hCoV-19/England/ALDP-B5CD7C/2020|2020-11-10|EPI\_ISL\_678837|Original|hCoV-19^^England|Human|Department of Pathology|COVID-19 Genomics UK (COG-UK) Consortium|Goodfellow|United Kingdom

>Spike|hCoV-19/England/NORW-F503B/2020|2020-11-05|EPI\_ISL\_665343|Original|hCoV-19^^England|Human|Quadram Institute Bioscience|COVID-19 Genomics UK (COG-UK) Consortium|Alikhan|United Kingdom

>Spike|hCoV-19/England/QEUA-9DE57C/2020|2020-09-21|EPI\_ISL\_589793|Original|hCoV-19^^England|Human|Lighthouse Lab in Glasgow|Wellcome Sanger Institute for the COVID-19 Genomics UK (COG-UK) consortium|Davies|United Kingdom

>Spike|hCoV-19/Spain/AR-IBV-98008013/2020|2020-09-30|EPI\_ISL\_654422|Original|hCoV-19^^Aragon|Human|Servicio de Microbiolog\u00eda|SeqCOVID-SPAIN consortium|IBV (CSIC)|Comas|Spain

>Spike|hCoV-19/England/ALDP-65DB76/2020|2020-07-03|EPI\_ISL\_555691|Original|hCoV-19^^England|Human|Lighthouse Lab in Alderley Park|Wellcome Sanger Institute for the COVID-19 Genomics UK (COG-UK) consortium|Davies|United Kingdom

>Spike|hCoV-19/Scotland/QEUA-9FB218/2020|2020-09-29|EPI\_ISL\_600582|Original|hCoV-19^^Scotland|Human|Lighthouse Lab in Glasgow|Wellcome Sanger Institute for the COVID-19 Genomics UK (COG-UK) consortium|Davies|United Kingdom

>Spike|hCoV-19/USA/FL-CDC-STM-P038/2020|2020-12-20|EPI\_ISL\_755614|Original|hCoV-19^^Florida|Human|Helix/Illumina|Genomics and Discovery|Cook|USA

>Spike|hCoV-19/Canada/QC-LSPQ-L00226167/2020|2020-03-17|EPI\_ISL\_535844|Original|hCoV-19^^Quebec|Human|Centre Hospitalier R\u00e9gional de Lanaudi\u00e8re|Laboratoire de sant\u00e9 publique du Qu\u00e9bec|Moreira|Canada

>Spike|hCoV-19/USA/WY-WPHL-20161549/2020|2020-12-08|EPI\_ISL\_765970|Original|hCoV-19^^Wyoming|Human|Wyoming Public Health Laboratory|Wyoming Public Health Laboratory|Hull|USA

>Spike|hCoV-19/USA/CA-QDX-1168/2020|2020-03-29|EPI\_ISL\_571815|Original|hCoV-19^^California|Human|Quest Diagnostics|Quest Diagnostics|Kagan|USA

>Spike|hCoV-19/England/QEUA-9DE55E/2020|2020-09-21|EPI\_ISL\_599662|Original|hCoV-19^^England|Human|Lighthouse Lab in Glasgow|Wellcome Sanger Institute for the COVID-19 Genomics UK (COG-UK) consortium|Davies|United Kingdom

>Spike|hCoV-19/England/GSTT-265DCD7/2020|2020-03-20|EPI\_ISL\_484093|Original|hCoV-19^^England|Human|Centre for Clinical Infection and Diagnostics Research and Genomics Innovation Unit|COVID-19 Genomics UK (COG-UK) Consortium|Awan|United Kingdom

>Spike|hCoV-19/USA/TX-HMH-MCoV-18548/2020|2020-11-19|EPI\_ISL\_784896|Original|hCoV-19^^Texas|Human|Houston Methodist Hospital|Houston Methodist Hospital|Long|USA

>Spike|hCoV-19/Mexico/NLE-UANL-1281/2020|2020-04-28|EPI\_ISL\_648600|Original|hCoV-19^^Nuevo Leon|Human|Laboratorio de Infectolog\u00eda\nServicio de

Infectolog\un00eda\nHospital Universitario Dr. Jos\un00e9 Eleuterio Gonz\un00ellez -  
Universidad Aut\un00f3noma de Nuevo Le\un00f3n|Laboratorio de Infectolog\un00eda  
Molecular\ndepartamento de Bioqu\un00edmica y Medicina Molecular\ndFacultad de Medicina  
- Unive

>rsidad Aut\un00f3noma de Nuevo Le\un00f3n|Gal\un00eln|Mexico

>Spike|hCoV-19/Northern Ireland/NIRE-FC77B/2020|2020-04-  
21|EPI\_ISL\_470029|Original|hCoV-19^^Northern Ireland|Human|Regional Virus  
Laboratory|Wellcome Sanger Institute for the COVID-19 Genomics UK (COG-UK)  
consortium|Davies|United Kingdom

>Spike|hCoV-19/England/CAMB-828D1/2020|2020-04-14|EPI\_ISL\_443417|Original|hCoV-  
19^^England|Human|Department of Pathology|Wellcome Sanger Institute for the COVID-19  
Genomics UK (COG-UK) consortium|Amato|United Kingdom

>Spike|hCoV-19/Japan/PG-5986/2020|2020-08-00|EPI\_ISL\_689099|Original|hCoV-  
19^^Japan|Human|Pathogen Genomics Center|Pathogen Genomics Center|Sekizuka|Japan

>Spike|hCoV-19/Spain/AR-IBV-005077/2020|2020-04-22|EPI\_ISL\_500288|Original|hCoV-  
19^^Aragon|Human|Servicio de Microbiolog\un00eda|SeqCOVID-SPAIN  
consortium/IBV (CSIC) |Comas|Spain

>Spike|hCoV-19/USA/LA-EVTL1241/2020|2020-12-17|EPI\_ISL\_768510|Original|hCoV-  
19^^Louisiana|Human|LSUHS Emerging Viral Threat Laboratory|Microbial Genome  
Sequencing Center|Kamil|USA

>Spike|hCoV-19/England/SHEF-C3BEA/2020|2020-10-29|EPI\_ISL\_653066|Original|hCoV-  
19^^England|Human|Virology Department|COVID-19 Genomics UK (COG-UK) Consortium|de  
Silva|United Kingdom

>Spike|hCoV-19/USA/CA-LAC-USC11/2020-06-04|2020-06-04|EPI\_ISL\_569674|Original|hCoV-  
19^^California|Human|Lee Lab|Lee Lab|Lee|USA

>Spike|hCoV-19/England/ALDP-9507A9/2020|2020-06-14|EPI\_ISL\_554395|Original|hCoV-  
19^^England|Human|Lighthouse Lab in Alderley Park|Wellcome Sanger Institute for the  
COVID-19 Genomics UK (COG-UK) consortium|Davies|United Kingdom

>Spike|hCoV-19/India/TG-CCMB-J350/2020|2020-04-02|EPI\_ISL\_447854|Original|hCoV-  
19^^Telangana|Human|CSIR-Centre for Cellular and Molecular Biology|CSIR-Centre for  
Cellular and Molecular Biology|Banu|India

>Spike|hCoV-19/USA/MA-MGH-00666/2020|2020-04-04|EPI\_ISL\_460165|Original|hCoV-  
19^^Massachusetts|Human|Massachusetts General Hospital|Infectious Disease  
Program|Lemieux|USA

>Spike|hCoV-19/USA/ME-HETL-J0060/2020|2020-03-20|EPI\_ISL\_513471|Original|hCoV-  
19^^Maine|Human|Maine HETL|Tewhey Lab|Tewhey|USA

>Spike|hCoV-19/USA/TX-HMH-5417/2020|2020-06-25|EPI\_ISL\_544761|Original|hCoV-  
19^^Texas|Human|Houston Methodist Hospital|Houston Methodist Hospital|Long|USA

>Spike|hCoV-19/USA/TX-HMH-MCoV-13607/2020|2020-08-21|EPI\_ISL\_788717|Original|hCoV-  
19^^Texas|Human|Houston Methodist Hospital|Houston Methodist Hospital|Long|USA

>Spike|hCoV-19/USA/WI-UW-761/2020|2020-07-05|EPI\_ISL\_495466|Original|hCoV-  
19^^Wisconsin|Human|University of Wisconsin-Madison AIDS Vaccine Research  
Laboratories|University of Wisconsin-Madison AIDS Vaccine Research  
Laboratories|Baczenas|USA

>Spike|hCoV-19/England/QEUH-BCB956/2020|2020-11-27|EPI\_ISL\_704141|Original|hCoV-  
19^^England|Human|Lighthouse Lab in Glasgow|Wellcome Sanger Institute for the COVID-  
19 Genomics UK (COG-UK) Consortium|Davies|United Kingdom

>Spike|hCoV-19/Switzerland/BL-ETHZ-260116/2020|2020-08-  
26|EPI\_ISL\_539425|Original|hCoV-19^^Basel-Landschaft|Human|Viollier AG|Department of  
Biosystems Science and Engineering|Nadeau|Switzerland

>Spike|hCoV-19/Portugal/R493/2020|2020-05-27|EPI\_ISL\_491292|Original|hCoV-  
19^^Portugal|Human|Instituto Gulbenkian de Ci\un00eancia|Instituto Gulbenkian de  
Ci\un00eancia|Leite|Portugal

>Spike|hCoV-19/England/QEUH-9A4287/2020|2020-09-01|EPI\_ISL\_540195|Original|hCoV-  
19^^England|Human|Lighthouse Lab in Glasgow|Wellcome Sanger Institute for the COVID-  
19 Genomics UK (COG-UK) consortium|Davies|United Kingdom

>Spike|hCoV-19/Australia/VIC2559/2020|2020-06-28|EPI\_ISL\_522243|Original|hCoV-  
19^^Victoria|Human|Microbiological Diagnostic Unit - Public Health Laboratory (MDU-  
PHL) |MDU-PHL|Schultz|Australia

>Spike|hCoV-19/USA/UT-UPHL-2012527847/2020|2020-08-03|EPI\_ISL\_745758|Original|hCoV-19^^Utah|Human|Ginkgo Bioworks Clinical Laboratory|Utah Public Health Laboratory|Young|USA

>Spike|hCoV-19/USA/MI-MDHHS-SC21417/2020|2020-03-24|EPI\_ISL\_507671|Original|hCoV-19^^Michigan|Human|Michigan Department of Health and Human Services|Michigan Department of Health and Human Services|Blankenship|USA

>Spike|hCoV-19/England/20134007204/2020|2020-03-23|EPI\_ISL\_423075|Original|hCoV-19^^England|Human|Respiratory Virus Unit|Respiratory Virus Unit|Platt|United Kingdom

>Spike|hCoV-19/England/CAMC-B0945B/2020|2020-10-29|EPI\_ISL\_673141|Original|hCoV-19^^England|Human|Lighthouse Lab in Cambridge|Wellcome Sanger Institute for the COVID-19 Genomics UK (COG-UK) Consortium|Davies|United Kingdom

>Spike|hCoV-19/England/205090681/2020|2020-12-11|EPI\_ISL\_766297|Original|hCoV-19^^England|Human|Respiratory Virus Unit|COVID-19 Genomics UK (COG-UK) Consortium|Platt|United Kingdom

>Spike|hCoV-19/USA/WY-CDC-2-3714364/2020|2020-12-06|EPI\_ISL\_751743|Original|hCoV-19^^Wyoming|Human|WY Public Health Laboratory|Genomics and Discovery|Queen|USA

>Spike|hCoV-19/England/CAMB-7FD7E/2020|2020-04-20|EPI\_ISL\_444410|Original|hCoV-19^^England|Human|Department of Pathology|COVID-19 Genomics UK (COG-UK) Consortium|Meredith|United Kingdom

>Spike|hCoV-19/USA/TX-HMH-MCoV-15979/2020|2020-07-10|EPI\_ISL\_785663|Original|hCoV-19^^Texas|Human|Houston Methodist Hospital|Houston Methodist Hospital|Long|USA

>Spike|hCoV-19/Switzerland/ZH-UZH-IMV108/2020|2020-12-20|EPI\_ISL\_730625|Original|hCoV-19^^Zurich|Human|Limmattal Hospital|Institute of Medical Virology|Schmutz|Switzerland

>Spike|hCoV-19/USA/UT-UPHL-2012499188/2020|2020-08-18|EPI\_ISL\_746116|Original|hCoV-19^^Utah|Human|Ginkgo Bioworks Clinical Laboratory|Utah Public Health Laboratory|Young|USA

>Spike|hCoV-19/Belgium/reg-a-0422588/2020|2020-04-22|EPI\_ISL\_734634|Original|hCoV-19^^Heusden-Zolder|Human|UZ Leuven|KU Leuven|Maes|Belgium

>Spike|hCoV-19/England/BRIS-12E41E/2020|2020-04-27|EPI\_ISL\_482028|Original|hCoV-19^^England|Human|PHE South West Regional Laboratory|Wellcome Sanger Institute for the COVID-19 Genomics UK (COG-UK) Consortium|Davies|United Kingdom

>Spike|hCoV-19/England/BRIS-12C4E3/2020|2020-05-06|EPI\_ISL\_469505|Original|hCoV-19^^England|Human|PHE South West Regional Laboratory|Wellcome Sanger Institute for the COVID-19 Genomics UK (COG-UK) consortium|Davies|United Kingdom

>Spike|hCoV-19/England/LIVE-9DEC2/2020|2020-04-05|EPI\_ISL\_453245|Original|hCoV-19^^England|Human|Liverpool Clinical Laboratories|COVID-19 Genomics UK (COG-UK) Consortium|Haldenby|United Kingdom

>Spike|hCoV-19/USA/MN-MDH-1961/2020|2020-08-20|EPI\_ISL\_613465|Original|hCoV-19^^Minnesota|Human|Public Health Laboratory - Infectious Disease Lab|Minnesota Department of Health|Lorentz|USA

>Spike|hCoV-19/Japan/PG-7557/2020|2020-06-00|EPI\_ISL\_686659|Original|hCoV-19^^Japan|Human|Chiba Prefectural Institute of Public Health|Pathogen Genomics Center|Sekizuka|Japan

>Spike|hCoV-19/Denmark/DCGC-20970/2020|2020-12-21|EPI\_ISL\_759481|Original|hCoV-19^^Hovedstaden|Human|Department of Virus and Microbiological Special Diagnostics|Albertsen Lab|Michaelsen|Denmark

>Spike|hCoV-19/Germany/BW-MVZ-LS-44/2020|2020-04-27|EPI\_ISL\_640261|Original|hCoV-19^^Baden-W\u00fcrtemberg|Human|MVZ Labor\u00e4rzte Singen|MVZ Labor\u00e4rzte Singen|Schmidt|Germany

>Spike|hCoV-19/England/ALDP-94A5B7/2020|2020-06-11|EPI\_ISL\_556382|Original|hCoV-19^^England|Human|Lighthouse Lab in Alderley Park|Wellcome Sanger Institute for the COVID-19 Genomics UK (COG-UK) consortium|Davies|United Kingdom

>Spike|hCoV-19/USA/TX-HMH-MCoV-9399/2020|2020-07-02|EPI\_ISL\_781097|Original|hCoV-19^^Texas|Human|Houston Methodist Hospital|Houston Methodist Hospital|Long|USA

>Spike|hCoV-19/Singapore/1026/2020|2020-03-22|EPI\_ISL\_574511|Original|hCoV-19^^Singapore|Human|National Public Health Laboratory|National Public Health Laboratory|Mak|Singapore

>Spike|hCoV-19/England/NORW-221AEB/2020|2020-12-20|EPI\_ISL\_764465|Original|hCoV-19^^England|Human|Quadram Institute Bioscience|COVID-19 Genomics UK (COG-UK) Consortium|Alikhan|United Kingdom

>Spike|hCoV-19/USA/OR-PROV-107/2020|2020-04-23|EPI\_ISL\_482375|Original|hCoV-19^^Oregon|Human|Providence St. Joseph Health Molecular Genomics Laboratory|Providence St. Joseph Health Molecular Genomics Laboratory|Dowdell|USA

>Spike|hCoV-19/Wales/PHWC-49A9DF/2020|2020-12-03|EPI\_ISL\_727628|Original|hCoV-19^^Wales|Human|Originating lab|COVID-19 Genomics UK (COG-UK) Consortium|Moore|United Kingdom

>Spike|hCoV-19/England/MILK-BB0CC4/2020|2020-11-17|EPI\_ISL\_720489|Original|hCoV-19^^England|Human|Lighthouse Lab in Milton Keynes|Wellcome Sanger Institute for the COVID-19 Genomics UK (COG-UK) Consortium|Davies|United Kingdom

>Spike|hCoV-19/Gibraltar/205000626/2020|2020-12-00|EPI\_ISL\_709962|Original|hCoV-19^^Gibraltar|Human|Microbiology|Respiratory Virus Unit|Platt|Gibraltar

>Spike|hCoV-19/England/ALDP-A2F511/2020|2020-10-06|EPI\_ISL\_587152|Original|hCoV-19^^England|Human|Lighthouse Lab in Alderley Park|Wellcome Sanger Institute for the COVID-19 Genomics UK (COG-UK) consortium|Davies|United Kingdom

>Spike|hCoV-19/USA/OR-OHSU-2433/2020|2020-08-14|EPI\_ISL\_667207|Original|hCoV-19^^Oregon|Human|OHSU Lab Services Molecular Microbiology Lab|Oregon SARS-CoV-2 Genome Sequencing Center|O'Roak|USA

>Spike|hCoV-19/Wales/PHWC-4829AD/2020|2020-10-19|EPI\_ISL\_611534|Original|hCoV-19^^Wales|Human|Wales Specialist Virology Centre Sequencing lab|COVID-19 Genomics UK (COG-UK) Consortium|Moore|United Kingdom

>Spike|hCoV-19/Wales/PHWC-28B98/2020|2020-04-03|EPI\_ISL\_445411|Original|hCoV-19^^Wales|Human|Wales Specialist Virology Centre|Public Health Wales Microbiology Cardiff|Moore|United Kingdom

>Spike|hCoV-19/USA/WA-UW172/2020|2020-03-13|EPI\_ISL\_416710|Original|hCoV-19^^Washington|Human|UW Virology Lab|UW Virology Lab|Roychoudhury|USA

>Spike|hCoV-19/Denmark/DCGC-4325/2020|2020-08-31|EPI\_ISL\_615525|Original|hCoV-19^^Syddanmark|Human|Department of Virus and Microbiological Special Diagnostics|Albertsen lab|Michaelsen|Denmark

>Spike|hCoV-19/France/PAC-IHU-1628/2020|2020-09-11|EPI\_ISL\_569237|Original|hCoV-19^^Provence-Alpes-C\u00f4te-d\u0201Azur|Human|MEPHI|MEPHI|Levasseur|France

>Spike|hCoV-19/USA/NM-NMDOH-2020242041/2020|2020-07-22|EPI\_ISL\_510888|Original|hCoV-19^^New Mexico|Human|New Mexico Department of Health Scientific Laboratory|New Mexico Department of Health Scientific Laboratory|Johnson|USA

>Spike|hCoV-19/USA/IL-UW-507/2020|2020-05-30|EPI\_ISL\_484882|Original|hCoV-19^^Illinois|Human|University of Wisconsin-Madison AIDS Vaccine Research Laboratories|University of Wisconsin-Madison AIDS Vaccine Research Laboratories|Baczenas|USA

>Spike|hCoV-19/Netherlands/ZH-EMC-1014/2020|2020-11-22|EPI\_ISL\_722685|Original|hCoV-19^^Zuid Holland|Human|Dutch COVID-19 response team|Erasmus Medical Center|Oude Munnink|Netherlands

>Spike|hCoV-19/England/20142016504/2020|2020-03-30|EPI\_ISL\_423436|Original|hCoV-19^^England|Human|Respiratory Virus Unit|Respiratory Virus Unit|Platt|United Kingdom

>Spike|hCoV-19/England/HECH-2599C67/2020|2020-05-04|EPI\_ISL\_482095|Original|hCoV-19^^England|Human|Microbiology Department|Wellcome Sanger Institute for the COVID-19 Genomics UK (COG-UK) consortium|Davies|United Kingdom

>Spike|hCoV-19/Wales/PHWC-4A3092/2020|2020-12-14|EPI\_ISL\_744047|Original|hCoV-19^^Wales|Human|Wales Specialist Virology Centre Sequencing lab|COVID-19 Genomics UK (COG-UK) Consortium|Moore|United Kingdom

>Spike|hCoV-19/Spain/RI-IBV-99010937/2020|2020-07-10|EPI\_ISL\_732774|Original|hCoV-19^^La Rioja|Human|Centro de Investigaci\u00f3n Biom\u00e9dica de La Rioja - Hospital San Pedro Logro\u00f1o|SeqCOVID-SPAIN consortium|IBV (CSIC)|Comas|Spain

>Spike|hCoV-19/USA/MI-MDHHS-SC22531/2020|2020-11-08|EPI\_ISL\_708531|Original|hCoV-19^^Michigan|Human|Michigan Department of Health and Human Services|Michigan Department of Health and Human Services|Jacob|USA

>Spike|hCoV-19/USA/LA-EVTL622/2020|2020-08-06|EPI\_ISL\_579026|Original|hCoV-19^^Louisiana|Human|LSUHS Emerging Viral Threat Laboratory|Microbial Genome Sequencing Center|Kamil|USA

>Spike|hCoV-19/England/ALDP-B5CDB8/2020|2020-11-10|EPI\_ISL\_655685|Original|hCoV-19^^England|Human|Lighthouse Lab in Alderley Park|Wellcome Sanger Institute for the COVID-19 Genomics UK (COG-UK) Consortium|Davies|United Kingdom

>Spike|hCoV-19/Denmark/DCGC-6545/2020|2020-10-05|EPI\_ISL\_619445|Original|hCoV-19^^Midtjylland|Human|Department of Virus and Microbiological Special Diagnostics|Albertsen lab|Michaelsen|Denmark

>Spike|hCoV-19/England/QEUH-AD3039/2020|2020-10-26|EPI\_ISL\_634055|Original|hCoV-19^^England|Human|Lighthouse Lab in Glasgow|Wellcome Sanger Institute for the COVID-19 Genomics UK (COG-UK) consortium|Davies|United Kingdom

>Spike|hCoV-19/England/QEUH-9F623B/2020|2020-09-25|EPI\_ISL\_588787|Original|hCoV-19^^England|Human|Lighthouse Lab in Glasgow|Wellcome Sanger Institute for the COVID-19 Genomics UK (COG-UK) consortium|Davies|United Kingdom

>Spike|hCoV-19/USA/NM-NMDOH-2020326575/2020|2020-09-03|EPI\_ISL\_632842|Original|hCoV-19^^New Mexico|Human|New Mexico Department of Health Scientific Laboratory|New Mexico Department of Health Scientific Laboratory|Johnson|USA

>Spike|hCoV-19/Wales/PHWC-2A255/2020|2020-04-06|EPI\_ISL\_445542|Original|hCoV-19^^Wales|Human|Wales Specialist Virology Centre|Public Health Wales Microbiology Cardiff|Moore|United Kingdom

>Spike|hCoV-19/England/20129160704/2020|2020-03-21|EPI\_ISL\_424121|Original|hCoV-19^^England|Human|Respiratory Virus Unit|Respiratory Virus Unit|Platt|United Kingdom

>Spike|hCoV-19/USA/TX-HMH-4703/2020|2020-06-19|EPI\_ISL\_544271|Original|hCoV-19^^Texas|Human|Houston Methodist Hospital|Houston Methodist Hospital|Long|USA

>Spike|hCoV-19/England/ALDP-9B599D/2020|2020-08-28|EPI\_ISL\_590351|Original|hCoV-19^^England|Human|Lighthouse Lab in Alderley Park|Wellcome Sanger Institute for the COVID-19 Genomics UK (COG-UK) consortium|Davies|United Kingdom

>Spike|hCoV-19/England/SHEF-C3C05/2020|2020-09-14|EPI\_ISL\_559905|Original|hCoV-19^^England|Human|Virology Department|COVID-19 Genomics UK (COG-UK) Consortium|de Silva|United Kingdom

>Spike|hCoV-19/USA/FL-BPHL-0105/2020|2020-04-28|EPI\_ISL\_445047|Original|hCoV-19^^Florida|Human|Florida Bureau of Public Health Laboratories|Florida Bureau of Public Health Laboratories|Blanton|USA

>Spike|hCoV-19/Wales/PHWC-492782/2020|2020-11-29|EPI\_ISL\_725697|Original|hCoV-19^^Wales|Human|Originating lab|COVID-19 Genomics UK (COG-UK) Consortium|Moore|United Kingdom

>Spike|hCoV-19/Denmark/DCGC-18298/2020|2020-12-07|EPI\_ISL\_749871|Original|hCoV-19^^Midtjylland|Human|Department of Virus and Microbiological Special Diagnostics|Albertsen Lab|Michaelsen|Denmark

>Spike|hCoV-19/Denmark/DCGC-5242/2020|2020-09-14|EPI\_ISL\_615173|Original|hCoV-19^^Sjaelland|Human|Department of Virus and Microbiological Special Diagnostics|Albertsen lab|Michaelsen|Denmark

>Spike|hCoV-19/England/205022338/2020|2020-12-07|EPI\_ISL\_766282|Original|hCoV-19^^England|Human|Respiratory Virus Unit|COVID-19 Genomics UK (COG-UK) Consortium|Platt|United Kingdom

>Spike|hCoV-19/Uganda/UG071/2020|2020-08-26|EPI\_ISL\_737985|Original|hCoV-19^^Uganda|Human|Uganda Central Public Health Lab and Uganda Virus Research Institute|MRC/UVRI & LSHTM Uganda Research Unit|Cotten|Uganda

>Spike|hCoV-19/USA/WA-S570/2020|2020-03-24|EPI\_ISL\_434330|Original|hCoV-19^^Washington|Human|Washington State Department of Health|Seattle Flu Study|Bedford|USA

>Spike|hCoV-19/England/MILK-9D4F69/2020|2020-09-19|EPI\_ISL\_601676|Original|hCoV-19^^England|Human|Lighthouse Lab in Milton Keynes|Wellcome Sanger Institute for the COVID-19 Genomics UK (COG-UK) consortium|Davies|United Kingdom

>Spike|hCoV-19/England/ALDP-B2525F/2020|2020-11-04|EPI\_ISL\_646497|Original|hCoV-19^^England|Human|Lighthouse Lab in Alderley Park|Wellcome Sanger Institute for the COVID-19 Genomics UK (COG-UK) Consortium|Davies|United Kingdom

>Spike|hCoV-19/Australia/TAS82/2020|2020-03-28|EPI\_ISL\_522753|Original|hCoV-19^^Tasmania|Human|Royal Hobart Hospital Microbiology Department|MDU-PHL|Schultz|Australia

>Spike|hCoV-19/Wales/PHWC-49DD49/2020|2020-12-01|EPI\_ISL\_742903|Original|hCoV-19^^Wales|Human|Wales Specialist Virology Centre Sequencing lab|COVID-19 Genomics UK (COG-UK) Consortium|Moore|United Kingdom

>Spike|hCoV-19/Wales/PHWC-4906C3/2020|2020-11-13|EPI\_ISL\_706500|Original|hCoV-19^^Wales|Human|Originating lab|COVID-19 Genomics UK (COG-UK) Consortium|Moore|United Kingdom

>Spike|hCoV-19/Scotland/QEUI-9DD15B/2020|2020-09-22|EPI\_ISL\_599677|Original|hCoV-19^^Scotland|Human|Lighthouse Lab in Glasgow|Wellcome Sanger Institute for the COVID-19 Genomics UK (COG-UK) consortium|Davies|United Kingdom

>Spike|hCoV-19/Switzerland/ZH-ETHZ-340127/2020|2020-10-26|EPI\_ISL\_721934|Original|hCoV-19^^Zurich|Human|Viollier AG|Department of Biosystems Science and Engineering|Nadeau|Switzerland

>Spike|hCoV-19/England/QEUI-AF5E28/2020|2020-10-30|EPI\_ISL\_663018|Original|hCoV-19^^England|Human|Lighthouse Lab in Glasgow|Wellcome Sanger Institute for the COVID-19 Genomics UK (COG-UK) Consortium|Davies|United Kingdom

>Spike|hCoV-19/Switzerland/SH-ETHZ-370460/2020|2020-11-16|EPI\_ISL\_693959|Original|hCoV-19^^Schaffhausen|Human|Viollier AG|Department of Biosystems Science and Engineering|Nadeau|Switzerland

>Spike|hCoV-19/Netherlands/NoordBrabant\_10003/2020|2020-02-28|EPI\_ISL\_454752|Original|hCoV-19^^Utrecht|Human|Dutch COVID-19 response team|National Institute for Public Health and the Environment (RIVM)|Meijer|Netherlands

>Spike|hCoV-19/England/ALDP-B45EBF/2020|2020-11-07|EPI\_ISL\_656301|Original|hCoV-19^^England|Human|Lighthouse Lab in Alderley Park|Wellcome Sanger Institute for the COVID-19 Genomics UK (COG-UK) Consortium|Davies|United Kingdom

>Spike|hCoV-19/USA/MI-MDHHS-SC22502/2020|2020-11-17|EPI\_ISL\_708205|Original|hCoV-19^^Michigan|Human|Michigan Department of Health and Human Services|Michigan Department of Health and Human Services|Jacob|USA

>Spike|hCoV-19/England/QEUI-BF0967/2020|2020-12-05|EPI\_ISL\_709159|Original|hCoV-19^^England|Human|Lighthouse Lab in Glasgow|Wellcome Sanger Institute for the COVID-19 Genomics UK (COG-UK) Consortium|Davies|United Kingdom

>Spike|hCoV-19/USA/TX-HMH-MCoV-16116/2020|2020-10-27|EPI\_ISL\_785800|Original|hCoV-19^^Texas|Human|Houston Methodist Hospital|Houston Methodist Hospital|Long|USA

>Spike|hCoV-19/India/MH-GA85/2020|2020-06-18|EPI\_ISL\_508280|Original|hCoV-19^^Maharashtra|Human|Government Medical College|National Institute of Biomedical Genomics|Maitra|India

>Spike|hCoV-19/Luxembourg/LNS5694717/2020|2020-11-26|EPI\_ISL\_744276|Original|hCoV-19^^Luxembourg|Human|Laboratoire national de sant\u00e9|Laboratoire national de sant\u00e9|Wienecke-Baldacchino|Luxembourg

>Spike|hCoV-19/England/ALDP-5C16C8/2020|2020-06-19|EPI\_ISL\_558634|Original|hCoV-19^^England|Human|Lighthouse Lab in Alderley Park|Wellcome Sanger Institute for the COVID-19 Genomics UK (COG-UK) consortium|Davies|United Kingdom

>Spike|hCoV-19/England/MILK-BAABC0/2020|2020-11-18|EPI\_ISL\_681594|Original|hCoV-19^^England|Human|Lighthouse Lab in Milton Keynes|Wellcome Sanger Institute for the COVID-19 Genomics UK (COG-UK) Consortium|Davies|United Kingdom

>Spike|hCoV-19/England/QEUI-BA2C3E/2020|2020-11-18|EPI\_ISL\_672880|Original|hCoV-19^^England|Human|Lighthouse Lab in Glasgow|Wellcome Sanger Institute for the COVID-19 Genomics UK (COG-UK) Consortium|Davies|United Kingdom

>Spike|hCoV-19/England/QEUI-A20307/2020|2020-10-01|EPI\_ISL\_587586|Original|hCoV-19^^England|Human|Lighthouse Lab in Glasgow|Wellcome Sanger Institute for the COVID-19 Genomics UK (COG-UK) consortium|Davies|United Kingdom

>Spike|hCoV-19/England/CAMB-1B246A/2020|2020-05-15|EPI\_ISL\_456681|Original|hCoV-19^^England|Human|Department of Pathology|COVID-19 Genomics UK (COG-UK) Consortium|Meredith|United Kingdom

>Spike|hCoV-19/USA/FL-BPHL-0581/2020|2020-03-21|EPI\_ISL\_508785|Original|hCoV-19^^Florida|Human|Florida Bureau of Public Health Laboratories|Florida Bureau of Public Health Laboratories|Blanton|USA

>Spike|hCoV-19/Wales/PHWC-484E06/2020|2020-10-23|EPI\_ISL\_628115|Original|hCoV-19^^Wales|Human|Wales Specialist Virology Centre Sequencing lab|COVID-19 Genomics UK (COG-UK) Consortium|Moore|United Kingdom

>Spike|hCoV-19/USA/TX-HMH-7651/2020|2020-06-26|EPI\_ISL\_546915|Original|hCoV-19^^Texas|Human|Houston Methodist Hospital|Houston Methodist Hospital|Long|USA

>Spike|hCoV-19/Japan/PG-3778/2020|2020-04-00|EPI\_ISL\_692030|Original|hCoV-19^^Japan|Human|Pathogen Genomics Center|Pathogen Genomics Center|Sekizuka|Japan

>Spike|hCoV-19/USA/CA-ALSR-3899/2020|2020-07-01|EPI\_ISL\_636266|Original|hCoV-19^^California|Human|San Diego County Public Health Laboratory|Andersen lab at Scripps Research|Gangavarapu|USA

>Spike|hCoV-19/England/20139007204/2020|2020-03-26|EPI\_ISL\_421859|Original|hCoV-19^^England|Human|Respiratory Virus Unit|Respiratory Virus Unit|Platt|United Kingdom

>Spike|hCoV-19/USA/VA-DCLS-1106/2020|2020-06-19|EPI\_ISL\_529911|Original|hCoV-19^^Virginia|Human|Virginia Division of Consolidated Laboratory Services|Virginia Division of Consolidated Laboratory Services|St. Jacques|USA

>Spike|hCoV-19/England/CAMB-1B50EB/2020|2020-06-19|EPI\_ISL\_477815|Original|hCoV-19^^England|Human|Department of Pathology|COVID-19 Genomics UK (COG-UK) Consortium|Meredith|United Kingdom

>Spike|hCoV-19/Wales/PHWC-485AB6/2020|2020-10-20|EPI\_ISL\_628248|Original|hCoV-19^^Wales|Human|Wales Specialist Virology Centre Sequencing lab|COVID-19 Genomics UK (COG-UK) Consortium|Moore|United Kingdom

>Spike|hCoV-19/Australia/QLD1014/2020|2020-03-28|EPI\_ISL\_530274|Original|hCoV-19^^Queensland|Human|Queensland Health Forensic and Scientific Services|Public Health Virology Laboratory|Nguyen|Australia

>Spike|hCoV-19/USA/WA-UW-22899/2020|2020-08-06|EPI\_ISL\_570731|Original|hCoV-19^^Washington|Human|UW Virology Lab|UW Virology Lab|Roychoudhury|USA

>Spike|hCoV-19/England/20169018304/2020|2020-04-17|EPI\_ISL\_465202|Original|hCoV-19^^England|Human|Respiratory Virus Unit|Respiratory Virus Unit|Platt|United Kingdom

>Spike|hCoV-19/England/CAMC-B219E5/2020|2020-11-02|EPI\_ISL\_647414|Original|hCoV-19^^England|Human|Lighthouse Lab in Cambridge|Wellcome Sanger Institute for the COVID-19 Genomics UK (COG-UK) Consortium|Davies|United Kingdom

>Spike|hCoV-19/Wales/PHWC-489654/2020|2020-10-28|EPI\_ISL\_639600|Original|hCoV-19^^Wales|Human|Wales Specialist Virology Centre Sequencing lab|COVID-19 Genomics UK (COG-UK) Consortium|Moore|United Kingdom

>Spike|hCoV-19/England/ALDP-B8593A/2020|2020-11-14|EPI\_ISL\_675673|Original|hCoV-19^^England|Human|Lighthouse Lab in Alderley Park|Wellcome Sanger Institute for the COVID-19 Genomics UK (COG-UK) Consortium|Davies|United Kingdom

>Spike|hCoV-19/England/CAMC-B22410/2020|2020-11-02|EPI\_ISL\_645917|Original|hCoV-19^^England|Human|Lighthouse Lab in Cambridge|Wellcome Sanger Institute for the COVID-19 Genomics UK (COG-UK) Consortium|Davies|United Kingdom

>Spike|hCoV-19/USA/TX-HMH-MCoV-14666/2020|2020-10-11|EPI\_ISL\_787951|Original|hCoV-19^^Texas|Human|Houston Methodist Hospital|Houston Methodist Hospital|Long|USA

>Spike|hCoV-19/Scotland/CVR220/2020|2020-03-18|EPI\_ISL\_425747|Original|hCoV-19^^Scotland|Human|West of Scotland Specialist Virology Centre|COVID-19 Genomics UK (COG-UK) Consortium|Robertson|United Kingdom

>Spike|hCoV-19/Canada/ON-PHL-20-01321/2020|2020-06-00|EPI\_ISL\_548924|Original|hCoV-19^^Ontario|Human|Public Health Ontario Laboratory|Public Health Ontario Laboratory|Guthrie|Canada

>Spike|hCoV-19/Denmark/DCGC-4874/2020|2020-09-21|EPI\_ISL\_621560|Original|hCoV-19^^Hovedstaden|Human|Department of Virus and Microbiological Special Diagnostics|Albertsen lab|Michaelsen|Denmark

>Spike|hCoV-19/USA/MN-MDH-1777/2020|2020-04-13|EPI\_ISL\_590837|Original|hCoV-19^^Minnesota|Human|Minnesota Department of Health|Minnesota Department of Health|Lorentz|USA

>Spike|hCoV-19/England/GSTT-265E131/2020|2020-03-30|EPI\_ISL\_484157|Original|hCoV-19^^England|Human|Centre for Clinical Infection and Diagnostics Research and Genomics Innovation Unit|COVID-19 Genomics UK (COG-UK) Consortium|Awan|United Kingdom

>Spike|hCoV-19/USA/DE-DHSS-F917739/2020|2020-03-24|EPI\_ISL\_565831|Original|hCoV-19^^Delaware|Human|Delaware Public Health Lab|Delaware Public Health Lab|Bajwa|USA

>Spike|hCoV-19/USA/AZ-TG371266/2020|2020-05-15|EPI\_ISL\_694526|Original|hCoV-19^^Arizona|Human|AZ SPHL|TGen North|French|USA

>Spike|hCoV-19/USA/LA-EVTL242/2020|2020-08-22|EPI\_ISL\_574376|Original|hCoV-19^^Louisiana|Human|LSUHS Emerging Viral Threat Laboratory|Microbial Genome Sequencing Center|Kamil|USA

>Spike|hCoV-19/Wales/PHWC-49AE94/2020|2020-12-06|EPI\_ISL\_742265|Original|hCoV-19^^Wales|Human|Wales Specialist Virology Centre Sequencing lab|COVID-19 Genomics UK (COG-UK) Consortium|Moore|United Kingdom

>Spike|hCoV-19/India/MH-NIV-227512/2020|2020-09-26|EPI\_ISL\_577723|Original|hCoV-19^^Maharashtra|Human|NIV Influenza|NIV Influenza|Potdar|India

>Spike|hCoV-19/England/QEUEH-9D0E8E/2020|2020-09-13|EPI\_ISL\_589958|Original|hCoV-19^^England|Human|Lighthouse Lab in Glasgow|Wellcome Sanger Institute for the COVID-19 Genomics UK (COG-UK) consortium|Davies|United Kingdom

>Spike|hCoV-19/England/ALDP-A84C42/2020|2020-10-16|EPI\_ISL\_610352|Original|hCoV-19^^England|Human|Lighthouse Lab in Alderley Park|Wellcome Sanger Institute for the COVID-19 Genomics UK (COG-UK) consortium|Davies|United Kingdom

>Spike|hCoV-19/England/ALDP-A7004D/2020|2020-10-15|EPI\_ISL\_608281|Original|hCoV-19^^England|Human|Lighthouse Lab in Alderley Park|Wellcome Sanger Institute for the COVID-19 Genomics UK (COG-UK) consortium|Davies|United Kingdom

>Spike|hCoV-19/Luxembourg/LNS3920210/2020|2020-11-23|EPI\_ISL\_740389|Original|hCoV-19^^Luxembourg|Human|Laboratoire national de sant\u00e9|Laboratoire national de sant\u00e9|Wienecke-Baldacchino|Luxembourg

>Spike|hCoV-19/USA/VA-DCLS-1037/2020|2020-06-03|EPI\_ISL\_526921|Original|hCoV-19^^Virginia|Human|Virginia DCLS|Virginia DCLS|St. Jacques|USA

>Spike|hCoV-19/England/LIVE-1D1D6A/2020|2020-05-12|EPI\_ISL\_573237|Original|hCoV-19^^England|Human|Liverpool Clinical Laboratories|COVID-19 Genomics UK (COG-UK) Consortium|Haldenby|United Kingdom

>Spike|hCoV-19/Switzerland/BE-ETHZ-310443/2020|2020-10-08|EPI\_ISL\_603516|Original|hCoV-19^^Bern|Human|Viollier AG|Department of Biosystems Science and Engineering|Nadeau|Switzerland

>Spike|hCoV-19/USA/CA-ALSR-3524/2020|2020-09-14|EPI\_ISL\_636068|Original|hCoV-19^^California|Human|San Diego County Public Health Laboratory|Andersen lab at Scripps Research|Gangavarapu|USA

>Spike|hCoV-19/England/QEUEH-9AE108/2020|2020-09-04|EPI\_ISL\_637334|Original|hCoV-19^^England|Human|Department of Pathology|COVID-19 Genomics UK (COG-UK) Consortium|Goodfellow|United Kingdom

>Spike|hCoV-19/England/LOND-124E1A4/2020|2020-00-00|EPI\_ISL\_584665|Original|hCoV-19^^England|Human|University College London Hospital|COVID-19 Genomics UK (COG-UK) Consortium|Byott|United Kingdom

>Spike|hCoV-19/Singapore/1294/2020|2020-05-11|EPI\_ISL\_648779|Original|hCoV-19^^Singapore|Human|Department of Laboratory Medicine|Department of Laboratory Medicine|Chen|Singapore

>Spike|hCoV-19/USA/TX-HMH-MCoV-13862/2020|2020-08-16|EPI\_ISL\_787155|Original|hCoV-19^^Texas|Human|Houston Methodist Hospital|Houston Methodist Hospital|Long|USA

>Spike|hCoV-19/United Arab Emirates/0872/2020|2020-05-19|EPI\_ISL\_699011|Original|hCoV-19^^Abu Dhabi|Human|Group 42 (G42) Healthcare|G42 Healthcare|Ogrodzki|United Arab Emirates

>Spike|hCoV-19/Taiwan/NTU05/2020|2020-03-13|EPI\_ISL\_422408|Vero E6|hCoV-19^^Taipei|Human|Department of Laboratory Medicine|Microbial Genomics Core Lab|Lin|Taiwan

>Spike|hCoV-19/USA/CA-IGI-0794/2020|2020-06-16|EPI\_ISL\_756338|Original|hCoV-19^^California|Human|Innovative Genomics Institute|Innovative Genomics Institute|Wyman|USA

>Spike|hCoV-19/USA/TX-HMH-3657/2020|2020-06-15|EPI\_ISL\_543101|Original|hCoV-19^^Texas|Human|Houston Methodist Hospital|Houston Methodist Hospital|Long|USA

>Spike|hCoV-19/England/QEUEH-9F51E4/2020|2020-09-25|EPI\_ISL\_588353|Original|hCoV-19^^England|Human|Lighthouse Lab in Glasgow|Wellcome Sanger Institute for the COVID-19 Genomics UK (COG-UK) consortium|Davies|United Kingdom

>Spike|hCoV-19/England/QEUEH-B418C4/2020|2020-11-08|EPI\_ISL\_658568|Original|hCoV-19^^England|Human|Lighthouse Lab in Glasgow|Wellcome Sanger Institute for the COVID-19 Genomics UK (COG-UK) Consortium|Davies|United Kingdom



>Spike|hCoV-19/USA/TX-HMH-513/2020|2020-04-02|EPI\_ISL\_544545|Original|hCoV-19^^Texas|Human|Houston Methodist Hospital|Houston Methodist Hospital|Long|USA

>Spike|hCoV-19/USA/WI-UW-1093/2020|2020-07-29|EPI\_ISL\_516518|Original|hCoV-19^^Wisconsin|Human|University of Wisconsin-Madison AIDS Vaccine Research Laboratories|University of Wisconsin-Madison AIDS Vaccine Research Laboratories|Baczenas|USA

>Spike|hCoV-19/Australia/VIC14109/2020|2020-08-25|EPI\_ISL\_563971|Original|hCoV-19^^Victoria|Human|Microbiological Diagnostic Unit - Public Health Laboratory (MDU-PHL) |MDU-PHL|Schultz|Australia

>Spike|hCoV-19/England/LCST-24D67AA/2020|2020-05-30|EPI\_ISL\_478292|Original|hCoV-19^^England|Human|University Hospitals Of Leicester NHS Trust and DeepSeq Nottingham|COVID-19 Genomics UK (COG-UK) Consortium|Loose|United Kingdom

>Spike|hCoV-19/USA/CA-CZB-1051/2020|2020-04-06|EPI\_ISL\_437051|Original|hCoV-19^^California|Human|County of Santa Clara Public Health|Chan-Zuckerberg Biohub|Hao|USA

>Spike|hCoV-19/Australia/VIC6676/2020|2020-07-20|EPI\_ISL\_521432|Original|hCoV-19^^Victoria|Human|Victorian Infectious Diseases Reference Laboratory (VIDRL) |VIDRL and MDU-PHL|Schultz|Australia

>Spike|hCoV-19/USA/WA-UW-2609/2020|2020-03-29|EPI\_ISL\_486006|Original|hCoV-19^^Washington|Human|UW Virology Lab|UW Virology Lab|Roychoudhury|USA

>Spike|hCoV-19/USA/CA-CZB-5170/2020|2020-08-12|EPI\_ISL\_583221|Original|hCoV-19^^California|Human|UCSF Clinical Microbiology Laboratory|Chan-Zuckerberg Biohub|Bhatt|USA

>Spike|hCoV-19/USA/VA-DCLS-0904/2020|2020-05-13|EPI\_ISL\_522779|Original|hCoV-19^^Virginia|Human|Virginia DCLS|Virginia DCLS|St. Jacques|USA

>Spike|hCoV-19/Russia/CRIE159932/2020|2020-03-30|EPI\_ISL\_486817|Original|hCoV-19^^Moscow|Human|Molecular diagnostic laboratory of Federal Budget Institution of Science \Central Research Institute of Epidemiology\ of The Federal Service on Customers' Rights Protection and Human Well-being Surveillance|Group of Genomics and Postgenomic Technologies of Central Research Institute of Epidemiology|Speranskaya|Russia

>Spike|hCoV-19/USA/FL-BPHL-0618/2020|2020-04-03|EPI\_ISL\_508822|Original|hCoV-19^^Florida|Human|Florida Bureau of Public Health Laboratories|Florida Bureau of Public Health Laboratories|Blanton|USA

>Spike|hCoV-19/Denmark/DCGC-11720/2020|2020-10-26|EPI\_ISL\_671092|Original|hCoV-19^^Sjælland|Human|Department of Virus and Microbiological Special Diagnostics|Albertsen Lab|Michaelsen|Denmark

>Spike|hCoV-19/Switzerland/BS-42205013/2020|2020-03-24|EPI\_ISL\_581733|Original|hCoV-19^^Basel-Stadt|Human|University Hospital Basel|University Hospital Basel|Roloff Handschin|Switzerland

>Spike|hCoV-19/USA/LA-EVTL1107/2020|2020-12-04|EPI\_ISL\_768377|Original|hCoV-19^^Louisiana|Human|LSUHS Emerging Viral Threat Laboratory|Microbial Genome Sequencing Center|Kamil|USA

>Spike|hCoV-19/USA/CA-CZB-12293/2020|2020-10-07|EPI\_ISL\_648387|Original|hCoV-19^^California|Human|Santa Clara County Public Health Laboratory|Chan-Zuckerberg Biohub|Bhatt|USA

>Spike|hCoV-19/Scotland/QEUH-96E298/2020|2020-08-20|EPI\_ISL\_534495|Original|hCoV-19^^Scotland|Human|NHSGGC West of Scotland Specialist Virology Centre / MRC-University of Glasgow Centre for Virus Research|Wellcome Sanger Institute for the COVID-19 Genomics UK (COG-UK) consortium|Davies|United Kingdom

>Spike|hCoV-19/Japan/PG-3566/2020|2020-06-00|EPI\_ISL\_691822|Original|hCoV-19^^Japan|Human|Pathogen Genomics Center|Pathogen Genomics Center|Sekizuka|Japan

>Spike|hCoV-19/Japan/PG-1421/2020|2020-04-00|EPI\_ISL\_685028|Original|hCoV-19^^Japan|Human|Saitama Prefectural Institute of Public Health|Pathogen Genomics Center|Sekizuka|Japan

>Spike|hCoV-19/Australia/VIC11168/2020|2020-08-08|EPI\_ISL\_563280|Original|hCoV-19^^Victoria|Human|Microbiological Diagnostic Unit - Public Health Laboratory (MDU-PHL) |MDU-PHL|Schultz|Australia

>Spike|hCoV-19/England/QEUA-B2C504/2020|2020-11-02|EPI\_ISL\_666022|Original|hCoV-19^England|Human|Liverpool Clinical Laboratories|COVID-19 Genomics UK (COG-UK) Consortium|Haldenby|United Kingdom

>Spike|hCoV-19/Wales/MILK-975CBE/2020|2020-08-19|EPI\_ISL\_552752|Original|hCoV-19^Wales|Human|Lighthouse Lab in Milton Keynes|Wellcome Sanger Institute for the COVID-19 Genomics UK (COG-UK) consortium|Davies|United Kingdom

>Spike|hCoV-19/USA/WI-GMF-24039/2020|2020-10-04|EPI\_ISL\_660888|Original|hCoV-19^Wisconsin|Human|Gundersen Molecular Diagnostics Laboratory|Kabara Cancer Research Institute|Kenny|USA

>Spike|hCoV-19/USA/UT-UPHL-2009336/2020|2020-05-14|EPI\_ISL\_524936|Original|hCoV-19^Utah|Human|Utah Public Health Laboratory|Utah Public Health Laboratory|Young|USA

>Spike|hCoV-19/England/QEUA-AF520E/2020|2020-10-30|EPI\_ISL\_662964|Original|hCoV-19^England|Human|Lighthouse Lab in Glasgow|Wellcome Sanger Institute for the COVID-19 Genomics UK (COG-UK) Consortium|Davies|United Kingdom

>Spike|hCoV-19/Brazil/SC-769/2020|2020-03-10|EPI\_ISL\_427306|Original|hCoV-19^Santa Catarina|Human|LACEN-SC - Laboratorio Central de Santa Catarina|Instituto Oswaldo Cruz FIOCRUZ - Laboratory of Respiratory Viruses and Measles (LVRs)|Silva|Brazil

>Spike|hCoV-19/England/CAMB-81131/2020|2020-04-16|EPI\_ISL\_438571|Original|hCoV-19^England|Human|Department of Pathology|COVID-19 Genomics UK (COG-UK) Consortium|Meredith|United Kingdom

>Spike|hCoV-19/Japan/PG-6784/2020|2020-08-00|EPI\_ISL\_687893|Original|hCoV-19^Japan|Human|Pathogen Genomics Center|Pathogen Genomics Center|Sekizuka|Japan

>Spike|hCoV-19/Wales/MILK-99D04B/2020|2020-08-30|EPI\_ISL\_549863|Original|hCoV-19^Wales|Human|Lighthouse Lab in Milton Keynes|Wellcome Sanger Institute for the COVID-19 Genomics UK (COG-UK) consortium|Davies|United Kingdom

>Spike|hCoV-19/Spain/AN-IBV-001192/2020|2020-03-25|EPI\_ISL\_452565|Original|hCoV-19^Andalucia|Human|Servicio de Microbiolog\u00eda y Parasitolog\u00eda cl\u00ednica. UCEIMP. Hospital Universitario Virgen del Roc\u00edo/IBIS/CSIC/US.|SeqCOVID-SPAIN consortium/IBV (CSIC) |Comas|Spain

>Spike|hCoV-19/Wales/PHWC-2A905/2020|2020-04-08|EPI\_ISL\_445635|Original|hCoV-19^Wales|Human|Wales Specialist Virology Centre|Public Health Wales Microbiology Cardiff|Moore|United Kingdom

>Spike|hCoV-19/England/CAMC-C46837/2020|2020-12-10|EPI\_ISL\_718504|Original|hCoV-19^England|Human|Lighthouse Lab in Cambridge|Wellcome Sanger Institute for the COVID-19 Genomics UK (COG-UK) Consortium|Davies|United Kingdom

>Spike|hCoV-19/England/QEUA-AD1183/2020|2020-10-26|EPI\_ISL\_633869|Original|hCoV-19^England|Human|Lighthouse Lab in Glasgow|Wellcome Sanger Institute for the COVID-19 Genomics UK (COG-UK) consortium|Davies|United Kingdom

>Spike|hCoV-19/Australia/VIC8448/2020|2020-07-27|EPI\_ISL\_565020|Original|hCoV-19^Victoria|Human|Microbiological Diagnostic Unit - Public Health Laboratory (MDU-PHL) |MDU-PHL|Schultz|Australia

>Spike|hCoV-19/USA/TX-HMH-MCoV-11190/2020|2020-09-02|EPI\_ISL\_789729|Original|hCoV-19^Texas|Human|Houston Methodist Hospital|Houston Methodist Hospital|Long|USA

>Spike|hCoV-19/USA/AZ-TG396379/2020|2020-06-11|EPI\_ISL\_694832|Original|hCoV-19^Arizona|Human|AZ SPHL|TGen North|French|USA

>Spike|hCoV-19/SaudiArabia/KAUST-MAKKAH293/2020|2020-04-21|EPI\_ISL\_513216|Original|hCoV-19^Makkah|Human|Pathogen Genomics Lab King Abdullah University of Science and Technology(KAUST)|Pathogen Genomics Lab King Abdullah University of Science and Technology(KAUST)|Mohamed Ghazzali|Saudi Arabia

>Spike|hCoV-19/England/ALDP-A51A62/2020|2020-10-07|EPI\_ISL\_598004|Original|hCoV-19^England|Human|Lighthouse Lab in Alderley Park|Wellcome Sanger Institute for the COVID-19 Genomics UK (COG-UK) consortium|Davies|United Kingdom

>Spike|hCoV-19/Singapore/19/2020|2020-03-02|EPI\_ISL\_419001|Original|hCoV-19^Singapore|Human|National Public Health Laboratory|National Public Health Laboratory|Mak|Singapore

>Spike|hCoV-19/Denmark/DCGC-14924/2020|2020-11-23|EPI\_ISL\_713525|Original|hCoV-19^Hovedstaden|Human|Department of Virus and Microbiological Special Diagnostics|Albertsen Lab|Michaelsen|Denmark

>Spike|hCoV-19/Portugal/PT1891/2020|2020-11-12|EPI\_ISL\_732106|Original|hCoV-19^^Portugal|Human|Instituto Nacional de Saude (INSA)|Instituto Nacional de Saude (INSA)|Borges|Portugal

>Spike|hCoV-19/England/ALDP-BC64A5/2020|2020-11-20|EPI\_ISL\_721247|Original|hCoV-19^^England|Human|Lighthouse Lab in Alderley Park|Wellcome Sanger Institute for the COVID-19 Genomics UK (COG-UK) Consortium|Davies|United Kingdom

>Spike|hCoV-19/Wales/PHWC-1642B8/2020|2020-04-25|EPI\_ISL\_474154|Original|hCoV-19^^Wales|Human|Originating lab|COVID-19 Genomics UK (COG-UK) Consortium|Moore|United Kingdom

>Spike|hCoV-19/England/QEUEH-A35E1D/2020|2020-10-04|EPI\_ISL\_706896|Original|hCoV-19^^England|Human|Oxford Viromics|COVID-19 Genomics UK (COG-UK) Consortium|Golubchik|United Kingdom

>Spike|hCoV-19/Wales/ALDP-AA50B8/2020|2020-10-21|EPI\_ISL\_634774|Original|hCoV-19^^Wales|Human|Lighthouse Lab in Alderley Park|Wellcome Sanger Institute for the COVID-19 Genomics UK (COG-UK) consortium|Davies|United Kingdom

>Spike|hCoV-19/England/QEUEH-A7827C/2020|2020-10-14|EPI\_ISL\_638747|Original|hCoV-19^^England|Human|Oxford Viromics|COVID-19 Genomics UK (COG-UK) Consortium|Golubchik|United Kingdom

>Spike|hCoV-19/England/QEUEH-B0F18B/2020|2020-11-02|EPI\_ISL\_642542|Original|hCoV-19^^England|Human|Lighthouse Lab in Glasgow|Wellcome Sanger Institute for the COVID-19 Genomics UK (COG-UK) Consortium|Davies|United Kingdom

>Spike|hCoV-19/Brazil/RJ-00318/2020|2020-05-12|EPI\_ISL\_623121|Original|hCoV-19^^Rio de Janeiro|Human|Laboratorio de Virologia Molecular / UFRJ|Bioinformatics Laboratory / LNCC|Almeida|Brazil

>Spike|hCoV-19/Denmark/DCGC-8577/2020|2020-10-26|EPI\_ISL\_625936|Original|hCoV-19^^Hovedstaden|Human|Department of Virus and Microbiological Special Diagnostics|Albertsen lab|Michaelsen|Denmark

>Spike|hCoV-19/Vietnam/VNHN\_1528/2020|2020-03-22|EPI\_ISL\_455697|Original|hCoV-19^^Hanoi|Human|National Hospital of Tropical Diseases|Oxford University Clinical Research Unit|Nguyen|Vietnam

>Spike|hCoV-19/Japan/PG-4243/2020|2020-07-00|EPI\_ISL\_692473|Original|hCoV-19^^Japan|Human|Fukuoka Institute of Health and Environmental Sciences|Pathogen Genomics Center|Sekizuka|Japan

>Spike|hCoV-19/England/CAMC-B354DE/2020|2020-11-05|EPI\_ISL\_659621|Original|hCoV-19^^England|Human|Lighthouse Lab in Cambridge|Wellcome Sanger Institute for the COVID-19 Genomics UK (COG-UK) Consortium|Davies|United Kingdom

>Spike|hCoV-19/USA/TX-HMH-5134/2020|2020-06-22|EPI\_ISL\_544550|Original|hCoV-19^^Texas|Human|Houston Methodist Hospital|Houston Methodist Hospital|Long|USA

>Spike|hCoV-19/England/QEUEH-9C80B0/2020|2020-09-10|EPI\_ISL\_567022|Original|hCoV-19^^England|Human|Lighthouse Lab in Glasgow|Wellcome Sanger Institute for the COVID-19 Genomics UK (COG-UK) consortium|Davies|United Kingdom

>Spike|hCoV-19/England/SHEF-CDDEA/2020|2020-06-22|EPI\_ISL\_493717|Original|hCoV-19^^England|Human|Virology Department|COVID-19 Genomics UK (COG-UK) Consortium|de Silva|United Kingdom

>Spike|hCoV-19/Palestine/47/2020|2020-08-17|EPI\_ISL\_596530|Original|hCoV-19^^Jerusalem|Human|Palestinian Ministry of Health|Molecular Genetics Lab|van Dorp|Palestine

>Spike|hCoV-19/England/ALDP-AA1E3A/2020|2020-10-22|EPI\_ISL\_625061|Original|hCoV-19^^England|Human|Lighthouse Lab in Alderley Park|Wellcome Sanger Institute for the COVID-19 Genomics UK (COG-UK) consortium|Davies|United Kingdom

>Spike|hCoV-19/Wales/PHWC-4838BE/2020|2020-10-20|EPI\_ISL\_627867|Original|hCoV-19^^Wales|Human|Wales Specialist Virology Centre Sequencing lab|COVID-19 Genomics UK (COG-UK) Consortium|Moore|United Kingdom

>Spike|hCoV-19/Luxembourg/LNS1360776/2020|2020-10-22|EPI\_ISL\_739923|Original|hCoV-19^^Luxembourg|Human|Laboratoire national de sant\u00e9|Laboratoire national de sant\u00e9|Wienecke-Baldacchino|Luxembourg

>Spike|hCoV-19/Denmark/DCGC-17268/2020|2020-12-14|EPI\_ISL\_750867|Original|hCoV-19^^Midtjylland|Human|Department of Virus and Microbiological Special Diagnostics|Albertsen Lab|Michaelsen|Denmark

>Spike|hCoV-19/France/ARA-58470/2020|2020-08-05|EPI\_ISL\_683366|Original|hCoV-19^^Auvergne-Rh\u00f4ne-Alpes|Human|CNR Virus des Infections Respiratoires - France SUD|CNR Virus des Infections Respiratoires - France SUD|Bal|France

>Spike|hCoV-19/Wales/PHWC-16A5E6/2020|2020-09-08|EPI\_ISL\_540913|Original|hCoV-19^^Wales|Human|Wales Specialist Virology Centre Sequencing lab|COVID-19 Genomics UK (COG-UK) Consortium|Moore|United Kingdom

>Spike|hCoV-19/Netherlands/UT-EMC-112/2020|2020-10-09|EPI\_ISL\_632634|Original|hCoV-19^^Utrecht|Human|Dutch COVID-19 response team|Erasmus Medical Center|Oude Munnink|Netherlands

>Spike|hCoV-19/Scotland/CVR4513/2020|2020-09-21|EPI\_ISL\_585374|Original|hCoV-19^^Scotland|Human|Lighthouse Lab in Glasgow / MRC-University of Glasgow Centre for Virus Research|COVID-19 Genomics UK (COG-UK) Consortium|Robertson|United Kingdom

>Spike|hCoV-19/USA/CA-CZB-11584/2020|2020-07-24|EPI\_ISL\_625564|Original|hCoV-19^^California|Human|NaN|Chan-Zuckerberg Biohub|Bhatt|USA

>Spike|hCoV-19/Denmark/DCGC-17803/2020|2020-12-14|EPI\_ISL\_749302|Original|hCoV-19^^Syddanmark|Human|Department of Virus and Microbiological Special Diagnostics|Albertsen Lab|Michaelsen|Denmark

>Spike|hCoV-19/England/LIVE-9F21F/2020|2020-05-04|EPI\_ISL\_453437|Original|hCoV-19^^England|Human|Liverpool Clinical Laboratories|COVID-19 Genomics UK (COG-UK) Consortium|Haldenby|United Kingdom

>Spike|hCoV-19/England/CAMB-74544/2020|2020-03-28|EPI\_ISL\_425304|Original|hCoV-19^^England|Human|Department of Pathology|COVID-19 Genomics UK (COG-UK) Consortium|Meredith|United Kingdom

>Spike|hCoV-19/England/20129062104/2020|2020-03-12|EPI\_ISL\_424058|Original|hCoV-19^^England|Human|Respiratory Virus Unit|Respiratory Virus Unit|Platt|United Kingdom

>Spike|hCoV-19/Netherlands/ZuidHolland\_183/2020|2020-04-25|EPI\_ISL\_461355|Original|hCoV-19^^Zuid Holland|Human|Dutch COVID-19 response team|Erasmus Medical Center|Oude Munnink|Netherlands

>Spike|hCoV-19/Denmark/DCGC-1167/2020|2020-03-16|EPI\_ISL\_614653|Original|hCoV-19^^Sjaelland|Human|Department of Virus and Microbiological Special Diagnostics|Albertsen lab|Michaelsen|Denmark

>Spike|hCoV-19/England/ALDP-4A8367/2020|2020-06-11|EPI\_ISL\_559493|Original|hCoV-19^^England|Human|Lighthouse Lab in Alderley Park|Wellcome Sanger Institute for the COVID-19 Genomics UK (COG-UK) consortium|Davies|United Kingdom

>Spike|hCoV-19/USA/TX-HMH-MCoV-9207/2020|2020-07-02|EPI\_ISL\_781000|Original|hCoV-19^^Texas|Human|Houston Methodist Hospital|Houston Methodist Hospital|Long|USA

>Spike|hCoV-19/Canada/QC\_AD6/2020|2020-04-06|EPI\_ISL\_476500|Original|hCoV-19^^Quebec|Human|Laboratoire de microbiologie|Smith Laboratory|Smith|Canada

>Spike|hCoV-19/Scotland/QEUA-9CFF25/2020|2020-09-16|EPI\_ISL\_601800|Original|hCoV-19^^Scotland|Human|Lighthouse Lab in Glasgow|Wellcome Sanger Institute for the COVID-19 Genomics UK (COG-UK) consortium|Davies|United Kingdom

>Spike|hCoV-19/England/ALDP-C88D1C/2020|2020-12-16|EPI\_ISL\_756390|Original|hCoV-19^^England|Human|Lighthouse Lab in Alderley Park|Wellcome Sanger Institute for the COVID-19 Genomics UK (COG-UK) Consortium|Davies|United Kingdom

>Spike|hCoV-19/USA/TX-HMH-MCoV-18663/2020|2020-11-20|EPI\_ISL\_785011|Original|hCoV-19^^Texas|Human|Houston Methodist Hospital|Houston Methodist Hospital|Long|USA

>Spike|hCoV-19/Germany/BE-ChVir-W1134-8182/2020|2020-04-01|EPI\_ISL\_753937|Original|hCoV-19^^Berlin|Human|Charit\u00e9 Universit\u00e4tsmedizin Berlin|Charit\u00e9 Universit\u00e4tsmedizin Berlin|Muehlemann|Germany

>Spike|hCoV-19/Wales/PHWC-4A2594/2020|2020-12-15|EPI\_ISL\_743909|Original|hCoV-19^^Wales|Human|Wales Specialist Virology Centre Sequencing lab|COVID-19 Genomics UK (COG-UK) Consortium|Moore|United Kingdom

>Spike|hCoV-19/Denmark/DCGC-19264/2020|2020-12-07|EPI\_ISL\_748271|Original|hCoV-19^^Midtjylland|Human|Department of Virus and Microbiological Special Diagnostics|Albertsen Lab|Michaelsen|Denmark

>Spike|hCoV-19/Germany/HH-hpi-p1356/2020|2020-03-27|EPI\_ISL\_775790|Original|hCoV-19^^Hamburg|Human|University Medical Center Hamburg Eppendorf|Heinrich Pette Institute|Robitaille|Germany

>Spike|hCoV-19/England/CAMB-7CBB3/2020|2020-04-05|EPI\_ISL\_470532|Original|hCoV-19^^England|Human|Department of Pathology|Wellcome Sanger Institute for the COVID-19 Genomics UK (COG-UK) consortium|Davies|United Kingdom

>Spike|hCoV-19/England/BRIS-130AF9/2020|2020-03-13|EPI\_ISL\_492664|Original|hCoV-19^^England|Human|PHE South West Regional Laboratory|Wellcome Sanger Institute for the COVID-19 Genomics UK (COG-UK) consortium|Davies|United Kingdom

>Spike|hCoV-19/England/CAMC-A420DB/2020|2020-10-04|EPI\_ISL\_609502|Original|hCoV-19^^England|Human|Lighthouse Lab in Cambridge|Wellcome Sanger Institute for the COVID-19 Genomics UK (COG-UK) consortium|Davies|United Kingdom

>Spike|hCoV-19/USA/NY-NYUMC699/2020|2020-03-26|EPI\_ISL\_451414|Original|hCoV-19^^New York|Human|NYU Langone Health|Departments of Pathology and Medicine|Maurano|USA

>Spike|hCoV-19/Australia/WA248/2020|2020-04-02|EPI\_ISL\_596810|Original|hCoV-19^^Western Australia|Human|PathWest Laboratory Medicine WA|PathWest Laboratory Medicine WA Microbial Surveillance Unit|Sikazwe|Australia

>Spike|hCoV-19/Denmark/DCGC-18557/2020|2020-12-07|EPI\_ISL\_750042|Original|hCoV-19^^Midtjylland|Human|Department of Virus and Microbiological Special Diagnostics|Albertsen Lab|Michaelsen|Denmark

>Spike|hCoV-19/USA/TX-HMH-MCoV-18540/2020|2020-11-20|EPI\_ISL\_784888|Original|hCoV-19^^Texas|Human|Houston Methodist Hospital|Houston Methodist Hospital|Long|USA

>Spike|hCoV-19/USA/TX-HMH-MCoV-9205/2020|2020-07-02|EPI\_ISL\_780476|Original|hCoV-19^^Texas|Human|Houston Methodist Hospital|Houston Methodist Hospital|Long|USA

>Spike|hCoV-19/Australia/NSW1316/2020|2020-12-21|EPI\_ISL\_767882|Original|hCoV-19^^New South Wales|Human|Medlab Pathology|NSW Health Pathology - Institute of Clinical Pathology and Medical Research; Westmead Hospital; University of Sydney|Gall|Australia

>Spike|hCoV-19/Wales/PHWC-162B46/2020|2020-05-20|EPI\_ISL\_473167|Original|hCoV-19^^Wales|Human|Wales Specialist Virology Centre Sequencing lab|COVID-19 Genomics UK (COG-UK) Consortium|Moore|United Kingdom

>Spike|hCoV-19/Sweden/20-08146/2020|2020-03-11|EPI\_ISL\_429118|Original|hCoV-19^^Halland|Human|Klinisk mikrobiologi och vardhygien Halmstad|The Public Health Agency of Sweden|Svartstr\u00f6m|Sweden

>Spike|hCoV-19/Wales/ALDP-C3B38F/2020|2020-12-08|EPI\_ISL\_767168|Original|hCoV-19^^Wales|Human|Lighthouse Lab in Alderley Park|Wellcome Sanger Institute for the COVID-19 Genomics UK (COG-UK) Consortium|Davies|United Kingdom

>Spike|hCoV-19/England/20129010204/2020|2020-03-20|EPI\_ISL\_423981|Original|hCoV-19^^England|Human|Respiratory Virus Unit|Respiratory Virus Unit|Platt|United Kingdom

>Spike|hCoV-19/Spain/VC-IBV-98004357/2020|2020-03-25|EPI\_ISL\_654481|Original|hCoV-19^^Comunitat Valenciana|Human|Servicio de Microbiolog\u00eda. Hospital General Universitario de Castell\u00f3n|SeqCOVID-SPAIN consortium|IBV(CSIC)|Comas|Spain

>Spike|hCoV-19/England/ALDP-A70450/2020|2020-10-15|EPI\_ISL\_607780|Original|hCoV-19^^England|Human|Lighthouse Lab in Alderley Park|Wellcome Sanger Institute for the COVID-19 Genomics UK (COG-UK) consortium|Davies|United Kingdom

>Spike|hCoV-19/England/MILK-B5646E/2020|2020-11-05|EPI\_ISL\_657631|Original|hCoV-19^^England|Human|Lighthouse Lab in Milton Keynes|Wellcome Sanger Institute for the COVID-19 Genomics UK (COG-UK) Consortium|Davies|United Kingdom

>Spike|hCoV-19/Serbia/Kraljevo-00160707/2020|2020-07-06|EPI\_ISL\_644570|Original|hCoV-19^^Kraljevo|Human|Veterinary Specialized Institute \Kraljevo\|Veterinary Specialized Institute \Kraljevo\|Vidanovic|Serbia

>Spike|hCoV-19/DRC/3778/2020|2020-04-24|EPI\_ISL\_447240|Original|hCoV-19^^Kinshasa|Human|Viral Respiratory Lab|Pathogen Sequencing Lab|Amuri|Democratic Republic of the Congo

>Spike|hCoV-19/England/MILK-671CA6/2020|2020-07-03|EPI\_ISL\_558058|Original|hCoV-19^^England|Human|Lighthouse Lab in Milton Keynes|Wellcome Sanger Institute for the COVID-19 Genomics UK (COG-UK) consortium|Davies|United Kingdom

>Spike|hCoV-19/Australia/VIC4978/2020|2020-07-13|EPI\_ISL\_519344|Original|hCoV-19^^Victoria|Human|Microbiological Diagnostic Unit - Public Health Laboratory (MDU-PHL)|MDU-PHL|Schultz|Australia

>Spike|hCoV-19/USA/VA-DCLS-2415/2020|2020-11-23|EPI\_ISL\_723481|Original|hCoV-19^^Virginia|Human|Virginia DCLS|Virginia DCLS|St. Jacques|USA

>Spike|hCoV-19/Netherlands/ZuidHolland\_96/2020|2020-03-30|EPI\_ISL\_422632|Original|hCoV-19^^Zuid Holland|Human|Dutch COVID-19 response team|Erasmus Medical Center|Oude Munnink|Netherlands

>Spike|hCoV-19/England/ALDP-C48167/2020|2020-12-12|EPI\_ISL\_718678|Original|hCoV-19^^England|Human|Lighthouse Lab in Alderley Park|Wellcome Sanger Institute for the COVID-19 Genomics UK (COG-UK) Consortium|Davies|United Kingdom

>Spike|hCoV-19/Brazil/RS-L10-CD150/2020|2020-03-14|EPI\_ISL\_476177|Original|hCoV-19^^Rio Grande do Sul|Human|DB Diagn\u00f3sticos do Brasil|Instituto de Medicina Tropical da Universidade de S\u00e3o Paulo|Faria|Brazil

>Spike|hCoV-19/Switzerland/BL-UHB-42190581/2020|2020-03-13|EPI\_ISL\_528073|Original|hCoV-19^^Basel-Land|Human|University Hospital Basel|University Hospital Basel|Roloff Handschin|Switzerland

>Spike|hCoV-19/England/QEUA-B6C429/2020|2020-11-11|EPI\_ISL\_655138|Original|hCoV-19^^England|Human|Lighthouse Lab in Glasgow|Wellcome Sanger Institute for the COVID-19 Genomics UK (COG-UK) Consortium|Davies|United Kingdom

>Spike|hCoV-19/England/EXET-135362/2020|2020-04-07|EPI\_ISL\_457051|Original|hCoV-19^^England|Human|University of Exeter|COVID-19 Genomics UK (COG-UK) Consortium|Temperton|United Kingdom

>Spike|hCoV-19/Portugal/PT0827/2020|2020-03-21|EPI\_ISL\_511086|Original|hCoV-19^^Portugal|Human|Instituto Nacional de Saude (INSA)|Instituto Nacional de Saude (INSA)|Borges|Portugal

>Spike|hCoV-19/England/QEUA-9437A9/2020|2020-07-23|EPI\_ISL\_532549|Original|hCoV-19^^England|Human|Lighthouse Lab in Glasgow|Wellcome Sanger Institute for the COVID-19 Genomics UK (COG-UK) consortium|Davies|United Kingdom

>Spike|hCoV-19/Chile/VB-CMM-28875/2020|2020-03-19|EPI\_ISL\_459864|Original|hCoV-19^^Valparaiso|Human|Center for Genome Regulation (CRG)|Center for Mathematical Modeling and Center for Genome Regulation. Santiago|Palma V\u00e1jares|Chile

>Spike|hCoV-19/England/NOTT-11C149/2020|2020-11-15|EPI\_ISL\_652399|Original|hCoV-19^^England|Human|Queens Medical Centre|COVID-19 Genomics UK (COG-UK) Consortium|Loose|United Kingdom

>Spike|hCoV-19/Japan/PG-0514/2020|2020-04-02|EPI\_ISL\_480172|Original|hCoV-19^^Kanto|Human|Gunma Prefectural Institute of Public Health and Environmental Sciences|Pathogen Genomics Center|Sekizuka|Japan

>Spike|hCoV-19/England/QEUA-A0BE4D/2020|2020-09-30|EPI\_ISL\_599297|Original|hCoV-19^^England|Human|Lighthouse Lab in Glasgow|Wellcome Sanger Institute for the COVID-19 Genomics UK (COG-UK) consortium|Davies|United Kingdom

>Spike|hCoV-19/England/QEUA-BCDDA3/2020|2020-11-26|EPI\_ISL\_704509|Original|hCoV-19^^England|Human|Lighthouse Lab in Glasgow|Wellcome Sanger Institute for the COVID-19 Genomics UK (COG-UK) Consortium|Davies|United Kingdom

>Spike|hCoV-19/Netherlands/NA\_659/2020|2020-00-00|EPI\_ISL\_461094|Original|hCoV-19^^Netherlands|Human|Dutch COVID-19 response team|Erasmus Medical Center|Oude Munnink|Netherlands

>Spike|hCoV-19/USA/TX-DSHS-0335/2020|2020-06-13|EPI\_ISL\_534302|Original|hCoV-19^^Texas|Human|Texas Department of State Health Services|Texas Department of State Health Services|Rahman|USA

>Spike|hCoV-19/England/MILK-BB163E/2020|2020-11-17|EPI\_ISL\_720267|Original|hCoV-19^^England|Human|Lighthouse Lab in Milton Keynes|Wellcome Sanger Institute for the COVID-19 Genomics UK (COG-UK) Consortium|Davies|United Kingdom

>Spike|hCoV-19/Switzerland/BE-ETHZ-230053/2020|2020-08-04|EPI\_ISL\_516591|Original|hCoV-19^^Bern|Human|Viollier AG|Department of Biosystems Science and Engineering|Nadeau|Switzerland

>Spike|hCoV-19/Australia/VIC16407/2020|2020-08-09|EPI\_ISL\_640432|Original|hCoV-19^^Victoria|Human|Microbiological Diagnostic Unit - Public Health Laboratory (MDU-PHL)|MDU-PHL|Schultz|Australia

>Spike|hCoV-19/England/CAMC-C71FE3/2020|2020-12-15|EPI\_ISL\_769159|Original|hCoV-19^^England|Human|Lighthouse Lab in Cambridge|Wellcome Sanger Institute for the COVID-19 Genomics UK (COG-UK) Consortium|Davies|United Kingdom

>Spike|hCoV-19/USA/TX-HMH-MCoV-18682/2020|2020-11-21|EPI\_ISL\_785030|Original|hCoV-19^^Texas|Human|Houston Methodist Hospital|Houston Methodist Hospital|Long|USA

>Spike|hCoV-19/Japan/IC-0280/2020|2020-11-00|EPI\_ISL\_667709|Original|hCoV-19^^Japan|Human|Pathogen Genomics Center|Pathogen Genomics Center|Sekizuka|Japan

>Spike|hCoV-19/Denmark/DCGC-20411/2020|2020-12-21|EPI\_ISL\_759132|Original|hCoV-19^^Hovedstaden|Human|Department of Virus and Microbiological Special Diagnostics|Albertsen Lab|Michaelsen|Denmark

>Spike|hCoV-19/England/20206035304/2020|2020-05-13|EPI\_ISL\_465660|Original|hCoV-19^^England|Human|Respiratory Virus Unit|Respiratory Virus Unit|Platt|United Kingdom

>Spike|hCoV-19/Thailand/Samut prakarn\_840/2020|2020-02-04|EPI\_ISL\_447919|Vero P2|hCoV-19^^Samut Prakarn|Human|n/a|National Institute of Health. Department of medical Sciences|Okada|Thailand

>Spike|hCoV-19/England/ALDP-A52788/2020|2020-10-07|EPI\_ISL\_597942|Original|hCoV-19^^England|Human|Lighthouse Lab in Alderley Park|Wellcome Sanger Institute for the COVID-19 Genomics UK (COG-UK) consortium|Davies|United Kingdom

>Spike|hCoV-19/Russia/OMS-ORINFI-6673S/2020|2020-05-11|EPI\_ISL\_569739|Original|hCoV-19^^Omsk|Human|Omsk Research Institute of Natural Focal Infections|WHO National Influenza Centre Russian Federation|Komissarov|Russia

>Spike|hCoV-19/India/DL-NIV-773/2020|2020-00-00|EPI\_ISL\_547873|unknown|hCoV-19^^Delhi|Human|Maximum Containment Laboratory|Maximum Containment Laboratory|Yadav|India

>Spike|hCoV-19/USA/AZ-TG648771/2020|2020-04-11|EPI\_ISL\_695941|Original|hCoV-19^^Arizona|Human|Sonora Quest Laboratories|TGen North|French|USA

>Spike|hCoV-19/England/MILK-BB24AC/2020|2020-11-18|EPI\_ISL\_720187|Original|hCoV-19^^England|Human|Lighthouse Lab in Milton Keynes|Wellcome Sanger Institute for the COVID-19 Genomics UK (COG-UK) Consortium|Davies|United Kingdom

>Spike|hCoV-19/Slovenia/8852/2020|2020-03-17|EPI\_ISL\_635251|Original|hCoV-19^^Slovenia|Human|Institute of Microbiology and Immunology|Institute of Microbiology and Immunology|Zakotnik|Slovenia

>Spike|hCoV-19/DRC/2529/2020|2020-04-15|EPI\_ISL\_437338|Original|hCoV-19^^Kinshasa|Human|Viral Respiratory Lab|Pathogen Sequencing Lab|Muyembe|Democratic Republic of the Congo

>Spike|hCoV-19/USA/TX-HMH-MCoV-10506/2020|2020-07-08|EPI\_ISL\_789506|Original|hCoV-19^^Texas|Human|Houston Methodist Hospital|Houston Methodist Hospital|Long|USA

>Spike|hCoV-19/Scotland/CVR1899/2020|2020-04-08|EPI\_ISL\_438851|Original|hCoV-19^^Scotland|Human|West of Scotland Specialist Virology Centre|COVID-19 Genomics UK (COG-UK) Consortium|Robertson|United Kingdom

>Spike|hCoV-19/Wales/PHWC-4995BE/2020|2020-12-04|EPI\_ISL\_727326|Original|hCoV-19^^Wales|Human|Originating lab|COVID-19 Genomics UK (COG-UK) Consortium|Moore|United Kingdom

>Spike|hCoV-19/USA/MI-UM-10033851236/2020|2020-04-04|EPI\_ISL\_578091|Original|hCoV-19^^Michigan|Human|University of Michigan Clinical Microbiology Laboratory|Lauring Lab|Valesano|USA

>Spike|hCoV-19/USA/AZ-TG547381/2020|2020-07-07|EPI\_ISL\_695513|Original|hCoV-19^^Arizona|Human|AZ SPHL|TGen North|French|USA

>Spike|hCoV-19/England/NORT-288D34/2020|2020-03-20|EPI\_ISL\_458639|Original|hCoV-19^^England|Human|NU-OMICS DNA Sequencing research facility|Wellcome Sanger Institute for the COVID-19 Genomics UK (COG-UK) consortium|Davies|United Kingdom

>Spike|hCoV-19/Switzerland/SZ-ETHZ-200046/2020|2020-07-10|EPI\_ISL\_510731|Original|hCoV-19^^Schwyz|Human|Viollier AG|Department of Biosystems Science and Engineering|Nadeau|Switzerland

>Spike|hCoV-19/Belgium/reg-0403290/2020|2020-04-03|EPI\_ISL\_464084|Original|hCoV-19^^Colfontaine|Human|KU Leuven|KU Leuven|Maes|Belgium

>Spike|hCoV-19/Switzerland/AG-ETHZ-360246/2020|2020-11-09|EPI\_ISL\_729244|Original|hCoV-19^^Aargau|Human|Viollier AG|Department of Biosystems Science and Engineering|Nadeau|Switzerland

>Spike|hCoV-19/England/MILK-9E0B57/2020|2020-09-21|EPI\_ISL\_601473|Original|hCoV-19^^England|Human|Lighthouse Lab in Milton Keynes|Wellcome Sanger Institute for the COVID-19 Genomics UK (COG-UK) consortium|Davies|United Kingdom

>Spike|hCoV-19/England/NORT-2839AE/2020|2020-04-01|EPI\_ISL\_488708|Original|hCoV-19^^England|Human|NU-OMICS DNA Sequencing research facility|Wellcome Sanger Institute for the COVID-19 Genomics UK (COG-UK) consortium|Davies|United Kingdom

>Spike|hCoV-19/England/ALDP-CB62F8/2020|2020-12-18|EPI\_ISL\_761723|Original|hCoV-19^^England|Human|Lighthouse Lab in Alderley Park|Wellcome Sanger Institute for the COVID-19 Genomics UK (COG-UK) Consortium|Davies|United Kingdom

>Spike|hCoV-19/India/TG-CCMB-AB395/2020|2020-08-13|EPI\_ISL\_539635|Original|hCoV-19^^Telangana|Human|CSIR-Centre for Cellular and Molecular Biology|CSIR-Centre for Cellular and Molecular Biology|Mukherjee|India

>Spike|hCoV-19/USA/CO-CDPHE-2009090322/2020|2020-09-08|EPI\_ISL\_677645|Original|hCoV-19^^Colorado|Human|Colorado Department of Public Health and Environment|Colorado Department of Public Health and Environment|Bankers|USA

>Spike|hCoV-19/England/CAMC-A58421/2020|2020-10-07|EPI\_ISL\_597015|Original|hCoV-19^^England|Human|Lighthouse Lab in Cambridge|Wellcome Sanger Institute for the COVID-19 Genomics UK (COG-UK) consortium|Davies|United Kingdom

>Spike|hCoV-19/Wales/PHWC-2B6C1/2020|2020-04-12|EPI\_ISL\_445747|Original|hCoV-19^^Wales|Human|Wales Specialist Virology Centre|Public Health Wales Microbiology Cardiff|Moore|United Kingdom

>Spike|hCoV-19/USA/WA-UW-1965/2020|2020-03-24|EPI\_ISL\_424324|Original|hCoV-19^^Washington|Human|UW Virology Lab|UW Virology Lab|Roychoudhury|USA

>Spike|hCoV-19/Denmark/DCGC-10779/2020|2020-11-02|EPI\_ISL\_670201|Original|hCoV-19^^Hovedstaden|Human|Department of Virus and Microbiological Special Diagnostics|Albertsen Lab|Michaelsen|Denmark

>Spike|hCoV-19/England/QEUA-9F4051/2020|2020-09-24|EPI\_ISL\_588582|Original|hCoV-19^^England|Human|Lighthouse Lab in Glasgow|Wellcome Sanger Institute for the COVID-19 Genomics UK (COG-UK) consortium|Davies|United Kingdom

>Spike|hCoV-19/England/ALDP-9BEA28/2020|2020-09-10|EPI\_ISL\_567954|Original|hCoV-19^^England|Human|Lighthouse Lab in Alderley Park|Wellcome Sanger Institute for the COVID-19 Genomics UK (COG-UK) consortium|Davies|United Kingdom

>Spike|hCoV-19/Switzerland/BE-ETHZ-240065/2020|2020-08-13|EPI\_ISL\_523905|Original|hCoV-19^^Bern|Human|Viollier AG|Department of Biosystems Science and Engineering|Nadeau|Switzerland

>Spike|hCoV-19/England/CAMC-A59666/2020|2020-10-09|EPI\_ISL\_596943|Original|hCoV-19^^England|Human|Lighthouse Lab in Cambridge|Wellcome Sanger Institute for the COVID-19 Genomics UK (COG-UK) consortium|Davies|United Kingdom

>Spike|hCoV-19/Hungary/UD-90300/2020|2020-10-04|EPI\_ISL\_671458|Original|hCoV-19^^Borsod-Aba\u00faj-Zempl\u00e9n county|Human|University of Debrecen|National Laboratory of Virology|Kemenesi|Hungary

>Spike|hCoV-19/Scotland/EDB7845/2020|2020-09-22|EPI\_ISL\_572707|Original|hCoV-19^^Scotland|Human|Virology Department|COVID-19 Genomics UK (COG-UK) Consortium|Williams|United Kingdom

>Spike|hCoV-19/Taiwan/TSGH-29/2020|2020-03-17|EPI\_ISL\_447255|Original|hCoV-19^^New Taipei City|Human|TSGH-CP molecular lab|TSGH-CP molecular lab|Shang|Taiwan

>Spike|hCoV-19/England/GSTT-265D879/2020|2020-03-25|EPI\_ISL\_484025|Original|hCoV-19^^England|Human|Centre for Clinical Infection and Diagnostics Research and Genomics Innovation Unit|COVID-19 Genomics UK (COG-UK) Consortium|Awan|United Kingdom

>Spike|hCoV-19/Serbia/Kosovska Mitrovica-05221607/2020|2020-07-15|EPI\_ISL\_644565|Original|hCoV-19^^Kosovska Mitrovica|Human|Veterinary Specialized Institute \Kraljevo\|Veterinary Specialized Institute \Kraljevo\|Vidanovic|Serbia

>Spike|hCoV-19/India/GJ-GBRC206/2020|2020-06-11|EPI\_ISL\_475032|Original|hCoV-19^^Gujarat|Human|Department of MicroBiology|Gujarat Biotechnology Research Centre|Joshi|India

>Spike|hCoV-19/Wales/PHWC-49B2D3/2020|2020-11-06|EPI\_ISL\_742317|Original|hCoV-19^^Wales|Human|Wales Specialist Virology Centre Sequencing lab|COVID-19 Genomics UK (COG-UK) Consortium|Moore|United Kingdom

>Spike|hCoV-19/Northern Ireland/NIRE-2341C2/2020|2020-10-14|EPI\_ISL\_680351|Original|hCoV-19^^Northern Ireland|Human|Regional Virus Laboratory|COVID-19 Genomics UK (COG-UK) Consortium|Fairley|United Kingdom

>Spike|hCoV-19/India/DL-NCDC-3176/2020|2020-04-05|EPI\_ISL\_436427|Original|hCoV-19^^Delhi|Human|National Centre for Disease control (NCDC)|NCDC/CSIR-IGIB|Singh|India

>Spike|hCoV-19/Spain/CL-IBV-97006167/2020|2020-04-05|EPI\_ISL\_537314|Original|hCoV-19^^Castilla y Leon|Human|Universidad de Le\u00f3n|SeqCOVID-SPAIN consortium/IBV (CSIC)|Comas|Spain



>Spike|hCoV-19/Belgium/ULG-11147/2020|2020-12-19|EPI\_ISL\_737391|Original|hCoV-19^^Li\u00e8ge|Human|Department of Clinical Microbiology|GIGA Medical Genomics|Durkin|Belgium

>Spike|hCoV-19/Switzerland/SZ-ETHZ-310390/2020|2020-10-08|EPI\_ISL\_603464|Original|hCoV-19^^Schwyz|Human|Viollier AG|Department of Biosystems Science and Engineering|Nadeau|Switzerland

>Spike|hCoV-19/Denmark/DCGC-3692/2020|2020-09-07|EPI\_ISL\_615468|Original|hCoV-19^^Hovedstaden|Human|Department of Virus and Microbiological Special Diagnostics|Albertsen lab|Michaelsen|Denmark

>Spike|hCoV-19/Austria/CeMM0199/2020|2020-03-15|EPI\_ISL\_438040|Original|hCoV-19^^Vienna|Human|Center for Virology|Bergthaler laboratory|Bergthaler|Austria

>Spike|hCoV-19/Spain/MD-HLP-R62/2020|2020-04-21|EPI\_ISL\_530108|Original|hCoV-19^^Madrid|Human|Hospital Universitario Ram\u00f3n y Cajal|Hospital Universitario La Paz|Viedma|Spain

>Spike|hCoV-19/USA/WA-UW-1478/2020|2020-03-18|EPI\_ISL\_424182|Original|hCoV-19^^Washington|Human|UW Virology Lab|UW Virology Lab|Roychoudhury|USA

>Spike|hCoV-19/England/CAMC-A81085/2020|2020-10-14|EPI\_ISL\_610798|Original|hCoV-19^^England|Human|Lighthouse Lab in Cambridge|Wellcome Sanger Institute for the COVID-19 Genomics UK (COG-UK) consortium|Davies|United Kingdom

>Spike|hCoV-19/England/CAMC-BC0CEF/2020|2020-11-22|EPI\_ISL\_704712|Original|hCoV-19^^England|Human|Lighthouse Lab in Cambridge|Wellcome Sanger Institute for the COVID-19 Genomics UK (COG-UK) Consortium|Davies|United Kingdom

>Spike|hCoV-19/England/CAMB-71B18/2020|2020-03-31|EPI\_ISL\_439619|Original|hCoV-19^^England|Human|Department of Pathology|Wellcome Sanger Institute for the COVID-19 Genomics UK (COG-UK) consortium|Amato|United Kingdom

>Spike|hCoV-19/England/LOND-1264DC2/2020|2020-11-22|EPI\_ISL\_724568|Original|hCoV-19^^England|Human|University College London|COVID-19 Genomics UK (COG-UK) Consortium|Roy|United Kingdom

>Spike|hCoV-19/England/ALDP-C489AB/2020|2020-12-12|EPI\_ISL\_736575|Original|hCoV-19^^England|Human|Lighthouse Lab in Alderley Park|Wellcome Sanger Institute for the COVID-19 Genomics UK (COG-UK) Consortium|Davies|United Kingdom

>Spike|hCoV-19/Mexico/BCN-ALSR-1704/2020|2020-04-22|EPI\_ISL\_496365|Original|hCoV-19^^Baja California|Human|Infectolab|Andersen lab at Scripps Research|Gangavarapu|Mexico

>Spike|hCoV-19/USA/TX-DSHS-0285/2020|2020-06-13|EPI\_ISL\_527852|Original|hCoV-19^^Texas|Human|Texas Department of State Health Services|Texas Department of State Health Services|Rahman|USA

>Spike|hCoV-19/England/ALDP-9C5A3D/2020|2020-09-11|EPI\_ISL\_567812|Original|hCoV-19^^England|Human|Lighthouse Lab in Alderley Park|Wellcome Sanger Institute for the COVID-19 Genomics UK (COG-UK) consortium|Davies|United Kingdom

>Spike|hCoV-19/India/OR-ILSCV21587/2020|2020-05-16|EPI\_ISL\_463083|Original|hCoV-19^^Odisha|Human|Institute of Life Sciences|Immunogenomics lab|Raghav|India

>Spike|hCoV-19/Scotland/CVR5333/2020|2020-10-24|EPI\_ISL\_651764|Original|hCoV-19^^Scotland|Human|West of Scotland Specialist Virology Centre|COVID-19 Genomics UK (COG-UK) Consortium|Robertson|United Kingdom

>Spike|hCoV-19/Ireland/D-NVRL-20IRL80439/2020|2020-11-08|EPI\_ISL\_732381|Original|hCoV-19^^Dublin|Human|National Virus Reference Laboratory|National Virus Reference Laboratory|Gonzalez|Ireland

>Spike|hCoV-19/France/IDF-2279/2020|2020-03-11|EPI\_ISL\_416500|Original|hCoV-19^^\u00e9-de-France|Human|LABM GH nord Essonne|National Reference Center for Viruses of Respiratory Infections|Enouf|France

>Spike|hCoV-19/England/ALDP-C3AB2E/2020|2020-12-09|EPI\_ISL\_731434|Original|hCoV-19^^England|Human|Lighthouse Lab in Alderley Park|Wellcome Sanger Institute for the COVID-19 Genomics UK (COG-UK) Consortium|Davies|United Kingdom

>Spike|hCoV-19/Canada/BC\_4799711/2020|2020-03-09|EPI\_ISL\_418830|Original|hCoV-19^^British Columbia|Human|BCCDC Public Health Laboratory|BCCDC Public Health Laboratory|Harrigan|Canada

>Spike|hCoV-19/Portugal/IGC4024/2020|2020-05-31|EPI\_ISL\_491224|Original|hCoV-19^^Portugal|Human|Instituto Gulbenkian de Ci\u00eancia|Instituto Gulbenkian de Ci\u00eancia|Leite|Portugal

>Spike|hCoV-19/England/20132032904/2020|2020-03-22|EPI\_ISL\_423775|Original|hCoV-19^^England|Human|Respiratory Virus Unit|Respiratory Virus Unit|Platt|United Kingdom

>Spike|hCoV-19/USA/MI-QDX-1639/2020|2020-03-18|EPI\_ISL\_603965|Original|hCoV-19^^Michigan|Human|Quest Diagnostics|Quest Diagnostics|Kagan|USA

>Spike|hCoV-19/Spain/MD-IBV-005344/2020|2020-03-19|EPI\_ISL\_510221|Original|hCoV-19^^Madrid|Human|Hospital General Universitario Gregorio Mara\u00f1\u00f3n|SeqCOVID-SPAIN consortium/IBV (CSIC)|Comas|Spain

>Spike|hCoV-19/England/QEUA-C3119E/2020|2020-12-11|EPI\_ISL\_731382|Original|hCoV-19^^England|Human|Lighthouse Lab in Glasgow|Wellcome Sanger Institute for the COVID-19 Genomics UK (COG-UK) Consortium|Davies|United Kingdom

>Spike|hCoV-19/England/QEUA-AF282D/2020|2020-10-30|EPI\_ISL\_662803|Original|hCoV-19^^England|Human|Lighthouse Lab in Glasgow|Wellcome Sanger Institute for the COVID-19 Genomics UK (COG-UK) Consortium|Davies|United Kingdom

>Spike|hCoV-19/Denmark/DCGC-6285/2020|2020-10-05|EPI\_ISL\_620045|Original|hCoV-19^^Hovedstaden|Human|Department of Virus and Microbiological Special Diagnostics|Albertsen lab|Michaelsen|Denmark

>Spike|hCoV-19/USA/WI-UW-1947/2020|2020-09-29|EPI\_ISL\_677355|Original|hCoV-19^^Wisconsin|Human|University of Wisconsin-Madison AIDS Vaccine Research Laboratories|University of Wisconsin-Madison AIDS Vaccine Research Laboratories|Baczenas|USA

>Spike|hCoV-19/England/MILK-B3C4AA/2020|2020-11-01|EPI\_ISL\_706148|Original|hCoV-19^^England|Human|Oxford Viromics|COVID-19 Genomics UK (COG-UK) Consortium|Golubchik|United Kingdom

>Spike|hCoV-19/England/BRIS-126258/2020|2020-04-10|EPI\_ISL\_458923|Original|hCoV-19^^England|Human|PHE South West Regional Laboratory|Wellcome Sanger Institute for the COVID-19 Genomics UK (COG-UK) consortium|Davies|United Kingdom

>Spike|hCoV-19/England/ALDP-BB3186/2020|2020-11-19|EPI\_ISL\_703205|Original|hCoV-19^^England|Human|Lighthouse Lab in Alderley Park|Wellcome Sanger Institute for the COVID-19 Genomics UK (COG-UK) Consortium|Davies|United Kingdom

>Spike|hCoV-19/Wales/PHWC-49F63D/2020|2020-12-08|EPI\_ISL\_743245|Original|hCoV-19^^Wales|Human|Wales Specialist Virology Centre Sequencing lab|COVID-19 Genomics UK (COG-UK) Consortium|Moore|United Kingdom

>Spike|hCoV-19/Scotland/CVR1385/2020|2020-03-31|EPI\_ISL\_433564|Original|hCoV-19^^Scotland|Human|West of Scotland Specialist Virology Centre|COVID-19 Genomics UK (COG-UK) Consortium|Robertson|United Kingdom

>Spike|hCoV-19/Ireland/CE-UHL118/2020|2020-04-07|EPI\_ISL\_681706|Original|hCoV-19^^Clare|Human|University Hospital Limerick|Irish Coronavirus Sequencing Consortium - Teagasc Moorepark|Walsh|Ireland

>Spike|hCoV-19/USA/WA-S1488/2020|2020-03-08|EPI\_ISL\_495663|Original|hCoV-19^^Washington|Human|Seattle Flu Study|Seattle Flu Study|Lee|USA

>Spike|hCoV-19/Australia/NSW2563/2020|2020-04-05|EPI\_ISL\_527056|Original|hCoV-19^^New South Wales|Human|Area of Virology|Area of Virology|Yeang|Australia

>Spike|hCoV-19/Northern Ireland/QEUA-9C85A2/2020|2020-09-11|EPI\_ISL\_567016|Original|hCoV-19^^Northern Ireland|Human|Lighthouse Lab in Glasgow|Wellcome Sanger Institute for the COVID-19 Genomics UK (COG-UK) consortium|Davies|United Kingdom

>Spike|hCoV-19/England/QEUA-CCA59E/2020|2020-12-23|EPI\_ISL\_782164|Original|hCoV-19^^England|Human|Lighthouse Lab in Glasgow|Wellcome Sanger Institute for the COVID-19 Genomics UK (COG-UK) Consortium|Davies|United Kingdom

>Spike|hCoV-19/France/IDF-4432/2020|2020-03-23|EPI\_ISL\_443317|Original|hCoV-19^^\u00cele-de-France|Human|Cabinet M\u00e9dical|National Reference Center for Viruses of Respiratory Infections|Enouf|France

>Spike|hCoV-19/England/MILK-9E236C/2020|2020-09-21|EPI\_ISL\_581351|Original|hCoV-19^^England|Human|Lighthouse Lab in Milton Keynes|Wellcome Sanger Institute for the COVID-19 Genomics UK (COG-UK) consortium|Davies|United Kingdom

>Spike|hCoV-19/USA/MA-MASPHL-00956/2020|2020-10-28|EPI\_ISL\_692815|Original|hCoV-19^^Massachusetts|Human|Massachusetts State Public Health Laboratory|Massachusetts State Public Health Laboratory|Lang|USA

>Spike|hCoV-19/Japan/PG-4892/2020|2020-08-00|EPI\_ISL\_690013|Original|hCoV-19^^Japan|Human|Sakai City Institute of Public Health|Pathogen Genomics Center|Sekizuka|Japan

>Spike|hCoV-19/USA/VA-DCLS-0998/2020|2020-05-30|EPI\_ISL\_526900|Original|hCoV-19^^Virginia|Human|Virginia DCLS|Virginia DCLS|St. Jacques|USA

>Spike|hCoV-19/Wales/PHWC-487B39/2020|2020-10-30|EPI\_ISL\_639277|Original|hCoV-19^^Wales|Human|Wales Specialist Virology Centre Sequencing lab|COVID-19 Genomics UK (COG-UK) Consortium|Moore|United Kingdom

>Spike|hCoV-19/USA/UT-08310/2020|2020-05-26|EPI\_ISL\_524106|Original|hCoV-19^^Utah|Human|Utah Public Health Laboratory|Utah Public Health Laboratory|Young|USA

>Spike|hCoV-19/England/LIVE-ABBCA/2020|2020-08-09|EPI\_ISL\_540628|Original|hCoV-19^^England|Human|Liverpool Clinical Laboratories|COVID-19 Genomics UK (COG-UK) Consortium|Haldenby|United Kingdom

>Spike|hCoV-19/England/ALDP-954866/2020|2020-06-09|EPI\_ISL\_555494|Original|hCoV-19^^England|Human|Lighthouse Lab in Alderley Park|Wellcome Sanger Institute for the COVID-19 Genomics UK (COG-UK) consortium|Davies|United Kingdom

>Spike|hCoV-19/England/NORW-EB26F/2020|2020-05-01|EPI\_ISL\_457412|Original|hCoV-19^^England|Human|Quadram Institute Bioscience|COVID-19 Genomics UK (COG-UK) Consortium|Alikhan|United Kingdom

>Spike|hCoV-19/Senegal/1406/2020|2020-03-29|EPI\_ISL\_480782|Original|hCoV-19^^Dakar|Human|Institut Pasteur Dakar|Institut Pasteur de Dakar|Dia|Senegal

>Spike|hCoV-19/Scotland/QEUA-AD02FA/2020|2020-10-26|EPI\_ISL\_643998|Original|hCoV-19^^Scotland|Human|Lighthouse Lab in Glasgow|Wellcome Sanger Institute for the COVID-19 Genomics UK (COG-UK) Consortium|Davies|United Kingdom

>Spike|hCoV-19/USA/UT-UPHL-2012803704/2020|2020-10-26|EPI\_ISL\_746255|Original|hCoV-19^^Utah|Human|Ginkgo Bioworks Clinical Laboratory|Utah Public Health Laboratory|Young|USA

>Spike|hCoV-19/India/DL-MaxCov0020-CSIR-IGIB/2020|2020-05-10|EPI\_ISL\_459922|Original|hCoV-19^^Delhi|Human|Devki Devi Foundation|CSIR-IGIB/Max|Pandey|India

>Spike|hCoV-19/Scotland/EDB8640/2020|2020-10-23|EPI\_ISL\_651985|Original|hCoV-19^^Scotland|Human|Virology Department|COVID-19 Genomics UK (COG-UK) Consortium|McHugh|United Kingdom

>Spike|hCoV-19/England/QEUA-A0BF4A/2020|2020-10-03|EPI\_ISL\_599162|Original|hCoV-19^^England|Human|Lighthouse Lab in Glasgow|Wellcome Sanger Institute for the COVID-19 Genomics UK (COG-UK) consortium|Davies|United Kingdom

>Spike|hCoV-19/Scotland/CVR3544/2020|2020-05-15|EPI\_ISL\_473679|Original|hCoV-19^^Scotland|Human|West of Scotland Specialist Virology Centre|COVID-19 Genomics UK (COG-UK) Consortium|Robertson|United Kingdom

>Spike|hCoV-19/Scotland/CVR1638/2020|2020-04-03|EPI\_ISL\_433639|Original|hCoV-19^^Scotland|Human|West of Scotland Specialist Virology Centre|COVID-19 Genomics UK (COG-UK) Consortium|Robertson|United Kingdom

>Spike|hCoV-19/England/MILK-A05353/2020|2020-09-30|EPI\_ISL\_599888|Original|hCoV-19^^England|Human|Lighthouse Lab in Milton Keynes|Wellcome Sanger Institute for the COVID-19 Genomics UK (COG-UK) Consortium|Davies|United Kingdom

>Spike|hCoV-19/USA/TX-HMH-MCoV-8614/2020|2020-07-01|EPI\_ISL\_780652|Original|hCoV-19^^Texas|Human|Houston Methodist Hospital|Houston Methodist Hospital|Long|USA

>Spike|hCoV-19/USA/UT-UPHL-05479/2020|2020-05-30|EPI\_ISL\_560882|Original|hCoV-19^^Utah|Human|Utah Public Health Laboratory|Utah Public Health Laboratory|Young|USA

>Spike|hCoV-19/USA/OR-PROV-081/2020|2020-04-18|EPI\_ISL\_482354|Original|hCoV-19^^Oregon|Human|Providence St. Joseph Health Molecular Genomics Laboratory|Providence St. Joseph Health Molecular Genomics Laboratory|Dowdell|USA

>Spike|hCoV-19/England/QEUA-B2DD92/2020|2020-11-02|EPI\_ISL\_646300|Original|hCoV-19^^England|Human|Lighthouse Lab in Glasgow|Wellcome Sanger Institute for the COVID-19 Genomics UK (COG-UK) Consortium|Davies|United Kingdom

>Spike|hCoV-19/USA/TX-HMH-MCoV-8348/2020|2020-07-08|EPI\_ISL\_784346|Original|hCoV-19^^Texas|Human|Houston Methodist Hospital|Houston Methodist Hospital|Long|USA

>Spike|hCoV-19/England/CAMB-75EEE/2020|2020-03-29|EPI\_ISL\_438494|Original|hCoV-19^^England|Human|Department of Pathology|Wellcome Sanger Institute for the COVID-19 Genomics UK (COG-UK) consortium|Amato|United Kingdom

>Spike|hCoV-19/USA/CA-CZB-3310/2020|2020-07-17|EPI\_ISL\_548330|Original|hCoV-19^^California|Human|County of San Luis Obispo Public Health Laboratory|Chan-Zuckerberg Biohub|Bhatt|USA

>Spike|hCoV-19/Switzerland/BS-UHB-42184956/2020|2020-03-10|EPI\_ISL\_527983|Original|hCoV-19^^Basel-Stadt|Human|University Hospital Basel|University Hospital Basel|Roloff Handschin|Switzerland

>Spike|hCoV-19/USA/CA-ALSR-3141/2020|2020-08-19|EPI\_ISL\_635871|Original|hCoV-19^^California|Human|San Diego County Public Health Laboratory|Andersen lab at Scripps Research|Gangavarapu|USA

>Spike|hCoV-19/Denmark/DCGC-2818/2020|2020-08-17|EPI\_ISL\_616454|Original|hCoV-19^^Midtjylland|Human|Department of Virus and Microbiological Special Diagnostics|Albertsen lab|Michaelsen|Denmark

>Spike|hCoV-19/Wales/PHWC-16B424/2020|2020-09-15|EPI\_ISL\_560288|Original|hCoV-19^^Wales|Human|Wales Specialist Virology Centre Sequencing lab|COVID-19 Genomics UK (COG-UK) Consortium|Moore|United Kingdom

>Spike|hCoV-19/England/CAMC-9D1F11/2020|2020-09-19|EPI\_ISL\_601704|Original|hCoV-19^^England|Human|Lighthouse Lab in Cambridge|Wellcome Sanger Institute for the COVID-19 Genomics UK (COG-UK) consortium|Davies|United Kingdom

>Spike|hCoV-19/Japan/PG-5691/2020|2020-06-00|EPI\_ISL\_688815|Original|hCoV-19^^Japan|Human|Pathogen Genomics Center|Pathogen Genomics Center|Sekizuka|Japan

>Spike|hCoV-19/USA/WI-UW-2127/2020|2020-09-24|EPI\_ISL\_677532|Original|hCoV-19^^Wisconsin|Human|University of Wisconsin-Madison AIDS Vaccine Research Laboratories|University of Wisconsin-Madison AIDS Vaccine Research Laboratories|Baczenas|USA

>Spike|hCoV-19/Switzerland/ZH-UZH-IMV7/2020|2020-03-29|EPI\_ISL\_590829|Vero P2|hCoV-19^^Zurich|Human|Institute of Medical Virology|Institute of Medical Virology|Kufner|Switzerland

>Spike|hCoV-19/USA/WA-UW-47284/2020|2020-12-09|EPI\_ISL\_776704|Original|hCoV-19^^Washington|Human|UW Virology Lab|UW Virology Lab|Roychoudhury|USA

>Spike|hCoV-19/Italy/VEN-IZSve-23-50/2020|2020-03-26|EPI\_ISL\_452185|Original|hCoV-19^^Veneto|Human|ULSS9 Distretto di Bussolengo|Istituto Zooprofilattico Sperimentale delle Venezie|Quaranta|Italy

>Spike|hCoV-19/England/MILK-9A6935/2020|2020-09-01|EPI\_ISL\_550103|Original|hCoV-19^^England|Human|Lighthouse Lab in Milton Keynes|Wellcome Sanger Institute for the COVID-19 Genomics UK (COG-UK) consortium|Davies|United Kingdom

>Spike|hCoV-19/USA/TX-DSHS-2020/2020|2020-06-18|EPI\_ISL\_766648|Original|hCoV-19^^Texas|Human|Texas Department of State Health Services|Texas Department of State Health Services|Rahman|USA

>Spike|hCoV-19/USA/CA-ALSR-2308/2020|2020-07-09|EPI\_ISL\_635423|Original|hCoV-19^^California|Human|San Diego County Public Health Laboratory|Andersen lab at Scripps Research|Gangavarapu|USA

>Spike|hCoV-19/Canada/ON-S773/2020|2020-04-10|EPI\_ISL\_591222|Original|hCoV-19^^Ontario|Human|Toronto Invasive Bacterial Diseases Network|McMaster University|McArthur|Canada

>Spike|hCoV-19/Denmark/DCGC-14365/2020|2020-11-30|EPI\_ISL\_711722|Original|hCoV-19^^Hovedstaden|Human|Department of Virus and Microbiological Special Diagnostics|Albertsen Lab|Michaelsen|Denmark

>Spike|hCoV-19/Australia/VIC7090/2020|2020-08-01|EPI\_ISL\_564224|Original|hCoV-19^^Victoria|Human|Victorian Infectious Diseases Reference Laboratory (VIDRL)|VIDRL and MDU-PHL|Schultz|Australia

>Spike|hCoV-19/USA/UT-UPHL-2009148/2020|2020-05-27|EPI\_ISL\_525138|Original|hCoV-19^^Utah|Human|Utah Public Health Laboratory|Utah Public Health Laboratory|Young|USA

>Spike|hCoV-19/USA/VA-DCLS-1383/2020|2020-07-06|EPI\_ISL\_572228|Original|hCoV-19^^Virginia|Human|Virginia DCLS|Virginia DCLS|St. Jacques|USA

>Spike|hCoV-19/England/ALDP-B835A1/2020|2020-11-15|EPI\_ISL\_675166|Original|hCoV-19^^England|Human|Lighthouse Lab in Alderley Park|Wellcome Sanger Institute for the COVID-19 Genomics UK (COG-UK) Consortium|Davies|United Kingdom

>Spike|hCoV-19/USA/CA-CZB-13489/2020|2020-10-23|EPI\_ISL\_672522|Original|hCoV-19^^California|Human|Madera County Department of Public Health|Chan-Zuckerberg Biohub|Bhatt|USA

>Spike|hCoV-19/Wales/PHWC-2BEAB/2020|2020-04-11|EPI\_ISL\_445862|Original|hCoV-19^^Wales|Human|Wales Specialist Virology Centre|Public Health Wales Microbiology Cardiff|Moore|United Kingdom

>Spike|hCoV-19/England/CAMB-764CD/2020|2020-03-29|EPI\_ISL\_438429|Original|hCoV-19^^England|Human|Department of Pathology|Wellcome Sanger Institute for the COVID-19 Genomics UK (COG-UK) consortium|Amato|United Kingdom

>Spike|hCoV-19/USA/MN-MDH-1566/2020|2020-08-11|EPI\_ISL\_527631|Original|hCoV-19^^Minnesota|Human|Mayo Clinic & Mayo Clinic Laboratories|Minnesota Department of Health|Garfin|USA

>Spike|hCoV-19/England/QEUA-BCB6AA/2020|2020-11-26|EPI\_ISL\_703830|Original|hCoV-19^^England|Human|Lighthouse Lab in Glasgow|Wellcome Sanger Institute for the COVID-19 Genomics UK (COG-UK) Consortium|Davies|United Kingdom

>Spike|hCoV-19/USA/MI-MDHHS-SC20352/2020|2020-03-30|EPI\_ISL\_450631|Original|hCoV-19^^Michigan|Human|Michigan Department of Health and Human Services|Michigan Department of Health and Human Services|Blankenship|USA

>Spike|hCoV-19/USA/NY-NYCPHL-000610/2020|2020-03-11|EPI\_ISL\_632067|Original|hCoV-19^^New York|Human|NYU Langone Health|New York City Public Health Laboratory|Wang|USA

>Spike|hCoV-19/South Korea/KDCA0366/2020|2020-07-05|EPI\_ISL\_760150|Original|hCoV-19^^South Korea|Human|Division of Emerging Infectious Diseases|Division of Emerging Infectious Diseases|Park|South Korea

>Spike|hCoV-19/USA/HI-H200047/2020|2020-04-16|EPI\_ISL\_752632|Original|hCoV-19^^Hawaii|Human|State Laboratories Division|State Laboratories Division|Sultana|USA

>Spike|hCoV-19/England/QEUA-9C9D5E/2020|2020-09-10|EPI\_ISL\_567374|Original|hCoV-19^^England|Human|Lighthouse Lab in Glasgow|Wellcome Sanger Institute for the COVID-19 Genomics UK (COG-UK) consortium|Davies|United Kingdom

>Spike|hCoV-19/USA/CT-Yale-244/2020|2020-04-01|EPI\_ISL\_469172|Original|hCoV-19^^Connecticut|Human|Yale Clinical Virology Laboratory|Grubaugh Lab - Yale School of Public Health|Grubaugh|USA

>Spike|hCoV-19/England/ALDP-A5023E/2020|2020-10-07|EPI\_ISL\_597789|Original|hCoV-19^^England|Human|Lighthouse Lab in Alderley Park|Wellcome Sanger Institute for the COVID-19 Genomics UK (COG-UK) consortium|Davies|United Kingdom

>Spike|hCoV-19/USA/TX-HMH-7972/2020|2020-07-06|EPI\_ISL\_545754|Original|hCoV-19^^Texas|Human|Houston Methodist Hospital|Houston Methodist Hospital|Long|USA

>Spike|hCoV-19/Canada/QC\_AY8/2020|2020-04-12|EPI\_ISL\_463956|Original|hCoV-19^^Quebec|Human|Laboratoire de microbiologie|Smith Laboratory|Smith|Canada

>Spike|hCoV-19/USA/TX-HMH-2333/2020|2020-05-27|EPI\_ISL\_545251|Original|hCoV-19^^Texas|Human|Houston Methodist Hospital|Houston Methodist Hospital|Long|USA

>Spike|hCoV-19/USA/MI-UM-10036671867/2020|2020-10-28|EPI\_ISL\_650102|Original|hCoV-19^^Michigan|Human|University of Michigan Clinical Microbiology Laboratory|Lauring Lab|Valesano|USA

>Spike|hCoV-19/England/CAMC-C4130E/2020|2020-12-10|EPI\_ISL\_719356|Original|hCoV-19^^England|Human|Lighthouse Lab in Cambridge|Wellcome Sanger Institute for the COVID-19 Genomics UK (COG-UK) Consortium|Davies|United Kingdom

>Spike|hCoV-19/England/ALDP-A6CEFF/2020|2020-10-14|EPI\_ISL\_608091|Original|hCoV-19^^England|Human|Lighthouse Lab in Alderley Park|Wellcome Sanger Institute for the COVID-19 Genomics UK (COG-UK) consortium|Davies|United Kingdom

>Spike|hCoV-19/Luxembourg/LNS2813963/2020|2020-03-22|EPI\_ISL\_740199|Original|hCoV-19^^Luxembourg|Human|Laboratoire national de sant\u00e9|Laboratoire national de sant\u00e9|Wienecke-Baldacchino|Luxembourg

>Spike|hCoV-19/USA/CA-CZB-9775/2020|2020-06-23|EPI\_ISL\_672174|Original|hCoV-19^^California|Human|The Ashley Laboratory|Chan-Zuckerberg Biohub|Bhatt|USA

>Spike|hCoV-19/England/CAMB-1BAE91/2020|2020-11-11|EPI\_ISL\_664178|Original|hCoV-19^^England|Human|Department of Pathology|COVID-19 Genomics UK (COG-UK) Consortium|Goodfellow|United Kingdom

>Spike|hCoV-19/Netherlands/Overijssel\_17/2020|2020-04-13|EPI\_ISL\_460806|Original|hCoV-19^^Overijssel|Human|Dutch COVID-19 response team|Erasmus Medical Center|Oude Munnink|Netherlands

>Spike|hCoV-19/Netherlands/ZH-RIVM-10063/2020|2020-04-07|EPI\_ISL\_547558|Original|hCoV-19^^Zuid Holland|Human|Dutch COVID-19 response

team|National Institute for Public Health and the Environment  
(RIVM)|Meijer|Netherlands  
>Spike|hCoV-19/USA/NY-PV09188/2020|2020-03-20|EPI\_ISL\_422545|Original|hCoV-19^^New  
York|Human|MHS Clinical Microbiology Laboratories|MHS Pathogen Surveillance  
Program|van Bakel|USA  
>Spike|hCoV-19/England/ALDP-BB2A8C/2020|2020-11-19|EPI\_ISL\_703089|Original|hCoV-  
19^^England|Human|Lighthouse Lab in Alderley Park|Wellcome Sanger Institute for the  
COVID-19 Genomics UK (COG-UK) Consortium|Davies|United Kingdom  
>Spike|hCoV-19/USA/WI-UW-374/2020|2020-05-20|EPI\_ISL\_480356|Original|hCoV-  
19^^Wisconsin|Human|University of Wisconsin-Madison AIDS Vaccine Research  
Laboratories|University of Wisconsin-Madison AIDS Vaccine Research  
Laboratories|Baczenas|USA  
>Spike|hCoV-19/England/QEUAH-9F95E4/2020|2020-09-27|EPI\_ISL\_589142|Original|hCoV-  
19^^England|Human|Lighthouse Lab in Glasgow|Wellcome Sanger Institute for the COVID-  
19 Genomics UK (COG-UK) consortium|Davies|United Kingdom  
>Spike|hCoV-19/England/CAMB-1AC296/2020|2020-04-28|EPI\_ISL\_444387|Original|hCoV-  
19^^England|Human|Department of Pathology|COVID-19 Genomics UK (COG-UK)  
Consortium|Meredith|United Kingdom  
>Spike|hCoV-19/England/LIVE-A837A/2020|2020-03-26|EPI\_ISL\_517151|Original|hCoV-  
19^^England|Human|Liverpool Clinical Laboratories|COVID-19 Genomics UK (COG-UK)  
Consortium|Haldenby|United Kingdom  
>Spike|hCoV-19/Scotland/QEUAH-9439A3/2020|2020-08-01|EPI\_ISL\_532563|Original|hCoV-  
19^^Scotland|Human|NHSGGC West of Scotland Specialist Virology Centre / MRC-  
University of Glasgow Centre for Virus Research|Wellcome Sanger Institute for the  
COVID-19 Genomics UK (COG-UK) consortium|Davies|United Kingdom  
>Spike|hCoV-19/Denmark/DCGC-17166/2020|2020-12-14|EPI\_ISL\_750335|Original|hCoV-  
19^^Midtjylland|Human|Department of Virus and Microbiological Special  
Diagnostics|Albertsen Lab|Michaelsen|Denmark  
>Spike|hCoV-19/England/CAMC-B33995/2020|2020-11-05|EPI\_ISL\_659121|Original|hCoV-  
19^^England|Human|Lighthouse Lab in Cambridge|Wellcome Sanger Institute for the  
COVID-19 Genomics UK (COG-UK) Consortium|Davies|United Kingdom  
>Spike|hCoV-19/Wales/PHWC-16EB59/2020|2020-10-04|EPI\_ISL\_585826|Original|hCoV-  
19^^Wales|Human|Wales Specialist Virology Centre Sequencing lab|COVID-19 Genomics UK  
(COG-UK) Consortium|Moore|United Kingdom  
>Spike|hCoV-19/Spain/AR-IBV-97005114/2020|2020-04-26|EPI\_ISL\_779734|Original|hCoV-  
19^^Aragon|Human|Servicio de Microbiología|SeqCOVID-SPAIN  
consortium/IBV (CSIC)|Comas|Spain  
>Spike|hCoV-19/Luxembourg/LNS2335124/2020|2020-04-24|EPI\_ISL\_445066|Original|hCoV-  
19^^Luxembourg|Human|Laboratoire National de Sante|Laboratoire National de  
Sante|Wienecke-Baldacchino|Luxembourg  
>Spike|hCoV-19/Denmark/DCGC-6768/2020|2020-10-12|EPI\_ISL\_619464|Original|hCoV-  
19^^Hovedstaden|Human|Department of Virus and Microbiological Special  
Diagnostics|Albertsen lab|Michaelsen|Denmark  
>Spike|hCoV-19/USA/UT-UPHL-2009031/2020|2020-05-14|EPI\_ISL\_525336|Original|hCoV-  
19^^Utah|Human|Utah Public Health Laboratory|Utah Public Health Laboratory|Young|USA  
>Spike|hCoV-19/Scotland/GCVR-17142B/2020|2020-03-28|EPI\_ISL\_489590|Original|hCoV-  
19^^Scotland|Human|NHSGGC West of Scotland Specialist Virology Centre / MRC-  
University of Glasgow Centre for Virus Research|Wellcome Sanger Institute for the  
COVID-19 Genomics UK (COG-UK) consortium|Davies|United Kingdom  
>Spike|hCoV-19/England/MILK-A7A140/2020|2020-10-15|EPI\_ISL\_606716|Original|hCoV-  
19^^England|Human|Lighthouse Lab in Milton Keynes|Wellcome Sanger Institute for the  
COVID-19 Genomics UK (COG-UK) consortium|Davies|United Kingdom  
>Spike|hCoV-19/England/ALDP-B7528D/2020|2020-11-12|EPI\_ISL\_662038|Original|hCoV-  
19^^England|Human|Lighthouse Lab in Alderley Park|Wellcome Sanger Institute for the  
COVID-19 Genomics UK (COG-UK) Consortium|Davies|United Kingdom  
>Spike|hCoV-19/England/MILK-AB8067/2020|2020-10-21|EPI\_ISL\_623324|Original|hCoV-  
19^^England|Human|Lighthouse Lab in Milton Keynes|Wellcome Sanger Institute for the  
COVID-19 Genomics UK (COG-UK) consortium|Davies|United Kingdom

>Spike|hCoV-19/England/CAMB-7E00D/2020|2020-04-05|EPI\_ISL\_441572|Original|hCoV-19^^England|Human|Department of Pathology|Wellcome Sanger Institute for the COVID-19 Genomics UK (COG-UK) consortium|Amato|United Kingdom

>Spike|hCoV-19/England/ALDP-B5B065/2020|2020-11-09|EPI\_ISL\_655417|Original|hCoV-19^^England|Human|Lighthouse Lab in Alderley Park|Wellcome Sanger Institute for the COVID-19 Genomics UK (COG-UK) Consortium|Davies|United Kingdom

>Spike|hCoV-19/USA/WI-UW-2056/2020|2020-10-04|EPI\_ISL\_677461|Original|hCoV-19^^Wisconsin|Human|University of Wisconsin-Madison AIDS Vaccine Research Laboratories|University of Wisconsin-Madison AIDS Vaccine Research Laboratories|Baczenas|USA

>Spike|hCoV-19/England/ALDP-9CBA19/2020|2020-09-16|EPI\_ISL\_575462|Original|hCoV-19^^England|Human|Lighthouse Lab in Alderley Park|Wellcome Sanger Institute for the COVID-19 Genomics UK (COG-UK) consortium|Davies|United Kingdom

>Spike|hCoV-19/England/ALDP-B63BF0/2020|2020-11-08|EPI\_ISL\_656547|Original|hCoV-19^^England|Human|Lighthouse Lab in Alderley Park|Wellcome Sanger Institute for the COVID-19 Genomics UK (COG-UK) Consortium|Davies|United Kingdom

>Spike|hCoV-19/England/MILK-B94464/2020|2020-11-13|EPI\_ISL\_676238|Original|hCoV-19^^England|Human|Lighthouse Lab in Milton Keynes|Wellcome Sanger Institute for the COVID-19 Genomics UK (COG-UK) Consortium|Davies|United Kingdom

>Spike|hCoV-19/England/ALDP-B1c965/2020|2020-11-01|EPI\_ISL\_645606|Original|hCoV-19^^England|Human|Lighthouse Lab in Alderley Park|Wellcome Sanger Institute for the COVID-19 Genomics UK (COG-UK) Consortium|Davies|United Kingdom

>Spike|hCoV-19/England/CAMC-AEB186/2020|2020-10-26|EPI\_ISL\_633135|Original|hCoV-19^^England|Human|Lighthouse Lab in Cambridge|Wellcome Sanger Institute for the COVID-19 Genomics UK (COG-UK) consortium|Davies|United Kingdom

>Spike|hCoV-19/England/QEUEH-AF66B6/2020|2020-10-30|EPI\_ISL\_663084|Original|hCoV-19^^England|Human|Lighthouse Lab in Glasgow|Wellcome Sanger Institute for the COVID-19 Genomics UK (COG-UK) Consortium|Davies|United Kingdom

>Spike|hCoV-19/Netherlands/ZH-EMC-533/2020|2020-00-00|EPI\_ISL\_577961|Original|hCoV-19^^Zuid Holland|Human|Dutch COVID-19 response team|Erasmus Medical Center|Oude Munnink|Netherlands

>Spike|hCoV-19/Spain/CT-IBV-005484/2020|2020-05-15|EPI\_ISL\_510515|Original|hCoV-19^^Catalunya|Human|Servicio de Microbiolog\u00eda|SeqCOVID-SPAIN consortium|IBV (CSIC)|Comas|Spain

>Spike|hCoV-19/England/QEUEH-9F7F15/2020|2020-09-27|EPI\_ISL\_595723|Original|hCoV-19^^England|Human|Oxford Viromics|COVID-19 Genomics UK (COG-UK) Consortium|Golubchik|United Kingdom

>Spike|hCoV-19/England/CAMB-7FE5D/2020|2020-04-19|EPI\_ISL\_444424|Original|hCoV-19^^England|Human|Department of Pathology|COVID-19 Genomics UK (COG-UK) Consortium|Meredith|United Kingdom

>Spike|hCoV-19/Germany/SN-RKI-NP-0034/2020|2020-12-08|EPI\_ISL\_763015|Original|hCoV-19^^Saxony|Human|Unit 17|Project group Epidemiology of Highly Pathogenic Microorganisms|Schubert|Germany

>Spike|hCoV-19/USA/CA-ALSR-5047/2020|2020-12-06|EPI\_ISL\_730314|Original|hCoV-19^^California|Human|San Diego County Public Health Laboratory|Andersen lab at Scripps Research|Gangavarapu|USA

>Spike|hCoV-19/Australia/VIC7100/2020|2020-08-01|EPI\_ISL\_564231|Original|hCoV-19^^Victoria|Human|Victorian Infectious Diseases Reference Laboratory (VIDRL)|VIDRL and MDU-PHL|Schultz|Australia

>Spike|hCoV-19/Sweden/20-53105/2020|2020-09-28|EPI\_ISL\_648197|Original|hCoV-19^^Sweden|Human|The Public Health Agency of Sweden|The Public Health Agency of Sweden|Svartstr\u00f6m|Sweden

>Spike|hCoV-19/England/MILK-9925CF/2020|2020-08-27|EPI\_ISL\_552047|Original|hCoV-19^^England|Human|Lighthouse Lab in Milton Keynes|Wellcome Sanger Institute for the COVID-19 Genomics UK (COG-UK) consortium|Davies|United Kingdom

>Spike|hCoV-19/USA/HI-H200381/2020|2020-09-18|EPI\_ISL\_752928|Original|hCoV-19^^Hawaii|Human|State Laboratories Division|State Laboratories Division|Sultana|USA

>Spike|hCoV-19/Wales/PHWC-48FDC2/2020|2020-11-11|EPI\_ISL\_681229|Original|hCoV-19^^Wales|Human|Wales Specialist Virology Centre Sequencing lab|COVID-19 Genomics UK (COG-UK) Consortium|Moore|United Kingdom

>Spike|hCoV-19/USA/UT-08413/2020|2020-05-13|EPI\_ISL\_524191|Original|hCoV-19^^Utah|Human|Utah Public Health Laboratory|Utah Public Health Laboratory|Young|USA

>Spike|hCoV-19/USA/TX-HMH-MCoV-15223/2020|2020-10-20|EPI\_ISL\_786707|Original|hCoV-19^^Texas|Human|Houston Methodist Hospital|Houston Methodist Hospital|Long|USA

>Spike|hCoV-19/Denmark/DCGC-17753/2020|2020-12-14|EPI\_ISL\_749544|Original|hCoV-19^^Syddanmark|Human|Department of Virus and Microbiological Special Diagnostics|Albertsen Lab|Michaelsen|Denmark

>Spike|hCoV-19/Canada/MB-NML-636/2020|2020-04-02|EPI\_ISL\_582296|Original|hCoV-19^^Manitoba|Human|Cadham Provincial Laboratory|National Microbiology Laboratory (NML)|Majer|Canada

>Spike|hCoV-19/Northern Ireland/NIRE-2334CA/2020|2020-10-01|EPI\_ISL\_680295|Original|hCoV-19^^Northern Ireland|Human|Regional Virus Laboratory|COVID-19 Genomics UK (COG-UK) Consortium|Fairley|United Kingdom

>Spike|hCoV-19/Japan/PG-4664/2020|2020-08-00|EPI\_ISL\_689801|Original|hCoV-19^^Japan|Human|Fukuoka Institute of Health and Environmental Sciences|Pathogen Genomics Center|Sekizuka|Japan

>Spike|hCoV-19/USA/TX-HMH-MCoV-19399/2020|2020-11-30|EPI\_ISL\_783818|Original|hCoV-19^^Texas|Human|Houston Methodist Hospital|Houston Methodist Hospital|Long|USA

>Spike|hCoV-19/England/ALDP-B83D12/2020|2020-11-14|EPI\_ISL\_674477|Original|hCoV-19^^England|Human|Lighthouse Lab in Alderley Park|Wellcome Sanger Institute for the COVID-19 Genomics UK (COG-UK) Consortium|Davies|United Kingdom

>Spike|hCoV-19/USA/CA-LACPHL-AC00008/2020|2020-08-18|EPI\_ISL\_707889|Original|hCoV-19^^California|Human|Los Angeles County Public Health Laboratory|Los Angeles County Public Health Laboratory|Hemarajata|USA

>Spike|hCoV-19/England/ALDP-A667DC/2020|2020-10-12|EPI\_ISL\_630426|Original|hCoV-19^^England|Human|Lighthouse Lab in Alderley Park|Wellcome Sanger Institute for the COVID-19 Genomics UK (COG-UK) consortium|Davies|United Kingdom

>Spike|hCoV-19/India/MH-NIV-QC-1450/2020|2020-09-08|EPI\_ISL\_577728|Original|hCoV-19^^Maharashtra|Human|NIV Influenza|NIV Influenza|Potdar|India

>Spike|hCoV-19/Japan/PG-0629/2020|2020-04-00|EPI\_ISL\_684239|Original|hCoV-19^^Japan|Human|Gunma Prefectural Institute of Public Health and Environmental Sciences|Pathogen Genomics Center|Sekizuka|Japan

>Spike|hCoV-19/England/20129042904/2020|2020-03-11|EPI\_ISL\_424046|Original|hCoV-19^^England|Human|Respiratory Virus Unit|Respiratory Virus Unit|Platt|United Kingdom

>Spike|hCoV-19/England/MILK-A44E1B/2020|2020-10-06|EPI\_ISL\_598711|Original|hCoV-19^^England|Human|Lighthouse Lab in Milton Keynes|Wellcome Sanger Institute for the COVID-19 Genomics UK (COG-UK) consortium|Davies|United Kingdom

>Spike|hCoV-19/Denmark/ALAB-HH89/2020|2020-03-15|EPI\_ISL\_429329|Original|hCoV-19^^Denmark|Human|Department of Clinical Microbiology|Albertsen lab|Kirkegaard|Denmark

>Spike|hCoV-19/USA/MD-MDH-0398/2020|2020-11-02|EPI\_ISL\_660092|Original|hCoV-19^^Maryland|Human|MD PHL|MD PHL|Keller|USA

>Spike|hCoV-19/USA/LA-GBCL-26556572/2020|2020-04-14|EPI\_ISL\_485200|Original|hCoV-19^^Louisiana|Human|River Road Testing Lab|Ginkgo Bioworks Clinical Laboratory|Smith|USA

>Spike|hCoV-19/Germany/ST-z2/2020|2020-04-16|EPI\_ISL\_776711|Vero E6|hCoV-19^^Saxony-Anhalt|Human|Institute of medical Microbiology and hospital Hygiene|Institute of medical Microbiology and hospital Hygiene|Tersteegen|Germany

>Spike|hCoV-19/England/ALDP-BC6690/2020|2020-11-22|EPI\_ISL\_721401|Original|hCoV-19^^England|Human|Lighthouse Lab in Alderley Park|Wellcome Sanger Institute for the COVID-19 Genomics UK (COG-UK) Consortium|Davies|United Kingdom

>Spike|hCoV-19/England/CAMC-B3368F/2020|2020-11-04|EPI\_ISL\_659387|Original|hCoV-19^^England|Human|Lighthouse Lab in Cambridge|Wellcome Sanger Institute for the COVID-19 Genomics UK (COG-UK) Consortium|Davies|United Kingdom

>Spike|hCoV-19/Japan/PG-1679/2020|2020-05-00|EPI\_ISL\_685285|Original|hCoV-19^^Japan|Human|Pathogen Genomics Center|Pathogen Genomics Center|Sekizuka|Japan

>Spike|hCoV-19/USA/TX-HMH-4608/2020|2020-06-21|EPI\_ISL\_543752|Original|hCoV-19^^Texas|Human|Houston Methodist Hospital|Houston Methodist Hospital|Long|USA



>Spike|hCoV-19/Spain/AN-IBV-006124/2020|2020-06-28|EPI\_ISL\_510453|Original|hCoV-19^^Andalucia|Human|Hospital Universitario Virgen de las Nieves de Granada-SAS|SeqCOVID-SPAIN consortium/IBV(CSIC)|Comas|Spain

>Spike|hCoV-19/Scotland/EDB10900/2020|2020-12-10|EPI\_ISL\_724249|Original|hCoV-19^^Scotland|Human|Virology Department|COVID-19 Genomics UK (COG-UK) Consortium|McHugh|United Kingdom

>Spike|hCoV-19/England/ALDP-97D120/2020|2020-07-17|EPI\_ISL\_526320|Original|hCoV-19^^England|Human|University of Birmingham|COVID-19 Genomics UK (COG-UK) Consortium|Loman|United Kingdom

>Spike|hCoV-19/England/MILK-B88964/2020|2020-11-13|EPI\_ISL\_675824|Original|hCoV-19^^England|Human|Lighthouse Lab in Milton Keynes|Wellcome Sanger Institute for the COVID-19 Genomics UK (COG-UK) Consortium|Davies|United Kingdom

>Spike|hCoV-19/England/ALDP-B5B742/2020|2020-11-09|EPI\_ISL\_655402|Original|hCoV-19^^England|Human|Lighthouse Lab in Alderley Park|Wellcome Sanger Institute for the COVID-19 Genomics UK (COG-UK) Consortium|Davies|United Kingdom

>Spike|hCoV-19/USA/CA-CHLA-PLM68468625/2020|2020-11-30|EPI\_ISL\_753495|Original|hCoV-19^^California|Human|Clinical virology Laboratory|Center for Personalized Medicine|Dien Bard|USA

>Spike|hCoV-19/USA/CA-QDX-659/2020|2020-03-22|EPI\_ISL\_571283|Original|hCoV-19^^California|Human|Quest Diagnostics|Quest Diagnostics|Kagan|USA

>Spike|hCoV-19/England/SHEF-CAA31/2020|2020-08-29|EPI\_ISL\_540751|Original|hCoV-19^^England|Human|Virology Department|COVID-19 Genomics UK (COG-UK) Consortium|de Silva|United Kingdom

>Spike|hCoV-19/Scotland/GCVR-16FB67/2020|2020-03-20|EPI\_ISL\_489585|Original|hCoV-19^^Scotland|Human|NHSGGC West of Scotland Specialist Virology Centre / MRC-University of Glasgow Centre for Virus Research|Wellcome Sanger Institute for the COVID-19 Genomics UK (COG-UK) consortium|Davies|United Kingdom

>Spike|hCoV-19/England/ALDP-A2FA03/2020|2020-10-06|EPI\_ISL\_587035|Original|hCoV-19^^England|Human|Lighthouse Lab in Alderley Park|Wellcome Sanger Institute for the COVID-19 Genomics UK (COG-UK) consortium|Davies|United Kingdom

>Spike|hCoV-19/USA/HI-H200667/2020|2020-12-01|EPI\_ISL\_753190|Original|hCoV-19^^Hawaii|Human|State Laboratories Division|State Laboratories Division|Sultana|USA

>Spike|hCoV-19/USA/MA-MGH-00481/2020|2020-04-04|EPI\_ISL\_460441|Original|hCoV-19^^Massachusetts|Human|Massachusetts General Hospital|Infectious Disease Program|Lemieux|USA

>Spike|hCoV-19/Sweden/20-50202/2020|2020-03-05|EPI\_ISL\_455868|Original|hCoV-19^^Stockholm|Human|Karolinska Universitetslaboratoriet|The Public Health Agency of Sweden|Svartstr\u00f6m|Sweden

>Spike|hCoV-19/England/ALDP-59C3A1/2020|2020-06-13|EPI\_ISL\_558387|Original|hCoV-19^^England|Human|Lighthouse Lab in Alderley Park|Wellcome Sanger Institute for the COVID-19 Genomics UK (COG-UK) Consortium|Davies|United Kingdom

>Spike|hCoV-19/Wales/PHWC-49E8A1/2020|2020-12-07|EPI\_ISL\_743061|Original|hCoV-19^^Wales|Human|Wales Specialist Virology Centre Sequencing lab|COVID-19 Genomics UK (COG-UK) Consortium|Moore|United Kingdom

>Spike|hCoV-19/USA/MI-MDHHS-SC21491/2020|2020-07-28|EPI\_ISL\_516218|Original|hCoV-19^^Michigan|Human|Michigan Department of Health and Human Services|Michigan Department of Health and Human Services|Blankenship|USA

>Spike|hCoV-19/Italy/VEN-IZSve-53842/2020|2020-05-27|EPI\_ISL\_636488|Original|hCoV-19^^Veneto|Human|ULSS9 Scaligera|Istituto Zooprofilattico Sperimentale delle Venezie|Quaranta|Italy

>Spike|hCoV-19/Denmark/DCGC-12930/2020|2020-12-07|EPI\_ISL\_712469|Original|hCoV-19^^Midtjylland|Human|Department of Virus and Microbiological Special Diagnostics|Albertsen Lab|Michaelsen|Denmark

>Spike|hCoV-19/USA/MI-MDHHS-SC21908/2020|2020-04-11|EPI\_ISL\_565969|Original|hCoV-19^^Michigan|Human|Michigan Department of Health and Human Services|Michigan Department of Health and Human Services|Blankenship|USA

>Spike|hCoV-19/England/BRIS-12A5B5/2020|2020-05-01|EPI\_ISL\_458408|Original|hCoV-19^^England|Human|PHE South West Regional Laboratory|Wellcome Sanger Institute for the COVID-19 Genomics UK (COG-UK) consortium|Davies|United Kingdom

>Spike|hCoV-19/USA/TX-HMH-MCoV-12754/2020|2020-08-30|EPI\_ISL\_790505|Original|hCoV-19^^Texas|Human|Houston Methodist Hospital|Houston Methodist Hospital|Long|USA

>Spike|hCoV-19/Denmark/DCGC-16120/2020|2020-11-16|EPI\_ISL\_714594|Original|hCoV-19^^Hovedstaden|Human|Department of Virus and Microbiological Special Diagnostics|Albertsen Lab|Michaelsen|Denmark

>Spike|hCoV-19/Denmark/DCGC-3837/2020|2020-08-24|EPI\_ISL\_622688|Original|hCoV-19^^Hovedstaden|Human|Department of Virus and Microbiological Special Diagnostics|Albertsen lab|Michaelsen|Denmark

>Spike|hCoV-19/USA/VA-DCLS-1890/2020|2020-10-01|EPI\_ISL\_614146|Original|hCoV-19^^Virginia|Human|Virginia DCLS|Virginia DCLS|St. Jacques|USA

>Spike|hCoV-19/Iran/K1r-24/2020|2020-03-00|EPI\_ISL\_582025|Original|hCoV-19^^Iran|Human|Virology|Virology|Ranjbar|Iran

>Spike|hCoV-19/England/MILK-83DCA4/2020|2020-07-17|EPI\_ISL\_557259|Original|hCoV-19^^England|Human|Lighthouse Lab in Milton Keynes|Wellcome Sanger Institute for the COVID-19 Genomics UK (COG-UK) consortium|Davies|United Kingdom

>Spike|hCoV-19/Australia/NSW1235/2020|2020-12-16|EPI\_ISL\_740866|Original|hCoV-19^^New South Wales|Human|Pathology North - Royal North Shore Hospital - NSW Health Pathology|NSW Health Pathology - Institute of Clinical Pathology and Medical Research; Westmead Hospital; University of Sydney|Gall|Australia

>Spike|hCoV-19/England/CAMC-B988EC/2020|2020-11-15|EPI\_ISL\_673837|Original|hCoV-19^^England|Human|Lighthouse Lab in Cambridge|Wellcome Sanger Institute for the COVID-19 Genomics UK (COG-UK) Consortium|Davies|United Kingdom

>Spike|hCoV-19/England/NORT-2825D8/2020|2020-03-27|EPI\_ISL\_472204|Original|hCoV-19^^England|Human|Northumbria University / South Tees Hospitals NHS Foundation Trust / North Cumbria Integrated Care NHS Foundation Trust / North Tees and Hartlepool NHS Foundation Trust / Newcastle Hospitals NHS Foundation Trust|COVID-19 Genomics UK (COG-UK) Consortium|Bashton|United Kingdom

>Spike|hCoV-19/USA/NY-NYCPHL-001423/2020|2020-11-20|EPI\_ISL\_683793|Original|hCoV-19^^New York|Human|DOHMH Corona New York City Public Health Laboratory|Wang|USA

>Spike|hCoV-19/USA/AZ-WL-CVG00001/2020|2020-09-30|EPI\_ISL\_765951|Original|hCoV-19^^Arizona|Human|Worobey Lab|Worobey Lab|Larsen|USA

>Spike|hCoV-19/Portugal/PT0745/2020|2020-03-22|EPI\_ISL\_511004|Original|hCoV-19^^Portugal|Human|Instituto Nacional de Saude (INSA)|Instituto Nacional de Saude (INSA)|Borges|Portugal

>Spike|hCoV-19/USA/CA-ALSR-2802/2020|2020-07-24|EPI\_ISL\_635685|Original|hCoV-19^^California|Human|San Diego County Public Health Laboratory|Andersen lab at Scripps Research|Gangavarapu|USA

>Spike|hCoV-19/Ireland/CE-NVRL-AIIDV1105v6/2020|2020-04-30|EPI\_ISL\_644317|Original|hCoV-19^^Clare|Human|CEPHR / Vincent's Hospital|Irish Coronavirus Sequencing Consortium - National Virus Reference Laboratory|Gonzalez|Ireland

>Spike|hCoV-19/England/BRIS-12F2F5/2020|2020-04-14|EPI\_ISL\_488361|Original|hCoV-19^^England|Human|PHE South West Regional Laboratory|Wellcome Sanger Institute for the COVID-19 Genomics UK (COG-UK) consortium|Davies|United Kingdom

>Spike|hCoV-19/USA/WI-WSLH-200589/2020|2020-04-03|EPI\_ISL\_631391|Original|hCoV-19^^Wisconsin|Human|Wisconsin State Laboratory of Hygiene Communicable Disease Division|Wisconsin State Laboratory of Hygiene Communicable Disease Division|Florek|USA

>Spike|hCoV-19/Scotland/QEUA-9AE41E/2020|2020-09-05|EPI\_ISL\_638905|Original|hCoV-19^^Scotland|Human|Department of Pathology|COVID-19 Genomics UK (COG-UK) Consortium|Goodfellow|United Kingdom

>Spike|hCoV-19/Switzerland/BL-ETHZ-100350/2020|2020-03-19|EPI\_ISL\_574899|Original|hCoV-19^^Basel-Landschaft|Human|Viollier AG|Department of Biosystems Science and Engineering|Nadeau|Switzerland

>Spike|hCoV-19/Brazil/RJ-2696/2020|2020-04-24|EPI\_ISL\_467358|Original|hCoV-19^^Rio de Janeiro|Human|Laboratory of Respiratory Viruses and Measles|Laboratory of Respiratory Viruses and Measles|Silva|Brazil

>Spike|hCoV-19/Denmark/DCGC-14126/2020|2020-11-30|EPI\_ISL\_711584|Original|hCoV-19^^Hovedstaden|Human|Department of Virus and Microbiological Special Diagnostics|Albertsen Lab|Michaelsen|Denmark

>Spike|hCoV-19/USA/MN-UW-1130/2020|2020-08-13|EPI\_ISL\_522882|Original|hCoV-19^^Minnesota|Human|University of Wisconsin-Madison AIDS Vaccine Research Laboratories|University of Wisconsin-Madison AIDS Vaccine Research Laboratories|Baczenas|USA

>Spike|hCoV-19/USA/NY-NYCPHL-000796/2020|2020-03-25|EPI\_ISL\_632176|Original|hCoV-19^^New York|Human|OCME Office Of Chief Medical Examiner|New York City Public Health Laboratory|Wang|USA

>Spike|hCoV-19/France/BRE-BR9066/2020|2020-09-04|EPI\_ISL\_613555|Original|hCoV-19^^Bretagne|Human|CHRU Pontchaillou - Laboratoire de Virologie\n2|National Reference Center for Viruses of Respiratory Infections|Enouf|France

>Spike|hCoV-19/England/CAMC-BC0775/2020|2020-11-22|EPI\_ISL\_705136|Original|hCoV-19^^England|Human|Lighthouse Lab in Cambridge|Wellcome Sanger Institute for the COVID-19 Genomics UK (COG-UK) Consortium|Davies|United Kingdom

>Spike|hCoV-19/England/ALDP-B83565/2020|2020-11-14|EPI\_ISL\_675692|Original|hCoV-19^^England|Human|Lighthouse Lab in Alderley Park|Wellcome Sanger Institute for the COVID-19 Genomics UK (COG-UK) Consortium|Davies|United Kingdom

>Spike|hCoV-19/England/ALDP-94D7CD/2020|2020-06-18|EPI\_ISL\_555002|Original|hCoV-19^^England|Human|Lighthouse Lab in Alderley Park|Wellcome Sanger Institute for the COVID-19 Genomics UK (COG-UK) consortium|Davies|United Kingdom

>Spike|hCoV-19/Netherlands/ZH-EMC-391/2020|2020-07-14|EPI\_ISL\_523731|Original|hCoV-19^^Zuid Holland|Human|Dutch COVID-19 response team|Erasmus Medical Center|Oude Munnink|Netherlands

>Spike|hCoV-19/mink/Netherlands/NB-EMC-60-4/2020|2020-00-00|EPI\_ISL\_632473|Original|hCoV-19^^Noord Brabant|Neovison vison|Dutch COVID-19 response team|Erasmus Medical Center|Oude Munnink|Netherlands

>Spike|hCoV-19/Netherlands/ZE-RIVM-21042/2020|2020-12-30|EPI\_ISL\_791056|Original|hCoV-19^^Zeeland|Human|Dutch COVID-19 response team|National Institute for Public Health and the Environment (RIVM)|Meijer|Netherlands

>Spike|hCoV-19/Nigeria/OS-CV296/2020|2020-08-03|EPI\_ISL\_729975|Original|hCoV-19^^Osun State|Human|Nigeria Centre for Disease Control (NCDC)|African Centre of Excellence for Genomics of Infectious Diseases (ACEGID)|Oluniyi|Nigeria

>Spike|hCoV-19/Japan/PG-4341/2020|2020-07-00|EPI\_ISL\_692569|Original|hCoV-19^^Japan|Human|Pathogen Genomics Center|Pathogen Genomics Center|Sekizuka|Japan

>Spike|hCoV-19/England/PORT-2D165F/2020|2020-06-08|EPI\_ISL\_512406|Original|hCoV-19^^England|Human|Centre for Enzyme Innovation|COVID-19 Genomics UK (COG-UK) Consortium|Robson|United Kingdom

>Spike|hCoV-19/England/LIVE-DB5F97/2020|2020-11-06|EPI\_ISL\_650140|Original|hCoV-19^^England|Human|Liverpool Clinical Laboratories|COVID-19 Genomics UK (COG-UK) Consortium|Haldenby|United Kingdom

>Spike|hCoV-19/England/QEUEH-96CFC0/2020|2020-08-21|EPI\_ISL\_530790|Original|hCoV-19^^England|Human|Lighthouse Lab in Glasgow|Wellcome Sanger Institute for the COVID-19 Genomics UK (COG-UK) consortium|Davies|United Kingdom

>Spike|hCoV-19/USA/NY-Wadsworth-290375-01/2020|2020-12-19|EPI\_ISL\_765554|Original|hCoV-19^^New York|Human|MONTEFIORE MEDICAL CENTER LABORATORIES|Wadsworth Center|Lasek-Nesselquist|USA

>Spike|hCoV-19/Japan/PG-1329/2020|2020-04-00|EPI\_ISL\_684937|Original|hCoV-19^^Japan|Human|Saitama Prefectural Institute of Public Health|Pathogen Genomics Center|Sekizuka|Japan

>Spike|hCoV-19/England/CAMB-82B7E/2020|2020-04-22|EPI\_ISL\_438665|Original|hCoV-19^^England|Human|Department of Pathology|COVID-19 Genomics UK (COG-UK) Consortium|Meredith|United Kingdom

>Spike|hCoV-19/Japan/PG-5785/2020|2020-08-00|EPI\_ISL\_688904|Original|hCoV-19^^Japan|Human|Fukuoka Institute of Health and Environmental Sciences|Pathogen Genomics Center|Sekizuka|Japan

>Spike|hCoV-19/England/CAMC-B77D4E/2020|2020-11-12|EPI\_ISL\_668254|Original|hCoV-19^^England|Human|Lighthouse Lab in Cambridge|Wellcome Sanger Institute for the COVID-19 Genomics UK (COG-UK) Consortium|Davies|United Kingdom

>Spike|hCoV-19/USA/NY-NYCPHL-001400/2020|2020-11-18|EPI\_ISL\_683779|Original|hCoV-19^^New York|Human|DOHMH Corona|New York City Public Health Laboratory|Wang|USA

>Spike|hCoV-19/Germany/HH-hpi-p1992/2020|2020-03-27|EPI\_ISL\_776310|Original|hCoV-19^^Hamburg|Human|University Medical Center Hamburg Eppendorf|Heinrich Pette Institute|Robitaille|Germany

>Spike|hCoV-19/Denmark/DCGC-21455/2020|2020-12-21|EPI\_ISL\_757733|Original|hCoV-19^^Hovedstaden|Human|Department of Virus and Microbiological Special Diagnostics|Albertsen Lab|Michaelsen|Denmark

>Spike|hCoV-19/England/EXET-13AC08/2020|2020-11-11|EPI\_ISL\_664267|Original|hCoV-19^^England|Human|University of Exeter|COVID-19 Genomics UK (COG-UK) Consortium|Temperton|United Kingdom

>Spike|hCoV-19/Switzerland/BL-ETHZ-100137/2020|2020-03-16|EPI\_ISL\_451721|Original|hCoV-19^^Basel-Landschaft|Human|Viollier AG|Department of Biosystems Science and Engineering|Nadeau|Switzerland

>Spike|hCoV-19/England/ALDP-B850CC/2020|2020-11-14|EPI\_ISL\_675920|Original|hCoV-19^^England|Human|Lighthouse Lab in Alderley Park|Wellcome Sanger Institute for the COVID-19 Genomics UK (COG-UK) Consortium|Davies|United Kingdom

>Spike|hCoV-19/Canada/QC-LSPQ-L00218371/2020|2020-03-14|EPI\_ISL\_535780|Original|hCoV-19^^Quebec|Human|Centre de SSS de la Haute-Yamaska|Laboratoire de sant\u00e9 publique du Qu\u00e9bec|Moreira|Canada

>Spike|hCoV-19/USA/CO-CDPHE-2009164179/2020|2020-09-16|EPI\_ISL\_710337|Original|hCoV-19^^Colorado|Human|Colorado Department of Public Health and Environment|Colorado Department of Public Health and Environment|Bankers|USA

>Spike|hCoV-19/Japan/PG-1454/2020|2020-04-00|EPI\_ISL\_685061|Original|hCoV-19^^Japan|Human|Saitama Prefectural Institute of Public Health|Pathogen Genomics Center|Sekizuka|Japan

>Spike|hCoV-19/Wales/PHWC-495B47/2020|2020-11-25|EPI\_ISL\_726444|Original|hCoV-19^^Wales|Human|Originating lab|COVID-19 Genomics UK (COG-UK) Consortium|Moore|United Kingdom

>Spike|hCoV-19/England/QEUEH-A1F4F9/2020|2020-10-01|EPI\_ISL\_587567|Original|hCoV-19^^England|Human|Lighthouse Lab in Glasgow|Wellcome Sanger Institute for the COVID-19 Genomics UK (COG-UK) consortium|Davies|United Kingdom

>Spike|hCoV-19/Australia/VIC648/2020|2020-03-28|EPI\_ISL\_426944|Original|hCoV-19^^Victoria|Human|Victorian Infectious Diseases Reference Laboratory (VIDRL)|Microbiological Diagnostic Unit Public Health Laboratory and Victorian Infectious Diseases Reference Laboratory|Schultz|Australia

>Spike|hCoV-19/USA/WI-UW-726/2020|2020-06-30|EPI\_ISL\_491401|Original|hCoV-19^^Wisconsin|Human|University of Wisconsin-Madison AIDS Vaccine Research Laboratories|University of Wisconsin-Madison AIDS Vaccine Research Laboratories|Baczenas|USA

>Spike|hCoV-19/USA/TX-DSHS-0399/2020|2020-05-31|EPI\_ISL\_542459|Original|hCoV-19^^Texas|Human|Texas Department of State Health Services|Texas Department of State Health Services|Rahman|USA

>Spike|hCoV-19/Canada/MB-NML-1183/2020|2020-07-28|EPI\_ISL\_582499|Original|hCoV-19^^Manitoba|Human|Cadham Provincial Laboratory|National Microbiology Laboratory (NML)|Majer|Canada

>Spike|hCoV-19/Australia/QLD1209/2020|2020-03-22|EPI\_ISL\_639800|Original|hCoV-19^^Australia|Human|unknown|Public Health Virology Laboratory|Nguyen|Australia

>Spike|hCoV-19/England/CAMC-B09F4B/2020|2020-10-30|EPI\_ISL\_673064|Original|hCoV-19^^England|Human|Lighthouse Lab in Cambridge|Wellcome Sanger Institute for the COVID-19 Genomics UK (COG-UK) Consortium|Davies|United Kingdom

>Spike|hCoV-19/USA/WA-S1690/2020|2020-05-30|EPI\_ISL\_496116|Original|hCoV-19^^Washington|Human|Washington State Department of Health|Seattle Flu Study|Lee|USA

>Spike|hCoV-19/USA/WA-OHSU-0520/2020|2020-06-12|EPI\_ISL\_526097|Original|hCoV-19^^Washington|Human|OHSU Lab Services Molecular Microbiology Lab|Ginkgo Bioworks Clinical Laboratory|O'Roak|USA

>Spike|hCoV-19/England/ALDP-A2DA8D/2020|2020-10-06|EPI\_ISL\_586768|Original|hCoV-19^^England|Human|Lighthouse Lab in Alderley Park|Wellcome Sanger Institute for the COVID-19 Genomics UK (COG-UK) consortium|Davies|United Kingdom

>Spike|hCoV-19/Australia/VIC8893/2020|2020-07-24|EPI\_ISL\_565267|Original|hCoV-19^^Victoria|Human|Microbiological Diagnostic Unit - Public Health Laboratory (MDU-PHL)|MDU-PHL|Schultz|Australia

>Spike|hCoV-19/England/QEUA-969901/2020|2020-08-14|EPI\_ISL\_530971|Original|hCoV-19^^England|Human|Lighthouse Lab in Glasgow|Wellcome Sanger Institute for the COVID-19 Genomics UK (COG-UK) consortium|Davies|United Kingdom

>Spike|hCoV-19/England/ALDP-A2F0E3/2020|2020-10-05|EPI\_ISL\_587131|Original|hCoV-19^^England|Human|Lighthouse Lab in Alderley Park|Wellcome Sanger Institute for the COVID-19 Genomics UK (COG-UK) consortium|Davies|United Kingdom

>Spike|hCoV-19/England/QEUA-98EF7D/2020|2020-08-28|EPI\_ISL\_540350|Original|hCoV-19^^England|Human|Lighthouse Lab in Glasgow|Wellcome Sanger Institute for the COVID-19 Genomics UK (COG-UK) consortium|Davies|United Kingdom

>Spike|hCoV-19/USA/NC-CDC-2-3693498/2020|2020-11-09|EPI\_ISL\_747174|Original|hCoV-19^^North Carolina|Human|Respiratory Viruses Branch|Respiratory Viruses Branch|Queen|USA

>Spike|hCoV-19/Australia/SAP058/2020|2020-03-27|EPI\_ISL\_451097|Original|hCoV-19^^South Australia|Human|SA Pathology|SA Pathology|Leong|Australia

>Spike|hCoV-19/USA/FL-BPHL-1027/2020|2020-07-21|EPI\_ISL\_517917|Original|hCoV-19^^Florida|Human|Florida Bureau of Public Health Laboratories|Florida Bureau of Public Health Laboratories|Blanton|USA

>Spike|hCoV-19/England/MILK-A059D9/2020|2020-09-29|EPI\_ISL\_599848|Original|hCoV-19^^England|Human|Lighthouse Lab in Milton Keynes|Wellcome Sanger Institute for the COVID-19 Genomics UK (COG-UK) consortium|Davies|United Kingdom

>Spike|hCoV-19/USA/UT-UPHL-2012424387/2020|2020-10-23|EPI\_ISL\_746295|Original|hCoV-19^^Utah|Human|Ginkgo Bioworks Clinical Laboratory|Utah Public Health Laboratory|Young|USA

>Spike|hCoV-19/England/MILK-ACBC8B/2020|2020-10-20|EPI\_ISL\_629346|Original|hCoV-19^^England|Human|Lighthouse Lab in Milton Keynes|Wellcome Sanger Institute for the COVID-19 Genomics UK (COG-UK) consortium|Davies|United Kingdom

>Spike|hCoV-19/Belgium/ULG-11040/2020|2020-11-30|EPI\_ISL\_722954|Original|hCoV-19^^Liege|Human|Department of Clinical Microbiology|GIGA Medical Genomics|Durkin|Belgium

>Spike|hCoV-19/Scotland/QEUA-A00C7B/2020|2020-10-02|EPI\_ISL\_585565|Original|hCoV-19^^Scotland|Human|University of Exeter|COVID-19 Genomics UK (COG-UK) Consortium|Temperton|United Kingdom

>Spike|hCoV-19/Denmark/DCGC-11357/2020|2020-11-02|EPI\_ISL\_670863|Original|hCoV-19^^Midtjylland|Human|Department of Virus and Microbiological Special Diagnostics|Albertsen Lab|Michaelsen|Denmark

>Spike|hCoV-19/Singapore/606/2020|2020-07-02|EPI\_ISL\_490056|Original|hCoV-19^^Singapore|Human|National Public Health Laboratory|National Public Health Laboratory|Mak|Singapore

>Spike|hCoV-19/England/BRIS-128371/2020|2020-04-16|EPI\_ISL\_469566|Original|hCoV-19^^England|Human|PHE South West Regional Laboratory|Wellcome Sanger Institute for the COVID-19 Genomics UK (COG-UK) consortium|Davies|United Kingdom

>Spike|hCoV-19/USA/MN-MDH-2068/2020|2020-10-24|EPI\_ISL\_683697|Original|hCoV-19^^Minnesota|Human|Essentia Health-St. Mary's Medical Center|Minnesota Department of Health|Garfin|USA

>Spike|hCoV-19/mink/Netherlands/NB-EMC-26-2/2020|2020-07-29|EPI\_ISL\_523087|Original|hCoV-19^^Noord Brabant|Neovison vison|Dutch COVID-19 response team|Erasmus Medical Center|Oude Munnink|Netherlands

>Spike|hCoV-19/England/ALDP-B74910/2020|2020-11-12|EPI\_ISL\_662274|Original|hCoV-19^^England|Human|Lighthouse Lab in Alderley Park|Wellcome Sanger Institute for the COVID-19 Genomics UK (COG-UK) Consortium|Davies|United Kingdom

>Spike|hCoV-19/England/QEUA-9B563C/2020|2020-09-03|EPI\_ISL\_590439|Original|hCoV-19^^England|Human|Lighthouse Lab in Glasgow|Wellcome Sanger Institute for the COVID-19 Genomics UK (COG-UK) consortium|Davies|United Kingdom

>Spike|hCoV-19/Singapore/727/2020|2020-06-23|EPI\_ISL\_500548|Original|hCoV-19^^Singapore|Human|Singapore General Hospital|Department of Microbiology|Abdul Rahman|Singapore

>Spike|hCoV-19/USA/UT-08454/2020|2020-05-20|EPI\_ISL\_524226|Original|hCoV-19^^Utah|Human|Utah Public Health Laboratory|Utah Public Health Laboratory|Young|USA

>Spike|hCoV-19/Denmark/DCGC-12249/2020|2020-11-16|EPI\_ISL\_682430|Original|hCoV-19^^Sjaelland|Human|Department of Virus and Microbiological Special Diagnostics|Albertsen Lab|Michaelsen|Denmark

>Spike|hCoV-19/Denmark/DCGC-21401/2020|2020-12-21|EPI\_ISL\_757726|Original|hCoV-19^^Hovedstaden|Human|Department of Virus and Microbiological Special Diagnostics|Albertsen Lab|Michaelsen|Denmark

>Spike|hCoV-19/USA/WA-UW-15204/2020|2020-07-08|EPI\_ISL\_717766|Original|hCoV-19^^Washington|Human|UW Virology Lab|UW Virology Lab|Roychoudhury|USA

>Spike|hCoV-19/USA/TX-HMH-MCoV-14023/2020|2020-08-14|EPI\_ISL\_787312|Original|hCoV-19^^Texas|Human|Houston Methodist Hospital|Houston Methodist Hospital|Long|USA

>Spike|hCoV-19/USA/NY-Wadsworth-290356-01/2020|2020-12-15|EPI\_ISL\_765541|Original|hCoV-19^^New York|Human|MONTEFIORE MEDICAL CENTER LABORATORIES|Wadsworth Center|Lasek-Nesselquist|USA

>Spike|hCoV-19/South Africa/KRISP-K002611/2020|2020-07-29|EPI\_ISL\_535475|Original|hCoV-19^^KwaZulu-Natal|Human|NHLS-IALCH|KRISP|de Oliveira|South Africa

>Spike|hCoV-19/USA/NM-NMDOH-2020324645/2020|2020-09-02|EPI\_ISL\_632834|Original|hCoV-19^^New Mexico|Human|New Mexico Department of Health Scientific Laboratory|New Mexico Department of Health Scientific Laboratory|Johnson|USA

>Spike|hCoV-19/England/ALDP-8BA00D/2020|2020-06-28|EPI\_ISL\_557146|Original|hCoV-19^^England|Human|Lighthouse Lab in Alderley Park|Wellcome Sanger Institute for the COVID-19 Genomics UK (COG-UK) consortium|Davies|United Kingdom

>Spike|hCoV-19/Japan/PG-1467/2020|2020-04-00|EPI\_ISL\_685074|Original|hCoV-19^^Japan|Human|Saitama Prefectural Institute of Public Health|Pathogen Genomics Center|Sekizuka|Japan

>Spike|hCoV-19/USA/MT-CDC-2-3693670/2020|2020-10-30|EPI\_ISL\_747032|Original|hCoV-19^^Montana|Human|Respiratory Viruses Branch|Respiratory Viruses Branch|Queen|USA

>Spike|hCoV-19/Luxembourg/LNS3343273/2020|2020-11-12|EPI\_ISL\_740293|Original|hCoV-19^^Luxembourg|Human|Laboratoire national de sant\u00e9|Laboratoire national de sant\u00e9|Wienecke-Baldacchino|Luxembourg

>Spike|hCoV-19/England/CAMB-1B5C14/2020|2020-08-17|EPI\_ISL\_529657|Original|hCoV-19^^England|Human|Department of Pathology|COVID-19 Genomics UK (COG-UK) Consortium|Meredith|United Kingdom

>Spike|hCoV-19/USA/MI-UM-10036434045/2020|2020-10-14|EPI\_ISL\_610248|Original|hCoV-19^^Michigan|Human|University of Michigan Clinical Microbiology Laboratory|Lauring Lab|Valesano|USA

>Spike|hCoV-19/England/ALDP-B628AF/2020|2020-11-09|EPI\_ISL\_656348|Original|hCoV-19^^England|Human|Lighthouse Lab in Alderley Park|Wellcome Sanger Institute for the COVID-19 Genomics UK (COG-UK) Consortium|Davies|United Kingdom

>Spike|hCoV-19/England/MILK-55E790/2020|2020-06-10|EPI\_ISL\_558378|Original|hCoV-19^^England|Human|Lighthouse Lab in Milton Keynes|Wellcome Sanger Institute for the COVID-19 Genomics UK (COG-UK) consortium|Davies|United Kingdom

>Spike|hCoV-19/Belgium/ULG-10250/2020|2020-07-20|EPI\_ISL\_515057|Original|hCoV-19^^Liege|Human|Department of Clinical Microbiology|GIGA Medical Genomics|Durkin|Belgium

>Spike|hCoV-19/USA/CA-CZB-3364/2020|2020-07-15|EPI\_ISL\_548289|Original|hCoV-19^^California|Human|Orange County Public Health Laboratory|Chan-Zuckerberg Biohub|Bhatt|USA

>Spike|hCoV-19/USA/WA-S785/2020|2020-04-14|EPI\_ISL\_449955|Original|hCoV-19^^Washington|Human|Washington State Department of Health|Seattle Flu Study|Bedford|USA

>Spike|hCoV-19/England/201161426/2020|2020-03-11|EPI\_ISL\_464840|Original|hCoV-19^^England|Human|Respiratory Virus Unit|Respiratory Virus Unit|Platt|United Kingdom

>Spike|hCoV-19/Australia/WA455/2020|2020-03-29|EPI\_ISL\_708749|Original|hCoV-19^^Western Australia|Human|PathWest Laboratory Medicine WA|PathWest Laboratory Medicine WA Microbial Surveillance Unit|Sikazwe|Australia

>Spike|hCoV-19/England/ALDP-B5D519/2020|2020-11-09|EPI\_ISL\_678907|Original|hCoV-19^^England|Human|Department of Pathology|COVID-19 Genomics UK (COG-UK) Consortium|Goodfellow|United Kingdom

>Spike|hCoV-19/USA/WA-S2803/2020|2020-08-26|EPI\_ISL\_530160|Original|hCoV-19^^Washington|Human|Seattle Flu Study|Seattle Flu Study|Lee|USA

>Spike|hCoV-19/Netherlands/ZH-EMC-896/2020|2020-10-04|EPI\_ISL\_632786|Original|hCoV-19^^Zuid Holland|Human|Dutch COVID-19 response team|Erasmus Medical Center|Oude Munnink|Netherlands

>Spike|hCoV-19/England/ALDP-650AB2/2020|2020-07-04|EPI\_ISL\_558098|Original|hCoV-19^^England|Human|Lighthouse Lab in Alderley Park|Wellcome Sanger Institute for the COVID-19 Genomics UK (COG-UK) consortium|Davies|United Kingdom

>Spike|hCoV-19/USA/CA-UCLA-218/2020|2020-06-02|EPI\_ISL\_537524|Original|hCoV-19^^California|Human|UCLA Pathology Clinical Microbiology Lab|Kruglyak Lab|Boocock|USA

>Spike|hCoV-19/United Arab Emirates/L2005036025/2020|2020-05-14|EPI\_ISL\_520674|Original|hCoV-19^^United Arab Emirates|Human|Mohammed Bin Rashid University of Medicine and Health Sciences|Al Jalila Genomics Center|Ramaswamy|United Arab Emirates

>Spike|hCoV-19/USA/CA-QDX-806/2020|2020-03-23|EPI\_ISL\_571499|Original|hCoV-19^^California|Human|Quest Diagnostics|Quest Diagnostics|Kagan|USA

>Spike|hCoV-19/Portugal/PT1619/2020|2020-07-09|EPI\_ISL\_693620|Original|hCoV-19^^Portugal|Human|Instituto Nacional de Saude (INSA)|Instituto Nacional de Saude (INSA)|Borges|Portugal

>Spike|hCoV-19/England/NORT-28399F/2020|2020-04-01|EPI\_ISL\_472246|Original|hCoV-19^^England|Human|Northumbria University / South Tees Hospitals NHS Foundation Trust / North Cumbria Integrated Care NHS Foundation Trust / North Tees and Hartlepool NHS Foundation Trust / Newcastle Hospitals NHS Foundation Trust|COVID-19 Genomics UK (COG-UK) Consortium|Bashton|United Kingdom

>Spike|hCoV-19/Australia/VIC2067/2020|2020-06-12|EPI\_ISL\_480757|Original|hCoV-19^^Victoria|Human|Microbiological Diagnostic Unit - Public Health Laboratory (MDU-PHL)|MDU-PHL|Schultz|Australia

>Spike|hCoV-19/Luxembourg/LNS8007299/2020|2020-10-27|EPI\_ISL\_744669|Original|hCoV-19^^Luxembourg|Human|Laboratoire national de sant\u00e9|Laboratoire national de sant\u00e9|Wienecke-Baldacchino|Luxembourg

>Spike|hCoV-19/England/NORT-28929E/2020|2020-03-28|EPI\_ISL\_458644|Original|hCoV-19^^England|Human|NU-OMICS DNA Sequencing research facility|Wellcome Sanger Institute for the COVID-19 Genomics UK (COG-UK) consortium|Davies|United Kingdom

>Spike|hCoV-19/USA/MI-UM-2006S000900/2020|2020-03-27|EPI\_ISL\_484746|Original|hCoV-19^^Michigan|Human|University of Michigan Clinical Microbiology Laboratory|Lauring Lab|Valesano|USA

>Spike|hCoV-19/USA/AZ-TG654332/2020|2020-04-13|EPI\_ISL\_695981|Original|hCoV-19^^Arizona|Human|Sonora Quest Laboratories|TGen North|French|USA

>Spike|hCoV-19/Iceland/83/2020|2020-03-09|EPI\_ISL\_417868|Original|hCoV-19^^Reykjavik|Human|The National University Hospital of Iceland|deCODE genetics|J\u00f3nsson|Iceland

>Spike|hCoV-19/Turkey/IST-GLAB-153/2020|2020-05-02|EPI\_ISL\_480252|Original|hCoV-19^^Istanbul|Human|Genomic Laboratory (GLAB) (Conjoint lab of Health Directorate of Istanbul and Istanbul Technical University)|Genomic Laboratory (GLAB)|Karacan|Turkey

>Spike|hCoV-19/Scotland/QEUH-96CF1B/2020|2020-08-21|EPI\_ISL\_534527|Original|hCoV-19^^Scotland|Human|NHSGGC West of Scotland Specialist Virology Centre / MRC-University of Glasgow Centre for Virus Research|Wellcome Sanger Institute for the COVID-19 Genomics UK (COG-UK) consortium|Davies|United Kingdom

>Spike|hCoV-19/England/ALDP-B84AA1/2020|2020-11-14|EPI\_ISL\_674488|Original|hCoV-19^^England|Human|Lighthouse Lab in Alderley Park|Wellcome Sanger Institute for the COVID-19 Genomics UK (COG-UK) Consortium|Davies|United Kingdom

>Spike|hCoV-19/England/ALDP-9CC9EE/2020|2020-09-16|EPI\_ISL\_573123|Original|hCoV-19^^England|Human|Quadram Institute Bioscience|COVID-19 Genomics UK (COG-UK) Consortium|Alikhan|United Kingdom

>Spike|hCoV-19/Wales/PHWC-483A4F/2020|2020-10-20|EPI\_ISL\_627886|Original|hCoV-19^^Wales|Human|Wales Specialist Virology Centre Sequencing lab|COVID-19 Genomics UK (COG-UK) Consortium|Moore|United Kingdom

>Spike|hCoV-19/England/NORT-2828B1/2020|2020-03-27|EPI\_ISL\_488495|Original|hCoV-19^^England|Human|NU-OMICS DNA Sequencing research facility|Wellcome Sanger Institute for the COVID-19 Genomics UK (COG-UK) consortium|Davies|United Kingdom

>Spike|hCoV-19/Australia/VIC5473/2020|2020-07-20|EPI\_ISL\_520222|Original|hCoV-19^^Victoria|Human|Microbiological Diagnostic Unit - Public Health Laboratory (MDU-PHL)|MDU-PHL|Schultz|Australia

>Spike|hCoV-19/Canada/BC-BCCDC-6450/2020|2020-10-00|EPI\_ISL\_740598|Original|hCoV-19^^British Columbia|Human|BCCDC Public Health Laboratory|BCCDC Public Health Laboratory|Prystajacky|Canada

>Spike|hCoV-19/Scotland/QEUH-9B845D/2020|2020-09-07|EPI\_ISL\_568240|Original|hCoV-19^^Scotland|Human|Lighthouse Lab in Glasgow|Wellcome Sanger Institute for the COVID-19 Genomics UK (COG-UK) consortium|Davies|United Kingdom

>Spike|hCoV-19/Switzerland/BE-ETHZ-321352/2020|2020-10-13|EPI\_ISL\_603602|Original|hCoV-19^^Bern|Human|Viollier AG|Department of Biosystems Science and Engineering|Nadeau|Switzerland

>Spike|hCoV-19/England/CAMC-C85FEC/2020|2020-12-17|EPI\_ISL\_756594|Original|hCoV-19^^England|Human|Lighthouse Lab in Cambridge|Wellcome Sanger Institute for the COVID-19 Genomics UK (COG-UK) Consortium|Davies|United Kingdom

>Spike|hCoV-19/England/BRIS-1278DD/2020|2020-04-01|EPI\_ISL\_469573|Original|hCoV-19^^England|Human|PHE South West Regional Laboratory|Wellcome Sanger Institute for the COVID-19 Genomics UK (COG-UK) consortium|Davies|United Kingdom

>Spike|hCoV-19/England/CAMC-A57835/2020|2020-10-08|EPI\_ISL\_597388|Original|hCoV-19^^England|Human|Lighthouse Lab in Cambridge|Wellcome Sanger Institute for the COVID-19 Genomics UK (COG-UK) consortium|Davies|United Kingdom

>Spike|hCoV-19/Belgium/reg-0423595/2020|2020-04-23|EPI\_ISL\_734642|Original|hCoV-19^^Diegem|Human|UZ Leuven|KU Leuven|Maes|Belgium

>Spike|hCoV-19/USA/TX-HMH-3123/2020|2020-06-10|EPI\_ISL\_544009|Original|hCoV-19^^Texas|Human|Houston Methodist Hospital|Houston Methodist Hospital|Long|USA

>Spike|hCoV-19/England/QEUH-AE290F/2020|2020-10-27|EPI\_ISL\_633589|Original|hCoV-19^^England|Human|Lighthouse Lab in Glasgow|Wellcome Sanger Institute for the COVID-19 Genomics UK (COG-UK) consortium|Davies|United Kingdom

>Spike|hCoV-19/Shandong/LY005-2/2020|2020-01-24|EPI\_ISL\_414938|Original|hCoV-19^^Shandong|Human|Shandong Provincial Center for Disease Control and Prevention|Beijing Institute of Microbiology and Epidemiology|Ma|China

>Spike|hCoV-19/USA/TX-HMH-MCoV-15626/2020|2020-10-24|EPI\_ISL\_785310|Original|hCoV-19^^Texas|Human|Houston Methodist Hospital|Houston Methodist Hospital|Long|USA

>Spike|hCoV-19/USA/WI-WSLH-200708/2020|2020-06-27|EPI\_ISL\_631465|Original|hCoV-19^^Wisconsin|Human|Wisconsin State Laboratory of Hygiene Communicable Disease Division|Wisconsin State Laboratory of Hygiene Communicable Disease Division|Florek|USA

>Spike|hCoV-19/England/CAMC-A56FC8/2020|2020-10-08|EPI\_ISL\_597335|Original|hCoV-19^^England|Human|Lighthouse Lab in Cambridge|Wellcome Sanger Institute for the COVID-19 Genomics UK (COG-UK) consortium|Davies|United Kingdom

>Spike|hCoV-19/USA/UT-UPHL-2009568/2020|2020-07-14|EPI\_ISL\_605247|Original|hCoV-19^^Utah|Human|Utah Public Health Laboratory|Utah Public Health Laboratory|Young|USA

>Spike|hCoV-19/Brazil/SP-818/2020|2020-03-31|EPI\_ISL\_776753|Original|hCoV-19^^S\u00e3o Paulo|Human|Instituto Adolfo Lutz - Central|Instituto Adolfo Lutz|Sacchi|Brazil

>Spike|hCoV-19/England/MILK-9A66D4/2020|2020-09-01|EPI\_ISL\_550154|Original|hCoV-19^^England|Human|Lighthouse Lab in Milton Keynes|Wellcome Sanger Institute for the COVID-19 Genomics UK (COG-UK) consortium|Davies|United Kingdom

>Spike|hCoV-19/USA/OH-CDC-2-3714473/2020|2020-11-23|EPI\_ISL\_751788|Original|hCoV-19^^Ohio|Human|OH Department of Health Laboratory|Genomics and Discovery|Queen|USA

>Spike|hCoV-19/Ireland/CO-NVRL-75IRL33312/2020|2020-10-07|EPI\_ISL\_671877|Original|hCoV-19^^Cork|Human|National Virus Reference Laboratory|National Virus Reference Laboratory|Gonzalez|Ireland

>Spike|hCoV-19/England/QEUH-AF5426/2020|2020-10-30|EPI\_ISL\_663180|Original|hCoV-19^^England|Human|Lighthouse Lab in Glasgow|Wellcome Sanger Institute for the COVID-19 Genomics UK (COG-UK) Consortium|Davies|United Kingdom



>Spike|hCoV-19/Wales/PHWC-2C648/2020|2020-03-31|EPI\_ISL\_445888|Original|hCoV-19^^Wales|Human|Wales Specialist Virology Centre|Public Health Wales Microbiology Cardiff|Moore|United Kingdom

>Spike|hCoV-19/Wales/MILK-5932DA/2020|2020-06-11|EPI\_ISL\_558296|Original|hCoV-19^^Wales|Human|Lighthouse Lab in Milton Keynes|Wellcome Sanger Institute for the COVID-19 Genomics UK (COG-UK) consortium|Davies|United Kingdom

>Spike|hCoV-19/Hong Kong/HKU-200723-088/2020|2020-07-07|EPI\_ISL\_497855|Original|hCoV-19^^Hong Kong|Human|Department of Microbiology|Department of Microbiology|Chan|China

>Spike|hCoV-19/USA/WI-UW-997/2020|2020-07-16|EPI\_ISL\_509991|Original|hCoV-19^^Wisconsin|Human|University of Wisconsin-Madison AIDS Vaccine Research Laboratories|University of Wisconsin-Madison AIDS Vaccine Research Laboratories|Baczenas|USA

>Spike|hCoV-19/USA/OR-PROV-016/2020|2020-04-03|EPI\_ISL\_482303|Original|hCoV-19^^Oregon|Human|Providence St. Joseph Health Molecular Genomics Laboratory|Providence St. Joseph Health Molecular Genomics Laboratory|Dowdell|USA

>Spike|hCoV-19/England/20109009804/2020|2020-03-04|EPI\_ISL\_464541|Original|hCoV-19^^England|Human|Respiratory Virus Unit|Respiratory Virus Unit|Platt|United Kingdom

>Spike|hCoV-19/USA/HI-H200552/2020|2020-10-24|EPI\_ISL\_753081|Original|hCoV-19^^Hawaii|Human|State Laboratories Division|State Laboratories Division|Sultana|USA

>Spike|hCoV-19/Wales/PHWC-491DAF/2020|2020-11-13|EPI\_ISL\_706778|Original|hCoV-19^^Wales|Human|Originating lab|COVID-19 Genomics UK (COG-UK) Consortium|Moore|United Kingdom

>Spike|hCoV-19/Australia/VIC2373/2020|2020-06-28|EPI\_ISL\_522093|Original|hCoV-19^^Victoria|Human|Victorian Infectious Diseases Reference Laboratory (VIDRL)|VIDRL and MDU-PHL|Schultz|Australia

>Spike|hCoV-19/England/CAMC-D02450/2020|2020-12-22|EPI\_ISL\_781559|Original|hCoV-19^^England|Human|Lighthouse Lab in Cambridge|Wellcome Sanger Institute for the COVID-19 Genomics UK (COG-UK) Consortium|Davies|United Kingdom

>Spike|hCoV-19/USA/MN-MDH-152/2020|2020-03-23|EPI\_ISL\_460055|Original|hCoV-19^^Minnesota|Human|Minnesota Department of Health|Minnesota Department of Health|Garfin|USA

>Spike|hCoV-19/USA/TX-HMH-MCoV-18266/2020|2020-11-17|EPI\_ISL\_784614|Original|hCoV-19^^Texas|Human|Houston Methodist Hospital|Houston Methodist Hospital|Long|USA

>Spike|hCoV-19/Australia/VIC536/2020|2020-03-24|EPI\_ISL\_426802|Original|hCoV-19^^Victoria|Human|Victorian Infectious Diseases Reference Laboratory (VIDRL)|Microbiological Diagnostic Unit Public Health Laboratory and Victorian Infectious Diseases Reference Laboratory|Schultz|Australia

>Spike|hCoV-19/England/ALDP-94EC63/2020|2020-06-17|EPI\_ISL\_556376|Original|hCoV-19^^England|Human|Lighthouse Lab in Alderley Park|Wellcome Sanger Institute for the COVID-19 Genomics UK (COG-UK) consortium|Davies|United Kingdom

>Spike|hCoV-19/Jordan/SEARCH-5469/2020|2020-09-08|EPI\_ISL\_755143|Original|hCoV-19^^Amman|Human|Biolab Diagnostic Laboratories|Andersen lab at Scripps Research|Gangavarapu|Jordan

>Spike|hCoV-19/Belgium/reg-0324870/2020|2020-03-24|EPI\_ISL\_734520|Original|hCoV-19^^Chaumont-gistoux|Human|UZ Leuven|KU Leuven|Maes|Belgium

>Spike|hCoV-19/England/SHEF-CF1FB/2020|2020-09-26|EPI\_ISL\_573744|Original|hCoV-19^^England|Human|Virology Department|COVID-19 Genomics UK (COG-UK) Consortium|de Silva|United Kingdom

>Spike|hCoV-19/Switzerland/SO-ETHZ-410061/2020|2020-12-17|EPI\_ISL\_737790|Original|hCoV-19^^Solothurn|Human|Viollier AG|Department of Biosystems Science and Engineering|Nadeau|Switzerland

>Spike|hCoV-19/Denmark/DCGC-20468/2020|2020-12-21|EPI\_ISL\_759170|Original|hCoV-19^^Sjaelland|Human|Department of Virus and Microbiological Special Diagnostics|Albertsen Lab|Michaelsen|Denmark

>Spike|hCoV-19/England/OXON-B00A5/2020|2020-00-00|EPI\_ISL\_478853|Original|hCoV-19^^England|Human|Oxford Viromics|COVID-19 Genomics UK (COG-UK) Consortium|Golubchik|United Kingdom

>Spike|hCoV-19/Wales/PHWC-49983D/2020|2020-12-04|EPI\_ISL\_727364|Original|hCoV-19^^Wales|Human|Originating lab|COVID-19 Genomics UK (COG-UK) Consortium|Moore|United Kingdom

>Spike|hCoV-19/Wales/PHWC-16A777/2020|2020-09-10|EPI\_ISL\_560100|Original|hCoV-19^^Wales|Human|Wales Specialist Virology Centre Sequencing lab|COVID-19 Genomics UK (COG-UK) Consortium|Moore|United Kingdom

>Spike|hCoV-19/Norway/5858/2020|2020-11-15|EPI\_ISL\_775339|Original|hCoV-19^^Viken|Human|Ostfold Hospital Trust - Kalnes|Norwegian Institute of Public Health|Vollan|Norway

>Spike|hCoV-19/Netherlands/NH-RIVM-20223/2020|2020-12-05|EPI\_ISL\_723375|Original|hCoV-19^^Noord-Holland|Human|Dutch COVID-19 response team|National Institute for Public Health and the Environment (RIVM)|Meijer|Netherlands

>Spike|hCoV-19/USA/LA-EVTL535/2020|2020-08-04|EPI\_ISL\_578939|Original|hCoV-19^^Louisiana|Human|LSUHS Emerging Viral Threat Laboratory|Microbial Genome Sequencing Center|Kamil|USA

>Spike|hCoV-19/Portugal/PT0942/2020|2020-04-09|EPI\_ISL\_511492|Original|hCoV-19^^Portugal|Human|Instituto Nacional de Saude (INSA)|Instituto Nacional de Saude (INSA) and Instituto Gulbenkian de Ciencia (IGC)|Borges|Portugal

>Spike|hCoV-19/Wales/PHWC-4A4B72/2020|2020-12-08|EPI\_ISL\_764771|Original|hCoV-19^^Wales|Human|Wales Specialist Virology Centre Sequencing lab|COVID-19 Genomics UK (COG-UK) Consortium|Moore|United Kingdom

>Spike|hCoV-19/Thailand/Bangkok-CONI-0094/2020|2020-03-28|EPI\_ISL\_458023|Original|hCoV-19^^Bangkok|Human|Hospital for Tropical Diseases|COVID-19 Network Investigations (CONI) Alliance|Batty|Thailand

>Spike|hCoV-19/Scotland/QEUA-B7BF9F/2020|2020-11-14|EPI\_ISL\_710844|Original|hCoV-19^^Scotland|Human|Lighthouse Lab in Glasgow|Wellcome Sanger Institute for the COVID-19 Genomics UK (COG-UK) Consortium|Davies|United Kingdom

>Spike|hCoV-19/Finland/4LS9F1/2020|2020-08-08|EPI\_ISL\_756013|Original|hCoV-19^^Uusimaa|Human|Department of Virology and Immunology|Department of Virology|Smura|Finland

>Spike|hCoV-19/England/MILK-B896E4/2020|2020-11-13|EPI\_ISL\_675859|Original|hCoV-19^^England|Human|Lighthouse Lab in Milton Keynes|Wellcome Sanger Institute for the COVID-19 Genomics UK (COG-UK) Consortium|Davies|United Kingdom

>Spike|hCoV-19/Canada/ON-OICR-SLB2854/2020|2020-04-07|EPI\_ISL\_538373|Original|hCoV-19^^Ontario|Human|Kingston Health Sciences Centre / Queen's University|Ontario Institute for Cancer Research|de Borja|Canada

>Spike|hCoV-19/Australia/VIC2986/2020|2020-07-07|EPI\_ISL\_521816|Original|hCoV-19^^Victoria|Human|Microbiological Diagnostic Unit - Public Health Laboratory (MDU-PHL)|MDU-PHL|Schultz|Australia

>Spike|hCoV-19/Russia/OMS-ORINFI-4761V-10K/2020|2020-05-03|EPI\_ISL\_629031|SPEV|hCoV-19^^Omsk|Human|Omsk Research Institute of Natural Focal Infections|WHO National Influenza Centre Russian Federation|Komissarov|Russia

>Spike|hCoV-19/England/ALDP-A6E428/2020|2020-10-15|EPI\_ISL\_607691|Original|hCoV-19^^England|Human|Lighthouse Lab in Alderley Park|Wellcome Sanger Institute for the COVID-19 Genomics UK (COG-UK) consortium|Davies|United Kingdom

>Spike|hCoV-19/England/QEUA-9C7C26/2020|2020-09-12|EPI\_ISL\_567041|Original|hCoV-19^^England|Human|Lighthouse Lab in Glasgow|Wellcome Sanger Institute for the COVID-19 Genomics UK (COG-UK) consortium|Davies|United Kingdom

>Spike|hCoV-19/England/BRIS-1853D84/2020|2020-04-27|EPI\_ISL\_492428|Original|hCoV-19^^England|Human|PHE South West Regional Laboratory|Wellcome Sanger Institute for the COVID-19 Genomics UK (COG-UK) consortium|Davies|United Kingdom

>Spike|hCoV-19/USA/CA-CZB0122/2020|2020-04-08|EPI\_ISL\_429009|Original|hCoV-19^^California|Human|UCSF Clinical Microbiology Laboratory|Chan-Zuckerberg Biohub|Kamm|USA

>Spike|hCoV-19/Scotland/EDB1899/2020|2020-04-17|EPI\_ISL\_491625|Original|hCoV-19^^Scotland|Human|Virology Department|Wellcome Sanger Institute for the COVID-19 Genomics UK (COG-UK) consortium|Davies|United Kingdom

>Spike|hCoV-19/Wales/PHWC-4981F7/2020|2020-11-30|EPI\_ISL\_727039|Original|hCoV-19^^Wales|Human|Originating lab|COVID-19 Genomics UK (COG-UK) Consortium|Moore|United Kingdom

>Spike|hCoV-19/Belgium/ULG-10968/2020|2020-09-08|EPI\_ISL\_707746|Original|hCoV-19^^Li\u00e8ge|Human|Department of Clinical Microbiology|GIGA Medical Genomics|Durkin|Belgium

>Spike|hCoV-19/USA/CA-CZB-3884/2020|2020-07-21|EPI\_ISL\_548500|Original|hCoV-19^^California|Human|County of Santa Clara Public Health Department|Chan-Zuckerberg Biohub|Bhatt|USA

>Spike|hCoV-19/USA/TX-HMH-MCoV-8452/2020|2020-07-01|EPI\_ISL\_780567|Original|hCoV-19^^Texas|Human|Houston Methodist Hospital|Houston Methodist Hospital|Long|USA

>Spike|hCoV-19/England/ALDP-A93E59/2020|2020-10-19|EPI\_ISL\_610993|Original|hCoV-19^^England|Human|Lighthouse Lab in Alderley Park|Wellcome Sanger Institute for the COVID-19 Genomics UK (COG-UK) consortium|Davies|United Kingdom

>Spike|hCoV-19/England/TBSD-2488E2A/2020|2020-04-30|EPI\_ISL\_482061|Original|hCoV-19^^England|Human|The Department of Microbiology|Wellcome Sanger Institute for the COVID-19 Genomics UK (COG-UK) consortium|Davies|United Kingdom

>Spike|hCoV-19/Wales/PHWC-48FF62/2020|2020-11-11|EPI\_ISL\_681254|Original|hCoV-19^^Wales|Human|Wales Specialist Virology Centre Sequencing lab|COVID-19 Genomics UK (COG-UK) Consortium|Moore|United Kingdom

>Spike|hCoV-19/Canada/ON-E70/2020|2020-03-28|EPI\_ISL\_593543|Original|hCoV-19^^Ontario|Human|Eastern Ontario Regional Laboratory Association|McMaster University|McArthur|Canada

>Spike|hCoV-19/England/C200044586/2020|2020-11-06|EPI\_ISL\_664043|Original|hCoV-19^^England|Human|Respiratory Virus Unit|COVID-19 Genomics UK (COG-UK) Consortium|Platt|United Kingdom

>Spike|hCoV-19/India/TG-CCMB-W908/2020|2020-07-14|EPI\_ISL\_528835|Original|hCoV-19^^Telangana|Human|CSIR-Centre for Cellular and Molecular Biology|CSIR-Centre for Cellular and Molecular Biology|Banu|India

>Spike|hCoV-19/Cote d'Ivoire/BKE0888/2020|2020-08-19|EPI\_ISL\_614388|Original|hCoV-19^^Boauk\u00e9|Human|Molecular diagnostic unit for viral haemorrhagic fevers and emerging viruses|Project group Epidemiology of Highly Pathogenic Microorganisms|Calvignac-Spencer|C\u00f4te d'Ivoire

>Spike|hCoV-19/Denmark/DCGC-13822/2020|2020-11-30|EPI\_ISL\_713043|Original|hCoV-19^^Midtjylland|Human|Department of Virus and Microbiological Special Diagnostics|Albertsen Lab|Michaelsen|Denmark

>Spike|hCoV-19/England/ALDP-A67410/2020|2020-10-12|EPI\_ISL\_630655|Original|hCoV-19^^England|Human|Lighthouse Lab in Alderley Park|Wellcome Sanger Institute for the COVID-19 Genomics UK (COG-UK) consortium|Davies|United Kingdom

>Spike|hCoV-19/USA/FL-UF-33/2020|2020-10-15|EPI\_ISL\_666619|Original|hCoV-19^^Florida|Human|Environmental and Global Health|Environmental and Global Health|Elbadry|USA

>Spike|hCoV-19/England/MILK-A45E0B/2020|2020-10-06|EPI\_ISL\_598562|Original|hCoV-19^^England|Human|Lighthouse Lab in Milton Keynes|Wellcome Sanger Institute for the COVID-19 Genomics UK (COG-UK) consortium|Davies|United Kingdom

>Spike|hCoV-19/Switzerland/UR-ETHZ-120168/2020|2020-04-26|EPI\_ISL\_468246|Original|hCoV-19^^Uri|Human|Viollier AG|Department of Biosystems Science and Engineering|Nadeau|Switzerland

>Spike|hCoV-19/USA/TX-HMH-MCoV-13267/2020|2020-08-25|EPI\_ISL\_788416|Original|hCoV-19^^Texas|Human|Houston Methodist Hospital|Houston Methodist Hospital|Long|USA

>Spike|hCoV-19/England/SHEF-10C865A/2020|2020-12-16|EPI\_ISL\_727880|Original|hCoV-19^^England|Human|Virology Department|COVID-19 Genomics UK (COG-UK) Consortium|de Silva|United Kingdom

>Spike|hCoV-19/England/NORW-E789E/2020|2020-05-05|EPI\_ISL\_449080|Original|hCoV-19^^England|Human|Quadram Institute Bioscience|COVID-19 Genomics UK (COG-UK) Consortium|Alikhan|United Kingdom

>Spike|hCoV-19/Denmark/DCGC-5256/2020|2020-09-07|EPI\_ISL\_615187|Original|hCoV-19^^Sjaelland|Human|Department of Virus and Microbiological Special Diagnostics|Albertsen lab|Michaelsen|Denmark

>Spike|hCoV-19/England/QEUH-C324D0/2020|2020-12-11|EPI\_ISL\_782638|Original|hCoV-19^^England|Human|Lighthouse Lab in Glasgow|Wellcome Sanger Institute for the COVID-19 Genomics UK (COG-UK) Consortium|Davies|United Kingdom

>Spike|hCoV-19/USA/NY-NYUMC741/2020|2020-03-20|EPI\_ISL\_451456|Original|hCoV-19^^New York|Human|NYU Langone Health|Departments of Pathology and Medicine|Maurano|USA

>Spike|hCoV-19/Belgium/reg-0722817/2020|2020-07-22|EPI\_ISL\_734821|Original|hCoV-19^^Sint-Genesius-Rode|Human|UZ Leuven|KU Leuven|Maes|Belgium

>Spike|hCoV-19/Scotland/QEUA-A78607/2020|2020-10-14|EPI\_ISL\_638978|Original|hCoV-19^^Scotland|Human|Oxford Viromics|COVID-19 Genomics UK (COG-UK) Consortium|Golubchik|United Kingdom

>Spike|hCoV-19/England/QEUA-B2C935/2020|2020-11-03|EPI\_ISL\_646783|Original|hCoV-19^^England|Human|Lighthouse Lab in Glasgow|Wellcome Sanger Institute for the COVID-19 Genomics UK (COG-UK) Consortium|Davies|United Kingdom

>Spike|hCoV-19/Luxembourg/LNS8217011/2020|2020-10-29|EPI\_ISL\_744705|Original|hCoV-19^^Luxembourg|Human|Laboratoire national de sant\u00e9|Laboratoire national de sant\u00e9|Wienecke-Baldacchino|Luxembourg

>Spike|hCoV-19/Chile/RM-153915/2020|2020-08-18|EPI\_ISL\_746654|Original|hCoV-19^^Region Metropolitana de Santiago|Human|Genetica Molecular and Subdepartamento de Virologia ISP Chile|Instituto de Salud Publica de Chile|Tognarelli|Chile

>Spike|hCoV-19/USA/TX-HMH-MCoV-15210/2020|2020-10-20|EPI\_ISL\_786694|Original|hCoV-19^^Texas|Human|Houston Methodist Hospital|Houston Methodist Hospital|Long|USA

>Spike|hCoV-19/Germany/NW-HHU-263/2020|2020-09-21|EPI\_ISL\_631351|Original|hCoV-19^^North Rhine-Westphalia|Human|ZOTZ KLIMAS MVZ D\u00fcsseldorf-Centrum GbR \u00dcBAG f\u00fcr Labormedizin|Center of Medical Microbiology|Wienemann|Germany

>Spike|hCoV-19/Belgium/ULG-10208/2020|2020-05-15|EPI\_ISL\_484697|Original|hCoV-19^^Belgium|Human|Department of Clinical Microbiology|GIGA Medical Genomics|Durkin|Belgium

>Spike|hCoV-19/Denmark/DCGC-15481/2020|2020-11-23|EPI\_ISL\_713847|Original|hCoV-19^^Syddanmark|Human|Department of Virus and Microbiological Special Diagnostics|Albertsen Lab|Michaelsen|Denmark

>Spike|hCoV-19/England/BRIS-126F33/2020|2020-04-23|EPI\_ISL\_469742|Original|hCoV-19^^England|Human|PHE South West Regional Laboratory|Wellcome Sanger Institute for the COVID-19 Genomics UK (COG-UK) consortium|Davies|United Kingdom

>Spike|hCoV-19/Australia/VIC16857/2020|2020-08-20|EPI\_ISL\_663609|Original|hCoV-19^^Victoria|Human|Microbiological Diagnostic Unit - Public Health Laboratory (MDU-PHL)|MDU-PHL|Schultz|Australia

>Spike|hCoV-19/France/PAC-MEPHI-2281/2020|2020-08-03|EPI\_ISL\_644532|Original|hCoV-19^^Provence-Alpes-Cote-d\u2019Azur|Human|MEPHI|MEPHI|Levasseur|France

>Spike|hCoV-19/England/QEUA-C32670/2020|2020-12-10|EPI\_ISL\_782565|Original|hCoV-19^^England|Human|Lighthouse Lab in Glasgow|Wellcome Sanger Institute for the COVID-19 Genomics UK (COG-UK) Consortium|Davies|United Kingdom

>Spike|hCoV-19/England/MILK-BDCAC8/2020|2020-11-27|EPI\_ISL\_709777|Original|hCoV-19^^England|Human|Lighthouse Lab in Milton Keynes|Wellcome Sanger Institute for the COVID-19 Genomics UK (COG-UK) Consortium|Davies|United Kingdom

>Spike|hCoV-19/USA/UT-UPHL-2012025968/2020|2020-07-27|EPI\_ISL\_745704|Original|hCoV-19^^Utah|Human|Ginkgo Bioworks Clinical Laboratory|Utah Public Health Laboratory|Young|USA

>Spike|hCoV-19/Scotland/QEUA-997F80/2020|2020-08-27|EPI\_ISL\_568391|Original|hCoV-19^^Scotland|Human|Lighthouse Lab in Glasgow|Wellcome Sanger Institute for the COVID-19 Genomics UK (COG-UK) consortium|Davies|United Kingdom

>Spike|hCoV-19/England/QEUA-A4D252/2020|2020-10-07|EPI\_ISL\_596105|Original|hCoV-19^^England|Human|Quadram Institute Bioscience|COVID-19 Genomics UK (COG-UK) Consortium|Alikhan|United Kingdom

>Spike|hCoV-19/England/ALDP-B24D04/2020|2020-11-04|EPI\_ISL\_646831|Original|hCoV-19^^England|Human|Lighthouse Lab in Alderley Park|Wellcome Sanger Institute for the COVID-19 Genomics UK (COG-UK) Consortium|Davies|United Kingdom

>Spike|hCoV-19/South Africa/R12597-20/2020|2020-06-16|EPI\_ISL\_504198|Original|hCoV-19^^North West|Human|National Institute for Communicable Diseases of the National Health Laboratory Service|National Institute for Communicable Diseases of the National Health Laboratory Service|Allam|South Africa

>Spike|hCoV-19/Switzerland/VD-ETHZ-260191/2020|2020-08-27|EPI\_ISL\_539479|Original|hCoV-19^^Vaud|Human|Viollier AG|Department of Biosystems Science and Engineering|Nadeau|Switzerland

>Spike|hCoV-19/USA/WI-UW-623/2020|2020-06-24|EPI\_ISL\_484998|Original|hCoV-19^^Wisconsin|Human|University of Wisconsin-Madison AIDS Vaccine Research Laboratories|University of Wisconsin-Madison AIDS Vaccine Research Laboratories|Baczenas|USA

>Spike|hCoV-19/Indonesia/SA-EIJK-12/2020|2020-03-27|EPI\_ISL\_568694|Original|hCoV-19^^North Sulawesi|Human|RSUP Prof. Dr. R. Kandou Manado|Eijkman Institute for Molecular Biology|Soebandrio|Indonesia

>Spike|hCoV-19/England/ALDP-9560A8/2020|2020-06-08|EPI\_ISL\_554029|Original|hCoV-19^^England|Human|Lighthouse Lab in Alderley Park|Wellcome Sanger Institute for the COVID-19 Genomics UK (COG-UK) consortium|Davies|United Kingdom

>Spike|hCoV-19/Spain/MD-IBV-99012442/2020|2020-11-27|EPI\_ISL\_780077|Original|hCoV-19^^Madrid|Human|Hospital General Universitario Gregorio Mara\u00f1\u00f3n|SeqCOVID-SPAIN consortium|IBV (CSIC)|Comas|Spain

>Spike|hCoV-19/England/CAMC-C440C8/2020|2020-12-10|EPI\_ISL\_719278|Original|hCoV-19^^England|Human|Lighthouse Lab in Cambridge|Wellcome Sanger Institute for the COVID-19 Genomics UK (COG-UK) Consortium|Davies|United Kingdom

>Spike|hCoV-19/England/201100060/2020|2020-03-06|EPI\_ISL\_464636|Original|hCoV-19^^England|Human|Respiratory Virus Unit|Respiratory Virus Unit|Platt|United Kingdom

>Spike|hCoV-19/Australia/VIC17904/2020|2020-08-25|EPI\_ISL\_779547|Original|hCoV-19^^Victoria|Human|Microbiological Diagnostic Unit - Public Health Laboratory (MDU-PHL)|MDU-PHL|Beck|Australia

>Spike|hCoV-19/USA/TX-HMH-1780/2020|2020-05-07|EPI\_ISL\_542834|Original|hCoV-19^^Texas|Human|Houston Methodist Hospital|Houston Methodist Hospital|Long|USA

>Spike|hCoV-19/Wales/PHWC-48FE83/2020|2020-11-11|EPI\_ISL\_681241|Original|hCoV-19^^Wales|Human|Wales Specialist Virology Centre Sequencing lab|COVID-19 Genomics UK (COG-UK) Consortium|Moore|United Kingdom

>Spike|hCoV-19/England/CAMC-B36473/2020|2020-11-05|EPI\_ISL\_645290|Original|hCoV-19^^England|Human|Lighthouse Lab in Cambridge|Wellcome Sanger Institute for the COVID-19 Genomics UK (COG-UK) Consortium|Davies|United Kingdom

>Spike|hCoV-19/England/ALDP-9555AA/2020|2020-06-12|EPI\_ISL\_553373|Original|hCoV-19^^England|Human|Lighthouse Lab in Alderley Park|Wellcome Sanger Institute for the COVID-19 Genomics UK (COG-UK) consortium|Davies|United Kingdom

>Spike|hCoV-19/Denmark/DCGC-10869/2020|2020-11-02|EPI\_ISL\_670256|Original|hCoV-19^^Sjaelland|Human|Department of Virus and Microbiological Special Diagnostics|Albertsen Lab|Michaelsen|Denmark

>Spike|hCoV-19/England/QEUEH-9B5669/2020|2020-09-03|EPI\_ISL\_590406|Original|hCoV-19^^England|Human|Lighthouse Lab in Glasgow|Wellcome Sanger Institute for the COVID-19 Genomics UK (COG-UK) consortium|Davies|United Kingdom

>Spike|hCoV-19/England/QEUEH-CADDD5/2020|2020-12-19|EPI\_ISL\_761191|Original|hCoV-19^^England|Human|Lighthouse Lab in Glasgow|Wellcome Sanger Institute for the COVID-19 Genomics UK (COG-UK) Consortium|Davies|United Kingdom

>Spike|hCoV-19/USA/TX-HMH-MCoV-8460/2020|2020-07-01|EPI\_ISL\_780572|Original|hCoV-19^^Texas|Human|Houston Methodist Hospital|Houston Methodist Hospital|Long|USA

>Spike|hCoV-19/Denmark/ALAB-SSI-672/2020|2020-03-27|EPI\_ISL\_437032|Original|hCoV-19^^Denmark|Human|Department of Virus and Microbiological Special Diagnostics|Albertsen lab|Kirkegaard|Denmark

>Spike|hCoV-19/Italy/APU-IZSPB\_305PT/2020|2020-11-03|EPI\_ISL\_653799|Original|hCoV-19^^Apulia|Human|I.R.C.C.S. \S. De Bellis\ - Ente Ospedaliero|Istituto Zooprofilattico Sperimentale della Puglia e della Basilicata|Parisi|Italy

>Spike|hCoV-19/Wales/PHWC-487173/2020|2020-10-13|EPI\_ISL\_639168|Original|hCoV-19^^Wales|Human|Wales Specialist Virology Centre Sequencing lab|COVID-19 Genomics UK (COG-UK) Consortium|Moore|United Kingdom

>Spike|hCoV-19/England/ALDP-B1CD69/2020|2020-11-01|EPI\_ISL\_645795|Original|hCoV-19^^England|Human|Lighthouse Lab in Alderley Park|Wellcome Sanger Institute for the COVID-19 Genomics UK (COG-UK) Consortium|Davies|United Kingdom

>Spike|hCoV-19/England/MILK-A7DAAC/2020|2020-10-13|EPI\_ISL\_606380|Original|hCoV-19^^England|Human|Lighthouse Lab in Milton Keynes|Wellcome Sanger Institute for the COVID-19 Genomics UK (COG-UK) consortium|Davies|United Kingdom

>Spike|hCoV-19/USA/WA-UW-2039/2020|2020-03-23|EPI\_ISL\_477697|Original|hCoV-19^^Washington|Human|UW Virology Lab|UW Virology Lab|Roychoudhury|USA

>Spike|hCoV-19/Thailand/Bangkok-0078/2020|2020-04-01|EPI\_ISL\_447019|Original|hCoV-19^^Bangkok|Human|Ramathibodi Hospital|COVID-19 Network Investigations (CONI) Alliance|Batty|Thailand

>Spike|hCoV-19/Denmark/DCGC-22629/2020|2020-12-14|EPI\_ISL\_757502|Original|hCoV-19^^Midtjylland|Human|Department of Virus and Microbiological Special Diagnostics|Albertsen Lab|Michaelsen|Denmark

>Spike|hCoV-19/Wales/MILK-99C48C/2020|2020-08-26|EPI\_ISL\_550726|Original|hCoV-19^^Wales|Human|Lighthouse Lab in Milton Keynes|Wellcome Sanger Institute for the COVID-19 Genomics UK (COG-UK) consortium|Davies|United Kingdom

>Spike|hCoV-19/England/20179043904/2020|2020-04-25|EPI\_ISL\_527349|Original|hCoV-19^^England|Human|Respiratory Virus Unit|Respiratory Virus Unit|Ledesma|United Kingdom

>Spike|hCoV-19/England/20118070604/2020|2020-03-12|EPI\_ISL\_464939|Original|hCoV-19^^England|Human|Respiratory Virus Unit|Respiratory Virus Unit|Platt|United Kingdom

>Spike|hCoV-19/USA/WA-S136/2020|2020-03-13|EPI\_ISL\_430173|Original|hCoV-19^^Washington|Human|Washington State Department of Health|Seattle Flu Study|Bedford|USA

>Spike|hCoV-19/England/ALDP-CBF9CD/2020|2020-12-20|EPI\_ISL\_778043|Original|hCoV-19^^England|Human|Lighthouse Lab in Alderley Park|Wellcome Sanger Institute for the COVID-19 Genomics UK (COG-UK) Consortium|Davies|United Kingdom

>Spike|hCoV-19/USA/ME-HETL-J0324/2020|2020-11-30|EPI\_ISL\_755453|Original|hCoV-19^^Maine|Human|Maine Health and Environmental Testing Laboratory|Tewhey Lab|Tewhey|USA

>Spike|hCoV-19/England/20198067904/2020|2020-05-07|EPI\_ISL\_465637|Original|hCoV-19^^England|Human|Respiratory Virus Unit|Respiratory Virus Unit|Platt|United Kingdom

>Spike|hCoV-19/England/CAMB-1B586B/2020|2020-06-30|EPI\_ISL\_512332|Original|hCoV-19^^England|Human|Department of Pathology|COVID-19 Genomics UK (COG-UK) Consortium|Meredith|United Kingdom

>Spike|hCoV-19/USA/MD-HP00377/2020|2020-04-02|EPI\_ISL\_511868|Original|hCoV-19^^Maryland|Human|Johns Hopkins Hospital Department of Pathology|Johns Hopkins Hospital Department of Pathology|Ramakrishnan|USA

>Spike|hCoV-19/Portugal/PT1740/2020|2020-11-09|EPI\_ISL\_731977|Original|hCoV-19^^Portugal|Human|Instituto Nacional de Saude (INSA)|Instituto Nacional de Saude (INSA)|Borges|Portugal

>Spike|hCoV-19/USA/UT-UPHL-2012661787/2020|2020-08-03|EPI\_ISL\_745642|Original|hCoV-19^^Utah|Human|Ginkgo Bioworks Clinical Laboratory|Utah Public Health Laboratory|Young|USA

>Spike|hCoV-19/USA/MI-MDHHS-SC22587/2020|2020-11-19|EPI\_ISL\_737160|Original|hCoV-19^^Michigan|Human|Michigan Department of Health and Human Services|Michigan Department of Health and Human Services|Blankenship|USA

>Spike|hCoV-19/England/CAMC-A64E06/2020|2020-10-10|EPI\_ISL\_608407|Original|hCoV-19^^England|Human|Lighthouse Lab in Cambridge|Wellcome Sanger Institute for the COVID-19 Genomics UK (COG-UK) consortium|Davies|United Kingdom

>Spike|hCoV-19/Spain/CT-IBV-97010146/2020|2020-11-03|EPI\_ISL\_683615|Original|hCoV-19^^Catalunya|Human|Servicio de Microbiolog\u00eda|SeqCOVID-SPAIN consortium|IBV (CSIC)|Comas|Spain

>Spike|hCoV-19/Denmark/DCGC-4965/2020|2020-09-21|EPI\_ISL\_621503|Original|hCoV-19^^Hovedstaden|Human|Department of Virus and Microbiological Special Diagnostics|Albertsen lab|Michaelsen|Denmark

>Spike|hCoV-19/Australia/VIC427/2020|2020-03-25|EPI\_ISL\_426727|Original|hCoV-19^^Victoria|Human|Victorian Infectious Diseases Reference Laboratory (VIDRL)|Microbiological Diagnostic Unit Public Health Laboratory and Victorian Infectious Diseases Reference Laboratory|Schultz|Australia

>Spike|hCoV-19/Brazil/SP-L5-CAMPI99/2020|2020-04-25|EPI\_ISL\_476425|Original|hCoV-19^^S\u00e3o Paulo|Human|Laborat\u00f3rio de Patologia Cl\u00ednica - UNICAMP|Laborat\u00f3rio de Estudos de V\u00edrus Emergentes - UNICAMP|Sabino|Brazil

>Spike|hCoV-19/Belgium/regal-12141403/2020|2020-12-14|EPI\_ISL\_738455|Original|hCoV-19^^Arendonk|Human|UZ Leuven|KU Leuven|Maes|Belgium

>Spike|hCoV-19/Luxembourg/LNS0087318/2020|2020-11-10|EPI\_ISL\_739709|Original|hCoV-19^^Luxembourg|Human|Laboratoire national de sant\u00e9|Laboratoire national de sant\u00e9|Wienecke-Baldacchino|Luxembourg

>Spike|hCoV-19/England/NORW-E9E6D/2020|2020-05-03|EPI\_ISL\_448374|Original|hCoV-19^^England|Human|Quadram Institute Bioscience|COVID-19 Genomics UK (COG-UK) Consortium|Alikhan|United Kingdom

>Spike|hCoV-19/Australia/VIC1157/2020|2020-04-09|EPI\_ISL\_430598|Original|hCoV-19^^Victoria|Human|Victorian Infectious Diseases Reference Laboratory (VIDRL)|Microbiological Diagnostic Unit Public Health Laboratory and Victorian Infectious Diseases Reference Laboratory|Schultz|Australia

>Spike|hCoV-19/England/QEUA-9BA79E/2020|2020-09-09|EPI\_ISL\_573602|Original|hCoV-19^^England|Human|Oxford Viromics|COVID-19 Genomics UK (COG-UK) Consortium|Golubchik|United Kingdom

>Spike|hCoV-19/England/MILK-BB2433/2020|2020-11-18|EPI\_ISL\_720083|Original|hCoV-19^^England|Human|Lighthouse Lab in Milton Keynes|Wellcome Sanger Institute for the COVID-19 Genomics UK (COG-UK) Consortium|Davies|United Kingdom

>Spike|hCoV-19/England/ALDP-9BDED2/2020|2020-09-10|EPI\_ISL\_568064|Original|hCoV-19^^England|Human|Lighthouse Lab in Alderley Park|Wellcome Sanger Institute for the COVID-19 Genomics UK (COG-UK) consortium|Davies|United Kingdom

>Spike|hCoV-19/Russia/SPE-RII-18220V/2020|2020-05-28|EPI\_ISL\_524017|Vero P1|hCoV-19^^Saint Petersburg|Human|WHO National Influenza Centre Russian Federation|WHO National Influenza Centre Russian Federation|Komissarov|Russia

>Spike|hCoV-19/Scotland/QEUA-9B0E48/2020|2020-09-03|EPI\_ISL\_560046|Original|hCoV-19^^Scotland|Human|Oxford Viromics|COVID-19 Genomics UK (COG-UK) Consortium|Golubchik|United Kingdom

>Spike|hCoV-19/USA/CO-CSU-D1657-1/2020|2020-04-02|EPI\_ISL\_527442|Original|hCoV-19^^Colorado|Human|Colorado State University - Ebel Lab|Colorado State University - Ebel Lab|Cline|USA

>Spike|hCoV-19/USA/CA-CDPH051/2020|2020-05-26|EPI\_ISL\_754953|Original|hCoV-19^^California|Human|California Department of Public Health|California Department of Public Health|Bell|USA

>Spike|hCoV-19/USA/IL\_1375/2020|2020-03-01|EPI\_ISL\_420789|Original|hCoV-19^^Illinois|Human|Illinois Department of Public Health Chicago Laboratory|Pathogen Discovery|Queen|USA

>Spike|hCoV-19/Denmark/DCGC-20481/2020|2020-12-21|EPI\_ISL\_758960|Original|hCoV-19^^Sjaelland|Human|Department of Virus and Microbiological Special Diagnostics|Albertsen Lab|Michaelsen|Denmark

>Spike|hCoV-19/USA/MI-MDHHS-SC20247/2020|2020-03-21|EPI\_ISL\_447217|Original|hCoV-19^^Michigan|Human|Michigan Department of Health and Human Services|Michigan Department of Health and Human Services|Blankenship|USA

>Spike|hCoV-19/Northern Ireland/NIRE-FB92B/2020|2020-09-01|EPI\_ISL\_585251|Original|hCoV-19^^Northern Ireland|Human|Regional Virus Laboratory|COVID-19 Genomics UK (COG-UK) Consortium|Fairley|United Kingdom

>Spike|hCoV-19/Denmark/DCGC-18337/2020|2020-12-07|EPI\_ISL\_749227|Original|hCoV-19^^Sjaelland|Human|Department of Virus and Microbiological Special Diagnostics|Albertsen Lab|Michaelsen|Denmark

>Spike|hCoV-19/Denmark/DCGC-4912/2020|2020-09-21|EPI\_ISL\_621450|Original|hCoV-19^^Midtjylland|Human|Department of Virus and Microbiological Special Diagnostics|Albertsen lab|Michaelsen|Denmark

>Spike|hCoV-19/USA/NY-NYUMC470/2020|2020-04-16|EPI\_ISL\_435535|Original|hCoV-19^^New York|Human|NYU Langone Health|Departments of Pathology and Medicine|Maurano|USA

>Spike|hCoV-19/Northern Ireland/NIRE-FF6D5/2020|2020-04-23|EPI\_ISL\_469858|Original|hCoV-19^^Northern Ireland|Human|Regional Virus Laboratory|Wellcome Sanger Institute for the COVID-19 Genomics UK (COG-UK) consortium|Davies|United Kingdom

>Spike|hCoV-19/USA/CA-IGI-0204/2020|2020-07-09|EPI\_ISL\_569932|Original|hCoV-19^^California|Human|Innovative Genomics Institute|Innovative Genomics Institute|Wyman|USA

>Spike|hCoV-19/Spain/MD-H12-37/2020|2020-04-01|EPI\_ISL\_529972|Original|hCoV-19^^Madrid|Human|Hospital Universitario 12 de Octubre|Hospital Universitario 12 de Octubre|Viedma|Spain

>Spike|hCoV-19/India/WB-IK88/2020|2020-05-19|EPI\_ISL\_508406|Original|hCoV-19^^West Bengal|Human|Institute of Post Graduate Medical Education & Research|National Institute of Biomedical Genomics|Maitra|India

>Spike|hCoV-19/Belgium/reg-10191131/2020|2020-10-19|EPI\_ISL\_735162|Original|hCoV-19^^Leuven|Human|UZ Leuven|KU Leuven|Maes|Belgium

>Spike|hCoV-19/England/MILK-BAAA69/2020|2020-11-17|EPI\_ISL\_681617|Original|hCoV-19^^England|Human|Lighthouse Lab in Milton Keynes|Wellcome Sanger Institute for the COVID-19 Genomics UK (COG-UK) Consortium|Davies|United Kingdom

>Spike|hCoV-19/USA/LA-GBCL-26791780/2020|2020-04-04|EPI\_ISL\_485386|Original|hCoV-19^^Louisiana|Human|River Road Testing Lab|Ginkgo Bioworks Clinical Laboratory|Smith|USA

>Spike|hCoV-19/Bahrain/920338796/2020|2020-10-11|EPI\_ISL\_681312|Original|hCoV-19^^Bahrain|Human|Communicable Disease Laboratory|Communicable Disease Laboratory|Altaif|Bahrain

>Spike|hCoV-19/England/QEUA-9A4339/2020|2020-09-01|EPI\_ISL\_540161|Original|hCoV-19^^England|Human|Lighthouse Lab in Glasgow|Wellcome Sanger Institute for the COVID-19 Genomics UK (COG-UK) consortium|Davies|United Kingdom

>Spike|hCoV-19/USA/WA-UW-31232/2020|2020-10-12|EPI\_ISL\_735467|Original|hCoV-19^^Washington|Human|UW Virology Lab|UW Virology Lab|Roychoudhury|USA

>Spike|hCoV-19/USA/AZ-TG664237/2020|2020-04-27|EPI\_ISL\_696042|Original|hCoV-19^^Arizona|Human|Sonora Quest Laboratories|TGen North|French|USA

>Spike|hCoV-19/Australia/VIC2451/2020|2020-06-28|EPI\_ISL\_522157|Original|hCoV-19^^Victoria|Human|Victorian Infectious Diseases Reference Laboratory (VIDRL)|VIDRL and MDU-PHL|Schultz|Australia

>Spike|hCoV-19/Spain/AR-IBV-2423/2020|2020-03-24|EPI\_ISL\_468859|Original|hCoV-19^^Aragon|Human|Servicio de Microbiolog\u00eda|SeqCOVID-SPAIN consortium|IBV (CSIC)|Comas|Spain

>Spike|hCoV-19/Denmark/DCGC-12566/2020|2020-11-16|EPI\_ISL\_682747|Original|hCoV-19^^Midtjylland|Human|Department of Virus and Microbiological Special Diagnostics|Albertsen Lab|Michaelsen|Denmark

>Spike|hCoV-19/England/ALDP-944544/2020|2020-06-07|EPI\_ISL\_554664|Original|hCoV-19^^England|Human|Lighthouse Lab in Alderley Park|Wellcome Sanger Institute for the COVID-19 Genomics UK (COG-UK) consortium|Davies|United Kingdom

>Spike|hCoV-19/Spain/AS-MG-80-19/2020|2020-05-30|EPI\_ISL\_462997|Original|hCoV-19^^Asturias|Human|Molecular Genetics|Molecular Genetics|Submitter|Spain

>Spike|hCoV-19/England/CAMC-B9A3E9/2020|2020-11-15|EPI\_ISL\_673255|Original|hCoV-19^^England|Human|Lighthouse Lab in Cambridge|Wellcome Sanger Institute for the COVID-19 Genomics UK (COG-UK) Consortium|Davies|United Kingdom

>Spike|hCoV-19/England/20108152504/2020|2020-03-03|EPI\_ISL\_464485|Original|hCoV-19^^England|Human|Respiratory Virus Unit|Respiratory Virus Unit|Platt|United Kingdom

>Spike|hCoV-19/England/LIVE-A8626/2020|2020-03-27|EPI\_ISL\_517191|Original|hCoV-19^^England|Human|Liverpool Clinical Laboratories|COVID-19 Genomics UK (COG-UK) Consortium|Haldenby|United Kingdom

>Spike|hCoV-19/Germany/SH-ChVir20308/2020|2020-11-16|EPI\_ISL\_729645|Original|hCoV-19^^Schleswig-Holstein|Human|A. Krumbholz|Charit\u00e9 Universit\u00e4tsmedizin Berlin|Muehlemann|Germany

>Spike|hCoV-19/Scotland/CVR5528/2020|2020-11-01|EPI\_ISL\_651829|Original|hCoV-19^^Scotland|Human|West of Scotland Specialist Virology Centre|COVID-19 Genomics UK (COG-UK) Consortium|Robertson|United Kingdom

>Spike|hCoV-19/Indonesia/JI-ITDua-1006NTv/2020|2020-03-27|EPI\_ISL\_759961|Vero P1|hCoV-19^^East Java|Human|Universitas Airlangga Hospital|Institute of Tropical Disease|Shimizu|Indonesia

>Spike|hCoV-19/United Arab Emirates/0988/2020|2020-06-10|EPI\_ISL\_699121|Original|hCoV-19^^Abu Dhabi|Human|Group 42 (G42) Healthcare|G42 Healthcare|Ogrodzki|United Arab Emirates

>Spike|hCoV-19/England/MILK-A5607A/2020|2020-10-08|EPI\_ISL\_595132|Original|hCoV-19^^England|Human|Quadram Institute Bioscience|COVID-19 Genomics UK (COG-UK) Consortium|Alikhan|United Kingdom



>Spike|hCoV-19/Canada/ON-CVD00891/2020|2020-04-16|EPI\_ISL\_586273|Original|hCoV-19^^Ontario|Human|Toronto Invasive Bacterial Diseases Network|McMaster University|McArthur|Canada

>Spike|hCoV-19/USA/TX-HMH-2843/2020|2020-06-07|EPI\_ISL\_543814|Original|hCoV-19^^Texas|Human|Houston Methodist Hospital|Houston Methodist Hospital|Long|USA

>Spike|hCoV-19/Australia/NSW559/2020|2020-03-22|EPI\_ISL\_455098|Original|hCoV-19^^New South Wales|Human|South Eastern Area Laboratory Services|NSW Health Pathology - Institute of Clinical Pathology and Medical Research; Westmead Hospital; University of Sydney|Gall|Australia

>Spike|hCoV-19/Denmark/DCGC-22235/2020|2020-12-14|EPI\_ISL\_757971|Original|hCoV-19^^Syddanmark|Human|Department of Virus and Microbiological Special Diagnostics|Albertsen Lab|Michaelsen|Denmark

>Spike|hCoV-19/Netherlands/ZH-RIVM-10310/2020|2020-00-00|EPI\_ISL\_636592|Original|hCoV-19^^ZuidHolland|Human|Dutch COVID-19 response team|National Institute for Public Health and the Environment (RIVM)|Meijer|Netherlands

>Spike|hCoV-19/USA/MI-MDHHS-SC21069/2020|2020-03-25|EPI\_ISL\_507845|Original|hCoV-19^^Michigan|Human|Michigan Department of Health and Human Services|Michigan Department of Health and Human Services|Blankenship|USA

>Spike|hCoV-19/Germany/BE-ChVir-W1418-8203/2020|2020-06-30|EPI\_ISL\_753960|Original|hCoV-19^^Berlin|Human|Charit\u00e9 Universit\u00e4tsmedizin Berlin|Charit\u00e9 Universit\u00e4tsmedizin Berlin|Muehlemann|Germany

>Spike|hCoV-19/Japan/PG-0660/2020|2020-04-00|EPI\_ISL\_684270|Original|hCoV-19^^Japan|Human|Gunma Prefectural Institute of Public Health and Environmental Sciences|Pathogen Genomics Center|Sekizuka|Japan

>Spike|hCoV-19/Netherlands/ZuidHolland\_129/2020|2020-04-25|EPI\_ISL\_461302|Original|hCoV-19^^Zuid Holland|Human|Dutch COVID-19 response team|Erasmus Medical Center|Oude Munnink|Netherlands

>Spike|hCoV-19/USA/LA-EVTL1322/2020|2020-12-11|EPI\_ISL\_778988|Original|hCoV-19^^Louisiana|Human|LSUHS Emerging Viral Threat Laboratory|Microbial Genome Sequencing Center|Kamil|USA

>Spike|hCoV-19/Colombia/TOL-INS-0345-T20/2020|2020-04-14|EPI\_ISL\_526963|Original|hCoV-19^^Tolima|Human|Instituto Nacional de Salud|Instituto Nacional de Salud|Franco-Mu\u00f1oz|Colombia

>Spike|hCoV-19/Australia/SAP168/2020|2020-03-19|EPI\_ISL\_492119|Original|hCoV-19^^South Australia|Human|SA Pathology|SA Pathology|Leong|Australia

>Spike|hCoV-19/England/ALDP-B241CC/2020|2020-11-04|EPI\_ISL\_646956|Original|hCoV-19^^England|Human|Lighthouse Lab in Alderley Park|Wellcome Sanger Institute for the COVID-19 Genomics UK (COG-UK) Consortium|Davies|United Kingdom

>Spike|hCoV-19/USA/CA-CZB-2764/2020|2020-06-27|EPI\_ISL\_582868|Original|hCoV-19^^California|Human|County of Santa Clara Public Health Department|Chan-Zuckerberg Biohub|Bhatt|USA

>Spike|hCoV-19/mink/Netherlands/NB-EMC-15-2/2020|2020-06-21|EPI\_ISL\_523024|Original|hCoV-19^^Noord Brabant|Neovison vison|Dutch COVID-19 response team|Erasmus Medical Center|Oude Munnink|Netherlands

>Spike|hCoV-19/England/MILK-B8D501/2020|2020-11-13|EPI\_ISL\_673990|Original|hCoV-19^^England|Human|Lighthouse Lab in Milton Keynes|Wellcome Sanger Institute for the COVID-19 Genomics UK (COG-UK) Consortium|Davies|United Kingdom

>Spike|hCoV-19/England/BRIS-12FB45/2020|2020-04-03|EPI\_ISL\_488423|Original|hCoV-19^^England|Human|PHE South West Regional Laboratory|Wellcome Sanger Institute for the COVID-19 Genomics UK (COG-UK) consortium|Davies|United Kingdom

>Spike|hCoV-19/Australia/VIC8793/2020|2020-07-31|EPI\_ISL\_565199|Original|hCoV-19^^Victoria|Human|Victorian Infectious Diseases Reference Laboratory (VIDRL)|VIDRL and MDU-PHL|Schultz|Australia

>Spike|hCoV-19/Australia/VIC1506/2020|2020-04-30|EPI\_ISL\_456470|Original|hCoV-19^^Victoria|Human|Victorian Infectious Diseases Reference Laboratory (VIDRL)|Microbiological Diagnostic Unit Public Health Laboratory and Victorian Infectious Diseases Reference Laboratory|Schultz|Australia

>Spike|hCoV-19/Spain/AN-IBV-002017/2020|2020-03-16|EPI\_ISL\_509628|Original|hCoV-19^^Andalucia|Human|Servicio de Microbiolog\u00eda. HRU de M\u00ella. Servicio Andaluz de Salud|SeqCOVID-SPAIN consortium|IBV(CSIC)|Comas|Spain

>Spike|hCoV-19/USA/GA-QDX-152/2020|2020-03-13|EPI\_ISL\_467848|Original|hCoV-19^^Georgia|Human|Quest Diagnostics|Quest Diagnostics|Kagan|USA

>Spike|hCoV-19/Denmark/DCGC-21898/2020|2020-12-21|EPI\_ISL\_758440|Original|hCoV-19^^Nordjylland|Human|Department of Virus and Microbiological Special Diagnostics|Albertsen Lab|Michaelsen|Denmark

>Spike|hCoV-19/England/CAMC-C72234/2020|2020-12-15|EPI\_ISL\_769192|Original|hCoV-19^^England|Human|Lighthouse Lab in Cambridge|Wellcome Sanger Institute for the COVID-19 Genomics UK (COG-UK) Consortium|Davies|United Kingdom

>Spike|hCoV-19/Ireland/TA-UHL134/2020|2020-04-08|EPI\_ISL\_681765|Original|hCoV-19^^Tipperary|Human|University Hospital Limerick|Irish Coronavirus Sequencing Consortium - Teagasc Moorepark|Walsh|Ireland

>Spike|hCoV-19/USA/UT-UPHL-2009178/2020|2020-05-28|EPI\_ISL\_525164|Original|hCoV-19^^Utah|Human|Utah Public Health Laboratory|Utah Public Health Laboratory|Young|USA

>Spike|hCoV-19/England/205120775/2020|2020-12-12|EPI\_ISL\_766311|Original|hCoV-19^^England|Human|Respiratory Virus Unit|COVID-19 Genomics UK (COG-UK) Consortium|Platt|United Kingdom

>Spike|hCoV-19/Denmark/DCGC-20114/2020|2020-12-07|EPI\_ISL\_747732|Original|hCoV-19^^Hovedstaden|Human|Department of Virus and Microbiological Special Diagnostics|Albertsen Lab|Michaelsen|Denmark

>Spike|hCoV-19/England/LOND-D4A07/2020|2020-04-10|EPI\_ISL\_444168|Original|hCoV-19^^England|Human|University College London|COVID-19 Genomics UK (COG-UK) Consortium|Roy|United Kingdom

>Spike|hCoV-19/USA/UT-UPHL-2012397233/2020|2020-11-27|EPI\_ISL\_746881|Original|hCoV-19^^Utah|Human|Utah Public Health Laboratory|Utah Public Health Laboratory|Gallagher|USA

>Spike|hCoV-19/England/QEUEH-9DC6B7/2020|2020-09-21|EPI\_ISL\_580939|Original|hCoV-19^^England|Human|Lighthouse Lab in Glasgow|Wellcome Sanger Institute for the COVID-19 Genomics UK (COG-UK) consortium|Davies|United Kingdom

>Spike|hCoV-19/England/ALDP-A524FA/2020|2020-10-07|EPI\_ISL\_598100|Original|hCoV-19^^England|Human|Lighthouse Lab in Alderley Park|Wellcome Sanger Institute for the COVID-19 Genomics UK (COG-UK) consortium|Davies|United Kingdom

>Spike|hCoV-19/Australia/VIC15639/2020|2020-08-01|EPI\_ISL\_593392|Original|hCoV-19^^Victoria|Human|Microbiological Diagnostic Unit - Public Health Laboratory (MDU-PHL)|MDU-PHL|Schultz|Australia

>Spike|hCoV-19/England/204781016/2020|2020-11-18|EPI\_ISL\_678750|Original|hCoV-19^^England|Human|Respiratory Virus Unit|COVID-19 Genomics UK (COG-UK) Consortium|Platt|United Kingdom

>Spike|hCoV-19/England/ALDP-BCA939/2020|2020-11-23|EPI\_ISL\_703266|Original|hCoV-19^^England|Human|Lighthouse Lab in Alderley Park|Wellcome Sanger Institute for the COVID-19 Genomics UK (COG-UK) Consortium|Davies|United Kingdom

>Spike|hCoV-19/Singapore/859/2020|2020-08-17|EPI\_ISL\_527368|Original|hCoV-19^^Singapore|Human|National Public Health Laboratory|National Public Health Laboratory|Mak|Singapore

>Spike|hCoV-19/Bangladesh/DNAS\_DRCIM\_isl\_6841/2020|2020-04-29|EPI\_ISL\_774906|Original|hCoV-19^^Dhaka|Human|Designated Reference Institute for Chemical Measurements (DRICM)|DNA SOLUTION LTD.|Rabbi|Bangladesh

>Spike|hCoV-19/England/QEUEH-9B9E21/2020|2020-09-07|EPI\_ISL\_549588|Original|hCoV-19^^England|Human|Lighthouse Lab in Glasgow|Wellcome Sanger Institute for the COVID-19 Genomics UK (COG-UK) consortium|Davies|United Kingdom

>Spike|hCoV-19/USA/CA-CZB-14632/2020|2020-11-16|EPI\_ISL\_738975|Original|hCoV-19^^California|Human|Orange County Public Health Lab|Chan-Zuckerberg Biohub|Kamm|USA

>Spike|hCoV-19/England/201180478/2020|2020-03-10|EPI\_ISL\_464918|Original|hCoV-19^^England|Human|Respiratory Virus Unit|Respiratory Virus Unit|Platt|United Kingdom

>Spike|hCoV-19/Denmark/DCGC-19527/2020|2020-12-07|EPI\_ISL\_749008|Original|hCoV-19^^Syddanmark|Human|Department of Virus and Microbiological Special Diagnostics|Albertsen Lab|Michaelsen|Denmark

>Spike|hCoV-19/England/CAMB-1B6A19/2020|2020-10-05|EPI\_ISL\_584322|Original|hCoV-19^^England|Human|Department of Pathology|COVID-19 Genomics UK (COG-UK) Consortium|Goodfellow|United Kingdom

>Spike|hCoV-19/USA/CA-QDX-2674/2020|2020-03-16|EPI\_ISL\_604914|Original|hCoV-19^^California|Human|Quest Diagnostics|Quest Diagnostics|Kagan|USA

>Spike|hCoV-19/England/SHEF-C19C4/2020|2020-11-26|EPI\_ISL\_706992|Original|hCoV-19^^England|Human|Virology Department|COVID-19 Genomics UK (COG-UK) Consortium|de Silva|United Kingdom

>Spike|hCoV-19/England/LIVE-A4FC5/2020|2020-03-06|EPI\_ISL\_500100|Original|hCoV-19^^England|Human|Liverpool Clinical Laboratories|COVID-19 Genomics UK (COG-UK) Consortium|Haldenby|United Kingdom

>Spike|hCoV-19/Germany/BY-ChVir-W1057-5795/2020|2020-03-27|EPI\_ISL\_754025|Original|hCoV-19^^Bavaria|Human|Charit\u00e9 Universit\u00e4tsmedizin Berlin|Charit\u00e9 Universit\u00e4tsmedizin Berlin|Muehlemann|Germany

>Spike|hCoV-19/Japan/IC-0489/2020|2020-12-00|EPI\_ISL\_768698|Original|hCoV-19^^Japan|Human|Pathogen Genomics Center|Pathogen Genomics Center|Sekizuka|Japan

>Spike|hCoV-19/England/ALDP-9E9F8F/2020|2020-09-24|EPI\_ISL\_580180|Original|hCoV-19^^England|Human|Lighthouse Lab in Alderley Park|Wellcome Sanger Institute for the COVID-19 Genomics UK (COG-UK) consortium|Davies|United Kingdom

>Spike|hCoV-19/England/CAMB-1B93EE/2020|2020-11-03|EPI\_ISL\_651707|Original|hCoV-19^^England|Human|Department of Pathology|COVID-19 Genomics UK (COG-UK) Consortium|Goodfellow|United Kingdom

>Spike|hCoV-19/England/MILK-A7A957/2020|2020-10-15|EPI\_ISL\_606417|Original|hCoV-19^^England|Human|Lighthouse Lab in Milton Keynes|Wellcome Sanger Institute for the COVID-19 Genomics UK (COG-UK) consortium|Davies|United Kingdom

>Spike|hCoV-19/Australia/VIC1614/2020|2020-05-07|EPI\_ISL\_456523|Original|hCoV-19^^Victoria|Human|Victorian Infectious Diseases Reference Laboratory (VIDRL)|Microbiological Diagnostic Unit Public Health Laboratory and Victorian Infectious Diseases Reference Laboratory|Schultz|Australia

>Spike|hCoV-19/USA/UT-UPHL-2008932/2020|2020-05-22|EPI\_ISL\_525037|Original|hCoV-19^^Utah|Human|Utah Public Health Laboratory|Utah Public Health Laboratory|Young|USA

>Spike|hCoV-19/England/CAMC-9EC195/2020|2020-09-24|EPI\_ISL\_580485|Original|hCoV-19^^England|Human|Lighthouse Lab in Cambridge|Wellcome Sanger Institute for the COVID-19 Genomics UK (COG-UK) consortium|Davies|United Kingdom

>Spike|hCoV-19/USA/TX-HMH-MCoV-15560/2020|2020-10-26|EPI\_ISL\_787044|Original|hCoV-19^^Texas|Human|Houston Methodist Hospital|Houston Methodist Hospital|Long|USA

>Spike|hCoV-19/England/NORT-2921E0/2020|2020-05-07|EPI\_ISL\_489074|Original|hCoV-19^^England|Human|NU-OMICS DNA Sequencing research facility|Wellcome Sanger Institute for the COVID-19 Genomics UK (COG-UK) consortium|Davies|United Kingdom

>Spike|hCoV-19/USA/UT-UPHL-03200/2020|2020-05-06|EPI\_ISL\_575266|Original|hCoV-19^^Utah|Human|Utah Public Health Laboratory|Utah Public Health Laboratory|Young|USA

>Spike|hCoV-19/Brazil/SP-155/2020|2020-04-18|EPI\_ISL\_515559|Original|hCoV-19^^S\u00e3o Paulo|Human|Hospital Sao Paulo de Ensino da Unifesp|Instituto Adolfo Lutz|Sacchi|Brazil

>Spike|hCoV-19/USA/VA-DCLS-1154/2020|2020-07-23|EPI\_ISL\_522821|Original|hCoV-19^^Virginia|Human|Virginia DCLS|Virginia DCLS|St. Jacques|USA

>Spike|hCoV-19/England/CAMC-945B6F/2020|2020-07-15|EPI\_ISL\_556714|Original|hCoV-19^^England|Human|Lighthouse Lab in Cambridge|Wellcome Sanger Institute for the COVID-19 Genomics UK (COG-UK) consortium|Davies|United Kingdom

>Spike|hCoV-19/England/LIVE-AA141/2020|2020-03-23|EPI\_ISL\_517408|Original|hCoV-19^^England|Human|Liverpool Clinical Laboratories|COVID-19 Genomics UK (COG-UK) Consortium|Haldenby|United Kingdom

>Spike|hCoV-19/USA/CA-ALSR-4805/2020|2020-04-01|EPI\_ISL\_730153|Original|hCoV-19^^California|Human|Scripps Medical Laboratory|Andersen lab at Scripps Research|Gangavarapu|USA

>Spike|hCoV-19/USA/TX-DSHS-1198/2020|2020-03-17|EPI\_ISL\_631660|Original|hCoV-19^^Texas|Human|Texas Department of State Health Services|Texas Department of State Health Services|Rahman|USA

>Spike|hCoV-19/Denmark/DCGC-15742/2020|2020-11-23|EPI\_ISL\_713199|Original|hCoV-19^^Syddanmark|Human|Department of Virus and Microbiological Special Diagnostics|Albertsen Lab|Michaelsen|Denmark

>Spike|hCoV-19/England/MILK-99D46D/2020|2020-08-30|EPI\_ISL\_549889|Original|hCoV-19^^England|Human|Lighthouse Lab in Milton Keynes|Wellcome Sanger Institute for the COVID-19 Genomics UK (COG-UK) consortium|Davies|United Kingdom

>Spike|hCoV-19/Wales/PHWC-1685AC/2020|2020-04-19|EPI\_ISL\_494257|Original|hCoV-19^^Wales|Human|Originating lab|COVID-19 Genomics UK (COG-UK) Consortium|Moore|United Kingdom

>Spike|hCoV-19/USA/WA-UW-10191/2020|2020-06-01|EPI\_ISL\_570276|Original|hCoV-19^^Washington|Human|UW Virology Lab|UW Virology Lab|Roychoudhury|USA

>Spike|hCoV-19/England/ALDP-C88F52/2020|2020-12-17|EPI\_ISL\_756471|Original|hCoV-19^^England|Human|Lighthouse Lab in Alderley Park|Wellcome Sanger Institute for the COVID-19 Genomics UK (COG-UK) Consortium|Davies|United Kingdom

>Spike|hCoV-19/Norway/4121/2020|2020-10-01|EPI\_ISL\_635094|Original|hCoV-19^^Oslo|Human|Oslo University Hospital|Norwegian Institute of Public Health|Vollan|Norway

>Spike|hCoV-19/England/ALDP-950CD7/2020|2020-06-14|EPI\_ISL\_554518|Original|hCoV-19^^England|Human|Lighthouse Lab in Alderley Park|Wellcome Sanger Institute for the COVID-19 Genomics UK (COG-UK) consortium|Davies|United Kingdom

>Spike|hCoV-19/Denmark/DCGC-6140/2020|2020-09-21|EPI\_ISL\_621174|Original|hCoV-19^^Midtjylland|Human|Department of Virus and Microbiological Special Diagnostics|Albertsen lab|Michaelsen|Denmark

>Spike|hCoV-19/Wales/PHWC-25A70/2020|2020-03-23|EPI\_ISL\_422341|Original|hCoV-19^^Wales|Human|Wales Specialist Virology Centre|Public Health Wales Microbiology Cardiff|Moore|United Kingdom

>Spike|hCoV-19/Denmark/DCGC-10141/2020|2020-11-09|EPI\_ISL\_669413|Original|hCoV-19^^Sjaelland|Human|Department of Virus and Microbiological Special Diagnostics|Albertsen Lab|Michaelsen|Denmark

>Spike|hCoV-19/USA/WA-UW-24930/2020|2020-08-12|EPI\_ISL\_570773|Original|hCoV-19^^Washington|Human|UW Virology Lab|UW Virology Lab|Roychoudhury|USA

>Spike|hCoV-19/England/CAMC-BFB4D4/2020|2020-12-04|EPI\_ISL\_709246|Original|hCoV-19^^England|Human|Lighthouse Lab in Cambridge|Wellcome Sanger Institute for the COVID-19 Genomics UK (COG-UK) Consortium|Davies|United Kingdom

>Spike|hCoV-19/Scotland/EDB5100/2020|2020-03-30|EPI\_ISL\_456971|Original|hCoV-19^^Scotland|Human|Virology Department|COVID-19 Genomics UK (COG-UK) Consortium|Williams|United Kingdom

>Spike|hCoV-19/England/LIVE-DB5FF1/2020|2020-11-07|EPI\_ISL\_650809|Original|hCoV-19^^England|Human|Liverpool Clinical Laboratories|COVID-19 Genomics UK (COG-UK) Consortium|Haldenby|United Kingdom

>Spike|hCoV-19/Denmark/DCGC-14695/2020|2020-11-23|EPI\_ISL\_711395|Original|hCoV-19^^Hovedstaden|Human|Department of Virus and Microbiological Special Diagnostics|Albertsen Lab|Michaelsen|Denmark

>Spike|hCoV-19/England/CAMB-7A58A/2020|2020-04-02|EPI\_ISL\_441230|Original|hCoV-19^^England|Human|Department of Pathology|Wellcome Sanger Institute for the COVID-19 Genomics UK (COG-UK) consortium|Amato|United Kingdom

>Spike|hCoV-19/Luxembourg/LNS8374303/2020|2020-12-22|EPI\_ISL\_771054|Original|hCoV-19^^Luxembourg|Human|Laboratoire national de sant\u00e9|Laboratoire national de sant\u00e9|Wienecke-Baldacchino|Luxembourg

>Spike|hCoV-19/USA/WI-QDX-193/2020|2020-04-30|EPI\_ISL\_494549|Original|hCoV-19^^Wisconsin|Human|Quest Diagnostics|Quest Diagnostics|Kagan|USA

>Spike|hCoV-19/England/SHEF-CD9D7/2020|2020-05-28|EPI\_ISL\_535080|Original|hCoV-19^^England|Human|Virology Department|COVID-19 Genomics UK (COG-UK) Consortium|de Silva|United Kingdom

>Spike|hCoV-19/Australia/VIC14932/2020|2020-08-18|EPI\_ISL\_593067|Original|hCoV-19^^Victoria|Human|Microbiological Diagnostic Unit - Public Health Laboratory (MDU-PHL)|MDU-PHL|Schultz|Australia

>Spike|hCoV-19/USA/HI-H200480/2020|2020-09-10|EPI\_ISL\_753022|Original|hCoV-19^^Hawaii|Human|State Laboratories Division|State Laboratories Division|Sultana|USA

>Spike|hCoV-19/Scotland/QEUH-96DD89/2020|2020-08-21|EPI\_ISL\_534539|Original|hCoV-19^^Scotland|Human|NHSGGC West of Scotland Specialist Virology Centre / MRC-University of Glasgow Centre for Virus Research|Wellcome Sanger Institute for the COVID-19 Genomics UK (COG-UK) consortium|Davies|United Kingdom

>Spike|hCoV-19/Canada/ON-S251/2020|2020-03-27|EPI\_ISL\_755835|Original|hCoV-19^^Ontario|Human|Toronto Invasive Bacterial Diseases Network|McMaster University|McArthur|Canada

>Spike|hCoV-19/England/GSTT-265D150/2020|2020-03-14|EPI\_ISL\_483916|Original|hCoV-19^^England|Human|Centre for Clinical Infection and Diagnostics Research and Genomics Innovation Unit|COVID-19 Genomics UK (COG-UK) Consortium|Awan|United Kingdom

>Spike|hCoV-19/USA/AZ-TG316209/2020|2020-05-18|EPI\_ISL\_694329|Original|hCoV-19^^Arizona|Human|TGen North|TGen North|French|USA

>Spike|hCoV-19/England/MILK-9E05D1/2020|2020-09-20|EPI\_ISL\_601410|Original|hCoV-19^^England|Human|Lighthouse Lab in Milton Keynes|Wellcome Sanger Institute for the COVID-19 Genomics UK (COG-UK) consortium|Davies|United Kingdom

>Spike|hCoV-19/England/BRIS-123349/2020|2020-04-05|EPI\_ISL\_442665|Original|hCoV-19^^England|Human|PHE South West Regional Laboratory|Wellcome Sanger Institute for the COVID-19 Genomics UK (COG-UK) consortium|Amato|United Kingdom

>Spike|hCoV-19/Netherlands/ZH-RIVM-20689/2020|2020-12-23|EPI\_ISL\_790757|Original|hCoV-19^^Zuid-holland|Human|Dutch COVID-19 response team|National Institute for Public Health and the Environment (RIVM)|Meijer|Netherlands

>Spike|hCoV-19/Panama/333517/2020|2020-03-27|EPI\_ISL\_496745|Original|hCoV-19^^Panama Center|Human|Gorgas Memorial Laboratory of Health Studies|Gorgas Memorial Laboratory of Health Studies|Martinez|Panama

>Spike|hCoV-19/England/MILK-BB104F/2020|2020-11-17|EPI\_ISL\_720159|Original|hCoV-19^^England|Human|Lighthouse Lab in Milton Keynes|Wellcome Sanger Institute for the COVID-19 Genomics UK (COG-UK) Consortium|Davies|United Kingdom

>Spike|hCoV-19/England/202880975/2020|2020-07-02|EPI\_ISL\_566061|Original|hCoV-19^^England|Human|Respiratory Virus Unit|Respiratory Virus Unit|Platt|United Kingdom

>Spike|hCoV-19/Thailand/Trang\_5008/2020|2020-03-23|EPI\_ISL\_455588|Vero P1|hCoV-19^^Trang|Human|Trang Hospital|National Institute of Health. Department of medical Sciences|Phuygun|Thailand

>Spike|hCoV-19/USA/ME-HETL-J0339/2020|2020-11-24|EPI\_ISL\_755467|Original|hCoV-19^^Maine|Human|Maine Health and Environmental Testing Laboratory|Tewhey Lab|Tewhey|USA

>Spike|hCoV-19/Singapore/1306/2020|2020-05-16|EPI\_ISL\_648793|Original|hCoV-19^^Singapore|Human|Department of Laboratory Medicine|Department of Laboratory Medicine|Chen|Singapore

>Spike|hCoV-19/England/ALDP-A84A66/2020|2020-10-18|EPI\_ISL\_610600|Original|hCoV-19^^England|Human|Lighthouse Lab in Alderley Park|Wellcome Sanger Institute for the COVID-19 Genomics UK (COG-UK) consortium|Davies|United Kingdom

>Spike|hCoV-19/Denmark/DCGC-14441/2020|2020-11-30|EPI\_ISL\_711133|Original|hCoV-19^^Hovedstaden|Human|Department of Virus and Microbiological Special Diagnostics|Albertsen Lab|Michaelsen|Denmark

>Spike|hCoV-19/England/SHEF-10CA263/2020|2020-12-03|EPI\_ISL\_741968|Original|hCoV-19^^England|Human|Virology Department|COVID-19 Genomics UK (COG-UK) Consortium|de Silva|United Kingdom

>Spike|hCoV-19/India/WB-IK10/2020|2020-04-14|EPI\_ISL\_508339|Original|hCoV-19^^West Bengal|Human|Institute of Post Graduate Medical Education & Research|National Institute of Biomedical Genomics|Maitra|India

>Spike|hCoV-19/England/ALDP-B84DE4/2020|2020-11-14|EPI\_ISL\_675777|Original|hCoV-19^^England|Human|Lighthouse Lab in Alderley Park|Wellcome Sanger Institute for the COVID-19 Genomics UK (COG-UK) Consortium|Davies|United Kingdom

>Spike|hCoV-19/USA/CA-ALSR-3086/2020|2020-09-02|EPI\_ISL\_635838|Original|hCoV-19^^California|Human|San Diego County Public Health Laboratory|Andersen lab at Scripps Research|Gangavarapu|USA

>Spike|hCoV-19/England/BRIS-129E51/2020|2020-04-15|EPI\_ISL\_458507|Original|hCoV-19^^England|Human|PHE South West Regional Laboratory|Wellcome Sanger Institute for the COVID-19 Genomics UK (COG-UK) consortium|Davies|United Kingdom

>Spike|hCoV-19/Denmark/DCGC-11860/2020|2020-10-26|EPI\_ISL\_671183|Original|hCoV-19^^Hovedstaden|Human|Department of Virus and Microbiological Special Diagnostics|Albertsen Lab|Michaelsen|Denmark

>Spike|hCoV-19/England/ALDP-C88F8F/2020|2020-12-17|EPI\_ISL\_756537|Original|hCoV-19^^England|Human|Lighthouse Lab in Alderley Park|Wellcome Sanger Institute for the COVID-19 Genomics UK (COG-UK) Consortium|Davies|United Kingdom

>Spike|hCoV-19/mink/Netherlands/NB-EMC-16-13/2020|2020-06-21|EPI\_ISL\_523031|Original|hCoV-19^^Noord Brabant|Neovison vison|Dutch COVID-19 response team|Erasmus Medical Center|Oude Munnink|Netherlands

>Spike|hCoV-19/USA/MI-UM-10036540841/2020|2020-10-20|EPI\_ISL\_640154|Original|hCoV-19^^Michigan|Human|University of Michigan Clinical Microbiology Laboratory|Lauring Lab|Valesano|USA

>Spike|hCoV-19/England/CAMC-B36042/2020|2020-11-05|EPI\_ISL\_645219|Original|hCoV-19^^England|Human|Lighthouse Lab in Cambridge|Wellcome Sanger Institute for the COVID-19 Genomics UK (COG-UK) Consortium|Davies|United Kingdom

>Spike|hCoV-19/Switzerland/ZH-ETHZ-410101/2020|2020-12-14|EPI\_ISL\_737451|Original|hCoV-19^^Zurich|Human|Viollier AG|Department of Biosystems Science and Engineering|Nadeau|Switzerland

>Spike|hCoV-19/Czech Republic/NRL\_8118-6/2020|2020-08-06|EPI\_ISL\_577627|Original|hCoV-19^^Northern Bohemia Region|Human|The National Institute of Public Health|State Veterinary Institute Prague|Nagy|Czech Republic

>Spike|hCoV-19/England/BRIS-127D56/2020|2020-04-17|EPI\_ISL\_469763|Original|hCoV-19^^England|Human|PHE South West Regional Laboratory|Wellcome Sanger Institute for the COVID-19 Genomics UK (COG-UK) consortium|Davies|United Kingdom

>Spike|hCoV-19/Australia/VIC7671/2020|2020-07-17|EPI\_ISL\_564566|Original|hCoV-19^^Victoria|Human|Microbiological Diagnostic Unit - Public Health Laboratory (MDU-PHL)|MDU-PHL|Schultz|Australia

>Spike|hCoV-19/Wales/PHWC-48CFFC/2020|2020-11-01|EPI\_ISL\_666565|Original|hCoV-19^^Wales|Human|Wales Specialist Virology Centre Sequencing lab|COVID-19 Genomics UK (COG-UK) Consortium|Moore|United Kingdom

>Spike|hCoV-19/Chile/RM-157480/2020|2020-08-21|EPI\_ISL\_746675|Original|hCoV-19^^Region Metropolitana de Santiago|Human|Genetica Molecular and Subdepartamento de Virologia ISP Chile|Instituto de Salud Publica de Chile|Tognarelli|Chile

>Spike|hCoV-19/Australia/WA97/2020|2020-03-27|EPI\_ISL\_512750|Original|hCoV-19^^Western Australia|Human|PathWest Laboratory Medicine WA|PathWest Laboratory Medicine WA Microbial Surveillance Unit|Sikazwe|Australia

>Spike|hCoV-19/England/NORT-293FB8/2020|2020-07-22|EPI\_ISL\_573333|Original|hCoV-19^^England|Human|Northumbria University / South Tees Hospitals NHS Foundation Trust / North Cumbria Integrated Care NHS Foundation Trust / North Tees and Hartlepool NHS Foundation Trust / Newcastle Hospitals NHS Foundation Trust|COVID-19 Genomics UK (COG-UK) Consortium|Bashton|United Kingdom

>Spike|hCoV-19/Netherlands/ZH-EMC-1172/2020|2020-12-16|EPI\_ISL\_763247|Original|hCoV-19^^Zuid Holland|Human|Dutch COVID-19 response team|Erasmus Medical Center|Oude Munnink|Netherlands

>Spike|hCoV-19/USA/TX-HMH-MCoV-8782/2020|2020-07-01|EPI\_ISL\_780748|Original|hCoV-19^^Texas|Human|Houston Methodist Hospital|Houston Methodist Hospital|Long|USA

>Spike|hCoV-19/USA/MA-MGH-00678/2020|2020-03-22|EPI\_ISL\_460118|Original|hCoV-19^^Massachusetts|Human|Massachusetts General Hospital|Infectious Disease Program|Lemieux|USA

>Spike|hCoV-19/Scotland/QEUA-AD2665/2020|2020-10-26|EPI\_ISL\_644016|Original|hCoV-19^^Scotland|Human|Lighthouse Lab in Glasgow|Wellcome Sanger Institute for the COVID-19 Genomics UK (COG-UK) Consortium|Davies|United Kingdom

>Spike|hCoV-19/Australia/NSW1256/2020|2020-12-18|EPI\_ISL\_740887|Original|hCoV-19^^New South Wales|Human|Pathology North - Royal North Shore Hospital - NSW Health Pathology|NSW Health Pathology - Institute of Clinical Pathology and Medical Research; Westmead Hospital; University of Sydney|Gall|Australia

>Spike|hCoV-19/Denmark/DCGC-4926/2020|2020-09-21|EPI\_ISL\_621464|Original|hCoV-19^^Hovedstaden|Human|Department of Virus and Microbiological Special Diagnostics|Albertsen lab|Michaelsen|Denmark

>Spike|hCoV-19/USA/TX-HMH-MCoV-13772/2020|2020-08-17|EPI\_ISL\_788865|Original|hCoV-19^^Texas|Human|Houston Methodist Hospital|Houston Methodist Hospital|Long|USA

>Spike|hCoV-19/Lithuania/C20-05-R11/2020|2020-05-18|EPI\_ISL\_560392|Original|hCoV-19^^Vilnius|Human|Vilnius University Hospital Santaros Klinikos|Institute of Biotechnology|Timinskas|Lithuania

>Spike|hCoV-19/England/ALDP-AA078B/2020|2020-10-22|EPI\_ISL\_623967|Original|hCoV-19^^England|Human|Lighthouse Lab in Alderley Park|Wellcome Sanger Institute for the COVID-19 Genomics UK (COG-UK) consortium|Davies|United Kingdom

>Spike|hCoV-19/USA/NY-NYCPHL-001197/2020|2020-10-30|EPI\_ISL\_683772|Original|hCoV-19^^New York|Human|DOHMH Morrisania|New York City Public Health Laboratory|Wang|USA

>Spike|hCoV-19/Scotland/CVR2082/2020|2020-04-10|EPI\_ISL\_484556|Original|hCoV-19^^Scotland|Human|West of Scotland Specialist Virology Centre|COVID-19 Genomics UK (COG-UK) Consortium|Robertson|United Kingdom

>Spike|hCoV-19/Denmark/DCGC-6086/2020|2020-10-05|EPI\_ISL\_620280|Original|hCoV-19^^Hovedstaden|Human|Department of Virus and Microbiological Special Diagnostics|Albertsen lab|Michaelsen|Denmark

>Spike|hCoV-19/Japan/PG-4334/2020|2020-07-00|EPI\_ISL\_692562|Original|hCoV-19^^Japan|Human|Pathogen Genomics Center|Pathogen Genomics Center|Sekizuka|Japan

>Spike|hCoV-19/USA/MA-MGH-00420/2020|2020-03-07|EPI\_ISL\_460245|Original|hCoV-19^^Massachusetts|Human|Massachusetts General Hospital|Infectious Disease Program|Lemieux|USA

>Spike|hCoV-19/USA/TX-DSHS-1638/2020|2020-06-24|EPI\_ISL\_710061|Original|hCoV-19^^Texas|Human|Texas Department of State Health Services|Texas Department of State Health Services|Rahman|USA

>Spike|hCoV-19/England/ALDP-B83125/2020|2020-11-14|EPI\_ISL\_675579|Original|hCoV-19^^England|Human|Lighthouse Lab in Alderley Park|Wellcome Sanger Institute for the COVID-19 Genomics UK (COG-UK) Consortium|Davies|United Kingdom

>Spike|hCoV-19/Wales/PHWC-33040/2020|2020-04-14|EPI\_ISL\_446727|Original|hCoV-19^^Wales|Human|Wales Specialist Virology Centre|Public Health Wales Microbiology Cardiff|Moore|United Kingdom

>Spike|hCoV-19/Wales/PHWC-15FD73/2020|2020-05-20|EPI\_ISL\_472852|Original|hCoV-19^^Wales|Human|Wales Specialist Virology Centre Sequencing lab|COVID-19 Genomics UK (COG-UK) Consortium|Moore|United Kingdom

>Spike|hCoV-19/Luxembourg/LNS8066882/2020|2020-12-28|EPI\_ISL\_770851|Original|hCoV-19^^Luxembourg|Human|Laboratoire national de sant\u00e9|Laboratoire national de sant\u00e9|Wienecke-Baldacchino|Luxembourg

>Spike|hCoV-19/England/ALDP-CB34E6/2020|2020-12-20|EPI\_ISL\_761316|Original|hCoV-19^^England|Human|Lighthouse Lab in Alderley Park|Wellcome Sanger Institute for the COVID-19 Genomics UK (COG-UK) Consortium|Davies|United Kingdom

>Spike|hCoV-19/England/QEUEH-B80F1F/2020|2020-11-14|EPI\_ISL\_668102|Original|hCoV-19^^England|Human|Lighthouse Lab in Glasgow|Wellcome Sanger Institute for the COVID-19 Genomics UK (COG-UK) Consortium|Davies|United Kingdom

>Spike|hCoV-19/Denmark/DCGC-3525/2020|2020-08-31|EPI\_ISL\_616316|Original|hCoV-19^^Hovedstaden|Human|Department of Virus and Microbiological Special Diagnostics|Albertsen lab|Michaelsen|Denmark

>Spike|hCoV-19/Shanghai/SH0101/2020|2020-02-09|EPI\_ISL\_416393|Original|hCoV-19^^Shanghai|Human|Shanghai Public Health Clinical Center|National Research Center for Translational Medicine (Shanghai)|Zhang|China

>Spike|hCoV-19/South Africa/KRISP-K002171/2020|2020-07-08|EPI\_ISL\_515573|Original|hCoV-19^^KwaZulu-Natal|Human|NHLS-IALCH|KRISP|de Oliveira|South Africa

>Spike|hCoV-19/USA/WA-NH7/2020|2020-03-13|EPI\_ISL\_418776|Original|hCoV-19^^Washington|Human|WA State Department of Health|Pathogen Discovery|Queen|USA

>Spike|hCoV-19/Singapore/934/2020|2020-03-31|EPI\_ISL\_538466|Original|hCoV-19^^Singapore|Human|Department of Laboratory Medicine|Department of Laboratory Medicine|Chen|Singapore

>Spike|hCoV-19/England/NOTT-11A0D5/2020|2020-11-04|EPI\_ISL\_638589|Original|hCoV-19^^England|Human|Queens Medical Centre|COVID-19 Genomics UK (COG-UK) Consortium|Loose|United Kingdom

>Spike|hCoV-19/Switzerland/BL-UHB-BS-42169471/2020|2020-02-28|EPI\_ISL\_418273|Original|hCoV-19^^Basel-Stadt|Human|University Hospital Basel|University Hospital Basel|Roloff Handschin|Switzerland

>Spike|hCoV-19/USA/LA-EVTL281/2020|2020-08-26|EPI\_ISL\_574415|Original|hCoV-19^^Louisiana|Human|LSUHS Emerging Viral Threat Laboratory|Microbial Genome Sequencing Center|Kamil|USA

>Spike|hCoV-19/England/QEUEH-95DFD1/2020|2020-08-07|EPI\_ISL\_537000|Original|hCoV-19^^England|Human|Lighthouse Lab in Glasgow|Wellcome Sanger Institute for the COVID-19 Genomics UK (COG-UK) consortium|Davies|United Kingdom

>Spike|hCoV-19/Denmark/DCGC-18171/2020|2020-12-14|EPI\_ISL\_749794|Original|hCoV-19^^Syddanmark|Human|Department of Virus and Microbiological Special Diagnostics|Albertsen Lab|Michaelsen|Denmark

>Spike|hCoV-19/USA/VA-DCLS-0320/2020|2020-05-04|EPI\_ISL\_467931|Original|hCoV-19^^Virginia|Human|Virginia DCLS|Virginia DCLS|St. Jacques|USA

>Spike|hCoV-19/Canada/QC\_AD4/2020|2020-04-11|EPI\_ISL\_444514|Original|hCoV-19^^Quebec|Human|Laboratoire de microbiologie|Smith Laboratory|Smith|Canada

>Spike|hCoV-19/mink/Denmark/AL3-Farm1/2020|2020-06-14|EPI\_ISL\_626342|Original|hCoV-19^^Denmark|Neovison vison|Statens Serum Institute|Statens Serum Institute|Rasmussen|Denmark

>Spike|hCoV-19/England/ALDP-A6F9EC/2020|2020-10-14|EPI\_ISL\_607761|Original|hCoV-19^^England|Human|Lighthouse Lab in Alderley Park|Wellcome Sanger Institute for the COVID-19 Genomics UK (COG-UK) consortium|Davies|United Kingdom

>Spike|hCoV-19/England/NOTT-1112D8/2020|2020-03-04|EPI\_ISL\_453644|Original|hCoV-19^^England|Human|Queens Medical Centre|COVID-19 Genomics UK (COG-UK) Consortium|Loose|United Kingdom

>Spike|hCoV-19/France/BRE-8948/2020|2020-08-06|EPI\_ISL\_560615|Original|hCoV-19^^Bretagne|Human|Hospital|National Reference Center for Viruses of Respiratory Infections|Enouf|France

>Spike|hCoV-19/Scotland/QEUEH-AAE802/2020|2020-10-22|EPI\_ISL\_644094|Original|hCoV-19^^Scotland|Human|Lighthouse Lab in Glasgow|Wellcome Sanger Institute for the COVID-19 Genomics UK (COG-UK) Consortium|Davies|United Kingdom

>Spike|hCoV-19/Scotland/QEUEH-A0BF2C/2020|2020-10-03|EPI\_ISL\_599325|Original|hCoV-19^^Scotland|Human|Lighthouse Lab in Glasgow|Wellcome Sanger Institute for the COVID-19 Genomics UK (COG-UK) consortium|Davies|United Kingdom

>Spike|hCoV-19/Norway/2828/2020|2020-06-29|EPI\_ISL\_493381|Original|hCoV-19^^Norway|Human|Medical Microbiology Unit|Norwegian Institute of Public Health|Kopperud Riis|Norway

>Spike|hCoV-19/England/ALDP-A92D99/2020|2020-10-19|EPI\_ISL\_611268|Original|hCoV-19^^England|Human|Lighthouse Lab in Alderley Park|Wellcome Sanger Institute for the COVID-19 Genomics UK (COG-UK) consortium|Davies|United Kingdom

>Spike|hCoV-19/USA/TX-HMH-MCoV-15501/2020|2020-10-23|EPI\_ISL\_786985|Original|hCoV-19^^Texas|Human|Houston Methodist Hospital|Houston Methodist Hospital|Long|USA

>Spike|hCoV-19/Spain/VC-IBV-98003521/2020|2020-03-27|EPI\_ISL\_537957|Original|hCoV-19^^Comunitat Valenciana|Human|Servicio de Microbiolog\u00eda. Hospital General Universitario de Castell\u00f3n|SeqCOVID-SPAIN consortium|IBV(CSIC)|Comas|Spain

>Spike|hCoV-19/USA/CO-CDPHE-2005220166/2020|2020-05-21|EPI\_ISL\_710303|Original|hCoV-19^^Colorado|Human|Colorado Department of Public Health and Environment|Colorado Department of Public Health and Environment|Bankers|USA

>Spike|hCoV-19/Poland/PL\_MCB\_96/2020|2020-05-10|EPI\_ISL\_645095|Original|hCoV-19^^Poland|Human|Human Genome Variation Research Group|Human Genome Variation Research Group|Poland

>Spike|hCoV-19/Germany/BE-ChVir-D1983-4479/2020|2020-09-26|EPI\_ISL\_753819|Original|hCoV-19^^Berlin|Human|Charit\u00e9 Universit\u00e4tsmedizin Berlin|Charit\u00e9 Universit\u00e4tsmedizin Berlin|Muehleemann|Germany

>Spike|hCoV-19/Netherlands/UT-EMC-222/2020|2020-12-08|EPI\_ISL\_722461|Original|hCoV-19^^Utrecht|Human|Dutch COVID-19 response team|Erasmus Medical Center|Oude Munnink|Netherlands



>Spike|hCoV-19/England/MILK-B5503E/2020|2020-11-04|EPI\_ISL\_657962|Original|hCoV-19^^England|Human|Lighthouse Lab in Milton Keynes|Wellcome Sanger Institute for the COVID-19 Genomics UK (COG-UK) Consortium|Davies|United Kingdom

>Spike|hCoV-19/Denmark/DCGC-9755/2020|2020-11-09|EPI\_ISL\_668485|Original|hCoV-19^^Hovedstaden|Human|Department of Virus and Microbiological Special Diagnostics|Albertsen Lab|Michaelsen|Denmark

>Spike|hCoV-19/England/LEED-2A9939/2020|2020-04-11|EPI\_ISL\_538834|Original|hCoV-19^^England|Human|Leeds Teaching Hospitals NHS Trust and Public Health England|Wellcome Sanger Institute for the COVID-19 Genomics UK (COG-UK) consortium|Davies|United Kingdom

>Spike|hCoV-19/England/EXET-137CFC/2020|2020-00-00|EPI\_ISL\_540581|Original|hCoV-19^^England|Human|University of Exeter|COVID-19 Genomics UK (COG-UK) Consortium|Temperton|United Kingdom

>Spike|hCoV-19/England/QEUEH-B2B75A/2020|2020-10-31|EPI\_ISL\_646593|Original|hCoV-19^^England|Human|Lighthouse Lab in Glasgow|Wellcome Sanger Institute for the COVID-19 Genomics UK (COG-UK) Consortium|Davies|United Kingdom

>Spike|hCoV-19/USA/TX-HMH-6700/2020|2020-06-24|EPI\_ISL\_546179|Original|hCoV-19^^Texas|Human|Houston Methodist Hospital|Houston Methodist Hospital|Long|USA

>Spike|hCoV-19/France/PAC-IHU-0391/2020|2020-03-29|EPI\_ISL\_569485|Original|hCoV-19^^Provence-Alpes-C\u00f4te-d\u0192Azur|Human|MEPHI|MEPHI|Levasseur|France

>Spike|hCoV-19/USA/TX-DSHS-0131/2020|2020-06-11|EPI\_ISL\_522958|Original|hCoV-19^^Texas|Human|Texas Department of State Health Services|Texas Department of State Health Services|Rahman|USA

>Spike|hCoV-19/India/DL-NCDC7085-CSIR-IGIB/2020|2020-05-27|EPI\_ISL\_482627|Original|hCoV-19^^Delhi|Human|National Centre for Disease control (NCDC)|NCDC/CSIR-IGIB|Singh|India

>Spike|hCoV-19/Norway/5411/2020|2020-10-30|EPI\_ISL\_775327|Original|hCoV-19^^Rogaland|Human|Dept. of Medical Microbiology|Norwegian Institute of Public Health|Vollan|Norway

>Spike|hCoV-19/Luxembourg/LNS9749716/2020|2020-12-03|EPI\_ISL\_770980|Original|hCoV-19^^Luxembourg|Human|Laboratoire national de sant\u00e9|Laboratoire national de sant\u00e9|Wienecke-Baldacchino|Luxembourg

>Spike|hCoV-19/USA/TX-HMH-MCoV-15885/2020|2020-07-10|EPI\_ISL\_785569|Original|hCoV-19^^Texas|Human|Houston Methodist Hospital|Houston Methodist Hospital|Long|USA

>Spike|hCoV-19/England/BRIS-12D3F4/2020|2020-05-04|EPI\_ISL\_481878|Original|hCoV-19^^England|Human|PHE South West Regional Laboratory|Wellcome Sanger Institute for the COVID-19 Genomics UK (COG-UK) consortium|Davies|United Kingdom

>Spike|hCoV-19/Sweden/20-21495/2020|2020-05-27|EPI\_ISL\_615077|Original|hCoV-19^^Uppsala|Human|Uppsala klinisk mikrobiologi|The Public Health Agency of Sweden|Svartstr\u00f6m|Sweden

>Spike|hCoV-19/India/MH-NIV-981/2020|2020-03-10|EPI\_ISL\_452213|Original|hCoV-19^^Maharashtra|Human|NIV Influenza|NIV Influenza|Potdar|India

>Spike|hCoV-19/USA/LA-SR0288/2020|2020-04-01|EPI\_ISL\_445143|Original|hCoV-19^^Louisiana|Human|Robert Garry lab|Andersen lab at Scripps Research|Gangavarapu|USA

>Spike|hCoV-19/England/ALDP-9E68F0/2020|2020-09-24|EPI\_ISL\_580319|Original|hCoV-19^^England|Human|Lighthouse Lab in Alderley Park|Wellcome Sanger Institute for the COVID-19 Genomics UK (COG-UK) consortium|Davies|United Kingdom

>Spike|hCoV-19/England/QEUEH-BC4A5A/2020|2020-11-25|EPI\_ISL\_703846|Original|hCoV-19^^England|Human|Lighthouse Lab in Glasgow|Wellcome Sanger Institute for the COVID-19 Genomics UK (COG-UK) Consortium|Davies|United Kingdom

>Spike|hCoV-19/Portugal/PT0875/2020|2020-03-27|EPI\_ISL\_511134|Original|hCoV-19^^Portugal|Human|Instituto Nacional de Saude (INSA)|Instituto Nacional de Saude (INSA)|Borges|Portugal

>Spike|hCoV-19/USA/WA-UW-26866/2020|2020-09-02|EPI\_ISL\_570557|Original|hCoV-19^^Washington|Human|UW Virology Lab|UW Virology Lab|Roychoudhury|USA

>Spike|hCoV-19/England/ALDP-9C4F20/2020|2020-09-10|EPI\_ISL\_567607|Original|hCoV-19^^England|Human|Lighthouse Lab in Alderley Park|Wellcome Sanger Institute for the COVID-19 Genomics UK (COG-UK) consortium|Davies|United Kingdom

>Spike|hCoV-19/USA/WI-WSLH-200100/2020|2020-03-29|EPI\_ISL\_471264|Original|hCoV-19^^Wisconsin|Human|Wisconsin State Laboratory of Hygiene Communicable Disease

Division|Wisconsin State Laboratory of Hygiene Communicable Disease  
Division|Florek|USA  
>Spike|hCoV-19/Netherlands/Gelderland\_163/2020|2020-05-26|EPI\_ISL\_460923|Original|hCoV-19^^Gelderland|Human|Dutch COVID-19 response team|Erasmus Medical Center|Oude Munnink|Netherlands  
>Spike|hCoV-19/USA/UT-UPHL-2008791/2020|2020-05-22|EPI\_ISL\_524818|Original|hCoV-19^^Utah|Human|Utah Public Health Laboratory|Utah Public Health Laboratory|Young|USA  
>Spike|hCoV-19/England/204742480/2020|2020-11-17|EPI\_ISL\_683543|Original|hCoV-19^^England|Human|Respiratory Virus Unit|COVID-19 Genomics UK (COG-UK) Consortium|Platt|United Kingdom  
>Spike|hCoV-19/USA/NV-NSPHL-A0156/2020|2020-05-14|EPI\_ISL\_515420|Original|hCoV-19^^Nevada|Human|Nevada State Public Health Laboratory|Nevada State Public Health Laboratory|Sevinsky|USA  
>Spike|hCoV-19/England/MILK-AC7D9B/2020|2020-10-21|EPI\_ISL\_629372|Original|hCoV-19^^England|Human|Lighthouse Lab in Milton Keynes|Wellcome Sanger Institute for the COVID-19 Genomics UK (COG-UK) consortium|Davies|United Kingdom  
>Spike|hCoV-19/Wales/PHWC-47D152/2020|2020-10-10|EPI\_ISL\_586104|Original|hCoV-19^^Wales|Human|Wales Specialist Virology Centre Sequencing lab|COVID-19 Genomics UK (COG-UK) Consortium|Moore|United Kingdom  
>Spike|hCoV-19/USA/MI-UM-10036322730/2020|2020-10-07|EPI\_ISL\_610067|Original|hCoV-19^^Michigan|Human|University of Michigan Clinical Microbiology Laboratory|Lauring Lab|Valesano|USA  
>Spike|hCoV-19/India/TG-CCMB-J300/2020|2020-04-03|EPI\_ISL\_458080|Original|hCoV-19^^Telangana|Human|CSIR-Centre for Cellular and Molecular Biology|CSIR-Centre for Cellular and Molecular Biology|Banu|India  
>Spike|hCoV-19/France/ARA-CDP29592/2020|2020-08-31|EPI\_ISL\_582115|Original|hCoV-19^^Auvergne-Rh\u00f4ne-Alpes|Human|CNR Virus des Infections Respiratoires - France SUD|CNR Virus des Infections Respiratoires - France SUD|Josset|France  
>Spike|hCoV-19/Brazil/SP-163/2020|2020-08-15|EPI\_ISL\_523959|Original|hCoV-19^^S\u00e3o Paulo|Human|Pronto Socorro Municipal de Perus|Instituto Adolfo Lutz|Sacchi|Brazil  
>Spike|hCoV-19/USA/WI-WSLH-200164/2020|2020-03-31|EPI\_ISL\_578390|Original|hCoV-19^^Wisconsin|Human|Wisconsin State Laboratory of Hygiene Communicable Disease Division|Wisconsin State Laboratory of Hygiene Communicable Disease Division|Florek|USA  
>Spike|hCoV-19/USA/NY-Wadsworth-13468-02/2020|2020-03-11|EPI\_ISL\_426294|Original|hCoV-19^^New York|Human|Wadsworth Center|Wadsworth Center|Lasek-Nesselquist|USA  
>Spike|hCoV-19/England/QEUH-78AC4F/2020|2020-07-15|EPI\_ISL\_533142|Original|hCoV-19^^England|Human|Lighthouse Lab in Glasgow|Wellcome Sanger Institute for the COVID-19 Genomics UK (COG-UK) consortium|Davies|United Kingdom  
>Spike|hCoV-19/Japan/PG-4559/2020|2020-07-00|EPI\_ISL\_689696|Original|hCoV-19^^Japan|Human|Fukuoka Institute of Health and Environmental Sciences|Pathogen Genomics Center|Sekizuka|Japan  
>Spike|hCoV-19/Australia/VIC10819/2020|2020-07-30|EPI\_ISL\_563108|Original|hCoV-19^^Victoria|Human|Microbiological Diagnostic Unit - Public Health Laboratory (MDU-PHL)|MDU-PHL|Schultz|Australia  
>Spike|hCoV-19/Vietnam/VNHN\_4806/2020|2020-04-08|EPI\_ISL\_455711|Original|hCoV-19^^Vinhphuc|Human|National Hospital of Tropical Diseases|Oxford University Clinical Research Unit|Nguyen|Vietnam  
>Spike|hCoV-19/England/CAMC-B52945/2020|2020-11-08|EPI\_ISL\_657678|Original|hCoV-19^^England|Human|Lighthouse Lab in Cambridge|Wellcome Sanger Institute for the COVID-19 Genomics UK (COG-UK) Consortium|Davies|United Kingdom  
>Spike|hCoV-19/England/ALDP-B1B26B/2020|2020-11-02|EPI\_ISL\_645665|Original|hCoV-19^^England|Human|Lighthouse Lab in Alderley Park|Wellcome Sanger Institute for the COVID-19 Genomics UK (COG-UK) Consortium|Davies|United Kingdom  
>Spike|hCoV-19/England/NOTT-116F63/2020|2020-10-20|EPI\_ISL\_612575|Original|hCoV-19^^England|Human|Queens Medical Centre|COVID-19 Genomics UK (COG-UK) Consortium|Loose|United Kingdom

>Spike|hCoV-19/England/ALDP-935959/2020|2020-06-21|EPI\_ISL\_552835|Original|hCoV-19^^England|Human|Lighthouse Lab in Alderley Park|Wellcome Sanger Institute for the COVID-19 Genomics UK (COG-UK) consortium|Davies|United Kingdom

>Spike|hCoV-19/USA/CA-QDX-681/2020|2020-03-19|EPI\_ISL\_571410|Original|hCoV-19^^California|Human|Quest Diagnostics|Quest Diagnostics|Kagan|USA

>Spike|hCoV-19/Wales/PHWC-1692E0/2020|2020-06-02|EPI\_ISL\_499402|Original|hCoV-19^^Wales|Human|Wales Specialist Virology Centre Sequencing lab|COVID-19 Genomics UK (COG-UK) Consortium|Moore|United Kingdom

>Spike|hCoV-19/England/QEUA-A9F5C1/2020|2020-10-20|EPI\_ISL\_611425|Original|hCoV-19^^England|Human|Lighthouse Lab in Glasgow|Wellcome Sanger Institute for the COVID-19 Genomics UK (COG-UK) consortium|Davies|United Kingdom

>Spike|hCoV-19/England/NOTT-1103F4/2020|2020-04-17|EPI\_ISL\_441511|Original|hCoV-19^^England|Human|Queens Medical Centre|COVID-19 Genomics UK (COG-UK) Consortium|Loose|United Kingdom

>Spike|hCoV-19/Saudi Arabia/KAUST-MAKKAH1386/2020|2020-06-23|EPI\_ISL\_678064|Original|hCoV-19^^Makkah|Human|Pathogen Genomics Lab King Abdullah University of Science and Technology(KAUST)|Pathogen Genomics Lab King Abdullah University of Science and Technology(KAUST)|Mohamed Ghazzali|Saudi Arabia

>Spike|hCoV-19/USA/MI-QDX-2316/2020|2020-03-15|EPI\_ISL\_604699|Original|hCoV-19^^Michigan|Human|Quest Diagnostics|Quest Diagnostics|Kagan|USA

>Spike|hCoV-19/England/MILK-AC7C61/2020|2020-10-22|EPI\_ISL\_634512|Original|hCoV-19^^England|Human|Lighthouse Lab in Milton Keynes|Wellcome Sanger Institute for the COVID-19 Genomics UK (COG-UK) consortium|Davies|United Kingdom

>Spike|hCoV-19/England/CAMC-C44BE5/2020|2020-12-10|EPI\_ISL\_718334|Original|hCoV-19^^England|Human|Lighthouse Lab in Cambridge|Wellcome Sanger Institute for the COVID-19 Genomics UK (COG-UK) Consortium|Davies|United Kingdom

>Spike|hCoV-19/England/ALDP-94CFC6/2020|2020-06-16|EPI\_ISL\_555974|Original|hCoV-19^^England|Human|Lighthouse Lab in Alderley Park|Wellcome Sanger Institute for the COVID-19 Genomics UK (COG-UK) consortium|Davies|United Kingdom

>Spike|hCoV-19/USA/CA-IGI-0112/2020|2020-06-03|EPI\_ISL\_495134|Original|hCoV-19^^California|Human|Innovative Genomics Institute|Innovative Genomics Institute|Shivram|USA

>Spike|hCoV-19/Germany/HH-hpi-p1634/2020|2020-03-17|EPI\_ISL\_775764|Original|hCoV-19^^Hamburg|Human|University Medical Center Hamburg Eppendorf|Heinrich Pette Institute|Robitaille|Germany

>Spike|hCoV-19/England/ALDP-CBF5D8/2020|2020-12-20|EPI\_ISL\_760565|Original|hCoV-19^^England|Human|Lighthouse Lab in Alderley Park|Wellcome Sanger Institute for the COVID-19 Genomics UK (COG-UK) Consortium|Davies|United Kingdom

>Spike|hCoV-19/England/ALDP-A6E3B2/2020|2020-10-15|EPI\_ISL\_607191|Original|hCoV-19^^England|Human|Lighthouse Lab in Alderley Park|Wellcome Sanger Institute for the COVID-19 Genomics UK (COG-UK) consortium|Davies|United Kingdom

>Spike|hCoV-19/USA/MI-UM-10036855279/2020|2020-11-09|EPI\_ISL\_728507|Original|hCoV-19^^Michigan|Human|University of Michigan Clinical Microbiology Laboratory|Lauring Lab|Valesano|USA

>Spike|hCoV-19/USA/MI-MDHHS-SC22302/2020|2020-11-10|EPI\_ISL\_708278|Original|hCoV-19^^Michigan|Human|Michigan Department of Health and Human Services|Michigan Department of Health and Human Services|Jacob|USA

>Spike|hCoV-19/Switzerland/BL-ETHZ-220011/2020|2020-07-27|EPI\_ISL\_511998|Original|hCoV-19^^Basel-Landschaft|Human|Viollier AG|Department of Biosystems Science and Engineering|Nadeau|Switzerland

>Spike|hCoV-19/USA/TX-HMH-MCoV-15138/2020|2020-10-16|EPI\_ISL\_786622|Original|hCoV-19^^Texas|Human|Houston Methodist Hospital|Houston Methodist Hospital|Long|USA

>Spike|hCoV-19/England/CAMC-B52A60/2020|2020-11-09|EPI\_ISL\_657525|Original|hCoV-19^^England|Human|Lighthouse Lab in Cambridge|Wellcome Sanger Institute for the COVID-19 Genomics UK (COG-UK) Consortium|Davies|United Kingdom

>Spike|hCoV-19/France/PAC-SC244/2020|2020-04-04|EPI\_ISL\_641529|Original|hCoV-19^^Provence-Alpes-Cote-d\u2019Azur|Human|CHU de Nice - H\u00f4pital Archet 11|CNR Virus des Infections Respiratoires - France SUD|Bal|France

>Spike|hCoV-19/Denmark/DCGC-10852/2020|2020-11-02|EPI\_ISL\_669491|Original|hCoV-19^^Midtjylland|Human|Department of Virus and Microbiological Special Diagnostics|Albertsen Lab|Michaelsen|Denmark

>Spike|hCoV-19/England/CAMB-73633/2020|2020-03-21|EPI\_ISL\_440015|Original|hCoV-19^^England|Human|Department of Pathology|Wellcome Sanger Institute for the COVID-19 Genomics UK (COG-UK) consortium|Amato|United Kingdom

>Spike|hCoV-19/USA/WA-S2252/2020|2020-06-09|EPI\_ISL\_497680|Original|hCoV-19^^Washington|Human|Washington State Department of Health|Seattle Flu Study|Lee|USA

>Spike|hCoV-19/South Africa/KRISP-K004035/2020|2020-10-14|EPI\_ISL\_635016|Original|hCoV-19^^KwaZulu-Natal|Human|National Health Laboratory Service - Inkosi Albert Luthuli Central Hospital (NHLS-IALCH)|KRISP|de Oliveira|South Africa

>Spike|hCoV-19/India/MH-NIV-57622/2020|2020-06-10|EPI\_ISL\_541726|Original|hCoV-19^^Maharashtra|Human|National Institute of Virology|National Institute of Virology|Potdar|India

>Spike|hCoV-19/Australia/VIC3340/2020|2020-07-08|EPI\_ISL\_521019|Original|hCoV-19^^Victoria|Human|Microbiological Diagnostic Unit - Public Health Laboratory (MDU-PHL)|MDU-PHL|Schultz|Australia

>Spike|hCoV-19/Scotland/QEUEH-962B3F/2020|2020-08-11|EPI\_ISL\_531802|Original|hCoV-19^^Scotland|Human|NHSGGC West of Scotland Specialist Virology Centre / MRC-University of Glasgow Centre for Virus Research|Wellcome Sanger Institute for the COVID-19 Genomics UK (COG-UK) consortium|Davies|United Kingdom

>Spike|hCoV-19/Japan/PG-4320/2020|2020-07-00|EPI\_ISL\_692548|Original|hCoV-19^^Japan|Human|Pathogen Genomics Center|Pathogen Genomics Center|Sekizuka|Japan

>Spike|hCoV-19/USA/TX-DSHS-0359/2020|2020-06-13|EPI\_ISL\_538296|Original|hCoV-19^^Texas|Human|Texas Department of State Health Services|Texas Department of State Health Services|Rahman|USA

>Spike|hCoV-19/England/QEUEH-A89C98/2020|2020-10-16|EPI\_ISL\_638820|Original|hCoV-19^^England|Human|Oxford Viromics|COVID-19 Genomics UK (COG-UK) Consortium|Golubchik|United Kingdom

>Spike|hCoV-19/England/QEUEH-B2F8BD/2020|2020-11-03|EPI\_ISL\_660059|Original|hCoV-19^^England|Human|Lighthouse Lab in Glasgow|Wellcome Sanger Institute for the COVID-19 Genomics UK (COG-UK) Consortium|Davies|United Kingdom

>Spike|hCoV-19/Wales/PHWC-251B7/2020|2020-03-22|EPI\_ISL\_420976|Original|hCoV-19^^Wales|Human|Wales Specialist Virology Centre|Public Health Wales Microbiology Cardiff|Moore|United Kingdom

>Spike|hCoV-19/USA/CT-Yale-628/2020|2020-07-10|EPI\_ISL\_730082|Original|hCoV-19^^Connecticut|Human|Yale Clinical Virology Laboratory|Grubaugh Lab - Yale School of Public Health|Grubaugh|USA

>Spike|hCoV-19/Australia/VIC4020/2020|2020-07-10|EPI\_ISL\_519406|Original|hCoV-19^^Victoria|Human|Microbiological Diagnostic Unit - Public Health Laboratory (MDU-PHL)|MDU-PHL|Schultz|Australia

>Spike|hCoV-19/Canada/ON-PHL-4464/2020|2020-03-00|EPI\_ISL\_418335|Original|hCoV-19^^Ontario|Human|Public Health Ontario Laboratories|Public Health Ontario Laboratories|Eshaghi|Canada

>Spike|hCoV-19/Wales/PHWC-4818ED/2020|2020-10-16|EPI\_ISL\_613122|Original|hCoV-19^^Wales|Human|Wales Specialist Virology Centre Sequencing lab|COVID-19 Genomics UK (COG-UK) Consortium|Moore|United Kingdom

>Spike|hCoV-19/USA/FL-BPHL-2009/2020|2020-06-12|EPI\_ISL\_653162|Original|hCoV-19^^Florida|Human|Florida Bureau of Public Health Laboratories|Florida Bureau of Public Health Laboratories|Blanton|USA

>Spike|hCoV-19/USA/NY-QDX-1963/2020|2020-03-16|EPI\_ISL\_604272|Original|hCoV-19^^New York|Human|Quest Diagnostics|Quest Diagnostics|Kagan|USA

>Spike|hCoV-19/Brazil/RJ-00346/2020|2020-05-08|EPI\_ISL\_623149|Original|hCoV-19^^Rio de Janeiro|Human|Laboratorio de Virologia Molecular / UFRJ|Bioinformatics Laboratory / LNCC|Almeida|Brazil

>Spike|hCoV-19/France/PAC-IHU-1344/2020|2020-08-19|EPI\_ISL\_569128|Original|hCoV-19^^Provence-Alpes-C\00f4te-d\02019Azur|Human|MEPHI|MEPHI|Levasseur|France

>Spike|hCoV-19/India/MH-ACTREC-033/2020|2020-05-07|EPI\_ISL\_699689|Original|hCoV-19^^Maharashtra|Human|Hematopathology Laboratory|Hematopathology Laboratory|Patkar|India

>Spike|hCoV-19/Canada/ON-S2005/2020|2020-11-24|EPI\_ISL\_755710|Original|hCoV-19^^Ontario|Human|Toronto Invasive Bacterial Diseases Network|McMaster University|McArthur|Canada

>Spike|hCoV-19/England/QEUA-AF2939/2020|2020-10-30|EPI\_ISL\_662750|Original|hCoV-19^^England|Human|Lighthouse Lab in Glasgow|Wellcome Sanger Institute for the COVID-19 Genomics UK (COG-UK) Consortium|Davies|United Kingdom

>Spike|hCoV-19/England/ALDP-9ED4C8/2020|2020-05-05|EPI\_ISL\_589392|Original|hCoV-19^^England|Human|Lighthouse Lab in Alderley Park|Wellcome Sanger Institute for the COVID-19 Genomics UK (COG-UK) consortium|Davies|United Kingdom

>Spike|hCoV-19/Wales/PHWC-47D1F8/2020|2020-10-10|EPI\_ISL\_586111|Original|hCoV-19^^Wales|Human|Wales Specialist Virology Centre Sequencing lab|COVID-19 Genomics UK (COG-UK) Consortium|Moore|United Kingdom

>Spike|hCoV-19/Canada/ON-S836/2020|2020-04-00|EPI\_ISL\_591241|Original|hCoV-19^^Ontario|Human|Toronto Invasive Bacterial Diseases Network|McMaster University|McArthur|Canada

>Spike|hCoV-19/USA/TX-HMH-MCoV-18046/2020|2020-11-12|EPI\_ISL\_786194|Original|hCoV-19^^Texas|Human|Houston Methodist Hospital|Houston Methodist Hospital|Long|USA

>Spike|hCoV-19/USA/CA-SR0184/2020|2020-03-23|EPI\_ISL\_437594|Original|hCoV-19^^California|Human|Scripps Medical Laboratory|Andersen lab at Scripps Research|Gangavarapu|USA

>Spike|hCoV-19/USA/TX-HMH-6091/2020|2020-06-25|EPI\_ISL\_547230|Original|hCoV-19^^Texas|Human|Houston Methodist Hospital|Houston Methodist Hospital|Long|USA

>Spike|hCoV-19/England/QEUA-BCBD87/2020|2020-11-27|EPI\_ISL\_704045|Original|hCoV-19^^England|Human|Lighthouse Lab in Glasgow|Wellcome Sanger Institute for the COVID-19 Genomics UK (COG-UK) Consortium|Davies|United Kingdom

>Spike|hCoV-19/England/CAMB-1BB6F2/2020|2020-11-20|EPI\_ISL\_664610|Original|hCoV-19^^England|Human|Department of Pathology|COVID-19 Genomics UK (COG-UK) Consortium|Goodfellow|United Kingdom

>Spike|hCoV-19/England/CAMC-C46B3E/2020|2020-12-10|EPI\_ISL\_718482|Original|hCoV-19^^England|Human|Lighthouse Lab in Cambridge|Wellcome Sanger Institute for the COVID-19 Genomics UK (COG-UK) Consortium|Davies|United Kingdom

>Spike|hCoV-19/USA/MI-QDX-302/2020|2020-03-21|EPI\_ISL\_571046|Original|hCoV-19^^Michigan|Human|Quest Diagnostics|Quest Diagnostics|Kagan|USA

>Spike|hCoV-19/Latvia/012/2020|2020-03-23|EPI\_ISL\_437091|Original|hCoV-19^^Latvia|Human|Latvijas Infektolo\u0123ijas centrs|Latvian Biomedical Research and Study Centre|Zrelavs|Latvia

>Spike|hCoV-19/Netherlands/NB-EMC-318/2020|2020-07-02|EPI\_ISL\_632359|Original|hCoV-19^^Noord Brabant|Human|Dutch COVID-19 response team|Erasmus Medical Center|Oude Munnink|Netherlands

>Spike|hCoV-19/USA/WI-GMF-30826/2020|2020-11-02|EPI\_ISL\_661058|Original|hCoV-19^^Wisconsin|Human|Gundersen Molecular Diagnostics Laboratory|Kabara Cancer Research Institute|Kenny|USA

>Spike|hCoV-19/England/MILK-A7D6F3/2020|2020-10-13|EPI\_ISL\_606323|Original|hCoV-19^^England|Human|Lighthouse Lab in Milton Keynes|Wellcome Sanger Institute for the COVID-19 Genomics UK (COG-UK) consortium|Davies|United Kingdom

>Spike|hCoV-19/Japan/PG-1506/2020|2020-04-00|EPI\_ISL\_685113|Original|hCoV-19^^Japan|Human|Saitama Prefectural Institute of Public Health|Pathogen Genomics Center|Sekizuka|Japan

>Spike|hCoV-19/Australia/NSW125/2020|2020-03-23|EPI\_ISL\_427785|Original|hCoV-19^^New South Wales|Human|Centre for Infectious Diseases and Microbiology Public Health|NSW Health Pathology - Institute of Clinical Pathology and Medical Research; Westmead Hospital; University of Sydney|Gall|Australia

>Spike|hCoV-19/Wales/PHWC-28E9F/2020|2020-04-03|EPI\_ISL\_445453|Original|hCoV-19^^Wales|Human|Wales Specialist Virology Centre|Public Health Wales Microbiology Cardiff|Moore|United Kingdom

>Spike|hCoV-19/India/OR-ILSCV29457/2020|2020-05-23|EPI\_ISL\_481129|Original|hCoV-19^^Odisha|Human|Immunogenomics lab|Immunogenomics lab|Raghav|India

>Spike|hCoV-19/England/QEUA-96DF74/2020|2020-08-18|EPI\_ISL\_530511|Original|hCoV-19^^England|Human|Lighthouse Lab in Glasgow|Wellcome Sanger Institute for the COVID-19 Genomics UK (COG-UK) consortium|Davies|United Kingdom

>Spike|hCoV-19/England/QEUA-B405EC/2020|2020-11-08|EPI\_ISL\_657160|Original|hCoV-19^^England|Human|Lighthouse Lab in Glasgow|Wellcome Sanger Institute for the COVID-19 Genomics UK (COG-UK) Consortium|Davies|United Kingdom

>Spike|hCoV-19/USA/MI-MDHHS-SC21666/2020|2020-07-12|EPI\_ISL\_516393|Original|hCoV-19^^Michigan|Human|Michigan Department of Health and Human Services|Michigan Department of Health and Human Services|Blankenship|USA

>Spike|hCoV-19/England/CAMB-7804F/2020|2020-04-01|EPI\_ISL\_441803|Original|hCoV-19^^England|Human|Department of Pathology|Wellcome Sanger Institute for the COVID-19 Genomics UK (COG-UK) consortium|Amato|United Kingdom

>Spike|hCoV-19/United Arab Emirates/0136/2020|2020-05-18|EPI\_ISL\_698323|Original|hCoV-19^^Abu Dhabi|Human|Group 42 (G42) Healthcare|G42 Healthcare|Ogrodzki|United Arab Emirates

>Spike|hCoV-19/England/BIRM-66E68/2020|2020-10-23|EPI\_ISL\_651598|Original|hCoV-19^^England|Human|University of Birmingham|COVID-19 Genomics UK (COG-UK) Consortium|Loman|United Kingdom

>Spike|hCoV-19/England/QEUA-897622/2020|2020-07-28|EPI\_ISL\_532812|Original|hCoV-19^^England|Human|Lighthouse Lab in Glasgow|Wellcome Sanger Institute for the COVID-19 Genomics UK (COG-UK) consortium|Davies|United Kingdom

>Spike|hCoV-19/Denmark/DCGC-10013/2020|2020-11-09|EPI\_ISL\_669334|Original|hCoV-19^^Hovedstaden|Human|Department of Virus and Microbiological Special Diagnostics|Albertsen Lab|Michaelsen|Denmark

>Spike|hCoV-19/South Korea/KDCA0334/2020|2020-10-18|EPI\_ISL\_760120|Original|hCoV-19^^South Korea|Human|Division of Emerging Infectious Diseases|Division of Emerging Infectious Diseases|Park|South Korea

>Spike|hCoV-19/USA/AZ-TG376426/2020|2020-06-15|EPI\_ISL\_694615|Original|hCoV-19^^Arizona|Human|TGen North|TGen North|French|USA

>Spike|hCoV-19/USA/LA-EVTL783/2020|2020-07-21|EPI\_ISL\_653474|Original|hCoV-19^^Louisiana|Human|LSUHS Emerging Viral Threat Laboratory|Microbial Genome Sequencing Center|Kamil|USA

>Spike|hCoV-19/Poland/77203/2020|2020-11-00|EPI\_ISL\_732897|Original|hCoV-19^^Poland|Human|genXone SA|genXone SA|Kaszuba|Poland

>Spike|hCoV-19/USA/CA-QDX-2520/2020|2020-03-17|EPI\_ISL\_604764|Original|hCoV-19^^California|Human|Quest Diagnostics|Quest Diagnostics|Kagan|USA

>Spike|hCoV-19/USA/WI-UW-2376/2020|2020-10-30|EPI\_ISL\_728142|Original|hCoV-19^^Wisconsin|Human|University of Wisconsin-Madison AIDS Vaccine Research Laboratories|University of Wisconsin-Madison AIDS Vaccine Research Laboratories|Baczenas|USA

>Spike|hCoV-19/USA/VA-DCLS-1925/2020|2020-10-12|EPI\_ISL\_614070|Original|hCoV-19^^Virginia|Human|Virginia DCLS|Virginia DCLS|St. Jacques|USA

>Spike|hCoV-19/Kenya/C5335/2020|2020-05-10|EPI\_ISL\_568762|Original|hCoV-19^^Mombasa|Human|KEMRI-Wellcome Trust Research Programme|KEMRI-CGMR-C Kilifi|KEMRI-Wellcome Trust Research Programme|KEMRI-CGMR-C Kilifi|Githinji|Kenya

>Spike|hCoV-19/England/CAMB-1B5B71/2020|2020-08-13|EPI\_ISL\_516999|Original|hCoV-19^^England|Human|Department of Pathology|COVID-19 Genomics UK (COG-UK) Consortium|Meredith|United Kingdom

>Spike|hCoV-19/Scotland/QEUA-A007C5/2020|2020-10-02|EPI\_ISL\_600190|Original|hCoV-19^^Scotland|Human|Lighthouse Lab in Glasgow|Wellcome Sanger Institute for the COVID-19 Genomics UK (COG-UK) consortium|Davies|United Kingdom

>Spike|hCoV-19/Wales/MILK-9E1813/2020|2020-09-19|EPI\_ISL\_577410|Original|hCoV-19^^Wales|Human|Oxford Viromics|COVID-19 Genomics UK (COG-UK) Consortium|Golubchik|United Kingdom

>Spike|hCoV-19/England/ALDP-CB58F7/2020|2020-12-18|EPI\_ISL\_761876|Original|hCoV-19^^England|Human|Lighthouse Lab in Alderley Park|Wellcome Sanger Institute for the COVID-19 Genomics UK (COG-UK) Consortium|Davies|United Kingdom

>Spike|hCoV-19/England/QEUA-B1450F/2020|2020-11-03|EPI\_ISL\_641789|Original|hCoV-19^^England|Human|Lighthouse Lab in Glasgow|Wellcome Sanger Institute for the COVID-19 Genomics UK (COG-UK) Consortium|Davies|United Kingdom

>Spike|hCoV-19/USA/UT-08439/2020|2020-05-20|EPI\_ISL\_524214|Original|hCoV-19^^Utah|Human|Utah Public Health Laboratory|Utah Public Health Laboratory|Young|USA

>Spike|hCoV-19/USA/DE-DHSS-F970937/2020|2020-06-17|EPI\_ISL\_693754|Original|hCoV-19^^Delaware|Human|Delaware Public Health Laboratory|Delaware Public Health Laboratory|Bajwa|USA

>Spike|hCoV-19/Scotland/EDB8325/2020|2020-10-05|EPI\_ISL\_611685|Original|hCoV-19^^Scotland|Human|Virology Department|COVID-19 Genomics UK (COG-UK) Consortium|McHugh|United Kingdom

>Spike|hCoV-19/USA/WA-UW46/2020|2020-03-09|EPI\_ISL\_415611|Original|hCoV-19^^Washington|Human|UW Virology Lab|UW Virology Lab|Roychoudhury|USA

>Spike|hCoV-19/England/LIVE-AA949/2020|2020-08-09|EPI\_ISL\_540587|Original|hCoV-19^^England|Human|Liverpool Clinical Laboratories|COVID-19 Genomics UK (COG-UK) Consortium|Haldenby|United Kingdom

>Spike|hCoV-19/England/CWAR-24DFDC3/2020|2020-06-14|EPI\_ISL\_584556|Original|hCoV-19^^England|Human|UHCW / University of Warwick|COVID-19 Genomics UK (COG-UK) Consortium|Stark|United Kingdom

>Spike|hCoV-19/Northern Ireland/NIRE-FC702/2020|2020-04-21|EPI\_ISL\_459367|Original|hCoV-19^^Northern Ireland|Human|Regional Virus Laboratory|Wellcome Sanger Institute for the COVID-19 Genomics UK (COG-UK) consortium|Davies|United Kingdom

>Spike|hCoV-19/USA/NM-DOH-2020317186/2020|2020-08-28|EPI\_ISL\_732725|Original|hCoV-19^^New Mexico|Human|New Mexico Department of Health Scientific Laboratory|New Mexico Department of Health Scientific Laboratory|Johnson|USA

>Spike|hCoV-19/USA/OH-ODH-SC35551/2020|2020-04-26|EPI\_ISL\_776774|Original|hCoV-19^^Ohio|Human|Ohio Department of Health Laboratory|Ohio Department of Health Laboratory|Holmes|USA

>Spike|hCoV-19/England/ALDP-A51C6C/2020|2020-10-07|EPI\_ISL\_598191|Original|hCoV-19^^England|Human|Lighthouse Lab in Alderley Park|Wellcome Sanger Institute for the COVID-19 Genomics UK (COG-UK) consortium|Davies|United Kingdom

>Spike|hCoV-19/Spain/PV-ISCI-III-201920/2020|2020-03-05|EPI\_ISL\_455354|Original|hCoV-19^^Basque Country|Human|Hospital de Cruces|Instituto de Salud Carlos III|Caballero|Spain

>Spike|hCoV-19/Switzerland/GE-ETHZ-350280/2020|2020-10-30|EPI\_ISL\_728815|Original|hCoV-19^^Geneva|Human|Viollier AG|Department of Biosystems Science and Engineering|Nadeau|Switzerland

>Spike|hCoV-19/England/MILK-9D3ED6/2020|2020-09-18|EPI\_ISL\_601494|Original|hCoV-19^^England|Human|Lighthouse Lab in Milton Keynes|Wellcome Sanger Institute for the COVID-19 Genomics UK (COG-UK) consortium|Davies|United Kingdom

>Spike|hCoV-19/England/CAMB-79327/2020|2020-04-03|EPI\_ISL\_441154|Original|hCoV-19^^England|Human|Department of Pathology|Wellcome Sanger Institute for the COVID-19 Genomics UK (COG-UK) consortium|Amato|United Kingdom

>Spike|hCoV-19/Switzerland/BL-ETHZ-380276/2020|2020-11-22|EPI\_ISL\_721784|Original|hCoV-19^^Basel-Landschaft|Human|Viollier AG|Department of Biosystems Science and Engineering|Nadeau|Switzerland

>Spike|hCoV-19/Iceland/504/2020|2020-03-21|EPI\_ISL\_424526|Original|hCoV-19^^Reykjavik|Human|The National University Hospital of Iceland|deCODE genetics|J\u00f3nsson|Iceland

>Spike|hCoV-19/USA/LA-GBCL-26556550/2020|2020-04-15|EPI\_ISL\_485185|Original|hCoV-19^^Louisiana|Human|River Road Testing Lab|Ginkgo Bioworks Clinical Laboratory|Smith|USA

>Spike|hCoV-19/USA/TX-HMH-2868/2020|2020-06-07|EPI\_ISL\_543838|Original|hCoV-19^^Texas|Human|Houston Methodist Hospital|Houston Methodist Hospital|Long|USA

>Spike|hCoV-19/Denmark/DCGC-16968/2020|2020-12-14|EPI\_ISL\_750216|Original|hCoV-19^^Midtjylland|Human|Department of Virus and Microbiological Special Diagnostics|Albertsen Lab|Michaelsen|Denmark

>Spike|hCoV-19/England/MILK-81D8E2/2020|2020-07-18|EPI\_ISL\_557281|Original|hCoV-19^^England|Human|Lighthouse Lab in Milton Keynes|Wellcome Sanger Institute for the COVID-19 Genomics UK (COG-UK) consortium|Davies|United Kingdom

>Spike|hCoV-19/England/ALDP-94DDF8/2020|2020-06-20|EPI\_ISL\_555668|Original|hCoV-19^^England|Human|Lighthouse Lab in Alderley Park|Wellcome Sanger Institute for the COVID-19 Genomics UK (COG-UK) consortium|Davies|United Kingdom

>Spike|hCoV-19/Scotland/QEUH-AE1F0E/2020|2020-10-27|EPI\_ISL\_649645|Original|hCoV-19^^Scotland|Human|Lighthouse Lab in Glasgow|Wellcome Sanger Institute for the COVID-19 Genomics UK (COG-UK) Consortium|Davies|United Kingdom

>Spike|hCoV-19/Ireland/G-NVRL-75IRL85497/2020|2020-10-14|EPI\_ISL\_671903|Original|hCoV-19^^Galway|Human|National Virus Reference Laboratory|National Virus Reference Laboratory|Gonzalez|Ireland

>Spike|hCoV-19/England/QEUH-B138BC/2020|2020-10-31|EPI\_ISL\_641667|Original|hCoV-19^^England|Human|Lighthouse Lab in Glasgow|Wellcome Sanger Institute for the COVID-19 Genomics UK (COG-UK) Consortium|Davies|United Kingdom

>Spike|hCoV-19/Australia/VIC5111/2020|2020-07-20|EPI\_ISL\_519914|Original|hCoV-19^^Victoria|Human|Microbiological Diagnostic Unit - Public Health Laboratory (MDU-PHL)|MDU-PHL|Schultz|Australia

>Spike|hCoV-19/USA/CA-CZB-2011/2020|2020-05-01|EPI\_ISL\_486266|Original|hCoV-19^^California|Human|Orange County Public Health Laboratory|Chan-Zuckerberg Biohub|McGeever|USA

>Spike|hCoV-19/England/LIVE-A8161/2020|2020-03-26|EPI\_ISL\_517121|Original|hCoV-19^^England|Human|Liverpool Clinical Laboratories|COVID-19 Genomics UK (COG-UK) Consortium|Haldenby|United Kingdom

>Spike|hCoV-19/South Africa/KRISP-K003389/2020|2020-09-10|EPI\_ISL\_602777|Original|hCoV-19^^KwaZulu-Natal|Human|NHLs-IALCH|KRISP|de Oliveira|South Africa

>Spike|hCoV-19/Wales/CVR4772/2020|2020-09-21|EPI\_ISL\_627345|Original|hCoV-19^^Wales|Human|West of Scotland Specialist Virology Centre|COVID-19 Genomics UK (COG-UK) Consortium|Robertson|United Kingdom

>Spike|hCoV-19/Japan/PG-4379/2020|2020-06-00|EPI\_ISL\_692606|Original|hCoV-19^^Japan|Human|Pathogen Genomics Center|Pathogen Genomics Center|Sekizuka|Japan

>Spike|hCoV-19/USA/TX-HMH-2691/2020|2020-06-06|EPI\_ISL\_545479|Original|hCoV-19^^Texas|Human|Houston Methodist Hospital|Houston Methodist Hospital|Long|USA

>Spike|hCoV-19/Japan/PG-8308/2020|2020-08-00|EPI\_ISL\_687407|Original|hCoV-19^^Japan|Human|Pathogen Genomics Center|Pathogen Genomics Center|Sekizuka|Japan

>Spike|hCoV-19/Denmark/DCGC-5894/2020|2020-10-05|EPI\_ISL\_620159|Original|hCoV-19^^Hovedstaden|Human|Department of Virus and Microbiological Special Diagnostics|Albertsen lab|Michaelsen|Denmark

>Spike|hCoV-19/England/MILK-ACE2B3/2020|2020-10-22|EPI\_ISL\_629722|Original|hCoV-19^^England|Human|Lighthouse Lab in Milton Keynes|Wellcome Sanger Institute for the COVID-19 Genomics UK (COG-UK) consortium|Davies|United Kingdom

>Spike|hCoV-19/England/MILK-BB1A50/2020|2020-11-18|EPI\_ISL\_720536|Original|hCoV-19^^England|Human|Lighthouse Lab in Milton Keynes|Wellcome Sanger Institute for the COVID-19 Genomics UK (COG-UK) Consortium|Davies|United Kingdom

>Spike|hCoV-19/England/QEUH-9F962D/2020|2020-09-25|EPI\_ISL\_589132|Original|hCoV-19^^England|Human|Lighthouse Lab in Glasgow|Wellcome Sanger Institute for the COVID-19 Genomics UK (COG-UK) consortium|Davies|United Kingdom

>Spike|hCoV-19/Netherlands/ZH-EMC-363/2020|2020-08-01|EPI\_ISL\_523703|Original|hCoV-19^^Zuid Holland|Human|Dutch COVID-19 response team|Erasmus Medical Center|Oude Munnink|Netherlands

>Spike|hCoV-19/USA/TX-HMH-MCoV-19628/2020|2020-11-24|EPI\_ISL\_783993|Original|hCoV-19^^Texas|Human|Houston Methodist Hospital|Houston Methodist Hospital|Long|USA

>Spike|hCoV-19/India/TG-CCMB-L1806/2020|2020-06-02|EPI\_ISL\_471634|Original|hCoV-19^^Telangana|Human|CSIR-Centre for Cellular and Molecular Biology|CSIR-Centre for Cellular and Molecular Biology|Banu|India

>Spike|hCoV-19/Australia/VIC12446/2020|2020-08-01|EPI\_ISL\_640363|Original|hCoV-19^^Victoria|Human|Microbiological Diagnostic Unit - Public Health Laboratory (MDU-PHL)|MDU-PHL|Schultz|Australia

>Spike|hCoV-19/USA/WI-UW-114/2020|2020-03-30|EPI\_ISL\_425171|Original|hCoV-19^^Wisconsin|Human|University of Wisconsin-Madison AIDS Vaccine Research Laboratories|University of Wisconsin-Madison AIDS Vaccine Research Laboratories|Baczenas|USA



>Spike|hCoV-19/USA/TX-HMH-1205/2020|2020-03-31|EPI\_ISL\_542585|Original|hCoV-19^^Texas|Human|Houston Methodist Hospital|Houston Methodist Hospital|Long|USA

>Spike|hCoV-19/USA/CA-IGI-0604/2020|2020-07-31|EPI\_ISL\_677843|Original|hCoV-19^^California|Human|Innovative Genomics Institute|Innovative Genomics Institute|Wyman|USA

>Spike|hCoV-19/USA/MA-MASPHL-00236/2020|2020-04-16|EPI\_ISL\_791681|Original|hCoV-19^^Massachusetts|Human|Massachusetts State Public Health Laboratory|Infectious Disease Program|Park|USA

>Spike|hCoV-19/Russia/SVE-RII-MH210S/2020|2020-07-22|EPI\_ISL\_560316|Original|hCoV-19^^Sverdlovsk|Human|UMMC-Health|WHO National Influenza Centre Russian Federation|Komissarov|Russia

>Spike|hCoV-19/Spain/MD-IBV-99008634/2020|2020-09-29|EPI\_ISL\_654163|Original|hCoV-19^^Madrid|Human|Hospital General Universitario Gregorio Mara\u00f1a|SeqCOVID-SPAIN consortium/IBV (CSIC)|Comas|Spain

>Spike|hCoV-19/Norway/2834/2020|2020-06-29|EPI\_ISL\_493387|Original|hCoV-19^^Norway|Human|Oslo University Hospital|Norwegian Institute of Public Health|Kopperud Riis|Norway

>Spike|hCoV-19/USA/TX-HMH-MCoV-19804/2020|2020-11-21|EPI\_ISL\_784138|Original|hCoV-19^^Texas|Human|Houston Methodist Hospital|Houston Methodist Hospital|Long|USA

>Spike|hCoV-19/England/BIRM-611BF/2020|2020-06-03|EPI\_ISL\_473438|Original|hCoV-19^^England|Human|University of Birmingham|COVID-19 Genomics UK (COG-UK) Consortium|Loman|United Kingdom

>Spike|hCoV-19/Australia/VIC4504/2020|2020-07-14|EPI\_ISL\_518915|Original|hCoV-19^^Victoria|Human|Microbiological Diagnostic Unit - Public Health Laboratory (MDU-PHL)|MDU-PHL|Schultz|Australia

>Spike|hCoV-19/England/CAMB-7F8E6/2020|2020-04-18|EPI\_ISL\_433478|Original|hCoV-19^^England|Human|Department of Pathology|COVID-19 Genomics UK (COG-UK) Consortium|Meredith|United Kingdom

>Spike|hCoV-19/England/CAMB-1AD918/2020|2020-05-02|EPI\_ISL\_448024|Original|hCoV-19^^England|Human|Department of Pathology|COVID-19 Genomics UK (COG-UK) Consortium|Meredith|United Kingdom

>Spike|hCoV-19/Japan/PG-7752/2020|2020-04-00|EPI\_ISL\_686854|Original|hCoV-19^^Japan|Human|Pathogen Genomics Center|Pathogen Genomics Center|Sekizuka|Japan

>Spike|hCoV-19/Australia/VIC7719/2020|2020-07-30|EPI\_ISL\_564602|Original|hCoV-19^^Victoria|Human|Microbiological Diagnostic Unit - Public Health Laboratory (MDU-PHL)|MDU-PHL|Schultz|Australia

>Spike|hCoV-19/USA/TX-HMH-MCoV-14102/2020|2020-08-14|EPI\_ISL\_787388|Original|hCoV-19^^Texas|Human|Houston Methodist Hospital|Houston Methodist Hospital|Long|USA

>Spike|hCoV-19/England/MILK-C61EF8/2020|2020-12-13|EPI\_ISL\_735591|Original|hCoV-19^^England|Human|Lighthouse Lab in Milton Keynes|Wellcome Sanger Institute for the COVID-19 Genomics UK (COG-UK) Consortium|Davies|United Kingdom

>Spike|hCoV-19/Australia/VIC4875/2020|2020-07-13|EPI\_ISL\_519258|Original|hCoV-19^^Victoria|Human|Victorian Infectious Diseases Reference Laboratory (VIDRL)|VIDRL and MDU-PHL|Schultz|Australia

>Spike|hCoV-19/Brazil/SP-826/2020|2020-03-26|EPI\_ISL\_776761|Original|hCoV-19^^S\u00e3o Paulo|Human|Instituto Adolfo Lutz - Central|Instituto Adolfo Lutz|Sacchi|Brazil

>Spike|hCoV-19/DRC/11341/2020|2020-05-25|EPI\_ISL\_527509|Original|hCoV-19^^Kinshasa|Human|Viral Respiratory Lab|Pathogen Sequencing Lab|Lokilo|Democratic Republic of the Congo

>Spike|hCoV-19/England/QEUH-B7E961/2020|2020-11-14|EPI\_ISL\_667849|Original|hCoV-19^^England|Human|Lighthouse Lab in Glasgow|Wellcome Sanger Institute for the COVID-19 Genomics UK (COG-UK) Consortium|Davies|United Kingdom

>Spike|hCoV-19/England/CAMB-84602/2020|2020-04-16|EPI\_ISL\_443648|Original|hCoV-19^^England|Human|Department of Pathology|Wellcome Sanger Institute for the COVID-19 Genomics UK (COG-UK) consortium|Amato|United Kingdom

>Spike|hCoV-19/USA/MN-GMF-16946/2020|2020-08-24|EPI\_ISL\_547733|Original|hCoV-19^^Minnesota|Human|Gundersen Molecular Diagnostics Laboratory|Kabara Cancer Research Institute|Kenny|USA

>Spike|hCoV-19/England/MILK-6A134E/2020|2020-07-02|EPI\_ISL\_551830|Original|hCoV-19^^England|Human|Lighthouse Lab in Milton Keynes|Wellcome Sanger Institute for the COVID-19 Genomics UK (COG-UK) consortium|Davies|United Kingdom

>Spike|hCoV-19/Australia/VIC243/2020|2020-03-21|EPI\_ISL\_419938|Original|hCoV-19^^Victoria|Human|Victorian Infectious Diseases Reference Laboratory (VIDRL)|Victorian Infectious Diseases Reference Laboratory and Microbiological Diagnostic Unit Public Health Laboratory|Schultz|Australia

>Spike|hCoV-19/mink/Netherlands/NB-EMC-29-20/2020|2020-08-12|EPI\_ISL\_577758|Original|hCoV-19^^Limburg|Neovison vison|Dutch COVID-19 response team|Erasmus Medical Center|Oude Munnink|Netherlands

>Spike|hCoV-19/USA/MI-MDHHS-SC20514/2020|2020-04-12|EPI\_ISL\_460562|Original|hCoV-19^^Michigan|Human|Michigan Department of Health and Human Services|Michigan Department of Health and Human Services|Blankenship|USA

>Spike|hCoV-19/Belgium/reg-0411471/2020|2020-04-11|EPI\_ISL\_476981|Original|hCoV-19^^La Louviere|Human|KU Leuven|KU Leuven|Maes|Belgium

>Spike|hCoV-19/India/DL-NCDC7512-CSIR-IGIB/2020|2020-05-28|EPI\_ISL\_482634|Original|hCoV-19^^Delhi|Human|National Centre for Disease control (NCDC)|NCDC/CSIR-IGIB|Singh|India

>Spike|hCoV-19/USA/TX-HMH-5300/2020|2020-06-19|EPI\_ISL\_544663|Original|hCoV-19^^Texas|Human|Houston Methodist Hospital|Houston Methodist Hospital|Long|USA

>Spike|hCoV-19/England/ALDP-BC7C42/2020|2020-11-23|EPI\_ISL\_721294|Original|hCoV-19^^England|Human|Lighthouse Lab in Alderley Park|Wellcome Sanger Institute for the COVID-19 Genomics UK (COG-UK) Consortium|Davies|United Kingdom

>Spike|hCoV-19/England/ALDP-B74F69/2020|2020-11-12|EPI\_ISL\_664919|Original|hCoV-19^^England|Human|Quadram Institute Bioscience|COVID-19 Genomics UK (COG-UK) Consortium|Alikhan|United Kingdom

>Spike|hCoV-19/England/MILK-A7A4FC/2020|2020-10-15|EPI\_ISL\_606620|Original|hCoV-19^^England|Human|Lighthouse Lab in Milton Keynes|Wellcome Sanger Institute for the COVID-19 Genomics UK (COG-UK) consortium|Davies|United Kingdom

>Spike|hCoV-19/Belgium/reg-0407282/2020|2020-04-07|EPI\_ISL\_464076|Original|hCoV-19^^Rebecq|Human|KU Leuven|KU Leuven|Maes|Belgium

>Spike|hCoV-19/England/QEUEH-AEF97B/2020|2020-10-29|EPI\_ISL\_662859|Original|hCoV-19^^England|Human|Lighthouse Lab in Glasgow|Wellcome Sanger Institute for the COVID-19 Genomics UK (COG-UK) Consortium|Davies|United Kingdom

>Spike|hCoV-19/Denmark/DCGC-18961/2020|2020-12-07|EPI\_ISL\_748668|Original|hCoV-19^^Nordjylland|Human|Department of Virus and Microbiological Special Diagnostics|Albertsen Lab|Michaelsen|Denmark

>Spike|hCoV-19/England/20149007404/2020|2020-03-31|EPI\_ISL\_466127|Original|hCoV-19^^England|Human|Respiratory Virus Unit|Respiratory Virus Unit|Platt|United Kingdom

>Spike|hCoV-19/Denmark/DCGC-11331/2020|2020-11-02|EPI\_ISL\_670844|Original|hCoV-19^^Hovedstaden|Human|Department of Virus and Microbiological Special Diagnostics|Albertsen Lab|Michaelsen|Denmark

>Spike|hCoV-19/Australia/VIC4014/2020|2020-07-10|EPI\_ISL\_519400|Original|hCoV-19^^Victoria|Human|Microbiological Diagnostic Unit - Public Health Laboratory (MDU-PHL)|MDU-PHL|Schultz|Australia

>Spike|hCoV-19/England/CAMC-B0C42B/2020|2020-10-29|EPI\_ISL\_643590|Original|hCoV-19^^England|Human|Lighthouse Lab in Cambridge|Wellcome Sanger Institute for the COVID-19 Genomics UK (COG-UK) Consortium|Davies|United Kingdom

>Spike|hCoV-19/England/CAMC-A82EA8/2020|2020-10-13|EPI\_ISL\_610691|Original|hCoV-19^^England|Human|Lighthouse Lab in Cambridge|Wellcome Sanger Institute for the COVID-19 Genomics UK (COG-UK) consortium|Davies|United Kingdom

>Spike|hCoV-19/England/ALDP-B5D1AC/2020|2020-11-09|EPI\_ISL\_678866|Original|hCoV-19^^England|Human|Department of Pathology|COVID-19 Genomics UK (COG-UK) Consortium|Goodfellow|United Kingdom

>Spike|hCoV-19/Australia/QLD1204/2020|2020-03-18|EPI\_ISL\_639795|Original|hCoV-19^^Australia|Human|unknown|Public Health Virology Laboratory|Nguyen|Australia

>Spike|hCoV-19/England/MILK-B0653D/2020|2020-10-24|EPI\_ISL\_652238|Original|hCoV-19^^England|Human|Quadram Institute Bioscience|COVID-19 Genomics UK (COG-UK) Consortium|Alikhan|United Kingdom

>Spike|hCoV-19/Scotland/QEUA-9DC49F/2020|2020-09-22|EPI\_ISL\_601139|Original|hCoV-19^^Scotland|Human|Lighthouse Lab in Glasgow|Wellcome Sanger Institute for the COVID-19 Genomics UK (COG-UK) consortium|Davies|United Kingdom

>Spike|hCoV-19/England/QEUA-AAB51D/2020|2020-10-20|EPI\_ISL\_651088|Original|hCoV-19^^England|Human|Oxford Viromics|COVID-19 Genomics UK (COG-UK) Consortium|Golubchik|United Kingdom

>Spike|hCoV-19/Wales/PHWC-4A1DCA/2020|2020-12-12|EPI\_ISL\_743815|Original|hCoV-19^^Wales|Human|Wales Specialist Virology Centre Sequencing lab|COVID-19 Genomics UK (COG-UK) Consortium|Moore|United Kingdom

>Spike|hCoV-19/Gibraltar/205121198/2020|2020-00-00|EPI\_ISL\_766328|Original|hCoV-19^^Gibraltar|Human|Microbiology|Respiratory Virus Unit|Platt|Gibraltar

>Spike|hCoV-19/England/NORW-F0434/2020|2020-09-29|EPI\_ISL\_577100|Original|hCoV-19^^England|Human|Quadram Institute Bioscience|COVID-19 Genomics UK (COG-UK) Consortium|Alikhan|United Kingdom

>Spike|hCoV-19/Denmark/DCGC-18838/2020|2020-12-07|EPI\_ISL\_748588|Original|hCoV-19^^Syddanmark|Human|Department of Virus and Microbiological Special Diagnostics|Albertsen Lab|Michaelsen|Denmark

>Spike|hCoV-19/France/HDF-3598/2020|2020-03-24|EPI\_ISL\_428358|Original|hCoV-19^^Hauts-de-France|Human|CH Jeanne de Navarre Laboratoire de Biologie|National Reference Center for Viruses of Respiratory Infections|Enouf|France

>Spike|hCoV-19/Wales/PHWC-2B412/2020|2020-04-11|EPI\_ISL\_445708|Original|hCoV-19^^Wales|Human|Wales Specialist Virology Centre|Public Health Wales Microbiology Cardiff|Moore|United Kingdom

>Spike|hCoV-19/Denmark/DCGC-8595/2020|2020-10-26|EPI\_ISL\_625958|Original|hCoV-19^^Syddanmark|Human|Department of Virus and Microbiological Special Diagnostics|Albertsen lab|Michaelsen|Denmark

>Spike|hCoV-19/Shanghai/SH0128/2020|2020-02-02|EPI\_ISL\_416409|Original|hCoV-19^^Shanghai|Human|Shanghai Public Health Clinical Center|National Research Center for Translational Medicine (Shanghai)|Zhang|China

>Spike|hCoV-19/USA/MN-MDH-1848/2020|2020-10-01|EPI\_ISL\_602983|Original|hCoV-19^^Minnesota|Human|Minnesota Department of Health|Minnesota Department of Health|Garfin|USA

>Spike|hCoV-19/South Korea/KCDC2457/2020|2020-06-08|EPI\_ISL\_514860|Original|hCoV-19^^South Korea|Human|Division of Viral Diseases|Division of Viral Diseases|Kim|South Korea

>Spike|hCoV-19/England/ALDP-943F56/2020|2020-06-07|EPI\_ISL\_554820|Original|hCoV-19^^England|Human|Lighthouse Lab in Alderley Park|Wellcome Sanger Institute for the COVID-19 Genomics UK (COG-UK) consortium|Davies|United Kingdom

>Spike|hCoV-19/England/ALDP-BE93FA/2020|2020-12-02|EPI\_ISL\_708927|Original|hCoV-19^^England|Human|Lighthouse Lab in Alderley Park|Wellcome Sanger Institute for the COVID-19 Genomics UK (COG-UK) Consortium|Davies|United Kingdom

>Spike|hCoV-19/England/MILK-A7BD69/2020|2020-10-15|EPI\_ISL\_607324|Original|hCoV-19^^England|Human|Lighthouse Lab in Milton Keynes|Wellcome Sanger Institute for the COVID-19 Genomics UK (COG-UK) consortium|Davies|United Kingdom

>Spike|hCoV-19/England/QEUA-A02532/2020|2020-09-29|EPI\_ISL\_584911|Original|hCoV-19^^England|Human|Quadram Institute Bioscience|COVID-19 Genomics UK (COG-UK) Consortium|Alikhan|United Kingdom

>Spike|hCoV-19/Scotland/CVR4637/2020|2020-09-24|EPI\_ISL\_611871|Original|hCoV-19^^Scotland|Human|West of Scotland Specialist Virology Centre|COVID-19 Genomics UK (COG-UK) Consortium|Robertson|United Kingdom

>Spike|hCoV-19/India/TG-CCMB-L1675/2020|2020-05-29|EPI\_ISL\_471621|Original|hCoV-19^^Telangana|Human|CSIR-Centre for Cellular and Molecular Biology|CSIR-Centre for Cellular and Molecular Biology|Banu|India

>Spike|hCoV-19/USA/MO-WUSTL037/2020|2020-06-19|EPI\_ISL\_493072|Original|hCoV-19^^Missouri|Human|Washington University in St. Louis|Washington University in St. Louis|Tahan|USA

>Spike|hCoV-19/USA/CA-CZB-2467/2020|2020-05-19|EPI\_ISL\_513872|Original|hCoV-19^^California|Human|San Francisco Public Health Laboratory|Chan-Zuckerberg Biohub|Kamm|USA

>Spike|hCoV-19/USA/UT-0100/2020|2020-03-15|EPI\_ISL\_430038|Original|hCoV-19^^Utah|Human|Utah Public Health Laboratory|Utah Public Health Laboratory|Young|USA

>Spike|hCoV-19/Denmark/DCGC-5705/2020|2020-09-21|EPI\_ISL\_621210|Original|hCoV-19^^Sjaelland|Human|Department of Virus and Microbiological Special Diagnostics|Albertsen lab|Michaelsen|Denmark

>Spike|hCoV-19/USA/MI-UM-10036522216/2020|2020-10-19|EPI\_ISL\_628884|Original|hCoV-19^^Michigan|Human|University of Michigan Clinical Microbiology Laboratory|Lauring Lab|Valesano|USA

>Spike|hCoV-19/England/QEUA-9B3CC3/2020|2020-09-07|EPI\_ISL\_572914|Original|hCoV-19^^England|Human|Virology Department|COVID-19 Genomics UK (COG-UK) Consortium|de Silva|United Kingdom

>Spike|hCoV-19/Switzerland/BS-UHB-42190971/2020|2020-03-14|EPI\_ISL\_528081|Original|hCoV-19^^Basel-Stadt|Human|University Hospital Basel|University Hospital Basel|Roloff Handschin|Switzerland

>Spike|hCoV-19/England/EXET-13F0BC/2020|2020-12-15|EPI\_ISL\_763433|Original|hCoV-19^^England|Human|University of Exeter|COVID-19 Genomics UK (COG-UK) Consortium|Temperton|United Kingdom

>Spike|hCoV-19/England/MILK-8284C2/2020|2020-07-16|EPI\_ISL\_557229|Original|hCoV-19^^England|Human|Lighthouse Lab in Milton Keynes|Wellcome Sanger Institute for the COVID-19 Genomics UK (COG-UK) consortium|Davies|United Kingdom

>Spike|hCoV-19/USA/VA-DCLS-1563/2020|2020-07-31|EPI\_ISL\_610127|Original|hCoV-19^^Virginia|Human|Virginia DCLS|Virginia DCLS|St. Jacques|USA

>Spike|hCoV-19/USA/FL-BPHL-1425/2020|2020-08-31|EPI\_ISL\_549207|Original|hCoV-19^^Florida|Human|Florida Bureau of Public Health Laboratories|Florida Bureau of Public Health Laboratories|Blanton|USA

>Spike|hCoV-19/USA/WA-UW-4746/2020|2020-03-27|EPI\_ISL\_461430|Original|hCoV-19^^Washington|Human|UW Virology Lab|UW Virology Lab|Roychoudhury|USA

>Spike|hCoV-19/England/ALDP-B73A4B/2020|2020-11-12|EPI\_ISL\_662605|Original|hCoV-19^^England|Human|Lighthouse Lab in Alderley Park|Wellcome Sanger Institute for the COVID-19 Genomics UK (COG-UK) Consortium|Davies|United Kingdom

>Spike|hCoV-19/Wales/PHWC-4A12BC/2020|2020-12-09|EPI\_ISL\_743649|Original|hCoV-19^^Wales|Human|Wales Specialist Virology Centre Sequencing lab|COVID-19 Genomics UK (COG-UK) Consortium|Moore|United Kingdom

>Spike|hCoV-19/Wales/PHWC-490BC4/2020|2020-11-15|EPI\_ISL\_706544|Original|hCoV-19^^Wales|Human|Originating lab|COVID-19 Genomics UK (COG-UK) Consortium|Moore|United Kingdom

>Spike|hCoV-19/USA/WA-S2258/2020|2020-06-09|EPI\_ISL\_497686|Original|hCoV-19^^Washington|Human|Washington State Department of Health|Seattle Flu Study|Lee|USA

>Spike|hCoV-19/England/CAMC-B20F7B/2020|2020-11-01|EPI\_ISL\_647732|Original|hCoV-19^^England|Human|Lighthouse Lab in Cambridge|Wellcome Sanger Institute for the COVID-19 Genomics UK (COG-UK) Consortium|Davies|United Kingdom

>Spike|hCoV-19/USA/NY-Wadsworth-217641-01/2020|2020-09-15|EPI\_ISL\_677101|Original|hCoV-19^^New York|Human|Wadsworth Center|Wadsworth Center|Lasek-Nesselquist|USA

>Spike|hCoV-19/England/ALDP-B5C987/2020|2020-11-08|EPI\_ISL\_655792|Original|hCoV-19^^England|Human|Lighthouse Lab in Alderley Park|Wellcome Sanger Institute for the COVID-19 Genomics UK (COG-UK) Consortium|Davies|United Kingdom

>Spike|hCoV-19/Denmark/DCGC-12221/2020|2020-11-16|EPI\_ISL\_682402|Original|hCoV-19^^Hovedstaden|Human|Department of Virus and Microbiological Special Diagnostics|Albertsen Lab|Michaelsen|Denmark

>Spike|hCoV-19/Wales/PHWC-4A683D/2020|2020-12-17|EPI\_ISL\_765076|Original|hCoV-19^^Wales|Human|Wales Specialist Virology Centre Sequencing lab|COVID-19 Genomics UK (COG-UK) Consortium|Moore|United Kingdom

>Spike|hCoV-19/USA/CA-CZB-1894/2020|2020-04-21|EPI\_ISL\_486193|Original|hCoV-19^^California|Human|Orange County Public Health Laboratory|Chan-Zuckerberg Biohub|McGeever|USA

>Spike|hCoV-19/England/CAMC-A816DE/2020|2020-10-13|EPI\_ISL\_610870|Original|hCoV-19^^England|Human|Lighthouse Lab in Cambridge|Wellcome Sanger Institute for the COVID-19 Genomics UK (COG-UK) consortium|Davies|United Kingdom

>Spike|hCoV-19/USA/TX-HMH-MCoV-11621/2020|2020-09-12|EPI\_ISL\_790070|Original|hCoV-19^^Texas|Human|Houston Methodist Hospital|Houston Methodist Hospital|Long|USA

>Spike|hCoV-19/USA/ME-HETL-J0007/2020|2020-03-13|EPI\_ISL\_513420|Original|hCoV-19^^Maine|Human|Maine HETL|Tewhey Lab|Tewhey|USA

>Spike|hCoV-19/USA/TX-DSHS-1916/2020|2020-07-11|EPI\_ISL\_751509|Original|hCoV-19^^Texas|Human|Texas Department of State Health Services|Texas Department of State Health Services|Rahman|USA

>Spike|hCoV-19/Switzerland/BE-UNIBE-218-0537/2020|2020-04-08|EPI\_ISL\_574854|Original|hCoV-19^^Bern|Human|Institute for Infectious Diseases|Institute for Infectious Diseases|Koch|Switzerland

>Spike|hCoV-19/England/ALDP-6FC60F/2020|2020-06-29|EPI\_ISL\_557471|Original|hCoV-19^^England|Human|Lighthouse Lab in Alderley Park|Wellcome Sanger Institute for the COVID-19 Genomics UK (COG-UK) consortium|Davies|United Kingdom

>Spike|hCoV-19/Portugal/PT1867/2020|2020-11-12|EPI\_ISL\_732086|Original|hCoV-19^^Portugal|Human|Instituto Nacional de Saude (INSA)|Instituto Nacional de Saude (INSA)|Borges|Portugal

>Spike|hCoV-19/India/DL-65029-CSIR-IGIB/2020|2020-08-11|EPI\_ISL\_636817|Original|hCoV-19^^Delhi|Human|National Centre for Disease control (NCDC)|NCDC/CSIR-IGIB|Faruq|India

>Spike|hCoV-19/England/BIRM-60226/2020|2020-07-21|EPI\_ISL\_529360|Original|hCoV-19^^England|Human|University of Birmingham|COVID-19 Genomics UK (COG-UK) Consortium|Loman|United Kingdom

>Spike|hCoV-19/Germany/HH-hpi-p1363/2020|2020-03-28|EPI\_ISL\_775762|Original|hCoV-19^^Hamburg|Human|University Medical Center Hamburg Eppendorf|Heinrich Pette Institute|Robitaille|Germany

>Spike|hCoV-19/Australia/VIC9587/2020|2020-08-23|EPI\_ISL\_565616|Original|hCoV-19^^Victoria|Human|Microbiological Diagnostic Unit - Public Health Laboratory (MDU-PHL)|MDU-PHL|Schultz|Australia

>Spike|hCoV-19/USA/MD-MDH-0244/2020|2020-10-02|EPI\_ISL\_602267|Original|hCoV-19^^Maryland|Human|MD PHL|MD PHL|Keller|USA

>Spike|hCoV-19/Wales/PHWC-48CE86/2020|2020-11-08|EPI\_ISL\_666549|Original|hCoV-19^^Wales|Human|Wales Specialist Virology Centre Sequencing lab|COVID-19 Genomics UK (COG-UK) Consortium|Moore|United Kingdom

>Spike|hCoV-19/Iceland/436/2020|2020-03-20|EPI\_ISL\_424460|Original|hCoV-19^^Reykjavik|Human|The National University Hospital of Iceland|deCODE genetics|J\u00f3nsson|Iceland

>Spike|hCoV-19/England/MILK-B96C00/2020|2020-11-13|EPI\_ISL\_674984|Original|hCoV-19^^England|Human|Lighthouse Lab in Milton Keynes|Wellcome Sanger Institute for the COVID-19 Genomics UK (COG-UK) Consortium|Davies|United Kingdom

>Spike|hCoV-19/England/MILK-9C33E9/2020|2020-09-10|EPI\_ISL\_566876|Original|hCoV-19^^England|Human|Lighthouse Lab in Milton Keynes|Wellcome Sanger Institute for the COVID-19 Genomics UK (COG-UK) consortium|Davies|United Kingdom

>Spike|hCoV-19/USA/CA-ALSR-4541/2020|2020-07-10|EPI\_ISL\_666999|Original|hCoV-19^^California|Human|San Diego County Public Health Laboratory|Andersen lab at Scripps Research|Gangavarapu|USA

>Spike|hCoV-19/Russia/SPE-RII-20906V/2020|2020-06-04|EPI\_ISL\_524030|Vero P1|hCoV-19^^Saint Petersburg|Human|WHO National Influenza Centre Russian Federation|WHO National Influenza Centre Russian Federation|Komissarov|Russia

>Spike|hCoV-19/Switzerland/BS-UHB-42186379/2020|2020-03-11|EPI\_ISL\_528003|Original|hCoV-19^^Basel-Stadt|Human|University Hospital Basel|University Hospital Basel|Roloff Handschin|Switzerland

>Spike|hCoV-19/USA/TX-HMH-MCoV-15732/2020|2020-07-09|EPI\_ISL\_785416|Original|hCoV-19^^Texas|Human|Houston Methodist Hospital|Houston Methodist Hospital|Long|USA

>Spike|hCoV-19/USA/TX-HMH-2166/2020|2020-05-20|EPI\_ISL\_545156|Original|hCoV-19^^Texas|Human|Houston Methodist Hospital|Houston Methodist Hospital|Long|USA

>Spike|hCoV-19/England/MILK-A471D3/2020|2020-10-06|EPI\_ISL\_598308|Original|hCoV-19^^England|Human|Lighthouse Lab in Milton Keynes|Wellcome Sanger Institute for the COVID-19 Genomics UK (COG-UK) consortium|Davies|United Kingdom

>Spike|hCoV-19/Northern Ireland/NIRE-234010/2020|2020-10-15|EPI\_ISL\_680334|Original|hCoV-19^^Northern Ireland|Human|Regional Virus Laboratory|COVID-19 Genomics UK (COG-UK) Consortium|Fairley|United Kingdom

>Spike|hCoV-19/Thailand/Bangkok-CONI-0190/2020|2020-03-26|EPI\_ISL\_498262|Original|hCoV-19^^Bangkok|Human|Ramathibodi Hospital|COVID-19 Network Investigations (CONI) Alliance|Batty|Thailand

>Spike|hCoV-19/England/ALDP-B83073/2020|2020-11-14|EPI\_ISL\_675637|Original|hCoV-19^^England|Human|Lighthouse Lab in Alderley Park|Wellcome Sanger Institute for the COVID-19 Genomics UK (COG-UK) Consortium|Davies|United Kingdom

>Spike|hCoV-19/Denmark/DCGC-14326/2020|2020-11-30|EPI\_ISL\_711696|Original|hCoV-19^^Midtjylland|Human|Department of Virus and Microbiological Special Diagnostics|Albertsen Lab|Michaelsen|Denmark

>Spike|hCoV-19/England/MILK-B94983/2020|2020-11-14|EPI\_ISL\_676262|Original|hCoV-19^^England|Human|Lighthouse Lab in Milton Keynes|Wellcome Sanger Institute for the COVID-19 Genomics UK (COG-UK) Consortium|Davies|United Kingdom

>Spike|hCoV-19/USA/TX-HMH0434/2020|2020-04-02|EPI\_ISL\_435017|Original|hCoV-19^^Texas|Human|Houston Methodist Hospital|Houston Methodist Hospital|Long|USA

>Spike|hCoV-19/USA/OR-OHSU-1083/2020|2020-07-09|EPI\_ISL\_525966|Original|hCoV-19^^Oregon|Human|OHSU Lab Services Molecular Microbiology Lab|Oregon SARS-CoV-2 Genome Sequencing Center|O'Roak|USA

>Spike|hCoV-19/England/ALDP-C8EA4C/2020|2020-12-15|EPI\_ISL\_777054|Original|hCoV-19^^England|Human|Lighthouse Lab in Alderley Park|Wellcome Sanger Institute for the COVID-19 Genomics UK (COG-UK) Consortium|Davies|United Kingdom

>Spike|hCoV-19/Australia/VIC2244/2020|2020-06-21|EPI\_ISL\_521977|Original|hCoV-19^^Victoria|Human|Victorian Infectious Diseases Reference Laboratory (VIDRL)|VIDRL and MDU-PHL|Schultz|Australia

>Spike|hCoV-19/Singapore/1507/2020|2020-12-26|EPI\_ISL\_768623|Original|hCoV-19^^Singapore|Human|National Public Health Laboratory|National Public Health Laboratory|Mak|Singapore

>Spike|hCoV-19/England/NORT-29E06F/2020|2020-05-06|EPI\_ISL\_488073|Original|hCoV-19^^England|Human|NU-OMICS DNA Sequencing research facility|Wellcome Sanger Institute for the COVID-19 Genomics UK (COG-UK) consortium|Davies|United Kingdom

>Spike|hCoV-19/England/CAMC-B36561/2020|2020-11-05|EPI\_ISL\_645359|Original|hCoV-19^^England|Human|Lighthouse Lab in Cambridge|Wellcome Sanger Institute for the COVID-19 Genomics UK (COG-UK) Consortium|Davies|United Kingdom

>Spike|hCoV-19/USA/AZ-TG276776/2020|2020-04-16|EPI\_ISL\_694134|Original|hCoV-19^^Arizona|Human|AZ SPHL|TGen North|French|USA

>Spike|hCoV-19/England/QEUEH-B2C1E2/2020|2020-11-03|EPI\_ISL\_680069|Original|hCoV-19^^England|Human|Department of Pathology|COVID-19 Genomics UK (COG-UK) Consortium|Goodfellow|United Kingdom

>Spike|hCoV-19/England/QEUEH-9BA0EE/2020|2020-09-07|EPI\_ISL\_573578|Original|hCoV-19^^England|Human|Oxford Viromics|COVID-19 Genomics UK (COG-UK) Consortium|Golubchik|United Kingdom

>Spike|hCoV-19/Wales/PHWC-496BFB/2020|2020-11-23|EPI\_ISL\_726701|Original|hCoV-19^^Wales|Human|Originating lab|COVID-19 Genomics UK (COG-UK) Consortium|Moore|United Kingdom

>Spike|hCoV-19/England/ALDP-A2FC0D/2020|2020-10-05|EPI\_ISL\_586991|Original|hCoV-19^^England|Human|Lighthouse Lab in Alderley Park|Wellcome Sanger Institute for the COVID-19 Genomics UK (COG-UK) consortium|Davies|United Kingdom

>Spike|hCoV-19/England/ALDP-9E92A4/2020|2020-09-24|EPI\_ISL\_584197|Original|hCoV-19^^England|Human|Virology Department|COVID-19 Genomics UK (COG-UK) Consortium|de Silva|United Kingdom

>Spike|hCoV-19/Scotland/QEUEH-9F9441/2020|2020-09-27|EPI\_ISL\_600903|Original|hCoV-19^^Scotland|Human|Lighthouse Lab in Glasgow|Wellcome Sanger Institute for the COVID-19 Genomics UK (COG-UK) consortium|Davies|United Kingdom

>Spike|hCoV-19/Japan/IC-0148/2020|2020-08-00|EPI\_ISL\_667577|Original|hCoV-19^^Japan|Human|Pathogen Genomics Center|Pathogen Genomics Center|Sekizuka|Japan

>Spike|hCoV-19/Spain/RI-IBV-005969/2020|2020-03-10|EPI\_ISL\_500403|Original|hCoV-19^^La Rioja|Human|Centro de Investigaci\u00f3n Biom\u00e9dica de La Rioja - Hospital San Pedro Logro\u00f1o|SeqCOVID-SPAIN consortium|IBV (CSIC)|Comas|Spain

>Spike|hCoV-19/USA/CA-ALSR-1167/2020|2020-04-02|EPI\_ISL\_494409|Original|hCoV-19^^California|Human|San Diego County Public Health Laboratory|Andersen lab at Scripps Research|Gangavarapu|USA

>Spike|hCoV-19/England/LIVE-A6A4A/2020|2020-03-19|EPI\_ISL\_499766|Original|hCoV-19^^England|Human|Liverpool Clinical Laboratories|COVID-19 Genomics UK (COG-UK) Consortium|Haldenby|United Kingdom

>Spike|hCoV-19/Denmark/DCGC-21274/2020|2020-12-21|EPI\_ISL\_759649|Original|hCoV-19^^Hovedstaden|Human|Department of Virus and Microbiological Special Diagnostics|Albertsen Lab|Michaelsen|Denmark

>Spike|hCoV-19/Australia/VIC6355/2020|2020-07-22|EPI\_ISL\_518335|Original|hCoV-19^^Victoria|Human|Microbiological Diagnostic Unit - Public Health Laboratory (MDU-PHL)|MDU-PHL|Schultz|Australia

>Spike|hCoV-19/USA/TX-HMH-MCoV-16160/2020|2020-10-27|EPI\_ISL\_785844|Original|hCoV-19^^Texas|Human|Houston Methodist Hospital|Houston Methodist Hospital|Long|USA

>Spike|hCoV-19/Australia/VIC9756/2020|2020-08-23|EPI\_ISL\_565694|Original|hCoV-19^^Victoria|Human|Microbiological Diagnostic Unit - Public Health Laboratory (MDU-PHL)|MDU-PHL|Schultz|Australia

>Spike|hCoV-19/England/CAMC-B533A0/2020|2020-11-08|EPI\_ISL\_657019|Original|hCoV-19^^England|Human|Lighthouse Lab in Cambridge|Wellcome Sanger Institute for the COVID-19 Genomics UK (COG-UK) Consortium|Davies|United Kingdom

>Spike|hCoV-19/England/QEUA-A00288/2020|2020-09-30|EPI\_ISL\_600309|Original|hCoV-19^^England|Human|Lighthouse Lab in Glasgow|Wellcome Sanger Institute for the COVID-19 Genomics UK (COG-UK) consortium|Davies|United Kingdom

>Spike|hCoV-19/USA/TX-HMH-803/2020|2020-04-07|EPI\_ISL\_545801|Original|hCoV-19^^Texas|Human|Houston Methodist Hospital|Houston Methodist Hospital|Long|USA

>Spike|hCoV-19/England/QEUA-998FF8/2020|2020-08-24|EPI\_ISL\_541810|Original|hCoV-19^^England|Human|Lighthouse Lab in Glasgow|Wellcome Sanger Institute for the COVID-19 Genomics UK (COG-UK) consortium|Davies|United Kingdom

>Spike|hCoV-19/South Korea/KCDC2695/2020|2020-07-04|EPI\_ISL\_522475|Original|hCoV-19^^South Korea|Human|Division of Viral Diseases|Division of Viral Diseases|Kim|South Korea

>Spike|hCoV-19/USA/MI-MDHHS-SC22258/2020|2020-11-03|EPI\_ISL\_666924|Original|hCoV-19^^Michigan|Human|Michigan Department of Health and Human Services|Michigan Department of Health and Human Services|Jacob|USA

>Spike|hCoV-19/USA/AZ-TG547219/2020|2020-07-02|EPI\_ISL\_695430|Original|hCoV-19^^Arizona|Human|AZ SPHL|TGen North|French|USA

>Spike|hCoV-19/Denmark/DCGC-10344/2020|2020-11-02|EPI\_ISL\_669914|Original|hCoV-19^^Hovedstaden|Human|Department of Virus and Microbiological Special Diagnostics|Albertsen Lab|Michaelsen|Denmark

>Spike|hCoV-19/Gambia/GC19-2663/2020|2020-07-21|EPI\_ISL\_561133|Original|hCoV-19^^Kombo|Human|MRCG at LSHTM Genomics lab|MRCG at LSHTM Genomics lab|Sesay|Gambia

>Spike|hCoV-19/England/OXON-AC534/2020|2020-04-05|EPI\_ISL\_448458|Original|hCoV-19^^England|Human|Oxford Viromics|COVID-19 Genomics UK (COG-UK) Consortium|Golubchik|United Kingdom

>Spike|hCoV-19/Belgium/regal-12111326/2020|2020-12-11|EPI\_ISL\_738379|Original|hCoV-19^^Mol|Human|UZ Leuven|KU Leuven|Maes|Belgium

>Spike|hCoV-19/USA/HI-H200423/2020|2020-09-23|EPI\_ISL\_752967|Original|hCoV-19^^Hawaii|Human|State Laboratories Division|State Laboratories Division|Sultana|USA

>Spike|hCoV-19/Dominican Republic/ICGEB\_UNIBE022/2020|2020-05-05|EPI\_ISL\_525467|Original|hCoV-19^^Dominican Republic|Human|Universidad Iberoamericana|International Centre for Genetic Engineering and Biotechnology (ICGEB) and ARGO Open Lab Platform|Paulino-Ramirez|Dominican Republic

>Spike|hCoV-19/Thailand/CO63-329-3/2020|2020-03-14|EPI\_ISL\_450964|Original|hCoV-19^^Thailand|Human|Center of Excellence in Clinical Virology|Center of Excellence in Clinical Virology|Poovorawan|Thailand

>Spike|hCoV-19/Scotland/CVR1053/2020|2020-03-28|EPI\_ISL\_433501|Original|hCoV-19^^Scotland|Human|West of Scotland Specialist Virology Centre|COVID-19 Genomics UK (COG-UK) Consortium|Robertson|United Kingdom

>Spike|hCoV-19/Denmark/DCGC-21395/2020|2020-12-21|EPI\_ISL\_758143|Original|hCoV-19^^Midtjylland|Human|Department of Virus and Microbiological Special Diagnostics|Albertsen Lab|Michaelsen|Denmark

>Spike|hCoV-19/England/QEUA-AA0044/2020|2020-10-20|EPI\_ISL\_652702|Original|hCoV-19^England|Human|University of Exeter|COVID-19 Genomics UK (COG-UK) Consortium|Temperton|United Kingdom

>Spike|hCoV-19/USA/WA-S300/2020|2020-03-25|EPI\_ISL\_430154|Original|hCoV-19^Washington|Human|Seattle Flu Study|Seattle Flu Study|Bedford|USA

>Spike|hCoV-19/Wales/PHWC-26004/2020|2020-03-25|EPI\_ISL\_422149|Original|hCoV-19^Wales|Human|Wales Specialist Virology Centre|Public Health Wales Microbiology Cardiff|Moore|United Kingdom

>Spike|hCoV-19/USA/WA-S623/2020|2020-04-18|EPI\_ISL\_438176|Original|hCoV-19^Washington|Human|Washington State Department of Health|Seattle Flu Study|Bedford|USA

>Spike|hCoV-19/England/MILK-BABC71/2020|2020-11-18|EPI\_ISL\_783100|Original|hCoV-19^England|Human|Lighthouse Lab in Milton Keynes|Wellcome Sanger Institute for the COVID-19 Genomics UK (COG-UK) Consortium|Davies|United Kingdom

>Spike|hCoV-19/Russia/MOW-RII-MH1995S/2020|2020-06-06|EPI\_ISL\_596339|Original|hCoV-19^Moscow|Human|Pathogenic Microorganisms Variability Laboratory|WHO National Influenza Centre Russian Federation|Komissarov|Russia

>Spike|hCoV-19/United Arab Emirates/0917/2020|2020-06-26|EPI\_ISL\_699055|Original|hCoV-19^Abu Dhabi|Human|Group 42 (G42) Healthcare|G42 Healthcare|Ogrodzki|United Arab Emirates

>Spike|hCoV-19/England/QEUA-9B43CD/2020|2020-09-04|EPI\_ISL\_559890|Original|hCoV-19^England|Human|Oxford Viromics|COVID-19 Genomics UK (COG-UK) Consortium|Golubchik|United Kingdom

>Spike|hCoV-19/Spain/CN-IBV-97006524/2020|2020-04-12|EPI\_ISL\_537727|Original|hCoV-19^Canary Islands|Human|Hospital Universitario de Gran Canaria Dr. Negr\u00ededn|SeqCOVID-SPAIN consortium|IBV(CSIC)|Comas|Spain

>Spike|hCoV-19/India/DL-MaxCov0045-CSIR-IGIB/2020|2020-04-28|EPI\_ISL\_459947|Original|hCoV-19^Delhi|Human|Devki Devi Foundation|CSIR-IGIB/Max|Pandey|India

>Spike|hCoV-19/USA/MI-MDHHS-SC21067/2020|2020-03-31|EPI\_ISL\_507843|Original|hCoV-19^Michigan|Human|Michigan Department of Health and Human Services|Michigan Department of Health and Human Services|Blankenship|USA

>Spike|hCoV-19/Belgium/ULG-10186/2020|2020-05-11|EPI\_ISL\_455974|Original|hCoV-19^Li\u00e8ge|Human|Department of Clinical Microbiology|GIGA Medical Genomics|Durkin|Belgium

>Spike|hCoV-19/England/QEUA-96F33A/2020|2020-08-17|EPI\_ISL\_530586|Original|hCoV-19^England|Human|Lighthouse Lab in Glasgow|Wellcome Sanger Institute for the COVID-19 Genomics UK (COG-UK) consortium|Davies|United Kingdom

>Spike|hCoV-19/Israel/CVL-46584/2020|2020-12-16|EPI\_ISL\_745080|Original|hCoV-19^Tel Aviv|Human|Israel Central Virology laboratory|Israel Central Virology laboratory|Zuckerman|Israel

>Spike|hCoV-19/USA/NY-Wadsworth-249749-01/2020|2020-10-20|EPI\_ISL\_754728|Original|hCoV-19^New York|Human|Wadsworth Center|Wadsworth Center|Lasek-Nesselquist|USA

>Spike|hCoV-19/Netherlands/ZH-EMC-1238/2020|2020-11-10|EPI\_ISL\_763307|Original|hCoV-19^Zuid Holland|Human|Dutch COVID-19 response team|Erasmus Medical Center|Oude Munnink|Netherlands

>Spike|hCoV-19/USA/TX-HMH-MCoV-8526/2020|2020-07-01|EPI\_ISL\_780608|Original|hCoV-19^Texas|Human|Houston Methodist Hospital|Houston Methodist Hospital|Long|USA

>Spike|hCoV-19/France/ARA-101286/2020|2020-11-04|EPI\_ISL\_683337|Original|hCoV-19^Auvergne-Rh\u00f4ne-Alpes|Human|CNR Virus des Infections Respiratoires - France SUD|CNR Virus des Infections Respiratoires - France SUD|Bal|France

>Spike|hCoV-19/USA/UT-08520/2020|2020-05-18|EPI\_ISL\_524283|Original|hCoV-19^Utah|Human|Utah Public Health Laboratory|Utah Public Health Laboratory|Young|USA

>Spike|hCoV-19/USA/TX-HMH-7032/2020|2020-06-28|EPI\_ISL\_546450|Original|hCoV-19^Texas|Human|Houston Methodist Hospital|Houston Methodist Hospital|Long|USA

>Spike|hCoV-19/Belgium/ULG-10569/2020|2020-10-23|EPI\_ISL\_626280|Original|hCoV-19^Li\u00e8ge|Human|Department of Clinical Microbiology|GIGA Medical Genomics|Durkin|Belgium



>Spike|hCoV-19/England/QEUA-AF4973/2020|2020-10-30|EPI\_ISL\_663076|Original|hCoV-19^^England|Human|Lighthouse Lab in Glasgow|Wellcome Sanger Institute for the COVID-19 Genomics UK (COG-UK) Consortium|Davies|United Kingdom

>Spike|hCoV-19/England/QEUA-A21DF9/2020|2020-10-01|EPI\_ISL\_587637|Original|hCoV-19^^England|Human|Lighthouse Lab in Glasgow|Wellcome Sanger Institute for the COVID-19 Genomics UK (COG-UK) consortium|Davies|United Kingdom

>Spike|hCoV-19/England/QEUA-AD26DE/2020|2020-10-23|EPI\_ISL\_629812|Original|hCoV-19^^England|Human|Lighthouse Lab in Glasgow|Wellcome Sanger Institute for the COVID-19 Genomics UK (COG-UK) consortium|Davies|United Kingdom

>Spike|hCoV-19/Wales/MILK-B05149/2020|2020-10-24|EPI\_ISL\_639009|Original|hCoV-19^^Wales|Human|Virology Department|COVID-19 Genomics UK (COG-UK) Consortium|de Silva|United Kingdom

>Spike|hCoV-19/Japan/PG-8585/2020|2020-08-00|EPI\_ISL\_686181|Original|hCoV-19^^Japan|Human|Pathogen Genomics Center|Pathogen Genomics Center|Sekizuka|Japan

>Spike|hCoV-19/Scotland/EDB1436/2020|2020-04-12|EPI\_ISL\_433447|Original|hCoV-19^^Scotland|Human|Virology Department|COVID-19 Genomics UK (COG-UK) Consortium|Williams|United Kingdom

>Spike|hCoV-19/Denmark/DCGC-5458/2020|2020-09-28|EPI\_ISL\_620783|Original|hCoV-19^^Syddanmark|Human|Department of Virus and Microbiological Special Diagnostics|Albertsen lab|Michaelsen|Denmark

>Spike|hCoV-19/Australia/VIC2690/2020|2020-07-02|EPI\_ISL\_521530|Original|hCoV-19^^Victoria|Human|Victorian Infectious Diseases Reference Laboratory (VIDRL)|VIDRL and MDU-PHL|Schultz|Australia

>Spike|hCoV-19/Belgium/regA-0721813/2020|2020-07-21|EPI\_ISL\_734806|Original|hCoV-19^^Koningshooikt|Human|UZ Leuven|KU Leuven|Maes|Belgium

>Spike|hCoV-19/Finland/12A46SVI/2020|2020-04-12|EPI\_ISL\_481540|Original|hCoV-19^^Uusimaa|Human|Department of Virology and Immunology|Department of Virology|Smura|Finland

>Spike|hCoV-19/England/NORT-284A31/2020|2020-03-26|EPI\_ISL\_478575|Original|hCoV-19^^England|Human|Northumbria University / South Tees Hospitals NHS Foundation Trust / North Cumbria Integrated Care NHS Foundation Trust / North Tees and Hartlepool NHS Foundation Trust / Newcastle Hospitals NHS Foundation Trust|COVID-19 Genomics UK (COG-UK) Consortium|Bashton|United Kingdom

>Spike|hCoV-19/Switzerland/SO-ETHZ-360169/2020|2020-11-06|EPI\_ISL\_693937|Original|hCoV-19^^Solothurn|Human|Viollier AG|Department of Biosystems Science and Engineering|Nadeau|Switzerland

>Spike|hCoV-19/USA/NY-NYUMC95/2020|2020-03-18|EPI\_ISL\_421707|Original|hCoV-19^^New York|Human|NYU Langone Health|Departments of Pathology and Medicine|Maurano|USA

>Spike|hCoV-19/USA/TX-DSHS-1897/2020|2020-07-08|EPI\_ISL\_751523|Original|hCoV-19^^Texas|Human|Texas Department of State Health Services|Texas Department of State Health Services|Rahman|USA

>Spike|hCoV-19/Wales/PHWC-48D438/2020|2020-11-01|EPI\_ISL\_680624|Original|hCoV-19^^Wales|Human|Wales Specialist Virology Centre Sequencing lab|COVID-19 Genomics UK (COG-UK) Consortium|Moore|United Kingdom

>Spike|hCoV-19/Switzerland/BL-ETHZ-270171/2020|2020-08-29|EPI\_ISL\_541457|Original|hCoV-19^^Basel-Landschaft|Human|Viollier AG|Department of Biosystems Science and Engineering|Nadeau|Switzerland

>Spike|hCoV-19/USA/CO-CSU-D2598-1/2020|2020-04-15|EPI\_ISL\_527470|Original|hCoV-19^^Colorado|Human|Colorado State University - Ebel Lab|Colorado State University - Ebel Lab|Cline|USA

>Spike|hCoV-19/USA/MS-CDC-6571/2020|2020-03-13|EPI\_ISL\_648023|Original|hCoV-19^^Mississippi|Human|MS Public Health Laboratory|Pathogen Discovery|Queen|USA

>Spike|hCoV-19/England/QEUA-B4383B/2020|2020-11-08|EPI\_ISL\_657351|Original|hCoV-19^^England|Human|Lighthouse Lab in Glasgow|Wellcome Sanger Institute for the COVID-19 Genomics UK (COG-UK) Consortium|Davies|United Kingdom

>Spike|hCoV-19/England/PORT-2F6065/2020|2020-12-12|EPI\_ISL\_741732|Original|hCoV-19^^England|Human|Centre for Enzyme Innovation|COVID-19 Genomics UK (COG-UK) Consortium|Robson|United Kingdom

>Spike|hCoV-19/Wales/PHWC-16E782/2020|2020-10-02|EPI\_ISL\_585766|Original|hCoV-19^^Wales|Human|Wales Specialist Virology Centre Sequencing lab|COVID-19 Genomics UK (COG-UK) Consortium|Moore|United Kingdom

>Spike|hCoV-19/England/CAMB-79A40/2020|2020-03-26|EPI\_ISL\_433815|Original|hCoV-19^^England|Human|Department of Pathology|COVID-19 Genomics UK (COG-UK) Consortium|Meredith|United Kingdom

>Spike|hCoV-19/England/QEUH-C33EFF/2020|2020-12-11|EPI\_ISL\_734002|Original|hCoV-19^^England|Human|Lighthouse Lab in Glasgow|Wellcome Sanger Institute for the COVID-19 Genomics UK (COG-UK) Consortium|Davies|United Kingdom

>Spike|hCoV-19/England/MILK-9921E9/2020|2020-08-27|EPI\_ISL\_540658|Original|hCoV-19^^England|Human|Queens Medical Centre|COVID-19 Genomics UK (COG-UK) Consortium|Loose|United Kingdom

>Spike|hCoV-19/Denmark/DCGC-9306/2020|2020-11-16|EPI\_ISL\_668900|Original|hCoV-19^^Nordjylland|Human|Department of Virus and Microbiological Special Diagnostics|Albertsen Lab|Michaelsen|Denmark

>Spike|hCoV-19/Iceland/497/2020|2020-03-21|EPI\_ISL\_424519|Original|hCoV-19^^Reykjavik|Human|The National University Hospital of Iceland|deCODE genetics|J\u00f3nsson|Iceland

>Spike|hCoV-19/Scotland/QEUH-C4BE4F/2020|2020-12-14|EPI\_ISL\_757088|Original|hCoV-19^^Scotland|Human|Lighthouse Lab in Glasgow|Wellcome Sanger Institute for the COVID-19 Genomics UK (COG-UK) Consortium|Davies|United Kingdom

>Spike|hCoV-19/Northern Ireland/QEUH-9B3DB1/2020|2020-09-03|EPI\_ISL\_573763|Original|hCoV-19^^Northern Ireland|Human|Virology Department|COVID-19 Genomics UK (COG-UK) Consortium|de Silva|United Kingdom

>Spike|hCoV-19/mink/Netherlands/NB-EMC-35-1/2020|2020-08-18|EPI\_ISL\_577772|Original|hCoV-19^^Noord Brabant|Neovison vison|Dutch COVID-19 response team|Erasmus Medical Center|Oude Munnink|Netherlands

>Spike|hCoV-19/USA/MD-HP00153/2020|2020-03-24|EPI\_ISL\_457782|Original|hCoV-19^^Maryland|Human|Johns Hopkins Hospital Department of Pathology|Johns Hopkins Hospital Department of Pathology|Ramakrishnan|USA

>Spike|hCoV-19/England/MILK-9F1B80/2020|2020-09-24|EPI\_ISL\_589606|Original|hCoV-19^^England|Human|Lighthouse Lab in Milton Keynes|Wellcome Sanger Institute for the COVID-19 Genomics UK (COG-UK) consortium|Davies|United Kingdom

>Spike|hCoV-19/USA/MI-MDHHS-SC22625/2020|2020-11-30|EPI\_ISL\_737152|Original|hCoV-19^^Michigan|Human|Michigan Department of Health and Human Services|Michigan Department of Health and Human Services|Blankenship|USA

>Spike|hCoV-19/Denmark/DCGC-9596/2020|2020-11-09|EPI\_ISL\_669056|Original|hCoV-19^^Nordjylland|Human|Department of Virus and Microbiological Special Diagnostics|Albertsen Lab|Michaelsen|Denmark

>Spike|hCoV-19/Denmark/DCGC-5847/2020|2020-09-28|EPI\_ISL\_621034|Original|hCoV-19^^Syddanmark|Human|Department of Virus and Microbiological Special Diagnostics|Albertsen lab|Michaelsen|Denmark

>Spike|hCoV-19/Scotland/QEUH-B66F88/2020|2020-11-11|EPI\_ISL\_676324|Original|hCoV-19^^Scotland|Human|Lighthouse Lab in Glasgow|Wellcome Sanger Institute for the COVID-19 Genomics UK (COG-UK) Consortium|Davies|United Kingdom

>Spike|hCoV-19/England/20142053804/2020|2020-03-28|EPI\_ISL\_423458|Original|hCoV-19^^England|Human|Respiratory Virus Unit|Respiratory Virus Unit|Platt|United Kingdom

>Spike|hCoV-19/USA/TX-HMH-MCoV-10242/2020|2020-07-07|EPI\_ISL\_789386|Original|hCoV-19^^Texas|Human|Houston Methodist Hospital|Houston Methodist Hospital|Long|USA

>Spike|hCoV-19/USA/FL-BPHL-2060/2020|2020-06-08|EPI\_ISL\_653213|Original|hCoV-19^^Florida|Human|Florida Bureau of Public Health Laboratories|Florida Bureau of Public Health Laboratories|Blanton|USA

>Spike|hCoV-19/Finland/6SS7H1/2020|2020-09-06|EPI\_ISL\_756089|Original|hCoV-19^^Uusimaa|Human|Department of Virology and Immunology|Department of Virology|Smura|Finland

>Spike|hCoV-19/England/20189157501/2020|2020-05-02|EPI\_ISL\_465558|Original|hCoV-19^^England|Human|Respiratory Virus Unit|Respiratory Virus Unit|Platt|United Kingdom

>Spike|hCoV-19/France/OCC-SC495/2020|2020-03-26|EPI\_ISL\_660690|Original|hCoV-19^^Occitanie|Human|CHU Montpellier|CNR Virus des Infections Respiratoires - France SUD|Bal|France

>Spike|hCoV-19/England/LIVE-A4763/2020|2020-03-12|EPI\_ISL\_500040|Original|hCoV-19^^England|Human|Liverpool Clinical Laboratories|COVID-19 Genomics UK (COG-UK) Consortium|Haldenby|United Kingdom

>Spike|hCoV-19/Australia/NSW1032/2020|2020-06-24|EPI\_ISL\_593684|Original|hCoV-19^^New South Wales|Human|South Eastern Area Laboratory Services (SEALS)|NSW Health Pathology - Institute of Clinical Pathology and Medical Research; Westmead Hospital; University of Sydney|Gall|Australia

>Spike|hCoV-19/USA/MA-MGH-03247/2020|2020-10-14|EPI\_ISL\_765757|Original|hCoV-19^^Massachusetts|Human|Massachusetts General Hospital|Infectious Disease Program|Park|USA

>Spike|hCoV-19/Wales/PHWC-30EEF/2020|2020-04-09|EPI\_ISL\_446377|Original|hCoV-19^^Wales|Human|Wales Specialist Virology Centre|Public Health Wales Microbiology Cardiff|Moore|United Kingdom

>Spike|hCoV-19/England/ALDP-9E66C9/2020|2020-09-23|EPI\_ISL\_580320|Original|hCoV-19^^England|Human|Lighthouse Lab in Alderley Park|Wellcome Sanger Institute for the COVID-19 Genomics UK (COG-UK) consortium|Davies|United Kingdom

>Spike|hCoV-19/Australia/VIC3123/2020|2020-07-06|EPI\_ISL\_520830|Original|hCoV-19^^Victoria|Human|Victorian Infectious Diseases Reference Laboratory (VIDRL)|VIDRL and MDU-PHL|Schultz|Australia

>Spike|hCoV-19/Scotland/QEUH-A00CA8/2020|2020-10-02|EPI\_ISL\_585568|Original|hCoV-19^^Scotland|Human|University of Exeter|COVID-19 Genomics UK (COG-UK) Consortium|Temperton|United Kingdom

>Spike|hCoV-19/USA/TX-HMH0388/2020|2020-03-31|EPI\_ISL\_434975|Original|hCoV-19^^Texas|Human|Houston Methodist Hospital|Houston Methodist Hospital|Long|USA

>Spike|hCoV-19/USA/CA-ALSR-2096/2020|2020-05-24|EPI\_ISL\_635346|Original|hCoV-19^^California|Human|San Diego County Public Health Laboratory|Andersen lab at Scripps Research|Gangavarapu|USA

>Spike|hCoV-19/England/MILK-9AB6DF/2020|2020-08-31|EPI\_ISL\_549454|Original|hCoV-19^^England|Human|Oxford Viromics|COVID-19 Genomics UK (COG-UK) Consortium|Golubchik|United Kingdom

>Spike|hCoV-19/England/CAMC-94BD18/2020|2020-07-15|EPI\_ISL\_556726|Original|hCoV-19^^England|Human|Lighthouse Lab in Cambridge|Wellcome Sanger Institute for the COVID-19 Genomics UK (COG-UK) consortium|Davies|United Kingdom

>Spike|hCoV-19/USA/VA-DCLS-0581/2020|2020-03-17|EPI\_ISL\_526802|Original|hCoV-19^^Virginia|Human|Virginia DCLS|Virginia DCLS|St. Jacques|USA

>Spike|hCoV-19/Denmark/DCGC-7828/2020|2020-10-19|EPI\_ISL\_618756|Original|hCoV-19^^Midtjylland|Human|Department of Virus and Microbiological Special Diagnostics|Albertsen lab|Michaelsen|Denmark

>Spike|hCoV-19/England/QEUH-B3F51D/2020|2020-11-08|EPI\_ISL\_658716|Original|hCoV-19^^England|Human|Lighthouse Lab in Glasgow|Wellcome Sanger Institute for the COVID-19 Genomics UK (COG-UK) Consortium|Davies|United Kingdom

>Spike|hCoV-19/Wales/PHWC-165B61/2020|2020-06-12|EPI\_ISL\_490771|Original|hCoV-19^^Wales|Human|Wales Specialist Virology Centre Sequencing lab|COVID-19 Genomics UK (COG-UK) Consortium|Moore|United Kingdom

>Spike|hCoV-19/England/ALDP-A6EB32/2020|2020-10-15|EPI\_ISL\_607121|Original|hCoV-19^^England|Human|Lighthouse Lab in Alderley Park|Wellcome Sanger Institute for the COVID-19 Genomics UK (COG-UK) consortium|Davies|United Kingdom

>Spike|hCoV-19/England/ALDP-B82AC1/2020|2020-11-14|EPI\_ISL\_675603|Original|hCoV-19^^England|Human|Lighthouse Lab in Alderley Park|Wellcome Sanger Institute for the COVID-19 Genomics UK (COG-UK) Consortium|Davies|United Kingdom

>Spike|hCoV-19/Spain/MD-IBV-99008658/2020|2020-09-29|EPI\_ISL\_654220|Original|hCoV-19^^Madrid|Human|Hospital General Universitario Gregorio Mara\u00f1a|SeqCOVID-SPAIN consortium|IBV (CSIC)|Comas|Spain

>Spike|hCoV-19/England/ALDP-C48B1E/2020|2020-12-12|EPI\_ISL\_736599|Original|hCoV-19^^England|Human|Lighthouse Lab in Alderley Park|Wellcome Sanger Institute for the COVID-19 Genomics UK (COG-UK) Consortium|Davies|United Kingdom

>Spike|hCoV-19/South Africa/R10398/2020|2020-06-03|EPI\_ISL\_490274|Original|hCoV-19^^Western Cape|Human|National Institute for Communicable Diseases of the National Health Laboratory Service|National Institute for Communicable Diseases of the National Health Laboratory Service|Allam|South Africa

>Spike|hCoV-19/Denmark/DCGC-15469/2020|2020-11-23|EPI\_ISL\_713841|Original|hCoV-19^^Hovedstaden|Human|Department of Virus and Microbiological Special Diagnostics|Albertsen Lab|Michaelsen|Denmark

>Spike|hCoV-19/USA/WA-UW-13293/2020|2020-07-03|EPI\_ISL\_501133|Original|hCoV-19^^Washington|Human|University of Washington Virology Lab|University of Washington Virology Lab|Roychoudhury|USA

>Spike|hCoV-19/England/QEUA-9C8CBC/2020|2020-09-11|EPI\_ISL\_567114|Original|hCoV-19^^England|Human|Lighthouse Lab in Glasgow|Wellcome Sanger Institute for the COVID-19 Genomics UK (COG-UK) consortium|Davies|United Kingdom

>Spike|hCoV-19/USA/WI-UW-1755/2020|2020-09-17|EPI\_ISL\_605628|Original|hCoV-19^^Wisconsin|Human|University of Wisconsin-Madison AIDS Vaccine Research Laboratories|University of Wisconsin-Madison AIDS Vaccine Research Laboratories|Baczenas|USA

>Spike|hCoV-19/Belgium/UGent-103/2020|2020-03-18|EPI\_ISL\_475063|Original|hCoV-19^^Ghent|Human|Lab voor klinische biologie|Onderzoeksgroep Virologie|Lambrechts|Belgium

>Spike|hCoV-19/Morocco/FMP-25/2020|2020-12-00|EPI\_ISL\_728352|Original|hCoV-19^^Temara|Human|Laboratoire Biolife|Laboratoire de Biotechnologie|Ouahgiri|Morocco

>Spike|hCoV-19/England/MILK-B965C9/2020|2020-11-13|EPI\_ISL\_676256|Original|hCoV-19^^England|Human|Lighthouse Lab in Milton Keynes|Wellcome Sanger Institute for the COVID-19 Genomics UK (COG-UK) Consortium|Davies|United Kingdom

>Spike|hCoV-19/England/MILK-BE6EDE/2020|2020-11-28|EPI\_ISL\_721529|Original|hCoV-19^^England|Human|Lighthouse Lab in Milton Keynes|Wellcome Sanger Institute for the COVID-19 Genomics UK (COG-UK) Consortium|Davies|United Kingdom

>Spike|hCoV-19/Australia/VIC11504/2020|2020-09-01|EPI\_ISL\_563400|Original|hCoV-19^^Victoria|Human|Microbiological Diagnostic Unit - Public Health Laboratory (MDU-PHL)|MDU-PHL|Schultz|Australia

>Spike|hCoV-19/Japan/PG-4998/2020|2020-08-00|EPI\_ISL\_690111|Original|hCoV-19^^Japan|Human|Pathogen Genomics Center|Pathogen Genomics Center|Sekizuka|Japan

>Spike|hCoV-19/England/MILK-B393A0/2020|2020-11-01|EPI\_ISL\_658819|Original|hCoV-19^^England|Human|Lighthouse Lab in Milton Keynes|Wellcome Sanger Institute for the COVID-19 Genomics UK (COG-UK) Consortium|Davies|United Kingdom

>Spike|hCoV-19/Netherlands/ZH-EMC-1080/2020|2020-12-07|EPI\_ISL\_722799|Original|hCoV-19^^Zuid Holland|Human|Dutch COVID-19 response team|Erasmus Medical Center|Oude Munnink|Netherlands

>Spike|hCoV-19/England/QEUA-CC9B42/2020|2020-12-23|EPI\_ISL\_782066|Original|hCoV-19^^England|Human|Lighthouse Lab in Glasgow|Wellcome Sanger Institute for the COVID-19 Genomics UK (COG-UK) Consortium|Davies|United Kingdom

>Spike|hCoV-19/South Africa/NHLS-UCT-GS-0018/2020|2020-08-13|EPI\_ISL\_640020|Original|hCoV-19^^Western Cape|Human|Mitchells Plain Hospital w MPH|NHLS/UCT|Iranzadeh|South Africa

>Spike|hCoV-19/Wales/MILK-9EF183/2020|2020-09-24|EPI\_ISL\_594905|Original|hCoV-19^^Wales|Human|Oxford Viromics|COVID-19 Genomics UK (COG-UK) Consortium|Golubchik|United Kingdom

>Spike|hCoV-19/England/MILK-ABB583/2020|2020-10-22|EPI\_ISL\_623512|Original|hCoV-19^^England|Human|Lighthouse Lab in Milton Keynes|Wellcome Sanger Institute for the COVID-19 Genomics UK (COG-UK) consortium|Davies|United Kingdom

>Spike|hCoV-19/Scotland/QEUA-9B6EBB/2020|2020-09-09|EPI\_ISL\_602131|Original|hCoV-19^^Scotland|Human|Lighthouse Lab in Glasgow|Wellcome Sanger Institute for the COVID-19 Genomics UK (COG-UK) consortium|Davies|United Kingdom

>Spike|hCoV-19/Switzerland/GE-SNRCI-2315/2020|2020-03-00|EPI\_ISL\_548150|Original|hCoV-19^^Geneve|Human|Laboratoire de Virologie|Swiss National Reference Centre for Influenza|Gon\00e7alves Cabecinhas|Switzerland

>Spike|hCoV-19/England/NOTT-11F911/2020|2020-11-27|EPI\_ISL\_725585|Original|hCoV-19^^England|Human|Lincolnshire Hospitals and DeepSeq Nottingham|COVID-19 Genomics UK (COG-UK) Consortium|Loose|United Kingdom

>Spike|hCoV-19/Denmark/DCGC-15846/2020|2020-11-23|EPI\_ISL\_714057|Original|hCoV-19^^Syddanmark|Human|Department of Virus and Microbiological Special Diagnostics|Albertsen Lab|Michaelsen|Denmark

>Spike|hCoV-19/Belgium/UGent-97/2020|2020-03-17|EPI\_ISL\_468745|Original|hCoV-19^^Ghent|Human|Lab voor klinische biologie|Onderzoeksgroep Virologie|Lambrechts|Belgium

>Spike|hCoV-19/England/ALDP-A6801B/2020|2020-10-12|EPI\_ISL\_608915|Original|hCoV-19^^England|Human|Lighthouse Lab in Alderley Park|Wellcome Sanger Institute for the COVID-19 Genomics UK (COG-UK) consortium|Davies|United Kingdom

>Spike|hCoV-19/England/SHEF-CD8DA/2020|2020-10-16|EPI\_ISL\_611775|Original|hCoV-19^^England|Human|Virology Department|COVID-19 Genomics UK (COG-UK) Consortium|de Silva|United Kingdom

>Spike|hCoV-19/England/QEUA-9F3975/2020|2020-09-24|EPI\_ISL\_588495|Original|hCoV-19^^England|Human|Lighthouse Lab in Glasgow|Wellcome Sanger Institute for the COVID-19 Genomics UK (COG-UK) consortium|Davies|United Kingdom

>Spike|hCoV-19/Australia/NSW2660/2020|2020-04-09|EPI\_ISL\_678334|Original|hCoV-19^^New South Wales|Human|Area of Virology|Virology Research Laboratory; Area of Virology|Foster|Australia

>Spike|hCoV-19/England/QEUA-B2EB3D/2020|2020-11-04|EPI\_ISL\_659818|Original|hCoV-19^^England|Human|Lighthouse Lab in Glasgow|Wellcome Sanger Institute for the COVID-19 Genomics UK (COG-UK) Consortium|Davies|United Kingdom

>Spike|hCoV-19/United Arab Emirates/1000/2020|2020-06-10|EPI\_ISL\_699132|Original|hCoV-19^^Abu Dhabi|Human|Group 42 (G42) Healthcare|G42 Healthcare|Ogrodzki|United Arab Emirates

>Spike|hCoV-19/Japan/PG-4804/2020|2020-08-00|EPI\_ISL\_689929|Original|hCoV-19^^Japan|Human|Pathogen Genomics Center|Pathogen Genomics Center|Sekizuka|Japan

>Spike|hCoV-19/USA/AZ-TG532068/2020|2020-07-01|EPI\_ISL\_695404|Original|hCoV-19^^Arizona|Human|AZ SPHL|TGen North|French|USA

>Spike|hCoV-19/Wales/PHWC-24631/2020|2020-03-17|EPI\_ISL\_419432|Original|hCoV-19^^Wales|Human|Wales Specialist Virology Centre|Public Health Wales Microbiology Cardiff|Moore|United Kingdom

>Spike|hCoV-19/USA/WA-S2802/2020|2020-08-25|EPI\_ISL\_530159|Original|hCoV-19^^Washington|Human|Seattle Flu Study|Seattle Flu Study|Lee|USA

>Spike|hCoV-19/England/ALDP-9CD90B/2020|2020-09-16|EPI\_ISL\_566115|Original|hCoV-19^^England|Human|Lighthouse Lab in Alderley Park|Wellcome Sanger Institute for the COVID-19 Genomics UK (COG-UK) consortium|Davies|United Kingdom

>Spike|hCoV-19/Australia/NSW813/2020|2020-08-08|EPI\_ISL\_526155|Original|hCoV-19^^New South Wales|Human|Pathology North - Royal North Shore Hospital - NSW Health Pathology|NSW Health Pathology - Institute of Clinical Pathology and Medical Research; Westmead Hospital; University of Sydney|Gall|Australia

>Spike|hCoV-19/England/QEUA-AE4C7D/2020|2020-10-27|EPI\_ISL\_633206|Original|hCoV-19^^England|Human|Lighthouse Lab in Glasgow|Wellcome Sanger Institute for the COVID-19 Genomics UK (COG-UK) consortium|Davies|United Kingdom

>Spike|hCoV-19/France/PAC-IHU-1340/2020|2020-08-19|EPI\_ISL\_569125|Original|hCoV-19^^Provence-Alpes-C\u00f4te-d\u2019Azur|Human|MEPHI|MEPHI|Levasseur|France

>Spike|hCoV-19/USA/TX-DSHS-1770/2020|2020-06-20|EPI\_ISL\_710410|Original|hCoV-19^^Texas|Human|Texas Department of State Health Services|Texas Department of State Health Services|Rahman|USA

>Spike|hCoV-19/France/PAC-IHU-0263/2020|2020-03-31|EPI\_ISL\_569420|Original|hCoV-19^^Provence-Alpes-C\u00f4te-d\u2019Azur|Human|MEPHI|MEPHI|Levasseur|France

>Spike|hCoV-19/Denmark/DCGC-3088/2020|2020-08-24|EPI\_ISL\_616868|Original|hCoV-19^^Hovedstaden|Human|Department of Virus and Microbiological Special Diagnostics|Albertsen lab|Michaelsen|Denmark

>Spike|hCoV-19/USA/CA-LACPHL-AA00017/2020|2020-08-06|EPI\_ISL\_710115|Original|hCoV-19^^California|Human|Los Angeles County PHL|Los Angeles County PHL|Hemrajata|USA

>Spike|hCoV-19/England/CAMC-BD2127/2020|2020-11-27|EPI\_ISL\_702108|Original|hCoV-19^^England|Human|Lighthouse Lab in Cambridge|Wellcome Sanger Institute for the COVID-19 Genomics UK (COG-UK) Consortium|Davies|United Kingdom

>Spike|hCoV-19/Australia/VIC2296/2020|2020-06-25|EPI\_ISL\_522017|Original|hCoV-19^^Victoria|Human|Microbiological Diagnostic Unit - Public Health Laboratory (MDU-PHL)|MDU-PHL|Schultz|Australia

>Spike|hCoV-19/England/ALDP-9BE09F/2020|2020-09-09|EPI\_ISL\_568199|Original|hCoV-19^^England|Human|Lighthouse Lab in Alderley Park|Wellcome Sanger Institute for the COVID-19 Genomics UK (COG-UK) consortium|Davies|United Kingdom

>Spike|hCoV-19/USA/CA-ALSR-3420/2020|2020-07-08|EPI\_ISL\_636018|Original|hCoV-19^^California|Human|San Diego County Public Health Laboratory|Andersen lab at Scripps Research|Gangavarapu|USA

>Spike|hCoV-19/Japan/PG-2917/2020|2020-04-00|EPI\_ISL\_691043|Original|hCoV-19^^Japan|Human|Pathogen Genomics Center|Pathogen Genomics Center|Sekizuka|Japan

>Spike|hCoV-19/USA/DE-DHSS-FLW00408437/2020|2020-12-02|EPI\_ISL\_766994|Original|hCoV-19^^Delaware|Human|Delaware Public Health Laboratory|Delaware Public Health Laboratory|Bajwa|USA

>Spike|hCoV-19/Japan/PG-6317/2020|2020-08-00|EPI\_ISL\_689428|Original|hCoV-19^^Japan|Human|Pathogen Genomics Center|Pathogen Genomics Center|Sekizuka|Japan

>Spike|hCoV-19/Nigeria/LA-CV371/2020|2020-05-14|EPI\_ISL\_730032|Original|hCoV-19^^Lagos State|Human|Nigeria Centre for Disease Control (NCDC)|African Centre of Excellence for Genomics of Infectious Diseases (ACEGID)|Oluniyi|Nigeria

>Spike|hCoV-19/England/MILK-85B587/2020|2020-07-17|EPI\_ISL\_557529|Original|hCoV-19^^England|Human|Lighthouse Lab in Milton Keynes|Wellcome Sanger Institute for the COVID-19 Genomics UK (COG-UK) consortium|Davies|United Kingdom

>Spike|hCoV-19/Australia/NSW2168/2020|2020-03-19|EPI\_ISL\_500639|Original|hCoV-19^^New South Wales|Human|Area of Virology|Area of Virology|Bull|Australia

>Spike|hCoV-19/England/QEUEH-BC360C/2020|2020-11-25|EPI\_ISL\_704048|Original|hCoV-19^^England|Human|Lighthouse Lab in Glasgow|Wellcome Sanger Institute for the COVID-19 Genomics UK (COG-UK) Consortium|Davies|United Kingdom

>Spike|hCoV-19/USA/WI-UW-2568/2021|2021-01-04|EPI\_ISL\_788911|Original|hCoV-19^^Wisconsin|Human|University of Wisconsin-Madison AIDS Vaccine Research Laboratories|University of Wisconsin-Madison AIDS Vaccine Research Laboratories|Moreno|USA

>Spike|hCoV-19/USA/WA-S2634/2020|2020-06-20|EPI\_ISL\_497266|Original|hCoV-19^^Washington|Human|Washington State Department of Health|Seattle Flu Study|Lee|USA

>Spike|hCoV-19/Spain/MD-IBV-99008552/2020|2020-09-13|EPI\_ISL\_654093|Original|hCoV-19^^Madrid|Human|Hospital General Universitario Gregorio Mara\u00f1a|SeqCOVID-SPAIN consortium/IBV (CSIC)|Comas|Spain

>Spike|hCoV-19/USA/UT-QDX-1790/2020|2020-03-14|EPI\_ISL\_604122|Original|hCoV-19^^Utah|Human|Quest Diagnostics|Quest Diagnostics|Kagan|USA

>Spike|hCoV-19/England/QEUEH-B2DCE0/2020|2020-11-03|EPI\_ISL\_646964|Original|hCoV-19^^England|Human|Lighthouse Lab in Glasgow|Wellcome Sanger Institute for the COVID-19 Genomics UK (COG-UK) Consortium|Davies|United Kingdom

>Spike|hCoV-19/USA/TX-HMH-MCoV-11886/2020|2020-09-16|EPI\_ISL\_790128|Original|hCoV-19^^Texas|Human|Houston Methodist Hospital|Houston Methodist Hospital|Long|USA

>Spike|hCoV-19/Ireland/D-NVRL-MPJ90913/2020|2020-04-09|EPI\_ISL\_768744|Original|hCoV-19^^Dublin|Human|National Virus Reference Laboratory|Irish Coronavirus Sequencing Consortium - Teagasc Moorepark|Walsh|Ireland

>Spike|hCoV-19/England/NORT-297A59/2020|2020-04-24|EPI\_ISL\_488114|Original|hCoV-19^^England|Human|NU-OMICS DNA Sequencing research facility|Wellcome Sanger Institute for the COVID-19 Genomics UK (COG-UK) consortium|Davies|United Kingdom

>Spike|hCoV-19/Scotland/QEUEH-AD195E/2020|2020-10-26|EPI\_ISL\_649708|Original|hCoV-19^^Scotland|Human|Lighthouse Lab in Glasgow|Wellcome Sanger Institute for the COVID-19 Genomics UK (COG-UK) Consortium|Davies|United Kingdom

>Spike|hCoV-19/USA/MI-MDHHS-SC22600/2020|2020-11-10|EPI\_ISL\_737173|Original|hCoV-19^^Michigan|Human|Michigan Department of Health and Human Services|Michigan Department of Health and Human Services|Blankenship|USA

>Spike|hCoV-19/Japan/PG-6737/2020|2020-08-00|EPI\_ISL\_687617|Original|hCoV-19^^Japan|Human|Pathogen Genomics Center|Pathogen Genomics Center|Sekizuka|Japan

>Spike|hCoV-19/England/CAMB-1BD5E4/2020|2020-00-00|EPI\_ISL\_764272|Original|hCoV-19^^England|Human|Department of Pathology|COVID-19 Genomics UK (COG-UK) Consortium|Goodfellow|United Kingdom

>Spike|hCoV-19/England/PORT-2D181D/2020|2020-04-12|EPI\_ISL\_484422|Original|hCoV-19^^England|Human|Centre for Enzyme Innovation|COVID-19 Genomics UK (COG-UK) Consortium|Robson|United Kingdom

>Spike|hCoV-19/Denmark/DCGC-2495/2020|2020-08-10|EPI\_ISL\_617766|Original|hCoV-19^^Syddanmark|Human|Department of Virus and Microbiological Special Diagnostics|Albertsen lab|Michaelsen|Denmark

>Spike|hCoV-19/Wuhan/YB012605/2020|2020-01-26|EPI\_ISL\_450502|unknown|hCoV-19^^Hubei|Human|unknown|CAS Key Laboratory of Special Pathogens and Biosafety and Center for Emerging Infectious Diseases|Submitter|China

>Spike|hCoV-19/Japan/PG-0212/2020|2020-03-21|EPI\_ISL\_479912|Original|hCoV-19^^Kansai|Human|Himeji City Institute of Environment and Health|Pathogen Genomics Center|Sekizuka|Japan

>Spike|hCoV-19/England/CAMB-7F6BF/2020|2020-04-08|EPI\_ISL\_470386|Original|hCoV-19^^England|Human|Department of Pathology|Wellcome Sanger Institute for the COVID-19 Genomics UK (COG-UK) consortium|Davies|United Kingdom

>Spike|hCoV-19/USA/UT-UPHL-2008896/2020|2020-05-26|EPI\_ISL\_525010|Original|hCoV-19^^Utah|Human|Utah Public Health Laboratory|Utah Public Health Laboratory|Young|USA

>Spike|hCoV-19/Wales/PHWC-485EBA/2020|2020-10-21|EPI\_ISL\_628290|Original|hCoV-19^^Wales|Human|Wales Specialist Virology Centre Sequencing lab|COVID-19 Genomics UK (COG-UK) Consortium|Moore|United Kingdom

>Spike|hCoV-19/Austria/CeMM0601/2020|2020-03-18|EPI\_ISL\_583612|Original|hCoV-19^^Kufstein|Human|Institut f\u00fcr Virologie am Department f\u00fcr Hygiene|Bergthaler laboratory|Bergthaler|Austria

>Spike|hCoV-19/Denmark/DCGC-10947/2020|2020-11-02|EPI\_ISL\_670303|Original|hCoV-19^^Sjaelland|Human|Department of Virus and Microbiological Special Diagnostics|Albertsen Lab|Michaelsen|Denmark

>Spike|hCoV-19/USA/LA-EVTL1451/2020|2020-12-17|EPI\_ISL\_779117|Original|hCoV-19^^Louisiana|Human|LSUHS Emerging Viral Threat Laboratory|Microbial Genome Sequencing Center|Kamil|USA

>Spike|hCoV-19/England/MILK-A6992E/2020|2020-10-09|EPI\_ISL\_665855|Original|hCoV-19^^England|Human|University of Exeter|COVID-19 Genomics UK (COG-UK) Consortium|Temperton|United Kingdom

>Spike|hCoV-19/England/QEUH-A01858/2020|2020-09-30|EPI\_ISL\_679997|Original|hCoV-19^^England|Human|Virology Department|COVID-19 Genomics UK (COG-UK) Consortium|de Silva|United Kingdom

>Spike|hCoV-19/England/ALDP-B46AD8/2020|2020-11-06|EPI\_ISL\_656084|Original|hCoV-19^^England|Human|Lighthouse Lab in Alderley Park|Wellcome Sanger Institute for the COVID-19 Genomics UK (COG-UK) Consortium|Davies|United Kingdom

>Spike|hCoV-19/Japan/Donner69/2020|2020-07-27|EPI\_ISL\_644973|Original|hCoV-19^^Kanto|Human|Department of Infectious Diseases|Center for Medical Genetics|Kosaki|Japan

>Spike|hCoV-19/Israel/13075719/2020|2020-03-29|EPI\_ISL\_447449|Original|hCoV-19^^Tel Aviv District|Human|Clinical Microbiology Laboratory|Stern Lab|Miller|Israel

>Spike|hCoV-19/Scotland/CVR451/2020|2020-03-23|EPI\_ISL\_433296|Original|hCoV-19^^Scotland|Human|West of Scotland Specialist Virology Centre|COVID-19 Genomics UK (COG-UK) Consortium|Robertson|United Kingdom

>Spike|hCoV-19/USA/MA-MGH-00653/2020|2020-04-02|EPI\_ISL\_460197|Original|hCoV-19^^Massachusetts|Human|Massachusetts General Hospital|Infectious Disease Program|Lemieux|USA

>Spike|hCoV-19/USA/WA-S809/2020|2020-04-15|EPI\_ISL\_449979|Original|hCoV-19^^Washington|Human|Washington State Department of Health|Seattle Flu Study|Bedford|USA

>Spike|hCoV-19/England/MILK-ACE5BA/2020|2020-10-21|EPI\_ISL\_629729|Original|hCoV-19^^England|Human|Lighthouse Lab in Milton Keynes|Wellcome Sanger Institute for the COVID-19 Genomics UK (COG-UK) consortium|Davies|United Kingdom

>Spike|hCoV-19/Spain/CL-IBV-97006285/2020|2020-04-21|EPI\_ISL\_537655|Original|hCoV-19^^Castilla y Leon|Human|Universidad de Le\u00f3n|SeqCOVID-SPAIN consortium|IBV (CSIC) |Comas|Spain

>Spike|hCoV-19/England/NORT-1B710A2/2020|2020-11-14|EPI\_ISL\_706302|Original|hCoV-19^^England|Human|Northumbria University / South Tees Hospitals NHS Foundation Trust / North Cumbria Integrated Care NHS Foundation Trust / North Tees and Hartlepool NHS Foundation Trust / Newcastle Hospitals NHS Foundation Trust|COVID-19 Genomics UK (COG-UK) Consortium|Bashton|United Kingdom

>Spike|hCoV-19/Australia/VIC178/2020|2020-03-18|EPI\_ISL\_419875|Original|hCoV-19^^Victoria|Human|Victorian Infectious Diseases Reference Laboratory (VIDRL)|Victorian Infectious Diseases Reference Laboratory and Microbiological Diagnostic Unit Public Health Laboratory|Schultz|Australia

>Spike|hCoV-19/England/MILK-62C5DC/2020|2020-07-05|EPI\_ISL\_557880|Original|hCoV-19^^England|Human|Lighthouse Lab in Milton Keynes|Wellcome Sanger Institute for the COVID-19 Genomics UK (COG-UK) consortium|Davies|United Kingdom

>Spike|hCoV-19/England/MILK-BB1D39/2020|2020-11-17|EPI\_ISL\_720580|Original|hCoV-19^^England|Human|Lighthouse Lab in Milton Keynes|Wellcome Sanger Institute for the COVID-19 Genomics UK (COG-UK) Consortium|Davies|United Kingdom

>Spike|hCoV-19/USA/IL-NM-1385/2020|2020-06-28|EPI\_ISL\_626517|Original|hCoV-19^^Illinois|Human|Northwestern Memorial Hospital|Ozer Lab|Ozer|USA

>Spike|hCoV-19/Scotland/CVR1523/2020|2020-04-03|EPI\_ISL\_453011|Original|hCoV-19^^Scotland|Human|West of Scotland Specialist Virology Centre|COVID-19 Genomics UK (COG-UK) Consortium|Robertson|United Kingdom

>Spike|hCoV-19/England/MILK-995AAF/2020|2020-08-23|EPI\_ISL\_551592|Original|hCoV-19^^England|Human|Lighthouse Lab in Milton Keynes|Wellcome Sanger Institute for the COVID-19 Genomics UK (COG-UK) consortium|Davies|United Kingdom

>Spike|hCoV-19/England/20170002704/2020|2020-04-19|EPI\_ISL\_465267|Original|hCoV-19^^England|Human|Respiratory Virus Unit|Respiratory Virus Unit|Platt|United Kingdom

>Spike|hCoV-19/England/BRIS-128793/2020|2020-04-15|EPI\_ISL\_458889|Original|hCoV-19^^England|Human|PHE South West Regional Laboratory|Wellcome Sanger Institute for the COVID-19 Genomics UK (COG-UK) consortium|Davies|United Kingdom

>Spike|hCoV-19/England/20186097004/2020|2020-04-29|EPI\_ISL\_465482|Original|hCoV-19^^England|Human|Respiratory Virus Unit|Respiratory Virus Unit|Platt|United Kingdom

>Spike|hCoV-19/Germany/NW-HHU-450/2020|2020-10-26|EPI\_ISL\_733521|Original|hCoV-19^^North Rhine-Westphalia|Human|ZOTZ KLIMAS MVZ D\u00f0fcsseldorf-Centrum GbR \u00dcBAG f\u00fcr Labormedizin|Center of Medical Microbiology|Wienemann|Germany

>Spike|hCoV-19/Japan/PG-3136/2020|2020-04-00|EPI\_ISL\_691258|Original|hCoV-19^^Japan|Human|Pathogen Genomics Center|Pathogen Genomics Center|Sekizuka|Japan

>Spike|hCoV-19/Singapore/208/2020|2020-04-29|EPI\_ISL\_462326|Original|hCoV-19^^Singapore|Human|National Public Health Laboratory|National Public Health Laboratory|Mak|Singapore

>Spike|hCoV-19/Netherlands/ZH-EMC-1061/2020|2020-12-04|EPI\_ISL\_722289|Original|hCoV-19^^Zuid Holland|Human|Dutch COVID-19 response team|Erasmus Medical Center|Oude Munnink|Netherlands

>Spike|hCoV-19/Wales/PHWC-4867CD/2020|2020-10-31|EPI\_ISL\_639080|Original|hCoV-19^^Wales|Human|Wales Specialist Virology Centre Sequencing lab|COVID-19 Genomics UK (COG-UK) Consortium|Moore|United Kingdom

>Spike|hCoV-19/England/MILK-9F085D/2020|2020-09-24|EPI\_ISL\_589761|Original|hCoV-19^^England|Human|Lighthouse Lab in Milton Keynes|Wellcome Sanger Institute for the COVID-19 Genomics UK (COG-UK) consortium|Davies|United Kingdom

>Spike|hCoV-19/England/MILK-BB005F/2020|2020-11-18|EPI\_ISL\_720365|Original|hCoV-19^^England|Human|Lighthouse Lab in Milton Keynes|Wellcome Sanger Institute for the COVID-19 Genomics UK (COG-UK) Consortium|Davies|United Kingdom

>Spike|hCoV-19/USA/CA-SR0459/2020|2020-05-19|EPI\_ISL\_467981|Original|hCoV-19^^California|Human|Rady's Childrens Hospital|Andersen lab at Scripps Research|Gangavarapu|USA

>Spike|hCoV-19/England/NORT-28B171/2020|2020-04-18|EPI\_ISL\_469307|Original|hCoV-19^^England|Human|NU-OMICS DNA Sequencing research facility|Wellcome Sanger Institute for the COVID-19 Genomics UK (COG-UK) consortium|Davies|United Kingdom

>Spike|hCoV-19/Singapore/553/2020|2020-04-11|EPI\_ISL\_483576|Original|hCoV-19^^Singapore|Human|National Public Health Laboratory|National Public Health Laboratory|Mak|Singapore

>Spike|hCoV-19/Denmark/DCGC-17846/2020|2020-12-14|EPI\_ISL\_749597|Original|hCoV-19^^Hovedstaden|Human|Department of Virus and Microbiological Special Diagnostics|Albertsen Lab|Michaelsen|Denmark

>Spike|hCoV-19/England/QEUH-C32F48/2020|2020-12-11|EPI\_ISL\_734036|Original|hCoV-19^^England|Human|Lighthouse Lab in Glasgow|Wellcome Sanger Institute for the COVID-19 Genomics UK (COG-UK) Consortium|Davies|United Kingdom



>Spike|hCoV-19/USA/WI-GMF-25145/2020|2020-10-10|EPI\_ISL\_660916|Original|hCoV-19^^Wisconsin|Human|Gundersen Molecular Diagnostics Laboratory|Kabara Cancer Research Institute|Kenny|USA

>Spike|hCoV-19/USA/MI-MDHHS-SC21598/2020|2020-03-26|EPI\_ISL\_516325|Original|hCoV-19^^Michigan|Human|Michigan Department of Health and Human Services|Michigan Department of Health and Human Services|Blankenship|USA

>Spike|hCoV-19/Wales/PHWC-15C963/2020|2020-05-05|EPI\_ISL\_472561|Original|hCoV-19^^Wales|Human|Wales Specialist Virology Centre Sequencing lab|COVID-19 Genomics UK (COG-UK) Consortium|Moore|United Kingdom

>Spike|hCoV-19/England/ALDP-B84FC0/2020|2020-11-15|EPI\_ISL\_674419|Original|hCoV-19^^England|Human|Lighthouse Lab in Alderley Park|Wellcome Sanger Institute for the COVID-19 Genomics UK (COG-UK) Consortium|Davies|United Kingdom

>Spike|hCoV-19/USA/TX-HMH-MCoV-12644/2020|2020-08-31|EPI\_ISL\_790438|Original|hCoV-19^^Texas|Human|Houston Methodist Hospital|Houston Methodist Hospital|Long|USA

>Spike|hCoV-19/England/LIVE-AA0BD/2020|2020-03-25|EPI\_ISL\_517399|Original|hCoV-19^^England|Human|Liverpool Clinical Laboratories|COVID-19 Genomics UK (COG-UK) Consortium|Haldenby|United Kingdom

>Spike|hCoV-19/England/LIVE-A4B49/2020|2020-03-11|EPI\_ISL\_500074|Original|hCoV-19^^England|Human|Liverpool Clinical Laboratories|COVID-19 Genomics UK (COG-UK) Consortium|Haldenby|United Kingdom

>Spike|hCoV-19/Australia/VIC16083/2020|2020-00-00|EPI\_ISL\_641287|Original|hCoV-19^^Victoria|Human|Microbiological Diagnostic Unit - Public Health Laboratory (MDU-PHL)|MDU-PHL|Schultz|Australia

>Spike|hCoV-19/USA/WA-S1766/2020|2020-06-01|EPI\_ISL\_496192|Original|hCoV-19^^Washington|Human|Washington State Department of Health|Seattle Flu Study|Lee|USA

>Spike|hCoV-19/USA/CA-CZB-15076/2020|2020-11-20|EPI\_ISL\_739501|Original|hCoV-19^^California|Human|Santa Clara County Public Health Laboratory|Chan-Zuckerberg Biohub|Kamm|USA

>Spike|hCoV-19/Spain/RI-IBV-99010965/2020|2020-10-29|EPI\_ISL\_732793|Original|hCoV-19^^La Rioja|Human|Centro de Investigaci\u00f3n Biom\u00e9dica de La Rioja - Hospital San Pedro Logro\u00f1o|SeqCOVID-SPAIN consortium/IBV (CSIC)|Comas|Spain

>Spike|hCoV-19/England/ALDP-6DDFDC/2020|2020-06-30|EPI\_ISL\_557661|Original|hCoV-19^^England|Human|Lighthouse Lab in Alderley Park|Wellcome Sanger Institute for the COVID-19 Genomics UK (COG-UK) consortium|Davies|United Kingdom

>Spike|hCoV-19/Wales/PHWC-4A1647/2020|2020-12-10|EPI\_ISL\_743704|Original|hCoV-19^^Wales|Human|Wales Specialist Virology Centre Sequencing lab|COVID-19 Genomics UK (COG-UK) Consortium|Moore|United Kingdom

>Spike|hCoV-19/England/SHEF-10D2857/2020|2020-12-22|EPI\_ISL\_765186|Original|hCoV-19^^England|Human|Virology Department|COVID-19 Genomics UK (COG-UK) Consortium|de Silva|United Kingdom

>Spike|hCoV-19/England/CAMB-7D8D9/2020|2020-04-06|EPI\_ISL\_441707|Original|hCoV-19^^England|Human|Department of Pathology|Wellcome Sanger Institute for the COVID-19 Genomics UK (COG-UK) consortium|Amato|United Kingdom

>Spike|hCoV-19/USA/WI-UW-2211/2020|2020-10-25|EPI\_ISL\_677614|Original|hCoV-19^^Wisconsin|Human|University of Wisconsin-Madison AIDS Vaccine Research Laboratories|University of Wisconsin-Madison AIDS Vaccine Research Laboratories|Baczenas|USA

>Spike|hCoV-19/England/QEUH-BCD329/2020|2020-11-26|EPI\_ISL\_704300|Original|hCoV-19^^England|Human|Lighthouse Lab in Glasgow|Wellcome Sanger Institute for the COVID-19 Genomics UK (COG-UK) Consortium|Davies|United Kingdom

>Spike|hCoV-19/England/GSTT-265D1E7/2020|2020-03-15|EPI\_ISL\_483924|Original|hCoV-19^^England|Human|Centre for Clinical Infection and Diagnostics Research and Genomics Innovation Unit|COVID-19 Genomics UK (COG-UK) Consortium|Awan|United Kingdom

>Spike|hCoV-19/USA/WI-UW-1555/2020|2020-09-15|EPI\_ISL\_605433|Original|hCoV-19^^Wisconsin|Human|University of Wisconsin-Madison AIDS Vaccine Research Laboratories|University of Wisconsin-Madison AIDS Vaccine Research Laboratories|Baczenas|USA

>Spike|hCoV-19/England/BIRM-5FBB6/2020|2020-05-21|EPI\_ISL\_473385|Original|hCoV-19^^England|Human|University of Birmingham|COVID-19 Genomics UK (COG-UK) Consortium|Loman|United Kingdom

>Spike|hCoV-19/USA/OR-OHSU-1719/2020|2020-07-24|EPI\_ISL\_526013|Original|hCoV-19^^Oregon|Human|OHSU Lab Services Molecular Microbiology Lab|Oregon SARS-CoV-2 Genome Sequencing Center|O'Roak|USA

>Spike|hCoV-19/USA/TX-HMH-MCoV-18337/2020|2020-11-19|EPI\_ISL\_784685|Original|hCoV-19^^Texas|Human|Houston Methodist Hospital|Houston Methodist Hospital|Long|USA

>Spike|hCoV-19/Luxembourg/LNS7874511/2020|2020-11-11|EPI\_ISL\_744645|Original|hCoV-19^^Luxembourg|Human|Laboratoire national de sant\u00e9|Laboratoire national de sant\u00e9|Wienecke-Baldacchino|Luxembourg

>Spike|hCoV-19/England/ALDP-B5CFB2/2020|2020-11-09|EPI\_ISL\_655952|Original|hCoV-19^^England|Human|Lighthouse Lab in Alderley Park|Wellcome Sanger Institute for the COVID-19 Genomics UK (COG-UK) Consortium|Davies|United Kingdom

>Spike|hCoV-19/Japan/PG-5232/2020|2020-08-00|EPI\_ISL\_690335|Original|hCoV-19^^Japan|Human|Pathogen Genomics Center|Pathogen Genomics Center|Sekizuka|Japan

>Spike|hCoV-19/Spain/VC-IBV-98002665/2020|2020-04-24|EPI\_ISL\_538002|Original|hCoV-19^^Comunitat Valenciana|Human|Servicio de Microbiologia. Hospital Arnau de Vilanova|SeqCOVID-SPAIN consortium|IBV(CSIC)|Comas|Spain

>Spike|hCoV-19/England/SHEF-D192B/2020|2020-10-19|EPI\_ISL\_613400|Original|hCoV-19^^England|Human|Virology Department|COVID-19 Genomics UK (COG-UK) Consortium|de Silva|United Kingdom

>Spike|hCoV-19/England/204040323/2020|2020-09-28|EPI\_ISL\_622838|Original|hCoV-19^^England|Human|Respiratory Virus Unit|Respiratory Virus Unit|Platt|United Kingdom

>Spike|hCoV-19/India/TG-CCMB-GC42/2020|2020-05-30|EPI\_ISL\_528819|Original|hCoV-19^^Telangana|Human|Department of Medicine|CSIR-Centre for Cellular and Molecular Biology|Banu|India

>Spike|hCoV-19/Spain/MD-H12-94/2020|2020-04-16|EPI\_ISL\_530020|Original|hCoV-19^^Madrid|Human|Hospital Universitario 12 de Octubre|Hospital Universitario 12 de Octubre|Viedma|Spain

>Spike|hCoV-19/England/CAMC-BC0317/2020|2020-11-22|EPI\_ISL\_704935|Original|hCoV-19^^England|Human|Lighthouse Lab in Cambridge|Wellcome Sanger Institute for the COVID-19 Genomics UK (COG-UK) Consortium|Davies|United Kingdom

>Spike|hCoV-19/Wales/PHWC-488A2C/2020|2020-10-24|EPI\_ISL\_639454|Original|hCoV-19^^Wales|Human|Wales Specialist Virology Centre Sequencing lab|COVID-19 Genomics UK (COG-UK) Consortium|Moore|United Kingdom

>Spike|hCoV-19/Northern Ireland/NIRE-2358F9/2020|2020-11-10|EPI\_ISL\_742162|Original|hCoV-19^^Northern Ireland|Human|Regional Virus Laboratory|COVID-19 Genomics UK (COG-UK) Consortium|Fairley|United Kingdom

>Spike|hCoV-19/USA/TX-HMH-MCoV-15375/2020|2020-10-22|EPI\_ISL\_786859|Original|hCoV-19^^Texas|Human|Houston Methodist Hospital|Houston Methodist Hospital|Long|USA

>Spike|hCoV-19/France/ARA-68072/2020|2020-09-04|EPI\_ISL\_683394|Original|hCoV-19^^Auvergne-Rh\u00f4ne-Alpes|Human|CNR Virus des Infections Respiratoires - France SUD|CNR Virus des Infections Respiratoires - France SUD|Bal|France

>Spike|hCoV-19/England/CAMB-81957/2020|2020-04-11|EPI\_ISL\_442588|Original|hCoV-19^^England|Human|Department of Pathology|Wellcome Sanger Institute for the COVID-19 Genomics UK (COG-UK) consortium|Amato|United Kingdom

>Spike|hCoV-19/England/QEUEH-960418/2020|2020-08-04|EPI\_ISL\_531976|Original|hCoV-19^^England|Human|Lighthouse Lab in Glasgow|Wellcome Sanger Institute for the COVID-19 Genomics UK (COG-UK) consortium|Davies|United Kingdom

>Spike|hCoV-19/England/CAMC-B1FD66/2020|2020-11-01|EPI\_ISL\_647640|Original|hCoV-19^^England|Human|Lighthouse Lab in Cambridge|Wellcome Sanger Institute for the COVID-19 Genomics UK (COG-UK) Consortium|Davies|United Kingdom

>Spike|hCoV-19/England/ALDP-ABD2F3/2020|2020-10-04|EPI\_ISL\_631173|Original|hCoV-19^^England|Human|Lighthouse Lab in Alderley Park|Wellcome Sanger Institute for the COVID-19 Genomics UK (COG-UK) consortium|Davies|United Kingdom

>Spike|hCoV-19/Wales/PHWC-2B597/2020|2020-04-10|EPI\_ISL\_445729|Original|hCoV-19^^Wales|Human|Wales Specialist Virology Centre|Public Health Wales Microbiology Cardiff|Moore|United Kingdom

>Spike|hCoV-19/USA/MI-MDHHS-SC21699/2020|2020-03-25|EPI\_ISL\_529818|Original|hCoV-19^^Michigan|Human|Michigan Department of Health and Human Services|Michigan Department of Health and Human Services|Blankenship|USA

>Spike|hCoV-19/England/CAMC-9D1F6C/2020|2020-09-19|EPI\_ISL\_601740|Original|hCoV-19^^England|Human|Lighthouse Lab in Cambridge|Wellcome Sanger Institute for the COVID-19 Genomics UK (COG-UK) consortium|Davies|United Kingdom

>Spike|hCoV-19/England/QEUH-AF670E/2020|2020-10-30|EPI\_ISL\_663193|Original|hCoV-19^^England|Human|Lighthouse Lab in Glasgow|Wellcome Sanger Institute for the COVID-19 Genomics UK (COG-UK) Consortium|Davies|United Kingdom

>Spike|hCoV-19/USA/OR-OHSU-2321/2020|2020-08-10|EPI\_ISL\_667182|Original|hCoV-19^^Oregon|Human|OHSU Lab Services Molecular Microbiology Lab|Oregon SARS-CoV-2 Genome Sequencing Center|O'Roak|USA

>Spike|hCoV-19/USA/TX-HMH-MCoV-18560/2020|2020-11-19|EPI\_ISL\_784908|Original|hCoV-19^^Texas|Human|Houston Methodist Hospital|Houston Methodist Hospital|Long|USA

>Spike|hCoV-19/Australia/VIC9285/2020|2020-07-09|EPI\_ISL\_565484|Original|hCoV-19^^Victoria|Human|Microbiological Diagnostic Unit - Public Health Laboratory (MDU-PHL)|MDU-PHL|Schultz|Australia

>Spike|hCoV-19/Australia/VIC1295/2020|2020-04-09|EPI\_ISL\_430712|Original|hCoV-19^^Victoria|Human|Victorian Infectious Diseases Reference Laboratory (VIDRL)|Microbiological Diagnostic Unit Public Health Laboratory and Victorian Infectious Diseases Reference Laboratory|Schultz|Australia

>Spike|hCoV-19/Wales/PHWC-4829E9/2020|2020-10-19|EPI\_ISL\_613258|Original|hCoV-19^^Wales|Human|Wales Specialist Virology Centre Sequencing lab|COVID-19 Genomics UK (COG-UK) Consortium|Moore|United Kingdom

>Spike|hCoV-19/USA/CA-CZB-2771/2020|2020-06-27|EPI\_ISL\_582870|Original|hCoV-19^^California|Human|County of Santa Clara Public Health Department|Chan-Zuckerberg Biohub|Bhatt|USA

>Spike|hCoV-19/Sweden/20-23086/2020|2020-03-20|EPI\_ISL\_654953|Original|hCoV-19^^Uppsala|Human|Uppsala klinisk mikrobiologi|The Public Health Agency of Sweden|Svartstr\u00f6m|Sweden

>Spike|hCoV-19/Denmark/DCGC-10522/2020|2020-11-02|EPI\_ISL\_669558|Original|hCoV-19^^Hovedstaden|Human|Department of Virus and Microbiological Special Diagnostics|Albertsen Lab|Michaelsen|Denmark

>Spike|hCoV-19/USA/WA-S1684/2020|2020-05-31|EPI\_ISL\_496110|Original|hCoV-19^^Washington|Human|Washington State Department of Health|Seattle Flu Study|Lee|USA

>Spike|hCoV-19/England/ALDP-9CBDE3/2020|2020-09-16|EPI\_ISL\_575575|Original|hCoV-19^^England|Human|Lighthouse Lab in Alderley Park|Wellcome Sanger Institute for the COVID-19 Genomics UK (COG-UK) consortium|Davies|United Kingdom

>Spike|hCoV-19/DRC/3451/2020|2020-04-22|EPI\_ISL\_447598|Original|hCoV-19^^Kinshasa|Human|Viral Respiratory Lab|Pathogen Sequencing Lab|Lusamaki|Democratic Republic of the Congo

>Spike|hCoV-19/England/MILK-B878FF/2020|2020-11-13|EPI\_ISL\_724812|Original|hCoV-19^^England|Human|Oxford Viromics|COVID-19 Genomics UK (COG-UK) Consortium|Golubchik|United Kingdom

>Spike|hCoV-19/England/CAMC-B347D6/2020|2020-11-05|EPI\_ISL\_659533|Original|hCoV-19^^England|Human|Lighthouse Lab in Cambridge|Wellcome Sanger Institute for the COVID-19 Genomics UK (COG-UK) Consortium|Davies|United Kingdom

>Spike|hCoV-19/Canada/BC\_23064916/2020|2020-03-00|EPI\_ISL\_462840|Original|hCoV-19^^British Columbia|Human|BCCDC Public Health Laboratory|BCCDC Public Health Laboratory|Harrigan|Canada

>Spike|hCoV-19/Northern Ireland/NIRE-FD09D/2020|2020-04-25|EPI\_ISL\_489182|Original|hCoV-19^^Northern Ireland|Human|Regional Virus Laboratory|Wellcome Sanger Institute for the COVID-19 Genomics UK (COG-UK) consortium|Davies|United Kingdom

>Spike|hCoV-19/USA/WI-UW-986/2020|2020-07-16|EPI\_ISL\_509982|Original|hCoV-19^^Wisconsin|Human|University of Wisconsin-Madison AIDS Vaccine Research Laboratories|University of Wisconsin-Madison AIDS Vaccine Research Laboratories|Baczenas|USA

>Spike|hCoV-19/England/CAMC-B98521/2020|2020-11-15|EPI\_ISL\_673687|Original|hCoV-19^^England|Human|Lighthouse Lab in Cambridge|Wellcome Sanger Institute for the COVID-19 Genomics UK (COG-UK) Consortium|Davies|United Kingdom

>Spike|hCoV-19/Wales/PHWC-3604D/2020|2020-04-28|EPI\_ISL\_474610|Original|hCoV-19^^Wales|Human|Originating lab|COVID-19 Genomics UK (COG-UK) Consortium|Moore|United Kingdom

>Spike|hCoV-19/Germany/SH-ChVir3045/2020|2020-03-18|EPI\_ISL\_729521|Original|hCoV-19^^Schleswig-Holstein|Human|A. Krumbholz|Charit\u00e9 Universit\u00e4tsmedizin Berlin|Muehlemann|Germany

>Spike|hCoV-19/Norway/5466/2020|2020-10-31|EPI\_ISL\_708102|Original|hCoV-19^^Nordland|Human|Nordland Hospital - Bodo|Norwegian Institute of Public Health|Kopperud Riis|Norway

>Spike|hCoV-19/USA/MS-CDC-6576/2020|2020-03-21|EPI\_ISL\_648028|Original|hCoV-19^^Mississippi|Human|MS Public Health Laboratory|Pathogen Discovery|Queen|USA

>Spike|hCoV-19/Japan/PG-8541/2020|2020-08-00|EPI\_ISL\_686137|Original|hCoV-19^^Japan|Human|Pathogen Genomics Center|Pathogen Genomics Center|Sekizuka|Japan

>Spike|hCoV-19/USA/WI-UW-1729/2020|2020-09-11|EPI\_ISL\_605602|Original|hCoV-19^^Wisconsin|Human|University of Wisconsin-Madison AIDS Vaccine Research Laboratories|University of Wisconsin-Madison AIDS Vaccine Research Laboratories|Baczenas|USA

>Spike|hCoV-19/Wales/PHWC-16BA6E/2020|2020-09-17|EPI\_ISL\_573934|Original|hCoV-19^^Wales|Human|Wales Specialist Virology Centre Sequencing lab|COVID-19 Genomics UK (COG-UK) Consortium|Moore|United Kingdom

>Spike|hCoV-19/England/QEUEH-C53F05/2020|2020-12-11|EPI\_ISL\_736356|Original|hCoV-19^^England|Human|Lighthouse Lab in Glasgow|Wellcome Sanger Institute for the COVID-19 Genomics UK (COG-UK) Consortium|Davies|United Kingdom

>Spike|hCoV-19/England/QEUEH-BA4258/2020|2020-11-18|EPI\_ISL\_721006|Original|hCoV-19^^England|Human|Lighthouse Lab in Glasgow|Wellcome Sanger Institute for the COVID-19 Genomics UK (COG-UK) Consortium|Davies|United Kingdom

>Spike|hCoV-19/USA/SC-DHEC-0048/2020|2020-03-25|EPI\_ISL\_491102|Original|hCoV-19^^South Carolina|Human|SC Department of Health and Environmental Control|SC Department of Health and Environmental Control|Flores|USA

>Spike|hCoV-19/USA/TX-HMH-2154/2020|2020-05-22|EPI\_ISL\_545148|Original|hCoV-19^^Texas|Human|Houston Methodist Hospital|Houston Methodist Hospital|Long|USA

>Spike|hCoV-19/Japan/PG-4096/2020|2020-07-00|EPI\_ISL\_692337|Original|hCoV-19^^Japan|Human|Pathogen Genomics Center|Pathogen Genomics Center|Sekizuka|Japan

>Spike|hCoV-19/England/LOND-D3ABD/2020|2020-04-06|EPI\_ISL\_441033|Original|hCoV-19^^England|Human|University College London|COVID-19 Genomics UK (COG-UK) Consortium|Roy|United Kingdom

>Spike|hCoV-19/England/CAMC-9DFBB5/2020|2020-09-21|EPI\_ISL\_576924|Original|hCoV-19^^England|Human|Oxford Viromics|COVID-19 Genomics UK (COG-UK) Consortium|Golubchik|United Kingdom

>Spike|hCoV-19/England/ALDP-A2D58C/2020|2020-10-06|EPI\_ISL\_586680|Original|hCoV-19^^England|Human|Lighthouse Lab in Alderley Park|Wellcome Sanger Institute for the COVID-19 Genomics UK (COG-UK) consortium|Davies|United Kingdom

>Spike|hCoV-19/Denmark/DCGC-8814/2020|2020-10-26|EPI\_ISL\_626090|Original|hCoV-19^^Syddanmark|Human|Department of Virus and Microbiological Special Diagnostics|Albertsen lab|Michaelsen|Denmark

>Spike|hCoV-19/England/ALDP-51FBAE/2020|2020-06-02|EPI\_ISL\_559037|Original|hCoV-19^^England|Human|Lighthouse Lab in Alderley Park|Wellcome Sanger Institute for the COVID-19 Genomics UK (COG-UK) consortium|Davies|United Kingdom

>Spike|hCoV-19/England/EXET-138F10/2020|2020-10-29|EPI\_ISL\_664439|Original|hCoV-19^^England|Human|University of Exeter|COVID-19 Genomics UK (COG-UK) Consortium|Temperton|United Kingdom

>Spike|hCoV-19/United Arab Emirates/0035/2020|2020-05-17|EPI\_ISL\_698244|Original|hCoV-19^^Abu Dhabi|Human|Group 42 (G42) Healthcare|G42 Healthcare|Ogrodzki|United Arab Emirates

>Spike|hCoV-19/Denmark/DCGC-19738/2020|2020-12-07|EPI\_ISL\_749143|Original|hCoV-19^^Hovedstaden|Human|Department of Virus and Microbiological Special Diagnostics|Albertsen Lab|Michaelsen|Denmark

>Spike|hCoV-19/England/ALDP-A69593/2020|2020-10-12|EPI\_ISL\_609069|Original|hCoV-19^^England|Human|Lighthouse Lab in Alderley Park|Wellcome Sanger Institute for the COVID-19 Genomics UK (COG-UK) consortium|Davies|United Kingdom

>Spike|hCoV-19/Canada/MB-NML-1030/2020|2020-03-27|EPI\_ISL\_582394|Original|hCoV-19^^Manitoba|Human|Cadham Provincial Laboratory|National Microbiology Laboratory (NML)|Majer|Canada

>Spike|hCoV-19/England/QEUA-CAEBCB/2020|2020-12-15|EPI\_ISL\_760542|Original|hCoV-19^^England|Human|Lighthouse Lab in Glasgow|Wellcome Sanger Institute for the COVID-19 Genomics UK (COG-UK) Consortium|Davies|United Kingdom

>Spike|hCoV-19/Scotland/EDB1829/2020|2020-04-16|EPI\_ISL\_433149|Original|hCoV-19^^Scotland|Human|Virology Department|COVID-19 Genomics UK (COG-UK) Consortium|Williams|United Kingdom

>Spike|hCoV-19/Denmark/DCGC-12955/2020|2020-12-07|EPI\_ISL\_712485|Original|hCoV-19^^Midtjylland|Human|Department of Virus and Microbiological Special Diagnostics|Albertsen Lab|Michaelsen|Denmark

>Spike|hCoV-19/USA/MI-UM-10035862042/2020|2020-09-09|EPI\_ISL\_583328|Original|hCoV-19^^Michigan|Human|University of Michigan Clinical Microbiology Laboratory|Lauring Lab|Valesano|USA

>Spike|hCoV-19/Japan/PG-5076/2020|2020-08-00|EPI\_ISL\_690186|Original|hCoV-19^^Japan|Human|Pathogen Genomics Center|Pathogen Genomics Center|Sekizuka|Japan

>Spike|hCoV-19/Japan/PG-0445/2020|2020-03-19|EPI\_ISL\_480109|Original|hCoV-19^^Kyusyu|Human|Oita Prefectural Institute of Public Health and Environmental Science|Pathogen Genomics Center|Sekizuka|Japan

>Spike|hCoV-19/England/MILK-B393CE/2020|2020-11-01|EPI\_ISL\_658975|Original|hCoV-19^^England|Human|Lighthouse Lab in Milton Keynes|Wellcome Sanger Institute for the COVID-19 Genomics UK (COG-UK) Consortium|Davies|United Kingdom

>Spike|hCoV-19/England/QEUA-895BBC/2020|2020-07-25|EPI\_ISL\_532781|Original|hCoV-19^^England|Human|Lighthouse Lab in Glasgow|Wellcome Sanger Institute for the COVID-19 Genomics UK (COG-UK) consortium|Davies|United Kingdom

>Spike|hCoV-19/England/MILK-ACE1E3/2020|2020-10-21|EPI\_ISL\_630287|Original|hCoV-19^^England|Human|Lighthouse Lab in Milton Keynes|Wellcome Sanger Institute for the COVID-19 Genomics UK (COG-UK) consortium|Davies|United Kingdom

>Spike|hCoV-19/USA/WI-UW-1872/2020|2020-09-10|EPI\_ISL\_605744|Original|hCoV-19^^Wisconsin|Human|University of Wisconsin-Madison AIDS Vaccine Research Laboratories|University of Wisconsin-Madison AIDS Vaccine Research Laboratories|Baczenas|USA

>Spike|hCoV-19/USA/CA-QDX-2120/2020|2020-03-18|EPI\_ISL\_604418|Original|hCoV-19^^California|Human|Quest Diagnostics|Quest Diagnostics|Kagan|USA

>Spike|hCoV-19/USA/CA-ALSR-3058/2020|2020-08-04|EPI\_ISL\_635820|Original|hCoV-19^^California|Human|San Diego County Public Health Laboratory|Andersen lab at Scripps Research|Gangavarapu|USA

>Spike|hCoV-19/Scotland/CVR07/2020|2020-03-09|EPI\_ISL\_415630|Original|hCoV-19^^Scotland|Human|West of Scotland Specialist Virology Centre|MRC-University of Glasgow Centre for Virus Research|Robertson|United Kingdom

>Spike|hCoV-19/USA/CO-CDPHE-2010234747/2020|2020-10-20|EPI\_ISL\_710277|Original|hCoV-19^^Colorado|Human|Colorado Department of Public Health and Environment|Colorado Department of Public Health and Environment|Bankers|USA

>Spike|hCoV-19/Spain/CT-IrsiCaixa-Own160320/2020|2020-03-16|EPI\_ISL\_483059|Original|hCoV-19^^Catalunya|Human|Hospital Universitari Germans Trias i Pujol|IrsiCaixa AIDS Research Lab|Noguera-Julian|Spain

>Spike|hCoV-19/Spain/PV-IBV-2128/2020|2020-04-12|EPI\_ISL\_468926|Original|hCoV-19^^Basque Country|Human|Servicio de Microbiolog\u00eda. Hospital Universitario Donostia. OSI Donostialdea. \u00c1rea de Enfermedades Infecciosas|SeqCOVID-SPAIN consortium/IBV (CSIC)|Comas|Spain

>Spike|hCoV-19/New Zealand/20VR0174/2020|2020-02-27|EPI\_ISL\_413490|Original|hCoV-19^^Auckland|Human|Auckland Hospital|Institute of Environmental Science and Research (ESR)|de Ligt|New Zealand

>Spike|hCoV-19/Germany/NW-UBI-32/2020|2020-06-18|EPI\_ISL\_631286|Original|hCoV-19^^North Rhine-Westphalia|Human|MVZ DIAMEDIS Diagnostische Medizin Sennestadt GmbH|Bielefeld University|Brandt|Germany

>Spike|hCoV-19/France/GES-1973/2020|2020-03-04|EPI\_ISL\_414631|Original|hCoV-19^^Grand-Est|Human|H\u00f4pital Robert Debr\u00e9 Laboratoire de Virologie|National Reference Center for Viruses of Respiratory Infections|Enouf|France

>Spike|hCoV-19/USA/LA-BIE-080/2020|2020-04-06|EPI\_ISL\_436948|Original|hCoV-19^^Louisiana|Human|Ochsner Health|Bioinfoexperts|Cross|USA

>Spike|hCoV-19/Denmark/DCGC-13981/2020|2020-11-30|EPI\_ISL\_711493|Original|hCoV-19^^Hovedstaden|Human|Department of Virus and Microbiological Special Diagnostics|Albertsen Lab|Michaelsen|Denmark

>Spike|hCoV-19/England/MILK-9A96D1/2020|2020-09-01|EPI\_ISL\_551153|Original|hCoV-19^^England|Human|Lighthouse Lab in Milton Keynes|Wellcome Sanger Institute for the COVID-19 Genomics UK (COG-UK) consortium|Davies|United Kingdom

>Spike|hCoV-19/Wales/PHWC-16F657/2020|2020-10-04|EPI\_ISL\_585999|Original|hCoV-19^^Wales|Human|Wales Specialist Virology Centre Sequencing lab|COVID-19 Genomics UK (COG-UK) Consortium|Moore|United Kingdom

>Spike|hCoV-19/Switzerland/BS-42413348/2020|2020-08-27|EPI\_ISL\_581988|Original|hCoV-19^^Basel-Stadt|Human|University Hospital Basel|University Hospital Basel|Roloff Handschin|Switzerland

>Spike|hCoV-19/England/QEUEH-BCB82C/2020|2020-11-27|EPI\_ISL\_703861|Original|hCoV-19^^England|Human|Lighthouse Lab in Glasgow|Wellcome Sanger Institute for the COVID-19 Genomics UK (COG-UK) Consortium|Davies|United Kingdom

>Spike|hCoV-19/England/204393809/2020|2020-10-24|EPI\_ISL\_649885|Original|hCoV-19^^England|Human|Respiratory Virus Unit|COVID-19 Genomics UK (COG-UK) Consortium|Platt|United Kingdom

>Spike|hCoV-19/Italy/SIC-AMVRC-4411/2020|2020-03-12|EPI\_ISL\_457721|Vero E6|hCoV-19^^Sicily|Human|Department of Infectious Diseases|Army Medical and Veterinary Research Center|Lista|Italy

>Spike|hCoV-19/Spain/AN-IBV-001995/2020|2020-03-16|EPI\_ISL\_509625|Original|hCoV-19^^Andalucia|Human|Servicio de Microbiolog\u00eda. HRU de M\u00ella. Servicio Andaluz de Salud|SeqCOVID-SPAIN consortium|IBV(CSIC)|Comas|Spain

>Spike|hCoV-19/USA/UT-UPHL-2009186/2020|2020-05-30|EPI\_ISL\_525169|Original|hCoV-19^^Utah|Human|Utah Public Health Laboratory|Utah Public Health Laboratory|Young|USA

>Spike|hCoV-19/Switzerland/GR-ETHZ-340133/2020|2020-10-27|EPI\_ISL\_721817|Original|hCoV-19^^Graub\u00fcnden|Human|Viollier AG|Department of Biosystems Science and Engineering|Nadeau|Switzerland

>Spike|hCoV-19/England/CAMB-7A247/2020|2020-04-02|EPI\_ISL\_441228|Original|hCoV-19^^England|Human|Department of Pathology|Wellcome Sanger Institute for the COVID-19 Genomics UK (COG-UK) consortium|Amato|United Kingdom

>Spike|hCoV-19/Australia/VIC14640/2020|2020-07-30|EPI\_ISL\_592929|Original|hCoV-19^^Victoria|Human|Microbiological Diagnostic Unit - Public Health Laboratory (MDU-PHL)|MDU-PHL|Schultz|Australia

>Spike|hCoV-19/USA/CA-CZB-1694/2020|2020-04-02|EPI\_ISL\_468629|Original|hCoV-19^^California|Human|Contra Costa Public Health Lab|Chan-Zuckerberg Biohub|McGeever|USA

>Spike|hCoV-19/England/LOND-124C3CE/2020|2020-05-12|EPI\_ISL\_492843|Original|hCoV-19^^England|Human|Royal Free Hospital / Health Services Laboratories|Wellcome Sanger Institute for the COVID-19 Genomics UK (COG-UK) consortium|Davies|United Kingdom

>Spike|hCoV-19/Sweden/20-51765/2020|2020-05-27|EPI\_ISL\_510845|Original|hCoV-19^^Vastra Gotaland|Human|Skovde/Unilabs|The Public Health Agency of Sweden|Svartstr\u00f6m|Sweden

>Spike|hCoV-19/England/ALDP-953F44/2020|2020-06-12|EPI\_ISL\_553806|Original|hCoV-19^^England|Human|Lighthouse Lab in Alderley Park|Wellcome Sanger Institute for the COVID-19 Genomics UK (COG-UK) consortium|Davies|United Kingdom

>Spike|hCoV-19/England/MILK-9A91EF/2020|2020-08-31|EPI\_ISL\_551000|Original|hCoV-19^^England|Human|Lighthouse Lab in Milton Keynes|Wellcome Sanger Institute for the COVID-19 Genomics UK (COG-UK) consortium|Davies|United Kingdom

>Spike|hCoV-19/USA/AZ-TG395931/2020|2020-06-08|EPI\_ISL\_694767|Original|hCoV-19^^Arizona|Human|AZ SPHL|TGen North|French|USA

>Spike|hCoV-19/USA/UT-QDX-2302/2020|2020-03-13|EPI\_ISL\_604616|Original|hCoV-19^^Utah|Human|Quest Diagnostics|Quest Diagnostics|Kagan|USA

>Spike|hCoV-19/England/ALDP-A6E534/2020|2020-10-15|EPI\_ISL\_607243|Original|hCoV-19^^England|Human|Lighthouse Lab in Alderley Park|Wellcome Sanger Institute for the COVID-19 Genomics UK (COG-UK) consortium|Davies|United Kingdom

>Spike|hCoV-19/England/ALDP-51E26E/2020|2020-06-02|EPI\_ISL\_558974|Original|hCoV-19^^England|Human|Lighthouse Lab in Alderley Park|Wellcome Sanger Institute for the COVID-19 Genomics UK (COG-UK) consortium|Davies|United Kingdom

>Spike|hCoV-19/Canada/ON-PHL-20-02455/2020|2020-09-00|EPI\_ISL\_671570|Original|hCoV-19^^Ontario|Human|Public Health Ontario Laboratory|Public Health Ontario Laboratory|Guthrie|Canada

>Spike|hCoV-19/USA/VA-DCLS-1228/2020|2020-07-29|EPI\_ISL\_528650|Original|hCoV-19^^Virginia|Human|Virginia DCLS|Virginia DCLS|St. Jacques|USA

>Spike|hCoV-19/England/OXON-B2AC3/2020|2020-04-13|EPI\_ISL\_534792|Original|hCoV-19^^England|Human|Oxford Viromics|COVID-19 Genomics UK (COG-UK) Consortium|Golubchik|United Kingdom

>Spike|hCoV-19/England/CAMC-B54011/2020|2020-11-09|EPI\_ISL\_656944|Original|hCoV-19^^England|Human|Lighthouse Lab in Cambridge|Wellcome Sanger Institute for the COVID-19 Genomics UK (COG-UK) Consortium|Davies|United Kingdom

>Spike|hCoV-19/USA/TX-HMH-MCoV-10199/2020|2020-07-07|EPI\_ISL\_789276|Original|hCoV-19^^Texas|Human|Houston Methodist Hospital|Houston Methodist Hospital|Long|USA

>Spike|hCoV-19/England/CAMC-A3F930/2020|2020-10-07|EPI\_ISL\_609699|Original|hCoV-19^^England|Human|Lighthouse Lab in Cambridge|Wellcome Sanger Institute for the COVID-19 Genomics UK (COG-UK) consortium|Davies|United Kingdom

>Spike|hCoV-19/England/ALDP-AC5E30/2020|2020-10-14|EPI\_ISL\_631035|Original|hCoV-19^^England|Human|Lighthouse Lab in Alderley Park|Wellcome Sanger Institute for the COVID-19 Genomics UK (COG-UK) consortium|Davies|United Kingdom

>Spike|hCoV-19/England/BRIS-125BC7/2020|2020-03-29|EPI\_ISL\_443792|Original|hCoV-19^^England|Human|PHE South West Regional Laboratory|Wellcome Sanger Institute for the COVID-19 Genomics UK (COG-UK) consortium|Amato|United Kingdom

>Spike|hCoV-19/England/OXON-AC9B0/2020|2020-04-05|EPI\_ISL\_448500|Original|hCoV-19^^England|Human|Oxford Viromics|COVID-19 Genomics UK (COG-UK) Consortium|Golubchik|United Kingdom

>Spike|hCoV-19/England/MILK-B59A3C/2020|2020-11-06|EPI\_ISL\_679900|Original|hCoV-19^^England|Human|Virology Department|COVID-19 Genomics UK (COG-UK) Consortium|de Silva|United Kingdom

>Spike|hCoV-19/England/BRIS-13072F/2020|2020-04-12|EPI\_ISL\_492542|Original|hCoV-19^^England|Human|PHE South West Regional Laboratory|Wellcome Sanger Institute for the COVID-19 Genomics UK (COG-UK) consortium|Davies|United Kingdom

>Spike|hCoV-19/England/NORT-287E14/2020|2020-11-12|EPI\_ISL\_725002|Original|hCoV-19^^England|Human|Northumbria University / South Tees Hospitals NHS Foundation Trust / North Cumbria Integrated Care NHS Foundation Trust / North Tees and Hartlepool NHS Foundation Trust / Newcastle Hospitals NHS Foundation Trust|COVID-19 Genomics UK (COG-UK) Consortium|Bashton|United Kingdom

>Spike|hCoV-19/England/QEUA-B1353D/2020|2020-11-02|EPI\_ISL\_641646|Original|hCoV-19^^England|Human|Lighthouse Lab in Glasgow|Wellcome Sanger Institute for the COVID-19 Genomics UK (COG-UK) Consortium|Davies|United Kingdom

>Spike|hCoV-19/Nigeria/ED20-CV162/2020|2020-03-30|EPI\_ISL\_527881|Original|hCoV-19^^Delta|Human|Nigeria Centre for Disease Control (NCDC)|African Centre of Excellence for Genomics of Infectious Diseases (ACEGID)|Oluniyi|Nigeria

>Spike|hCoV-19/Wales/PHWC-48E947/2020|2020-11-13|EPI\_ISL\_680935|Original|hCoV-19^^Wales|Human|Wales Specialist Virology Centre Sequencing lab|COVID-19 Genomics UK (COG-UK) Consortium|Moore|United Kingdom

>Spike|hCoV-19/England/ALDP-B491D0/2020|2020-11-07|EPI\_ISL\_649361|Original|hCoV-19^^England|Human|Lighthouse Lab in Alderley Park|Wellcome Sanger Institute for the COVID-19 Genomics UK (COG-UK) Consortium|Davies|United Kingdom

>Spike|hCoV-19/England/CAMC-B9C4E4/2020|2020-11-15|EPI\_ISL\_673421|Original|hCoV-19^^England|Human|Lighthouse Lab in Cambridge|Wellcome Sanger Institute for the COVID-19 Genomics UK (COG-UK) Consortium|Davies|United Kingdom

>Spike|hCoV-19/France/ARA-09193/2020|2020-03-15|EPI\_ISL\_508878|Original|hCoV-19^^Auvergne-Rh\u00f4ne-Alpes|Human|GH Les Portes du Sud|CNR Virus des Infections Respiratoires - France SUD|Josset|France

>Spike|hCoV-19/England/ALDP-9EA0C7/2020|2020-09-24|EPI\_ISL\_580130|Original|hCoV-19^^England|Human|Lighthouse Lab in Alderley Park|Wellcome Sanger Institute for the COVID-19 Genomics UK (COG-UK) consortium|Davies|United Kingdom

>Spike|hCoV-19/England/MILK-B0205E/2020|2020-10-24|EPI\_ISL\_642819|Original|hCoV-19^^England|Human|Lighthouse Lab in Milton Keynes|Wellcome Sanger Institute for the COVID-19 Genomics UK (COG-UK) Consortium|Davies|United Kingdom

>Spike|hCoV-19/Denmark/DCGC-8768/2020|2020-10-26|EPI\_ISL\_626038|Original|hCoV-19^^Midtjylland|Human|Department of Virus and Microbiological Special Diagnostics|Albertsen lab|Michaelsen|Denmark

>Spike|hCoV-19/USA/MN-MDH-1061/2020|2020-05-14|EPI\_ISL\_462906|Original|hCoV-19^^Minnesota|Human|Minnesota Department of Health|Minnesota Department of Health|Garfin|USA

>Spike|hCoV-19/Switzerland/BS-UHB-42186439/2020|2020-03-11|EPI\_ISL\_528008|Original|hCoV-19^^Basel-Stadt|Human|University Hospital Basel|University Hospital Basel|Roloff Handschin|Switzerland

>Spike|hCoV-19/England/QEUEH-AF4D86/2020|2020-10-30|EPI\_ISL\_662983|Original|hCoV-19^^England|Human|Lighthouse Lab in Glasgow|Wellcome Sanger Institute for the COVID-19 Genomics UK (COG-UK) Consortium|Davies|United Kingdom

>Spike|hCoV-19/India/MH-GA78/2020|2020-06-18|EPI\_ISL\_508272|Original|hCoV-19^^Maharashtra|Human|Government Medical College|National Institute of Biomedical Genomics|Maitra|India

>Spike|hCoV-19/Saudi Arabia/KAUST-Madinah208/2020|2020-04-06|EPI\_ISL\_437715|Original|hCoV-19^^Madinah|Human|Pathogen Genomics Lab King Abdullah University of Science and Technology(KAUST)|Pathogen Genomics Lab King Abdullah University of Science and Technology(KAUST)|Mohamed Ghazzali|Saudi Arabia

>Spike|hCoV-19/Australia/VIC5132/2020|2020-07-18|EPI\_ISL\_519935|Original|hCoV-19^^Victoria|Human|Microbiological Diagnostic Unit - Public Health Laboratory (MDU-PHL)|MDU-PHL|Schultz|Australia

>Spike|hCoV-19/Denmark/DCGC-14801/2020|2020-11-23|EPI\_ISL\_711992|Original|hCoV-19^^Hovedstaden|Human|Department of Virus and Microbiological Special Diagnostics|Albertsen Lab|Michaelsen|Denmark

>Spike|hCoV-19/England/CAMC-A57F9A/2020|2020-10-09|EPI\_ISL\_597180|Original|hCoV-19^^England|Human|Lighthouse Lab in Cambridge|Wellcome Sanger Institute for the COVID-19 Genomics UK (COG-UK) consortium|Davies|United Kingdom

>Spike|hCoV-19/Wales/PHWC-4897CA/2020|2020-11-03|EPI\_ISL\_639618|Original|hCoV-19^^Wales|Human|Wales Specialist Virology Centre Sequencing lab|COVID-19 Genomics UK (COG-UK) Consortium|Moore|United Kingdom

>Spike|hCoV-19/England/MILK-ACE06E/2020|2020-10-20|EPI\_ISL\_630063|Original|hCoV-19^^England|Human|Lighthouse Lab in Milton Keynes|Wellcome Sanger Institute for the COVID-19 Genomics UK (COG-UK) consortium|Davies|United Kingdom

>Spike|hCoV-19/Netherlands/ZuidHolland\_39/2020|2020-03-17|EPI\_ISL\_422911|Original|hCoV-19^^Zuid Holland|Human|Dutch COVID-19 response team|Erasmus Medical Center|Oude Munnink|Netherlands

>Spike|hCoV-19/England/ALDP-CB15D6/2020|2020-12-06|EPI\_ISL\_760952|Original|hCoV-19^^England|Human|Lighthouse Lab in Alderley Park|Wellcome Sanger Institute for the COVID-19 Genomics UK (COG-UK) Consortium|Davies|United Kingdom

>Spike|hCoV-19/England/SHEF-C8E46/2020|2020-08-31|EPI\_ISL\_540742|Original|hCoV-19^^England|Human|Virology Department|COVID-19 Genomics UK (COG-UK) Consortium|de Silva|United Kingdom

>Spike|hCoV-19/England/ALDP-A678E7/2020|2020-10-12|EPI\_ISL\_630686|Original|hCoV-19^^England|Human|Lighthouse Lab in Alderley Park|Wellcome Sanger Institute for the COVID-19 Genomics UK (COG-UK) consortium|Davies|United Kingdom

>Spike|hCoV-19/England/SHEF-10C912B/2020|2020-12-02|EPI\_ISL\_706975|Original|hCoV-19^^England|Human|Virology Department|COVID-19 Genomics UK (COG-UK) Consortium|de Silva|United Kingdom

>Spike|hCoV-19/England/QEUEH-9F953F/2020|2020-09-25|EPI\_ISL\_589219|Original|hCoV-19^^England|Human|Lighthouse Lab in Glasgow|Wellcome Sanger Institute for the COVID-19 Genomics UK (COG-UK) consortium|Davies|United Kingdom

>Spike|hCoV-19/Netherlands/OV-EMC-44/2020|2020-04-18|EPI\_ISL\_523428|Original|hCoV-19^^Overijssel|Human|Dutch COVID-19 response team|Erasmus Medical Center|Oude Munnink|Netherlands



>Spike|hCoV-19/Denmark/DCGC-13589/2020|2020-11-30|EPI\_ISL\_712895|Original|hCoV-19^^Midtjylland|Human|Department of Virus and Microbiological Special Diagnostics|Albertsen Lab|Michaelsen|Denmark

>Spike|hCoV-19/England/QEUA-88A80E/2020|2020-07-29|EPI\_ISL\_532685|Original|hCoV-19^^England|Human|Lighthouse Lab in Glasgow|Wellcome Sanger Institute for the COVID-19 Genomics UK (COG-UK) consortium|Davies|United Kingdom

>Spike|hCoV-19/England/CAMC-B9C578/2020|2020-11-15|EPI\_ISL\_673476|Original|hCoV-19^^England|Human|Lighthouse Lab in Cambridge|Wellcome Sanger Institute for the COVID-19 Genomics UK (COG-UK) Consortium|Davies|United Kingdom

>Spike|hCoV-19/England/NOTT-11A13C/2020|2020-11-05|EPI\_ISL\_637427|Original|hCoV-19^^England|Human|Queens Medical Centre|COVID-19 Genomics UK (COG-UK) Consortium|Loose|United Kingdom

>Spike|hCoV-19/USA/WA-S2230/2020|2020-06-10|EPI\_ISL\_497658|Original|hCoV-19^^Washington|Human|Washington State Department of Health|Seattle Flu Study|Lee|USA

>Spike|hCoV-19/Germany/BB-ChVir-D933-5624/2020|2020-03-14|EPI\_ISL\_753766|Original|hCoV-19^^Brandenburg|Human|Charit\u00e9 Universit\u00e4tsmedizin Berlin|Charit\u00e9 Universit\u00e4tsmedizin Berlin|Muehlemann|Germany

>Spike|hCoV-19/England/ALDP-B62881/2020|2020-11-09|EPI\_ISL\_656541|Original|hCoV-19^^England|Human|Lighthouse Lab in Alderley Park|Wellcome Sanger Institute for the COVID-19 Genomics UK (COG-UK) Consortium|Davies|United Kingdom

>Spike|hCoV-19/USA/TX-HMH-MCoV-19152/2020|2020-11-23|EPI\_ISL\_783657|Original|hCoV-19^^Texas|Human|Houston Methodist Hospital|Houston Methodist Hospital|Long|USA

>Spike|hCoV-19/Denmark/DCGC-18108/2020|2020-12-14|EPI\_ISL\_749759|Original|hCoV-19^^Hovedstaden|Human|Department of Virus and Microbiological Special Diagnostics|Albertsen Lab|Michaelsen|Denmark

>Spike|hCoV-19/USA/DE-DHSS-F956504/2020|2020-05-27|EPI\_ISL\_708445|Original|hCoV-19^^Delaware|Human|Delaware Public Health Lab|Delaware Public Health Lab|Bajwa|USA

>Spike|hCoV-19/Wales/PHWC-31358/2020|2020-04-12|EPI\_ISL\_446435|Original|hCoV-19^^Wales|Human|Wales Specialist Virology Centre|Public Health Wales Microbiology Cardiff|Moore|United Kingdom

>Spike|hCoV-19/England/ALDP-A685D0/2020|2020-10-12|EPI\_ISL\_608592|Original|hCoV-19^^England|Human|Lighthouse Lab in Alderley Park|Wellcome Sanger Institute for the COVID-19 Genomics UK (COG-UK) consortium|Davies|United Kingdom

>Spike|hCoV-19/England/OXON-B1CCE/2020|2020-05-06|EPI\_ISL\_479085|Original|hCoV-19^^England|Human|Oxford Viromics|COVID-19 Genomics UK (COG-UK) Consortium|Golubchik|United Kingdom

>Spike|hCoV-19/Netherlands/OV-EMC-115/2020|2020-11-07|EPI\_ISL\_763155|Original|hCoV-19^^Overijssel|Human|Dutch COVID-19 response team|Erasmus Medical Center|Oude Munnink|Netherlands

>Spike|hCoV-19/England/ALDP-B74E99/2020|2020-11-12|EPI\_ISL\_679000|Original|hCoV-19^^England|Human|Queens Medical Centre|COVID-19 Genomics UK (COG-UK) Consortium|Loose|United Kingdom

>Spike|hCoV-19/USA/NY-NYUMC495/2020|2020-03-18|EPI\_ISL\_436743|Original|hCoV-19^^New York|Human|NYU Langone Health|Departments of Pathology and Medicine|Maurano|USA

>Spike|hCoV-19/England/QEUA-AF7284/2020|2020-10-29|EPI\_ISL\_662666|Original|hCoV-19^^England|Human|Lighthouse Lab in Glasgow|Wellcome Sanger Institute for the COVID-19 Genomics UK (COG-UK) Consortium|Davies|United Kingdom

>Spike|hCoV-19/Wales/PHWC-499AEC/2020|2020-12-05|EPI\_ISL\_727401|Original|hCoV-19^^Wales|Human|Originating lab|COVID-19 Genomics UK (COG-UK) Consortium|Moore|United Kingdom

>Spike|hCoV-19/Denmark/DCGC-1699/2020|2020-06-22|EPI\_ISL\_618166|Original|hCoV-19^^Midtjylland|Human|Department of Virus and Microbiological Special Diagnostics|Albertsen lab|Michaelsen|Denmark

>Spike|hCoV-19/Nigeria/OY008-CV29/2020|2020-03-27|EPI\_ISL\_455429|Original|hCoV-19^^Oyo State|Human|Nigeria Centre for Disease Control (NCDC)|African Centre of Excellence for Genomics of Infectious Diseases (ACEGID)|Oluniyi|Nigeria

>Spike|hCoV-19/Belgium/regal-12141441/2020|2020-12-14|EPI\_ISL\_738493|Original|hCoV-19^^Mol|Human|UZ Leuven|KU Leuven|Maes|Belgium

>Spike|hCoV-19/Denmark/DCGC-14784/2020|2020-11-23|EPI\_ISL\_711978|Original|hCoV-19^^Midtjylland|Human|Department of Virus and Microbiological Special Diagnostics|Albertsen Lab|Michaelsen|Denmark

>Spike|hCoV-19/Thailand/Bangkok-CONI-0331/2020|2020-12-08|EPI\_ISL\_728562|Original|hCoV-19^^Bangkok|Human|Institute for Urban Disease Control and Prevention|COVID-19 Network Investigations (CONI) Alliance|Batty|Thailand

>Spike|hCoV-19/England/QEUEH-BEB06A/2020|2020-12-03|EPI\_ISL\_708944|Original|hCoV-19^^England|Human|Lighthouse Lab in Glasgow|Wellcome Sanger Institute for the COVID-19 Genomics UK (COG-UK) Consortium|Davies|United Kingdom

>Spike|hCoV-19/Wales/ALDP-AA24EC/2020|2020-10-22|EPI\_ISL\_634779|Original|hCoV-19^^Wales|Human|Lighthouse Lab in Alderley Park|Wellcome Sanger Institute for the COVID-19 Genomics UK (COG-UK) consortium|Davies|United Kingdom

>Spike|hCoV-19/England/ALDP-9EA953/2020|2020-09-24|EPI\_ISL\_580089|Original|hCoV-19^^England|Human|Lighthouse Lab in Alderley Park|Wellcome Sanger Institute for the COVID-19 Genomics UK (COG-UK) consortium|Davies|United Kingdom

>Spike|hCoV-19/Australia/VIC7885/2020|2020-08-09|EPI\_ISL\_564727|Original|hCoV-19^^Victoria|Human|Microbiological Diagnostic Unit - Public Health Laboratory (MDU-PHL)|MDU-PHL|Schultz|Australia

>Spike|hCoV-19/England/LOND-1263604/2020|2020-11-04|EPI\_ISL\_679456|Original|hCoV-19^^England|Human|University College London|COVID-19 Genomics UK (COG-UK) Consortium|Roy|United Kingdom

>Spike|hCoV-19/Switzerland/AG-ETHZ-220032/2020|2020-07-29|EPI\_ISL\_512014|Original|hCoV-19^^Aargau|Human|Viollier AG|Department of Biosystems Science and Engineering|Nadeau|Switzerland

>Spike|hCoV-19/Japan/PG-7870/2020|2020-07-00|EPI\_ISL\_686971|Original|hCoV-19^^Japan|Human|Pathogen Genomics Center|Pathogen Genomics Center|Sekizuka|Japan

>Spike|hCoV-19/Australia/ACT0075/2020|2020-04-02|EPI\_ISL\_498535|Original|hCoV-19^^Australian Capital Territory|Human|ACT Pathology|Schwessinger Lab|Hall|Australia

>Spike|hCoV-19/England/CAMC-B0AEE3/2020|2020-10-29|EPI\_ISL\_643613|Original|hCoV-19^^England|Human|Lighthouse Lab in Cambridge|Wellcome Sanger Institute for the COVID-19 Genomics UK (COG-UK) Consortium|Davies|United Kingdom

>Spike|hCoV-19/Wales/PHWC-4903AE/2020|2020-10-30|EPI\_ISL\_706474|Original|hCoV-19^^Wales|Human|Originating lab|COVID-19 Genomics UK (COG-UK) Consortium|Moore|United Kingdom

>Spike|hCoV-19/Denmark/DCGC-16245/2020|2020-11-16|EPI\_ISL\_714469|Original|hCoV-19^^Syddanmark|Human|Department of Virus and Microbiological Special Diagnostics|Albertsen Lab|Michaelsen|Denmark

>Spike|hCoV-19/England/QEUEH-CC5311/2020|2020-12-21|EPI\_ISL\_760453|Original|hCoV-19^^England|Human|Lighthouse Lab in Glasgow|Wellcome Sanger Institute for the COVID-19 Genomics UK (COG-UK) Consortium|Davies|United Kingdom

>Spike|hCoV-19/Ecuador/USFQ-520/2020|2020-10-02|EPI\_ISL\_660539|Original|hCoV-19^^Pastaza|Human|Institute of Microbiology|Institute of Microbiology|Cardenas|Ecuador

>Spike|hCoV-19/England/QEUEH-B43798/2020|2020-11-08|EPI\_ISL\_657116|Original|hCoV-19^^England|Human|Lighthouse Lab in Glasgow|Wellcome Sanger Institute for the COVID-19 Genomics UK (COG-UK) Consortium|Davies|United Kingdom

>Spike|hCoV-19/Belgium/UGent-148/2020|2020-03-26|EPI\_ISL\_634876|Original|hCoV-19^^Ghent|Human|Lab voor klinische biologie|Onderzoeksgroep Virologie|Lambrechts|Belgium

>Spike|hCoV-19/Wales/PHWC-26EDD/2020|2020-03-30|EPI\_ISL\_422115|Original|hCoV-19^^Wales|Human|Wales Specialist Virology Centre|Public Health Wales Microbiology Cardiff|Moore|United Kingdom

>Spike|hCoV-19/England/NORW-EEB9E/2020|2020-00-00|EPI\_ISL\_529250|Original|hCoV-19^^England|Human|Quadram Institute Bioscience|COVID-19 Genomics UK (COG-UK) Consortium|Alikhan|United Kingdom

>Spike|hCoV-19/USA/TX-HMH-MCoV-15835/2020|2020-07-10|EPI\_ISL\_785519|Original|hCoV-19^^Texas|Human|Houston Methodist Hospital|Houston Methodist Hospital|Long|USA

>Spike|hCoV-19/Australia/VIC6497/2020|2020-07-20|EPI\_ISL\_521272|Original|hCoV-19^^Victoria|Human|Victorian Infectious Diseases Reference Laboratory (VIDRL)|VIDRL and MDU-PHL|Schultz|Australia

>Spike|hCoV-19/England/ALDP-A500E9/2020|2020-10-07|EPI\_ISL\_597581|Original|hCoV-19^^England|Human|Lighthouse Lab in Alderley Park|Wellcome Sanger Institute for the COVID-19 Genomics UK (COG-UK) consortium|Davies|United Kingdom

>Spike|hCoV-19/England/ALDP-BCABD9/2020|2020-11-23|EPI\_ISL\_703464|Original|hCoV-19^^England|Human|Lighthouse Lab in Alderley Park|Wellcome Sanger Institute for the COVID-19 Genomics UK (COG-UK) Consortium|Davies|United Kingdom

>Spike|hCoV-19/Australia/VIC6007/2020|2020-07-23|EPI\_ISL\_518782|Original|hCoV-19^^Victoria|Human|Microbiological Diagnostic Unit - Public Health Laboratory (MDU-PHL)|MDU-PHL|Schultz|Australia

>Spike|hCoV-19/England/CAMC-9911DB/2020|2020-08-27|EPI\_ISL\_551853|Original|hCoV-19^^England|Human|Lighthouse Lab in Cambridge|Wellcome Sanger Institute for the COVID-19 Genomics UK (COG-UK) consortium|Davies|United Kingdom

>Spike|hCoV-19/England/CAMC-9DF6A5/2020|2020-09-21|EPI\_ISL\_638417|Original|hCoV-19^^England|Human|Department of Pathology|COVID-19 Genomics UK (COG-UK) Consortium|Goodfellow|United Kingdom

>Spike|hCoV-19/USA/WA-UW-23501/2020|2020-08-11|EPI\_ISL\_576467|Original|hCoV-19^^Washington|Human|UW Virology Lab|UW Virology Lab|Roychoudhury|USA

>Spike|hCoV-19/Ireland/CO-NVRL-78IRL74454/2020|2020-11-22|EPI\_ISL\_752569|Original|hCoV-19^^Cork|Human|National Virus Reference Laboratory|National Virus Reference Laboratory|Gonzalez|Ireland

>Spike|hCoV-19/Denmark/DCGC-10930/2020|2020-11-02|EPI\_ISL\_670290|Original|hCoV-19^^Hovedstaden|Human|Department of Virus and Microbiological Special Diagnostics|Albertsen Lab|Michaelsen|Denmark

>Spike|hCoV-19/Scotland/GCVR-171652/2020|2020-03-29|EPI\_ISL\_469970|Original|hCoV-19^^Scotland|Human|NHSGGC West of Scotland Specialist Virology Centre / MRC-University of Glasgow Centre for Virus Research|Wellcome Sanger Institute for the COVID-19 Genomics UK (COG-UK) consortium|Davies|United Kingdom

>Spike|hCoV-19/England/ALDP-B1C015/2020|2020-11-01|EPI\_ISL\_645753|Original|hCoV-19^^England|Human|Lighthouse Lab in Alderley Park|Wellcome Sanger Institute for the COVID-19 Genomics UK (COG-UK) Consortium|Davies|United Kingdom

>Spike|hCoV-19/Chile/RM-72436/2020|2020-05-23|EPI\_ISL\_746489|Original|hCoV-19^^Region Metropolitana de Santiago|Human|Genetica Molecular and Subdepartamento de Virologia ISP Chile|Instituto de Salud Publica de Chile|Tognarelli|Chile

>Spike|hCoV-19/Japan/PG-0172/2020|2020-03-15|EPI\_ISL\_479881|Original|hCoV-19^^Hokkaido|Human|Sapporo City Institute of Public Health|Pathogen Genomics Center|Sekizuka|Japan

>Spike|hCoV-19/England/LIVE-AB948/2020|2020-05-09|EPI\_ISL\_612443|Original|hCoV-19^^England|Human|Liverpool Clinical Laboratories|COVID-19 Genomics UK (COG-UK) Consortium|Haldenby|United Kingdom

>Spike|hCoV-19/Finland/18MR1cG2/2020|2020-11-18|EPI\_ISL\_757321|Original|hCoV-19^^Uusimaa|Human|Department of Virology and Immunology|Department of Virology|Smura|Finland

>Spike|hCoV-19/England/MILK-B3A59A/2020|2020-11-02|EPI\_ISL\_658922|Original|hCoV-19^^England|Human|Lighthouse Lab in Milton Keynes|Wellcome Sanger Institute for the COVID-19 Genomics UK (COG-UK) Consortium|Davies|United Kingdom

>Spike|hCoV-19/England/ALDP-A92722/2020|2020-10-19|EPI\_ISL\_610940|Original|hCoV-19^^England|Human|Lighthouse Lab in Alderley Park|Wellcome Sanger Institute for the COVID-19 Genomics UK (COG-UK) consortium|Davies|United Kingdom

>Spike|hCoV-19/England/CAMC-B36A17/2020|2020-11-05|EPI\_ISL\_645256|Original|hCoV-19^^England|Human|Lighthouse Lab in Cambridge|Wellcome Sanger Institute for the COVID-19 Genomics UK (COG-UK) Consortium|Davies|United Kingdom

>Spike|hCoV-19/Wales/PHWC-496F0E/2020|2020-11-25|EPI\_ISL\_726748|Original|hCoV-19^^Wales|Human|Originating lab|COVID-19 Genomics UK (COG-UK) Consortium|Moore|United Kingdom

>Spike|hCoV-19/Thailand/Bangkok-CONI-0283/2020|2020-03-15|EPI\_ISL\_693361|Original|hCoV-19^^Bangkok|Human|Ramathibodi Hospital|COVID-19 Network Investigations (CONI) Alliance|Batty|Thailand

>Spike|hCoV-19/England/ALDP-A6D6E7/2020|2020-10-15|EPI\_ISL\_608082|Original|hCoV-19^^England|Human|Lighthouse Lab in Alderley Park|Wellcome Sanger Institute for the COVID-19 Genomics UK (COG-UK) consortium|Davies|United Kingdom

>Spike|hCoV-19/England/ALDP-B83037/2020|2020-11-14|EPI\_ISL\_675523|Original|hCoV-19^^England|Human|Lighthouse Lab in Alderley Park|Wellcome Sanger Institute for the COVID-19 Genomics UK (COG-UK) Consortium|Davies|United Kingdom

>Spike|hCoV-19/Canada/ON-PHL-20-02433/2020|2020-09-00|EPI\_ISL\_671532|Original|hCoV-19^^Ontario|Human|Public Health Ontario Laboratory|Public Health Ontario Laboratory|Guthrie|Canada

>Spike|hCoV-19/England/QEUH-AACDF6/2020|2020-10-19|EPI\_ISL\_652917|Original|hCoV-19^^England|Human|Oxford Viromics|COVID-19 Genomics UK (COG-UK) Consortium|Golubchik|United Kingdom

>Spike|hCoV-19/Belgium/UGent-290/2020|2020-11-24|EPI\_ISL\_718019|Original|hCoV-19^^Ghent|Human|Lab voor klinische biologie|Onderzoeksgroep Virologie|Lambrechts|Belgium

>Spike|hCoV-19/Denmark/DCGC-7562/2020|2020-10-12|EPI\_ISL\_618476|Original|hCoV-19^^Hovedstaden|Human|Department of Virus and Microbiological Special Diagnostics|Albertsen lab|Michaelsen|Denmark

>Spike|hCoV-19/England/LIVE-DC3048/2020|2020-11-25|EPI\_ISL\_702523|Original|hCoV-19^^England|Human|Liverpool Clinical Laboratories|COVID-19 Genomics UK (COG-UK) Consortium|Haldenby|United Kingdom

>Spike|hCoV-19/Wales/PHWC-27434/2020|2020-03-30|EPI\_ISL\_431918|Original|hCoV-19^^Wales|Human|Wales Specialist Virology Centre|Public Health Wales Microbiology Cardiff|Moore|United Kingdom

>Spike|hCoV-19/England/CAMC-B9866A/2020|2020-11-15|EPI\_ISL\_675026|Original|hCoV-19^^England|Human|Lighthouse Lab in Cambridge|Wellcome Sanger Institute for the COVID-19 Genomics UK (COG-UK) Consortium|Davies|United Kingdom

>Spike|hCoV-19/England/SHEF-D0E0F/2020|2020-10-08|EPI\_ISL\_596223|Original|hCoV-19^^England|Human|Virology Department|COVID-19 Genomics UK (COG-UK) Consortium|de Silva|United Kingdom

>Spike|hCoV-19/England/MILK-9AAF99/2020|2020-08-31|EPI\_ISL\_551042|Original|hCoV-19^^England|Human|Lighthouse Lab in Milton Keynes|Wellcome Sanger Institute for the COVID-19 Genomics UK (COG-UK) consortium|Davies|United Kingdom

>Spike|hCoV-19/England/CAMC-C264A2/2020|2020-12-07|EPI\_ISL\_733614|Original|hCoV-19^^England|Human|Lighthouse Lab in Cambridge|Wellcome Sanger Institute for the COVID-19 Genomics UK (COG-UK) Consortium|Davies|United Kingdom

>Spike|hCoV-19/England/NORT-282972/2020|2020-03-27|EPI\_ISL\_488662|Original|hCoV-19^^England|Human|NU-OMICS DNA Sequencing research facility|Wellcome Sanger Institute for the COVID-19 Genomics UK (COG-UK) consortium|Davies|United Kingdom

>Spike|hCoV-19/USA/WI-GMF-24082/2020|2020-10-05|EPI\_ISL\_660890|Original|hCoV-19^^Wisconsin|Human|Gundersen Molecular Diagnostics Laboratory|Kabara Cancer Research Institute|Kenny|USA

>Spike|hCoV-19/England/NORT-29DF45/2020|2020-05-06|EPI\_ISL\_493501|Original|hCoV-19^^England|Human|Northumbria University / South Tees Hospitals NHS Foundation Trust / North Cumbria Integrated Care NHS Foundation Trust / North Tees and Hartlepool NHS Foundation Trust / Newcastle Hospitals NHS Foundation Trust|COVID-19 Genomics UK (COG-UK) Consortium|Bashton|United Kingdom

>Spike|hCoV-19/USA/WA-UW-7032/2020|2020-04-07|EPI\_ISL\_570164|Original|hCoV-19^^Washington|Human|UW Virology Lab|UW Virology Lab|Roychoudhury|USA

>Spike|hCoV-19/England/CAMC-A3F323/2020|2020-10-06|EPI\_ISL\_609586|Original|hCoV-19^^England|Human|Lighthouse Lab in Cambridge|Wellcome Sanger Institute for the COVID-19 Genomics UK (COG-UK) consortium|Davies|United Kingdom

>Spike|hCoV-19/England/MILK-ACDD68/2020|2020-10-21|EPI\_ISL\_630076|Original|hCoV-19^^England|Human|Lighthouse Lab in Milton Keynes|Wellcome Sanger Institute for the COVID-19 Genomics UK (COG-UK) consortium|Davies|United Kingdom

>Spike|hCoV-19/USA/CA-CHLA-PLM92698286/2020|2020-11-30|EPI\_ISL\_753493|Original|hCoV-19^^California|Human|Clinical virology Laboratory|Center for Personalized Medicine|Dien Bard|USA

>Spike|hCoV-19/South Africa/R12641-20/2020|2020-06-16|EPI\_ISL\_504203|Original|hCoV-19^^North West|Human|National Institute for Communicable Diseases of the National Health Laboratory Service|National Institute for Communicable Diseases of the National Health Laboratory Service|Allam|South Africa

>Spike|hCoV-19/England/ALDP-C3BFE5/2020|2020-12-10|EPI\_ISL\_731745|Original|hCoV-19^^England|Human|Lighthouse Lab in Alderley Park|Wellcome Sanger Institute for the COVID-19 Genomics UK (COG-UK) Consortium|Davies|United Kingdom

>Spike|hCoV-19/Japan/PG-8684/2020|2020-09-00|EPI\_ISL\_686280|Original|hCoV-19^^Japan|Human|Pathogen Genomics Center|Pathogen Genomics Center|Sekizuka|Japan

>Spike|hCoV-19/USA/UT-020/2020|2020-03-20|EPI\_ISL\_417028|Original|hCoV-19^^Utah|Human|Utah Public Health Laboratory|Utah Public Health Laboratory|Young|USA

>Spike|hCoV-19/Japan/PG-8919/2020|2020-09-00|EPI\_ISL\_686465|Original|hCoV-19^^Japan|Human|Pathogen Genomics Center|Pathogen Genomics Center|Sekizuka|Japan

>Spike|hCoV-19/DRC/5019/2020|2020-05-02|EPI\_ISL\_496511|Original|hCoV-19^^Kinshasa|Human|Viral Respiratory Lab|Pathogen Sequencing Lab|Lokilo|Democratic Republic of the Congo

>Spike|hCoV-19/USA/TX-HMH-4423/2020|2020-06-17|EPI\_ISL\_543607|Original|hCoV-19^^Texas|Human|Houston Methodist Hospital|Houston Methodist Hospital|Long|USA

>Spike|hCoV-19/Spain/AR-IBV-2483/2020|2020-03-24|EPI\_ISL\_468785|Original|hCoV-19^^Aragon|Human|Servicio de Microbiolog\u00eda|SeqCOVID-SPAIN consortium/IBV (CSIC) |Comas|Spain

>Spike|hCoV-19/England/ALDP-C4847D/2020|2020-12-12|EPI\_ISL\_736604|Original|hCoV-19^^England|Human|Lighthouse Lab in Alderley Park|Wellcome Sanger Institute for the COVID-19 Genomics UK (COG-UK) Consortium|Davies|United Kingdom

>Spike|hCoV-19/USA/TX-HMH-6208/2020|2020-06-22|EPI\_ISL\_547313|Original|hCoV-19^^Texas|Human|Houston Methodist Hospital|Houston Methodist Hospital|Long|USA

>Spike|hCoV-19/USA/LA-GBCL-26791738/2020|2020-04-06|EPI\_ISL\_485355|Original|hCoV-19^^Louisiana|Human|River Road Testing Lab|Ginkgo Bioworks Clinical Laboratory|Smith|USA

>Spike|hCoV-19/USA/NY-Wadsworth-218073-01/2020|2020-09-15|EPI\_ISL\_765505|Original|hCoV-19^^New York|Human|Wadsworth Center|Wadsworth Center|Lasek-Nesselquist|USA

>Spike|hCoV-19/England/205260241/2020|2020-12-07|EPI\_ISL\_766506|Original|hCoV-19^^England|Human|Respiratory Virus Unit|COVID-19 Genomics UK (COG-UK) Consortium|Platt|United Kingdom

>Spike|hCoV-19/USA/UT-UPHL-2012204862/2020|2020-10-19|EPI\_ISL\_746279|Original|hCoV-19^^Utah|Human|Ginkgo Bioworks Clinical Laboratory|Utah Public Health Laboratory|Young|USA

>Spike|hCoV-19/Switzerland/VD-ETHZ-360047/2020|2020-11-10|EPI\_ISL\_693885|Original|hCoV-19^^Vaud|Human|Viollier AG|Department of Biosystems Science and Engineering|Nadeau|Switzerland

>Spike|hCoV-19/USA/CA-CZB-15155/2020|2020-11-23|EPI\_ISL\_738987|Original|hCoV-19^^California|Human|Santa Clara County Public Health Laboratory|Chan-Zuckerberg Biohub|Kamm|USA

>Spike|hCoV-19/USA/GA-CDC-5097/2020|2020-06-29|EPI\_ISL\_566086|Original|hCoV-19^^Georgia|Human|GA Department of Public Health Laboratory|Pathogen Discovery|Queen|USA

>Spike|hCoV-19/Canada/BC\_06803213/2020|2020-04-00|EPI\_ISL\_466806|Original|hCoV-19^^British Columbia|Human|BCCDC Public Health Laboratory|BCCDC Public Health Laboratory|Harrigan|Canada

>Spike|hCoV-19/Germany/NW-UBI-25/2020|2020-06-18|EPI\_ISL\_631279|Original|hCoV-19^^North Rhine-Westphalia|Human|MVZ DIAMEDIS Diagnostische Medizin Sennestadt GmbH|Bielefeld University|Brandt|Germany

>Spike|hCoV-19/USA/TX-HMH-MCoV-8596/2020|2020-07-01|EPI\_ISL\_780641|Original|hCoV-19^^Texas|Human|Houston Methodist Hospital|Houston Methodist Hospital|Long|USA

>Spike|hCoV-19/USA/WA-UW184/2020|2020-03-12|EPI\_ISL\_416722|Original|hCoV-19^^Washington|Human|UW Virology Lab|UW Virology Lab|Roychoudhury|USA

>Spike|hCoV-19/England/MILK-A6BB80/2020|2020-10-09|EPI\_ISL\_608789|Original|hCoV-19^^England|Human|Lighthouse Lab in Milton Keynes|Wellcome Sanger Institute for the COVID-19 Genomics UK (COG-UK) consortium|Davies|United Kingdom

>Spike|hCoV-19/England/ALDP-B46522/2020|2020-11-07|EPI\_ISL\_656102|Original|hCoV-19^^England|Human|Lighthouse Lab in Alderley Park|Wellcome Sanger Institute for the COVID-19 Genomics UK (COG-UK) Consortium|Davies|United Kingdom

>Spike|hCoV-19/England/MILK-B02944/2020|2020-10-24|EPI\_ISL\_642908|Original|hCoV-19^^England|Human|Lighthouse Lab in Milton Keynes|Wellcome Sanger Institute for the COVID-19 Genomics UK (COG-UK) Consortium|Davies|United Kingdom

>Spike|hCoV-19/India/MH-ACTREC-375/2020|2020-07-24|EPI\_ISL\_700024|Original|hCoV-19^^Maharashtra|Human|Hematopathology Laboratory|Hematopathology Laboratory|Patkar|India

>Spike|hCoV-19/England/CAMC-942F2A/2020|2020-07-24|EPI\_ISL\_556907|Original|hCoV-19^^England|Human|Lighthouse Lab in Cambridge|Wellcome Sanger Institute for the COVID-19 Genomics UK (COG-UK) consortium|Davies|United Kingdom

>Spike|hCoV-19/England/20139027904/2020|2020-03-26|EPI\_ISL\_421907|Original|hCoV-19^^England|Human|Respiratory Virus Unit|Respiratory Virus Unit|Platt|United Kingdom

>Spike|hCoV-19/Australia/VIC1559/2020|2020-05-03|EPI\_ISL\_456482|Original|hCoV-19^^Victoria|Human|Victorian Infectious Diseases Reference Laboratory (VIDRL)|Microbiological Diagnostic Unit Public Health Laboratory and Victorian Infectious Diseases Reference Laboratory|Schultz|Australia

>Spike|hCoV-19/Scotland/CVR5128/2020|2020-10-16|EPI\_ISL\_627195|Original|hCoV-19^^Scotland|Human|West of Scotland Specialist Virology Centre|COVID-19 Genomics UK (COG-UK) Consortium|Robertson|United Kingdom

>Spike|hCoV-19/USA/WA-UW24/2020|2020-03-05|EPI\_ISL\_414593|Original|hCoV-19^^Washington|Human|UW Virology Lab|UW Virology Lab|Roychoudhury|USA

>Spike|hCoV-19/England/EXET-13AAB3/2020|2020-11-11|EPI\_ISL\_665084|Original|hCoV-19^^England|Human|University of Exeter|COVID-19 Genomics UK (COG-UK) Consortium|Temperton|United Kingdom

>Spike|hCoV-19/England/QEUA-9B887F/2020|2020-09-08|EPI\_ISL\_549627|Original|hCoV-19^^England|Human|Lighthouse Lab in Glasgow|Wellcome Sanger Institute for the COVID-19 Genomics UK (COG-UK) consortium|Davies|United Kingdom

>Spike|hCoV-19/England/ALDP-B83E2E/2020|2020-11-14|EPI\_ISL\_674229|Original|hCoV-19^^England|Human|Lighthouse Lab in Alderley Park|Wellcome Sanger Institute for the COVID-19 Genomics UK (COG-UK) Consortium|Davies|United Kingdom

>Spike|hCoV-19/Denmark/DCGC-10832/2020|2020-11-02|EPI\_ISL\_670238|Original|hCoV-19^^Sjaelland|Human|Department of Virus and Microbiological Special Diagnostics|Albertsen Lab|Michaelsen|Denmark

>Spike|hCoV-19/Denmark/DCGC-1253/2020|2020-06-08|EPI\_ISL\_618020|Original|hCoV-19^^Syddanmark|Human|Department of Virus and Microbiological Special Diagnostics|Albertsen lab|Michaelsen|Denmark

>Spike|hCoV-19/USA/TX-HMH-MCoV-15670/2020|2020-07-09|EPI\_ISL\_785354|Original|hCoV-19^^Texas|Human|Houston Methodist Hospital|Houston Methodist Hospital|Long|USA

>Spike|hCoV-19/USA/MI-UM-10036634193/2020|2020-10-26|EPI\_ISL\_650042|Original|hCoV-19^^Michigan|Human|University of Michigan Clinical Microbiology Laboratory|Lauring Lab|Valesano|USA

>Spike|hCoV-19/Japan/PG-1177/2020|2020-04-00|EPI\_ISL\_684787|Original|hCoV-19^^Japan|Human|Pathogen Genomics Center|Pathogen Genomics Center|Sekizuka|Japan

>Spike|hCoV-19/Wales/QEUA-A9FFE1/2020|2020-10-19|EPI\_ISL\_625324|Original|hCoV-19^^Wales|Human|Lighthouse Lab in Glasgow|Wellcome Sanger Institute for the COVID-19 Genomics UK (COG-UK) consortium|Davies|United Kingdom

>Spike|hCoV-19/USA/WI-UW-2355/2020|2020-11-18|EPI\_ISL\_728121|Original|hCoV-19^^Wisconsin|Human|University of Wisconsin-Madison AIDS Vaccine Research Laboratories|University of Wisconsin-Madison AIDS Vaccine Research Laboratories|Baczenas|USA

>Spike|hCoV-19/Japan/PG-2532/2020|2020-05-00|EPI\_ISL\_690667|Original|hCoV-19^^Japan|Human|Saitama Prefectural Institute of Public Health|Pathogen Genomics Center|Sekizuka|Japan

>Spike|hCoV-19/England/204220386/2020|2020-10-12|EPI\_ISL\_609887|Original|hCoV-19^^England|Human|Respiratory Virus Unit|Respiratory Virus Unit|Platt|United Kingdom

>Spike|hCoV-19/Netherlands/ZH-EMC-724/2020|2020-09-29|EPI\_ISL\_632571|Original|hCoV-19^^Zuid Holland|Human|Dutch COVID-19 response team|Erasmus Medical Center|Oude Munnink|Netherlands

>Spike|hCoV-19/Denmark/DCGC-5689/2020|2020-09-28|EPI\_ISL\_619976|Original|hCoV-19^^Hovedstaden|Human|Department of Virus and Microbiological Special Diagnostics|Albertsen lab|Michaelsen|Denmark

>Spike|hCoV-19/Denmark/DCGC-18890/2020|2020-12-07|EPI\_ISL\_748621|Original|hCoV-19^^Syddanmark|Human|Department of Virus and Microbiological Special Diagnostics|Albertsen Lab|Michaelsen|Denmark

>Spike|hCoV-19/USA/LA-EVTL737/2020|2020-07-17|EPI\_ISL\_653428|Original|hCoV-19^^Louisiana|Human|LSUHS Emerging Viral Threat Laboratory|Microbial Genome Sequencing Center|Kamil|USA

>Spike|hCoV-19/Belgium/reg-09151223/2020|2020-09-15|EPI\_ISL\_734936|Original|hCoV-19^^Tervuren|Human|UZ Leuven|KU Leuven|Maes|Belgium

>Spike|hCoV-19/USA/AZ-TG547386/2020|2020-07-07|EPI\_ISL\_695515|Original|hCoV-19^^Arizona|Human|AZ SPHL|TGen North|French|USA

>Spike|hCoV-19/England/QEUH-9F34ED/2020|2020-09-24|EPI\_ISL\_588664|Original|hCoV-19^^England|Human|Lighthouse Lab in Glasgow|Wellcome Sanger Institute for the COVID-19 Genomics UK (COG-UK) consortium|Davies|United Kingdom

>Spike|hCoV-19/Scotland/QEUH-98F5E3/2020|2020-08-27|EPI\_ISL\_540383|Original|hCoV-19^^Scotland|Human|Lighthouse Lab in Glasgow|Wellcome Sanger Institute for the COVID-19 Genomics UK (COG-UK) consortium|Davies|United Kingdom

>Spike|hCoV-19/England/CAMC-BFB28F/2020|2020-12-04|EPI\_ISL\_709038|Original|hCoV-19^^England|Human|Lighthouse Lab in Cambridge|Wellcome Sanger Institute for the COVID-19 Genomics UK (COG-UK) Consortium|Davies|United Kingdom

>Spike|hCoV-19/England/WSFT-25C1659/2020|2020-04-21|EPI\_ISL\_495095|Original|hCoV-19^^England|Human|Department of Medical Microbiology|Wellcome Sanger Institute for the COVID-19 Genomics UK (COG-UK) consortium|Davies|United Kingdom

>Spike|hCoV-19/USA/CA-CDPH002/2020|2020-03-18|EPI\_ISL\_515895|Original|hCoV-19^^California|Human|California Department of Public Health|California Department of Public Health|Bell|USA

>Spike|hCoV-19/England/CAMB-73DB6/2020|2020-04-01|EPI\_ISL\_433697|Original|hCoV-19^^England|Human|Department of Pathology|COVID-19 Genomics UK (COG-UK) Consortium|Meredith|United Kingdom

>Spike|hCoV-19/Scotland/EDB391/2020|2020-03-30|EPI\_ISL\_425994|Original|hCoV-19^^Scotland|Human|Virology Department|COVID-19 Genomics UK (COG-UK) Consortium|Williams|United Kingdom

>Spike|hCoV-19/USA/UT-08479/2020|2020-05-21|EPI\_ISL\_524248|Original|hCoV-19^^Utah|Human|Utah Public Health Laboratory|Utah Public Health Laboratory|Young|USA

>Spike|hCoV-19/USA/UT-UPHL-2009115/2020|2020-05-14|EPI\_ISL\_525114|Original|hCoV-19^^Utah|Human|Utah Public Health Laboratory|Utah Public Health Laboratory|Young|USA

>Spike|hCoV-19/Belgium/reg-10061040/2020|2020-10-06|EPI\_ISL\_735060|Original|hCoV-19^^Haasrode|Human|UZ Leuven|KU Leuven|Maes|Belgium

>Spike|hCoV-19/Denmark/DCGC-4490/2020|2020-09-07|EPI\_ISL\_615675|Original|hCoV-19^^Syddanmark|Human|Department of Virus and Microbiological Special Diagnostics|Albertsen lab|Michaelsen|Denmark

>Spike|hCoV-19/Scotland/EDB4170/2020|2020-04-18|EPI\_ISL\_449277|Original|hCoV-19^^Scotland|Human|Virology Department|COVID-19 Genomics UK (COG-UK) Consortium|Williams|United Kingdom

>Spike|hCoV-19/England/ALDP-9D923E/2020|2020-09-18|EPI\_ISL\_576710|Original|hCoV-19^^England|Human|Oxford Viromics|COVID-19 Genomics UK (COG-UK) Consortium|Golubchik|United Kingdom

>Spike|hCoV-19/USA/WI-UW-1379/2020|2020-09-04|EPI\_ISL\_536750|Original|hCoV-19^^Wisconsin|Human|University of Wisconsin-Madison AIDS Vaccine Research Laboratories|University of Wisconsin-Madison AIDS Vaccine Research Laboratories|Baczenas|USA

>Spike|hCoV-19/England/ALDP-95C44C/2020|2020-06-20|EPI\_ISL\_554869|Original|hCoV-19^^England|Human|Lighthouse Lab in Alderley Park|Wellcome Sanger Institute for the COVID-19 Genomics UK (COG-UK) consortium|Davies|United Kingdom

>Spike|hCoV-19/Denmark/DCGC-7448/2020|2020-10-12|EPI\_ISL\_619343|Original|hCoV-19^^Hovedstaden|Human|Department of Virus and Microbiological Special Diagnostics|Albertsen lab|Michaelsen|Denmark

>Spike|hCoV-19/USA/UT-UPHL-2009603/2020|2020-07-18|EPI\_ISL\_605281|Original|hCoV-19^^Utah|Human|Utah Public Health Laboratory|Utah Public Health Laboratory|Young|USA

>Spike|hCoV-19/Sweden/20-51733/2020|2020-05-18|EPI\_ISL\_510838|Original|hCoV-19^^Stockholm|Human|Karolinska Universitetslaboratoriet|The Public Health Agency of Sweden|Svartstr\u00f6m|Sweden

>Spike|hCoV-19/Japan/PG-5717/2020|2020-07-00|EPI\_ISL\_688839|Original|hCoV-19^^Japan|Human|Pathogen Genomics Center|Pathogen Genomics Center|Sekizuka|Japan

>Spike|hCoV-19/USA/TX-HMH-MCoV-18018/2020|2020-11-16|EPI\_ISL\_786166|Original|hCoV-19^^Texas|Human|Houston Methodist Hospital|Houston Methodist Hospital|Long|USA

>Spike|hCoV-19/England/MILK-CA6D63/2020|2020-12-18|EPI\_ISL\_761478|Original|hCoV-19^^England|Human|Lighthouse Lab in Milton Keynes|Wellcome Sanger Institute for the COVID-19 Genomics UK (COG-UK) Consortium|Davies|United Kingdom

>Spike|hCoV-19/Denmark/DCGC-17882/2020|2020-12-14|EPI\_ISL\_749620|Original|hCoV-19^^Hovedstaden|Human|Department of Virus and Microbiological Special Diagnostics|Albertsen Lab|Michaelsen|Denmark

>Spike|hCoV-19/England/20144018204/2020|2020-03-30|EPI\_ISL\_421938|Original|hCoV-19^^England|Human|Respiratory Virus Unit|Respiratory Virus Unit|Platt|United Kingdom

>Spike|hCoV-19/England/PORT-2CF733/2020|2020-05-12|EPI\_ISL\_461978|Original|hCoV-19^^England|Human|Centre for Enzyme Innovation|COVID-19 Genomics UK (COG-UK) Consortium|Robson|United Kingdom

>Spike|hCoV-19/Australia/NSW2544/2020|2020-04-04|EPI\_ISL\_527045|Original|hCoV-19^^New South Wales|Human|Area of Virology|Area of Virology|Yeang|Australia

>Spike|hCoV-19/England/CAMC-B780F9/2020|2020-11-12|EPI\_ISL\_668369|Original|hCoV-19^^England|Human|Lighthouse Lab in Cambridge|Wellcome Sanger Institute for the COVID-19 Genomics UK (COG-UK) Consortium|Davies|United Kingdom

>Spike|hCoV-19/Denmark/DCGC-1709/2020|2020-03-23|EPI\_ISL\_618342|Original|hCoV-19^^Sjælland|Human|Department of Virus and Microbiological Special Diagnostics|Albertsen lab|Michaelsen|Denmark

>Spike|hCoV-19/Scotland/QEUH-B7DFAC/2020|2020-11-12|EPI\_ISL\_742257|Original|hCoV-19^^Scotland|Human|Oxford Viromics|COVID-19 Genomics UK (COG-UK) Consortium|Golubchik|United Kingdom

>Spike|hCoV-19/USA/NY-NYCPHL-000210/2020|2020-04-20|EPI\_ISL\_631743|Original|hCoV-19^^New York|Human|Jamaica Hospital Medical Center|New York City Public Health Laboratory|Wang|USA

>Spike|hCoV-19/France/BRE-IPP9969/2020|2020-10-27|EPI\_ISL\_718228|Original|hCoV-19^^Bretagne|Human|Hospital|National Reference Center for Viruses of Respiratory Infections|Enouf|France

>Spike|hCoV-19/England/ALDP-A850AF/2020|2020-10-17|EPI\_ISL\_610360|Original|hCoV-19^^England|Human|Lighthouse Lab in Alderley Park|Wellcome Sanger Institute for the COVID-19 Genomics UK (COG-UK) consortium|Davies|United Kingdom

>Spike|hCoV-19/USA/TX-HMH-MCoV-14545/2020|2020-10-09|EPI\_ISL\_787830|Original|hCoV-19^^Texas|Human|Houston Methodist Hospital|Houston Methodist Hospital|Long|USA

>Spike|hCoV-19/USA/MI-UM-10033766580/2020|2020-03-24|EPI\_ISL\_578097|Original|hCoV-19^^Michigan|Human|University of Michigan Clinical Microbiology Laboratory|Lauring Lab|Valesano|USA

>Spike|hCoV-19/Scotland/CVR2085/2020|2020-04-09|EPI\_ISL\_490660|Original|hCoV-19^^Scotland|Human|West of Scotland Specialist Virology Centre|COVID-19 Genomics UK (COG-UK) Consortium|Robertson|United Kingdom

>Spike|hCoV-19/Wales/PHWC-499545/2020|2020-12-03|EPI\_ISL\_727320|Original|hCoV-19^^Wales|Human|Originating lab|COVID-19 Genomics UK (COG-UK) Consortium|Moore|United Kingdom

>Spike|hCoV-19/Japan/PG-1095/2020|2020-04-00|EPI\_ISL\_684705|Original|hCoV-19^^Japan|Human|Pathogen Genomics Center|Pathogen Genomics Center|Sekizuka|Japan

>Spike|hCoV-19/Spain/CT-IBV-005622/2020|2020-03-26|EPI\_ISL\_508659|Original|hCoV-19^^Catalunya|Human|Departamento de Microbiolog\u00eda|SeqCOVID-SPAIN consortium|IBV (CSIC) |Comas|Spain

>Spike|hCoV-19/England/CAMC-C3FEE4/2020|2020-12-10|EPI\_ISL\_719471|Original|hCoV-19^^England|Human|Lighthouse Lab in Cambridge|Wellcome Sanger Institute for the COVID-19 Genomics UK (COG-UK) Consortium|Davies|United Kingdom

>Spike|hCoV-19/Spain/VC-IBV-98007309/2020|2020-09-17|EPI\_ISL\_654487|Original|hCoV-19^^Comunitat Valenciana|Human|Servicio de Microbiolog\u00eda. Hospital Cl\u00ednico Universitario de Valencia|SeqCOVID-SPAIN consortium|IBV (CSIC) |Comas|Spain



>Spike|hCoV-19/Germany/HH-hpi-p1594/2020|2020-03-16|EPI\_ISL\_775824|Original|hCoV-19^^Hamburg|Human|University Medical Center Hamburg Eppendorf|Heinrich Pette Institute|Robitaille|Germany

>Spike|hCoV-19/Brazil/SP-L24-CD623/2020|2020-04-13|EPI\_ISL\_672700|Original|hCoV-19^^S\u00e3o Paulo|Human|Hospital das Cl\u00ednicas da Faculdade de Medicina da Universidade de S\u00e3o Paulo (HC-FMUSP)|Laborat\u00f3rio de Parasitologia M\u00e9dica - Instituto de Medicina Tropical - Universidade de S\u00e3o Paulo|de Jesus|Brazil

>Spike|hCoV-19/South Africa/KRISP-K003500/2020|2020-09-16|EPI\_ISL\_602824|Original|hCoV-19^^KwaZulu-Natal|Human|NHL-SIALCH|KRISP|de Oliveira|South Africa

>Spike|hCoV-19/England/QEUH-9C9583/2020|2020-09-09|EPI\_ISL\_567453|Original|hCoV-19^^England|Human|Lighthouse Lab in Glasgow|Wellcome Sanger Institute for the COVID-19 Genomics UK (COG-UK) consortium|Davies|United Kingdom

>Spike|hCoV-19/USA/NMDOH-2020305829/2020|2020-08-21|EPI\_ISL\_542061|Original|hCoV-19^^New Mexico|Human|New Mexico Department of Health Scientific Laboratory|New Mexico Department of Health Scientific Laboratory|Johnson|USA

>Spike|hCoV-19/Luxembourg/LNS2363167/2020|2020-10-19|EPI\_ISL\_740108|Original|hCoV-19^^Luxembourg|Human|Laboratoire national de sant\u00e9|Laboratoire national de sant\u00e9|Wienecke-Baldacchino|Luxembourg

>Spike|hCoV-19/England/NORT-294816/2020|2020-08-08|EPI\_ISL\_573356|Original|hCoV-19^^England|Human|Northumbria University / South Tees Hospitals NHS Foundation Trust / North Cumbria Integrated Care NHS Foundation Trust / North Tees and Hartlepool NHS Foundation Trust / Newcastle Hospitals NHS Foundation Trust|COVID-19 Genomics UK (COG-UK) Consortium|Bashton|United Kingdom

>Spike|hCoV-19/Wales/PHWC-4A5D11/2020|2020-12-13|EPI\_ISL\_764969|Original|hCoV-19^^Wales|Human|Wales Specialist Virology Centre Sequencing lab|COVID-19 Genomics UK (COG-UK) Consortium|Moore|United Kingdom

>Spike|hCoV-19/Wales/ALDP-C3BA8A/2020|2020-12-10|EPI\_ISL\_767233|Original|hCoV-19^^Wales|Human|Lighthouse Lab in Alderley Park|Wellcome Sanger Institute for the COVID-19 Genomics UK (COG-UK) Consortium|Davies|United Kingdom

>Spike|hCoV-19/USA/CA-ALSR-4754/2020|2020-10-30|EPI\_ISL\_730123|Original|hCoV-19^^California|Human|San Diego County Public Health Laboratory|Andersen lab at Scripps Research|Gangavarapu|USA

>Spike|hCoV-19/Switzerland/BE-ETHZ-270130/2020|2020-09-03|EPI\_ISL\_541434|Original|hCoV-19^^Bern|Human|Viollier AG|Department of Biosystems Science and Engineering|Nadeau|Switzerland

>Spike|hCoV-19/England/ALDP-A2E57C/2020|2020-10-05|EPI\_ISL\_586655|Original|hCoV-19^^England|Human|Lighthouse Lab in Alderley Park|Wellcome Sanger Institute for the COVID-19 Genomics UK (COG-UK) consortium|Davies|United Kingdom

>Spike|hCoV-19/England/NORT-28122D/2020|2020-03-10|EPI\_ISL\_472160|Original|hCoV-19^^England|Human|Northumbria University / South Tees Hospitals NHS Foundation Trust / North Cumbria Integrated Care NHS Foundation Trust / North Tees and Hartlepool NHS Foundation Trust / Newcastle Hospitals NHS Foundation Trust|COVID-19 Genomics UK (COG-UK) Consortium|Bashton|United Kingdom

>Spike|hCoV-19/USA/MI-MDHHS-SC21334/2020|2020-04-04|EPI\_ISL\_507589|Original|hCoV-19^^Michigan|Human|Michigan Department of Health and Human Services|Michigan Department of Health and Human Services|Blankenship|USA

>Spike|hCoV-19/Netherlands/NoordHolland\_32/2020|2020-05-19|EPI\_ISL\_461221|Original|hCoV-19^^Noord Holland|Human|Dutch COVID-19 response team|Erasmus Medical Center|Oude Munnink|Netherlands

>Spike|hCoV-19/USA/TX-HMH-1380/2020|2020-05-01|EPI\_ISL\_542684|Original|hCoV-19^^Texas|Human|Houston Methodist Hospital|Houston Methodist Hospital|Long|USA

>Spike|hCoV-19/Australia/VIC1273/2020|2020-04-14|EPI\_ISL\_436131|Original|hCoV-19^^Victoria|Human|Victorian Infectious Diseases Reference Laboratory (VIDRL)|Microbiological Diagnostic Unit Public Health Laboratory and Victorian Infectious Diseases Reference Laboratory|Schultz|Australia

>Spike|hCoV-19/Switzerland/VD-ETHZ-280160/2020|2020-09-09|EPI\_ISL\_560512|Original|hCoV-19^^Vaud|Human|Viollier AG|Department of Biosystems Science and Engineering|Nadeau|Switzerland

>Spike|hCoV-19/USA/TX-HMH-MCoV-15605/2020|2020-10-26|EPI\_ISL\_787089|Original|hCoV-19^^Texas|Human|Houston Methodist Hospital|Houston Methodist Hospital|Long|USA

>Spike|hCoV-19/England/MILK-B5511D/2020|2020-11-06|EPI\_ISL\_657938|Original|hCoV-19^^England|Human|Lighthouse Lab in Milton Keynes|Wellcome Sanger Institute for the COVID-19 Genomics UK (COG-UK) Consortium|Davies|United Kingdom

>Spike|hCoV-19/England/CAMC-B2239B/2020|2020-11-02|EPI\_ISL\_645925|Original|hCoV-19^^England|Human|Lighthouse Lab in Cambridge|Wellcome Sanger Institute for the COVID-19 Genomics UK (COG-UK) Consortium|Davies|United Kingdom

>Spike|hCoV-19/England/20130053404/2020|2020-03-21|EPI\_ISL\_423635|Original|hCoV-19^^England|Human|Respiratory Virus Unit|Respiratory Virus Unit|Platt|United Kingdom

>Spike|hCoV-19/USA/TX-HMH-MCoV-12493/2020|2020-09-29|EPI\_ISL\_790364|Original|hCoV-19^^Texas|Human|Houston Methodist Hospital|Houston Methodist Hospital|Long|USA

>Spike|hCoV-19/South Africa/LR00139/2020|2020-07-20|EPI\_ISL\_514370|Original|hCoV-19^^Gauteng|Human|National Institute for Communicable Diseases of the National Health Laboratory Service|National Institute for Communicable Diseases of the National Health Laboratory Service|Allam|South Africa

>Spike|hCoV-19/England/NORT-283A8D/2020|2020-04-02|EPI\_ISL\_478516|Original|hCoV-19^^England|Human|Northumbria University / South Tees Hospitals NHS Foundation Trust / North Cumbria Integrated Care NHS Foundation Trust / North Tees and Hartlepool NHS Foundation Trust / Newcastle Hospitals NHS Foundation Trust|COVID-19 Genomics UK (COG-UK) Consortium|Bashton|United Kingdom

>Spike|hCoV-19/Scotland/EDB2245/2020|2020-04-21|EPI\_ISL\_473784|Original|hCoV-19^^Scotland|Human|Virology Department|COVID-19 Genomics UK (COG-UK) Consortium|Williams|United Kingdom

>Spike|hCoV-19/Wuhan/HB-WHCM-110/2020|2020-03-02|EPI\_ISL\_455403|Original|hCoV-19^^Hubei|Human|Wuhan Chain Medical Labs (CMLabs)|State Key Laboratory of Biotherapy of Sichuan University|Tang|China

>Spike|hCoV-19/England/ALDP-C3B54D/2020|2020-12-09|EPI\_ISL\_730874|Original|hCoV-19^^England|Human|Lighthouse Lab in Alderley Park|Wellcome Sanger Institute for the COVID-19 Genomics UK (COG-UK) Consortium|Davies|United Kingdom

>Spike|hCoV-19/USA/MI-MDHHS-SC21279/2020|2020-04-10|EPI\_ISL\_507534|Original|hCoV-19^^Michigan|Human|Michigan Department of Health and Human Services|Michigan Department of Health and Human Services|Blankenship|USA

>Spike|hCoV-19/Wales/PHWC-484F4F/2020|2020-10-24|EPI\_ISL\_628127|Original|hCoV-19^^Wales|Human|Wales Specialist Virology Centre Sequencing lab|COVID-19 Genomics UK (COG-UK) Consortium|Moore|United Kingdom

>Spike|hCoV-19/USA/TX-HMH-MCoV-13006/2020|2020-08-28|EPI\_ISL\_788157|Original|hCoV-19^^Texas|Human|Houston Methodist Hospital|Houston Methodist Hospital|Long|USA

>Spike|hCoV-19/Belgium/UGent-302/2020|2020-12-01|EPI\_ISL\_718026|Original|hCoV-19^^Ghent|Human|Lab voor klinische biologie|Onderzoeksgroep Virologie|Lambrechts|Belgium

>Spike|hCoV-19/Scotland/EDB3231/2020|2020-04-07|EPI\_ISL\_488952|Original|hCoV-19^^Scotland|Human|Virology Department|Wellcome Sanger Institute for the COVID-19 Genomics UK (COG-UK) consortium|Davies|United Kingdom

>Spike|hCoV-19/England/20140068504/2020|2020-03-30|EPI\_ISL\_465887|Original|hCoV-19^^England|Human|Respiratory Virus Unit|Respiratory Virus Unit|Platt|United Kingdom

>Spike|hCoV-19/Wales/PHWC-48C17E/2020|2020-11-04|EPI\_ISL\_665802|Original|hCoV-19^^Wales|Human|Wales Specialist Virology Centre Sequencing lab|COVID-19 Genomics UK (COG-UK) Consortium|Moore|United Kingdom

>Spike|hCoV-19/England/LIVE-1DE019/2020|2020-10-09|EPI\_ISL\_611737|Original|hCoV-19^^England|Human|Liverpool Clinical Laboratories|COVID-19 Genomics UK (COG-UK) Consortium|Haldenby|United Kingdom

>Spike|hCoV-19/Denmark/DCGC-9526/2020|2020-11-09|EPI\_ISL\_669020|Original|hCoV-19^^Sjaelland|Human|Department of Virus and Microbiological Special Diagnostics|Albertsen Lab|Michaelsen|Denmark

>Spike|hCoV-19/Australia/NSW2549/2020|2020-04-04|EPI\_ISL\_527050|Original|hCoV-19^^New South Wales|Human|Area of Virology|Area of Virology|Yeang|Australia

>Spike|hCoV-19/England/CAMC-B21086/2020|2020-11-01|EPI\_ISL\_647680|Original|hCoV-19^^England|Human|Lighthouse Lab in Cambridge|Wellcome Sanger Institute for the COVID-19 Genomics UK (COG-UK) Consortium|Davies|United Kingdom

>Spike|hCoV-19/England/EXET-13F377/2020|2020-12-16|EPI\_ISL\_764225|Original|hCoV-19^^England|Human|University of Exeter|COVID-19 Genomics UK (COG-UK) Consortium|Temperton|United Kingdom

>Spike|hCoV-19/England/ALDP-B46777/2020|2020-11-07|EPI\_ISL\_656128|Original|hCoV-19^^England|Human|Lighthouse Lab in Alderley Park|Wellcome Sanger Institute for the COVID-19 Genomics UK (COG-UK) Consortium|Davies|United Kingdom

>Spike|hCoV-19/England/NORT-28946B/2020|2020-03-29|EPI\_ISL\_458697|Original|hCoV-19^^England|Human|NU-OMICS DNA Sequencing research facility|Wellcome Sanger Institute for the COVID-19 Genomics UK (COG-UK) consortium|Davies|United Kingdom

>Spike|hCoV-19/England/CAMB-748F0/2020|2020-03-28|EPI\_ISL\_425336|Original|hCoV-19^^England|Human|Department of Pathology|COVID-19 Genomics UK (COG-UK) Consortium|Meredith|United Kingdom

>Spike|hCoV-19/England/BRIS-12BFD4/2020|2020-05-11|EPI\_ISL\_469345|Original|hCoV-19^^England|Human|PHE South West Regional Laboratory|Wellcome Sanger Institute for the COVID-19 Genomics UK (COG-UK) consortium|Davies|United Kingdom

>Spike|hCoV-19/England/ALDP-8F132F/2020|2020-06-25|EPI\_ISL\_556622|Original|hCoV-19^^England|Human|Lighthouse Lab in Alderley Park|Wellcome Sanger Institute for the COVID-19 Genomics UK (COG-UK) consortium|Davies|United Kingdom

>Spike|hCoV-19/England/LOND-D5E37/2020|2020-04-19|EPI\_ISL\_444250|Original|hCoV-19^^England|Human|University College London|COVID-19 Genomics UK (COG-UK) Consortium|Roy|United Kingdom

>Spike|hCoV-19/Australia/QLD1183/2020|2020-03-26|EPI\_ISL\_639774|Original|hCoV-19^^Australia|Human|unknown|Public Health Virology Laboratory|Nguyen|Australia

>Spike|hCoV-19/England/QEUA-9F4482/2020|2020-09-25|EPI\_ISL\_588374|Original|hCoV-19^^England|Human|Lighthouse Lab in Glasgow|Wellcome Sanger Institute for the COVID-19 Genomics UK (COG-UK) consortium|Davies|United Kingdom

>Spike|hCoV-19/Japan/PG-2888/2020|2020-05-00|EPI\_ISL\_691014|Original|hCoV-19^^Japan|Human|Pathogen Genomics Center|Pathogen Genomics Center|Sekizuka|Japan

>Spike|hCoV-19/Wales/PHWC-487164/2020|2020-10-16|EPI\_ISL\_637616|Original|hCoV-19^^Wales|Human|Wales Specialist Virology Centre Sequencing lab|COVID-19 Genomics UK (COG-UK) Consortium|Moore|United Kingdom

>Spike|hCoV-19/India/MH-AFMC-5075/2020|2020-05-20|EPI\_ISL\_497886|Original|hCoV-19^^Maharashtra|Human|Armed Forces Medical College|National Centre For Cell Science|Paul|India

>Spike|hCoV-19/Denmark/DCGC-8045/2020|2020-10-26|EPI\_ISL\_617169|Original|hCoV-19^^Midtjylland|Human|Department of Virus and Microbiological Special Diagnostics|Albertsen lab|Michaelsen|Denmark

>Spike|hCoV-19/England/LOND-124DB2F/2020|2020-00-00|EPI\_ISL\_584642|Original|hCoV-19^^England|Human|University College London Hospital|COVID-19 Genomics UK (COG-UK) Consortium|Byott|United Kingdom

>Spike|hCoV-19/England/CAMB-1B809D/2020|2020-10-16|EPI\_ISL\_638190|Original|hCoV-19^^England|Human|Department of Pathology|COVID-19 Genomics UK (COG-UK) Consortium|Goodfellow|United Kingdom

>Spike|hCoV-19/England/CAMB-1AD56F/2020|2020-04-26|EPI\_ISL\_489447|Original|hCoV-19^^England|Human|Department of Pathology|Wellcome Sanger Institute for the COVID-19 Genomics UK (COG-UK) consortium|Davies|United Kingdom

>Spike|hCoV-19/England/ALDP-B1D612/2020|2020-10-31|EPI\_ISL\_646064|Original|hCoV-19^^England|Human|Lighthouse Lab in Alderley Park|Wellcome Sanger Institute for the COVID-19 Genomics UK (COG-UK) Consortium|Davies|United Kingdom

>Spike|hCoV-19/England/ALDP-AA25BC/2020|2020-10-22|EPI\_ISL\_630757|Original|hCoV-19^^England|Human|Lighthouse Lab in Alderley Park|Wellcome Sanger Institute for the COVID-19 Genomics UK (COG-UK) consortium|Davies|United Kingdom

>Spike|hCoV-19/Spain/MD-IBV-99012422/2020|2020-11-23|EPI\_ISL\_780033|Original|hCoV-19^^Madrid|Human|Hospital General Universitario Gregorio Mara\u00f1a|SeqCOVID-SPAIN consortium/IBV (CSIC)|Comas|Spain

>Spike|hCoV-19/South Africa/KRISP-K001099/2020|2020-07-13|EPI\_ISL\_509348|Original|hCoV-19^^KwaZulu-Natal|Human|NHLS-IALCH|KRISP|de Oliveira|South Africa

>Spike|hCoV-19/England/204760137/2020|2020-11-18|EPI\_ISL\_678735|Original|hCoV-19^^England|Human|Respiratory Virus Unit|COVID-19 Genomics UK (COG-UK) Consortium|Platt|United Kingdom

>Spike|hCoV-19/Australia/VIC3036/2020|2020-06-28|EPI\_ISL\_520749|Original|hCoV-19^^Victoria|Human|Victorian Infectious Diseases Reference Laboratory (VIDRL)|VIDRL and MDU-PHL|Schultz|Australia

>Spike|hCoV-19/Netherlands/GE-EMC-408/2020|2020-11-12|EPI\_ISL\_722620|Original|hCoV-19^^Gelderland|Human|Dutch COVID-19 response team|Erasmus Medical Center|Oude Munnink|Netherlands

>Spike|hCoV-19/Iceland/189/2020|2020-03-16|EPI\_ISL\_417709|Original|hCoV-19^^Reykjavik|Human|The National University Hospital of Iceland|deCODE genetics|J\u00f3nsson|Iceland

>Spike|hCoV-19/Finland/23LS5H3/2020|2020-10-23|EPI\_ISL\_759779|Original|hCoV-19^^Uusimaa|Human|Department of Virology and Immunology|Department of Virology|Smura|Finland

>Spike|hCoV-19/England/ALDP-9EA874/2020|2020-09-24|EPI\_ISL\_579969|Original|hCoV-19^^England|Human|Lighthouse Lab in Alderley Park|Wellcome Sanger Institute for the COVID-19 Genomics UK (COG-UK) consortium|Davies|United Kingdom

>Spike|hCoV-19/USA/MI-MDHHS-SC20800/2020|2020-05-19|EPI\_ISL\_471821|Original|hCoV-19^^Michigan|Human|Michigan Department of Health and Human Services|Michigan Department of Health and Human Services|Blankenship|USA

>Spike|hCoV-19/Italy/LOM-IZSGC-TE31135/2020|2020-05-02|EPI\_ISL\_528937|Original|hCoV-19^^Lombardy|Human|Agenzia di Tutela della Salute di Bergamo|Istituto Zooprofilattico Sperimentale dell'Abruzzo e Molise \G.Caporale\|Lorusso|Italy

>Spike|hCoV-19/Denmark/DCGC-21834/2020|2020-12-21|EPI\_ISL\_758393|Original|hCoV-19^^Syddanmark|Human|Department of Virus and Microbiological Special Diagnostics|Albertsen Lab|Michaelsen|Denmark

>Spike|hCoV-19/Canada/QC-LSPQ-L00216421/2020|2020-03-13|EPI\_ISL\_535746|Original|hCoV-19^^Quebec|Human|Centre hospitalier de St-Mary|Laboratoire de sant\u00e9 publique du Qu\u00e9bec|Moreira|Canada

>Spike|hCoV-19/England/ALDP-94D55A/2020|2020-06-15|EPI\_ISL\_555079|Original|hCoV-19^^England|Human|Lighthouse Lab in Alderley Park|Wellcome Sanger Institute for the COVID-19 Genomics UK (COG-UK) consortium|Davies|United Kingdom

>Spike|hCoV-19/South Africa/LR00134/2020|2020-07-20|EPI\_ISL\_514365|Original|hCoV-19^^Gauteng|Human|National Institute for Communicable Diseases of the National Health Laboratory Service|National Institute for Communicable Diseases of the National Health Laboratory Service|Allam|South Africa

>Spike|hCoV-19/USA/TX-HMH-MCoV-9795/2020|2020-07-04|EPI\_ISL\_780280|Original|hCoV-19^^Texas|Human|Houston Methodist Hospital|Houston Methodist Hospital|Long|USA

>Spike|hCoV-19/USA/TX-HMH-2223/2020|2020-05-15|EPI\_ISL\_545188|Original|hCoV-19^^Texas|Human|Houston Methodist Hospital|Houston Methodist Hospital|Long|USA

>Spike|hCoV-19/Denmark/DCGC-3571/2020|2020-08-31|EPI\_ISL\_616366|Original|hCoV-19^^Syddanmark|Human|Department of Virus and Microbiological Special Diagnostics|Albertsen lab|Michaelsen|Denmark

>Spike|hCoV-19/Scotland/QEUA-AF47D3/2020|2020-10-30|EPI\_ISL\_676459|Original|hCoV-19^^Scotland|Human|Lighthouse Lab in Glasgow|Wellcome Sanger Institute for the COVID-19 Genomics UK (COG-UK) Consortium|Davies|United Kingdom

>Spike|hCoV-19/England/QEUA-B80814/2020|2020-11-14|EPI\_ISL\_661709|Original|hCoV-19^^England|Human|Lighthouse Lab in Glasgow|Wellcome Sanger Institute for the COVID-19 Genomics UK (COG-UK) Consortium|Davies|United Kingdom

>Spike|hCoV-19/Wales/PHWC-35B3E/2020|2020-04-24|EPI\_ISL\_474530|Original|hCoV-19^^Wales|Human|Originating lab|COVID-19 Genomics UK (COG-UK) Consortium|Moore|United Kingdom

>Spike|hCoV-19/England/20169004504/2020|2020-04-16|EPI\_ISL\_465178|Original|hCoV-19^^England|Human|Respiratory Virus Unit|Respiratory Virus Unit|Platt|United Kingdom

>Spike|hCoV-19/England/MILK-AC7803/2020|2020-10-21|EPI\_ISL\_630301|Original|hCoV-19^^England|Human|Lighthouse Lab in Milton Keynes|Wellcome Sanger Institute for the COVID-19 Genomics UK (COG-UK) consortium|Davies|United Kingdom

>Spike|hCoV-19/England/CAMB-1B74A1/2020|2020-10-19|EPI\_ISL\_638323|Original|hCoV-19^^England|Human|Department of Pathology|COVID-19 Genomics UK (COG-UK) Consortium|Goodfellow|United Kingdom

>Spike|hCoV-19/USA/TX-HMH-6315/2020|2020-07-04|EPI\_ISL\_547384|Original|hCoV-19^^Texas|Human|Houston Methodist Hospital|Houston Methodist Hospital|Long|USA

>Spike|hCoV-19/Wales/PHWC-496FE0/2020|2020-11-26|EPI\_ISL\_726762|Original|hCoV-19^^Wales|Human|Originating lab|COVID-19 Genomics UK (COG-UK) Consortium|Moore|United Kingdom

>Spike|hCoV-19/Japan/PG-1741/2020|2020-05-00|EPI\_ISL\_685347|Original|hCoV-19^^Japan|Human|Pathogen Genomics Center|Pathogen Genomics Center|Sekizuka|Japan

>Spike|hCoV-19/Canada/BC\_6004567/2020|2020-03-10|EPI\_ISL\_418836|Original|hCoV-19^^British Columbia|Human|BCCDC Public Health Laboratory|BCCDC Public Health Laboratory|Harrigan|Canada

>Spike|hCoV-19/England/204541008/2020|2020-11-04|EPI\_ISL\_678666|Original|hCoV-19^^England|Human|Respiratory Virus Unit|COVID-19 Genomics UK (COG-UK) Consortium|Platt|United Kingdom

>Spike|hCoV-19/Japan/PG-3764/2020|2020-04-00|EPI\_ISL\_692017|Original|hCoV-19^^Japan|Human|Pathogen Genomics Center|Pathogen Genomics Center|Sekizuka|Japan

>Spike|hCoV-19/USA/TX-HMH-4052/2020|2020-06-17|EPI\_ISL\_543328|Original|hCoV-19^^Texas|Human|Houston Methodist Hospital|Houston Methodist Hospital|Long|USA

>Spike|hCoV-19/England/GSTT-265D85B/2020|2020-03-25|EPI\_ISL\_484023|Original|hCoV-19^^England|Human|Centre for Clinical Infection and Diagnostics Research and Genomics Innovation Unit|COVID-19 Genomics UK (COG-UK) Consortium|Awan|United Kingdom

>Spike|hCoV-19/Norway/2808/2020|2020-06-29|EPI\_ISL\_493373|Original|hCoV-19^^Norway|Human|Furst Medical Laboratory|Norwegian Institute of Public Health|Kopperud Riis|Norway

>Spike|hCoV-19/Australia/VIC15250/2020|2020-08-26|EPI\_ISL\_593219|Original|hCoV-19^^Victoria|Human|Microbiological Diagnostic Unit - Public Health Laboratory (MDU-PHL)|MDU-PHL|Schultz|Australia

>Spike|hCoV-19/Australia/VIC3965/2020|2020-07-13|EPI\_ISL\_519357|Original|hCoV-19^^Victoria|Human|Microbiological Diagnostic Unit - Public Health Laboratory (MDU-PHL)|MDU-PHL|Schultz|Australia

>Spike|hCoV-19/USA/OR-OHSU-0809/2020|2020-06-22|EPI\_ISL\_525905|Original|hCoV-19^^Oregon|Human|OHSU Lab Services Molecular Microbiology Lab|Oregon SARS-CoV-2 Genome Sequencing Center|O'Roak|USA

>Spike|hCoV-19/USA/WA-S2239/2020|2020-06-09|EPI\_ISL\_497667|Original|hCoV-19^^Washington|Human|Washington State Department of Health|Seattle Flu Study|Lee|USA

>Spike|hCoV-19/USA/LA-EVTL942/2020|2020-08-11|EPI\_ISL\_653633|Original|hCoV-19^^Louisiana|Human|LSUHS Emerging Viral Threat Laboratory|Microbial Genome Sequencing Center|Kamil|USA

>Spike|hCoV-19/Guangdong/MZ01/2020|2020-02-13|EPI\_ISL\_454417|Original|hCoV-19^^Guangdong|Human|Research and Experiment Center|Research and Experiment Center|Submitter|China

>Spike|hCoV-19/Japan/PG-7272/2020|2020-08-00|EPI\_ISL\_688375|Original|hCoV-19^^Japan|Human|Saitama Prefectural Institute of Public Health|Pathogen Genomics Center|Sekizuka|Japan

>Spike|hCoV-19/England/MILK-B8ED9F/2020|2020-11-13|EPI\_ISL\_674508|Original|hCoV-19^^England|Human|Lighthouse Lab in Milton Keynes|Wellcome Sanger Institute for the COVID-19 Genomics UK (COG-UK) Consortium|Davies|United Kingdom

>Spike|hCoV-19/USA/TX-HMH-MCoV-10709/2020|2020-07-08|EPI\_ISL\_789143|Original|hCoV-19^^Texas|Human|Houston Methodist Hospital|Houston Methodist Hospital|Long|USA

>Spike|hCoV-19/England/CAMB-1AE373/2020|2020-04-22|EPI\_ISL\_459498|Original|hCoV-19^^England|Human|Department of Pathology|Wellcome Sanger Institute for the COVID-19 Genomics UK (COG-UK) consortium|Davies|United Kingdom

>Spike|hCoV-19/Scotland/CVR1977/2020|2020-04-08|EPI\_ISL\_433269|Original|hCoV-19^^Scotland|Human|West of Scotland Specialist Virology Centre|COVID-19 Genomics UK (COG-UK) Consortium|Robertson|United Kingdom

>Spike|hCoV-19/USA/MI-MDHHS-SC21980/2020|2020-06-15|EPI\_ISL\_566030|Original|hCoV-19^^Michigan|Human|Michigan Department of Health and Human Services|Michigan Department of Health and Human Services|Blankenship|USA

>Spike|hCoV-19/Switzerland/UR-ETHZ-200014/2020|2020-07-13|EPI\_ISL\_510703|Original|hCoV-19^^Uri|Human|Viollier AG|Department of Biosystems Science and Engineering|Nadeau|Switzerland

>Spike|hCoV-19/Northern Ireland/QEUI-96AB0A/2020|2020-08-17|EPI\_ISL\_531320|Original|hCoV-19^^Northern Ireland|Human|Lighthouse Lab in Glasgow|Wellcome Sanger Institute for the COVID-19 Genomics UK (COG-UK) consortium|Davies|United Kingdom

>Spike|hCoV-19/Denmark/DCGC-6159/2020|2020-10-05|EPI\_ISL\_620062|Original|hCoV-19^^Hovedstaden|Human|Department of Virus and Microbiological Special Diagnostics|Albertsen lab|Michaelsen|Denmark

>Spike|hCoV-19/England/CAMB-8382B/2020|2020-04-14|EPI\_ISL\_443568|Original|hCoV-19^^England|Human|Department of Pathology|Wellcome Sanger Institute for the COVID-19 Genomics UK (COG-UK) consortium|Amato|United Kingdom

>Spike|hCoV-19/USA/WI-UW-1964/2020|2020-09-24|EPI\_ISL\_677372|Original|hCoV-19^^Wisconsin|Human|University of Wisconsin-Madison AIDS Vaccine Research Laboratories|University of Wisconsin-Madison AIDS Vaccine Research Laboratories|Baczenas|USA

>Spike|hCoV-19/Japan/PG-5266/2020|2020-08-00|EPI\_ISL\_690369|Original|hCoV-19^^Japan|Human|Pathogen Genomics Center|Pathogen Genomics Center|Sekizuka|Japan

>Spike|hCoV-19/Wales/PHWC-480A51/2020|2020-10-22|EPI\_ISL\_612205|Original|hCoV-19^^Wales|Human|Wales Specialist Virology Centre Sequencing lab|COVID-19 Genomics UK (COG-UK) Consortium|Moore|United Kingdom

>Spike|hCoV-19/Australia/VIC11660/2020|2020-07-24|EPI\_ISL\_591830|Original|hCoV-19^^Victoria|Human|Microbiological Diagnostic Unit - Public Health Laboratory (MDU-PHL)|MDU-PHL|Schultz|Australia

>Spike|hCoV-19/Denmark/DCGC-7083/2020|2020-10-12|EPI\_ISL\_619097|Original|hCoV-19^^Hovedstaden|Human|Department of Virus and Microbiological Special Diagnostics|Albertsen lab|Michaelsen|Denmark

>Spike|hCoV-19/mink/Netherlands/NB-EMC-43-5/2020|2020-09-01|EPI\_ISL\_577798|Original|hCoV-19^^Noord Brabant|Neovison vison|Dutch COVID-19 response team|Erasmus Medical Center|Oude Munnink|Netherlands

>Spike|hCoV-19/South Africa/NHLS-UCT-GS-1808/2020|2020-08-31|EPI\_ISL\_700597|Original|hCoV-19^^Western Cape|Human|Mitchells Plain Hospital wc MPH|NHLS/UCT|Iranzadeh|South Africa

>Spike|hCoV-19/England/QEUI-551E10/2020|2020-05-12|EPI\_ISL\_532270|Original|hCoV-19^^England|Human|Lighthouse Lab in Glasgow|Wellcome Sanger Institute for the COVID-19 Genomics UK (COG-UK) consortium|Davies|United Kingdom

>Spike|hCoV-19/Australia/VIC1440/2020|2020-04-19|EPI\_ISL\_563977|Original|hCoV-19^^Victoria|Human|Victorian Infectious Diseases Reference Laboratory (VIDRL)|VIDRL and MDU-PHL|Schultz|Australia

>Spike|hCoV-19/Spain/MD-IBV-99008475/2020|2020-08-08|EPI\_ISL\_654058|Original|hCoV-19^^Madrid|Human|Hospital General Universitario Gregorio Mara\u00f1a|SeqCOVID-SPAIN consortium/IBV (CSIC)|Comas|Spain

>Spike|hCoV-19/England/CAMC-AB0366/2020|2020-10-23|EPI\_ISL\_623437|Original|hCoV-19^^England|Human|Lighthouse Lab in Cambridge|Wellcome Sanger Institute for the COVID-19 Genomics UK (COG-UK) consortium|Davies|United Kingdom

>Spike|hCoV-19/USA/TX-DSHS-0873/2020|2020-06-16|EPI\_ISL\_610009|Original|hCoV-19^^Texas|Human|Texas Department of State Health Services|Texas Department of State Health Services|Rahman|USA

>Spike|hCoV-19/England/EXET-138736/2020|2020-10-17|EPI\_ISL\_627426|Original|hCoV-19^^England|Human|University of Exeter|COVID-19 Genomics UK (COG-UK) Consortium|Temperton|United Kingdom

>Spike|hCoV-19/England/LOND-12E85EC/2020|2020-12-15|EPI\_ISL\_741333|Original|hCoV-19^^England|Human|University College London|COVID-19 Genomics UK (COG-UK) Consortium|Roy|United Kingdom

>Spike|hCoV-19/Japan/PG-4914/2020|2020-07-00|EPI\_ISL\_690034|Original|hCoV-19^^Japan|Human|Pathogen Genomics Center|Pathogen Genomics Center|Sekizuka|Japan

>Spike|hCoV-19/USA/MN-MDH-1500/2020|2020-03-24|EPI\_ISL\_518893|Original|hCoV-19^^Minnesota|Human|Mayo Clinic & Mayo Clinic Laboratories|Minnesota Department of Health|Garfin|USA

>Spike|hCoV-19/England/CAMB-82EFD/2020|2020-04-13|EPI\_ISL\_443330|Original|hCoV-19^^England|Human|Department of Pathology|Wellcome Sanger Institute for the COVID-19 Genomics UK (COG-UK) consortium|Amato|United Kingdom

>Spike|hCoV-19/USA/CA-CZB-11520/2020|2020-07-18|EPI\_ISL\_625577|Original|hCoV-19^^California|Human|NaN|Chan-Zuckerberg Biohub|Bhatt|USA

>Spike|hCoV-19/Portugal/PT2032/2020|2020-11-09|EPI\_ISL\_732248|Original|hCoV-19^^Portugal|Human|Instituto Nacional de Saude (INSA) and Instituto Gulbenkian de Ciencia (IGC)|Instituto Nacional de Saude (INSA) and Instituto Gulbenkian de Ciencia (IGC)|Borges|Portugal

>Spike|hCoV-19/England/NORT-294F3F/2020|2020-03-29|EPI\_ISL\_488467|Original|hCoV-19^^England|Human|NU-OMICS DNA Sequencing research facility|Wellcome Sanger Institute for the COVID-19 Genomics UK (COG-UK) consortium|Davies|United Kingdom

>Spike|hCoV-19/Scotland/QEUA-A0AE11/2020|2020-10-03|EPI\_ISL\_599145|Original|hCoV-19^^Scotland|Human|Lighthouse Lab in Glasgow|Wellcome Sanger Institute for the COVID-19 Genomics UK (COG-UK) consortium|Davies|United Kingdom

>Spike|hCoV-19/Australia/VIC2938/2020|2020-07-09|EPI\_ISL\_521769|Original|hCoV-19^^Victoria|Human|Microbiological Diagnostic Unit - Public Health Laboratory (MDU-PHL)|MDU-PHL|Schultz|Australia

>Spike|hCoV-19/Austria/CeMM1094/2020|2020-08-03|EPI\_ISL\_583890|Original|hCoV-19^^St. Wolfgang|Human|Austrian Agency for Health and Food Safety (AGES)|Bergthaler laboratory|Bergthaler|Austria

>Spike|hCoV-19/Denmark/DCGC-4240/2020|2020-09-14|EPI\_ISL\_622133|Original|hCoV-19^^Hovedstaden|Human|Department of Virus and Microbiological Special Diagnostics|Albertsen lab|Michaelsen|Denmark

>Spike|hCoV-19/England/MILK-A7AF64/2020|2020-10-14|EPI\_ISL\_607501|Original|hCoV-19^^England|Human|Lighthouse Lab in Milton Keynes|Wellcome Sanger Institute for the COVID-19 Genomics UK (COG-UK) consortium|Davies|United Kingdom

>Spike|hCoV-19/USA/LA-EVTL545/2020|2020-08-05|EPI\_ISL\_578949|Original|hCoV-19^^Louisiana|Human|LSUHS Emerging Viral Threat Laboratory|Microbial Genome Sequencing Center|Kamil|USA

>Spike|hCoV-19/USA/CA-CZB-1265/2020|2020-05-12|EPI\_ISL\_454685|Original|hCoV-19^^California|Human|County of Santa Clara Public Health Department|Chan-Zuckerberg Biohub|Hao|USA

>Spike|hCoV-19/Scotland/CVR2041/2020|2020-04-09|EPI\_ISL\_490654|Original|hCoV-19^^Scotland|Human|West of Scotland Specialist Virology Centre|COVID-19 Genomics UK (COG-UK) Consortium|Robertson|United Kingdom

>Spike|hCoV-19/Australia/VIC6950/2020|2020-07-21|EPI\_ISL\_564161|Original|hCoV-19^^Victoria|Human|Microbiological Diagnostic Unit - Public Health Laboratory (MDU-PHL)|MDU-PHL|Schultz|Australia

>Spike|hCoV-19/Wales/PHWC-16D2DD/2020|2020-09-24|EPI\_ISL\_574223|Original|hCoV-19^^Wales|Human|Wales Specialist Virology Centre Sequencing lab|COVID-19 Genomics UK (COG-UK) Consortium|Moore|United Kingdom

>Spike|hCoV-19/USA/OR-OHSU-0905/2020|2020-06-04|EPI\_ISL\_525924|Original|hCoV-19^^Oregon|Human|OHSU Lab Services Molecular Microbiology Lab|Oregon SARS-CoV-2 Genome Sequencing Center|O'Roak|USA

>Spike|hCoV-19/Scotland/CVR377/2020|2020-03-23|EPI\_ISL\_439066|Original|hCoV-19^^Scotland|Human|West of Scotland Specialist Virology Centre|COVID-19 Genomics UK (COG-UK) Consortium|Robertson|United Kingdom

>Spike|hCoV-19/Colombia/MAG-GVI-93450/2020|2020-04-01|EPI\_ISL\_447777|Original|hCoV-19^^Magdalena|Human|Instituto Nacional de Salud|Grupo de Investigaciones Microbiol\u00f3gicas-UR (GIMUR)|Ram\u00e9dez|Colombia

>Spike|hCoV-19/England/MILK-9A6D1B/2020|2020-09-03|EPI\_ISL\_550048|Original|hCoV-19^^England|Human|Lighthouse Lab in Milton Keynes|Wellcome Sanger Institute for the COVID-19 Genomics UK (COG-UK) consortium|Davies|United Kingdom

>Spike|hCoV-19/USA/CA-CDPH103/2020|2020-07-28|EPI\_ISL\_754936|Original|hCoV-19^^California|Human|California Department of Public Health|California Department of Public Health|Bell|USA

>Spike|hCoV-19/USA/WY-WPHL-20157057/2020|2020-12-02|EPI\_ISL\_756130|Original|hCoV-19^^Wyoming|Human|Wyoming Public Health Laboratory|Wyoming Public Health Laboratory|Hull|USA

>Spike|hCoV-19/Switzerland/LU-ETHZ-260088/2020|2020-08-25|EPI\_ISL\_539409|Original|hCoV-19^^Luzern|Human|Viollier AG|Department of Biosystems Science and Engineering|Nadeau|Switzerland

>Spike|hCoV-19/Denmark/DCGC-21103/2020|2020-12-21|EPI\_ISL\_759556|Original|hCoV-19^^Nordjylland|Human|Department of Virus and Microbiological Special Diagnostics|Albertsen Lab|Michaelsen|Denmark

>Spike|hCoV-19/Spain/PV-IBV-2113/2020|2020-04-11|EPI\_ISL\_468881|Original|hCoV-19^^Basque Country|Human|Servicio de Microbiolog\u00eda. Hospital Universitario Donostia. OSI Donostialdea. \u00clrea de Enfermedades Infecciosas|SeqCOVID-SPAIN consortium/IBV (CSIC) |Comas|Spain

>Spike|hCoV-19/USA/TX-DSHS-1232/2020|2020-03-25|EPI\_ISL\_654753|Original|hCoV-19^^Texas|Human|Texas Department of State Health Services|Texas Department of State Health Services|Rahman|USA

>Spike|hCoV-19/Canada/NL\_98/2020|2020-03-22|EPI\_ISL\_469237|Original|hCoV-19^^Newfoundland and Labrador|Human|Public Health Laboratory|National Microbiology Laboratory|Majer|Canada

>Spike|hCoV-19/USA/CA-CZB-12305/2020|2020-10-07|EPI\_ISL\_648394|Original|hCoV-19^^California|Human|Santa Clara County Public Health Laboratory|Chan-Zuckerberg Biohub|Bhatt|USA

>Spike|hCoV-19/Brazil/SP-L7-CD73/2020|2020-03-24|EPI\_ISL\_476440|Original|hCoV-19^^S\u00e3o Paulo|Human|Hospital da Cl\u00ednicas da Faculdade de Medicina da Universidade de S\u00e3o Paulo|Instituto de Medicina Tropical da Univesidade de S\u00e3o Paulo|Sabino|Brazil

>Spike|hCoV-19/Denmark/DCGC-20124/2020|2020-12-07|EPI\_ISL\_747997|Original|hCoV-19^^Syddanmark|Human|Department of Virus and Microbiological Special Diagnostics|Albertsen Lab|Michaelsen|Denmark

>Spike|hCoV-19/Northern Ireland/NIRE-234380/2020|2020-10-14|EPI\_ISL\_680376|Original|hCoV-19^^Northern Ireland|Human|Regional Virus Laboratory|COVID-19 Genomics UK (COG-UK) Consortium|Fairley|United Kingdom

>Spike|hCoV-19/England/MILK-B55C85/2020|2020-11-05|EPI\_ISL\_658265|Original|hCoV-19^^England|Human|Lighthouse Lab in Milton Keynes|Wellcome Sanger Institute for the COVID-19 Genomics UK (COG-UK) Consortium|Davies|United Kingdom

>Spike|hCoV-19/England/ALDP-9CACBA/2020|2020-09-16|EPI\_ISL\_575727|Original|hCoV-19^^England|Human|Lighthouse Lab in Alderley Park|Wellcome Sanger Institute for the COVID-19 Genomics UK (COG-UK) consortium|Davies|United Kingdom

>Spike|hCoV-19/South Korea/KCDC2615/2020|2020-07-01|EPI\_ISL\_515018|Original|hCoV-19^^South Korea|Human|Division of Viral Diseases|Division of Viral Diseases|Kim|South Korea

>Spike|hCoV-19/Scotland/GCVR-173C8B/2020|2020-04-05|EPI\_ISL\_459101|Original|hCoV-19^^Scotland|Human|NHSGGC West of Scotland Specialist Virology Centre / MRC-University of Glasgow Centre for Virus Research|Wellcome Sanger Institute for the COVID-19 Genomics UK (COG-UK) consortium|Davies|United Kingdom

>Spike|hCoV-19/Australia/VIC2856/2020|2020-07-02|EPI\_ISL\_521687|Original|hCoV-19^^Victoria|Human|Microbiological Diagnostic Unit - Public Health Laboratory (MDU-PHL) |MDU-PHL|Schultz|Australia

>Spike|hCoV-19/Denmark/DCGC-10603/2020|2020-11-02|EPI\_ISL\_670080|Original|hCoV-19^^Midtjylland|Human|Department of Virus and Microbiological Special Diagnostics|Albertsen Lab|Michaelsen|Denmark

>Spike|hCoV-19/England/QEUH-96AEA7/2020|2020-08-14|EPI\_ISL\_531273|Original|hCoV-19^^England|Human|Lighthouse Lab in Glasgow|Wellcome Sanger Institute for the COVID-19 Genomics UK (COG-UK) consortium|Davies|United Kingdom

>Spike|hCoV-19/England/ALDP-9CD77A/2020|2020-09-16|EPI\_ISL\_566163|Original|hCoV-19^^England|Human|Lighthouse Lab in Alderley Park|Wellcome Sanger Institute for the COVID-19 Genomics UK (COG-UK) consortium|Davies|United Kingdom

>Spike|hCoV-19/USA/WI-UW-1629/2020|2020-09-00|EPI\_ISL\_605503|Original|hCoV-19^^Wisconsin|Human|University of Wisconsin-Madison AIDS Vaccine Research Laboratories|University of Wisconsin-Madison AIDS Vaccine Research Laboratories|Baczenas|USA



>Spike|hCoV-19/New Zealand/20VR2024/2020|2020-00-00|EPI\_ISL\_579211|Original|hCoV-19^^Combined Wellington|Human|Wellington SCL (WN)|Institute of Environmental Science and Research (ESR)|Wang|New Zealand

>Spike|hCoV-19/England/CAMB-1AD59C/2020|2020-04-25|EPI\_ISL\_489535|Original|hCoV-19^^England|Human|Department of Pathology|Wellcome Sanger Institute for the COVID-19 Genomics UK (COG-UK) consortium|Davies|United Kingdom

>Spike|hCoV-19/USA/WA-S854/2020|2020-04-24|EPI\_ISL\_463344|Original|hCoV-19^^Washington|Human|Washington State Department of Health|Seattle Flu Study|Bedford|USA

>Spike|hCoV-19/England/20138024104/2020|2020-03-25|EPI\_ISL\_423304|Original|hCoV-19^^England|Human|Respiratory Virus Unit|Respiratory Virus Unit|Platt|United Kingdom

>Spike|hCoV-19/USA/VA-DCLS-0185/2020|2020-04-07|EPI\_ISL\_437401|Original|hCoV-19^^Virginia|Human|Virginia DCLS|Virginia DCLS|St. Jacques|USA

>Spike|hCoV-19/USA/FL-BPHL-1561/2020|2020-09-10|EPI\_ISL\_568659|Original|hCoV-19^^Florida|Human|Florida Bureau of Public Health Laboratories|Florida Bureau of Public Health Laboratories|Blanton|USA

>Spike|hCoV-19/South Africa/KRISP-K002624/2020|2020-08-01|EPI\_ISL\_535487|Original|hCoV-19^^KwaZulu-Natal|Human|NHLs-IALCH|KRISP|de Oliveira|South Africa

>Spike|hCoV-19/England/BRIS-128FD7/2020|2020-04-19|EPI\_ISL\_458857|Original|hCoV-19^^England|Human|PHE South West Regional Laboratory|Wellcome Sanger Institute for the COVID-19 Genomics UK (COG-UK) consortium|Davies|United Kingdom

>Spike|hCoV-19/USA/CA-ALSR-4263/2020|2020-10-20|EPI\_ISL\_648923|Original|hCoV-19^^California|Human|San Diego County Public Health Laboratory|Andersen lab at Scripps Research|Gangavarapu|USA

>Spike|hCoV-19/Wales/PHWC-49FBE3/2020|2020-12-09|EPI\_ISL\_743331|Original|hCoV-19^^Wales|Human|Wales Specialist Virology Centre Sequencing lab|COVID-19 Genomics UK (COG-UK) Consortium|Moore|United Kingdom

>Spike|hCoV-19/England/MILK-B8C04D/2020|2020-11-13|EPI\_ISL\_674371|Original|hCoV-19^^England|Human|Lighthouse Lab in Milton Keynes|Wellcome Sanger Institute for the COVID-19 Genomics UK (COG-UK) Consortium|Davies|United Kingdom

>Spike|hCoV-19/England/CAMB-7D9F4/2020|2020-04-07|EPI\_ISL\_441637|Original|hCoV-19^^England|Human|Department of Pathology|Wellcome Sanger Institute for the COVID-19 Genomics UK (COG-UK) consortium|Amato|United Kingdom

>Spike|hCoV-19/England/ALDP-9CDFAF/2020|2020-09-16|EPI\_ISL\_566283|Original|hCoV-19^^England|Human|Lighthouse Lab in Alderley Park|Wellcome Sanger Institute for the COVID-19 Genomics UK (COG-UK) consortium|Davies|United Kingdom

>Spike|hCoV-19/Wales/PHWC-2766B/2020|2020-03-30|EPI\_ISL\_431913|Original|hCoV-19^^Wales|Human|Wales Specialist Virology Centre|Public Health Wales Microbiology Cardiff|Moore|United Kingdom

>Spike|hCoV-19/England/QEUA-AE4E2C/2020|2020-10-27|EPI\_ISL\_633190|Original|hCoV-19^^England|Human|Lighthouse Lab in Glasgow|Wellcome Sanger Institute for the COVID-19 Genomics UK (COG-UK) consortium|Davies|United Kingdom

>Spike|hCoV-19/England/ALDP-95459C/2020|2020-06-12|EPI\_ISL\_553740|Original|hCoV-19^^England|Human|Lighthouse Lab in Alderley Park|Wellcome Sanger Institute for the COVID-19 Genomics UK (COG-UK) consortium|Davies|United Kingdom

>Spike|hCoV-19/Chile/RM-110983/2020|2020-06-25|EPI\_ISL\_746579|Original|hCoV-19^^Region Metropolitana de Santiago|Human|Genetica Molecular and Subdepartamento de Virologia ISP Chile|Instituto de Salud Publica de Chile|Tognarelli|Chile

>Spike|hCoV-19/Scotland/QEUA-B69626/2020|2020-11-11|EPI\_ISL\_676366|Original|hCoV-19^^Scotland|Human|Lighthouse Lab in Glasgow|Wellcome Sanger Institute for the COVID-19 Genomics UK (COG-UK) Consortium|Davies|United Kingdom

>Spike|hCoV-19/United Arab Emirates/0330/2020|2020-05-18|EPI\_ISL\_698506|Original|hCoV-19^^Abu Dhabi|Human|Group 42 (G42) Healthcare|G42 Healthcare|Ogrodzki|United Arab Emirates

>Spike|hCoV-19/Japan/PG-5421/2020|2020-08-00|EPI\_ISL\_690524|Original|hCoV-19^^Japan|Human|Fukuoka Institute of Health and Environmental Sciences|Pathogen Genomics Center|Sekizuka|Japan

>Spike|hCoV-19/Spain/VC-IBV-98003584/2020|2020-03-31|EPI\_ISL\_538613|Original|hCoV-19^^Comunitat Valenciana|Human|Servicio de Microbiolog\u00eda. Hospital General Universitario de Castell\u00f3n|SeqCOVID-SPAIN consortium/IBV(CSIC)|Comas|Spain

>Spike|hCoV-19/Spain/MD-H12-25/2020|2020-03-22|EPI\_ISL\_428688|Original|hCoV-19^^Madrid|Human|Hospital Universitario 12 de Octubre|Hospital Universitario 12 de Octubre|Viedma|Spain

>Spike|hCoV-19/Portugal/PT0359/2020|2020-03-19|EPI\_ISL\_454075|Original|hCoV-19^^Portugal|Human|unknown|Instituto Nacional de Saude (INSA)|Borges|Portugal

>Spike|hCoV-19/USA/CA-UCLA-147/2020|2020-04-07|EPI\_ISL\_537490|Original|hCoV-19^^California|Human|UCLA Pathology Clinical Microbiology Lab|Kruglyak Lab|Boocock|USA

>Spike|hCoV-19/France/ARA-19311/2020|2020-04-03|EPI\_ISL\_508977|Original|hCoV-19^^Auvergne-Rh\u00f4ne-Alpes|Human|CNR Virus des Infections Respiratoires - France SUD|CNR Virus des Infections Respiratoires - France SUD|Josset|France

>Spike|hCoV-19/Japan/PG-0496/2020|2020-04-06|EPI\_ISL\_480155|Original|hCoV-19^^HokurikuShinsyu|Human|Fukui Prefectural Institute of Public Health and Environmental Science|Pathogen Genomics Center|Sekizuka|Japan

>Spike|hCoV-19/England/ALDP-A6C82E/2020|2020-10-13|EPI\_ISL\_608172|Original|hCoV-19^^England|Human|Lighthouse Lab in Alderley Park|Wellcome Sanger Institute for the COVID-19 Genomics UK (COG-UK) consortium|Davies|United Kingdom

>Spike|hCoV-19/England/CAMB-731E7/2020|2020-03-22|EPI\_ISL\_440195|Original|hCoV-19^^England|Human|Department of Pathology|Wellcome Sanger Institute for the COVID-19 Genomics UK (COG-UK) consortium|Amato|United Kingdom

>Spike|hCoV-19/England/ALDP-BC7899/2020|2020-11-21|EPI\_ISL\_721419|Original|hCoV-19^^England|Human|Lighthouse Lab in Alderley Park|Wellcome Sanger Institute for the COVID-19 Genomics UK (COG-UK) Consortium|Davies|United Kingdom

>Spike|hCoV-19/Wales/PHWC-16C6F0/2020|2020-06-09|EPI\_ISL\_574085|Original|hCoV-19^^Wales|Human|Wales Specialist Virology Centre Sequencing lab|COVID-19 Genomics UK (COG-UK) Consortium|Moore|United Kingdom

>Spike|hCoV-19/Denmark/DCGC-4233/2020|2020-09-14|EPI\_ISL\_622126|Original|hCoV-19^^Hovedstaden|Human|Department of Virus and Microbiological Special Diagnostics|Albertsen lab|Michaelsen|Denmark

>Spike|hCoV-19/Spain/CM-IBV-003770/2020|2020-04-03|EPI\_ISL\_474805|Original|hCoV-19^^Castilla La Mancha|Human|Complejo Hospitalario Universitario de Albacete|SeqCOVID-SPAIN consortium/IBV(CSIC)|Comas|Spain

>Spike|hCoV-19/Switzerland/BLETHZ-280151/2020|2020-09-09|EPI\_ISL\_560460|Original|hCoV-19^^Basel-Landschaft|Human|Viollier AG|Department of Biosystems Science and Engineering|Nadeau|Switzerland

>Spike|hCoV-19/USA/TX-HMH-2876/2020|2020-06-08|EPI\_ISL\_543845|Original|hCoV-19^^Texas|Human|Houston Methodist Hospital|Houston Methodist Hospital|Long|USA

>Spike|hCoV-19/Wales/PHWC-30FA0/2020|2020-04-09|EPI\_ISL\_446388|Original|hCoV-19^^Wales|Human|Wales Specialist Virology Centre|Public Health Wales Microbiology Cardiff|Moore|United Kingdom

>Spike|hCoV-19/Wales/PHWC-49A82D/2020|2020-12-02|EPI\_ISL\_727604|Original|hCoV-19^^Wales|Human|Originating lab|COVID-19 Genomics UK (COG-UK) Consortium|Moore|United Kingdom

>Spike|hCoV-19/England/QEUA-A0B083/2020|2020-09-30|EPI\_ISL\_599150|Original|hCoV-19^^England|Human|Lighthouse Lab in Glasgow|Wellcome Sanger Institute for the COVID-19 Genomics UK (COG-UK) consortium|Davies|United Kingdom

>Spike|hCoV-19/Scotland/QEUA-98F219/2020|2020-08-29|EPI\_ISL\_568442|Original|hCoV-19^^Scotland|Human|Lighthouse Lab in Glasgow|Wellcome Sanger Institute for the COVID-19 Genomics UK (COG-UK) consortium|Davies|United Kingdom

>Spike|hCoV-19/USA/CA-CZB-16089/2020|2020-11-29|EPI\_ISL\_738576|Original|hCoV-19^^California|Human|Renegade|Chan-Zuckerberg Biohub|Kamm|USA

>Spike|hCoV-19/Denmark/DCGC-20377/2020|2020-12-21|EPI\_ISL\_759115|Original|hCoV-19^^Hovedstaden|Human|Department of Virus and Microbiological Special Diagnostics|Albertsen Lab|Michaelsen|Denmark

>Spike|hCoV-19/England/204260213/2020|2020-10-14|EPI\_ISL\_609899|Original|hCoV-19^^England|Human|Respiratory Virus Unit|Respiratory Virus Unit|Platt|United Kingdom

>Spike|hCoV-19/Luxembourg/LNS6009012/2020|2020-11-19|EPI\_ISL\_744336|Original|hCoV-19^^Luxembourg|Human|Laboratoire national de sant\u00e9|Laboratoire national de sant\u00e9|Wienecke-Baldacchino|Luxembourg

>Spike|hCoV-19/England/BRIS-130A62/2020|2020-04-14|EPI\_ISL\_492710|Original|hCoV-19^^England|Human|PHE South West Regional Laboratory|Wellcome Sanger Institute for the COVID-19 Genomics UK (COG-UK) consortium|Davies|United Kingdom

>Spike|hCoV-19/USA/WA-UW-3560/2020|2020-03-25|EPI\_ISL\_570029|Original|hCoV-19^^Washington|Human|UW Virology Lab|UW Virology Lab|Roychoudhury|USA

>Spike|hCoV-19/England/QEUEH-AD2489/2020|2020-10-25|EPI\_ISL\_634197|Original|hCoV-19^^England|Human|Lighthouse Lab in Glasgow|Wellcome Sanger Institute for the COVID-19 Genomics UK (COG-UK) consortium|Davies|United Kingdom

>Spike|hCoV-19/Wales/PHWC-4965C0/2020|2020-11-19|EPI\_ISL\_726605|Original|hCoV-19^^Wales|Human|Originating lab|COVID-19 Genomics UK (COG-UK) Consortium|Moore|United Kingdom

>Spike|hCoV-19/Hong Kong/VM20121501/2020|2020-09-13|EPI\_ISL\_730609|Original|hCoV-19^^Hong Kong|Human|Tuen Mun Hospital|Hong Kong Department of Health|Mak|China

>Spike|hCoV-19/Japan/PG-2485/2020|2020-04-00|EPI\_ISL\_686090|Original|hCoV-19^^Japan|Human|Saitama Prefectural Institute of Public Health|Pathogen Genomics Center|Sekizuka|Japan

>Spike|hCoV-19/Suriname/SR-46/2020|2020-07-07|EPI\_ISL\_517657|Original|hCoV-19^^Suriname|Human|Academic Hospital Paramaribo|Erasmus Medical Center|M\u00f4cnger|Suriname

>Spike|hCoV-19/England/ALDP-6EA7B6/2020|2020-06-30|EPI\_ISL\_557617|Original|hCoV-19^^England|Human|Lighthouse Lab in Alderley Park|Wellcome Sanger Institute for the COVID-19 Genomics UK (COG-UK) consortium|Davies|United Kingdom

>Spike|hCoV-19/England/QEUEH-797A27/2020|2020-07-15|EPI\_ISL\_533139|Original|hCoV-19^^England|Human|Lighthouse Lab in Glasgow|Wellcome Sanger Institute for the COVID-19 Genomics UK (COG-UK) consortium|Davies|United Kingdom

>Spike|hCoV-19/Japan/PG-2120/2020|2020-05-00|EPI\_ISL\_685725|Original|hCoV-19^^Japan|Human|Pathogen Genomics Center|Pathogen Genomics Center|Sekizuka|Japan

>Spike|hCoV-19/England/QEUEH-B108CE/2020|2020-11-02|EPI\_ISL\_642544|Original|hCoV-19^^England|Human|Lighthouse Lab in Glasgow|Wellcome Sanger Institute for the COVID-19 Genomics UK (COG-UK) Consortium|Davies|United Kingdom

>Spike|hCoV-19/Japan/PG-4579/2020|2020-07-00|EPI\_ISL\_689716|Original|hCoV-19^^Japan|Human|Pathogen Genomics Center|Pathogen Genomics Center|Sekizuka|Japan

>Spike|hCoV-19/USA/TX-DSHS-0111/2020|2020-05-28|EPI\_ISL\_522394|Original|hCoV-19^^Texas|Human|Texas Department of State Health Services|Texas Department of State Health Services|Rahman|USA

>Spike|hCoV-19/USA/MA-MGH-00446/2020|2020-04-01|EPI\_ISL\_460352|Original|hCoV-19^^Massachusetts|Human|Massachusetts General Hospital|Infectious Disease Program|Lemieux|USA

>Spike|hCoV-19/Denmark/DCGC-12403/2020|2020-11-16|EPI\_ISL\_682584|Original|hCoV-19^^Hovedstaden|Human|Department of Virus and Microbiological Special Diagnostics|Albertsen Lab|Michaelsen|Denmark

>Spike|hCoV-19/USA/CA-CZB-14877/2020|2020-11-20|EPI\_ISL\_739072|Original|hCoV-19^^California|Human|Orange County Public Health Lab|Chan-Zuckerberg Biohub|Kamm|USA

>Spike|hCoV-19/England/20138026104/2020|2020-03-26|EPI\_ISL\_423311|Original|hCoV-19^^England|Human|Respiratory Virus Unit|Respiratory Virus Unit|Platt|United Kingdom

>Spike|hCoV-19/USA/MI-UM-10033920353/2020|2020-04-13|EPI\_ISL\_578158|Original|hCoV-19^^Michigan|Human|University of Michigan Clinical Microbiology Laboratory|Lauring Lab|Valesano|USA

>Spike|hCoV-19/Netherlands/UT-RIVM-10168/2020|2020-00-00|EPI\_ISL\_547555|Original|hCoV-19^^Utrecht|Human|Dutch COVID-19 response team|National Institute for Public Health and the Environment (RIVM)|Meijer|Netherlands

>Spike|hCoV-19/England/MILK-55949E/2020|2020-06-09|EPI\_ISL\_558322|Original|hCoV-19^^England|Human|Lighthouse Lab in Milton Keynes|Wellcome Sanger Institute for the COVID-19 Genomics UK (COG-UK) consortium|Davies|United Kingdom

>Spike|hCoV-19/England/CAMC-B083F5/2020|2020-10-29|EPI\_ISL\_643844|Original|hCoV-19^^England|Human|Lighthouse Lab in Cambridge|Wellcome Sanger Institute for the COVID-19 Genomics UK (COG-UK) Consortium|Davies|United Kingdom

>Spike|hCoV-19/USA/WI-UW-818/2020|2020-05-26|EPI\_ISL\_509825|Original|hCoV-19^^Wisconsin|Human|University of Wisconsin-Madison AIDS Vaccine Research Laboratories|University of Wisconsin-Madison AIDS Vaccine Research Laboratories|Baczenas|USA

>Spike|hCoV-19/England/ALDP-BBA0EC/2020|2020-11-20|EPI\_ISL\_701882|Original|hCoV-19^^England|Human|Lighthouse Lab in Alderley Park|Wellcome Sanger Institute for the COVID-19 Genomics UK (COG-UK) Consortium|Davies|United Kingdom

>Spike|hCoV-19/USA/LA-GBCL-26159766/2020|2020-04-11|EPI\_ISL\_485016|Original|hCoV-19^^Louisiana|Human|River Road Testing Lab|Ginkgo Bioworks Clinical Laboratory|Smith|USA

>Spike|hCoV-19/Canada/ON-S1569/2020|2020-09-02|EPI\_ISL\_755922|Original|hCoV-19^^Ontario|Human|Toronto Invasive Bacterial Diseases Network|McMaster University|McArthur|Canada

>Spike|hCoV-19/Japan/PG-0285/2020|2020-03-23|EPI\_ISL\_479964|Original|hCoV-19^^Kanto|Human|Tokyo Metropolitan Institute of Public Health|Pathogen Genomics Center|Sekizuka|Japan

>Spike|hCoV-19/England/QEUEH-95F8B6/2020|2020-08-08|EPI\_ISL\_532336|Original|hCoV-19^^England|Human|Lighthouse Lab in Glasgow|Wellcome Sanger Institute for the COVID-19 Genomics UK (COG-UK) consortium|Davies|United Kingdom

>Spike|hCoV-19/England/202881378/2020|2020-06-09|EPI\_ISL\_491713|Original|hCoV-19^^England|Human|Respiratory Virus Unit|Respiratory Virus Unit|Platt|United Kingdom

>Spike|hCoV-19/England/CAMB-72AA1/2020|2020-03-22|EPI\_ISL\_439924|Original|hCoV-19^^England|Human|Department of Pathology|Wellcome Sanger Institute for the COVID-19 Genomics UK (COG-UK) consortium|Amato|United Kingdom

>Spike|hCoV-19/England/CAMC-C463DC/2020|2020-12-10|EPI\_ISL\_718502|Original|hCoV-19^^England|Human|Lighthouse Lab in Cambridge|Wellcome Sanger Institute for the COVID-19 Genomics UK (COG-UK) Consortium|Davies|United Kingdom

>Spike|hCoV-19/USA/FL-BPHL-0300/2020|2020-06-01|EPI\_ISL\_480951|Original|hCoV-19^^Florida|Human|Florida Bureau of Public Health Laboratories|Florida Bureau of Public Health Laboratories|Blanton|USA

>Spike|hCoV-19/USA/WA-UW-10088/2020|2020-05-29|EPI\_ISL\_461458|Original|hCoV-19^^Washington|Human|UW Virology Lab|UW Virology Lab|Roychoudhury|USA

>Spike|hCoV-19/Scotland/EDB2896/2020|2020-04-01|EPI\_ISL\_488973|Original|hCoV-19^^Scotland|Human|Virology Department|Wellcome Sanger Institute for the COVID-19 Genomics UK (COG-UK) consortium|Davies|United Kingdom

>Spike|hCoV-19/USA/OR-OHSU-3996/2020|2020-11-06|EPI\_ISL\_667520|Original|hCoV-19^^Oregon|Human|OHSU Lab Services Molecular Microbiology Lab|Oregon SARS-CoV-2 Genome Sequencing Center|O'Roak|USA

>Spike|hCoV-19/United Arab Emirates/L3290248480/2020|2020-05-19|EPI\_ISL\_520693|Original|hCoV-19^^United Arab Emirates|Human|Mohammed Bin Rashid University of Medicine and Health Sciences|Al Jalila Genomics Center|Ramaswamy|United Arab Emirates

>Spike|hCoV-19/England/MILK-AC926D/2020|2020-10-21|EPI\_ISL\_629402|Original|hCoV-19^^England|Human|Lighthouse Lab in Milton Keynes|Wellcome Sanger Institute for the COVID-19 Genomics UK (COG-UK) consortium|Davies|United Kingdom

>Spike|hCoV-19/England/QEUEH-A00A44/2020|2020-10-02|EPI\_ISL\_584897|Original|hCoV-19^^England|Human|University of Exeter|COVID-19 Genomics UK (COG-UK) Consortium|Temperton|United Kingdom

>Spike|hCoV-19/England/CAMB-72115/2020|2020-03-28|EPI\_ISL\_439576|Original|hCoV-19^^England|Human|Department of Pathology|Wellcome Sanger Institute for the COVID-19 Genomics UK (COG-UK) consortium|Amato|United Kingdom

>Spike|hCoV-19/England/QEUEH-BC3DBC/2020|2020-11-25|EPI\_ISL\_704178|Original|hCoV-19^^England|Human|Lighthouse Lab in Glasgow|Wellcome Sanger Institute for the COVID-19 Genomics UK (COG-UK) Consortium|Davies|United Kingdom

>Spike|hCoV-19/USA/MA-MASPHL-00661/2020|2020-05-18|EPI\_ISL\_692974|Original|hCoV-19^^Massachusetts|Human|Massachusetts State Public Health Laboratory|Massachusetts State Public Health Laboratory|Lang|USA

>Spike|hCoV-19/Japan/PG-0987/2020|2020-04-00|EPI\_ISL\_684597|Original|hCoV-19^^Japan|Human|Pathogen Genomics Center|Pathogen Genomics Center|Sekizuka|Japan

>Spike|hCoV-19/England/CAMC-B08D8E/2020|2020-10-29|EPI\_ISL\_673178|Original|hCoV-19^^England|Human|Lighthouse Lab in Cambridge|Wellcome Sanger Institute for the COVID-19 Genomics UK (COG-UK) Consortium|Davies|United Kingdom

>Spike|hCoV-19/USA/LA-EVTL07/2020|2020-04-15|EPI\_ISL\_435040|Original|hCoV-19^^Louisiana|Human|LSUHS Emerging Viral Threat Laboratory|Microbial Genome Sequencing Center|Kamil|USA

>Spike|hCoV-19/England/QEUEH-C32898/2020|2020-12-09|EPI\_ISL\_782500|Original|hCoV-19^^England|Human|Lighthouse Lab in Glasgow|Wellcome Sanger Institute for the COVID-19 Genomics UK (COG-UK) Consortium|Davies|United Kingdom

>Spike|hCoV-19/Wales/PHWC-4A2BFC/2020|2020-12-13|EPI\_ISL\_743993|Original|hCoV-19^^Wales|Human|Wales Specialist Virology Centre Sequencing lab|COVID-19 Genomics UK (COG-UK) Consortium|Moore|United Kingdom

>Spike|hCoV-19/USA/CA-ALSR-0999-SAN/2020|2020-04-22|EPI\_ISL\_483453|Original|hCoV-19^^California|Human|UC San Diego Center for Advanced Laboratory Medicine|Andersen lab at Scripps Research|Gangavarapu|USA

>Spike|hCoV-19/Portugal/PT2090/2020|2020-11-08|EPI\_ISL\_738120|Original|hCoV-19^^Portugal|Human|Instituto Nacional de Saude (INSA)|Instituto Nacional de Saude (INSA)|Borges|Portugal

>Spike|hCoV-19/England/CAMC-B324A4/2020|2020-11-05|EPI\_ISL\_659113|Original|hCoV-19^^England|Human|Lighthouse Lab in Cambridge|Wellcome Sanger Institute for the COVID-19 Genomics UK (COG-UK) Consortium|Davies|United Kingdom

>Spike|hCoV-19/England/CAMC-B51D68/2020|2020-11-08|EPI\_ISL\_657926|Original|hCoV-19^^England|Human|Lighthouse Lab in Cambridge|Wellcome Sanger Institute for the COVID-19 Genomics UK (COG-UK) Consortium|Davies|United Kingdom

>Spike|hCoV-19/England/EXET-135335/2020|2020-04-08|EPI\_ISL\_457049|Original|hCoV-19^^England|Human|University of Exeter|COVID-19 Genomics UK (COG-UK) Consortium|Temperton|United Kingdom

>Spike|hCoV-19/England/QEUEH-9F4CF3/2020|2020-09-25|EPI\_ISL\_588291|Original|hCoV-19^^England|Human|Lighthouse Lab in Glasgow|Wellcome Sanger Institute for the COVID-19 Genomics UK (COG-UK) consortium|Davies|United Kingdom

>Spike|hCoV-19/USA/CA-CZB-2523/2020|2020-05-01|EPI\_ISL\_513898|Original|hCoV-19^^California|Human|UCSF Clinical Microbiology Laboratory|Chan-Zuckerberg Biohub|Kamm|USA

>Spike|hCoV-19/USA/TX-HMH-MCoV-8140/2020|2020-06-30|EPI\_ISL\_784227|Original|hCoV-19^^Texas|Human|Houston Methodist Hospital|Houston Methodist Hospital|Long|USA

>Spike|hCoV-19/England/201180330/2020|2020-03-11|EPI\_ISL\_464898|Original|hCoV-19^^England|Human|Respiratory Virus Unit|Respiratory Virus Unit|Platt|United Kingdom

>Spike|hCoV-19/Switzerland/BE-UNIBE-163-0431/2020|2020-03-16|EPI\_ISL\_574803|Original|hCoV-19^^Bern|Human|Institute for Infectious Diseases|Institute for Infectious Diseases|Koch|Switzerland

>Spike|hCoV-19/England/QEUEH-A21306/2020|2020-10-01|EPI\_ISL\_587517|Original|hCoV-19^^England|Human|Lighthouse Lab in Glasgow|Wellcome Sanger Institute for the COVID-19 Genomics UK (COG-UK) consortium|Davies|United Kingdom

>Spike|hCoV-19/India/KA-InStem-NCBS-0032/2020|2020-06-16|EPI\_ISL\_477233|Original|hCoV-19^^Karnataka|Human|Institute for Stem Cell Science and Regenerative Medicine|National Centre for Biological Sciences|Ali|India

>Spike|hCoV-19/Germany/BY-MVP-0079/2020|2020-03-30|EPI\_ISL\_437273|Original|hCoV-19^^Bavaria|Human|Max von Pettenkofer Institute|Laboratory for Functional Genome Analysis|Graf|Germany

>Spike|hCoV-19/England/CAMC-A81EB8/2020|2020-10-12|EPI\_ISL\_610827|Original|hCoV-19^^England|Human|Lighthouse Lab in Cambridge|Wellcome Sanger Institute for the COVID-19 Genomics UK (COG-UK) consortium|Davies|United Kingdom

>Spike|hCoV-19/Bangladesh/BCSIR-NILMRC-339/2020|2020-07-15|EPI\_ISL\_498800|Original|hCoV-19^^Rajshahi|Human|National Institute of Laboratory Medicine and Referral Center|Genomic Research Lab|Khan|Bangladesh

>Spike|hCoV-19/USA/TX-HMH-3424/2020|2020-06-14|EPI\_ISL\_544182|Original|hCoV-19^^Texas|Human|Houston Methodist Hospital|Houston Methodist Hospital|Long|USA

>Spike|hCoV-19/Wales/PHWC-328D0/2020|2020-04-15|EPI\_ISL\_474363|Original|hCoV-19^^Wales|Human|Originating lab|COVID-19 Genomics UK (COG-UK) Consortium|Moore|United Kingdom

>Spike|hCoV-19/England/LOND-D516B/2020|2020-04-15|EPI\_ISL\_449682|Original|hCoV-19^^England|Human|University College London|COVID-19 Genomics UK (COG-UK) Consortium|Roy|United Kingdom

>Spike|hCoV-19/Denmark/DCGC-2901/2020|2020-08-17|EPI\_ISL\_616535|Original|hCoV-19^^Nordjylland|Human|Department of Virus and Microbiological Special Diagnostics|Albertsen lab|Michaelsen|Denmark

>Spike|hCoV-19/Switzerland/BE-ETHZ-100801/2020|2020-03-25|EPI\_ISL\_451751|Original|hCoV-19^^Bern|Human|Viollier AG|Department of Biosystems Science and Engineering|Nadeau|Switzerland

>Spike|hCoV-19/mink/Netherlands/NB-EMC-9-1/2020|2020-06-03|EPI\_ISL\_523119|Original|hCoV-19^^Noord Brabant|Neovison vison|Dutch COVID-19 response team|Erasmus Medical Center|Oude Munnink|Netherlands

>Spike|hCoV-19/Australia/VIC2561/2020|2020-07-03|EPI\_ISL\_522245|Original|hCoV-19^^Victoria|Human|Microbiological Diagnostic Unit - Public Health Laboratory (MDU-PHL) |MDU-PHL|Schultz|Australia

>Spike|hCoV-19/Denmark/DCGC-12274/2020|2020-11-16|EPI\_ISL\_682455|Original|hCoV-19^^Sjaelland|Human|Department of Virus and Microbiological Special Diagnostics|Albertsen Lab|Michaelsen|Denmark

>Spike|hCoV-19/USA/WI-GMF-11949/2020|2020-07-22|EPI\_ISL\_547637|Original|hCoV-19^^Wisconsin|Human|Gundersen Molecular Diagnostics Laboratory|Kabara Cancer Research Institute|Kenny|USA

>Spike|hCoV-19/England/QEUEH-BA1710/2020|2020-11-18|EPI\_ISL\_719661|Original|hCoV-19^^England|Human|Lighthouse Lab in Glasgow|Wellcome Sanger Institute for the COVID-19 Genomics UK (COG-UK) Consortium|Davies|United Kingdom

>Spike|hCoV-19/Netherlands/ZH-EMC-1097/2020|2020-12-14|EPI\_ISL\_722778|Original|hCoV-19^^Zuid Holland|Human|Dutch COVID-19 response team|Erasmus Medical Center|Oude Munnink|Netherlands

>Spike|hCoV-19/Wales/PHWC-15D4BC/2020|2020-03-29|EPI\_ISL\_472726|Original|hCoV-19^^Wales|Human|Wales Specialist Virology Centre Sequencing lab|COVID-19 Genomics UK (COG-UK) Consortium|Moore|United Kingdom

>Spike|hCoV-19/USA/WI-UW-1655/2020|2020-09-10|EPI\_ISL\_605529|Original|hCoV-19^^Wisconsin|Human|University of Wisconsin-Madison AIDS Vaccine Research Laboratories|University of Wisconsin-Madison AIDS Vaccine Research Laboratories|Baczenas|USA

>Spike|hCoV-19/USA/MI-UM-10034012043/2020|2020-04-24|EPI\_ISL\_578167|Original|hCoV-19^^Michigan|Human|University of Michigan Clinical Microbiology Laboratory|Lauring Lab|Valesano|USA

>Spike|hCoV-19/Denmark/DCGC-9298/2020|2020-11-16|EPI\_ISL\_668893|Original|hCoV-19^^Nordjylland|Human|Department of Virus and Microbiological Special Diagnostics|Albertsen Lab|Michaelsen|Denmark

>Spike|hCoV-19/Scotland/QEUEH-9F66C6/2020|2020-09-27|EPI\_ISL\_600664|Original|hCoV-19^^Scotland|Human|Lighthouse Lab in Glasgow|Wellcome Sanger Institute for the COVID-19 Genomics UK (COG-UK) consortium|Davies|United Kingdom

>Spike|hCoV-19/England/ALDP-A68EE4/2020|2020-10-12|EPI\_ISL\_608646|Original|hCoV-19^^England|Human|Lighthouse Lab in Alderley Park|Wellcome Sanger Institute for the COVID-19 Genomics UK (COG-UK) consortium|Davies|United Kingdom

>Spike|hCoV-19/England/CAMC-B0B0FB/2020|2020-10-29|EPI\_ISL\_643494|Original|hCoV-19^^England|Human|Lighthouse Lab in Cambridge|Wellcome Sanger Institute for the COVID-19 Genomics UK (COG-UK) Consortium|Davies|United Kingdom

>Spike|hCoV-19/Russia/StPetersburg-RII7505S/2020|2020-04-20|EPI\_ISL\_450255|Original|hCoV-19^^Saint Petersburg|Human|WHO National Influenza Centre Russian Federation|WHO National Influenza Centre Russian Federation|Komissarov|Russia

>Spike|hCoV-19/England/CAMC-BC1F4F/2020|2020-11-20|EPI\_ISL\_705146|Original|hCoV-19^^England|Human|Lighthouse Lab in Cambridge|Wellcome Sanger Institute for the COVID-19 Genomics UK (COG-UK) Consortium|Davies|United Kingdom

>Spike|hCoV-19/England/NOTT-1206DA/2020|2020-12-09|EPI\_ISL\_725639|Original|hCoV-19^^England|Human|Queens Medical Centre|COVID-19 Genomics UK (COG-UK) Consortium|Loose|United Kingdom

>Spike|hCoV-19/England/ALDP-B75539/2020|2020-11-12|EPI\_ISL\_740912|Original|hCoV-19^^England|Human|Oxford Viromics|COVID-19 Genomics UK (COG-UK) Consortium|Golubchik|United Kingdom

>Spike|hCoV-19/England/ALDP-95CFB4/2020|2020-06-18|EPI\_ISL\_554877|Original|hCoV-19^^England|Human|Lighthouse Lab in Alderley Park|Wellcome Sanger Institute for the COVID-19 Genomics UK (COG-UK) consortium|Davies|United Kingdom

>Spike|hCoV-19/USA/CA-LACPHL-AF00035/2020|2020-12-20|EPI\_ISL\_754118|Original|hCoV-19^^California|Human|UCLA Clinical Micro Lab|Los Angeles County PHL|Hemarajata|USA

>Spike|hCoV-19/England/MILK-99290F/2020|2020-08-27|EPI\_ISL\_552060|Original|hCoV-19^^England|Human|Lighthouse Lab in Milton Keynes|Wellcome Sanger Institute for the COVID-19 Genomics UK (COG-UK) consortium|Davies|United Kingdom

>Spike|hCoV-19/Japan/PG-7844/2020|2020-08-00|EPI\_ISL\_686945|Original|hCoV-19^^Japan|Human|Pathogen Genomics Center|Pathogen Genomics Center|Sekizuka|Japan

>Spike|hCoV-19/South Korea/KCDC2103/2020|2020-03-09|EPI\_ISL\_498004|Original|hCoV-19^^South Korea|Human|Division of Viral Diseases|Division of Viral Diseases|Kim|South Korea

>Spike|hCoV-19/England/CAMB-1BB962/2020|2020-11-17|EPI\_ISL\_679167|Original|hCoV-19^^England|Human|Department of Pathology|COVID-19 Genomics UK (COG-UK) Consortium|Goodfellow|United Kingdom

>Spike|hCoV-19/USA/CA-CZB0167/2020|2020-04-08|EPI\_ISL\_429053|Original|hCoV-19^^California|Human|UCSF Clinical Microbiology Laboratory|Chan-Zuckerberg Biohub|Kamm|USA

>Spike|hCoV-19/Wales/PHWC-49B9B0/2020|2020-12-06|EPI\_ISL\_742411|Original|hCoV-19^^Wales|Human|Wales Specialist Virology Centre Sequencing lab|COVID-19 Genomics UK (COG-UK) Consortium|Moore|United Kingdom

>Spike|hCoV-19/Spain/PV-IBV-005159/2020|2020-06-23|EPI\_ISL\_509646|Original|hCoV-19^^Basque Country|Human|Servicio de Microbiolog\u00eda. Hospital Universitario Donostia. OSI Donostialdea. \u00c1rea de Enfermedades Infecciosas|SeqCOVID-SPAIN consortium/IBV (CSIC) |Comas|Spain

>Spike|hCoV-19/Wales/PHWC-49ADB5/2020|2020-12-03|EPI\_ISL\_727686|Original|hCoV-19^^Wales|Human|Originating lab|COVID-19 Genomics UK (COG-UK) Consortium|Moore|United Kingdom

>Spike|hCoV-19/England/MILK-B3B9BB/2020|2020-11-01|EPI\_ISL\_679782|Original|hCoV-19^^England|Human|Oxford Viromics|COVID-19 Genomics UK (COG-UK) Consortium|Golubchik|United Kingdom

>Spike|hCoV-19/Malaysia/IMR\_WC1177/2020|2020-03-05|EPI\_ISL\_430439|Original|hCoV-19^^Malaysia|Human|Institute for Medical Research|Institute for Medical Research Infectious Disease Research Centre|Suppiah|Malaysia

>Spike|hCoV-19/Luxembourg/LNS3493823/2020|2020-10-23|EPI\_ISL\_740318|Original|hCoV-19^^Luxembourg|Human|Laboratoire national de sant\u00e9|Laboratoire national de sant\u00e9|Wienecke-Baldacchino|Luxembourg

>Spike|hCoV-19/Wales/PHWC-4A200C/2020|2020-12-14|EPI\_ISL\_743842|Original|hCoV-19^^Wales|Human|Wales Specialist Virology Centre Sequencing lab|COVID-19 Genomics UK (COG-UK) Consortium|Moore|United Kingdom

>Spike|hCoV-19/USA/WA-S693/2020|2020-04-08|EPI\_ISL\_449863|Original|hCoV-19^^Washington|Human|Washington State Department of Health|Seattle Flu Study|Bedford|USA

>Spike|hCoV-19/Switzerland/SH-ETHZ-410536/2020|2020-11-26|EPI\_ISL\_737777|Original|hCoV-19^^Schaffhausen|Human|Viollier AG|Department of Biosystems Science and Engineering|Nadeau|Switzerland

>Spike|hCoV-19/Singapore/559/2020|2020-06-19|EPI\_ISL\_483582|Original|hCoV-19^^Singapore|Human|National Public Health Laboratory|National Public Health Laboratory|Mak|Singapore

>Spike|hCoV-19/England/MILK-B8C8CD/2020|2020-11-12|EPI\_ISL\_676004|Original|hCoV-19^^England|Human|Lighthouse Lab in Milton Keynes|Wellcome Sanger Institute for the COVID-19 Genomics UK (COG-UK) Consortium|Davies|United Kingdom

>Spike|hCoV-19/England/204590466/2020|2020-11-06|EPI\_ISL\_683507|Original|hCoV-19^^England|Human|Respiratory Virus Unit|COVID-19 Genomics UK (COG-UK) Consortium|Platt|United Kingdom

>Spike|hCoV-19/Japan/PG-2508/2020|2020-04-00|EPI\_ISL\_690646|Original|hCoV-19^^Japan|Human|Saitama Prefectural Institute of Public Health|Pathogen Genomics Center|Sekizuka|Japan

>Spike|hCoV-19/USA/UT-UPHL-2012642645/2020|2020-08-14|EPI\_ISL\_745550|Original|hCoV-19^^Utah|Human|Ginkgo Bioworks Clinical Laboratory|Utah Public Health Laboratory|Young|USA

>Spike|hCoV-19/England/QEUEH-B41642/2020|2020-11-08|EPI\_ISL\_658619|Original|hCoV-19^^England|Human|Lighthouse Lab in Glasgow|Wellcome Sanger Institute for the COVID-19 Genomics UK (COG-UK) Consortium|Davies|United Kingdom

>Spike|hCoV-19/Canada/ON-PHL-20-01760/2020|2020-07-00|EPI\_ISL\_636913|Original|hCoV-19^^Ontario|Human|Public Health Ontario Laboratory|Public Health Ontario Laboratory|Guthrie|Canada

>Spike|hCoV-19/Luxembourg/LNS2907333/2020|2020-03-12|EPI\_ISL\_419580|Original|hCoV-19^^Luxembourg|Human|Laboratoire National de Sant\u00e9|Laboratoire National de Sant\u00e9|Wienecke-Baldacchino|Luxembourg

>Spike|hCoV-19/Belgium/ULG-10923/2020|2020-11-24|EPI\_ISL\_678463|Original|hCoV-19^^Li\u00e8ge|Human|Department of Clinical Microbiology|GIGA Medical Genomics|Durkin|Belgium

>Spike|hCoV-19/England/ALDP-A51868/2020|2020-10-07|EPI\_ISL\_598233|Original|hCoV-19^^England|Human|Lighthouse Lab in Alderley Park|Wellcome Sanger Institute for the COVID-19 Genomics UK (COG-UK) consortium|Davies|United Kingdom

>Spike|hCoV-19/England/ALDP-B73EE5/2020|2020-11-12|EPI\_ISL\_664344|Original|hCoV-19^^England|Human|Quadram Institute Bioscience|COVID-19 Genomics UK (COG-UK) Consortium|Alikhan|United Kingdom

>Spike|hCoV-19/Australia/VIC14491/2020|2020-08-09|EPI\_ISL\_592518|Original|hCoV-19^^Victoria|Human|Microbiological Diagnostic Unit - Public Health Laboratory (MDU-PHL)|MDU-PHL|Schultz|Australia

>Spike|hCoV-19/USA/LA-BIE-058/2020|2020-04-07|EPI\_ISL\_455613|Original|hCoV-19^^Louisiana|Human|Ochsner Health|Bioinfoexperts|Cross|USA

>Spike|hCoV-19/Scotland/GCVR-171F57/2020|2020-03-31|EPI\_ISL\_469944|Original|hCoV-19^^Scotland|Human|NHSGGC West of Scotland Specialist Virology Centre / MRC-University of Glasgow Centre for Virus Research|Wellcome Sanger Institute for the COVID-19 Genomics UK (COG-UK) consortium|Davies|United Kingdom

>Spike|hCoV-19/Japan/PG-4657/2020|2020-07-00|EPI\_ISL\_689794|Original|hCoV-19^^Japan|Human|Fukuoka Institute of Health and Environmental Sciences|Pathogen Genomics Center|Sekizuka|Japan

>Spike|hCoV-19/England/CAMB-77F34/2020|2020-04-01|EPI\_ISL\_440840|Original|hCoV-19^^England|Human|Department of Pathology|Wellcome Sanger Institute for the COVID-19 Genomics UK (COG-UK) consortium|Amato|United Kingdom

>Spike|hCoV-19/Denmark/DCGC-3229/2020|2020-08-24|EPI\_ISL\_616889|Original|hCoV-19^^Syddanmark|Human|Department of Virus and Microbiological Special Diagnostics|Albertsen lab|Michaelsen|Denmark

>Spike|hCoV-19/England/ALDP-93578C/2020|2020-06-21|EPI\_ISL\_552937|Original|hCoV-19^^England|Human|Lighthouse Lab in Alderley Park|Wellcome Sanger Institute for the COVID-19 Genomics UK (COG-UK) consortium|Davies|United Kingdom

>Spike|hCoV-19/USA/TX-HMH-MCoV-15485/2020|2020-10-23|EPI\_ISL\_786969|Original|hCoV-19^^Texas|Human|Houston Methodist Hospital|Houston Methodist Hospital|Long|USA

>Spike|hCoV-19/Wales/PHWC-33F61/2020|2020-04-17|EPI\_ISL\_446846|Original|hCoV-19^^Wales|Human|Wales Specialist Virology Centre|Public Health Wales Microbiology Cardiff|Moore|United Kingdom

>Spike|hCoV-19/England/CAMB-1AE7B3/2020|2020-04-29|EPI\_ISL\_524615|Original|hCoV-19^^England|Human|Department of Pathology|Wellcome Sanger Institute for the COVID-19 Genomics UK (COG-UK) consortium|Davies|United Kingdom

>Spike|hCoV-19/Australia/VIC9333/2020|2020-08-12|EPI\_ISL\_565509|Original|hCoV-19^^Victoria|Human|Victorian Infectious Diseases Reference Laboratory (VIDRL)|VIDRL and MDU-PHL|Schultz|Australia



>Spike|hCoV-19/Denmark/DCGC-1577/2020|2020-06-22|EPI\_ISL\_618147|Original|hCoV-19^^Hovedstaden|Human|Department of Virus and Microbiological Special Diagnostics|Albertsen lab|Michaelsen|Denmark

>Spike|hCoV-19/England/MILK-B3D579/2020|2020-11-01|EPI\_ISL\_645399|Original|hCoV-19^^England|Human|Lighthouse Lab in Milton Keynes|Wellcome Sanger Institute for the COVID-19 Genomics UK (COG-UK) Consortium|Davies|United Kingdom

>Spike|hCoV-19/England/CAMC-B98855/2020|2020-11-15|EPI\_ISL\_673805|Original|hCoV-19^^England|Human|Lighthouse Lab in Cambridge|Wellcome Sanger Institute for the COVID-19 Genomics UK (COG-UK) Consortium|Davies|United Kingdom

>Spike|hCoV-19/England/CAMB-84875/2020|2020-03-04|EPI\_ISL\_440554|Original|hCoV-19^^England|Human|Department of Pathology|Wellcome Sanger Institute for the COVID-19 Genomics UK (COG-UK) consortium|Amato|United Kingdom

>Spike|hCoV-19/Australia/VIC7344/2020|2020-08-06|EPI\_ISL\_564350|Original|hCoV-19^^Victoria|Human|Victorian Infectious Diseases Reference Laboratory (VIDRL)|VIDRL and MDU-PHL|Schultz|Australia

>Spike|hCoV-19/USA/VA-DCLS-2311/2020|2020-10-22|EPI\_ISL\_734264|Original|hCoV-19^^Virginia|Human|Virginia Division of Consolidated Laboratory Services (DCLS)|Virginia Division of Consolidated Laboratory Services (DCLS)|St. Jacques|USA

>Spike|hCoV-19/USA/WA-UW-11656/2020|2020-06-18|EPI\_ISL\_570455|Original|hCoV-19^^Washington|Human|UW Virology Lab|UW Virology Lab|Roychoudhury|USA

>Spike|hCoV-19/USA/PA-MGSC32-05/2020|2020-03-25|EPI\_ISL\_436482|Original|hCoV-19^^Pennsylvania|Human|UPMC Clinical Laboratory|Microbial Genome Sequencing Center|Cooper|USA

>Spike|hCoV-19/USA/WA-S1377/2020|2020-05-19|EPI\_ISL\_495827|Original|hCoV-19^^Washington|Human|Washington State Department of Health|Seattle Flu Study|Lee|USA

>Spike|hCoV-19/Denmark/DCGC-10267/2020|2020-11-09|EPI\_ISL\_669735|Original|hCoV-19^^Nordjylland|Human|Department of Virus and Microbiological Special Diagnostics|Albertsen Lab|Michaelsen|Denmark

>Spike|hCoV-19/Northern Ireland/NIRE-10933A/2020|2020-10-20|EPI\_ISL\_652329|Original|hCoV-19^^Northern Ireland|Human|Regional Virus Laboratory|COVID-19 Genomics UK (COG-UK) Consortium|Fairley|United Kingdom

>Spike|hCoV-19/England/NOTT-11774C/2020|2020-10-23|EPI\_ISL\_611833|Original|hCoV-19^^England|Human|Queens Medical Centre|COVID-19 Genomics UK (COG-UK) Consortium|Loose|United Kingdom

>Spike|hCoV-19/Denmark/DCGC-19700/2020|2020-12-07|EPI\_ISL\_749120|Original|hCoV-19^^Hovedstaden|Human|Department of Virus and Microbiological Special Diagnostics|Albertsen Lab|Michaelsen|Denmark

>Spike|hCoV-19/England/MILK-BB1777/2020|2020-11-18|EPI\_ISL\_720064|Original|hCoV-19^^England|Human|Lighthouse Lab in Milton Keynes|Wellcome Sanger Institute for the COVID-19 Genomics UK (COG-UK) Consortium|Davies|United Kingdom

>Spike|hCoV-19/Japan/PG-2565/2020|2020-06-00|EPI\_ISL\_690700|Original|hCoV-19^^Japan|Human|Pathogen Genomics Center|Pathogen Genomics Center|Sekizuka|Japan

>Spike|hCoV-19/Finland/20A16S7/2020|2020-04-20|EPI\_ISL\_481595|Original|hCoV-19^^Uusimaa|Human|Department of Virology and Immunology|Department of Virology|Smura|Finland

>Spike|hCoV-19/England/MILK-ACCF27/2020|2020-10-21|EPI\_ISL\_630042|Original|hCoV-19^^England|Human|Lighthouse Lab in Milton Keynes|Wellcome Sanger Institute for the COVID-19 Genomics UK (COG-UK) consortium|Davies|United Kingdom

>Spike|hCoV-19/England/CAMC-9D1E50/2020|2020-09-19|EPI\_ISL\_601590|Original|hCoV-19^^England|Human|Lighthouse Lab in Cambridge|Wellcome Sanger Institute for the COVID-19 Genomics UK (COG-UK) consortium|Davies|United Kingdom

>Spike|hCoV-19/England/ALDP-B5D69E/2020|2020-11-09|EPI\_ISL\_703516|Original|hCoV-19^^England|Human|Department of Pathology|COVID-19 Genomics UK (COG-UK) Consortium|Goodfellow|United Kingdom

>Spike|hCoV-19/Mexico/BCN-ALSR-4766/2020|2020-08-24|EPI\_ISL\_730128|Original|hCoV-19^^Baja California|Human|Sharp HealthCare Laboratory|Andersen lab at Scripps Research|Gangavarapu|Mexico

>Spike|hCoV-19/Italy/LOM-UniMI09/2020|2020-02-24|EPI\_ISL\_779713|Original|hCoV-19^^Lombardy|Human|Laboratory of Infectious Diseases|Laboratory of Infectious Diseases|Lai|Italy

>Spike|hCoV-19/Wales/MILK-99A697/2020|2020-08-29|EPI\_ISL\_550397|Original|hCoV-19^^Wales|Human|Lighthouse Lab in Milton Keynes|Wellcome Sanger Institute for the COVID-19 Genomics UK (COG-UK) consortium|Davies|United Kingdom

>Spike|hCoV-19/England/QEUH-B32091/2020|2020-11-04|EPI\_ISL\_646274|Original|hCoV-19^^England|Human|Lighthouse Lab in Glasgow|Wellcome Sanger Institute for the COVID-19 Genomics UK (COG-UK) Consortium|Davies|United Kingdom

>Spike|hCoV-19/Scotland/QEUH-A4B922/2020|2020-10-08|EPI\_ISL\_628494|Original|hCoV-19^^Scotland|Human|Oxford Viromics|COVID-19 Genomics UK (COG-UK) Consortium|Golubchik|United Kingdom

>Spike|hCoV-19/USA/TX-HMH-4709/2020|2020-06-20|EPI\_ISL\_544277|Original|hCoV-19^^Texas|Human|Houston Methodist Hospital|Houston Methodist Hospital|Long|USA

>Spike|hCoV-19/Australia/VIC2770/2020|2020-07-06|EPI\_ISL\_521605|Original|hCoV-19^^Victoria|Human|Microbiological Diagnostic Unit - Public Health Laboratory (MDU-PHL)|MDU-PHL|Schultz|Australia

>Spike|hCoV-19/Wales/PHWC-27D0C/2020|2020-04-01|EPI\_ISL\_431991|Original|hCoV-19^^Wales|Human|Wales Specialist Virology Centre|Public Health Wales Microbiology Cardiff|Moore|United Kingdom

>Spike|hCoV-19/England/PORT-2D5C77/2020|2020-12-19|EPI\_ISL\_763823|Original|hCoV-19^^England|Human|Centre for Enzyme Innovation|COVID-19 Genomics UK (COG-UK) Consortium|Robson|United Kingdom

>Spike|hCoV-19/Anhui/HN015/2020|2020-02-06|EPI\_ISL\_450418|unknown|hCoV-19^^Anhui|Human|unknown|Anhui Provincial Center for Disease Control|Submitter|China

>Spike|hCoV-19/England/MILK-A2296D/2020|2020-10-03|EPI\_ISL\_612531|Original|hCoV-19^^England|Human|Northumbria University / South Tees Hospitals NHS Foundation Trust / North Cumbria Integrated Care NHS Foundation Trust / North Tees and Hartlepool NHS Foundation Trust / Newcastle Hospitals NHS Foundation Trust|COVID-19 Genomics UK (COG-UK) Consortium|Bashton|United Kingdom

>Spike|hCoV-19/England/20139007504/2020|2020-03-27|EPI\_ISL\_421860|Original|hCoV-19^^England|Human|Respiratory Virus Unit|Respiratory Virus Unit|Platt|United Kingdom

>Spike|hCoV-19/England/MILK-AC9546/2020|2020-10-21|EPI\_ISL\_629428|Original|hCoV-19^^England|Human|Lighthouse Lab in Milton Keynes|Wellcome Sanger Institute for the COVID-19 Genomics UK (COG-UK) consortium|Davies|United Kingdom

>Spike|hCoV-19/USA/NJ-CDC-2-3693474/2020|2020-11-09|EPI\_ISL\_747111|Original|hCoV-19^^New Jersey|Human|Respiratory Viruses Branch|Respiratory Viruses Branch|Queen|USA

>Spike|hCoV-19/England/CAMC-B097F8/2020|2020-10-30|EPI\_ISL\_672957|Original|hCoV-19^^England|Human|Lighthouse Lab in Cambridge|Wellcome Sanger Institute for the COVID-19 Genomics UK (COG-UK) Consortium|Davies|United Kingdom

>Spike|hCoV-19/Switzerland/SZ-ETHZ-210040/2020|2020-07-23|EPI\_ISL\_510781|Original|hCoV-19^^Schwyz|Human|Viollier AG|Department of Biosystems Science and Engineering|Nadeau|Switzerland

>Spike|hCoV-19/England/MILK-ACDCC2/2020|2020-10-21|EPI\_ISL\_630111|Original|hCoV-19^^England|Human|Lighthouse Lab in Milton Keynes|Wellcome Sanger Institute for the COVID-19 Genomics UK (COG-UK) consortium|Davies|United Kingdom

>Spike|hCoV-19/Scotland/CVR4946/2020|2020-09-30|EPI\_ISL\_594710|Original|hCoV-19^^Scotland|Human|West of Scotland Specialist Virology Centre|COVID-19 Genomics UK (COG-UK) Consortium|Robertson|United Kingdom

>Spike|hCoV-19/Wales/PHWC-49D295/2020|2020-12-10|EPI\_ISL\_742759|Original|hCoV-19^^Wales|Human|Wales Specialist Virology Centre Sequencing lab|COVID-19 Genomics UK (COG-UK) Consortium|Moore|United Kingdom

>Spike|hCoV-19/Brazil/SP-L39-CD1044/2020|2020-05-13|EPI\_ISL\_722066|Original|hCoV-19^^S\u00e3o Paulo|Human|Hospital das Cl\u00ednicas Universidade de S\u00e3o Paulo Medical School|Laborat\u00f3rio de Parasitologia M\u00e9dica - Instituto de Medicina Tropical - Universidade de S\u00e3o Paulo|de Jesus|Brazil

>Spike|hCoV-19/Belgium/UGent-126/2020|2020-06-15|EPI\_ISL\_481223|Original|hCoV-19^^Ghent|Human|Lab voor klinische biologie|Onderzoeksgroep Virologie|Lambrechts|Belgium

>Spike|hCoV-19/England/ALDP-9FDAF0/2020|2020-10-01|EPI\_ISL\_588037|Original|hCoV-19^^England|Human|Lighthouse Lab in Alderley Park|Wellcome Sanger Institute for the COVID-19 Genomics UK (COG-UK) consortium|Davies|United Kingdom

>Spike|hCoV-19/England/NOTT-119DB1/2020|2020-11-03|EPI\_ISL\_741609|Original|hCoV-19^^England|Human|Queens Medical Centre|COVID-19 Genomics UK (COG-UK) Consortium|Loose|United Kingdom

>Spike|hCoV-19/Iceland/370/2020|2020-03-19|EPI\_ISL\_424394|Original|hCoV-19^^Reykjavik|Human|The National University Hospital of Iceland|deCODE genetics|J\u00f3nsson|Iceland

>Spike|hCoV-19/USA/CA-CHLA-PLM71790747/2020|2020-12-04|EPI\_ISL\_753614|Original|hCoV-19^^California|Human|Clinical virology Laboratory|Center for Personalized Medicine|Dien Bard|USA

>Spike|hCoV-19/USA/MI-MDHHS-SC22449/2020|2020-11-08|EPI\_ISL\_708537|Original|hCoV-19^^Michigan|Human|Michigan Department of Health and Human Services|Michigan Department of Health and Human Services|Jacob|USA

>Spike|hCoV-19/Hong Kong/HKU-200723-030/2020|2020-01-29|EPI\_ISL\_497797|Original|hCoV-19^^Hong Kong|Human|Department of Microbiology|Department of Microbiology|Chan|China

>Spike|hCoV-19/Norway/4619/2020|2020-10-18|EPI\_ISL\_635101|Original|hCoV-19^^Viken|Human|Medical Microbiology Unit|Norwegian Institute of Public Health|Vollan|Norway

>Spike|hCoV-19/Canada/ON-S158/2020|2020-03-24|EPI\_ISL\_755754|Original|hCoV-19^^Ontario|Human|Toronto Invasive Bacterial Diseases Network|McMaster University|McArthur|Canada

>Spike|hCoV-19/USA/WI-UW-1096/2020|2020-07-25|EPI\_ISL\_516521|Original|hCoV-19^^Wisconsin|Human|University of Wisconsin-Madison AIDS Vaccine Research Laboratories|University of Wisconsin-Madison AIDS Vaccine Research Laboratories|Baczenas|USA

>Spike|hCoV-19/England/NOTT-114141/2020|2020-10-04|EPI\_ISL\_577142|Original|hCoV-19^^England|Human|Queens Medical Centre|COVID-19 Genomics UK (COG-UK) Consortium|Loose|United Kingdom

>Spike|hCoV-19/USA/WA-UW-3880/2020|2020-03-26|EPI\_ISL\_427199|Original|hCoV-19^^Washington|Human|UW Virology Lab|UW Virology Lab|Roychoudhury|USA

>Spike|hCoV-19/Wales/PHWC-47D50B/2020|2020-10-05|EPI\_ISL\_586155|Original|hCoV-19^^Wales|Human|Wales Specialist Virology Centre Sequencing lab|COVID-19 Genomics UK (COG-UK) Consortium|Moore|United Kingdom

>Spike|hCoV-19/Spain/RI-IBV-99005864/2020|2020-03-05|EPI\_ISL\_537407|Original|hCoV-19^^La Rioja|Human|Centro de Investigaci\u00f3n Biom\u00e9dica de La Rioja - Hospital San Pedro Logro\u00f1o|SeqCOVID-SPAIN consortium|IBV (CSIC)|Comas|Spain

>Spike|hCoV-19/USA/TX-HMH-7440/2020|2020-06-26|EPI\_ISL\_546770|Original|hCoV-19^^Texas|Human|Houston Methodist Hospital|Houston Methodist Hospital|Long|USA

>Spike|hCoV-19/USA/UT-UPHL-2008829/2020|2020-05-29|EPI\_ISL\_524849|Original|hCoV-19^^Utah|Human|Utah Public Health Laboratory|Utah Public Health Laboratory|Young|USA

>Spike|hCoV-19/Denmark/DCGC-20980/2020|2020-12-21|EPI\_ISL\_759487|Original|hCoV-19^^Hovedstaden|Human|Department of Virus and Microbiological Special Diagnostics|Albertsen Lab|Michaelsen|Denmark

>Spike|hCoV-19/England/ALDP-909420/2020|2020-06-22|EPI\_ISL\_551420|Original|hCoV-19^^England|Human|Lighthouse Lab in Alderley Park|Wellcome Sanger Institute for the COVID-19 Genomics UK (COG-UK) consortium|Davies|United Kingdom

>Spike|hCoV-19/England/CAMB-754B7/2020|2020-03-16|EPI\_ISL\_425395|Original|hCoV-19^^England|Human|Department of Pathology|COVID-19 Genomics UK (COG-UK) Consortium|Meredith|United Kingdom

>Spike|hCoV-19/England/204591723/2020|2020-11-07|EPI\_ISL\_700648|Original|hCoV-19^^England|Human|Respiratory Virus Unit|COVID-19 Genomics UK (COG-UK) Consortium|Platt|United Kingdom

>Spike|hCoV-19/England/MILK-AC800A/2020|2020-10-21|EPI\_ISL\_629626|Original|hCoV-19^^England|Human|Lighthouse Lab in Milton Keynes|Wellcome Sanger Institute for the COVID-19 Genomics UK (COG-UK) consortium|Davies|United Kingdom

>Spike|hCoV-19/England/GSTT-265D572/2020|2020-03-23|EPI\_ISL\_483978|Original|hCoV-19^^England|Human|Centre for Clinical Infection and Diagnostics Research and Genomics Innovation Unit|COVID-19 Genomics UK (COG-UK) Consortium|Awan|United Kingdom

>Spike|hCoV-19/Japan/PG-7905/2020|2020-07-00|EPI\_ISL\_687006|Original|hCoV-19^^Japan|Human|Pathogen Genomics Center|Pathogen Genomics Center|Sekizuka|Japan

>Spike|hCoV-19/USA/TX-HMH-MCoV-18738/2020|2020-11-21|EPI\_ISL\_785080|Original|hCoV-19^^Texas|Human|Houston Methodist Hospital|Houston Methodist Hospital|Long|USA

>Spike|hCoV-19/Denmark/DCGC-3151/2020|2020-08-31|EPI\_ISL\_615971|Original|hCoV-19^^Hovedstaden|Human|Department of Virus and Microbiological Special Diagnostics|Albertsen lab|Michaelsen|Denmark

>Spike|hCoV-19/England/QEUA-98F2A0/2020|2020-08-27|EPI\_ISL\_540388|Original|hCoV-19^^England|Human|Lighthouse Lab in Glasgow|Wellcome Sanger Institute for the COVID-19 Genomics UK (COG-UK) consortium|Davies|United Kingdom

>Spike|hCoV-19/United Arab Emirates/0187/2020|2020-05-18|EPI\_ISL\_698374|Original|hCoV-19^^Abu Dhabi|Human|Group 42 (G42) Healthcare|G42 Healthcare|Ogrodzki|United Arab Emirates

>Spike|hCoV-19/USA/MI-MDHHS-SC20706/2020|2020-04-27|EPI\_ISL\_471730|Original|hCoV-19^^Michigan|Human|Michigan Department of Health and Human Services|Michigan Department of Health and Human Services|Blankenship|USA

>Spike|hCoV-19/USA/TX-HMH-MCoV-14861/2020|2020-10-12|EPI\_ISL\_786345|Original|hCoV-19^^Texas|Human|Houston Methodist Hospital|Houston Methodist Hospital|Long|USA

>Spike|hCoV-19/Japan/PG-3642/2020|2020-04-00|EPI\_ISL\_691895|Original|hCoV-19^^Japan|Human|Pathogen Genomics Center|Pathogen Genomics Center|Sekizuka|Japan

>Spike|hCoV-19/Australia/VIC13436/2020|2020-08-06|EPI\_ISL\_563732|Original|hCoV-19^^Victoria|Human|Microbiological Diagnostic Unit - Public Health Laboratory (MDU-PHL)|MDU-PHL|Schultz|Australia

>Spike|hCoV-19/England/ALDP-A52524/2020|2020-10-07|EPI\_ISL\_597887|Original|hCoV-19^^England|Human|Lighthouse Lab in Alderley Park|Wellcome Sanger Institute for the COVID-19 Genomics UK (COG-UK) consortium|Davies|United Kingdom

>Spike|hCoV-19/USA/TX-DSHS-0559/2020|2020-05-14|EPI\_ISL\_574462|Original|hCoV-19^^Texas|Human|Texas Department of State Health Services|Texas Department of State Health Services|Rahman|USA

>Spike|hCoV-19/USA/NY-NYUMC19/2020|2020-03-17|EPI\_ISL\_418204|Original|hCoV-19^^New York|Human|NYU Langone Health|Department of Pathology and Medicine|Maurano|USA

>Spike|hCoV-19/Northern Ireland/QEUA-964159/2020|2020-08-12|EPI\_ISL\_536921|Original|hCoV-19^^Northern Ireland|Human|Lighthouse Lab in Glasgow|Wellcome Sanger Institute for the COVID-19 Genomics UK (COG-UK) consortium|Davies|United Kingdom

>Spike|hCoV-19/Wales/PHWC-47ED4E/2020|2020-10-10|EPI\_ISL\_595584|Original|hCoV-19^^Wales|Human|Originating lab|COVID-19 Genomics UK (COG-UK) Consortium|Moore|United Kingdom

>Spike|hCoV-19/England/QEUA-9AEFD1/2020|2020-09-03|EPI\_ISL\_573523|Original|hCoV-19^^England|Human|University College London|COVID-19 Genomics UK (COG-UK) Consortium|Roy|United Kingdom

>Spike|hCoV-19/England/ALDP-BCA517/2020|2020-11-23|EPI\_ISL\_703368|Original|hCoV-19^^England|Human|Lighthouse Lab in Alderley Park|Wellcome Sanger Institute for the COVID-19 Genomics UK (COG-UK) Consortium|Davies|United Kingdom

>Spike|hCoV-19/Australia/NSW1241/2020|2020-12-08|EPI\_ISL\_740872|Original|hCoV-19^^New South Wales|Human|South Eastern Area Laboratory Services (SEALS)|NSW Health Pathology - Institute of Clinical Pathology and Medical Research; Westmead Hospital; University of Sydney|Gall|Australia

>Spike|hCoV-19/Netherlands/NB-EMC-283/2020|2020-00-00|EPI\_ISL\_574782|Original|hCoV-19^^Noord Brabant|Human|Dutch COVID-19 response team|Erasmus Medical Center|Oude Munnink|Netherlands

>Spike|hCoV-19/Australia/VIC3578/2020|2020-07-08|EPI\_ISL\_520327|Original|hCoV-19^^Victoria|Human|Victorian Infectious Diseases Reference Laboratory (VIDRL)|VIDRL and MDU-PHL|Schultz|Australia

>Spike|hCoV-19/England/LIVE-DBB5F9/2020|2020-11-14|EPI\_ISL\_664299|Original|hCoV-19^^England|Human|Liverpool Clinical Laboratories|COVID-19 Genomics UK (COG-UK) Consortium|Haldenby|United Kingdom

>Spike|hCoV-19/England/CAMC-C2C907/2020|2020-12-08|EPI\_ISL\_733909|Original|hCoV-19^^England|Human|Lighthouse Lab in Cambridge|Wellcome Sanger Institute for the COVID-19 Genomics UK (COG-UK) Consortium|Davies|United Kingdom

>Spike|hCoV-19/Japan/PG-4510/2020|2020-07-00|EPI\_ISL\_689649|Original|hCoV-19^^Japan|Human|Pathogen Genomics Center|Pathogen Genomics Center|Sekizuka|Japan

>Spike|hCoV-19/USA/CA-IGI-0006/2020|2020-05-15|EPI\_ISL\_467946|Original|hCoV-19^^California|Human|Innovative Genomics Institute|Innovative Genomics Institute|Wyman|USA

>Spike|hCoV-19/Scotland/EDB10643/2020|2020-12-01|EPI\_ISL\_705790|Original|hCoV-19^^Scotland|Human|Virology Department|COVID-19 Genomics UK (COG-UK) Consortium|McHugh|United Kingdom

>Spike|hCoV-19/England/ALDP-5D9557/2020|2020-06-18|EPI\_ISL\_558576|Original|hCoV-19^^England|Human|Lighthouse Lab in Alderley Park|Wellcome Sanger Institute for the COVID-19 Genomics UK (COG-UK) consortium|Davies|United Kingdom

>Spike|hCoV-19/England/SHEF-D333A/2020|2020-03-23|EPI\_ISL\_475509|Original|hCoV-19^^England|Human|Virology Department|COVID-19 Genomics UK (COG-UK) Consortium|de Silva|United Kingdom

>Spike|hCoV-19/Denmark/DCGC-15888/2020|2020-11-23|EPI\_ISL\_714085|Original|hCoV-19^^Sjaelland|Human|Department of Virus and Microbiological Special Diagnostics|Albertsen Lab|Michaelsen|Denmark

>Spike|hCoV-19/Australia/VIC6558/2020|2020-07-17|EPI\_ISL\_521326|Original|hCoV-19^^Victoria|Human|Victorian Infectious Diseases Reference Laboratory (VIDRL)|VIDRL and MDU-PHL|Schultz|Australia

>Spike|hCoV-19/Switzerland/BS-UHB-42190051/2020|2020-03-13|EPI\_ISL\_528058|Original|hCoV-19^^Basel-Stadt|Human|University Hospital Basel|University Hospital Basel|Roloff Handschin|Switzerland

>Spike|hCoV-19/Denmark/DCGC-3681/2020|2020-09-07|EPI\_ISL\_615456|Original|hCoV-19^^Sjaelland|Human|Department of Virus and Microbiological Special Diagnostics|Albertsen lab|Michaelsen|Denmark

>Spike|hCoV-19/England/QEUEH-B7D58C/2020|2020-11-14|EPI\_ISL\_741873|Original|hCoV-19^^England|Human|Oxford Viromics|COVID-19 Genomics UK (COG-UK) Consortium|Golubchik|United Kingdom

>Spike|hCoV-19/England/MILK-BA9DF8/2020|2020-11-17|EPI\_ISL\_783206|Original|hCoV-19^^England|Human|Lighthouse Lab in Milton Keynes|Wellcome Sanger Institute for the COVID-19 Genomics UK (COG-UK) Consortium|Davies|United Kingdom

>Spike|hCoV-19/England/ALDP-B463EC/2020|2020-11-07|EPI\_ISL\_656110|Original|hCoV-19^^England|Human|Lighthouse Lab in Alderley Park|Wellcome Sanger Institute for the COVID-19 Genomics UK (COG-UK) Consortium|Davies|United Kingdom

>Spike|hCoV-19/USA/TX-DSHS-1334/2020|2020-04-03|EPI\_ISL\_654916|Original|hCoV-19^^Texas|Human|Texas Department of State Health Services|Texas Department of State Health Services|Rahman|USA

>Spike|hCoV-19/USA/NY-PV09385/2020|2020-03-19|EPI\_ISL\_450068|Original|hCoV-19^^New York|Human|MSSS Clinical Microbiology Laboratories|MSSS Pathogen Surveillance Program|van Bakel|USA

>Spike|hCoV-19/Spain/RI-IBV-99010908/2020|2020-08-03|EPI\_ISL\_732754|Original|hCoV-19^^La Rioja|Human|Centro de Investigaci\u00f3n Biom\u00e9dica de La Rioja - Hospital San Pedro Logro\u00f1o|SeqCOVID-SPAIN consortium|IBV (CSIC)|Comas|Spain

>Spike|hCoV-19/USA/CA-CHLA-PLM50981298/2020|2020-11-15|EPI\_ISL\_753337|Original|hCoV-19^^California|Human|Clinical virology Laboratory|Center for Personalized Medicine|Dien Bard|USA

>Spike|hCoV-19/Wales/PHWC-4A4662/2020|2020-12-16|EPI\_ISL\_764718|Original|hCoV-19^^Wales|Human|Wales Specialist Virology Centre Sequencing lab|COVID-19 Genomics UK (COG-UK) Consortium|Moore|United Kingdom

>Spike|hCoV-19/England/LIVE-AB975/2020|2020-06-12|EPI\_ISL\_612444|Original|hCoV-19^^England|Human|Liverpool Clinical Laboratories|COVID-19 Genomics UK (COG-UK) Consortium|Haldenby|United Kingdom

>Spike|hCoV-19/Tunisia/6736/2020|2020-03-31|EPI\_ISL\_707792|Original|hCoV-19^^Tunis|Human|1-Laboratory of Microbiology|1-Clinical and Experimental Pharmacology Lab|Boutiba-Ben Boubaker|Tunisia

>Spike|hCoV-19/USA/TX-DSHS-0629/2020|2020-06-25|EPI\_ISL\_576285|Original|hCoV-19^^Texas|Human|Texas Department of State Health Services|Texas Department of State Health Services|Rahman|USA

>Spike|hCoV-19/USA/TX-HMH-MCoV-13456/2020|2020-08-23|EPI\_ISL\_788591|Original|hCoV-19^^Texas|Human|Houston Methodist Hospital|Houston Methodist Hospital|Long|USA

>Spike|hCoV-19/Denmark/DCGC-10938/2020|2020-11-02|EPI\_ISL\_670297|Original|hCoV-19^^Hovedstaden|Human|Department of Virus and Microbiological Special Diagnostics|Albertsen Lab|Michaelsen|Denmark

>Spike|hCoV-19/England/205260312/2020|2020-12-07|EPI\_ISL\_766514|Original|hCoV-19^^England|Human|Respiratory Virus Unit|COVID-19 Genomics UK (COG-UK) Consortium|Platt|United Kingdom

>Spike|hCoV-19/England/CAMB-72FC0/2020|2020-03-22|EPI\_ISL\_440279|Original|hCoV-19^^England|Human|Department of Pathology|Wellcome Sanger Institute for the COVID-19 Genomics UK (COG-UK) consortium|Amato|United Kingdom

>Spike|hCoV-19/India/DL-NCDC7624-CSIR-IGIB/2020|2020-05-28|EPI\_ISL\_482650|Original|hCoV-19^^Delhi|Human|National Centre for Disease control (NCDC)|NCDC/CSIR-IGIB|Singh|India

>Spike|hCoV-19/England/QEUH-96C661/2020|2020-08-04|EPI\_ISL\_530932|Original|hCoV-19^^England|Human|Lighthouse Lab in Glasgow|Wellcome Sanger Institute for the COVID-19 Genomics UK (COG-UK) consortium|Davies|United Kingdom

>Spike|hCoV-19/Denmark/DCGC-17108/2020|2020-12-14|EPI\_ISL\_750762|Original|hCoV-19^^Sjaelland|Human|Department of Virus and Microbiological Special Diagnostics|Albertsen Lab|Michaelsen|Denmark

>Spike|hCoV-19/England/20118087404/2020|2020-03-12|EPI\_ISL\_464945|Original|hCoV-19^^England|Human|Respiratory Virus Unit|Respiratory Virus Unit|Platt|United Kingdom

>Spike|hCoV-19/Denmark/DCGC-11295/2020|2020-11-02|EPI\_ISL\_670820|Original|hCoV-19^^Hovedstaden|Human|Department of Virus and Microbiological Special Diagnostics|Albertsen Lab|Michaelsen|Denmark

>Spike|hCoV-19/Spain/IB-IBV-2506/2020|2020-03-20|EPI\_ISL\_468976|Original|hCoV-19^^Illes Balears|Human|Servicio de Microbiolog\u00eda|SeqCOVID-SPAIN consortium|IBV (CSIC) |Comas|Spain

>Spike|hCoV-19/England/ALDP-955BF3/2020|2020-06-12|EPI\_ISL\_555417|Original|hCoV-19^^England|Human|Lighthouse Lab in Alderley Park|Wellcome Sanger Institute for the COVID-19 Genomics UK (COG-UK) consortium|Davies|United Kingdom

>Spike|hCoV-19/Wales/PHWC-484923/2020|2020-10-16|EPI\_ISL\_628059|Original|hCoV-19^^Wales|Human|Wales Specialist Virology Centre Sequencing lab|COVID-19 Genomics UK (COG-UK) Consortium|Moore|United Kingdom

>Spike|hCoV-19/Switzerland/BE-ETHZ-410880/2020|2020-12-14|EPI\_ISL\_737744|Original|hCoV-19^^Bern|Human|Viollier AG|Department of Biosystems Science and Engineering|Nadeau|Switzerland

>Spike|hCoV-19/England/MILK-A47F60/2020|2020-10-06|EPI\_ISL\_598458|Original|hCoV-19^^England|Human|Lighthouse Lab in Milton Keynes|Wellcome Sanger Institute for the COVID-19 Genomics UK (COG-UK) consortium|Davies|United Kingdom

>Spike|hCoV-19/Australia/VIC17422/2020|2020-08-19|EPI\_ISL\_663881|Original|hCoV-19^^Victoria|Human|Microbiological Diagnostic Unit - Public Health Laboratory (MDU-PHL) |MDU-PHL|Schultz|Australia

>Spike|hCoV-19/USA/MN-GMF-31401/2020|2020-11-04|EPI\_ISL\_661087|Original|hCoV-19^^Minnesota|Human|Gundersen Molecular Diagnostics Laboratory|Kabara Cancer Research Institute|Kenny|USA

>Spike|hCoV-19/England/NOTT-110CBD/2020|2020-05-01|EPI\_ISL\_448403|Original|hCoV-19^^England|Human|Queens Medical Centre|COVID-19 Genomics UK (COG-UK) Consortium|Loose|United Kingdom

>Spike|hCoV-19/USA/MN-MDH-1729/2020|2020-09-16|EPI\_ISL\_576238|Original|hCoV-19^^Minnesota|Human|Minnesota Department of Health|Minnesota Department of Health|Garfin|USA

>Spike|hCoV-19/England/NOTT-114448/2020|2020-10-07|EPI\_ISL\_577164|Original|hCoV-19^^England|Human|Queens Medical Centre|COVID-19 Genomics UK (COG-UK) Consortium|Loose|United Kingdom

>Spike|hCoV-19/USA/MI-MDHHS-SC21850/2020|2020-04-27|EPI\_ISL\_565893|Original|hCoV-19^^Michigan|Human|Michigan Department of Health and Human Services|Michigan Department of Health and Human Services|Blankenship|USA

>Spike|hCoV-19/USA/MI-QDX-356/2020|2020-03-22|EPI\_ISL\_571099|Original|hCoV-19^^Michigan|Human|Quest Diagnostics|Quest Diagnostics|Kagan|USA

>Spike|hCoV-19/USA/WI-UW-2466/2020|2020-12-28|EPI\_ISL\_759741|Original|hCoV-19^^Wisconsin|Human|University of Wisconsin-Madison AIDS Vaccine Research

Laboratories|University of Wisconsin-Madison AIDS Vaccine Research  
Laboratories|Moreno|USA  
>Spike|hCoV-19/Sweden/20-08909/2020|2020-05-28|EPI\_ISL\_510815|Original|hCoV-19^^Stockholm|Human|NA|The Public Health Agency of Sweden|Svartstr\u00f6m|Sweden  
>Spike|hCoV-19/Netherlands/ZH-EMC-804/2020|2020-10-14|EPI\_ISL\_632683|Original|hCoV-19^^Zuid Holland|Human|Dutch COVID-19 response team|Erasmus Medical Center|Oude Munnink|Netherlands  
>Spike|hCoV-19/Australia/VIC7874/2020|2020-08-10|EPI\_ISL\_564720|Original|hCoV-19^^Victoria|Human|Microbiological Diagnostic Unit - Public Health Laboratory (MDU-PHL)|MDU-PHL|Schultz|Australia  
>Spike|hCoV-19/Chile/MA-ISPCH-2/2020|2020-03-15|EPI\_ISL\_445269|Original|hCoV-19^^Magallanes|Human|HOSPITAL REG.LAUTARO NAVARRO AVARI\u00c1|Instituto de Salud Publica de Chile|Fernandez|Chile  
>Spike|hCoV-19/Mexico/CMX-INdRE-07/2020|2020-02-28|EPI\_ISL\_452139|Original|hCoV-19^^State of Mexico|Human|Instituto de Diagnostico y Referencia Epidemiologicos (INDRE)|Instituto de diagn\u00f3stico y Referencia Epidemiologicos (INDRE)|Rodriguez|Mexico  
>Spike|hCoV-19/England/QEUH-AD5AEE/2020|2020-10-26|EPI\_ISL\_634685|Original|hCoV-19^^England|Human|Lighthouse Lab in Glasgow|Wellcome Sanger Institute for the COVID-19 Genomics UK (COG-UK) consortium|Davies|United Kingdom  
>Spike|hCoV-19/Australia/VIC14097/2020|2020-09-16|EPI\_ISL\_562726|Original|hCoV-19^^Victoria|Human|Microbiological Diagnostic Unit - Public Health Laboratory (MDU-PHL)|MDU-PHL|Schultz|Australia  
>Spike|hCoV-19/USA/WI-UW-1314/2020|2020-08-27|EPI\_ISL\_536686|Original|hCoV-19^^Wisconsin|Human|University of Wisconsin-Madison AIDS Vaccine Research Laboratories|University of Wisconsin-Madison AIDS Vaccine Research Laboratories|Baczenas|USA  
>Spike|hCoV-19/USA/CA-ALSR-4366/2020|2020-07-15|EPI\_ISL\_648992|Original|hCoV-19^^California|Human|San Diego County Public Health Laboratory|Andersen lab at Scripps Research|Gangavarapu|USA  
>Spike|hCoV-19/England/CAMB-75D3C/2020|2020-03-28|EPI\_ISL\_438336|Original|hCoV-19^^England|Human|Department of Pathology|Wellcome Sanger Institute for the COVID-19 Genomics UK (COG-UK) consortium|Amato|United Kingdom  
>Spike|hCoV-19/England/MILK-AC7C34/2020|2020-10-22|EPI\_ISL\_634380|Original|hCoV-19^^England|Human|Lighthouse Lab in Milton Keynes|Wellcome Sanger Institute for the COVID-19 Genomics UK (COG-UK) consortium|Davies|United Kingdom  
>Spike|hCoV-19/Denmark/DCGC-6944/2020|2020-10-12|EPI\_ISL\_619790|Original|hCoV-19^^Hovedstaden|Human|Department of Virus and Microbiological Special Diagnostics|Albertsen lab|Michaelsen|Denmark  
>Spike|hCoV-19/USA/MI-QDX-1158/2020|2020-03-24|EPI\_ISL\_571888|Original|hCoV-19^^Michigan|Human|Quest Diagnostics|Quest Diagnostics|Kagan|USA  
>Spike|hCoV-19/Singapore/231/2020|2020-03-27|EPI\_ISL\_462349|Original|hCoV-19^^Singapore|Human|National Public Health Laboratory|National Public Health Laboratory|Mak|Singapore  
>Spike|hCoV-19/Japan/IC-0235/2020|2020-09-00|EPI\_ISL\_667664|Original|hCoV-19^^Japan|Human|Pathogen Genomics Center|Pathogen Genomics Center|Sekizuka|Japan  
>Spike|hCoV-19/Japan/PG-7255/2020|2020-08-00|EPI\_ISL\_688358|Original|hCoV-19^^Japan|Human|Saitama Prefectural Institute of Public Health|Pathogen Genomics Center|Sekizuka|Japan  
>Spike|hCoV-19/Japan/PG-5889/2020|2020-08-00|EPI\_ISL\_689004|Original|hCoV-19^^Japan|Human|Pathogen Genomics Center|Pathogen Genomics Center|Sekizuka|Japan  
>Spike|hCoV-19/England/CAMC-B9948D/2020|2020-11-15|EPI\_ISL\_673784|Original|hCoV-19^^England|Human|Lighthouse Lab in Cambridge|Wellcome Sanger Institute for the COVID-19 Genomics UK (COG-UK) Consortium|Davies|United Kingdom  
>Spike|hCoV-19/Denmark/DCGC-2015/2020|2020-07-20|EPI\_ISL\_618229|Original|hCoV-19^^Hovedstaden|Human|Department of Virus and Microbiological Special Diagnostics|Albertsen lab|Michaelsen|Denmark  
>Spike|hCoV-19/South Africa/L00158/2020|2020-07-26|EPI\_ISL\_622986|Original|hCoV-19^^Gauteng|Human|Lancet Laboratories|National Institute for Communicable Diseases of the National Health Laboratory Service|Allam|South Africa

>Spike|hCoV-19/Scotland/GCVR-16FEB9/2020|2020-03-22|EPI\_ISL\_489584|Original|hCoV-19^^Scotland|Human|NHS GGC West of Scotland Specialist Virology Centre / MRC-University of Glasgow Centre for Virus Research|Wellcome Sanger Institute for the COVID-19 Genomics UK (COG-UK) consortium|Davies|United Kingdom

>Spike|hCoV-19/USA/MA\_0020/2020|2020-03-05|EPI\_ISL\_424843|Original|hCoV-19^^Massachusetts|Human|MA State Public Health Laboratory|Pathogen Discovery|Queen|USA

>Spike|hCoV-19/Japan/PG-8065/2020|2020-07-00|EPI\_ISL\_687166|Original|hCoV-19^^Japan|Human|Pathogen Genomics Center|Pathogen Genomics Center|Sekizuka|Japan

>Spike|hCoV-19/USA/CA-CZB-10854/2020|2020-07-27|EPI\_ISL\_583098|Original|hCoV-19^^California|Human|Humboldt County Public Health Laboratory|Chan-Zuckerberg Biohub|Bhatt|USA

>Spike|hCoV-19/USA/WA-S2380/2020|2020-06-12|EPI\_ISL\_497012|Original|hCoV-19^^Washington|Human|Washington State Department of Health|Seattle Flu Study|Lee|USA

>Spike|hCoV-19/USA/TX-HMH-MCoV-12611/2020|2020-08-31|EPI\_ISL\_789839|Original|hCoV-19^^Texas|Human|Houston Methodist Hospital|Houston Methodist Hospital|Long|USA

>Spike|hCoV-19/Canada/NS-NML-1341/2020|2020-04-12|EPI\_ISL\_579718|Original|hCoV-19^^Nova Scotia|Human|QEII Health Sciences Centre|National Microbiology Laboratory (NML)|Majer|Canada

>Spike|hCoV-19/Portugal/PT0215/2020|2020-03-30|EPI\_ISL\_453929|Original|hCoV-19^^Portugal|Human|unknown|Instituto Nacional de Saude (INSA)|Borges|Portugal

>Spike|hCoV-19/England/QEUH-B9E7AD/2020|2020-11-18|EPI\_ISL\_719948|Original|hCoV-19^^England|Human|Lighthouse Lab in Glasgow|Wellcome Sanger Institute for the COVID-19 Genomics UK (COG-UK) Consortium|Davies|United Kingdom

>Spike|hCoV-19/England/QEUH-9DE600/2020|2020-09-21|EPI\_ISL\_581174|Original|hCoV-19^^England|Human|Lighthouse Lab in Glasgow|Wellcome Sanger Institute for the COVID-19 Genomics UK (COG-UK) consortium|Davies|United Kingdom

>Spike|hCoV-19/Mexico/NLE-UANL-013/2020|2020-05-23|EPI\_ISL\_779178|Original|hCoV-19^^Nuevo Leon|Human|Laboratorio de Infectolog\u00eda|Laboratorio de Infectolog\u00eda Molecular|Gal\u00e9n|Mexico

>Spike|hCoV-19/England/QEUH-9DCFCB/2020|2020-09-21|EPI\_ISL\_599642|Original|hCoV-19^^England|Human|Lighthouse Lab in Glasgow|Wellcome Sanger Institute for the COVID-19 Genomics UK (COG-UK) consortium|Davies|United Kingdom

>Spike|hCoV-19/Nigeria/ED1010-CV215/2020|2020-05-04|EPI\_ISL\_527879|Original|hCoV-19^^Edo|Human|Nigeria Centre for Disease Control (NCDC)|African Centre of Excellence for Genomics of Infectious Diseases (ACEGID)|Oluniyi|Nigeria

>Spike|hCoV-19/India/MH-NIV-99913/2020|2020-07-06|EPI\_ISL\_541751|Original|hCoV-19^^Maharashtra|Human|National Institute of Virology|National Institute of Virology|Potdar|India

>Spike|hCoV-19/Vietnam/HCMC-35022/2020|2020-03-24|EPI\_ISL\_498171|unknown|hCoV-19^^Ho Chi Minh City|Human|OUCRU|OUCRU|Nguyen|Vietnam

>Spike|hCoV-19/Australia/VIC7798/2020|2020-08-02|EPI\_ISL\_564666|Original|hCoV-19^^Victoria|Human|Microbiological Diagnostic Unit - Public Health Laboratory (MDU-PHL)|MDU-PHL|Schultz|Australia

>Spike|hCoV-19/USA/CA-CZB-11686/2020|2020-09-28|EPI\_ISL\_625495|Original|hCoV-19^^California|Human|Santa Clara County Public Health Laboratory|Chan-Zuckerberg Biohub|Bhatt|USA

>Spike|hCoV-19/England/ALDP-6C02E2/2020|2020-07-02|EPI\_ISL\_557901|Original|hCoV-19^^England|Human|Lighthouse Lab in Alderley Park|Wellcome Sanger Institute for the COVID-19 Genomics UK (COG-UK) consortium|Davies|United Kingdom

>Spike|hCoV-19/England/EXET-135F13/2020|2020-04-01|EPI\_ISL\_457181|Original|hCoV-19^^England|Human|University of Exeter|COVID-19 Genomics UK (COG-UK) Consortium|Temperton|United Kingdom

>Spike|hCoV-19/England/QEUH-B7EBF2/2020|2020-11-14|EPI\_ISL\_661677|Original|hCoV-19^^England|Human|Lighthouse Lab in Glasgow|Wellcome Sanger Institute for the COVID-19 Genomics UK (COG-UK) Consortium|Davies|United Kingdom

>Spike|hCoV-19/England/ALDP-8FCD53/2020|2020-06-24|EPI\_ISL\_551413|Original|hCoV-19^^England|Human|Lighthouse Lab in Alderley Park|Wellcome Sanger Institute for the COVID-19 Genomics UK (COG-UK) consortium|Davies|United Kingdom



>Spike|hCoV-19/USA/WA-UW-3562/2020|2020-03-24|EPI\_ISL\_570030|Original|hCoV-19^^Washington|Human|UW Virology Lab|UW Virology Lab|Roychoudhury|USA

>Spike|hCoV-19/Scotland/EDB2684/2020|2020-04-26|EPI\_ISL\_439264|Original|hCoV-19^^Scotland|Human|Virology Department|COVID-19 Genomics UK (COG-UK) Consortium|Williams|United Kingdom

>Spike|hCoV-19/USA/OH-ODH-SC35013/2020|2020-04-23|EPI\_ISL\_765209|Original|hCoV-19^^Ohio|Human|Ohio Department of Health Laboratory|Ohio Department of Health Laboratory|Holmes|USA

>Spike|hCoV-19/Denmark/DCGC-5797/2020|2020-09-28|EPI\_ISL\_620984|Original|hCoV-19^^Syddanmark|Human|Department of Virus and Microbiological Special Diagnostics|Albertsen lab|Michaelsen|Denmark

>Spike|hCoV-19/USA/TX-HMH-1492/2020|2020-04-24|EPI\_ISL\_542752|Original|hCoV-19^^Texas|Human|Houston Methodist Hospital|Houston Methodist Hospital|Long|USA

>Spike|hCoV-19/USA/NY-NYCPHL-000617/2020|2020-03-12|EPI\_ISL\_632073|Original|hCoV-19^^New York|Human|OCME Office Of Chief Medical Examiner|New York City Public Health Laboratory|Wang|USA

>Spike|hCoV-19/England/QEUEH-C321AC/2020|2020-12-11|EPI\_ISL\_782717|Original|hCoV-19^^England|Human|Lighthouse Lab in Glasgow|Wellcome Sanger Institute for the COVID-19 Genomics UK (COG-UK) Consortium|Davies|United Kingdom

>Spike|hCoV-19/South Korea/KCDC2121/2020|2020-03-15|EPI\_ISL\_498022|Original|hCoV-19^^South Korea|Human|Division of Viral Diseases|Division of Viral Diseases|Kim|South Korea

>Spike|hCoV-19/USA/TX-HMH-MCoV-15325/2020|2020-10-21|EPI\_ISL\_786809|Original|hCoV-19^^Texas|Human|Houston Methodist Hospital|Houston Methodist Hospital|Long|USA

>Spike|hCoV-19/Japan/PG-7051/2020|2020-08-00|EPI\_ISL\_688156|Original|hCoV-19^^Japan|Human|Pathogen Genomics Center|Pathogen Genomics Center|Sekizuka|Japan

>Spike|hCoV-19/USA/TX-HMH-MCoV-10185/2020|2020-07-06|EPI\_ISL\_789360|Original|hCoV-19^^Texas|Human|Houston Methodist Hospital|Houston Methodist Hospital|Long|USA

>Spike|hCoV-19/Scotland/EDB11103/2020|2020-12-04|EPI\_ISL\_763511|Original|hCoV-19^^Scotland|Human|Virology Department|COVID-19 Genomics UK (COG-UK) Consortium|McHugh|United Kingdom

>Spike|hCoV-19/England/ALDP-94C791/2020|2020-06-15|EPI\_ISL\_556057|Original|hCoV-19^^England|Human|Lighthouse Lab in Alderley Park|Wellcome Sanger Institute for the COVID-19 Genomics UK (COG-UK) consortium|Davies|United Kingdom

>Spike|hCoV-19/Japan/PG-5477/2020|2020-08-00|EPI\_ISL\_690580|Original|hCoV-19^^Japan|Human|Pathogen Genomics Center|Pathogen Genomics Center|Sekizuka|Japan

>Spike|hCoV-19/England/QEUEH-AD3673/2020|2020-10-26|EPI\_ISL\_633925|Original|hCoV-19^^England|Human|Lighthouse Lab in Glasgow|Wellcome Sanger Institute for the COVID-19 Genomics UK (COG-UK) consortium|Davies|United Kingdom

>Spike|hCoV-19/England/MILK-973166/2020|2020-08-20|EPI\_ISL\_575977|Original|hCoV-19^^England|Human|Lighthouse Lab in Milton Keynes|Wellcome Sanger Institute for the COVID-19 Genomics UK (COG-UK) consortium|Davies|United Kingdom

>Spike|hCoV-19/Scotland/EDB6104/2020|2020-05-12|EPI\_ISL\_478225|Original|hCoV-19^^Scotland|Human|Virology Department|COVID-19 Genomics UK (COG-UK) Consortium|Williams|United Kingdom

>Spike|hCoV-19/Denmark/DCGC-8651/2020|2020-10-26|EPI\_ISL\_625994|Original|hCoV-19^^Midtjylland|Human|Department of Virus and Microbiological Special Diagnostics|Albertsen lab|Michaelsen|Denmark

>Spike|hCoV-19/USA/TX-DSHS-0634/2020|2020-06-26|EPI\_ISL\_576290|Original|hCoV-19^^Texas|Human|Texas Department of State Health Services|Texas Department of State Health Services|Rahman|USA

>Spike|hCoV-19/Australia/VIC858/2020|2020-04-05|EPI\_ISL\_427117|Original|hCoV-19^^Victoria|Human|Victorian Infectious Diseases Reference Laboratory (VIDRL)|Microbiological Diagnostic Unit Public Health Laboratory and Victorian Infectious Diseases Reference Laboratory|Schultz|Australia

>Spike|hCoV-19/England/LIVE-DBD4FA/2020|2020-10-28|EPI\_ISL\_664362|Original|hCoV-19^^England|Human|Liverpool Clinical Laboratories|COVID-19 Genomics UK (COG-UK) Consortium|Haldenby|United Kingdom

>Spike|hCoV-19/England/QEUA-B80EB8/2020|2020-11-14|EPI\_ISL\_667838|Original|hCoV-19^^England|Human|Lighthouse Lab in Glasgow|Wellcome Sanger Institute for the COVID-19 Genomics UK (COG-UK) Consortium|Davies|United Kingdom

>Spike|hCoV-19/England/LEED-2A85EB/2020|2020-03-27|EPI\_ISL\_539053|Original|hCoV-19^^England|Human|Leeds Teaching Hospitals NHS Trust and Public Health England|Wellcome Sanger Institute for the COVID-19 Genomics UK (COG-UK) consortium|Davies|United Kingdom

>Spike|hCoV-19/England/NORW-ED1AC/2020|2020-06-18|EPI\_ISL\_478720|Original|hCoV-19^^England|Human|Quadram Institute Bioscience|COVID-19 Genomics UK (COG-UK) Consortium|Alikhan|United Kingdom

>Spike|hCoV-19/Denmark/DCGC-20651/2020|2020-12-21|EPI\_ISL\_758755|Original|hCoV-19^^Hovedstaden|Human|Department of Virus and Microbiological Special Diagnostics|Albertsen Lab|Michaelsen|Denmark

>Spike|hCoV-19/England/MILK-A7AC6D/2020|2020-10-16|EPI\_ISL\_606651|Original|hCoV-19^^England|Human|Lighthouse Lab in Milton Keynes|Wellcome Sanger Institute for the COVID-19 Genomics UK (COG-UK) consortium|Davies|United Kingdom

>Spike|hCoV-19/Denmark/DCGC-15025/2020|2020-11-23|EPI\_ISL\_713587|Original|hCoV-19^^Midtjylland|Human|Department of Virus and Microbiological Special Diagnostics|Albertsen Lab|Michaelsen|Denmark

>Spike|hCoV-19/USA/LA-EVTL541/2020|2020-06-26|EPI\_ISL\_578945|Original|hCoV-19^^Louisiana|Human|LSUHS Emerging Viral Threat Laboratory|Microbial Genome Sequencing Center|Kamil|USA

>Spike|hCoV-19/USA/NY-Wadsworth-142781-01/2020|2020-04-10|EPI\_ISL\_676975|Original|hCoV-19^^New York|Human|Wadsworth Center|Wadsworth Center|Lasek-Nesselquist|USA

>Spike|hCoV-19/USA/WA-UW-13370/2020|2020-07-01|EPI\_ISL\_570967|Original|hCoV-19^^Washington|Human|UW Virology Lab|UW Virology Lab|Roychoudhury|USA

>Spike|hCoV-19/USA/TX-DSHS-0840/2020|2020-06-08|EPI\_ISL\_593582|Original|hCoV-19^^Texas|Human|Texas Department of State Health Services|Texas Department of State Health Services|Rahman|USA

>Spike|hCoV-19/Russia/MUR-RII-MH1701S/2020|2020-09-17|EPI\_ISL\_602345|Original|hCoV-19^^Murmansk|Human|HELIX LLC|WHO National Influenza Centre Russian Federation|Komissarov|Russia

>Spike|hCoV-19/USA/CA-CDC-4708/2020|2020-06-04|EPI\_ISL\_535685|Original|hCoV-19^^California|Human|CDPH|Pathogen Discovery|Queen|USA

>Spike|hCoV-19/Luxembourg/LNS3858275/2020|2020-10-24|EPI\_ISL\_740383|Original|hCoV-19^^Luxembourg|Human|Laboratoire national de sant\u00e9|Laboratoire national de sant\u00e9|Wienecke-Baldacchino|Luxembourg

>Spike|hCoV-19/Japan/PG-7987/2020|2020-08-00|EPI\_ISL\_687088|Original|hCoV-19^^Japan|Human|Pathogen Genomics Center|Pathogen Genomics Center|Sekizuka|Japan

>Spike|hCoV-19/Wales/PHWC-48FA25/2020|2020-11-10|EPI\_ISL\_681175|Original|hCoV-19^^Wales|Human|Wales Specialist Virology Centre Sequencing lab|COVID-19 Genomics UK (COG-UK) Consortium|Moore|United Kingdom

>Spike|hCoV-19/Australia/VIC7522/2020|2020-00-00|EPI\_ISL\_564468|Original|hCoV-19^^Victoria|Human|Microbiological Diagnostic Unit - Public Health Laboratory (MDU-PHL)|MDU-PHL|Schultz|Australia

>Spike|hCoV-19/Denmark/DCGC-17516/2020|2020-12-14|EPI\_ISL\_750272|Original|hCoV-19^^Midtjylland|Human|Department of Virus and Microbiological Special Diagnostics|Albertsen Lab|Michaelsen|Denmark

>Spike|hCoV-19/Germany/BE-ChVir-W1060-4393/2020|2020-03-30|EPI\_ISL\_753928|Original|hCoV-19^^Berlin|Human|Charit\u00e9 Universit\u00e4tsmedizin Berlin|Charit\u00e9 Universit\u00e4tsmedizin Berlin|Muehlemann|Germany

>Spike|hCoV-19/England/SHEF-10B2DF4/2020|2020-05-16|EPI\_ISL\_537253|Original|hCoV-19^^England|Human|Virology Department|Wellcome Sanger Institute for the COVID-19 Genomics UK (COG-UK) consortium|Davies|United Kingdom

>Spike|hCoV-19/England/LIVE-9B2B9/2020|2020-03-27|EPI\_ISL\_449428|Original|hCoV-19^^England|Human|Liverpool Clinical Laboratories|COVID-19 Genomics UK (COG-UK) Consortium|Haldenby|United Kingdom

>Spike|hCoV-19/USA/GA-EHC-043Q/2020|2020-03-15|EPI\_ISL\_754759|Original|hCoV-19^^Georgia|Human|Emory Molecular Diagnostics Laboratory|Piantadosi Lab|Piantadosi|USA

>Spike|hCoV-19/England/QEUA-C34034/2020|2020-12-11|EPI\_ISL\_734066|Original|hCoV-19^^England|Human|Lighthouse Lab in Glasgow|Wellcome Sanger Institute for the COVID-19 Genomics UK (COG-UK) Consortium|Davies|United Kingdom

>Spike|hCoV-19/Denmark/DCGC-16354/2020|2020-11-16|EPI\_ISL\_714719|Original|hCoV-19^^Hovedstaden|Human|Department of Virus and Microbiological Special Diagnostics|Albertsen Lab|Michaelsen|Denmark

>Spike|hCoV-19/USA/WA-S429/2020|2020-03-25|EPI\_ISL\_434189|Original|hCoV-19^^Washington|Human|Washington State Department of Health|Seattle Flu Study|Bedford|USA

>Spike|hCoV-19/England/OXON-AFBB7/2020|2020-04-16|EPI\_ISL\_478810|Original|hCoV-19^^England|Human|Oxford Viromics|COVID-19 Genomics UK (COG-UK) Consortium|Golubchik|United Kingdom

>Spike|hCoV-19/England/LOND-D6391/2020|2020-04-21|EPI\_ISL\_487537|Original|hCoV-19^^England|Human|University College London|Wellcome Sanger Institute for the COVID-19 Genomics UK (COG-UK) consortium|Davies|United Kingdom

>Spike|hCoV-19/USA/VA-DCLS-1025/2020|2020-06-03|EPI\_ISL\_526914|Original|hCoV-19^^Virginia|Human|Virginia DCLS|Virginia DCLS|St. Jacques|USA

>Spike|hCoV-19/Switzerland/VD-ETHZ-110508/2020|2020-04-07|EPI\_ISL\_451914|Original|hCoV-19^^Vaud|Human|Viollier AG|Department of Biosystems Science and Engineering|Nadeau|Switzerland

>Spike|hCoV-19/USA/TX-HMH-MCoV-19414/2020|2020-11-30|EPI\_ISL\_783826|Original|hCoV-19^^Texas|Human|Houston Methodist Hospital|Houston Methodist Hospital|Long|USA

>Spike|hCoV-19/Australia/VIC285/2020|2020-03-22|EPI\_ISL\_419976|Original|hCoV-19^^Victoria|Human|Victorian Infectious Diseases Reference Laboratory (VIDRL)|Victorian Infectious Diseases Reference Laboratory and Microbiological Diagnostic Unit Public Health Laboratory|Schultz|Australia

>Spike|hCoV-19/USA/UT-UPHL-2012086186/2020|2020-08-08|EPI\_ISL\_745614|Original|hCoV-19^^Utah|Human|Ginkgo Bioworks Clinical Laboratory|Utah Public Health Laboratory|Young|USA

>Spike|hCoV-19/Jordan/AM-ALSR-5158/2020|2020-10-18|EPI\_ISL\_730397|Original|hCoV-19^^Amman|Human|Biolab Diagnostic Laboratories|Andersen lab at Scripps Research|Gangavarapu|Jordan

>Spike|hCoV-19/England/QEUA-997C2F/2020|2020-08-28|EPI\_ISL\_559753|Original|hCoV-19^^England|Human|Oxford Viromics|COVID-19 Genomics UK (COG-UK) Consortium|Golubchik|United Kingdom

>Spike|hCoV-19/Italy/UMB-IZSUM-48682-15/2020|2020-10-29|EPI\_ISL\_763096|Original|hCoV-19^^Umbria|Human|Istituto Zooprofilattico Sperimentale dell' Umbria e delle Marche - Togo Rosati|Istituto Superiore di Sanit\u00e0|De Sabato|Italy

>Spike|hCoV-19/Switzerland/BE-ETHZ-400066/2020|2020-12-05|EPI\_ISL\_729118|Original|hCoV-19^^Bern|Human|Viollier AG|Department of Biosystems Science and Engineering|Nadeau|Switzerland

>Spike|hCoV-19/Wales/PHWC-2431C/2020|2020-03-18|EPI\_ISL\_474229|Original|hCoV-19^^Wales|Human|Originating lab|COVID-19 Genomics UK (COG-UK) Consortium|Moore|United Kingdom

>Spike|hCoV-19/USA/MI-MDHHS-SC20638/2020|2020-04-26|EPI\_ISL\_462720|Original|hCoV-19^^Michigan|Human|Michigan Department of Health and Human Services|Michigan Department of Health and Human Services|Blankenship|USA

>Spike|hCoV-19/England/QEUA-A0BE98/2020|2020-09-29|EPI\_ISL\_599296|Original|hCoV-19^^England|Human|Lighthouse Lab in Glasgow|Wellcome Sanger Institute for the COVID-19 Genomics UK (COG-UK) consortium|Davies|United Kingdom

>Spike|hCoV-19/Brazil/RJ-2057/2020|2020-04-16|EPI\_ISL\_456102|Original|hCoV-19^^Rio de Janeiro|Human|Laboratory of Respiratory Viruses and Measles|Laboratory of Respiratory Viruses and Measles|Silva|Brazil

>Spike|hCoV-19/USA/NY-QDX-2536/2020|2020-03-16|EPI\_ISL\_604830|Original|hCoV-19^^New York|Human|Quest Diagnostics|Quest Diagnostics|Kagan|USA

>Spike|hCoV-19/USA/LA-GBCL-26684462/2020|2020-04-04|EPI\_ISL\_485283|Original|hCoV-19^^Louisiana|Human|River Road Testing Lab|Ginkgo Bioworks Clinical Laboratory|Smith|USA

>Spike|hCoV-19/USA/TX-HMH-1819/2020|2020-05-14|EPI\_ISL\_542862|Original|hCoV-19^^Texas|Human|Houston Methodist Hospital|Houston Methodist Hospital|Long|USA

>Spike|hCoV-19/Singapore/1492/2020|2020-12-22|EPI\_ISL\_754101|Original|hCoV-19^^Singapore|Human|National Public Health Laboratory|National Public Health Laboratory|Mak|Singapore

>Spike|hCoV-19/England/WSFT-25C1000/2020|2020-04-22|EPI\_ISL\_492839|Original|hCoV-19^^England|Human|Department of Medical Microbiology|Wellcome Sanger Institute for the COVID-19 Genomics UK (COG-UK) consortium|Davies|United Kingdom

>Spike|hCoV-19/USA/TX-HMH-MCoV-18187/2020|2020-11-13|EPI\_ISL\_784535|Original|hCoV-19^^Texas|Human|Houston Methodist Hospital|Houston Methodist Hospital|Long|USA

>Spike|hCoV-19/Denmark/DCGC-8492/2020|2020-10-26|EPI\_ISL\_625916|Original|hCoV-19^^Midtjylland|Human|Department of Virus and Microbiological Special Diagnostics|Albertsen lab|Michaelsen|Denmark

>Spike|hCoV-19/USA/OR-OHSU-2219/2020|2020-08-07|EPI\_ISL\_667150|Original|hCoV-19^^Oregon|Human|OHSU Lab Services Molecular Microbiology Lab|Oregon SARS-CoV-2 Genome Sequencing Center|O'Roak|USA

>Spike|hCoV-19/Wales/PHWC-481CC3/2020|2020-10-12|EPI\_ISL\_611663|Original|hCoV-19^^Wales|Human|Wales Specialist Virology Centre Sequencing lab|COVID-19 Genomics UK (COG-UK) Consortium|Moore|United Kingdom

>Spike|hCoV-19/Austria/CeMM0809/2020|2020-04-27|EPI\_ISL\_583711|Original|hCoV-19^^Austria|Human|Center for Virology|Bergthaler laboratory|Bergthaler|Austria

>Spike|hCoV-19/USA/CA-CZB-3890/2020|2020-07-21|EPI\_ISL\_548543|Original|hCoV-19^^California|Human|County of Santa Clara Public Health Department|Chan-Zuckerberg Biohub|Bhatt|USA

>Spike|hCoV-19/USA/TX-HMH-5163/2020|2020-06-22|EPI\_ISL\_544570|Original|hCoV-19^^Texas|Human|Houston Methodist Hospital|Houston Methodist Hospital|Long|USA

>Spike|hCoV-19/Australia/VIC14045/2020|2020-08-20|EPI\_ISL\_563944|Original|hCoV-19^^Victoria|Human|Microbiological Diagnostic Unit - Public Health Laboratory (MDU-PHL)|MDU-PHL|Schultz|Australia

>Spike|hCoV-19/Wales/PHWC-48AE3D/2020|2020-11-04|EPI\_ISL\_665659|Original|hCoV-19^^Wales|Human|Wales Specialist Virology Centre Sequencing lab|COVID-19 Genomics UK (COG-UK) Consortium|Moore|United Kingdom

>Spike|hCoV-19/USA/MD-MDH-0201/2020|2020-06-08|EPI\_ISL\_560814|Original|hCoV-19^^Maryland|Human|Maryland Public Health Laboratory|Maryland Public Health Laboratory|Keller|USA

>Spike|hCoV-19/Denmark/DCGC-3874/2020|2020-09-07|EPI\_ISL\_615592|Original|hCoV-19^^Hovedstaden|Human|Department of Virus and Microbiological Special Diagnostics|Albertsen lab|Michaelsen|Denmark

>Spike|hCoV-19/Japan/PG-3389/2020|2020-05-00|EPI\_ISL\_691503|Original|hCoV-19^^Japan|Human|Pathogen Genomics Center|Pathogen Genomics Center|Sekizuka|Japan

>Spike|hCoV-19/USA/CA-CHLA-PLM62737694/2020|2020-11-30|EPI\_ISL\_753545|Original|hCoV-19^^California|Human|Clinical virology Laboratory|Center for Personalized Medicine|Dien Bard|USA

>Spike|hCoV-19/England/CAMB-754FB/2020|2020-03-13|EPI\_ISL\_425399|Original|hCoV-19^^England|Human|Department of Pathology|COVID-19 Genomics UK (COG-UK) Consortium|Meredith|United Kingdom

>Spike|hCoV-19/USA/WI-UW-2353/2020|2020-11-15|EPI\_ISL\_728119|Original|hCoV-19^^Wisconsin|Human|University of Wisconsin-Madison AIDS Vaccine Research Laboratories|University of Wisconsin-Madison AIDS Vaccine Research Laboratories|Baczenas|USA

>Spike|hCoV-19/Scotland/GCVR-171A29/2020|2020-03-27|EPI\_ISL\_489455|Original|hCoV-19^^Scotland|Human|NHSGGC West of Scotland Specialist Virology Centre / MRC-University of Glasgow Centre for Virus Research|Wellcome Sanger Institute for the COVID-19 Genomics UK (COG-UK) consortium|Davies|United Kingdom

>Spike|hCoV-19/USA/WA-UW-2247/2020|2020-03-24|EPI\_ISL\_426129|Original|hCoV-19^^Washington|Human|UW Virology Lab|UW Virology Lab|Roychoudhury|USA

>Spike|hCoV-19/USA/MN-MDH-119/2020|2020-03-20|EPI\_ISL\_427275|Original|hCoV-19^^Minnesota|Human|Minnesota Department of Health|Minnesota Department of Health|Wang|USA

>Spike|hCoV-19/Japan/PG-4524/2020|2020-08-00|EPI\_ISL\_689663|Original|hCoV-19^^Japan|Human|Pathogen Genomics Center|Pathogen Genomics Center|Sekizuka|Japan

>Spike|hCoV-19/Australia/VIC8420/2020|2020-07-28|EPI\_ISL\_565000|Original|hCoV-19^^Victoria|Human|Microbiological Diagnostic Unit - Public Health Laboratory (MDU-PHL)|MDU-PHL|Schultz|Australia

>Spike|hCoV-19/Denmark/DCGC-6867/2020|2020-10-12|EPI\_ISL\_619712|Original|hCoV-19^^Hovedstaden|Human|Department of Virus and Microbiological Special Diagnostics|Albertsen lab|Michaelsen|Denmark

>Spike|hCoV-19/Scotland/QEUEH-9E46CB/2020|2020-09-23|EPI\_ISL\_600972|Original|hCoV-19^^Scotland|Human|Lighthouse Lab in Glasgow|Wellcome Sanger Institute for the COVID-19 Genomics UK (COG-UK) consortium|Davies|United Kingdom

>Spike|hCoV-19/USA/UT-UPHL-201016782/2020|2020-05-30|EPI\_ISL\_594017|Original|hCoV-19^^Utah|Human|Utah Public Health Laboratory|Utah Public Health Laboratory|Young|USA

>Spike|hCoV-19/Scotland/EDB4706/2020|2020-05-10|EPI\_ISL\_449323|Original|hCoV-19^^Scotland|Human|Virology Department|COVID-19 Genomics UK (COG-UK) Consortium|Williams|United Kingdom

>Spike|hCoV-19/USA/AZ-TG396354/2020|2020-06-10|EPI\_ISL\_694812|Original|hCoV-19^^Arizona|Human|AZ SPHL|TGen North|French|USA

>Spike|hCoV-19/USA/TX-HMH-MCoV-12999/2020|2020-08-28|EPI\_ISL\_788150|Original|hCoV-19^^Texas|Human|Houston Methodist Hospital|Houston Methodist Hospital|Long|USA

>Spike|hCoV-19/Japan/PG-7598/2020|2020-07-00|EPI\_ISL\_686700|Original|hCoV-19^^Japan|Human|Chiba Prefectural Institute of Public Health|Pathogen Genomics Center|Sekizuka|Japan

>Spike|hCoV-19/England/QEUEH-96AE98/2020|2020-08-15|EPI\_ISL\_531240|Original|hCoV-19^^England|Human|Lighthouse Lab in Glasgow|Wellcome Sanger Institute for the COVID-19 Genomics UK (COG-UK) consortium|Davies|United Kingdom

>Spike|hCoV-19/Denmark/DCGC-12530/2020|2020-11-16|EPI\_ISL\_682711|Original|hCoV-19^^Hovedstaden|Human|Department of Virus and Microbiological Special Diagnostics|Albertsen Lab|Michaelsen|Denmark

>Spike|hCoV-19/England/QEUEH-9FB12A/2020|2020-09-29|EPI\_ISL\_588235|Original|hCoV-19^^England|Human|Lighthouse Lab in Glasgow|Wellcome Sanger Institute for the COVID-19 Genomics UK (COG-UK) consortium|Davies|United Kingdom

>Spike|hCoV-19/Denmark/DCGC-10657/2020|2020-11-02|EPI\_ISL\_669739|Original|hCoV-19^^Nordjylland|Human|Department of Virus and Microbiological Special Diagnostics|Albertsen Lab|Michaelsen|Denmark

>Spike|hCoV-19/England/MILK-A6C28A/2020|2020-10-07|EPI\_ISL\_609006|Original|hCoV-19^^England|Human|Lighthouse Lab in Milton Keynes|Wellcome Sanger Institute for the COVID-19 Genomics UK (COG-UK) consortium|Davies|United Kingdom

>Spike|hCoV-19/Scotland/EDB1063/2020|2020-04-06|EPI\_ISL\_473783|Original|hCoV-19^^Scotland|Human|Virology Department|COVID-19 Genomics UK (COG-UK) Consortium|Williams|United Kingdom

>Spike|hCoV-19/Portugal/PT0200/2020|2020-03-29|EPI\_ISL\_453916|Original|hCoV-19^^Portugal|Human|unknown|Instituto Nacional de Saude (INSA)|Borges|Portugal

>Spike|hCoV-19/England/ALDP-523C77/2020|2020-06-02|EPI\_ISL\_559058|Original|hCoV-19^^England|Human|Lighthouse Lab in Alderley Park|Wellcome Sanger Institute for the COVID-19 Genomics UK (COG-UK) consortium|Davies|United Kingdom

>Spike|hCoV-19/Scotland/CVR44/2020|2020-03-13|EPI\_ISL\_425772|Original|hCoV-19^^Scotland|Human|West of Scotland Specialist Virology Centre|COVID-19 Genomics UK (COG-UK) Consortium|Robertson|United Kingdom

>Spike|hCoV-19/USA/TX-HMH-MCoV-18843/2020|2020-11-23|EPI\_ISL\_785162|Original|hCoV-19^^Texas|Human|Houston Methodist Hospital|Houston Methodist Hospital|Long|USA

>Spike|hCoV-19/England/QEUEH-9D16C1/2020|2020-09-14|EPI\_ISL\_573654|Original|hCoV-19^^England|Human|University College London|COVID-19 Genomics UK (COG-UK) Consortium|Roy|United Kingdom

>Spike|hCoV-19/Denmark/DCGC-9937/2020|2020-11-09|EPI\_ISL\_669281|Original|hCoV-19^^Midtjylland|Human|Department of Virus and Microbiological Special Diagnostics|Albertsen Lab|Michaelsen|Denmark

>Spike|hCoV-19/USA/NY-Wadsworth-41115-01/2020|2020-04-06|EPI\_ISL\_676819|Original|hCoV-19^^New York|Human|Wadsworth Center|Wadsworth Center|Lasek-Nesselquist|USA

>Spike|hCoV-19/Philippines/PH-RITM-0012/2020|2020-03-06|EPI\_ISL\_491468|Original|hCoV-19^^NCR|Human|Research Institute for Tropical Medicine|Research Institute for Tropical Medicine|Polotan|Philippines

>Spike|hCoV-19/Australia/VIC5286/2020|2020-07-22|EPI\_ISL\_520050|Original|hCoV-19^^Victoria|Human|Microbiological Diagnostic Unit - Public Health Laboratory (MDU-PHL)|MDU-PHL|Schultz|Australia

>Spike|hCoV-19/USA/TX-HMH-MCoV-13598/2020|2020-08-20|EPI\_ISL\_788708|Original|hCoV-19^^Texas|Human|Houston Methodist Hospital|Houston Methodist Hospital|Long|USA

>Spike|hCoV-19/Scotland/QEUH-ALF64E/2020|2020-10-01|EPI\_ISL\_598973|Original|hCoV-19^^Scotland|Human|Lighthouse Lab in Glasgow|Wellcome Sanger Institute for the COVID-19 Genomics UK (COG-UK) consortium|Davies|United Kingdom

>Spike|hCoV-19/Spain/MD-IBV-99008650/2020|2020-09-29|EPI\_ISL\_654185|Original|hCoV-19^^Madrid|Human|Hospital General Universitario Gregorio Mara\u00f1\u00f3n|SeqCOVID-SPAIN consortium/IBV (CSIC)|Comas|Spain

>Spike|hCoV-19/USA/AZ-TG280089/2020|2020-04-29|EPI\_ISL\_694145|Original|hCoV-19^^Arizona|Human|TGen North|TGen North|French|USA

>Spike|hCoV-19/England/MILK-95D9F1/2020|2020-06-19|EPI\_ISL\_556186|Original|hCoV-19^^England|Human|Lighthouse Lab in Milton Keynes|Wellcome Sanger Institute for the COVID-19 Genomics UK (COG-UK) consortium|Davies|United Kingdom

>Spike|hCoV-19/Sweden/20-52537/2020|2020-08-05|EPI\_ISL\_534250|Original|hCoV-19^^Gavleborg|Human|Gavle Sjukhus|The Public Health Agency of Sweden|Svartstr\u00f6m|Sweden

>Spike|hCoV-19/England/ALDP-A68224/2020|2020-10-12|EPI\_ISL\_608502|Original|hCoV-19^^England|Human|Lighthouse Lab in Alderley Park|Wellcome Sanger Institute for the COVID-19 Genomics UK (COG-UK) consortium|Davies|United Kingdom

>Spike|hCoV-19/Wales/PHWC-16D1D0/2020|2020-09-18|EPI\_ISL\_574210|Original|hCoV-19^^Wales|Human|Wales Specialist Virology Centre Sequencing lab|COVID-19 Genomics UK (COG-UK) Consortium|Moore|United Kingdom

>Spike|hCoV-19/Denmark/DCGC-12911/2020|2020-12-07|EPI\_ISL\_712457|Original|hCoV-19^^Hovedstaden|Human|Department of Virus and Microbiological Special Diagnostics|Albertsen Lab|Michaelsen|Denmark

>Spike|hCoV-19/USA/NY-Wadsworth-281613-01/2020|2020-11-30|EPI\_ISL\_754411|Original|hCoV-19^^New York|Human|Wadsworth Center|Wadsworth Center|Lasek-Nesselquist|USA

>Spike|hCoV-19/USA/MA-MGH-03419/2020|2020-11-11|EPI\_ISL\_765829|Original|hCoV-19^^Massachusetts|Human|Massachusetts General Hospital|Infectious Disease Program|Park|USA

>Spike|hCoV-19/England/QEUH-B80AF0/2020|2020-11-14|EPI\_ISL\_661952|Original|hCoV-19^^England|Human|Lighthouse Lab in Glasgow|Wellcome Sanger Institute for the COVID-19 Genomics UK (COG-UK) Consortium|Davies|United Kingdom

>Spike|hCoV-19/England/ALDP-BC74D1/2020|2020-11-22|EPI\_ISL\_721192|Original|hCoV-19^^England|Human|Lighthouse Lab in Alderley Park|Wellcome Sanger Institute for the COVID-19 Genomics UK (COG-UK) Consortium|Davies|United Kingdom

>Spike|hCoV-19/Austria/CeMM0794/2020|2020-05-20|EPI\_ISL\_583704|Original|hCoV-19^^Austria|Human|Center for Virology|Bergthaler laboratory|Bergthaler|Austria

>Spike|hCoV-19/Scotland/GCVR-170037/2020|2020-03-24|EPI\_ISL\_459691|Original|hCoV-19^^Scotland|Human|NHSGGC West of Scotland Specialist Virology Centre / MRC-University of Glasgow Centre for Virus Research|Wellcome Sanger Institute for the COVID-19 Genomics UK (COG-UK) consortium|Davies|United Kingdom

>Spike|hCoV-19/Scotland/QEUH-8937D8/2020|2020-07-28|EPI\_ISL\_532753|Original|hCoV-19^^Scotland|Human|NHSGGC West of Scotland Specialist Virology Centre / MRC-University of Glasgow Centre for Virus Research|Wellcome Sanger Institute for the COVID-19 Genomics UK (COG-UK) consortium|Davies|United Kingdom

>Spike|hCoV-19/USA/WI-UW-698/2020|2020-06-29|EPI\_ISL\_491376|Original|hCoV-19^^Wisconsin|Human|University of Wisconsin-Madison AIDS Vaccine Research Laboratories|University of Wisconsin-Madison AIDS Vaccine Research Laboratories|Baczenas|USA

>Spike|hCoV-19/Denmark/DCGC-13659/2020|2020-11-30|EPI\_ISL\_712943|Original|hCoV-19^^Midtjylland|Human|Department of Virus and Microbiological Special Diagnostics|Albertsen Lab|Michaelsen|Denmark

>Spike|hCoV-19/Denmark/DCGC-16455/2020|2020-11-16|EPI\_ISL\_714154|Original|hCoV-19^^Hovedstaden|Human|Department of Virus and Microbiological Special Diagnostics|Albertsen Lab|Michaelsen|Denmark

>Spike|hCoV-19/England/MILK-9A84AB/2020|2020-09-02|EPI\_ISL\_550180|Original|hCoV-19^^England|Human|Lighthouse Lab in Milton Keynes|Wellcome Sanger Institute for the COVID-19 Genomics UK (COG-UK) consortium|Davies|United Kingdom

>Spike|hCoV-19/USA/NY-QDX-2529/2020|2020-03-15|EPI\_ISL\_604825|Original|hCoV-19^^New York|Human|Quest Diagnostics|Quest Diagnostics|Kagan|USA

>Spike|hCoV-19/Canada/ON-E37/2020|2020-05-26|EPI\_ISL\_593515|Original|hCoV-19^^Ontario|Human|Eastern Ontario Regional Laboratory Association|McMaster University|McArthur|Canada

>Spike|hCoV-19/USA/MI-MDHHS-SC21218/2020|2020-04-08|EPI\_ISL\_507475|Original|hCoV-19^^Michigan|Human|Michigan Department of Health and Human Services|Michigan Department of Health and Human Services|Blankenship|USA

>Spike|hCoV-19/Italy/LOM-INMI-BG-7158/2020|2020-02-24|EPI\_ISL\_460081|Original|hCoV-19^^Lombardy|Human|Molecular Virology Unit|Laboratory of Virology|Gruber|Italy

>Spike|hCoV-19/USA/WI-UW-2666/2020|2020-12-29|EPI\_ISL\_791179|Original|hCoV-19^^Wisconsin|Human|University of Wisconsin-Madison AIDS Vaccine Research Laboratories|University of Wisconsin-Madison AIDS Vaccine Research Laboratories|Moreno|USA

>Spike|hCoV-19/Denmark/DCGC-18458/2020|2020-12-07|EPI\_ISL\_749980|Original|hCoV-19^^Nordjylland|Human|Department of Virus and Microbiological Special Diagnostics|Albertsen Lab|Michaelsen|Denmark

>Spike|hCoV-19/Scotland/QEUEH-9CF022/2020|2020-09-17|EPI\_ISL\_601888|Original|hCoV-19^^Scotland|Human|Lighthouse Lab in Glasgow|Wellcome Sanger Institute for the COVID-19 Genomics UK (COG-UK) consortium|Davies|United Kingdom

>Spike|hCoV-19/USA/TX-HMH-3703/2020|2020-06-15|EPI\_ISL\_543121|Original|hCoV-19^^Texas|Human|Houston Methodist Hospital|Houston Methodist Hospital|Long|USA

>Spike|hCoV-19/USA/CA-IGI-0406/2020|2020-07-20|EPI\_ISL\_756318|Original|hCoV-19^^California|Human|Innovative Genomics Institute|Innovative Genomics Institute|Wyman|USA

>Spike|hCoV-19/England/BRIS-1266F2/2020|2020-04-09|EPI\_ISL\_459074|Original|hCoV-19^^England|Human|PHE South West Regional Laboratory|Wellcome Sanger Institute for the COVID-19 Genomics UK (COG-UK) consortium|Davies|United Kingdom

>Spike|hCoV-19/Denmark/DCGC-14517/2020|2020-11-30|EPI\_ISL\_711813|Original|hCoV-19^^Midtjylland|Human|Department of Virus and Microbiological Special Diagnostics|Albertsen Lab|Michaelsen|Denmark

>Spike|hCoV-19/England/QEUEH-B31E5C/2020|2020-11-04|EPI\_ISL\_646383|Original|hCoV-19^^England|Human|Lighthouse Lab in Glasgow|Wellcome Sanger Institute for the COVID-19 Genomics UK (COG-UK) Consortium|Davies|United Kingdom

>Spike|hCoV-19/Japan/PG-4761/2020|2020-08-00|EPI\_ISL\_689897|Original|hCoV-19^^Japan|Human|Pathogen Genomics Center|Pathogen Genomics Center|Sekizuka|Japan

>Spike|hCoV-19/England/NORW-E8A1F/2020|2020-00-00|EPI\_ISL\_448264|Original|hCoV-19^^England|Human|Quadram Institute Bioscience|COVID-19 Genomics UK (COG-UK) Consortium|Alikhan|United Kingdom

>Spike|hCoV-19/England/ALDP-BB8BDE/2020|2020-11-20|EPI\_ISL\_703159|Original|hCoV-19^^England|Human|Lighthouse Lab in Alderley Park|Wellcome Sanger Institute for the COVID-19 Genomics UK (COG-UK) Consortium|Davies|United Kingdom

>Spike|hCoV-19/USA/CO-CDPHE-2008180319/2020|2020-08-17|EPI\_ISL\_710218|Original|hCoV-19^^Colorado|Human|Colorado Department of Public Health and Environment|Colorado Department of Public Health and Environment|Bankers|USA

>Spike|hCoV-19/England/ALDP-950150/2020|2020-06-16|EPI\_ISL\_555190|Original|hCoV-19^^England|Human|Lighthouse Lab in Alderley Park|Wellcome Sanger Institute for the COVID-19 Genomics UK (COG-UK) consortium|Davies|United Kingdom

>Spike|hCoV-19/England/ALDP-B83574/2020|2020-11-14|EPI\_ISL\_675700|Original|hCoV-19^^England|Human|Lighthouse Lab in Alderley Park|Wellcome Sanger Institute for the COVID-19 Genomics UK (COG-UK) Consortium|Davies|United Kingdom

>Spike|hCoV-19/USA/IL-NM-0422/2020|2020-04-13|EPI\_ISL\_626401|Original|hCoV-19^^Illinois|Human|Northwestern Memorial Hospital|Ozer Lab|Ozer|USA

>Spike|hCoV-19/England/ALDP-A6F8D0/2020|2020-10-15|EPI\_ISL\_607022|Original|hCoV-19^^England|Human|Lighthouse Lab in Alderley Park|Wellcome Sanger Institute for the COVID-19 Genomics UK (COG-UK) consortium|Davies|United Kingdom

>Spike|hCoV-19/Denmark/DCGC-20403/2020|2020-12-21|EPI\_ISL\_759126|Original|hCoV-19^^Hovedstaden|Human|Department of Virus and Microbiological Special Diagnostics|Albertsen Lab|Michaelsen|Denmark

>Spike|hCoV-19/England/LOND-D5ECE/2020|2020-04-19|EPI\_ISL\_444257|Original|hCoV-19^^England|Human|University College London|COVID-19 Genomics UK (COG-UK) Consortium|Roy|United Kingdom

>Spike|hCoV-19/England/CAMC-B3428A/2020|2020-11-05|EPI\_ISL\_659549|Original|hCoV-19^^England|Human|Lighthouse Lab in Cambridge|Wellcome Sanger Institute for the COVID-19 Genomics UK (COG-UK) Consortium|Davies|United Kingdom

>Spike|hCoV-19/England/QEUEH-C33D98/2020|2020-12-11|EPI\_ISL\_734073|Original|hCoV-19^^England|Human|Lighthouse Lab in Glasgow|Wellcome Sanger Institute for the COVID-19 Genomics UK (COG-UK) Consortium|Davies|United Kingdom

>Spike|hCoV-19/England/PORT-2D0D79/2020|2020-03-31|EPI\_ISL\_475280|Original|hCoV-19^^England|Human|Centre for Enzyme Innovation|COVID-19 Genomics UK (COG-UK) Consortium|Robson|United Kingdom

>Spike|hCoV-19/England/ALDP-C3B914/2020|2020-12-11|EPI\_ISL\_730988|Original|hCoV-19^^England|Human|Lighthouse Lab in Alderley Park|Wellcome Sanger Institute for the COVID-19 Genomics UK (COG-UK) Consortium|Davies|United Kingdom

>Spike|hCoV-19/England/QEUEH-B66674/2020|2020-11-11|EPI\_ISL\_661500|Original|hCoV-19^^England|Human|Lighthouse Lab in Glasgow|Wellcome Sanger Institute for the COVID-19 Genomics UK (COG-UK) Consortium|Davies|United Kingdom

>Spike|hCoV-19/Hungary/SRC-17881c/2020|2020-03-19|EPI\_ISL\_435425|Original|hCoV-19^^Szeged|Human|Virological Research Group|Bioinformatics Research Group|Herczeg|Hungary

>Spike|hCoV-19/USA/MI-MDHHS-SC20653/2020|2020-04-27|EPI\_ISL\_462735|Original|hCoV-19^^Michigan|Human|Michigan Department of Health and Human Services|Michigan Department of Health and Human Services|Blankenship|USA

>Spike|hCoV-19/India/MH-NIV-136271/2020|2020-07-26|EPI\_ISL\_541695|Original|hCoV-19^^Maharashtra|Human|National Institute of Virology|National Institute of Virology|Potdar|India

>Spike|hCoV-19/England/PORT-2D17A7/2020|2020-04-10|EPI\_ISL\_514469|Original|hCoV-19^^England|Human|Centre for Enzyme Innovation|COVID-19 Genomics UK (COG-UK) Consortium|Robson|United Kingdom

>Spike|hCoV-19/England/MILK-9F1A83/2020|2020-09-23|EPI\_ISL\_589677|Original|hCoV-19^^England|Human|Lighthouse Lab in Milton Keynes|Wellcome Sanger Institute for the COVID-19 Genomics UK (COG-UK) consortium|Davies|United Kingdom

>Spike|hCoV-19/England/QEUEH-B9EBED/2020|2020-11-18|EPI\_ISL\_719783|Original|hCoV-19^^England|Human|Lighthouse Lab in Glasgow|Wellcome Sanger Institute for the COVID-19 Genomics UK (COG-UK) Consortium|Davies|United Kingdom

>Spike|hCoV-19/USA/WI-GMF-18574/2020|2020-09-03|EPI\_ISL\_547768|Original|hCoV-19^^Wisconsin|Human|Gundersen Molecular Diagnostics Laboratory|Kabara Cancer Research Institute|Kenny|USA

>Spike|hCoV-19/England/ALDP-BB99B5/2020|2020-11-20|EPI\_ISL\_702653|Original|hCoV-19^^England|Human|Lighthouse Lab in Alderley Park|Wellcome Sanger Institute for the COVID-19 Genomics UK (COG-UK) Consortium|Davies|United Kingdom

>Spike|hCoV-19/USA/NY-QDX-1251/2020|2020-03-15|EPI\_ISL\_572018|Original|hCoV-19^^New York|Human|Quest Diagnostics|Quest Diagnostics|Kagan|USA

>Spike|hCoV-19/England/ALDP-A2D80B/2020|2020-10-05|EPI\_ISL\_586647|Original|hCoV-19^^England|Human|Lighthouse Lab in Alderley Park|Wellcome Sanger Institute for the COVID-19 Genomics UK (COG-UK) consortium|Davies|United Kingdom

>Spike|hCoV-19/England/ALDP-C3BB3C/2020|2020-12-10|EPI\_ISL\_731768|Original|hCoV-19^^England|Human|Lighthouse Lab in Alderley Park|Wellcome Sanger Institute for the COVID-19 Genomics UK (COG-UK) Consortium|Davies|United Kingdom



>Spike|hCoV-19/Australia/VIC3827/2020|2020-07-10|EPI\_ISL\_520540|Original|hCoV-19^^Victoria|Human|Microbiological Diagnostic Unit - Public Health Laboratory (MDU-PHL)|MDU-PHL|Schultz|Australia

>Spike|hCoV-19/USA/MI-MDHHS-SC21881/2020|2020-04-16|EPI\_ISL\_565942|Original|hCoV-19^^Michigan|Human|Michigan Department of Health and Human Services|Michigan Department of Health and Human Services|Blankenship|USA

>Spike|hCoV-19/Wales/MILK-992BCD/2020|2020-08-26|EPI\_ISL\_552182|Original|hCoV-19^^Wales|Human|Lighthouse Lab in Milton Keynes|Wellcome Sanger Institute for the COVID-19 Genomics UK (COG-UK) consortium|Davies|United Kingdom

>Spike|hCoV-19/USA/MN-MDH-2220/2020|2020-11-13|EPI\_ISL\_770794|Original|hCoV-19^^Minnesota|Human|Hennepin County Medical Center|Minnesota Department of Health|Lorentz|USA

>Spike|hCoV-19/Finland/2LS13A7/2020|2020-10-02|EPI\_ISL\_756116|Original|hCoV-19^^Uusimaa|Human|Department of Virology and Immunology|Department of Virology|Smura|Finland

>Spike|hCoV-19/Netherlands/NH-EMC-41/2020|2020-06-08|EPI\_ISL\_523410|Original|hCoV-19^^Noord Holland|Human|Dutch COVID-19 response team|Erasmus Medical Center|Oude Munnink|Netherlands

>Spike|hCoV-19/Singapore/792/2020|2020-06-04|EPI\_ISL\_512828|Original|hCoV-19^^Singapore|Human|National Public Health Laboratory|National Public Health Laboratory|Mak|Singapore

>Spike|hCoV-19/Wales/ALDP-B19FDF/2020|2020-11-01|EPI\_ISL\_710941|Original|hCoV-19^^Wales|Human|Lighthouse Lab in Alderley Park|Wellcome Sanger Institute for the COVID-19 Genomics UK (COG-UK) Consortium|Davies|United Kingdom

>Spike|hCoV-19/Germany/NW-ChVir-W1049-5662/2020|2020-03-26|EPI\_ISL\_754047|Original|hCoV-19^^North Rhine-Westphalia|Human|Charit\u00e9 Universit\u00e4tsmedizin Berlin|Charit\u00e9 Universit\u00e4tsmedizin Berlin|Muehlemann|Germany

>Spike|hCoV-19/Thailand/NIH-1889/2020|2020-03-03|EPI\_ISL\_434697|Original|hCoV-19^^Nonthaburi|Human|unknown|National Institute of Health. Department of medical Sciences|Okada|Thailand

>Spike|hCoV-19/England/ALDP-BCA720/2020|2020-11-23|EPI\_ISL\_703357|Original|hCoV-19^^England|Human|Lighthouse Lab in Alderley Park|Wellcome Sanger Institute for the COVID-19 Genomics UK (COG-UK) Consortium|Davies|United Kingdom

>Spike|hCoV-19/England/BRIS-128CC1/2020|2020-04-14|EPI\_ISL\_458871|Original|hCoV-19^^England|Human|PHE South West Regional Laboratory|Wellcome Sanger Institute for the COVID-19 Genomics UK (COG-UK) consortium|Davies|United Kingdom

>Spike|hCoV-19/USA/VA-DCLS-0212/2020|2020-04-04|EPI\_ISL\_437427|Original|hCoV-19^^Virginia|Human|Virginia DCLS|Virginia DCLS|St. Jacques|USA

>Spike|hCoV-19/USA/NY-NYUMC356/2020|2020-04-08|EPI\_ISL\_430383|Original|hCoV-19^^New York|Human|NYU Langone Health|Departments of Pathology and Medicine|Maurano|USA

>Spike|hCoV-19/Canada/QC-LSPQ-L00242238/2020|2020-03-29|EPI\_ISL\_536314|Original|hCoV-19^^Quebec|Human|H\u00f4pital Charles-LeMoine|Laboratoire de sant\u00e9 publique du Qu\u00e9bec|Moreira|Canada

>Spike|hCoV-19/Wales/PHWC-2A668/2020|2020-04-06|EPI\_ISL\_445600|Original|hCoV-19^^Wales|Human|Wales Specialist Virology Centre|Public Health Wales Microbiology Cardiff|Moore|United Kingdom

>Spike|hCoV-19/USA/CA-SR0457/2020|2020-03-30|EPI\_ISL\_467979|Original|hCoV-19^^California|Human|San Diego County Public Health Laboratory|Andersen lab at Scripps Research|Gangavarapu|USA

>Spike|hCoV-19/USA/MI-MDHHS-SC20312/2020|2020-04-04|EPI\_ISL\_447109|Original|hCoV-19^^Michigan|Human|Michigan Department of Health and Human Services|Michigan Department of Health and Human Services|Blankenship|USA

>Spike|hCoV-19/USA/TX-HMH-MCoV-12515/2020|2020-09-30|EPI\_ISL\_790376|Original|hCoV-19^^Texas|Human|Houston Methodist Hospital|Houston Methodist Hospital|Long|USA

>Spike|hCoV-19/Belgium/BM-03012/2020|2020-03-01|EPI\_ISL\_415154|Original|hCoV-19^^Kraainem|Human|KU Leuven|KU Leuven|Maes|Belgium

>Spike|hCoV-19/England/ALDP-94F664/2020|2020-06-20|EPI\_ISL\_555994|Original|hCoV-19^^England|Human|Lighthouse Lab in Alderley Park|Wellcome Sanger Institute for the COVID-19 Genomics UK (COG-UK) consortium|Davies|United Kingdom

>Spike|hCoV-19/Denmark/DCGC-2837/2020|2020-08-24|EPI\_ISL\_616664|Original|hCoV-19^^Hovedstaden|Human|Department of Virus and Microbiological Special Diagnostics|Albertsen lab|Michaelsen|Denmark

>Spike|hCoV-19/Denmark/DCGC-22434/2020|2020-12-14|EPI\_ISL\_757412|Original|hCoV-19^^Hovedstaden|Human|Department of Virus and Microbiological Special Diagnostics|Albertsen Lab|Michaelsen|Denmark

>Spike|hCoV-19/USA/MI-QDX-481/2020|2020-03-24|EPI\_ISL\_571215|Original|hCoV-19^^Michigan|Human|Quest Diagnostics|Quest Diagnostics|Kagan|USA

>Spike|hCoV-19/Wales/PHWC-48DB06/2020|2020-11-01|EPI\_ISL\_680727|Original|hCoV-19^^Wales|Human|Wales Specialist Virology Centre Sequencing lab|COVID-19 Genomics UK (COG-UK) Consortium|Moore|United Kingdom

>Spike|hCoV-19/England/QEUEH-CAD85C/2020|2020-12-20|EPI\_ISL\_760818|Original|hCoV-19^^England|Human|Lighthouse Lab in Glasgow|Wellcome Sanger Institute for the COVID-19 Genomics UK (COG-UK) Consortium|Davies|United Kingdom

>Spike|hCoV-19/England/LIVE-9F6B9/2020|2020-04-18|EPI\_ISL\_472000|Original|hCoV-19^^England|Human|Liverpool Clinical Laboratories|COVID-19 Genomics UK (COG-UK) Consortium|Haldenby|United Kingdom

>Spike|hCoV-19/USA/UT-02939/2020|2020-04-30|EPI\_ISL\_498671|Original|hCoV-19^^Utah|Human|Utah Public Health Laboratory|Utah Public Health Laboratory|Butz|USA

>Spike|hCoV-19/Australia/VIC247/2020|2020-03-21|EPI\_ISL\_419942|Original|hCoV-19^^Victoria|Human|Victorian Infectious Diseases Reference Laboratory (VIDRL)|Victorian Infectious Diseases Reference Laboratory and Microbiological Diagnostic Unit Public Health Laboratory|Schultz|Australia

>Spike|hCoV-19/Denmark/DCGC-22068/2020|2020-12-14|EPI\_ISL\_757932|Original|hCoV-19^^Syddanmark|Human|Department of Virus and Microbiological Special Diagnostics|Albertsen Lab|Michaelsen|Denmark

>Spike|hCoV-19/USA/NY-NYCPHL-001148/2020|2020-10-26|EPI\_ISL\_671730|Original|hCoV-19^^New York|Human|DOHMH Jamaica|New York City Public Health Laboratory|Wang|USA

>Spike|hCoV-19/Australia/VIC5024/2020|2020-07-15|EPI\_ISL\_519828|Original|hCoV-19^^Victoria|Human|Microbiological Diagnostic Unit - Public Health Laboratory (MDU-PHL)|MDU-PHL|Schultz|Australia

>Spike|hCoV-19/USA/CA-ALSR-2971/2020|2020-09-02|EPI\_ISL\_635761|Original|hCoV-19^^California|Human|San Diego County Public Health Laboratory|Andersen lab at Scripps Research|Gangavarapu|USA

>Spike|hCoV-19/USA/FL-BPHL-050/2020|2020-04-15|EPI\_ISL\_436554|Original|hCoV-19^^Florida|Human|Florida Bureau of Public Health Laboratories|Florida Bureau of Public Health Laboratories|Blanton|USA

>Spike|hCoV-19/England/CAMC-B09E5D/2020|2020-10-29|EPI\_ISL\_673039|Original|hCoV-19^^England|Human|Lighthouse Lab in Cambridge|Wellcome Sanger Institute for the COVID-19 Genomics UK (COG-UK) Consortium|Davies|United Kingdom

>Spike|hCoV-19/England/QEUEH-9980F5/2020|2020-08-27|EPI\_ISL\_537187|Original|hCoV-19^^England|Human|Lighthouse Lab in Glasgow|Wellcome Sanger Institute for the COVID-19 Genomics UK (COG-UK) consortium|Davies|United Kingdom

>Spike|hCoV-19/Wales/PHWC-266C6/2020|2020-03-27|EPI\_ISL\_422251|Original|hCoV-19^^Wales|Human|Wales Specialist Virology Centre|Public Health Wales Microbiology Cardiff|Moore|United Kingdom

>Spike|hCoV-19/Bangladesh/BCSIR-NILMRC-153/2020|2020-06-18|EPI\_ISL\_480442|Original|hCoV-19^^Rajshahi|Human|National Institute of Laboratory Medicine and Referral Center|Bangladesh Council of Scientific and Industrial Research|Khan|Bangladesh

>Spike|hCoV-19/Russia/CRIE4924360/2020|2020-07-15|EPI\_ISL\_534337|Original|hCoV-19^^Moscow|Human|Molecular diagnostic laboratory of Federal Budget Institution of Science \Central Research Institute of Epidemiology\ of The Federal Service on Customers' Rights Protection and Human Well-being Surveillance|Group of Genomics and Postgenomic Technologies of Central Research Institute of Epidemiology|Speranskaya|Russia

>Spike|hCoV-19/South Africa/KRISP-0090/2020|2020-04-03|EPI\_ISL\_467459|Original|hCoV-19^^KwaZulu-Natal|Human|AMPATH-DBN|KRISP|de Oliveira|South Africa

>Spike|hCoV-19/Denmark/DCGC-16802/2020|2020-12-14|EPI\_ISL\_750199|Original|hCoV-19^^Hovedstaden|Human|Department of Virus and Microbiological Special Diagnostics|Albertsen Lab|Michaelsen|Denmark

>Spike|hCoV-19/England/ALDP-A6D3E0/2020|2020-10-15|EPI\_ISL\_608160|Original|hCoV-19^^England|Human|Lighthouse Lab in Alderley Park|Wellcome Sanger Institute for the COVID-19 Genomics UK (COG-UK) consortium|Davies|United Kingdom

>Spike|hCoV-19/England/QEUA-AEF9B7/2020|2020-10-29|EPI\_ISL\_662791|Original|hCoV-19^^England|Human|Lighthouse Lab in Glasgow|Wellcome Sanger Institute for the COVID-19 Genomics UK (COG-UK) Consortium|Davies|United Kingdom

>Spike|hCoV-19/England/CAMB-7714D/2020|2020-04-01|EPI\_ISL\_439437|Original|hCoV-19^^England|Human|Department of Pathology|Wellcome Sanger Institute for the COVID-19 Genomics UK (COG-UK) consortium|Amato|United Kingdom

>Spike|hCoV-19/USA/CA-CZB-15261/2020|2020-11-24|EPI\_ISL\_738684|Original|hCoV-19^^California|Human|Santa Clara County Public Health Laboratory|Chan-Zuckerberg Biohub|Kamm|USA

>Spike|hCoV-19/England/MILK-A6B40D/2020|2020-10-09|EPI\_ISL\_608837|Original|hCoV-19^^England|Human|Lighthouse Lab in Milton Keynes|Wellcome Sanger Institute for the COVID-19 Genomics UK (COG-UK) consortium|Davies|United Kingdom

>Spike|hCoV-19/India/DL-IGIB11304410/2020|2020-07-00|EPI\_ISL\_751278|Original|hCoV-19^^Delhi|Human|Devki Devi Foundation|CSIR-IGIB/Max|Pandey|India

>Spike|hCoV-19/USA/UT-02845/2020|2020-04-29|EPI\_ISL\_513654|Original|hCoV-19^^Utah|Human|Utah Public Health Laboratory|Utah Public Health Laboratory|Butz|USA

>Spike|hCoV-19/Netherlands/ZH-EMC-887/2020|2020-10-30|EPI\_ISL\_632398|Original|hCoV-19^^Zuid Holland|Human|Dutch COVID-19 response team|Erasmus Medical Center|Oude Munnink|Netherlands

>Spike|hCoV-19/USA/UT-UPHL-2009132/2020|2020-05-30|EPI\_ISL\_525127|Original|hCoV-19^^Utah|Human|Utah Public Health Laboratory|Utah Public Health Laboratory|Young|USA

>Spike|hCoV-19/USA/DE-DHSS-F917921/2020|2020-03-25|EPI\_ISL\_576226|Original|hCoV-19^^Delaware|Human|Delaware Public Health Lab|Delaware Public Health Lab|Bajwa|USA

>Spike|hCoV-19/USA/CA-CZB-3950/2020|2020-08-05|EPI\_ISL\_548577|Original|hCoV-19^^California|Human|Contra Costa Public Health Lab|Chan-Zuckerberg Biohub|Bhatt|USA

>Spike|hCoV-19/Jordan/SR-034/2020|2020-03-17|EPI\_ISL\_429994|Original|hCoV-19^^Amman|Human|Biolab Diagnostic Laboratories|Andersen lab at Scripps Research|Gangavarapu|Jordan

>Spike|hCoV-19/England/ALDP-A94298/2020|2020-10-20|EPI\_ISL\_624571|Original|hCoV-19^^England|Human|Lighthouse Lab in Alderley Park|Wellcome Sanger Institute for the COVID-19 Genomics UK (COG-UK) consortium|Davies|United Kingdom

>Spike|hCoV-19/USA/GA\_2147/2020|2020-03-00|EPI\_ISL\_426418|Original|hCoV-19^^Georgia|Human|GA Department of Public Health Laboratory|Pathogen Discovery|Queen|USA

>Spike|hCoV-19/USA/LA-EVTL1199/2020|2020-12-11|EPI\_ISL\_768468|Original|hCoV-19^^Louisiana|Human|LSUHS Emerging Viral Threat Laboratory|Microbial Genome Sequencing Center|Kamil|USA

>Spike|hCoV-19/India/OR-ILSCV30442/2020|2020-05-24|EPI\_ISL\_481146|Original|hCoV-19^^Odisha|Human|Immunogenomics lab|Immunogenomics lab|Raghav|India

>Spike|hCoV-19/USA/NV-NSPHL-A0195/2020|2020-05-26|EPI\_ISL\_515449|Original|hCoV-19^^Nevada|Human|Nevada State Public Health Laboratory|Nevada State Public Health Laboratory|Sevinsky|USA

>Spike|hCoV-19/Wales/PHWC-497A0C/2020|2020-11-23|EPI\_ISL\_726918|Original|hCoV-19^^Wales|Human|Originating lab|COVID-19 Genomics UK (COG-UK) Consortium|Moore|United Kingdom

>Spike|hCoV-19/Japan/PG-3425/2020|2020-04-00|EPI\_ISL\_691537|Original|hCoV-19^^Japan|Human|Sakai City Institute of Public Health|Pathogen Genomics Center|Sekizuka|Japan

>Spike|hCoV-19/Switzerland/SZ-ETHZ-120043/2020|2020-04-20|EPI\_ISL\_468231|Original|hCoV-19^^Schwyz|Human|Viollier AG|Department of Biosystems Science and Engineering|Nadeau|Switzerland

>Spike|hCoV-19/England/QEUA-BC45B3/2020|2020-11-25|EPI\_ISL\_703673|Original|hCoV-19^^England|Human|Lighthouse Lab in Glasgow|Wellcome Sanger Institute for the COVID-19 Genomics UK (COG-UK) Consortium|Davies|United Kingdom

>Spike|hCoV-19/England/CAMB-1B7113/2020|2020-10-13|EPI\_ISL\_638305|Original|hCoV-19^^England|Human|Department of Pathology|COVID-19 Genomics UK (COG-UK) Consortium|Goodfellow|United Kingdom

>Spike|hCoV-19/England/BRIS-128A4F/2020|2020-04-14|EPI\_ISL\_458850|Original|hCoV-19^^England|Human|PHE South West Regional Laboratory|Wellcome Sanger Institute for the COVID-19 Genomics UK (COG-UK) consortium|Davies|United Kingdom

>Spike|hCoV-19/India/UT-AR14/2020|2020-06-06|EPI\_ISL\_508161|Original|hCoV-19^^Uttarakhand|Human|All india institute of Medical Sciences Rishikesh|National Institute of Biomedical Genomics|Maitra|India

>Spike|hCoV-19/Scotland/EDB2843/2020|2020-03-31|EPI\_ISL\_488961|Original|hCoV-19^^Scotland|Human|Virology Department|Wellcome Sanger Institute for the COVID-19 Genomics UK (COG-UK) consortium|Davies|United Kingdom

>Spike|hCoV-19/England/MILK-C30997/2020|2020-12-07|EPI\_ISL\_782940|Original|hCoV-19^^England|Human|Lighthouse Lab in Milton Keynes|Wellcome Sanger Institute for the COVID-19 Genomics UK (COG-UK) Consortium|Davies|United Kingdom

>Spike|hCoV-19/Portugal/PT1818/2020|2020-11-14|EPI\_ISL\_732041|Original|hCoV-19^^Portugal|Human|Instituto Nacional de Saude (INSA)|Instituto Nacional de Saude (INSA)|Borges|Portugal

>Spike|hCoV-19/Australia/VIC3253/2020|2020-07-10|EPI\_ISL\_520933|Original|hCoV-19^^Victoria|Human|Microbiological Diagnostic Unit - Public Health Laboratory (MDU-PHL)|MDU-PHL|Schultz|Australia

>Spike|hCoV-19/Scotland/QEUA-9E3EA6/2020|2020-09-24|EPI\_ISL\_601010|Original|hCoV-19^^Scotland|Human|Lighthouse Lab in Glasgow|Wellcome Sanger Institute for the COVID-19 Genomics UK (COG-UK) consortium|Davies|United Kingdom

>Spike|hCoV-19/USA/ID-QDX-1533/2020|2020-03-17|EPI\_ISL\_603816|Original|hCoV-19^^Idaho|Human|Quest Diagnostics|Quest Diagnostics|Kagan|USA

>Spike|hCoV-19/England/QEUA-9FA57A/2020|2020-09-29|EPI\_ISL\_588201|Original|hCoV-19^^England|Human|Lighthouse Lab in Glasgow|Wellcome Sanger Institute for the COVID-19 Genomics UK (COG-UK) consortium|Davies|United Kingdom

>Spike|hCoV-19/England/NOTT-121840/2020|2020-12-22|EPI\_ISL\_764508|Original|hCoV-19^^England|Human|Queens Medical Centre|COVID-19 Genomics UK (COG-UK) Consortium|Loose|United Kingdom

>Spike|hCoV-19/England/204742221/2020|2020-00-00|EPI\_ISL\_649925|Original|hCoV-19^^England|Human|Respiratory Virus Unit|COVID-19 Genomics UK (COG-UK) Consortium|Platt|United Kingdom

>Spike|hCoV-19/USA/CA-CZB-1916/2020|2020-04-22|EPI\_ISL\_486209|Original|hCoV-19^^California|Human|Orange County Public Health Laboratory|Chan-Zuckerberg Biohub|McGeever|USA

>Spike|hCoV-19/New Zealand/20VR2030/2020|2020-04-01|EPI\_ISL\_456338|Original|hCoV-19^^Combined Wellington|Human|Wellington SCL|Institute of Environmental Science and Research (ESR)|de Ligt|New Zealand

>Spike|hCoV-19/Iran/K1r-116/2020|2020-04-27|EPI\_ISL\_568503|Original|hCoV-19^^Iran|Human|Virology|Virology|Ranjbar|Iran

>Spike|hCoV-19/England/NORT-28C389/2020|2020-05-13|EPI\_ISL\_478598|Original|hCoV-19^^England|Human|Northumbria University / South Tees Hospitals NHS Foundation Trust / North Cumbria Integrated Care NHS Foundation Trust / North Tees and Hartlepool NHS Foundation Trust / Newcastle Hospitals NHS Foundation Trust|COVID-19 Genomics UK (COG-UK) Consortium|Bashton|United Kingdom

>Spike|hCoV-19/Chile/RM-130924/2020|2020-07-22|EPI\_ISL\_746623|Original|hCoV-19^^Region Metropolitana de Santiago|Human|Genetica Molecular and Subdepartamento de Virologia ISP Chile|Instituto de Salud Publica de Chile|Tognarelli|Chile

>Spike|hCoV-19/USA/UT-UPHL-2009023/2020|2020-05-13|EPI\_ISL\_525329|Original|hCoV-19^^Utah|Human|Utah Public Health Laboratory|Utah Public Health Laboratory|Young|USA

>Spike|hCoV-19/England/MILK-9C39BA/2020|2020-09-10|EPI\_ISL\_566833|Original|hCoV-19^^England|Human|Lighthouse Lab in Milton Keynes|Wellcome Sanger Institute for the COVID-19 Genomics UK (COG-UK) consortium|Davies|United Kingdom

>Spike|hCoV-19/USA/CA-ALSR-3760/2020|2020-06-03|EPI\_ISL\_636187|Original|hCoV-19^^California|Human|San Diego County Public Health Laboratory|Andersen lab at Scripps Research|Gangavarapu|USA

>Spike|hCoV-19/Japan/IC-0396/2020|2020-12-00|EPI\_ISL\_736907|Original|hCoV-19^^Japan|Human|Pathogen Genomics Center|Pathogen Genomics Center|Sekizuka|Japan

>Spike|hCoV-19/Japan/IC-0457/2020|2020-12-00|EPI\_ISL\_768666|Original|hCoV-19^^Japan|Human|Pathogen Genomics Center|Pathogen Genomics Center|Sekizuka|Japan

>Spike|hCoV-19/USA/CO-CSU-D0590-2/2020|2020-04-29|EPI\_ISL\_527420|Original|hCoV-19^^Colorado|Human|Colorado State University - Ebel Lab|Colorado State University - Ebel Lab|Cline|USA

>Spike|hCoV-19/Israel/CVL-75-ngs/2020|2020-12-24|EPI\_ISL\_776648|Original|hCoV-19^^Israel|Human|Israel Central Virology laboratory|Israel Central Virology laboratory|Zuckerman|Israel

>Spike|hCoV-19/England/MILK-B948A4/2020|2020-11-14|EPI\_ISL\_676227|Original|hCoV-19^^England|Human|Lighthouse Lab in Milton Keynes|Wellcome Sanger Institute for the COVID-19 Genomics UK (COG-UK) Consortium|Davies|United Kingdom

>Spike|hCoV-19/Israel/CVL-n-7501/2020|2020-04-11|EPI\_ISL\_475012|Original|hCoV-19^^Israel|Human|Israel Central Virology laboratory|Israel Central Virology laboratory|Zuckerman|Israel

>Spike|hCoV-19/USA/CA-CZB-10158/2020|2020-05-22|EPI\_ISL\_672236|Original|hCoV-19^^California|Human|The Ashley Laboratory|Chan-Zuckerberg Biohub|Bhatt|USA

>Spike|hCoV-19/Australia/VIC1408/2020|2020-04-16|EPI\_ISL\_456426|Original|hCoV-19^^Victoria|Human|Victorian Infectious Diseases Reference Laboratory (VIDRL)|Microbiological Diagnostic Unit Public Health Laboratory and Victorian Infectious Diseases Reference Laboratory|Schultz|Australia

>Spike|hCoV-19/England/LIVE-DC2850/2020|2020-11-24|EPI\_ISL\_703735|Original|hCoV-19^^England|Human|Liverpool Clinical Laboratories|COVID-19 Genomics UK (COG-UK) Consortium|Haldenby|United Kingdom

>Spike|hCoV-19/USA/CA-CHLA-PLM41302615/2020|2020-11-19|EPI\_ISL\_753381|Original|hCoV-19^^California|Human|Clinical virology Laboratory|Center for Personalized Medicine|Dien Bard|USA

>Spike|hCoV-19/Scotland/CVR2163/2020|2020-04-11|EPI\_ISL\_473511|Original|hCoV-19^^Scotland|Human|West of Scotland Specialist Virology Centre|COVID-19 Genomics UK (COG-UK) Consortium|Robertson|United Kingdom

>Spike|hCoV-19/England/NOTT-1153A4/2020|2020-10-13|EPI\_ISL\_595239|Original|hCoV-19^^England|Human|Queens Medical Centre|COVID-19 Genomics UK (COG-UK) Consortium|Loose|United Kingdom

>Spike|hCoV-19/Japan/PG-6102/2020|2020-08-00|EPI\_ISL\_689214|Original|hCoV-19^^Japan|Human|Pathogen Genomics Center|Pathogen Genomics Center|Sekizuka|Japan

>Spike|hCoV-19/USA/AZ-TG409929/2020|2020-06-24|EPI\_ISL\_694960|Original|hCoV-19^^Arizona|Human|TGen North|TGen North|French|USA

>Spike|hCoV-19/Canada/BC-BCCDC-7233/2020|2020-11-00|EPI\_ISL\_740625|Original|hCoV-19^^British Columbia|Human|BCCDC Public Health Laboratory|BCCDC Public Health Laboratory|Prystajecky|Canada

>Spike|hCoV-19/Egypt/EGY-S033/2020|2020-08-17|EPI\_ISL\_526988|Original|hCoV-19^^Egypt|Human|Biological prevention|Biological prevention|Seadawy|Egypt

>Spike|hCoV-19/USA/UT-01231/2020|2020-04-08|EPI\_ISL\_436913|Original|hCoV-19^^Utah|Human|Utah Public Health Laboratory|Utah Public Health Laboratory|Young|USA

>Spike|hCoV-19/USA/NY-Wadsworth-46276-01/2020|2020-04-13|EPI\_ISL\_677665|Original|hCoV-19^^New York|Human|Wadsworth Center|Wadsworth Center|Lasek-Nesselquist|USA

>Spike|hCoV-19/Denmark/DCGC-18349/2020|2020-12-07|EPI\_ISL\_749909|Original|hCoV-19^^Hovedstaden|Human|Department of Virus and Microbiological Special Diagnostics|Albertsen Lab|Michaelsen|Denmark

>Spike|hCoV-19/England/LIVE-A736C/2020|2020-03-28|EPI\_ISL\_517008|Original|hCoV-19^^England|Human|Liverpool Clinical Laboratories|COVID-19 Genomics UK (COG-UK) Consortium|Haldenby|United Kingdom

>Spike|hCoV-19/Lithuania/MR-LUHS-Eilnr236606/2020|2020-12-20|EPI\_ISL\_770513|Original|hCoV-19^^Alytaus apskritis|Human|Lithuanian University of Health Sciences Hospital|Lithuanian University of Health Sciences|Zemaitis|Lithuania

>Spike|hCoV-19/Australia/VIC8207/2020|2020-08-10|EPI\_ISL\_564899|Original|hCoV-19^^Victoria|Human|Microbiological Diagnostic Unit - Public Health Laboratory (MDU-PHL)|MDU-PHL|Schultz|Australia

>Spike|hCoV-19/Belgium/UGent-205/2020|2020-10-22|EPI\_ISL\_717588|Original|hCoV-19^^Ghent|Human|Lab voor klinische biologie|Onderzoeksgroep Virologie|Lambrechts|Belgium

>Spike|hCoV-19/England/QEUH-B3FB1B/2020|2020-11-08|EPI\_ISL\_658621|Original|hCoV-19^^England|Human|Lighthouse Lab in Glasgow|Wellcome Sanger Institute for the COVID-19 Genomics UK (COG-UK) Consortium|Davies|United Kingdom

>Spike|hCoV-19/Singapore/1449/2020|2020-12-06|EPI\_ISL\_728185|Original|hCoV-19^^Singapore|Human|National Public Health Laboratory|National Public Health Laboratory|Mak|Singapore

>Spike|hCoV-19/Denmark/DCGC-9387/2020|2020-11-16|EPI\_ISL\_668945|Original|hCoV-19^^Midtjylland|Human|Department of Virus and Microbiological Special Diagnostics|Albertsen Lab|Michaelsen|Denmark

>Spike|hCoV-19/England/MILK-9AB305/2020|2020-08-31|EPI\_ISL\_551255|Original|hCoV-19^^England|Human|Lighthouse Lab in Milton Keynes|Wellcome Sanger Institute for the COVID-19 Genomics UK (COG-UK) consortium|Davies|United Kingdom

>Spike|hCoV-19/USA/WI-WSLH-200729/2020|2020-07-06|EPI\_ISL\_631485|Original|hCoV-19^^Wisconsin|Human|Wisconsin State Laboratory of Hygiene Communicable Disease Division|Wisconsin State Laboratory of Hygiene Communicable Disease Division|Florek|USA

>Spike|hCoV-19/Denmark/ALAB-SSI-711/2020|2020-03-28|EPI\_ISL\_444869|Original|hCoV-19^^Denmark|Human|Department of Virus and Microbiological Special Diagnostics|Albertsen lab|Kirkegaard|Denmark

>Spike|hCoV-19/England/ALDP-A952F1/2020|2020-10-20|EPI\_ISL\_624639|Original|hCoV-19^^England|Human|Lighthouse Lab in Alderley Park|Wellcome Sanger Institute for the COVID-19 Genomics UK (COG-UK) consortium|Davies|United Kingdom

>Spike|hCoV-19/USA/MI-MDHHS-SC20619/2020|2020-04-29|EPI\_ISL\_462701|Original|hCoV-19^^Michigan|Human|Michigan Department of Health and Human Services|Michigan Department of Health and Human Services|Blankenship|USA

>Spike|hCoV-19/England/MILK-B02698/2020|2020-10-24|EPI\_ISL\_642911|Original|hCoV-19^^England|Human|Lighthouse Lab in Milton Keynes|Wellcome Sanger Institute for the COVID-19 Genomics UK (COG-UK) Consortium|Davies|United Kingdom

>Spike|hCoV-19/USA/AZ-TG371273/2020|2020-05-15|EPI\_ISL\_694532|Original|hCoV-19^^Arizona|Human|AZ SPHL|TGen North|French|USA

>Spike|hCoV-19/Canada/QC-LSPQ-L00232723/2020|2020-03-22|EPI\_ISL\_535994|Original|hCoV-19^^Quebec|Human|H\u00f4pital Laurentien|Laboratoire de sant\u00e9 publique du Qu\u00e9bec|Moreira|Canada

>Spike|hCoV-19/Australia/VIC14493/2020|2020-08-13|EPI\_ISL\_592520|Original|hCoV-19^^Victoria|Human|Microbiological Diagnostic Unit - Public Health Laboratory (MDU-PHL)|MDU-PHL|Schultz|Australia

>Spike|hCoV-19/France/PAC-MEPHI-0143/2020|2020-03-18|EPI\_ISL\_644403|Original|hCoV-19^^Provence-Alpes-Cote-d\u2019Azur|Human|MEPHI|MEPHI|Levasseur|France

>Spike|hCoV-19/England/ALDP-AC11C2/2020|2020-10-10|EPI\_ISL\_630985|Original|hCoV-19^^England|Human|Lighthouse Lab in Alderley Park|Wellcome Sanger Institute for the COVID-19 Genomics UK (COG-UK) consortium|Davies|United Kingdom

>Spike|hCoV-19/USA/CA-QRTP-Donor1/2020|2020-04-01|EPI\_ISL\_490210|Original|hCoV-19^^California|Human|Quest Diagnostics|Q Squared Solutions - QRTP facility|Weigman|USA

>Spike|hCoV-19/USA/CA-ALSR-1878/2020|2020-05-20|EPI\_ISL\_512216|Original|hCoV-19^^California|Human|San Diego County Public Health Laboratory|Andersen lab at Scripps Research|Gangavarapu|USA

>Spike|hCoV-19/Wales/PHWC-2ACB1/2020|2020-04-06|EPI\_ISL\_445689|Original|hCoV-19^^Wales|Human|Wales Specialist Virology Centre|Public Health Wales Microbiology Cardiff|Moore|United Kingdom

>Spike|hCoV-19/England/QEUH-9C8D31/2020|2020-09-10|EPI\_ISL\_567170|Original|hCoV-19^^England|Human|Lighthouse Lab in Glasgow|Wellcome Sanger Institute for the COVID-19 Genomics UK (COG-UK) consortium|Davies|United Kingdom

>Spike|hCoV-19/USA/TX-HMH-1120/2020|2020-04-22|EPI\_ISL\_542542|Original|hCoV-19^^Texas|Human|Houston Methodist Hospital|Houston Methodist Hospital|Long|USA

>Spike|hCoV-19/England/ALDP-9CC1B9/2020|2020-09-16|EPI\_ISL\_573090|Original|hCoV-19^^England|Human|Quadram Institute Bioscience|COVID-19 Genomics UK (COG-UK) Consortium|Alikhan|United Kingdom

>Spike|hCoV-19/England/EXET-138A5B/2020|2020-10-14|EPI\_ISL\_626686|Original|hCoV-19^^England|Human|University of Exeter|COVID-19 Genomics UK (COG-UK) Consortium|Temperton|United Kingdom

>Spike|hCoV-19/USA/TX-HMH-MCoV-16329/2020|2020-11-02|EPI\_ISL\_786013|Original|hCoV-19^^Texas|Human|Houston Methodist Hospital|Houston Methodist Hospital|Long|USA

>Spike|hCoV-19/England/CAMC-B36938/2020|2020-11-05|EPI\_ISL\_645309|Original|hCoV-19^^England|Human|Lighthouse Lab in Cambridge|Wellcome Sanger Institute for the COVID-19 Genomics UK (COG-UK) Consortium|Davies|United Kingdom

>Spike|hCoV-19/Nepal/70N/2020|2020-08-03|EPI\_ISL\_754073|Original|hCoV-19^^Rautahat|Human|National Public Health Laboratory|Nepal Health Research Council|Bhattarai|Nepal

>Spike|hCoV-19/Italy/APU-UniMI-5428/2020|2020-04-11|EPI\_ISL\_525564|Original|hCoV-19^^Apulia|Human|Istituto Zooprofilattico Sperimentale Puglia e Basilicata; Dipartimento di Bioscienze|Beaconlab (Bioinformatics|Chiara|Italy

>Spike|hCoV-19/England/MILK-A7C3A2/2020|2020-10-15|EPI\_ISL\_606441|Original|hCoV-19^^England|Human|Lighthouse Lab in Milton Keynes|Wellcome Sanger Institute for the COVID-19 Genomics UK (COG-UK) consortium|Davies|United Kingdom

>Spike|hCoV-19/England/MILK-B94C11/2020|2020-11-14|EPI\_ISL\_673828|Original|hCoV-19^^England|Human|Lighthouse Lab in Milton Keynes|Wellcome Sanger Institute for the COVID-19 Genomics UK (COG-UK) Consortium|Davies|United Kingdom

>Spike|hCoV-19/England/BIRM-64F3A/2020|2020-09-25|EPI\_ISL\_594533|Original|hCoV-19^^England|Human|University of Birmingham|COVID-19 Genomics UK (COG-UK) Consortium|Loman|United Kingdom

>Spike|hCoV-19/USA/CA-CZB-3744/2020|2020-07-24|EPI\_ISL\_548431|Original|hCoV-19^^California|Human|Orange County Public Health Laboratory|Chan-Zuckerberg Biohub|Bhatt|USA

>Spike|hCoV-19/England/SHEF-D193A/2020|2020-04-11|EPI\_ISL\_442495|Original|hCoV-19^^England|Human|Virology Department|COVID-19 Genomics UK (COG-UK) Consortium|de Silva|United Kingdom

>Spike|hCoV-19/Gibraltar/204641715/2020|2020-00-00|EPI\_ISL\_637193|Original|hCoV-19^^Gibraltar|Human|Microbiology|Respiratory Virus Unit|Platt|Gibraltar

>Spike|hCoV-19/Spain/AR-IBV-98010582/2020|2020-10-05|EPI\_ISL\_722245|Original|hCoV-19^^Aragon|Human|Servicio de Microbiolog\u00eda|SeqCOVID-SPAIN consortium|IBV (CSIC)|Comas|Spain

>Spike|hCoV-19/Netherlands/OV-EMC-119/2020|2020-11-07|EPI\_ISL\_763159|Original|hCoV-19^^Overijssel|Human|Dutch COVID-19 response team|Erasmus Medical Center|Oude Munnink|Netherlands

>Spike|hCoV-19/England/QEUEH-962C5A/2020|2020-08-10|EPI\_ISL\_531764|Original|hCoV-19^^England|Human|Lighthouse Lab in Glasgow|Wellcome Sanger Institute for the COVID-19 Genomics UK (COG-UK) consortium|Davies|United Kingdom

>Spike|hCoV-19/USA/NY-WCMP12C09P/2020|2020-03-16|EPI\_ISL\_427602|Original|hCoV-19^^New York|Human|NewYork-Presbyterian & Mason Lab|Mason Lab|Mason|USA

>Spike|hCoV-19/England/ALDP-BB56EF/2020|2020-11-20|EPI\_ISL\_703083|Original|hCoV-19^^England|Human|Lighthouse Lab in Alderley Park|Wellcome Sanger Institute for the COVID-19 Genomics UK (COG-UK) Consortium|Davies|United Kingdom

>Spike|hCoV-19/USA/UT-016/2020|2020-03-13|EPI\_ISL\_417966|Original|hCoV-19^^Utah|Human|Utah Public Health Laboratory|Utah Public Health Laboratory|Young|USA

>Spike|hCoV-19/England/QEUEH-A0019A/2020|2020-09-30|EPI\_ISL\_600359|Original|hCoV-19^^England|Human|Lighthouse Lab in Glasgow|Wellcome Sanger Institute for the COVID-19 Genomics UK (COG-UK) consortium|Davies|United Kingdom

>Spike|hCoV-19/Panama/329893/2020|2020-03-09|EPI\_ISL\_496655|Original|hCoV-19^^Panama Center|Human|Gorgas Memorial Laboratory of Health Studies|Gorgas Memorial Laboratory of Health Studies|Martinez|Panama

>Spike|hCoV-19/Portugal/PT1833/2020|2020-11-09|EPI\_ISL\_732054|Original|hCoV-19^^Portugal|Human|Instituto Nacional de Saude (INSA)|Instituto Nacional de Saude (INSA)|Borges|Portugal

>Spike|hCoV-19/Wales/PHWC-164CC9/2020|2020-05-21|EPI\_ISL\_479369|Original|hCoV-19^^Wales|Human|Wales Specialist Virology Centre Sequencing lab|COVID-19 Genomics UK (COG-UK) Consortium|Moore|United Kingdom

>Spike|hCoV-19/USA/NY-NYUMC719/2020|2020-03-21|EPI\_ISL\_451434|Original|hCoV-19^^New York|Human|NYU Langone Health|Departments of Pathology and Medicine|Maurano|USA

>Spike|hCoV-19/USA/PA-MGEL-00160/2020|2020-04-12|EPI\_ISL\_681950|Original|hCoV-19^^Pennsylvania|Human|UPMC Clinical Microbiology Laboratory|Microbial Genomic Epidemiology Laboratory|Griffith|USA

>Spike|hCoV-19/England/NOTT-11233E/2020|2020-04-30|EPI\_ISL\_484372|Original|hCoV-19^^England|Human|Lincolnshire Hospitals and DeepSeq Nottingham|COVID-19 Genomics UK (COG-UK) Consortium|Loose|United Kingdom

>Spike|hCoV-19/England/MILK-80F33D/2020|2020-07-16|EPI\_ISL\_557199|Original|hCoV-19^^England|Human|Lighthouse Lab in Milton Keynes|Wellcome Sanger Institute for the COVID-19 Genomics UK (COG-UK) consortium|Davies|United Kingdom

>Spike|hCoV-19/Belgium/reg-0611919/2020|2020-06-11|EPI\_ISL\_734493|Original|hCoV-19^^Overijse|Human|UZ Leuven|KU Leuven|Maes|Belgium

>Spike|hCoV-19/Canada/NS-NML-1363/2020|2020-04-14|EPI\_ISL\_579739|Original|hCoV-19^^Nova Scotia|Human|QEII Health Sciences Centre|National Microbiology Laboratory (NML)|Majer|Canada

>Spike|hCoV-19/England/CAMC-BC011D/2020|2020-11-22|EPI\_ISL\_704718|Original|hCoV-19^^England|Human|Lighthouse Lab in Cambridge|Wellcome Sanger Institute for the COVID-19 Genomics UK (COG-UK) Consortium|Davies|United Kingdom

>Spike|hCoV-19/Portugal/PT0972/2020|2020-03-29|EPI\_ISL\_511521|Original|hCoV-19^^Portugal|Human|Instituto Nacional de Saude (INSA)|Instituto Nacional de Saude (INSA)|Borges|Portugal

>Spike|hCoV-19/Japan/PG-8343/2020|2020-08-00|EPI\_ISL\_687442|Original|hCoV-19^^Japan|Human|Pathogen Genomics Center|Pathogen Genomics Center|Sekizuka|Japan

>Spike|hCoV-19/Russia/Moscow-25I/2020|2020-04-02|EPI\_ISL\_428851|Vero Pl|hCoV-19^^Moscow|Human|FSBSI \Chumakov Federal Scientific Center for Research and Development of Immune-and-Biological Products of Russian Academy of Sciences\|FSBSI \Chumakov Federal Scientific Center for Research and Development of Immune-and-Biological Products of Russian Academy of Sciences\ & NRC \Kurchatov institute\|Kozlovskaya|Russia

>Spike|hCoV-19/USA/TX-DSHS-1605/2020|2020-09-04|EPI\_ISL\_700709|Original|hCoV-19^^Texas|Human|Texas Department of State Health Services|Texas Department of State Health Services|Rahman|USA

>Spike|hCoV-19/Wales/PHWC-163AC0/2020|2020-05-07|EPI\_ISL\_474039|Original|hCoV-19^^Wales|Human|Originating lab|COVID-19 Genomics UK (COG-UK) Consortium|Moore|United Kingdom

>Spike|hCoV-19/England/LIVE-9E456/2020|2020-04-02|EPI\_ISL\_453302|Original|hCoV-19^^England|Human|Liverpool Clinical Laboratories|COVID-19 Genomics UK (COG-UK) Consortium|Haldenby|United Kingdom

>Spike|hCoV-19/Denmark/DCGC-19285/2020|2020-12-07|EPI\_ISL\_748864|Original|hCoV-19^^Midtjylland|Human|Department of Virus and Microbiological Special Diagnostics|Albertsen Lab|Michaelsen|Denmark

>Spike|hCoV-19/Switzerland/SZ-ETHZ-190018/2020|2020-07-06|EPI\_ISL\_500883|Original|hCoV-19^^Schwyz|Human|Viollier AG|Department of Biosystems Science and Engineering|Nadeau|Switzerland

>Spike|hCoV-19/USA/TX-HMH-MCoV-18549/2020|2020-11-19|EPI\_ISL\_784897|Original|hCoV-19^^Texas|Human|Houston Methodist Hospital|Houston Methodist Hospital|Long|USA

>Spike|hCoV-19/USA/TX-HMH-MCoV-18130/2020|2020-11-13|EPI\_ISL\_784478|Original|hCoV-19^^Texas|Human|Houston Methodist Hospital|Houston Methodist Hospital|Long|USA

>Spike|hCoV-19/England/MILK-ABBC51/2020|2020-10-21|EPI\_ISL\_631051|Original|hCoV-19^^England|Human|Lighthouse Lab in Milton Keynes|Wellcome Sanger Institute for the COVID-19 Genomics UK (COG-UK) consortium|Davies|United Kingdom

>Spike|hCoV-19/USA/TX-HMH-MCoV-15110/2020|2020-10-20|EPI\_ISL\_786594|Original|hCoV-19^^Texas|Human|Houston Methodist Hospital|Houston Methodist Hospital|Long|USA

>Spike|hCoV-19/Brazil/SP-279/2020|2020-03-23|EPI\_ISL\_527858|Original|hCoV-19^^S\u00e3o Paulo|Human|Pronto Atendimento Sancta Maggiore Jardim Paulista|Instituto Adolfo Lutz|Sacchi|Brazil



>Spike|hCoV-19/DRC/2363/2020|2020-04-14|EPI\_ISL\_437194|Original|hCoV-19^^Kinshasa|Human|Viral Respiratory Lab|Pathogen Sequencing Lab|Muyembe|Democratic Republic of the Congo

>Spike|hCoV-19/England/ALDP-B62757/2020|2020-11-07|EPI\_ISL\_656572|Original|hCoV-19^^England|Human|Lighthouse Lab in Alderley Park|Wellcome Sanger Institute for the COVID-19 Genomics UK (COG-UK) Consortium|Davies|United Kingdom

>Spike|hCoV-19/England/QEUH-B2DE17/2020|2020-11-03|EPI\_ISL\_646186|Original|hCoV-19^^England|Human|Lighthouse Lab in Glasgow|Wellcome Sanger Institute for the COVID-19 Genomics UK (COG-UK) Consortium|Davies|United Kingdom

>Spike|hCoV-19/England/QEUH-A9EC81/2020|2020-10-20|EPI\_ISL\_611296|Original|hCoV-19^^England|Human|Lighthouse Lab in Glasgow|Wellcome Sanger Institute for the COVID-19 Genomics UK (COG-UK) consortium|Davies|United Kingdom

>Spike|hCoV-19/England/ALDP-92099D/2020|2020-06-23|EPI\_ISL\_552863|Original|hCoV-19^^England|Human|Lighthouse Lab in Alderley Park|Wellcome Sanger Institute for the COVID-19 Genomics UK (COG-UK) consortium|Davies|United Kingdom

>Spike|hCoV-19/New Zealand/20VR3175/2020|2020-03-25|EPI\_ISL\_579464|Original|hCoV-19^^Canterbury|Human|Canterbury Health Laboratories|Institute of Environmental Science and Research (ESR)|Wang|New Zealand

>Spike|hCoV-19/Denmark/DCGC-1185/2020|2020-05-18|EPI\_ISL\_614831|Original|hCoV-19^^Hovedstaden|Human|Department of Virus and Microbiological Special Diagnostics|Albertsen lab|Michaelsen|Denmark

>Spike|hCoV-19/England/NORT-281B31/2020|2020-03-23|EPI\_ISL\_472179|Original|hCoV-19^^England|Human|Northumbria University / South Tees Hospitals NHS Foundation Trust / North Cumbria Integrated Care NHS Foundation Trust / North Tees and Hartlepool NHS Foundation Trust / Newcastle Hospitals NHS Foundation Trust|COVID-19 Genomics UK (COG-UK) Consortium|Bashton|United Kingdom

>Spike|hCoV-19/Lithuania/MR-LUHS-Eilnr222/2020|2020-08-05|EPI\_ISL\_636847|Original|hCoV-19^^Kauno apskritis|Human|Lithuanian University of Health Sciences Hospital|Lithuanian University of Health Sciences|Zemaitis|Lithuania

>Spike|hCoV-19/England/MILK-958510/2020|2020-06-09|EPI\_ISL\_554691|Original|hCoV-19^^England|Human|Lighthouse Lab in Milton Keynes|Wellcome Sanger Institute for the COVID-19 Genomics UK (COG-UK) consortium|Davies|United Kingdom

>Spike|hCoV-19/Japan/PG-1907/2020|2020-04-00|EPI\_ISL\_685513|Original|hCoV-19^^Japan|Human|Pathogen Genomics Center|Pathogen Genomics Center|Sekizuka|Japan

>Spike|hCoV-19/USA/ME-HETL-J0059/2020|2020-03-16|EPI\_ISL\_513470|Original|hCoV-19^^Maine|Human|Maine HETL|Tewhey Lab|Tewhey|USA

>Spike|hCoV-19/Wales/PHWC-4A0B0D/2020|2020-12-10|EPI\_ISL\_743544|Original|hCoV-19^^Wales|Human|Wales Specialist Virology Centre Sequencing lab|COVID-19 Genomics UK (COG-UK) Consortium|Moore|United Kingdom

>Spike|hCoV-19/USA/ME-HETL-J0451/2020|2020-12-17|EPI\_ISL\_755548|Original|hCoV-19^^Maine|Human|Maine Health and Environmental Testing Laboratory|Tewhey Lab|Tewhey|USA

>Spike|hCoV-19/Australia/WA503/2020|2020-12-03|EPI\_ISL\_708796|Original|hCoV-19^^Western Australia|Human|PathWest Laboratory Medicine WA|PathWest Laboratory Medicine WA Microbial Surveillance Unit|Sikazwe|Australia

>Spike|hCoV-19/USA/VA-DCLS-0132/2020|2020-04-14|EPI\_ISL\_437771|Original|hCoV-19^^Virginia|Human|Virginia DCLS|Virginia DCLS|St. Jacques|USA

>Spike|hCoV-19/England/NORW-F158B/2020|2020-10-23|EPI\_ISL\_627605|Original|hCoV-19^^England|Human|Quadram Institute Bioscience|COVID-19 Genomics UK (COG-UK) Consortium|Alikhan|United Kingdom

>Spike|hCoV-19/Luxembourg/LNS2033831/2020|2020-10-27|EPI\_ISL\_740042|Original|hCoV-19^^Luxembourg|Human|Laboratoire national de sant\u00e9|Laboratoire national de sant\u00e9|Wienecke-Baldacchino|Luxembourg

>Spike|hCoV-19/England/ALDP-C3D2BD/2020|2020-12-10|EPI\_ISL\_736771|Original|hCoV-19^^England|Human|Lighthouse Lab in Alderley Park|Wellcome Sanger Institute for the COVID-19 Genomics UK (COG-UK) Consortium|Davies|United Kingdom

>Spike|hCoV-19/Scotland/QEUH-9F5F9F/2020|2020-09-27|EPI\_ISL\_600882|Original|hCoV-19^^Scotland|Human|Lighthouse Lab in Glasgow|Wellcome Sanger Institute for the COVID-19 Genomics UK (COG-UK) consortium|Davies|United Kingdom

>Spike|hCoV-19/England/ALDP-A879FD/2020|2020-10-16|EPI\_ISL\_606095|Original|hCoV-19^^England|Human|Lighthouse Lab in Alderley Park|Wellcome Sanger Institute for the COVID-19 Genomics UK (COG-UK) consortium|Davies|United Kingdom

>Spike|hCoV-19/Denmark/DCGC-17254/2020|2020-12-14|EPI\_ISL\_750859|Original|hCoV-19^^Midtjylland|Human|Department of Virus and Microbiological Special Diagnostics|Albertsen Lab|Michaelsen|Denmark

>Spike|hCoV-19/USA/UT-03864/2020|2020-04-08|EPI\_ISL\_470723|Original|hCoV-19^^Utah|Human|Utah Public Health Laboratory|Utah Public Health Laboratory|Butz|USA

>Spike|hCoV-19/Finland/9A784S11A/2020|2020-04-09|EPI\_ISL\_481734|Original|hCoV-19^^Uusimaa|Human|Department of Virology and Immunology|Department of Virology|Smura|Finland

>Spike|hCoV-19/Wales/PHWC-4956FB/2020|2020-11-23|EPI\_ISL\_726385|Original|hCoV-19^^Wales|Human|Originating lab|COVID-19 Genomics UK (COG-UK) Consortium|Moore|United Kingdom

>Spike|hCoV-19/USA/NY-NYCPHL-000343/2020|2020-04-10|EPI\_ISL\_631855|Original|hCoV-19^^New York|Human|Flushing Hospital Medical Center|New York City Public Health Laboratory|Wang|USA

>Spike|hCoV-19/Canada/ON-PHL-20-03775/2020|2020-11-00|EPI\_ISL\_775084|Original|hCoV-19^^Ontario|Human|Public Health Ontario Laboratory|Public Health Ontario Laboratory|Guthrie|Canada

>Spike|hCoV-19/England/NOTT-111B0A/2020|2020-05-28|EPI\_ISL\_461961|Original|hCoV-19^^England|Human|Queens Medical Centre|COVID-19 Genomics UK (COG-UK) Consortium|Loose|United Kingdom

>Spike|hCoV-19/England/ALDP-71D78C/2020|2020-07-01|EPI\_ISL\_557692|Original|hCoV-19^^England|Human|Lighthouse Lab in Alderley Park|Wellcome Sanger Institute for the COVID-19 Genomics UK (COG-UK) consortium|Davies|United Kingdom

>Spike|hCoV-19/Denmark/DCGC-11192/2020|2020-11-02|EPI\_ISL\_670446|Original|hCoV-19^^Hovedstaden|Human|Department of Virus and Microbiological Special Diagnostics|Albertsen Lab|Michaelsen|Denmark

>Spike|hCoV-19/USA/WA-UW-3369/2020|2020-03-27|EPI\_ISL\_491020|Original|hCoV-19^^Washington|Human|UW Virology Lab|UW Virology Lab|Roychoudhury|USA

>Spike|hCoV-19/Japan/PG-1539/2020|2020-04-00|EPI\_ISL\_685145|Original|hCoV-19^^Japan|Human|Pathogen Genomics Center|Pathogen Genomics Center|Sekizuka|Japan

>Spike|hCoV-19/Japan/PG-3967/2020|2020-07-00|EPI\_ISL\_692215|Original|hCoV-19^^Japan|Human|Pathogen Genomics Center|Pathogen Genomics Center|Sekizuka|Japan

>Spike|hCoV-19/Denmark/DCGC-17736/2020|2020-12-14|EPI\_ISL\_750253|Original|hCoV-19^^Hovedstaden|Human|Department of Virus and Microbiological Special Diagnostics|Albertsen Lab|Michaelsen|Denmark

>Spike|hCoV-19/England/QEUEH-B40072/2020|2020-11-08|EPI\_ISL\_657198|Original|hCoV-19^^England|Human|Lighthouse Lab in Glasgow|Wellcome Sanger Institute for the COVID-19 Genomics UK (COG-UK) Consortium|Davies|United Kingdom

>Spike|hCoV-19/England/BIRM-5FB2F/2020|2020-05-19|EPI\_ISL\_473376|Original|hCoV-19^^England|Human|University of Birmingham|COVID-19 Genomics UK (COG-UK) Consortium|Loman|United Kingdom

>Spike|hCoV-19/USA/TX-HMH-MCoV-18328/2020|2020-11-18|EPI\_ISL\_784676|Original|hCoV-19^^Texas|Human|Houston Methodist Hospital|Houston Methodist Hospital|Long|USA

>Spike|hCoV-19/England/SHEF-10C97ED/2020|2020-12-21|EPI\_ISL\_763368|Original|hCoV-19^^England|Human|Virology Department|COVID-19 Genomics UK (COG-UK) Consortium|de Silva|United Kingdom

>Spike|hCoV-19/Brazil/RJ-INCA-C189/2020|2020-04-30|EPI\_ISL\_513523|Original|hCoV-19^^Rio de Janeiro|Human|Programa de Oncovirologia|Programa de Oncovirologia|Ramos Goes|Brazil

>Spike|hCoV-19/USA/WA-UW-13070/2020|2020-06-30|EPI\_ISL\_570946|Original|hCoV-19^^Washington|Human|UW Virology Lab|UW Virology Lab|Roychoudhury|USA

>Spike|hCoV-19/USA/TX-HMH-1524/2020|2020-04-25|EPI\_ISL\_542773|Original|hCoV-19^^Texas|Human|Houston Methodist Hospital|Houston Methodist Hospital|Long|USA

>Spike|hCoV-19/Switzerland/BE-ETHZ-310512/2020|2020-10-08|EPI\_ISL\_603580|Original|hCoV-19^^Bern|Human|Viollier AG|Department of Biosystems Science and Engineering|Nadeau|Switzerland

>Spike|hCoV-19/England/LIVE-1D51E2/2020|2020-09-19|EPI\_ISL\_572817|Original|hCoV-19^^England|Human|Liverpool Clinical Laboratories|COVID-19 Genomics UK (COG-UK) Consortium|Haldenby|United Kingdom

>Spike|hCoV-19/Netherlands/Gelderland\_61/2020|2020-05-18|EPI\_ISL\_460960|Original|hCoV-19^^Gelderland|Human|Dutch COVID-19 response team|Erasmus Medical Center|Oude Munnink|Netherlands

>Spike|hCoV-19/USA/WA-UW-4407/2020|2020-03-31|EPI\_ISL\_426137|Original|hCoV-19^^Washington|Human|UW Virology Lab|UW Virology Lab|Roychoudhury|USA

>Spike|hCoV-19/USA/MI-MDHHS-SC20325/2020|2020-03-15|EPI\_ISL\_450604|Original|hCoV-19^^Michigan|Human|Michigan Department of Health and Human Services|Michigan Department of Health and Human Services|Blankenship|USA

>Spike|hCoV-19/Denmark/DCGC-5663/2020|2020-09-28|EPI\_ISL\_619950|Original|hCoV-19^^Hovedstaden|Human|Department of Virus and Microbiological Special Diagnostics|Albertsen lab|Michaelsen|Denmark

>Spike|hCoV-19/England/ALDP-B23FA5/2020|2020-11-04|EPI\_ISL\_646388|Original|hCoV-19^^England|Human|Lighthouse Lab in Alderley Park|Wellcome Sanger Institute for the COVID-19 Genomics UK (COG-UK) Consortium|Davies|United Kingdom

>Spike|hCoV-19/USA/MN-MDH-1539/2020|2020-08-03|EPI\_ISL\_527604|Original|hCoV-19^^Minnesota|Human|Minnesota Department of Health|Minnesota Department of Health|Garfin|USA

>Spike|hCoV-19/England/QEUEH-96E2B6/2020|2020-08-20|EPI\_ISL\_530554|Original|hCoV-19^^England|Human|Lighthouse Lab in Glasgow|Wellcome Sanger Institute for the COVID-19 Genomics UK (COG-UK) consortium|Davies|United Kingdom

>Spike|hCoV-19/USA/AZ-TG332684/2020|2020-05-28|EPI\_ISL\_694355|Original|hCoV-19^^Arizona|Human|TGen North|TGen North|French|USA

>Spike|hCoV-19/Australia/VIC13295/2020|2020-07-28|EPI\_ISL\_563655|Original|hCoV-19^^Victoria|Human|Microbiological Diagnostic Unit - Public Health Laboratory (MDU-PHL)|MDU-PHL|Schultz|Australia

>Spike|hCoV-19/Brazil/RS-00645/2020|2020-11-25|EPI\_ISL\_770591|Original|hCoV-19^^Rio Grande do Sul|Human|Laborat\u00f3rio de Microbiologia Molecular - Universidade FEEVALE|Bioinformatics Laboratory / LNCC|Almeida|Brazil

>Spike|hCoV-19/England/ALDP-9FCD07/2020|2020-10-02|EPI\_ISL\_587811|Original|hCoV-19^^England|Human|Lighthouse Lab in Alderley Park|Wellcome Sanger Institute for the COVID-19 Genomics UK (COG-UK) consortium|Davies|United Kingdom

>Spike|hCoV-19/Wales/PHWC-49AD5B/2020|2020-12-03|EPI\_ISL\_727681|Original|hCoV-19^^Wales|Human|Originating lab|COVID-19 Genomics UK (COG-UK) Consortium|Moore|United Kingdom

>Spike|hCoV-19/USA/MI-MDHHS-SC20456/2020|2020-05-07|EPI\_ISL\_459995|Original|hCoV-19^^Michigan|Human|Michigan Department of Health and Human Services|Michigan Department of Health and Human Services|Blankenship|USA

>Spike|hCoV-19/USA/MI-UM-10036567616/2020|2020-10-22|EPI\_ISL\_640275|Original|hCoV-19^^Michigan|Human|University of Michigan Clinical Microbiology Laboratory|Lauring Lab|Valesano|USA

>Spike|hCoV-19/England/ALDP-A704BA/2020|2020-10-15|EPI\_ISL\_607671|Original|hCoV-19^^England|Human|Lighthouse Lab in Alderley Park|Wellcome Sanger Institute for the COVID-19 Genomics UK (COG-UK) consortium|Davies|United Kingdom

>Spike|hCoV-19/England/QEUEH-B67F4B/2020|2020-11-11|EPI\_ISL\_661959|Original|hCoV-19^^England|Human|Lighthouse Lab in Glasgow|Wellcome Sanger Institute for the COVID-19 Genomics UK (COG-UK) Consortium|Davies|United Kingdom

>Spike|hCoV-19/Scotland/EDB5956/2020|2020-05-02|EPI\_ISL\_487674|Original|hCoV-19^^Scotland|Human|Virology Department|Wellcome Sanger Institute for the COVID-19 Genomics UK (COG-UK) consortium|Davies|United Kingdom

>Spike|hCoV-19/USA/WI-UW-212/2020|2020-03-25|EPI\_ISL\_428308|Original|hCoV-19^^Wisconsin|Human|University of Wisconsin-Madison AIDS Vaccine Research Laboratories|University of Wisconsin-Madison AIDS Vaccine Research Laboratories|Moreno|USA

>Spike|hCoV-19/England/CAMC-B5363E/2020|2020-11-08|EPI\_ISL\_656873|Original|hCoV-19^^England|Human|Lighthouse Lab in Cambridge|Wellcome Sanger Institute for the COVID-19 Genomics UK (COG-UK) Consortium|Davies|United Kingdom

>Spike|hCoV-19/Wales/PHWC-47FE86/2020|2020-10-13|EPI\_ISL\_612822|Original|hCoV-19^^Wales|Human|Wales Specialist Virology Centre Sequencing lab|COVID-19 Genomics UK (COG-UK) Consortium|Moore|United Kingdom

>Spike|hCoV-19/England/QEUA-9A4463/2020|2020-09-01|EPI\_ISL\_540181|Original|hCoV-19^^England|Human|Lighthouse Lab in Glasgow|Wellcome Sanger Institute for the COVID-19 Genomics UK (COG-UK) consortium|Davies|United Kingdom

>Spike|hCoV-19/Wales/PHWC-2EB1A/2020|2020-04-08|EPI\_ISL\_446116|Original|hCoV-19^^Wales|Human|Wales Specialist Virology Centre|Public Health Wales Microbiology Cardiff|Moore|United Kingdom

>Spike|hCoV-19/USA/TX-HMH-MCoV-11504/2020|2020-09-09|EPI\_ISL\_790035|Original|hCoV-19^^Texas|Human|Houston Methodist Hospital|Houston Methodist Hospital|Long|USA

>Spike|hCoV-19/England/ALDP-9CBFB0/2020|2020-09-16|EPI\_ISL\_575442|Original|hCoV-19^^England|Human|Lighthouse Lab in Alderley Park|Wellcome Sanger Institute for the COVID-19 Genomics UK (COG-UK) consortium|Davies|United Kingdom

>Spike|hCoV-19/France/OCC-107/2020|2020-10-22|EPI\_ISL\_671953|Original|hCoV-19^^Occitanie|Human|CHU Purpan - Laboratoire de Virologie - Institut F\u00e9d\u00e9ratif de Biologie|CHU Purpan - Laboratoire de Virologie - Institut F\u00e9d\u00e9ratif de Biologie|Latour|France

>Spike|hCoV-19/Scotland/GCVR-16F97C/2020|2020-03-19|EPI\_ISL\_632249|Original|hCoV-19^^Scotland|Human|NHSGGC West of Scotland Specialist Virology Centre|MRC-University of Glasgow Centre for Virus Research|Robertson|United Kingdom

>Spike|hCoV-19/USA/TX-HMH-MCoV-19177/2020|2020-11-24|EPI\_ISL\_783671|Original|hCoV-19^^Texas|Human|Houston Methodist Hospital|Houston Methodist Hospital|Long|USA

>Spike|hCoV-19/USA/MN-MDH-2125/2020|2020-11-02|EPI\_ISL\_708463|Original|hCoV-19^^Minnesota|Human|Minnesota Department of Health|Minnesota Department of Health|Lorentz|USA

>Spike|hCoV-19/Denmark/DCGC-16940/2020|2020-12-14|EPI\_ISL\_750315|Original|hCoV-19^^Midtjylland|Human|Department of Virus and Microbiological Special Diagnostics|Albertsen Lab|Michaelsen|Denmark

>Spike|hCoV-19/Scotland/QEUA-9E4722/2020|2020-09-23|EPI\_ISL\_601092|Original|hCoV-19^^Scotland|Human|Lighthouse Lab in Glasgow|Wellcome Sanger Institute for the COVID-19 Genomics UK (COG-UK) consortium|Davies|United Kingdom

>Spike|hCoV-19/England/LOND-124D2DF/2020|2020-03-31|EPI\_ISL\_507080|Original|hCoV-19^^England|Human|University College London Hospital|COVID-19 Genomics UK (COG-UK) Consortium|Byott|United Kingdom

>Spike|hCoV-19/England/20122017304/2020|2020-03-15|EPI\_ISL\_465739|Original|hCoV-19^^England|Human|Respiratory Virus Unit|Respiratory Virus Unit|Platt|United Kingdom

>Spike|hCoV-19/USA/CA-ALSR-2018/2020|2020-05-09|EPI\_ISL\_635308|Original|hCoV-19^^California|Human|San Diego County Public Health Laboratory|Andersen lab at Scripps Research|Gangavarapu|USA

>Spike|hCoV-19/Netherlands/Zeeland\_8/2020|2020-03-06|EPI\_ISL\_461290|Original|hCoV-19^^Zeeland|Human|Dutch COVID-19 response team|Erasmus Medical Center|Oude Munnink|Netherlands

>Spike|hCoV-19/USA/NY-QDX-2009/2020|2020-03-17|EPI\_ISL\_604362|Original|hCoV-19^^New York|Human|Quest Diagnostics|Quest Diagnostics|Kagan|USA

>Spike|hCoV-19/India/MH-ACTREC-243/2020|2020-07-06|EPI\_ISL\_699896|Original|hCoV-19^^Maharashtra|Human|Hematopathology Laboratory|Hematopathology Laboratory|Patkar|India

>Spike|hCoV-19/Scotland/EDB6148/2020|2020-05-14|EPI\_ISL\_473887|Original|hCoV-19^^Scotland|Human|Virology Department|COVID-19 Genomics UK (COG-UK) Consortium|Williams|United Kingdom

>Spike|hCoV-19/Denmark/DCGC-6874/2020|2020-10-12|EPI\_ISL\_619719|Original|hCoV-19^^Hovedstaden|Human|Department of Virus and Microbiological Special Diagnostics|Albertsen lab|Michaelsen|Denmark

>Spike|hCoV-19/England/QEUA-C31F1C/2020|2020-12-11|EPI\_ISL\_782590|Original|hCoV-19^^England|Human|Lighthouse Lab in Glasgow|Wellcome Sanger Institute for the COVID-19 Genomics UK (COG-UK) Consortium|Davies|United Kingdom

>Spike|hCoV-19/USA/CA-ALSR-1275/2020|2020-05-06|EPI\_ISL\_494473|Original|hCoV-19^^California|Human|San Diego County Public Health Laboratory|Andersen lab at Scripps Research|Gangavarapu|USA

>Spike|hCoV-19/England/CAMB-1AED0C/2020|2020-05-06|EPI\_ISL\_448074|Original|hCoV-19^^England|Human|Department of Pathology|COVID-19 Genomics UK (COG-UK) Consortium|Meredith|United Kingdom

>Spike|hCoV-19/England/BRIS-12234A/2020|2020-03-21|EPI\_ISL\_440056|Original|hCoV-19^^England|Human|PHE South West Regional Laboratory|Wellcome Sanger Institute for the COVID-19 Genomics UK (COG-UK) consortium|Amato|United Kingdom

>Spike|hCoV-19/England/ALDP-B83222/2020|2020-11-14|EPI\_ISL\_675510|Original|hCoV-19^^England|Human|Lighthouse Lab in Alderley Park|Wellcome Sanger Institute for the COVID-19 Genomics UK (COG-UK) Consortium|Davies|United Kingdom

>Spike|hCoV-19/England/CAMB-76D3B/2020|2020-03-31|EPI\_ISL\_425424|Original|hCoV-19^^England|Human|Department of Pathology|COVID-19 Genomics UK (COG-UK) Consortium|Meredith|United Kingdom

>Spike|hCoV-19/Japan/P3-1/2020|2020-03-09|EPI\_ISL\_419299|Original|hCoV-19^^Ishikawa|Human|Ishikawa Prefectural Institute of Public Health and Environmental Science|Pathogen Genomics Center|Sekizuka|Japan

>Spike|hCoV-19/India/KA-nimh-3975/2020|2020-04-23|EPI\_ISL\_486881|Original|hCoV-19^^Karnataka|Human|CV Raman Hospital|Department of Neurovirology|Pattabiraman|India

>Spike|hCoV-19/Australia/VIC4534/2020|2020-07-15|EPI\_ISL\_518945|Original|hCoV-19^^Victoria|Human|Microbiological Diagnostic Unit - Public Health Laboratory (MDU-PHL) |MDU-PHL|Schultz|Australia

>Spike|hCoV-19/England/ALDP-94AEAD/2020|2020-06-11|EPI\_ISL\_556383|Original|hCoV-19^^England|Human|Lighthouse Lab in Alderley Park|Wellcome Sanger Institute for the COVID-19 Genomics UK (COG-UK) consortium|Davies|United Kingdom

>Spike|hCoV-19/England/ALDP-B5C398/2020|2020-11-10|EPI\_ISL\_655936|Original|hCoV-19^^England|Human|Lighthouse Lab in Alderley Park|Wellcome Sanger Institute for the COVID-19 Genomics UK (COG-UK) Consortium|Davies|United Kingdom

>Spike|hCoV-19/England/MILK-A23CAF/2020|2020-10-03|EPI\_ISL\_665652|Original|hCoV-19^^England|Human|Centre for Enzyme Innovation|COVID-19 Genomics UK (COG-UK) Consortium|Robson|United Kingdom

>Spike|hCoV-19/United Arab Emirates/0186/2020|2020-05-18|EPI\_ISL\_698373|Original|hCoV-19^^Abu Dhabi|Human|Group 42 (G42) Healthcare|G42 Healthcare|Ogrodzki|United Arab Emirates

>Spike|hCoV-19/USA/WA-S701/2020|2020-04-10|EPI\_ISL\_449871|Original|hCoV-19^^Washington|Human|Washington State Department of Health|Seattle Flu Study|Bedford|USA

>Spike|hCoV-19/USA/LA-EVTL733/2020|2020-07-16|EPI\_ISL\_653424|Original|hCoV-19^^Louisiana|Human|LSUHS Emerging Viral Threat Laboratory|Microbial Genome Sequencing Center|Kamil|USA

>Spike|hCoV-19/England/ALDP-49969D/2020|2020-05-27|EPI\_ISL\_559405|Original|hCoV-19^^England|Human|Lighthouse Lab in Alderley Park|Wellcome Sanger Institute for the COVID-19 Genomics UK (COG-UK) consortium|Davies|United Kingdom

>Spike|hCoV-19/England/CAMB-1B808E/2020|2020-10-24|EPI\_ISL\_638189|Original|hCoV-19^^England|Human|Department of Pathology|COVID-19 Genomics UK (COG-UK) Consortium|Goodfellow|United Kingdom

>Spike|hCoV-19/USA/VA-DCLS-1519/2020|2020-07-28|EPI\_ISL\_581516|Original|hCoV-19^^Virginia|Human|Virginia DCLS|Virginia DCLS|St. Jacques|USA

>Spike|hCoV-19/USA/NE-11509/2020|2020-05-05|EPI\_ISL\_475223|Original|hCoV-19^^Nebraska|Human|Nebraska Public Health Laboratory|UNMC COVID-19 Response Team|Pratt|USA

>Spike|hCoV-19/Denmark/DCGC-17791/2020|2020-12-14|EPI\_ISL\_749571|Original|hCoV-19^^Syddanmark|Human|Department of Virus and Microbiological Special Diagnostics|Albertsen Lab|Michaelsen|Denmark

>Spike|hCoV-19/Japan/PG-2518/2020|2020-04-00|EPI\_ISL\_690654|Original|hCoV-19^^Japan|Human|Saitama Prefectural Institute of Public Health|Pathogen Genomics Center|Sekizuka|Japan

>Spike|hCoV-19/Switzerland/ZH-ETHZ-140028/2020|2020-05-21|EPI\_ISL\_476093|Original|hCoV-19^^Zurich|Human|Viollier AG|Department of Biosystems Science and Engineering|Nadeau|Switzerland

>Spike|hCoV-19/Canada/BC\_14667611/2020|2020-04-00|EPI\_ISL\_468658|Original|hCoV-19^^British Columbia|Human|BCCDC Public Health Laboratory|BCCDC Public Health Laboratory|Harrigan|Canada

>Spike|hCoV-19/England/CAMC-9496A6/2020|2020-07-27|EPI\_ISL\_556063|Original|hCoV-19^^England|Human|Lighthouse Lab in Cambridge|Wellcome Sanger Institute for the COVID-19 Genomics UK (COG-UK) consortium|Davies|United Kingdom

>Spike|hCoV-19/England/CAMC-B0B6EA/2020|2020-10-27|EPI\_ISL\_643330|Original|hCoV-19^^England|Human|Lighthouse Lab in Cambridge|Wellcome Sanger Institute for the COVID-19 Genomics UK (COG-UK) Consortium|Davies|United Kingdom

>Spike|hCoV-19/England/ALDP-BBB591/2020|2020-11-18|EPI\_ISL\_702443|Original|hCoV-19^^England|Human|Lighthouse Lab in Alderley Park|Wellcome Sanger Institute for the COVID-19 Genomics UK (COG-UK) Consortium|Davies|United Kingdom

>Spike|hCoV-19/England/QEUH-7A8540/2020|2020-07-11|EPI\_ISL\_533114|Original|hCoV-19^^England|Human|Lighthouse Lab in Glasgow|Wellcome Sanger Institute for the COVID-19 Genomics UK (COG-UK) consortium|Davies|United Kingdom

>Spike|hCoV-19/Georgia/Tb-54/2020|2020-02-27|EPI\_ISL\_415641|Original|hCoV-19^^Tbilisi|Human|R. G. Lugar Center for Public Health Research|R. G. Lugar Center for Public Health Research|Murtskhvaladze|Georgia

>Spike|hCoV-19/England/CAMB-7B1C1/2020|2020-04-12|EPI\_ISL\_433929|Original|hCoV-19^^England|Human|Department of Pathology|COVID-19 Genomics UK (COG-UK) Consortium|Meredith|United Kingdom

>Spike|hCoV-19/England/CAMC-B079F4/2020|2020-10-30|EPI\_ISL\_643688|Original|hCoV-19^^England|Human|Lighthouse Lab in Cambridge|Wellcome Sanger Institute for the COVID-19 Genomics UK (COG-UK) Consortium|Davies|United Kingdom

>Spike|hCoV-19/USA/MI-MDHHS-SC20864/2020|2020-04-19|EPI\_ISL\_471885|Original|hCoV-19^^Michigan|Human|Michigan Department of Health and Human Services|Michigan Department of Health and Human Services|Blankenship|USA

>Spike|hCoV-19/England/ALDP-95A53C/2020|2020-06-12|EPI\_ISL\_553393|Original|hCoV-19^^England|Human|Lighthouse Lab in Alderley Park|Wellcome Sanger Institute for the COVID-19 Genomics UK (COG-UK) consortium|Davies|United Kingdom

>Spike|hCoV-19/Germany/SH-ChVir20806/2020|2020-12-02|EPI\_ISL\_729416|Original|hCoV-19^^Schleswig-Holstein|Human|A. Krumbholz|Charit\u00e9 Universit\u00e4tsmedizin Berlin|Muehlemann|Germany

>Spike|hCoV-19/England/ALDP-A87D00/2020|2020-10-17|EPI\_ISL\_606080|Original|hCoV-19^^England|Human|Lighthouse Lab in Alderley Park|Wellcome Sanger Institute for the COVID-19 Genomics UK (COG-UK) consortium|Davies|United Kingdom

>Spike|hCoV-19/USA/WA-S422/2020|2020-03-25|EPI\_ISL\_434182|Original|hCoV-19^^Washington|Human|Washington State Department of Health|Seattle Flu Study|Bedford|USA

>Spike|hCoV-19/France/PAC-IHU-0597/2020|2020-04-10|EPI\_ISL\_568880|Original|hCoV-19^^Provence-Alpes-C\u00f4te-d\u00e0z|Human|MEPHI|MEPHI|Levasseur|France

>Spike|hCoV-19/Australia/VIC633/2020|2020-03-27|EPI\_ISL\_426875|Original|hCoV-19^^Victoria|Human|Victorian Infectious Diseases Reference Laboratory (VIDRL)|Microbiological Diagnostic Unit Public Health Laboratory and Victorian Infectious Diseases Reference Laboratory|Schultz|Australia

>Spike|hCoV-19/USA/TX-HMH-MCoV-8642/2020|2020-07-01|EPI\_ISL\_780672|Original|hCoV-19^^Texas|Human|Houston Methodist Hospital|Houston Methodist Hospital|Long|USA

>Spike|hCoV-19/England/ALDP-B5B37B/2020|2020-11-09|EPI\_ISL\_655564|Original|hCoV-19^^England|Human|Lighthouse Lab in Alderley Park|Wellcome Sanger Institute for the COVID-19 Genomics UK (COG-UK) Consortium|Davies|United Kingdom

>Spike|hCoV-19/England/NOTT-121938/2020|2020-12-24|EPI\_ISL\_763678|Original|hCoV-19^^England|Human|Queens Medical Centre|COVID-19 Genomics UK (COG-UK) Consortium|Loose|United Kingdom

>Spike|hCoV-19/USA/CA-CZB-1573/2020|2020-04-12|EPI\_ISL\_468505|Original|hCoV-19^^California|Human|Ventura County Public Health Lab|Chan-Zuckerberg Biohub|Hao|USA

>Spike|hCoV-19/England/ALDP-A2F11D/2020|2020-10-05|EPI\_ISL\_587153|Original|hCoV-19^^England|Human|Lighthouse Lab in Alderley Park|Wellcome Sanger Institute for the COVID-19 Genomics UK (COG-UK) consortium|Davies|United Kingdom

>Spike|hCoV-19/Ireland/MO-NVRL-79IRL03919/2020|2020-11-28|EPI\_ISL\_732495|Original|hCoV-19^^Mayo|Human|National Virus Reference Laboratory|National Virus Reference Laboratory|Gonzalez|Ireland

>Spike|hCoV-19/Australia/VIC2875/2020|2020-07-02|EPI\_ISL\_521706|Original|hCoV-19^^Victoria|Human|Microbiological Diagnostic Unit - Public Health Laboratory (MDU-PHL)|MDU-PHL|Schultz|Australia

>Spike|hCoV-19/USA/OR-PROV-041/2020|2020-03-18|EPI\_ISL\_482323|Original|hCoV-19^^Oregon|Human|Providence St. Joseph Health Molecular Genomics Laboratory|Providence St. Joseph Health Molecular Genomics Laboratory|Dowdell|USA

>Spike|hCoV-19/England/ALDP-94A57B/2020|2020-06-11|EPI\_ISL\_556369|Original|hCoV-19^^England|Human|Lighthouse Lab in Alderley Park|Wellcome Sanger Institute for the COVID-19 Genomics UK (COG-UK) consortium|Davies|United Kingdom

>Spike|hCoV-19/England/MILK-B3920D/2020|2020-11-01|EPI\_ISL\_652297|Original|hCoV-19^^England|Human|University of Exeter|COVID-19 Genomics UK (COG-UK) Consortium|Temperton|United Kingdom

>Spike|hCoV-19/England/MILK-970DA1/2020|2020-08-18|EPI\_ISL\_553024|Original|hCoV-19^^England|Human|Lighthouse Lab in Milton Keynes|Wellcome Sanger Institute for the COVID-19 Genomics UK (COG-UK) consortium|Davies|United Kingdom

>Spike|hCoV-19/England/MILK-A7D893/2020|2020-10-12|EPI\_ISL\_709934|Original|hCoV-19^^England|Human|Lighthouse Lab in Milton Keynes|Wellcome Sanger Institute for the COVID-19 Genomics UK (COG-UK) Consortium|Davies|United Kingdom

>Spike|hCoV-19/England/MILK-AC75A2/2020|2020-10-21|EPI\_ISL\_634455|Original|hCoV-19^^England|Human|Lighthouse Lab in Milton Keynes|Wellcome Sanger Institute for the COVID-19 Genomics UK (COG-UK) consortium|Davies|United Kingdom

>Spike|hCoV-19/England/ALDP-B23D32/2020|2020-11-04|EPI\_ISL\_646377|Original|hCoV-19^^England|Human|Lighthouse Lab in Alderley Park|Wellcome Sanger Institute for the COVID-19 Genomics UK (COG-UK) Consortium|Davies|United Kingdom

>Spike|hCoV-19/USA/MI-UM-2006S001092/2020|2020-04-16|EPI\_ISL\_495576|Original|hCoV-19^^Michigan|Human|University of Michigan Clinical Microbiology Laboratory|Lauring Lab|Valesano|USA

>Spike|hCoV-19/USA/WI-UW-704/2020|2020-07-02|EPI\_ISL\_491382|Original|hCoV-19^^Wisconsin|Human|University of Wisconsin-Madison AIDS Vaccine Research Laboratories|University of Wisconsin-Madison AIDS Vaccine Research Laboratories|Baczenas|USA

>Spike|hCoV-19/Denmark/DCGC-20167/2020|2020-11-30|EPI\_ISL\_748022|Original|hCoV-19^^Syddanmark|Human|Department of Virus and Microbiological Special Diagnostics|Albertsen Lab|Michaelsen|Denmark

>Spike|hCoV-19/England/ALDP-950FA1/2020|2020-06-13|EPI\_ISL\_554165|Original|hCoV-19^^England|Human|Lighthouse Lab in Alderley Park|Wellcome Sanger Institute for the COVID-19 Genomics UK (COG-UK) consortium|Davies|United Kingdom

>Spike|hCoV-19/England/ALDP-A6C40C/2020|2020-10-14|EPI\_ISL\_608108|Original|hCoV-19^^England|Human|Lighthouse Lab in Alderley Park|Wellcome Sanger Institute for the COVID-19 Genomics UK (COG-UK) consortium|Davies|United Kingdom

>Spike|hCoV-19/USA/WA-UW51/2020|2020-03-08|EPI\_ISL\_415616|Original|hCoV-19^^Washington|Human|UW Virology Lab|UW Virology Lab|Roychoudhury|USA

>Spike|hCoV-19/England/CAMB-1B1780/2020|2020-05-08|EPI\_ISL\_458539|Original|hCoV-19^^England|Human|Department of Pathology|Wellcome Sanger Institute for the COVID-19 Genomics UK (COG-UK) consortium|Davies|United Kingdom

>Spike|hCoV-19/England/MILK-B59841/2020|2020-11-06|EPI\_ISL\_679875|Original|hCoV-19^^England|Human|Virology Department|COVID-19 Genomics UK (COG-UK) Consortium|de Silva|United Kingdom

>Spike|hCoV-19/USA/WI-GMF-16244/2020|2020-08-20|EPI\_ISL\_547721|Original|hCoV-19^^Wisconsin|Human|Gundersen Molecular Diagnostics Laboratory|Kabara Cancer Research Institute|Kenny|USA

>Spike|hCoV-19/USA/NY-Wadsworth-248102-01/2020|2020-10-18|EPI\_ISL\_734367|Original|hCoV-19^^New York|Human|Wadsworth Center|Wadsworth Center|Lasek-Nesselquist|USA

>Spike|hCoV-19/England/205020035/2020|2020-12-06|EPI\_ISL\_723037|Original|hCoV-19^^England|Human|Respiratory Virus Unit|COVID-19 Genomics UK (COG-UK) Consortium|Platt|United Kingdom

>Spike|hCoV-19/England/QEUEH-998031/2020|2020-08-27|EPI\_ISL\_537152|Original|hCoV-19^^England|Human|Lighthouse Lab in Glasgow|Wellcome Sanger Institute for the COVID-19 Genomics UK (COG-UK) consortium|Davies|United Kingdom

>Spike|hCoV-19/USA/CA-ALSR-1387/2020|2020-05-08|EPI\_ISL\_494577|Original|hCoV-19^^California|Human|San Diego County Public Health Laboratory|Andersen lab at Scripps Research|Gangavarapu|USA

>Spike|hCoV-19/Canada/BC\_10404289/2020|2020-03-00|EPI\_ISL\_477078|Original|hCoV-19^^British Columbia|Human|BCCDC Public Health Laboratory|BCCDC Public Health Laboratory|Harrigan|Canada

>Spike|hCoV-19/England/CAMB-756F5/2020|2020-03-12|EPI\_ISL\_440457|Original|hCoV-19^^England|Human|Department of Pathology|Wellcome Sanger Institute for the COVID-19 Genomics UK (COG-UK) consortium|Amato|United Kingdom

>Spike|hCoV-19/England/QEUEH-B9E4C4/2020|2020-11-18|EPI\_ISL\_719777|Original|hCoV-19^^England|Human|Lighthouse Lab in Glasgow|Wellcome Sanger Institute for the COVID-19 Genomics UK (COG-UK) Consortium|Davies|United Kingdom

>Spike|hCoV-19/USA/NY-Wadsworth-290741-01/2020|2020-12-21|EPI\_ISL\_767563|Original|hCoV-19^^New York|Human|URMC LABS|Wadsworth Center|Lasek-Nesselquist|USA

>Spike|hCoV-19/England/QEUEH-CDE2EB/2020|2020-12-26|EPI\_ISL\_782191|Original|hCoV-19^^England|Human|Lighthouse Lab in Glasgow|Wellcome Sanger Institute for the COVID-19 Genomics UK (COG-UK) Consortium|Davies|United Kingdom

>Spike|hCoV-19/USA/WI-WSLH-200688/2020|2020-09-14|EPI\_ISL\_631445|Original|hCoV-19^^Wisconsin|Human|Wisconsin State Laboratory of Hygiene Communicable Disease Division|Wisconsin State Laboratory of Hygiene Communicable Disease Division|Florek|USA

>Spike|hCoV-19/Japan/PG-7030/2020|2020-08-00|EPI\_ISL\_688135|Original|hCoV-19^^Japan|Human|Pathogen Genomics Center|Pathogen Genomics Center|Sekizuka|Japan

>Spike|hCoV-19/England/ALDP-AA4DB2/2020|2020-10-22|EPI\_ISL\_630816|Original|hCoV-19^^England|Human|Lighthouse Lab in Alderley Park|Wellcome Sanger Institute for the COVID-19 Genomics UK (COG-UK) consortium|Davies|United Kingdom

>Spike|hCoV-19/England/QEUEH-9F3034/2020|2020-09-24|EPI\_ISL\_600772|Original|hCoV-19^^England|Human|Lighthouse Lab in Glasgow|Wellcome Sanger Institute for the COVID-19 Genomics UK (COG-UK) consortium|Davies|United Kingdom

>Spike|hCoV-19/Wales/CAMC-AAFDA8/2020|2020-10-22|EPI\_ISL\_634807|Original|hCoV-19^^Wales|Human|Lighthouse Lab in Cambridge|Wellcome Sanger Institute for the COVID-19 Genomics UK (COG-UK) consortium|Davies|United Kingdom

>Spike|hCoV-19/USA/CA-ALSR-3394/2020|2020-07-07|EPI\_ISL\_636001|Original|hCoV-19^^California|Human|San Diego County Public Health Laboratory|Andersen lab at Scripps Research|Gangavarapu|USA

>Spike|hCoV-19/Wales/PHWC-497D6D/2020|2020-11-30|EPI\_ISL\_726970|Original|hCoV-19^^Wales|Human|Originating lab|COVID-19 Genomics UK (COG-UK) Consortium|Moore|United Kingdom

>Spike|hCoV-19/Australia/VIC11283/2020|2020-07-18|EPI\_ISL\_563312|Original|hCoV-19^^Victoria|Human|Microbiological Diagnostic Unit - Public Health Laboratory (MDU-PHL)|MDU-PHL|Schultz|Australia

>Spike|hCoV-19/Australia/VIC3101/2020|2020-07-06|EPI\_ISL\_520808|Original|hCoV-19^^Victoria|Human|Victorian Infectious Diseases Reference Laboratory (VIDRL)|VIDRL and MDU-PHL|Schultz|Australia

>Spike|hCoV-19/Netherlands/NB-EMC-229/2020|2020-05-11|EPI\_ISL\_523352|Original|hCoV-19^^Noord Brabant|Human|Dutch COVID-19 response team|Erasmus Medical Center|Oude Munnink|Netherlands

>Spike|hCoV-19/Canada/BC-BCCDC-7287/2020|2020-11-00|EPI\_ISL\_740658|Original|hCoV-19^^British Columbia|Human|BCCDC Public Health Laboratory|BCCDC Public Health Laboratory|Prystajecky|Canada

>Spike|hCoV-19/England/NORW-E8BFE/2020|2020-04-14|EPI\_ISL\_448290|Original|hCoV-19^^England|Human|Quadram Institute Bioscience|COVID-19 Genomics UK (COG-UK) Consortium|Alikhan|United Kingdom

>Spike|hCoV-19/England/MILK-ACF2D0/2020|2020-10-22|EPI\_ISL\_629676|Original|hCoV-19^^England|Human|Lighthouse Lab in Milton Keynes|Wellcome Sanger Institute for the COVID-19 Genomics UK (COG-UK) consortium|Davies|United Kingdom



>Spike|hCoV-19/England/SHEF-BFFE5/2020|2020-03-25|EPI\_ISL\_418321|Original|hCoV-19^^England|Human|Virology Department|Department of Infection|de Silva|United Kingdom

>Spike|hCoV-19/England/ALDP-A84C24/2020|2020-10-16|EPI\_ISL\_610386|Original|hCoV-19^^England|Human|Lighthouse Lab in Alderley Park|Wellcome Sanger Institute for the COVID-19 Genomics UK (COG-UK) consortium|Davies|United Kingdom

>Spike|hCoV-19/Scotland/EDB5971/2020|2020-05-04|EPI\_ISL\_487939|Original|hCoV-19^^Scotland|Human|Virology Department|Wellcome Sanger Institute for the COVID-19 Genomics UK (COG-UK) consortium|Davies|United Kingdom

>Spike|hCoV-19/England/QEUA-9F5393/2020|2020-09-25|EPI\_ISL\_638668|Original|hCoV-19^^England|Human|Department of Pathology|COVID-19 Genomics UK (COG-UK) Consortium|Goodfellow|United Kingdom

>Spike|hCoV-19/Japan/PG-6961/2020|2020-07-00|EPI\_ISL\_688066|Original|hCoV-19^^Japan|Human|Pathogen Genomics Center|Pathogen Genomics Center|Sekizuka|Japan

>Spike|hCoV-19/Switzerland/GE-SNRCI-20/2020|2020-03-00|EPI\_ISL\_548149|Original|hCoV-19^^Geneve|Human|Laboratoire de Virologie|Swiss National Reference Centre for Influenza|Gon\u00e7alves Cabecinhas|Switzerland

>Spike|hCoV-19/Australia/VIC4501/2020|2020-07-14|EPI\_ISL\_518912|Original|hCoV-19^^Victoria|Human|Microbiological Diagnostic Unit - Public Health Laboratory (MDU-PHL)|MDU-PHL|Schultz|Australia

>Spike|hCoV-19/Netherlands/NA\_692/2020|2020-03-29|EPI\_ISL\_461127|Original|hCoV-19^^Netherlands|Human|Dutch COVID-19 response team|Erasmus Medical Center|Oude Munnink|Netherlands

>Spike|hCoV-19/Iceland/286/2020|2020-03-18|EPI\_ISL\_417614|Original|hCoV-19^^Reykjavik|Human|The National University Hospital of Iceland|deCODE genetics|J\u00f3nsson|Iceland

>Spike|hCoV-19/USA/NY-PV09170/2020|2020-03-19|EPI\_ISL\_422532|Original|hCoV-19^^New York|Human|MSHS Clinical Microbiology Laboratories|MSHS Pathogen Surveillance Program|van Bakel|USA

>Spike|hCoV-19/England/SHEF-D2544/2020|2020-07-10|EPI\_ISL\_526449|Original|hCoV-19^^England|Human|Virology Department|COVID-19 Genomics UK (COG-UK) Consortium|de Silva|United Kingdom

>Spike|hCoV-19/England/ALDP-A6E604/2020|2020-10-15|EPI\_ISL\_607185|Original|hCoV-19^^England|Human|Lighthouse Lab in Alderley Park|Wellcome Sanger Institute for the COVID-19 Genomics UK (COG-UK) consortium|Davies|United Kingdom

>Spike|hCoV-19/Switzerland/AR-ETHZ-410900/2020|2020-11-30|EPI\_ISL\_737661|Original|hCoV-19^^Appenzell Ausserrhoden|Human|Viollier AG|Department of Biosystems Science and Engineering|Nadeau|Switzerland

>Spike|hCoV-19/Scotland/QEUA-A4B7BF/2020|2020-10-08|EPI\_ISL\_628479|Original|hCoV-19^^Scotland|Human|Oxford Viromics|COVID-19 Genomics UK (COG-UK) Consortium|Golubchik|United Kingdom

>Spike|hCoV-19/England/QEUA-CC2C55/2020|2020-12-21|EPI\_ISL\_760571|Original|hCoV-19^^England|Human|Lighthouse Lab in Glasgow|Wellcome Sanger Institute for the COVID-19 Genomics UK (COG-UK) Consortium|Davies|United Kingdom

>Spike|hCoV-19/Netherlands/Gelderland\_110/2020|2020-05-22|EPI\_ISL\_460871|Original|hCoV-19^^Gelderland|Human|Dutch COVID-19 response team|Erasmus Medical Center|Oude Munnink|Netherlands

>Spike|hCoV-19/Wales/ALDP-AA4D58/2020|2020-10-21|EPI\_ISL\_630945|Original|hCoV-19^^Wales|Human|Lighthouse Lab in Alderley Park|Wellcome Sanger Institute for the COVID-19 Genomics UK (COG-UK) consortium|Davies|United Kingdom

>Spike|hCoV-19/England/ALDP-B74576/2020|2020-11-12|EPI\_ISL\_678927|Original|hCoV-19^^England|Human|Queens Medical Centre|COVID-19 Genomics UK (COG-UK) Consortium|Loose|United Kingdom

>Spike|hCoV-19/Turkey/KU-015/2020|2020-05-27|EPI\_ISL\_495425|Original|hCoV-19^^Kars Province|Human|Kafkas University|Kafkas University|Karamese|Turkey

>Spike|hCoV-19/Spain/VC-IBV-98003492/2020|2020-04-08|EPI\_ISL\_539283|Original|hCoV-19^^Comunitat Valenciana|Human|Hospital Universitario de La Ribera (Alzira)|SeqCOVID-SPAIN consortium|IBV (CSIC)|Comas|Spain

>Spike|hCoV-19/USA/CO-CDPHE-2011210229/2020|2020-11-19|EPI\_ISL\_771264|Original|hCoV-19^^Colorado|Human|Colorado Department of Public Health and Environment|Colorado Department of Public Health and Environment|Bankers|USA

>Spike|hCoV-19/Sweden/20-53445/2020|2020-11-16|EPI\_ISL\_710607|Original|hCoV-19^^Skane|Human|Halsomedicinskt Center|The Public Health Agency of Sweden|Svartstr\u00f6m|Sweden

>Spike|hCoV-19/Australia/VIC8947/2020|2020-07-28|EPI\_ISL\_565301|Original|hCoV-19^^Victoria|Human|Microbiological Diagnostic Unit - Public Health Laboratory (MDU-PHL)|MDU-PHL|Schultz|Australia

>Spike|hCoV-19/USA/WA-UW-22009/2020|2020-08-06|EPI\_ISL\_570857|Original|hCoV-19^^Washington|Human|UW Virology Lab|UW Virology Lab|Roychoudhury|USA

>Spike|hCoV-19/Wales/PHWC-47F493/2020|2020-10-11|EPI\_ISL\_612681|Original|hCoV-19^^Wales|Human|Wales Specialist Virology Centre Sequencing lab|COVID-19 Genomics UK (COG-UK) Consortium|Moore|United Kingdom

>Spike|hCoV-19/Panama/331837/2020|2020-03-19|EPI\_ISL\_496695|Original|hCoV-19^^Panama West|Human|Gorgas Memorial Laboratory of Health Studies|Gorgas Memorial Laboratory of Health Studies|Martinez|Panama

>Spike|hCoV-19/England/QEUA-1F453/2020|2020-10-01|EPI\_ISL\_587552|Original|hCoV-19^^England|Human|Lighthouse Lab in Glasgow|Wellcome Sanger Institute for the COVID-19 Genomics UK (COG-UK) consortium|Davies|United Kingdom

>Spike|hCoV-19/England/205161237/2020|2020-12-16|EPI\_ISL\_766431|Original|hCoV-19^^England|Human|Respiratory Virus Unit|COVID-19 Genomics UK (COG-UK) Consortium|Platt|United Kingdom

>Spike|hCoV-19/Denmark/DCGC-17240/2020|2020-12-14|EPI\_ISL\_750342|Original|hCoV-19^^Midtjylland|Human|Department of Virus and Microbiological Special Diagnostics|Albertsen Lab|Michaelsen|Denmark

>Spike|hCoV-19/Iceland/448/2020|2020-03-20|EPI\_ISL\_424472|Original|hCoV-19^^Reykjavik|Human|The National University Hospital of Iceland|deCODE genetics|J\u00f3nsson|Iceland

>Spike|hCoV-19/Switzerland/GE-SNRCI-8083/2020|2020-03-00|EPI\_ISL\_548214|Original|hCoV-19^^Geneve|Human|Laboratoire de Virologie|Swiss National Reference Centre for Influenza|Gon\u00e7alves Cabecinhas|Switzerland

>Spike|hCoV-19/USA/NY-NYUMC350/2020|2020-04-08|EPI\_ISL\_430377|Original|hCoV-19^^New York|Human|NYU Langone Health|Departments of Pathology and Medicine|Maurano|USA

>Spike|hCoV-19/Wales/PHWC-31B6F/2020|2020-04-11|EPI\_ISL\_474326|Original|hCoV-19^^Wales|Human|Originating lab|COVID-19 Genomics UK (COG-UK) Consortium|Moore|United Kingdom

>Spike|hCoV-19/USA/WI-GMF-M00021/2020|2020-06-19|EPI\_ISL\_547672|Original|hCoV-19^^Wisconsin|Human|Gundersen Clinical Microbiology Laboratory|Kabara Cancer Research Institute|Kenny|USA

>Spike|hCoV-19/England/EXET-13761C/2020|2020-05-06|EPI\_ISL\_471981|Original|hCoV-19^^England|Human|University of Exeter|COVID-19 Genomics UK (COG-UK) Consortium|Temperton|United Kingdom

>Spike|hCoV-19/England/OXON-B1851/2020|2020-04-17|EPI\_ISL\_479049|Original|hCoV-19^^England|Human|Oxford Viromics|COVID-19 Genomics UK (COG-UK) Consortium|Golubchik|United Kingdom

>Spike|hCoV-19/England/MILK-B3D2BE/2020|2020-11-01|EPI\_ISL\_645374|Original|hCoV-19^^England|Human|Lighthouse Lab in Milton Keynes|Wellcome Sanger Institute for the COVID-19 Genomics UK (COG-UK) Consortium|Davies|United Kingdom

>Spike|hCoV-19/Scotland/QEUA-AD4B28/2020|2020-10-27|EPI\_ISL\_644028|Original|hCoV-19^^Scotland|Human|Lighthouse Lab in Glasgow|Wellcome Sanger Institute for the COVID-19 Genomics UK (COG-UK) Consortium|Davies|United Kingdom

>Spike|hCoV-19/England/CAMC-9414FF/2020|2020-07-22|EPI\_ISL\_556830|Original|hCoV-19^^England|Human|Lighthouse Lab in Cambridge|Wellcome Sanger Institute for the COVID-19 Genomics UK (COG-UK) consortium|Davies|United Kingdom

>Spike|hCoV-19/Thailand/Bangkok-CONI-0211/2020|2020-03-18|EPI\_ISL\_512861|Original|hCoV-19^^Bangkok|Human|Ramathibodi Hospital|COVID-19 Network Investigations (CONI) Alliance|Batty|Thailand

>Spike|hCoV-19/USA/WA-QDX-564/2020|2020-03-18|EPI\_ISL\_571404|Original|hCoV-19^^Washington|Human|Quest Diagnostics|Quest Diagnostics|Kagan|USA

>Spike|hCoV-19/USA/CA-ALSR-2359/2020|2020-07-09|EPI\_ISL\_635441|Original|hCoV-19^^California|Human|San Diego County Public Health Laboratory|Andersen lab at Scripps Research|Gangavarapu|USA

>Spike|hCoV-19/South Africa/KRISP-0149/2020|2020-05-30|EPI\_ISL\_467499|Original|hCoV-19^^KwaZulu-Natal|Human|Molecular Diagnostics Services (MDS)|KRISP|de Oliveira|South Africa

>Spike|hCoV-19/Romania/USAFSAM-S564/2020|2020-11-28|EPI\_ISL\_738341|Original|hCoV-19^^Romania|Human|Landstuhl Regional Medical Center|United States Air Force School of Aerospace Medicine|Fries|Romania

>Spike|hCoV-19/England/QEUEH-CDE3D9/2020|2020-12-26|EPI\_ISL\_782481|Original|hCoV-19^^England|Human|Lighthouse Lab in Glasgow|Wellcome Sanger Institute for the COVID-19 Genomics UK (COG-UK) Consortium|Davies|United Kingdom

>Spike|hCoV-19/USA/SC-DHEC-0935/2020|2020-06-26|EPI\_ISL\_541674|Original|hCoV-19^^South Carolina|Human|Microbiology Division|Microbiology Division|Flores|USA

>Spike|hCoV-19/USA/MI-UM-10036799087/2020|2020-11-05|EPI\_ISL\_707843|Original|hCoV-19^^Michigan|Human|University of Michigan Clinical Microbiology Laboratory|Lauring Lab|Valesano|USA

>Spike|hCoV-19/Argentina/C3013/2020|2020-03-22|EPI\_ISL\_420598|Original|hCoV-19^^Argentina|Human|Servicio Virosis Respiratorias-Departamento Virolog\u00eda-INEI|Instituto Nacional Enfermedades Infecciosas C.G.Malbran|Baumeister|Argentina

>Spike|hCoV-19/England/PORT-2D1464/2020|2020-00-00|EPI\_ISL\_512390|Original|hCoV-19^^England|Human|Centre for Enzyme Innovation|COVID-19 Genomics UK (COG-UK) Consortium|Robson|United Kingdom

>Spike|hCoV-19/USA/NY-QDX-1965/2020|2020-03-16|EPI\_ISL\_604273|Original|hCoV-19^^New York|Human|Quest Diagnostics|Quest Diagnostics|Kagan|USA

>Spike|hCoV-19/England/MILK-ACE4F9/2020|2020-10-21|EPI\_ISL\_629366|Original|hCoV-19^^England|Human|Lighthouse Lab in Milton Keynes|Wellcome Sanger Institute for the COVID-19 Genomics UK (COG-UK) consortium|Davies|United Kingdom

>Spike|hCoV-19/Scotland/EDB2456/2020|2020-04-22|EPI\_ISL\_439212|Original|hCoV-19^^Scotland|Human|Virology Department|COVID-19 Genomics UK (COG-UK) Consortium|Williams|United Kingdom

>Spike|hCoV-19/USA/UT-UPHL-2012659055/2020|2020-08-17|EPI\_ISL\_745500|Original|hCoV-19^^Utah|Human|Ginkgo Bioworks Clinical Laboratory|Utah Public Health Laboratory|Young|USA

>Spike|hCoV-19/Spain/VC-IBV-98003088/2020|2020-03-14|EPI\_ISL\_538024|Original|hCoV-19^^Comunitat Valenciana|Human|Hospital Universitari i Polit\u00e8cnic La Fe de Val\u00e8ncia|SeqCOVID-SPAIN consortium/IBV(CSIC)|Comas|Spain

>Spike|hCoV-19/Norway/5795/2020|2020-11-10|EPI\_ISL\_775333|Original|hCoV-19^^Vestland|Human|Foerde Hospital|Norwegian Institute of Public Health|Vollan|Norway

>Spike|hCoV-19/Denmark/DCGC-16410/2020|2020-11-16|EPI\_ISL\_714750|Original|hCoV-19^^Hovedstaden|Human|Department of Virus and Microbiological Special Diagnostics|Albertsen Lab|Michaelsen|Denmark

>Spike|hCoV-19/England/QEUEH-B12079/2020|2020-11-02|EPI\_ISL\_642596|Original|hCoV-19^^England|Human|Lighthouse Lab in Glasgow|Wellcome Sanger Institute for the COVID-19 Genomics UK (COG-UK) Consortium|Davies|United Kingdom

>Spike|hCoV-19/England/BRIS-12A3F7/2020|2020-04-30|EPI\_ISL\_469914|Original|hCoV-19^^England|Human|PHE South West Regional Laboratory|Wellcome Sanger Institute for the COVID-19 Genomics UK (COG-UK) consortium|Davies|United Kingdom

>Spike|hCoV-19/USA/CA-CZB-13038/2020|2020-05-14|EPI\_ISL\_672318|Original|hCoV-19^^California|Human|Alameda County Public Health Lab|Chan-Zuckerberg Biohub|Bhatt|USA

>Spike|hCoV-19/England/NOTT-1118A9/2020|2020-05-22|EPI\_ISL\_461936|Original|hCoV-19^^England|Human|Queens Medical Centre|COVID-19 Genomics UK (COG-UK) Consortium|Loose|United Kingdom

>Spike|hCoV-19/Moldova/ICGEB\_MD7/2020|2020-06-17|EPI\_ISL\_516936|Original|hCoV-19^^Straseni|Human|Nicolae Testemitanu State University of Medicine and Pharmacy|International Centre for Genetic Engineering and Biotechnology (ICGEB) and ARGO Open Lab Platform for Genome Sequencing|Ulinici|Moldova

>Spike|hCoV-19/England/20144000904/2020|2020-03-30|EPI\_ISL\_423475|Original|hCoV-19^^England|Human|Respiratory Virus Unit|Respiratory Virus Unit|Platt|United Kingdom

>Spike|hCoV-19/England/ALDP-C3DCCE/2020|2020-12-10|EPI\_ISL\_731587|Original|hCoV-19^^England|Human|Lighthouse Lab in Alderley Park|Wellcome Sanger Institute for the COVID-19 Genomics UK (COG-UK) Consortium|Davies|United Kingdom

>Spike|hCoV-19/England/210100410/2021|2021-01-00|EPI\_ISL\_791278|Original|hCoV-19^^England|Human|Respiratory Virus Unit|COVID-19 Genomics UK (COG-UK) Consortium|Platt|United Kingdom

>Spike|hCoV-19/England/ALDP-A2E0B7/2020|2020-10-06|EPI\_ISL\_586847|Original|hCoV-19^^England|Human|Lighthouse Lab in Alderley Park|Wellcome Sanger Institute for the COVID-19 Genomics UK (COG-UK) consortium|Davies|United Kingdom

>Spike|hCoV-19/England/ALDP-A66E9B/2020|2020-10-12|EPI\_ISL\_630502|Original|hCoV-19^^England|Human|Lighthouse Lab in Alderley Park|Wellcome Sanger Institute for the COVID-19 Genomics UK (COG-UK) consortium|Davies|United Kingdom

>Spike|hCoV-19/USA/TX-HMH-MCoV-12568/2020|2020-08-31|EPI\_ISL\_790397|Original|hCoV-19^^Texas|Human|Houston Methodist Hospital|Houston Methodist Hospital|Long|USA

>Spike|hCoV-19/Gibraltar/204462903/2020|2020-10-29|EPI\_ISL\_632801|Original|hCoV-19^^Gibraltar|Human|Microbiology|Respiratory Virus Unit|Platt|Gibraltar

>Spike|hCoV-19/Switzerland/ZH-ETHZ-310365/2020|2020-10-07|EPI\_ISL\_603439|Original|hCoV-19^^Zurich|Human|Viollier AG|Department of Biosystems Science and Engineering|Nadeau|Switzerland

>Spike|hCoV-19/England/NORT-2861EF/2020|2020-08-28|EPI\_ISL\_573318|Original|hCoV-19^^England|Human|Northumbria University / South Tees Hospitals NHS Foundation Trust / North Cumbria Integrated Care NHS Foundation Trust / North Tees and Hartlepool NHS Foundation Trust / Newcastle Hospitals NHS Foundation Trust|COVID-19 Genomics UK (COG-UK) Consortium|Bashton|United Kingdom

>Spike|hCoV-19/Turkey/KU-020/2020|2020-05-05|EPI\_ISL\_495430|Original|hCoV-19^^Kars Province|Human|Kafkas University|Kafkas University|Karamese|Turkey

>Spike|hCoV-19/England/QEUA-BCB886/2020|2020-11-27|EPI\_ISL\_704117|Original|hCoV-19^^England|Human|Lighthouse Lab in Glasgow|Wellcome Sanger Institute for the COVID-19 Genomics UK (COG-UK) Consortium|Davies|United Kingdom

>Spike|hCoV-19/USA/NM-DOH-2020308468/2020|2020-08-24|EPI\_ISL\_602180|Original|hCoV-19^^New Mexico|Human|New Mexico Department of Health Scientific Laboratory|New Mexico Department of Health Scientific Laboratory|Johnson|USA

>Spike|hCoV-19/Denmark/DCGC-1064/2020|2020-06-01|EPI\_ISL\_614489|Original|hCoV-19^^Hovedstaden|Human|Department of Virus and Microbiological Special Diagnostics|Albertsen lab|Michaelsen|Denmark

>Spike|hCoV-19/Germany/un-ChVir-W1288-8106/2020|2020-04-20|EPI\_ISL\_753702|Original|hCoV-19^^Germany|Human|Charit\u00e9 Universit\u00e4tsmedizin Berlin|Charit\u00e9 Universit\u00e4tsmedizin Berlin|Muehleemann|Germany

>Spike|hCoV-19/Switzerland/BS-UHB-42203703/2020|2020-03-23|EPI\_ISL\_528366|Original|hCoV-19^^Basel-Stadt|Human|University Hospital Basel|University Hospital Basel|Roloff Handschin|Switzerland

>Spike|hCoV-19/England/QEUA-A4B087/2020|2020-10-05|EPI\_ISL\_637811|Original|hCoV-19^^England|Human|Department of Pathology|COVID-19 Genomics UK (COG-UK) Consortium|Goodfellow|United Kingdom

>Spike|hCoV-19/USA/UT-QDX-82/2020|2020-03-11|EPI\_ISL\_467925|Original|hCoV-19^^Utah|Human|Quest Diagnostics|Quest Diagnostics|Kagan|USA

>Spike|hCoV-19/England/CAMC-B20AF2/2020|2020-11-02|EPI\_ISL\_647735|Original|hCoV-19^^England|Human|Lighthouse Lab in Cambridge|Wellcome Sanger Institute for the COVID-19 Genomics UK (COG-UK) Consortium|Davies|United Kingdom

>Spike|hCoV-19/USA/WI-UW-1011/2020|2020-07-17|EPI\_ISL\_516437|Original|hCoV-19^^Wisconsin|Human|University of Wisconsin-Madison AIDS Vaccine Research Laboratories|University of Wisconsin-Madison AIDS Vaccine Research Laboratories|Baczenas|USA

>Spike|hCoV-19/England/ALDP-A6C721/2020|2020-10-14|EPI\_ISL\_607270|Original|hCoV-19^^England|Human|Lighthouse Lab in Alderley Park|Wellcome Sanger Institute for the COVID-19 Genomics UK (COG-UK) consortium|Davies|United Kingdom

>Spike|hCoV-19/Denmark/ALAB-HH-128/2020|2020-03-11|EPI\_ISL\_452009|Original|hCoV-19^^Denmark|Human|Department of Clinical Microbiology|Albertsen lab|Kirkegaard|Denmark

>Spike|hCoV-19/Denmark/DCGC-20805/2020|2020-12-21|EPI\_ISL\_759374|Original|hCoV-19^^Syddanmark|Human|Department of Virus and Microbiological Special Diagnostics|Albertsen Lab|Michaelsen|Denmark

>Spike|hCoV-19/England/20110000906/2020|2020-03-06|EPI\_ISL\_417304|Original|hCoV-19^^England|Human|Respiratory Virus Unit|Respiratory Virus Unit|Platt|United Kingdom

>Spike|hCoV-19/Wales/PHWC-488F78/2020|2020-11-03|EPI\_ISL\_639521|Original|hCoV-19^^Wales|Human|Wales Specialist Virology Centre Sequencing lab|COVID-19 Genomics UK (COG-UK) Consortium|Moore|United Kingdom

>Spike|hCoV-19/cat/Belgium/BE-MG-0320/2020|2020-03-11|EPI\_ISL\_487275|Original|hCoV-19^^Belgium|Felis catus|Department of Veterinary Pathology|Department of Veterinary Pathology|Submitter|Belgium

>Spike|hCoV-19/USA/FL-BPHL-1290/2020|2020-08-28|EPI\_ISL\_541222|Original|hCoV-19^^Florida|Human|Florida Bureau of Public Health Laboratories|Florida Bureau of Public Health Laboratories|Blanton|USA

>Spike|hCoV-19/USA/ME-HETL-J0165/2020|2020-09-15|EPI\_ISL\_755347|Original|hCoV-19^^Maine|Human|Maine Health and Environmental Testing Laboratory|Tewhey Lab|Tewhey|USA

>Spike|hCoV-19/Denmark/DCGC-8406/2020|2020-10-26|EPI\_ISL\_617381|Original|hCoV-19^^Hovedstaden|Human|Department of Virus and Microbiological Special Diagnostics|Albertsen lab|Michaelsen|Denmark

>Spike|hCoV-19/USA/MI-MDHHS-SC20605/2020|2020-04-29|EPI\_ISL\_462687|Original|hCoV-19^^Michigan|Human|Michigan Department of Health and Human Services|Michigan Department of Health and Human Services|Blankenship|USA

>Spike|hCoV-19/Netherlands/UT-EMC-160/2020|2020-11-05|EPI\_ISL\_722728|Original|hCoV-19^^Utrecht|Human|Dutch COVID-19 response team|Erasmus Medical Center|Oude Munnink|Netherlands

>Spike|hCoV-19/England/QEUEH-7D35C4/2020|2020-07-23|EPI\_ISL\_532953|Original|hCoV-19^^England|Human|Lighthouse Lab in Glasgow|Wellcome Sanger Institute for the COVID-19 Genomics UK (COG-UK) consortium|Davies|United Kingdom

>Spike|hCoV-19/USA/WA-UW-6441/2020|2020-04-03|EPI\_ISL\_570115|Original|hCoV-19^^Washington|Human|UW Virology Lab|UW Virology Lab|Roychoudhury|USA

>Spike|hCoV-19/England/NORT-1B799FA/2020|2020-11-26|EPI\_ISL\_741442|Original|hCoV-19^^England|Human|Northumbria University / South Tees Hospitals NHS Foundation Trust / North Cumbria Integrated Care NHS Foundation Trust / North Tees and Hartlepool NHS Foundation Trust / Newcastle Hospitals NHS Foundation Trust|COVID-19 Genomics UK (COG-UK) Consortium|Bashton|United Kingdom

>Spike|hCoV-19/Wales/PHWC-47F0F9/2020|2020-10-10|EPI\_ISL\_612629|Original|hCoV-19^^Wales|Human|Wales Specialist Virology Centre Sequencing lab|COVID-19 Genomics UK (COG-UK) Consortium|Moore|United Kingdom

>Spike|hCoV-19/India/GJ-GBRC229b/2020|2020-06-12|EPI\_ISL\_476868|Original|hCoV-19^^Gujarat|Human|Banas Medical College and Research Institute|Gujarat Biotechnology Research Centre|Joshi|India

>Spike|hCoV-19/England/MILK-BB0787/2020|2020-11-17|EPI\_ISL\_720524|Original|hCoV-19^^England|Human|Lighthouse Lab in Milton Keynes|Wellcome Sanger Institute for the COVID-19 Genomics UK (COG-UK) Consortium|Davies|United Kingdom

>Spike|hCoV-19/Japan/PG-2311/2020|2020-05-00|EPI\_ISL\_685916|Original|hCoV-19^^Japan|Human|Pathogen Genomics Center|Pathogen Genomics Center|Sekizuka|Japan

>Spike|hCoV-19/Denmark/DCGC-5174/2020|2020-09-21|EPI\_ISL\_621712|Original|hCoV-19^^Syddanmark|Human|Department of Virus and Microbiological Special Diagnostics|Albertsen lab|Michaelsen|Denmark

>Spike|hCoV-19/Netherlands/GE-RIVM-21064/2020|2020-12-22|EPI\_ISL\_791076|Original|hCoV-19^^Gelderland|Human|Dutch COVID-19 response team|National Institute for Public Health and the Environment (RIVM)|Meijer|Netherlands

>Spike|hCoV-19/Canada/ON-PHL-20-01164/2020|2020-06-00|EPI\_ISL\_548786|Original|hCoV-19^^Ontario|Human|Public Health Ontario Laboratory|Public Health Ontario Laboratory|Guthrie|Canada

>Spike|hCoV-19/England/CAMB-7DCCE/2020|2020-04-07|EPI\_ISL\_441592|Original|hCoV-19^^England|Human|Department of Pathology|Wellcome Sanger Institute for the COVID-19 Genomics UK (COG-UK) consortium|Amato|United Kingdom

>Spike|hCoV-19/Scotland/CVR4918/2020|2020-10-04|EPI\_ISL\_594684|Original|hCoV-19^^Scotland|Human|West of Scotland Specialist Virology Centre|COVID-19 Genomics UK (COG-UK) Consortium|Robertson|United Kingdom

>Spike|hCoV-19/England/MILK-99E36F/2020|2020-08-31|EPI\_ISL\_550655|Original|hCoV-19^^England|Human|Lighthouse Lab in Milton Keynes|Wellcome Sanger Institute for the COVID-19 Genomics UK (COG-UK) consortium|Davies|United Kingdom

>Spike|hCoV-19/USA/TX-HMH-7302/2020|2020-06-29|EPI\_ISL\_546659|Original|hCoV-19^^Texas|Human|Houston Methodist Hospital|Houston Methodist Hospital|Long|USA

>Spike|hCoV-19/USA/UT-UPHL-2009367/2020|2020-05-18|EPI\_ISL\_524960|Original|hCoV-19^^Utah|Human|Utah Public Health Laboratory|Utah Public Health Laboratory|Young|USA

>Spike|hCoV-19/France/PAC-IHU-0649/2020|2020-03-06|EPI\_ISL\_568913|Original|hCoV-19^^Provence-Alpes-C\u00f4te-d\u2019Azur|Human|MEPHI|MEPHI|Levasseur|France

>Spike|hCoV-19/England/OXON-B387D/2020|2020-03-17|EPI\_ISL\_534891|Original|hCoV-19^^England|Human|Oxford Viromics|COVID-19 Genomics UK (COG-UK) Consortium|Golubchik|United Kingdom

>Spike|hCoV-19/USA/HI-H200641/2020|2020-11-23|EPI\_ISL\_753165|Original|hCoV-19^^Hawaii|Human|State Laboratories Division|State Laboratories Division|Sultana|USA

>Spike|hCoV-19/USA/WA-UW-47120/2020|2020-12-16|EPI\_ISL\_756228|Original|hCoV-19^^Washington|Human|UW Virology Lab|UW Virology Lab|Roychoudhury|USA

>Spike|hCoV-19/England/QEUH-AD1A2E/2020|2020-10-26|EPI\_ISL\_634591|Original|hCoV-19^^England|Human|Lighthouse Lab in Glasgow|Wellcome Sanger Institute for the COVID-19 Genomics UK (COG-UK) consortium|Davies|United Kingdom

>Spike|hCoV-19/Wales/PHWC-4816B6/2020|2020-10-01|EPI\_ISL\_611849|Original|hCoV-19^^Wales|Human|Wales Specialist Virology Centre Sequencing lab|COVID-19 Genomics UK (COG-UK) Consortium|Moore|United Kingdom

>Spike|hCoV-19/Japan/PG-8950/2020|2020-09-00|EPI\_ISL\_686496|Original|hCoV-19^^Japan|Human|Pathogen Genomics Center|Pathogen Genomics Center|Sekizuka|Japan

>Spike|hCoV-19/Denmark/DCGC-3987/2020|2020-09-14|EPI\_ISL\_615757|Original|hCoV-19^^Hovedstaden|Human|Department of Virus and Microbiological Special Diagnostics|Albertsen lab|Michaelsen|Denmark

>Spike|hCoV-19/USA/NY-Wadsworth-264196-01/2020|2020-11-05|EPI\_ISL\_754521|Original|hCoV-19^^New York|Human|Wadsworth Center|Wadsworth Center|Lasek-Nesselquist|USA

>Spike|hCoV-19/England/MILK-AB8708/2020|2020-10-21|EPI\_ISL\_623521|Original|hCoV-19^^England|Human|Lighthouse Lab in Milton Keynes|Wellcome Sanger Institute for the COVID-19 Genomics UK (COG-UK) consortium|Davies|United Kingdom

>Spike|hCoV-19/England/ALDP-9CAE0F/2020|2020-09-16|EPI\_ISL\_575482|Original|hCoV-19^^England|Human|Lighthouse Lab in Alderley Park|Wellcome Sanger Institute for the COVID-19 Genomics UK (COG-UK) consortium|Davies|United Kingdom

>Spike|hCoV-19/Australia/VIC4527/2020|2020-00-00|EPI\_ISL\_518938|Original|hCoV-19^^Victoria|Human|Microbiological Diagnostic Unit - Public Health Laboratory (MDU-PHL)|MDU-PHL|Schultz|Australia

>Spike|hCoV-19/England/ALDP-A92EE1/2020|2020-10-20|EPI\_ISL\_611243|Original|hCoV-19^^England|Human|Lighthouse Lab in Alderley Park|Wellcome Sanger Institute for the COVID-19 Genomics UK (COG-UK) consortium|Davies|United Kingdom

>Spike|hCoV-19/Chile/RM-ISPCH-70/2020|2020-03-21|EPI\_ISL\_445366|Original|hCoV-19^^Region Metropolitana de Santiago|Human|HOSPITAL DR. SOTERO DEL RIO|Instituto de Salud Publica de Chile|Fernandez|Chile

>Spike|hCoV-19/Canada/ON-PHL-20-01284/2020|2020-06-00|EPI\_ISL\_548889|Original|hCoV-19^^Ontario|Human|Public Health Ontario Laboratory|Public Health Ontario Laboratory|Guthrie|Canada

>Spike|hCoV-19/India/MH-ACTREC-491/2020|2020-08-14|EPI\_ISL\_700139|Original|hCoV-19^^Maharashtra|Human|Hematopathology Laboratory|Hematopathology Laboratory|Patkar|India

>Spike|hCoV-19/Brazil/AP-IEC-164346/2020|2020-04-20|EPI\_ISL\_458145|Original|hCoV-19^^Amapa|Human|\uffeffEvandro Chagas Institute|\uffeffEvandro Chagas Institute|Sousa J\u00fanior|Brazil

>Spike|hCoV-19/Vietnam/HCMC-35009/2020|2020-03-22|EPI\_ISL\_498185|unknown|hCoV-19^^Ho Chi Minh City|Human|OUCRU|OUCRU|Nguyen|Vietnam

>Spike|hCoV-19/Canada/ON-PHL-20-01212/2020|2020-06-00|EPI\_ISL\_548834|Original|hCoV-19^^Ontario|Human|Public Health Ontario Laboratory|Public Health Ontario Laboratory|Guthrie|Canada

>Spike|hCoV-19/Denmark/DCGC-1216/2020|2020-05-18|EPI\_ISL\_614859|Original|hCoV-19^^Hovedstaden|Human|Department of Virus and Microbiological Special Diagnostics|Albertsen lab|Michaelsen|Denmark

>Spike|hCoV-19/Netherlands/Gelderland\_9/2020|2020-03-18|EPI\_ISL\_422645|Original|hCoV-19^^Gelderland|Human|Dutch COVID-19 response team|Erasmus Medical Center|Oude Munnink|Netherlands

>Spike|hCoV-19/England/QEUA-B3A8E/2020|2020-11-18|EPI\_ISL\_672771|Original|hCoV-19^^England|Human|Lighthouse Lab in Glasgow|Wellcome Sanger Institute for the COVID-19 Genomics UK (COG-UK) Consortium|Davies|United Kingdom

>Spike|hCoV-19/USA/MI-QDX-2284/2020|2020-03-15|EPI\_ISL\_604547|Original|hCoV-19^^Michigan|Human|Quest Diagnostics|Quest Diagnostics|Kagan|USA

>Spike|hCoV-19/England/QEUA-AE53C2/2020|2020-10-27|EPI\_ISL\_633168|Original|hCoV-19^^England|Human|Lighthouse Lab in Glasgow|Wellcome Sanger Institute for the COVID-19 Genomics UK (COG-UK) consortium|Davies|United Kingdom

>Spike|hCoV-19/USA/LA-EVTL966/2020|2020-08-17|EPI\_ISL\_653657|Original|hCoV-19^^Louisiana|Human|LSUHS Emerging Viral Threat Laboratory|Microbial Genome Sequencing Center|Kamil|USA

>Spike|hCoV-19/England/NORT-294C92/2020|2020-03-27|EPI\_ISL\_488571|Original|hCoV-19^^England|Human|NU-OMICS DNA Sequencing research facility|Wellcome Sanger Institute for the COVID-19 Genomics UK (COG-UK) consortium|Davies|United Kingdom

>Spike|hCoV-19/Denmark/DCGC-15529/2020|2020-11-23|EPI\_ISL\_713872|Original|hCoV-19^^Nordjylland|Human|Department of Virus and Microbiological Special Diagnostics|Albertsen Lab|Michaelsen|Denmark

>Spike|hCoV-19/USA/TX-HMH-MCoV-10694/2020|2020-07-09|EPI\_ISL\_789127|Original|hCoV-19^^Texas|Human|Houston Methodist Hospital|Houston Methodist Hospital|Long|USA

>Spike|hCoV-19/Russia/Moscow-77627/2020|2020-03-22|EPI\_ISL\_428884|VerohCoV-19^^Moscow|Human|State Research Center of Virology and Biotechnology VECTOR|State Research Center of Virology and Biotechnology VECTOR|Shvalov|Russia

>Spike|hCoV-19/USA/AL-SV106V1/2020|2020-05-05|EPI\_ISL\_509427|Original|hCoV-19^^Alabama|Human|Microbiology and Immunology|Microbiology and Immunology|Rayner|USA

>Spike|hCoV-19/Germany/NW-MPP-23/2020|2020-06-05|EPI\_ISL\_487412|Original|hCoV-19^^North Rhine-Westphalia|Human|Labor Knei\u00dfler GmbH & Co. KG|Heinrich Pette Institute|G\u00f6ttingen|Germany

>Spike|hCoV-19/Denmark/DCGC-11887/2020|2020-10-26|EPI\_ISL\_671197|Original|hCoV-19^^Nordjylland|Human|Department of Virus and Microbiological Special Diagnostics|Albertsen Lab|Michaelsen|Denmark

>Spike|hCoV-19/Denmark/DCGC-2519/2020|2020-08-17|EPI\_ISL\_617755|Original|hCoV-19^^Nordjylland|Human|Department of Virus and Microbiological Special Diagnostics|Albertsen lab|Michaelsen|Denmark

>Spike|hCoV-19/USA/TX-HMH-MCoV-10949/2020|2020-07-09|EPI\_ISL\_789691|Original|hCoV-19^^Texas|Human|Houston Methodist Hospital|Houston Methodist Hospital|Long|USA

>Spike|hCoV-19/England/QEUA-CDEAD4/2020|2020-12-26|EPI\_ISL\_782403|Original|hCoV-19^^England|Human|Lighthouse Lab in Glasgow|Wellcome Sanger Institute for the COVID-19 Genomics UK (COG-UK) Consortium|Davies|United Kingdom

>Spike|hCoV-19/Japan/NGS-CD-235/2020|2020-04-24|EPI\_ISL\_481259|VerohCoV-19^^Nagasaki|Human|Department of Emerging Infectious Diseases|Department of Emerging Infectious Diseases|Abe|Japan

>Spike|hCoV-19/Brazil/SP-824/2020|2020-04-30|EPI\_ISL\_776759|Original|hCoV-19^^S\u00e3o Paulo|Human|Instituto Adolfo Lutz - Central|Instituto Adolfo Lutz|Sacchi|Brazil

>Spike|hCoV-19/England/MILK-B3D9C8/2020|2020-11-01|EPI\_ISL\_741376|Original|hCoV-19^^England|Human|Oxford Viromics|COVID-19 Genomics UK (COG-UK) Consortium|Golubchik|United Kingdom

>Spike|hCoV-19/England/CAMB-79DED/2020|2020-04-02|EPI\_ISL\_441299|Original|hCoV-19^^England|Human|Department of Pathology|Wellcome Sanger Institute for the COVID-19 Genomics UK (COG-UK) consortium|Amato|United Kingdom

>Spike|hCoV-19/USA/NY-NYUMC614/2020|2020-04-01|EPI\_ISL\_444731|Original|hCoV-19^^New York|Human|NYU Langone Health|Departments of Pathology and Medicine|Maurano|USA

>Spike|hCoV-19/Gibraltar/204841706/2020|2020-00-00|EPI\_ISL\_671277|Original|hCoV-19^^Gibraltar|Human|Microbiology|Respiratory Virus Unit|Platt|Gibraltar

>Spike|hCoV-19/USA/MN-MDH-1014/2020|2020-04-30|EPI\_ISL\_462859|Original|hCoV-19^^Minnesota|Human|Minnesota Department of Health|Minnesota Department of Health|Garfin|USA

>Spike|hCoV-19/USA/CA-ALSR-3583/2020|2020-06-25|EPI\_ISL\_636096|Original|hCoV-19^^California|Human|San Diego County Public Health Laboratory|Andersen lab at Scripps Research|Gangavarapu|USA

>Spike|hCoV-19/Scotland/QEUIH-9D048C/2020|2020-09-16|EPI\_ISL\_601856|Original|hCoV-19^^Scotland|Human|Lighthouse Lab in Glasgow|Wellcome Sanger Institute for the COVID-19 Genomics UK (COG-UK) consortium|Davies|United Kingdom

>Spike|hCoV-19/England/MILK-614698/2020|2020-07-06|EPI\_ISL\_557948|Original|hCoV-19^^England|Human|Lighthouse Lab in Milton Keynes|Wellcome Sanger Institute for the COVID-19 Genomics UK (COG-UK) consortium|Davies|United Kingdom

>Spike|hCoV-19/England/CAMB-7F1EB/2020|2020-04-08|EPI\_ISL\_443028|Original|hCoV-19^^England|Human|Department of Pathology|Wellcome Sanger Institute for the COVID-19 Genomics UK (COG-UK) consortium|Amato|United Kingdom

>Spike|hCoV-19/England/CAMC-B09D7E/2020|2020-10-29|EPI\_ISL\_672990|Original|hCoV-19^^England|Human|Lighthouse Lab in Cambridge|Wellcome Sanger Institute for the COVID-19 Genomics UK (COG-UK) Consortium|Davies|United Kingdom

>Spike|hCoV-19/Spain/MD-HLP-110/2020|2020-05-21|EPI\_ISL\_530039|Original|hCoV-19^^Madrid|Human|Hospital Universitario La Paz|Hospital Universitario La Paz|Viedma|Spain

>Spike|hCoV-19/England/ALDP-C58C27/2020|2020-12-14|EPI\_ISL\_736141|Original|hCoV-19^^England|Human|Lighthouse Lab in Alderley Park|Wellcome Sanger Institute for the COVID-19 Genomics UK (COG-UK) Consortium|Davies|United Kingdom

>Spike|hCoV-19/Germany/BW-UT-016/2020|2020-05-20|EPI\_ISL\_508695|Original|hCoV-19^^Baden-W\u00fcrtemberg|Human|Institut f\u00fcr Virologie und Epidemiologie der Viruskrankheiten|NGS Competence Center T\u00fcbingen|Angelov|Germany

>Spike|hCoV-19/England/CAMC-B774A3/2020|2020-11-12|EPI\_ISL\_783402|Original|hCoV-19^^England|Human|Lighthouse Lab in Cambridge|Wellcome Sanger Institute for the COVID-19 Genomics UK (COG-UK) Consortium|Davies|United Kingdom

>Spike|hCoV-19/England/BHRT-24B3A6E/2020|2020-06-02|EPI\_ISL\_528800|Original|hCoV-19^^England|Human|Microbiology Department|Wellcome Sanger Institute for the COVID-19 Genomics UK (COG-UK) consortium|Davies|United Kingdom

>Spike|hCoV-19/England/CAMC-A58EF6/2020|2020-10-09|EPI\_ISL\_596934|Original|hCoV-19^^England|Human|Lighthouse Lab in Cambridge|Wellcome Sanger Institute for the COVID-19 Genomics UK (COG-UK) consortium|Davies|United Kingdom

>Spike|hCoV-19/Japan/PG-3869/2020|2020-06-00|EPI\_ISL\_692120|Original|hCoV-19^^Japan|Human|Tokyo Metropolitan Institute of Public Health|Pathogen Genomics Center|Sekizuka|Japan

>Spike|hCoV-19/England/QEUIH-C32203/2020|2020-12-11|EPI\_ISL\_730659|Original|hCoV-19^^England|Human|Lighthouse Lab in Glasgow|Wellcome Sanger Institute for the COVID-19 Genomics UK (COG-UK) Consortium|Davies|United Kingdom

>Spike|hCoV-19/USA/AZ-TG408199/2020|2020-06-16|EPI\_ISL\_694937|Original|hCoV-19^^Arizona|Human|AZ SPHL|TGen North|French|USA

>Spike|hCoV-19/Spain/AN-IBV-002019/2020|2020-03-16|EPI\_ISL\_509629|Original|hCoV-19^^Andalucia|Human|Servicio de Microbiolog\u00eda. HRU de M\u00e9llaga. Servicio Andaluz de Salud|SeqCOVID-SPAIN consortium|IBV(CSIC)|Comas|Spain

>Spike|hCoV-19/USA/TX-HMH-MCoV-18195/2020|2020-11-12|EPI\_ISL\_784543|Original|hCoV-19^^Texas|Human|Houston Methodist Hospital|Houston Methodist Hospital|Long|USA

>Spike|hCoV-19/Japan/PG-6587/2020|2020-07-00|EPI\_ISL\_687699|Original|hCoV-19^^Japan|Human|Niigata Prefectural Institute of Public Health and Environmental Sciences|Pathogen Genomics Center|Sekizuka|Japan

>Spike|hCoV-19/England/CAMB-81BAC/2020|2020-04-12|EPI\_ISL\_442591|Original|hCoV-19^^England|Human|Department of Pathology|Wellcome Sanger Institute for the COVID-19 Genomics UK (COG-UK) consortium|Amato|United Kingdom

>Spike|hCoV-19/England/ALDP-C39F32/2020|2020-12-08|EPI\_ISL\_731000|Original|hCoV-19^^England|Human|Lighthouse Lab in Alderley Park|Wellcome Sanger Institute for the COVID-19 Genomics UK (COG-UK) Consortium|Davies|United Kingdom



>Spike|hCoV-19/Japan/PG-0819/2020|2020-03-00|EPI\_ISL\_684429|Original|hCoV-19^^Japan|Human|Fukuoka Institute of Health and Environmental Sciences|Pathogen Genomics Center|Sekizuka|Japan

>Spike|hCoV-19/England/MILK-482293/2020|2020-04-29|EPI\_ISL\_559663|Original|hCoV-19^^England|Human|Lighthouse Lab in Milton Keynes|Wellcome Sanger Institute for the COVID-19 Genomics UK (COG-UK) consortium|Davies|United Kingdom

>Spike|hCoV-19/Denmark/DCGC-21481/2020|2020-12-21|EPI\_ISL\_757739|Original|hCoV-19^^Midtjylland|Human|Department of Virus and Microbiological Special Diagnostics|Albertsen Lab|Michaelsen|Denmark

>Spike|hCoV-19/England/ALDP-951B51/2020|2020-06-10|EPI\_ISL\_551344|Original|hCoV-19^^England|Human|Lighthouse Lab in Alderley Park|Wellcome Sanger Institute for the COVID-19 Genomics UK (COG-UK) consortium|Davies|United Kingdom

>Spike|hCoV-19/Japan/IC-0042/2020|2020-05-00|EPI\_ISL\_591384|Original|hCoV-19^^Japan|Human|Pathogen Genomics Center|Pathogen Genomics Center|Sekizuka|Japan

>Spike|hCoV-19/Denmark/DCGC-16704/2020|2020-11-02|EPI\_ISL\_714926|Original|hCoV-19^^Syddanmark|Human|Department of Virus and Microbiological Special Diagnostics|Albertsen Lab|Michaelsen|Denmark

>Spike|hCoV-19/England/QEUEH-C5BE79/2020|2020-12-14|EPI\_ISL\_769388|Original|hCoV-19^^England|Human|Lighthouse Lab in Glasgow|Wellcome Sanger Institute for the COVID-19 Genomics UK (COG-UK) Consortium|Davies|United Kingdom

>Spike|hCoV-19/Congo/UKT-009/2020|2020-06-06|EPI\_ISL\_581490|Original|hCoV-19^^Brazzaville|Human|Fondation Congolaise pour la recherche medicale (FCRM)|NGS Competence Center T\u00fcbingen|Angelov|Republic of Congo

>Spike|hCoV-19/USA/MN-MDH-2022/2020|2020-11-02|EPI\_ISL\_654703|Original|hCoV-19^^Minnesota|Human|Minnesota Department of Health|Minnesota Department of Health|Lorentz|USA

>Spike|hCoV-19/England/ALDP-B75DAA/2020|2020-11-12|EPI\_ISL\_723703|Original|hCoV-19^^England|Human|Oxford Viromics|COVID-19 Genomics UK (COG-UK) Consortium|Golubchik|United Kingdom

>Spike|hCoV-19/Australia/VIC149/2020|2020-03-17|EPI\_ISL\_419846|Original|hCoV-19^^Victoria|Human|Victorian Infectious Diseases Reference Laboratory (VIDRL)|Victorian Infectious Diseases Reference Laboratory and Microbiological Diagnostic Unit Public Health Laboratory|Schultz|Australia

>Spike|hCoV-19/USA/TX-HMH-MCoV-9421/2020|2020-07-03|EPI\_ISL\_781110|Original|hCoV-19^^Texas|Human|Houston Methodist Hospital|Houston Methodist Hospital|Long|USA

>Spike|hCoV-19/England/NOTT-11863F/2020|2020-10-28|EPI\_ISL\_627678|Original|hCoV-19^^England|Human|Queens Medical Centre|COVID-19 Genomics UK (COG-UK) Consortium|Loose|United Kingdom

>Spike|hCoV-19/Netherlands/NA\_358/2020|2020-04-07|EPI\_ISL\_455162|Original|hCoV-19^^Netherlands|Human|Dutch COVID-19 response team|Erasmus Medical Center|Oude Munnink|Netherlands

>Spike|hCoV-19/Japan/PG-4147/2020|2020-07-00|EPI\_ISL\_692386|Original|hCoV-19^^Japan|Human|Pathogen Genomics Center|Pathogen Genomics Center|Sekizuka|Japan

>Spike|hCoV-19/England/NORT-2A0FF4/2020|2020-00-00|EPI\_ISL\_652346|Original|hCoV-19^^England|Human|Northumbria University / South Tees Hospitals NHS Foundation Trust / North Cumbria Integrated Care NHS Foundation Trust / North Tees and Hartlepool NHS Foundation Trust / Newcastle Hospitals NHS Foundation Trust|COVID-19 Genomics UK (COG-UK) Consortium|Bashton|United Kingdom

>Spike|hCoV-19/Ireland/LH-NVRL-20ILR11489/2020|2020-11-22|EPI\_ISL\_732513|Original|hCoV-19^^Louth|Human|National Virus Reference Laboratory|National Virus Reference Laboratory|Gonzalez|Ireland

>Spike|hCoV-19/USA/IN-CDC-2-3713959/2020|2020-12-04|EPI\_ISL\_751599|Original|hCoV-19^^Indiana|Human|IN State Department of Health Laboratory Services|Genomics and Discovery|Queen|USA

>Spike|hCoV-19/England/20148026504/2020|2020-04-02|EPI\_ISL\_422008|Original|hCoV-19^^England|Human|Respiratory Virus Unit|Respiratory Virus Unit|Platt|United Kingdom

>Spike|hCoV-19/Denmark/DCGC-15774/2020|2020-11-23|EPI\_ISL\_713435|Original|hCoV-19^^Midtjylland|Human|Department of Virus and Microbiological Special Diagnostics|Albertsen Lab|Michaelsen|Denmark

>Spike|hCoV-19/England/ALDP-9D7D5D/2020|2020-09-18|EPI\_ISL\_576627|Original|hCoV-19^^England|Human|Oxford Viromics|COVID-19 Genomics UK (COG-UK) Consortium|Golubchik|United Kingdom

>Spike|hCoV-19/USA/CA-ALSR-4328/2020|2020-09-21|EPI\_ISL\_648973|Original|hCoV-19^^California|Human|San Diego County Public Health Laboratory|Andersen lab at Scripps Research|Gangavarapu|USA

>Spike|hCoV-19/USA/NY-NYCPHL-000033/2020|2020-03-05|EPI\_ISL\_631529|Original|hCoV-19^^New York|Human|St. Johns Episcopal Hospital|New York City Public Health Laboratory|Wang|USA

>Spike|hCoV-19/England/QEUA-A1DCF3/2020|2020-09-29|EPI\_ISL\_587335|Original|hCoV-19^^England|Human|Lighthouse Lab in Glasgow|Wellcome Sanger Institute for the COVID-19 Genomics UK (COG-UK) consortium|Davies|United Kingdom

>Spike|hCoV-19/England/QEUA-BC4BEE/2020|2020-11-25|EPI\_ISL\_704180|Original|hCoV-19^^England|Human|Lighthouse Lab in Glasgow|Wellcome Sanger Institute for the COVID-19 Genomics UK (COG-UK) Consortium|Davies|United Kingdom

>Spike|hCoV-19/Singapore/1171/2020|2020-04-11|EPI\_ISL\_648099|Original|hCoV-19^^Singapore|Human|Department of Laboratory Medicine|Department of Laboratory Medicine|Chen|Singapore

>Spike|hCoV-19/England/QEUA-AD19D6/2020|2020-10-26|EPI\_ISL\_634664|Original|hCoV-19^^England|Human|Lighthouse Lab in Glasgow|Wellcome Sanger Institute for the COVID-19 Genomics UK (COG-UK) consortium|Davies|United Kingdom

>Spike|hCoV-19/England/20139051304/2020|2020-03-27|EPI\_ISL\_420701|Original|hCoV-19^^England|Human|Respiratory Virus Unit|Respiratory Virus Unit|Platt|United Kingdom

>Spike|hCoV-19/Australia/VIC5996/2020|2020-07-18|EPI\_ISL\_518771|Original|hCoV-19^^Victoria|Human|Microbiological Diagnostic Unit - Public Health Laboratory (MDU-PHL)|MDU-PHL|Schultz|Australia

>Spike|hCoV-19/Netherlands/ZH-RIVM-20688/2020|2020-12-23|EPI\_ISL\_790756|Original|hCoV-19^^Zuid-holland|Human|Dutch COVID-19 response team|National Institute for Public Health and the Environment (RIVM)|Meijer|Netherlands

>Spike|hCoV-19/USA/CA-CHLA-PLM56822120/2020|2020-11-30|EPI\_ISL\_753526|Original|hCoV-19^^California|Human|Clinical virology Laboratory|Center for Personalized Medicine|Dien Bard|USA

>Spike|hCoV-19/England/CAMC-9D6F0D/2020|2020-09-20|EPI\_ISL\_584336|Original|hCoV-19^^England|Human|Virology Department|COVID-19 Genomics UK (COG-UK) Consortium|de Silva|United Kingdom

>Spike|hCoV-19/Ireland/D-NVRL-20G35404/2020|2020-03-20|EPI\_ISL\_605105|Original|hCoV-19^^Dublin|Human|National Virus Reference Laboratory|Irish Coronavirus Sequencing Consortium - Helixworks|Chalapati|Ireland

>Spike|hCoV-19/USA/WI-UW-2224/2020|2020-10-15|EPI\_ISL\_677627|Original|hCoV-19^^Wisconsin|Human|University of Wisconsin-Madison AIDS Vaccine Research Laboratories|University of Wisconsin-Madison AIDS Vaccine Research Laboratories|Baczenas|USA

>Spike|hCoV-19/Australia/VIC12080/2020|2020-07-23|EPI\_ISL\_641154|Original|hCoV-19^^Victoria|Human|Microbiological Diagnostic Unit - Public Health Laboratory (MDU-PHL)|MDU-PHL|Schultz|Australia

>Spike|hCoV-19/England/MILK-C515D8/2020|2020-12-11|EPI\_ISL\_769763|Original|hCoV-19^^England|Human|Lighthouse Lab in Milton Keynes|Wellcome Sanger Institute for the COVID-19 Genomics UK (COG-UK) Consortium|Davies|United Kingdom

>Spike|hCoV-19/England/MILK-A6BF1B/2020|2020-10-09|EPI\_ISL\_609136|Original|hCoV-19^^England|Human|Lighthouse Lab in Milton Keynes|Wellcome Sanger Institute for the COVID-19 Genomics UK (COG-UK) consortium|Davies|United Kingdom

>Spike|hCoV-19/Belgium/reg-09201062/2020|2020-09-20|EPI\_ISL\_735004|Original|hCoV-19^^Kessel-Lo|Human|UZ Leuven|KU Leuven|Maes|Belgium

>Spike|hCoV-19/USA/TX-HMH-MCoV-10814/2020|2020-07-05|EPI\_ISL\_789639|Original|hCoV-19^^Texas|Human|Houston Methodist Hospital|Houston Methodist Hospital|Long|USA

>Spike|hCoV-19/Singapore/1331/2020|2020-06-01|EPI\_ISL\_648820|Original|hCoV-19^^Singapore|Human|Department of Laboratory Medicine|Department of Laboratory Medicine|Chen|Singapore

>Spike|hCoV-19/Wales/PHWC-2E34F/2020|2020-04-16|EPI\_ISL\_446090|Original|hCoV-19^^Wales|Human|Wales Specialist Virology Centre|Public Health Wales Microbiology Cardiff|Moore|United Kingdom

>Spike|hCoV-19/USA/TX-HMH-751/2020|2020-04-03|EPI\_ISL\_546810|Original|hCoV-19^^Texas|Human|Houston Methodist Hospital|Houston Methodist Hospital|Long|USA

>Spike|hCoV-19/Scotland/CVR1256/2020|2020-03-31|EPI\_ISL\_438781|Original|hCoV-19^^Scotland|Human|West of Scotland Specialist Virology Centre|COVID-19 Genomics UK (COG-UK) Consortium|Robertson|United Kingdom

>Spike|hCoV-19/Wales/QEUEH-B6792F/2020|2020-11-09|EPI\_ISL\_710864|Original|hCoV-19^^Wales|Human|Lighthouse Lab in Glasgow|Wellcome Sanger Institute for the COVID-19 Genomics UK (COG-UK) Consortium|Davies|United Kingdom

>Spike|hCoV-19/Japan/PG-2463/2020|2020-04-00|EPI\_ISL\_686068|Original|hCoV-19^^Japan|Human|Pathogen Genomics Center|Pathogen Genomics Center|Sekizuka|Japan

>Spike|hCoV-19/USA/NY-QDX-1177/2020|2020-03-13|EPI\_ISL\_571987|Original|hCoV-19^^New York|Human|Quest Diagnostics|Quest Diagnostics|Kagan|USA

>Spike|hCoV-19/England/ALDP-AA1E1C/2020|2020-10-22|EPI\_ISL\_625022|Original|hCoV-19^^England|Human|Lighthouse Lab in Alderley Park|Wellcome Sanger Institute for the COVID-19 Genomics UK (COG-UK) consortium|Davies|United Kingdom

>Spike|hCoV-19/Australia/VIC3531/2020|2020-07-07|EPI\_ISL\_520280|Original|hCoV-19^^Victoria|Human|Victorian Infectious Diseases Reference Laboratory (VIDRL)|VIDRL and MDU-PHL|Schultz|Australia

>Spike|hCoV-19/Portugal/PT1997/2020|2020-11-17|EPI\_ISL\_732218|Original|hCoV-19^^Portugal|Human|Instituto Nacional de Saude (INSA) and Instituto Gulbenkian de Ciencia (IGC)|Instituto Nacional de Saude (INSA) and Instituto Gulbenkian de Ciencia (IGC)|Borges|Portugal

>Spike|hCoV-19/England/ALDP-9C4CA1/2020|2020-09-11|EPI\_ISL\_567684|Original|hCoV-19^^England|Human|Lighthouse Lab in Alderley Park|Wellcome Sanger Institute for the COVID-19 Genomics UK (COG-UK) consortium|Davies|United Kingdom

>Spike|hCoV-19/India/WB-IK1/2020|2020-03-30|EPI\_ISL\_508338|Original|hCoV-19^^West Bengal|Human|Institute of Post Graduate Medical Education & Research|National Institute of Biomedical Genomics|Maitra|India

>Spike|hCoV-19/USA/UT-08389/2020|2020-05-26|EPI\_ISL\_524171|Original|hCoV-19^^Utah|Human|Utah Public Health Laboratory|Utah Public Health Laboratory|Young|USA

>Spike|hCoV-19/England/NOTT-1136AD/2020|2020-09-10|EPI\_ISL\_549521|Original|hCoV-19^^England|Human|Lincolnshire Hospitals and DeepSeq Nottingham|COVID-19 Genomics UK (COG-UK) Consortium|Loose|United Kingdom

>Spike|hCoV-19/Wales/PHWC-47E203/2020|2020-10-12|EPI\_ISL\_595423|Original|hCoV-19^^Wales|Human|Originating lab|COVID-19 Genomics UK (COG-UK) Consortium|Moore|United Kingdom

>Spike|hCoV-19/England/ALDP-A2D2A3/2020|2020-10-06|EPI\_ISL\_586762|Original|hCoV-19^^England|Human|Lighthouse Lab in Alderley Park|Wellcome Sanger Institute for the COVID-19 Genomics UK (COG-UK) consortium|Davies|United Kingdom

>Spike|hCoV-19/England/QEUEH-9C9565/2020|2020-09-10|EPI\_ISL\_567381|Original|hCoV-19^^England|Human|Lighthouse Lab in Glasgow|Wellcome Sanger Institute for the COVID-19 Genomics UK (COG-UK) consortium|Davies|United Kingdom

>Spike|hCoV-19/Scotland/CVR3993/2020|2020-09-02|EPI\_ISL\_540790|Original|hCoV-19^^Scotland|Human|West of Scotland Specialist Virology Centre|COVID-19 Genomics UK (COG-UK) Consortium|Robertson|United Kingdom

>Spike|hCoV-19/France/PAC-IHU-0675/2020|2020-04-15|EPI\_ISL\_568927|Original|hCoV-19^^Provence-Alpes-C\u00f4te-d\u2019Azur|Human|MEPHI|MEPHI|Levasseur|France

>Spike|hCoV-19/Denmark/DCGC-3705/2020|2020-08-31|EPI\_ISL\_615483|Original|hCoV-19^^Syddanmark|Human|Department of Virus and Microbiological Special Diagnostics|Albertsen lab|Michaelsen|Denmark

>Spike|hCoV-19/Australia/VIC8239/2020|2020-08-06|EPI\_ISL\_564914|Original|hCoV-19^^Victoria|Human|Microbiological Diagnostic Unit - Public Health Laboratory (MDU-PHL)|MDU-PHL|Schultz|Australia

>Spike|hCoV-19/Australia/NSW111/2020|2020-03-16|EPI\_ISL\_427661|Original|hCoV-19^^New South Wales|Human|Centre for Infectious Diseases and Microbiology Public Health|NSW Health Pathology - Institute of Clinical Pathology and Medical Research; Westmead Hospital; University of Sydney|Gall|Australia

>Spike|hCoV-19/England/BRIS-18543BE/2020|2020-04-29|EPI\_ISL\_492322|Original|hCoV-19^^England|Human|PHE South West Regional Laboratory|Wellcome Sanger Institute for the COVID-19 Genomics UK (COG-UK) consortium|Davies|United Kingdom

>Spike|hCoV-19/Spain/EX-IBV-005015/2020|2020-03-13|EPI\_ISL\_510324|Original|hCoV-19^^Extremadura|Human|Hospital San Pedro de Alc\u00e9ntara (C\u00e9lceres)|SeqCOVID-SPAIN consortium/IBV (CSIC)|Comas|Spain

>Spike|hCoV-19/Canada/QC-LSPQ-L00210314/2020|2020-03-01|EPI\_ISL\_535716|Original|hCoV-19^^Quebec|Human|H\u00f4pital de Verdun|Laboratoire de sant\u00e9 publique du Qu\u00e9bec|Moreira|Canada

>Spike|hCoV-19/Belgium/ULG-10262/2020|2020-07-20|EPI\_ISL\_515069|Original|hCoV-19^^Liege|Human|Department of Clinical Microbiology|GIGA Medical Genomics|Durkin|Belgium

>Spike|hCoV-19/England/ALDP-9CAAED/2020|2020-09-16|EPI\_ISL\_575756|Original|hCoV-19^^England|Human|Lighthouse Lab in Alderley Park|Wellcome Sanger Institute for the COVID-19 Genomics UK (COG-UK) consortium|Davies|United Kingdom

>Spike|hCoV-19/Finland/9LS12AG7/2020|2020-10-09|EPI\_ISL\_755946|Original|hCoV-19^^Uusimaa|Human|Department of Virology and Immunology|Department of Virology|Smura|Finland

>Spike|hCoV-19/India/GJ-GBRC268b/2020|2020-06-13|EPI\_ISL\_483865|Original|hCoV-19^^Gujarat|Human|Department of Microbiology|Gujarat Biotechnology Research Centre|Joshi|India

>Spike|hCoV-19/Australia/VIC8477/2020|2020-07-28|EPI\_ISL\_565042|Original|hCoV-19^^Victoria|Human|Microbiological Diagnostic Unit - Public Health Laboratory (MDU-PHL)|MDU-PHL|Schultz|Australia

>Spike|hCoV-19/Japan/PG-2007/2020|2020-04-00|EPI\_ISL\_685612|Original|hCoV-19^^Japan|Human|Tokyo Metropolitan Institute of Public Health|Pathogen Genomics Center|Sekizuka|Japan

>Spike|hCoV-19/Canada/ON-PHL-20-03632/2020|2020-11-00|EPI\_ISL\_775136|Original|hCoV-19^^Ontario|Human|Public Health Ontario Laboratory|Public Health Ontario Laboratory|Guthrie|Canada

>Spike|hCoV-19/England/LOND-D4C10/2020|2020-04-14|EPI\_ISL\_449664|Original|hCoV-19^^England|Human|University College London|COVID-19 Genomics UK (COG-UK) Consortium|Roy|United Kingdom

>Spike|hCoV-19/Belgium/regal-10191266/2020|2020-10-19|EPI\_ISL\_735176|Original|hCoV-19^^Winksele|Human|UZ Leuven|KU Leuven|Maes|Belgium

>Spike|hCoV-19/Brazil/SP-883/2020|2020-12-06|EPI\_ISL\_755649|Original|hCoV-19^^S\u00e3o Paulo|Human|Instituto Adolfo Lutz - Regional de Santo Andre|Instituto Adolfo Lutz|Sacchi|Brazil

>Spike|hCoV-19/England/20139024604/2020|2020-03-27|EPI\_ISL\_421893|Original|hCoV-19^^England|Human|Respiratory Virus Unit|Respiratory Virus Unit|Platt|United Kingdom

>Spike|hCoV-19/England/PORT-2D48B0/2020|2020-10-13|EPI\_ISL\_611772|Original|hCoV-19^^England|Human|Centre for Enzyme Innovation|COVID-19 Genomics UK (COG-UK) Consortium|Robson|United Kingdom

>Spike|hCoV-19/Wales/PHWC-3654E/2020|2020-05-01|EPI\_ISL\_474680|Original|hCoV-19^^Wales|Human|Originating lab|COVID-19 Genomics UK (COG-UK) Consortium|Moore|United Kingdom

>Spike|hCoV-19/Spain/MD-H12-3203/2020|2020-03-11|EPI\_ISL\_428702|Original|hCoV-19^^Madrid|Human|Hospital Universitario 12 de Octubre|Hospital Universitario 12 de Octubre|Viedma|Spain

>Spike|hCoV-19/England/MILK-9A7F8D/2020|2020-09-02|EPI\_ISL\_572617|Original|hCoV-19^^England|Human|Virology Department|COVID-19 Genomics UK (COG-UK) Consortium|Williams|United Kingdom

>Spike|hCoV-19/USA/UT-UPHL-2009725/2020|2020-07-25|EPI\_ISL\_605397|Original|hCoV-19^^Utah|Human|Utah Public Health Laboratory|Utah Public Health Laboratory|Young|USA

>Spike|hCoV-19/France/PAC-IHU-0530/2020|2020-04-07|EPI\_ISL\_569574|Original|hCoV-19^^Provence-Alpes-C\u00f4te-d\u00e0z|Human|MEPHI|MEPHI|Levasseur|France

>Spike|hCoV-19/Australia/NSW1390/2020|2020-12-29|EPI\_ISL\_779400|Original|hCoV-19^^New South Wales|Human|South Eastern Area Laboratory Services (SEALS)|NSW Health Pathology - Institute of Clinical Pathology and Medical Research; Westmead Hospital; University of Sydney|Gall|Australia

>Spike|hCoV-19/Wales/PHWC-485236/2020|2020-10-25|EPI\_ISL\_626658|Original|hCoV-19^^Wales|Human|Wales Specialist Virology Centre Sequencing lab|COVID-19 Genomics UK (COG-UK) Consortium|Moore|United Kingdom

>Spike|hCoV-19/Denmark/ALAB-HH-121/2020|2020-03-11|EPI\_ISL\_452002|Original|hCoV-19^^Denmark|Human|Department of Clinical Microbiology|Albertsen lab|Kirkegaard|Denmark

>Spike|hCoV-19/South Korea/KCDC2579/2020|2020-06-27|EPI\_ISL\_514982|Original|hCoV-19^^South Korea|Human|Division of Viral Diseases|Division of Viral Diseases|Kim|South Korea

>Spike|hCoV-19/England/CAMC-A41DF3/2020|2020-10-08|EPI\_ISL\_609319|Original|hCoV-19^^England|Human|Lighthouse Lab in Cambridge|Wellcome Sanger Institute for the COVID-19 Genomics UK (COG-UK) consortium|Davies|United Kingdom

>Spike|hCoV-19/Denmark/DCGC-10156/2020|2020-11-09|EPI\_ISL\_669426|Original|hCoV-19^^Nordjylland|Human|Department of Virus and Microbiological Special Diagnostics|Albertsen Lab|Michaelsen|Denmark

>Spike|hCoV-19/Wales/PHWC-480CA6/2020|2020-10-10|EPI\_ISL\_612990|Original|hCoV-19^^Wales|Human|Wales Specialist Virology Centre Sequencing lab|COVID-19 Genomics UK (COG-UK) Consortium|Moore|United Kingdom

>Spike|hCoV-19/USA/TX-HMH-MCoV-15091/2020|2020-10-16|EPI\_ISL\_786575|Original|hCoV-19^^Texas|Human|Houston Methodist Hospital|Houston Methodist Hospital|Long|USA

>Spike|hCoV-19/England/CAMB-1BD669/2020|2020-11-30|EPI\_ISL\_764326|Original|hCoV-19^^England|Human|Department of Pathology|COVID-19 Genomics UK (COG-UK) Consortium|Goodfellow|United Kingdom

>Spike|hCoV-19/England/CAMC-A655E2/2020|2020-10-11|EPI\_ISL\_608540|Original|hCoV-19^^England|Human|Lighthouse Lab in Cambridge|Wellcome Sanger Institute for the COVID-19 Genomics UK (COG-UK) consortium|Davies|United Kingdom

>Spike|hCoV-19/England/ALDP-A6EEC0/2020|2020-10-14|EPI\_ISL\_607126|Original|hCoV-19^^England|Human|Lighthouse Lab in Alderley Park|Wellcome Sanger Institute for the COVID-19 Genomics UK (COG-UK) consortium|Davies|United Kingdom

>Spike|hCoV-19/Belgium/regal-12141389/2020|2020-12-14|EPI\_ISL\_738441|Original|hCoV-19^^Mol|Human|UZ Leuven|KU Leuven|Maes|Belgium

>Spike|hCoV-19/Japan/PG-5964/2020|2020-07-00|EPI\_ISL\_689079|Original|hCoV-19^^Japan|Human|Tokyo Metropolitan Institute of Public Health|Pathogen Genomics Center|Sekizuka|Japan

>Spike|hCoV-19/Denmark/DCGC-9253/2020|2020-11-16|EPI\_ISL\_668875|Original|hCoV-19^^Syddanmark|Human|Department of Virus and Microbiological Special Diagnostics|Albertsen Lab|Michaelsen|Denmark

>Spike|hCoV-19/USA/VA-DCLS-0584/2020|2020-03-17|EPI\_ISL\_526805|Original|hCoV-19^^Virginia|Human|Virginia DCLS|Virginia DCLS|St. Jacques|USA

>Spike|hCoV-19/Hangzhou/HZCDC0162/2020|2020-01-23|EPI\_ISL\_421224|Original|hCoV-19^^Hangzhou|Human|Hangzhou Center for Diseases Control and Prevention|Hangzhou Center for Diseases Control and Prevention|Li|China

>Spike|hCoV-19/England/BRIS-122FDD/2020|2020-04-02|EPI\_ISL\_440647|Original|hCoV-19^^England|Human|PHE South West Regional Laboratory|Wellcome Sanger Institute for the COVID-19 Genomics UK (COG-UK) consortium|Amato|United Kingdom

>Spike|hCoV-19/Wales/PHWC-4984FE/2020|2020-12-01|EPI\_ISL\_727085|Original|hCoV-19^^Wales|Human|Originating lab|COVID-19 Genomics UK (COG-UK) Consortium|Moore|United Kingdom

>Spike|hCoV-19/Germany/HH-hpi-p1859/2020|2020-03-23|EPI\_ISL\_775932|Original|hCoV-19^^Hamburg|Human|University Medical Center Hamburg Eppendorf|Heinrich Pette Institute|Robitaille|Germany

>Spike|hCoV-19/Portugal/PT1661/2020|2020-11-11|EPI\_ISL\_731963|Original|hCoV-19^^Portugal|Human|Instituto Nacional de Saude (INSA)|Instituto Nacional de Saude (INSA)|Borges|Portugal

>Spike|hCoV-19/Finland/23LS9A7/2020|2020-10-23|EPI\_ISL\_759794|Original|hCoV-19^^Uusimaa|Human|Department of Virology and Immunology|Department of Virology|Smura|Finland

>Spike|hCoV-19/USA/WA-UW-10447/2020|2020-06-05|EPI\_ISL\_570310|Original|hCoV-19^^Washington|Human|UW Virology Lab|UW Virology Lab|Roychoudhury|USA

>Spike|hCoV-19/England/CAMC-BBDB33/2020|2020-11-22|EPI\_ISL\_705616|Original|hCoV-19^^England|Human|Virology Department|COVID-19 Genomics UK (COG-UK) Consortium|de Silva|United Kingdom

>Spike|hCoV-19/Belgium/JRH-030459/2020|2020-03-04|EPI\_ISL\_418988|Original|hCoV-19^^Zolder|Human|Institute information KU Leuven|Institute information KU Leuven|Maes|Belgium

>Spike|hCoV-19/England/ALDP-B2451B/2020|2020-11-04|EPI\_ISL\_646963|Original|hCoV-19^^England|Human|Lighthouse Lab in Alderley Park|Wellcome Sanger Institute for the COVID-19 Genomics UK (COG-UK) Consortium|Davies|United Kingdom

>Spike|hCoV-19/USA/VA-DCLS-0229/2020|2020-04-05|EPI\_ISL\_452806|Original|hCoV-19^^Virginia|Human|Virginia DCLS|Virginia DCLS|St. Jacques|USA

>Spike|hCoV-19/Lebanon/LAU-uk4/2020|2020-12-22|EPI\_ISL\_768743|Original|hCoV-19^^Beirut|Human|MoPH (Lebanese ministry of public health)|Microbial Genomics Lab LAU Byblos|Koweyes|Lebanon

>Spike|hCoV-19/Nigeria/LA-CV379/2020|2020-05-30|EPI\_ISL\_730035|Original|hCoV-19^^Lagos State|Human|Nigeria Centre for Disease Control (NCDC)|African Centre of Excellence for Genomics of Infectious Diseases (ACEGID)|Oluniyi|Nigeria

>Spike|hCoV-19/USA/ME-HETL-J0317/2020|2020-11-30|EPI\_ISL\_755447|Original|hCoV-19^^Maine|Human|Maine Health and Environmental Testing Laboratory|Tewhey Lab|Tewhey|USA

>Spike|hCoV-19/England/QEUEH-9AE8B8/2020|2020-09-02|EPI\_ISL\_577251|Original|hCoV-19^^England|Human|University of Exeter|COVID-19 Genomics UK (COG-UK) Consortium|Temperton|United Kingdom

>Spike|hCoV-19/England/MILK-ABC449/2020|2020-10-22|EPI\_ISL\_631203|Original|hCoV-19^^England|Human|Lighthouse Lab in Milton Keynes|Wellcome Sanger Institute for the COVID-19 Genomics UK (COG-UK) consortium|Davies|United Kingdom

>Spike|hCoV-19/Czech Republic/NRL\_4033/2020|2020-03-11|EPI\_ISL\_476067|Original|hCoV-19^^Hranice na Morav\u011b|Human|The National Institute of Public Health|State Veterinary Institute Prague and The National Institute of Public Health|Nagy|Czech Republic

>Spike|hCoV-19/Denmark/DCGC-3252/2020|2020-08-31|EPI\_ISL\_615982|Original|hCoV-19^^Syddanmark|Human|Department of Virus and Microbiological Special Diagnostics|Albertsen lab|Michaelsen|Denmark

>Spike|hCoV-19/England/QEUEH-B142AE/2020|2020-11-02|EPI\_ISL\_641822|Original|hCoV-19^^England|Human|Lighthouse Lab in Glasgow|Wellcome Sanger Institute for the COVID-19 Genomics UK (COG-UK) Consortium|Davies|United Kingdom

>Spike|hCoV-19/England/QEUEH-B10D47/2020|2020-11-02|EPI\_ISL\_642378|Original|hCoV-19^^England|Human|Lighthouse Lab in Glasgow|Wellcome Sanger Institute for the COVID-19 Genomics UK (COG-UK) Consortium|Davies|United Kingdom

>Spike|hCoV-19/France/IDF-9144/2020|2020-09-14|EPI\_ISL\_593910|Original|hCoV-19^^\u00cele-de-France|Human|Hospital|National Reference Center for Viruses of Respiratory Infections|Enouf|France

>Spike|hCoV-19/Australia/VIC13155/2020|2020-07-31|EPI\_ISL\_641175|Original|hCoV-19^^Victoria|Human|Microbiological Diagnostic Unit - Public Health Laboratory (MDU-PHL)|MDU-PHL|Schultz|Australia

>Spike|hCoV-19/Denmark/DCGC-8027/2020|2020-10-26|EPI\_ISL\_617139|Original|hCoV-19^^Hovedstaden|Human|Department of Virus and Microbiological Special Diagnostics|Albertsen lab|Michaelsen|Denmark

>Spike|hCoV-19/Australia/VIC4721/2020|2020-07-14|EPI\_ISL\_519109|Original|hCoV-19^^Victoria|Human|Microbiological Diagnostic Unit - Public Health Laboratory (MDU-PHL)|MDU-PHL|Schultz|Australia

>Spike|hCoV-19/Russia/SVE-RII-MH2034S/2020|2020-09-21|EPI\_ISL\_602385|Original|hCoV-19^^Sverdlovsk|Human|HELIX LLC|WHO National Influenza Centre Russian Federation|Komissarov|Russia

>Spike|hCoV-19/England/CAMC-B53908/2020|2020-11-08|EPI\_ISL\_656720|Original|hCoV-19^^England|Human|Lighthouse Lab in Cambridge|Wellcome Sanger Institute for the COVID-19 Genomics UK (COG-UK) Consortium|Davies|United Kingdom

>Spike|hCoV-19/Australia/VIC3109/2020|2020-07-06|EPI\_ISL\_520816|Original|hCoV-19^^Victoria|Human|Victorian Infectious Diseases Reference Laboratory (VIDRL)|VIDRL and MDU-PHL|Schultz|Australia

>Spike|hCoV-19/Spain/RI-IBV-99005911/2020|2020-03-25|EPI\_ISL\_537449|Original|hCoV-19^^La Rioja|Human|Centro de Investigaci\u00f3n Biom\u00e9dica de La Rioja - Hospital San Pedro Logro\u00f1o|SeqCOVID-SPAIN consortium/IBV (CSIC)|Comas|Spain

>Spike|hCoV-19/England/HECH-259A273/2020|2020-05-26|EPI\_ISL\_488844|Original|hCoV-19^^England|Human|Microbiology Department|Wellcome Sanger Institute for the COVID-19 Genomics UK (COG-UK) consortium|Davies|United Kingdom

>Spike|hCoV-19/England/20139039504/2020|2020-03-27|EPI\_ISL\_420673|Original|hCoV-19^^England|Human|Respiratory Virus Unit|Respiratory Virus Unit|Platt|United Kingdom

>Spike|hCoV-19/DRC/6743/2020|2020-05-11|EPI\_ISL\_495635|Original|hCoV-19^^Kinshasa|Human|Viral Respiratory Lab|Pathogen Sequencing Lab|Lokilo|Democratic Republic of the Congo

>Spike|hCoV-19/England/CAMB-7DC91/2020|2020-04-05|EPI\_ISL\_441715|Original|hCoV-19^^England|Human|Department of Pathology|Wellcome Sanger Institute for the COVID-19 Genomics UK (COG-UK) consortium|Amato|United Kingdom

>Spike|hCoV-19/Spain/PV-IBV-004207/2020|2020-04-03|EPI\_ISL\_510492|Original|hCoV-19^^Basque Country|Human|Servicio de Microbiolog\u00eda. Hospital Universitario Donostia. OSI Donostialdea. \u00c1rea de Enfermedades Infecciosas|SeqCOVID-SPAIN consortium/IBV (CSIC)|Comas|Spain

>Spike|hCoV-19/England/ALDP-A68D05/2020|2020-10-12|EPI\_ISL\_608555|Original|hCoV-19^^England|Human|Lighthouse Lab in Alderley Park|Wellcome Sanger Institute for the COVID-19 Genomics UK (COG-UK) consortium|Davies|United Kingdom

>Spike|hCoV-19/Wales/PHWC-169AD9/2020|2020-07-27|EPI\_ISL\_514578|Original|hCoV-19^^Wales|Human|Wales Specialist Virology Centre Sequencing lab|COVID-19 Genomics UK (COG-UK) Consortium|Moore|United Kingdom

>Spike|hCoV-19/USA/GA\_1445/2020|2020-03-04|EPI\_ISL\_420788|Original|hCoV-19^^Georgia|Human|GA Department of Public Health|Pathogen Discovery|Queen|USA

>Spike|hCoV-19/Scotland/EDB5039/2020|2020-04-02|EPI\_ISL\_456951|Original|hCoV-19^^Scotland|Human|Virology Department|COVID-19 Genomics UK (COG-UK) Consortium|Williams|United Kingdom

>Spike|hCoV-19/England/MILK-A7BDA5/2020|2020-10-15|EPI\_ISL\_607436|Original|hCoV-19^^England|Human|Lighthouse Lab in Milton Keynes|Wellcome Sanger Institute for the COVID-19 Genomics UK (COG-UK) consortium|Davies|United Kingdom

>Spike|hCoV-19/England/ALDP-9EDDEB/2020|2020-05-06|EPI\_ISL\_589486|Original|hCoV-19^^England|Human|Lighthouse Lab in Alderley Park|Wellcome Sanger Institute for the COVID-19 Genomics UK (COG-UK) consortium|Davies|United Kingdom

>Spike|hCoV-19/England/NORT-1B873EC/2020|2020-10-05|EPI\_ISL\_724979|Original|hCoV-19^^England|Human|Northumbria University / South Tees Hospitals NHS Foundation Trust / North Cumbria Integrated Care NHS Foundation Trust / North Tees and Hartlepool NHS Foundation Trust / Newcastle Hospitals NHS Foundation Trust|COVID-19 Genomics UK (COG-UK) Consortium|Bashton|United Kingdom

>Spike|hCoV-19/Switzerland/GE-ETHZ-270137/2020|2020-08-28|EPI\_ISL\_541464|Original|hCoV-19^^Geneva|Human|Viollier AG|Department of Biosystems Science and Engineering|Nadeau|Switzerland

>Spike|hCoV-19/England/MILK-A184D2/2020|2020-09-30|EPI\_ISL\_595041|Original|hCoV-19^^England|Human|Northumbria University / South Tees Hospitals NHS Foundation Trust / North Cumbria Integrated Care NHS Foundation Trust / North Tees and Hartlepool NHS Foundation Trust / Newcastle Hospitals NHS Foundation Trust|COVID-19 Genomics UK (COG-UK) Consortium|Bashton|United Kingdom

>Spike|hCoV-19/Norway/2949/2020|2020-07-31|EPI\_ISL\_549143|Original|hCoV-19^^Viken|Human|Furst Medical Laboratory|Norwegian Institute of Public Health|Kopperud Riis|Norway

>Spike|hCoV-19/England/ALDP-95C7E9/2020|2020-06-21|EPI\_ISL\_555081|Original|hCoV-19^^England|Human|Lighthouse Lab in Alderley Park|Wellcome Sanger Institute for the COVID-19 Genomics UK (COG-UK) consortium|Davies|United Kingdom

>Spike|hCoV-19/USA/WA-S1208/2020|2020-05-07|EPI\_ISL\_463698|Original|hCoV-19^^Washington|Human|Washington State Department of Health|Seattle Flu Study|Bedford|USA

>Spike|hCoV-19/Denmark/DCGC-15010/2020|2020-11-23|EPI\_ISL\_713104|Original|hCoV-19^^Hovedstaden|Human|Department of Virus and Microbiological Special Diagnostics|Albertsen Lab|Michaelsen|Denmark

>Spike|hCoV-19/United Arab Emirates/0987/2020|2020-06-10|EPI\_ISL\_699120|Original|hCoV-19^^Abu Dhabi|Human|Group 42 (G42) Healthcare|G42 Healthcare|Ogrodzki|United Arab Emirates

>Spike|hCoV-19/England/BRIS-13065F/2020|2020-04-12|EPI\_ISL\_492632|Original|hCoV-19^^England|Human|PHE South West Regional Laboratory|Wellcome Sanger Institute for the COVID-19 Genomics UK (COG-UK) consortium|Davies|United Kingdom

>Spike|hCoV-19/Australia/VIC5822/2020|2020-00-00|EPI\_ISL\_518616|Original|hCoV-19^^Victoria|Human|Microbiological Diagnostic Unit - Public Health Laboratory (MDU-PHL)|MDU-PHL|Schultz|Australia

>Spike|hCoV-19/England/MILK-9D4048/2020|2020-09-18|EPI\_ISL\_601576|Original|hCoV-19^^England|Human|Lighthouse Lab in Milton Keynes|Wellcome Sanger Institute for the COVID-19 Genomics UK (COG-UK) consortium|Davies|United Kingdom

>Spike|hCoV-19/Wales/PHWC-15DC78/2020|2020-05-13|EPI\_ISL\_472768|Original|hCoV-19^^Wales|Human|Wales Specialist Virology Centre Sequencing lab|COVID-19 Genomics UK (COG-UK) Consortium|Moore|United Kingdom

>Spike|hCoV-19/USA/TX-HMH-MCoV-18989/2020|2020-11-25|EPI\_ISL\_785268|Original|hCoV-19^^Texas|Human|Houston Methodist Hospital|Houston Methodist Hospital|Long|USA

>Spike|hCoV-19/Sweden/20-06909/2020|2020-04-06|EPI\_ISL\_450811|Original|hCoV-19^^Uppsala|Human|Knivsta VC|The Public Health Agency of Sweden|Svartstr\u00f6m|Sweden

>Spike|hCoV-19/England/CAMC-A64923/2020|2020-10-11|EPI\_ISL\_608907|Original|hCoV-19^^England|Human|Lighthouse Lab in Cambridge|Wellcome Sanger Institute for the COVID-19 Genomics UK (COG-UK) Consortium|Davies|United Kingdom

>Spike|hCoV-19/Finland/5A81S4A10/2020|2020-04-05|EPI\_ISL\_481693|Original|hCoV-19^^Uusimaa|Human|Department of Virology and Immunology|Department of Virology|Smura|Finland

>Spike|hCoV-19/Scotland/EDB2064/2020|2020-04-18|EPI\_ISL\_433171|Original|hCoV-19^^Scotland|Human|Virology Department|COVID-19 Genomics UK (COG-UK) Consortium|Williams|United Kingdom

>Spike|hCoV-19/England/204621518/2020|2020-11-09|EPI\_ISL\_700613|Original|hCoV-19^^England|Human|Respiratory Virus Unit|COVID-19 Genomics UK (COG-UK) Consortium|Platt|United Kingdom

>Spike|hCoV-19/South Africa/KRISP-K002883/2020|2020-09-04|EPI\_ISL\_602695|Original|hCoV-19^^KwaZulu-Natal|Human|NHLs-IALCH|KRISP|de Oliveira|South Africa

>Spike|hCoV-19/England/CAMC-B0C87A/2020|2020-10-31|EPI\_ISL\_643589|Original|hCoV-19^^England|Human|Lighthouse Lab in Cambridge|Wellcome Sanger Institute for the COVID-19 Genomics UK (COG-UK) Consortium|Davies|United Kingdom

>Spike|hCoV-19/Japan/PG-3444/2020|2020-06-00|EPI\_ISL\_691554|Original|hCoV-19^^Japan|Human|Pathogen Genomics Center|Pathogen Genomics Center|Sekizuka|Japan

>Spike|hCoV-19/Japan/PG-5506/2020|2020-08-00|EPI\_ISL\_690608|Original|hCoV-19^^Japan|Human|Pathogen Genomics Center|Pathogen Genomics Center|Sekizuka|Japan

>Spike|hCoV-19/Australia/NSW2259/2020|2020-03-21|EPI\_ISL\_500696|Original|hCoV-19^^New South Wales|Human|Area of Virology|Area of Virology|Bull|Australia

>Spike|hCoV-19/England/QEUH-AAA9A9/2020|2020-10-21|EPI\_ISL\_652724|Original|hCoV-19^^England|Human|Oxford Viromics|COVID-19 Genomics UK (COG-UK) Consortium|Golubchik|United Kingdom

>Spike|hCoV-19/USA/FL-BPHL-2229/2020|2020-09-08|EPI\_ISL\_666851|Original|hCoV-19^^Florida|Human|Florida Bureau of Public Health Laboratories|Florida Bureau of Public Health Laboratories|Blanton|USA

>Spike|hCoV-19/Japan/PG-2925/2020|2020-04-00|EPI\_ISL\_691051|Original|hCoV-19^^Japan|Human|Pathogen Genomics Center|Pathogen Genomics Center|Sekizuka|Japan

>Spike|hCoV-19/Spain/IB-IBV-99007252/2020|2020-03-05|EPI\_ISL\_541965|Original|hCoV-19^^Balear Islands|Human|Servicio de Microbiolog\u00eda|SeqCOVID-SPAIN consortium|IBV (CSIC)|Comas|Spain

>Spike|hCoV-19/Australia/VIC6247/2020|2020-07-20|EPI\_ISL\_518240|Original|hCoV-19^^Victoria|Human|Victorian Infectious Diseases Reference Laboratory (VIDRL)|VIDRL and MDU-PHL|Schultz|Australia



>Spike|hCoV-19/England/ALDP-952FFA/2020|2020-06-11|EPI\_ISL\_553677|Original|hCoV-19^^England|Human|Lighthouse Lab in Alderley Park|Wellcome Sanger Institute for the COVID-19 Genomics UK (COG-UK) consortium|Davies|United Kingdom

>Spike|hCoV-19/USA/TX-HMH-MCoV-13413/2020|2020-08-24|EPI\_ISL\_788551|Original|hCoV-19^^Texas|Human|Houston Methodist Hospital|Houston Methodist Hospital|Long|USA

>Spike|hCoV-19/USA/MN-MDH-1321/2020|2020-03-25|EPI\_ISL\_495620|Original|hCoV-19^^Minnesota|Human|Minnesota Department of Health|Minnesota Department of Health|Garfin|USA

>Spike|hCoV-19/Denmark/DCGC-10378/2020|2020-11-02|EPI\_ISL\_669932|Original|hCoV-19^^Hovedstaden|Human|Department of Virus and Microbiological Special Diagnostics|Albertsen Lab|Michaelsen|Denmark

>Spike|hCoV-19/Scotland/QEUEH-9F61E3/2020|2020-09-27|EPI\_ISL\_600876|Original|hCoV-19^^Scotland|Human|Lighthouse Lab in Glasgow|Wellcome Sanger Institute for the COVID-19 Genomics UK (COG-UK) consortium|Davies|United Kingdom

>Spike|hCoV-19/USA/NY-Wadsworth-213973-01/2020|2020-09-09|EPI\_ISL\_765484|Original|hCoV-19^^New York|Human|Wadsworth Center|Wadsworth Center|Lasek-Nesselquist|USA

>Spike|hCoV-19/England/QEUEH-AAE125/2020|2020-10-22|EPI\_ISL\_630712|Original|hCoV-19^^England|Human|Lighthouse Lab in Glasgow|Wellcome Sanger Institute for the COVID-19 Genomics UK (COG-UK) consortium|Davies|United Kingdom

>Spike|hCoV-19/USA/CT-UW-3417/2020|2020-03-26|EPI\_ISL\_490982|Original|hCoV-19^^Connecticut|Human|UW Virology Lab|UW Virology Lab|Roychoudhury|USA

>Spike|hCoV-19/USA/TX-HMH-MCoV-10057/2020|2020-07-06|EPI\_ISL\_789308|Original|hCoV-19^^Texas|Human|Houston Methodist Hospital|Houston Methodist Hospital|Long|USA

>Spike|hCoV-19/Switzerland/UR-ETHZ-300437/2020|2020-09-29|EPI\_ISL\_603391|Original|hCoV-19^^Uri|Human|Viollier AG|Department of Biosystems Science and Engineering|Nadeau|Switzerland

>Spike|hCoV-19/USA/TX-HMH-MCoV-9052/2020|2020-07-03|EPI\_ISL\_780921|Original|hCoV-19^^Texas|Human|Houston Methodist Hospital|Houston Methodist Hospital|Long|USA

>Spike|hCoV-19/England/ALDP-C3BEBB/2020|2020-12-09|EPI\_ISL\_731599|Original|hCoV-19^^England|Human|Lighthouse Lab in Alderley Park|Wellcome Sanger Institute for the COVID-19 Genomics UK (COG-UK) Consortium|Davies|United Kingdom

>Spike|hCoV-19/Australia/VIC4857/2020|2020-07-17|EPI\_ISL\_519241|Original|hCoV-19^^Victoria|Human|Microbiological Diagnostic Unit - Public Health Laboratory (MDU-PHL)|MDU-PHL|Schultz|Australia

>Spike|hCoV-19/USA/TX-HMH-7629/2020|2020-06-26|EPI\_ISL\_546899|Original|hCoV-19^^Texas|Human|Houston Methodist Hospital|Houston Methodist Hospital|Long|USA

>Spike|hCoV-19/England/QEUEH-9C9064/2020|2020-09-11|EPI\_ISL\_567055|Original|hCoV-19^^England|Human|Lighthouse Lab in Glasgow|Wellcome Sanger Institute for the COVID-19 Genomics UK (COG-UK) consortium|Davies|United Kingdom

>Spike|hCoV-19/Russia/AST-RII-MH4136S/2020|2020-07-29|EPI\_ISL\_733170|Original|hCoV-19^^Astrakhan|Human|Pathogenic Microorganisms Variability Laboratory|WHO National Influenza Centre Russian Federation|Komissarov|Russia

>Spike|hCoV-19/USA/MI-MDHHS-SC21810/2020|2020-07-15|EPI\_ISL\_565853|Original|hCoV-19^^Michigan|Human|Michigan Department of Health and Human Services|Michigan Department of Health and Human Services|Blankenship|USA

>Spike|hCoV-19/USA/MI-MDHHS-SC22588/2020|2020-11-24|EPI\_ISL\_737161|Original|hCoV-19^^Michigan|Human|Michigan Department of Health and Human Services|Michigan Department of Health and Human Services|Blankenship|USA

>Spike|hCoV-19/USA/TX-DSHS-0073/2020|2020-05-09|EPI\_ISL\_522358|Original|hCoV-19^^Texas|Human|Texas Department of State Health Services|Texas Department of State Health Services|Rahman|USA

>Spike|hCoV-19/USA/TX-DSHS-0408/2020|2020-06-01|EPI\_ISL\_542467|Original|hCoV-19^^Texas|Human|Texas Department of State Health Services|Texas Department of State Health Services|Rahman|USA

>Spike|hCoV-19/England/ALDP-98154B/2020|2020-08-09|EPI\_ISL\_552596|Original|hCoV-19^^England|Human|Lighthouse Lab in Alderley Park|Wellcome Sanger Institute for the COVID-19 Genomics UK (COG-UK) consortium|Davies|United Kingdom

>Spike|hCoV-19/England/QEUA-CC7CD8/2020|2020-12-21|EPI\_ISL\_760494|Original|hCoV-19^^England|Human|Lighthouse Lab in Glasgow|Wellcome Sanger Institute for the COVID-19 Genomics UK (COG-UK) Consortium|Davies|United Kingdom

>Spike|hCoV-19/England/ALDP-B5E518/2020|2020-11-09|EPI\_ISL\_723664|Original|hCoV-19^^England|Human|Oxford Viromics|COVID-19 Genomics UK (COG-UK) Consortium|Golubchik|United Kingdom

>Spike|hCoV-19/USA/TX-HMH-1547/2020|2020-04-13|EPI\_ISL\_542787|Original|hCoV-19^^Texas|Human|Houston Methodist Hospital|Houston Methodist Hospital|Long|USA

>Spike|hCoV-19/England/QEUA-B120E2/2020|2020-11-02|EPI\_ISL\_642668|Original|hCoV-19^^England|Human|Lighthouse Lab in Glasgow|Wellcome Sanger Institute for the COVID-19 Genomics UK (COG-UK) Consortium|Davies|United Kingdom

>Spike|hCoV-19/Spain/PV-HUB-51235493/2020|2020-06-08|EPI\_ISL\_483571|Original|hCoV-19^^Basque Country|Human|Clinical Microbiology Laboratory- Basurto University Hospital|Biocruces-Bizkaia|Urrutikoetxea-Gutierrez|Spain

>Spike|hCoV-19/Malta/BAL-Sliema-2/2020|2020-09-04|EPI\_ISL\_576118|Original|hCoV-19^^Malta|Human|Laboratory|Laboratory|Biazzo,M.|Malta

>Spike|hCoV-19/Faroe Islands/HFS-30/2020|2020-03-15|EPI\_ISL\_526943|Original|hCoV-19^^Faroe Islands|Human|Faroese National Reference Laboratory for Fish and Animal Diseases|Faroese National Reference Laboratory for Fish and Animal Diseases|Dahl|Faroe Islands

>Spike|hCoV-19/USA/WI-UW-1619/2020|2020-09-17|EPI\_ISL\_605489|Original|hCoV-19^^Wisconsin|Human|University of Wisconsin-Madison AIDS Vaccine Research Laboratories|University of Wisconsin-Madison AIDS Vaccine Research Laboratories|Baczenas|USA

>Spike|hCoV-19/Scotland/CVR3009/2020|2020-04-23|EPI\_ISL\_461618|Original|hCoV-19^^Scotland|Human|West of Scotland Specialist Virology Centre|COVID-19 Genomics UK (COG-UK) Consortium|Robertson|United Kingdom

>Spike|hCoV-19/USA/UT-UPHL-201026014/2020|2020-06-22|EPI\_ISL\_594271|Original|hCoV-19^^Utah|Human|Utah Public Health Laboratory|Utah Public Health Laboratory|Young|USA

>Spike|hCoV-19/Wales/PHWC-16F262/2020|2020-10-05|EPI\_ISL\_585936|Original|hCoV-19^^Wales|Human|Wales Specialist Virology Centre Sequencing lab|COVID-19 Genomics UK (COG-UK) Consortium|Moore|United Kingdom

>Spike|hCoV-19/Canada/UN-CRCHUM-PreFreeze-3/2020|2020-09-04|EPI\_ISL\_667760|Original|hCoV-19^^Canada|Human|Microbiology|Microbiology|Benoit,P.|Canada

>Spike|hCoV-19/USA/TX-HMH-MCoV-13185/2020|2020-08-25|EPI\_ISL\_788336|Original|hCoV-19^^Texas|Human|Houston Methodist Hospital|Houston Methodist Hospital|Long|USA

>Spike|hCoV-19/USA/AZ-TG668350/2020|2020-05-14|EPI\_ISL\_696272|Original|hCoV-19^^Arizona|Human|Sonora Quest Laboratories|TGen North|French|USA

>Spike|hCoV-19/Portugal/PT0174/2020|2020-03-28|EPI\_ISL\_453890|Original|hCoV-19^^Portugal|Human|unknown|Instituto Nacional de Saude (INSA)|Borges|Portugal

>Spike|hCoV-19/USA/MO-QDX-535/2020|2020-03-18|EPI\_ISL\_571386|Original|hCoV-19^^Missouri|Human|Quest Diagnostics|Quest Diagnostics|Kagan|USA

>Spike|hCoV-19/Japan/PG-5634/2020|2020-03-00|EPI\_ISL\_688759|Original|hCoV-19^^Japan|Human|Pathogen Genomics Center|Pathogen Genomics Center|Sekizuka|Japan

>Spike|hCoV-19/USA/CO-CDPHE-2100014374/2020|2020-11-20|EPI\_ISL\_771303|Original|hCoV-19^^Colorado|Human|Colorado Department of Public Health and Environment|Colorado Department of Public Health and Environment|Bankers|USA

>Spike|hCoV-19/England/LIVE-DC2920/2020|2020-11-24|EPI\_ISL\_703421|Original|hCoV-19^^England|Human|Liverpool Clinical Laboratories|COVID-19 Genomics UK (COG-UK) Consortium|Haldenby|United Kingdom

>Spike|hCoV-19/Scotland/QEUA-A1E032/2020|2020-10-01|EPI\_ISL\_598848|Original|hCoV-19^^Scotland|Human|Lighthouse Lab in Glasgow|Wellcome Sanger Institute for the COVID-19 Genomics UK (COG-UK) consortium|Davies|United Kingdom

>Spike|hCoV-19/England/OXON-AF856/2020|2020-04-15|EPI\_ISL\_478777|Original|hCoV-19^^England|Human|Oxford Viromics|COVID-19 Genomics UK (COG-UK) Consortium|Golubchik|United Kingdom

>Spike|hCoV-19/England/MILK-9C2265/2020|2020-09-11|EPI\_ISL\_566633|Original|hCoV-19^^England|Human|Lighthouse Lab in Milton Keynes|Wellcome Sanger Institute for the COVID-19 Genomics UK (COG-UK) consortium|Davies|United Kingdom

>Spike|hCoV-19/India/DL-IGIB11303980/2020|2020-07-00|EPI\_ISL\_751299|Original|hCoV-19^^Delhi|Human|Devki Devi Foundation|CSIR-IGIB/Max|Pandey|India

>Spike|hCoV-19/England/ALDP-B248D6/2020|2020-11-04|EPI\_ISL\_646949|Original|hCoV-19^^England|Human|Lighthouse Lab in Alderley Park|Wellcome Sanger Institute for the COVID-19 Genomics UK (COG-UK) Consortium|Davies|United Kingdom

>Spike|hCoV-19/Wales/PHWC-49F8BF/2020|2020-12-09|EPI\_ISL\_743284|Original|hCoV-19^^Wales|Human|Wales Specialist Virology Centre Sequencing lab|COVID-19 Genomics UK (COG-UK) Consortium|Moore|United Kingdom

>Spike|hCoV-19/USA/WA-S924/2020|2020-04-26|EPI\_ISL\_463414|Original|hCoV-19^^Washington|Human|Washington State Department of Health|Seattle Flu Study|Bedford|USA

>Spike|hCoV-19/Germany/HH-hpi-p1905/2020|2020-03-24|EPI\_ISL\_776242|Original|hCoV-19^^Hamburg|Human|University Medical Center Hamburg Eppendorf|Heinrich Pette Institute|Robitaille|Germany

>Spike|hCoV-19/England/BIRM-6444A/2020|2020-09-19|EPI\_ISL\_594494|Original|hCoV-19^^England|Human|University of Birmingham|COVID-19 Genomics UK (COG-UK) Consortium|Loman|United Kingdom

>Spike|hCoV-19/England/CAMC-A6544F/2020|2020-10-11|EPI\_ISL\_608439|Original|hCoV-19^^England|Human|Lighthouse Lab in Cambridge|Wellcome Sanger Institute for the COVID-19 Genomics UK (COG-UK) consortium|Davies|United Kingdom

>Spike|hCoV-19/Luxembourg/LNS4723540/2020|2020-11-04|EPI\_ISL\_740531|Original|hCoV-19^^Luxembourg|Human|Laboratoire national de sant\u00e9|Laboratoire national de sant\u00e9|Wienecke-Baldacchino|Luxembourg

>Spike|hCoV-19/USA/CA-CHLA-PLM41118038/2020|2020-12-07|EPI\_ISL\_753670|Original|hCoV-19^^California|Human|Clinical virology Laboratory|Center for Personalized Medicine|Dien Bard|USA

>Spike|hCoV-19/Australia/QLD1210/2020|2020-03-22|EPI\_ISL\_639801|Original|hCoV-19^^Australia|Human|unknown|Public Health Virology Laboratory|Nguyen|Australia

>Spike|hCoV-19/USA/MI-UM-10036287406/2020|2020-10-05|EPI\_ISL\_596578|Original|hCoV-19^^Michigan|Human|University of Michigan Clinical Microbiology Laboratory|Lauring Lab|Valesano|USA

>Spike|hCoV-19/USA/UT-UPHL-201002601/2020|2020-04-24|EPI\_ISL\_594429|Original|hCoV-19^^Utah|Human|Utah Public Health Laboratory|Utah Public Health Laboratory|Young|USA

>Spike|hCoV-19/Suriname/SR-08/2020|2020-06-00|EPI\_ISL\_517619|Original|hCoV-19^^Suriname|Human|Academic Hospital Paramaribo|Erasmus Medical Center|M\u00f4cnger|Suriname

>Spike|hCoV-19/Denmark/DCGC-7717/2020|2020-10-19|EPI\_ISL\_618575|Original|hCoV-19^^Sjaelland|Human|Department of Virus and Microbiological Special Diagnostics|Albertsen lab|Michaelsen|Denmark

>Spike|hCoV-19/England/QEUA-AAB7DB/2020|2020-10-21|EPI\_ISL\_652814|Original|hCoV-19^^England|Human|Oxford Viromics|COVID-19 Genomics UK (COG-UK) Consortium|Golubchik|United Kingdom

>Spike|hCoV-19/England/NOTT-10E229/2020|2020-03-20|EPI\_ISL\_425514|Original|hCoV-19^^England|Human|Queens Medical Centre|COVID-19 Genomics UK (COG-UK) Consortium|Loose|United Kingdom

>Spike|hCoV-19/Hungary/UD-57410/2020|2020-09-02|EPI\_ISL\_671431|Original|hCoV-19^^Szabolcs-Szatm\u00e9r-Bereg county|Human|University of Debrecen|National Laboratory of Virology|Kemenesi|Hungary

>Spike|hCoV-19/Denmark/DCGC-20532/2020|2020-12-21|EPI\_ISL\_759206|Original|hCoV-19^^Hovedstaden|Human|Department of Virus and Microbiological Special Diagnostics|Albertsen Lab|Michaelsen|Denmark

>Spike|hCoV-19/Slovakia/UKBA-603/2020|2020-11-12|EPI\_ISL\_788981|Original|hCoV-19^^Nove Zamky|Human|Institute of Virology|Faculty of Natural Sciences|Vinar|Slovakia

>Spike|hCoV-19/Brazil/RS-00665/2020|2020-11-26|EPI\_ISL\_770607|Original|hCoV-19^^Rio Grande do Sul|Human|Laborat\u00f3rio de Microbiologia Molecular - Universidade FEEVALE|Bioinformatics Laboratory / LNCC|Almeida|Brazil

>Spike|hCoV-19/Japan/PG-2811/2020|2020-04-00|EPI\_ISL\_690938|Original|hCoV-19^^Japan|Human|Pathogen Genomics Center|Pathogen Genomics Center|Sekizuka|Japan

>Spike|hCoV-19/Saudi Arabia/KAUST-JEDDAH489/2020|2020-04-08|EPI\_ISL\_751224|Original|hCoV-19^^Jeddah|Human|Pathogen Genomics Lab King Abdullah

University of Science and Technology(KAUST)|Pathogen Genomics Lab King Abdullah  
University of Science and Technology(KAUST)|Mohamed Ghazzali|Saudi Arabia  
>Spike|hCoV-19/England/NOTT-1137E6/2020|2020-09-24|EPI\_ISL\_573432|Original|hCoV-  
19^^England|Human|Queens Medical Centre|COVID-19 Genomics UK (COG-UK)  
Consortium|Loose|United Kingdom  
>Spike|hCoV-19/Scotland/CVR3198/2020|2020-04-28|EPI\_ISL\_449218|Original|hCoV-  
19^^Scotland|Human|West of Scotland Specialist Virology Centre|COVID-19 Genomics UK  
(COG-UK) Consortium|Robertson|United Kingdom  
>Spike|hCoV-19/Wales/PHWC-16682D/2020|2020-06-18|EPI\_ISL\_494046|Original|hCoV-  
19^^Wales|Human|Originating lab|COVID-19 Genomics UK (COG-UK) Consortium|Moore|United  
Kingdom  
>Spike|hCoV-19/England/MILK-9AAE05/2020|2020-08-26|EPI\_ISL\_581390|Original|hCoV-  
19^^England|Human|Lighthouse Lab in Milton Keynes|Wellcome Sanger Institute for the  
COVID-19 Genomics UK (COG-UK) consortium|Davies|United Kingdom  
>Spike|hCoV-19/Germany/NW-UBI-40/2020|2020-06-17|EPI\_ISL\_631294|Original|hCoV-  
19^^North Rhine-Westphalia|Human|MVZ DIAMEDIS Diagnostische Medizin Sennestadt  
GmbH|Bielefeld University|Brandt|Germany  
>Spike|hCoV-19/Scotland/EDB2579/2020|2020-04-24|EPI\_ISL\_439233|Original|hCoV-  
19^^Scotland|Human|Virology Department|COVID-19 Genomics UK (COG-UK)  
Consortium|Williams|United Kingdom  
>Spike|hCoV-19/England/ALDP-C3A274/2020|2020-12-09|EPI\_ISL\_730948|Original|hCoV-  
19^^England|Human|Lighthouse Lab in Alderley Park|Wellcome Sanger Institute for the  
COVID-19 Genomics UK (COG-UK) Consortium|Davies|United Kingdom  
>Spike|hCoV-19/England/MILK-ACCA26/2020|2020-10-21|EPI\_ISL\_629347|Original|hCoV-  
19^^England|Human|Lighthouse Lab in Milton Keynes|Wellcome Sanger Institute for the  
COVID-19 Genomics UK (COG-UK) consortium|Davies|United Kingdom  
>Spike|hCoV-19/England/ALDP-B48E34/2020|2020-11-07|EPI\_ISL\_649478|Original|hCoV-  
19^^England|Human|Lighthouse Lab in Alderley Park|Wellcome Sanger Institute for the  
COVID-19 Genomics UK (COG-UK) Consortium|Davies|United Kingdom  
>Spike|hCoV-19/Netherlands/NB-EMC-243/2020|2020-06-19|EPI\_ISL\_523366|Original|hCoV-  
19^^Noord Brabant|Human|Dutch COVID-19 response team|Erasmus Medical Center|Oude  
Munnink|Netherlands  
>Spike|hCoV-19/USA/CA-QDX-2493/2020|2020-03-16|EPI\_ISL\_604757|Original|hCoV-  
19^^California|Human|Quest Diagnostics|Quest Diagnostics|Kagan|USA  
>Spike|hCoV-19/England/NORW-F0768/2020|2020-10-12|EPI\_ISL\_595190|Original|hCoV-  
19^^England|Human|Quadram Institute Bioscience|COVID-19 Genomics UK (COG-UK)  
Consortium|Alikhan|United Kingdom  
>Spike|hCoV-19/USA/MN-CDC-6205/2020|2020-04-23|EPI\_ISL\_527672|Original|hCoV-  
19^^Minnesota|Human|MN PHL Division|Pathogen Discovery|Queen|USA  
>Spike|hCoV-19/Japan/PG-7961/2020|2020-05-00|EPI\_ISL\_687062|Original|hCoV-  
19^^Japan|Human|Kanagawa Prefectural Institute of Public Health|Pathogen Genomics  
Center|Sekizuka|Japan  
>Spike|hCoV-19/Denmark/DCGC-3099/2020|2020-08-31|EPI\_ISL\_615915|Original|hCoV-  
19^^Midtjylland|Human|Department of Virus and Microbiological Special  
Diagnostics|Albertsen lab|Michaelsen|Denmark  
>Spike|hCoV-19/Australia/VIC4735/2020|2020-07-15|EPI\_ISL\_519123|Original|hCoV-  
19^^Victoria|Human|Microbiological Diagnostic Unit - Public Health Laboratory (MDU-  
PHL)|MDU-PHL|Schultz|Australia  
>Spike|hCoV-19/United Arab Emirates/0120/2020|2020-05-  
15|EPI\_ISL\_698310|Original|hCoV-19^^Abu Dhabi|Human|Group 42 (G42) Healthcare|G42  
Healthcare|Ogrodzki|United Arab Emirates  
>Spike|hCoV-19/England/CAMC-B52365/2020|2020-11-08|EPI\_ISL\_656956|Original|hCoV-  
19^^England|Human|Lighthouse Lab in Cambridge|Wellcome Sanger Institute for the  
COVID-19 Genomics UK (COG-UK) Consortium|Davies|United Kingdom  
>Spike|hCoV-19/Wales/PHWC-33DC1/2020|2020-04-16|EPI\_ISL\_446822|Original|hCoV-  
19^^Wales|Human|Wales Specialist Virology Centre|Public Health Wales Microbiology  
Cardiff|Moore|United Kingdom  
>Spike|hCoV-19/Denmark/DCGC-12695/2020|2020-11-16|EPI\_ISL\_682876|Original|hCoV-  
19^^Syddanmark|Human|Department of Virus and Microbiological Special  
Diagnostics|Albertsen Lab|Michaelsen|Denmark

>Spike|hCoV-19/USA/CA-CZB-6745/2020|2020-08-21|EPI\_ISL\_582999|Original|hCoV-19^^California|Human|Orange County Public Health Lab|Chan-Zuckerberg Biohub|Bhatt|USA

>Spike|hCoV-19/USA/FL-BPHL-1271/2020|2020-08-03|EPI\_ISL\_541203|Original|hCoV-19^^Florida|Human|Florida Bureau of Public Health Laboratories|Florida Bureau of Public Health Laboratories|Blanton|USA

>Spike|hCoV-19/Luxembourg/LNS8910032/2020|2020-11-09|EPI\_ISL\_744821|Original|hCoV-19^^Luxembourg|Human|Laboratoire national de sant\u00e9|Laboratoire national de sant\u00e9|Wienecke-Baldacchino|Luxembourg

>Spike|hCoV-19/England/QEUI-9F6D2B/2020|2020-09-27|EPI\_ISL\_595626|Original|hCoV-19^^England|Human|Oxford Viromics|COVID-19 Genomics UK (COG-UK) Consortium|Golubchik|United Kingdom

>Spike|hCoV-19/Mexico/BCN-ALSR-4920/2020|2020-08-09|EPI\_ISL\_730211|Original|hCoV-19^^Baja California|Human|Genomica Lab Molecular|Andersen lab at Scripps Research|Gangavarapu|Mexico

>Spike|hCoV-19/Thailand/Bangkok-0035/2020|2020-03-18|EPI\_ISL\_429171|Original|hCoV-19^^Bangkok|Human|Ramathibodi Hospital|COVID-19 Network Investigations (CONI) Alliance|Batty|Thailand

>Spike|hCoV-19/England/MILK-97455A/2020|2020-08-20|EPI\_ISL\_575873|Original|hCoV-19^^England|Human|Lighthouse Lab in Milton Keynes|Wellcome Sanger Institute for the COVID-19 Genomics UK (COG-UK) consortium|Davies|United Kingdom

>Spike|hCoV-19/Canada/ON-S222/2020|2020-03-26|EPI\_ISL\_586382|Original|hCoV-19^^Ontario|Human|Toronto Invasive Bacterial Diseases Network|McMaster University|McArthur|Canada

>Spike|hCoV-19/England/QEUI-96F297/2020|2020-08-17|EPI\_ISL\_530471|Original|hCoV-19^^England|Human|Lighthouse Lab in Glasgow|Wellcome Sanger Institute for the COVID-19 Genomics UK (COG-UK) consortium|Davies|United Kingdom

>Spike|hCoV-19/England/QEUI-B2F71A/2020|2020-11-04|EPI\_ISL\_659835|Original|hCoV-19^^England|Human|Lighthouse Lab in Glasgow|Wellcome Sanger Institute for the COVID-19 Genomics UK (COG-UK) Consortium|Davies|United Kingdom

>Spike|hCoV-19/England/QEUI-B65FC5/2020|2020-11-10|EPI\_ISL\_655806|Original|hCoV-19^^England|Human|Lighthouse Lab in Glasgow|Wellcome Sanger Institute for the COVID-19 Genomics UK (COG-UK) Consortium|Davies|United Kingdom

>Spike|hCoV-19/England/NOTT-11283F/2020|2020-04-14|EPI\_ISL\_493551|Original|hCoV-19^^England|Human|Lincolnshire Hospitals and DeepSeq Nottingham|COVID-19 Genomics UK (COG-UK) Consortium|Loose|United Kingdom

>Spike|hCoV-19/USA/WI-UW-367/2020|2020-04-01|EPI\_ISL\_450721|Original|hCoV-19^^Wisconsin|Human|University of Wisconsin-Madison AIDS Vaccine Research Laboratories|University of Wisconsin-Madison AIDS Vaccine Research Laboratories|Baczenas|USA

>Spike|hCoV-19/Wales/PHWC-16D05B/2020|2020-09-20|EPI\_ISL\_574198|Original|hCoV-19^^Wales|Human|Wales Specialist Virology Centre Sequencing lab|COVID-19 Genomics UK (COG-UK) Consortium|Moore|United Kingdom

>Spike|hCoV-19/Japan/IC-0204/2020|2020-07-00|EPI\_ISL\_667633|Original|hCoV-19^^Japan|Human|Pathogen Genomics Center|Pathogen Genomics Center|Sekizuka|Japan

>Spike|hCoV-19/USA/TX-DSHS-0943/2020|2020-06-20|EPI\_ISL\_602241|Original|hCoV-19^^Texas|Human|Texas Department of State Health Services|Texas Department of State Health Services|Rahman|USA

>Spike|hCoV-19/England/BIRM-62AE0/2020|2020-09-02|EPI\_ISL\_529643|Original|hCoV-19^^England|Human|University of Birmingham|COVID-19 Genomics UK (COG-UK) Consortium|Loman|United Kingdom

>Spike|hCoV-19/England/CAMC-B33555/2020|2020-11-05|EPI\_ISL\_659162|Original|hCoV-19^^England|Human|Lighthouse Lab in Cambridge|Wellcome Sanger Institute for the COVID-19 Genomics UK (COG-UK) Consortium|Davies|United Kingdom

>Spike|hCoV-19/Denmark/DCGC-7071/2020|2020-10-12|EPI\_ISL\_619122|Original|hCoV-19^^Midtjylland|Human|Department of Virus and Microbiological Special Diagnostics|Albertsen lab|Michaelsen|Denmark

>Spike|hCoV-19/England/QEUI-9A414E/2020|2020-09-01|EPI\_ISL\_540202|Original|hCoV-19^^England|Human|Lighthouse Lab in Glasgow|Wellcome Sanger Institute for the COVID-19 Genomics UK (COG-UK) consortium|Davies|United Kingdom

>Spike|hCoV-19/Japan/PG-6658/2020|2020-07-00|EPI\_ISL\_687769|Original|hCoV-19^^Japan|Human|Pathogen Genomics Center|Pathogen Genomics Center|Sekizuka|Japan

>Spike|hCoV-19/Germany/HH-hpi-p1994/2020|2020-03-27|EPI\_ISL\_776311|Original|hCoV-19^^Hamburg|Human|University Medical Center Hamburg Eppendorf|Heinrich Pette Institute|Robitaille|Germany

>Spike|hCoV-19/Nigeria/OS523-CV53/2020|2020-05-11|EPI\_ISL\_527893|Original|hCoV-19^^Osun|Human|Nigeria Centre for Disease Control (NCDC)|African Centre of Excellence for Genomics of Infectious Diseases (ACEGID)|Oluniyi|Nigeria

>Spike|hCoV-19/USA/UT-UPHL-2009089/2020|2020-05-13|EPI\_ISL\_525095|Original|hCoV-19^^Utah|Human|Utah Public Health Laboratory|Utah Public Health Laboratory|Young|USA

>Spike|hCoV-19/England/QEUA-9FAE51/2020|2020-09-25|EPI\_ISL\_588100|Original|hCoV-19^^England|Human|Lighthouse Lab in Glasgow|Wellcome Sanger Institute for the COVID-19 Genomics UK (COG-UK) consortium|Davies|United Kingdom

>Spike|hCoV-19/Scotland/EDB2701/2020|2020-03-27|EPI\_ISL\_488980|Original|hCoV-19^^Scotland|Human|Virology Department|Wellcome Sanger Institute for the COVID-19 Genomics UK (COG-UK) consortium|Davies|United Kingdom

>Spike|hCoV-19/South Africa/KRISP-K002596/2020|2020-07-29|EPI\_ISL\_535461|Original|hCoV-19^^KwaZulu-Natal|Human|NHL-IALCH|KRISP|de Oliveira|South Africa

>Spike|hCoV-19/USA/TX-DSHS-0731/2020|2020-05-14|EPI\_ISL\_584133|Original|hCoV-19^^Texas|Human|Texas Department of State Health Services|Texas Department of State Health Services|Rahman|USA

>Spike|hCoV-19/United Arab Emirates/L920633851/2020|2020-03-31|EPI\_ISL\_520726|Original|hCoV-19^^United Arab Emirates|Human|Mohammed Bin Rashid University of Medicine and Health Sciences|Al Jalila Genomics Center|Ramaswamy|United Arab Emirates

>Spike|hCoV-19/Australia/QLD1276/2020|2020-03-21|EPI\_ISL\_693277|Original|hCoV-19^^Australia|Human|unknown|Public Health Virology Laboratory|Nguyen|Australia

>Spike|hCoV-19/Denmark/DCGC-19449/2020|2020-12-07|EPI\_ISL\_748954|Original|hCoV-19^^Hovedstaden|Human|Department of Virus and Microbiological Special Diagnostics|Albertsen Lab|Michaelsen|Denmark

>Spike|hCoV-19/Wales/PHWC-3470E/2020|2020-04-18|EPI\_ISL\_446964|Original|hCoV-19^^Wales|Human|Wales Specialist Virology Centre|Public Health Wales Microbiology Cardiff|Moore|United Kingdom

>Spike|hCoV-19/Switzerland/BS-42221953/2020|2020-04-06|EPI\_ISL\_581680|Original|hCoV-19^^Basel-Stadt|Human|University Hospital Basel|University Hospital Basel|Roloff Handschin|Switzerland

>Spike|hCoV-19/England/ALDP-50630C/2020|2020-06-25|EPI\_ISL\_559176|Original|hCoV-19^^England|Human|Lighthouse Lab in Alderley Park|Wellcome Sanger Institute for the COVID-19 Genomics UK (COG-UK) consortium|Davies|United Kingdom

>Spike|hCoV-19/USA/CA-CZB-11956/2020|2020-10-07|EPI\_ISL\_625664|Original|hCoV-19^^California|Human|UCSF Clinical Microbiology Laboratory|Chan-Zuckerberg Biohub|Bhatt|USA

>Spike|hCoV-19/England/CAMC-A589E6/2020|2020-10-09|EPI\_ISL\_597069|Original|hCoV-19^^England|Human|Lighthouse Lab in Cambridge|Wellcome Sanger Institute for the COVID-19 Genomics UK (COG-UK) consortium|Davies|United Kingdom

>Spike|hCoV-19/England/CAMB-1B7553/2020|2020-00-00|EPI\_ISL\_637679|Original|hCoV-19^^England|Human|Department of Pathology|COVID-19 Genomics UK (COG-UK) Consortium|Goodfellow|United Kingdom

>Spike|hCoV-19/England/CAMC-B7984B/2020|2020-11-12|EPI\_ISL\_741020|Original|hCoV-19^^England|Human|Oxford Viromics|COVID-19 Genomics UK (COG-UK) Consortium|Golubchik|United Kingdom

>Spike|hCoV-19/England/201360127/2020|2020-03-25|EPI\_ISL\_423219|Original|hCoV-19^^England|Human|Respiratory Virus Unit|Respiratory Virus Unit|Platt|United Kingdom

>Spike|hCoV-19/Denmark/DCGC-11379/2020|2020-11-02|EPI\_ISL\_670877|Original|hCoV-19^^Hovedstaden|Human|Department of Virus and Microbiological Special Diagnostics|Albertsen Lab|Michaelsen|Denmark

>Spike|hCoV-19/USA/TX-HMH-MCoV-15260/2020|2020-10-19|EPI\_ISL\_786744|Original|hCoV-19^^Texas|Human|Houston Methodist Hospital|Houston Methodist Hospital|Long|USA

>Spike|hCoV-19/Scotland/QEUH-A9B46E/2020|2020-10-20|EPI\_ISL\_625361|Original|hCoV-19^^Scotland|Human|Lighthouse Lab in Glasgow|Wellcome Sanger Institute for the COVID-19 Genomics UK (COG-UK) consortium|Davies|United Kingdom

>Spike|hCoV-19/Denmark/DCGC-9987/2020|2020-11-09|EPI\_ISL\_669312|Original|hCoV-19^^Hovedstaden|Human|Department of Virus and Microbiological Special Diagnostics|Albertsen Lab|Michaelsen|Denmark

>Spike|hCoV-19/Norway/3980/2020|2020-09-28|EPI\_ISL\_775307|Original|hCoV-19^^Oslo|Human|Oslo University Hospital|Norwegian Institute of Public Health|Vollan|Norway

>Spike|hCoV-19/England/QEUH-C013BF/2020|2020-12-04|EPI\_ISL\_720811|Original|hCoV-19^^England|Human|Lighthouse Lab in Glasgow|Wellcome Sanger Institute for the COVID-19 Genomics UK (COG-UK) Consortium|Davies|United Kingdom

>Spike|hCoV-19/Australia/VIC8902/2020|2020-07-22|EPI\_ISL\_565273|Original|hCoV-19^^Victoria|Human|Microbiological Diagnostic Unit - Public Health Laboratory (MDU-PHL)|MDU-PHL|Schultz|Australia

>Spike|hCoV-19/USA/MN-QDX-1334/2020|2020-03-15|EPI\_ISL\_572123|Original|hCoV-19^^Minnesota|Human|Quest Diagnostics|Quest Diagnostics|Kagan|USA

>Spike|hCoV-19/Indonesia/JK-EIJK37/2020|2020-05-10|EPI\_ISL\_766046|Original|hCoV-19^^Jakarta|Human|RSUP Fatmawati|Eijkman Institute for Molecular Biology|Soebandrio|Indonesia

>Spike|hCoV-19/Denmark/DCGC-22498/2020|2020-12-14|EPI\_ISL\_757594|Original|hCoV-19^^Midtjylland|Human|Department of Virus and Microbiological Special Diagnostics|Albertsen Lab|Michaelsen|Denmark

>Spike|hCoV-19/Australia/VIC3208/2020|2020-07-03|EPI\_ISL\_520894|Original|hCoV-19^^Victoria|Human|Victorian Infectious Diseases Reference Laboratory (VIDRL)|VIDRL and MDU-PHL|Schultz|Australia

>Spike|hCoV-19/USA/UT-01865/2020|2020-04-13|EPI\_ISL\_498638|Original|hCoV-19^^Utah|Human|Utah Public Health Laboratory|Utah Public Health Laboratory|Butz|USA

>Spike|hCoV-19/England/LIVE-1D6DB0/2020|2020-09-09|EPI\_ISL\_572426|Original|hCoV-19^^England|Human|Liverpool Clinical Laboratories|COVID-19 Genomics UK (COG-UK) Consortium|Haldenby|United Kingdom

>Spike|hCoV-19/England/ALDP-94F8B9/2020|2020-06-16|EPI\_ISL\_555812|Original|hCoV-19^^England|Human|Lighthouse Lab in Alderley Park|Wellcome Sanger Institute for the COVID-19 Genomics UK (COG-UK) consortium|Davies|United Kingdom

>Spike|hCoV-19/USA/TX-HMH-MCoV-8287/2020|2020-07-08|EPI\_ISL\_784310|Original|hCoV-19^^Texas|Human|Houston Methodist Hospital|Houston Methodist Hospital|Long|USA

>Spike|hCoV-19/Denmark/DCGC-12206/2020|2020-11-16|EPI\_ISL\_682387|Original|hCoV-19^^Midtjylland|Human|Department of Virus and Microbiological Special Diagnostics|Albertsen Lab|Michaelsen|Denmark

>Spike|hCoV-19/Denmark/DCGC-1395/2020|2020-04-20|EPI\_ISL\_622478|Original|hCoV-19^^Hovedstaden|Human|Department of Virus and Microbiological Special Diagnostics|Albertsen lab|Michaelsen|Denmark

>Spike|hCoV-19/England/CAMC-AB1EEC/2020|2020-10-23|EPI\_ISL\_623724|Original|hCoV-19^^England|Human|Lighthouse Lab in Cambridge|Wellcome Sanger Institute for the COVID-19 Genomics UK (COG-UK) consortium|Davies|United Kingdom

>Spike|hCoV-19/Wales/PHWC-29EF8/2020|2020-04-02|EPI\_ISL\_474254|Original|hCoV-19^^Wales|Human|Originating lab|COVID-19 Genomics UK (COG-UK) Consortium|Moore|United Kingdom

>Spike|hCoV-19/USA/VA-DCLS-0301/2020|2020-05-18|EPI\_ISL\_463104|Original|hCoV-19^^Virginia|Human|Virginia DCLS|Virginia DCLS|St. Jacques|USA

>Spike|hCoV-19/England/ALDP-9CDA80/2020|2020-09-16|EPI\_ISL\_566323|Original|hCoV-19^^England|Human|Lighthouse Lab in Alderley Park|Wellcome Sanger Institute for the COVID-19 Genomics UK (COG-UK) consortium|Davies|United Kingdom

>Spike|hCoV-19/Australia/QLD1223/2020|2020-03-29|EPI\_ISL\_639814|Original|hCoV-19^^Australia|Human|unknown|Public Health Virology Laboratory|Nguyen|Australia

>Spike|hCoV-19/Denmark/ALAB-SSI-1263/2020|2020-03-09|EPI\_ISL\_444835|Original|hCoV-19^^Denmark|Human|Department of Virus and Microbiological Special Diagnostics|Albertsen lab|Kirkegaard|Denmark

>Spike|hCoV-19/Wales/PHWC-2DE9A/2020|2020-04-06|EPI\_ISL\_446033|Original|hCoV-19^^Wales|Human|Wales Specialist Virology Centre|Public Health Wales Microbiology Cardiff|Moore|United Kingdom

>Spike|hCoV-19/Japan/PG-1260/2020|2020-00-00|EPI\_ISL\_684870|Original|hCoV-19^^Japan|Human|Pathogen Genomics Center|Pathogen Genomics Center|Sekizuka|Japan

>Spike|hCoV-19/USA/WA-UW-29899/2020|2020-10-02|EPI\_ISL\_576564|Original|hCoV-19^^Washington|Human|UW Virology Lab|UW Virology Lab|Roychoudhury|USA

>Spike|hCoV-19/Denmark/DCGC-2681/2020|2020-08-17|EPI\_ISL\_617902|Original|hCoV-19^^Sjaelland|Human|Department of Virus and Microbiological Special Diagnostics|Albertsen lab|Michaelsen|Denmark

>Spike|hCoV-19/Australia/VIC5129/2020|2020-07-18|EPI\_ISL\_519932|Original|hCoV-19^^Victoria|Human|Microbiological Diagnostic Unit - Public Health Laboratory (MDU-PHL)|MDU-PHL|Schultz|Australia

>Spike|hCoV-19/Wales/PHWC-1659B2/2020|2020-06-22|EPI\_ISL\_490749|Original|hCoV-19^^Wales|Human|Wales Specialist Virology Centre Sequencing lab|COVID-19 Genomics UK (COG-UK) Consortium|Moore|United Kingdom

>Spike|hCoV-19/USA/WY-WPHL-20153958/2020|2020-11-30|EPI\_ISL\_770119|Original|hCoV-19^^Wyoming|Human|Wyoming Public Health Laboratory|Wyoming Public Health Laboratory|Hull|USA

>Spike|hCoV-19/Canada/QC-LSPQ-L00233380/2020|2020-03-23|EPI\_ISL\_536021|Original|hCoV-19^^Quebec|Human|H\u00f4pital Pierre-Boucher|Laboratoire de sant\u00e9 publique du Qu\u00e9bec|Moreira|Canada

>Spike|hCoV-19/Spain/PV-IBV-000901/2020|2020-03-26|EPI\_ISL\_452665|Original|hCoV-19^^Basque Country|Human|Servicio de Microbiolog\u00eda. Hospital Universitario Donostia. OSI Donostialdea. \u00c1rea de Enfermedades Infecciosas|SeqCOVID-SPAIN consortium/IBV (CSIC)|Comas|Spain

>Spike|hCoV-19/England/SHEF-C1311/2020|2020-05-29|EPI\_ISL\_529353|Original|hCoV-19^^England|Human|Virology Department|COVID-19 Genomics UK (COG-UK) Consortium|de Silva|United Kingdom

>Spike|hCoV-19/USA/HI-H200327/2020|2020-08-20|EPI\_ISL\_752885|Original|hCoV-19^^Hawaii|Human|State Laboratories Division|State Laboratories Division|Sultana|USA

>Spike|hCoV-19/Brazil/RJ-1921/2020|2020-04-09|EPI\_ISL\_456091|Original|hCoV-19^^Rio de Janeiro|Human|Laboratory of Respiratory Viruses and Measles|Laboratory of Respiratory Viruses and Measles|Silva|Brazil

>Spike|hCoV-19/England/QEUEH-B7C31A/2020|2020-11-13|EPI\_ISL\_668240|Original|hCoV-19^^England|Human|Lighthouse Lab in Glasgow|Wellcome Sanger Institute for the COVID-19 Genomics UK (COG-UK) Consortium|Davies|United Kingdom

>Spike|hCoV-19/Jordan/AM-ALSR-3928/2020|2020-09-30|EPI\_ISL\_636293|Original|hCoV-19^^Amman|Human|Biolab Diagnostic Laboratories|Andersen lab at Scripps Research|Gangavarapu|Jordan

>Spike|hCoV-19/England/MILK-974D70/2020|2020-08-21|EPI\_ISL\_552452|Original|hCoV-19^^England|Human|Lighthouse Lab in Milton Keynes|Wellcome Sanger Institute for the COVID-19 Genomics UK (COG-UK) consortium|Davies|United Kingdom

>Spike|hCoV-19/England/CAMB-84B6D/2020|2020-03-10|EPI\_ISL\_440525|Original|hCoV-19^^England|Human|Department of Pathology|Wellcome Sanger Institute for the COVID-19 Genomics UK (COG-UK) consortium|Amato|United Kingdom

>Spike|hCoV-19/Australia/VIC3996/2020|2020-07-05|EPI\_ISL\_519385|Original|hCoV-19^^Victoria|Human|Victorian Infectious Diseases Reference Laboratory (VIDRL)|VIDRL and MDU-PHL|Schultz|Australia

>Spike|hCoV-19/England/QEUEH-B6950B/2020|2020-11-11|EPI\_ISL\_655219|Original|hCoV-19^^England|Human|Lighthouse Lab in Glasgow|Wellcome Sanger Institute for the COVID-19 Genomics UK (COG-UK) Consortium|Davies|United Kingdom

>Spike|hCoV-19/USA/VA-DCLS-0324/2020|2020-05-04|EPI\_ISL\_614105|Original|hCoV-19^^Virginia|Human|Virginia DCLS|Virginia DCLS|St. Jacques|USA

>Spike|hCoV-19/England/OXON-B0F8A/2020|2020-04-27|EPI\_ISL\_478983|Original|hCoV-19^^England|Human|Oxford Viromics|COVID-19 Genomics UK (COG-UK) Consortium|Golubchik|United Kingdom

>Spike|hCoV-19/Netherlands/GE-EMC-241/2020|2020-00-00|EPI\_ISL\_523220|Original|hCoV-19^^Gelderland|Human|Dutch COVID-19 response team|Erasmus Medical Center|Oude Munnink|Netherlands



>Spike|hCoV-19/Australia/VIC3882/2020|2020-07-13|EPI\_ISL\_520595|Original|hCoV-19^^Victoria|Human|Microbiological Diagnostic Unit - Public Health Laboratory (MDU-PHL)|MDU-PHL|Schultz|Australia

>Spike|hCoV-19/Scotland/EDB8299/2020|2020-10-12|EPI\_ISL\_612318|Original|hCoV-19^^Scotland|Human|Virology Department|COVID-19 Genomics UK (COG-UK) Consortium|McHugh|United Kingdom

>Spike|hCoV-19/Belgium/ULG-10167/2020|2020-04-19|EPI\_ISL\_447161|Original|hCoV-19^^Liege|Human|Department of Clinical Microbiology|GIGA Medical Genomics|Durkin|Belgium

>Spike|hCoV-19/Denmark/DCGC-17581/2020|2020-12-14|EPI\_ISL\_751082|Original|hCoV-19^^Syddanmark|Human|Department of Virus and Microbiological Special Diagnostics|Albertsen Lab|Michaelsen|Denmark

>Spike|hCoV-19/England/CAMC-B7AD4B/2020|2020-11-13|EPI\_ISL\_741173|Original|hCoV-19^^England|Human|Oxford Viromics|COVID-19 Genomics UK (COG-UK) Consortium|Golubchik|United Kingdom

>Spike|hCoV-19/Switzerland/Vs-ETHZ-410763/2020|2020-12-11|EPI\_ISL\_737640|Original|hCoV-19^^Valais|Human|Viollier AG|Department of Biosystems Science and Engineering|Nadeau|Switzerland

>Spike|hCoV-19/England/QEUH-C93E66/2020|2020-12-18|EPI\_ISL\_777600|Original|hCoV-19^^England|Human|Lighthouse Lab in Glasgow|Wellcome Sanger Institute for the COVID-19 Genomics UK (COG-UK) Consortium|Davies|United Kingdom

>Spike|hCoV-19/Wales/PHWC-49CC7A/2020|2020-12-07|EPI\_ISL\_742668|Original|hCoV-19^^Wales|Human|Wales Specialist Virology Centre Sequencing lab|COVID-19 Genomics UK (COG-UK) Consortium|Moore|United Kingdom

>Spike|hCoV-19/England/QEUH-969D41/2020|2020-08-12|EPI\_ISL\_530825|Original|hCoV-19^^England|Human|Lighthouse Lab in Glasgow|Wellcome Sanger Institute for the COVID-19 Genomics UK (COG-UK) consortium|Davies|United Kingdom

>Spike|hCoV-19/USA/NM-NMDOH-2020134990/2020|2020-06-18|EPI\_ISL\_535282|Original|hCoV-19^^New Mexico|Human|New Mexico Department of Health Scientific Laboratory|New Mexico Department of Health Scientific Laboratory|Johnson|USA

>Spike|hCoV-19/England/ALDP-9B6185/2020|2020-08-28|EPI\_ISL\_572989|Original|hCoV-19^^England|Human|Oxford Viromics|COVID-19 Genomics UK (COG-UK) Consortium|Golubchik|United Kingdom

>Spike|hCoV-19/Northern Ireland/NIRE-1083FF/2020|2020-09-09|EPI\_ISL\_585189|Original|hCoV-19^^Northern Ireland|Human|Regional Virus Laboratory|COVID-19 Genomics UK (COG-UK) Consortium|Fairley|United Kingdom

>Spike|hCoV-19/Wales/PHWC-16EDBD/2020|2020-10-05|EPI\_ISL\_585863|Original|hCoV-19^^Wales|Human|Wales Specialist Virology Centre Sequencing lab|COVID-19 Genomics UK (COG-UK) Consortium|Moore|United Kingdom

>Spike|hCoV-19/England/MILK-9C2BE2/2020|2020-09-10|EPI\_ISL\_566486|Original|hCoV-19^^England|Human|Lighthouse Lab in Milton Keynes|Wellcome Sanger Institute for the COVID-19 Genomics UK (COG-UK) consortium|Davies|United Kingdom

>Spike|hCoV-19/Australia/VIC5774/2020|2020-07-21|EPI\_ISL\_518572|Original|hCoV-19^^Victoria|Human|Microbiological Diagnostic Unit - Public Health Laboratory (MDU-PHL)|MDU-PHL|Schultz|Australia

>Spike|hCoV-19/England/CAMB-1AB1A9/2020|2020-04-19|EPI\_ISL\_470305|Original|hCoV-19^^England|Human|Department of Pathology|Wellcome Sanger Institute for the COVID-19 Genomics UK (COG-UK) consortium|Davies|United Kingdom

>Spike|hCoV-19/England/ALDP-5D2BA7/2020|2020-06-19|EPI\_ISL\_558532|Original|hCoV-19^^England|Human|Lighthouse Lab in Alderley Park|Wellcome Sanger Institute for the COVID-19 Genomics UK (COG-UK) consortium|Davies|United Kingdom

>Spike|hCoV-19/USA/TX-HMH-MCoV-15075/2020|2020-10-18|EPI\_ISL\_786559|Original|hCoV-19^^Texas|Human|Houston Methodist Hospital|Houston Methodist Hospital|Long|USA

>Spike|hCoV-19/USA/TX-HMH-MCoV-12831/2020|2020-08-19|EPI\_ISL\_790555|Original|hCoV-19^^Texas|Human|Houston Methodist Hospital|Houston Methodist Hospital|Long|USA

>Spike|hCoV-19/Denmark/DCGC-15324/2020|2020-11-23|EPI\_ISL\_713765|Original|hCoV-19^^Hovedstaden|Human|Department of Virus and Microbiological Special Diagnostics|Albertsen Lab|Michaelsen|Denmark

>Spike|hCoV-19/England/CAMC-A3EAC5/2020|2020-10-05|EPI\_ISL\_609630|Original|hCoV-19^^England|Human|Lighthouse Lab in Cambridge|Wellcome Sanger Institute for the COVID-19 Genomics UK (COG-UK) consortium|Davies|United Kingdom

>Spike|hCoV-19/England/CAMB-1B81A9/2020|2020-10-24|EPI\_ISL\_637464|Original|hCoV-19^^England|Human|Department of Pathology|COVID-19 Genomics UK (COG-UK) Consortium|Goodfellow|United Kingdom

>Spike|hCoV-19/USA/NY-NYUMC279/2020|2020-04-05|EPI\_ISL\_428793|Original|hCoV-19^^New York|Human|NYU Langone Health|Departments of Pathology and Medicine|Maurano|USA

>Spike|hCoV-19/England/MILK-BAB2F7/2020|2020-11-17|EPI\_ISL\_783311|Original|hCoV-19^^England|Human|Lighthouse Lab in Milton Keynes|Wellcome Sanger Institute for the COVID-19 Genomics UK (COG-UK) Consortium|Davies|United Kingdom

>Spike|hCoV-19/Wales/PHWC-2EEF3/2020|2020-04-07|EPI\_ISL\_446173|Original|hCoV-19^^Wales|Human|Wales Specialist Virology Centre|Public Health Wales Microbiology Cardiff|Moore|United Kingdom

>Spike|hCoV-19/Australia/VIC6036/2020|2020-07-22|EPI\_ISL\_518077|Original|hCoV-19^^Victoria|Human|Microbiological Diagnostic Unit - Public Health Laboratory (MDU-PHL)|MDU-PHL|Schultz|Australia

>Spike|hCoV-19/England/ALDP-955BC6/2020|2020-06-12|EPI\_ISL\_554004|Original|hCoV-19^^England|Human|Lighthouse Lab in Alderley Park|Wellcome Sanger Institute for the COVID-19 Genomics UK (COG-UK) consortium|Davies|United Kingdom

>Spike|hCoV-19/England/MILK-B8EC92/2020|2020-11-13|EPI\_ISL\_674694|Original|hCoV-19^^England|Human|Lighthouse Lab in Milton Keynes|Wellcome Sanger Institute for the COVID-19 Genomics UK (COG-UK) Consortium|Davies|United Kingdom

>Spike|hCoV-19/England/CAMB-1AFF41/2020|2020-05-04|EPI\_ISL\_459201|Original|hCoV-19^^England|Human|Department of Pathology|Wellcome Sanger Institute for the COVID-19 Genomics UK (COG-UK) consortium|Davies|United Kingdom

>Spike|hCoV-19/USA/FL-BPHL-0268/2020|2020-05-05|EPI\_ISL\_480919|Original|hCoV-19^^Florida|Human|Florida Bureau of Public Health Laboratories|Florida Bureau of Public Health Laboratories|Blanton|USA

>Spike|hCoV-19/USA/TX-HMH-2265/2020|2020-05-24|EPI\_ISL\_545214|Original|hCoV-19^^Texas|Human|Houston Methodist Hospital|Houston Methodist Hospital|Long|USA

>Spike|hCoV-19/England/PORT-2EA1E9/2020|2020-00-00|EPI\_ISL\_665484|Original|hCoV-19^^England|Human|Centre for Enzyme Innovation|COVID-19 Genomics UK (COG-UK) Consortium|Robson|United Kingdom

>Spike|hCoV-19/Malaysia/IMR\_WC94436/2020|2020-05-29|EPI\_ISL\_490102|Original|hCoV-19^^Malaysia|Human|Institute for Medical Research|Institute for Medical Research|Suppiah|Malaysia

>Spike|hCoV-19/England/MILK-9AA39D/2020|2020-09-01|EPI\_ISL\_550942|Original|hCoV-19^^England|Human|Lighthouse Lab in Milton Keynes|Wellcome Sanger Institute for the COVID-19 Genomics UK (COG-UK) consortium|Davies|United Kingdom

>Spike|hCoV-19/Spain/PV-IBV-98007669/2020|2020-09-12|EPI\_ISL\_582075|Original|hCoV-19^^Basque Country|Human|Servicio de Microbiolog\u00eda. Hospital Universitario Donostia. OSI Donostialdea. \u00clrea de Enfermedades Infecciosas|SeqCOVID-SPAIN consortium|IBV (CSIC)|Comas|Spain

>Spike|hCoV-19/England/MILK-CA92DA/2020|2020-12-17|EPI\_ISL\_767107|Original|hCoV-19^^England|Human|Lighthouse Lab in Milton Keynes|Wellcome Sanger Institute for the COVID-19 Genomics UK (COG-UK) Consortium|Davies|United Kingdom

>Spike|hCoV-19/USA/TX-DSHS-0255/2020|2020-04-25|EPI\_ISL\_527828|Original|hCoV-19^^Texas|Human|Texas Department of State Health Services|Texas Department of State Health Services|Rahman|USA

>Spike|hCoV-19/Australia/VIC7299/2020|2020-07-20|EPI\_ISL\_564332|Original|hCoV-19^^Victoria|Human|Victorian Infectious Diseases Reference Laboratory (VIDRL)|VIDRL and MDU-PHL|Schultz|Australia

>Spike|hCoV-19/England/BIRM-6A338/2020|2020-11-09|EPI\_ISL\_679043|Original|hCoV-19^^England|Human|University of Birmingham|COVID-19 Genomics UK (COG-UK) Consortium|Loman|United Kingdom

>Spike|hCoV-19/England/MILK-9E13F4/2020|2020-09-19|EPI\_ISL\_577073|Original|hCoV-19^^England|Human|Oxford Viromics|COVID-19 Genomics UK (COG-UK) Consortium|Golubchik|United Kingdom

>Spike|hCoV-19/USA/VA-DCLS-2462/2020|2020-11-18|EPI\_ISL\_734206|Original|hCoV-19^^Virginia|Human|Virginia Division of Consolidated Laboratory Services (DCLS)|Virginia Division of Consolidated Laboratory Services (DCLS)|St. Jacques|USA

>Spike|hCoV-19/USA/NY-Wadsworth-237005-01/2020|2020-10-05|EPI\_ISL\_754539|Original|hCoV-19^^New York|Human|Wadsworth Center|Wadsworth Center|Lasek-Nesselquist|USA

>Spike|hCoV-19/Canada/QC-AG4/2020|2020-04-11|EPI\_ISL\_463913|Original|hCoV-19^^Quebec|Human|Laboratoire de microbiologie|Smith Laboratory|Smith|Canada

>Spike|hCoV-19/Netherlands/ZH-EMC-571/2020|2020-09-20|EPI\_ISL\_577999|Original|hCoV-19^^Zuid Holland|Human|Dutch COVID-19 response team|Erasmus Medical Center|Oude Munnink|Netherlands

>Spike|hCoV-19/France/ARA-108709/2020|2020-11-18|EPI\_ISL\_728521|Original|hCoV-19^^Auvergne-Rhône-Alpes|Human|CNR Virus des Infections Respiratoires - France SUD|CNR Virus des Infections Respiratoires - France SUD|Bal|France

>Spike|hCoV-19/Spain/VC-IBV-98004429/2020|2020-04-14|EPI\_ISL\_583923|Original|hCoV-19^^Comunitat Valenciana|Human|Servicio de Microbiología. Hospital General Universitario de Castellón|SeqCOVID-SPAIN consortium|IBV(CSIC)|Comas|Spain

>Spike|hCoV-19/USA/OR-OHSU-1349/2020|2020-07-15|EPI\_ISL\_509187|Original|hCoV-19^^Oregon|Human|OHSU Lab Services Molecular Microbiology Lab|Oregon SARS-CoV-2 Genome Sequencing Center|O'Roak|USA

>Spike|hCoV-19/Wales/ALDP-95AB2B/2020|2020-06-11|EPI\_ISL\_555005|Original|hCoV-19^^Wales|Human|Lighthouse Lab in Alderley Park|Wellcome Sanger Institute for the COVID-19 Genomics UK (COG-UK) consortium|Davies|United Kingdom

>Spike|hCoV-19/Japan/PG-8333/2020|2020-08-00|EPI\_ISL\_687432|Original|hCoV-19^^Japan|Human|Pathogen Genomics Center|Pathogen Genomics Center|Sekizuka|Japan

>Spike|hCoV-19/England/NORW-EB2D8/2020|2020-05-03|EPI\_ISL\_472307|Original|hCoV-19^^England|Human|Quadram Institute Bioscience|COVID-19 Genomics UK (COG-UK) Consortium|Alikhan|United Kingdom

>Spike|hCoV-19/Denmark/DCGC-8608/2020|2020-10-26|EPI\_ISL\_625978|Original|hCoV-19^^Midtjylland|Human|Department of Virus and Microbiological Special Diagnostics|Albertsen lab|Michaelsen|Denmark

>Spike|hCoV-19/Japan/PG-1662/2020|2020-04-00|EPI\_ISL\_685268|Original|hCoV-19^^Japan|Human|Pathogen Genomics Center|Pathogen Genomics Center|Sekizuka|Japan

>Spike|hCoV-19/England/ALDP-4F909D/2020|2020-06-24|EPI\_ISL\_559285|Original|hCoV-19^^England|Human|Lighthouse Lab in Alderley Park|Wellcome Sanger Institute for the COVID-19 Genomics UK (COG-UK) consortium|Davies|United Kingdom

>Spike|hCoV-19/USA/WI-UW-1368/2020|2020-09-08|EPI\_ISL\_536739|Original|hCoV-19^^Wisconsin|Human|University of Wisconsin-Madison AIDS Vaccine Research Laboratories|University of Wisconsin-Madison AIDS Vaccine Research Laboratories|Baczenas|USA

>Spike|hCoV-19/England/ALDP-94F242/2020|2020-06-18|EPI\_ISL\_556006|Original|hCoV-19^^England|Human|Lighthouse Lab in Alderley Park|Wellcome Sanger Institute for the COVID-19 Genomics UK (COG-UK) consortium|Davies|United Kingdom

>Spike|hCoV-19/England/EXET-138815/2020|2020-10-15|EPI\_ISL\_626727|Original|hCoV-19^^England|Human|University of Exeter|COVID-19 Genomics UK (COG-UK) Consortium|Temperton|United Kingdom

>Spike|hCoV-19/England/ALDP-C0660C/2020|2020-12-05|EPI\_ISL\_709554|Original|hCoV-19^^England|Human|Lighthouse Lab in Alderley Park|Wellcome Sanger Institute for the COVID-19 Genomics UK (COG-UK) Consortium|Davies|United Kingdom

>Spike|hCoV-19/Scotland/EDB2594/2020|2020-04-24|EPI\_ISL\_439235|Original|hCoV-19^^Scotland|Human|Virology Department|COVID-19 Genomics UK (COG-UK) Consortium|Williams|United Kingdom

>Spike|hCoV-19/Malaysia/HPUPM-ML0074/2020|2020-04-07|EPI\_ISL\_738086|Original|hCoV-19^^Kuala Lumpur|Human|National Public Health Laboratory|Department of Medical Microbiology|Lam|Malaysia

>Spike|hCoV-19/USA/MN48-MDH48/2020|2020-03-13|EPI\_ISL\_417495|Original|hCoV-19^^Minnesota|Human|Minnesota Department of Health|Minnesota Department of Health|Wang|USA

>Spike|hCoV-19/England/BRIS-122BBB/2020|2020-04-02|EPI\_ISL\_440785|Original|hCoV-19^^England|Human|PHE South West Regional Laboratory|Wellcome Sanger Institute for the COVID-19 Genomics UK (COG-UK) consortium|Amato|United Kingdom

>Spike|hCoV-19/USA/WA-S1987/2020|2020-06-04|EPI\_ISL\_497415|Original|hCoV-19^^Washington|Human|Washington State Department of Health|Seattle Flu Study|Lee|USA

>Spike|hCoV-19/USA/UT-04105/2020|2020-05-12|EPI\_ISL\_475743|Original|hCoV-19^^Utah|Human|Utah Public Health Laboratory|Utah Public Health Laboratory|Young|USA

>Spike|hCoV-19/Netherlands/NH-EMC-82/2020|2020-09-02|EPI\_ISL\_632527|Original|hCoV-19^^Noord Holland|Human|Dutch COVID-19 response team|Erasmus Medical Center|Oude Munnink|Netherlands

>Spike|hCoV-19/Portugal/PT0848/2020|2020-03-27|EPI\_ISL\_511107|Original|hCoV-19^^Portugal|Human|Instituto Nacional de Saude (INSA)|Instituto Nacional de Saude (INSA)|Borges|Portugal

>Spike|hCoV-19/USA/CO-CDPHE-2009053313/2020|2020-09-04|EPI\_ISL\_710263|Original|hCoV-19^^Colorado|Human|Colorado Department of Public Health and Environment|Colorado Department of Public Health and Environment|Bankers|USA

>Spike|hCoV-19/England/LIVE-A256B/2020|2020-05-19|EPI\_ISL\_499998|Original|hCoV-19^^England|Human|Liverpool Clinical Laboratories|COVID-19 Genomics UK (COG-UK) Consortium|Haldenby|United Kingdom

>Spike|hCoV-19/England/NOTT-119B4E/2020|2020-11-04|EPI\_ISL\_627726|Original|hCoV-19^^England|Human|Queens Medical Centre|COVID-19 Genomics UK (COG-UK) Consortium|Loose|United Kingdom

>Spike|hCoV-19/England/OXON-B46FA/2020|2020-04-25|EPI\_ISL\_534967|Original|hCoV-19^^England|Human|Oxford Viromics|COVID-19 Genomics UK (COG-UK) Consortium|Golubchik|United Kingdom

>Spike|hCoV-19/USA/MN-MDH-1758/2020|2020-04-10|EPI\_ISL\_590763|Original|hCoV-19^^Minnesota|Human|Minnesota Department of Health|Minnesota Department of Health|Lorentz|USA

>Spike|hCoV-19/Northern Ireland/NIRE-101F2F/2020|2020-03-23|EPI\_ISL\_453479|Original|hCoV-19^^Northern Ireland|Human|Regional Virus Laboratory|COVID-19 Genomics UK (COG-UK) Consortium|Fairley|United Kingdom

>Spike|hCoV-19/Australia/VIC6101/2020|2020-07-11|EPI\_ISL\_518124|Original|hCoV-19^^Victoria|Human|Victorian Infectious Diseases Reference Laboratory (VIDRL)|VIDRL and MDU-PHL|Schultz|Australia

>Spike|hCoV-19/USA/AZ-TG666104/2020|2020-05-01|EPI\_ISL\_696194|Original|hCoV-19^^Arizona|Human|Sonora Quest Laboratories|TGen North|French|USA

>Spike|hCoV-19/USA/LA-GBCL-26674722/2020|2020-04-11|EPI\_ISL\_485250|Original|hCoV-19^^Louisiana|Human|River Road Testing Lab|Ginkgo Bioworks Clinical Laboratory|Smith|USA

>Spike|hCoV-19/Russia/StPetersburg-RII13532S/2020|2020-05-10|EPI\_ISL\_507256|Original|hCoV-19^^Saint Petersburg|Human|WHO National Influenza Centre Russian Federation|WHO National Influenza Centre Russian Federation|Komissarov|Russia

>Spike|hCoV-19/USA/WI-QDX-779/2020|2020-03-16|EPI\_ISL\_571565|Original|hCoV-19^^Wisconsin|Human|Quest Diagnostics|Quest Diagnostics|Kagan|USA

>Spike|hCoV-19/Japan/PG-1253/2020|2020-00-00|EPI\_ISL\_684863|Original|hCoV-19^^Japan|Human|Pathogen Genomics Center|Pathogen Genomics Center|Sekizuka|Japan

>Spike|hCoV-19/England/ALDP-9E6C6D/2020|2020-09-24|EPI\_ISL\_580572|Original|hCoV-19^^England|Human|Lighthouse Lab in Alderley Park|Wellcome Sanger Institute for the COVID-19 Genomics UK (COG-UK) consortium|Davies|United Kingdom

>Spike|hCoV-19/USA/CA-ALSR-3082/2020|2020-09-04|EPI\_ISL\_635834|Original|hCoV-19^^California|Human|San Diego County Public Health Laboratory|Andersen lab at Scripps Research|Gangavarapu|USA

>Spike|hCoV-19/USA/VA-DCLS-0350/2020|2020-05-08|EPI\_ISL\_463117|Original|hCoV-19^^Virginia|Human|Virginia DCLS|Virginia DCLS|St. Jacques|USA

>Spike|hCoV-19/Denmark/DCGC-17927/2020|2020-12-14|EPI\_ISL\_749649|Original|hCoV-19^^Hovedstaden|Human|Department of Virus and Microbiological Special Diagnostics|Albertsen Lab|Michaelsen|Denmark

>Spike|hCoV-19/England/QEUA-AF4C89/2020|2020-10-30|EPI\_ISL\_663192|Original|hCoV-19^^England|Human|Lighthouse Lab in Glasgow|Wellcome Sanger Institute for the COVID-19 Genomics UK (COG-UK) Consortium|Davies|United Kingdom

>Spike|hCoV-19/England/LIVE-A93A6/2020|2020-07-24|EPI\_ISL\_526370|Original|hCoV-19^^England|Human|Liverpool Clinical Laboratories|COVID-19 Genomics UK (COG-UK) Consortium|Haldenby|United Kingdom

>Spike|hCoV-19/Russia/MOW-RII-MH3431S/2020|2020-10-07|EPI\_ISL\_733149|Original|hCoV-19^^Moscow|Human|HELIX LLC|WHO National Influenza Centre Russian Federation|Komissarov|Russia

>Spike|hCoV-19/England/PORT-2D3DEF/2020|2020-04-22|EPI\_ISL\_512414|Original|hCoV-19^^England|Human|Centre for Enzyme Innovation|COVID-19 Genomics UK (COG-UK) Consortium|Robson|United Kingdom

>Spike|hCoV-19/Denmark/DCGC-19187/2020|2020-12-07|EPI\_ISL\_748801|Original|hCoV-19^^Sjaelland|Human|Department of Virus and Microbiological Special Diagnostics|Albertsen Lab|Michaelsen|Denmark

>Spike|hCoV-19/Finland/16MR9cA1/2020|2020-11-16|EPI\_ISL\_757299|Original|hCoV-19^^Uusimaa|Human|Department of Virology and Immunology|Department of Virology|Smura|Finland

>Spike|hCoV-19/England/BRIS-12224D/2020|2020-03-23|EPI\_ISL\_440026|Original|hCoV-19^^England|Human|PHE South West Regional Laboratory|Wellcome Sanger Institute for the COVID-19 Genomics UK (COG-UK) consortium|Amato|United Kingdom

>Spike|hCoV-19/Wales/PHWC-499E86/2020|2020-11-24|EPI\_ISL\_727457|Original|hCoV-19^^Wales|Human|Originating lab|COVID-19 Genomics UK (COG-UK) Consortium|Moore|United Kingdom

>Spike|hCoV-19/Scotland/QEUA-A63B00/2020|2020-10-09|EPI\_ISL\_596180|Original|hCoV-19^^Scotland|Human|Quadram Institute Bioscience|COVID-19 Genomics UK (COG-UK) Consortium|Alikhan|United Kingdom

>Spike|hCoV-19/USA/TX-HMH-MCoV-10110/2020|2020-07-06|EPI\_ISL\_789277|Original|hCoV-19^^Texas|Human|Houston Methodist Hospital|Houston Methodist Hospital|Long|USA

>Spike|hCoV-19/England/NORW-EE81F/2020|2020-07-05|EPI\_ISL\_493542|Original|hCoV-19^^England|Human|Quadram Institute Bioscience|COVID-19 Genomics UK (COG-UK) Consortium|Alikhan|United Kingdom

>Spike|hCoV-19/Netherlands/GE-EMC-247/2020|2020-00-00|EPI\_ISL\_523226|Original|hCoV-19^^Gelderland|Human|Dutch COVID-19 response team|Erasmus Medical Center|Oude Munnink|Netherlands

>Spike|hCoV-19/USA/NY-NYCPHL-000784/2020|2020-03-21|EPI\_ISL\_632164|Original|hCoV-19^^New York|Human|Richmond University Medical Center|New York City Public Health Laboratory|Wang|USA

>Spike|hCoV-19/England/CAMC-B52A7F/2020|2020-11-09|EPI\_ISL\_657516|Original|hCoV-19^^England|Human|Lighthouse Lab in Cambridge|Wellcome Sanger Institute for the COVID-19 Genomics UK (COG-UK) Consortium|Davies|United Kingdom

>Spike|hCoV-19/Australia/VIC13576/2020|2020-08-01|EPI\_ISL\_563763|Original|hCoV-19^^Victoria|Human|Microbiological Diagnostic Unit - Public Health Laboratory (MDU-PHL)|MDU-PHL|Schultz|Australia

>Spike|hCoV-19/USA/FL-BPHL-0966/2020|2020-07-09|EPI\_ISL\_517856|Original|hCoV-19^^Florida|Human|Florida Bureau of Public Health Laboratories|Florida Bureau of Public Health Laboratories|Blanton|USA

>Spike|hCoV-19/USA/HI-H200644/2020|2020-11-23|EPI\_ISL\_753168|Original|hCoV-19^^Hawaii|Human|State Laboratories Division|State Laboratories Division|Sultana|USA

>Spike|hCoV-19/England/LIVE-DCC434/2020|2020-11-25|EPI\_ISL\_724507|Original|hCoV-19^^England|Human|Liverpool Clinical Laboratories|COVID-19 Genomics UK (COG-UK) Consortium|Haldenby|United Kingdom

>Spike|hCoV-19/England/ALDP-B5CBAF/2020|2020-11-09|EPI\_ISL\_655815|Original|hCoV-19^^England|Human|Lighthouse Lab in Alderley Park|Wellcome Sanger Institute for the COVID-19 Genomics UK (COG-UK) Consortium|Davies|United Kingdom

>Spike|hCoV-19/Wales/MILK-B02B7B/2020|2020-10-24|EPI\_ISL\_647808|Original|hCoV-19^^Wales|Human|Lighthouse Lab in Milton Keynes|Wellcome Sanger Institute for the COVID-19 Genomics UK (COG-UK) Consortium|Davies|United Kingdom

>Spike|hCoV-19/USA/TX-HMH-3446/2020|2020-06-11|EPI\_ISL\_544200|Original|hCoV-19^^Texas|Human|Houston Methodist Hospital|Houston Methodist Hospital|Long|USA

>Spike|hCoV-19/USA/NY-Wadsworth-42409-01/2020|2020-04-09|EPI\_ISL\_525663|Original|hCoV-19^^New York|Human|Wadsworth Center|Wadsworth Center|Plitnick|USA

>Spike|hCoV-19/Sweden/20-08946/2020|2020-08-09|EPI\_ISL\_560981|Original|hCoV-19^^Stockholm|Human|Capio S|The Public Health Agency of Sweden|Svartstr\u00f6m|Sweden

>Spike|hCoV-19/Wales/PHWC-33ACA/2020|2020-04-20|EPI\_ISL\_446783|Original|hCoV-19^^Wales|Human|Wales Specialist Virology Centre|Public Health Wales Microbiology Cardiff|Moore|United Kingdom

>Spike|hCoV-19/England/QEUA-A1E472/2020|2020-09-29|EPI\_ISL\_587390|Original|hCoV-19^^England|Human|Lighthouse Lab in Glasgow|Wellcome Sanger Institute for the COVID-19 Genomics UK (COG-UK) consortium|Davies|United Kingdom

>Spike|hCoV-19/USA/TX-HMH-6265/2020|2020-06-22|EPI\_ISL\_547350|Original|hCoV-19^^Texas|Human|Houston Methodist Hospital|Houston Methodist Hospital|Long|USA

>Spike|hCoV-19/Scotland/EDB3027/2020|2020-04-03|EPI\_ISL\_488993|Original|hCoV-19^^Scotland|Human|Virology Department|Wellcome Sanger Institute for the COVID-19 Genomics UK (COG-UK) consortium|Davies|United Kingdom

>Spike|hCoV-19/England/ALDP-C06138/2020|2020-12-05|EPI\_ISL\_721517|Original|hCoV-19^^England|Human|Lighthouse Lab in Alderley Park|Wellcome Sanger Institute for the COVID-19 Genomics UK (COG-UK) Consortium|Davies|United Kingdom

>Spike|hCoV-19/India/MH-ACTREC-486/2020|2020-08-13|EPI\_ISL\_700134|Original|hCoV-19^^Maharashtra|Human|Hematopathology Laboratory|Hematopathology Laboratory|Patkar|India

>Spike|hCoV-19/Finland/15LS6BE3/2020|2020-10-15|EPI\_ISL\_756178|Original|hCoV-19^^Uusimaa|Human|Department of Virology and Immunology|Department of Virology|Smura|Finland

>Spike|hCoV-19/USA/NY-NYUMC210/2020|2020-04-03|EPI\_ISL\_427505|Original|hCoV-19^^New York|Human|NYU Langone Health|Departments of Pathology and Medicine|Maurano|USA

>Spike|hCoV-19/England/CAMB-1BA9CD/2020|2020-11-13|EPI\_ISL\_664770|Original|hCoV-19^^England|Human|Department of Pathology|COVID-19 Genomics UK (COG-UK) Consortium|Goodfellow|United Kingdom

>Spike|hCoV-19/England/ALDP-9D8EE0/2020|2020-09-18|EPI\_ISL\_576682|Original|hCoV-19^^England|Human|Oxford Viromics|COVID-19 Genomics UK (COG-UK) Consortium|Golubchik|United Kingdom

>Spike|hCoV-19/Spain/VC-IBV-98003545/2020|2020-03-28|EPI\_ISL\_537971|Original|hCoV-19^^Comunitat Valenciana|Human|Servicio de Microbiolog\u00eda. Hospital General Universitario de Castell\u00f3n|SeqCOVID-SPAIN consortium|IBV(CSIC)|Comas|Spain

>Spike|hCoV-19/Australia/VIC32/2020|2020-03-10|EPI\_ISL\_419751|Original|hCoV-19^^Victoria|Human|Victorian Infectious Diseases Reference Laboratory (VIDRL)|Victorian Infectious Diseases Reference Laboratory and Microbiological Diagnostic Unit Public Health Laboratory|Schultz|Australia

>Spike|hCoV-19/India/OR-ILSCV16512/2020|2020-05-12|EPI\_ISL\_463051|Original|hCoV-19^^Odisha|Human|Institute of Life Sciences|Immunogenomics lab|Raghav|India

>Spike|hCoV-19/USA/TX-HMH-MCoV-14325/2020|2020-10-05|EPI\_ISL\_787610|Original|hCoV-19^^Texas|Human|Houston Methodist Hospital|Houston Methodist Hospital|Long|USA

>Spike|hCoV-19/Denmark/DCGC-4352/2020|2020-09-07|EPI\_ISL\_615554|Original|hCoV-19^^Nordjylland|Human|Department of Virus and Microbiological Special Diagnostics|Albertsen lab|Michaelsen|Denmark

>Spike|hCoV-19/USA/WI-UW-2500/2020|2020-12-30|EPI\_ISL\_779332|Original|hCoV-19^^Wisconsin|Human|University of Wisconsin-Madison AIDS Vaccine Research Laboratories|University of Wisconsin-Madison AIDS Vaccine Research Laboratories|Moreno|USA

>Spike|hCoV-19/England/MILK-A7C876/2020|2020-10-15|EPI\_ISL\_607549|Original|hCoV-19^^England|Human|Lighthouse Lab in Milton Keynes|Wellcome Sanger Institute for the COVID-19 Genomics UK (COG-UK) consortium|Davies|United Kingdom

>Spike|hCoV-19/Italy/VEN-IZSVE-20RS2160-33/2020|2020-11-26|EPI\_ISL\_747463|Original|hCoV-19^^Veneto|Human|Ospedale San Bonifacio|Istituto Zooprofilattico Sperimentale delle Venezie|Quaranta|Italy

>Spike|hCoV-19/England/QEUA-BCCAE9/2020|2020-11-25|EPI\_ISL\_704396|Original|hCoV-19^^England|Human|Lighthouse Lab in Glasgow|Wellcome Sanger Institute for the COVID-19 Genomics UK (COG-UK) Consortium|Davies|United Kingdom

>Spike|hCoV-19/England/ALDP-A2EFBA/2020|2020-10-05|EPI\_ISL\_587123|Original|hCoV-19^^England|Human|Lighthouse Lab in Alderley Park|Wellcome Sanger Institute for the COVID-19 Genomics UK (COG-UK) consortium|Davies|United Kingdom

>Spike|hCoV-19/Australia/VIC17146/2020|2020-08-14|EPI\_ISL\_663762|Original|hCoV-19^^Victoria|Human|Microbiological Diagnostic Unit - Public Health Laboratory (MDU-PHL)|MDU-PHL|Schultz|Australia

>Spike|hCoV-19/USA/CA-CZB-10903/2020|2020-08-20|EPI\_ISL\_583132|Original|hCoV-19^^California|Human|Humboldt County Public Health Laboratory|Chan-Zuckerberg Biohub|Bhatt|USA

>Spike|hCoV-19/USA/CA-IGI-0091/2020|2020-06-11|EPI\_ISL\_511845|Original|hCoV-19^^California|Human|Innovative Genomics Institute|Innovative Genomics Institute|Wyman|USA

>Spike|hCoV-19/USA/NY-NYCPHL-001193/2020|2020-10-30|EPI\_ISL\_683937|Original|hCoV-19^^New York|Human|DOHMH Central Harlem|New York City Public Health Laboratory|Wang|USA

>Spike|hCoV-19/England/BRIS-1853E27/2020|2020-04-27|EPI\_ISL\_492410|Original|hCoV-19^^England|Human|PHE South West Regional Laboratory|Wellcome Sanger Institute for the COVID-19 Genomics UK (COG-UK) consortium|Davies|United Kingdom

>Spike|hCoV-19/Denmark/DCGC-22617/2020|2020-12-14|EPI\_ISL\_757672|Original|hCoV-19^^Syddanmark|Human|Department of Virus and Microbiological Special Diagnostics|Albertsen Lab|Michaelsen|Denmark

>Spike|hCoV-19/USA/NY-NYCPHL-001018/2020|2020-09-14|EPI\_ISL\_633036|Original|hCoV-19^^New York|Human|DOHMH Morrisania|New York City Public Health Laboratory|Wang|USA

>Spike|hCoV-19/Japan/PG-0443/2020|2020-03-30|EPI\_ISL\_480108|Original|hCoV-19^^Kanto|Human|Koshigaya City Public Health Center|Pathogen Genomics Center|Sekizuka|Japan

>Spike|hCoV-19/Wales/MILK-956916/2020|2020-06-06|EPI\_ISL\_554142|Original|hCoV-19^^Wales|Human|Lighthouse Lab in Milton Keynes|Wellcome Sanger Institute for the COVID-19 Genomics UK (COG-UK) consortium|Davies|United Kingdom

>Spike|hCoV-19/England/GSTT-265DE95/2020|2020-03-28|EPI\_ISL\_484119|Original|hCoV-19^^England|Human|Centre for Clinical Infection and Diagnostics Research and Genomics Innovation Unit|COVID-19 Genomics UK (COG-UK) Consortium|Awan|United Kingdom

>Spike|hCoV-19/England/ALDP-B469DB/2020|2020-11-07|EPI\_ISL\_656141|Original|hCoV-19^^England|Human|Lighthouse Lab in Alderley Park|Wellcome Sanger Institute for the COVID-19 Genomics UK (COG-UK) Consortium|Davies|United Kingdom

>Spike|hCoV-19/France/OCC-SC543/2020|2020-03-30|EPI\_ISL\_645200|Original|hCoV-19^^Occitanie|Human|CHU N\u00eemes|CNR Virus des Infections Respiratoires - France SUD|Bal|France

>Spike|hCoV-19/Denmark/ALAB-SSI-1261/2020|2020-03-09|EPI\_ISL\_444833|Original|hCoV-19^^Denmark|Human|Department of Virus and Microbiological Special Diagnostics|Albertsen lab|Kirkegaard|Denmark

>Spike|hCoV-19/New Zealand/20VR0996/2020|2020-03-16|EPI\_ISL\_456179|Original|hCoV-19^^Auckland|Human|LabPLUS|Institute of Environmental Science and Research (ESR)|de Ligt|New Zealand

>Spike|hCoV-19/USA/CA-ALSR-4130/2020|2020-07-02|EPI\_ISL\_648838|Original|hCoV-19^^California|Human|San Diego County Public Health Laboratory|Andersen lab at Scripps Research|Gangavarapu|USA

>Spike|hCoV-19/England/SHEF-C3DD5/2020|2020-11-09|EPI\_ISL\_680130|Original|hCoV-19^^England|Human|Virology Department|COVID-19 Genomics UK (COG-UK) Consortium|de Silva|United Kingdom

>Spike|hCoV-19/USA/CA-SEARCH-5416/2020|2020-11-30|EPI\_ISL\_755226|Original|hCoV-19^^California|Human|UCSD EXCITE lab|Andersen lab at Scripps Research|Gangavarapu|USA

>Spike|hCoV-19/Sweden/20-53612/2020|2020-11-21|EPI\_ISL\_766618|Original|hCoV-19^^Vastra Gotaland|Human|Klinisk mikrobiologi|The Public Health Agency of Sweden|Svartstr\u00f6m|Sweden

>Spike|hCoV-19/Austria/CeMM0432/2020|2020-03-25|EPI\_ISL\_475859|Original|hCoV-19^^Austria|Human|Austrian Agency for Health and Food Safety (AGES)|Bergthaler laboratory|Bergthaler|Austria

>Spike|hCoV-19/North Macedonia/11890/2020|2020-09-09|EPI\_ISL\_678259|Original|hCoV-19^^Shtip|Human|Clinical Hospital - Shtip|Research Center for Genetic Engineering and Biotechnology \Georgi D. Efremov\u201d|Dimovski|North Macedonia

>Spike|hCoV-19/USA/WI-QDX-194/2020|2020-04-30|EPI\_ISL\_494550|Original|hCoV-19^^Wisconsin|Human|Quest Diagnostics|Quest Diagnostics|Kagan|USA

>Spike|hCoV-19/England/204960125/2020|2020-12-02|EPI\_ISL\_723010|Original|hCoV-19^^England|Human|Respiratory Virus Unit|COVID-19 Genomics UK (COG-UK) Consortium|Platt|United Kingdom

>Spike|hCoV-19/USA/FL-06-UMTL-A388/2020|2020-06-09|EPI\_ISL\_479765|Original|hCoV-19^^Florida|Human|University of Miami Immunology and Histocompatibility Laboratory|University of Miami Immunology and Histocompatibility Laboratory|Margolles-Clark|USA

>Spike|hCoV-19/Germany/HH-hpi-p2180/2020|2020-03-28|EPI\_ISL\_776409|Original|hCoV-19^^Hamburg|Human|University Medical Center Hamburg Eppendorf|Heinrich Pette Institute|Robitaille|Germany

>Spike|hCoV-19/England/SHEF-CB1B3/2020|2020-04-11|EPI\_ISL\_442379|Original|hCoV-19^^England|Human|Virology Department|COVID-19 Genomics UK (COG-UK) Consortium|de Silva|United Kingdom

>Spike|hCoV-19/England/BRIS-12F7AB/2020|2020-03-07|EPI\_ISL\_488277|Original|hCoV-19^^England|Human|PHE South West Regional Laboratory|Wellcome Sanger Institute for the COVID-19 Genomics UK (COG-UK) consortium|Davies|United Kingdom

>Spike|hCoV-19/England/QEUH-9F3BE8/2020|2020-09-24|EPI\_ISL\_588618|Original|hCoV-19^^England|Human|Lighthouse Lab in Glasgow|Wellcome Sanger Institute for the COVID-19 Genomics UK (COG-UK) consortium|Davies|United Kingdom

>Spike|hCoV-19/England/MILK-BB2390/2020|2020-11-18|EPI\_ISL\_720140|Original|hCoV-19^^England|Human|Lighthouse Lab in Milton Keynes|Wellcome Sanger Institute for the COVID-19 Genomics UK (COG-UK) Consortium|Davies|United Kingdom

>Spike|hCoV-19/USA/NV-NSPHL-A0139/2020|2020-04-30|EPI\_ISL\_515406|Original|hCoV-19^^Nevada|Human|Nevada State Public Health Laboratory|Nevada State Public Health Laboratory|Sevinsky|USA

>Spike|hCoV-19/Russia/AST-RII-MH4460S/2020|2020-08-15|EPI\_ISL\_733201|Original|hCoV-19^^Astrakhan|Human|Pathogenic Microorganisms Variability Laboratory|WHO National Influenza Centre Russian Federation|Komissarov|Russia

>Spike|hCoV-19/USA/HI-H200097/2020|2020-04-24|EPI\_ISL\_752662|Original|hCoV-19^^Hawaii|Human|State Laboratories Division|State Laboratories Division|Sultana|USA

>Spike|hCoV-19/Denmark/DCGC-8457/2020|2020-10-26|EPI\_ISL\_617405|Original|hCoV-19^^Syddanmark|Human|Department of Virus and Microbiological Special Diagnostics|Albertsen lab|Michaelsen|Denmark

>Spike|hCoV-19/Czech Republic/IAB\_10/2020|2020-03-31|EPI\_ISL\_426887|Original|hCoV-19^^Czech Republic|Human|Motol University Hospital|Institute of Applied Biotechnologies a.s.|Broz|Czech Republic

>Spike|hCoV-19/England/20129096504/2020|2020-03-11|EPI\_ISL\_424081|Original|hCoV-19^^England|Human|Respiratory Virus Unit|Respiratory Virus Unit|Platt|United Kingdom

>Spike|hCoV-19/Japan/PG-7515/2020|2020-08-00|EPI\_ISL\_686617|Original|hCoV-19^^Japan|Human|Pathogen Genomics Center|Pathogen Genomics Center|Sekizuka|Japan

>Spike|hCoV-19/Australia/VIC3103/2020|2020-07-04|EPI\_ISL\_520810|Original|hCoV-19^^Victoria|Human|Victorian Infectious Diseases Reference Laboratory (VIDRL)|VIDRL and MDU-PHL|Schultz|Australia

>Spike|hCoV-19/Wales/PHWC-1603C8/2020|2020-05-15|EPI\_ISL\_472927|Original|hCoV-19^^Wales|Human|Wales Specialist Virology Centre Sequencing lab|COVID-19 Genomics UK (COG-UK) Consortium|Moore|United Kingdom

>Spike|hCoV-19/USA/MD-MDH-0529/2020|2020-12-01|EPI\_ISL\_778906|Original|hCoV-19^^Maryland|Human|Maryland Public Health Laboratory|Maryland Public Health Laboratory|Keller|USA

>Spike|hCoV-19/United Arab Emirates/0470/2020|2020-05-18|EPI\_ISL\_698639|Original|hCoV-19^^Abu Dhabi|Human|Group 42 (G42) Healthcare|G42 Healthcare|Ogrodzki|United Arab Emirates

>Spike|hCoV-19/England/201360130/2020|2020-03-25|EPI\_ISL\_423220|Original|hCoV-19^^England|Human|Respiratory Virus Unit|Respiratory Virus Unit|Platt|United Kingdom



>Spike|hCoV-19/Wales/PHWC-480383/2020|2020-10-22|EPI\_ISL\_612878|Original|hCoV-19^^Wales|Human|Wales Specialist Virology Centre Sequencing lab|COVID-19 Genomics UK (COG-UK) Consortium|Moore|United Kingdom

>Spike|hCoV-19/USA/VA-DCLS-1663/2020|2020-08-29|EPI\_ISL\_644834|Original|hCoV-19^^Virginia|Human|Virginia DCLS|Virginia DCLS|St. Jacques|USA

>Spike|hCoV-19/New Zealand/20CV0116/2020|2020-08-17|EPI\_ISL\_548002|Original|hCoV-19^^Combined Auckland|Human|Middlemore Hospital|Institute of Environmental Science and Research (ESR)|Wang|New Zealand

>Spike|hCoV-19/Japan/PG-1636/2020|2020-03-00|EPI\_ISL\_685242|Original|hCoV-19^^Japan|Human|Pathogen Genomics Center|Pathogen Genomics Center|Sekizuka|Japan

>Spike|hCoV-19/USA/WI-UW-634/2020|2020-06-28|EPI\_ISL\_491327|Original|hCoV-19^^Wisconsin|Human|University of Wisconsin-Madison AIDS Vaccine Research Laboratories|University of Wisconsin-Madison AIDS Vaccine Research Laboratories|Baczenas|USA

>Spike|hCoV-19/England/LIVE-A9B80/2020|2020-03-24|EPI\_ISL\_517330|Original|hCoV-19^^England|Human|Liverpool Clinical Laboratories|COVID-19 Genomics UK (COG-UK) Consortium|Haldenby|United Kingdom

>Spike|hCoV-19/Singapore/1319/2020|2020-05-21|EPI\_ISL\_648807|Original|hCoV-19^^Singapore|Human|Department of Laboratory Medicine|Department of Laboratory Medicine|Chen|Singapore

>Spike|hCoV-19/Sweden/20-13107/2020|2020-12-29|EPI\_ISL\_775566|Original|hCoV-19^^Stockholm|Human|ABC|The Public Health Agency of Sweden|Svartstr\u00f6m|Sweden

>Spike|hCoV-19/USA/LA-EVTL172/2020|2020-05-14|EPI\_ISL\_574307|Original|hCoV-19^^Louisiana|Human|LSUHS Emerging Viral Threat Laboratory|Microbial Genome Sequencing Center|Kamil|USA

>Spike|hCoV-19/England/QEUH-CC7ADE/2020|2020-12-21|EPI\_ISL\_760262|Original|hCoV-19^^England|Human|Lighthouse Lab in Glasgow|Wellcome Sanger Institute for the COVID-19 Genomics UK (COG-UK) Consortium|Davies|United Kingdom

>Spike|hCoV-19/Switzerland/GE-ETHZ-321475/2020|2020-10-14|EPI\_ISL\_603687|Original|hCoV-19^^Geneva|Human|Viollier AG|Department of Biosystems Science and Engineering|Nadeau|Switzerland

>Spike|hCoV-19/Australia/NSW1363/2020|2020-12-28|EPI\_ISL\_767929|Original|hCoV-19^^New South Wales|Human|Southern. IML Pathology|NSW Health Pathology - Institute of Clinical Pathology and Medical Research; Westmead Hospital; University of Sydney|Gall|Australia

>Spike|hCoV-19/USA/NY-NYCPHL-000982/2020|2020-09-28|EPI\_ISL\_633009|Original|hCoV-19^^New York|Human|DOHMH Central Harlem|New York City Public Health Laboratory|Wang|USA

>Spike|hCoV-19/Ireland/WX-NVRL-72IRL33081/2020|2020-08-15|EPI\_ISL\_578334|Original|hCoV-19^^Wexford|Human|National Virus Reference Laboratory|National Virus Reference Laboratory|Gonzalez|Ireland

>Spike|hCoV-19/USA/WA-UW279/2020|2020-03-15|EPI\_ISL\_418064|Original|hCoV-19^^Washington|Human|UW Virology Lab|UW Virology Lab|Roychoudhury|USA

>Spike|hCoV-19/Germany/NW-HHU-462/2020|2020-12-11|EPI\_ISL\_770696|Original|hCoV-19^^North Rhine-Westphalia|Human|ZOTZ KLIMAS MVZ D\u00fcsseldorf-Centrum GbR \u00dcBAG f\u00fcr Labormedizin|Center of Medical Microbiology|Wienemann|Germany

>Spike|hCoV-19/Scotland/QEUH-9FF803/2020|2020-10-02|EPI\_ISL\_600132|Original|hCoV-19^^Scotland|Human|Lighthouse Lab in Glasgow|Wellcome Sanger Institute for the COVID-19 Genomics UK (COG-UK) consortium|Davies|United Kingdom

>Spike|hCoV-19/USA/TX-HMH-MCoV-10579/2020|2020-07-08|EPI\_ISL\_789543|Original|hCoV-19^^Texas|Human|Houston Methodist Hospital|Houston Methodist Hospital|Long|USA

>Spike|hCoV-19/USA/WA-S54/2020|2020-03-05|EPI\_ISL\_417107|Original|hCoV-19^^Washington|Human|Washington State Department of Health|Seattle Flu Study|Bedford|USA

>Spike|hCoV-19/USA/WA-S1555/2020|2020-05-26|EPI\_ISL\_495981|Original|hCoV-19^^Washington|Human|Washington State Department of Health|Seattle Flu Study|Lee|USA

>Spike|hCoV-19/England/MILK-B3B71B/2020|2020-11-01|EPI\_ISL\_679762|Original|hCoV-19^^England|Human|Oxford Viromics|COVID-19 Genomics UK (COG-UK) Consortium|Golubchik|United Kingdom

>Spike|hCoV-19/England/QEUA-C4BBC0/2020|2020-12-14|EPI\_ISL\_736678|Original|hCoV-19^^England|Human|Lighthouse Lab in Glasgow|Wellcome Sanger Institute for the COVID-19 Genomics UK (COG-UK) Consortium|Davies|United Kingdom

>Spike|hCoV-19/USA/CO-Broad-CMU\_00116/2020|2020-11-10|EPI\_ISL\_765579|Original|hCoV-19^^Colorado|Human|Colorado Mesa University|Infectious Disease Program|Park|USA

>Spike|hCoV-19/England/CAMC-B21B49/2020|2020-11-01|EPI\_ISL\_647280|Original|hCoV-19^^England|Human|Lighthouse Lab in Cambridge|Wellcome Sanger Institute for the COVID-19 Genomics UK (COG-UK) Consortium|Davies|United Kingdom

>Spike|hCoV-19/USA/MA-MASPHL-00780/2020|2020-09-25|EPI\_ISL\_692916|Original|hCoV-19^^Massachusetts|Human|Massachusetts State Public Health Laboratory|Massachusetts State Public Health Laboratory|Lang|USA

>Spike|hCoV-19/England/ALDP-A2E22A/2020|2020-10-06|EPI\_ISL\_586919|Original|hCoV-19^^England|Human|Lighthouse Lab in Alderley Park|Wellcome Sanger Institute for the COVID-19 Genomics UK (COG-UK) consortium|Davies|United Kingdom

>Spike|hCoV-19/Russia/SVE-RII-MH2843S/2020|2020-09-25|EPI\_ISL\_733030|Original|hCoV-19^^Sverdlovsk|Human|HELIX LLC|WHO National Influenza Centre Russian Federation|Komissarov|Russia

>Spike|hCoV-19/Australia/VIC2524/2020|2020-06-30|EPI\_ISL\_522218|Original|hCoV-19^^Victoria|Human|Microbiological Diagnostic Unit - Public Health Laboratory (MDU-PHL)|MDU-PHL|Schultz|Australia

>Spike|hCoV-19/Netherlands/FR-EMC-52/2020|2020-06-02|EPI\_ISL\_523144|Original|hCoV-19^^Friesland|Human|Dutch COVID-19 response team|Erasmus Medical Center|Oude Munnink|Netherlands

>Spike|hCoV-19/Netherlands/NoordBrabant\_147/2020|2020-03-24|EPI\_ISL\_461182|Original|hCoV-19^^Noord Brabant|Human|Dutch COVID-19 response team|Erasmus Medical Center|Oude Munnink|Netherlands

>Spike|hCoV-19/Wales/PHWC-16D598/2020|2020-09-20|EPI\_ISL\_574254|Original|hCoV-19^^Wales|Human|Wales Specialist Virology Centre Sequencing lab|COVID-19 Genomics UK (COG-UK) Consortium|Moore|United Kingdom

>Spike|hCoV-19/England/MILK-BDC5E5/2020|2020-11-27|EPI\_ISL\_709770|Original|hCoV-19^^England|Human|Lighthouse Lab in Milton Keynes|Wellcome Sanger Institute for the COVID-19 Genomics UK (COG-UK) Consortium|Davies|United Kingdom

>Spike|hCoV-19/Sweden/20-08125/2020|2020-03-09|EPI\_ISL\_454441|Original|hCoV-19^^Halland|Human|Halmstad klinisk mikrobiologi|The Public Health Agency of Sweden|Svartstr\u00f6m|Sweden

>Spike|hCoV-19/USA/TX-DSHS-1429/2020|2020-06-23|EPI\_ISL\_671613|Original|hCoV-19^^Texas|Human|Texas Department of State Health Services|Texas Department of State Health Services|Rahman|USA

>Spike|hCoV-19/USA/WI-GMF-06787/2020|2020-06-17|EPI\_ISL\_489910|Original|hCoV-19^^Wisconsin|Human|Gundersen Molecular Diagnostics Laboratory|Kabara Cancer Research Institute|Kenny|USA

>Spike|hCoV-19/Japan/PG-0700/2020|2020-04-00|EPI\_ISL\_684310|Original|hCoV-19^^Japan|Human|Pathogen Genomics Center|Pathogen Genomics Center|Sekizuka|Japan

>Spike|hCoV-19/Jordan/AZ-ALSR-5227/2020|2020-10-18|EPI\_ISL\_730465|Original|hCoV-19^^Zarqa|Human|Biolab Diagnostic Laboratories|Andersen lab at Scripps Research|Gangavarapu|Jordan

>Spike|hCoV-19/USA/TX-HMH-MCoV-14912/2020|2020-10-14|EPI\_ISL\_786396|Original|hCoV-19^^Texas|Human|Houston Methodist Hospital|Houston Methodist Hospital|Long|USA

>Spike|hCoV-19/Northern Ireland/NIRE-2335B8/2020|2020-09-17|EPI\_ISL\_680301|Original|hCoV-19^^Northern Ireland|Human|Regional Virus Laboratory|COVID-19 Genomics UK (COG-UK) Consortium|Fairley|United Kingdom

>Spike|hCoV-19/Wales/PHWC-47EB44/2020|2020-10-07|EPI\_ISL\_595557|Original|hCoV-19^^Wales|Human|Originating lab|COVID-19 Genomics UK (COG-UK) Consortium|Moore|United Kingdom

>Spike|hCoV-19/Denmark/DCGC-771/2020|2020-03-09|EPI\_ISL\_614764|Original|hCoV-19^^Syddanmark|Human|Department of Virus and Microbiological Special Diagnostics|Albertsen lab|Michaelsen|Denmark

>Spike|hCoV-19/Denmark/DCGC-21040/2020|2020-12-21|EPI\_ISL\_759521|Original|hCoV-19^^Hovedstaden|Human|Department of Virus and Microbiological Special Diagnostics|Albertsen Lab|Michaelsen|Denmark

>Spike|hCoV-19/England/ALDP-A2E7D0/2020|2020-10-05|EPI\_ISL\_586616|Original|hCoV-19^^England|Human|Lighthouse Lab in Alderley Park|Wellcome Sanger Institute for the COVID-19 Genomics UK (COG-UK) consortium|Davies|United Kingdom

>Spike|hCoV-19/Australia/VIC5249/2020|2020-07-10|EPI\_ISL\_520014|Original|hCoV-19^^Victoria|Human|Microbiological Diagnostic Unit - Public Health Laboratory (MDU-PHL)|MDU-PHL|Schultz|Australia

>Spike|hCoV-19/England/QEUA-B7F2B0/2020|2020-11-14|EPI\_ISL\_668124|Original|hCoV-19^^England|Human|Lighthouse Lab in Glasgow|Wellcome Sanger Institute for the COVID-19 Genomics UK (COG-UK) Consortium|Davies|United Kingdom

>Spike|hCoV-19/USA/TX-HMH-4317/2020|2020-06-20|EPI\_ISL\_543526|Original|hCoV-19^^Texas|Human|Houston Methodist Hospital|Houston Methodist Hospital|Long|USA

>Spike|hCoV-19/Switzerland/ZH-ETHZ-310415/2020|2020-10-08|EPI\_ISL\_603489|Original|hCoV-19^^Zurich|Human|Viollier AG|Department of Biosystems Science and Engineering|Nadeau|Switzerland

>Spike|hCoV-19/USA/WI-UW-776/2020|2020-07-04|EPI\_ISL\_495480|Original|hCoV-19^^Wisconsin|Human|University of Wisconsin-Madison AIDS Vaccine Research Laboratories|University of Wisconsin-Madison AIDS Vaccine Research Laboratories|Baczenas|USA

>Spike|hCoV-19/India/GJ-GBRC228a/2020|2020-06-11|EPI\_ISL\_476865|Original|hCoV-19^^Gujarat|Human|GMERS Medical College and Hospital|Gujarat Biotechnology Research Centre|Joshi|India

>Spike|hCoV-19/England/MILK-A44C99/2020|2020-10-06|EPI\_ISL\_598685|Original|hCoV-19^^England|Human|Lighthouse Lab in Milton Keynes|Wellcome Sanger Institute for the COVID-19 Genomics UK (COG-UK) consortium|Davies|United Kingdom

>Spike|hCoV-19/Australia/VIC4231/2020|2020-07-15|EPI\_ISL\_519559|Original|hCoV-19^^Victoria|Human|Microbiological Diagnostic Unit - Public Health Laboratory (MDU-PHL)|MDU-PHL|Schultz|Australia

>Spike|hCoV-19/USA/TX-HMH-5810/2020|2020-06-30|EPI\_ISL\_547032|Original|hCoV-19^^Texas|Human|Houston Methodist Hospital|Houston Methodist Hospital|Long|USA

>Spike|hCoV-19/England/ALDP-955768/2020|2020-06-12|EPI\_ISL\_554373|Original|hCoV-19^^England|Human|Lighthouse Lab in Alderley Park|Wellcome Sanger Institute for the COVID-19 Genomics UK (COG-UK) consortium|Davies|United Kingdom

>Spike|hCoV-19/Portugal/PT0238/2020|2020-03-31|EPI\_ISL\_453952|Original|hCoV-19^^Portugal|Human|unknown|Instituto Nacional de Saude (INSA)|Borges|Portugal

>Spike|hCoV-19/Spain/NC-IBV-001400/2020|2020-03-18|EPI\_ISL\_452501|Original|hCoV-19^^Navarra|Human|Cl\u00ednica Universidad de Navarra. Servicio de Enfermedades Infecciosas y Microbiolog\u00eda cl\u00ednica|SeqCOVID-SPAIN consortium/IBV (CSIC)|Comas|Spain

>Spike|hCoV-19/USA/MI-MDHHS-SC21443/2020|2020-03-25|EPI\_ISL\_507697|Original|hCoV-19^^Michigan|Human|Michigan Department of Health and Human Services|Michigan Department of Health and Human Services|Blankenship|USA

>Spike|hCoV-19/England/QEUA-B9FDD7/2020|2020-11-18|EPI\_ISL\_721090|Original|hCoV-19^^England|Human|Lighthouse Lab in Glasgow|Wellcome Sanger Institute for the COVID-19 Genomics UK (COG-UK) Consortium|Davies|United Kingdom

>Spike|hCoV-19/Denmark/DCGC-3995/2020|2020-09-14|EPI\_ISL\_615765|Original|hCoV-19^^Nordjylland|Human|Department of Virus and Microbiological Special Diagnostics|Albertsen lab|Michaelsen|Denmark

>Spike|hCoV-19/England/QEUA-AF580C/2020|2020-10-30|EPI\_ISL\_663056|Original|hCoV-19^^England|Human|Lighthouse Lab in Glasgow|Wellcome Sanger Institute for the COVID-19 Genomics UK (COG-UK) Consortium|Davies|United Kingdom

>Spike|hCoV-19/England/QEUA-95E8D5/2020|2020-08-09|EPI\_ISL\_532354|Original|hCoV-19^^England|Human|Lighthouse Lab in Glasgow|Wellcome Sanger Institute for the COVID-19 Genomics UK (COG-UK) consortium|Davies|United Kingdom

>Spike|hCoV-19/Latvia/038/2020|2020-04-27|EPI\_ISL\_486421|Original|hCoV-19^^Latvia|Human|Centr\u0101l\u0101 laboratorija|Latvian Biomedical Research and Study Centre|Zrelavs|Latvia

>Spike|hCoV-19/USA/NM-NMDOH-2020328211/2020|2020-09-03|EPI\_ISL\_644588|Original|hCoV-19^^New Mexico|Human|New Mexico Department of Health Scientific Laboratory|New Mexico Department of Health Scientific Laboratory|Johnson|USA

>Spike|hCoV-19/England/20139024904/2020|2020-03-27|EPI\_ISL\_421895|Original|hCoV-19^^England|Human|Respiratory Virus Unit|Respiratory Virus Unit|Platt|United Kingdom

>Spike|hCoV-19/South Korea/KCDC2536/2020|2020-06-19|EPI\_ISL\_514939|Original|hCoV-19^^South Korea|Human|Division of Viral Diseases|Division of Viral Diseases|Kim|South Korea

>Spike|hCoV-19/England/QEUEH-8AEDC9/2020|2020-07-21|EPI\_ISL\_532651|Original|hCoV-19^^England|Human|Lighthouse Lab in Glasgow|Wellcome Sanger Institute for the COVID-19 Genomics UK (COG-UK) consortium|Davies|United Kingdom

>Spike|hCoV-19/England/MILK-9716C3/2020|2020-08-18|EPI\_ISL\_553232|Original|hCoV-19^^England|Human|Lighthouse Lab in Milton Keynes|Wellcome Sanger Institute for the COVID-19 Genomics UK (COG-UK) consortium|Davies|United Kingdom

>Spike|hCoV-19/Scotland/CVR2095/2020|2020-04-10|EPI\_ISL\_493766|Original|hCoV-19^^Scotland|Human|West of Scotland Specialist Virology Centre|COVID-19 Genomics UK (COG-UK) Consortium|Robertson|United Kingdom

>Spike|hCoV-19/England/20126008606/2020|2020-03-19|EPI\_ISL\_423882|Original|hCoV-19^^England|Human|Respiratory Virus Unit|Respiratory Virus Unit|Platt|United Kingdom

>Spike|hCoV-19/Belgium/reg-0403882/2020|2020-04-03|EPI\_ISL\_734532|Original|hCoV-19^^Beauvechain|Human|UZ Leuven|KU Leuven|Maes|Belgium

>Spike|hCoV-19/England/ALDP-B5E4FD/2020|2020-11-09|EPI\_ISL\_723662|Original|hCoV-19^^England|Human|Oxford Viromics|COVID-19 Genomics UK (COG-UK) Consortium|Golubchik|United Kingdom

>Spike|hCoV-19/Wales/PHWC-48C1E7/2020|2020-11-03|EPI\_ISL\_666405|Original|hCoV-19^^Wales|Human|Wales Specialist Virology Centre Sequencing lab|COVID-19 Genomics UK (COG-UK) Consortium|Moore|United Kingdom

>Spike|hCoV-19/Scotland/CVR3012/2020|2020-04-23|EPI\_ISL\_461621|Original|hCoV-19^^Scotland|Human|West of Scotland Specialist Virology Centre|COVID-19 Genomics UK (COG-UK) Consortium|Robertson|United Kingdom

>Spike|hCoV-19/Canada/MB-NML-167/2020|2020-03-31|EPI\_ISL\_582244|Original|hCoV-19^^Manitoba|Human|Cadham Provincial Laboratory|National Microbiology Laboratory (NML)|Majer|Canada

>Spike|hCoV-19/England/MILK-ACD58E/2020|2020-10-21|EPI\_ISL\_634458|Original|hCoV-19^^England|Human|Lighthouse Lab in Milton Keynes|Wellcome Sanger Institute for the COVID-19 Genomics UK (COG-UK) consortium|Davies|United Kingdom

>Spike|hCoV-19/England/PORT-2F53B8/2020|2020-00-00|EPI\_ISL\_702744|Original|hCoV-19^^England|Human|Centre for Enzyme Innovation|COVID-19 Genomics UK (COG-UK) Consortium|Robson|United Kingdom

>Spike|hCoV-19/England/SHEF-D028B/2020|2020-04-29|EPI\_ISL\_490636|Original|hCoV-19^^England|Human|Virology Department|COVID-19 Genomics UK (COG-UK) Consortium|de Silva|United Kingdom

>Spike|hCoV-19/USA/MN-MDH-390/2020|2020-04-08|EPI\_ISL\_437368|Original|hCoV-19^^Minnesota|Human|Minnesota Department of Health|Minnesota Department of Health|Garfin|USA

>Spike|hCoV-19/Japan/IC-0058/2020|2020-06-00|EPI\_ISL\_591400|Original|hCoV-19^^Japan|Human|Pathogen Genomics Center|Pathogen Genomics Center|Sekizuka|Japan

>Spike|hCoV-19/USA/TX-HMH-7479/2020|2020-06-30|EPI\_ISL\_546790|Original|hCoV-19^^Texas|Human|Houston Methodist Hospital|Houston Methodist Hospital|Long|USA

>Spike|hCoV-19/USA/CO-CDPHE-2008181790/2020|2020-08-17|EPI\_ISL\_677310|Original|hCoV-19^^Colorado|Human|Colorado Department of Public Health and Environment|Colorado Department of Public Health and Environment|Bankers|USA

>Spike|hCoV-19/England/MILK-B56B1E/2020|2020-11-06|EPI\_ISL\_656733|Original|hCoV-19^^England|Human|Lighthouse Lab in Milton Keynes|Wellcome Sanger Institute for the COVID-19 Genomics UK (COG-UK) Consortium|Davies|United Kingdom

>Spike|hCoV-19/Australia/VIC5968/2020|2020-00-00|EPI\_ISL\_518743|Original|hCoV-19^^Victoria|Human|Microbiological Diagnostic Unit - Public Health Laboratory (MDU-PHL)|MDU-PHL|Schultz|Australia

>Spike|hCoV-19/USA/TX-HMH-MCoV-14149/2020|2020-10-03|EPI\_ISL\_787434|Original|hCoV-19^^Texas|Human|Houston Methodist Hospital|Houston Methodist Hospital|Long|USA

>Spike|hCoV-19/England/QEUEH-AAA97C/2020|2020-10-21|EPI\_ISL\_652722|Original|hCoV-19^^England|Human|Oxford Viromics|COVID-19 Genomics UK (COG-UK) Consortium|Golubchik|United Kingdom

>Spike|hCoV-19/Netherlands/NoordBrabant\_89/2020|2020-00-00|EPI\_ISL\_422883|Original|hCoV-19^^Noord Brabant|Human|Dutch COVID-19 response team|Erasmus Medical Center|Oude Munnink|Netherlands

>Spike|hCoV-19/Northern Ireland/QEUA-96AC07/2020|2020-08-17|EPI\_ISL\_531342|Original|hCoV-19^^Northern Ireland|Human|Lighthouse Lab in Glasgow|Wellcome Sanger Institute for the COVID-19 Genomics UK (COG-UK) consortium|Davies|United Kingdom

>Spike|hCoV-19/USA/TX-HMH-MCoV-12240/2020|2020-09-24|EPI\_ISL\_790261|Original|hCoV-19^^Texas|Human|Houston Methodist Hospital|Houston Methodist Hospital|Long|USA

>Spike|hCoV-19/Australia/VIC935/2020|2020-03-25|EPI\_ISL\_430471|Original|hCoV-19^^Victoria|Human|Microbiological Diagnostic Unit Public Health Laboratory|Microbiological Diagnostic Unit Public Health Laboratory|Schultz|Australia

>Spike|hCoV-19/USA/TX-HMH-2064/2020|2020-05-10|EPI\_ISL\_545098|Original|hCoV-19^^Texas|Human|Houston Methodist Hospital|Houston Methodist Hospital|Long|USA

>Spike|hCoV-19/USA/MA-MGH-03261/2020|2020-10-19|EPI\_ISL\_765762|Original|hCoV-19^^Massachusetts|Human|Massachusetts General Hospital|Infectious Disease Program|Park|USA

>Spike|hCoV-19/Iceland/571/2020|2020-03-28|EPI\_ISL\_424591|Original|hCoV-19^^Reykjavik|Human|The National University Hospital of Iceland|deCODE genetics|J\u00f3nsson|Iceland

>Spike|hCoV-19/Japan/TKYT30430/2020|2020-08-00|EPI\_ISL\_649144|Original|hCoV-19^^Japan|Human|Tokyo Metropolitan Institute of Public Health|Tokyo Metropolitan Institute of Public Health|Ryota|Japan

>Spike|hCoV-19/Japan/PG-4163/2020|2020-07-00|EPI\_ISL\_692402|Original|hCoV-19^^Japan|Human|Pathogen Genomics Center|Pathogen Genomics Center|Sekizuka|Japan

>Spike|hCoV-19/Bangladesh/BCSIR-NILMRC-290/2020|2020-07-14|EPI\_ISL\_498549|Original|hCoV-19^^Rangpur|Human|National Institute of Laboratory Medicine and Referral Center|Genomic Research Lab|Khan|Bangladesh

>Spike|hCoV-19/Spain/VC-FISABIO-274/2020|2020-03-26|EPI\_ISL\_436369|Original|hCoV-19^^Comunitat Valenciana|Human|Servicio de Microbiologia. Hospital Clinico Universitario de Valencia|Sequencing and Bioinformatics Service and Molecular Epidemiology Research Group. FISABIO-Public Health|Gonzalez-Candelas|Spain

>Spike|hCoV-19/England/MILK-86F043/2020|2020-07-17|EPI\_ISL\_557365|Original|hCoV-19^^England|Human|Lighthouse Lab in Milton Keynes|Wellcome Sanger Institute for the COVID-19 Genomics UK (COG-UK) consortium|Davies|United Kingdom

>Spike|hCoV-19/USA/TX-HMH071/2020|2020-03-18|EPI\_ISL\_434780|Original|hCoV-19^^Texas|Human|Houston Methodist Hospital|Houston Methodist Hospital|Long|USA

>Spike|hCoV-19/Wales/PHWC-496A1C/2020|2020-11-22|EPI\_ISL\_726672|Original|hCoV-19^^Wales|Human|Originating lab|COVID-19 Genomics UK (COG-UK) Consortium|Moore|United Kingdom

>Spike|hCoV-19/Australia/NSW691/2020|2020-07-20|EPI\_ISL\_513334|Original|hCoV-19^^New South Wales|Human|Sydney South West Pathology Service (SSWPS) - Liverpool Hospital - NSW Health Pathology|NSW Health Pathology - Institute of Clinical Pathology and Medical Research; Westmead Hospital; University of Sydney|Gall|Australia

>Spike|hCoV-19/England/QEUA-8AE576/2020|2020-07-24|EPI\_ISL\_532717|Original|hCoV-19^^England|Human|Lighthouse Lab in Glasgow|Wellcome Sanger Institute for the COVID-19 Genomics UK (COG-UK) consortium|Davies|United Kingdom

>Spike|hCoV-19/Denmark/DCGC-1315/2020|2020-06-08|EPI\_ISL\_618049|Original|hCoV-19^^Hovedstaden|Human|Department of Virus and Microbiological Special Diagnostics|Albertsen lab|Michaelsen|Denmark

>Spike|hCoV-19/USA/TX-HMH-MCoV-19709/2020|2020-11-22|EPI\_ISL\_784061|Original|hCoV-19^^Texas|Human|Houston Methodist Hospital|Houston Methodist Hospital|Long|USA

>Spike|hCoV-19/Germany/SH-ChVir20305/2020|2020-11-15|EPI\_ISL\_729642|Original|hCoV-19^^Schleswig-Holstein|Human|A. Krumbholz|Charit\u00e9 Universit\u00e4tsmedizin Berlin|Muehlemann|Germany

>Spike|hCoV-19/England/ALDP-AA4B8B/2020|2020-10-21|EPI\_ISL\_624447|Original|hCoV-19^^England|Human|Lighthouse Lab in Alderley Park|Wellcome Sanger Institute for the COVID-19 Genomics UK (COG-UK) consortium|Davies|United Kingdom

>Spike|hCoV-19/England/QEUEH-B117EE/2020|2020-11-02|EPI\_ISL\_642285|Original|hCoV-19^^England|Human|Lighthouse Lab in Glasgow|Wellcome Sanger Institute for the COVID-19 Genomics UK (COG-UK) Consortium|Davies|United Kingdom

>Spike|hCoV-19/USA/HI-H200616/2020|2020-11-23|EPI\_ISL\_753142|Original|hCoV-19^^Hawaii|Human|State Laboratories Division|State Laboratories Division|Sultana|USA

>Spike|hCoV-19/Japan/PG-2980/2020|2020-04-00|EPI\_ISL\_691104|Original|hCoV-19^^Japan|Human|Pathogen Genomics Center|Pathogen Genomics Center|Sekizuka|Japan

>Spike|hCoV-19/England/CAMB-78926/2020|2020-04-07|EPI\_ISL\_433792|Original|hCoV-19^^England|Human|Department of Pathology|COVID-19 Genomics UK (COG-UK) Consortium|Meredith|United Kingdom

>Spike|hCoV-19/USA/MA-MGH-02781/2020|2020-09-24|EPI\_ISL\_765631|Original|hCoV-19^^Massachusetts|Human|Massachusetts General Hospital|Infectious Disease Program|Park|USA

>Spike|hCoV-19/Wales/PHWC-4993C3/2020|2020-12-04|EPI\_ISL\_727298|Original|hCoV-19^^Wales|Human|Originating lab|COVID-19 Genomics UK (COG-UK) Consortium|Moore|United Kingdom

>Spike|hCoV-19/USA/TX-DSHS-1158/2020|2020-07-03|EPI\_ISL\_634959|Original|hCoV-19^^Texas|Human|Texas Department of State Health Services|Texas Department of State Health Services|Rahman|USA

>Spike|hCoV-19/South Africa/L00162/2020|2020-07-26|EPI\_ISL\_622955|Original|hCoV-19^^Gauteng|Human|Lancet Laboratories|National Institute for Communicable Diseases of the National Health Laboratory Service|Allam|South Africa

>Spike|hCoV-19/Scotland/EDB3895/2020|2020-05-01|EPI\_ISL\_439359|Original|hCoV-19^^Scotland|Human|Virology Department|COVID-19 Genomics UK (COG-UK) Consortium|Williams|United Kingdom

>Spike|hCoV-19/Luxembourg/LNS6614402/2020|2020-11-30|EPI\_ISL\_770862|Original|hCoV-19^^Luxembourg|Human|Laboratoire national de sant\u00e9|Laboratoire national de sant\u00e9|Wienecke-Baldacchino|Luxembourg

>Spike|hCoV-19/England/MILK-970266/2020|2020-08-17|EPI\_ISL\_553227|Original|hCoV-19^^England|Human|Lighthouse Lab in Milton Keynes|Wellcome Sanger Institute for the COVID-19 Genomics UK (COG-UK) consortium|Davies|United Kingdom

>Spike|hCoV-19/England/QEUEH-9A43DF/2020|2020-09-01|EPI\_ISL\_540166|Original|hCoV-19^^England|Human|Lighthouse Lab in Glasgow|Wellcome Sanger Institute for the COVID-19 Genomics UK (COG-UK) consortium|Davies|United Kingdom

>Spike|hCoV-19/USA/CA-UCLA-2/2020|2020-04-11|EPI\_ISL\_537509|Original|hCoV-19^^California|Human|UCLA Pathology Clinical Microbiology Lab|Kruglyak Lab|Boocock|USA

>Spike|hCoV-19/USA/WI-UW-1283/2020|2020-08-21|EPI\_ISL\_536655|Original|hCoV-19^^Wisconsin|Human|University of Wisconsin-Madison AIDS Vaccine Research Laboratories|University of Wisconsin-Madison AIDS Vaccine Research Laboratories|Baczenas|USA

>Spike|hCoV-19/England/SHEF-CBA5E/2020|2020-10-31|EPI\_ISL\_651224|Original|hCoV-19^^England|Human|Virology Department|COVID-19 Genomics UK (COG-UK) Consortium|de Silva|United Kingdom

>Spike|hCoV-19/England/ALDP-6E9D00/2020|2020-06-30|EPI\_ISL\_557733|Original|hCoV-19^^England|Human|Lighthouse Lab in Alderley Park|Wellcome Sanger Institute for the COVID-19 Genomics UK (COG-UK) consortium|Davies|United Kingdom

>Spike|hCoV-19/England/QEUEH-95E811/2020|2020-08-07|EPI\_ISL\_532341|Original|hCoV-19^^England|Human|Lighthouse Lab in Glasgow|Wellcome Sanger Institute for the COVID-19 Genomics UK (COG-UK) consortium|Davies|United Kingdom

>Spike|hCoV-19/England/BRIS-1221B9/2020|2020-03-22|EPI\_ISL\_439953|Original|hCoV-19^^England|Human|PHE South West Regional Laboratory|Wellcome Sanger Institute for the COVID-19 Genomics UK (COG-UK) consortium|Amato|United Kingdom

>Spike|hCoV-19/USA/WA-S2271/2020|2020-06-10|EPI\_ISL\_497699|Original|hCoV-19^^Washington|Human|Washington State Department of Health|Seattle Flu Study|Lee|USA

>Spike|hCoV-19/England/CAMC-B23172/2020|2020-11-02|EPI\_ISL\_651721|Original|hCoV-19^^England|Human|Virology Department|COVID-19 Genomics UK (COG-UK) Consortium|de Silva|United Kingdom

>Spike|hCoV-19/Germany/ST-MD006/2020|2020-04-16|EPI\_ISL\_728346|Original|hCoV-19^^Saxony-Anhalt|Human|Institute of medical Microbiology and hospital Hygiene|Institute of medical Microbiology and hospital Hygiene|Tersteegen|Germany

>Spike|hCoV-19/Australia/VIC17536/2020|2020-08-19|EPI\_ISL\_663914|Original|hCoV-19^^Victoria|Human|Microbiological Diagnostic Unit - Public Health Laboratory (MDU-PHL)|MDU-PHL|Schultz|Australia

>Spike|hCoV-19/Scotland/CVR2190/2020|2020-04-11|EPI\_ISL\_477871|Original|hCoV-19^^Scotland|Human|West of Scotland Specialist Virology Centre|COVID-19 Genomics UK (COG-UK) Consortium|Robertson|United Kingdom

>Spike|hCoV-19/USA/LA-EVTL979/2020|2020-08-18|EPI\_ISL\_653670|Original|hCoV-19^^Louisiana|Human|LSUHS Emerging Viral Threat Laboratory|Microbial Genome Sequencing Center|Kamil|USA

>Spike|hCoV-19/USA/WA-S2196/2020|2020-06-08|EPI\_ISL\_497624|Original|hCoV-19^^Washington|Human|Washington State Department of Health|Seattle Flu Study|Lee|USA

>Spike|hCoV-19/USA/WA-S2365/2020|2020-06-11|EPI\_ISL\_496997|Original|hCoV-19^^Washington|Human|Washington State Department of Health|Seattle Flu Study|Lee|USA

>Spike|hCoV-19/Singapore/109/2020|2020-03-05|EPI\_ISL\_443201|Original|hCoV-19^^Singapore|Human|National Public Health Laboratory|National Public Health Laboratory|Mak|Singapore

>Spike|hCoV-19/Portugal/PT0427/2020|2020-03-28|EPI\_ISL\_454151|Original|hCoV-19^^Portugal|Human|unknown|Instituto Nacional de Saude (INSA)|Borges|Portugal

>Spike|hCoV-19/USA/TX-HMH-MCoV-13763/2020|2020-08-17|EPI\_ISL\_788856|Original|hCoV-19^^Texas|Human|Houston Methodist Hospital|Houston Methodist Hospital|Long|USA

>Spike|hCoV-19/Brazil/PE-IAM248/2020|2020-04-09|EPI\_ISL\_500871|Original|hCoV-19^^Pernambuco|Human|LACEN/PE|WallauLab|Wallau|Brazil

>Spike|hCoV-19/England/ALDP-C3BC1B/2020|2020-12-11|EPI\_ISL\_731229|Original|hCoV-19^^England|Human|Lighthouse Lab in Alderley Park|Wellcome Sanger Institute for the COVID-19 Genomics UK (COG-UK) Consortium|Davies|United Kingdom

>Spike|hCoV-19/Wales/PHWC-49787B/2020|2020-11-22|EPI\_ISL\_726893|Original|hCoV-19^^Wales|Human|Originating lab|COVID-19 Genomics UK (COG-UK) Consortium|Moore|United Kingdom

>Spike|hCoV-19/USA/TX-DSHS-1230/2020|2020-03-27|EPI\_ISL\_654731|Original|hCoV-19^^Texas|Human|Texas Department of State Health Services|Texas Department of State Health Services|Rahman|USA

>Spike|hCoV-19/England/MILK-AC83D4/2020|2020-10-21|EPI\_ISL\_629290|Original|hCoV-19^^England|Human|Lighthouse Lab in Milton Keynes|Wellcome Sanger Institute for the COVID-19 Genomics UK (COG-UK) consortium|Davies|United Kingdom

>Spike|hCoV-19/Northern Ireland/NIRE-233767/2020|2020-10-01|EPI\_ISL\_680314|Original|hCoV-19^^Northern Ireland|Human|Regional Virus Laboratory|COVID-19 Genomics UK (COG-UK) Consortium|Fairley|United Kingdom

>Spike|hCoV-19/Japan/PG-1452/2020|2020-04-00|EPI\_ISL\_685059|Original|hCoV-19^^Japan|Human|Saitama Prefectural Institute of Public Health|Pathogen Genomics Center|Sekizuka|Japan

>Spike|hCoV-19/England/QEUEH-B6AFFD/2020|2020-11-11|EPI\_ISL\_662547|Original|hCoV-19^^England|Human|Lighthouse Lab in Glasgow|Wellcome Sanger Institute for the COVID-19 Genomics UK (COG-UK) Consortium|Davies|United Kingdom

>Spike|hCoV-19/USA/CA-SR0412/2020|2020-04-21|EPI\_ISL\_458282|Original|hCoV-19^^California|Human|Scripps Medical Laboratory|Andersen lab at Scripps Research|Gangavarapu|USA

>Spike|hCoV-19/Denmark/DCGC-2125/2020|2020-07-27|EPI\_ISL\_618388|Original|hCoV-19^^Sjaelland|Human|Department of Virus and Microbiological Special Diagnostics|Albertsen lab|Michaelsen|Denmark

>Spike|hCoV-19/England/ALDP-B84D11/2020|2020-11-15|EPI\_ISL\_674484|Original|hCoV-19^^England|Human|Lighthouse Lab in Alderley Park|Wellcome Sanger Institute for the COVID-19 Genomics UK (COG-UK) Consortium|Davies|United Kingdom

>Spike|hCoV-19/England/BRIS-126786/2020|2020-04-10|EPI\_ISL\_459011|Original|hCoV-19^^England|Human|PHE South West Regional Laboratory|Wellcome Sanger Institute for the COVID-19 Genomics UK (COG-UK) consortium|Davies|United Kingdom

>Spike|hCoV-19/England/MILK-9A8E8F/2020|2020-09-01|EPI\_ISL\_551159|Original|hCoV-19^^England|Human|Lighthouse Lab in Milton Keynes|Wellcome Sanger Institute for the COVID-19 Genomics UK (COG-UK) consortium|Davies|United Kingdom

>Spike|hCoV-19/England/LIVE-A45B4/2020|2020-07-03|EPI\_ISL\_584620|Original|hCoV-19^^England|Human|Liverpool Clinical Laboratories|COVID-19 Genomics UK (COG-UK) Consortium|Haldenby|United Kingdom

>Spike|hCoV-19/USA/WI-GMF-00986/2020|2020-04-06|EPI\_ISL\_426159|Original|hCoV-19^^Minnesota|Human|Gundersen Molecular Diagnostics Laboratory|Kabara Cancer Research Institute|Kenny|USA

>Spike|hCoV-19/Denmark/DCGC-6261/2020|2020-10-05|EPI\_ISL\_620021|Original|hCoV-19^^Hovedstaden|Human|Department of Virus and Microbiological Special Diagnostics|Albertsen lab|Michaelsen|Denmark

>Spike|hCoV-19/Denmark/DCGC-10762/2020|2020-11-02|EPI\_ISL\_670190|Original|hCoV-19^^Sjaelland|Human|Department of Virus and Microbiological Special Diagnostics|Albertsen Lab|Michaelsen|Denmark

>Spike|hCoV-19/Japan/PG-7521/2020|2020-08-00|EPI\_ISL\_686623|Original|hCoV-19^^Japan|Human|Pathogen Genomics Center|Pathogen Genomics Center|Sekizuka|Japan

>Spike|hCoV-19/Indonesia/BT-MRINUPH-200622-158/2020|2020-06-17|EPI\_ISL\_779384|Original|hCoV-19^^Banten|Human|Siloam Hospital Lippo Village|Mochtar Riady Institute for Nanotechnology-Universitas Pelita Harapan|Suriapranata|Indonesia

>Spike|hCoV-19/Scotland/EDB7808/2020|2020-09-22|EPI\_ISL\_572776|Original|hCoV-19^^Scotland|Human|Virology Department|COVID-19 Genomics UK (COG-UK) Consortium|Williams|United Kingdom

>Spike|hCoV-19/England/LIVE-9BA1B/2020|2020-04-19|EPI\_ISL\_440894|Original|hCoV-19^^England|Human|Liverpool Clinical Laboratories|COVID-19 Genomics UK (COG-UK) Consortium|Haldenby|United Kingdom

>Spike|hCoV-19/Wales/PHWC-47D32F/2020|2020-10-08|EPI\_ISL\_586129|Original|hCoV-19^^Wales|Human|Wales Specialist Virology Centre Sequencing lab|COVID-19 Genomics UK (COG-UK) Consortium|Moore|United Kingdom

>Spike|hCoV-19/England/QEUEH-AD3A4A/2020|2020-10-26|EPI\_ISL\_629955|Original|hCoV-19^^England|Human|Lighthouse Lab in Glasgow|Wellcome Sanger Institute for the COVID-19 Genomics UK (COG-UK) consortium|Davies|United Kingdom

>Spike|hCoV-19/England/ALDP-9E76F5/2020|2020-09-24|EPI\_ISL\_638212|Original|hCoV-19^^England|Human|Department of Pathology|COVID-19 Genomics UK (COG-UK) Consortium|Goodfellow|United Kingdom

>Spike|hCoV-19/Scotland/QEUEH-AD6704/2020|2020-10-26|EPI\_ISL\_649780|Original|hCoV-19^^Scotland|Human|Lighthouse Lab in Glasgow|Wellcome Sanger Institute for the COVID-19 Genomics UK (COG-UK) Consortium|Davies|United Kingdom

>Spike|hCoV-19/USA/MA-MGH-00192/2020|2020-03-26|EPI\_ISL\_460304|Original|hCoV-19^^Massachusetts|Human|Massachusetts General Hospital|Infectious Disease Program|Lemieux|USA

>Spike|hCoV-19/England/201040046/2020|2020-03-04|EPI\_ISL\_464315|Original|hCoV-19^^England|Human|Respiratory Virus Unit|Respiratory Virus Unit|Platt|United Kingdom

>Spike|hCoV-19/Wales/PHWC-2863D/2020|2020-03-30|EPI\_ISL\_432359|Original|hCoV-19^^Wales|Human|Wales Specialist Virology Centre|Public Health Wales Microbiology Cardiff|Moore|United Kingdom

>Spike|hCoV-19/USA/MI-MDHHS-SC21688/2020|2020-03-24|EPI\_ISL\_529807|Original|hCoV-19^^Michigan|Human|Michigan Department of Health and Human Services|Michigan Department of Health and Human Services|Blankenship|USA

>Spike|hCoV-19/USA/TX-HMH-MCoV-12609/2020|2020-08-31|EPI\_ISL\_790418|Original|hCoV-19^^Texas|Human|Houston Methodist Hospital|Houston Methodist Hospital|Long|USA

>Spike|hCoV-19/England/MILK-9F0A48/2020|2020-09-24|EPI\_ISL\_589612|Original|hCoV-19^^England|Human|Lighthouse Lab in Milton Keynes|Wellcome Sanger Institute for the COVID-19 Genomics UK (COG-UK) consortium|Davies|United Kingdom

>Spike|hCoV-19/South Africa/KRISP-K002384/2020|2020-07-22|EPI\_ISL\_515750|Original|hCoV-19^^KwaZulu-Natal|Human|NHLS-IALCH|KRISP|de Oliveira|South Africa



>Spike|hCoV-19/Spain/CT-IBV-97009567/2020|2020-07-28|EPI\_ISL\_683633|Original|hCoV-19^^Catalunya|Human|Servicio de Microbiolog\u00eda|SeqCOVID-SPAIN consortium/IBV (CSIC) |Comas|Spain

>Spike|hCoV-19/Denmark/DCGC-21209/2020|2020-12-21|EPI\_ISL\_758815|Original|hCoV-19^^Hovedstaden|Human|Department of Virus and Microbiological Special Diagnostics|Albertsen Lab|Michaelsen|Denmark

>Spike|hCoV-19/Canada/BC\_03452391/2020|2020-04-00|EPI\_ISL\_466741|Original|hCoV-19^^British Columbia|Human|BCCDC Public Health Laboratory|BCCDC Public Health Laboratory|Harrigan|Canada

>Spike|hCoV-19/USA/VA-DCLS-0261/2020|2020-04-18|EPI\_ISL\_452834|Original|hCoV-19^^Virginia|Human|Virginia DCLS|Virginia DCLS|St. Jacques|USA

>Spike|hCoV-19/Australia/VIC15488/2020|2020-07-30|EPI\_ISL\_593328|Original|hCoV-19^^Victoria|Human|Microbiological Diagnostic Unit - Public Health Laboratory (MDU-PHL) |MDU-PHL|Schultz|Australia

>Spike|hCoV-19/England/QEUEH-B42386/2020|2020-11-08|EPI\_ISL\_657216|Original|hCoV-19^^England|Human|Lighthouse Lab in Glasgow|Wellcome Sanger Institute for the COVID-19 Genomics UK (COG-UK) Consortium|Davies|United Kingdom

>Spike|hCoV-19/Japan/PG-8228/2020|2020-08-00|EPI\_ISL\_687327|Original|hCoV-19^^Japan|Human|Pathogen Genomics Center|Pathogen Genomics Center|Sekizuka|Japan

>Spike|hCoV-19/Guangzhou/GZMU0030/2020|2020-02-27|EPI\_ISL\_414686|Original|hCoV-19^^Guangdong|Human|State Key Laboratory of Respiratory Disease|The First Affiliated Hospital of Guangzhou Medical University & BGI-Shenzhen|Ji|China

>Spike|hCoV-19/Australia/WA24/2020|2020-04-01|EPI\_ISL\_470842|Original|hCoV-19^^Western Australia|Human|PathWest Laboratory Medicine WA|PathWest Laboratory Medicine WA|Sikazwe|Australia

>Spike|hCoV-19/USA/UT-01822/2020|2020-04-10|EPI\_ISL\_509572|Original|hCoV-19^^Utah|Human|Utah Public Health Laboratory|Utah Public Health Laboratory|Butz|USA

>Spike|hCoV-19/England/BRIS-122DD3/2020|2020-04-03|EPI\_ISL\_440726|Original|hCoV-19^^England|Human|PHE South West Regional Laboratory|Wellcome Sanger Institute for the COVID-19 Genomics UK (COG-UK) consortium|Amato|United Kingdom

>Spike|hCoV-19/England/PORT-2E8EC6/2020|2020-00-00|EPI\_ISL\_763603|Original|hCoV-19^^England|Human|Centre for Enzyme Innovation|COVID-19 Genomics UK (COG-UK) Consortium|Robson|United Kingdom

>Spike|hCoV-19/USA/VA-DCLS-0543/2020|2020-03-12|EPI\_ISL\_485844|Original|hCoV-19^^Virginia|Human|Virginia DCLS|Virginia DCLS|St. Jacques|USA

>Spike|hCoV-19/England/MILK-B06209/2020|2020-10-24|EPI\_ISL\_643016|Original|hCoV-19^^England|Human|Lighthouse Lab in Milton Keynes|Wellcome Sanger Institute for the COVID-19 Genomics UK (COG-UK) Consortium|Davies|United Kingdom

>Spike|hCoV-19/Australia/VIC13347/2020|2020-07-30|EPI\_ISL\_563686|Original|hCoV-19^^Victoria|Human|Microbiological Diagnostic Unit - Public Health Laboratory (MDU-PHL) |MDU-PHL|Schultz|Australia

>Spike|hCoV-19/England/QEUEH-96E641/2020|2020-08-17|EPI\_ISL\_530587|Original|hCoV-19^^England|Human|Lighthouse Lab in Glasgow|Wellcome Sanger Institute for the COVID-19 Genomics UK (COG-UK) consortium|Davies|United Kingdom

>Spike|hCoV-19/England/ALDP-A6EE84/2020|2020-10-14|EPI\_ISL\_607047|Original|hCoV-19^^England|Human|Lighthouse Lab in Alderley Park|Wellcome Sanger Institute for the COVID-19 Genomics UK (COG-UK) consortium|Davies|United Kingdom

>Spike|hCoV-19/Norway/3122/2020|2020-08-07|EPI\_ISL\_590921|Original|hCoV-19^^Viken|Human|Ostfold Hospital Trust - Kalnes|Norwegian Institute of Public Health|Vollan|Norway

>Spike|hCoV-19/Netherlands/ZH-EMC-855/2020|2020-10-16|EPI\_ISL\_632737|Original|hCoV-19^^Zuid Holland|Human|Dutch COVID-19 response team|Erasmus Medical Center|Oude Munnink|Netherlands

>Spike|hCoV-19/USA/WA-S2668/2020|2020-06-22|EPI\_ISL\_497300|Original|hCoV-19^^Washington|Human|Washington State Department of Health|Seattle Flu Study|Lee|USA

>Spike|hCoV-19/USA/NY-NYCPHL-000507/2020|2020-03-25|EPI\_ISL\_631968|Original|hCoV-19^^New York|Human|Flushing Hospital Medical Center|New York City Public Health Laboratory|Wang|USA

>Spike|hCoV-19/Scotland/CVR307/2020|2020-03-21|EPI\_ISL\_439025|Original|hCoV-19^^Scotland|Human|West of Scotland Specialist Virology Centre|COVID-19 Genomics UK (COG-UK) Consortium|Robertson|United Kingdom

>Spike|hCoV-19/USA/AZ-TG648625/2020|2020-04-27|EPI\_ISL\_695863|Original|hCoV-19^^Arizona|Human|Sonora Quest Laboratories|TGen North|French|USA

>Spike|hCoV-19/Australia/SAP320/2020|2020-03-27|EPI\_ISL\_483100|Original|hCoV-19^^South Australia|Human|SA Pathology|SA Pathology|Leong|Australia

>Spike|hCoV-19/England/ALDP-B85A73/2020|2020-11-14|EPI\_ISL\_675636|Original|hCoV-19^^England|Human|Lighthouse Lab in Alderley Park|Wellcome Sanger Institute for the COVID-19 Genomics UK (COG-UK) Consortium|Davies|United Kingdom

>Spike|hCoV-19/Denmark/DCGC-4624/2020|2020-09-21|EPI\_ISL\_621293|Original|hCoV-19^^Hovedstaden|Human|Department of Virus and Microbiological Special Diagnostics|Albertsen lab|Michaelsen|Denmark

>Spike|hCoV-19/USA/CA-ALSR-4807/2020|2020-05-05|EPI\_ISL\_730154|Original|hCoV-19^^California|Human|Scripps Medical Laboratory|Andersen lab at Scripps Research|Gangavarapu|USA

>Spike|hCoV-19/England/ALDP-B742BB/2020|2020-11-12|EPI\_ISL\_662063|Original|hCoV-19^^England|Human|Lighthouse Lab in Alderley Park|Wellcome Sanger Institute for the COVID-19 Genomics UK (COG-UK) Consortium|Davies|United Kingdom

>Spike|hCoV-19/Wales/PHWC-289BC/2020|2020-04-03|EPI\_ISL\_432157|Original|hCoV-19^^Wales|Human|Wales Specialist Virology Centre|Public Health Wales Microbiology Cardiff|Moore|United Kingdom

>Spike|hCoV-19/England/MILK-C61405/2020|2020-12-13|EPI\_ISL\_769326|Original|hCoV-19^^England|Human|Lighthouse Lab in Milton Keynes|Wellcome Sanger Institute for the COVID-19 Genomics UK (COG-UK) Consortium|Davies|United Kingdom

>Spike|hCoV-19/Romania/284783/2020|2020-05-14|EPI\_ISL\_455474|Original|hCoV-19^^Arges|Human|Laboratory for Respiratory Viruses|Cantacuzino Institute|Lazar|Romania

>Spike|hCoV-19/Denmark/DCGC-19023/2020|2020-12-07|EPI\_ISL\_748705|Original|hCoV-19^^Nordjylland|Human|Department of Virus and Microbiological Special Diagnostics|Albertsen Lab|Michaelsen|Denmark

>Spike|hCoV-19/Scotland/QEUH-961198/2020|2020-08-05|EPI\_ISL\_532080|Original|hCoV-19^^Scotland|Human|NHSGGC West of Scotland Specialist Virology Centre / MRC-University of Glasgow Centre for Virus Research|Wellcome Sanger Institute for the COVID-19 Genomics UK (COG-UK) consortium|Davies|United Kingdom

>Spike|hCoV-19/England/ALDP-944386/2020|2020-06-07|EPI\_ISL\_554642|Original|hCoV-19^^England|Human|Lighthouse Lab in Alderley Park|Wellcome Sanger Institute for the COVID-19 Genomics UK (COG-UK) consortium|Davies|United Kingdom

>Spike|hCoV-19/USA/TX-HMH-MCoV-12364/2020|2020-09-25|EPI\_ISL\_790313|Original|hCoV-19^^Texas|Human|Houston Methodist Hospital|Houston Methodist Hospital|Long|USA

>Spike|hCoV-19/Poland/PL\_MCB\_6/2020|2020-04-07|EPI\_ISL\_645005|Original|hCoV-19^^Poland|Human|Human Genome Variation Research Group|Human Genome Variation Research Group||Poland

>Spike|hCoV-19/Sweden/20-53570/2020|2020-11-26|EPI\_ISL\_710576|Original|hCoV-19^^Skane|Human|VC Sorgenfrimottagningen|The Public Health Agency of Sweden|Svartstr\u00f6m|Sweden

>Spike|hCoV-19/England/ALDP-C3C791/2020|2020-12-10|EPI\_ISL\_731155|Original|hCoV-19^^England|Human|Lighthouse Lab in Alderley Park|Wellcome Sanger Institute for the COVID-19 Genomics UK (COG-UK) Consortium|Davies|United Kingdom

>Spike|hCoV-19/Switzerland/TI-ETHZ-120202/2020|2020-04-28|EPI\_ISL\_468275|Original|hCoV-19^^Ticino|Human|Viollier AG|Department of Biosystems Science and Engineering|Nadeau|Switzerland

>Spike|hCoV-19/Wales/PHWC-4A1489/2020|2020-12-09|EPI\_ISL\_743677|Original|hCoV-19^^Wales|Human|Wales Specialist Virology Centre Sequencing lab|COVID-19 Genomics UK (COG-UK) Consortium|Moore|United Kingdom

>Spike|hCoV-19/Spain/MD-IBV-001366/2020|2020-03-12|EPI\_ISL\_452535|Original|hCoV-19^^Madrid|Human|Cl\u00ednica Universidad de Navarra. Servicio de Enfermedades Infecciosas y Microbiolog\u00eda cl\u00ednica|SeqCOVID-SPAIN consortium/IBV (CSIC) |Comas|Spain

>Spike|hCoV-19/Germany/BE-ChVir-D1938-8233/2020|2020-09-28|EPI\_ISL\_753786|Original|hCoV-19^^Berlin|Human|Charit\u00e9 Universit\u00e4tsmedizin Berlin|Charit\u00e9 Universit\u00e4tsmedizin Berlin|Muehlemann|Germany

>Spike|hCoV-19/Denmark/DCGC-12300/2020|2020-11-16|EPI\_ISL\_682481|Original|hCoV-19^^Midtjylland|Human|Department of Virus and Microbiological Special Diagnostics|Albertsen Lab|Michaelsen|Denmark

>Spike|hCoV-19/USA/WI-UW-256/2020|2020-04-06|EPI\_ISL\_428730|Original|hCoV-19^^Wisconsin|Human|University of Wisconsin-Madison AIDS Vaccine Research Laboratories|University of Wisconsin-Madison AIDS Vaccine Research Laboratories|Baczenas|USA

>Spike|hCoV-19/Spain/AR-IBV-2451/2020|2020-03-28|EPI\_ISL\_468770|Original|hCoV-19^^Aragon|Human|Servicio de Microbiolog\u00eda|SeqCOVID-SPAIN consortium/IBV (CSIC) |Comas|Spain

>Spike|hCoV-19/Australia/WA318/2020|2020-04-10|EPI\_ISL\_596861|Original|hCoV-19^^Western Australia|Human|PathWest Laboratory Medicine WA|PathWest Laboratory Medicine WA Microbial Surveillance Unit|Sikazwe|Australia

>Spike|hCoV-19/USA/TX-HMH-MCoV-15431/2020|2020-10-22|EPI\_ISL\_786915|Original|hCoV-19^^Texas|Human|Houston Methodist Hospital|Houston Methodist Hospital|Long|USA

>Spike|hCoV-19/Netherlands/NA\_170/2020|2020-03-16|EPI\_ISL\_422705|Original|hCoV-19^^Netherlands|Human|Dutch COVID-19 response team|Erasmus Medical Center|Oude Munnink|Netherlands

>Spike|hCoV-19/USA/WA-S929/2020|2020-04-23|EPI\_ISL\_463419|Original|hCoV-19^^Washington|Human|Washington State Department of Health|Seattle Flu Study|Bedford|USA

>Spike|hCoV-19/England/QEUEH-CC96F6/2020|2020-12-23|EPI\_ISL\_782115|Original|hCoV-19^^England|Human|Lighthouse Lab in Glasgow|Wellcome Sanger Institute for the COVID-19 Genomics UK (COG-UK) Consortium|Davies|United Kingdom

>Spike|hCoV-19/England/CAMC-BC22CD/2020|2020-11-22|EPI\_ISL\_704982|Original|hCoV-19^^England|Human|Lighthouse Lab in Cambridge|Wellcome Sanger Institute for the COVID-19 Genomics UK (COG-UK) Consortium|Davies|United Kingdom

>Spike|hCoV-19/Russia/KLU-RII-MH3421S/2020|2020-10-06|EPI\_ISL\_733142|Original|hCoV-19^^Kaluga|Human|HELIX LLC|WHO National Influenza Centre Russian Federation|Komissarov|Russia

>Spike|hCoV-19/England/ALDP-A6885F/2020|2020-10-12|EPI\_ISL\_608434|Original|hCoV-19^^England|Human|Lighthouse Lab in Alderley Park|Wellcome Sanger Institute for the COVID-19 Genomics UK (COG-UK) consortium|Davies|United Kingdom

>Spike|hCoV-19/Luxembourg/LNS1639067/2020|2020-11-20|EPI\_ISL\_739966|Original|hCoV-19^^Luxembourg|Human|Laboratoire national de sant\u00e9|Laboratoire national de sant\u00e9|Wienecke-Baldacchino|Luxembourg

>Spike|hCoV-19/USA/FL-BPHL-1867/2020|2020-04-09|EPI\_ISL\_613757|Original|hCoV-19^^Florida|Human|Florida Bureau of Public Health Laboratories|Florida Bureau of Public Health Laboratories|Blanton|USA

>Spike|hCoV-19/England/204321425/2020|2020-10-20|EPI\_ISL\_649827|Original|hCoV-19^^England|Human|Respiratory Virus Unit|COVID-19 Genomics UK (COG-UK) Consortium|Platt|United Kingdom

>Spike|hCoV-19/England/ALDP-A2D9EA/2020|2020-10-06|EPI\_ISL\_586764|Original|hCoV-19^^England|Human|Lighthouse Lab in Alderley Park|Wellcome Sanger Institute for the COVID-19 Genomics UK (COG-UK) consortium|Davies|United Kingdom

>Spike|hCoV-19/Bahrein/BAH-02/2020|2020-03-11|EPI\_ISL\_483543|Original|hCoV-19^^Bahrain|Human|Kingdom of Bahrein Ministry of Health|Erasmus Medical Center|Oude Munnink|Bahrain

>Spike|hCoV-19/England/NORT-2A5399/2020|2020-09-24|EPI\_ISL\_584688|Original|hCoV-19^^England|Human|Northumbria University / South Tees Hospitals NHS Foundation Trust / North Cumbria Integrated Care NHS Foundation Trust / North Tees and Hartlepool NHS Foundation Trust / Newcastle Hospitals NHS Foundation Trust|COVID-19 Genomics UK (COG-UK) Consortium|Bashton|United Kingdom

>Spike|hCoV-19/USA/NY-NYCPHL-000676/2020|2020-03-13|EPI\_ISL\_632094|Original|hCoV-19^^New York|Human|Jamaica Hospital Medical Center|New York City Public Health Laboratory|Wang|USA

>Spike|hCoV-19/Denmark/DCGC-22386/2020|2020-12-14|EPI\_ISL\_757531|Original|hCoV-19^^Hovedstaden|Human|Department of Virus and Microbiological Special Diagnostics|Albertsen Lab|Michaelsen|Denmark

>Spike|hCoV-19/England/ALDP-9E6AAF/2020|2020-09-24|EPI\_ISL\_580624|Original|hCoV-19^^England|Human|Lighthouse Lab in Alderley Park|Wellcome Sanger Institute for the COVID-19 Genomics UK (COG-UK) consortium|Davies|United Kingdom

>Spike|hCoV-19/USA/TX-HMH-MCoV-14114/2020|2020-10-03|EPI\_ISL\_787400|Original|hCoV-19^^Texas|Human|Houston Methodist Hospital|Houston Methodist Hospital|Long|USA

>Spike|hCoV-19/Wales/PHWC-4928DA/2020|2020-11-20|EPI\_ISL\_725716|Original|hCoV-19^^Wales|Human|Originating lab|COVID-19 Genomics UK (COG-UK) Consortium|Moore|United Kingdom

>Spike|hCoV-19/New Zealand/20VR1860/2020|2020-03-31|EPI\_ISL\_456287|Original|hCoV-19^^Southern|Human|Southern Community Labs Dunedin|Institute of Environmental Science and Research (ESR)|de Ligt|New Zealand

>Spike|hCoV-19/England/MILK-A9178D/2020|2020-10-19|EPI\_ISL\_705983|Original|hCoV-19^^England|Human|Oxford Viromics|COVID-19 Genomics UK (COG-UK) Consortium|Golubchik|United Kingdom

>Spike|hCoV-19/Denmark/DCGC-3102/2020|2020-08-31|EPI\_ISL\_615918|Original|hCoV-19^^Sjaelland|Human|Department of Virus and Microbiological Special Diagnostics|Albertsen lab|Michaelsen|Denmark

>Spike|hCoV-19/Denmark/DCGC-21913/2020|2020-12-21|EPI\_ISL\_758452|Original|hCoV-19^^Hovedstaden|Human|Department of Virus and Microbiological Special Diagnostics|Albertsen Lab|Michaelsen|Denmark

>Spike|hCoV-19/Canada/ON-S763/2020|2020-04-00|EPI\_ISL\_586439|Original|hCoV-19^^Ontario|Human|Toronto Invasive Bacterial Diseases Network|McMaster University|McArthur|Canada

>Spike|hCoV-19/Switzerland/BL-UHB-42197767/2020|2020-03-18|EPI\_ISL\_528219|Original|hCoV-19^^Basel-Land|Human|University Hospital Basel|University Hospital Basel|Roloff Handschin|Switzerland

>Spike|hCoV-19/England/ALDP-B26F48/2020|2020-11-04|EPI\_ISL\_664385|Original|hCoV-19^^England|Human|Northumbria University / South Tees Hospitals NHS Foundation Trust / North Cumbria Integrated Care NHS Foundation Trust / North Tees and Hartlepool NHS Foundation Trust / Newcastle Hospitals NHS Foundation Trust|COVID-19 Genomics UK (COG-UK) Consortium|Bashton|United Kingdom

>Spike|hCoV-19/England/ALDP-CEFBF7/2020|2020-12-21|EPI\_ISL\_781318|Original|hCoV-19^^England|Human|Lighthouse Lab in Alderley Park|Wellcome Sanger Institute for the COVID-19 Genomics UK (COG-UK) Consortium|Davies|United Kingdom

>Spike|hCoV-19/USA/CA-CZB-1702/2020|2020-04-02|EPI\_ISL\_468636|Original|hCoV-19^^California|Human|Contra Costa Public Health Lab|Chan-Zuckerberg Biohub|McGeever|USA

>Spike|hCoV-19/USA/VA-DCLS-0645/2020|2020-04-11|EPI\_ISL\_495317|Original|hCoV-19^^Virginia|Human|Virginia DCLS|Virginia DCLS|St. Jacques|USA

>Spike|hCoV-19/Japan/PG-1657/2020|2020-04-00|EPI\_ISL\_685263|Original|hCoV-19^^Japan|Human|Pathogen Genomics Center|Pathogen Genomics Center|Sekizuka|Japan

>Spike|hCoV-19/USA/TX-HMH-MCoV-10664/2020|2020-07-08|EPI\_ISL\_789189|Original|hCoV-19^^Texas|Human|Houston Methodist Hospital|Houston Methodist Hospital|Long|USA

>Spike|hCoV-19/England/QEUIH-9433D2/2020|2020-07-31|EPI\_ISL\_532590|Original|hCoV-19^^England|Human|Lighthouse Lab in Glasgow|Wellcome Sanger Institute for the COVID-19 Genomics UK (COG-UK) consortium|Davies|United Kingdom

>Spike|hCoV-19/England/NORT-286E33/2020|2020-10-26|EPI\_ISL\_652340|Original|hCoV-19^^England|Human|Northumbria University / South Tees Hospitals NHS Foundation Trust / North Cumbria Integrated Care NHS Foundation Trust / North Tees and Hartlepool NHS Foundation Trust / Newcastle Hospitals NHS Foundation Trust|COVID-19 Genomics UK (COG-UK) Consortium|Bashton|United Kingdom

>Spike|hCoV-19/Canada/NS-NML-1366/2020|2020-04-14|EPI\_ISL\_579742|Original|hCoV-19^^Nova Scotia|Human|QEII Health Sciences Centre|National Microbiology Laboratory (NML)|Majer|Canada

>Spike|hCoV-19/USA/TX-HMH-MCoV-16166/2020|2020-10-29|EPI\_ISL\_785850|Original|hCoV-19^^Texas|Human|Houston Methodist Hospital|Houston Methodist Hospital|Long|USA

>Spike|hCoV-19/England/NOTT-114C6E/2020|2020-10-10|EPI\_ISL\_584766|Original|hCoV-19^^England|Human|Queens Medical Centre|COVID-19 Genomics UK (COG-UK) Consortium|Loose|United Kingdom

>Spike|hCoV-19/England/ALDP-A66BB2/2020|2020-10-12|EPI\_ISL\_630673|Original|hCoV-19^^England|Human|Lighthouse Lab in Alderley Park|Wellcome Sanger Institute for the COVID-19 Genomics UK (COG-UK) consortium|Davies|United Kingdom

>Spike|hCoV-19/England/201141474/2020|2020-03-09|EPI\_ISL\_464756|Original|hCoV-19^^England|Human|Respiratory Virus Unit|Respiratory Virus Unit|Platt|United Kingdom

>Spike|hCoV-19/Sweden/20-07919/2020|2020-04-24|EPI\_ISL\_450823|Original|hCoV-19^^Vastra Gotaland|Human|Narhalsan Backa vardcentral|The Public Health Agency of Sweden|Svartstr\u00f6m|Sweden

>Spike|hCoV-19/England/MILK-9AA0B4/2020|2020-09-01|EPI\_ISL\_550949|Original|hCoV-19^^England|Human|Lighthouse Lab in Milton Keynes|Wellcome Sanger Institute for the COVID-19 Genomics UK (COG-UK) consortium|Davies|United Kingdom

>Spike|hCoV-19/USA/TX-DSHS-1663/2020|2020-06-24|EPI\_ISL\_710066|Original|hCoV-19^^Texas|Human|Texas Department of State Health Services|Texas Department of State Health Services|Rahman|USA

>Spike|hCoV-19/USA/TX-HMH-MCoV-12984/2020|2020-08-28|EPI\_ISL\_788135|Original|hCoV-19^^Texas|Human|Houston Methodist Hospital|Houston Methodist Hospital|Long|USA

>Spike|hCoV-19/England/LIVE-9A575/2020|2020-03-26|EPI\_ISL\_449346|Original|hCoV-19^^England|Human|Liverpool Clinical Laboratories|COVID-19 Genomics UK (COG-UK) Consortium|Haldenby|United Kingdom

>Spike|hCoV-19/USA/MI-MDHHS-SC20065/2020|2020-03-23|EPI\_ISL\_437152|Original|hCoV-19^^Michigan|Human|Michigan Department of Health and Human Services|Michigan Department of Health and Human Services|Blankenship|USA

>Spike|hCoV-19/England/QEUA-B11863/2020|2020-11-02|EPI\_ISL\_642454|Original|hCoV-19^^England|Human|Lighthouse Lab in Glasgow|Wellcome Sanger Institute for the COVID-19 Genomics UK (COG-UK) Consortium|Davies|United Kingdom

>Spike|hCoV-19/England/MILK-B8C283/2020|2020-11-12|EPI\_ISL\_674327|Original|hCoV-19^^England|Human|Lighthouse Lab in Milton Keynes|Wellcome Sanger Institute for the COVID-19 Genomics UK (COG-UK) Consortium|Davies|United Kingdom

>Spike|hCoV-19/Denmark/DCGC-12313/2020|2020-11-16|EPI\_ISL\_682494|Original|hCoV-19^^Midtjylland|Human|Department of Virus and Microbiological Special Diagnostics|Albertsen Lab|Michaelsen|Denmark

>Spike|hCoV-19/Belgium/ULG-10290/2020|2020-07-23|EPI\_ISL\_540457|Original|hCoV-19^^Hainaut|Human|University of Li\u00e8ge COVID-19 testing center|GIGA Medical Genomics|Durkin|Belgium

>Spike|hCoV-19/USA/UT-08645/2020|2020-05-07|EPI\_ISL\_524379|Original|hCoV-19^^Utah|Human|Utah Public Health Laboratory|Utah Public Health Laboratory|Young|USA

>Spike|hCoV-19/USA/CA-CZB-12872/2020|2020-10-16|EPI\_ISL\_648527|Original|hCoV-19^^California|Human|Orange County Public Health Lab|Chan-Zuckerberg Biohub|Bhatt|USA

>Spike|hCoV-19/England/QEUA-9B9A1E/2020|2020-09-07|EPI\_ISL\_549794|Original|hCoV-19^^England|Human|Lighthouse Lab in Glasgow|Wellcome Sanger Institute for the COVID-19 Genomics UK (COG-UK) consortium|Davies|United Kingdom

>Spike|hCoV-19/Russia/PRI-RII-MH765S/2020|2020-08-11|EPI\_ISL\_733011|Original|hCoV-19^^Primorsky|Human|WHO National Influenza Centre Russian Federation|WHO National Influenza Centre Russian Federation|Komissarov|Russia

>Spike|hCoV-19/Denmark/DCGC-6132/2020|2020-09-21|EPI\_ISL\_621166|Original|hCoV-19^^Midtjylland|Human|Department of Virus and Microbiological Special Diagnostics|Albertsen lab|Michaelsen|Denmark

>Spike|hCoV-19/USA/MI-UM-10036774731/2020|2020-11-04|EPI\_ISL\_728372|Original|hCoV-19^^Michigan|Human|University of Michigan Clinical Microbiology Laboratory|Lauring Lab|Valesano|USA

>Spike|hCoV-19/Australia/VIC4595/2020|2020-07-13|EPI\_ISL\_518996|Original|hCoV-19^^Victoria|Human|Victorian Infectious Diseases Reference Laboratory (VIDRL)|VIDRL and MDU-PHL|Schultz|Australia

>Spike|hCoV-19/Belgium/Rega-0328186/2020|2020-03-28|EPI\_ISL\_458156|Original|hCoV-19^^Kaggevinne|Human|KU Leuven|KU Leuven|Maes|Belgium

>Spike|hCoV-19/Finland/15ES7C1/2020|2020-08-15|EPI\_ISL\_756166|Original|hCoV-19^^Uusimaa|Human|Department of Virology and Immunology|Department of Virology|Smura|Finland

>Spike|hCoV-19/England/QEUA-A9F6FB/2020|2020-10-20|EPI\_ISL\_611408|Original|hCoV-19^^England|Human|Lighthouse Lab in Glasgow|Wellcome Sanger Institute for the COVID-19 Genomics UK (COG-UK) consortium|Davies|United Kingdom

>Spike|hCoV-19/Belgium/ULG-10029/2020|2020-03-30|EPI\_ISL\_421203|Original|hCoV-19^^Li\u00e8ge|Human|Department of Clinical Microbiology|GIGA Medical Genomics|Durkin|Belgium

>Spike|hCoV-19/India/WB-IICB-022/2020|2020-08-12|EPI\_ISL\_581496|Original|hCoV-19^^West Bengal|Human|CSIR-Indian Institute of Chemical Biology|CSIR-Indian Institute of Chemical Biology|Bhowmik|India

>Spike|hCoV-19/England/OXON-ADE92/2020|2020-00-00|EPI\_ISL\_448642|Original|hCoV-19^^England|Human|Oxford Viromics|COVID-19 Genomics UK (COG-UK) Consortium|Golubchik|United Kingdom

>Spike|hCoV-19/Iran/SA-Isf-16/2020|2020-05-09|EPI\_ISL\_591062|Original|hCoV-19^^Iran|Human|Infectious Diseases and Tropical Medicine Research Center|Infectious Diseases and Tropical Medicine Research Center|Haghjooy Javanmard,S.|Iran

>Spike|hCoV-19/England/NORW-F8821/2020|2020-11-10|EPI\_ISL\_650211|Original|hCoV-19^^England|Human|Quadram Institute Bioscience|COVID-19 Genomics UK (COG-UK) Consortium|Alikhan|United Kingdom

>Spike|hCoV-19/Denmark/DCGC-17503/2020|2020-12-14|EPI\_ISL\_751027|Original|hCoV-19^^Hovedstaden|Human|Department of Virus and Microbiological Special Diagnostics|Albertsen Lab|Michaelsen|Denmark

>Spike|hCoV-19/Denmark/DCGC-15512/2020|2020-11-23|EPI\_ISL\_713861|Original|hCoV-19^^Nordjylland|Human|Department of Virus and Microbiological Special Diagnostics|Albertsen Lab|Michaelsen|Denmark

>Spike|hCoV-19/Wales/PHWC-495B83/2020|2020-11-25|EPI\_ISL\_726448|Original|hCoV-19^^Wales|Human|Originating lab|COVID-19 Genomics UK (COG-UK) Consortium|Moore|United Kingdom

>Spike|hCoV-19/USA/WA-UW-1572/2020|2020-03-19|EPI\_ISL\_424171|Original|hCoV-19^^Washington|Human|UW Virology Lab|UW Virology Lab|Roychoudhury|USA

>Spike|hCoV-19/England/LEED-2AA17C/2020|2020-04-09|EPI\_ISL\_538833|Original|hCoV-19^^England|Human|Leeds Teaching Hospitals NHS Trust and Public Health England|Wellcome Sanger Institute for the COVID-19 Genomics UK (COG-UK) consortium|Davies|United Kingdom

>Spike|hCoV-19/England/SHEF-C6E75/2020|2020-08-30|EPI\_ISL\_540735|Original|hCoV-19^^England|Human|Virology Department|COVID-19 Genomics UK (COG-UK) Consortium|de Silva|United Kingdom

>Spike|hCoV-19/USA/ME-HETL-J0022/2020|2020-03-13|EPI\_ISL\_513434|Original|hCoV-19^^Maine|Human|Maine HETL|Tewhey Lab|Tewhey|USA

>Spike|hCoV-19/England/QEUA-B41572/2020|2020-11-08|EPI\_ISL\_658709|Original|hCoV-19^^England|Human|Lighthouse Lab in Glasgow|Wellcome Sanger Institute for the COVID-19 Genomics UK (COG-UK) Consortium|Davies|United Kingdom

>Spike|hCoV-19/USA/FL-BPHL-1620/2020|2020-09-04|EPI\_ISL\_594310|Original|hCoV-19^^Florida|Human|Florida Bureau of Public Health Laboratories|Florida Bureau of Public Health Laboratories|Blanton|USA

>Spike|hCoV-19/USA/MA-MGH-00211/2020|2020-03-27|EPI\_ISL\_460425|Original|hCoV-19^^Massachusetts|Human|Massachusetts General Hospital|Infectious Disease Program|Lemieux|USA

>Spike|hCoV-19/Denmark/DCGC-8431/2020|2020-10-26|EPI\_ISL\_617925|Original|hCoV-19^^Sjaelland|Human|Department of Virus and Microbiological Special Diagnostics|Albertsen lab|Michaelsen|Denmark

>Spike|hCoV-19/India/MH-GA57/2020|2020-06-20|EPI\_ISL\_508252|Original|hCoV-19^^Maharashtra|Human|Government Medical College|National Institute of Biomedical Genomics|Maitra|India

>Spike|hCoV-19/Poland/PL\_MCB\_93/2020|2020-05-10|EPI\_ISL\_645092|Original|hCoV-19^^Poland|Human|Human Genome Variation Research Group|Human Genome Variation Research Group|Poland

>Spike|hCoV-19/France/ARA-SC146/2020|2020-05-08|EPI\_ISL\_700410|Original|hCoV-19^^Auvergne-Rhône-Alpes|Human|Centre hospitalier M\u00e9tropole Savoie|CNR Virus des Infections Respiratoires - France SUD|Bal|France

>Spike|hCoV-19/Denmark/DCGC-22664/2020|2020-11-02|EPI\_ISL\_757700|Original|hCoV-19^^Hovedstaden|Human|Department of Virus and Microbiological Special Diagnostics|Albertsen Lab|Michaelsen|Denmark

>Spike|hCoV-19/Canada/NS\_32/2020|2020-03-15|EPI\_ISL\_429814|Original|hCoV-19^^Nova Scotia|Human|Queen Elizabeth II Health Science Centre|National Microbiology Laboratory|Majer|Canada

>Spike|hCoV-19/USA/WI-UW-1073/2020|2020-07-26|EPI\_ISL\_516499|Original|hCoV-19^^Wisconsin|Human|University of Wisconsin-Madison AIDS Vaccine Research Laboratories|University of Wisconsin-Madison AIDS Vaccine Research Laboratories|Baczenas|USA

>Spike|hCoV-19/England/MILK-9D4093/2020|2020-09-18|EPI\_ISL\_601626|Original|hCoV-19^^England|Human|Lighthouse Lab in Milton Keynes|Wellcome Sanger Institute for the COVID-19 Genomics UK (COG-UK) consortium|Davies|United Kingdom

>Spike|hCoV-19/South Africa/KRISP-K004548/2020|2020-10-27|EPI\_ISL\_660245|Original|hCoV-19^^KwaZulu-Natal|Human|NHLS-IALCH|KRISP|de Oliveira|South Africa

>Spike|hCoV-19/England/ALDP-C25CD8/2020|2020-12-06|EPI\_ISL\_782993|Original|hCoV-19^^England|Human|Lighthouse Lab in Alderley Park|Wellcome Sanger Institute for the COVID-19 Genomics UK (COG-UK) Consortium|Davies|United Kingdom

>Spike|hCoV-19/USA/FL\_6318/2020|2020-03-02|EPI\_ISL\_420785|Original|hCoV-19^^Florida|Human|FL Bureau of Health Laboratories Tampa|Pathogen Discovery|Queen|USA

>Spike|hCoV-19/South Africa/KRISP-K002588/2020|2020-07-31|EPI\_ISL\_535453|Original|hCoV-19^^KwaZulu-Natal|Human|NHLS-IALCH|KRISP|de Oliveira|South Africa

>Spike|hCoV-19/USA/UN-CDC-7441/2020|2020-04-21|EPI\_ISL\_514070|Original|hCoV-19^^USA|Human|Navy and Marine Corps Public Health Center|Pathogen Discovery|Queen|USA

>Spike|hCoV-19/Belgium/UGent-333/2020|2020-12-14|EPI\_ISL\_745218|Original|hCoV-19^^Ghent|Human|Lab voor klinische biologie|Onderzoeksgroep Virologie|Lambrechts|Belgium

>Spike|hCoV-19/England/MILK-B06263/2020|2020-10-24|EPI\_ISL\_642839|Original|hCoV-19^^England|Human|Lighthouse Lab in Milton Keynes|Wellcome Sanger Institute for the COVID-19 Genomics UK (COG-UK) Consortium|Davies|United Kingdom

>Spike|hCoV-19/England/204561545/2020|2020-11-05|EPI\_ISL\_678693|Original|hCoV-19^^England|Human|Respiratory Virus Unit|COVID-19 Genomics UK (COG-UK) Consortium|Platt|United Kingdom

>Spike|hCoV-19/Wales/PHWC-497213/2020|2020-11-26|EPI\_ISL\_726797|Original|hCoV-19^^Wales|Human|Originating lab|COVID-19 Genomics UK (COG-UK) Consortium|Moore|United Kingdom

>Spike|hCoV-19/England/NORW-EAB74/2020|2020-05-10|EPI\_ISL\_457357|Original|hCoV-19^^England|Human|Quadram Institute Bioscience|COVID-19 Genomics UK (COG-UK) Consortium|Alikhan|United Kingdom

>Spike|hCoV-19/England/QEUI-AAE732/2020|2020-10-22|EPI\_ISL\_652975|Original|hCoV-19^^England|Human|Oxford Viromics|COVID-19 Genomics UK (COG-UK) Consortium|Golubchik|United Kingdom

>Spike|hCoV-19/England/QEUI-9B3E63/2020|2020-09-08|EPI\_ISL\_573553|Original|hCoV-19^^England|Human|Virology Department|COVID-19 Genomics UK (COG-UK) Consortium|de Silva|United Kingdom

>Spike|hCoV-19/Nigeria/LA-CV262/2020|2020-04-05|EPI\_ISL\_729946|Original|hCoV-19^^Lagos State|Human|Nigeria Centre for Disease Control (NCDC)|African Centre of Excellence for Genomics of Infectious Diseases (ACEGID)|Oluniyi|Nigeria

>Spike|hCoV-19/England/ALDP-9508F1/2020|2020-06-14|EPI\_ISL\_554588|Original|hCoV-19^^England|Human|Lighthouse Lab in Alderley Park|Wellcome Sanger Institute for the COVID-19 Genomics UK (COG-UK) consortium|Davies|United Kingdom

>Spike|hCoV-19/Netherlands/LI-EMC-154/2020|2020-11-24|EPI\_ISL\_763122|Original|hCoV-19^^Limburg|Human|Dutch COVID-19 response team|Erasmus Medical Center|Oude Munnink|Netherlands

>Spike|hCoV-19/England/LIVE-DC0931/2020|2020-11-04|EPI\_ISL\_702541|Original|hCoV-19^^England|Human|Liverpool Clinical Laboratories|COVID-19 Genomics UK (COG-UK) Consortium|Haldenby|United Kingdom

>Spike|hCoV-19/Belgium/Rega-0331264/2020|2020-03-31|EPI\_ISL\_458234|Original|hCoV-19^^Leuven|Human|KU Leuven|KU Leuven|Maes|Belgium

>Spike|hCoV-19/England/ALDP-A6D544/2020|2020-10-15|EPI\_ISL\_608300|Original|hCoV-19^^England|Human|Lighthouse Lab in Alderley Park|Wellcome Sanger Institute for the COVID-19 Genomics UK (COG-UK) consortium|Davies|United Kingdom

>Spike|hCoV-19/England/ALDP-C8E745/2020|2020-12-15|EPI\_ISL\_777627|Original|hCoV-19^^England|Human|Lighthouse Lab in Alderley Park|Wellcome Sanger Institute for the COVID-19 Genomics UK (COG-UK) Consortium|Davies|United Kingdom

>Spike|hCoV-19/Scotland/QEUH-C33105/2020|2020-12-11|EPI\_ISL\_757158|Original|hCoV-19^^Scotland|Human|Lighthouse Lab in Glasgow|Wellcome Sanger Institute for the COVID-19 Genomics UK (COG-UK) Consortium|Davies|United Kingdom

>Spike|hCoV-19/Spain/VC-IBV-98004410/2020|2020-04-13|EPI\_ISL\_583917|Original|hCoV-19^^Comunitat\_Valenciana|Human|Servicio de Microbiolog\u00eda. Hospital General Universitario de Castell\u00f3n|SeqCOVID-SPAIN consortium|IBV (CSIC)|Comas|Spain

>Spike|hCoV-19/England/MILK-99CE8E/2020|2020-08-31|EPI\_ISL\_549819|Original|hCoV-19^^England|Human|Lighthouse Lab in Milton Keynes|Wellcome Sanger Institute for the COVID-19 Genomics UK (COG-UK) consortium|Davies|United Kingdom

>Spike|hCoV-19/Australia/VIC1798/2020|2020-05-23|EPI\_ISL\_480622|Original|hCoV-19^^Victoria|Human|Victorian Infectious Diseases Reference Laboratory (VIDRL)|VIDRL and MDU-PHL|Schultz|Australia

>Spike|hCoV-19/USA/AZ-TG395903/2020|2020-06-08|EPI\_ISL\_694747|Original|hCoV-19^^Arizona|Human|AZ SPHL|TGen North|French|USA

>Spike|hCoV-19/England/QEUH-96455D/2020|2020-08-10|EPI\_ISL\_536951|Original|hCoV-19^^England|Human|Lighthouse Lab in Glasgow|Wellcome Sanger Institute for the COVID-19 Genomics UK (COG-UK) consortium|Davies|United Kingdom

>Spike|hCoV-19/Luxembourg/LNS3949541/2020|2020-12-01|EPI\_ISL\_770869|Original|hCoV-19^^Luxembourg|Human|Laboratoire national de sant\u00e9|Laboratoire national de sant\u00e9|Wienecke-Baldacchino|Luxembourg

>Spike|hCoV-19/Scotland/CVR2671/2020|2020-04-17|EPI\_ISL\_484633|Original|hCoV-19^^Scotland|Human|West of Scotland Specialist Virology Centre|COVID-19 Genomics UK (COG-UK) Consortium|Robertson|United Kingdom

>Spike|hCoV-19/England/QEUH-B11265/2020|2020-11-02|EPI\_ISL\_642538|Original|hCoV-19^^England|Human|Lighthouse Lab in Glasgow|Wellcome Sanger Institute for the COVID-19 Genomics UK (COG-UK) Consortium|Davies|United Kingdom

>Spike|hCoV-19/Scotland/QEUH-960F80/2020|2020-08-05|EPI\_ISL\_531943|Original|hCoV-19^^Scotland|Human|NHSGGC West of Scotland Specialist Virology Centre / MRC-University of Glasgow Centre for Virus Research|Wellcome Sanger Institute for the COVID-19 Genomics UK (COG-UK) consortium|Davies|United Kingdom

>Spike|hCoV-19/USA/NM-DOH-2020641108/2020|2020-12-26|EPI\_ISL\_767060|Original|hCoV-19^^New Mexico|Human|New Mexico Department of Health Scientific Laboratory|New Mexico Department of Health Scientific Laboratory|Malone|USA

>Spike|hCoV-19/Wales/PHWC-49303B/2020|2020-11-28|EPI\_ISL\_725826|Original|hCoV-19^^Wales|Human|Originating lab|COVID-19 Genomics UK (COG-UK) Consortium|Moore|United Kingdom

>Spike|hCoV-19/England/LIVE-9D5DC/2020|2020-04-10|EPI\_ISL\_453215|Original|hCoV-19^^England|Human|Liverpool Clinical Laboratories|COVID-19 Genomics UK (COG-UK) Consortium|Haldenby|United Kingdom

>Spike|hCoV-19/Wales/PHWC-48023B/2020|2020-10-18|EPI\_ISL\_612866|Original|hCoV-19^^Wales|Human|Wales Specialist Virology Centre Sequencing lab|COVID-19 Genomics UK (COG-UK) Consortium|Moore|United Kingdom

>Spike|hCoV-19/England/QEUH-96B19E/2020|2020-08-18|EPI\_ISL\_531349|Original|hCoV-19^^England|Human|Lighthouse Lab in Glasgow|Wellcome Sanger Institute for the COVID-19 Genomics UK (COG-UK) consortium|Davies|United Kingdom

>Spike|hCoV-19/Wales/PHWC-16C353/2020|2020-09-22|EPI\_ISL\_574044|Original|hCoV-19^^Wales|Human|Wales Specialist Virology Centre Sequencing lab|COVID-19 Genomics UK (COG-UK) Consortium|Moore|United Kingdom



>Spike|hCoV-19/Spain/PV-IBV-2140/2020|2020-04-12|EPI\_ISL\_468906|Original|hCoV-19^^Basque Country|Human|Servicio de Microbiolog\u00eda. Hospital Universitario Donostia. OSI Donostialdea. \u00c1rea de Enfermedades Infecciosas|SeqCOVID-SPAIN consortium/IBV (CSIC) |Comas|Spain

>Spike|hCoV-19/England/20149008104/2020|2020-03-31|EPI\_ISL\_466133|Original|hCoV-19^^England|Human|Respiratory Virus Unit|Respiratory Virus Unit|Platt|United Kingdom

>Spike|hCoV-19/USA/MD-HP12120/2020|2020-12-26|EPI\_ISL\_791433|Original|hCoV-19^^Maryland|Human|Johns Hopkins Hospital Department of Pathology|Johns Hopkins Hospital Department of Pathology|Morris|USA

>Spike|hCoV-19/Australia/VIC4028/2020|2020-07-12|EPI\_ISL\_519414|Original|hCoV-19^^Victoria|Human|Microbiological Diagnostic Unit - Public Health Laboratory (MDU-PHL) |MDU-PHL|Schultz|Australia

>Spike|hCoV-19/England/ALDP-C06833/2020|2020-12-06|EPI\_ISL\_709560|Original|hCoV-19^^England|Human|Lighthouse Lab in Alderley Park|Wellcome Sanger Institute for the COVID-19 Genomics UK (COG-UK) Consortium|Davies|United Kingdom

>Spike|hCoV-19/USA/AZ-TG306003/2020|2020-04-30|EPI\_ISL\_694311|Original|hCoV-19^^Arizona|Human|AZ SPHL|TGen North|French|USA

>Spike|hCoV-19/Scotland/QEUEH-96E4CF/2020|2020-08-20|EPI\_ISL\_534501|Original|hCoV-19^^Scotland|Human|NHSGGC West of Scotland Specialist Virology Centre / MRC-University of Glasgow Centre for Virus Research|Wellcome Sanger Institute for the COVID-19 Genomics UK (COG-UK) consortium|Davies|United Kingdom

>Spike|hCoV-19/Germany/HH-hpi-p1781/2020|2020-03-19|EPI\_ISL\_775698|Original|hCoV-19^^Hamburg|Human|University Medical Center Hamburg Eppendorf|Heinrich Pette Institute|Robitaille|Germany

>Spike|hCoV-19/Wales/ALDP-94C737/2020|2020-06-15|EPI\_ISL\_555888|Original|hCoV-19^^Wales|Human|Lighthouse Lab in Alderley Park|Wellcome Sanger Institute for the COVID-19 Genomics UK (COG-UK) consortium|Davies|United Kingdom

>Spike|hCoV-19/Singapore/309/2020|2020-05-15|EPI\_ISL\_462427|Original|hCoV-19^^Singapore|Human|National Public Health Laboratory|National Public Health Laboratory|Mak|Singapore

>Spike|hCoV-19/England/LIVE-A2FC7/2020|2020-05-18|EPI\_ISL\_499911|Original|hCoV-19^^England|Human|Liverpool Clinical Laboratories|COVID-19 Genomics UK (COG-UK) Consortium|Haldenby|United Kingdom

>Spike|hCoV-19/Australia/QLD1190/2020|2020-03-27|EPI\_ISL\_639781|Original|hCoV-19^^Australia|Human|unknown|Public Health Virology Laboratory|Nguyen|Australia

>Spike|hCoV-19/Wales/PHWC-30CD6/2020|2020-04-11|EPI\_ISL\_446349|Original|hCoV-19^^Wales|Human|Wales Specialist Virology Centre|Public Health Wales Microbiology Cardiff|Moore|United Kingdom

>Spike|hCoV-19/Scotland/QEUEH-9DEAC8/2020|2020-09-21|EPI\_ISL\_601190|Original|hCoV-19^^Scotland|Human|Lighthouse Lab in Glasgow|Wellcome Sanger Institute for the COVID-19 Genomics UK (COG-UK) consortium|Davies|United Kingdom

>Spike|hCoV-19/Belgium/ULG-10877/2020|2020-11-13|EPI\_ISL\_678420|Original|hCoV-19^^Li\u00e8ge|Human|Department of Clinical Microbiology|GIGA Medical Genomics|Durkin|Belgium

>Spike|hCoV-19/Wales/PHWC-480C1F/2020|2020-10-18|EPI\_ISL\_611564|Original|hCoV-19^^Wales|Human|Wales Specialist Virology Centre Sequencing lab|COVID-19 Genomics UK (COG-UK) Consortium|Moore|United Kingdom

>Spike|hCoV-19/Japan/PG-1798/2020|2020-05-00|EPI\_ISL\_685404|Original|hCoV-19^^Japan|Human|Pathogen Genomics Center|Pathogen Genomics Center|Sekizuka|Japan

>Spike|hCoV-19/Wales/PHWC-16A8B0/2020|2020-09-12|EPI\_ISL\_560119|Original|hCoV-19^^Wales|Human|Wales Specialist Virology Centre Sequencing lab|COVID-19 Genomics UK (COG-UK) Consortium|Moore|United Kingdom

>Spike|hCoV-19/England/OXON-B440F/2020|2020-03-24|EPI\_ISL\_534953|Original|hCoV-19^^England|Human|Oxford Viromics|COVID-19 Genomics UK (COG-UK) Consortium|Golubchik|United Kingdom

>Spike|hCoV-19/England/LIVE-DC0D17/2020|2020-11-03|EPI\_ISL\_704057|Original|hCoV-19^^England|Human|Liverpool Clinical Laboratories|COVID-19 Genomics UK (COG-UK) Consortium|Haldenby|United Kingdom

>Spike|hCoV-19/England/OXON-AF4E9/2020|2020-00-00|EPI\_ISL\_478745|Original|hCoV-19^^England|Human|Oxford Viromics|COVID-19 Genomics UK (COG-UK) Consortium|Golubchik|United Kingdom

>Spike|hCoV-19/Russia/StPetersburg-RII15228S/2020|2020-05-12|EPI\_ISL\_507262|Original|hCoV-19^^Saint Petersburg|Human|WHO National Influenza Centre Russian Federation|WHO National Influenza Centre Russian Federation|Komissarov|Russia

>Spike|hCoV-19/Denmark/DCGC-15792/2020|2020-11-23|EPI\_ISL\_713307|Original|hCoV-19^^Nordjylland|Human|Department of Virus and Microbiological Special Diagnostics|Albertsen Lab|Michaelsen|Denmark

>Spike|hCoV-19/USA/CA-CHLA-PLM50806022/2020|2020-12-04|EPI\_ISL\_753642|Original|hCoV-19^^California|Human|Clinical virology Laboratory|Center for Personalized Medicine|Dien Bard|USA

>Spike|hCoV-19/England/MILK-9D5399/2020|2020-09-19|EPI\_ISL\_577052|Original|hCoV-19^^England|Human|Centre for Enzyme Innovation|COVID-19 Genomics UK (COG-UK) Consortium|Robson|United Kingdom

>Spike|hCoV-19/England/PORT-2F5CEA/2020|2020-04-04|EPI\_ISL\_512420|Original|hCoV-19^^England|Human|Centre for Enzyme Innovation|COVID-19 Genomics UK (COG-UK) Consortium|Robson|United Kingdom

>Spike|hCoV-19/USA/MN-MDH-1633/2020|2020-04-28|EPI\_ISL\_539827|Original|hCoV-19^^Minnesota|Human|Minnesota Department of Health|Minnesota Department of Health|Garfin|USA

>Spike|hCoV-19/United Arab Emirates/0100/2020|2020-05-19|EPI\_ISL\_698184|Original|hCoV-19^^Abu Dhabi|Human|Group 42 (G42) Healthcare|G42 Healthcare|Ogrodzki|United Arab Emirates

>Spike|hCoV-19/Northern Ireland/MILK-970FAB/2020|2020-08-17|EPI\_ISL\_553239|Original|hCoV-19^^Northern Ireland|Human|Lighthouse Lab in Milton Keynes|Wellcome Sanger Institute for the COVID-19 Genomics UK (COG-UK) consortium|Davies|United Kingdom

>Spike|hCoV-19/Denmark/DCGC-8454/2020|2020-10-26|EPI\_ISL\_617387|Original|hCoV-19^^Syddanmark|Human|Department of Virus and Microbiological Special Diagnostics|Albertsen lab|Michaelsen|Denmark

>Spike|hCoV-19/England/MILK-B02971/2020|2020-10-24|EPI\_ISL\_642891|Original|hCoV-19^^England|Human|Lighthouse Lab in Milton Keynes|Wellcome Sanger Institute for the COVID-19 Genomics UK (COG-UK) Consortium|Davies|United Kingdom

>Spike|hCoV-19/England/QEUEH-CC21FC/2020|2020-12-21|EPI\_ISL\_760682|Original|hCoV-19^^England|Human|Lighthouse Lab in Glasgow|Wellcome Sanger Institute for the COVID-19 Genomics UK (COG-UK) Consortium|Davies|United Kingdom

>Spike|hCoV-19/England/CAMB-1AC928/2020|2020-04-23|EPI\_ISL\_489549|Original|hCoV-19^^England|Human|Department of Pathology|Wellcome Sanger Institute for the COVID-19 Genomics UK (COG-UK) consortium|Davies|United Kingdom

>Spike|hCoV-19/England/MILK-970460/2020|2020-08-17|EPI\_ISL\_581401|Original|hCoV-19^^England|Human|Lighthouse Lab in Milton Keynes|Wellcome Sanger Institute for the COVID-19 Genomics UK (COG-UK) consortium|Davies|United Kingdom

>Spike|hCoV-19/USA/MA-MGH-00229/2020|2020-04-06|EPI\_ISL\_460188|Original|hCoV-19^^Massachusetts|Human|Massachusetts General Hospital|Infectious Disease Program|Lemieux|USA

>Spike|hCoV-19/England/BRIS-12DD50/2020|2020-05-30|EPI\_ISL\_481984|Original|hCoV-19^^England|Human|PHE South West Regional Laboratory|Wellcome Sanger Institute for the COVID-19 Genomics UK (COG-UK) consortium|Davies|United Kingdom

>Spike|hCoV-19/England/MILK-9947E5/2020|2020-08-24|EPI\_ISL\_552285|Original|hCoV-19^^England|Human|Lighthouse Lab in Milton Keynes|Wellcome Sanger Institute for the COVID-19 Genomics UK (COG-UK) consortium|Davies|United Kingdom

>Spike|hCoV-19/USA/CA-CZB-13119/2020|2020-10-27|EPI\_ISL\_672415|Original|hCoV-19^^California|Human|Madera County Department of Public Health|Chan-Zuckerberg Biohub|Bhatt|USA

>Spike|hCoV-19/India/TG-CCMB-L1564/2020|2020-05-26|EPI\_ISL\_471620|Original|hCoV-19^^Telangana|Human|CSIR-Centre for Cellular and Molecular Biology|CSIR-Centre for Cellular and Molecular Biology|Banu|India

>Spike|hCoV-19/England/CAMC-C98933/2020|2020-12-17|EPI\_ISL\_777632|Original|hCoV-19^^England|Human|Lighthouse Lab in Cambridge|Wellcome Sanger Institute for the COVID-19 Genomics UK (COG-UK) Consortium|Davies|United Kingdom

>Spike|hCoV-19/USA/CA-CZB-2020/2020|2020-05-03|EPI\_ISL\_486272|Original|hCoV-19^^California|Human|Orange County Public Health Laboratory|Chan-Zuckerberg Biohub|McGeever|USA

>Spike|hCoV-19/England/CAMC-B338B6/2020|2020-11-05|EPI\_ISL\_659145|Original|hCoV-19^^England|Human|Lighthouse Lab in Cambridge|Wellcome Sanger Institute for the COVID-19 Genomics UK (COG-UK) Consortium|Davies|United Kingdom

>Spike|hCoV-19/Wales/PHWC-495C62/2020|2020-11-25|EPI\_ISL\_726462|Original|hCoV-19^^Wales|Human|Originating lab|COVID-19 Genomics UK (COG-UK) Consortium|Moore|United Kingdom

>Spike|hCoV-19/England/205160491/2020|2020-12-16|EPI\_ISL\_766422|Original|hCoV-19^^England|Human|Respiratory Virus Unit|COVID-19 Genomics UK (COG-UK) Consortium|Platt|United Kingdom

>Spike|hCoV-19/England/MILK-874E6F/2020|2020-07-19|EPI\_ISL\_557470|Original|hCoV-19^^England|Human|Lighthouse Lab in Milton Keynes|Wellcome Sanger Institute for the COVID-19 Genomics UK (COG-UK) consortium|Davies|United Kingdom

>Spike|hCoV-19/Switzerland/ZH-ETHZ-260186/2020|2020-08-27|EPI\_ISL\_539475|Original|hCoV-19^^Zurich|Human|Viollier AG|Department of Biosystems Science and Engineering|Nadeau|Switzerland

>Spike|hCoV-19/Spain/PV-IBV-003228/2020|2020-03-14|EPI\_ISL\_480985|Original|hCoV-19^^Basque Country|Human|Servicio de Microbiolog\u00eda. Hospital Universitario Donostia. OSI Donostialdea. \u00c1rea de Enfermedades Infecciosas|SeqCOVID-SPAIN consortium/IBV (CSIC) |Comas|Spain

>Spike|hCoV-19/Wales/PHWC-361A4/2020|2020-04-29|EPI\_ISL\_474630|Original|hCoV-19^^Wales|Human|Originating lab|COVID-19 Genomics UK (COG-UK) Consortium|Moore|United Kingdom

>Spike|hCoV-19/Wales/MILK-9E2126/2020|2020-09-20|EPI\_ISL\_581259|Original|hCoV-19^^Wales|Human|Lighthouse Lab in Milton Keynes|Wellcome Sanger Institute for the COVID-19 Genomics UK (COG-UK) consortium|Davies|United Kingdom

>Spike|hCoV-19/USA/TX-HMH-MCoV-15513/2020|2020-10-23|EPI\_ISL\_786997|Original|hCoV-19^^Texas|Human|Houston Methodist Hospital|Houston Methodist Hospital|Long|USA

>Spike|hCoV-19/Italy/LAZ-INMI-134/2020|2020-12-22|EPI\_ISL\_765572|Original|hCoV-19^^Lazio|Human|National Institute for Infectious Diseases|National Institute for Infectious Diseases|Gruber|Italy

>Spike|hCoV-19/England/MILK-9573CC/2020|2020-06-13|EPI\_ISL\_554025|Original|hCoV-19^^England|Human|Lighthouse Lab in Milton Keynes|Wellcome Sanger Institute for the COVID-19 Genomics UK (COG-UK) consortium|Davies|United Kingdom

>Spike|hCoV-19/England/ALDP-A6C888/2020|2020-10-15|EPI\_ISL\_608048|Original|hCoV-19^^England|Human|Lighthouse Lab in Alderley Park|Wellcome Sanger Institute for the COVID-19 Genomics UK (COG-UK) consortium|Davies|United Kingdom

>Spike|hCoV-19/USA/MI-UM-10036705555/2020|2020-10-30|EPI\_ISL\_682106|Original|hCoV-19^^Michigan|Human|University of Michigan Clinical Microbiology Laboratory|Lauring Lab|Valesano|USA

>Spike|hCoV-19/USA/IL\_1293/2020|2020-03-01|EPI\_ISL\_420790|Original|hCoV-19^^Illinois|Human|Illinois Department of Public Health Chicago Laboratory|Pathogen Discovery|Queen|USA

>Spike|hCoV-19/England/NORW-EA743/2020|2020-05-21|EPI\_ISL\_461863|Original|hCoV-19^^England|Human|Quadram Institute Bioscience|COVID-19 Genomics UK (COG-UK) Consortium|Alikhan|United Kingdom

>Spike|hCoV-19/Australia/NSW3075/2020|2020-11-16|EPI\_ISL\_678383|Original|hCoV-19^^New South Wales|Human|Area of Virology|Virology Research Laboratory; Area of Virology|Foster|Australia

>Spike|hCoV-19/USA/MI-QDX-369/2020|2020-03-23|EPI\_ISL\_571112|Original|hCoV-19^^Michigan|Human|Quest Diagnostics|Quest Diagnostics|Kagan|USA

>Spike|hCoV-19/England/LOND-D656E/2020|2020-04-22|EPI\_ISL\_487578|Original|hCoV-19^^England|Human|University College London|Wellcome Sanger Institute for the COVID-19 Genomics UK (COG-UK) consortium|Davies|United Kingdom

>Spike|hCoV-19/USA/CO-CDPHE-2100016535/2020|2020-11-20|EPI\_ISL\_771324|Original|hCoV-19^^Colorado|Human|Colorado Department of Public Health and Environment|Colorado Department of Public Health and Environment|Bankers|USA

>Spike|hCoV-19/USA/CA-CZB-4081/2020|2020-08-10|EPI\_ISL\_548651|Original|hCoV-19^^California|Human|Orange County Public Health Laboratory|Chan-Zuckerberg Biohub|Bhatt|USA

>Spike|hCoV-19/Wales/PHWC-4960ED/2020|2020-11-26|EPI\_ISL\_726531|Original|hCoV-19^^Wales|Human|Originating lab|COVID-19 Genomics UK (COG-UK) Consortium|Moore|United Kingdom

>Spike|hCoV-19/Scotland/EDB7826/2020|2020-09-21|EPI\_ISL\_572414|Original|hCoV-19^^Scotland|Human|Virology Department|COVID-19 Genomics UK (COG-UK) Consortium|Williams|United Kingdom

>Spike|hCoV-19/USA/AZ-TG666178/2020|2020-05-01|EPI\_ISL\_696255|Original|hCoV-19^^Arizona|Human|Sonora Quest Laboratories|TGen North|French|USA

>Spike|hCoV-19/USA/TX-HMH-5183/2020|2020-06-19|EPI\_ISL\_544582|Original|hCoV-19^^Texas|Human|Houston Methodist Hospital|Houston Methodist Hospital|Long|USA

>Spike|hCoV-19/New Zealand/20CV0269/2020|2020-03-21|EPI\_ISL\_579063|Original|hCoV-19^^Hawkes Bay|Human|Canterbury Health Laboratories|Institute of Environmental Science and Research (ESR)|Wang|New Zealand

>Spike|hCoV-19/England/CAMC-B7AF81/2020|2020-11-12|EPI\_ISL\_723973|Original|hCoV-19^^England|Human|Oxford Viromics|COVID-19 Genomics UK (COG-UK) Consortium|Golubchik|United Kingdom

>Spike|hCoV-19/England/CAMC-A65D80/2020|2020-10-11|EPI\_ISL\_637516|Original|hCoV-19^^England|Human|Department of Pathology|COVID-19 Genomics UK (COG-UK) Consortium|Goodfellow|United Kingdom

>Spike|hCoV-19/USA/TX-HMH-MCoV-11862/2020|2020-09-16|EPI\_ISL\_790122|Original|hCoV-19^^Texas|Human|Houston Methodist Hospital|Houston Methodist Hospital|Long|USA

>Spike|hCoV-19/Sichuan/SC-PHCC1-030/2020|2020-01-27|EPI\_ISL\_451351|Original|hCoV-19^^Sichuan|Human|West China Hospital of Sichuan University|State Key Laboratory of Biotherapy of Sichuan University|Tang|China

>Spike|hCoV-19/Spain/MD-IBV-99008558/2020|2020-09-19|EPI\_ISL\_654099|Original|hCoV-19^^Madrid|Human|Hospital General Universitario Gregorio Mara\u00f1a|SeqCOVID-SPAIN consortium/IBV (CSIC)|Comas|Spain

>Spike|hCoV-19/Wales/PHWC-4923F7/2020|2020-11-17|EPI\_ISL\_706844|Original|hCoV-19^^Wales|Human|Originating lab|COVID-19 Genomics UK (COG-UK) Consortium|Moore|United Kingdom

>Spike|hCoV-19/England/SHEF-CFCDC/2020|2020-05-06|EPI\_ISL\_475482|Original|hCoV-19^^England|Human|Virology Department|COVID-19 Genomics UK (COG-UK) Consortium|de Silva|United Kingdom

>Spike|hCoV-19/England/QEUA-A375E9/2020|2020-10-05|EPI\_ISL\_638728|Original|hCoV-19^^England|Human|Wales Specialist Virology Centre Sequencing lab|COVID-19 Genomics UK (COG-UK) Consortium|Moore|United Kingdom

>Spike|hCoV-19/England/ALDP-A6DCA9/2020|2020-10-14|EPI\_ISL\_606993|Original|hCoV-19^^England|Human|Lighthouse Lab in Alderley Park|Wellcome Sanger Institute for the COVID-19 Genomics UK (COG-UK) consortium|Davies|United Kingdom

>Spike|hCoV-19/England/BRIS-126BE4/2020|2020-04-10|EPI\_ISL\_458978|Original|hCoV-19^^England|Human|PHE South West Regional Laboratory|Wellcome Sanger Institute for the COVID-19 Genomics UK (COG-UK) consortium|Davies|United Kingdom

>Spike|hCoV-19/South Korea/KCDC2151/2020|2020-03-23|EPI\_ISL\_498052|Original|hCoV-19^^South Korea|Human|Division of Viral Diseases|Division of Viral Diseases|Kim|South Korea

>Spike|hCoV-19/Australia/VIC7115/2020|2020-08-03|EPI\_ISL\_564240|Original|hCoV-19^^Victoria|Human|Victorian Infectious Diseases Reference Laboratory (VIDRL)|VIDRL and MDU-PHL|Schultz|Australia

>Spike|hCoV-19/England/CAMC-948E36/2020|2020-07-22|EPI\_ISL\_556522|Original|hCoV-19^^England|Human|Lighthouse Lab in Cambridge|Wellcome Sanger Institute for the COVID-19 Genomics UK (COG-UK) consortium|Davies|United Kingdom

>Spike|hCoV-19/Denmark/DCGC-21960/2020|2020-12-21|EPI\_ISL\_758478|Original|hCoV-19^^Nordjylland|Human|Department of Virus and Microbiological Special Diagnostics|Albertsen Lab|Michaelsen|Denmark

>Spike|hCoV-19/Switzerland/VS-ETHZ-321390/2020|2020-10-13|EPI\_ISL\_603631|Original|hCoV-19^^Valais|Human|Viollier AG|Department of Biosystems Science and Engineering|Nadeau|Switzerland

>Spike|hCoV-19/India/MH-ACTREC-332/2020|2020-07-19|EPI\_ISL\_699981|Original|hCoV-19^^Maharashtra|Human|Hematopathology Laboratory|Hematopathology Laboratory|Patkar|India

>Spike|hCoV-19/Japan/PG-2238/2020|2020-04-00|EPI\_ISL\_685843|Original|hCoV-19^^Japan|Human|Pathogen Genomics Center|Pathogen Genomics Center|Sekizuka|Japan

>Spike|hCoV-19/Wales/MILK-9A9255/2020|2020-09-01|EPI\_ISL\_551166|Original|hCoV-19^^Wales|Human|Lighthouse Lab in Milton Keynes|Wellcome Sanger Institute for the COVID-19 Genomics UK (COG-UK) consortium|Davies|United Kingdom

>Spike|hCoV-19/Scotland/QEUEH-96DB07/2020|2020-08-20|EPI\_ISL\_534514|Original|hCoV-19^^Scotland|Human|NHSGGC West of Scotland Specialist Virology Centre / MRC-University of Glasgow Centre for Virus Research|Wellcome Sanger Institute for the COVID-19 Genomics UK (COG-UK) consortium|Davies|United Kingdom

>Spike|hCoV-19/Netherlands/Gelderland\_31/2020|2020-04-09|EPI\_ISL\_460931|Original|hCoV-19^^Gelderland|Human|Dutch COVID-19 response team|Erasmus Medical Center|Oude Munnink|Netherlands

>Spike|hCoV-19/USA/FL-BPHL-2227/2020|2020-09-04|EPI\_ISL\_666849|Original|hCoV-19^^Florida|Human|Florida Bureau of Public Health Laboratories|Florida Bureau of Public Health Laboratories|Blanton|USA

>Spike|hCoV-19/England/NORW-F52AE/2020|2020-11-16|EPI\_ISL\_725239|Original|hCoV-19^^England|Human|Quadram Institute Bioscience|COVID-19 Genomics UK (COG-UK) Consortium|Alikhan|United Kingdom

>Spike|hCoV-19/Portugal/PT1941/2020|2020-11-10|EPI\_ISL\_732169|Original|hCoV-19^^Portugal|Human|Instituto Nacional de Saude (INSA) and Instituto Gulbenkian de Ciencia (IGC)|Instituto Nacional de Saude (INSA) and Instituto Gulbenkian de Ciencia (IGC)|Borges|Portugal

>Spike|hCoV-19/USA/WI-UW-2335/2020|2020-11-19|EPI\_ISL\_728101|Original|hCoV-19^^Wisconsin|Human|University of Wisconsin-Madison AIDS Vaccine Research Laboratories|University of Wisconsin-Madison AIDS Vaccine Research Laboratories|Baczenas|USA

>Spike|hCoV-19/England/CAMC-AEAD29/2020|2020-10-26|EPI\_ISL\_633308|Original|hCoV-19^^England|Human|Lighthouse Lab in Cambridge|Wellcome Sanger Institute for the COVID-19 Genomics UK (COG-UK) consortium|Davies|United Kingdom

>Spike|hCoV-19/England/CAMC-B9C54B/2020|2020-11-15|EPI\_ISL\_673348|Original|hCoV-19^^England|Human|Lighthouse Lab in Cambridge|Wellcome Sanger Institute for the COVID-19 Genomics UK (COG-UK) Consortium|Davies|United Kingdom

>Spike|hCoV-19/England/MILK-BB013E/2020|2020-11-18|EPI\_ISL\_720123|Original|hCoV-19^^England|Human|Lighthouse Lab in Milton Keynes|Wellcome Sanger Institute for the COVID-19 Genomics UK (COG-UK) Consortium|Davies|United Kingdom

>Spike|hCoV-19/England/204961201/2020|2020-12-01|EPI\_ISL\_678830|Original|hCoV-19^^England|Human|Respiratory Virus Unit|COVID-19 Genomics UK (COG-UK) Consortium|Platt|United Kingdom

>Spike|hCoV-19/USA/MI-MDHHS-SC20192/2020|2020-03-21|EPI\_ISL\_447057|Original|hCoV-19^^Michigan|Human|Michigan Department of Health and Human Services|Michigan Department of Health and Human Services|Blankenship|USA

>Spike|hCoV-19/England/QEUEH-B42368/2020|2020-11-08|EPI\_ISL\_657123|Original|hCoV-19^^England|Human|Lighthouse Lab in Glasgow|Wellcome Sanger Institute for the COVID-19 Genomics UK (COG-UK) Consortium|Davies|United Kingdom

>Spike|hCoV-19/England/201090694/2020|2020-03-08|EPI\_ISL\_464598|Original|hCoV-19^^England|Human|Respiratory Virus Unit|Respiratory Virus Unit|Platt|United Kingdom

>Spike|hCoV-19/Denmark/DCGC-5669/2020|2020-09-28|EPI\_ISL\_619956|Original|hCoV-19^^Midtjylland|Human|Department of Virus and Microbiological Special Diagnostics|Albertsen lab|Michaelsen|Denmark

>Spike|hCoV-19/Denmark/DCGC-12822/2020|2020-10-19|EPI\_ISL\_683003|Original|hCoV-19^^Nordjylland|Human|Department of Virus and Microbiological Special Diagnostics|Albertsen Lab|Michaelsen|Denmark

>Spike|hCoV-19/Lithuania/AL-LUHS-Eilnr2/2020|2020-04-02|EPI\_ISL\_603083|Original|hCoV-19^^Alytaus apskritis|Human|Lithuanian University of Health Sciences Hospital|Lithuanian University of Health Sciences|Zemaitis|Lithuania

>Spike|hCoV-19/England/QEUH-9DDD1B/2020|2020-09-21|EPI\_ISL\_599736|Original|hCoV-19^^England|Human|Lighthouse Lab in Glasgow|Wellcome Sanger Institute for the COVID-19 Genomics UK (COG-UK) consortium|Davies|United Kingdom

>Spike|hCoV-19/Switzerland/SO-ETHZ-380279/2020|2020-11-25|EPI\_ISL\_721875|Original|hCoV-19^^Solothurn|Human|Viollier AG|Department of Biosystems Science and Engineering|Nadeau|Switzerland

>Spike|hCoV-19/England/NOTT-1142D5/2020|2020-10-06|EPI\_ISL\_577156|Original|hCoV-19^^England|Human|Queens Medical Centre|COVID-19 Genomics UK (COG-UK) Consortium|Loose|United Kingdom

>Spike|hCoV-19/USA/TX-HMH-MCoV-10817/2020|2020-07-05|EPI\_ISL\_789642|Original|hCoV-19^^Texas|Human|Houston Methodist Hospital|Houston Methodist Hospital|Long|USA

>Spike|hCoV-19/England/ALDP-94CD80/2020|2020-06-15|EPI\_ISL\_556070|Original|hCoV-19^^England|Human|Lighthouse Lab in Alderley Park|Wellcome Sanger Institute for the COVID-19 Genomics UK (COG-UK) consortium|Davies|United Kingdom

>Spike|hCoV-19/Denmark/DCGC-18207/2020|2020-12-14|EPI\_ISL\_749387|Original|hCoV-19^^Syddanmark|Human|Department of Virus and Microbiological Special Diagnostics|Albertsen Lab|Michaelsen|Denmark

>Spike|hCoV-19/USA/MN-MDH-1118/2020|2020-05-04|EPI\_ISL\_470798|Original|hCoV-19^^Minnesota|Human|M Health Fairview|Minnesota Department of Health|Garfin|USA

>Spike|hCoV-19/England/CAMB-7F558/2020|2020-04-08|EPI\_ISL\_442910|Original|hCoV-19^^England|Human|Department of Pathology|Wellcome Sanger Institute for the COVID-19 Genomics UK (COG-UK) consortium|Amato|United Kingdom

>Spike|hCoV-19/Spain/MD-IBV-99012419/2020|2020-11-17|EPI\_ISL\_780039|Original|hCoV-19^^Madrid|Human|Hospital General Universitario Gregorio Mara\u00f1a|SeqCOVID-SPAIN consortium|IBV (CSIC)|Comas|Spain

>Spike|hCoV-19/England/QEUH-CDF87F/2020|2020-12-26|EPI\_ISL\_782168|Original|hCoV-19^^England|Human|Lighthouse Lab in Glasgow|Wellcome Sanger Institute for the COVID-19 Genomics UK (COG-UK) Consortium|Davies|United Kingdom

>Spike|hCoV-19/USA/WA-S974/2020|2020-05-01|EPI\_ISL\_463464|Original|hCoV-19^^Washington|Human|Washington State Department of Health|Seattle Flu Study|Bedford|USA

>Spike|hCoV-19/England/NORT-298663/2020|2020-04-22|EPI\_ISL\_488149|Original|hCoV-19^^England|Human|NU-OMICS DNA Sequencing research facility|Wellcome Sanger Institute for the COVID-19 Genomics UK (COG-UK) consortium|Davies|United Kingdom

>Spike|hCoV-19/USA/TX-HMH-6127/2020|2020-07-07|EPI\_ISL\_547260|Original|hCoV-19^^Texas|Human|Houston Methodist Hospital|Houston Methodist Hospital|Long|USA

>Spike|hCoV-19/England/CWAR-24FDD32/2020|2020-05-05|EPI\_ISL\_584515|Original|hCoV-19^^England|Human|UHCW / University of Warwick|COVID-19 Genomics UK (COG-UK) Consortium|Stark|United Kingdom

>Spike|hCoV-19/Wales/PHWC-16DFB8/2020|2020-10-01|EPI\_ISL\_585649|Original|hCoV-19^^Wales|Human|Wales Specialist Virology Centre Sequencing lab|COVID-19 Genomics UK (COG-UK) Consortium|Moore|United Kingdom

>Spike|hCoV-19/Scotland/QEUH-9B44CA/2020|2020-09-02|EPI\_ISL\_573810|Original|hCoV-19^^Scotland|Human|Virology Department|COVID-19 Genomics UK (COG-UK) Consortium|de Silva|United Kingdom

>Spike|hCoV-19/Scotland/EDB8745/2020|2020-10-25|EPI\_ISL\_651989|Original|hCoV-19^^Scotland|Human|Virology Department|COVID-19 Genomics UK (COG-UK) Consortium|McHugh|United Kingdom

>Spike|hCoV-19/USA/CA-CZB-1586/2020|2020-03-23|EPI\_ISL\_468516|Original|hCoV-19^^California|Human|San Joaquin County Public Health Lab|Chan-Zuckerberg Biohub|Hao|USA

>Spike|hCoV-19/USA/TX-HMH-MCoV-13195/2020|2020-08-26|EPI\_ISL\_788346|Original|hCoV-19^^Texas|Human|Houston Methodist Hospital|Houston Methodist Hospital|Long|USA

>Spike|hCoV-19/USA/TX-HMH-6420/2020|2020-07-05|EPI\_ISL\_545986|Original|hCoV-19^^Texas|Human|Houston Methodist Hospital|Houston Methodist Hospital|Long|USA

>Spike|hCoV-19/Wales/PHWC-482EBD/2020|2020-10-11|EPI\_ISL\_627750|Original|hCoV-19^^Wales|Human|Wales Specialist Virology Centre Sequencing lab|COVID-19 Genomics UK (COG-UK) Consortium|Moore|United Kingdom

>Spike|hCoV-19/USA/VA-DCLS-0451/2020|2020-05-05|EPI\_ISL\_477664|Original|hCoV-19^^Virginia|Human|Virginia DCLS|Virginia DCLS|St. Jacques|USA

>Spike|hCoV-19/USA/CT-Yale-310/2020|2020-03-30|EPI\_ISL\_476538|Original|hCoV-19^^Connecticut|Human|Yale Clinical Virology Laboratory|Grubaugh Lab - Yale School of Public Health|Grubaugh|USA

>Spike|hCoV-19/England/LIVE-AAF47/2020|2020-07-28|EPI\_ISL\_540624|Original|hCoV-19^^England|Human|Liverpool Clinical Laboratories|COVID-19 Genomics UK (COG-UK) Consortium|Haldenby|United Kingdom

>Spike|hCoV-19/USA/WA-S143/2020|2020-03-15|EPI\_ISL\_430180|Original|hCoV-19^^Washington|Human|Washington State Department of Health|Seattle Flu Study|Bedford|USA

>Spike|hCoV-19/Scotland/CVR4938/2020|2020-10-02|EPI\_ISL\_594704|Original|hCoV-19^^Scotland|Human|West of Scotland Specialist Virology Centre|COVID-19 Genomics UK (COG-UK) Consortium|Robertson|United Kingdom

>Spike|hCoV-19/England/20134006704/2020|2020-03-24|EPI\_ISL\_423072|Original|hCoV-19^^England|Human|Respiratory Virus Unit|Respiratory Virus Unit|Platt|United Kingdom

>Spike|hCoV-19/England/EXET-13A619/2020|2020-11-09|EPI\_ISL\_664216|Original|hCoV-19^^England|Human|University of Exeter|COVID-19 Genomics UK (COG-UK) Consortium|Temperton|United Kingdom

>Spike|hCoV-19/Australia/VIC788/2020|2020-03-31|EPI\_ISL\_427063|Original|hCoV-19^^Victoria|Human|Microbiological Diagnostic Unit Public Health Laboratory|Microbiological Diagnostic Unit Public Health Laboratory|Schultz|Australia

>Spike|hCoV-19/USA/CA-QDX-1540/2020|2020-03-18|EPI\_ISL\_603788|Original|hCoV-19^^California|Human|Quest Diagnostics|Quest Diagnostics|Kagan|USA

>Spike|hCoV-19/USA/MN-MDH-2079/2020|2020-10-31|EPI\_ISL\_683708|Original|hCoV-19^^Minnesota|Human|Essentia Health-St. Mary's Medical Center|Minnesota Department of Health|Garfin|USA

>Spike|hCoV-19/Wales/PHWC-36450/2020|2020-04-30|EPI\_ISL\_474667|Original|hCoV-19^^Wales|Human|Originating lab|COVID-19 Genomics UK (COG-UK) Consortium|Moore|United Kingdom

>Spike|hCoV-19/India/MH-NIV-17547/2020|2020-04-29|EPI\_ISL\_479508|Original|hCoV-19^^Maharashtra|Human|NIV Influenza|NIV Influenza|Potdar|India

>Spike|hCoV-19/England/ALDP-9CB27B/2020|2020-09-16|EPI\_ISL\_575451|Original|hCoV-19^^England|Human|Lighthouse Lab in Alderley Park|Wellcome Sanger Institute for the COVID-19 Genomics UK (COG-UK) consortium|Davies|United Kingdom

>Spike|hCoV-19/Denmark/DCGC-9473/2020|2020-11-09|EPI\_ISL\_668720|Original|hCoV-19^^Nordjylland|Human|Department of Virus and Microbiological Special Diagnostics|Albertsen Lab|Michaelsen|Denmark

>Spike|hCoV-19/Japan/PG-0368/2020|2020-03-25|EPI\_ISL\_480038|Original|hCoV-19^^Kanto|Human|Tochigi Prefectural Institute of Public Health and Environmental Science|Pathogen Genomics Center|Sekizuka|Japan

>Spike|hCoV-19/Wales/PHWC-49453B/2020|2020-11-19|EPI\_ISL\_726130|Original|hCoV-19^^Wales|Human|Originating lab|COVID-19 Genomics UK (COG-UK) Consortium|Moore|United Kingdom

>Spike|hCoV-19/Australia/VIC5283/2020|2020-07-17|EPI\_ISL\_520048|Original|hCoV-19^^Victoria|Human|Microbiological Diagnostic Unit - Public Health Laboratory (MDU-PHL)|MDU-PHL|Schultz|Australia

>Spike|hCoV-19/England/PORT-2F560A/2020|2020-00-00|EPI\_ISL\_703502|Original|hCoV-19^^England|Human|Centre for Enzyme Innovation|COVID-19 Genomics UK (COG-UK) Consortium|Robson|United Kingdom

>Spike|hCoV-19/Spain/AN-IBV-001086/2020|2020-03-27|EPI\_ISL\_452600|Original|hCoV-19^^Andalucia|Human|Servicio de Microbiolog\u00eda y Parasitolog\u00eda cl\u00ednica. UCEIMP. Hospital Universitario Virgen del Roc\u00edo/IBIS/CSIC/US.|SeqCOVID-SPAIN consortium/IBV (CSIC)|Comas|Spain

>Spike|hCoV-19/England/NOTT-110655/2020|2020-04-17|EPI\_ISL\_441541|Original|hCoV-19^^England|Human|Queens Medical Centre|COVID-19 Genomics UK (COG-UK) Consortium|Loose|United Kingdom

>Spike|hCoV-19/Germany/HH-hpi-p2072/2020|2020-03-20|EPI\_ISL\_775734|Original|hCoV-19^^Hamburg|Human|University Medical Center Hamburg Eppendorf|Heinrich Pette Institute|Robitaille|Germany

>Spike|hCoV-19/Ireland/D-NVRL-20G35265/2020|2020-03-20|EPI\_ISL\_605090|Original|hCoV-19^^Dublin|Human|National Virus Reference Laboratory|Irish Coronavirus Sequencing Consortium - Helixworks|Chalapati|Ireland

>Spike|hCoV-19/USA/WY-WPHL-20172755/2020|2020-12-31|EPI\_ISL\_770479|Original|hCoV-19^^Wyoming|Human|Wyoming Public Health Laboratory|Wyoming Public Health Laboratory|Hull|USA

>Spike|hCoV-19/USA/CA-CZB-216/2020|2020-08-26|EPI\_ISL\_583002|Original|hCoV-19^^California|Human|Orange County Public Health Lab|Chan-Zuckerberg Biohub|Bhatt|USA

>Spike|hCoV-19/England/LOND-124D3BE/2020|2020-03-29|EPI\_ISL\_507093|Original|hCoV-19^^England|Human|University College London Hospital|COVID-19 Genomics UK (COG-UK) Consortium|Byott|United Kingdom

>Spike|hCoV-19/Mexico/BCN-ALSR-1708/2020|2020-04-20|EPI\_ISL\_496369|Original|hCoV-19^^Baja California|Human|Infectolab|Andersen lab at Scripps Research|Gangavarapu|Mexico

>Spike|hCoV-19/USA/FL-BPHL-0945/2020|2020-07-16|EPI\_ISL\_517835|Original|hCoV-19^^Florida|Human|Florida Bureau of Public Health Laboratories|Florida Bureau of Public Health Laboratories|Blanton|USA

>Spike|hCoV-19/England/ALDP-A6C35A/2020|2020-10-15|EPI\_ISL\_608342|Original|hCoV-19^^England|Human|Lighthouse Lab in Alderley Park|Wellcome Sanger Institute for the COVID-19 Genomics UK (COG-UK) consortium|Davies|United Kingdom

>Spike|hCoV-19/England/ALDP-CBFE28/2020|2020-12-20|EPI\_ISL\_760535|Original|hCoV-19^^England|Human|Lighthouse Lab in Alderley Park|Wellcome Sanger Institute for the COVID-19 Genomics UK (COG-UK) Consortium|Davies|United Kingdom

>Spike|hCoV-19/USA/UT-03992/2020|2020-05-09|EPI\_ISL\_493024|Original|hCoV-19^^Utah|Human|Utah Public Health Laboratory|Utah Public Health Laboratory|Butz|USA

>Spike|hCoV-19/Australia/NSW1283/2020|2020-12-17|EPI\_ISL\_745107|Original|hCoV-19^^New South Wales|Human|Pathology North - Royal North Shore Hospital - NSW Health Pathology|CIDM-PH|Gall|Australia

>Spike|hCoV-19/Australia/VIC4133/2020|2020-07-14|EPI\_ISL\_519505|Original|hCoV-19^^Victoria|Human|Microbiological Diagnostic Unit - Public Health Laboratory (MDU-PHL)|MDU-PHL|Schultz|Australia

>Spike|hCoV-19/England/QEUEH-96AEE3/2020|2020-08-15|EPI\_ISL\_531258|Original|hCoV-19^^England|Human|Lighthouse Lab in Glasgow|Wellcome Sanger Institute for the COVID-19 Genomics UK (COG-UK) consortium|Davies|United Kingdom

>Spike|hCoV-19/England/QEUEH-9F60F5/2020|2020-09-25|EPI\_ISL\_588728|Original|hCoV-19^^England|Human|Lighthouse Lab in Glasgow|Wellcome Sanger Institute for the COVID-19 Genomics UK (COG-UK) consortium|Davies|United Kingdom

>Spike|hCoV-19/India/DL-IGIB11305065/2020|2020-07-00|EPI\_ISL\_751307|Original|hCoV-19^^Delhi|Human|Devki Devi Foundation|CSIR-IGIB|Max|Pandey|India

>Spike|hCoV-19/Belgium/reg-0621709/2020|2020-06-21|EPI\_ISL\_734775|Original|hCoV-19^^Brussel|Human|UZ Leuven|KU Leuven|Maes|Belgium

>Spike|hCoV-19/England/MILK-A0660E/2020|2020-10-01|EPI\_ISL\_600080|Original|hCoV-19^^England|Human|Lighthouse Lab in Milton Keynes|Wellcome Sanger Institute for the COVID-19 Genomics UK (COG-UK) consortium|Davies|United Kingdom

>Spike|hCoV-19/England/QEUEH-95E389/2020|2020-08-08|EPI\_ISL\_537045|Original|hCoV-19^^England|Human|Lighthouse Lab in Glasgow|Wellcome Sanger Institute for the COVID-19 Genomics UK (COG-UK) consortium|Davies|United Kingdom

>Spike|hCoV-19/Wales/PHWC-493772/2020|2020-11-29|EPI\_ISL\_725937|Original|hCoV-19^^Wales|Human|Originating lab|COVID-19 Genomics UK (COG-UK) Consortium|Moore|United Kingdom

>Spike|hCoV-19/USA/NY-Wadsworth-292772-01/2020|2020-12-26|EPI\_ISL\_769944|Original|hCoV-19^^New York|Human|Albany Medical Center Hospital Clinical Laboratories|Wadsworth Center|Lasek-Nesselquist|USA

>Spike|hCoV-19/England/20169002804/2020|2020-04-16|EPI\_ISL\_465172|Original|hCoV-19^^England|Human|Respiratory Virus Unit|Respiratory Virus Unit|Platt|United Kingdom

>Spike|hCoV-19/USA/IL-NM055/2020|2020-03-14|EPI\_ISL\_444551|Original|hCoV-19^^Illinois|Human|Northwestern Memorial Hospital|Ozer Lab|Ozer|USA



>Spike|hCoV-19/Wales/PHWC-279EA/2020|2020-03-01|EPI\_ISL\_431938|Original|hCoV-19^^Wales|Human|Wales Specialist Virology Centre|Public Health Wales Microbiology Cardiff|Moore|United Kingdom

>Spike|hCoV-19/USA/TX-HMH-MCoV-16038/2020|2020-10-30|EPI\_ISL\_785722|Original|hCoV-19^^Texas|Human|Houston Methodist Hospital|Houston Methodist Hospital|Long|USA

>Spike|hCoV-19/Spain/VC-FISABIO-293/2020|2020-03-17|EPI\_ISL\_436388|Original|hCoV-19^^Comunitat Valenciana|Human|Servicio de Microbiolog\u00eda. Consorcio Hospital General Universitario de Valencia|Sequencing and Bioinformatics Service and Molecular Epidemiology Research Group. FISABIO-Public Health|Gonzalez-Candelas|Spain

>Spike|hCoV-19/Scotland/GCVR-1706BD/2020|2020-03-23|EPI\_ISL\_459634|Original|hCoV-19^^Scotland|Human|NHSGGC West of Scotland Specialist Virology Centre / MRC-University of Glasgow Centre for Virus Research|Wellcome Sanger Institute for the COVID-19 Genomics UK (COG-UK) consortium|Davies|United Kingdom

>Spike|hCoV-19/England/SHEF-10CA0A5/2020|2020-12-18|EPI\_ISL\_765166|Original|hCoV-19^^England|Human|Virology Department|COVID-19 Genomics UK (COG-UK) Consortium|de Silva|United Kingdom

>Spike|hCoV-19/Switzerland/BE-ETHZ-400062/2020|2020-12-05|EPI\_ISL\_729115|Original|hCoV-19^^Bern|Human|Viollier AG|Department of Biosystems Science and Engineering|Nadeau|Switzerland

>Spike|hCoV-19/United Arab Emirates/L6599/2020|2020-02-25|EPI\_ISL\_435138|Original|hCoV-19^^United Arab Emirates|Human|Mohammed Bin Rashid University of Medicine and Health Sciences|Al Jalila Genomics Center|Ramaswamy|United Arab Emirates

>Spike|hCoV-19/Canada/ON-PHL-20-03659/2020|2020-11-00|EPI\_ISL\_775097|Original|hCoV-19^^Ontario|Human|Public Health Ontario Laboratory|Public Health Ontario Laboratory|Guthrie|Canada

>Spike|hCoV-19/USA/TX-HMH-MCoV-19264/2020|2020-11-23|EPI\_ISL\_783724|Original|hCoV-19^^Texas|Human|Houston Methodist Hospital|Houston Methodist Hospital|Long|USA

>Spike|hCoV-19/USA/TX-HMH-MCoV-14985/2020|2020-10-17|EPI\_ISL\_786469|Original|hCoV-19^^Texas|Human|Houston Methodist Hospital|Houston Methodist Hospital|Long|USA

>Spike|hCoV-19/Wales/PHWC-4A2FD2/2020|2020-12-14|EPI\_ISL\_744040|Original|hCoV-19^^Wales|Human|Wales Specialist Virology Centre Sequencing lab|COVID-19 Genomics UK (COG-UK) Consortium|Moore|United Kingdom

>Spike|hCoV-19/USA/MN-MDH-1257/2020|2020-06-09|EPI\_ISL\_482978|Original|hCoV-19^^Minnesota|Human|Mayo Clinic & Mayo Clinic Laboratories|Minnesota Department of Health|Garfin|USA

>Spike|hCoV-19/England/MILK-ACFB99/2020|2020-10-22|EPI\_ISL\_652126|Original|hCoV-19^^England|Human|Oxford Viromics|COVID-19 Genomics UK (COG-UK) Consortium|Golubchik|United Kingdom

>Spike|hCoV-19/South Africa/KRISP-K004628/2020|2020-11-02|EPI\_ISL\_660644|Original|hCoV-19^^KwaZulu-Natal|Human|NHLS-IALCH|KRISP|de Oliveira|South Africa

>Spike|hCoV-19/Japan/PG-5710/2020|2020-08-00|EPI\_ISL\_688833|Original|hCoV-19^^Japan|Human|Pathogen Genomics Center|Pathogen Genomics Center|Sekizuka|Japan

>Spike|hCoV-19/Panama/339644/2020|2020-04-12|EPI\_ISL\_496898|Original|hCoV-19^^Colon|Human|Gorgas Memorial Laboratory of Health Studies|Gorgas Memorial Laboratory of Health Studies|Martinez|Panama

>Spike|hCoV-19/Australia/VIC8800/2020|2020-07-31|EPI\_ISL\_565203|Original|hCoV-19^^Victoria|Human|Victorian Infectious Diseases Reference Laboratory (VIDRL)|VIDRL and MDU-PHL|Schultz|Australia

>Spike|hCoV-19/USA/TX-HMH-MCoV-13531/2020|2020-08-21|EPI\_ISL\_788656|Original|hCoV-19^^Texas|Human|Houston Methodist Hospital|Houston Methodist Hospital|Long|USA

>Spike|hCoV-19/Japan/PG-7134/2020|2020-08-00|EPI\_ISL\_688239|Original|hCoV-19^^Japan|Human|Pathogen Genomics Center|Pathogen Genomics Center|Sekizuka|Japan

>Spike|hCoV-19/England/QEUH-B6A36A/2020|2020-11-11|EPI\_ISL\_662448|Original|hCoV-19^^England|Human|Lighthouse Lab in Glasgow|Wellcome Sanger Institute for the COVID-19 Genomics UK (COG-UK) Consortium|Davies|United Kingdom

>Spike|hCoV-19/USA/TX-DSHS-0447/2020|2020-06-05|EPI\_ISL\_541982|Original|hCoV-19^^Texas|Human|Texas Department of State Health Services|Texas Department of State Health Services|Rahman|USA

>Spike|hCoV-19/England/MILK-9AB262/2020|2020-08-31|EPI\_ISL\_551199|Original|hCoV-19^^England|Human|Lighthouse Lab in Milton Keynes|Wellcome Sanger Institute for the COVID-19 Genomics UK (COG-UK) consortium|Davies|United Kingdom

>Spike|hCoV-19/Thailand/Bangkok\_269/2020|2020-01-26|EPI\_ISL\_447915|Vero P2|hCoV-19^^Bangkok|Human|n/a|National Institute of Health. Department of medical Sciences|Okada|Thailand

>Spike|hCoV-19/England/ALDP-A2F748/2020|2020-10-05|EPI\_ISL\_587155|Original|hCoV-19^^England|Human|Lighthouse Lab in Alderley Park|Wellcome Sanger Institute for the COVID-19 Genomics UK (COG-UK) consortium|Davies|United Kingdom

>Spike|hCoV-19/France/ARA-SC395/2020|2020-04-05|EPI\_ISL\_645196|Original|hCoV-19^^Auvergne-Rhone-Alpes|Human|CHU Clermont-Ferrand|CNR Virus des Infections Respiratoires - France SUD|Bal|France

>Spike|hCoV-19/Wales/PHWC-4963C6/2020|2020-11-20|EPI\_ISL\_726573|Original|hCoV-19^^Wales|Human|Originating lab|COVID-19 Genomics UK (COG-UK) Consortium|Moore|United Kingdom

>Spike|hCoV-19/England/MILK-AC8073/2020|2020-10-22|EPI\_ISL\_629627|Original|hCoV-19^^England|Human|Lighthouse Lab in Milton Keynes|Wellcome Sanger Institute for the COVID-19 Genomics UK (COG-UK) consortium|Davies|United Kingdom

>Spike|hCoV-19/Denmark/DCGC-8079/2020|2020-10-26|EPI\_ISL\_617176|Original|hCoV-19^^Sjaelland|Human|Department of Virus and Microbiological Special Diagnostics|Albertsen lab|Michaelsen|Denmark

>Spike|hCoV-19/Spain/PV-HUD-96195073/2020|2020-03-25|EPI\_ISL\_475720|Original|hCoV-19^^Basque Country|Human|Microbiology|Microbiology|Submitter|Spain

>Spike|hCoV-19/Portugal/PT0132/2020|2020-03-25|EPI\_ISL\_453848|Original|hCoV-19^^Portugal|Human|unknown|Instituto Nacional de Saude (INSA)|Borges|Portugal

>Spike|hCoV-19/Belgium/ULG-11041/2020|2020-11-30|EPI\_ISL\_722930|Original|hCoV-19^^Liege|Human|Department of Clinical Microbiology|GIGA Medical Genomics|Durkin|Belgium

>Spike|hCoV-19/Suriname/SR-61/2020|2020-07-16|EPI\_ISL\_518810|Original|hCoV-19^^Suriname|Human|Academic Hospital Paramaribo|Erasmus Medical Center|M\u00fcnger|Suriname

>Spike|hCoV-19/England/ALDP-B5D731/2020|2020-11-09|EPI\_ISL\_704957|Original|hCoV-19^^England|Human|Department of Pathology|COVID-19 Genomics UK (COG-UK) Consortium|Goodfellow|United Kingdom

>Spike|hCoV-19/India/DL-IGIB11304567/2020|2020-07-00|EPI\_ISL\_751241|Original|hCoV-19^^Delhi|Human|Devki Devi Foundation|CSIR-IGIB/Max|Pandey|India

>Spike|hCoV-19/England/QEUH-C4BBDF/2020|2020-12-14|EPI\_ISL\_769802|Original|hCoV-19^^England|Human|Lighthouse Lab in Glasgow|Wellcome Sanger Institute for the COVID-19 Genomics UK (COG-UK) Consortium|Davies|United Kingdom

>Spike|hCoV-19/England/CAMB-1BC8A0/2020|2020-11-30|EPI\_ISL\_764287|Original|hCoV-19^^England|Human|Department of Pathology|COVID-19 Genomics UK (COG-UK) Consortium|Goodfellow|United Kingdom

>Spike|hCoV-19/USA/CT-Yale-403/2020|2020-03-31|EPI\_ISL\_738305|Original|hCoV-19^^Connecticut|Human|Connecticut Veterans' Affairs Hospital|Grubaugh Lab - Yale School of Public Health|Grubaugh|USA

>Spike|hCoV-19/USA/NY-Wadsworth-242678-01/2020|2020-10-11|EPI\_ISL\_734336|Original|hCoV-19^^New York|Human|Wadsworth Center|Wadsworth Center|Lasek-Nesselquist|USA

>Spike|hCoV-19/Germany/NW-RKI-NP-0010/2020|2020-11-23|EPI\_ISL\_763026|Original|hCoV-19^^North Rhine-Westphalia|Human|Unit 17|Project group Epidemiology of Highly Pathogenic Microorganisms|Schubert|Germany

>Spike|hCoV-19/USA/NC-QDX-174/2020|2020-04-27|EPI\_ISL\_494526|Original|hCoV-19^^North Carolina|Human|Quest Diagnostics|Quest Diagnostics|Kagan|USA

>Spike|hCoV-19/England/MILK-ACE471/2020|2020-10-21|EPI\_ISL\_629271|Original|hCoV-19^^England|Human|Lighthouse Lab in Milton Keynes|Wellcome Sanger Institute for the COVID-19 Genomics UK (COG-UK) consortium|Davies|United Kingdom

>Spike|hCoV-19/Scotland/QEUH-A4B227/2020|2020-10-08|EPI\_ISL\_638936|Original|hCoV-19^^Scotland|Human|Department of Pathology|COVID-19 Genomics UK (COG-UK) Consortium|Goodfellow|United Kingdom

>Spike|hCoV-19/England/BRIS-1234DD/2020|2020-04-06|EPI\_ISL\_442759|Original|hCoV-19^^England|Human|PHE South West Regional Laboratory|Wellcome Sanger Institute for the COVID-19 Genomics UK (COG-UK) consortium|Amato|United Kingdom

>Spike|hCoV-19/USA/CA-ALSR-3597/2020|2020-06-24|EPI\_ISL\_636103|Original|hCoV-19^^California|Human|San Diego County Public Health Laboratory|Andersen lab at Scripps Research|Gangavarapu|USA

>Spike|hCoV-19/Belgium/ULG-10815/2020|2020-11-17|EPI\_ISL\_661213|Original|hCoV-19^^Li\u00e8ge|Human|Department of Clinical Microbiology|GIGA Medical Genomics|Durkin|Belgium

>Spike|hCoV-19/Wales/PHWC-337A5/2020|2020-04-17|EPI\_ISL\_446748|Original|hCoV-19^^Wales|Human|Wales Specialist Virology Centre|Public Health Wales Microbiology Cardiff|Moore|United Kingdom

>Spike|hCoV-19/England/QEUEH-AD0430/2020|2020-10-25|EPI\_ISL\_629774|Original|hCoV-19^^England|Human|Lighthouse Lab in Glasgow|Wellcome Sanger Institute for the COVID-19 Genomics UK (COG-UK) consortium|Davies|United Kingdom

>Spike|hCoV-19/England/QEUEH-B2C425/2020|2020-11-02|EPI\_ISL\_665707|Original|hCoV-19^^England|Human|Liverpool Clinical Laboratories|COVID-19 Genomics UK (COG-UK) Consortium|Haldenby|United Kingdom

>Spike|hCoV-19/Northern Ireland/NIRE-1074B1/2020|2020-03-30|EPI\_ISL\_585157|Original|hCoV-19^^Northern Ireland|Human|Regional Virus Laboratory|COVID-19 Genomics UK (COG-UK) Consortium|Fairley|United Kingdom

>Spike|hCoV-19/England/QEUEH-B4092C/2020|2020-11-08|EPI\_ISL\_657065|Original|hCoV-19^^England|Human|Lighthouse Lab in Glasgow|Wellcome Sanger Institute for the COVID-19 Genomics UK (COG-UK) Consortium|Davies|United Kingdom

>Spike|hCoV-19/Spain/VC-IBV-98004478/2020|2020-03-25|EPI\_ISL\_583940|Original|hCoV-19^^Comunitat\_Valenciana|Human|Servicio de Microbiolog\u00eda. Hospital General Universitario de Castell\u00f3n|SeqCOVID-SPAIN consortium|IBV(CSIC)|Comas|Spain

>Spike|hCoV-19/USA/MA-Yale-440/2020|2020-04-11|EPI\_ISL\_738256|Original|hCoV-19^^Massachusetts|Human|Connecticut Veterans' Affairs Hospital|Grubaugh Lab - Yale School of Public Health|Grubaugh|USA

>Spike|hCoV-19/England/20169001704/2020|2020-04-17|EPI\_ISL\_465167|Original|hCoV-19^^England|Human|Respiratory Virus Unit|Respiratory Virus Unit|Platt|United Kingdom

>Spike|hCoV-19/England/LOND-1250CDB/2020|2020-11-07|EPI\_ISL\_665808|Original|hCoV-19^^England|Human|University College London Hospital|COVID-19 Genomics UK (COG-UK) Consortium|Byott|United Kingdom

>Spike|hCoV-19/Denmark/DCGC-14254/2020|2020-11-30|EPI\_ISL\_711657|Original|hCoV-19^^Sjælland|Human|Department of Virus and Microbiological Special Diagnostics|Albertsen Lab|Michaelsen|Denmark

>Spike|hCoV-19/England/OXON-AD375/2020|2020-00-00|EPI\_ISL\_448577|Original|hCoV-19^^England|Human|Oxford Viromics|COVID-19 Genomics UK (COG-UK) Consortium|Golubchik|United Kingdom

>Spike|hCoV-19/Denmark/DCGC-5298/2020|2020-09-14|EPI\_ISL\_615229|Original|hCoV-19^^Sjælland|Human|Department of Virus and Microbiological Special Diagnostics|Albertsen lab|Michaelsen|Denmark

>Spike|hCoV-19/England/ALDP-A93E95/2020|2020-10-19|EPI\_ISL\_611238|Original|hCoV-19^^England|Human|Lighthouse Lab in Alderley Park|Wellcome Sanger Institute for the COVID-19 Genomics UK (COG-UK) consortium|Davies|United Kingdom

>Spike|hCoV-19/Thailand/Bangkok-CONI-0276/2020|2020-03-14|EPI\_ISL\_693354|Original|hCoV-19^^Bangkok|Human|Ramathibodi Hospital|COVID-19 Network Investigations (CONI) Alliance|Batty|Thailand

>Spike|hCoV-19/England/QEUEH-943615/2020|2020-07-30|EPI\_ISL\_532618|Original|hCoV-19^^England|Human|Lighthouse Lab in Glasgow|Wellcome Sanger Institute for the COVID-19 Genomics UK (COG-UK) consortium|Davies|United Kingdom

>Spike|hCoV-19/England/QEUEH-A0AB47/2020|2020-09-30|EPI\_ISL\_599375|Original|hCoV-19^^England|Human|Lighthouse Lab in Glasgow|Wellcome Sanger Institute for the COVID-19 Genomics UK (COG-UK) consortium|Davies|United Kingdom

>Spike|hCoV-19/England/ALDP-A52463/2020|2020-10-07|EPI\_ISL\_598029|Original|hCoV-19^^England|Human|Lighthouse Lab in Alderley Park|Wellcome Sanger Institute for the COVID-19 Genomics UK (COG-UK) consortium|Davies|United Kingdom

>Spike|hCoV-19/USA/NY-Wadsworth-287419-01/2020|2020-12-15|EPI\_ISL\_767461|Original|hCoV-19^^New York|Human|Wadsworth Center|Wadsworth Center|Lasek-Nesselquist|USA

>Spike|hCoV-19/England/NOTT-113045/2020|2020-09-09|EPI\_ISL\_534758|Original|hCoV-19^^England|Human|Queens Medical Centre|COVID-19 Genomics UK (COG-UK) Consortium|Loose|United Kingdom

>Spike|hCoV-19/England/CAMC-941608/2020|2020-07-23|EPI\_ISL\_556861|Original|hCoV-19^^England|Human|Lighthouse Lab in Cambridge|Wellcome Sanger Institute for the COVID-19 Genomics UK (COG-UK) consortium|Davies|United Kingdom

>Spike|hCoV-19/USA/TX-HMH-4064/2020|2020-06-18|EPI\_ISL\_543337|Original|hCoV-19^^Texas|Human|Houston Methodist Hospital|Houston Methodist Hospital|Long|USA

>Spike|hCoV-19/England/NORT-2958F7/2020|2020-04-02|EPI\_ISL\_478641|Original|hCoV-19^^England|Human|Northumbria University / South Tees Hospitals NHS Foundation Trust / North Cumbria Integrated Care NHS Foundation Trust / North Tees and Hartlepool NHS Foundation Trust / Newcastle Hospitals NHS Foundation Trust|COVID-19 Genomics UK (COG-UK) Consortium|Bashton|United Kingdom

>Spike|hCoV-19/South Korea/KCDC2811/2020|2020-08-01|EPI\_ISL\_526745|Original|hCoV-19^^South Korea|Human|Center for Laboratory Control of Infectious Diseases|Center for Laboratory Control of Infectious Diseases|Kim|South Korea

>Spike|hCoV-19/USA/TX-DSHS-0755/2020|2020-05-14|EPI\_ISL\_584156|Original|hCoV-19^^Texas|Human|Texas Department of State Health Services|Texas Department of State Health Services|Rahman|USA

>Spike|hCoV-19/Russia/OMS-ORINFI-7139S/2020|2020-05-14|EPI\_ISL\_639937|Original|hCoV-19^^Omsk|Human|Omsk Research Institute of Natural Focal Infections|WHO National Influenza Centre Russian Federation|Komissarov|Russia

>Spike|hCoV-19/USA/WA-S2250/2020|2020-06-09|EPI\_ISL\_497678|Original|hCoV-19^^Washington|Human|Washington State Department of Health|Seattle Flu Study|Lee|USA

>Spike|hCoV-19/Scotland/QEUH-B132DC/2020|2020-11-03|EPI\_ISL\_649613|Original|hCoV-19^^Scotland|Human|Lighthouse Lab in Glasgow|Wellcome Sanger Institute for the COVID-19 Genomics UK (COG-UK) Consortium|Davies|United Kingdom

>Spike|hCoV-19/USA/TX-HMH-MCoV-12804/2020|2020-08-19|EPI\_ISL\_790536|Original|hCoV-19^^Texas|Human|Houston Methodist Hospital|Houston Methodist Hospital|Long|USA

>Spike|hCoV-19/England/ALDP-A6D580/2020|2020-10-14|EPI\_ISL\_607169|Original|hCoV-19^^England|Human|Lighthouse Lab in Alderley Park|Wellcome Sanger Institute for the COVID-19 Genomics UK (COG-UK) consortium|Davies|United Kingdom

>Spike|hCoV-19/England/20129163604/2020|2020-03-21|EPI\_ISL\_424126|Original|hCoV-19^^England|Human|Respiratory Virus Unit|Respiratory Virus Unit|Platt|United Kingdom

>Spike|hCoV-19/Wales/PHWC-163EA6/2020|2020-05-06|EPI\_ISL\_474097|Original|hCoV-19^^Wales|Human|Originating lab|COVID-19 Genomics UK (COG-UK) Consortium|Moore|United Kingdom

>Spike|hCoV-19/Canada/QC-LSPQ-L00234333/2020|2020-03-23|EPI\_ISL\_536051|Original|hCoV-19^^Quebec|Human|H\u00f4pital de Hull|Laboratoire de sant\u00e9 publique du Qu\u00e9bec|Moreira|Canada

>Spike|hCoV-19/USA/CO-CDPHE-2011020168/2020|2020-11-01|EPI\_ISL\_771235|Original|hCoV-19^^Colorado|Human|Colorado Department of Public Health and Environment|Colorado Department of Public Health and Environment|Bankers|USA

>Spike|hCoV-19/Wales/MILK-BB17E0/2020|2020-11-18|EPI\_ISL\_767239|Original|hCoV-19^^Wales|Human|Lighthouse Lab in Milton Keynes|Wellcome Sanger Institute for the COVID-19 Genomics UK (COG-UK) Consortium|Davies|United Kingdom

>Spike|hCoV-19/England/ALDP-A68725/2020|2020-10-12|EPI\_ISL\_630579|Original|hCoV-19^^England|Human|Lighthouse Lab in Alderley Park|Wellcome Sanger Institute for the COVID-19 Genomics UK (COG-UK) consortium|Davies|United Kingdom

>Spike|hCoV-19/England/ALDP-A8668E/2020|2020-10-17|EPI\_ISL\_605950|Original|hCoV-19^^England|Human|Lighthouse Lab in Alderley Park|Wellcome Sanger Institute for the COVID-19 Genomics UK (COG-UK) consortium|Davies|United Kingdom

>Spike|hCoV-19/England/CAMC-C3FC26/2020|2020-12-10|EPI\_ISL\_719517|Original|hCoV-19^^England|Human|Lighthouse Lab in Cambridge|Wellcome Sanger Institute for the COVID-19 Genomics UK (COG-UK) Consortium|Davies|United Kingdom

>Spike|hCoV-19/USA/MN-MDH-1597/2020|2020-05-11|EPI\_ISL\_530193|Original|hCoV-19^^Minnesota|Human|Minnesota Department of Health|Minnesota Department of Health|Garfin|USA

>Spike|hCoV-19/USA/WI-GMF-21045/2020|2020-09-18|EPI\_ISL\_660827|Original|hCoV-19^^Wisconsin|Human|Gundersen Molecular Diagnostics Laboratory|Kabara Cancer Research Institute|Kenny|USA

>Spike|hCoV-19/Singapore/31/2020|2020-03-10|EPI\_ISL\_420108|Original|hCoV-19^^Singapore|Human|National Centre for Infectious Diseases|Programme in Emerging Infectious Diseases|Smith|Singapore

>Spike|hCoV-19/Denmark/DCGC-7763/2020|2020-10-19|EPI\_ISL\_618721|Original|hCoV-19^^Hovedstaden|Human|Department of Virus and Microbiological Special Diagnostics|Albertsen lab|Michaelsen|Denmark

>Spike|hCoV-19/Japan/PG-8137/2020|2020-08-00|EPI\_ISL\_687236|Original|hCoV-19^^Japan|Human|Pathogen Genomics Center|Pathogen Genomics Center|Sekizuka|Japan

>Spike|hCoV-19/England/QEUA-A004FB/2020|2020-10-02|EPI\_ISL\_584883|Original|hCoV-19^^England|Human|University of Exeter|COVID-19 Genomics UK (COG-UK) Consortium|Temperton|United Kingdom

>Spike|hCoV-19/USA/TX-HMH-5523/2020|2020-06-29|EPI\_ISL\_544843|Original|hCoV-19^^Texas|Human|Houston Methodist Hospital|Houston Methodist Hospital|Long|USA

>Spike|hCoV-19/Thailand/SamutSakhon-CONI-0349/2020|2020-12-19|EPI\_ISL\_733543|Original|hCoV-19^^Samut Sakhon|Human|Institute for Urban Disease Control and Prevention|COVID-19 Network Investigations (CONI) Alliance|Batty|Thailand

>Spike|hCoV-19/Singapore/146nan/2020|2020-03-16|EPI\_ISL\_648075|Original|hCoV-19^^Singapore|Human|Department of Laboratory Medicine|Department of Laboratory Medicine|Chen|Singapore

>Spike|hCoV-19/England/ALDP-950035/2020|2020-06-15|EPI\_ISL\_555304|Original|hCoV-19^^England|Human|Lighthouse Lab in Alderley Park|Wellcome Sanger Institute for the COVID-19 Genomics UK (COG-UK) Consortium|Davies|United Kingdom

>Spike|hCoV-19/England/ALDP-9E8CB6/2020|2020-09-24|EPI\_ISL\_584169|Original|hCoV-19^^England|Human|Centre for Enzyme Innovation|COVID-19 Genomics UK (COG-UK) Consortium|Robson|United Kingdom

>Spike|hCoV-19/Wales/MILK-9EFA4C/2020|2020-09-23|EPI\_ISL\_594972|Original|hCoV-19^^Wales|Human|Queens Medical Centre|COVID-19 Genomics UK (COG-UK) Consortium|Loose|United Kingdom

>Spike|hCoV-19/USA/UT-UPHL-2012885604/2020|2020-08-08|EPI\_ISL\_745775|Original|hCoV-19^^Utah|Human|Ginkgo Bioworks Clinical Laboratory|Utah Public Health Laboratory|Young|USA

>Spike|hCoV-19/England/EXET-13E2B7/2020|2020-12-05|EPI\_ISL\_724316|Original|hCoV-19^^England|Human|University of Exeter|COVID-19 Genomics UK (COG-UK) Consortium|Temperton|United Kingdom

>Spike|hCoV-19/Denmark/DCGC-16125/2020|2020-11-16|EPI\_ISL\_714598|Original|hCoV-19^^Midtjylland|Human|Department of Virus and Microbiological Special Diagnostics|Albertsen Lab|Michaelsen|Denmark

>Spike|hCoV-19/Singapore/1081/2020|2020-10-06|EPI\_ISL\_596471|Original|hCoV-19^^Singapore|Human|National Public Health Laboratory|National Public Health Laboratory|Mak|Singapore

>Spike|hCoV-19/USA/VA-DCLS-1114/2020|2020-06-15|EPI\_ISL\_529916|Original|hCoV-19^^Virginia|Human|Virginia Division of Consolidated Laboratory Services|Virginia Division of Consolidated Laboratory Services|St. Jacques|USA

>Spike|hCoV-19/England/ALDP-BB5227/2020|2020-11-21|EPI\_ISL\_701799|Original|hCoV-19^^England|Human|Lighthouse Lab in Alderley Park|Wellcome Sanger Institute for the COVID-19 Genomics UK (COG-UK) Consortium|Davies|United Kingdom

>Spike|hCoV-19/England/CAMB-7C6A3/2020|2020-04-04|EPI\_ISL\_441636|Original|hCoV-19^^England|Human|Department of Pathology|Wellcome Sanger Institute for the COVID-19 Genomics UK (COG-UK) consortium|Amato|United Kingdom

>Spike|hCoV-19/England/EXET-1384C6/2020|2020-09-13|EPI\_ISL\_611702|Original|hCoV-19^^England|Human|University of Exeter|COVID-19 Genomics UK (COG-UK) Consortium|Temperton|United Kingdom

>Spike|hCoV-19/England/ALDP-BBB3B5/2020|2020-11-21|EPI\_ISL\_702529|Original|hCoV-19^^England|Human|Lighthouse Lab in Alderley Park|Wellcome Sanger Institute for the COVID-19 Genomics UK (COG-UK) Consortium|Davies|United Kingdom

>Spike|hCoV-19/Singapore/1117/2020|2020-10-26|EPI\_ISL\_626628|Original|hCoV-19^^Singapore|Human|National Public Health Laboratory|National Public Health Laboratory|Mak|Singapore

>Spike|hCoV-19/England/QEUEH-9CEB6E/2020|2020-09-17|EPI\_ISL\_590034|Original|hCoV-19^^England|Human|Lighthouse Lab in Glasgow|Wellcome Sanger Institute for the COVID-19 Genomics UK (COG-UK) consortium|Davies|United Kingdom

>Spike|hCoV-19/Australia/VIC9403/2020|2020-08-19|EPI\_ISL\_565537|Original|hCoV-19^^Victoria|Human|Microbiological Diagnostic Unit - Public Health Laboratory (MDU-PHL)|MDU-PHL|Schultz|Australia

>Spike|hCoV-19/England/ALDP-A5214E/2020|2020-10-07|EPI\_ISL\_598016|Original|hCoV-19^^England|Human|Lighthouse Lab in Alderley Park|Wellcome Sanger Institute for the COVID-19 Genomics UK (COG-UK) consortium|Davies|United Kingdom

>Spike|hCoV-19/USA/WI-GMF-20453/2020|2020-09-15|EPI\_ISL\_660795|Original|hCoV-19^^Wisconsin|Human|Gundersen Molecular Diagnostics Laboratory|Kabara Cancer Research Institute|Kenny|USA

>Spike|hCoV-19/Wales/PHWC-247B6/2020|2020-03-19|EPI\_ISL\_419445|Original|hCoV-19^^Wales|Human|Wales Specialist Virology Centre|Public Health Wales Microbiology Cardiff|Moore|United Kingdom

>Spike|hCoV-19/Scotland/CVR5214/2020|2020-10-20|EPI\_ISL\_627391|Original|hCoV-19^^Scotland|Human|West of Scotland Specialist Virology Centre|COVID-19 Genomics UK (COG-UK) Consortium|Robertson|United Kingdom

>Spike|hCoV-19/England/CAMB-1B24E2/2020|2020-05-18|EPI\_ISL\_456686|Original|hCoV-19^^England|Human|Department of Pathology|COVID-19 Genomics UK (COG-UK) Consortium|Meredith|United Kingdom

>Spike|hCoV-19/USA/AZ-TG547301/2020|2020-07-01|EPI\_ISL\_695473|Original|hCoV-19^^Arizona|Human|AZ SPHL|TGen North|French|USA

>Spike|hCoV-19/Wales/PHWC-48A8F3/2020|2020-11-03|EPI\_ISL\_652612|Original|hCoV-19^^Wales|Human|Wales Specialist Virology Centre Sequencing lab|COVID-19 Genomics UK (COG-UK) Consortium|Moore|United Kingdom

>Spike|hCoV-19/Scotland/CVR5257/2020|2020-10-13|EPI\_ISL\_626927|Original|hCoV-19^^Scotland|Human|West of Scotland Specialist Virology Centre|COVID-19 Genomics UK (COG-UK) Consortium|Robertson|United Kingdom

>Spike|hCoV-19/France/PAC-IHU-0760/2020|2020-03-04|EPI\_ISL\_568957|Original|hCoV-19^^Provence-Alpes-C\u00f4te-d\u2019Azur|Human|MEPHI|MEPHI|Levasseur|France

>Spike|hCoV-19/Mexico/CMX-INDRE\_12/2020|2020-03-12|EPI\_ISL\_455436|Original|hCoV-19^^Mexico City|Human|Instituto de Diagnostico y Referencia Epidemiologicos (INDRE)|Instituto de Diagnostico y Referencia Epidemiologicos (INDRE)|Mendieta|Mexico

>Spike|hCoV-19/Switzerland/SH-ETHZ-370462/2020|2020-11-16|EPI\_ISL\_693961|Original|hCoV-19^^Schaffhausen|Human|Viollier AG|Department of Biosystems Science and Engineering|Nadeau|Switzerland

>Spike|hCoV-19/England/CAMC-9B1B13/2020|2020-09-04|EPI\_ISL\_566467|Original|hCoV-19^^England|Human|Lighthouse Lab in Cambridge|Wellcome Sanger Institute for the COVID-19 Genomics UK (COG-UK) consortium|Davies|United Kingdom

>Spike|hCoV-19/USA/CT-QDX-1489/2020|2020-03-16|EPI\_ISL\_603810|Original|hCoV-19^^Connecticut|Human|Quest Diagnostics|Quest Diagnostics|Kagan|USA

>Spike|hCoV-19/England/MILK-C3033F/2020|2020-12-07|EPI\_ISL\_783010|Original|hCoV-19^^England|Human|Lighthouse Lab in Milton Keynes|Wellcome Sanger Institute for the COVID-19 Genomics UK (COG-UK) Consortium|Davies|United Kingdom

>Spike|hCoV-19/Wales/PHWC-48F472/2020|2020-11-10|EPI\_ISL\_681096|Original|hCoV-19^^Wales|Human|Wales Specialist Virology Centre Sequencing lab|COVID-19 Genomics UK (COG-UK) Consortium|Moore|United Kingdom

>Spike|hCoV-19/North Macedonia/9359/2020|2020-08-05|EPI\_ISL\_677725|Original|hCoV-19^^Ohrid|Human|General Hospital - Ohrid|Research Center for Genetic Engineering and Biotechnology \u201d|Georgi D. Efremov|Dimovski|North Macedonia

>Spike|hCoV-19/England/PORT-2F50EE/2020|2020-00-00|EPI\_ISL\_706884|Original|hCoV-19^^England|Human|Centre for Enzyme Innovation|COVID-19 Genomics UK (COG-UK) Consortium|Robson|United Kingdom

>Spike|hCoV-19/United Arab Emirates/0800/2020|2020-05-19|EPI\_ISL\_698940|Original|hCoV-19^^Abu Dhabi|Human|Group 42 (G42) Healthcare|G42 Healthcare|Ogrodzki|United Arab Emirates

>Spike|hCoV-19/USA/CA-CHLA-PLM35584098/2020|2020-11-19|EPI\_ISL\_753392|Original|hCoV-19^^California|Human|Clinical virology Laboratory|Center for Personalized Medicine|Dien Bard|USA

>Spike|hCoV-19/USA/CA-LACPHL-AF00058/2020|2020-12-18|EPI\_ISL\_754133|Original|hCoV-19^^California|Human|USC Clinical Lab|Los Angeles County PHL|Hemarajata|USA

>Spike|hCoV-19/England/201060007/2020|2020-03-04|EPI\_ISL\_464357|Original|hCoV-19^^England|Human|Respiratory Virus Unit|Respiratory Virus Unit|Platt|United Kingdom

>Spike|hCoV-19/Brazil/RJ-00330/2020|2020-04-30|EPI\_ISL\_623133|Original|hCoV-19^^Rio de Janeiro|Human|Laboratorio de Virologia Molecular / UFRJ|Bioinformatics Laboratory / LNCC|Almeida|Brazil

>Spike|hCoV-19/USA/MD-HP00114/2020|2020-03-24|EPI\_ISL\_457769|Original|hCoV-19^^Maryland|Human|Johns Hopkins Hospital Department of Pathology|Johns Hopkins Hospital Department of Pathology|Ramakrishnan|USA

>Spike|hCoV-19/England/ALDP-95CA59/2020|2020-06-15|EPI\_ISL\_553612|Original|hCoV-19^^England|Human|Lighthouse Lab in Alderley Park|Wellcome Sanger Institute for the COVID-19 Genomics UK (COG-UK) consortium|Davies|United Kingdom

>Spike|hCoV-19/USA/NY-Wadsworth-282305-01/2020|2020-12-02|EPI\_ISL\_754436|Original|hCoV-19^^New York|Human|Wadsworth Center|Wadsworth Center|Lasek-Nesselquist|USA

>Spike|hCoV-19/Australia/VIC14117/2020|2020-08-17|EPI\_ISL\_563976|Original|hCoV-19^^Victoria|Human|Microbiological Diagnostic Unit - Public Health Laboratory (MDU-PHL) |MDU-PHL|Schultz|Australia

>Spike|hCoV-19/Suriname/SR-32/2020|2020-06-25|EPI\_ISL\_517643|Original|hCoV-19^^Suriname|Human|Academic Hospital Paramaribo|Erasmus Medical Center|M\u00f0fcnger|Suriname

>Spike|hCoV-19/USA/HI-H200541/2020|2020-11-05|EPI\_ISL\_753072|Original|hCoV-19^^Hawaii|Human|State Laboratories Division|State Laboratories Division|Sultana|USA

>Spike|hCoV-19/Ireland/LH-NVRL-20ILR08007/2020|2020-11-10|EPI\_ISL\_732411|Original|hCoV-19^^Louth|Human|National Virus Reference Laboratory|National Virus Reference Laboratory|Gonzalez|Ireland

>Spike|hCoV-19/Scotland/CVR5753/2020|2020-11-06|EPI\_ISL\_703829|Original|hCoV-19^^Scotland|Human|West of Scotland Specialist Virology Centre|COVID-19 Genomics UK (COG-UK) Consortium|Robertson|United Kingdom

>Spike|hCoV-19/Australia/VIC9927/2020|2020-08-26|EPI\_ISL\_565784|Original|hCoV-19^^Victoria|Human|Microbiological Diagnostic Unit - Public Health Laboratory (MDU-PHL) |MDU-PHL|Schultz|Australia

>Spike|hCoV-19/USA/CO-CDPHE-2009170023/2020|2020-09-16|EPI\_ISL\_710282|Original|hCoV-19^^Colorado|Human|Colorado Department of Public Health and Environment|Colorado Department of Public Health and Environment|Bankers|USA

>Spike|hCoV-19/USA/WI-UW-964/2020|2020-06-04|EPI\_ISL\_509962|Original|hCoV-19^^Wisconsin|Human|University of Wisconsin-Madison AIDS Vaccine Research Laboratories|University of Wisconsin-Madison AIDS Vaccine Research Laboratories|Baczenas|USA

>Spike|hCoV-19/Northern Ireland/NIRE-FCF82/2020|2020-04-26|EPI\_ISL\_489162|Original|hCoV-19^^Northern Ireland|Human|Regional Virus Laboratory|Wellcome Sanger Institute for the COVID-19 Genomics UK (COG-UK) consortium|Davies|United Kingdom

>Spike|hCoV-19/England/CAMC-B0837D/2020|2020-10-29|EPI\_ISL\_643903|Original|hCoV-19^^England|Human|Lighthouse Lab in Cambridge|Wellcome Sanger Institute for the COVID-19 Genomics UK (COG-UK) Consortium|Davies|United Kingdom

>Spike|hCoV-19/England/QEUEH-9FF232/2020|2020-10-02|EPI\_ISL\_600219|Original|hCoV-19^^England|Human|Lighthouse Lab in Glasgow|Wellcome Sanger Institute for the COVID-19 Genomics UK (COG-UK) consortium|Davies|United Kingdom

>Spike|hCoV-19/USA/CT-Yale-048/2020|2020-03-25|EPI\_ISL\_419516|Original|hCoV-19^^Connecticut|Human|Yale COVID-19 Biorepository|Grubaugh Lab - Yale School of Public Health|Grubaugh|USA

>Spike|hCoV-19/Denmark/DCGC-6690/2020|2020-10-12|EPI\_ISL\_619593|Original|hCoV-19^^Syddanmark|Human|Department of Virus and Microbiological Special Diagnostics|Albertsen lab|Michaelsen|Denmark

>Spike|hCoV-19/Australia/VIC5941/2020|2020-07-18|EPI\_ISL\_518720|Original|hCoV-19^^Victoria|Human|Microbiological Diagnostic Unit - Public Health Laboratory (MDU-PHL)|MDU-PHL|Schultz|Australia

>Spike|hCoV-19/England/QEUH-AAAD9E/2020|2020-10-21|EPI\_ISL\_652741|Original|hCoV-19^^England|Human|Oxford Viromics|COVID-19 Genomics UK (COG-UK) Consortium|Golubchik|United Kingdom

>Spike|hCoV-19/Spain/MD-IBV-003697/2020|2020-04-02|EPI\_ISL\_467207|Original|hCoV-19^^Madrid|Human|Hospital General Universitario Gregorio Mara\u00f1\u00f3n|SeqCOVID-SPAIN consortium/IBV (CSIC)|Comas|Spain

>Spike|hCoV-19/England/204960184/2020|2020-12-02|EPI\_ISL\_747497|Original|hCoV-19^^England|Human|Respiratory Virus Unit|COVID-19 Genomics UK (COG-UK) Consortium|Miah|United Kingdom

>Spike|hCoV-19/USA/HI-H200133/2020|2020-07-09|EPI\_ISL\_752696|Original|hCoV-19^^Hawaii|Human|State Laboratories Division|State Laboratories Division|Sultana|USA

>Spike|hCoV-19/Belgium/ULG-10485/2020|2020-09-23|EPI\_ISL\_581592|Original|hCoV-19^^Li\u00e8ge|Human|Department of Clinical Microbiology|GIGA Medical Genomics|Durkin|Belgium

>Spike|hCoV-19/USA/TX-HMH-MCoV-13551/2020|2020-08-21|EPI\_ISL\_788669|Original|hCoV-19^^Texas|Human|Houston Methodist Hospital|Houston Methodist Hospital|Long|USA

>Spike|hCoV-19/USA/WA-UW70/2020|2020-03-10|EPI\_ISL\_415598|Original|hCoV-19^^Washington|Human|UW Virology Lab|UW Virology Lab|Roychoudhury|USA

>Spike|hCoV-19/England/QEUH-C346AB/2020|2020-12-11|EPI\_ISL\_734054|Original|hCoV-19^^England|Human|Lighthouse Lab in Glasgow|Wellcome Sanger Institute for the COVID-19 Genomics UK (COG-UK) Consortium|Davies|United Kingdom

>Spike|hCoV-19/USA/IL-NM-0486/2020|2020-04-23|EPI\_ISL\_626426|Original|hCoV-19^^Illinois|Human|Northwestern Memorial Hospital|Ozer Lab|Ozer|USA

>Spike|hCoV-19/England/EXET-135A8B/2020|2020-04-04|EPI\_ISL\_457131|Original|hCoV-19^^England|Human|University of Exeter|COVID-19 Genomics UK (COG-UK) Consortium|Temperton|United Kingdom

>Spike|hCoV-19/USA/CA-CZB-3308/2020|2020-07-17|EPI\_ISL\_548329|Original|hCoV-19^^California|Human|County of San Luis Obispo Public Health Laboratory|Chan-Zuckerberg Biohub|Bhatt|USA

>Spike|hCoV-19/Australia/VIC7519/2020|2020-00-00|EPI\_ISL\_564465|Original|hCoV-19^^Victoria|Human|Microbiological Diagnostic Unit - Public Health Laboratory (MDU-PHL)|MDU-PHL|Schultz|Australia

>Spike|hCoV-19/Denmark/DCGC-8994/2020|2020-10-26|EPI\_ISL\_625696|Original|hCoV-19^^Hovedstaden|Human|Department of Virus and Microbiological Special Diagnostics|Albertsen lab|Michaelsen|Denmark

>Spike|hCoV-19/England/OXON-B2753/2020|2020-04-13|EPI\_ISL\_479174|Original|hCoV-19^^England|Human|Oxford Viromics|COVID-19 Genomics UK (COG-UK) Consortium|Golubchik|United Kingdom

>Spike|hCoV-19/Norway/4336/2020|2020-10-12|EPI\_ISL\_635182|Original|hCoV-19^^Nordland|Human|Nordland Hospital - Bodo|Norwegian Institute of Public Health|Vollan|Norway

>Spike|hCoV-19/USA/WY-WPHL-20063117/2020|2020-08-17|EPI\_ISL\_769880|Original|hCoV-19^^Wyoming|Human|Wyoming Public Health Laboratory|Wyoming Public Health Laboratory|Hull|USA

>Spike|hCoV-19/England/20149052404/2020|2020-04-04|EPI\_ISL\_466206|Original|hCoV-19^^England|Human|Respiratory Virus Unit|Respiratory Virus Unit|Platt|United Kingdom

>Spike|hCoV-19/USA/MD-MDH-0416/2020|2020-11-04|EPI\_ISL\_666786|Original|hCoV-19^^Maryland|Human|Maryland Public Health Laboratory|Maryland Public Health Laboratory|Keller|USA

>Spike|hCoV-19/Thailand/Bangkok-0054/2020|2020-03-28|EPI\_ISL\_446996|Original|hCoV-19^^Bangkok|Human|Ramathibodi Hospital|COVID-19 Network Investigations (CONI) Alliance|Batty|Thailand



>Spike|hCoV-19/Denmark/DCGC-8139/2020|2020-10-26|EPI\_ISL\_617214|Original|hCoV-19^^Hovedstaden|Human|Department of Virus and Microbiological Special Diagnostics|Albertsen lab|Michaelsen|Denmark

>Spike|hCoV-19/USA/TX-HMH-MCoV-18914/2020|2020-11-26|EPI\_ISL\_785218|Original|hCoV-19^^Texas|Human|Houston Methodist Hospital|Houston Methodist Hospital|Long|USA

>Spike|hCoV-19/England/QEUEH-AE52C5/2020|2020-10-27|EPI\_ISL\_633184|Original|hCoV-19^^England|Human|Lighthouse Lab in Glasgow|Wellcome Sanger Institute for the COVID-19 Genomics UK (COG-UK) consortium|Davies|United Kingdom

>Spike|hCoV-19/England/ALDP-9C5C46/2020|2020-09-10|EPI\_ISL\_567821|Original|hCoV-19^^England|Human|Lighthouse Lab in Alderley Park|Wellcome Sanger Institute for the COVID-19 Genomics UK (COG-UK) consortium|Davies|United Kingdom

>Spike|hCoV-19/USA/WI-UW-166/2020|2020-03-17|EPI\_ISL\_428262|Original|hCoV-19^^Wisconsin|Human|University of Wisconsin-Madison AIDS Vaccine Research Laboratories|University of Wisconsin-Madison AIDS Vaccine Research Laboratories|Moreno|USA

>Spike|hCoV-19/England/CAMC-C6FE54/2020|2020-12-15|EPI\_ISL\_769091|Original|hCoV-19^^England|Human|Lighthouse Lab in Cambridge|Wellcome Sanger Institute for the COVID-19 Genomics UK (COG-UK) Consortium|Davies|United Kingdom

>Spike|hCoV-19/England/CAMC-A656A3/2020|2020-10-10|EPI\_ISL\_608598|Original|hCoV-19^^England|Human|Lighthouse Lab in Cambridge|Wellcome Sanger Institute for the COVID-19 Genomics UK (COG-UK) consortium|Davies|United Kingdom

>Spike|hCoV-19/USA/WA-UW-29758/2020|2020-09-28|EPI\_ISL\_717780|Original|hCoV-19^^Washington|Human|UW Virology Lab|UW Virology Lab|Roychoudhury|USA

>Spike|hCoV-19/England/QEUEH-9FB0A5/2020|2020-09-29|EPI\_ISL\_588212|Original|hCoV-19^^England|Human|Lighthouse Lab in Glasgow|Wellcome Sanger Institute for the COVID-19 Genomics UK (COG-UK) consortium|Davies|United Kingdom

>Spike|hCoV-19/England/MILK-956EDB/2020|2020-06-08|EPI\_ISL\_554310|Original|hCoV-19^^England|Human|Lighthouse Lab in Milton Keynes|Wellcome Sanger Institute for the COVID-19 Genomics UK (COG-UK) consortium|Davies|United Kingdom

>Spike|hCoV-19/England/ALDP-B6363B/2020|2020-11-09|EPI\_ISL\_656616|Original|hCoV-19^^England|Human|Lighthouse Lab in Alderley Park|Wellcome Sanger Institute for the COVID-19 Genomics UK (COG-UK) Consortium|Davies|United Kingdom

>Spike|hCoV-19/Singapore/471/2020|2020-03-15|EPI\_ISL\_476806|Original|hCoV-19^^Singapore|Human|Department of Laboratory Medicine\nTan Tock Seng Hospital|Department of Laboratory Medicine\nTan Tock Seng Hospital|Chen|Singapore

>Spike|hCoV-19/France/ARA-SC397/2020|2020-04-07|EPI\_ISL\_641546|Original|hCoV-19^^Auvergne-Rhone-Alpes|Human|CHU Clermont-Ferrand|CNR Virus des Infections Respiratoires - France SUD|Bal|France

>Spike|hCoV-19/Scotland/EDB8092/2020|2020-10-02|EPI\_ISL\_585478|Original|hCoV-19^^Scotland|Human|Virology Department|COVID-19 Genomics UK (COG-UK) Consortium|McHugh|United Kingdom

>Spike|hCoV-19/Scotland/CVR2937/2020|2020-04-22|EPI\_ISL\_438999|Original|hCoV-19^^Scotland|Human|West of Scotland Specialist Virology Centre|COVID-19 Genomics UK (COG-UK) Consortium|Robertson|United Kingdom

>Spike|hCoV-19/Denmark/DCGC-10620/2020|2020-11-02|EPI\_ISL\_670094|Original|hCoV-19^^Nordjylland|Human|Department of Virus and Microbiological Special Diagnostics|Albertsen Lab|Michaelsen|Denmark

>Spike|hCoV-19/Japan/IC-0405/2020|2020-12-00|EPI\_ISL\_736914|Original|hCoV-19^^Japan|Human|Pathogen Genomics Center|Pathogen Genomics Center|Sekizuka|Japan

>Spike|hCoV-19/Canada/BC\_19803546/2020|2020-04-00|EPI\_ISL\_469223|Original|hCoV-19^^British Columbia|Human|BCCDC Public Health Laboratory|BCCDC Public Health Laboratory|Harrigan|Canada

>Spike|hCoV-19/Scotland/CVR2531/2020|2020-04-15|EPI\_ISL\_438924|Original|hCoV-19^^Scotland|Human|West of Scotland Specialist Virology Centre|COVID-19 Genomics UK (COG-UK) Consortium|Robertson|United Kingdom

>Spike|hCoV-19/USA/CA-ALSR-1860/2020|2020-05-19|EPI\_ISL\_512210|Original|hCoV-19^^California|Human|San Diego County Public Health Laboratory|Andersen lab at Scripps Research|Gangavarapu|USA

>Spike|hCoV-19/Wales/PHWC-49B376/2020|2020-11-11|EPI\_ISL\_742324|Original|hCoV-19^^Wales|Human|Wales Specialist Virology Centre Sequencing lab|COVID-19 Genomics UK (COG-UK) Consortium|Moore|United Kingdom

>Spike|hCoV-19/England/QEUH-B668C9/2020|2020-11-11|EPI\_ISL\_662531|Original|hCoV-19^^England|Human|Lighthouse Lab in Glasgow|Wellcome Sanger Institute for the COVID-19 Genomics UK (COG-UK) Consortium|Davies|United Kingdom

>Spike|hCoV-19/Australia/VIC14377/2020|2020-09-19|EPI\_ISL\_592475|Original|hCoV-19^^Victoria|Human|Microbiological Diagnostic Unit - Public Health Laboratory (MDU-PHL)|MDU-PHL|Schultz|Australia

>Spike|hCoV-19/USA/CO-QDX-2195/2020|2020-03-16|EPI\_ISL\_604516|Original|hCoV-19^^Colorado|Human|Quest Diagnostics|Quest Diagnostics|Kagan|USA

>Spike|hCoV-19/USA/MI-MDHHS-SC21785/2020|2020-08-14|EPI\_ISL\_529903|Original|hCoV-19^^Michigan|Human|Michigan Department of Health and Human Services|Michigan Department of Health and Human Services|Blankenship|USA

>Spike|hCoV-19/Wales/MILK-9EF9F4/2020|2020-09-23|EPI\_ISL\_594967|Original|hCoV-19^^Wales|Human|Queens Medical Centre|COVID-19 Genomics UK (COG-UK) Consortium|Loose|United Kingdom

>Spike|hCoV-19/England/MILK-B3BB1F/2020|2020-11-02|EPI\_ISL\_706095|Original|hCoV-19^^England|Human|Oxford Viromics|COVID-19 Genomics UK (COG-UK) Consortium|Golubchik|United Kingdom

>Spike|hCoV-19/Switzerland/AG-ETHZ-410317/2020|2020-12-16|EPI\_ISL\_737547|Original|hCoV-19^^Aargau|Human|Viollier AG|Department of Biosystems Science and Engineering|Nadeau|Switzerland

>Spike|hCoV-19/USA/MA-MASPHL-00658/2020|2020-05-18|EPI\_ISL\_692975|Original|hCoV-19^^Massachusetts|Human|Massachusetts State Public Health Laboratory|Massachusetts State Public Health Laboratory|Lang|USA

>Spike|hCoV-19/USA/CO-CSU-D1068/2020|2020-04-02|EPI\_ISL\_527433|Original|hCoV-19^^Colorado|Human|Colorado State University - Ebel Lab|Colorado State University - Ebel Lab|Cline|USA

>Spike|hCoV-19/Belgium/reg-0408689/2020|2020-04-08|EPI\_ISL\_734544|Original|hCoV-19^^Koekeberg|Human|UZ Leuven|KU Leuven|Maes|Belgium

>Spike|hCoV-19/Wales/PHWC-49AF82/2020|2020-12-05|EPI\_ISL\_742277|Original|hCoV-19^^Wales|Human|Wales Specialist Virology Centre Sequencing lab|COVID-19 Genomics UK (COG-UK) Consortium|Moore|United Kingdom

>Spike|hCoV-19/England/ALDP-A51895/2020|2020-10-07|EPI\_ISL\_597964|Original|hCoV-19^^England|Human|Lighthouse Lab in Alderley Park|Wellcome Sanger Institute for the COVID-19 Genomics UK (COG-UK) consortium|Davies|United Kingdom

>Spike|hCoV-19/England/CAMC-C41298/2020|2020-12-10|EPI\_ISL\_719154|Original|hCoV-19^^England|Human|Lighthouse Lab in Cambridge|Wellcome Sanger Institute for the COVID-19 Genomics UK (COG-UK) Consortium|Davies|United Kingdom

>Spike|hCoV-19/England/LIVE-9F789/2020|2020-04-21|EPI\_ISL\_472013|Original|hCoV-19^^England|Human|Liverpool Clinical Laboratories|COVID-19 Genomics UK (COG-UK) Consortium|Haldenby|United Kingdom

>Spike|hCoV-19/Spain/CT-IBV-005569/2020|2020-03-26|EPI\_ISL\_508679|Original|hCoV-19^^Catalunya|Human|Departamento de Microbiolog\u00eda|SeqCOVID-SPAIN consortium|IBV (CSIC)|Comas|Spain

>Spike|hCoV-19/England/MILK-A6ABFA/2020|2020-10-09|EPI\_ISL\_608796|Original|hCoV-19^^England|Human|Lighthouse Lab in Milton Keynes|Wellcome Sanger Institute for the COVID-19 Genomics UK (COG-UK) consortium|Davies|United Kingdom

>Spike|hCoV-19/Netherlands/ZuidHolland\_180/2020|2020-04-22|EPI\_ISL\_461352|Original|hCoV-19^^Zuid Holland|Human|Dutch COVID-19 response team|Erasmus Medical Center|Oude Munnink|Netherlands

>Spike|hCoV-19/England/MILK-B39513/2020|2020-11-02|EPI\_ISL\_658928|Original|hCoV-19^^England|Human|Lighthouse Lab in Milton Keynes|Wellcome Sanger Institute for the COVID-19 Genomics UK (COG-UK) Consortium|Davies|United Kingdom

>Spike|hCoV-19/England/CAMC-C98AC7/2020|2020-12-17|EPI\_ISL\_777454|Original|hCoV-19^^England|Human|Lighthouse Lab in Cambridge|Wellcome Sanger Institute for the COVID-19 Genomics UK (COG-UK) Consortium|Davies|United Kingdom

>Spike|hCoV-19/England/CAMC-B5115D/2020|2020-11-08|EPI\_ISL\_657744|Original|hCoV-19^^England|Human|Lighthouse Lab in Cambridge|Wellcome Sanger Institute for the COVID-19 Genomics UK (COG-UK) Consortium|Davies|United Kingdom

>Spike|hCoV-19/England/QEUH-CCDD2A/2020|2020-12-24|EPI\_ISL\_782452|Original|hCoV-19^^England|Human|Lighthouse Lab in Glasgow|Wellcome Sanger Institute for the COVID-19 Genomics UK (COG-UK) Consortium|Davies|United Kingdom

>Spike|hCoV-19/Colombia/DC-INS-3569/2020|2020-06-30|EPI\_ISL\_653755|Original|hCoV-19^^Bogota|Human|Instituto Nacional de Salud|Instituto Nacional de Salud|Franco-Mu\u00f1oz|Colombia

>Spike|hCoV-19/Chile/RM-191993/2020|2020-09-28|EPI\_ISL\_746483|Original|hCoV-19^^Region Metropolitana de Santiago|Human|Genetica Molecular and Subdepartamento de Virologia ISP Chile|Instituto de Salud Publica de Chile|Tognarelli|Chile

>Spike|hCoV-19/USA/VA-DCLS-1285/2020|2020-08-14|EPI\_ISL\_572299|Original|hCoV-19^^Virginia|Human|Virginia DCLS|Virginia DCLS|St. Jacques|USA

>Spike|hCoV-19/USA/MD-MDH-0274/2020|2020-10-13|EPI\_ISL\_629055|Original|hCoV-19^^Maryland|Human|Maryland Public Health Laboratory|Maryland Public Health Laboratory|Keller|USA

>Spike|hCoV-19/England/MILK-BB0FAD/2020|2020-11-18|EPI\_ISL\_720241|Original|hCoV-19^^England|Human|Lighthouse Lab in Milton Keynes|Wellcome Sanger Institute for the COVID-19 Genomics UK (COG-UK) Consortium|Davies|United Kingdom

>Spike|hCoV-19/Spain/IB-IBV-99010808/2020|2020-10-17|EPI\_ISL\_691679|Original|hCoV-19^^Balear Islands|Human|Servicio de Microbiolog\u00eda|SeqCOVID-SPAIN consortium/IBV (CSIC) |Comas|Spain

>Spike|hCoV-19/India/DL-NCDC1613-CSIR-IGIB/2020|2020-05-17|EPI\_ISL\_482500|Original|hCoV-19^^Delhi|Human|National Centre for Disease control (NCDC) |NCDC/CSIR-IGIB|Pandey|India

>Spike|hCoV-19/Switzerland/LU-ETHZ-400372/2020|2020-12-09|EPI\_ISL\_729182|Original|hCoV-19^^Lucerne|Human|Viollier AG|Department of Biosystems Science and Engineering|Nadeau|Switzerland

>Spike|hCoV-19/Japan/PG-4580/2020|2020-07-00|EPI\_ISL\_689717|Original|hCoV-19^^Japan|Human|Pathogen Genomics Center|Pathogen Genomics Center|Sekizuka|Japan

>Spike|hCoV-19/Sweden/20-50564/2020|2020-03-30|EPI\_ISL\_510818|Original|hCoV-19^^Vasternorrland|Human|Klinisk mikrobiologi Vasternorrland|The Public Health Agency of Sweden|Svartstr\u00f6m|Sweden

>Spike|hCoV-19/USA/TX-HMH-3178/2020|2020-06-11|EPI\_ISL\_544052|Original|hCoV-19^^Texas|Human|Houston Methodist Hospital|Houston Methodist Hospital|Long|USA

>Spike|hCoV-19/Ecuador/USFQ-177/2020|2020-08-12|EPI\_ISL\_525431|Original|hCoV-19^^Zamora-Chinchipec|Human|Institute of Microbiology|Institute of Microbiology|Cardenas|Ecuador

>Spike|hCoV-19/USA/WI-UW-1399/2020|2020-09-03|EPI\_ISL\_536770|Original|hCoV-19^^Wisconsin|Human|University of Wisconsin-Madison AIDS Vaccine Research Laboratories|University of Wisconsin-Madison AIDS Vaccine Research Laboratories|Baczenas|USA

>Spike|hCoV-19/Denmark/DCGC-20603/2020|2020-12-21|EPI\_ISL\_759249|Original|hCoV-19^^Hovedstaden|Human|Department of Virus and Microbiological Special Diagnostics|Albertsen Lab|Michaelsen|Denmark

>Spike|hCoV-19/USA/TX-HMH-4180/2020|2020-06-18|EPI\_ISL\_543416|Original|hCoV-19^^Texas|Human|Houston Methodist Hospital|Houston Methodist Hospital|Long|USA

>Spike|hCoV-19/USA/AZ-TG552537/2020|2020-07-29|EPI\_ISL\_695535|Original|hCoV-19^^Arizona|Human|TGen North|TGen North|French|USA

>Spike|hCoV-19/USA/LA-CDC-1284/2020|2020-06-11|EPI\_ISL\_535325|Vero P1|hCoV-19^^Louisiana|Human|LA Office of Public Health Laboratories|Pathogen Discovery|Queen|USA

>Spike|hCoV-19/England/CAMC-B7919B/2020|2020-11-12|EPI\_ISL\_668014|Original|hCoV-19^^England|Human|Lighthouse Lab in Cambridge|Wellcome Sanger Institute for the COVID-19 Genomics UK (COG-UK) Consortium|Davies|United Kingdom

>Spike|hCoV-19/England/SHEF-10CC36E/2020|2020-12-17|EPI\_ISL\_741990|Original|hCoV-19^^England|Human|Virology Department|COVID-19 Genomics UK (COG-UK) Consortium|de Silva|United Kingdom

>Spike|hCoV-19/England/ALDP-9E6DB5/2020|2020-09-24|EPI\_ISL\_580363|Original|hCoV-19^^England|Human|Lighthouse Lab in Alderley Park|Wellcome Sanger Institute for the COVID-19 Genomics UK (COG-UK) consortium|Davies|United Kingdom

>Spike|hCoV-19/England/MILK-BB2187/2020|2020-11-18|EPI\_ISL\_720419|Original|hCoV-19^^England|Human|Lighthouse Lab in Milton Keynes|Wellcome Sanger Institute for the COVID-19 Genomics UK (COG-UK) Consortium|Davies|United Kingdom

>Spike|hCoV-19/England/ALDP-9CBF29/2020|2020-09-16|EPI\_ISL\_575660|Original|hCoV-19^^England|Human|Lighthouse Lab in Alderley Park|Wellcome Sanger Institute for the COVID-19 Genomics UK (COG-UK) consortium|Davies|United Kingdom

>Spike|hCoV-19/USA/NY-QDX-864/2020|2020-03-17|EPI\_ISL\_571671|Original|hCoV-19^^New York|Human|Quest Diagnostics|Quest Diagnostics|Kagan|USA

>Spike|hCoV-19/USA/NY-Wadsworth-269631-01/2020|2020-11-10|EPI\_ISL\_734436|Original|hCoV-19^^New York|Human|Wadsworth Center|Wadsworth Center|Lasek-Nesselquist|USA

>Spike|hCoV-19/USA/TX-HMH-3016/2020|2020-05-30|EPI\_ISL\_543936|Original|hCoV-19^^Texas|Human|Houston Methodist Hospital|Houston Methodist Hospital|Long|USA

>Spike|hCoV-19/Denmark/DCGC-1868/2020|2020-03-30|EPI\_ISL\_622550|Original|hCoV-19^^Hovedstaden|Human|Department of Virus and Microbiological Special Diagnostics|Albertsen lab|Michaelsen|Denmark

>Spike|hCoV-19/USA/MI-MDHHS-SC22172/2020|2020-10-12|EPI\_ISL\_614223|Original|hCoV-19^^Michigan|Human|Michigan Department of Health and Human Services|Michigan Department of Health and Human Services|Jacob|USA

>Spike|hCoV-19/Germany/NW-HHU-311/2020|2020-10-05|EPI\_ISL\_631314|Original|hCoV-19^^North Rhine-Westphalia|Human|ZOTZ KLIMAS MVZ D\u00f0fcsseldorf-Centrum GbR \u00dcBAG f\u00fcr Labormedizin|Center of Medical Microbiology|Wienemann|Germany

>Spike|hCoV-19/USA/WA-S2165/2020|2020-06-08|EPI\_ISL\_497593|Original|hCoV-19^^Washington|Human|Washington State Department of Health|Seattle Flu Study|Lee|USA

>Spike|hCoV-19/England/MILK-C60D38/2020|2020-12-13|EPI\_ISL\_769508|Original|hCoV-19^^England|Human|Lighthouse Lab in Milton Keynes|Wellcome Sanger Institute for the COVID-19 Genomics UK (COG-UK) Consortium|Davies|United Kingdom

>Spike|hCoV-19/England/ALDP-A6F8FE/2020|2020-10-15|EPI\_ISL\_607282|Original|hCoV-19^^England|Human|Lighthouse Lab in Alderley Park|Wellcome Sanger Institute for the COVID-19 Genomics UK (COG-UK) consortium|Davies|United Kingdom

>Spike|hCoV-19/Denmark/DCGC-15392/2020|2020-11-23|EPI\_ISL\_713208|Original|hCoV-19^^Hovedstaden|Human|Department of Virus and Microbiological Special Diagnostics|Albertsen Lab|Michaelsen|Denmark

>Spike|hCoV-19/USA/TX-HMH-MCoV-13705/2020|2020-08-19|EPI\_ISL\_788801|Original|hCoV-19^^Texas|Human|Houston Methodist Hospital|Houston Methodist Hospital|Long|USA

>Spike|hCoV-19/Australia/VIC16019/2020|2020-08-02|EPI\_ISL\_640566|Original|hCoV-19^^Victoria|Human|Microbiological Diagnostic Unit - Public Health Laboratory (MDU-PHL)|MDU-PHL|Schultz|Australia

>Spike|hCoV-19/England/MILK-ACC25B/2020|2020-10-21|EPI\_ISL\_629127|Original|hCoV-19^^England|Human|Lighthouse Lab in Milton Keynes|Wellcome Sanger Institute for the COVID-19 Genomics UK (COG-UK) consortium|Davies|United Kingdom

>Spike|hCoV-19/Scotland/CVR334/2020|2020-03-21|EPI\_ISL\_439053|Original|hCoV-19^^Scotland|Human|West of Scotland Specialist Virology Centre|COVID-19 Genomics UK (COG-UK) Consortium|Robertson|United Kingdom

>Spike|hCoV-19/Denmark/DCGC-13448/2020|2020-11-30|EPI\_ISL\_712451|Original|hCoV-19^^Hovedstaden|Human|Department of Virus and Microbiological Special Diagnostics|Albertsen Lab|Michaelsen|Denmark

>Spike|hCoV-19/England/MILK-994A28/2020|2020-08-26|EPI\_ISL\_552429|Original|hCoV-19^^England|Human|Lighthouse Lab in Milton Keynes|Wellcome Sanger Institute for the COVID-19 Genomics UK (COG-UK) consortium|Davies|United Kingdom

>Spike|hCoV-19/Wales/PHWC-494F3D/2020|2020-11-25|EPI\_ISL\_726273|Original|hCoV-19^^Wales|Human|Originating lab|COVID-19 Genomics UK (COG-UK) Consortium|Moore|United Kingdom

>Spike|hCoV-19/Denmark/DCGC-6383/2020|2020-09-28|EPI\_ISL\_622308|Original|hCoV-19^^Hovedstaden|Human|Department of Virus and Microbiological Special Diagnostics|Albertsen lab|Michaelsen|Denmark

>Spike|hCoV-19/Switzerland/BL-UHB-42202243/2020|2020-03-22|EPI\_ISL\_528329|Original|hCoV-19^^Basel-Land|Human|University Hospital Basel|University Hospital Basel|Roloff Handschin|Switzerland

>Spike|hCoV-19/England/ALDP-661B51/2020|2020-07-03|EPI\_ISL\_555688|Original|hCoV-19^^England|Human|Lighthouse Lab in Alderley Park|Wellcome Sanger Institute for the COVID-19 Genomics UK (COG-UK) consortium|Davies|United Kingdom

>Spike|hCoV-19/England/LIVE-A6488/2020|2020-03-18|EPI\_ISL\_499711|Original|hCoV-19^^England|Human|Liverpool Clinical Laboratories|COVID-19 Genomics UK (COG-UK) Consortium|Haldenby|United Kingdom

>Spike|hCoV-19/USA/TX-DSHS-1970/2020|2020-06-06|EPI\_ISL\_766736|Original|hCoV-19^^Texas|Human|Texas Department of State Health Services|Texas Department of State Health Services|Rahman|USA

>Spike|hCoV-19/Australia/VIC9318/2020|2020-08-18|EPI\_ISL\_565503|Original|hCoV-19^^Victoria|Human|Microbiological Diagnostic Unit - Public Health Laboratory (MDU-PHL)|MDU-PHL|Schultz|Australia

>Spike|hCoV-19/Switzerland/AG-ETHZ-331076/2020|2020-10-20|EPI\_ISL\_614894|Original|hCoV-19^^Aargau|Human|Viollier AG|Department of Biosystems Science and Engineering|Nadeau|Switzerland

>Spike|hCoV-19/North Macedonia/ChVir7918/2020|2020-06-25|EPI\_ISL\_492086|Original|hCoV-19^^North Macedonia|Human|Institute for Public Health of the Republic of North Macedonia|Charite Universitatsmedizin Berlin|Muehlemann|North Macedonia

>Spike|hCoV-19/Australia/VIC4537/2020|2020-07-16|EPI\_ISL\_518948|Original|hCoV-19^^Victoria|Human|Microbiological Diagnostic Unit - Public Health Laboratory (MDU-PHL)|MDU-PHL|Schultz|Australia

>Spike|hCoV-19/England/ALDP-5C9F5C/2020|2020-06-19|EPI\_ISL\_558607|Original|hCoV-19^^England|Human|Lighthouse Lab in Alderley Park|Wellcome Sanger Institute for the COVID-19 Genomics UK (COG-UK) consortium|Davies|United Kingdom

>Spike|hCoV-19/USA/MI-MDHHS-SC20135/2020|2020-03-26|EPI\_ISL\_436867|Original|hCoV-19^^Michigan|Human|Michigan Department of Health and Human Services|Michigan Department of Health and Human Services|Blankenship|USA

>Spike|hCoV-19/USA/CA-LACPHL-AE00041/2020|2020-07-17|EPI\_ISL\_708733|Original|hCoV-19^^California|Human|Los Angeles County Public Health Laboratory|Los Angeles County Public Health Laboratory|Hemarajata|USA

>Spike|hCoV-19/South Africa/KRISP-EB00584394/2020|2020-11-25|EPI\_ISL\_736988|Original|hCoV-19^^KwaZulu-Natal|Human|NHLs-IALCH|KRISP|de Oliveira|South Africa

>Spike|hCoV-19/Denmark/DCGC-19135/2020|2020-12-07|EPI\_ISL\_748773|Original|hCoV-19^^Hovedstaden|Human|Department of Virus and Microbiological Special Diagnostics|Albertsen Lab|Michaelsen|Denmark

>Spike|hCoV-19/USA/WA-S881/2020|2020-04-23|EPI\_ISL\_463371|Original|hCoV-19^^Washington|Human|Washington State Department of Health|Seattle Flu Study|Bedford|USA

>Spike|hCoV-19/Hong Kong/HKU-200823-001/2020|2020-03-26|EPI\_ISL\_516798|Original|hCoV-19^^Hong Kong|Human|Department of Microbiology|Department of Microbiology|Chan|China

>Spike|hCoV-19/England/QEUH-C317D8/2020|2020-12-11|EPI\_ISL\_730875|Original|hCoV-19^^England|Human|Lighthouse Lab in Glasgow|Wellcome Sanger Institute for the COVID-19 Genomics UK (COG-UK) Consortium|Davies|United Kingdom

>Spike|hCoV-19/Wales/PHWC-49779C/2020|2020-11-22|EPI\_ISL\_726879|Original|hCoV-19^^Wales|Human|Originating lab|COVID-19 Genomics UK (COG-UK) Consortium|Moore|United Kingdom

>Spike|hCoV-19/Denmark/DCGC-22446/2020|2020-12-14|EPI\_ISL\_757401|Original|hCoV-19^^Hovedstaden|Human|Department of Virus and Microbiological Special Diagnostics|Albertsen Lab|Michaelsen|Denmark

>Spike|hCoV-19/Denmark/DCGC-12536/2020|2020-11-16|EPI\_ISL\_682717|Original|hCoV-19^^Hovedstaden|Human|Department of Virus and Microbiological Special Diagnostics|Albertsen Lab|Michaelsen|Denmark

>Spike|hCoV-19/USA/IL-UW-987/2020|2020-07-16|EPI\_ISL\_509805|Original|hCoV-19^^Illinois|Human|University of Wisconsin-Madison AIDS Vaccine Research

Laboratories|University of Wisconsin-Madison AIDS Vaccine Research  
Laboratories|Baczenas|USA  
>Spike|hCoV-19/India/MH-ACTREC-570/2020|2020-08-31|EPI\_ISL\_700214|Original|hCoV-19^^Maharashtra|Human|Hematopathology Laboratory|Hematopathology Laboratory|Patkar|India  
>Spike|hCoV-19/England/CAMB-81025/2020|2020-04-20|EPI\_ISL\_438557|Original|hCoV-19^^England|Human|Department of Pathology|COVID-19 Genomics UK (COG-UK) Consortium|Meredith|United Kingdom  
>Spike|hCoV-19/USA/CA-ALSR-4141/2020|2020-06-27|EPI\_ISL\_648845|Original|hCoV-19^^California|Human|San Diego County Public Health Laboratory|Andersen lab at Scripps Research|Gangavarapu|USA  
>Spike|hCoV-19/Wales/PHWC-49A67E/2020|2020-12-02|EPI\_ISL\_727579|Original|hCoV-19^^Wales|Human|Originating lab|COVID-19 Genomics UK (COG-UK) Consortium|Moore|United Kingdom  
>Spike|hCoV-19/USA/CA-SR0237/2020|2020-04-26|EPI\_ISL\_437567|Original|hCoV-19^^California|Human|Scripps Medical Laboratory|Andersen lab at Scripps Research|Gangavarapu|USA  
>Spike|hCoV-19/England/QEUEH-9FA871/2020|2020-09-28|EPI\_ISL\_588080|Original|hCoV-19^^England|Human|Lighthouse Lab in Glasgow|Wellcome Sanger Institute for the COVID-19 Genomics UK (COG-UK) consortium|Davies|United Kingdom  
>Spike|hCoV-19/Australia/NSW918/2020|2020-09-02|EPI\_ISL\_544999|Original|hCoV-19^^New South Wales|Human|St Vincent's Pathology (SydPath)|NSW Health Pathology - Institute of Clinical Pathology and Medical Research; Westmead Hospital; University of Sydney|Gall|Australia  
>Spike|hCoV-19/England/MILK-ACCD4B/2020|2020-10-21|EPI\_ISL\_630246|Original|hCoV-19^^England|Human|Lighthouse Lab in Milton Keynes|Wellcome Sanger Institute for the COVID-19 Genomics UK (COG-UK) consortium|Davies|United Kingdom  
>Spike|hCoV-19/England/ALDP-B840EB/2020|2020-11-14|EPI\_ISL\_674217|Original|hCoV-19^^England|Human|Lighthouse Lab in Alderley Park|Wellcome Sanger Institute for the COVID-19 Genomics UK (COG-UK) Consortium|Davies|United Kingdom  
>Spike|hCoV-19/Germany/HH-hpi-p1968/2020|2020-03-25|EPI\_ISL\_776291|Original|hCoV-19^^Hamburg|Human|University Medical Center Hamburg Eppendorf|Heinrich Pette Institute|Robitaille|Germany  
>Spike|hCoV-19/England/QEUEH-BA1FFA/2020|2020-11-18|EPI\_ISL\_719822|Original|hCoV-19^^England|Human|Lighthouse Lab in Glasgow|Wellcome Sanger Institute for the COVID-19 Genomics UK (COG-UK) Consortium|Davies|United Kingdom  
>Spike|hCoV-19/England/CAMC-B98D29/2020|2020-11-15|EPI\_ISL\_673653|Original|hCoV-19^^England|Human|Lighthouse Lab in Cambridge|Wellcome Sanger Institute for the COVID-19 Genomics UK (COG-UK) Consortium|Davies|United Kingdom  
>Spike|hCoV-19/USA/WA-S1798/2020|2020-06-02|EPI\_ISL\_496224|Original|hCoV-19^^Washington|Human|Washington State Department of Health|Seattle Flu Study|Lee|USA  
>Spike|hCoV-19/Denmark/DCGC-2962/2020|2020-08-24|EPI\_ISL\_616724|Original|hCoV-19^^Hovedstaden|Human|Department of Virus and Microbiological Special Diagnostics|Albertsen lab|Michaelsen|Denmark  
>Spike|hCoV-19/England/MILK-9E0331/2020|2020-09-20|EPI\_ISL\_601474|Original|hCoV-19^^England|Human|Lighthouse Lab in Milton Keynes|Wellcome Sanger Institute for the COVID-19 Genomics UK (COG-UK) consortium|Davies|United Kingdom  
>Spike|hCoV-19/USA/WI-UW-1588/2020|2020-09-18|EPI\_ISL\_605465|Original|hCoV-19^^Wisconsin|Human|University of Wisconsin-Madison AIDS Vaccine Research Laboratories|University of Wisconsin-Madison AIDS Vaccine Research Laboratories|Baczenas|USA  
>Spike|hCoV-19/Portugal/PT1907/2020|2020-11-11|EPI\_ISL\_732120|Original|hCoV-19^^Portugal|Human|Instituto Nacional de Saude (INSA) and Instituto Gulbenkian de Ciencia (IGC)|Instituto Nacional de Saude (INSA) and Instituto Gulbenkian de Ciencia (IGC)|Borges|Portugal  
>Spike|hCoV-19/England/QEUEH-9C9CD9/2020|2020-09-10|EPI\_ISL\_567359|Original|hCoV-19^^England|Human|Lighthouse Lab in Glasgow|Wellcome Sanger Institute for the COVID-19 Genomics UK (COG-UK) consortium|Davies|United Kingdom

>Spike|hCoV-19/Denmark/ALAB-HH65/2020|2020-03-17|EPI\_ISL\_429311|Original|hCoV-19^^Denmark|Human|Department of Clinical Microbiology|Albertsen lab|Kirkegaard|Denmark

>Spike|hCoV-19/USA/VA-DCLS-0887/2020|2020-04-30|EPI\_ISL\_516676|Original|hCoV-19^^Virginia|Human|Virginia DCLS|Virginia DCLS|St. Jacques|USA

>Spike|hCoV-19/Wales/PHWC-252B4/2020|2020-03-23|EPI\_ISL\_420985|Original|hCoV-19^^Wales|Human|Wales Specialist Virology Centre|Public Health Wales Microbiology Cardiff|Moore|United Kingdom

>Spike|hCoV-19/Denmark/DCGC-3021/2020|2020-08-24|EPI\_ISL\_616799|Original|hCoV-19^^Hovedstaden|Human|Department of Virus and Microbiological Special Diagnostics|Albertsen lab|Michaelsen|Denmark

>Spike|hCoV-19/Japan/PG-1852/2020|2020-05-00|EPI\_ISL\_685458|Original|hCoV-19^^Japan|Human|Tokyo Metropolitan Institute of Public Health|Pathogen Genomics Center|Sekizuka|Japan

>Spike|hCoV-19/England/OXON-AFC5A/2020|2020-04-16|EPI\_ISL\_478816|Original|hCoV-19^^England|Human|Oxford Viromics|COVID-19 Genomics UK (COG-UK) Consortium|Golubchik|United Kingdom

>Spike|hCoV-19/Australia/NSW2152/2020|2020-03-15|EPI\_ISL\_509504|Original|hCoV-19^^New South Wales|Human|Area of Virology|Area of Virology|Yeang|Australia

>Spike|hCoV-19/Japan/IC-0116/2020|2020-07-00|EPI\_ISL\_591457|Original|hCoV-19^^Japan|Human|Pathogen Genomics Center|Pathogen Genomics Center|Sekizuka|Japan

>Spike|hCoV-19/Netherlands/ZH-EMC-953/2020|2020-10-29|EPI\_ISL\_722569|Original|hCoV-19^^Zuid Holland|Human|Dutch COVID-19 response team|Erasmus Medical Center|Oude Munnink|Netherlands

>Spike|hCoV-19/Northern Ireland/NIRE-106F57/2020|2020-05-30|EPI\_ISL\_501023|Original|hCoV-19^^Northern Ireland|Human|Regional Virus Laboratory|Wellcome Sanger Institute for the COVID-19 Genomics UK (COG-UK) consortium|Davies|United Kingdom

>Spike|hCoV-19/Jiangsu/JS02/2020|2020-01-24|EPI\_ISL\_411952|P3|hCoV-19^^Jiangsu|Human|NHC Key laboratory of Enteric Pathogenic Microbiology|Jiangsu Provincial Center for Disease Control & Prevention|Cui|China

>Spike|hCoV-19/England/QEUEH-C4BBB1/2020|2020-12-14|EPI\_ISL\_736489|Original|hCoV-19^^England|Human|Lighthouse Lab in Glasgow|Wellcome Sanger Institute for the COVID-19 Genomics UK (COG-UK) Consortium|Davies|United Kingdom

>Spike|hCoV-19/England/EXET-13D9FF/2020|2020-00-00|EPI\_ISL\_724271|Original|hCoV-19^^England|Human|University of Exeter|COVID-19 Genomics UK (COG-UK) Consortium|Temperton|United Kingdom

>Spike|hCoV-19/England/CAMB-7D059/2020|2020-04-05|EPI\_ISL\_442059|Original|hCoV-19^^England|Human|Department of Pathology|Wellcome Sanger Institute for the COVID-19 Genomics UK (COG-UK) consortium|Amato|United Kingdom

>Spike|hCoV-19/Denmark/DCGC-18328/2020|2020-12-07|EPI\_ISL\_749324|Original|hCoV-19^^Midtjylland|Human|Department of Virus and Microbiological Special Diagnostics|Albertsen Lab|Michaelsen|Denmark

>Spike|hCoV-19/USA/CA-CZB-11188/2020|2020-09-15|EPI\_ISL\_625542|Original|hCoV-19^^California|Human|Alameda County Public Health Lab|Chan-Zuckerberg Biohub|Bhatt|USA

>Spike|hCoV-19/USA/WA-S2336/2020|2020-06-11|EPI\_ISL\_496968|Original|hCoV-19^^Washington|Human|Washington State Department of Health|Seattle Flu Study|Lee|USA

>Spike|hCoV-19/England/LOND-D6267/2020|2020-04-21|EPI\_ISL\_482162|Original|hCoV-19^^England|Human|University College London|Wellcome Sanger Institute for the COVID-19 Genomics UK (COG-UK) consortium|Davies|United Kingdom

>Spike|hCoV-19/Brazil/SP-774/2020|2020-06-20|EPI\_ISL\_735422|Original|hCoV-19^^S\u00e3o Paulo|Human|UBS Dematchi|Instituto Adolfo Lutz|Sacchi|Brazil

>Spike|hCoV-19/South Korea/KDCA0059/2020|2020-09-02|EPI\_ISL\_747300|Original|hCoV-19^^South Korea|Human|Division of Emerging Infectious Diseases|Division of Emerging Infectious Diseases|Park|South Korea

>Spike|hCoV-19/England/204541010/2020|2020-11-02|EPI\_ISL\_678667|Original|hCoV-19^^England|Human|Respiratory Virus Unit|COVID-19 Genomics UK (COG-UK) Consortium|Platt|United Kingdom

>Spike|hCoV-19/Japan/PG-4532/2020|2020-07-00|EPI\_ISL\_689670|Original|hCoV-19^^Japan|Human|Pathogen Genomics Center|Pathogen Genomics Center|Sekizuka|Japan

>Spike|hCoV-19/India/MH-NCCS-NR570/2020|2020-05-08|EPI\_ISL\_496587|Original|hCoV-19^^Maharashtra|Human|National Centre For Cell Science|National Centre For Cell Science|Paul|India

>Spike|hCoV-19/Australia/VIC13670/2020|2020-08-14|EPI\_ISL\_563804|Original|hCoV-19^^Victoria|Human|Microbiological Diagnostic Unit - Public Health Laboratory (MDU-PHL)|MDU-PHL|Schultz|Australia

>Spike|hCoV-19/England/QEUH-BC45A4/2020|2020-11-25|EPI\_ISL\_703654|Original|hCoV-19^^England|Human|Lighthouse Lab in Glasgow|Wellcome Sanger Institute for the COVID-19 Genomics UK (COG-UK) Consortium|Davies|United Kingdom

>Spike|hCoV-19/Canada/QC-LSPQ-L00216427/2020|2020-03-12|EPI\_ISL\_535747|Original|hCoV-19^^Quebec|Human|Centre de SSS de Trois-Rivières|Laboratoire de santé publique du Québec|Moreira|Canada

>Spike|hCoV-19/Canada/ON-S1559/2020|2020-09-04|EPI\_ISL\_755917|Original|hCoV-19^^Ontario|Human|Toronto Invasive Bacterial Diseases Network|McMaster University|McArthur|Canada

>Spike|hCoV-19/Finland/25SS6H11/2020|2020-09-25|EPI\_ISL\_759924|Original|hCoV-19^^Uusimaa|Human|Department of Virology and Immunology|Department of Virology|Smura|Finland

>Spike|hCoV-19/England/ALDP-AA4383/2020|2020-10-21|EPI\_ISL\_624405|Original|hCoV-19^^England|Human|Lighthouse Lab in Alderley Park|Wellcome Sanger Institute for the COVID-19 Genomics UK (COG-UK) consortium|Davies|United Kingdom

>Spike|hCoV-19/Poland/PL\_MCB\_67/2020|2020-04-16|EPI\_ISL\_645066|Original|hCoV-19^^Poland|Human|Human Genome Variation Research Group|Human Genome Variation Research Group||Poland

>Spike|hCoV-19/Denmark/DCGC-19002/2020|2020-12-07|EPI\_ISL\_748263|Original|hCoV-19^^Syddanmark|Human|Department of Virus and Microbiological Special Diagnostics|Albertsen Lab|Michaelsen|Denmark

>Spike|hCoV-19/USA/TX-DSHS-0511/2020|2020-06-21|EPI\_ISL\_560954|Original|hCoV-19^^Texas|Human|Texas Department of State Health Services|Texas Department of State Health Services|Rahman|USA

>Spike|hCoV-19/Wales/PHWC-484FC7/2020|2020-10-19|EPI\_ISL\_628133|Original|hCoV-19^^Wales|Human|Wales Specialist Virology Centre Sequencing lab|COVID-19 Genomics UK (COG-UK) Consortium|Moore|United Kingdom

>Spike|hCoV-19/Denmark/DCGC-22351/2020|2020-12-14|EPI\_ISL\_758697|Original|hCoV-19^^Hovedstaden|Human|Department of Virus and Microbiological Special Diagnostics|Albertsen Lab|Michaelsen|Denmark

>Spike|hCoV-19/England/ALDP-6FD8AE/2020|2020-06-30|EPI\_ISL\_557491|Original|hCoV-19^^England|Human|Lighthouse Lab in Alderley Park|Wellcome Sanger Institute for the COVID-19 Genomics UK (COG-UK) consortium|Davies|United Kingdom

>Spike|hCoV-19/England/ALDP-954D1C/2020|2020-06-12|EPI\_ISL\_553480|Original|hCoV-19^^England|Human|Lighthouse Lab in Alderley Park|Wellcome Sanger Institute for the COVID-19 Genomics UK (COG-UK) consortium|Davies|United Kingdom

>Spike|hCoV-19/England/CAMB-7B5C5/2020|2020-04-04|EPI\_ISL\_440616|Original|hCoV-19^^England|Human|Department of Pathology|Wellcome Sanger Institute for the COVID-19 Genomics UK (COG-UK) consortium|Amato|United Kingdom

>Spike|hCoV-19/England/NORT-2943D9/2020|2020-07-31|EPI\_ISL\_573342|Original|hCoV-19^^England|Human|Northumbria University / South Tees Hospitals NHS Foundation Trust / North Cumbria Integrated Care NHS Foundation Trust / North Tees and Hartlepool NHS Foundation Trust / Newcastle Hospitals NHS Foundation Trust|COVID-19 Genomics UK (COG-UK) Consortium|Bashton|United Kingdom

>Spike|hCoV-19/USA/TX-HMH-MCoV-9517/2020|2020-07-03|EPI\_ISL\_781160|Original|hCoV-19^^Texas|Human|Houston Methodist Hospital|Houston Methodist Hospital|Long|USA

>Spike|hCoV-19/USA/FL-BPHL-1670/2020|2020-07-05|EPI\_ISL\_594359|Original|hCoV-19^^Florida|Human|Florida Bureau of Public Health Laboratories|Florida Bureau of Public Health Laboratories|Blanton|USA

>Spike|hCoV-19/USA/WA-S817/2020|2020-04-17|EPI\_ISL\_449987|Original|hCoV-19^^Washington|Human|Washington State Department of Health|Seattle Flu Study|Bedford|USA



>Spike|hCoV-19/Australia/VIC3833/2020|2020-07-13|EPI\_ISL\_520546|Original|hCoV-19^^Victoria|Human|Microbiological Diagnostic Unit - Public Health Laboratory (MDU-PHL)|MDU-PHL|Schultz|Australia

>Spike|hCoV-19/Australia/VIC10917/2020|2020-09-05|EPI\_ISL\_563153|Original|hCoV-19^^Victoria|Human|Microbiological Diagnostic Unit - Public Health Laboratory (MDU-PHL)|MDU-PHL|Schultz|Australia

>Spike|hCoV-19/England/CAMC-B529CD/2020|2020-11-09|EPI\_ISL\_657623|Original|hCoV-19^^England|Human|Lighthouse Lab in Cambridge|Wellcome Sanger Institute for the COVID-19 Genomics UK (COG-UK) Consortium|Davies|United Kingdom

>Spike|hCoV-19/Finland/3LS6E7/2020|2020-10-03|EPI\_ISL\_756110|Original|hCoV-19^^Uusimaa|Human|Department of Virology and Immunology|Department of Virology|Smura|Finland

>Spike|hCoV-19/Australia/VIC12999/2020|2020-08-03|EPI\_ISL\_592144|Original|hCoV-19^^Victoria|Human|Victorian Infectious Diseases Reference Laboratory (VIDRL)|VIDRL and MDU-PHL|Schultz|Australia

>Spike|hCoV-19/England/MILK-ACDB7D/2020|2020-10-21|EPI\_ISL\_644067|Original|hCoV-19^^England|Human|Lighthouse Lab in Milton Keynes|Wellcome Sanger Institute for the COVID-19 Genomics UK (COG-UK) Consortium|Davies|United Kingdom

>Spike|hCoV-19/USA/FL-BPHL-0405/2020|2020-05-14|EPI\_ISL\_489814|Original|hCoV-19^^Florida|Human|Florida Bureau of Public Health Laboratories|Florida Bureau of Public Health Laboratories|Blanton|USA

>Spike|hCoV-19/USA/NY-PV09077/2020|2020-03-20|EPI\_ISL\_421623|Original|hCoV-19^^New York|Human|MSHS Clinical Microbiology Laboratories|MSHS Pathogen Surveillance Program|van Bakel|USA

>Spike|hCoV-19/India/WB-IK19/2020|2020-04-24|EPI\_ISL\_508348|Original|hCoV-19^^West Bengal|Human|Institute of Post Graduate Medical Education & Research|National Institute of Biomedical Genomics|Maitra|India

>Spike|hCoV-19/Spain/MD-IBV-99008782/2020|2020-10-20|EPI\_ISL\_654325|Original|hCoV-19^^Madrid|Human|Hospital General Universitario Gregorio Mara\u00f1a|SeqCOVID-SPAIN consortium/IBV (CSIC)|Comas|Spain

>Spike|hCoV-19/USA/MI-MDHHS-SC21639/2020|2020-03-31|EPI\_ISL\_516366|Original|hCoV-19^^Michigan|Human|Michigan Department of Health and Human Services|Michigan Department of Health and Human Services|Blankenship|USA

>Spike|hCoV-19/England/SHEF-C7DC2/2020|2020-09-19|EPI\_ISL\_573714|Original|hCoV-19^^England|Human|Virology Department|COVID-19 Genomics UK (COG-UK) Consortium|de Silva|United Kingdom

>Spike|hCoV-19/Japan/PG-3689/2020|2020-04-00|EPI\_ISL\_691942|Original|hCoV-19^^Japan|Human|Pathogen Genomics Center|Pathogen Genomics Center|Sekizuka|Japan

>Spike|hCoV-19/Sweden/20-50129/2020|2020-03-06|EPI\_ISL\_430861|Original|hCoV-19^^Varmland|Human|Klinisk mikrobiologi Orebro|The Public Health Agency of Sweden|Svartstr\u00f6m|Sweden

>Spike|hCoV-19/England/MILK-ABBCAC/2020|2020-10-21|EPI\_ISL\_631252|Original|hCoV-19^^England|Human|Lighthouse Lab in Milton Keynes|Wellcome Sanger Institute for the COVID-19 Genomics UK (COG-UK) consortium|Davies|United Kingdom

>Spike|hCoV-19/Poland/77242/2020|2020-11-00|EPI\_ISL\_732862|Original|hCoV-19^^Poland|Human|genXone SA|genXone SA|Kaszuba|Poland

>Spike|hCoV-19/USA/CA-ALSR-1112-SAN/2020|2020-06-22|EPI\_ISL\_483535|Original|hCoV-19^^California|Human|San Diego County Public Health Laboratory|Andersen lab at Scripps Research|Gangavarapu|USA

>Spike|hCoV-19/Wales/PHWC-262B3/2020|2020-03-27|EPI\_ISL\_422196|Original|hCoV-19^^Wales|Human|Wales Specialist Virology Centre|Public Health Wales Microbiology Cardiff|Moore|United Kingdom

>Spike|hCoV-19/England/QEUEH-CC2E31/2020|2020-12-21|EPI\_ISL\_760730|Original|hCoV-19^^England|Human|Lighthouse Lab in Glasgow|Wellcome Sanger Institute for the COVID-19 Genomics UK (COG-UK) Consortium|Davies|United Kingdom

>Spike|hCoV-19/England/ALDP-B5B38A/2020|2020-11-09|EPI\_ISL\_655399|Original|hCoV-19^^England|Human|Lighthouse Lab in Alderley Park|Wellcome Sanger Institute for the COVID-19 Genomics UK (COG-UK) Consortium|Davies|United Kingdom

>Spike|hCoV-19/Denmark/DCGC-16503/2020|2020-11-16|EPI\_ISL\_714805|Original|hCoV-19^^Midtjylland|Human|Department of Virus and Microbiological Special Diagnostics|Albertsen Lab|Michaelsen|Denmark

>Spike|hCoV-19/England/BRIS-12648F/2020|2020-04-10|EPI\_ISL\_458999|Original|hCoV-19^^England|Human|PHE South West Regional Laboratory|Wellcome Sanger Institute for the COVID-19 Genomics UK (COG-UK) consortium|Davies|United Kingdom

>Spike|hCoV-19/England/LOND-12512D8/2020|2020-11-11|EPI\_ISL\_665517|Original|hCoV-19^^England|Human|University College London Hospital|COVID-19 Genomics UK (COG-UK) Consortium|Byott|United Kingdom

>Spike|hCoV-19/Japan/IC-0503/2020|2020-12-00|EPI\_ISL\_768712|Original|hCoV-19^^Japan|Human|Pathogen Genomics Center|Pathogen Genomics Center|Sekizuka|Japan

>Spike|hCoV-19/England/QEUEH-B67B38/2020|2020-11-11|EPI\_ISL\_661506|Original|hCoV-19^^England|Human|Lighthouse Lab in Glasgow|Wellcome Sanger Institute for the COVID-19 Genomics UK (COG-UK) Consortium|Davies|United Kingdom

>Spike|hCoV-19/England/NORT-299AA2/2020|2020-04-27|EPI\_ISL\_492478|Original|hCoV-19^^England|Human|NU-OMICS DNA Sequencing research facility|Wellcome Sanger Institute for the COVID-19 Genomics UK (COG-UK) consortium|Davies|United Kingdom

>Spike|hCoV-19/Scotland/EDB6085/2020|2020-05-11|EPI\_ISL\_478209|Original|hCoV-19^^Scotland|Human|Virology Department|COVID-19 Genomics UK (COG-UK) Consortium|Williams|United Kingdom

>Spike|hCoV-19/Australia/VIC16350/2020|2020-08-03|EPI\_ISL\_640420|Original|hCoV-19^^Victoria|Human|Microbiological Diagnostic Unit - Public Health Laboratory (MDU-PHL)|MDU-PHL|Schultz|Australia

>Spike|hCoV-19/USA/WA-UW37/2020|2020-03-06|EPI\_ISL\_416454|Original|hCoV-19^^Washington|Human|UW Virology Lab|UW Virology Lab|Roychoudhury|USA

>Spike|hCoV-19/Austria/CeMM0391/2020|2020-03-10|EPI\_ISL\_475831|Original|hCoV-19^^Austria|Human|Austrian Agency for Health and Food Safety (AGES)|Bergthaler laboratory|Bergthaler|Austria

>Spike|hCoV-19/Netherlands/ZH-EMC-928/2020|2020-10-27|EPI\_ISL\_722324|Original|hCoV-19^^Zuid Holland|Human|Dutch COVID-19 response team|Erasmus Medical Center|Oude Munnink|Netherlands

>Spike|hCoV-19/USA/CA-UW-MAY052/2020|2020-04-11|EPI\_ISL\_500532|Original|hCoV-19^^California|Human|Mayo Clinic Laboratories|University of Washington Virology Lab|Roychoudhury|USA

>Spike|hCoV-19/Denmark/DCGC-19749/2020|2020-12-07|EPI\_ISL\_747756|Original|hCoV-19^^Midtjylland|Human|Department of Virus and Microbiological Special Diagnostics|Albertsen Lab|Michaelsen|Denmark

>Spike|hCoV-19/Belgium/ULG-10069/2020|2020-04-03|EPI\_ISL\_424633|Original|hCoV-19^^Li\u00e8ge|Human|Department of Clinical Microbiology|GIGA Medical Genomics|Durkin|Belgium

>Spike|hCoV-19/England/CAMC-A58940/2020|2020-10-06|EPI\_ISL\_596951|Original|hCoV-19^^England|Human|Lighthouse Lab in Cambridge|Wellcome Sanger Institute for the COVID-19 Genomics UK (COG-UK) consortium|Davies|United Kingdom

>Spike|hCoV-19/USA/CA-ALSR-4146/2020|2020-06-27|EPI\_ISL\_648850|Original|hCoV-19^^California|Human|San Diego County Public Health Laboratory|Andersen lab at Scripps Research|Gangavarapu|USA

>Spike|hCoV-19/England/QEUEH-B2B383/2020|2020-11-03|EPI\_ISL\_646680|Original|hCoV-19^^England|Human|Lighthouse Lab in Glasgow|Wellcome Sanger Institute for the COVID-19 Genomics UK (COG-UK) Consortium|Davies|United Kingdom

>Spike|hCoV-19/Canada/BC-BCCDC-6472/2020|2020-10-00|EPI\_ISL\_740617|Original|hCoV-19^^British Columbia|Human|BCCDC Public Health Laboratory|BCCDC Public Health Laboratory|Prystajecky|Canada

>Spike|hCoV-19/India/TG-CCMB-J048/2020|2020-03-31|EPI\_ISL\_447559|Original|hCoV-19^^Telangana|Human|CSIR-Centre for Cellular and Molecular Biology|CSIR-Centre for Cellular and Molecular Biology|Banu|India

>Spike|hCoV-19/Wales/PHWC-160726/2020|2020-05-20|EPI\_ISL\_472970|Original|hCoV-19^^Wales|Human|Wales Specialist Virology Centre Sequencing lab|COVID-19 Genomics UK (COG-UK) Consortium|Moore|United Kingdom

>Spike|hCoV-19/Switzerland/BE-ETHZ-250098/2020|2020-08-19|EPI\_ISL\_535614|Original|hCoV-19^^Bern|Human|Viollier AG|Department of Biosystems Science and Engineering|Nadeau|Switzerland

>Spike|hCoV-19/Singapore/1023/2020|2020-03-24|EPI\_ISL\_574508|Original|hCoV-19^^Singapore|Human|National Public Health Laboratory|National Public Health Laboratory|Mak|Singapore

>Spike|hCoV-19/USA/MA-MGH-03149/2020|2020-09-08|EPI\_ISL\_765720|Original|hCoV-19^^Massachusetts|Human|Massachusetts General Hospital|Infectious Disease Program|Park|USA

>Spike|hCoV-19/USA/HI-H200050/2020|2020-04-20|EPI\_ISL\_752635|Original|hCoV-19^^Hawaii|Human|State Laboratories Division|State Laboratories Division|Sultana|USA

>Spike|hCoV-19/England/ALDP-955FBB/2020|2020-06-08|EPI\_ISL\_553903|Original|hCoV-19^^England|Human|Lighthouse Lab in Alderley Park|Wellcome Sanger Institute for the COVID-19 Genomics UK (COG-UK) consortium|Davies|United Kingdom

>Spike|hCoV-19/England/MILK-9AB36F/2020|2020-08-31|EPI\_ISL\_551105|Original|hCoV-19^^England|Human|Lighthouse Lab in Milton Keynes|Wellcome Sanger Institute for the COVID-19 Genomics UK (COG-UK) consortium|Davies|United Kingdom

>Spike|hCoV-19/USA/TX-HMH-MCoV-11544/2020|2020-09-11|EPI\_ISL\_789979|Original|hCoV-19^^Texas|Human|Houston Methodist Hospital|Houston Methodist Hospital|Long|USA

>Spike|hCoV-19/England/MILK-AC8DE5/2020|2020-10-22|EPI\_ISL\_629606|Original|hCoV-19^^England|Human|Lighthouse Lab in Milton Keynes|Wellcome Sanger Institute for the COVID-19 Genomics UK (COG-UK) consortium|Davies|United Kingdom

>Spike|hCoV-19/Scotland/QEUH-96CEB4/2020|2020-08-21|EPI\_ISL\_534577|Original|hCoV-19^^Scotland|Human|NHSGGC West of Scotland Specialist Virology Centre / MRC-University of Glasgow Centre for Virus Research|Wellcome Sanger Institute for the COVID-19 Genomics UK (COG-UK) consortium|Davies|United Kingdom

>Spike|hCoV-19/Australia/VIC4781/2020|2020-00-00|EPI\_ISL\_519167|Original|hCoV-19^^Victoria|Human|Microbiological Diagnostic Unit - Public Health Laboratory (MDU-PHL)|MDU-PHL|Schultz|Australia

>Spike|hCoV-19/Kenya/C2449/2020|2020-04-24|EPI\_ISL\_457878|Original|hCoV-19^^Kenya|Human|KEMRI-CGMR-C|KEMRI-Wellcome Trust Research Programme/KEMRI-CGMR-C Kilifi|Githinji|Kenya

>Spike|hCoV-19/Denmark/DCGC-11844/2020|2020-10-26|EPI\_ISL\_671170|Original|hCoV-19^^Hovedstaden|Human|Department of Virus and Microbiological Special Diagnostics|Albertsen Lab|Michaelsen|Denmark

>Spike|hCoV-19/England/QEUH-9C8B28/2020|2020-09-11|EPI\_ISL\_567093|Original|hCoV-19^^England|Human|Lighthouse Lab in Glasgow|Wellcome Sanger Institute for the COVID-19 Genomics UK (COG-UK) consortium|Davies|United Kingdom

>Spike|hCoV-19/Iceland/155/2020|2020-03-15|EPI\_ISL\_417737|Original|hCoV-19^^Reykjavik|Human|The National University Hospital of Iceland|deCODE genetics|J\u00f3nsson|Iceland

>Spike|hCoV-19/USA/NJ-QDX-1216/2020|2020-03-17|EPI\_ISL\_571975|Original|hCoV-19^^New Jersey|Human|Quest Diagnostics|Quest Diagnostics|Kagan|USA

>Spike|hCoV-19/Belgium/ULG-10950/2020|2020-09-05|EPI\_ISL\_707729|Original|hCoV-19^^Li\u00e8ge|Human|Department of Clinical Microbiology|GIGA Medical Genomics|Durkin|Belgium

>Spike|hCoV-19/Wuhan/HB-WH2-160/2020|2020-02-28|EPI\_ISL\_454928|Original|hCoV-19^^Hubei|Human|Wuhan Chain Medical Labs (CMLabs)|State Key Laboratory of Biotherapy of Sichuan University|Tang|China

>Spike|hCoV-19/Australia/WA254/2020|2020-08-24|EPI\_ISL\_594168|Original|hCoV-19^^Western Australia|Human|PathWest Laboratory Medicine WA|PathWest Laboratory Medicine WA Microbial Surveillance Unit|Sikazwe|Australia

>Spike|hCoV-19/England/LOND-D58B1/2020|2020-04-17|EPI\_ISL\_457272|Original|hCoV-19^^England|Human|University College London|COVID-19 Genomics UK (COG-UK) Consortium|Roy|United Kingdom

>Spike|hCoV-19/Netherlands/NH-RIVM-20754/2020|2020-12-14|EPI\_ISL\_790816|Original|hCoV-19^^Noord-Holland|Human|Dutch COVID-19 response team|National Institute for Public Health and the Environment (RIVM)|Meijer|Netherlands

>Spike|hCoV-19/Australia/VIC3070/2020|2020-07-09|EPI\_ISL\_520777|Original|hCoV-19^^Victoria|Human|Microbiological Diagnostic Unit - Public Health Laboratory (MDU-PHL)|MDU-PHL|Schultz|Australia

>Spike|hCoV-19/USA/TX-HMH-2424/2020|2020-05-28|EPI\_ISL\_545305|Original|hCoV-19^^Texas|Human|Houston Methodist Hospital|Houston Methodist Hospital|Long|USA

>Spike|hCoV-19/USA/WA-S1727/2020|2020-06-01|EPI\_ISL\_496153|Original|hCoV-19^^Washington|Human|Washington State Department of Health|Seattle Flu Study|Lee|USA

>Spike|hCoV-19/Wales/PHWC-366C3/2020|2020-04-30|EPI\_ISL\_474700|Original|hCoV-19^^Wales|Human|Originating lab|COVID-19 Genomics UK (COG-UK) Consortium|Moore|United Kingdom

>Spike|hCoV-19/USA/CA-CZB-11546/2020|2020-07-24|EPI\_ISL\_625568|Original|hCoV-19^^California|Human|NaN|Chan-Zuckerberg Biohub|Bhatt|USA

>Spike|hCoV-19/Finland/5May84S2/2020|2020-05-05|EPI\_ISL\_481706|Original|hCoV-19^^Uusimaa|Human|Department of Virology and Immunology|Department of Virology|Smura|Finland

>Spike|hCoV-19/USA/WI-GMF-05642/2020|2020-06-08|EPI\_ISL\_471148|Original|hCoV-19^^Wisconsin|Human|Gundersen Molecular Diagnostics Laboratory|Kabara Cancer Research Institute|Kenny|USA

>Spike|hCoV-19/USA/NY-NYCPHL-001146/2020|2020-10-25|EPI\_ISL\_671728|Original|hCoV-19^^New York|Human|DOHMH Morrisania|New York City Public Health Laboratory|Wang|USA

>Spike|hCoV-19/Germany/BY-MVP-0118/2020|2020-03-20|EPI\_ISL\_451938|Original|hCoV-19^^Bavaria|Human|Max von Pettenkofer Institute|Laboratory for Functional Genome Analysis|Graf|Germany

>Spike|hCoV-19/Denmark/DCGC-2530/2020|2020-08-17|EPI\_ISL\_617800|Original|hCoV-19^^Hovedstaden|Human|Department of Virus and Microbiological Special Diagnostics|Albertsen lab|Michaelsen|Denmark

>Spike|hCoV-19/England/ALDP-B83D6D/2020|2020-11-14|EPI\_ISL\_674465|Original|hCoV-19^^England|Human|Lighthouse Lab in Alderley Park|Wellcome Sanger Institute for the COVID-19 Genomics UK (COG-UK) Consortium|Davies|United Kingdom

>Spike|hCoV-19/Denmark/DCGC-1683/2020|2020-03-09|EPI\_ISL\_622429|Original|hCoV-19^^Hovedstaden|Human|Department of Virus and Microbiological Special Diagnostics|Albertsen lab|Michaelsen|Denmark

>Spike|hCoV-19/South Africa/KRISP-K001318/2020|2020-07-18|EPI\_ISL\_515803|Original|hCoV-19^^KwaZulu-Natal|Human|Medical Disagnostics Services (MDS)|KRISP|de Oliveira|South Africa

>Spike|hCoV-19/USA/WI-UW-61/2020|2020-03-23|EPI\_ISL\_421319|Original|hCoV-19^^Wisconsin|Human|University of Wisconsin-Madison AIDS Vaccine Research Laboratories|University of Wisconsin-Madison AIDS Vaccine Research Laboratories|Baczenas|USA

>Spike|hCoV-19/Canada/BC\_64686/2020|2020-03-05|EPI\_ISL\_415586|Original|hCoV-19^^British Columbia|Human|BCCDC Public Health Laboratory|BCCDC Public Health Laboratory|Harrigan|Canada

>Spike|hCoV-19/England/OXON-B4038/2020|2020-03-23|EPI\_ISL\_534925|Original|hCoV-19^^England|Human|Oxford Viromics|COVID-19 Genomics UK (COG-UK) Consortium|Golubchik|United Kingdom

>Spike|hCoV-19/England/CWAR-24FDA77/2020|2020-04-30|EPI\_ISL\_584472|Original|hCoV-19^^England|Human|UHCW / University of Warwick|COVID-19 Genomics UK (COG-UK) Consortium|Stark|United Kingdom

>Spike|hCoV-19/Switzerland/BL-ETHZ-100814/2020|2020-03-26|EPI\_ISL\_451764|Original|hCoV-19^^Basel-Landschaft|Human|Viollier AG|Department of Biosystems Science and Engineering|Nadeau|Switzerland

>Spike|hCoV-19/Australia/VIC5729/2020|2020-07-18|EPI\_ISL\_518530|Original|hCoV-19^^Victoria|Human|Microbiological Diagnostic Unit - Public Health Laboratory (MDU-PHL)|MDU-PHL|Schultz|Australia

>Spike|hCoV-19/Denmark/DCGC-6937/2020|2020-10-12|EPI\_ISL\_619783|Original|hCoV-19^^Hovedstaden|Human|Department of Virus and Microbiological Special Diagnostics|Albertsen lab|Michaelsen|Denmark

>Spike|hCoV-19/Australia/NSW1107/2020|2020-08-11|EPI\_ISL\_593722|Original|hCoV-19^^New South Wales|Human|South Eastern Area Laboratory Services (SEALS)|NSW Health Pathology

- Institute of Clinical Pathology and Medical Research; Westmead Hospital; University of Sydney|Gall|Australia

>Spike|hCoV-19/Japan/PG-3102/2020|2020-04-00|EPI\_ISL\_691224|Original|hCoV-19^^Japan|Human|Pathogen Genomics Center|Pathogen Genomics Center|Sekizuka|Japan

>Spike|hCoV-19/England/NORT-295C37/2020|2020-04-04|EPI\_ISL\_478660|Original|hCoV-19^^England|Human|Northumbria University / South Tees Hospitals NHS Foundation Trust / North Cumbria Integrated Care NHS Foundation Trust / North Tees and Hartlepool NHS Foundation Trust / Newcastle Hospitals NHS Foundation Trust|COVID-19 Genomics UK (COG-UK) Consortium|Bashton|United Kingdom

>Spike|hCoV-19/USA/TX-HMH-4037/2020|2020-06-16|EPI\_ISL\_543316|Original|hCoV-19^^Texas|Human|Houston Methodist Hospital|Houston Methodist Hospital|Long|USA

>Spike|hCoV-19/England/ALDP-B48DEC/2020|2020-11-07|EPI\_ISL\_649337|Original|hCoV-19^^England|Human|Lighthouse Lab in Alderley Park|Wellcome Sanger Institute for the COVID-19 Genomics UK (COG-UK) Consortium|Davies|United Kingdom

>Spike|hCoV-19/England/ALDP-49BE84/2020|2020-06-11|EPI\_ISL\_559329|Original|hCoV-19^^England|Human|Lighthouse Lab in Alderley Park|Wellcome Sanger Institute for the COVID-19 Genomics UK (COG-UK) consortium|Davies|United Kingdom

>Spike|hCoV-19/Scotland/EDB9256/2020|2020-11-04|EPI\_ISL\_652054|Original|hCoV-19^^Scotland|Human|Virology Department|COVID-19 Genomics UK (COG-UK) Consortium|McHugh|United Kingdom

>Spike|hCoV-19/USA/WI-UW-267/2020|2020-04-08|EPI\_ISL\_434613|Original|hCoV-19^^Wisconsin|Human|University of Wisconsin-Madison AIDS Vaccine Research Laboratories|University of Wisconsin-Madison AIDS Vaccine Research Laboratories|Baczenas|USA

>Spike|hCoV-19/Denmark/DCGC-5451/2020|2020-09-21|EPI\_ISL\_620776|Original|hCoV-19^^Syddanmark|Human|Department of Virus and Microbiological Special Diagnostics|Albertsen lab|Michaelsen|Denmark

>Spike|hCoV-19/England/QEUA-96C1AC/2020|2020-08-13|EPI\_ISL\_530867|Original|hCoV-19^^England|Human|Lighthouse Lab in Glasgow|Wellcome Sanger Institute for the COVID-19 Genomics UK (COG-UK) consortium|Davies|United Kingdom

>Spike|hCoV-19/England/CAMB-1B8042/2020|2020-10-24|EPI\_ISL\_638040|Original|hCoV-19^^England|Human|Department of Pathology|COVID-19 Genomics UK (COG-UK) Consortium|Goodfellow|United Kingdom

>Spike|hCoV-19/Denmark/DCGC-16909/2020|2020-12-14|EPI\_ISL\_750637|Original|hCoV-19^^Nordjylland|Human|Department of Virus and Microbiological Special Diagnostics|Albertsen Lab|Michaelsen|Denmark

>Spike|hCoV-19/England/QEUA-A8B856/2020|2020-10-17|EPI\_ISL\_643119|Original|hCoV-19^^England|Human|Lighthouse Lab in Glasgow|Wellcome Sanger Institute for the COVID-19 Genomics UK (COG-UK) Consortium|Davies|United Kingdom

>Spike|hCoV-19/Italy/LAZ-INMI-52/2020|2020-06-04|EPI\_ISL\_603159|Original|hCoV-19^^Lazio|Human|INMI Lazzaro Spallanzani IRCCS|INMI Lazzaro Spallanzani IRCCS|Gruber|Italy

>Spike|hCoV-19/Denmark/DCGC-21688/2020|2020-12-21|EPI\_ISL\_758310|Original|hCoV-19^^Hovedstaden|Human|Department of Virus and Microbiological Special Diagnostics|Albertsen Lab|Michaelsen|Denmark

>Spike|hCoV-19/Luxembourg/LNS0423098/2020|2020-08-10|EPI\_ISL\_739773|Original|hCoV-19^^Luxembourg|Human|Laboratoire national de sant\u00e9|Laboratoire national de sant\u00e9|Wienecke-Baldacchino|Luxembourg

>Spike|hCoV-19/Australia/VIC3866/2020|2020-07-13|EPI\_ISL\_520579|Original|hCoV-19^^Victoria|Human|Microbiological Diagnostic Unit - Public Health Laboratory (MDU-PHL)|MDU-PHL|Schultz|Australia

>Spike|hCoV-19/Japan/PG-4135/2020|2020-07-00|EPI\_ISL\_692374|Original|hCoV-19^^Japan|Human|Pathogen Genomics Center|Pathogen Genomics Center|Sekizuka|Japan

>Spike|hCoV-19/Australia/VIC92/2020|2020-03-15|EPI\_ISL\_419809|Original|hCoV-19^^Victoria|Human|Victorian Infectious Diseases Reference Laboratory (VIDRL)|Victorian Infectious Diseases Reference Laboratory and Microbiological Diagnostic Unit Public Health Laboratory|Schultz|Australia

>Spike|hCoV-19/USA/PA-MGEL-00207/2020|2020-04-15|EPI\_ISL\_681962|Original|hCoV-19^^Pennsylvania|Human|UPMC Clinical Microbiology Laboratory|Microbial Genomic Epidemiology Laboratory|Griffith|USA

>Spike|hCoV-19/Japan/PG-2368/2020|2020-05-00|EPI\_ISL\_685973|Original|hCoV-19^^Japan|Human|Tokyo Metropolitan Institute of Public Health|Pathogen Genomics Center|Sekizuka|Japan

>Spike|hCoV-19/India/MH-NIV-65819/2020|2020-06-16|EPI\_ISL\_479661|Original|hCoV-19^^Maharashtra|Human|NIV Influenza|NIV Influenza|Potdar|India

>Spike|hCoV-19/England/MILK-9C23BD/2020|2020-09-09|EPI\_ISL\_566479|Original|hCoV-19^^England|Human|Lighthouse Lab in Milton Keynes|Wellcome Sanger Institute for the COVID-19 Genomics UK (COG-UK) consortium|Davies|United Kingdom

>Spike|hCoV-19/USA/CA-SCCPHD-UC133/2020|2020-03-07|EPI\_ISL\_435612|Original|hCoV-19^^California|Human|Santa Clara County Public Health Department|Chiu Laboratory|Chiu|USA

>Spike|hCoV-19/Thailand/Bangkok-CONI-0333/2020|2020-12-08|EPI\_ISL\_728563|Original|hCoV-19^^Bangkok|Human|Institute for Urban Disease Control and Prevention|COVID-19 Network Investigations (CONI) Alliance|Batty|Thailand

>Spike|hCoV-19/Denmark/DCGC-19670/2020|2020-12-07|EPI\_ISL\_749100|Original|hCoV-19^^Midtjylland|Human|Department of Virus and Microbiological Special Diagnostics|Albertsen Lab|Michaelsen|Denmark

>Spike|hCoV-19/Scotland/EDB3790/2020|2020-04-29|EPI\_ISL\_439324|Original|hCoV-19^^Scotland|Human|Virology Department|COVID-19 Genomics UK (COG-UK) Consortium|Williams|United Kingdom

>Spike|hCoV-19/Wales/MILK-9A89BB/2020|2020-09-01|EPI\_ISL\_560081|Original|hCoV-19^^Wales|Human|Oxford Viromics|COVID-19 Genomics UK (COG-UK) Consortium|Golubchik|United Kingdom

>Spike|hCoV-19/England/MILK-9F02B9/2020|2020-09-25|EPI\_ISL\_580831|Original|hCoV-19^^England|Human|Lighthouse Lab in Milton Keynes|Wellcome Sanger Institute for the COVID-19 Genomics UK (COG-UK) consortium|Davies|United Kingdom

>Spike|hCoV-19/Wales/PHWC-47DE2E/2020|2020-10-10|EPI\_ISL\_595367|Original|hCoV-19^^Wales|Human|Originating lab|COVID-19 Genomics UK (COG-UK) Consortium|Moore|United Kingdom

>Spike|hCoV-19/England/MILK-C3044B/2020|2020-12-07|EPI\_ISL\_782958|Original|hCoV-19^^England|Human|Lighthouse Lab in Milton Keynes|Wellcome Sanger Institute for the COVID-19 Genomics UK (COG-UK) Consortium|Davies|United Kingdom

>Spike|hCoV-19/Thailand/Bangkok-14918/2020|2020-10-05|EPI\_ISL\_708816|Vero P1|hCoV-19^^Bangkok|Human|Urban Institute for Disease Prevention and Control|National Institute of Health|Phuygun|Thailand

>Spike|hCoV-19/Germany/NW-HHU-476/2020|2020-12-11|EPI\_ISL\_770710|Original|hCoV-19^^North Rhine-Westphalia|Human|ZOTZ KLIMAS MVZ D\u00f0fcsseldorf-Centrum GbR \u00dcBAG f\u00fcr Labormedizin|Center of Medical Microbiology|Wienemann|Germany

>Spike|hCoV-19/England/QEUEH-AD15B4/2020|2020-10-24|EPI\_ISL\_633865|Original|hCoV-19^^England|Human|Lighthouse Lab in Glasgow|Wellcome Sanger Institute for the COVID-19 Genomics UK (COG-UK) consortium|Davies|United Kingdom

>Spike|hCoV-19/England/CAMC-AAF69E/2020|2020-10-23|EPI\_ISL\_631063|Original|hCoV-19^^England|Human|Lighthouse Lab in Cambridge|Wellcome Sanger Institute for the COVID-19 Genomics UK (COG-UK) consortium|Davies|United Kingdom

>Spike|hCoV-19/Scotland/EDB9442/2020|2020-10-30|EPI\_ISL\_680531|Original|hCoV-19^^Scotland|Human|Virology Department|COVID-19 Genomics UK (COG-UK) Consortium|McHugh|United Kingdom

>Spike|hCoV-19/Denmark/DCGC-7530/2020|2020-10-12|EPI\_ISL\_618462|Original|hCoV-19^^Hovedstaden|Human|Department of Virus and Microbiological Special Diagnostics|Albertsen lab|Michaelsen|Denmark

>Spike|hCoV-19/USA/TX-HMH-MCoV-19238/2020|2020-11-28|EPI\_ISL\_783710|Original|hCoV-19^^Texas|Human|Houston Methodist Hospital|Houston Methodist Hospital|Long|USA

>Spike|hCoV-19/England/QEUEH-B9F751/2020|2020-11-18|EPI\_ISL\_721103|Original|hCoV-19^^England|Human|Lighthouse Lab in Glasgow|Wellcome Sanger Institute for the COVID-19 Genomics UK (COG-UK) Consortium|Davies|United Kingdom

>Spike|hCoV-19/USA/WI-GMF-17526/2020|2020-08-28|EPI\_ISL\_547744|Original|hCoV-19^^Wisconsin|Human|Gundersen Molecular Diagnostics Laboratory|Kabara Cancer Research Institute|Kenny|USA

>Spike|hCoV-19/England/QEUA-AE2899/2020|2020-10-27|EPI\_ISL\_633571|Original|hCoV-19^^England|Human|Lighthouse Lab in Glasgow|Wellcome Sanger Institute for the COVID-19 Genomics UK (COG-UK) consortium|Davies|United Kingdom

>Spike|hCoV-19/England/NORT-296DF7/2020|2020-04-28|EPI\_ISL\_488168|Original|hCoV-19^^England|Human|NU-OMICS DNA Sequencing research facility|Wellcome Sanger Institute for the COVID-19 Genomics UK (COG-UK) consortium|Davies|United Kingdom

>Spike|hCoV-19/England/ALDP-9EA74A/2020|2020-09-24|EPI\_ISL\_580020|Original|hCoV-19^^England|Human|Lighthouse Lab in Alderley Park|Wellcome Sanger Institute for the COVID-19 Genomics UK (COG-UK) consortium|Davies|United Kingdom

>Spike|hCoV-19/Spain/MD-H12-34/2020|2020-03-12|EPI\_ISL\_428697|Original|hCoV-19^^Madrid|Human|Hospital Universitario 12 de Octubre|Hospital Universitario 12 de Octubre|Viedma|Spain

>Spike|hCoV-19/England/QEUA-A5E142/2020|2020-10-12|EPI\_ISL\_597370|Original|hCoV-19^^England|Human|Lighthouse Lab in Glasgow|Wellcome Sanger Institute for the COVID-19 Genomics UK (COG-UK) consortium|Davies|United Kingdom

>Spike|hCoV-19/England/NORT-28D43A/2020|2020-11-17|EPI\_ISL\_702823|Original|hCoV-19^^England|Human|Northumbria University / South Tees Hospitals NHS Foundation Trust / North Cumbria Integrated Care NHS Foundation Trust / North Tees and Hartlepool NHS Foundation Trust / Newcastle Hospitals NHS Foundation Trust|COVID-19 Genomics UK (COG-UK) Consortium|Bashton|United Kingdom

>Spike|hCoV-19/England/ALDP-C39512/2020|2020-12-09|EPI\_ISL\_731312|Original|hCoV-19^^England|Human|Lighthouse Lab in Alderley Park|Wellcome Sanger Institute for the COVID-19 Genomics UK (COG-UK) Consortium|Davies|United Kingdom

>Spike|hCoV-19/Canada/BC\_21466919/2020|2020-03-00|EPI\_ISL\_462816|Original|hCoV-19^^British Columbia|Human|BCCDC Public Health Laboratory|BCCDC Public Health Laboratory|Harrigan|Canada

>Spike|hCoV-19/Singapore/892/2020|2020-09-04|EPI\_ISL\_536433|Original|hCoV-19^^Singapore|Human|National Public Health Laboratory|National Public Health Laboratory|Mak|Singapore

>Spike|hCoV-19/England/ALDP-BB370C/2020|2020-11-19|EPI\_ISL\_703175|Original|hCoV-19^^England|Human|Lighthouse Lab in Alderley Park|Wellcome Sanger Institute for the COVID-19 Genomics UK (COG-UK) Consortium|Davies|United Kingdom

>Spike|hCoV-19/Scotland/QEUA-A314D3/2020|2020-10-05|EPI\_ISL\_595896|Original|hCoV-19^^Scotland|Human|Quadram Institute Bioscience|COVID-19 Genomics UK (COG-UK) Consortium|Alikhan|United Kingdom

>Spike|hCoV-19/England/CAMB-79178/2020|2020-04-03|EPI\_ISL\_441136|Original|hCoV-19^^England|Human|Department of Pathology|Wellcome Sanger Institute for the COVID-19 Genomics UK (COG-UK) consortium|Amato|United Kingdom

>Spike|hCoV-19/Ireland/D-NVRL-20Z06394/2020|2020-04-17|EPI\_ISL\_681899|Original|hCoV-19^^Dublin|Human|National Virus Reference Laboratory|Irish Coronavirus Sequencing Consortium - Teagasc Moorepark|Walsh|Ireland

>Spike|hCoV-19/England/MILK-ACC4A0/2020|2020-10-21|EPI\_ISL\_634430|Original|hCoV-19^^England|Human|Lighthouse Lab in Milton Keynes|Wellcome Sanger Institute for the COVID-19 Genomics UK (COG-UK) consortium|Davies|United Kingdom

>Spike|hCoV-19/Malaysia/UNIMAS-B072/2020|2020-11-06|EPI\_ISL\_718216|Original|hCoV-19^^Sarawak|Human|Borneo Medical Centre|Institute of Health and Community Medicine|Jonathan|Malaysia

>Spike|hCoV-19/USA/FL-BPHL-1937/2020|2020-04-08|EPI\_ISL\_613804|Original|hCoV-19^^Florida|Human|Florida Bureau of Public Health Laboratories|Florida Bureau of Public Health Laboratories|Blanton|USA

>Spike|hCoV-19/mink/Netherlands/NB-EMC-41-5/2020|2020-08-27|EPI\_ISL\_577792|Original|hCoV-19^^Limburg|Neovison vison|Dutch COVID-19 response team|Erasmus Medical Center|Oude Munnink|Netherlands

>Spike|hCoV-19/Scotland/CVR4345/2020|2020-09-10|EPI\_ISL\_573783|Original|hCoV-19^^Scotland|Human|West of Scotland Specialist Virology Centre|COVID-19 Genomics UK (COG-UK) Consortium|Robertson|United Kingdom

>Spike|hCoV-19/USA/MA-JLL-796350S/2020|2020-05-05|EPI\_ISL\_648270|Original|hCoV-19^^Massachusetts|Human|Brigham and Women's Hospital|Jonathan Li laboratory|Choudhary|USA

>Spike|hCoV-19/Ecuador/36230/2020|2020-05-08|EPI\_ISL\_491950|Original|hCoV-19^^Los Rios|Human|Instituto Nacional de Investigaci\u00f3n en Salud P\u00fablica - INSPI|INSPI - Charit\u00e9|Bruno Caicedo|Ecuador

>Spike|hCoV-19/Canada/ON-S1012/2020|2020-04-16|EPI\_ISL\_586280|Original|hCoV-19^^Ontario|Human|Toronto Invasive Bacterial Diseases Network|McMaster University|McArthur|Canada

>Spike|hCoV-19/Australia/VIC4096/2020|2020-07-14|EPI\_ISL\_519477|Original|hCoV-19^^Victoria|Human|Microbiological Diagnostic Unit - Public Health Laboratory (MDU-PHL)|MDU-PHL|Schultz|Australia

>Spike|hCoV-19/USA/UT-08418/2020|2020-05-20|EPI\_ISL\_524196|Original|hCoV-19^^Utah|Human|Utah Public Health Laboratory|Utah Public Health Laboratory|Young|USA

>Spike|hCoV-19/USA/NE-11437/2020|2020-05-04|EPI\_ISL\_475211|Original|hCoV-19^^Nebraska|Human|Nebraska Public Health Laboratory|UNMC COVID-19 Response Team|Pratt|USA

>Spike|hCoV-19/Belgium/reg-0417515/2020|2020-04-17|EPI\_ISL\_734607|Original|hCoV-19^^Lubbeek|Human|UZ Leuven|KU Leuven|Maes|Belgium

>Spike|hCoV-19/England/LIVE-9E1D7/2020|2020-04-03|EPI\_ISL\_453276|Original|hCoV-19^^England|Human|Liverpool Clinical Laboratories|COVID-19 Genomics UK (COG-UK) Consortium|Haldenby|United Kingdom

>Spike|hCoV-19/Wales/PHWC-47D574/2020|2020-10-07|EPI\_ISL\_586160|Original|hCoV-19^^Wales|Human|Wales Specialist Virology Centre Sequencing lab|COVID-19 Genomics UK (COG-UK) Consortium|Moore|United Kingdom

>Spike|hCoV-19/England/LOND-D4490/2020|2020-04-08|EPI\_ISL\_444126|Original|hCoV-19^^England|Human|University College London|COVID-19 Genomics UK (COG-UK) Consortium|Roy|United Kingdom

>Spike|hCoV-19/Spain/MD-IBV-99008528/2020|2020-09-10|EPI\_ISL\_654052|Original|hCoV-19^^Madrid|Human|Hospital General Universitario Gregorio Mara\u00f1a|SeqCOVID-SPAIN consortium|IBV (CSIC)|Comas|Spain

>Spike|hCoV-19/England/ALDP-CB6814/2020|2020-12-17|EPI\_ISL\_761814|Original|hCoV-19^^England|Human|Lighthouse Lab in Alderley Park|Wellcome Sanger Institute for the COVID-19 Genomics UK (COG-UK) Consortium|Davies|United Kingdom

>Spike|hCoV-19/England/ALDP-6E97E4/2020|2020-06-30|EPI\_ISL\_557608|Original|hCoV-19^^England|Human|Lighthouse Lab in Alderley Park|Wellcome Sanger Institute for the COVID-19 Genomics UK (COG-UK) consortium|Davies|United Kingdom

>Spike|hCoV-19/England/QEUEH-9DDB8A/2020|2020-09-21|EPI\_ISL\_599717|Original|hCoV-19^^England|Human|Lighthouse Lab in Glasgow|Wellcome Sanger Institute for the COVID-19 Genomics UK (COG-UK) consortium|Davies|United Kingdom

>Spike|hCoV-19/Peru/LIM-UPCH-0169/2020|2020-10-12|EPI\_ISL\_729876|Original|hCoV-19^^Lima|Human|Laboratorio de Referencia Nacional de Virus Respiratorios|Laboratorio de Gen\u00f3mica Microbiana|Tsukayama|Peru

>Spike|hCoV-19/Brazil/RJ-00335/2020|2020-03-30|EPI\_ISL\_623138|Original|hCoV-19^^Rio de Janeiro|Human|Laboratorio de Virologia Molecular / UFRJ|Bioinformatics Laboratory / LNCC|Almeida|Brazil

>Spike|hCoV-19/Denmark/DCGC-11838/2020|2020-10-26|EPI\_ISL\_671165|Original|hCoV-19^^Midtjylland|Human|Department of Virus and Microbiological Special Diagnostics|Albertsen Lab|Michaelsen|Denmark

>Spike|hCoV-19/Australia/VIC10373/2020|2020-08-28|EPI\_ISL\_562892|Original|hCoV-19^^Victoria|Human|Microbiological Diagnostic Unit - Public Health Laboratory (MDU-PHL)|MDU-PHL|Schultz|Australia

>Spike|hCoV-19/Australia/VIC16388/2020|2020-08-09|EPI\_ISL\_640604|Original|hCoV-19^^Victoria|Human|Microbiological Diagnostic Unit - Public Health Laboratory (MDU-PHL)|MDU-PHL|Schultz|Australia

>Spike|hCoV-19/United Arab Emirates/0556/2020|2020-05-19|EPI\_ISL\_698717|Original|hCoV-19^^Abu Dhabi|Human|Group 42 (G42) Healthcare|G42 Healthcare|Ogrodzki|United Arab Emirates

>Spike|hCoV-19/England/QEUEH-549604/2020|2020-05-13|EPI\_ISL\_533395|Original|hCoV-19^^England|Human|Lighthouse Lab in Glasgow|Wellcome Sanger Institute for the COVID-19 Genomics UK (COG-UK) consortium|Davies|United Kingdom



>Spike|hCoV-19/Wales/PHWC-307B7/2020|2020-04-08|EPI\_ISL\_446279|Original|hCoV-19^^Wales|Human|Wales Specialist Virology Centre|Public Health Wales Microbiology Cardiff|Moore|United Kingdom

>Spike|hCoV-19/England/ALDP-B5C3C5/2020|2020-11-10|EPI\_ISL\_655857|Original|hCoV-19^^England|Human|Lighthouse Lab in Alderley Park|Wellcome Sanger Institute for the COVID-19 Genomics UK (COG-UK) Consortium|Davies|United Kingdom

>Spike|hCoV-19/England/CAMC-B7A74D/2020|2020-11-12|EPI\_ISL\_741137|Original|hCoV-19^^England|Human|Oxford Viromics|COVID-19 Genomics UK (COG-UK) Consortium|Golubchik|United Kingdom

>Spike|hCoV-19/Sweden/20-08110/2020|2020-03-09|EPI\_ISL\_454481|Original|hCoV-19^^Stockholm|Human|Karolinska Universitetslaboratoriet|The Public Health Agency of Sweden|Svartstr\u00f6m|Sweden

>Spike|hCoV-19/Canada/QC-LSPQ-L00227476/2020|2020-03-18|EPI\_ISL\_535862|Original|hCoV-19^^Quebec|Human|H\u00f4pital Pierre-Le Gardeur|Laboratoire de sant\u00e9 publique du Qu\u00e9bec|Moreira|Canada

>Spike|hCoV-19/England/MILK-ABC32E/2020|2020-10-22|EPI\_ISL\_631076|Original|hCoV-19^^England|Human|Lighthouse Lab in Milton Keynes|Wellcome Sanger Institute for the COVID-19 Genomics UK (COG-UK) consortium|Davies|United Kingdom

>Spike|hCoV-19/England/SHEF-C8857/2020|2020-05-04|EPI\_ISL\_457631|Original|hCoV-19^^England|Human|Virology Department|COVID-19 Genomics UK (COG-UK) Consortium|de Silva|United Kingdom

>Spike|hCoV-19/Denmark/DCGC-4281/2020|2020-09-07|EPI\_ISL\_615718|Original|hCoV-19^^Midtjylland|Human|Department of Virus and Microbiological Special Diagnostics|Albertsen lab|Michaelsen|Denmark

>Spike|hCoV-19/USA/AK-PHL588/2020|2020-06-23|EPI\_ISL\_512153|Original|hCoV-19^^Alaska|Human|Alaska State Virology Laboratory|Alaska State Virology Laboratory|Drown|USA

>Spike|hCoV-19/USA/TX-HMH-2323/2020|2020-05-29|EPI\_ISL\_545243|Original|hCoV-19^^Texas|Human|Houston Methodist Hospital|Houston Methodist Hospital|Long|USA

>Spike|hCoV-19/Wales/PHWC-489223/2020|2020-11-01|EPI\_ISL\_639551|Original|hCoV-19^^Wales|Human|Wales Specialist Virology Centre Sequencing lab|COVID-19 Genomics UK (COG-UK) Consortium|Moore|United Kingdom

>Spike|hCoV-19/England/NORW-EA224/2020|2020-05-12|EPI\_ISL\_457334|Original|hCoV-19^^England|Human|Quadram Institute Bioscience|COVID-19 Genomics UK (COG-UK) Consortium|Alikhan|United Kingdom

>Spike|hCoV-19/England/LIVE-DC6A65/2020|2020-11-23|EPI\_ISL\_705286|Original|hCoV-19^^England|Human|Liverpool Clinical Laboratories|COVID-19 Genomics UK (COG-UK) Consortium|Haldenby|United Kingdom

>Spike|hCoV-19/Denmark/DCGC-7929/2020|2020-10-26|EPI\_ISL\_618898|Original|hCoV-19^^Hovedstaden|Human|Department of Virus and Microbiological Special Diagnostics|Albertsen lab|Michaelsen|Denmark

>Spike|hCoV-19/England/ALDP-A2E907/2020|2020-10-05|EPI\_ISL\_586964|Original|hCoV-19^^England|Human|Lighthouse Lab in Alderley Park|Wellcome Sanger Institute for the COVID-19 Genomics UK (COG-UK) consortium|Davies|United Kingdom

>Spike|hCoV-19/England/QEUEH-880E33/2020|2020-07-22|EPI\_ISL\_532691|Original|hCoV-19^^England|Human|Lighthouse Lab in Glasgow|Wellcome Sanger Institute for the COVID-19 Genomics UK (COG-UK) consortium|Davies|United Kingdom

>Spike|hCoV-19/Switzerland/SO-ETHZ-410304/2020|2020-12-15|EPI\_ISL\_737559|Original|hCoV-19^^Solothurn|Human|Viollier AG|Department of Biosystems Science and Engineering|Nadeau|Switzerland

>Spike|hCoV-19/USA/WA-S1589/2020|2020-05-26|EPI\_ISL\_496015|Original|hCoV-19^^Washington|Human|Washington State Department of Health|Seattle Flu Study|Lee|USA

>Spike|hCoV-19/Wales/PHWC-4A4152/2020|2020-12-15|EPI\_ISL\_764658|Original|hCoV-19^^Wales|Human|Wales Specialist Virology Centre Sequencing lab|COVID-19 Genomics UK (COG-UK) Consortium|Moore|United Kingdom

>Spike|hCoV-19/England/ALDP-4A3D7D/2020|2020-06-03|EPI\_ISL\_559639|Original|hCoV-19^^England|Human|Lighthouse Lab in Alderley Park|Wellcome Sanger Institute for the COVID-19 Genomics UK (COG-UK) consortium|Davies|United Kingdom

>Spike|hCoV-19/England/20134002104/2020|2020-03-18|EPI\_ISL\_423053|Original|hCoV-19^^England|Human|Respiratory Virus Unit|Respiratory Virus Unit|Platt|United Kingdom

>Spike|hCoV-19/Northern Ireland/NIRE-234DA0/2020|2020-10-19|EPI\_ISL\_763719|Original|hCoV-19^^Northern Ireland|Human|Regional Virus Laboratory|COVID-19 Genomics UK (COG-UK) Consortium|Fairley|United Kingdom

>Spike|hCoV-19/Wales/PHWC-49E908/2020|2020-12-08|EPI\_ISL\_743066|Original|hCoV-19^^Wales|Human|Wales Specialist Virology Centre Sequencing lab|COVID-19 Genomics UK (COG-UK) Consortium|Moore|United Kingdom

>Spike|hCoV-19/India/MH-ACTREC-163/2020|2020-06-04|EPI\_ISL\_699819|Original|hCoV-19^^Maharashtra|Human|Hematopathology Laboratory|Hematopathology Laboratory|Patkar|India

>Spike|hCoV-19/Denmark/DCGC-16267/2020|2020-11-16|EPI\_ISL\_714673|Original|hCoV-19^^Midtjylland|Human|Department of Virus and Microbiological Special Diagnostics|Albertsen Lab|Michaelsen|Denmark

>Spike|hCoV-19/Denmark/DCGC-20067/2020|2020-12-07|EPI\_ISL\_747572|Original|hCoV-19^^Hovedstaden|Human|Department of Virus and Microbiological Special Diagnostics|Albertsen Lab|Michaelsen|Denmark

>Spike|hCoV-19/Wales/ALDP-C068E8/2020|2020-12-05|EPI\_ISL\_710662|Original|hCoV-19^^Wales|Human|Lighthouse Lab in Alderley Park|Wellcome Sanger Institute for the COVID-19 Genomics UK (COG-UK) Consortium|Davies|United Kingdom

>Spike|hCoV-19/USA/CA-CZB-13061/2020|2020-05-17|EPI\_ISL\_672331|Original|hCoV-19^^California|Human|Alameda County Public Health Lab|Chan-Zuckerberg Biohub|Bhatt|USA

>Spike|hCoV-19/England/NORT-1B71B0B/2020|2020-11-19|EPI\_ISL\_702495|Original|hCoV-19^^England|Human|Northumbria University / South Tees Hospitals NHS Foundation Trust / North Cumbria Integrated Care NHS Foundation Trust / North Tees and Hartlepool NHS Foundation Trust / Newcastle Hospitals NHS Foundation Trust|COVID-19 Genomics UK (COG-UK) Consortium|Bashton|United Kingdom

>Spike|hCoV-19/USA/NY-PV09334/2020|2020-03-18|EPI\_ISL\_450022|Original|hCoV-19^^New York|Human|MSHS Clinical Microbiology Laboratories|MSHS Pathogen Surveillance Program|van Bakel|USA

>Spike|hCoV-19/USA/CA-CZB-11166/2020|2020-09-15|EPI\_ISL\_625524|Original|hCoV-19^^California|Human|Alameda County Public Health Lab|Chan-Zuckerberg Biohub|Bhatt|USA

>Spike|hCoV-19/Wales/CAMC-AAF537/2020|2020-10-22|EPI\_ISL\_634789|Original|hCoV-19^^Wales|Human|Lighthouse Lab in Cambridge|Wellcome Sanger Institute for the COVID-19 Genomics UK (COG-UK) consortium|Davies|United Kingdom

>Spike|hCoV-19/England/MILK-9A6EBE/2020|2020-09-02|EPI\_ISL\_550148|Original|hCoV-19^^England|Human|Lighthouse Lab in Milton Keynes|Wellcome Sanger Institute for the COVID-19 Genomics UK (COG-UK) consortium|Davies|United Kingdom

>Spike|hCoV-19/DRC/11093/2020|2020-05-24|EPI\_ISL\_527527|Original|hCoV-19^^Kinshasa|Human|Viral Respiratory Lab|Pathogen Sequencing Lab|Lokilo|Democratic Republic of the Congo

>Spike|hCoV-19/Australia/WA127/2020|2020-04-10|EPI\_ISL\_596690|Original|hCoV-19^^Western Australia|Human|PathWest Laboratory Medicine WA|PathWest Laboratory Medicine WA Microbial Surveillance Unit|Sikazwe|Australia

>Spike|hCoV-19/USA/UT-UPHL-201103251/2020|2020-10-08|EPI\_ISL\_628944|Original|hCoV-19^^Utah|Human|Utah Public Health Laboratory|Utah Public Health Laboratory|Young|USA

>Spike|hCoV-19/USA/TX-HMH-MCoV-15870/2020|2020-07-10|EPI\_ISL\_785554|Original|hCoV-19^^Texas|Human|Houston Methodist Hospital|Houston Methodist Hospital|Long|USA

>Spike|hCoV-19/Scotland/CVR4125/2020|2020-09-07|EPI\_ISL\_573767|Original|hCoV-19^^Scotland|Human|West of Scotland Specialist Virology Centre|COVID-19 Genomics UK (COG-UK) Consortium|Robertson|United Kingdom

>Spike|hCoV-19/England/204200087/2020|2020-10-10|EPI\_ISL\_609862|Original|hCoV-19^^England|Human|Respiratory Virus Unit|Respiratory Virus Unit|Platt|United Kingdom

>Spike|hCoV-19/England/CAMB-81BCA/2020|2020-04-12|EPI\_ISL\_443083|Original|hCoV-19^^England|Human|Department of Pathology|Wellcome Sanger Institute for the COVID-19 Genomics UK (COG-UK) consortium|Amato|United Kingdom

>Spike|hCoV-19/England/ALDP-A2F9F7/2020|2020-10-05|EPI\_ISL\_587138|Original|hCoV-19^^England|Human|Lighthouse Lab in Alderley Park|Wellcome Sanger Institute for the COVID-19 Genomics UK (COG-UK) consortium|Davies|United Kingdom

>Spike|hCoV-19/England/ALDP-A6F71F/2020|2020-10-14|EPI\_ISL\_607057|Original|hCoV-19^^England|Human|Lighthouse Lab in Alderley Park|Wellcome Sanger Institute for the COVID-19 Genomics UK (COG-UK) consortium|Davies|United Kingdom

>Spike|hCoV-19/Scotland/QEUH-9D0CA2/2020|2020-09-16|EPI\_ISL\_601840|Original|hCoV-19^^Scotland|Human|Lighthouse Lab in Glasgow|Wellcome Sanger Institute for the COVID-19 Genomics UK (COG-UK) consortium|Davies|United Kingdom

>Spike|hCoV-19/USA/FL-BPHL-1589/2020|2020-05-21|EPI\_ISL\_594279|Original|hCoV-19^^Florida|Human|Florida Bureau of Public Health Laboratories|Florida Bureau of Public Health Laboratories|Blanton|USA

>Spike|hCoV-19/Cyprus/001/2020|2020-03-11|EPI\_ISL\_463741|Original|hCoV-19^^Cyprus|Human|Department of Molecular Virology|Department of Molecular Virology|Richter|Cyprus

>Spike|hCoV-19/USA/NY-NYCPHL-000273/2020|2020-03-18|EPI\_ISL\_631799|Original|hCoV-19^^New York|Human|NYC HH Lincoln Medical And Mental Health Center|New York City Public Health Laboratory|Wang|USA

>Spike|hCoV-19/England/MILK-C52A05/2020|2020-12-11|EPI\_ISL\_736452|Original|hCoV-19^^England|Human|Lighthouse Lab in Milton Keynes|Wellcome Sanger Institute for the COVID-19 Genomics UK (COG-UK) Consortium|Davies|United Kingdom

>Spike|hCoV-19/England/CAMC-9EC65A/2020|2020-09-24|EPI\_ISL\_580621|Original|hCoV-19^^England|Human|Lighthouse Lab in Cambridge|Wellcome Sanger Institute for the COVID-19 Genomics UK (COG-UK) consortium|Davies|United Kingdom

>Spike|hCoV-19/Wales/PHWC-163FFE/2020|2020-05-08|EPI\_ISL\_474114|Original|hCoV-19^^Wales|Human|Originating lab|COVID-19 Genomics UK (COG-UK) Consortium|Moore|United Kingdom

>Spike|hCoV-19/USA/LA-EVTL1256/2020|2020-12-04|EPI\_ISL\_778922|Original|hCoV-19^^Louisiana|Human|LSUHS Emerging Viral Threat Laboratory|Microbial Genome Sequencing Center|Kamil|USA

>Spike|hCoV-19/USA/TX-HMH-MCoV-15275/2020|2020-10-19|EPI\_ISL\_786759|Original|hCoV-19^^Texas|Human|Houston Methodist Hospital|Houston Methodist Hospital|Long|USA

>Spike|hCoV-19/USA/UT-UPHL-2009731/2020|2020-07-27|EPI\_ISL\_605403|Original|hCoV-19^^Utah|Human|Utah Public Health Laboratory|Utah Public Health Laboratory|Young|USA

>Spike|hCoV-19/Switzerland/VD-ETHZ-260016/2020|2020-08-21|EPI\_ISL\_539351|Original|hCoV-19^^Vaud|Human|Viollier AG|Department of Biosystems Science and Engineering|Nadeau|Switzerland

>Spike|hCoV-19/Portugal/PT1936/2020|2020-11-15|EPI\_ISL\_732146|Original|hCoV-19^^Portugal|Human|Instituto Nacional de Saude (INSA) and Instituto Gulbenkian de Ciencia (IGC)|Instituto Nacional de Saude (INSA) and Instituto Gulbenkian de Ciencia (IGC)|Borges|Portugal

>Spike|hCoV-19/England/ALDP-94CF99/2020|2020-06-14|EPI\_ISL\_556008|Original|hCoV-19^^England|Human|Lighthouse Lab in Alderley Park|Wellcome Sanger Institute for the COVID-19 Genomics UK (COG-UK) consortium|Davies|United Kingdom

>Spike|hCoV-19/England/LIVE-A9A74/2020|2020-03-24|EPI\_ISL\_517314|Original|hCoV-19^^England|Human|Liverpool Clinical Laboratories|COVID-19 Genomics UK (COG-UK) Consortium|Haldenby|United Kingdom

>Spike|hCoV-19/England/ALDP-BCA6C9/2020|2020-11-23|EPI\_ISL\_703271|Original|hCoV-19^^England|Human|Lighthouse Lab in Alderley Park|Wellcome Sanger Institute for the COVID-19 Genomics UK (COG-UK) Consortium|Davies|United Kingdom

>Spike|hCoV-19/Scotland/CVR4529/2020|2020-09-22|EPI\_ISL\_585389|Original|hCoV-19^^Scotland|Human|Lighthouse Lab in Glasgow / MRC-University of Glasgow Centre for Virus Research|COVID-19 Genomics UK (COG-UK) Consortium|Robertson|United Kingdom

>Spike|hCoV-19/USA/NM-UNM-00320/2020|2020-04-20|EPI\_ISL\_508066|Original|hCoV-19^^New Mexico|Human|New Mexico Department of Health Scientific Laboratory Division|Center for Global Health|Domman|USA

>Spike|hCoV-19/USA/WI-WSLH-200723/2020|2020-10-03|EPI\_ISL\_631479|Original|hCoV-19^^Wisconsin|Human|Wisconsin State Laboratory of Hygiene Communicable Disease Division|Wisconsin State Laboratory of Hygiene Communicable Disease Division|Florek|USA

>Spike|hCoV-19/USA/CT-CDC-2-3714070/2020|2020-11-24|EPI\_ISL\_751729|Original|hCoV-19^^Connecticut|Human|CT-Dr. Katherine A. Kelley State Public Health Lab|Genomics and Discovery|Queen|USA

>Spike|hCoV-19/Ireland/TA-UHL36/2020|2020-04-10|EPI\_ISL\_681772|Original|hCoV-19^^Tipperary|Human|University Hospital Limerick|Irish Coronavirus Sequencing Consortium - Teagasc Moorepark|Walsh|Ireland

>Spike|hCoV-19/India/DL-NCDC2192-CSIR-IGIB/2020|2020-05-18|EPI\_ISL\_482547|Original|hCoV-19^^Delhi|Human|National Centre for Disease control (NCDC)|NCDC/CSIR-IGIB|Pandey|India

>Spike|hCoV-19/Singapore/735/2020|2020-04-16|EPI\_ISL\_500541|Original|hCoV-19^^Singapore|Human|Singapore General Hospital|Department of Microbiology|Abdul Rahman|Singapore

>Spike|hCoV-19/Austria/CeMM0919/2020|2020-03-16|EPI\_ISL\_583771|Original|hCoV-19^^Austria|Human|Dr. Gernot Walder GmbH|Bergthaler laboratory|Bergthaler|Austria

>Spike|hCoV-19/Vietnam/38142/2020|2020-01-24|EPI\_ISL\_416427|Vero|hCoV-19^^Thanhhoa|Human|National Influenza Center|National Influenza Center|Ung|Vietnam

>Spike|hCoV-19/USA/MD-MDH-0486/2020|2020-11-30|EPI\_ISL\_778871|Original|hCoV-19^^Maryland|Human|Maryland Public Health Laboratory|Maryland Public Health Laboratory|Keller|USA

>Spike|hCoV-19/South Africa/L00161/2020|2020-07-26|EPI\_ISL\_622964|Original|hCoV-19^^Gauteng|Human|Lancet Laboratories|National Institute for Communicable Diseases of the National Health Laboratory Service|Allam|South Africa

>Spike|hCoV-19/USA/MI-MDHHS-SC21298/2020|2020-04-06|EPI\_ISL\_507553|Original|hCoV-19^^Michigan|Human|Michigan Department of Health and Human Services|Michigan Department of Health and Human Services|Blankenship|USA

>Spike|hCoV-19/England/SHEF-C1C25/2020|2020-05-02|EPI\_ISL\_457588|Original|hCoV-19^^England|Human|Virology Department|COVID-19 Genomics UK (COG-UK) Consortium|de Silva|United Kingdom

>Spike|hCoV-19/Germany/HH-hpi-p1563/2020|2020-03-15|EPI\_ISL\_776044|Original|hCoV-19^^Hamburg|Human|University Medical Center Hamburg Eppendorf|Heinrich Pette Institute|Robitaille|Germany

>Spike|hCoV-19/England/MILK-BB1373/2020|2020-11-17|EPI\_ISL\_720008|Original|hCoV-19^^England|Human|Lighthouse Lab in Milton Keynes|Wellcome Sanger Institute for the COVID-19 Genomics UK (COG-UK) Consortium|Davies|United Kingdom

>Spike|hCoV-19/Scotland/QEUH-AAF3B5/2020|2020-10-22|EPI\_ISL\_653019|Original|hCoV-19^^Scotland|Human|Oxford Viromics|COVID-19 Genomics UK (COG-UK) Consortium|Golubchik|United Kingdom

>Spike|hCoV-19/Australia/VIC13602/2020|2020-08-14|EPI\_ISL\_563778|Original|hCoV-19^^Victoria|Human|Microbiological Diagnostic Unit - Public Health Laboratory (MDU-PHL)|MDU-PHL|Schultz|Australia

>Spike|hCoV-19/Scotland/GCVR-173A54/2020|2020-04-07|EPI\_ISL\_459152|Original|hCoV-19^^Scotland|Human|NHSGGC West of Scotland Specialist Virology Centre / MRC-University of Glasgow Centre for Virus Research|Wellcome Sanger Institute for the COVID-19 Genomics UK (COG-UK) consortium|Davies|United Kingdom

>Spike|hCoV-19/England/CAMC-A3F5E1/2020|2020-10-06|EPI\_ISL\_609683|Original|hCoV-19^^England|Human|Lighthouse Lab in Cambridge|Wellcome Sanger Institute for the COVID-19 Genomics UK (COG-UK) consortium|Davies|United Kingdom

>Spike|hCoV-19/England/LIVE-1E08C1/2020|2020-10-10|EPI\_ISL\_611750|Original|hCoV-19^^England|Human|Liverpool Clinical Laboratories|COVID-19 Genomics UK (COG-UK) Consortium|Haldenby|United Kingdom

>Spike|hCoV-19/South Africa/KRISP-K005324/2020|2020-11-16|EPI\_ISL\_678614|Original|hCoV-19^^KwaZulu-Natal|Human|NHLS-IALCH|KRISP|de Oliveira|South Africa

>Spike|hCoV-19/England/LOND-1264797/2020|2020-11-16|EPI\_ISL\_679548|Original|hCoV-19^^England|Human|University College London|COVID-19 Genomics UK (COG-UK) Consortium|Roy|United Kingdom

>Spike|hCoV-19/USA/CA-ALSR-4322/2020|2020-10-13|EPI\_ISL\_648970|Original|hCoV-19^^California|Human|San Diego County Public Health Laboratory|Andersen lab at Scripps Research|Gangavarapu|USA

>Spike|hCoV-19/Sweden/20-14087/2020|2020-04-27|EPI\_ISL\_450826|Original|hCoV-19^^Uppsala|Human|Uppsala Narakut Aleris|The Public Health Agency of Sweden|Svartstr\u00f6m|Sweden

>Spike|hCoV-19/Thailand/Bangkok-CONI-0313/2020|2020-03-17|EPI\_ISL\_693384|Original|hCoV-19^^Bangkok|Human|Ramathibodi Hospital|COVID-19 Network Investigations (CONI) Alliance|Batty|Thailand

>Spike|hCoV-19/USA/TX-HMH-5489/2020|2020-06-24|EPI\_ISL\_544811|Original|hCoV-19^^Texas|Human|Houston Methodist Hospital|Houston Methodist Hospital|Long|USA

>Spike|hCoV-19/Japan/PG-0370/2020|2020-03-25|EPI\_ISL\_480040|Original|hCoV-19^^Kanto|Human|Tochigi Prefectural Institute of Public Health and Environmental Science|Pathogen Genomics Center|Sekizuka|Japan

>Spike|hCoV-19/England/CAMB-80C8C/2020|2020-04-10|EPI\_ISL\_442886|Original|hCoV-19^^England|Human|Department of Pathology|Wellcome Sanger Institute for the COVID-19 Genomics UK (COG-UK) consortium|Amato|United Kingdom

>Spike|hCoV-19/England/204290227/2020|2020-10-16|EPI\_ISL\_613601|Original|hCoV-19^^England|Human|Respiratory Virus Unit|Respiratory Virus Unit|Platt|United Kingdom

>Spike|hCoV-19/Scotland/EDB5735/2020|2020-04-08|EPI\_ISL\_473851|Original|hCoV-19^^Scotland|Human|Virology Department|COVID-19 Genomics UK (COG-UK) Consortium|Williams|United Kingdom

>Spike|hCoV-19/England/MILK-9F0AEE/2020|2020-09-24|EPI\_ISL\_589751|Original|hCoV-19^^England|Human|Lighthouse Lab in Milton Keynes|Wellcome Sanger Institute for the COVID-19 Genomics UK (COG-UK) consortium|Davies|United Kingdom

>Spike|hCoV-19/Germany/HH-hpi-p2009/2020|2020-03-21|EPI\_ISL\_776319|Original|hCoV-19^^Hamburg|Human|University Medical Center Hamburg Eppendorf|Heinrich Pette Institute|Robitaille|Germany

>Spike|hCoV-19/Scotland/CVR3123/2020|2020-04-26|EPI\_ISL\_439035|Original|hCoV-19^^Scotland|Human|West of Scotland Specialist Virology Centre|COVID-19 Genomics UK (COG-UK) Consortium|Robertson|United Kingdom

>Spike|hCoV-19/Russia/PRI-RII-MH770S/2020|2020-08-11|EPI\_ISL\_733014|Original|hCoV-19^^Primorsky|Human|WHO National Influenza Centre Russian Federation|WHO National Influenza Centre Russian Federation|Komissarov|Russia

>Spike|hCoV-19/France/NAQ-SC223/2020|2020-04-27|EPI\_ISL\_649971|Original|hCoV-19^^Nouvelle-Aquitaine|Human|CHU Bordeaux|CNR Virus des Infections Respiratoires - France SUD|Bal|France

>Spike|hCoV-19/England/QEUEH-9BACEA/2020|2020-09-07|EPI\_ISL\_573634|Original|hCoV-19^^England|Human|Oxford Viromics|COVID-19 Genomics UK (COG-UK) Consortium|Golubchik|United Kingdom

>Spike|hCoV-19/USA/TX-DSHS-0952/2020|2020-07-16|EPI\_ISL\_602249|Original|hCoV-19^^Texas|Human|Texas Department of State Health Services|Texas Department of State Health Services|Rahman|USA

>Spike|hCoV-19/Switzerland/GE-SNRCI-8452/2020|2020-03-00|EPI\_ISL\_548228|Original|hCoV-19^^Geneve|Human|Laboratoire de Virologie|Swiss National Reference Centre for Influenza|Gon\u00e7alves Cabecinhas|Switzerland

>Spike|hCoV-19/England/QEUEH-962A8D/2020|2020-08-10|EPI\_ISL\_531798|Original|hCoV-19^^England|Human|Lighthouse Lab in Glasgow|Wellcome Sanger Institute for the COVID-19 Genomics UK (COG-UK) consortium|Davies|United Kingdom

>Spike|hCoV-19/Wales/PHWC-4912CE/2020|2020-11-07|EPI\_ISL\_706637|Original|hCoV-19^^Wales|Human|Originating lab|COVID-19 Genomics UK (COG-UK) Consortium|Moore|United Kingdom

>Spike|hCoV-19/Japan/PG-1021/2020|2020-03-00|EPI\_ISL\_684631|Original|hCoV-19^^Japan|Human|Tokyo Metropolitan Institute of Public Health|Pathogen Genomics Center|Sekizuka|Japan

>Spike|hCoV-19/England/CAMC-C404A2/2020|2020-12-10|EPI\_ISL\_718619|Original|hCoV-19^^England|Human|Lighthouse Lab in Cambridge|Wellcome Sanger Institute for the COVID-19 Genomics UK (COG-UK) Consortium|Davies|United Kingdom

>Spike|hCoV-19/Gibraltar/204841766/2020|2020-00-00|EPI\_ISL\_671332|Original|hCoV-19^^Gibraltar|Human|Microbiology|Respiratory Virus Unit|Platt|Gibraltar

>Spike|hCoV-19/Australia/NSW657/2020|2020-07-19|EPI\_ISL\_498776|Original|hCoV-19^^New South Wales|Human|Pathology West - NSW Health Pathology|NSW Health Pathology - Institute of Clinical Pathology and Medical Research; Westmead Hospital; University of Sydney|Gall|Australia

>Spike|hCoV-19/Denmark/DCGC-828/2020|2020-04-20|EPI\_ISL\_614740|Original|hCoV-19^^Hovedstaden|Human|Department of Virus and Microbiological Special Diagnostics|Albertsen lab|Michaelsen|Denmark

>Spike|hCoV-19/Russia/Krasnodar-80902/2020|2020-03-23|EPI\_ISL\_428892|Vero|hCoV-19^^Krasnodar|Human|State Research Center of Virology and Biotechnology VECTOR|State Research Center of Virology and Biotechnology VECTOR|Shvalov|Russia

>Spike|hCoV-19/England/203660642/2020|2020-09-02|EPI\_ISL\_566076|Original|hCoV-19^^England|Human|Respiratory Virus Unit|Respiratory Virus Unit|Platt|United Kingdom

>Spike|hCoV-19/Australia/VIC3114/2020|2020-07-06|EPI\_ISL\_520821|Original|hCoV-19^^Victoria|Human|Victorian Infectious Diseases Reference Laboratory (VIDRL)|VIDRL and MDU-PHL|Schultz|Australia

>Spike|hCoV-19/USA/UT-UPHL-03843/2020|2020-04-01|EPI\_ISL\_560861|Original|hCoV-19^^Utah|Human|Utah Public Health Laboratory|Utah Public Health Laboratory|Young|USA

>Spike|hCoV-19/USA/AZ-TG480074/2020|2020-07-08|EPI\_ISL\_695062|Original|hCoV-19^^Arizona|Human|TGen North|TGen North|French|USA

>Spike|hCoV-19/Northern Ireland/QEUI-962346/2020|2020-08-10|EPI\_ISL\_531663|Original|hCoV-19^^Northern Ireland|Human|Lighthouse Lab in Glasgow|Wellcome Sanger Institute for the COVID-19 Genomics UK (COG-UK) consortium|Davies|United Kingdom

>Spike|hCoV-19/USA/LA-EVTL1160/2020|2020-12-10|EPI\_ISL\_768429|Original|hCoV-19^^Louisiana|Human|LSUHS Emerging Viral Threat Laboratory|Microbial Genome Sequencing Center|Kamil|USA

>Spike|hCoV-19/Scotland/QEUI-9AE214/2020|2020-09-04|EPI\_ISL\_637671|Original|hCoV-19^^Scotland|Human|Department of Pathology|COVID-19 Genomics UK (COG-UK) Consortium|Goodfellow|United Kingdom

>Spike|hCoV-19/Wales/PHWC-30E3A/2020|2020-04-09|EPI\_ISL\_446366|Original|hCoV-19^^Wales|Human|Wales Specialist Virology Centre|Public Health Wales Microbiology Cardiff|Moore|United Kingdom

>Spike|hCoV-19/Japan/PG-6887/2020|2020-00-00|EPI\_ISL\_687995|Original|hCoV-19^^Japan|Human|Pathogen Genomics Center|Pathogen Genomics Center|Sekizuka|Japan

>Spike|hCoV-19/England/MILK-A7D884/2020|2020-10-13|EPI\_ISL\_606546|Original|hCoV-19^^England|Human|Lighthouse Lab in Milton Keynes|Wellcome Sanger Institute for the COVID-19 Genomics UK (COG-UK) consortium|Davies|United Kingdom

>Spike|hCoV-19/England/QEUI-9B5265/2020|2020-09-03|EPI\_ISL\_590425|Original|hCoV-19^^England|Human|Lighthouse Lab in Glasgow|Wellcome Sanger Institute for the COVID-19 Genomics UK (COG-UK) consortium|Davies|United Kingdom

>Spike|hCoV-19/Denmark/DCGC-5989/2020|2020-09-28|EPI\_ISL\_621098|Original|hCoV-19^^Midtjylland|Human|Department of Virus and Microbiological Special Diagnostics|Albertsen lab|Michaelsen|Denmark

>Spike|hCoV-19/India/DL-NCDC2214-CSIR-IGIB/2020|2020-05-18|EPI\_ISL\_482552|Original|hCoV-19^^Delhi|Human|National Centre for Disease control (NCDC)|NCDC/CSIR-IGIB|Pandey|India

>Spike|hCoV-19/England/ALDP-952E2A/2020|2020-06-11|EPI\_ISL\_553655|Original|hCoV-19^^England|Human|Lighthouse Lab in Alderley Park|Wellcome Sanger Institute for the COVID-19 Genomics UK (COG-UK) consortium|Davies|United Kingdom

>Spike|hCoV-19/USA/AK-PHL041/2020|2020-03-23|EPI\_ISL\_437514|Original|hCoV-19^^Alaska|Human|Alaska State Virology Laboratory|Alaska State Virology Laboratory|Chen|USA

>Spike|hCoV-19/England/ALDP-B5B575/2020|2020-11-07|EPI\_ISL\_655342|Original|hCoV-19^^England|Human|Lighthouse Lab in Alderley Park|Wellcome Sanger Institute for the COVID-19 Genomics UK (COG-UK) Consortium|Davies|United Kingdom

>Spike|hCoV-19/Scotland/CVR2199/2020|2020-04-11|EPI\_ISL\_448159|Original|hCoV-19^^Scotland|Human|West of Scotland Specialist Virology Centre|COVID-19 Genomics UK (COG-UK) Consortium|Robertson|United Kingdom

>Spike|hCoV-19/France/OCC-SC480/2020|2020-03-24|EPI\_ISL\_660681|Original|hCoV-19^^Occitanie|Human|CHU Montpellier|CNR Virus des Infections Respiratoires - France SUD|Bal|France

>Spike|hCoV-19/England/BRIS-12F79C/2020|2020-03-11|EPI\_ISL\_488199|Original|hCoV-19^^England|Human|PHE South West Regional Laboratory|Wellcome Sanger Institute for the COVID-19 Genomics UK (COG-UK) consortium|Davies|United Kingdom

>Spike|hCoV-19/Wales/PHWC-4A2F87/2020|2020-12-14|EPI\_ISL\_744038|Original|hCoV-19^^Wales|Human|Wales Specialist Virology Centre Sequencing lab|COVID-19 Genomics UK (COG-UK) Consortium|Moore|United Kingdom

>Spike|hCoV-19/England/CAMB-77963/2020|2020-03-30|EPI\_ISL\_439476|Original|hCoV-19^^England|Human|Department of Pathology|Wellcome Sanger Institute for the COVID-19 Genomics UK (COG-UK) consortium|Amato|United Kingdom

>Spike|hCoV-19/Norway/4016/2020|2020-09-28|EPI\_ISL\_590877|original|hCoV-19^^Rogaland|Human|Dept. of Medical Microbiology|Norwegian Institute of Public Health|Vollan|Norway

>Spike|hCoV-19/USA/NY-Wadsworth-200235-01/2020|2020-07-07|EPI\_ISL\_677069|Original|hCoV-19^^New York|Human|Masonic Medical Research Institute|Wadsworth Center|Lasek-Nesselquist|USA

>Spike|hCoV-19/England/QEUEH-B6A625/2020|2020-11-11|EPI\_ISL\_662430|Original|hCoV-19^^England|Human|Lighthouse Lab in Glasgow|Wellcome Sanger Institute for the COVID-19 Genomics UK (COG-UK) Consortium|Davies|United Kingdom

>Spike|hCoV-19/Spain/CN-IBV-97006518/2020|2020-04-05|EPI\_ISL\_537723|Original|hCoV-19^^Canary Islands|Human|Hospital Universitario de Gran Canaria Dr. Negr\u00ededn|SeqCOVID-SPAIN consortium|IBV(CSIC)|Comas|Spain

>Spike|hCoV-19/Denmark/DCGC-14362/2020|2020-11-30|EPI\_ISL\_711124|Original|hCoV-19^^Hovedstaden|Human|Department of Virus and Microbiological Special Diagnostics|Albertsen Lab|Michaelsen|Denmark

>Spike|hCoV-19/Denmark/DCGC-8893/2020|2020-11-02|EPI\_ISL\_626164|Original|hCoV-19^^Hovedstaden|Human|Department of Virus and Microbiological Special Diagnostics|Albertsen lab|Michaelsen|Denmark

>Spike|hCoV-19/England/CAMC-B2047C/2020|2020-11-02|EPI\_ISL\_647507|Original|hCoV-19^^England|Human|Lighthouse Lab in Cambridge|Wellcome Sanger Institute for the COVID-19 Genomics UK (COG-UK) Consortium|Davies|United Kingdom

>Spike|hCoV-19/Spain/MD-HLP-90/2020|2020-05-02|EPI\_ISL\_530087|Original|hCoV-19^^Madrid|Human|Hospital Universitario La Paz|Hospital Universitario La Paz|Viedma|Spain

>Spike|hCoV-19/England/OXON-AE550/2020|2020-00-00|EPI\_ISL\_448701|Original|hCoV-19^^England|Human|Oxford Viromics|COVID-19 Genomics UK (COG-UK) Consortium|Golubchik|United Kingdom

>Spike|hCoV-19/USA/CA-ALSR-1437/2020|2020-03-27|EPI\_ISL\_494603|Original|hCoV-19^^California|Human|Scripps Medical Laboratory|Andersen lab at Scripps Research|Gangavarapu|USA

>Spike|hCoV-19/USA/UT-UPHL-2012067509/2020|2020-08-02|EPI\_ISL\_745732|Original|hCoV-19^^Utah|Human|Ginkgo Bioworks Clinical Laboratory|Utah Public Health Laboratory|Young|USA

>Spike|hCoV-19/England/QEUEH-B81488/2020|2020-11-14|EPI\_ISL\_668248|Original|hCoV-19^^England|Human|Lighthouse Lab in Glasgow|Wellcome Sanger Institute for the COVID-19 Genomics UK (COG-UK) Consortium|Davies|United Kingdom

>Spike|hCoV-19/USA/TX-HMH-1069/2020|2020-04-13|EPI\_ISL\_542516|Original|hCoV-19^^Texas|Human|Houston Methodist Hospital|Houston Methodist Hospital|Long|USA

>Spike|hCoV-19/Wales/PHWC-484079/2020|2020-10-24|EPI\_ISL\_627961|Original|hCoV-19^^Wales|Human|Wales Specialist Virology Centre Sequencing lab|COVID-19 Genomics UK (COG-UK) Consortium|Moore|United Kingdom

>Spike|hCoV-19/USA/WI-UW-1745/2020|2020-09-17|EPI\_ISL\_605618|Original|hCoV-19^^Wisconsin|Human|University of Wisconsin-Madison AIDS Vaccine Research Laboratories|University of Wisconsin-Madison AIDS Vaccine Research Laboratories|Baczenas|USA

>Spike|hCoV-19/England/MILK-AC8240/2020|2020-10-22|EPI\_ISL\_629451|Original|hCoV-19^^England|Human|Lighthouse Lab in Milton Keynes|Wellcome Sanger Institute for the COVID-19 Genomics UK (COG-UK) consortium|Davies|United Kingdom

>Spike|hCoV-19/Netherlands/LI-RIVM-20448/2020|2020-12-09|EPI\_ISL\_728667|Original|hCoV-19^^Limburg|Human|Dutch COVID-19 response team|National Institute for Public Health and the Environment (RIVM)|Meijer|Netherlands

>Spike|hCoV-19/Denmark/DCGC-8324/2020|2020-10-26|EPI\_ISL\_617300|Original|hCoV-19^^Hovedstaden|Human|Department of Virus and Microbiological Special Diagnostics|Albertsen lab|Michaelsen|Denmark

>Spike|hCoV-19/England/NORT-298250/2020|2020-04-28|EPI\_ISL\_488077|Original|hCoV-19^^England|Human|NU-OMICS DNA Sequencing research facility|Wellcome Sanger Institute for the COVID-19 Genomics UK (COG-UK) consortium|Davies|United Kingdom

>Spike|hCoV-19/Czech Republic/NRL\_2554/2020|2020-03-11|EPI\_ISL\_471547|Original|hCoV-19^^Prague|Human|The National Institute of Public Health|State Veterinary Institute Prague and The National Institute of Public Health|Nagy|Czech Republic

>Spike|hCoV-19/USA/NY-PV09492/2020|2020-03-21|EPI\_ISL\_450164|Original|hCoV-19^^New York|Human|MSHS Clinical Microbiology Laboratories|MSHS Pathogen Surveillance Program|van Bakel|USA

>Spike|hCoV-19/France/ARA-SC088/2020|2020-03-05|EPI\_ISL\_693391|Original|hCoV-19^^Auvergne-Rhône-Alpes|Human|Centre hospitalier M\u00e9tropole Savoie|CNR Virus des Infections Respiratoires - France SUD|Bal|France

>Spike|hCoV-19/Scotland/QEUH-AD6388/2020|2020-10-24|EPI\_ISL\_644001|Original|hCoV-19^^Scotland|Human|Lighthouse Lab in Glasgow|Wellcome Sanger Institute for the COVID-19 Genomics UK (COG-UK) Consortium|Davies|United Kingdom

>Spike|hCoV-19/USA/LA-EVTL077/2020|2020-05-08|EPI\_ISL\_451238|Original|hCoV-19^^Louisiana|Human|LSUHS Emerging Viral Threat Laboratory|Microbial Genome Sequencing Center|Kamil|USA

>Spike|hCoV-19/Netherlands/UT-EMC-139/2020|2020-10-19|EPI\_ISL\_632732|Original|hCoV-19^^Utrecht|Human|Dutch COVID-19 response team|Erasmus Medical Center|Oude Munnink|Netherlands

>Spike|hCoV-19/England/ALDP-9B61EF/2020|2020-08-28|EPI\_ISL\_572992|Original|hCoV-19^^England|Human|Oxford Viromics|COVID-19 Genomics UK (COG-UK) Consortium|Golubchik|United Kingdom

>Spike|hCoV-19/USA/CA-CZB-10040/2020|2020-06-11|EPI\_ISL\_672197|Original|hCoV-19^^California|Human|The Ashley Laboratory|Chan-Zuckerberg Biohub|Bhatt|USA

>Spike|hCoV-19/England/MILK-9C399C/2020|2020-09-10|EPI\_ISL\_566872|Original|hCoV-19^^England|Human|Lighthouse Lab in Milton Keynes|Wellcome Sanger Institute for the COVID-19 Genomics UK (COG-UK) consortium|Davies|United Kingdom

>Spike|hCoV-19/England/MILK-A1D4CE/2020|2020-10-03|EPI\_ISL\_595063|Original|hCoV-19^^England|Human|Queens Medical Centre|COVID-19 Genomics UK (COG-UK) Consortium|Loose|United Kingdom

>Spike|hCoV-19/Japan/PG-7208/2020|2020-07-00|EPI\_ISL\_688312|Original|hCoV-19^^Japan|Human|Saitama Prefectural Institute of Public Health|Pathogen Genomics Center|Sekizuka|Japan

>Spike|hCoV-19/Peru/LIM-UPCH-0148/2020|2020-08-28|EPI\_ISL\_568542|Original|hCoV-19^^Lima|Human|Laboratorio de Referencia Nacional de Virus Respiratorios|Laboratorio de Gen\u00f3mica Microbiana|Tsukayama|Peru

>Spike|hCoV-19/Latvia/143/2020|2020-09-09|EPI\_ISL\_639640|Original|hCoV-19^^Latvia|Human|Centr\u0101l\u0101 Laboratorija|Latvian Biomedical Research and Study Centre|Zrel\u0113vs|Latvia

>Spike|hCoV-19/Germany/HH-hpi-p1276/2020|2020-03-15|EPI\_ISL\_775759|Original|hCoV-19^^Hamburg|Human|University Medical Center Hamburg Eppendorf|Heinrich Pette Institute|Robitaille|Germany

>Spike|hCoV-19/France/NAQ-SC212/2020|2020-03-27|EPI\_ISL\_649964|Original|hCoV-19^^Nouvelle-Aquitaine|Human|CHU Bordeaux|CNR Virus des Infections Respiratoires - France SUD|Bal|France

>Spike|hCoV-19/Scotland/EDB1496/2020|2020-04-12|EPI\_ISL\_526460|Original|hCoV-19^^Scotland|Human|Virology Department|COVID-19 Genomics UK (COG-UK) Consortium|Williams|United Kingdom

>Spike|hCoV-19/Scotland/EDB5906/2020|2020-04-30|EPI\_ISL\_487843|Original|hCoV-19^^Scotland|Human|Virology Department|Wellcome Sanger Institute for the COVID-19 Genomics UK (COG-UK) consortium|Davies|United Kingdom

>Spike|hCoV-19/Luxembourg/LNS2964698/2020|2020-06-30|EPI\_ISL\_740227|Original|hCoV-19^^Luxembourg|Human|Laboratoire national de sant\u00e9|Laboratoire national de sant\u00e9|Wienecke-Baldacchino|Luxembourg



>Spike|hCoV-19/England/CAMB-7CF7B/2020|2020-04-06|EPI\_ISL\_442224|Original|hCoV-19^^England|Human|Department of Pathology|Wellcome Sanger Institute for the COVID-19 Genomics UK (COG-UK) consortium|Amato|United Kingdom

>Spike|hCoV-19/England/20100004806/2020|2020-02-29|EPI\_ISL\_415134|Original|hCoV-19^^England|Human|Respiratory Virus Unit|Respiratory Virus Unit|Platt|United Kingdom

>Spike|hCoV-19/USA/CA-CZB-1555/2020|2020-03-18|EPI\_ISL\_468495|Original|hCoV-19^^California|Human|Ventura County Public Health Lab|Chan-Zuckerberg Biohub|Hao|USA

>Spike|hCoV-19/USA/TX-HMH-4307/2020|2020-06-18|EPI\_ISL\_543517|Original|hCoV-19^^Texas|Human|Houston Methodist Hospital|Houston Methodist Hospital|Long|USA

>Spike|hCoV-19/Scotland/EDB3042/2020|2020-04-03|EPI\_ISL\_488920|Original|hCoV-19^^Scotland|Human|Virology Department|Wellcome Sanger Institute for the COVID-19 Genomics UK (COG-UK) consortium|Davies|United Kingdom

>Spike|hCoV-19/United Arab Emirates/0703/2020|2020-05-15|EPI\_ISL\_698854|Original|hCoV-19^^Abu Dhabi|Human|Group 42 (G42) Healthcare|G42 Healthcare|Ogrodzki|United Arab Emirates

>Spike|hCoV-19/Portugal/IGC4392/2020|2020-06-07|EPI\_ISL\_491245|Original|hCoV-19^^Portugal|Human|Instituto Gulbenkian de Ci\u00eancia|Instituto Gulbenkian de Ci\u00eancia|Leite|Portugal

>Spike|hCoV-19/England/CAMC-B345CD/2020|2020-11-06|EPI\_ISL\_659727|Original|hCoV-19^^England|Human|Lighthouse Lab in Cambridge|Wellcome Sanger Institute for the COVID-19 Genomics UK (COG-UK) Consortium|Davies|United Kingdom

>Spike|hCoV-19/Malaysia/IMR\_WC413/2020|2020-02-08|EPI\_ISL\_455791|Vero E6|hCoV-19^^Selangor|Human|Institutē for Medical Research|Malaysia Genome Institute|Mat Isa|Malaysia

>Spike|hCoV-19/Belgium/ULG-10280/2020|2020-07-24|EPI\_ISL\_540447|Original|hCoV-19^^Anvers|Human|University of Li\u00e8ge COVID-19 testing center|GIGA Medical Genomics|Durkin|Belgium

>Spike|hCoV-19/England/MILK-B3916A/2020|2020-11-02|EPI\_ISL\_650163|Original|hCoV-19^^England|Human|University of Exeter|COVID-19 Genomics UK (COG-UK) Consortium|Temperton|United Kingdom

>Spike|hCoV-19/Wales/PHWC-15DD93/2020|2020-05-14|EPI\_ISL\_472775|Original|hCoV-19^^Wales|Human|Wales Specialist Virology Centre Sequencing lab|COVID-19 Genomics UK (COG-UK) Consortium|Moore|United Kingdom

>Spike|hCoV-19/USA/NMDOH-2020324000/2020|2020-09-01|EPI\_ISL\_542091|Original|hCoV-19^^New Mexico|Human|New Mexico Department of Health Scientific Laboratory|New Mexico Department of Health Scientific Laboratory|Johnson|USA

>Spike|hCoV-19/Wales/PHWC-49FD38/2020|2020-12-08|EPI\_ISL\_743348|Original|hCoV-19^^Wales|Human|Wales Specialist Virology Centre Sequencing lab|COVID-19 Genomics UK (COG-UK) Consortium|Moore|United Kingdom

>Spike|hCoV-19/England/QEUEH-C5BCBB/2020|2020-12-14|EPI\_ISL\_735894|Original|hCoV-19^^England|Human|Lighthouse Lab in Glasgow|Wellcome Sanger Institute for the COVID-19 Genomics UK (COG-UK) Consortium|Davies|United Kingdom

>Spike|hCoV-19/South Africa/KRISP-K004033/2020|2020-10-12|EPI\_ISL\_635014|Original|hCoV-19^^KwaZulu-Natal|Human|National Health Laboratory Service - Inkosi Albert Luthuli Central Hospital (NHLS-IALCH)|KRISP|de Oliveira|South Africa

>Spike|hCoV-19/USA/CruiseA-8/2020|2020-02-17|EPI\_ISL\_413613|Original|hCoV-19^^USA|Human|unknown|Pathogen Discovery|Queen|USA

>Spike|hCoV-19/Hong Kong/VB20175873/2020|2020-08-14|EPI\_ISL\_539822|Original|hCoV-19^^Hong Kong|Human|Communicable Disease Branch|Hong Kong Department of Health|Tsang|China

>Spike|hCoV-19/Denmark/DCGC-6912/2020|2020-10-12|EPI\_ISL\_619758|Original|hCoV-19^^Hovedstaden|Human|Department of Virus and Microbiological Special Diagnostics|Albertsen lab|Michaelsen|Denmark

>Spike|hCoV-19/USA/UT-08615/2020|2020-05-26|EPI\_ISL\_524356|Original|hCoV-19^^Utah|Human|Utah Public Health Laboratory|Utah Public Health Laboratory|Young|USA

>Spike|hCoV-19/England/QEUEH-9DE372/2020|2020-09-21|EPI\_ISL\_599637|Original|hCoV-19^^England|Human|Lighthouse Lab in Glasgow|Wellcome Sanger Institute for the COVID-19 Genomics UK (COG-UK) consortium|Davies|United Kingdom

>Spike|hCoV-19/England/SHEF-CCD63/2020|2020-10-05|EPI\_ISL\_650283|Original|hCoV-19^^England|Human|Virology Department|COVID-19 Genomics UK (COG-UK) Consortium|de Silva|United Kingdom

>Spike|hCoV-19/England/CAMC-B087CC/2020|2020-10-30|EPI\_ISL\_643828|Original|hCoV-19^^England|Human|Lighthouse Lab in Cambridge|Wellcome Sanger Institute for the COVID-19 Genomics UK (COG-UK) Consortium|Davies|United Kingdom

>Spike|hCoV-19/England/BRIS-12E214/2020|2020-04-10|EPI\_ISL\_481981|Original|hCoV-19^^England|Human|PHE South West Regional Laboratory|Wellcome Sanger Institute for the COVID-19 Genomics UK (COG-UK) consortium|Davies|United Kingdom

>Spike|hCoV-19/Spain/AR-IBV-2413/2020|2020-03-23|EPI\_ISL\_468845|Original|hCoV-19^^Aragon|Human|Servicio de Microbiolog\u00eda|SeqCOVID-SPAIN consortium/IBV (CSIC) |Comas|Spain

>Spike|hCoV-19/USA/MA-MASPHL-00081/2020|2020-04-03|EPI\_ISL\_791570|Original|hCoV-19^^Massachusetts|Human|Massachusetts State Public Health Laboratory|Infectious Disease Program|Park|USA

>Spike|hCoV-19/Scotland/QEUH-9F4B7E/2020|2020-09-25|EPI\_ISL\_600637|Original|hCoV-19^^Scotland|Human|Lighthouse Lab in Glasgow|Wellcome Sanger Institute for the COVID-19 Genomics UK (COG-UK) consortium|Davies|United Kingdom

>Spike|hCoV-19/Switzerland/BE-ETHZ-420680/2020|2020-12-23|EPI\_ISL\_768040|Original|hCoV-19^^Bern|Human|Viollier AG|Department of Biosystems Science and Engineering|Nadeau|Switzerland

>Spike|hCoV-19/England/QEUH-9B77A0/2020|2020-09-08|EPI\_ISL\_590614|Original|hCoV-19^^England|Human|Lighthouse Lab in Glasgow|Wellcome Sanger Institute for the COVID-19 Genomics UK (COG-UK) consortium|Davies|United Kingdom

>Spike|hCoV-19/Netherlands/NB-RIVM-20608/2020|2020-12-10|EPI\_ISL\_790691|Original|hCoV-19^^Noord-Brabant|Human|Dutch COVID-19 response team|National Institute for Public Health and the Environment (RIVM) |Meijer|Netherlands

>Spike|hCoV-19/USA/TX-HMH-MCoV-9770/2020|2020-07-06|EPI\_ISL\_780265|Original|hCoV-19^^Texas|Human|Houston Methodist Hospital|Houston Methodist Hospital|Long|USA

>Spike|hCoV-19/Denmark/DCGC-18235/2020|2020-12-14|EPI\_ISL\_749831|Original|hCoV-19^^Midtjylland|Human|Department of Virus and Microbiological Special Diagnostics|Albertsen Lab|Michaelsen|Denmark

>Spike|hCoV-19/USA/FL-BPHL-1610/2020|2020-07-28|EPI\_ISL\_594300|Original|hCoV-19^^Florida|Human|Florida Bureau of Public Health Laboratories|Florida Bureau of Public Health Laboratories|Blanton|USA

>Spike|hCoV-19/Scotland/QEUH-9CEA16/2020|2020-09-17|EPI\_ISL\_601939|Original|hCoV-19^^Scotland|Human|Lighthouse Lab in Glasgow|Wellcome Sanger Institute for the COVID-19 Genomics UK (COG-UK) consortium|Davies|United Kingdom

>Spike|hCoV-19/England/BRIS-12A88F/2020|2020-04-29|EPI\_ISL\_458299|Original|hCoV-19^^England|Human|PHE South West Regional Laboratory|Wellcome Sanger Institute for the COVID-19 Genomics UK (COG-UK) consortium|Davies|United Kingdom

>Spike|hCoV-19/Luxembourg/LNS0109742/2020|2020-10-26|EPI\_ISL\_739715|Original|hCoV-19^^Luxembourg|Human|Laboratoire national de sant\u00e9|Laboratoire national de sant\u00e9|Wienecke-Baldacchino|Luxembourg

>Spike|hCoV-19/England/CAMC-B331D9/2020|2020-11-05|EPI\_ISL\_659140|Original|hCoV-19^^England|Human|Lighthouse Lab in Cambridge|Wellcome Sanger Institute for the COVID-19 Genomics UK (COG-UK) Consortium|Davies|United Kingdom

>Spike|hCoV-19/England/EXET-138235/2020|2020-10-06|EPI\_ISL\_612392|Original|hCoV-19^^England|Human|University of Exeter|COVID-19 Genomics UK (COG-UK) Consortium|Temperton|United Kingdom

>Spike|hCoV-19/England/ALDP-953CA7/2020|2020-06-12|EPI\_ISL\_554525|Original|hCoV-19^^England|Human|Lighthouse Lab in Alderley Park|Wellcome Sanger Institute for the COVID-19 Genomics UK (COG-UK) consortium|Davies|United Kingdom

>Spike|hCoV-19/England/MILK-995A18/2020|2020-08-23|EPI\_ISL\_551668|Original|hCoV-19^^England|Human|Lighthouse Lab in Milton Keynes|Wellcome Sanger Institute for the COVID-19 Genomics UK (COG-UK) consortium|Davies|United Kingdom

>Spike|hCoV-19/England/205141202/2020|2020-12-16|EPI\_ISL\_756149|Original|hCoV-19^^England|Human|Respiratory Virus Unit|COVID-19 Genomics UK (COG-UK) Consortium|Miah|United Kingdom

>Spike|hCoV-19/USA/OK-CDC-2-3693595/2020|2020-11-16|EPI\_ISL\_747157|Original|hCoV-19^^Oklahoma|Human|Respiratory Viruses Branch|Respiratory Viruses Branch|Queen|USA

>Spike|hCoV-19/England/MILK-A7DBC7/2020|2020-10-13|EPI\_ISL\_638470|Original|hCoV-19^^England|Human|Oxford Viromics|COVID-19 Genomics UK (COG-UK) Consortium|Golubchik|United Kingdom

>Spike|hCoV-19/Australia/VIC9839/2020|2020-08-17|EPI\_ISL\_565741|Original|hCoV-19^^Victoria|Human|Victorian Infectious Diseases Reference Laboratory (VIDRL)|VIDRL and MDU-PHL|Schultz|Australia

>Spike|hCoV-19/India/GJ-GBRC311a/2020|2020-06-20|EPI\_ISL\_495065|Original|hCoV-19^^Gujarat|Human|GAIMS & G K General Hospital|Gujarat Biotechnology Research Centre|Joshi|India

>Spike|hCoV-19/England/204121781/2020|2020-10-05|EPI\_ISL\_609848|Original|hCoV-19^^England|Human|Respiratory Virus Unit|Respiratory Virus Unit|Platt|United Kingdom

>Spike|hCoV-19/USA/AZ-TG666171/2020|2020-05-01|EPI\_ISL\_696250|Original|hCoV-19^^Arizona|Human|Sonora Quest Laboratories|TGen North|French|USA

>Spike|hCoV-19/Denmark/DCGC-1169/2020|2020-03-16|EPI\_ISL\_614639|Original|hCoV-19^^Hovedstaden|Human|Department of Virus and Microbiological Special Diagnostics|Albertsen lab|Michaelsen|Denmark

>Spike|hCoV-19/Scotland/CVR929/2020|2020-03-28|EPI\_ISL\_433362|Original|hCoV-19^^Scotland|Human|West of Scotland Specialist Virology Centre|COVID-19 Genomics UK (COG-UK) Consortium|Robertson|United Kingdom

>Spike|hCoV-19/Wales/PHWC-4A54FE/2020|2020-12-16|EPI\_ISL\_764877|Original|hCoV-19^^Wales|Human|Wales Specialist Virology Centre Sequencing lab|COVID-19 Genomics UK (COG-UK) Consortium|Moore|United Kingdom

>Spike|hCoV-19/France/PAC-IHU-0407/2020|2020-04-02|EPI\_ISL\_569492|Original|hCoV-19^^Provence-Alpes-C\u00f4te-d\u2019Azur|Human|MEPHI|MEPHI|Levasseur|France

>Spike|hCoV-19/Brazil/RO-03/2020|2020-05-11|EPI\_ISL\_514133|Original|hCoV-19^^Rond\u00f4nia|Human|Rond\u00f4nia Central Public Health Laboratory (LACEN/RO)|Molecular Virology Laboratory of Oswaldo Cruz Foundation of Rond\u00f4nia|Souza Botelho|Brazil

>Spike|hCoV-19/Brazil/SP-777/2020|2020-07-01|EPI\_ISL\_776765|Original|hCoV-19^^S\u00e3o Paulo|Human|Instituto Adolfo Lutz - Regional de Santo Andre|Instituto Adolfo Lutz|Sacchi|Brazil

>Spike|hCoV-19/England/CAMC-C9870C/2020|2020-12-18|EPI\_ISL\_777439|Original|hCoV-19^^England|Human|Lighthouse Lab in Cambridge|Wellcome Sanger Institute for the COVID-19 Genomics UK (COG-UK) Consortium|Davies|United Kingdom

>Spike|hCoV-19/England/MILK-A8F04B/2020|2020-10-15|EPI\_ISL\_650588|Original|hCoV-19^^England|Human|Northumbria University / South Tees Hospitals NHS Foundation Trust / North Cumbria Integrated Care NHS Foundation Trust / North Tees and Hartlepool NHS Foundation Trust / Newcastle Hospitals NHS Foundation Trust|COVID-19 Genomics UK (COG-UK) Consortium|Bashton|United Kingdom

>Spike|hCoV-19/Luxembourg/LNS7047940/2020|2020-10-19|EPI\_ISL\_744502|Original|hCoV-19^^Luxembourg|Human|Laboratoire national de sant\u00e9|Laboratoire national de sant\u00e9|Wienecke-Baldacchino|Luxembourg

>Spike|hCoV-19/England/QEUH-9F34CF/2020|2020-09-24|EPI\_ISL\_588574|Original|hCoV-19^^England|Human|Lighthouse Lab in Glasgow|Wellcome Sanger Institute for the COVID-19 Genomics UK (COG-UK) consortium|Davies|United Kingdom

>Spike|hCoV-19/England/CAMC-B7B005/2020|2020-11-12|EPI\_ISL\_723976|Original|hCoV-19^^England|Human|Oxford Viromics|COVID-19 Genomics UK (COG-UK) Consortium|Golubchik|United Kingdom

>Spike|hCoV-19/England/SHEF-D2957/2020|2020-03-26|EPI\_ISL\_442510|Original|hCoV-19^^England|Human|Virology Department|COVID-19 Genomics UK (COG-UK) Consortium|de Silva|United Kingdom

>Spike|hCoV-19/Northern Ireland/NIRE-109033/2020|2020-10-13|EPI\_ISL\_650535|Original|hCoV-19^^Northern Ireland|Human|Regional Virus Laboratory|COVID-19 Genomics UK (COG-UK) Consortium|Fairley|United Kingdom

>Spike|hCoV-19/England/LIVE-1D4C00/2020|2020-09-04|EPI\_ISL\_611629|Original|hCoV-19^^England|Human|Liverpool Clinical Laboratories|COVID-19 Genomics UK (COG-UK) Consortium|Haldenby|United Kingdom

>Spike|hCoV-19/England/CAMB-80F47/2020|2020-04-15|EPI\_ISL\_444450|Original|hCoV-19^^England|Human|Department of Pathology|COVID-19 Genomics UK (COG-UK) Consortium|Meredith|United Kingdom

>Spike|hCoV-19/Spain/CT-IBV-97007960/2020|2020-09-14|EPI\_ISL\_654524|Original|hCoV-19^^Catalunya|Human|Servicio de Microbiolog\u00eda|SeqCOVID-SPAIN consortium/IBV (CSIC) |Comas|Spain

>Spike|hCoV-19/USA/TX-HMH-MCoV-15009/2020|2020-10-16|EPI\_ISL\_786493|Original|hCoV-19^^Texas|Human|Houston Methodist Hospital|Houston Methodist Hospital|Long|USA

>Spike|hCoV-19/England/PORT-2CFD04/2020|2020-05-07|EPI\_ISL\_461988|Original|hCoV-19^^England|Human|Centre for Enzyme Innovation|COVID-19 Genomics UK (COG-UK) Consortium|Robson|United Kingdom

>Spike|hCoV-19/England/EXET-136273/2020|2020-04-13|EPI\_ISL\_457214|Original|hCoV-19^^England|Human|University of Exeter|COVID-19 Genomics UK (COG-UK) Consortium|Temperton|United Kingdom

>Spike|hCoV-19/England/MILK-AC9045/2020|2020-10-22|EPI\_ISL\_629580|Original|hCoV-19^^England|Human|Lighthouse Lab in Milton Keynes|Wellcome Sanger Institute for the COVID-19 Genomics UK (COG-UK) Consortium|Davies|United Kingdom

>Spike|hCoV-19/Wales/MILK-9E1260/2020|2020-09-20|EPI\_ISL\_580904|Original|hCoV-19^^Wales|Human|Lighthouse Lab in Milton Keynes|Wellcome Sanger Institute for the COVID-19 Genomics UK (COG-UK) consortium|Davies|United Kingdom

>Spike|hCoV-19/USA/TX-HMH-2527/2020|2020-06-01|EPI\_ISL\_545363|Original|hCoV-19^^Texas|Human|Houston Methodist Hospital|Houston Methodist Hospital|Long|USA

>Spike|hCoV-19/Wales/PHWC-484747/2020|2020-10-20|EPI\_ISL\_628039|Original|hCoV-19^^Wales|Human|Wales Specialist Virology Centre Sequencing lab|COVID-19 Genomics UK (COG-UK) Consortium|Moore|United Kingdom

>Spike|hCoV-19/USA/MI-QDX-565/2020|2020-03-16|EPI\_ISL\_571319|Original|hCoV-19^^Michigan|Human|Quest Diagnostics|Quest Diagnostics|Kagan|USA

>Spike|hCoV-19/England/CAMC-B20922/2020|2020-11-02|EPI\_ISL\_647585|Original|hCoV-19^^England|Human|Lighthouse Lab in Cambridge|Wellcome Sanger Institute for the COVID-19 Genomics UK (COG-UK) Consortium|Davies|United Kingdom

>Spike|hCoV-19/USA/VA-DCLS-0358/2020|2020-04-27|EPI\_ISL\_516687|Original|hCoV-19^^Virginia|Human|Virginia DCLS|Virginia DCLS|St. Jacques|USA

>Spike|hCoV-19/USA/MD-MDH-0531/2020|2020-11-30|EPI\_ISL\_778908|Original|hCoV-19^^Maryland|Human|Maryland Public Health Laboratory|Maryland Public Health Laboratory|Keller|USA

>Spike|hCoV-19/Denmark/DCGC-7055/2020|2020-10-12|EPI\_ISL\_619904|Original|hCoV-19^^Sjaelland|Human|Department of Virus and Microbiological Special Diagnostics|Albertsen lab|Michaelsen|Denmark

>Spike|hCoV-19/USA/WI-UW-303/2020|2020-04-13|EPI\_ISL\_436597|Original|hCoV-19^^Wisconsin|Human|University of Wisconsin-Madison AIDS Vaccine Research Laboratories|University of Wisconsin-Madison AIDS Vaccine Research Laboratories|Baczenas|USA

>Spike|hCoV-19/England/ALDP-CB63E6/2020|2020-12-18|EPI\_ISL\_761768|Original|hCoV-19^^England|Human|Lighthouse Lab in Alderley Park|Wellcome Sanger Institute for the COVID-19 Genomics UK (COG-UK) Consortium|Davies|United Kingdom

>Spike|hCoV-19/Australia/VIC13740/2020|2020-09-01|EPI\_ISL\_592313|Original|hCoV-19^^Victoria|Human|Microbiological Diagnostic Unit - Public Health Laboratory (MDU-PHL) |MDU-PHL|Schultz|Australia

>Spike|hCoV-19/USA/MI-UM-10036858504/2020|2020-11-09|EPI\_ISL\_728456|Original|hCoV-19^^Michigan|Human|University of Michigan Clinical Microbiology Laboratory|Lauring Lab|Valesano|USA

>Spike|hCoV-19/USA/TX-HMH-3526/2020|2020-06-10|EPI\_ISL\_544224|Original|hCoV-19^^Texas|Human|Houston Methodist Hospital|Houston Methodist Hospital|Long|USA

>Spike|hCoV-19/Denmark/DCGC-19022/2020|2020-12-07|EPI\_ISL\_748292|Original|hCoV-19^^Hovedstaden|Human|Department of Virus and Microbiological Special Diagnostics|Albertsen Lab|Michaelsen|Denmark

>Spike|hCoV-19/England/MILK-A05A7C/2020|2020-09-29|EPI\_ISL\_599990|Original|hCoV-19^^England|Human|Lighthouse Lab in Milton Keynes|Wellcome Sanger Institute for the COVID-19 Genomics UK (COG-UK) consortium|Davies|United Kingdom

>Spike|hCoV-19/Denmark/DCGC-8459/2020|2020-10-26|EPI\_ISL\_617920|Original|hCoV-19^^Nordjylland|Human|Department of Virus and Microbiological Special Diagnostics|Albertsen lab|Michaelsen|Denmark

>Spike|hCoV-19/Canada/MB-NML-818/2020|2020-07-10|EPI\_ISL\_582319|Original|hCoV-19^^Manitoba|Human|Cadham Provincial Laboratory|National Microbiology Laboratory (NML)|Majer|Canada

>Spike|hCoV-19/USA/WA-S325/2020|2020-04-03|EPI\_ISL\_434085|Original|hCoV-19^^Washington|Human|Washington State Department of Health|Seattle Flu Study|Bedford|USA

>Spike|hCoV-19/Netherlands/UT-RIVM-20601/2020|2020-12-16|EPI\_ISL\_790684|Original|hCoV-19^^Utrecht|Human|Dutch COVID-19 response team|National Institute for Public Health and the Environment (RIVM)|Meijer|Netherlands

>Spike|hCoV-19/Denmark/DCGC-6510/2020|2020-10-05|EPI\_ISL\_619410|Original|hCoV-19^^Midtjylland|Human|Department of Virus and Microbiological Special Diagnostics|Albertsen lab|Michaelsen|Denmark

>Spike|hCoV-19/USA/UT-UPHL-04476/2020|2020-05-20|EPI\_ISL\_525342|Original|hCoV-19^^Utah|Human|Utah Public Health Laboratory|Utah Public Health Laboratory|Young|USA

>Spike|hCoV-19/Denmark/DCGC-3651/2020|2020-08-31|EPI\_ISL\_615423|Original|hCoV-19^^Midtjylland|Human|Department of Virus and Microbiological Special Diagnostics|Albertsen lab|Michaelsen|Denmark

>Spike|hCoV-19/Wales/PHWC-2A12B/2020|2020-04-04|EPI\_ISL\_432178|Original|hCoV-19^^Wales|Human|Wales Specialist Virology Centre|Public Health Wales Microbiology Cardiff|Moore|United Kingdom

>Spike|hCoV-19/Spain/CT-IBV-003733/2020|2020-04-04|EPI\_ISL\_480995|Original|hCoV-19^^Catalunya|Human|ISGlobal|SeqCOVID-SPAIN consortium/IBV (CSIC)|Comas|Spain

>Spike|hCoV-19/England/ALDP-94E5FF/2020|2020-06-17|EPI\_ISL\_555369|Original|hCoV-19^^England|Human|Lighthouse Lab in Alderley Park|Wellcome Sanger Institute for the COVID-19 Genomics UK (COG-UK) consortium|Davies|United Kingdom

>Spike|hCoV-19/USA/TX-DSHS-1067/2020|2020-06-16|EPI\_ISL\_628727|Original|hCoV-19^^Texas|Human|Texas Department of State Health Services|Texas Department of State Health Services|Rahman|USA

>Spike|hCoV-19/USA/NY-Wadsworth-290384-01/2020|2020-12-17|EPI\_ISL\_765562|Original|hCoV-19^^New York|Human|MONTEFIORE MEDICAL CENTER LABORATORIES|Wadsworth Center|Lasek-Nesselquist|USA

>Spike|hCoV-19/England/ALDP-6AF1DD/2020|2020-07-01|EPI\_ISL\_557780|Original|hCoV-19^^England|Human|Lighthouse Lab in Alderley Park|Wellcome Sanger Institute for the COVID-19 Genomics UK (COG-UK) consortium|Davies|United Kingdom

>Spike|hCoV-19/England/ALDP-A4FD9B/2020|2020-10-06|EPI\_ISL\_597740|Original|hCoV-19^^England|Human|Lighthouse Lab in Alderley Park|Wellcome Sanger Institute for the COVID-19 Genomics UK (COG-UK) consortium|Davies|United Kingdom

>Spike|hCoV-19/Wales/PHWC-27C0F/2020|2020-03-31|EPI\_ISL\_432298|Original|hCoV-19^^Wales|Human|Wales Specialist Virology Centre|Public Health Wales Microbiology Cardiff|Moore|United Kingdom

>Spike|hCoV-19/England/NOTT-117366/2020|2020-10-21|EPI\_ISL\_679925|Original|hCoV-19^^England|Human|Queens Medical Centre|COVID-19 Genomics UK (COG-UK) Consortium|Loose|United Kingdom

>Spike|hCoV-19/South Africa/NHLS-UCT-GS-2683/2020|2020-05-04|EPI\_ISL\_700415|Original|hCoV-19^^Western Cape|Human|Guguletu CHC wc GDH|NHLS/UCT|Iranzadeh|South Africa

>Spike|hCoV-19/Mexico/BCN-ALSR-4951/2020|2020-08-02|EPI\_ISL\_730226|Original|hCoV-19^^Baja California|Human|Genomica Lab Molecular|Andersen lab at Scripps Research|Gangavarapu|Mexico

>Spike|hCoV-19/Wales/PHWC-490C85/2020|2020-11-16|EPI\_ISL\_706555|Original|hCoV-19^^Wales|Human|Originating lab|COVID-19 Genomics UK (COG-UK) Consortium|Moore|United Kingdom

>Spike|hCoV-19/USA/VA-DCLS-2154/2020|2020-10-28|EPI\_ISL\_734237|Original|hCoV-19^^Virginia|Human|Virginia Division of Consolidated Laboratory Services (DCLS)|Virginia Division of Consolidated Laboratory Services (DCLS)|St. Jacques|USA

>Spike|hCoV-19/North Macedonia/3122/2020|2020-06-11|EPI\_ISL\_516421|Original|hCoV-19^^Skopje|Human|Center for public health - Skopje|Research Center for Genetic Engineering and Biotechnology \Georgi D. Efremov\u201d|Dimovski|North Macedonia

>Spike|hCoV-19/Iceland/289/2020|2020-03-18|EPI\_ISL\_417617|Original|hCoV-19^^Reykjavik|Human|The National University Hospital of Iceland|deCODE genetics|J\u00f3nsson|Iceland

>Spike|hCoV-19/England/20128041504/2020|2020-03-19|EPI\_ISL\_423962|Original|hCoV-19^^England|Human|Respiratory Virus Unit|Respiratory Virus Unit|Platt|United Kingdom

>Spike|hCoV-19/England/SHEF-CC677/2020|2020-10-09|EPI\_ISL\_613386|Original|hCoV-19^^England|Human|Virology Department|COVID-19 Genomics UK (COG-UK) Consortium|de Silva|United Kingdom

>Spike|hCoV-19/USA/TX-HMH-6572/2020|2020-06-24|EPI\_ISL\_546095|Original|hCoV-19^^Texas|Human|Houston Methodist Hospital|Houston Methodist Hospital|Long|USA

>Spike|hCoV-19/France/NAQ-SC280/2020|2020-03-30|EPI\_ISL\_644673|Original|hCoV-19^^Nouvelle-Aquitaine|Human|CHU de Limoges|CNR Virus des Infections Respiratoires - France SUD|Bal|France

>Spike|hCoV-19/Singapore/1224/2020|2020-04-24|EPI\_ISL\_648640|Original|hCoV-19^^Singapore|Human|Department of Laboratory Medicine|Department of Laboratory Medicine|Chen|Singapore

>Spike|hCoV-19/England/CAMC-BBE1F4/2020|2020-11-22|EPI\_ISL\_705405|Original|hCoV-19^^England|Human|Virology Department|COVID-19 Genomics UK (COG-UK) Consortium|de Silva|United Kingdom

>Spike|hCoV-19/Portugal/PT1013/2020|2020-03-26|EPI\_ISL\_511560|Original|hCoV-19^^Portugal|Human|Instituto Nacional de Saude (INSA)|Instituto Nacional de Saude (INSA)|Borges|Portugal

>Spike|hCoV-19/Wales/PHWC-166395/2020|2020-05-26|EPI\_ISL\_493989|Original|hCoV-19^^Wales|Human|Originating lab|COVID-19 Genomics UK (COG-UK) Consortium|Moore|United Kingdom

>Spike|hCoV-19/Australia/VIC13479/2020|2020-08-03|EPI\_ISL\_592255|Original|hCoV-19^^Victoria|Human|Microbiological Diagnostic Unit - Public Health Laboratory (MDU-PHL)|MDU-PHL|Schultz|Australia

>Spike|hCoV-19/Jordan/AM-ALSR-4094/2020|2020-10-03|EPI\_ISL\_636454|Original|hCoV-19^^Amman|Human|Biolab Diagnostic Laboratories|Andersen lab at Scripps Research|Gangavarapu|Jordan

>Spike|hCoV-19/England/QEUEH-C93E2A/2020|2020-12-18|EPI\_ISL\_777622|Original|hCoV-19^^England|Human|Lighthouse Lab in Glasgow|Wellcome Sanger Institute for the COVID-19 Genomics UK (COG-UK) Consortium|Davies|United Kingdom

>Spike|hCoV-19/England/CAMC-B521A7/2020|2020-11-08|EPI\_ISL\_658007|Original|hCoV-19^^England|Human|Lighthouse Lab in Cambridge|Wellcome Sanger Institute for the COVID-19 Genomics UK (COG-UK) Consortium|Davies|United Kingdom

>Spike|hCoV-19/Scotland/EDB8430/2020|2020-10-16|EPI\_ISL\_612189|Original|hCoV-19^^Scotland|Human|Virology Department|COVID-19 Genomics UK (COG-UK) Consortium|McHugh|United Kingdom

>Spike|hCoV-19/England/QEUEH-9F5A25/2020|2020-09-27|EPI\_ISL\_588933|Original|hCoV-19^^England|Human|Lighthouse Lab in Glasgow|Wellcome Sanger Institute for the COVID-19 Genomics UK (COG-UK) consortium|Davies|United Kingdom

>Spike|hCoV-19/England/20106004902/2020|2020-03-05|EPI\_ISL\_417241|Original|hCoV-19^^England|Human|Respiratory Virus Unit|Respiratory Virus Unit|Platt|United Kingdom

>Spike|hCoV-19/England/204991196/2020|2020-12-05|EPI\_ISL\_723034|Original|hCoV-19^^England|Human|Respiratory Virus Unit|COVID-19 Genomics UK (COG-UK) Consortium|Platt|United Kingdom

>Spike|hCoV-19/England/QEUEH-C32B35/2020|2020-12-11|EPI\_ISL\_782497|Original|hCoV-19^^England|Human|Lighthouse Lab in Glasgow|Wellcome Sanger Institute for the COVID-19 Genomics UK (COG-UK) Consortium|Davies|United Kingdom

>Spike|hCoV-19/Wales/PHWC-487076/2020|2020-11-01|EPI\_ISL\_639161|Original|hCoV-19^^Wales|Human|Wales Specialist Virology Centre Sequencing lab|COVID-19 Genomics UK (COG-UK) Consortium|Moore|United Kingdom

>Spike|hCoV-19/England/ALDP-A85A38/2020|2020-10-18|EPI\_ISL\_610560|Original|hCoV-19^^England|Human|Lighthouse Lab in Alderley Park|Wellcome Sanger Institute for the COVID-19 Genomics UK (COG-UK) consortium|Davies|United Kingdom

>Spike|hCoV-19/USA/NY-QDX-1945/2020|2020-03-15|EPI\_ISL\_604265|Original|hCoV-19^^New York|Human|Quest Diagnostics|Quest Diagnostics|Kagan|USA  
>Spike|hCoV-19/USA/TX-HMH-MCoV-14778/2020|2020-10-12|EPI\_ISL\_786263|Original|hCoV-19^^Texas|Human|Houston Methodist Hospital|Houston Methodist Hospital|Long|USA  
>Spike|hCoV-19/USA/CA-CZB-13082/2020|2020-05-07|EPI\_ISL\_672053|Original|hCoV-19^^California|Human|Alameda County Public Health Lab|Chan-Zuckerberg Biohub|Bhatt|USA  
>Spike|hCoV-19/New Zealand/20CV0426/2020|2020-10-13|EPI\_ISL\_622808|Original|hCoV-19^^South Canterbury|Human|Canterbury Health Laboratories|Institute of Environmental Science and Research (ESR)|Wang|New Zealand  
>Spike|hCoV-19/USA/WI-UW-2381/2020|2020-10-29|EPI\_ISL\_728146|Original|hCoV-19^^Wisconsin|Human|University of Wisconsin-Madison AIDS Vaccine Research Laboratories|University of Wisconsin-Madison AIDS Vaccine Research Laboratories|Baczenas|USA  
>Spike|hCoV-19/England/CAMC-A82206/2020|2020-10-12|EPI\_ISL\_610680|Original|hCoV-19^^England|Human|Lighthouse Lab in Cambridge|Wellcome Sanger Institute for the COVID-19 Genomics UK (COG-UK) consortium|Davies|United Kingdom  
>Spike|hCoV-19/USA/HI-H200078/2020|2020-06-05|EPI\_ISL\_752646|Original|hCoV-19^^Hawaii|Human|State Laboratories Division|State Laboratories Division|Sultana|USA  
>Spike|hCoV-19/England/CAMC-B07EAA/2020|2020-10-29|EPI\_ISL\_643581|Original|hCoV-19^^England|Human|Lighthouse Lab in Cambridge|Wellcome Sanger Institute for the COVID-19 Genomics UK (COG-UK) Consortium|Davies|United Kingdom  
>Spike|hCoV-19/USA/CT-QDX-1405/2020|2020-03-16|EPI\_ISL\_572101|Original|hCoV-19^^Connecticut|Human|Quest Diagnostics|Quest Diagnostics|Kagan|USA  
>Spike|hCoV-19/England/QEUEH-96C379/2020|2020-08-12|EPI\_ISL\_530947|Original|hCoV-19^^England|Human|Lighthouse Lab in Glasgow|Wellcome Sanger Institute for the COVID-19 Genomics UK (COG-UK) consortium|Davies|United Kingdom  
>Spike|hCoV-19/England/MILK-9D3CCD/2020|2020-09-17|EPI\_ISL\_601490|Original|hCoV-19^^England|Human|Lighthouse Lab in Milton Keynes|Wellcome Sanger Institute for the COVID-19 Genomics UK (COG-UK) consortium|Davies|United Kingdom  
>Spike|hCoV-19/Australia/NSW2128/2020|2020-04-30|EPI\_ISL\_500623|Original|hCoV-19^^New South Wales|Human|Area of Virology|Area of Virology|Bull|Australia  
>Spike|hCoV-19/USA/TX-HMH-MCoV-13474/2020|2020-08-22|EPI\_ISL\_788604|Original|hCoV-19^^Texas|Human|Houston Methodist Hospital|Houston Methodist Hospital|Long|USA  
>Spike|hCoV-19/USA/LA-EVTL521/2020|2020-06-25|EPI\_ISL\_578925|Original|hCoV-19^^Louisiana|Human|LSUHS Emerging Viral Threat Laboratory|Microbial Genome Sequencing Center|Kamil|USA  
>Spike|hCoV-19/USA/TX-HMH-MCoV-8558/2020|2020-07-02|EPI\_ISL\_780626|Original|hCoV-19^^Texas|Human|Houston Methodist Hospital|Houston Methodist Hospital|Long|USA  
>Spike|hCoV-19/England/MILK-A47EFA/2020|2020-10-05|EPI\_ISL\_598275|Original|hCoV-19^^England|Human|Lighthouse Lab in Milton Keynes|Wellcome Sanger Institute for the COVID-19 Genomics UK (COG-UK) consortium|Davies|United Kingdom  
>Spike|hCoV-19/SaudiArabia/KAUST-JEDDAH993/2020|2020-06-17|EPI\_ISL\_513067|Original|hCoV-19^^Jeddah|Human|Pathogen Genomics Lab King Abdullah University of Science and Technology(KAUST)|Pathogen Genomics Lab King Abdullah University of Science and Technology(KAUST)|Mohamed Ghazzali|Saudi Arabia  
>Spike|hCoV-19/Japan/PG-0648/2020|2020-04-00|EPI\_ISL\_684258|Original|hCoV-19^^Japan|Human|Gunma Prefectural Institute of Public Health and Environmental Sciences|Pathogen Genomics Center|Sekizuka|Japan  
>Spike|hCoV-19/Australia/WA03/2020|2020-03-14|EPI\_ISL\_420533|Original|hCoV-19^^Western Australia|Human|Department of Microbiology|Department of Microbiology|Sikazwe|Australia  
>Spike|hCoV-19/Australia/VIC5594/2020|2020-07-19|EPI\_ISL\_518410|Original|hCoV-19^^Victoria|Human|Microbiological Diagnostic Unit - Public Health Laboratory (MDU-PHL)|MDU-PHL|Schultz|Australia  
>Spike|hCoV-19/USA/WI-UW-1892/2020|2020-09-22|EPI\_ISL\_605761|Original|hCoV-19^^Wisconsin|Human|University of Wisconsin-Madison AIDS Vaccine Research Laboratories|University of Wisconsin-Madison AIDS Vaccine Research Laboratories|Baczenas|USA

>Spike|hCoV-19/USA/FL-BPHL-0484/2020|2020-03-20|EPI\_ISL\_495390|Original|hCoV-19^^Florida|Human|Florida Bureau of Public Health Laboratories|Florida Bureau of Public Health Laboratories|Blanton|USA

>Spike|hCoV-19/England/MILK-B387B4/2020|2020-11-01|EPI\_ISL\_658950|Original|hCoV-19^^England|Human|Lighthouse Lab in Milton Keynes|Wellcome Sanger Institute for the COVID-19 Genomics UK (COG-UK) Consortium|Davies|United Kingdom

>Spike|hCoV-19/England/ALDP-9C50C2/2020|2020-09-10|EPI\_ISL\_567558|Original|hCoV-19^^England|Human|Lighthouse Lab in Alderley Park|Wellcome Sanger Institute for the COVID-19 Genomics UK (COG-UK) consortium|Davies|United Kingdom

>Spike|hCoV-19/England/ALDP-9CB7F4/2020|2020-09-16|EPI\_ISL\_575545|Original|hCoV-19^^England|Human|Lighthouse Lab in Alderley Park|Wellcome Sanger Institute for the COVID-19 Genomics UK (COG-UK) consortium|Davies|United Kingdom

>Spike|hCoV-19/England/LOND-1260519/2020|2020-04-07|EPI\_ISL\_524667|Original|hCoV-19^^England|Human|North West London Pathology|Wellcome Sanger Institute for the COVID-19 Genomics UK (COG-UK) consortium|Davies|United Kingdom

>Spike|hCoV-19/Wales/PHWC-488F1E/2020|2020-11-01|EPI\_ISL\_639516|Original|hCoV-19^^Wales|Human|Wales Specialist Virology Centre Sequencing lab|COVID-19 Genomics UK (COG-UK) Consortium|Moore|United Kingdom

>Spike|hCoV-19/Iran/K1r-69/2020|2020-04-00|EPI\_ISL\_591324|Original|hCoV-19^^Iran|Human|Virology|Virology|Ranjbar|Iran

>Spike|hCoV-19/USA/CA-CZB-13663/2020|2020-11-04|EPI\_ISL\_738720|Original|hCoV-19^^California|Human|Santa Clara County Public Health Laboratory|Chan-Zuckerberg Biohub|Kamm|USA

>Spike|hCoV-19/England/ALDP-A67C72/2020|2020-10-12|EPI\_ISL\_630668|Original|hCoV-19^^England|Human|Lighthouse Lab in Alderley Park|Wellcome Sanger Institute for the COVID-19 Genomics UK (COG-UK) consortium|Davies|United Kingdom

>Spike|hCoV-19/England/20176041104/2020|2020-04-21|EPI\_ISL\_465411|Original|hCoV-19^^England|Human|Respiratory Virus Unit|Respiratory Virus Unit|Platt|United Kingdom

>Spike|hCoV-19/England/CAMC-B53470/2020|2020-11-08|EPI\_ISL\_662635|Original|hCoV-19^^England|Human|Lighthouse Lab in Cambridge|Wellcome Sanger Institute for the COVID-19 Genomics UK (COG-UK) Consortium|Davies|United Kingdom

>Spike|hCoV-19/England/CAMC-A417F5/2020|2020-10-06|EPI\_ISL\_609398|Original|hCoV-19^^England|Human|Lighthouse Lab in Cambridge|Wellcome Sanger Institute for the COVID-19 Genomics UK (COG-UK) consortium|Davies|United Kingdom

>Spike|hCoV-19/England/QEUEH-95E29B/2020|2020-08-08|EPI\_ISL\_537023|Original|hCoV-19^^England|Human|Lighthouse Lab in Glasgow|Wellcome Sanger Institute for the COVID-19 Genomics UK (COG-UK) consortium|Davies|United Kingdom

>Spike|hCoV-19/USA/VA-DCLS-2236/2020|2020-11-07|EPI\_ISL\_734216|Original|hCoV-19^^Virginia|Human|Virginia Division of Consolidated Laboratory Services (DCLS)|Virginia Division of Consolidated Laboratory Services (DCLS)|St. Jacques|USA

>Spike|hCoV-19/England/LOND-D4BB9/2020|2020-04-11|EPI\_ISL\_449658|Original|hCoV-19^^England|Human|University College London|COVID-19 Genomics UK (COG-UK) Consortium|Roy|United Kingdom

>Spike|hCoV-19/Denmark/DCGC-20071/2020|2020-12-07|EPI\_ISL\_747668|Original|hCoV-19^^Hovedstaden|Human|Department of Virus and Microbiological Special Diagnostics|Albertsen Lab|Michaelsen|Denmark

>Spike|hCoV-19/USA/CA-CDPH254/2020|2020-11-14|EPI\_ISL\_755090|Original|hCoV-19^^California|Human|California Department of Public Health|California Department of Public Health|Bell|USA

>Spike|hCoV-19/England/MILK-B5A619/2020|2020-11-06|EPI\_ISL\_658295|Original|hCoV-19^^England|Human|Lighthouse Lab in Milton Keynes|Wellcome Sanger Institute for the COVID-19 Genomics UK (COG-UK) Consortium|Davies|United Kingdom

>Spike|hCoV-19/England/QEUEH-AAEDD6/2020|2020-10-20|EPI\_ISL\_653007|Original|hCoV-19^^England|Human|Oxford Viromics|COVID-19 Genomics UK (COG-UK) Consortium|Golubchik|United Kingdom

>Spike|hCoV-19/Scotland/QEUEH-96E26B/2020|2020-08-20|EPI\_ISL\_534476|Original|hCoV-19^^Scotland|Human|NHSGGC West of Scotland Specialist Virology Centre / MRC - University of Glasgow Centre for Virus Research|Wellcome Sanger Institute for the COVID-19 Genomics UK (COG-UK) consortium|Davies|United Kingdom



>Spike|hCoV-19/USA/CA-CZB-1137/2020|2020-03-25|EPI\_ISL\_447888|Original|hCoV-19^^California|Human|University of California|Chan-Zuckerberg Biohub|Hao|USA

>Spike|hCoV-19/USA/NY-NYCPHL-000781/2020|2020-03-20|EPI\_ISL\_632161|Original|hCoV-19^^New York|Human|SUNY Downstate Medical Center|New York City Public Health Laboratory|Wang|USA

>Spike|hCoV-19/Wales/ALDP-9D8BF8/2020|2020-09-18|EPI\_ISL\_577383|Original|hCoV-19^^Wales|Human|Oxford Viromics|COVID-19 Genomics UK (COG-UK) Consortium|Golubchik|United Kingdom

>Spike|hCoV-19/USA/CA-CZB-14841/2020|2020-11-20|EPI\_ISL\_739299|Original|hCoV-19^^California|Human|Humboldt County Public Health Laboratory|Chan-Zuckerberg Biohub|Kamm|USA

>Spike|hCoV-19/England/QEUA-9BAC17/2020|2020-09-07|EPI\_ISL\_572924|Original|hCoV-19^^England|Human|Oxford Viromics|COVID-19 Genomics UK (COG-UK) Consortium|Golubchik|United Kingdom

>Spike|hCoV-19/Scotland/QEUA-A7784E/2020|2020-10-14|EPI\_ISL\_638945|Original|hCoV-19^^Scotland|Human|Oxford Viromics|COVID-19 Genomics UK (COG-UK) Consortium|Golubchik|United Kingdom

>Spike|hCoV-19/USA/CA-CZB-14069/2020|2020-06-24|EPI\_ISL\_738892|Original|hCoV-19^^California|Human|Alameda County Public Health Lab|Chan-Zuckerberg Biohub|Kamm|USA

>Spike|hCoV-19/England/QEUA-9B72DC/2020|2020-09-07|EPI\_ISL\_590620|Original|hCoV-19^^England|Human|Lighthouse Lab in Glasgow|Wellcome Sanger Institute for the COVID-19 Genomics UK (COG-UK) consortium|Davies|United Kingdom

>Spike|hCoV-19/Scotland/QEUA-AF61E2/2020|2020-10-30|EPI\_ISL\_676488|Original|hCoV-19^^Scotland|Human|Lighthouse Lab in Glasgow|Wellcome Sanger Institute for the COVID-19 Genomics UK (COG-UK) Consortium|Davies|United Kingdom

>Spike|hCoV-19/England/CAMC-B549CB/2020|2020-11-09|EPI\_ISL\_658228|Original|hCoV-19^^England|Human|Lighthouse Lab in Cambridge|Wellcome Sanger Institute for the COVID-19 Genomics UK (COG-UK) Consortium|Davies|United Kingdom

>Spike|hCoV-19/USA/TX-HMH-2170/2020|2020-05-22|EPI\_ISL\_545159|Original|hCoV-19^^Texas|Human|Houston Methodist Hospital|Houston Methodist Hospital|Long|USA

>Spike|hCoV-19/USA/CO-CDPHE-2008063260/2020|2020-08-05|EPI\_ISL\_710320|Original|hCoV-19^^Colorado|Human|Colorado Department of Public Health and Environment|Colorado Department of Public Health and Environment|Bankers|USA

>Spike|hCoV-19/England/ALDP-B73DF7/2020|2020-11-12|EPI\_ISL\_664495|Original|hCoV-19^^England|Human|Quadram Institute Bioscience|COVID-19 Genomics UK (COG-UK) Consortium|Alikhan|United Kingdom

>Spike|hCoV-19/Denmark/DCGC-2680/2020|2020-08-17|EPI\_ISL\_617901|Original|hCoV-19^^Sjælland|Human|Department of Virus and Microbiological Special Diagnostics|Albertsen lab|Michaelsen|Denmark

>Spike|hCoV-19/USA/MA-MASPHL-00148/2020|2020-04-03|EPI\_ISL\_791619|Original|hCoV-19^^Massachusetts|Human|Massachusetts State Public Health Laboratory|Infectious Disease Program|Park|USA

>Spike|hCoV-19/Ireland/OY-NVRL-75IRL70179/2020|2020-10-12|EPI\_ISL\_671926|Original|hCoV-19^^Offaly|Human|National Virus Reference Laboratory|National Virus Reference Laboratory|Gonzalez|Ireland

>Spike|hCoV-19/Finland/21A19S11/2020|2020-04-21|EPI\_ISL\_481607|Original|hCoV-19^^Uusimaa|Human|Department of Virology and Immunology|Department of Virology|Smura|Finland

>Spike|hCoV-19/Luxembourg/LNS4463577/2020|2020-10-26|EPI\_ISL\_740474|Original|hCoV-19^^Luxembourg|Human|Laboratoire national de santé|Laboratoire national de santé|Wienecke-Baldacchino|Luxembourg

>Spike|hCoV-19/Luxembourg/LNS6755246/2020|2020-10-22|EPI\_ISL\_744465|Original|hCoV-19^^Luxembourg|Human|Laboratoire national de santé|Laboratoire national de santé|Wienecke-Baldacchino|Luxembourg

>Spike|hCoV-19/England/QEUA-A1FCA6/2020|2020-10-01|EPI\_ISL\_587690|Original|hCoV-19^^England|Human|Lighthouse Lab in Glasgow|Wellcome Sanger Institute for the COVID-19 Genomics UK (COG-UK) consortium|Davies|United Kingdom

>Spike|hCoV-19/England/MILK-977DE6/2020|2020-07-27|EPI\_ISL\_550500|Original|hCoV-19^^England|Human|Lighthouse Lab in Milton Keynes|Wellcome Sanger Institute for the COVID-19 Genomics UK (COG-UK) consortium|Davies|United Kingdom

>Spike|hCoV-19/USA/LA-EVTL352/2020|2020-05-25|EPI\_ISL\_578758|Original|hCoV-19^^Louisiana|Human|LSUHS Emerging Viral Threat Laboratory|Microbial Genome Sequencing Center|Kamil|USA

>Spike|hCoV-19/England/C200037134/2020|2020-00-00|EPI\_ISL\_636728|Original|hCoV-19^^England|Human|Respiratory Virus Unit|Respiratory Virus Unit|Platt|United Kingdom

>Spike|hCoV-19/England/MILK-B3864E/2020|2020-11-01|EPI\_ISL\_658822|Original|hCoV-19^^England|Human|Lighthouse Lab in Milton Keynes|Wellcome Sanger Institute for the COVID-19 Genomics UK (COG-UK) Consortium|Davies|United Kingdom

>Spike|hCoV-19/England/NORW-F065C/2020|2020-00-00|EPI\_ISL\_627585|Original|hCoV-19^^England|Human|Quadram Institute Bioscience|COVID-19 Genomics UK (COG-UK) Consortium|Alikhan|United Kingdom

>Spike|hCoV-19/Ireland/DL-NVRL-20G48972/2020|2020-04-05|EPI\_ISL\_666699|Original|hCoV-19^^Donegal|Human|National Virus Reference Lab (NVRL)|Irish Coronavirus Sequencing Consortium-Teagasc Grange|McCabe|Ireland

>Spike|hCoV-19/USA/CA-ALSR-2631/2020|2020-07-09|EPI\_ISL\_635598|Original|hCoV-19^^California|Human|San Diego County Public Health Laboratory|Andersen lab at Scripps Research|Gangavarapu|USA

>Spike|hCoV-19/USA/OR-PROV-014/2020|2020-04-01|EPI\_ISL\_482301|Original|hCoV-19^^Oregon|Human|Providence St. Joseph Health Molecular Genomics Laboratory|Providence St. Joseph Health Molecular Genomics Laboratory|Dowdell|USA

>Spike|hCoV-19/Northern Ireland/NIRE-102C63/2020|2020-04-20|EPI\_ISL\_489193|Original|hCoV-19^^Northern Ireland|Human|Regional Virus Laboratory|Wellcome Sanger Institute for the COVID-19 Genomics UK (COG-UK) consortium|Davies|United Kingdom

>Spike|hCoV-19/Iceland/480/2020|2020-03-20|EPI\_ISL\_424503|Original|hCoV-19^^Reykjavik|Human|The National University Hospital of Iceland|deCODE genetics|J\u00f3nsson|Iceland

>Spike|hCoV-19/Denmark/DCGC-19956/2020|2020-12-07|EPI\_ISL\_747889|Original|hCoV-19^^Hovedstaden|Human|Department of Virus and Microbiological Special Diagnostics|Albertsen Lab|Michaelsen|Denmark

>Spike|hCoV-19/Denmark/DCGC-12203/2020|2020-11-16|EPI\_ISL\_682384|Original|hCoV-19^^Sjaelland|Human|Department of Virus and Microbiological Special Diagnostics|Albertsen Lab|Michaelsen|Denmark

>Spike|hCoV-19/England/BRIS-124D86/2020|2020-03-26|EPI\_ISL\_443977|Original|hCoV-19^^England|Human|PHE South West Regional Laboratory|Wellcome Sanger Institute for the COVID-19 Genomics UK (COG-UK) consortium|Amato|United Kingdom

>Spike|hCoV-19/Wales/PHWC-16DAD5/2020|2020-09-19|EPI\_ISL\_577488|Original|hCoV-19^^Wales|Human|Wales Specialist Virology Centre Sequencing lab|COVID-19 Genomics UK (COG-UK) Consortium|Moore|United Kingdom

>Spike|hCoV-19/Sweden/20-08969/2020|2020-08-04|EPI\_ISL\_654942|Original|hCoV-19^^Skane|Human|Klinisk mikrobiologi|The Public Health Agency of Sweden|Svartstr\u00f6m|Sweden

>Spike|hCoV-19/Denmark/DCGC-7523/2020|2020-10-12|EPI\_ISL\_619387|Original|hCoV-19^^Hovedstaden|Human|Department of Virus and Microbiological Special Diagnostics|Albertsen lab|Michaelsen|Denmark

>Spike|hCoV-19/Australia/SAP121/2020|2020-03-19|EPI\_ISL\_492110|Original|hCoV-19^^South Australia|Human|SA Pathology|SA Pathology|Leong|Australia

>Spike|hCoV-19/USA/WA-S168/2020|2020-03-18|EPI\_ISL\_430206|Original|hCoV-19^^Washington|Human|Washington State Department of Health|Seattle Flu Study|Bedford|USA

>Spike|hCoV-19/Australia/VIC3034/2020|2020-07-02|EPI\_ISL\_563987|Original|hCoV-19^^Victoria|Human|Victorian Infectious Diseases Reference Laboratory (VIDRL)|VIDRL and MDU-PHL|Schultz|Australia

>Spike|hCoV-19/USA/WA-S457/2020|2020-04-02|EPI\_ISL\_434217|Original|hCoV-19^^Washington|Human|Washington State Department of Health|Seattle Flu Study|Bedford|USA

>Spike|hCoV-19/England/QEUH-B1355B/2020|2020-11-01|EPI\_ISL\_641711|Original|hCoV-19^^England|Human|Lighthouse Lab in Glasgow|Wellcome Sanger Institute for the COVID-19 Genomics UK (COG-UK) Consortium|Davies|United Kingdom

>Spike|hCoV-19/India/MH-NIV-3472/2020|2020-03-17|EPI\_ISL\_454528|Original|hCoV-19^^Maharashtra|Human|NIV Influenza|NIV Influenza|Potdar|India

>Spike|hCoV-19/England/OXON-B4EC5/2020|2020-03-20|EPI\_ISL\_535021|Original|hCoV-19^^England|Human|Oxford Viromics|COVID-19 Genomics UK (COG-UK) Consortium|Golubchik|United Kingdom

>Spike|hCoV-19/India/DL-NCDC2330-CSIR-IGIB/2020|2020-05-19|EPI\_ISL\_482559|Original|hCoV-19^^Delhi|Human|National Centre for Disease control (NCDC)|NCDC/CSIR-IGIB|Pandey|India

>Spike|hCoV-19/England/MILK-A7B8C2/2020|2020-10-15|EPI\_ISL\_607611|Original|hCoV-19^^England|Human|Lighthouse Lab in Milton Keynes|Wellcome Sanger Institute for the COVID-19 Genomics UK (COG-UK) consortium|Davies|United Kingdom

>Spike|hCoV-19/Spain/CT-IBV-97007957/2020|2020-10-01|EPI\_ISL\_654510|Original|hCoV-19^^Catalunya|Human|Servicio de Microbiolog\u00eda|SeqCOVID-SPAIN consortium|IBV (CSIC)|Comas|Spain

>Spike|hCoV-19/South Korea/KCDC2447/2020|2020-06-04|EPI\_ISL\_514850|Original|hCoV-19^^South Korea|Human|Division of Viral Diseases|Division of Viral Diseases|Kim|South Korea

>Spike|hCoV-19/France/ARA-67363/2020|2020-09-03|EPI\_ISL\_683385|Original|hCoV-19^^Auvergne-Rh\u00f4ne-Alpes|Human|CNR Virus des Infections Respiratoires - France SUD|CNR Virus des Infections Respiratoires - France SUD|Bal|France

>Spike|hCoV-19/USA/WA-S2843/2020|2020-09-16|EPI\_ISL\_574685|Original|hCoV-19^^Washington|Human|Seattle Flu Study|Seattle Flu Study|Lee|USA

>Spike|hCoV-19/England/CAMB-8127A/2020|2020-04-11|EPI\_ISL\_442976|Original|hCoV-19^^England|Human|Department of Pathology|Wellcome Sanger Institute for the COVID-19 Genomics UK (COG-UK) consortium|Amato|United Kingdom

>Spike|hCoV-19/England/NOTT-10E14A/2020|2020-03-17|EPI\_ISL\_425502|Original|hCoV-19^^England|Human|Queens Medical Centre|COVID-19 Genomics UK (COG-UK) Consortium|Loose|United Kingdom

>Spike|hCoV-19/Scotland/QEUA-AAB629/2020|2020-10-21|EPI\_ISL\_652802|Original|hCoV-19^^Scotland|Human|Oxford Viromics|COVID-19 Genomics UK (COG-UK) Consortium|Golubchik|United Kingdom

>Spike|hCoV-19/USA/TX-HMH-MCoV-15364/2020|2020-10-21|EPI\_ISL\_786848|Original|hCoV-19^^Texas|Human|Houston Methodist Hospital|Houston Methodist Hospital|Long|USA

>Spike|hCoV-19/France/ARA-70764/2020|2020-09-10|EPI\_ISL\_693491|Original|hCoV-19^^Auvergne-Rh\u00f4ne-Alpes|Human|CNR Virus des Infections Respiratoires - France SUD|CNR Virus des Infections Respiratoires - France SUD|Bal|France

>Spike|hCoV-19/Australia/VIC11324/2020|2020-07-24|EPI\_ISL\_563330|Original|hCoV-19^^Victoria|Human|Microbiological Diagnostic Unit - Public Health Laboratory (MDU-PHL)|MDU-PHL|Schultz|Australia

>Spike|hCoV-19/England/QEUA-9CA519/2020|2020-09-10|EPI\_ISL\_567321|Original|hCoV-19^^England|Human|Lighthouse Lab in Glasgow|Wellcome Sanger Institute for the COVID-19 Genomics UK (COG-UK) consortium|Davies|United Kingdom

>Spike|hCoV-19/Japan/PG-3207/2020|2020-04-00|EPI\_ISL\_690621|Original|hCoV-19^^Japan|Human|Pathogen Genomics Center|Pathogen Genomics Center|Sekizuka|Japan

>Spike|hCoV-19/England/CAMC-B0A0FC/2020|2020-10-29|EPI\_ISL\_672998|Original|hCoV-19^^England|Human|Lighthouse Lab in Cambridge|Wellcome Sanger Institute for the COVID-19 Genomics UK (COG-UK) Consortium|Davies|United Kingdom

>Spike|hCoV-19/USA/FL-BPHL-2001/2020|2020-03-26|EPI\_ISL\_653154|Original|hCoV-19^^Florida|Human|Florida Bureau of Public Health Laboratories|Florida Bureau of Public Health Laboratories|Blanton|USA

>Spike|hCoV-19/Denmark/DCGC-15743/2020|2020-11-23|EPI\_ISL\_713994|Original|hCoV-19^^Syddanmark|Human|Department of Virus and Microbiological Special Diagnostics|Albertsen Lab|Michaelsen|Denmark

>Spike|hCoV-19/USA/WI-WSLH-200390/2020|2020-04-23|EPI\_ISL\_578556|Original|hCoV-19^^Wisconsin|Human|Wisconsin State Laboratory of Hygiene Communicable Disease Division|Wisconsin State Laboratory of Hygiene Communicable Disease Division|Florek|USA

>Spike|hCoV-19/Australia/SAP481/2020|2020-08-05|EPI\_ISL\_513911|Original|hCoV-19^^South Australia|Human|SA Pathology|SA Pathology|Leong|Australia

>Spike|hCoV-19/England/204221492/2020|2020-00-00|EPI\_ISL\_593991|Original|hCoV-19^^England|Human|Respiratory Virus Unit|Respiratory Virus Unit|Platt|United Kingdom

>Spike|hCoV-19/England/NORW-F062F/2020|2020-10-14|EPI\_ISL\_595186|Original|hCoV-19^^England|Human|Quadram Institute Bioscience|COVID-19 Genomics UK (COG-UK) Consortium|Alikhan|United Kingdom

>Spike|hCoV-19/England/MILK-9C2EBC/2020|2020-09-10|EPI\_ISL\_566483|Original|hCoV-19^^England|Human|Lighthouse Lab in Milton Keynes|Wellcome Sanger Institute for the COVID-19 Genomics UK (COG-UK) consortium|Davies|United Kingdom

>Spike|hCoV-19/England/MILK-A46B12/2020|2020-10-06|EPI\_ISL\_598312|Original|hCoV-19^^England|Human|Lighthouse Lab in Milton Keynes|Wellcome Sanger Institute for the COVID-19 Genomics UK (COG-UK) consortium|Davies|United Kingdom

>Spike|hCoV-19/Japan/PG-4092/2020|2020-07-00|EPI\_ISL\_692333|Original|hCoV-19^^Japan|Human|Pathogen Genomics Center|Pathogen Genomics Center|Sekizuka|Japan

>Spike|hCoV-19/USA/AZ-TG648646/2020|2020-04-27|EPI\_ISL\_695878|Original|hCoV-19^^Arizona|Human|Sonora Quest Laboratories|TGen North|French|USA

>Spike|hCoV-19/USA/LA-EVTL436/2020|2020-06-11|EPI\_ISL\_578842|Original|hCoV-19^^Louisiana|Human|LSUHS Emerging Viral Threat Laboratory|Microbial Genome Sequencing Center|Kamil|USA

>Spike|hCoV-19/Japan/Donner24/2020|2020-04-20|EPI\_ISL\_438968|Original|hCoV-19^^Kanto|Human|Keio University School of Medicine|Keio University School of Medicine|Kosaki|Japan

>Spike|hCoV-19/Scotland/EDB3233/2020|2020-04-07|EPI\_ISL\_488983|Original|hCoV-19^^Scotland|Human|Virology Department|Wellcome Sanger Institute for the COVID-19 Genomics UK (COG-UK) consortium|Davies|United Kingdom

>Spike|hCoV-19/India/UT-AR36/2020|2020-05-28|EPI\_ISL\_508183|Original|hCoV-19^^Uttarakhand|Human|All india institute of Medical Sciences Rishikesh|National Institute of Biomedical Genomics|Maitra|India

>Spike|hCoV-19/England/LOND-12600DC/2020|2020-03-19|EPI\_ISL\_516847|Original|hCoV-19^^England|Human|North West London Pathology|Wellcome Sanger Institute for the COVID-19 Genomics UK (COG-UK) consortium|Davies|United Kingdom

>Spike|hCoV-19/England/MILK-9775FD/2020|2020-07-24|EPI\_ISL\_550515|Original|hCoV-19^^England|Human|Lighthouse Lab in Milton Keynes|Wellcome Sanger Institute for the COVID-19 Genomics UK (COG-UK) consortium|Davies|United Kingdom

>Spike|hCoV-19/USA/TX-HMH-4479/2020|2020-06-17|EPI\_ISL\_543654|Original|hCoV-19^^Texas|Human|Houston Methodist Hospital|Houston Methodist Hospital|Long|USA

>Spike|hCoV-19/England/ALDP-AA181E/2020|2020-10-22|EPI\_ISL\_625179|Original|hCoV-19^^England|Human|Lighthouse Lab in Alderley Park|Wellcome Sanger Institute for the COVID-19 Genomics UK (COG-UK) consortium|Davies|United Kingdom

>Spike|hCoV-19/England/CAMC-B9AF21/2020|2020-11-15|EPI\_ISL\_673862|Original|hCoV-19^^England|Human|Lighthouse Lab in Cambridge|Wellcome Sanger Institute for the COVID-19 Genomics UK (COG-UK) Consortium|Davies|United Kingdom

>Spike|hCoV-19/Japan/PG-5384/2020|2020-08-00|EPI\_ISL\_690487|Original|hCoV-19^^Japan|Human|Fukuoka Institute of Health and Environmental Sciences|Pathogen Genomics Center|Sekizuka|Japan

>Spike|hCoV-19/Switzerland/BS-UHB-42203106/2020|2020-03-23|EPI\_ISL\_528344|Original|hCoV-19^^Basel-Stadt|Human|University Hospital Basel|University Hospital Basel|Roloff Handschin|Switzerland

>Spike|hCoV-19/USA/LA-EVTL1111/2020|2020-12-04|EPI\_ISL\_768381|Original|hCoV-19^^Louisiana|Human|LSUHS Emerging Viral Threat Laboratory|Microbial Genome Sequencing Center|Kamil|USA

>Spike|hCoV-19/Spain/MD-IBV-99008802/2020|2020-09-21|EPI\_ISL\_654153|Original|hCoV-19^^Madrid|Human|Hospital General Universitario Gregorio Mara\u00f1a|SeqCOVID-SPAIN consortium|IBV (CSIC)|Comas|Spain

>Spike|hCoV-19/England/QEUH-BCB464/2020|2020-11-26|EPI\_ISL\_704188|Original|hCoV-19^^England|Human|Lighthouse Lab in Glasgow|Wellcome Sanger Institute for the COVID-19 Genomics UK (COG-UK) Consortium|Davies|United Kingdom

>Spike|hCoV-19/England/QEUH-B66313/2020|2020-11-09|EPI\_ISL\_661490|Original|hCoV-19^^England|Human|Lighthouse Lab in Glasgow|Wellcome Sanger Institute for the COVID-19 Genomics UK (COG-UK) Consortium|Davies|United Kingdom

>Spike|hCoV-19/USA/CA-UCLA-228/2020|2020-04-16|EPI\_ISL\_537533|Original|hCoV-19^^California|Human|UCLA Pathology Clinical Microbiology Lab|Kruglyak Lab|Boocock|USA

>Spike|hCoV-19/USA/TX-HMH-2261/2020|2020-05-24|EPI\_ISL\_545211|Original|hCoV-19^^Texas|Human|Houston Methodist Hospital|Houston Methodist Hospital|Long|USA

>Spike|hCoV-19/USA/LA-BIE-SUS3/2020|2020-04-06|EPI\_ISL\_767407|Original|hCoV-19^^Louisiana|Human|Ochsner Health|BioInfo Experts|Cross|USA

>Spike|hCoV-19/Israel/701002458/2020|2020-03-24|EPI\_ISL\_447297|Original|hCoV-19^^South Coast District|Human|Microbiology Division|Stern Lab|Miller|Israel

>Spike|hCoV-19/England/MILK-ACE602/2020|2020-10-21|EPI\_ISL\_629217|Original|hCoV-19^^England|Human|Lighthouse Lab in Milton Keynes|Wellcome Sanger Institute for the COVID-19 Genomics UK (COG-UK) consortium|Davies|United Kingdom

>Spike|hCoV-19/Netherlands/GE-EMC-257/2020|2020-04-19|EPI\_ISL\_523236|Original|hCoV-19^^Gelderland|Human|Dutch COVID-19 response team|Erasmus Medical Center|Oude Munnink|Netherlands

>Spike|hCoV-19/Japan/PG-8338/2020|2020-08-00|EPI\_ISL\_687437|Original|hCoV-19^^Japan|Human|Pathogen Genomics Center|Pathogen Genomics Center|Sekizuka|Japan

>Spike|hCoV-19/England/CAMC-AAF634/2020|2020-10-23|EPI\_ISL\_630972|Original|hCoV-19^^England|Human|Lighthouse Lab in Cambridge|Wellcome Sanger Institute for the COVID-19 Genomics UK (COG-UK) consortium|Davies|United Kingdom

>Spike|hCoV-19/England/NORT-2A489B/2020|2020-09-11|EPI\_ISL\_573387|Original|hCoV-19^^England|Human|Northumbria University / South Tees Hospitals NHS Foundation Trust / North Cumbria Integrated Care NHS Foundation Trust / North Tees and Hartlepool NHS Foundation Trust / Newcastle Hospitals NHS Foundation Trust|COVID-19 Genomics UK (COG-UK) Consortium|Bashton|United Kingdom

>Spike|hCoV-19/England/ALDP-AA1DE2/2020|2020-10-22|EPI\_ISL\_625224|Original|hCoV-19^^England|Human|Lighthouse Lab in Alderley Park|Wellcome Sanger Institute for the COVID-19 Genomics UK (COG-UK) consortium|Davies|United Kingdom

>Spike|hCoV-19/Scotland/CVR3188/2020|2020-04-28|EPI\_ISL\_453097|Original|hCoV-19^^Scotland|Human|West of Scotland Specialist Virology Centre|COVID-19 Genomics UK (COG-UK) Consortium|Robertson|United Kingdom

>Spike|hCoV-19/England/EXET-13C4FF/2020|2020-11-21|EPI\_ISL\_705134|Original|hCoV-19^^England|Human|University of Exeter|COVID-19 Genomics UK (COG-UK) Consortium|Temperton|United Kingdom

>Spike|hCoV-19/England/ALDP-6C1D95/2020|2020-07-01|EPI\_ISL\_557806|Original|hCoV-19^^England|Human|Lighthouse Lab in Alderley Park|Wellcome Sanger Institute for the COVID-19 Genomics UK (COG-UK) consortium|Davies|United Kingdom

>Spike|hCoV-19/Singapore/919/2020|2020-03-21|EPI\_ISL\_538450|Original|hCoV-19^^Singapore|Human|Department of Laboratory Medicine|Department of Laboratory Medicine|Chen|Singapore

>Spike|hCoV-19/Northern Ireland/NIRE-10728A/2020|2020-03-30|EPI\_ISL\_585131|Original|hCoV-19^^Northern Ireland|Human|Regional Virus Laboratory|COVID-19 Genomics UK (COG-UK) Consortium|Fairley|United Kingdom

>Spike|hCoV-19/England/MILK-B56CEE/2020|2020-11-05|EPI\_ISL\_657003|Original|hCoV-19^^England|Human|Lighthouse Lab in Milton Keynes|Wellcome Sanger Institute for the COVID-19 Genomics UK (COG-UK) Consortium|Davies|United Kingdom

>Spike|hCoV-19/England/MILK-99D078/2020|2020-08-30|EPI\_ISL\_549828|Original|hCoV-19^^England|Human|Lighthouse Lab in Milton Keynes|Wellcome Sanger Institute for the COVID-19 Genomics UK (COG-UK) consortium|Davies|United Kingdom

>Spike|hCoV-19/USA/VA-DCLS-1831/2020|2020-09-22|EPI\_ISL\_609987|Original|hCoV-19^^Virginia|Human|Virginia DCLS|Virginia DCLS|St. Jacques|USA

>Spike|hCoV-19/England/ALDP-A701B3/2020|2020-10-15|EPI\_ISL\_608182|Original|hCoV-19^^England|Human|Lighthouse Lab in Alderley Park|Wellcome Sanger Institute for the COVID-19 Genomics UK (COG-UK) consortium|Davies|United Kingdom

>Spike|hCoV-19/USA/TX-HMH-MCoV-10800/2020|2020-07-06|EPI\_ISL\_789631|Original|hCoV-19^^Texas|Human|Houston Methodist Hospital|Houston Methodist Hospital|Long|USA

>Spike|hCoV-19/England/QEUH-B41527/2020|2020-11-08|EPI\_ISL\_658536|Original|hCoV-19^^England|Human|Lighthouse Lab in Glasgow|Wellcome Sanger Institute for the COVID-19 Genomics UK (COG-UK) Consortium|Davies|United Kingdom

>Spike|hCoV-19/Wales/PHWC-483AB8/2020|2020-10-11|EPI\_ISL\_627891|Original|hCoV-19^^Wales|Human|Wales Specialist Virology Centre Sequencing lab|COVID-19 Genomics UK (COG-UK) Consortium|Moore|United Kingdom

>Spike|hCoV-19/USA/NM-DOH-2020641030/2020|2020-12-26|EPI\_ISL\_767051|Original|hCoV-19^^New Mexico|Human|New Mexico Department of Health Scientific Laboratory|New Mexico Department of Health Scientific Laboratory|Malone|USA

>Spike|hCoV-19/Scotland/QEUEH-96D78B/2020|2020-08-20|EPI\_ISL\_534530|Original|hCoV-19^^Scotland|Human|NHSGGC West of Scotland Specialist Virology Centre / MRC-University of Glasgow Centre for Virus Research|Wellcome Sanger Institute for the COVID-19 Genomics UK (COG-UK) consortium|Davies|United Kingdom

>Spike|hCoV-19/USA/TX-DSHS-1295/2020|2020-03-31|EPI\_ISL\_648222|Original|hCoV-19^^Texas|Human|Texas Department of State Health Services|Texas Department of State Health Services|Rahman|USA

>Spike|hCoV-19/England/NORT-1B71D23/2020|2020-11-20|EPI\_ISL\_705067|Original|hCoV-19^^England|Human|Northumbria University / South Tees Hospitals NHS Foundation Trust / North Cumbria Integrated Care NHS Foundation Trust / North Tees and Hartlepool NHS Foundation Trust / Newcastle Hospitals NHS Foundation Trust|COVID-19 Genomics UK (COG-UK) Consortium|Bashton|United Kingdom

>Spike|hCoV-19/USA/UT-02516/2020|2020-04-23|EPI\_ISL\_493104|Original|hCoV-19^^Utah|Human|Utah Public Health Laboratory|Utah Public Health Laboratory|Butz|USA

>Spike|hCoV-19/USA/TX-HMH-986/2020|2020-04-10|EPI\_ISL\_545948|Original|hCoV-19^^Texas|Human|Houston Methodist Hospital|Houston Methodist Hospital|Long|USA

>Spike|hCoV-19/USA/FL-BPHL-1988/2020|2020-04-18|EPI\_ISL\_653141|Original|hCoV-19^^Florida|Human|Florida Bureau of Public Health Laboratories|Florida Bureau of Public Health Laboratories|Blanton|USA

>Spike|hCoV-19/Russia/AST-RII-MH4494S/2020|2020-08-06|EPI\_ISL\_733211|Original|hCoV-19^^Astrakhan|Human|Pathogenic Microorganisms Variability Laboratory|WHO National Influenza Centre Russian Federation|Komissarov|Russia

>Spike|hCoV-19/England/NORT-288F7A/2020|2020-03-25|EPI\_ISL\_458653|Original|hCoV-19^^England|Human|NU-OMICS DNA Sequencing research facility|Wellcome Sanger Institute for the COVID-19 Genomics UK (COG-UK) consortium|Davies|United Kingdom

>Spike|hCoV-19/Portugal/PT1448/2020|2020-03-30|EPI\_ISL\_511407|Original|hCoV-19^^Portugal|Human|Instituto Nacional de Saude (INSA)|Instituto Nacional de Saude (INSA)|Borges|Portugal

>Spike|hCoV-19/Nigeria/NCDC-08/2020|2020-08-21|EPI\_ISL\_737200|Original|hCoV-19^^FCT|Human|National Reference Laboratory|National Reference Laboratory|Ndodo|Nigeria

>Spike|hCoV-19/USA/NV-NSPHL-A0152/2020|2020-05-14|EPI\_ISL\_515416|Original|hCoV-19^^Nevada|Human|Nevada State Public Health Laboratory|Nevada State Public Health Laboratory|Sevinsky|USA

>Spike|hCoV-19/Australia/VIC6004/2020|2020-07-23|EPI\_ISL\_518779|Original|hCoV-19^^Victoria|Human|Microbiological Diagnostic Unit - Public Health Laboratory (MDU-PHL)|MDU-PHL|Schultz|Australia

>Spike|hCoV-19/Wales/PHWC-47FA0A/2020|2020-10-16|EPI\_ISL\_612758|Original|hCoV-19^^Wales|Human|Wales Specialist Virology Centre Sequencing lab|COVID-19 Genomics UK (COG-UK) Consortium|Moore|United Kingdom

>Spike|hCoV-19/Denmark/DCGC-2455/2020|2020-08-03|EPI\_ISL\_617415|Original|hCoV-19^^Syddanmark|Human|Department of Virus and Microbiological Special Diagnostics|Albertsen lab|Michaelsen|Denmark

>Spike|hCoV-19/England/CAMC-A41CAB/2020|2020-10-06|EPI\_ISL\_609486|Original|hCoV-19^^England|Human|Lighthouse Lab in Cambridge|Wellcome Sanger Institute for the COVID-19 Genomics UK (COG-UK) consortium|Davies|United Kingdom

>Spike|hCoV-19/USA/AZ-TG389333/2020|2020-06-17|EPI\_ISL\_694698|Original|hCoV-19^^Arizona|Human|TGen North|TGen North|French|USA

>Spike|hCoV-19/Australia/VIC17159/2020|2020-08-16|EPI\_ISL\_663772|Original|hCoV-19^^Victoria|Human|Microbiological Diagnostic Unit - Public Health Laboratory (MDU-PHL)|MDU-PHL|Schultz|Australia

>Spike|hCoV-19/Wales/PHWC-169F52/2020|2020-08-28|EPI\_ISL\_529713|Original|hCoV-19^^Wales|Human|Wales Specialist Virology Centre Sequencing lab|COVID-19 Genomics UK (COG-UK) Consortium|Moore|United Kingdom

>Spike|hCoV-19/Denmark/DCGC-21513/2020|2020-12-21|EPI\_ISL\_758204|Original|hCoV-19^^Hovedstaden|Human|Department of Virus and Microbiological Special Diagnostics|Albertsen Lab|Michaelsen|Denmark

>Spike|hCoV-19/England/LIVE-99A2C/2020|2020-04-12|EPI\_ISL\_439788|Original|hCoV-19^^England|Human|Liverpool Clinical Laboratories|COVID-19 Genomics UK (COG-UK) Consortium|Haldenby|United Kingdom

>Spike|hCoV-19/England/QEUE-9CFF9E/2020|2020-09-14|EPI\_ISL\_589906|Original|hCoV-19^^England|Human|Lighthouse Lab in Glasgow|Wellcome Sanger Institute for the COVID-19 Genomics UK (COG-UK) consortium|Davies|United Kingdom

>Spike|hCoV-19/England/LIVE-DC7D4D/2020|2020-11-17|EPI\_ISL\_705930|Original|hCoV-19^^England|Human|Liverpool Clinical Laboratories|COVID-19 Genomics UK (COG-UK) Consortium|Haldenby|United Kingdom

>Spike|hCoV-19/England/CAMB-81702/2020|2020-04-11|EPI\_ISL\_442531|Original|hCoV-19^^England|Human|Department of Pathology|Wellcome Sanger Institute for the COVID-19 Genomics UK (COG-UK) consortium|Amato|United Kingdom

>Spike|hCoV-19/India/WB-S32/2020|2020-05-01|EPI\_ISL\_455661|Original|hCoV-19^^West Bengal|Human|ICMR-National Institute of Cholera and Enteric Diseases|National Institute of Biomedical Genomics|Maitra|India

>Spike|hCoV-19/England/ALDP-9336BE/2020|2020-06-21|EPI\_ISL\_552945|Original|hCoV-19^^England|Human|Lighthouse Lab in Alderley Park|Wellcome Sanger Institute for the COVID-19 Genomics UK (COG-UK) consortium|Davies|United Kingdom

>Spike|hCoV-19/England/ALDP-9FD216/2020|2020-10-02|EPI\_ISL\_588050|Original|hCoV-19^^England|Human|Lighthouse Lab in Alderley Park|Wellcome Sanger Institute for the COVID-19 Genomics UK (COG-UK) consortium|Davies|United Kingdom

>Spike|hCoV-19/USA/UT-UPHL-2009571/2020|2020-07-18|EPI\_ISL\_605250|Original|hCoV-19^^Utah|Human|Utah Public Health Laboratory|Utah Public Health Laboratory|Young|USA

>Spike|hCoV-19/England/QEUE-AE30AF/2020|2020-10-26|EPI\_ISL\_633523|Original|hCoV-19^^England|Human|Lighthouse Lab in Glasgow|Wellcome Sanger Institute for the COVID-19 Genomics UK (COG-UK) consortium|Davies|United Kingdom

>Spike|hCoV-19/England/CAMB-1B2260/2020|2020-05-11|EPI\_ISL\_469909|Original|hCoV-19^^England|Human|Department of Pathology|Wellcome Sanger Institute for the COVID-19 Genomics UK (COG-UK) consortium|Davies|United Kingdom

>Spike|hCoV-19/USA/MI-MDHHS-SC21704/2020|2020-06-16|EPI\_ISL\_529823|Original|hCoV-19^^Michigan|Human|Michigan Department of Health and Human Services|Michigan Department of Health and Human Services|Blankenship|USA

>Spike|hCoV-19/Wales/PHWC-2670F/2020|2020-03-27|EPI\_ISL\_422231|Original|hCoV-19^^Wales|Human|Wales Specialist Virology Centre|Public Health Wales Microbiology Cardiff|Moore|United Kingdom

>Spike|hCoV-19/Australia/VIC16072/2020|2020-08-02|EPI\_ISL\_640467|Original|hCoV-19^^Victoria|Human|Microbiological Diagnostic Unit - Public Health Laboratory (MDU-PHL)|MDU-PHL|Schultz|Australia

>Spike|hCoV-19/Japan/PG-4933/2020|2020-07-00|EPI\_ISL\_690053|Original|hCoV-19^^Japan|Human|Pathogen Genomics Center|Pathogen Genomics Center|Sekizuka|Japan

>Spike|hCoV-19/Beijing/BJ709/2020|2020-02-07|EPI\_ISL\_430729|Original|hCoV-19^^Beijing|Human|Chinese PLA Institute for Disease Control and Prevention|Chinese PLA Institute for Disease Control and Prevention|Li|China

>Spike|hCoV-19/USA/TX-DSHS-0788/2020|2020-05-22|EPI\_ISL\_590856|Original|hCoV-19^^Texas|Human|Texas Department of State Health Services|Texas Department of State Health Services|Rahman|USA

>Spike|hCoV-19/USA/TX-DSHS-1019/2020|2020-03-23|EPI\_ISL\_644173|Original|hCoV-19^^Texas|Human|Texas Department of State Health Services|Texas Department of State Health Services|Rahman|USA

>Spike|hCoV-19/Iran/SA-Isf-48/2020|2020-06-24|EPI\_ISL\_672600|Original|hCoV-19^^Iran|Human|Infectious Diseases and Tropical Medicine Research Center|Infectious Diseases and Tropical Medicine Research Center|Ahangarzadeh, S.|Iran

>Spike|hCoV-19/England/ALDP-C4996E/2020|2020-12-13|EPI\_ISL\_718871|Original|hCoV-19^^England|Human|Lighthouse Lab in Alderley Park|Wellcome Sanger Institute for the COVID-19 Genomics UK (COG-UK) Consortium|Davies|United Kingdom

>Spike|hCoV-19/Canada/BC\_04286257/2020|2020-04-00|EPI\_ISL\_466765|Original|hCoV-19^^British Columbia|Human|BCCDC Public Health Laboratory|BCCDC Public Health Laboratory|Harrigan|Canada

>Spike|hCoV-19/England/ALDP-AC5D42/2020|2020-10-14|EPI\_ISL\_631215|Original|hCoV-19^^England|Human|Lighthouse Lab in Alderley Park|Wellcome Sanger Institute for the COVID-19 Genomics UK (COG-UK) consortium|Davies|United Kingdom

>Spike|hCoV-19/Denmark/DCGC-12008/2020|2020-06-15|EPI\_ISL\_671255|Original|hCoV-19^^Nordjylland|Human|Department of Virus and Microbiological Special Diagnostics|Albertsen Lab|Michaelsen|Denmark

>Spike|hCoV-19/England/LIVE-9F2E2/2020|2020-05-02|EPI\_ISL\_453443|Original|hCoV-19^^England|Human|Liverpool Clinical Laboratories|COVID-19 Genomics UK (COG-UK) Consortium|Haldenby|United Kingdom

>Spike|hCoV-19/Netherlands/GE-RIVM-20209/2020|2020-11-26|EPI\_ISL\_723362|Original|hCoV-19^^Gelderland|Human|Dutch COVID-19 response team|National Institute for Public Health and the Environment (RIVM)|Meijer|Netherlands

>Spike|hCoV-19/England/MILK-9C447C/2020|2020-09-09|EPI\_ISL\_566900|Original|hCoV-19^^England|Human|Lighthouse Lab in Milton Keynes|Wellcome Sanger Institute for the COVID-19 Genomics UK (COG-UK) consortium|Davies|United Kingdom

>Spike|hCoV-19/Denmark/DCGC-7703/2020|2020-10-19|EPI\_ISL\_618614|Original|hCoV-19^^Midtjylland|Human|Department of Virus and Microbiological Special Diagnostics|Albertsen lab|Michaelsen|Denmark

>Spike|hCoV-19/India/UN-1100/2020|2020-03-10|EPI\_ISL\_421664|Original|hCoV-19^^India|Human|National Influenza Center|Indian Council of Medical Research-National Institute of Virology|Yadav|India

>Spike|hCoV-19/England/204300795/2020|2020-10-19|EPI\_ISL\_649816|Original|hCoV-19^^England|Human|Respiratory Virus Unit|COVID-19 Genomics UK (COG-UK) Consortium|Platt|United Kingdom

>Spike|hCoV-19/England/204180611/2020|2020-10-07|EPI\_ISL\_609856|Original|hCoV-19^^England|Human|Respiratory Virus Unit|Respiratory Virus Unit|Platt|United Kingdom

>Spike|hCoV-19/England/CAMC-A6471A/2020|2020-10-09|EPI\_ISL\_609101|Original|hCoV-19^^England|Human|Lighthouse Lab in Cambridge|Wellcome Sanger Institute for the COVID-19 Genomics UK (COG-UK) consortium|Davies|United Kingdom

>Spike|hCoV-19/Portugal/PT1479/2020|2020-03-27|EPI\_ISL\_511438|Original|hCoV-19^^Portugal|Human|Instituto Nacional de Saude (INSA)|Instituto Nacional de Saude (INSA)|Borges|Portugal

>Spike|hCoV-19/England/20129106504/2020|2020-03-11|EPI\_ISL\_424091|Original|hCoV-19^^England|Human|Respiratory Virus Unit|Respiratory Virus Unit|Platt|United Kingdom

>Spike|hCoV-19/USA/UT-05/2020|2020-03-13|EPI\_ISL\_415543|Vero|hCoV-19^^Utah|Human|Utah Public Health Laboratory|Utah Public Health Laboratory|Young|USA

>Spike|hCoV-19/Singapore/546/2020|2020-05-27|EPI\_ISL\_482693|Original|hCoV-19^^Singapore|Human|Singapore General Hospital|Department of Microbiology|Abdul Rahman|Singapore

>Spike|hCoV-19/England/MILK-B94473/2020|2020-11-13|EPI\_ISL\_676049|Original|hCoV-19^^England|Human|Lighthouse Lab in Milton Keynes|Wellcome Sanger Institute for the COVID-19 Genomics UK (COG-UK) Consortium|Davies|United Kingdom

>Spike|hCoV-19/Australia/VIC5971/2020|2020-07-20|EPI\_ISL\_518746|Original|hCoV-19^^Victoria|Human|Microbiological Diagnostic Unit - Public Health Laboratory (MDU-PHL)|MDU-PHL|Schultz|Australia

>Spike|hCoV-19/USA/TX-HMH-6173/2020|2020-07-04|EPI\_ISL\_547291|Original|hCoV-19^^Texas|Human|Houston Methodist Hospital|Houston Methodist Hospital|Long|USA

>Spike|hCoV-19/Denmark/DCGC-1359/2020|2020-03-30|EPI\_ISL\_622209|Original|hCoV-19^^Sjaelland|Human|Department of Virus and Microbiological Special Diagnostics|Albertsen lab|Michaelsen|Denmark

>Spike|hCoV-19/India/DL-NCDC3803-CSIR-IGIB/2020|2020-05-20|EPI\_ISL\_482573|Original|hCoV-19^^Delhi|Human|National Centre for Disease control (NCDC)|NCDC/CSIR-IGIB|Pandey|India

>Spike|hCoV-19/Belgium/ULG-10368/2020|2020-08-04|EPI\_ISL\_540535|Original|hCoV-19^^Li\u00e8ge|Human|Department of Clinical Microbiology|GIGA Medical Genomics|Durkin|Belgium



>Spike|hCoV-19/England/ALDP-CB4CA1/2020|2020-12-18|EPI\_ISL\_761879|Original|hCoV-19^^England|Human|Lighthouse Lab in Alderley Park|Wellcome Sanger Institute for the COVID-19 Genomics UK (COG-UK) Consortium|Davies|United Kingdom

>Spike|hCoV-19/Japan/PG-7652/2020|2020-08-00|EPI\_ISL\_686754|Original|hCoV-19^^Japan|Human|Chiba Prefectural Institute of Public Health|Pathogen Genomics Center|Sekizuka|Japan

>Spike|hCoV-19/Netherlands/GE-EMC-229/2020|2020-06-02|EPI\_ISL\_523209|Original|hCoV-19^^Gelderland|Human|Dutch COVID-19 response team|Erasmus Medical Center|Oude Munnink|Netherlands

>Spike|hCoV-19/Scotland/QEUA-A9DFD4/2020|2020-10-20|EPI\_ISL\_652674|Original|hCoV-19^^Scotland|Human|Queens Medical Centre|COVID-19 Genomics UK (COG-UK) Consortium|Loose|United Kingdom

>Spike|hCoV-19/Australia/VIC15671/2020|2020-08-02|EPI\_ISL\_593407|Original|hCoV-19^^Victoria|Human|Microbiological Diagnostic Unit - Public Health Laboratory (MDU-PHL)|MDU-PHL|Schultz|Australia

>Spike|hCoV-19/USA/TX-HMH-MCoV-14277/2020|2020-10-04|EPI\_ISL\_787562|Original|hCoV-19^^Texas|Human|Houston Methodist Hospital|Houston Methodist Hospital|Long|USA

>Spike|hCoV-19/Denmark/DCGC-5259/2020|2020-09-07|EPI\_ISL\_615190|Original|hCoV-19^^Sjaelland|Human|Department of Virus and Microbiological Special Diagnostics|Albertsen lab|Michaelsen|Denmark

>Spike|hCoV-19/England/ALDP-6B2DD3/2020|2020-07-01|EPI\_ISL\_557839|Original|hCoV-19^^England|Human|Lighthouse Lab in Alderley Park|Wellcome Sanger Institute for the COVID-19 Genomics UK (COG-UK) consortium|Davies|United Kingdom

>Spike|hCoV-19/Indonesia/AC-NIHRD-PME4523/2020|2020-06-18|EPI\_ISL\_791981|Original|hCoV-19^^Aceh|Human|Balai Litbang Aceh|National Institute of Health Research and Development|Setiawati|Indonesia

>Spike|hCoV-19/England/ALDP-AA3B8C/2020|2020-10-22|EPI\_ISL\_624442|Original|hCoV-19^^England|Human|Lighthouse Lab in Alderley Park|Wellcome Sanger Institute for the COVID-19 Genomics UK (COG-UK) consortium|Davies|United Kingdom

>Spike|hCoV-19/England/QEUA-B9EE02/2020|2020-11-18|EPI\_ISL\_719923|Original|hCoV-19^^England|Human|Lighthouse Lab in Glasgow|Wellcome Sanger Institute for the COVID-19 Genomics UK (COG-UK) Consortium|Davies|United Kingdom

>Spike|hCoV-19/Denmark/DCGC-5007/2020|2020-09-21|EPI\_ISL\_621800|Original|hCoV-19^^Hovedstaden|Human|Department of Virus and Microbiological Special Diagnostics|Albertsen lab|Michaelsen|Denmark

>Spike|hCoV-19/Wales/PHWC-16288B/2020|2020-05-22|EPI\_ISL\_473132|Original|hCoV-19^^Wales|Human|Wales Specialist Virology Centre Sequencing lab|COVID-19 Genomics UK (COG-UK) Consortium|Moore|United Kingdom

>Spike|hCoV-19/England/MILK-9D402A/2020|2020-09-18|EPI\_ISL\_601695|Original|hCoV-19^^England|Human|Lighthouse Lab in Milton Keynes|Wellcome Sanger Institute for the COVID-19 Genomics UK (COG-UK) consortium|Davies|United Kingdom

>Spike|hCoV-19/England/QEUA-7923B8/2020|2020-07-15|EPI\_ISL\_533018|Original|hCoV-19^^England|Human|Lighthouse Lab in Glasgow|Wellcome Sanger Institute for the COVID-19 Genomics UK (COG-UK) consortium|Davies|United Kingdom

>Spike|hCoV-19/Australia/NSW2631/2020|2020-07-21|EPI\_ISL\_678325|Original|hCoV-19^^New South Wales|Human|Area of Virology|Virology Research Laboratory; Area of Virology|Foster|Australia

>Spike|hCoV-19/England/CAMC-C2690D/2020|2020-12-07|EPI\_ISL\_782920|Original|hCoV-19^^England|Human|Lighthouse Lab in Cambridge|Wellcome Sanger Institute for the COVID-19 Genomics UK (COG-UK) Consortium|Davies|United Kingdom

>Spike|hCoV-19/England/ALDP-9D7A65/2020|2020-09-17|EPI\_ISL\_576610|Original|hCoV-19^^England|Human|Oxford Viromics|COVID-19 Genomics UK (COG-UK) Consortium|Golubchik|United Kingdom

>Spike|hCoV-19/England/CAMC-B21CDD/2020|2020-11-01|EPI\_ISL\_647290|Original|hCoV-19^^England|Human|Lighthouse Lab in Cambridge|Wellcome Sanger Institute for the COVID-19 Genomics UK (COG-UK) Consortium|Davies|United Kingdom

>Spike|hCoV-19/England/MILK-A064D7/2020|2020-09-30|EPI\_ISL\_600071|Original|hCoV-19^^England|Human|Lighthouse Lab in Milton Keynes|Wellcome Sanger Institute for the COVID-19 Genomics UK (COG-UK) consortium|Davies|United Kingdom

>Spike|hCoV-19/England/ALDP-C8B98E/2020|2020-12-16|EPI\_ISL\_756452|Original|hCoV-19^^England|Human|Lighthouse Lab in Alderley Park|Wellcome Sanger Institute for the COVID-19 Genomics UK (COG-UK) Consortium|Davies|United Kingdom

>Spike|hCoV-19/England/ALDP-95AF89/2020|2020-06-15|EPI\_ISL\_555667|Original|hCoV-19^^England|Human|Lighthouse Lab in Alderley Park|Wellcome Sanger Institute for the COVID-19 Genomics UK (COG-UK) consortium|Davies|United Kingdom

>Spike|hCoV-19/England/NOTT-1124D1/2020|2020-05-31|EPI\_ISL\_484385|Original|hCoV-19^^England|Human|University Hospitals Of Leicester NHS Trust and DeepSeq Nottingham|COVID-19 Genomics UK (COG-UK) Consortium|Loose|United Kingdom

>Spike|hCoV-19/USA/CA-CZB-1442/2020|2020-03-28|EPI\_ISL\_468409|Original|hCoV-19^^California|Human|County of San Luis Obispo Public Health Laboratory|Chan-Zuckerberg Biohub|Hao|USA

>Spike|hCoV-19/Japan/PG-4864/2020|2020-07-00|EPI\_ISL\_689985|Original|hCoV-19^^Japan|Human|Pathogen Genomics Center|Pathogen Genomics Center|Sekizuka|Japan

>Spike|hCoV-19/Ireland/D-NVRL-MPV53968/2020|2020-04-05|EPI\_ISL\_767765|Original|hCoV-19^^Dublin|Human|National Virus Reference Laboratory|Irish Coronavirus Sequencing Consortium - Teagasc Moorepark|Walsh|Ireland

>Spike|hCoV-19/England/CAMC-B548EC/2020|2020-11-09|EPI\_ISL\_658202|Original|hCoV-19^^England|Human|Lighthouse Lab in Cambridge|Wellcome Sanger Institute for the COVID-19 Genomics UK (COG-UK) Consortium|Davies|United Kingdom

>Spike|hCoV-19/Wales/PHWC-4978A8/2020|2020-11-22|EPI\_ISL\_726896|Original|hCoV-19^^Wales|Human|Originating lab|COVID-19 Genomics UK (COG-UK) Consortium|Moore|United Kingdom

>Spike|hCoV-19/USA/MN-GMF-21836/2020|2020-09-22|EPI\_ISL\_660841|Original|hCoV-19^^Minnesota|Human|Gundersen Molecular Diagnostics Laboratory|Kabara Cancer Research Institute|Kenny|USA

>Spike|hCoV-19/England/QEUH-544D9B/2020|2020-05-14|EPI\_ISL\_533345|Original|hCoV-19^^England|Human|Lighthouse Lab in Glasgow|Wellcome Sanger Institute for the COVID-19 Genomics UK (COG-UK) consortium|Davies|United Kingdom

>Spike|hCoV-19/Singapore/538/2020|2020-06-02|EPI\_ISL\_482686|Original|hCoV-19^^Singapore|Human|Singapore General Hospital|Department of Microbiology|Abdul Rahman|Singapore

>Spike|hCoV-19/England/BIRM-5FCA4/2020|2020-05-15|EPI\_ISL\_473394|Original|hCoV-19^^England|Human|University of Birmingham|COVID-19 Genomics UK (COG-UK) Consortium|Loman|United Kingdom

>Spike|hCoV-19/Netherlands/GE-RIVM-10095/2020|2020-03-10|EPI\_ISL\_547461|Original|hCoV-19^^Gelderland|Human|Dutch COVID-19 response team|National Institute for Public Health and the Environment (RIVM)|Meijer|Netherlands

>Spike|hCoV-19/England/NORT-289753/2020|2020-04-01|EPI\_ISL\_458679|Original|hCoV-19^^England|Human|NU-OMICS DNA Sequencing research facility|Wellcome Sanger Institute for the COVID-19 Genomics UK (COG-UK) consortium|Davies|United Kingdom

>Spike|hCoV-19/Scotland/GCVR-16FF10/2020|2020-03-21|EPI\_ISL\_459525|Original|hCoV-19^^Scotland|Human|NHSGGC West of Scotland Specialist Virology Centre / MRC-University of Glasgow Centre for Virus Research|Wellcome Sanger Institute for the COVID-19 Genomics UK (COG-UK) consortium|Davies|United Kingdom

>Spike|hCoV-19/Australia/VIC13798/2020|2020-08-17|EPI\_ISL\_592318|Original|hCoV-19^^Victoria|Human|Microbiological Diagnostic Unit - Public Health Laboratory (MDU-PHL)|MDU-PHL|Schultz|Australia

>Spike|hCoV-19/Sweden/20-53233/2020|2020-10-26|EPI\_ISL\_648208|Original|hCoV-19^^Sweden|Human|Orebro|The Public Health Agency of Sweden|Svartstr\u00f6m|Sweden

>Spike|hCoV-19/Ireland/WX-NVRL-76IRL29790/2020|2020-10-18|EPI\_ISL\_732462|Original|hCoV-19^^Wexford|Human|National Virus Reference Laboratory|National Virus Reference Laboratory|Gonzalez|Ireland

>Spike|hCoV-19/USA/NE-10851/2020|2020-05-04|EPI\_ISL\_475189|Original|hCoV-19^^Nebraska|Human|Nebraska Public Health Laboratory|UNMC COVID-19 Response Team|Pratt|USA

>Spike|hCoV-19/Denmark/DCGC-10360/2020|2020-11-02|EPI\_ISL\_669924|Original|hCoV-19^^Nordjylland|Human|Department of Virus and Microbiological Special Diagnostics|Albertsen Lab|Michaelsen|Denmark

>Spike|hCoV-19/Wales/PHWC-4A1717/2020|2020-12-10|EPI\_ISL\_743715|Original|hCoV-19^^Wales|Human|Wales Specialist Virology Centre Sequencing lab|COVID-19 Genomics UK (COG-UK) Consortium|Moore|United Kingdom

>Spike|hCoV-19/England/NOTT-10F695/2020|2020-04-03|EPI\_ISL\_433034|Original|hCoV-19^^England|Human|Queens Medical Centre|COVID-19 Genomics UK (COG-UK) Consortium|Loose|United Kingdom

>Spike|hCoV-19/England/ALDP-B25055/2020|2020-11-04|EPI\_ISL\_646532|Original|hCoV-19^^England|Human|Lighthouse Lab in Alderley Park|Wellcome Sanger Institute for the COVID-19 Genomics UK (COG-UK) Consortium|Davies|United Kingdom

>Spike|hCoV-19/England/201040083/2020|2020-03-03|EPI\_ISL\_464324|Original|hCoV-19^^England|Human|Respiratory Virus Unit|Respiratory Virus Unit|Platt|United Kingdom

>Spike|hCoV-19/USA/HI-H200413/2020|2020-08-07|EPI\_ISL\_752957|Original|hCoV-19^^Hawaii|Human|State Laboratories Division|State Laboratories Division|Sultana|USA

>Spike|hCoV-19/England/QEUEH-A9B738/2020|2020-10-20|EPI\_ISL\_611327|Original|hCoV-19^^England|Human|Lighthouse Lab in Glasgow|Wellcome Sanger Institute for the COVID-19 Genomics UK (COG-UK) consortium|Davies|United Kingdom

>Spike|hCoV-19/England/ALDP-A863B4/2020|2020-10-17|EPI\_ISL\_606077|Original|hCoV-19^^England|Human|Lighthouse Lab in Alderley Park|Wellcome Sanger Institute for the COVID-19 Genomics UK (COG-UK) consortium|Davies|United Kingdom

>Spike|hCoV-19/England/ALDP-B84634/2020|2020-11-15|EPI\_ISL\_675409|Original|hCoV-19^^England|Human|Lighthouse Lab in Alderley Park|Wellcome Sanger Institute for the COVID-19 Genomics UK (COG-UK) Consortium|Davies|United Kingdom

>Spike|hCoV-19/Spain/MD-IBV-99012404/2020|2020-11-16|EPI\_ISL\_780060|Original|hCoV-19^^Madrid|Human|Hospital General Universitario Gregorio Mara\u00f1\u00f3n|SeqCOVID-SPAIN consortium/IBV(CSIC)|Comas|Spain

>Spike|hCoV-19/Denmark/DCGC-20675/2020|2020-12-21|EPI\_ISL\_759292|Original|hCoV-19^^Sjaelland|Human|Department of Virus and Microbiological Special Diagnostics|Albertsen Lab|Michaelsen|Denmark

>Spike|hCoV-19/Sweden/20-53256/2020|2020-10-15|EPI\_ISL\_648155|Original|hCoV-19^^Sweden|Human|Stockholm|The Public Health Agency of Sweden|Svartstr\u00f6m|Sweden

>Spike|hCoV-19/England/ALDP-94FCBD/2020|2020-06-16|EPI\_ISL\_555224|Original|hCoV-19^^England|Human|Lighthouse Lab in Alderley Park|Wellcome Sanger Institute for the COVID-19 Genomics UK (COG-UK) consortium|Davies|United Kingdom

>Spike|hCoV-19/Wales/PHWC-49850A/2020|2020-12-01|EPI\_ISL\_727086|Original|hCoV-19^^Wales|Human|Originating lab|COVID-19 Genomics UK (COG-UK) Consortium|Moore|United Kingdom

>Spike|hCoV-19/England/BRIS-12D145/2020|2020-04-26|EPI\_ISL\_481864|Original|hCoV-19^^England|Human|PHE South West Regional Laboratory|Wellcome Sanger Institute for the COVID-19 Genomics UK (COG-UK) consortium|Davies|United Kingdom

>Spike|hCoV-19/England/BRIS-127FAB/2020|2020-04-18|EPI\_ISL\_469613|Original|hCoV-19^^England|Human|PHE South West Regional Laboratory|Wellcome Sanger Institute for the COVID-19 Genomics UK (COG-UK) consortium|Davies|United Kingdom

>Spike|hCoV-19/Spain/CN-IBV-97006509/2020|2020-03-30|EPI\_ISL\_537717|Original|hCoV-19^^Canary Islands|Human|Hospital Universitario de Gran Canaria Dr. Negr\u00e9d\u00e9n|SeqCOVID-SPAIN consortium/IBV(CSIC)|Comas|Spain

>Spike|hCoV-19/England/CAMC-B37D86/2020|2020-11-06|EPI\_ISL\_659018|Original|hCoV-19^^England|Human|Lighthouse Lab in Cambridge|Wellcome Sanger Institute for the COVID-19 Genomics UK (COG-UK) Consortium|Davies|United Kingdom

>Spike|hCoV-19/Brazil/RS-00622/2020|2020-11-23|EPI\_ISL\_770573|Original|hCoV-19^^Rio Grande do Sul|Human|Laborat\u00f3rio de Microbiologia Molecular - Universidade FEEVALE|Bioinformatics Laboratory / LNCC|Almeida|Brazil

>Spike|hCoV-19/England/GSTT-265D615/2020|2020-03-24|EPI\_ISL\_483988|Original|hCoV-19^^England|Human|Centre for Clinical Infection and Diagnostics Research and Genomics Innovation Unit|COVID-19 Genomics UK (COG-UK) Consortium|Awan|United Kingdom

>Spike|hCoV-19/Switzerland/SO-ETHZ-410122/2020|2020-12-16|EPI\_ISL\_737792|Original|hCoV-19^^Solothurn|Human|Viollier AG|Department of Biosystems Science and Engineering|Nadeau|Switzerland

>Spike|hCoV-19/England/ALDP-C23126/2020|2020-12-06|EPI\_ISL\_733783|Original|hCoV-19^^England|Human|Lighthouse Lab in Alderley Park|Wellcome Sanger Institute for the COVID-19 Genomics UK (COG-UK) Consortium|Davies|United Kingdom

>Spike|hCoV-19/England/20194148101/2020|2020-05-04|EPI\_ISL\_465620|Original|hCoV-19^^England|Human|Respiratory Virus Unit|Respiratory Virus Unit|Platt|United Kingdom

>Spike|hCoV-19/England/LOND-D512F/2020|2020-04-14|EPI\_ISL\_444203|Original|hCoV-19^^England|Human|University College London|COVID-19 Genomics UK (COG-UK) Consortium|Roy|United Kingdom

>Spike|hCoV-19/England/ALDP-A66AE2/2020|2020-10-12|EPI\_ISL\_630459|Original|hCoV-19^^England|Human|Lighthouse Lab in Alderley Park|Wellcome Sanger Institute for the COVID-19 Genomics UK (COG-UK) consortium|Davies|United Kingdom

>Spike|hCoV-19/Belgium/HMJ-0330330/2020|2020-03-30|EPI\_ISL\_462184|Original|hCoV-19^^Beerse|Human|KU Leuven|KU Leuven|Maes|Belgium

>Spike|hCoV-19/Portugal/PT0940/2020|2020-04-08|EPI\_ISL\_511490|Original|hCoV-19^^Portugal|Human|Instituto Nacional de Saude (INSA)|Instituto Nacional de Saude (INSA) and Instituto Gulbenkian de Ciencia (IGC)|Borges|Portugal

>Spike|hCoV-19/USA/TX-HMH-7459/2020|2020-06-26|EPI\_ISL\_546780|Original|hCoV-19^^Texas|Human|Houston Methodist Hospital|Houston Methodist Hospital|Long|USA

>Spike|hCoV-19/USA/MN-MDH-84/2020|2020-03-15|EPI\_ISL\_460068|Original|hCoV-19^^Minnesota|Human|Minnesota Department of Health|Minnesota Department of Health|Garfin|USA

>Spike|hCoV-19/USA/UT-02921/2020|2020-04-30|EPI\_ISL\_509543|Original|hCoV-19^^Utah|Human|Utah Public Health Laboratory|Utah Public Health Laboratory|Butz|USA

>Spike|hCoV-19/South Korea/KDCA0403/2020|2020-11-05|EPI\_ISL\_760187|Original|hCoV-19^^South Korea|Human|Division of Emerging Infectious Diseases|Division of Emerging Infectious Diseases|Park|South Korea

>Spike|hCoV-19/England/ALDP-4A7492/2020|2020-06-08|EPI\_ISL\_559641|Original|hCoV-19^^England|Human|Lighthouse Lab in Alderley Park|Wellcome Sanger Institute for the COVID-19 Genomics UK (COG-UK) consortium|Davies|United Kingdom

>Spike|hCoV-19/Wales/PHWC-486921/2020|2020-10-28|EPI\_ISL\_639091|Original|hCoV-19^^Wales|Human|Wales Specialist Virology Centre Sequencing lab|COVID-19 Genomics UK (COG-UK) Consortium|Moore|United Kingdom

>Spike|hCoV-19/England/ALDP-AA5382/2020|2020-10-21|EPI\_ISL\_625153|Original|hCoV-19^^England|Human|Lighthouse Lab in Alderley Park|Wellcome Sanger Institute for the COVID-19 Genomics UK (COG-UK) consortium|Davies|United Kingdom

>Spike|hCoV-19/Denmark/DCGC-6108/2020|2020-09-21|EPI\_ISL\_621142|Original|hCoV-19^^Midtjylland|Human|Department of Virus and Microbiological Special Diagnostics|Albertsen lab|Michaelsen|Denmark

>Spike|hCoV-19/England/ALDP-A84B09/2020|2020-10-18|EPI\_ISL\_610490|Original|hCoV-19^^England|Human|Lighthouse Lab in Alderley Park|Wellcome Sanger Institute for the COVID-19 Genomics UK (COG-UK) consortium|Davies|United Kingdom

>Spike|hCoV-19/England/ALDP-A68EF3/2020|2020-10-12|EPI\_ISL\_608543|Original|hCoV-19^^England|Human|Lighthouse Lab in Alderley Park|Wellcome Sanger Institute for the COVID-19 Genomics UK (COG-UK) consortium|Davies|United Kingdom

>Spike|hCoV-19/Netherlands/NH-RIVM-20434/2020|2020-12-07|EPI\_ISL\_728653|Original|hCoV-19^^Noord-Holland|Human|Dutch COVID-19 response team|National Institute for Public Health and the Environment (RIVM)|Meijer|Netherlands

>Spike|hCoV-19/England/MILK-9EF10B/2020|2020-09-25|EPI\_ISL\_594901|Original|hCoV-19^^England|Human|Oxford Viromics|COVID-19 Genomics UK (COG-UK) Consortium|Golubchik|United Kingdom

>Spike|hCoV-19/Scotland/EDB9050/2020|2020-10-31|EPI\_ISL\_652039|Original|hCoV-19^^Scotland|Human|Virology Department|COVID-19 Genomics UK (COG-UK) Consortium|McHugh|United Kingdom

>Spike|hCoV-19/USA/CA-ALSR-1818/2020|2020-05-20|EPI\_ISL\_512196|Original|hCoV-19^^California|Human|San Diego County Public Health Laboratory|Andersen lab at Scripps Research|Gangavarapu|USA

>Spike|hCoV-19/USA/NY-Wadsworth-49019-01/2020|2020-04-16|EPI\_ISL\_676858|Original|hCoV-19^^New York|Human|Wadsworth Center|Wadsworth Center|Lasek-Nesselquist|USA

>Spike|hCoV-19/USA/CT-UW-6259/2020|2020-04-01|EPI\_ISL\_430960|Original|hCoV-19^^Connecticut|Human|UW Virology Lab|UW Virology Lab|Roychoudhury|USA

>Spike|hCoV-19/South Africa/R10315/2020|2020-05-28|EPI\_ISL\_490270|Original|hCoV-19^^Western Cape|Human|National Institute for Communicable Diseases of the National Health Laboratory Service|National Institute for Communicable Diseases of the National Health Laboratory Service|Allam|South Africa

>Spike|hCoV-19/USA/NY-Wadsworth-41107-01/2020|2020-04-05|EPI\_ISL\_525659|Original|hCoV-19^^New York|Human|Wadsworth Center|Wadsworth Center|Plitnick|USA

>Spike|hCoV-19/England/20124003404/2020|2020-03-17|EPI\_ISL\_465773|Original|hCoV-19^^England|Human|Respiratory Virus Unit|Respiratory Virus Unit|Platt|United Kingdom

>Spike|hCoV-19/USA/NC\_200445/2020|2020-05-00|EPI\_ISL\_458292|Original|hCoV-19^^North Carolina|Human|Dirk Dittmer|Dirk Dittmer|Moorad|USA

>Spike|hCoV-19/England/NOTT-111EF2/2020|2020-05-03|EPI\_ISL\_472423|Original|hCoV-19^^England|Human|Queens Medical Centre|COVID-19 Genomics UK (COG-UK) Consortium|Loose|United Kingdom

>Spike|hCoV-19/England/CAMC-B22823/2020|2020-11-01|EPI\_ISL\_647165|Original|hCoV-19^^England|Human|Lighthouse Lab in Cambridge|Wellcome Sanger Institute for the COVID-19 Genomics UK (COG-UK) Consortium|Davies|United Kingdom

>Spike|hCoV-19/Australia/VIC12059/2020|2020-07-24|EPI\_ISL\_591911|Original|hCoV-19^^Victoria|Human|Microbiological Diagnostic Unit - Public Health Laboratory (MDU-PHL)|MDU-PHL|Schultz|Australia

>Spike|hCoV-19/Ireland/WW-NVRL-20G35325/2020|2020-03-20|EPI\_ISL\_605074|Original|hCoV-19^^Wicklow|Human|National Virus Reference Laboratory|Irish Coronavirus Sequencing Consortium - Helixworks|Chalapati|Ireland

>Spike|hCoV-19/England/NOTT-11A6C4/2020|2020-11-06|EPI\_ISL\_638595|Original|hCoV-19^^England|Human|Queens Medical Centre|COVID-19 Genomics UK (COG-UK) Consortium|Loose|United Kingdom

>Spike|hCoV-19/USA/TX-HMH-MCoV-12383/2020|2020-09-26|EPI\_ISL\_790322|Original|hCoV-19^^Texas|Human|Houston Methodist Hospital|Houston Methodist Hospital|Long|USA

>Spike|hCoV-19/Costa Rica/INC-0115/2020|2020-07-21|EPI\_ISL\_682255|Original|hCoV-19^^Heredia|Human|HOSPITAL SAN VICENTE DE PAUL|Inciensa|Soto-Garita|Costa Rica

>Spike|hCoV-19/Netherlands/OV-RIVM-20124/2020|2020-11-10|EPI\_ISL\_723299|Original|hCoV-19^^Overijssel|Human|Dutch COVID-19 response team|National Institute for Public Health and the Environment (RIVM)|Meijer|Netherlands

>Spike|hCoV-19/Denmark/DCGC-3702/2020|2020-08-31|EPI\_ISL\_615480|Original|hCoV-19^^Syddanmark|Human|Department of Virus and Microbiological Special Diagnostics|Albertsen lab|Michaelsen|Denmark

>Spike|hCoV-19/USA/AZ-TG532052/2020|2020-07-01|EPI\_ISL\_695400|Original|hCoV-19^^Arizona|Human|AZ SPHL|TGen North|French|USA

>Spike|hCoV-19/Sweden/20-22278/2020|2020-09-17|EPI\_ISL\_654893|Original|hCoV-19^^Skane|Human|Klinisk mikrobiologi|The Public Health Agency of Sweden|Svartstr\u00f6m|Sweden

>Spike|hCoV-19/England/ALDP-980281/2020|2020-08-06|EPI\_ISL\_529537|Original|hCoV-19^^England|Human|Queens Medical Centre|COVID-19 Genomics UK (COG-UK) Consortium|Loose|United Kingdom

>Spike|hCoV-19/USA/VA-DCLS-1819/2020|2020-09-22|EPI\_ISL\_614139|Original|hCoV-19^^Virginia|Human|Virginia DCLS|Virginia DCLS|St. Jacques|USA

>Spike|hCoV-19/England/LOND-124C768/2020|2020-00-00|EPI\_ISL\_490428|Original|hCoV-19^^England|Human|University College London Hospital|COVID-19 Genomics UK (COG-UK) Consortium|Byott|United Kingdom

>Spike|hCoV-19/USA/WI-UW-1819/2020|2020-09-09|EPI\_ISL\_605691|Original|hCoV-19^^Wisconsin|Human|University of Wisconsin-Madison AIDS Vaccine Research Laboratories|University of Wisconsin-Madison AIDS Vaccine Research Laboratories|Baczenas|USA

>Spike|hCoV-19/England/CAMB-7F50D/2020|2020-04-08|EPI\_ISL\_470397|Original|hCoV-19^^England|Human|Department of Pathology|Wellcome Sanger Institute for the COVID-19 Genomics UK (COG-UK) consortium|Davies|United Kingdom

>Spike|hCoV-19/Wales/PHWC-32A52/2020|2020-04-14|EPI\_ISL\_474386|Original|hCoV-19^^Wales|Human|Originating lab|COVID-19 Genomics UK (COG-UK) Consortium|Moore|United Kingdom

>Spike|hCoV-19/Denmark/DCGC-21326/2020|2020-12-21|EPI\_ISL\_759679|Original|hCoV-19^^Denmark|Human|Department of Virus and Microbiological Special Diagnostics|Albertsen Lab|Michaelsen|Denmark

>Spike|hCoV-19/England/CAMC-B234F1/2020|2020-11-02|EPI\_ISL\_651731|Original|hCoV-19^^England|Human|Virology Department|COVID-19 Genomics UK (COG-UK) Consortium|de Silva|United Kingdom

>Spike|hCoV-19/USA/TX-HMH-MCoV-18122/2020|2020-11-17|EPI\_ISL\_784470|Original|hCoV-19^^Texas|Human|Houston Methodist Hospital|Houston Methodist Hospital|Long|USA

>Spike|hCoV-19/Wales/PHWC-2A695/2020|2020-04-06|EPI\_ISL\_445603|Original|hCoV-19^^Wales|Human|Wales Specialist Virology Centre|Public Health Wales Microbiology Cardiff|Moore|United Kingdom

>Spike|hCoV-19/England/ALDP-B7344D/2020|2020-11-12|EPI\_ISL\_662358|Original|hCoV-19^^England|Human|Lighthouse Lab in Alderley Park|Wellcome Sanger Institute for the COVID-19 Genomics UK (COG-UK) Consortium|Davies|United Kingdom

>Spike|hCoV-19/Germany/NI-ChVir-W1701-6761/2020|2020-08-10|EPI\_ISL\_754044|Original|hCoV-19^^Lower Saxony|Human|Charit\u00e9 Universit\u00e4tsmedizin Berlin|Charit\u00e9 Universit\u00e4tsmedizin Berlin|Muehlemann|Germany

>Spike|hCoV-19/Switzerland/VD-ETHZ-270174/2020|2020-08-29|EPI\_ISL\_541498|Original|hCoV-19^^Vaud|Human|Viollier AG|Department of Biosystems Science and Engineering|Nadeau|Switzerland

>Spike|hCoV-19/Canada/ON-S1836/2020|2020-11-24|EPI\_ISL\_729300|Original|hCoV-19^^Ontario|Human|Toronto Invasive Bacterial Diseases Network|McMaster University|McArthur|Canada

>Spike|hCoV-19/USA/MI-MDHHS-SC22277/2020|2020-10-19|EPI\_ISL\_666943|Original|hCoV-19^^Michigan|Human|Michigan Department of Health and Human Services|Michigan Department of Health and Human Services|Jacob|USA

>Spike|hCoV-19/England/ALDP-AA5355/2020|2020-10-21|EPI\_ISL\_625259|Original|hCoV-19^^England|Human|Lighthouse Lab in Alderley Park|Wellcome Sanger Institute for the COVID-19 Genomics UK (COG-UK) consortium|Davies|United Kingdom

>Spike|hCoV-19/England/ALDP-954D76/2020|2020-06-12|EPI\_ISL\_553485|Original|hCoV-19^^England|Human|Lighthouse Lab in Alderley Park|Wellcome Sanger Institute for the COVID-19 Genomics UK (COG-UK) consortium|Davies|United Kingdom

>Spike|hCoV-19/Australia/VIC3228/2020|2020-06-29|EPI\_ISL\_520911|Original|hCoV-19^^Victoria|Human|Victorian Infectious Diseases Reference Laboratory (VIDRL)|VIDRL and MDU-PHL|Schultz|Australia

>Spike|hCoV-19/Denmark/DCGC-22344/2020|2020-12-14|EPI\_ISL\_758692|Original|hCoV-19^^Midtjylland|Human|Department of Virus and Microbiological Special Diagnostics|Albertsen Lab|Michaelsen|Denmark

>Spike|hCoV-19/England/ALDP-B76723/2020|2020-11-12|EPI\_ISL\_723776|Original|hCoV-19^^England|Human|Oxford Viromics|COVID-19 Genomics UK (COG-UK) Consortium|Golubchik|United Kingdom

>Spike|hCoV-19/Wales/PHWC-4A3A49/2020|2020-12-16|EPI\_ISL\_764597|Original|hCoV-19^^Wales|Human|Wales Specialist Virology Centre Sequencing lab|COVID-19 Genomics UK (COG-UK) Consortium|Moore|United Kingdom

>Spike|hCoV-19/England/QEUEH-B0E40B/2020|2020-11-02|EPI\_ISL\_641925|Original|hCoV-19^^England|Human|Lighthouse Lab in Glasgow|Wellcome Sanger Institute for the COVID-19 Genomics UK (COG-UK) Consortium|Davies|United Kingdom

>Spike|hCoV-19/Denmark/DCGC-1875/2020|2020-05-04|EPI\_ISL\_622540|Original|hCoV-19^^Hovedstaden|Human|Department of Virus and Microbiological Special Diagnostics|Albertsen lab|Michaelsen|Denmark

>Spike|hCoV-19/USA/WA-S2454/2020|2020-06-16|EPI\_ISL\_497086|Original|hCoV-19^^Washington|Human|Washington State Department of Health|Seattle Flu Study|Lee|USA

>Spike|hCoV-19/USA/CA-ALSR-2647/2020|2020-07-11|EPI\_ISL\_635610|Original|hCoV-19^^California|Human|San Diego County Public Health Laboratory|Andersen lab at Scripps Research|Gangavarapu|USA

>Spike|hCoV-19/England/NORW-E710C/2020|2020-04-22|EPI\_ISL\_453552|Original|hCoV-19^^England|Human|Quadram Institute Bioscience|COVID-19 Genomics UK (COG-UK) Consortium|Alikhan|United Kingdom

>Spike|hCoV-19/England/CAMB-1BAFE9/2020|2020-11-11|EPI\_ISL\_664812|Original|hCoV-19^^England|Human|Department of Pathology|COVID-19 Genomics UK (COG-UK) Consortium|Goodfellow|United Kingdom

>Spike|hCoV-19/Denmark/DCGC-1193/2020|2020-05-18|EPI\_ISL\_614839|Original|hCoV-19^^Hovedstaden|Human|Department of Virus and Microbiological Special Diagnostics|Albertsen lab|Michaelsen|Denmark

>Spike|hCoV-19/USA/TX-HMH-MCoV-18474/2020|2020-11-18|EPI\_ISL\_784822|Original|hCoV-19^^Texas|Human|Houston Methodist Hospital|Houston Methodist Hospital|Long|USA

>Spike|hCoV-19/England/SHEF-C74BE/2020|2020-10-06|EPI\_ISL\_613372|Original|hCoV-19^^England|Human|Virology Department|COVID-19 Genomics UK (COG-UK) Consortium|de Silva|United Kingdom

>Spike|hCoV-19/Switzerland/VD-ETHZ-300251/2020|2020-09-30|EPI\_ISL\_603283|Original|hCoV-19^^Vaud|Human|Viollier AG|Department of Biosystems Science and Engineering|Nadeau|Switzerland

>Spike|hCoV-19/USA/MA-MASPHL-00728/2020|2020-09-21|EPI\_ISL\_692944|Original|hCoV-19^^Massachusetts|Human|Massachusetts State Public Health Laboratory|Massachusetts State Public Health Laboratory|Lang|USA

>Spike|hCoV-19/Scotland/EDB8687/2020|2020-10-25|EPI\_ISL\_650182|Original|hCoV-19^^Scotland|Human|Virology Department|COVID-19 Genomics UK (COG-UK) Consortium|McHugh|United Kingdom

>Spike|hCoV-19/Bahrain/340861245\_S21/2020|2020-10-14|EPI\_ISL\_632254|Original|hCoV-19^^Bahrain|Human|Communicable Disease Laboratory|Communicable Disease Laboratory|Altaif|Bahrain

>Spike|hCoV-19/USA/NY-NYUMC685/2020|2020-04-02|EPI\_ISL\_450402|Original|hCoV-19^^New York|Human|NYU Langone Health|Departments of Pathology and Medicine|Maurano|USA

>Spike|hCoV-19/Scotland/EDB5668/2020|2020-04-12|EPI\_ISL\_473827|Original|hCoV-19^^Scotland|Human|Virology Department|COVID-19 Genomics UK (COG-UK) Consortium|Williams|United Kingdom

>Spike|hCoV-19/Wales/PHWC-483B97/2020|2020-10-18|EPI\_ISL\_627902|Original|hCoV-19^^Wales|Human|Wales Specialist Virology Centre Sequencing lab|COVID-19 Genomics UK (COG-UK) Consortium|Moore|United Kingdom

>Spike|hCoV-19/England/MILK-B966B7/2020|2020-11-14|EPI\_ISL\_676205|Original|hCoV-19^^England|Human|Lighthouse Lab in Milton Keynes|Wellcome Sanger Institute for the COVID-19 Genomics UK (COG-UK) Consortium|Davies|United Kingdom

>Spike|hCoV-19/Greece/202\_32984/2020|2020-03-12|EPI\_ISL\_437876|Original|hCoV-19^^Athens|Human|Laboratory of Microbiology|Laboratory of Biology|Karakasiliotis|Greece

>Spike|hCoV-19/England/CAMC-A3F4E4/2020|2020-10-06|EPI\_ISL\_609648|Original|hCoV-19^^England|Human|Lighthouse Lab in Cambridge|Wellcome Sanger Institute for the COVID-19 Genomics UK (COG-UK) consortium|Davies|United Kingdom

>Spike|hCoV-19/England/CAMB-1BC56D/2020|2020-11-27|EPI\_ISL\_723879|Original|hCoV-19^^England|Human|Department of Pathology|COVID-19 Genomics UK (COG-UK) Consortium|Goodfellow|United Kingdom

>Spike|hCoV-19/USA/CA-ALSR-1558/2020|2020-05-12|EPI\_ISL\_494660|Original|hCoV-19^^California|Human|Scripps Medical Laboratory|Andersen lab at Scripps Research|Gangavarapu|USA

>Spike|hCoV-19/USA/TX-HMH-MCoV-10515/2020|2020-07-08|EPI\_ISL\_789511|Original|hCoV-19^^Texas|Human|Houston Methodist Hospital|Houston Methodist Hospital|Long|USA

>Spike|hCoV-19/England/20172060804/2020|2020-04-20|EPI\_ISL\_465372|Original|hCoV-19^^England|Human|Respiratory Virus Unit|Respiratory Virus Unit|Platt|United Kingdom

>Spike|hCoV-19/England/ALDP-B74752/2020|2020-11-12|EPI\_ISL\_662156|Original|hCoV-19^^England|Human|Lighthouse Lab in Alderley Park|Wellcome Sanger Institute for the COVID-19 Genomics UK (COG-UK) Consortium|Davies|United Kingdom

>Spike|hCoV-19/Spain/AS-IBV-98006633/2020|2020-04-01|EPI\_ISL\_654625|Original|hCoV-19^^Asturias|Human|Servicio de Microbiolog\u00eda|SeqCOVID-SPAIN consortium|IBV (CSIC) |Comas|Spain

>Spike|hCoV-19/England/QEUH-9B9C54/2020|2020-09-07|EPI\_ISL\_549554|Original|hCoV-19^^England|Human|Lighthouse Lab in Glasgow|Wellcome Sanger Institute for the COVID-19 Genomics UK (COG-UK) consortium|Davies|United Kingdom

>Spike|hCoV-19/England/ALDP-94D03B/2020|2020-06-15|EPI\_ISL\_555879|Original|hCoV-19^^England|Human|Lighthouse Lab in Alderley Park|Wellcome Sanger Institute for the COVID-19 Genomics UK (COG-UK) consortium|Davies|United Kingdom

>Spike|hCoV-19/Austria/CeMM0314/2020|2020-03-30|EPI\_ISL\_475786|Original|hCoV-19^^Vienna|Human|Center for Virology|Bergthaler laboratory|Bergthaler|Austria

>Spike|hCoV-19/England/BRIS-127CA4/2020|2020-04-18|EPI\_ISL\_469644|Original|hCoV-19^^England|Human|PHE South West Regional Laboratory|Wellcome Sanger Institute for the COVID-19 Genomics UK (COG-UK) consortium|Davies|United Kingdom

>Spike|hCoV-19/Cote d'Ivoire/BKE0189/2020|2020-06-16|EPI\_ISL\_614360|Original|hCoV-19^^Boauk\u00e9|Human|Molecular diagnostic unit for viral haemorrhagic fevers and emerging viruses|Project group Epidemiology of Highly Pathogenic Microorganisms|Calvignac-Spencer|C\u00f4te d'Ivoire

>Spike|hCoV-19/England/20179042804/2020|2020-04-24|EPI\_ISL\_528432|Original|hCoV-19^^England|Human|Respiratory Virus Unit|Respiratory Virus Unit|Platt|United Kingdom

>Spike|hCoV-19/Thailand/Bangkok-CONI-0110/2020|2020-03-12|EPI\_ISL\_455913|Original|hCoV-19^^Bangkok|Human|Ramathibodi Hospital|COVID-19 Network Investigations (CONI) Alliance|Batty|Thailand

>Spike|hCoV-19/Japan/PG-7117/2020|2020-08-00|EPI\_ISL\_688222|Original|hCoV-19^^Japan|Human|Pathogen Genomics Center|Pathogen Genomics Center|Sekizuka|Japan

>Spike|hCoV-19/USA/NY-NYCPHL-000222/2020|2020-03-18|EPI\_ISL\_631752|Original|hCoV-19^^New York|Human|NYC HH Lincoln Medical And Mental Health Center|New York City Public Health Laboratory|Wang|USA

>Spike|hCoV-19/Belgium/ULG-10494/2020|2020-09-23|EPI\_ISL\_581656|Original|hCoV-19^^Li\u00e8ge|Human|Department of Clinical Microbiology|GIGA Medical Genomics|Durkin|Belgium

>Spike|hCoV-19/England/ALDP-B1A75E/2020|2020-11-02|EPI\_ISL\_645768|Original|hCoV-19^^England|Human|Lighthouse Lab in Alderley Park|Wellcome Sanger Institute for the COVID-19 Genomics UK (COG-UK) Consortium|Davies|United Kingdom

>Spike|hCoV-19/England/CAMB-7B273/2020|2020-04-11|EPI\_ISL\_433934|Original|hCoV-19^^England|Human|Department of Pathology|COVID-19 Genomics UK (COG-UK) Consortium|Meredith|United Kingdom

>Spike|hCoV-19/England/ALDP-A2D48F/2020|2020-10-06|EPI\_ISL\_586818|Original|hCoV-19^^England|Human|Lighthouse Lab in Alderley Park|Wellcome Sanger Institute for the COVID-19 Genomics UK (COG-UK) consortium|Davies|United Kingdom

>Spike|hCoV-19/Italy/LOM-INMI-13075-B/2020|2020-03-01|EPI\_ISL\_451308|Original|hCoV-19^^Lombardy|Human|Molecular Virology Unit|Laboratory of Virology|Gruber|Italy

>Spike|hCoV-19/England/QEUH-B2DC86/2020|2020-11-03|EPI\_ISL\_646937|Original|hCoV-19^^England|Human|Lighthouse Lab in Glasgow|Wellcome Sanger Institute for the COVID-19 Genomics UK (COG-UK) Consortium|Davies|United Kingdom

>Spike|hCoV-19/England/200940527/2020|2020-02-25|EPI\_ISL\_414005|Original|hCoV-19^^England|Human|Respiratory Virus Unit|Respiratory Virus Unit|Platt|United Kingdom

>Spike|hCoV-19/Scotland/QEUH-A1E3DF/2020|2020-10-01|EPI\_ISL\_598836|Original|hCoV-19^^Scotland|Human|Lighthouse Lab in Glasgow|Wellcome Sanger Institute for the COVID-19 Genomics UK (COG-UK) consortium|Davies|United Kingdom

>Spike|hCoV-19/England/CAMB-76E47/2020|2020-03-31|EPI\_ISL\_439415|Original|hCoV-19^^England|Human|Department of Pathology|Wellcome Sanger Institute for the COVID-19 Genomics UK (COG-UK) consortium|Amato|United Kingdom

>Spike|hCoV-19/England/CAMC-B215B4/2020|2020-11-03|EPI\_ISL\_647381|Original|hCoV-19^^England|Human|Lighthouse Lab in Cambridge|Wellcome Sanger Institute for the COVID-19 Genomics UK (COG-UK) Consortium|Davies|United Kingdom

>Spike|hCoV-19/Australia/VIC11973/2020|2020-07-26|EPI\_ISL\_563500|Original|hCoV-19^^Victoria|Human|Microbiological Diagnostic Unit - Public Health Laboratory (MDU-PHL)|MDU-PHL|Schultz|Australia

>Spike|hCoV-19/Australia/NSW620/2020|2020-06-19|EPI\_ISL\_490029|Original|hCoV-19^^New South Wales|Human|South Eastern Area Laboratory Services (SEALS)|NSW Health Pathology - Institute of Clinical Pathology and Medical Research; Westmead Hospital; University of Sydney|Gall|Australia

>Spike|hCoV-19/Wales/PHWC-4A39D3/2020|2020-12-16|EPI\_ISL\_763538|Original|hCoV-19^^Wales|Human|Wales Specialist Virology Centre Sequencing lab|COVID-19 Genomics UK (COG-UK) Consortium|Moore|United Kingdom



>Spike|hCoV-19/England/20146064304/2020|2020-04-01|EPI\_ISL\_421994|Original|hCoV-19^^England|Human|Respiratory Virus Unit|Respiratory Virus Unit|Platt|United Kingdom

>Spike|hCoV-19/Wales/PHWC-2C165/2020|2020-04-04|EPI\_ISL\_474282|Original|hCoV-19^^Wales|Human|Originating lab|COVID-19 Genomics UK (COG-UK) Consortium|Moore|United Kingdom

>Spike|hCoV-19/Japan/PG-0040/2020|2020-03-05|EPI\_ISL\_479807|Original|hCoV-19^^Kanto|Human|Saitama Prefectural Institute of Public Health|Pathogen Genomics Center|Sekizuka|Japan

>Spike|hCoV-19/Nigeria/OY608-CV172/2020|2020-06-11|EPI\_ISL\_527903|Original|hCoV-19^^Oyo|Human|Nigeria Centre for Disease Control (NCDC)|African Centre of Excellence for Genomics of Infectious Diseases (ACEGID)|Oluniyi|Nigeria

>Spike|hCoV-19/USA/MI-MDHHS-SC22395/2020|2020-11-11|EPI\_ISL\_708375|Original|hCoV-19^^Michigan|Human|Michigan Department of Health and Human Services|Michigan Department of Health and Human Services|Jacob|USA

>Spike|hCoV-19/Australia/VIC6199/2020|2020-07-23|EPI\_ISL\_518201|Original|hCoV-19^^Victoria|Human|Victorian Infectious Diseases Reference Laboratory (VIDRL)|VIDRL and MDU-PHL|Schultz|Australia

>Spike|hCoV-19/Wales/PHWC-483757/2020|2020-10-08|EPI\_ISL\_626850|Original|hCoV-19^^Wales|Human|Wales Specialist Virology Centre Sequencing lab|COVID-19 Genomics UK (COG-UK) Consortium|Moore|United Kingdom

>Spike|hCoV-19/Australia/VIC4076/2020|2020-07-11|EPI\_ISL\_519458|Original|hCoV-19^^Victoria|Human|Microbiological Diagnostic Unit - Public Health Laboratory (MDU-PHL)|MDU-PHL|Schultz|Australia

>Spike|hCoV-19/USA/MI-UM-2006S001102/2020|2020-04-15|EPI\_ISL\_495581|Original|hCoV-19^^Michigan|Human|University of Michigan Clinical Microbiology Laboratory|Lauring Lab|Valesano|USA

>Spike|hCoV-19/Scotland/QEUA-A78FEE/2020|2020-10-12|EPI\_ISL\_638985|Original|hCoV-19^^Scotland|Human|Oxford Viromics|COVID-19 Genomics UK (COG-UK) Consortium|Golubchik|United Kingdom

>Spike|hCoV-19/USA/TX-HMH-MCoV-15780/2020|2020-07-10|EPI\_ISL\_785464|Original|hCoV-19^^Texas|Human|Houston Methodist Hospital|Houston Methodist Hospital|Long|USA

>Spike|hCoV-19/Scotland/CVR2403/2020|2020-04-13|EPI\_ISL\_438900|Original|hCoV-19^^Scotland|Human|West of Scotland Specialist Virology Centre|COVID-19 Genomics UK (COG-UK) Consortium|Robertson|United Kingdom

>Spike|hCoV-19/Singapore/951/2020|2020-04-07|EPI\_ISL\_538485|Original|hCoV-19^^Singapore|Human|Department of Laboratory Medicine|Department of Laboratory Medicine|Chen|Singapore

>Spike|hCoV-19/Netherlands/NH-RIVM-21074/2020|2020-12-15|EPI\_ISL\_791081|Original|hCoV-19^^Noord-Holland|Human|Dutch COVID-19 response team|National Institute for Public Health and the Environment (RIVM)|Meijer|Netherlands

>Spike|hCoV-19/England/QEUA-BCBDB4/2020|2020-11-27|EPI\_ISL\_704458|Original|hCoV-19^^England|Human|Lighthouse Lab in Glasgow|Wellcome Sanger Institute for the COVID-19 Genomics UK (COG-UK) Consortium|Davies|United Kingdom

>Spike|hCoV-19/USA/CA-ALSR-3863/2020|2020-07-02|EPI\_ISL\_636250|Original|hCoV-19^^California|Human|San Diego County Public Health Laboratory|Andersen lab at Scripps Research|Gangavarapu|USA

>Spike|hCoV-19/India/DL-NCDC-01475/2020|2020-03-15|EPI\_ISL\_435065|Original|hCoV-19^^Delhi|Human|National Centre for Disease control (NCDC)|NCDC/CSIR-IGIB|Faruq|India

>Spike|hCoV-19/Gibraltar/204421201/2020|2020-10-27|EPI\_ISL\_613662|Original|hCoV-19^^Gibraltar|Human|Microbiology|Respiratory Virus Unit|Platt|Gibraltar

>Spike|hCoV-19/USA/NMDOH-2020320942/2020|2020-09-01|EPI\_ISL\_542065|Original|hCoV-19^^Texas|Human|New Mexico Department of Health Scientific Laboratory|New Mexico Department of Health Scientific Laboratory|Johnson|USA

>Spike|hCoV-19/New Zealand/20VR3192/2020|2020-03-26|EPI\_ISL\_579479|Original|hCoV-19^^Canterbury|Human|Canterbury Health Laboratories|Institute of Environmental Science and Research (ESR)|Wang|New Zealand

>Spike|hCoV-19/USA/FL-BPHL-2174/2020|2020-08-18|EPI\_ISL\_653327|Original|hCoV-19^^Florida|Human|Florida Bureau of Public Health Laboratories|Florida Bureau of Public Health Laboratories|Blanton|USA

>Spike|hCoV-19/South Africa/KRISP-K003490/2020|2020-09-14|EPI\_ISL\_602820|Original|hCoV-19^^KwaZulu-Natal|Human|NHLS-IALCH|KRISP|de Oliveira|South Africa

>Spike|hCoV-19/England/CAMB-79925/2020|2020-04-01|EPI\_ISL\_441302|Original|hCoV-19^^England|Human|Department of Pathology|Wellcome Sanger Institute for the COVID-19 Genomics UK (COG-UK) consortium|Amato|United Kingdom

>Spike|hCoV-19/USA/UT-UPHL-201009890/2020|2020-05-31|EPI\_ISL\_594014|Original|hCoV-19^^Utah|Human|Utah Public Health Laboratory|Utah Public Health Laboratory|Young|USA

>Spike|hCoV-19/USA/WA-S1101/2020|2020-05-04|EPI\_ISL\_463591|Original|hCoV-19^^Washington|Human|Washington State Department of Health|Seattle Flu Study|Bedford|USA

>Spike|hCoV-19/Scotland/EDB4679/2020|2020-05-08|EPI\_ISL\_449320|Original|hCoV-19^^Scotland|Human|Virology Department|COVID-19 Genomics UK (COG-UK) Consortium|Williams|United Kingdom

>Spike|hCoV-19/Wales/PHWC-162B28/2020|2020-05-30|EPI\_ISL\_473165|Original|hCoV-19^^Wales|Human|Wales Specialist Virology Centre Sequencing lab|COVID-19 Genomics UK (COG-UK) Consortium|Moore|United Kingdom

>Spike|hCoV-19/Wales/PHWC-4A693A/2020|2020-12-17|EPI\_ISL\_765086|Original|hCoV-19^^Wales|Human|Wales Specialist Virology Centre Sequencing lab|COVID-19 Genomics UK (COG-UK) Consortium|Moore|United Kingdom

>Spike|hCoV-19/Gambia/3749/2020|2020-07-30|EPI\_ISL\_561012|Original|hCoV-19^^Kombo|Human|MRCG at LSHTM Genomics lab|MRCG at LSHTM Genomics lab|Sesay|Gambia

>Spike|hCoV-19/Switzerland/GE-ETHZ-120005/2020|2020-04-17|EPI\_ISL\_468206|Original|hCoV-19^^Geneve|Human|Viollier AG|Department of Biosystems Science and Engineering|Nadeau|Switzerland

>Spike|hCoV-19/India/MH-ACTREC-135/2020|2020-05-28|EPI\_ISL\_699791|Original|hCoV-19^^Maharashtra|Human|Hematopathology Laboratory|Hematopathology Laboratory|Patkar|India

>Spike|hCoV-19/England/QEUEH-962407/2020|2020-08-10|EPI\_ISL\_531849|Original|hCoV-19^^England|Human|Lighthouse Lab in Glasgow|Wellcome Sanger Institute for the COVID-19 Genomics UK (COG-UK) consortium|Davies|United Kingdom

>Spike|hCoV-19/Germany/HH-hpi-p2463/2020|2020-04-29|EPI\_ISL\_776522|Original|hCoV-19^^Hamburg|Human|University Medical Center Hamburg Eppendorf|Heinrich Pette Institute|Robitaille|Germany

>Spike|hCoV-19/India/GJ-GBRC243/2020|2020-06-14|EPI\_ISL\_483824|Original|hCoV-19^^Gujarat|Human|GMERS Medical College Himmatnagar|Gujarat Biotechnology Research Centre|Joshi|India

>Spike|hCoV-19/England/CAMC-A5895F/2020|2020-10-06|EPI\_ISL\_597144|Original|hCoV-19^^England|Human|Lighthouse Lab in Cambridge|Wellcome Sanger Institute for the COVID-19 Genomics UK (COG-UK) consortium|Davies|United Kingdom

>Spike|hCoV-19/Netherlands/ZH-EMC-697/2020|2020-09-18|EPI\_ISL\_632419|Original|hCoV-19^^Zuid Holland|Human|Dutch COVID-19 response team|Erasmus Medical Center|Oude Munnink|Netherlands

>Spike|hCoV-19/USA/MN-MDH-1205/2020|2020-04-30|EPI\_ISL\_477294|Original|hCoV-19^^Minnesota|Human|Mayo Clinic & Mayo Clinic Laboratories|Minnesota Department of Health|Garfin|USA

>Spike|hCoV-19/USA/UN-UW-1403/2020|2020-03-16|EPI\_ISL\_422982|Original|hCoV-19^^USA|Human|UW Virology Lab|UW Virology Lab|Roychoudhury|USA

>Spike|hCoV-19/Norway/2872/2020|2020-07-10|EPI\_ISL\_500791|Original|hCoV-19^^Norway|Human|Hospital of Southern Norway - Kristiansand|Norwegian Institute of Public Health|Kopperud Riis|Norway

>Spike|hCoV-19/South Africa/Tygerberg\_334\_CC2/2020|2020-10-10|EPI\_ISL\_660141|Original|hCoV-19^^Western Cape|Human|Hamadi|National Health Laboratory Service (NHLS)|de Oliveira|South Africa

>Spike|hCoV-19/England/QEUEH-B2B4F9/2020|2020-11-03|EPI\_ISL\_646570|Original|hCoV-19^^England|Human|Lighthouse Lab in Glasgow|Wellcome Sanger Institute for the COVID-19 Genomics UK (COG-UK) Consortium|Davies|United Kingdom

>Spike|hCoV-19/England/QEUEH-A33529/2020|2020-10-05|EPI\_ISL\_628390|Original|hCoV-19^^England|Human|Virology Department|COVID-19 Genomics UK (COG-UK) Consortium|de Silva|United Kingdom

>Spike|hCoV-19/Denmark/DCGC-4486/2020|2020-09-07|EPI\_ISL\_615671|Original|hCoV-19^^Nordjylland|Human|Department of Virus and Microbiological Special Diagnostics|Albertsen lab|Michaelsen|Denmark

>Spike|hCoV-19/Japan/PG-4596/2020|2020-08-00|EPI\_ISL\_689733|Original|hCoV-19^^Japan|Human|Pathogen Genomics Center|Pathogen Genomics Center|Sekizuka|Japan

>Spike|hCoV-19/Scotland/EDB6437/2020|2020-04-27|EPI\_ISL\_487669|Original|hCoV-19^^Scotland|Human|Virology Department|Wellcome Sanger Institute for the COVID-19 Genomics UK (COG-UK) consortium|Davies|United Kingdom

>Spike|hCoV-19/Denmark/DCGC-10432/2020|2020-11-02|EPI\_ISL\_669966|Original|hCoV-19^^Hovedstaden|Human|Department of Virus and Microbiological Special Diagnostics|Albertsen Lab|Michaelsen|Denmark

>Spike|hCoV-19/India/MH-ACTREC-631/2020|2020-09-11|EPI\_ISL\_723068|Original|hCoV-19^^Maharashtra|Human|Hematopathology Laboratory|Hematopathology Laboratory|Patkar|India

>Spike|hCoV-19/USA/MI-UM-10036662641/2020|2020-10-28|EPI\_ISL\_650079|Original|hCoV-19^^Michigan|Human|University of Michigan Clinical Microbiology Laboratory|Lauring Lab|Valesano|USA

>Spike|hCoV-19/Japan/PG-3904/2020|2020-07-00|EPI\_ISL\_692155|Original|hCoV-19^^Japan|Human|Pathogen Genomics Center|Pathogen Genomics Center|Sekizuka|Japan

>Spike|hCoV-19/England/ALDP-C8EA2E/2020|2020-12-14|EPI\_ISL\_777228|Original|hCoV-19^^England|Human|Lighthouse Lab in Alderley Park|Wellcome Sanger Institute for the COVID-19 Genomics UK (COG-UK) Consortium|Davies|United Kingdom

>Spike|hCoV-19/Denmark/DCGC-22426/2020|2020-12-14|EPI\_ISL\_757557|Original|hCoV-19^^Midtjylland|Human|Department of Virus and Microbiological Special Diagnostics|Albertsen Lab|Michaelsen|Denmark

>Spike|hCoV-19/England/CAMB-825AD/2020|2020-04-13|EPI\_ISL\_443558|Original|hCoV-19^^England|Human|Department of Pathology|Wellcome Sanger Institute for the COVID-19 Genomics UK (COG-UK) consortium|Amato|United Kingdom

>Spike|hCoV-19/Netherlands/NoordBrabant\_58/2020|2020-03-11|EPI\_ISL\_415514|Original|hCoV-19^^Noord Brabant|Human|Dutch COVID-19 response team|Erasmus Medical Center|Oude Munnink|Netherlands

>Spike|hCoV-19/England/QEUEH-B2D363/2020|2020-11-04|EPI\_ISL\_660012|Original|hCoV-19^^England|Human|Lighthouse Lab in Glasgow|Wellcome Sanger Institute for the COVID-19 Genomics UK (COG-UK) Consortium|Davies|United Kingdom

>Spike|hCoV-19/Wales/ALDP-5B35CC/2020|2020-06-17|EPI\_ISL\_558751|Original|hCoV-19^^Wales|Human|Lighthouse Lab in Alderley Park|Wellcome Sanger Institute for the COVID-19 Genomics UK (COG-UK) consortium|Davies|United Kingdom

>Spike|hCoV-19/England/CAMC-B374FA/2020|2020-11-05|EPI\_ISL\_645420|Original|hCoV-19^^England|Human|Lighthouse Lab in Cambridge|Wellcome Sanger Institute for the COVID-19 Genomics UK (COG-UK) Consortium|Davies|United Kingdom

>Spike|hCoV-19/England/MILK-9C2CC1/2020|2020-09-10|EPI\_ISL\_566505|Original|hCoV-19^^England|Human|Lighthouse Lab in Milton Keynes|Wellcome Sanger Institute for the COVID-19 Genomics UK (COG-UK) consortium|Davies|United Kingdom

>Spike|hCoV-19/England/BRIS-126A05/2020|2020-04-08|EPI\_ISL\_459062|Original|hCoV-19^^England|Human|PHE South West Regional Laboratory|Wellcome Sanger Institute for the COVID-19 Genomics UK (COG-UK) consortium|Davies|United Kingdom

>Spike|hCoV-19/India/OR-ILSCV32889/2020|2020-06-05|EPI\_ISL\_481171|Original|hCoV-19^^Odisha|Human|Immunogenomics lab|Immunogenomics lab|Raghav|India

>Spike|hCoV-19/Denmark/DCGC-20408/2020|2020-12-21|EPI\_ISL\_759130|Original|hCoV-19^^Nordjylland|Human|Department of Virus and Microbiological Special Diagnostics|Albertsen Lab|Michaelsen|Denmark

>Spike|hCoV-19/Spain/CM-IBV-003816/2020|2020-05-25|EPI\_ISL\_474820|Original|hCoV-19^^Castilla La Mancha|Human|Complejo Hospitalario Universitario de Albacete|SeqCOVID-SPAIN consortium|IBV(CSIC)|Comas|Spain

>Spike|hCoV-19/USA/WI-GMF-26052/2020|2020-10-15|EPI\_ISL\_660945|Original|hCoV-19^^Wisconsin|Human|Gundersen Molecular Diagnostics Laboratory|Kabara Cancer Research Institute|Kenny|USA

>Spike|hCoV-19/England/CAMB-1B9973/2020|2020-11-07|EPI\_ISL\_664954|Original|hCoV-19^^England|Human|Department of Pathology|COVID-19 Genomics UK (COG-UK) Consortium|Goodfellow|United Kingdom

>Spike|hCoV-19/England/LIVE-9FACC/2020|2020-06-05|EPI\_ISL\_472037|Original|hCoV-19^^England|Human|Liverpool Clinical Laboratories|COVID-19 Genomics UK (COG-UK) Consortium|Haldenby|United Kingdom

>Spike|hCoV-19/USA/NJ-NYUMC627/2020|2020-04-02|EPI\_ISL\_444744|Original|hCoV-19^^New Jersey|Human|NYU Langone Health|Departments of Pathology and Medicine|Maurano|USA

>Spike|hCoV-19/USA/CA-ALSR-1098-SAN/2020|2020-06-17|EPI\_ISL\_483525|Original|hCoV-19^^California|Human|UC San Diego Center for Advanced Laboratory Medicine|Andersen lab at Scripps Research|Gangavarapu|USA

>Spike|hCoV-19/Australia/SAP603/2021|2021-01-02|EPI\_ISL\_771368|Original|hCoV-19^^South Australia|Human|SA Pathology|SA Pathology|Leong|Australia

>Spike|hCoV-19/Latvia/201/2020|2020-09-21|EPI\_ISL\_770034|Original|hCoV-19^^Latvia|Human|E. Gulbja Laboratorija|Latvian Biomedical Research and Study Centre|Zrelavs|Latvia

>Spike|hCoV-19/Finland/5LS20D9/2020|2020-10-05|EPI\_ISL\_756053|Original|hCoV-19^^Uusimaa|Human|Department of Virology and Immunology|Department of Virology|Smura|Finland

>Spike|hCoV-19/USA/MI-MDHHS-SC20641/2020|2020-04-23|EPI\_ISL\_462723|Original|hCoV-19^^Michigan|Human|Michigan Department of Health and Human Services|Michigan Department of Health and Human Services|Blankenship|USA

>Spike|hCoV-19/England/QEUEH-9C851B/2020|2020-09-11|EPI\_ISL\_567001|Original|hCoV-19^^England|Human|Lighthouse Lab in Glasgow|Wellcome Sanger Institute for the COVID-19 Genomics UK (COG-UK) consortium|Davies|United Kingdom

>Spike|hCoV-19/Australia/VIC3027/2020|2020-07-01|EPI\_ISL\_521856|Original|hCoV-19^^Victoria|Human|Victorian Infectious Diseases Reference Laboratory (VIDRL)|VIDRL and MDU-PHL|Schultz|Australia

>Spike|hCoV-19/England/CAMB-8308D/2020|2020-04-13|EPI\_ISL\_443605|Original|hCoV-19^^England|Human|Department of Pathology|Wellcome Sanger Institute for the COVID-19 Genomics UK (COG-UK) consortium|Amato|United Kingdom

>Spike|hCoV-19/England/ALDP-9CBAA0/2020|2020-09-15|EPI\_ISL\_575526|Original|hCoV-19^^England|Human|Lighthouse Lab in Alderley Park|Wellcome Sanger Institute for the COVID-19 Genomics UK (COG-UK) consortium|Davies|United Kingdom

>Spike|hCoV-19/Canada/QC\_AN5/2020|2020-04-19|EPI\_ISL\_515219|Original|hCoV-19^^Quebec|Human|Laboratoire de microbiologie|Smith Laboratory|Smith|Canada

>Spike|hCoV-19/South Africa/KRISP-0067/2020|2020-04-03|EPI\_ISL\_467451|Original|hCoV-19^^KwaZulu-Natal|Human|AMPATH-DBN|KRISP|de Oliveira|South Africa

>Spike|hCoV-19/USA/HI-H200454/2020|2020-09-02|EPI\_ISL\_752997|Original|hCoV-19^^Hawaii|Human|State Laboratories Division|State Laboratories Division|Sultana|USA

>Spike|hCoV-19/England/LIVE-DBE839/2020|2020-10-28|EPI\_ISL\_664664|Original|hCoV-19^^England|Human|Liverpool Clinical Laboratories|COVID-19 Genomics UK (COG-UK) Consortium|Haldenby|United Kingdom

>Spike|hCoV-19/Spain/MD-IBV-99007337/2020|2020-08-25|EPI\_ISL\_582823|Original|hCoV-19^^Madrid|Human|Hospital General Universitario Gregorio Mara\u00f1a|SeqCOVID-SPAIN consortium|IBV (CSIC)|Comas|Spain

>Spike|hCoV-19/Wales/PHWC-36784/2020|2020-04-28|EPI\_ISL\_474710|Original|hCoV-19^^Wales|Human|Originating lab|COVID-19 Genomics UK (COG-UK) Consortium|Moore|United Kingdom

>Spike|hCoV-19/Denmark/DCGC-22558/2020|2020-12-14|EPI\_ISL\_757635|Original|hCoV-19^^Nordjylland|Human|Department of Virus and Microbiological Special Diagnostics|Albertsen Lab|Michaelsen|Denmark

>Spike|hCoV-19/England/NORT-29AD3F/2020|2020-05-25|EPI\_ISL\_492457|Original|hCoV-19^^England|Human|NU-OMICS DNA Sequencing research facility|Wellcome Sanger Institute for the COVID-19 Genomics UK (COG-UK) Consortium|Davies|United Kingdom

>Spike|hCoV-19/Switzerland/TI-ETHZ-420514/2020|2020-12-22|EPI\_ISL\_768238|Original|hCoV-19^^Ticino|Human|Viollier AG|Department of Biosystems Science and Engineering|Nadeau|Switzerland

>Spike|hCoV-19/England/NOTT-11C826/2020|2020-11-17|EPI\_ISL\_652412|Original|hCoV-19^^England|Human|Queens Medical Centre|COVID-19 Genomics UK (COG-UK) Consortium|Loose|United Kingdom

>Spike|hCoV-19/England/ALDP-A6D2C5/2020|2020-10-14|EPI\_ISL\_608288|Original|hCoV-19^^England|Human|Lighthouse Lab in Alderley Park|Wellcome Sanger Institute for the COVID-19 Genomics UK (COG-UK) consortium|Davies|United Kingdom

>Spike|hCoV-19/Wales/MILK-9C23CC/2020|2020-09-09|EPI\_ISL\_566587|Original|hCoV-19^^Wales|Human|Lighthouse Lab in Milton Keynes|Wellcome Sanger Institute for the COVID-19 Genomics UK (COG-UK) consortium|Davies|United Kingdom

>Spike|hCoV-19/Denmark/DCGC-2117/2020|2020-07-27|EPI\_ISL\_618379|Original|hCoV-19^^Sjaelland|Human|Department of Virus and Microbiological Special Diagnostics|Albertsen lab|Michaelsen|Denmark

>Spike|hCoV-19/USA/TX-HMH-4764/2020|2020-06-21|EPI\_ISL\_544314|Original|hCoV-19^^Texas|Human|Houston Methodist Hospital|Houston Methodist Hospital|Long|USA

>Spike|hCoV-19/Wales/ALDP-BB94D2/2020|2020-11-20|EPI\_ISL\_710734|Original|hCoV-19^^Wales|Human|Lighthouse Lab in Alderley Park|Wellcome Sanger Institute for the COVID-19 Genomics UK (COG-UK) Consortium|Davies|United Kingdom

>Spike|hCoV-19/Russia/Buryatia-87105/2020|2020-03-30|EPI\_ISL\_428920|Vero|hCoV-19^^Buryatia|Human|State Research Center of Virology and Biotechnology VECTOR|State Research Center of Virology and Biotechnology VECTOR|Shvalov|Russia

>Spike|hCoV-19/Spain/MD-IBV-003668/2020|2020-04-01|EPI\_ISL\_467209|Original|hCoV-19^^Madrid|Human|Hospital General Universitario Gregorio Mara\u00f1\u00f3n|SeqCOVID-SPAIN consortium/IBV (CSIC)|Comas|Spain

>Spike|hCoV-19/USA/WA-S265/2020|2020-03-05|EPI\_ISL\_430119|Original|hCoV-19^^Washington|Human|Seattle Flu Study|Seattle Flu Study|Bedford|USA

>Spike|hCoV-19/England/CAMB-1AB349/2020|2020-04-19|EPI\_ISL\_470159|Original|hCoV-19^^England|Human|Department of Pathology|Wellcome Sanger Institute for the COVID-19 Genomics UK (COG-UK) consortium|Davies|United Kingdom

>Spike|hCoV-19/England/QEUH-9F8011/2020|2020-09-27|EPI\_ISL\_589006|Original|hCoV-19^^England|Human|Lighthouse Lab in Glasgow|Wellcome Sanger Institute for the COVID-19 Genomics UK (COG-UK) consortium|Davies|United Kingdom

>Spike|hCoV-19/Scotland/QEUH-96D69D/2020|2020-08-20|EPI\_ISL\_534567|Original|hCoV-19^^Scotland|Human|NHSGGC West of Scotland Specialist Virology Centre / MRC-University of Glasgow Centre for Virus Research|Wellcome Sanger Institute for the COVID-19 Genomics UK (COG-UK) consortium|Davies|United Kingdom

>Spike|hCoV-19/Japan/PG-2225/2020|2020-04-00|EPI\_ISL\_685830|Original|hCoV-19^^Japan|Human|Pathogen Genomics Center|Pathogen Genomics Center|Sekizuka|Japan

>Spike|hCoV-19/Northern Ireland/NIRE-233503/2020|2020-10-04|EPI\_ISL\_680297|Original|hCoV-19^^Northern Ireland|Human|Regional Virus Laboratory|COVID-19 Genomics UK (COG-UK) Consortium|Fairley|United Kingdom

>Spike|hCoV-19/USA/MI-MDHHS-SC20676/2020|2020-05-14|EPI\_ISL\_471700|Original|hCoV-19^^Michigan|Human|Michigan Department of Health and Human Services|Michigan Department of Health and Human Services|Blankenship|USA

>Spike|hCoV-19/Portugal/PT0163/2020|2020-03-28|EPI\_ISL\_453879|Original|hCoV-19^^Portugal|Human|unknown|Instituto Nacional de Saude (INSA)|Borges|Portugal

>Spike|hCoV-19/USA/UT-UPHL-201214564/2020|2020-04-03|EPI\_ISL\_672535|Original|hCoV-19^^Utah|Human|Utah Public Health Laboratory|Utah Public Health Laboratory|Young|USA

>Spike|hCoV-19/Scotland/CVR4361/2020|2020-09-14|EPI\_ISL\_573786|Original|hCoV-19^^Scotland|Human|West of Scotland Specialist Virology Centre|COVID-19 Genomics UK (COG-UK) Consortium|Robertson|United Kingdom

>Spike|hCoV-19/United Arab Emirates/0880/2020|2020-05-19|EPI\_ISL\_699018|Original|hCoV-19^^Abu Dhabi|Human|Group 42 (G42) Healthcare|G42 Healthcare|Ogrodzki|United Arab Emirates

>Spike|hCoV-19/USA/MA-MGH-00091/2020|2020-03-26|EPI\_ISL\_460348|Original|hCoV-19^^Massachusetts|Human|Massachusetts General Hospital|Infectious Disease Program|Lemieux|USA

>Spike|hCoV-19/USA/ID-UW-1935/2020|2020-03-22|EPI\_ISL\_424319|Original|hCoV-19^^Idaho|Human|UW Virology Lab|UW Virology Lab|Roychoudhury|USA

>Spike|hCoV-19/England/CAMC-94774B/2020|2020-07-22|EPI\_ISL\_556551|Original|hCoV-19^^England|Human|Lighthouse Lab in Cambridge|Wellcome Sanger Institute for the COVID-19 Genomics UK (COG-UK) consortium|Davies|United Kingdom

>Spike|hCoV-19/Germany/NW-HHU-67/2020|2020-03-25|EPI\_ISL\_523938|Original|hCoV-19^^North Rhine-Westphalia|Human|Center of Medical Microbiology|Center of Medical Microbiology|Wienemann|Germany

>Spike|hCoV-19/Wales/ALDP-AA1B42/2020|2020-10-22|EPI\_ISL\_634768|Original|hCoV-19^^Wales|Human|Lighthouse Lab in Alderley Park|Wellcome Sanger Institute for the COVID-19 Genomics UK (COG-UK) consortium|Davies|United Kingdom

>Spike|hCoV-19/England/CAMB-7324E/2020|2020-03-22|EPI\_ISL\_440132|Original|hCoV-19^^England|Human|Department of Pathology|Wellcome Sanger Institute for the COVID-19 Genomics UK (COG-UK) consortium|Amato|United Kingdom

>Spike|hCoV-19/USA/VA-DCLS-1607/2020|2020-08-18|EPI\_ISL\_614017|Original|hCoV-19^^Virginia|Human|Virginia DCLS|Virginia DCLS|St. Jacques|USA

>Spike|hCoV-19/England/QEUH-A4D137/2020|2020-10-05|EPI\_ISL\_596094|Original|hCoV-19^^England|Human|Quadram Institute Bioscience|COVID-19 Genomics UK (COG-UK) Consortium|Alikhan|United Kingdom

>Spike|hCoV-19/England/LIVE-A9CBA/2020|2020-03-24|EPI\_ISL\_517348|Original|hCoV-19^^England|Human|Liverpool Clinical Laboratories|COVID-19 Genomics UK (COG-UK) Consortium|Haldenby|United Kingdom

>Spike|hCoV-19/Canada/QC-LSPQ-L00217833/2020|2020-03-13|EPI\_ISL\_535768|Original|hCoV-19^^Quebec|Human|Centre hospitalier de St-Mary|Laboratoire de sant e publique du Qu bec|Moreira|Canada

>Spike|hCoV-19/England/MILK-ACEB03/2020|2020-10-20|EPI\_ISL\_629745|Original|hCoV-19^^England|Human|Lighthouse Lab in Milton Keynes|Wellcome Sanger Institute for the COVID-19 Genomics UK (COG-UK) consortium|Davies|United Kingdom

>Spike|hCoV-19/England/ALDP-A67F1F/2020|2020-10-12|EPI\_ISL\_608366|Original|hCoV-19^^England|Human|Lighthouse Lab in Alderley Park|Wellcome Sanger Institute for the COVID-19 Genomics UK (COG-UK) consortium|Davies|United Kingdom

>Spike|hCoV-19/Scotland/EDB8440/2020|2020-10-16|EPI\_ISL\_612359|Original|hCoV-19^^Scotland|Human|Virology Department|COVID-19 Genomics UK (COG-UK) Consortium|McHugh|United Kingdom

>Spike|hCoV-19/Australia/VIC5549/2020|2020-07-21|EPI\_ISL\_518378|Original|hCoV-19^^Victoria|Human|Microbiological Diagnostic Unit - Public Health Laboratory (MDU-PHL)|MDU-PHL|Schultz|Australia

>Spike|hCoV-19/England/LIVE-A48D9/2020|2020-03-10|EPI\_ISL\_499824|Original|hCoV-19^^England|Human|Liverpool Clinical Laboratories|COVID-19 Genomics UK (COG-UK) Consortium|Haldenby|United Kingdom

>Spike|hCoV-19/USA/AZ-TG395399/2020|2020-06-22|EPI\_ISL\_694721|Original|hCoV-19^^Arizona|Human|TGen North|TGen North|French|USA

>Spike|hCoV-19/Netherlands/Tilburg\_/2020|2020-00-00|EPI\_ISL\_413585|Original|hCoV-19^^Tilburg|Human|unknown|Erasmus Medical Center|Oude Munnink|Netherlands

>Spike|hCoV-19/USA/NY-NYUMC578/2020|2020-03-30|EPI\_ISL\_444695|Original|hCoV-19^^New York|Human|NYU Langone Health|Departments of Pathology and Medicine|Maurano|USA

>Spike|hCoV-19/England/20124036202/2020|2020-03-17|EPI\_ISL\_418717|Original|hCoV-19^^England|Human|Respiratory Virus Unit|Respiratory Virus Unit|Platt|United Kingdom

>Spike|hCoV-19/Chile/RM-165839/2020|2020-08-31|EPI\_ISL\_746696|Original|hCoV-19^^Region Metropolitana de Santiago|Human|Genetica Molecular and Subdepartamento de Virologia ISP Chile|Instituto de Salud Publica de Chile|Tognarelli|Chile

>Spike|hCoV-19/Japan/PG-6898/2020|2020-08-00|EPI\_ISL\_688006|Original|hCoV-19^^Japan|Human|Pathogen Genomics Center|Pathogen Genomics Center|Sekizuka|Japan

>Spike|hCoV-19/Wales/PHWC-16F8E8/2020|2020-10-07|EPI\_ISL\_586036|Original|hCoV-19^^Wales|Human|Wales Specialist Virology Centre Sequencing lab|COVID-19 Genomics UK (COG-UK) Consortium|Moore|United Kingdom

>Spike|hCoV-19/South Korea/KCDC2538/2020|2020-06-20|EPI\_ISL\_514941|Original|hCoV-19^^South Korea|Human|Division of Viral Diseases|Division of Viral Diseases|Kim|South Korea

>Spike|hCoV-19/USA/UT-02543/2020|2020-04-24|EPI\_ISL\_487200|Original|hCoV-19^^Utah|Human|Utah Public Health Laboratory|Utah Public Health Laboratory|Butz|USA

>Spike|hCoV-19/England/QEUH-9B8DAD/2020|2020-09-07|EPI\_ISL\_549770|Original|hCoV-19^^England|Human|Lighthouse Lab in Glasgow|Wellcome Sanger Institute for the COVID-19 Genomics UK (COG-UK) consortium|Davies|United Kingdom

>Spike|hCoV-19/USA/VA-DCLS-2538/2020|2020-11-19|EPI\_ISL\_734254|Original|hCoV-19^^Virginia|Human|Virginia Division of Consolidated Laboratory Services (DCLS)|Virginia Division of Consolidated Laboratory Services (DCLS)|St. Jacques|USA

>Spike|hCoV-19/USA/TX-HMH-MCoV-13321/2020|2020-08-24|EPI\_ISL\_788469|Original|hCoV-19^^Texas|Human|Houston Methodist Hospital|Houston Methodist Hospital|Long|USA

>Spike|hCoV-19/Wales/PHWC-485A4D/2020|2020-10-25|EPI\_ISL\_628241|Original|hCoV-19^^Wales|Human|Wales Specialist Virology Centre Sequencing lab|COVID-19 Genomics UK (COG-UK) Consortium|Moore|United Kingdom

>Spike|hCoV-19/Guangzhou/GZMU0077/2020|2020-02-11|EPI\_ISL\_457689|Original|hCoV-19^^Guangzhou|Human|The First Affiliated Hospital of Guangzhou Medical University|BGI-shenzhen & The First Affiliated Hospital of Guangzhou Medical University|Ji|China

>Spike|hCoV-19/England/CAMC-B7967E/2020|2020-11-13|EPI\_ISL\_667968|Original|hCoV-19^^England|Human|Lighthouse Lab in Cambridge|Wellcome Sanger Institute for the COVID-19 Genomics UK (COG-UK) Consortium|Davies|United Kingdom

>Spike|hCoV-19/Scotland/GCVR-16FC73/2020|2020-03-21|EPI\_ISL\_489667|Original|hCoV-19^^Scotland|Human|NHSGGC West of Scotland Specialist Virology Centre / MRC-University of Glasgow Centre for Virus Research|Wellcome Sanger Institute for the COVID-19 Genomics UK (COG-UK) consortium|Davies|United Kingdom

>Spike|hCoV-19/Australia/TAS95/2020|2020-04-09|EPI\_ISL\_522765|Original|hCoV-19^^Tasmania|Human|Royal Hobart Hospital Microbiology Department|MDU-PHL|Schultz|Australia

>Spike|hCoV-19/Australia/VIC3989/2020|2020-07-16|EPI\_ISL\_519379|Original|hCoV-19^^Victoria|Human|Microbiological Diagnostic Unit - Public Health Laboratory (MDU-PHL)|MDU-PHL|Schultz|Australia

>Spike|hCoV-19/Denmark/DCGC-7329/2020|2020-10-12|EPI\_ISL\_619296|Original|hCoV-19^^Syddanmark|Human|Department of Virus and Microbiological Special Diagnostics|Albertsen lab|Michaelsen|Denmark

>Spike|hCoV-19/England/CAMC-A81E7C/2020|2020-10-14|EPI\_ISL\_610802|Original|hCoV-19^^England|Human|Lighthouse Lab in Cambridge|Wellcome Sanger Institute for the COVID-19 Genomics UK (COG-UK) consortium|Davies|United Kingdom

>Spike|hCoV-19/England/QEUH-AD2058/2020|2020-10-26|EPI\_ISL\_634063|Original|hCoV-19^^England|Human|Lighthouse Lab in Glasgow|Wellcome Sanger Institute for the COVID-19 Genomics UK (COG-UK) consortium|Davies|United Kingdom

>Spike|hCoV-19/England/BRIS-122F37/2020|2020-04-04|EPI\_ISL\_440639|Original|hCoV-19^^England|Human|PHE South West Regional Laboratory|Wellcome Sanger Institute for the COVID-19 Genomics UK (COG-UK) consortium|Amato|United Kingdom

>Spike|hCoV-19/South Africa/KRISP-K002898/2020|2020-09-04|EPI\_ISL\_602710|Original|hCoV-19^^KwaZulu-Natal|Human|NHLS-IALCH|KRISP|de Oliveira|South Africa

>Spike|hCoV-19/England/LIVE-9C519/2020|2020-03-21|EPI\_ISL\_449547|Original|hCoV-19^^England|Human|Liverpool Clinical Laboratories|COVID-19 Genomics UK (COG-UK) Consortium|Haldenby|United Kingdom

>Spike|hCoV-19/USA/WA-UW-13016/2020|2020-06-30|EPI\_ISL\_570837|Original|hCoV-19^^Washington|Human|UW Virology Lab|UW Virology Lab|Roychoudhury|USA

>Spike|hCoV-19/Denmark/DCGC-20163/2020|2020-11-30|EPI\_ISL\_747577|Original|hCoV-19^^Hovedstaden|Human|Department of Virus and Microbiological Special Diagnostics|Albertsen Lab|Michaelsen|Denmark

>Spike|hCoV-19/Denmark/DCGC-11921/2020|2020-10-19|EPI\_ISL\_670537|Original|hCoV-19^^Syddanmark|Human|Department of Virus and Microbiological Special Diagnostics|Albertsen Lab|Michaelsen|Denmark

>Spike|hCoV-19/England/MILK-B398B0/2020|2020-11-01|EPI\_ISL\_679649|Original|hCoV-19^^England|Human|Oxford Viromics|COVID-19 Genomics UK (COG-UK) Consortium|Golubchik|United Kingdom

>Spike|hCoV-19/England/QEUH-943387/2020|2020-07-29|EPI\_ISL\_532574|Original|hCoV-19^^England|Human|Lighthouse Lab in Glasgow|Wellcome Sanger Institute for the COVID-19 Genomics UK (COG-UK) consortium|Davies|United Kingdom

>Spike|hCoV-19/Hungary/US-57572w/2020|2020-10-02|EPI\_ISL\_677796|Original|hCoV-19^^B\u00e9k\u00e9s county|Human|University of Szeged|National Laboratory of Virology|Kemenesi|Hungary

>Spike|hCoV-19/United Arab Emirates/0164/2020|2020-05-18|EPI\_ISL\_698351|Original|hCoV-19^^Abu Dhabi|Human|Group 42 (G42) Healthcare|G42 Healthcare|Ogrodzki|United Arab Emirates

>Spike|hCoV-19/England/QEUEH-9FF584/2020|2020-10-02|EPI\_ISL\_600202|Original|hCoV-19^^England|Human|Lighthouse Lab in Glasgow|Wellcome Sanger Institute for the COVID-19 Genomics UK (COG-UK) consortium|Davies|United Kingdom

>Spike|hCoV-19/Northern Ireland/NIRE-233345/2020|2020-09-29|EPI\_ISL\_680282|Original|hCoV-19^^Northern Ireland|Human|Regional Virus Laboratory|COVID-19 Genomics UK (COG-UK) Consortium|Fairley|United Kingdom

>Spike|hCoV-19/USA/TX-HMH-6798/2020|2020-06-25|EPI\_ISL\_546250|Original|hCoV-19^^Texas|Human|Houston Methodist Hospital|Houston Methodist Hospital|Long|USA

>Spike|hCoV-19/Australia/VIC13306/2020|2020-07-27|EPI\_ISL\_563662|Original|hCoV-19^^Victoria|Human|Microbiological Diagnostic Unit - Public Health Laboratory (MDU-PHL)|MDU-PHL|Schultz|Australia

>Spike|hCoV-19/England/QEUEH-9F6462/2020|2020-09-25|EPI\_ISL\_589013|Original|hCoV-19^^England|Human|Lighthouse Lab in Glasgow|Wellcome Sanger Institute for the COVID-19 Genomics UK (COG-UK) consortium|Davies|United Kingdom

>Spike|hCoV-19/England/MILK-624CEE/2020|2020-07-06|EPI\_ISL\_557917|Original|hCoV-19^^England|Human|Lighthouse Lab in Milton Keynes|Wellcome Sanger Institute for the COVID-19 Genomics UK (COG-UK) consortium|Davies|United Kingdom

>Spike|hCoV-19/England/MILK-B55827/2020|2020-11-06|EPI\_ISL\_657417|Original|hCoV-19^^England|Human|Lighthouse Lab in Milton Keynes|Wellcome Sanger Institute for the COVID-19 Genomics UK (COG-UK) Consortium|Davies|United Kingdom

>Spike|hCoV-19/England/ALDP-A507D5/2020|2020-10-07|EPI\_ISL\_597538|Original|hCoV-19^^England|Human|Lighthouse Lab in Alderley Park|Wellcome Sanger Institute for the COVID-19 Genomics UK (COG-UK) consortium|Davies|United Kingdom

>Spike|hCoV-19/England/MILK-A69F0E/2020|2020-10-09|EPI\_ISL\_608725|Original|hCoV-19^^England|Human|Lighthouse Lab in Milton Keynes|Wellcome Sanger Institute for the COVID-19 Genomics UK (COG-UK) consortium|Davies|United Kingdom

>Spike|hCoV-19/Northern Ireland/QEUEH-96406B/2020|2020-08-12|EPI\_ISL\_536871|Original|hCoV-19^^Northern Ireland|Human|Lighthouse Lab in Glasgow|Wellcome Sanger Institute for the COVID-19 Genomics UK (COG-UK) consortium|Davies|United Kingdom

>Spike|hCoV-19/England/ALDP-955A8D/2020|2020-06-12|EPI\_ISL\_555414|Original|hCoV-19^^England|Human|Lighthouse Lab in Alderley Park|Wellcome Sanger Institute for the COVID-19 Genomics UK (COG-UK) consortium|Davies|United Kingdom

>Spike|hCoV-19/Sweden/20-21542/2020|2020-08-02|EPI\_ISL\_582784|Original|hCoV-19^^Uppsala|Human|Uppsala klinisk mikrobiologi|The Public Health Agency of Sweden|Svartstr\u00f6m|Sweden

>Spike|hCoV-19/USA/OR-OHSU-2743/2020|2020-08-28|EPI\_ISL\_667299|Original|hCoV-19^^Oregon|Human|OHSU Lab Services Molecular Microbiology Lab|Oregon SARS-CoV-2 Genome Sequencing Center|O'Roak|USA

>Spike|hCoV-19/Germany/BE-ChVir1959/2020|2020-03-07|EPI\_ISL\_729489|Original|hCoV-19^^Berlin|Human|Charit\u00e9 Universit\u00e4tsmedizin Berlin|Charit\u00e9 Universit\u00e4tsmedizin Berlin|Muehlemann|Germany

>Spike|hCoV-19/USA/TX-HMH-2419/2020|2020-05-27|EPI\_ISL\_545300|Original|hCoV-19^^Texas|Human|Houston Methodist Hospital|Houston Methodist Hospital|Long|USA

>Spike|hCoV-19/England/QEUEH-A8C0B7/2020|2020-10-16|EPI\_ISL\_643312|Original|hCoV-19^^England|Human|Lighthouse Lab in Glasgow|Wellcome Sanger Institute for the COVID-19 Genomics UK (COG-UK) Consortium|Davies|United Kingdom

>Spike|hCoV-19/England/LOND-D459D/2020|2020-04-08|EPI\_ISL\_444136|Original|hCoV-19^^England|Human|University College London|COVID-19 Genomics UK (COG-UK) Consortium|Roy|United Kingdom

>Spike|hCoV-19/Jordan/AM-ALSR-4034/2020|2020-10-03|EPI\_ISL\_636394|Original|hCoV-19^^Amman|Human|Biolab Diagnostic Laboratories|Andersen lab at Scripps Research|Gangavarapu|Jordan

>Spike|hCoV-19/England/ALDP-CB4F3F/2020|2020-12-17|EPI\_ISL\_761804|Original|hCoV-19^^England|Human|Lighthouse Lab in Alderley Park|Wellcome Sanger Institute for the COVID-19 Genomics UK (COG-UK) Consortium|Davies|United Kingdom



>Spike|hCoV-19/Canada/ON-S1770/2020|2020-11-08|EPI\_ISL\_755771|Original|hCoV-19^^Ontario|Human|Toronto Invasive Bacterial Diseases Network|McMaster University|McArthur|Canada

>Spike|hCoV-19/England/CAMC-AAF9FF/2020|2020-10-22|EPI\_ISL\_631135|Original|hCoV-19^^England|Human|Lighthouse Lab in Cambridge|Wellcome Sanger Institute for the COVID-19 Genomics UK (COG-UK) consortium|Davies|United Kingdom

>Spike|hCoV-19/Wales/PHWC-48B35B/2020|2020-11-05|EPI\_ISL\_666225|Original|hCoV-19^^Wales|Human|Wales Specialist Virology Centre Sequencing lab|COVID-19 Genomics UK (COG-UK) Consortium|Moore|United Kingdom

>Spike|hCoV-19/USA/CA-CZB-12839/2020|2020-10-20|EPI\_ISL\_648485|Original|hCoV-19^^California|Human|Santa Clara County Public Health Laboratory|Chan-Zuckerberg Biohub|Bhatt|USA

>Spike|hCoV-19/England/CAMC-B3279C/2020|2020-11-05|EPI\_ISL\_659695|Original|hCoV-19^^England|Human|Lighthouse Lab in Cambridge|Wellcome Sanger Institute for the COVID-19 Genomics UK (COG-UK) Consortium|Davies|United Kingdom

>Spike|hCoV-19/Australia/VIC12859/2020|2020-07-28|EPI\_ISL\_591798|Original|hCoV-19^^Victoria|Human|Microbiological Diagnostic Unit - Public Health Laboratory (MDU-PHL)|MDU-PHL|Schultz|Australia

>Spike|hCoV-19/Australia/VIC1574/2020|2020-00-00|EPI\_ISL\_456493|Original|hCoV-19^^Victoria|Human|Victorian Infectious Diseases Reference Laboratory (VIDRL)|Microbiological Diagnostic Unit Public Health Laboratory and Victorian Infectious Diseases Reference Laboratory|Schultz|Australia

>Spike|hCoV-19/Scotland/QEUH-AD01C0/2020|2020-10-26|EPI\_ISL\_649764|Original|hCoV-19^^Scotland|Human|Lighthouse Lab in Glasgow|Wellcome Sanger Institute for the COVID-19 Genomics UK (COG-UK) Consortium|Davies|United Kingdom

>Spike|hCoV-19/Australia/VIC8170/2020|2020-08-13|EPI\_ISL\_562663|Original|hCoV-19^^Victoria|Human|Microbiological Diagnostic Unit - Public Health Laboratory (MDU-PHL)|MDU-PHL|Schultz|Australia

>Spike|hCoV-19/Scotland/CVR2215/2020|2020-04-12|EPI\_ISL\_438879|Original|hCoV-19^^Scotland|Human|West of Scotland Specialist Virology Centre|COVID-19 Genomics UK (COG-UK) Consortium|Robertson|United Kingdom

>Spike|hCoV-19/England/QEUH-B1264A/2020|2020-11-02|EPI\_ISL\_642616|Original|hCoV-19^^England|Human|Lighthouse Lab in Glasgow|Wellcome Sanger Institute for the COVID-19 Genomics UK (COG-UK) Consortium|Davies|United Kingdom

>Spike|hCoV-19/England/SHEF-BFCEE/2020|2020-03-07|EPI\_ISL\_416733|Original|hCoV-19^^England|Human|Virology Department|Department of Infection|de Silva|United Kingdom

>Spike|hCoV-19/Australia/VIC8189/2020|2020-08-14|EPI\_ISL\_564891|Original|hCoV-19^^Victoria|Human|Microbiological Diagnostic Unit - Public Health Laboratory (MDU-PHL)|MDU-PHL|Schultz|Australia

>Spike|hCoV-19/England/LIVE-1DDA58/2020|2020-09-28|EPI\_ISL\_611517|Original|hCoV-19^^England|Human|Liverpool Clinical Laboratories|COVID-19 Genomics UK (COG-UK) Consortium|Haldenby|United Kingdom

>Spike|hCoV-19/USA/CT-CDC-2-3693591/2020|2020-11-05|EPI\_ISL\_747134|Original|hCoV-19^^Connecticut|Human|Respiratory Viruses Branch|Respiratory Viruses Branch|Queen|USA

>Spike|hCoV-19/USA/WA-UW-3340/2020|2020-03-26|EPI\_ISL\_491017|Original|hCoV-19^^Washington|Human|UW Virology Lab|UW Virology Lab|Roychoudhury|USA

>Spike|hCoV-19/England/CAMB-1B628A/2020|2020-09-16|EPI\_ISL\_572472|Original|hCoV-19^^England|Human|Department of Pathology|COVID-19 Genomics UK (COG-UK) Consortium|Goodfellow|United Kingdom

>Spike|hCoV-19/Japan/PG-2293/2020|2020-04-00|EPI\_ISL\_685898|Original|hCoV-19^^Japan|Human|Pathogen Genomics Center|Pathogen Genomics Center|Sekizuka|Japan

>Spike|hCoV-19/Luxembourg/LNS6222636/2020|2020-10-29|EPI\_ISL\_744384|Original|hCoV-19^^Luxembourg|Human|Laboratoire national de sant\u00e9|Laboratoire national de sant\u00e9|Wienecke-Baldacchino|Luxembourg

>Spike|hCoV-19/Luxembourg/LNS3955853/2020|2020-11-22|EPI\_ISL\_740395|Original|hCoV-19^^Luxembourg|Human|Laboratoire national de sant\u00e9|Laboratoire national de sant\u00e9|Wienecke-Baldacchino|Luxembourg

>Spike|hCoV-19/England/QEUH-AD5A48/2020|2020-10-26|EPI\_ISL\_634693|Original|hCoV-19^^England|Human|Lighthouse Lab in Glasgow|Wellcome Sanger Institute for the COVID-19 Genomics UK (COG-UK) consortium|Davies|United Kingdom

>Spike|hCoV-19/England/20138088004/2020|2020-03-24|EPI\_ISL\_421845|Original|hCoV-19^^England|Human|Respiratory Virus Unit|Respiratory Virus Unit|Platt|United Kingdom

>Spike|hCoV-19/England/NORW-E760D/2020|2020-05-04|EPI\_ISL\_461805|Original|hCoV-19^^England|Human|Quadram Institute Bioscience|COVID-19 Genomics UK (COG-UK) Consortium|Alikhan|United Kingdom

>Spike|hCoV-19/England/BRIS-12B165/2020|2020-05-10|EPI\_ISL\_469827|Original|hCoV-19^^England|Human|PHE South West Regional Laboratory|Wellcome Sanger Institute for the COVID-19 Genomics UK (COG-UK) consortium|Davies|United Kingdom

>Spike|hCoV-19/Japan/PG-5375/2020|2020-08-00|EPI\_ISL\_690478|Original|hCoV-19^^Japan|Human|Fukuoka Institute of Health and Environmental Sciences|Pathogen Genomics Center|Sekizuka|Japan

>Spike|hCoV-19/USA/NY-Wadsworth-264178-01/2020|2020-11-05|EPI\_ISL\_734419|Original|hCoV-19^^New York|Human|Wadsworth Center|Wadsworth Center|Lasek-Nesselquist|USA

>Spike|hCoV-19/Japan/PG-4132/2020|2020-07-00|EPI\_ISL\_692371|Original|hCoV-19^^Japan|Human|Pathogen Genomics Center|Pathogen Genomics Center|Sekizuka|Japan

>Spike|hCoV-19/USA/UT-UPHL-2012514756/2020|2020-08-10|EPI\_ISL\_745861|Original|hCoV-19^^Utah|Human|Ginkgo Bioworks Clinical Laboratory|Utah Public Health Laboratory|Young|USA

>Spike|hCoV-19/Denmark/DCGC-11695/2020|2020-10-26|EPI\_ISL\_670522|Original|hCoV-19^^Sjaelland|Human|Department of Virus and Microbiological Special Diagnostics|Albertsen Lab|Michaelsen|Denmark

>Spike|hCoV-19/England/CAMC-BBB8E3/2020|2020-11-21|EPI\_ISL\_704297|Original|hCoV-19^^England|Human|Department of Pathology|COVID-19 Genomics UK (COG-UK) Consortium|Goodfellow|United Kingdom

>Spike|hCoV-19/Scotland/QEUA-C14911/2020|2020-12-06|EPI\_ISL\_710672|Original|hCoV-19^^Scotland|Human|Lighthouse Lab in Glasgow|Wellcome Sanger Institute for the COVID-19 Genomics UK (COG-UK) Consortium|Davies|United Kingdom

>Spike|hCoV-19/England/QEUA-CAD1D9/2020|2020-12-20|EPI\_ISL\_760956|Original|hCoV-19^^England|Human|Lighthouse Lab in Glasgow|Wellcome Sanger Institute for the COVID-19 Genomics UK (COG-UK) Consortium|Davies|United Kingdom

>Spike|hCoV-19/England/LIVE-AA475/2020|2020-05-20|EPI\_ISL\_517456|Original|hCoV-19^^England|Human|Liverpool Clinical Laboratories|COVID-19 Genomics UK (COG-UK) Consortium|Haldenby|United Kingdom

>Spike|hCoV-19/USA/TX-HMH-MCoV-18364/2020|2020-11-18|EPI\_ISL\_784712|Original|hCoV-19^^Texas|Human|Houston Methodist Hospital|Houston Methodist Hospital|Long|USA

>Spike|hCoV-19/Switzerland/BL-ETHZ-310385/2020|2020-10-08|EPI\_ISL\_603459|Original|hCoV-19^^Basel-Landschaft|Human|Viollier AG|Department of Biosystems Science and Engineering|Nadeau|Switzerland

>Spike|hCoV-19/England/NORT-2843AF/2020|2020-03-19|EPI\_ISL\_488673|Original|hCoV-19^^England|Human|NU-OMICS DNA Sequencing research facility|Wellcome Sanger Institute for the COVID-19 Genomics UK (COG-UK) consortium|Davies|United Kingdom

>Spike|hCoV-19/England/QEUA-9F3878/2020|2020-09-24|EPI\_ISL\_588719|Original|hCoV-19^^England|Human|Lighthouse Lab in Glasgow|Wellcome Sanger Institute for the COVID-19 Genomics UK (COG-UK) consortium|Davies|United Kingdom

>Spike|hCoV-19/Iceland/253/2020|2020-03-17|EPI\_ISL\_417581|Original|hCoV-19^^Reykjavik|Human|The National University Hospital of Iceland|deCODE genetics|J\u00f3nsson|Iceland

>Spike|hCoV-19/England/ALDP-94E1A0/2020|2020-06-17|EPI\_ISL\_555547|Original|hCoV-19^^England|Human|Lighthouse Lab in Alderley Park|Wellcome Sanger Institute for the COVID-19 Genomics UK (COG-UK) consortium|Davies|United Kingdom

>Spike|hCoV-19/Denmark/DCGC-12557/2020|2020-11-16|EPI\_ISL\_682738|Original|hCoV-19^^Hovedstaden|Human|Department of Virus and Microbiological Special Diagnostics|Albertsen Lab|Michaelsen|Denmark

>Spike|hCoV-19/Russia/StPetersburg-RII7658S/2020|2020-04-21|EPI\_ISL\_450265|Original|hCoV-19^^Saint Petersburg|Human|WHO National Influenza Centre Russian Federation|WHO National Influenza Centre Russian Federation|Komissarov|Russia

>Spike|hCoV-19/Norway/CS-13/2020|2020-04-14|EPI\_ISL\_666593|Original|hCoV-19^^Viken|Human|Dept. of Microbiology and Infection Control|Dept. of Microbiology and Infection Control|Hesselberg L\u00f8vestad|Norway

>Spike|hCoV-19/England/ALDP-C230CF/2020|2020-12-06|EPI\_ISL\_733605|Original|hCoV-19^^England|Human|Lighthouse Lab in Alderley Park|Wellcome Sanger Institute for the COVID-19 Genomics UK (COG-UK) Consortium|Davies|United Kingdom

>Spike|hCoV-19/USA/UT-UPHL-03195/2020|2020-05-06|EPI\_ISL\_576368|Original|hCoV-19^^Utah|Human|Utah Public Health Laboratory|Utah Public Health Laboratory|Young|USA

>Spike|hCoV-19/Canada/QC-LSPQ-L00242576/2020|2020-03-29|EPI\_ISL\_536328|Original|hCoV-19^^Quebec|Human|H\u00f8pital Charles-LeMoyn\u00e9|Laboratoire de sant\u00e9 publique du Qu\u00e9bec|Moreira|Canada

>Spike|hCoV-19/USA/TX-HMH-7974/2020|2020-06-30|EPI\_ISL\_545756|Original|hCoV-19^^Texas|Human|Houston Methodist Hospital|Houston Methodist Hospital|Long|USA

>Spike|hCoV-19/Wales/PHWC-16E97D/2020|2020-10-01|EPI\_ISL\_585796|Original|hCoV-19^^Wales|Human|Wales Specialist Virology Centre Sequencing lab|COVID-19 Genomics UK (COG-UK) Consortium|Moore|United Kingdom

>Spike|hCoV-19/England/20126104304/2020|2020-03-18|EPI\_ISL\_423914|Original|hCoV-19^^England|Human|Respiratory Virus Unit|Respiratory Virus Unit|Platt|United Kingdom

>Spike|hCoV-19/Sweden/20-13176/2020|2020-12-28|EPI\_ISL\_766719|Original|hCoV-19^^Stockholm|Human|A05 Biomedicum|The Public Health Agency of Sweden|Svartstr\u00f8m|Sweden

>Spike|hCoV-19/England/QEUA-A0B038/2020|2020-10-01|EPI\_ISL\_599351|Original|hCoV-19^^England|Human|Lighthouse Lab in Glasgow|Wellcome Sanger Institute for the COVID-19 Genomics UK (COG-UK) consortium|Davies|United Kingdom

>Spike|hCoV-19/Netherlands/NB-RIVM-20272/2020|2020-11-25|EPI\_ISL\_723414|Original|hCoV-19^^Noord-Brabant|Human|Dutch COVID-19 response team|National Institute for Public Health and the Environment (RIVM)|Meijer|Netherlands

>Spike|hCoV-19/Norway/7051/2020|2020-12-17|EPI\_ISL\_775458|Original|hCoV-19^^Troms og Finnmark|Human|University Hospital of Northern Norway|Norwegian Institute of Public Health|Vollan|Norway

>Spike|hCoV-19/England/BRIS-12C577/2020|2020-05-15|EPI\_ISL\_469475|Original|hCoV-19^^England|Human|PHE South West Regional Laboratory|Wellcome Sanger Institute for the COVID-19 Genomics UK (COG-UK) consortium|Davies|United Kingdom

>Spike|hCoV-19/USA/VA-DCLS-1908/2020|2020-10-05|EPI\_ISL\_614151|Original|hCoV-19^^Virginia|Human|Virginia DCLS|Virginia DCLS|St. Jacques|USA

>Spike|hCoV-19/Spain/EX-ISCI-201899/2020|2020-03-09|EPI\_ISL\_539561|Original|hCoV-19^^Extremadura|Human|Hospital San Pedro de Alc\u00e1ntara|Instituto de Salud Carlos III|Caballero|Spain

>Spike|hCoV-19/England/BRIS-126BA8/2020|2020-04-10|EPI\_ISL\_458982|Original|hCoV-19^^England|Human|PHE South West Regional Laboratory|Wellcome Sanger Institute for the COVID-19 Genomics UK (COG-UK) consortium|Davies|United Kingdom

>Spike|hCoV-19/England/MILK-9A8B3D/2020|2020-08-31|EPI\_ISL\_550120|Original|hCoV-19^^England|Human|Lighthouse Lab in Milton Keynes|Wellcome Sanger Institute for the COVID-19 Genomics UK (COG-UK) consortium|Davies|United Kingdom

>Spike|hCoV-19/Scotland/CVR2934/2020|2020-04-22|EPI\_ISL\_461598|Original|hCoV-19^^Scotland|Human|West of Scotland Specialist Virology Centre|COVID-19 Genomics UK (COG-UK) Consortium|Robertson|United Kingdom

>Spike|hCoV-19/England/20134025704/2020|2020-03-24|EPI\_ISL\_423131|Original|hCoV-19^^England|Human|Respiratory Virus Unit|Respiratory Virus Unit|Platt|United Kingdom

>Spike|hCoV-19/USA/TX-HMH-MCoV-12678/2020|2020-08-31|EPI\_ISL\_790460|Original|hCoV-19^^Texas|Human|Houston Methodist Hospital|Houston Methodist Hospital|Long|USA

>Spike|hCoV-19/England/LIVE-DBD409/2020|2020-10-27|EPI\_ISL\_664355|Original|hCoV-19^^England|Human|Liverpool Clinical Laboratories|COVID-19 Genomics UK (COG-UK) Consortium|Haldenby|United Kingdom

>Spike|hCoV-19/USA/WI-UW-1864/2020|2020-09-10|EPI\_ISL\_605736|Original|hCoV-19^^Wisconsin|Human|University of Wisconsin-Madison AIDS Vaccine Research Laboratories|University of Wisconsin-Madison AIDS Vaccine Research Laboratories|Baczenas|USA

>Spike|hCoV-19/England/ALDP-B5C35C/2020|2020-11-10|EPI\_ISL\_655687|Original|hCoV-19^^England|Human|Lighthouse Lab in Alderley Park|Wellcome Sanger Institute for the COVID-19 Genomics UK (COG-UK) Consortium|Davies|United Kingdom

>Spike|hCoV-19/USA/AZ-TG666126/2020|2020-05-02|EPI\_ISL\_696212|Original|hCoV-19^^Arizona|Human|Sonora Quest Laboratories|TGen North|French|USA

>Spike|hCoV-19/USA/AZ-TG654291/2020|2020-04-11|EPI\_ISL\_695948|Original|hCoV-19^^Arizona|Human|Sonora Quest Laboratories|TGen North|French|USA

>Spike|hCoV-19/Denmark/DCGC-7251/2020|2020-10-12|EPI\_ISL\_619011|Original|hCoV-19^^Midtjylland|Human|Department of Virus and Microbiological Special Diagnostics|Albertsen lab|Michaelsen|Denmark

>Spike|hCoV-19/England/ALDP-C3AC49/2020|2020-12-08|EPI\_ISL\_731626|Original|hCoV-19^^England|Human|Lighthouse Lab in Alderley Park|Wellcome Sanger Institute for the COVID-19 Genomics UK (COG-UK) Consortium|Davies|United Kingdom

>Spike|hCoV-19/India/WB-IK23/2020|2020-04-25|EPI\_ISL\_508353|Original|hCoV-19^^West Bengal|Human|Institute of Post Graduate Medical Education & Research|National Institute of Biomedical Genomics|Maitra|India

>Spike|hCoV-19/Thailand/Nonthaburi\_68/2020|2020-01-15|EPI\_ISL\_447910|Vero P2|hCoV-19^^Nonthaburi|Human|n/a|National Institute of Health. Department of medical Sciences|Okada|Thailand

>Spike|hCoV-19/England/QEUEH-C9321F/2020|2020-12-17|EPI\_ISL\_762022|Original|hCoV-19^^England|Human|Lighthouse Lab in Glasgow|Wellcome Sanger Institute for the COVID-19 Genomics UK (COG-UK) Consortium|Davies|United Kingdom

>Spike|hCoV-19/Turkey/IST-GLAB-284/2020|2020-05-21|EPI\_ISL\_735332|Original|hCoV-19^^Istanbul|Human|Genomic Laboratory (GLAB) (Conjoint lab of Health Directorate of Istanbul and Istanbul Technical University)|Genomic Laboratory (GLAB)|Karacan|Turkey

>Spike|hCoV-19/Australia/VIC635/2020|2020-03-28|EPI\_ISL\_426876|Original|hCoV-19^^Victoria|Human|Victorian Infectious Diseases Reference Laboratory (VIDRL)|Microbiological Diagnostic Unit Public Health Laboratory and Victorian Infectious Diseases Reference Laboratory|Schultz|Australia

>Spike|hCoV-19/England/CAMB-1BA022/2020|2020-11-04|EPI\_ISL\_651576|Original|hCoV-19^^England|Human|Department of Pathology|COVID-19 Genomics UK (COG-UK) Consortium|Goodfellow|United Kingdom

>Spike|hCoV-19/Belgium/reg-0917992/2020|2020-09-17|EPI\_ISL\_734984|Original|hCoV-19^^Herk-de-Stad|Human|UZ Leuven|KU Leuven|Maes|Belgium

>Spike|hCoV-19/Denmark/DCGC-4215/2020|2020-09-14|EPI\_ISL\_622108|Original|hCoV-19^^Sjaelland|Human|Department of Virus and Microbiological Special Diagnostics|Albertsen lab|Michaelsen|Denmark

>Spike|hCoV-19/Australia/VIC4064/2020|2020-07-09|EPI\_ISL\_519446|Original|hCoV-19^^Victoria|Human|Microbiological Diagnostic Unit - Public Health Laboratory (MDU-PHL)|MDU-PHL|Schultz|Australia

>Spike|hCoV-19/Canada/ON-E30/2020|2020-05-25|EPI\_ISL\_593508|Original|hCoV-19^^Ontario|Human|Eastern Ontario Regional Laboratory Association|McMaster University|McArthur|Canada

>Spike|hCoV-19/Scotland/EDB2661/2020|2020-04-25|EPI\_ISL\_439253|Original|hCoV-19^^Scotland|Human|Virology Department|COVID-19 Genomics UK (COG-UK) Consortium|Williams|United Kingdom

>Spike|hCoV-19/Russia/Buryatia-87104/2020|2020-03-30|EPI\_ISL\_428914|Vero|hCoV-19^^Buryatia|Human|State Research Center of Virology and Biotechnology VECTOR|State Research Center of Virology and Biotechnology VECTOR|Shvalov|Russia

>Spike|hCoV-19/Wales/PHWC-16C159/2020|2020-09-16|EPI\_ISL\_574016|Original|hCoV-19^^Wales|Human|Wales Specialist Virology Centre Sequencing lab|COVID-19 Genomics UK (COG-UK) Consortium|Moore|United Kingdom

>Spike|hCoV-19/Luxembourg/LNS3433209/2020|2020-11-22|EPI\_ISL\_740309|Original|hCoV-19^^Luxembourg|Human|Laboratoire national de sant\u00e9|Laboratoire national de sant\u00e9|Wienecke-Baldacchino|Luxembourg

>Spike|hCoV-19/USA/MN-MDH-1547/2020|2020-08-03|EPI\_ISL\_527612|Original|hCoV-19^^Minnesota|Human|Minnesota Department of Health|Minnesota Department of Health|Garfin|USA

>Spike|hCoV-19/USA/MA-UW-MAYO45/2020|2020-03-23|EPI\_ISL\_500529|Original|hCoV-19^^Massachusetts|Human|Mayo Clinic Laboratories|University of Washington Virology Lab|Roychoudhury|USA

>Spike|hCoV-19/Scotland/EDB5510/2020|2020-04-19|EPI\_ISL\_487662|Original|hCoV-19^^Scotland|Human|Virology Department|Wellcome Sanger Institute for the COVID-19 Genomics UK (COG-UK) consortium|Davies|United Kingdom

>Spike|hCoV-19/England/ALDP-982CDC/2020|2020-08-10|EPI\_ISL\_552574|Original|hCoV-19^^England|Human|Lighthouse Lab in Alderley Park|Wellcome Sanger Institute for the COVID-19 Genomics UK (COG-UK) consortium|Davies|United Kingdom

>Spike|hCoV-19/Scotland/QEUH-9DD4BC/2020|2020-09-22|EPI\_ISL\_599726|Original|hCoV-19^^Scotland|Human|Lighthouse Lab in Glasgow|Wellcome Sanger Institute for the COVID-19 Genomics UK (COG-UK) consortium|Davies|United Kingdom

>Spike|hCoV-19/Australia/ACT0043/2020|2020-03-27|EPI\_ISL\_498510|Original|hCoV-19^^Australian Capital Territory|Human|ACT Pathology|Schwessinger Lab|Hall|Australia

>Spike|hCoV-19/England/LIVE-DC7FED/2020|2020-11-16|EPI\_ISL\_703219|Original|hCoV-19^^England|Human|Liverpool Clinical Laboratories|COVID-19 Genomics UK (COG-UK) Consortium|Haldenby|United Kingdom

>Spike|hCoV-19/Netherlands/ZH-RIVM-21021/2020|2020-12-13|EPI\_ISL\_791037|Original|hCoV-19^^Zuid-holland|Human|Dutch COVID-19 response team|National Institute for Public Health and the Environment (RIVM)|Meijer|Netherlands

>Spike|hCoV-19/Denmark/DCGC-5215/2020|2020-09-14|EPI\_ISL\_621753|Original|hCoV-19^^Syddanmark|Human|Department of Virus and Microbiological Special Diagnostics|Albertsen lab|Michaelsen|Denmark

>Spike|hCoV-19/Scotland/QEUH-96413B/2020|2020-08-12|EPI\_ISL\_534400|Original|hCoV-19^^Scotland|Human|NHSGGC West of Scotland Specialist Virology Centre / MRC-University of Glasgow Centre for Virus Research|Wellcome Sanger Institute for the COVID-19 Genomics UK (COG-UK) consortium|Davies|United Kingdom

>Spike|hCoV-19/Wales/PHWC-47F3B4/2020|2020-10-07|EPI\_ISL\_612668|Original|hCoV-19^^Wales|Human|Wales Specialist Virology Centre Sequencing lab|COVID-19 Genomics UK (COG-UK) Consortium|Moore|United Kingdom

>Spike|hCoV-19/United Arab Emirates/0567/2020|2020-05-15|EPI\_ISL\_698726|Original|hCoV-19^^Abu Dhabi|Human|Group 42 (G42) Healthcare|G42 Healthcare|Ogrodzki|United Arab Emirates

>Spike|hCoV-19/Saudi Arabia/KAUST-MAKKAH1515/2020|2020-04-14|EPI\_ISL\_678099|Original|hCoV-19^^Makkah|Human|Pathogen Genomics Lab King Abdullah University of Science and Technology(KAUST)|Pathogen Genomics Lab King Abdullah University of Science and Technology(KAUST)|Mohamed Ghazzali|Saudi Arabia

>Spike|hCoV-19/Belgium/ULG-10778/2020|2020-10-31|EPI\_ISL\_644624|Original|hCoV-19^^Li\u00e8ge|Human|Department of Clinical Microbiology|GIGA Medical Genomics|Durkin|Belgium

>Spike|hCoV-19/Wales/PHWC-15E855/2020|2020-05-13|EPI\_ISL\_472838|Original|hCoV-19^^Wales|Human|Wales Specialist Virology Centre Sequencing lab|COVID-19 Genomics UK (COG-UK) Consortium|Moore|United Kingdom

>Spike|hCoV-19/England/ALDP-A68EB7/2020|2020-10-12|EPI\_ISL\_608657|Original|hCoV-19^^England|Human|Lighthouse Lab in Alderley Park|Wellcome Sanger Institute for the COVID-19 Genomics UK (COG-UK) consortium|Davies|United Kingdom

>Spike|hCoV-19/England/MILK-B3DE6F/2020|2020-11-01|EPI\_ISL\_741403|Original|hCoV-19^^England|Human|Oxford Viromics|COVID-19 Genomics UK (COG-UK) Consortium|Golubchik|United Kingdom

>Spike|hCoV-19/Singapore/1201/2020|2020-04-21|EPI\_ISL\_648617|Original|hCoV-19^^Singapore|Human|Department of Laboratory Medicine|Department of Laboratory Medicine|Chen|Singapore

>Spike|hCoV-19/England/MILK-9959B1/2020|2020-08-23|EPI\_ISL\_551577|Original|hCoV-19^^England|Human|Lighthouse Lab in Milton Keynes|Wellcome Sanger Institute for the COVID-19 Genomics UK (COG-UK) consortium|Davies|United Kingdom

>Spike|hCoV-19/Scotland/QEUH-A369FD/2020|2020-10-05|EPI\_ISL\_638933|Original|hCoV-19^^Scotland|Human|Wales Specialist Virology Centre Sequencing lab|COVID-19 Genomics UK (COG-UK) Consortium|Moore|United Kingdom

>Spike|hCoV-19/Denmark/DCGC-1573/2020|2020-06-15|EPI\_ISL\_618143|Original|hCoV-19^^Sjaelland|Human|Department of Virus and Microbiological Special Diagnostics|Albertsen lab|Michaelsen|Denmark

>Spike|hCoV-19/England/LOND-DAB1D/2020|2020-11-04|EPI\_ISL\_724694|Original|hCoV-19^^England|Human|University College London|COVID-19 Genomics UK (COG-UK) Consortium|Roy|United Kingdom

>Spike|hCoV-19/England/ALDP-92DD49/2020|2020-06-22|EPI\_ISL\_551392|Original|hCoV-19^^England|Human|Lighthouse Lab in Alderley Park|Wellcome Sanger Institute for the COVID-19 Genomics UK (COG-UK) consortium|Davies|United Kingdom

>Spike|hCoV-19/Australia/VIC7350/2020|2020-07-24|EPI\_ISL\_564354|Original|hCoV-19^^Victoria|Human|Victorian Infectious Diseases Reference Laboratory (VIDRL)|VIDRL and MDU-PHL|Schultz|Australia

>Spike|hCoV-19/Wales/PHWC-2B272/2020|2020-04-08|EPI\_ISL\_431928|Original|hCoV-19^^Wales|Human|Wales Specialist Virology Centre|Public Health Wales Microbiology Cardiff|Moore|United Kingdom

>Spike|hCoV-19/South Africa/KRISP-K004080/2020|2020-10-19|EPI\_ISL\_635056|Original|hCoV-19^^KwaZulu-Natal|Human|National Health Laboratory Service - Inkosi Albert Luthuli Central Hospital (NHLS-IALCH)|KRISP|de Oliveira|South Africa

>Spike|hCoV-19/England/QEUH-9F6F25/2020|2020-09-27|EPI\_ISL\_595646|Original|hCoV-19^^England|Human|Oxford Viromics|COVID-19 Genomics UK (COG-UK) Consortium|Golubchik|United Kingdom

>Spike|hCoV-19/England/201380236/2020|2020-03-25|EPI\_ISL\_465835|Original|hCoV-19^^England|Human|Respiratory Virus Unit|Respiratory Virus Unit|Platt|United Kingdom

>Spike|hCoV-19/USA/WI-GMF-11146/2020|2020-07-17|EPI\_ISL\_547626|Original|hCoV-19^^Wisconsin|Human|Gundersen Molecular Diagnostics Laboratory|Kabara Cancer Research Institute|Kenny|USA

>Spike|hCoV-19/France/PAC-IHU-1210/2020|2020-08-17|EPI\_ISL\_569086|Original|hCoV-19^^Provence-Alpes-C\u00f4te-d\u2019Azur|Human|MEPHI|MEPHI|Levasseur|France

>Spike|hCoV-19/USA/VA-DCLS-2424/2020|2020-11-23|EPI\_ISL\_723488|Original|hCoV-19^^Virginia|Human|Virginia DCLS|Virginia DCLS|St. Jacques|USA

>Spike|hCoV-19/England/NORT-2959D6/2020|2020-04-03|EPI\_ISL\_478644|Original|hCoV-19^^England|Human|Northumbria University / South Tees Hospitals NHS Foundation Trust / North Cumbria Integrated Care NHS Foundation Trust / North Tees and Hartlepool NHS Foundation Trust / Newcastle Hospitals NHS Foundation Trust|COVID-19 Genomics UK (COG-UK) Consortium|Bashton|United Kingdom

>Spike|hCoV-19/England/QEUH-B9F51B/2020|2020-11-18|EPI\_ISL\_720937|Original|hCoV-19^^England|Human|Lighthouse Lab in Glasgow|Wellcome Sanger Institute for the COVID-19 Genomics UK (COG-UK) Consortium|Davies|United Kingdom

>Spike|hCoV-19/Wales/PHWC-48800C/2020|2020-10-29|EPI\_ISL\_639338|Original|hCoV-19^^Wales|Human|Wales Specialist Virology Centre Sequencing lab|COVID-19 Genomics UK (COG-UK) Consortium|Moore|United Kingdom

>Spike|hCoV-19/USA/CO-CDPHE-2007151943/2020|2020-07-15|EPI\_ISL\_771230|Original|hCoV-19^^Colorado|Human|Colorado Department of Public Health and Environment|Colorado Department of Public Health and Environment|Bankers|USA

>Spike|hCoV-19/Peru/LAM-INS-035/2020|2020-04-01|EPI\_ISL\_491460|Original|hCoV-19^^Lambayeque|Human|Laboratorio de Referencia Nacional de Virus Respiratorio. Instituto Nacional de Salud Per\u00fa|Laboratorio de Referencia Nacional de Biotecnolog\u00eda y Biolog\u00eda Molecular. Instituto Nacional de Salud Per\u00fa|Padilla Rojas|Peru

>Spike|hCoV-19/England/ALDP-95A6C0/2020|2020-06-12|EPI\_ISL\_553426|Original|hCoV-19^^England|Human|Lighthouse Lab in Alderley Park|Wellcome Sanger Institute for the COVID-19 Genomics UK (COG-UK) consortium|Davies|United Kingdom

>Spike|hCoV-19/USA/NY-Wadsworth-40149-01/2020|2020-04-07|EPI\_ISL\_676811|Original|hCoV-19^^New York|Human|Wadsworth Center|Wadsworth Center|Lasek-Nesselquist|USA

>Spike|hCoV-19/Switzerland/TI-ETHZ-100042/2020|2020-03-11|EPI\_ISL\_466965|Original|hCoV-19^^Ticino|Human|Viollier AG|Department of Biosystems Science and Engineering|Nadeau|Switzerland

>Spike|hCoV-19/England/MILK-ACDA43/2020|2020-10-21|EPI\_ISL\_630046|Original|hCoV-19^^England|Human|Lighthouse Lab in Milton Keynes|Wellcome Sanger Institute for the COVID-19 Genomics UK (COG-UK) consortium|Davies|United Kingdom

>Spike|hCoV-19/Scotland/EDB6640/2020|2020-05-28|EPI\_ISL\_493963|Original|hCoV-19^^Scotland|Human|Virology Department|COVID-19 Genomics UK (COG-UK) Consortium|Williams|United Kingdom

>Spike|hCoV-19/England/QEUH-A9D305/2020|2020-10-20|EPI\_ISL\_727779|Original|hCoV-19^^England|Human|Centre for Enzyme Innovation|COVID-19 Genomics UK (COG-UK) Consortium|Robson|United Kingdom

>Spike|hCoV-19/India/TG-CCMB-L1959/2020|2020-06-04|EPI\_ISL\_495174|Original|hCoV-19^^Telangana|Human|CSIR-Centre for Cellular and Molecular Biology|CSIR-Centre for Cellular and Molecular Biology|Banu|India

>Spike|hCoV-19/Scotland/EDB8712/2020|2020-10-24|EPI\_ISL\_651120|Original|hCoV-19^^Scotland|Human|Virology Department|COVID-19 Genomics UK (COG-UK) Consortium|McHugh|United Kingdom

>Spike|hCoV-19/Israel/CVL-45646/2020|2020-12-09|EPI\_ISL\_745051|Original|hCoV-19^^Tel Aviv|Human|Israel Central Virology laboratory|Israel Central Virology laboratory|Zuckerman|Israel

>Spike|hCoV-19/England/CAMC-BC1F8B/2020|2020-11-22|EPI\_ISL\_705011|Original|hCoV-19^^England|Human|Lighthouse Lab in Cambridge|Wellcome Sanger Institute for the COVID-19 Genomics UK (COG-UK) Consortium|Davies|United Kingdom

>Spike|hCoV-19/England/ALDP-9C5CA0/2020|2020-09-10|EPI\_ISL\_567647|Original|hCoV-19^^England|Human|Lighthouse Lab in Alderley Park|Wellcome Sanger Institute for the COVID-19 Genomics UK (COG-UK) consortium|Davies|United Kingdom

>Spike|hCoV-19/Wales/PHWC-49AD79/2020|2020-12-03|EPI\_ISL\_727682|Original|hCoV-19^^Wales|Human|Originating lab|COVID-19 Genomics UK (COG-UK) Consortium|Moore|United Kingdom

>Spike|hCoV-19/United Arab Emirates/0178/2020|2020-05-18|EPI\_ISL\_698365|Original|hCoV-19^^Abu Dhabi|Human|Group 42 (G42) Healthcare|G42 Healthcare|Ogrodzki|United Arab Emirates

>Spike|hCoV-19/India/MH-BJMC-1701/2020|2020-04-19|EPI\_ISL\_497889|Original|hCoV-19^^Maharashtra|Human|B.J. Govt. Medical College|National Centre For Cell Science|Paul|India

>Spike|hCoV-19/England/MILK-BB0A9D/2020|2020-11-18|EPI\_ISL\_720126|Original|hCoV-19^^England|Human|Lighthouse Lab in Milton Keynes|Wellcome Sanger Institute for the COVID-19 Genomics UK (COG-UK) Consortium|Davies|United Kingdom

>Spike|hCoV-19/England/ALDP-9548DF/2020|2020-06-09|EPI\_ISL\_555420|Original|hCoV-19^^England|Human|Lighthouse Lab in Alderley Park|Wellcome Sanger Institute for the COVID-19 Genomics UK (COG-UK) consortium|Davies|United Kingdom

>Spike|hCoV-19/England/BRIS-130E75/2020|2020-03-21|EPI\_ISL\_501580|Original|hCoV-19^^England|Human|PHE South West Regional Laboratory|Wellcome Sanger Institute for the COVID-19 Genomics UK (COG-UK) consortium|Davies|United Kingdom

>Spike|hCoV-19/England/ALDP-982823/2020|2020-08-09|EPI\_ISL\_552681|Original|hCoV-19^^England|Human|Lighthouse Lab in Alderley Park|Wellcome Sanger Institute for the COVID-19 Genomics UK (COG-UK) consortium|Davies|United Kingdom

>Spike|hCoV-19/USA/TX-HMH-MCoV-15687/2020|2020-07-09|EPI\_ISL\_785371|Original|hCoV-19^^Texas|Human|Houston Methodist Hospital|Houston Methodist Hospital|Long|USA

>Spike|hCoV-19/England/ALDP-A85D3F/2020|2020-10-17|EPI\_ISL\_610522|Original|hCoV-19^^England|Human|Lighthouse Lab in Alderley Park|Wellcome Sanger Institute for the COVID-19 Genomics UK (COG-UK) consortium|Davies|United Kingdom

>Spike|hCoV-19/England/CAMB-7C03C/2020|2020-04-13|EPI\_ISL\_433982|Original|hCoV-19^^England|Human|Department of Pathology|COVID-19 Genomics UK (COG-UK) Consortium|Meredith|United Kingdom

>Spike|hCoV-19/Portugal/PT2052/2020|2020-11-13|EPI\_ISL\_732266|Original|hCoV-19^^Portugal|Human|Instituto Nacional de Saude (INSA) and Instituto Gulbenkian de Ciencia (IGC)|Instituto Nacional de Saude (INSA) and Instituto Gulbenkian de Ciencia (IGC)|Borges|Portugal

>Spike|hCoV-19/England/20139036104/2020|2020-03-27|EPI\_ISL\_421922|Original|hCoV-19^^England|Human|Respiratory Virus Unit|Respiratory Virus Unit|Platt|United Kingdom

>Spike|hCoV-19/England/QEUEH-BC3675/2020|2020-11-25|EPI\_ISL\_704010|Original|hCoV-19^^England|Human|Lighthouse Lab in Glasgow|Wellcome Sanger Institute for the COVID-19 Genomics UK (COG-UK) Consortium|Davies|United Kingdom

>Spike|hCoV-19/Japan/PG-5699/2020|2020-07-00|EPI\_ISL\_688823|Original|hCoV-19^^Japan|Human|Pathogen Genomics Center|Pathogen Genomics Center|Sekizuka|Japan

>Spike|hCoV-19/Wales/PHWC-4A0226/2020|2020-12-04|EPI\_ISL\_743414|Original|hCoV-19^^Wales|Human|Wales Specialist Virology Centre Sequencing lab|COVID-19 Genomics UK (COG-UK) Consortium|Moore|United Kingdom

>Spike|hCoV-19/England/LIVE-DC1806/2020|2020-11-05|EPI\_ISL\_702708|Original|hCoV-19^^England|Human|Liverpool Clinical Laboratories|COVID-19 Genomics UK (COG-UK) Consortium|Haldenby|United Kingdom

>Spike|hCoV-19/England/ALDP-702C7C/2020|2020-06-30|EPI\_ISL\_557571|Original|hCoV-19^^England|Human|Lighthouse Lab in Alderley Park|Wellcome Sanger Institute for the COVID-19 Genomics UK (COG-UK) consortium|Davies|United Kingdom

>Spike|hCoV-19/France/PAC-IHU-0623/2020|2020-04-12|EPI\_ISL\_568896|Original|hCoV-19^^Provence-Alpes-C\u00f4te-d\u00a9Azur|Human|MEPHI|MEPHI|Levasseur|France

>Spike|hCoV-19/England/LIVE-AAE3B/2020|2020-07-28|EPI\_ISL\_540621|Original|hCoV-19^^England|Human|Liverpool Clinical Laboratories|COVID-19 Genomics UK (COG-UK) Consortium|Haldenby|United Kingdom

>Spike|hCoV-19/Chile/RM-203937/2020|2020-10-10|EPI\_ISL\_746759|Original|hCoV-19^^Region Metropolitana de Santiago|Human|Genetica Molecular and Subdepartamento de Virologia ISP Chile|Instituto de Salud Publica de Chile|Tognarelli|Chile

>Spike|hCoV-19/Denmark/DCGC-2595/2020|2020-08-17|EPI\_ISL\_617831|Original|hCoV-19^^Midtjylland|Human|Department of Virus and Microbiological Special Diagnostics|Albertsen lab|Michaelsen|Denmark

>Spike|hCoV-19/Wales/PHWC-496311/2020|2020-11-26|EPI\_ISL\_726563|Original|hCoV-19^^Wales|Human|Originating lab|COVID-19 Genomics UK (COG-UK) Consortium|Moore|United Kingdom

>Spike|hCoV-19/USA/ID-QDX-1720/2020|2020-03-17|EPI\_ISL\_604029|Original|hCoV-19^^Idaho|Human|Quest Diagnostics|Quest Diagnostics|Kagan|USA

>Spike|hCoV-19/Denmark/DCGC-3282/2020|2020-08-31|EPI\_ISL\_616034|Original|hCoV-19^^Hovedstaden|Human|Department of Virus and Microbiological Special Diagnostics|Albertsen lab|Michaelsen|Denmark

>Spike|hCoV-19/Northern Ireland/NIRE-1002FA/2020|2020-05-02|EPI\_ISL\_489343|Original|hCoV-19^^Northern Ireland|Human|Regional Virus Laboratory|Wellcome Sanger Institute for the COVID-19 Genomics UK (COG-UK) consortium|Davies|United Kingdom

>Spike|hCoV-19/England/BRIS-12B244/2020|2020-05-17|EPI\_ISL\_469813|Original|hCoV-19^^England|Human|PHE South West Regional Laboratory|Wellcome Sanger Institute for the COVID-19 Genomics UK (COG-UK) consortium|Davies|United Kingdom

>Spike|hCoV-19/England/OXON-B13AB/2020|2020-04-23|EPI\_ISL\_479008|Original|hCoV-19^^England|Human|Oxford Viromics|COVID-19 Genomics UK (COG-UK) Consortium|Golubchik|United Kingdom

>Spike|hCoV-19/England/BIRM-60781/2020|2020-06-05|EPI\_ISL\_483887|Original|hCoV-19^^England|Human|University of Birmingham|COVID-19 Genomics UK (COG-UK) Consortium|Loman|United Kingdom

>Spike|hCoV-19/England/QEUEH-B12167/2020|2020-11-02|EPI\_ISL\_642274|Original|hCoV-19^^England|Human|Lighthouse Lab in Glasgow|Wellcome Sanger Institute for the COVID-19 Genomics UK (COG-UK) Consortium|Davies|United Kingdom

>Spike|hCoV-19/England/QEUEH-B31EA7/2020|2020-11-04|EPI\_ISL\_646265|Original|hCoV-19^^England|Human|Lighthouse Lab in Glasgow|Wellcome Sanger Institute for the COVID-19 Genomics UK (COG-UK) Consortium|Davies|United Kingdom

>Spike|hCoV-19/USA/TX-HMH-MCoV-15609/2020|2020-10-23|EPI\_ISL\_787093|Original|hCoV-19^^Texas|Human|Houston Methodist Hospital|Houston Methodist Hospital|Long|USA

>Spike|hCoV-19/Ireland/D-NVRL-20G35221/2020|2020-03-20|EPI\_ISL\_605095|Original|hCoV-19^^Dublin|Human|National Virus Reference Laboratory|Irish Coronavirus Sequencing Consortium - Helixworks|Chalapati|Ireland

>Spike|hCoV-19/Switzerland/TI-ETHZ-100048/2020|2020-03-11|EPI\_ISL\_466970|Original|hCoV-19^^Ticino|Human|Viollier AG|Department of Biosystems Science and Engineering|Nadeau|Switzerland



>Spike|hCoV-19/England/QEUA-A1DC20/2020|2020-09-29|EPI\_ISL\_587513|Original|hCoV-19^England|Human|Lighthouse Lab in Glasgow|Wellcome Sanger Institute for the COVID-19 Genomics UK (COG-UK) consortium|Davies|United Kingdom

>Spike|hCoV-19/England/QEUA-9F8E71/2020|2020-09-27|EPI\_ISL\_588790|Original|hCoV-19^England|Human|Lighthouse Lab in Glasgow|Wellcome Sanger Institute for the COVID-19 Genomics UK (COG-UK) consortium|Davies|United Kingdom

>Spike|hCoV-19/USA/UT-UPHL-2008983/2020|2020-05-11|EPI\_ISL\_525300|Original|hCoV-19^Utah|Human|Utah Public Health Laboratory|Utah Public Health Laboratory|Young|USA

>Spike|hCoV-19/England/MILK-87009A/2020|2020-07-16|EPI\_ISL\_557422|Original|hCoV-19^England|Human|Lighthouse Lab in Milton Keynes|Wellcome Sanger Institute for the COVID-19 Genomics UK (COG-UK) consortium|Davies|United Kingdom

>Spike|hCoV-19/England/MILK-BAC645/2020|2020-11-18|EPI\_ISL\_681501|Original|hCoV-19^England|Human|Lighthouse Lab in Milton Keynes|Wellcome Sanger Institute for the COVID-19 Genomics UK (COG-UK) Consortium|Davies|United Kingdom

>Spike|hCoV-19/Denmark/DCGC-13297/2020|2020-11-30|EPI\_ISL\_712717|Original|hCoV-19^Hovedstaden|Human|Department of Virus and Microbiological Special Diagnostics|Albertsen Lab|Michaelsen|Denmark

>Spike|hCoV-19/England/CAMC-9E0085/2020|2020-09-21|EPI\_ISL\_576956|Original|hCoV-19^England|Human|Oxford Viromics|COVID-19 Genomics UK (COG-UK) Consortium|Golubchik|United Kingdom

>Spike|hCoV-19/USA/TX-HMH-MCoV-15193/2020|2020-10-19|EPI\_ISL\_786677|Original|hCoV-19^Texas|Human|Houston Methodist Hospital|Houston Methodist Hospital|Long|USA

>Spike|hCoV-19/Spain/AN-IBV-98001646/2020|2020-04-07|EPI\_ISL\_538123|Original|hCoV-19^Andalucia|Human|Servicio de Microbiolog\u00eda y Parasitolog\u00eda cl\u00ednica. UCEIMP. Hospital Universitario Virgen del Roc\u00edo/IBIS/CSIC/US|SeqCOVID-SPAIN consortium/IBV (CSIC)|Comas|Spain

>Spike|hCoV-19/USA/AZ-TG491543/2020|2020-06-21|EPI\_ISL\_695159|Original|hCoV-19^Arizona|Human|AZ SPHL|TGen North|French|USA

>Spike|hCoV-19/USA/PA-MGEL-00165/2020|2020-04-11|EPI\_ISL\_681953|Original|hCoV-19^Pennsylvania|Human|UPMC Clinical Microbiology Laboratory|Microbial Genomic Epidemiology Laboratory|Griffith|USA

>Spike|hCoV-19/England/CAMC-B22674/2020|2020-11-02|EPI\_ISL\_647184|Original|hCoV-19^England|Human|Lighthouse Lab in Cambridge|Wellcome Sanger Institute for the COVID-19 Genomics UK (COG-UK) Consortium|Davies|United Kingdom

>Spike|hCoV-19/England/CAMC-BC0793/2020|2020-11-22|EPI\_ISL\_705142|Original|hCoV-19^England|Human|Lighthouse Lab in Cambridge|Wellcome Sanger Institute for the COVID-19 Genomics UK (COG-UK) Consortium|Davies|United Kingdom

>Spike|hCoV-19/India/MH-ACTREC-226/2020|2020-07-01|EPI\_ISL\_699880|Original|hCoV-19^Maharashtra|Human|Hematopathology Laboratory|Hematopathology Laboratory|Patkar|India

>Spike|hCoV-19/Jordan/AM-ALSR-4056/2020|2020-10-03|EPI\_ISL\_636416|Original|hCoV-19^Amman|Human|Biolab Diagnostic Laboratories|Andersen lab at Scripps Research|Gangavarapu|Jordan

>Spike|hCoV-19/USA/SC-DHEC-0618/2020|2020-06-19|EPI\_ISL\_538426|Original|hCoV-19^South Carolina|Human|Microbiology Division|Microbiology Division|Flores|USA

>Spike|hCoV-19/Jordan/AQ-ALSR-5243/2020|2020-10-18|EPI\_ISL\_730481|Original|hCoV-19^Aqaba|Human|Biolab Diagnostic Laboratories|Andersen lab at Scripps Research|Gangavarapu|Jordan

>Spike|hCoV-19/United Arab Emirates/0027/2020|2020-05-17|EPI\_ISL\_698236|Original|hCoV-19^Abu Dhabi|Human|Group 42 (G42) Healthcare|G42 Healthcare|Ogrodzki|United Arab Emirates

>Spike|hCoV-19/Northern Ireland/NIRE-10740C/2020|2020-03-31|EPI\_ISL\_585147|Original|hCoV-19^Northern Ireland|Human|Regional Virus Laboratory|COVID-19 Genomics UK (COG-UK) Consortium|Fairley|United Kingdom

>Spike|hCoV-19/Netherlands/NoordBrabant\_131/2020|2020-04-08|EPI\_ISL\_461166|Original|hCoV-19^Noord Brabant|Human|Dutch COVID-19 response team|Erasmus Medical Center|Oude Munnink|Netherlands

>Spike|hCoV-19/England/LIVE-DCA788/2020|2020-12-06|EPI\_ISL\_724384|Original|hCoV-19^England|Human|Liverpool Clinical Laboratories|COVID-19 Genomics UK (COG-UK) Consortium|Haldenby|United Kingdom

>Spike|hCoV-19/England/ALDP-A6D896/2020|2020-10-14|EPI\_ISL\_607721|Original|hCoV-19^^England|Human|Lighthouse Lab in Alderley Park|Wellcome Sanger Institute for the COVID-19 Genomics UK (COG-UK) consortium|Davies|United Kingdom

>Spike|hCoV-19/USA/CA-QDX-1170/2020|2020-03-28|EPI\_ISL\_571817|Original|hCoV-19^^California|Human|Quest Diagnostics|Quest Diagnostics|Kagan|USA

>Spike|hCoV-19/Denmark/DCGC-7541/2020|2020-10-12|EPI\_ISL\_618453|Original|hCoV-19^^Hovedstaden|Human|Department of Virus and Microbiological Special Diagnostics|Albertsen lab|Michaelsen|Denmark

>Spike|hCoV-19/England/ALDP-B62EE9/2020|2020-11-08|EPI\_ISL\_655279|Original|hCoV-19^^England|Human|Lighthouse Lab in Alderley Park|Wellcome Sanger Institute for the COVID-19 Genomics UK (COG-UK) Consortium|Davies|United Kingdom

>Spike|hCoV-19/Thailand/Bangkok-CONI-0265/2020|2020-03-14|EPI\_ISL\_693344|Original|hCoV-19^^Bangkok|Human|Ramathibodi Hospital|COVID-19 Network Investigations (CONI) Alliance|Batty|Thailand

>Spike|hCoV-19/South Africa/KRISP-K003703/2020|2020-10-06|EPI\_ISL\_602883|Original|hCoV-19^^KwaZulu-Natal|Human|NHLS-IALCH|KRISP|de Oliveira|South Africa

>Spike|hCoV-19/England/MILK-A06097/2020|2020-10-01|EPI\_ISL\_600085|Original|hCoV-19^^England|Human|Lighthouse Lab in Milton Keynes|Wellcome Sanger Institute for the COVID-19 Genomics UK (COG-UK) consortium|Davies|United Kingdom

>Spike|hCoV-19/Denmark/DCGC-11060/2020|2020-11-02|EPI\_ISL\_670371|Original|hCoV-19^^Syddanmark|Human|Department of Virus and Microbiological Special Diagnostics|Albertsen Lab|Michaelsen|Denmark

>Spike|hCoV-19/Japan/PG-4293/2020|2020-07-00|EPI\_ISL\_692522|Original|hCoV-19^^Japan|Human|Pathogen Genomics Center|Pathogen Genomics Center|Sekizuka|Japan

>Spike|hCoV-19/Japan/PG-6910/2020|2020-09-00|EPI\_ISL\_688018|Original|hCoV-19^^Japan|Human|Pathogen Genomics Center|Pathogen Genomics Center|Sekizuka|Japan

>Spike|hCoV-19/England/QEUEH-9CE1F3/2020|2020-09-15|EPI\_ISL\_590024|Original|hCoV-19^^England|Human|Lighthouse Lab in Glasgow|Wellcome Sanger Institute for the COVID-19 Genomics UK (COG-UK) consortium|Davies|United Kingdom

>Spike|hCoV-19/United Arab Emirates/0647/2020|2020-05-15|EPI\_ISL\_698803|Original|hCoV-19^^Abu Dhabi|Human|Group 42 (G42) Healthcare|G42 Healthcare|Ogrodzki|United Arab Emirates

>Spike|hCoV-19/USA/AZ-TG396377/2020|2020-06-11|EPI\_ISL\_694830|Original|hCoV-19^^Arizona|Human|AZ SPHL|TGen North|French|USA

>Spike|hCoV-19/Wales/PHWC-49FAF5/2020|2020-12-09|EPI\_ISL\_743320|Original|hCoV-19^^Wales|Human|Wales Specialist Virology Centre Sequencing lab|COVID-19 Genomics UK (COG-UK) Consortium|Moore|United Kingdom

>Spike|hCoV-19/Belgium/BG-030551/2020|2020-03-05|EPI\_ISL\_418806|Original|hCoV-19^^Beersel|Human|KU Leuven|KU Leuven|Maes|Belgium

>Spike|hCoV-19/Pakistan/JRCGR-KHI47/2020|2020-08-10|EPI\_ISL\_779285|Original|hCoV-19^^Karachi|Human|Jamil-ur-Rahman Center for Genome Research|Jamil-ur-Rahman Center for Genome Research|Shakeel|Pakistan

>Spike|hCoV-19/USA/TX-HMH-MCoV-15164/2020|2020-10-20|EPI\_ISL\_786648|Original|hCoV-19^^Texas|Human|Houston Methodist Hospital|Houston Methodist Hospital|Long|USA

>Spike|hCoV-19/USA/NY-NYCPHL-000152/2020|2020-04-06|EPI\_ISL\_631688|Original|hCoV-19^^New York|Human|Wildlife Conservation Society - Bronx Zoo|New York City Public Health Laboratory|Wang|USA

>Spike|hCoV-19/USA/MA-MGH-02809/2020|2020-09-26|EPI\_ISL\_765642|Original|hCoV-19^^Massachusetts|Human|Massachusetts General Hospital|Infectious Disease Program|Park|USA

>Spike|hCoV-19/Northern Ireland/QEUEH-9622D0/2020|2020-08-10|EPI\_ISL\_531767|Original|hCoV-19^^Northern Ireland|Human|Lighthouse Lab in Glasgow|Wellcome Sanger Institute for the COVID-19 Genomics UK (COG-UK) consortium|Davies|United Kingdom

>Spike|hCoV-19/England/ALDP-C48D45/2020|2020-12-10|EPI\_ISL\_736543|Original|hCoV-19^^England|Human|Lighthouse Lab in Alderley Park|Wellcome Sanger Institute for the COVID-19 Genomics UK (COG-UK) Consortium|Davies|United Kingdom

>Spike|hCoV-19/Costa Rica/INC-0094/2020|2020-07-01|EPI\_ISL\_682236|Original|hCoV-19^^San Jose|Human|AREA DE SALUD LOS CHILES|Inciensa|Soto-Garita|Costa Rica

>Spike|hCoV-19/Northern Ireland/NIRE-108FDD/2020|2020-10-13|EPI\_ISL\_652307|Original|hCoV-19^^Northern Ireland|Human|Regional Virus Laboratory|COVID-19 Genomics UK (COG-UK) Consortium|Fairley|United Kingdom

>Spike|hCoV-19/USA/TX-HMH-MCoV-13141/2020|2020-08-26|EPI\_ISL\_788292|Original|hCoV-19^^Texas|Human|Houston Methodist Hospital|Houston Methodist Hospital|Long|USA

>Spike|hCoV-19/Hungary/US-31847w/2020|2020-08-31|EPI\_ISL\_677735|Original|hCoV-19^^Csongr\u00e9ld county|Human|University of Szeged|National Laboratory of Virology|Kemenesi|Hungary

>Spike|hCoV-19/India/TG-CDFD-C1325/2020|2020-06-06|EPI\_ISL\_528555|Original|hCoV-19^^Telangana|Human|National Genomics Core-Center for DNA Fingerprinting and Diagnostics|National Genomics Core-Center for DNA Fingerprinting and Diagnostics (NGC-CDFD) - DBT's PAN-INDIA-1000 Genome consortium|Vashisht|India

>Spike|hCoV-19/Denmark/DCGC-15435/2020|2020-11-23|EPI\_ISL\_713826|Original|hCoV-19^^Hovedstaden|Human|Department of Virus and Microbiological Special Diagnostics|Albertsen Lab|Michaelsen|Denmark

>Spike|hCoV-19/USA/NY-Wadsworth-258525-01/2020|2020-10-29|EPI\_ISL\_734412|Original|hCoV-19^^New York|Human|Wadsworth Center|Wadsworth Center|Lasek-Nesselquist|USA

>Spike|hCoV-19/England/20129143004/2020|2020-03-11|EPI\_ISL\_424109|Original|hCoV-19^^England|Human|Respiratory Virus Unit|Respiratory Virus Unit|Platt|United Kingdom

>Spike|hCoV-19/USA/CA-ALSR-4723/2020|2020-09-29|EPI\_ISL\_730106|Original|hCoV-19^^California|Human|San Diego County Public Health Laboratory|Andersen lab at Scripps Research|Gangavarapu|USA

>Spike|hCoV-19/England/OXON-BOD62/2020|2020-00-00|EPI\_ISL\_478961|Original|hCoV-19^^England|Human|Oxford Viromics|COVID-19 Genomics UK (COG-UK) Consortium|Golubchik|United Kingdom

>Spike|hCoV-19/Denmark/DCGC-20026/2020|2020-12-07|EPI\_ISL\_747569|Original|hCoV-19^^Sjaelland|Human|Department of Virus and Microbiological Special Diagnostics|Albertsen Lab|Michaelsen|Denmark

>Spike|hCoV-19/Japan/IC-0170/2020|2020-09-00|EPI\_ISL\_667599|Original|hCoV-19^^Japan|Human|Pathogen Genomics Center|Pathogen Genomics Center|Sekizuka|Japan

>Spike|hCoV-19/Thailand/SamutSakhon-CONI-0359/2020|2020-12-19|EPI\_ISL\_733553|Original|hCoV-19^^Samut Sakhon|Human|Institute for Urban Disease Control and Prevention|COVID-19 Network Investigations (CONI) Alliance|Batty|Thailand

>Spike|hCoV-19/Scotland/EDB4153/2020|2020-04-18|EPI\_ISL\_456924|Original|hCoV-19^^Scotland|Human|Virology Department|COVID-19 Genomics UK (COG-UK) Consortium|Williams|United Kingdom

>Spike|hCoV-19/Scotland/CVR410/2020|2020-03-22|EPI\_ISL\_439077|Original|hCoV-19^^Scotland|Human|West of Scotland Specialist Virology Centre|COVID-19 Genomics UK (COG-UK) Consortium|Robertson|United Kingdom

>Spike|hCoV-19/England/ALDP-BB510C/2020|2020-11-21|EPI\_ISL\_701734|Original|hCoV-19^^England|Human|Lighthouse Lab in Alderley Park|Wellcome Sanger Institute for the COVID-19 Genomics UK (COG-UK) Consortium|Davies|United Kingdom

>Spike|hCoV-19/Australia/VIC13947/2020|2020-07-23|EPI\_ISL\_563888|Original|hCoV-19^^Victoria|Human|Microbiological Diagnostic Unit - Public Health Laboratory (MDU-PHL)|MDU-PHL|Schultz|Australia

>Spike|hCoV-19/England/20134001304/2020|2020-03-19|EPI\_ISL\_423048|Original|hCoV-19^^England|Human|Respiratory Virus Unit|Respiratory Virus Unit|Platt|United Kingdom

>Spike|hCoV-19/USA/NY-NYCPHL-000866/2020|2020-03-25|EPI\_ISL\_632939|Original|hCoV-19^^New York|Human|Jamaica Hospital Medical Center|New York City Public Health Laboratory|Wang|USA

>Spike|hCoV-19/England/EXET-1359AC/2020|2020-04-22|EPI\_ISL\_457121|Original|hCoV-19^^England|Human|University of Exeter|COVID-19 Genomics UK (COG-UK) Consortium|Temperton|United Kingdom

>Spike|hCoV-19/Gibraltar/204462834/2020|2020-10-29|EPI\_ISL\_615008|Original|hCoV-19^^Gibraltar|Human|Microbiology|Respiratory Virus Unit|Platt|Gibraltar

>Spike|hCoV-19/Denmark/DCGC-14667/2020|2020-11-23|EPI\_ISL\_711899|Original|hCoV-19^^Syddanmark|Human|Department of Virus and Microbiological Special Diagnostics|Albertsen Lab|Michaelsen|Denmark

>Spike|hCoV-19/USA/DE-DHSS-F918466/2020|2020-03-31|EPI\_ISL\_593970|Original|hCoV-19^^Delaware|Human|Delaware Public Health Lab|Delaware Public Health Lab|Bajwa|USA

>Spike|hCoV-19/USA/MN-MDH-1280/2020|2020-03-15|EPI\_ISL\_483001|Original|hCoV-19^^Minnesota|Human|Minnesota Department of Health|Minnesota Department of Health|Garfin|USA

>Spike|hCoV-19/Japan/PG-3720/2020|2020-04-00|EPI\_ISL\_691973|Original|hCoV-19^^Japan|Human|Pathogen Genomics Center|Pathogen Genomics Center|Sekizuka|Japan

>Spike|hCoV-19/England/QEUA-A0ACDB/2020|2020-10-03|EPI\_ISL\_599154|Original|hCoV-19^^England|Human|Lighthouse Lab in Glasgow|Wellcome Sanger Institute for the COVID-19 Genomics UK (COG-UK) consortium|Davies|United Kingdom

>Spike|hCoV-19/Portugal/PT2044/2020|2020-11-12|EPI\_ISL\_732259|Original|hCoV-19^^Portugal|Human|Instituto Nacional de Saude (INSA) and Instituto Gulbenkian de Ciencia (IGC)|Instituto Nacional de Saude (INSA) and Instituto Gulbenkian de Ciencia (IGC)|Borges|Portugal

>Spike|hCoV-19/Australia/VIC14499/2020|2020-08-12|EPI\_ISL\_592523|Original|hCoV-19^^Victoria|Human|Microbiological Diagnostic Unit - Public Health Laboratory (MDU-PHL)|MDU-PHL|Schultz|Australia

>Spike|hCoV-19/Australia/QLD1302/2020|2020-03-24|EPI\_ISL\_693295|Original|hCoV-19^^Australia|Human|unknown|Public Health Virology Laboratory|Nguyen|Australia

>Spike|hCoV-19/England/CAMB-1AEDEE/2020|2020-05-11|EPI\_ISL\_452866|Original|hCoV-19^^England|Human|Department of Pathology|COVID-19 Genomics UK (COG-UK) Consortium|Meredith|United Kingdom

>Spike|hCoV-19/England/ALDP-B4649E/2020|2020-11-07|EPI\_ISL\_656118|Original|hCoV-19^^England|Human|Lighthouse Lab in Alderley Park|Wellcome Sanger Institute for the COVID-19 Genomics UK (COG-UK) Consortium|Davies|United Kingdom

>Spike|hCoV-19/USA/TX-DSHS-0882/2020|2020-06-16|EPI\_ISL\_610018|Original|hCoV-19^^Texas|Human|Texas Department of State Health Services|Texas Department of State Health Services|Rahman|USA

>Spike|hCoV-19/USA/MD-MDH-0135/2020|2020-07-10|EPI\_ISL\_534699|Original|hCoV-19^^Maryland|Human|MD PHL|MD PHL|Keller|USA

>Spike|hCoV-19/England/ALDP-9CB545/2020|2020-09-16|EPI\_ISL\_575585|Original|hCoV-19^^England|Human|Lighthouse Lab in Alderley Park|Wellcome Sanger Institute for the COVID-19 Genomics UK (COG-UK) consortium|Davies|United Kingdom

>Spike|hCoV-19/Australia/VIC7886/2020|2020-08-07|EPI\_ISL\_564728|Original|hCoV-19^^Victoria|Human|Microbiological Diagnostic Unit - Public Health Laboratory (MDU-PHL)|MDU-PHL|Schultz|Australia

>Spike|hCoV-19/USA/NY-Wadsworth-204625-01/2020|2020-08-26|EPI\_ISL\_677083|Original|hCoV-19^^New York|Human|Wadsworth Center|Wadsworth Center|Lasek-Nesselquist|USA

>Spike|hCoV-19/England/QEUA-B7EA6E/2020|2020-11-14|EPI\_ISL\_667898|Original|hCoV-19^^England|Human|Lighthouse Lab in Glasgow|Wellcome Sanger Institute for the COVID-19 Genomics UK (COG-UK) Consortium|Davies|United Kingdom

>Spike|hCoV-19/England/LOND-D70F3/2020|2020-04-10|EPI\_ISL\_478460|Original|hCoV-19^^England|Human|University College London|COVID-19 Genomics UK (COG-UK) Consortium|Roy|United Kingdom

>Spike|hCoV-19/Denmark/DCGC-8050/2020|2020-10-26|EPI\_ISL\_617159|Original|hCoV-19^^Syddanmark|Human|Department of Virus and Microbiological Special Diagnostics|Albertsen lab|Michaelsen|Denmark

>Spike|hCoV-19/England/SHEF-10CCC72/2020|2020-12-03|EPI\_ISL\_741995|Original|hCoV-19^^England|Human|Virology Department|COVID-19 Genomics UK (COG-UK) Consortium|de Silva|United Kingdom

>Spike|hCoV-19/USA/WA-S1213/2020|2020-05-07|EPI\_ISL\_463703|Original|hCoV-19^^Washington|Human|Washington State Department of Health|Seattle Flu Study|Bedford|USA

>Spike|hCoV-19/Scotland/EDB7846/2020|2020-09-22|EPI\_ISL\_573798|Original|hCoV-19^^Scotland|Human|Virology Department|COVID-19 Genomics UK (COG-UK) Consortium|Williams|United Kingdom

>Spike|hCoV-19/England/BRIS-133874/2020|2020-08-06|EPI\_ISL\_524488|Original|hCoV-19^^England|Human|PHE South West Regional Laboratory|Wellcome Sanger Institute for the COVID-19 Genomics UK (COG-UK) consortium|Davies|United Kingdom

>Spike|hCoV-19/USA/CA-QDX-1976/2020|2020-03-16|EPI\_ISL\_604218|Original|hCoV-19^^California|Human|Quest Diagnostics|Quest Diagnostics|Kagan|USA

>Spike|hCoV-19/England/ALDP-4FA3EE/2020|2020-06-24|EPI\_ISL\_559129|Original|hCoV-19^^England|Human|Lighthouse Lab in Alderley Park|Wellcome Sanger Institute for the COVID-19 Genomics UK (COG-UK) Consortium|Davies|United Kingdom

>Spike|hCoV-19/England/NORT-288D9E/2020|2020-03-22|EPI\_ISL\_453488|Original|hCoV-19^^England|Human|Northumbria University / South Tees Hospitals NHS Foundation Trust / North Cumbria Integrated Care NHS Foundation Trust / North Tees and Hartlepool NHS Foundation Trust / Newcastle Hospitals NHS Foundation Trust|COVID-19 Genomics UK (COG-UK) Consortium|Bashton|United Kingdom

>Spike|hCoV-19/Australia/VIC3189/2020|2020-07-03|EPI\_ISL\_520876|Original|hCoV-19^^Victoria|Human|Victorian Infectious Diseases Reference Laboratory (VIDRL)|VIDRL and MDU-PHL|Schultz|Australia

>Spike|hCoV-19/USA/TX-HMH-MCoV-14162/2020|2020-10-03|EPI\_ISL\_787447|Original|hCoV-19^^Texas|Human|Houston Methodist Hospital|Houston Methodist Hospital|Long|USA

>Spike|hCoV-19/Wales/PHWC-498FFD/2020|2020-12-01|EPI\_ISL\_727243|Original|hCoV-19^^Wales|Human|Originating lab|COVID-19 Genomics UK (COG-UK) Consortium|Moore|United Kingdom

>Spike|hCoV-19/England/PORT-2E994C/2020|2020-11-05|EPI\_ISL\_727746|Original|hCoV-19^^England|Human|Centre for Enzyme Innovation|COVID-19 Genomics UK (COG-UK) Consortium|Robson|United Kingdom

>Spike|hCoV-19/Denmark/DCGC-17570/2020|2020-12-14|EPI\_ISL\_751075|Original|hCoV-19^^Hovedstaden|Human|Department of Virus and Microbiological Special Diagnostics|Albertsen Lab|Michaelsen|Denmark

>Spike|hCoV-19/England/QEUEH-96F19A/2020|2020-08-17|EPI\_ISL\_530493|Original|hCoV-19^^England|Human|Lighthouse Lab in Glasgow|Wellcome Sanger Institute for the COVID-19 Genomics UK (COG-UK) consortium|Davies|United Kingdom

>Spike|hCoV-19/England/204390346/2020|2020-10-23|EPI\_ISL\_637138|Original|hCoV-19^^England|Human|Respiratory Virus Unit|COVID-19 Genomics UK (COG-UK) Consortium|Platt|United Kingdom

>Spike|hCoV-19/Luxembourg/LNS0985896/2020|2020-10-19|EPI\_ISL\_739867|Original|hCoV-19^^Luxembourg|Human|Laboratoire national de sant\u00e9|Laboratoire national de sant\u00e9|Wienecke-Baldacchino|Luxembourg

>Spike|hCoV-19/USA/NY-Wadsworth-15616-01/2020|2020-03-14|EPI\_ISL\_426310|Original|hCoV-19^^New York|Human|Wadsworth Center|Wadsworth Center|Lasek-Nesselquist|USA

>Spike|hCoV-19/USA/CA-SCCPHD-UC34/2020|2020-03-05|EPI\_ISL\_429879|Original|hCoV-19^^California|Human|Santa Clara County Public Health Department|Chiu Laboratory|Chiu|USA

>Spike|hCoV-19/Australia/VIC13036/2020|2020-07-20|EPI\_ISL\_592160|Original|hCoV-19^^Victoria|Human|Victorian Infectious Diseases Reference Laboratory (VIDRL)|VIDRL and MDU-PHL|Schultz|Australia

>Spike|hCoV-19/England/MILK-9E2F68/2020|2020-09-21|EPI\_ISL\_581221|Original|hCoV-19^^England|Human|Lighthouse Lab in Milton Keynes|Wellcome Sanger Institute for the COVID-19 Genomics UK (COG-UK) consortium|Davies|United Kingdom

>Spike|hCoV-19/Denmark/DCGC-878/2020|2020-05-18|EPI\_ISL\_614818|Original|hCoV-19^^Nordjylland|Human|Department of Virus and Microbiological Special Diagnostics|Albertsen lab|Michaelsen|Denmark

>Spike|hCoV-19/Wales/PHWC-362ED/2020|2020-04-30|EPI\_ISL\_474648|Original|hCoV-19^^Wales|Human|Originating lab|COVID-19 Genomics UK (COG-UK) Consortium|Moore|United Kingdom

>Spike|hCoV-19/England/MILK-B062EB/2020|2020-10-24|EPI\_ISL\_642854|Original|hCoV-19^^England|Human|Lighthouse Lab in Milton Keynes|Wellcome Sanger Institute for the COVID-19 Genomics UK (COG-UK) Consortium|Davies|United Kingdom

>Spike|hCoV-19/Wales/PHWC-4A3706/2020|2020-12-15|EPI\_ISL\_744129|Original|hCoV-19^^Wales|Human|Wales Specialist Virology Centre Sequencing lab|COVID-19 Genomics UK (COG-UK) Consortium|Moore|United Kingdom

>Spike|hCoV-19/USA/TX-DSHS-1841/2020|2020-06-23|EPI\_ISL\_745275|Original|hCoV-19^^Texas|Human|Texas Department of State Health Services|Texas Department of State Health Services|Rahman|USA

>Spike|hCoV-19/England/MILK-ACC0D9/2020|2020-10-21|EPI\_ISL\_629413|Original|hCoV-19^^England|Human|Lighthouse Lab in Milton Keynes|Wellcome Sanger Institute for the COVID-19 Genomics UK (COG-UK) consortium|Davies|United Kingdom

>Spike|hCoV-19/England/QEUEH-AE22B9/2020|2020-10-27|EPI\_ISL\_633491|Original|hCoV-19^^England|Human|Lighthouse Lab in Glasgow|Wellcome Sanger Institute for the COVID-19 Genomics UK (COG-UK) consortium|Davies|United Kingdom

>Spike|hCoV-19/Belgium/UGent-89/2020|2020-03-17|EPI\_ISL\_468737|Original|hCoV-19^^Ghent|Human|Lab voor klinische biologie|Onderzoeksgroep Virologie|Lambrechts|Belgium

>Spike|hCoV-19/England/QEUEH-B0E878/2020|2020-11-02|EPI\_ISL\_642103|Original|hCoV-19^^England|Human|Lighthouse Lab in Glasgow|Wellcome Sanger Institute for the COVID-19 Genomics UK (COG-UK) Consortium|Davies|United Kingdom

>Spike|hCoV-19/USA/WA-UW-6701/2020|2020-04-11|EPI\_ISL\_461449|Original|hCoV-19^^Washington|Human|UW Virology Lab|UW Virology Lab|Roychoudhury|USA

>Spike|hCoV-19/England/CAMB-78D48/2020|2020-04-03|EPI\_ISL\_441336|Original|hCoV-19^^England|Human|Department of Pathology|Wellcome Sanger Institute for the COVID-19 Genomics UK (COG-UK) consortium|Amato|United Kingdom

>Spike|hCoV-19/Wales/PHWC-3180E/2020|2020-04-11|EPI\_ISL\_446492|Original|hCoV-19^^Wales|Human|Wales Specialist Virology Centre|Public Health Wales Microbiology Cardiff|Moore|United Kingdom

>Spike|hCoV-19/England/CAMC-AAF6F8/2020|2020-10-23|EPI\_ISL\_631078|Original|hCoV-19^^England|Human|Lighthouse Lab in Cambridge|Wellcome Sanger Institute for the COVID-19 Genomics UK (COG-UK) consortium|Davies|United Kingdom

>Spike|hCoV-19/Denmark/DCGC-17039/2020|2020-12-14|EPI\_ISL\_750394|Original|hCoV-19^^Syddanmark|Human|Department of Virus and Microbiological Special Diagnostics|Albertsen Lab|Michaelsen|Denmark

>Spike|hCoV-19/England/LIVE-DC7D5C/2020|2020-11-17|EPI\_ISL\_705168|Original|hCoV-19^^England|Human|Liverpool Clinical Laboratories|COVID-19 Genomics UK (COG-UK) Consortium|Haldenby|United Kingdom

>Spike|hCoV-19/Scotland/GCVR-17235A/2020|2020-03-30|EPI\_ISL\_470001|Original|hCoV-19^^Scotland|Human|NHSGGC West of Scotland Specialist Virology Centre / MRC-University of Glasgow Centre for Virus Research|Wellcome Sanger Institute for the COVID-19 Genomics UK (COG-UK) consortium|Davies|United Kingdom

>Spike|hCoV-19/Wales/MILK-9D4989/2020|2020-09-19|EPI\_ISL\_601516|Original|hCoV-19^^Wales|Human|Lighthouse Lab in Milton Keynes|Wellcome Sanger Institute for the COVID-19 Genomics UK (COG-UK) consortium|Davies|United Kingdom

>Spike|hCoV-19/USA/FL-BPHL-0583/2020|2020-03-23|EPI\_ISL\_508787|Original|hCoV-19^^Florida|Human|Florida Bureau of Public Health Laboratories|Florida Bureau of Public Health Laboratories|Blanton|USA

>Spike|hCoV-19/Switzerland/ZH-ETHZ-160002/2020|2020-06-22|EPI\_ISL\_486501|Original|hCoV-19^^Zurich|Human|Viollier AG|Department of Biosystems Science and Engineering|Nadeau|Switzerland

>Spike|hCoV-19/Australia/VIC7113/2020|2020-08-03|EPI\_ISL\_564238|Original|hCoV-19^^Victoria|Human|Victorian Infectious Diseases Reference Laboratory (VIDRL)|VIDRL and MDU-PHL|Schultz|Australia

>Spike|hCoV-19/England/QEUEH-AD3EA8/2020|2020-10-26|EPI\_ISL\_629912|Original|hCoV-19^^England|Human|Lighthouse Lab in Glasgow|Wellcome Sanger Institute for the COVID-19 Genomics UK (COG-UK) consortium|Davies|United Kingdom

>Spike|hCoV-19/USA/NY-Wadsworth-211749-01/2020|2020-09-04|EPI\_ISL\_677096|Original|hCoV-19^^New York|Human|Wadsworth Center|Wadsworth Center|Lasek-Nesselquist|USA

>Spike|hCoV-19/USA/TX-HMH-MCoV-18154/2020|2020-11-12|EPI\_ISL\_784502|Original|hCoV-19^^Texas|Human|Houston Methodist Hospital|Houston Methodist Hospital|Long|USA

>Spike|hCoV-19/Belgium/DB-03023/2020|2020-03-02|EPI\_ISL\_416470|Original|hCoV-19^^Couthuin|Human|KU Leuven|KU Leuven|Maes|Belgium

>Spike|hCoV-19/England/BRIS-127FD8/2020|2020-04-18|EPI\_ISL\_469538|Original|hCoV-19^^England|Human|PHE South West Regional Laboratory|Wellcome Sanger Institute for the COVID-19 Genomics UK (COG-UK) consortium|Davies|United Kingdom

>Spike|hCoV-19/USA/AZ-TG664554/2020|2020-04-20|EPI\_ISL\_696170|Original|hCoV-19^^Arizona|Human|Sonora Quest Laboratories|TGen North|French|USA

>Spike|hCoV-19/England/204700692/2020|2020-11-16|EPI\_ISL\_678710|Original|hCoV-19^^England|Human|Respiratory Virus Unit|COVID-19 Genomics UK (COG-UK) Consortium|Platt|United Kingdom

>Spike|hCoV-19/England/ALDP-A87210/2020|2020-10-14|EPI\_ISL\_606001|Original|hCoV-19^^England|Human|Lighthouse Lab in Alderley Park|Wellcome Sanger Institute for the COVID-19 Genomics UK (COG-UK) consortium|Davies|United Kingdom

>Spike|hCoV-19/USA/NC-CDC-6999/2020|2020-03-03|EPI\_ISL\_452124|Original|hCoV-19^^North Carolina|Human|NC State Laboratory of Public Health|Pathogen Discovery|Queen|USA

>Spike|hCoV-19/England/204290478/2020|2020-10-16|EPI\_ISL\_622860|Original|hCoV-19^^England|Human|Respiratory Virus Unit|Respiratory Virus Unit|Platt|United Kingdom

>Spike|hCoV-19/USA/WA-S343/2020|2020-04-02|EPI\_ISL\_434103|Original|hCoV-19^^Washington|Human|Washington State Department of Health|Seattle Flu Study|Bedford|USA

>Spike|hCoV-19/England/ALDP-5AF5E1/2020|2020-06-19|EPI\_ISL\_558765|Original|hCoV-19^^England|Human|Lighthouse Lab in Alderley Park|Wellcome Sanger Institute for the COVID-19 Genomics UK (COG-UK) consortium|Davies|United Kingdom

>Spike|hCoV-19/USA/UT-08420/2020|2020-05-20|EPI\_ISL\_524198|Original|hCoV-19^^Utah|Human|Utah Public Health Laboratory|Utah Public Health Laboratory|Young|USA

>Spike|hCoV-19/Netherlands/NH-RIVM-20624/2020|2020-12-16|EPI\_ISL\_790702|Original|hCoV-19^^Noord-Holland|Human|Dutch COVID-19 response team|National Institute for Public Health and the Environment (RIVM)|Meijer|Netherlands

>Spike|hCoV-19/Canada/ON-PHL-20-00011/2020|2020-00-00|EPI\_ISL\_548694|Original|hCoV-19^^Ontario|Human|Public Health Ontario Laboratory|Public Health Ontario Laboratory|Guthrie|Canada

>Spike|hCoV-19/Canada/BC-BCCDC-7242/2020|2020-11-00|EPI\_ISL\_740633|Original|hCoV-19^^British Columbia|Human|BCCDC Public Health Laboratory|BCCDC Public Health Laboratory|Prystajecky|Canada

>Spike|hCoV-19/England/ALDP-C3C773/2020|2020-12-10|EPI\_ISL\_730917|Original|hCoV-19^^England|Human|Lighthouse Lab in Alderley Park|Wellcome Sanger Institute for the COVID-19 Genomics UK (COG-UK) Consortium|Davies|United Kingdom

>Spike|hCoV-19/USA/CA-CHLA-PLM55573502/2020|2020-12-01|EPI\_ISL\_753572|Original|hCoV-19^^California|Human|Clinical virology Laboratory|Center for Personalized Medicine|Dien Bard|USA

>Spike|hCoV-19/England/ALDP-B45F8F/2020|2020-11-07|EPI\_ISL\_656250|Original|hCoV-19^^England|Human|Lighthouse Lab in Alderley Park|Wellcome Sanger Institute for the COVID-19 Genomics UK (COG-UK) Consortium|Davies|United Kingdom

>Spike|hCoV-19/Wales/PHWC-3558B/2020|2020-04-23|EPI\_ISL\_474446|Original|hCoV-19^^Wales|Human|Originating lab|COVID-19 Genomics UK (COG-UK) Consortium|Moore|United Kingdom

>Spike|hCoV-19/USA/WA-S1789/2020|2020-06-02|EPI\_ISL\_496215|Original|hCoV-19^^Washington|Human|Washington State Department of Health|Seattle Flu Study|Lee|USA

>Spike|hCoV-19/Germany/HH-hpi-p2333/2020|2020-03-28|EPI\_ISL\_776445|Original|hCoV-19^^Hamburg|Human|University Medical Center Hamburg Eppendorf|Heinrich Pette Institute|Robitaille|Germany

>Spike|hCoV-19/Australia/NSW971/2020|2020-09-09|EPI\_ISL\_545043|Original|hCoV-19^^New South Wales|Human|Sydney South West Pathology Service (SSWPS) - Royal Prince Alfred Hospital - NSW Health Pathology|NSW Health Pathology - Institute of Clinical Pathology and Medical Research; Westmead Hospital; University of Sydney|Gall|Australia

>Spike|hCoV-19/England/204100511/2020|2020-10-03|EPI\_ISL\_609835|Original|hCoV-19^^England|Human|Respiratory Virus Unit|Respiratory Virus Unit|Platt|United Kingdom

>Spike|hCoV-19/Wales/PHWC-48C74F/2020|2020-11-08|EPI\_ISL\_666463|Original|hCoV-19^^Wales|Human|Wales Specialist Virology Centre Sequencing lab|COVID-19 Genomics UK (COG-UK) Consortium|Moore|United Kingdom

>Spike|hCoV-19/Japan/PG-2281/2020|2020-04-00|EPI\_ISL\_685886|Original|hCoV-19^^Japan|Human|Pathogen Genomics Center|Pathogen Genomics Center|Sekizuka|Japan

>Spike|hCoV-19/USA/LA-SR0274/2020|2020-04-02|EPI\_ISL\_445129|Original|hCoV-19^^Louisiana|Human|Robert Garry lab|Andersen lab at Scripps Research|Gangavarapu|USA

>Spike|hCoV-19/France/ARA-67140/2020|2020-09-02|EPI\_ISL\_692739|Original|hCoV-19^^Auvergne-Rhône-Alpes|Human|CNR Virus des Infections Respiratoires - France SUD|CNR Virus des Infections Respiratoires - France SUD|Bal|France

>Spike|hCoV-19/England/CAMB-1B9B8C/2020|2020-11-09|EPI\_ISL\_664960|Original|hCoV-19^^England|Human|Department of Pathology|COVID-19 Genomics UK (COG-UK) Consortium|Goodfellow|United Kingdom

>Spike|hCoV-19/England/CAMB-839FB/2020|2020-04-16|EPI\_ISL\_443334|Original|hCoV-19^^England|Human|Department of Pathology|Wellcome Sanger Institute for the COVID-19 Genomics UK (COG-UK) consortium|Amato|United Kingdom

>Spike|hCoV-19/USA/WI-WSLH-200501/2020|2020-05-21|EPI\_ISL\_578642|Original|hCoV-19^^Wisconsin|Human|Wisconsin State Laboratory of Hygiene Communicable Disease Division|Wisconsin State Laboratory of Hygiene Communicable Disease Division|Florek|USA

>Spike|hCoV-19/Morocco/HMIMV-Rabat102-03/2020|2020-03-31|EPI\_ISL\_471456|Original|hCoV-19^^Rabat|Human|Centre de Virologie des Maladies Tropicales|Functional Genomic Platform/Service Analyses Biologique/UATRS/ Centre National Pour la Recherche Scientifique Et Technique (CNRST)|El Fahime|Morocco

>Spike|hCoV-19/Scotland/QEUEH-BA2FCC/2020|2020-11-18|EPI\_ISL\_710830|Original|hCoV-19^^Scotland|Human|Lighthouse Lab in Glasgow|Wellcome Sanger Institute for the COVID-19 Genomics UK (COG-UK) Consortium|Davies|United Kingdom

>Spike|hCoV-19/USA/TX-HMH-6595/2020|2020-06-24|EPI\_ISL\_546113|Original|hCoV-19^^Texas|Human|Houston Methodist Hospital|Houston Methodist Hospital|Long|USA

>Spike|hCoV-19/Wales/PHWC-4A4538/2020|2020-12-16|EPI\_ISL\_764705|Original|hCoV-19^^Wales|Human|Wales Specialist Virology Centre Sequencing lab|COVID-19 Genomics UK (COG-UK) Consortium|Moore|United Kingdom

>Spike|hCoV-19/Portugal/PT1242/2020|2020-03-31|EPI\_ISL\_511203|Original|hCoV-19^^Portugal|Human|Instituto Nacional de Saude (INSA) and Instituto Gulbenkian de Ciencia (IGC)|Instituto Nacional de Saude (INSA) and Instituto Gulbenkian de Ciencia (IGC)|Borges|Portugal

>Spike|hCoV-19/England/QEUEH-960D77/2020|2020-08-06|EPI\_ISL\_531993|Original|hCoV-19^^England|Human|Lighthouse Lab in Glasgow|Wellcome Sanger Institute for the COVID-19 Genomics UK (COG-UK) consortium|Davies|United Kingdom

>Spike|hCoV-19/Denmark/DCGC-14464/2020|2020-11-30|EPI\_ISL\_711783|Original|hCoV-19^^Hovedstaden|Human|Department of Virus and Microbiological Special Diagnostics|Albertsen Lab|Michaelsen|Denmark

>Spike|hCoV-19/Palestine/44/2020|2020-08-17|EPI\_ISL\_596527|Original|hCoV-19^^Jerusalem|Human|Palestinian Ministry of Health|Molecular Genetics Lab|van Dorp|Palestine

>Spike|hCoV-19/Scotland/EDB10822/2020|2020-12-08|EPI\_ISL\_724240|Original|hCoV-19^^Scotland|Human|Virology Department|COVID-19 Genomics UK (COG-UK) Consortium|McHugh|United Kingdom

>Spike|hCoV-19/Wales/PHWC-168EFC/2020|2020-05-02|EPI\_ISL\_499365|Original|hCoV-19^^Wales|Human|Originating lab|COVID-19 Genomics UK (COG-UK) Consortium|Moore|United Kingdom

>Spike|hCoV-19/England/QEUEH-A9F3F4/2020|2020-10-20|EPI\_ISL\_611342|Original|hCoV-19^^England|Human|Lighthouse Lab in Glasgow|Wellcome Sanger Institute for the COVID-19 Genomics UK (COG-UK) consortium|Davies|United Kingdom

>Spike|hCoV-19/England/MILK-B3DE14/2020|2020-11-01|EPI\_ISL\_741399|Original|hCoV-19^^England|Human|Oxford Viromics|COVID-19 Genomics UK (COG-UK) Consortium|Golubchik|United Kingdom

>Spike|hCoV-19/India/DL-NCDC1733-CSIR-IGIB/2020|2020-05-18|EPI\_ISL\_482503|Original|hCoV-19^^Delhi|Human|National Centre for Disease control (NCDC)|NCDC/CSIR-IGIB|Pandey|India

>Spike|hCoV-19/England/ALDP-9E8348/2020|2020-09-24|EPI\_ISL\_638246|Original|hCoV-19^^England|Human|Department of Pathology|COVID-19 Genomics UK (COG-UK) Consortium|Goodfellow|United Kingdom

>Spike|hCoV-19/England/CAMC-B34879/2020|2020-11-05|EPI\_ISL\_659625|Original|hCoV-19^^England|Human|Lighthouse Lab in Cambridge|Wellcome Sanger Institute for the COVID-19 Genomics UK (COG-UK) Consortium|Davies|United Kingdom



>Spike|hCoV-19/Japan/PG-4247/2020|2020-07-00|EPI\_ISL\_692477|Original|hCoV-19^^Japan|Human|Fukuoka Institute of Health and Environmental Sciences|Pathogen Genomics Center|Sekizuka|Japan

>Spike|hCoV-19/Denmark/DCGC-6362/2020|2020-09-21|EPI\_ISL\_622279|Original|hCoV-19^^NA|Human|Department of Virus and Microbiological Special Diagnostics|Albertsen lab|Michaelsen|Denmark

>Spike|hCoV-19/Austria/CeMM0346/2020|2020-04-06|EPI\_ISL\_475806|Original|hCoV-19^^Lower Austria|Human|Center for Virology|Bergthaler laboratory|Bergthaler|Austria

>Spike|hCoV-19/USA/WA-UW-1948/2020|2020-03-24|EPI\_ISL\_424301|Original|hCoV-19^^Washington|Human|UW Virology Lab|UW Virology Lab|Roychoudhury|USA

>Spike|hCoV-19/England/MILK-ACDA5/2020|2020-10-20|EPI\_ISL\_630264|Original|hCoV-19^^England|Human|Lighthouse Lab in Milton Keynes|Wellcome Sanger Institute for the COVID-19 Genomics UK (COG-UK) consortium|Davies|United Kingdom

>Spike|hCoV-19/Wales/PHWC-2B7BF/2020|2020-04-12|EPI\_ISL\_445762|Original|hCoV-19^^Wales|Human|Wales Specialist Virology Centre|Public Health Wales Microbiology Cardiff|Moore|United Kingdom

>Spike|hCoV-19/Bosnia and Herzegovina/ChVir7353/2020|2020-03-21|EPI\_ISL\_462459|Original|hCoV-19^^Novi Travnik|Human|Clinical Center|Charite Universitatsmedizin Berlin|Muehlemann|Bosnia and Herzegovina

>Spike|hCoV-19/USA/UT-UPHL-2012212287/2020|2020-09-22|EPI\_ISL\_745982|Original|hCoV-19^^Utah|Human|Ginkgo Bioworks Clinical Laboratory|Utah Public Health Laboratory|Young|USA

>Spike|hCoV-19/USA/TX-HMH-MCoV-12133/2020|2020-09-22|EPI\_ISL\_790214|Original|hCoV-19^^Texas|Human|Houston Methodist Hospital|Houston Methodist Hospital|Long|USA

>Spike|hCoV-19/Cote d'Ivoire/BKE0761/2020|2020-07-28|EPI\_ISL\_681839|Original|hCoV-19^^Bouafle|Human|Molecular diagnostic unit for viral haemorrhagic fevers and emerging viruses|Project group Epidemiology of Highly Pathogenic Microorganisms|Schubert|C\u00f4te d'Ivoire

>Spike|hCoV-19/Australia/VIC5082/2020|2020-07-17|EPI\_ISL\_519885|Original|hCoV-19^^Victoria|Human|Microbiological Diagnostic Unit - Public Health Laboratory (MDU-PHL)|MDU-PHL|Schultz|Australia

>Spike|hCoV-19/United Arab Emirates/0492/2020|2020-05-18|EPI\_ISL\_698659|Original|hCoV-19^^Abu Dhabi|Human|Group 42 (G42) Healthcare|G42 Healthcare|Ogrodzki|United Arab Emirates

>Spike|hCoV-19/England/NOTT-10EC58/2020|2020-03-27|EPI\_ISL\_432907|Original|hCoV-19^^England|Human|Queens Medical Centre|COVID-19 Genomics UK (COG-UK) Consortium|Loose|United Kingdom

>Spike|hCoV-19/USA/CA-ALSR-1075-SAN/2020|2020-06-23|EPI\_ISL\_483502|Original|hCoV-19^^California|Human|UC San Diego Center for Advanced Laboratory Medicine|Andersen lab at Scripps Research|Gangavarapu|USA

>Spike|hCoV-19/England/ALDP-A2DECD/2020|2020-10-05|EPI\_ISL\_586725|Original|hCoV-19^^England|Human|Lighthouse Lab in Alderley Park|Wellcome Sanger Institute for the COVID-19 Genomics UK (COG-UK) consortium|Davies|United Kingdom

>Spike|hCoV-19/Germany/NW-HHU-17/2020|2020-03-11|EPI\_ISL\_417462|Original|hCoV-19^^North Rhine-Westphalia|Human|Center of Medical Microbiology|Center of Medical Microbiology|Wienemann|Germany

>Spike|hCoV-19/Austria/CeMM1091/2020|2020-08-03|EPI\_ISL\_583887|Original|hCoV-19^^St. Wolfgang|Human|Austrian Agency for Health and Food Safety (AGES)|Bergthaler laboratory|Bergthaler|Austria

>Spike|hCoV-19/England/ALDP-94A186/2020|2020-06-11|EPI\_ISL\_556311|Original|hCoV-19^^England|Human|Lighthouse Lab in Alderley Park|Wellcome Sanger Institute for the COVID-19 Genomics UK (COG-UK) consortium|Davies|United Kingdom

>Spike|hCoV-19/USA/CA-ALSR-2982/2020|2020-09-02|EPI\_ISL\_635771|Original|hCoV-19^^California|Human|San Diego County Public Health Laboratory|Andersen lab at Scripps Research|Gangavarapu|USA

>Spike|hCoV-19/Denmark/DCGC-20382/2020|2020-12-21|EPI\_ISL\_759117|Original|hCoV-19^^Midtjylland|Human|Department of Virus and Microbiological Special Diagnostics|Albertsen Lab|Michaelsen|Denmark

>Spike|hCoV-19/England/ALDP-9E714F/2020|2020-09-24|EPI\_ISL\_580538|Original|hCoV-19^^England|Human|Lighthouse Lab in Alderley Park|Wellcome Sanger Institute for the COVID-19 Genomics UK (COG-UK) consortium|Davies|United Kingdom

>Spike|hCoV-19/Jordan/AM-ALSR-3961/2020|2020-09-30|EPI\_ISL\_636324|Original|hCoV-19^^Amman|Human|Biolab Diagnostic Laboratories|Andersen lab at Scripps Research|Gangavarapu|Jordan

>Spike|hCoV-19/England/CAMC-A3F666/2020|2020-10-05|EPI\_ISL\_609729|Original|hCoV-19^^England|Human|Lighthouse Lab in Cambridge|Wellcome Sanger Institute for the COVID-19 Genomics UK (COG-UK) consortium|Davies|United Kingdom

>Spike|hCoV-19/USA/CA-CZB-12365/2020|2020-10-12|EPI\_ISL\_648435|Original|hCoV-19^^California|Human|Santa Clara County Public Health Laboratory|Chan-Zuckerberg Biohub|Bhatt|USA

>Spike|hCoV-19/South Korea/KDCA0418/2020|2020-10-26|EPI\_ISL\_760202|Original|hCoV-19^^South Korea|Human|Division of Emerging Infectious Diseases|Division of Emerging Infectious Diseases|Park|South Korea

>Spike|hCoV-19/Norway/4637/2020|2020-10-19|EPI\_ISL\_635194|Original|hCoV-19^^Innlandet|Human|Akershus University Hospital|Norwegian Institute of Public Health|Vollan|Norway

>Spike|hCoV-19/England/QEUEH-9C8D04/2020|2020-09-11|EPI\_ISL\_567026|Original|hCoV-19^^England|Human|Lighthouse Lab in Glasgow|Wellcome Sanger Institute for the COVID-19 Genomics UK (COG-UK) consortium|Davies|United Kingdom

>Spike|hCoV-19/Luxembourg/LNS9789059/2020|2020-11-17|EPI\_ISL\_744983|Original|hCoV-19^^Luxembourg|Human|Laboratoire national de sant\u00e9|Laboratoire national de sant\u00e9|Wienecke-Baldacchino|Luxembourg

>Spike|hCoV-19/Wales/PHWC-3481A/2020|2020-04-15|EPI\_ISL\_446980|Original|hCoV-19^^Wales|Human|Wales Specialist Virology Centre|Public Health Wales Microbiology Cardiff|Moore|United Kingdom

>Spike|hCoV-19/Wales/CAMC-BC1C0C/2020|2020-11-22|EPI\_ISL\_710823|Original|hCoV-19^^Wales|Human|Lighthouse Lab in Cambridge|Wellcome Sanger Institute for the COVID-19 Genomics UK (COG-UK) Consortium|Davies|United Kingdom

>Spike|hCoV-19/Sweden/20-23091/2020|2020-10-08|EPI\_ISL\_648130|Original|hCoV-19^^Sweden|Human|Uppsala klinisk mikrobiologi|The Public Health Agency of Sweden|Svartstr\u00f6m|Sweden

>Spike|hCoV-19/India/MH-ACTREC-389/2020|2020-07-28|EPI\_ISL\_700038|Original|hCoV-19^^Maharashtra|Human|Hematopathology Laboratory|Hematopathology Laboratory|Patkar|India

>Spike|hCoV-19/Australia/VIC7596/2020|2020-07-24|EPI\_ISL\_564520|Original|hCoV-19^^Victoria|Human|Microbiological Diagnostic Unit - Public Health Laboratory (MDU-PHL)|MDU-PHL|Schultz|Australia

>Spike|hCoV-19/USA/NY-Wadsworth-292734-01/2020|2020-12-06|EPI\_ISL\_767715|Original|hCoV-19^^New York|Human|MEMORIAL SLOAN KETTERING CANCER CENTER|Wadsworth Center|Lasek-Nesselquist|USA

>Spike|hCoV-19/Singapore/102/2020|2020-03-16|EPI\_ISL\_443194|Original|hCoV-19^^Singapore|Human|National Public Health Laboratory|National Public Health Laboratory|Mak|Singapore

>Spike|hCoV-19/Wales/PHWC-24886/2020|2020-03-00|EPI\_ISL\_432406|Original|hCoV-19^^Wales|Human|Wales Specialist Virology Centre|Public Health Wales Microbiology Cardiff|Moore|United Kingdom

>Spike|hCoV-19/USA/AZ-TG305802/2020|2020-04-28|EPI\_ISL\_694281|Original|hCoV-19^^Arizona|Human|AZ SPHL|TGen North|French|USA

>Spike|hCoV-19/England/MILK-BAB9E3/2020|2020-11-18|EPI\_ISL\_681538|Original|hCoV-19^^England|Human|Lighthouse Lab in Milton Keynes|Wellcome Sanger Institute for the COVID-19 Genomics UK (COG-UK) Consortium|Davies|United Kingdom

>Spike|hCoV-19/Australia/VIC6746/2020|2020-07-25|EPI\_ISL\_564025|Original|hCoV-19^^Victoria|Human|Victorian Infectious Diseases Reference Laboratory (VIDRL)|VIDRL and MDU-PHL|Schultz|Australia

>Spike|hCoV-19/Denmark/DCGC-3683/2020|2020-09-07|EPI\_ISL\_615458|Original|hCoV-19^^Hovedstaden|Human|Department of Virus and Microbiological Special Diagnostics|Albertsen lab|Michaelsen|Denmark

>Spike|hCoV-19/England/ALDP-9BE1F6/2020|2020-09-09|EPI\_ISL\_568016|Original|hCoV-19^^England|Human|Lighthouse Lab in Alderley Park|Wellcome Sanger Institute for the COVID-19 Genomics UK (COG-UK) consortium|Davies|United Kingdom

>Spike|hCoV-19/Scotland/QEUH-A638FA/2020|2020-10-09|EPI\_ISL\_596162|Original|hCoV-19^^Scotland|Human|Quadram Institute Bioscience|COVID-19 Genomics UK (COG-UK) Consortium|Alikhan|United Kingdom

>Spike|hCoV-19/USA/LA-EVTL108/2020|2020-05-06|EPI\_ISL\_451269|Original|hCoV-19^^Louisiana|Human|LSUHS Emerging Viral Threat Laboratory|Microbial Genome Sequencing Center|Kamil|USA

>Spike|hCoV-19/South Africa/KRISP-K000641/2020|2020-07-13|EPI\_ISL\_509290|Original|hCoV-19^^KwaZulu-Natal|Human|NHLs-IALCH|KRISP|de Oliveira|South Africa

>Spike|hCoV-19/USA/TX-HMH-6519/2020|2020-06-27|EPI\_ISL\_546053|Original|hCoV-19^^Texas|Human|Houston Methodist Hospital|Houston Methodist Hospital|Long|USA

>Spike|hCoV-19/USA/NY-Wadsworth-290318-01/2020|2020-12-14|EPI\_ISL\_765519|Original|hCoV-19^^New York|Human|SARATOGA HOSPITAL LABORATORY|Wadsworth Center|Lasek-Nesselquist|USA

>Spike|hCoV-19/USA/LA-EVTL914/2020|2020-07-09|EPI\_ISL\_653605|Original|hCoV-19^^Louisiana|Human|LSUHS Emerging Viral Threat Laboratory|Microbial Genome Sequencing Center|Kamil|USA

>Spike|hCoV-19/Denmark/DCGC-6018/2020|2020-09-21|EPI\_ISL\_621127|Original|hCoV-19^^Midtjylland|Human|Department of Virus and Microbiological Special Diagnostics|Albertsen lab|Michaelsen|Denmark

>Spike|hCoV-19/Scotland/CVR4030/2020|2020-08-29|EPI\_ISL\_535128|Original|hCoV-19^^Scotland|Human|West of Scotland Specialist Virology Centre|COVID-19 Genomics UK (COG-UK) Consortium|Robertson|United Kingdom

>Spike|hCoV-19/Australia/VIC10954/2020|2020-07-31|EPI\_ISL\_563164|Original|hCoV-19^^Victoria|Human|Microbiological Diagnostic Unit - Public Health Laboratory (MDU-PHL)|MDU-PHL|Schultz|Australia

>Spike|hCoV-19/USA/NY-Wadsworth-286380-01/2020|2020-12-11|EPI\_ISL\_754573|Original|hCoV-19^^New York|Human|Wadsworth Center|Wadsworth Center|Lasek-Nesselquist|USA

>Spike|hCoV-19/England/ALDP-B853E1/2020|2020-11-15|EPI\_ISL\_681665|Original|hCoV-19^^England|Human|Lighthouse Lab in Alderley Park|Wellcome Sanger Institute for the COVID-19 Genomics UK (COG-UK) Consortium|Davies|United Kingdom

>Spike|hCoV-19/England/ALDP-6BDF5A/2020|2020-07-01|EPI\_ISL\_557746|Original|hCoV-19^^England|Human|Lighthouse Lab in Alderley Park|Wellcome Sanger Institute for the COVID-19 Genomics UK (COG-UK) consortium|Davies|United Kingdom

>Spike|hCoV-19/England/ALDP-9CE0BA/2020|2020-09-16|EPI\_ISL\_566294|Original|hCoV-19^^England|Human|Lighthouse Lab in Alderley Park|Wellcome Sanger Institute for the COVID-19 Genomics UK (COG-UK) consortium|Davies|United Kingdom

>Spike|hCoV-19/England/QEUH-B68A67/2020|2020-11-11|EPI\_ISL\_655240|Original|hCoV-19^^England|Human|Lighthouse Lab in Glasgow|Wellcome Sanger Institute for the COVID-19 Genomics UK (COG-UK) Consortium|Davies|United Kingdom

>Spike|hCoV-19/USA/MI-UM-10036001658/2020|2020-09-17|EPI\_ISL\_583363|Original|hCoV-19^^Michigan|Human|University of Michigan Clinical Microbiology Laboratory|Lauring Lab|Valesano|USA

>Spike|hCoV-19/England/MILK-AB85FF/2020|2020-10-21|EPI\_ISL\_623573|Original|hCoV-19^^England|Human|Lighthouse Lab in Milton Keynes|Wellcome Sanger Institute for the COVID-19 Genomics UK (COG-UK) consortium|Davies|United Kingdom

>Spike|hCoV-19/Australia/VIC11998/2020|2020-07-25|EPI\_ISL\_640916|Original|hCoV-19^^Victoria|Human|Microbiological Diagnostic Unit - Public Health Laboratory (MDU-PHL)|MDU-PHL|Schultz|Australia

>Spike|hCoV-19/England/ALDP-A669E5/2020|2020-10-12|EPI\_ISL\_630632|Original|hCoV-19^^England|Human|Lighthouse Lab in Alderley Park|Wellcome Sanger Institute for the COVID-19 Genomics UK (COG-UK) consortium|Davies|United Kingdom

>Spike|hCoV-19/England/LIVE-DB7B64/2020|2020-11-02|EPI\_ISL\_651251|Original|hCoV-19^^England|Human|Liverpool Clinical Laboratories|COVID-19 Genomics UK (COG-UK) Consortium|Haldenby|United Kingdom

>Spike|hCoV-19/Spain/RI-IBV-99005856/2020|2020-03-25|EPI\_ISL\_537399|Original|hCoV-19^^La Rioja|Human|Centro de Investigaci\u00f3n Biom\u00e9dica de La Rioja - Hospital San Pedro Logro\u00f1o|SeqCOVID-SPAIN consortium/IBV (CSIC)|Comas|Spain

>Spike|hCoV-19/Scotland/EDB8360/2020|2020-10-13|EPI\_ISL\_612341|Original|hCoV-19^^Scotland|Human|Virology Department|COVID-19 Genomics UK (COG-UK) Consortium|McHugh|United Kingdom

>Spike|hCoV-19/Australia/VIC2859/2020|2020-07-02|EPI\_ISL\_521690|Original|hCoV-19^^Victoria|Human|Microbiological Diagnostic Unit - Public Health Laboratory (MDU-PHL)|MDU-PHL|Schultz|Australia

>Spike|hCoV-19/Scotland/QEUH-9E4EA5/2020|2020-09-24|EPI\_ISL\_601000|Original|hCoV-19^^Scotland|Human|Lighthouse Lab in Glasgow|Wellcome Sanger Institute for the COVID-19 Genomics UK (COG-UK) consortium|Davies|United Kingdom

>Spike|hCoV-19/England/CAMB-1AC2B4/2020|2020-04-28|EPI\_ISL\_444388|Original|hCoV-19^^England|Human|Department of Pathology|COVID-19 Genomics UK (COG-UK) Consortium|Meredith|United Kingdom

>Spike|hCoV-19/Denmark/DCGC-14775/2020|2020-11-23|EPI\_ISL\_711971|Original|hCoV-19^^Hovedstaden|Human|Department of Virus and Microbiological Special Diagnostics|Albertsen Lab|Michaelsen|Denmark

>Spike|hCoV-19/England/203290070/2020|2020-07-31|EPI\_ISL\_514353|Original|hCoV-19^^England|Human|Respiratory Virus Unit|Respiratory Virus Unit|Platt|United Kingdom

>Spike|hCoV-19/Mexico/BCN-ALSR-1694/2020|2020-04-27|EPI\_ISL\_496355|Original|hCoV-19^^Baja California|Human|Infectolab|Andersen lab at Scripps Research|Gangavarapu|Mexico

>Spike|hCoV-19/USA/MN-MDH-1882/2020|2020-10-12|EPI\_ISL\_603017|Original|hCoV-19^^Minnesota|Human|Essentia Health-St. Mary's Medical Center|Minnesota Department of Health|Garfin|USA

>Spike|hCoV-19/Northern Ireland/NIRE-232E36/2020|2020-09-24|EPI\_ISL\_680227|Original|hCoV-19^^Northern Ireland|Human|Regional Virus Laboratory|COVID-19 Genomics UK (COG-UK) Consortium|Fairley|United Kingdom

>Spike|hCoV-19/England/CAMB-74605/2020|2020-03-24|EPI\_ISL\_425315|Original|hCoV-19^^England|Human|Department of Pathology|COVID-19 Genomics UK (COG-UK) Consortium|Meredith|United Kingdom

>Spike|hCoV-19/Singapore/1459/2020|2020-12-10|EPI\_ISL\_728195|Original|hCoV-19^^Singapore|Human|National Public Health Laboratory|National Public Health Laboratory|Mak|Singapore

>Spike|hCoV-19/England/CAMB-1BBC4B/2020|2020-11-17|EPI\_ISL\_679212|Original|hCoV-19^^England|Human|Department of Pathology|COVID-19 Genomics UK (COG-UK) Consortium|Goodfellow|United Kingdom

>Spike|hCoV-19/Switzerland/BL-ETHZ-190086/2020|2020-07-07|EPI\_ISL\_500942|Original|hCoV-19^^Basel-Landschaft|Human|Viollier AG|Department of Biosystems Science and Engineering|Nadeau|Switzerland

>Spike|hCoV-19/USA/MD-MDH-0415/2020|2020-11-04|EPI\_ISL\_666785|Original|hCoV-19^^Maryland|Human|Maryland Public Health Laboratory|Maryland Public Health Laboratory|Keller|USA

>Spike|hCoV-19/England/BRIS-1270E4/2020|2020-04-23|EPI\_ISL\_469583|Original|hCoV-19^^England|Human|PHE South West Regional Laboratory|Wellcome Sanger Institute for the COVID-19 Genomics UK (COG-UK) consortium|Davies|United Kingdom

>Spike|hCoV-19/Denmark/ALAB-SSI-728/2020|2020-03-28|EPI\_ISL\_444879|Original|hCoV-19^^Denmark|Human|Department of Virus and Microbiological Special Diagnostics|Albertsen lab|Kirkegaard|Denmark

>Spike|hCoV-19/England/QEUH-BCE8FC/2020|2020-11-26|EPI\_ISL\_704539|Original|hCoV-19^^England|Human|Lighthouse Lab in Glasgow|Wellcome Sanger Institute for the COVID-19 Genomics UK (COG-UK) Consortium|Davies|United Kingdom

>Spike|hCoV-19/England/ALDP-AA0ACE/2020|2020-10-22|EPI\_ISL\_625070|Original|hCoV-19^^England|Human|Lighthouse Lab in Alderley Park|Wellcome Sanger Institute for the COVID-19 Genomics UK (COG-UK) consortium|Davies|United Kingdom

>Spike|hCoV-19/Switzerland/BE-ETHZ-400080/2020|2020-12-06|EPI\_ISL\_729129|Original|hCoV-19^^Bern|Human|Viollier AG|Department of Biosystems Science and Engineering|Nadeau|Switzerland

>Spike|hCoV-19/Hong Kong/VM20002493-2/2020|2020-02-09|EPI\_ISL\_414527|Original|hCoV-19^^Hong Kong|Human|Hong Kong Department of Health|School of Public Health|Chu|China

>Spike|hCoV-19/England/LCST-24D67E6/2020|2020-05-30|EPI\_ISL\_478296|Original|hCoV-19^^England|Human|University Hospitals Of Leicester NHS Trust and DeepSeq Nottingham|COVID-19 Genomics UK (COG-UK) Consortium|Loose|United Kingdom

>Spike|hCoV-19/USA/MI-MDHHS-SC20781/2020|2020-04-22|EPI\_ISL\_471802|Original|hCoV-19^^Michigan|Human|Michigan Department of Health and Human Services|Michigan Department of Health and Human Services|Blankenship|USA

>Spike|hCoV-19/USA/UT-UPHL-02833/2020|2020-04-25|EPI\_ISL\_575093|Original|hCoV-19^^Utah|Human|Utah Public Health Laboratory|Utah Public Health Laboratory|Young|USA

>Spike|hCoV-19/England/CAMC-B08EE5/2020|2020-10-30|EPI\_ISL\_673081|Original|hCoV-19^^England|Human|Lighthouse Lab in Cambridge|Wellcome Sanger Institute for the COVID-19 Genomics UK (COG-UK) Consortium|Davies|United Kingdom

>Spike|hCoV-19/USA/NV-CDC-2-3714281/2020|2020-12-04|EPI\_ISL\_751778|Original|hCoV-19^^Nevada|Human|NV State Public Health Laboratory|Genomics and Discovery|Queen|USA

>Spike|hCoV-19/Wales/MILK-A46356/2020|2020-10-05|EPI\_ISL\_609284|Original|hCoV-19^^Wales|Human|Lighthouse Lab in Milton Keynes|Wellcome Sanger Institute for the COVID-19 Genomics UK (COG-UK) consortium|Davies|United Kingdom

>Spike|hCoV-19/Australia/NSW873/2020|2020-03-20|EPI\_ISL\_526697|Original|hCoV-19^^New South Wales|Human|South Eastern Area Laboratory Services (SEALS)|NSW Health Pathology - Institute of Clinical Pathology and Medical Research; Westmead Hospital; University of Sydney|Gall|Australia

>Spike|hCoV-19/England/QEUH-9CF927/2020|2020-09-16|EPI\_ISL\_590164|Original|hCoV-19^^England|Human|Lighthouse Lab in Glasgow|Wellcome Sanger Institute for the COVID-19 Genomics UK (COG-UK) consortium|Davies|United Kingdom

>Spike|hCoV-19/Japan/PG-1272/2020|2020-03-00|EPI\_ISL\_684881|Original|hCoV-19^^Japan|Human|Saitama Prefectural Institute of Public Health|Pathogen Genomics Center|Sekizuka|Japan

>Spike|hCoV-19/England/OXON-AF9EA/2020|2020-00-00|EPI\_ISL\_478793|Original|hCoV-19^^England|Human|Oxford Viromics|COVID-19 Genomics UK (COG-UK) Consortium|Golubchik|United Kingdom

>Spike|hCoV-19/England/QEUH-998893/2020|2020-08-23|EPI\_ISL\_540055|Original|hCoV-19^^England|Human|Lighthouse Lab in Glasgow|Wellcome Sanger Institute for the COVID-19 Genomics UK (COG-UK) consortium|Davies|United Kingdom

>Spike|hCoV-19/Wales/ALDP-C8A309/2020|2020-12-16|EPI\_ISL\_762643|Original|hCoV-19^^Wales|Human|Lighthouse Lab in Alderley Park|Wellcome Sanger Institute for the COVID-19 Genomics UK (COG-UK) Consortium|Davies|United Kingdom

>Spike|hCoV-19/England/QEUH-881D53/2020|2020-07-24|EPI\_ISL\_532777|Original|hCoV-19^^England|Human|Lighthouse Lab in Glasgow|Wellcome Sanger Institute for the COVID-19 Genomics UK (COG-UK) consortium|Davies|United Kingdom

>Spike|hCoV-19/England/QEUH-AD2261/2020|2020-10-26|EPI\_ISL\_634180|Original|hCoV-19^^England|Human|Lighthouse Lab in Glasgow|Wellcome Sanger Institute for the COVID-19 Genomics UK (COG-UK) consortium|Davies|United Kingdom

>Spike|hCoV-19/DRC/D09-0687/2020|2020-05-20|EPI\_ISL\_636986|Original|hCoV-19^^Kinshasa|Human|Virology Lab|Project group Epidemiology of Highly Pathogenic Microorganisms|Calvignac-Spencer|Democratic Republic of the Congo

>Spike|hCoV-19/England/ALDP-CB35C5/2020|2020-12-20|EPI\_ISL\_761216|Original|hCoV-19^^England|Human|Lighthouse Lab in Alderley Park|Wellcome Sanger Institute for the COVID-19 Genomics UK (COG-UK) Consortium|Davies|United Kingdom

>Spike|hCoV-19/England/CAMC-B788D3/2020|2020-11-11|EPI\_ISL\_783445|Original|hCoV-19^^England|Human|Lighthouse Lab in Cambridge|Wellcome Sanger Institute for the COVID-19 Genomics UK (COG-UK) Consortium|Davies|United Kingdom

>Spike|hCoV-19/USA/ME-HETL-J0367/2020|2020-12-07|EPI\_ISL\_755489|Original|hCoV-19^^Maine|Human|Maine Health and Environmental Testing Laboratory|Tewhey Lab|Tewhey|USA

>Spike|hCoV-19/England/CAMC-B990C5/2020|2020-11-15|EPI\_ISL\_673361|Original|hCoV-19^^England|Human|Lighthouse Lab in Cambridge|Wellcome Sanger Institute for the COVID-19 Genomics UK (COG-UK) Consortium|Davies|United Kingdom

>Spike|hCoV-19/Australia/VIC5944/2020|2020-07-16|EPI\_ISL\_518723|Original|hCoV-19^^Victoria|Human|Victorian Infectious Diseases Reference Laboratory (VIDRL)|VIDRL and MDU-PHL|Schultz|Australia

>Spike|hCoV-19/Wales/PHWC-30B15/2020|2020-04-10|EPI\_ISL\_446322|Original|hCoV-19^^Wales|Human|Wales Specialist Virology Centre|Public Health Wales Microbiology Cardiff|Moore|United Kingdom

>Spike|hCoV-19/Wales/MILK-9E0FC4/2020|2020-09-20|EPI\_ISL\_581029|Original|hCoV-19^^Wales|Human|Lighthouse Lab in Milton Keynes|Wellcome Sanger Institute for the COVID-19 Genomics UK (COG-UK) consortium|Davies|United Kingdom

>Spike|hCoV-19/United Arab Emirates/0655/2020|2020-05-16|EPI\_ISL\_698810|Original|hCoV-19^^Abu Dhabi|Human|Group 42 (G42) Healthcare|G42 Healthcare|Ogrodzki|United Arab Emirates

>Spike|hCoV-19/England/ALDP-B1A40C/2020|2020-11-01|EPI\_ISL\_646114|Original|hCoV-19^^England|Human|Lighthouse Lab in Alderley Park|Wellcome Sanger Institute for the COVID-19 Genomics UK (COG-UK) Consortium|Davies|United Kingdom

>Spike|hCoV-19/Scotland/EDB1158/2020|2020-04-07|EPI\_ISL\_433412|Original|hCoV-19^^Scotland|Human|Virology Department|COVID-19 Genomics UK (COG-UK) Consortium|Williams|United Kingdom

>Spike|hCoV-19/England/QEUEH-B69529/2020|2020-11-11|EPI\_ISL\_655255|Original|hCoV-19^^England|Human|Lighthouse Lab in Glasgow|Wellcome Sanger Institute for the COVID-19 Genomics UK (COG-UK) Consortium|Davies|United Kingdom

>Spike|hCoV-19/Netherlands/NA\_540/2020|2020-00-00|EPI\_ISL\_460713|Original|hCoV-19^^Netherlands|Human|Dutch COVID-19 response team|Erasmus Medical Center|Oude Munnink|Netherlands

>Spike|hCoV-19/England/QEUEH-B0DD2F/2020|2020-11-02|EPI\_ISL\_642105|Original|hCoV-19^^England|Human|Lighthouse Lab in Glasgow|Wellcome Sanger Institute for the COVID-19 Genomics UK (COG-UK) Consortium|Davies|United Kingdom

>Spike|hCoV-19/England/LOND-126124E/2020|2020-04-02|EPI\_ISL\_524628|Original|hCoV-19^^England|Human|North West London Pathology|Wellcome Sanger Institute for the COVID-19 Genomics UK (COG-UK) consortium|Davies|United Kingdom

>Spike|hCoV-19/England/204521764/2020|2020-11-02|EPI\_ISL\_678645|Original|hCoV-19^^England|Human|Respiratory Virus Unit|COVID-19 Genomics UK (COG-UK) Consortium|Platt|United Kingdom

>Spike|hCoV-19/Australia/VIC15403/2020|2020-07-30|EPI\_ISL\_593287|Original|hCoV-19^^Victoria|Human|Microbiological Diagnostic Unit - Public Health Laboratory (MDU-PHL)|MDU-PHL|Schultz|Australia

>Spike|hCoV-19/Gibraltar/205000710/2020|2020-12-00|EPI\_ISL\_710032|Original|hCoV-19^^Gibraltar|Human|Microbiology|Respiratory Virus Unit|Platt|Gibraltar

>Spike|hCoV-19/Australia/NSW1238/2020|2020-12-10|EPI\_ISL\_740869|Original|hCoV-19^^New South Wales|Human|South Eastern Area Laboratory Services (SEALS)|NSW Health Pathology - Institute of Clinical Pathology and Medical Research; Westmead Hospital; University of Sydney|Gall|Australia

>Spike|hCoV-19/USA/TX-HMH-MCoV-18109/2020|2020-11-13|EPI\_ISL\_784457|Original|hCoV-19^^Texas|Human|Houston Methodist Hospital|Houston Methodist Hospital|Long|USA

>Spike|hCoV-19/Japan/IC-0357/2020|2020-12-00|EPI\_ISL\_721600|Original|hCoV-19^^Japan|Human|Pathogen Genomics Center|Pathogen Genomics Center|Sekizuka|Japan

>Spike|hCoV-19/India/MH-ACTREC-582/2020|2020-09-02|EPI\_ISL\_700223|Original|hCoV-19^^Maharashtra|Human|Hematopathology Laboratory|Hematopathology Laboratory|Patkar|India

>Spike|hCoV-19/England/MILK-95704D/2020|2020-06-10|EPI\_ISL\_554306|Original|hCoV-19^^England|Human|Lighthouse Lab in Milton Keynes|Wellcome Sanger Institute for the COVID-19 Genomics UK (COG-UK) consortium|Davies|United Kingdom

>Spike|hCoV-19/Netherlands/ZH-EMC-431/2020|2020-08-11|EPI\_ISL\_523769|Original|hCoV-19^^Zuid Holland|Human|Dutch COVID-19 response team|Erasmus Medical Center|Oude Munnink|Netherlands

>Spike|hCoV-19/Denmark/DCGC-20011/2020|2020-12-07|EPI\_ISL\_747928|Original|hCoV-19^^Hovedstaden|Human|Department of Virus and Microbiological Special Diagnostics|Albertsen Lab|Michaelsen|Denmark

>Spike|hCoV-19/England/MILK-99A882/2020|2020-08-29|EPI\_ISL\_550317|Original|hCoV-19^^England|Human|Lighthouse Lab in Milton Keynes|Wellcome Sanger Institute for the COVID-19 Genomics UK (COG-UK) consortium|Davies|United Kingdom

>Spike|hCoV-19/England/ALDP-A2EE62/2020|2020-10-05|EPI\_ISL\_587087|Original|hCoV-19^^England|Human|Lighthouse Lab in Alderley Park|Wellcome Sanger Institute for the COVID-19 Genomics UK (COG-UK) consortium|Davies|United Kingdom

>Spike|hCoV-19/Kenya/S338/2020|2020-03-29|EPI\_ISL\_457936|Original|hCoV-19^^Kenya|Human|KEMRI-Centre for Virus Research|KEMRI-Wellcome Trust Research Programme/KEMRI-CGMR-C Kilifi|Githinji|Kenya

>Spike|hCoV-19/Australia/VIC12339/2020|2020-07-25|EPI\_ISL\_591961|Original|hCoV-19^^Victoria|Human|Microbiological Diagnostic Unit - Public Health Laboratory (MDU-PHL)|MDU-PHL|Schultz|Australia

>Spike|hCoV-19/Japan/PG-3346/2020|2020-04-00|EPI\_ISL\_691461|Original|hCoV-19^^Japan|Human|Pathogen Genomics Center|Pathogen Genomics Center|Sekizuka|Japan

>Spike|hCoV-19/USA/NY-NYUMC581/2020|2020-03-30|EPI\_ISL\_444698|Original|hCoV-19^^New York|Human|NYU Langone Health|Departments of Pathology and Medicine|Maurano|USA

>Spike|hCoV-19/USA/MN-MDH-1594/2020|2020-05-15|EPI\_ISL\_530190|Original|hCoV-19^^Minnesota|Human|Minnesota Department of Health|Minnesota Department of Health|Garfin|USA

>Spike|hCoV-19/United Arab Emirates/skmc-3607928/2020|2020-09-14|EPI\_ISL\_582672|Original|hCoV-19^^United Arab Emirates|Human|Sheikh Khalifa Medical City|Molecular/Surveillance lab\nSheikh Khalifa Medical City|Amirtharaj|United Arab Emirates

>Spike|hCoV-19/USA/OR-OHSU-1223/2020|2020-07-13|EPI\_ISL\_509165|Original|hCoV-19^^Oregon|Human|OHSU Lab Services Molecular Microbiology Lab|Oregon SARS-CoV-2 Genome Sequencing Center|O'Roak|USA

>Spike|hCoV-19/Czech Republic/NRL\_8814/2020|2020-09-11|EPI\_ISL\_626576|Original|hCoV-19^^Central Bohemian Region|Human|The National Institute of Public Health|State Veterinary Institute Prague|Nagy|Czech Republic

>Spike|hCoV-19/England/MILK-ACC622/2020|2020-10-21|EPI\_ISL\_629110|Original|hCoV-19^^England|Human|Lighthouse Lab in Milton Keynes|Wellcome Sanger Institute for the COVID-19 Genomics UK (COG-UK) consortium|Davies|United Kingdom

>Spike|hCoV-19/England/QEUEH-C4CC35/2020|2020-12-13|EPI\_ISL\_761018|Original|hCoV-19^^England|Human|Lighthouse Lab in Glasgow|Wellcome Sanger Institute for the COVID-19 Genomics UK (COG-UK) Consortium|Davies|United Kingdom

>Spike|hCoV-19/England/NORW-21F79E/2020|2020-12-08|EPI\_ISL\_725049|Original|hCoV-19^^England|Human|Quadram Institute Bioscience|COVID-19 Genomics UK (COG-UK) Consortium|Alikhan|United Kingdom

>Spike|hCoV-19/Wales/PHWC-25E56/2020|2020-03-25|EPI\_ISL\_422307|Original|hCoV-19^^Wales|Human|Wales Specialist Virology Centre|Public Health Wales Microbiology Cardiff|Moore|United Kingdom

>Spike|hCoV-19/Belgium/ULG-11015/2020|2020-11-17|EPI\_ISL\_708459|Original|hCoV-19^^Liege|Human|Department of Clinical Microbiology|GIGA Medical Genomics|Durkin|Belgium

>Spike|hCoV-19/England/ALDP-9BCE5B/2020|2020-09-09|EPI\_ISL\_573080|Original|hCoV-19^^England|Human|Oxford Viromics|COVID-19 Genomics UK (COG-UK) Consortium|Golubchik|United Kingdom

>Spike|hCoV-19/Bahrain/340859251\_S1/2020|2020-10-14|EPI\_ISL\_632273|Original|hCoV-19^^Bahrain|Human|Communicable Disease Laboratory|Communicable Disease Laboratory|Altaif|Bahrain

>Spike|hCoV-19/England/LIVE-9ED4C/2020|2020-04-04|EPI\_ISL\_453390|Original|hCoV-19^^England|Human|Liverpool Clinical Laboratories|COVID-19 Genomics UK (COG-UK) Consortium|Haldenby|United Kingdom

>Spike|hCoV-19/USA/TX-HMH-MCoV-13743/2020|2020-08-18|EPI\_ISL\_788836|Original|hCoV-19^^Texas|Human|Houston Methodist Hospital|Houston Methodist Hospital|Long|USA

>Spike|hCoV-19/England/ALDP-94E36E/2020|2020-06-18|EPI\_ISL\_555307|Original|hCoV-19^^England|Human|Lighthouse Lab in Alderley Park|Wellcome Sanger Institute for the COVID-19 Genomics UK (COG-UK) consortium|Davies|United Kingdom

>Spike|hCoV-19/England/CAMC-B546E2/2020|2020-11-08|EPI\_ISL\_658187|Original|hCoV-19^^England|Human|Lighthouse Lab in Cambridge|Wellcome Sanger Institute for the COVID-19 Genomics UK (COG-UK) Consortium|Davies|United Kingdom

>Spike|hCoV-19/England/ALDP-B4699F/2020|2020-11-07|EPI\_ISL\_656058|Original|hCoV-19^^England|Human|Lighthouse Lab in Alderley Park|Wellcome Sanger Institute for the COVID-19 Genomics UK (COG-UK) Consortium|Davies|United Kingdom

>Spike|hCoV-19/India/DL-61015-CSIR-IGIB/2020|2020-08-06|EPI\_ISL\_636767|Original|hCoV-19^^Delhi|Human|National Centre for Disease control (NCDC)|NCDC/CSIR-IGIB|Faruq|India

>Spike|hCoV-19/USA/TX-HMH-MCoV-10448/2020|2020-07-08|EPI\_ISL\_789280|Original|hCoV-19^^Texas|Human|Houston Methodist Hospital|Houston Methodist Hospital|Long|USA

>Spike|hCoV-19/Australia/VIC2047/2020|2020-06-13|EPI\_ISL\_521908|Original|hCoV-19^^Victoria|Human|Microbiological Diagnostic Unit - Public Health Laboratory (MDU-PHL)|MDU-PHL|Schultz|Australia

>Spike|hCoV-19/Wales/PHWC-48A5CF/2020|2020-11-04|EPI\_ISL\_652573|Original|hCoV-19^^Wales|Human|Wales Specialist Virology Centre Sequencing lab|COVID-19 Genomics UK (COG-UK) Consortium|Moore|United Kingdom

>Spike|hCoV-19/USA/CA-ALSR-3193/2020|2020-06-02|EPI\_ISL\_635907|Original|hCoV-19^^California|Human|San Diego County Public Health Laboratory|Andersen lab at Scripps Research|Gangavarapu|USA

>Spike|hCoV-19/Singapore/1140/2020|2020-04-15|EPI\_ISL\_648049|Original|hCoV-19^^Singapore|Human|Department of Laboratory Medicine|Department of Laboratory Medicine|Chen|Singapore

>Spike|hCoV-19/England/ALDP-9525E9/2020|2020-06-09|EPI\_ISL\_554064|Original|hCoV-19^^England|Human|Lighthouse Lab in Alderley Park|Wellcome Sanger Institute for the COVID-19 Genomics UK (COG-UK) consortium|Davies|United Kingdom

>Spike|hCoV-19/Brazil/RJ-UFRJ-1640/2020|2020-04-29|EPI\_ISL\_492033|Original|hCoV-19^^Rio de Janeiro|Human|Instituto de Biologia do Ex\u00e9rcito|Laborat\u00f3rio Metabolismo Macromolecular FirminoTorres de Castro|Moura-Neto|Brazil

>Spike|hCoV-19/Scotland/MILK-A69E10/2020|2020-10-09|EPI\_ISL\_625419|Original|hCoV-19^^Scotland|Human|Lighthouse Lab in Milton Keynes|Wellcome Sanger Institute for the COVID-19 Genomics UK (COG-UK) consortium|Davies|United Kingdom

>Spike|hCoV-19/England/CAMC-B99D82/2020|2020-11-15|EPI\_ISL\_673455|Original|hCoV-19^^England|Human|Lighthouse Lab in Cambridge|Wellcome Sanger Institute for the COVID-19 Genomics UK (COG-UK) Consortium|Davies|United Kingdom

>Spike|hCoV-19/England/QEUEH-A9EE30/2020|2020-10-20|EPI\_ISL\_611463|Original|hCoV-19^^England|Human|Lighthouse Lab in Glasgow|Wellcome Sanger Institute for the COVID-19 Genomics UK (COG-UK) consortium|Davies|United Kingdom

>Spike|hCoV-19/Italy/ABR-IZSGC-TE46428/2020|2020-05-14|EPI\_ISL\_528996|Original|hCoV-19^^Abruzzo|Human|Servizio di igiene epidemiologia e sanit\u00e0 pubblica (SIESP)-Chieti|Istituto Zooprofilattico Sperimentale dell'Abruzzo e Molise \G.Caporale\|Lorusso|Italy

>Spike|hCoV-19/Wales/PHWC-488655/2020|2020-11-02|EPI\_ISL\_638062|Original|hCoV-19^^Wales|Human|Wales Specialist Virology Centre Sequencing lab|COVID-19 Genomics UK (COG-UK) Consortium|Moore|United Kingdom

>Spike|hCoV-19/England/SHEF-C290F/2020|2020-09-03|EPI\_ISL\_559901|Original|hCoV-19^^England|Human|Virology Department|COVID-19 Genomics UK (COG-UK) Consortium|de Silva|United Kingdom

>Spike|hCoV-19/USA/PR-CDC-3578/2020|2020-03-08|EPI\_ISL\_447845|Original|hCoV-19^^Puerto Rico|Human|PR - Biological and Chemical Emergencies Lab Office of Public Health Preparedness and Response|Pathogen Discovery|Queen|USA

>Spike|hCoV-19/England/ALDP-B832B9/2020|2020-11-14|EPI\_ISL\_675648|Original|hCoV-19^^England|Human|Lighthouse Lab in Alderley Park|Wellcome Sanger Institute for the COVID-19 Genomics UK (COG-UK) Consortium|Davies|United Kingdom

>Spike|hCoV-19/India/UT-AR9/2020|2020-05-22|EPI\_ISL\_508206|Original|hCoV-19^^Uttarakhand|Human|All india institute of Medical Sciences Rishikesh|National Institute of Biomedical Genomics|Maitra|India

>Spike|hCoV-19/USA/UT-UPHL-201211125/2020|2020-04-07|EPI\_ISL\_678527|Original|hCoV-19^^Utah|Human|Utah Public Health Laboratory|Utah Public Health Laboratory|Young|USA



>Spike|hCoV-19/Denmark/DCGC-7105/2020|2020-10-12|EPI\_ISL\_619144|Original|hCoV-19^^Midtjylland|Human|Department of Virus and Microbiological Special Diagnostics|Albertsen lab|Michaelsen|Denmark

>Spike|hCoV-19/England/ALDP-A857D7/2020|2020-10-17|EPI\_ISL\_610287|Original|hCoV-19^^England|Human|Lighthouse Lab in Alderley Park|Wellcome Sanger Institute for the COVID-19 Genomics UK (COG-UK) consortium|Davies|United Kingdom

>Spike|hCoV-19/USA/PA-MGEL-00002/2020|2020-03-23|EPI\_ISL\_681940|Original|hCoV-19^^Pennsylvania|Human|UPMC Clinical Microbiology Laboratory|Microbial Genomic Epidemiology Laboratory|Griffith|USA

>Spike|hCoV-19/England/MILK-817F3E/2020|2020-07-18|EPI\_ISL\_557189|Original|hCoV-19^^England|Human|Lighthouse Lab in Milton Keynes|Wellcome Sanger Institute for the COVID-19 Genomics UK (COG-UK) Consortium|Davies|United Kingdom

>Spike|hCoV-19/USA/MI-MDHHS-SC21568/2020|2020-03-22|EPI\_ISL\_516295|Original|hCoV-19^^Michigan|Human|Michigan Department of Health and Human Services|Michigan Department of Health and Human Services|Blankenship|USA

>Spike|hCoV-19/England/CAMB-1BCC59/2020|2020-12-01|EPI\_ISL\_763793|Original|hCoV-19^^England|Human|Department of Pathology|COVID-19 Genomics UK (COG-UK) Consortium|Goodfellow|United Kingdom

>Spike|hCoV-19/USA/WA-S2098/2020|2020-06-05|EPI\_ISL\_497526|Original|hCoV-19^^Washington|Human|Washington State Department of Health|Seattle Flu Study|Lee|USA

>Spike|hCoV-19/Denmark/DCGC-11495/2020|2020-11-02|EPI\_ISL\_670957|Original|hCoV-19^^Sjaelland|Human|Department of Virus and Microbiological Special Diagnostics|Albertsen Lab|Michaelsen|Denmark

>Spike|hCoV-19/India/HR-THSTI-BAL-41/2020|2020-04-07|EPI\_ISL\_454859|Original|hCoV-19^^Haryana|Human|Translational Health Science and Technology Institute -ESIC medical college and hospital|THSTI Bioassay laboratory|Medigeshi|India

>Spike|hCoV-19/England/CAMC-B22D42/2020|2020-11-02|EPI\_ISL\_647277|Original|hCoV-19^^England|Human|Lighthouse Lab in Cambridge|Wellcome Sanger Institute for the COVID-19 Genomics UK (COG-UK) Consortium|Davies|United Kingdom

>Spike|hCoV-19/England/QEUEH-9F89CB/2020|2020-09-25|EPI\_ISL\_588831|Original|hCoV-19^^England|Human|Lighthouse Lab in Glasgow|Wellcome Sanger Institute for the COVID-19 Genomics UK (COG-UK) consortium|Davies|United Kingdom

>Spike|hCoV-19/USA/IL-NM050/2020|2020-03-14|EPI\_ISL\_444547|Original|hCoV-19^^Illinois|Human|Northwestern Memorial Hospital|Ozer Lab|Ozer|USA

>Spike|hCoV-19/USA/CA-SR0432/2020|2020-03-26|EPI\_ISL\_467962|Original|hCoV-19^^California|Human|San Diego County Public Health Laboratory|Andersen lab at Scripps Research|Gangavarapu|USA

>Spike|hCoV-19/England/ALDP-9EA73B/2020|2020-09-24|EPI\_ISL\_589782|Original|hCoV-19^^England|Human|Lighthouse Lab in Alderley Park|Wellcome Sanger Institute for the COVID-19 Genomics UK (COG-UK) consortium|Davies|United Kingdom

>Spike|hCoV-19/USA/TX-DSHS-0281/2020|2020-06-13|EPI\_ISL\_527848|Original|hCoV-19^^Texas|Human|Texas Department of State Health Services|Texas Department of State Health Services|Rahman|USA

>Spike|hCoV-19/USA/WA-S2047/2020|2020-06-05|EPI\_ISL\_497475|Original|hCoV-19^^Washington|Human|Washington State Department of Health|Seattle Flu Study|Lee|USA

>Spike|hCoV-19/England/BRIS-1310D8/2020|2020-03-14|EPI\_ISL\_501593|Original|hCoV-19^^England|Human|PHE South West Regional Laboratory|Wellcome Sanger Institute for the COVID-19 Genomics UK (COG-UK) consortium|Davies|United Kingdom

>Spike|hCoV-19/England/QEUEH-B6993C/2020|2020-11-11|EPI\_ISL\_661343|Original|hCoV-19^^England|Human|Lighthouse Lab in Glasgow|Wellcome Sanger Institute for the COVID-19 Genomics UK (COG-UK) Consortium|Davies|United Kingdom

>Spike|hCoV-19/USA/TX-HMH-MCoV-19516/2020|2020-11-30|EPI\_ISL\_783895|Original|hCoV-19^^Texas|Human|Houston Methodist Hospital|Houston Methodist Hospital|Long|USA

>Spike|hCoV-19/Singapore/40/2020|2020-03-31|EPI\_ISL\_422433|Original|hCoV-19^^Singapore|Human|National Public Health Laboratory|National Public Health Laboratory|Mak|Singapore

>Spike|hCoV-19/USA/IN\_72003/2020|2020-03-07|EPI\_ISL\_426422|Original|hCoV-19^^Indiana|Human|IN State Department of Health Laboratory Services|Pathogen Discovery|Queen|USA

>Spike|hCoV-19/England/ALDP-BC8986/2020|2020-11-22|EPI\_ISL\_721189|Original|hCoV-19^^England|Human|Lighthouse Lab in Alderley Park|Wellcome Sanger Institute for the COVID-19 Genomics UK (COG-UK) Consortium|Davies|United Kingdom

>Spike|hCoV-19/England/ALDP-BBA662/2020|2020-11-20|EPI\_ISL\_702446|Original|hCoV-19^^England|Human|Lighthouse Lab in Alderley Park|Wellcome Sanger Institute for the COVID-19 Genomics UK (COG-UK) Consortium|Davies|United Kingdom

>Spike|hCoV-19/England/MILK-9E0E9A/2020|2020-09-20|EPI\_ISL\_580940|Original|hCoV-19^^England|Human|Lighthouse Lab in Milton Keynes|Wellcome Sanger Institute for the COVID-19 Genomics UK (COG-UK) consortium|Davies|United Kingdom

>Spike|hCoV-19/South Korea/KCDC2417/2020|2020-06-03|EPI\_ISL\_514820|Original|hCoV-19^^South Korea|Human|Division of Viral Diseases|Division of Viral Diseases|Kim|South Korea

>Spike|hCoV-19/Netherlands/GR-RIVM-20834/2020|2020-12-15|EPI\_ISL\_790889|Original|hCoV-19^^Groningen|Human|Dutch COVID-19 response team|National Institute for Public Health and the Environment (RIVM)|Meijer|Netherlands

>Spike|hCoV-19/Northern Ireland/QEUA-96F0CA/2020|2020-08-18|EPI\_ISL\_530619|Original|hCoV-19^^Northern Ireland|Human|Lighthouse Lab in Glasgow|Wellcome Sanger Institute for the COVID-19 Genomics UK (COG-UK) consortium|Davies|United Kingdom

>Spike|hCoV-19/England/MILK-AC82B9/2020|2020-10-22|EPI\_ISL\_629579|Original|hCoV-19^^England|Human|Lighthouse Lab in Milton Keynes|Wellcome Sanger Institute for the COVID-19 Genomics UK (COG-UK) consortium|Davies|United Kingdom

>Spike|hCoV-19/Spain/MD-IBV-99012468/2020|2020-11-14|EPI\_ISL\_780092|Original|hCoV-19^^Madrid|Human|Hospital General Universitario Gregorio Mara\u00f1\u00f3n|SeqCOVID-SPAIN consortium/IBV (CSIC)|Comas|Spain

>Spike|hCoV-19/South Africa/KRISP-0099/2020|2020-04-01|EPI\_ISL\_467463|Original|hCoV-19^^KwaZulu-Natal|Human|AMPATH-DBN|KRISP|de Oliveira|South Africa

>Spike|hCoV-19/England/CAMC-B99DA0/2020|2020-11-15|EPI\_ISL\_673506|Original|hCoV-19^^England|Human|Lighthouse Lab in Cambridge|Wellcome Sanger Institute for the COVID-19 Genomics UK (COG-UK) Consortium|Davies|United Kingdom

>Spike|hCoV-19/England/QEUA-B4017F/2020|2020-11-08|EPI\_ISL\_657268|Original|hCoV-19^^England|Human|Lighthouse Lab in Glasgow|Wellcome Sanger Institute for the COVID-19 Genomics UK (COG-UK) Consortium|Davies|United Kingdom

>Spike|hCoV-19/Switzerland/VD-ETHZ-100333/2020|2020-03-18|EPI\_ISL\_575011|Original|hCoV-19^^Vaud|Human|Viollier AG|Department of Biosystems Science and Engineering|Nadeau|Switzerland

>Spike|hCoV-19/England/MILK-A7C3FD/2020|2020-10-15|EPI\_ISL\_606580|Original|hCoV-19^^England|Human|Lighthouse Lab in Milton Keynes|Wellcome Sanger Institute for the COVID-19 Genomics UK (COG-UK) consortium|Davies|United Kingdom

>Spike|hCoV-19/Australia/VIC18034/2020|2020-12-31|EPI\_ISL\_779642|Original|hCoV-19^^Victoria|Human|Microbiological Diagnostic Unit - Public Health Laboratory (MDU-PHL)|MDU-PHL|Beck|Australia

>Spike|hCoV-19/England/ALDP-8DB75C/2020|2020-06-25|EPI\_ISL\_557067|Original|hCoV-19^^England|Human|Lighthouse Lab in Alderley Park|Wellcome Sanger Institute for the COVID-19 Genomics UK (COG-UK) consortium|Davies|United Kingdom

>Spike|hCoV-19/England/QEUA-A00974/2020|2020-09-30|EPI\_ISL\_600298|Original|hCoV-19^^England|Human|Lighthouse Lab in Glasgow|Wellcome Sanger Institute for the COVID-19 Genomics UK (COG-UK) consortium|Davies|United Kingdom

>Spike|hCoV-19/USA/WI-UW-2515/2020|2020-12-30|EPI\_ISL\_779347|Original|hCoV-19^^Wisconsin|Human|University of Wisconsin-Madison AIDS Vaccine Research Laboratories|University of Wisconsin-Madison AIDS Vaccine Research Laboratories|Moreno|USA

>Spike|hCoV-19/Denmark/DCGC-3013/2020|2020-08-24|EPI\_ISL\_616791|Original|hCoV-19^^Hovedstaden|Human|Department of Virus and Microbiological Special Diagnostics|Albertsen lab|Michaelsen|Denmark

>Spike|hCoV-19/Australia/QLD1056/2020|2020-09-09|EPI\_ISL\_576141|Original|hCoV-19^^Australia|Human|unknown|Public Health Virology Laboratory|Nguyen|Australia

>Spike|hCoV-19/England/EXET-1391DD/2020|2020-00-00|EPI\_ISL\_664148|Original|hCoV-19^^England|Human|University of Exeter|COVID-19 Genomics UK (COG-UK) Consortium|Temperton|United Kingdom

>Spike|hCoV-19/USA/ID-UW-2174/2020|2020-03-23|EPI\_ISL\_426061|Original|hCoV-19^^Idaho|Human|UW Virology Lab|UW Virology Lab|Roychoudhury|USA

>Spike|hCoV-19/England/OXON-AE2FF/2020|2020-00-00|EPI\_ISL\_448681|Original|hCoV-19^^England|Human|Oxford Viromics|COVID-19 Genomics UK (COG-UK) Consortium|Golubchik|United Kingdom

>Spike|hCoV-19/England/201790471/2020|2020-04-24|EPI\_ISL\_527257|Original|hCoV-19^^England|Human|Respiratory Virus Unit|Respiratory Virus Unit|Miah|United Kingdom

>Spike|hCoV-19/England/MILK-99D588/2020|2020-08-30|EPI\_ISL\_549858|Original|hCoV-19^^England|Human|Lighthouse Lab in Milton Keynes|Wellcome Sanger Institute for the COVID-19 Genomics UK (COG-UK) consortium|Davies|United Kingdom

>Spike|hCoV-19/Netherlands/NA\_264/2020|2020-03-30|EPI\_ISL\_422575|Original|hCoV-19^^Netherlands|Human|Dutch COVID-19 response team|Erasmus Medical Center|Oude Munnink|Netherlands

>Spike|hCoV-19/Scotland/EDB2720/2020|2020-03-27|EPI\_ISL\_489018|Original|hCoV-19^^Scotland|Human|Virology Department|Wellcome Sanger Institute for the COVID-19 Genomics UK (COG-UK) consortium|Davies|United Kingdom

>Spike|hCoV-19/Northern Ireland/NIRE-107387/2020|2020-03-30|EPI\_ISL\_585141|Original|hCoV-19^^Northern Ireland|Human|Regional Virus Laboratory|COVID-19 Genomics UK (COG-UK) Consortium|Fairley|United Kingdom

>Spike|hCoV-19/USA/WI-WSLH-200240/2020|2020-04-14|EPI\_ISL\_578460|Original|hCoV-19^^Wisconsin|Human|Wisconsin State Laboratory of Hygiene Communicable Disease Division|Wisconsin State Laboratory of Hygiene Communicable Disease Division|Florek|USA

>Spike|hCoV-19/Luxembourg/LNS3113282/2020|2020-11-14|EPI\_ISL\_740249|Original|hCoV-19^^Luxembourg|Human|Laboratoire national de sant\u00e9|Laboratoire national de sant\u00e9|Wienecke-Baldacchino|Luxembourg

>Spike|hCoV-19/Netherlands/OV-EMC-123/2020|2020-11-19|EPI\_ISL\_763163|Original|hCoV-19^^Overijssel|Human|Dutch COVID-19 response team|Erasmus Medical Center|Oude Munnink|Netherlands

>Spike|hCoV-19/USA/TX-HMH-4987/2020|2020-06-22|EPI\_ISL\_544438|Original|hCoV-19^^Texas|Human|Houston Methodist Hospital|Houston Methodist Hospital|Long|USA

>Spike|hCoV-19/England/MILK-995368/2020|2020-08-24|EPI\_ISL\_552434|Original|hCoV-19^^England|Human|Lighthouse Lab in Milton Keynes|Wellcome Sanger Institute for the COVID-19 Genomics UK (COG-UK) consortium|Davies|United Kingdom

>Spike|hCoV-19/USA/CA-QDX-1115/2020|2020-03-21|EPI\_ISL\_571811|Original|hCoV-19^^California|Human|Quest Diagnostics|Quest Diagnostics|Kagan|USA

>Spike|hCoV-19/England/CAMB-84A06/2020|2020-03-10|EPI\_ISL\_440543|Original|hCoV-19^^England|Human|Department of Pathology|Wellcome Sanger Institute for the COVID-19 Genomics UK (COG-UK) consortium|Amato|United Kingdom

>Spike|hCoV-19/South Korea/KCDC2260/2020|2020-05-12|EPI\_ISL\_510598|Original|hCoV-19^^South Korea|Human|Division of Viral Diseases|Division of Viral Diseases|Kim|South Korea

>Spike|hCoV-19/USA/UT-UPHL-2012762917/2020|2020-08-17|EPI\_ISL\_746054|Original|hCoV-19^^Utah|Human|Ginkgo Bioworks Clinical Laboratory|Utah Public Health Laboratory|Young|USA

>Spike|hCoV-19/England/ALDP-A6E358/2020|2020-10-15|EPI\_ISL\_607222|Original|hCoV-19^^England|Human|Lighthouse Lab in Alderley Park|Wellcome Sanger Institute for the COVID-19 Genomics UK (COG-UK) consortium|Davies|United Kingdom

>Spike|hCoV-19/England/NORT-28BF1D/2020|2020-05-10|EPI\_ISL\_457316|Original|hCoV-19^^England|Human|Northumbria University / South Tees Hospitals NHS Foundation Trust / North Cumbria Integrated Care NHS Foundation Trust / North Tees and Hartlepool NHS Foundation Trust / Newcastle Hospitals NHS Foundation Trust|COVID-19 Genomics UK (COG-UK) Consortium|Bashton|United Kingdom

>Spike|hCoV-19/USA/TX-HMH-3422/2020|2020-06-14|EPI\_ISL\_544180|Original|hCoV-19^^Texas|Human|Houston Methodist Hospital|Houston Methodist Hospital|Long|USA

>Spike|hCoV-19/South Africa/KRISP-K003519/2020|2020-09-26|EPI\_ISL\_602838|Original|hCoV-19^^KwaZulu-Natal|Human|NHLS-IALCH|KRISP|de Oliveira|South Africa

>Spike|hCoV-19/England/CAMB-7B8DB/2020|2020-04-05|EPI\_ISL\_442117|Original|hCoV-19^^England|Human|Department of Pathology|Wellcome Sanger Institute for the COVID-19 Genomics UK (COG-UK) consortium|Amato|United Kingdom

>Spike|hCoV-19/Oman/205033209/2020|2020-05-03|EPI\_ISL\_458128|Original|hCoV-19^^Muscat|Human|Oman National Influenza Centre|Department of Microbiology and Immunology-SQUH|AL Zadjali|Oman

>Spike|hCoV-19/USA/WA-UW-47378/2020|2020-12-14|EPI\_ISL\_776667|Original|hCoV-19^^Washington|Human|UW Virology Lab|UW Virology Lab|Roychoudhury|USA

>Spike|hCoV-19/England/NORW-E9911/2020|2020-04-29|EPI\_ISL\_461837|Original|hCoV-19^^England|Human|Quadram Institute Bioscience|COVID-19 Genomics UK (COG-UK) Consortium|Alikhan|United Kingdom

>Spike|hCoV-19/USA/CA-ALSR-3861/2020|2020-07-01|EPI\_ISL\_636248|Original|hCoV-19^^California|Human|San Diego County Public Health Laboratory|Andersen lab at Scripps Research|Gangavarapu|USA

>Spike|hCoV-19/USA/VA-DCLS-2129/2020|2020-10-28|EPI\_ISL\_677154|Original|hCoV-19^^Virginia|Human|Virginia Division of Consolidated Laboratory Services|Virginia Division of Consolidated Laboratory Services|St. Jacques|USA

>Spike|hCoV-19/Belgium/reg-10191285/2020|2020-10-19|EPI\_ISL\_735192|Original|hCoV-19^^Bierbeek|Human|UZ Leuven|KU Leuven|Maes|Belgium

>Spike|hCoV-19/Australia/VIC785/2020|2020-03-30|EPI\_ISL\_427060|Original|hCoV-19^^Victoria|Human|Microbiological Diagnostic Unit Public Health Laboratory|Microbiological Diagnostic Unit Public Health Laboratory|Schultz|Australia

>Spike|hCoV-19/England/CAMC-AEBOE3/2020|2020-10-25|EPI\_ISL\_633105|Original|hCoV-19^^England|Human|Lighthouse Lab in Cambridge|Wellcome Sanger Institute for the COVID-19 Genomics UK (COG-UK) consortium|Davies|United Kingdom

>Spike|hCoV-19/Switzerland/ZH-ETHZ-100803/2020|2020-03-25|EPI\_ISL\_451753|Original|hCoV-19^^Zurich|Human|Viollier AG|Department of Biosystems Science and Engineering|Nadeau|Switzerland

>Spike|hCoV-19/Ireland/OY-NVRL-MPS84145/2020|2020-04-11|EPI\_ISL\_767825|Original|hCoV-19^^Offaly|Human|National Virus Reference Laboratory|Irish Coronavirus Sequencing Consortium - Teagasc Moorepark|Walsh|Ireland

>Spike|hCoV-19/USA/NY-NYCPHL-001439/2020|2020-11-23|EPI\_ISL\_683804|Original|hCoV-19^^New York|Human|DOHMH Morrisania|New York City Public Health Laboratory|Wang|USA

>Spike|hCoV-19/Peru/LIM-INS-147/2020|2020-03-14|EPI\_ISL\_536542|Original|hCoV-19^^Lima|Human|Instituto Nacional de Salud|Laboratorio de Infecciones Respiratorias Agudas|Lopez|Peru

>Spike|hCoV-19/Denmark/DCGC-1639/2020|2020-04-06|EPI\_ISL\_619151|Original|hCoV-19^^Hovedstaden|Human|Department of Virus and Microbiological Special Diagnostics|Albertsen lab|Michaelsen|Denmark

>Spike|hCoV-19/Saudi Arabia/KAUST-MADINAH605/2020|2020-05-06|EPI\_ISL\_513170|Original|hCoV-19^^Madinah|Human|Pathogen Genomics Lab King Abdullah University of Science and Technology(KAUST)|Pathogen Genomics Lab King Abdullah University of Science and Technology(KAUST)|Mohamed Ghazzali|Saudi Arabia

>Spike|hCoV-19/USA/UT-UPHL-2012015753/2020|2020-08-17|EPI\_ISL\_746309|Original|hCoV-19^^Utah|Human|Ginkgo Bioworks Clinical Laboratory|Utah Public Health Laboratory|Young|USA

>Spike|hCoV-19/New Zealand/20VR1941/2020|2020-04-04|EPI\_ISL\_456317|Original|hCoV-19^^Southern|Human|Southern Community Labs Dunedin|Institute of Environmental Science and Research (ESR)|de Ligt|New Zealand

>Spike|hCoV-19/Denmark/DCGC-18281/2020|2020-12-07|EPI\_ISL\_749860|Original|hCoV-19^^Hovedstaden|Human|Department of Virus and Microbiological Special Diagnostics|Albertsen Lab|Michaelsen|Denmark

>Spike|hCoV-19/Wales/PHWC-1694F9/2020|2020-04-01|EPI\_ISL\_499451|Original|hCoV-19^^Wales|Human|Wales Specialist Virology Centre Sequencing lab|COVID-19 Genomics UK (COG-UK) Consortium|Moore|United Kingdom

>Spike|hCoV-19/England/QEUA-AD33D6/2020|2020-10-26|EPI\_ISL\_634044|Original|hCoV-19^^England|Human|Lighthouse Lab in Glasgow|Wellcome Sanger Institute for the COVID-19 Genomics UK (COG-UK) consortium|Davies|United Kingdom

>Spike|hCoV-19/USA/TX-HMH-MCoV-14438/2020|2020-10-08|EPI\_ISL\_787723|Original|hCoV-19^^Texas|Human|Houston Methodist Hospital|Houston Methodist Hospital|Long|USA

>Spike|hCoV-19/England/CAMC-A3F4F3/2020|2020-10-06|EPI\_ISL\_609716|Original|hCoV-19^^England|Human|Lighthouse Lab in Cambridge|Wellcome Sanger Institute for the COVID-19 Genomics UK (COG-UK) consortium|Davies|United Kingdom

>Spike|hCoV-19/Denmark/DCGC-9540/2020|2020-11-09|EPI\_ISL\_669029|Original|hCoV-19^^Nordjylland|Human|Department of Virus and Microbiological Special Diagnostics|Albertsen Lab|Michaelsen|Denmark

>Spike|hCoV-19/England/LIVE-DBAF1A/2020|2020-11-13|EPI\_ISL\_664643|Original|hCoV-19^^England|Human|Liverpool Clinical Laboratories|COVID-19 Genomics UK (COG-UK) Consortium|Haldenby|United Kingdom

>Spike|hCoV-19/USA/WI-UW-518/2020|2020-06-24|EPI\_ISL\_484893|Original|hCoV-19^^Wisconsin|Human|University of Wisconsin-Madison AIDS Vaccine Research Laboratories|University of Wisconsin-Madison AIDS Vaccine Research Laboratories|Baczenas|USA

>Spike|hCoV-19/Spain/MD-IBV-005287/2020|2020-03-15|EPI\_ISL\_510173|Original|hCoV-19^^Madrid|Human|Hospital General Universitario Gregorio Mara\u00f1a|SeqCOVID-SPAIN consortium/IBV (CSIC)|Comas|Spain

>Spike|hCoV-19/England/CAMB-8464E/2020|2020-04-27|EPI\_ISL\_438744|Original|hCoV-19^^England|Human|Department of Pathology|COVID-19 Genomics UK (COG-UK) Consortium|Meredith|United Kingdom

>Spike|hCoV-19/South Africa/KRISP-0406/2020|2020-06-22|EPI\_ISL\_495531|Original|hCoV-19^^KwaZulu-Natal|Human|NHL-IALCH|KRISP|de Oliveira|South Africa

>Spike|hCoV-19/England/OXON-B3D8D/2020|2020-04-21|EPI\_ISL\_534912|Original|hCoV-19^^England|Human|Oxford Viromics|COVID-19 Genomics UK (COG-UK) Consortium|Golubchik|United Kingdom

>Spike|hCoV-19/England/ALDP-CB363B/2020|2020-12-20|EPI\_ISL\_761281|Original|hCoV-19^^England|Human|Lighthouse Lab in Alderley Park|Wellcome Sanger Institute for the COVID-19 Genomics UK (COG-UK) Consortium|Davies|United Kingdom

>Spike|hCoV-19/Denmark/DCGC-1159/2020|2020-03-16|EPI\_ISL\_614668|Original|hCoV-19^^Hovedstaden|Human|Department of Virus and Microbiological Special Diagnostics|Albertsen lab|Michaelsen|Denmark

>Spike|hCoV-19/Lithuania/MR-LUHS-Eilnr238326/2020|2020-12-22|EPI\_ISL\_770529|Original|hCoV-19^^Kauno apskritis|Human|Lithuanian University of Health Sciences Hospital|Lithuanian University of Health Sciences|Zemaitis|Lithuania

>Spike|hCoV-19/USA/CA-CZB-3338/2020|2020-07-13|EPI\_ISL\_548300|Original|hCoV-19^^California|Human|Orange County Public Health Laboratory|Chan-Zuckerberg Biohub|Bhatt|USA

>Spike|hCoV-19/Switzerland/BS-42395137/2020|2020-08-14|EPI\_ISL\_581954|Original|hCoV-19^^Basel-Stadt|Human|University Hospital Basel|University Hospital Basel|Roloff Handschin|Switzerland

>Spike|hCoV-19/USA/CA-CZB-11920/2020|2020-10-04|EPI\_ISL\_625602|Original|hCoV-19^^California|Human|Santa Clara County Public Health Laboratory|Chan-Zuckerberg Biohub|Bhatt|USA

>Spike|hCoV-19/Canada/ON-PHL-3350/2020|2020-03-00|EPI\_ISL\_418366|Original|hCoV-19^^Ontario|Human|Public Health Ontario Laboratories|Public Health Ontario Laboratories|Eshaghi|Canada

>Spike|hCoV-19/England/LIVE-DB4F10/2020|2020-10-22|EPI\_ISL\_650381|Original|hCoV-19^^England|Human|Liverpool Clinical Laboratories|COVID-19 Genomics UK (COG-UK) Consortium|Haldenby|United Kingdom

>Spike|hCoV-19/England/MILK-ACE66C/2020|2020-10-21|EPI\_ISL\_629631|Original|hCoV-19^^England|Human|Lighthouse Lab in Milton Keynes|Wellcome Sanger Institute for the COVID-19 Genomics UK (COG-UK) consortium|Davies|United Kingdom

>Spike|hCoV-19/USA/UT-02232/2020|2020-04-14|EPI\_ISL\_436929|Original|hCoV-19^^Utah|Human|Utah Public Health Laboratory|Utah Public Health Laboratory|Young|USA

>Spike|hCoV-19/Scotland/QEUH-9F469B/2020|2020-09-27|EPI\_ISL\_600735|Original|hCoV-19^^Scotland|Human|Lighthouse Lab in Glasgow|Wellcome Sanger Institute for the COVID-19 Genomics UK (COG-UK) consortium|Davies|United Kingdom

>Spike|hCoV-19/England/BRIS-12B7EB/2020|2020-05-20|EPI\_ISL\_487591|Original|hCoV-19^^England|Human|PHE South West Regional Laboratory|Wellcome Sanger Institute for the COVID-19 Genomics UK (COG-UK) consortium|Davies|United Kingdom

>Spike|hCoV-19/Belgium/reg-0419532/2020|2020-04-19|EPI\_ISL\_734625|Original|hCoV-19^^Tournai|Human|UZ Leuven|KU Leuven|Maes|Belgium

>Spike|hCoV-19/Denmark/ALAB-SSI474/2020|2020-03-25|EPI\_ISL\_429554|Original|hCoV-19^^Denmark|Human|Department of Virus and Microbiological Special Diagnostics|Albertsen lab|Kirkegaard|Denmark

>Spike|hCoV-19/England/EXET-13F31D/2020|2020-12-16|EPI\_ISL\_763535|Original|hCoV-19^^England|Human|University of Exeter|COVID-19 Genomics UK (COG-UK) Consortium|Temperton|United Kingdom

>Spike|hCoV-19/Denmark/DCGC-19411/2020|2020-12-07|EPI\_ISL\_748932|Original|hCoV-19^^Syddanmark|Human|Department of Virus and Microbiological Special Diagnostics|Albertsen Lab|Michaelsen|Denmark

>Spike|hCoV-19/Japan/PG-4210/2020|2020-07-00|EPI\_ISL\_692448|Original|hCoV-19^^Japan|Human|Fukuoka Institute of Health and Environmental Sciences|Pathogen Genomics Center|Sekizuka|Japan

>Spike|hCoV-19/USA/UT-08485/2020|2020-05-20|EPI\_ISL\_524254|Original|hCoV-19^^Utah|Human|Utah Public Health Laboratory|Utah Public Health Laboratory|Young|USA

>Spike|hCoV-19/USA/NC-QDX-202/2020|2020-04-30|EPI\_ISL\_494530|Original|hCoV-19^^North Carolina|Human|Quest Diagnostics|Quest Diagnostics|Kagan|USA

>Spike|hCoV-19/Portugal/PT1750/2020|2020-11-11|EPI\_ISL\_731987|Original|hCoV-19^^Portugal|Human|Instituto Nacional de Saude (INSA)|Instituto Nacional de Saude (INSA)|Borges|Portugal

>Spike|hCoV-19/Australia/VIC8550/2020|2020-08-18|EPI\_ISL\_565087|Original|hCoV-19^^Victoria|Human|Microbiological Diagnostic Unit - Public Health Laboratory (MDU-PHL)|MDU-PHL|Schultz|Australia

>Spike|hCoV-19/USA/TX-HMH-MCoV-12744/2020|2020-08-29|EPI\_ISL\_790501|Original|hCoV-19^^Texas|Human|Houston Methodist Hospital|Houston Methodist Hospital|Long|USA

>Spike|hCoV-19/Switzerland/BS-42204745/2020|2020-03-24|EPI\_ISL\_581729|Original|hCoV-19^^Basel-Stadt|Human|University Hospital Basel|University Hospital Basel|Roloff Handschin|Switzerland

>Spike|hCoV-19/Denmark/DCGC-2637/2020|2020-08-17|EPI\_ISL\_616516|Original|hCoV-19^^Syddanmark|Human|Department of Virus and Microbiological Special Diagnostics|Albertsen lab|Michaelsen|Denmark

>Spike|hCoV-19/England/ALDP-A2D416/2020|2020-10-06|EPI\_ISL\_586588|Original|hCoV-19^^England|Human|Lighthouse Lab in Alderley Park|Wellcome Sanger Institute for the COVID-19 Genomics UK (COG-UK) consortium|Davies|United Kingdom

>Spike|hCoV-19/USA/UT-02699/2020|2020-04-27|EPI\_ISL\_522266|Original|hCoV-19^^Utah|Human|Utah Public Health Laboratory|Utah Public Health Laboratory|Young|USA

>Spike|hCoV-19/USA/WA-S1590/2020|2020-05-26|EPI\_ISL\_496016|Original|hCoV-19^^Washington|Human|Washington State Department of Health|Seattle Flu Study|Lee|USA

>Spike|hCoV-19/Oman/205039772/2020|2020-05-29|EPI\_ISL\_492007|Original|hCoV-19^^Muscat|Human|Oman-NIC|Department of Microbiology and Immunology-SQUH|AL Zadjali|Oman

>Spike|hCoV-19/Wales/PHWC-2415E/2020|2020-03-16|EPI\_ISL\_418149|Original|hCoV-19^^Wales|Human|Wales Specialist Virology Centre|Public Health Wales Microbiology Cardiff|Moore|United Kingdom

>Spike|hCoV-19/Japan/PG-1356/2020|2020-04-00|EPI\_ISL\_684964|Original|hCoV-19^^Japan|Human|Saitama Prefectural Institute of Public Health|Pathogen Genomics Center|Sekizuka|Japan

>Spike|hCoV-19/England/ALDP-982085/2020|2020-08-09|EPI\_ISL\_552748|Original|hCoV-19^^England|Human|Lighthouse Lab in Alderley Park|Wellcome Sanger Institute for the COVID-19 Genomics UK (COG-UK) consortium|Davies|United Kingdom

>Spike|hCoV-19/Costa Rica/INC-0041/2020|2020-03-20|EPI\_ISL\_491452|Original|hCoV-19^^Alajuela|Human|Hospital San Rafael de Alajuela|Inciensa|Brenes Porras|Costa Rica

>Spike|hCoV-19/England/NORW-F6568/2020|2020-11-30|EPI\_ISL\_706368|Original|hCoV-19^^England|Human|Quadram Institute Bioscience|COVID-19 Genomics UK (COG-UK) Consortium|Alikhan|United Kingdom

>Spike|hCoV-19/Scotland/QEUEH-9436E8/2020|2020-08-02|EPI\_ISL\_532572|Original|hCoV-19^^Scotland|Human|NHSGGC West of Scotland Specialist Virology Centre / MRC-University of Glasgow Centre for Virus Research|Wellcome Sanger Institute for the COVID-19 Genomics UK (COG-UK) consortium|Davies|United Kingdom

>Spike|hCoV-19/Uganda/UG015/2020|2020-04-27|EPI\_ISL\_451197|Original|hCoV-19^^Uganda|Human|Uganda Virus Research Institute|MRC/UVRI & LSHTM Uganda\00a0Research Unit|Cotten|Uganda

>Spike|hCoV-19/England/NORW-E7500/2020|2020-05-04|EPI\_ISL\_449044|Original|hCoV-19^^England|Human|Quadram Institute Bioscience|COVID-19 Genomics UK (COG-UK) Consortium|Alikhan|United Kingdom

>Spike|hCoV-19/Japan/PG-8686/2020|2020-09-00|EPI\_ISL\_686282|Original|hCoV-19^^Japan|Human|Pathogen Genomics Center|Pathogen Genomics Center|Sekizuka|Japan

>Spike|hCoV-19/England/ALDP-A87061/2020|2020-10-17|EPI\_ISL\_605958|Original|hCoV-19^^England|Human|Lighthouse Lab in Alderley Park|Wellcome Sanger Institute for the COVID-19 Genomics UK (COG-UK) consortium|Davies|United Kingdom

>Spike|hCoV-19/USA/CA-CZB-3333/2020|2020-07-10|EPI\_ISL\_548272|Original|hCoV-19^^California|Human|Orange County Public Health Laboratory|Chan-Zuckerberg Biohub|Bhatt|USA

>Spike|hCoV-19/Portugal/PT0543/2020|2020-04-08|EPI\_ISL\_454267|Original|hCoV-19^^Portugal|Human|unknown|Instituto Nacional de Saude (INSA)|Borges|Portugal

>Spike|hCoV-19/Wales/PHWC-35A6E/2020|2020-04-24|EPI\_ISL\_474518|Original|hCoV-19^^Wales|Human|Originating lab|COVID-19 Genomics UK (COG-UK) Consortium|Moore|United Kingdom

>Spike|hCoV-19/Scotland/QEUEH-AF5286/2020|2020-10-30|EPI\_ISL\_676471|Original|hCoV-19^^Scotland|Human|Lighthouse Lab in Glasgow|Wellcome Sanger Institute for the COVID-19 Genomics UK (COG-UK) Consortium|Davies|United Kingdom

>Spike|hCoV-19/Denmark/DCGC-20005/2020|2020-12-07|EPI\_ISL\_747923|Original|hCoV-19^^Sjaelland|Human|Department of Virus and Microbiological Special Diagnostics|Albertsen Lab|Michaelsen|Denmark

>Spike|hCoV-19/England/MILK-BABAB3/2020|2020-11-18|EPI\_ISL\_720557|Original|hCoV-19^^England|Human|Lighthouse Lab in Milton Keynes|Wellcome Sanger Institute for the COVID-19 Genomics UK (COG-UK) Consortium|Davies|United Kingdom

>Spike|hCoV-19/Scotland/QEUEH-95E1E9/2020|2020-08-10|EPI\_ISL\_534432|Original|hCoV-19^^Scotland|Human|NHSGGC West of Scotland Specialist Virology Centre / MRC-University of Glasgow Centre for Virus Research|Wellcome Sanger Institute for the COVID-19 Genomics UK (COG-UK) consortium|Davies|United Kingdom

>Spike|hCoV-19/USA/CA-CZB-9753/2020|2020-06-03|EPI\_ISL\_672165|Original|hCoV-19^^California|Human|The Ashley Laboratory|Chan-Zuckerberg Biohub|Bhatt|USA

>Spike|hCoV-19/England/CAMC-B34DA7/2020|2020-11-05|EPI\_ISL\_659488|Original|hCoV-19^^England|Human|Lighthouse Lab in Cambridge|Wellcome Sanger Institute for the COVID-19 Genomics UK (COG-UK) Consortium|Davies|United Kingdom

>Spike|hCoV-19/Wales/PHWC-497547/2020|2020-11-30|EPI\_ISL\_726845|Original|hCoV-19^^Wales|Human|Originating lab|COVID-19 Genomics UK (COG-UK) Consortium|Moore|United Kingdom

>Spike|hCoV-19/Scotland/EDB5159/2020|2020-05-17|EPI\_ISL\_456981|Original|hCoV-19^^Scotland|Human|Virology Department|COVID-19 Genomics UK (COG-UK) Consortium|Williams|United Kingdom

>Spike|hCoV-19/England/ALDP-6DA986/2020|2020-06-30|EPI\_ISL\_556101|Original|hCoV-19^^England|Human|Lighthouse Lab in Alderley Park|Wellcome Sanger Institute for the COVID-19 Genomics UK (COG-UK) consortium|Davies|United Kingdom

>Spike|hCoV-19/Australia/VIC7795/2020|2020-08-05|EPI\_ISL\_564663|Original|hCoV-19^^Victoria|Human|Microbiological Diagnostic Unit - Public Health Laboratory (MDU-PHL) |MDU-PHL|Schultz|Australia

>Spike|hCoV-19/England/LIVE-9E720/2020|2020-04-10|EPI\_ISL\_453326|Original|hCoV-19^^England|Human|Liverpool Clinical Laboratories|COVID-19 Genomics UK (COG-UK) Consortium|Haldenby|United Kingdom

>Spike|hCoV-19/England/CAMB-1B4125/2020|2020-06-01|EPI\_ISL\_473459|Original|hCoV-19^^England|Human|Department of Pathology|COVID-19 Genomics UK (COG-UK) Consortium|Meredith|United Kingdom

>Spike|hCoV-19/England/QEUA-AACD9C/2020|2020-10-20|EPI\_ISL\_652915|Original|hCoV-19^^England|Human|Oxford Viromics|COVID-19 Genomics UK (COG-UK) Consortium|Golubchik|United Kingdom

>Spike|hCoV-19/Japan/PG-0926/2020|2020-04-00|EPI\_ISL\_684536|Original|hCoV-19^^Japan|Human|Pathogen Genomics Center|Pathogen Genomics Center|Sekizuka|Japan

>Spike|hCoV-19/England/CAMB-72564/2020|2020-03-21|EPI\_ISL\_439938|Original|hCoV-19^^England|Human|Department of Pathology|Wellcome Sanger Institute for the COVID-19 Genomics UK (COG-UK) consortium|Amato|United Kingdom

>Spike|hCoV-19/Canada/QC-LSPQ-L00227457/2020|2020-03-18|EPI\_ISL\_535861|Original|hCoV-19^^Quebec|Human|H\u00f4pital Pierre-Le Gardeur|Laboratoire de sant\u00e9 publique du Qu\u00e9bec|Moreira|Canada

>Spike|hCoV-19/England/MILK-B8C3EA/2020|2020-11-13|EPI\_ISL\_674378|Original|hCoV-19^^England|Human|Lighthouse Lab in Milton Keynes|Wellcome Sanger Institute for the COVID-19 Genomics UK (COG-UK) Consortium|Davies|United Kingdom

>Spike|hCoV-19/England/QEUA-9B9128/2020|2020-09-07|EPI\_ISL\_549776|Original|hCoV-19^^England|Human|Lighthouse Lab in Glasgow|Wellcome Sanger Institute for the COVID-19 Genomics UK (COG-UK) consortium|Davies|United Kingdom

>Spike|hCoV-19/USA/LA-EVTL1312/2020|2020-12-11|EPI\_ISL\_778978|Original|hCoV-19^^Louisiana|Human|LSUHS Emerging Viral Threat Laboratory|Microbial Genome Sequencing Center|Kamil|USA

>Spike|hCoV-19/England/CAMC-B532A3/2020|2020-11-08|EPI\_ISL\_657404|Original|hCoV-19^^England|Human|Lighthouse Lab in Cambridge|Wellcome Sanger Institute for the COVID-19 Genomics UK (COG-UK) Consortium|Davies|United Kingdom

>Spike|hCoV-19/England/ALDP-AA085B/2020|2020-10-22|EPI\_ISL\_624990|Original|hCoV-19^^England|Human|Lighthouse Lab in Alderley Park|Wellcome Sanger Institute for the COVID-19 Genomics UK (COG-UK) consortium|Davies|United Kingdom

>Spike|hCoV-19/USA/TX-HMH-1500/2020|2020-04-07|EPI\_ISL\_542757|Original|hCoV-19^^Texas|Human|Houston Methodist Hospital|Houston Methodist Hospital|Long|USA

>Spike|hCoV-19/Denmark/DCGC-4748/2020|2020-09-14|EPI\_ISL\_622187|Original|hCoV-19^^Syddanmark|Human|Department of Virus and Microbiological Special Diagnostics|Albertsen lab|Michaelsen|Denmark

>Spike|hCoV-19/Denmark/DCGC-5094/2020|2020-09-21|EPI\_ISL\_621632|Original|hCoV-19^^Sjaelland|Human|Department of Virus and Microbiological Special Diagnostics|Albertsen lab|Michaelsen|Denmark

>Spike|hCoV-19/USA/MI-MDHHS-SC20682/2020|2020-05-15|EPI\_ISL\_471706|Original|hCoV-19^^Michigan|Human|Michigan Department of Health and Human Services|Michigan Department of Health and Human Services|Blankenship|USA

>Spike|hCoV-19/Wales/PHWC-493174/2020|2020-11-28|EPI\_ISL\_725846|Original|hCoV-19^^Wales|Human|Originating lab|COVID-19 Genomics UK (COG-UK) Consortium|Moore|United Kingdom

>Spike|hCoV-19/England/ALDP-B74691/2020|2020-11-12|EPI\_ISL\_662227|Original|hCoV-19^^England|Human|Lighthouse Lab in Alderley Park|Wellcome Sanger Institute for the COVID-19 Genomics UK (COG-UK) Consortium|Davies|United Kingdom

>Spike|hCoV-19/England/ALDP-B25037/2020|2020-11-04|EPI\_ISL\_646549|Original|hCoV-19^^England|Human|Lighthouse Lab in Alderley Park|Wellcome Sanger Institute for the COVID-19 Genomics UK (COG-UK) Consortium|Davies|United Kingdom

>Spike|hCoV-19/England/BIRM-675EA/2020|2020-10-29|EPI\_ISL\_651619|Original|hCoV-19^^England|Human|University of Birmingham|COVID-19 Genomics UK (COG-UK) Consortium|Loman|United Kingdom

>Spike|hCoV-19/Luxembourg/LNS9462606/2020|2020-11-09|EPI\_ISL\_744920|Original|hCoV-19^^Luxembourg|Human|Laboratoire national de sant\u00e9|Laboratoire national de sant\u00e9|Wienecke-Baldacchino|Luxembourg

>Spike|hCoV-19/India/DL-IGIB11305766/2020|2020-08-00|EPI\_ISL\_751276|Original|hCoV-19^^Delhi|Human|Devki Devi Foundation|CSIR-IGIB/Max|Pandey|India

>Spike|hCoV-19/England/SHEF-10CFD6D/2020|2020-12-21|EPI\_ISL\_763514|Original|hCoV-19^^England|Human|Virology Department|COVID-19 Genomics UK (COG-UK) Consortium|de Silva|United Kingdom



>Spike|hCoV-19/Sweden/20-52687/2020|2020-08-17|EPI\_ISL\_648193|Original|hCoV-19^^Vastra Gotaland|Human|Klinisk mikrobiologi SAS Borås|The Public Health Agency of Sweden|Svartstr\u00f6m|Sweden

>Spike|hCoV-19/Australia/SAP389/2020|2020-03-22|EPI\_ISL\_492154|Original|hCoV-19^^South Australia|Human|SA Pathology|SA Pathology|Leong|Australia

>Spike|hCoV-19/England/CAMC-B51612/2020|2020-11-08|EPI\_ISL\_657759|Original|hCoV-19^^England|Human|Lighthouse Lab in Cambridge|Wellcome Sanger Institute for the COVID-19 Genomics UK (COG-UK) Consortium|Davies|United Kingdom

>Spike|hCoV-19/England/CAMC-B08F88/2020|2020-10-29|EPI\_ISL\_673037|Original|hCoV-19^^England|Human|Lighthouse Lab in Cambridge|Wellcome Sanger Institute for the COVID-19 Genomics UK (COG-UK) Consortium|Davies|United Kingdom

>Spike|hCoV-19/USA/NY-NYCPHL-001076/2020|2020-10-15|EPI\_ISL\_633077|Original|hCoV-19^^New York|Human|DOHMH Chelsea|New York City Public Health Laboratory|Wang|USA

>Spike|hCoV-19/England/SHEF-10C611F/2020|2020-12-21|EPI\_ISL\_765151|Original|hCoV-19^^England|Human|Virology Department|COVID-19 Genomics UK (COG-UK) Consortium|de Silva|United Kingdom

>Spike|hCoV-19/Luxembourg/LNS7459401/2020|2020-11-03|EPI\_ISL\_744572|Original|hCoV-19^^Luxembourg|Human|Laboratoire national de sant\u00e9|Laboratoire national de sant\u00e9|Wienecke-Baldacchino|Luxembourg

>Spike|hCoV-19/Singapore/889/2020|2020-09-03|EPI\_ISL\_536430|Original|hCoV-19^^Singapore|Human|National Public Health Laboratory|National Public Health Laboratory|Mak|Singapore

>Spike|hCoV-19/Denmark/DCGC-14632/2020|2020-11-23|EPI\_ISL\_711881|Original|hCoV-19^^Hovedstaden|Human|Department of Virus and Microbiological Special Diagnostics|Albertsen Lab|Michaelsen|Denmark

>Spike|hCoV-19/England/CAMC-B2153C/2020|2020-11-02|EPI\_ISL\_647548|Original|hCoV-19^^England|Human|Lighthouse Lab in Cambridge|Wellcome Sanger Institute for the COVID-19 Genomics UK (COG-UK) Consortium|Davies|United Kingdom

>Spike|hCoV-19/Canada/BC-BCCDC-7320/2020|2020-11-00|EPI\_ISL\_740683|Original|hCoV-19^^British Columbia|Human|BCCDC Public Health Laboratory|BCCDC Public Health Laboratory|Prystajacky|Canada

>Spike|hCoV-19/England/QEUA-AD2C63/2020|2020-10-26|EPI\_ISL\_634136|Original|hCoV-19^^England|Human|Lighthouse Lab in Glasgow|Wellcome Sanger Institute for the COVID-19 Genomics UK (COG-UK) consortium|Davies|United Kingdom

>Spike|hCoV-19/England/MILK-AB75A5/2020|2020-10-21|EPI\_ISL\_623266|Original|hCoV-19^^England|Human|Lighthouse Lab in Milton Keynes|Wellcome Sanger Institute for the COVID-19 Genomics UK (COG-UK) consortium|Davies|United Kingdom

>Spike|hCoV-19/USA/CA-CHLA-PLM52453720/2020|2020-11-30|EPI\_ISL\_753439|Original|hCoV-19^^California|Human|Clinical virology Laboratory|Center for Personalized Medicine|Dien Bard|USA

>Spike|hCoV-19/England/20138063104/2020|2020-03-26|EPI\_ISL\_423318|Original|hCoV-19^^England|Human|Respiratory Virus Unit|Respiratory Virus Unit|Platt|United Kingdom

>Spike|hCoV-19/England/QEUA-C15FB4/2020|2020-12-06|EPI\_ISL\_709446|Original|hCoV-19^^England|Human|Lighthouse Lab in Glasgow|Wellcome Sanger Institute for the COVID-19 Genomics UK (COG-UK) Consortium|Davies|United Kingdom

>Spike|hCoV-19/England/ALDP-94D5D2/2020|2020-06-18|EPI\_ISL\_555044|Original|hCoV-19^^England|Human|Lighthouse Lab in Alderley Park|Wellcome Sanger Institute for the COVID-19 Genomics UK (COG-UK) consortium|Davies|United Kingdom

>Spike|hCoV-19/Denmark/DCGC-6986/2020|2020-10-12|EPI\_ISL\_619832|Original|hCoV-19^^Sjælland|Human|Department of Virus and Microbiological Special Diagnostics|Albertsen lab|Michaelsen|Denmark

>Spike|hCoV-19/Japan/PG-4819/2020|2020-07-00|EPI\_ISL\_689943|Original|hCoV-19^^Japan|Human|Pathogen Genomics Center|Pathogen Genomics Center|Sekizuka|Japan

>Spike|hCoV-19/Denmark/DCGC-16018/2020|2020-11-23|EPI\_ISL\_714538|Original|hCoV-19^^Midtjylland|Human|Department of Virus and Microbiological Special Diagnostics|Albertsen Lab|Michaelsen|Denmark

>Spike|hCoV-19/USA/ID-QDX-1082/2020|2020-03-19|EPI\_ISL\_571825|Original|hCoV-19^^Idaho|Human|Quest Diagnostics|Quest Diagnostics|Kagan|USA

>Spike|hCoV-19/Wales/MILK-515944/2020|2020-06-11|EPI\_ISL\_558921|Original|hCoV-19^^Wales|Human|Lighthouse Lab in Milton Keynes|Wellcome Sanger Institute for the COVID-19 Genomics UK (COG-UK) Consortium|Davies|United Kingdom

>Spike|hCoV-19/USA/MI-UM-10036683197/2020|2020-10-29|EPI\_ISL\_650106|Original|hCoV-19^^Michigan|Human|University of Michigan Clinical Microbiology Laboratory|Lauring Lab|Valesano|USA

>Spike|hCoV-19/England/ALDP-CECCDD/2020|2020-12-20|EPI\_ISL\_781201|Original|hCoV-19^^England|Human|Lighthouse Lab in Alderley Park|Wellcome Sanger Institute for the COVID-19 Genomics UK (COG-UK) Consortium|Davies|United Kingdom

>Spike|hCoV-19/Spain/MD-IBV-99008577/2020|2020-09-21|EPI\_ISL\_654117|Original|hCoV-19^^Madrid|Human|Hospital General Universitario Gregorio Mara\u00f1a|SeqCOVID-SPAIN consortium/IBV (CSIC)|Comas|Spain

>Spike|hCoV-19/Germany/NW-HHU-479/2020|2020-12-06|EPI\_ISL\_770713|Original|hCoV-19^^North Rhine-Westphalia|Human|ZOTZ KLIMAS MVZ D\u00fcsseldorf-Centrum GbR \u00dcBAG f\u00fcr Labormedizin|Center of Medical Microbiology|Wienemann|Germany

>Spike|hCoV-19/Malaysia/3479/2020|2020-03-30|EPI\_ISL\_501204|Original|hCoV-19^^Kuala Lumpur|Human|Department of Medical Microbiology|Department of Medical Microbiology|Chan|Malaysia

>Spike|hCoV-19/Canada/ON-PHL-20-02457/2020|2020-09-00|EPI\_ISL\_671598|Original|hCoV-19^^Ontario|Human|Public Health Ontario Laboratory|Public Health Ontario Laboratory|Guthrie|Canada

>Spike|hCoV-19/England/PORT-2D1DC3/2020|2020-04-03|EPI\_ISL\_499280|Original|hCoV-19^^England|Human|Centre for Enzyme Innovation|COVID-19 Genomics UK (COG-UK) Consortium|Robson|United Kingdom

>Spike|hCoV-19/USA/NV-NSPHL-A0082/2020|2020-04-13|EPI\_ISL\_515359|Original|hCoV-19^^Nevada|Human|Nevada State Public Health Laboratory|Nevada State Public Health Laboratory|Sevinsky|USA

>Spike|hCoV-19/India/DL-60907-CSIR-IGIB/2020|2020-08-06|EPI\_ISL\_636779|Original|hCoV-19^^Delhi|Human|National Centre for Disease control (NCDC)|NCDC/CSIR-IGIB|Faruq|India

>Spike|hCoV-19/England/BRIS-12FD03/2020|2020-04-08|EPI\_ISL\_492517|Original|hCoV-19^^England|Human|PHE South West Regional Laboratory|Wellcome Sanger Institute for the COVID-19 Genomics UK (COG-UK) consortium|Davies|United Kingdom

>Spike|hCoV-19/Ireland/LK-NVRL-MPW54586/2020|2020-05-20|EPI\_ISL\_767811|Original|hCoV-19^^Limerick|Human|National Virus Reference Laboratory|Irish Coronavirus Sequencing Consortium - Teagasc Moorepark|Walsh|Ireland

>Spike|hCoV-19/England/ALDP-A686DD/2020|2020-10-12|EPI\_ISL\_630381|Original|hCoV-19^^England|Human|Lighthouse Lab in Alderley Park|Wellcome Sanger Institute for the COVID-19 Genomics UK (COG-UK) consortium|Davies|United Kingdom

>Spike|hCoV-19/Japan/PG-8926/2020|2020-08-00|EPI\_ISL\_686472|Original|hCoV-19^^Japan|Human|Pathogen Genomics Center|Pathogen Genomics Center|Sekizuka|Japan

>Spike|hCoV-19/Scotland/EDB048/2020|2020-03-17|EPI\_ISL\_425852|Original|hCoV-19^^Scotland|Human|Virology Department|COVID-19 Genomics UK (COG-UK) Consortium|Williams|United Kingdom

>Spike|hCoV-19/Australia/VIC5195/2020|2020-00-00|EPI\_ISL\_519960|Original|hCoV-19^^Victoria|Human|Microbiological Diagnostic Unit - Public Health Laboratory (MDU-PHL)|MDU-PHL|Schultz|Australia

>Spike|hCoV-19/Germany/SH-ChVir20744/2020|2020-11-19|EPI\_ISL\_729681|Original|hCoV-19^^Schleswig-Holstein|Human|A. Krumbholz|Charit\u00e9 Universit\u00e4tsmedizin Berlin|Muehlemann|Germany

>Spike|hCoV-19/England/MILK-B051FE/2020|2020-10-24|EPI\_ISL\_638546|Original|hCoV-19^^England|Human|Virology Department|COVID-19 Genomics UK (COG-UK) Consortium|de Silva|United Kingdom

>Spike|hCoV-19/England/20169023204/2020|2020-04-18|EPI\_ISL\_465218|Original|hCoV-19^^England|Human|Respiratory Virus Unit|Respiratory Virus Unit|Platt|United Kingdom

>Spike|hCoV-19/USA/CA-CZB-14586/2020|2020-11-16|EPI\_ISL\_739275|Original|hCoV-19^^California|Human|Santa Clara County Public Health Laboratory|Chan-Zuckerberg Biohub|Kamm|USA

>Spike|hCoV-19/Denmark/DCGC-22211/2020|2020-12-14|EPI\_ISL\_758616|Original|hCoV-19^^Hovedstaden|Human|Department of Virus and Microbiological Special Diagnostics|Albertsen Lab|Michaelsen|Denmark

>Spike|hCoV-19/England/PORT-2D5D83/2020|2020-12-19|EPI\_ISL\_765144|Original|hCoV-19^^England|Human|Centre for Enzyme Innovation|COVID-19 Genomics UK (COG-UK) Consortium|Robson|United Kingdom

>Spike|hCoV-19/USA/WI-GMF-18031/2020|2020-08-31|EPI\_ISL\_547752|Original|hCoV-19^^Wisconsin|Human|Gundersen Molecular Diagnostics Laboratory|Kabara Cancer Research Institute|Kenny|USA

>Spike|hCoV-19/Denmark/DCGC-2717/2020|2020-08-17|EPI\_ISL\_616450|Original|hCoV-19^^Midtjylland|Human|Department of Virus and Microbiological Special Diagnostics|Albertsen lab|Michaelsen|Denmark

>Spike|hCoV-19/England/ALDP-B639F6/2020|2020-11-09|EPI\_ISL\_656410|Original|hCoV-19^^England|Human|Lighthouse Lab in Alderley Park|Wellcome Sanger Institute for the COVID-19 Genomics UK (COG-UK) Consortium|Davies|United Kingdom

>Spike|hCoV-19/Denmark/DCGC-17269/2020|2020-12-14|EPI\_ISL\_750868|Original|hCoV-19^^Syddanmark|Human|Department of Virus and Microbiological Special Diagnostics|Albertsen Lab|Michaelsen|Denmark

>Spike|hCoV-19/Japan/PG-8279/2020|2020-08-00|EPI\_ISL\_687378|Original|hCoV-19^^Japan|Human|Pathogen Genomics Center|Pathogen Genomics Center|Sekizuka|Japan

>Spike|hCoV-19/Wales/PHWC-3670C/2020|2020-05-01|EPI\_ISL\_474703|Original|hCoV-19^^Wales|Human|Originating lab|COVID-19 Genomics UK (COG-UK) Consortium|Moore|United Kingdom

>Spike|hCoV-19/Canada/BC\_65034/2020|2020-03-04|EPI\_ISL\_415585|Original|hCoV-19^^British Columbia|Human|BCCDC Public Health Laboratory|BCCDC Public Health Laboratory|Harrigan|Canada

>Spike|hCoV-19/England/MILK-A45A25/2020|2020-10-06|EPI\_ISL\_598700|Original|hCoV-19^^England|Human|Lighthouse Lab in Milton Keynes|Wellcome Sanger Institute for the COVID-19 Genomics UK (COG-UK) consortium|Davies|United Kingdom

>Spike|hCoV-19/USA/CO-CDPHE-2100036501/2020|2020-11-24|EPI\_ISL\_771344|Original|hCoV-19^^Colorado|Human|Colorado Department of Public Health and Environment|Colorado Department of Public Health and Environment|Bankers|USA

>Spike|hCoV-19/Scotland/CVR1498/2020|2020-04-02|EPI\_ISL\_433602|Original|hCoV-19^^Scotland|Human|West of Scotland Specialist Virology Centre|COVID-19 Genomics UK (COG-UK) Consortium|Robertson|United Kingdom

>Spike|hCoV-19/Iceland/532/2020|2020-03-28|EPI\_ISL\_424552|Original|hCoV-19^^Reykjavik|Human|The National University Hospital of Iceland|deCODE genetics|J\u00f3nsson|Iceland

>Spike|hCoV-19/USA/AZ-TG486481/2020|2020-07-08|EPI\_ISL\_695085|Original|hCoV-19^^Arizona|Human|TGen North|TGen North|French|USA

>Spike|hCoV-19/England/MILK-A4624A/2020|2020-09-29|EPI\_ISL\_709947|Original|hCoV-19^^England|Human|Lighthouse Lab in Milton Keynes|Wellcome Sanger Institute for the COVID-19 Genomics UK (COG-UK) Consortium|Davies|United Kingdom

>Spike|hCoV-19/USA/WA-UW-3247/2020|2020-03-28|EPI\_ISL\_491011|Original|hCoV-19^^Washington|Human|UW Virology Lab|UW Virology Lab|Roychoudhury|USA

>Spike|hCoV-19/Denmark/DCGC-19916/2020|2020-12-07|EPI\_ISL\_747865|Original|hCoV-19^^Hovedstaden|Human|Department of Virus and Microbiological Special Diagnostics|Albertsen Lab|Michaelsen|Denmark

>Spike|hCoV-19/USA/IL-NM-0960/2020|2020-05-27|EPI\_ISL\_626486|Original|hCoV-19^^Illinois|Human|Northwestern Memorial Hospital|Ozer Lab|Ozer|USA

>Spike|hCoV-19/USA/LA-EVTL154/2020|2020-04-01|EPI\_ISL\_455997|Original|hCoV-19^^Louisiana|Human|LSUHS Emerging Viral Threat Laboratory|Microbial Genome Sequencing Center|Kamil|USA

>Spike|hCoV-19/USA/UT-UPHL-2012933851/2020|2020-08-13|EPI\_ISL\_745989|Original|hCoV-19^^Utah|Human|Ginkgo Bioworks Clinical Laboratory|Utah Public Health Laboratory|Young|USA

>Spike|hCoV-19/England/QEUAH-9642DE/2020|2020-08-12|EPI\_ISL\_536877|Original|hCoV-19^^England|Human|Lighthouse Lab in Glasgow|Wellcome Sanger Institute for the COVID-19 Genomics UK (COG-UK) consortium|Davies|United Kingdom

>Spike|hCoV-19/England/BRIS-1309DE/2020|2020-03-13|EPI\_ISL\_492719|Original|hCoV-19^^England|Human|PHE South West Regional Laboratory|Wellcome Sanger Institute for the COVID-19 Genomics UK (COG-UK) consortium|Davies|United Kingdom

>Spike|hCoV-19/England/ALDP-A2D30A/2020|2020-10-06|EPI\_ISL\_586793|Original|hCoV-19^^England|Human|Lighthouse Lab in Alderley Park|Wellcome Sanger Institute for the COVID-19 Genomics UK (COG-UK) consortium|Davies|United Kingdom

>Spike|hCoV-19/England/QEUA-B67C62/2020|2020-11-11|EPI\_ISL\_661362|Original|hCoV-19^^England|Human|Lighthouse Lab in Glasgow|Wellcome Sanger Institute for the COVID-19 Genomics UK (COG-UK) Consortium|Davies|United Kingdom

>Spike|hCoV-19/USA/VA-DCLS-1537/2020|2020-08-07|EPI\_ISL\_581532|Original|hCoV-19^^Virginia|Human|Virginia DCLS|Virginia DCLS|St. Jacques|USA

>Spike|hCoV-19/Australia/VIC1409/2020|2020-04-16|EPI\_ISL\_456428|Original|hCoV-19^^Victoria|Human|Victorian Infectious Diseases Reference Laboratory (VIDRL)|Microbiological Diagnostic Unit Public Health Laboratory and Victorian Infectious Diseases Reference Laboratory|Schultz|Australia

>Spike|hCoV-19/England/EXET-13AD32/2020|2020-11-11|EPI\_ISL\_665093|Original|hCoV-19^^England|Human|University of Exeter|COVID-19 Genomics UK (COG-UK) Consortium|Temperton|United Kingdom

>Spike|hCoV-19/Wales/PHWC-4931ED/2020|2020-11-28|EPI\_ISL\_725853|Original|hCoV-19^^Wales|Human|Originating lab|COVID-19 Genomics UK (COG-UK) Consortium|Moore|United Kingdom

>Spike|hCoV-19/England/ALDP-9038DF/2020|2020-06-24|EPI\_ISL\_552983|Original|hCoV-19^^England|Human|Lighthouse Lab in Alderley Park|Wellcome Sanger Institute for the COVID-19 Genomics UK (COG-UK) consortium|Davies|United Kingdom

>Spike|hCoV-19/Denmark/DCGC-5435/2020|2020-09-14|EPI\_ISL\_615367|Original|hCoV-19^^Midtjylland|Human|Department of Virus and Microbiological Special Diagnostics|Albertsen lab|Michaelsen|Denmark

>Spike|hCoV-19/England/CAMB-7A7B1/2020|2020-04-03|EPI\_ISL\_441242|Original|hCoV-19^^England|Human|Department of Pathology|Wellcome Sanger Institute for the COVID-19 Genomics UK (COG-UK) consortium|Amato|United Kingdom

>Spike|hCoV-19/Denmark/DCGC-4977/2020|2020-09-14|EPI\_ISL\_622748|Original|hCoV-19^^Hovedstaden|Human|Department of Virus and Microbiological Special Diagnostics|Albertsen lab|Michaelsen|Denmark

>Spike|hCoV-19/USA/MN-MDH-1110/2020|2020-05-01|EPI\_ISL\_470790|Original|hCoV-19^^Minnesota|Human|M Health Fairview|Minnesota Department of Health|Garfin|USA

>Spike|hCoV-19/England/ALDP-6D5DE9/2020|2020-07-02|EPI\_ISL\_556078|Original|hCoV-19^^England|Human|Lighthouse Lab in Alderley Park|Wellcome Sanger Institute for the COVID-19 Genomics UK (COG-UK) consortium|Davies|United Kingdom

>Spike|hCoV-19/USA/OR-OHSU-2187/2020|2020-08-06|EPI\_ISL\_667140|Original|hCoV-19^^Oregon|Human|OHSU Lab Services Molecular Microbiology Lab|Oregon SARS-CoV-2 Genome Sequencing Center|O'Roak|USA

>Spike|hCoV-19/England/MILK-9D3CBE/2020|2020-09-18|EPI\_ISL\_601782|Original|hCoV-19^^England|Human|Lighthouse Lab in Milton Keynes|Wellcome Sanger Institute for the COVID-19 Genomics UK (COG-UK) consortium|Davies|United Kingdom

>Spike|hCoV-19/Ecuador/ZZ-SARS-1/2020|2020-03-23|EPI\_ISL\_681702|Original|hCoV-19^^Quito|Human|Zurita & Zurita Laboratorios|Zurita & Zurita Laboratorios|Sevillano|Ecuador

>Spike|hCoV-19/England/ALDP-B46601/2020|2020-11-07|EPI\_ISL\_656277|Original|hCoV-19^^England|Human|Lighthouse Lab in Alderley Park|Wellcome Sanger Institute for the COVID-19 Genomics UK (COG-UK) Consortium|Davies|United Kingdom

>Spike|hCoV-19/USA/WA-UW-10381/2020|2020-06-04|EPI\_ISL\_501088|Original|hCoV-19^^Washington|Human|University of Washington Virology Lab|University of Washington Virology Lab|Roychoudhury|USA

>Spike|hCoV-19/Scotland/QEUA-A01357/2020|2020-10-02|EPI\_ISL\_595802|Original|hCoV-19^^Scotland|Human|Virology Department|COVID-19 Genomics UK (COG-UK) Consortium|de Silva|United Kingdom

>Spike|hCoV-19/Denmark/DCGC-13203/2020|2020-11-30|EPI\_ISL\_712649|Original|hCoV-19^^Sjaelland|Human|Department of Virus and Microbiological Special Diagnostics|Albertsen Lab|Michaelsen|Denmark

>Spike|hCoV-19/USA/TX-HMH-MCoV-15915/2020|2020-07-10|EPI\_ISL\_785599|Original|hCoV-19^^Texas|Human|Houston Methodist Hospital|Houston Methodist Hospital|Long|USA

>Spike|hCoV-19/England/CAMC-B99CEF/2020|2020-11-15|EPI\_ISL\_673340|Original|hCoV-19^^England|Human|Lighthouse Lab in Cambridge|Wellcome Sanger Institute for the COVID-19 Genomics UK (COG-UK) Consortium|Davies|United Kingdom

>Spike|hCoV-19/India/WB-IICB-006/2020|2020-09-10|EPI\_ISL\_578080|Original|hCoV-19^^West Bengal|Human|CSIR-Indian Institute of Chemical Biology|CSIR-Indian Institute of Chemical Biology|Bhowmik|India

>Spike|hCoV-19/USA/TX-HMH-MCoV-15310/2020|2020-10-21|EPI\_ISL\_786794|Original|hCoV-19^^Texas|Human|Houston Methodist Hospital|Houston Methodist Hospital|Long|USA

>Spike|hCoV-19/Denmark/DCGC-16335/2020|2020-11-16|EPI\_ISL\_714709|Original|hCoV-19^^Hovedstaden|Human|Department of Virus and Microbiological Special Diagnostics|Albertsen Lab|Michaelsen|Denmark

>Spike|hCoV-19/Japan/PG-6066/2020|2020-07-00|EPI\_ISL\_689178|Original|hCoV-19^^Japan|Human|Pathogen Genomics Center|Pathogen Genomics Center|Sekizuka|Japan

>Spike|hCoV-19/Norway/3027/2020|2020-08-05|EPI\_ISL\_549057|Original|hCoV-19^^Oslo|Human|Furst Medical Laboratory|Norwegian Institute of Public Health|Kopperud Riis|Norway

>Spike|hCoV-19/Canada/ON-S710/2020|2020-04-00|EPI\_ISL\_591144|Original|hCoV-19^^Ontario|Human|Toronto Invasive Bacterial Diseases Network|McMaster University|McArthur|Canada

>Spike|hCoV-19/USA/CA-QDX-1986/2020|2020-03-18|EPI\_ISL\_604297|Original|hCoV-19^^California|Human|Quest Diagnostics|Quest Diagnostics|Kagan|USA

>Spike|hCoV-19/England/LIVE-A1FE6/2020|2020-05-18|EPI\_ISL\_490372|Original|hCoV-19^^England|Human|Liverpool Clinical Laboratories|COVID-19 Genomics UK (COG-UK) Consortium|Haldenby|United Kingdom

>Spike|hCoV-19/England/QEUH-C5B85D/2020|2020-12-14|EPI\_ISL\_735920|Original|hCoV-19^^England|Human|Lighthouse Lab in Glasgow|Wellcome Sanger Institute for the COVID-19 Genomics UK (COG-UK) Consortium|Davies|United Kingdom

>Spike|hCoV-19/Portugal/PT1175/2020|2020-03-23|EPI\_ISL\_511721|Original|hCoV-19^^Portugal|Human|Instituto Nacional de Saude (INSA)|Instituto Nacional de Saude (INSA)|Borges|Portugal

>Spike|hCoV-19/Denmark/DCGC-5853/2020|2020-09-28|EPI\_ISL\_621040|Original|hCoV-19^^Midtjylland|Human|Department of Virus and Microbiological Special Diagnostics|Albertsen lab|Michaelsen|Denmark

>Spike|hCoV-19/Spain/PV-IBV-001482/2020|2020-03-18|EPI\_ISL\_467178|Original|hCoV-19^^Basque Country|Human|Hospital Universitario Araba. Vitoria-Gasteiz|SeqCOVID-SPAIN consortium|IBV (CSIC)|Comas|Spain

>Spike|hCoV-19/Japan/PG-8248/2020|2020-08-00|EPI\_ISL\_687347|Original|hCoV-19^^Japan|Human|Pathogen Genomics Center|Pathogen Genomics Center|Sekizuka|Japan

>Spike|hCoV-19/England/CAMC-B07D9E/2020|2020-10-29|EPI\_ISL\_643396|Original|hCoV-19^^England|Human|Lighthouse Lab in Cambridge|Wellcome Sanger Institute for the COVID-19 Genomics UK (COG-UK) Consortium|Davies|United Kingdom

>Spike|hCoV-19/Japan/PG-0504/2020|2020-04-05|EPI\_ISL\_480163|Original|hCoV-19^^HokurikuShinsyu|Human|Fukui Prefectural Institute of Public Health and Environmental Science|Pathogen Genomics Center|Sekizuka|Japan

>Spike|hCoV-19/USA/VA-DCLS-1867/2020|2020-09-23|EPI\_ISL\_614086|Original|hCoV-19^^Virginia|Human|Virginia DCLS|Virginia DCLS|St. Jacques|USA

>Spike|hCoV-19/Singapore/1176/2020|2020-04-11|EPI\_ISL\_648104|Original|hCoV-19^^Singapore|Human|Department of Laboratory Medicine|Department of Laboratory Medicine|Chen|Singapore

>Spike|hCoV-19/Belgium/reg-0501636/2020|2020-05-01|EPI\_ISL\_734693|Original|hCoV-19^^Blicquy|Human|UZ Leuven|KU Leuven|Maes|Belgium

>Spike|hCoV-19/USA/MN-MDH-1825/2020|2020-09-15|EPI\_ISL\_602960|Original|hCoV-19^^Minnesota|Human|Minnesota Department of Health|Minnesota Department of Health|Garfin|USA

>Spike|hCoV-19/Peru/LIM-INS-156/2020|2020-03-20|EPI\_ISL\_536549|Original|hCoV-19^^Lima|Human|Instituto Nacional de Salud|Laboratorio de Infecciones Respiratorias Agudas|Lopez|Peru

>Spike|hCoV-19/England/NORW-E97BD/2020|2020-04-23|EPI\_ISL\_448332|Original|hCoV-19^^England|Human|Quadram Institute Bioscience|COVID-19 Genomics UK (COG-UK) Consortium|Alikhan|United Kingdom

>Spike|hCoV-19/England/CAMB-79D38/2020|2020-04-02|EPI\_ISL\_440615|Original|hCoV-19^^England|Human|Department of Pathology|Wellcome Sanger Institute for the COVID-19 Genomics UK (COG-UK) consortium|Amato|United Kingdom

>Spike|hCoV-19/England/MILK-A7BD87/2020|2020-10-15|EPI\_ISL\_607471|Original|hCoV-19^^England|Human|Lighthouse Lab in Milton Keynes|Wellcome Sanger Institute for the COVID-19 Genomics UK (COG-UK) consortium|Davies|United Kingdom

>Spike|hCoV-19/Russia/SPE-RII-8542V/2020|2020-04-22|EPI\_ISL\_524051|Vero P1|hCoV-19^^Saint Petersburg|Human|WHO National Influenza Centre Russian Federation|WHO National Influenza Centre Russian Federation|Komissarov|Russia

>Spike|hCoV-19/USA/NV-CDC-2-3714168/2020|2020-12-04|EPI\_ISL\_751557|Original|hCoV-19^^Nevada|Human|NV State Public Health Laboratory|Genomics and Discovery|Queen|USA

>Spike|hCoV-19/England/MILK-B39425/2020|2020-11-01|EPI\_ISL\_658743|Original|hCoV-19^^England|Human|Lighthouse Lab in Milton Keynes|Wellcome Sanger Institute for the COVID-19 Genomics UK (COG-UK) Consortium|Davies|United Kingdom

>Spike|hCoV-19/Finland/2LS12G2/2020|2020-10-02|EPI\_ISL\_756113|Original|hCoV-19^^Uusimaa|Human|Department of Virology and Immunology|Department of Virology|Smura|Finland

>Spike|hCoV-19/England/QEUEH-9F7CA5/2020|2020-09-27|EPI\_ISL\_588892|Original|hCoV-19^^England|Human|Lighthouse Lab in Glasgow|Wellcome Sanger Institute for the COVID-19 Genomics UK (COG-UK) consortium|Davies|United Kingdom

>Spike|hCoV-19/USA/FL-BPHL-2181/2020|2020-08-20|EPI\_ISL\_653334|Original|hCoV-19^^Florida|Human|Florida Bureau of Public Health Laboratories|Florida Bureau of Public Health Laboratories|Blanton|USA

>Spike|hCoV-19/England/BRIS-1298AE/2020|2020-03-31|EPI\_ISL\_458426|Original|hCoV-19^^England|Human|PHE South West Regional Laboratory|Wellcome Sanger Institute for the COVID-19 Genomics UK (COG-UK) consortium|Davies|United Kingdom

>Spike|hCoV-19/England/EXET-13E5EB/2020|2020-00-00|EPI\_ISL\_724334|Original|hCoV-19^^England|Human|University of Exeter|COVID-19 Genomics UK (COG-UK) Consortium|Temperton|United Kingdom

>Spike|hCoV-19/England/QEUEH-BA421C/2020|2020-11-18|EPI\_ISL\_721079|Original|hCoV-19^^England|Human|Lighthouse Lab in Glasgow|Wellcome Sanger Institute for the COVID-19 Genomics UK (COG-UK) Consortium|Davies|United Kingdom

>Spike|hCoV-19/Bahrain/340861142/2020|2020-10-14|EPI\_ISL\_632252|Original|hCoV-19^^Bahrain|Human|Communicable Disease Laboratory|Communicable Disease Laboratory|Altaif|Bahrain

>Spike|hCoV-19/England/NORT-282E19/2020|2020-03-28|EPI\_ISL\_488517|Original|hCoV-19^^England|Human|NU-OMICS DNA Sequencing research facility|Wellcome Sanger Institute for the COVID-19 Genomics UK (COG-UK) consortium|Davies|United Kingdom

>Spike|hCoV-19/Denmark/DCGC-22131/2020|2020-12-14|EPI\_ISL\_758574|Original|hCoV-19^^Hovedstaden|Human|Department of Virus and Microbiological Special Diagnostics|Albertsen Lab|Michaelsen|Denmark

>Spike|hCoV-19/Austria/CeMM0696/2020|2020-04-22|EPI\_ISL\_583652|Original|hCoV-19^^Austria|Human|Austrian Agency for Health and Food Safety (AGES)|Bergthaler laboratory|Bergthaler|Austria

>Spike|hCoV-19/USA/MI-MDHHS-SC20040/2020|2020-03-19|EPI\_ISL\_437127|Original|hCoV-19^^Michigan|Human|Michigan Department of Health and Human Services|Michigan Department of Health and Human Services|Blankenship|USA

>Spike|hCoV-19/England/MILK-A457F1/2020|2020-10-06|EPI\_ISL\_598531|Original|hCoV-19^^England|Human|Lighthouse Lab in Milton Keynes|Wellcome Sanger Institute for the COVID-19 Genomics UK (COG-UK) consortium|Davies|United Kingdom

>Spike|hCoV-19/England/CAMC-B34A0A/2020|2020-11-05|EPI\_ISL\_659742|Original|hCoV-19^^England|Human|Lighthouse Lab in Cambridge|Wellcome Sanger Institute for the COVID-19 Genomics UK (COG-UK) Consortium|Davies|United Kingdom

>Spike|hCoV-19/Hong Kong/VM20031411/2020|2020-07-08|EPI\_ISL\_510096|Original|hCoV-19^^Hong Kong|Human|Queen Elizabeth Hospital|Hong Kong Department of Health|Mak|China

>Spike|hCoV-19/England/ALDP-A5290A/2020|2020-10-07|EPI\_ISL\_598034|Original|hCoV-19^^England|Human|Lighthouse Lab in Alderley Park|Wellcome Sanger Institute for the COVID-19 Genomics UK (COG-UK) consortium|Davies|United Kingdom

>Spike|hCoV-19/USA/UT-UPHL-2009297/2020|2020-05-14|EPI\_ISL\_524906|Original|hCoV-19^^Utah|Human|Utah Public Health Laboratory|Utah Public Health Laboratory|Young|USA

>Spike|hCoV-19/USA/CA-ALSR-4870/2020|2020-11-05|EPI\_ISL\_730189|Original|hCoV-19^^California|Human|San Diego County Public Health Laboratory|Andersen lab at Scripps Research|Gangavarapu|USA

>Spike|hCoV-19/Denmark/DCGC-15148/2020|2020-11-23|EPI\_ISL\_713143|Original|hCoV-19^^Hovedstaden|Human|Department of Virus and Microbiological Special Diagnostics|Albertsen Lab|Michaelsen|Denmark

>Spike|hCoV-19/Scotland/EDB3424/2020|2020-04-10|EPI\_ISL\_487826|Original|hCoV-19^^Scotland|Human|Virology Department|Wellcome Sanger Institute for the COVID-19 Genomics UK (COG-UK) consortium|Davies|United Kingdom

>Spike|hCoV-19/USA/WA-S769/2020|2020-04-14|EPI\_ISL\_449939|Original|hCoV-19^^Washington|Human|Washington State Department of Health|Seattle Flu Study|Bedford|USA

>Spike|hCoV-19/England/CAMC-B9A60E/2020|2020-11-15|EPI\_ISL\_673716|Original|hCoV-19^^England|Human|Lighthouse Lab in Cambridge|Wellcome Sanger Institute for the COVID-19 Genomics UK (COG-UK) Consortium|Davies|United Kingdom

>Spike|hCoV-19/North Macedonia/3515/2020|2020-06-15|EPI\_ISL\_677707|Original|hCoV-19^^Kumanovo|Human|General Hospital - Kumanovo|Research Center for Genetic Engineering and Biotechnology \Georgi D. Efremov\u201d|Dimovski|North Macedonia

>Spike|hCoV-19/Netherlands/ZH-EMC-939/2020|2020-00-00|EPI\_ISL\_722491|Original|hCoV-19^^Zuid Holland|Human|Dutch COVID-19 response team|Erasmus Medical Center|Oude Munnink|Netherlands

>Spike|hCoV-19/England/CAMC-BD16A1/2020|2020-11-28|EPI\_ISL\_702215|Original|hCoV-19^^England|Human|Lighthouse Lab in Cambridge|Wellcome Sanger Institute for the COVID-19 Genomics UK (COG-UK) Consortium|Davies|United Kingdom

>Spike|hCoV-19/Wales/PHWC-48C651/2020|2020-11-03|EPI\_ISL\_666451|Original|hCoV-19^^Wales|Human|Wales Specialist Virology Centre Sequencing lab|COVID-19 Genomics UK (COG-UK) Consortium|Moore|United Kingdom

>Spike|hCoV-19/England/ALDP-A510F7/2020|2020-10-07|EPI\_ISL\_597946|Original|hCoV-19^^England|Human|Lighthouse Lab in Alderley Park|Wellcome Sanger Institute for the COVID-19 Genomics UK (COG-UK) consortium|Davies|United Kingdom

>Spike|hCoV-19/USA/CA-ALSR-2960/2020|2020-09-01|EPI\_ISL\_635750|Original|hCoV-19^^California|Human|San Diego County Public Health Laboratory|Andersen lab at Scripps Research|Gangavarapu|USA

>Spike|hCoV-19/Wales/PHWC-25B7D/2020|2020-03-25|EPI\_ISL\_422180|Original|hCoV-19^^Wales|Human|Wales Specialist Virology Centre|Public Health Wales Microbiology Cardiff|Moore|United Kingdom

>Spike|hCoV-19/USA/LA-EVTL806/2020|2020-07-24|EPI\_ISL\_653497|Original|hCoV-19^^Louisiana|Human|LSUHS Emerging Viral Threat Laboratory|Microbial Genome Sequencing Center|Kamil|USA

>Spike|hCoV-19/England/MILK-BAA119/2020|2020-11-18|EPI\_ISL\_783229|Original|hCoV-19^^England|Human|Lighthouse Lab in Milton Keynes|Wellcome Sanger Institute for the COVID-19 Genomics UK (COG-UK) Consortium|Davies|United Kingdom

>Spike|hCoV-19/USA/NY-PV09359/2020|2020-03-16|EPI\_ISL\_450047|Original|hCoV-19^^New York|Human|MSSS Clinical Microbiology Laboratories|MSSS Pathogen Surveillance Program|van Bakel|USA

>Spike|hCoV-19/USA/TX-HMH-MCoV-18614/2020|2020-11-19|EPI\_ISL\_784962|Original|hCoV-19^^Texas|Human|Houston Methodist Hospital|Houston Methodist Hospital|Long|USA

>Spike|hCoV-19/England/ALDP-B2484F/2020|2020-11-04|EPI\_ISL\_646924|Original|hCoV-19^^England|Human|Lighthouse Lab in Alderley Park|Wellcome Sanger Institute for the COVID-19 Genomics UK (COG-UK) Consortium|Davies|United Kingdom

>Spike|hCoV-19/Denmark/DCGC-19501/2020|2020-12-07|EPI\_ISL\_748991|Original|hCoV-19^^Hovedstaden|Human|Department of Virus and Microbiological Special Diagnostics|Albertsen Lab|Michaelsen|Denmark

>Spike|hCoV-19/Singapore/1183/2020|2020-04-12|EPI\_ISL\_648111|Original|hCoV-19^^Singapore|Human|Department of Laboratory Medicine|Department of Laboratory Medicine|Chen|Singapore

>Spike|hCoV-19/France/ARA-103382/2020|2020-11-09|EPI\_ISL\_683343|Original|hCoV-19^^Auvergne-Rh\u00f4ne-Alpes|Human|CNR Virus des Infections Respiratoires - France SUD|CNR Virus des Infections Respiratoires - France SUD|Bal|France

>Spike|hCoV-19/Scotland/QEUH-BCCC10/2020|2020-11-26|EPI\_ISL\_710802|Original|hCoV-19^^Scotland|Human|Lighthouse Lab in Glasgow|Wellcome Sanger Institute for the COVID-19 Genomics UK (COG-UK) Consortium|Davies|United Kingdom

>Spike|hCoV-19/Portugal/PT1270/2020|2020-03-20|EPI\_ISL\_511231|Original|hCoV-19^^Portugal|Human|Instituto Nacional de Saude (INSA) and Instituto Gulbenkian de Ciencia (IGC)|Instituto Nacional de Saude (INSA) and Instituto Gulbenkian de Ciencia (IGC)|Borges|Portugal

>Spike|hCoV-19/USA/WI-GMF-28356/2020|2020-10-28|EPI\_ISL\_661015|Original|hCoV-19^^Wisconsin|Human|Gundersen Molecular Diagnostics Laboratory|Kabara Cancer Research Institute|Kenny|USA

>Spike|hCoV-19/England/OXON-AC8D1/2020|2020-04-05|EPI\_ISL\_448491|Original|hCoV-19^^England|Human|Oxford Viromics|COVID-19 Genomics UK (COG-UK) Consortium|Golubchik|United Kingdom

>Spike|hCoV-19/Japan/PG-6543/2020|2020-08-00|EPI\_ISL\_687657|Original|hCoV-19^^Japan|Human|Pathogen Genomics Center|Pathogen Genomics Center|Sekizuka|Japan

>Spike|hCoV-19/England/MILK-978750/2020|2020-07-31|EPI\_ISL\_550428|Original|hCoV-19^^England|Human|Lighthouse Lab in Milton Keynes|Wellcome Sanger Institute for the COVID-19 Genomics UK (COG-UK) consortium|Davies|United Kingdom

>Spike|hCoV-19/USA/MD-MDH-0297/2020|2020-10-14|EPI\_ISL\_629077|Original|hCoV-19^^Maryland|Human|Maryland Public Health Laboratory|Maryland Public Health Laboratory|Keller|USA

>Spike|hCoV-19/England/QEUH-B3F42F/2020|2020-11-08|EPI\_ISL\_658558|Original|hCoV-19^^England|Human|Lighthouse Lab in Glasgow|Wellcome Sanger Institute for the COVID-19 Genomics UK (COG-UK) Consortium|Davies|United Kingdom

>Spike|hCoV-19/Tunisia/61600/2020|2020-11-23|EPI\_ISL\_707700|Original|hCoV-19^^Nabeul|Human|1-Laboratory of Microbiology|1-Clinical and Experimental Pharmacology Lab|Boutiba-Ben Boubaker|Tunisia

>Spike|hCoV-19/Denmark/DCGC-11828/2020|2020-10-26|EPI\_ISL\_671159|Original|hCoV-19^^Nordjylland|Human|Department of Virus and Microbiological Special Diagnostics|Albertsen Lab|Michaelsen|Denmark

>Spike|hCoV-19/Croatia/AU-S10new/2020|2020-04-09|EPI\_ISL\_468656|Original|hCoV-19^^Istria|Human|Institute for Public Health|Laboratory for advanced genomics|Vugrek|Croatia

>Spike|hCoV-19/England/LIVE-A3CA1/2020|2020-05-19|EPI\_ISL\_500021|Original|hCoV-19^^England|Human|Liverpool Clinical Laboratories|COVID-19 Genomics UK (COG-UK) Consortium|Haldenby|United Kingdom

>Spike|hCoV-19/England/BIRM-6708F/2020|2020-10-28|EPI\_ISL\_650995|Original|hCoV-19^^England|Human|University of Birmingham|COVID-19 Genomics UK (COG-UK) Consortium|Loman|United Kingdom

>Spike|hCoV-19/England/CAMC-B3341C/2020|2020-11-05|EPI\_ISL\_659301|Original|hCoV-19^^England|Human|Lighthouse Lab in Cambridge|Wellcome Sanger Institute for the COVID-19 Genomics UK (COG-UK) Consortium|Davies|United Kingdom

>Spike|hCoV-19/Suriname/SR-71/2020|2020-07-09|EPI\_ISL\_518818|Original|hCoV-19^^Suriname|Human|Academic Hospital Paramaribo|Erasmus Medical Center|M\u00f0fcnger|Suriname

>Spike|hCoV-19/England/201360276/2020|2020-03-25|EPI\_ISL\_423261|Original|hCoV-19^^England|Human|Respiratory Virus Unit|Respiratory Virus Unit|Platt|United Kingdom

>Spike|hCoV-19/USA/WI-UW-1589/2020|2020-09-18|EPI\_ISL\_605466|Original|hCoV-19^^Wisconsin|Human|University of Wisconsin-Madison AIDS Vaccine Research Laboratories|University of Wisconsin-Madison AIDS Vaccine Research Laboratories|Baczenas|USA

>Spike|hCoV-19/USA/CT-Yale-028/2020|2020-03-18|EPI\_ISL\_419521|Original|hCoV-19^^Connecticut|Human|Yale Clinical Virology Laboratory|Grubaugh Lab - Yale School of Public Health|Grubaugh|USA

>Spike|hCoV-19/England/QEUH-B9E7CB/2020|2020-11-18|EPI\_ISL\_719821|Original|hCoV-19^^England|Human|Lighthouse Lab in Glasgow|Wellcome Sanger Institute for the COVID-19 Genomics UK (COG-UK) Consortium|Davies|United Kingdom

>Spike|hCoV-19/United Arab Emirates/0883/2020|2020-05-19|EPI\_ISL\_699021|Original|hCoV-19^^Abu Dhabi|Human|Group 42 (G42) Healthcare|G42 Healthcare|Ogrodzki|United Arab Emirates



>Spike|hCoV-19/SaudiArabia/KAUST-MADINAH1049/2020|2020-06-13|EPI\_ISL\_513080|Original|hCoV-19^^Madinah|Human|Pathogen Genomics Lab King Abdullah University of Science and Technology(KAUST)|Pathogen Genomics Lab King Abdullah University of Science and Technology(KAUST)|Mohamed Ghazzali|Saudi Arabia

>Spike|hCoV-19/USA/TX-HMH-MCoV-14754/2020|2020-10-01|EPI\_ISL\_786239|Original|hCoV-19^^Texas|Human|Houston Methodist Hospital|Houston Methodist Hospital|Long|USA

>Spike|hCoV-19/England/20192005804/2020|2020-05-04|EPI\_ISL\_526543|Original|hCoV-19^^England|Human|Respiratory Virus Unit|Respiratory Virus Unit|Ledesma|United Kingdom

>Spike|hCoV-19/Switzerland/GR-ETHZ-250080/2020|2020-08-18|EPI\_ISL\_535602|Original|hCoV-19^^Graub\u00fcnden|Human|Viollier AG|Department of Biosystems Science and Engineering|Nadeau|Switzerland

>Spike|hCoV-19/Scotland/QEUH-C5411D/2020|2020-12-12|EPI\_ISL\_757054|Original|hCoV-19^^Scotland|Human|Lighthouse Lab in Glasgow|Wellcome Sanger Institute for the COVID-19 Genomics UK (COG-UK) Consortium|Davies|United Kingdom

>Spike|hCoV-19/Wales/PHWC-499CC8/2020|2020-12-04|EPI\_ISL\_727429|Original|hCoV-19^^Wales|Human|Originating lab|COVID-19 Genomics UK (COG-UK) Consortium|Moore|United Kingdom

>Spike|hCoV-19/Australia/VIC2713/2020|2020-07-04|EPI\_ISL\_521551|Original|hCoV-19^^Victoria|Human|Victorian Infectious Diseases Reference Laboratory (VIDRL)|VIDRL and MDU-PHL|Schultz|Australia

>Spike|hCoV-19/Scotland/EDB1182/2020|2020-04-08|EPI\_ISL\_433426|Original|hCoV-19^^Scotland|Human|Virology Department|COVID-19 Genomics UK (COG-UK) Consortium|Williams|United Kingdom

>Spike|hCoV-19/Israel/CVL-n18352/2020|2020-06-04|EPI\_ISL\_516894|Original|hCoV-19^^Tel Aviv|Human|Israel Central Virology laboratory|Israel Central Virology laboratory|Zuckerman|Israel

>Spike|hCoV-19/England/MILK-B564C8/2020|2020-11-05|EPI\_ISL\_657688|Original|hCoV-19^^England|Human|Lighthouse Lab in Milton Keynes|Wellcome Sanger Institute for the COVID-19 Genomics UK (COG-UK) Consortium|Davies|United Kingdom

>Spike|hCoV-19/Italy/SAR-ASSL/2020|2020-10-19|EPI\_ISL\_710503|Original|hCoV-19^^Sardinia|Human|Laboratorio specialistico UOC Ematologia - Ospedale \San Francesco - ATS-ASSL Nuoro|Laboratorio specialistico UOC Ematologia - Ospedale \San Francesco - ATS-ASSL Nuoro|Piras|Italy

>Spike|hCoV-19/India/GJ-GBRC351b/2020|2020-06-18|EPI\_ISL\_514597|Original|hCoV-19^^Gujarat|Human|B.J. Medical College and Civil hospital|Gujarat Biotechnology Research Centre|Joshi|India

>Spike|hCoV-19/Japan/PG-4528/2020|2020-07-00|EPI\_ISL\_689666|Original|hCoV-19^^Japan|Human|Pathogen Genomics Center|Pathogen Genomics Center|Sekizuka|Japan

>Spike|hCoV-19/Spain/PV-IBV-004228/2020|2020-04-05|EPI\_ISL\_500292|Original|hCoV-19^^Basque Country|Human|Servicio de Microbiolog\u00eda. Hospital Universitario Donostia. OSI Donostialdea. \u00c1rea de Enfermedades Infecciosas|SeqCOVID-SPAIN consortium/IBV (CSIC)|Comas|Spain

>Spike|hCoV-19/Denmark/DCGC-19715/2020|2020-12-07|EPI\_ISL\_749129|Original|hCoV-19^^Hovedstaden|Human|Department of Virus and Microbiological Special Diagnostics|Albertsen Lab|Michaelsen|Denmark

>Spike|hCoV-19/England/CAMB-1B982B/2020|2020-11-05|EPI\_ISL\_664453|Original|hCoV-19^^England|Human|Department of Pathology|COVID-19 Genomics UK (COG-UK) Consortium|Goodfellow|United Kingdom

>Spike|hCoV-19/England/MILK-9F0310/2020|2020-09-25|EPI\_ISL\_580717|Original|hCoV-19^^England|Human|Lighthouse Lab in Milton Keynes|Wellcome Sanger Institute for the COVID-19 Genomics UK (COG-UK) consortium|Davies|United Kingdom

>Spike|hCoV-19/England/CAMC-B0B4FF/2020|2020-10-29|EPI\_ISL\_643488|Original|hCoV-19^^England|Human|Lighthouse Lab in Cambridge|Wellcome Sanger Institute for the COVID-19 Genomics UK (COG-UK) Consortium|Davies|United Kingdom

>Spike|hCoV-19/Mali/M002707/2020|2020-04-12|EPI\_ISL\_487461|Original|hCoV-19^^Bamako|Human|CICM-Mali|Bundeswehr Institut of Microbiology|Antwerpen|Mali

>Spike|hCoV-19/Australia/VIC9021/2020|2020-07-24|EPI\_ISL\_565358|Original|hCoV-19^^Victoria|Human|Microbiological Diagnostic Unit - Public Health Laboratory (MDU-PHL)|MDU-PHL|Schultz|Australia

>Spike|hCoV-19/Wales/PHWC-16583D/2020|2020-05-25|EPI\_ISL\_490731|Original|hCoV-19^^Wales|Human|Wales Specialist Virology Centre Sequencing lab|COVID-19 Genomics UK (COG-UK) Consortium|Moore|United Kingdom

>Spike|hCoV-19/Australia/VIC10167/2020|2020-08-26|EPI\_ISL\_562813|Original|hCoV-19^^Victoria|Human|Microbiological Diagnostic Unit - Public Health Laboratory (MDU-PHL)|MDU-PHL|Schultz|Australia

>Spike|hCoV-19/England/MILK-9A86C3/2020|2020-08-31|EPI\_ISL\_549414|Original|hCoV-19^^England|Human|Oxford Viromics|COVID-19 Genomics UK (COG-UK) Consortium|Golubchik|United Kingdom

>Spike|hCoV-19/USA/CA-CDPH134/2020|2020-07-08|EPI\_ISL\_755056|Original|hCoV-19^^California|Human|California Department of Public Health|California Department of Public Health|Bell|USA

>Spike|hCoV-19/Denmark/DCGC-17902/2020|2020-12-14|EPI\_ISL\_749194|Original|hCoV-19^^Hovedstaden|Human|Department of Virus and Microbiological Special Diagnostics|Albertsen Lab|Michaelsen|Denmark

>Spike|hCoV-19/England/MILK-993BF9/2020|2020-08-27|EPI\_ISL\_552272|Original|hCoV-19^^England|Human|Lighthouse Lab in Milton Keynes|Wellcome Sanger Institute for the COVID-19 Genomics UK (COG-UK) consortium|Davies|United Kingdom

>Spike|hCoV-19/Australia/VIC106/2020|2020-03-17|EPI\_ISL\_419820|Original|hCoV-19^^Victoria|Human|Victorian Infectious Diseases Reference Laboratory (VIDRL)|Victorian Infectious Diseases Reference Laboratory and Microbiological Diagnostic Unit Public Health Laboratory|Schultz|Australia

>Spike|hCoV-19/Australia/VIC7563/2020|2020-00-00|EPI\_ISL\_564501|Original|hCoV-19^^Victoria|Human|Microbiological Diagnostic Unit - Public Health Laboratory (MDU-PHL)|MDU-PHL|Schultz|Australia

>Spike|hCoV-19/Switzerland/SO-ETHZ-390227/2020|2020-11-27|EPI\_ISL\_721689|Original|hCoV-19^^Solothurn|Human|Viollier AG|Department of Biosystems Science and Engineering|Nadeau|Switzerland

>Spike|hCoV-19/Switzerland/BS-42217061/2020|2020-04-02|EPI\_ISL\_581819|Original|hCoV-19^^Basel-Stadt|Human|University Hospital Basel|University Hospital Basel|Roloff Handschin|Switzerland

>Spike|hCoV-19/Wales/ALDP-9FDB66/2020|2020-10-01|EPI\_ISL\_600525|Original|hCoV-19^^Wales|Human|Lighthouse Lab in Alderley Park|Wellcome Sanger Institute for the COVID-19 Genomics UK (COG-UK) consortium|Davies|United Kingdom

>Spike|hCoV-19/England/20139009604/2020|2020-03-27|EPI\_ISL\_421869|Original|hCoV-19^^England|Human|Respiratory Virus Unit|Respiratory Virus Unit|Platt|United Kingdom

>Spike|hCoV-19/England/QEUA-B7E48E/2020|2020-11-14|EPI\_ISL\_668238|Original|hCoV-19^^England|Human|Lighthouse Lab in Glasgow|Wellcome Sanger Institute for the COVID-19 Genomics UK (COG-UK) Consortium|Davies|United Kingdom

>Spike|hCoV-19/Japan/PG-6592/2020|2020-07-00|EPI\_ISL\_687704|Original|hCoV-19^^Japan|Human|Niigata Prefectural Institute of Public Health and Environmental Sciences|Pathogen Genomics Center|Sekizuka|Japan

>Spike|hCoV-19/Wales/PHWC-49A0E9/2020|2020-11-30|EPI\_ISL\_727494|Original|hCoV-19^^Wales|Human|Originating lab|COVID-19 Genomics UK (COG-UK) Consortium|Moore|United Kingdom

>Spike|hCoV-19/USA/MI-MDHHS-SC20594/2020|2020-04-30|EPI\_ISL\_462676|Original|hCoV-19^^Michigan|Human|Michigan Department of Health and Human Services|Michigan Department of Health and Human Services|Blankenship|USA

>Spike|hCoV-19/USA/MN-UMGC-4/2020|2020-03-31|EPI\_ISL\_443255|Original|hCoV-19^^Minnesota|Human|M Health Fairview|University of Minnesota Genomics Center|Garbe|USA

>Spike|hCoV-19/England/QEUA-9F86D3/2020|2020-09-27|EPI\_ISL\_588887|Original|hCoV-19^^England|Human|Lighthouse Lab in Glasgow|Wellcome Sanger Institute for the COVID-19 Genomics UK (COG-UK) consortium|Davies|United Kingdom

>Spike|hCoV-19/USA/LA-GBCL-26791753/2020|2020-04-06|EPI\_ISL\_485368|Original|hCoV-19^^Louisiana|Human|River Road Testing Lab|Ginkgo Bioworks Clinical Laboratory|Smith|USA

>Spike|hCoV-19/USA/MS-CDC-6578/2020|2020-03-23|EPI\_ISL\_648042|Original|hCoV-19^^Mississippi|Human|MS Public Health Laboratory|Pathogen Discovery|Queen|USA

>Spike|hCoV-19/USA/NV-NSPHL-A0097/2020|2020-04-14|EPI\_ISL\_515373|Original|hCoV-19^^Nevada|Human|Nevada State Public Health Laboratory|Nevada State Public Health Laboratory|Sevinsky|USA

>Spike|hCoV-19/England/CAMC-9422D6/2020|2020-07-23|EPI\_ISL\_556869|Original|hCoV-19^^England|Human|Lighthouse Lab in Cambridge|Wellcome Sanger Institute for the COVID-19 Genomics UK (COG-UK) consortium|Davies|United Kingdom

>Spike|hCoV-19/England/ALDP-C8DED8/2020|2020-12-15|EPI\_ISL\_777525|Original|hCoV-19^^England|Human|Lighthouse Lab in Alderley Park|Wellcome Sanger Institute for the COVID-19 Genomics UK (COG-UK) Consortium|Davies|United Kingdom

>Spike|hCoV-19/Australia/VIC11636/2020|2020-07-22|EPI\_ISL\_563440|Original|hCoV-19^^Victoria|Human|Microbiological Diagnostic Unit - Public Health Laboratory (MDU-PHL)|MDU-PHL|Schultz|Australia

>Spike|hCoV-19/Australia/VIC15357/2020|2020-08-04|EPI\_ISL\_593259|Original|hCoV-19^^Victoria|Human|Microbiological Diagnostic Unit - Public Health Laboratory (MDU-PHL)|MDU-PHL|Schultz|Australia

>Spike|hCoV-19/England/CAMC-B9AF9A/2020|2020-11-15|EPI\_ISL\_673409|Original|hCoV-19^^England|Human|Lighthouse Lab in Cambridge|Wellcome Sanger Institute for the COVID-19 Genomics UK (COG-UK) Consortium|Davies|United Kingdom

>Spike|hCoV-19/England/C200031974/2020|2020-00-00|EPI\_ISL\_636704|Original|hCoV-19^^England|Human|Respiratory Virus Unit|Respiratory Virus Unit|Platt|United Kingdom

>Spike|hCoV-19/USA/CO-CSU-D1675/2020|2020-04-02|EPI\_ISL\_527446|Original|hCoV-19^^Colorado|Human|Colorado State University - Ebel Lab|Colorado State University - Ebel Lab|Cline|USA

>Spike|hCoV-19/England/CAMB-779DC/2020|2020-03-31|EPI\_ISL\_439502|Original|hCoV-19^^England|Human|Department of Pathology|Wellcome Sanger Institute for the COVID-19 Genomics UK (COG-UK) consortium|Amato|United Kingdom

>Spike|hCoV-19/England/LOND-1286E9A/2020|2020-05-05|EPI\_ISL\_541781|Original|hCoV-19^^England|Human|Barts Health NHS Trust|Wellcome Sanger Institute for the COVID-19 Genomics UK (COG-UK) consortium|Davies|United Kingdom

>Spike|hCoV-19/United Arab Emirates/0239/2020|2020-05-17|EPI\_ISL\_698421|Original|hCoV-19^^Abu Dhabi|Human|Group 42 (G42) Healthcare|G42 Healthcare|Ogrodzki|United Arab Emirates

>Spike|hCoV-19/USA/TX-HMH-MCoV-15081/2020|2020-10-17|EPI\_ISL\_786565|Original|hCoV-19^^Texas|Human|Houston Methodist Hospital|Houston Methodist Hospital|Long|USA

>Spike|hCoV-19/England/OXON-B1806/2020|2020-04-24|EPI\_ISL\_479047|Original|hCoV-19^^England|Human|Oxford Viromics|COVID-19 Genomics UK (COG-UK) Consortium|Golubchik|United Kingdom

>Spike|hCoV-19/France/ARA-10189/2020|2020-03-17|EPI\_ISL\_418424|Original|hCoV-19^^Auvergne-Rh\u00f4ne-Alpes|Human|Institut des Agents Infectieux (IAI)|CNR Virus des Infections Respiratoires - France SUD|Josset|France

>Spike|hCoV-19/USA/OH-ODH-SC34324/2020|2020-04-19|EPI\_ISL\_789103|Original|hCoV-19^^Ohio|Human|Ohio Department of Health Laboratory|Ohio Department of Health Laboratory|Holmes|USA

>Spike|hCoV-19/USA/CA-ALSR-0943-SAN/2020|2020-03-28|EPI\_ISL\_483427|Original|hCoV-19^^California|Human|UC San Diego Center for Advanced Laboratory Medicine|Andersen lab at Scripps Research|Gangavarapu|USA

>Spike|hCoV-19/England/BRIS-12240B/2020|2020-04-04|EPI\_ISL\_440657|Original|hCoV-19^^England|Human|PHE South West Regional Laboratory|Wellcome Sanger Institute for the COVID-19 Genomics UK (COG-UK) consortium|Amato|United Kingdom

>Spike|hCoV-19/England/CAMC-B362A6/2020|2020-11-05|EPI\_ISL\_645522|Original|hCoV-19^^England|Human|Lighthouse Lab in Cambridge|Wellcome Sanger Institute for the COVID-19 Genomics UK (COG-UK) Consortium|Davies|United Kingdom

>Spike|hCoV-19/England/CAMB-1ACBAA/2020|2020-04-23|EPI\_ISL\_489554|Original|hCoV-19^^England|Human|Department of Pathology|Wellcome Sanger Institute for the COVID-19 Genomics UK (COG-UK) consortium|Davies|United Kingdom

>Spike|hCoV-19/USA/NY-NYCPHL-001529/2020|2020-12-01|EPI\_ISL\_745448|Original|hCoV-19^^New York|Human|DOHMH Crown Heights|New York City Public Health Laboratory|Wang|USA

>Spike|hCoV-19/England/ALDP-CEAF5E/2020|2020-12-21|EPI\_ISL\_781499|Original|hCoV-19^^England|Human|Lighthouse Lab in Alderley Park|Wellcome Sanger Institute for the COVID-19 Genomics UK (COG-UK) Consortium|Davies|United Kingdom

>Spike|hCoV-19/England/LIVE-A8662/2020|2020-03-26|EPI\_ISL\_517195|Original|hCoV-19^^England|Human|Liverpool Clinical Laboratories|COVID-19 Genomics UK (COG-UK) Consortium|Haldenby|United Kingdom

>Spike|hCoV-19/Wales/PHWC-2F1AE/2020|2020-04-06|EPI\_ISL\_446212|Original|hCoV-19^^Wales|Human|Wales Specialist Virology Centre|Public Health Wales Microbiology Cardiff|Moore|United Kingdom

>Spike|hCoV-19/USA/TX-HMH-MCoV-15577/2020|2020-10-26|EPI\_ISL\_787061|Original|hCoV-19^^Texas|Human|Houston Methodist Hospital|Houston Methodist Hospital|Long|USA

>Spike|hCoV-19/South Korea/KCDC2674/2020|2020-06-18|EPI\_ISL\_522456|Original|hCoV-19^^South Korea|Human|Center for Laboratory Control of Infectious Diseases|Center for Laboratory Control of Infectious Diseases|Kim|South Korea

>Spike|hCoV-19/USA/TX-HMH-8055/2020|2020-07-01|EPI\_ISL\_545822|Original|hCoV-19^^Texas|Human|Houston Methodist Hospital|Houston Methodist Hospital|Long|USA

>Spike|hCoV-19/England/QEUH-AD1EB9/2020|2020-10-26|EPI\_ISL\_629824|Original|hCoV-19^^England|Human|Lighthouse Lab in Glasgow|Wellcome Sanger Institute for the COVID-19 Genomics UK (COG-UK) consortium|Davies|United Kingdom

>Spike|hCoV-19/Spain/VC-IBV-98004428/2020|2020-04-14|EPI\_ISL\_722236|Original|hCoV-19^^Comunitat Valenciana|Human|Servicio de Microbiolog\u00eda. Hospital General Universitario de Castell\u00f3n|SeqCOVID-SPAIN consortium|IBV(CSIC)|Comas|Spain

>Spike|hCoV-19/Scotland/EDB102/2020|2020-03-22|EPI\_ISL\_425892|Original|hCoV-19^^Scotland|Human|Virology Department|COVID-19 Genomics UK (COG-UK) Consortium|Williams|United Kingdom

>Spike|hCoV-19/Japan/PG-0210/2020|2020-03-19|EPI\_ISL\_479910|Original|hCoV-19^^Kansai|Human|Himeji City Institute of Environment and Health|Pathogen Genomics Center|Sekizuka|Japan

>Spike|hCoV-19/England/LIVE-9A8A9/2020|2020-03-29|EPI\_ISL\_449371|Original|hCoV-19^^England|Human|Liverpool Clinical Laboratories|COVID-19 Genomics UK (COG-UK) Consortium|Haldenby|United Kingdom

>Spike|hCoV-19/Germany/NW-HHU-392/2020|2020-11-01|EPI\_ISL\_718073|Original|hCoV-19^^North Rhine-Westphalia|Human|ZOTZ KLIMAS MVZ D\u00fcsseldorf-Centrum GbR \u00dcBAG f\u00fcr Labormedizin|Center of Medical Microbiology|Wienemann|Germany

>Spike|hCoV-19/USA/UT-UPHL-04318\_2/2020|2020-05-18|EPI\_ISL\_591308|Original|hCoV-19^^Utah|Human|Utah Public Health Laboratory|Utah Public Health Laboratory|Young|USA

>Spike|hCoV-19/England/ALDP-BE912D/2020|2020-12-03|EPI\_ISL\_708868|Original|hCoV-19^^England|Human|Lighthouse Lab in Alderley Park|Wellcome Sanger Institute for the COVID-19 Genomics UK (COG-UK) Consortium|Davies|United Kingdom

>Spike|hCoV-19/England/NORT-292D37/2020|2020-05-19|EPI\_ISL\_489102|Original|hCoV-19^^England|Human|NU-OMICS DNA Sequencing research facility|Wellcome Sanger Institute for the COVID-19 Genomics UK (COG-UK) consortium|Davies|United Kingdom

>Spike|hCoV-19/England/QEUH-9F5B7D/2020|2020-09-25|EPI\_ISL\_588334|Original|hCoV-19^^England|Human|Lighthouse Lab in Glasgow|Wellcome Sanger Institute for the COVID-19 Genomics UK (COG-UK) consortium|Davies|United Kingdom

>Spike|hCoV-19/Switzerland/VD-ETHZ-360315/2020|2020-11-06|EPI\_ISL\_729217|Original|hCoV-19^^Vaud|Human|Viollier AG|Department of Biosystems Science and Engineering|Nadeau|Switzerland

>Spike|hCoV-19/England/CAMC-B78F65/2020|2020-11-12|EPI\_ISL\_668061|Original|hCoV-19^^England|Human|Lighthouse Lab in Cambridge|Wellcome Sanger Institute for the COVID-19 Genomics UK (COG-UK) Consortium|Davies|United Kingdom

>Spike|hCoV-19/Singapore/1323/2020|2020-05-22|EPI\_ISL\_648811|Original|hCoV-19^^Singapore|Human|Department of Laboratory Medicine|Department of Laboratory Medicine|Chen|Singapore

>Spike|hCoV-19/USA/CA-QDX-1875/2020|2020-03-15|EPI\_ISL\_604188|Original|hCoV-19^^California|Human|Quest Diagnostics|Quest Diagnostics|Kagan|USA

>Spike|hCoV-19/England/ALDP-B62C0D/2020|2020-11-08|EPI\_ISL\_655365|Original|hCoV-19^^England|Human|Lighthouse Lab in Alderley Park|Wellcome Sanger Institute for the COVID-19 Genomics UK (COG-UK) Consortium|Davies|United Kingdom

>Spike|hCoV-19/England/MILK-A190CE/2020|2020-10-01|EPI\_ISL\_612481|Original|hCoV-19^^England|Human|Wales Specialist Virology Centre Sequencing lab|COVID-19 Genomics UK (COG-UK) Consortium|Moore|United Kingdom

>Spike|hCoV-19/Belgium/ULG-10988/2020|2020-11-14|EPI\_ISL\_707757|Original|hCoV-19^^Li\u00e8ge|Human|Department of Clinical Microbiology|GIGA Medical Genomics|Durkin|Belgium

>Spike|hCoV-19/USA/CA-CZB0750/2020|2020-04-03|EPI\_ISL\_429018|Original|hCoV-19^^California|Human|UCSF Clinical Microbiology Laboratory|Chan-Zuckerberg Biohub|Kamm|USA

>Spike|hCoV-19/Switzerland/ZH-ETHZ-120245/2020|2020-05-04|EPI\_ISL\_468304|Original|hCoV-19^^Zurich|Human|Viollier AG|Department of Biosystems Science and Engineering|Nadeau|Switzerland

>Spike|hCoV-19/Iceland/353/2020|2020-03-18|EPI\_ISL\_424377|Original|hCoV-19^^Reykjavik|Human|deCODE genetics|deCODE genetics|J\u00f3nsson|Iceland

>Spike|hCoV-19/Wales/PHWC-160F2E/2020|2020-05-23|EPI\_ISL\_473067|Original|hCoV-19^^Wales|Human|Wales Specialist Virology Centre Sequencing lab|COVID-19 Genomics UK (COG-UK) Consortium|Moore|United Kingdom

>Spike|hCoV-19/England/LIVE-A5B48/2020|2020-03-17|EPI\_ISL\_499616|Original|hCoV-19^^England|Human|Liverpool Clinical Laboratories|COVID-19 Genomics UK (COG-UK) Consortium|Haldenby|United Kingdom

>Spike|hCoV-19/USA/WA-S1248/2020|2020-05-11|EPI\_ISL\_495698|Original|hCoV-19^^Washington|Human|Washington State Department of Health|Seattle Flu Study|Lee|USA

>Spike|hCoV-19/England/MILK-CA3E54/2020|2020-12-16|EPI\_ISL\_762398|Original|hCoV-19^^England|Human|Lighthouse Lab in Milton Keynes|Wellcome Sanger Institute for the COVID-19 Genomics UK (COG-UK) Consortium|Davies|United Kingdom

>Spike|hCoV-19/Portugal/PT1220/2020|2020-03-27|EPI\_ISL\_511763|Original|hCoV-19^^Portugal|Human|Instituto Nacional de Saude (INSA)|Instituto Nacional de Saude (INSA) and Instituto Gulbenkian de Ciencia (IGC)|Borges|Portugal

>Spike|hCoV-19/England/MILK-9E05C2/2020|2020-09-20|EPI\_ISL\_601278|Original|hCoV-19^^England|Human|Lighthouse Lab in Milton Keynes|Wellcome Sanger Institute for the COVID-19 Genomics UK (COG-UK) consortium|Davies|United Kingdom

>Spike|hCoV-19/USA/PA-MGEL-00759/2020|2020-09-17|EPI\_ISL\_682048|Original|hCoV-19^^Pennsylvania|Human|UPMC Clinical Microbiology Laboratory|Microbial Genomic Epidemiology Laboratory|Griffith|USA

>Spike|hCoV-19/USA/NY-NYUMC81/2020|2020-03-18|EPI\_ISL\_421582|Original|hCoV-19^^New York|Human|NYU Langone Health|Departments of Pathology and Medicine|Maurano|USA

>Spike|hCoV-19/Wales/PHWC-15D1F1/2020|2020-05-04|EPI\_ISL\_472683|Original|hCoV-19^^Wales|Human|Wales Specialist Virology Centre Sequencing lab|COVID-19 Genomics UK (COG-UK) Consortium|Moore|United Kingdom

>Spike|hCoV-19/USA/FL-BPHL-1163/2020|2020-08-19|EPI\_ISL\_526649|Original|hCoV-19^^Florida|Human|Florida Bureau of Public Health Laboratories|Florida Bureau of Public Health Laboratories|Blanton|USA

>Spike|hCoV-19/England/CAMC-9463C0/2020|2020-07-15|EPI\_ISL\_556662|Original|hCoV-19^^England|Human|Lighthouse Lab in Cambridge|Wellcome Sanger Institute for the COVID-19 Genomics UK (COG-UK) consortium|Davies|United Kingdom

>Spike|hCoV-19/USA/UT-UPHL-201126930/2020|2020-05-13|EPI\_ISL\_628976|Original|hCoV-19^^Utah|Human|Utah Public Health Laboratory|Utah Public Health Laboratory|Young|USA

>Spike|hCoV-19/Denmark/DCGC-7689/2020|2020-10-19|EPI\_ISL\_618612|Original|hCoV-19^^Hovedstaden|Human|Department of Virus and Microbiological Special Diagnostics|Albertsen lab|Michaelsen|Denmark

>Spike|hCoV-19/United Arab Emirates/0530/2020|2020-05-17|EPI\_ISL\_698692|Original|hCoV-19^^Abu Dhabi|Human|Group 42 (G42) Healthcare|G42 Healthcare|Ogrodzki|United Arab Emirates

>Spike|hCoV-19/Hungary/UD-8157/2020|2020-04-14|EPI\_ISL\_476077|Original|hCoV-19^^Heves County|Human|University of Debrecen|National Laboratory of Virology|Kemenesi|Hungary

>Spike|hCoV-19/USA/MA-MASPHL-00457/2020|2020-04-30|EPI\_ISL\_693105|Original|hCoV-19^^Massachusetts|Human|Massachusetts State Public Health Laboratory|Massachusetts State Public Health Laboratory|Lang|USA

>Spike|hCoV-19/Brazil/RS-00608/2020|2020-11-24|EPI\_ISL\_770560|Original|hCoV-19^^Rio Grande do Sul|Human|Laborat\u00f3rio de Microbiologia Molecular - Universidade FEEVALE|Bioinformatics Laboratory / LNCC|Almeida|Brazil

>Spike|hCoV-19/Japan/PG-8646/2020|2020-09-00|EPI\_ISL\_686242|Original|hCoV-19^^Japan|Human|Pathogen Genomics Center|Pathogen Genomics Center|Sekizuka|Japan

>Spike|hCoV-19/Finland/9LS11AA9/2020|2020-10-09|EPI\_ISL\_755943|Original|hCoV-19^^Uusimaa|Human|Department of Virology and Immunology|Department of Virology|Smura|Finland

>Spike|hCoV-19/India/TG-CCMB-L1728/2020|2020-05-30|EPI\_ISL\_471628|Original|hCoV-19^^Telangana|Human|CSIR-Centre for Cellular and Molecular Biology|CSIR-Centre for Cellular and Molecular Biology|Banu|India

>Spike|hCoV-19/Australia/VIC15028/2020|2020-07-29|EPI\_ISL\_593111|Original|hCoV-19^^Victoria|Human|Microbiological Diagnostic Unit - Public Health Laboratory (MDU-PHL)|MDU-PHL|Schultz|Australia

>Spike|hCoV-19/India/GJ-GBRC112/2020|2020-05-02|EPI\_ISL\_451157|Original|hCoV-19^^Gujarat|Human|Government Medical College|Gujarat Biotechnology Research Centre|Joshi|India

>Spike|hCoV-19/USA/WY-WPHL-20063053/2020|2020-08-18|EPI\_ISL\_766878|Original|hCoV-19^^Wyoming|Human|Wyoming Public Health Laboratory|Wyoming Public Health Laboratory|Hull|USA

>Spike|hCoV-19/USA/CO-CDPHE-2004230012/2020|2020-04-21|EPI\_ISL\_677255|Original|hCoV-19^^Colorado|Human|Colorado Department of Public Health and Environment|Colorado Department of Public Health and Environment|Bankers|USA

>Spike|hCoV-19/USA/MI-UM-10033851156/2020|2020-04-04|EPI\_ISL\_578139|Original|hCoV-19^^Michigan|Human|University of Michigan Clinical Microbiology Laboratory|Lauring Lab|Valesano|USA

>Spike|hCoV-19/England/NORW-F099F/2020|2020-10-09|EPI\_ISL\_584744|Original|hCoV-19^^England|Human|Quadram Institute Bioscience|COVID-19 Genomics UK (COG-UK) Consortium|Alikhan|United Kingdom

>Spike|hCoV-19/Japan/Donner60/2020|2020-07-16|EPI\_ISL\_644964|Original|hCoV-19^^Kanto|Human|Department of Infectious Diseases|Center for Medical Genetics|Kosaki|Japan

>Spike|hCoV-19/Netherlands/LI-EMC-112/2020|2020-11-05|EPI\_ISL\_722726|Original|hCoV-19^^Limburg|Human|Dutch COVID-19 response team|Erasmus Medical Center|Oude Munnink|Netherlands

>Spike|hCoV-19/England/QEUEH-9F8336/2020|2020-09-27|EPI\_ISL\_588878|Original|hCoV-19^^England|Human|Lighthouse Lab in Glasgow|Wellcome Sanger Institute for the COVID-19 Genomics UK (COG-UK) consortium|Davies|United Kingdom

>Spike|hCoV-19/England/CAMC-AAF722/2020|2020-10-23|EPI\_ISL\_631008|Original|hCoV-19^^England|Human|Lighthouse Lab in Cambridge|Wellcome Sanger Institute for the COVID-19 Genomics UK (COG-UK) consortium|Davies|United Kingdom

>Spike|hCoV-19/USA/MI-MDHHS-SC20083/2020|2020-03-26|EPI\_ISL\_437170|Original|hCoV-19^^Michigan|Human|Michigan Department of Health and Human Services|Michigan Department of Health and Human Services|Blankenship|USA

>Spike|hCoV-19/England/ALDP-C58BFD/2020|2020-12-14|EPI\_ISL\_735899|Original|hCoV-19^^England|Human|Lighthouse Lab in Alderley Park|Wellcome Sanger Institute for the COVID-19 Genomics UK (COG-UK) Consortium|Davies|United Kingdom

>Spike|hCoV-19/USA/NY-Wadsworth-11661-01/2020|2020-03-08|EPI\_ISL\_529034|Original|hCoV-19^^New York|Human|Wadsworth Center|Wadsworth Center|Plitnick|USA

>Spike|hCoV-19/England/ALDP-B5CFA3/2020|2020-11-09|EPI\_ISL\_655726|Original|hCoV-19^^England|Human|Lighthouse Lab in Alderley Park|Wellcome Sanger Institute for the COVID-19 Genomics UK (COG-UK) Consortium|Davies|United Kingdom

>Spike|hCoV-19/USA/NY-Wadsworth-261032-01/2020|2020-11-02|EPI\_ISL\_754510|Original|hCoV-19^^New York|Human|Wadsworth Center|Wadsworth Center|Lasek-Nesselquist|USA

>Spike|hCoV-19/Brazil/PE-IAM171/2020|2020-04-09|EPI\_ISL\_500867|Original|hCoV-19^^Pernambuco|Human|LACEN/PE|WallauLab|Wallau|Brazil

>Spike|hCoV-19/England/ALDP-9387E3/2020|2020-06-21|EPI\_ISL\_551360|Original|hCoV-19^^England|Human|Lighthouse Lab in Alderley Park|Wellcome Sanger Institute for the COVID-19 Genomics UK (COG-UK) consortium|Davies|United Kingdom

>Spike|hCoV-19/USA/WA-UW-22990/2020|2020-08-10|EPI\_ISL\_570743|Original|hCoV-19^^Washington|Human|UW Virology Lab|UW Virology Lab|Roychoudhury|USA

>Spike|hCoV-19/England/MILK-A0648C/2020|2020-09-30|EPI\_ISL\_600062|Original|hCoV-19^^England|Human|Lighthouse Lab in Milton Keynes|Wellcome Sanger Institute for the COVID-19 Genomics UK (COG-UK) consortium|Davies|United Kingdom

>Spike|hCoV-19/England/MILK-9E3091/2020|2020-09-21|EPI\_ISL\_581251|Original|hCoV-19^^England|Human|Lighthouse Lab in Milton Keynes|Wellcome Sanger Institute for the COVID-19 Genomics UK (COG-UK) consortium|Davies|United Kingdom

>Spike|hCoV-19/England/ALDP-C3D639/2020|2020-12-10|EPI\_ISL\_730786|Original|hCoV-19^^England|Human|Lighthouse Lab in Alderley Park|Wellcome Sanger Institute for the COVID-19 Genomics UK (COG-UK) Consortium|Davies|United Kingdom

>Spike|hCoV-19/Switzerland/VD-ETHZ-270065/2020|2020-09-02|EPI\_ISL\_541474|Original|hCoV-19^^Vaud|Human|Viollier AG|Department of Biosystems Science and Engineering|Nadeau|Switzerland

>Spike|hCoV-19/England/20124003804/2020|2020-03-17|EPI\_ISL\_465775|Original|hCoV-19^^England|Human|Respiratory Virus Unit|Respiratory Virus Unit|Platt|United Kingdom

>Spike|hCoV-19/England/LOND-D6A50/2020|2020-04-23|EPI\_ISL\_461764|Original|hCoV-19^^England|Human|University College London|COVID-19 Genomics UK (COG-UK) Consortium|Roy|United Kingdom

>Spike|hCoV-19/Japan/PG-6739/2020|2020-08-00|EPI\_ISL\_687849|Original|hCoV-19^^Japan|Human|Pathogen Genomics Center|Pathogen Genomics Center|Sekizuka|Japan

>Spike|hCoV-19/USA/TX-HMH-MCoV-10301/2020|2020-07-08|EPI\_ISL\_789116|Original|hCoV-19^^Texas|Human|Houston Methodist Hospital|Houston Methodist Hospital|Long|USA

>Spike|hCoV-19/England/NOTT-10E739/2020|2020-03-24|EPI\_ISL\_425586|Original|hCoV-19^^England|Human|Queens Medical Centre|COVID-19 Genomics UK (COG-UK) Consortium|Loose|United Kingdom

>Spike|hCoV-19/England/ALDP-92CAE9/2020|2020-06-21|EPI\_ISL\_552969|Original|hCoV-19^^England|Human|Lighthouse Lab in Alderley Park|Wellcome Sanger Institute for the COVID-19 Genomics UK (COG-UK) consortium|Davies|United Kingdom

>Spike|hCoV-19/Wales/PHWC-482B98/2020|2020-10-21|EPI\_ISL\_613270|Original|hCoV-19^^Wales|Human|Wales Specialist Virology Centre Sequencing lab|COVID-19 Genomics UK (COG-UK) Consortium|Moore|United Kingdom

>Spike|hCoV-19/South Korea/KCDC2021/2020|2020-02-18|EPI\_ISL\_471426|Original|hCoV-19^^South Korea|Human|Division of Viral Diseases|Division of Viral Diseases|Kim|South Korea

>Spike|hCoV-19/Belgium/ULG-10666/2020|2020-10-26|EPI\_ISL\_636642|Original|hCoV-19^^Li\u00e8ge|Human|Department of Clinical Microbiology|GIGA Medical Genomics|Durkin|Belgium

>Spike|hCoV-19/Palestine/82/2020|2020-07-05|EPI\_ISL\_596557|Original|hCoV-19^^Hebron|Human|Palestinian Ministry of Health|Molecular Genetics Lab|van Dorp|Palestine

>Spike|hCoV-19/Spain/IB-IBV-99011579/2020|2020-12-08|EPI\_ISL\_779904|Original|hCoV-19^^Balear Islands|Human|Servicio de Microbiolog\u00eda|SeqCOVID-SPAIN consortium|IBV (CSIC) |Comas|Spain

>Spike|hCoV-19/England/EXET-135BD3/2020|2020-03-25|EPI\_ISL\_457144|Original|hCoV-19^^England|Human|University of Exeter|COVID-19 Genomics UK (COG-UK) Consortium|Temperton|United Kingdom

>Spike|hCoV-19/USA/FL-BPHL-023/2020|2020-04-14|EPI\_ISL\_436527|Original|hCoV-19^^Florida|Human|Florida Bureau of Public Health Laboratories|Florida Bureau of Public Health Laboratories|Blanton|USA

>Spike|hCoV-19/England/ALDP-94B3AD/2020|2020-06-11|EPI\_ISL\_555828|Original|hCoV-19^^England|Human|Lighthouse Lab in Alderley Park|Wellcome Sanger Institute for the COVID-19 Genomics UK (COG-UK) consortium|Davies|United Kingdom

>Spike|hCoV-19/Denmark/DCGC-22232/2020|2020-12-14|EPI\_ISL\_757941|Original|hCoV-19^^Nordjylland|Human|Department of Virus and Microbiological Special Diagnostics|Albertsen Lab|Michaelsen|Denmark

>Spike|hCoV-19/Germany/BY-MVP-0186/2020|2020-04-13|EPI\_ISL\_466879|Original|hCoV-19^^Bavaria|Human|Max von Pettenkofer Institute|Laboratory for Functional Genome Analysis|Graf|Germany

>Spike|hCoV-19/Belgium/reg-0414478/2020|2020-04-14|EPI\_ISL\_476988|Original|hCoV-19^^Tervuren|Human|KU Leuven|KU Leuven|Maes|Belgium

>Spike|hCoV-19/Denmark/DCGC-9352/2020|2020-11-16|EPI\_ISL\_668923|Original|hCoV-19^^Syddanmark|Human|Department of Virus and Microbiological Special Diagnostics|Albertsen Lab|Michaelsen|Denmark

>Spike|hCoV-19/South Korea/KCDC2363/2020|2020-05-30|EPI\_ISL\_514766|Original|hCoV-19^^South Korea|Human|Division of Viral Diseases|Division of Viral Diseases|Kim|South Korea

>Spike|hCoV-19/Bangladesh/DNAS\_DRCIM\_isl\_Sik-bip 1/2020|2020-06-30|EPI\_ISL\_774936|Original|hCoV-19^^Dhaka|Human|Designated Reference Institute for Chemical Measurements (DRICM)|DNA SOLUTION LTD.|Rabbi|Bangladesh

>Spike|hCoV-19/USA/NY-NYUMC161/2020|2020-04-01|EPI\_ISL\_424968|Original|hCoV-19^^New York|Human|NYU Langone Health|Departments of Pathology and Medicine|Maurano|USA

>Spike|hCoV-19/Wales/PHWC-324AF/2020|2020-04-12|EPI\_ISL\_446651|Original|hCoV-19^^Wales|Human|Wales Specialist Virology Centre|Public Health Wales Microbiology Cardiff|Moore|United Kingdom

>Spike|hCoV-19/USA/GA-QDX-2443/2020|2020-03-13|EPI\_ISL\_604778|Original|hCoV-19^^Georgia|Human|Quest Diagnostics|Quest Diagnostics|Kagan|USA

>Spike|hCoV-19/Denmark/DCGC-21663/2020|2020-12-21|EPI\_ISL\_758295|Original|hCoV-19^^Hovedstaden|Human|Department of Virus and Microbiological Special Diagnostics|Albertsen Lab|Michaelsen|Denmark

>Spike|hCoV-19/England/CAMC-A5904A/2020|2020-10-09|EPI\_ISL\_597053|Original|hCoV-19^^England|Human|Lighthouse Lab in Cambridge|Wellcome Sanger Institute for the COVID-19 Genomics UK (COG-UK) consortium|Davies|United Kingdom

>Spike|hCoV-19/Spain/CT-IBV-97007955/2020|2020-10-07|EPI\_ISL\_654529|Original|hCoV-19^^Catalunya|Human|Servicio de Microbiolog\u00eda|SeqCOVID-SPAIN consortium|IBV (CSIC)|Comas|Spain

>Spike|hCoV-19/Wales/PHWC-16B1E1/2020|2020-09-14|EPI\_ISL\_560259|Original|hCoV-19^^Wales|Human|Wales Specialist Virology Centre Sequencing lab|COVID-19 Genomics UK (COG-UK) Consortium|Moore|United Kingdom

>Spike|hCoV-19/Canada/ON-PHL-20-03799/2020|2020-11-00|EPI\_ISL\_775060|Original|hCoV-19^^Ontario|Human|Public Health Ontario Laboratory|Public Health Ontario Laboratory|Guthrie|Canada

>Spike|hCoV-19/Wales/PHWC-4872BC/2020|2020-10-29|EPI\_ISL\_639179|Original|hCoV-19^^Wales|Human|Wales Specialist Virology Centre Sequencing lab|COVID-19 Genomics UK (COG-UK) Consortium|Moore|United Kingdom

>Spike|hCoV-19/Switzerland/BS-UHB-42180429/2020|2020-03-07|EPI\_ISL\_527952|Original|hCoV-19^^Basel-Stadt|Human|University Hospital Basel|University Hospital Basel|Roloff Handschin|Switzerland

>Spike|hCoV-19/USA/TX-HMH-6162/2020|2020-07-07|EPI\_ISL\_547282|Original|hCoV-19^^Texas|Human|Houston Methodist Hospital|Houston Methodist Hospital|Long|USA

>Spike|hCoV-19/Ireland/TA-NVRL-73IRL43192/2020|2020-09-09|EPI\_ISL\_596905|Original|hCoV-19^^Tipperary|Human|National Virus Reference Laboratory|National Virus Reference Laboratory|Gonzalez|Ireland

>Spike|hCoV-19/England/MILK-BFF6F8/2020|2020-12-02|EPI\_ISL\_720799|Original|hCoV-19^^England|Human|Lighthouse Lab in Milton Keynes|Wellcome Sanger Institute for the COVID-19 Genomics UK (COG-UK) Consortium|Davies|United Kingdom

>Spike|hCoV-19/USA/WA-S996/2020|2020-04-28|EPI\_ISL\_463486|Original|hCoV-19^^Washington|Human|Washington State Department of Health|Seattle Flu Study|Bedford|USA

>Spike|hCoV-19/USA/TX-HMH-MCoV-12892/2020|2020-08-19|EPI\_ISL\_788044|Original|hCoV-19^^Texas|Human|Houston Methodist Hospital|Houston Methodist Hospital|Long|USA

>Spike|hCoV-19/Scotland/GCVR-17209F/2020|2020-03-31|EPI\_ISL\_469998|Original|hCoV-19^^Scotland|Human|NHSGGC West of Scotland Specialist Virology Centre / MRC-University of Glasgow Centre for Virus Research|Wellcome Sanger Institute for the COVID-19 Genomics UK (COG-UK) consortium|Davies|United Kingdom



>Spike|hCoV-19/Wales/PHWC-169C5B/2020|2020-08-15|EPI\_ISL\_517609|Original|hCoV-19^^Wales|Human|Wales Specialist Virology Centre Sequencing lab|COVID-19 Genomics UK (COG-UK) Consortium|Moore|United Kingdom

>Spike|hCoV-19/Canada/QC-LSPQ-L00232042/2020|2020-03-19|EPI\_ISL\_535970|Original|hCoV-19^^Quebec|Human|CSSS de la Minganie|Laboratoire de sant\u00e9 publique du Qu\u00e9bec|Moreira|Canada

>Spike|hCoV-19/Netherlands/ZH-EMC-251/2020|2020-00-00|EPI\_ISL\_523593|Original|hCoV-19^^Zuid Holland|Human|Dutch COVID-19 response team|Erasmus Medical Center|Oude Munnink|Netherlands

>Spike|hCoV-19/Panama/336440/2020|2020-04-05|EPI\_ISL\_496850|Original|hCoV-19^^Panama Center|Human|Gorgas Memorial Laboratory of Health Studies|Gorgas Memorial Laboratory of Health Studies|Martinez|Panama

>Spike|hCoV-19/Australia/VIC7012/2020|2020-07-24|EPI\_ISL\_564197|Original|hCoV-19^^Victoria|Human|Victorian Infectious Diseases Reference Laboratory (VIDRL)|VIDRL and MDU-PHL|Schultz|Australia

>Spike|hCoV-19/South Africa/R03006/2020|2020-03-07|EPI\_ISL\_417186|Original|hCoV-19^^KwaZulu-Natal|Human|National Institute for Communicable Diseases of the National Health Laboratory Service|National Institute for Communicable Diseases of the National Health Laboratory Service|Allam|South Africa

>Spike|hCoV-19/Australia/VIC4745/2020|2020-07-16|EPI\_ISL\_519133|Original|hCoV-19^^Victoria|Human|Microbiological Diagnostic Unit - Public Health Laboratory (MDU-PHL)|MDU-PHL|Schultz|Australia

>Spike|hCoV-19/Australia/NSW145/2020|2020-03-21|EPI\_ISL\_427708|Original|hCoV-19^^New South Wales|Human|Centre for Infectious Diseases and Microbiology Public Health|NSW Health Pathology - Institute of Clinical Pathology and Medical Research; Westmead Hospital; University of Sydney|Gall|Australia

>Spike|hCoV-19/Denmark/DCGC-19525/2020|2020-12-07|EPI\_ISL\_749007|Original|hCoV-19^^Hovedstaden|Human|Department of Virus and Microbiological Special Diagnostics|Albertsen Lab|Michaelsen|Denmark

>Spike|hCoV-19/USA/NY-NYCPHL-001380/2020|2020-11-17|EPI\_ISL\_683989|Original|hCoV-19^^New York|Human|DOHMH Chelsea|New York City Public Health Laboratory|Wang|USA

>Spike|hCoV-19/England/QEUH-B436AA/2020|2020-11-08|EPI\_ISL\_657143|Original|hCoV-19^^England|Human|Lighthouse Lab in Glasgow|Wellcome Sanger Institute for the COVID-19 Genomics UK (COG-UK) Consortium|Davies|United Kingdom

>Spike|hCoV-19/USA/FL-BPHL-1712/2020|2020-09-30|EPI\_ISL\_613845|Original|hCoV-19^^Florida|Human|Florida Bureau of Public Health Laboratories|Florida Bureau of Public Health Laboratories|Blanton|USA

>Spike|hCoV-19/Denmark/DCGC-2617/2020|2020-08-17|EPI\_ISL\_617854|Original|hCoV-19^^Midtjylland|Human|Department of Virus and Microbiological Special Diagnostics|Albertsen lab|Michaelsen|Denmark

>Spike|hCoV-19/USA/MN-MDH-1212/2020|2020-05-21|EPI\_ISL\_477301|Original|hCoV-19^^Minnesota|Human|Mayo Clinic & Mayo Clinic Laboratories|Minnesota Department of Health|Garfin|USA

>Spike|hCoV-19/England/ALDP-B74FE1/2020|2020-11-12|EPI\_ISL\_662138|Original|hCoV-19^^England|Human|Lighthouse Lab in Alderley Park|Wellcome Sanger Institute for the COVID-19 Genomics UK (COG-UK) Consortium|Davies|United Kingdom

>Spike|hCoV-19/Australia/NSW2021/2020|2020-03-20|EPI\_ISL\_500604|Original|hCoV-19^^New South Wales|Human|Area of Virology|Area of Virology|Bull|Australia

>Spike|hCoV-19/USA/TX-HMH-5286/2020|2020-06-21|EPI\_ISL\_544655|Original|hCoV-19^^Texas|Human|Houston Methodist Hospital|Houston Methodist Hospital|Long|USA

>Spike|hCoV-19/USA/TX-HMH-2727/2020|2020-06-07|EPI\_ISL\_545509|Original|hCoV-19^^Texas|Human|Houston Methodist Hospital|Houston Methodist Hospital|Long|USA

>Spike|hCoV-19/Indonesia/JK-EIJK31/2020|2020-04-22|EPI\_ISL\_766043|Original|hCoV-19^^Jakarta|Human|RS Pelni|Eijkman Institute for Molecular Biology|Soebandrio|Indonesia

>Spike|hCoV-19/England/QEUH-A61E54/2020|2020-10-12|EPI\_ISL\_628653|Original|hCoV-19^^England|Human|Oxford Viromics|COVID-19 Genomics UK (COG-UK) Consortium|Golubchik|United Kingdom

>Spike|hCoV-19/Japan/PG-3203/2020|2020-04-00|EPI\_ISL\_691323|Original|hCoV-19^^Japan|Human|Pathogen Genomics Center|Pathogen Genomics Center|Sekizuka|Japan

>Spike|hCoV-19/USA/CA-SEARCH-5566/2020|2020-11-25|EPI\_ISL\_755298|Original|hCoV-19^^California|Human|San Diego County Public Health Laboratory|Andersen lab at Scripps Research|Gangavarapu|USA

>Spike|hCoV-19/England/204661389/2020|2020-11-11|EPI\_ISL\_686576|Original|hCoV-19^^England|Human|Respiratory Virus Unit|COVID-19 Genomics UK (COG-UK) Consortium|Platt|United Kingdom

>Spike|hCoV-19/Spain/PV-IBV-004300/2020|2020-04-09|EPI\_ISL\_510415|Original|hCoV-19^^Basque Country|Human|Servicio de Microbiolog\u00eda. Hospital Universitario Donostia. OSI Donostialdea. \u00c1rea de Enfermedades Infecciosas|SeqCOVID-SPAIN consortium/IBV (CSIC) |Comas|Spain

>Spike|hCoV-19/Georgia/Tb/2020|2020-03-13|EPI\_ISL\_416482|Original|hCoV-19^^Tbilisi|Human|R. G. Lugar Center for Public Health Research|R. G. Lugar Center for Public Health Research|Murtskhvaladze|Georgia

>Spike|hCoV-19/Canada/NB\_261/2020|2020-04-05|EPI\_ISL\_481752|Original|hCoV-19^^New Brunswick|Human|Dr. Georges-L.-Dumont University Hospital Centre|National Microbiology Laboratory|Grudeski|Canada

>Spike|hCoV-19/USA/TX-DSHS-0093/2020|2020-05-24|EPI\_ISL\_522377|Original|hCoV-19^^Texas|Human|Texas Department of State Health Services|Texas Department of State Health Services|Rahman|USA

>Spike|hCoV-19/England/QEUEH-A9ED7F/2020|2020-10-20|EPI\_ISL\_611415|Original|hCoV-19^^England|Human|Lighthouse Lab in Glasgow|Wellcome Sanger Institute for the COVID-19 Genomics UK (COG-UK) consortium|Davies|United Kingdom

>Spike|hCoV-19/Japan/PG-3380/2020|2020-04-00|EPI\_ISL\_691495|Original|hCoV-19^^Japan|Human|Pathogen Genomics Center|Pathogen Genomics Center|Sekizuka|Japan

>Spike|hCoV-19/USA/AZ-TG547333/2020|2020-07-06|EPI\_ISL\_695484|Original|hCoV-19^^Arizona|Human|AZ SPHL|TGen North|French|USA

>Spike|hCoV-19/USA/CA-ALSR-4530/2020|2020-10-21|EPI\_ISL\_666990|Original|hCoV-19^^California|Human|San Diego County Public Health Laboratory|Andersen lab at Scripps Research|Gangavarapu|USA

>Spike|hCoV-19/England/ALDP-C3CA01/2020|2020-12-09|EPI\_ISL\_731705|Original|hCoV-19^^England|Human|Lighthouse Lab in Alderley Park|Wellcome Sanger Institute for the COVID-19 Genomics UK (COG-UK) Consortium|Davies|United Kingdom

>Spike|hCoV-19/England/CAMB-75BE7/2020|2020-03-28|EPI\_ISL\_438371|Original|hCoV-19^^England|Human|Department of Pathology|Wellcome Sanger Institute for the COVID-19 Genomics UK (COG-UK) consortium|Amato|United Kingdom

>Spike|hCoV-19/England/QEUEH-9C84F0/2020|2020-09-11|EPI\_ISL\_567129|Original|hCoV-19^^England|Human|Lighthouse Lab in Glasgow|Wellcome Sanger Institute for the COVID-19 Genomics UK (COG-UK) consortium|Davies|United Kingdom

>Spike|hCoV-19/England/QEUEH-95E538/2020|2020-08-10|EPI\_ISL\_537098|Original|hCoV-19^^England|Human|Lighthouse Lab in Glasgow|Wellcome Sanger Institute for the COVID-19 Genomics UK (COG-UK) consortium|Davies|United Kingdom

>Spike|hCoV-19/Chile/MA-CADIUMAG-38/2020|2020-05-28|EPI\_ISL\_681684|Original|hCoV-19^^Magallanes|Human|Molecular Medicine Laboratory|Centro Asistencial Docente y de Investigacion|Navarrete|Chile

>Spike|hCoV-19/Denmark/DCGC-2919/2020|2020-08-17|EPI\_ISL\_616554|Original|hCoV-19^^NA|Human|Department of Virus and Microbiological Special Diagnostics|Albertsen lab|Michaelsen|Denmark

>Spike|hCoV-19/USA/DE-DHSS-F1020820/2020|2020-10-29|EPI\_ISL\_708410|Original|hCoV-19^^Delaware|Human|Delaware Public Health Lab|Delaware Public Health Lab|Bajwa|USA

>Spike|hCoV-19/England/NORW-F0382/2020|2020-10-16|EPI\_ISL\_627583|Original|hCoV-19^^England|Human|Quadram Institute Bioscience|COVID-19 Genomics UK (COG-UK) Consortium|Alikhan|United Kingdom

>Spike|hCoV-19/England/LOND-D406F/2020|2020-04-04|EPI\_ISL\_444089|Original|hCoV-19^^England|Human|University College London|COVID-19 Genomics UK (COG-UK) Consortium|Roy|United Kingdom

>Spike|hCoV-19/England/QEUEH-A1DA71/2020|2020-09-29|EPI\_ISL\_587393|Original|hCoV-19^^England|Human|Lighthouse Lab in Glasgow|Wellcome Sanger Institute for the COVID-19 Genomics UK (COG-UK) consortium|Davies|United Kingdom

>Spike|hCoV-19/Singapore/1482/2020|2020-12-20|EPI\_ISL\_754097|Original|hCoV-19^^Singapore|Human|National Public Health Laboratory|National Public Health Laboratory|Mak|Singapore

>Spike|hCoV-19/Wales/PHWC-47CF3B/2020|2020-10-09|EPI\_ISL\_586072|Original|hCoV-19^^Wales|Human|Wales Specialist Virology Centre Sequencing lab|COVID-19 Genomics UK (COG-UK) Consortium|Moore|United Kingdom

>Spike|hCoV-19/Belgium/ULG-10230/2020|2020-05-16|EPI\_ISL\_498136|Original|hCoV-19^^Li\u00e8ge|Human|Department of Clinical Microbiology|GIGA Medical Genomics|Durkin|Belgium

>Spike|hCoV-19/USA/FL-UF-36/2020|2020-10-06|EPI\_ISL\_666622|Original|hCoV-19^^Florida|Human|Environmental and Global Health|Environmental and Global Health|Elbadry|USA

>Spike|hCoV-19/England/QEUEH-9DB0E7/2020|2020-09-21|EPI\_ISL\_580865|Original|hCoV-19^^England|Human|Lighthouse Lab in Glasgow|Wellcome Sanger Institute for the COVID-19 Genomics UK (COG-UK) consortium|Davies|United Kingdom

>Spike|hCoV-19/England/ALDP-A2FD37/2020|2020-10-06|EPI\_ISL\_586998|Original|hCoV-19^^England|Human|Lighthouse Lab in Alderley Park|Wellcome Sanger Institute for the COVID-19 Genomics UK (COG-UK) consortium|Davies|United Kingdom

>Spike|hCoV-19/USA/CA-UCLA-213/2020|2020-05-26|EPI\_ISL\_537520|Original|hCoV-19^^California|Human|UCLA Pathology Clinical Microbiology Lab|Kruglyak Lab|Boocock|USA

>Spike|hCoV-19/Norway/6735/2020|2020-12-05|EPI\_ISL\_775409|Original|hCoV-19^^Vestland|Human|Haukeland University Hospital|Norwegian Institute of Public Health|Vollan|Norway

>Spike|hCoV-19/England/QEUEH-A4B1FD/2020|2020-10-05|EPI\_ISL\_637820|Original|hCoV-19^^England|Human|Department of Pathology|COVID-19 Genomics UK (COG-UK) Consortium|Goodfellow|United Kingdom

>Spike|hCoV-19/India/UP-MW24/2020|2020-05-17|EPI\_ISL\_508428|Original|hCoV-19^^Uttar Pradesh|Human|Mahatma Gandhi Institute of Medical Sciences|National Institute of Biomedical Genomics|Maitra|India

>Spike|hCoV-19/England/QEUEH-9C8117/2020|2020-09-11|EPI\_ISL\_567194|Original|hCoV-19^^England|Human|Lighthouse Lab in Glasgow|Wellcome Sanger Institute for the COVID-19 Genomics UK (COG-UK) consortium|Davies|United Kingdom

>Spike|hCoV-19/England/NORW-F7CEA/2020|2020-11-13|EPI\_ISL\_650454|Original|hCoV-19^^England|Human|Quadram Institute Bioscience|COVID-19 Genomics UK (COG-UK) Consortium|Alikhan|United Kingdom

>Spike|hCoV-19/Singapore/1096/2020|2020-10-14|EPI\_ISL\_596486|Original|hCoV-19^^Singapore|Human|National Public Health Laboratory|National Public Health Laboratory|Mak|Singapore

>Spike|hCoV-19/Australia/VIC3635/2020|2020-07-08|EPI\_ISL\_520375|Original|hCoV-19^^Victoria|Human|Victorian Infectious Diseases Reference Laboratory (VIDRL)|VIDRL and MDU-PHL|Schultz|Australia

>Spike|hCoV-19/Thailand/Samut Songkhram-0942/2020|2020-03-00|EPI\_ISL\_489991|Vero P2|hCoV-19^^Samut Songkhram|Human|National Institute of Health|National Institute of Health|Phuygun|Thailand

>Spike|hCoV-19/England/NORT-2847D0/2020|2020-03-24|EPI\_ISL\_478569|Original|hCoV-19^^England|Human|Northumbria University / South Tees Hospitals NHS Foundation Trust / North Cumbria Integrated Care NHS Foundation Trust / North Tees and Hartlepool NHS Foundation Trust / Newcastle Hospitals NHS Foundation Trust|COVID-19 Genomics UK (COG-UK) Consortium|Bashton|United Kingdom

>Spike|hCoV-19/Northern Ireland/NIRE-2343CC/2020|2020-10-15|EPI\_ISL\_680380|Original|hCoV-19^^Northern Ireland|Human|Regional Virus Laboratory|COVID-19 Genomics UK (COG-UK) Consortium|Fairley|United Kingdom

>Spike|hCoV-19/England/20100077906/2020|2020-03-01|EPI\_ISL\_415139|Original|hCoV-19^^England|Human|Respiratory Virus Unit|Respiratory Virus Unit|Platt|United Kingdom

>Spike|hCoV-19/USA/TX-HMH-7300/2020|2020-06-29|EPI\_ISL\_546657|Original|hCoV-19^^Texas|Human|Houston Methodist Hospital|Houston Methodist Hospital|Long|USA

>Spike|hCoV-19/USA/AZ-TG395929/2020|2020-06-08|EPI\_ISL\_694765|Original|hCoV-19^^Arizona|Human|AZ SPHL|TGen North|French|USA

>Spike|hCoV-19/Wales/PHWC-16CAF4/2020|2020-09-24|EPI\_ISL\_574135|Original|hCoV-19^^Wales|Human|Wales Specialist Virology Centre Sequencing lab|COVID-19 Genomics UK (COG-UK) Consortium|Moore|United Kingdom

>Spike|hCoV-19/United Arab Emirates/0598/2020|2020-05-15|EPI\_ISL\_698756|Original|hCoV-19^^Abu Dhabi|Human|Group 42 (G42) Healthcare|G42 Healthcare|Ogrodzki|United Arab Emirates

>Spike|hCoV-19/Brazil/SP-L39-CD1027/2020|2020-05-12|EPI\_ISL\_722007|Original|hCoV-19^^S\u00e3o Paulo|Human|Hospital das Cl\u00ednicas Universidade de S\u00e3o Paulo Medical School|Laborat\u00f3rio de Parasitologia M\u00e9dica - Instituto de Medicina Tropical - Universidade de S\u00e3o Paulo|de Jesus|Brazil

>Spike|hCoV-19/Scotland/CVR804/2020|2020-03-27|EPI\_ISL\_433345|Original|hCoV-19^^Scotland|Human|West of Scotland Specialist Virology Centre|COVID-19 Genomics UK (COG-UK) Consortium|Robertson|United Kingdom

>Spike|hCoV-19/USA/MD-MDH-0130/2020|2020-07-08|EPI\_ISL\_524895|Original|hCoV-19^^Maryland|Human|MD PHL|MD PHL|Keller|USA

>Spike|hCoV-19/England/LIVE-A5D15/2020|2020-03-17|EPI\_ISL\_499574|Original|hCoV-19^^England|Human|Liverpool Clinical Laboratories|COVID-19 Genomics UK (COG-UK) Consortium|Haldenby|United Kingdom

>Spike|hCoV-19/India/TG-NGC-CDFD-15/2020|2020-05-27|EPI\_ISL\_466853|Original|hCoV-19^^Telangana|Human|National Genomics Core-Center for DNA Fingerprinting and Diagnostics|National Genomics Core-Center for DNA Fingerprinting and Diagnostics (NGC-CDFD)- DBT's PAN-INDIA-1000 Genome consortium|Vashisht|India

>Spike|hCoV-19/Denmark/DCGC-20373/2020|2020-12-21|EPI\_ISL\_758707|Original|hCoV-19^^Sjaelland|Human|Department of Virus and Microbiological Special Diagnostics|Albertsen Lab|Michaelsen|Denmark

>Spike|hCoV-19/England/MILK-ABB082/2020|2020-10-21|EPI\_ISL\_623231|Original|hCoV-19^^England|Human|Lighthouse Lab in Milton Keynes|Wellcome Sanger Institute for the COVID-19 Genomics UK (COG-UK) consortium|Davies|United Kingdom

>Spike|hCoV-19/Denmark/DCGC-17068/2020|2020-12-14|EPI\_ISL\_750220|Original|hCoV-19^^Syddanmark|Human|Department of Virus and Microbiological Special Diagnostics|Albertsen Lab|Michaelsen|Denmark

>Spike|hCoV-19/England/CAMC-B51515/2020|2020-11-08|EPI\_ISL\_657801|Original|hCoV-19^^England|Human|Lighthouse Lab in Cambridge|Wellcome Sanger Institute for the COVID-19 Genomics UK (COG-UK) Consortium|Davies|United Kingdom

>Spike|hCoV-19/England/MILK-AB797C/2020|2020-10-21|EPI\_ISL\_623734|Original|hCoV-19^^England|Human|Lighthouse Lab in Milton Keynes|Wellcome Sanger Institute for the COVID-19 Genomics UK (COG-UK) consortium|Davies|United Kingdom

>Spike|hCoV-19/England/MILK-B044BA/2020|2020-10-21|EPI\_ISL\_651016|Original|hCoV-19^^England|Human|Department of Pathology|COVID-19 Genomics UK (COG-UK) Consortium|Goodfellow|United Kingdom

>Spike|hCoV-19/USA/VA-DCLS-0347/2020|2020-05-08|EPI\_ISL\_463114|Original|hCoV-19^^Virginia|Human|Virginia DCLS|Virginia DCLS|St. Jacques|USA

>Spike|hCoV-19/USA/TX-DSHS-0077/2020|2020-05-09|EPI\_ISL\_522362|Original|hCoV-19^^Texas|Human|Texas Department of State Health Services|Texas Department of State Health Services|Rahman|USA

>Spike|hCoV-19/England/QEUA-A9F7BC/2020|2020-10-19|EPI\_ISL\_665986|Original|hCoV-19^^England|Human|Northumbria University / South Tees Hospitals NHS Foundation Trust / North Cumbria Integrated Care NHS Foundation Trust / North Tees and Hartlepool NHS Foundation Trust / Newcastle Hospitals NHS Foundation Trust|COVID-19 Genomics UK (COG-UK) Consortium|Bashton|United Kingdom

>Spike|hCoV-19/USA/LA-GBCL-26674727/2020|2020-04-10|EPI\_ISL\_485253|Original|hCoV-19^^Louisiana|Human|River Road Testing Lab|Ginkgo Bioworks Clinical Laboratory|Smith|USA

>Spike|hCoV-19/USA/UT-UPHL-2012551252/2020|2020-08-14|EPI\_ISL\_746171|Original|hCoV-19^^Utah|Human|Ginkgo Bioworks Clinical Laboratory|Utah Public Health Laboratory|Young|USA

>Spike|hCoV-19/Scotland/CVR4524/2020|2020-09-22|EPI\_ISL\_585384|Original|hCoV-19^^Scotland|Human|Lighthouse Lab in Glasgow / MRC-University of Glasgow Centre for Virus Research|COVID-19 Genomics UK (COG-UK) Consortium|Robertson|United Kingdom

>Spike|hCoV-19/Denmark/DCGC-17312/2020|2020-12-14|EPI\_ISL\_750897|Original|hCoV-19^^Midtjylland|Human|Department of Virus and Microbiological Special Diagnostics|Albertsen Lab|Michaelsen|Denmark

>Spike|hCoV-19/USA/WA-UW-22436/2020|2020-08-06|EPI\_ISL\_570687|Original|hCoV-19^^Washington|Human|UW Virology Lab|UW Virology Lab|Roychoudhury|USA

>Spike|hCoV-19/Hungary/UD-57884/2020|2020-09-02|EPI\_ISL\_671434|Original|hCoV-19^^Hajd\|u00fa-Bihar county|Human|University of Debrecen|National Laboratory of Virology|Kemenesi|Hungary

>Spike|hCoV-19/USA/TX-QDX-191/2020|2020-04-29|EPI\_ISL\_494546|Original|hCoV-19^^Texas|Human|Quest Diagnostics|Quest Diagnostics|Kagan|USA

>Spike|hCoV-19/Sweden/20-51598/2020|2020-05-19|EPI\_ISL\_469067|Original|hCoV-19^^Stockholm|Human|Kungsholmsdoktorn|The Public Health Agency of Sweden|Svartstr\|u00f6m|Sweden

>Spike|hCoV-19/USA/NY-Wadsworth-247525-01/2020|2020-10-17|EPI\_ISL\_734356|Original|hCoV-19^^New York|Human|Wadsworth Center|Wadsworth Center|Lasek-Nesselquist|USA

>Spike|hCoV-19/Brazil/SP-170/2020|2020-03-31|EPI\_ISL\_523969|Original|hCoV-19^^S\|u00e3o Paulo|Human|Hospital Sao Paulo de Ensino da Unifesp|Instituto Adolfo Lutz|Sacchi|Brazil

>Spike|hCoV-19/USA/NY-Wadsworth-285002-01/2020|2020-12-08|EPI\_ISL\_754469|Original|hCoV-19^^New York|Human|Wadsworth Center|Wadsworth Center|Lasek-Nesselquist|USA

>Spike|hCoV-19/Spain/MD-IBV-99012344/2020|2020-11-20|EPI\_ISL\_779993|Original|hCoV-19^^Madrid|Human|Hospital General Universitario Gregorio Mara\|u00f1\|u00f3n|SeqCOVID-SPAIN consortium/IBV (CSIC)|Comas|Spain

>Spike|hCoV-19/mink/Netherlands/NB-EMC-25-11/2020|2020-07-26|EPI\_ISL\_523083|Original|hCoV-19^^Noord Brabant|Neovison vison|Dutch COVID-19 response team|Erasmus Medical Center|Oude Munnink|Netherlands

>Spike|hCoV-19/England/SHEF-C0F3C/2020|2020-06-14|EPI\_ISL\_479196|Original|hCoV-19^^England|Human|Virology Department|COVID-19 Genomics UK (COG-UK) Consortium|de Silva|United Kingdom

>Spike|hCoV-19/India/GJ-GBRC46/2020|2020-04-29|EPI\_ISL\_444477|Original|hCoV-19^^Gujarat|Human|B.J. Medical College and Civil hospital|Gujarat Biotechnology Research Centre|Joshi|India

>Spike|hCoV-19/USA/PA-MGEL77/2020|2020-03-28|EPI\_ISL\_454363|Original|hCoV-19^^Pennsylvania|Human|UPMC Clinical Microbiology Laboratory|Microbial Genome Sequencing Center|Mustapha|USA

>Spike|hCoV-19/Hong Kong/HKPU32\_0402/2020|2020-02-09|EPI\_ISL\_417193|Original|hCoV-19^^Hong Kong|Human|Department of Clinical Pathology|Department of Health Technology and Informatics|Leung|China

>Spike|hCoV-19/England/QEUEH-B7F8CD/2020|2020-11-14|EPI\_ISL\_674499|Original|hCoV-19^^England|Human|Lighthouse Lab in Glasgow|Wellcome Sanger Institute for the COVID-19 Genomics UK (COG-UK) Consortium|Davies|United Kingdom

>Spike|hCoV-19/USA/TX-DSHS-1272/2020|2020-03-31|EPI\_ISL\_648224|Original|hCoV-19^^Texas|Human|Texas Department of State Health Services|Texas Department of State Health Services|Rahman|USA

>Spike|hCoV-19/USA/WA-UW-21562/2020|2020-08-03|EPI\_ISL\_570988|Original|hCoV-19^^Washington|Human|UW Virology Lab|UW Virology Lab|Roychoudhury|USA

>Spike|hCoV-19/England/SHEF-10B2802/2020|2020-04-27|EPI\_ISL\_537283|Original|hCoV-19^^England|Human|Virology Department|Wellcome Sanger Institute for the COVID-19 Genomics UK (COG-UK) consortium|Davies|United Kingdom

>Spike|hCoV-19/England/QEUEH-C14A1E/2020|2020-12-06|EPI\_ISL\_709557|Original|hCoV-19^^England|Human|Lighthouse Lab in Glasgow|Wellcome Sanger Institute for the COVID-19 Genomics UK (COG-UK) Consortium|Davies|United Kingdom

>Spike|hCoV-19/Australia/NSW1389/2020|2020-12-30|EPI\_ISL\_779399|Original|hCoV-19^^New South Wales|Human|South Eastern Area Laboratory Services (SEALS)|NSW Health Pathology - Institute of Clinical Pathology and Medical Research; Westmead Hospital; University of Sydney|Gall|Australia

>Spike|hCoV-19/England/ALDP-9DA464/2020|2020-09-18|EPI\_ISL\_576875|Original|hCoV-19^^England|Human|Oxford Viromics|COVID-19 Genomics UK (COG-UK) Consortium|Golubchik|United Kingdom

>Spike|hCoV-19/USA/UT-UPHL-05430/2020|2020-06-02|EPI\_ISL\_560879|Original|hCoV-19^^Utah|Human|Utah Public Health Laboratory|Utah Public Health Laboratory|Young|USA

>Spike|hCoV-19/Japan/PG-0951/2020|2020-04-00|EPI\_ISL\_684561|Original|hCoV-19^^Japan|Human|Pathogen Genomics Center|Pathogen Genomics Center|Sekizuka|Japan

>Spike|hCoV-19/USA/TX-HMH-MCoV-11322/2020|2020-09-03|EPI\_ISL\_789764|Original|hCoV-19^^Texas|Human|Houston Methodist Hospital|Houston Methodist Hospital|Long|USA

>Spike|hCoV-19/England/ALDP-A6E491/2020|2020-10-15|EPI\_ISL\_607751|Original|hCoV-19^^England|Human|Lighthouse Lab in Alderley Park|Wellcome Sanger Institute for the COVID-19 Genomics UK (COG-UK) consortium|Davies|United Kingdom

>Spike|hCoV-19/Wales/PHWC-4A67B8/2020|2020-12-17|EPI\_ISL\_763410|Original|hCoV-19^^Wales|Human|Wales Specialist Virology Centre Sequencing lab|COVID-19 Genomics UK (COG-UK) Consortium|Moore|United Kingdom

>Spike|hCoV-19/France/GES-8783/2020|2020-03-22|EPI\_ISL\_560625|Original|hCoV-19^^Grand-Est|Human|Hospital|National Reference Center for Viruses of Respiratory Infections|Enouf|France

>Spike|hCoV-19/USA/UT-04127/2020|2020-05-13|EPI\_ISL\_487251|Original|hCoV-19^^Utah|Human|Utah Public Health Laboratory|Utah Public Health Laboratory|Butz|USA

>Spike|hCoV-19/South Africa/KRISP-K000612/2020|2020-07-01|EPI\_ISL\_509264|Original|hCoV-19^^KwaZulu-Natal|Human|NHLs-IALCH|KRISP|de Oliveira|South Africa

>Spike|hCoV-19/Netherlands/NB-EMC-454/2020|2020-07-14|EPI\_ISL\_722803|Original|hCoV-19^^Noord Brabant|Human|Dutch COVID-19 response team|Erasmus Medical Center|Oude Munnink|Netherlands

>Spike|hCoV-19/Hong Kong/VB20209003/2020|2020-10-06|EPI\_ISL\_760045|Original|hCoV-19^^Hong Kong|Human|Hong Kong Department of Health|School of Public Health|Chu|China

>Spike|hCoV-19/USA/WI-UW-1216/2020|2020-08-19|EPI\_ISL\_536589|Original|hCoV-19^^Wisconsin|Human|University of Wisconsin-Madison AIDS Vaccine Research Laboratories|University of Wisconsin-Madison AIDS Vaccine Research Laboratories|Baczenas|USA

>Spike|hCoV-19/Russia/SVE-RII-MH1441S/2020|2020-09-06|EPI\_ISL\_596276|Original|hCoV-19^^Sverdlovsk|Human|HELIX LCC|WHO National Influenza Centre Russian Federation|Komissarov|Russia

>Spike|hCoV-19/England/LOND-12F0D25/2020|2020-11-28|EPI\_ISL\_679618|Original|hCoV-19^^England|Human|University College London|COVID-19 Genomics UK (COG-UK) Consortium|Roy|United Kingdom

>Spike|hCoV-19/England/MILK-A47A14/2020|2020-10-06|EPI\_ISL\_598314|Original|hCoV-19^^England|Human|Lighthouse Lab in Milton Keynes|Wellcome Sanger Institute for the COVID-19 Genomics UK (COG-UK) consortium|Davies|United Kingdom

>Spike|hCoV-19/France/CVL-8289/2020|2020-03-28|EPI\_ISL\_560578|Original|hCoV-19^^Centre-Val de Loire|Human|h\u00f4pital|National Reference Center for Viruses of Respiratory Infections|Enouf|France

>Spike|hCoV-19/Malaysia/IMR-WI200/2020|2020-10-08|EPI\_ISL\_718311|VerohCoV-19^^Malaysia|Human|Institute for Medical Research|Institute for Medical Research|Suppiah|Malaysia

>Spike|hCoV-19/Luxembourg/LNS5751796/2020|2020-11-26|EPI\_ISL\_744293|Original|hCoV-19^^Luxembourg|Human|Laboratoire national de sant\u00e9|Laboratoire national de sant\u00e9|Wienecke-Baldacchino|Luxembourg

>Spike|hCoV-19/Saudi Arabia/KAUST-Makkah179/2020|2020-04-06|EPI\_ISL\_437702|Original|hCoV-19^^Makkah|Human|Pathogen Genomics Lab King Abdullah University of Science and Technology(KAUST)|Pathogen Genomics Lab King Abdullah University of Science and Technology(KAUST)|Mohamed Ghazzali|Saudi Arabia

>Spike|hCoV-19/USA/TX-DSHS-0946/2020|2020-07-06|EPI\_ISL\_602244|Original|hCoV-19^^Texas|Human|Texas Department of State Health Services|Texas Department of State Health Services|Rahman|USA

>Spike|hCoV-19/Netherlands/NH-RIVM-20009/2020|2020-11-21|EPI\_ISL\_723208|Original|hCoV-19^^Noord-Holland|Human|Dutch COVID-19 response team|National Institute for Public Health and the Environment (RIVM)|Meijer|Netherlands

>Spike|hCoV-19/England/QEUEH-C34025/2020|2020-12-11|EPI\_ISL\_734158|Original|hCoV-19^^England|Human|Lighthouse Lab in Glasgow|Wellcome Sanger Institute for the COVID-19 Genomics UK (COG-UK) Consortium|Davies|United Kingdom

>Spike|hCoV-19/USA/NY-NYUMC562/2020|2020-03-30|EPI\_ISL\_444679|Original|hCoV-19^^New York|Human|NYU Langone Health|Departments of Pathology and Medicine|Maurano|USA

>Spike|hCoV-19/Denmark/DCGC-22282/2020|2020-12-14|EPI\_ISL\_758654|Original|hCoV-19^^Hovedstaden|Human|Department of Virus and Microbiological Special Diagnostics|Albertsen Lab|Michaelsen|Denmark

>Spike|hCoV-19/Luxembourg/LNS9388233/2020|2020-10-16|EPI\_ISL\_744899|Original|hCoV-19^^Luxembourg|Human|Laboratoire national de sant\u00e9|Laboratoire national de sant\u00e9|Wienecke-Baldacchino|Luxembourg

>Spike|hCoV-19/USA/IL-QDX-686/2020|2020-03-18|EPI\_ISL\_571435|Original|hCoV-19^^Illinois|Human|Quest Diagnostics|Quest Diagnostics|Kagan|USA

>Spike|hCoV-19/England/CAMC-C71F89/2020|2020-12-15|EPI\_ISL\_769066|Original|hCoV-19^^England|Human|Lighthouse Lab in Cambridge|Wellcome Sanger Institute for the COVID-19 Genomics UK (COG-UK) Consortium|Davies|United Kingdom

>Spike|hCoV-19/Switzerland/BL-ETHZ-240045/2020|2020-08-12|EPI\_ISL\_523887|Original|hCoV-19^^Basel-Landschaft|Human|Viollier AG|Department of Biosystems Science and Engineering|Nadeau|Switzerland

>Spike|hCoV-19/England/QEUEH-B9E50D/2020|2020-11-18|EPI\_ISL\_721004|Original|hCoV-19^^England|Human|Lighthouse Lab in Glasgow|Wellcome Sanger Institute for the COVID-19 Genomics UK (COG-UK) Consortium|Davies|United Kingdom

>Spike|hCoV-19/Australia/VIC1697/2020|2020-05-17|EPI\_ISL\_456584|Original|hCoV-19^^Victoria|Human|Victorian Infectious Diseases Reference Laboratory (VIDRL)|Microbiological Diagnostic Unit Public Health Laboratory and Victorian Infectious Diseases Reference Laboratory|Schultz|Australia

>Spike|hCoV-19/USA/NY-Wadsworth-249841-01/2020|2020-10-20|EPI\_ISL\_734377|Original|hCoV-19^^New York|Human|Wadsworth Center|Wadsworth Center|Lasek-Nesselquist|USA

>Spike|hCoV-19/Canada/ON-A11/2020|2020-11-24|EPI\_ISL\_755714|Original|hCoV-19^^Ontario|Human|Toronto Invasive Bacterial Diseases Network|McMaster University|McArthur|Canada

>Spike|hCoV-19/Wales/PHWC-49BBF6/2020|2020-12-06|EPI\_ISL\_742444|Original|hCoV-19^^Wales|Human|Wales Specialist Virology Centre Sequencing lab|COVID-19 Genomics UK (COG-UK) Consortium|Moore|United Kingdom

>Spike|hCoV-19/Denmark/DCGC-8951/2020|2020-10-26|EPI\_ISL\_626200|Original|hCoV-19^^Hovedstaden|Human|Department of Virus and Microbiological Special Diagnostics|Albertsen lab|Michaelsen|Denmark

>Spike|hCoV-19/Ireland/MN-NVRL-20IRL50683/2020|2020-09-29|EPI\_ISL\_639898|Original|hCoV-19^^Monaghan|Human|National Virus Reference Laboratory|National Virus Reference Laboratory|Gonzalez|Ireland

>Spike|hCoV-19/England/ALDP-AC5DAC/2020|2020-10-14|EPI\_ISL\_631150|Original|hCoV-19^^England|Human|Lighthouse Lab in Alderley Park|Wellcome Sanger Institute for the COVID-19 Genomics UK (COG-UK) consortium|Davies|United Kingdom

>Spike|hCoV-19/Japan/PG-7808/2020|2020-07-00|EPI\_ISL\_686910|Original|hCoV-19^^Japan|Human|Pathogen Genomics Center|Pathogen Genomics Center|Sekizuka|Japan

>Spike|hCoV-19/Denmark/DCGC-20536/2020|2020-12-21|EPI\_ISL\_758894|Original|hCoV-19^^Syddanmark|Human|Department of Virus and Microbiological Special Diagnostics|Albertsen Lab|Michaelsen|Denmark

>Spike|hCoV-19/England/NOTT-10E335/2020|2020-03-21|EPI\_ISL\_425530|Original|hCoV-19^^England|Human|Queens Medical Centre|COVID-19 Genomics UK (COG-UK) Consortium|Loose|United Kingdom

>Spike|hCoV-19/Wales/PHWC-4802A4/2020|2020-10-08|EPI\_ISL\_612870|Original|hCoV-19^^Wales|Human|Wales Specialist Virology Centre Sequencing lab|COVID-19 Genomics UK (COG-UK) Consortium|Moore|United Kingdom

>Spike|hCoV-19/England/QEUEH-C34429/2020|2020-12-10|EPI\_ISL\_734097|Original|hCoV-19^^England|Human|Lighthouse Lab in Glasgow|Wellcome Sanger Institute for the COVID-19 Genomics UK (COG-UK) Consortium|Davies|United Kingdom

>Spike|hCoV-19/Denmark/DCGC-9485/2020|2020-11-09|EPI\_ISL\_668995|Original|hCoV-19^^Midtjylland|Human|Department of Virus and Microbiological Special Diagnostics|Albertsen Lab|Michaelsen|Denmark

>Spike|hCoV-19/USA/WA-S132/2020|2020-03-13|EPI\_ISL\_430169|Original|hCoV-19^^Washington|Human|Washington State Department of Health|Seattle Flu Study|Bedford|USA

>Spike|hCoV-19/Australia/VIC2155/2020|2020-06-16|EPI\_ISL\_480767|Original|hCoV-19^^Victoria|Human|Microbiological Diagnostic Unit - Public Health Laboratory (MDU-PHL)|MDU-PHL|Schultz|Australia

>Spike|hCoV-19/Denmark/DCGC-10000/2020|2020-11-09|EPI\_ISL\_669323|Original|hCoV-19^^Hovedstaden|Human|Department of Virus and Microbiological Special Diagnostics|Albertsen Lab|Michaelsen|Denmark

>Spike|hCoV-19/USA/TX-HMH-2958/2020|2020-06-08|EPI\_ISL\_543892|Original|hCoV-19^^Texas|Human|Houston Methodist Hospital|Houston Methodist Hospital|Long|USA

>Spike|hCoV-19/USA/UT-06242/2020|2020-04-22|EPI\_ISL\_493123|Original|hCoV-19^^Utah|Human|Utah Public Health Laboratory|Utah Public Health Laboratory|Butz|USA

>Spike|hCoV-19/USA/TX-HMH-6774/2020|2020-06-25|EPI\_ISL\_546235|Original|hCoV-19^^Texas|Human|Houston Methodist Hospital|Houston Methodist Hospital|Long|USA

>Spike|hCoV-19/England/MILK-A4764D/2020|2020-10-05|EPI\_ISL\_598266|Original|hCoV-19^^England|Human|Lighthouse Lab in Milton Keynes|Wellcome Sanger Institute for the COVID-19 Genomics UK (COG-UK) consortium|Davies|United Kingdom

>Spike|hCoV-19/England/OXON-AE972/2020|2020-00-00|EPI\_ISL\_448738|Original|hCoV-19^^England|Human|Oxford Viromics|COVID-19 Genomics UK (COG-UK) Consortium|Golubchik|United Kingdom

>Spike|hCoV-19/New Zealand/20VR3008/2020|2020-00-00|EPI\_ISL\_579380|Original|hCoV-19^^Combined Wellington|Human|Wellington SCL (WN)|Institute of Environmental Science and Research (ESR)|Wang|New Zealand

>Spike|hCoV-19/USA/CA-CZB-14634/2020|2020-11-16|EPI\_ISL\_739345|Original|hCoV-19^^California|Human|Orange County Public Health Lab|Chan-Zuckerberg Biohub|Kamm|USA

>Spike|hCoV-19/India/TG-NGC-CDFD-34/2020|2020-05-30|EPI\_ISL\_466872|Original|hCoV-19^^Telangana|Human|National Genomics Core-Center for DNA Fingerprinting and Diagnostics|National Genomics Core-Center for DNA Fingerprinting and Diagnostics (NGC-CDFD)- DBT's PAN-INDIA-1000 Genome consortium|Vashisht|India

>Spike|hCoV-19/England/CAMB-74D1F/2020|2020-03-16|EPI\_ISL\_425368|Original|hCoV-19^^England|Human|Department of Pathology|COVID-19 Genomics UK (COG-UK) Consortium|Meredith|United Kingdom

>Spike|hCoV-19/USA/OR-OHSU-2535/2020|2020-08-19|EPI\_ISL\_667241|Original|hCoV-19^^Oregon|Human|OHSU Lab Services Molecular Microbiology Lab|Oregon SARS-CoV-2 Genome Sequencing Center|O'Roak|USA

>Spike|hCoV-19/USA/TX-HMH-MCoV-15894/2020|2020-07-10|EPI\_ISL\_785578|Original|hCoV-19^^Texas|Human|Houston Methodist Hospital|Houston Methodist Hospital|Long|USA

>Spike|hCoV-19/England/QEUH-B68B37/2020|2020-11-11|EPI\_ISL\_654970|Original|hCoV-19^^England|Human|Lighthouse Lab in Glasgow|Wellcome Sanger Institute for the COVID-19 Genomics UK (COG-UK) Consortium|Davies|United Kingdom

>Spike|hCoV-19/Scotland/EDB1568/2020|2020-04-12|EPI\_ISL\_433084|Original|hCoV-19^^Scotland|Human|Virology Department|COVID-19 Genomics UK (COG-UK) Consortium|Williams|United Kingdom

>Spike|hCoV-19/USA/MI-MDHHS-SC20984/2020|2020-06-10|EPI\_ISL\_507771|Original|hCoV-19^^Michigan|Human|Michigan Department of Health and Human Services|Michigan Department of Health and Human Services|Blankenship|USA

>Spike|hCoV-19/Wales/PHWC-165BDA/2020|2020-06-21|EPI\_ISL\_490778|Original|hCoV-19^^Wales|Human|Wales Specialist Virology Centre Sequencing lab|COVID-19 Genomics UK (COG-UK) Consortium|Moore|United Kingdom

>Spike|hCoV-19/Denmark/DCGC-19155/2020|2020-12-07|EPI\_ISL\_748784|Original|hCoV-19^^Syddanmark|Human|Department of Virus and Microbiological Special Diagnostics|Albertsen Lab|Michaelsen|Denmark

>Spike|hCoV-19/USA/CA-ALSR-0980-SAN/2020|2020-03-31|EPI\_ISL\_483439|Original|hCoV-19^^California|Human|UC San Diego Center for Advanced Laboratory Medicine|Andersen lab at Scripps Research|Gangavarapu|USA



>Spike|hCoV-19/Wales/PHWC-292CF/2020|2020-04-02|EPI\_ISL\_445504|Original|hCoV-19^^Wales|Human|Wales Specialist Virology Centre|Public Health Wales Microbiology Cardiff|Moore|United Kingdom

>Spike|hCoV-19/SaudiArabia/KAUST-MADINAH333/2020|2020-04-24|EPI\_ISL\_513127|Original|hCoV-19^^Madinah|Human|Pathogen Genomics Lab King Abdullah University of Science and Technology(KAUST)|Pathogen Genomics Lab King Abdullah University of Science and Technology(KAUST)|Mohamed Ghazzali|Saudi Arabia

>Spike|hCoV-19/Japan/PG-6731/2020|2020-08-00|EPI\_ISL\_687842|Original|hCoV-19^^Japan|Human|Pathogen Genomics Center|Pathogen Genomics Center|Sekizuka|Japan

>Spike|hCoV-19/USA/WA-OHSU-0366/2020|2020-05-29|EPI\_ISL\_509118|Original|hCoV-19^^Washington|Human|OHSU Lab Services Molecular Microbiology Lab|Oregon SARS-CoV-2 Genome Sequencing Center|O'Roak|USA

>Spike|hCoV-19/USA/WI-GMF-07392/2020|2020-06-22|EPI\_ISL\_489918|Original|hCoV-19^^Wisconsin|Human|Gundersen Molecular Diagnostics Laboratory|Kabara Cancer Research Institute|Kenny|USA

>Spike|hCoV-19/Australia/VIC16853/2020|2020-08-16|EPI\_ISL\_663606|Original|hCoV-19^^Victoria|Human|Microbiological Diagnostic Unit - Public Health Laboratory (MDU-PHL)|MDU-PHL|Schultz|Australia

>Spike|hCoV-19/USA/MA-MGH-03043/2020|2020-08-01|EPI\_ISL\_765691|Original|hCoV-19^^Massachusetts|Human|Massachusetts General Hospital|Infectious Disease Program|Park|USA

>Spike|hCoV-19/Wales/PHWC-314EC/2020|2020-04-12|EPI\_ISL\_446454|Original|hCoV-19^^Wales|Human|Wales Specialist Virology Centre|Public Health Wales Microbiology Cardiff|Moore|United Kingdom

>Spike|hCoV-19/Czech Republic/NRL\_10533/2020|2020-10-29|EPI\_ISL\_737029|Original|hCoV-19^^Prague|Human|The National Institute of Public Health|State Veterinary Institute Prague|Nagy|Czech Republic

>Spike|hCoV-19/England/CAMB-82947/2020|2020-04-21|EPI\_ISL\_438640|Original|hCoV-19^^England|Human|Department of Pathology|COVID-19 Genomics UK (COG-UK) Consortium|Meredith|United Kingdom

>Spike|hCoV-19/Japan/PG-8149/2020|2020-09-00|EPI\_ISL\_687248|Original|hCoV-19^^Japan|Human|Pathogen Genomics Center|Pathogen Genomics Center|Sekizuka|Japan

>Spike|hCoV-19/England/ALDP-9E582E/2020|2020-09-24|EPI\_ISL\_589278|Original|hCoV-19^^England|Human|Lighthouse Lab in Alderley Park|Wellcome Sanger Institute for the COVID-19 Genomics UK (COG-UK) consortium|Davies|United Kingdom

>Spike|hCoV-19/Japan/PG-1713/2020|2020-04-00|EPI\_ISL\_685319|Original|hCoV-19^^Japan|Human|Pathogen Genomics Center|Pathogen Genomics Center|Sekizuka|Japan

>Spike|hCoV-19/Australia/VIC4491/2020|2020-07-16|EPI\_ISL\_518902|Original|hCoV-19^^Victoria|Human|Microbiological Diagnostic Unit - Public Health Laboratory (MDU-PHL)|MDU-PHL|Schultz|Australia

>Spike|hCoV-19/India/WB-NCDC-02252/2020|2020-03-28|EPI\_ISL\_435097|Original|hCoV-19^^West Bengal|Human|National Centre for Disease control (NCDC)|NCDC/CSIR-IGIB|Faruq|India

>Spike|hCoV-19/England/20162005104/2020|2020-04-13|EPI\_ISL\_466396|Original|hCoV-19^^England|Human|Respiratory Virus Unit|Respiratory Virus Unit|Platt|United Kingdom

>Spike|hCoV-19/Denmark/DCGC-5014/2020|2020-09-14|EPI\_ISL\_621818|Original|hCoV-19^^Hovedstaden|Human|Department of Virus and Microbiological Special Diagnostics|Albertsen lab|Michaelsen|Denmark

>Spike|hCoV-19/Denmark/DCGC-21320/2020|2020-12-21|EPI\_ISL\_759674|Original|hCoV-19^^Syddanmark|Human|Department of Virus and Microbiological Special Diagnostics|Albertsen Lab|Michaelsen|Denmark

>Spike|hCoV-19/Belgium/ULG-10154/2020|2020-04-18|EPI\_ISL\_447150|Original|hCoV-19^^Liege|Human|Department of Clinical Microbiology|GIGA Medical Genomics|Durkin|Belgium

>Spike|hCoV-19/India/TG-CDFD-C2910/2020|2020-06-19|EPI\_ISL\_528586|Original|hCoV-19^^Telangana|Human|National Genomics Core-Center for DNA Fingerprinting and Diagnostics|National Genomics Core-Center for DNA Fingerprinting and Diagnostics (NGC-CDFD)- DBT's PAN-INDIA-1000 Genome consortium|Vashisht|India

>Spike|hCoV-19/Norway/4907/2020|2020-10-24|EPI\_ISL\_668429|Original|hCoV-19^^Nordland|Human|Nordland Hospital - Bodo|Norwegian Institute of Public Health|Kopperud Riis|Norway

>Spike|hCoV-19/England/201361041/2020|2020-03-26|EPI\_ISL\_421792|Original|hCoV-19^^England|Human|Respiratory Virus Unit|Respiratory Virus Unit|Platt|United Kingdom

>Spike|hCoV-19/USA/TX-HMH-MCoV-14710/2020|2020-10-12|EPI\_ISL\_787995|Original|hCoV-19^^Texas|Human|Houston Methodist Hospital|Houston Methodist Hospital|Long|USA

>Spike|hCoV-19/England/ALDP-A93FDE/2020|2020-10-19|EPI\_ISL\_611199|Original|hCoV-19^^England|Human|Lighthouse Lab in Alderley Park|Wellcome Sanger Institute for the COVID-19 Genomics UK (COG-UK) consortium|Davies|United Kingdom

>Spike|hCoV-19/USA/MN-QDX-1023/2020|2020-03-15|EPI\_ISL\_571749|Original|hCoV-19^^Minnesota|Human|Quest Diagnostics|Quest Diagnostics|Kagan|USA

>Spike|hCoV-19/Denmark/DCGC-21250/2020|2020-12-21|EPI\_ISL\_759091|Original|hCoV-19^^Hovedstaden|Human|Department of Virus and Microbiological Special Diagnostics|Albertsen Lab|Michaelsen|Denmark

>Spike|hCoV-19/Wales/PHWC-2672D/2020|2020-03-27|EPI\_ISL\_422027|Original|hCoV-19^^Wales|Human|Wales Specialist Virology Centre|Public Health Wales Microbiology Cardiff|Moore|United Kingdom

>Spike|hCoV-19/England/BRIS-1238B3/2020|2020-04-06|EPI\_ISL\_442718|Original|hCoV-19^^England|Human|PHE South West Regional Laboratory|Wellcome Sanger Institute for the COVID-19 Genomics UK (COG-UK) consortium|Amato|United Kingdom

>Spike|hCoV-19/Wales/PHWC-164740/2020|2020-05-25|EPI\_ISL\_479304|Original|hCoV-19^^Wales|Human|Wales Specialist Virology Centre Sequencing lab|COVID-19 Genomics UK (COG-UK) Consortium|Moore|United Kingdom

>Spike|hCoV-19/England/CAMC-C477FD/2020|2020-12-10|EPI\_ISL\_718688|Original|hCoV-19^^England|Human|Lighthouse Lab in Cambridge|Wellcome Sanger Institute for the COVID-19 Genomics UK (COG-UK) Consortium|Davies|United Kingdom

>Spike|hCoV-19/Scotland/CVR2639/2020|2020-04-17|EPI\_ISL\_484625|Original|hCoV-19^^Scotland|Human|West of Scotland Specialist Virology Centre|COVID-19 Genomics UK (COG-UK) Consortium|Robertson|United Kingdom

>Spike|hCoV-19/England/MILK-BB1425/2020|2020-11-18|EPI\_ISL\_720024|Original|hCoV-19^^England|Human|Lighthouse Lab in Milton Keynes|Wellcome Sanger Institute for the COVID-19 Genomics UK (COG-UK) Consortium|Davies|United Kingdom

>Spike|hCoV-19/Australia/VIC11106/2020|2020-08-12|EPI\_ISL\_563251|Original|hCoV-19^^Victoria|Human|Microbiological Diagnostic Unit - Public Health Laboratory (MDU-PHL)|MDU-PHL|Schultz|Australia

>Spike|hCoV-19/Spain/AR-IBV-2430/2020|2020-03-28|EPI\_ISL\_468843|Original|hCoV-19^^Aragon|Human|Servicio de Microbiolog\u00eda|SeqCOVID-SPAIN consortium|IBV (CSIC)|Comas|Spain

>Spike|hCoV-19/Denmark/DCGC-10631/2020|2020-11-02|EPI\_ISL\_670104|Original|hCoV-19^^Hovedstaden|Human|Department of Virus and Microbiological Special Diagnostics|Albertsen Lab|Michaelsen|Denmark

>Spike|hCoV-19/Wales/ALDP-BCAB24/2020|2020-11-23|EPI\_ISL\_710751|Original|hCoV-19^^Wales|Human|Lighthouse Lab in Alderley Park|Wellcome Sanger Institute for the COVID-19 Genomics UK (COG-UK) Consortium|Davies|United Kingdom

>Spike|hCoV-19/England/QEUEH-BC3EC8/2020|2020-11-24|EPI\_ISL\_703410|Original|hCoV-19^^England|Human|Lighthouse Lab in Glasgow|Wellcome Sanger Institute for the COVID-19 Genomics UK (COG-UK) Consortium|Davies|United Kingdom

>Spike|hCoV-19/England/BRIS-124BB9/2020|2020-03-25|EPI\_ISL\_443950|Original|hCoV-19^^England|Human|PHE South West Regional Laboratory|Wellcome Sanger Institute for the COVID-19 Genomics UK (COG-UK) consortium|Amato|United Kingdom

>Spike|hCoV-19/Scotland/EDB6050/2020|2020-05-08|EPI\_ISL\_487981|Original|hCoV-19^^Scotland|Human|Virology Department|Wellcome Sanger Institute for the COVID-19 Genomics UK (COG-UK) consortium|Davies|United Kingdom

>Spike|hCoV-19/Malaysia/IMR-WI120/2020|2020-08-16|EPI\_ISL\_718276|Original|hCoV-19^^Malaysia|Human|Institute for Medical Research|Institute for Medical Research|Suppiah|Malaysia

>Spike|hCoV-19/England/BRIS-12609A/2020|2020-04-09|EPI\_ISL\_459085|Original|hCoV-19^^England|Human|PHE South West Regional Laboratory|Wellcome Sanger Institute for the COVID-19 Genomics UK (COG-UK) consortium|Davies|United Kingdom

>Spike|hCoV-19/USA/CO-CDPHE-2009170297/2020|2020-09-16|EPI\_ISL\_710254|Original|hCoV-19^^Colorado|Human|Colorado Department of Public Health and Environment|Colorado Department of Public Health and Environment|Bankers|USA

>Spike|hCoV-19/England/QEUEH-95F8D4/2020|2020-08-05|EPI\_ISL\_532442|Original|hCoV-19^^England|Human|Lighthouse Lab in Glasgow|Wellcome Sanger Institute for the COVID-19 Genomics UK (COG-UK) consortium|Davies|United Kingdom

>Spike|hCoV-19/New Zealand/20CV0285/2020|2020-03-25|EPI\_ISL\_579075|Original|hCoV-19^^Taranaki|Human|Canterbury Health Laboratories|Institute of Environmental Science and Research (ESR)|Wang|New Zealand

>Spike|hCoV-19/England/ALDP-AA45C9/2020|2020-10-21|EPI\_ISL\_624344|Original|hCoV-19^^England|Human|Lighthouse Lab in Alderley Park|Wellcome Sanger Institute for the COVID-19 Genomics UK (COG-UK) consortium|Davies|United Kingdom

>Spike|hCoV-19/Wales/PHWC-4924E5/2020|2020-11-17|EPI\_ISL\_706852|Original|hCoV-19^^Wales|Human|Originating lab|COVID-19 Genomics UK (COG-UK) Consortium|Moore|United Kingdom

>Spike|hCoV-19/Canada/BC\_20722019/2020|2020-03-00|EPI\_ISL\_462779|Original|hCoV-19^^British Columbia|Human|BCCDC Public Health Laboratory|BCCDC Public Health Laboratory|Harrigan|Canada

>Spike|hCoV-19/USA/TX-HMH-MCoV-15651/2020|2020-07-09|EPI\_ISL\_785335|Original|hCoV-19^^Texas|Human|Houston Methodist Hospital|Houston Methodist Hospital|Long|USA

>Spike|hCoV-19/Canada/ON-S868/2020|2020-04-00|EPI\_ISL\_591250|Original|hCoV-19^^Ontario|Human|Toronto Invasive Bacterial Diseases Network|McMaster University|McArthur|Canada

>Spike|hCoV-19/South Africa/KRISP-0137/2020|2020-05-14|EPI\_ISL\_467489|Original|hCoV-19^^KwaZulu-Natal|Human|Molecular Diagnostics Services (MDS)|KRISP|de Oliveira|South Africa

>Spike|hCoV-19/Denmark/DCGC-15923/2020|2020-11-23|EPI\_ISL\_714118|Original|hCoV-19^^Hovedstaden|Human|Department of Virus and Microbiological Special Diagnostics|Albertsen Lab|Michaelsen|Denmark

>Spike|hCoV-19/England/CAMB-84F16/2020|2020-03-12|EPI\_ISL\_440452|Original|hCoV-19^^England|Human|Department of Pathology|Wellcome Sanger Institute for the COVID-19 Genomics UK (COG-UK) consortium|Amato|United Kingdom

>Spike|hCoV-19/England/ALDP-94BBB4/2020|2020-06-14|EPI\_ISL\_555784|Original|hCoV-19^^England|Human|Lighthouse Lab in Alderley Park|Wellcome Sanger Institute for the COVID-19 Genomics UK (COG-UK) consortium|Davies|United Kingdom

>Spike|hCoV-19/England/ALDP-6E90BC/2020|2020-06-30|EPI\_ISL\_557668|Original|hCoV-19^^England|Human|Lighthouse Lab in Alderley Park|Wellcome Sanger Institute for the COVID-19 Genomics UK (COG-UK) consortium|Davies|United Kingdom

>Spike|hCoV-19/Denmark/DCGC-14408/2020|2020-11-30|EPI\_ISL\_711750|Original|hCoV-19^^Hovedstaden|Human|Department of Virus and Microbiological Special Diagnostics|Albertsen Lab|Michaelsen|Denmark

>Spike|hCoV-19/USA/MA-MGH-03506/2020|2020-11-24|EPI\_ISL\_765865|Original|hCoV-19^^Massachusetts|Human|Massachusetts General Hospital|Infectious Disease Program|Park|USA

>Spike|hCoV-19/Scotland/QEUEH-96E1AA/2020|2020-08-18|EPI\_ISL\_534502|Original|hCoV-19^^Scotland|Human|NHSGGC West of Scotland Specialist Virology Centre / MRC-University of Glasgow Centre for Virus Research|Wellcome Sanger Institute for the COVID-19 Genomics UK (COG-UK) consortium|Davies|United Kingdom

>Spike|hCoV-19/USA/WA-S2495/2020|2020-06-17|EPI\_ISL\_497127|Original|hCoV-19^^Washington|Human|Washington State Department of Health|Seattle Flu Study|Lee|USA

>Spike|hCoV-19/Netherlands/ZH-EMC-310/2020|2020-05-23|EPI\_ISL\_523652|Original|hCoV-19^^Zuid Holland|Human|Dutch COVID-19 response team|Erasmus Medical Center|Oude Munnink|Netherlands

>Spike|hCoV-19/England/QEUEH-B2EB79/2020|2020-11-04|EPI\_ISL\_659957|Original|hCoV-19^^England|Human|Lighthouse Lab in Glasgow|Wellcome Sanger Institute for the COVID-19 Genomics UK (COG-UK) Consortium|Davies|United Kingdom

>Spike|hCoV-19/England/ALDP-B24557/2020|2020-11-04|EPI\_ISL\_647093|Original|hCoV-19^^England|Human|Lighthouse Lab in Alderley Park|Wellcome Sanger Institute for the COVID-19 Genomics UK (COG-UK) Consortium|Davies|United Kingdom

>Spike|hCoV-19/England/BRIS-12E6CD/2020|2020-04-21|EPI\_ISL\_488255|Original|hCoV-19^^England|Human|PHE South West Regional Laboratory|Wellcome Sanger Institute for the COVID-19 Genomics UK (COG-UK) consortium|Davies|United Kingdom

>Spike|hCoV-19/England/ALDP-502E4B/2020|2020-06-25|EPI\_ISL\_559152|Original|hCoV-19^^England|Human|Lighthouse Lab in Alderley Park|Wellcome Sanger Institute for the COVID-19 Genomics UK (COG-UK) consortium|Davies|United Kingdom

>Spike|hCoV-19/Australia/QLD1191/2020|2020-03-28|EPI\_ISL\_639782|Original|hCoV-19^^Australia|Human|unknown|Public Health Virology Laboratory|Nguyen|Australia

>Spike|hCoV-19/England/NORT-2814EB/2020|2020-03-16|EPI\_ISL\_488750|Original|hCoV-19^^England|Human|NU-OMICS DNA Sequencing research facility|Wellcome Sanger Institute for the COVID-19 Genomics UK (COG-UK) consortium|Davies|United Kingdom

>Spike|hCoV-19/Japan/PG-2004/2020|2020-04-00|EPI\_ISL\_685609|Original|hCoV-19^^Japan|Human|Tokyo Metropolitan Institute of Public Health|Pathogen Genomics Center|Sekizuka|Japan

>Spike|hCoV-19/Scotland/EDB111/2020|2020-03-22|EPI\_ISL\_425899|Original|hCoV-19^^Scotland|Human|Virology Department|COVID-19 Genomics UK (COG-UK) Consortium|Williams|United Kingdom

>Spike|hCoV-19/England/20139023604/2020|2020-03-27|EPI\_ISL\_421888|Original|hCoV-19^^England|Human|Respiratory Virus Unit|Respiratory Virus Unit|Platt|United Kingdom

>Spike|hCoV-19/USA/TX-HMH-MCoV-11254/2020|2020-09-04|EPI\_ISL\_789750|Original|hCoV-19^^Texas|Human|Houston Methodist Hospital|Houston Methodist Hospital|Long|USA

>Spike|hCoV-19/England/20112112106/2020|2020-03-10|EPI\_ISL\_417314|Original|hCoV-19^^England|Human|Respiratory Virus Unit|Respiratory Virus Unit|Platt|United Kingdom

>Spike|hCoV-19/Norway/CS-23/2020|2020-05-04|EPI\_ISL\_666603|Original|hCoV-19^^Viken|Human|Dept. of Microbiology and Infection Control|Dept. of Microbiology and Infection Control|Hesselberg L\u00f8vestad|Norway

>Spike|hCoV-19/Chile/AT-CMM-00064/2020|2020-05-01|EPI\_ISL\_468759|Original|hCoV-19^^Atacama|Human|Laboratorio de Biologia Molecular|Center for Mathematical Modeling and Center for Genome Regulation. Santiago|Palma V\u00e9jares|Chile

>Spike|hCoV-19/Netherlands/LI-EMC-117/2020|2020-11-07|EPI\_ISL\_722738|Original|hCoV-19^^Limburg|Human|Dutch COVID-19 response team|Erasmus Medical Center|Oude Munnink|Netherlands

>Spike|hCoV-19/England/NORW-F654A/2020|2020-11-30|EPI\_ISL\_704850|Original|hCoV-19^^England|Human|Quadram Institute Bioscience|COVID-19 Genomics UK (COG-UK) Consortium|Alikhan|United Kingdom

>Spike|hCoV-19/England/CAMC-9916AF/2020|2020-08-27|EPI\_ISL\_552173|Original|hCoV-19^^England|Human|Lighthouse Lab in Cambridge|Wellcome Sanger Institute for the COVID-19 Genomics UK (COG-UK) consortium|Davies|United Kingdom

>Spike|hCoV-19/USA/TX-DSHS-1499/2020|2020-06-22|EPI\_ISL\_683414|Original|hCoV-19^^Texas|Human|Texas Department of State Health Services|Texas Department of State Health Services|Rahman|USA

>Spike|hCoV-19/USA/TX-HMH-MCoV-15149/2020|2020-10-16|EPI\_ISL\_786633|Original|hCoV-19^^Texas|Human|Houston Methodist Hospital|Houston Methodist Hospital|Long|USA

>Spike|hCoV-19/England/LIVE-DCCD39/2020|2020-12-11|EPI\_ISL\_724525|Original|hCoV-19^^England|Human|Liverpool Clinical Laboratories|COVID-19 Genomics UK (COG-UK) Consortium|Haldenby|United Kingdom

>Spike|hCoV-19/USA/WA-UW-11350/2020|2020-06-22|EPI\_ISL\_570400|Original|hCoV-19^^Washington|Human|UW Virology Lab|UW Virology Lab|Roychoudhury|USA

>Spike|hCoV-19/USA/WI-WSLH-200199/2020|2020-03-16|EPI\_ISL\_578422|Original|hCoV-19^^Wisconsin|Human|Wisconsin State Laboratory of Hygiene Communicable Disease Division|Wisconsin State Laboratory of Hygiene Communicable Disease Division|Florek|USA

>Spike|hCoV-19/United Arab Emirates/0064/2020|2020-05-19|EPI\_ISL\_698272|Original|hCoV-19^^Abu Dhabi|Human|Group 42 (G42) Healthcare|G42 Healthcare|Ogrodzki|United Arab Emirates

>Spike|hCoV-19/England/ALDP-B5BED4/2020|2020-11-10|EPI\_ISL\_655837|Original|hCoV-19^^England|Human|Lighthouse Lab in Alderley Park|Wellcome Sanger Institute for the COVID-19 Genomics UK (COG-UK) Consortium|Davies|United Kingdom

>Spike|hCoV-19/Spain/MD-IBV-97010070/2020|2020-03-18|EPI\_ISL\_779746|Original|hCoV-19^^Madrid|Human|IdISSC/Hospital Cl\u00e9nico San Carlos de Madrid\u200b|SeqCOVID-SPAIN consortium/IBV (CSIC)|Comas|Spain

>Spike|hCoV-19/England/CAMB-1ABF27/2020|2020-04-26|EPI\_ISL\_444348|Original|hCoV-19^^England|Human|Department of Pathology|COVID-19 Genomics UK (COG-UK) Consortium|Meredith|United Kingdom

>Spike|hCoV-19/Denmark/DCGC-9638/2020|2020-11-09|EPI\_ISL\_668481|Original|hCoV-19^^Midtjylland|Human|Department of Virus and Microbiological Special Diagnostics|Albertsen Lab|Michaelsen|Denmark

>Spike|hCoV-19/New Zealand/20VR2063/2020|2020-04-04|EPI\_ISL\_456355|Original|hCoV-19^^Canterbury|Human|Canterbury Health Laboratories|Institute of Environmental Science and Research (ESR)|de Ligt|New Zealand

>Spike|hCoV-19/Wales/PHWC-16873D/2020|2020-05-20|EPI\_ISL\_494279|Original|hCoV-19^^Wales|Human|Originating lab|COVID-19 Genomics UK (COG-UK) Consortium|Moore|United Kingdom

>Spike|hCoV-19/USA/CA-CDPH034/2020|2020-06-19|EPI\_ISL\_515925|Original|hCoV-19^^California|Human|California Department of Public Health|California Department of Public Health|Bell|USA

>Spike|hCoV-19/Australia/VIC2819/2020|2020-07-02|EPI\_ISL\_521650|Original|hCoV-19^^Victoria|Human|Microbiological Diagnostic Unit - Public Health Laboratory (MDU-PHL)|MDU-PHL|Schultz|Australia

>Spike|hCoV-19/England/BIRM-66080/2020|2020-10-07|EPI\_ISL\_594616|Original|hCoV-19^^England|Human|University of Birmingham|COVID-19 Genomics UK (COG-UK) Consortium|Loman|United Kingdom

>Spike|hCoV-19/Switzerland/VD-ETHZ-310355/2020|2020-10-07|EPI\_ISL\_603429|Original|hCoV-19^^Vaud|Human|Viollier AG|Department of Biosystems Science and Engineering|Nadeau|Switzerland

>Spike|hCoV-19/England/ALDP-B5B0A1/2020|2020-11-09|EPI\_ISL\_655465|Original|hCoV-19^^England|Human|Lighthouse Lab in Alderley Park|Wellcome Sanger Institute for the COVID-19 Genomics UK (COG-UK) Consortium|Davies|United Kingdom

>Spike|hCoV-19/USA/MI-MDHHS-SC20109/2020|2020-03-25|EPI\_ISL\_436885|Original|hCoV-19^^Michigan|Human|Michigan Department of Health and Human Services|Michigan Department of Health and Human Services|Blankenship|USA

>Spike|hCoV-19/England/ALDP-BCA975/2020|2020-11-23|EPI\_ISL\_703543|Original|hCoV-19^^England|Human|Lighthouse Lab in Alderley Park|Wellcome Sanger Institute for the COVID-19 Genomics UK (COG-UK) Consortium|Davies|United Kingdom

>Spike|hCoV-19/Turkey/KU-010/2020|2020-05-17|EPI\_ISL\_495420|Original|hCoV-19^^Kars Province|Human|Kafkas University|Kafkas University|Karamese|Turkey

>Spike|hCoV-19/Wales/PHWC-4A58E3/2020|2020-12-16|EPI\_ISL\_764937|Original|hCoV-19^^Wales|Human|Wales Specialist Virology Centre Sequencing lab|COVID-19 Genomics UK (COG-UK) Consortium|Moore|United Kingdom

>Spike|hCoV-19/England/BIRM-60DE9/2020|2020-07-14|EPI\_ISL\_529592|Original|hCoV-19^^England|Human|University of Birmingham|COVID-19 Genomics UK (COG-UK) Consortium|Loman|United Kingdom

>Spike|hCoV-19/Japan/PG-6271/2020|2020-08-00|EPI\_ISL\_689382|Original|hCoV-19^^Japan|Human|Pathogen Genomics Center|Pathogen Genomics Center|Sekizuka|Japan

>Spike|hCoV-19/USA/UT-QDX-2669/2020|2020-03-12|EPI\_ISL\_604987|Original|hCoV-19^^Utah|Human|Quest Diagnostics|Quest Diagnostics|Kagan|USA

>Spike|hCoV-19/Netherlands/NA\_403/2020|2020-03-27|EPI\_ISL\_455205|Original|hCoV-19^^Netherlands|Human|Dutch COVID-19 response team|Erasmus Medical Center|Oude Munnink|Netherlands

>Spike|hCoV-19/USA/LA-EVTL053/2020|2020-04-27|EPI\_ISL\_451214|Original|hCoV-19^^Louisiana|Human|LSUHS Emerging Viral Threat Laboratory|Microbial Genome Sequencing Center|Kamil|USA

>Spike|hCoV-19/USA/WI-UW-1761/2020|2020-09-18|EPI\_ISL\_605634|Original|hCoV-19^^Wisconsin|Human|University of Wisconsin-Madison AIDS Vaccine Research Laboratories|University of Wisconsin-Madison AIDS Vaccine Research Laboratories|Baczenas|USA

>Spike|hCoV-19/England/MILK-617EAC/2020|2020-07-06|EPI\_ISL\_557786|Original|hCoV-19^^England|Human|Lighthouse Lab in Milton Keynes|Wellcome Sanger Institute for the COVID-19 Genomics UK (COG-UK) consortium|Davies|United Kingdom

>Spike|hCoV-19/Denmark/DCGC-17425/2020|2020-12-14|EPI\_ISL\_750972|Original|hCoV-19^^Midtjylland|Human|Department of Virus and Microbiological Special Diagnostics|Albertsen Lab|Michaelsen|Denmark

>Spike|hCoV-19/England/MILK-BB0DEF/2020|2020-11-18|EPI\_ISL\_720656|Original|hCoV-19^^England|Human|Lighthouse Lab in Milton Keynes|Wellcome Sanger Institute for the COVID-19 Genomics UK (COG-UK) Consortium|Davies|United Kingdom

>Spike|hCoV-19/England/PORT-2F5E3F/2020|2020-10-08|EPI\_ISL\_613302|Original|hCoV-19^^England|Human|Centre for Enzyme Innovation|COVID-19 Genomics UK (COG-UK) Consortium|Robson|United Kingdom

>Spike|hCoV-19/USA/WA-S1059/2020|2020-04-28|EPI\_ISL\_463549|Original|hCoV-19^^Washington|Human|Washington State Department of Health|Seattle Flu Study|Bedford|USA

>Spike|hCoV-19/Japan/IC-0425/2020|2020-11-00|EPI\_ISL\_768634|Original|hCoV-19^^Japan|Human|Pathogen Genomics Center|Pathogen Genomics Center|Sekizuka|Japan

>Spike|hCoV-19/Costa Rica/INC-0162/2020|2020-10-13|EPI\_ISL\_769987|Original|hCoV-19^^Heredia|Human|Laboratorio Clinico Labin|Inciensa|Soto-Garita|Costa Rica

>Spike|hCoV-19/England/ALDP-C3DDF8/2020|2020-12-10|EPI\_ISL\_731814|Original|hCoV-19^^England|Human|Lighthouse Lab in Alderley Park|Wellcome Sanger Institute for the COVID-19 Genomics UK (COG-UK) Consortium|Davies|United Kingdom

>Spike|hCoV-19/Wales/PHWC-49C5F7/2020|2020-12-10|EPI\_ISL\_742580|Original|hCoV-19^^Wales|Human|Wales Specialist Virology Centre Sequencing lab|COVID-19 Genomics UK (COG-UK) Consortium|Moore|United Kingdom

>Spike|hCoV-19/USA/CA-ALSR-3838/2020|2020-06-11|EPI\_ISL\_636235|Original|hCoV-19^^California|Human|San Diego County Public Health Laboratory|Andersen lab at Scripps Research|Gangavarapu|USA

>Spike|hCoV-19/USA/CA-CZB-10225/2020|2020-05-16|EPI\_ISL\_672264|Original|hCoV-19^^California|Human|The Ashley Laboratory|Chan-Zuckerberg Biohub|Bhatt|USA

>Spike|hCoV-19/England/CAMB-7417D/2020|2020-03-20|EPI\_ISL\_440366|Original|hCoV-19^^England|Human|Department of Pathology|Wellcome Sanger Institute for the COVID-19 Genomics UK (COG-UK) consortium|Amato|United Kingdom

>Spike|hCoV-19/Finland/18LS10AC5/2020|2020-10-18|EPI\_ISL\_756285|Original|hCoV-19^^Uusimaa|Human|Department of Virology and Immunology|Department of Virology|Smura|Finland

>Spike|hCoV-19/England/NORW-E994E/2020|2020-04-23|EPI\_ISL\_448344|Original|hCoV-19^^England|Human|Quadram Institute Bioscience|COVID-19 Genomics UK (COG-UK) Consortium|Alikhan|United Kingdom

>Spike|hCoV-19/England/NORW-E72BE/2020|2020-04-20|EPI\_ISL\_449018|Original|hCoV-19^^England|Human|Quadram Institute Bioscience|COVID-19 Genomics UK (COG-UK) Consortium|Alikhan|United Kingdom

>Spike|hCoV-19/Australia/VIC146/2020|2020-03-17|EPI\_ISL\_419843|Original|hCoV-19^^Victoria|Human|Victorian Infectious Diseases Reference Laboratory (VIDRL)|Victorian Infectious Diseases Reference Laboratory and Microbiological Diagnostic Unit Public Health Laboratory|Schultz|Australia

>Spike|hCoV-19/Denmark/DCGC-14173/2020|2020-11-30|EPI\_ISL\_711064|Original|hCoV-19^^Hovedstaden|Human|Department of Virus and Microbiological Special Diagnostics|Albertsen Lab|Michaelsen|Denmark

>Spike|hCoV-19/England/ALDP-9BDB26/2020|2020-09-10|EPI\_ISL\_568054|Original|hCoV-19^^England|Human|Lighthouse Lab in Alderley Park|Wellcome Sanger Institute for the COVID-19 Genomics UK (COG-UK) consortium|Davies|United Kingdom

>Spike|hCoV-19/Scotland/QEUEH-B10B01/2020|2020-11-02|EPI\_ISL\_649598|Original|hCoV-19^^Scotland|Human|Lighthouse Lab in Glasgow|Wellcome Sanger Institute for the COVID-19 Genomics UK (COG-UK) Consortium|Davies|United Kingdom

>Spike|hCoV-19/Scotland/QEUEH-9DD3BF/2020|2020-09-22|EPI\_ISL\_599546|Original|hCoV-19^^Scotland|Human|Lighthouse Lab in Glasgow|Wellcome Sanger Institute for the COVID-19 Genomics UK (COG-UK) consortium|Davies|United Kingdom

>Spike|hCoV-19/Japan/PG-4463/2020|2020-07-00|EPI\_ISL\_692686|Original|hCoV-19^^Japan|Human|Pathogen Genomics Center|Pathogen Genomics Center|Sekizuka|Japan

>Spike|hCoV-19/Hong Kong/VM20003446/2020|2020-03-15|EPI\_ISL\_463311|Original|hCoV-19^^Hong Kong|Human|Queen Elizabeth Hospital|Hong Kong Department of Health|Mak|China

>Spike|hCoV-19/USA/CA-ALSR-4425/2020|2020-10-26|EPI\_ISL\_649020|Original|hCoV-19^^California|Human|San Diego County Public Health Laboratory|Andersen lab at Scripps Research|Gangavarapu|USA

>Spike|hCoV-19/Scotland/QEUA-A48E17/2020|2020-10-08|EPI\_ISL\_595927|Original|hCoV-19^^Scotland|Human|Quadram Institute Bioscience|COVID-19 Genomics UK (COG-UK) Consortium|Alikhan|United Kingdom

>Spike|hCoV-19/USA/UT-UPHL-2012000183/2020|2020-08-13|EPI\_ISL\_745893|Original|hCoV-19^^Utah|Human|Ginkgo Bioworks Clinical Laboratory|Utah Public Health Laboratory|Young|USA

>Spike|hCoV-19/Scotland/CVR4666/2020|2020-09-28|EPI\_ISL\_612303|Original|hCoV-19^^Scotland|Human|West of Scotland Specialist Virology Centre|COVID-19 Genomics UK (COG-UK) Consortium|Robertson|United Kingdom

>Spike|hCoV-19/USA/UT-UPHL-04906/2020|2020-05-26|EPI\_ISL\_575197|Original|hCoV-19^^Utah|Human|Utah Public Health Laboratory|Utah Public Health Laboratory|Young|USA

>Spike|hCoV-19/USA/LA-EVTL1455/2020|2020-12-17|EPI\_ISL\_779121|Original|hCoV-19^^Louisiana|Human|LSUHS Emerging Viral Threat Laboratory|Microbial Genome Sequencing Center|Kamil|USA

>Spike|hCoV-19/Wales/PHWC-28961/2020|2020-03-30|EPI\_ISL\_431946|Original|hCoV-19^^Wales|Human|Wales Specialist Virology Centre|Public Health Wales Microbiology Cardiff|Moore|United Kingdom

>Spike|hCoV-19/England/QEUA-9B7E6F/2020|2020-09-06|EPI\_ISL\_590565|Original|hCoV-19^^England|Human|Lighthouse Lab in Glasgow|Wellcome Sanger Institute for the COVID-19 Genomics UK (COG-UK) consortium|Davies|United Kingdom

>Spike|hCoV-19/England/ALDP-6E0E24/2020|2020-07-01|EPI\_ISL\_557704|Original|hCoV-19^^England|Human|Lighthouse Lab in Alderley Park|Wellcome Sanger Institute for the COVID-19 Genomics UK (COG-UK) consortium|Davies|United Kingdom

>Spike|hCoV-19/England/ALDP-9829C6/2020|2020-08-10|EPI\_ISL\_552449|Original|hCoV-19^^England|Human|Lighthouse Lab in Alderley Park|Wellcome Sanger Institute for the COVID-19 Genomics UK (COG-UK) consortium|Davies|United Kingdom

>Spike|hCoV-19/Wales/PHWC-494AB4/2020|2020-11-17|EPI\_ISL\_726213|Original|hCoV-19^^Wales|Human|Originating lab|COVID-19 Genomics UK (COG-UK) Consortium|Moore|United Kingdom

>Spike|hCoV-19/Australia/VIC8515/2020|2020-07-28|EPI\_ISL\_565066|Original|hCoV-19^^Victoria|Human|Microbiological Diagnostic Unit - Public Health Laboratory (MDU-PHL)|MDU-PHL|Schultz|Australia

>Spike|hCoV-19/England/QEUA-B66823/2020|2020-11-10|EPI\_ISL\_655202|Original|hCoV-19^^England|Human|Lighthouse Lab in Glasgow|Wellcome Sanger Institute for the COVID-19 Genomics UK (COG-UK) Consortium|Davies|United Kingdom

>Spike|hCoV-19/England/ALDP-A526D6/2020|2020-10-07|EPI\_ISL\_598042|Original|hCoV-19^^England|Human|Lighthouse Lab in Alderley Park|Wellcome Sanger Institute for the COVID-19 Genomics UK (COG-UK) consortium|Davies|United Kingdom

>Spike|hCoV-19/England/BIRM-5E6B6/2020|2020-03-22|EPI\_ISL\_444299|Original|hCoV-19^^England|Human|University of Birmingham|COVID-19 Genomics UK (COG-UK) Consortium|Loman|United Kingdom

>Spike|hCoV-19/Switzerland/BL-ETHZ-360006/2020|2020-11-12|EPI\_ISL\_693866|Original|hCoV-19^^Basel-Landschaft|Human|Viollier AG|Department of Biosystems Science and Engineering|Nadeau|Switzerland

>Spike|hCoV-19/Portugal/PT0107/2020|2020-03-21|EPI\_ISL\_453823|Original|hCoV-19^^Portugal|Human|unknown|Instituto Nacional de Saude (INSA)|Borges|Portugal

>Spike|hCoV-19/Spain/CT-IBV-005573/2020|2020-04-22|EPI\_ISL\_508685|Original|hCoV-19^^Catalunya|Human|Departamento de Microbiolog\u00eda|SeqCOVID-SPAIN consortium|IBV (CSIC)|Comas|Spain

>Spike|hCoV-19/Australia/VIC8124/2020|2020-08-15|EPI\_ISL\_564863|Original|hCoV-19^^Victoria|Human|Microbiological Diagnostic Unit - Public Health Laboratory (MDU-PHL)|MDU-PHL|Schultz|Australia

>Spike|hCoV-19/USA/CA-CHLA-PLM59547698/2020|2020-11-30|EPI\_ISL\_753523|Original|hCoV-19^^California|Human|Clinical virology Laboratory|Center for Personalized Medicine|Dien Bard|USA

>Spike|hCoV-19/Wales/PHWC-483229/2020|2020-10-22|EPI\_ISL\_627296|Original|hCoV-19^^Wales|Human|Wales Specialist Virology Centre Sequencing lab|COVID-19 Genomics UK (COG-UK) Consortium|Moore|United Kingdom

>Spike|hCoV-19/England/QEUH-9DAFBE/2020|2020-09-22|EPI\_ISL\_580928|Original|hCoV-19^^England|Human|Lighthouse Lab in Glasgow|Wellcome Sanger Institute for the COVID-19 Genomics UK (COG-UK) consortium|Davies|United Kingdom

>Spike|hCoV-19/USA/MI-UM-10035685395/2020|2020-08-27|EPI\_ISL\_583272|Original|hCoV-19^^Michigan|Human|University of Michigan Clinical Microbiology Laboratory|Lauring Lab|Valesano|USA

>Spike|hCoV-19/USA/NY-PV09420/2020|2020-03-13|EPI\_ISL\_450099|Original|hCoV-19^^New York|Human|MSHS Clinical Microbiology Laboratories|MSHS Pathogen Surveillance Program|van Bakel|USA

>Spike|hCoV-19/Scotland/CVR4869/2020|2020-10-04|EPI\_ISL\_650519|Original|hCoV-19^^Scotland|Human|West of Scotland Specialist Virology Centre|COVID-19 Genomics UK (COG-UK) Consortium|Robertson|United Kingdom

>Spike|hCoV-19/USA/LA-EVTL1406/2020|2020-12-11|EPI\_ISL\_779072|Original|hCoV-19^^Louisiana|Human|LSUHS Emerging Viral Threat Laboratory|Microbial Genome Sequencing Center|Kamil|USA

>Spike|hCoV-19/USA/AZ-TG618054/2020|2020-07-20|EPI\_ISL\_695694|Original|hCoV-19^^Arizona|Human|AZ SPHL|TGen North|French|USA

>Spike|hCoV-19/England/C200042027/2020|2020-11-02|EPI\_ISL\_649796|Original|hCoV-19^^England|Human|Respiratory Virus Unit|COVID-19 Genomics UK (COG-UK) Consortium|Platt|United Kingdom

>Spike|hCoV-19/England/CAMC-CB7716/2020|2020-12-19|EPI\_ISL\_777847|Original|hCoV-19^^England|Human|Lighthouse Lab in Cambridge|Wellcome Sanger Institute for the COVID-19 Genomics UK (COG-UK) Consortium|Davies|United Kingdom

>Spike|hCoV-19/Wales/PHWC-16B363/2020|2020-09-09|EPI\_ISL\_560278|Original|hCoV-19^^Wales|Human|Wales Specialist Virology Centre Sequencing lab|COVID-19 Genomics UK (COG-UK) Consortium|Moore|United Kingdom

>Spike|hCoV-19/Northern Ireland/NIRE-23471B/2020|2020-10-14|EPI\_ISL\_680428|Original|hCoV-19^^Northern Ireland|Human|Regional Virus Laboratory|COVID-19 Genomics UK (COG-UK) Consortium|Fairley|United Kingdom

>Spike|hCoV-19/USA/TX-HMH-MCoV-13424/2020|2020-08-24|EPI\_ISL\_788560|Original|hCoV-19^^Texas|Human|Houston Methodist Hospital|Houston Methodist Hospital|Long|USA

>Spike|hCoV-19/Spain/IB-IBV-99010820/2020|2020-08-01|EPI\_ISL\_691638|Original|hCoV-19^^Balear Islands|Human|Servicio de Microbiolog\u00eda|SeqCOVID-SPAIN consortium|IBV (CSIC)|Comas|Spain

>Spike|hCoV-19/USA/CA-CZB-3995/2020|2020-07-29|EPI\_ISL\_548598|Original|hCoV-19^^California|Human|County of Santa Clara Public Health Department|Chan-Zuckerberg Biohub|Bhatt|USA

>Spike|hCoV-19/USA/TX-HMH-MCoV-14918/2020|2020-10-15|EPI\_ISL\_786402|Original|hCoV-19^^Texas|Human|Houston Methodist Hospital|Houston Methodist Hospital|Long|USA

>Spike|hCoV-19/Canada/QC\_BB6/2020|2020-04-11|EPI\_ISL\_515243|Original|hCoV-19^^Quebec|Human|Laboratoire de microbiologie|Smith Laboratory|Smith|Canada

>Spike|hCoV-19/Japan/PG-4942/2020|2020-07-00|EPI\_ISL\_690061|Original|hCoV-19^^Japan|Human|Pathogen Genomics Center|Pathogen Genomics Center|Sekizuka|Japan

>Spike|hCoV-19/England/QEUH-A4CF98/2020|2020-10-03|EPI\_ISL\_596073|Original|hCoV-19^^England|Human|Quadram Institute Bioscience|COVID-19 Genomics UK (COG-UK) Consortium|Alikhan|United Kingdom

>Spike|hCoV-19/USA/TX-DSHS-1464/2020|2020-06-22|EPI\_ISL\_676623|Original|hCoV-19^^Texas|Human|Texas Department of State Health Services|Texas Department of State Health Services|Rahman|USA

>Spike|hCoV-19/Netherlands/NA\_48/2020|2020-03-09|EPI\_ISL\_422809|Original|hCoV-19^^Netherlands|Human|Dutch COVID-19 response team|Erasmus Medical Center|Oude Munnink|Netherlands

>Spike|hCoV-19/Denmark/DCGC-20924/2020|2020-12-21|EPI\_ISL\_759450|Original|hCoV-19^^Hovedstaden|Human|Department of Virus and Microbiological Special Diagnostics|Albertsen Lab|Michaelsen|Denmark



>Spike|hCoV-19/England/QEUA-794B54/2020|2020-07-15|EPI\_ISL\_533224|Original|hCoV-19^England|Human|Lighthouse Lab in Glasgow|Wellcome Sanger Institute for the COVID-19 Genomics UK (COG-UK) consortium|Davies|United Kingdom

>Spike|hCoV-19/England/ALDP-A6FB5F/2020|2020-10-15|EPI\_ISL\_607051|Original|hCoV-19^England|Human|Lighthouse Lab in Alderley Park|Wellcome Sanger Institute for the COVID-19 Genomics UK (COG-UK) consortium|Davies|United Kingdom

>Spike|hCoV-19/Wales/PHWC-15C927/2020|2020-03-26|EPI\_ISL\_472557|Original|hCoV-19^Wales|Human|Wales Specialist Virology Centre Sequencing lab|COVID-19 Genomics UK (COG-UK) Consortium|Moore|United Kingdom

>Spike|hCoV-19/USA/TX-HMH-MCoV-9297/2020|2020-07-03|EPI\_ISL\_781046|Original|hCoV-19^Texas|Human|Houston Methodist Hospital|Houston Methodist Hospital|Long|USA

>Spike|hCoV-19/USA/WI-GMF-19492/2020|2020-09-09|EPI\_ISL\_547814|Original|hCoV-19^Wisconsin|Human|Gundersen Molecular Diagnostics Laboratory|Kabara Cancer Research Institute|Kenny|USA

>Spike|hCoV-19/Australia/NSW23/2020|2020-03-04|EPI\_ISL\_427650|Original|hCoV-19^New South Wales|Human|Centre for Infectious Diseases and Microbiology Public Health|NSW Health Pathology - Institute of Clinical Pathology and Medical Research; Westmead Hospital; University of Sydney|Gall|Australia

>Spike|hCoV-19/United Arab Emirates/0968/2020|2020-06-29|EPI\_ISL\_699104|Original|hCoV-19^Abu Dhabi|Human|Group 42 (G42) Healthcare|G42 Healthcare|Ogrodzki|United Arab Emirates

>Spike|hCoV-19/United Arab Emirates/0050/2020|2020-05-18|EPI\_ISL\_698258|Original|hCoV-19^Abu Dhabi|Human|Group 42 (G42) Healthcare|G42 Healthcare|Ogrodzki|United Arab Emirates

>Spike|hCoV-19/Germany/SH-ChVir9989/2020|2020-11-03|EPI\_ISL\_729660|Original|hCoV-19^Schleswig-Holstein|Human|A. Krumbholz|Charit\u00e9 Universit\u00e4tsmedizin Berlin|Muehlemann|Germany

>Spike|hCoV-19/Russia/MOS-CRIE-4974299/2020|2020-07-15|EPI\_ISL\_660434|Original|hCoV-19^Moscow|Human|Molecular diagnostic laboratory of Federal Budget Institution of Science \Central Research Institute of Epidemiology\ of The Federal Service on Customers' Rights Protection and Human Well-being Surveillance|Group of Genomics and Postgenomic Technologies of Central Research Institute of Epidemiology

>|Samoilov|Russia

>Spike|hCoV-19/Wales/PHWC-35C95/2020|2020-04-27|EPI\_ISL\_474551|Original|hCoV-19^Wales|Human|Originating lab|COVID-19 Genomics UK (COG-UK) Consortium|Moore|United Kingdom

>Spike|hCoV-19/USA/WI-UW-867/2020|2020-07-09|EPI\_ISL\_509870|Original|hCoV-19^Wisconsin|Human|University of Wisconsin-Madison AIDS Vaccine Research Laboratories|University of Wisconsin-Madison AIDS Vaccine Research Laboratories|Baczenas|USA

>Spike|hCoV-19/Luxembourg/LNS0497696/2020|2020-10-31|EPI\_ISL\_739791|Original|hCoV-19^Luxembourg|Human|Laboratoire national de sant\u00e9|Laboratoire national de sant\u00e9|Wienecke-Baldacchino|Luxembourg

>Spike|hCoV-19/England/CAMC-B98F6F/2020|2020-11-15|EPI\_ISL\_673270|Original|hCoV-19^England|Human|Lighthouse Lab in Cambridge|Wellcome Sanger Institute for the COVID-19 Genomics UK (COG-UK) Consortium|Davies|United Kingdom

>Spike|hCoV-19/New Zealand/20VR2494/2020|2020-00-00|EPI\_ISL\_579251|Original|hCoV-19^Auckland|Human|LabPLUS|Institute of Environmental Science and Research (ESR)|Wang|New Zealand

>Spike|hCoV-19/England/LIVE-9A5B1/2020|2020-03-25|EPI\_ISL\_449350|Original|hCoV-19^England|Human|Liverpool Clinical Laboratories|COVID-19 Genomics UK (COG-UK) Consortium|Haldenby|United Kingdom

>Spike|hCoV-19/England/ALDP-6570D7/2020|2020-07-03|EPI\_ISL\_558097|Original|hCoV-19^England|Human|Lighthouse Lab in Alderley Park|Wellcome Sanger Institute for the COVID-19 Genomics UK (COG-UK) consortium|Davies|United Kingdom

>Spike|hCoV-19/England/CAMC-B51CA7/2020|2020-11-09|EPI\_ISL\_658178|Original|hCoV-19^England|Human|Lighthouse Lab in Cambridge|Wellcome Sanger Institute for the COVID-19 Genomics UK (COG-UK) Consortium|Davies|United Kingdom

>Spike|hCoV-19/USA/TX-HMH-MCoV-19769/2020|2020-11-29|EPI\_ISL\_784110|Original|hCoV-19^Texas|Human|Houston Methodist Hospital|Houston Methodist Hospital|Long|USA

>Spike|hCoV-19/England/QEUA-A1F013/2020|2020-09-29|EPI\_ISL\_587325|Original|hCoV-19^^England|Human|Lighthouse Lab in Glasgow|Wellcome Sanger Institute for the COVID-19 Genomics UK (COG-UK) consortium|Davies|United Kingdom

>Spike|hCoV-19/USA/CA-CZB-2191/2020|2020-05-26|EPI\_ISL\_513740|Original|hCoV-19^^California|Human|Orange County Public Health Lab|Chan-Zuckerberg Biohub|Kamm|USA

>Spike|hCoV-19/Japan/PG-2018/2020|2020-04-00|EPI\_ISL\_685623|Original|hCoV-19^^Japan|Human|Pathogen Genomics Center|Pathogen Genomics Center|Sekizuka|Japan

>Spike|hCoV-19/Switzerland/GR-ETHZ-100838/2020|2020-03-25|EPI\_ISL\_451786|Original|hCoV-19^^Graubunden|Human|Viollier AG|Department of Biosystems Science and Engineering|Nadeau|Switzerland

>Spike|hCoV-19/England/QEUA-9B81CF/2020|2020-09-04|EPI\_ISL\_590570|Original|hCoV-19^^England|Human|Lighthouse Lab in Glasgow|Wellcome Sanger Institute for the COVID-19 Genomics UK (COG-UK) consortium|Davies|United Kingdom

>Spike|hCoV-19/USA/MA-MGH-00650/2020|2020-04-02|EPI\_ISL\_460254|Original|hCoV-19^^Massachusetts|Human|Massachusetts General Hospital|Infectious Disease Program|Lemieux|USA

>Spike|hCoV-19/England/QEUA-B6978D/2020|2020-11-11|EPI\_ISL\_661435|Original|hCoV-19^^England|Human|Lighthouse Lab in Glasgow|Wellcome Sanger Institute for the COVID-19 Genomics UK (COG-UK) Consortium|Davies|United Kingdom

>Spike|hCoV-19/Scotland/CVR4400/2020|2020-09-22|EPI\_ISL\_585274|Original|hCoV-19^^Scotland|Human|West of Scotland Specialist Virology Centre|COVID-19 Genomics UK (COG-UK) Consortium|Robertson|United Kingdom

>Spike|hCoV-19/USA/CA-ALSR-2627/2020|2020-07-11|EPI\_ISL\_635595|Original|hCoV-19^^California|Human|San Diego County Public Health Laboratory|Andersen lab at Scripps Research|Gangavarapu|USA

>Spike|hCoV-19/England/ALDP-4AAC1F/2020|2020-06-11|EPI\_ISL\_559593|Original|hCoV-19^^England|Human|Lighthouse Lab in Alderley Park|Wellcome Sanger Institute for the COVID-19 Genomics UK (COG-UK) consortium|Davies|United Kingdom

>Spike|hCoV-19/Denmark/DCGC-16961/2020|2020-12-14|EPI\_ISL\_750668|Original|hCoV-19^^Syddanmark|Human|Department of Virus and Microbiological Special Diagnostics|Albertsen Lab|Michaelsen|Denmark

>Spike|hCoV-19/USA/WI-GMF-23113/2020|2020-09-29|EPI\_ISL\_660866|Original|hCoV-19^^Wisconsin|Human|Gundersen Molecular Diagnostics Laboratory|Kabara Cancer Research Institute|Kenny|USA

>Spike|hCoV-19/England/QEUA-AD0D80/2020|2020-10-25|EPI\_ISL\_633788|Original|hCoV-19^^England|Human|Lighthouse Lab in Glasgow|Wellcome Sanger Institute for the COVID-19 Genomics UK (COG-UK) consortium|Davies|United Kingdom

>Spike|hCoV-19/Scotland/QEUA-AF4D95/2020|2020-10-30|EPI\_ISL\_676485|Original|hCoV-19^^Scotland|Human|Lighthouse Lab in Glasgow|Wellcome Sanger Institute for the COVID-19 Genomics UK (COG-UK) Consortium|Davies|United Kingdom

>Spike|hCoV-19/Wales/PHWC-4A4547/2020|2020-12-16|EPI\_ISL\_763753|Original|hCoV-19^^Wales|Human|Wales Specialist Virology Centre Sequencing lab|COVID-19 Genomics UK (COG-UK) Consortium|Moore|United Kingdom

>Spike|hCoV-19/USA/TX-HMH-3025/2020|2020-05-30|EPI\_ISL\_543943|Original|hCoV-19^^Texas|Human|Houston Methodist Hospital|Houston Methodist Hospital|Long|USA

>Spike|hCoV-19/Japan/PG-2386/2020|2020-03-00|EPI\_ISL\_685991|Original|hCoV-19^^Japan|Human|Pathogen Genomics Center|Pathogen Genomics Center|Sekizuka|Japan

>Spike|hCoV-19/USA/AK-PHL1812/2020|2020-07-21|EPI\_ISL\_528504|Original|hCoV-19^^Alaska|Human|Alaska State Virology Laboratory|Alaska State Virology Laboratory|Drown|USA

>Spike|hCoV-19/England/210100358/2021|2021-01-04|EPI\_ISL\_791242|Original|hCoV-19^^England|Human|Respiratory Virus Unit|COVID-19 Genomics UK (COG-UK) Consortium|Platt|United Kingdom

>Spike|hCoV-19/Netherlands/NB-EMC-315/2020|2020-10-10|EPI\_ISL\_632667|Original|hCoV-19^^Noord Brabant|Human|Dutch COVID-19 response team|Erasmus Medical Center|Oude Munnink|Netherlands

>Spike|hCoV-19/Bosnia and Herzegovina/01-Livno/2020|2020-05-27|EPI\_ISL\_462753|Original|hCoV-19^^Livno|Human|University Clinical Hospital of Mostar|University of Sarajevo Veterinary Faculty|Goletic|Bosnia and Herzegovina

>Spike|hCoV-19/USA/TX-HMH-MCoV-10251/2020|2020-07-07|EPI\_ISL\_789391|Original|hCoV-19^^Texas|Human|Houston Methodist Hospital|Houston Methodist Hospital|Long|USA

>Spike|hCoV-19/USA/CA-QDX-922/2020|2020-03-23|EPI\_ISL\_571578|Original|hCoV-19^^California|Human|Quest Diagnostics|Quest Diagnostics|Kagan|USA

>Spike|hCoV-19/England/ALDP-9ED2BF/2020|2020-05-05|EPI\_ISL\_589314|Original|hCoV-19^^England|Human|Lighthouse Lab in Alderley Park|Wellcome Sanger Institute for the COVID-19 Genomics UK (COG-UK) consortium|Davies|United Kingdom

>Spike|hCoV-19/Switzerland/TI-ETHZ-100075/2020|2020-03-12|EPI\_ISL\_451668|Original|hCoV-19^^Ticino|Human|Viollier AG|Department of Biosystems Science and Engineering|Nadeau|Switzerland

>Spike|hCoV-19/Russia/MO-RII-MH3571S/2020|2020-10-13|EPI\_ISL\_733154|Original|hCoV-19^^Mordovia|Human|WHO National Influenza Centre Russian Federation|WHO National Influenza Centre Russian Federation|Komissarov|Russia

>Spike|hCoV-19/Singapore/14/2020|2020-02-13|EPI\_ISL\_414380|Vero P1|hCoV-19^^Singapore|Human|National Centre for Infectious Diseases|Programme in Emerging Infectious Diseases|Smith|Singapore

>Spike|hCoV-19/England/BRIS-12193A/2020|2020-03-16|EPI\_ISL\_440220|Original|hCoV-19^^England|Human|PHE South West Regional Laboratory|Wellcome Sanger Institute for the COVID-19 Genomics UK (COG-UK) consortium|Amato|United Kingdom

>Spike|hCoV-19/Russia/SCPM-O-05/2020|2020-03-21|EPI\_ISL\_451967|Original|hCoV-19^^Moscow|Human|Federal Budget Institution of Science|Federal Budget Institution of Science|Bogun|Russia

>Spike|hCoV-19/Denmark/DCGC-1589/2020|2020-04-13|EPI\_ISL\_618633|Original|hCoV-19^^Hovedstaden|Human|Department of Virus and Microbiological Special Diagnostics|Albertsen lab|Michaelsen|Denmark

>Spike|hCoV-19/USA/UT-08378/2020|2020-05-26|EPI\_ISL\_524161|Original|hCoV-19^^Utah|Human|Utah Public Health Laboratory|Utah Public Health Laboratory|Young|USA

>Spike|hCoV-19/USA/NY-NYUMC617/2020|2020-04-02|EPI\_ISL\_444734|Original|hCoV-19^^New York|Human|NYU Langone Health|Departments of Pathology and Medicine|Maurano|USA

>Spike|hCoV-19/Wales/PHWC-276A7/2020|2020-03-31|EPI\_ISL\_432007|Original|hCoV-19^^Wales|Human|Wales Specialist Virology Centre|Public Health Wales Microbiology Cardiff|Moore|United Kingdom

>Spike|hCoV-19/England/NORW-F9D5E/2020|2020-12-14|EPI\_ISL\_741596|Original|hCoV-19^^England|Human|Quadram Institute Bioscience|COVID-19 Genomics UK (COG-UK) Consortium|Alikhan|United Kingdom

>Spike|hCoV-19/England/CAMC-B342F3/2020|2020-11-05|EPI\_ISL\_659592|Original|hCoV-19^^England|Human|Lighthouse Lab in Cambridge|Wellcome Sanger Institute for the COVID-19 Genomics UK (COG-UK) Consortium|Davies|United Kingdom

>Spike|hCoV-19/England/ALDP-AA07C7/2020|2020-10-22|EPI\_ISL\_624033|Original|hCoV-19^^England|Human|Lighthouse Lab in Alderley Park|Wellcome Sanger Institute for the COVID-19 Genomics UK (COG-UK) consortium|Davies|United Kingdom

>Spike|hCoV-19/Portugal/PT1688/2020|2020-11-11|EPI\_ISL\_732155|Original|hCoV-19^^Portugal|Human|Instituto Nacional de Saude (INSA) and Instituto Gulbenkian de Ciencia (IGC)|Instituto Nacional de Saude (INSA) and Instituto Gulbenkian de Ciencia (IGC)|Borges|Portugal

>Spike|hCoV-19/England/ALDP-B83F94/2020|2020-11-14|EPI\_ISL\_674182|Original|hCoV-19^^England|Human|Lighthouse Lab in Alderley Park|Wellcome Sanger Institute for the COVID-19 Genomics UK (COG-UK) Consortium|Davies|United Kingdom

>Spike|hCoV-19/England/QEUEH-BA1B7E/2020|2020-11-18|EPI\_ISL\_719857|Original|hCoV-19^^England|Human|Lighthouse Lab in Glasgow|Wellcome Sanger Institute for the COVID-19 Genomics UK (COG-UK) Consortium|Davies|United Kingdom

>Spike|hCoV-19/Japan/PG-1589/2020|2020-04-00|EPI\_ISL\_685195|Original|hCoV-19^^Japan|Human|Pathogen Genomics Center|Pathogen Genomics Center|Sekizuka|Japan

>Spike|hCoV-19/Wales/PHWC-49056C/2020|2020-11-06|EPI\_ISL\_703868|Original|hCoV-19^^Wales|Human|Originating lab|COVID-19 Genomics UK (COG-UK) Consortium|Moore|United Kingdom

>Spike|hCoV-19/South Korea/KCDC2745/2020|2020-07-18|EPI\_ISL\_522524|Original|hCoV-19^^South Korea|Human|Division of Viral Diseases|Division of Viral Diseases|Kim|South Korea

>Spike|hCoV-19/England/ALDP-A508A5/2020|2020-10-07|EPI\_ISL\_597682|Original|hCoV-19^^England|Human|Lighthouse Lab in Alderley Park|Wellcome Sanger Institute for the COVID-19 Genomics UK (COG-UK) consortium|Davies|United Kingdom

>Spike|hCoV-19/England/ALDP-9BEBAD/2020|2020-09-10|EPI\_ISL\_567926|Original|hCoV-19^^England|Human|Lighthouse Lab in Alderley Park|Wellcome Sanger Institute for the COVID-19 Genomics UK (COG-UK) consortium|Davies|United Kingdom

>Spike|hCoV-19/England/MILK-B883C0/2020|2020-11-13|EPI\_ISL\_674262|Original|hCoV-19^^England|Human|Lighthouse Lab in Milton Keynes|Wellcome Sanger Institute for the COVID-19 Genomics UK (COG-UK) Consortium|Davies|United Kingdom

>Spike|hCoV-19/USA/CA-CZB-15938/2020|2020-11-30|EPI\_ISL\_739027|Original|hCoV-19^^California|Human|Santa Clara County Public Health Laboratory|Chan-Zuckerberg Biohub|Kamm|USA

>Spike|hCoV-19/USA/WI-UW-471/2020|2020-06-17|EPI\_ISL\_484846|Original|hCoV-19^^Wisconsin|Human|University of Wisconsin-Madison AIDS Vaccine Research Laboratories|University of Wisconsin-Madison AIDS Vaccine Research Laboratories|Baczenas|USA

>Spike|hCoV-19/Wales/PHWC-48896B/2020|2020-11-01|EPI\_ISL\_639448|Original|hCoV-19^^Wales|Human|Wales Specialist Virology Centre Sequencing lab|COVID-19 Genomics UK (COG-UK) Consortium|Moore|United Kingdom

>Spike|hCoV-19/USA/FL-BPHL-0206/2020|2020-04-13|EPI\_ISL\_480857|Original|hCoV-19^^Florida|Human|Florida Bureau of Public Health Laboratories|Florida Bureau of Public Health Laboratories|Blanton|USA

>Spike|hCoV-19/Denmark/DCGC-21392/2020|2020-12-21|EPI\_ISL\_758141|Original|hCoV-19^^Midtjylland|Human|Department of Virus and Microbiological Special Diagnostics|Albertsen Lab|Michaelsen|Denmark

>Spike|hCoV-19/England/LOND-DC304/2020|2020-08-13|EPI\_ISL\_627466|Original|hCoV-19^^England|Human|University College London|COVID-19 Genomics UK (COG-UK) Consortium|Roy|United Kingdom

>Spike|hCoV-19/Northern Ireland/NIRE-105C33/2020|2020-05-27|EPI\_ISL\_488875|Original|hCoV-19^^Northern Ireland|Human|Regional Virus Laboratory|Wellcome Sanger Institute for the COVID-19 Genomics UK (COG-UK) consortium|Davies|United Kingdom

>Spike|hCoV-19/Iran/HGRC-2-2162/2020|2020-03-26|EPI\_ISL\_437512|unknown|hCoV-19^^Iran|Human|Human Genetic Research Center|Human Genetic Research Center|Submitter|Iran

>Spike|hCoV-19/England/BRIS-121DE3/2020|2020-03-21|EPI\_ISL\_440008|Original|hCoV-19^^England|Human|PHE South West Regional Laboratory|Wellcome Sanger Institute for the COVID-19 Genomics UK (COG-UK) consortium|Amato|United Kingdom

>Spike|hCoV-19/England/CAMC-B334B2/2020|2020-11-05|EPI\_ISL\_659202|Original|hCoV-19^^England|Human|Lighthouse Lab in Cambridge|Wellcome Sanger Institute for the COVID-19 Genomics UK (COG-UK) Consortium|Davies|United Kingdom

>Spike|hCoV-19/Wales/PHWC-485F6C/2020|2020-10-25|EPI\_ISL\_628295|Original|hCoV-19^^Wales|Human|Wales Specialist Virology Centre Sequencing lab|COVID-19 Genomics UK (COG-UK) Consortium|Moore|United Kingdom

>Spike|hCoV-19/South Korea/KCDC2669/2020|2020-05-29|EPI\_ISL\_522451|Original|hCoV-19^^South Korea|Human|Center for Laboratory Control of Infectious Diseases|Center for Laboratory Control of Infectious Diseases|Kim|South Korea

>Spike|hCoV-19/Denmark/DCGC-7001/2020|2020-10-12|EPI\_ISL\_619848|Original|hCoV-19^^Hovedstaden|Human|Department of Virus and Microbiological Special Diagnostics|Albertsen lab|Michaelsen|Denmark

>Spike|hCoV-19/Wales/PHWC-24507/2020|2020-03-18|EPI\_ISL\_419422|Original|hCoV-19^^Wales|Human|Wales Specialist Virology Centre|Public Health Wales Microbiology Cardiff|Moore|United Kingdom

>Spike|hCoV-19/England/MILK-A7BBAB/2020|2020-10-15|EPI\_ISL\_607489|Original|hCoV-19^^England|Human|Lighthouse Lab in Milton Keynes|Wellcome Sanger Institute for the COVID-19 Genomics UK (COG-UK) consortium|Davies|United Kingdom

>Spike|hCoV-19/USA/MA-MGH-00579/2020|2020-03-28|EPI\_ISL\_460192|Original|hCoV-19^^Massachusetts|Human|Massachusetts General Hospital|Infectious Disease Program|Lemieux|USA

>Spike|hCoV-19/France/PAC-IHU-0222/2020|2020-03-28|EPI\_ISL\_569386|Original|hCoV-19^^Provence-Alpes-C\u00f4te-d\u2019Azur|Human|MEPHI|MEPHI|Levasseur|France

>Spike|hCoV-19/Germany/NW-HHU-299/2020|2020-10-02|EPI\_ISL\_778844|Original|hCoV-19^^North Rhine-Westphalia|Human|ZOTZ KLIMAS MVZ D\u00f0fcsseldorf-Centrum GbR \u00dcBAG f\u00f0fcr Labormedizin|Center of Medical Microbiology|Wienemann|Germany

>Spike|hCoV-19/France/PAC-SC249/2020|2020-05-07|EPI\_ISL\_641534|Original|hCoV-19^^Provence-Alpes-Cote-d\u2019Azur|Human|CHU de Nice - H\u00f0pital Archet 16|CNR Virus des Infections Respiratoires - France SUD|Bal|France

>Spike|hCoV-19/England/QEUH-AADE4D/2020|2020-10-22|EPI\_ISL\_651478|Original|hCoV-19^^England|Human|Oxford Viromics|COVID-19 Genomics UK (COG-UK) Consortium|Golubchik|United Kingdom

>Spike|hCoV-19/England/QEUH-B12E9D/2020|2020-11-02|EPI\_ISL\_642739|Original|hCoV-19^^England|Human|Lighthouse Lab in Glasgow|Wellcome Sanger Institute for the COVID-19 Genomics UK (COG-UK) Consortium|Davies|United Kingdom

>Spike|hCoV-19/USA/MI-MDHHS-SC20173/2020|2020-03-17|EPI\_ISL\_436889|Original|hCoV-19^^Michigan|Human|Michigan Department of Health and Human Services|Michigan Department of Health and Human Services|Blankenship|USA

>Spike|hCoV-19/England/QEUH-B6AD6C/2020|2020-11-11|EPI\_ISL\_662543|Original|hCoV-19^^England|Human|Lighthouse Lab in Glasgow|Wellcome Sanger Institute for the COVID-19 Genomics UK (COG-UK) Consortium|Davies|United Kingdom

>Spike|hCoV-19/Wales/PHWC-48CEC2/2020|2020-11-05|EPI\_ISL\_666552|Original|hCoV-19^^Wales|Human|Wales Specialist Virology Centre Sequencing lab|COVID-19 Genomics UK (COG-UK) Consortium|Moore|United Kingdom

>Spike|hCoV-19/Wales/PHWC-1686F4/2020|2020-05-21|EPI\_ISL\_494275|Original|hCoV-19^^Wales|Human|Originating lab|COVID-19 Genomics UK (COG-UK) Consortium|Moore|United Kingdom

>Spike|hCoV-19/USA/TX-HMH-3059/2020|2020-06-04|EPI\_ISL\_543965|Original|hCoV-19^^Texas|Human|Houston Methodist Hospital|Houston Methodist Hospital|Long|USA

>Spike|hCoV-19/England/NORT-1B71312/2020|2020-11-14|EPI\_ISL\_706307|Original|hCoV-19^^England|Human|Northumbria University / South Tees Hospitals NHS Foundation Trust / North Cumbria Integrated Care NHS Foundation Trust / North Tees and Hartlepool NHS Foundation Trust / Newcastle Hospitals NHS Foundation Trust|COVID-19 Genomics UK (COG-UK) Consortium|Bashton|United Kingdom

>Spike|hCoV-19/Germany/NW-HHU-177/2020|2020-03-26|EPI\_ISL\_602499|Original|hCoV-19^^North Rhine-Westphalia|Human|Institute for Virology|Center of Medical Microbiology|Wienemann|Germany

>Spike|hCoV-19/South Africa/KRISP-K002230/2020|2020-07-21|EPI\_ISL\_515626|Original|hCoV-19^^KwaZulu-Natal|Human|NHLS-IALCH|KRISP|de Oliveira|South Africa

>Spike|hCoV-19/England/ALDP-B5C3B6/2020|2020-11-10|EPI\_ISL\_655789|Original|hCoV-19^^England|Human|Lighthouse Lab in Alderley Park|Wellcome Sanger Institute for the COVID-19 Genomics UK (COG-UK) Consortium|Davies|United Kingdom

>Spike|hCoV-19/Denmark/DCGC-9733/2020|2020-11-09|EPI\_ISL\_669134|Original|hCoV-19^^Hovedstaden|Human|Department of Virus and Microbiological Special Diagnostics|Albertsen Lab|Michaelsen|Denmark

>Spike|hCoV-19/USA/OR-OHSU-0983/2020|2020-07-06|EPI\_ISL\_525942|Original|hCoV-19^^Oregon|Human|OHSU Lab Services Molecular Microbiology Lab|Oregon SARS-CoV-2 Genome Sequencing Center|O'Roak|USA

>Spike|hCoV-19/England/203740645/2020|2020-08-27|EPI\_ISL\_539880|Original|hCoV-19^^England|Human|Respiratory Virus Unit|Respiratory Virus Unit|Platt|United Kingdom

>Spike|hCoV-19/USA/TX-HMH-8024/2020|2020-07-01|EPI\_ISL\_545797|Original|hCoV-19^^Texas|Human|Houston Methodist Hospital|Houston Methodist Hospital|Long|USA

>Spike|hCoV-19/England/20156049204/2020|2020-04-08|EPI\_ISL\_466332|Original|hCoV-19^^England|Human|Respiratory Virus Unit|Respiratory Virus Unit|Platt|United Kingdom

>Spike|hCoV-19/Denmark/DCGC-20865/2020|2020-12-21|EPI\_ISL\_758963|Original|hCoV-19^^Nordjylland|Human|Department of Virus and Microbiological Special Diagnostics|Albertsen Lab|Michaelsen|Denmark

>Spike|hCoV-19/Wales/PHWC-16807E/2020|2020-06-06|EPI\_ISL\_494195|Original|hCoV-19^^Wales|Human|Originating lab|COVID-19 Genomics UK (COG-UK) Consortium|Moore|United Kingdom

>Spike|hCoV-19/Wales/MILK-9E2038/2020|2020-09-20|EPI\_ISL\_581243|Original|hCoV-19^^Wales|Human|Lighthouse Lab in Milton Keynes|Wellcome Sanger Institute for the COVID-19 Genomics UK (COG-UK) consortium|Davies|United Kingdom

>Spike|hCoV-19/Norway/6476/2020|2020-11-18|EPI\_ISL\_775499|Original|hCoV-19^^Vestfold og Telemark|Human|Vestfold Hospital|Norwegian Institute of Public Health|Vollan|Norway

>Spike|hCoV-19/Japan/PG-5821/2020|2020-08-00|EPI\_ISL\_688938|Original|hCoV-19^^Japan|Human|Fukuoka Institute of Health and Environmental Sciences|Pathogen Genomics Center|Sekizuka|Japan

>Spike|hCoV-19/USA/CA-ALSR-2828/2020|2020-07-20|EPI\_ISL\_635700|Original|hCoV-19^^California|Human|San Diego County Public Health Laboratory|Andersen lab at Scripps Research|Gangavarapu|USA

>Spike|hCoV-19/England/ALDP-B85985/2020|2020-11-14|EPI\_ISL\_675740|Original|hCoV-19^^England|Human|Lighthouse Lab in Alderley Park|Wellcome Sanger Institute for the COVID-19 Genomics UK (COG-UK) Consortium|Davies|United Kingdom

>Spike|hCoV-19/Wales/PHWC-481E81/2020|2020-10-16|EPI\_ISL\_613182|Original|hCoV-19^^Wales|Human|Wales Specialist Virology Centre Sequencing lab|COVID-19 Genomics UK (COG-UK) Consortium|Moore|United Kingdom

>Spike|hCoV-19/USA/AZ-TG648731/2020|2020-04-10|EPI\_ISL\_695915|Original|hCoV-19^^Arizona|Human|Sonora Quest Laboratories|TGen North|French|USA

>Spike|hCoV-19/Northern Ireland/NIRE-232FE8/2020|2020-09-27|EPI\_ISL\_680243|Original|hCoV-19^^Northern Ireland|Human|Regional Virus Laboratory|COVID-19 Genomics UK (COG-UK) Consortium|Fairley|United Kingdom

>Spike|hCoV-19/England/MILK-9588EA/2020|2020-06-15|EPI\_ISL\_554789|Original|hCoV-19^^England|Human|Lighthouse Lab in Milton Keynes|Wellcome Sanger Institute for the COVID-19 Genomics UK (COG-UK) consortium|Davies|United Kingdom

>Spike|hCoV-19/USA/UT-UPHL-201124725/2020|2020-04-20|EPI\_ISL\_623209|Original|hCoV-19^^Utah|Human|Utah Public Health Laboratory|Utah Public Health Laboratory|Young|USA

>Spike|hCoV-19/Italy/UMB-IZSUM-48682-13/2020|2020-10-19|EPI\_ISL\_763323|Original|hCoV-19^^Umbria|Human|Istituto Zooprofilattico Sperimentale dell' Umbria e delle Marche - Togo Rosati|Istituto Superiore di Sanit\u00e0|De Sabato|Italy

>Spike|hCoV-19/England/QEUH-C32ED2/2020|2020-12-11|EPI\_ISL\_734033|Original|hCoV-19^^England|Human|Lighthouse Lab in Glasgow|Wellcome Sanger Institute for the COVID-19 Genomics UK (COG-UK) Consortium|Davies|United Kingdom

>Spike|hCoV-19/England/OXON-AE7E1/2020|2020-00-00|EPI\_ISL\_448721|Original|hCoV-19^^England|Human|Oxford Viromics|COVID-19 Genomics UK (COG-UK) Consortium|Golubchik|United Kingdom

>Spike|hCoV-19/USA/NJ-NYUMC84/2020|2020-03-18|EPI\_ISL\_421585|Original|hCoV-19^^New Jersey|Human|NYU Langone Health|Departments of Pathology and Medicine|Maurano|USA

>Spike|hCoV-19/Denmark/DCGC-18195/2020|2020-12-14|EPI\_ISL\_749377|Original|hCoV-19^^Syddanmark|Human|Department of Virus and Microbiological Special Diagnostics|Albertsen Lab|Michaelsen|Denmark

>Spike|hCoV-19/England/CAMB-82E93/2020|2020-04-12|EPI\_ISL\_443356|Original|hCoV-19^^England|Human|Department of Pathology|Wellcome Sanger Institute for the COVID-19 Genomics UK (COG-UK) consortium|Amato|United Kingdom

>Spike|hCoV-19/Czech Republic/NRL\_4038/2020|2020-03-18|EPI\_ISL\_530347|Original|hCoV-19^^Zlin|Human|The National Institute of Public Health|State Veterinary Institute Prague|Nagy|Czech Republic

>Spike|hCoV-19/USA/TX-HMH-MCoV-15997/2020|2020-07-10|EPI\_ISL\_785681|Original|hCoV-19^^Texas|Human|Houston Methodist Hospital|Houston Methodist Hospital|Long|USA

>Spike|hCoV-19/England/NOTT-121719/2020|2020-12-18|EPI\_ISL\_741650|Original|hCoV-19^^England|Human|Queens Medical Centre|COVID-19 Genomics UK (COG-UK) Consortium|Loose|United Kingdom

>Spike|hCoV-19/England/MILK-9F1E87/2020|2020-09-24|EPI\_ISL\_589637|Original|hCoV-19^^England|Human|Lighthouse Lab in Milton Keynes|Wellcome Sanger Institute for the COVID-19 Genomics UK (COG-UK) consortium|Davies|United Kingdom

>Spike|hCoV-19/England/CAMB-1B8A80/2020|2020-10-29|EPI\_ISL\_651676|Original|hCoV-19^^England|Human|Department of Pathology|COVID-19 Genomics UK (COG-UK) Consortium|Goodfellow|United Kingdom

>Spike|hCoV-19/Denmark/ALAB-SSI-671/2020|2020-03-27|EPI\_ISL\_437031|Original|hCoV-19^^Denmark|Human|Department of Virus and Microbiological Special Diagnostics|Albertsen lab|Kirkegaard|Denmark

>Spike|hCoV-19/England/ALDP-C3B7FC/2020|2020-12-11|EPI\_ISL\_731023|Original|hCoV-19^^England|Human|Lighthouse Lab in Alderley Park|Wellcome Sanger Institute for the COVID-19 Genomics UK (COG-UK) Consortium|Davies|United Kingdom

>Spike|hCoV-19/USA/SC-DHEC-1092/2020|2020-07-10|EPI\_ISL\_541668|Original|hCoV-19^^South Carolina|Human|Microbiology Division|Microbiology Division|Flores|USA

>Spike|hCoV-19/USA/TX-HMH075/2020|2020-03-19|EPI\_ISL\_434784|Original|hCoV-19^^Texas|Human|Houston Methodist Hospital|Houston Methodist Hospital|Long|USA

>Spike|hCoV-19/USA/WA-UW-2980/2020|2020-03-27|EPI\_ISL\_486066|Original|hCoV-19^^Washington|Human|UW Virology Lab|UW Virology Lab|Roychoudhury|USA

>Spike|hCoV-19/Japan/PG-3852/2020|2020-07-00|EPI\_ISL\_692103|Original|hCoV-19^^Japan|Human|Pathogen Genomics Center|Pathogen Genomics Center|Sekizuka|Japan

>Spike|hCoV-19/Guangdong/GDFS2020054-P0005/2020|2020-02-10|EPI\_ISL\_413850|Original|hCoV-19^^Guangdong|Human|Guangdong Provincial Institution of Public Health|Guangdong Provincial Institution of Public Health|Lu|China

>Spike|hCoV-19/Latvia/178/2020|2020-09-30|EPI\_ISL\_639675|Original|hCoV-19^^Latvia|Human|E. Gulbja Laboratorija|Latvian Biomedical Research and Study Centre|Zrelavs|Latvia

>Spike|hCoV-19/Peru/LIM-INS-121/2020|2020-05-04|EPI\_ISL\_536519|Original|hCoV-19^^Lima|Human|Instituto Nacional de Salud|Laboratorio de Infecciones Respiratorias Agudas|Lopez|Peru

>Spike|hCoV-19/Wales/PHWC-4A49C3/2020|2020-12-09|EPI\_ISL\_763760|Original|hCoV-19^^Wales|Human|Wales Specialist Virology Centre Sequencing lab|COVID-19 Genomics UK (COG-UK) Consortium|Moore|United Kingdom

>Spike|hCoV-19/USA/NY-Wadsworth-281404-01/2020|2020-10-30|EPI\_ISL\_734470|Original|hCoV-19^^New York|Human|Masonic Medical Research Institute|Wadsworth Center|Lasek-Nesselquist|USA

>Spike|hCoV-19/Czech Republic/NRL-8631/2020|2020-09-04|EPI\_ISL\_568577|Original|hCoV-19^^Prague|Human|The National Institute of Public Health|State Veterinary Institute Prague|Nagy|Czech Republic

>Spike|hCoV-19/Saudi Arabia/85715/2020|2020-03-15|EPI\_ISL\_469244|Original|hCoV-19^^Jeddah|Human|Special Infectious Agents Unit|Special Infectious Agents Unit|Submitter|Saudi Arabia

>Spike|hCoV-19/USA/SC-20-1415-T10/2020|2020-07-03|EPI\_ISL\_516763|Original|hCoV-19^^South Carolina|Human|van Bakel Laboratory|van Bakel Laboratory|van Bakel|USA

>Spike|hCoV-19/England/ALDP-B74BFC/2020|2020-11-12|EPI\_ISL\_678986|Original|hCoV-19^^England|Human|Queens Medical Centre|COVID-19 Genomics UK (COG-UK) Consortium|Loose|United Kingdom

>Spike|hCoV-19/England/LIVE-A06E2/2020|2020-05-28|EPI\_ISL\_472127|Original|hCoV-19^^England|Human|Liverpool Clinical Laboratories|COVID-19 Genomics UK (COG-UK) Consortium|Haldenby|United Kingdom

>Spike|hCoV-19/Denmark/DCGC-8341/2020|2020-10-26|EPI\_ISL\_617335|Original|hCoV-19^^Midtjylland|Human|Department of Virus and Microbiological Special Diagnostics|Albertsen lab|Michaelsen|Denmark

>Spike|hCoV-19/Denmark/DCGC-18398/2020|2020-12-07|EPI\_ISL\_749231|Original|hCoV-19^^Hovedstaden|Human|Department of Virus and Microbiological Special Diagnostics|Albertsen Lab|Michaelsen|Denmark

>Spike|hCoV-19/England/LOND-D9B1E/2020|2020-10-13|EPI\_ISL\_612078|Original|hCoV-19^^England|Human|University College London|COVID-19 Genomics UK (COG-UK) Consortium|Roy|United Kingdom

>Spike|hCoV-19/England/ALDP-B3F128/2020|2020-10-28|EPI\_ISL\_645368|Original|hCoV-19^^England|Human|Lighthouse Lab in Alderley Park|Wellcome Sanger Institute for the COVID-19 Genomics UK (COG-UK) Consortium|Davies|United Kingdom

>Spike|hCoV-19/USA/TX-HMH-6496/2020|2020-06-27|EPI\_ISL\_546037|Original|hCoV-19^^Texas|Human|Houston Methodist Hospital|Houston Methodist Hospital|Long|USA

>Spike|hCoV-19/Denmark/DCGC-12938/2020|2020-12-07|EPI\_ISL\_712417|Original|hCoV-19^^Hovedstaden|Human|Department of Virus and Microbiological Special Diagnostics|Albertsen Lab|Michaelsen|Denmark

>Spike|hCoV-19/England/QEUEH-B9FEE3/2020|2020-11-18|EPI\_ISL\_719685|Original|hCoV-19^^England|Human|Lighthouse Lab in Glasgow|Wellcome Sanger Institute for the COVID-19 Genomics UK (COG-UK) Consortium|Davies|United Kingdom

>Spike|hCoV-19/England/PORT-2CFEFE/2020|2020-00-00|EPI\_ISL\_493624|Original|hCoV-19^^England|Human|Centre for Enzyme Innovation|COVID-19 Genomics UK (COG-UK) Consortium|Robson|United Kingdom

>Spike|hCoV-19/England/MILK-ACCA17/2020|2020-10-21|EPI\_ISL\_629161|Original|hCoV-19^^England|Human|Lighthouse Lab in Milton Keynes|Wellcome Sanger Institute for the COVID-19 Genomics UK (COG-UK) consortium|Davies|United Kingdom

>Spike|hCoV-19/England/ALDP-A67B39/2020|2020-10-12|EPI\_ISL\_630353|Original|hCoV-19^^England|Human|Lighthouse Lab in Alderley Park|Wellcome Sanger Institute for the COVID-19 Genomics UK (COG-UK) consortium|Davies|United Kingdom

>Spike|hCoV-19/Iceland/280/2020|2020-03-17|EPI\_ISL\_417608|Original|hCoV-19^^Reykjavik|Human|The National University Hospital of Iceland|deCODE genetics|J\u00f3nsson|Iceland

>Spike|hCoV-19/Wales/PHWC-496DD7/2020|2020-11-24|EPI\_ISL\_726730|Original|hCoV-19^^Wales|Human|Originating lab|COVID-19 Genomics UK (COG-UK) Consortium|Moore|United Kingdom

>Spike|hCoV-19/England/MILK-A6A468/2020|2020-10-09|EPI\_ISL\_627506|Original|hCoV-19^^England|Human|Virology Department|COVID-19 Genomics UK (COG-UK) Consortium|de Silva|United Kingdom

>Spike|hCoV-19/England/QEUEH-B7EBA7/2020|2020-11-14|EPI\_ISL\_668120|Original|hCoV-19^^England|Human|Lighthouse Lab in Glasgow|Wellcome Sanger Institute for the COVID-19 Genomics UK (COG-UK) Consortium|Davies|United Kingdom

>Spike|hCoV-19/USA/MI-MDHHS-SC21318/2020|2020-04-01|EPI\_ISL\_507573|Original|hCoV-19^^Michigan|Human|Michigan Department of Health and Human Services|Michigan Department of Health and Human Services|Blankenship|USA

>Spike|hCoV-19/SaudiArabia/KAUST-MADINAH860/2020|2020-05-26|EPI\_ISL\_513196|Original|hCoV-19^^Madinah|Human|Pathogen Genomics Lab King Abdullah University of Science and Technology(KAUST)|Pathogen Genomics Lab King Abdullah University of Science and Technology(KAUST)|Mohamed Ghazzali|Saudi Arabia

>Spike|hCoV-19/USA/MN-QDX-1019/2020|2020-03-14|EPI\_ISL\_571745|Original|hCoV-19^^Minnesota|Human|Quest Diagnostics|Quest Diagnostics|Kagan|USA

>Spike|hCoV-19/England/ALDP-A523C0/2020|2020-10-07|EPI\_ISL\_598137|Original|hCoV-19^^England|Human|Lighthouse Lab in Alderley Park|Wellcome Sanger Institute for the COVID-19 Genomics UK (COG-UK) consortium|Davies|United Kingdom

>Spike|hCoV-19/USA/WI-UW-628/2020|2020-06-28|EPI\_ISL\_491323|Original|hCoV-19^^Wisconsin|Human|University of Wisconsin-Madison AIDS Vaccine Research Laboratories|University of Wisconsin-Madison AIDS Vaccine Research Laboratories|Baczenas|USA

>Spike|hCoV-19/South Africa/KRISP-0138/2020|2020-05-14|EPI\_ISL\_467490|Original|hCoV-19^^KwaZulu-Natal|Human|Molecular Diagnostics Services (MDS)|KRISP|de Oliveira|South Africa

>Spike|hCoV-19/England/MILK-A6BB35/2020|2020-10-09|EPI\_ISL\_608843|Original|hCoV-19^^England|Human|Lighthouse Lab in Milton Keynes|Wellcome Sanger Institute for the COVID-19 Genomics UK (COG-UK) consortium|Davies|United Kingdom

>Spike|hCoV-19/Netherlands/ZH-EMC-1008/2020|2020-11-18|EPI\_ISL\_722672|Original|hCoV-19^^Zuid Holland|Human|Dutch COVID-19 response team|Erasmus Medical Center|Oude Munnink|Netherlands

>Spike|hCoV-19/England/C200043942/2020|2020-11-07|EPI\_ISL\_666749|Original|hCoV-19^^England|Human|Respiratory Virus Unit|COVID-19 Genomics UK (COG-UK) Consortium|Platt|United Kingdom

>Spike|hCoV-19/Thailand/WU5-3/2020|2020-01-31|EPI\_ISL\_450955|Original|hCoV-19^^Thailand|Human|Center of Excellence in Clinical Virology|Center of Excellence in Clinical Virology|Poovorawan|Thailand

>Spike|hCoV-19/USA/NE-10837/2020|2020-05-04|EPI\_ISL\_475188|Original|hCoV-19^^Nebraska|Human|Nebraska Public Health Laboratory|UNMC COVID-19 Response Team|Pratt|USA



>Spike|hCoV-19/England/MILK-974648/2020|2020-08-21|EPI\_ISL\_575908|Original|hCoV-19^^England|Human|Lighthouse Lab in Milton Keynes|Wellcome Sanger Institute for the COVID-19 Genomics UK (COG-UK) consortium|Davies|United Kingdom

>Spike|hCoV-19/Scotland/CVR5971/2020|2020-11-24|EPI\_ISL\_703754|Original|hCoV-19^^Scotland|Human|West of Scotland Specialist Virology Centre|COVID-19 Genomics UK (COG-UK) Consortium|Robertson|United Kingdom

>Spike|hCoV-19/Switzerland/BS-UHB-42181327/2020|2020-03-08|EPI\_ISL\_527955|Original|hCoV-19^^Basel-Stadt|Human|University Hospital Basel|University Hospital Basel|Roloff Handschin|Switzerland

>Spike|hCoV-19/Wales/PHWC-27AD8/2020|2020-03-30|EPI\_ISL\_432369|Original|hCoV-19^^Wales|Human|Wales Specialist Virology Centre|Public Health Wales Microbiology Cardiff|Moore|United Kingdom

>Spike|hCoV-19/England/QEUEH-9B5502/2020|2020-09-03|EPI\_ISL\_590410|Original|hCoV-19^^England|Human|Lighthouse Lab in Glasgow|Wellcome Sanger Institute for the COVID-19 Genomics UK (COG-UK) consortium|Davies|United Kingdom

>Spike|hCoV-19/England/LOND-D7EAE/2020|2020-04-16|EPI\_ISL\_492496|Original|hCoV-19^^England|Human|University College London|Wellcome Sanger Institute for the COVID-19 Genomics UK (COG-UK) consortium|Davies|United Kingdom

>Spike|hCoV-19/England/CAMC-990DF6/2020|2020-08-27|EPI\_ISL\_551883|Original|hCoV-19^^England|Human|Lighthouse Lab in Cambridge|Wellcome Sanger Institute for the COVID-19 Genomics UK (COG-UK) consortium|Davies|United Kingdom

>Spike|hCoV-19/England/CAMC-B9A352/2020|2020-11-15|EPI\_ISL\_673615|Original|hCoV-19^^England|Human|Lighthouse Lab in Cambridge|Wellcome Sanger Institute for the COVID-19 Genomics UK (COG-UK) Consortium|Davies|United Kingdom

>Spike|hCoV-19/England/ALDP-A6D887/2020|2020-10-14|EPI\_ISL\_607920|Original|hCoV-19^^England|Human|Lighthouse Lab in Alderley Park|Wellcome Sanger Institute for the COVID-19 Genomics UK (COG-UK) consortium|Davies|United Kingdom

>Spike|hCoV-19/USA/WI-WSLH-200402/2020|2020-04-23|EPI\_ISL\_578568|Original|hCoV-19^^Wisconsin|Human|Wisconsin State Laboratory of Hygiene Communicable Disease Division|Wisconsin State Laboratory of Hygiene Communicable Disease Division|Florek|USA

>Spike|hCoV-19/USA/WA-S1836/2020|2020-05-27|EPI\_ISL\_496262|Original|hCoV-19^^Washington|Human|Washington State Department of Health|Seattle Flu Study|Lee|USA

>Spike|hCoV-19/England/CAMC-B786E8/2020|2020-11-12|EPI\_ISL\_783434|Original|hCoV-19^^England|Human|Lighthouse Lab in Cambridge|Wellcome Sanger Institute for the COVID-19 Genomics UK (COG-UK) Consortium|Davies|United Kingdom

>Spike|hCoV-19/Denmark/DCGC-13153/2020|2020-11-30|EPI\_ISL\_712619|Original|hCoV-19^^Hovedstaden|Human|Department of Virus and Microbiological Special Diagnostics|Albertsen Lab|Michaelsen|Denmark

>Spike|hCoV-19/USA/NY-Wadsworth-248654-01/2020|2020-10-19|EPI\_ISL\_754719|Original|hCoV-19^^New York|Human|Wadsworth Center|Wadsworth Center|Lasek-Nesselquist|USA

>Spike|hCoV-19/England/20129037304/2020|2020-03-20|EPI\_ISL\_424038|Original|hCoV-19^^England|Human|Respiratory Virus Unit|Respiratory Virus Unit|Platt|United Kingdom

>Spike|hCoV-19/USA/TX-HMH-1721/2020|2020-04-17|EPI\_ISL\_542790|Original|hCoV-19^^Texas|Human|Houston Methodist Hospital|Houston Methodist Hospital|Long|USA

>Spike|hCoV-19/Belgium/reg-0326873/2020|2020-03-26|EPI\_ISL\_734523|Original|hCoV-19^^Glimes|Human|UZ Leuven|KU Leuven|Maes|Belgium

>Spike|hCoV-19/USA/WA-S50/2020|2020-03-05|EPI\_ISL\_417103|Original|hCoV-19^^Washington|Human|Washington State Department of Health|Seattle Flu Study|Bedford|USA

>Spike|hCoV-19/England/ALDP-A52472/2020|2020-10-07|EPI\_ISL\_597903|Original|hCoV-19^^England|Human|Lighthouse Lab in Alderley Park|Wellcome Sanger Institute for the COVID-19 Genomics UK (COG-UK) consortium|Davies|United Kingdom

>Spike|hCoV-19/India/UN-1617/2020|2020-03-12|EPI\_ISL\_421670|Original|hCoV-19^^India|Human|National Influenza Center|Indian Council of Medical Research-National Institute of Virology|Yadav|India

>Spike|hCoV-19/USA/TX-HMH-MCoV-14592/2020|2020-10-11|EPI\_ISL\_787877|Original|hCoV-19^^Texas|Human|Houston Methodist Hospital|Houston Methodist Hospital|Long|USA

>Spike|hCoV-19/Denmark/DCGC-20475/2020|2020-12-21|EPI\_ISL\_759173|Original|hCoV-19^^Sjaelland|Human|Department of Virus and Microbiological Special Diagnostics|Albertsen Lab|Michaelsen|Denmark

>Spike|hCoV-19/USA/MI-MDHHS-SC21718/2020|2020-07-13|EPI\_ISL\_529837|Original|hCoV-19^^Michigan|Human|Michigan Department of Health and Human Services|Michigan Department of Health and Human Services|Blankenship|USA

>Spike|hCoV-19/Denmark/DCGC-2492/2020|2020-08-10|EPI\_ISL\_617763|Original|hCoV-19^^Hovedstaden|Human|Department of Virus and Microbiological Special Diagnostics|Albertsen lab|Michaelsen|Denmark

>Spike|hCoV-19/Austria/CeMM0115/2020|2020-03-18|EPI\_ISL\_437973|Original|hCoV-19^^Innsbruck|Human|Universitaetsklinik f\u00fcr Innere Medizin II Innsbruck|Bergthaler laboratory|Bergthaler|Austria

>Spike|hCoV-19/USA/TX-HMH-MCoV-19333/2020|2020-11-29|EPI\_ISL\_783769|Original|hCoV-19^^Texas|Human|Houston Methodist Hospital|Houston Methodist Hospital|Long|USA

>Spike|hCoV-19/France/IDF-50010DC/2020|2020-03-00|EPI\_ISL\_447657|Original|hCoV-19^^France|Human|H\u00f4pital Henri-Mondor Ap-Hp|H\u00f4pital Henri-Mondor Ap-Hp|Rodriguez|France

>Spike|hCoV-19/USA/MA-MGH-00811/2020|2020-04-13|EPI\_ISL\_791774|Original|hCoV-19^^Massachusetts|Human|Massachusetts General Hospital|Infectious Disease Program|Park|USA

>Spike|hCoV-19/South Africa/NHLS-UCT-GS-2058/2020|2020-09-18|EPI\_ISL\_700559|Original|hCoV-19^^Western Cape|Human|Heideveld Emergency Centre|NHLS/UCT|Iranzadeh|South Africa

>Spike|hCoV-19/Russia/CRIE5047362/2020|2020-07-16|EPI\_ISL\_534343|Original|hCoV-19^^Moscow|Human|Molecular diagnostic laboratory of Federal Budget Institution of Science \Central Research Institute of Epidemiology\ of The Federal Service on Customers' Rights Protection and Human Well-being Surveillance|Group of Genomics and Postgenomic Technologies of Central Research Institute of Epidemiology|Speranskaya|Russia

>Spike|hCoV-19/England/CAMB-1B147A/2020|2020-05-07|EPI\_ISL\_458525|Original|hCoV-19^^England|Human|Department of Pathology|Wellcome Sanger Institute for the COVID-19 Genomics UK (COG-UK) consortium|Davies|United Kingdom

>Spike|hCoV-19/Wales/PHWC-482C86/2020|2020-10-21|EPI\_ISL\_613277|Original|hCoV-19^^Wales|Human|Wales Specialist Virology Centre Sequencing lab|COVID-19 Genomics UK (COG-UK) Consortium|Moore|United Kingdom

>Spike|hCoV-19/Netherlands/NH-RIVM-20486/2020|2020-12-06|EPI\_ISL\_728701|Original|hCoV-19^^Noord-Holland|Human|Dutch COVID-19 response team|National Institute for Public Health and the Environment (RIVM)|Meijer|Netherlands

>Spike|hCoV-19/England/MILK-B031B4/2020|2020-10-21|EPI\_ISL\_642970|Original|hCoV-19^^England|Human|Lighthouse Lab in Milton Keynes|Wellcome Sanger Institute for the COVID-19 Genomics UK (COG-UK) Consortium|Davies|United Kingdom

>Spike|hCoV-19/England/MILK-A7BBF6/2020|2020-10-15|EPI\_ISL\_607397|Original|hCoV-19^^England|Human|Lighthouse Lab in Milton Keynes|Wellcome Sanger Institute for the COVID-19 Genomics UK (COG-UK) consortium|Davies|United Kingdom

>Spike|hCoV-19/England/CAMB-7768A/2020|2020-04-01|EPI\_ISL\_439443|Original|hCoV-19^^England|Human|Department of Pathology|Wellcome Sanger Institute for the COVID-19 Genomics UK (COG-UK) consortium|Amato|United Kingdom

>Spike|hCoV-19/England/MILK-9A8F40/2020|2020-09-01|EPI\_ISL\_551234|Original|hCoV-19^^England|Human|Lighthouse Lab in Milton Keynes|Wellcome Sanger Institute for the COVID-19 Genomics UK (COG-UK) consortium|Davies|United Kingdom

>Spike|hCoV-19/USA/WA-UW275/2020|2020-03-14|EPI\_ISL\_418060|Original|hCoV-19^^Washington|Human|UW Virology Lab|UW Virology Lab|Roychoudhury|USA

>Spike|hCoV-19/Switzerland/BE-ETHZ-300431/2020|2020-09-30|EPI\_ISL\_603386|Original|hCoV-19^^Bern|Human|Viollier AG|Department of Biosystems Science and Engineering|Nadeau|Switzerland

>Spike|hCoV-19/France/PAC-IHU-0423/2020|2020-04-02|EPI\_ISL\_569498|Original|hCoV-19^^Provence-Alpes-C\u00f4te-d\u00e0z|Human|MEPHI|MEPHI|Levasseur|France

>Spike|hCoV-19/Denmark/DCGC-15095/2020|2020-11-23|EPI\_ISL\_713627|Original|hCoV-19^^Midtjylland|Human|Department of Virus and Microbiological Special Diagnostics|Albertsen Lab|Michaelsen|Denmark

>Spike|hCoV-19/Wales/PHWC-49F943/2020|2020-12-09|EPI\_ISL\_743293|Original|hCoV-19^^Wales|Human|Wales Specialist Virology Centre Sequencing lab|COVID-19 Genomics UK (COG-UK) Consortium|Moore|United Kingdom

>Spike|hCoV-19/Brazil/MA-IEC-164827/2020|2020-04-24|EPI\_ISL\_524788|Original|hCoV-19^^Maranh\u00e3o|Human|\uffeffEvandro Chagas Institute|\uffeffEvandro Chagas Institute|Sousa J\u00fanior|Brazil

>Spike|hCoV-19/Australia/TAS248/2020|2020-04-21|EPI\_ISL\_522675|Original|hCoV-19^^Tasmania|Human|Royal Hobart Hospital Microbiology Department|MDU-PHL|Schultz|Australia

>Spike|hCoV-19/England/ALDP-9CB8D3/2020|2020-09-16|EPI\_ISL\_575565|Original|hCoV-19^^England|Human|Lighthouse Lab in Alderley Park|Wellcome Sanger Institute for the COVID-19 Genomics UK (COG-UK) consortium|Davies|United Kingdom

>Spike|hCoV-19/Russia/StPetersburg-RII11251S/2020|2020-04-30|EPI\_ISL\_507247|Original|hCoV-19^^Saint Petersburg|Human|WHO National Influenza Centre Russian Federation|WHO National Influenza Centre Russian Federation|Komissarov|Russia

>Spike|hCoV-19/India/DL-NCDC5641-CSIR-IGIB/2020|2020-05-25|EPI\_ISL\_482605|Original|hCoV-19^^Delhi|Human|National Centre for Disease control (NCDC)|NCDC/CSIR-IGIB|Singh|India

>Spike|hCoV-19/Netherlands/NA\_49/2020|2020-03-09|EPI\_ISL\_422810|Original|hCoV-19^^Netherlands|Human|Dutch COVID-19 response team|Erasmus Medical Center|Oude Munnink|Netherlands

>Spike|hCoV-19/England/ALDP-AA1DB5/2020|2020-10-22|EPI\_ISL\_624968|Original|hCoV-19^^England|Human|Lighthouse Lab in Alderley Park|Wellcome Sanger Institute for the COVID-19 Genomics UK (COG-UK) consortium|Davies|United Kingdom

>Spike|hCoV-19/USA/CA-CZB-2068/2020|2020-04-27|EPI\_ISL\_486311|Original|hCoV-19^^California|Human|San Joaquin County Public Health Lab|Chan-Zuckerberg Biohub|McGeever|USA

>Spike|hCoV-19/England/CAMC-A65D35/2020|2020-10-11|EPI\_ISL\_638445|Original|hCoV-19^^England|Human|Department of Pathology|COVID-19 Genomics UK (COG-UK) Consortium|Goodfellow|United Kingdom

>Spike|hCoV-19/Australia/VIC9904/2020|2020-08-24|EPI\_ISL\_565774|Original|hCoV-19^^Victoria|Human|Microbiological Diagnostic Unit - Public Health Laboratory (MDU-PHL)|MDU-PHL|Schultz|Australia

>Spike|hCoV-19/England/ALDP-A93581/2020|2020-10-19|EPI\_ISL\_611044|Original|hCoV-19^^England|Human|Lighthouse Lab in Alderley Park|Wellcome Sanger Institute for the COVID-19 Genomics UK (COG-UK) consortium|Davies|United Kingdom

>Spike|hCoV-19/England/MILK-B06281/2020|2020-10-24|EPI\_ISL\_643019|Original|hCoV-19^^England|Human|Lighthouse Lab in Milton Keynes|Wellcome Sanger Institute for the COVID-19 Genomics UK (COG-UK) Consortium|Davies|United Kingdom

>Spike|hCoV-19/New Zealand/20VR1454/2020|2020-03-22|EPI\_ISL\_456220|Original|hCoV-19^^Southern|Human|Southern Community Labs Dunedin|Institute of Environmental Science and Research (ESR)|de Ligt|New Zealand

>Spike|hCoV-19/USA/TX-HMH-MCoV-9844/2020|2020-07-06|EPI\_ISL\_780303|Original|hCoV-19^^Texas|Human|Houston Methodist Hospital|Houston Methodist Hospital|Long|USA

>Spike|hCoV-19/England/ALDP-653017/2020|2020-07-03|EPI\_ISL\_558228|Original|hCoV-19^^England|Human|Lighthouse Lab in Alderley Park|Wellcome Sanger Institute for the COVID-19 Genomics UK (COG-UK) consortium|Davies|United Kingdom

>Spike|hCoV-19/Singapore/284/2020|2020-04-09|EPI\_ISL\_462402|Original|hCoV-19^^Singapore|Human|National Public Health Laboratory|National Public Health Laboratory|Mak|Singapore

>Spike|hCoV-19/Wales/PHWC-24DE1/2020|2020-03-21|EPI\_ISL\_420941|Original|hCoV-19^^Wales|Human|Wales Specialist Virology Centre|Public Health Wales Microbiology Cardiff|Moore|United Kingdom

>Spike|hCoV-19/England/MILK-B55845/2020|2020-11-06|EPI\_ISL\_657441|Original|hCoV-19^^England|Human|Lighthouse Lab in Milton Keynes|Wellcome Sanger Institute for the COVID-19 Genomics UK (COG-UK) Consortium|Davies|United Kingdom

>Spike|hCoV-19/Wales/PHWC-49D541/2020|2020-12-11|EPI\_ISL\_742797|Original|hCoV-19^^Wales|Human|Wales Specialist Virology Centre Sequencing lab|COVID-19 Genomics UK (COG-UK) Consortium|Moore|United Kingdom

>Spike|hCoV-19/England/CAMB-826F5/2020|2020-04-13|EPI\_ISL\_443524|Original|hCoV-19^^England|Human|Department of Pathology|Wellcome Sanger Institute for the COVID-19 Genomics UK (COG-UK) consortium|Amato|United Kingdom

>Spike|hCoV-19/England/QEUH-5E6AA3/2020|2020-06-16|EPI\_ISL\_533280|Original|hCoV-19^^England|Human|Lighthouse Lab in Glasgow|Wellcome Sanger Institute for the COVID-19 Genomics UK (COG-UK) consortium|Davies|United Kingdom

>Spike|hCoV-19/USA/LA-EVTL759/2020|2020-07-20|EPI\_ISL\_653450|Original|hCoV-19^^Louisiana|Human|LSUHS Emerging Viral Threat Laboratory|Microbial Genome Sequencing Center|Kamil|USA

>Spike|hCoV-19/Wales/PHWC-48B0EB/2020|2020-11-03|EPI\_ISL\_666193|Original|hCoV-19^^Wales|Human|Wales Specialist Virology Centre Sequencing lab|COVID-19 Genomics UK (COG-UK) Consortium|Moore|United Kingdom

>Spike|hCoV-19/Japan/TK-YE63557d/2020|2020-03-00|EPI\_ISL\_582137|Original|hCoV-19^^Tokyo|Human|Tokyo Metropolitan Institute of Public Health|Tokyo Metropolitan Institute of Public Health|Nagashima|Japan

>Spike|hCoV-19/USA/CA-CZB-14536/2020|2020-11-11|EPI\_ISL\_738672|Original|hCoV-19^^California|Human|Santa Clara County Public Health Laboratory|Chan-Zuckerberg Biohub|Kamm|USA

>Spike|hCoV-19/England/CAMC-B22BA2/2020|2020-11-02|EPI\_ISL\_647355|Original|hCoV-19^^England|Human|Lighthouse Lab in Cambridge|Wellcome Sanger Institute for the COVID-19 Genomics UK (COG-UK) Consortium|Davies|United Kingdom

>Spike|hCoV-19/England/MILK-974B67/2020|2020-08-21|EPI\_ISL\_552503|Original|hCoV-19^^England|Human|Lighthouse Lab in Milton Keynes|Wellcome Sanger Institute for the COVID-19 Genomics UK (COG-UK) consortium|Davies|United Kingdom

>Spike|hCoV-19/USA/UT-UPHL-2012768126/2020|2020-11-30|EPI\_ISL\_746466|Original|hCoV-19^^Utah|Human|Utah Public Health Laboratory|Utah Public Health Laboratory|Gallagher|USA

>Spike|hCoV-19/USA/WI-UW-1516/2020|2020-09-14|EPI\_ISL\_541642|Original|hCoV-19^^Wisconsin|Human|University of Wisconsin-Madison AIDS Vaccine Research Laboratories|University of Wisconsin-Madison AIDS Vaccine Research Laboratories|Baczenas|USA

>Spike|hCoV-19/USA/TX-HMH-MCoV-10784/2020|2020-07-05|EPI\_ISL\_789625|Original|hCoV-19^^Texas|Human|Houston Methodist Hospital|Houston Methodist Hospital|Long|USA

>Spike|hCoV-19/Scotland/CVR5957/2020|2020-11-23|EPI\_ISL\_705696|Original|hCoV-19^^Scotland|Human|West of Scotland Specialist Virology Centre|COVID-19 Genomics UK (COG-UK) Consortium|Robertson|United Kingdom

>Spike|hCoV-19/USA/WA-UW82/2020|2020-03-10|EPI\_ISL\_416438|Original|hCoV-19^^Washington|Human|UW Virology Lab|UW Virology Lab|Roychoudhury|USA

>Spike|hCoV-19/Switzerland/BL-UHB-42197033/2020|2020-03-18|EPI\_ISL\_528203|Original|hCoV-19^^Basel-Land|Human|University Hospital Basel|University Hospital Basel|Roloff Handschin|Switzerland

>Spike|hCoV-19/USA/MA-MASPHL-00042/2020|2020-04-02|EPI\_ISL\_791545|Original|hCoV-19^^Massachusetts|Human|Massachusetts State Public Health Laboratory|Infectious Disease Program|Park|USA

>Spike|hCoV-19/England/ALDP-AA5364/2020|2020-10-21|EPI\_ISL\_625230|Original|hCoV-19^^England|Human|Lighthouse Lab in Alderley Park|Wellcome Sanger Institute for the COVID-19 Genomics UK (COG-UK) consortium|Davies|United Kingdom

>Spike|hCoV-19/England/MILK-B96E28/2020|2020-11-14|EPI\_ISL\_674937|Original|hCoV-19^^England|Human|Lighthouse Lab in Milton Keynes|Wellcome Sanger Institute for the COVID-19 Genomics UK (COG-UK) Consortium|Davies|United Kingdom

>Spike|hCoV-19/Portugal/PT0992/2020|2020-03-22|EPI\_ISL\_511540|Original|hCoV-19^^Portugal|Human|Instituto Nacional de Saude (INSA)|Instituto Nacional de Saude (INSA)|Borges|Portugal

>Spike|hCoV-19/United Arab Emirates/skmc-3890161/2020|2020-09-23|EPI\_ISL\_582681|Original|hCoV-19^^United Arab Emirates|Human|Sheikh Khalifa Medical City|Molecular/Surveillance lab\nSheikh Khalifa Medical City|Amirtharaj|United Arab Emirates

>Spike|hCoV-19/England/QEUA-AD40A1/2020|2020-10-26|EPI\_ISL\_633739|Original|hCoV-19^^England|Human|Lighthouse Lab in Glasgow|Wellcome Sanger Institute for the COVID-19 Genomics UK (COG-UK) consortium|Davies|United Kingdom

>Spike|hCoV-19/Denmark/DCGC-20075/2020|2020-12-07|EPI\_ISL\_747966|Original|hCoV-19^^Syddanmark|Human|Department of Virus and Microbiological Special Diagnostics|Albertsen Lab|Michaelsen|Denmark

>Spike|hCoV-19/USA/MN-MDH-2196/2020|2020-11-28|EPI\_ISL\_723147|Original|hCoV-19^^Minnesota|Human|Vault Health|Minnesota Department of Health|Lorentz|USA

>Spike|hCoV-19/USA/TX-HMH-MCoV-11351/2020|2020-09-06|EPI\_ISL\_789776|Original|hCoV-19^^Texas|Human|Houston Methodist Hospital|Houston Methodist Hospital|Long|USA

>Spike|hCoV-19/Canada/ON-PHL-20-01272/2020|2020-06-00|EPI\_ISL\_548880|Original|hCoV-19^^Ontario|Human|Public Health Ontario Laboratory|Public Health Ontario Laboratory|Guthrie|Canada

>Spike|hCoV-19/England/QEUA-9CA50A/2020|2020-09-10|EPI\_ISL\_567496|Original|hCoV-19^^England|Human|Lighthouse Lab in Glasgow|Wellcome Sanger Institute for the COVID-19 Genomics UK (COG-UK) consortium|Davies|United Kingdom

>Spike|hCoV-19/England/MILK-BABC17/2020|2020-11-18|EPI\_ISL\_681386|Original|hCoV-19^^England|Human|Lighthouse Lab in Milton Keynes|Wellcome Sanger Institute for the COVID-19 Genomics UK (COG-UK) Consortium|Davies|United Kingdom

>Spike|hCoV-19/England/MILK-93A462/2020|2020-06-21|EPI\_ISL\_552802|Original|hCoV-19^^England|Human|Lighthouse Lab in Milton Keynes|Wellcome Sanger Institute for the COVID-19 Genomics UK (COG-UK) consortium|Davies|United Kingdom

>Spike|hCoV-19/USA/LA-GBCL-26684507/2020|2020-04-10|EPI\_ISL\_485312|Original|hCoV-19^^Louisiana|Human|River Road Testing Lab|Ginkgo Bioworks Clinical Laboratory|Smith|USA

>Spike|hCoV-19/USA/TX-HMH-MCoV-13350/2020|2020-08-24|EPI\_ISL\_788497|Original|hCoV-19^^Texas|Human|Houston Methodist Hospital|Houston Methodist Hospital|Long|USA

>Spike|hCoV-19/Wales/PHWC-4A6554/2020|2020-12-17|EPI\_ISL\_765047|Original|hCoV-19^^Wales|Human|Wales Specialist Virology Centre Sequencing lab|COVID-19 Genomics UK (COG-UK) Consortium|Moore|United Kingdom

>Spike|hCoV-19/England/QEUA-9A4199/2020|2020-09-01|EPI\_ISL\_540215|Original|hCoV-19^^England|Human|Lighthouse Lab in Glasgow|Wellcome Sanger Institute for the COVID-19 Genomics UK (COG-UK) consortium|Davies|United Kingdom

>Spike|hCoV-19/England/MILK-99531D/2020|2020-08-24|EPI\_ISL\_552208|Original|hCoV-19^^England|Human|Lighthouse Lab in Milton Keynes|Wellcome Sanger Institute for the COVID-19 Genomics UK (COG-UK) consortium|Davies|United Kingdom

>Spike|hCoV-19/USA/CA-ALSR-1943/2020|2020-07-08|EPI\_ISL\_512248|Original|hCoV-19^^California|Human|San Diego County Public Health Laboratory|Andersen lab at Scripps Research|Gangavarapu|USA

>Spike|hCoV-19/Greece/55\_36015/2020|2020-03-23|EPI\_ISL\_447834|unknown|hCoV-19^^Athens|Human|unknown|Department of Medicine|Submitter|Greece

>Spike|hCoV-19/Switzerland/VD-ETHZ-370507/2020|2020-11-17|EPI\_ISL\_693991|Original|hCoV-19^^Vaud|Human|Viollier AG|Department of Biosystems Science and Engineering|Nadeau|Switzerland

>Spike|hCoV-19/England/QEUA-ALDE2A/2020|2020-09-29|EPI\_ISL\_587571|Original|hCoV-19^^England|Human|Lighthouse Lab in Glasgow|Wellcome Sanger Institute for the COVID-19 Genomics UK (COG-UK) consortium|Davies|United Kingdom

>Spike|hCoV-19/USA/MA-MGH-00042/2020|2020-03-25|EPI\_ISL\_460105|Original|hCoV-19^^Massachusetts|Human|Massachusetts General Hospital|Infectious Disease Program|Lemieux|USA

>Spike|hCoV-19/India/DL-NCDC-A1-CSIR-IGIB/2020|2020-08-00|EPI\_ISL\_636826|Original|hCoV-19^^Delhi|Human|National Centre for Disease control (NCDC)|NCDC/CSIR-IGIB|Faruq|India

>Spike|hCoV-19/Singapore/866/2020|2020-04-28|EPI\_ISL\_527375|Original|hCoV-19^^Singapore|Human|National Public Health Laboratory|National Public Health Laboratory|Mak|Singapore

>Spike|hCoV-19/England/ALDP-905A6E/2020|2020-06-24|EPI\_ISL\_551446|Original|hCoV-19^^England|Human|Lighthouse Lab in Alderley Park|Wellcome Sanger Institute for the COVID-19 Genomics UK (COG-UK) consortium|Davies|United Kingdom

>Spike|hCoV-19/England/QEUEH-B689D3/2020|2020-11-11|EPI\_ISL\_661327|Original|hCoV-19^^England|Human|Lighthouse Lab in Glasgow|Wellcome Sanger Institute for the COVID-19 Genomics UK (COG-UK) Consortium|Davies|United Kingdom

>Spike|hCoV-19/Denmark/DCGC-2986/2020|2020-08-24|EPI\_ISL\_616748|Original|hCoV-19^^Syddanmark|Human|Department of Virus and Microbiological Special Diagnostics|Albertsen lab|Michaelsen|Denmark

>Spike|hCoV-19/USA/MI-MDHHS-SC21920/2020|2020-09-26|EPI\_ISL\_576198|Original|hCoV-19^^Michigan|Human|Michigan Department of Health and Human Services|Michigan Department of Health and Human Services|Blankenship|USA

>Spike|hCoV-19/England/ALDP-A51EA2/2020|2020-10-07|EPI\_ISL\_597994|Original|hCoV-19^^England|Human|Lighthouse Lab in Alderley Park|Wellcome Sanger Institute for the COVID-19 Genomics UK (COG-UK) consortium|Davies|United Kingdom

>Spike|hCoV-19/USA/NY-NYCPHL-000267/2020|2020-03-16|EPI\_ISL\_631793|Original|hCoV-19^^New York|Human|SUNY Downstate Medical Center|New York City Public Health Laboratory|Wang|USA

>Spike|hCoV-19/England/BRIS-1852FCB/2020|2020-03-30|EPI\_ISL\_492259|Original|hCoV-19^^England|Human|PHE South West Regional Laboratory|Wellcome Sanger Institute for the COVID-19 Genomics UK (COG-UK) consortium|Davies|United Kingdom

>Spike|hCoV-19/Denmark/DCGC-5124/2020|2020-09-21|EPI\_ISL\_621662|Original|hCoV-19^^Syddanmark|Human|Department of Virus and Microbiological Special Diagnostics|Albertsen lab|Michaelsen|Denmark

>Spike|hCoV-19/USA/WI-UW-2588/2021|2021-01-04|EPI\_ISL\_791106|Original|hCoV-19^^Wisconsin|Human|University of Wisconsin-Madison AIDS Vaccine Research Laboratories|University of Wisconsin-Madison AIDS Vaccine Research Laboratories|Moreno|USA

>Spike|hCoV-19/Wales/PHWC-4816C5/2020|2020-10-02|EPI\_ISL\_613100|Original|hCoV-19^^Wales|Human|Wales Specialist Virology Centre Sequencing lab|COVID-19 Genomics UK (COG-UK) Consortium|Moore|United Kingdom

>Spike|hCoV-19/Australia/VIC11830/2020|2020-08-09|EPI\_ISL\_591869|Original|hCoV-19^^Victoria|Human|Victorian Infectious Diseases Reference Laboratory (VIDRL)|VIDRL and MDU-PHL|Schultz|Australia

>Spike|hCoV-19/Germany/TH-IIMK-CaSe-4/2020|2020-04-03|EPI\_ISL\_728293|Original|hCoV-19^^Thuringia|Human|Jena University Hospital|Institute of infectious medicine & hospital hygiene|Brandt|Germany

>Spike|hCoV-19/England/QEUEH-A02909/2020|2020-09-29|EPI\_ISL\_584935|Original|hCoV-19^^England|Human|Quadram Institute Bioscience|COVID-19 Genomics UK (COG-UK) Consortium|Alikhan|United Kingdom

>Spike|hCoV-19/South Africa/KRISP-0534/2020|2020-07-14|EPI\_ISL\_498077|Original|hCoV-19^^KwaZulu-Natal|Human|NHLS-IALCH|KRISP|de Oliveira|South Africa

>Spike|hCoV-19/England/CAMB-79FD8/2020|2020-04-02|EPI\_ISL\_441238|Original|hCoV-19^^England|Human|Department of Pathology|Wellcome Sanger Institute for the COVID-19 Genomics UK (COG-UK) consortium|Amato|United Kingdom

>Spike|hCoV-19/USA/CA-CZB-1016/2020|2020-04-09|EPI\_ISL\_436657|Original|hCoV-19^^California|Human|County of Santa Clara Public Health Department|Chan-Zuckerberg Biohub|Hao|USA

>Spike|hCoV-19/England/20109052206/2020|2020-03-06|EPI\_ISL\_417274|Original|hCoV-19^^England|Human|Respiratory Virus Unit|Respiratory Virus Unit|Platt|United Kingdom

>Spike|hCoV-19/New Zealand/20VR0770/2020|2020-03-18|EPI\_ISL\_456168|Original|hCoV-19^^Waikato|Human|Waikato Hospital|Institute of Environmental Science and Research (ESR)|de Ligt|New Zealand

>Spike|hCoV-19/USA/TX-HMH-2505/2020|2020-05-15|EPI\_ISL\_545343|Original|hCoV-19^^Texas|Human|Houston Methodist Hospital|Houston Methodist Hospital|Long|USA

>Spike|hCoV-19/Luxembourg/LNS2003228/2020|2020-10-31|EPI\_ISL\_740036|Original|hCoV-19^^Luxembourg|Human|Laboratoire national de sant\u00e9|Laboratoire national de sant\u00e9|Wienecke-Baldacchino|Luxembourg

>Spike|hCoV-19/Australia/VIC9279/2020|2020-00-00|EPI\_ISL\_565481|Original|hCoV-19^^Victoria|Human|Microbiological Diagnostic Unit - Public Health Laboratory (MDU-PHL)|MDU-PHL|Schultz|Australia

>Spike|hCoV-19/England/QEUEH-AE1BEC/2020|2020-10-25|EPI\_ISL\_633522|Original|hCoV-19^^England|Human|Lighthouse Lab in Glasgow|Wellcome Sanger Institute for the COVID-19 Genomics UK (COG-UK) consortium|Davies|United Kingdom

>Spike|hCoV-19/USA/WA-UW-4546/2020|2020-03-31|EPI\_ISL\_429598|Original|hCoV-19^^Washington|Human|UW Virology Lab|UW Virology Lab|Roychoudhury|USA

>Spike|hCoV-19/USA/AZ-TG443359/2020|2020-06-25|EPI\_ISL\_694996|Original|hCoV-19^^Arizona|Human|TGen North|TGen North|French|USA

>Spike|hCoV-19/USA/WA-OHSU-2337/2020|2020-08-11|EPI\_ISL\_667187|Original|hCoV-19^^Washington|Human|OHSU Lab Services Molecular Microbiology Lab|Oregon SARS-CoV-2 Genome Sequencing Center|O'Roak|USA

>Spike|hCoV-19/Denmark/DCGC-19104/2020|2020-12-07|EPI\_ISL\_748511|Original|hCoV-19^^Hovedstaden|Human|Department of Virus and Microbiological Special Diagnostics|Albertsen Lab|Michaelsen|Denmark

>Spike|hCoV-19/England/CAMC-B0A496/2020|2020-10-29|EPI\_ISL\_673067|Original|hCoV-19^^England|Human|Lighthouse Lab in Cambridge|Wellcome Sanger Institute for the COVID-19 Genomics UK (COG-UK) Consortium|Davies|United Kingdom

>Spike|hCoV-19/England/MILK-ACD6D6/2020|2020-10-20|EPI\_ISL\_634463|Original|hCoV-19^^England|Human|Lighthouse Lab in Milton Keynes|Wellcome Sanger Institute for the COVID-19 Genomics UK (COG-UK) consortium|Davies|United Kingdom

>Spike|hCoV-19/Gibraltar/204462873/2020|2020-10-29|EPI\_ISL\_615040|Original|hCoV-19^^Gibraltar|Human|Microbiology|Respiratory Virus Unit|Platt|Gibraltar

>Spike|hCoV-19/England/20132072203/2020|2020-03-23|EPI\_ISL\_420506|Original|hCoV-19^^England|Human|Respiratory Virus Unit|Respiratory Virus Unit|Platt|United Kingdom

>Spike|hCoV-19/Spain/PV-IBV-004249/2020|2020-04-06|EPI\_ISL\_500313|Original|hCoV-19^^Basque Country|Human|Servicio de Microbiolog\u00eda. Hospital Universitario Donostia. OSI Donostialdea. \u00c1rea de Enfermedades Infecciosas|SeqCOVID-SPAIN consortium/IBV (CSIC) |Comas|Spain

>Spike|hCoV-19/USA/MN-MDH-1762/2020|2020-04-10|EPI\_ISL\_590767|Original|hCoV-19^^Minnesota|Human|Minnesota Department of Health|Minnesota Department of Health|Lorentz|USA

>Spike|hCoV-19/Hong Kong/VM20091480/2020|2020-07-30|EPI\_ISL\_602615|Original|hCoV-19^^Hong Kong|Human|Pamela Youde Nethersole Eastern Hospital|Hong Kong Department of Health|Mak|China

>Spike|hCoV-19/England/EXET-138BFE/2020|2020-10-03|EPI\_ISL\_626891|Original|hCoV-19^^England|Human|University of Exeter|COVID-19 Genomics UK (COG-UK) Consortium|Temperton|United Kingdom

>Spike|hCoV-19/Canada/QC-LSPQ-L00237128/2020|2020-03-25|EPI\_ISL\_536165|Original|hCoV-19^^Quebec|Human|H\u00f4pital du Suro\u00eet|Laboratoire de sant\u00e9 publique du Qu\u00e9bec|Moreira|Canada

>Spike|hCoV-19/Wales/PHWC-16A953/2020|2020-09-08|EPI\_ISL\_560129|Original|hCoV-19^^Wales|Human|Wales Specialist Virology Centre Sequencing lab|COVID-19 Genomics UK (COG-UK) Consortium|Moore|United Kingdom

>Spike|hCoV-19/USA/MI-MDHHS-SC21350/2020|2020-04-01|EPI\_ISL\_507604|Original|hCoV-19^^Michigan|Human|Michigan Department of Health and Human Services|Michigan Department of Health and Human Services|Blankenship|USA

>Spike|hCoV-19/England/QEUEH-BCBA53/2020|2020-11-27|EPI\_ISL\_704431|Original|hCoV-19^^England|Human|Lighthouse Lab in Glasgow|Wellcome Sanger Institute for the COVID-19 Genomics UK (COG-UK) Consortium|Davies|United Kingdom

>Spike|hCoV-19/Denmark/DCGC-11088/2020|2020-11-02|EPI\_ISL\_670384|Original|hCoV-19^^Hovedstaden|Human|Department of Virus and Microbiological Special Diagnostics|Albertsen Lab|Michaelsen|Denmark

>Spike|hCoV-19/England/ALDP-B76CF7/2020|2020-11-12|EPI\_ISL\_723805|Original|hCoV-19^^England|Human|Oxford Viromics|COVID-19 Genomics UK (COG-UK) Consortium|Golubchik|United Kingdom

>Spike|hCoV-19/England/MILK-9D49C5/2020|2020-09-19|EPI\_ISL\_601616|Original|hCoV-19^^England|Human|Lighthouse Lab in Milton Keynes|Wellcome Sanger Institute for the COVID-19 Genomics UK (COG-UK) consortium|Davies|United Kingdom

>Spike|hCoV-19/England/MILK-9A5426/2020|2020-09-03|EPI\_ISL\_550011|Original|hCoV-19^^England|Human|Lighthouse Lab in Milton Keynes|Wellcome Sanger Institute for the COVID-19 Genomics UK (COG-UK) consortium|Davies|United Kingdom

>Spike|hCoV-19/South Korea/KCDC2788/2020|2020-07-24|EPI\_ISL\_526722|Original|hCoV-19^^South Korea|Human|Division of Viral Diseases|Division of Viral Diseases|Kim|South Korea

>Spike|hCoV-19/England/MILK-9E0B48/2020|2020-09-21|EPI\_ISL\_601313|Original|hCoV-19^^England|Human|Lighthouse Lab in Milton Keynes|Wellcome Sanger Institute for the COVID-19 Genomics UK (COG-UK) consortium|Davies|United Kingdom

>Spike|hCoV-19/England/LIVE-1D1E3A/2020|2020-05-13|EPI\_ISL\_572682|Original|hCoV-19^^England|Human|Liverpool Clinical Laboratories|COVID-19 Genomics UK (COG-UK) Consortium|Haldenby|United Kingdom

>Spike|hCoV-19/Wales/PHWC-2947E/2020|2020-04-03|EPI\_ISL\_445522|Original|hCoV-19^^Wales|Human|Wales Specialist Virology Centre|Public Health Wales Microbiology Cardiff|Moore|United Kingdom

>Spike|hCoV-19/Gibraltar/204462925/2020|2020-10-29|EPI\_ISL\_632822|Original|hCoV-19^^Gibraltar|Human|Microbiology|Respiratory Virus Unit|Platt|Gibraltar

>Spike|hCoV-19/Belgium/reg-10191299/2020|2020-10-19|EPI\_ISL\_735203|Original|hCoV-19^^Sterrebeek|Human|UZ Leuven|KU Leuven|Maes|Belgium

>Spike|hCoV-19/USA/CA-ALSR-4519/2020|2020-10-19|EPI\_ISL\_666982|Original|hCoV-19^^California|Human|San Diego County Public Health Laboratory|Andersen lab at Scripps Research|Gangavarapu|USA

>Spike|hCoV-19/Japan/Donner25/2020|2020-04-22|EPI\_ISL\_438969|Original|hCoV-19^^Kanto|Human|Keio University School of Medicine|Keio University School of Medicine|Kosaki|Japan

>Spike|hCoV-19/England/20122069604/2020|2020-03-15|EPI\_ISL\_465758|Original|hCoV-19^^England|Human|Respiratory Virus Unit|Respiratory Virus Unit|Platt|United Kingdom

>Spike|hCoV-19/USA/PA-MGEL-00324/2020|2020-03-18|EPI\_ISL\_681999|Original|hCoV-19^^Pennsylvania|Human|UPMC Clinical Microbiology Laboratory|Microbial Genomic Epidemiology Laboratory|Griffith|USA

>Spike|hCoV-19/Japan/PG-5936/2020|2020-00-00|EPI\_ISL\_689051|Original|hCoV-19^^Japan|Human|Gunma Prefectural Institute of Public Health and Environmental Sciences|Pathogen Genomics Center|Sekizuka|Japan

>Spike|hCoV-19/Wales/MILK-9715E4/2020|2020-08-18|EPI\_ISL\_553141|Original|hCoV-19^^Wales|Human|Lighthouse Lab in Milton Keynes|Wellcome Sanger Institute for the COVID-19 Genomics UK (COG-UK) consortium|Davies|United Kingdom

>Spike|hCoV-19/Australia/VIC5575/2020|2020-07-15|EPI\_ISL\_518393|Original|hCoV-19^^Victoria|Human|Victorian Infectious Diseases Reference Laboratory (VIDRL)|VIDRL and MDU-PHL|Schultz|Australia

>Spike|hCoV-19/Wales/PHWC-49B6B9/2020|2020-12-03|EPI\_ISL\_742369|Original|hCoV-19^^Wales|Human|Wales Specialist Virology Centre Sequencing lab|COVID-19 Genomics UK (COG-UK) Consortium|Moore|United Kingdom

>Spike|hCoV-19/Wales/PHWC-49E6D4/2020|2020-12-08|EPI\_ISL\_743035|Original|hCoV-19^^Wales|Human|Wales Specialist Virology Centre Sequencing lab|COVID-19 Genomics UK (COG-UK) Consortium|Moore|United Kingdom

>Spike|hCoV-19/USA/MN-CDC-6536/2020|2020-04-22|EPI\_ISL\_527723|Original|hCoV-19^^Minnesota|Human|MN PHL Division|Pathogen Discovery|Queen|USA

>Spike|hCoV-19/England/MILK-9AB2DB/2020|2020-08-31|EPI\_ISL\_551010|Original|hCoV-19^^England|Human|Lighthouse Lab in Milton Keynes|Wellcome Sanger Institute for the COVID-19 Genomics UK (COG-UK) consortium|Davies|United Kingdom

>Spike|hCoV-19/Netherlands/ZH-EMC-392/2020|2020-07-16|EPI\_ISL\_523732|Original|hCoV-19^^Zuid Holland|Human|Dutch COVID-19 response team|Erasmus Medical Center|Oude Munnink|Netherlands

>Spike|hCoV-19/India/TG-CCMB-L1477/2020|2020-05-25|EPI\_ISL\_471605|Original|hCoV-19^^Telangana|Human|CSIR-Centre for Cellular and Molecular Biology|CSIR-Centre for Cellular and Molecular Biology|Banu|India

>Spike|hCoV-19/mink/Netherlands/NB-EMC-60-1/2020|2020-00-00|EPI\_ISL\_632470|Original|hCoV-19^^Noord Brabant|Neovison vison|Dutch COVID-19 response team|Erasmus Medical Center|Oude Munnink|Netherlands

>Spike|hCoV-19/Netherlands/UT-RIVM-10064/2020|2020-04-08|EPI\_ISL\_547519|Original|hCoV-19^^Utrecht|Human|Dutch COVID-19 response team|National Institute for Public Health and the Environment (RIVM)|Meijer|Netherlands



>Spike|hCoV-19/USA/HI-H200158/2020|2020-07-23|EPI\_ISL\_752720|Original|hCoV-19^^Hawaii|Human|State Laboratories Division|State Laboratories Division|Sultana|USA

>Spike|hCoV-19/England/CAMC-B52CD3/2020|2020-11-09|EPI\_ISL\_657507|Original|hCoV-19^^England|Human|Lighthouse Lab in Cambridge|Wellcome Sanger Institute for the COVID-19 Genomics UK (COG-UK) Consortium|Davies|United Kingdom

>Spike|hCoV-19/England/20148004904/2020|2020-04-03|EPI\_ISL\_422001|Original|hCoV-19^^England|Human|Respiratory Virus Unit|Respiratory Virus Unit|Platt|United Kingdom

>Spike|hCoV-19/England/ALDP-8E91B7/2020|2020-06-25|EPI\_ISL\_581424|Original|hCoV-19^^England|Human|Lighthouse Lab in Alderley Park|Wellcome Sanger Institute for the COVID-19 Genomics UK (COG-UK) consortium|Davies|United Kingdom

>Spike|hCoV-19/England/LIVE-9A5A2/2020|2020-03-23|EPI\_ISL\_449349|Original|hCoV-19^^England|Human|Liverpool Clinical Laboratories|COVID-19 Genomics UK (COG-UK) Consortium|Haldenby|United Kingdom

>Spike|hCoV-19/South Korea/KCDC2514/2020|2020-06-17|EPI\_ISL\_514917|Original|hCoV-19^^South Korea|Human|Division of Viral Diseases|Division of Viral Diseases|Kim|South Korea

>Spike|hCoV-19/Wales/PHWC-488DBA/2020|2020-10-26|EPI\_ISL\_639502|Original|hCoV-19^^Wales|Human|Wales Specialist Virology Centre Sequencing lab|COVID-19 Genomics UK (COG-UK) Consortium|Moore|United Kingdom

>Spike|hCoV-19/Japan/PG-7763/2020|2020-04-00|EPI\_ISL\_686865|Original|hCoV-19^^Japan|Human|Pathogen Genomics Center|Pathogen Genomics Center|Sekizuka|Japan

>Spike|hCoV-19/England/ALDP-A84996/2020|2020-10-18|EPI\_ISL\_610406|Original|hCoV-19^^England|Human|Lighthouse Lab in Alderley Park|Wellcome Sanger Institute for the COVID-19 Genomics UK (COG-UK) consortium|Davies|United Kingdom

>Spike|hCoV-19/England/PORT-2CF3B7/2020|2020-04-27|EPI\_ISL\_453673|Original|hCoV-19^^England|Human|Centre for Enzyme Innovation|COVID-19 Genomics UK (COG-UK) Consortium|Robson|United Kingdom

>Spike|hCoV-19/USA/NY-Wadsworth-292760-01/2020|2020-12-26|EPI\_ISL\_769936|Original|hCoV-19^^New York|Human|Albany Medical Center Hospital Clinical Laboratories|Wadsworth Center|Lasek-Nesselquist|USA

>Spike|hCoV-19/England/CWAR-24FDB92/2020|2020-05-02|EPI\_ISL\_584489|Original|hCoV-19^^England|Human|UHCW / University of Warwick|COVID-19 Genomics UK (COG-UK) Consortium|Stark|United Kingdom

>Spike|hCoV-19/USA/MN-MDH-2201/2020|2020-11-28|EPI\_ISL\_723152|Original|hCoV-19^^Minnesota|Human|Vault Health|Minnesota Department of Health|Lorentz|USA

>Spike|hCoV-19/Denmark/DCGC-15065/2020|2020-11-23|EPI\_ISL\_713613|Original|hCoV-19^^Sjaelland|Human|Department of Virus and Microbiological Special Diagnostics|Albertsen Lab|Michaelsen|Denmark

>Spike|hCoV-19/Denmark/DCGC-22567/2020|2020-12-14|EPI\_ISL\_757642|Original|hCoV-19^^Nordjylland|Human|Department of Virus and Microbiological Special Diagnostics|Albertsen Lab|Michaelsen|Denmark

>Spike|hCoV-19/USA/MA-MGH-00600/2020|2020-03-28|EPI\_ISL\_460382|Original|hCoV-19^^Massachusetts|Human|Massachusetts General Hospital|Infectious Disease Program|Lemieux|USA

>Spike|hCoV-19/England/CAMB-1AB112/2020|2020-04-19|EPI\_ISL\_470273|Original|hCoV-19^^England|Human|Department of Pathology|Wellcome Sanger Institute for the COVID-19 Genomics UK (COG-UK) consortium|Davies|United Kingdom

>Spike|hCoV-19/USA/MI-MDHHS-SC22468/2020|2020-11-03|EPI\_ISL\_708570|Original|hCoV-19^^Michigan|Human|Michigan Department of Health and Human Services|Michigan Department of Health and Human Services|Jacob|USA

>Spike|hCoV-19/England/CAMC-C71CEC/2020|2020-12-15|EPI\_ISL\_769113|Original|hCoV-19^^England|Human|Lighthouse Lab in Cambridge|Wellcome Sanger Institute for the COVID-19 Genomics UK (COG-UK) Consortium|Davies|United Kingdom

>Spike|hCoV-19/England/QEUEH-B0DCD7/2020|2020-11-02|EPI\_ISL\_642091|Original|hCoV-19^^England|Human|Lighthouse Lab in Glasgow|Wellcome Sanger Institute for the COVID-19 Genomics UK (COG-UK) Consortium|Davies|United Kingdom

>Spike|hCoV-19/England/ALDP-95C707/2020|2020-06-16|EPI\_ISL\_554898|Original|hCoV-19^^England|Human|Lighthouse Lab in Alderley Park|Wellcome Sanger Institute for the COVID-19 Genomics UK (COG-UK) consortium|Davies|United Kingdom

>Spike|hCoV-19/USA/WA-S947/2020|2020-04-26|EPI\_ISL\_463437|Original|hCoV-19^^Washington|Human|Washington State Department of Health|Seattle Flu Study|Bedford|USA

>Spike|hCoV-19/USA/WI-UW-720/2020|2020-06-29|EPI\_ISL\_491395|Original|hCoV-19^^Wisconsin|Human|University of Wisconsin-Madison AIDS Vaccine Research Laboratories|University of Wisconsin-Madison AIDS Vaccine Research Laboratories|Baczenas|USA

>Spike|hCoV-19/USA/NY-PV09317/2020|2020-03-21|EPI\_ISL\_450009|Original|hCoV-19^^New York|Human|MSHS Clinical Microbiology Laboratories|MSHS Pathogen Surveillance Program|van Bakel|USA

>Spike|hCoV-19/Wales/PHWC-28E62/2020|2020-04-03|EPI\_ISL\_445450|Original|hCoV-19^^Wales|Human|Wales Specialist Virology Centre|Public Health Wales Microbiology Cardiff|Moore|United Kingdom

>Spike|hCoV-19/South Africa/KRISP-0485/2020|2020-07-03|EPI\_ISL\_495561|Original|hCoV-19^^KwaZulu-Natal|Human|NHLs-IALCH|KRISP|de Oliveira|South Africa

>Spike|hCoV-19/England/CAMB-1AB543/2020|2020-04-21|EPI\_ISL\_470193|Original|hCoV-19^^England|Human|Department of Pathology|Wellcome Sanger Institute for the COVID-19 Genomics UK (COG-UK) consortium|Davies|United Kingdom

>Spike|hCoV-19/Wales/PHWC-493E04/2020|2020-11-20|EPI\_ISL\_726030|Original|hCoV-19^^Wales|Human|Originating lab|COVID-19 Genomics UK (COG-UK) Consortium|Moore|United Kingdom

>Spike|hCoV-19/England/MILK-AC8116/2020|2020-10-21|EPI\_ISL\_634442|Original|hCoV-19^^England|Human|Lighthouse Lab in Milton Keynes|Wellcome Sanger Institute for the COVID-19 Genomics UK (COG-UK) consortium|Davies|United Kingdom

>Spike|hCoV-19/Russia/SVE-RII-MH1442S/2020|2020-09-06|EPI\_ISL\_602331|Original|hCoV-19^^Sverdlovsk|Human|HELIX LLC|WHO National Influenza Centre Russian Federation|Komissarov|Russia

>Spike|hCoV-19/Denmark/ALAB-SSI-834/2020|2020-03-28|EPI\_ISL\_437677|Original|hCoV-19^^Denmark|Human|Department of Virus and Microbiological Special Diagnostics|Albertsen lab|Kirkegaard|Denmark

>Spike|hCoV-19/USA/TX-HMH-4833/2020|2020-06-20|EPI\_ISL\_544363|Original|hCoV-19^^Texas|Human|Houston Methodist Hospital|Houston Methodist Hospital|Long|USA

>Spike|hCoV-19/England/LIVE-993B8/2020|2020-04-08|EPI\_ISL\_439715|Original|hCoV-19^^England|Human|Liverpool Clinical Laboratories|COVID-19 Genomics UK (COG-UK) Consortium|Haldenby|United Kingdom

>Spike|hCoV-19/England/ALDP-A84C7F/2020|2020-10-16|EPI\_ISL\_610391|Original|hCoV-19^^England|Human|Lighthouse Lab in Alderley Park|Wellcome Sanger Institute for the COVID-19 Genomics UK (COG-UK) consortium|Davies|United Kingdom

>Spike|hCoV-19/USA/MI-MDHHS-SC20756/2020|2020-04-23|EPI\_ISL\_471777|Original|hCoV-19^^Michigan|Human|Michigan Department of Health and Human Services|Michigan Department of Health and Human Services|Blankenship|USA

>Spike|hCoV-19/Hong Kong/VM20128259/2020|2020-10-05|EPI\_ISL\_730584|Original|hCoV-19^^Hong Kong|Human|Hong Kong Sanatorium & Hospital|Hong Kong Department of Health|Mak|China

>Spike|hCoV-19/Germany/BW-MVZ-LS-02/2020|2020-04-09|EPI\_ISL\_640220|Original|hCoV-19^^Baden-W\u00fcrtemberg|Human|MVZ Labor\u00e4rzte Singen|MVZ Labor\u00e4rzte Singen|Schmidt|Germany

>Spike|hCoV-19/USA/OR-PROV-125/2020|2020-04-28|EPI\_ISL\_482389|Original|hCoV-19^^Oregon|Human|Providence St. Joseph Health Molecular Genomics Laboratory|Providence St. Joseph Health Molecular Genomics Laboratory|Dowdell|USA

>Spike|hCoV-19/USA/LA-CDC-2111/2020|2020-05-29|EPI\_ISL\_535349|Original|hCoV-19^^Louisiana|Human|LA Office of Public Health Laboratories|Pathogen Discovery|Queen|USA

>Spike|hCoV-19/South Africa/KRISP-K002876/2020|2020-09-07|EPI\_ISL\_602689|Original|hCoV-19^^KwaZulu-Natal|Human|NHLs-IALCH|KRISP|de Oliveira|South Africa

>Spike|hCoV-19/England/QEUH-9F5551/2020|2020-09-25|EPI\_ISL\_588628|Original|hCoV-19^^England|Human|Lighthouse Lab in Glasgow|Wellcome Sanger Institute for the COVID-19 Genomics UK (COG-UK) consortium|Davies|United Kingdom

>Spike|hCoV-19/USA/TX-HMH-7399/2020|2020-06-29|EPI\_ISL\_546737|Original|hCoV-19^^Texas|Human|Houston Methodist Hospital|Houston Methodist Hospital|Long|USA

>Spike|hCoV-19/USA/WI-UW-2387/2020|2020-10-29|EPI\_ISL\_728152|Original|hCoV-19^^Wisconsin|Human|University of Wisconsin-Madison AIDS Vaccine Research Laboratories|University of Wisconsin-Madison AIDS Vaccine Research Laboratories|Baczenas|USA

>Spike|hCoV-19/England/QEUA-A9FC62/2020|2020-10-20|EPI\_ISL\_665317|Original|hCoV-19^^England|Human|Northumbria University / South Tees Hospitals NHS Foundation Trust / North Cumbria Integrated Care NHS Foundation Trust / North Tees and Hartlepool NHS Foundation Trust / Newcastle Hospitals NHS Foundation Trust|COVID-19 Genomics UK (COG-UK) Consortium|Bashton|United Kingdom

>Spike|hCoV-19/Northern Ireland/NIRE-106546/2020|2020-05-02|EPI\_ISL\_500985|Original|hCoV-19^^Northern Ireland|Human|Regional Virus Laboratory|Wellcome Sanger Institute for the COVID-19 Genomics UK (COG-UK) consortium|Davies|United Kingdom

>Spike|hCoV-19/England/QEUA-9F81D2/2020|2020-09-27|EPI\_ISL\_588927|Original|hCoV-19^^England|Human|Lighthouse Lab in Glasgow|Wellcome Sanger Institute for the COVID-19 Genomics UK (COG-UK) Consortium|Davies|United Kingdom

>Spike|hCoV-19/England/MILK-A6BC6F/2020|2020-10-09|EPI\_ISL\_608848|Original|hCoV-19^^England|Human|Lighthouse Lab in Milton Keynes|Wellcome Sanger Institute for the COVID-19 Genomics UK (COG-UK) consortium|Davies|United Kingdom

>Spike|hCoV-19/England/ALDP-B1CA9F/2020|2020-11-02|EPI\_ISL\_723525|Original|hCoV-19^^England|Human|Centre for Enzyme Innovation|COVID-19 Genomics UK (COG-UK) Consortium|Robson|United Kingdom

>Spike|hCoV-19/England/ALDP-C3ABD3/2020|2020-12-09|EPI\_ISL\_731538|Original|hCoV-19^^England|Human|Lighthouse Lab in Alderley Park|Wellcome Sanger Institute for the COVID-19 Genomics UK (COG-UK) Consortium|Davies|United Kingdom

>Spike|hCoV-19/England/20132091904/2020|2020-03-22|EPI\_ISL\_423825|Original|hCoV-19^^England|Human|Respiratory Virus Unit|Respiratory Virus Unit|Platt|United Kingdom

>Spike|hCoV-19/Spain/CT-IBV-97007964/2020|2020-10-07|EPI\_ISL\_654525|Original|hCoV-19^^Catalunya|Human|Servicio de Microbiolog\u00eda|SeqCOVID-SPAIN consortium|IBV (CSIC) |Comas|Spain

>Spike|hCoV-19/England/ALDP-9E7DA5/2020|2020-09-24|EPI\_ISL\_638229|Original|hCoV-19^^England|Human|Department of Pathology|COVID-19 Genomics UK (COG-UK) Consortium|Goodfellow|United Kingdom

>Spike|hCoV-19/Wales/PHWC-1637AB/2020|2020-05-09|EPI\_ISL\_473994|Original|hCoV-19^^Wales|Human|Originating lab|COVID-19 Genomics UK (COG-UK) Consortium|Moore|United Kingdom

>Spike|hCoV-19/Wales/PHWC-487234/2020|2020-10-31|EPI\_ISL\_639175|Original|hCoV-19^^Wales|Human|Wales Specialist Virology Centre Sequencing lab|COVID-19 Genomics UK (COG-UK) Consortium|Moore|United Kingdom

>Spike|hCoV-19/England/CAMC-B5212F/2020|2020-11-08|EPI\_ISL\_657795|Original|hCoV-19^^England|Human|Lighthouse Lab in Cambridge|Wellcome Sanger Institute for the COVID-19 Genomics UK (COG-UK) Consortium|Davies|United Kingdom

>Spike|hCoV-19/Canada/QC-LSPQ-L00231068/2020|2020-03-21|EPI\_ISL\_535943|Original|hCoV-19^^Quebec|Human|H\u00f4pital de Saint-Eustache|Laboratoire de sant\u00e9 publique du Qu\u00e9bec|Moreira|Canada

>Spike|hCoV-19/South Korea/KCDC2292/2020|2020-05-21|EPI\_ISL\_510628|Vero E6 P1|hCoV-19^^South Korea|Human|Division of Viral Diseases|Division of Viral Diseases|Kim|South Korea

>Spike|hCoV-19/Japan/PG-8318/2020|2020-08-00|EPI\_ISL\_687417|Original|hCoV-19^^Japan|Human|Pathogen Genomics Center|Pathogen Genomics Center|Sekizuka|Japan

>Spike|hCoV-19/England/NORT-2A4E99/2020|2020-09-18|EPI\_ISL\_572911|Original|hCoV-19^^England|Human|Northumbria University / South Tees Hospitals NHS Foundation Trust / North Cumbria Integrated Care NHS Foundation Trust / North Tees and Hartlepool NHS Foundation Trust / Newcastle Hospitals NHS Foundation Trust|COVID-19 Genomics UK (COG-UK) Consortium|Bashton|United Kingdom

>Spike|hCoV-19/Wales/PHWC-16C8BE/2020|2020-09-23|EPI\_ISL\_574106|Original|hCoV-19^^Wales|Human|Wales Specialist Virology Centre Sequencing lab|COVID-19 Genomics UK (COG-UK) Consortium|Moore|United Kingdom

>Spike|hCoV-19/Israel/130711367/2020|2020-04-22|EPI\_ISL\_447452|Original|hCoV-19^^North District|Human|Clinical Microbiology Laboratory|Stern Lab|Miller|Israel

>Spike|hCoV-19/Netherlands/Gelderland\_105/2020|2020-05-21|EPI\_ISL\_460866|Original|hCoV-19^^Gelderland|Human|Dutch COVID-19 response team|Erasmus Medical Center|Oude Munnink|Netherlands

>Spike|hCoV-19/USA/LA-EVTL269/2020|2020-08-22|EPI\_ISL\_574403|Original|hCoV-19^^Louisiana|Human|LSUHS Emerging Viral Threat Laboratory|Microbial Genome Sequencing Center|Kamil|USA

>Spike|hCoV-19/Belgium/Rega-0330255/2020|2020-03-30|EPI\_ISL\_458225|Original|hCoV-19^^Hasselt|Human|KU Leuven|KU Leuven|Maes|Belgium

>Spike|hCoV-19/England/ALDP-A6CA64/2020|2020-10-14|EPI\_ISL\_607192|Original|hCoV-19^^England|Human|Lighthouse Lab in Alderley Park|Wellcome Sanger Institute for the COVID-19 Genomics UK (COG-UK) consortium|Davies|United Kingdom

>Spike|hCoV-19/Denmark/DCGC-5172/2020|2020-09-21|EPI\_ISL\_621710|Original|hCoV-19^^Syddanmark|Human|Department of Virus and Microbiological Special Diagnostics|Albertsen lab|Michaelsen|Denmark

>Spike|hCoV-19/USA/MI-UM-10036852112/2020|2020-11-09|EPI\_ISL\_728504|Original|hCoV-19^^Michigan|Human|University of Michigan Clinical Microbiology Laboratory|Lauring Lab|Valesano|USA

>Spike|hCoV-19/United Arab Emirates/0052/2020|2020-05-18|EPI\_ISL\_698260|Original|hCoV-19^^Abu Dhabi|Human|Group 42 (G42) Healthcare|G42 Healthcare|Ogrodzki|United Arab Emirates

>Spike|hCoV-19/USA/TX-HMH-1229/2020|2020-04-16|EPI\_ISL\_542595|Original|hCoV-19^^Texas|Human|Houston Methodist Hospital|Houston Methodist Hospital|Long|USA

>Spike|hCoV-19/Japan/PG-4781/2020|2020-08-00|EPI\_ISL\_689628|Original|hCoV-19^^Japan|Human|Pathogen Genomics Center|Pathogen Genomics Center|Sekizuka|Japan

>Spike|hCoV-19/England/CAMB-1BCDDE/2020|2020-12-05|EPI\_ISL\_723899|Original|hCoV-19^^England|Human|Department of Pathology|COVID-19 Genomics UK (COG-UK) Consortium|Goodfellow|United Kingdom

>Spike|hCoV-19/Wales/PHWC-49C111/2020|2020-12-07|EPI\_ISL\_742510|Original|hCoV-19^^Wales|Human|Wales Specialist Virology Centre Sequencing lab|COVID-19 Genomics UK (COG-UK) Consortium|Moore|United Kingdom

>Spike|hCoV-19/England/ALDP-94EE21/2020|2020-06-17|EPI\_ISL\_556475|Original|hCoV-19^^England|Human|Lighthouse Lab in Alderley Park|Wellcome Sanger Institute for the COVID-19 Genomics UK (COG-UK) consortium|Davies|United Kingdom

>Spike|hCoV-19/Canada/ON-UHTC-0282/2020|2020-07-06|EPI\_ISL\_569992|Original|hCoV-19^^Ontario|Human|Unity Health Toronto|Ontario Institute for Cancer Research|de Borja|Canada

>Spike|hCoV-19/Portugal/PT1615/2020|2020-07-08|EPI\_ISL\_693617|Original|hCoV-19^^Portugal|Human|Instituto Nacional de Saude (INSA)|Instituto Nacional de Saude (INSA)|Borges|Portugal

>Spike|hCoV-19/USA/VA-DCLS-1558/2020|2020-08-07|EPI\_ISL\_610122|Original|hCoV-19^^Virginia|Human|Virginia DCLS|Virginia DCLS|St. Jacques|USA

>Spike|hCoV-19/USA/WA-S1958/2020|2020-06-03|EPI\_ISL\_497386|Original|hCoV-19^^Washington|Human|Washington State Department of Health|Seattle Flu Study|Lee|USA

>Spike|hCoV-19/USA/NV-NSPHL-A0107/2020|2020-04-17|EPI\_ISL\_515380|Original|hCoV-19^^Nevada|Human|Nevada State Public Health Laboratory|Nevada State Public Health Laboratory|Sevinsky|USA

>Spike|hCoV-19/Belgium/reg-0512550/2020|2020-05-12|EPI\_ISL\_734726|Original|hCoV-19^^Zeel|Human|UZ Leuven|KU Leuven|Maes|Belgium

>Spike|hCoV-19/England/ALDP-A86CE6/2020|2020-10-16|EPI\_ISL\_606193|Original|hCoV-19^^England|Human|Lighthouse Lab in Alderley Park|Wellcome Sanger Institute for the COVID-19 Genomics UK (COG-UK) consortium|Davies|United Kingdom

>Spike|hCoV-19/Scotland/QEUEH-9E4661/2020|2020-09-23|EPI\_ISL\_600984|Original|hCoV-19^^Scotland|Human|Lighthouse Lab in Glasgow|Wellcome Sanger Institute for the COVID-19 Genomics UK (COG-UK) consortium|Davies|United Kingdom

>Spike|hCoV-19/England/QEUEH-AE1C70/2020|2020-10-26|EPI\_ISL\_633450|Original|hCoV-19^^England|Human|Lighthouse Lab in Glasgow|Wellcome Sanger Institute for the COVID-19 Genomics UK (COG-UK) consortium|Davies|United Kingdom

>Spike|hCoV-19/Netherlands/UT-EMC-85/2020|2020-08-30|EPI\_ISL\_577901|Original|hCoV-19^^Utrecht|Human|Dutch COVID-19 response team|Erasmus Medical Center|Oude Munnink|Netherlands

>Spike|hCoV-19/France/ARA-SC137/2020|2020-05-11|EPI\_ISL\_700401|Original|hCoV-19^^Auvergne-Rh\u00f4ne-Alpes|Human|Centre hospitalier M\u00e9tropole Savoie|CNR Virus des Infections Respiratoires - France SUD|Bal|France

>Spike|hCoV-19/USA/SC-DHEC-0545/2020|2020-06-19|EPI\_ISL\_529085|Original|hCoV-19^^South Carolina|Human|Microbiology Division|Microbiology Division|Flores,H.|USA

>Spike|hCoV-19/India/MH-NCCS-NR1553/2020|2020-05-17|EPI\_ISL\_496562|Original|hCoV-19^^Maharashtra|Human|National Centre For Cell Science|National Centre For Cell Science|Paul|India

>Spike|hCoV-19/Denmark/DCGC-5949/2020|2020-10-05|EPI\_ISL\_620214|Original|hCoV-19^^Hovedstaden|Human|Department of Virus and Microbiological Special Diagnostics|Albertsen lab|Michaelsen|Denmark

>Spike|hCoV-19/Canada/ON-PHL-20-03699/2020|2020-11-00|EPI\_ISL\_775182|Original|hCoV-19^^Ontario|Human|Public Health Ontario Laboratory|Public Health Ontario Laboratory|Guthrie|Canada

>Spike|hCoV-19/England/ALDP-B2732D/2020|2020-11-04|EPI\_ISL\_664245|Original|hCoV-19^^England|Human|Northumbria University / South Tees Hospitals NHS Foundation Trust / North Cumbria Integrated Care NHS Foundation Trust / North Tees and Hartlepool NHS Foundation Trust / Newcastle Hospitals NHS Foundation Trust|COVID-19 Genomics UK (COG-UK) Consortium|Bashton|United Kingdom

>Spike|hCoV-19/Switzerland/BS-ETHZ-100119/2020|2020-03-16|EPI\_ISL\_451703|Original|hCoV-19^^Basel-Stadt|Human|Viollier AG|Department of Biosystems Science and Engineering|Nadeau|Switzerland

>Spike|hCoV-19/England/NORW-F202F/2020|2020-10-22|EPI\_ISL\_627650|Original|hCoV-19^^England|Human|Quadram Institute Bioscience|COVID-19 Genomics UK (COG-UK) Consortium|Alikhan|United Kingdom

>Spike|hCoV-19/USA/TX-HMH-5877/2020|2020-06-30|EPI\_ISL\_547080|Original|hCoV-19^^Texas|Human|Houston Methodist Hospital|Houston Methodist Hospital|Long|USA

>Spike|hCoV-19/Finland/15CE5/2020|2020-12-04|EPI\_ISL\_732586|Original|hCoV-19^^Uusimaa|Human|Department of Virology and Immunology|Department of Virology|Smura|Finland

>Spike|hCoV-19/Australia/VIC2811/2020|2020-07-02|EPI\_ISL\_521642|Original|hCoV-19^^Victoria|Human|Microbiological Diagnostic Unit - Public Health Laboratory (MDU-PHL) |MDU-PHL|Schultz|Australia

>Spike|hCoV-19/Wales/PHWC-24ADB/2020|2020-03-20|EPI\_ISL\_419481|Original|hCoV-19^^Wales|Human|Wales Specialist Virology Centre|Public Health Wales Microbiology Cardiff|Moore|United Kingdom

>Spike|hCoV-19/England/205080449/2020|2020-12-10|EPI\_ISL\_747500|Original|hCoV-19^^England|Human|Respiratory Virus Unit|COVID-19 Genomics UK (COG-UK) Consortium|Miah|United Kingdom

>Spike|hCoV-19/Denmark/DCGC-16932/2020|2020-12-14|EPI\_ISL\_750650|Original|hCoV-19^^Midtjylland|Human|Department of Virus and Microbiological Special Diagnostics|Albertsen Lab|Michaelsen|Denmark

>Spike|hCoV-19/India/TG-CCMB-W863/2020|2020-07-14|EPI\_ISL\_528828|Original|hCoV-19^^Telangana|Human|CSIR-Centre for Cellular and Molecular Biology|CSIR-Centre for Cellular and Molecular Biology|Banu|India

>Spike|hCoV-19/England/ALDP-9BE74F/2020|2020-09-09|EPI\_ISL\_568182|Original|hCoV-19^^England|Human|Lighthouse Lab in Alderley Park|Wellcome Sanger Institute for the COVID-19 Genomics UK (COG-UK) consortium|Davies|United Kingdom

>Spike|hCoV-19/Belgium/reg-0414582/2020|2020-04-14|EPI\_ISL\_734580|Original|hCoV-19^^Herent|Human|UZ Leuven|KU Leuven|Maes|Belgium

>Spike|hCoV-19/Denmark/DCGC-3491/2020|2020-08-31|EPI\_ISL\_616279|Original|hCoV-19^^Hovedstaden|Human|Department of Virus and Microbiological Special Diagnostics|Albertsen lab|Michaelsen|Denmark

>Spike|hCoV-19/Luxembourg/LNS9926590/2020|2020-10-24|EPI\_ISL\_745012|Original|hCoV-19^^Luxembourg|Human|Laboratoire national de sant\u00e9|Laboratoire national de sant\u00e9|Wienecke-Baldacchino|Luxembourg

>Spike|hCoV-19/England/QEUA-7997A6/2020|2020-07-15|EPI\_ISL\_533141|Original|hCoV-19^^England|Human|Lighthouse Lab in Glasgow|Wellcome Sanger Institute for the COVID-19 Genomics UK (COG-UK) consortium|Davies|United Kingdom

>Spike|hCoV-19/USA/MO-QDX-2079/2020|2020-03-17|EPI\_ISL\_604481|Original|hCoV-19^^Missouri|Human|Quest Diagnostics|Quest Diagnostics|Kagan|USA

>Spike|hCoV-19/Wales/PHWC-1636CC/2020|2020-04-29|EPI\_ISL\_473981|Original|hCoV-19^^Wales|Human|Originating lab|COVID-19 Genomics UK (COG-UK) Consortium|Moore|United Kingdom

>Spike|hCoV-19/Canada/MB-NML-1054/2020|2020-03-22|EPI\_ISL\_582413|Original|hCoV-19^^Manitoba|Human|Cadham Provincial Laboratory|National Microbiology Laboratory (NML)|Majer|Canada

>Spike|hCoV-19/England/CAMB-1BCCFF/2020|2020-12-02|EPI\_ISL\_740955|Original|hCoV-19^^England|Human|Department of Pathology|COVID-19 Genomics UK (COG-UK) Consortium|Goodfellow|United Kingdom

>Spike|hCoV-19/England/ALDP-B84968/2020|2020-11-14|EPI\_ISL\_675416|Original|hCoV-19^^England|Human|Lighthouse Lab in Alderley Park|Wellcome Sanger Institute for the COVID-19 Genomics UK (COG-UK) Consortium|Davies|United Kingdom

>Spike|hCoV-19/England/MILK-AC84FF/2020|2020-10-21|EPI\_ISL\_629594|Original|hCoV-19^^England|Human|Lighthouse Lab in Milton Keynes|Wellcome Sanger Institute for the COVID-19 Genomics UK (COG-UK) consortium|Davies|United Kingdom

>Spike|hCoV-19/Wales/PHWC-49D5C9/2020|2020-12-11|EPI\_ISL\_742804|Original|hCoV-19^^Wales|Human|Wales Specialist Virology Centre Sequencing lab|COVID-19 Genomics UK (COG-UK) Consortium|Moore|United Kingdom

>Spike|hCoV-19/Denmark/DCGC-16578/2020|2020-11-16|EPI\_ISL\_714848|Original|hCoV-19^^Hovedstaden|Human|Department of Virus and Microbiological Special Diagnostics|Albertsen Lab|Michaelsen|Denmark

>Spike|hCoV-19/Italy/PIE-SLL-MS53/2020|2020-03-31|EPI\_ISL\_569869|Original|hCoV-19^^Piedmont|Human|Amedeo di savoia|Crosetto lab|Harbers|Italy

>Spike|hCoV-19/Scotland/EDB2976/2020|2020-04-02|EPI\_ISL\_487689|Original|hCoV-19^^Scotland|Human|Virology Department|Wellcome Sanger Institute for the COVID-19 Genomics UK (COG-UK) consortium|Davies|United Kingdom

>Spike|hCoV-19/Japan/PG-3491/2020|2020-07-00|EPI\_ISL\_691600|Original|hCoV-19^^Japan|Human|Pathogen Genomics Center|Pathogen Genomics Center|Sekizuka|Japan

>Spike|hCoV-19/SaudiArabia/KAUST-JEDDAH992/2020|2020-06-17|EPI\_ISL\_513066|Original|hCoV-19^^Jeddah|Human|Pathogen Genomics Lab King Abdullah University of Science and Technology(KAUST)|Pathogen Genomics Lab King Abdullah University of Science and Technology(KAUST)|Mohamed Ghazzali|Saudi Arabia

>Spike|hCoV-19/England/LIVE-DC478E/2020|2020-11-10|EPI\_ISL\_705905|Original|hCoV-19^^England|Human|Liverpool Clinical Laboratories|COVID-19 Genomics UK (COG-UK) Consortium|Haldenby|United Kingdom

>Spike|hCoV-19/Wales/PHWC-496029/2020|2020-11-22|EPI\_ISL\_726520|Original|hCoV-19^^Wales|Human|Originating lab|COVID-19 Genomics UK (COG-UK) Consortium|Moore|United Kingdom

>Spike|hCoV-19/England/ALDP-A6CA46/2020|2020-10-15|EPI\_ISL\_607069|Original|hCoV-19^^England|Human|Lighthouse Lab in Alderley Park|Wellcome Sanger Institute for the COVID-19 Genomics UK (COG-UK) consortium|Davies|United Kingdom

>Spike|hCoV-19/Scotland/EDB6686/2020|2020-05-11|EPI\_ISL\_507186|Original|hCoV-19^^Scotland|Human|Virology Department|COVID-19 Genomics UK (COG-UK) Consortium|Williams|United Kingdom

>Spike|hCoV-19/Denmark/DCGC-17021/2020|2020-12-14|EPI\_ISL\_750716|Original|hCoV-19^^Midtjylland|Human|Department of Virus and Microbiological Special Diagnostics|Albertsen Lab|Michaelsen|Denmark

>Spike|hCoV-19/Brazil/DF-861/2020|2020-03-23|EPI\_ISL\_427296|Original|hCoV-19^^Distrito Federal|Human|Instituto Oswaldo Cruz FIOCRUZ - Laboratory of Respiratory Viruses and Measles (LVRS)|Instituto Oswaldo Cruz FIOCRUZ - Laboratory of Respiratory Viruses and Measles (LVRS)|Silva|Brazil

>Spike|hCoV-19/England/LIVE-DC400B/2020|2020-11-08|EPI\_ISL\_703417|Original|hCoV-19^^England|Human|Liverpool Clinical Laboratories|COVID-19 Genomics UK (COG-UK) Consortium|Haldenby|United Kingdom

>Spike|hCoV-19/USA/LA-EVTL520/2020|2020-06-25|EPI\_ISL\_578924|Original|hCoV-19^^Louisiana|Human|LSUHS Emerging Viral Threat Laboratory|Microbial Genome Sequencing Center|Kamil|USA

>Spike|hCoV-19/Japan/PG-6322/2020|2020-08-00|EPI\_ISL\_689433|Original|hCoV-19^^Japan|Human|Pathogen Genomics Center|Pathogen Genomics Center|Sekizuka|Japan

>Spike|hCoV-19/Netherlands/NA\_71/2020|2020-03-10|EPI\_ISL\_422831|Original|hCoV-19^^Netherlands|Human|Dutch COVID-19 response team|Erasmus Medical Center|Oude Munnink|Netherlands

>Spike|hCoV-19/Netherlands/NA\_400/2020|2020-03-26|EPI\_ISL\_455202|Original|hCoV-19^^Netherlands|Human|Dutch COVID-19 response team|Erasmus Medical Center|Oude Munnink|Netherlands

>Spike|hCoV-19/England/204291952/2020|2020-10-18|EPI\_ISL\_660744|Original|hCoV-19^^England|Human|Respiratory Virus Unit|COVID-19 Genomics UK (COG-UK) Consortium|Platt|United Kingdom

>Spike|hCoV-19/USA/LA-EVTL372/2020|2020-06-01|EPI\_ISL\_578778|Original|hCoV-19^^Louisiana|Human|LSUHS Emerging Viral Threat Laboratory|Microbial Genome Sequencing Center|Kamil|USA

>Spike|hCoV-19/England/QEUEH-C31F0D/2020|2020-12-11|EPI\_ISL\_782698|Original|hCoV-19^^England|Human|Lighthouse Lab in Glasgow|Wellcome Sanger Institute for the COVID-19 Genomics UK (COG-UK) Consortium|Davies|United Kingdom

>Spike|hCoV-19/USA/FL-BPHL-0550/2020|2020-05-27|EPI\_ISL\_508753|Original|hCoV-19^^Florida|Human|Florida Bureau of Public Health Laboratories|Florida Bureau of Public Health Laboratories|Blanton|USA

>Spike|hCoV-19/Portugal/PT1879/2020|2020-11-12|EPI\_ISL\_732096|Original|hCoV-19^^Portugal|Human|Instituto Nacional de Saude (INSA)|Instituto Nacional de Saude (INSA)|Borges|Portugal

>Spike|hCoV-19/USA/WI-WSLH-200317/2020|2020-04-20|EPI\_ISL\_578498|Original|hCoV-19^^Wisconsin|Human|Wisconsin State Laboratory of Hygiene Communicable Disease Division|Wisconsin State Laboratory of Hygiene Communicable Disease Division|Florek|USA

>Spike|hCoV-19/Wales/PHWC-48CF65/2020|2020-11-07|EPI\_ISL\_666559|Original|hCoV-19^^Wales|Human|Wales Specialist Virology Centre Sequencing lab|COVID-19 Genomics UK (COG-UK) Consortium|Moore|United Kingdom

>Spike|hCoV-19/Australia/VIC16869/2020|2020-08-18|EPI\_ISL\_663614|Original|hCoV-19^^Victoria|Human|Microbiological Diagnostic Unit - Public Health Laboratory (MDU-PHL)|MDU-PHL|Schultz|Australia

>Spike|hCoV-19/England/ALDP-B832D7/2020|2020-11-14|EPI\_ISL\_675618|Original|hCoV-19^^England|Human|Lighthouse Lab in Alderley Park|Wellcome Sanger Institute for the COVID-19 Genomics UK (COG-UK) Consortium|Davies|United Kingdom

>Spike|hCoV-19/Japan/NGY-NNH-014/2020|2020-07-22|EPI\_ISL\_568569|Original|hCoV-19^^Aichi|Human|Department of Infectious Diseases and Immunology|Clinical Research Center|Iwatani|Japan

>Spike|hCoV-19/England/CAMC-B9AE33/2020|2020-11-15|EPI\_ISL\_673758|Original|hCoV-19^^England|Human|Lighthouse Lab in Cambridge|Wellcome Sanger Institute for the COVID-19 Genomics UK (COG-UK) Consortium|Davies|United Kingdom

>Spike|hCoV-19/USA/AZ-TG269238/2020|2020-03-20|EPI\_ISL\_426521|Original|hCoV-19^^Arizona|Human|TGen North|TGen North|Lemmer|USA

>Spike|hCoV-19/USA/TX-HMH-4741/2020|2020-06-20|EPI\_ISL\_544298|Original|hCoV-19^^Texas|Human|Houston Methodist Hospital|Houston Methodist Hospital|Long|USA

>Spike|hCoV-19/USA/WA-UW-11438/2020|2020-06-22|EPI\_ISL\_570407|Original|hCoV-19^^Washington|Human|UW Virology Lab|UW Virology Lab|Roychoudhury|USA

>Spike|hCoV-19/Scotland/EDB6041/2020|2020-05-07|EPI\_ISL\_487868|Original|hCoV-19^^Scotland|Human|Virology Department|Wellcome Sanger Institute for the COVID-19 Genomics UK (COG-UK) consortium|Davies|United Kingdom

>Spike|hCoV-19/England/LIVE-DC66E9/2020|2020-11-27|EPI\_ISL\_703916|Original|hCoV-19^^England|Human|Liverpool Clinical Laboratories|COVID-19 Genomics UK (COG-UK) Consortium|Haldenby|United Kingdom

>Spike|hCoV-19/USA/TX-HMH-MCoV-19631/2020|2020-11-29|EPI\_ISL\_783996|Original|hCoV-19^^Texas|Human|Houston Methodist Hospital|Houston Methodist Hospital|Long|USA

>Spike|hCoV-19/USA/IL-UW-363/2020|2020-04-17|EPI\_ISL\_450717|Original|hCoV-19^^Illinois|Human|University of Wisconsin-Madison AIDS Vaccine Research Laboratories|University of Wisconsin-Madison AIDS Vaccine Research Laboratories|Baczenas|USA

>Spike|hCoV-19/Netherlands/OV-EMC-106/2020|2020-09-26|EPI\_ISL\_722830|Original|hCoV-19^^Overijssel|Human|Dutch COVID-19 response team|Erasmus Medical Center|Oude Munnink|Netherlands

>Spike|hCoV-19/England/CAMB-1AE1C4/2020|2020-04-27|EPI\_ISL\_459469|Original|hCoV-19^^England|Human|Department of Pathology|Wellcome Sanger Institute for the COVID-19 Genomics UK (COG-UK) consortium|Davies|United Kingdom

>Spike|hCoV-19/Latvia/067/2020|2020-07-08|EPI\_ISL\_501275|Original|hCoV-19^^Latvia|Human|E. Gulbja Laboratorija|Latvian Biomedical Research and Study Centre|Zrelavs|Latvia

>Spike|hCoV-19/Denmark/DCGC-10565/2020|2020-11-02|EPI\_ISL\_669487|Original|hCoV-19^^Midtjylland|Human|Department of Virus and Microbiological Special Diagnostics|Albertsen Lab|Michaelsen|Denmark

>Spike|hCoV-19/Sweden/20-07768/2020|2020-04-23|EPI\_ISL\_450818|Original|hCoV-19^^Jonkoping|Human|Aneby VC|The Public Health Agency of Sweden|Svartstr\u00f6m|Sweden

>Spike|hCoV-19/USA/TX-HMH-MCoV-14403/2020|2020-10-06|EPI\_ISL\_787688|Original|hCoV-19^^Texas|Human|Houston Methodist Hospital|Houston Methodist Hospital|Long|USA

>Spike|hCoV-19/Wales/PHWC-490C67/2020|2020-11-16|EPI\_ISL\_706554|Original|hCoV-19^^Wales|Human|Originating lab|COVID-19 Genomics UK (COG-UK) Consortium|Moore|United Kingdom

>Spike|hCoV-19/Australia/VIC3609/2020|2020-07-09|EPI\_ISL\_520353|Original|hCoV-19^^Victoria|Human|Victorian Infectious Diseases Reference Laboratory (VIDRL)|VIDRL and MDU-PHL|Schultz|Australia

>Spike|hCoV-19/England/LIVE-A688C/2020|2020-03-19|EPI\_ISL\_499749|Original|hCoV-19^^England|Human|Liverpool Clinical Laboratories|COVID-19 Genomics UK (COG-UK) Consortium|Haldenby|United Kingdom

>Spike|hCoV-19/Brazil/SP-L15-CD284/2020|2020-03-30|EPI\_ISL\_476275|Original|hCoV-19^^S\u00e3o Paulo|Human|Hospital da Cl\u00ednicas da Faculdade de Medicina da Universidade de S\u00e3o Paulo|Instituto de Medicina Tropical da Univesidade de S\u00e3o Paulo|Faria|Brazil

>Spike|hCoV-19/England/SHEF-C0770/2020|2020-03-23|EPI\_ISL\_420239|Original|hCoV-19^^England|Human|Virology Department|Department of Infection|de Silva|United Kingdom

>Spike|hCoV-19/United Arab Emirates/L2004034634/2020|2020-04-17|EPI\_ISL\_520669|Original|hCoV-19^^United Arab Emirates|Human|Mohammed Bin Rashid University of Medicine and Health Sciences|Al Jalila Genomics Center|Ramaswamy|United Arab Emirates

>Spike|hCoV-19/Denmark/ALAB-HH-142/2020|2020-03-11|EPI\_ISL\_452021|Original|hCoV-19^^Denmark|Human|Department of Clinical Microbiology|Albertsen lab|Kirkegaard|Denmark

>Spike|hCoV-19/Wales/ALDP-B1D57F/2020|2020-11-01|EPI\_ISL\_710988|Original|hCoV-19^^Wales|Human|Lighthouse Lab in Alderley Park|Wellcome Sanger Institute for the COVID-19 Genomics UK (COG-UK) Consortium|Davies|United Kingdom

>Spike|hCoV-19/USA/OR-PROV-161/2020|2020-05-06|EPI\_ISL\_482415|Original|hCoV-19^^Oregon|Human|Providence St. Joseph Health Molecular Genomics Laboratory|Providence St. Joseph Health Molecular Genomics Laboratory|Dowdell|USA

>Spike|hCoV-19/Denmark/DCGC-10250/2020|2020-11-09|EPI\_ISL\_669857|Original|hCoV-19^^Nordjylland|Human|Department of Virus and Microbiological Special Diagnostics|Albertsen Lab|Michaelsen|Denmark

>Spike|hCoV-19/Switzerland/VD-ETHZ-100848/2020|2020-03-25|EPI\_ISL\_451794|Original|hCoV-19^^Vaud|Human|Viollier AG|Department of Biosystems Science and Engineering|Nadeau|Switzerland

>Spike|hCoV-19/Luxembourg/LNS0486612/2020|2020-12-21|EPI\_ISL\_771104|Original|hCoV-19^^Luxembourg|Human|Laboratoire national de sant\u00e9|Laboratoire national de sant\u00e9|Wienecke-Baldacchino|Luxembourg

>Spike|hCoV-19/Japan/PG-2026/2020|2020-04-00|EPI\_ISL\_685631|Original|hCoV-19^^Japan|Human|Pathogen Genomics Center|Pathogen Genomics Center|Sekizuka|Japan



>Spike|hCoV-19/Denmark/DCGC-20280/2020|2020-11-30|EPI\_ISL\_747677|Original|hCoV-19^^Syddanmark|Human|Department of Virus and Microbiological Special Diagnostics|Albertsen Lab|Michaelsen|Denmark

>Spike|hCoV-19/England/SHEF-CFE12/2020|2020-05-02|EPI\_ISL\_457669|Original|hCoV-19^^England|Human|Virology Department|COVID-19 Genomics UK (COG-UK) Consortium|de Silva|United Kingdom

>Spike|hCoV-19/USA/TX-HMH-MCoV-18059/2020|2020-11-14|EPI\_ISL\_784407|Original|hCoV-19^^Texas|Human|Houston Methodist Hospital|Houston Methodist Hospital|Long|USA

>Spike|hCoV-19/Scotland/EDB1827/2020|2020-04-16|EPI\_ISL\_433147|Original|hCoV-19^^Scotland|Human|Virology Department|COVID-19 Genomics UK (COG-UK) Consortium|Williams|United Kingdom

>Spike|hCoV-19/England/MILK-B05194/2020|2020-10-24|EPI\_ISL\_665864|Original|hCoV-19^^England|Human|Virology Department|COVID-19 Genomics UK (COG-UK) Consortium|de Silva|United Kingdom

>Spike|hCoV-19/Japan/PG-8935/2020|2020-08-00|EPI\_ISL\_686481|Original|hCoV-19^^Japan|Human|Pathogen Genomics Center|Pathogen Genomics Center|Sekizuka|Japan

>Spike|hCoV-19/England/SHEF-C12F6/2020|2020-09-24|EPI\_ISL\_573688|Original|hCoV-19^^England|Human|Virology Department|COVID-19 Genomics UK (COG-UK) Consortium|de Silva|United Kingdom

>Spike|hCoV-19/USA/CA-QDX-2019/2020|2020-03-23|EPI\_ISL\_604308|Original|hCoV-19^^California|Human|Quest Diagnostics|Quest Diagnostics|Kagan|USA

>Spike|hCoV-19/England/QEUEH-9B51FF/2020|2020-09-03|EPI\_ISL\_590387|Original|hCoV-19^^England|Human|Lighthouse Lab in Glasgow|Wellcome Sanger Institute for the COVID-19 Genomics UK (COG-UK) consortium|Davies|United Kingdom

>Spike|hCoV-19/USA/NY-NYUMC760/2020|2020-03-26|EPI\_ISL\_451474|Original|hCoV-19^^New Jersey|Human|NYU Langone Health|Departments of Pathology and Medicine|Maurano|USA

>Spike|hCoV-19/Denmark/DCGC-20356/2020|2020-09-28|EPI\_ISL\_747597|Original|hCoV-19^^Sjaelland|Human|Department of Virus and Microbiological Special Diagnostics|Albertsen Lab|Michaelsen|Denmark

>Spike|hCoV-19/England/QEUEH-960393/2020|2020-08-05|EPI\_ISL\_532091|Original|hCoV-19^^England|Human|Lighthouse Lab in Glasgow|Wellcome Sanger Institute for the COVID-19 Genomics UK (COG-UK) consortium|Davies|United Kingdom

>Spike|hCoV-19/USA/AR-QDX-532/2020|2020-03-18|EPI\_ISL\_571261|Original|hCoV-19^^Arkansas|Human|Quest Diagnostics|Quest Diagnostics|Kagan|USA

>Spike|hCoV-19/Wales/PHWC-164986/2020|2020-05-28|EPI\_ISL\_479329|Original|hCoV-19^^Wales|Human|Wales Specialist Virology Centre Sequencing lab|COVID-19 Genomics UK (COG-UK) Consortium|Moore|United Kingdom

>Spike|hCoV-19/Denmark/DCGC-11542/2020|2020-11-02|EPI\_ISL\_670985|Original|hCoV-19^^Nordjylland|Human|Department of Virus and Microbiological Special Diagnostics|Albertsen Lab|Michaelsen|Denmark

>Spike|hCoV-19/Wales/PHWC-494665/2020|2020-11-20|EPI\_ISL\_726149|Original|hCoV-19^^Wales|Human|Originating lab|COVID-19 Genomics UK (COG-UK) Consortium|Moore|United Kingdom

>Spike|hCoV-19/Switzerland/BL-ETHZ-270149/2020|2020-08-28|EPI\_ISL\_541452|Original|hCoV-19^^Basel-Landschaft|Human|Viollier AG|Department of Biosystems Science and Engineering|Nadeau|Switzerland

>Spike|hCoV-19/Sweden/20-53395/2020|2020-11-05|EPI\_ISL\_676497|Original|hCoV-19^^Vastra Gotaland|Human|Klinisk Mikrobiologi|The Public Health Agency of Sweden|Svartstr\u00f6m|Sweden

>Spike|hCoV-19/Singapore/1009/2020|2020-09-29|EPI\_ISL\_574494|Original|hCoV-19^^Singapore|Human|National Public Health Laboratory|National Public Health Laboratory|Mak|Singapore

>Spike|hCoV-19/Japan/PG-3066/2020|2020-04-00|EPI\_ISL\_691189|Original|hCoV-19^^Japan|Human|Pathogen Genomics Center|Pathogen Genomics Center|Sekizuka|Japan

>Spike|hCoV-19/England/NOTT-111D5F/2020|2020-06-06|EPI\_ISL\_472403|Original|hCoV-19^^England|Human|Queens Medical Centre|COVID-19 Genomics UK (COG-UK) Consortium|Loose|United Kingdom

>Spike|hCoV-19/England/CAMC-BC20A5/2020|2020-11-22|EPI\_ISL\_705183|Original|hCoV-19^^England|Human|Lighthouse Lab in Cambridge|Wellcome Sanger Institute for the COVID-19 Genomics UK (COG-UK) Consortium|Davies|United Kingdom

>Spike|hCoV-19/England/QEUA-961E73/2020|2020-07-30|EPI\_ISL\_537081|Original|hCoV-19^^England|Human|Lighthouse Lab in Glasgow|Wellcome Sanger Institute for the COVID-19 Genomics UK (COG-UK) consortium|Davies|United Kingdom

>Spike|hCoV-19/England/BRIS-125990/2020|2020-03-30|EPI\_ISL\_443734|Original|hCoV-19^^England|Human|PHE South West Regional Laboratory|Wellcome Sanger Institute for the COVID-19 Genomics UK (COG-UK) consortium|Amato|United Kingdom

>Spike|hCoV-19/Sweden/20-08092/2020|2020-03-06|EPI\_ISL\_454464|Original|hCoV-19^^Stockholm|Human|Karolinska Universitetslaboratoriet|The Public Health Agency of Sweden|Svartstr\u00f6m|Sweden

>Spike|hCoV-19/USA/WI-GMF-31997/2020|2020-11-06|EPI\_ISL\_661122|Original|hCoV-19^^Wisconsin|Human|Gundersen Molecular Diagnostics Laboratory|Kabara Cancer Research Institute|Kenny|USA

>Spike|hCoV-19/England/20156036504/2020|2020-04-08|EPI\_ISL\_466306|Original|hCoV-19^^England|Human|Respiratory Virus Unit|Respiratory Virus Unit|Platt|United Kingdom

>Spike|hCoV-19/England/LIVE-DBD3A2/2020|2020-10-27|EPI\_ISL\_665133|Original|hCoV-19^^England|Human|Liverpool Clinical Laboratories|COVID-19 Genomics UK (COG-UK) Consortium|Haldenby|United Kingdom

>Spike|hCoV-19/Norway/3541/2020|2020-09-10|EPI\_ISL\_590930|original|hCoV-19^^Oslo|Human|Oslo University Hospital|Norwegian Institute of Public Health|Vollan|Norway

>Spike|hCoV-19/Sweden/20-51337/2020|2020-05-08|EPI\_ISL\_475542|Original|hCoV-19^^Stockholm|Human|Kungsholmsdoktorn|The Public Health Agency of Sweden|Svartstr\u00f6m|Sweden

>Spike|hCoV-19/England/ALDP-9D90E9/2020|2020-09-18|EPI\_ISL\_576698|Original|hCoV-19^^England|Human|Oxford Viromics|COVID-19 Genomics UK (COG-UK) Consortium|Golubchik|United Kingdom

>Spike|hCoV-19/England/SHEF-10D5EBC/2020|2020-12-15|EPI\_ISL\_742082|Original|hCoV-19^^England|Human|Virology Department|COVID-19 Genomics UK (COG-UK) Consortium|de Silva|United Kingdom

>Spike|hCoV-19/Northern Ireland/QEUA-96CAFC/2020|2020-08-21|EPI\_ISL\_530725|Original|hCoV-19^^Northern Ireland|Human|Lighthouse Lab in Glasgow|Wellcome Sanger Institute for the COVID-19 Genomics UK (COG-UK) consortium|Davies|United Kingdom

>Spike|hCoV-19/Switzerland/AG-UZH-1000478260/2020|2020-03-02|EPI\_ISL\_524476|Original|hCoV-19^^Aargau|Human|B\u00f6clach Hospital|Institute of Medical Virology|Schmutz|Switzerland

>Spike|hCoV-19/Wales/PHWC-48C4DF/2020|2020-11-05|EPI\_ISL\_666435|Original|hCoV-19^^Wales|Human|Wales Specialist Virology Centre Sequencing lab|COVID-19 Genomics UK (COG-UK) Consortium|Moore|United Kingdom

>Spike|hCoV-19/USA/FL-BPHL-1588/2020|2020-09-24|EPI\_ISL\_594278|Original|hCoV-19^^Florida|Human|Florida Bureau of Public Health Laboratories|Florida Bureau of Public Health Laboratories|Blanton|USA

>Spike|hCoV-19/England/MILK-A55FBA/2020|2020-10-08|EPI\_ISL\_595124|Original|hCoV-19^^England|Human|Quadram Institute Bioscience|COVID-19 Genomics UK (COG-UK) Consortium|Alikhan|United Kingdom

>Spike|hCoV-19/Israel/CVL-128-ngs/2020|2020-12-27|EPI\_ISL\_776841|Original|hCoV-19^^Israel|Human|Israel Central Virology laboratory|Israel Central Virology laboratory|Zuckerman|Israel

>Spike|hCoV-19/England/CAMB-82297/2020|2020-04-12|EPI\_ISL\_443587|Original|hCoV-19^^England|Human|Department of Pathology|Wellcome Sanger Institute for the COVID-19 Genomics UK (COG-UK) consortium|Amato|United Kingdom

>Spike|hCoV-19/Spain/IB-IBV-2571/2020|2020-04-07|EPI\_ISL\_468980|Original|hCoV-19^^Illes Balears|Human|Servicio de Microbiolog\u00eda|SeqCOVID-SPAIN consortium|IBV (CSIC) |Comas|Spain

>Spike|hCoV-19/Singapore/1303/2020|2020-05-15|EPI\_ISL\_648790|Original|hCoV-19^^Singapore|Human|Department of Laboratory Medicine|Department of Laboratory Medicine|Chen|Singapore

>Spike|hCoV-19/England/MILK-A7C8D0/2020|2020-10-15|EPI\_ISL\_607553|Original|hCoV-19^^England|Human|Lighthouse Lab in Milton Keynes|Wellcome Sanger Institute for the COVID-19 Genomics UK (COG-UK) consortium|Davies|United Kingdom

>Spike|hCoV-19/England/ALDP-9EA72C/2020|2020-09-24|EPI\_ISL\_580078|Original|hCoV-19^^England|Human|Lighthouse Lab in Alderley Park|Wellcome Sanger Institute for the COVID-19 Genomics UK (COG-UK) consortium|Davies|United Kingdom

>Spike|hCoV-19/Spain/VC-IBV-98006446/2020|2020-06-30|EPI\_ISL\_538654|Original|hCoV-19^^Comunitat Valenciana|Human|Servicio de Microbiolog\u00eda. Hospital General Universitario de Castell\u00f3n|SeqCOVID-SPAIN consortium|IBV(CSIC)|Comas|Spain

>Spike|hCoV-19/Wales/MILK-A4748F/2020|2020-10-05|EPI\_ISL\_609269|Original|hCoV-19^^Wales|Human|Lighthouse Lab in Milton Keynes|Wellcome Sanger Institute for the COVID-19 Genomics UK (COG-UK) consortium|Davies|United Kingdom

>Spike|hCoV-19/USA/MA-MASPHL-00865/2020|2020-05-18|EPI\_ISL\_692860|Original|hCoV-19^^Massachusetts|Human|Massachusetts State Public Health Laboratory|Massachusetts State Public Health Laboratory|Lang|USA

>Spike|hCoV-19/Scotland/EDB6177/2020|2020-05-16|EPI\_ISL\_473903|Original|hCoV-19^^Scotland|Human|Virology Department|COVID-19 Genomics UK (COG-UK) Consortium|Williams|United Kingdom

>Spike|hCoV-19/USA/MI-UM-10036281666/2020|2020-10-05|EPI\_ISL\_596571|Original|hCoV-19^^Michigan|Human|University of Michigan Clinical Microbiology Laboratory|Lauring Lab|Valesano|USA

>Spike|hCoV-19/Sweden/20-08725/2020|2020-03-30|EPI\_ISL\_475114|Original|hCoV-19^^Halland|Human|Halmstad klinisk mikrobiologi|The Public Health Agency of Sweden|Svartstr\u00f6m|Sweden

>Spike|hCoV-19/England/CAMC-B34132/2020|2020-11-05|EPI\_ISL\_659660|Original|hCoV-19^^England|Human|Lighthouse Lab in Cambridge|Wellcome Sanger Institute for the COVID-19 Genomics UK (COG-UK) Consortium|Davies|United Kingdom

>Spike|hCoV-19/USA/MN-MDH-1317/2020|2020-03-24|EPI\_ISL\_495616|Original|hCoV-19^^Minnesota|Human|Minnesota Department of Health|Minnesota Department of Health|Garfin|USA

>Spike|hCoV-19/USA/NY-Wadsworth-285156-01/2020|2020-12-08|EPI\_ISL\_754465|Original|hCoV-19^^New York|Human|Wadsworth Center|Wadsworth Center|Lasek-Nesselquist|USA

>Spike|hCoV-19/England/MILK-AC74F0/2020|2020-10-21|EPI\_ISL\_630221|Original|hCoV-19^^England|Human|Lighthouse Lab in Milton Keynes|Wellcome Sanger Institute for the COVID-19 Genomics UK (COG-UK) consortium|Davies|United Kingdom

>Spike|hCoV-19/Wales/PHWC-160DE8/2020|2020-05-22|EPI\_ISL\_473054|Original|hCoV-19^^Wales|Human|Wales Specialist Virology Centre Sequencing lab|COVID-19 Genomics UK (COG-UK) Consortium|Moore|United Kingdom

>Spike|hCoV-19/USA/CA-CZB-3952/2020|2020-07-28|EPI\_ISL\_548522|Original|hCoV-19^^California|Human|UCSF Clinical Microbiology Laboratory|Chan-Zuckerberg Biohub|Bhatt|USA

>Spike|hCoV-19/Austria/CeMM0413/2020|2020-03-05|EPI\_ISL\_475843|Original|hCoV-19^^Austria|Human|Austrian Agency for Health and Food Safety (AGES)|Bergthaler laboratory|Bergthaler|Austria

>Spike|hCoV-19/Japan/PG-4614/2020|2020-08-00|EPI\_ISL\_689751|Original|hCoV-19^^Japan|Human|Pathogen Genomics Center|Pathogen Genomics Center|Sekizuka|Japan

>Spike|hCoV-19/England/LIVE-A47FA/2020|2020-03-12|EPI\_ISL\_500045|Original|hCoV-19^^England|Human|Liverpool Clinical Laboratories|COVID-19 Genomics UK (COG-UK) Consortium|Haldenby|United Kingdom

>Spike|hCoV-19/France/OCC-SC501/2020|2020-04-06|EPI\_ISL\_660695|Original|hCoV-19^^Occitanie|Human|CHU Montpellier|CNR Virus des Infections Respiratoires - France SUD|Bal|France

>Spike|hCoV-19/Sri Lanka/COV91/2020|2020-03-19|EPI\_ISL\_428672|Original|hCoV-19^^Sri Lanka|Human|Centre for Dengue Research|Centre for Dengue Research|Malavige|Sri Lanka

>Spike|hCoV-19/England/CAMB-7EB48/2020|2020-04-07|EPI\_ISL\_442969|Original|hCoV-19^^England|Human|Department of Pathology|Wellcome Sanger Institute for the COVID-19 Genomics UK (COG-UK) consortium|Amato|United Kingdom

>Spike|hCoV-19/USA/MI-UM-10035531897/2020|2020-08-18|EPI\_ISL\_583275|Original|hCoV-19^^Michigan|Human|University of Michigan Clinical Microbiology Laboratory|Lauring Lab|Valesano|USA

>Spike|hCoV-19/USA/UT-QDX-2487/2020|2020-03-13|EPI\_ISL\_604851|Original|hCoV-19^^Utah|Human|Quest Diagnostics|Quest Diagnostics|Kagan|USA

>Spike|hCoV-19/Sweden/20-05823/2020|2020-03-17|EPI\_ISL\_445222|Original|hCoV-19^^Halland|Human|Saroledens Familjelakare|The Public Health Agency of Sweden|Svartstr\u00f6m|Sweden

>Spike|hCoV-19/England/MILK-BAAE21/2020|2020-11-17|EPI\_ISL\_681493|Original|hCoV-19^^England|Human|Lighthouse Lab in Milton Keynes|Wellcome Sanger Institute for the COVID-19 Genomics UK (COG-UK) Consortium|Davies|United Kingdom

>Spike|hCoV-19/England/QEUEH-B7E970/2020|2020-11-14|EPI\_ISL\_668052|Original|hCoV-19^^England|Human|Lighthouse Lab in Glasgow|Wellcome Sanger Institute for the COVID-19 Genomics UK (COG-UK) Consortium|Davies|United Kingdom

>Spike|hCoV-19/Switzerland/VD-ETHZ-200070/2020|2020-07-15|EPI\_ISL\_510751|Original|hCoV-19^^Vaud|Human|Viollier AG|Department of Biosystems Science and Engineering|Nadeau|Switzerland

>Spike|hCoV-19/England/QEUEH-B67A4A/2020|2020-11-11|EPI\_ISL\_661629|Original|hCoV-19^^England|Human|Lighthouse Lab in Glasgow|Wellcome Sanger Institute for the COVID-19 Genomics UK (COG-UK) Consortium|Davies|United Kingdom

>Spike|hCoV-19/Wales/PHWC-483256/2020|2020-10-16|EPI\_ISL\_627794|Original|hCoV-19^^Wales|Human|Wales Specialist Virology Centre Sequencing lab|COVID-19 Genomics UK (COG-UK) Consortium|Moore|United Kingdom

>Spike|hCoV-19/USA/TX-HMH-975/2020|2020-04-07|EPI\_ISL\_545942|Original|hCoV-19^^Texas|Human|Houston Methodist Hospital|Houston Methodist Hospital|Long|USA

>Spike|hCoV-19/England/BRIS-1853EFA/2020|2020-04-28|EPI\_ISL\_492252|Original|hCoV-19^^England|Human|PHE South West Regional Laboratory|Wellcome Sanger Institute for the COVID-19 Genomics UK (COG-UK) consortium|Davies|United Kingdom

>Spike|hCoV-19/England/MILK-9A8FB9/2020|2020-09-01|EPI\_ISL\_551148|Original|hCoV-19^^England|Human|Lighthouse Lab in Milton Keynes|Wellcome Sanger Institute for the COVID-19 Genomics UK (COG-UK) consortium|Davies|United Kingdom

>Spike|hCoV-19/USA/TX-HMH-MCoV-12290/2020|2020-09-25|EPI\_ISL\_789934|Original|hCoV-19^^Texas|Human|Houston Methodist Hospital|Houston Methodist Hospital|Long|USA

>Spike|hCoV-19/England/QEUEH-B2EEDA/2020|2020-11-03|EPI\_ISL\_659894|Original|hCoV-19^^England|Human|Lighthouse Lab in Glasgow|Wellcome Sanger Institute for the COVID-19 Genomics UK (COG-UK) Consortium|Davies|United Kingdom

>Spike|hCoV-19/Scotland/EDB5486/2020|2020-04-26|EPI\_ISL\_461757|Original|hCoV-19^^Scotland|Human|Virology Department|COVID-19 Genomics UK (COG-UK) Consortium|Williams|United Kingdom

>Spike|hCoV-19/USA/CA-ALSR-2772/2020|2020-07-15|EPI\_ISL\_635672|Original|hCoV-19^^California|Human|San Diego County Public Health Laboratory|Andersen lab at Scripps Research|Gangavarapu|USA

>Spike|hCoV-19/USA/TX-HMH-2162/2020|2020-05-22|EPI\_ISL\_545153|Original|hCoV-19^^Texas|Human|Houston Methodist Hospital|Houston Methodist Hospital|Long|USA

>Spike|hCoV-19/Brazil/RJ-00466/2020|2020-07-08|EPI\_ISL\_717861|Original|hCoV-19^^Rio de Janeiro|Human|Laboratorio de Virologia Molecular / UFRJ|Bioinformatics Laboratory / LNCC|Almeida|Brazil

>Spike|hCoV-19/USA/CA-CZB-1477/2020|2020-05-01|EPI\_ISL\_468429|Original|hCoV-19^^California|Human|County of San Luis Obispo Public Health Laboratory|Chan-Zuckerberg Biohub|Hao|USA

>Spike|hCoV-19/England/204180141/2020|2020-09-27|EPI\_ISL\_583984|Original|hCoV-19^^England|Human|Respiratory Virus Unit|Respiratory Virus Unit|Platt|United Kingdom

>Spike|hCoV-19/USA/FL-BPHL-0575/2020|2020-03-21|EPI\_ISL\_508779|Original|hCoV-19^^Florida|Human|Florida Bureau of Public Health Laboratories|Florida Bureau of Public Health Laboratories|Blanton|USA

>Spike|hCoV-19/Denmark/DCGC-5496/2020|2020-09-21|EPI\_ISL\_620821|Original|hCoV-19^^Syddanmark|Human|Department of Virus and Microbiological Special Diagnostics|Albertsen lab|Michaelsen|Denmark

>Spike|hCoV-19/England/QEUEH-9F997F/2020|2020-09-26|EPI\_ISL\_589240|Original|hCoV-19^^England|Human|Lighthouse Lab in Glasgow|Wellcome Sanger Institute for the COVID-19 Genomics UK (COG-UK) consortium|Davies|United Kingdom

>Spike|hCoV-19/Denmark/DCGC-10128/2020|2020-11-09|EPI\_ISL\_669410|Original|hCoV-19^^Nordjylland|Human|Department of Virus and Microbiological Special Diagnostics|Albertsen Lab|Michaelsen|Denmark

>Spike|hCoV-19/USA/CA-UCLA-66/2020|2020-03-31|EPI\_ISL\_537591|Original|hCoV-19^^California|Human|UCLA Pathology Clinical Microbiology Lab|Kruglyak Lab|Boocock|USA

>Spike|hCoV-19/USA/LA-EVTL658/2020|2020-07-13|EPI\_ISL\_653350|Original|hCoV-19^^Louisiana|Human|LSUHS Emerging Viral Threat Laboratory|Microbial Genome Sequencing Center|Kamil|USA

>Spike|hCoV-19/England/MILK-BB213C/2020|2020-11-18|EPI\_ISL\_720341|Original|hCoV-19^^England|Human|Lighthouse Lab in Milton Keynes|Wellcome Sanger Institute for the COVID-19 Genomics UK (COG-UK) Consortium|Davies|United Kingdom

>Spike|hCoV-19/England/MILK-AC928B/2020|2020-10-21|EPI\_ISL\_629155|Original|hCoV-19^^England|Human|Lighthouse Lab in Milton Keynes|Wellcome Sanger Institute for the COVID-19 Genomics UK (COG-UK) consortium|Davies|United Kingdom

>Spike|hCoV-19/USA/CA-CZB-11878/2020|2020-04-08|EPI\_ISL\_672276|Original|hCoV-19^^California|Human|Santa Clara County Public Health Laboratory|Chan-Zuckerberg Biohub|Bhatt|USA

>Spike|hCoV-19/USA/MI-QDX-2261/2020|2020-03-14|EPI\_ISL\_604545|Original|hCoV-19^^Michigan|Human|Quest Diagnostics|Quest Diagnostics|Kagan|USA

>Spike|hCoV-19/Northern Ireland/QEUA-961ACA/2020|2020-08-02|EPI\_ISL\_537094|Original|hCoV-19^^Northern Ireland|Human|Lighthouse Lab in Glasgow|Wellcome Sanger Institute for the COVID-19 Genomics UK (COG-UK) consortium|Davies|United Kingdom

>Spike|hCoV-19/England/QEUA-9B704B/2020|2020-09-09|EPI\_ISL\_590577|Original|hCoV-19^^England|Human|Lighthouse Lab in Glasgow|Wellcome Sanger Institute for the COVID-19 Genomics UK (COG-UK) consortium|Davies|United Kingdom

>Spike|hCoV-19/England/BIRM-65573/2020|2020-10-06|EPI\_ISL\_594566|Original|hCoV-19^^England|Human|University of Birmingham|COVID-19 Genomics UK (COG-UK) Consortium|Loman|United Kingdom

>Spike|hCoV-19/Denmark/DCGC-5033/2020|2020-09-21|EPI\_ISL\_621820|Original|hCoV-19^^Hovedstaden|Human|Department of Virus and Microbiological Special Diagnostics|Albertsen lab|Michaelsen|Denmark

>Spike|hCoV-19/England/QEUA-9B85B4/2020|2020-09-10|EPI\_ISL\_549738|Original|hCoV-19^^England|Human|Lighthouse Lab in Glasgow|Wellcome Sanger Institute for the COVID-19 Genomics UK (COG-UK) consortium|Davies|United Kingdom

>Spike|hCoV-19/USA/TX-DSHS-0265/2020|2020-06-13|EPI\_ISL\_527832|Original|hCoV-19^^Texas|Human|Texas Department of State Health Services|Texas Department of State Health Services|Rahman|USA

>Spike|hCoV-19/Italy/CAM-IZSM-32830/2020|2020-03-28|EPI\_ISL\_572324|Vero|hCoV-19^^Campania|Human|IZSM|IZSM|Viscardi|Italy

>Spike|hCoV-19/Japan/PG-2019/2020|2020-04-00|EPI\_ISL\_685624|Original|hCoV-19^^Japan|Human|Pathogen Genomics Center|Pathogen Genomics Center|Sekizuka|Japan

>Spike|hCoV-19/England/CWAR-24FDC17/2020|2020-05-03|EPI\_ISL\_584497|Original|hCoV-19^^England|Human|UHCW / University of Warwick|COVID-19 Genomics UK (COG-UK) Consortium|Stark|United Kingdom

>Spike|hCoV-19/USA/OR-PROV-139/2020|2020-05-02|EPI\_ISL\_482400|Original|hCoV-19^^Oregon|Human|Providence St. Joseph Health Molecular Genomics Laboratory|Providence St. Joseph Health Molecular Genomics Laboratory|Dowdell|USA

>Spike|hCoV-19/USA/TX-HMH-MCoV-12972/2020|2020-08-28|EPI\_ISL\_788124|Original|hCoV-19^^Texas|Human|Houston Methodist Hospital|Houston Methodist Hospital|Long|USA

>Spike|hCoV-19/Denmark/DCGC-15857/2020|2020-11-23|EPI\_ISL\_714066|Original|hCoV-19^^Midtjylland|Human|Department of Virus and Microbiological Special Diagnostics|Albertsen Lab|Michaelsen|Denmark

>Spike|hCoV-19/England/QEUA-9A4490/2020|2020-09-01|EPI\_ISL\_540143|Original|hCoV-19^^England|Human|Lighthouse Lab in Glasgow|Wellcome Sanger Institute for the COVID-19 Genomics UK (COG-UK) consortium|Davies|United Kingdom

>Spike|hCoV-19/England/BRIS-12BF6B/2020|2020-05-08|EPI\_ISL\_469428|Original|hCoV-19^^England|Human|PHE South West Regional Laboratory|Wellcome Sanger Institute for the COVID-19 Genomics UK (COG-UK) consortium|Davies|United Kingdom

>Spike|hCoV-19/Australia/VIC11146/2020|2020-08-10|EPI\_ISL\_563269|Original|hCoV-19^^Victoria|Human|Microbiological Diagnostic Unit - Public Health Laboratory (MDU-PHL)|MDU-PHL|Schultz|Australia

>Spike|hCoV-19/Portugal/PT1770/2020|2020-11-10|EPI\_ISL\_732001|Original|hCoV-19^^Portugal|Human|Instituto Nacional de Saude (INSA)|Instituto Nacional de Saude (INSA)|Borges|Portugal

>Spike|hCoV-19/Japan/PG-3309/2020|2020-04-00|EPI\_ISL\_691424|Original|hCoV-19^^Japan|Human|Pathogen Genomics Center|Pathogen Genomics Center|Sekizuka|Japan

>Spike|hCoV-19/USA/WA-UW-6550/2020|2020-04-03|EPI\_ISL\_570128|Original|hCoV-19^^Washington|Human|UW Virology Lab|UW Virology Lab|Roychoudhury|USA

>Spike|hCoV-19/Australia/VIC5336/2020|2020-07-17|EPI\_ISL\_520099|Original|hCoV-19^^Victoria|Human|Microbiological Diagnostic Unit - Public Health Laboratory (MDU-PHL)|MDU-PHL|Schultz|Australia

>Spike|hCoV-19/England/MILK-B562EC/2020|2020-11-05|EPI\_ISL\_657519|Original|hCoV-19^^England|Human|Lighthouse Lab in Milton Keynes|Wellcome Sanger Institute for the COVID-19 Genomics UK (COG-UK) Consortium|Davies|United Kingdom

>Spike|hCoV-19/USA/LA-EVTL817/2020|2020-07-27|EPI\_ISL\_653508|Original|hCoV-19^^Louisiana|Human|LSUHS Emerging Viral Threat Laboratory|Microbial Genome Sequencing Center|Kamil|USA

>Spike|hCoV-19/Spain/EX-IBV-005003/2020|2020-03-13|EPI\_ISL\_510312|Original|hCoV-19^^Extremadura|Human|Hospital San Pedro de Alc\u00e9ntara (C\u00e9rceres)|SeqCOVID-SPAIN consortium/IBV (CSIC)|Comas|Spain

>Spike|hCoV-19/Scotland/CVR2969/2020|2020-04-21|EPI\_ISL\_453088|Original|hCoV-19^^Scotland|Human|West of Scotland Specialist Virology Centre|COVID-19 Genomics UK (COG-UK) Consortium|Robertson|United Kingdom

>Spike|hCoV-19/England/QEUA-9FA334/2020|2020-09-28|EPI\_ISL\_588241|Original|hCoV-19^^England|Human|Lighthouse Lab in Glasgow|Wellcome Sanger Institute for the COVID-19 Genomics UK (COG-UK) consortium|Davies|United Kingdom

>Spike|hCoV-19/Denmark/DCGC-19182/2020|2020-12-07|EPI\_ISL\_748204|Original|hCoV-19^^Midtjylland|Human|Department of Virus and Microbiological Special Diagnostics|Albertsen Lab|Michaelsen|Denmark

>Spike|hCoV-19/England/QEUA-AA0062/2020|2020-10-20|EPI\_ISL\_611312|Original|hCoV-19^^England|Human|Lighthouse Lab in Glasgow|Wellcome Sanger Institute for the COVID-19 Genomics UK (COG-UK) consortium|Davies|United Kingdom

>Spike|hCoV-19/Russia/CRIE140762/2020|2020-03-29|EPI\_ISL\_460605|Original|hCoV-19^^Moscow|Human|Molecular diagnostic laboratory of Federal Budget Institution of Science \Central Research Institute of Epidemiology\ of The Federal Service on Customers' Rights Protection and Human Well-being Surveillance|Group of Genomics and Postgenomic Technologies of Central Research Institute of Epidemiology|Spera  
>nskaya|Russia

>Spike|hCoV-19/Scotland/QEUA-9901AF/2020|2020-08-30|EPI\_ISL\_540010|Original|hCoV-19^^Scotland|Human|Lighthouse Lab in Glasgow|Wellcome Sanger Institute for the COVID-19 Genomics UK (COG-UK) consortium|Davies|United Kingdom

>Spike|hCoV-19/England/MILK-B88788/2020|2020-11-13|EPI\_ISL\_674265|Original|hCoV-19^^England|Human|Lighthouse Lab in Milton Keynes|Wellcome Sanger Institute for the COVID-19 Genomics UK (COG-UK) Consortium|Davies|United Kingdom

>Spike|hCoV-19/Wales/PHWC-4A1762/2020|2020-12-10|EPI\_ISL\_743720|Original|hCoV-19^^Wales|Human|Wales Specialist Virology Centre Sequencing lab|COVID-19 Genomics UK (COG-UK) Consortium|Moore|United Kingdom

>Spike|hCoV-19/Bangladesh/BCSIR-NILMRC-116/2020|2020-06-07|EPI\_ISL\_475759|Original|hCoV-19^^Rangpur|Human|National Institute of Laboratory Medicine and Referral Center|Genomic Research Lab|Khan|Bangladesh

>Spike|hCoV-19/England/CAMB-1B966D/2020|2020-11-06|EPI\_ISL\_664571|Original|hCoV-19^^England|Human|Department of Pathology|COVID-19 Genomics UK (COG-UK) Consortium|Goodfellow|United Kingdom

>Spike|hCoV-19/Portugal/PT1459/2020|2020-03-26|EPI\_ISL\_511418|Original|hCoV-19^^Portugal|Human|Instituto Nacional de Saude (INSA)|Instituto Nacional de Saude (INSA)|Borges|Portugal

>Spike|hCoV-19/England/BRIS-12FDA9/2020|2020-04-10|EPI\_ISL\_492742|Original|hCoV-19^^England|Human|PHE South West Regional Laboratory|Wellcome Sanger Institute for the COVID-19 Genomics UK (COG-UK) consortium|Davies|United Kingdom

>Spike|hCoV-19/USA/UT-UPHL-2008805/2020|2020-05-29|EPI\_ISL\_524831|Original|hCoV-19^^Utah|Human|Utah Public Health Laboratory|Utah Public Health Laboratory|Young|USA

>Spike|hCoV-19/England/CAMC-A4141C/2020|2020-10-07|EPI\_ISL\_609424|Original|hCoV-19^^England|Human|Lighthouse Lab in Cambridge|Wellcome Sanger Institute for the COVID-19 Genomics UK (COG-UK) consortium|Davies|United Kingdom

>Spike|hCoV-19/Australia/VIC2305/2020|2020-06-17|EPI\_ISL\_522026|Original|hCoV-19^^Victoria|Human|Microbiological Diagnostic Unit - Public Health Laboratory (MDU-PHL)|MDU-PHL|Schultz|Australia

>Spike|hCoV-19/England/QEUH-B2C856/2020|2020-11-04|EPI\_ISL\_665328|Original|hCoV-19^^England|Human|Liverpool Clinical Laboratories|COVID-19 Genomics UK (COG-UK) Consortium|Haldenby|United Kingdom

>Spike|hCoV-19/Australia/VIC5991/2020|2020-07-20|EPI\_ISL\_518766|Original|hCoV-19^^Victoria|Human|Microbiological Diagnostic Unit - Public Health Laboratory (MDU-PHL)|MDU-PHL|Schultz|Australia

>Spike|hCoV-19/Spain/VC-IBV-98003083/2020|2020-03-14|EPI\_ISL\_538019|Original|hCoV-19^^Comunitat Valenciana|Human|Hospital Universitari i Polit\u00e8cnic La Fe de Val\u00e8ncia|SeqCOVID-SPAIN consortium/IBV(CSIC)|Comas|Spain

>Spike|hCoV-19/England/BRIS-1239B0/2020|2020-04-07|EPI\_ISL\_442673|Original|hCoV-19^^England|Human|PHE South West Regional Laboratory|Wellcome Sanger Institute for the COVID-19 Genomics UK (COG-UK) consortium|Amato|United Kingdom

>Spike|hCoV-19/USA/WI-UW-82/2020|2020-03-25|EPI\_ISL\_421341|Original|hCoV-19^^Wisconsin|Human|University of Wisconsin-Madison AIDS Vaccine Research Laboratories|University of Wisconsin-Madison AIDS Vaccine Research Laboratories|Baczenas|USA

>Spike|hCoV-19/USA/UT-08383/2020|2020-05-15|EPI\_ISL\_524166|Original|hCoV-19^^Utah|Human|Utah Public Health Laboratory|Utah Public Health Laboratory|Young|USA

>Spike|hCoV-19/England/QEUH-A0AC71/2020|2020-10-01|EPI\_ISL\_599407|Original|hCoV-19^^England|Human|Lighthouse Lab in Glasgow|Wellcome Sanger Institute for the COVID-19 Genomics UK (COG-UK) consortium|Davies|United Kingdom

>Spike|hCoV-19/USA/MI-MDHHS-SC20510/2020|2020-05-08|EPI\_ISL\_460558|Original|hCoV-19^^Michigan|Human|Michigan Department of Health and Human Services|Michigan Department of Health and Human Services|Blankenship|USA

>Spike|hCoV-19/England/ALDP-A8494B/2020|2020-10-18|EPI\_ISL\_610313|Original|hCoV-19^^England|Human|Lighthouse Lab in Alderley Park|Wellcome Sanger Institute for the COVID-19 Genomics UK (COG-UK) consortium|Davies|United Kingdom

>Spike|hCoV-19/England/CAMB-1B8F18/2020|2020-11-03|EPI\_ISL\_650353|Original|hCoV-19^^England|Human|Department of Pathology|COVID-19 Genomics UK (COG-UK) Consortium|Goodfellow|United Kingdom

>Spike|hCoV-19/Scotland/CVR11/2020|2020-03-10|EPI\_ISL\_425655|Original|hCoV-19^^Scotland|Human|West of Scotland Specialist Virology Centre|COVID-19 Genomics UK (COG-UK) Consortium|Robertson|United Kingdom

>Spike|hCoV-19/England/MILK-B3E3D8/2020|2020-11-02|EPI\_ISL\_706275|Original|hCoV-19^^England|Human|Oxford Viromics|COVID-19 Genomics UK (COG-UK) Consortium|Golubchik|United Kingdom

>Spike|hCoV-19/Jordan/AQ-ALSR-5268/2020|2020-10-07|EPI\_ISL\_730506|Original|hCoV-19^^Aqaba|Human|Biolab Diagnostic Laboratories|Andersen lab at Scripps Research|Gangavarapu|Jordan

>Spike|hCoV-19/South Africa/LR00114/2020|2020-07-20|EPI\_ISL\_514408|Original|hCoV-19^^Gauteng|Human|National Institute for Communicable Diseases of the National Health Laboratory Service|National Institute for Communicable Diseases of the National Health Laboratory Service|Allam|South Africa

>Spike|hCoV-19/England/PORT-2D15E9/2020|2020-04-20|EPI\_ISL\_484413|Original|hCoV-19^^England|Human|Centre for Enzyme Innovation|COVID-19 Genomics UK (COG-UK) Consortium|Robson|United Kingdom

>Spike|hCoV-19/Canada/ON-S1796/2020|2020-11-15|EPI\_ISL\_755791|Original|hCoV-19^^Ontario|Human|Toronto Invasive Bacterial Diseases Network|McMaster University|McArthur|Canada

>Spike|hCoV-19/Australia/VIC3548/2020|2020-07-06|EPI\_ISL\_520297|Original|hCoV-19^^Victoria|Human|Victorian Infectious Diseases Reference Laboratory (VIDRL)|VIDRL and MDU-PHL|Schultz|Australia

>Spike|hCoV-19/England/ALDP-9E66BA/2020|2020-09-23|EPI\_ISL\_580568|Original|hCoV-19^^England|Human|Lighthouse Lab in Alderley Park|Wellcome Sanger Institute for the COVID-19 Genomics UK (COG-UK) consortium|Davies|United Kingdom

>Spike|hCoV-19/Russia/OMS-ORINFI-9661S/2020|2020-06-22|EPI\_ISL\_569843|Original|hCoV-19^^Omsk|Human|Omsk Research Institute of Natural Focal Infections|WHO National Influenza Centre Russian Federation|Komissarov|Russia

>Spike|hCoV-19/USA/CA-QDX-2114/2020|2020-03-19|EPI\_ISL\_604416|Original|hCoV-19^^California|Human|Quest Diagnostics|Quest Diagnostics|Kagan|USA

>Spike|hCoV-19/Ireland/KK-NVRL-72IRL37138/2020|2020-08-17|EPI\_ISL\_578304|Original|hCoV-19^^Kilkenny|Human|National Virus Reference Laboratory|National Virus Reference Laboratory|Gonzalez|Ireland

>Spike|hCoV-19/Wales/PHWC-4A490F/2020|2020-12-08|EPI\_ISL\_764746|Original|hCoV-19^^Wales|Human|Wales Specialist Virology Centre Sequencing lab|COVID-19 Genomics UK (COG-UK) Consortium|Moore|United Kingdom

>Spike|hCoV-19/Canada/BC\_03470015/2020|2020-04-00|EPI\_ISL\_466745|Original|hCoV-19^^British Columbia|Human|BCCDC Public Health Laboratory|BCCDC Public Health Laboratory|Harrigan|Canada

>Spike|hCoV-19/Denmark/DCGC-12803/2020|2020-10-26|EPI\_ISL\_682984|Original|hCoV-19^^Nordjylland|Human|Department of Virus and Microbiological Special Diagnostics|Albertsen Lab|Michaelsen|Denmark

>Spike|hCoV-19/Denmark/DCGC-16557/2020|2020-11-16|EPI\_ISL\_714835|Original|hCoV-19^^Hovedstaden|Human|Department of Virus and Microbiological Special Diagnostics|Albertsen Lab|Michaelsen|Denmark

>Spike|hCoV-19/Australia/VIC458/2020|2020-03-26|EPI\_ISL\_426752|Original|hCoV-19^^Victoria|Human|Victorian Infectious Diseases Reference Laboratory (VIDRL)|Microbiological Diagnostic Unit Public Health Laboratory and Victorian Infectious Diseases Reference Laboratory|Schultz|Australia

>Spike|hCoV-19/Luxembourg/LNS9789433/2020|2020-10-31|EPI\_ISL\_744984|Original|hCoV-19^^Luxembourg|Human|Laboratoire national de sant\u00e9|Laboratoire national de sant\u00e9|Wienecke-Baldacchino|Luxembourg

>Spike|hCoV-19/USA/WA-S2277/2020|2020-06-09|EPI\_ISL\_497705|Original|hCoV-19^^Washington|Human|Washington State Department of Health|Seattle Flu Study|Lee|USA

>Spike|hCoV-19/India/GJ-GBRC53/2020|2020-05-04|EPI\_ISL\_444484|Original|hCoV-19^^Gujarat|Human|Gujarat Biotechnology Research Centre|Gujarat Biotechnology Research Centre|Joshi|India

>Spike|hCoV-19/Wales/PHWC-49C023/2020|2020-12-07|EPI\_ISL\_742496|Original|hCoV-19^^Wales|Human|Wales Specialist Virology Centre Sequencing lab|COVID-19 Genomics UK (COG-UK) Consortium|Moore|United Kingdom

>Spike|hCoV-19/USA/FL-BPHL-039/2020|2020-04-16|EPI\_ISL\_436543|Original|hCoV-19^^Florida|Human|Florida Bureau of Public Health Laboratories|Florida Bureau of Public Health Laboratories|Blanton|USA

>Spike|hCoV-19/Russia/SVE-RII-MH1725S/2020|2020-09-18|EPI\_ISL\_602359|Original|hCoV-19^^Sverdlovsk|Human|HELIX LLC|WHO National Influenza Centre Russian Federation|Komissarov|Russia

>Spike|hCoV-19/Scotland/QEUH-98EF31/2020|2020-08-28|EPI\_ISL\_568447|Original|hCoV-19^^Scotland|Human|Lighthouse Lab in Glasgow|Wellcome Sanger Institute for the COVID-19 Genomics UK (COG-UK) consortium|Davies|United Kingdom

>Spike|hCoV-19/USA/MN-MDH-1279/2020|2020-03-15|EPI\_ISL\_483000|Original|hCoV-19^^Minnesota|Human|Minnesota Department of Health|Minnesota Department of Health|Garfin|USA

>Spike|hCoV-19/USA/TX-HMH-2870/2020|2020-06-08|EPI\_ISL\_543840|Original|hCoV-19^^Texas|Human|Houston Methodist Hospital|Houston Methodist Hospital|Long|USA

>Spike|hCoV-19/England/204381377/2020|2020-10-22|EPI\_ISL\_649861|Original|hCoV-19^^England|Human|Respiratory Virus Unit|COVID-19 Genomics UK (COG-UK) Consortium|Platt|United Kingdom

>Spike|hCoV-19/England/ALDP-9FDEE5/2020|2020-10-01|EPI\_ISL\_587891|Original|hCoV-19^^England|Human|Lighthouse Lab in Alderley Park|Wellcome Sanger Institute for the COVID-19 Genomics UK (COG-UK) consortium|Davies|United Kingdom



>Spike|hCoV-19/Denmark/DCGC-20864/2020|2020-12-21|EPI\_ISL\_759415|Original|hCoV-19^^Nordjylland|Human|Department of Virus and Microbiological Special Diagnostics|Albertsen Lab|Michaelsen|Denmark

>Spike|hCoV-19/Wales/PHWC-48AEF1/2020|2020-11-01|EPI\_ISL\_666172|Original|hCoV-19^^Wales|Human|Wales Specialist Virology Centre Sequencing lab|COVID-19 Genomics UK (COG-UK) Consortium|Moore|United Kingdom

>Spike|hCoV-19/England/QEUA-5F0F01/2020|2020-06-16|EPI\_ISL\_533261|Original|hCoV-19^^England|Human|Lighthouse Lab in Glasgow|Wellcome Sanger Institute for the COVID-19 Genomics UK (COG-UK) consortium|Davies|United Kingdom

>Spike|hCoV-19/Wales/PHWC-32DA4/2020|2020-04-14|EPI\_ISL\_446688|Original|hCoV-19^^Wales|Human|Wales Specialist Virology Centre|Public Health Wales Microbiology Cardiff|Moore|United Kingdom

>Spike|hCoV-19/Netherlands/OV-RIVM-20145/2020|2020-11-29|EPI\_ISL\_723315|Original|hCoV-19^^Overijssel|Human|Dutch COVID-19 response team|National Institute for Public Health and the Environment (RIVM)|Meijer|Netherlands

>Spike|hCoV-19/Denmark/DCGC-9394/2020|2020-11-16|EPI\_ISL\_668947|Original|hCoV-19^^Sjaelland|Human|Department of Virus and Microbiological Special Diagnostics|Albertsen Lab|Michaelsen|Denmark

>Spike|hCoV-19/USA/MI-UM-2006S000864/2020|2020-03-29|EPI\_ISL\_484719|Original|hCoV-19^^Michigan|Human|University of Michigan Clinical Microbiology Laboratory|Lauring Lab|Valesano|USA

>Spike|hCoV-19/USA/CA-CZB-14648/2020|2020-11-16|EPI\_ISL\_739397|Original|hCoV-19^^California|Human|Orange County Public Health Lab|Chan-Zuckerberg Biohub|Kamm|USA

>Spike|hCoV-19/Switzerland/BL-ETHZ-200024/2020|2020-07-14|EPI\_ISL\_510713|Original|hCoV-19^^Basel-Landschaft|Human|Viollier AG|Department of Biosystems Science and Engineering|Nadeau|Switzerland

>Spike|hCoV-19/England/ALDP-5B57B5/2020|2020-06-19|EPI\_ISL\_558771|Original|hCoV-19^^England|Human|Lighthouse Lab in Alderley Park|Wellcome Sanger Institute for the COVID-19 Genomics UK (COG-UK) consortium|Davies|United Kingdom

>Spike|hCoV-19/England/CAMC-B374CD/2020|2020-11-05|EPI\_ISL\_645400|Original|hCoV-19^^England|Human|Lighthouse Lab in Cambridge|Wellcome Sanger Institute for the COVID-19 Genomics UK (COG-UK) Consortium|Davies|United Kingdom

>Spike|hCoV-19/England/MILK-9EEC83/2020|2020-09-24|EPI\_ISL\_580662|Original|hCoV-19^^England|Human|Lighthouse Lab in Milton Keynes|Wellcome Sanger Institute for the COVID-19 Genomics UK (COG-UK) consortium|Davies|United Kingdom

>Spike|hCoV-19/Wales/PHWC-4A237C/2020|2020-12-16|EPI\_ISL\_743878|Original|hCoV-19^^Wales|Human|Wales Specialist Virology Centre Sequencing lab|COVID-19 Genomics UK (COG-UK) Consortium|Moore|United Kingdom

>Spike|hCoV-19/USA/WA-S689/2020|2020-04-08|EPI\_ISL\_449859|Original|hCoV-19^^Washington|Human|Washington State Department of Health|Seattle Flu Study|Bedford|USA

>Spike|hCoV-19/England/MILK-B0696E/2020|2020-10-29|EPI\_ISL\_652255|Original|hCoV-19^^England|Human|Quadram Institute Bioscience|COVID-19 Genomics UK (COG-UK) Consortium|Alikhan|United Kingdom

>Spike|hCoV-19/USA/CA-CZB-3903/2020|2020-07-24|EPI\_ISL\_548560|Original|hCoV-19^^California|Human|County of San Luis Obispo Public Health Laboratory|Chan-Zuckerberg Biohub|Bhatt|USA

>Spike|hCoV-19/England/LIVE-A95EC/2020|2020-07-15|EPI\_ISL\_526380|Original|hCoV-19^^England|Human|Liverpool Clinical Laboratories|COVID-19 Genomics UK (COG-UK) Consortium|Haldenby|United Kingdom

>Spike|hCoV-19/Denmark/DCGC-10813/2020|2020-11-02|EPI\_ISL\_670223|Original|hCoV-19^^Hovedstaden|Human|Department of Virus and Microbiological Special Diagnostics|Albertsen Lab|Michaelsen|Denmark

>Spike|hCoV-19/Sichuan/SC-WCH-310/2020|2020-01-24|EPI\_ISL\_451380|Original|hCoV-19^^Sichuan|Human|West China Hospital of Sichuan University|State Key Laboratory of Biotherapy of Sichuan University|Tang|China

>Spike|hCoV-19/USA/TX-HMH-6873/2020|2020-06-26|EPI\_ISL\_546309|Original|hCoV-19^^Texas|Human|Houston Methodist Hospital|Houston Methodist Hospital|Long|USA

>Spike|hCoV-19/Denmark/DCGC-11329/2020|2020-11-02|EPI\_ISL\_670595|Original|hCoV-19^^Hovedstaden|Human|Department of Virus and Microbiological Special Diagnostics|Albertsen Lab|Michaelsen|Denmark

>Spike|hCoV-19/Japan/IC-0371/2020|2020-12-00|EPI\_ISL\_721612|Original|hCoV-19^^Japan|Human|Pathogen Genomics Center|Pathogen Genomics Center|Sekizuka|Japan

>Spike|hCoV-19/Northern Ireland/NIRE-10826B/2020|2020-04-01|EPI\_ISL\_585179|Original|hCoV-19^^Northern Ireland|Human|Regional Virus Laboratory|COVID-19 Genomics UK (COG-UK) Consortium|Fairley|United Kingdom

>Spike|hCoV-19/Scotland/EDB8370/2020|2020-10-14|EPI\_ISL\_612346|Original|hCoV-19^^Scotland|Human|Virology Department|COVID-19 Genomics UK (COG-UK) Consortium|McHugh|United Kingdom

>Spike|hCoV-19/England/CAMC-B07C37/2020|2020-10-29|EPI\_ISL\_643841|Original|hCoV-19^^England|Human|Lighthouse Lab in Cambridge|Wellcome Sanger Institute for the COVID-19 Genomics UK (COG-UK) Consortium|Davies|United Kingdom

>Spike|hCoV-19/USA/MI-MDHHS-SC22510/2020|2020-11-18|EPI\_ISL\_708213|Original|hCoV-19^^Michigan|Human|Michigan Department of Health and Human Services|Michigan Department of Health and Human Services|Jacob|USA

>Spike|hCoV-19/England/BRIS-129431/2020|2020-04-19|EPI\_ISL\_458748|Original|hCoV-19^^England|Human|PHE South West Regional Laboratory|Wellcome Sanger Institute for the COVID-19 Genomics UK (COG-UK) consortium|Davies|United Kingdom

>Spike|hCoV-19/Japan/PG-7621/2020|2020-08-00|EPI\_ISL\_686723|Original|hCoV-19^^Japan|Human|Chiba Prefectural Institute of Public Health|Pathogen Genomics Center|Sekizuka|Japan

>Spike|hCoV-19/England/MILK-BABBB0/2020|2020-11-18|EPI\_ISL\_681582|Original|hCoV-19^^England|Human|Lighthouse Lab in Milton Keynes|Wellcome Sanger Institute for the COVID-19 Genomics UK (COG-UK) Consortium|Davies|United Kingdom

>Spike|hCoV-19/USA/CA-CZB-15468/2020|2020-12-05|EPI\_ISL\_738872|Original|hCoV-19^^California|Human|Orange County Public Health Lab|Chan-Zuckerberg Biohub|Kamm|USA

>Spike|hCoV-19/Japan/PG-6233/2020|2020-08-00|EPI\_ISL\_689345|Original|hCoV-19^^Japan|Human|Pathogen Genomics Center|Pathogen Genomics Center|Sekizuka|Japan

>Spike|hCoV-19/USA/TX-HMH-1942/2020|2020-05-20|EPI\_ISL\_542912|Original|hCoV-19^^Texas|Human|Houston Methodist Hospital|Houston Methodist Hospital|Long|USA

>Spike|hCoV-19/England/ALDP-9D8D4D/2020|2020-09-18|EPI\_ISL\_576667|Original|hCoV-19^^England|Human|Oxford Viromics|COVID-19 Genomics UK (COG-UK) Consortium|Golubchik|United Kingdom

>Spike|hCoV-19/Sweden/20-53794/2020|2020-12-16|EPI\_ISL\_766713|Original|hCoV-19^^Vastmanland|Human|Klinisk Mikrobiologi|The Public Health Agency of Sweden|Svartstr\u00f6m|Sweden

>Spike|hCoV-19/South Korea/KDCA0091/2020|2020-09-23|EPI\_ISL\_747330|Original|hCoV-19^^South Korea|Human|Division of Emerging Infectious Diseases|Division of Emerging Infectious Diseases|Park|South Korea

>Spike|hCoV-19/England/CAMC-A66068/2020|2020-10-11|EPI\_ISL\_627060|Original|hCoV-19^^England|Human|University of Exeter|COVID-19 Genomics UK (COG-UK) Consortium|Temperton|United Kingdom

>Spike|hCoV-19/England/CAMB-7DEC8/2020|2020-04-06|EPI\_ISL\_441627|Original|hCoV-19^^England|Human|Department of Pathology|Wellcome Sanger Institute for the COVID-19 Genomics UK (COG-UK) consortium|Amato|United Kingdom

>Spike|hCoV-19/Denmark/DCGC-4645/2020|2020-09-14|EPI\_ISL\_621877|Original|hCoV-19^^Sjælland|Human|Department of Virus and Microbiological Special Diagnostics|Albertsen lab|Michaelsen|Denmark

>Spike|hCoV-19/Gambia/GC19-1814/2020|2020-05-28|EPI\_ISL\_561032|Original|hCoV-19^^Kombo|Human|MRCG at LSHTM Genomics lab|MRCG at LSHTM Genomics lab|Sesay|Gambia

>Spike|hCoV-19/Switzerland/BL-ETHZ-120036/2020|2020-04-20|EPI\_ISL\_468226|Original|hCoV-19^^Basel-Landschaft|Human|Viollier AG|Department of Biosystems Science and Engineering|Nadeau|Switzerland

>Spike|hCoV-19/Australia/QLD982/2020|2020-03-21|EPI\_ISL\_530262|Original|hCoV-19^^Queensland|Human|Queensland Health Forensic and Scientific Services|Public Health Virology Laboratory|Nguyen|Australia

>Spike|hCoV-19/England/MILK-BB2512/2020|2020-11-18|EPI\_ISL\_720316|Original|hCoV-19^^England|Human|Lighthouse Lab in Milton Keynes|Wellcome Sanger Institute for the COVID-19 Genomics UK (COG-UK) Consortium|Davies|United Kingdom

>Spike|hCoV-19/USA/UT-08650/2020|2020-05-07|EPI\_ISL\_524382|Original|hCoV-19^^Utah|Human|Utah Public Health Laboratory|Utah Public Health Laboratory|Young|USA

>Spike|hCoV-19/England/MILK-B94437/2020|2020-11-13|EPI\_ISL\_676230|Original|hCoV-19^^England|Human|Lighthouse Lab in Milton Keynes|Wellcome Sanger Institute for the COVID-19 Genomics UK (COG-UK) Consortium|Davies|United Kingdom

>Spike|hCoV-19/Denmark/DCGC-13429/2020|2020-11-30|EPI\_ISL\_712171|Original|hCoV-19^^Hovedstaden|Human|Department of Virus and Microbiological Special Diagnostics|Albertsen Lab|Michaelsen|Denmark

>Spike|hCoV-19/South Africa/NHLS-UCT-GS-1947/2020|2020-08-29|EPI\_ISL\_640046|Original|hCoV-19^^Western Cape|Human|Valkenberg Hospital wc VBH|NHLS/UCT|Iranzadeh|South Africa

>Spike|hCoV-19/Northern Ireland/NIRE-FB2C6/2020|2020-08-30|EPI\_ISL\_585224|Original|hCoV-19^^Northern Ireland|Human|Regional Virus Laboratory|COVID-19 Genomics UK (COG-UK) Consortium|Fairley|United Kingdom

>Spike|hCoV-19/Denmark/DCGC-834/2020|2020-04-20|EPI\_ISL\_614703|Original|hCoV-19^^Hovedstaden|Human|Department of Virus and Microbiological Special Diagnostics|Albertsen lab|Michaelsen|Denmark

>Spike|hCoV-19/Wales/PHWC-162EF2/2020|2020-05-29|EPI\_ISL\_473218|Original|hCoV-19^^Wales|Human|Wales Specialist Virology Centre Sequencing lab|COVID-19 Genomics UK (COG-UK) Consortium|Moore|United Kingdom

>Spike|hCoV-19/USA/WI-UW-2425/2020|2020-12-11|EPI\_ISL\_754629|Original|hCoV-19^^Wisconsin|Human|University of Wisconsin-Madison AIDS Vaccine Research Laboratories|University of Wisconsin-Madison AIDS Vaccine Research Laboratories|Moreno|USA

>Spike|hCoV-19/USA/CA-ALSR-3770/2020|2020-06-04|EPI\_ISL\_636190|Original|hCoV-19^^California|Human|San Diego County Public Health Laboratory|Andersen lab at Scripps Research|Gangavarapu|USA

>Spike|hCoV-19/Spain/CL-IBV-97006176/2020|2020-04-06|EPI\_ISL\_537323|Original|hCoV-19^^Castilla y Leon|Human|Universidad de Le\u00f3n|SeqCOVID-SPAIN consortium/IBV (CSIC)|Comas|Spain

>Spike|hCoV-19/Wales/PHWC-165712/2020|2020-05-14|EPI\_ISL\_490717|Original|hCoV-19^^Wales|Human|Wales Specialist Virology Centre Sequencing lab|COVID-19 Genomics UK (COG-UK) Consortium|Moore|United Kingdom

>Spike|hCoV-19/Japan/PG-5194/2020|2020-08-00|EPI\_ISL\_690297|Original|hCoV-19^^Japan|Human|Pathogen Genomics Center|Pathogen Genomics Center|Sekizuka|Japan

>Spike|hCoV-19/Switzerland/VD-ETHZ-180039/2020|2020-07-01|EPI\_ISL\_489977|Original|hCoV-19^^Vaud|Human|Viollier AG|Department of Biosystems Science and Engineering|Nadeau|Switzerland

>Spike|hCoV-19/England/MILK-995395/2020|2020-08-24|EPI\_ISL\_552254|Original|hCoV-19^^England|Human|Lighthouse Lab in Milton Keynes|Wellcome Sanger Institute for the COVID-19 Genomics UK (COG-UK) consortium|Davies|United Kingdom

>Spike|hCoV-19/USA/MN-MDH-1353/2020|2020-04-21|EPI\_ISL\_507942|Original|hCoV-19^^Minnesota|Human|Minnesota Department of Health|Minnesota Department of Health|Garfin|USA

>Spike|hCoV-19/Denmark/DCGC-7151/2020|2020-10-12|EPI\_ISL\_619169|Original|hCoV-19^^Hovedstaden|Human|Department of Virus and Microbiological Special Diagnostics|Albertsen lab|Michaelsen|Denmark

>Spike|hCoV-19/Hungary/US-57529w/2020|2020-10-01|EPI\_ISL\_677789|Original|hCoV-19^^B\u00e9lcs-Kiskun county|Human|University of Szeged|National Laboratory of Virology|Kemenesi|Hungary

>Spike|hCoV-19/Canada/NS-NML-1251/2020|2020-04-06|EPI\_ISL\_579642|Original|hCoV-19^^Nova Scotia|Human|QEII Health Sciences Centre|National Microbiology Laboratory (NML)|Majer|Canada

>Spike|hCoV-19/USA/CA-CZB-13981/2020|2020-06-16|EPI\_ISL\_738934|Original|hCoV-19^^California|Human|Alameda County Public Health Lab|Chan-Zuckerberg Biohub|Kamm|USA

>Spike|hCoV-19/USA/LA-CDC-1293/2020|2020-06-10|EPI\_ISL\_535334|Vero P1|hCoV-19^^Louisiana|Human|LA Office of Public Health Laboratories|Pathogen Discovery|Queen|USA

>Spike|hCoV-19/USA/TX-HMH-636/2020|2020-04-11|EPI\_ISL\_547416|Original|hCoV-19^^Texas|Human|Houston Methodist Hospital|Houston Methodist Hospital|Long|USA

>Spike|hCoV-19/Wales/PHWC-4915C5/2020|2020-10-28|EPI\_ISL\_703227|Original|hCoV-19^^Wales|Human|Originating lab|COVID-19 Genomics UK (COG-UK) Consortium|Moore|United Kingdom

>Spike|hCoV-19/England/MILK-A6A019/2020|2020-10-08|EPI\_ISL\_608835|Original|hCoV-19^^England|Human|Lighthouse Lab in Milton Keynes|Wellcome Sanger Institute for the COVID-19 Genomics UK (COG-UK) consortium|Davies|United Kingdom

>Spike|hCoV-19/Denmark/ALAB-SSI511/2020|2020-03-26|EPI\_ISL\_429579|Original|hCoV-19^^Denmark|Human|Department of Virus and Microbiological Special Diagnostics|Albertsen lab|Kirkegaard|Denmark

>Spike|hCoV-19/Denmark/DCGC-6628/2020|2020-10-12|EPI\_ISL\_619677|Original|hCoV-19^^Hovedstaden|Human|Department of Virus and Microbiological Special Diagnostics|Albertsen lab|Michaelsen|Denmark

>Spike|hCoV-19/Bangladesh/DNAS\_DRICM\_isl\_18964/2020|2020-06-27|EPI\_ISL\_775011|Original|hCoV-19^^Dhaka|Human|Designated Reference Institute for Chemical Measurements (DRICM)|DNA SOLUTION LTD.|Rabbi|Bangladesh

>Spike|hCoV-19/Australia/VIC3516/2020|2020-07-08|EPI\_ISL\_520268|Original|hCoV-19^^Victoria|Human|Victorian Infectious Diseases Reference Laboratory (VIDRL)|VIDRL and MDU-PHL|Schultz|Australia

>Spike|hCoV-19/Australia/VIC1412/2020|2020-04-16|EPI\_ISL\_456431|Original|hCoV-19^^Victoria|Human|Victorian Infectious Diseases Reference Laboratory (VIDRL)|Microbiological Diagnostic Unit Public Health Laboratory and Victorian Infectious Diseases Reference Laboratory|Schultz|Australia

>Spike|hCoV-19/England/ALDP-B5B038/2020|2020-11-08|EPI\_ISL\_655604|Original|hCoV-19^^England|Human|Lighthouse Lab in Alderley Park|Wellcome Sanger Institute for the COVID-19 Genomics UK (COG-UK) Consortium|Davies|United Kingdom

>Spike|hCoV-19/Northern Ireland/NIRE-FAAA1/2020|2020-04-02|EPI\_ISL\_441761|Original|hCoV-19^^Northern Ireland|Human|Regional Virus Laboratory|Wellcome Sanger Institute for the COVID-19 Genomics UK (COG-UK) consortium|Amato|United Kingdom

>Spike|hCoV-19/USA/CA-CZB-12945/2020|2020-10-19|EPI\_ISL\_672367|Original|hCoV-19^^California|Human|Orange County Public Health Lab|Chan-Zuckerberg Biohub|Bhatt|USA

>Spike|hCoV-19/Australia/VIC5672/2020|2020-07-19|EPI\_ISL\_518479|Original|hCoV-19^^Victoria|Human|Microbiological Diagnostic Unit - Public Health Laboratory (MDU-PHL)|MDU-PHL|Schultz|Australia

>Spike|hCoV-19/Greece/246\_32206/2020|2020-03-10|EPI\_ISL\_437905|Original|hCoV-19^^Athens|Human|Laboratory of Microbiology|Laboratory of Biology|Karakasiliotis|Greece

>Spike|hCoV-19/Denmark/DCGC-17869/2020|2020-12-14|EPI\_ISL\_749611|Original|hCoV-19^^Nordjylland|Human|Department of Virus and Microbiological Special Diagnostics|Albertsen Lab|Michaelsen|Denmark

>Spike|hCoV-19/USA/TX-HMH-6995/2020|2020-06-28|EPI\_ISL\_546417|Original|hCoV-19^^Texas|Human|Houston Methodist Hospital|Houston Methodist Hospital|Long|USA

>Spike|hCoV-19/Denmark/DCGC-12348/2020|2020-11-16|EPI\_ISL\_682529|Original|hCoV-19^^Midtjylland|Human|Department of Virus and Microbiological Special Diagnostics|Albertsen Lab|Michaelsen|Denmark

>Spike|hCoV-19/England/ALDP-A70283/2020|2020-10-15|EPI\_ISL\_608162|Original|hCoV-19^^England|Human|Lighthouse Lab in Alderley Park|Wellcome Sanger Institute for the COVID-19 Genomics UK (COG-UK) consortium|Davies|United Kingdom

>Spike|hCoV-19/USA/WI-WSLH-200736/2020|2020-08-31|EPI\_ISL\_631492|Original|hCoV-19^^Wisconsin|Human|Wisconsin State Laboratory of Hygiene Communicable Disease Division|Wisconsin State Laboratory of Hygiene Communicable Disease Division|Florek|USA

>Spike|hCoV-19/Gambia/NPHL-1424/2020|2020-07-04|EPI\_ISL\_561229|Original|hCoV-19^^Kombo|Human|MRCG at LSHTM Genomics lab|MRCG at LSHTM Genomics lab|Sesay|Gambia

>Spike|hCoV-19/England/CAMC-CB8FC2/2020|2020-12-18|EPI\_ISL\_778023|Original|hCoV-19^^England|Human|Lighthouse Lab in Cambridge|Wellcome Sanger Institute for the COVID-19 Genomics UK (COG-UK) Consortium|Davies|United Kingdom

>Spike|hCoV-19/Iran/SA-Isf-30/2020|2020-04-18|EPI\_ISL\_672582|Original|hCoV-19^^Iran|Human|Infectious Diseases and Tropical Medicine Research Center|Infectious Diseases and Tropical Medicine Research Center|Ahangarzadeh, S.|Iran

>Spike|hCoV-19/USA/TX-HMH-2887/2020|2020-06-09|EPI\_ISL\_543855|Original|hCoV-19^^Texas|Human|Houston Methodist Hospital|Houston Methodist Hospital|Long|USA

>Spike|hCoV-19/Wales/MILK-9E102A/2020|2020-09-20|EPI\_ISL\_581093|Original|hCoV-19^^Wales|Human|Lighthouse Lab in Milton Keynes|Wellcome Sanger Institute for the COVID-19 Genomics UK (COG-UK) consortium|Davies|United Kingdom

>Spike|hCoV-19/England/20206026604/2020|2020-05-11|EPI\_ISL\_465657|Original|hCoV-19^^England|Human|Respiratory Virus Unit|Respiratory Virus Unit|Platt|United Kingdom

>Spike|hCoV-19/Scotland/QEUH-9D020A/2020|2020-09-16|EPI\_ISL\_601816|Original|hCoV-19^^Scotland|Human|Lighthouse Lab in Glasgow|Wellcome Sanger Institute for the COVID-19 Genomics UK (COG-UK) consortium|Davies|United Kingdom

>Spike|hCoV-19/USA/MD-HP12010/2020|2020-11-04|EPI\_ISL\_791354|Original|hCoV-19^^Maryland|Human|Johns Hopkins Hospital Department of Pathology|Johns Hopkins Hospital Department of Pathology|Morris|USA

>Spike|hCoV-19/USA/LA-EVTL303/2020|2020-05-12|EPI\_ISL\_578710|Original|hCoV-19^^Louisiana|Human|LSUHS Emerging Viral Threat Laboratory|Microbial Genome Sequencing Center|Kamil|USA

>Spike|hCoV-19/Norway/4014/2020|2020-09-21|EPI\_ISL\_590967|original|hCoV-19^^Rogaland|Human|Dept. of Medical Microbiology|Norwegian Institute of Public Health|Vollan|Norway

>Spike|hCoV-19/USA/NY-PV09453/2020|2020-03-19|EPI\_ISL\_450127|Original|hCoV-19^^New York|Human|MSHS Clinical Microbiology Laboratories|MSHS Pathogen Surveillance Program|van Bakel|USA

>Spike|hCoV-19/USA/LA-EVTL1091/2020|2020-12-01|EPI\_ISL\_768361|Original|hCoV-19^^Louisiana|Human|LSUHS Emerging Viral Threat Laboratory|Microbial Genome Sequencing Center|Kamil|USA

>Spike|hCoV-19/Denmark/DCGC-6026/2020|2020-09-21|EPI\_ISL\_621135|Original|hCoV-19^^Midtjylland|Human|Department of Virus and Microbiological Special Diagnostics|Albertsen lab|Michaelsen|Denmark

>Spike|hCoV-19/Australia/VIC17654/2020|2020-08-05|EPI\_ISL\_663973|Original|hCoV-19^^Victoria|Human|Microbiological Diagnostic Unit - Public Health Laboratory (MDU-PHL) |MDU-PHL|Schultz|Australia

>Spike|hCoV-19/Denmark/DCGC-6953/2020|2020-10-12|EPI\_ISL\_619799|Original|hCoV-19^^Syddanmark|Human|Department of Virus and Microbiological Special Diagnostics|Albertsen lab|Michaelsen|Denmark

>Spike|hCoV-19/USA/MI-QDX-1151/2020|2020-03-22|EPI\_ISL\_571881|Original|hCoV-19^^Michigan|Human|Quest Diagnostics|Quest Diagnostics|Kagan|USA

>Spike|hCoV-19/England/BRIS-12B1DE/2020|2020-05-14|EPI\_ISL\_469838|Original|hCoV-19^^England|Human|PHE South West Regional Laboratory|Wellcome Sanger Institute for the COVID-19 Genomics UK (COG-UK) consortium|Davies|United Kingdom

>Spike|hCoV-19/USA/WA-S2215/2020|2020-06-08|EPI\_ISL\_497643|Original|hCoV-19^^Washington|Human|Washington State Department of Health|Seattle Flu Study|Lee|USA

>Spike|hCoV-19/Denmark/DCGC-12917/2020|2020-12-07|EPI\_ISL\_712461|Original|hCoV-19^^Hovedstaden|Human|Department of Virus and Microbiological Special Diagnostics|Albertsen Lab|Michaelsen|Denmark

>Spike|hCoV-19/Australia/QLD1017/2020|2020-04-15|EPI\_ISL\_530277|Original|hCoV-19^^Queensland|Human|Queensland Health Forensic and Scientific Services|Public Health Virology Laboratory|Nguyen|Australia

>Spike|hCoV-19/Belgium/regal-12141383/2020|2020-12-14|EPI\_ISL\_738435|Original|hCoV-19^^Mol|Human|UZ Leuven|KU Leuven|Maes|Belgium

>Spike|hCoV-19/USA/CO-CDPHE-2008063119/2020|2020-08-05|EPI\_ISL\_677299|Original|hCoV-19^^Colorado|Human|Colorado Department of Public Health and Environment|Colorado Department of Public Health and Environment|Bankers|USA

>Spike|hCoV-19/USA/VA-DCLS-0851/2020|2020-04-30|EPI\_ISL\_516715|Original|hCoV-19^^Virginia|Human|Virginia DCLS|Virginia DCLS|St. Jacques|USA

>Spike|hCoV-19/England/QEUA-9B74D6/2020|2020-09-07|EPI\_ISL\_590668|Original|hCoV-19^England|Human|Lighthouse Lab in Glasgow|Wellcome Sanger Institute for the COVID-19 Genomics UK (COG-UK) consortium|Davies|United Kingdom

>Spike|hCoV-19/England/NORW-E8FD4/2020|2020-04-25|EPI\_ISL\_453572|Original|hCoV-19^England|Human|Quadram Institute Bioscience|COVID-19 Genomics UK (COG-UK) Consortium|Alikhan|United Kingdom

>Spike|hCoV-19/England/CAMB-1BB267/2020|2020-11-10|EPI\_ISL\_664832|Original|hCoV-19^England|Human|Department of Pathology|COVID-19 Genomics UK (COG-UK) Consortium|Goodfellow|United Kingdom

>Spike|hCoV-19/England/MILK-9A8818/2020|2020-08-31|EPI\_ISL\_549427|Original|hCoV-19^England|Human|Oxford Viromics|COVID-19 Genomics UK (COG-UK) Consortium|Golubchik|United Kingdom

>Spike|hCoV-19/Wales/PHWC-339AF/2020|2020-04-20|EPI\_ISL\_446773|Original|hCoV-19^Wales|Human|Wales Specialist Virology Centre|Public Health Wales Microbiology Cardiff|Moore|United Kingdom

>Spike|hCoV-19/England/QEUA-A5E93B/2020|2020-10-12|EPI\_ISL\_597474|Original|hCoV-19^England|Human|Lighthouse Lab in Glasgow|Wellcome Sanger Institute for the COVID-19 Genomics UK (COG-UK) consortium|Davies|United Kingdom

>Spike|hCoV-19/Northern Ireland/NIRE-FC8F0/2020|2020-04-22|EPI\_ISL\_459401|Original|hCoV-19^Northern Ireland|Human|Regional Virus Laboratory|Wellcome Sanger Institute for the COVID-19 Genomics UK (COG-UK) consortium|Davies|United Kingdom

>Spike|hCoV-19/Japan/PG-3351/2020|2020-04-00|EPI\_ISL\_691466|Original|hCoV-19^Japan|Human|Pathogen Genomics Center|Pathogen Genomics Center|Sekizuka|Japan

>Spike|hCoV-19/Wales/PHWC-48F436/2020|2020-11-09|EPI\_ISL\_681092|Original|hCoV-19^Wales|Human|Wales Specialist Virology Centre Sequencing lab|COVID-19 Genomics UK (COG-UK) Consortium|Moore|United Kingdom

>Spike|hCoV-19/Finland/25LS10CE11/2020|2020-10-25|EPI\_ISL\_759901|Original|hCoV-19^Uusimaa|Human|Department of Virology and Immunology|Department of Virology|Smura|Finland

>Spike|hCoV-19/New Zealand/20VR2562/2020|2020-04-15|EPI\_ISL\_456387|Original|hCoV-19^Counties Manukau|Human|Middlemore Hospital|Institute of Environmental Science and Research (ESR)|de Ligt|New Zealand

>Spike|hCoV-19/Luxembourg/LNS5694108/2020|2020-10-21|EPI\_ISL\_744275|Original|hCoV-19^Luxembourg|Human|Laboratoire national de sant\u00e9|Laboratoire national de sant\u00e9|Wienecke-Baldacchino|Luxembourg

>Spike|hCoV-19/Denmark/DCGC-11242/2020|2020-11-02|EPI\_ISL\_670580|Original|hCoV-19^Sjælland|Human|Department of Virus and Microbiological Special Diagnostics|Albertsen Lab|Michaelsen|Denmark

>Spike|hCoV-19/USA/MN-QDX-1007/2020|2020-03-16|EPI\_ISL\_571733|Original|hCoV-19^Minnesota|Human|Quest Diagnostics|Quest Diagnostics|Kagan|USA

>Spike|hCoV-19/USA/CA-ALSR-3362/2020|2020-09-16|EPI\_ISL\_635982|Original|hCoV-19^California|Human|San Diego County Public Health Laboratory|Andersen lab at Scripps Research|Gangavarapu|USA

>Spike|hCoV-19/England/QEUA-AD2762/2020|2020-10-26|EPI\_ISL\_629840|Original|hCoV-19^England|Human|Lighthouse Lab in Glasgow|Wellcome Sanger Institute for the COVID-19 Genomics UK (COG-UK) consortium|Davies|United Kingdom

>Spike|hCoV-19/Chile/MA-CADIUMAG-11/2020|2020-04-15|EPI\_ISL\_681677|Original|hCoV-19^Magallanes|Human|Molecular Medicine Laboratory|Centro Asistencial Docente y de Investigacion|Navarrete|Chile

>Spike|hCoV-19/England/ALDP-C3CFB7/2020|2020-12-10|EPI\_ISL\_731113|Original|hCoV-19^England|Human|Lighthouse Lab in Alderley Park|Wellcome Sanger Institute for the COVID-19 Genomics UK (COG-UK) Consortium|Davies|United Kingdom

>Spike|hCoV-19/Australia/VIC1661/2020|2020-05-12|EPI\_ISL\_456562|Original|hCoV-19^Victoria|Human|Victorian Infectious Diseases Reference Laboratory (VIDRL)|Microbiological Diagnostic Unit Public Health Laboratory and Victorian Infectious Diseases Reference Laboratory|Schultz|Australia

>Spike|hCoV-19/USA/UT-UPHL-2012372658/2020|2020-08-01|EPI\_ISL\_746079|Original|hCoV-19^Utah|Human|Ginkgo Bioworks Clinical Laboratory|Utah Public Health Laboratory|Young|USA

>Spike|hCoV-19/England/NORT-2A0D81/2020|2020-04-30|EPI\_ISL\_572663|Original|hCoV-19^^England|Human|Northumbria University / South Tees Hospitals NHS Foundation Trust / North Cumbria Integrated Care NHS Foundation Trust / North Tees and Hartlepool NHS Foundation Trust / Newcastle Hospitals NHS Foundation Trust|COVID-19 Genomics UK (COG-UK) Consortium|Bashton|United Kingdom

>Spike|hCoV-19/England/LIVE-A56DE/2020|2020-03-20|EPI\_ISL\_500141|Original|hCoV-19^^England|Human|Liverpool Clinical Laboratories|COVID-19 Genomics UK (COG-UK) Consortium|Haldenby|United Kingdom

>Spike|hCoV-19/USA/AZ-QDX-1079/2020|2020-03-20|EPI\_ISL\_571803|Original|hCoV-19^^Arizona|Human|Quest Diagnostics|Quest Diagnostics|Kagan|USA

>Spike|hCoV-19/Wales/ALDP-C3AE61/2020|2020-12-08|EPI\_ISL\_767160|Original|hCoV-19^^Wales|Human|Lighthouse Lab in Alderley Park|Wellcome Sanger Institute for the COVID-19 Genomics UK (COG-UK) Consortium|Davies|United Kingdom

>Spike|hCoV-19/Brazil/PE-IAM900/2020|2020-05-03|EPI\_ISL\_572359|Original|hCoV-19^^Pernambuco|Human|LACEN/PE|WallauLab|Wallau|Brazil

>Spike|hCoV-19/Jordan/AM-ALSR-4997/2020|2020-10-11|EPI\_ISL\_730270|Original|hCoV-19^^Amman|Human|Biolab Diagnostic Laboratories|Andersen lab at Scripps Research|Gangavarapu|Jordan

>Spike|hCoV-19/Wales/PHWC-49C3DF/2020|2020-12-07|EPI\_ISL\_742552|Original|hCoV-19^^Wales|Human|Wales Specialist Virology Centre Sequencing lab|COVID-19 Genomics UK (COG-UK) Consortium|Moore|United Kingdom

>Spike|hCoV-19/England/LIVE-DCOAF2/2020|2020-11-04|EPI\_ISL\_702512|Original|hCoV-19^^England|Human|Liverpool Clinical Laboratories|COVID-19 Genomics UK (COG-UK) Consortium|Haldenby|United Kingdom

>Spike|hCoV-19/Singapore/401/2020|2020-04-17|EPI\_ISL\_469150|Original|hCoV-19^^Singapore|Human|National Public Health Laboratory|National Public Health Laboratory|Mak|Singapore

>Spike|hCoV-19/England/QEUEH-B1348B/2020|2020-11-02|EPI\_ISL\_641688|Original|hCoV-19^^England|Human|Lighthouse Lab in Glasgow|Wellcome Sanger Institute for the COVID-19 Genomics UK (COG-UK) Consortium|Davies|United Kingdom

>Spike|hCoV-19/Germany/NW-HHU-39/2020|2020-03-17|EPI\_ISL\_425123|Original|hCoV-19^^North Rhine-Westphalia|Human|Center of Medical Microbiology|Center of Medical Microbiology|Wienemann|Germany

>Spike|hCoV-19/Denmark/DCGC-1013/2020|2020-03-23|EPI\_ISL\_614474|Original|hCoV-19^^Hovedstaden|Human|Department of Virus and Microbiological Special Diagnostics|Albertsen lab|Michaelsen|Denmark

>Spike|hCoV-19/USA/CA-UCLA-25/2020|2020-05-22|EPI\_ISL\_537551|Original|hCoV-19^^California|Human|UCLA Pathology Clinical Microbiology Lab|Kruglyak Lab|Boocock|USA

>Spike|hCoV-19/England/CAMC-A64A6C/2020|2020-10-11|EPI\_ISL\_608959|Original|hCoV-19^^England|Human|Lighthouse Lab in Cambridge|Wellcome Sanger Institute for the COVID-19 Genomics UK (COG-UK) consortium|Davies|United Kingdom

>Spike|hCoV-19/England/MILK-B5A303/2020|2020-11-06|EPI\_ISL\_658102|Original|hCoV-19^^England|Human|Lighthouse Lab in Milton Keynes|Wellcome Sanger Institute for the COVID-19 Genomics UK (COG-UK) Consortium|Davies|United Kingdom

>Spike|hCoV-19/England/MILK-A91A75/2020|2020-10-19|EPI\_ISL\_706006|Original|hCoV-19^^England|Human|Oxford Viromics|COVID-19 Genomics UK (COG-UK) Consortium|Golubchik|United Kingdom

>Spike|hCoV-19/England/QEUEH-A8BEEB/2020|2020-10-17|EPI\_ISL\_643261|Original|hCoV-19^^England|Human|Lighthouse Lab in Glasgow|Wellcome Sanger Institute for the COVID-19 Genomics UK (COG-UK) Consortium|Davies|United Kingdom

>Spike|hCoV-19/England/ALDP-B83028/2020|2020-11-14|EPI\_ISL\_675512|Original|hCoV-19^^England|Human|Lighthouse Lab in Alderley Park|Wellcome Sanger Institute for the COVID-19 Genomics UK (COG-UK) Consortium|Davies|United Kingdom

>Spike|hCoV-19/Chile/RM-ISPCH-40/2020|2020-03-17|EPI\_ISL\_445319|Original|hCoV-19^^Region Metropolitana de Santiago|Human|HOSPITAL FELIX BULNES|Instituto de Salud Publica de Chile|Fernandez|Chile

>Spike|hCoV-19/France/ARA-09112-isl/2020|2020-03-14|EPI\_ISL\_578177|BGM P3|hCoV-19^^Auvergne-Rh\u00f4ne-Alpes|Human|CNR Virus des Infections Respiratoires - France SUD|CNR Virus des Infections Respiratoires - France SUD|Josset|France

>Spike|hCoV-19/Scotland/CVR3857/2020|2020-06-08|EPI\_ISL\_484660|Original|hCoV-19^^Scotland|Human|West of Scotland Specialist Virology Centre|COVID-19 Genomics UK (COG-UK) Consortium|Robertson|United Kingdom

>Spike|hCoV-19/England/ALDP-CEB1C0/2020|2020-12-21|EPI\_ISL\_782377|Original|hCoV-19^^England|Human|Lighthouse Lab in Alderley Park|Wellcome Sanger Institute for the COVID-19 Genomics UK (COG-UK) Consortium|Davies|United Kingdom

>Spike|hCoV-19/England/CAMB-81535/2020|2020-04-11|EPI\_ISL\_443104|Original|hCoV-19^^England|Human|Department of Pathology|Wellcome Sanger Institute for the COVID-19 Genomics UK (COG-UK) consortium|Amato|United Kingdom

>Spike|hCoV-19/USA/FL-BPHL-0934/2020|2020-07-16|EPI\_ISL\_517824|Original|hCoV-19^^Florida|Human|Florida Bureau of Public Health Laboratories|Florida Bureau of Public Health Laboratories|Blanton|USA

>Spike|hCoV-19/Jordan/AM-ALSR-5189/2020|2020-10-20|EPI\_ISL\_730428|Original|hCoV-19^^Amman|Human|Biolab Diagnostic Laboratories|Andersen lab at Scripps Research|Gangavarapu|Jordan

>Spike|hCoV-19/USA/UT-UPHL-201216071/2020|2020-04-06|EPI\_ISL\_678520|Original|hCoV-19^^Utah|Human|Utah Public Health Laboratory|Utah Public Health Laboratory|Young|USA

>Spike|hCoV-19/Wales/PHWC-49E847/2020|2020-12-08|EPI\_ISL\_743056|Original|hCoV-19^^Wales|Human|Wales Specialist Virology Centre Sequencing lab|COVID-19 Genomics UK (COG-UK) Consortium|Moore|United Kingdom

>Spike|hCoV-19/England/204980829/2020|2020-12-04|EPI\_ISL\_754306|Original|hCoV-19^^England|Human|Respiratory Virus Unit|COVID-19 Genomics UK (COG-UK) Consortium|Platt|United Kingdom

>Spike|hCoV-19/Iceland/403/2020|2020-03-19|EPI\_ISL\_424427|Original|hCoV-19^^Reykjavik|Human|The National University Hospital of Iceland|deCODE genetics|J\u00f3nsson|Iceland

>Spike|hCoV-19/England/CAMB-1AAE49/2020|2020-04-17|EPI\_ISL\_444318|Original|hCoV-19^^England|Human|Department of Pathology|COVID-19 Genomics UK (COG-UK) Consortium|Meredith|United Kingdom

>Spike|hCoV-19/England/204221432/2020|2020-00-00|EPI\_ISL\_593808|Original|hCoV-19^^England|Human|Respiratory Virus Unit|Respiratory Virus Unit|Platt|United Kingdom

>Spike|hCoV-19/England/SHEF-D0B08/2020|2020-08-31|EPI\_ISL\_540766|Original|hCoV-19^^England|Human|Virology Department|COVID-19 Genomics UK (COG-UK) Consortium|de Silva|United Kingdom

>Spike|hCoV-19/Northern Ireland/NIRE-FC034/2020|2020-04-13|EPI\_ISL\_470082|Original|hCoV-19^^Northern Ireland|Human|Regional Virus Laboratory|Wellcome Sanger Institute for the COVID-19 Genomics UK (COG-UK) consortium|Davies|United Kingdom

>Spike|hCoV-19/Timor-Leste/TL25/2020|2020-03-30|EPI\_ISL\_456600|Original|hCoV-19^^Timor-Leste|Human|National Health Laboratory|Microbiological Diagnostic Unit Public Health Laboratory|Schultz|Timor-Leste

>Spike|hCoV-19/England/CAMC-A81DCA/2020|2020-10-12|EPI\_ISL\_610837|Original|hCoV-19^^England|Human|Lighthouse Lab in Cambridge|Wellcome Sanger Institute for the COVID-19 Genomics UK (COG-UK) consortium|Davies|United Kingdom

>Spike|hCoV-19/USA/TX-HMH-MCoV-11512/2020|2020-09-06|EPI\_ISL\_790037|Original|hCoV-19^^Texas|Human|Houston Methodist Hospital|Houston Methodist Hospital|Long|USA

>Spike|hCoV-19/England/ALDP-A521E4/2020|2020-10-07|EPI\_ISL\_598090|Original|hCoV-19^^England|Human|Lighthouse Lab in Alderley Park|Wellcome Sanger Institute for the COVID-19 Genomics UK (COG-UK) consortium|Davies|United Kingdom

>Spike|hCoV-19/USA/TX-HMH-3436/2020|2020-06-13|EPI\_ISL\_544192|Original|hCoV-19^^Texas|Human|Houston Methodist Hospital|Houston Methodist Hospital|Long|USA

>Spike|hCoV-19/USA/TX-HMH-MCoV-14081/2020|2020-08-14|EPI\_ISL\_787367|Original|hCoV-19^^Texas|Human|Houston Methodist Hospital|Houston Methodist Hospital|Long|USA

>Spike|hCoV-19/Australia/TAS79/2020|2020-04-09|EPI\_ISL\_522750|Original|hCoV-19^^Tasmania|Human|Royal Hobart Hospital Microbiology Department|MDU-PHL|Schultz|Australia

>Spike|hCoV-19/Norway/2802/2020|2020-06-26|EPI\_ISL\_493368|Original|hCoV-19^^Norway|Human|Furst Medical Laboratory|Norwegian Institute of Public Health|Kopperud Riis|Norway



>Spike|hCoV-19/New Zealand/20VR1956/2020|2020-04-06|EPI\_ISL\_579176|Original|hCoV-19^^Southern|Human|Southern Community Labs Dunedin|Institute of Environmental Science and Research (ESR)|Wang|New Zealand

>Spike|hCoV-19/England/ALDP-AA1ED0/2020|2020-10-22|EPI\_ISL\_624247|Original|hCoV-19^^England|Human|Lighthouse Lab in Alderley Park|Wellcome Sanger Institute for the COVID-19 Genomics UK (COG-UK) consortium|Davies|United Kingdom

>Spike|hCoV-19/Netherlands/ZH-EMC-514/2020|2020-08-26|EPI\_ISL\_577943|Original|hCoV-19^^Zuid Holland|Human|Dutch COVID-19 response team|Erasmus Medical Center|Oude Munnink|Netherlands

>Spike|hCoV-19/England/MILK-97501C/2020|2020-08-19|EPI\_ISL\_552628|Original|hCoV-19^^England|Human|Lighthouse Lab in Milton Keynes|Wellcome Sanger Institute for the COVID-19 Genomics UK (COG-UK) consortium|Davies|United Kingdom

>Spike|hCoV-19/Denmark/DCGC-19003/2020|2020-12-07|EPI\_ISL\_748692|Original|hCoV-19^^Hovedstaden|Human|Department of Virus and Microbiological Special Diagnostics|Albertsen Lab|Michaelsen|Denmark

>Spike|hCoV-19/Switzerland/BS-UHB-42192492/2020|2020-03-16|EPI\_ISL\_528128|Original|hCoV-19^^Basel-Stadt|Human|University Hospital Basel|University Hospital Basel|Roloff Handschin|Switzerland

>Spike|hCoV-19/Slovenia/12380/2020|2020-03-24|EPI\_ISL\_635259|Original|hCoV-19^^Slovenia|Human|Institute of Microbiology and Immunology|Institute of Microbiology and Immunology|Zakotnik|Slovenia

>Spike|hCoV-19/Panama/334779/2020|2020-03-31|EPI\_ISL\_496793|Original|hCoV-19^^Panama Center|Human|Gorgas Memorial Laboratory of Health Studies|Gorgas Memorial Laboratory of Health Studies|Martinez|Panama

>Spike|hCoV-19/USA/CA-CDPH287/2020|2020-11-27|EPI\_ISL\_755109|Original|hCoV-19^^California|Human|California Department of Public Health|California Department of Public Health|Bell|USA

>Spike|hCoV-19/USA/CA-CZB-13689/2020|2020-11-05|EPI\_ISL\_739605|Original|hCoV-19^^California|Human|Santa Clara County Public Health Laboratory|Chan-Zuckerberg Biohub|Kamm|USA

>Spike|hCoV-19/Iceland/554/2020|2020-03-27|EPI\_ISL\_424574|Original|hCoV-19^^Reykjavik|Human|The National University Hospital of Iceland|deCODE genetics|J\u00f3nsson|Iceland

>Spike|hCoV-19/England/ALDP-C6A19C/2020|2020-12-11|EPI\_ISL\_778519|Original|hCoV-19^^England|Human|Lighthouse Lab in Alderley Park|Wellcome Sanger Institute for the COVID-19 Genomics UK (COG-UK) Consortium|Davies|United Kingdom

>Spike|hCoV-19/USA/CT-Yale-238/2020|2020-04-01|EPI\_ISL\_463170|Original|hCoV-19^^Connecticut|Human|Yale Clinical Virology Laboratory|Grubaugh Lab - Yale School of Public Health|Grubaugh|USA

>Spike|hCoV-19/England/LEED-2A8BBC/2020|2020-04-02|EPI\_ISL\_539065|Original|hCoV-19^^England|Human|Leeds Teaching Hospitals NHS Trust and Public Health England|Wellcome Sanger Institute for the COVID-19 Genomics UK (COG-UK) consortium|Davies|United Kingdom

>Spike|hCoV-19/Germany/HH-hpi-pl467/2020|2020-03-11|EPI\_ISL\_775979|Original|hCoV-19^^Hamburg|Human|University Medical Center Hamburg Eppendorf|Heinrich Pette Institute|Robitaille|Germany

>Spike|hCoV-19/USA/UT-03034/2020|2020-05-01|EPI\_ISL\_522306|Original|hCoV-19^^Utah|Human|Utah Public Health Laboratory|Utah Public Health Laboratory|Young|USA

>Spike|hCoV-19/Portugal/PT2058/2020|2020-11-09|EPI\_ISL\_732272|Original|hCoV-19^^Portugal|Human|Instituto Nacional de Saude (INSA) and Instituto Gulbenkian de Ciencia (IGC)|Instituto Nacional de Saude (INSA) and Instituto Gulbenkian de Ciencia (IGC)|Borges|Portugal

>Spike|hCoV-19/England/ALDP-A94F82/2020|2020-10-19|EPI\_ISL\_624611|Original|hCoV-19^^England|Human|Lighthouse Lab in Alderley Park|Wellcome Sanger Institute for the COVID-19 Genomics UK (COG-UK) consortium|Davies|United Kingdom

>Spike|hCoV-19/England/MILK-654B24/2020|2020-07-04|EPI\_ISL\_558103|Original|hCoV-19^^England|Human|Lighthouse Lab in Milton Keynes|Wellcome Sanger Institute for the COVID-19 Genomics UK (COG-UK) consortium|Davies|United Kingdom

>Spike|hCoV-19/Germany/SH-ChVir9979/2020|2020-11-02|EPI\_ISL\_729414|Original|hCoV-19^^Schleswig-Holstein|Human|A. Krumbholz|Charit\u00e9 Universit\u00e4tsmedizin Berlin|Muehleemann|Germany

>Spike|hCoV-19/Spain/MD-IBV-99007329/2020|2020-08-18|EPI\_ISL\_582816|Original|hCoV-19^^Madrid|Human|Hospital General Universitario Gregorio Mara\u00f1a\u00f3n|SeqCOVID-SPAIN consortium/IBV (CSIC)|Comas|Spain

>Spike|hCoV-19/Northern Ireland/NIRE-FA643/2020|2020-04-06|EPI\_ISL\_459335|Original|hCoV-19^^Northern Ireland|Human|Regional Virus Laboratory|Wellcome Sanger Institute for the COVID-19 Genomics UK (COG-UK) consortium|Davies|United Kingdom

>Spike|hCoV-19/USA/AZ-TG517518/2020|2020-06-29|EPI\_ISL\_695343|Original|hCoV-19^^Arizona|Human|AZ SPHL|TGen North|French|USA

>Spike|hCoV-19/England/PORT-2D315C/2020|2020-04-09|EPI\_ISL\_529491|Original|hCoV-19^^England|Human|Centre for Enzyme Innovation|COVID-19 Genomics UK (COG-UK) Consortium|Robson|United Kingdom

>Spike|hCoV-19/Australia/VIC7852/2020|2020-07-29|EPI\_ISL\_564703|Original|hCoV-19^^Victoria|Human|Microbiological Diagnostic Unit - Public Health Laboratory (MDU-PHL)|MDU-PHL|Schultz|Australia

>Spike|hCoV-19/USA/CA-ALSR-0815-SAN/2020|2020-03-30|EPI\_ISL\_483377|Original|hCoV-19^^California|Human|UC San Diego Center for Advanced Laboratory Medicine|Andersen lab at Scripps Research|Gangavarapu|USA

>Spike|hCoV-19/England/MILK-BAFA55/2020|2020-11-17|EPI\_ISL\_783298|Original|hCoV-19^^England|Human|Lighthouse Lab in Milton Keynes|Wellcome Sanger Institute for the COVID-19 Genomics UK (COG-UK) Consortium|Davies|United Kingdom

>Spike|hCoV-19/England/NOTT-10E669/2020|2020-03-24|EPI\_ISL\_425575|Original|hCoV-19^^England|Human|Queens Medical Centre|COVID-19 Genomics UK (COG-UK) Consortium|Loose|United Kingdom

>Spike|hCoV-19/England/CAMC-B53540/2020|2020-11-08|EPI\_ISL\_656864|Original|hCoV-19^^England|Human|Lighthouse Lab in Cambridge|Wellcome Sanger Institute for the COVID-19 Genomics UK (COG-UK) Consortium|Davies|United Kingdom

>Spike|hCoV-19/Belgium/ULG-10401/2020|2020-08-19|EPI\_ISL\_540568|Original|hCoV-19^^Li\u00e8ge|Human|Department of Clinical Microbiology|GIGA Medical Genomics|Durkin|Belgium

>Spike|hCoV-19/USA/CA-ALSR-5057/2020|2020-09-21|EPI\_ISL\_730323|Original|hCoV-19^^California|Human|San Diego County Public Health Laboratory|Andersen lab at Scripps Research|Gangavarapu|USA

>Spike|hCoV-19/Scotland/EDB5728/2020|2020-04-09|EPI\_ISL\_487663|Original|hCoV-19^^Scotland|Human|Virology Department|Wellcome Sanger Institute for the COVID-19 Genomics UK (COG-UK) consortium|Davies|United Kingdom

>Spike|hCoV-19/Denmark/DCGC-3154/2020|2020-08-31|EPI\_ISL\_615974|Original|hCoV-19^^Syddanmark|Human|Department of Virus and Microbiological Special Diagnostics|Albertsen lab|Michaelsen|Denmark

>Spike|hCoV-19/England/ALDP-B75C43/2020|2020-11-12|EPI\_ISL\_723687|Original|hCoV-19^^England|Human|Oxford Viromics|COVID-19 Genomics UK (COG-UK) Consortium|Golubchik|United Kingdom

>Spike|hCoV-19/USA/LA-EVTL1186/2020|2020-12-11|EPI\_ISL\_768455|Original|hCoV-19^^Louisiana|Human|LSUHS Emerging Viral Threat Laboratory|Microbial Genome Sequencing Center|Kamil|USA

>Spike|hCoV-19/England/ALDP-A6D2E3/2020|2020-10-14|EPI\_ISL\_608200|Original|hCoV-19^^England|Human|Lighthouse Lab in Alderley Park|Wellcome Sanger Institute for the COVID-19 Genomics UK (COG-UK) consortium|Davies|United Kingdom

>Spike|hCoV-19/Israel/CVL-45523/2020|2020-12-07|EPI\_ISL\_745045|Original|hCoV-19^^Northern|Human|Israel Central Virology laboratory|Israel Central Virology laboratory|Zuckerman|Israel

>Spike|hCoV-19/Denmark/DCGC-5660/2020|2020-09-28|EPI\_ISL\_619947|Original|hCoV-19^^Hovedstaden|Human|Department of Virus and Microbiological Special Diagnostics|Albertsen lab|Michaelsen|Denmark

>Spike|hCoV-19/USA/MN-MDH-1960/2020|2020-08-20|EPI\_ISL\_613466|Original|hCoV-19^^Minnesota|Human|Public Health Laboratory - Infectious Disease Lab|Minnesota Department of Health|Lorentz|USA

>Spike|hCoV-19/Wales/PHWC-485403/2020|2020-10-25|EPI\_ISL\_628181|Original|hCoV-19^^Wales|Human|Wales Specialist Virology Centre Sequencing lab|COVID-19 Genomics UK (COG-UK) Consortium|Moore|United Kingdom

>Spike|hCoV-19/USA/CA-ALSR-4782/2020|2020-04-06|EPI\_ISL\_730138|Original|hCoV-19^^California|Human|Scripps Medical Laboratory|Andersen lab at Scripps Research|Gangavarapu|USA

>Spike|hCoV-19/USA/NY-QDX-1235/2020|2020-03-17|EPI\_ISL\_572011|Original|hCoV-19^^New York|Human|Quest Diagnostics|Quest Diagnostics|Kagan|USA

>Spike|hCoV-19/Spain/MD-IBV-99008699/2020|2020-08-13|EPI\_ISL\_654279|Original|hCoV-19^^Madrid|Human|Hospital General Universitario Gregorio Marañón|SeqCOVID-SPAIN consortium/IBV (CSIC)|Comas|Spain

>Spike|hCoV-19/Denmark/DCGC-1542/2020|2020-05-25|EPI\_ISL\_617963|Original|hCoV-19^^Hovedstaden|Human|Department of Virus and Microbiological Special Diagnostics|Albertsen lab|Michaelsen|Denmark

>Spike|hCoV-19/India/MH-NIV-216133/2020|2020-09-18|EPI\_ISL\_577659|Original|hCoV-19^^Maharashtra|Human|NIV Influenza|NIV Influenza|Potdar|India

>Spike|hCoV-19/England/ALDP-B622ED/2020|2020-11-09|EPI\_ISL\_656395|Original|hCoV-19^^England|Human|Lighthouse Lab in Alderley Park|Wellcome Sanger Institute for the COVID-19 Genomics UK (COG-UK) Consortium|Davies|United Kingdom

>Spike|hCoV-19/USA/CT-Yale-073/2020|2020-04-02|EPI\_ISL\_428401|Original|hCoV-19^^Connecticut|Human|Yale COVID-19 Biorepository|Grubaugh Lab - Yale School of Public Health|Grubaugh|USA

>Spike|hCoV-19/Scotland/QEUA-9E4081/2020|2020-09-24|EPI\_ISL\_601085|Original|hCoV-19^^Scotland|Human|Lighthouse Lab in Glasgow|Wellcome Sanger Institute for the COVID-19 Genomics UK (COG-UK) consortium|Davies|United Kingdom

>Spike|hCoV-19/Canada/ON-UHTC-0197/2020|2020-05-29|EPI\_ISL\_569978|Original|hCoV-19^^Ontario|Human|Unity Health Toronto|Ontario Institute for Cancer Research|de Borja|Canada

>Spike|hCoV-19/Japan/PG-8548/2020|2020-08-00|EPI\_ISL\_686144|Original|hCoV-19^^Japan|Human|Pathogen Genomics Center|Pathogen Genomics Center|Sekizuka|Japan

>Spike|hCoV-19/USA/CO-CSU-C2673-1/2020|2020-04-02|EPI\_ISL\_527408|Original|hCoV-19^^Colorado|Human|Colorado State University - Ebel Lab|Colorado State University - Ebel Lab|Cline|USA

>Spike|hCoV-19/USA/AZ-TG491661/2020|2020-06-24|EPI\_ISL\_695205|Original|hCoV-19^^Arizona|Human|AZ SPHL|TGen North|French|USA

>Spike|hCoV-19/Denmark/DCGC-8356/2020|2020-10-26|EPI\_ISL\_617369|Original|hCoV-19^^Hovedstaden|Human|Department of Virus and Microbiological Special Diagnostics|Albertsen lab|Michaelsen|Denmark

>Spike|hCoV-19/England/QEUA-9A416C/2020|2020-09-01|EPI\_ISL\_540196|Original|hCoV-19^^England|Human|Lighthouse Lab in Glasgow|Wellcome Sanger Institute for the COVID-19 Genomics UK (COG-UK) consortium|Davies|United Kingdom

>Spike|hCoV-19/Hong Kong/VB20065033/2020|2020-04-07|EPI\_ISL\_444050|Original|hCoV-19^^Hong Kong|Human|Shek Wu Hui Jockey Club General Out-patient Clinic|Hong Kong Department of Health|Mak|China

>Spike|hCoV-19/England/ALDP-B7728B/2020|2020-11-12|EPI\_ISL\_662352|Original|hCoV-19^^England|Human|Lighthouse Lab in Alderley Park|Wellcome Sanger Institute for the COVID-19 Genomics UK (COG-UK) Consortium|Davies|United Kingdom

>Spike|hCoV-19/England/CAMC-B9A55C/2020|2020-11-15|EPI\_ISL\_673815|Original|hCoV-19^^England|Human|Lighthouse Lab in Cambridge|Wellcome Sanger Institute for the COVID-19 Genomics UK (COG-UK) Consortium|Davies|United Kingdom

>Spike|hCoV-19/Denmark/DCGC-11594/2020|2020-11-02|EPI\_ISL\_671013|Original|hCoV-19^^Hovedstaden|Human|Department of Virus and Microbiological Special Diagnostics|Albertsen Lab|Michaelsen|Denmark

>Spike|hCoV-19/England/QEUA-C31F3A/2020|2020-12-11|EPI\_ISL\_782587|Original|hCoV-19^^England|Human|Lighthouse Lab in Glasgow|Wellcome Sanger Institute for the COVID-19 Genomics UK (COG-UK) Consortium|Davies|United Kingdom

>Spike|hCoV-19/Denmark/DCGC-9577/2020|2020-11-09|EPI\_ISL\_668479|Original|hCoV-19^^Hovedstaden|Human|Department of Virus and Microbiological Special Diagnostics|Albertsen Lab|Michaelsen|Denmark

>Spike|hCoV-19/Denmark/DCGC-14743/2020|2020-11-23|EPI\_ISL\_711949|Original|hCoV-19^^Hovedstaden|Human|Department of Virus and Microbiological Special Diagnostics|Albertsen Lab|Michaelsen|Denmark

>Spike|hCoV-19/Scotland/QEUIH-9E43D3/2020|2020-09-22|EPI\_ISL\_601038|Original|hCoV-19^^Scotland|Human|Lighthouse Lab in Glasgow|Wellcome Sanger Institute for the COVID-19 Genomics UK (COG-UK) consortium|Davies|United Kingdom

>Spike|hCoV-19/England/NORT-2828FD/2020|2020-03-27|EPI\_ISL\_488646|Original|hCoV-19^^England|Human|NU-OMICS DNA Sequencing research facility|Wellcome Sanger Institute for the COVID-19 Genomics UK (COG-UK) consortium|Davies|United Kingdom

>Spike|hCoV-19/England/OXON-AE392/2020|2020-00-00|EPI\_ISL\_448686|Original|hCoV-19^^England|Human|Oxford Viromics|COVID-19 Genomics UK (COG-UK) Consortium|Golubchik|United Kingdom

>Spike|hCoV-19/Switzerland/GE-HUG-8102/2020|2020-03-01|EPI\_ISL\_415458|Original|hCoV-19^^Geneve|Human|University Hospitals of Geneva Laboratory of Virology|University Hospitals of Geneva Laboratory of Virology|Cordey|Switzerland

>Spike|hCoV-19/Wales/PHWC-27D1B/2020|2020-04-01|EPI\_ISL\_432335|Original|hCoV-19^^Wales|Human|Wales Specialist Virology Centre|Public Health Wales Microbiology Cardiff|Moore|United Kingdom

>Spike|hCoV-19/England/QEUIH-AD0B68/2020|2020-10-26|EPI\_ISL\_633906|Original|hCoV-19^^England|Human|Lighthouse Lab in Glasgow|Wellcome Sanger Institute for the COVID-19 Genomics UK (COG-UK) consortium|Davies|United Kingdom

>Spike|hCoV-19/Canada/BC\_26060645/2020|2020-04-00|EPI\_ISL\_477038|Original|hCoV-19^^British Columbia|Human|BCCDC Public Health Laboratory|BCCDC Public Health Laboratory|Harrigan|Canada

>Spike|hCoV-19/Norway/3628/2020|2020-09-25|EPI\_ISL\_635111|Original|hCoV-19^^Tr\u00f8ndelag|Human|Department of Medical Microbiology|Norwegian Institute of Public Health|Vollan|Norway

>Spike|hCoV-19/Belgium/VGA-030672/2020|2020-03-06|EPI\_ISL\_420328|Original|hCoV-19^^Alken|Human|KU Leuven|KU Leuven|Maes|Belgium

>Spike|hCoV-19/USA/MA-MGH-03402/2020|2020-12-07|EPI\_ISL\_765820|Original|hCoV-19^^Massachusetts|Human|North Shore Medical Center|Infectious Disease Program|Park|USA

>Spike|hCoV-19/England/MILK-B02179/2020|2020-10-24|EPI\_ISL\_642991|Original|hCoV-19^^England|Human|Lighthouse Lab in Milton Keynes|Wellcome Sanger Institute for the COVID-19 Genomics UK (COG-UK) Consortium|Davies|United Kingdom

>Spike|hCoV-19/USA/NY-Wadsworth-290015-01/2020|2020-12-21|EPI\_ISL\_767523|Original|hCoV-19^^New York|Human|Wadsworth Center|Wadsworth Center|Lasek-Nesselquist|USA

>Spike|hCoV-19/England/MILK-9AAA3E/2020|2020-08-31|EPI\_ISL\_550863|Original|hCoV-19^^England|Human|Lighthouse Lab in Milton Keynes|Wellcome Sanger Institute for the COVID-19 Genomics UK (COG-UK) consortium|Davies|United Kingdom

>Spike|hCoV-19/USA/IL-UW-454/2020|2020-06-02|EPI\_ISL\_484829|Original|hCoV-19^^Illinois|Human|University of Wisconsin-Madison AIDS Vaccine Research Laboratories|University of Wisconsin-Madison AIDS Vaccine Research Laboratories|Baczenas|USA

>Spike|hCoV-19/India/GJ-GBRC-391a/2020|2020-07-06|EPI\_ISL\_524756|Original|hCoV-19^^Gujarat|Human|GMERS Medical College and Hospital|Gujarat Biotechnology Research Centre|Joshi|India

>Spike|hCoV-19/Denmark/DCGC-22410/2020|2020-12-14|EPI\_ISL\_757548|Original|hCoV-19^^Midtjylland|Human|Department of Virus and Microbiological Special Diagnostics|Albertsen Lab|Michaelsen|Denmark

>Spike|hCoV-19/Denmark/DCGC-17785/2020|2020-12-14|EPI\_ISL\_749566|Original|hCoV-19^^Hovedstaden|Human|Department of Virus and Microbiological Special Diagnostics|Albertsen Lab|Michaelsen|Denmark

>Spike|hCoV-19/England/20118143704/2020|2020-03-12|EPI\_ISL\_464973|Original|hCoV-19^^England|Human|Respiratory Virus Unit|Respiratory Virus Unit|Platt|United Kingdom

>Spike|hCoV-19/USA/TX-HMH-3711/2020|2020-06-16|EPI\_ISL\_543128|Original|hCoV-19^^Texas|Human|Houston Methodist Hospital|Houston Methodist Hospital|Long|USA

>Spike|hCoV-19/Wales/PHWC-481E27/2020|2020-10-18|EPI\_ISL\_613176|Original|hCoV-19^^Wales|Human|Wales Specialist Virology Centre Sequencing lab|COVID-19 Genomics UK (COG-UK) Consortium|Moore|United Kingdom

>Spike|hCoV-19/England/QEUH-B104E8/2020|2020-11-02|EPI\_ISL\_642326|Original|hCoV-19^^England|Human|Lighthouse Lab in Glasgow|Wellcome Sanger Institute for the COVID-19 Genomics UK (COG-UK) Consortium|Davies|United Kingdom

>Spike|hCoV-19/Iran/K1r-78/2020|2020-04-27|EPI\_ISL\_568478|Original|hCoV-19^^Iran|Human|Virology|Virology|Ranjbar|Iran

>Spike|hCoV-19/England/ALDP-C3AA7C/2020|2020-12-09|EPI\_ISL\_731632|Original|hCoV-19^^England|Human|Lighthouse Lab in Alderley Park|Wellcome Sanger Institute for the COVID-19 Genomics UK (COG-UK) Consortium|Davies|United Kingdom

>Spike|hCoV-19/Denmark/DCGC-7221/2020|2020-10-12|EPI\_ISL\_619005|Original|hCoV-19^^Nordjylland|Human|Department of Virus and Microbiological Special Diagnostics|Albertsen lab|Michaelsen|Denmark

>Spike|hCoV-19/England/ALDP-A52287/2020|2020-10-07|EPI\_ISL\_598236|Original|hCoV-19^^England|Human|Lighthouse Lab in Alderley Park|Wellcome Sanger Institute for the COVID-19 Genomics UK (COG-UK) consortium|Davies|United Kingdom

>Spike|hCoV-19/Switzerland/AG-ETHZ-210058/2020|2020-07-19|EPI\_ISL\_510791|Original|hCoV-19^^Aargau|Human|Viollier AG|Department of Biosystems Science and Engineering|Nadeau|Switzerland

>Spike|hCoV-19/USA/UT-UPHL-201110857/2020|2020-10-05|EPI\_ISL\_628938|Original|hCoV-19^^Utah|Human|Utah Public Health Laboratory|Utah Public Health Laboratory|Young|USA

>Spike|hCoV-19/Spain/GA-IBV-002715/2020|2020-04-08|EPI\_ISL\_467294|Original|hCoV-19^^Galicia|Human|Hospital Cl\u00e9nico Universitario de Santiago de Compostela|SeqCOVID-SPAIN consortium|IBV (CSIC)|Comas|Spain

>Spike|hCoV-19/South Korea/KDCA0170/2020|2020-11-14|EPI\_ISL\_747404|Original|hCoV-19^^South Korea|Human|Division of Emerging Infectious Diseases|Division of Emerging Infectious Diseases|Park|South Korea

>Spike|hCoV-19/Japan/PG-1836/2020|2020-04-00|EPI\_ISL\_685442|Original|hCoV-19^^Japan|Human|Tokyo Metropolitan Institute of Public Health|Pathogen Genomics Center|Sekizuka|Japan

>Spike|hCoV-19/Denmark/DCGC-13915/2020|2020-11-30|EPI\_ISL\_711448|Original|hCoV-19^^Hovedstaden|Human|Department of Virus and Microbiological Special Diagnostics|Albertsen Lab|Michaelsen|Denmark

>Spike|hCoV-19/Denmark/DCGC-19497/2020|2020-12-07|EPI\_ISL\_748988|Original|hCoV-19^^Syddanmark|Human|Department of Virus and Microbiological Special Diagnostics|Albertsen Lab|Michaelsen|Denmark

>Spike|hCoV-19/England/ALDP-B5BB46/2020|2020-11-10|EPI\_ISL\_655396|Original|hCoV-19^^England|Human|Lighthouse Lab in Alderley Park|Wellcome Sanger Institute for the COVID-19 Genomics UK (COG-UK) Consortium|Davies|United Kingdom

>Spike|hCoV-19/Japan/PG-5698/2020|2020-07-00|EPI\_ISL\_688822|Original|hCoV-19^^Japan|Human|Pathogen Genomics Center|Pathogen Genomics Center|Sekizuka|Japan

>Spike|hCoV-19/USA/FL-BPHL-0234/2020|2020-04-23|EPI\_ISL\_480885|Original|hCoV-19^^Florida|Human|Florida Bureau of Public Health Laboratories|Florida Bureau of Public Health Laboratories|Blanton|USA

>Spike|hCoV-19/Belgium/ULG-10641/2020|2020-10-26|EPI\_ISL\_636619|Original|hCoV-19^^Li\u00e8ge|Human|Department of Clinical Microbiology|GIGA Medical Genomics|Durkin|Belgium

>Spike|hCoV-19/USA/TX-HMH-MCoV-13929/2020|2020-08-15|EPI\_ISL\_787221|Original|hCoV-19^^Texas|Human|Houston Methodist Hospital|Houston Methodist Hospital|Long|USA

>Spike|hCoV-19/USA/UT-UPHL-2012633929/2020|2020-08-13|EPI\_ISL\_745608|Original|hCoV-19^^Utah|Human|Ginkgo Bioworks Clinical Laboratory|Utah Public Health Laboratory|Young|USA

>Spike|hCoV-19/USA/WI-GMF-18461/2020|2020-09-02|EPI\_ISL\_547761|Original|hCoV-19^^Wisconsin|Human|Gundersen Molecular Diagnostics Laboratory|Kabara Cancer Research Institute|Kenny|USA

>Spike|hCoV-19/Australia/VIC3020/2020|2020-07-03|EPI\_ISL\_521849|Original|hCoV-19^^Victoria|Human|Victorian Infectious Diseases Reference Laboratory (VIDRL)|VIDRL and MDU-PHL|Schultz|Australia

>Spike|hCoV-19/USA/UT-03042/2020|2020-05-01|EPI\_ISL\_522313|Original|hCoV-19^^Utah|Human|Utah Public Health Laboratory|Utah Public Health Laboratory|Young|USA

>Spike|hCoV-19/England/ALDP-B1B18C/2020|2020-11-01|EPI\_ISL\_645762|Original|hCoV-19^^England|Human|Lighthouse Lab in Alderley Park|Wellcome Sanger Institute for the COVID-19 Genomics UK (COG-UK) Consortium|Davies|United Kingdom

>Spike|hCoV-19/USA/CT-Yale-232/2020|2020-03-31|EPI\_ISL\_463165|Original|hCoV-19^^Connecticut|Human|Yale Clinical Virology Laboratory|Grubaugh Lab - Yale School of Public Health|Grubaugh|USA

>Spike|hCoV-19/England/ALDP-B622CF/2020|2020-11-09|EPI\_ISL\_656423|Original|hCoV-19^^England|Human|Lighthouse Lab in Alderley Park|Wellcome Sanger Institute for the COVID-19 Genomics UK (COG-UK) Consortium|Davies|United Kingdom

>Spike|hCoV-19/England/20134024004/2020|2020-03-24|EPI\_ISL\_423125|Original|hCoV-19^^England|Human|Respiratory Virus Unit|Respiratory Virus Unit|Platt|United Kingdom

>Spike|hCoV-19/England/ALDP-A6EFCD/2020|2020-10-15|EPI\_ISL\_607701|Original|hCoV-19^^England|Human|Lighthouse Lab in Alderley Park|Wellcome Sanger Institute for the COVID-19 Genomics UK (COG-UK) consortium|Davies|United Kingdom

>Spike|hCoV-19/England/20120019704/2020|2020-03-16|EPI\_ISL\_465157|Original|hCoV-19^^England|Human|Respiratory Virus Unit|Respiratory Virus Unit|Platt|United Kingdom

>Spike|hCoV-19/England/MILK-B95B31/2020|2020-11-13|EPI\_ISL\_675023|Original|hCoV-19^^England|Human|Lighthouse Lab in Milton Keynes|Wellcome Sanger Institute for the COVID-19 Genomics UK (COG-UK) Consortium|Davies|United Kingdom

>Spike|hCoV-19/England/CAMB-7A9E8/2020|2020-04-02|EPI\_ISL\_440565|Original|hCoV-19^^England|Human|Department of Pathology|Wellcome Sanger Institute for the COVID-19 Genomics UK (COG-UK) consortium|Amato|United Kingdom

>Spike|hCoV-19/England/QEUEH-B3F7CC/2020|2020-11-08|EPI\_ISL\_658433|Original|hCoV-19^^England|Human|Lighthouse Lab in Glasgow|Wellcome Sanger Institute for the COVID-19 Genomics UK (COG-UK) Consortium|Davies|United Kingdom

>Spike|hCoV-19/Japan/PG-0921/2020|2020-04-00|EPI\_ISL\_684531|Original|hCoV-19^^Japan|Human|Pathogen Genomics Center|Pathogen Genomics Center|Sekizuka|Japan

>Spike|hCoV-19/Denmark/DCGC-6149/2020|2020-08-17|EPI\_ISL\_621183|Original|hCoV-19^^Midtjylland|Human|Department of Virus and Microbiological Special Diagnostics|Albertsen lab|Michaelsen|Denmark

>Spike|hCoV-19/Canada/ON-PHL-20-03645/2020|2020-11-00|EPI\_ISL\_775149|Original|hCoV-19^^Ontario|Human|Public Health Ontario Laboratory|Public Health Ontario Laboratory|Guthrie|Canada

>Spike|hCoV-19/Netherlands/un-EMC-730/2020|2020-04-23|EPI\_ISL\_523485|Original|hCoV-19^^Netherlands|Human|Dutch COVID-19 response team|Erasmus Medical Center|Oude Munnink|Netherlands

>Spike|hCoV-19/England/20182029404/2020|2020-04-28|EPI\_ISL\_465452|Original|hCoV-19^^England|Human|Respiratory Virus Unit|Respiratory Virus Unit|Platt|United Kingdom

>Spike|hCoV-19/England/QEUEH-AACCCC/2020|2020-10-20|EPI\_ISL\_652912|Original|hCoV-19^^England|Human|Oxford Viromics|COVID-19 Genomics UK (COG-UK) Consortium|Golubchik|United Kingdom

>Spike|hCoV-19/France/ARA-SC048/2020|2020-04-03|EPI\_ISL\_666667|Original|hCoV-19^^Auvergne-Rh\u00f4ne-Alpes|Human|Laboratoire du Centre Hospitalier Annecy Genevois|CNR Virus des Infections Respiratoires - France SUD|Bal|France

>Spike|hCoV-19/England/SHEF-C2222/2020|2020-04-02|EPI\_ISL\_432742|Original|hCoV-19^^England|Human|Virology Department|COVID-19 Genomics UK (COG-UK) Consortium|de Silva|United Kingdom

>Spike|hCoV-19/USA/CA-ALSR-0538-SAN/2020|2020-04-29|EPI\_ISL\_483210|Original|hCoV-19^^California|Human|UC San Diego Center for Advanced Laboratory Medicine|Andersen lab at Scripps Research|Gangavarapu|USA

>Spike|hCoV-19/USA/FL-BPHL-1318/2020|2020-07-14|EPI\_ISL\_541256|Original|hCoV-19^^Florida|Human|Florida Bureau of Public Health Laboratories|Florida Bureau of Public Health Laboratories|Blanton|USA

>Spike|hCoV-19/Denmark/DCGC-13502/2020|2020-11-30|EPI\_ISL\_712838|Original|hCoV-19^^Syddanmark|Human|Department of Virus and Microbiological Special Diagnostics|Albertsen Lab|Michaelsen|Denmark

>Spike|hCoV-19/Italy/VEN-UniVR-151/2020|2020-04-13|EPI\_ISL\_751322|Original|hCoV-19^^Veneto|Human|IRCCS Sacro Cuore Don Calabria Hospital|University of Verona|Mori|Italy

>Spike|hCoV-19/Russia/Moscow-71605/2020|2020-03-19|EPI\_ISL\_428872|Vero|hCoV-19^^Moscow Region|Human|State Research Center of Virology and Biotechnology VECTOR|State Research Center of Virology and Biotechnology VECTOR|Shvalov|Russia

>Spike|hCoV-19/Iceland/267/2020|2020-03-17|EPI\_ISL\_417595|Original|hCoV-19^^Reykjavik|Human|The National University Hospital of Iceland|deCODE genetics|J\u00f3nsson|Iceland

>Spike|hCoV-19/England/ALDP-B74831/2020|2020-11-12|EPI\_ISL\_678946|Original|hCoV-19^^England|Human|Queens Medical Centre|COVID-19 Genomics UK (COG-UK) Consortium|Loose|United Kingdom

>Spike|hCoV-19/Denmark/DCGC-19086/2020|2020-12-07|EPI\_ISL\_748748|Original|hCoV-19^^Hovedstaden|Human|Department of Virus and Microbiological Special Diagnostics|Albertsen Lab|Michaelsen|Denmark

>Spike|hCoV-19/Australia/VIC4179/2020|2020-07-11|EPI\_ISL\_519520|Original|hCoV-19^^Victoria|Human|Victorian Infectious Diseases Reference Laboratory (VIDRL)|VIDRL and MDU-PHL|Schultz|Australia

>Spike|hCoV-19/Belgium/regal-12141431/2020|2020-12-14|EPI\_ISL\_738483|Original|hCoV-19^^Arendonk|Human|UZ Leuven|KU Leuven|Maes|Belgium

>Spike|hCoV-19/DRC/10248/2020|2020-05-22|EPI\_ISL\_591087|Original|hCoV-19^^Kinshasa|Human|Viral Respiratory Lab|Pathogen Sequencing Lab|Lokilo|Democratic Republic of the Congo

>Spike|hCoV-19/England/ALDP-95CE7B/2020|2020-06-21|EPI\_ISL\_555056|Original|hCoV-19^^England|Human|Lighthouse Lab in Alderley Park|Wellcome Sanger Institute for the COVID-19 Genomics UK (COG-UK) consortium|Davies|United Kingdom

>Spike|hCoV-19/Uruguay/UY-652/2020|2020-05-25|EPI\_ISL\_480340|Original|hCoV-19^^Rivera|Human|Microbial Genomics Laboratory|Microbial Genomics Laboratory|Iraola|Uruguay

>Spike|hCoV-19/Russia/StPetersburg-RII8317S/2020|2020-04-21|EPI\_ISL\_450271|Original|hCoV-19^^Saint Petersburg|Human|WHO National Influenza Centre Russian Federation|WHO National Influenza Centre Russian Federation|Komissarov|Russia

>Spike|hCoV-19/England/QEUEH-B6C984/2020|2020-11-11|EPI\_ISL\_655104|Original|hCoV-19^^England|Human|Lighthouse Lab in Glasgow|Wellcome Sanger Institute for the COVID-19 Genomics UK (COG-UK) Consortium|Davies|United Kingdom

>Spike|hCoV-19/England/BIRM-61ED6/2020|2020-03-26|EPI\_ISL\_529616|Original|hCoV-19^^England|Human|University of Birmingham|COVID-19 Genomics UK (COG-UK) Consortium|Loman|United Kingdom

>Spike|hCoV-19/Denmark/DCGC-17032/2020|2020-12-14|EPI\_ISL\_750323|Original|hCoV-19^^Sjaelland|Human|Department of Virus and Microbiological Special Diagnostics|Albertsen Lab|Michaelsen|Denmark

>Spike|hCoV-19/Northern Ireland/QEUEH-943DC5/2020|2020-07-28|EPI\_ISL\_532575|Original|hCoV-19^^Northern Ireland|Human|Lighthouse Lab in Glasgow|Wellcome Sanger Institute for the COVID-19 Genomics UK (COG-UK) consortium|Davies|United Kingdom

>Spike|hCoV-19/England/CAMB-1B6536/2020|2020-09-29|EPI\_ISL\_584286|Original|hCoV-19^^England|Human|Department of Pathology|COVID-19 Genomics UK (COG-UK) Consortium|Goodfellow|United Kingdom

>Spike|hCoV-19/England/MILK-A4799F/2020|2020-10-05|EPI\_ISL\_598344|Original|hCoV-19^^England|Human|Lighthouse Lab in Milton Keynes|Wellcome Sanger Institute for the COVID-19 Genomics UK (COG-UK) consortium|Davies|United Kingdom

>Spike|hCoV-19/Oman/RESP-20-4028/2020|2020-03-20|EPI\_ISL\_457987|Original|hCoV-19^^Muscat|Human|Oman-NIC|Oman-NIC|Al Mahruqi|Oman

>Spike|hCoV-19/USA/CA-IGI-0333/2020|2020-06-26|EPI\_ISL\_576524|Original|hCoV-19^^California|Human|Innovative Genomics Institute|Innovative Genomics Institute|Wyman|USA

>Spike|hCoV-19/USA/NY-Wadsworth-41425-01/2020|2020-04-08|EPI\_ISL\_676824|Original|hCoV-19^^New York|Human|Wadsworth Center|Wadsworth Center|Lasek-Nesselquist|USA

>Spike|hCoV-19/Denmark/DCGC-21106/2020|2020-12-21|EPI\_ISL\_759558|Original|hCoV-19^^Sjaelland|Human|Department of Virus and Microbiological Special Diagnostics|Albertsen Lab|Michaelsen|Denmark

>Spike|hCoV-19/USA/TX-HMH-MCoV-13629/2020|2020-08-20|EPI\_ISL\_788735|Original|hCoV-19^^Texas|Human|Houston Methodist Hospital|Houston Methodist Hospital|Long|USA

>Spike|hCoV-19/England/LIVE-9C50A/2020|2020-03-21|EPI\_ISL\_449546|Original|hCoV-19^^England|Human|Liverpool Clinical Laboratories|COVID-19 Genomics UK (COG-UK) Consortium|Haldenby|United Kingdom

>Spike|hCoV-19/USA/MD-MDH-0510/2020|2020-11-30|EPI\_ISL\_778891|Original|hCoV-19^^Maryland|Human|Maryland Public Health Laboratory|Maryland Public Health Laboratory|Keller|USA

>Spike|hCoV-19/USA/LA-GBCL-26791732/2020|2020-04-09|EPI\_ISL\_485350|Original|hCoV-19^^Louisiana|Human|River Road Testing Lab|Ginkgo Bioworks Clinical Laboratory|Smith|USA

>Spike|hCoV-19/Wales/MILK-9A8687/2020|2020-09-02|EPI\_ISL\_550046|Original|hCoV-19^^Wales|Human|Lighthouse Lab in Milton Keynes|Wellcome Sanger Institute for the COVID-19 Genomics UK (COG-UK) consortium|Davies|United Kingdom

>Spike|hCoV-19/England/CAMC-A58F8A/2020|2020-10-08|EPI\_ISL\_597227|Original|hCoV-19^^England|Human|Lighthouse Lab in Cambridge|Wellcome Sanger Institute for the COVID-19 Genomics UK (COG-UK) consortium|Davies|United Kingdom

>Spike|hCoV-19/USA/AZ-TG664300/2020|2020-04-28|EPI\_ISL\_696094|Original|hCoV-19^^Arizona|Human|Sonora Quest Laboratories|TGen North|French|USA

>Spike|hCoV-19/Netherlands/NA\_459/2020|2020-04-02|EPI\_ISL\_455261|Original|hCoV-19^^Netherlands|Human|Dutch COVID-19 response team|Erasmus Medical Center|Oude Munnink|Netherlands

>Spike|hCoV-19/Denmark/DCGC-3191/2020|2020-08-31|EPI\_ISL\_616014|Original|hCoV-19^^Hovedstaden|Human|Department of Virus and Microbiological Special Diagnostics|Albertsen lab|Michaelsen|Denmark

>Spike|hCoV-19/England/QEUEH-B2D06C/2020|2020-11-04|EPI\_ISL\_680098|Original|hCoV-19^^England|Human|Department of Pathology|COVID-19 Genomics UK (COG-UK) Consortium|Goodfellow|United Kingdom

>Spike|hCoV-19/England/LOND-126086B/2020|2020-04-05|EPI\_ISL\_524699|Original|hCoV-19^^England|Human|North West London Pathology|Wellcome Sanger Institute for the COVID-19 Genomics UK (COG-UK) consortium|Davies|United Kingdom

>Spike|hCoV-19/USA/TX-DSHS-1675/2020|2020-06-24|EPI\_ISL\_710083|Original|hCoV-19^^Texas|Human|Texas Department of State Health Services|Texas Department of State Health Services|Rahman|USA

>Spike|hCoV-19/Australia/VIC115/2020|2020-03-18|EPI\_ISL\_419717|Original|hCoV-19^^Victoria|Human|Microbiological Diagnostic Unit Public Health Laboratory|Microbiological Diagnostic Unit Public Health Laboratory|Schultz|Australia

>Spike|hCoV-19/Northern Ireland/QEUEH-96995C/2020|2020-08-14|EPI\_ISL\_531120|Original|hCoV-19^^Northern Ireland|Human|Lighthouse Lab in Glasgow|Wellcome Sanger Institute for the COVID-19 Genomics UK (COG-UK) consortium|Davies|United Kingdom

>Spike|hCoV-19/Turkey/HSGM-11520/2020|2020-03-23|EPI\_ISL\_429873|Original|hCoV-19^^Kocaeli|Human|Ministry of Health Turkey|Ministry of Health Turkey|Bayrakdar|Turkey

>Spike|hCoV-19/Scotland/QEUEH-95FA47/2020|2020-08-06|EPI\_ISL\_532390|Original|hCoV-19^^Scotland|Human|NHSGGC West of Scotland Specialist Virology Centre / MRC-University of Glasgow Centre for Virus Research|Wellcome Sanger Institute for the COVID-19 Genomics UK (COG-UK) consortium|Davies|United Kingdom

>Spike|hCoV-19/England/MILK-A192F5/2020|2020-10-01|EPI\_ISL\_612500|Original|hCoV-19^^England|Human|Wales Specialist Virology Centre Sequencing lab|COVID-19 Genomics UK (COG-UK) Consortium|Moore|United Kingdom

>Spike|hCoV-19/Japan/PG-4352/2020|2020-07-00|EPI\_ISL\_692580|Original|hCoV-19^^Japan|Human|Pathogen Genomics Center|Pathogen Genomics Center|Sekizuka|Japan

>Spike|hCoV-19/England/20134003204/2020|2020-03-23|EPI\_ISL\_423057|Original|hCoV-19^^England|Human|Respiratory Virus Unit|Respiratory Virus Unit|Platt|United Kingdom



>Spike|hCoV-19/Belgium/ULG-10986/2020|2020-10-25|EPI\_ISL\_708455|Original|hCoV-19^^Liege|Human|Department of Clinical Microbiology|GIGA Medical Genomics|Durkin|Belgium

>Spike|hCoV-19/Belgium/ULG-10759/2020|2020-09-20|EPI\_ISL\_641601|Original|hCoV-19^^Li\u00e8ge|Human|Department of Clinical Microbiology|GIGA Medical Genomics|Durkin|Belgium

>Spike|hCoV-19/USA/HI-H200136/2020|2020-07-10|EPI\_ISL\_752699|Original|hCoV-19^^Hawaii|Human|State Laboratories Division|State Laboratories Division|Sultana|USA

>Spike|hCoV-19/England/NOTT-10FCDF/2020|2020-04-08|EPI\_ISL\_441437|Original|hCoV-19^^England|Human|Queens Medical Centre|COVID-19 Genomics UK (COG-UK) Consortium|Loose|United Kingdom

>Spike|hCoV-19/Wales/PHWC-4A036F/2020|2020-12-10|EPI\_ISL\_743434|Original|hCoV-19^^Wales|Human|Wales Specialist Virology Centre Sequencing lab|COVID-19 Genomics UK (COG-UK) Consortium|Moore|United Kingdom

>Spike|hCoV-19/USA/CA-CZB-3368/2020|2020-07-17|EPI\_ISL\_548326|Original|hCoV-19^^California|Human|Orange County Public Health Laboratory|Chan-Zuckerberg Biohub|Bhatt|USA

>Spike|hCoV-19/Japan/Donner1/2020|2020-04-06|EPI\_ISL\_437601|Original|hCoV-19^^Kanto|Human|Keio University School of Medicine|Keio University School of Medicine|Kosaki|Japan

>Spike|hCoV-19/England/LIVE-A73C6/2020|2020-03-28|EPI\_ISL\_517014|Original|hCoV-19^^England|Human|Liverpool Clinical Laboratories|COVID-19 Genomics UK (COG-UK) Consortium|Haldenby|United Kingdom

>Spike|hCoV-19/England/CAMC-9DF4AB/2020|2020-09-19|EPI\_ISL\_638407|Original|hCoV-19^^England|Human|Department of Pathology|COVID-19 Genomics UK (COG-UK) Consortium|Goodfellow|United Kingdom

>Spike|hCoV-19/Belgium/LPJ-0401364/2020|2020-04-01|EPI\_ISL\_462218|Original|hCoV-19^^Waasmont|Human|KU Leuven|KU Leuven|Maes|Belgium

>Spike|hCoV-19/Australia/VIC9425/2020|2020-08-13|EPI\_ISL\_562677|Original|hCoV-19^^Victoria|Human|Microbiological Diagnostic Unit - Public Health Laboratory (MDU-PHL)|MDU-PHL|Schultz|Australia

>Spike|hCoV-19/Japan/PG-5679/2020|2020-04-00|EPI\_ISL\_688803|Original|hCoV-19^^Japan|Human|Pathogen Genomics Center|Pathogen Genomics Center|Sekizuka|Japan

>Spike|hCoV-19/Wales/PHWC-15FCFB/2020|2020-04-20|EPI\_ISL\_472651|Original|hCoV-19^^Wales|Human|Wales Specialist Virology Centre Sequencing lab|COVID-19 Genomics UK (COG-UK) Consortium|Moore|United Kingdom

>Spike|hCoV-19/Denmark/DCGC-20612/2020|2020-12-21|EPI\_ISL\_759253|Original|hCoV-19^^Hovedstaden|Human|Department of Virus and Microbiological Special Diagnostics|Albertsen Lab|Michaelsen|Denmark

>Spike|hCoV-19/Wuhan/HB-WH3-173/2020|2020-02-28|EPI\_ISL\_454939|Original|hCoV-19^^Hubei|Human|Wuhan Chain Medical Labs (CMLabs)|State Key Laboratory of Biotherapy of Sichuan University|Tang|China

>Spike|hCoV-19/England/MILK-B3DA4D/2020|2020-10-31|EPI\_ISL\_741380|Original|hCoV-19^^England|Human|Oxford Viromics|COVID-19 Genomics UK (COG-UK) Consortium|Golubchik|United Kingdom

>Spike|hCoV-19/Wales/MILK-A46374/2020|2020-10-05|EPI\_ISL\_609288|Original|hCoV-19^^Wales|Human|Lighthouse Lab in Milton Keynes|Wellcome Sanger Institute for the COVID-19 Genomics UK (COG-UK) consortium|Davies|United Kingdom

>Spike|hCoV-19/USA/TX-HMH-3172/2020|2020-06-11|EPI\_ISL\_544048|Original|hCoV-19^^Texas|Human|Houston Methodist Hospital|Houston Methodist Hospital|Long|USA

>Spike|hCoV-19/England/CAMC-B9A5F2/2020|2020-11-15|EPI\_ISL\_673588|Original|hCoV-19^^England|Human|Lighthouse Lab in Cambridge|Wellcome Sanger Institute for the COVID-19 Genomics UK (COG-UK) Consortium|Davies|United Kingdom

>Spike|hCoV-19/USA/FL-BPHL-1368/2020|2020-07-20|EPI\_ISL\_541305|Original|hCoV-19^^Florida|Human|Florida Bureau of Public Health Laboratories|Florida Bureau of Public Health Laboratories|Blanton|USA

>Spike|hCoV-19/Wales/MILK-9EF00E/2020|2020-09-24|EPI\_ISL\_594893|Original|hCoV-19^^Wales|Human|Oxford Viromics|COVID-19 Genomics UK (COG-UK) Consortium|Golubchik|United Kingdom

>Spike|hCoV-19/Denmark/ALAB-SSI501/2020|2020-03-24|EPI\_ISL\_429572|Original|hCoV-19^^Denmark|Human|Department of Virus and Microbiological Special Diagnostics|Albertsen lab|Kirkegaard|Denmark

>Spike|hCoV-19/England/GSTT-6746/2020|2020-03-29|EPI\_ISL\_560726|Original|hCoV-19^^England|Human|Centre for Clinical Infection and Diagnostics Research and Genomics Innovation Unit|Centre for Clinical Infection and Diagnostics Research and Genomics Innovation Unit|Awan|United Kingdom

>Spike|hCoV-19/USA/GA-CDC-0851/2020|2020-07-06|EPI\_ISL\_509662|Original|hCoV-19^^Georgia|Human|Georgia Department of Health|Pathogen Discovery|Queen|USA

>Spike|hCoV-19/Australia/VIC13329/2020|2020-08-07|EPI\_ISL\_563676|Original|hCoV-19^^Victoria|Human|Microbiological Diagnostic Unit - Public Health Laboratory (MDU-PHL)|MDU-PHL|Schultz|Australia

>Spike|hCoV-19/England/ALDP-94EA0F/2020|2020-06-17|EPI\_ISL\_555105|Original|hCoV-19^^England|Human|Lighthouse Lab in Alderley Park|Wellcome Sanger Institute for the COVID-19 Genomics UK (COG-UK) consortium|Davies|United Kingdom

>Spike|hCoV-19/England/MILK-9A6917/2020|2020-09-01|EPI\_ISL\_550248|Original|hCoV-19^^England|Human|Lighthouse Lab in Milton Keynes|Wellcome Sanger Institute for the COVID-19 Genomics UK (COG-UK) consortium|Davies|United Kingdom

>Spike|hCoV-19/England/ALDP-955D93/2020|2020-06-12|EPI\_ISL\_553912|Original|hCoV-19^^England|Human|Lighthouse Lab in Alderley Park|Wellcome Sanger Institute for the COVID-19 Genomics UK (COG-UK) consortium|Davies|United Kingdom

>Spike|hCoV-19/Northern Ireland/NIRE-2334E8/2020|2020-10-04|EPI\_ISL\_680296|Original|hCoV-19^^Northern Ireland|Human|Regional Virus Laboratory|COVID-19 Genomics UK (COG-UK) Consortium|Fairley|United Kingdom

>Spike|hCoV-19/USA/CA-CZB-14797/2020|2020-11-16|EPI\_ISL\_739389|Original|hCoV-19^^California|Human|Humboldt County Public Health Laboratory|Chan-Zuckerberg Biohub|Kamm|USA

>Spike|hCoV-19/England/NORT-2890FE/2020|2020-03-27|EPI\_ISL\_453497|Original|hCoV-19^^England|Human|Northumbria University / South Tees Hospitals NHS Foundation Trust / North Cumbria Integrated Care NHS Foundation Trust / North Tees and Hartlepool NHS Foundation Trust / Newcastle Hospitals NHS Foundation Trust|COVID-19 Genomics UK (COG-UK) Consortium|Bashton|United Kingdom

>Spike|hCoV-19/Denmark/DCGC-4534/2020|2020-09-21|EPI\_ISL\_621330|Original|hCoV-19^^Hovedstaden|Human|Department of Virus and Microbiological Special Diagnostics|Albertsen lab|Michaelsen|Denmark

>Spike|hCoV-19/USA/TX-DSHS-0190/2020|2020-04-13|EPI\_ISL\_524069|Original|hCoV-19^^Texas|Human|Texas Department of State Health Services|Texas Department of State Health Services|Rahman|USA

>Spike|hCoV-19/USA/AZ-TG395963/2020|2020-06-09|EPI\_ISL\_694788|Original|hCoV-19^^Arizona|Human|AZ SPHL|TGen North|French|USA

>Spike|hCoV-19/England/QEUI-B7D531/2020|2020-11-14|EPI\_ISL\_741871|Original|hCoV-19^^England|Human|Oxford Viromics|COVID-19 Genomics UK (COG-UK) Consortium|Golubchik|United Kingdom

>Spike|hCoV-19/USA/WY-WPHL-20171669/2020|2020-12-29|EPI\_ISL\_770449|Original|hCoV-19^^Wyoming|Human|Wyoming Public Health Laboratory|Wyoming Public Health Laboratory|Hull|USA

>Spike|hCoV-19/Denmark/DCGC-7141/2020|2020-10-12|EPI\_ISL\_619162|Original|hCoV-19^^Hovedstaden|Human|Department of Virus and Microbiological Special Diagnostics|Albertsen lab|Michaelsen|Denmark

>Spike|hCoV-19/England/QEUI-B117C0/2020|2020-11-02|EPI\_ISL\_642241|Original|hCoV-19^^England|Human|Lighthouse Lab in Glasgow|Wellcome Sanger Institute for the COVID-19 Genomics UK (COG-UK) Consortium|Davies|United Kingdom

>Spike|hCoV-19/Denmark/DCGC-6083/2020|2020-10-05|EPI\_ISL\_620277|Original|hCoV-19^^Hovedstaden|Human|Department of Virus and Microbiological Special Diagnostics|Albertsen lab|Michaelsen|Denmark

EOF
